# Supplementary material
Source: PubMed Central journal article supplement (PMC6181788)
Supplement: NIHMS971121-supplement-Supp_TableS1-3.pdf [file NIHMS971121-supplement-Supp_TableS1-3.pdf]

Supplemental tables for:

## Neuronal calcineurin transcriptional targets parallel changes observed in Alzheimer disease brain

Sarah C. Hopp\*<sup>1</sup>, Nathan A. Bihlmeyer\*<sup>2</sup>, John P. Corradi<sup>3</sup>, Charles Vanderburg<sup>1</sup>, Angela M. Cacace<sup>3</sup>, Sudeshna Das<sup>2</sup>, Timothy W. Clark<sup>2</sup>, Rebecca A. Betensky<sup>4</sup>, Bradley T. Hyman<sup>1</sup>, Eloise Hudry<sup>1</sup>

<sup>1</sup>Alzheimer's disease Research Laboratory, Department of Neurology, MassGeneral Institute for Neurodegenerative Disease, Massachusetts General Hospital and Harvard Medical School, 114 16<sup>th</sup> Street, Charlestown, MA 02129, USA.

<sup>2</sup> MIND Informatics, MassGeneral Institute for Neurodegenerative Disease, Massachusetts General Hospital and Harvard Medical School, 65 Landsdowne Street, Cambridge, MA, 02139 USA.

<sup>3</sup> Exploratory Biology and Genomics, Bristol-Myers Squibb, 5 Research Parkway, Wallingford, CT 06492, USA.

<sup>4</sup> Department of Biostatistics, Harvard T. H. Chan School of Public Health, 655 Huntington Avenue, Boston, MA 02115, USA.

\*These authors contributed equally to the work herein

Supplemental Table 1 caCN\_vs\_GFP\_SVA\_Limma\_Results

| Probe           | Mouse_Gene            | Human_Gene | logFC | AveExpr | t      | P.Value  | adj.P.Val | B     |
|-----------------|-----------------------|------------|-------|---------|--------|----------|-----------|-------|
| 1447992_PM_s_at | Pcsk2                 | PCSK2      | -3.64 | 4.75    | -24.71 | 1.48E-10 | 6.68E-06  | 13.00 |
| 1455227_PM_at   | Nceh1                 | NCEH1      | -1.86 | 4.51    | -18.62 | 2.63E-09 | 5.93E-05  | 11.13 |
| 1443612_PM_at   | Ano3                  | ANO3       | -3.23 | 4.49    | -17.46 | 5.02E-09 | 7.56E-05  | 10.66 |
| 1456089_PM_at   | Trim23                | TRIM23     | -2.34 | 4.94    | -15.89 | 1.29E-08 | 1.26E-04  | 9.93  |
| 1426775_PM_s_at | Scamp1                | SCAMP1     | -2.06 | 5.84    | -15.77 | 1.39E-08 | 1.26E-04  | 9.87  |
| 1423662_PM_at   | Atp6ap2               | ATP6AP2    | -3.58 | 6.33    | -14.29 | 3.73E-08 | 1.62E-04  | 9.07  |
| 1434800_PM_at   | Sv2b                  | SV2B       | -3.01 | 6.16    | -14.62 | 2.96E-08 | 1.62E-04  | 9.26  |
| 1455469_PM_at   | Slc6a7                | SLC6A7     | -2.78 | 7.52    | -14.18 | 4.01E-08 | 1.62E-04  | 9.00  |
| 1439971_PM_at   | Dzank1                | DZANK1     | -2.77 | 6.15    | -13.76 | 5.39E-08 | 1.62E-04  | 8.76  |
| 1422600_PM_at   | Rasgrf1               | RASGRF1    | -2.71 | 5.40    | -14.44 | 3.36E-08 | 1.62E-04  | 9.15  |
| 1442786_PM_s_at | Rufy3                 | RUFY3      | -2.53 | 4.57    | -14.81 | 2.61E-08 | 1.62E-04  | 9.36  |
| 1428537_PM_at   | Csnk1a1               | CSNK1A1L   | -2.28 | 6.04    | -13.79 | 5.27E-08 | 1.62E-04  | 8.77  |
| 1433442_PM_at   | Klh9                  | KLHL9      | -1.59 | 6.53    | -13.83 | 5.14E-08 | 1.62E-04  | 8.80  |
| 1448610_PM_a_at | Sod2                  | SOD2       | -1.42 | 6.68    | -13.86 | 5.01E-08 | 1.62E-04  | 8.82  |
| 1416009_PM_at   | Tspan3                | TSPAN3     | -1.26 | 7.51    | -14.91 | 2.44E-08 | 1.62E-04  | 9.42  |
| 1455620_PM_at   | Hs3st4                | HS3ST4     | -3.02 | 4.99    | -13.52 | 6.44E-08 | 1.71E-04  | 8.60  |
| 1452116_PM_s_at | Atf2 /// LOC102641666 | ATF2       | -1.52 | 5.39    | -13.58 | 6.16E-08 | 1.71E-04  | 8.64  |
| 1437087_PM_at   | Lrrc8b                | LRRC8B     | -2.31 | 6.11    | -13.42 | 6.89E-08 | 1.73E-04  | 8.55  |
| 1426392_PM_a_at | Actr3                 | ACTR3      | -2.27 | 5.30    | -12.98 | 9.57E-08 | 2.27E-04  | 8.26  |
| 1418210_PM_at   | Pfn2                  | PFN2       | -2.09 | 4.74    | -12.73 | 1.16E-07 | 2.54E-04  | 8.10  |
| 1416853_PM_at   | Ncdn                  | NCDN       | -1.84 | 5.95    | -12.71 | 1.18E-07 | 2.54E-04  | 8.08  |
| 1429425_PM_at   | Rnf139                | RNF139     | -3.20 | 6.22    | -12.53 | 1.35E-07 | 2.69E-04  | 7.96  |
| 1455272_PM_at   | Grm5                  | GRM5       | -3.14 | 4.94    | -12.08 | 1.94E-07 | 2.69E-04  | 7.65  |
| 1454782_PM_at   | Adgrb3                | ADGRB3     | -3.07 | 5.57    | -12.04 | 2.00E-07 | 2.69E-04  | 7.62  |
| 1433986_PM_at   | Smim13                | SMIM13     | -2.93 | 6.88    | -12.43 | 1.46E-07 | 2.69E-04  | 7.89  |
| 1455176_PM_a_at | Syt11                 | SYT11      | -2.66 | 6.06    | -12.49 | 1.39E-07 | 2.69E-04  | 7.94  |
| 1417319_PM_at   | Pvr13                 | NECTIN3    | -2.50 | 5.66    | -12.19 | 1.78E-07 | 2.69E-04  | 7.72  |
| 1452051_PM_at   | Actr3                 | ACTR3      | -2.37 | 5.60    | -12.10 | 1.90E-07 | 2.69E-04  | 7.66  |
| 1415783_PM_at   | Vps35                 | VPS35      | -2.14 | 5.30    | -12.26 | 1.68E-07 | 2.69E-04  | 7.77  |
| 1417864_PM_at   | Pgk1                  | PGK1       | -2.02 | 7.55    | -11.99 | 2.08E-07 | 2.69E-04  | 7.58  |
| 1453000_PM_at   | Camsap2               | CAMSAP2    | -1.87 | 8.11    | -12.17 | 1.80E-07 | 2.69E-04  | 7.71  |
| 1435811_PM_a_at | Unc50                 | UNC50      | -1.70 | 6.26    | -12.20 | 1.76E-07 | 2.69E-04  | 7.73  |
| 1460192_PM_at   | Osbpl1a               | OSBPL1A    | -1.47 | 6.79    | -11.99 | 2.09E-07 | 2.69E-04  | 7.58  |
| 1416364_PM_at   | Hsp90ab1              | HSP90AB1   | -1.39 | 7.69    | -12.22 | 1.72E-07 | 2.69E-04  | 7.75  |
| 1438458_PM_a_at | Sfpq                  | SFPQ       | 1.79  | 9.90    | 12.05  | 1.99E-07 | 2.69E-04  | 7.62  |
| 1431686_PM_a_at | Gmfb                  | GMFB       | -2.88 | 6.31    | -11.88 | 2.27E-07 | 2.77E-04  | 7.50  |
| 1448299_PM_at   | Slc1a1                | SLC1A1     | -2.83 | 5.72    | -11.83 | 2.37E-07 | 2.77E-04  | 7.46  |
| 1459971_PM_at   | Kcnt2                 | KCNT2      | -2.68 | 5.34    | -11.84 | 2.36E-07 | 2.77E-04  | 7.47  |
| 1437290_PM_at   | Impad1                | IMPAD1     | -1.70 | 4.19    | -11.82 | 2.40E-07 | 2.77E-04  | 7.46  |
| 1416446_PM_at   | Tmem30a               | TMEM30A    | -3.81 | 6.60    | -11.72 | 2.59E-07 | 2.92E-04  | 7.39  |
| 1454711_PM_at   | Trio                  | TRIO       | -2.19 | 5.78    | -11.68 | 2.69E-07 | 2.97E-04  | 7.35  |
| 1434958_PM_at   | Sacs                  | SACS       | -3.41 | 5.75    | -11.55 | 3.00E-07 | 3.01E-04  | 7.25  |
| 1457273_PM_at   | Tenm2                 | TENM2      | -2.92 | 7.92    | -11.55 | 3.00E-07 | 3.01E-04  | 7.26  |
| 1452789_PM_at   | Snn                   | SNN        | -1.72 | 6.78    | -11.55 | 3.00E-07 | 3.01E-04  | 7.25  |
| 1423362_PM_at   | Sort1                 | SORT1      | -1.50 | 6.01    | -11.55 | 3.00E-07 | 3.01E-04  | 7.26  |
| 1453367_PM_a_at | Abhd12                | ABHD12     | -2.91 | 4.88    | -11.48 | 3.18E-07 | 3.06E-04  | 7.20  |
| 1448434_PM_at   | Rnf103                | RNF103     | -2.05 | 5.03    | -11.48 | 3.18E-07 | 3.06E-04  | 7.20  |
| 1456144_PM_at   | Nav3                  | NAV3       | -2.12 | 4.03    | -11.39 | 3.43E-07 | 3.22E-04  | 7.13  |
| 1417490_PM_at   | Ctsb                  | CTSB       | -1.72 | 7.07    | -11.33 | 3.60E-07 | 3.25E-04  | 7.09  |
| 1417568_PM_at   | Ncald                 | NCALD      | -1.47 | 6.11    | -11.36 | 3.53E-07 | 3.25E-04  | 7.11  |
| 1416484_PM_at   | Ttc3                  | TTC3       | -2.39 | 7.01    | -11.29 | 3.72E-07 | 3.29E-04  | 7.06  |
| 1452363_PM_a_at | Atp2a2                | ATP2A2     | -2.79 | 6.50    | -11.26 | 3.82E-07 | 3.32E-04  | 7.03  |
| 1428643_PM_at   | Mgat5                 | MGAT5      | -3.09 | 4.73    | -11.24 | 3.90E-07 | 3.32E-04  | 7.02  |
| 1417051_PM_at   | Pcdh8                 | PCDH8      | -1.92 | 3.71    | -11.18 | 4.09E-07 | 3.42E-04  | 6.97  |
| 1451200_PM_at   | Kif1b                 | KIF1B      | -1.78 | 7.29    | -11.15 | 4.19E-07 | 3.44E-04  | 6.95  |
| 1439757_PM_s_at | Epha4                 | EPHA4      | -3.58 | 6.19    | -11.13 | 4.30E-07 | 3.46E-04  | 6.93  |
| 1423039_PM_a_at | Bzw1                  | BZW1       | -1.68 | 4.96    | -11.08 | 4.46E-07 | 3.53E-04  | 6.89  |
| 1427481_PM_a_at | Atp1a3                | ATP1A3     | -2.33 | 8.46    | -11.06 | 4.55E-07 | 3.54E-04  | 6.88  |
| 1424368_PM_s_at | Ubqln1                | UBQLN1     | -2.56 | 5.93    | -10.92 | 5.16E-07 | 3.77E-04  | 6.76  |
| 1455249_PM_at   | Slc36a4               | SLC36A4    | -2.28 | 5.08    | -10.92 | 5.13E-07 | 3.77E-04  | 6.77  |
| 1426369_PM_at   | Far1                  | FAR1       | -1.92 | 4.43    | -10.91 | 5.18E-07 | 3.77E-04  | 6.76  |
| 1436161_PM_at   | Pds5b                 | PDS5B      | -1.75 | 5.45    | -10.92 | 5.15E-07 | 3.77E-04  | 6.76  |
| 1434848_PM_at   | Gpr27                 | GPR27      | -2.15 | 7.09    | -10.81 | 5.65E-07 | 3.91E-04  | 6.68  |
| 1451096_PM_at   | Ndufs2                | NDUFS2     | -1.95 | 5.59    | -10.85 | 5.48E-07 | 3.91E-04  | 6.70  |
| 1438695_PM_at   | Ube3a                 | UBE3A      | -1.94 | 5.03    | -10.80 | 5.72E-07 | 3.91E-04  | 6.67  |
| 1453612_PM_at   | Nek1                  | NEK1       | 2.12  | 4.22    | 10.80  | 5.70E-07 | 3.91E-04  | 6.67  |
| 1423758_PM_at   | G3bp2                 | G3BP2      | -2.76 | 5.82    | -10.74 | 6.05E-07 | 4.07E-04  | 6.62  |
| 1436350_PM_at   | Fam171b               | FAM171B    | -1.90 | 5.47    | -10.70 | 6.24E-07 | 4.14E-04  | 6.59  |
| 1416041_PM_at   | Sgk1                  | SGK1       | -2.15 | 6.61    | -10.64 | 6.62E-07 | 4.27E-04  | 6.53  |
| 1424014_PM_at   | Pagr1a                | PAGR1      | 1.79  | 6.41    | 10.65  | 6.54E-07 | 4.27E-04  | 6.54  |
| 1426404_PM_a_at | Rnf11                 | RNF11      | -1.86 | 4.60    | -10.57 | 7.02E-07 | 4.35E-04  | 6.48  |
| 1439777_PM_at   | Celf2                 | CEL2       | -1.83 | 5.31    | -10.57 | 7.03E-07 | 4.35E-04  | 6.48  |
| 1444952_PM_a_at | Nucks1                | NUCKS1     | 2.89  | 9.16    | 10.57  | 7.04E-07 | 4.35E-04  | 6.47  |

|                 |                                                                                                                                                                              |          |       |      |        |          |          |      |
|-----------------|------------------------------------------------------------------------------------------------------------------------------------------------------------------------------|----------|-------|------|--------|----------|----------|------|
| 1415678_PM_at   | Ppm1a                                                                                                                                                                        | PPM1A    | -1.71 | 5.25 | -10.53 | 7.26E-07 | 4.43E-04 | 6.45 |
| 1433536_PM_at   | Lrp11                                                                                                                                                                        | LRP11    | -2.50 | 6.73 | -10.48 | 7.65E-07 | 4.45E-04 | 6.40 |
| 1430982_PM_at   | Srsf1                                                                                                                                                                        | SRSF1    | -2.16 | 5.10 | -10.48 | 7.61E-07 | 4.45E-04 | 6.40 |
| 1416943_PM_at   | LOC102641153 /// Ube2e1                                                                                                                                                      | UBE2E1   | -2.00 | 6.46 | -10.46 | 7.74E-07 | 4.45E-04 | 6.39 |
| 1416985_PM_at   | Sirpa                                                                                                                                                                        | SIRPB1   | -1.82 | 5.88 | -10.50 | 7.52E-07 | 4.45E-04 | 6.41 |
| 1426265_PM_x_at | Dlat                                                                                                                                                                         | DLAT     | -1.77 | 4.42 | -10.46 | 7.78E-07 | 4.45E-04 | 6.38 |
| 1418157_PM_at   | Nr2f1                                                                                                                                                                        | NR2F1    | -2.57 | 7.13 | -10.39 | 8.29E-07 | 4.63E-04 | 6.32 |
| 1438007_PM_at   | Fam19a2                                                                                                                                                                      | FAM19A2  | -1.75 | 4.05 | -10.39 | 8.31E-07 | 4.63E-04 | 6.32 |
| 1452508_PM_x_at | Ptms                                                                                                                                                                         | NA       | 2.01  | 6.92 | 10.35  | 8.58E-07 | 4.72E-04 | 6.29 |
| 1448083_PM_at   | Nalcn                                                                                                                                                                        | NALCN    | -1.88 | 4.76 | -10.33 | 8.78E-07 | 4.77E-04 | 6.27 |
| 1440534_PM_at   | 6330403A02Rik                                                                                                                                                                | STUM     | -2.82 | 5.51 | -10.28 | 9.14E-07 | 4.80E-04 | 6.23 |
| 1418017_PM_at   | Pum2                                                                                                                                                                         | PUM2     | -1.59 | 4.26 | -10.29 | 9.05E-07 | 4.80E-04 | 6.25 |
| 1421662_PM_a_at | Tusc3                                                                                                                                                                        | TUSC3    | -1.13 | 4.64 | -10.30 | 8.97E-07 | 4.80E-04 | 6.24 |
| 1440816_PM_x_at | Ddx1                                                                                                                                                                         | DDX1     | -1.56 | 4.94 | -10.26 | 9.34E-07 | 4.84E-04 | 6.21 |
| 1448578_PM_at   | Pafah1b1                                                                                                                                                                     | PAFAH1B1 | -1.44 | 6.55 | -10.23 | 9.64E-07 | 4.94E-04 | 6.18 |
| 1418016_PM_at   | Pum2                                                                                                                                                                         | PUM2     | -1.67 | 4.62 | -10.18 | 1.01E-06 | 5.10E-04 | 6.14 |
| 1434968_PM_a_at | Actr3                                                                                                                                                                        | ACTR3    | -2.32 | 5.44 | -10.14 | 1.04E-06 | 5.23E-04 | 6.11 |
| 1455344_PM_at   | Efna3                                                                                                                                                                        | EFNA3    | -2.37 | 4.92 | -10.13 | 1.06E-06 | 5.23E-04 | 6.10 |
| 1446127_PM_at   | Zeb1                                                                                                                                                                         | ZEB1     | 2.36  | 4.41 | 10.12  | 1.07E-06 | 5.23E-04 | 6.09 |
| 1421478_PM_a_at | Zfp318                                                                                                                                                                       | ZNF318   | -2.48 | 5.31 | -10.11 | 1.08E-06 | 5.23E-04 | 6.08 |
| 1455762_PM_at   | Kidins220                                                                                                                                                                    | NA       | -2.48 | 4.63 | -10.08 | 1.11E-06 | 5.32E-04 | 6.05 |
| 1418615_PM_at   | Astn1                                                                                                                                                                        | ASTN1    | -3.67 | 7.55 | -10.05 | 1.14E-06 | 5.32E-04 | 6.03 |
| 1439607_PM_at   | Slc7a14                                                                                                                                                                      | SLC7A14  | -3.14 | 5.44 | -10.05 | 1.13E-06 | 5.32E-04 | 6.03 |
| 1435003_PM_at   | Plka                                                                                                                                                                         | PI4KA    | -2.20 | 6.17 | -10.04 | 1.14E-06 | 5.32E-04 | 6.02 |
| 1427504_PM_s_at | Srsf2                                                                                                                                                                        | SRSF2    | -1.12 | 4.94 | -9.98  | 1.21E-06 | 5.59E-04 | 5.97 |
| 1424341_PM_s_at | Pcdha1 /// Pcdha10 ///<br>Pcdha11 /// Pcdha12 ///<br>Pcdha2 /// Pcdha3 ///<br>Pcdha4 /// Pcdha5 ///<br>Pcdha6 /// Pcdha7 ///<br>Pcdha8 /// Pcdha9 ///<br>Pcdhac1 /// Pcdhac2 | PCDHA7   | -2.92 | 5.07 | -9.86  | 1.37E-06 | 6.17E-04 | 5.86 |
| 1415986_PM_at   | Cln4                                                                                                                                                                         | CLCN4    | -1.87 | 4.81 | -9.86  | 1.36E-06 | 6.17E-04 | 5.86 |
| 1421017_PM_at   | Nrg3                                                                                                                                                                         | NRG3     | -2.64 | 6.81 | -9.81  | 1.43E-06 | 6.23E-04 | 5.81 |
| 1418785_PM_at   | Mapk8ip2                                                                                                                                                                     | MAPK8IP2 | -2.35 | 5.06 | -9.81  | 1.42E-06 | 6.23E-04 | 5.82 |
| 1424827_PM_a_at | Csnk1a1                                                                                                                                                                      | CSNK1A1L | -1.99 | 6.83 | -9.80  | 1.44E-06 | 6.23E-04 | 5.81 |
| 1449012_PM_s_at | Fndc4                                                                                                                                                                        | FNDC4    | -1.41 | 4.00 | -9.83  | 1.40E-06 | 6.23E-04 | 5.83 |
| 1434298_PM_at   | Zeb2                                                                                                                                                                         | ZEB2     | -2.07 | 5.03 | -9.73  | 1.55E-06 | 6.64E-04 | 5.74 |
| 1423640_PM_at   | Synpr                                                                                                                                                                        | SYNPR    | -3.30 | 7.49 | -9.69  | 1.60E-06 | 6.83E-04 | 5.71 |
| 1416094_PM_at   | Adam9                                                                                                                                                                        | ADAM9    | -1.99 | 4.39 | -9.66  | 1.66E-06 | 7.00E-04 | 5.67 |
| 1415863_PM_at   | Eif4g2                                                                                                                                                                       | EIF4G2   | -2.86 | 6.23 | -9.59  | 1.77E-06 | 7.23E-04 | 5.61 |
| 1454826_PM_at   | Zbtb11                                                                                                                                                                       | ZBTB11   | -2.20 | 4.69 | -9.59  | 1.77E-06 | 7.23E-04 | 5.61 |
| 1435486_PM_at   | Pak3                                                                                                                                                                         | PAK3     | -1.82 | 5.98 | -9.59  | 1.78E-06 | 7.23E-04 | 5.61 |
| 1418664_PM_at   | Mpdz                                                                                                                                                                         | MPDZ     | -1.37 | 6.51 | -9.61  | 1.74E-06 | 7.23E-04 | 5.63 |
| 1448867_PM_at   | Tmem9b                                                                                                                                                                       | TMEM9B   | -1.96 | 6.14 | -9.56  | 1.83E-06 | 7.36E-04 | 5.58 |
| 1450731_PM_s_at | Tnfrsf21                                                                                                                                                                     | TNFRSF21 | -3.36 | 4.99 | -9.49  | 1.96E-06 | 7.52E-04 | 5.52 |
| 1434709_PM_at   | Nrcam                                                                                                                                                                        | NRCAM    | -2.14 | 7.31 | -9.47  | 1.99E-06 | 7.52E-04 | 5.50 |
| 1422307_PM_at   | Gm10401                                                                                                                                                                      | NA       | -2.01 | 4.52 | -9.49  | 1.95E-06 | 7.52E-04 | 5.52 |
| 1426678_PM_at   | Zfp706                                                                                                                                                                       | ZNF706   | -1.99 | 5.97 | -9.46  | 2.01E-06 | 7.52E-04 | 5.49 |
| 1434108_PM_at   | Fbxo11                                                                                                                                                                       | FBXO11   | -1.96 | 5.61 | -9.46  | 2.02E-06 | 7.52E-04 | 5.49 |
| 1451783_PM_a_at | Kifap3                                                                                                                                                                       | KIFAP3   | -1.92 | 8.06 | -9.49  | 1.95E-06 | 7.52E-04 | 5.52 |
| 1428412_PM_at   | Tm9sf3                                                                                                                                                                       | TM9SF3   | -1.76 | 7.04 | -9.51  | 1.91E-06 | 7.52E-04 | 5.54 |
| 1429709_PM_at   | Pmpcb                                                                                                                                                                        | PMPCB    | -1.11 | 3.44 | -9.46  | 2.01E-06 | 7.52E-04 | 5.49 |
| 1427135_PM_at   | Srek1                                                                                                                                                                        | SREK1    | 2.74  | 6.19 | 9.47   | 1.99E-06 | 7.52E-04 | 5.50 |
| 1433968_PM_a_at | Megf9                                                                                                                                                                        | MEGF9    | -3.47 | 7.19 | -9.43  | 2.07E-06 | 7.66E-04 | 5.46 |
| 1441491_PM_at   | ---                                                                                                                                                                          | NA       | -1.19 | 4.44 | -9.42  | 2.09E-06 | 7.67E-04 | 5.45 |
| 1448955_PM_s_at | Cadps                                                                                                                                                                        | CADPS    | -2.84 | 6.30 | -9.38  | 2.17E-06 | 7.74E-04 | 5.42 |
| 1433604_PM_x_at | Aldoa                                                                                                                                                                        | ALDOA    | -2.42 | 5.64 | -9.38  | 2.18E-06 | 7.74E-04 | 5.42 |
| 1448551_PM_a_at | Trim2                                                                                                                                                                        | TRIM2    | -2.39 | 5.43 | -9.38  | 2.17E-06 | 7.74E-04 | 5.42 |
| 1420815_PM_at   | Gdi2                                                                                                                                                                         | GDI2     | -2.04 | 5.22 | -9.39  | 2.15E-06 | 7.74E-04 | 5.43 |
| 1426628_PM_at   | Tmem184c                                                                                                                                                                     | TMEM184C | -2.55 | 5.06 | -9.37  | 2.21E-06 | 7.76E-04 | 5.40 |
| 1428305_PM_at   | Pcsk2                                                                                                                                                                        | PCSK2    | -1.16 | 5.74 | -9.36  | 2.22E-06 | 7.76E-04 | 5.40 |
| 1428437_PM_at   | Lsm14a                                                                                                                                                                       | LSM14A   | -1.59 | 5.31 | -9.35  | 2.24E-06 | 7.80E-04 | 5.39 |
| 1452841_PM_at   | Pgm2l1                                                                                                                                                                       | PGM2L1   | -1.95 | 4.62 | -9.33  | 2.29E-06 | 7.88E-04 | 5.37 |
| 1435637_PM_at   | Iitfg1                                                                                                                                                                       | ITFG1    | -3.06 | 4.28 | -9.30  | 2.36E-06 | 8.06E-04 | 5.34 |
| 1439382_PM_x_at | Ddr1                                                                                                                                                                         | DDR1     | -1.14 | 6.64 | -9.28  | 2.40E-06 | 8.15E-04 | 5.32 |
| 1429105_PM_at   | Dlgap1                                                                                                                                                                       | DLGAP1   | -1.36 | 4.93 | -9.26  | 2.45E-06 | 8.27E-04 | 5.30 |
| 1423488_PM_at   | Mmd                                                                                                                                                                          | MMD      | -2.77 | 5.90 | -9.20  | 2.61E-06 | 8.72E-04 | 5.24 |
| 1424029_PM_at   | Tspyl4                                                                                                                                                                       | TSPYL4   | -2.29 | 6.44 | -9.19  | 2.63E-06 | 8.72E-04 | 5.24 |
| 1452196_PM_a_at | Nckap1                                                                                                                                                                       | NCKAP1   | -1.87 | 9.34 | -9.18  | 2.66E-06 | 8.78E-04 | 5.22 |
| 1434638_PM_at   | Grin2a                                                                                                                                                                       | GRI N2A  | -3.51 | 7.71 | -9.14  | 2.78E-06 | 8.95E-04 | 5.18 |
| 1438432_PM_at   | ---                                                                                                                                                                          | NA       | -2.62 | 6.18 | -9.11  | 2.85E-06 | 8.95E-04 | 5.16 |
| 1454794_PM_at   | Spast                                                                                                                                                                        | SPAST    | -2.30 | 5.24 | -9.10  | 2.90E-06 | 8.95E-04 | 5.14 |
| 1452213_PM_at   | Tex2                                                                                                                                                                         | TEX2     | -1.96 | 4.51 | -9.13  | 2.81E-06 | 8.95E-04 | 5.17 |

|                 |                              |         |       |      |       |          |          |      |
|-----------------|------------------------------|---------|-------|------|-------|----------|----------|------|
| 1429189_PM_at   | Arsb                         | ARSB    | -1.90 | 3.71 | -9.15 | 2.75E-06 | 8.95E-04 | 5.19 |
| 1452209_PM_at   | Pkp4                         | PKP4    | -1.79 | 8.81 | -9.10 | 2.88E-06 | 8.95E-04 | 5.15 |
| 1423183_PM_at   | Lgi1                         | LG11    | -1.69 | 6.28 | -9.10 | 2.87E-06 | 8.95E-04 | 5.15 |
| 1433851_PM_at   | Ppp4r2                       | PPP4R2  | -1.48 | 5.03 | -9.12 | 2.83E-06 | 8.95E-04 | 5.17 |
| 1416408_PM_at   | Acox1                        | ACOX1   | -1.40 | 7.35 | -9.13 | 2.81E-06 | 8.95E-04 | 5.17 |
| 1448179_PM_at   | Usmg5                        | NA      | -0.95 | 8.95 | -9.09 | 2.93E-06 | 9.00E-04 | 5.13 |
| 1433596_PM_at   | Dnajc6                       | DNAJC6  | -2.77 | 7.92 | -9.07 | 2.97E-06 | 9.03E-04 | 5.12 |
| 1433504_PM_at   | Pygb                         | PYGB    | -1.71 | 5.01 | -9.07 | 2.98E-06 | 9.03E-04 | 5.12 |
| 1416790_PM_a_at | Gm9855 /// Tdg /// Tdg-ps    | TDG     | -1.66 | 6.33 | -9.05 | 3.05E-06 | 9.14E-04 | 5.09 |
| 1439200_PM_x_at | Erdr1                        | NA      | 2.27  | 7.33 | 9.04  | 3.06E-06 | 9.14E-04 | 5.09 |
| 1426776_PM_at   | Wasl                         | WASL    | -2.56 | 6.89 | -8.97 | 3.30E-06 | 9.68E-04 | 5.02 |
| 1438671_PM_at   | Ppp2r2c                      | PPP2R2C | -1.70 | 7.61 | -8.97 | 3.30E-06 | 9.68E-04 | 5.02 |
| 1436025_PM_at   | Ccdc88a                      | CCDC88A | -1.50 | 4.05 | -8.97 | 3.29E-06 | 9.68E-04 | 5.02 |
| 1415915_PM_at   | Ddx1                         | DDX1    | -1.40 | 6.60 | -8.96 | 3.33E-06 | 9.69E-04 | 5.01 |
| 1455737_PM_at   | Ppm1h                        | PPM1H   | -2.42 | 5.28 | -8.94 | 3.41E-06 | 9.80E-04 | 4.99 |
| 1423561_PM_at   | Nell2                        | NELL2   | -2.02 | 6.75 | -8.94 | 3.40E-06 | 9.80E-04 | 4.99 |
| 1435715_PM_x_at | Gm9855 /// Tdg /// Tdg-ps    | TDG     | -1.31 | 5.12 | -8.93 | 3.46E-06 | 9.88E-04 | 4.97 |
| 1423091_PM_a_at | Gpm6b                        | GPM6B   | -1.57 | 9.77 | -8.91 | 3.52E-06 | 9.98E-04 | 4.96 |
| 1449110_PM_at   | Rhob                         | RHOB    | -1.84 | 6.93 | -8.90 | 3.56E-06 | 1.00E-03 | 4.95 |
| 1452380_PM_at   | Epha7                        | EPHA7   | -2.87 | 5.33 | -8.87 | 3.67E-06 | 1.02E-03 | 4.92 |
| 1460580_PM_at   | Pcnx                         | PCNX1   | -2.20 | 6.83 | -8.87 | 3.68E-06 | 1.02E-03 | 4.91 |
| 1435203_PM_at   | Man2a2                       | MAN2A2  | -1.82 | 6.77 | -8.87 | 3.67E-06 | 1.02E-03 | 4.92 |
| 1450053_PM_at   | Kif2a                        | KIF2A   | -2.38 | 5.48 | -8.84 | 3.77E-06 | 1.04E-03 | 4.89 |
| 1452396_PM_at   | Scaf4                        | SCAF4   | 2.41  | 8.50 | 8.81  | 3.88E-06 | 1.06E-03 | 4.86 |
| 1451485_PM_at   | Luc7l3                       | LUC7L3  | 0.96  | 9.24 | 8.79  | 4.00E-06 | 1.09E-03 | 4.83 |
| 1426264_PM_at   | Dlat                         | DLAT    | -1.67 | 4.53 | -8.77 | 4.07E-06 | 1.10E-03 | 4.82 |
| 1423295_PM_at   | Tm9sf2                       | TM9SF2  | -1.86 | 4.46 | -8.75 | 4.16E-06 | 1.12E-03 | 4.80 |
| 1429021_PM_at   | Epha4                        | EPHA4   | -4.28 | 7.35 | -8.73 | 4.25E-06 | 1.13E-03 | 4.78 |
| 1428410_PM_at   | Naa50                        | NAA50   | -1.95 | 4.12 | -8.71 | 4.31E-06 | 1.14E-03 | 4.76 |
| 1451175_PM_at   | Spc3                         | SPCS3   | -1.43 | 5.66 | -8.72 | 4.30E-06 | 1.14E-03 | 4.76 |
| 1443790_PM_x_at | Partic1                      | NA      | -2.31 | 5.04 | -8.70 | 4.39E-06 | 1.15E-03 | 4.74 |
| 1436534_PM_at   | Trove2                       | TROVE2  | -1.90 | 5.71 | -8.68 | 4.46E-06 | 1.16E-03 | 4.73 |
| 1417344_PM_at   | Emc7                         | EMC7    | -2.16 | 5.55 | -8.65 | 4.61E-06 | 1.19E-03 | 4.70 |
| 1423649_PM_at   | Tmem68                       | TMEM68  | -1.74 | 3.94 | -8.65 | 4.61E-06 | 1.19E-03 | 4.70 |
| 1448108_PM_at   | Serinc1                      | SERINC1 | -2.58 | 6.66 | -8.61 | 4.84E-06 | 1.23E-03 | 4.65 |
| 1426376_PM_at   | Reep5                        | REEP5   | -2.12 | 7.11 | -8.60 | 4.86E-06 | 1.23E-03 | 4.64 |
| 1418963_PM_at   | Fam188a                      | MINDY3  | -2.04 | 4.72 | -8.61 | 4.82E-06 | 1.23E-03 | 4.65 |
| 1450123_PM_at   | Ryr2                         | RYR2    | -2.44 | 5.14 | -8.58 | 4.97E-06 | 1.24E-03 | 4.62 |
| 1428407_PM_at   | Hnrnpa0                      | HNRNPA0 | -2.11 | 4.55 | -8.56 | 5.08E-06 | 1.24E-03 | 4.60 |
| 1427464_PM_s_at | Hspa5                        | HSPA5   | -1.96 | 6.93 | -8.57 | 5.05E-06 | 1.24E-03 | 4.61 |
| 1416600_PM_a_at | Rcan1                        | RCAN1   | -1.91 | 5.80 | -8.57 | 5.05E-06 | 1.24E-03 | 4.61 |
| 1454851_PM_at   | Nr2c2                        | NR2C2   | -1.84 | 5.91 | -8.56 | 5.07E-06 | 1.24E-03 | 4.60 |
| 1452660_PM_s_at | Klhl7                        | KLHL7   | -1.71 | 3.96 | -8.57 | 5.03E-06 | 1.24E-03 | 4.61 |
| 1448595_PM_a_at | Bex1                         | BEX2    | 2.19  | 9.07 | 8.57  | 5.01E-06 | 1.24E-03 | 4.62 |
| 1420474_PM_at   | Mtpn                         | MTPN    | -2.30 | 6.90 | -8.54 | 5.18E-06 | 1.25E-03 | 4.58 |
| 1417609_PM_at   | Ube2a /// Ube2b              | UBE2A   | -1.73 | 4.72 | -8.54 | 5.22E-06 | 1.25E-03 | 4.58 |
| 1434728_PM_at   | Gria3                        | GRIA3   | -1.54 | 7.20 | -8.53 | 5.23E-06 | 1.25E-03 | 4.58 |
| 1451285_PM_at   | Fus                          | FUS     | 1.85  | 8.77 | 8.54  | 5.20E-06 | 1.25E-03 | 4.58 |
| 1416711_PM_at   | Tbr1                         | TBR1    | -2.29 | 5.01 | -8.52 | 5.33E-06 | 1.25E-03 | 4.56 |
| 1453185_PM_at   | Pnlsr                        | PNLSR   | 1.57  | 8.41 | 8.52  | 5.31E-06 | 1.25E-03 | 4.56 |
| 1426805_PM_at   | Smarca4                      | SMARCA4 | 1.76  | 5.18 | 8.52  | 5.32E-06 | 1.25E-03 | 4.56 |
| 1428971_PM_at   | Ccny                         | CCNY    | -1.82 | 6.90 | -8.49 | 5.46E-06 | 1.28E-03 | 4.53 |
| 1428075_PM_at   | Gm3244 /// Gm3873 /// Ndufb4 | NDUFB4  | -2.28 | 5.38 | -8.49 | 5.50E-06 | 1.28E-03 | 4.53 |
| 1434877_PM_at   | Nptx1                        | NPTX1   | -4.04 | 7.93 | -8.45 | 5.74E-06 | 1.32E-03 | 4.48 |
| 1456226_PM_x_at | Ddr1                         | DDR1    | -1.38 | 8.19 | -8.45 | 5.74E-06 | 1.32E-03 | 4.48 |
| 1450890_PM_a_at | Abi1                         | ABI1    | -2.18 | 5.55 | -8.43 | 5.86E-06 | 1.34E-03 | 4.46 |
| 1451231_PM_a_at | Cul2                         | CUL2    | -1.56 | 3.59 | -8.40 | 6.06E-06 | 1.38E-03 | 4.43 |
| 1428334_PM_at   | Ostm1                        | OSTM1   | -1.96 | 5.09 | -8.38 | 6.20E-06 | 1.41E-03 | 4.41 |
| 1450757_PM_at   | Cdh11                        | CDH11   | -2.37 | 5.14 | -8.31 | 6.65E-06 | 1.48E-03 | 4.34 |
| 1436340_PM_at   | Frrs1l                       | FRRS1L  | -1.95 | 6.99 | -8.31 | 6.68E-06 | 1.48E-03 | 4.34 |
| 1453104_PM_at   | Mapk1                        | MAPK1   | -1.89 | 5.84 | -8.31 | 6.69E-06 | 1.48E-03 | 4.34 |
| 1448129_PM_at   | Arpc5                        | ARPC5   | -1.86 | 4.72 | -8.31 | 6.69E-06 | 1.48E-03 | 4.34 |
| 1434706_PM_at   | Vcpi1                        | VCPI1   | -1.79 | 6.57 | -8.32 | 6.63E-06 | 1.48E-03 | 4.34 |
| 1452155_PM_a_at | Ddx17                        | DDX17   | -1.86 | 5.44 | -8.30 | 6.76E-06 | 1.48E-03 | 4.32 |
| 1428103_PM_at   | Adam10                       | ADAM10  | -1.83 | 6.60 | -8.30 | 6.77E-06 | 1.48E-03 | 4.32 |
| 1422130_PM_at   | Nptx1                        | NPTX1   | -2.87 | 5.52 | -8.27 | 6.94E-06 | 1.51E-03 | 4.30 |
| 1419650_PM_at   | Zfr                          | ZFR     | -2.50 | 6.55 | -8.26 | 7.08E-06 | 1.53E-03 | 4.28 |
| 1455358_PM_at   | Rbfox1                       | RBFOX1  | -1.99 | 6.40 | -8.26 | 7.06E-06 | 1.53E-03 | 4.28 |
| 1434249_PM_s_at | Trim9                        | TRIM9   | -1.52 | 7.49 | -8.22 | 7.33E-06 | 1.58E-03 | 4.25 |
| 1415794_PM_a_at | Spin1                        | SPIN1   | -2.13 | 6.05 | -8.22 | 7.38E-06 | 1.58E-03 | 4.24 |
| 1440859_PM_at   | Akap6                        | AKAP6   | -2.30 | 5.43 | -8.21 | 7.47E-06 | 1.59E-03 | 4.23 |
| 1427468_PM_at   | Ppp3cb                       | PPP3CB  | -1.97 | 6.59 | -8.18 | 7.70E-06 | 1.62E-03 | 4.20 |

|                 |          |          |       |       |       |          |          |      |
|-----------------|----------|----------|-------|-------|-------|----------|----------|------|
| 1420739_PM_at   | Cntn3    | CNTN3    | -1.75 | 3.81  | -8.18 | 7.70E-06 | 1.62E-03 | 4.20 |
| 1457144_PM_at   | Scn2b    | SCN2B    | 1.25  | 4.37  | 8.16  | 7.85E-06 | 1.65E-03 | 4.18 |
| 1452130_PM_at   | Tmx2     | TMX2     | -2.24 | 5.25  | -8.15 | 7.95E-06 | 1.66E-03 | 4.17 |
| 1435234_PM_at   | Ncoa2    | NCOA2    | -1.76 | 6.31  | -8.15 | 7.96E-06 | 1.66E-03 | 4.17 |
| 1435187_PM_at   | Tomm20   | TOMM20   | -1.98 | 6.06  | -8.14 | 8.04E-06 | 1.66E-03 | 4.16 |
| 1434000_PM_at   | Kras     | KRAS     | -1.09 | 6.49  | -8.15 | 8.01E-06 | 1.66E-03 | 4.16 |
| 1427598_PM_at   | Snord116 | NA       | 1.61  | 8.15  | 8.14  | 8.07E-06 | 1.66E-03 | 4.15 |
| 1435028_PM_at   | Wdr7     | WDR7     | -1.64 | 6.82  | -8.10 | 8.43E-06 | 1.72E-03 | 4.11 |
| 1435687_PM_at   | Sv2b     | SV2B     | -2.19 | 7.29  | -8.08 | 8.62E-06 | 1.75E-03 | 4.09 |
| 1435614_PM_s_at | Rasgrf1  | RASGRF1  | -2.58 | 8.28  | -8.06 | 8.79E-06 | 1.78E-03 | 4.07 |
| 1433751_PM_at   | Slc39a10 | SLC39A10 | -2.24 | 6.00  | -8.06 | 8.85E-06 | 1.78E-03 | 4.06 |
| 1435043_PM_at   | Plcb1    | PLCB1    | -2.21 | 6.88  | -8.04 | 8.98E-06 | 1.80E-03 | 4.05 |
| 1415821_PM_at   | Nptn     | NPTN     | -1.55 | 9.04  | -8.04 | 9.02E-06 | 1.80E-03 | 4.04 |
| 1434020_PM_at   | Pdap1    | PDAP1    | 1.54  | 6.55  | 8.04  | 9.05E-06 | 1.80E-03 | 4.04 |
| 1434272_PM_at   | Cpeb2    | CPEB2    | -1.74 | 5.67  | -8.03 | 9.11E-06 | 1.80E-03 | 4.03 |
| 1435291_PM_at   | Lemd3    | LEMD3    | -2.03 | 5.24  | -8.01 | 9.34E-06 | 1.81E-03 | 4.01 |
| 1435164_PM_s_at | Uba3     | UBA3     | -1.95 | 4.24  | -8.02 | 9.23E-06 | 1.81E-03 | 4.02 |
| 1455266_PM_at   | Kif5c    | KIF5C    | -1.81 | 9.25  | -8.01 | 9.34E-06 | 1.81E-03 | 4.01 |
| 1430154_PM_at   | Vps13a   | NA       | -1.72 | 4.68  | -8.01 | 9.28E-06 | 1.81E-03 | 4.02 |
| 1448230_PM_at   | Usp10    | USP10    | -1.56 | 4.91  | -8.02 | 9.26E-06 | 1.81E-03 | 4.02 |
| 1459430_PM_at   | Gpr158   | GPR158   | -2.48 | 5.20  | -8.00 | 9.46E-06 | 1.81E-03 | 4.00 |
| 1447522_PM_s_at | Tnks2    | TNKS2    | -2.45 | 6.10  | -7.98 | 9.63E-06 | 1.81E-03 | 3.98 |
| 1453008_PM_at   | Trnp1    | TRNP1    | -1.68 | 5.45  | -7.99 | 9.58E-06 | 1.81E-03 | 3.99 |
| 1434146_PM_at   | Gria2    | GRIA2    | -1.56 | 8.93  | -7.98 | 9.63E-06 | 1.81E-03 | 3.98 |
| 1421847_PM_at   | Wsb2     | WSB2     | -1.22 | 8.62  | -8.00 | 9.42E-06 | 1.81E-03 | 4.00 |
| 1435133_PM_at   | Ugcg     | UGCG     | -1.17 | 5.00  | -7.98 | 9.62E-06 | 1.81E-03 | 3.98 |
| 1439159_PM_at   | ---      | NA       | 0.81  | 3.03  | 7.98  | 9.61E-06 | 1.81E-03 | 3.98 |
| 1420487_PM_at   | ---      | NA       | -1.94 | 5.58  | -7.95 | 9.97E-06 | 1.86E-03 | 3.95 |
| 1426949_PM_s_at | Tpr      | TPR      | -1.36 | 5.17  | -7.95 | 9.97E-06 | 1.86E-03 | 3.95 |
| 1455357_PM_x_at | Tomm20   | TOMM20   | -1.39 | 5.88  | -7.93 | 1.02E-05 | 1.88E-03 | 3.93 |
| 1418841_PM_s_at | Cdk11b   | CDK11A   | 0.99  | 4.00  | 7.93  | 1.02E-05 | 1.88E-03 | 3.93 |
| 1434284_PM_at   | Bdp1     | BDP1     | -2.29 | 4.94  | -7.88 | 1.08E-05 | 1.98E-03 | 3.87 |
| 1460631_PM_at   | Ogt      | OGT      | -2.24 | 7.17  | -7.85 | 1.12E-05 | 2.05E-03 | 3.84 |
| 1434781_PM_at   | Dnajc16  | DNAJC16  | -1.94 | 7.93  | -7.85 | 1.12E-05 | 2.05E-03 | 3.83 |
| 1460552_PM_at   | Snrnp200 | SNRNP200 | -1.13 | 6.38  | -7.85 | 1.12E-05 | 2.05E-03 | 3.83 |
| 1428844_PM_a_at | Bclaf1   | BCLAF1   | 1.17  | 9.17  | 7.84  | 1.13E-05 | 2.05E-03 | 3.82 |
| 1417829_PM_a_at | Rab15    | RAB15    | -1.93 | 6.64  | -7.83 | 1.15E-05 | 2.06E-03 | 3.81 |
| 1452649_PM_at   | Rtn4     | RTN4     | -1.23 | 10.11 | -7.83 | 1.14E-05 | 2.06E-03 | 3.81 |
| 1428140_PM_at   | Oxct1    | OXCT1    | -1.21 | 6.04  | -7.83 | 1.14E-05 | 2.06E-03 | 3.82 |
| 1429691_PM_at   | Ptprg    | PTPRG    | -2.01 | 6.59  | -7.82 | 1.16E-05 | 2.07E-03 | 3.80 |
| 1433985_PM_at   | Abi2     | ABI2     | -2.17 | 6.46  | -7.79 | 1.19E-05 | 2.12E-03 | 3.77 |
| 1429211_PM_at   | Cadm2    | CADM2    | -2.59 | 7.10  | -7.78 | 1.20E-05 | 2.13E-03 | 3.76 |
| 1449010_PM_at   | Hspa4l   | HSPA4L   | -2.29 | 4.67  | -7.77 | 1.22E-05 | 2.15E-03 | 3.75 |
| 1422431_PM_at   | Magee1   | MAGEE1   | -1.06 | 2.88  | -7.77 | 1.23E-05 | 2.15E-03 | 3.74 |
| 1423222_PM_at   | Cap2     | CAP2     | -1.49 | 4.64  | -7.75 | 1.25E-05 | 2.19E-03 | 3.72 |
| 1426662_PM_at   | Cmas     | CMAS     | -1.43 | 4.77  | -7.73 | 1.28E-05 | 2.24E-03 | 3.70 |
| 1447991_PM_at   | Pcsk2    | PCSK2    | -1.72 | 8.90  | -7.73 | 1.29E-05 | 2.24E-03 | 3.70 |
| 1449677_PM_s_at | Tmem38b  | TMEM38B  | -1.50 | 4.93  | -7.72 | 1.30E-05 | 2.24E-03 | 3.69 |
| 1434816_PM_at   | Vps33a   | VPS33A   | -2.01 | 4.03  | -7.71 | 1.31E-05 | 2.26E-03 | 3.68 |
| 1452836_PM_at   | Lpin2    | LPIN2    | -2.43 | 6.79  | -7.70 | 1.33E-05 | 2.27E-03 | 3.67 |
| 1428999_PM_at   | Phf3     | PHF3     | 2.07  | 7.80  | 7.70  | 1.32E-05 | 2.27E-03 | 3.67 |
| 1428078_PM_at   | Rnft1    | RNFT1    | -1.52 | 3.93  | -7.69 | 1.34E-05 | 2.28E-03 | 3.66 |
| 1419225_PM_at   | Cacna2d3 | CACNA2D3 | -2.13 | 4.99  | -7.69 | 1.35E-05 | 2.29E-03 | 3.65 |
| 1426830_PM_a_at | Ahcy1l   | AHCYL1   | -1.91 | 4.75  | -7.68 | 1.36E-05 | 2.30E-03 | 3.64 |
| 1456637_PM_at   | Lrrtm2   | LRRTM2   | -1.56 | 6.50  | -7.68 | 1.36E-05 | 2.30E-03 | 3.64 |
| 1446622_PM_at   | ---      | NA       | -1.16 | 4.00  | -7.67 | 1.37E-05 | 2.30E-03 | 3.64 |
| 1455361_PM_at   | Dgkb     | NA       | -2.45 | 6.89  | -7.66 | 1.40E-05 | 2.32E-03 | 3.62 |
| 1416280_PM_at   | Uba2     | UBA2     | -1.39 | 5.15  | -7.65 | 1.40E-05 | 2.32E-03 | 3.61 |
| 1450543_PM_at   | Myo1h    | MYO1H    | -1.09 | 4.68  | -7.65 | 1.40E-05 | 2.32E-03 | 3.61 |
| 1423325_PM_at   | Pnn      | PNN      | 1.28  | 7.55  | 7.65  | 1.40E-05 | 2.32E-03 | 3.61 |
| 1435940_PM_at   | Dclk1    | DCLK1    | -1.51 | 5.82  | -7.64 | 1.42E-05 | 2.34E-03 | 3.60 |
| 1437745_PM_at   | Chd7     | CHD7     | 1.57  | 3.15  | 7.64  | 1.43E-05 | 2.34E-03 | 3.60 |
| 1436076_PM_at   | Dlgap1   | DLGAP1   | -2.47 | 7.25  | -7.63 | 1.45E-05 | 2.36E-03 | 3.58 |
| 1422438_PM_at   | Ephx1    | EPHX1    | -1.03 | 3.42  | -7.62 | 1.45E-05 | 2.37E-03 | 3.58 |
| 1454715_PM_at   | Raly1    | RALY1    | -1.36 | 6.82  | -7.60 | 1.48E-05 | 2.41E-03 | 3.56 |
| 1422640_PM_at   | Pcdhb9   | PCDHB4   | -1.22 | 3.33  | -7.60 | 1.49E-05 | 2.41E-03 | 3.55 |
| 1454967_PM_at   | Crebrf   | CREBRF   | -1.21 | 4.77  | -7.60 | 1.49E-05 | 2.41E-03 | 3.55 |
| 1435218_PM_at   | Rasgef1a | RASGEF1A | -1.16 | 3.80  | -7.60 | 1.50E-05 | 2.41E-03 | 3.55 |
| 1454768_PM_at   | Kcnf1    | KCNF1    | -1.99 | 4.85  | -7.58 | 1.52E-05 | 2.42E-03 | 3.53 |
| 1426457_PM_at   | Smap     | SLMAP    | -1.96 | 6.10  | -7.58 | 1.52E-05 | 2.42E-03 | 3.53 |
| 1459907_PM_a_at | Whsc11   | NSD3     | 2.07  | 3.77  | 7.59  | 1.51E-05 | 2.42E-03 | 3.54 |
| 1436743_PM_at   | Cadm2    | CADM2    | -2.48 | 6.01  | -7.57 | 1.56E-05 | 2.45E-03 | 3.51 |
| 1428938_PM_at   | Gnaq     | GNAQ     | -1.67 | 5.82  | -7.56 | 1.56E-05 | 2.45E-03 | 3.51 |
| 1456037_PM_x_at | Preb     | PREB     | 2.31  | 6.89  | 7.57  | 1.55E-05 | 2.45E-03 | 3.52 |
| 1434697_PM_at   | Ddx6     | DDX6     | -1.15 | 6.13  | -7.56 | 1.57E-05 | 2.46E-03 | 3.50 |

|                 |                               |           |       |       |       |          |          |      |
|-----------------|-------------------------------|-----------|-------|-------|-------|----------|----------|------|
| 1433561_PM_at   | Acap2                         | ACAP2     | -2.27 | 4.27  | -7.54 | 1.60E-05 | 2.47E-03 | 3.48 |
| 1429938_PM_at   | A930009E05Rik ///<br>Tmem178b | TMEM178B  | -1.83 | 3.79  | -7.55 | 1.59E-05 | 2.47E-03 | 3.49 |
| 1434328_PM_at   | Rpl15                         | RPL15     | -1.69 | 6.30  | -7.55 | 1.59E-05 | 2.47E-03 | 3.49 |
| 1449999_PM_a_at | Cacna2d1                      | CACNA2D1  | -1.34 | 5.30  | -7.54 | 1.59E-05 | 2.47E-03 | 3.49 |
| 1456341_PM_a_at | Klf9                          | KLf9      | -1.30 | 9.42  | -7.54 | 1.60E-05 | 2.47E-03 | 3.48 |
| 1421861_PM_at   | Clstn1                        | CLSTN1    | -1.95 | 8.66  | -7.54 | 1.61E-05 | 2.47E-03 | 3.48 |
| 1449739_PM_at   | Ptdss1                        | NA        | -0.80 | 5.42  | -7.53 | 1.62E-05 | 2.48E-03 | 3.47 |
| 1435260_PM_at   | Akt3                          | NA        | -0.95 | 7.61  | -7.53 | 1.63E-05 | 2.48E-03 | 3.46 |
| 1448954_PM_at   | Nrip3                         | NRIP3     | -2.21 | 4.74  | -7.52 | 1.64E-05 | 2.49E-03 | 3.46 |
| 1437331_PM_a_at | Arf3                          | ARF3      | -0.86 | 9.42  | -7.51 | 1.65E-05 | 2.51E-03 | 3.45 |
| 1452905_PM_at   | Meg3                          | NA        | 1.53  | 9.01  | 7.51  | 1.67E-05 | 2.52E-03 | 3.44 |
| 1433852_PM_at   | Kidins220                     | KIDINS220 | -1.29 | 8.35  | -7.49 | 1.70E-05 | 2.56E-03 | 3.42 |
| 1444422_PM_at   | Pcdh19                        | PCDH19    | -1.77 | 3.46  | -7.48 | 1.73E-05 | 2.58E-03 | 3.41 |
| 1423052_PM_at   | Arf4                          | ARF4      | -1.61 | 5.42  | -7.47 | 1.73E-05 | 2.58E-03 | 3.40 |
| 1448236_PM_at   | Rdx                           | RDX       | -1.44 | 4.86  | -7.47 | 1.73E-05 | 2.58E-03 | 3.40 |
| 1416755_PM_at   | Dnajb1                        | DNAJB1    | -2.11 | 7.60  | -7.47 | 1.74E-05 | 2.58E-03 | 3.40 |
| 1423274_PM_at   | Ints6                         | NA        | -1.58 | 8.89  | -7.47 | 1.75E-05 | 2.59E-03 | 3.39 |
| 1423470_PM_at   | Ptbp2                         | PTBP2     | -1.31 | 4.85  | -7.46 | 1.76E-05 | 2.60E-03 | 3.39 |
| 1421089_PM_a_at | Pinx1                         | PINX1     | 1.44  | 4.04  | 7.45  | 1.78E-05 | 2.61E-03 | 3.38 |
| 1436405_PM_at   | Dock4                         | NA        | -3.64 | 6.89  | -7.43 | 1.82E-05 | 2.63E-03 | 3.36 |
| 1416060_PM_at   | Tbc1d15                       | TBC1D15   | -2.67 | 5.70  | -7.43 | 1.82E-05 | 2.63E-03 | 3.36 |
| 1456478_PM_at   | Pgm2l1                        | PGM2L1    | -2.28 | 7.52  | -7.43 | 1.82E-05 | 2.63E-03 | 3.36 |
| 1452832_PM_s_at | Cds2                          | CDS2      | -2.04 | 5.74  | -7.44 | 1.81E-05 | 2.63E-03 | 3.36 |
| 1415686_PM_at   | Rab14                         | RAB14     | -1.57 | 6.06  | -7.44 | 1.80E-05 | 2.63E-03 | 3.37 |
| 1434556_PM_at   | Tmem170b                      | TMEM170B  | -2.62 | 5.29  | -7.41 | 1.86E-05 | 2.68E-03 | 3.33 |
| 1450066_PM_at   | Ubr1                          | UBR1      | -1.19 | 8.28  | -7.42 | 1.86E-05 | 2.68E-03 | 3.34 |
| 1435437_PM_at   | Setd7                         | SETD7     | -0.99 | 6.31  | -7.41 | 1.87E-05 | 2.69E-03 | 3.33 |
| 1420956_PM_at   | Apc                           | APC       | -1.51 | 4.96  | -7.40 | 1.89E-05 | 2.70E-03 | 3.32 |
| 1431403_PM_a_at | Map7d2                        | MAP7D2    | 2.51  | 6.01  | 7.40  | 1.90E-05 | 2.71E-03 | 3.31 |
| 1422449_PM_s_at | Rcn2                          | RCN2      | -1.85 | 5.61  | -7.38 | 1.93E-05 | 2.74E-03 | 3.30 |
| 1418954_PM_at   | Camkk1                        | CAMKK1    | -1.24 | 4.30  | -7.38 | 1.94E-05 | 2.74E-03 | 3.29 |
| 1418360_PM_at   | Rnf112                        | RNF112    | -1.46 | 5.91  | -7.37 | 1.96E-05 | 2.76E-03 | 3.28 |
| 1428801_PM_at   | Mgat3                         | MGAT3     | -2.08 | 5.88  | -7.35 | 2.01E-05 | 2.82E-03 | 3.26 |
| 1438193_PM_at   | Nrxn3                         | NRXN3     | -1.48 | 6.75  | -7.35 | 2.01E-05 | 2.82E-03 | 3.26 |
| 1448339_PM_at   | Tmem30a                       | TMEM30A   | -2.33 | 5.84  | -7.34 | 2.04E-05 | 2.84E-03 | 3.25 |
| 1416829_PM_at   | Atp5b                         | ATP5B     | -2.19 | 6.15  | -7.34 | 2.03E-05 | 2.84E-03 | 3.25 |
| 1423917_PM_a_at | Ctnn                          | CTTN      | -2.04 | 5.57  | -7.33 | 2.07E-05 | 2.87E-03 | 3.23 |
| 1420000_PM_s_at | Igfbp1                        | IGFBP1    | -2.02 | 5.85  | -7.32 | 2.07E-05 | 2.87E-03 | 3.23 |
| 1419917_PM_s_at | Tmed7                         | TMED7     | -1.30 | 3.89  | -7.32 | 2.08E-05 | 2.87E-03 | 3.23 |
| 1435820_PM_x_at | Ddr1                          | DDR1      | -1.16 | 8.08  | -7.31 | 2.11E-05 | 2.90E-03 | 3.21 |
| 1426631_PM_at   | Pus7                          | PUS7      | -1.23 | 2.86  | -7.30 | 2.13E-05 | 2.92E-03 | 3.20 |
| 1450934_PM_at   | Eif4a2                        | EIF4A2    | -1.84 | 8.41  | -7.30 | 2.13E-05 | 2.92E-03 | 3.20 |
| 1444437_PM_at   | Usp34                         | USP34     | -1.94 | 4.42  | -7.28 | 2.18E-05 | 2.92E-03 | 3.18 |
| 1450642_PM_at   | Secisbp2l                     | SECISBP2L | -1.91 | 5.93  | -7.28 | 2.17E-05 | 2.92E-03 | 3.18 |
| 1451035_PM_a_at | Akr1a1                        | AKR1A1    | -1.86 | 5.63  | -7.28 | 2.18E-05 | 2.92E-03 | 3.18 |
| 1430583_PM_at   | Nrcam                         | NRCAM     | -1.52 | 6.83  | -7.28 | 2.17E-05 | 2.92E-03 | 3.18 |
| 1416880_PM_at   | Mcl1                          | MCL1      | -1.38 | 4.01  | -7.28 | 2.19E-05 | 2.92E-03 | 3.17 |
| 1455559_PM_at   | Pcnx12                        | PCNX2     | -1.22 | 2.84  | -7.28 | 2.19E-05 | 2.92E-03 | 3.17 |
| 1426703_PM_at   | Gak                           | GAK       | -1.22 | 4.62  | -7.29 | 2.16E-05 | 2.92E-03 | 3.19 |
| 1450354_PM_a_at | Ptdss2                        | PTDSS2    | 0.70  | 3.17  | 7.29  | 2.15E-05 | 2.92E-03 | 3.19 |
| 1425942_PM_a_at | Gpm6b                         | GPM6B     | -1.80 | 5.23  | -7.26 | 2.23E-05 | 2.96E-03 | 3.15 |
| 1426798_PM_a_at | Ppp1r15b                      | PPP1R15B  | -1.56 | 5.97  | -7.27 | 2.22E-05 | 2.96E-03 | 3.16 |
| 1455000_PM_at   | Gpr68                         | GPR68     | -2.43 | 3.53  | -7.25 | 2.26E-05 | 2.98E-03 | 3.14 |
| 1449710_PM_s_at | Atp5a1                        | ATP5A1    | -1.32 | 10.14 | -7.26 | 2.25E-05 | 2.98E-03 | 3.14 |
| 1435074_PM_at   | Tmem106b                      | TMEM106B  | -1.44 | 4.74  | -7.23 | 2.31E-05 | 3.04E-03 | 3.12 |
| 1437640_PM_at   | Frrs1l                        | FRRS1L    | -1.86 | 5.32  | -7.20 | 2.42E-05 | 3.17E-03 | 3.07 |
| 1448708_PM_at   | Med1                          | MED1      | -1.48 | 3.28  | -7.19 | 2.43E-05 | 3.17E-03 | 3.07 |
| 1423024_PM_at   | Sh2d1b1 /// Sh2d1b2           | SH2D1B    | 0.60  | 3.26  | 7.19  | 2.43E-05 | 3.17E-03 | 3.07 |
| 1419252_PM_at   | Eps15                         | EPS15     | -1.73 | 8.08  | -7.18 | 2.47E-05 | 3.20E-03 | 3.05 |
| 1435247_PM_at   | Uba5                          | UBA5      | -1.53 | 5.10  | -7.18 | 2.46E-05 | 3.20E-03 | 3.06 |
| 1456675_PM_at   | Mpr1p                         | MPRI1P    | 2.46  | 4.88  | 7.18  | 2.47E-05 | 3.20E-03 | 3.05 |
| 1416181_PM_at   | Mesdc2                        | MESDC2    | -2.53 | 6.92  | -7.18 | 2.48E-05 | 3.20E-03 | 3.05 |
| 1448763_PM_at   | Atad1                         | ATAD1     | -1.08 | 3.80  | -7.17 | 2.49E-05 | 3.20E-03 | 3.05 |
| 1434018_PM_at   | Fam168b                       | FAM168B   | -1.22 | 6.60  | -7.17 | 2.50E-05 | 3.21E-03 | 3.04 |
| 1435404_PM_at   | Disp2                         | DISP2     | -2.52 | 6.35  | -7.16 | 2.52E-05 | 3.22E-03 | 3.03 |
| 1434764_PM_at   | Akap11                        | AKAP11    | -1.84 | 8.84  | -7.16 | 2.53E-05 | 3.22E-03 | 3.03 |
| 1457132_PM_at   | Lrrc10b                       | LRRC10B   | -1.64 | 5.74  | -7.16 | 2.54E-05 | 3.22E-03 | 3.03 |
| 1428286_PM_at   | 2900097C17Rik                 | NA        | -1.08 | 10.42 | -7.16 | 2.54E-05 | 3.22E-03 | 3.03 |
| 1435021_PM_at   | Gabbr3                        | GABRB3    | -3.25 | 7.00  | -7.15 | 2.55E-05 | 3.22E-03 | 3.02 |
| 1454984_PM_at   | Lifr                          | LIFR      | -2.83 | 5.00  | -7.14 | 2.60E-05 | 3.26E-03 | 3.00 |
| 1428393_PM_at   | Nrn1                          | NRN1      | -2.45 | 6.18  | -7.14 | 2.60E-05 | 3.26E-03 | 3.00 |
| 1429432_PM_at   | Prrc2c                        | PRRC2C    | 1.99  | 4.77  | 7.14  | 2.59E-05 | 3.26E-03 | 3.01 |
| 1448753_PM_at   | Srp9                          | SRP9      | -2.20 | 5.86  | -7.13 | 2.63E-05 | 3.28E-03 | 2.99 |
| 1460440_PM_at   | Adgrl3                        | ADGRL3    | -1.15 | 4.19  | -7.13 | 2.63E-05 | 3.28E-03 | 2.99 |

|                 |               |           |       |       |       |          |          |      |
|-----------------|---------------|-----------|-------|-------|-------|----------|----------|------|
| 1416447_PM_at   | Tmem30a       | TMEM30A   | -1.99 | 4.42  | -7.12 | 2.66E-05 | 3.31E-03 | 2.98 |
| 1448669_PM_at   | Dkk3          | DKK3      | -1.82 | 4.68  | -7.11 | 2.67E-05 | 3.31E-03 | 2.97 |
| 1422984_PM_at   | Clip2         | CLIP2     | 1.19  | 6.06  | 7.12  | 2.67E-05 | 3.31E-03 | 2.98 |
| 1433514_PM_at   | Etnk1         | ETNK1     | -1.79 | 5.45  | -7.11 | 2.70E-05 | 3.33E-03 | 2.97 |
| 1417625_PM_s_at | Ackr3         | ACKR3     | -2.21 | 5.44  | -7.10 | 2.71E-05 | 3.33E-03 | 2.96 |
| 1426645_PM_at   | Hsp90aa1      | HSP90AA1  | -1.72 | 7.50  | -7.10 | 2.71E-05 | 3.33E-03 | 2.96 |
| 1434039_PM_at   | Appbp2        | APPBP2    | -1.48 | 4.86  | -7.09 | 2.74E-05 | 3.35E-03 | 2.95 |
| 1452953_PM_at   | Tvp23b        | TVP23B    | -1.47 | 4.53  | -7.10 | 2.74E-05 | 3.35E-03 | 2.95 |
| 1452322_PM_a_at | Brwd1         | BRWD1     | 1.37  | 7.57  | 7.08  | 2.79E-05 | 3.40E-03 | 2.93 |
| 1417974_PM_at   | Kpna4         | KPNA4     | -2.08 | 4.94  | -7.08 | 2.81E-05 | 3.41E-03 | 2.93 |
| 1428416_PM_at   | Zc2hc1a       | ZC2HC1A   | -1.66 | 5.46  | -7.06 | 2.84E-05 | 3.43E-03 | 2.91 |
| 1435274_PM_at   | Spopl         | SPOPL     | -1.53 | 4.33  | -7.07 | 2.84E-05 | 3.43E-03 | 2.92 |
| 1451177_PM_at   | Dnajb4        | DNAJB4    | -1.99 | 6.06  | -7.06 | 2.87E-05 | 3.43E-03 | 2.91 |
| 1433585_PM_at   | Tnpo1         | TNPO1     | -1.60 | 4.87  | -7.06 | 2.87E-05 | 3.43E-03 | 2.91 |
| 1437147_PM_at   | Gabrg2        | GABRG2    | -1.44 | 4.48  | -7.06 | 2.88E-05 | 3.43E-03 | 2.90 |
| 1424111_PM_at   | Igf2r         | IGF2R     | -1.15 | 3.41  | -7.06 | 2.87E-05 | 3.43E-03 | 2.90 |
| 1417672_PM_at   | Slc4a10       | SLC4A10   | -2.41 | 6.67  | -7.05 | 2.90E-05 | 3.44E-03 | 2.89 |
| 1418357_PM_at   | Foxg1         | FOXG1     | -2.15 | 5.88  | -7.05 | 2.90E-05 | 3.44E-03 | 2.89 |
| 1423331_PM_a_at | Pvr13         | NECTIN3   | -3.00 | 7.09  | -7.04 | 2.92E-05 | 3.45E-03 | 2.89 |
| 1454697_PM_at   | Sec62         | SEC62     | -1.96 | 6.95  | -7.04 | 2.93E-05 | 3.46E-03 | 2.89 |
| 1421929_PM_at   | Epha4         | EPHA4     | -2.74 | 6.43  | -7.03 | 2.97E-05 | 3.50E-03 | 2.87 |
| 1415779_PM_s_at | Actg1         | ACTG1     | -0.92 | 6.94  | -7.02 | 3.00E-05 | 3.53E-03 | 2.86 |
| 1452908_PM_at   | Dip2a         | DIP2A     | -1.85 | 5.15  | -6.99 | 3.13E-05 | 3.65E-03 | 2.82 |
| 1455785_PM_at   | Kcna1         | NA        | -1.52 | 5.36  | -6.99 | 3.13E-05 | 3.65E-03 | 2.82 |
| 1425340_PM_a_at | Ptpra         | PTPRA     | -1.40 | 4.11  | -6.99 | 3.12E-05 | 3.65E-03 | 2.82 |
| 1452631_PM_at   | Rufy2         | RUFY2     | 2.30  | 5.22  | 6.98  | 3.15E-05 | 3.67E-03 | 2.81 |
| 1448005_PM_at   | Sash1         | SASH1     | -2.09 | 5.37  | -6.98 | 3.16E-05 | 3.67E-03 | 2.81 |
| 1452159_PM_at   | Apmap         | APMAP     | -1.84 | 6.73  | -6.97 | 3.21E-05 | 3.71E-03 | 2.79 |
| 1451310_PM_a_at | Ctsl          | CTSV      | -1.67 | 4.60  | -6.97 | 3.22E-05 | 3.72E-03 | 2.79 |
| 1435145_PM_at   | Cadm2         | CADM2     | -1.69 | 3.97  | -6.96 | 3.23E-05 | 3.72E-03 | 2.79 |
| 1433939_PM_at   | Aff3          | AFF3      | -1.19 | 6.35  | -6.96 | 3.25E-05 | 3.73E-03 | 2.78 |
| 1433531_PM_at   | Acsl4         | ACSL4     | -1.99 | 6.58  | -6.95 | 3.27E-05 | 3.75E-03 | 2.77 |
| 1422455_PM_s_at | Nsf           | NSF       | -1.32 | 4.67  | -6.95 | 3.28E-05 | 3.75E-03 | 2.77 |
| 1448233_PM_at   | Prnp          | PRNP      | -2.31 | 8.14  | -6.95 | 3.29E-05 | 3.75E-03 | 2.77 |
| 1419246_PM_s_at | Rab14         | RAB14     | -1.69 | 7.97  | -6.94 | 3.34E-05 | 3.79E-03 | 2.76 |
| 1452318_PM_a_at | Hspa1b        | NA        | -2.54 | 3.98  | -6.93 | 3.38E-05 | 3.83E-03 | 2.74 |
| 1450930_PM_at   | Hpca          | HPCA      | -1.55 | 10.65 | -6.93 | 3.38E-05 | 3.83E-03 | 2.74 |
| 1418758_PM_a_at | Cyth3         | CYTH3     | -1.67 | 4.82  | -6.92 | 3.42E-05 | 3.86E-03 | 2.73 |
| 1434056_PM_a_at | Ndufb6        | NDUFB6    | -2.31 | 5.35  | -6.91 | 3.44E-05 | 3.87E-03 | 2.72 |
| 1449979_PM_a_at | Spock3        | SPOCK3    | -1.90 | 4.73  | -6.90 | 3.47E-05 | 3.90E-03 | 2.72 |
| 1427075_PM_s_at | Pcmt2         | PCMTD2    | -1.20 | 6.59  | -6.90 | 3.50E-05 | 3.92E-03 | 2.71 |
| 1427442_PM_a_at | App           | APP       | -2.28 | 8.85  | -6.88 | 3.58E-05 | 3.94E-03 | 2.69 |
| 1427296_PM_at   | Fam120a       | FAM120A   | -2.04 | 6.48  | -6.88 | 3.57E-05 | 3.94E-03 | 2.69 |
| 1454834_PM_at   | Nfib          | NFIB      | -1.92 | 5.30  | -6.89 | 3.53E-05 | 3.94E-03 | 2.70 |
| 1459871_PM_x_at | March2        | MARCH2    | -1.36 | 5.60  | -6.89 | 3.56E-05 | 3.94E-03 | 2.69 |
| 1454965_PM_at   | Fam171b       | FAM171B   | -1.29 | 4.25  | -6.89 | 3.56E-05 | 3.94E-03 | 2.69 |
| 1415929_PM_at   | Map1k3b       | MAP1LC3B2 | -0.85 | 4.18  | -6.88 | 3.58E-05 | 3.94E-03 | 2.68 |
| 1457150_PM_at   | Al428301      | NA        | 1.45  | 7.71  | 6.89  | 3.54E-05 | 3.94E-03 | 2.70 |
| 1434219_PM_at   | Stim2         | STIM2     | -2.88 | 5.74  | -6.87 | 3.64E-05 | 3.99E-03 | 2.67 |
| 1430439_PM_at   | Mctp1         | MCTP1     | -2.62 | 5.39  | -6.86 | 3.65E-05 | 3.99E-03 | 2.66 |
| 1420609_PM_at   | March7        | MARCH7    | -1.99 | 6.40  | -6.86 | 3.65E-05 | 3.99E-03 | 2.66 |
| 1460678_PM_at   | Klhdc2        | KLHDC2    | -1.72 | 5.68  | -6.84 | 3.74E-05 | 4.08E-03 | 2.64 |
| 1434397_PM_at   | Zdhc17        | ZDHHC17   | -1.94 | 5.95  | -6.84 | 3.77E-05 | 4.11E-03 | 2.63 |
| 1445061_PM_at   | Gm33298       | NA        | -2.29 | 5.03  | -6.83 | 3.80E-05 | 4.11E-03 | 2.63 |
| 1423079_PM_a_at | Tomm20        | TOMM20    | -1.97 | 5.16  | -6.83 | 3.79E-05 | 4.11E-03 | 2.63 |
| 1415908_PM_at   | Tspyl1        | TSPYL1    | -1.69 | 4.79  | -6.82 | 3.85E-05 | 4.16E-03 | 2.61 |
| 1417077_PM_at   | Bcap29        | BCAP29    | -1.64 | 4.36  | -6.82 | 3.88E-05 | 4.18E-03 | 2.60 |
| 1423176_PM_at   | Tob1          | TOB1      | -1.58 | 3.94  | -6.81 | 3.91E-05 | 4.20E-03 | 2.60 |
| 1436260_PM_at   | Cacna1e       | CACNA1E   | -2.00 | 8.44  | -6.81 | 3.92E-05 | 4.20E-03 | 2.59 |
| 1415949_PM_at   | Cpe           | CPE       | -1.28 | 11.18 | -6.81 | 3.94E-05 | 4.21E-03 | 2.59 |
| 1435968_PM_at   | Ptprn2        | NA        | -1.94 | 6.91  | -6.79 | 4.02E-05 | 4.29E-03 | 2.57 |
| 1436934_PM_s_at | Aco2          | ACO2      | -1.74 | 6.85  | -6.79 | 4.03E-05 | 4.29E-03 | 2.57 |
| 1445372_PM_at   | ---           | NA        | 1.78  | 3.64  | 6.79  | 4.03E-05 | 4.29E-03 | 2.57 |
| 1436141_PM_at   | Cabp7         | CABP7     | -2.96 | 5.71  | -6.78 | 4.05E-05 | 4.29E-03 | 2.56 |
| 1437738_PM_at   | Atp2c1        | ATP2C1    | -1.36 | 6.68  | -6.78 | 4.06E-05 | 4.30E-03 | 2.56 |
| 1433563_PM_s_at | Derl1         | DERL1     | -1.93 | 3.21  | -6.77 | 4.12E-05 | 4.32E-03 | 2.54 |
| 1419544_PM_at   | Atp6v1c1      | ATP6V1C1  | -1.66 | 5.18  | -6.77 | 4.12E-05 | 4.32E-03 | 2.55 |
| 1437787_PM_at   | Lrmt2         | LRRTM2    | -1.03 | 2.93  | -6.77 | 4.11E-05 | 4.32E-03 | 2.55 |
| 1438476_PM_a_at | Chd4          | CHD4      | 1.19  | 5.87  | 6.77  | 4.10E-05 | 4.32E-03 | 2.55 |
| 1427476_PM_a_at | Trim32        | TRIM32    | -3.05 | 6.84  | -6.76 | 4.15E-05 | 4.34E-03 | 2.54 |
| 1431811_PM_a_at | Fbxo34        | FBXO34    | -1.87 | 4.71  | -6.76 | 4.19E-05 | 4.36E-03 | 2.53 |
| 1454739_PM_at   | Cdc27         | CD27      | -1.01 | 5.81  | -6.76 | 4.19E-05 | 4.36E-03 | 2.53 |
| 1448238_PM_at   | 2700060E02Rik | C14orf166 | -1.86 | 5.12  | -6.75 | 4.21E-05 | 4.36E-03 | 2.52 |
| 1418162_PM_at   | Tlr4          | TLR4      | -0.80 | 2.34  | -6.75 | 4.22E-05 | 4.37E-03 | 2.52 |
| 1448673_PM_at   | Pvr13         | NECTIN3   | -3.12 | 6.45  | -6.75 | 4.24E-05 | 4.37E-03 | 2.52 |

|                 |         |            |       |       |       |          |          |      |
|-----------------|---------|------------|-------|-------|-------|----------|----------|------|
| 1456107_PM_x_at | Eftud2  | EFTUD2     | -1.77 | 5.73  | -6.73 | 4.31E-05 | 4.37E-03 | 2.50 |
| 1434564_PM_at   | E2f3    | E2F3       | -1.66 | 5.42  | -6.74 | 4.28E-05 | 4.37E-03 | 2.51 |
| 1460455_PM_at   | Ubr3    | UBR3       | -1.64 | 6.24  | -6.73 | 4.33E-05 | 4.37E-03 | 2.50 |
| 1423265_PM_at   | Minpp1  | MINPP1     | -1.48 | 4.50  | -6.73 | 4.31E-05 | 4.37E-03 | 2.50 |
| 1417182_PM_at   | Dnaja2  | DNAAJ2     | -1.47 | 4.95  | -6.74 | 4.29E-05 | 4.37E-03 | 2.50 |
| 1421297_PM_a_at | Cacna1c | CACNA1C    | -1.47 | 3.84  | -6.74 | 4.26E-05 | 4.37E-03 | 2.51 |
| 1433712_PM_at   | Cep170b | CEP170B    | -1.33 | 7.78  | -6.75 | 4.25E-05 | 4.37E-03 | 2.51 |
| 1418659_PM_at   | Clock   | CLOCK      | -1.32 | 4.49  | -6.73 | 4.31E-05 | 4.37E-03 | 2.50 |
| 1435908_PM_at   | ---     | NA         | 1.29  | 6.49  | 6.73  | 4.33E-05 | 4.37E-03 | 2.50 |
| 1449080_PM_at   | Hdac2   | HDAC2      | 2.15  | 8.33  | 6.73  | 4.33E-05 | 4.37E-03 | 2.50 |
| 1433654_PM_at   | Mgea5   | MGEA5      | -1.46 | 9.39  | -6.73 | 4.35E-05 | 4.38E-03 | 2.49 |
| 1436984_PM_at   | Abi2    | ABI2       | -1.77 | 5.32  | -6.72 | 4.37E-05 | 4.40E-03 | 2.49 |
| 1456538_PM_at   | Sdccag8 | SDCCAG8    | -1.74 | 6.41  | -6.71 | 4.42E-05 | 4.40E-03 | 2.47 |
| 1426380_PM_at   | Eif4b   | EIF4B      | -1.72 | 4.63  | -6.72 | 4.40E-05 | 4.40E-03 | 2.48 |
| 1455777_PM_x_at | Hsd17b4 | HSD17B4    | -1.64 | 4.49  | -6.71 | 4.43E-05 | 4.40E-03 | 2.47 |
| 1426994_PM_at   | Phpp1   | PHLPP1     | -1.49 | 5.45  | -6.71 | 4.42E-05 | 4.40E-03 | 2.47 |
| 1416462_PM_at   | Caprin1 | CAPRIN1    | -1.14 | 4.29  | -6.71 | 4.43E-05 | 4.40E-03 | 2.47 |
| 1438992_PM_x_at | Atf4    | ATF4       | 1.07  | 8.68  | 6.72  | 4.40E-05 | 4.40E-03 | 2.48 |
| 1457446_PM_at   | Opcml   | OPCML      | -2.69 | 5.16  | -6.70 | 4.49E-05 | 4.40E-03 | 2.46 |
| 1434429_PM_at   | Syt16   | SYT16      | -1.61 | 3.67  | -6.70 | 4.49E-05 | 4.40E-03 | 2.46 |
| 1455018_PM_at   | Lmtk2   | LMTK2      | -1.44 | 4.02  | -6.70 | 4.48E-05 | 4.40E-03 | 2.46 |
| 1416951_PM_a_at | Atp6v1d | ATP6V1D    | -1.23 | 7.60  | -6.70 | 4.48E-05 | 4.40E-03 | 2.46 |
| 1455597_PM_at   | Map3k2  | MAP3K2     | -1.03 | 3.73  | -6.70 | 4.49E-05 | 4.40E-03 | 2.46 |
| 1421035_PM_a_at | Magi3   | MAGI3      | 1.34  | 6.08  | 6.71  | 4.46E-05 | 4.40E-03 | 2.47 |
| 1419811_PM_at   | Adcy9   | NA         | -1.56 | 4.09  | -6.70 | 4.51E-05 | 4.40E-03 | 2.46 |
| 1415999_PM_at   | Hey1    | HEY1       | -2.08 | 5.99  | -6.69 | 4.56E-05 | 4.45E-03 | 2.44 |
| 1428644_PM_at   | Mgat5   | MGAT5      | -1.79 | 5.31  | -6.68 | 4.62E-05 | 4.47E-03 | 2.43 |
| 1436991_PM_x_at | Gsn     | GSN        | -1.72 | 6.76  | -6.68 | 4.63E-05 | 4.47E-03 | 2.43 |
| 1417702_PM_a_at | Hnmt    | HNMT       | -1.23 | 4.04  | -6.68 | 4.62E-05 | 4.47E-03 | 2.43 |
| 1434679_PM_at   | Ncan    | NCAN       | -1.01 | 6.76  | -6.68 | 4.61E-05 | 4.47E-03 | 2.43 |
| 1433987_PM_at   | Hpcal4  | HPCAL4     | -1.61 | 5.47  | -6.67 | 4.66E-05 | 4.49E-03 | 2.42 |
| 1416119_PM_at   | Txn1    | TXN1       | -1.25 | 5.19  | -6.67 | 4.67E-05 | 4.49E-03 | 2.42 |
| 1433571_PM_at   | Serinc5 | SERINC5    | -0.95 | 3.71  | -6.67 | 4.66E-05 | 4.49E-03 | 2.42 |
| 1419922_PM_s_at | Atrnl1  | ATRL1      | -1.91 | 5.24  | -6.67 | 4.70E-05 | 4.50E-03 | 2.41 |
| 1417378_PM_at   | Cadm1   | CADM1      | -1.32 | 6.72  | -6.67 | 4.70E-05 | 4.50E-03 | 2.41 |
| 1454672_PM_at   | Nefl    | NEFL       | -2.05 | 5.98  | -6.66 | 4.73E-05 | 4.51E-03 | 2.41 |
| 1435308_PM_at   | Fut9    | FUT9       | -1.66 | 4.05  | -6.66 | 4.73E-05 | 4.51E-03 | 2.41 |
| 1456726_PM_x_at | Qars    | QARS       | -1.28 | 7.34  | -6.65 | 4.77E-05 | 4.54E-03 | 2.40 |
| 1428272_PM_at   | Eif1b   | EIF1B      | -1.60 | 6.63  | -6.65 | 4.83E-05 | 4.58E-03 | 2.39 |
| 1450061_PM_at   | Enc1    | ENC1       | -1.95 | 9.07  | -6.63 | 4.90E-05 | 4.63E-03 | 2.37 |
| 1418565_PM_at   | Serbp1  | SERBP1     | -1.39 | 5.51  | -6.63 | 4.92E-05 | 4.65E-03 | 2.37 |
| 1436188_PM_a_at | Ndrg4   | NDRG4      | -1.92 | 9.72  | -6.62 | 4.96E-05 | 4.67E-03 | 2.36 |
| 1422881_PM_s_at | Sypl    | SYPL1      | -1.20 | 5.80  | -6.62 | 4.97E-05 | 4.67E-03 | 2.36 |
| 1416082_PM_at   | Rab1a   | RAB1A      | -1.19 | 7.79  | -6.62 | 4.97E-05 | 4.67E-03 | 2.36 |
| 1416069_PM_at   | Pfkp    | PFKP       | -1.46 | 7.12  | -6.61 | 5.06E-05 | 4.72E-03 | 2.34 |
| 1452694_PM_at   | Ipgk1   | IPGK1      | -1.43 | 5.13  | -6.61 | 5.04E-05 | 4.72E-03 | 2.34 |
| 1455434_PM_a_at | Ktn1    | KTN1       | -1.28 | 4.32  | -6.61 | 5.06E-05 | 4.72E-03 | 2.34 |
| 1417435_PM_at   | Large   | LARGE1     | -1.81 | 5.93  | -6.60 | 5.13E-05 | 4.77E-03 | 2.33 |
| 1426448_PM_at   | Pja1    | PJA1       | -1.15 | 5.16  | -6.59 | 5.17E-05 | 4.77E-03 | 2.32 |
| 1420037_PM_at   | Atp5a1  | NA         | -1.13 | 10.70 | -6.59 | 5.17E-05 | 4.77E-03 | 2.32 |
| 1430694_PM_at   | ---     | NA         | -0.94 | 2.42  | -6.59 | 5.17E-05 | 4.77E-03 | 2.32 |
| 1427699_PM_a_at | Ptpn11  | PTPN11     | 1.14  | 3.74  | 6.59  | 5.16E-05 | 4.77E-03 | 2.32 |
| 1420475_PM_at   | Mtpn    | MTPN       | -2.14 | 6.48  | -6.58 | 5.25E-05 | 4.81E-03 | 2.30 |
| 1434058_PM_at   | Mtmr12  | MTMR12     | -1.90 | 4.31  | -6.58 | 5.25E-05 | 4.81E-03 | 2.30 |
| 1417417_PM_a_at | Cox6a1  | COX6A1     | -1.21 | 10.15 | -6.58 | 5.26E-05 | 4.81E-03 | 2.30 |
| 1435769_PM_at   | Akap9   | AKAP9      | -0.85 | 4.29  | -6.58 | 5.23E-05 | 4.81E-03 | 2.31 |
| 1449620_PM_s_at | Adcy9   | NA         | -0.99 | 4.61  | -6.58 | 5.28E-05 | 4.82E-03 | 2.30 |
| 1419913_PM_at   | Strap   | NA         | -1.37 | 5.11  | -6.57 | 5.30E-05 | 4.84E-03 | 2.29 |
| 1445473_PM_at   | Diras2  | DIRAS2     | 1.01  | 4.53  | 6.57  | 5.33E-05 | 4.86E-03 | 2.29 |
| 1420621_PM_a_at | App     | APP        | -2.12 | 7.72  | -6.56 | 5.36E-05 | 4.87E-03 | 2.28 |
| 1416129_PM_at   | Errf1   | ERRF1      | -1.49 | 5.37  | -6.54 | 5.50E-05 | 4.98E-03 | 2.26 |
| 1435436_PM_at   | Epas1   | EPAS1      | -1.73 | 7.21  | -6.54 | 5.54E-05 | 5.00E-03 | 2.25 |
| 1417489_PM_at   | Npy2r   | NPY2R      | -1.52 | 4.96  | -6.54 | 5.55E-05 | 5.00E-03 | 2.25 |
| 1426618_PM_a_at | Pomgnt1 | POMGNT1    | -1.00 | 4.31  | -6.54 | 5.54E-05 | 5.00E-03 | 2.25 |
| 1415916_PM_a_at | Mthfd1  | MTHFD1     | -2.43 | 5.18  | -6.53 | 5.60E-05 | 5.03E-03 | 2.24 |
| 1426562_PM_a_at | Olfm1   | OLFM1      | -1.92 | 6.64  | -6.53 | 5.61E-05 | 5.03E-03 | 2.24 |
| 1448174_PM_at   | Cul1    | CUL1       | -1.10 | 4.83  | -6.53 | 5.61E-05 | 5.03E-03 | 2.24 |
| 1451179_PM_a_at | Qk      | QKI        | -1.51 | 5.90  | -6.52 | 5.65E-05 | 5.05E-03 | 2.23 |
| 1434541_PM_x_at | Khdrbs1 | KHDRBS1    | -1.59 | 5.93  | -6.51 | 5.72E-05 | 5.10E-03 | 2.22 |
| 1428386_PM_at   | Acsl3   | ACSL3      | -2.29 | 6.22  | -6.51 | 5.77E-05 | 5.14E-03 | 2.21 |
| 1416706_PM_at   | Rpe     | RPEL1      | -1.78 | 3.95  | -6.50 | 5.83E-05 | 5.17E-03 | 2.20 |
| 1419918_PM_at   | Tmed7   | NA         | -1.48 | 4.88  | -6.50 | 5.85E-05 | 5.17E-03 | 2.20 |
| 1455229_PM_x_at | Pgs1    | PGS1       | -1.39 | 3.88  | -6.50 | 5.84E-05 | 5.17E-03 | 2.20 |
| 1429286_PM_at   | Gkn3    | AC097495.1 | -0.89 | 2.70  | -6.50 | 5.86E-05 | 5.17E-03 | 2.19 |
| 1420811_PM_a_at | Ctnnb1  | CTNNB1     | -1.18 | 9.88  | -6.49 | 5.88E-05 | 5.19E-03 | 2.19 |



|                 |               |            |       |       |       |          |          |      |
|-----------------|---------------|------------|-------|-------|-------|----------|----------|------|
| 1423684_PM_at   | Hnrnpk        | HNRNPK     | -1.18 | 7.27  | -6.49 | 5.90E-05 | 5.19E-03 | 2.19 |
| 1424821_PM_at   | Ndfip1        | NA         | -1.24 | 9.87  | -6.49 | 5.92E-05 | 5.20E-03 | 2.18 |
| 1426481_PM_at   | Klhl22        | KLHL22     | -1.85 | 4.18  | -6.48 | 5.98E-05 | 5.23E-03 | 2.17 |
| 1426965_PM_at   | Rap2a         | RAP2A      | -1.17 | 5.06  | -6.48 | 5.98E-05 | 5.23E-03 | 2.17 |
| 1449262_PM_s_at | Lin7c         | LIN7C      | 1.48  | 3.65  | 6.48  | 6.02E-05 | 5.25E-03 | 2.17 |
| 1434383_PM_at   | Pja2          | PJA2       | -1.33 | 8.12  | -6.47 | 6.06E-05 | 5.28E-03 | 2.16 |
| 1433679_PM_at   | Fubp3         | FUBP3      | -1.53 | 4.92  | -6.47 | 6.10E-05 | 5.29E-03 | 2.15 |
| 1435152_PM_at   | Leng8         | LENG8      | 0.90  | 8.30  | 6.47  | 6.09E-05 | 5.29E-03 | 2.15 |
| 1450923_PM_at   | Tgfb2         | TGFB2      | -2.91 | 4.79  | -6.46 | 6.14E-05 | 5.32E-03 | 2.15 |
| 1425784_PM_a_at | Olfm1         | OLFM1      | -2.74 | 7.05  | -6.45 | 6.20E-05 | 5.34E-03 | 2.14 |
| 1427889_PM_at   | Sptan1        | SPTAN1     | -0.98 | 7.61  | -6.46 | 6.18E-05 | 5.34E-03 | 2.14 |
| 1426040_PM_a_at | Odf2          | ODF2       | 2.91  | 4.87  | 6.45  | 6.20E-05 | 5.34E-03 | 2.14 |
| 1443629_PM_at   | Nav1          | NAV1       | 0.54  | 3.13  | 6.45  | 6.22E-05 | 5.35E-03 | 2.13 |
| 1460180_PM_at   | Hexb          | HEXB       | -1.78 | 5.50  | -6.44 | 6.32E-05 | 5.42E-03 | 2.12 |
| 1453329_PM_s_at | Nkain2        | NKAIN2     | -1.57 | 6.15  | -6.44 | 6.34E-05 | 5.43E-03 | 2.12 |
| 1435554_PM_at   | Tmcc3         | TMCC3      | -1.89 | 4.86  | -6.41 | 6.53E-05 | 5.57E-03 | 2.08 |
| 1440116_PM_at   | D630045J12Rik | KIAA1549   | -1.30 | 3.90  | -6.41 | 6.52E-05 | 5.57E-03 | 2.09 |
| 1438673_PM_at   | Slc4a7        | SLC4A7     | -1.21 | 3.97  | -6.41 | 6.54E-05 | 5.57E-03 | 2.08 |
| 1455880_PM_s_at | Becn1         | BECN1      | -1.67 | 4.36  | -6.41 | 6.56E-05 | 5.57E-03 | 2.08 |
| 1455978_PM_a_at | Matn2         | MATN2      | -1.70 | 4.72  | -6.41 | 6.58E-05 | 5.57E-03 | 2.08 |
| 1426840_PM_at   | Ythdf3        | YTHDF3     | -1.38 | 4.56  | -6.41 | 6.59E-05 | 5.57E-03 | 2.08 |
| 1459191_PM_at   | ---           | NA         | 0.96  | 4.11  | 6.41  | 6.58E-05 | 5.57E-03 | 2.08 |
| 1415822_PM_at   | Scd2          | SCD        | -3.24 | 6.99  | -6.40 | 6.63E-05 | 5.57E-03 | 2.07 |
| 1435933_PM_at   | Scn2a1        | SCN2A      | -1.76 | 8.32  | -6.40 | 6.63E-05 | 5.57E-03 | 2.07 |
| 1447821_PM_at   | Cux2          | CUX2       | 0.65  | 5.59  | 6.40  | 6.61E-05 | 5.57E-03 | 2.07 |
| 1452708_PM_a_at | Luc7l         | LUC7L      | 1.66  | 4.17  | 6.40  | 6.67E-05 | 5.59E-03 | 2.06 |
| 1435374_PM_at   | Cdy2          | CDYL2      | -1.19 | 3.86  | -6.40 | 6.68E-05 | 5.60E-03 | 2.06 |
| 1447349_PM_s_at | Ep400         | EP400      | -1.41 | 3.39  | -6.39 | 6.73E-05 | 5.63E-03 | 2.05 |
| 1420043_PM_s_at | Thoc1         | THOC1      | -1.81 | 5.92  | -6.39 | 6.77E-05 | 5.64E-03 | 2.05 |
| 1439978_PM_at   | Srcap         | AC106886.5 | 1.25  | 4.41  | 6.39  | 6.76E-05 | 5.64E-03 | 2.05 |
| 1453095_PM_at   | Rab10         | RAB10      | -1.92 | 4.94  | -6.38 | 6.82E-05 | 5.67E-03 | 2.04 |
| 1460352_PM_s_at | Pik3r4        | PIK3R4     | -2.08 | 5.70  | -6.38 | 6.86E-05 | 5.67E-03 | 2.04 |
| 1454976_PM_at   | Sod2          | SOD2       | -1.47 | 6.12  | -6.38 | 6.86E-05 | 5.67E-03 | 2.04 |
| 1455653_PM_at   | Ccnj          | CCNJ       | -1.41 | 3.14  | -6.38 | 6.84E-05 | 5.67E-03 | 2.04 |
| 1433521_PM_at   | Ankrd13c      | ANKRD13C   | -1.74 | 4.75  | -6.37 | 6.90E-05 | 5.69E-03 | 2.03 |
| 1437201_PM_at   | Lrrc4c        | LRRC4C     | -1.93 | 8.15  | -6.37 | 6.95E-05 | 5.72E-03 | 2.02 |
| 1424296_PM_at   | Gclc          | GCLC       | -0.76 | 4.17  | -6.36 | 6.98E-05 | 5.74E-03 | 2.02 |
| 1429503_PM_at   | Fam69a        | FAM69A     | -1.31 | 3.50  | -6.36 | 7.02E-05 | 5.75E-03 | 2.01 |
| 1455845_PM_at   | Wscd1         | WSCD1      | -1.17 | 5.22  | -6.36 | 7.01E-05 | 5.75E-03 | 2.01 |
| 1448803_PM_at   | Golga4        | GOLGA4     | 1.30  | 4.80  | 6.35  | 7.06E-05 | 5.77E-03 | 2.01 |
| 1451195_PM_a_at | Tmx1          | TMX1       | -1.39 | 7.09  | -6.35 | 7.11E-05 | 5.80E-03 | 2.00 |
| 1455829_PM_at   | Usp14         | NA         | -1.82 | 5.26  | -6.34 | 7.18E-05 | 5.85E-03 | 1.99 |
| 1424309_PM_a_at | Mocs2         | MOCS2      | -1.47 | 8.02  | -6.33 | 7.28E-05 | 5.92E-03 | 1.98 |
| 1452771_PM_s_at | Acsl3         | ACSL3      | -2.39 | 6.18  | -6.33 | 7.32E-05 | 5.93E-03 | 1.97 |
| 1448368_PM_at   | Dctn6         | DCTN6      | -1.18 | 5.53  | -6.33 | 7.31E-05 | 5.93E-03 | 1.97 |
| 1416037_PM_a_at | Cct2          | CCT2       | -2.05 | 5.10  | -6.33 | 7.34E-05 | 5.94E-03 | 1.97 |
| 1418143_PM_at   | Vps45         | VPS45      | -0.82 | 4.20  | -6.32 | 7.39E-05 | 5.97E-03 | 1.96 |
| 1452388_PM_at   | Hspa1a        | NA         | -1.75 | 4.36  | -6.32 | 7.43E-05 | 5.99E-03 | 1.96 |
| 1460482_PM_at   | Nwd2          | NWD2       | -1.14 | 3.74  | -6.30 | 7.55E-05 | 6.08E-03 | 1.94 |
| 1426709_PM_a_at | Usp33         | USP33      | -1.72 | 5.47  | -6.30 | 7.63E-05 | 6.12E-03 | 1.93 |
| 1427618_PM_at   | Cdh9          | CDH9       | -1.59 | 3.78  | -6.29 | 7.67E-05 | 6.12E-03 | 1.92 |
| 1415741_PM_at   | Tmem165       | TMEM165    | -1.54 | 4.74  | -6.29 | 7.65E-05 | 6.12E-03 | 1.93 |
| 1437433_PM_at   | B3galt2       | B3GALT2    | -1.44 | 3.47  | -6.30 | 7.64E-05 | 6.12E-03 | 1.93 |
| 1436602_PM_x_at | Cacna1b       | CACNA1B    | -1.18 | 8.74  | -6.29 | 7.67E-05 | 6.12E-03 | 1.92 |
| 1456443_PM_at   | 4930404N11Rik | C19orf71   | 0.90  | 3.96  | 6.29  | 7.70E-05 | 6.13E-03 | 1.92 |
| 1429737_PM_a_at | Crls1         | CRLS1      | -1.40 | 3.51  | -6.28 | 7.78E-05 | 6.18E-03 | 1.91 |
| 1429225_PM_at   | Slc24a2       | SLC24A2    | -1.84 | 5.57  | -6.28 | 7.79E-05 | 6.18E-03 | 1.91 |
| 1452214_PM_at   | Skil          | SKIL       | -2.78 | 5.70  | -6.27 | 7.85E-05 | 6.20E-03 | 1.90 |
| 1418209_PM_a_at | Pfn2          | PFN2       | -1.50 | 10.70 | -6.27 | 7.85E-05 | 6.20E-03 | 1.90 |
| 1440056_PM_at   | Slt1          | NA         | -0.82 | 4.89  | -6.27 | 7.89E-05 | 6.22E-03 | 1.90 |
| 1438574_PM_at   | Gpr152        | GPR152     | 0.62  | 2.85  | 6.27  | 7.89E-05 | 6.22E-03 | 1.90 |
| 1435862_PM_at   | Son           | SON        | -1.59 | 5.76  | -6.26 | 7.98E-05 | 6.27E-03 | 1.89 |
| 1416329_PM_at   | Cyfp1         | CYFIP1     | -1.81 | 6.36  | -6.26 | 8.01E-05 | 6.29E-03 | 1.88 |
| 1452720_PM_a_at | Fip1l1        | FIP1L1     | 1.66  | 8.23  | 6.26  | 8.04E-05 | 6.30E-03 | 1.88 |
| 1448413_PM_at   | 2410016O06Rik | RIOX1      | -1.34 | 4.10  | -6.25 | 8.14E-05 | 6.37E-03 | 1.87 |
| 1452005_PM_at   | Dlat          | DLAT       | -2.35 | 5.09  | -6.24 | 8.18E-05 | 6.38E-03 | 1.86 |
| 1448007_PM_at   | Baz2b         | BAZ2B      | 1.83  | 5.73  | 6.24  | 8.19E-05 | 6.38E-03 | 1.86 |
| 1432980_PM_at   | 5730420F10Rik | NA         | 2.64  | 3.96  | 6.24  | 8.20E-05 | 6.38E-03 | 1.86 |
| 1434717_PM_at   | Cul3          | CUL3       | -0.84 | 4.14  | -6.23 | 8.29E-05 | 6.44E-03 | 1.85 |
| 1435957_PM_at   | Kcna3         | KCNQ3      | -2.05 | 5.69  | -6.23 | 8.33E-05 | 6.45E-03 | 1.84 |
| 1436159_PM_at   | Usp32         | USP32      | -1.50 | 7.31  | -6.23 | 8.33E-05 | 6.45E-03 | 1.84 |
| 1419736_PM_a_at | Eif1ax        | EIF1AX     | -1.43 | 4.80  | -6.23 | 8.36E-05 | 6.45E-03 | 1.84 |
| 1419949_PM_at   | Tmem38b       | NA         | -1.26 | 4.72  | -6.23 | 8.37E-05 | 6.45E-03 | 1.84 |
| 1429043_PM_at   | Smnmc1        | SMNDC1     | -1.17 | 3.97  | -6.23 | 8.36E-05 | 6.45E-03 | 1.84 |
| 1458351_PM_s_at | Klhl2         | NA         | -2.02 | 6.85  | -6.22 | 8.44E-05 | 6.48E-03 | 1.83 |

|                 |                         |            |       |       |       |          |          |      |
|-----------------|-------------------------|------------|-------|-------|-------|----------|----------|------|
| 1447374_PM_at   | ---                     | NA         | 1.27  | 3.43  | 6.22  | 8.43E-05 | 6.48E-03 | 1.83 |
| 1428237_PM_at   | Akirin2                 | AKIRIN2    | -1.91 | 6.45  | -6.21 | 8.57E-05 | 6.56E-03 | 1.81 |
| 1448376_PM_at   | Wrnp1                   | WRNP1      | -1.83 | 5.33  | -6.21 | 8.58E-05 | 6.56E-03 | 1.81 |
| 1430301_PM_at   | Stxbp5                  | STXBP5     | -1.12 | 5.92  | -6.20 | 8.62E-05 | 6.59E-03 | 1.81 |
| 1458269_PM_at   | Pcdh9                   | PCDH9      | 0.80  | 4.89  | 6.19  | 8.77E-05 | 6.68E-03 | 1.79 |
| 1454046_PM_x_at | Pgs1                    | PGS1       | -1.18 | 3.49  | -6.19 | 8.79E-05 | 6.69E-03 | 1.79 |
| 1428192_PM_at   | Kbtbd7                  | KBTBD6     | -0.93 | 3.45  | -6.19 | 8.83E-05 | 6.71E-03 | 1.78 |
| 1449772_PM_at   | Tbc1d14                 | NA         | -1.91 | 5.68  | -6.18 | 8.97E-05 | 6.79E-03 | 1.77 |
| 1415993_PM_at   | Sqle                    | SQLE       | -1.40 | 3.37  | -6.17 | 8.99E-05 | 6.79E-03 | 1.76 |
| 1415865_PM_s_at | Bpgm                    | BPGM       | -1.19 | 7.93  | -6.17 | 8.98E-05 | 6.79E-03 | 1.77 |
| 1417978_PM_at   | Eif4e3                  | EIF4E3     | 1.96  | 4.72  | 6.17  | 8.99E-05 | 6.79E-03 | 1.76 |
| 1435511_PM_at   | Syn2                    | SYN2       | -1.45 | 3.92  | -6.16 | 9.10E-05 | 6.85E-03 | 1.75 |
| 1424666_PM_at   | Gpatch8                 | GPATCH8    | -1.23 | 2.94  | -6.16 | 9.19E-05 | 6.91E-03 | 1.74 |
| 1452960_PM_at   | Scyl3                   | SCYL3      | -1.56 | 4.14  | -6.16 | 9.22E-05 | 6.92E-03 | 1.74 |
| 1417365_PM_a_at | Calm1                   | NA         | -1.23 | 8.29  | -6.15 | 9.23E-05 | 6.92E-03 | 1.74 |
| 1433648_PM_at   | Spag9                   | SPAG9      | -1.79 | 5.93  | -6.15 | 9.30E-05 | 6.95E-03 | 1.73 |
| 1415704_PM_a_at | Cdv3                    | CDV3       | -1.45 | 7.53  | -6.15 | 9.30E-05 | 6.95E-03 | 1.73 |
| 1452714_PM_at   | Tanc1                   | TANC1      | -1.39 | 3.95  | -6.14 | 9.34E-05 | 6.97E-03 | 1.73 |
| 1420597_PM_a_at | Cabp2                   | CABP2      | 0.61  | 2.80  | 6.14  | 9.37E-05 | 6.98E-03 | 1.72 |
| 1435869_PM_s_at | Ap2a2                   | AP2A2      | -1.70 | 6.07  | -6.14 | 9.41E-05 | 6.99E-03 | 1.72 |
| 1426790_PM_at   | Ssrp1                   | SSRP1      | 1.31  | 6.09  | 6.14  | 9.41E-05 | 6.99E-03 | 1.72 |
| 1422593_PM_at   | Ap3s1                   | AP3S1      | -1.75 | 6.84  | -6.14 | 9.43E-05 | 6.99E-03 | 1.72 |
| 1449036_PM_at   | Rnf128                  | RNF128     | -1.22 | 6.33  | -6.13 | 9.53E-05 | 7.06E-03 | 1.71 |
| 1416952_PM_at   | Atp6v1d                 | ATP6V1D    | -1.85 | 6.33  | -6.13 | 9.60E-05 | 7.08E-03 | 1.70 |
| 1435051_PM_at   | Wdr44                   | WDR44      | -1.30 | 5.32  | -6.12 | 9.60E-05 | 7.08E-03 | 1.70 |
| 1439399_PM_a_at | ---                     | NA         | -1.74 | 5.22  | -6.12 | 9.69E-05 | 7.14E-03 | 1.69 |
| 1435120_PM_at   | Cdh11                   | NA         | -2.51 | 7.11  | -6.11 | 9.85E-05 | 7.24E-03 | 1.67 |
| 1456863_PM_at   | Epha4                   | EPHA4      | -3.73 | 4.96  | -6.10 | 9.96E-05 | 7.30E-03 | 1.66 |
| 1419106_PM_at   | 2210409E12Rik /// Coil  | COIL       | 0.55  | 5.38  | 6.10  | 9.97E-05 | 7.30E-03 | 1.66 |
| 1447902_PM_at   | 1810013A23Rik /// Ppard | PPARD      | 0.59  | 6.46  | 6.10  | 9.95E-05 | 7.30E-03 | 1.66 |
| 1435146_PM_s_at | Cadm2                   | CADM2      | -2.73 | 6.40  | -6.09 | 1.01E-04 | 7.36E-03 | 1.65 |
| 1422474_PM_at   | Pde4b                   | PDE4B      | -1.48 | 5.80  | -6.08 | 1.02E-04 | 7.41E-03 | 1.64 |
| 1417535_PM_at   | Fbxo25                  | FBXO25     | -0.90 | 3.72  | -6.08 | 1.02E-04 | 7.41E-03 | 1.64 |
| 1433031_PM_at   | 2900064K03Rik           | NA         | 1.80  | 4.54  | 6.08  | 1.02E-04 | 7.44E-03 | 1.64 |
| 1421446_PM_at   | Prkcg                   | PRKCG      | -2.04 | 5.19  | -6.07 | 1.03E-04 | 7.46E-03 | 1.63 |
| 1434075_PM_at   | BC030336                | C16orf52   | -2.25 | 6.73  | -6.07 | 1.03E-04 | 7.48E-03 | 1.63 |
| 1427990_PM_at   | Usp45                   | USP45      | -1.20 | 4.03  | -6.07 | 1.04E-04 | 7.50E-03 | 1.62 |
| 1451224_PM_at   | Scamp5                  | SCAMP5     | -0.68 | 3.99  | -6.07 | 1.04E-04 | 7.50E-03 | 1.62 |
| 1423574_PM_s_at | Srd5a3                  | SRD5A3     | -1.78 | 3.55  | -6.06 | 1.04E-04 | 7.53E-03 | 1.62 |
| 1423195_PM_at   | Hiat1                   | ACI18553.2 | -1.57 | 4.46  | -6.06 | 1.05E-04 | 7.54E-03 | 1.61 |
| 1433404_PM_at   | 4930423O20Rik           | NA         | 1.09  | 3.67  | 6.06  | 1.05E-04 | 7.54E-03 | 1.61 |
| 1417592_PM_at   | Mtor                    | MTOR       | -1.33 | 6.82  | -6.05 | 1.06E-04 | 7.58E-03 | 1.60 |
| 1418429_PM_at   | Kif5b                   | KIF5B      | -1.19 | 3.67  | -6.05 | 1.06E-04 | 7.58E-03 | 1.60 |
| 1433476_PM_at   | Fam8a1                  | FAM8A1     | -1.71 | 5.98  | -6.05 | 1.07E-04 | 7.61E-03 | 1.59 |
| 1422945_PM_a_at | Kif5c                   | KIF5C      | -1.36 | 7.70  | -6.05 | 1.06E-04 | 7.61E-03 | 1.60 |
| 1449583_PM_at   | Pcdhb20                 | NA         | -1.15 | 3.21  | -6.05 | 1.07E-04 | 7.61E-03 | 1.59 |
| 1440371_PM_at   | ---                     | NA         | -1.39 | 7.31  | -6.04 | 1.07E-04 | 7.65E-03 | 1.59 |
| 1421189_PM_at   | Gabbr3                  | GABRB3     | -1.40 | 6.94  | -6.04 | 1.08E-04 | 7.68E-03 | 1.58 |
| 1428259_PM_at   | Pxdn                    | PXDN       | -1.69 | 3.93  | -6.04 | 1.08E-04 | 7.69E-03 | 1.58 |
| 1425319_PM_s_at | Snrnp48                 | SNRNP48    | 2.42  | 6.81  | 6.04  | 1.08E-04 | 7.69E-03 | 1.58 |
| 1424800_PM_at   | Enah                    | ENAH       | -1.10 | 8.51  | -6.03 | 1.09E-04 | 7.69E-03 | 1.57 |
| 1452346_PM_at   | B4gat1                  | B4GAT1     | -1.21 | 5.28  | -6.03 | 1.09E-04 | 7.72E-03 | 1.57 |
| 1427129_PM_a_at | Hrnpr                   | HNRNPR     | -1.91 | 4.92  | -6.02 | 1.10E-04 | 7.74E-03 | 1.56 |
| 1423560_PM_at   | Nell2                   | NELL2      | -1.45 | 6.34  | -6.03 | 1.10E-04 | 7.74E-03 | 1.56 |
| 1426615_PM_s_at | Ndrp4                   | NDRG4      | -1.24 | 10.53 | -6.02 | 1.10E-04 | 7.74E-03 | 1.56 |
| 1447463_PM_at   | ---                     | NA         | -2.27 | 4.47  | -6.02 | 1.11E-04 | 7.77E-03 | 1.56 |
| 1460329_PM_at   | B4galt6                 | B4GALT6    | -2.31 | 7.09  | -6.02 | 1.11E-04 | 7.79E-03 | 1.55 |
| 1426877_PM_a_at | Pbrm1                   | PBRM1      | -1.70 | 5.10  | -6.02 | 1.11E-04 | 7.79E-03 | 1.55 |
| 1427231_PM_at   | Robo1                   | ROBO1      | -2.98 | 6.18  | -6.01 | 1.12E-04 | 7.83E-03 | 1.54 |
| 1425415_PM_a_at | Slc1a1                  | SLC1A1     | -2.20 | 5.35  | -6.01 | 1.12E-04 | 7.83E-03 | 1.54 |
| 1417069_PM_a_at | Gmfb                    | GMFB       | -2.52 | 5.53  | -6.00 | 1.14E-04 | 7.86E-03 | 1.53 |
| 1426675_PM_at   | Tom70a                  | TOMM70     | -1.98 | 6.53  | -6.00 | 1.14E-04 | 7.86E-03 | 1.53 |
| 1435038_PM_s_at | Aak1                    | AAK1       | -1.73 | 6.84  | -6.00 | 1.13E-04 | 7.86E-03 | 1.53 |
| 1429761_PM_at   | Rtn1                    | RTN1       | -1.61 | 7.52  | -6.00 | 1.14E-04 | 7.86E-03 | 1.53 |
| 1451728_PM_at   | Wdr13                   | WDR13      | -1.59 | 5.15  | -6.00 | 1.13E-04 | 7.86E-03 | 1.53 |
| 1426351_PM_at   | Hspd1                   | HSPD1      | -1.25 | 7.04  | -6.00 | 1.13E-04 | 7.86E-03 | 1.53 |
| 1428806_PM_at   | Csnk1g1                 | CSNK1G1    | -0.86 | 5.35  | -5.99 | 1.15E-04 | 7.91E-03 | 1.52 |
| 1457702_PM_at   | Gpr12                   | GPR12      | -1.61 | 4.61  | -5.99 | 1.15E-04 | 7.91E-03 | 1.52 |
| 1416852_PM_a_at | Ncdn                    | NCDN       | -1.55 | 9.98  | -5.98 | 1.16E-04 | 7.99E-03 | 1.51 |
| 1436483_PM_at   | Myt1l                   | MYT1L      | -1.07 | 5.88  | -5.99 | 1.16E-04 | 7.99E-03 | 1.51 |
| 1456480_PM_at   | Fry                     | FRY        | -2.14 | 8.19  | -5.98 | 1.17E-04 | 8.00E-03 | 1.50 |
| 1418475_PM_at   | Scnn1b                  | SCNN1B     | 0.64  | 3.20  | 5.98  | 1.17E-04 | 8.02E-03 | 1.50 |
| 1447343_PM_at   | Nrp2                    | NRP2       | 0.70  | 4.62  | 5.98  | 1.18E-04 | 8.04E-03 | 1.50 |
| 1455840_PM_at   | Rapgef5                 | RAPGEF5    | -1.10 | 4.54  | -5.97 | 1.18E-04 | 8.04E-03 | 1.49 |
| 1428764_PM_at   | Meg3                    | NA         | 0.77  | 10.56 | 5.97  | 1.18E-04 | 8.04E-03 | 1.49 |

|                 |                                                  |                |       |       |       |          |          |      |
|-----------------|--------------------------------------------------|----------------|-------|-------|-------|----------|----------|------|
| 1454230_PM_a_at | Slc25a27                                         | SLC25A27       | 1.39  | 4.12  | 5.97  | 1.18E-04 | 8.04E-03 | 1.49 |
| 1448340_PM_at   | Tmem30a                                          | NA             | -1.55 | 5.81  | -5.97 | 1.19E-04 | 8.06E-03 | 1.49 |
| 1429468_PM_at   | Dnajb14                                          | DNAJB14        | -0.74 | 4.78  | -5.97 | 1.19E-04 | 8.06E-03 | 1.49 |
| 1454919_PM_at   | Nmt2                                             | NMT2           | -1.27 | 6.41  | -5.97 | 1.19E-04 | 8.09E-03 | 1.48 |
| 1424775_PM_at   | Oas1a                                            | OAS1           | 0.80  | 3.56  | 5.96  | 1.19E-04 | 8.09E-03 | 1.48 |
| 1437002_PM_at   | Fam73a                                           | MIGA1          | -1.52 | 4.39  | -5.96 | 1.20E-04 | 8.10E-03 | 1.48 |
| 1424986_PM_s_at | Fbxw7                                            | FBXW7          | -1.12 | 7.29  | -5.96 | 1.20E-04 | 8.10E-03 | 1.47 |
| 1421851_PM_at   | Map1b                                            | MAP1B          | -2.28 | 7.15  | -5.96 | 1.21E-04 | 8.12E-03 | 1.47 |
| 1452740_PM_at   | Myh10                                            | MYH10          | -1.19 | 6.71  | -5.96 | 1.21E-04 | 8.13E-03 | 1.47 |
| 1442879_PM_at   | ---                                              | NA             | -0.66 | 2.03  | -5.96 | 1.21E-04 | 8.13E-03 | 1.47 |
| 1450632_PM_at   | Rhoa                                             | RHOA           | -1.43 | 6.21  | -5.95 | 1.21E-04 | 8.15E-03 | 1.46 |
| 1452056_PM_s_at | Ppp3ca                                           | PPP3CA         | -2.16 | 7.02  | -5.95 | 1.23E-04 | 8.17E-03 | 1.45 |
| 1420563_PM_at   | Gria3                                            | GRIA3          | -1.87 | 7.32  | -5.95 | 1.23E-04 | 8.17E-03 | 1.45 |
| 1426649_PM_at   | Tmeff1                                           | MSANTD3-TMEFF1 | -1.59 | 4.21  | -5.95 | 1.23E-04 | 8.17E-03 | 1.45 |
| 1427673_PM_a_at | Sema3e                                           | SEMA3E         | -1.29 | 5.22  | -5.95 | 1.23E-04 | 8.17E-03 | 1.45 |
| 1456420_PM_at   | Arid4a                                           | ARID4A         | 1.43  | 7.94  | 5.95  | 1.23E-04 | 8.17E-03 | 1.45 |
| 1418430_PM_at   | Kif5b                                            | KIF5B          | -1.81 | 4.99  | -5.94 | 1.24E-04 | 8.23E-03 | 1.44 |
| 1425517_PM_s_at | Ogt                                              | OGT            | -1.48 | 6.32  | -5.94 | 1.24E-04 | 8.23E-03 | 1.44 |
| 1451971_PM_at   | Cul4a                                            | CUL4A          | -1.73 | 6.38  | -5.93 | 1.25E-04 | 8.26E-03 | 1.44 |
| 1454239_PM_at   | 4930578G10Rik ///<br>Gm42277 ///<br>LOC102638670 | NA             | 0.65  | 3.30  | 5.93  | 1.25E-04 | 8.26E-03 | 1.44 |
| 1417312_PM_at   | Dkk3                                             | DKK3           | -2.22 | 7.55  | -5.92 | 1.26E-04 | 8.31E-03 | 1.42 |
| 1440231_PM_at   | Map9                                             | MAP9           | -1.90 | 7.14  | -5.92 | 1.27E-04 | 8.31E-03 | 1.42 |
| 1448248_PM_at   | Crk                                              | CRK            | -1.71 | 6.33  | -5.92 | 1.27E-04 | 8.31E-03 | 1.42 |
| 1421982_PM_a_at | Unc50                                            | UNC50          | -1.68 | 5.96  | -5.93 | 1.26E-04 | 8.31E-03 | 1.43 |
| 1426358_PM_at   | Taok1                                            | TAOK1          | -1.66 | 5.18  | -5.92 | 1.26E-04 | 8.31E-03 | 1.42 |
| 1455928_PM_x_at | Lztr1                                            | LZTR1          | -1.21 | 8.75  | -5.93 | 1.26E-04 | 8.31E-03 | 1.43 |
| 1439597_PM_at   | LOC102643260                                     | NA             | 1.01  | 2.93  | 5.92  | 1.27E-04 | 8.31E-03 | 1.42 |
| 1452251_PM_at   | Nbea                                             | NBEA           | -2.59 | 6.08  | -5.92 | 1.27E-04 | 8.31E-03 | 1.42 |
| 1452142_PM_at   | Slc6a1                                           | SLC6A1         | -2.01 | 6.61  | -5.92 | 1.27E-04 | 8.31E-03 | 1.42 |
| 1415838_PM_at   | Serinc1                                          | SERINC1        | -1.94 | 7.51  | -5.92 | 1.28E-04 | 8.33E-03 | 1.41 |
| 1437598_PM_at   | Zbtb20                                           | ZBTB20         | -2.55 | 6.12  | -5.91 | 1.28E-04 | 8.34E-03 | 1.41 |
| 1428387_PM_at   | Acsl3                                            | ACSL3          | -1.83 | 4.28  | -5.91 | 1.28E-04 | 8.34E-03 | 1.41 |
| 1452973_PM_at   | Ppm1k                                            | PPM1K          | -1.23 | 4.68  | -5.91 | 1.29E-04 | 8.35E-03 | 1.41 |
| 1435768_PM_at   | Arid4b                                           | ARID4B         | -2.06 | 4.04  | -5.91 | 1.29E-04 | 8.36E-03 | 1.40 |
| 1436226_PM_at   | LOC102642819 ///Tceb1                            | ELOC           | -1.69 | 7.52  | -5.91 | 1.29E-04 | 8.37E-03 | 1.40 |
| 1429443_PM_at   | Cpne4                                            | CPNE4          | -1.40 | 3.66  | -5.91 | 1.29E-04 | 8.37E-03 | 1.40 |
| 1436992_PM_x_at | Vdac1                                            | VDAC1          | -0.63 | 10.90 | -5.90 | 1.30E-04 | 8.42E-03 | 1.39 |
| 1429429_PM_s_at | Pcmtd1                                           | PCMTD1         | -1.46 | 5.64  | -5.90 | 1.31E-04 | 8.42E-03 | 1.39 |
| 1438945_PM_x_at | Gja1                                             | GJA1           | -1.46 | 8.01  | -5.90 | 1.31E-04 | 8.43E-03 | 1.39 |
| 1448336_PM_at   | Drg1                                             | DRG1           | -1.15 | 3.00  | -5.90 | 1.31E-04 | 8.43E-03 | 1.39 |
| 1455333_PM_at   | Tns3                                             | TNS3           | -1.91 | 5.34  | -5.89 | 1.32E-04 | 8.45E-03 | 1.38 |
| 1452821_PM_at   | Tial1                                            | TIAL1          | -0.95 | 3.47  | -5.89 | 1.32E-04 | 8.45E-03 | 1.38 |
| 1423188_PM_a_at | Brk1                                             | BRK1           | -1.73 | 5.37  | -5.89 | 1.32E-04 | 8.46E-03 | 1.38 |
| 1426689_PM_s_at | Sdha                                             | SDHA           | -1.55 | 9.65  | -5.89 | 1.32E-04 | 8.46E-03 | 1.38 |
| 1425513_PM_at   | Map2k7                                           | MAP2K7         | -0.71 | 5.14  | -5.89 | 1.33E-04 | 8.49E-03 | 1.37 |
| 1438151_PM_x_at | Zdhhc14                                          | ZDHHCL14       | -1.36 | 6.76  | -5.89 | 1.33E-04 | 8.50E-03 | 1.37 |
| 1452666_PM_a_at | Tmcc2                                            | TMCC2          | -0.77 | 2.46  | -5.88 | 1.34E-04 | 8.50E-03 | 1.37 |
| 1452156_PM_a_at | Nisch                                            | NISCH          | -1.12 | 8.80  | -5.88 | 1.34E-04 | 8.55E-03 | 1.36 |
| 1436066_PM_at   | Kalrn                                            | KALRN          | -1.09 | 10.00 | -5.88 | 1.35E-04 | 8.58E-03 | 1.36 |
| 1419392_PM_at   | Pclo                                             | PCLO           | -2.76 | 7.35  | -5.87 | 1.36E-04 | 8.60E-03 | 1.35 |
| 1450380_PM_at   | Epdr1                                            | EPDR1          | -1.89 | 5.17  | -5.87 | 1.36E-04 | 8.63E-03 | 1.35 |
| 1454962_PM_at   | Spire1                                           | SPIRE1         | -1.94 | 6.37  | -5.87 | 1.37E-04 | 8.64E-03 | 1.34 |
| 1424970_PM_at   | Purg                                             | PURG           | -1.74 | 5.96  | -5.86 | 1.37E-04 | 8.66E-03 | 1.34 |
| 1415881_PM_at   | Ghitm                                            | GHITM          | -1.35 | 7.83  | -5.86 | 1.38E-04 | 8.72E-03 | 1.33 |
| 1434754_PM_at   | Rap1gap2                                         | RAP1GAP2       | -0.64 | 3.19  | -5.86 | 1.39E-04 | 8.74E-03 | 1.33 |
| 1437735_PM_at   | Ppp1r12a                                         | NA             | -1.24 | 8.34  | -5.85 | 1.40E-04 | 8.78E-03 | 1.32 |
| 1443119_PM_at   | Grm7                                             | GRM7           | -1.68 | 7.66  | -5.85 | 1.41E-04 | 8.83E-03 | 1.31 |
| 1438452_PM_at   | Nebi                                             | NA             | -1.02 | 3.51  | -5.85 | 1.41E-04 | 8.83E-03 | 1.32 |
| 1454657_PM_s_at | Naa35                                            | NAA35          | -0.71 | 5.44  | -5.84 | 1.41E-04 | 8.83E-03 | 1.31 |
| 1452176_PM_at   | Nup153                                           | NUP153         | -2.56 | 5.49  | -5.84 | 1.43E-04 | 8.92E-03 | 1.30 |
| 1438630_PM_x_at | Mat2a                                            | NA             | -1.48 | 7.10  | -5.84 | 1.43E-04 | 8.92E-03 | 1.30 |
| 1425266_PM_a_at | Rap1gds1                                         | RAP1GDS1       | -1.33 | 4.38  | -5.83 | 1.43E-04 | 8.92E-03 | 1.30 |
| 1455855_PM_x_at | Hnrnpab                                          | HNRNPAB        | -1.23 | 6.15  | -5.83 | 1.44E-04 | 8.96E-03 | 1.29 |
| 1435216_PM_a_at | Odf2                                             | ODF2           | 1.58  | 4.21  | 5.83  | 1.44E-04 | 8.96E-03 | 1.29 |
| 1428607_PM_at   | Araf                                             | ARAF           | -1.73 | 4.92  | -5.83 | 1.45E-04 | 8.99E-03 | 1.29 |
| 1434062_PM_at   | Rabgap1l                                         | RABGAP1L       | -1.42 | 5.78  | -5.82 | 1.45E-04 | 9.00E-03 | 1.28 |
| 1434843_PM_at   | Fam179b                                          | TOGARAM1       | -0.79 | 3.41  | -5.82 | 1.45E-04 | 9.00E-03 | 1.28 |
| 1436535_PM_at   | Trove2                                           | TROVE2         | -1.21 | 3.25  | -5.82 | 1.46E-04 | 9.01E-03 | 1.28 |
| 1450451_PM_at   | Spock2                                           | SPOCK2         | 1.62  | 4.57  | 5.82  | 1.46E-04 | 9.01E-03 | 1.28 |
| 1426906_PM_at   | Mmdal                                            | IFI16          | -0.86 | 3.08  | -5.82 | 1.46E-04 | 9.03E-03 | 1.28 |
| 1429183_PM_at   | Pkp2                                             | PKP2           | -1.67 | 4.45  | -5.82 | 1.47E-04 | 9.04E-03 | 1.27 |
| 1449198_PM_a_at | St3gal5                                          | ST3GAL5        | -1.49 | 6.26  | -5.82 | 1.47E-04 | 9.04E-03 | 1.27 |
| 1435326_PM_at   | Lpgat1                                           | LPGAT1         | -1.33 | 6.83  | -5.81 | 1.49E-04 | 9.12E-03 | 1.26 |

|                 |                                                                                                    |          |       |       |       |          |          |      |
|-----------------|----------------------------------------------------------------------------------------------------|----------|-------|-------|-------|----------|----------|------|
| 1434776_PM_at   | Sema5a                                                                                             | SEMA5A   | -2.06 | 5.22  | -5.80 | 1.50E-04 | 9.18E-03 | 1.25 |
| 1433828_PM_at   | Atp8a1                                                                                             | NA       | -1.46 | 3.63  | -5.80 | 1.50E-04 | 9.20E-03 | 1.25 |
| 1416179_PM_a_at | Rdx                                                                                                | RDX      | -1.39 | 5.74  | -5.80 | 1.50E-04 | 9.20E-03 | 1.25 |
| 1450755_PM_at   | Pafah1b2                                                                                           | PAFAH1B2 | -1.79 | 4.45  | -5.80 | 1.51E-04 | 9.20E-03 | 1.25 |
| 1442401_PM_at   | ---                                                                                                | NA       | 0.83  | 2.89  | 5.80  | 1.51E-04 | 9.20E-03 | 1.24 |
| 1460419_PM_a_at | Prkcb                                                                                              | PRKCB    | -1.22 | 7.82  | -5.79 | 1.51E-04 | 9.22E-03 | 1.24 |
| 1436455_PM_at   | Asph                                                                                               | NA       | -1.35 | 6.12  | -5.79 | 1.52E-04 | 9.27E-03 | 1.23 |
| 1428453_PM_at   | Naa30                                                                                              | NAA30    | -0.61 | 3.72  | -5.79 | 1.53E-04 | 9.28E-03 | 1.23 |
| 1423106_PM_at   | Ube2b                                                                                              | UBE2B    | -1.38 | 5.87  | -5.78 | 1.55E-04 | 9.39E-03 | 1.22 |
| 1457092_PM_at   | Fam19a1                                                                                            | FAM19A1  | -1.89 | 4.24  | -5.77 | 1.56E-04 | 9.41E-03 | 1.21 |
| 1435224_PM_at   | Crebbp                                                                                             | CREBBP   | -1.46 | 5.79  | -5.77 | 1.56E-04 | 9.41E-03 | 1.21 |
| 1425568_PM_a_at | Tmem33                                                                                             | TMEM33   | -1.29 | 3.43  | -5.77 | 1.56E-04 | 9.41E-03 | 1.21 |
| 1426864_PM_a_at | Ncam1                                                                                              | NCAM1    | -0.89 | 6.33  | -5.77 | 1.56E-04 | 9.41E-03 | 1.21 |
| 1433174_PM_a_at | ---                                                                                                | NA       | 1.24  | 4.61  | 5.77  | 1.57E-04 | 9.47E-03 | 1.20 |
| 1447277_PM_s_at | Pcyox1                                                                                             | PCYOX1   | -2.29 | 7.37  | -5.77 | 1.57E-04 | 9.47E-03 | 1.20 |
| 1438068_PM_at   | ---                                                                                                | NA       | -2.34 | 6.12  | -5.76 | 1.58E-04 | 9.48E-03 | 1.20 |
| 1453636_PM_at   | ---                                                                                                | NA       | 0.69  | 3.74  | 5.76  | 1.58E-04 | 9.48E-03 | 1.20 |
| 1456764_PM_at   | Slc35f3                                                                                            | NA       | -2.27 | 8.12  | -5.76 | 1.59E-04 | 9.48E-03 | 1.19 |
| 1454809_PM_at   | Ncoa7                                                                                              | NCOA7    | -1.29 | 3.48  | -5.76 | 1.58E-04 | 9.48E-03 | 1.20 |
| 1423043_PM_s_at | Ddx3x                                                                                              | DDX3X    | -1.17 | 4.57  | -5.76 | 1.59E-04 | 9.48E-03 | 1.19 |
| 1455722_PM_at   | Waf3                                                                                               | WASF3    | -0.99 | 8.20  | -5.76 | 1.59E-04 | 9.48E-03 | 1.19 |
| 1453791_PM_at   | C130071C03Rik                                                                                      | NA       | -0.92 | 2.78  | -5.76 | 1.59E-04 | 9.48E-03 | 1.19 |
| 1437288_PM_at   | Impad1                                                                                             | IMPAD1   | -2.29 | 5.57  | -5.76 | 1.59E-04 | 9.50E-03 | 1.19 |
| 1417011_PM_at   | Sdc2                                                                                               | SDC2     | -1.80 | 3.86  | -5.75 | 1.61E-04 | 9.55E-03 | 1.18 |
| 1419754_PM_at   | Myo5a                                                                                              | MYO5A    | -1.59 | 5.24  | -5.75 | 1.62E-04 | 9.59E-03 | 1.18 |
| 1441927_PM_at   | Syt7                                                                                               | SYT7     | -1.03 | 9.95  | -5.75 | 1.62E-04 | 9.59E-03 | 1.17 |
| 1428369_PM_s_at | Arhgap21                                                                                           | ARHGAP21 | -1.24 | 4.92  | -5.75 | 1.62E-04 | 9.60E-03 | 1.17 |
| 1455796_PM_x_at | Olfm1                                                                                              | OLFM1    | -0.91 | 11.35 | -5.74 | 1.63E-04 | 9.64E-03 | 1.17 |
| 1415703_PM_at   | Huwe1                                                                                              | HUWE1    | -1.11 | 3.90  | -5.74 | 1.64E-04 | 9.66E-03 | 1.16 |
| 1438650_PM_x_at | Gja1                                                                                               | GJA1     | -1.44 | 7.71  | -5.74 | 1.64E-04 | 9.68E-03 | 1.16 |
| 1455080_PM_at   | Ppp1r16b                                                                                           | PPP1R16B | -0.91 | 3.43  | -5.74 | 1.64E-04 | 9.68E-03 | 1.16 |
| 1443248_PM_at   | Tmco3                                                                                              | NA       | 0.88  | 3.98  | 5.74  | 1.64E-04 | 9.68E-03 | 1.16 |
| 1433966_PM_x_at | Asns                                                                                               | ASNS     | -1.36 | 6.93  | -5.73 | 1.67E-04 | 9.79E-03 | 1.14 |
| 1416064_PM_a_at | Hspa5                                                                                              | HSPA5    | -2.66 | 6.76  | -5.72 | 1.68E-04 | 9.81E-03 | 1.14 |
| 1415971_PM_at   | Marcks                                                                                             | MARCKS   | -1.95 | 5.57  | -5.72 | 1.67E-04 | 9.81E-03 | 1.14 |
| 1452353_PM_at   | Gpr155                                                                                             | GPR155   | -1.94 | 7.13  | -5.72 | 1.68E-04 | 9.81E-03 | 1.14 |
| 1415708_PM_at   | Tug1                                                                                               | NA       | -1.50 | 4.63  | -5.72 | 1.68E-04 | 9.81E-03 | 1.14 |
| 1429741_PM_at   | Kcnn1                                                                                              | KCNN1    | -1.22 | 3.58  | -5.72 | 1.68E-04 | 9.81E-03 | 1.14 |
| 1417598_PM_a_at | Fxr1                                                                                               | FXR1     | -1.10 | 6.22  | -5.72 | 1.68E-04 | 9.81E-03 | 1.14 |
| 1415814_PM_at   | Atp6v1b2                                                                                           | ATP6V1B2 | -1.53 | 5.72  | -5.71 | 1.70E-04 | 9.88E-03 | 1.13 |
| 1438260_PM_at   | Kcnn2                                                                                              | NA       | -1.72 | 5.42  | -5.71 | 1.71E-04 | 9.93E-03 | 1.12 |
| 1424764_PM_at   | Sez6l                                                                                              | SEZ6L    | -1.45 | 5.76  | -5.71 | 1.71E-04 | 9.93E-03 | 1.12 |
| 1455869_PM_at   | ---                                                                                                | NA       | 2.14  | 4.58  | 5.70  | 1.72E-04 | 1.00E-02 | 1.11 |
| 1428186_PM_at   | Kctd6                                                                                              | KCTD6    | -2.02 | 6.01  | -5.69 | 1.75E-04 | 1.01E-02 | 1.10 |
| 1443403_PM_at   | ---                                                                                                | NA       | -1.00 | 2.85  | -5.69 | 1.75E-04 | 1.01E-02 | 1.10 |
| 1433707_PM_at   | Gabra4                                                                                             | GABRA4   | -2.07 | 5.41  | -5.69 | 1.76E-04 | 1.01E-02 | 1.09 |
| 1457823_PM_at   | Cyr61                                                                                              | CYR61    | -1.08 | 2.73  | -5.69 | 1.75E-04 | 1.01E-02 | 1.09 |
| 1430834_PM_at   | Gprin3                                                                                             | GPRI N3  | -0.82 | 2.98  | -5.69 | 1.75E-04 | 1.01E-02 | 1.09 |
| 1452439_PM_s_at | Srsf2                                                                                              | SRSF2    | -1.26 | 4.57  | -5.69 | 1.76E-04 | 1.02E-02 | 1.09 |
| 1420325_PM_at   | Cramp1l                                                                                            | NA       | -1.08 | 4.13  | -5.68 | 1.78E-04 | 1.02E-02 | 1.08 |
| 1450464_PM_at   | E4f1                                                                                               | E4F1     | 0.95  | 3.64  | 5.68  | 1.78E-04 | 1.02E-02 | 1.08 |
| 1419938_PM_s_at | Arhgef17                                                                                           | ARHGEF17 | -1.74 | 5.20  | -5.68 | 1.79E-04 | 1.02E-02 | 1.07 |
| 1457181_PM_at   | Desi1                                                                                              | NA       | 0.79  | 3.20  | 5.67  | 1.81E-04 | 1.03E-02 | 1.06 |
| 1455812_PM_x_at | Vasn                                                                                               | VASN     | -2.55 | 4.69  | -5.67 | 1.81E-04 | 1.04E-02 | 1.06 |
| 1436993_PM_x_at | Pfn2                                                                                               | PFN2     | -1.26 | 10.83 | -5.66 | 1.82E-04 | 1.04E-02 | 1.06 |
| 1448548_PM_at   | Tulp4                                                                                              | TULP4    | -1.83 | 5.07  | -5.66 | 1.82E-04 | 1.04E-02 | 1.05 |
| 1419499_PM_at   | Gpam                                                                                               | NA       | -1.69 | 6.56  | -5.66 | 1.82E-04 | 1.04E-02 | 1.06 |
| 1426442_PM_at   | Gpm6a                                                                                              | GPM6A    | -1.54 | 9.69  | -5.66 | 1.83E-04 | 1.04E-02 | 1.05 |
| 1448410_PM_at   | Ube4b                                                                                              | UBE4B    | -0.93 | 4.32  | -5.66 | 1.83E-04 | 1.04E-02 | 1.05 |
| 1451949_PM_at   | Igh-V7183 /// Igh-VJ558 /// Ighg /// Ighg2b /// Ighj3 /// Ighm /// Ighv4-2 /// Ighv5-9 /// Ighv7-3 | NA       | 0.98  | 3.65  | 5.66  | 1.83E-04 | 1.04E-02 | 1.05 |
| 1445684_PM_s_at | Hdac2                                                                                              | HDAC2    | -1.53 | 6.73  | -5.66 | 1.83E-04 | 1.04E-02 | 1.05 |
| 1416688_PM_at   | Snap91                                                                                             | SNAP91   | -1.53 | 8.28  | -5.66 | 1.84E-04 | 1.04E-02 | 1.05 |
| 1449928_PM_at   | Dynlt3                                                                                             | DYNLT3   | -1.37 | 6.12  | -5.66 | 1.84E-04 | 1.04E-02 | 1.05 |
| 1418101_PM_a_at | Rtn3                                                                                               | RTN3     | -1.18 | 8.12  | -5.66 | 1.84E-04 | 1.04E-02 | 1.05 |
| 1450910_PM_at   | Cap2                                                                                               | CAP2     | -2.28 | 5.96  | -5.65 | 1.85E-04 | 1.04E-02 | 1.04 |
| 1450054_PM_at   | Add1                                                                                               | ADD1     | -2.10 | 7.01  | -5.65 | 1.85E-04 | 1.04E-02 | 1.04 |
| 1453034_PM_at   | Zfp251                                                                                             | NA       | -1.95 | 5.92  | -5.65 | 1.85E-04 | 1.04E-02 | 1.04 |
| 1417005_PM_at   | Klc1                                                                                               | KLC1     | -1.76 | 8.09  | -5.65 | 1.85E-04 | 1.04E-02 | 1.04 |
| 1451095_PM_at   | Asns                                                                                               | ASNS     | -1.50 | 4.04  | -5.65 | 1.86E-04 | 1.05E-02 | 1.03 |
| 1459908_PM_at   | ---                                                                                                | NA       | -0.91 | 7.62  | -5.65 | 1.86E-04 | 1.05E-02 | 1.03 |
| 1455672_PM_s_at | Cplx2                                                                                              | CPLX2    | -1.23 | 5.60  | -5.64 | 1.88E-04 | 1.05E-02 | 1.02 |
| 1419473_PM_a_at | Cck                                                                                                | CCK      | -1.03 | 3.65  | -5.64 | 1.88E-04 | 1.05E-02 | 1.02 |

|                 |                       |            |       |      |       |          |          |      |
|-----------------|-----------------------|------------|-------|------|-------|----------|----------|------|
| 1428193_PM_at   | Usp9x                 | USP9X      | -1.88 | 7.19 | -5.64 | 1.89E-04 | 1.06E-02 | 1.02 |
| 1438366_PM_x_at | Cln3                  | CLCN3      | -1.60 | 3.29 | -5.63 | 1.90E-04 | 1.06E-02 | 1.01 |
| 1419925_PM_s_at | Tmx3                  | TMX3       | -1.33 | 5.97 | -5.63 | 1.90E-04 | 1.06E-02 | 1.01 |
| 1428080_PM_at   | Pgam5                 | PGAM5      | -1.24 | 4.17 | -5.63 | 1.92E-04 | 1.07E-02 | 1.00 |
| 1450738_PM_at   | Kif21a                | KIF21A     | -1.45 | 7.13 | -5.62 | 1.93E-04 | 1.07E-02 | 1.00 |
| 1435666_PM_at   | Mast3                 | MAST3      | -2.93 | 6.73 | -5.61 | 1.95E-04 | 1.08E-02 | 0.98 |
| 1421955_PM_a_at | Nedd4                 | NEDD4      | -1.70 | 5.49 | -5.61 | 1.95E-04 | 1.08E-02 | 0.98 |
| 1454975_PM_at   | Zfc3h1                | ZFC3H1     | -1.67 | 4.54 | -5.61 | 1.96E-04 | 1.08E-02 | 0.98 |
| 1437436_PM_s_at | Grk6                  | GRK6       | -1.10 | 5.69 | -5.61 | 1.96E-04 | 1.08E-02 | 0.98 |
| 1457984_PM_at   | Crh                   | CRH        | 5.04  | 7.24 | 5.61  | 1.96E-04 | 1.08E-02 | 0.98 |
| 1444117_PM_at   | ---                   | NA         | -0.96 | 4.15 | -5.61 | 1.97E-04 | 1.08E-02 | 0.98 |
| 1455087_PM_at   | Snhg14                | NA         | -1.37 | 5.97 | -5.59 | 2.01E-04 | 1.10E-02 | 0.96 |
| 1451074_PM_at   | Rnf13                 | RNF13      | -1.06 | 5.11 | -5.59 | 2.01E-04 | 1.10E-02 | 0.95 |
| 1455807_PM_at   | Tspy5                 | TSPYL5     | -0.98 | 3.38 | -5.60 | 2.01E-04 | 1.10E-02 | 0.96 |
| 1418637_PM_at   | Etv3                  | ETV3       | -0.95 | 6.77 | -5.59 | 2.01E-04 | 1.10E-02 | 0.95 |
| 1429257_PM_at   | Meg3                  | NA         | 1.78  | 4.85 | 5.59  | 2.01E-04 | 1.10E-02 | 0.96 |
| 1438085_PM_at   | Heatr5b               | HEATR5B    | -1.07 | 2.91 | -5.59 | 2.03E-04 | 1.11E-02 | 0.94 |
| 1434451_PM_at   | Atxn1                 | ATXN1      | -0.80 | 5.30 | -5.59 | 2.03E-04 | 1.11E-02 | 0.95 |
| 1417492_PM_at   | Ctsb                  | CTSB       | -1.71 | 4.16 | -5.58 | 2.04E-04 | 1.11E-02 | 0.94 |
| 1423159_PM_at   | Dld                   | DLD        | -1.29 | 3.77 | -5.58 | 2.05E-04 | 1.12E-02 | 0.94 |
| 1417512_PM_at   | Ev5                   | EV5        | -1.18 | 4.41 | -5.58 | 2.05E-04 | 1.12E-02 | 0.93 |
| 1436812_PM_at   | Fkrp                  | FKRP       | -1.91 | 6.12 | -5.58 | 2.06E-04 | 1.12E-02 | 0.93 |
| 1419328_PM_at   | Sema4f                | SEMA4F     | -1.86 | 4.09 | -5.58 | 2.06E-04 | 1.12E-02 | 0.93 |
| 1415911_PM_at   | Impact                | IMPACT     | -1.14 | 3.62 | -5.57 | 2.07E-04 | 1.12E-02 | 0.93 |
| 1435659_PM_a_at | Tpi1                  | TPI1       | -1.01 | 7.47 | -5.57 | 2.07E-04 | 1.12E-02 | 0.93 |
| 1423489_PM_at   | Mmd                   | MMD        | -2.25 | 8.90 | -5.57 | 2.08E-04 | 1.12E-02 | 0.92 |
| 1436420_PM_a_at | Ipo4                  | IPO4       | -1.87 | 3.43 | -5.57 | 2.08E-04 | 1.12E-02 | 0.92 |
| 1423983_PM_at   | Sez6l2                | SEZ6L2     | -1.85 | 5.62 | -5.57 | 2.07E-04 | 1.12E-02 | 0.92 |
| 1434010_PM_at   | Fam117b               | FAM117B    | -1.44 | 4.20 | -5.57 | 2.07E-04 | 1.12E-02 | 0.92 |
| 1454664_PM_a_at | Eif5 /// LOC102641436 | EIF5       | -1.12 | 7.44 | -5.57 | 2.08E-04 | 1.12E-02 | 0.92 |
| 1426357_PM_at   | Taok1                 | TAOK1      | -0.77 | 4.95 | -5.57 | 2.08E-04 | 1.12E-02 | 0.92 |
| 1433754_PM_at   | Mbnl2                 | MBNL2      | -1.62 | 7.63 | -5.57 | 2.09E-04 | 1.13E-02 | 0.91 |
| 1423150_PM_at   | Scg5                  | SCG5       | -1.88 | 5.75 | -5.56 | 2.10E-04 | 1.13E-02 | 0.91 |
| 1448934_PM_at   | Ndufa10               | NDUFA10    | -1.78 | 6.70 | -5.55 | 2.13E-04 | 1.14E-02 | 0.90 |
| 1424528_PM_at   | Cgref1                | CGREF1     | 0.62  | 2.85 | 5.55  | 2.13E-04 | 1.14E-02 | 0.90 |
| 1454000_PM_s_at | Ccdc173               | CCDC173    | 0.92  | 3.12 | 5.55  | 2.13E-04 | 1.14E-02 | 0.90 |
| 1428229_PM_at   | Prkd3                 | PRKD3      | -0.65 | 2.25 | -5.55 | 2.14E-04 | 1.15E-02 | 0.89 |
| 1435359_PM_at   | Mtssl1                | MTSSL1     | 1.34  | 3.34 | 5.55  | 2.15E-04 | 1.15E-02 | 0.89 |
| 1422421_PM_at   | Defa-rs12             | NA         | 0.78  | 3.75 | 5.54  | 2.16E-04 | 1.15E-02 | 0.88 |
| 1443713_PM_at   | Chl1                  | CHL1       | -1.81 | 4.54 | -5.54 | 2.17E-04 | 1.16E-02 | 0.88 |
| 1438973_PM_x_at | Gja1                  | GJA1       | -1.11 | 5.97 | -5.54 | 2.18E-04 | 1.16E-02 | 0.87 |
| 1428681_PM_at   | Gm608                 | USF3       | -1.52 | 5.29 | -5.53 | 2.19E-04 | 1.16E-02 | 0.87 |
| 1428347_PM_at   | Cyfp2                 | CYFIP2     | -2.10 | 5.40 | -5.53 | 2.20E-04 | 1.17E-02 | 0.86 |
| 1435523_PM_s_at | Smim10l1              | SMIM10L1   | -1.54 | 6.10 | -5.53 | 2.20E-04 | 1.17E-02 | 0.86 |
| 1454607_PM_s_at | Psat1                 | PSAT1      | -1.87 | 5.68 | -5.53 | 2.22E-04 | 1.17E-02 | 0.86 |
| 1460597_PM_at   | Asxl2                 | ASXL2      | -1.09 | 3.50 | -5.53 | 2.21E-04 | 1.17E-02 | 0.86 |
| 1417840_PM_at   | Cep19                 | CEP19      | -2.05 | 6.25 | -5.52 | 2.23E-04 | 1.17E-02 | 0.85 |
| 1434650_PM_at   | Pogz                  | POGZ       | -1.68 | 4.50 | -5.52 | 2.23E-04 | 1.17E-02 | 0.85 |
| 1426985_PM_s_at | Fam76b                | FAM76B     | -1.45 | 4.90 | -5.52 | 2.23E-04 | 1.17E-02 | 0.85 |
| 1416735_PM_at   | Asah1                 | ASAH1      | -1.45 | 5.67 | -5.52 | 2.23E-04 | 1.17E-02 | 0.85 |
| 1423802_PM_at   | Camkv                 | CAMKV      | -1.21 | 3.58 | -5.52 | 2.23E-04 | 1.17E-02 | 0.85 |
| 1415950_PM_a_at | Pebp1                 | PEBP1      | -0.75 | 9.80 | -5.52 | 2.23E-04 | 1.17E-02 | 0.85 |
| 1454650_PM_at   | Trim35                | TRIM35     | -0.71 | 5.67 | -5.52 | 2.23E-04 | 1.17E-02 | 0.85 |
| 1452646_PM_at   | Trp53inp2             | TP53INP2   | -1.57 | 4.65 | -5.52 | 2.24E-04 | 1.17E-02 | 0.85 |
| 1450444_PM_a_at | Nr1h3                 | NR1H3      | 0.68  | 3.20 | 5.52  | 2.24E-04 | 1.17E-02 | 0.85 |
| 1418317_PM_at   | Lhx2                  | LHX2       | -0.87 | 3.23 | -5.51 | 2.26E-04 | 1.18E-02 | 0.84 |
| 1417510_PM_at   | Vps4a                 | ACO26464.4 | -1.59 | 4.52 | -5.51 | 2.26E-04 | 1.18E-02 | 0.84 |
| 1429624_PM_at   | Sltm                  | SLTM       | 1.05  | 6.29 | 5.51  | 2.27E-04 | 1.18E-02 | 0.84 |
| 1418883_PM_a_at | Pabpc1                | PABPC1     | -0.93 | 4.24 | -5.51 | 2.27E-04 | 1.18E-02 | 0.83 |
| 1417438_PM_at   | Rdh14                 | RDH14      | -1.35 | 6.36 | -5.51 | 2.27E-04 | 1.18E-02 | 0.83 |
| 1437171_PM_x_at | Gsn                   | GSN        | -1.32 | 4.37 | -5.50 | 2.29E-04 | 1.19E-02 | 0.82 |
| 1434470_PM_at   | Syt13                 | SYT13      | -0.89 | 3.84 | -5.50 | 2.30E-04 | 1.19E-02 | 0.82 |
| 1460608_PM_at   | Cacna1b               | CACNA1B    | -1.06 | 9.35 | -5.50 | 2.31E-04 | 1.20E-02 | 0.82 |
| 1449666_PM_at   | Atrn1                 | NA         | -1.72 | 4.74 | -5.49 | 2.33E-04 | 1.20E-02 | 0.81 |
| 1452385_PM_at   | Usp53                 | USP53      | -0.72 | 2.76 | -5.49 | 2.33E-04 | 1.20E-02 | 0.81 |
| 1433691_PM_at   | Ppp1r3c               | PPP1R3C    | -0.67 | 2.93 | -5.49 | 2.33E-04 | 1.20E-02 | 0.81 |
| 1442523_PM_at   | Gm5124                | NA         | 0.53  | 2.91 | 5.49  | 2.32E-04 | 1.20E-02 | 0.81 |
| 1420910_PM_at   | Plpp2                 | NA         | -1.04 | 3.21 | -5.49 | 2.33E-04 | 1.20E-02 | 0.80 |
| 1455365_PM_at   | Cdh8                  | CDH8       | -1.51 | 5.31 | -5.49 | 2.34E-04 | 1.20E-02 | 0.80 |
| 1451002_PM_at   | Aco2                  | ACO2       | -2.08 | 5.52 | -5.48 | 2.38E-04 | 1.22E-02 | 0.79 |
| 1435123_PM_at   | Efr3b                 | EFR3B      | -1.76 | 6.48 | -5.48 | 2.37E-04 | 1.22E-02 | 0.79 |
| 1425742_PM_a_at | Tsc22d1               | TSC22D1    | -1.73 | 8.18 | -5.48 | 2.37E-04 | 1.22E-02 | 0.79 |
| 1454740_PM_at   | Mib1                  | MIB1       | -1.50 | 5.93 | -5.48 | 2.37E-04 | 1.22E-02 | 0.79 |
| 1437992_PM_x_at | Gja1                  | GJA1       | -1.27 | 8.89 | -5.48 | 2.38E-04 | 1.22E-02 | 0.79 |
| 1438054_PM_x_at | Ppp2r2c               | PPP2R2C    | -1.15 | 3.07 | -5.48 | 2.38E-04 | 1.22E-02 | 0.79 |

|                 |                       |            |       |       |       |          |          |      |
|-----------------|-----------------------|------------|-------|-------|-------|----------|----------|------|
| 1428107_PM_at   | Sh3bgrl               | SH3BGRL    | -1.10 | 5.89  | -5.48 | 2.37E-04 | 1.22E-02 | 0.79 |
| 1430124_PM_x_at | Akr1a1                | AKR1A1     | -0.89 | 6.39  | -5.48 | 2.37E-04 | 1.22E-02 | 0.79 |
| 1426978_PM_at   | Klh2                  | KLHL2      | -1.71 | 8.78  | -5.48 | 2.38E-04 | 1.22E-02 | 0.78 |
| 1437629_PM_at   | Arhgef19              | ARHGEF19   | 0.49  | 2.58  | 5.47  | 2.39E-04 | 1.22E-02 | 0.78 |
| 1415933_PM_a_at | Cox5a                 | COX5A      | -2.45 | 7.97  | -5.47 | 2.41E-04 | 1.23E-02 | 0.77 |
| 1436616_PM_at   | Inpp4a                | INPP4A     | -1.18 | 5.21  | -5.47 | 2.41E-04 | 1.23E-02 | 0.77 |
| 1460570_PM_at   | Pgbd5                 | PGBD5      | -1.73 | 5.26  | -5.46 | 2.43E-04 | 1.23E-02 | 0.76 |
| 1421713_PM_a_at | Gm12540 /// Mrps33    | MRPS33     | -1.50 | 6.33  | -5.46 | 2.42E-04 | 1.23E-02 | 0.77 |
| 1421075_PM_s_at | Cyp7b1                | CYP7B1     | -1.07 | 4.08  | -5.46 | 2.42E-04 | 1.23E-02 | 0.77 |
| 1453065_PM_at   | Aldh5a1               | ALDH5A1    | -0.90 | 3.88  | -5.46 | 2.43E-04 | 1.23E-02 | 0.77 |
| 1441871_PM_at   | 1810044D09Rik         | NA         | 0.86  | 7.57  | 5.46  | 2.43E-04 | 1.23E-02 | 0.76 |
| 1458335_PM_x_at | Urm1                  | URM1       | 0.89  | 5.26  | 5.46  | 2.43E-04 | 1.23E-02 | 0.77 |
| 1433758_PM_at   | Nisch                 | NISCH      | 1.33  | 3.57  | 5.46  | 2.44E-04 | 1.23E-02 | 0.76 |
| 1434515_PM_at   | Ncoa1                 | NCOA1      | -1.99 | 5.08  | -5.45 | 2.46E-04 | 1.24E-02 | 0.75 |
| 1454886_PM_x_at | Trim9                 | TRIM9      | -1.88 | 6.15  | -5.45 | 2.47E-04 | 1.24E-02 | 0.75 |
| 1447325_PM_at   | ---                   | NA         | 0.68  | 3.71  | 5.45  | 2.47E-04 | 1.24E-02 | 0.75 |
| 1455426_PM_at   | Epha3                 | EPHA3      | -2.10 | 4.76  | -5.45 | 2.48E-04 | 1.24E-02 | 0.74 |
| 1418501_PM_a_at | Oxr1                  | OXR1       | -1.55 | 9.03  | -5.45 | 2.48E-04 | 1.24E-02 | 0.74 |
| 1418503_PM_at   | Hspa9                 | HSPA9      | -1.04 | 6.06  | -5.45 | 2.48E-04 | 1.24E-02 | 0.74 |
| 1447634_PM_x_at | Rcvtb2                | RCVTB2     | 1.75  | 4.17  | 5.45  | 2.48E-04 | 1.24E-02 | 0.74 |
| 1439184_PM_s_at | Txndc17               | TXNDC17    | -1.64 | 6.95  | -5.45 | 2.49E-04 | 1.24E-02 | 0.74 |
| 1417935_PM_at   | Mkrrn2                | MKRN2      | -1.36 | 4.64  | -5.44 | 2.50E-04 | 1.25E-02 | 0.74 |
| 1434673_PM_at   | Gpr22                 | GPR22      | -0.59 | 2.68  | -5.44 | 2.51E-04 | 1.25E-02 | 0.73 |
| 1454612_PM_at   | Mex3c                 | MEX3C      | -1.52 | 4.25  | -5.44 | 2.52E-04 | 1.25E-02 | 0.73 |
| 1436853_PM_a_at | Snca                  | SNCA       | -1.52 | 9.34  | -5.44 | 2.52E-04 | 1.25E-02 | 0.73 |
| 1437160_PM_at   | Nlgn1                 | NLGN1      | -1.58 | 7.48  | -5.43 | 2.53E-04 | 1.26E-02 | 0.72 |
| 1433726_PM_at   | 2310035C23Rik         | KIAA1468   | -1.34 | 6.22  | -5.43 | 2.53E-04 | 1.26E-02 | 0.72 |
| 1452820_PM_at   | Wdr11                 | WDR11      | -1.58 | 6.92  | -5.43 | 2.54E-04 | 1.26E-02 | 0.72 |
| 1450858_PM_a_at | Ube2d3                | UBE2D3     | -1.02 | 5.29  | -5.43 | 2.55E-04 | 1.26E-02 | 0.72 |
| 1415875_PM_at   | 3010003L21Rik         | NA         | 1.89  | 3.92  | 5.43  | 2.55E-04 | 1.26E-02 | 0.71 |
| 1420982_PM_at   | Rbm39                 | NA         | -0.97 | 5.78  | -5.43 | 2.56E-04 | 1.26E-02 | 0.71 |
| 1452981_PM_at   | Cntn1                 | CNTN1      | -2.30 | 6.91  | -5.43 | 2.56E-04 | 1.27E-02 | 0.71 |
| 1421692_PM_at   | Cacna1e               | NA         | -2.21 | 5.32  | -5.41 | 2.60E-04 | 1.28E-02 | 0.69 |
| 1434310_PM_at   | Bmpr2                 | BMPR2      | -1.69 | 8.10  | -5.41 | 2.60E-04 | 1.28E-02 | 0.69 |
| 1416660_PM_at   | Eif3a                 | EIF3A      | 0.68  | 9.02  | 5.41  | 2.63E-04 | 1.29E-02 | 0.68 |
| 1427044_PM_a_at | Amph                  | AMPH       | -1.77 | 6.70  | -5.40 | 2.65E-04 | 1.30E-02 | 0.68 |
| 1433747_PM_at   | ---                   | NA         | -1.60 | 9.35  | -5.40 | 2.67E-04 | 1.31E-02 | 0.67 |
| 1425503_PM_at   | Gcnt2                 | GCNT2      | -1.32 | 3.52  | -5.39 | 2.69E-04 | 1.32E-02 | 0.66 |
| 1434990_PM_at   | Ppm1e                 | PPM1E      | -0.99 | 6.25  | -5.39 | 2.69E-04 | 1.32E-02 | 0.66 |
| 1436329_PM_at   | Egr3                  | NA         | -1.53 | 4.56  | -5.39 | 2.71E-04 | 1.33E-02 | 0.66 |
| 1439799_PM_at   | ---                   | NA         | -0.53 | 2.29  | -5.38 | 2.73E-04 | 1.34E-02 | 0.65 |
| 1452779_PM_at   | Ube2ql1               | UBE2QL1    | -0.88 | 4.62  | -5.38 | 2.74E-04 | 1.34E-02 | 0.64 |
| 1448161_PM_a_at | Clcn4                 | CLCN4      | -1.02 | 5.28  | -5.38 | 2.75E-04 | 1.34E-02 | 0.64 |
| 1450031_PM_at   | Aff4                  | AFF4       | -2.22 | 6.85  | -5.37 | 2.76E-04 | 1.34E-02 | 0.64 |
| 1438344_PM_at   | Plpp5                 | PLPPR5     | -1.82 | 3.94  | -5.38 | 2.76E-04 | 1.34E-02 | 0.64 |
| 1433757_PM_a_at | Nisch                 | NISCH      | 2.35  | 4.88  | 5.37  | 2.76E-04 | 1.34E-02 | 0.64 |
| 1435095_PM_at   | Gabbr1                | GABRB1     | -2.05 | 5.53  | -5.37 | 2.76E-04 | 1.34E-02 | 0.63 |
| 1439606_PM_at   | Katnal1               | KATNAL1    | -0.86 | 4.60  | -5.37 | 2.78E-04 | 1.35E-02 | 0.63 |
| 1460121_PM_at   | ---                   | NA         | -0.87 | 3.85  | -5.37 | 2.78E-04 | 1.35E-02 | 0.63 |
| 1424323_PM_at   | Noc2l                 | NOC2L      | 1.37  | 5.01  | 5.37  | 2.79E-04 | 1.35E-02 | 0.63 |
| 1431094_PM_at   | ---                   | NA         | 1.03  | 2.89  | 5.37  | 2.79E-04 | 1.35E-02 | 0.62 |
| 1439824_PM_at   | Chm                   | CHM        | -1.66 | 3.62  | -5.37 | 2.80E-04 | 1.35E-02 | 0.62 |
| 1455234_PM_at   | B3galt1               | B3GALT1    | -1.79 | 6.91  | -5.36 | 2.81E-04 | 1.36E-02 | 0.62 |
| 1448106_PM_at   | Necap1                | NECAP1     | -1.28 | 6.92  | -5.36 | 2.81E-04 | 1.36E-02 | 0.62 |
| 1448147_PM_at   | Tnfrsf19              | TNFRSF19   | -1.22 | 3.60  | -5.36 | 2.81E-04 | 1.36E-02 | 0.62 |
| 1426583_PM_at   | Atf2 /// LOC102641666 | ATF2       | -1.38 | 3.82  | -5.36 | 2.82E-04 | 1.36E-02 | 0.61 |
| 1441369_PM_at   | ---                   | NA         | -1.87 | 4.54  | -5.36 | 2.83E-04 | 1.36E-02 | 0.61 |
| 1435519_PM_at   | Rap1b                 | AC113404.3 | -0.86 | 5.68  | -5.36 | 2.83E-04 | 1.36E-02 | 0.61 |
| 1435452_PM_at   | Slc35g1               | SLC35G1    | -0.59 | 3.24  | -5.36 | 2.83E-04 | 1.36E-02 | 0.61 |
| 1437641_PM_at   | Rprd2                 | NA         | -1.20 | 4.04  | -5.35 | 2.84E-04 | 1.36E-02 | 0.61 |
| 1416288_PM_at   | Dnaja1                | DNAJA1     | -1.28 | 8.32  | -5.35 | 2.87E-04 | 1.38E-02 | 0.59 |
| 1421096_PM_at   | Trpc1                 | TRPC1      | -1.64 | 5.28  | -5.34 | 2.89E-04 | 1.38E-02 | 0.59 |
| 1419169_PM_at   | Mapk6                 | MAPK6      | -0.83 | 3.18  | -5.34 | 2.89E-04 | 1.38E-02 | 0.59 |
| 1438078_PM_at   | Dgke                  | DGKE       | -1.60 | 4.87  | -5.34 | 2.90E-04 | 1.38E-02 | 0.59 |
| 1419924_PM_at   | Fnip1                 | NA         | -1.42 | 4.09  | -5.34 | 2.90E-04 | 1.38E-02 | 0.58 |
| 1437750_PM_at   | Tmem158               | NA         | -1.38 | 3.89  | -5.34 | 2.91E-04 | 1.39E-02 | 0.58 |
| 1447053_PM_x_at | Ssr3                  | SSR3       | -1.15 | 6.38  | -5.34 | 2.91E-04 | 1.39E-02 | 0.58 |
| 1450932_PM_s_at | Dock9                 | DOCK9      | -1.81 | 8.53  | -5.33 | 2.93E-04 | 1.39E-02 | 0.57 |
| 1421383_PM_at   | Ccdc82                | CCDC82     | 1.19  | 4.28  | 5.33  | 2.94E-04 | 1.40E-02 | 0.57 |
| 1438459_PM_x_at | Sfpq                  | SFPQ       | 1.24  | 10.60 | 5.33  | 2.95E-04 | 1.40E-02 | 0.57 |
| 1448939_PM_at   | Usp25                 | USP25      | -2.16 | 4.47  | -5.32 | 2.97E-04 | 1.41E-02 | 0.56 |
| 1439375_PM_x_at | Aldoa                 | ALDOA      | -1.83 | 7.75  | -5.32 | 2.97E-04 | 1.41E-02 | 0.56 |
| 1424358_PM_at   | Ube2e2                | UBE2E2     | -1.37 | 6.88  | -5.32 | 2.99E-04 | 1.41E-02 | 0.56 |
| 1436103_PM_at   | Rab3ip                | ACO25263.2 | -1.17 | 4.23  | -5.32 | 2.99E-04 | 1.41E-02 | 0.55 |
| 1435543_PM_at   | Apc                   | APC        | -1.05 | 7.44  | -5.32 | 3.00E-04 | 1.41E-02 | 0.55 |

|                 |                                                                                                    |          |       |      |       |          |          |      |
|-----------------|----------------------------------------------------------------------------------------------------|----------|-------|------|-------|----------|----------|------|
| 1417741_PM_at   | Pygl                                                                                               | PYGL     | -0.70 | 2.21 | -5.31 | 3.02E-04 | 1.42E-02 | 0.54 |
| 1441008_PM_at   | Dym                                                                                                | NA       | 0.98  | 5.34 | 5.31  | 3.03E-04 | 1.43E-02 | 0.54 |
| 1419103_PM_a_at | Abhd6                                                                                              | ABHD6    | -2.11 | 3.91 | -5.31 | 3.05E-04 | 1.43E-02 | 0.54 |
| 1423212_PM_at   | Phc1                                                                                               | PHC1     | -0.94 | 4.01 | -5.31 | 3.04E-04 | 1.43E-02 | 0.54 |
| 1439436_PM_x_at | Incenp                                                                                             | INCENP   | 2.41  | 5.98 | 5.31  | 3.05E-04 | 1.43E-02 | 0.54 |
| 1417221_PM_at   | Ppm1a                                                                                              | NA       | -0.76 | 3.15 | -5.30 | 3.06E-04 | 1.43E-02 | 0.53 |
| 1455005_PM_s_at | Slc5a2                                                                                             | SLC5A2   | 0.86  | 3.85 | 5.30  | 3.06E-04 | 1.43E-02 | 0.53 |
| 1428260_PM_at   | Atl1                                                                                               | ATL1     | -1.64 | 6.01 | -5.30 | 3.07E-04 | 1.43E-02 | 0.53 |
| 1434551_PM_at   | Hnrnpul2                                                                                           | HNRNPUL2 | -1.33 | 5.55 | -5.30 | 3.08E-04 | 1.44E-02 | 0.53 |
| 1445121_PM_at   | Opn4                                                                                               | OPN4     | 0.49  | 3.27 | 5.30  | 3.09E-04 | 1.44E-02 | 0.52 |
| 1443636_PM_at   | ---                                                                                                | NA       | 0.73  | 6.05 | 5.30  | 3.08E-04 | 1.44E-02 | 0.52 |
| 1447749_PM_at   | Smyd5                                                                                              | SMYD5    | 2.06  | 7.49 | 5.30  | 3.09E-04 | 1.44E-02 | 0.52 |
| 1420537_PM_at   | Kctd4                                                                                              | KCTD4    | -1.59 | 4.40 | -5.29 | 3.11E-04 | 1.44E-02 | 0.52 |
| 1423251_PM_at   | Luc7l2                                                                                             | LUC7L2   | -0.67 | 9.49 | -5.29 | 3.11E-04 | 1.44E-02 | 0.52 |
| 1439878_PM_at   | Ivl                                                                                                | IVL      | -0.51 | 2.20 | -5.29 | 3.10E-04 | 1.44E-02 | 0.52 |
| 1435252_PM_at   | B3galt6                                                                                            | B3GALT6  | -1.04 | 4.57 | -5.29 | 3.12E-04 | 1.45E-02 | 0.51 |
| 1435964_PM_a_at | Taok3                                                                                              | TAOK3    | 1.90  | 6.94 | 5.29  | 3.12E-04 | 1.45E-02 | 0.51 |
| 1439463_PM_x_at | Gm21596 /// Hmgb1 ///<br>Hmgb1-ps1 /// Hmgb1-ps2<br>/// Hmgb1-ps5 /// Hmgb1-<br>ps7 /// Hmgb1-rs15 | HMGGB1   | 1.06  | 9.05 | 5.28  | 3.16E-04 | 1.46E-02 | 0.50 |
| 1415891_PM_at   | Suclg1                                                                                             | SUCLG1   | -1.30 | 4.39 | -5.28 | 3.17E-04 | 1.46E-02 | 0.50 |
| 1427108_PM_at   | 9530068E07Rik                                                                                      | C5orf15  | -1.25 | 5.28 | -5.28 | 3.18E-04 | 1.47E-02 | 0.49 |
| 1452860_PM_at   | Fbxl17                                                                                             | FBXL17   | -1.13 | 5.02 | -5.28 | 3.18E-04 | 1.47E-02 | 0.49 |
| 1418339_PM_at   | Recql                                                                                              | RECQL    | -1.01 | 4.46 | -5.28 | 3.18E-04 | 1.47E-02 | 0.49 |
| 1451449_PM_at   | Erlec1                                                                                             | ERLEC1   | -1.73 | 5.46 | -5.28 | 3.19E-04 | 1.47E-02 | 0.49 |
| 1416731_PM_at   | Top2b                                                                                              | TOP2B    | -0.63 | 4.67 | -5.28 | 3.19E-04 | 1.47E-02 | 0.49 |
| 1459866_PM_x_at | Cyfp1                                                                                              | CYFP1    | -2.17 | 7.11 | -5.27 | 3.20E-04 | 1.47E-02 | 0.49 |
| 1417007_PM_a_at | Vps4b                                                                                              | VPS4B    | -1.69 | 6.02 | -5.27 | 3.20E-04 | 1.47E-02 | 0.49 |
| 1423701_PM_at   | Coasy                                                                                              | COASY    | -1.92 | 4.30 | -5.27 | 3.21E-04 | 1.47E-02 | 0.48 |
| 1434937_PM_at   | Mycbp2                                                                                             | MYCBP2   | -1.28 | 7.62 | -5.27 | 3.21E-04 | 1.47E-02 | 0.48 |
| 1428749_PM_at   | Dmxl2                                                                                              | DMXL2    | -2.12 | 8.55 | -5.27 | 3.21E-04 | 1.47E-02 | 0.48 |
| 1427838_PM_at   | Tubb2a                                                                                             | NA       | -0.96 | 8.78 | -5.27 | 3.22E-04 | 1.47E-02 | 0.48 |
| 1452143_PM_at   | Sptbn1                                                                                             | SPTBN1   | -1.50 | 8.12 | -5.26 | 3.24E-04 | 1.48E-02 | 0.47 |
| 1428131_PM_a_at | Cdc42se1                                                                                           | CD42SE1  | -1.30 | 4.58 | -5.26 | 3.24E-04 | 1.48E-02 | 0.47 |
| 1430869_PM_a_at | Habp4                                                                                              | HABP4    | 1.23  | 7.53 | 5.27  | 3.24E-04 | 1.48E-02 | 0.47 |
| 1418599_PM_at   | Col11a1                                                                                            | COL11A1  | 1.64  | 4.27 | 5.26  | 3.25E-04 | 1.48E-02 | 0.47 |
| 1438040_PM_a_at | Hsp90b1                                                                                            | HSP90B1  | -1.99 | 7.13 | -5.26 | 3.27E-04 | 1.49E-02 | 0.47 |
| 1424442_PM_a_at | Pja2                                                                                               | PJA2     | -1.65 | 7.93 | -5.26 | 3.28E-04 | 1.49E-02 | 0.46 |
| 1429476_PM_s_at | Dnaja2                                                                                             | DNAJA2   | -1.24 | 5.86 | -5.26 | 3.28E-04 | 1.49E-02 | 0.46 |
| 1451674_PM_at   | Slc12a5                                                                                            | SLC12A5  | -1.02 | 8.92 | -5.26 | 3.28E-04 | 1.49E-02 | 0.46 |
| 1439912_PM_at   | Ppp2ca                                                                                             | PPP2CA   | 1.94  | 6.40 | 5.25  | 3.29E-04 | 1.49E-02 | 0.46 |
| 1435874_PM_at   | Prkab2                                                                                             | PRKAB2   | -1.15 | 7.24 | -5.25 | 3.30E-04 | 1.50E-02 | 0.45 |
| 1452763_PM_at   | ---                                                                                                | NA       | -1.23 | 3.68 | -5.25 | 3.32E-04 | 1.50E-02 | 0.45 |
| 1434509_PM_at   | Rapgef6                                                                                            | RAPGEF6  | -1.81 | 4.69 | -5.24 | 3.34E-04 | 1.50E-02 | 0.44 |
| 1460601_PM_at   | Myrip                                                                                              | MYRIP    | -1.73 | 6.85 | -5.24 | 3.34E-04 | 1.50E-02 | 0.44 |
| 1421980_PM_at   | Kcnc3                                                                                              | KCNC3    | 1.21  | 3.87 | 5.25  | 3.34E-04 | 1.50E-02 | 0.44 |
| 1441961_PM_at   | Map9                                                                                               | MAP9     | 1.60  | 7.12 | 5.25  | 3.33E-04 | 1.50E-02 | 0.45 |
| 1420928_PM_at   | St6gal1                                                                                            | ST6GAL1  | -1.42 | 4.43 | -5.24 | 3.36E-04 | 1.51E-02 | 0.44 |
| 1428089_PM_at   | Slitrk1                                                                                            | SLITRK1  | -1.10 | 4.44 | -5.24 | 3.36E-04 | 1.51E-02 | 0.44 |
| 1435589_PM_at   | Ccdc85b                                                                                            | NA       | 0.55  | 2.99 | 5.24  | 3.37E-04 | 1.51E-02 | 0.43 |
| 1427695_PM_a_at | Pou2f1                                                                                             | POU2F1   | 0.59  | 3.37 | 5.24  | 3.37E-04 | 1.51E-02 | 0.44 |
| 1448944_PM_at   | Nrp1                                                                                               | NRP1     | -2.09 | 4.64 | -5.23 | 3.40E-04 | 1.52E-02 | 0.43 |
| 1433486_PM_at   | Cln3                                                                                               | CLCN3    | -1.48 | 6.27 | -5.23 | 3.41E-04 | 1.53E-02 | 0.42 |
| 1416004_PM_at   | Ywhah                                                                                              | YWHAH    | -1.59 | 9.87 | -5.23 | 3.43E-04 | 1.53E-02 | 0.42 |
| 1419554_PM_at   | Cd47                                                                                               | CD47     | -1.26 | 4.00 | -5.23 | 3.43E-04 | 1.53E-02 | 0.42 |
| 1437069_PM_at   | Osbpl8                                                                                             | OSBPL8   | -1.20 | 7.18 | -5.23 | 3.42E-04 | 1.53E-02 | 0.42 |
| 1450896_PM_at   | Arhgap5                                                                                            | NA       | -0.79 | 4.33 | -5.23 | 3.42E-04 | 1.53E-02 | 0.42 |
| 1459274_PM_at   | Gpr135                                                                                             | NA       | -0.96 | 2.99 | -5.22 | 3.46E-04 | 1.54E-02 | 0.41 |
| 1429204_PM_at   | Camk2n2                                                                                            | CAMK2N2  | -0.96 | 6.15 | -5.22 | 3.46E-04 | 1.54E-02 | 0.41 |
| 1434419_PM_s_at | Tardbp                                                                                             | TARDBP   | 0.81  | 3.05 | 5.22  | 3.47E-04 | 1.54E-02 | 0.41 |
| 1420934_PM_a_at | Srrm1                                                                                              | SRRM1    | 2.20  | 5.31 | 5.22  | 3.48E-04 | 1.55E-02 | 0.40 |
| 1453865_PM_a_at | Otud5                                                                                              | OTUD5    | 0.61  | 3.82 | 5.21  | 3.49E-04 | 1.55E-02 | 0.40 |
| 1423095_PM_s_at | Crbn                                                                                               | CRBN     | -1.65 | 4.78 | -5.21 | 3.50E-04 | 1.55E-02 | 0.40 |
| 1439442_PM_x_at | Yars2                                                                                              | YARS2    | -1.25 | 4.79 | -5.21 | 3.50E-04 | 1.55E-02 | 0.40 |
| 1421496_PM_at   | Acer2                                                                                              | ACER2    | 0.48  | 8.36 | 5.21  | 3.50E-04 | 1.55E-02 | 0.40 |
| 1419939_PM_at   | Arhgef17                                                                                           | NA       | -1.46 | 5.74 | -5.21 | 3.51E-04 | 1.55E-02 | 0.39 |
| 1433794_PM_at   | Setx                                                                                               | SETX     | -1.18 | 4.14 | -5.21 | 3.51E-04 | 1.55E-02 | 0.39 |
| 1428626_PM_at   | Lysmd2                                                                                             | LYSMD2   | -0.55 | 2.78 | -5.21 | 3.52E-04 | 1.55E-02 | 0.39 |
| 1430240_PM_a_at | Clgn                                                                                               | CLGN     | 0.56  | 2.51 | 5.20  | 3.54E-04 | 1.56E-02 | 0.38 |
| 1455374_PM_at   | Kcnj3                                                                                              | KCNJ3    | -1.36 | 8.10 | -5.20 | 3.55E-04 | 1.56E-02 | 0.38 |
| 1433902_PM_at   | Kbtbd8                                                                                             | KBTBD8   | -0.87 | 4.35 | -5.20 | 3.59E-04 | 1.58E-02 | 0.37 |
| 1417508_PM_at   | Rnf19a                                                                                             | RNF19A   | -2.60 | 4.57 | -5.19 | 3.61E-04 | 1.58E-02 | 0.37 |

|                 |                                                                    |            |       |       |       |          |          |      |
|-----------------|--------------------------------------------------------------------|------------|-------|-------|-------|----------|----------|------|
| 1420196_PM_s_at | LOC102641289 ///Tbc1d14                                            | TBC1D14    | -2.23 | 5.42  | -5.19 | 3.63E-04 | 1.59E-02 | 0.36 |
| 1450729_PM_at   | Hs2t1                                                              | AC093155.3 | -1.96 | 5.24  | -5.19 | 3.63E-04 | 1.59E-02 | 0.36 |
| 1456798_PM_at   | ---                                                                | NA         | -1.96 | 4.12  | -5.19 | 3.63E-04 | 1.59E-02 | 0.36 |
| 1434530_PM_at   | Tenm4                                                              | TENM4      | -0.96 | 3.36  | -5.18 | 3.66E-04 | 1.60E-02 | 0.35 |
| 1444956_PM_at   | Klh7                                                               | NA         | -1.06 | 3.47  | -5.18 | 3.68E-04 | 1.61E-02 | 0.35 |
| 1429097_PM_at   | Rnf150                                                             | RNF150     | -1.97 | 5.90  | -5.17 | 3.70E-04 | 1.62E-02 | 0.34 |
| 1415671_PM_at   | Atp6v0d1                                                           | ATP6VOD1   | -1.68 | 5.06  | -5.17 | 3.71E-04 | 1.62E-02 | 0.34 |
| 1434440_PM_at   | Gnai1                                                              | GNAI1      | -1.28 | 5.68  | -5.17 | 3.71E-04 | 1.62E-02 | 0.34 |
| 1433695_PM_at   | Cnr1p1                                                             | CNRIP1     | -1.26 | 7.54  | -5.17 | 3.72E-04 | 1.62E-02 | 0.34 |
| 1445705_PM_x_at | Dpp8                                                               | DPP8       | 0.45  | 2.77  | 5.17  | 3.72E-04 | 1.62E-02 | 0.33 |
| 1417253_PM_at   | Frg1                                                               | FRG1       | 1.74  | 5.65  | 5.17  | 3.74E-04 | 1.63E-02 | 0.33 |
| 1416056_PM_a_at | Ndufb11                                                            | NDUFB11    | -1.38 | 7.99  | -5.16 | 3.76E-04 | 1.64E-02 | 0.32 |
| 1421917_PM_at   | Pdgfra                                                             | PDGFRA     | -1.27 | 3.62  | -5.16 | 3.80E-04 | 1.65E-02 | 0.31 |
| 1416300_PM_a_at | LOC102641364 ///Slc25a3                                            | SLC25A3    | -1.18 | 6.47  | -5.16 | 3.80E-04 | 1.65E-02 | 0.31 |
| 1419089_PM_at   | Timp3                                                              | TIMP3      | -0.73 | 2.94  | -5.16 | 3.81E-04 | 1.65E-02 | 0.31 |
| 1438076_PM_at   | Gm5481 /// Gm6109 ///<br>Gm6570 /// Gm7429 ///<br>Gm9703 /// Rpl30 | RPL30      | -0.69 | 2.62  | -5.15 | 3.82E-04 | 1.65E-02 | 0.31 |
| 1435949_PM_at   | Zc3h3                                                              | ZC3H3      | 0.54  | 3.47  | 5.15  | 3.84E-04 | 1.66E-02 | 0.30 |
| 1421019_PM_at   | 1700021F05Rik                                                      | C6orf203   | 1.08  | 7.27  | 5.15  | 3.84E-04 | 1.66E-02 | 0.30 |
| 1426582_PM_at   | Atf2 /// LOC102641666                                              | ATF2       | -1.74 | 6.39  | -5.15 | 3.87E-04 | 1.66E-02 | 0.30 |
| 1425837_PM_a_at | Noct                                                               | NOCT       | -1.21 | 4.75  | -5.15 | 3.87E-04 | 1.66E-02 | 0.30 |
| 1454774_PM_at   | Zfp445                                                             | NA         | -1.09 | 6.29  | -5.15 | 3.87E-04 | 1.66E-02 | 0.29 |
| 1426476_PM_at   | Rasa1                                                              | RASA1      | -0.81 | 3.05  | -5.15 | 3.86E-04 | 1.66E-02 | 0.30 |
| 1435011_PM_x_at | Akr1a1                                                             | AKR1A1     | -1.29 | 6.58  | -5.14 | 3.87E-04 | 1.67E-02 | 0.29 |
| 1450627_PM_at   | Ank                                                                | ANKH       | -1.40 | 4.09  | -5.14 | 3.89E-04 | 1.67E-02 | 0.29 |
| 1426069_PM_s_at | Slc7a4                                                             | SLC7A4     | -0.69 | 3.58  | -5.14 | 3.89E-04 | 1.67E-02 | 0.29 |
| 1423890_PM_x_at | Atp1b1                                                             | ATP1B1     | -0.73 | 10.29 | -5.14 | 3.90E-04 | 1.67E-02 | 0.29 |
| 1434996_PM_at   | Slc25a16                                                           | SLC25A16   | -1.50 | 4.33  | -5.14 | 3.93E-04 | 1.68E-02 | 0.28 |
| 1445031_PM_at   | ---                                                                | NA         | 0.55  | 2.52  | 5.13  | 3.95E-04 | 1.69E-02 | 0.27 |
| 1423051_PM_at   | Hnrnpu                                                             | HNRNPU     | 0.83  | 8.66  | 5.13  | 3.97E-04 | 1.70E-02 | 0.27 |
| 1442864_PM_at   | ---                                                                | NA         | 1.01  | 3.59  | 5.13  | 3.97E-04 | 1.70E-02 | 0.27 |
| 1415687_PM_a_at | Psap                                                               | PSAP       | -0.87 | 5.89  | -5.13 | 3.98E-04 | 1.70E-02 | 0.27 |
| 1416067_PM_at   | Ifrd1                                                              | IFRD1      | -1.23 | 4.99  | -5.12 | 3.99E-04 | 1.70E-02 | 0.26 |
| 1429215_PM_at   | ---                                                                | NA         | -1.69 | 4.82  | -5.12 | 4.00E-04 | 1.70E-02 | 0.26 |
| 1435991_PM_at   | Nr3c2                                                              | NR3C2      | -2.13 | 5.01  | -5.12 | 4.03E-04 | 1.71E-02 | 0.25 |
| 1459903_PM_at   | Sema7a                                                             | SEMA7A     | -0.99 | 5.35  | -5.12 | 4.04E-04 | 1.71E-02 | 0.25 |
| 1431505_PM_at   | Pph1                                                               | NA         | -0.63 | 2.13  | -5.12 | 4.04E-04 | 1.71E-02 | 0.25 |
| 1444562_PM_at   | ---                                                                | NA         | 1.55  | 6.33  | 5.12  | 4.04E-04 | 1.71E-02 | 0.25 |
| 1421500_PM_at   | Sts                                                                | NA         | 0.99  | 4.20  | 5.11  | 4.05E-04 | 1.72E-02 | 0.25 |
| 1434082_PM_at   | Cdk17                                                              | CDK17      | -1.75 | 5.45  | -5.11 | 4.06E-04 | 1.72E-02 | 0.25 |
| 1428204_PM_at   | Gabbr2                                                             | NA         | 0.82  | 7.53  | 5.11  | 4.06E-04 | 1.72E-02 | 0.25 |
| 1423393_PM_at   | Clic4                                                              | CLIC4      | -1.65 | 4.46  | -5.11 | 4.08E-04 | 1.72E-02 | 0.24 |
| 1436451_PM_a_at | Gm21540 /// Tmed2                                                  | TMED2      | -1.32 | 8.47  | -5.11 | 4.09E-04 | 1.72E-02 | 0.24 |
| 1446264_PM_at   | ---                                                                | NA         | 0.81  | 5.46  | 5.11  | 4.09E-04 | 1.72E-02 | 0.24 |
| 1447809_PM_x_at | Zfp420                                                             | NA         | 1.21  | 6.87  | 5.11  | 4.09E-04 | 1.72E-02 | 0.24 |
| 1452566_PM_at   | ---                                                                | NA         | 0.74  | 3.03  | 5.11  | 4.09E-04 | 1.72E-02 | 0.24 |
| 1421648_PM_at   | Nlgn1                                                              | NA         | -1.82 | 4.86  | -5.10 | 4.11E-04 | 1.73E-02 | 0.23 |
| 1434083_PM_a_at | Elmod1                                                             | ELMOD1     | -1.58 | 8.04  | -5.11 | 4.11E-04 | 1.73E-02 | 0.23 |
| 1421545_PM_a_at | Syne1                                                              | SYNE1      | 1.04  | 3.94  | 5.10  | 4.11E-04 | 1.73E-02 | 0.23 |
| 1436826_PM_at   | Tmtc3                                                              | TMT3       | -0.57 | 2.83  | -5.10 | 4.12E-04 | 1.73E-02 | 0.23 |
| 1423667_PM_at   | Mat2a                                                              | NA         | -1.40 | 5.60  | -5.10 | 4.13E-04 | 1.73E-02 | 0.23 |
| 1438407_PM_at   | Dsel                                                               | DSEL       | -1.38 | 5.47  | -5.10 | 4.15E-04 | 1.74E-02 | 0.22 |
| 1436941_PM_at   | Nxpe3                                                              | NXPE3      | -1.65 | 4.41  | -5.09 | 4.18E-04 | 1.75E-02 | 0.22 |
| 1451437_PM_at   | Zdhhc20                                                            | ZDHHC20    | -1.96 | 4.96  | -5.09 | 4.22E-04 | 1.76E-02 | 0.21 |
| 1429710_PM_at   | Styx                                                               | NA         | -1.05 | 4.89  | -5.09 | 4.21E-04 | 1.76E-02 | 0.21 |
| 1428707_PM_at   | Ptms                                                               | NA         | 1.37  | 8.36  | 5.09  | 4.21E-04 | 1.76E-02 | 0.21 |
| 1418011_PM_a_at | Sh3glb1                                                            | SH3GLB1    | -0.49 | 3.07  | -5.09 | 4.23E-04 | 1.76E-02 | 0.20 |
| 1435384_PM_at   | Ube2n                                                              | NA         | -1.19 | 4.58  | -5.08 | 4.27E-04 | 1.78E-02 | 0.20 |
| 1448682_PM_at   | Dynl1                                                              | DYNLL1     | -1.66 | 7.39  | -5.07 | 4.31E-04 | 1.79E-02 | 0.19 |
| 1452769_PM_at   | Rnf145                                                             | RNF145     | -1.08 | 5.48  | -5.07 | 4.31E-04 | 1.79E-02 | 0.19 |
| 1439267_PM_x_at | ---                                                                | NA         | -1.83 | 7.29  | -5.07 | 4.32E-04 | 1.79E-02 | 0.18 |
| 1454758_PM_a_at | Tsc22d1                                                            | TSC22D1    | -2.30 | 5.04  | -5.07 | 4.33E-04 | 1.79E-02 | 0.18 |
| 1459088_PM_at   | C79557                                                             | NA         | 0.49  | 2.77  | 5.07  | 4.33E-04 | 1.79E-02 | 0.18 |
| 1428525_PM_at   | Pnmal1                                                             | NA         | -1.19 | 7.73  | -5.07 | 4.35E-04 | 1.80E-02 | 0.18 |
| 1423818_PM_a_at | Ar16p1                                                             | ARL6IP1    | -1.65 | 6.61  | -5.07 | 4.35E-04 | 1.80E-02 | 0.18 |
| 1456348_PM_x_at | Paqr5                                                              | PAQR5      | 0.54  | 5.92  | 5.07  | 4.36E-04 | 1.80E-02 | 0.17 |
| 1419673_PM_at   | Spock1                                                             | SPOCK1     | -1.63 | 6.61  | -5.06 | 4.38E-04 | 1.81E-02 | 0.17 |
| 1436774_PM_at   | Sel1l                                                              | SEL1L      | -1.57 | 7.26  | -5.06 | 4.39E-04 | 1.81E-02 | 0.17 |
| 1426905_PM_a_at | Dnajc10                                                            | DNAJC10    | -1.16 | 7.09  | -5.06 | 4.41E-04 | 1.82E-02 | 0.16 |
| 1441663_PM_at   | ---                                                                | NA         | 0.54  | 2.82  | 5.06  | 4.42E-04 | 1.82E-02 | 0.16 |
| 1444151_PM_at   | ---                                                                | NA         | 0.69  | 3.22  | 5.06  | 4.43E-04 | 1.82E-02 | 0.16 |
| 1433614_PM_at   | Srx27                                                              | SRX27      | -0.63 | 3.87  | -5.05 | 4.45E-04 | 1.83E-02 | 0.15 |



|                 |                      |            |       |       |       |          |          |      |
|-----------------|----------------------|------------|-------|-------|-------|----------|----------|------|
| 1460444_PM_at   | Arrb1                | ARRB1      | -0.91 | 4.94  | -5.05 | 4.46E-04 | 1.83E-02 | 0.15 |
| 1441948_PM_x_at | Zfand3               | ZFAND3     | -1.80 | 5.99  | -5.05 | 4.47E-04 | 1.83E-02 | 0.15 |
| 1419592_PM_at   | Unc5c                | UNC5C      | -1.29 | 3.59  | -5.05 | 4.47E-04 | 1.83E-02 | 0.15 |
| 1448707_PM_at   | Taf13                | TAF13      | -0.56 | 7.71  | -5.05 | 4.49E-04 | 1.84E-02 | 0.14 |
| 1423462_PM_at   | Tab2                 | TAB2       | -1.23 | 8.07  | -5.04 | 4.50E-04 | 1.84E-02 | 0.14 |
| 1428418_PM_s_at | Zc2hc1a              | ZC2HC1A    | -0.86 | 2.73  | -5.04 | 4.51E-04 | 1.84E-02 | 0.14 |
| 1434053_PM_x_at | Atp5k                | ATP5I      | 1.02  | 9.54  | 5.04  | 4.52E-04 | 1.85E-02 | 0.14 |
| 1423727_PM_at   | Cnih1                | CNIH1      | -1.69 | 4.98  | -5.04 | 4.53E-04 | 1.85E-02 | 0.13 |
| 1420403_PM_at   | Atp2b2               | ATP2B2     | -1.38 | 5.31  | -5.04 | 4.53E-04 | 1.85E-02 | 0.14 |
| 1418560_PM_at   | Pdha1                | PDHA1      | -1.68 | 5.47  | -5.04 | 4.55E-04 | 1.85E-02 | 0.13 |
| 1423812_PM_s_at | Vopp1                | VOPP1      | -0.84 | 3.85  | -5.04 | 4.55E-04 | 1.85E-02 | 0.13 |
| 1454716_PM_x_at | Cox5b///LOC102641600 | COX5B      | -0.99 | 9.26  | -5.04 | 4.56E-04 | 1.86E-02 | 0.13 |
| 1428087_PM_at   | Dnm1l                | DNM1L      | -2.00 | 5.49  | -5.03 | 4.57E-04 | 1.86E-02 | 0.13 |
| 1455244_PM_at   | Daam1                | DAAM1      | -1.20 | 5.59  | -5.03 | 4.57E-04 | 1.86E-02 | 0.13 |
| 1456464_PM_x_at | ---                  | NA         | -1.87 | 4.97  | -5.03 | 4.59E-04 | 1.86E-02 | 0.12 |
| 1459793_PM_s_at | Lymr5                | NA         | -1.37 | 3.34  | -5.03 | 4.58E-04 | 1.86E-02 | 0.12 |
| 1428194_PM_at   | Usp9x                | USP9X      | -2.11 | 6.96  | -5.03 | 4.60E-04 | 1.86E-02 | 0.12 |
| 1434063_PM_at   | Zfp664               | ZNF664     | -1.35 | 5.61  | -5.03 | 4.61E-04 | 1.86E-02 | 0.12 |
| 1455664_PM_at   | Rtn4rl1              | RTN4RL1    | -1.15 | 4.19  | -5.03 | 4.60E-04 | 1.86E-02 | 0.12 |
| 1423307_PM_s_at | Tgohn1///Tgohn2      | TGOLN2     | -1.07 | 4.67  | -5.03 | 4.62E-04 | 1.87E-02 | 0.11 |
| 1456462_PM_x_at | Ppp1cb               | PPP1CB     | -0.72 | 7.00  | -5.03 | 4.63E-04 | 1.87E-02 | 0.11 |
| 1435698_PM_at   | Rictor               | RICTOR     | -1.43 | 5.21  | -5.02 | 4.65E-04 | 1.87E-02 | 0.11 |
| 1437744_PM_at   | Slitrk4              | SLITRK4    | -0.87 | 3.12  | -5.02 | 4.64E-04 | 1.87E-02 | 0.11 |
| 1436847_PM_s_at | Cdca8                | CDCA8      | 1.13  | 5.29  | 5.02  | 4.64E-04 | 1.87E-02 | 0.11 |
| 1430530_PM_s_at | Nmral1               | NMRAL1     | 0.48  | 3.22  | 5.02  | 4.65E-04 | 1.87E-02 | 0.11 |
| 1448399_PM_at   | Tax1bp1              | TAX1BP1    | -1.31 | 4.58  | -5.02 | 4.68E-04 | 1.88E-02 | 0.10 |
| 1418884_PM_x_at | Tuba1a               | NA         | -0.90 | 11.35 | -5.02 | 4.68E-04 | 1.88E-02 | 0.10 |
| 1451388_PM_a_at | Atp11b               | ATP11B     | -1.58 | 6.26  | -5.02 | 4.70E-04 | 1.88E-02 | 0.10 |
| 1449314_PM_at   | Zfpm2                | ZFPM2      | -1.23 | 4.72  | -5.02 | 4.70E-04 | 1.88E-02 | 0.10 |
| 1455787_PM_x_at | Minpp1               | MINPP1     | -1.89 | 5.83  | -5.02 | 4.70E-04 | 1.88E-02 | 0.10 |
| 1423230_PM_at   | Inpp5e               | INPP5E     | -1.57 | 4.49  | -5.01 | 4.73E-04 | 1.89E-02 | 0.09 |
| 1434265_PM_s_at | Ank2                 | ANK2       | -1.46 | 8.30  | -5.01 | 4.72E-04 | 1.89E-02 | 0.09 |
| 1449181_PM_at   | Fech                 | FECH       | -1.11 | 3.71  | -5.01 | 4.73E-04 | 1.89E-02 | 0.09 |
| 1434130_PM_at   | Lhfp12               | LHFPL2     | -0.81 | 2.86  | -5.01 | 4.72E-04 | 1.89E-02 | 0.09 |
| 1422539_PM_at   | Extl2                | EXTL2      | -1.33 | 6.94  | -5.01 | 4.74E-04 | 1.89E-02 | 0.09 |
| 1433772_PM_at   | Hspa13               | HSPA13     | -1.25 | 3.61  | -5.01 | 4.75E-04 | 1.89E-02 | 0.09 |
| 1416679_PM_at   | Abcd3                | ABCD3      | -1.14 | 5.56  | -5.01 | 4.74E-04 | 1.89E-02 | 0.09 |
| 1416240_PM_at   | Psmb7                | PSMB7      | -1.21 | 5.94  | -5.01 | 4.76E-04 | 1.89E-02 | 0.09 |
| 1428579_PM_at   | Fmn12                | FMNL2      | -1.19 | 3.76  | -5.01 | 4.75E-04 | 1.89E-02 | 0.09 |
| 1437550_PM_at   | Dhx36                | DHX36      | -1.40 | 4.65  | -5.00 | 4.78E-04 | 1.89E-02 | 0.08 |
| 1448259_PM_at   | Fstl1                | FSTL1      | -1.39 | 4.06  | -5.00 | 4.78E-04 | 1.89E-02 | 0.08 |
| 1417965_PM_at   | Plekha1              | PLEKHA1    | -0.85 | 4.76  | -5.00 | 4.79E-04 | 1.89E-02 | 0.08 |
| 1440838_PM_at   | Kcnb1                | NA         | -1.22 | 3.43  | -5.00 | 4.79E-04 | 1.90E-02 | 0.08 |
| 1416850_PM_s_at | Cisd1                | CISD1      | -2.07 | 6.31  | -5.00 | 4.83E-04 | 1.90E-02 | 0.07 |
| 1448655_PM_at   | Lrp1                 | LRP1       | -1.18 | 3.69  | -5.00 | 4.82E-04 | 1.90E-02 | 0.07 |
| 1455030_PM_at   | Ptprj                | PTPRJ      | -1.15 | 3.08  | -5.00 | 4.82E-04 | 1.90E-02 | 0.07 |
| 1452167_PM_at   | Selt                 | SELENOT    | -0.78 | 8.09  | -5.00 | 4.84E-04 | 1.91E-02 | 0.07 |
| 1433450_PM_at   | Cdk5r1               | CDK5R1     | -1.33 | 6.67  | -5.00 | 4.84E-04 | 1.91E-02 | 0.07 |
| 1421970_PM_a_at | Gria2                | GRIA2      | -2.15 | 8.60  | -4.99 | 4.86E-04 | 1.91E-02 | 0.07 |
| 1454691_PM_at   | Nrxn1                | NRXN1      | -2.11 | 6.89  | -4.99 | 4.87E-04 | 1.91E-02 | 0.06 |
| 1429771_PM_at   | Lmbrd2               | NA         | -1.45 | 6.02  | -4.99 | 4.87E-04 | 1.91E-02 | 0.06 |
| 1436850_PM_at   | Creg2                | CREG2      | -2.55 | 5.27  | -4.99 | 4.88E-04 | 1.91E-02 | 0.06 |
| 1417027_PM_at   | Trim2                | TRIM2      | -2.03 | 7.53  | -4.99 | 4.90E-04 | 1.91E-02 | 0.06 |
| 1417980_PM_a_at | Insig2               | INSIG2     | -1.99 | 6.68  | -4.99 | 4.90E-04 | 1.91E-02 | 0.06 |
| 1423097_PM_s_at | Capn7                | CAPN7      | -1.31 | 6.68  | -4.99 | 4.90E-04 | 1.91E-02 | 0.06 |
| 1424210_PM_at   | Erlin1               | ERLIN1     | -1.24 | 5.20  | -4.99 | 4.90E-04 | 1.91E-02 | 0.06 |
| 1428236_PM_at   | Acbd5                | ACBD5      | -1.24 | 5.99  | -4.99 | 4.89E-04 | 1.91E-02 | 0.06 |
| 1416476_PM_a_at | Ube2d2a              | UBE2D2     | -0.75 | 8.84  | -4.99 | 4.90E-04 | 1.91E-02 | 0.06 |
| 1444717_PM_at   | ---                  | NA         | 0.70  | 3.21  | 4.99  | 4.88E-04 | 1.91E-02 | 0.06 |
| 1433832_PM_at   | Sun2                 | SUN2       | -1.15 | 7.94  | -4.98 | 4.94E-04 | 1.92E-02 | 0.05 |
| 1433816_PM_at   | Slc25a51             | SLC25A52   | -0.86 | 6.67  | -4.98 | 4.94E-04 | 1.92E-02 | 0.05 |
| 1452661_PM_at   | Tfrc                 | TFRC       | -1.80 | 5.86  | -4.98 | 4.94E-04 | 1.92E-02 | 0.05 |
| 1428871_PM_at   | Msl1                 | MSL1       | -1.33 | 6.03  | -4.98 | 4.96E-04 | 1.93E-02 | 0.04 |
| 1460554_PM_s_at | Glg1                 | NA         | -0.73 | 4.67  | -4.98 | 4.96E-04 | 1.93E-02 | 0.04 |
| 1450368_PM_a_at | Ppp3r1///Wdr92       | ACO17083.4 | -1.27 | 4.65  | -4.98 | 4.97E-04 | 1.93E-02 | 0.04 |
| 1418768_PM_at   | Opa1                 | OPA1       | -1.28 | 3.69  | -4.98 | 4.99E-04 | 1.93E-02 | 0.04 |
| 1434179_PM_at   | Kmt2c                | KMT2C      | -1.75 | 5.70  | -4.97 | 5.02E-04 | 1.95E-02 | 0.03 |
| 1458273_PM_at   | Hnrnpd               | HNRNPD     | -1.23 | 4.11  | -4.97 | 5.04E-04 | 1.95E-02 | 0.03 |
| 1415962_PM_at   | Eif3h                | EIF3H      | -1.54 | 5.31  | -4.97 | 5.06E-04 | 1.96E-02 | 0.02 |
| 1441082_PM_at   | Dscam                | DSCAM      | -1.34 | 3.64  | -4.97 | 5.06E-04 | 1.96E-02 | 0.02 |
| 1454926_PM_at   | Sphkap               | SPHKAP     | -1.98 | 6.17  | -4.97 | 5.07E-04 | 1.96E-02 | 0.02 |
| 1451025_PM_at   | Arl1                 | ARL1       | -1.36 | 5.64  | -4.96 | 5.08E-04 | 1.96E-02 | 0.02 |
| 1454618_PM_at   | C86187               | NA         | -0.58 | 3.28  | -4.96 | 5.09E-04 | 1.96E-02 | 0.02 |
| 1432049_PM_at   | 4930422122Rik        | NA         | 0.50  | 3.29  | 4.96  | 5.11E-04 | 1.97E-02 | 0.01 |
| 1438397_PM_a_at | Rbm39                | RBM39      | 2.02  | 6.56  | 4.96  | 5.11E-04 | 1.97E-02 | 0.01 |

|                 |               |           |       |       |       |          |          |       |
|-----------------|---------------|-----------|-------|-------|-------|----------|----------|-------|
| 1416483_PM_at   | Ttc3          | TTC3      | -1.22 | 8.02  | -4.96 | 5.14E-04 | 1.97E-02 | 0.01  |
| 1453054_PM_at   | Scamp1        | SCAMP1    | -1.20 | 4.20  | -4.96 | 5.14E-04 | 1.97E-02 | 0.01  |
| 1448149_PM_at   | Ctnna1        | CTNNA1    | -1.17 | 4.41  | -4.96 | 5.13E-04 | 1.97E-02 | 0.01  |
| 1450193_PM_at   | Hcn1          | HCN1      | -0.76 | 3.47  | -4.96 | 5.14E-04 | 1.97E-02 | 0.01  |
| 1425341_PM_at   | Kcnk3         | KCNK3     | 0.52  | 3.84  | 4.96  | 5.13E-04 | 1.97E-02 | 0.01  |
| 1445633_PM_at   | ---           | NA        | 0.71  | 5.77  | 4.96  | 5.14E-04 | 1.97E-02 | 0.01  |
| 1433267_PM_at   | Ing1          | NA        | 0.76  | 4.22  | 4.96  | 5.15E-04 | 1.97E-02 | 0.01  |
| 1448116_PM_at   | Uba1          | UBA1      | -0.87 | 5.73  | -4.95 | 5.17E-04 | 1.98E-02 | 0.00  |
| 1447811_PM_s_at | Amigo1        | AMIGO1    | -0.86 | 5.64  | -4.95 | 5.18E-04 | 1.98E-02 | 0.00  |
| 1416614_PM_at   | Eid1          | EID1      | -1.60 | 5.07  | -4.95 | 5.19E-04 | 1.98E-02 | 0.00  |
| 1418816_PM_at   | Chmp1b        | NA        | -0.73 | 4.04  | -4.95 | 5.20E-04 | 1.98E-02 | 0.00  |
| 1446978_PM_at   | ---           | NA        | 0.59  | 4.28  | 4.95  | 5.19E-04 | 1.98E-02 | 0.00  |
| 1437619_PM_x_at | Ddr1          | DDR1      | -0.54 | 3.40  | -4.95 | 5.21E-04 | 1.98E-02 | -0.01 |
| 1429705_PM_at   | Spaca4        | SPACA4    | 0.52  | 3.91  | 4.95  | 5.22E-04 | 1.98E-02 | -0.01 |
| 1422504_PM_at   | Glr3          | GLRB      | -2.25 | 5.71  | -4.94 | 5.24E-04 | 1.99E-02 | -0.01 |
| 1434205_PM_at   | Ppp2r5c       | PPP2R5C   | -0.91 | 3.73  | -4.94 | 5.23E-04 | 1.99E-02 | -0.01 |
| 1459679_PM_s_at | Myo1b         | MYO1B     | -0.63 | 2.48  | -4.94 | 5.25E-04 | 1.99E-02 | -0.01 |
| 1427131_PM_s_at | Lrrc58        | LRRC58    | -1.81 | 4.70  | -4.94 | 5.26E-04 | 1.99E-02 | -0.02 |
| 1416921_PM_x_at | Aldoa         | ALDOA     | -1.35 | 8.14  | -4.94 | 5.26E-04 | 1.99E-02 | -0.02 |
| 1432808_PM_at   | ---           | NA        | 1.65  | 4.85  | 4.94  | 5.27E-04 | 1.99E-02 | -0.02 |
| 1422895_PM_at   | Vamp4         | VAMP4     | -1.42 | 4.06  | -4.94 | 5.28E-04 | 2.00E-02 | -0.02 |
| 1425585_PM_at   | Med12         | MED12     | 0.69  | 2.90  | 4.94  | 5.28E-04 | 2.00E-02 | -0.02 |
| 1449225_PM_a_at | Mapk8ip2      | MAPK8IP2  | -2.05 | 7.43  | -4.94 | 5.30E-04 | 2.00E-02 | -0.02 |
| 1423347_PM_at   | Sec23a        | SEC23A    | -1.67 | 6.93  | -4.94 | 5.31E-04 | 2.00E-02 | -0.02 |
| 1458697_PM_at   | ---           | NA        | 1.94  | 4.68  | 4.93  | 5.31E-04 | 2.00E-02 | -0.03 |
| 1422686_PM_s_at | Exoc4         | EXOC4     | -1.69 | 5.19  | -4.93 | 5.34E-04 | 2.01E-02 | -0.03 |
| 1425554_PM_a_at | Cdc16         | CDC16     | -1.09 | 4.21  | -4.93 | 5.34E-04 | 2.01E-02 | -0.03 |
| 1419104_PM_at   | Abhd6         | NA        | -1.09 | 5.20  | -4.93 | 5.33E-04 | 2.01E-02 | -0.03 |
| 1428535_PM_at   | 9430020K01Rik | KIAA1462  | -1.13 | 3.95  | -4.93 | 5.35E-04 | 2.01E-02 | -0.03 |
| 1419384_PM_at   | Pick1         | PICK1     | 0.45  | 3.68  | 4.93  | 5.35E-04 | 2.01E-02 | -0.03 |
| 1448198_PM_a_at | Ndufb8        | NDUFB8    | -0.94 | 6.45  | -4.93 | 5.37E-04 | 2.01E-02 | -0.04 |
| 1439600_PM_at   | ---           | NA        | 0.52  | 2.78  | 4.93  | 5.37E-04 | 2.01E-02 | -0.04 |
| 1452833_PM_at   | Rapgef2       | RAPGEF2   | -2.77 | 6.16  | -4.93 | 5.38E-04 | 2.01E-02 | -0.04 |
| 1416767_PM_a_at | Smm14         | SMIM14    | -1.06 | 9.17  | -4.93 | 5.39E-04 | 2.01E-02 | -0.04 |
| 1428845_PM_at   | Bclaf1        | BCLAF1    | -1.05 | 5.33  | -4.93 | 5.38E-04 | 2.01E-02 | -0.04 |
| 1435612_PM_at   | Opcml         | OPCML     | -1.17 | 8.78  | -4.92 | 5.40E-04 | 2.02E-02 | -0.04 |
| 1423604_PM_at   | Ncan          | NCAN      | -1.37 | 4.73  | -4.92 | 5.42E-04 | 2.02E-02 | -0.05 |
| 1420957_PM_at   | Apc           | APC       | -1.20 | 6.40  | -4.92 | 5.42E-04 | 2.02E-02 | -0.05 |
| 1448381_PM_at   | Gfm1          | GFM1      | -1.26 | 3.53  | -4.92 | 5.44E-04 | 2.03E-02 | -0.05 |
| 1438258_PM_at   | Vldlr         | VLDLR     | -1.69 | 5.39  | -4.92 | 5.47E-04 | 2.03E-02 | -0.05 |
| 1423591_PM_at   | Fgfr1op2      | FGFR1OP2  | -0.93 | 8.44  | -4.92 | 5.46E-04 | 2.03E-02 | -0.05 |
| 1423423_PM_at   | Pdia3         | PDIA3     | -2.13 | 5.91  | -4.92 | 5.47E-04 | 2.03E-02 | -0.06 |
| 1454696_PM_at   | Gnb1          | GNB1      | -1.39 | 8.45  | -4.91 | 5.48E-04 | 2.03E-02 | -0.06 |
| 1423941_PM_at   | Camk2g        | CAMK2G    | -0.51 | 5.63  | -4.91 | 5.49E-04 | 2.03E-02 | -0.06 |
| 1446493_PM_at   | Cdc14a        | CDC14A    | 0.64  | 2.71  | 4.91  | 5.48E-04 | 2.03E-02 | -0.06 |
| 1433666_PM_s_at | Vps41         | VPS41     | -1.62 | 5.23  | -4.91 | 5.51E-04 | 2.04E-02 | -0.06 |
| 1419912_PM_s_at | Strap         | STRAP     | -1.59 | 5.33  | -4.91 | 5.51E-04 | 2.04E-02 | -0.06 |
| 1447693_PM_s_at | Neo1          | NEO1      | -1.13 | 8.41  | -4.91 | 5.51E-04 | 2.04E-02 | -0.06 |
| 1423369_PM_at   | Fmr1          | FMR1      | -0.82 | 4.37  | -4.91 | 5.54E-04 | 2.04E-02 | -0.07 |
| 1455111_PM_at   | Yipf6         | YIPF6     | -1.60 | 6.83  | -4.90 | 5.56E-04 | 2.05E-02 | -0.07 |
| 1428943_PM_at   | Nudt13        | NUDT13    | 0.47  | 3.43  | 4.91  | 5.56E-04 | 2.05E-02 | -0.07 |
| 1418695_PM_a_at | Kcmf1         | KCMF1     | -0.98 | 5.85  | -4.90 | 5.59E-04 | 2.06E-02 | -0.08 |
| 1420630_PM_at   | Fam234b       | FAM234B   | -1.80 | 6.09  | -4.90 | 5.63E-04 | 2.07E-02 | -0.08 |
| 1454666_PM_at   | Klf3          | KLF3      | -1.39 | 4.56  | -4.90 | 5.62E-04 | 2.07E-02 | -0.08 |
| 1456601_PM_x_at | Fxyd2         | FXVD2     | 0.43  | 3.28  | 4.90  | 5.63E-04 | 2.07E-02 | -0.08 |
| 1452619_PM_a_at | Agbl3         | AGBL3     | -0.43 | 2.56  | -4.89 | 5.67E-04 | 2.08E-02 | -0.09 |
| 1416551_PM_at   | Atp2a2        | ATP2A2    | -2.14 | 8.77  | -4.89 | 5.70E-04 | 2.09E-02 | -0.10 |
| 1425512_PM_at   | Map2k7        | MAP2K7    | 0.55  | 3.29  | 4.89  | 5.71E-04 | 2.09E-02 | -0.10 |
| 1425181_PM_at   | Sgip1         | SGIP1     | -1.58 | 4.19  | -4.89 | 5.71E-04 | 2.09E-02 | -0.10 |
| 1459459_PM_at   | ---           | NA        | 0.93  | 3.14  | 4.89  | 5.72E-04 | 2.09E-02 | -0.10 |
| 1416419_PM_s_at | Gabarapl1     | GABARAPL1 | -0.99 | 8.43  | -4.88 | 5.74E-04 | 2.10E-02 | -0.10 |
| 1428937_PM_at   | Atp2b1        | ATP2B1    | -1.79 | 7.84  | -4.88 | 5.75E-04 | 2.10E-02 | -0.11 |
| 1455448_PM_at   | Dagla         | DAGLA     | -1.30 | 5.06  | -4.88 | 5.78E-04 | 2.11E-02 | -0.11 |
| 1428438_PM_s_at | Lsm14a        | LSM14A    | -1.83 | 6.20  | -4.87 | 5.82E-04 | 2.12E-02 | -0.12 |
| 1431703_PM_at   | ---           | NA        | 0.82  | 2.75  | 4.88  | 5.82E-04 | 2.12E-02 | -0.12 |
| 1441423_PM_at   | ---           | NA        | -0.91 | 2.72  | -4.87 | 5.85E-04 | 2.13E-02 | -0.12 |
| 1452236_PM_at   | Abcf1         | ABCF1     | 1.19  | 7.80  | 4.87  | 5.86E-04 | 2.13E-02 | -0.12 |
| 1436051_PM_at   | Myo5a         | MYO5A     | -1.76 | 6.48  | -4.87 | 5.89E-04 | 2.14E-02 | -0.13 |
| 1448598_PM_at   | Mmp17         | MMP17     | -1.46 | 5.77  | -4.87 | 5.89E-04 | 2.14E-02 | -0.13 |
| 1421904_PM_at   | Tgs1          | TGS1      | -1.44 | 5.06  | -4.87 | 5.90E-04 | 2.14E-02 | -0.13 |
| 1435930_PM_at   | Scaper        | SCAPER    | -1.30 | 6.77  | -4.86 | 5.92E-04 | 2.15E-02 | -0.13 |
| 1457325_PM_at   | Kcns2         | NA        | -1.02 | 5.57  | -4.86 | 5.94E-04 | 2.15E-02 | -0.14 |
| 1455102_PM_at   | Larp4         | LARP4     | -1.45 | 4.44  | -4.86 | 5.95E-04 | 2.15E-02 | -0.14 |
| 1422758_PM_at   | Chst2         | CHST2     | -0.97 | 10.02 | -4.86 | 5.96E-04 | 2.16E-02 | -0.14 |
| 1423173_PM_at   | Napb          | NAPB      | -0.77 | 4.60  | -4.86 | 5.96E-04 | 2.16E-02 | -0.14 |

|                 |          |           |       |      |       |          |          |       |
|-----------------|----------|-----------|-------|------|-------|----------|----------|-------|
| 1423328_PM_at   | Gdap1    | GDAP1     | -1.61 | 6.00 | -4.86 | 5.97E-04 | 2.16E-02 | -0.14 |
| 1442732_PM_at   | Hadhb    | HADHB     | 0.78  | 3.39 | -4.86 | 5.98E-04 | 2.16E-02 | -0.15 |
| 1423211_PM_at   | Nop10    | NOP10     | -1.43 | 3.81 | -4.86 | 5.99E-04 | 2.16E-02 | -0.15 |
| 1445403_PM_at   | ---      | NA        | 0.58  | 2.97 | 4.86  | 5.99E-04 | 2.16E-02 | -0.15 |
| 1439134_PM_s_at | ---      | NA        | -1.02 | 3.91 | -4.85 | 6.01E-04 | 2.17E-02 | -0.15 |
| 1438547_PM_x_at | Tor2a    | TOR2A     | -0.90 | 3.55 | -4.85 | 6.02E-04 | 2.17E-02 | -0.15 |
| 1418428_PM_at   | Kif5b    | KIF5B     | -1.58 | 5.85 | -4.85 | 6.04E-04 | 2.17E-02 | -0.16 |
| 1454116_PM_a_at | Mterf3   | MTERF3    | -0.75 | 3.20 | -4.85 | 6.05E-04 | 2.18E-02 | -0.16 |
| 1426718_PM_at   | Skiv2l2  | SKIV2L2   | -0.97 | 4.25 | -4.85 | 6.07E-04 | 2.18E-02 | -0.16 |
| 1441165_PM_s_at | Clstn2   | CLSTN2    | -2.36 | 8.67 | -4.84 | 6.13E-04 | 2.20E-02 | -0.17 |
| 1425262_PM_at   | Cebpg    | CEBPG     | -1.01 | 4.17 | -4.84 | 6.14E-04 | 2.20E-02 | -0.17 |
| 1428618_PM_at   | Hcfc2    | HCFC2     | -0.67 | 2.86 | -4.84 | 6.14E-04 | 2.20E-02 | -0.17 |
| 1427069_PM_at   | Fbxo28   | FBXO28    | -0.64 | 3.20 | -4.84 | 6.13E-04 | 2.20E-02 | -0.17 |
| 1418617_PM_x_at | Clgn     | CLGN      | 0.49  | 2.72 | 4.84  | 6.14E-04 | 2.20E-02 | -0.17 |
| 1415930_PM_a_at | Map1k3b  | MAP1K3B2  | -1.64 | 6.26 | -4.83 | 6.19E-04 | 2.21E-02 | -0.18 |
| 1453782_PM_at   | Ankrd33b | NA        | -1.57 | 4.07 | -4.84 | 6.18E-04 | 2.21E-02 | -0.18 |
| 1429109_PM_at   | Msl2     | MSL2      | 0.93  | 6.05 | 4.83  | 6.19E-04 | 2.21E-02 | -0.18 |
| 1430965_PM_at   | ---      | NA        | 1.13  | 3.26 | 4.84  | 6.18E-04 | 2.21E-02 | -0.18 |
| 1430999_PM_a_at | Scoc     | SCOC      | -1.11 | 6.05 | -4.83 | 6.20E-04 | 2.21E-02 | -0.18 |
| 1453504_PM_at   | Taf15    | TAF15     | 1.37  | 5.25 | 4.83  | 6.20E-04 | 2.21E-02 | -0.18 |
| 1429718_PM_at   | Slitrk5  | SLITRK5   | -1.93 | 5.63 | -4.83 | 6.23E-04 | 2.21E-02 | -0.19 |
| 1435757_PM_a_at | Uqcrc2   | UQCRC2    | -1.24 | 7.29 | -4.83 | 6.23E-04 | 2.21E-02 | -0.19 |
| 1434180_PM_at   | Fermt2   | FERMT2    | -0.77 | 3.68 | -4.83 | 6.23E-04 | 2.21E-02 | -0.19 |
| 1424843_PM_a_at | Gas5     | NA        | 1.51  | 7.65 | 4.83  | 6.23E-04 | 2.21E-02 | -0.19 |
| 1455481_PM_at   | Ids      | IDS       | -1.32 | 8.95 | -4.83 | 6.25E-04 | 2.21E-02 | -0.19 |
| 1444388_PM_at   | ---      | NA        | 0.56  | 4.04 | 4.83  | 6.24E-04 | 2.21E-02 | -0.19 |
| 1422124_PM_a_at | Ptprc    | PTPRC     | -0.99 | 2.58 | -4.83 | 6.27E-04 | 2.22E-02 | -0.19 |
| 1440500_PM_at   | Map3k10  | MAP3K10   | 1.04  | 3.03 | 4.83  | 6.28E-04 | 2.22E-02 | -0.19 |
| 1435387_PM_at   | Slc2a13  | SLC2A13   | -1.43 | 4.05 | -4.82 | 6.29E-04 | 2.22E-02 | -0.20 |
| 1452118_PM_at   | Rrp1b    | RRP1B     | 0.79  | 3.19 | 4.82  | 6.30E-04 | 2.23E-02 | -0.20 |
| 1433901_PM_at   | Caprin1  | CAPRIN1   | -1.47 | 8.20 | -4.82 | 6.33E-04 | 2.23E-02 | -0.20 |
| 1425861_PM_x_at | Cacna2d1 | CACNA2D1  | -1.02 | 3.29 | -4.82 | 6.32E-04 | 2.23E-02 | -0.20 |
| 1426591_PM_at   | Gfm2     | GFM2      | -0.46 | 2.67 | -4.82 | 6.33E-04 | 2.23E-02 | -0.20 |
| 1454855_PM_at   | Magi2    | MAGI2     | -1.10 | 3.82 | -4.82 | 6.35E-04 | 2.23E-02 | -0.21 |
| 1423200_PM_at   | Ncor1    | NCOR1     | -0.98 | 6.61 | -4.82 | 6.34E-04 | 2.23E-02 | -0.20 |
| 1433474_PM_at   | Edil3    | EDIL3     | -0.74 | 3.32 | -4.82 | 6.35E-04 | 2.23E-02 | -0.21 |
| 1456039_PM_at   | Snx14    | SNX14     | -1.57 | 4.07 | -4.82 | 6.36E-04 | 2.24E-02 | -0.21 |
| 1436202_PM_at   | Malat1   | NA        | -1.29 | 6.37 | -4.81 | 6.39E-04 | 2.24E-02 | -0.21 |
| 1448736_PM_a_at | Hprt     | HPRT1     | -1.15 | 5.08 | -4.81 | 6.39E-04 | 2.24E-02 | -0.21 |
| 1455827_PM_at   | Mbnl2    | MBNL2     | -0.75 | 4.28 | -4.81 | 6.39E-04 | 2.24E-02 | -0.21 |
| 1448156_PM_at   | Tff1     | TFF1      | 0.54  | 3.13 | 4.81  | 6.39E-04 | 2.24E-02 | -0.21 |
| 1420907_PM_at   | Cd2ap    | CD2AP     | -0.65 | 2.74 | -4.81 | 6.41E-04 | 2.24E-02 | -0.22 |
| 1426699_PM_at   | AU040320 | KIAA0319L | 0.66  | 4.54 | 4.81  | 6.43E-04 | 2.25E-02 | -0.22 |
| 1418749_PM_at   | Psd3     | PSD3      | -1.25 | 5.16 | -4.81 | 6.44E-04 | 2.25E-02 | -0.22 |
| 1451520_PM_at   | Spg20    | SPG20     | -1.93 | 4.64 | -4.81 | 6.45E-04 | 2.25E-02 | -0.22 |
| 1416470_PM_a_at | Rpn1     | RPN1      | -1.56 | 4.66 | -4.81 | 6.46E-04 | 2.25E-02 | -0.22 |
| 1422320_PM_x_at | Phx5     | NA        | 0.66  | 8.81 | 4.81  | 6.47E-04 | 2.26E-02 | -0.23 |
| 1438224_PM_at   | Zswim5   | ZSWIM5    | -0.81 | 6.17 | -4.80 | 6.49E-04 | 2.26E-02 | -0.23 |
| 1418534_PM_at   | Fzd2     | FZD2      | -1.70 | 4.26 | -4.80 | 6.49E-04 | 2.26E-02 | -0.23 |
| 1439048_PM_at   | Cadm2    | CADM2     | -1.89 | 7.19 | -4.80 | 6.51E-04 | 2.26E-02 | -0.23 |
| 1437126_PM_at   | ---      | NA        | 0.48  | 2.51 | 4.80  | 6.51E-04 | 2.26E-02 | -0.23 |
| 1422578_PM_at   | Cs       | CS        | -1.22 | 5.18 | -4.80 | 6.52E-04 | 2.27E-02 | -0.23 |
| 1425114_PM_at   | Rbbp6    | RBBP6     | -2.21 | 4.63 | -4.80 | 6.56E-04 | 2.27E-02 | -0.24 |
| 1417946_PM_at   | Abhd3    | ABHD3     | -1.57 | 4.27 | -4.80 | 6.56E-04 | 2.27E-02 | -0.24 |
| 1430265_PM_at   | Appbp2os | NA        | 0.37  | 3.72 | 4.80  | 6.57E-04 | 2.28E-02 | -0.24 |
| 1460430_PM_at   | Rap2c    | RAP2C     | -1.03 | 4.66 | -4.80 | 6.57E-04 | 2.28E-02 | -0.24 |
| 1423383_PM_a_at | Osbpl9   | OSBPL9    | -0.81 | 3.09 | -4.79 | 6.61E-04 | 2.29E-02 | -0.25 |
| 1441024_PM_at   | Stim2    | STIM2     | -1.78 | 5.77 | -4.79 | 6.63E-04 | 2.29E-02 | -0.25 |
| 1421205_PM_at   | Atm      | ATM       | -1.36 | 2.52 | -4.79 | 6.68E-04 | 2.30E-02 | -0.26 |
| 1415990_PM_at   | Vdac2    | VDAC2     | -1.16 | 5.92 | -4.79 | 6.68E-04 | 2.30E-02 | -0.26 |
| 1433984_PM_a_at | Mdh2     | MDH2      | -1.16 | 9.83 | -4.78 | 6.69E-04 | 2.30E-02 | -0.26 |
| 1448008_PM_at   | Ankhd1   | ANKHD1    | 1.49  | 6.37 | 4.78  | 6.69E-04 | 2.30E-02 | -0.26 |
| 1416130_PM_at   | Prnp     | PRNP      | -1.29 | 4.34 | -4.78 | 6.71E-04 | 2.31E-02 | -0.26 |
| 1433716_PM_x_at | Gfra2    | GFRA2     | -1.04 | 3.92 | -4.78 | 6.71E-04 | 2.31E-02 | -0.26 |
| 1415800_PM_at   | Gja1     | GJA1      | -1.79 | 7.27 | -4.78 | 6.72E-04 | 2.31E-02 | -0.26 |
| 1437628_PM_s_at | Rhoa     | RHOA      | -1.09 | 5.33 | -4.78 | 6.73E-04 | 2.31E-02 | -0.26 |
| 1448184_PM_at   | Fkbp1a   | FKBP1C    | -2.17 | 7.24 | -4.78 | 6.77E-04 | 2.31E-02 | -0.27 |
| 1415923_PM_at   | Ndn      | NDN       | -1.33 | 4.22 | -4.78 | 6.76E-04 | 2.31E-02 | -0.27 |
| 1418444_PM_a_at | Gde1     | GDE1      | -0.90 | 3.13 | -4.78 | 6.75E-04 | 2.31E-02 | -0.27 |
| 1449149_PM_at   | Traf3    | TRAF3     | -0.65 | 2.37 | -4.78 | 6.75E-04 | 2.31E-02 | -0.27 |
| 1458611_PM_at   | ---      | NA        | 0.62  | 3.40 | 4.78  | 6.76E-04 | 2.31E-02 | -0.27 |
| 1438688_PM_at   | Srrm2    | SRRM2     | 1.35  | 8.87 | 4.78  | 6.76E-04 | 2.31E-02 | -0.27 |
| 1438208_PM_at   | Taok2    | TAOK2     | 0.66  | 3.66 | 4.78  | 6.78E-04 | 2.32E-02 | -0.27 |
| 1458830_PM_at   | Fgf14    | NA        | 1.96  | 5.24 | 4.78  | 6.78E-04 | 2.32E-02 | -0.27 |
| 1428231_PM_at   | Cpsf6    | CPSF6     | -1.56 | 6.56 | -4.77 | 6.83E-04 | 2.33E-02 | -0.28 |

|                 |                        |          |       |       |       |          |          |       |
|-----------------|------------------------|----------|-------|-------|-------|----------|----------|-------|
| 1426401_PM_at   | Ppp3ca                 | PPP3CA   | -1.25 | 8.03  | -4.77 | 6.82E-04 | 2.33E-02 | -0.28 |
| 1433724_PM_at   | D15Ert621e             | FAM91A1  | -0.70 | 2.35  | -4.77 | 6.83E-04 | 2.33E-02 | -0.28 |
| 1428631_PM_a_at | Uqcr2                  | UQCRC2   | -1.25 | 4.90  | -4.77 | 6.84E-04 | 2.33E-02 | -0.28 |
| 1425332_PM_at   | Zfp106                 | ZNF106   | -1.75 | 5.86  | -4.77 | 6.87E-04 | 2.34E-02 | -0.29 |
| 1434537_PM_at   | Sko3a1                 | SLCO3A1  | -0.69 | 3.68  | -4.77 | 6.87E-04 | 2.34E-02 | -0.29 |
| 1420048_PM_at   | C78859                 | NA       | -0.67 | 2.72  | -4.77 | 6.89E-04 | 2.34E-02 | -0.29 |
| 1451355_PM_at   | Acer2                  | ACER2    | -0.72 | 4.55  | -4.77 | 6.89E-04 | 2.34E-02 | -0.29 |
| 1440431_PM_at   | LOC102643017           | NA       | 0.67  | 2.05  | 4.76  | 6.91E-04 | 2.34E-02 | -0.29 |
| 1421023_PM_at   | Pik3c2a                | PIK3C2A  | -0.96 | 2.79  | -4.76 | 6.94E-04 | 2.35E-02 | -0.30 |
| 1433540_PM_x_at | Ppp1cb                 | PPP1CB   | -0.78 | 8.16  | -4.76 | 6.96E-04 | 2.36E-02 | -0.30 |
| 1458095_PM_at   | ---                    | NA       | 1.12  | 2.99  | 4.76  | 6.97E-04 | 2.36E-02 | -0.30 |
| 1448009_PM_at   | Uggt1                  | UGGT1    | -1.57 | 4.24  | -4.76 | 6.99E-04 | 2.36E-02 | -0.30 |
| 1450954_PM_at   | Yme1l1                 | YME1L1   | -1.77 | 5.71  | -4.75 | 7.02E-04 | 2.37E-02 | -0.31 |
| 1434286_PM_at   | Trps1                  | TRPS1    | -1.48 | 7.77  | -4.75 | 7.01E-04 | 2.37E-02 | -0.31 |
| 1437457_PM_a_at | Mtpn                   | MTPN     | -1.38 | 6.41  | -4.75 | 7.02E-04 | 2.37E-02 | -0.31 |
| 1429383_PM_at   | Csnk1g3                | CSNK1G3  | -1.15 | 5.29  | -4.75 | 7.00E-04 | 2.37E-02 | -0.30 |
| 1437801_PM_at   | Morf4l1 /// Morf4l1b   | MORF4L1  | -0.83 | 8.54  | -4.75 | 7.01E-04 | 2.37E-02 | -0.31 |
| 1428489_PM_at   | Zcrb1                  | ZCRB1    | 0.53  | 10.15 | 4.75  | 7.03E-04 | 2.37E-02 | -0.31 |
| 1417658_PM_at   | LOC105242484 /// Tbrg4 | NA       | 0.43  | 2.40  | 4.75  | 7.05E-04 | 2.37E-02 | -0.31 |
| 1449522_PM_at   | Unc5c                  | UNC5C    | -2.26 | 6.78  | -4.75 | 7.08E-04 | 2.38E-02 | -0.32 |
| 1450122_PM_at   | Ptprg                  | PTPRG    | -1.53 | 3.13  | -4.75 | 7.08E-04 | 2.38E-02 | -0.32 |
| 1417849_PM_at   | Zfp704                 | ZNF704   | 0.48  | 2.83  | 4.75  | 7.08E-04 | 2.38E-02 | -0.32 |
| 1423517_PM_at   | Cct6a                  | NA       | -1.87 | 7.39  | -4.75 | 7.09E-04 | 2.38E-02 | -0.32 |
| 1437840_PM_s_at | D2hgdh                 | D2HGDH   | 0.70  | 6.66  | 4.75  | 7.10E-04 | 2.38E-02 | -0.32 |
| 1433562_PM_s_at | Atp5f1                 | ATP5F1   | -1.80 | 7.17  | -4.74 | 7.12E-04 | 2.38E-02 | -0.32 |
| 1417418_PM_s_at | Cox6a1                 | COX6A1   | -2.08 | 7.14  | -4.74 | 7.14E-04 | 2.39E-02 | -0.32 |
| 1440343_PM_at   | Rps6ka5                | NA       | -1.29 | 4.50  | -4.74 | 7.14E-04 | 2.39E-02 | -0.33 |
| 1427280_PM_at   | Scn2a1                 | SCN2A    | -1.21 | 8.13  | -4.74 | 7.15E-04 | 2.39E-02 | -0.33 |
| 1429659_PM_at   | Smc2                   | SMC2     | 0.50  | 3.15  | 4.74  | 7.17E-04 | 2.40E-02 | -0.33 |
| 1428314_PM_at   | Pcnp                   | PCNP     | -0.98 | 7.55  | -4.74 | 7.21E-04 | 2.41E-02 | -0.33 |
| 1448304_PM_a_at | Rab6a                  | RAB6C    | -1.37 | 7.37  | -4.73 | 7.25E-04 | 2.42E-02 | -0.34 |
| 1435416_PM_x_at | Pigq                   | PIGQ     | 0.86  | 6.94  | 4.73  | 7.27E-04 | 2.42E-02 | -0.34 |
| 1455056_PM_at   | Lmo7                   | LMO7     | -1.57 | 5.72  | -4.73 | 7.28E-04 | 2.42E-02 | -0.34 |
| 1456604_PM_a_at | Pcmt1                  | PCMT1    | -1.48 | 4.81  | -4.73 | 7.29E-04 | 2.42E-02 | -0.35 |
| 1435469_PM_at   | Qsox2                  | QSOX2    | -1.24 | 3.41  | -4.73 | 7.29E-04 | 2.42E-02 | -0.35 |
| 1435377_PM_at   | Trappc13               | TRAPPC13 | -1.41 | 5.78  | -4.73 | 7.30E-04 | 2.42E-02 | -0.35 |
| 1423895_PM_a_at | Celf2                  | CEL2     | -1.82 | 7.80  | -4.73 | 7.32E-04 | 2.43E-02 | -0.35 |
| 1427144_PM_at   | Hnrnp1l                | HNRNP1L  | -1.58 | 6.16  | -4.72 | 7.34E-04 | 2.43E-02 | -0.35 |
| 1421750_PM_a_at | Vbp1                   | VBP1     | -1.21 | 6.09  | -4.72 | 7.34E-04 | 2.43E-02 | -0.35 |
| 1428969_PM_at   | Trappc8                | TRAPPC8  | -1.37 | 5.31  | -4.72 | 7.37E-04 | 2.44E-02 | -0.36 |
| 1435251_PM_at   | Snx13                  | SNX13    | -1.66 | 4.81  | -4.72 | 7.37E-04 | 2.44E-02 | -0.36 |
| 1428830_PM_at   | Atm                    | NA       | -1.41 | 4.09  | -4.72 | 7.40E-04 | 2.45E-02 | -0.36 |
| 1416786_PM_at   | Acvr1                  | ACVR1    | -0.93 | 3.61  | -4.71 | 7.47E-04 | 2.47E-02 | -0.37 |
| 1421258_PM_a_at | Pklr                   | PKLR     | 0.67  | 4.56  | 4.71  | 7.48E-04 | 2.47E-02 | -0.37 |
| 1436566_PM_at   | Rab40b                 | RAB40A   | -1.74 | 4.09  | -4.71 | 7.50E-04 | 2.47E-02 | -0.37 |
| 1429579_PM_at   | Gucy1a2                | NA       | -1.19 | 4.57  | -4.71 | 7.51E-04 | 2.48E-02 | -0.38 |
| 1452753_PM_at   | Foxk2                  | FOXK2    | -1.24 | 4.19  | -4.71 | 7.56E-04 | 2.49E-02 | -0.38 |
| 1434888_PM_a_at | Matr3                  | MATR3    | -1.26 | 8.16  | -4.70 | 7.58E-04 | 2.50E-02 | -0.38 |
| 1415749_PM_a_at | Rragc                  | RRAGC    | -0.83 | 4.86  | -4.70 | 7.60E-04 | 2.50E-02 | -0.39 |
| 1451480_PM_at   | E2f4                   | E2F4     | 0.64  | 2.93  | 4.70  | 7.61E-04 | 2.50E-02 | -0.39 |
| 1448274_PM_at   | C1qbp                  | C1QBP    | -1.53 | 5.80  | -4.70 | 7.64E-04 | 2.51E-02 | -0.39 |
| 1436493_PM_at   | Ctnx2                  | CTNX2    | -1.39 | 5.48  | -4.70 | 7.63E-04 | 2.51E-02 | -0.39 |
| 1455502_PM_at   | Madd                   | MADD     | -1.25 | 5.72  | -4.70 | 7.64E-04 | 2.51E-02 | -0.39 |
| 1415867_PM_at   | Cct4                   | CCT4     | -1.04 | 4.57  | -4.70 | 7.65E-04 | 2.51E-02 | -0.39 |
| 1450072_PM_at   | Ash1l                  | ASH1L    | -0.70 | 3.78  | -4.70 | 7.66E-04 | 2.51E-02 | -0.40 |
| 1437052_PM_s_at | Slc2a3                 | SLC2A3   | -2.23 | 5.87  | -4.69 | 7.69E-04 | 2.51E-02 | -0.40 |
| 1434890_PM_at   | Opa1                   | OPA1     | -1.91 | 5.76  | -4.69 | 7.69E-04 | 2.51E-02 | -0.40 |
| 1429310_PM_at   | Flrt3                  | FLRT3    | -1.52 | 4.40  | -4.69 | 7.72E-04 | 2.51E-02 | -0.40 |
| 1429291_PM_at   | Psm1                   | PSMD1    | -1.36 | 4.37  | -4.69 | 7.69E-04 | 2.51E-02 | -0.40 |
| 1426819_PM_at   | Hipk3                  | HIPK3    | -1.28 | 4.00  | -4.69 | 7.70E-04 | 2.51E-02 | -0.40 |
| 1433631_PM_at   | Eif5 /// LOC102641436  | EIF5     | -1.01 | 6.60  | -4.69 | 7.71E-04 | 2.51E-02 | -0.40 |
| 1443900_PM_at   | Chd8                   | CHD8     | 1.00  | 5.11  | 4.69  | 7.71E-04 | 2.51E-02 | -0.40 |
| 1431024_PM_a_at | Arid4b                 | ARID4B   | 1.08  | 8.56  | 4.69  | 7.71E-04 | 2.51E-02 | -0.40 |
| 1455836_PM_at   | Papola                 | NA       | 1.44  | 5.75  | 4.69  | 7.72E-04 | 2.51E-02 | -0.40 |
| 1428302_PM_at   | Mrp48                  | MRPL48   | -2.07 | 5.23  | -4.69 | 7.73E-04 | 2.51E-02 | -0.40 |
| 1424848_PM_at   | Kcnma1                 | KCNMA1   | -1.33 | 4.55  | -4.69 | 7.73E-04 | 2.51E-02 | -0.40 |
| 1428137_PM_at   | Arl8b                  | ARL8B    | -1.79 | 5.71  | -4.69 | 7.75E-04 | 2.52E-02 | -0.41 |
| 1438554_PM_x_at | Eif4h                  | EIF4H    | -1.29 | 5.54  | -4.69 | 7.75E-04 | 2.52E-02 | -0.41 |
| 1428284_PM_at   | Nol4                   | NOL4L    | -1.07 | 5.10  | -4.69 | 7.77E-04 | 2.52E-02 | -0.41 |
| 1421841_PM_at   | Fgfr3                  | FGFR3    | -1.16 | 4.92  | -4.69 | 7.78E-04 | 2.52E-02 | -0.41 |
| 1440119_PM_at   | ---                    | NA       | 0.76  | 2.99  | 4.69  | 7.79E-04 | 2.52E-02 | -0.41 |
| 1456965_PM_at   | ---                    | NA       | 0.66  | 4.02  | 4.69  | 7.80E-04 | 2.52E-02 | -0.41 |
| 1455968_PM_x_at | Gm21540 /// Tmed2      | TMED2    | -1.19 | 8.78  | -4.69 | 7.80E-04 | 2.52E-02 | -0.41 |
| 1429040_PM_at   | Gm21811                | NA       | -0.75 | 5.32  | -4.68 | 7.81E-04 | 2.52E-02 | -0.41 |
| 1449038_PM_at   | Hsd11b1                | HSD11B1  | -1.47 | 4.70  | -4.68 | 7.90E-04 | 2.55E-02 | -0.43 |

|                 |                                                            |          |       |      |       |          |          |       |
|-----------------|------------------------------------------------------------|----------|-------|------|-------|----------|----------|-------|
| 1452737_PM_at   | LOC102642197 ///<br>LOC102642895 ///Smim15                 | SMIM15   | -0.97 | 4.09 | -4.68 | 7.91E-04 | 2.55E-02 | -0.43 |
| 1455064_PM_at   | Rab36                                                      | RAB36    | 0.59  | 3.47 | 4.67  | 7.93E-04 | 2.56E-02 | -0.43 |
| 1460418_PM_x_at | H2-T18                                                     | NA       | 0.57  | 4.54 | 4.67  | 7.97E-04 | 2.57E-02 | -0.44 |
| 1417731_PM_at   | Pqbp1                                                      | PQBP1    | 1.51  | 7.29 | 4.67  | 7.97E-04 | 2.57E-02 | -0.44 |
| 1433659_PM_at   | Tube4p4                                                    | TUBGCP4  | -0.80 | 6.69 | -4.67 | 7.98E-04 | 2.57E-02 | -0.44 |
| 1452189_PM_at   | Wdr82                                                      | WDR82    | -0.81 | 4.75 | -4.67 | 8.03E-04 | 2.58E-02 | -0.44 |
| 1435440_PM_at   | Pdzd8                                                      | PDZD8    | -0.71 | 3.87 | -4.66 | 8.06E-04 | 2.59E-02 | -0.45 |
| 1450132_PM_at   | Hivep3                                                     | HIVEP3   | 0.66  | 4.63 | 4.66  | 8.08E-04 | 2.59E-02 | -0.45 |
| 1426377_PM_at   | Zfp281                                                     | ZNF281   | -0.88 | 6.73 | -4.66 | 8.12E-04 | 2.60E-02 | -0.45 |
| 1437421_PM_at   | Sk9a7                                                      | NA       | -1.16 | 4.32 | -4.66 | 8.13E-04 | 2.61E-02 | -0.46 |
| 1454825_PM_at   | Vps51                                                      | VP551    | -0.73 | 3.13 | -4.66 | 8.14E-04 | 2.61E-02 | -0.46 |
| 1442508_PM_at   | Proca1                                                     | PROCA1   | 0.49  | 2.83 | 4.66  | 8.14E-04 | 2.61E-02 | -0.46 |
| 1455911_PM_x_at | Ndufb11                                                    | NDUFB11  | -1.41 | 7.38 | -4.66 | 8.17E-04 | 2.61E-02 | -0.46 |
| 1415691_PM_at   | Dlg1                                                       | DLG1     | -1.03 | 5.81 | -4.66 | 8.16E-04 | 2.61E-02 | -0.46 |
| 1435667_PM_at   | Rims1                                                      | NA       | -0.89 | 5.19 | -4.66 | 8.16E-04 | 2.61E-02 | -0.46 |
| 1417530_PM_a_at | Srp9                                                       | SRP9     | -1.67 | 5.86 | -4.66 | 8.18E-04 | 2.61E-02 | -0.46 |
| 1417558_PM_at   | Fyn                                                        | FYN      | -0.83 | 5.28 | -4.65 | 8.23E-04 | 2.63E-02 | -0.47 |
| 1449289_PM_a_at | B2m                                                        | B2M      | -2.44 | 7.11 | -4.65 | 8.25E-04 | 2.63E-02 | -0.47 |
| 1428572_PM_at   | Basp1                                                      | BASP1    | -1.18 | 8.69 | -4.65 | 8.29E-04 | 2.64E-02 | -0.47 |
| 1457559_PM_at   | ---                                                        | NA       | 0.55  | 3.61 | 4.65  | 8.28E-04 | 2.64E-02 | -0.47 |
| 1424878_PM_at   | Gm20605 ///Lrch4                                           | LRCH4    | 0.68  | 3.62 | 4.65  | 8.29E-04 | 2.64E-02 | -0.48 |
| 1423451_PM_at   | Pgrmc1                                                     | PGRMC1   | -1.32 | 6.15 | -4.65 | 8.30E-04 | 2.64E-02 | -0.48 |
| 1455076_PM_a_at | Asun                                                       | INTS13   | 1.24  | 4.75 | 4.64  | 8.31E-04 | 2.64E-02 | -0.48 |
| 1451201_PM_s_at | Rnh1                                                       | RNH1     | -0.70 | 4.47 | -4.64 | 8.32E-04 | 2.64E-02 | -0.48 |
| 1456072_PM_at   | Ppp1r9a                                                    | PPP1R9A  | -1.65 | 5.64 | -4.64 | 8.38E-04 | 2.65E-02 | -0.49 |
| 1436982_PM_at   | Tnrc6b                                                     | TNRC6B   | -1.19 | 5.36 | -4.64 | 8.36E-04 | 2.65E-02 | -0.48 |
| 1453134_PM_at   | Pik3ca                                                     | PIK3CA   | -1.06 | 3.80 | -4.64 | 8.38E-04 | 2.65E-02 | -0.49 |
| 1416879_PM_at   | Mrp51                                                      | MRP51    | -0.77 | 3.51 | -4.64 | 8.37E-04 | 2.65E-02 | -0.48 |
| 1457419_PM_s_at | Gm32266 ///Gm32554 ///<br>Gm33468 ///Gm38694 ///<br>Gm4047 | NA       | 0.70  | 3.07 | 4.64  | 8.37E-04 | 2.65E-02 | -0.49 |
| 1433806_PM_x_at | Calr                                                       | CALR     | 0.91  | 8.77 | 4.64  | 8.35E-04 | 2.65E-02 | -0.48 |
| 1453360_PM_a_at | Tex9                                                       | TEX9     | 1.29  | 4.05 | 4.64  | 8.37E-04 | 2.65E-02 | -0.49 |
| 1447454_PM_at   | ---                                                        | NA       | 1.40  | 3.48 | 4.64  | 8.40E-04 | 2.65E-02 | -0.49 |
| 1415880_PM_a_at | Lamp1                                                      | LAMP1    | -1.19 | 7.08 | -4.64 | 8.41E-04 | 2.65E-02 | -0.49 |
| 1453186_PM_at   | Pnlsr                                                      | PNLSR    | 0.88  | 9.29 | 4.63  | 8.45E-04 | 2.66E-02 | -0.49 |
| 1435285_PM_at   | Mpped2                                                     | MPPED2   | -1.31 | 4.22 | -4.63 | 8.47E-04 | 2.67E-02 | -0.50 |
| 1440339_PM_at   | Enpp1                                                      | ENPP1    | -0.62 | 2.40 | -4.63 | 8.50E-04 | 2.68E-02 | -0.50 |
| 1427016_PM_at   | 4932438A13Rik                                              | KIAA1109 | -1.15 | 3.27 | -4.63 | 8.53E-04 | 2.68E-02 | -0.50 |
| 1454420_PM_at   | 5730420F10Rik                                              | NA       | -0.68 | 2.79 | -4.63 | 8.53E-04 | 2.68E-02 | -0.50 |
| 1441785_PM_at   | Shisa6                                                     | SHISA6   | -1.73 | 4.52 | -4.62 | 8.58E-04 | 2.70E-02 | -0.51 |
| 1437527_PM_x_at | Mcl1                                                       | MCL1     | -1.29 | 6.81 | -4.62 | 8.60E-04 | 2.70E-02 | -0.51 |
| 1436783_PM_x_at | Ywhab                                                      | YWHAB    | -1.61 | 8.72 | -4.62 | 8.65E-04 | 2.71E-02 | -0.52 |
| 1416499_PM_a_at | Dctn6                                                      | DCTN6    | -2.65 | 7.42 | -4.62 | 8.67E-04 | 2.71E-02 | -0.52 |
| 1460449_PM_at   | Anks1b                                                     | ANKS1B   | -1.60 | 5.46 | -4.62 | 8.67E-04 | 2.71E-02 | -0.52 |
| 1438801_PM_at   | Dnm3                                                       | DNM3     | 1.57  | 5.77 | 4.62  | 8.67E-04 | 2.71E-02 | -0.52 |
| 1440759_PM_at   | Kcna2                                                      | KCNA2    | -1.95 | 5.23 | -4.62 | 8.70E-04 | 2.72E-02 | -0.52 |
| 1437987_PM_at   | Arhgap5                                                    | NA       | -1.40 | 4.80 | -4.62 | 8.69E-04 | 2.72E-02 | -0.52 |
| 1431400_PM_a_at | Gas7                                                       | GAS7     | 1.36  | 3.91 | 4.62  | 8.69E-04 | 2.72E-02 | -0.52 |
| 1415755_PM_a_at | Ube2v1                                                     | UBE2V1   | -0.62 | 2.63 | -4.61 | 8.71E-04 | 2.72E-02 | -0.53 |
| 1424463_PM_at   | Mfsd6                                                      | MFSD6    | -1.90 | 8.16 | -4.61 | 8.72E-04 | 2.72E-02 | -0.53 |
| 1428419_PM_at   | Epg5                                                       | EPG5     | -1.36 | 3.52 | -4.61 | 8.74E-04 | 2.72E-02 | -0.53 |
| 1424455_PM_at   | Gprasp1                                                    | GPRASP1  | -1.21 | 7.84 | -4.61 | 8.74E-04 | 2.72E-02 | -0.53 |
| 1423702_PM_at   | H1f0                                                       | H1FO     | -0.86 | 5.71 | -4.61 | 8.74E-04 | 2.72E-02 | -0.53 |
| 1427888_PM_a_at | Sptan1                                                     | SPTAN1   | -1.10 | 7.82 | -4.61 | 8.81E-04 | 2.74E-02 | -0.54 |
| 1441267_PM_at   | ---                                                        | NA       | -0.87 | 2.59 | -4.61 | 8.81E-04 | 2.74E-02 | -0.54 |
| 1415778_PM_at   | Morf4l2                                                    | MORF4L2  | -0.85 | 6.91 | -4.61 | 8.81E-04 | 2.74E-02 | -0.54 |
| 1449944_PM_a_at | Sec61a2                                                    | SEC61A2  | -1.81 | 4.05 | -4.61 | 8.82E-04 | 2.74E-02 | -0.54 |
| 1457044_PM_at   | Macc1                                                      | MACC1    | -1.15 | 3.09 | -4.61 | 8.84E-04 | 2.74E-02 | -0.54 |
| 1436533_PM_at   | Trove2                                                     | TROVE2   | -1.14 | 3.44 | -4.61 | 8.84E-04 | 2.74E-02 | -0.54 |
| 1432942_PM_at   | ---                                                        | NA       | 1.69  | 4.71 | 4.61  | 8.84E-04 | 2.74E-02 | -0.54 |
| 1425462_PM_at   | Fbxw11                                                     | FBXW11   | -1.62 | 5.54 | -4.60 | 8.87E-04 | 2.74E-02 | -0.54 |
| 1455484_PM_at   | Elavl3                                                     | ELAVL3   | -0.42 | 3.13 | -4.60 | 8.87E-04 | 2.74E-02 | -0.54 |
| 1417073_PM_a_at | Qk                                                         | QKI      | -1.54 | 6.90 | -4.60 | 8.89E-04 | 2.75E-02 | -0.55 |
| 1434933_PM_at   | Rc3h1                                                      | RC3H1    | -0.95 | 6.57 | -4.60 | 8.89E-04 | 2.75E-02 | -0.55 |
| 1454950_PM_at   | Fam168a                                                    | FAM168A  | 0.51  | 3.54 | 4.60  | 8.91E-04 | 2.75E-02 | -0.55 |
| 1458637_PM_x_at | ---                                                        | NA       | 1.67  | 6.43 | 4.59  | 8.99E-04 | 2.77E-02 | -0.56 |
| 1426389_PM_at   | Camk1d                                                     | CAMK1D   | -1.03 | 3.40 | -4.59 | 9.00E-04 | 2.78E-02 | -0.56 |
| 1426737_PM_at   | Gspt1                                                      | GSPT1    | -1.56 | 4.55 | -4.59 | 9.02E-04 | 2.78E-02 | -0.56 |
| 1426670_PM_at   | Agrn                                                       | AGRN     | -1.33 | 6.97 | -4.59 | 9.02E-04 | 2.78E-02 | -0.56 |
| 1424095_PM_at   | Rtca                                                       | RTCA     | -0.77 | 5.30 | -4.59 | 9.03E-04 | 2.78E-02 | -0.56 |
| 1448607_PM_at   | Nampt                                                      | NAMPT    | -1.52 | 4.18 | -4.59 | 9.06E-04 | 2.78E-02 | -0.57 |
| 1424539_PM_at   | SkUb4a ///Ubl4a                                            | UBL4A    | -1.29 | 5.20 | -4.59 | 9.05E-04 | 2.78E-02 | -0.56 |

|                 |          |            |       |       |       |          |          |       |
|-----------------|----------|------------|-------|-------|-------|----------|----------|-------|
| 1423845_PM_at   | Cscd2    | CSCD2      | 0.82  | 3.52  | 4.59  | 9.06E-04 | 2.78E-02 | -0.57 |
| 1457168_PM_at   | ---      | NA         | 1.20  | 3.40  | 4.59  | 9.05E-04 | 2.78E-02 | -0.56 |
| 1452289_PM_a_at | Rnf135   | RNF135     | -0.61 | 2.75  | -4.59 | 9.10E-04 | 2.79E-02 | -0.57 |
| 1452711_PM_at   | Atl1     | ATL1       | -1.79 | 6.01  | -4.59 | 9.12E-04 | 2.79E-02 | -0.57 |
| 1434778_PM_at   | Wapl     | WAPL       | -1.50 | 4.39  | -4.59 | 9.11E-04 | 2.79E-02 | -0.57 |
| 1418626_PM_a_at | Clu      | CLU        | -1.37 | 5.66  | -4.59 | 9.12E-04 | 2.79E-02 | -0.57 |
| 1417515_PM_at   | Lsm10    | LSM10      | -0.63 | 2.32  | -4.59 | 9.13E-04 | 2.79E-02 | -0.57 |
| 1436164_PM_at   | Slc30a1  | SLC30A1    | -1.66 | 5.43  | -4.58 | 9.14E-04 | 2.79E-02 | -0.57 |
| 1422620_PM_s_at | Plpp1    | PLPP1      | -1.60 | 3.34  | -4.58 | 9.15E-04 | 2.79E-02 | -0.57 |
| 1438975_PM_x_at | Zdhhc14  | ZDHHC14    | -1.31 | 8.77  | -4.58 | 9.17E-04 | 2.80E-02 | -0.58 |
| 1426975_PM_at   | Os9      | OS9        | 1.31  | 3.44  | 4.58  | 9.17E-04 | 2.80E-02 | -0.58 |
| 1455883_PM_a_at | Lrrtm1   | LRRTM1     | -1.83 | 4.70  | -4.58 | 9.19E-04 | 2.80E-02 | -0.58 |
| 1451109_PM_a_at | Nedd4    | NEDD4      | -0.99 | 5.06  | -4.58 | 9.20E-04 | 2.80E-02 | -0.58 |
| 1433752_PM_s_at | Trappc11 | TRAPPC11   | -0.83 | 4.39  | -4.58 | 9.20E-04 | 2.80E-02 | -0.58 |
| 1423299_PM_at   | Txn1     | TXNL1      | -1.74 | 5.66  | -4.58 | 9.25E-04 | 2.80E-02 | -0.59 |
| 1433448_PM_at   | Slc25a44 | SLC25A44   | -1.50 | 3.66  | -4.58 | 9.25E-04 | 2.80E-02 | -0.59 |
| 1416604_PM_at   | Cyc1     | CYC1       | -1.22 | 5.01  | -4.58 | 9.24E-04 | 2.80E-02 | -0.58 |
| 1416939_PM_at   | Ppa1     | PPA1       | -1.05 | 5.25  | -4.58 | 9.26E-04 | 2.80E-02 | -0.59 |
| 1455401_PM_at   | Camkk2   | CAMKK2     | -0.85 | 3.62  | -4.58 | 9.26E-04 | 2.80E-02 | -0.59 |
| 1442317_PM_at   | ---      | NA         | 0.64  | 2.60  | 4.58  | 9.23E-04 | 2.80E-02 | -0.58 |
| 1424521_PM_at   | Zfand2b  | ZFAND2B    | 0.69  | 5.40  | 4.58  | 9.26E-04 | 2.80E-02 | -0.59 |
| 1436093_PM_at   | Epha10   | NA         | 1.14  | 3.83  | 4.58  | 9.26E-04 | 2.80E-02 | -0.59 |
| 1434042_PM_s_at | Mttr3    | MTMR3      | -0.77 | 8.23  | -4.57 | 9.30E-04 | 2.81E-02 | -0.59 |
| 1429048_PM_at   | Bloc1s2  | BLOC1S2    | -0.60 | 3.39  | -4.57 | 9.30E-04 | 2.81E-02 | -0.59 |
| 1437197_PM_at   | Sorbs2   | SORBS2     | -1.60 | 7.40  | -4.57 | 9.34E-04 | 2.82E-02 | -0.60 |
| 1460586_PM_at   | Megf8    | MEGF8      | -0.92 | 6.09  | -4.57 | 9.32E-04 | 2.82E-02 | -0.59 |
| 1427347_PM_s_at | Tubb2a   | TUBB2A     | -0.75 | 11.39 | -4.57 | 9.34E-04 | 2.82E-02 | -0.60 |
| 1447825_PM_x_at | Pcdh8    | PCDH8      | -1.52 | 9.89  | -4.57 | 9.35E-04 | 2.82E-02 | -0.60 |
| 1434060_PM_at   | Herc1    | HERC1      | -1.07 | 6.49  | -4.57 | 9.35E-04 | 2.82E-02 | -0.60 |
| 1437614_PM_x_at | Zdhhc14  | ZDHHC14    | -1.31 | 8.77  | -4.57 | 9.39E-04 | 2.83E-02 | -0.60 |
| 1420808_PM_at   | Ncoa4    | NCOA4      | -1.42 | 4.67  | -4.56 | 9.42E-04 | 2.84E-02 | -0.60 |
| 1438647_PM_x_at | Cetn2    | CETN2      | -1.25 | 4.78  | -4.56 | 9.45E-04 | 2.84E-02 | -0.61 |
| 1455792_PM_x_at | Ndn      | NDN        | -1.28 | 8.15  | -4.56 | 9.47E-04 | 2.84E-02 | -0.61 |
| 1449095_PM_at   | Vps54    | VPS54      | -1.06 | 6.12  | -4.56 | 9.47E-04 | 2.84E-02 | -0.61 |
| 1423346_PM_at   | Degs1    | DEGS1      | -1.30 | 6.96  | -4.56 | 9.50E-04 | 2.85E-02 | -0.61 |
| 1436577_PM_at   | Arhgef9  | ARHGEF9    | -1.44 | 5.41  | -4.56 | 9.51E-04 | 2.85E-02 | -0.61 |
| 1415817_PM_s_at | Cct7     | CCT7       | -0.93 | 4.83  | -4.56 | 9.51E-04 | 2.85E-02 | -0.61 |
| 1418042_PM_a_at | Abcc5    | ABCC5      | -1.52 | 2.61  | -4.56 | 9.56E-04 | 2.86E-02 | -0.62 |
| 1428244_PM_at   | Larp1    | LARP1      | -1.52 | 4.86  | -4.55 | 9.58E-04 | 2.86E-02 | -0.62 |
| 1428091_PM_at   | Klh7     | KLHL7      | -1.30 | 3.95  | -4.56 | 9.56E-04 | 2.86E-02 | -0.62 |
| 1426204_PM_a_at | Opr1     | OPRL1      | -0.86 | 2.94  | -4.55 | 9.58E-04 | 2.86E-02 | -0.62 |
| 1426089_PM_a_at | Bc003331 | C1orf27    | -0.78 | 3.90  | -4.56 | 9.56E-04 | 2.86E-02 | -0.62 |
| 1417516_PM_at   | Ddit3    | DDIT3      | 0.47  | 4.52  | 4.56  | 9.57E-04 | 2.86E-02 | -0.62 |
| 1439688_PM_at   | Fbln1    | FBLN1      | 0.63  | 5.54  | 4.55  | 9.57E-04 | 2.86E-02 | -0.62 |
| 1423249_PM_at   | Nktr     | NKTR       | 1.54  | 6.57  | 4.55  | 9.67E-04 | 2.88E-02 | -0.63 |
| 1426930_PM_at   | Celf4    | CELF4      | -1.36 | 9.59  | -4.54 | 9.73E-04 | 2.90E-02 | -0.64 |
| 1447853_PM_x_at | Klf13a   | NA         | 3.29  | 5.84  | 4.54  | 9.74E-04 | 2.90E-02 | -0.64 |
| 1428368_PM_at   | Arhgap21 | ARHGAP21   | -1.64 | 4.33  | -4.54 | 9.76E-04 | 2.90E-02 | -0.64 |
| 1436027_PM_at   | Osbpl11  | OSBPL11    | -0.93 | 3.80  | -4.54 | 9.77E-04 | 2.90E-02 | -0.64 |
| 1449662_PM_at   | ---      | NA         | -1.28 | 5.00  | -4.54 | 9.78E-04 | 2.91E-02 | -0.64 |
| 1459151_PM_x_at | Ifi35    | IFI35      | 0.83  | 4.58  | 4.54  | 9.86E-04 | 2.93E-02 | -0.65 |
| 1455137_PM_at   | Raggef5  | NA         | -1.44 | 5.66  | -4.53 | 9.89E-04 | 2.93E-02 | -0.65 |
| 1448312_PM_at   | Pcsk2    | PCSK2      | -1.37 | 4.89  | -4.53 | 9.90E-04 | 2.93E-02 | -0.66 |
| 1452856_PM_at   | Crebzf   | CREBZF     | -1.20 | 5.13  | -4.53 | 9.91E-04 | 2.93E-02 | -0.66 |
| 1416114_PM_at   | Sparcl1  | SPARCL1    | -1.19 | 5.74  | -4.53 | 9.91E-04 | 2.93E-02 | -0.66 |
| 1460093_PM_at   | ---      | NA         | 0.65  | 2.84  | 4.53  | 9.92E-04 | 2.94E-02 | -0.66 |
| 1434539_PM_at   | Lrrn3    | LRRN3      | -2.14 | 5.89  | -4.53 | 9.95E-04 | 2.94E-02 | -0.66 |
| 1440084_PM_at   | ---      | NA         | -1.35 | 3.60  | -4.53 | 9.96E-04 | 2.94E-02 | -0.66 |
| 1438578_PM_a_at | Btbd10   | BTBD10     | -1.04 | 4.85  | -4.53 | 9.93E-04 | 2.94E-02 | -0.66 |
| 1436316_PM_at   | Klf13    | KLf13      | -0.70 | 4.59  | -4.53 | 9.96E-04 | 2.94E-02 | -0.66 |
| 1452418_PM_at   | Gm20186  | NA         | 0.81  | 5.96  | 4.53  | 9.95E-04 | 2.94E-02 | -0.66 |
| 1423278_PM_at   | Ptprk    | PTPRK      | -1.55 | 5.18  | -4.53 | 9.98E-04 | 2.94E-02 | -0.66 |
| 1437927_PM_at   | Dlg2     | NA         | -1.34 | 4.71  | -4.53 | 9.98E-04 | 2.94E-02 | -0.66 |
| 1433591_PM_at   | Ppp3r1   | ACO17083.4 | -0.76 | 4.15  | -4.52 | 1.00E-03 | 2.96E-02 | -0.67 |
| 1460260_PM_s_at | Kpna1    | KPNA1      | -0.94 | 5.86  | -4.52 | 1.01E-03 | 2.96E-02 | -0.67 |
| 1434022_PM_at   | Zbtb33   | ZBTB33     | -0.69 | 4.24  | -4.52 | 1.01E-03 | 2.96E-02 | -0.67 |
| 1445263_PM_at   | ---      | NA         | -0.48 | 3.44  | -4.52 | 1.01E-03 | 2.97E-02 | -0.68 |
| 1444912_PM_at   | ---      | NA         | 0.55  | 4.02  | 4.52  | 1.01E-03 | 2.97E-02 | -0.68 |
| 1444786_PM_at   | Nol3     | NOL3       | 0.91  | 4.46  | 4.52  | 1.02E-03 | 2.98E-02 | -0.68 |
| 1434197_PM_at   | Atrn     | ATRN       | -0.69 | 3.08  | -4.52 | 1.02E-03 | 2.99E-02 | -0.68 |
| 1455034_PM_at   | Nr4a2    | NR4A2      | 2.69  | 6.76  | 4.52  | 1.02E-03 | 2.99E-02 | -0.68 |
| 1421190_PM_at   | Gabbr3   | GABRB3     | -1.73 | 5.27  | -4.51 | 1.02E-03 | 2.99E-02 | -0.69 |
| 1436788_PM_at   | Acp2     | ACP2       | -1.69 | 6.33  | -4.51 | 1.02E-03 | 2.99E-02 | -0.69 |
| 1441751_PM_at   | Serbp1   | SERBP1     | -1.25 | 3.08  | -4.51 | 1.02E-03 | 2.99E-02 | -0.69 |
| 1444824_PM_at   | C76793   | NA         | 0.51  | 2.99  | 4.51  | 1.02E-03 | 2.99E-02 | -0.69 |

|                 |                                     |            |       |      |       |          |          |       |
|-----------------|-------------------------------------|------------|-------|------|-------|----------|----------|-------|
| 1454323_PM_at   | ---                                 | NA         | 0.52  | 2.63 | 4.51  | 1.02E-03 | 2.99E-02 | -0.69 |
| 1422863_PM_s_at | Pdlm5                               | PDLIM5     | 0.67  | 2.82 | 4.51  | 1.03E-03 | 2.99E-02 | -0.69 |
| 1453086_PM_at   | 6330408A02Rik                       | C19orf68   | 0.52  | 3.09 | 4.51  | 1.03E-03 | 3.00E-02 | -0.69 |
| 1422508_PM_at   | Atp6v1a                             | ATP6V1A    | -3.09 | 7.72 | -4.51 | 1.03E-03 | 3.00E-02 | -0.69 |
| 1447880_PM_x_at | S1pr2                               | S1PR2      | 0.46  | 3.92 | 4.51  | 1.03E-03 | 3.00E-02 | -0.69 |
| 1447521_PM_x_at | Arhgap39                            | ARHGAP39   | -1.40 | 6.19 | -4.51 | 1.03E-03 | 3.00E-02 | -0.70 |
| 1426174_PM_s_at | Igh-v7183 /// Ighg /// Ighg2b       | NA         | 0.43  | 2.57 | 4.51  | 1.03E-03 | 3.00E-02 | -0.70 |
| 1434774_PM_at   | Rhbdf2                              | RHBDF2     | 0.56  | 3.60 | 4.50  | 1.04E-03 | 3.02E-02 | -0.70 |
| 1450924_PM_at   | Hdgfrp3                             | ACO24270.1 | -1.18 | 4.55 | -4.50 | 1.04E-03 | 3.02E-02 | -0.70 |
| 1426880_PM_at   | Et4                                 | KIAA1217   | -1.09 | 4.78 | -4.50 | 1.04E-03 | 3.02E-02 | -0.71 |
| 1428312_PM_at   | Lrrc57                              | LRRC57     | -0.89 | 4.47 | -4.50 | 1.04E-03 | 3.02E-02 | -0.71 |
| 1419915_PM_at   | Nus1                                | NA         | -0.87 | 4.09 | -4.50 | 1.05E-03 | 3.03E-02 | -0.71 |
| 1446404_PM_at   | ---                                 | NA         | 0.88  | 3.20 | 4.50  | 1.05E-03 | 3.03E-02 | -0.71 |
| 1434113_PM_a_at | Rexo4                               | REXO4      | -1.34 | 4.97 | -4.50 | 1.05E-03 | 3.04E-02 | -0.71 |
| 1423181_PM_s_at | Clns1a                              | CLNS1A     | -0.78 | 4.47 | -4.50 | 1.05E-03 | 3.04E-02 | -0.71 |
| 1416256_PM_a_at | Tubb5                               | TUBB5      | -1.12 | 6.22 | -4.49 | 1.05E-03 | 3.05E-02 | -0.72 |
| 1415764_PM_at   | Zbed6 /// Zc3h11a                   | ZC3H11B    | -1.04 | 4.16 | -4.49 | 1.05E-03 | 3.05E-02 | -0.72 |
| 1437199_PM_at   | Dusp5                               | DUSP5      | 0.87  | 3.98 | 4.49  | 1.05E-03 | 3.05E-02 | -0.72 |
| 1419443_PM_at   | Sap18                               | SAP18      | -1.73 | 6.03 | -4.49 | 1.06E-03 | 3.05E-02 | -0.72 |
| 1436342_PM_a_at | Ubxn1                               | UBXN1      | 1.93  | 8.29 | 4.49  | 1.06E-03 | 3.05E-02 | -0.72 |
| 1458353_PM_at   | Nwd1                                | NA         | 1.70  | 5.84 | 4.49  | 1.06E-03 | 3.05E-02 | -0.72 |
| 1435445_PM_at   | Ccnt2                               | CCNT2      | -1.55 | 5.26 | -4.49 | 1.06E-03 | 3.06E-02 | -0.72 |
| 1443830_PM_x_at | Rnf103                              | RNF103     | -1.25 | 7.82 | -4.49 | 1.06E-03 | 3.06E-02 | -0.73 |
| 1429901_PM_at   | Nkain2                              | NKAIN2     | -0.95 | 3.05 | -4.49 | 1.06E-03 | 3.06E-02 | -0.73 |
| 1436713_PM_s_at | ---                                 | NA         | 2.13  | 4.48 | 4.49  | 1.07E-03 | 3.07E-02 | -0.73 |
| 1449380_PM_at   | Pacsin1                             | PAC SIN1   | -1.03 | 5.50 | -4.49 | 1.07E-03 | 3.07E-02 | -0.73 |
| 1416351_PM_at   | Map2k1                              | MAP2K1     | -0.81 | 6.30 | -4.48 | 1.07E-03 | 3.09E-02 | -0.74 |
| 1438619_PM_x_at | Zdhc14                              | ZDHH C14   | -1.62 | 7.72 | -4.48 | 1.08E-03 | 3.09E-02 | -0.74 |
| 1425328_PM_at   | Fam76a                              | FAM76A     | -0.75 | 3.80 | -4.48 | 1.08E-03 | 3.10E-02 | -0.74 |
| 1435016_PM_at   | Trak2                               | TRAK2      | -0.67 | 2.96 | -4.48 | 1.08E-03 | 3.10E-02 | -0.74 |
| 1434513_PM_at   | Atp13a3                             | ATP13A3    | -0.88 | 4.92 | -4.48 | 1.08E-03 | 3.10E-02 | -0.74 |
| 1448283_PM_a_at | Uba2                                | UBA2       | -1.59 | 5.29 | -4.48 | 1.08E-03 | 3.10E-02 | -0.75 |
| 1456485_PM_at   | Npat                                | NPAT       | -0.72 | 4.94 | -4.48 | 1.08E-03 | 3.10E-02 | -0.75 |
| 1416430_PM_at   | Cat                                 | CAT        | -1.09 | 8.10 | -4.48 | 1.09E-03 | 3.10E-02 | -0.75 |
| 1456387_PM_at   | Nol4                                | NOL4       | -0.63 | 2.81 | -4.48 | 1.09E-03 | 3.10E-02 | -0.75 |
| 1458683_PM_at   | LOC10038947 /// Sirpb1a /// Sirpb1b | SIRPB1     | 0.47  | 2.27 | 4.48  | 1.09E-03 | 3.10E-02 | -0.75 |
| 1435078_PM_at   | Tanc2                               | TANC2      | -0.89 | 3.79 | -4.47 | 1.09E-03 | 3.11E-02 | -0.75 |
| 1445867_PM_at   | AL023008                            | NA         | 0.60  | 3.06 | 4.47  | 1.09E-03 | 3.12E-02 | -0.76 |
| 1438969_PM_x_at | Dhx30                               | DHX30      | -1.53 | 6.25 | -4.47 | 1.10E-03 | 3.13E-02 | -0.76 |
| 1442309_PM_at   | ---                                 | NA         | -0.45 | 2.32 | NA    | 1.10E-03 | 3.13E-02 | -0.76 |
| 1448591_PM_at   | Ctss                                | CTSS       | -1.92 | 5.98 | -4.47 | 1.10E-03 | 3.13E-02 | -0.76 |
| 1450394_PM_at   | Golph3                              | GOLPH3     | -0.90 | 5.56 | -4.46 | 1.10E-03 | 3.14E-02 | -0.76 |
| 1426712_PM_at   | Slc6a15                             | SLC6A15    | -1.16 | 3.31 | -4.46 | 1.10E-03 | 3.14E-02 | -0.77 |
| 1455286_PM_at   | Btbd1                               | BTBD1      | -0.91 | 8.89 | -4.46 | 1.11E-03 | 3.15E-02 | -0.77 |
| 1448909_PM_a_at | MrpB9                               | MRPL39     | 1.85  | 8.90 | 4.46  | 1.11E-03 | 3.15E-02 | -0.77 |
| 1416773_PM_at   | Wee1                                | NA         | -0.57 | 4.48 | -4.46 | 1.11E-03 | 3.15E-02 | -0.77 |
| 1433388_PM_at   | ---                                 | NA         | 0.91  | 3.86 | 4.46  | 1.11E-03 | 3.15E-02 | -0.77 |
| 1418629_PM_a_at | Khdrbs1                             | KHDRBS1    | -0.78 | 3.51 | -4.46 | 1.12E-03 | 3.16E-02 | -0.78 |
| 1426554_PM_a_at | Pgam1                               | PGAM1      | -0.97 | 8.47 | -4.46 | 1.12E-03 | 3.16E-02 | -0.78 |
| 1424318_PM_at   | Lgal3l                              | LGALS1     | -1.21 | 3.47 | -4.46 | 1.12E-03 | 3.16E-02 | -0.78 |
| 1426762_PM_s_at | Kdm1a                               | KDM1A      | -1.18 | 5.24 | -4.46 | 1.12E-03 | 3.16E-02 | -0.78 |
| 1449019_PM_at   | Akap1                               | AKAP1      | -1.14 | 3.66 | -4.46 | 1.12E-03 | 3.16E-02 | -0.78 |
| 1452952_PM_at   | Fam217b                             | FAM217B    | -0.61 | 3.89 | -4.46 | 1.12E-03 | 3.16E-02 | -0.78 |
| 1417368_PM_s_at | Ndufa2                              | NDUFA2     | 0.73  | 9.13 | 4.45  | 1.12E-03 | 3.17E-02 | -0.78 |
| 1433597_PM_at   | Arglu1                              | ARGLU1     | -0.92 | 6.52 | -4.45 | 1.13E-03 | 3.19E-02 | -0.79 |
| 1429559_PM_at   | Gnaq                                | GNAQ       | -1.69 | 5.53 | -4.45 | 1.13E-03 | 3.20E-02 | -0.79 |
| 1434655_PM_at   | Foxk1                               | FOXK1      | -1.44 | 7.22 | -4.45 | 1.14E-03 | 3.20E-02 | -0.79 |
| 1421923_PM_at   | Sh3bp5                              | SH3BP5     | -2.13 | 4.42 | -4.45 | 1.14E-03 | 3.20E-02 | -0.79 |
| 1458885_PM_at   | ---                                 | NA         | 0.65  | 3.14 | 4.45  | 1.14E-03 | 3.21E-02 | -0.80 |
| 1460239_PM_at   | Tspan13                             | TSPAN13    | -1.20 | 4.22 | -4.44 | 1.14E-03 | 3.22E-02 | -0.80 |
| 1429108_PM_at   | Msl2                                | MSL2       | -1.17 | 6.90 | -4.44 | 1.14E-03 | 3.22E-02 | -0.80 |
| 1456535_PM_at   | Vps13c                              | NA         | -1.23 | 4.90 | -4.44 | 1.14E-03 | 3.22E-02 | -0.80 |
| 1422835_PM_at   | Kcnd2                               | KCND2      | -1.32 | 4.41 | -4.44 | 1.15E-03 | 3.24E-02 | -0.81 |
| 1437508_PM_at   | Sp4                                 | SP4        | -1.19 | 4.47 | -4.44 | 1.15E-03 | 3.24E-02 | -0.81 |
| 1426480_PM_at   | Sbds                                | SBDS       | 0.66  | 3.98 | 4.44  | 1.15E-03 | 3.24E-02 | -0.81 |
| 1437236_PM_a_at | Zfp110                              | ZNF274     | -0.56 | 2.40 | -4.44 | 1.16E-03 | 3.24E-02 | -0.81 |
| 1452825_PM_at   | Tmem59l                             | TMEM59L    | -1.31 | 5.04 | -4.43 | 1.16E-03 | 3.26E-02 | -0.82 |
| 1459613_PM_at   | ---                                 | NA         | 1.48  | 3.79 | 4.43  | 1.16E-03 | 3.26E-02 | -0.82 |
| 1438328_PM_at   | Hcfc2                               | HCFC2      | -1.28 | 3.94 | -4.43 | 1.16E-03 | 3.26E-02 | -0.82 |
| 1460390_PM_at   | Sorl1                               | SORL1      | -1.56 | 6.87 | -4.43 | 1.17E-03 | 3.26E-02 | -0.82 |
| 1434259_PM_at   | Rbakdn                              | NA         | 0.52  | 3.14 | 4.43  | 1.17E-03 | 3.26E-02 | -0.82 |
| 1428187_PM_at   | Cd47                                | CD47       | -1.08 | 7.13 | -4.43 | 1.17E-03 | 3.27E-02 | -0.82 |
| 1454806_PM_at   | Fam49a                              | FAM49A     | -0.87 | 4.73 | -4.43 | 1.17E-03 | 3.27E-02 | -0.82 |

|                 |            |            |       |       |       |          |          |       |
|-----------------|------------|------------|-------|-------|-------|----------|----------|-------|
| 1438827_PM_at   | Gls        | NA         | 0.46  | 2.96  | 4.43  | 1.17E-03 | 3.27E-02 | -0.82 |
| 1419664_PM_at   | Srr        | SRR        | -0.78 | 3.14  | -4.43 | 1.17E-03 | 3.27E-02 | -0.83 |
| 1428717_PM_at   | Scrn1      | SCRN1      | 0.51  | 4.22  | 4.43  | 1.17E-03 | 3.27E-02 | -0.83 |
| 1452915_PM_at   | Prkar2a    | PRKAR2A    | -1.57 | 4.63  | -4.42 | 1.18E-03 | 3.28E-02 | -0.83 |
| 1452587_PM_at   | Actr2      | ACTR2      | -0.92 | 7.81  | -4.42 | 1.18E-03 | 3.28E-02 | -0.83 |
| 1434703_PM_at   | Extl3      | EXTL3      | -0.89 | 5.20  | -4.42 | 1.18E-03 | 3.28E-02 | -0.83 |
| 1433576_PM_at   | Mat2a      | NA         | -0.88 | 4.53  | -4.42 | 1.18E-03 | 3.28E-02 | -0.83 |
| 1427835_PM_at   | Pou2f1     | NA         | 0.63  | 3.36  | 4.42  | 1.18E-03 | 3.28E-02 | -0.83 |
| 1444534_PM_at   | ---        | NA         | 0.55  | 3.68  | 4.42  | 1.18E-03 | 3.29E-02 | -0.84 |
| 1416971_PM_at   | Cox7a2     | COX7A2     | -1.61 | 6.62  | -4.42 | 1.19E-03 | 3.29E-02 | -0.84 |
| 1450070_PM_s_at | Pak1       | PAK1       | -1.14 | 6.57  | -4.42 | 1.19E-03 | 3.29E-02 | -0.84 |
| 1420827_PM_a_at | Ccng1      | CCNG1      | -0.81 | 4.30  | -4.42 | 1.19E-03 | 3.29E-02 | -0.84 |
| 1449508_PM_at   | Il27ra     | IL27RA     | 0.55  | 3.03  | 4.42  | 1.19E-03 | 3.29E-02 | -0.84 |
| 1447449_PM_at   | Cpeb2      | NA         | 0.69  | 3.67  | 4.42  | 1.19E-03 | 3.29E-02 | -0.84 |
| 1422490_PM_at   | Bnip2      | BNIP2      | -0.96 | 5.83  | -4.42 | 1.19E-03 | 3.29E-02 | -0.84 |
| 1427311_PM_at   | Bptf       | BPTF       | 1.28  | 8.60  | 4.42  | 1.19E-03 | 3.29E-02 | -0.84 |
| 1451576_PM_at   | Prkdc      | PRKDC      | -1.09 | 2.96  | -4.42 | 1.19E-03 | 3.30E-02 | -0.84 |
| 1455450_PM_at   | Ptpn3      | PTPN3      | -0.88 | 4.60  | -4.41 | 1.20E-03 | 3.30E-02 | -0.84 |
| 1452969_PM_at   | Atp2b1     | ATP2B1     | -2.20 | 7.48  | -4.41 | 1.20E-03 | 3.31E-02 | -0.85 |
| 1450634_PM_at   | Atp6v1a    | ATP6V1A    | -1.25 | 5.30  | -4.41 | 1.20E-03 | 3.31E-02 | -0.85 |
| 1452328_PM_s_at | Pja2       | PJA2       | -1.36 | 4.43  | -4.41 | 1.20E-03 | 3.32E-02 | -0.85 |
| 1448440_PM_x_at | Myd8f      | MYD8F      | -0.88 | 6.62  | -4.41 | 1.20E-03 | 3.32E-02 | -0.85 |
| 1436258_PM_at   | Arhgef9    | ARHGEF9    | 1.55  | 4.91  | 4.41  | 1.21E-03 | 3.34E-02 | -0.86 |
| 1438251_PM_x_at | Htra1      | HTRA1      | -1.26 | 9.05  | -4.40 | 1.22E-03 | 3.35E-02 | -0.86 |
| 1427162_PM_a_at | Elk4       | ELK4       | -0.60 | 5.45  | -4.40 | 1.22E-03 | 3.35E-02 | -0.86 |
| 1419984_PM_s_at | Zfp644     | ZNF644     | -0.80 | 4.91  | -4.40 | 1.22E-03 | 3.35E-02 | -0.86 |
| 1448018_PM_at   | ---        | NA         | 1.02  | 6.22  | 4.40  | 1.22E-03 | 3.35E-02 | -0.87 |
| 1448263_PM_a_at | Cndp2      | CNDP2      | -2.06 | 5.75  | -4.40 | 1.22E-03 | 3.35E-02 | -0.87 |
| 1455145_PM_at   | Pcdh19     | PCDH19     | -1.49 | 3.74  | -4.40 | 1.22E-03 | 3.35E-02 | -0.87 |
| 1451127_PM_at   | Vopp1      | VOPP1      | -1.23 | 2.75  | -4.40 | 1.22E-03 | 3.35E-02 | -0.87 |
| 1432271_PM_a_at | Dcun1d5    | DCUN1D5    | -1.06 | 4.63  | -4.40 | 1.22E-03 | 3.35E-02 | -0.87 |
| 1418524_PM_at   | Pcm1       | PCM1       | -0.99 | 5.00  | -4.40 | 1.23E-03 | 3.36E-02 | -0.87 |
| 1419277_PM_at   | Usp48      | USP48      | 0.81  | 3.64  | 4.40  | 1.23E-03 | 3.36E-02 | -0.87 |
| 1455444_PM_at   | Gabra2     | GABRA2     | -1.66 | 6.31  | -4.39 | 1.23E-03 | 3.37E-02 | -0.88 |
| 1416635_PM_at   | Smpdl3a    | SMPDL3A    | -1.04 | 3.92  | -4.39 | 1.24E-03 | 3.37E-02 | -0.88 |
| 1421000_PM_at   | Cnot4      | CNOT4      | -0.47 | 3.11  | -4.39 | 1.24E-03 | 3.37E-02 | -0.88 |
| 1415964_PM_at   | Scd1       | SCD        | -2.37 | 5.39  | -4.39 | 1.24E-03 | 3.38E-02 | -0.88 |
| 1423725_PM_at   | Pls3       | PLS3       | -1.54 | 6.28  | -4.39 | 1.24E-03 | 3.38E-02 | -0.88 |
| 1415829_PM_at   | Lbr        | LBR        | -1.00 | 2.98  | -4.39 | 1.24E-03 | 3.38E-02 | -0.88 |
| 1424293_PM_s_at | Tmem55a    | TMEM55A    | -0.72 | 3.61  | -4.39 | 1.24E-03 | 3.38E-02 | -0.88 |
| 1452371_PM_at   | Srsf11     | SRSF11     | -1.18 | 6.01  | -4.39 | 1.25E-03 | 3.39E-02 | -0.89 |
| 1443485_PM_at   | Epha7      | EPHA7      | -0.89 | 5.64  | -4.39 | 1.25E-03 | 3.39E-02 | -0.89 |
| 1451214_PM_at   | Kbtbd2     | KBTBD2     | -0.44 | 2.81  | -4.39 | 1.24E-03 | 3.39E-02 | -0.89 |
| 1459640_PM_at   | ---        | NA         | 0.50  | 2.62  | 4.39  | 1.25E-03 | 3.39E-02 | -0.89 |
| 1454712_PM_at   | Slc25a51   | SLC25A52   | -1.29 | 5.28  | -4.39 | 1.25E-03 | 3.39E-02 | -0.89 |
| 1417308_PM_at   | Pkm        | PKM        | -1.59 | 7.80  | -4.39 | 1.25E-03 | 3.39E-02 | -0.89 |
| 1426982_PM_at   | Flywch1    | NA         | -0.79 | 3.77  | -4.39 | 1.25E-03 | 3.39E-02 | -0.89 |
| 1426870_PM_at   | Fbxo33     | FBXO33     | -1.08 | 3.82  | -4.39 | 1.25E-03 | 3.40E-02 | -0.89 |
| 1435349_PM_at   | Nrp2       | NRP2       | -1.28 | 4.23  | -4.38 | 1.25E-03 | 3.40E-02 | -0.89 |
| 1439768_PM_x_at | Sema4f     | SEMA4F     | -2.99 | 5.49  | -4.38 | 1.26E-03 | 3.41E-02 | -0.90 |
| 1434672_PM_at   | Gpr22      | GPR22      | -2.07 | 6.25  | -4.38 | 1.26E-03 | 3.41E-02 | -0.90 |
| 1448788_PM_at   | Cd200      | CD200      | -1.79 | 6.64  | -4.38 | 1.26E-03 | 3.41E-02 | -0.90 |
| 1418640_PM_at   | Sirt1      | SIRT1      | -0.63 | 2.21  | -4.38 | 1.26E-03 | 3.41E-02 | -0.90 |
| 1419583_PM_at   | Cbx4       | CBX4       | -0.58 | 5.36  | -4.38 | 1.26E-03 | 3.42E-02 | -0.90 |
| 1424221_PM_at   | Susd4      | SUSD4      | -1.11 | 3.37  | -4.38 | 1.27E-03 | 3.43E-02 | -0.91 |
| 1455489_PM_at   | Lrrtm2     | LRRTM2     | -1.59 | 5.25  | -4.38 | 1.27E-03 | 3.43E-02 | -0.91 |
| 1424672_PM_at   | Dmxl1      | DMXL1      | -1.39 | 5.50  | -4.37 | 1.28E-03 | 3.44E-02 | -0.91 |
| 1428463_PM_a_at | Ppp2r5e    | PPP2R5E    | -1.21 | 4.25  | -4.37 | 1.28E-03 | 3.44E-02 | -0.91 |
| 1440487_PM_at   | Dcc        | NA         | -1.84 | 5.97  | -4.37 | 1.28E-03 | 3.45E-02 | -0.92 |
| 1451209_PM_at   | Cers5      | CERS5      | -0.90 | 4.97  | -4.37 | 1.28E-03 | 3.45E-02 | -0.92 |
| 1438449_PM_at   | Cdc42bpa   | CD42BPA    | 1.21  | 7.39  | 4.37  | 1.28E-03 | 3.45E-02 | -0.92 |
| 1421997_PM_s_at | Iitga3     | ITGA3      | 0.54  | 4.43  | 4.37  | 1.29E-03 | 3.46E-02 | -0.92 |
| 1434670_PM_at   | Kif5a      | KIF5A      | -1.60 | 8.07  | -4.37 | 1.29E-03 | 3.46E-02 | -0.92 |
| 1436868_PM_at   | Rtn4rl1    | RTN4RL1    | -1.23 | 5.07  | -4.37 | 1.29E-03 | 3.47E-02 | -0.92 |
| 1437825_PM_at   | Lrrc4c     | LRRC4C     | -0.77 | 3.40  | -4.37 | 1.29E-03 | 3.47E-02 | -0.92 |
| 1439380_PM_x_at | Meg3       | NA         | 0.40  | 10.22 | 4.36  | 1.30E-03 | 3.48E-02 | -0.93 |
| 1457901_PM_at   | D4Erttd76e | NA         | 0.54  | 2.74  | 4.36  | 1.30E-03 | 3.48E-02 | -0.93 |
| 1427555_PM_at   | Kmt2d      | KMT2D      | 1.04  | 4.27  | 4.36  | 1.30E-03 | 3.48E-02 | -0.93 |
| 1415725_PM_at   | Rrn3       | RRN3       | -1.24 | 3.81  | -4.36 | 1.30E-03 | 3.48E-02 | -0.93 |
| 1435994_PM_at   | Kcnh1      | AL590132.1 | -0.79 | 3.66  | -4.36 | 1.30E-03 | 3.48E-02 | -0.93 |
| 1419062_PM_at   | Epb41l3    | EPB41L3    | -0.72 | 4.75  | -4.36 | 1.30E-03 | 3.48E-02 | -0.93 |
| 1436237_PM_at   | Ttc9       | NA         | 1.38  | 5.70  | 4.36  | 1.30E-03 | 3.48E-02 | -0.93 |
| 1424464_PM_s_at | Mfsd6      | MFSD6      | -2.38 | 7.15  | -4.36 | 1.31E-03 | 3.50E-02 | -0.94 |
| 1422834_PM_at   | Kcnd2      | KCND2      | -1.33 | 6.08  | -4.36 | 1.31E-03 | 3.50E-02 | -0.94 |
| 1458643_PM_at   | ---        | NA         | -1.11 | 5.76  | -4.36 | 1.31E-03 | 3.50E-02 | -0.94 |



|                 |                     |            |       |      |       |          |          |       |
|-----------------|---------------------|------------|-------|------|-------|----------|----------|-------|
| 1454675_PM_at   | Thra                | THRA       | -0.75 | 7.82 | -4.36 | 1.31E-03 | 3.50E-02 | -0.94 |
| 1454955_PM_at   | Ipo7                | NA         | -1.06 | 4.01 | -4.35 | 1.32E-03 | 3.51E-02 | -0.94 |
| 1450721_PM_at   | Acp1///LOC102642088 | ACP1       | -0.76 | 6.43 | -4.35 | 1.32E-03 | 3.52E-02 | -0.95 |
| 1420545_PM_a_at | Chn1                | CHN1       | -2.09 | 6.31 | -4.35 | 1.32E-03 | 3.52E-02 | -0.95 |
| 1423033_PM_at   | Stt3a               | STT3A      | -0.56 | 3.04 | -4.35 | 1.32E-03 | 3.52E-02 | -0.95 |
| 1456575_PM_at   | Ndn                 | NA         | -0.85 | 2.15 | -4.35 | 1.33E-03 | 3.52E-02 | -0.95 |
| 1443760_PM_at   | Fam196a             | NA         | 1.01  | 5.27 | 4.35  | 1.33E-03 | 3.53E-02 | -0.95 |
| 1437466_PM_at   | Alcam               | ALCAM      | -1.76 | 7.60 | -4.35 | 1.33E-03 | 3.53E-02 | -0.95 |
| 1437689_PM_x_at | Clu                 | CLU        | -1.20 | 8.40 | -4.35 | 1.33E-03 | 3.53E-02 | -0.95 |
| 1416659_PM_at   | Eif3a               | EIF3A      | -0.97 | 6.81 | -4.35 | 1.33E-03 | 3.53E-02 | -0.96 |
| 1423679_PM_at   | Tmem246             | TMEM246    | -0.90 | 4.70 | -4.35 | 1.33E-03 | 3.53E-02 | -0.95 |
| 1430646_PM_at   | ---                 | NA         | 1.08  | 4.38 | 4.35  | 1.33E-03 | 3.53E-02 | -0.95 |
| 1428473_PM_at   | Ppp3cb              | PPP3CB     | -1.51 | 7.94 | -4.34 | 1.34E-03 | 3.53E-02 | -0.96 |
| 1437389_PM_x_at | Khdrbs1             | KHDRBS1    | -1.29 | 6.40 | -4.34 | 1.34E-03 | 3.53E-02 | -0.96 |
| 1457423_PM_at   | Nalcn               | NALCN      | -1.14 | 5.60 | -4.34 | 1.34E-03 | 3.53E-02 | -0.96 |
| 1451180_PM_a_at | Nt5c3b              | NT5C3B     | 0.37  | 2.61 | 4.34  | 1.34E-03 | 3.53E-02 | -0.96 |
| 1447970_PM_at   | ---                 | NA         | 0.38  | 2.50 | 4.34  | 1.34E-03 | 3.53E-02 | -0.96 |
| 1440178_PM_x_at | Zap70               | ZAP70      | 0.39  | 3.44 | 4.34  | 1.34E-03 | 3.53E-02 | -0.96 |
| 1440682_PM_at   | ---                 | NA         | 0.61  | 2.86 | 4.34  | 1.34E-03 | 3.53E-02 | -0.96 |
| 1423256_PM_a_at | Atp6v1g1            | ATP6V1G1   | 1.06  | 7.68 | 4.34  | 1.34E-03 | 3.53E-02 | -0.96 |
| 1426051_PM_a_at | Cenpb               | CENPB      | 2.10  | 3.99 | 4.34  | 1.34E-03 | 3.53E-02 | -0.96 |
| 1435444_PM_at   | Atf6                | ATF6       | -0.63 | 2.71 | -4.34 | 1.34E-03 | 3.54E-02 | -0.96 |
| 1421397_PM_a_at | Pidd1               | PIDD1      | 0.55  | 3.73 | 4.34  | 1.34E-03 | 3.54E-02 | -0.96 |
| 1434057_PM_at   | Ndufb6              | NDUFB6     | -1.48 | 5.53 | -4.34 | 1.35E-03 | 3.54E-02 | -0.96 |
| 1428277_PM_at   | Otud6b              | OTUD6B     | -1.28 | 3.78 | -4.34 | 1.35E-03 | 3.54E-02 | -0.97 |
| 1453608_PM_at   | Cspp1               | CSPP1      | 0.89  | 3.02 | 4.34  | 1.35E-03 | 3.54E-02 | -0.97 |
| 1420557_PM_at   | Epha5               | EPHA5      | -1.65 | 7.09 | -4.34 | 1.35E-03 | 3.54E-02 | -0.97 |
| 1434295_PM_at   | Rasgrp1             | RASGRP1    | -2.50 | 8.03 | -4.34 | 1.35E-03 | 3.55E-02 | -0.97 |
| 1453208_PM_at   | Smm10l1             | SMIM10L1   | -1.53 | 7.33 | -4.34 | 1.35E-03 | 3.55E-02 | -0.97 |
| 1416678_PM_at   | Cops3               | COPS3      | -1.24 | 5.13 | -4.34 | 1.35E-03 | 3.55E-02 | -0.97 |
| 1435900_PM_at   | Zbtb43              | ZBTB43     | -1.22 | 4.64 | -4.34 | 1.35E-03 | 3.55E-02 | -0.97 |
| 1431203_PM_at   | Sdccag8             | SDCCAG8    | 1.51  | 5.68 | 4.34  | 1.35E-03 | 3.55E-02 | -0.97 |
| 1435434_PM_at   | Braf                | BRAF       | -1.27 | 4.32 | -4.33 | 1.36E-03 | 3.55E-02 | -0.97 |
| 1448691_PM_at   | Ubqln4              | UBQLN4     | -1.11 | 4.80 | -4.33 | 1.36E-03 | 3.55E-02 | -0.97 |
| 1434949_PM_at   | Arm8                | ARM8       | -1.00 | 6.63 | -4.34 | 1.36E-03 | 3.55E-02 | -0.97 |
| 1423046_PM_s_at | Ncbp2               | NCBP2      | -0.71 | 4.84 | -4.33 | 1.36E-03 | 3.55E-02 | -0.98 |
| 1437923_PM_at   | Csnk1a1             | NA         | 0.46  | 3.00 | 4.34  | 1.36E-03 | 3.55E-02 | -0.97 |
| 1458347_PM_s_at | Tmprss2             | TMPPRS2    | 0.55  | 9.48 | 4.33  | 1.36E-03 | 3.55E-02 | -0.98 |
| 1434931_PM_at   | Neo1                | NEO1       | -1.47 | 4.96 | -4.33 | 1.37E-03 | 3.55E-02 | -0.98 |
| 1452058_PM_a_at | Rnf11               | RNF11      | -1.41 | 5.40 | -4.33 | 1.36E-03 | 3.55E-02 | -0.98 |
| 1438769_PM_a_at | Thyn1               | THYN1      | -1.32 | 3.09 | -4.33 | 1.36E-03 | 3.55E-02 | -0.98 |
| 1417465_PM_at   | Fnta                | FNTA       | -1.24 | 5.37 | -4.33 | 1.37E-03 | 3.55E-02 | -0.98 |
| 1452061_PM_s_at | Strbp               | STRBP      | -0.98 | 3.31 | -4.33 | 1.37E-03 | 3.55E-02 | -0.98 |
| 1434558_PM_at   | Wdr47               | WDR47      | -0.82 | 5.08 | -4.33 | 1.37E-03 | 3.55E-02 | -0.98 |
| 1430406_PM_at   | Dennd1b             | DENND1B    | 0.32  | 2.44 | 4.33  | 1.37E-03 | 3.55E-02 | -0.98 |
| 1441721_PM_at   | Gm33738             | NA         | 0.45  | 2.74 | 4.33  | 1.36E-03 | 3.55E-02 | -0.98 |
| 1438266_PM_at   | Adamsl5             | ADAMTSL5   | 0.57  | 3.15 | 4.33  | 1.36E-03 | 3.55E-02 | -0.98 |
| 1453382_PM_at   | Fbxo42              | FBXO42     | 0.66  | 3.22 | 4.33  | 1.37E-03 | 3.55E-02 | -0.98 |
| 1441653_PM_at   | Srcap               | AC106886.5 | 0.87  | 3.30 | 4.33  | 1.37E-03 | 3.55E-02 | -0.98 |
| 1418083_PM_at   | 0610009B22Rik       | TRAPPC2    | -0.84 | 4.52 | -4.33 | 1.37E-03 | 3.56E-02 | -0.99 |
| 1439115_PM_at   | Mcp1                | MCPH1      | 0.45  | 3.27 | 4.33  | 1.38E-03 | 3.56E-02 | -0.99 |
| 1434283_PM_at   | Ard5b               | NA         | -1.61 | 3.31 | -4.33 | 1.38E-03 | 3.57E-02 | -0.99 |
| 1428074_PM_at   | Tmem158             | TMEM158    | -1.55 | 8.44 | -4.33 | 1.38E-03 | 3.57E-02 | -0.99 |
| 1421107_PM_at   | Stk4                | STK4       | 0.62  | 2.57 | 4.32  | 1.38E-03 | 3.57E-02 | -0.99 |
| 1428251_PM_at   | Smchd1              | SMCHD1     | -1.06 | 4.14 | -4.32 | 1.39E-03 | 3.58E-02 | -0.99 |
| 1421199_PM_at   | Dlg2                | DLG2       | -1.49 | 5.39 | -4.32 | 1.39E-03 | 3.58E-02 | -1.00 |
| 1450894_PM_a_at | Ap2m1               | AP2M1      | -0.94 | 9.35 | -4.32 | 1.39E-03 | 3.58E-02 | -1.00 |
| 1429841_PM_at   | Megf10              | MEGF10     | -0.77 | 3.13 | -4.32 | 1.39E-03 | 3.59E-02 | -1.00 |
| 1460092_PM_at   | ---                 | NA         | 0.67  | 3.40 | 4.32  | 1.39E-03 | 3.59E-02 | -1.00 |
| 1426611_PM_at   | Psmc2               | PSMC2      | -1.03 | 5.59 | -4.32 | 1.40E-03 | 3.59E-02 | -1.00 |
| 1443524_PM_x_at | Bcl10               | BCL10      | -0.90 | 3.06 | -4.32 | 1.40E-03 | 3.59E-02 | -1.00 |
| 1449820_PM_at   | Cort                | CORT       | 0.39  | 2.80 | 4.32  | 1.40E-03 | 3.59E-02 | -1.00 |
| 1444934_PM_at   | Zfp276              | ZNF276     | 0.60  | 2.52 | 4.32  | 1.40E-03 | 3.59E-02 | -1.00 |
| 1459574_PM_at   | ---                 | NA         | -0.88 | 2.85 | -4.32 | 1.40E-03 | 3.60E-02 | -1.00 |
| 1422559_PM_at   | Ube2n               | NA         | -1.07 | 4.55 | -4.32 | 1.40E-03 | 3.60E-02 | -1.01 |
| 1429650_PM_at   | Stk40               | STK40      | 0.42  | 3.17 | 4.31  | 1.40E-03 | 3.60E-02 | -1.01 |
| 1443514_PM_at   | ---                 | NA         | 2.10  | 3.63 | 4.31  | 1.40E-03 | 3.60E-02 | -1.01 |
| 1436889_PM_at   | Gabra1              | GABRA1     | -1.42 | 7.09 | -4.31 | 1.41E-03 | 3.61E-02 | -1.01 |
| 1449117_PM_at   | Jund                | JUND       | 0.50  | 8.70 | 4.31  | 1.41E-03 | 3.61E-02 | -1.01 |
| 1426671_PM_a_at | Rbm39               | RBM39      | -0.89 | 6.01 | -4.31 | 1.41E-03 | 3.61E-02 | -1.01 |
| 1428852_PM_at   | Dock3               | DOCK3      | -1.35 | 4.95 | -4.31 | 1.41E-03 | 3.61E-02 | -1.01 |
| 1429772_PM_at   | Pkna2               | PLXNA2     | -1.89 | 4.79 | -4.31 | 1.41E-03 | 3.62E-02 | -1.01 |
| 1416385_PM_a_at | M6pr                | M6PR       | -1.16 | 4.90 | -4.31 | 1.42E-03 | 3.62E-02 | -1.02 |
| 1460432_PM_a_at | Eif3e               | EIF3E      | -1.08 | 7.47 | -4.31 | 1.42E-03 | 3.62E-02 | -1.02 |
| 1433934_PM_at   | Sec24a              | SEC24A     | -1.06 | 3.80 | -4.31 | 1.42E-03 | 3.62E-02 | -1.02 |

|                 |                      |           |       |      |       |          |          |       |
|-----------------|----------------------|-----------|-------|------|-------|----------|----------|-------|
| 1460365_PM_a_at | Dnm1                 | DNM1      | -0.96 | 7.16 | -4.31 | 1.42E-03 | 3.62E-02 | -1.02 |
| 1436570_PM_at   | Pag1                 | PAG1      | -0.91 | 3.09 | -4.31 | 1.42E-03 | 3.62E-02 | -1.02 |
| 1424806_PM_s_at | Tmem214              | TMEM214   | 0.86  | 3.92 | 4.31  | 1.42E-03 | 3.62E-02 | -1.02 |
| 1423266_PM_at   | Fam213b              | FAM213B   | 0.58  | 3.90 | 4.31  | 1.42E-03 | 3.62E-02 | -1.02 |
| 1440107_PM_at   | ---                  | NA        | 0.91  | 3.44 | 4.31  | 1.42E-03 | 3.62E-02 | -1.02 |
| 1443678_PM_at   | ---                  | NA        | 0.95  | 6.29 | 4.31  | 1.42E-03 | 3.62E-02 | -1.02 |
| 1423509_PM_a_at | Iapp                 | IAPP      | 0.64  | 4.70 | 4.30  | 1.43E-03 | 3.63E-02 | -1.02 |
| 1453756_PM_at   | Nlgn3                | NLGN3     | -1.10 | 2.89 | -4.30 | 1.43E-03 | 3.63E-02 | -1.02 |
| 1423361_PM_at   | Yme1l1               | YME1L1    | -1.15 | 4.27 | -4.30 | 1.43E-03 | 3.63E-02 | -1.02 |
| 1423680_PM_at   | Fads1                | FADS1     | -2.32 | 5.60 | -4.30 | 1.43E-03 | 3.63E-02 | -1.03 |
| 1416988_PM_at   | Msh2                 | MSH2      | -0.44 | 2.48 | -4.30 | 1.44E-03 | 3.65E-02 | -1.03 |
| 1426820_PM_at   | 2610507B11Rik        | KIAA0100  | -1.48 | 5.67 | -4.30 | 1.44E-03 | 3.65E-02 | -1.03 |
| 1443838_PM_x_at | Fads2                | NA        | -1.15 | 4.74 | -4.30 | 1.44E-03 | 3.65E-02 | -1.03 |
| 1441315_PM_s_at | Slc19a2              | SLC19A2   | -1.91 | 4.37 | -4.30 | 1.44E-03 | 3.65E-02 | -1.03 |
| 1418564_PM_s_at | Serbp1               | SERBP1    | -0.87 | 7.82 | -4.30 | 1.44E-03 | 3.65E-02 | -1.03 |
| 1423723_PM_s_at | Tardbp               | TARDBP    | -1.10 | 6.44 | -4.29 | 1.45E-03 | 3.67E-02 | -1.04 |
| 1436191_PM_at   | Arid4a               | ARID4A    | -1.06 | 3.98 | -4.29 | 1.45E-03 | 3.67E-02 | -1.04 |
| 1436646_PM_at   | ---                  | NA        | -0.95 | 8.97 | -4.29 | 1.45E-03 | 3.67E-02 | -1.04 |
| 1443534_PM_at   | ---                  | NA        | 0.44  | 2.70 | 4.29  | 1.45E-03 | 3.67E-02 | -1.04 |
| 1438398_PM_at   | Rbm39                | NA        | 1.21  | 6.90 | 4.29  | 1.45E-03 | 3.67E-02 | -1.04 |
| 1421116_PM_a_at | Rtn4                 | RTN4      | -1.53 | 7.21 | -4.29 | 1.45E-03 | 3.67E-02 | -1.04 |
| 1415963_PM_at   | Hnrnp2               | HNRNP2    | -1.47 | 5.13 | -4.29 | 1.46E-03 | 3.67E-02 | -1.04 |
| 1448203_PM_at   | Atp5l                | ATP5L     | -1.09 | 3.76 | -4.29 | 1.46E-03 | 3.67E-02 | -1.04 |
| 1426964_PM_at   | Abrac1               | ABRACL    | -0.73 | 4.06 | -4.29 | 1.45E-03 | 3.67E-02 | -1.04 |
| 1444425_PM_at   | ---                  | NA        | -0.60 | 2.70 | -4.29 | 1.46E-03 | 3.67E-02 | -1.04 |
| 1459327_PM_at   | ---                  | NA        | 0.36  | 2.17 | 4.29  | 1.46E-03 | 3.67E-02 | -1.04 |
| 1416970_PM_a_at | Cox7a2               | COX7A2    | -2.51 | 7.32 | -4.29 | 1.46E-03 | 3.67E-02 | -1.05 |
| 1437357_PM_at   | Ythdc2               | YTHDC2    | -1.68 | 5.42 | -4.29 | 1.46E-03 | 3.67E-02 | -1.05 |
| 1456588_PM_x_at | Cox5b///LOC102641600 | COX5B     | -0.82 | 9.73 | -4.29 | 1.46E-03 | 3.67E-02 | -1.05 |
| 1436400_PM_at   | Fxr1                 | FXR1      | -0.81 | 4.89 | -4.29 | 1.46E-03 | 3.67E-02 | -1.05 |
| 1422695_PM_at   | Ttyh1                | TTYH1     | -1.66 | 6.26 | -4.29 | 1.46E-03 | 3.68E-02 | -1.05 |
| 1441944_PM_s_at | Gpr135               | NA        | -1.39 | 3.65 | -4.29 | 1.47E-03 | 3.68E-02 | -1.05 |
| 1455659_PM_at   | Tmcc1                | TMCC1     | -1.04 | 4.29 | -4.29 | 1.47E-03 | 3.68E-02 | -1.05 |
| 1450320_PM_at   | ---                  | NA        | 0.66  | 3.37 | 4.29  | 1.47E-03 | 3.68E-02 | -1.05 |
| 1447172_PM_at   | ---                  | NA        | 0.71  | 3.11 | 4.29  | 1.47E-03 | 3.68E-02 | -1.05 |
| 1416145_PM_at   | Dhx15                | DHX15     | -1.39 | 4.52 | -4.29 | 1.47E-03 | 3.68E-02 | -1.06 |
| 1437044_PM_a_at | Gba                  | GBA       | -1.53 | 4.96 | -4.28 | 1.47E-03 | 3.69E-02 | -1.06 |
| 1438774_PM_s_at | Pgm2l1               | PGM2L1    | -2.05 | 8.24 | -4.28 | 1.48E-03 | 3.70E-02 | -1.06 |
| 1449661_PM_at   | Suz12                | NA        | -1.28 | 3.81 | -4.28 | 1.48E-03 | 3.70E-02 | -1.06 |
| 1426491_PM_at   | Herc2                | HERC2     | -0.92 | 4.46 | -4.28 | 1.48E-03 | 3.70E-02 | -1.06 |
| 1452047_PM_at   | Cacybp               | CACYBP    | -1.25 | 5.61 | -4.28 | 1.48E-03 | 3.70E-02 | -1.06 |
| 1435921_PM_at   | Atxn1l               | ATXN1L    | -1.24 | 4.88 | -4.28 | 1.49E-03 | 3.71E-02 | -1.06 |
| 1449574_PM_a_at | Cdc42                | CDC42     | -1.92 | 7.04 | -4.28 | 1.49E-03 | 3.71E-02 | -1.07 |
| 1417939_PM_at   | Rad51ap1             | RAD51AP1  | 0.39  | 2.91 | 4.28  | 1.49E-03 | 3.71E-02 | -1.07 |
| 1460359_PM_at   | Armxc3               | ARMCX3    | -1.10 | 7.63 | -4.28 | 1.49E-03 | 3.71E-02 | -1.07 |
| 1447239_PM_at   | ---                  | NA        | -0.57 | 2.37 | -4.28 | 1.49E-03 | 3.71E-02 | -1.07 |
| 1439124_PM_at   | Wdr91                | NA        | 1.07  | 5.77 | 4.28  | 1.49E-03 | 3.71E-02 | -1.07 |
| 1435542_PM_s_at | Ctnbp2nl             | CTTNBP2NL | -1.18 | 4.33 | -4.28 | 1.49E-03 | 3.71E-02 | -1.07 |
| 1443395_PM_at   | D6Ert490e            | NA        | 0.56  | 2.35 | 4.28  | 1.49E-03 | 3.71E-02 | -1.07 |
| 1420618_PM_at   | Cpeb4                | CPEB4     | -1.07 | 7.87 | -4.27 | 1.50E-03 | 3.72E-02 | -1.07 |
| 1430979_PM_a_at | Prdx2                | PRDX2     | -2.24 | 7.04 | -4.27 | 1.50E-03 | 3.73E-02 | -1.08 |
| 1446651_PM_at   | ---                  | NA        | 1.16  | 3.82 | 4.27  | 1.50E-03 | 3.73E-02 | -1.08 |
| 1423973_PM_a_at | Arf3                 | ARF3      | -2.02 | 7.45 | -4.27 | 1.51E-03 | 3.74E-02 | -1.08 |
| 1455462_PM_at   | Adcy2                | ADCY2     | -0.96 | 4.73 | -4.27 | 1.51E-03 | 3.74E-02 | -1.08 |
| 1434674_PM_at   | Lyst                 | NA        | -1.98 | 3.88 | -4.27 | 1.51E-03 | 3.74E-02 | -1.08 |
| 1456312_PM_x_at | Gsn                  | GSN       | -0.98 | 4.07 | -4.27 | 1.51E-03 | 3.74E-02 | -1.08 |
| 1442311_PM_at   | ---                  | NA        | -0.89 | 2.41 | -4.27 | 1.51E-03 | 3.74E-02 | -1.08 |
| 1438552_PM_x_at | Zyx                  | ZYX       | 0.41  | 2.44 | 4.27  | 1.51E-03 | 3.74E-02 | -1.08 |
| 1436908_PM_at   | Pcm1                 | PCM1      | -1.12 | 4.45 | -4.27 | 1.51E-03 | 3.74E-02 | -1.08 |
| 1416209_PM_at   | Glud1                | GLUD1     | -1.38 | 6.52 | -4.27 | 1.52E-03 | 3.75E-02 | -1.09 |
| 1452050_PM_at   | Camk1d               | CAMK1D    | -1.88 | 5.89 | -4.26 | 1.52E-03 | 3.75E-02 | -1.09 |
| 1423722_PM_at   | Vmp1                 | VMP1      | -1.55 | 6.34 | -4.26 | 1.52E-03 | 3.76E-02 | -1.09 |
| 1454570_PM_at   | ---                  | NA        | 0.45  | 2.63 | 4.26  | 1.52E-03 | 3.76E-02 | -1.09 |
| 1437393_PM_at   | Prkca                | PRKCA     | -1.41 | 6.73 | -4.26 | 1.53E-03 | 3.76E-02 | -1.09 |
| 1437293_PM_x_at | Ust                  | UST       | -1.19 | 4.26 | -4.26 | 1.53E-03 | 3.76E-02 | -1.09 |
| 1436803_PM_a_at | Ndufb9               | NDUFB9    | -1.03 | 9.40 | -4.26 | 1.54E-03 | 3.78E-02 | -1.10 |
| 1449904_PM_at   | Dopey2               | NA        | 0.51  | 2.85 | 4.26  | 1.54E-03 | 3.78E-02 | -1.10 |
| 1438943_PM_x_at | Rpn1                 | RPN1      | -1.57 | 8.36 | -4.26 | 1.54E-03 | 3.78E-02 | -1.10 |
| 1418520_PM_at   | Tgoln1///Tgoln2      | TGOLN2    | -1.07 | 3.41 | -4.26 | 1.54E-03 | 3.79E-02 | -1.10 |
| 1454626_PM_at   | Clc                  | CLC       | -0.95 | 7.21 | -4.25 | 1.55E-03 | 3.80E-02 | -1.10 |
| 1457267_PM_at   | A13001015Rik         | C1orf74   | -0.78 | 3.67 | -4.25 | 1.55E-03 | 3.80E-02 | -1.11 |
| 1429193_PM_at   | Ankib1               | ANKIB1    | -1.44 | 4.64 | -4.25 | 1.55E-03 | 3.81E-02 | -1.11 |
| 1455403_PM_at   | Manea                | MANEA     | -1.33 | 4.35 | -4.25 | 1.55E-03 | 3.81E-02 | -1.11 |
| 1448361_PM_at   | Ttc3                 | TTC3      | -1.09 | 8.94 | -4.25 | 1.56E-03 | 3.82E-02 | -1.11 |
| 1448397_PM_at   | Gjb6                 | GJB6      | -0.57 | 2.98 | -4.25 | 1.56E-03 | 3.82E-02 | -1.11 |

|                 |                                                       |          |       |       |       |          |          |       |
|-----------------|-------------------------------------------------------|----------|-------|-------|-------|----------|----------|-------|
| 1420628_PM_at   | Pura                                                  | PURA     | -1.26 | 5.98  | -4.25 | 1.56E-03 | 3.82E-02 | -1.11 |
| 1436946_PM_s_at | Gm15776 /// Gng5 ///<br>LOC102641276                  | GNG5     | -1.47 | 4.86  | -4.25 | 1.56E-03 | 3.82E-02 | -1.11 |
| 1453176_PM_a_at | Erich2                                                | ERICH2   | 0.38  | 2.21  | 4.25  | 1.56E-03 | 3.82E-02 | -1.12 |
| 1423114_PM_at   | Ube2d3                                                | UBE2D3   | -1.35 | 5.92  | -4.25 | 1.57E-03 | 3.83E-02 | -1.12 |
| 1457985_PM_at   | Clmn                                                  | CLMN     | 0.87  | 4.12  | 4.25  | 1.57E-03 | 3.83E-02 | -1.12 |
| 1419211_PM_s_at | Asun                                                  | INTS13   | 0.77  | 3.55  | 4.25  | 1.57E-03 | 3.83E-02 | -1.12 |
| 1448442_PM_a_at | Psm3                                                  | PSMA3    | -0.67 | 6.84  | -4.25 | 1.57E-03 | 3.83E-02 | -1.12 |
| 1418300_PM_a_at | Mknk2                                                 | MKNK2    | -1.53 | 6.76  | -4.25 | 1.57E-03 | 3.83E-02 | -1.12 |
| 1453928_PM_a_at | Ssb                                                   | SSB      | 0.86  | 9.02  | 4.24  | 1.57E-03 | 3.83E-02 | -1.12 |
| 1424985_PM_a_at | Sox10                                                 | SOX10    | 0.63  | 3.85  | 4.24  | 1.58E-03 | 3.85E-02 | -1.13 |
| 1435867_PM_at   | Kdm7a                                                 | KDM7A    | -1.04 | 4.54  | -4.24 | 1.58E-03 | 3.85E-02 | -1.13 |
| 1429588_PM_at   | 2810470A19Rik                                         | KIAA1551 | -0.90 | 4.31  | -4.24 | 1.58E-03 | 3.85E-02 | -1.13 |
| 1435204_PM_at   | Prmt8                                                 | PRMT8    | -0.53 | 7.01  | -4.24 | 1.58E-03 | 3.85E-02 | -1.13 |
| 1460262_PM_a_at | 1700037H04Rik                                         | C20orf27 | 0.71  | 4.83  | 4.24  | 1.58E-03 | 3.85E-02 | -1.13 |
| 1418736_PM_at   | B3galnt1                                              | B3GALNT1 | -1.43 | 6.51  | -4.24 | 1.59E-03 | 3.86E-02 | -1.13 |
| 1452231_PM_x_at | Mndal                                                 | IFI16    | -0.62 | 3.88  | -4.24 | 1.59E-03 | 3.86E-02 | -1.13 |
| 1454942_PM_at   | Fam129a                                               | FAM129A  | -0.49 | 2.38  | -4.24 | 1.59E-03 | 3.86E-02 | -1.13 |
| 1455588_PM_at   | Lym4                                                  | LYRM4    | -0.90 | 4.21  | -4.24 | 1.59E-03 | 3.87E-02 | -1.14 |
| 1450970_PM_at   | Got1                                                  | GOT1     | -0.56 | 8.69  | -4.23 | 1.60E-03 | 3.88E-02 | -1.14 |
| 1456406_PM_at   | ---                                                   | NA       | 1.15  | 4.17  | 4.23  | 1.60E-03 | 3.88E-02 | -1.14 |
| 1452406_PM_x_at | Erdr1                                                 | NA       | 0.97  | 4.14  | 4.23  | 1.61E-03 | 3.89E-02 | -1.14 |
| 1455418_PM_at   | ---                                                   | NA       | -0.66 | 5.69  | -4.23 | 1.61E-03 | 3.89E-02 | -1.15 |
| 1417483_PM_at   | Nfkbiz                                                | NFKBIZ   | -0.59 | 4.12  | -4.23 | 1.61E-03 | 3.89E-02 | -1.15 |
| 1451215_PM_at   | Prrc1                                                 | PRRC1    | 0.50  | 3.38  | 4.23  | 1.61E-03 | 3.89E-02 | -1.14 |
| 1434904_PM_at   | Hivep2                                                | HIVEP2   | -1.67 | 7.21  | -4.23 | 1.61E-03 | 3.90E-02 | -1.15 |
| 1435781_PM_at   | Cand1                                                 | CAND1    | -1.33 | 6.85  | -4.23 | 1.61E-03 | 3.90E-02 | -1.15 |
| 1450859_PM_s_at | Ube2d3                                                | UBE2D3   | -1.78 | 5.94  | -4.23 | 1.62E-03 | 3.91E-02 | -1.15 |
| 1438685_PM_at   | Gm12942 /// Zmy6                                      | ZMYM6    | -0.85 | 2.45  | -4.23 | 1.62E-03 | 3.91E-02 | -1.15 |
| 1423415_PM_at   | Gpr83                                                 | GPR83    | -0.54 | 2.65  | -4.23 | 1.62E-03 | 3.91E-02 | -1.15 |
| 1430433_PM_at   | 4933406J08Rik                                         | TERB2    | 0.61  | 4.22  | 4.23  | 1.62E-03 | 3.91E-02 | -1.15 |
| 1457570_PM_at   | A230001M10Rik                                         | NA       | -0.59 | 2.36  | -4.22 | 1.62E-03 | 3.91E-02 | -1.15 |
| 1444126_PM_at   | ---                                                   | NA       | -0.84 | 2.46  | -4.22 | 1.63E-03 | 3.92E-02 | -1.16 |
| 1424489_PM_a_at | Trit1                                                 | TRIT1    | -1.58 | 4.13  | -4.22 | 1.63E-03 | 3.92E-02 | -1.16 |
| 1448131_PM_at   | Mfn2                                                  | MFN2     | -1.11 | 3.96  | -4.22 | 1.63E-03 | 3.92E-02 | -1.16 |
| 1436089_PM_at   | Ints6                                                 | NA       | -1.04 | 3.20  | -4.22 | 1.63E-03 | 3.92E-02 | -1.16 |
| 1435784_PM_at   | Atg9a                                                 | ATG9A    | -1.04 | 3.61  | -4.22 | 1.63E-03 | 3.92E-02 | -1.16 |
| 1458212_PM_at   | ---                                                   | NA       | 0.61  | 3.35  | 4.22  | 1.63E-03 | 3.92E-02 | -1.16 |
| 1456492_PM_at   | Mau2                                                  | MAU2     | 0.52  | 3.02  | 4.22  | 1.64E-03 | 3.93E-02 | -1.16 |
| 1415701_PM_x_at | Gm9794 /// LOC100044627<br>/// LOC100862455 /// Rpl23 | RPL23    | 0.46  | 8.36  | 4.22  | 1.64E-03 | 3.93E-02 | -1.16 |
| 1450229_PM_at   | Med14                                                 | MED14    | -0.72 | 3.37  | -4.22 | 1.64E-03 | 3.94E-02 | -1.17 |
| 1425274_PM_at   | Asph                                                  | ASPH     | 0.82  | 3.60  | 4.22  | 1.64E-03 | 3.94E-02 | -1.17 |
| 1458440_PM_at   | Specc1                                                | SPECC1   | -1.56 | 4.59  | -4.22 | 1.65E-03 | 3.94E-02 | -1.17 |
| 1431367_PM_at   | March1                                                | MARCH1   | 0.78  | 3.00  | 4.22  | 1.65E-03 | 3.95E-02 | -1.17 |
| 1438976_PM_x_at | Mat2a                                                 | NA       | -0.91 | 6.75  | -4.21 | 1.65E-03 | 3.95E-02 | -1.17 |
| 1433035_PM_at   | 5430430K15Rik                                         | NA       | 0.62  | 2.95  | 4.21  | 1.65E-03 | 3.95E-02 | -1.17 |
| 1459820_PM_at   | Kdm7a                                                 | KDM7A    | 0.66  | 4.03  | 4.21  | 1.65E-03 | 3.95E-02 | -1.17 |
| 1456655_PM_at   | ---                                                   | NA       | 1.18  | 3.52  | 4.21  | 1.65E-03 | 3.95E-02 | -1.17 |
| 1459376_PM_at   | ---                                                   | NA       | 1.39  | 4.81  | 4.21  | 1.65E-03 | 3.95E-02 | -1.17 |
| 1428000_PM_at   | Tmem60                                                | TMEM60   | -1.23 | 3.63  | -4.21 | 1.66E-03 | 3.95E-02 | -1.18 |
| 1420820_PM_at   | Myll2a                                                | MYL12A   | -0.98 | 3.15  | -4.21 | 1.66E-03 | 3.95E-02 | -1.17 |
| 1427158_PM_at   | Mpr30                                                 | MRP30    | -0.58 | 4.05  | -4.21 | 1.66E-03 | 3.95E-02 | -1.17 |
| 1439495_PM_at   | Uvssa                                                 | UVSSA    | -0.40 | 3.31  | -4.21 | 1.66E-03 | 3.95E-02 | -1.18 |
| 1452253_PM_at   | Crim1                                                 | CRIM1    | -1.34 | 3.92  | -4.21 | 1.66E-03 | 3.95E-02 | -1.18 |
| 1451356_PM_at   | Anp32e                                                | ANP32E   | -1.13 | 5.01  | -4.21 | 1.66E-03 | 3.95E-02 | -1.18 |
| 1432747_PM_at   | Gm41852                                               | NA       | 0.53  | 2.60  | 4.21  | 1.66E-03 | 3.95E-02 | -1.18 |
| 1448570_PM_at   | Gmf                                                   | GMFB     | -1.66 | 6.52  | -4.21 | 1.67E-03 | 3.96E-02 | -1.18 |
| 1439133_PM_at   | ---                                                   | NA       | -1.01 | 5.89  | -4.21 | 1.67E-03 | 3.96E-02 | -1.18 |
| 1418713_PM_at   | Pcbd1                                                 | PCBD1    | 0.54  | 3.22  | 4.21  | 1.67E-03 | 3.96E-02 | -1.18 |
| 1454995_PM_at   | Ddah1                                                 | DDAH1    | -1.71 | 5.91  | -4.21 | 1.67E-03 | 3.97E-02 | -1.18 |
| 1439830_PM_at   | Map3k5                                                | MAP3K5   | -0.89 | 7.07  | -4.21 | 1.67E-03 | 3.97E-02 | -1.19 |
| 1459540_PM_at   | Cdc26                                                 | NA       | 0.49  | 3.05  | 4.21  | 1.67E-03 | 3.97E-02 | -1.19 |
| 1452797_PM_at   | Fastkd3                                               | FASTKD3  | -0.59 | 4.27  | -4.20 | 1.68E-03 | 3.98E-02 | -1.19 |
| 1441693_PM_at   | Adams3                                                | NA       | -1.24 | 3.65  | -4.20 | 1.68E-03 | 3.98E-02 | -1.19 |
| 1436959_PM_x_at | Nsmf                                                  | NSMF     | -0.40 | 11.50 | -4.20 | 1.68E-03 | 3.98E-02 | -1.19 |
| 1423078_PM_a_at | Msmo1                                                 | MSMO1    | -1.38 | 3.32  | -4.20 | 1.68E-03 | 3.98E-02 | -1.19 |
| 1443412_PM_s_at | Mmp16                                                 | MMP16    | -1.20 | 3.05  | -4.20 | 1.69E-03 | 3.99E-02 | -1.19 |
| 1425562_PM_s_at | Trnt1                                                 | TRNT1    | -0.69 | 3.60  | -4.20 | 1.69E-03 | 3.99E-02 | -1.19 |
| 1444937_PM_at   | ---                                                   | NA       | 0.93  | 3.56  | 4.20  | 1.69E-03 | 3.99E-02 | -1.19 |
| 1420617_PM_at   | Cpeb4                                                 | CPEB4    | -1.58 | 3.66  | -4.20 | 1.69E-03 | 3.99E-02 | -1.19 |
| 1415751_PM_at   | Hp1bp3                                                | HP1BP3   | -0.91 | 7.75  | -4.20 | 1.70E-03 | 4.01E-02 | -1.20 |
| 1430170_PM_at   | Bbs10                                                 | BBS10    | -0.56 | 2.48  | -4.20 | 1.70E-03 | 4.01E-02 | -1.20 |
| 1451569_PM_at   | Nr2c2                                                 | NR2C2    | -1.30 | 4.48  | -4.19 | 1.71E-03 | 4.03E-02 | -1.21 |

|                 |                                                                                                                                                                              |          |       |       |       |          |          |       |
|-----------------|------------------------------------------------------------------------------------------------------------------------------------------------------------------------------|----------|-------|-------|-------|----------|----------|-------|
| 1424886_PM_at   | Ptprd                                                                                                                                                                        | PTPRD    | -1.01 | 7.70  | -4.19 | 1.71E-03 | 4.03E-02 | -1.21 |
| 1450714_PM_at   | Azin1                                                                                                                                                                        | AZIN1    | -0.86 | 4.54  | -4.19 | 1.71E-03 | 4.03E-02 | -1.21 |
| 1428460_PM_at   | Syn2                                                                                                                                                                         | SYN2     | -1.90 | 8.24  | -4.19 | 1.71E-03 | 4.04E-02 | -1.21 |
| 1450008_PM_a_at | Ctnn1                                                                                                                                                                        | CTNNB1   | -0.69 | 4.06  | -4.19 | 1.71E-03 | 4.04E-02 | -1.21 |
| 1437447_PM_s_at | Erc1                                                                                                                                                                         | ERCC1    | 0.50  | 3.87  | 4.19  | 1.72E-03 | 4.04E-02 | -1.21 |
| 1444527_PM_at   | ---                                                                                                                                                                          | NA       | 0.38  | 2.97  | 4.19  | 1.72E-03 | 4.04E-02 | -1.21 |
| 1424719_PM_a_at | Mapt                                                                                                                                                                         | MAPT     | 0.68  | 2.89  | 4.19  | 1.72E-03 | 4.04E-02 | -1.21 |
| 1437405_PM_a_at | Igf1bp4                                                                                                                                                                      | IGFBP4   | -2.70 | 5.42  | -4.19 | 1.72E-03 | 4.04E-02 | -1.21 |
| 1420879_PM_a_at | Ywhab                                                                                                                                                                        | YWHAB    | -1.57 | 8.57  | -4.19 | 1.72E-03 | 4.04E-02 | -1.21 |
| 1443558_PM_s_at | Nt5dc3                                                                                                                                                                       | NT5DC3   | -1.21 | 4.12  | -4.19 | 1.72E-03 | 4.04E-02 | -1.22 |
| 1451988_PM_s_at | Chmp4b                                                                                                                                                                       | CHMP4B   | -0.99 | 6.12  | -4.19 | 1.72E-03 | 4.04E-02 | -1.22 |
| 1452298_PM_a_at | Myo5b                                                                                                                                                                        | MYO5B    | -1.59 | 5.69  | -4.19 | 1.73E-03 | 4.05E-02 | -1.22 |
| 1448690_PM_at   | Kcnk1                                                                                                                                                                        | KCNK1    | -1.30 | 6.20  | -4.18 | 1.73E-03 | 4.06E-02 | -1.22 |
| 1423626_PM_at   | Dst                                                                                                                                                                          | DST      | -1.03 | 6.56  | -4.18 | 1.74E-03 | 4.07E-02 | -1.23 |
| 1417190_PM_at   | Nampt                                                                                                                                                                        | NAMPT    | -0.82 | 3.46  | -4.18 | 1.74E-03 | 4.07E-02 | -1.22 |
| 1444324_PM_at   | E530001K10Rik /// Mir670                                                                                                                                                     | NA       | 0.37  | 2.35  | 4.18  | 1.74E-03 | 4.07E-02 | -1.23 |
| 1447315_PM_at   | ---                                                                                                                                                                          | NA       | 0.47  | 3.10  | 4.18  | 1.75E-03 | 4.08E-02 | -1.23 |
| 1418332_PM_a_at | Agtpbp1                                                                                                                                                                      | AGTPBP1  | -1.51 | 7.73  | -4.18 | 1.75E-03 | 4.08E-02 | -1.23 |
| 1425185_PM_at   | Desi2                                                                                                                                                                        | DESI2    | -1.07 | 6.48  | -4.18 | 1.75E-03 | 4.08E-02 | -1.23 |
| 1430967_PM_at   | ---                                                                                                                                                                          | NA       | 0.85  | 3.38  | 4.18  | 1.75E-03 | 4.08E-02 | -1.23 |
| 1456609_PM_at   | Camk2n1                                                                                                                                                                      | CAMK2N1  | -2.61 | 7.58  | -4.18 | 1.75E-03 | 4.09E-02 | -1.23 |
| 1427256_PM_at   | Vcan                                                                                                                                                                         | VCAN     | -0.75 | 2.95  | -4.18 | 1.75E-03 | 4.09E-02 | -1.23 |
| 1453354_PM_at   | Ino80dos                                                                                                                                                                     | NA       | -0.50 | 2.83  | -4.18 | 1.76E-03 | 4.09E-02 | -1.23 |
| 1460577_PM_at   | Jmy                                                                                                                                                                          | JMY      | -1.20 | 3.94  | -4.18 | 1.76E-03 | 4.10E-02 | -1.23 |
| 1418772_PM_at   | Fam208b                                                                                                                                                                      | FAM208B  | -0.61 | 3.29  | -4.17 | 1.76E-03 | 4.10E-02 | -1.24 |
| 1443486_PM_at   | Cog7                                                                                                                                                                         | COG7     | -1.40 | 6.95  | -4.17 | 1.77E-03 | 4.11E-02 | -1.24 |
| 1438752_PM_at   | ---                                                                                                                                                                          | NA       | -1.57 | 4.10  | -4.17 | 1.77E-03 | 4.11E-02 | -1.24 |
| 1426929_PM_at   | Celf4                                                                                                                                                                        | CELF4    | -1.21 | 6.43  | -4.17 | 1.77E-03 | 4.11E-02 | -1.24 |
| 1456577_PM_x_at | Pitrm1                                                                                                                                                                       | PITRM1   | -1.13 | 5.53  | -4.17 | 1.77E-03 | 4.11E-02 | -1.24 |
| 1455898_PM_x_at | Slc2a3                                                                                                                                                                       | SLC2A3   | -1.29 | 5.88  | -4.17 | 1.77E-03 | 4.12E-02 | -1.24 |
| 1434738_PM_at   | Tarsl2                                                                                                                                                                       | TARSL2   | -0.49 | 2.50  | -4.17 | 1.77E-03 | 4.12E-02 | -1.24 |
| 1459628_PM_at   | ---                                                                                                                                                                          | NA       | 0.49  | 2.42  | 4.17  | 1.78E-03 | 4.12E-02 | -1.24 |
| 1416387_PM_at   | Pip4k2c                                                                                                                                                                      | PIP4K2C  | -1.19 | 5.56  | -4.17 | 1.78E-03 | 4.12E-02 | -1.25 |
| 1451820_PM_at   | Diras1                                                                                                                                                                       | DIRAS1   | 0.57  | 3.42  | 4.17  | 1.78E-03 | 4.13E-02 | -1.25 |
| 1456354_PM_at   | Chrna4                                                                                                                                                                       | CHRNA4   | 0.59  | 4.98  | 4.17  | 1.78E-03 | 4.13E-02 | -1.25 |
| 1421907_PM_at   | Med1                                                                                                                                                                         | MED1     | -1.33 | 4.23  | -4.17 | 1.79E-03 | 4.14E-02 | -1.25 |
| 1428608_PM_at   | My1l2b                                                                                                                                                                       | MYL12B   | -0.67 | 7.32  | -4.16 | 1.79E-03 | 4.14E-02 | -1.25 |
| 1442674_PM_at   | ---                                                                                                                                                                          | NA       | 0.52  | 2.33  | 4.16  | 1.79E-03 | 4.15E-02 | -1.26 |
| 1450433_PM_at   | Rbpj                                                                                                                                                                         | RBPJL    | 0.36  | 2.28  | 4.16  | 1.80E-03 | 4.16E-02 | -1.26 |
| 1435194_PM_at   | Hspa4                                                                                                                                                                        | HSPA4    | -0.87 | 10.16 | -4.16 | 1.80E-03 | 4.17E-02 | -1.26 |
| 1456080_PM_a_at | Serinc3                                                                                                                                                                      | SERINC3  | -0.94 | 5.69  | -4.16 | 1.81E-03 | 4.18E-02 | -1.26 |
| 1423794_PM_at   | Atg13                                                                                                                                                                        | ATG13    | 0.90  | 3.17  | 4.16  | 1.81E-03 | 4.18E-02 | -1.27 |
| 1448959_PM_at   | Ndufs4                                                                                                                                                                       | NDUFS4   | -1.51 | 6.30  | -4.15 | 1.82E-03 | 4.19E-02 | -1.27 |
| 1441801_PM_at   | ---                                                                                                                                                                          | NA       | -1.41 | 4.60  | -4.15 | 1.82E-03 | 4.19E-02 | -1.27 |
| 1433587_PM_at   | Rgmb                                                                                                                                                                         | NA       | -1.08 | 4.81  | -4.16 | 1.82E-03 | 4.19E-02 | -1.27 |
| 1418619_PM_at   | Icam5                                                                                                                                                                        | ICAM5    | -0.56 | 2.54  | -4.15 | 1.82E-03 | 4.20E-02 | -1.27 |
| 1459925_PM_at   | C78282                                                                                                                                                                       | NA       | 0.43  | 4.05  | 4.15  | 1.82E-03 | 4.20E-02 | -1.27 |
| 1420663_PM_at   | Zbtb7b                                                                                                                                                                       | ZBTB7B   | 0.43  | 3.06  | 4.15  | 1.83E-03 | 4.21E-02 | -1.27 |
| 1426884_PM_at   | Rmnd5a                                                                                                                                                                       | RMND5A   | -0.84 | 4.27  | -4.15 | 1.83E-03 | 4.21E-02 | -1.28 |
| 1428500_PM_at   | Lrp6                                                                                                                                                                         | LRP6     | -1.48 | 5.21  | -4.15 | 1.83E-03 | 4.21E-02 | -1.28 |
| 1454728_PM_s_at | Atp8a1                                                                                                                                                                       | ATP8A1   | -1.95 | 7.79  | -4.15 | 1.84E-03 | 4.22E-02 | -1.28 |
| 1420798_PM_s_at | Pcdha1 /// Pcdha10 ///<br>Pcdha11 /// Pcdha12 ///<br>Pcdha2 /// Pcdha3 ///<br>Pcdha4 /// Pcdha5 ///<br>Pcdha6 /// Pcdha7 ///<br>Pcdha8 /// Pcdha9 ///<br>Pcdha11 /// Pcdha12 | PCDHA7   | -1.62 | 5.77  | -4.15 | 1.84E-03 | 4.22E-02 | -1.28 |
| 1444804_PM_at   | D17Ert096e                                                                                                                                                                   | NA       | 0.48  | 2.57  | 4.15  | 1.84E-03 | 4.23E-02 | -1.28 |
| 1424586_PM_at   | Ehbp1                                                                                                                                                                        | EHBP1    | -1.19 | 5.26  | -4.15 | 1.84E-03 | 4.23E-02 | -1.28 |
| 1440325_PM_at   | Rab30                                                                                                                                                                        | NA       | -1.05 | 3.60  | -4.15 | 1.84E-03 | 4.23E-02 | -1.28 |
| 1428076_PM_s_at | Gm3244 /// Gm3873 ///<br>Ndufb4                                                                                                                                              | NDUFB4   | -1.55 | 5.30  | -4.15 | 1.85E-03 | 4.23E-02 | -1.28 |
| 1436539_PM_at   | Clmn                                                                                                                                                                         | CLMN     | 2.66  | 3.75  | 4.14  | 1.85E-03 | 4.23E-02 | -1.29 |
| 1423069_PM_at   | Adnp /// Dpm1 /// Dpm1-<br>adnp                                                                                                                                              | ADNP     | -1.33 | 6.59  | -4.14 | 1.85E-03 | 4.24E-02 | -1.29 |
| 1418479_PM_at   | Vps54                                                                                                                                                                        | VPS54    | -1.02 | 3.69  | -4.14 | 1.85E-03 | 4.24E-02 | -1.29 |
| 1447555_PM_at   | ---                                                                                                                                                                          | NA       | 0.59  | 2.38  | 4.14  | 1.85E-03 | 4.24E-02 | -1.29 |
| 1438902_PM_a_at | Hsp90aa1                                                                                                                                                                     | HSP90AA1 | -0.70 | 9.08  | -4.14 | 1.86E-03 | 4.24E-02 | -1.29 |
| 1455806_PM_x_at | Ndufa12                                                                                                                                                                      | NDUFA12  | -1.08 | 5.83  | -4.14 | 1.86E-03 | 4.25E-02 | -1.29 |
| 1455402_PM_at   | Socs7                                                                                                                                                                        | SOCS7    | -0.89 | 10.51 | -4.14 | 1.87E-03 | 4.28E-02 | -1.30 |
| 1450397_PM_at   | Map1b                                                                                                                                                                        | MAP1B    | -1.27 | 6.51  | -4.13 | 1.89E-03 | 4.30E-02 | -1.30 |
| 1445817_PM_at   | BB168181                                                                                                                                                                     | NA       | 0.89  | 4.75  | 4.13  | 1.88E-03 | 4.30E-02 | -1.30 |
| 1417507_PM_at   | Cyb561                                                                                                                                                                       | CYB561   | -1.07 | 3.27  | -4.13 | 1.89E-03 | 4.31E-02 | -1.31 |

|                 |                                                                                                                                                                                                                                                                                               |         |       |      |       |          |          |       |
|-----------------|-----------------------------------------------------------------------------------------------------------------------------------------------------------------------------------------------------------------------------------------------------------------------------------------------|---------|-------|------|-------|----------|----------|-------|
| 1428362_PM_at   | Eif4g2                                                                                                                                                                                                                                                                                        | EIF4G2  | -1.06 | 5.32 | -4.13 | 1.89E-03 | 4.31E-02 | -1.31 |
| 1459877_PM_x_at | Rnf185                                                                                                                                                                                                                                                                                        | RNF185  | -1.05 | 5.11 | -4.13 | 1.89E-03 | 4.31E-02 | -1.31 |
| 1451977_PM_at   | Dyrk1a                                                                                                                                                                                                                                                                                        | DYRK1A  | -0.70 | 2.63 | -4.13 | 1.89E-03 | 4.31E-02 | -1.31 |
| 1432561_PM_at   | 4930569F06Rik                                                                                                                                                                                                                                                                                 | NA      | 0.39  | 2.79 | 4.13  | 1.89E-03 | 4.31E-02 | -1.31 |
| 1435050_PM_at   | Arfgef3                                                                                                                                                                                                                                                                                       | NA      | -2.33 | 7.11 | -4.13 | 1.89E-03 | 4.31E-02 | -1.31 |
| 1455547_PM_at   | Zc3h7b                                                                                                                                                                                                                                                                                        | ZC3H7B  | -1.26 | 4.74 | -4.13 | 1.90E-03 | 4.31E-02 | -1.31 |
| 1448061_PM_at   | Msr1                                                                                                                                                                                                                                                                                          | MSR1    | 0.47  | 2.95 | 4.13  | 1.90E-03 | 4.32E-02 | -1.31 |
| 1433593_PM_at   | Ypel5                                                                                                                                                                                                                                                                                         | YPEL5   | -1.31 | 6.72 | -4.13 | 1.90E-03 | 4.33E-02 | -1.32 |
| 1415957_PM_a_at | Rrp1                                                                                                                                                                                                                                                                                          | RRP1    | 0.68  | 5.24 | 4.12  | 1.91E-03 | 4.34E-02 | -1.32 |
| 1442646_PM_at   | ---                                                                                                                                                                                                                                                                                           | NA      | 0.34  | 2.45 | 4.12  | 1.91E-03 | 4.34E-02 | -1.32 |
| 1450868_PM_at   | Hgsnat                                                                                                                                                                                                                                                                                        | HGSNAT  | -0.91 | 3.73 | -4.12 | 1.92E-03 | 4.34E-02 | -1.32 |
| 1423057_PM_at   | Capza2                                                                                                                                                                                                                                                                                        | CAPZA2  | -1.61 | 6.38 | -4.12 | 1.92E-03 | 4.35E-02 | -1.32 |
| 1426066_PM_a_at | Dtna                                                                                                                                                                                                                                                                                          | DTNA    | 0.59  | 3.11 | 4.12  | 1.92E-03 | 4.35E-02 | -1.32 |
| 1452467_PM_at   | Mmab                                                                                                                                                                                                                                                                                          | MMAB    | 2.08  | 4.33 | 4.12  | 1.92E-03 | 4.35E-02 | -1.32 |
| 1445418_PM_at   | Smg6                                                                                                                                                                                                                                                                                          | SMG6    | 0.83  | 5.56 | 4.12  | 1.93E-03 | 4.36E-02 | -1.33 |
| 1458891_PM_at   | ---                                                                                                                                                                                                                                                                                           | NA      | 0.48  | 2.59 | 4.12  | 1.93E-03 | 4.37E-02 | -1.33 |
| 1430250_PM_at   | ---                                                                                                                                                                                                                                                                                           | NA      | 0.69  | 3.07 | 4.12  | 1.94E-03 | 4.38E-02 | -1.33 |
| 1440681_PM_at   | ---                                                                                                                                                                                                                                                                                           | NA      | -1.56 | 4.80 | -4.12 | 1.94E-03 | 4.38E-02 | -1.33 |
| 1456003_PM_a_at | Slc1a4                                                                                                                                                                                                                                                                                        | SLC1A4  | -0.68 | 7.65 | -4.11 | 1.94E-03 | 4.38E-02 | -1.33 |
| 1457346_PM_at   | ---                                                                                                                                                                                                                                                                                           | NA      | 0.34  | 2.80 | 4.11  | 1.95E-03 | 4.40E-02 | -1.34 |
| 1428170_PM_at   | LOC102643195 /// Zfp180                                                                                                                                                                                                                                                                       | ZNF180  | -0.85 | 5.03 | -4.11 | 1.95E-03 | 4.40E-02 | -1.34 |
| 1439044_PM_at   | Zfp354c                                                                                                                                                                                                                                                                                       | ZNF354C | -0.72 | 3.61 | -4.11 | 1.95E-03 | 4.40E-02 | -1.34 |
| 1420478_PM_at   | Nap1l1                                                                                                                                                                                                                                                                                        | NAP1L1  | -1.58 | 4.65 | -4.11 | 1.96E-03 | 4.41E-02 | -1.34 |
| 1437807_PM_x_at | Ctnna1                                                                                                                                                                                                                                                                                        | CTNNA1  | -1.54 | 5.88 | -4.11 | 1.96E-03 | 4.41E-02 | -1.34 |
| 1417674_PM_s_at | Golga4                                                                                                                                                                                                                                                                                        | GOLGA4  | -0.76 | 6.44 | -4.11 | 1.96E-03 | 4.41E-02 | -1.34 |
| 1451725_PM_a_at | Psm4                                                                                                                                                                                                                                                                                          | PSMD4   | 0.39  | 2.84 | 4.11  | 1.96E-03 | 4.41E-02 | -1.34 |
| 1428933_PM_at   | Hdac8                                                                                                                                                                                                                                                                                         | HDAC8   | 0.40  | 2.54 | 4.11  | 1.97E-03 | 4.42E-02 | -1.35 |
| 1419616_PM_at   | Bmpr2                                                                                                                                                                                                                                                                                         | BMPR2   | -0.73 | 3.93 | -4.10 | 1.97E-03 | 4.43E-02 | -1.35 |
| 1421867_PM_at   | Nr3c1                                                                                                                                                                                                                                                                                         | NR3C1   | -1.20 | 3.28 | -4.10 | 1.98E-03 | 4.44E-02 | -1.35 |
| 1416029_PM_at   | Klf10                                                                                                                                                                                                                                                                                         | KLF10   | -1.16 | 3.98 | -4.10 | 1.98E-03 | 4.44E-02 | -1.35 |
| 1441679_PM_at   | ---                                                                                                                                                                                                                                                                                           | NA      | 3.43  | 6.00 | 4.10  | 1.98E-03 | 4.44E-02 | -1.35 |
| 1439656_PM_at   | ---                                                                                                                                                                                                                                                                                           | NA      | -0.64 | 2.68 | -4.10 | 1.99E-03 | 4.47E-02 | -1.36 |
| 1443730_PM_at   | ---                                                                                                                                                                                                                                                                                           | NA      | 0.47  | 2.70 | 4.10  | 2.00E-03 | 4.48E-02 | -1.36 |
| 1430348_PM_at   | ---                                                                                                                                                                                                                                                                                           | NA      | -0.81 | 4.83 | -4.10 | 2.00E-03 | 4.48E-02 | -1.36 |
| 1438550_PM_x_at | Srr                                                                                                                                                                                                                                                                                           | SRR     | -1.33 | 3.43 | -4.09 | 2.01E-03 | 4.49E-02 | -1.37 |
| 1436223_PM_at   | Itgb8                                                                                                                                                                                                                                                                                         | ITGB8   | -0.90 | 3.95 | -4.09 | 2.01E-03 | 4.49E-02 | -1.37 |
| 1427099_PM_at   | Maz                                                                                                                                                                                                                                                                                           | MAZ     | 0.58  | 4.27 | 4.09  | 2.01E-03 | 4.49E-02 | -1.37 |
| 1424395_PM_at   | Asrg1                                                                                                                                                                                                                                                                                         | ASRGL1  | -1.15 | 4.30 | -4.09 | 2.01E-03 | 4.50E-02 | -1.37 |
| 1431405_PM_a_at | Cspp1                                                                                                                                                                                                                                                                                         | CSPP1   | 0.87  | 3.01 | 4.09  | 2.01E-03 | 4.50E-02 | -1.37 |
| 1442211_PM_at   | ---                                                                                                                                                                                                                                                                                           | NA      | 0.48  | 2.84 | 4.09  | 2.01E-03 | 4.50E-02 | -1.37 |
| 1420831_PM_at   | Qsox1                                                                                                                                                                                                                                                                                         | QSOX1   | 0.69  | 3.42 | 4.09  | 2.02E-03 | 4.51E-02 | -1.37 |
| 1452514_PM_a_at | Kit                                                                                                                                                                                                                                                                                           | KIT     | -1.08 | 2.95 | -4.09 | 2.02E-03 | 4.51E-02 | -1.38 |
| 1427011_PM_a_at | Lanc1                                                                                                                                                                                                                                                                                         | LANCL1  | -0.80 | 5.93 | -4.09 | 2.02E-03 | 4.51E-02 | -1.38 |
| 1419068_PM_at   | Rabgef1                                                                                                                                                                                                                                                                                       | RABGEF1 | -0.58 | 2.76 | -4.09 | 2.02E-03 | 4.51E-02 | -1.38 |
| 1458616_PM_at   | ---                                                                                                                                                                                                                                                                                           | NA      | 0.41  | 2.79 | 4.09  | 2.02E-03 | 4.51E-02 | -1.38 |
| 1424993_PM_at   | Msantd4                                                                                                                                                                                                                                                                                       | MSANTD4 | -1.48 | 6.11 | -4.09 | 2.03E-03 | 4.52E-02 | -1.38 |
| 1448653_PM_at   | Eed                                                                                                                                                                                                                                                                                           | EED     | -0.88 | 3.64 | -4.09 | 2.03E-03 | 4.52E-02 | -1.38 |
| 1460414_PM_at   | Obsl1                                                                                                                                                                                                                                                                                         | OBSL1   | 0.58  | 3.25 | 4.09  | 2.03E-03 | 4.52E-02 | -1.38 |
| 1441435_PM_at   | ---                                                                                                                                                                                                                                                                                           | NA      | 0.49  | 2.46 | 4.09  | 2.03E-03 | 4.52E-02 | -1.38 |
| 1452731_PM_x_at | Gm10409 /// Gm2897 ///<br>Gm2956 /// Gm3002 ///<br>Gm3095 /// Gm3164 ///<br>Gm3173 /// Gm3317 ///<br>Gm3373 /// Gm3383 ///<br>Gm33933 /// Gm3488 ///<br>Gm3500 /// Gm3558 ///<br>Gm3636 /// Gm3696 ///<br>Gm5796 /// LOC100040870<br>/// LOC100861615 ///<br>LOC101055754 ///<br>LOC102638110 | NA      | 0.58  | 9.42 | 4.09  | 2.04E-03 | 4.53E-02 | -1.38 |
| 1425486_PM_s_at | Mtmr6                                                                                                                                                                                                                                                                                         | MTMR6   | -1.48 | 6.99 | -4.08 | 2.04E-03 | 4.53E-02 | -1.38 |
| 1428225_PM_s_at | Hnrnpdl                                                                                                                                                                                                                                                                                       | HNRNPDL | -0.86 | 4.70 | -4.08 | 2.04E-03 | 4.53E-02 | -1.38 |
| 1439471_PM_at   | Gm20269                                                                                                                                                                                                                                                                                       | NA      | 0.50  | 3.13 | 4.08  | 2.04E-03 | 4.53E-02 | -1.38 |
| 1428526_PM_at   | Naa38                                                                                                                                                                                                                                                                                         | NAA38   | -1.42 | 5.90 | -4.08 | 2.04E-03 | 4.53E-02 | -1.39 |
| 1454710_PM_at   | Spink2                                                                                                                                                                                                                                                                                        | SPINK2  | 0.28  | 3.05 | 4.08  | 2.04E-03 | 4.53E-02 | -1.39 |
| 1421673_PM_s_at | Stx1b                                                                                                                                                                                                                                                                                         | STX1B   | 1.69  | 5.71 | 4.08  | 2.04E-03 | 4.53E-02 | -1.39 |
| 1429489_PM_at   | Rexo1                                                                                                                                                                                                                                                                                         | REXO1   | 0.42  | 3.41 | 4.08  | 2.05E-03 | 4.55E-02 | -1.39 |
| 1437920_PM_at   | Epha5                                                                                                                                                                                                                                                                                         | EPHA5   | -1.00 | 3.43 | -4.08 | 2.06E-03 | 4.56E-02 | -1.39 |
| 1456423_PM_at   | Mbd5                                                                                                                                                                                                                                                                                          | MBD5    | -1.02 | 3.48 | -4.08 | 2.06E-03 | 4.56E-02 | -1.39 |
| 1428106_PM_at   | Cluh                                                                                                                                                                                                                                                                                          | CLUH    | -0.73 | 3.24 | -4.08 | 2.06E-03 | 4.56E-02 | -1.39 |
| 1425469_PM_a_at | LOC105247125                                                                                                                                                                                                                                                                                  | NA      | -0.53 | 2.14 | -4.08 | 2.07E-03 | 4.57E-02 | -1.40 |
| 1449563_PM_at   | Cntn1                                                                                                                                                                                                                                                                                         | CNTN1   | -1.19 | 7.03 | -4.07 | 2.07E-03 | 4.58E-02 | -1.40 |

|                 |                               |            |       |      |       |          |          |       |
|-----------------|-------------------------------|------------|-------|------|-------|----------|----------|-------|
| 1450942_PM_at   | Zfp830                        | NA         | -0.71 | 2.35 | -4.07 | 2.07E-03 | 4.58E-02 | -1.40 |
| 1445679_PM_at   | Atp2b3                        | NA         | -2.24 | 6.96 | -4.07 | 2.08E-03 | 4.59E-02 | -1.40 |
| 1433965_PM_at   | Atp8a1                        | ATP8A1     | -1.83 | 5.97 | -4.07 | 2.08E-03 | 4.60E-02 | -1.41 |
| 1441418_PM_at   | ---                           | NA         | 0.45  | 2.32 | 4.07  | 2.08E-03 | 4.60E-02 | -1.41 |
| 1456438_PM_x_at | Rpn1                          | RPN1       | -1.52 | 8.57 | -4.07 | 2.09E-03 | 4.60E-02 | -1.41 |
| 1447159_PM_at   | ---                           | NA         | 0.52  | 2.34 | 4.07  | 2.09E-03 | 4.60E-02 | -1.41 |
| 1452433_PM_at   | ---                           | NA         | 0.69  | 9.50 | 4.07  | 2.09E-03 | 4.60E-02 | -1.41 |
| 1459617_PM_at   | ---                           | NA         | 0.98  | 4.07 | 4.07  | 2.09E-03 | 4.61E-02 | -1.41 |
| 1438143_PM_s_at | Atxn2                         | ATXN2      | -1.78 | 6.48 | -4.07 | 2.10E-03 | 4.61E-02 | -1.41 |
| 1450903_PM_at   | Rad23b                        | RAD23B     | -1.13 | 7.36 | -4.07 | 2.09E-03 | 4.61E-02 | -1.41 |
| 1435209_PM_at   | Focad                         | FOCAD      | -0.66 | 5.63 | -4.07 | 2.10E-03 | 4.61E-02 | -1.41 |
| 1448305_PM_at   | Rab6a                         | RAB6C      | -1.41 | 8.70 | -4.07 | 2.10E-03 | 4.61E-02 | -1.41 |
| 1447169_PM_at   | ---                           | NA         | 1.84  | 3.37 | 4.07  | 2.10E-03 | 4.62E-02 | -1.42 |
| 1448162_PM_at   | Vcam1                         | VCAM1      | -1.13 | 3.46 | -4.06 | 2.11E-03 | 4.64E-02 | -1.42 |
| 1453915_PM_a_at | Slc37a3                       | SLC37A3    | -0.95 | 3.33 | -4.06 | 2.11E-03 | 4.64E-02 | -1.42 |
| 1433344_PM_at   | 4930448K20Rik                 | NA         | 0.52  | 3.72 | 4.06  | 2.13E-03 | 4.66E-02 | -1.43 |
| 1415711_PM_at   | Arfgef1                       | ARFGEF1    | -1.44 | 5.74 | -4.06 | 2.13E-03 | 4.67E-02 | -1.43 |
| 1425672_PM_a_at | Trpc2 ///Xntrpc               | NA         | 0.34  | 3.22 | 4.06  | 2.14E-03 | 4.68E-02 | -1.43 |
| 1438883_PM_at   | Fgf5                          | FGF5       | -0.93 | 3.98 | -4.06 | 2.14E-03 | 4.68E-02 | -1.43 |
| 1455712_PM_at   | Hist3h2a                      | HIST3H2A   | -1.46 | 5.50 | -4.05 | 2.16E-03 | 4.72E-02 | -1.44 |
| 1418588_PM_at   | Nrsn1                         | NRSN1      | -1.06 | 5.11 | -4.05 | 2.16E-03 | 4.73E-02 | -1.44 |
| 1437700_PM_at   | Schp1                         | IQJ-SCHIP1 | -1.03 | 3.94 | -4.05 | 2.16E-03 | 4.73E-02 | -1.44 |
| 1422524_PM_at   | Abcb6                         | ABCB6      | -0.40 | 4.12 | -4.05 | 2.16E-03 | 4.73E-02 | -1.44 |
| 1440790_PM_x_at | ---                           | NA         | 0.49  | 2.68 | 4.05  | 2.16E-03 | 4.73E-02 | -1.44 |
| 1457553_PM_at   | ---                           | NA         | 0.58  | 2.29 | 4.05  | 2.16E-03 | 4.73E-02 | -1.44 |
| 1424659_PM_at   | Slit2                         | SLIT2      | -1.95 | 4.93 | -4.05 | 2.17E-03 | 4.73E-02 | -1.44 |
| 1446856_PM_at   | D3Wsu167e                     | NA         | -0.70 | 3.11 | -4.05 | 2.17E-03 | 4.74E-02 | -1.45 |
| 1435848_PM_at   | D430041D05Rik                 | KIAA1549L  | -0.58 | 2.98 | -4.05 | 2.18E-03 | 4.74E-02 | -1.45 |
| 1423915_PM_at   | Olfml2b                       | OLFML2B    | -0.76 | 3.17 | -4.04 | 2.18E-03 | 4.75E-02 | -1.45 |
| 1437360_PM_at   | Pcdh19                        | PCDH19     | -1.18 | 3.75 | -4.04 | 2.19E-03 | 4.76E-02 | -1.46 |
| 1451172_PM_at   | Tprgl                         | TPRG1L     | -1.05 | 7.11 | -4.04 | 2.19E-03 | 4.76E-02 | -1.46 |
| 1434663_PM_at   | Mzt1                          | MZT1       | -0.92 | 3.86 | -4.04 | 2.19E-03 | 4.76E-02 | -1.46 |
| 1457695_PM_at   | Synrg                         | SYNRG      | -0.82 | 3.60 | -4.04 | 2.19E-03 | 4.76E-02 | -1.46 |
| 1449935_PM_a_at | Dnaja3                        | DNAA3      | -0.77 | 3.45 | -4.04 | 2.19E-03 | 4.76E-02 | -1.46 |
| 1428121_PM_at   | Mvb12b                        | MVB12B     | 0.78  | 5.70 | 4.04  | 2.20E-03 | 4.77E-02 | -1.46 |
| 1416858_PM_a_at | Fkbp3                         | FKBP3      | -1.41 | 8.14 | -4.04 | 2.20E-03 | 4.78E-02 | -1.46 |
| 1433829_PM_a_at | Hnrnpa2b1 ///<br>LOC102642938 | HNRNPA2B1  | -1.13 | 7.10 | -4.04 | 2.20E-03 | 4.78E-02 | -1.46 |
| 1433346_PM_at   | 5830432F11Rik                 | NA         | 0.47  | 2.97 | 4.04  | 2.20E-03 | 4.78E-02 | -1.46 |
| 1447779_PM_x_at | Ddx39b                        | DDX39B     | -0.47 | 2.99 | -4.04 | 2.20E-03 | 4.78E-02 | -1.46 |
| 1455847_PM_at   | Pak7                          | PAK5       | -0.90 | 2.58 | -4.04 | 2.21E-03 | 4.79E-02 | -1.46 |
| 1428288_PM_at   | ---                           | NA         | -1.50 | 5.62 | -4.04 | 2.21E-03 | 4.79E-02 | -1.47 |
| 1433444_PM_at   | Hmgcs1                        | HMGCS1     | -1.03 | 3.99 | -4.04 | 2.21E-03 | 4.79E-02 | -1.47 |
| 1450968_PM_at   | Uqcrf51                       | UQCRF51    | -0.83 | 4.21 | -4.04 | 2.21E-03 | 4.79E-02 | -1.47 |
| 1439036_PM_a_at | Atp1b1                        | ATP1B1     | -2.90 | 7.04 | -4.03 | 2.21E-03 | 4.79E-02 | -1.47 |
| 1459366_PM_at   | ---                           | NA         | 0.35  | 3.01 | 4.03  | 2.22E-03 | 4.79E-02 | -1.47 |
| 1417101_PM_at   | Hspa2                         | HSPA2      | -1.22 | 7.20 | -4.03 | 2.22E-03 | 4.80E-02 | -1.47 |
| 1424707_PM_at   | Tmed10                        | TMED10     | -0.99 | 4.74 | -4.03 | 2.22E-03 | 4.81E-02 | -1.47 |
| 1419070_PM_at   | Cys1                          | CYS1       | -1.65 | 3.99 | -4.03 | 2.23E-03 | 4.81E-02 | -1.47 |
| 1416131_PM_s_at | Efr3a                         | EFR3A      | -1.56 | 4.65 | -4.03 | 2.23E-03 | 4.81E-02 | -1.47 |
| 1434752_PM_at   | Zfp207                        | ZNF207     | 0.74  | 5.31 | 4.03  | 2.23E-03 | 4.81E-02 | -1.47 |
| 1432856_PM_at   | ---                           | NA         | -0.61 | 2.25 | -4.03 | 2.23E-03 | 4.81E-02 | -1.48 |
| 1420477_PM_at   | Nap1l1                        | NAP1L1     | -1.67 | 7.06 | -4.03 | 2.24E-03 | 4.82E-02 | -1.48 |
| 1417947_PM_at   | Pcna                          | PCNA       | -1.32 | 5.45 | -4.03 | 2.24E-03 | 4.82E-02 | -1.48 |
| 1437559_PM_at   | Rgs7bp                        | RGS7BP     | -0.88 | 3.21 | -4.03 | 2.24E-03 | 4.82E-02 | -1.48 |
| 1433537_PM_at   | Atrx                          | ATRX       | -0.87 | 7.87 | -4.03 | 2.24E-03 | 4.82E-02 | -1.48 |
| 1433524_PM_at   | Gm15800                       | HECTD4     | -0.68 | 3.63 | -4.03 | 2.24E-03 | 4.82E-02 | -1.48 |
| 1440278_PM_at   | Dynll1                        | DYNLL1     | -0.59 | 3.14 | -4.03 | 2.24E-03 | 4.82E-02 | -1.48 |
| 1425544_PM_at   | Plekha5                       | PLEKHA5    | 0.97  | 5.98 | 4.03  | 2.24E-03 | 4.82E-02 | -1.48 |
| 1434264_PM_at   | Ank2                          | ANK2       | -1.39 | 8.02 | -4.03 | 2.25E-03 | 4.82E-02 | -1.48 |
| 1451622_PM_at   | Lmbrd1                        | LMBRD1     | -1.00 | 4.39 | -4.03 | 2.24E-03 | 4.82E-02 | -1.48 |
| 1424654_PM_at   | Acp2                          | ACP2       | -1.22 | 4.09 | -4.02 | 2.25E-03 | 4.84E-02 | -1.48 |
| 1460565_PM_at   | Slc41a1                       | SLC41A1    | -1.00 | 3.72 | -4.02 | 2.25E-03 | 4.84E-02 | -1.48 |
| 1429949_PM_at   | Fam160a2                      | FAM160A2   | -1.11 | 6.55 | -4.02 | 2.26E-03 | 4.84E-02 | -1.49 |
| 1427413_PM_a_at | Celf1                         | CEL1       | -1.10 | 3.65 | -4.02 | 2.26E-03 | 4.85E-02 | -1.49 |
| 1438413_PM_at   | Senp7                         | SENP7      | -0.66 | 2.99 | -4.02 | 2.28E-03 | 4.88E-02 | -1.49 |
| 1451018_PM_at   | Leprotl1                      | LEPROTL1   | -1.02 | 3.28 | -4.02 | 2.28E-03 | 4.88E-02 | -1.50 |
| 1454990_PM_at   | Arid2                         | ARID2      | -1.39 | 4.32 | -4.01 | 2.29E-03 | 4.89E-02 | -1.50 |
| 1428539_PM_at   | Smg1                          | SMG1       | -1.26 | 4.70 | -4.01 | 2.29E-03 | 4.89E-02 | -1.50 |
| 1437820_PM_at   | Foxs1                         | FOXS1      | 0.32  | 2.61 | 4.02  | 2.29E-03 | 4.89E-02 | -1.50 |
| 1450003_PM_at   | Adra2b                        | ADRA2B     | 0.40  | 2.94 | 4.02  | 2.28E-03 | 4.89E-02 | -1.50 |
| 1444274_PM_at   | ---                           | NA         | 0.59  | 3.47 | 4.01  | 2.29E-03 | 4.90E-02 | -1.50 |
| 1438319_PM_x_at | Fastkd2                       | FASTKD2    | 1.53  | 5.79 | 4.01  | 2.29E-03 | 4.90E-02 | -1.50 |
| 1451666_PM_at   | Acly                          | ACLY       | -0.67 | 4.36 | -4.01 | 2.29E-03 | 4.90E-02 | -1.50 |
| 1423073_PM_at   | Cmpk1                         | CMPK1      | -1.56 | 6.44 | -4.01 | 2.30E-03 | 4.90E-02 | -1.50 |

|                 |                                                            |          |       |      |       |          |          |       |
|-----------------|------------------------------------------------------------|----------|-------|------|-------|----------|----------|-------|
| 1419249_PM_at   | Cdk14                                                      | CDK14    | -1.15 | 3.36 | -4.01 | 2.30E-03 | 4.90E-02 | -1.51 |
| 1417857_PM_at   | Mmaa                                                       | MMAA     | 0.85  | 4.90 | 4.01  | 2.30E-03 | 4.90E-02 | -1.50 |
| 1435312_PM_at   | Paqr7                                                      | PAQR7    | -1.09 | 4.43 | -4.01 | 2.30E-03 | 4.91E-02 | -1.51 |
| 1415826_PM_at   | Atp6v1h                                                    | ATP6V1H  | -1.33 | 3.95 | -4.01 | 2.31E-03 | 4.91E-02 | -1.51 |
| 1460315_PM_s_at | Tbk1                                                       | TBK1     | -1.05 | 5.22 | -4.01 | 2.31E-03 | 4.91E-02 | -1.51 |
| 1440945_PM_at   | Glccl1                                                     | GLCC1    | 0.74  | 4.31 | 4.01  | 2.31E-03 | 4.91E-02 | -1.51 |
| 1417404_PM_at   | Elov6                                                      | ELOVL6   | -1.10 | 3.49 | -4.01 | 2.31E-03 | 4.92E-02 | -1.51 |
| 1423506_PM_a_at | Nnat                                                       | NA       | 1.47  | 7.99 | 4.01  | 2.31E-03 | 4.92E-02 | -1.51 |
| 1424413_PM_at   | Ogfrl1                                                     | OGFRL1   | -1.72 | 7.56 | -4.01 | 2.32E-03 | 4.92E-02 | -1.51 |
| 1459682_PM_at   | Gm5602                                                     | NA       | -1.02 | 2.66 | -4.01 | 2.32E-03 | 4.92E-02 | -1.51 |
| 1423102_PM_a_at | Rnf10                                                      | RNF10    | -0.52 | 2.95 | -4.01 | 2.32E-03 | 4.92E-02 | -1.51 |
| 1429900_PM_at   | ---                                                        | NA       | 0.94  | 8.85 | 4.00  | 2.33E-03 | 4.94E-02 | -1.52 |
| 1425143_PM_a_at | Ndufs1                                                     | NDUFS1   | -1.18 | 5.06 | -4.00 | 2.33E-03 | 4.94E-02 | -1.52 |
| 1433887_PM_at   | Dnajc3                                                     | DNAJC3   | -0.98 | 4.59 | -4.00 | 2.33E-03 | 4.94E-02 | -1.52 |
| 1447938_PM_at   | Gm21093 /// Gm21158 /// Gm2192 /// Gm3883 /// LOC100041536 | NA       | 0.62  | 2.89 | 4.00  | 2.33E-03 | 4.94E-02 | -1.52 |
| 1438386_PM_x_at | Mat2a                                                      | NA       | -0.88 | 7.90 | -4.00 | 2.34E-03 | 4.95E-02 | -1.52 |
| 1435335_PM_a_at | Gnptab                                                     | GNPTAB   | -1.28 | 2.93 | -4.00 | 2.34E-03 | 4.96E-02 | -1.52 |
| 1455619_PM_at   | BC062258 /// LOC102643247                                  | NA       | 0.33  | 2.44 | 4.00  | 2.35E-03 | 4.96E-02 | -1.53 |
| 1433944_PM_at   | Hectd2                                                     | HECTD2   | -1.50 | 5.64 | -4.00 | 2.35E-03 | 4.97E-02 | -1.53 |
| 1434460_PM_at   | Bbs4                                                       | BS4      | -1.46 | 3.15 | -4.00 | 2.35E-03 | 4.97E-02 | -1.53 |
| 1437671_PM_x_at | Prss23                                                     | PRSS23   | -1.29 | 3.16 | -4.00 | 2.35E-03 | 4.97E-02 | -1.53 |
| 1429167_PM_at   | Ccdc112                                                    | CCDC112  | -0.74 | 3.55 | -4.00 | 2.35E-03 | 4.97E-02 | -1.53 |
| 1420980_PM_at   | Pak1                                                       | PAK1     | -1.33 | 4.10 | -4.00 | 2.36E-03 | 4.97E-02 | -1.53 |
| 1418545_PM_at   | Wasf1                                                      | WASF1    | -0.97 | 9.73 | -4.00 | 2.36E-03 | 4.97E-02 | -1.53 |
| 1425174_PM_at   | ---                                                        | NA       | 0.33  | 2.86 | 4.00  | 2.36E-03 | 4.97E-02 | -1.53 |
| 1435263_PM_at   | Tmem106a                                                   | TMEM106A | 0.45  | 2.49 | 4.00  | 2.36E-03 | 4.97E-02 | -1.53 |
| 1442651_PM_at   | ---                                                        | NA       | 0.79  | 3.01 | 4.00  | 2.36E-03 | 4.97E-02 | -1.53 |
| 1456867_PM_x_at | Ergic3                                                     | ERGIC3   | 0.57  | 6.72 | 4.00  | 2.36E-03 | 4.97E-02 | -1.53 |
| 1418324_PM_at   | Fem1b                                                      | FEM1B    | -1.80 | 7.63 | -3.99 | 2.37E-03 | 4.98E-02 | -1.53 |
| 1428118_PM_at   | Lingo1                                                     | LINGO1   | -0.89 | 5.33 | -3.99 | 2.37E-03 | 4.99E-02 | -1.54 |
| 1437983_PM_at   | Sall1                                                      | SALL1    | -0.72 | 3.84 | -3.99 | 2.37E-03 | 4.99E-02 | -1.54 |
| 1436771_PM_x_at | Pgd                                                        | PGD      | 1.52  | 6.12 | 3.99  | 2.38E-03 | 4.99E-02 | -1.54 |
| 1460698_PM_a_at | Sec11c                                                     | SEC11C   | -0.93 | 7.28 | -3.99 | 2.38E-03 | 4.99E-02 | -1.54 |
| 1435006_PM_s_at | Abcb7                                                      | ABCB7    | -0.77 | 3.22 | -3.99 | 2.38E-03 | 5.00E-02 | -1.54 |
| 1423804_PM_a_at | Gm38481 /// Id1                                            | ID1      | -1.30 | 7.62 | -3.99 | 2.38E-03 | 5.00E-02 | -1.54 |
| 1434402_PM_at   | Samd8                                                      | SAMD8    | -1.54 | 7.31 | -3.99 | 2.39E-03 | 5.00E-02 | -1.54 |
| 1419041_PM_at   | Irfg1                                                      | ITFG1    | -1.00 | 3.18 | -3.99 | 2.39E-03 | 5.00E-02 | -1.54 |
| 1431771_PM_a_at | Irak1bp1                                                   | IRAK1BP1 | -0.90 | 3.95 | -3.99 | 2.39E-03 | 5.00E-02 | -1.54 |
| 1426014_PM_a_at | Cdhr5                                                      | CDHR5    | 0.36  | 2.38 | 3.99  | 2.39E-03 | 5.00E-02 | -1.54 |
| 1432882_PM_at   | 4932431P20Rik                                              | NA       | 0.45  | 6.56 | 3.99  | 2.39E-03 | 5.00E-02 | -1.54 |
| 1436334_PM_at   | Synj1                                                      | SYNJ1    | -1.45 | 6.08 | -3.99 | 2.39E-03 | 5.01E-02 | -1.55 |
| 1429089_PM_s_at | 2900026A02Rik                                              | KIAA1671 | -2.68 | 5.56 | -3.99 | 2.40E-03 | 5.02E-02 | -1.55 |
| 1453471_PM_at   | Iah1                                                       | NA       | 0.41  | 3.26 | 3.99  | 2.40E-03 | 5.02E-02 | -1.55 |
| 1455029_PM_at   | Kif21a                                                     | KIF21A   | -1.43 | 7.37 | -3.98 | 2.40E-03 | 5.02E-02 | -1.55 |
| 1436113_PM_a_at | St13                                                       | ST13     | -1.09 | 4.84 | -3.98 | 2.40E-03 | 5.02E-02 | -1.55 |
| 1422798_PM_at   | Cntnap2                                                    | CNTNAP2  | -0.97 | 3.52 | -3.98 | 2.40E-03 | 5.02E-02 | -1.55 |
| 1419030_PM_at   | Ero1l                                                      | ERO1A    | -0.94 | 3.49 | -3.98 | 2.40E-03 | 5.02E-02 | -1.55 |
| 1425811_PM_a_at | Csrp1                                                      | CSRP1    | -1.29 | 6.28 | -3.98 | 2.41E-03 | 5.02E-02 | -1.55 |
| 1455499_PM_at   | Nrxn2                                                      | NRXN2    | 0.46  | 3.18 | 3.98  | 2.41E-03 | 5.03E-02 | -1.55 |
| 1459706_PM_at   | ---                                                        | NA       | 0.52  | 2.54 | 3.98  | 2.42E-03 | 5.04E-02 | -1.56 |
| 1436096_PM_at   | Mkln1                                                      | MKLN1    | -0.67 | 2.95 | -3.98 | 2.42E-03 | 5.05E-02 | -1.56 |
| 1425293_PM_a_at | Zcchc18                                                    | ZCCHC12  | -1.11 | 6.33 | -3.98 | 2.43E-03 | 5.06E-02 | -1.56 |
| 1419672_PM_at   | Spock1                                                     | SPOCK1   | -1.65 | 6.20 | -3.98 | 2.43E-03 | 5.06E-02 | -1.56 |
| 1455821_PM_x_at | C1qbp                                                      | C1QBP    | -1.49 | 4.78 | -3.98 | 2.44E-03 | 5.07E-02 | -1.57 |
| 1439367_PM_x_at | Arf4                                                       | ARF4     | -1.28 | 6.34 | -3.98 | 2.44E-03 | 5.07E-02 | -1.56 |
| 1416570_PM_s_at | Gfm1                                                       | GFM1     | -1.25 | 4.17 | -3.98 | 2.44E-03 | 5.07E-02 | -1.57 |
| 1427136_PM_s_at | Srek1                                                      | SREK1    | 0.84  | 4.77 | 3.98  | 2.44E-03 | 5.07E-02 | -1.57 |
| 1454956_PM_at   | Rps6kb1                                                    | RPS6KB1  | -1.39 | 5.03 | -3.97 | 2.44E-03 | 5.07E-02 | -1.57 |
| 1448103_PM_s_at | Nono                                                       | NONO     | -0.97 | 5.28 | -3.97 | 2.44E-03 | 5.07E-02 | -1.57 |
| 1425254_PM_at   | Foxn4                                                      | FOXN4    | 0.31  | 2.44 | 3.97  | 2.45E-03 | 5.08E-02 | -1.57 |
| 1417869_PM_s_at | Ctsz                                                       | CTSZ     | -1.58 | 5.00 | -3.97 | 2.46E-03 | 5.10E-02 | -1.57 |
| 1421963_PM_a_at | Cdc25b                                                     | CDC25B   | 0.35  | 2.83 | 3.97  | 2.46E-03 | 5.10E-02 | -1.57 |
| 1440867_PM_at   | Spry4                                                      | SPRY4    | 0.85  | 3.21 | 3.97  | 2.46E-03 | 5.10E-02 | -1.57 |
| 1434799_PM_x_at | Aldoa                                                      | ALDOA    | -1.52 | 7.88 | -3.97 | 2.47E-03 | 5.11E-02 | -1.58 |
| 1423096_PM_at   | Capn7                                                      | CAPN7    | -1.14 | 4.58 | -3.97 | 2.47E-03 | 5.11E-02 | -1.58 |
| 1429967_PM_at   | ---                                                        | NA       | 1.07  | 4.35 | 3.97  | 2.47E-03 | 5.11E-02 | -1.58 |
| 1433516_PM_a_at | Myeov2                                                     | COPS9    | -0.76 | 9.63 | -3.97 | 2.48E-03 | 5.12E-02 | -1.58 |
| 1437741_PM_at   | Rab21                                                      | RAB21    | -0.54 | 7.62 | -3.97 | 2.47E-03 | 5.12E-02 | -1.58 |
| 1442514_PM_a_at | Ell3 /// Serinc4                                           | ELL3     | -0.63 | 4.31 | -3.97 | 2.48E-03 | 5.12E-02 | -1.58 |
| 1459315_PM_at   | ---                                                        | NA       | 0.47  | 2.90 | 3.96  | 2.49E-03 | 5.14E-02 | -1.58 |
| 1416171_PM_at   | Kans2                                                      | KANSL2   | -1.21 | 5.47 | -3.96 | 2.50E-03 | 5.15E-02 | -1.59 |
| 1437475_PM_at   | Xrn1                                                       | XRN1     | -0.85 | 3.10 | -3.96 | 2.51E-03 | 5.17E-02 | -1.59 |

|                 |                       |          |       |       |       |          |          |       |
|-----------------|-----------------------|----------|-------|-------|-------|----------|----------|-------|
| 1450889_PM_at   | Hltf                  | HLTF     | -0.67 | 2.81  | -3.96 | 2.51E-03 | 5.18E-02 | -1.59 |
| 1442171_PM_at   | Prpf40a               | PRPF40A  | -0.58 | 2.87  | -3.95 | 2.53E-03 | 5.22E-02 | -1.60 |
| 1456839_PM_at   | ---                   | NA       | 0.75  | 3.11  | 3.95  | 2.54E-03 | 5.23E-02 | -1.61 |
| 1427987_PM_at   | Safb2                 | SAFB2    | 0.77  | 4.65  | 3.95  | 2.54E-03 | 5.23E-02 | -1.61 |
| 1426236_PM_a_at | Glul                  | GLUL     | -1.22 | 9.99  | -3.95 | 2.55E-03 | 5.25E-02 | -1.61 |
| 1426407_PM_at   | Celf1                 | CELF1    | -0.80 | 7.35  | -3.95 | 2.55E-03 | 5.25E-02 | -1.61 |
| 1435362_PM_at   | Foxj3                 | FOXJ3    | -1.01 | 7.87  | -3.95 | 2.56E-03 | 5.26E-02 | -1.61 |
| 1438177_PM_x_at | Entpd4 /// Gm21685    | ENTPD4   | -1.53 | 8.52  | -3.95 | 2.56E-03 | 5.26E-02 | -1.61 |
| 1437686_PM_x_at | Cux1                  | CUX1     | 0.50  | 3.47  | 3.95  | 2.56E-03 | 5.27E-02 | -1.61 |
| 1423177_PM_a_at | Abi1                  | ABI1     | -0.98 | 5.21  | -3.95 | 2.57E-03 | 5.27E-02 | -1.62 |
| 1436551_PM_at   | Fgfr1                 | FGFR1    | -0.65 | 3.58  | -3.94 | 2.57E-03 | 5.27E-02 | -1.62 |
| 1422158_PM_at   | Clstn2                | CLSTN2   | -1.28 | 3.43  | -3.94 | 2.57E-03 | 5.27E-02 | -1.62 |
| 1423726_PM_at   | Vat1                  | VAT1     | 0.43  | 2.91  | 3.94  | 2.57E-03 | 5.27E-02 | -1.62 |
| 1441499_PM_at   | Grid1                 | GRID1    | -1.25 | 5.43  | -3.94 | 2.57E-03 | 5.28E-02 | -1.62 |
| 1429861_PM_at   | Pcdh9                 | PCDH9    | -1.58 | 5.87  | -3.94 | 2.58E-03 | 5.28E-02 | -1.62 |
| 1422732_PM_at   | Polvip2               | POLVIP2  | -0.74 | 3.74  | -3.94 | 2.58E-03 | 5.29E-02 | -1.62 |
| 1447790_PM_at   | Erdr1                 | NA       | 0.47  | 2.69  | 3.94  | 2.59E-03 | 5.29E-02 | -1.62 |
| 1451295_PM_a_at | Chd4                  | CHD4     | 0.71  | 3.98  | 3.94  | 2.59E-03 | 5.29E-02 | -1.62 |
| 1415904_PM_at   | Lpl                   | LPL      | -1.67 | 6.11  | -3.94 | 2.59E-03 | 5.29E-02 | -1.63 |
| 1452261_PM_at   | Shprh                 | SHPRH    | -0.97 | 2.77  | -3.94 | 2.59E-03 | 5.29E-02 | -1.63 |
| 1448352_PM_at   | Luzp1                 | LUZP1    | -0.83 | 8.31  | -3.94 | 2.59E-03 | 5.29E-02 | -1.63 |
| 1451238_PM_at   | Jkamp                 | JKAMP    | -0.73 | 2.98  | -3.94 | 2.59E-03 | 5.29E-02 | -1.63 |
| 1420008_PM_s_at | Wwc1                  | WWC1     | -1.76 | 5.95  | -3.94 | 2.59E-03 | 5.30E-02 | -1.63 |
| 1420840_PM_at   | Plekha3               | PLEKHA3  | -0.53 | 3.10  | -3.94 | 2.60E-03 | 5.30E-02 | -1.63 |
| 1422684_PM_a_at | Exoc4                 | EXOC4    | -1.37 | 4.23  | -3.94 | 2.60E-03 | 5.30E-02 | -1.63 |
| 1449549_PM_at   | Efnb2                 | EFNB2    | 0.39  | 2.85  | 3.94  | 2.60E-03 | 5.30E-02 | -1.63 |
| 1423172_PM_at   | Napb                  | NAPB     | -0.77 | 8.01  | -3.94 | 2.60E-03 | 5.30E-02 | -1.63 |
| 1455809_PM_x_at | Ric8                  | RIC8A    | -0.71 | 7.54  | -3.93 | 2.61E-03 | 5.32E-02 | -1.63 |
| 1451837_PM_at   | Ap3b2                 | AP3B2    | 0.35  | 2.50  | 3.93  | 2.61E-03 | 5.32E-02 | -1.63 |
| 1433655_PM_at   | Rnf141                | RNF141   | -0.44 | 4.02  | -3.93 | 2.61E-03 | 5.32E-02 | -1.63 |
| 1437868_PM_at   | Fam46a                | FAM46A   | 0.59  | 2.56  | 3.93  | 2.61E-03 | 5.32E-02 | -1.63 |
| 1444128_PM_at   | Arhgap26              | NA       | 1.01  | 4.20  | 3.93  | 2.61E-03 | 5.32E-02 | -1.63 |
| 1423408_PM_a_at | Chtop                 | CHTOP    | -0.83 | 4.52  | -3.93 | 2.62E-03 | 5.32E-02 | -1.64 |
| 1436994_PM_a_at | Hist1h1c              | HIST1H1C | -1.49 | 5.13  | -3.93 | 2.63E-03 | 5.35E-02 | -1.64 |
| 1434682_PM_at   | Zfp770                | ZNF770   | -1.15 | 5.60  | -3.93 | 2.63E-03 | 5.35E-02 | -1.64 |
| 1457156_PM_at   | Trhde                 | TRHDE    | -2.74 | 7.61  | -3.93 | 2.64E-03 | 5.35E-02 | -1.64 |
| 1428648_PM_at   | Cand1                 | CAND1    | -0.76 | 2.76  | -3.93 | 2.64E-03 | 5.36E-02 | -1.65 |
| 1426900_PM_at   | Jmjd1c                | JMJD1C   | -1.95 | 6.50  | -3.93 | 2.65E-03 | 5.36E-02 | -1.65 |
| 1431067_PM_at   | Tceanc2               | TCEANC2  | -0.45 | 2.36  | -3.93 | 2.65E-03 | 5.36E-02 | -1.65 |
| 1453142_PM_at   | 4921507P07Rik         | C7orf31  | -1.32 | 2.72  | -3.93 | 2.65E-03 | 5.37E-02 | -1.65 |
| 1445706_PM_x_at | ---                   | NA       | 0.81  | 5.23  | 3.93  | 2.65E-03 | 5.37E-02 | -1.65 |
| 1459014_PM_at   | Slc1a2                | NA       | -1.94 | 7.83  | -3.92 | 2.66E-03 | 5.38E-02 | -1.65 |
| 1449472_PM_at   | Gpr12                 | GPR12    | -0.76 | 3.55  | -3.92 | 2.66E-03 | 5.38E-02 | -1.65 |
| 1431062_PM_a_at | Exoc4                 | EXOC4    | 0.41  | 2.69  | 3.92  | 2.66E-03 | 5.39E-02 | -1.65 |
| 1447744_PM_s_at | ---                   | NA       | 0.72  | 5.15  | 3.92  | 2.67E-03 | 5.40E-02 | -1.66 |
| 1415885_PM_at   | Chgb                  | CHGB     | -1.05 | 10.98 | -3.92 | 2.67E-03 | 5.40E-02 | -1.66 |
| 1417975_PM_at   | Kpna4                 | KPNA4    | -1.35 | 4.21  | -3.92 | 2.68E-03 | 5.41E-02 | -1.66 |
| 1436293_PM_x_at | Ildr2                 | ILDR2    | -1.67 | 5.96  | -3.92 | 2.68E-03 | 5.41E-02 | -1.66 |
| 1456243_PM_x_at | Mcl1                  | MCL1     | -0.91 | 6.35  | -3.92 | 2.69E-03 | 5.41E-02 | -1.66 |
| 1447090_PM_s_at | Arl1                  | ARL1     | -0.81 | 7.05  | -3.92 | 2.68E-03 | 5.41E-02 | -1.66 |
| 1427224_PM_at   | Acsm2                 | ACSM2B   | -0.76 | 2.89  | -3.92 | 2.68E-03 | 5.41E-02 | -1.66 |
| 1455362_PM_at   | Angel2                | ANGEL2   | -1.39 | 5.35  | -3.92 | 2.69E-03 | 5.42E-02 | -1.66 |
| 1416150_PM_a_at | Srsf3                 | SRSF3    | -1.38 | 5.09  | -3.92 | 2.70E-03 | 5.42E-02 | -1.67 |
| 1453120_PM_at   | Tmx4                  | TMX4     | -1.15 | 9.09  | -3.92 | 2.69E-03 | 5.42E-02 | -1.66 |
| 1417202_PM_s_at | Uba3                  | UBA3     | -1.05 | 4.69  | -3.92 | 2.69E-03 | 5.42E-02 | -1.66 |
| 1431251_PM_at   | Lrrc3                 | LRRC3    | -0.82 | 2.98  | -3.92 | 2.69E-03 | 5.42E-02 | -1.66 |
| 1433660_PM_at   | Tubgcp4               | TUBGCP4  | -0.79 | 4.40  | -3.92 | 2.69E-03 | 5.42E-02 | -1.66 |
| 1433424_PM_at   | ---                   | NA       | 0.40  | 3.61  | 3.92  | 2.69E-03 | 5.42E-02 | -1.66 |
| 1416396_PM_at   | Snx4                  | SNX4     | 0.55  | 3.06  | 3.92  | 2.70E-03 | 5.42E-02 | -1.67 |
| 1424039_PM_at   | Saraf                 | SARAF    | -1.31 | 6.79  | -3.91 | 2.71E-03 | 5.44E-02 | -1.67 |
| 1416824_PM_at   | B230118H07Rik         | C11orf74 | -0.91 | 3.83  | -3.91 | 2.71E-03 | 5.44E-02 | -1.67 |
| 1433645_PM_at   | Slc44a1               | SLC44A1  | -1.22 | 5.39  | -3.91 | 2.71E-03 | 5.44E-02 | -1.67 |
| 1434846_PM_at   | Dennd4c               | DENND4C  | -0.52 | 2.99  | -3.91 | 2.71E-03 | 5.44E-02 | -1.67 |
| 1435747_PM_at   | Fgf14                 | FGF14    | -1.14 | 5.93  | -3.91 | 2.72E-03 | 5.45E-02 | -1.67 |
| 1436452_PM_x_at | Gm21540 /// Tmed2     | TMED2    | -1.08 | 8.07  | -3.91 | 2.72E-03 | 5.45E-02 | -1.67 |
| 1440740_PM_at   | Ctdspl2               | CTDSP2   | 0.36  | 2.23  | 3.91  | 2.72E-03 | 5.45E-02 | -1.67 |
| 1424922_PM_a_at | Brd4                  | BRD4     | 1.22  | 7.65  | 3.91  | 2.72E-03 | 5.45E-02 | -1.67 |
| 1433445_PM_x_at | Hmgcs1                | HMGCS1   | -0.92 | 4.04  | -3.91 | 2.73E-03 | 5.45E-02 | -1.68 |
| 1428620_PM_at   | Ensa                  | ENSA     | -0.80 | 5.38  | -3.91 | 2.72E-03 | 5.45E-02 | -1.68 |
| 1425115_PM_at   | Rbbp6                 | RBBP6    | -0.98 | 4.28  | -3.91 | 2.73E-03 | 5.46E-02 | -1.68 |
| 1424949_PM_at   | Huwe1                 | HUWE1    | -0.93 | 7.16  | -3.91 | 2.73E-03 | 5.46E-02 | -1.68 |
| 1423132_PM_a_at | LOC102642514 /// Nsa2 | NSA2     | 0.94  | 6.93  | 3.91  | 2.73E-03 | 5.46E-02 | -1.68 |
| 1428082_PM_at   | Acsf5                 | ACSF5    | -1.60 | 7.13  | -3.91 | 2.73E-03 | 5.46E-02 | -1.68 |
| 1448843_PM_at   | Ssr1                  | SSR1     | -0.70 | 5.03  | -3.91 | 2.73E-03 | 5.46E-02 | -1.68 |
| 1442340_PM_x_at | Cyr61                 | CYR61    | -1.19 | 2.71  | -3.91 | 2.74E-03 | 5.47E-02 | -1.68 |



|                 |                               |            |       |       |       |          |          |       |
|-----------------|-------------------------------|------------|-------|-------|-------|----------|----------|-------|
| 1425485_PM_at   | Mtmr6                         | MTMR6      | -0.73 | 4.65  | -3.90 | 2.74E-03 | 5.47E-02 | -1.68 |
| 1444836_PM_at   | ---                           | NA         | -0.38 | 2.31  | -3.90 | 2.75E-03 | 5.48E-02 | -1.68 |
| 1437071_PM_at   | Elf1ax                        | EIF1AX     | -1.27 | 5.34  | -3.90 | 2.75E-03 | 5.48E-02 | -1.69 |
| 1424205_PM_at   | Gnm1                          | GINM1      | -1.13 | 3.70  | -3.90 | 2.75E-03 | 5.48E-02 | -1.69 |
| 1430896_PM_s_at | Nudt7                         | NUDT7      | 0.54  | 2.74  | 3.90  | 2.76E-03 | 5.48E-02 | -1.69 |
| 1453187_PM_at   | Ociad2                        | OCIAD2     | -1.23 | 6.15  | -3.90 | 2.76E-03 | 5.49E-02 | -1.69 |
| 1447830_PM_s_at | Rgs2                          | RGS2       | -1.15 | 6.38  | -3.90 | 2.76E-03 | 5.49E-02 | -1.69 |
| 1424681_PM_a_at | PsmA5                         | PSMA5      | -1.12 | 5.05  | -3.90 | 2.76E-03 | 5.49E-02 | -1.69 |
| 1451152_PM_a_at | Atp1b1                        | ATP1B1     | -0.77 | 10.30 | -3.90 | 2.76E-03 | 5.49E-02 | -1.69 |
| 1434028_PM_at   | Arnt2                         | ARNT2      | -0.72 | 3.17  | -3.90 | 2.76E-03 | 5.49E-02 | -1.69 |
| 1432931_PM_at   | Nrxn3                         | NRXN3      | 1.07  | 3.35  | 3.90  | 2.77E-03 | 5.49E-02 | -1.69 |
| 1435605_PM_at   | Actr3b                        | ACTR3B     | -0.58 | 6.62  | -3.90 | 2.77E-03 | 5.49E-02 | -1.69 |
| 1433501_PM_at   | Ctso                          | CTSO       | -1.02 | 3.00  | -3.90 | 2.77E-03 | 5.50E-02 | -1.69 |
| 1432842_PM_s_at | Cdk5rap2 /// Gm2423 /// Ywhaq | YWHAQ      | -0.94 | 6.14  | -3.90 | 2.77E-03 | 5.50E-02 | -1.69 |
| 1451324_PM_s_at | Fyttl1                        | FYTTD1     | -0.68 | 2.93  | -3.90 | 2.77E-03 | 5.50E-02 | -1.69 |
| 1447908_PM_x_at | Ttc3                          | TTC3       | -0.93 | 4.99  | -3.90 | 2.78E-03 | 5.50E-02 | -1.70 |
| 1439692_PM_at   | ---                           | NA         | 0.58  | 2.54  | 3.90  | 2.78E-03 | 5.50E-02 | -1.70 |
| 1424424_PM_at   | Slc39a1                       | SLC39A1    | -0.48 | 4.03  | -3.90 | 2.78E-03 | 5.51E-02 | -1.70 |
| 1451051_PM_a_at | Scyl1                         | SCYL1      | 0.45  | 2.92  | 3.89  | 2.79E-03 | 5.52E-02 | -1.70 |
| 1451600_PM_s_at | Ces3a /// Ces3b               | CES3       | 0.40  | 2.72  | 3.89  | 2.79E-03 | 5.52E-02 | -1.70 |
| 1453731_PM_a_at | Dram2                         | DRAM2      | -0.73 | 3.33  | -3.89 | 2.80E-03 | 5.53E-02 | -1.70 |
| 1433463_PM_at   | Brox                          | BROX       | -0.99 | 3.28  | -3.89 | 2.80E-03 | 5.53E-02 | -1.70 |
| 1439046_PM_at   | Nsrp1                         | NSRP1      | 0.96  | 6.88  | 3.89  | 2.80E-03 | 5.53E-02 | -1.70 |
| 1434864_PM_at   | Nipa1                         | NIPA1      | -1.27 | 5.38  | -3.89 | 2.81E-03 | 5.53E-02 | -1.71 |
| 1416886_PM_at   | C1d                           | C1D        | -0.57 | 2.69  | -3.89 | 2.80E-03 | 5.53E-02 | -1.71 |
| 1460425_PM_at   | 1700001C19Rik                 | AL096814.1 | 0.47  | 2.84  | 3.89  | 2.80E-03 | 5.53E-02 | -1.70 |
| 1451917_PM_a_at | Dclk1                         | DCLK1      | 1.90  | 6.62  | 3.89  | 2.81E-03 | 5.53E-02 | -1.71 |
| 1428094_PM_at   | Lamp2                         | LAMP2      | -0.87 | 4.58  | -3.89 | 2.81E-03 | 5.53E-02 | -1.71 |
| 1458349_PM_s_at | ---                           | NA         | 0.58  | 3.97  | 3.89  | 2.81E-03 | 5.53E-02 | -1.71 |
| 1435923_PM_at   | Ado                           | ADO        | -1.92 | 4.01  | -3.89 | 2.81E-03 | 5.54E-02 | -1.71 |
| 1454811_PM_a_at | Serinc1                       | SERINC1    | -1.87 | 5.32  | -3.89 | 2.82E-03 | 5.54E-02 | -1.71 |
| 1448112_PM_at   | Gm12338                       | NA         | -1.65 | 7.10  | -3.89 | 2.82E-03 | 5.54E-02 | -1.71 |
| 1424402_PM_at   | Rufy3                         | RUFY3      | -1.40 | 3.74  | -3.89 | 2.82E-03 | 5.54E-02 | -1.71 |
| 1435774_PM_at   | LOC106740 /// Phf10           | PHF10      | -0.87 | 4.69  | -3.89 | 2.82E-03 | 5.54E-02 | -1.71 |
| 1437842_PM_at   | Plcx1                         | PLCXD1     | -0.86 | 2.39  | -3.89 | 2.82E-03 | 5.54E-02 | -1.71 |
| 1438166_PM_x_at | Ndufs4                        | NDUFS4     | -0.65 | 4.39  | -3.89 | 2.82E-03 | 5.54E-02 | -1.71 |
| 1430514_PM_a_at | Cd99                          | NA         | 0.34  | 4.07  | 3.89  | 2.82E-03 | 5.54E-02 | -1.71 |
| 1438956_PM_x_at | Pim3                          | PIM3       | 0.40  | 3.76  | 3.89  | 2.82E-03 | 5.54E-02 | -1.71 |
| 1436858_PM_at   | Mbnl2                         | MBNL2      | 1.03  | 3.67  | 3.89  | 2.82E-03 | 5.54E-02 | -1.71 |
| 1418414_PM_at   | Kcnn1                         | AL590132.1 | 0.51  | 3.43  | 3.89  | 2.83E-03 | 5.54E-02 | -1.71 |
| 1416807_PM_at   | Rpl36a                        | RPL36AL    | -1.02 | 5.70  | -3.89 | 2.83E-03 | 5.55E-02 | -1.71 |
| 1441722_PM_at   | ---                           | NA         | 0.90  | 3.11  | 3.89  | 2.83E-03 | 5.55E-02 | -1.71 |
| 1426758_PM_s_at | Meg3                          | NA         | 2.51  | 6.17  | 3.89  | 2.83E-03 | 5.55E-02 | -1.72 |
| 1426371_PM_at   | Far1                          | FAR1       | -0.68 | 3.22  | -3.88 | 2.84E-03 | 5.55E-02 | -1.72 |
| 1424637_PM_s_at | Ccdc47                        | CCDC47     | -1.50 | 8.19  | -3.88 | 2.85E-03 | 5.56E-02 | -1.72 |
| 1448153_PM_at   | Cox5a                         | COX5A      | -1.44 | 7.33  | -3.88 | 2.85E-03 | 5.56E-02 | -1.72 |
| 1423807_PM_a_at | Calm2                         | CALM2      | -0.57 | 10.86 | -3.88 | 2.85E-03 | 5.56E-02 | -1.72 |
| 1429025_PM_a_at | Hexim2                        | HEXIM2     | 0.32  | 2.68  | 3.88  | 2.85E-03 | 5.56E-02 | -1.72 |
| 1423064_PM_at   | Dnm3a                         | DNMT3A     | 1.55  | 6.53  | 3.88  | 2.85E-03 | 5.56E-02 | -1.72 |
| 1424628_PM_a_at | Ndufv3                        | NDUFV3     | 1.89  | 7.73  | 3.88  | 2.85E-03 | 5.56E-02 | -1.72 |
| 1441202_PM_at   | ---                           | NA         | 0.55  | 3.01  | 3.88  | 2.86E-03 | 5.57E-02 | -1.72 |
| 1426379_PM_at   | Elf4b                         | EIF4B      | 0.66  | 5.26  | 3.88  | 2.86E-03 | 5.57E-02 | -1.72 |
| 1423639_PM_at   | Hrh2                          | HRH2       | 0.53  | 3.67  | 3.88  | 2.87E-03 | 5.59E-02 | -1.73 |
| 1419267_PM_at   | Nfyb                          | NFYB       | -1.37 | 4.59  | -3.88 | 2.87E-03 | 5.59E-02 | -1.73 |
| 1439145_PM_at   | Lck                           | LCK        | 1.06  | 3.74  | 3.88  | 2.87E-03 | 5.59E-02 | -1.73 |
| 1435020_PM_at   | Klhdc2                        | KLHDC2     | -1.09 | 5.93  | -3.88 | 2.87E-03 | 5.59E-02 | -1.73 |
| 1434804_PM_at   | Exoc6b                        | EXOC6B     | -0.88 | 3.54  | -3.88 | 2.87E-03 | 5.59E-02 | -1.73 |
| 1439067_PM_at   | Lair1                         | LAIR1      | -1.15 | 3.45  | -3.88 | 2.88E-03 | 5.60E-02 | -1.73 |
| 1431177_PM_a_at | Rpl10a /// Rpl10a-ps1         | RPL10A     | -1.05 | 7.02  | -3.88 | 2.88E-03 | 5.60E-02 | -1.73 |
| 1443734_PM_at   | D5Wsu148e                     | NA         | 0.46  | 3.48  | 3.88  | 2.88E-03 | 5.60E-02 | -1.73 |
| 1421534_PM_at   | Dfna5                         | DFNA5      | -0.90 | 5.26  | -3.87 | 2.88E-03 | 5.60E-02 | -1.73 |
| 1458907_PM_at   | ---                           | NA         | 1.46  | 3.43  | 3.87  | 2.88E-03 | 5.60E-02 | -1.73 |
| 1415726_PM_at   | Ankrd17                       | ANKRD17    | -1.18 | 6.62  | -3.87 | 2.90E-03 | 5.61E-02 | -1.74 |
| 1417669_PM_at   | Abhd12                        | ABHD12     | -0.80 | 5.06  | -3.87 | 2.90E-03 | 5.61E-02 | -1.74 |
| 1417626_PM_at   | Pde4dip                       | PDE4DIP    | -0.54 | 2.74  | -3.87 | 2.89E-03 | 5.61E-02 | -1.74 |
| 1448209_PM_a_at | Slc22a17                      | SLC22A17   | -0.44 | 3.49  | -3.87 | 2.89E-03 | 5.61E-02 | -1.74 |
| 1447028_PM_at   | 4930563E22Rik                 | NA         | 0.48  | 2.57  | 3.87  | 2.90E-03 | 5.61E-02 | -1.74 |
| 1416958_PM_at   | Nr1d2                         | NR1D2      | -1.22 | 5.44  | -3.87 | 2.90E-03 | 5.61E-02 | -1.74 |
| 1450931_PM_at   | Dock9                         | DOCK9      | -1.66 | 8.17  | -3.87 | 2.90E-03 | 5.62E-02 | -1.74 |
| 1441217_PM_at   | ---                           | NA         | 0.48  | 3.28  | 3.87  | 2.91E-03 | 5.63E-02 | -1.74 |
| 1455101_PM_at   | Phactr2                       | PHACTR2    | -0.75 | 4.33  | -3.87 | 2.91E-03 | 5.63E-02 | -1.74 |
| 1421477_PM_at   | Cplx2                         | CPLX2      | 1.95  | 6.25  | 3.87  | 2.92E-03 | 5.64E-02 | -1.75 |
| 1441319_PM_at   | Rbm5                          | RBM5       | 0.93  | 5.14  | 3.87  | 2.92E-03 | 5.65E-02 | -1.75 |
| 1426124_PM_a_at | Clk1                          | CLK1       | -1.53 | 5.92  | -3.87 | 2.93E-03 | 5.65E-02 | -1.75 |

|                 |                                              |            |       |      |       |          |          |       |
|-----------------|----------------------------------------------|------------|-------|------|-------|----------|----------|-------|
| 1432758_PM_at   | 2900011L18Rik                                | NA         | 0.32  | 2.52 | 3.87  | 2.93E-03 | 5.65E-02 | -1.75 |
| 1433947_PM_at   | Rab37                                        | RAB37      | 0.59  | 3.74 | 3.87  | 2.93E-03 | 5.65E-02 | -1.75 |
| 1435089_PM_at   | 2010111101Rik                                | C9orf3     | -0.51 | 3.09 | -3.87 | 2.93E-03 | 5.65E-02 | -1.75 |
| 1423142_PM_a_at | Gtpbp4                                       | GTPBP4     | -1.04 | 3.52 | -3.86 | 2.94E-03 | 5.66E-02 | -1.75 |
| 1422750_PM_a_at | Zmynd10                                      | ZMYND10    | 0.48  | 2.67 | 3.86  | 2.94E-03 | 5.66E-02 | -1.75 |
| 1451280_PM_at   | Arpp21                                       | ARPP21     | 1.44  | 5.63 | 3.86  | 2.95E-03 | 5.68E-02 | -1.75 |
| 1448645_PM_at   | Msl3                                         | MSL3       | -0.90 | 4.83 | -3.86 | 2.96E-03 | 5.69E-02 | -1.76 |
| 1438668_PM_x_at | Atxn2l                                       | ATXN2L     | 0.63  | 4.04 | 3.86  | 2.96E-03 | 5.69E-02 | -1.76 |
| 1456922_PM_at   | Snx29                                        | SNX29      | 0.58  | 3.54 | 3.86  | 2.96E-03 | 5.70E-02 | -1.76 |
| 1431144_PM_at   | Srrd                                         | SRRD       | 0.41  | 4.29 | 3.86  | 2.97E-03 | 5.71E-02 | -1.76 |
| 1439190_PM_at   | Fhad1                                        | FHAD1      | 0.41  | 2.76 | 3.86  | 2.97E-03 | 5.71E-02 | -1.76 |
| 1425424_PM_at   | ---                                          | NA         | 0.45  | 3.08 | 3.86  | 2.97E-03 | 5.71E-02 | -1.76 |
| 1457028_PM_at   | A430033K04Rik                                | NA         | 0.50  | 2.74 | 3.86  | 2.97E-03 | 5.71E-02 | -1.76 |
| 1416986_PM_a_at | Sirpa                                        | SIRPB1     | -0.82 | 6.94 | -3.85 | 2.98E-03 | 5.72E-02 | -1.77 |
| 1434685_PM_at   | Plppr4                                       | PLPPR4     | -2.33 | 8.06 | -3.85 | 2.99E-03 | 5.74E-02 | -1.77 |
| 1455496_PM_at   | Pfas                                         | PFAS       | -1.30 | 3.95 | -3.85 | 2.99E-03 | 5.74E-02 | -1.77 |
| 1449413_PM_at   | Mpv17l                                       | AC140504.1 | -1.13 | 5.31 | -3.85 | 2.99E-03 | 5.74E-02 | -1.77 |
| 1449390_PM_at   | Gpatch4                                      | GPATCH4    | 1.51  | 7.85 | 3.85  | 3.00E-03 | 5.75E-02 | -1.77 |
| 1459829_PM_x_at | Sde2                                         | SDE2       | 0.60  | 3.21 | 3.85  | 3.00E-03 | 5.75E-02 | -1.77 |
| 1454686_PM_at   | 6430706D22Rik ///<br>A730008H23Rik /// Hjurp | HJURP      | 0.65  | 3.19 | 3.85  | 3.00E-03 | 5.75E-02 | -1.77 |
| 1451558_PM_at   | Fbxw7                                        | FBXW7      | -1.42 | 7.69 | -3.85 | 3.00E-03 | 5.75E-02 | -1.77 |
| 1440474_PM_at   | Crot                                         | CROT       | 0.42  | 2.94 | 3.85  | 3.00E-03 | 5.75E-02 | -1.77 |
| 1433602_PM_at   | Gabra5                                       | GABRA5     | -1.53 | 7.05 | -3.85 | 3.01E-03 | 5.75E-02 | -1.78 |
| 1448838_PM_at   | Topors                                       | TOPORS     | -0.85 | 3.21 | -3.85 | 3.01E-03 | 5.75E-02 | -1.78 |
| 1433729_PM_x_at | Pmpcb                                        | PMPCB      | -0.84 | 6.39 | -3.85 | 3.01E-03 | 5.75E-02 | -1.78 |
| 1454044_PM_a_at | Pex3                                         | PEX3       | -0.66 | 2.81 | -3.85 | 3.01E-03 | 5.75E-02 | -1.78 |
| 1419946_PM_s_at | Rab2a                                        | NA         | -0.92 | 8.51 | -3.85 | 3.01E-03 | 5.76E-02 | -1.78 |
| 1434582_PM_at   | Erc2                                         | ERC2       | -1.59 | 8.03 | -3.85 | 3.02E-03 | 5.76E-02 | -1.78 |
| 1445688_PM_at   | ---                                          | NA         | 0.56  | 3.92 | 3.85  | 3.02E-03 | 5.76E-02 | -1.78 |
| 1449682_PM_s_at | Tubb2a-ps2 /// Tubb2b                        | TUBB2B     | 0.85  | 3.41 | 3.85  | 3.02E-03 | 5.76E-02 | -1.78 |
| 1443647_PM_at   | ---                                          | NA         | 1.09  | 3.09 | 3.85  | 3.03E-03 | 5.77E-02 | -1.78 |
| 1436324_PM_at   | Stard9                                       | STARD9     | 0.60  | 3.34 | 3.85  | 3.03E-03 | 5.77E-02 | -1.78 |
| 1441808_PM_at   | ---                                          | NA         | 0.54  | 3.34 | 3.84  | 3.03E-03 | 5.78E-02 | -1.78 |
| 1423957_PM_at   | Aen                                          | AEN        | -0.64 | 5.23 | -3.84 | 3.04E-03 | 5.78E-02 | -1.78 |
| 1428409_PM_at   | Naa50                                        | NAA50      | -1.20 | 6.11 | -3.84 | 3.04E-03 | 5.78E-02 | -1.79 |
| 1417040_PM_a_at | Bok                                          | BOK        | -1.00 | 5.31 | -3.84 | 3.04E-03 | 5.79E-02 | -1.79 |
| 1455959_PM_s_at | Gclc                                         | GCLC       | -0.65 | 4.06 | -3.84 | 3.04E-03 | 5.79E-02 | -1.79 |
| 1429415_PM_at   | Zmynd8                                       | ZMYND8     | 0.66  | 3.93 | 3.84  | 3.04E-03 | 5.79E-02 | -1.79 |
| 1434912_PM_at   | Ric3                                         | RIC3       | -0.88 | 5.05 | -3.84 | 3.05E-03 | 5.79E-02 | -1.79 |
| 1416685_PM_s_at | Fbl /// LOC102643269                         | FBL        | 0.74  | 4.16 | 3.84  | 3.05E-03 | 5.79E-02 | -1.79 |
| 1447283_PM_at   | Tsga10                                       | TSGA10     | 0.58  | 3.11 | 3.84  | 3.05E-03 | 5.80E-02 | -1.79 |
| 1443430_PM_at   | ---                                          | NA         | 0.85  | 3.62 | 3.84  | 3.06E-03 | 5.81E-02 | -1.79 |
| 1428594_PM_at   | Ralgapa1                                     | RALGAPA1   | -0.78 | 5.28 | -3.84 | 3.07E-03 | 5.82E-02 | -1.79 |
| 1417262_PM_at   | Ptgs2                                        | PTGS2      | -2.08 | 6.14 | -3.84 | 3.07E-03 | 5.82E-02 | -1.80 |
| 1421251_PM_at   | Zfp40                                        | NA         | -0.43 | 2.40 | -3.84 | 3.07E-03 | 5.82E-02 | -1.80 |
| 1432839_PM_at   | ---                                          | NA         | 0.46  | 2.39 | 3.84  | 3.07E-03 | 5.82E-02 | -1.80 |
| 1421939_PM_a_at | Stag1                                        | STAG1      | 0.41  | 2.90 | 3.84  | 3.08E-03 | 5.82E-02 | -1.80 |
| 1448737_PM_at   | Tspan7                                       | TSPAN7     | -0.66 | 9.54 | -3.84 | 3.08E-03 | 5.83E-02 | -1.80 |
| 1451331_PM_at   | Ppp1r1b                                      | PPP1R1B    | 0.43  | 2.68 | 3.83  | 3.08E-03 | 5.83E-02 | -1.80 |
| 1445538_PM_at   | ---                                          | NA         | 1.87  | 3.81 | 3.84  | 3.08E-03 | 5.83E-02 | -1.80 |
| 1436824_PM_x_at | Rnf26                                        | RNF26      | -1.61 | 3.61 | -3.83 | 3.09E-03 | 5.84E-02 | -1.80 |
| 1457531_PM_a_at | A930017K11Rik                                | NA         | 0.35  | 2.68 | 3.83  | 3.09E-03 | 5.84E-02 | -1.80 |
| 1426741_PM_a_at | Fastkd2                                      | FASTKD2    | 1.89  | 6.05 | 3.83  | 3.09E-03 | 5.84E-02 | -1.80 |
| 1433971_PM_at   | Camta1                                       | CAMTA1     | -1.54 | 7.17 | -3.83 | 3.09E-03 | 5.84E-02 | -1.80 |
| 1423883_PM_at   | Acsl1                                        | ACSL1      | -1.38 | 4.27 | -3.83 | 3.10E-03 | 5.84E-02 | -1.80 |
| 1437865_PM_at   | Spata13                                      | SPATA13    | -1.08 | 2.58 | -3.83 | 3.10E-03 | 5.86E-02 | -1.81 |
| 1446789_PM_at   | Zcrrb1                                       | ZCRB1      | -0.99 | 3.01 | -3.83 | 3.11E-03 | 5.86E-02 | -1.81 |
| 1457747_PM_at   | Gira3                                        | NA         | -0.93 | 2.71 | -3.83 | 3.12E-03 | 5.87E-02 | -1.81 |
| 1433413_PM_at   | Nrxn1                                        | NRXN1      | -0.90 | 2.79 | -3.83 | 3.12E-03 | 5.87E-02 | -1.81 |
| 1459348_PM_at   | ---                                          | NA         | 0.46  | 2.40 | 3.83  | 3.11E-03 | 5.87E-02 | -1.81 |
| 1454936_PM_at   | Vars2                                        | VAR2       | 0.48  | 3.39 | 3.83  | 3.12E-03 | 5.87E-02 | -1.81 |
| 1430212_PM_at   | Zfp712                                       | NA         | -1.15 | 2.36 | -3.83 | 3.12E-03 | 5.87E-02 | -1.81 |
| 1416165_PM_at   | Rab31                                        | RAB31      | -1.01 | 3.53 | -3.83 | 3.13E-03 | 5.88E-02 | -1.81 |
| 1454271_PM_at   | 1810013D15Rik                                | NA         | 0.40  | 2.82 | 3.83  | 3.13E-03 | 5.88E-02 | -1.81 |
| 1436647_PM_at   | Cdan1 /// Ttbk2                              | CDAN1      | 0.40  | 2.60 | 3.83  | 3.13E-03 | 5.88E-02 | -1.82 |
| 1425855_PM_a_at | Crk                                          | CRK        | 0.44  | 2.90 | 3.83  | 3.13E-03 | 5.88E-02 | -1.82 |
| 1416648_PM_at   | Dync1h1                                      | DYNC1H1    | -1.79 | 6.69 | -3.82 | 3.14E-03 | 5.89E-02 | -1.82 |
| 1446302_PM_at   | ---                                          | NA         | 0.35  | 2.04 | 3.82  | 3.14E-03 | 5.89E-02 | -1.82 |
| 1458102_PM_at   | ---                                          | NA         | 0.76  | 2.93 | 3.82  | 3.14E-03 | 5.89E-02 | -1.82 |
| 1435389_PM_at   | Reps2                                        | REPS2      | -0.97 | 5.34 | -3.82 | 3.14E-03 | 5.89E-02 | -1.82 |
| 1452120_PM_at   | Naa40                                        | NAA40      | 0.43  | 2.66 | 3.82  | 3.15E-03 | 5.90E-02 | -1.82 |
| 1450808_PM_at   | Fpr1                                         | FPR1       | 0.38  | 2.77 | 3.82  | 3.15E-03 | 5.90E-02 | -1.82 |
| 1441458_PM_at   | Rasa4                                        | RASA4B     | 0.31  | 2.68 | 3.82  | 3.15E-03 | 5.91E-02 | -1.82 |
| 1453111_PM_a_at | Slc25a39                                     | SLC25A39   | 0.55  | 3.50 | 3.82  | 3.15E-03 | 5.91E-02 | -1.82 |

|                 |               |           |       |       |       |          |          |       |
|-----------------|---------------|-----------|-------|-------|-------|----------|----------|-------|
| 1420942_PM_s_at | Rgs5          | RG55      | -1.08 | 3.23  | -3.82 | 3.16E-03 | 5.91E-02 | -1.82 |
| 1431694_PM_a_at | Ctnnbp1       | CTNNBIP1  | 0.52  | 3.39  | 3.82  | 3.16E-03 | 5.91E-02 | -1.82 |
| 1454424_PM_at   | Tenm2         | TENM2     | 1.41  | 4.60  | 3.82  | 3.16E-03 | 5.91E-02 | -1.82 |
| 1425786_PM_a_at | Hsf4          | HSF4      | 0.34  | 2.55  | 3.82  | 3.16E-03 | 5.91E-02 | -1.83 |
| 1428585_PM_at   | Actn1         | ACTN1     | -0.69 | 5.61  | -3.82 | 3.17E-03 | 5.92E-02 | -1.83 |
| 1433488_PM_x_at | Gns           | GNS       | -2.04 | 6.46  | -3.82 | 3.17E-03 | 5.92E-02 | -1.83 |
| 1437035_PM_x_at | Rnf14         | RNF14     | -1.81 | 6.90  | -3.82 | 3.17E-03 | 5.92E-02 | -1.83 |
| 1451157_PM_at   | Rnf187        | NA        | 0.37  | 2.71  | 3.82  | 3.17E-03 | 5.92E-02 | -1.83 |
| 1458195_PM_at   | Vps13d        | VPS13D    | 0.35  | 2.99  | 3.82  | 3.18E-03 | 5.92E-02 | -1.83 |
| 1434989_PM_at   | Unc80         | UNC80     | -2.02 | 6.56  | -3.82 | 3.18E-03 | 5.93E-02 | -1.83 |
| 1457282_PM_x_at | ---           | NA        | 0.43  | 8.17  | 3.82  | 3.18E-03 | 5.93E-02 | -1.83 |
| 1432219_PM_at   | Nol9          | NOL9      | 0.54  | 2.97  | 3.82  | 3.18E-03 | 5.93E-02 | -1.83 |
| 1432775_PM_at   | Rabgap1l      | NA        | 1.30  | 4.56  | 3.81  | 3.20E-03 | 5.95E-02 | -1.84 |
| 1447140_PM_at   | ---           | NA        | 0.69  | 6.50  | 3.81  | 3.20E-03 | 5.95E-02 | -1.84 |
| 1417999_PM_at   | Iitm2b        | ITM2B     | -1.21 | 9.38  | -3.81 | 3.20E-03 | 5.95E-02 | -1.84 |
| 1450062_PM_a_at | Maged1        | MAGED1    | -0.89 | 5.67  | -3.81 | 3.20E-03 | 5.95E-02 | -1.84 |
| 1441854_PM_at   | ---           | NA        | 0.54  | 2.89  | 3.81  | 3.20E-03 | 5.95E-02 | -1.84 |
| 1429011_PM_x_at | Snrnp70       | SNRNP70   | 0.80  | 5.72  | 3.81  | 3.20E-03 | 5.95E-02 | -1.84 |
| 1426976_PM_at   | Usp47         | USP47     | -0.97 | 4.60  | -3.81 | 3.21E-03 | 5.96E-02 | -1.84 |
| 1433761_PM_at   | Pde4dip       | PDE4DIP   | -0.56 | 3.02  | -3.81 | 3.21E-03 | 5.96E-02 | -1.84 |
| 1438805_PM_at   | Ccnd3         | CCND3     | -0.53 | 2.34  | -3.81 | 3.21E-03 | 5.96E-02 | -1.84 |
| 1436910_PM_at   | Rasa2         | RASAL2    | -0.77 | 4.21  | -3.81 | 3.22E-03 | 5.97E-02 | -1.84 |
| 1460675_PM_at   | Igsf8         | IGSF8     | -0.74 | 6.88  | -3.81 | 3.22E-03 | 5.97E-02 | -1.84 |
| 1421349_PM_x_at | Cend1         | CEND1     | 0.45  | 7.24  | 3.81  | 3.22E-03 | 5.97E-02 | -1.84 |
| 1450848_PM_at   | Dap3          | DAP3      | -1.06 | 5.49  | -3.81 | 3.22E-03 | 5.97E-02 | -1.84 |
| 1429962_PM_at   | Cebpz         | CEBPZ     | -0.48 | 2.24  | -3.81 | 3.23E-03 | 5.98E-02 | -1.85 |
| 1416949_PM_s_at | Slc39a7       | SLC39A7   | -1.23 | 4.21  | -3.81 | 3.23E-03 | 5.98E-02 | -1.85 |
| 1426789_PM_s_at | Ssrp1         | SSRP1     | -0.68 | 5.10  | -3.81 | 3.23E-03 | 5.98E-02 | -1.85 |
| 1445583_PM_x_at | ---           | NA        | -0.86 | 3.08  | -3.81 | 3.23E-03 | 5.98E-02 | -1.85 |
| 1426565_PM_at   | Igf1r         | IGF1R     | 0.48  | 3.17  | 3.81  | 3.24E-03 | 5.99E-02 | -1.85 |
| 1437212_PM_at   | Zfp420        | NA        | -0.75 | 3.55  | -3.80 | 3.26E-03 | 6.02E-02 | -1.86 |
| 1452517_PM_at   | Plekhh1       | PLEKHH1   | -0.69 | 2.93  | -3.80 | 3.27E-03 | 6.03E-02 | -1.86 |
| 1415692_PM_s_at | Canx          | CANX      | -1.07 | 5.71  | -3.80 | 3.28E-03 | 6.05E-02 | -1.86 |
| 1429394_PM_at   | A13001015Rik  | C1orf74   | -0.62 | 3.38  | -3.80 | 3.28E-03 | 6.05E-02 | -1.86 |
| 1448770_PM_a_at | Atpif1        | ATPIF1    | -0.43 | 10.02 | -3.80 | 3.28E-03 | 6.05E-02 | -1.86 |
| 1424056_PM_at   | Usp48         | USP48     | 0.52  | 3.38  | 3.80  | 3.28E-03 | 6.05E-02 | -1.86 |
| 1437852_PM_x_at | Cpsf3         | CPSF3     | -1.33 | 5.08  | -3.80 | 3.28E-03 | 6.05E-02 | -1.86 |
| 1429795_PM_at   | 1700001L05Rik | NA        | 0.34  | 3.04  | 3.80  | 3.28E-03 | 6.05E-02 | -1.86 |
| 1441246_PM_s_at | Dpys5         | DPYSL5    | 0.45  | 2.70  | 3.80  | 3.29E-03 | 6.05E-02 | -1.86 |
| 1457539_PM_at   | ---           | NA        | 0.63  | 4.02  | 3.80  | 3.29E-03 | 6.05E-02 | -1.86 |
| 1431391_PM_at   | Ralgps1       | RALGPS1   | 0.63  | 3.23  | 3.79  | 3.29E-03 | 6.06E-02 | -1.87 |
| 1457616_PM_at   | ---           | NA        | 1.01  | 3.48  | 3.79  | 3.29E-03 | 6.06E-02 | -1.87 |
| 1437427_PM_at   | 4933405O20Rik | NA        | -0.70 | 2.21  | -3.79 | 3.30E-03 | 6.06E-02 | -1.87 |
| 1424015_PM_at   | Dennd5a       | DENND5A   | -0.86 | 5.77  | -3.79 | 3.30E-03 | 6.07E-02 | -1.87 |
| 1430299_PM_at   | Tsc22d4       | TSC22D4   | 0.37  | 2.46  | 3.79  | 3.30E-03 | 6.07E-02 | -1.87 |
| 1418921_PM_at   | Cadm3         | CADM3     | -1.59 | 5.88  | -3.79 | 3.31E-03 | 6.07E-02 | -1.87 |
| 1438613_PM_at   | Kcna4         | KCNA4     | -1.42 | 5.78  | -3.79 | 3.31E-03 | 6.07E-02 | -1.87 |
| 1424241_PM_at   | Slc30a6       | SLC30A6   | -0.86 | 4.13  | -3.79 | 3.30E-03 | 6.07E-02 | -1.87 |
| 1448234_PM_at   | Dnajb6        | DNAJB6    | -0.77 | 7.09  | -3.79 | 3.31E-03 | 6.07E-02 | -1.87 |
| 1431620_PM_at   | LOC100125594  | NA        | 0.32  | 2.50  | 3.79  | 3.31E-03 | 6.07E-02 | -1.87 |
| 1431198_PM_x_at | 9430038101Rik | LINC00959 | 0.48  | 3.68  | 3.79  | 3.31E-03 | 6.07E-02 | -1.87 |
| 1446849_PM_at   | ---           | NA        | 0.49  | 3.01  | 3.79  | 3.31E-03 | 6.07E-02 | -1.87 |
| 1430379_PM_at   | ---           | NA        | 1.38  | 3.93  | 3.79  | 3.31E-03 | 6.07E-02 | -1.87 |
| 1420480_PM_at   | Cnnm3         | CNNM3     | 0.35  | 2.55  | 3.79  | 3.32E-03 | 6.08E-02 | -1.87 |
| 1435196_PM_at   | Ntrk2         | NTRK2     | -1.49 | 3.81  | -3.79 | 3.32E-03 | 6.08E-02 | -1.87 |
| 1454701_PM_at   | 4930503L19Rik | NA        | -0.72 | 2.84  | -3.79 | 3.33E-03 | 6.08E-02 | -1.88 |
| 1452491_PM_at   | Gm11767       | NA        | 0.46  | 3.56  | 3.79  | 3.32E-03 | 6.08E-02 | -1.88 |
| 1450749_PM_a_at | Nr4a2         | NR4A2     | 0.85  | 3.85  | 3.79  | 3.33E-03 | 6.08E-02 | -1.88 |
| 1435635_PM_at   | Pcmt1         | PCMTD1    | -0.99 | 6.81  | -3.79 | 3.33E-03 | 6.08E-02 | -1.88 |
| 1453166_PM_at   | Mcu           | MCU       | 0.64  | 3.51  | 3.79  | 3.33E-03 | 6.09E-02 | -1.88 |
| 1433819_PM_s_at | Agpat3        | AGPAT3    | -0.97 | 4.87  | -3.79 | 3.34E-03 | 6.09E-02 | -1.88 |
| 1438939_PM_x_at | Ndn           | NDN       | -0.58 | 2.24  | -3.79 | 3.34E-03 | 6.09E-02 | -1.88 |
| 1457430_PM_at   | ---           | NA        | 0.33  | 2.67  | 3.79  | 3.34E-03 | 6.09E-02 | -1.88 |
| 1418561_PM_at   | Sf3b1         | SF3B1     | -0.61 | 4.49  | -3.79 | 3.34E-03 | 6.10E-02 | -1.88 |
| 1439904_PM_at   | Fstl5         | FSTL5     | -1.33 | 3.90  | -3.79 | 3.35E-03 | 6.10E-02 | -1.88 |
| 1455468_PM_at   | Dpy19l3       | DPY19L3   | -0.94 | 3.69  | -3.78 | 3.35E-03 | 6.10E-02 | -1.88 |
| 1450728_PM_at   | Fjx1          | FJX1      | -0.85 | 4.31  | -3.79 | 3.35E-03 | 6.10E-02 | -1.88 |
| 1440700_PM_a_at | Arhgef18      | ARHGEF18  | 0.43  | 3.63  | 3.79  | 3.35E-03 | 6.10E-02 | -1.88 |
| 1432789_PM_at   | 8030476L19Rik | NA        | 0.60  | 2.80  | 3.79  | 3.35E-03 | 6.10E-02 | -1.88 |
| 1445549_PM_at   | Robo1         | NA        | -0.96 | 3.96  | -3.78 | 3.36E-03 | 6.11E-02 | -1.89 |
| 1451436_PM_at   | Sbno1         | SBNO1     | -0.89 | 4.67  | -3.78 | 3.36E-03 | 6.12E-02 | -1.89 |
| 1441178_PM_at   | Dtwd2         | DTWD2     | -0.85 | 2.43  | -3.78 | 3.36E-03 | 6.12E-02 | -1.89 |
| 1428185_PM_at   | Kctd18        | KCTD18    | 0.84  | 5.06  | 3.78  | 3.37E-03 | 6.12E-02 | -1.89 |
| 1440797_PM_at   | ---           | NA        | 0.85  | 3.13  | 3.78  | 3.37E-03 | 6.12E-02 | -1.89 |
| 1448830_PM_at   | Dusp1         | DUSP1     | 0.85  | 6.17  | 3.78  | 3.37E-03 | 6.12E-02 | -1.89 |

|                 |                               |            |       |       |       |          |          |       |
|-----------------|-------------------------------|------------|-------|-------|-------|----------|----------|-------|
| 1437143_PM_a_at | Tmx1                          | TMX1       | -0.88 | 7.82  | -3.78 | 3.37E-03 | 6.12E-02 | -1.89 |
| 1450050_PM_at   | Hira                          | HIRA       | -0.54 | 3.30  | -3.78 | 3.38E-03 | 6.12E-02 | -1.89 |
| 1458070_PM_at   | Vtcn1                         | VTCN1      | 0.46  | 2.63  | 3.78  | 3.38E-03 | 6.12E-02 | -1.89 |
| 1450614_PM_x_at | Ifna5                         | IFNA6      | 0.61  | 3.77  | 3.78  | 3.38E-03 | 6.12E-02 | -1.89 |
| 1434613_PM_at   | ---                           | NA         | -0.98 | 6.88  | -3.78 | 3.39E-03 | 6.13E-02 | -1.89 |
| 1437419_PM_at   | Bmp2k                         | BMP2K      | -0.90 | 3.49  | -3.78 | 3.39E-03 | 6.13E-02 | -1.89 |
| 1423215_PM_at   | Spcs2                         | SPCS2      | -0.79 | 3.77  | -3.78 | 3.39E-03 | 6.13E-02 | -1.89 |
| 1455024_PM_at   | Tlk1                          | TLK1       | -0.62 | 3.41  | -3.78 | 3.38E-03 | 6.13E-02 | -1.89 |
| 1458617_PM_at   | Zmynd8                        | ZMYND8     | 0.98  | 3.84  | 3.78  | 3.39E-03 | 6.13E-02 | -1.89 |
| 1416684_PM_at   | Fbl///LOC102643269            | FBL        | 0.85  | 3.25  | 3.78  | 3.39E-03 | 6.14E-02 | -1.90 |
| 1433624_PM_at   | Prrc2b                        | PRRC2B     | -0.84 | 5.93  | -3.78 | 3.40E-03 | 6.14E-02 | -1.90 |
| 1454625_PM_at   | Phf6                          | PHF6       | -0.64 | 2.73  | -3.78 | 3.40E-03 | 6.14E-02 | -1.90 |
| 1416504_PM_at   | Ulk1                          | ULK1       | 0.41  | 3.49  | 3.77  | 3.41E-03 | 6.16E-02 | -1.90 |
| 1454938_PM_at   | Srx13                         | SNX13      | -1.03 | 4.11  | -3.77 | 3.41E-03 | 6.16E-02 | -1.90 |
| 1453151_PM_at   | Slc26a3                       | NA         | 0.65  | 2.41  | 3.77  | 3.41E-03 | 6.16E-02 | -1.90 |
| 1431234_PM_at   | Itprip1                       | ITPRIPL1   | 0.33  | 2.58  | 3.77  | 3.42E-03 | 6.16E-02 | -1.91 |
| 1416938_PM_at   | Chchd1                        | CHCHD1     | 0.48  | 4.40  | 3.77  | 3.42E-03 | 6.16E-02 | -1.90 |
| 1450838_PM_x_at | Rpl37 /// Rpl37rt             | RPL37      | 0.53  | 5.21  | 3.77  | 3.42E-03 | 6.16E-02 | -1.90 |
| 1454524_PM_at   | ---                           | NA         | 0.55  | 2.99  | 3.77  | 3.42E-03 | 6.16E-02 | -1.90 |
| 1458215_PM_at   | Setdb1                        | SETDB1     | 1.74  | 5.31  | 3.77  | 3.42E-03 | 6.16E-02 | -1.90 |
| 1455337_PM_at   | Fgd4                          | FGD4       | -1.21 | 4.72  | -3.77 | 3.43E-03 | 6.18E-02 | -1.91 |
| 1438243_PM_at   | Rps6ka4                       | NA         | 0.30  | 2.53  | 3.77  | 3.43E-03 | 6.18E-02 | -1.91 |
| 1428413_PM_at   | Ccny                          | CCNY       | -0.71 | 4.33  | -3.77 | 3.44E-03 | 6.19E-02 | -1.91 |
| 1459662_PM_at   | ---                           | NA         | -0.59 | 2.81  | -3.77 | 3.44E-03 | 6.19E-02 | -1.91 |
| 1424578_PM_at   | Arrdc1                        | ARRDC1     | 0.40  | 2.50  | 3.77  | 3.45E-03 | 6.20E-02 | -1.91 |
| 1417258_PM_at   | Cct5                          | CCT5       | -1.12 | 3.93  | -3.77 | 3.45E-03 | 6.20E-02 | -1.91 |
| 1421571_PM_a_at | Ly6c1 /// Ly6c2               | NA         | -0.87 | 3.48  | -3.77 | 3.45E-03 | 6.20E-02 | -1.91 |
| 1454958_PM_at   | Gsk3b                         | GSK3B      | -1.54 | 7.82  | -3.77 | 3.46E-03 | 6.21E-02 | -1.92 |
| 1455047_PM_at   | Fbxo3                         | FBXO3      | -1.27 | 4.69  | -3.77 | 3.46E-03 | 6.21E-02 | -1.92 |
| 1440847_PM_at   | ---                           | NA         | 0.35  | 2.75  | 3.77  | 3.46E-03 | 6.21E-02 | -1.92 |
| 1429839_PM_a_at | Yaf2                          | YAF2       | -1.60 | 6.06  | -3.76 | 3.47E-03 | 6.21E-02 | -1.92 |
| 1420965_PM_a_at | Enc1                          | ENC1       | -0.96 | 11.26 | -3.76 | 3.47E-03 | 6.21E-02 | -1.92 |
| 1450247_PM_a_at | Scamp5                        | SCAMP5     | 0.56  | 3.64  | 3.76  | 3.47E-03 | 6.21E-02 | -1.92 |
| 1437978_PM_at   | ---                           | NA         | 0.79  | 4.10  | 3.76  | 3.47E-03 | 6.21E-02 | -1.92 |
| 1456702_PM_x_at | Mat2a                         | NA         | -0.85 | 7.51  | -3.76 | 3.47E-03 | 6.22E-02 | -1.92 |
| 1416220_PM_at   | Spcs1                         | SPCS1      | -0.88 | 6.62  | -3.76 | 3.47E-03 | 6.22E-02 | -1.92 |
| 1428173_PM_at   | Eml2                          | EML2       | 1.50  | 4.32  | 3.76  | 3.49E-03 | 6.24E-02 | -1.92 |
| 1450510_PM_a_at | Cacna1a                       | CACNA1A    | -0.78 | 3.75  | -3.76 | 3.49E-03 | 6.25E-02 | -1.93 |
| 1422778_PM_at   | Ak6 /// LOC105247169 /// Taf9 | TAFA9      | -0.95 | 3.66  | -3.76 | 3.50E-03 | 6.25E-02 | -1.93 |
| 1453221_PM_at   | Gopc                          | AL132671.2 | -0.69 | 4.33  | -3.76 | 3.51E-03 | 6.27E-02 | -1.93 |
| 1418643_PM_at   | Tspan13                       | TSPAN13    | -1.19 | 8.71  | -3.76 | 3.51E-03 | 6.27E-02 | -1.93 |
| 1434132_PM_at   | E430025E21Rik                 | WASHC5     | -0.81 | 3.25  | -3.76 | 3.52E-03 | 6.28E-02 | -1.93 |
| 1429164_PM_at   | Prss36                        | PRSS36     | 0.32  | 2.99  | 3.76  | 3.52E-03 | 6.28E-02 | -1.93 |
| 1453514_PM_at   | ---                           | NA         | -1.12 | 5.18  | -3.76 | 3.52E-03 | 6.28E-02 | -1.93 |
| 1420878_PM_a_at | Ywhab                         | YWHAB      | -0.91 | 5.65  | -3.75 | 3.53E-03 | 6.29E-02 | -1.94 |
| 1453118_PM_s_at | LOC102642602 /// Rpl22        | RPL22      | 1.36  | 6.06  | 3.75  | 3.53E-03 | 6.29E-02 | -1.94 |
| 1436607_PM_a_at | Kidins220                     | KIDINS220  | -1.44 | 5.20  | -3.75 | 3.54E-03 | 6.30E-02 | -1.94 |
| 1417339_PM_a_at | Dynll1                        | DYNLL1     | -1.20 | 8.00  | -3.75 | 3.54E-03 | 6.30E-02 | -1.94 |
| 1448460_PM_at   | Acvr1                         | ACVR1      | -1.48 | 3.67  | -3.75 | 3.54E-03 | 6.31E-02 | -1.94 |
| 1419360_PM_a_at | Ss18                          | SS18       | -0.45 | 3.94  | -3.75 | 3.55E-03 | 6.31E-02 | -1.94 |
| 1419641_PM_at   | Purb                          | PURB       | -1.05 | 5.93  | -3.75 | 3.56E-03 | 6.34E-02 | -1.95 |
| 1452083_PM_a_at | Pja1                          | PJA1       | -1.00 | 7.31  | -3.75 | 3.56E-03 | 6.34E-02 | -1.95 |
| 1458179_PM_at   | ---                           | NA         | 0.92  | 2.76  | 3.75  | 3.56E-03 | 6.34E-02 | -1.95 |
| 1451627_PM_a_at | Slc1a2                        | SLC1A2     | -0.90 | 7.51  | -3.75 | 3.57E-03 | 6.34E-02 | -1.95 |
| 1431149_PM_at   | B430105A11Rik                 | NA         | -0.68 | 2.74  | -3.75 | 3.57E-03 | 6.35E-02 | -1.95 |
| 1427186_PM_a_at | Mef2a                         | MEF2A      | -1.50 | 3.40  | -3.75 | 3.58E-03 | 6.35E-02 | -1.95 |
| 1415698_PM_at   | Golm1                         | GOLM1      | -1.12 | 6.47  | -3.75 | 3.58E-03 | 6.35E-02 | -1.95 |
| 1436174_PM_at   | Atad2                         | ATAD2      | -1.47 | 4.93  | -3.74 | 3.59E-03 | 6.37E-02 | -1.95 |
| 1416605_PM_at   | Nhp2                          | NHP2       | 0.39  | 2.31  | 3.74  | 3.59E-03 | 6.37E-02 | -1.95 |
| 1446664_PM_at   | D15Ert154e                    | NA         | 0.36  | 3.27  | 3.74  | 3.59E-03 | 6.37E-02 | -1.95 |
| 1418795_PM_at   | Cds2                          | CDS2       | 0.75  | 4.35  | 3.74  | 3.60E-03 | 6.37E-02 | -1.96 |
| 1423562_PM_at   | Prrt1                         | NA         | 0.50  | 2.63  | 3.74  | 3.60E-03 | 6.38E-02 | -1.96 |
| 1452225_PM_at   | Sppl2a                        | SPPL2A     | -1.06 | 5.56  | -3.74 | 3.60E-03 | 6.38E-02 | -1.96 |
| 1457285_PM_at   | Zscan26                       | ZSCAN26    | -1.09 | 5.48  | -3.74 | 3.60E-03 | 6.38E-02 | -1.96 |
| 1448196_PM_at   | Mat2b                         | MAT2B      | -1.05 | 5.81  | -3.74 | 3.61E-03 | 6.39E-02 | -1.96 |
| 1436913_PM_at   | Cdc14a                        | CDC14A     | -0.73 | 3.69  | -3.74 | 3.61E-03 | 6.39E-02 | -1.96 |
| 1422866_PM_at   | Col13a1                       | COL13A1    | 0.71  | 3.35  | 3.74  | 3.62E-03 | 6.39E-02 | -1.96 |
| 1455937_PM_at   | Lrrtm4                        | LRRTM4     | -0.84 | 4.27  | -3.74 | 3.62E-03 | 6.40E-02 | -1.96 |
| 1435711_PM_at   | ---                           | NA         | 0.46  | 4.00  | 3.74  | 3.62E-03 | 6.40E-02 | -1.96 |
| 1423220_PM_at   | Eif4e                         | EIF4E      | -0.64 | 5.14  | -3.74 | 3.64E-03 | 6.42E-02 | -1.97 |
| 1429330_PM_at   | Gabra4                        | GABRA4     | -0.39 | 2.78  | -3.74 | 3.63E-03 | 6.42E-02 | -1.97 |
| 1452958_PM_at   | Asphd2                        | ASPHD2     | -0.66 | 3.67  | -3.74 | 3.64E-03 | 6.42E-02 | -1.97 |
| 1429348_PM_at   | Sema3c                        | SEMA3C     | -0.55 | 2.36  | -3.73 | 3.65E-03 | 6.43E-02 | -1.97 |
| 1444649_PM_at   | ---                           | NA         | 0.87  | 3.50  | 3.73  | 3.65E-03 | 6.43E-02 | -1.97 |

|                 |                          |          |       |      |       |          |          |       |
|-----------------|--------------------------|----------|-------|------|-------|----------|----------|-------|
| 1426987_PM_at   | Inafm2                   | NA       | -0.80 | 3.37 | -3.73 | 3.65E-03 | 6.43E-02 | -1.97 |
| 1433440_PM_x_at | Uba2                     | UBA2     | -0.82 | 5.77 | -3.73 | 3.65E-03 | 6.44E-02 | -1.97 |
| 1460331_PM_at   | Tm9sf2                   | TM9SF2   | -1.07 | 3.15 | -3.73 | 3.66E-03 | 6.44E-02 | -1.97 |
| 1431746_PM_a_at | Uba3                     | UBA3     | -0.82 | 3.93 | -3.73 | 3.66E-03 | 6.45E-02 | -1.97 |
| 1426522_PM_at   | Hadhb                    | HADHB    | -1.55 | 4.76 | -3.73 | 3.67E-03 | 6.46E-02 | -1.98 |
| 1457032_PM_at   | Ak5                      | AK5      | -1.53 | 6.79 | -3.73 | 3.67E-03 | 6.46E-02 | -1.98 |
| 1425909_PM_at   | ---                      | NA       | 0.36  | 3.17 | 3.73  | 3.67E-03 | 6.46E-02 | -1.98 |
| 1434349_PM_at   | Vars2                    | VARS2    | 0.40  | 2.99 | 3.73  | 3.68E-03 | 6.46E-02 | -1.98 |
| 1443286_PM_at   | AU019754                 | NA       | 0.56  | 2.71 | 3.73  | 3.68E-03 | 6.46E-02 | -1.98 |
| 1436692_PM_at   | E130308A19Rik            | KIAA1958 | 1.61  | 4.97 | 3.73  | 3.68E-03 | 6.46E-02 | -1.98 |
| 1451236_PM_at   | Rerg                     | REGG     | -0.87 | 2.79 | -3.73 | 3.68E-03 | 6.46E-02 | -1.98 |
| 1425900_PM_at   | Hkdc1                    | HKDC1    | 0.43  | 2.72 | 3.73  | 3.68E-03 | 6.46E-02 | -1.98 |
| 1430247_PM_at   | Daam2                    | DAAM2    | 1.07  | 4.28 | 3.73  | 3.69E-03 | 6.47E-02 | -1.98 |
| 1421312_PM_a_at | Kifc2                    | KIFC2    | -1.31 | 6.97 | -3.73 | 3.70E-03 | 6.48E-02 | -1.98 |
| 1427247_PM_at   | Plppr4                   | PLPPR4   | -1.03 | 8.99 | -3.73 | 3.70E-03 | 6.48E-02 | -1.98 |
| 1423350_PM_at   | Socs5                    | SOCS5    | -0.98 | 6.08 | -3.73 | 3.70E-03 | 6.48E-02 | -1.98 |
| 1421126_PM_at   | Ryr2                     | RYZ      | -1.05 | 4.73 | -3.72 | 3.71E-03 | 6.50E-02 | -1.99 |
| 1430975_PM_at   | 8430416G17Rik /// Gm4013 | NA       | 0.42  | 3.28 | 3.72  | 3.72E-03 | 6.51E-02 | -1.99 |
| 1418592_PM_at   | Dnaja4                   | DNAJA4   | 0.35  | 2.95 | 3.72  | 3.73E-03 | 6.52E-02 | -1.99 |
| 1453016_PM_at   | Hspb11                   | HSPB11   | -0.66 | 3.25 | -3.72 | 3.73E-03 | 6.53E-02 | -1.99 |
| 1424635_PM_at   | Eef1a1                   | NA       | -1.37 | 7.95 | -3.72 | 3.74E-03 | 6.53E-02 | -1.99 |
| 1416902_PM_a_at | Cox5b /// LOC102641600   | COX5B    | -0.98 | 9.06 | -3.72 | 3.74E-03 | 6.53E-02 | -1.99 |
| 1428210_PM_s_at | Chuk                     | CHUK     | -0.97 | 5.26 | -3.72 | 3.74E-03 | 6.53E-02 | -1.99 |
| 1446257_PM_at   | Hs6st2                   | HS6ST2   | 0.44  | 2.51 | 3.72  | 3.74E-03 | 6.53E-02 | -1.99 |
| 1415961_PM_at   | Iitm2c                   | ITM2C    | -0.65 | 6.76 | -3.72 | 3.74E-03 | 6.54E-02 | -2.00 |
| 1434693_PM_at   | LOC105243129             | NA       | 0.57  | 3.14 | 3.72  | 3.74E-03 | 6.54E-02 | -2.00 |
| 1454797_PM_at   | Tmem55b                  | TMEM55B  | -0.88 | 4.30 | -3.72 | 3.75E-03 | 6.55E-02 | -2.00 |
| 1418558_PM_at   | Rax                      | RAX      | 0.31  | 2.40 | 3.72  | 3.75E-03 | 6.55E-02 | -2.00 |
| 1435057_PM_x_at | Polr1e                   | POLR1E   | -0.38 | 2.74 | -3.72 | 3.76E-03 | 6.56E-02 | -2.00 |
| 1451493_PM_at   | Ndfip1                   | NDFIP1   | -0.83 | 5.18 | -3.71 | 3.77E-03 | 6.57E-02 | -2.00 |
| 1458439_PM_a_at | Dzip3                    | DZIP3    | -1.26 | 6.85 | -3.71 | 3.77E-03 | 6.57E-02 | -2.00 |
| 1438157_PM_s_at | Nfkbia                   | NFKBIA   | 0.99  | 6.09 | 3.71  | 3.78E-03 | 6.58E-02 | -2.00 |
| 1437062_PM_s_at | Phyhipl                  | PHYHIPL  | -1.61 | 7.55 | -3.71 | 3.79E-03 | 6.59E-02 | -2.01 |
| 1456505_PM_at   | Braf                     | BRAF     | -1.59 | 5.51 | -3.71 | 3.78E-03 | 6.59E-02 | -2.01 |
| 1421850_PM_at   | Map1b                    | MAP1B    | -0.84 | 8.83 | -3.71 | 3.78E-03 | 6.59E-02 | -2.01 |
| 1417907_PM_at   | Gm10705 /// Ube2l3       | UBE2L5P  | -1.34 | 4.05 | -3.71 | 3.79E-03 | 6.59E-02 | -2.01 |
| 1450120_PM_at   | Scn1a                    | SCN1A    | -1.03 | 5.22 | -3.71 | 3.80E-03 | 6.60E-02 | -2.01 |
| 1450016_PM_at   | Ccng1                    | CCNG1    | -1.11 | 5.10 | -3.71 | 3.80E-03 | 6.60E-02 | -2.01 |
| 1447558_PM_at   | ---                      | NA       | 0.84  | 3.48 | 3.71  | 3.80E-03 | 6.61E-02 | -2.01 |
| 1435059_PM_at   | Asap1                    | ASAP1    | -0.51 | 3.79 | -3.71 | 3.81E-03 | 6.62E-02 | -2.01 |
| 1418170_PM_a_at | Zcchc14                  | ZCCHC14  | -0.59 | 5.10 | -3.71 | 3.82E-03 | 6.64E-02 | -2.02 |
| 1439891_PM_at   | Zfp703                   | NA       | 0.41  | 3.09 | 3.71  | 3.82E-03 | 6.64E-02 | -2.02 |
| 1445983_PM_at   | ---                      | NA       | -0.32 | 2.42 | -3.71 | 3.83E-03 | 6.64E-02 | -2.02 |
| 1438810_PM_at   | ---                      | NA       | 0.43  | 2.76 | 3.71  | 3.83E-03 | 6.64E-02 | -2.02 |
| 1436082_PM_at   | ---                      | NA       | -1.08 | 3.94 | -3.70 | 3.83E-03 | 6.64E-02 | -2.02 |
| 1434745_PM_at   | Ccnd2                    | CCND2    | -1.33 | 3.59 | -3.70 | 3.84E-03 | 6.65E-02 | -2.02 |
| 1458510_PM_at   | AU019823                 | C11orf57 | 0.55  | 4.01 | 3.70  | 3.84E-03 | 6.65E-02 | -2.02 |
| 1455421_PM_x_at | Fam131b                  | FAM131B  | -1.11 | 5.79 | -3.70 | 3.84E-03 | 6.65E-02 | -2.02 |
| 1436499_PM_at   | Sgms1                    | SGMS1    | -0.64 | 2.69 | -3.70 | 3.85E-03 | 6.65E-02 | -2.02 |
| 1460385_PM_a_at | Rnf112                   | RNF112   | 0.42  | 3.08 | 3.70  | 3.85E-03 | 6.65E-02 | -2.02 |
| 1430216_PM_at   | Zfp292                   | ZNF292   | 1.00  | 3.34 | 3.70  | 3.84E-03 | 6.65E-02 | -2.02 |
| 1427241_PM_at   | Papolg                   | PAPOLG   | -0.80 | 3.09 | -3.70 | 3.85E-03 | 6.65E-02 | -2.02 |
| 1418361_PM_at   | Gas8                     | GAS8     | 0.46  | 2.84 | 3.70  | 3.86E-03 | 6.67E-02 | -2.03 |
| 1445512_PM_at   | Brd4                     | NA       | 0.49  | 2.84 | 3.70  | 3.86E-03 | 6.67E-02 | -2.03 |
| 1437406_PM_x_at | Igfbbp4                  | IGFBP4   | -1.91 | 4.84 | -3.70 | 3.87E-03 | 6.68E-02 | -2.03 |
| 1456283_PM_at   | Neto1                    | NETO1    | -1.43 | 8.00 | -3.70 | 3.88E-03 | 6.68E-02 | -2.03 |
| 1435169_PM_at   | Crebrf                   | CREBRF   | -0.68 | 4.46 | -3.70 | 3.88E-03 | 6.68E-02 | -2.03 |
| 1434393_PM_at   | Usp34                    | USP34    | -0.65 | 2.64 | -3.70 | 3.87E-03 | 6.68E-02 | -2.03 |
| 1454941_PM_at   | Nmt1                     | NMT1     | -0.57 | 5.34 | -3.70 | 3.88E-03 | 6.68E-02 | -2.03 |
| 1428862_PM_at   | Ttc17                    | TTC17    | -0.55 | 3.48 | -3.70 | 3.88E-03 | 6.68E-02 | -2.03 |
| 1451068_PM_s_at | Rps25                    | RPS25    | -1.80 | 6.41 | -3.70 | 3.88E-03 | 6.68E-02 | -2.03 |
| 1449272_PM_at   | Cadm3                    | CADM3    | -0.47 | 4.73 | -3.70 | 3.88E-03 | 6.68E-02 | -2.03 |
| 1423401_PM_at   | Etv6                     | ETV6     | 0.39  | 2.60 | 3.70  | 3.88E-03 | 6.68E-02 | -2.03 |
| 1451886_PM_at   | Speg                     | SPEG     | 1.57  | 7.85 | 3.70  | 3.89E-03 | 6.68E-02 | -2.03 |
| 1443597_PM_at   | Med14                    | MED14    | -0.47 | 2.43 | -3.70 | 3.89E-03 | 6.69E-02 | -2.03 |
| 1435207_PM_at   | Dixdc1                   | DIXDC1   | -1.61 | 4.36 | -3.70 | 3.89E-03 | 6.69E-02 | -2.03 |
| 1426011_PM_a_at | Ggnbp2                   | GGNBP2   | -1.17 | 5.78 | -3.70 | 3.89E-03 | 6.69E-02 | -2.03 |
| 1416496_PM_at   | Mrfap1                   | MRFAP1   | -1.00 | 8.60 | -3.70 | 3.89E-03 | 6.69E-02 | -2.03 |
| 1419945_PM_s_at | Rab2a                    | RAB2A    | -1.18 | 7.76 | -3.69 | 3.91E-03 | 6.70E-02 | -2.04 |
| 1430181_PM_at   | H1fnt                    | H1FNT    | 0.32  | 2.96 | 3.69  | 3.91E-03 | 6.70E-02 | -2.04 |
| 1460483_PM_at   | ---                      | NA       | 0.77  | 3.32 | 3.69  | 3.91E-03 | 6.70E-02 | -2.04 |
| 1430356_PM_at   | ---                      | NA       | 1.20  | 3.58 | 3.69  | 3.91E-03 | 6.70E-02 | -2.04 |
| 1457802_PM_at   | ---                      | NA       | 1.45  | 5.09 | 3.69  | 3.91E-03 | 6.70E-02 | -2.04 |
| 1422424_PM_at   | ---                      | NA       | 1.69  | 5.97 | 3.69  | 3.91E-03 | 6.70E-02 | -2.04 |

|                 |            |            |       |      |       |          |          |       |
|-----------------|------------|------------|-------|------|-------|----------|----------|-------|
| 1415925_PM_a_at | Nup62      | NA         | -1.25 | 4.48 | -3.69 | 3.91E-03 | 6.70E-02 | -2.04 |
| 1451502_PM_at   | Pla2g10    | PLA2G10    | 0.39  | 2.38 | 3.69  | 3.92E-03 | 6.71E-02 | -2.04 |
| 1426245_PM_s_at | Mapre2     | MAPRE2     | -0.73 | 6.27 | -3.69 | 3.92E-03 | 6.71E-02 | -2.04 |
| 1416799_PM_at   | Trpm7      | TRPM7      | -0.92 | 3.77 | -3.69 | 3.92E-03 | 6.72E-02 | -2.04 |
| 1416904_PM_at   | Mbnl1      | MBNL1      | -0.83 | 3.49 | -3.69 | 3.93E-03 | 6.73E-02 | -2.04 |
| 1423515_PM_at   | Scn8a      | SCN8A      | -1.52 | 7.06 | -3.69 | 3.94E-03 | 6.73E-02 | -2.05 |
| 1417191_PM_at   | Dnajb9     | DNAJB9     | -1.35 | 6.09 | -3.69 | 3.94E-03 | 6.73E-02 | -2.05 |
| 1418860_PM_a_at | Letmd1     | LETMD1     | -1.20 | 4.89 | -3.69 | 3.94E-03 | 6.73E-02 | -2.05 |
| 1422526_PM_at   | Acs1       | ACSL1      | -0.79 | 3.56 | -3.69 | 3.95E-03 | 6.73E-02 | -2.05 |
| 1415919_PM_at   | Npdc1      | NPDC1      | -0.65 | 6.08 | -3.69 | 3.94E-03 | 6.73E-02 | -2.05 |
| 1418380_PM_at   | Terf1      | TERF1      | 0.69  | 3.52 | 3.69  | 3.94E-03 | 6.73E-02 | -2.05 |
| 1419766_PM_at   | Sik1       | CU639417.2 | 0.69  | 3.61 | 3.69  | 3.94E-03 | 6.73E-02 | -2.05 |
| 1459235_PM_at   | ---        | NA         | 1.23  | 4.09 | 3.69  | 3.94E-03 | 6.73E-02 | -2.05 |
| 1452664_PM_a_at | Tm7sf3     | TM7SF3     | -1.30 | 3.81 | -3.69 | 3.95E-03 | 6.73E-02 | -2.05 |
| 1453003_PM_at   | Sorl1      | SORL1      | -1.95 | 6.61 | -3.69 | 3.95E-03 | 6.74E-02 | -2.05 |
| 1449765_PM_at   | C76628     | NA         | 0.66  | 2.49 | 3.69  | 3.96E-03 | 6.74E-02 | -2.05 |
| 1423934_PM_at   | Plet1      | PLET1      | 0.38  | 2.57 | 3.68  | 3.97E-03 | 6.76E-02 | -2.05 |
| 1437560_PM_at   | Ntrk2      | NTRK2      | 0.70  | 6.33 | 3.68  | 3.97E-03 | 6.76E-02 | -2.06 |
| 1418442_PM_at   | Xpo1       | XPO1       | -0.96 | 5.95 | -3.68 | 3.98E-03 | 6.77E-02 | -2.06 |
| 1455477_PM_s_at | Pdk1ip1    | PDZK1IP1   | 0.45  | 3.32 | 3.68  | 3.98E-03 | 6.77E-02 | -2.06 |
| 1424330_PM_at   | Senp1      | SENP1      | 1.03  | 4.66 | 3.68  | 3.98E-03 | 6.77E-02 | -2.06 |
| 1450026_PM_a_at | B3gnt2     | B3GNT2     | -1.57 | 5.15 | -3.68 | 3.98E-03 | 6.77E-02 | -2.06 |
| 1423657_PM_at   | Cdipt      | CDIPT      | -1.03 | 3.99 | -3.68 | 3.99E-03 | 6.77E-02 | -2.06 |
| 1434491_PM_a_at | Cox6c      | COX6C      | -0.66 | 9.89 | -3.68 | 3.99E-03 | 6.78E-02 | -2.06 |
| 1451546_PM_s_at | Tmem40     | TMEM40     | 0.29  | 2.67 | 3.68  | 3.99E-03 | 6.78E-02 | -2.06 |
| 1448258_PM_a_at | Spcs1      | SPCS1      | -1.41 | 6.31 | -3.68 | 4.00E-03 | 6.79E-02 | -2.06 |
| 1453899_PM_at   | ---        | NA         | 0.37  | 2.44 | 3.68  | 4.00E-03 | 6.79E-02 | -2.06 |
| 1431867_PM_a_at | Pdilt      | PDILT      | 0.41  | 2.90 | 3.68  | 4.00E-03 | 6.79E-02 | -2.06 |
| 1455628_PM_at   | Epb41lb    | EPB41LB    | -0.97 | 6.08 | -3.68 | 4.01E-03 | 6.80E-02 | -2.06 |
| 1443263_PM_at   | ---        | NA         | 0.44  | 2.59 | 3.68  | 4.01E-03 | 6.80E-02 | -2.07 |
| 1428978_PM_at   | Ppm1a      | NA         | -1.20 | 4.52 | -3.68 | 4.02E-03 | 6.80E-02 | -2.07 |
| 1426794_PM_at   | Ptpns      | PTPRS      | -0.89 | 8.32 | -3.68 | 4.03E-03 | 6.81E-02 | -2.07 |
| 1456125_PM_a_at | Dynll1     | DYNLL1     | -0.73 | 8.10 | -3.68 | 4.02E-03 | 6.81E-02 | -2.07 |
| 1459485_PM_at   | ---        | NA         | -0.44 | 2.76 | -3.68 | 4.02E-03 | 6.81E-02 | -2.07 |
| 1425592_PM_at   | Tnpo2      | TNPO2      | 0.40  | 2.47 | 3.68  | 4.02E-03 | 6.81E-02 | -2.07 |
| 1453144_PM_at   | Pisd-ps3   | NA         | 1.38  | 5.09 | 3.68  | 4.02E-03 | 6.81E-02 | -2.07 |
| 1420100_PM_s_at | D13Ert787e | NA         | 0.74  | 2.87 | 3.68  | 4.03E-03 | 6.81E-02 | -2.07 |
| 1431718_PM_at   | ---        | NA         | 0.50  | 2.64 | 3.68  | 4.03E-03 | 6.81E-02 | -2.07 |
| 1449834_PM_at   | Magix      | MAGIX      | 0.27  | 3.53 | 3.67  | 4.03E-03 | 6.81E-02 | -2.07 |
| 1437375_PM_at   | Rfx3       | RFX3       | -1.25 | 5.23 | -3.67 | 4.03E-03 | 6.81E-02 | -2.07 |
| 1437566_PM_at   | Gnl2       | GNL2       | -0.28 | 2.47 | -3.67 | 4.04E-03 | 6.81E-02 | -2.07 |
| 1417086_PM_at   | Pafah1b1   | PAFAH1B1   | -0.84 | 5.81 | -3.67 | 4.04E-03 | 6.82E-02 | -2.07 |
| 1418124_PM_at   | Emc4       | EMC4       | -0.78 | 4.48 | -3.67 | 4.05E-03 | 6.82E-02 | -2.07 |
| 1444058_PM_at   | Dzip3      | DZIP3      | -0.76 | 5.72 | -3.67 | 4.05E-03 | 6.83E-02 | -2.07 |
| 1419497_PM_at   | Cdkn1b     | CDKN1B     | 1.77  | 3.93 | 3.67  | 4.05E-03 | 6.83E-02 | -2.07 |
| 1437429_PM_at   | Adamts1    | ADAMTS1    | 0.55  | 2.62 | 3.67  | 4.05E-03 | 6.83E-02 | -2.07 |
| 1421871_PM_at   | Sh3bgrl    | SH3BGR1    | -1.57 | 7.20 | -3.67 | 4.06E-03 | 6.83E-02 | -2.08 |
| 1428128_PM_at   | Atxn7l3b   | ATXN7L3B   | -1.15 | 6.35 | -3.67 | 4.06E-03 | 6.83E-02 | -2.08 |
| 1416454_PM_s_at | Acta2      | ACTA2      | -2.75 | 4.54 | -3.67 | 4.07E-03 | 6.84E-02 | -2.08 |
| 1451572_PM_a_at | Mff        | MTF        | -1.07 | 4.19 | -3.67 | 4.07E-03 | 6.84E-02 | -2.08 |
| 1449466_PM_at   | Clec3b     | CLEC3B     | 0.36  | 2.19 | 3.67  | 4.07E-03 | 6.84E-02 | -2.08 |
| 1451551_PM_at   | Krt84      | KRT84      | 0.37  | 2.73 | 3.67  | 4.07E-03 | 6.84E-02 | -2.08 |
| 1427209_PM_at   | Baz2a      | BAZ2A      | 0.82  | 3.48 | 3.67  | 4.07E-03 | 6.84E-02 | -2.08 |
| 1454704_PM_at   | Scarb2     | SCARB2     | -1.02 | 5.64 | -3.67 | 4.08E-03 | 6.84E-02 | -2.08 |
| 1423962_PM_at   | Wdr26      | WDR26      | -1.01 | 4.17 | -3.67 | 4.08E-03 | 6.84E-02 | -2.08 |
| 1441151_PM_at   | AU044157   | NA         | 0.84  | 3.91 | 3.67  | 4.08E-03 | 6.84E-02 | -2.08 |
| 1434170_PM_at   | Dcaf12l1   | DCAF12L1   | -1.43 | 5.40 | -3.67 | 4.09E-03 | 6.87E-02 | -2.09 |
| 1427289_PM_at   | Ddhd1      | DDHD1      | 0.41  | 3.79 | 3.66  | 4.10E-03 | 6.88E-02 | -2.09 |
| 1419717_PM_at   | Sema3e     | SEMA3E     | -0.61 | 2.85 | -3.66 | 4.11E-03 | 6.88E-02 | -2.09 |
| 1421335_PM_a_at | Egfl7      | EGFL7      | 0.31  | 3.22 | 3.66  | 4.11E-03 | 6.88E-02 | -2.09 |
| 1417263_PM_at   | Ptgs2      | PTGS2      | -1.19 | 4.04 | -3.66 | 4.13E-03 | 6.91E-02 | -2.09 |
| 1458550_PM_at   | Myo1d      | MYO1D      | -0.37 | 2.37 | -3.66 | 4.13E-03 | 6.91E-02 | -2.09 |
| 1457353_PM_at   | ---        | NA         | -0.34 | 2.07 | -3.66 | 4.13E-03 | 6.91E-02 | -2.09 |
| 1450833_PM_at   | Chrm1      | CHRM1      | 0.45  | 2.81 | 3.66  | 4.13E-03 | 6.91E-02 | -2.09 |
| 1425523_PM_at   | Rbm25      | RBM25      | 0.92  | 5.23 | 3.66  | 4.13E-03 | 6.91E-02 | -2.09 |
| 1424662_PM_at   | Pmpca      | PMPCA      | -0.86 | 5.39 | -3.66 | 4.14E-03 | 6.92E-02 | -2.10 |
| 1444858_PM_at   | ---        | NA         | 0.47  | 2.39 | 3.66  | 4.14E-03 | 6.92E-02 | -2.10 |
| 1427592_PM_at   | Pcdh7      | PCDH7      | -1.41 | 5.40 | -3.66 | 4.14E-03 | 6.92E-02 | -2.10 |
| 1458698_PM_at   | ---        | NA         | 0.33  | 2.19 | 3.66  | 4.15E-03 | 6.93E-02 | -2.10 |
| 1417179_PM_at   | Tspan5     | TSPAN5     | -1.10 | 4.42 | -3.66 | 4.15E-03 | 6.93E-02 | -2.10 |
| 1425565_PM_at   | Rest       | REST       | 0.51  | 2.98 | 3.66  | 4.16E-03 | 6.94E-02 | -2.10 |
| 1447382_PM_at   | Pigt       | PIGT       | -0.86 | 2.53 | -3.66 | 4.16E-03 | 6.94E-02 | -2.10 |
| 1423123_PM_at   | Rad54l     | RAD54L     | 0.84  | 3.99 | 3.66  | 4.16E-03 | 6.94E-02 | -2.10 |
| 1460165_PM_at   | Ppp1ca     | PPP1CA     | -0.87 | 3.63 | -3.65 | 4.17E-03 | 6.95E-02 | -2.10 |
| 1431191_PM_a_at | Syt1       | SYT1       | -0.84 | 8.73 | -3.65 | 4.17E-03 | 6.95E-02 | -2.10 |

|                 |                       |          |       |      |       |          |          |       |
|-----------------|-----------------------|----------|-------|------|-------|----------|----------|-------|
| 1434786_PM_at   | Ppp1r12b              | PPP1R12B | -0.82 | 4.23 | -3.65 | 4.18E-03 | 6.96E-02 | -2.11 |
| 1429582_PM_at   | Nacc2                 | NACC2    | 0.45  | 4.81 | 3.65  | 4.18E-03 | 6.96E-02 | -2.11 |
| 1416018_PM_at   | Dr1                   | DR1      | -1.40 | 4.10 | -3.65 | 4.18E-03 | 6.96E-02 | -2.11 |
| 1436842_PM_at   | Fam63b                | MINDY2   | -0.73 | 5.12 | -3.65 | 4.18E-03 | 6.96E-02 | -2.11 |
| 1428138_PM_s_at | Arl8b                 | ARL8B    | -1.64 | 6.78 | -3.65 | 4.19E-03 | 6.97E-02 | -2.11 |
| 1434540_PM_a_at | CltA                  | CLTA     | 2.10  | 6.37 | 3.65  | 4.20E-03 | 6.98E-02 | -2.11 |
| 1448465_PM_at   | Nipsnap1              | NIPSNAP1 | -0.56 | 3.10 | -3.65 | 4.20E-03 | 6.98E-02 | -2.11 |
| 1420345_PM_at   | Cldn14                | CLDN14   | 0.33  | 2.48 | 3.65  | 4.20E-03 | 6.98E-02 | -2.11 |
| 1460720_PM_at   | Trpc4ap               | TRPC4AP  | 0.34  | 3.50 | 3.65  | 4.21E-03 | 6.98E-02 | -2.11 |
| 1459950_PM_at   | ---                   | NA       | 0.55  | 2.71 | 3.65  | 4.21E-03 | 6.99E-02 | -2.11 |
| 1427159_PM_at   | Pcf11                 | PCF11    | -1.26 | 4.66 | -3.65 | 4.22E-03 | 7.00E-02 | -2.12 |
| 1426895_PM_at   | Zfp24                 | ZNF24    | -0.88 | 4.01 | -3.65 | 4.22E-03 | 7.00E-02 | -2.11 |
| 1418433_PM_at   | Cab39                 | CAB39    | -1.14 | 4.48 | -3.65 | 4.23E-03 | 7.01E-02 | -2.12 |
| 1416478_PM_a_at | Mdh2                  | MDH2     | -1.06 | 6.23 | -3.65 | 4.23E-03 | 7.01E-02 | -2.12 |
| 1435783_PM_at   | Fam169a               | FAM169A  | -0.97 | 4.10 | -3.65 | 4.23E-03 | 7.01E-02 | -2.12 |
| 1425518_PM_at   | Rapgef4               | RAPGEF4  | -1.37 | 5.87 | -3.65 | 4.24E-03 | 7.01E-02 | -2.12 |
| 1436117_PM_at   | AB30010M2ORik         | KIAA1107 | -1.16 | 3.51 | -3.65 | 4.24E-03 | 7.01E-02 | -2.12 |
| 1451086_PM_s_at | Rac1                  | RAC1     | -0.91 | 7.73 | -3.65 | 4.24E-03 | 7.01E-02 | -2.12 |
| 1438919_PM_x_at | Fdft1                 | FDFT1    | 0.30  | 2.93 | 3.65  | 4.24E-03 | 7.01E-02 | -2.12 |
| 1437497_PM_a_at | Hsp90aa1              | HSP90AA1 | 0.74  | 9.61 | 3.65  | 4.23E-03 | 7.01E-02 | -2.12 |
| 1435227_PM_at   | Bcl11b                | BCL11B   | -1.77 | 6.08 | -3.64 | 4.24E-03 | 7.02E-02 | -2.12 |
| 1446346_PM_at   | ---                   | NA       | 0.45  | 2.74 | 3.64  | 4.25E-03 | 7.03E-02 | -2.12 |
| 1437326_PM_x_at | Cela3b                | CELA3B   | 0.38  | 2.58 | 3.64  | 4.25E-03 | 7.03E-02 | -2.12 |
| 1434743_PM_x_at | Rusc1                 | RUSC1    | 0.96  | 4.24 | 3.64  | 4.26E-03 | 7.03E-02 | -2.12 |
| 1422736_PM_at   | Ranbp9                | RANBP9   | -1.49 | 4.16 | -3.64 | 4.27E-03 | 7.03E-02 | -2.13 |
| 1426803_PM_at   | Gm17066 /// Rbm26     | RBM26    | -0.73 | 3.68 | -3.64 | 4.27E-03 | 7.03E-02 | -2.13 |
| 1426879_PM_at   | Trmt1l                | TRMT1L   | -0.41 | 2.30 | -3.64 | 4.27E-03 | 7.03E-02 | -2.13 |
| 1438512_PM_at   | BC048679              | NA       | 0.43  | 3.77 | 3.64  | 4.26E-03 | 7.03E-02 | -2.13 |
| 1417758_PM_at   | Itga2b                | ITGA2B   | 0.45  | 2.63 | 3.64  | 4.27E-03 | 7.03E-02 | -2.13 |
| 1421004_PM_at   | Cntrl                 | CNTRL    | 0.46  | 2.68 | 3.64  | 4.27E-03 | 7.03E-02 | -2.13 |
| 1428708_PM_x_at | Ptms                  | NA       | 1.18  | 8.50 | 3.64  | 4.27E-03 | 7.03E-02 | -2.13 |
| 1450034_PM_at   | Stat1                 | STAT1    | -0.92 | 2.78 | -3.64 | 4.27E-03 | 7.04E-02 | -2.13 |
| 1443590_PM_at   | ---                   | NA       | 0.48  | 2.84 | 3.64  | 4.28E-03 | 7.04E-02 | -2.13 |
| 1447851_PM_x_at | Atp10a                | ATP10A   | 0.74  | 2.64 | 3.64  | 4.28E-03 | 7.04E-02 | -2.13 |
| 1427270_PM_a_at | Bsdc1                 | BSDC1    | -1.14 | 5.97 | -3.64 | 4.28E-03 | 7.04E-02 | -2.13 |
| 1449814_PM_at   | Frat1                 | NA       | 0.39  | 3.46 | 3.64  | 4.28E-03 | 7.04E-02 | -2.13 |
| 1454482_PM_at   | 5830474E16Rik         | NA       | 1.35  | 5.16 | 3.64  | 4.28E-03 | 7.04E-02 | -2.13 |
| 1459466_PM_at   | ---                   | NA       | 0.73  | 5.65 | 3.64  | 4.30E-03 | 7.06E-02 | -2.13 |
| 1423080_PM_at   | Tomm20                | TOMM20   | -0.61 | 3.44 | -3.64 | 4.30E-03 | 7.07E-02 | -2.13 |
| 1428658_PM_at   | LOC105247253 /// Pin4 | PIN4     | 0.76  | 5.16 | 3.64  | 4.31E-03 | 7.08E-02 | -2.14 |
| 1441937_PM_s_at | Pink1                 | PINK1    | -0.95 | 9.54 | -3.63 | 4.32E-03 | 7.08E-02 | -2.14 |
| 1443941_PM_at   | Ccdc149               | CCDC149  | -0.74 | 4.64 | -3.63 | 4.32E-03 | 7.08E-02 | -2.14 |
| 1459073_PM_x_at | ---                   | NA       | 0.49  | 3.08 | 3.63  | 4.32E-03 | 7.08E-02 | -2.14 |
| 1425167_PM_a_at | Gngt1                 | GNGT1    | 0.54  | 3.83 | 3.63  | 4.31E-03 | 7.08E-02 | -2.14 |
| 1436017_PM_at   | Aars2                 | AARS2    | 0.39  | 3.23 | 3.63  | 4.33E-03 | 7.09E-02 | -2.14 |
| 1455009_PM_at   | Cpd                   | CPD      | -1.18 | 5.41 | -3.63 | 4.33E-03 | 7.09E-02 | -2.14 |
| 1417748_PM_x_at | Foxm1                 | FOXM1    | 0.38  | 2.35 | 3.63  | 4.33E-03 | 7.09E-02 | -2.14 |
| 1418161_PM_at   | Jph3                  | JPH3     | -0.89 | 4.64 | -3.63 | 4.35E-03 | 7.11E-02 | -2.14 |
| 1420711_PM_a_at | Pex2                  | PEX2     | -0.56 | 3.47 | -3.63 | 4.35E-03 | 7.11E-02 | -2.14 |
| 1421711_PM_at   | Zfp109                | NA       | 0.33  | 2.85 | 3.63  | 4.35E-03 | 7.11E-02 | -2.14 |
| 1424540_PM_at   | Hipk1                 | HIPK1    | -0.66 | 5.01 | -3.63 | 4.35E-03 | 7.12E-02 | -2.15 |
| 1428241_PM_at   | Ap5s1                 | AP5S1    | 0.30  | 2.79 | 3.63  | 4.36E-03 | 7.13E-02 | -2.15 |
| 1435358_PM_at   | Cuedc1                | CUEDC1   | 0.42  | 3.06 | 3.63  | 4.36E-03 | 7.13E-02 | -2.15 |
| 1432715_PM_at   | ---                   | NA       | 0.27  | 2.44 | 3.63  | 4.37E-03 | 7.15E-02 | -2.15 |
| 1433192_PM_at   | ---                   | NA       | -0.53 | 2.68 | -3.62 | 4.39E-03 | 7.16E-02 | -2.15 |
| 1440201_PM_at   | Slc8a1                | NA       | -0.40 | 2.77 | -3.62 | 4.39E-03 | 7.16E-02 | -2.15 |
| 1438278_PM_a_at | Cwc22                 | CWC22    | 1.33  | 5.32 | 3.62  | 4.39E-03 | 7.16E-02 | -2.15 |
| 1455436_PM_at   | Diras2                | DIRAS2   | -1.14 | 4.53 | -3.62 | 4.39E-03 | 7.17E-02 | -2.16 |
| 1437385_PM_at   | Ccbe1                 | NA       | -1.33 | 5.00 | -3.62 | 4.40E-03 | 7.17E-02 | -2.16 |
| 1454617_PM_at   | Arrdc3                | ARRDC3   | -0.58 | 3.45 | -3.62 | 4.40E-03 | 7.17E-02 | -2.16 |
| 1418814_PM_s_at | Ndufa12               | NDUFA12  | -1.22 | 6.73 | -3.62 | 4.40E-03 | 7.17E-02 | -2.16 |
| 1447587_PM_at   | ---                   | NA       | 1.24  | 3.71 | 3.62  | 4.41E-03 | 7.18E-02 | -2.16 |
| 1434916_PM_at   | Vkorc1l1              | NA       | -0.51 | 4.28 | -3.62 | 4.41E-03 | 7.18E-02 | -2.16 |
| 1454961_PM_at   | Synj1                 | SYNJ1    | -1.59 | 9.13 | -3.62 | 4.41E-03 | 7.18E-02 | -2.16 |
| 1454139_PM_at   | ---                   | NA       | 0.35  | 2.51 | 3.62  | 4.42E-03 | 7.19E-02 | -2.16 |
| 1453999_PM_at   | Urb1                  | URB1     | 0.40  | 3.22 | 3.62  | 4.42E-03 | 7.19E-02 | -2.16 |
| 1417612_PM_at   | Ier5                  | IER5     | -1.04 | 3.88 | -3.62 | 4.43E-03 | 7.20E-02 | -2.16 |
| 1432016_PM_a_at | Idh3a                 | IDH3A    | -0.67 | 6.45 | -3.62 | 4.43E-03 | 7.20E-02 | -2.16 |
| 1448638_PM_at   | Mtbp                  | MTBP     | 0.45  | 2.74 | 3.62  | 4.43E-03 | 7.20E-02 | -2.16 |
| 1440688_PM_at   | Arhgap26              | ARHGAP26 | 1.30  | 5.07 | 3.62  | 4.43E-03 | 7.20E-02 | -2.16 |
| 1427834_PM_at   | Spi16                 | NA       | 0.30  | 2.34 | 3.62  | 4.44E-03 | 7.20E-02 | -2.17 |
| 1449888_PM_at   | Epas1                 | EPAS1    | -1.03 | 3.97 | -3.62 | 4.45E-03 | 7.23E-02 | -2.17 |
| 1442253_PM_at   | Erc2                  | ERCC2    | 0.32  | 3.03 | 3.62  | 4.46E-03 | 7.23E-02 | -2.17 |
| 1427223_PM_a_at | Acsm2                 | ACSM2B   | 0.41  | 2.55 | 3.62  | 4.45E-03 | 7.23E-02 | -2.17 |
| 1444977_PM_at   | ---                   | NA       | 0.45  | 3.00 | 3.62  | 4.46E-03 | 7.23E-02 | -2.17 |

|                 |                                                       |          |       |       |       |          |          |       |
|-----------------|-------------------------------------------------------|----------|-------|-------|-------|----------|----------|-------|
| 1422794_PM_at   | Cul3                                                  | CUL3     | -0.88 | 6.75  | -3.61 | 4.47E-03 | 7.24E-02 | -2.17 |
| 1441654_PM_at   | ---                                                   | NA       | 0.34  | 2.31  | 3.61  | 4.47E-03 | 7.24E-02 | -2.17 |
| 1436900_PM_x_at | Leprot                                                | LEPROT   | -0.85 | 6.59  | -3.61 | 4.48E-03 | 7.25E-02 | -2.17 |
| 1420564_PM_at   | Insrr                                                 | INSRR    | 0.42  | 3.46  | 3.61  | 4.49E-03 | 7.26E-02 | -2.18 |
| 1423138_PM_at   | Wdr4                                                  | WDR4     | 0.58  | 4.32  | 3.61  | 4.49E-03 | 7.26E-02 | -2.18 |
| 1454971_PM_x_at | Tsc22d1                                               | TSC22D1  | -0.77 | 10.04 | -3.61 | 4.50E-03 | 7.27E-02 | -2.18 |
| 1416417_PM_a_at | Ndufb7                                                | NDUFB7   | 0.82  | 9.99  | 3.61  | 4.49E-03 | 7.27E-02 | -2.18 |
| 1427975_PM_at   | Rasl10a                                               | RASL10A  | -0.69 | 2.55  | -3.61 | 4.50E-03 | 7.28E-02 | -2.18 |
| 1416928_PM_at   | Rbm12                                                 | RBM12    | -0.70 | 5.22  | -3.61 | 4.51E-03 | 7.29E-02 | -2.18 |
| 1428939_PM_s_at | Gnaq                                                  | GNAQ     | -1.83 | 6.95  | -3.61 | 4.52E-03 | 7.29E-02 | -2.18 |
| 1415998_PM_at   | Vdac1                                                 | VDAC1    | -1.63 | 6.94  | -3.61 | 4.52E-03 | 7.29E-02 | -2.18 |
| 1435982_PM_at   | Stx12                                                 | STX12    | -0.94 | 5.92  | -3.61 | 4.51E-03 | 7.29E-02 | -2.18 |
| 1433497_PM_at   | Aqr                                                   | AQR      | -0.31 | 2.81  | -3.61 | 4.52E-03 | 7.29E-02 | -2.18 |
| 1444802_PM_at   | Sec22a                                                | SEC22A   | 0.34  | 2.63  | 3.61  | 4.52E-03 | 7.29E-02 | -2.18 |
| 1417488_PM_at   | Fosl1                                                 | FOSL1    | 0.58  | 2.95  | 3.61  | 4.52E-03 | 7.29E-02 | -2.18 |
| 1460421_PM_at   | Gm38402                                               | NA       | -1.06 | 2.73  | -3.61 | 4.52E-03 | 7.29E-02 | -2.18 |
| 1422709_PM_a_at | Wdr46                                                 | WDR46    | 0.45  | 3.73  | 3.61  | 4.52E-03 | 7.29E-02 | -2.19 |
| 1421005_PM_at   | Cntrl                                                 | CNTRL    | 0.96  | 4.68  | 3.61  | 4.53E-03 | 7.29E-02 | -2.19 |
| 1424353_PM_at   | Lrpprc                                                | LRPPRC   | -1.07 | 4.41  | -3.60 | 4.54E-03 | 7.32E-02 | -2.19 |
| 1442021_PM_at   | Gnal                                                  | GNAL     | -1.05 | 4.01  | -3.60 | 4.55E-03 | 7.32E-02 | -2.19 |
| 1416485_PM_at   | Timm23                                                | TIMM23   | -0.55 | 6.22  | -3.60 | 4.55E-03 | 7.32E-02 | -2.19 |
| 1446033_PM_at   | C87882                                                | NA       | 0.37  | 3.20  | 3.60  | 4.55E-03 | 7.32E-02 | -2.19 |
| 1451841_PM_a_at | Ncor2                                                 | NCOR2    | 0.46  | 3.98  | 3.60  | 4.56E-03 | 7.33E-02 | -2.19 |
| 1448199_PM_at   | Ankrd10                                               | ANKRD10  | -1.04 | 5.36  | -3.60 | 4.56E-03 | 7.33E-02 | -2.19 |
| 1460540_PM_at   | ---                                                   | NA       | -0.93 | 2.52  | -3.60 | 4.56E-03 | 7.33E-02 | -2.19 |
| 1435173_PM_at   | Ate1                                                  | ATE1     | -0.78 | 9.10  | -3.60 | 4.57E-03 | 7.33E-02 | -2.19 |
| 1419195_PM_at   | Wfdc15b                                               | NA       | 0.30  | 2.25  | 3.60  | 4.57E-03 | 7.33E-02 | -2.20 |
| 1448220_PM_at   | Ctrb1                                                 | CTRB1    | 0.32  | 2.55  | 3.60  | 4.57E-03 | 7.33E-02 | -2.19 |
| 1417722_PM_at   | Pgl5                                                  | PGL5     | 0.33  | 3.08  | 3.60  | 4.57E-03 | 7.33E-02 | -2.20 |
| 1454859_PM_a_at | Gm9794 /// LOC100044627<br>/// LOC100862455 /// RpL23 | RPL23    | 0.40  | 10.38 | 3.60  | 4.58E-03 | 7.33E-02 | -2.20 |
| 1441309_PM_at   | Adamts10                                              | ADAMTS10 | 0.45  | 3.95  | 3.60  | 4.58E-03 | 7.33E-02 | -2.20 |
| 1450228_PM_a_at | Pip5k1c                                               | PIP5K1C  | 0.63  | 3.11  | 3.60  | 4.56E-03 | 7.33E-02 | -2.19 |
| 1457193_PM_at   | Kmt2c                                                 | KMT2C    | 1.20  | 7.25  | 3.60  | 4.57E-03 | 7.33E-02 | -2.19 |
| 1426361_PM_at   | Zbed6 /// Zc3h11a                                     | ZC3H11B  | 1.41  | 5.00  | 3.60  | 4.57E-03 | 7.33E-02 | -2.20 |
| 1448642_PM_at   | Pcbp1                                                 | PCBP1    | -0.95 | 5.45  | -3.60 | 4.60E-03 | 7.36E-02 | -2.20 |
| 1444560_PM_at   | St7l                                                  | ST7L     | -0.73 | 2.63  | -3.60 | 4.60E-03 | 7.36E-02 | -2.20 |
| 1428516_PM_a_at | Alkbh7                                                | ALKBH7   | 0.33  | 2.88  | 3.60  | 4.60E-03 | 7.36E-02 | -2.20 |
| 1444034_PM_at   | Raggef4                                               | NA       | 0.30  | 2.30  | 3.60  | 4.60E-03 | 7.36E-02 | -2.20 |
| 1424306_PM_at   | Elov4                                                 | ELOVL4   | -0.69 | 4.52  | -3.60 | 4.61E-03 | 7.36E-02 | -2.20 |
| 1424005_PM_at   | B230219D22Rik                                         | CSorf24  | -1.42 | 7.29  | -3.60 | 4.61E-03 | 7.37E-02 | -2.20 |
| 1459826_PM_at   | Kcna2                                                 | KCNQ2    | -1.20 | 7.29  | -3.60 | 4.61E-03 | 7.37E-02 | -2.20 |
| 1455758_PM_at   | Prkcg                                                 | PRKCG    | -1.71 | 8.97  | -3.59 | 4.62E-03 | 7.37E-02 | -2.21 |
| 1418932_PM_at   | Nfil3                                                 | NFIL3    | -0.71 | 5.18  | -3.59 | 4.62E-03 | 7.38E-02 | -2.21 |
| 1460412_PM_at   | Fbln7                                                 | FBLN7    | 0.38  | 2.99  | 3.59  | 4.62E-03 | 7.38E-02 | -2.21 |
| 1441977_PM_at   | ---                                                   | NA       | 0.68  | 3.96  | 3.59  | 4.62E-03 | 7.38E-02 | -2.21 |
| 1458917_PM_at   | ---                                                   | NA       | 1.10  | 4.58  | 3.59  | 4.62E-03 | 7.38E-02 | -2.21 |
| 1451008_PM_at   | St8sia3                                               | ST8SIA3  | -1.51 | 7.95  | -3.59 | 4.63E-03 | 7.39E-02 | -2.21 |
| 1456330_PM_at   | Pcgf2                                                 | PCGF2    | 0.36  | 2.52  | 3.59  | 4.63E-03 | 7.39E-02 | -2.21 |
| 1437458_PM_x_at | Clu                                                   | CLU      | -1.14 | 8.35  | -3.59 | 4.64E-03 | 7.39E-02 | -2.21 |
| 1448882_PM_at   | Emc6                                                  | EMC6     | -0.98 | 3.03  | -3.59 | 4.65E-03 | 7.40E-02 | -2.21 |
| 1428499_PM_at   | Kantr                                                 | NA       | -0.86 | 9.20  | -3.59 | 4.65E-03 | 7.40E-02 | -2.21 |
| 1430532_PM_at   | Dym                                                   | DYM      | 0.37  | 2.99  | 3.59  | 4.65E-03 | 7.41E-02 | -2.21 |
| 1452878_PM_at   | Prkce                                                 | PRKCE    | -1.31 | 7.17  | -3.59 | 4.66E-03 | 7.41E-02 | -2.22 |
| 1423570_PM_at   | Abcg1                                                 | ABCG1    | -0.87 | 4.87  | -3.59 | 4.66E-03 | 7.41E-02 | -2.21 |
| 1455079_PM_at   | Dcun1d4                                               | DCUN1D4  | -0.81 | 2.95  | -3.59 | 4.67E-03 | 7.41E-02 | -2.22 |
| 1447284_PM_at   | Trem1                                                 | TREM1    | 0.39  | 2.44  | 3.59  | 4.66E-03 | 7.41E-02 | -2.22 |
| 1428004_PM_at   | Snrnp25                                               | SNRNP25  | 0.63  | 2.64  | 3.59  | 4.66E-03 | 7.41E-02 | -2.22 |
| 1458472_PM_at   | Rptor                                                 | RPTOR    | 0.44  | 2.78  | 3.59  | 4.67E-03 | 7.42E-02 | -2.22 |
| 1446514_PM_at   | ---                                                   | NA       | 0.30  | 2.72  | 3.59  | 4.68E-03 | 7.43E-02 | -2.22 |
| 1438708_PM_x_at | Ywhab                                                 | YWHAB    | -0.63 | 5.21  | -3.59 | 4.69E-03 | 7.45E-02 | -2.22 |
| 1460429_PM_at   | Cdc5l                                                 | CDC5L    | -1.02 | 3.73  | -3.58 | 4.70E-03 | 7.45E-02 | -2.22 |
| 1445933_PM_at   | Ube2e1                                                | UBE2E1   | 0.62  | 4.68  | 3.58  | 4.70E-03 | 7.45E-02 | -2.22 |
| 1427281_PM_at   | Scn2a1                                                | SCN2A    | -1.07 | 4.18  | -3.58 | 4.71E-03 | 7.46E-02 | -2.22 |
| 1433920_PM_at   | Sema4c                                                | SEMA4C   | -0.83 | 3.16  | -3.58 | 4.71E-03 | 7.46E-02 | -2.22 |
| 1435190_PM_at   | Chl1                                                  | CHL1     | -0.72 | 9.32  | -3.58 | 4.71E-03 | 7.46E-02 | -2.23 |
| 1426512_PM_at   | Olfm3                                                 | OLFM3    | 0.34  | 2.18  | 3.58  | 4.70E-03 | 7.46E-02 | -2.22 |
| 1457149_PM_at   | Ttc22                                                 | TTC22    | 0.63  | 3.25  | 3.58  | 4.71E-03 | 7.46E-02 | -2.23 |
| 1456070_PM_at   | Ptprg                                                 | PTPRG    | -1.92 | 4.81  | -3.58 | 4.72E-03 | 7.46E-02 | -2.23 |
| 1423535_PM_at   | Strn3                                                 | STRN3    | -0.85 | 5.88  | -3.58 | 4.72E-03 | 7.46E-02 | -2.23 |
| 1425952_PM_a_at | Gcg                                                   | GCG      | 0.30  | 2.55  | 3.58  | 4.72E-03 | 7.46E-02 | -2.23 |
| 1453872_PM_at   | Dmrtc2                                                | DMRTC2   | 0.32  | 2.37  | 3.58  | 4.72E-03 | 7.46E-02 | -2.23 |
| 1420926_PM_at   | Arx                                                   | ARX      | 0.40  | 4.04  | 3.58  | 4.71E-03 | 7.46E-02 | -2.23 |
| 1447588_PM_x_at | ---                                                   | NA       | 1.01  | 3.82  | 3.58  | 4.72E-03 | 7.46E-02 | -2.23 |



|                 |                        |          |       |      |       |          |          |       |
|-----------------|------------------------|----------|-------|------|-------|----------|----------|-------|
| 1418570_PM_at   | Ncstn                  | NCSTN    | -0.35 | 3.15 | -3.58 | 4.73E-03 | 7.46E-02 | -2.23 |
| 1441019_PM_at   | Fbxo3                  | FBXO3    | 0.34  | 2.31 | 3.58  | 4.73E-03 | 7.46E-02 | -2.23 |
| 1437534_PM_at   | ---                    | NA       | 0.44  | 3.07 | 3.58  | 4.73E-03 | 7.46E-02 | -2.23 |
| 1423471_PM_at   | Ptpb2                  | NA       | 0.62  | 4.70 | 3.58  | 4.73E-03 | 7.46E-02 | -2.23 |
| 1443705_PM_at   | ---                    | NA       | 1.24  | 3.58 | 3.58  | 4.73E-03 | 7.46E-02 | -2.23 |
| 1419788_PM_at   | ---                    | NA       | -0.50 | 2.85 | -3.58 | 4.73E-03 | 7.47E-02 | -2.23 |
| 1418427_PM_at   | Kif5b                  | KIF5B    | -0.81 | 5.23 | -3.58 | 4.74E-03 | 7.47E-02 | -2.23 |
| 1434214_PM_at   | Lamtor4                | LAMTOR4  | 0.47  | 3.95 | 3.58  | 4.75E-03 | 7.49E-02 | -2.23 |
| 1438901_PM_at   | Mettl22                | METTL22  | 0.39  | 3.59 | 3.58  | 4.75E-03 | 7.49E-02 | -2.23 |
| 1435745_PM_at   | 5031439G07Rik          | KIAA0930 | -0.78 | 4.83 | -3.58 | 4.76E-03 | 7.49E-02 | -2.24 |
| 1416582_PM_a_at | Bad                    | BAD      | 0.86  | 6.22 | 3.58  | 4.77E-03 | 7.51E-02 | -2.24 |
| 1455799_PM_at   | Rorb                   | RORB     | -0.65 | 3.00 | -3.57 | 4.78E-03 | 7.51E-02 | -2.24 |
| 1448353_PM_x_at | Rpn1                   | RPN1     | -0.57 | 3.98 | -3.57 | 4.78E-03 | 7.51E-02 | -2.24 |
| 1456958_PM_at   | ---                    | NA       | 0.39  | 2.56 | 3.57  | 4.79E-03 | 7.53E-02 | -2.24 |
| 1420908_PM_at   | Cd2ap                  | CD2AP    | -0.63 | 2.51 | -3.57 | 4.79E-03 | 7.53E-02 | -2.24 |
| 1434757_PM_at   | Cbfa2t2                | CBFA2T2  | -0.96 | 4.47 | -3.57 | 4.81E-03 | 7.55E-02 | -2.25 |
| 1434362_PM_at   | Soat1                  | SOAT1    | -0.51 | 3.54 | -3.57 | 4.80E-03 | 7.55E-02 | -2.25 |
| 1415973_PM_at   | Marcks                 | MARCKS   | -1.21 | 5.57 | -3.57 | 4.81E-03 | 7.55E-02 | -2.25 |
| 1428011_PM_a_at | Erbp2ip                | ERBIN    | -1.07 | 4.29 | -3.57 | 4.81E-03 | 7.55E-02 | -2.25 |
| 1448443_PM_at   | Serpini1               | SERPINI1 | -1.05 | 7.53 | -3.57 | 4.81E-03 | 7.55E-02 | -2.25 |
| 1434761_PM_at   | Lrrtm3                 | LRRTM3   | 0.30  | 2.36 | 3.57  | 4.83E-03 | 7.57E-02 | -2.25 |
| 1419127_PM_at   | Npy                    | NPY      | 1.64  | 5.78 | 3.57  | 4.83E-03 | 7.57E-02 | -2.25 |
| 1435138_PM_at   | Fam155a                | FAM155A  | -1.32 | 5.79 | -3.57 | 4.83E-03 | 7.57E-02 | -2.25 |
| 1434740_PM_at   | Scarf2                 | SCARF2   | 0.26  | 2.67 | 3.57  | 4.84E-03 | 7.58E-02 | -2.25 |
| 1432627_PM_at   | ---                    | NA       | 0.94  | 3.04 | 3.57  | 4.85E-03 | 7.59E-02 | -2.25 |
| 1436640_PM_x_at | Agpat4                 | AGPAT4   | -1.12 | 7.81 | -3.57 | 4.85E-03 | 7.60E-02 | -2.26 |
| 1450418_PM_a_at | Yipf4                  | YIPF4    | -1.04 | 4.72 | -3.56 | 4.86E-03 | 7.61E-02 | -2.26 |
| 1426705_PM_s_at | Iars                   | IARS     | -0.80 | 4.36 | -3.56 | 4.86E-03 | 7.61E-02 | -2.26 |
| 1460506_PM_s_at | LOC102641347 ///Ndufc2 | NDUFC2   | -1.18 | 5.84 | -3.56 | 4.87E-03 | 7.62E-02 | -2.26 |
| 1428171_PM_at   | Prpf39                 | PRPF39   | 0.70  | 6.14 | 3.56  | 4.87E-03 | 7.62E-02 | -2.26 |
| 1427525_PM_at   | Cd151                  | NA       | 0.53  | 4.46 | 3.56  | 4.88E-03 | 7.62E-02 | -2.26 |
| 1430670_PM_at   | Ccdc91                 | CCDC91   | 0.78  | 3.58 | 3.56  | 4.89E-03 | 7.64E-02 | -2.26 |
| 1432936_PM_at   | ---                    | NA       | 0.69  | 3.02 | 3.56  | 4.89E-03 | 7.64E-02 | -2.26 |
| 1441396_PM_at   | B3galt1                | B3GALT1  | -0.55 | 2.95 | -3.56 | 4.89E-03 | 7.64E-02 | -2.26 |
| 1435375_PM_at   | Fam105a                | FAM105A  | -1.00 | 5.64 | -3.56 | 4.90E-03 | 7.65E-02 | -2.27 |
| 1434868_PM_at   | 4933431E20Rik          | NA       | -0.66 | 3.18 | -3.56 | 4.91E-03 | 7.66E-02 | -2.27 |
| 1454060_PM_a_at | Nras                   | NRAS     | -0.60 | 3.54 | -3.56 | 4.92E-03 | 7.67E-02 | -2.27 |
| 1428817_PM_at   | Mon2                   | MON2     | -0.46 | 4.71 | -3.56 | 4.92E-03 | 7.67E-02 | -2.27 |
| 1443581_PM_at   | ---                    | NA       | 0.32  | 2.52 | 3.56  | 4.92E-03 | 7.67E-02 | -2.27 |
| 1441464_PM_at   | ---                    | NA       | 1.28  | 5.79 | 3.56  | 4.92E-03 | 7.67E-02 | -2.27 |
| 1437210_PM_a_at | Brd2                   | BRD2     | 1.04  | 5.39 | 3.56  | 4.92E-03 | 7.67E-02 | -2.27 |
| 1417466_PM_at   | Rgs5                   | RGSS     | -1.00 | 6.90 | -3.56 | 4.93E-03 | 7.67E-02 | -2.27 |
| 1426646_PM_at   | Smim7                  | SMIM7    | -0.99 | 4.32 | -3.56 | 4.93E-03 | 7.67E-02 | -2.27 |
| 1421242_PM_at   | Rnf144a                | RNF144A  | 0.98  | 3.98 | 3.56  | 4.93E-03 | 7.67E-02 | -2.27 |
| 1451311_PM_a_at | Adipor1                | ADIPOR1  | -0.58 | 3.69 | -3.55 | 4.94E-03 | 7.68E-02 | -2.27 |
| 1460576_PM_at   | Exoc6                  | NA       | -1.57 | 7.12 | -3.55 | 4.95E-03 | 7.69E-02 | -2.27 |
| 1418937_PM_at   | Dio2                   | DIO2     | -1.34 | 5.56 | -3.55 | 4.95E-03 | 7.70E-02 | -2.28 |
| 1435008_PM_at   | Slc9a6                 | SLC9A6   | -1.06 | 7.58 | -3.55 | 4.95E-03 | 7.70E-02 | -2.28 |
| 1444552_PM_at   | ---                    | NA       | 0.73  | 3.18 | 3.55  | 4.95E-03 | 7.70E-02 | -2.28 |
| 1440934_PM_at   | Faxc                   | NA       | -0.93 | 4.17 | -3.55 | 4.96E-03 | 7.70E-02 | -2.28 |
| 1452184_PM_at   | Ndufb9                 | NDUFB9   | -0.91 | 6.66 | -3.55 | 4.96E-03 | 7.70E-02 | -2.28 |
| 1453287_PM_at   | Ankrd33b               | ANKRD33B | 0.45  | 2.51 | 3.55  | 4.96E-03 | 7.70E-02 | -2.28 |
| 1441164_PM_at   | ---                    | NA       | 0.33  | 3.03 | 3.55  | 4.96E-03 | 7.70E-02 | -2.28 |
| 1419738_PM_a_at | Tpm2                   | TPM2     | -2.82 | 5.64 | -3.55 | 4.97E-03 | 7.70E-02 | -2.28 |
| 1418255_PM_s_at | Srf                    | SRF      | -0.59 | 4.52 | -3.55 | 4.97E-03 | 7.70E-02 | -2.28 |
| 1423990_PM_at   | Rab28                  | RAB28    | -0.54 | 6.28 | -3.55 | 4.97E-03 | 7.70E-02 | -2.28 |
| 1446331_PM_at   | Ptgfr                  | PTGFR    | -1.04 | 2.53 | -3.55 | 4.98E-03 | 7.71E-02 | -2.28 |
| 1455741_PM_a_at | Ece1                   | ECE1     | 0.52  | 3.54 | 3.55  | 4.99E-03 | 7.72E-02 | -2.28 |
| 1439250_PM_at   | Slitrk3                | SLITRK3  | -1.07 | 4.77 | -3.55 | 5.00E-03 | 7.74E-02 | -2.28 |
| 1429838_PM_at   | Spag16                 | SPAG16   | 0.36  | 3.01 | 3.55  | 5.02E-03 | 7.76E-02 | -2.29 |
| 1436118_PM_at   | Vangl2                 | VANGL2   | 0.51  | 3.12 | 3.55  | 5.02E-03 | 7.76E-02 | -2.29 |
| 1426205_PM_at   | Ppp1cb                 | PPP1CB   | -0.73 | 7.60 | -3.55 | 5.02E-03 | 7.76E-02 | -2.29 |
| 1436138_PM_at   | Ttc19                  | TTC19    | -1.19 | 5.49 | -3.54 | 5.03E-03 | 7.77E-02 | -2.29 |
| 1447007_PM_at   | Tcp11x2                | NA       | 0.68  | 4.93 | 3.54  | 5.03E-03 | 7.77E-02 | -2.29 |
| 1429853_PM_at   | 1700018C11Rik          | TEX48    | 0.36  | 2.44 | 3.54  | 5.03E-03 | 7.77E-02 | -2.29 |
| 1444762_PM_at   | ---                    | NA       | 0.38  | 2.47 | 3.54  | 5.03E-03 | 7.77E-02 | -2.29 |
| 1438282_PM_at   | Syt1                   | SYT1     | 1.30  | 3.47 | 3.54  | 5.04E-03 | 7.78E-02 | -2.29 |
| 1450166_PM_at   | Ids                    | IDS      | -1.09 | 4.13 | -3.54 | 5.05E-03 | 7.79E-02 | -2.29 |
| 1436012_PM_s_at | Scrn2                  | SCRN2    | 0.38  | 3.76 | 3.54  | 5.05E-03 | 7.79E-02 | -2.30 |
| 1423236_PM_at   | Galnt1                 | GALNT1   | -0.72 | 3.58 | -3.54 | 5.05E-03 | 7.79E-02 | -2.30 |
| 1438390_PM_s_at | Pttg1                  | PTTG1    | -0.46 | 8.94 | -3.54 | 5.06E-03 | 7.81E-02 | -2.30 |
| 1419073_PM_at   | Tmeff2                 | TMEFF2   | -0.69 | 7.97 | -3.54 | 5.07E-03 | 7.81E-02 | -2.30 |
| 1442922_PM_at   | Chfr                   | CHFR     | 0.62  | 2.61 | 3.54  | 5.07E-03 | 7.81E-02 | -2.30 |
| 1450964_PM_a_at | Ospl9                  | OSBPL9   | -1.06 | 3.93 | -3.54 | 5.07E-03 | 7.81E-02 | -2.30 |

|                 |               |          |       |       |       |          |          |       |
|-----------------|---------------|----------|-------|-------|-------|----------|----------|-------|
| 1435427_PM_x_at | Fam193a       | FAM193A  | 1.46  | 4.96  | 3.54  | 5.07E-03 | 7.81E-02 | -2.30 |
| 1440113_PM_at   | Mta1          | NA       | 0.37  | 3.32  | 3.54  | 5.08E-03 | 7.82E-02 | -2.30 |
| 1455016_PM_at   | Prpf38b       | PRPF38B  | 0.99  | 3.13  | 3.54  | 5.08E-03 | 7.82E-02 | -2.30 |
| 1428179_PM_at   | Ndufv2        | NDUFV2   | -1.20 | 6.00  | -3.54 | 5.09E-03 | 7.83E-02 | -2.30 |
| 1444539_PM_at   | ---           | NA       | 0.43  | 3.75  | 3.54  | 5.09E-03 | 7.83E-02 | -2.30 |
| 1453795_PM_at   | Fahd2a        | FAHD2B   | 0.45  | 3.06  | 3.54  | 5.09E-03 | 7.83E-02 | -2.30 |
| 1455571_PM_x_at | Calm1         | NA       | -0.88 | 10.22 | -3.54 | 5.10E-03 | 7.83E-02 | -2.31 |
| 1429939_PM_at   | Ppp6r3        | NA       | 0.68  | 3.42  | 3.54  | 5.10E-03 | 7.83E-02 | -2.31 |
| 1421485_PM_at   | Ttbk2         | CDAN1    | 1.01  | 3.14  | 3.54  | 5.10E-03 | 7.83E-02 | -2.31 |
| 1423168_PM_at   | Mob4          | MOB4     | -1.48 | 5.43  | -3.53 | 5.12E-03 | 7.85E-02 | -2.31 |
| 1452774_PM_at   | Hnrnpa3       | NA       | -0.92 | 6.59  | -3.53 | 5.12E-03 | 7.85E-02 | -2.31 |
| 1415672_PM_at   | Golga7        | GOLGA7   | -0.64 | 5.42  | -3.53 | 5.12E-03 | 7.85E-02 | -2.31 |
| 1428561_PM_at   | Khl11         | NA       | -1.14 | 3.97  | -3.53 | 5.13E-03 | 7.86E-02 | -2.31 |
| 1444435_PM_at   | Vps13b        | VPS13B   | -0.71 | 3.69  | -3.53 | 5.13E-03 | 7.86E-02 | -2.31 |
| 1459214_PM_at   | ---           | NA       | 0.98  | 3.07  | 3.53  | 5.12E-03 | 7.86E-02 | -2.31 |
| 1453941_PM_at   | 4930579P08Rik | NA       | 0.40  | 2.64  | 3.53  | 5.13E-03 | 7.86E-02 | -2.31 |
| 1442198_PM_at   | ---           | NA       | 0.51  | 3.03  | 3.53  | 5.14E-03 | 7.87E-02 | -2.31 |
| 1437148_PM_at   | Arcp2         | ARPC2    | -1.80 | 5.62  | -3.53 | 5.15E-03 | 7.88E-02 | -2.31 |
| 1439381_PM_x_at | Marveld1      | MARVELD1 | -1.10 | 8.46  | -3.53 | 5.15E-03 | 7.88E-02 | -2.32 |
| 1429514_PM_at   | Plpp3         | PLPP3    | -1.03 | 4.21  | -3.53 | 5.16E-03 | 7.88E-02 | -2.32 |
| 1434914_PM_at   | Rab6b         | RAB6B    | -0.98 | 8.20  | -3.53 | 5.16E-03 | 7.88E-02 | -2.32 |
| 1419931_PM_at   | Abcb7         | NA       | -0.76 | 3.52  | -3.53 | 5.16E-03 | 7.88E-02 | -2.32 |
| 1440552_PM_at   | ---           | NA       | 0.36  | 2.21  | 3.53  | 5.16E-03 | 7.88E-02 | -2.32 |
| 1453762_PM_at   | Vps26b        | VPS26B   | 0.38  | 2.55  | 3.53  | 5.16E-03 | 7.88E-02 | -2.32 |
| 1453098_PM_at   | Gria2         | GRIA2    | 0.88  | 7.37  | 3.53  | 5.15E-03 | 7.88E-02 | -2.31 |
| 1423721_PM_at   | Tpm1          | TPM1     | -1.70 | 4.74  | -3.53 | 5.18E-03 | 7.90E-02 | -2.32 |
| 1448526_PM_at   | Kpnb1         | KPNB1    | -0.87 | 3.64  | -3.53 | 5.18E-03 | 7.90E-02 | -2.32 |
| 1425493_PM_at   | Bmpr1a        | BMPRI1A  | -1.51 | 4.31  | -3.53 | 5.19E-03 | 7.91E-02 | -2.32 |
| 1415873_PM_a_at | Actr1a        | ACTR1A   | -0.95 | 3.75  | -3.53 | 5.19E-03 | 7.91E-02 | -2.32 |
| 1424205_PM_at   | Smarca5       | SMARCA5  | -0.72 | 6.55  | -3.53 | 5.19E-03 | 7.91E-02 | -2.32 |
| 1438999_PM_a_at | Nfat5         | NFAT5    | -0.70 | 3.63  | -3.53 | 5.20E-03 | 7.91E-02 | -2.32 |
| 1445262_PM_at   | ---           | NA       | -0.49 | 2.35  | -3.53 | 5.19E-03 | 7.91E-02 | -2.32 |
| 1446653_PM_at   | ---           | NA       | 0.31  | 2.26  | 3.53  | 5.19E-03 | 7.91E-02 | -2.32 |
| 1418931_PM_at   | Reg4          | REG4     | 0.34  | 2.63  | 3.53  | 5.19E-03 | 7.91E-02 | -2.32 |
| 1446557_PM_at   | Plppr1        | PLPPR1   | 0.71  | 3.08  | 3.53  | 5.19E-03 | 7.91E-02 | -2.32 |
| 1452421_PM_at   | Hoxa3         | HOXA3    | 0.97  | 4.47  | 3.52  | 5.20E-03 | 7.91E-02 | -2.32 |
| 1455046_PM_a_at | Pogz          | POGZ     | -1.20 | 6.63  | -3.52 | 5.20E-03 | 7.92E-02 | -2.33 |
| 1429896_PM_at   | ---           | NA       | -1.40 | 4.53  | -3.52 | 5.21E-03 | 7.93E-02 | -2.33 |
| 1454878_PM_at   | Dzip3         | DZIP3    | -1.32 | 7.13  | -3.52 | 5.22E-03 | 7.93E-02 | -2.33 |
| 1423519_PM_at   | Abhd17c       | ABHD17C  | -1.17 | 3.92  | -3.52 | 5.22E-03 | 7.93E-02 | -2.33 |
| 1450888_PM_at   | Napb          | NAPB     | -0.85 | 5.09  | -3.52 | 5.22E-03 | 7.93E-02 | -2.33 |
| 1423332_PM_at   | Sdcbp         | SDCBP    | -1.12 | 8.61  | -3.52 | 5.24E-03 | 7.95E-02 | -2.33 |
| 1421948_PM_a_at | Cep89         | CEP89    | 0.40  | 2.92  | 3.52  | 5.24E-03 | 7.95E-02 | -2.33 |
| 1421313_PM_s_at | Ctn           | CTTN     | 0.56  | 2.71  | 3.52  | 5.24E-03 | 7.95E-02 | -2.33 |
| 1455982_PM_at   | Jmjd4         | JMJD4    | 0.51  | 3.90  | 3.52  | 5.25E-03 | 7.96E-02 | -2.33 |
| 1425938_PM_a_at | Fkbp11        | FKBP11   | 0.30  | 2.32  | 3.52  | 5.25E-03 | 7.97E-02 | -2.33 |
| 1450385_PM_at   | Kpna3         | KPNA3    | -0.96 | 4.17  | -3.52 | 5.27E-03 | 7.98E-02 | -2.34 |
| 1452826_PM_s_at | Fbxl20        | FBXL20   | 1.19  | 5.55  | 3.52  | 5.27E-03 | 7.98E-02 | -2.34 |
| 1452766_PM_at   | Tppp          | TPPP     | -1.45 | 6.23  | -3.52 | 5.27E-03 | 7.98E-02 | -2.34 |
| 1455239_PM_at   | Ifitm10       | IFITM10  | 0.43  | 3.34  | 3.52  | 5.27E-03 | 7.98E-02 | -2.34 |
| 1458036_PM_at   | ---           | NA       | -0.67 | 2.81  | -3.52 | 5.28E-03 | 7.99E-02 | -2.34 |
| 1455264_PM_at   | Fam132a       | C1QTNF12 | 0.28  | 2.65  | 3.52  | 5.28E-03 | 7.99E-02 | -2.34 |
| 1445972_PM_at   | Ush2a         | USH2A    | 0.32  | 2.51  | 3.52  | 5.28E-03 | 7.99E-02 | -2.34 |
| 1458540_PM_at   | ---           | NA       | 0.57  | 3.77  | 3.52  | 5.28E-03 | 7.99E-02 | -2.34 |
| 1454849_PM_x_at | Clu           | CLU      | -1.56 | 8.08  | -3.52 | 5.29E-03 | 7.99E-02 | -2.34 |
| 1441815_PM_at   | Neto1         | NA       | -0.96 | 4.81  | -3.51 | 5.29E-03 | 7.99E-02 | -2.34 |
| 1435754_PM_at   | Zyg11b        | ZYG11B   | -1.29 | 8.37  | -3.51 | 5.30E-03 | 8.00E-02 | -2.34 |
| 1459707_PM_at   | ---           | NA       | 0.46  | 3.08  | 3.51  | 5.30E-03 | 8.00E-02 | -2.34 |
| 1442226_PM_at   | Sema3e        | SEMA3E   | -1.67 | 5.50  | -3.51 | 5.33E-03 | 8.03E-02 | -2.35 |
| 1433509_PM_s_at | Reep1         | REEP1    | -1.27 | 4.72  | -3.51 | 5.33E-03 | 8.03E-02 | -2.35 |
| 1417538_PM_at   | Slc35a1       | SLC35A1  | -1.25 | 3.60  | -3.51 | 5.32E-03 | 8.03E-02 | -2.35 |
| 1423480_PM_at   | Nol11         | NOL11    | -0.86 | 2.43  | -3.51 | 5.33E-03 | 8.03E-02 | -2.35 |
| 1423884_PM_at   | Cirh1a        | UTP4     | -0.59 | 3.36  | -3.51 | 5.33E-03 | 8.03E-02 | -2.35 |
| 1439743_PM_at   | Efn2          | NA       | -0.57 | 6.24  | -3.51 | 5.33E-03 | 8.03E-02 | -2.35 |
| 1434026_PM_at   | Atp8b2        | ATP8B2   | -0.43 | 3.03  | -3.51 | 5.33E-03 | 8.03E-02 | -2.35 |
| 1449863_PM_a_at | Dlx5          | DLX5     | 0.50  | 2.61  | 3.51  | 5.33E-03 | 8.03E-02 | -2.35 |
| 1437127_PM_at   | Zfp945        | NA       | -1.19 | 2.95  | -3.51 | 5.34E-03 | 8.04E-02 | -2.35 |
| 1456898_PM_at   | Pura          | PURA     | -0.91 | 7.19  | -3.51 | 5.34E-03 | 8.04E-02 | -2.35 |
| 1454641_PM_at   | Cggbp1        | CGGBP1   | -0.90 | 5.84  | -3.51 | 5.34E-03 | 8.04E-02 | -2.35 |
| 1427032_PM_at   | Herc4         | HERC4    | -0.79 | 2.82  | -3.51 | 5.35E-03 | 8.04E-02 | -2.35 |
| 1424624_PM_at   | 2900011008Rik | C16orf45 | -0.61 | 7.66  | -3.51 | 5.35E-03 | 8.05E-02 | -2.35 |
| 1418582_PM_at   | Cbfa2t3       | CBFA2T3  | 0.40  | 3.50  | 3.51  | 5.36E-03 | 8.05E-02 | -2.35 |
| 1434468_PM_at   | Otud4         | OTUD4    | -0.67 | 7.55  | -3.51 | 5.37E-03 | 8.06E-02 | -2.36 |
| 1422751_PM_at   | Tle1          | TLE1     | -0.84 | 3.04  | -3.51 | 5.37E-03 | 8.06E-02 | -2.36 |
| 1428714_PM_at   | Pgrmc2        | PGRMC2   | -0.98 | 5.52  | -3.51 | 5.37E-03 | 8.07E-02 | -2.36 |

|                 |                         |            |       |      |       |          |          |       |
|-----------------|-------------------------|------------|-------|------|-------|----------|----------|-------|
| 1433891_PM_at   | Lgr4                    | LGR4       | -0.70 | 4.72 | -3.51 | 5.38E-03 | 8.07E-02 | -2.36 |
| 1452409_PM_at   | Gltscr2                 | NOP53      | 0.36  | 3.44 | 3.51  | 5.37E-03 | 8.07E-02 | -2.36 |
| 1418047_PM_at   | Neurod6                 | NEUROD6    | -2.00 | 6.82 | -3.50 | 5.40E-03 | 8.08E-02 | -2.36 |
| 1434190_PM_at   | Gm14680 /// Sms         | SMS        | -1.28 | 6.86 | -3.50 | 5.40E-03 | 8.08E-02 | -2.36 |
| 1438171_PM_x_at | Mettl9                  | METTL9     | -1.15 | 4.74 | -3.50 | 5.40E-03 | 8.08E-02 | -2.36 |
| 1446382_PM_at   | ---                     | NA         | -0.98 | 3.72 | -3.50 | 5.39E-03 | 8.08E-02 | -2.36 |
| 1439274_PM_at   | Prune2                  | NA         | -0.70 | 2.84 | -3.50 | 5.39E-03 | 8.08E-02 | -2.36 |
| 1448333_PM_at   | Adprh                   | ADPRH      | -0.58 | 2.90 | -3.50 | 5.40E-03 | 8.08E-02 | -2.36 |
| 1435799_PM_at   | Sugp2                   | SUGP2      | -0.53 | 3.38 | -3.50 | 5.40E-03 | 8.08E-02 | -2.36 |
| 1417359_PM_at   | Mfap2                   | MFAP2      | 0.45  | 3.16 | 3.50  | 5.40E-03 | 8.08E-02 | -2.36 |
| 1441076_PM_at   | Mpv17                   | MPV17      | 0.50  | 4.17 | 3.50  | 5.40E-03 | 8.08E-02 | -2.36 |
| 1451918_PM_a_at | Borc5                   | BORCS5     | 0.66  | 3.34 | 3.50  | 5.40E-03 | 8.08E-02 | -2.36 |
| 1430807_PM_at   | Klh22                   | KLHL22     | 0.91  | 2.55 | 3.50  | 5.39E-03 | 8.08E-02 | -2.36 |
| 1457800_PM_at   | ---                     | NA         | -1.00 | 9.82 | -3.50 | 5.42E-03 | 8.10E-02 | -2.37 |
| 1456170_PM_x_at | Calr                    | CALR       | 0.80  | 8.28 | 3.50  | 5.42E-03 | 8.10E-02 | -2.37 |
| 1435547_PM_at   | Mkl2                    | MKL2       | -0.89 | 6.36 | -3.50 | 5.42E-03 | 8.10E-02 | -2.37 |
| 1430236_PM_s_at | Gsdma2                  | GSDMA      | 0.37  | 3.83 | 3.50  | 5.43E-03 | 8.11E-02 | -2.37 |
| 1417157_PM_at   | Actr10                  | ACTR10     | -1.27 | 3.74 | -3.50 | 5.44E-03 | 8.12E-02 | -2.37 |
| 1422518_PM_at   | Cask                    | CASK       | -0.98 | 3.91 | -3.50 | 5.44E-03 | 8.12E-02 | -2.37 |
| 1417314_PM_at   | Cfb                     | AL645922.1 | 0.32  | 2.68 | 3.50  | 5.44E-03 | 8.12E-02 | -2.37 |
| 1441611_PM_at   | Zdhc6                   | ZDHHC6     | 0.36  | 2.89 | 3.50  | 5.44E-03 | 8.12E-02 | -2.37 |
| 1448027_PM_at   | Ncoa3                   | NCOA3      | -0.81 | 4.11 | -3.50 | 5.45E-03 | 8.12E-02 | -2.37 |
| 1434474_PM_at   | Abca5                   | ABCA5      | -1.36 | 5.88 | -3.50 | 5.46E-03 | 8.13E-02 | -2.37 |
| 1433194_PM_at   | ---                     | NA         | -0.89 | 2.83 | -3.50 | 5.46E-03 | 8.13E-02 | -2.37 |
| 1433928_PM_a_at | Rpl13a                  | RPL13A     | -1.14 | 4.64 | -3.50 | 5.46E-03 | 8.13E-02 | -2.37 |
| 1438318_PM_x_at | Ngdn                    | NGDN       | -1.99 | 5.87 | -3.50 | 5.47E-03 | 8.14E-02 | -2.37 |
| 1415813_PM_at   | Api5                    | API5       | -1.55 | 6.74 | -3.49 | 5.47E-03 | 8.14E-02 | -2.38 |
| 1433855_PM_at   | Abat                    | ABAT       | -1.15 | 3.52 | -3.49 | 5.47E-03 | 8.14E-02 | -2.38 |
| 1444611_PM_at   | Gm38561                 | NA         | -0.44 | 2.41 | -3.49 | 5.47E-03 | 8.14E-02 | -2.38 |
| 1446555_PM_at   | ---                     | NA         | -0.38 | 2.53 | -3.49 | 5.47E-03 | 8.14E-02 | -2.38 |
| 1447011_PM_at   | ---                     | NA         | 0.35  | 2.37 | 3.49  | 5.48E-03 | 8.14E-02 | -2.38 |
| 1417815_PM_a_at | Serinc3                 | SERINC3    | -1.67 | 7.75 | -3.49 | 5.49E-03 | 8.15E-02 | -2.38 |
| 1416663_PM_at   | Ndufa9                  | AC005833.3 | -0.78 | 5.12 | -3.49 | 5.49E-03 | 8.15E-02 | -2.38 |
| 1436022_PM_at   | Exog                    | EXOG       | 0.36  | 2.49 | 3.49  | 5.49E-03 | 8.15E-02 | -2.38 |
| 1436030_PM_at   | Cachd1                  | CACHD1     | -1.64 | 7.43 | -3.49 | 5.50E-03 | 8.16E-02 | -2.38 |
| 1429179_PM_at   | Colec11                 | COLEC11    | 0.50  | 2.87 | 3.49  | 5.51E-03 | 8.18E-02 | -2.38 |
| 1434901_PM_at   | Zbtb2                   | ZBTB2      | -0.62 | 2.88 | -3.49 | 5.53E-03 | 8.20E-02 | -2.39 |
| 1437687_PM_x_at | Fkbp9                   | FKBP9      | -1.47 | 4.26 | -3.49 | 5.53E-03 | 8.20E-02 | -2.39 |
| 1423772_PM_x_at | Slc25a5                 | SLC25A5    | -1.15 | 6.58 | -3.49 | 5.53E-03 | 8.20E-02 | -2.39 |
| 1455424_PM_at   | Wnk2                    | WNK2       | -0.48 | 2.52 | -3.49 | 5.53E-03 | 8.20E-02 | -2.39 |
| 1434439_PM_at   | Gsk3b                   | GSK3B      | -0.64 | 3.10 | -3.49 | 5.55E-03 | 8.23E-02 | -2.39 |
| 1416250_PM_at   | Btg2                    | BTG2       | 0.31  | 2.47 | 3.49  | 5.56E-03 | 8.23E-02 | -2.39 |
| 1425338_PM_at   | Plcb4                   | PLCB4      | 1.09  | 4.58 | 3.49  | 5.56E-03 | 8.23E-02 | -2.39 |
| 1416008_PM_at   | Satb1                   | SATB1      | -0.86 | 5.90 | -3.48 | 5.57E-03 | 8.24E-02 | -2.39 |
| 1420010_PM_at   | Serinc4                 | SERINC4    | -0.81 | 5.58 | -3.48 | 5.57E-03 | 8.24E-02 | -2.39 |
| 1417351_PM_a_at | Snrpa1                  | SNRPA1     | -1.14 | 5.52 | -3.48 | 5.57E-03 | 8.24E-02 | -2.39 |
| 1460707_PM_at   | Ptp4a2                  | PTP4A2     | -1.02 | 7.39 | -3.48 | 5.57E-03 | 8.24E-02 | -2.39 |
| 1433953_PM_at   | Zfp277                  | ZNF277     | -0.36 | 2.42 | -3.48 | 5.58E-03 | 8.25E-02 | -2.39 |
| 1416058_PM_s_at | Atp5c1                  | ATP5C1     | -1.41 | 7.55 | -3.48 | 5.58E-03 | 8.25E-02 | -2.40 |
| 1437230_PM_at   | Kcna1                   | NA         | -1.35 | 4.02 | -3.48 | 5.59E-03 | 8.25E-02 | -2.40 |
| 1424289_PM_at   | Osgin2                  | OSGIN2     | -1.33 | 3.23 | -3.48 | 5.59E-03 | 8.25E-02 | -2.40 |
| 1448285_PM_at   | Rgs4                    | RG54       | 0.99  | 3.15 | 3.48  | 5.60E-03 | 8.26E-02 | -2.40 |
| 1431328_PM_at   | Ppp1cb                  | NA         | -0.54 | 8.90 | -3.48 | 5.60E-03 | 8.26E-02 | -2.40 |
| 1426024_PM_a_at | Dbn1                    | DBN1       | -1.21 | 3.46 | -3.48 | 5.61E-03 | 8.27E-02 | -2.40 |
| 1455167_PM_at   | Cox8c                   | COX8C      | 0.37  | 2.33 | 3.48  | 5.61E-03 | 8.28E-02 | -2.40 |
| 1451004_PM_at   | Acvr2a                  | ACVR2A     | -0.96 | 4.99 | -3.48 | 5.62E-03 | 8.28E-02 | -2.40 |
| 1434801_PM_x_at | Slc25a5                 | SLC25A5    | -0.61 | 5.18 | -3.48 | 5.62E-03 | 8.28E-02 | -2.40 |
| 1435890_PM_at   | Atl3                    | ATL3       | -0.53 | 2.67 | -3.48 | 5.62E-03 | 8.28E-02 | -2.40 |
| 1420096_PM_at   | Zscan21                 | NA         | 0.85  | 5.17 | 3.48  | 5.62E-03 | 8.28E-02 | -2.40 |
| 1423161_PM_s_at | Spred1                  | SPRED1     | -1.61 | 4.04 | -3.48 | 5.63E-03 | 8.28E-02 | -2.40 |
| 1424065_PM_at   | Edem1                   | EDEM1      | -0.56 | 3.77 | -3.48 | 5.63E-03 | 8.28E-02 | -2.40 |
| 1449920_PM_at   | Cyp19a1                 | CYP19A1    | 0.44  | 2.40 | 3.48  | 5.64E-03 | 8.29E-02 | -2.40 |
| 1446951_PM_at   | P4ha3                   | P4HA3      | 0.57  | 3.34 | 3.48  | 5.64E-03 | 8.29E-02 | -2.41 |
| 1442543_PM_at   | ---                     | NA         | 0.47  | 3.29 | 3.48  | 5.64E-03 | 8.30E-02 | -2.41 |
| 1416175_PM_a_at | Vdac3                   | VDAC3      | -1.84 | 5.76 | -3.47 | 5.67E-03 | 8.32E-02 | -2.41 |
| 1419420_PM_at   | St6galnac5              | ST6GALNACS | -1.71 | 6.54 | -3.47 | 5.67E-03 | 8.32E-02 | -2.41 |
| 1455554_PM_at   | A830039N20Rik /// Kcna1 | NA         | -1.08 | 6.66 | -3.47 | 5.66E-03 | 8.32E-02 | -2.41 |
| 1449024_PM_a_at | Hexa                    | AC009690.1 | -0.80 | 5.68 | -3.47 | 5.67E-03 | 8.32E-02 | -2.41 |
| 1423213_PM_at   | Plxnc1                  | PLXNC1     | -0.77 | 3.15 | -3.47 | 5.67E-03 | 8.32E-02 | -2.41 |
| 1426272_PM_at   | Lmbr1                   | LMBR1      | -0.51 | 4.43 | -3.47 | 5.67E-03 | 8.32E-02 | -2.41 |
| 1447815_PM_x_at | Irf2bpl                 | IRF2BPL    | -0.42 | 3.15 | -3.47 | 5.67E-03 | 8.32E-02 | -2.41 |
| 1454052_PM_at   | Hormad2                 | HORMAD2    | 0.32  | 2.33 | 3.47  | 5.67E-03 | 8.32E-02 | -2.41 |
| 1446143_PM_at   | ---                     | NA         | 0.84  | 3.20 | 3.47  | 5.66E-03 | 8.32E-02 | -2.41 |
| 1453839_PM_a_at | Pl16                    | PI16       | 0.40  | 2.65 | 3.47  | 5.68E-03 | 8.32E-02 | -2.41 |

|                 |                            |              |       |      |       |          |          |       |
|-----------------|----------------------------|--------------|-------|------|-------|----------|----------|-------|
| 1435402_PM_at   | Gramd1b                    | GRAMD1B      | 0.71  | 3.03 | 3.47  | 5.69E-03 | 8.33E-02 | -2.41 |
| 1455512_PM_at   | Shisa6                     | SHISA6       | -2.68 | 6.05 | -3.47 | 5.69E-03 | 8.33E-02 | -2.41 |
| 1431777_PM_a_at | Hmgn3                      | HMGN3        | -1.10 | 5.46 | -3.47 | 5.69E-03 | 8.33E-02 | -2.41 |
| 1417737_PM_at   | Mrp31                      | MRP31        | -0.83 | 4.97 | -3.47 | 5.69E-03 | 8.33E-02 | -2.41 |
| 1443045_PM_at   | ---                        | NA           | 0.28  | 2.26 | 3.47  | 5.70E-03 | 8.34E-02 | -2.42 |
| 1456282_PM_at   | ---                        | NA           | 0.91  | 6.62 | 3.47  | 5.70E-03 | 8.34E-02 | -2.42 |
| 1425228_PM_a_at | Dguok                      | DGUOK        | -0.61 | 2.65 | -3.47 | 5.70E-03 | 8.34E-02 | -2.42 |
| 1429464_PM_at   | Prkaa2                     | PRKAA2       | -0.54 | 2.82 | -3.47 | 5.71E-03 | 8.34E-02 | -2.42 |
| 1416450_PM_at   | Taf8                       | TAF8         | 0.49  | 3.26 | 3.47  | 5.70E-03 | 8.34E-02 | -2.42 |
| 1449627_PM_at   | Osbpl6                     | NA           | -0.76 | 3.33 | -3.47 | 5.71E-03 | 8.34E-02 | -2.42 |
| 1429715_PM_at   | Ppp2r2a                    | PPP2R2A      | -0.66 | 3.61 | -3.47 | 5.71E-03 | 8.34E-02 | -2.42 |
| 1455409_PM_at   | Spire1                     | SPIRE1       | -0.63 | 7.24 | -3.47 | 5.72E-03 | 8.35E-02 | -2.42 |
| 1450624_PM_at   | Bhmt                       | BHMT         | 0.50  | 3.07 | 3.47  | 5.72E-03 | 8.35E-02 | -2.42 |
| 1457449_PM_at   | ---                        | NA           | 0.73  | 2.52 | 3.47  | 5.73E-03 | 8.36E-02 | -2.42 |
| 1433461_PM_at   | Sf3b2                      | SF3B2        | -0.37 | 2.80 | -3.47 | 5.73E-03 | 8.36E-02 | -2.42 |
| 1433702_PM_at   | Ermp1                      | ERMP1        | -0.89 | 4.43 | -3.47 | 5.75E-03 | 8.38E-02 | -2.43 |
| 1459343_PM_at   | ---                        | NA           | 0.29  | 2.39 | 3.47  | 5.75E-03 | 8.38E-02 | -2.43 |
| 1445233_PM_at   | ---                        | NA           | 0.44  | 2.55 | 3.47  | 5.75E-03 | 8.38E-02 | -2.42 |
| 1443589_PM_at   | DxErt242e                  | NA           | 1.36  | 4.44 | 3.47  | 5.75E-03 | 8.38E-02 | -2.42 |
| 1445734_PM_at   | ---                        | NA           | 0.48  | 2.93 | 3.47  | 5.75E-03 | 8.38E-02 | -2.43 |
| 1448102_PM_a_at | Wdr61                      | WDR61        | -1.56 | 5.69 | -3.46 | 5.77E-03 | 8.39E-02 | -2.43 |
| 1419741_PM_at   | Supt16                     | SUPT16H      | 0.63  | 5.85 | 3.46  | 5.76E-03 | 8.39E-02 | -2.43 |
| 1421738_PM_at   | Gabra2                     | GABRA2       | -0.85 | 3.61 | -3.46 | 5.77E-03 | 8.40E-02 | -2.43 |
| 1447448_PM_s_at | Klf6                       | KLF6         | -1.49 | 3.73 | -3.46 | 5.78E-03 | 8.40E-02 | -2.43 |
| 1451828_PM_a_at | Acs4                       | ACSL4        | -1.12 | 3.71 | -3.46 | 5.79E-03 | 8.41E-02 | -2.43 |
| 1418603_PM_at   | Avpr1a                     | AVPR1A       | -0.48 | 2.51 | -3.46 | 5.79E-03 | 8.41E-02 | -2.43 |
| 1446595_PM_at   | ---                        | NA           | 0.53  | 2.58 | 3.46  | 5.79E-03 | 8.41E-02 | -2.43 |
| 1441587_PM_at   | Plch2                      | PLCH2        | 1.06  | 2.92 | 3.46  | 5.79E-03 | 8.41E-02 | -2.43 |
| 1437076_PM_at   | A930017M01Rik              | NA           | -0.51 | 2.44 | -3.46 | 5.79E-03 | 8.41E-02 | -2.43 |
| 1415696_PM_at   | Sar1a                      | SAR1A        | -1.01 | 6.81 | -3.46 | 5.80E-03 | 8.42E-02 | -2.43 |
| 1437804_PM_at   | Igfbp7                     | NA           | 0.46  | 2.62 | 3.46  | 5.81E-03 | 8.43E-02 | -2.43 |
| 1429300_PM_at   | Ankrd9                     | ANKRD9       | 0.28  | 2.28 | 3.46  | 5.81E-03 | 8.43E-02 | -2.43 |
| 1424076_PM_at   | Gdpd1                      | GDPD1        | -1.25 | 6.46 | -3.46 | 5.82E-03 | 8.44E-02 | -2.44 |
| 1436309_PM_at   | Neto2                      | NETO2        | -1.09 | 3.10 | -3.46 | 5.82E-03 | 8.44E-02 | -2.44 |
| 1432847_PM_at   | ---                        | NA           | 0.38  | 2.48 | 3.46  | 5.82E-03 | 8.44E-02 | -2.44 |
| 1454634_PM_at   | Fuk                        | FUK          | 0.39  | 4.60 | 3.46  | 5.82E-03 | 8.44E-02 | -2.44 |
| 1426193_PM_at   | Otos                       | OTOS         | 0.41  | 2.82 | 3.46  | 5.82E-03 | 8.44E-02 | -2.44 |
| 1451909_PM_a_at | Prpf4b                     | PRPF4B       | 0.46  | 3.28 | 3.46  | 5.84E-03 | 8.45E-02 | -2.44 |
| 1459320_PM_at   | ---                        | NA           | -0.71 | 3.24 | -3.46 | 5.85E-03 | 8.46E-02 | -2.44 |
| 1434796_PM_at   | Vamp4                      | VAMP4        | -0.60 | 7.13 | -3.46 | 5.84E-03 | 8.46E-02 | -2.44 |
| 1416791_PM_a_at | Nxf1///Tmem223             | NXF1         | 0.98  | 5.46 | 3.46  | 5.85E-03 | 8.46E-02 | -2.44 |
| 1445686_PM_at   | ---                        | NA           | 0.37  | 2.66 | 3.46  | 5.85E-03 | 8.46E-02 | -2.44 |
| 1422078_PM_at   | Akt3                       | AKT3         | -1.09 | 4.86 | -3.45 | 5.87E-03 | 8.48E-02 | -2.44 |
| 1455406_PM_at   | Cask                       | CASK         | -0.58 | 3.59 | -3.45 | 5.87E-03 | 8.48E-02 | -2.44 |
| 1416015_PM_s_at | Abce1                      | ABCE1        | -0.65 | 3.22 | -3.45 | 5.88E-03 | 8.49E-02 | -2.45 |
| 1435672_PM_at   | ---                        | NA           | -0.72 | 4.98 | -3.45 | 5.88E-03 | 8.49E-02 | -2.45 |
| 1421550_PM_a_at | Trim34a /// Trim34b        | TRIM6-TRIM34 | -0.61 | 2.72 | -3.45 | 5.89E-03 | 8.49E-02 | -2.45 |
| 1444217_PM_at   | Mrp38                      | MRPL38       | 0.38  | 2.55 | 3.45  | 5.88E-03 | 8.49E-02 | -2.45 |
| 1434849_PM_at   | Tspyl2                     | TSPYL2       | 0.74  | 3.95 | 3.45  | 5.88E-03 | 8.49E-02 | -2.45 |
| 1454722_PM_at   | Pten                       | PTEN         | -1.39 | 5.64 | -3.45 | 5.90E-03 | 8.50E-02 | -2.45 |
| 1434597_PM_at   | Larp4b                     | LARP4B       | -0.85 | 6.19 | -3.45 | 5.90E-03 | 8.50E-02 | -2.45 |
| 1453498_PM_x_at | Steap3                     | STEAP3       | 0.39  | 2.79 | 3.45  | 5.90E-03 | 8.50E-02 | -2.45 |
| 1448701_PM_a_at | Krit1                      | KRIT1        | -0.55 | 3.48 | -3.45 | 5.91E-03 | 8.51E-02 | -2.45 |
| 1431163_PM_at   | 2700046G09Rik              | NA           | 0.45  | 2.63 | 3.45  | 5.91E-03 | 8.51E-02 | -2.45 |
| 1455782_PM_at   | Samd7                      | SAMD7        | 0.32  | 2.72 | 3.45  | 5.91E-03 | 8.51E-02 | -2.45 |
| 1443539_PM_at   | ---                        | NA           | 1.71  | 6.77 | 3.45  | 5.92E-03 | 8.52E-02 | -2.45 |
| 1429849_PM_at   | Kans3                      | KANSL3       | 0.51  | 3.26 | 3.45  | 5.92E-03 | 8.52E-02 | -2.45 |
| 1432285_PM_at   | 1700128F08Rik              | NA           | 0.60  | 3.74 | 3.45  | 5.92E-03 | 8.52E-02 | -2.45 |
| 1449084_PM_s_at | Sh3d19                     | SH3D19       | -0.96 | 3.95 | -3.45 | 5.94E-03 | 8.54E-02 | -2.46 |
| 1424139_PM_at   | Rap1a                      | RAP1A        | -1.07 | 5.85 | -3.45 | 5.95E-03 | 8.55E-02 | -2.46 |
| 1455627_PM_at   | Col8a1                     | COL8A1       | -1.97 | 3.98 | -3.45 | 5.95E-03 | 8.55E-02 | -2.46 |
| 1416153_PM_at   | Srp54a ///Srp54b ///Srp54c | SRP54        | -0.42 | 5.42 | -3.45 | 5.95E-03 | 8.55E-02 | -2.46 |
| 1428883_PM_at   | Tmem57                     | TMEM57       | -1.34 | 5.86 | -3.44 | 5.99E-03 | 8.60E-02 | -2.47 |
| 1417981_PM_at   | Insig2                     | INSIG2       | -0.81 | 5.36 | -3.44 | 5.99E-03 | 8.60E-02 | -2.47 |
| 1416500_PM_at   | Sacm1l                     | SACM1L       | -0.89 | 5.99 | -3.44 | 6.00E-03 | 8.61E-02 | -2.47 |
| 1421870_PM_at   | Trim44                     | TRIM44       | -1.07 | 8.49 | -3.44 | 6.00E-03 | 8.61E-02 | -2.47 |
| 1442057_PM_at   | AA986695                   | NA           | 0.41  | 2.61 | 3.44  | 6.00E-03 | 8.61E-02 | -2.47 |
| 1433740_PM_at   | Tmem87b                    | TMEM87B      | -0.75 | 4.78 | -3.44 | 6.01E-03 | 8.62E-02 | -2.47 |
| 1417014_PM_at   | Hspb8                      | HSPB8        | 0.28  | 2.35 | 3.44  | 6.02E-03 | 8.63E-02 | -2.47 |
| 1450059_PM_at   | Fancg                      | FANCG        | -1.80 | 6.05 | -3.44 | 6.02E-03 | 8.63E-02 | -2.47 |
| 1453398_PM_at   | A930009A15Rik              | NA           | 0.38  | 3.29 | 3.44  | 6.03E-03 | 8.63E-02 | -2.47 |
| 1422877_PM_at   | Pcdhb12                    | NA           | -0.62 | 2.92 | -3.44 | 6.03E-03 | 8.64E-02 | -2.47 |
| 1437291_PM_at   | 2700081O15Rik              | C11orf95     | -1.06 | 3.41 | -3.44 | 6.03E-03 | 8.64E-02 | -2.47 |
| 1434135_PM_at   | B3galnt2                   | B3GALNT2     | -0.49 | 4.90 | -3.44 | 6.04E-03 | 8.64E-02 | -2.47 |

|                 |                                                                                                                                                                                                                                                                    |         |       |      |       |          |          |       |
|-----------------|--------------------------------------------------------------------------------------------------------------------------------------------------------------------------------------------------------------------------------------------------------------------|---------|-------|------|-------|----------|----------|-------|
| 1417374_PM_at   | Tuba4a                                                                                                                                                                                                                                                             | TUBA4A  | -0.90 | 5.82 | -3.44 | 6.04E-03 | 8.64E-02 | -2.47 |
| 1428411_PM_at   | ---                                                                                                                                                                                                                                                                | NA      | -1.38 | 7.13 | -3.44 | 6.04E-03 | 8.64E-02 | -2.47 |
| 1423654_PM_a_at | Rnf4                                                                                                                                                                                                                                                               | RNF4    | -1.04 | 3.99 | -3.44 | 6.05E-03 | 8.65E-02 | -2.48 |
| 1419236_PM_at   | Helb                                                                                                                                                                                                                                                               | HELB    | 0.95  | 3.55 | 3.44  | 6.05E-03 | 8.65E-02 | -2.48 |
|                 | Gm10406 /// Gm2897 ///<br>Gm2956 /// Gm3095 ///<br>Gm3164 /// Gm3173 ///<br>Gm3317 /// Gm3373 ///<br>Gm3383 /// Gm33933 ///<br>Gm3488 /// Gm3500 ///<br>Gm3558 /// Gm3636 ///<br>Gm3696 /// Gm5796 ///<br>LOC100040870 ///<br>LOC100861615 ///<br>LOC101055754 /// |         |       |      |       |          |          |       |
| 1428301_PM_at   | LOC102638110                                                                                                                                                                                                                                                       | NA      | 0.54  | 9.40 | 3.43  | 6.07E-03 | 8.67E-02 | -2.48 |
| 1436122_PM_at   | Zfp667                                                                                                                                                                                                                                                             | ZNF667  | -0.58 | 2.90 | -3.43 | 6.08E-03 | 8.68E-02 | -2.48 |
| 1432310_PM_at   | ---                                                                                                                                                                                                                                                                | NA      | 0.35  | 2.72 | 3.43  | 6.08E-03 | 8.68E-02 | -2.48 |
| 1453096_PM_x_at | Rpl27                                                                                                                                                                                                                                                              | NA      | 0.59  | 7.71 | 3.43  | 6.08E-03 | 8.68E-02 | -2.48 |
| 1417181_PM_a_at | Kifap3                                                                                                                                                                                                                                                             | KIFAP3  | -0.96 | 7.92 | -3.43 | 6.09E-03 | 8.70E-02 | -2.48 |
| 1440252_PM_at   | H2afj                                                                                                                                                                                                                                                              | NA      | -0.54 | 2.73 | -3.43 | 6.10E-03 | 8.70E-02 | -2.48 |
| 1432023_PM_a_at | Slc17a9                                                                                                                                                                                                                                                            | SLC17A9 | 0.33  | 2.99 | 3.43  | 6.12E-03 | 8.73E-02 | -2.49 |
| 1426585_PM_s_at | Mapk1                                                                                                                                                                                                                                                              | MAPK1   | -1.11 | 4.53 | -3.43 | 6.13E-03 | 8.74E-02 | -2.49 |
| 1438622_PM_x_at | Tubb4b /// Tubb4b-ps1                                                                                                                                                                                                                                              | TUBB4B  | -0.31 | 2.37 | -3.43 | 6.13E-03 | 8.74E-02 | -2.49 |
| 1457270_PM_at   | Gas7                                                                                                                                                                                                                                                               | GAS7    | -0.94 | 5.40 | -3.43 | 6.15E-03 | 8.75E-02 | -2.49 |
| 1437289_PM_at   | Impad1                                                                                                                                                                                                                                                             | IMPAD1  | -0.80 | 6.52 | -3.43 | 6.15E-03 | 8.75E-02 | -2.49 |
| 1434719_PM_at   | A2m                                                                                                                                                                                                                                                                | A2M     | 0.45  | 3.08 | 3.43  | 6.15E-03 | 8.75E-02 | -2.49 |
| 1421930_PM_at   | Icos                                                                                                                                                                                                                                                               | ICOS    | 0.46  | 2.66 | 3.43  | 6.15E-03 | 8.75E-02 | -2.49 |
| 1450902_PM_at   | Brd3                                                                                                                                                                                                                                                               | BRD3    | 0.63  | 3.24 | 3.43  | 6.16E-03 | 8.76E-02 | -2.49 |
| 1449530_PM_at   | Trps1                                                                                                                                                                                                                                                              | TRPS1   | -1.39 | 5.12 | -3.42 | 6.17E-03 | 8.77E-02 | -2.49 |
| 1421844_PM_at   | Il1rap                                                                                                                                                                                                                                                             | IL1RAP  | -0.58 | 2.72 | -3.42 | 6.17E-03 | 8.77E-02 | -2.49 |
| 1436168_PM_at   | Paqr9                                                                                                                                                                                                                                                              | PAQR9   | -1.18 | 5.08 | -3.42 | 6.17E-03 | 8.78E-02 | -2.50 |
| 1445024_PM_at   | Stard7                                                                                                                                                                                                                                                             | STARD7  | 0.71  | 3.51 | 3.42  | 6.18E-03 | 8.78E-02 | -2.50 |
| 1423417_PM_at   | Smarcc1                                                                                                                                                                                                                                                            | SMARCC1 | 0.75  | 3.42 | 3.42  | 6.18E-03 | 8.78E-02 | -2.50 |
| 1434270_PM_at   | Npcd /// Nptxr                                                                                                                                                                                                                                                     | NPTXR   | -0.80 | 9.77 | -3.42 | 6.18E-03 | 8.78E-02 | -2.50 |
| 1435262_PM_at   | Pign                                                                                                                                                                                                                                                               | PIGN    | -0.73 | 4.90 | -3.42 | 6.19E-03 | 8.78E-02 | -2.50 |
| 1442752_PM_at   | ---                                                                                                                                                                                                                                                                | NA      | -0.33 | 2.41 | -3.42 | 6.19E-03 | 8.79E-02 | -2.50 |
| 1416505_PM_at   | Nr4a1                                                                                                                                                                                                                                                              | NR4A1   | 0.61  | 3.28 | 3.42  | 6.20E-03 | 8.79E-02 | -2.50 |
| 1446814_PM_at   | Art2b                                                                                                                                                                                                                                                              | NA      | 0.36  | 3.70 | 3.42  | 6.20E-03 | 8.80E-02 | -2.50 |
| 1454353_PM_at   | 4833420D23Rik                                                                                                                                                                                                                                                      | NA      | 0.39  | 3.57 | 3.42  | 6.21E-03 | 8.80E-02 | -2.50 |
| 1446183_PM_at   | Als2                                                                                                                                                                                                                                                               | ALS2    | 0.56  | 2.88 | 3.42  | 6.21E-03 | 8.80E-02 | -2.50 |
| 1425204_PM_s_at | Ddx19a /// Ddx19b                                                                                                                                                                                                                                                  | DDX19A  | 1.17  | 4.49 | 3.42  | 6.21E-03 | 8.80E-02 | -2.50 |
| 1428854_PM_at   | Tmed8                                                                                                                                                                                                                                                              | TMED8   | -0.85 | 3.47 | -3.42 | 6.21E-03 | 8.81E-02 | -2.50 |
| 1431088_PM_at   | Foxp4                                                                                                                                                                                                                                                              | FOXP4   | 0.58  | 3.04 | 3.42  | 6.22E-03 | 8.81E-02 | -2.50 |
| 1444178_PM_at   | Gm9895                                                                                                                                                                                                                                                             | NA      | 0.36  | 2.26 | 3.42  | 6.23E-03 | 8.82E-02 | -2.50 |
| 1416120_PM_at   | Rrm2                                                                                                                                                                                                                                                               | RRM2    | 0.37  | 2.62 | 3.42  | 6.23E-03 | 8.82E-02 | -2.50 |
| 1423010_PM_at   | Sacs                                                                                                                                                                                                                                                               | SACS    | -0.99 | 3.27 | -3.42 | 6.24E-03 | 8.82E-02 | -2.51 |
| 1433770_PM_at   | Dpysl2                                                                                                                                                                                                                                                             | DPYSL2  | -0.84 | 9.45 | -3.42 | 6.24E-03 | 8.82E-02 | -2.51 |
| 1434422_PM_at   | 1700066M21Rik                                                                                                                                                                                                                                                      | C2orf69 | -0.57 | 4.10 | -3.42 | 6.24E-03 | 8.82E-02 | -2.51 |
| 1436436_PM_at   | Cnih4                                                                                                                                                                                                                                                              | CNIH4   | -0.54 | 2.64 | -3.42 | 6.24E-03 | 8.82E-02 | -2.51 |
| 1453226_PM_at   | Kif18b                                                                                                                                                                                                                                                             | KIF18B  | 0.30  | 2.51 | 3.42  | 6.24E-03 | 8.82E-02 | -2.51 |
| 1430818_PM_at   | Tmc1                                                                                                                                                                                                                                                               | NA      | 0.39  | 2.76 | 3.42  | 6.24E-03 | 8.82E-02 | -2.51 |
| 1418394_PM_a_at | Adgre5                                                                                                                                                                                                                                                             | ADGRE5  | 0.35  | 3.55 | 3.42  | 6.25E-03 | 8.83E-02 | -2.51 |
| 1418579_PM_at   | Cetn2                                                                                                                                                                                                                                                              | CETN2   | -0.76 | 2.72 | -3.42 | 6.25E-03 | 8.83E-02 | -2.51 |
| 1417358_PM_s_at | Sorbs1                                                                                                                                                                                                                                                             | NA      | 0.40  | 2.84 | 3.42  | 6.25E-03 | 8.83E-02 | -2.51 |
| 1454045_PM_a_at | Pgs1                                                                                                                                                                                                                                                               | PGS1    | -0.70 | 3.66 | -3.42 | 6.26E-03 | 8.83E-02 | -2.51 |
| 1427708_PM_a_at | Nf2                                                                                                                                                                                                                                                                | NF2     | 0.80  | 2.84 | 3.42  | 6.26E-03 | 8.84E-02 | -2.51 |
| 1448439_PM_at   | Myd8f                                                                                                                                                                                                                                                              | MYDGF   | -1.18 | 6.70 | -3.42 | 6.27E-03 | 8.84E-02 | -2.51 |
| 1422934_PM_x_at | Defa-rs7                                                                                                                                                                                                                                                           | NA      | 0.37  | 2.99 | 3.42  | 6.27E-03 | 8.84E-02 | -2.51 |
| 1425537_PM_at   | Ppm1a                                                                                                                                                                                                                                                              | NA      | -1.05 | 3.80 | -3.41 | 6.29E-03 | 8.86E-02 | -2.51 |
| 1430033_PM_at   | ---                                                                                                                                                                                                                                                                | NA      | 0.27  | 2.26 | 3.41  | 6.29E-03 | 8.87E-02 | -2.52 |
| 1431595_PM_at   | ---                                                                                                                                                                                                                                                                | NA      | 0.46  | 2.92 | 3.41  | 6.30E-03 | 8.87E-02 | -2.52 |
| 1447107_PM_at   | Ddx55                                                                                                                                                                                                                                                              | DDX55   | 0.46  | 2.66 | 3.41  | 6.30E-03 | 8.87E-02 | -2.52 |
| 1449914_PM_at   | Ribc1                                                                                                                                                                                                                                                              | RIBC1   | 0.52  | 3.58 | 3.41  | 6.30E-03 | 8.87E-02 | -2.52 |
| 1446266_PM_at   | Cts8                                                                                                                                                                                                                                                               | CTSL    | -0.58 | 2.33 | -3.41 | 6.30E-03 | 8.87E-02 | -2.52 |
| 1441474_PM_at   | ---                                                                                                                                                                                                                                                                | NA      | 0.29  | 2.88 | 3.41  | 6.31E-03 | 8.87E-02 | -2.52 |
| 1451879_PM_a_at | Skc6a18                                                                                                                                                                                                                                                            | SLC6A18 | 0.32  | 2.85 | 3.41  | 6.31E-03 | 8.87E-02 | -2.52 |
| 1430677_PM_at   | 4930442L01Rik                                                                                                                                                                                                                                                      | NA      | 0.42  | 2.50 | 3.41  | 6.32E-03 | 8.88E-02 | -2.52 |
| 1444157_PM_a_at | Kdm5c                                                                                                                                                                                                                                                              | KDM5C   | -0.71 | 2.85 | -3.41 | 6.32E-03 | 8.89E-02 | -2.52 |
| 1435128_PM_at   | Baiap2                                                                                                                                                                                                                                                             | BAIAP2  | -0.44 | 3.99 | -3.41 | 6.35E-03 | 8.92E-02 | -2.52 |
| 1425427_PM_at   | Gm20767                                                                                                                                                                                                                                                            | NA      | 0.47  | 3.08 | 3.41  | 6.35E-03 | 8.92E-02 | -2.52 |
| 1417165_PM_at   | Mbd2                                                                                                                                                                                                                                                               | MBD2    | -0.72 | 7.11 | -3.41 | 6.35E-03 | 8.92E-02 | -2.52 |
| 1446624_PM_at   | Fktn                                                                                                                                                                                                                                                               | FKTN    | -1.96 | 3.34 | -3.41 | 6.37E-03 | 8.94E-02 | -2.53 |
| 1428293_PM_at   | Bod1                                                                                                                                                                                                                                                               | BOD1L2  | -0.57 | 6.62 | -3.41 | 6.37E-03 | 8.94E-02 | -2.53 |
| 1442719_PM_at   | ---                                                                                                                                                                                                                                                                | NA      | -1.03 | 2.30 | -3.41 | 6.38E-03 | 8.95E-02 | -2.53 |

|                 |                                                           |          |       |      |       |          |          |       |
|-----------------|-----------------------------------------------------------|----------|-------|------|-------|----------|----------|-------|
|                 | BB287469 /// Eif1a ///<br>Gm2016 /// Gm4027 ///<br>Gm5662 | NA       | 0.89  | 3.48 | 3.40  | 6.38E-03 | 8.95E-02 | -2.53 |
| 1445547_PM_at   | ---                                                       | NA       | 0.27  | 2.34 | 3.40  | 6.40E-03 | 8.96E-02 | -2.53 |
| 1453524_PM_at   | ---                                                       | NA       | 0.47  | 2.84 | 3.40  | 6.40E-03 | 8.96E-02 | -2.53 |
| 1426817_PM_at   | Mk167                                                     | MK167    | 0.51  | 2.75 | 3.40  | 6.40E-03 | 8.96E-02 | -2.53 |
| 1416107_PM_at   | Nsg2                                                      | HMP19    | -1.70 | 7.48 | -3.40 | 6.41E-03 | 8.98E-02 | -2.53 |
| 1430132_PM_at   | Krt28                                                     | KRT28    | 0.42  | 2.81 | 3.40  | 6.41E-03 | 8.98E-02 | -2.53 |
| 1442789_PM_at   | ---                                                       | NA       | 0.63  | 3.26 | 3.40  | 6.41E-03 | 8.98E-02 | -2.53 |
| 1456864_PM_at   | ---                                                       | NA       | 1.05  | 4.06 | 3.40  | 6.41E-03 | 8.98E-02 | -2.53 |
| 1448573_PM_a_at | Ceacam10                                                  | PSG7     | -0.61 | 2.12 | -3.40 | 6.42E-03 | 8.98E-02 | -2.54 |
| 1434897_PM_a_at | Slc25a4                                                   | SLC25A4  | -0.56 | 9.49 | -3.40 | 6.43E-03 | 8.98E-02 | -2.54 |
| 1452487_PM_x_at | Pira2 /// Pira6                                           | NA       | 1.13  | 5.94 | 3.40  | 6.43E-03 | 8.98E-02 | -2.54 |
| 1432663_PM_at   | 1500005C15Rik                                             | NA       | 0.39  | 2.66 | 3.40  | 6.44E-03 | 8.99E-02 | -2.54 |
| 1419777_PM_at   | ---                                                       | NA       | 0.40  | 2.94 | 3.40  | 6.44E-03 | 8.99E-02 | -2.54 |
| 1416477_PM_at   | Ube2d2a                                                   | UBE2D2   | -1.34 | 7.15 | -3.40 | 6.45E-03 | 9.00E-02 | -2.54 |
| 1451566_PM_at   | Zfp810                                                    | ZNF717   | -0.90 | 3.43 | -3.40 | 6.45E-03 | 9.00E-02 | -2.54 |
| 1419365_PM_at   | Pex11a                                                    | PEX11A   | -0.65 | 3.31 | -3.40 | 6.45E-03 | 9.00E-02 | -2.54 |
| 1416549_PM_at   | Slc35b4                                                   | SLC35B4  | -0.39 | 2.96 | -3.40 | 6.44E-03 | 9.00E-02 | -2.54 |
| 1436694_PM_s_at | Neurod4                                                   | NEUROD4  | 0.79  | 2.49 | 3.40  | 6.45E-03 | 9.00E-02 | -2.54 |
| 1444692_PM_at   | ---                                                       | NA       | 0.87  | 3.15 | 3.40  | 6.46E-03 | 9.00E-02 | -2.54 |
| 1455307_PM_at   | Fam193a                                                   | FAM193A  | 1.70  | 6.65 | 3.40  | 6.45E-03 | 9.00E-02 | -2.54 |
| 1441071_PM_at   | ---                                                       | NA       | 2.38  | 4.93 | 3.40  | 6.46E-03 | 9.00E-02 | -2.54 |
| 1457838_PM_at   | Cdc45                                                     | CDC45    | 0.65  | 3.80 | 3.40  | 6.46E-03 | 9.00E-02 | -2.54 |
| 1449916_PM_at   | Pbx4                                                      | PBX4     | 0.36  | 3.07 | 3.40  | 6.47E-03 | 9.01E-02 | -2.54 |
| 1426162_PM_a_at | Rpl7                                                      | NA       | -1.25 | 5.14 | -3.39 | 6.50E-03 | 9.04E-02 | -2.55 |
| 1434483_PM_at   | Usp12                                                     | USP12    | -0.92 | 3.66 | -3.39 | 6.49E-03 | 9.04E-02 | -2.55 |
| 1420488_PM_at   | Mrops14                                                   | MRPS14   | -0.56 | 4.27 | -3.39 | 6.49E-03 | 9.04E-02 | -2.55 |
| 1426104_PM_at   | Mapk14                                                    | MAPK14   | 0.31  | 2.58 | 3.39  | 6.50E-03 | 9.04E-02 | -2.55 |
| 1444193_PM_at   | Adhfe1                                                    | ADHFE1   | 0.52  | 3.69 | 3.39  | 6.50E-03 | 9.04E-02 | -2.55 |
| 1450911_PM_at   | Ppib                                                      | PPIB     | -0.94 | 5.12 | -3.39 | 6.51E-03 | 9.05E-02 | -2.55 |
| 1451912_PM_a_at | Fgfr1                                                     | FGFR1    | 0.45  | 2.77 | 3.39  | 6.51E-03 | 9.05E-02 | -2.55 |
| 1428461_PM_at   | Ppp2r5e                                                   | PPP2R5E  | -0.85 | 4.12 | -3.39 | 6.51E-03 | 9.05E-02 | -2.55 |
| 1435346_PM_at   | Ccdc82                                                    | NA       | 0.55  | 3.16 | 3.39  | 6.53E-03 | 9.07E-02 | -2.55 |
| 1453622_PM_s_at | Mllt3                                                     | MLLT3    | -1.13 | 5.89 | -3.39 | 6.54E-03 | 9.08E-02 | -2.55 |
| 1426012_PM_a_at | Ccar2                                                     | CCAR2    | -0.63 | 3.78 | -3.39 | 6.54E-03 | 9.08E-02 | -2.55 |
| 1417044_PM_at   | Lcmt1                                                     | LCMT1    | -0.59 | 3.19 | -3.39 | 6.54E-03 | 9.08E-02 | -2.55 |
| 1435478_PM_at   | Wdr26                                                     | WDR26    | -0.53 | 9.27 | -3.39 | 6.54E-03 | 9.08E-02 | -2.55 |
| 1419645_PM_at   | Cstf2                                                     | CSTF2    | -0.85 | 5.48 | -3.39 | 6.55E-03 | 9.08E-02 | -2.55 |
| 1437386_PM_at   | Ling1                                                     | LINGO1   | -0.74 | 6.88 | -3.39 | 6.55E-03 | 9.08E-02 | -2.55 |
| 1448688_PM_at   | Podxl                                                     | PODXL    | -0.68 | 3.57 | -3.39 | 6.56E-03 | 9.09E-02 | -2.56 |
| 1420326_PM_s_at | Cramp1l                                                   | CRAMP1   | -0.51 | 3.89 | -3.39 | 6.56E-03 | 9.09E-02 | -2.56 |
| 1443439_PM_at   | ---                                                       | NA       | 0.29  | 2.69 | 3.39  | 6.56E-03 | 9.09E-02 | -2.56 |
| 1453556_PM_x_at | Cd99                                                      | NA       | 0.30  | 2.41 | 3.39  | 6.56E-03 | 9.09E-02 | -2.56 |
| 1434794_PM_at   | Rhof                                                      | RHOF     | -0.41 | 2.53 | -3.39 | 6.57E-03 | 9.09E-02 | -2.56 |
| 1447111_PM_at   | ---                                                       | NA       | 0.28  | 2.68 | 3.39  | 6.58E-03 | 9.10E-02 | -2.56 |
| 1447553_PM_x_at | Ric3                                                      | RIC3     | -1.43 | 4.04 | -3.39 | 6.59E-03 | 9.11E-02 | -2.56 |
| 1449955_PM_at   | Cacna1f                                                   | CACNA1F  | 0.34  | 2.20 | 3.39  | 6.59E-03 | 9.11E-02 | -2.56 |
| 1424114_PM_s_at | Lamb1                                                     | LAMB1    | -1.88 | 5.09 | -3.39 | 6.60E-03 | 9.12E-02 | -2.56 |
| 1456783_PM_at   | Zdbf2                                                     | ZDBF2    | -0.86 | 4.14 | -3.38 | 6.60E-03 | 9.12E-02 | -2.56 |
| 1430900_PM_at   | ---                                                       | NA       | 0.31  | 2.38 | 3.38  | 6.61E-03 | 9.12E-02 | -2.56 |
| 1439137_PM_at   | Slc4a9                                                    | SLC4A9   | 0.34  | 2.35 | 3.38  | 6.60E-03 | 9.12E-02 | -2.56 |
| 1432941_PM_at   | 5730408A14Rik                                             | NA       | 1.29  | 3.72 | 3.39  | 6.60E-03 | 9.12E-02 | -2.56 |
| 1416091_PM_at   | Map4                                                      | MAP4     | -0.72 | 5.88 | -3.38 | 6.61E-03 | 9.13E-02 | -2.56 |
| 1454952_PM_s_at | Ncapd3                                                    | NCAPD3   | -0.66 | 2.98 | -3.38 | 6.62E-03 | 9.13E-02 | -2.56 |
| 1451043_PM_at   | Nek6                                                      | NEK6     | -0.57 | 2.46 | -3.38 | 6.61E-03 | 9.13E-02 | -2.56 |
| 1445916_PM_at   | ---                                                       | NA       | 0.39  | 2.30 | 3.38  | 6.62E-03 | 9.13E-02 | -2.57 |
| 1438606_PM_a_at | Clic4                                                     | CLIC4    | -1.59 | 3.95 | -3.38 | 6.63E-03 | 9.14E-02 | -2.57 |
| 1458663_PM_at   | ---                                                       | NA       | 1.03  | 3.19 | 3.38  | 6.63E-03 | 9.14E-02 | -2.57 |
| 1437216_PM_at   | Ccdc88a                                                   | CCDC88A  | -1.59 | 4.09 | -3.38 | 6.64E-03 | 9.14E-02 | -2.57 |
| 1426621_PM_a_at | Ppp2r2b                                                   | PPP2R2B  | -0.54 | 3.07 | -3.38 | 6.64E-03 | 9.14E-02 | -2.57 |
| 1439047_PM_s_at | Recql                                                     | RECQL    | -0.50 | 3.21 | -3.38 | 6.64E-03 | 9.14E-02 | -2.57 |
| 1420640_PM_at   | Jmy                                                       | JMY      | -1.56 | 5.43 | -3.38 | 6.65E-03 | 9.15E-02 | -2.57 |
| 1417015_PM_at   | Rassf3                                                    | RASSF3   | 0.34  | 2.89 | 3.38  | 6.65E-03 | 9.15E-02 | -2.57 |
| 1452435_PM_at   | Dcaf5                                                     | DCAF5    | 0.49  | 3.78 | 3.38  | 6.65E-03 | 9.15E-02 | -2.57 |
| 1457535_PM_at   | 4932438A13Rik                                             | KIAA1109 | 0.63  | 2.80 | 3.38  | 6.66E-03 | 9.16E-02 | -2.57 |
| 1457069_PM_at   | Ascc3                                                     | ASCC3    | -0.66 | 4.94 | -3.38 | 6.66E-03 | 9.16E-02 | -2.57 |
| 1455188_PM_at   | Ephb1                                                     | NA       | -1.70 | 6.62 | -3.38 | 6.67E-03 | 9.16E-02 | -2.57 |
| 1445487_PM_at   | ---                                                       | NA       | 0.53  | 2.75 | 3.38  | 6.67E-03 | 9.17E-02 | -2.57 |
| 1456600_PM_a_at | Rnf7                                                      | RNF7     | -1.03 | 6.93 | -3.38 | 6.68E-03 | 9.17E-02 | -2.57 |
| 1446884_PM_at   | AU022554                                                  | NA       | 0.31  | 2.90 | 3.38  | 6.68E-03 | 9.17E-02 | -2.57 |
| 1446080_PM_at   | ---                                                       | NA       | 0.33  | 2.50 | 3.38  | 6.68E-03 | 9.17E-02 | -2.57 |
| 1423629_PM_at   | Dnm2                                                      | DNM2     | 0.38  | 3.59 | 3.38  | 6.68E-03 | 9.17E-02 | -2.57 |
| 1421602_PM_at   | Shbg                                                      | SHBG     | 0.34  | 2.33 | 3.38  | 6.70E-03 | 9.19E-02 | -2.58 |
| 1437442_PM_at   | Pcdh7                                                     | PCDH7    | -1.97 | 6.85 | -3.38 | 6.71E-03 | 9.20E-02 | -2.58 |

|                 |                  |           |       |      |       |          |          |       |
|-----------------|------------------|-----------|-------|------|-------|----------|----------|-------|
| 1454405_PM_at   | Gm41646          | NA        | 0.41  | 3.06 | 3.38  | 6.71E-03 | 9.20E-02 | -2.58 |
| 1420483_PM_at   | Cnmn3            | CNNM3     | 0.53  | 2.94 | 3.38  | 6.71E-03 | 9.20E-02 | -2.58 |
| 1415683_PM_at   | Nmt1             | NMT1      | -0.78 | 4.88 | -3.38 | 6.71E-03 | 9.20E-02 | -2.58 |
| 1416918_PM_at   | Dlg3             | DLG3      | -0.52 | 6.23 | -3.37 | 6.72E-03 | 9.20E-02 | -2.58 |
| 1446358_PM_at   | ---              | NA        | 0.58  | 3.66 | 3.37  | 6.72E-03 | 9.20E-02 | -2.58 |
| 1421250_PM_at   | ---              | NA        | 0.46  | 2.88 | 3.37  | 6.73E-03 | 9.21E-02 | -2.58 |
| 1421894_PM_a_at | Tpp2             | TPP2      | -1.19 | 4.81 | -3.37 | 6.73E-03 | 9.21E-02 | -2.58 |
| 1416565_PM_at   | Cox6b1           | COX6B1    | -1.35 | 7.72 | -3.37 | 6.74E-03 | 9.22E-02 | -2.58 |
| 1435945_PM_a_at | Kcnn4            | KCNN4     | 0.54  | 3.89 | 3.37  | 6.74E-03 | 9.22E-02 | -2.58 |
| 1443942_PM_at   | ---              | NA        | 0.40  | 2.72 | 3.37  | 6.75E-03 | 9.23E-02 | -2.58 |
| 1426607_PM_at   | Gm7120           | TMEM267   | -0.61 | 2.93 | -3.37 | 6.76E-03 | 9.23E-02 | -2.59 |
| 1442449_PM_at   | Slc6a2           | SLC6A2    | 0.32  | 2.54 | 3.37  | 6.76E-03 | 9.23E-02 | -2.59 |
| 1431923_PM_at   | Aifm3            | AIFM3     | 0.39  | 2.82 | 3.37  | 6.76E-03 | 9.23E-02 | -2.59 |
| 1417788_PM_at   | Sncg             | SNCG      | 0.54  | 3.90 | 3.37  | 6.75E-03 | 9.23E-02 | -2.59 |
| 1425028_PM_a_at | Tpm2             | TPM2      | -2.62 | 5.52 | -3.37 | 6.76E-03 | 9.23E-02 | -2.59 |
| 1445247_PM_at   | C530044C16Rik    | NA        | 0.35  | 2.73 | 3.37  | 6.77E-03 | 9.23E-02 | -2.59 |
| 1435580_PM_at   | Peak1            | PEAK1     | -1.01 | 5.26 | -3.37 | 6.77E-03 | 9.23E-02 | -2.59 |
| 1455534_PM_s_at | Osbpl11          | OSBPL11   | -1.22 | 3.50 | -3.37 | 6.77E-03 | 9.24E-02 | -2.59 |
| 1435797_PM_at   | Ept1             | SELENOI   | -0.85 | 3.99 | -3.37 | 6.78E-03 | 9.24E-02 | -2.59 |
| 1453381_PM_at   | Rsf1             | RSF1      | -0.83 | 5.63 | -3.37 | 6.79E-03 | 9.25E-02 | -2.59 |
| 1443364_PM_at   | Dek              | NA        | -1.27 | 2.75 | -3.37 | 6.79E-03 | 9.25E-02 | -2.59 |
| 1418819_PM_at   | Arl8b            | ARL8B     | -1.16 | 3.87 | -3.37 | 6.79E-03 | 9.25E-02 | -2.59 |
| 1428205_PM_x_at | Gabbr2           | NA        | 0.77  | 7.63 | 3.37  | 6.79E-03 | 9.25E-02 | -2.59 |
| 1416254_PM_a_at | Vps16            | VPS16     | -0.81 | 4.62 | -3.37 | 6.80E-03 | 9.26E-02 | -2.59 |
| 1428792_PM_at   | Bcas1            | BCAS1     | -1.67 | 7.72 | -3.37 | 6.81E-03 | 9.27E-02 | -2.59 |
| 1436137_PM_at   | Slc6a17          | SLC6A17   | -1.47 | 7.44 | -3.37 | 6.81E-03 | 9.27E-02 | -2.59 |
| 1418622_PM_at   | Rab2a            | RAB2A     | -1.42 | 7.19 | -3.37 | 6.82E-03 | 9.27E-02 | -2.60 |
| 1417513_PM_at   | Evi5             | EVI5      | -1.08 | 5.82 | -3.37 | 6.82E-03 | 9.27E-02 | -2.60 |
| 1434934_PM_at   | Atpa1            | ATPAF1    | -0.82 | 4.09 | -3.37 | 6.82E-03 | 9.27E-02 | -2.60 |
| 1450107_PM_a_at | Renbp            | RENBP     | 0.25  | 2.26 | 3.37  | 6.82E-03 | 9.27E-02 | -2.60 |
| 1455811_PM_at   | Eif3l            | EIF3L     | 0.45  | 2.95 | 3.37  | 6.82E-03 | 9.27E-02 | -2.59 |
| 1430103_PM_at   | LOC105244333     | NA        | 0.59  | 2.41 | 3.37  | 6.83E-03 | 9.27E-02 | -2.60 |
| 1460046_PM_at   | ---              | NA        | -0.33 | 2.31 | -3.36 | 6.84E-03 | 9.29E-02 | -2.60 |
| 1445835_PM_at   | ---              | NA        | 0.36  | 2.73 | 3.36  | 6.84E-03 | 9.29E-02 | -2.60 |
| 1420506_PM_a_at | Stxbp1           | STXBP1    | 1.07  | 5.96 | 3.36  | 6.84E-03 | 9.29E-02 | -2.60 |
| 1450683_PM_at   | Tagln3           | TAGLN3    | -0.93 | 5.16 | -3.36 | 6.85E-03 | 9.30E-02 | -2.60 |
| 1424736_PM_at   | Eef2             | EEF2      | -0.78 | 7.95 | -3.36 | 6.86E-03 | 9.30E-02 | -2.60 |
| 1452399_PM_at   | Rgs6             | RGS6      | 0.30  | 2.30 | 3.36  | 6.87E-03 | 9.31E-02 | -2.60 |
| 1458403_PM_at   | Tnik             | TNIK      | -0.97 | 4.48 | -3.36 | 6.87E-03 | 9.32E-02 | -2.60 |
| 1444675_PM_at   | ---              | NA        | 1.11  | 3.67 | 3.36  | 6.87E-03 | 9.32E-02 | -2.60 |
| 1427006_PM_at   | Rapgef1          | RAPGEF1   | -0.69 | 4.99 | -3.36 | 6.88E-03 | 9.32E-02 | -2.60 |
| 1460319_PM_at   | Fut8             | FUT8      | -0.94 | 4.52 | -3.36 | 6.90E-03 | 9.35E-02 | -2.61 |
| 1452872_PM_at   | Ank3             | ANK3      | -1.57 | 4.57 | -3.36 | 6.91E-03 | 9.36E-02 | -2.61 |
| 1428534_PM_at   | Nr2c2ap          | NR2C2AP   | 0.28  | 3.25 | 3.36  | 6.92E-03 | 9.37E-02 | -2.61 |
| 1431075_PM_a_at | Eif4enif1        | EIF4ENIF1 | -0.44 | 3.43 | -3.36 | 6.93E-03 | 9.38E-02 | -2.61 |
| 1423298_PM_at   | Add3             | ADD3      | -0.67 | 4.92 | -3.36 | 6.94E-03 | 9.39E-02 | -2.61 |
| 1439257_PM_x_at | Rpn1             | RPN1      | -1.49 | 8.37 | -3.36 | 6.95E-03 | 9.40E-02 | -2.61 |
| 1450069_PM_a_at | Celf2            | CELF2     | -0.64 | 6.66 | -3.35 | 6.95E-03 | 9.40E-02 | -2.61 |
| 1453718_PM_at   | Bcl2l12          | BCL2L12   | 0.46  | 3.32 | 3.35  | 6.96E-03 | 9.40E-02 | -2.62 |
| 1458529_PM_at   | Gm4793           | NA        | 0.41  | 3.31 | 3.35  | 6.97E-03 | 9.42E-02 | -2.62 |
| 1460029_PM_at   | Mtg2             | MTG2      | 0.55  | 3.63 | 3.35  | 6.98E-03 | 9.42E-02 | -2.62 |
| 1453911_PM_at   | ---              | NA        | 0.35  | 2.41 | 3.35  | 6.98E-03 | 9.43E-02 | -2.62 |
| 1429446_PM_at   | Nemf             | NEMF      | -1.00 | 7.42 | -3.35 | 6.99E-03 | 9.43E-02 | -2.62 |
| 1450873_PM_at   | Gtpbp4           | GTPBP4    | -0.90 | 5.55 | -3.35 | 6.99E-03 | 9.43E-02 | -2.62 |
| 1418665_PM_at   | Impa2            | IMPA2     | 0.27  | 2.72 | 3.35  | 6.99E-03 | 9.43E-02 | -2.62 |
| 1421103_PM_at   | Bmp2k            | BMP2K     | 0.41  | 2.57 | 3.35  | 6.99E-03 | 9.43E-02 | -2.62 |
| 1435222_PM_at   | Foxp1            | FOXP1     | 1.77  | 5.17 | 3.35  | 6.99E-03 | 9.43E-02 | -2.62 |
| 1444514_PM_at   | ---              | NA        | 0.79  | 3.39 | 3.35  | 7.00E-03 | 9.43E-02 | -2.62 |
| 1437110_PM_at   | 2810474O19Rik    | KIAA1551  | 0.92  | 3.30 | 3.35  | 7.00E-03 | 9.43E-02 | -2.62 |
| 1415831_PM_at   | Psmd2            | PSMD2     | -0.76 | 5.54 | -3.35 | 7.01E-03 | 9.45E-02 | -2.62 |
| 1431707_PM_a_at | Cyth3            | CYTH3     | 0.40  | 2.96 | 3.35  | 7.02E-03 | 9.45E-02 | -2.62 |
| 1454301_PM_at   | Tenm3            | NA        | 0.32  | 2.70 | 3.35  | 7.02E-03 | 9.45E-02 | -2.62 |
| 1430245_PM_at   | ---              | NA        | 0.81  | 3.15 | 3.35  | 7.02E-03 | 9.45E-02 | -2.62 |
| 1448033_PM_at   | Tatdn1           | TATDN1    | 0.89  | 6.23 | 3.35  | 7.03E-03 | 9.45E-02 | -2.62 |
| 1436915_PM_x_at | Laptm4b          | LAPTM4B   | -0.97 | 5.18 | -3.35 | 7.03E-03 | 9.45E-02 | -2.63 |
| 1438232_PM_at   | Foxp2            | FOXP2     | 0.67  | 3.30 | 3.35  | 7.03E-03 | 9.45E-02 | -2.63 |
| 1425667_PM_at   | Acot11           | ACOT11    | 0.38  | 2.92 | 3.35  | 7.03E-03 | 9.46E-02 | -2.63 |
| 1444090_PM_at   | Pram1            | PRAM1     | 0.34  | 2.46 | 3.35  | 7.05E-03 | 9.47E-02 | -2.63 |
| 1432935_PM_at   | 5330433J24Rik    | NA        | 1.15  | 4.44 | 3.35  | 7.05E-03 | 9.47E-02 | -2.63 |
| 1450937_PM_at   | Lin7c            | LIN7C     | -1.14 | 4.43 | -3.35 | 7.05E-03 | 9.47E-02 | -2.63 |
| 1457329_PM_at   | ---              | NA        | 1.22  | 3.54 | 3.35  | 7.06E-03 | 9.48E-02 | -2.63 |
| 1435430_PM_at   | LOC102641872 /// | TRAPPC10  | -1.49 | 6.62 | -3.35 | 7.06E-03 | 9.48E-02 | -2.63 |
| 1446219_PM_at   | D930015E06Rik    | KIAA0922  | 0.42  | 2.39 | 3.35  | 7.06E-03 | 9.48E-02 | -2.63 |
| 1424048_PM_a_at | Cyb5r1           | CYB5R1    | -0.92 | 4.04 | -3.34 | 7.07E-03 | 9.49E-02 | -2.63 |

|                 |                                                              |            |       |      |       |          |          |       |
|-----------------|--------------------------------------------------------------|------------|-------|------|-------|----------|----------|-------|
| 1416584_PM_at   | Man2b2                                                       | MAN2B2     | 0.35  | 4.05 | 3.34  | 7.08E-03 | 9.49E-02 | -2.63 |
| 1455059_PM_at   | Helz                                                         | HELZ       | -0.50 | 3.18 | -3.34 | 7.08E-03 | 9.49E-02 | -2.63 |
| 1457787_PM_at   | LOC105242824                                                 | NA         | 0.35  | 2.47 | 3.34  | 7.09E-03 | 9.50E-02 | -2.63 |
| 1448943_PM_at   | Nrp1                                                         | NRP1       | -1.93 | 7.13 | -3.34 | 7.09E-03 | 9.50E-02 | -2.63 |
| 1427844_PM_a_at | Cebpb                                                        | CEBPB      | 0.27  | 2.47 | 3.34  | 7.09E-03 | 9.50E-02 | -2.63 |
| 1436624_PM_at   | Dnm3                                                         | DNM3       | -1.26 | 5.60 | -3.34 | 7.10E-03 | 9.50E-02 | -2.63 |
| 1433546_PM_at   | Gns                                                          | GNS        | -0.77 | 3.94 | -3.34 | 7.10E-03 | 9.50E-02 | -2.63 |
| 1424251_PM_a_at | Hnrnpdl                                                      | HNRNPDL    | -1.11 | 7.43 | -3.34 | 7.10E-03 | 9.51E-02 | -2.64 |
| 1440545_PM_at   | Grm1                                                         | GRM1       | -1.63 | 6.22 | -3.34 | 7.11E-03 | 9.52E-02 | -2.64 |
| 1433723_PM_s_at | Serf2                                                        | SERF2      | -1.53 | 6.46 | -3.34 | 7.12E-03 | 9.52E-02 | -2.64 |
| 1435147_PM_x_at | Cadm2                                                        | CADM2      | -1.52 | 6.07 | -3.34 | 7.12E-03 | 9.52E-02 | -2.64 |
| 1460265_PM_at   | Pa2g4                                                        | NA         | -1.26 | 7.71 | -3.34 | 7.12E-03 | 9.52E-02 | -2.64 |
| 1424824_PM_at   | Slain1                                                       | SLAIN1     | -0.97 | 6.11 | -3.34 | 7.13E-03 | 9.52E-02 | -2.64 |
| 1416655_PM_at   | C1galt1c1                                                    | C1GALT1C1  | -1.05 | 4.92 | -3.34 | 7.13E-03 | 9.53E-02 | -2.64 |
| 1439439_PM_x_at | Eef1d                                                        | EEF1D      | 0.84  | 8.31 | 3.34  | 7.14E-03 | 9.53E-02 | -2.64 |
| 1434335_PM_at   | Dip2b                                                        | DIP2B      | -0.82 | 5.46 | -3.34 | 7.14E-03 | 9.54E-02 | -2.64 |
| 1436446_PM_at   | 8030462N17Rik                                                | NA         | -0.77 | 3.84 | -3.34 | 7.16E-03 | 9.55E-02 | -2.64 |
| 1442664_PM_at   | ---                                                          | NA         | 0.31  | 2.47 | 3.34  | 7.16E-03 | 9.55E-02 | -2.64 |
| 1421133_PM_at   | Pvr13                                                        | NECTIN3    | 0.52  | 2.93 | 3.34  | 7.16E-03 | 9.55E-02 | -2.64 |
| 1449031_PM_at   | Cited1                                                       | CITED1     | -0.36 | 2.29 | -3.34 | 7.17E-03 | 9.56E-02 | -2.65 |
| 1424867_PM_a_at | Glyat                                                        | GLYAT      | -0.35 | 2.01 | -3.34 | 7.17E-03 | 9.56E-02 | -2.65 |
| 1426898_PM_at   | Tab1                                                         | TAB1       | 0.31  | 2.25 | 3.34  | 7.17E-03 | 9.56E-02 | -2.65 |
| 1433412_PM_at   | ---                                                          | NA         | 0.34  | 2.89 | 3.34  | 7.18E-03 | 9.56E-02 | -2.65 |
| 1435324_PM_x_at | Gm21596 /// Hmgb1 /// Hmgb1-ps2 /// Hmgb1-ps5 /// Hmgb1-rs15 | HMGB1      | 0.52  | 8.82 | 3.34  | 7.18E-03 | 9.56E-02 | -2.65 |
| 1420642_PM_a_at | Romo1                                                        | ROMO1      | -1.09 | 6.67 | -3.34 | 7.18E-03 | 9.57E-02 | -2.65 |
| 1431085_PM_a_at | Pcmt1                                                        | PCMT1      | -1.53 | 5.46 | -3.34 | 7.19E-03 | 9.57E-02 | -2.65 |
| 1416586_PM_at   | Zfp239                                                       | ZNF239     | -1.34 | 4.77 | -3.34 | 7.19E-03 | 9.57E-02 | -2.65 |
| 1450665_PM_at   | Gabpa                                                        | GABPA      | 0.60  | 4.54 | 3.34  | 7.19E-03 | 9.57E-02 | -2.65 |
| 1435060_PM_at   | Tmod2                                                        | TMOD2      | -1.13 | 7.27 | -3.33 | 7.20E-03 | 9.57E-02 | -2.65 |
| 1456347_PM_at   | ---                                                          | NA         | 0.34  | 2.89 | 3.33  | 7.20E-03 | 9.57E-02 | -2.65 |
| 1428768_PM_at   | Pan3                                                         | PAN3       | 0.63  | 5.31 | 3.33  | 7.20E-03 | 9.57E-02 | -2.65 |
| 1420814_PM_at   | Gdi2                                                         | GDI2       | -0.65 | 4.88 | -3.33 | 7.20E-03 | 9.57E-02 | -2.65 |
| 1429013_PM_at   | Map7d2                                                       | MAP7D2     | -0.80 | 4.58 | -3.33 | 7.22E-03 | 9.58E-02 | -2.65 |
| 1458871_PM_at   | Tmprss11e                                                    | TMPRSS11E  | -0.64 | 2.36 | -3.33 | 7.22E-03 | 9.58E-02 | -2.65 |
| 1423557_PM_at   | Ifngr2                                                       | IFNGR2     | -0.53 | 3.49 | -3.33 | 7.22E-03 | 9.58E-02 | -2.65 |
| 1430492_PM_at   | ---                                                          | NA         | 0.29  | 2.56 | 3.33  | 7.22E-03 | 9.58E-02 | -2.65 |
| 1460493_PM_at   | ---                                                          | NA         | 0.66  | 3.58 | 3.33  | 7.21E-03 | 9.58E-02 | -2.65 |
| 1444273_PM_at   | ---                                                          | NA         | 0.70  | 4.30 | 3.33  | 7.22E-03 | 9.58E-02 | -2.65 |
| 1459115_PM_at   | ---                                                          | NA         | 0.39  | 3.04 | 3.33  | 7.23E-03 | 9.59E-02 | -2.65 |
| 1424700_PM_at   | Tmem38b                                                      | TMEM38B    | 0.68  | 2.77 | 3.33  | 7.24E-03 | 9.59E-02 | -2.65 |
| 1418959_PM_at   | Tmprss5                                                      | TMPRSS5    | 0.47  | 3.32 | 3.33  | 7.24E-03 | 9.59E-02 | -2.65 |
| 1452999_PM_at   | Smndc1                                                       | SMNDC1     | -0.81 | 3.23 | -3.33 | 7.24E-03 | 9.59E-02 | -2.65 |
| 1438640_PM_x_at | Pgk1                                                         | PGK1       | -0.99 | 8.00 | -3.33 | 7.26E-03 | 9.61E-02 | -2.66 |
| 1418540_PM_a_at | Ptpre                                                        | PTPRE      | -0.64 | 3.12 | -3.33 | 7.26E-03 | 9.61E-02 | -2.66 |
| 1430718_PM_s_at | Dnajc24                                                      | DNAJC24    | 0.38  | 2.58 | 3.33  | 7.26E-03 | 9.61E-02 | -2.66 |
| 1458460_PM_at   | ---                                                          | NA         | 0.79  | 3.51 | 3.33  | 7.25E-03 | 9.61E-02 | -2.66 |
| 1435409_PM_at   | Tmem26                                                       | TMEM26     | -0.65 | 2.24 | -3.33 | 7.27E-03 | 9.61E-02 | -2.66 |
| 1417247_PM_at   | Al597479                                                     | C2orf49    | -0.49 | 3.48 | -3.33 | 7.27E-03 | 9.61E-02 | -2.66 |
| 1445666_PM_at   | ---                                                          | NA         | 1.21  | 4.20 | 3.33  | 7.27E-03 | 9.61E-02 | -2.66 |
| 1420493_PM_a_at | Pcyt2                                                        | PCYT2      | 0.47  | 3.50 | 3.33  | 7.29E-03 | 9.64E-02 | -2.66 |
| 1438016_PM_at   | Dkc1                                                         | DKC1       | -0.42 | 3.70 | -3.33 | 7.29E-03 | 9.64E-02 | -2.66 |
| 1419546_PM_at   | Atp6v1c1                                                     | ATP6V1C1   | -1.71 | 6.82 | -3.33 | 7.31E-03 | 9.66E-02 | -2.66 |
| 1460199_PM_a_at | Pafah1b1                                                     | PAFAH1B1   | -0.90 | 6.84 | -3.33 | 7.31E-03 | 9.66E-02 | -2.66 |
| 1435618_PM_at   | Pnma2                                                        | PNMA2      | -0.90 | 4.41 | -3.33 | 7.32E-03 | 9.66E-02 | -2.66 |
| 1441451_PM_at   | Brwd3                                                        | BRWD3      | -0.47 | 2.62 | -3.32 | 7.32E-03 | 9.66E-02 | -2.67 |
| 1424625_PM_a_at | Dennd1a                                                      | DENND1A    | 0.37  | 2.93 | 3.32  | 7.33E-03 | 9.67E-02 | -2.67 |
| 1427991_PM_s_at | Usp45                                                        | USP45      | -1.04 | 4.85 | -3.32 | 7.34E-03 | 9.68E-02 | -2.67 |
| 1418212_PM_at   | Omg                                                          | OMG        | -0.81 | 4.62 | -3.32 | 7.34E-03 | 9.68E-02 | -2.67 |
| 1426355_PM_a_at | Coa5                                                         | COA5       | -1.42 | 5.44 | -3.32 | 7.35E-03 | 9.68E-02 | -2.67 |
| 1427022_PM_at   | Ddx42                                                        | DDX42      | -0.80 | 4.42 | -3.32 | 7.37E-03 | 9.70E-02 | -2.67 |
| 1446449_PM_at   | ---                                                          | NA         | -0.28 | 2.59 | -3.32 | 7.36E-03 | 9.70E-02 | -2.67 |
| 1427390_PM_at   | Bloc1s3                                                      | ACO05779.2 | 0.32  | 3.07 | 3.32  | 7.37E-03 | 9.70E-02 | -2.67 |
| 1432799_PM_at   | ---                                                          | NA         | 0.36  | 2.30 | 3.32  | 7.36E-03 | 9.70E-02 | -2.67 |
| 1422020_PM_at   | Spry4                                                        | SPRY4      | 0.40  | 2.31 | 3.32  | 7.36E-03 | 9.70E-02 | -2.67 |
| 1440351_PM_at   | ---                                                          | NA         | 0.65  | 2.53 | 3.32  | 7.36E-03 | 9.70E-02 | -2.67 |
| 1438917_PM_x_at | Nup62                                                        | NA         | -1.06 | 4.12 | -3.32 | 7.37E-03 | 9.70E-02 | -2.67 |
| 1427580_PM_a_at | Rian                                                         | NA         | -1.09 | 6.72 | -3.32 | 7.38E-03 | 9.70E-02 | -2.67 |
| 1433588_PM_at   | Fam21                                                        | WASHC2C    | -1.24 | 4.70 | -3.32 | 7.38E-03 | 9.70E-02 | -2.67 |
| 1420530_PM_at   | Dpf1                                                         | DPF1       | 0.40  | 2.88 | 3.32  | 7.38E-03 | 9.70E-02 | -2.67 |
| 1441535_PM_at   | ---                                                          | NA         | 0.67  | 3.36 | 3.32  | 7.40E-03 | 9.72E-02 | -2.68 |
| 1454654_PM_at   | Dirc2                                                        | DIRC2      | -0.71 | 3.21 | -3.32 | 7.42E-03 | 9.74E-02 | -2.68 |
| 1420809_PM_a_at | Chp1                                                         | CHP1       | -0.70 | 7.63 | -3.32 | 7.42E-03 | 9.74E-02 | -2.68 |
| 1459658_PM_at   | Mcm5                                                         | MCM5       | 0.25  | 1.99 | 3.32  | 7.42E-03 | 9.74E-02 | -2.68 |



|                 |               |          |       |      |       |          |          |       |
|-----------------|---------------|----------|-------|------|-------|----------|----------|-------|
| 1426587_PM_a_at | Stat3         | STAT3    | 0.39  | 2.94 | 3.32  | 7.42E-03 | 9.74E-02 | -2.68 |
| 1444856_PM_at   | ---           | NA       | 0.67  | 3.63 | 3.32  | 7.41E-03 | 9.74E-02 | -2.68 |
| 1420191_PM_s_at | Tmem191c      | TMEM191C | -0.96 | 7.04 | -3.32 | 7.43E-03 | 9.74E-02 | -2.68 |
| 1419582_PM_at   | Cyp2c55       | CYP2C18  | 0.67  | 3.26 | 3.32  | 7.43E-03 | 9.74E-02 | -2.68 |
| 1454149_PM_a_at | Ccnl2         | CCNL2    | 0.46  | 7.59 | 3.32  | 7.43E-03 | 9.74E-02 | -2.68 |
| 1443270_PM_at   | ---           | NA       | 0.71  | 3.28 | 3.32  | 7.44E-03 | 9.75E-02 | -2.68 |
| 1447496_PM_s_at | Fank1         | FANK1    | 0.78  | 3.28 | 3.32  | 7.44E-03 | 9.75E-02 | -2.68 |
| 1440134_PM_at   | Cyp4a31       | CYP4A11  | 0.69  | 2.45 | 3.31  | 7.45E-03 | 9.76E-02 | -2.68 |
| 1439041_PM_at   | Slc39a10      | SLC39A10 | -1.43 | 3.95 | -3.31 | 7.45E-03 | 9.76E-02 | -2.68 |
| 1416723_PM_at   | Tcf4          | TCF4     | -1.00 | 7.84 | -3.31 | 7.45E-03 | 9.76E-02 | -2.68 |
| 1445913_PM_at   | A730090H04Rik | NA       | 0.37  | 2.42 | 3.31  | 7.46E-03 | 9.76E-02 | -2.68 |
| 1436135_PM_at   | Nlgn3         | NLGN3    | -1.25 | 5.07 | -3.31 | 7.47E-03 | 9.77E-02 | -2.69 |
| 1432430_PM_a_at | Kansl1        | KANSL1   | 0.64  | 2.60 | 3.31  | 7.47E-03 | 9.77E-02 | -2.69 |
| 1435746_PM_at   | Srpk2         | SRPK2    | -0.80 | 3.73 | -3.31 | 7.49E-03 | 9.79E-02 | -2.69 |
| 1428317_PM_at   | Fundc2        | NA       | -0.58 | 2.78 | -3.31 | 7.49E-03 | 9.79E-02 | -2.69 |
| 1446189_PM_at   | Kat6b         | KAT6B    | -0.68 | 3.13 | -3.31 | 7.50E-03 | 9.80E-02 | -2.69 |
| 1449326_PM_x_at | Saa2          | NA       | 0.50  | 3.19 | 3.31  | 7.50E-03 | 9.80E-02 | -2.69 |
| 1423329_PM_at   | Gdap1         | GDAP1    | -1.07 | 5.79 | -3.31 | 7.50E-03 | 9.80E-02 | -2.69 |
| 1434777_PM_at   | Mycl          | MYCL     | -1.65 | 3.80 | -3.31 | 7.51E-03 | 9.81E-02 | -2.69 |
| 1427516_PM_a_at | Boc           | BOC      | -1.07 | 2.67 | -3.31 | 7.52E-03 | 9.81E-02 | -2.69 |
| 1442972_PM_at   | ---           | NA       | 0.43  | 3.12 | 3.31  | 7.52E-03 | 9.81E-02 | -2.69 |
| 1445194_PM_at   | Cnksr2        | CNKS2    | -1.12 | 3.77 | -3.31 | 7.52E-03 | 9.81E-02 | -2.69 |
| 1424024_PM_at   | Mcf2d         | MCFD2    | -1.08 | 4.21 | -3.31 | 7.53E-03 | 9.82E-02 | -2.69 |
| 1425812_PM_a_at | Cacna1b       | CACNA1B  | 0.42  | 3.00 | 3.31  | 7.54E-03 | 9.83E-02 | -2.69 |
| 1426892_PM_at   | Utrn          | UTRN     | 1.48  | 6.10 | 3.31  | 7.54E-03 | 9.83E-02 | -2.69 |
| 1423059_PM_at   | Ptk2          | PTK2     | -1.09 | 5.48 | -3.31 | 7.55E-03 | 9.83E-02 | -2.70 |
| 1416564_PM_at   | Sox7          | SOX7     | 0.35  | 2.97 | 3.31  | 7.54E-03 | 9.83E-02 | -2.70 |
| 1444331_PM_at   | ---           | NA       | 0.43  | 2.48 | 3.31  | 7.54E-03 | 9.83E-02 | -2.70 |
| 1434727_PM_at   | Hepacam       | HEPACAM  | 0.51  | 4.63 | 3.31  | 7.55E-03 | 9.83E-02 | -2.70 |
| 1458666_PM_at   | ---           | NA       | 0.28  | 2.18 | 3.31  | 7.55E-03 | 9.83E-02 | -2.70 |
| 1458815_PM_at   | AU021884      | NA       | 0.50  | 3.30 | 3.31  | 7.55E-03 | 9.83E-02 | -2.70 |
| 1416638_PM_at   | Sall2         | SALL2    | -1.00 | 4.69 | -3.31 | 7.56E-03 | 9.83E-02 | -2.70 |
| 1460242_PM_at   | Cd55          | CD55     | -1.18 | 2.83 | -3.31 | 7.56E-03 | 9.84E-02 | -2.70 |
| 1435656_PM_at   | Gmps          | GMPS     | -1.37 | 6.25 | -3.31 | 7.57E-03 | 9.84E-02 | -2.70 |
| 1447871_PM_at   | ---           | NA       | 1.44  | 3.22 | 3.30  | 7.58E-03 | 9.85E-02 | -2.70 |
| 1433946_PM_at   | Zik1          | ZIK1     | -0.70 | 3.87 | -3.30 | 7.58E-03 | 9.85E-02 | -2.70 |
| 1416857_PM_at   | Sdf2          | SDF2     | -0.89 | 5.14 | -3.30 | 7.59E-03 | 9.85E-02 | -2.70 |
| 1420514_PM_at   | Tmem47        | TMEM47   | -0.82 | 6.13 | -3.30 | 7.59E-03 | 9.85E-02 | -2.70 |
| 1450864_PM_at   | Calm3         | CALM3    | 0.87  | 6.81 | 3.30  | 7.59E-03 | 9.85E-02 | -2.70 |
| 1428190_PM_at   | Slc25a1       | SLC25A1  | 0.29  | 2.53 | 3.30  | 7.59E-03 | 9.86E-02 | -2.70 |
| 1430526_PM_a_at | Smarca2       | SMARCA2  | -1.20 | 6.05 | -3.30 | 7.60E-03 | 9.86E-02 | -2.70 |
| 1449700_PM_at   | Igfbp1        | NA       | -0.78 | 3.52 | -3.30 | 7.61E-03 | 9.86E-02 | -2.70 |
| 1418996_PM_a_at | Lym5          | ETFRF1   | -0.67 | 2.57 | -3.30 | 7.61E-03 | 9.86E-02 | -2.70 |
| 1455287_PM_at   | Cdk6          | CDK6     | 0.25  | 2.64 | 3.30  | 7.60E-03 | 9.86E-02 | -2.70 |
| 1445254_PM_at   | ---           | NA       | 0.32  | 3.67 | 3.30  | 7.61E-03 | 9.86E-02 | -2.70 |
| 1415805_PM_at   | Clps          | CLPS     | 0.36  | 3.01 | 3.30  | 7.61E-03 | 9.86E-02 | -2.70 |
| 1428651_PM_at   | Klh24         | NA       | -1.19 | 6.10 | -3.30 | 7.62E-03 | 9.87E-02 | -2.71 |
| 1452078_PM_a_at | Slc11a2       | SLC11A2  | 0.50  | 4.76 | 3.30  | 7.62E-03 | 9.87E-02 | -2.71 |
| 1453442_PM_at   | LOC102633000  | NA       | 0.30  | 2.89 | 3.30  | 7.63E-03 | 9.88E-02 | -2.71 |
| 1456297_PM_at   | Slc46a2       | SLC46A2  | 0.45  | 4.33 | 3.30  | 7.63E-03 | 9.88E-02 | -2.71 |
| 1428330_PM_at   | Dopey2        | DOPEY2   | -0.78 | 3.54 | -3.30 | 7.64E-03 | 9.88E-02 | -2.71 |
| 1448342_PM_at   | Mapk10        | MAPK10   | -0.75 | 5.29 | -3.30 | 7.64E-03 | 9.88E-02 | -2.71 |
| 1423851_PM_a_at | Shisa2        | SHISA2   | -0.52 | 2.69 | -3.30 | 7.64E-03 | 9.88E-02 | -2.71 |
| 1446964_PM_at   | ---           | NA       | 0.60  | 3.15 | 3.30  | 7.64E-03 | 9.88E-02 | -2.71 |
| 1422232_PM_at   | Phox2b        | PHOX2B   | 0.40  | 2.72 | 3.30  | 7.65E-03 | 9.88E-02 | -2.71 |
| 1429452_PM_x_at | Pisd-ps3      | NA       | 1.13  | 5.12 | 3.30  | 7.65E-03 | 9.89E-02 | -2.71 |
| 1433131_PM_at   | 5033425B01Rik | NA       | 0.30  | 2.42 | 3.30  | 7.66E-03 | 9.89E-02 | -2.71 |
| 1458991_PM_at   | ---           | NA       | 0.37  | 2.72 | 3.30  | 7.66E-03 | 9.89E-02 | -2.71 |
| 1436628_PM_at   | Ulk4          | ULK4     | 0.28  | 2.32 | 3.30  | 7.66E-03 | 9.89E-02 | -2.71 |
| 1420671_PM_x_at | Ms4a4c        | NA       | 0.37  | 2.51 | 3.30  | 7.66E-03 | 9.89E-02 | -2.71 |
| 1426354_PM_at   | Bap1          | BAP1     | -0.80 | 3.90 | -3.30 | 7.67E-03 | 9.89E-02 | -2.71 |
| 1421772_PM_a_at | Cox7a2l       | COX7A2L  | -0.78 | 7.67 | -3.30 | 7.67E-03 | 9.89E-02 | -2.71 |
| 1452124_PM_at   | Ank3          | ANK3     | -0.58 | 6.48 | -3.30 | 7.67E-03 | 9.89E-02 | -2.71 |
| 1442634_PM_at   | ---           | NA       | -0.47 | 2.76 | -3.30 | 7.67E-03 | 9.89E-02 | -2.71 |
| 1454362_PM_at   | ---           | NA       | 0.41  | 2.89 | 3.30  | 7.68E-03 | 9.89E-02 | -2.71 |
| 1430568_PM_at   | Zc3h13        | ZC3H13   | 0.76  | 7.24 | 3.30  | 7.68E-03 | 9.89E-02 | -2.71 |
| 1442387_PM_at   | ---           | NA       | 0.36  | 3.15 | 3.30  | 7.68E-03 | 9.89E-02 | -2.71 |
| 1428254_PM_at   | Purb          | PURB     | -1.21 | 7.53 | -3.30 | 7.68E-03 | 9.89E-02 | -2.71 |
| 1418060_PM_a_at | Mapk7         | MAPK7    | 0.52  | 3.35 | 3.30  | 7.69E-03 | 9.89E-02 | -2.71 |
| 1460326_PM_at   | Pik3ca        | PIK3CA   | -0.90 | 5.93 | -3.29 | 7.71E-03 | 9.91E-02 | -2.72 |
| 1455273_PM_at   | Zbtb6         | ZBTB6    | -0.72 | 4.38 | -3.29 | 7.71E-03 | 9.91E-02 | -2.72 |
| 1453631_PM_at   | Stx8          | STX8     | 0.31  | 2.52 | 3.29  | 7.71E-03 | 9.91E-02 | -2.72 |
| 1453401_PM_at   | 4930428O21Rik | NA       | 0.32  | 2.70 | 3.30  | 7.71E-03 | 9.91E-02 | -2.72 |
| 1439010_PM_at   | Larp4         | LARP4    | -0.66 | 4.08 | -3.29 | 7.72E-03 | 9.92E-02 | -2.72 |
| 1441370_PM_at   | Tmcc1         | TMCC1    | -0.42 | 2.21 | -3.29 | 7.72E-03 | 9.92E-02 | -2.72 |

|                 |                      |           |       |      |       |          |          |       |
|-----------------|----------------------|-----------|-------|------|-------|----------|----------|-------|
| 1437380_PM_x_at | Pgd                  | PGD       | 1.45  | 5.99 | 3.29  | 7.73E-03 | 9.92E-02 | -2.72 |
| 1439107_PM_a_at | Kmt2e                | KMT2E     | -0.87 | 5.69 | -3.29 | 7.73E-03 | 9.93E-02 | -2.72 |
| 1447699_PM_at   | Gm26744              | NA        | 0.98  | 5.85 | 3.29  | 7.74E-03 | 9.93E-02 | -2.72 |
| 1434561_PM_at   | Asx1                 | ASXL1     | -0.59 | 6.02 | -3.29 | 7.74E-03 | 9.94E-02 | -2.72 |
| 1416143_PM_at   | Atp5j                | ATP5J     | -0.62 | 7.83 | -3.29 | 7.75E-03 | 9.94E-02 | -2.72 |
| 1431891_PM_at   | Zswim5               | ZSWIM5    | 0.42  | 2.63 | 3.29  | 7.76E-03 | 9.95E-02 | -2.72 |
| 1430404_PM_at   | ---                  | NA        | -1.16 | 3.25 | -3.29 | 7.76E-03 | 9.95E-02 | -2.72 |
| 1441963_PM_at   | Lzts3                | LZTS3     | -1.10 | 4.73 | -3.29 | 7.77E-03 | 9.96E-02 | -2.72 |
| 1454881_PM_s_at | Upk3b                | UPK3B     | 0.40  | 2.71 | 3.29  | 7.77E-03 | 9.96E-02 | -2.73 |
| 1452612_PM_at   | Ltn1                 | LTN1      | -1.31 | 5.34 | -3.29 | 7.80E-03 | 9.97E-02 | -2.73 |
| 1425491_PM_at   | Bmpr1a               | BMPR1A    | -1.11 | 5.53 | -3.29 | 7.79E-03 | 9.97E-02 | -2.73 |
| 1434671_PM_at   | Ptpn4                | PTPN4     | -1.09 | 6.53 | -3.29 | 7.79E-03 | 9.97E-02 | -2.73 |
| 1452256_PM_at   | Tefm                 | TEFM      | -0.66 | 2.76 | -3.29 | 7.81E-03 | 9.97E-02 | -2.73 |
| 1446912_PM_at   | ---                  | NA        | 0.27  | 2.26 | 3.29  | 7.80E-03 | 9.97E-02 | -2.73 |
| 1431221_PM_at   | ---                  | NA        | 0.29  | 2.54 | 3.29  | 7.80E-03 | 9.97E-02 | -2.73 |
| 1416646_PM_at   | Afp                  | AFP       | 0.37  | 2.72 | 3.29  | 7.80E-03 | 9.97E-02 | -2.73 |
| 1454828_PM_at   | Gpr107               | GPR107    | 0.45  | 3.09 | 3.29  | 7.79E-03 | 9.97E-02 | -2.73 |
| 1439461_PM_x_at | Nsmce4a              | NSMCE4A   | 0.51  | 5.51 | 3.29  | 7.80E-03 | 9.97E-02 | -2.73 |
| 1450799_PM_at   | Adcyap1r1            | ADCYAP1R1 | 0.61  | 3.56 | 3.29  | 7.80E-03 | 9.97E-02 | -2.73 |
| 1448057_PM_at   | ---                  | NA        | 0.64  | 4.71 | 3.29  | 7.81E-03 | 9.97E-02 | -2.73 |
| 1460524_PM_at   | ---                  | NA        | 0.85  | 3.21 | 3.29  | 7.79E-03 | 9.97E-02 | -2.73 |
| 1442846_PM_at   | ---                  | NA        | 1.35  | 2.79 | 3.29  | 7.80E-03 | 9.97E-02 | -2.73 |
| 1424071_PM_s_at | Ice1                 | ICE1      | -0.60 | 7.26 | -3.29 | 7.82E-03 | 9.98E-02 | -2.73 |
| 1439238_PM_at   | Sun2                 | SUN2      | 0.30  | 2.79 | 3.29  | 7.82E-03 | 9.98E-02 | -2.73 |
| 1454161_PM_s_at | 0610007P14Rik        | C14orf1   | -0.41 | 3.00 | -3.29 | 7.83E-03 | 9.99E-02 | -2.73 |
| 1454220_PM_at   | ---                  | NA        | 0.58  | 2.62 | 3.29  | 7.83E-03 | 9.99E-02 | -2.73 |
| 1452630_PM_at   | Trem1                | TREML1    | 0.30  | 2.46 | 3.29  | 7.84E-03 | 9.99E-02 | -2.73 |
| 1445019_PM_at   | ---                  | NA        | 1.13  | 3.35 | 3.29  | 7.84E-03 | 9.99E-02 | -2.73 |
| 1450539_PM_at   | Krtap5-1             | NA        | 0.38  | 2.41 | 3.28  | 7.84E-03 | 9.99E-02 | -2.73 |
| 1448251_PM_at   | Clmp                 | CLMP      | -0.86 | 2.99 | -3.28 | 7.85E-03 | 1.00E-01 | -2.74 |
| 1458628_PM_at   | ---                  | NA        | -0.55 | 2.34 | -3.28 | 7.85E-03 | 1.00E-01 | -2.74 |
| 1442404_PM_at   | ---                  | NA        | 0.48  | 3.85 | 3.28  | 7.86E-03 | 1.00E-01 | -2.74 |
| 1420935_PM_a_at | Srrm1                | SRRM1     | 1.55  | 6.49 | 3.28  | 7.85E-03 | 1.00E-01 | -2.74 |
| 1421252_PM_a_at | Mef2a                | MEF2A     | -1.12 | 3.19 | -3.28 | 7.86E-03 | 1.00E-01 | -2.74 |
| 1422052_PM_at   | Cdh8                 | CDH8      | -1.10 | 4.13 | -3.28 | 7.87E-03 | 1.00E-01 | -2.74 |
| 1416703_PM_at   | Mapk14               | MAPK14    | -1.09 | 6.93 | -3.28 | 7.87E-03 | 1.00E-01 | -2.74 |
| 1450971_PM_at   | Gadd45b              | GADD45B   | 0.32  | 2.49 | 3.28  | 7.87E-03 | 1.00E-01 | -2.74 |
| 1450186_PM_s_at | Gnas                 | GNAS      | -0.96 | 9.54 | -3.28 | 7.88E-03 | 1.00E-01 | -2.74 |
| 1442947_PM_x_at | ---                  | NA        | -0.73 | 3.36 | -3.28 | 7.90E-03 | 1.00E-01 | -2.74 |
| 1439287_PM_at   | ---                  | NA        | 0.28  | 2.34 | 3.28  | 7.90E-03 | 1.00E-01 | -2.74 |
| 1451439_PM_at   | Nepro                | NEPRO     | 0.79  | 4.02 | 3.28  | 7.89E-03 | 1.00E-01 | -2.74 |
| 1440015_PM_at   | Tcf4                 | TCF4      | -0.54 | 6.21 | -3.28 | 7.91E-03 | 1.00E-01 | -2.74 |
| 1436268_PM_at   | Ddn                  | DDN       | -1.98 | 9.64 | -3.28 | 7.92E-03 | 1.00E-01 | -2.74 |
| 1459807_PM_x_at | P4htm                | P4HTM     | -1.51 | 5.67 | -3.28 | 7.92E-03 | 1.00E-01 | -2.74 |
| 1441926_PM_x_at | Tmie                 | TMIE      | -1.34 | 3.34 | -3.28 | 7.92E-03 | 1.00E-01 | -2.74 |
| 1460544_PM_at   | Naa35                | NAA35     | -0.78 | 4.12 | -3.28 | 7.92E-03 | 1.00E-01 | -2.74 |
| 1435613_PM_x_at | Cox5b///LOC102641600 | COX5B     | -0.67 | 9.65 | -3.28 | 7.92E-03 | 1.00E-01 | -2.74 |
| 1428841_PM_at   | Best1                | BEST1     | 0.38  | 2.97 | 3.28  | 7.91E-03 | 1.00E-01 | -2.74 |
| 1443169_PM_at   | Cnot4                | NA        | 0.59  | 3.43 | 3.28  | 7.93E-03 | 1.00E-01 | -2.74 |
| 1439435_PM_x_at | Pgk1                 | PGK1      | -0.96 | 8.51 | -3.28 | 7.93E-03 | 1.00E-01 | -2.75 |
| 1417250_PM_at   | Rlim                 | RLIM      | -0.73 | 3.72 | -3.28 | 7.94E-03 | 1.00E-01 | -2.75 |
| 1459491_PM_at   | D12Erd673e           | NA        | 0.28  | 2.63 | 3.28  | 7.94E-03 | 1.00E-01 | -2.75 |
| 1432858_PM_at   | D730048M19Rik        | NA        | 0.40  | 2.86 | 3.28  | 7.94E-03 | 1.00E-01 | -2.75 |
| 1445644_PM_at   | Sarm1                | SARM1     | -0.89 | 3.94 | -3.28 | 7.95E-03 | 1.01E-01 | -2.75 |
| 1437040_PM_at   | Etnk2                | ETNK2     | 0.34  | 2.40 | 3.28  | 7.96E-03 | 1.01E-01 | -2.75 |
| 1416200_PM_at   | Iib3                 | IL33      | -1.12 | 3.52 | -3.28 | 7.97E-03 | 1.01E-01 | -2.75 |
| 1448665_PM_at   | Dmd                  | DMD       | -1.03 | 4.72 | -3.28 | 7.97E-03 | 1.01E-01 | -2.75 |
| 1441201_PM_at   | ---                  | NA        | 0.49  | 2.75 | 3.27  | 7.98E-03 | 1.01E-01 | -2.75 |
| 1457847_PM_at   | ---                  | NA        | -0.30 | 2.13 | -3.27 | 7.98E-03 | 1.01E-01 | -2.75 |
| 1432036_PM_at   | 4933436H12Rik        | NA        | 0.33  | 2.86 | 3.27  | 7.98E-03 | 1.01E-01 | -2.75 |
| 1449158_PM_at   | Kcnk2                | KCNK2     | -1.12 | 3.52 | -3.27 | 7.99E-03 | 1.01E-01 | -2.75 |
| 1423784_PM_at   | Gars                 | GARS      | -1.10 | 5.61 | -3.27 | 8.00E-03 | 1.01E-01 | -2.75 |
| 1446729_PM_at   | Disp2                | DISP2     | -1.03 | 4.32 | -3.27 | 8.01E-03 | 1.01E-01 | -2.75 |
| 1460350_PM_at   | Osbp                 | OSBP      | -0.91 | 5.04 | -3.27 | 8.03E-03 | 1.01E-01 | -2.76 |
| 1439972_PM_at   | Etnk1                | ETNK1     | -0.72 | 3.83 | -3.27 | 8.01E-03 | 1.01E-01 | -2.76 |
| 1452263_PM_at   | Slc35f4              | SLC35F4   | -0.61 | 2.61 | -3.27 | 8.01E-03 | 1.01E-01 | -2.75 |
| 1440535_PM_at   | Uros                 | UROS      | 0.26  | 2.25 | 3.27  | 8.02E-03 | 1.01E-01 | -2.76 |
| 1460741_PM_x_at | D17Wsu92e            | Cgorf106  | 0.30  | 2.39 | 3.27  | 8.02E-03 | 1.01E-01 | -2.76 |
| 1446611_PM_at   | ---                  | NA        | 0.33  | 2.69 | 3.27  | 8.01E-03 | 1.01E-01 | -2.75 |
| 1430311_PM_at   | Marcks               | NA        | 0.33  | 2.74 | 3.27  | 8.02E-03 | 1.01E-01 | -2.76 |
| 1418741_PM_at   | Iitgb7               | ITGB7     | 0.40  | 3.13 | 3.27  | 8.02E-03 | 1.01E-01 | -2.76 |
| 1451829_PM_a_at | Nf2                  | NF2       | 0.50  | 3.30 | 3.27  | 8.02E-03 | 1.01E-01 | -2.76 |
| 1440063_PM_at   | Farsa                | FARSA     | 0.57  | 2.77 | 3.27  | 8.03E-03 | 1.01E-01 | -2.76 |
| 1439037_PM_at   | Ddx17                | DDX17     | 0.90  | 4.82 | 3.27  | 8.02E-03 | 1.01E-01 | -2.76 |
| 1452659_PM_at   | Dek                  | DEK       | -0.92 | 4.66 | -3.27 | 8.05E-03 | 1.01E-01 | -2.76 |

|                 |                        |            |       |      |       |          |          |       |
|-----------------|------------------------|------------|-------|------|-------|----------|----------|-------|
| 1424124_PM_at   | Mospd2                 | MOSPD2     | -0.69 | 3.27 | -3.27 | 8.04E-03 | 1.01E-01 | -2.76 |
| 1416497_PM_at   | Pdia4                  | PDIA4      | -0.57 | 4.04 | -3.27 | 8.05E-03 | 1.01E-01 | -2.76 |
| 1439188_PM_at   | Cpsf6                  | CPSF6      | -0.48 | 2.97 | -3.27 | 8.05E-03 | 1.01E-01 | -2.76 |
| 1422728_PM_at   | Inha                   | INHA       | 0.42  | 2.48 | 3.27  | 8.04E-03 | 1.01E-01 | -2.76 |
| 1420187_PM_at   | C76628                 | NA         | 0.75  | 3.56 | 3.27  | 8.05E-03 | 1.01E-01 | -2.76 |
| 1448322_PM_a_at | Cox41                  | COX41      | -1.54 | 6.69 | -3.27 | 8.05E-03 | 1.01E-01 | -2.76 |
| 1448557_PM_at   | Fam13c                 | FAM13C     | -1.61 | 6.70 | -3.27 | 8.05E-03 | 1.01E-01 | -2.76 |
| 1430068_PM_at   | ---                    | NA         | -1.46 | 5.02 | -3.27 | 8.07E-03 | 1.01E-01 | -2.76 |
| 1455058_PM_at   | Mtmr9                  | NA         | -0.91 | 3.62 | -3.27 | 8.07E-03 | 1.01E-01 | -2.76 |
| 1430381_PM_at   | Ftsj1                  | FTSJ1      | 0.31  | 2.46 | 3.27  | 8.07E-03 | 1.01E-01 | -2.76 |
| 1432153_PM_at   | ---                    | NA         | 0.79  | 4.00 | 3.27  | 8.07E-03 | 1.01E-01 | -2.76 |
| 1452526_PM_a_at | Pax6                   | PAX6       | 1.59  | 3.20 | 3.27  | 8.07E-03 | 1.01E-01 | -2.76 |
| 1455516_PM_at   | Csrnp3                 | CSRNP3     | -0.56 | 3.26 | -3.27 | 8.09E-03 | 1.01E-01 | -2.76 |
| 1421259_PM_at   | Pklr                   | PKLR       | 0.29  | 2.33 | 3.27  | 8.09E-03 | 1.01E-01 | -2.76 |
| 1424090_PM_at   | Sdcbp2                 | SDCBP2     | 0.45  | 2.67 | 3.27  | 8.09E-03 | 1.01E-01 | -2.76 |
| 1442460_PM_at   | ---                    | NA         | 0.43  | 2.82 | 3.27  | 8.09E-03 | 1.01E-01 | -2.77 |
| 1460332_PM_at   | Pln                    | PLN        | -1.63 | 3.17 | -3.27 | 8.11E-03 | 1.01E-01 | -2.77 |
| 1416053_PM_at   | Lrrn1                  | LRRN1      | -1.41 | 4.22 | -3.27 | 8.11E-03 | 1.01E-01 | -2.77 |
| 1435069_PM_at   | BC064078               | NA         | 0.44  | 3.70 | 3.27  | 8.11E-03 | 1.01E-01 | -2.77 |
| 1433225_PM_at   | 6330403N20Rik          | NA         | 0.32  | 2.37 | 3.26  | 8.12E-03 | 1.02E-01 | -2.77 |
| 1447203_PM_at   | Gm28729                | NA         | 0.52  | 3.34 | 3.27  | 8.11E-03 | 1.02E-01 | -2.77 |
| 1446086_PM_s_at | Gl2                    | GLI2       | 0.63  | 3.98 | 3.26  | 8.12E-03 | 1.02E-01 | -2.77 |
| 1427523_PM_at   | Six3                   | SIX3       | 0.35  | 2.86 | 3.26  | 8.12E-03 | 1.02E-01 | -2.77 |
| 1437031_PM_at   | Acsf6                  | ACSL6      | -0.86 | 3.88 | -3.26 | 8.14E-03 | 1.02E-01 | -2.77 |
| 1442751_PM_at   | Trio                   | NA         | 0.36  | 2.40 | 3.26  | 8.14E-03 | 1.02E-01 | -2.77 |
| 1433167_PM_at   | 4930444E06Rik          | NA         | 0.30  | 2.78 | 3.26  | 8.15E-03 | 1.02E-01 | -2.77 |
| 1440209_PM_at   | March1                 | MARCH1     | -0.87 | 4.54 | -3.26 | 8.15E-03 | 1.02E-01 | -2.77 |
| 1458363_PM_at   | Zdhc17                 | ZDHC17     | 0.38  | 2.47 | 3.26  | 8.15E-03 | 1.02E-01 | -2.77 |
| 1427250_PM_at   | Atp2a2                 | ATP2A2     | -0.89 | 9.16 | -3.26 | 8.17E-03 | 1.02E-01 | -2.77 |
| 1438562_PM_a_at | Ptpn2                  | PTPN2      | 1.54  | 6.15 | 3.26  | 8.16E-03 | 1.02E-01 | -2.77 |
| 1439910_PM_a_at | LOC105242493 /// Tradd | TRADD      | 0.46  | 2.96 | 3.26  | 8.17E-03 | 1.02E-01 | -2.77 |
| 1432486_PM_a_at | Prss40                 | NA         | 0.40  | 2.83 | 3.26  | 8.18E-03 | 1.02E-01 | -2.78 |
| 1418577_PM_at   | Trim8                  | TRIM8      | -1.21 | 4.88 | -3.26 | 8.20E-03 | 1.02E-01 | -2.78 |
| 1425745_PM_a_at | Tacc2                  | TACC2      | -0.69 | 3.33 | -3.26 | 8.20E-03 | 1.02E-01 | -2.78 |
| 1436507_PM_at   | Irak2                  | IRAK2      | 0.27  | 2.25 | 3.26  | 8.19E-03 | 1.02E-01 | -2.78 |
| 1448750_PM_at   | Hand1                  | HAND1      | 0.34  | 2.85 | 3.26  | 8.20E-03 | 1.02E-01 | -2.78 |
| 1444338_PM_at   | LOC105247334           | NA         | 0.38  | 2.27 | 3.26  | 8.19E-03 | 1.02E-01 | -2.78 |
| 1417198_PM_at   | Wwc2                   | WWC2       | 0.78  | 2.60 | 3.26  | 8.19E-03 | 1.02E-01 | -2.78 |
| 1451810_PM_at   | Map3k7cl               | MAP3K7CL   | -0.35 | 3.32 | -3.26 | 8.20E-03 | 1.02E-01 | -2.78 |
| 1458330_PM_x_at | ---                    | NA         | -0.29 | 2.65 | -3.26 | 8.20E-03 | 1.02E-01 | -2.78 |
| 1438635_PM_x_at | B930041F14Rik          | FND10      | -1.29 | 5.17 | -3.26 | 8.23E-03 | 1.02E-01 | -2.78 |
| 1419869_PM_s_at | Hdlbp                  | HDLBP      | -1.14 | 3.59 | -3.26 | 8.22E-03 | 1.02E-01 | -2.78 |
| 1428374_PM_at   | Glce                   | GLCE       | -1.01 | 4.64 | -3.26 | 8.23E-03 | 1.02E-01 | -2.78 |
| 1448447_PM_at   | Tonsl /// Vps28        | TONSL      | -0.81 | 4.31 | -3.26 | 8.22E-03 | 1.02E-01 | -2.78 |
| 1440279_PM_at   | Tmx3                   | TMX3       | -0.62 | 5.13 | -3.26 | 8.22E-03 | 1.02E-01 | -2.78 |
| 1427871_PM_at   | Ptafr                  | NA         | 0.38  | 4.23 | 3.26  | 8.22E-03 | 1.02E-01 | -2.78 |
| 1445591_PM_at   | ---                    | NA         | 0.55  | 3.00 | 3.26  | 8.23E-03 | 1.02E-01 | -2.78 |
| 1443375_PM_at   | Gnas                   | GNAS       | 0.62  | 2.72 | 3.26  | 8.21E-03 | 1.02E-01 | -2.78 |
| 1425220_PM_x_at | AF067061               | NA         | 0.86  | 4.17 | 3.26  | 8.22E-03 | 1.02E-01 | -2.78 |
| 1455143_PM_at   | Nlgn2                  | NLGN2      | -1.06 | 5.99 | -3.26 | 8.24E-03 | 1.02E-01 | -2.78 |
| 1452468_PM_s_at | Mmab                   | MMAB       | 0.43  | 2.69 | 3.26  | 8.24E-03 | 1.02E-01 | -2.78 |
| 1422429_PM_at   | Rnf14                  | RNF14      | -2.00 | 7.18 | -3.26 | 8.25E-03 | 1.02E-01 | -2.78 |
| 1448534_PM_at   | Sirpa                  | SIRPB1     | -1.02 | 4.46 | -3.25 | 8.26E-03 | 1.02E-01 | -2.79 |
| 1448268_PM_at   | Tmed9                  | TMED9      | -0.84 | 6.53 | -3.25 | 8.26E-03 | 1.02E-01 | -2.79 |
| 1422492_PM_at   | Cpox                   | CPOX       | -0.84 | 4.24 | -3.25 | 8.26E-03 | 1.02E-01 | -2.79 |
| 1435977_PM_at   | Hdgfrp3                | ACO24270.1 | -0.28 | 4.70 | -3.25 | 8.26E-03 | 1.02E-01 | -2.79 |
| 1428292_PM_at   | Ndor1                  | NDOR1      | 0.39  | 3.08 | 3.25  | 8.26E-03 | 1.02E-01 | -2.79 |
| 1440972_PM_at   | Nsd1                   | NA         | 0.98  | 4.37 | 3.25  | 8.26E-03 | 1.02E-01 | -2.79 |
| 1442167_PM_at   | Cyfp2                  | NA         | 1.00  | 3.97 | 3.25  | 8.27E-03 | 1.02E-01 | -2.79 |
| 1436549_PM_a_at | Hnrnpa1                | NA         | -1.50 | 6.68 | -3.25 | 8.29E-03 | 1.02E-01 | -2.79 |
| 1419911_PM_at   | ---                    | NA         | -0.93 | 7.35 | -3.25 | 8.29E-03 | 1.02E-01 | -2.79 |
| 1436498_PM_at   | Arih1                  | ARIH1      | -0.87 | 3.46 | -3.25 | 8.28E-03 | 1.02E-01 | -2.79 |
| 1421827_PM_at   | Dll4                   | DLL4       | 0.25  | 2.34 | 3.25  | 8.28E-03 | 1.02E-01 | -2.79 |
| 1432964_PM_at   | Arih2                  | NA         | 0.35  | 2.95 | 3.25  | 8.29E-03 | 1.02E-01 | -2.79 |
| 1424087_PM_at   | Psmg3                  | PSMG3      | 0.42  | 2.95 | 3.25  | 8.28E-03 | 1.02E-01 | -2.79 |
| 1425824_PM_a_at | Pcsk4                  | PCSK4      | 0.50  | 3.16 | 3.25  | 8.28E-03 | 1.02E-01 | -2.79 |
| 1419512_PM_at   | Prpf40b                | PRPF40B    | 0.73  | 4.53 | 3.25  | 8.29E-03 | 1.02E-01 | -2.79 |
| 1433460_PM_at   | Ttc7b                  | TTC7B      | 1.50  | 7.14 | 3.25  | 8.29E-03 | 1.02E-01 | -2.79 |
| 1454315_PM_at   | ---                    | NA         | -0.41 | 2.09 | -3.25 | 8.30E-03 | 1.02E-01 | -2.79 |
| 1429906_PM_at   | ---                    | NA         | 1.24  | 5.59 | 3.25  | 8.31E-03 | 1.03E-01 | -2.79 |
| 1456275_PM_at   | Mrp21                  | MRPL21     | 0.51  | 4.47 | 3.25  | 8.31E-03 | 1.03E-01 | -2.79 |
| 1447923_PM_at   | 1810026B05Rik          | NA         | -0.73 | 3.99 | -3.25 | 8.32E-03 | 1.03E-01 | -2.79 |
| 1458140_PM_at   | Slit2                  | SLIT2      | -0.50 | 2.59 | -3.25 | 8.33E-03 | 1.03E-01 | -2.79 |
| 1448015_PM_at   | Dzip3                  | DZIP3      | -0.69 | 3.30 | -3.25 | 8.33E-03 | 1.03E-01 | -2.79 |
| 1452572_PM_at   | Camk4                  | NA         | 0.68  | 4.44 | 3.25  | 8.34E-03 | 1.03E-01 | -2.79 |

|                 |                                                                                                                                                                                                                                                                                                                                         |          |       |       |       |          |          |       |
|-----------------|-----------------------------------------------------------------------------------------------------------------------------------------------------------------------------------------------------------------------------------------------------------------------------------------------------------------------------------------|----------|-------|-------|-------|----------|----------|-------|
| 1426579_PM_at   | Gnl2                                                                                                                                                                                                                                                                                                                                    | GNL2     | 0.41  | 4.44  | 3.25  | 8.34E-03 | 1.03E-01 | -2.80 |
| 1423468_PM_at   | Steap3                                                                                                                                                                                                                                                                                                                                  | STEAP3   | 0.51  | 3.08  | 3.25  | 8.35E-03 | 1.03E-01 | -2.80 |
| 1453734_PM_at   | Atrx                                                                                                                                                                                                                                                                                                                                    | ATRX     | -0.98 | 2.59  | -3.25 | 8.36E-03 | 1.03E-01 | -2.80 |
| 1426366_PM_at   | Ago2                                                                                                                                                                                                                                                                                                                                    | AGO2     | 0.40  | 2.81  | 3.25  | 8.37E-03 | 1.03E-01 | -2.80 |
| 1457458_PM_at   | Zc3h4                                                                                                                                                                                                                                                                                                                                   | NA       | -0.65 | 2.33  | -3.25 | 8.37E-03 | 1.03E-01 | -2.80 |
| 1460357_PM_at   | Ythdf2                                                                                                                                                                                                                                                                                                                                  | YTHDF2   | -0.64 | 7.19  | -3.25 | 8.37E-03 | 1.03E-01 | -2.80 |
| 1423584_PM_at   | Igfbp7                                                                                                                                                                                                                                                                                                                                  | IGFBP7   | -1.08 | 5.08  | -3.25 | 8.38E-03 | 1.03E-01 | -2.80 |
| 1430246_PM_at   | 4933406C10Rik                                                                                                                                                                                                                                                                                                                           | NA       | 0.32  | 2.72  | 3.25  | 8.38E-03 | 1.03E-01 | -2.80 |
| 1459821_PM_x_at | Kdm7a                                                                                                                                                                                                                                                                                                                                   | KDM7A    | 0.48  | 3.70  | 3.25  | 8.38E-03 | 1.03E-01 | -2.80 |
| 1422544_PM_at   | Myo10                                                                                                                                                                                                                                                                                                                                   | MYO10    | 1.28  | 4.59  | 3.25  | 8.39E-03 | 1.03E-01 | -2.80 |
| 1425722_PM_at   | Iigp1b                                                                                                                                                                                                                                                                                                                                  | NA       | 0.30  | 2.34  | 3.24  | 8.41E-03 | 1.03E-01 | -2.80 |
| 1431018_PM_at   | 1810013L24Rik                                                                                                                                                                                                                                                                                                                           | C16orf72 | 0.41  | 2.42  | 3.24  | 8.41E-03 | 1.03E-01 | -2.80 |
| 1446118_PM_at   | D17Erd165e                                                                                                                                                                                                                                                                                                                              | NA       | 0.31  | 2.49  | 3.24  | 8.42E-03 | 1.03E-01 | -2.80 |
| 1420070_PM_a_at | Slc9a5                                                                                                                                                                                                                                                                                                                                  | SLC9A5   | 0.38  | 3.19  | 3.24  | 8.42E-03 | 1.03E-01 | -2.81 |
| 1441189_PM_at   | ---                                                                                                                                                                                                                                                                                                                                     | NA       | 0.29  | 2.30  | 3.24  | 8.43E-03 | 1.03E-01 | -2.81 |
| 1434511_PM_at   | Phkb                                                                                                                                                                                                                                                                                                                                    | PHKB     | -0.91 | 4.60  | -3.24 | 8.44E-03 | 1.04E-01 | -2.81 |
| 1454736_PM_at   | Sowahc                                                                                                                                                                                                                                                                                                                                  | SOWAHC   | -0.39 | 3.62  | -3.24 | 8.44E-03 | 1.04E-01 | -2.81 |
| 1455206_PM_at   | Rps6ka3                                                                                                                                                                                                                                                                                                                                 | RPS6KA3  | -0.74 | 3.47  | -3.24 | 8.45E-03 | 1.04E-01 | -2.81 |
| 1445314_PM_at   | Etv1                                                                                                                                                                                                                                                                                                                                    | ETV1     | 0.38  | 2.24  | 3.24  | 8.46E-03 | 1.04E-01 | -2.81 |
| 1429050_PM_at   | Chic2                                                                                                                                                                                                                                                                                                                                   | CHIC2    | -0.51 | 3.35  | -3.24 | 8.46E-03 | 1.04E-01 | -2.81 |
| 1442558_PM_at   | Gm10421                                                                                                                                                                                                                                                                                                                                 | NA       | 0.46  | 2.91  | 3.24  | 8.46E-03 | 1.04E-01 | -2.81 |
| 1439839_PM_at   | LOC105242526                                                                                                                                                                                                                                                                                                                            | NA       | 0.59  | 2.78  | 3.24  | 8.46E-03 | 1.04E-01 | -2.81 |
| 1417763_PM_at   | Ssr1                                                                                                                                                                                                                                                                                                                                    | SSR1     | -1.06 | 5.33  | -3.24 | 8.47E-03 | 1.04E-01 | -2.81 |
| 1433135_PM_at   | Golgb1                                                                                                                                                                                                                                                                                                                                  | GOLGB1   | 0.35  | 2.45  | 3.24  | 8.48E-03 | 1.04E-01 | -2.81 |
| 1451066_PM_at   | Mboat7                                                                                                                                                                                                                                                                                                                                  | MBOAT7   | -0.99 | 6.52  | -3.24 | 8.49E-03 | 1.04E-01 | -2.81 |
| 1424063_PM_at   | Scgb1b27                                                                                                                                                                                                                                                                                                                                | NA       | 0.31  | 3.07  | 3.24  | 8.49E-03 | 1.04E-01 | -2.81 |
| 1420718_PM_at   | Tenm2                                                                                                                                                                                                                                                                                                                                   | TENM2    | -1.19 | 5.78  | -3.24 | 8.49E-03 | 1.04E-01 | -2.81 |
| 1417451_PM_a_at | Ppia                                                                                                                                                                                                                                                                                                                                    | PPIA     | -0.95 | 7.40  | -3.24 | 8.49E-03 | 1.04E-01 | -2.81 |
| 1433586_PM_at   | Rgmb                                                                                                                                                                                                                                                                                                                                    | NA       | -0.81 | 5.00  | -3.24 | 8.50E-03 | 1.04E-01 | -2.81 |
| 1443500_PM_at   | ---                                                                                                                                                                                                                                                                                                                                     | NA       | -0.66 | 3.37  | -3.24 | 8.50E-03 | 1.04E-01 | -2.81 |
| 1452671_PM_s_at | Lman1                                                                                                                                                                                                                                                                                                                                   | LMAN1    | -0.63 | 3.63  | -3.24 | 8.50E-03 | 1.04E-01 | -2.81 |
| 1425623_PM_a_at | Cbs                                                                                                                                                                                                                                                                                                                                     | CBSL     | 0.51  | 4.18  | 3.24  | 8.50E-03 | 1.04E-01 | -2.81 |
| 1452989_PM_at   | Ppm1a                                                                                                                                                                                                                                                                                                                                   | NA       | -1.27 | 5.72  | -3.24 | 8.51E-03 | 1.04E-01 | -2.82 |
| 1457347_PM_at   | Ryr1                                                                                                                                                                                                                                                                                                                                    | RYR1     | 0.95  | 3.83  | 3.24  | 8.51E-03 | 1.04E-01 | -2.82 |
| 1449014_PM_at   | Lactb                                                                                                                                                                                                                                                                                                                                   | LACTB    | -0.64 | 3.57  | -3.24 | 8.52E-03 | 1.04E-01 | -2.82 |
| 1427176_PM_s_at | Syne4                                                                                                                                                                                                                                                                                                                                   | SYNE4    | 0.54  | 2.97  | 3.24  | 8.52E-03 | 1.04E-01 | -2.82 |
| 1431377_PM_at   | ---                                                                                                                                                                                                                                                                                                                                     | NA       | 0.37  | 3.40  | 3.24  | 8.54E-03 | 1.04E-01 | -2.82 |
| 1421828_PM_at   | Kpna3                                                                                                                                                                                                                                                                                                                                   | KPNA3    | -0.86 | 3.31  | -3.23 | 8.55E-03 | 1.04E-01 | -2.82 |
| 1432094_PM_a_at | Vps50                                                                                                                                                                                                                                                                                                                                   | VPS50    | -0.79 | 5.24  | -3.23 | 8.56E-03 | 1.04E-01 | -2.82 |
| 1419209_PM_at   | Cxcl1                                                                                                                                                                                                                                                                                                                                   | CXCL3    | 0.31  | 2.64  | 3.23  | 8.56E-03 | 1.04E-01 | -2.82 |
| 1444623_PM_at   | E530011L22Rik                                                                                                                                                                                                                                                                                                                           | NA       | 0.41  | 3.59  | 3.23  | 8.56E-03 | 1.04E-01 | -2.82 |
| 1453270_PM_a_at | Phf14                                                                                                                                                                                                                                                                                                                                   | PHF14    | 2.07  | 5.50  | 3.23  | 8.55E-03 | 1.04E-01 | -2.82 |
| 1447909_PM_s_at | Selk                                                                                                                                                                                                                                                                                                                                    | SELENOK  | 0.80  | 3.31  | 3.23  | 8.56E-03 | 1.04E-01 | -2.82 |
| 1449561_PM_at   | Nkapl                                                                                                                                                                                                                                                                                                                                   | NKAPL    | 0.36  | 2.60  | 3.23  | 8.59E-03 | 1.05E-01 | -2.82 |
| 1446354_PM_at   | ---                                                                                                                                                                                                                                                                                                                                     | NA       | 0.36  | 2.28  | 3.23  | 8.60E-03 | 1.05E-01 | -2.83 |
| 1437723_PM_s_at | Derl1                                                                                                                                                                                                                                                                                                                                   | DERL1    | -2.31 | 7.09  | -3.23 | 8.61E-03 | 1.05E-01 | -2.83 |
| 1425460_PM_at   | Mttr2                                                                                                                                                                                                                                                                                                                                   | MTMR2    | -0.59 | 4.39  | -3.23 | 8.61E-03 | 1.05E-01 | -2.83 |
| 1416189_PM_a_at | Sec61a1                                                                                                                                                                                                                                                                                                                                 | SEC61A1  | -0.59 | 10.15 | -3.23 | 8.62E-03 | 1.05E-01 | -2.83 |
| 1453512_PM_at   | ---                                                                                                                                                                                                                                                                                                                                     | NA       | -0.59 | 2.72  | -3.23 | 8.63E-03 | 1.05E-01 | -2.83 |
| 1445149_PM_at   | ---                                                                                                                                                                                                                                                                                                                                     | NA       | 0.39  | 2.57  | 3.23  | 8.64E-03 | 1.05E-01 | -2.83 |
| 1427285_PM_s_at | Malat1                                                                                                                                                                                                                                                                                                                                  | NA       | 0.98  | 8.50  | 3.23  | 8.65E-03 | 1.05E-01 | -2.83 |
| 1447748_PM_x_at | Slc29a2                                                                                                                                                                                                                                                                                                                                 | SLC29A2  | 0.44  | 3.55  | 3.23  | 8.65E-03 | 1.05E-01 | -2.83 |
| 1433888_PM_at   | Atp2b2                                                                                                                                                                                                                                                                                                                                  | ATP2B2   | -1.20 | 9.35  | -3.23 | 8.66E-03 | 1.05E-01 | -2.83 |
| 1451052_PM_at   | Cog8 /// Pdf                                                                                                                                                                                                                                                                                                                            | COG8     | -0.86 | 4.07  | -3.23 | 8.67E-03 | 1.05E-01 | -2.83 |
| 1455616_PM_at   | Aebp2                                                                                                                                                                                                                                                                                                                                   | AEBP2    | 0.43  | 2.78  | 3.23  | 8.66E-03 | 1.05E-01 | -2.83 |
| 1439465_PM_x_at | Agbl5                                                                                                                                                                                                                                                                                                                                   | AGBL5    | 1.38  | 5.47  | 3.23  | 8.67E-03 | 1.05E-01 | -2.83 |
| 1433844_PM_a_at | Dusp9                                                                                                                                                                                                                                                                                                                                   | DUSP9    | 0.31  | 2.88  | 3.23  | 8.68E-03 | 1.05E-01 | -2.83 |
| 1429373_PM_x_at | Crtc2                                                                                                                                                                                                                                                                                                                                   | CRTC2    | 0.42  | 3.68  | 3.23  | 8.68E-03 | 1.05E-01 | -2.83 |
| 1447937_PM_a_at | 4933409K07Rik ///<br>Gm13301 /// Gm17167 ///<br>Gm21075 /// Gm21093 ///<br>Gm21158 /// Gm2163 ///<br>Gm2192 /// Gm29801 ///<br>Gm29804 /// Gm29830 ///<br>Gm29964 /// Gm3883 ///<br>Gm3893 /// Gm42275 ///<br>Gm5859 /// Gm7819 ///<br>LOC100041536 ///<br>LOC100041599 ///<br>LOC101055676 ///<br>LOC101056144 ///<br>LOC102637418 /// | FAM205A  | 0.55  | 4.83  | 3.23  | 8.67E-03 | 1.05E-01 | -2.83 |
| 1442388_PM_at   | ---                                                                                                                                                                                                                                                                                                                                     | NA       | 0.72  | 3.16  | 3.23  | 8.68E-03 | 1.05E-01 | -2.83 |

|                 |                       |           |       |      |       |          |          |       |
|-----------------|-----------------------|-----------|-------|------|-------|----------|----------|-------|
| 1450102_PM_a_at | Amfr                  | AMFR      | -0.86 | 5.49 | -3.23 | 8.68E-03 | 1.05E-01 | -2.84 |
| 1431613_PM_a_at | Kcnk10                | KCNK10    | 0.37  | 2.59 | 3.23  | 8.69E-03 | 1.05E-01 | -2.84 |
| 1458379_PM_at   | 9330159F19Rik         | KIAA0408  | -1.05 | 9.24 | -3.23 | 8.69E-03 | 1.05E-01 | -2.84 |
| 1443327_PM_at   | D130043K22Rik         | KIAA0319  | -0.41 | 3.15 | -3.22 | 8.71E-03 | 1.05E-01 | -2.84 |
| 1442981_PM_at   | ---                   | NA        | 0.88  | 2.82 | 3.22  | 8.71E-03 | 1.05E-01 | -2.84 |
| 1433925_PM_at   | Dync1li2              | DYNC1L12  | -0.51 | 5.79 | -3.22 | 8.71E-03 | 1.05E-01 | -2.84 |
| 1434386_PM_at   | Atp2c1                | ATP2C1    | -0.95 | 6.01 | -3.22 | 8.73E-03 | 1.06E-01 | -2.84 |
| 1441274_PM_at   | ---                   | NA        | 0.67  | 2.77 | 3.22  | 8.73E-03 | 1.06E-01 | -2.84 |
| 1438099_PM_at   | Trio                  | TRIO      | 0.99  | 4.03 | 3.22  | 8.73E-03 | 1.06E-01 | -2.84 |
| 1426528_PM_at   | Nrp2                  | NRP2      | -1.30 | 6.83 | -3.22 | 8.73E-03 | 1.06E-01 | -2.84 |
| 1422846_PM_at   | Rbp2                  | RBP2      | 0.27  | 2.76 | 3.22  | 8.73E-03 | 1.06E-01 | -2.84 |
| 1440929_PM_at   | Ggnbp2                | GGNBP2    | 0.39  | 2.46 | 3.22  | 8.74E-03 | 1.06E-01 | -2.84 |
| 1416953_PM_at   | Ctgf                  | CTGF      | -1.11 | 3.81 | -3.22 | 8.74E-03 | 1.06E-01 | -2.84 |
| 1454671_PM_at   | Insig1                | INSIG1    | -0.61 | 6.47 | -3.22 | 8.74E-03 | 1.06E-01 | -2.84 |
| 1460566_PM_at   | Map1a                 | MAP1A     | -0.99 | 6.12 | -3.22 | 8.76E-03 | 1.06E-01 | -2.84 |
| 1428512_PM_at   | Bhlhb9                | BHLHB9    | -0.53 | 3.91 | -3.22 | 8.76E-03 | 1.06E-01 | -2.84 |
| 1418028_PM_at   | Dct                   | DCT       | 0.36  | 2.55 | 3.22  | 8.76E-03 | 1.06E-01 | -2.84 |
| 1430126_PM_at   | 2310035C23Rik         | KIAA1468  | 0.27  | 2.20 | 3.22  | 8.78E-03 | 1.06E-01 | -2.85 |
| 1447700_PM_x_at | Ss18l1                | SS18L1    | 0.30  | 2.34 | 3.22  | 8.79E-03 | 1.06E-01 | -2.85 |
| 1442134_PM_at   | Prr11                 | PRR11     | 0.62  | 2.64 | 3.22  | 8.79E-03 | 1.06E-01 | -2.85 |
| 1430500_PM_s_at | Mtx2                  | MTX2      | -0.94 | 4.55 | -3.22 | 8.80E-03 | 1.06E-01 | -2.85 |
| 1456921_PM_at   | ---                   | NA        | 0.36  | 2.31 | 3.22  | 8.81E-03 | 1.06E-01 | -2.85 |
| 1416537_PM_at   | Crel1                 | CREL1     | -0.99 | 3.83 | -3.22 | 8.81E-03 | 1.06E-01 | -2.85 |
| 1449523_PM_at   | Bcl7c                 | BCL7C     | 0.33  | 2.61 | 3.22  | 8.82E-03 | 1.06E-01 | -2.85 |
| 1417349_PM_at   | Bloc1s6               | BLOC1S6   | -1.14 | 4.40 | -3.22 | 8.82E-03 | 1.06E-01 | -2.85 |
| 1432645_PM_at   | ---                   | NA        | 0.37  | 2.49 | 3.22  | 8.83E-03 | 1.06E-01 | -2.85 |
| 1452658_PM_at   | Krr1                  | KRR1      | 0.63  | 3.27 | 3.22  | 8.83E-03 | 1.06E-01 | -2.85 |
| 1459632_PM_at   | ---                   | NA        | -0.97 | 2.54 | -3.22 | 8.84E-03 | 1.06E-01 | -2.85 |
| 1436874_PM_x_at | Slc25a5               | SLC25A5   | -0.57 | 5.83 | -3.22 | 8.84E-03 | 1.06E-01 | -2.85 |
| 1448911_PM_at   | Atp4b                 | ATP4B     | 0.38  | 2.99 | 3.22  | 8.84E-03 | 1.06E-01 | -2.85 |
| 1440824_PM_at   | ---                   | NA        | 0.41  | 6.46 | 3.21  | 8.85E-03 | 1.06E-01 | -2.85 |
| 1456253_PM_s_at | Klf17                 | NA        | 0.78  | 7.55 | 3.21  | 8.85E-03 | 1.06E-01 | -2.85 |
| 1443272_PM_at   | Igdcc4                | NA        | 0.42  | 3.87 | 3.21  | 8.86E-03 | 1.06E-01 | -2.86 |
| 1426130_PM_at   | LOC102643259 ///Nxn1l | NXNL1     | 0.51  | 3.20 | 3.21  | 8.86E-03 | 1.06E-01 | -2.86 |
| 1438831_PM_at   | ---                   | NA        | 0.33  | 2.18 | 3.21  | 8.87E-03 | 1.07E-01 | -2.86 |
| 1449884_PM_at   | Efcab2                | EFCAB2    | 0.91  | 3.50 | 3.21  | 8.89E-03 | 1.07E-01 | -2.86 |
| 1434585_PM_at   | Tulp4                 | TULP4     | -0.85 | 3.64 | -3.21 | 8.90E-03 | 1.07E-01 | -2.86 |
| 1425753_PM_a_at | Ung                   | UNG       | 0.56  | 3.93 | 3.21  | 8.90E-03 | 1.07E-01 | -2.86 |
| 1442929_PM_at   | ---                   | NA        | 0.68  | 2.66 | 3.21  | 8.90E-03 | 1.07E-01 | -2.86 |
| 1429625_PM_at   | Cdk5                  | CDKL5     | -1.03 | 4.48 | -3.21 | 8.91E-03 | 1.07E-01 | -2.86 |
| 1423171_PM_at   | Gpr88                 | GPR88     | -0.88 | 2.71 | -3.21 | 8.91E-03 | 1.07E-01 | -2.86 |
| 1449911_PM_at   | Lag3                  | LAG3      | 0.31  | 2.51 | 3.21  | 8.91E-03 | 1.07E-01 | -2.86 |
| 1450622_PM_at   | Bcar1                 | BCAR1     | 0.39  | 3.61 | 3.21  | 8.91E-03 | 1.07E-01 | -2.86 |
| 1435608_PM_at   | Znrf3                 | ZNRF3     | -0.46 | 3.42 | -3.21 | 8.92E-03 | 1.07E-01 | -2.86 |
| 1434465_PM_x_at | Vldlr                 | VLDLR     | -1.25 | 6.45 | -3.21 | 8.93E-03 | 1.07E-01 | -2.86 |
| 1460575_PM_at   | Eif2a                 | EIF2A     | -0.72 | 3.58 | -3.21 | 8.94E-03 | 1.07E-01 | -2.86 |
| 1423228_PM_at   | B4galt6               | B4GALT6   | -1.09 | 5.30 | -3.21 | 8.94E-03 | 1.07E-01 | -2.86 |
| 1448389_PM_at   | Wdr5                  | WDR5      | 0.40  | 2.51 | 3.21  | 8.95E-03 | 1.07E-01 | -2.87 |
| 1440788_PM_at   | Gas8                  | NA        | -0.35 | 2.59 | -3.21 | 8.96E-03 | 1.07E-01 | -2.87 |
| 1446025_PM_at   | ---                   | NA        | 0.41  | 2.68 | 3.21  | 8.97E-03 | 1.07E-01 | -2.87 |
| 1443899_PM_at   | Cep162                | CEP162    | 0.43  | 3.64 | 3.21  | 8.97E-03 | 1.07E-01 | -2.87 |
| 1442964_PM_at   | ---                   | NA        | 0.44  | 2.74 | 3.21  | 8.96E-03 | 1.07E-01 | -2.87 |
| 1444509_PM_at   | Tra2b                 | TRA2B     | 0.67  | 2.52 | 3.21  | 8.96E-03 | 1.07E-01 | -2.87 |
| 1436701_PM_at   | Apela ///Trim61       | APELA     | 0.33  | 2.78 | 3.21  | 8.97E-03 | 1.07E-01 | -2.87 |
| 1441682_PM_s_at | Xpot                  | XPOT      | -0.73 | 4.95 | -3.21 | 8.98E-03 | 1.07E-01 | -2.87 |
| 1446519_PM_at   | ---                   | NA        | 0.27  | 2.30 | 3.21  | 8.98E-03 | 1.07E-01 | -2.87 |
| 1451430_PM_at   | Slit2                 | SLIT2     | -0.77 | 2.93 | -3.21 | 8.99E-03 | 1.07E-01 | -2.87 |
| 1438766_PM_at   | Pnrc2                 | PNRC2     | 0.36  | 2.61 | 3.21  | 8.99E-03 | 1.07E-01 | -2.87 |
| 1428922_PM_at   | Tril                  | TRIL      | -0.61 | 3.27 | -3.21 | 8.99E-03 | 1.07E-01 | -2.87 |
| 1434721_PM_at   | Ankle2                | ANKLE2    | -0.70 | 5.06 | -3.20 | 9.00E-03 | 1.07E-01 | -2.87 |
| 1420801_PM_at   | Npas1                 | NPAS1     | 0.39  | 2.90 | 3.20  | 9.02E-03 | 1.08E-01 | -2.87 |
| 1439771_PM_s_at | D13Erd608e            | NA        | 0.38  | 2.91 | 3.20  | 9.02E-03 | 1.08E-01 | -2.87 |
| 1423461_PM_a_at | Ubl3                  | UBL3      | -1.00 | 5.33 | -3.20 | 9.03E-03 | 1.08E-01 | -2.87 |
| 1422312_PM_a_at | Neurog3               | NEUROG3   | 0.31  | 2.29 | 3.20  | 9.03E-03 | 1.08E-01 | -2.87 |
| 1435001_PM_at   | Pla                   | NA        | -0.81 | 3.85 | -3.20 | 9.04E-03 | 1.08E-01 | -2.88 |
| 1452948_PM_at   | Tnfaip8l2             | TNFAIP8L2 | 0.42  | 3.66 | 3.20  | 9.04E-03 | 1.08E-01 | -2.87 |
| 1434392_PM_at   | Usp34                 | USP34     | -0.84 | 6.74 | -3.20 | 9.05E-03 | 1.08E-01 | -2.88 |
| 1455482_PM_at   | Ap2a2                 | AP2A2     | 0.76  | 3.94 | 3.20  | 9.06E-03 | 1.08E-01 | -2.88 |
| 1433827_PM_at   | Atp8a1                | ATP8A1    | -1.56 | 7.63 | -3.20 | 9.06E-03 | 1.08E-01 | -2.88 |
| 1451990_PM_at   | Mapre2                | MAPRE2    | -0.51 | 4.05 | -3.20 | 9.07E-03 | 1.08E-01 | -2.88 |
| 1443508_PM_at   | Dlgap1                | DLGAP1    | 0.33  | 2.56 | 3.20  | 9.07E-03 | 1.08E-01 | -2.88 |
| 1459715_PM_at   | ---                   | NA        | 0.39  | 3.25 | 3.20  | 9.07E-03 | 1.08E-01 | -2.88 |
| 1438400_PM_at   | Kans3                 | KANSL3    | -1.00 | 3.70 | -3.20 | 9.08E-03 | 1.08E-01 | -2.88 |
| 1448704_PM_s_at | Vmp                   | SELENOS   | -1.01 | 4.77 | -3.20 | 9.09E-03 | 1.08E-01 | -2.88 |
| 1429612_PM_at   | Eml4                  | EML4      | -0.75 | 5.51 | -3.20 | 9.09E-03 | 1.08E-01 | -2.88 |

|                 |                |          |       |      |       |          |          |       |
|-----------------|----------------|----------|-------|------|-------|----------|----------|-------|
| 1429384_PM_at   | Csnk1g3        | CSNK1G3  | -0.71 | 2.80 | -3.20 | 9.09E-03 | 1.08E-01 | -2.88 |
| 1423445_PM_at   | Rock1          | ROCK1    | -0.71 | 3.18 | -3.20 | 9.09E-03 | 1.08E-01 | -2.88 |
| 1418817_PM_at   | Chmp1b         | NA       | -0.56 | 3.11 | -3.20 | 9.09E-03 | 1.08E-01 | -2.88 |
| 1423050_PM_s_at | Hrnnpu         | HNRNPU   | -0.45 | 8.27 | -3.20 | 9.09E-03 | 1.08E-01 | -2.88 |
| 1455205_PM_a_at | Usp19          | USP19    | -1.07 | 4.61 | -3.20 | 9.11E-03 | 1.08E-01 | -2.88 |
| 1424674_PM_at   | Slc39a6        | SLC39A6  | -2.04 | 8.31 | -3.20 | 9.12E-03 | 1.08E-01 | -2.88 |
| 1434194_PM_at   | Map2           | MAP2     | -1.08 | 8.74 | -3.20 | 9.12E-03 | 1.08E-01 | -2.88 |
| 1426688_PM_at   | Sdha           | SDHA     | -0.43 | 5.83 | -3.20 | 9.12E-03 | 1.08E-01 | -2.88 |
| 1423831_PM_at   | Prkag2         | PRKAG2   | -0.87 | 2.81 | -3.20 | 9.13E-03 | 1.08E-01 | -2.89 |
| 1442587_PM_at   | ---            | NA       | -0.85 | 2.91 | -3.20 | 9.13E-03 | 1.08E-01 | -2.89 |
| 1419703_PM_at   | Col5a3         | COL5A3   | 0.36  | 2.78 | 3.20  | 9.13E-03 | 1.08E-01 | -2.88 |
| 1420076_PM_at   | ---            | NA       | 0.76  | 4.29 | 3.20  | 9.13E-03 | 1.08E-01 | -2.89 |
| 1430991_PM_at   | ---            | NA       | -1.40 | 5.86 | -3.20 | 9.14E-03 | 1.08E-01 | -2.89 |
| 1444025_PM_at   | Kcnj3          | KCNJ3    | -1.23 | 5.10 | -3.20 | 9.15E-03 | 1.08E-01 | -2.89 |
| 1434653_PM_at   | Ptk2b          | PTK2B    | -0.98 | 8.09 | -3.20 | 9.14E-03 | 1.08E-01 | -2.89 |
| 1433676_PM_at   | Wnk1           | WNK1     | -0.91 | 7.50 | -3.20 | 9.15E-03 | 1.08E-01 | -2.89 |
| 1454964_PM_at   | Rprd1a         | RPRD1A   | -0.65 | 5.38 | -3.20 | 9.15E-03 | 1.08E-01 | -2.89 |
| 1440241_PM_at   | ---            | NA       | 0.24  | 2.11 | 3.20  | 9.16E-03 | 1.08E-01 | -2.89 |
| 1458049_PM_at   | Hgd            | HGD      | 0.44  | 2.94 | 3.20  | 9.15E-03 | 1.08E-01 | -2.89 |
| 1440434_PM_at   | ---            | NA       | 0.72  | 2.67 | 3.19  | 9.16E-03 | 1.08E-01 | -2.89 |
| 1449622_PM_s_at | Atp6ap1        | ATP6AP1  | -0.98 | 5.73 | -3.19 | 9.17E-03 | 1.08E-01 | -2.89 |
| 1419926_PM_at   | Tmx3           | NA       | -0.76 | 6.79 | -3.19 | 9.19E-03 | 1.09E-01 | -2.89 |
| 1440658_PM_at   | ---            | NA       | -1.08 | 4.87 | -3.19 | 9.22E-03 | 1.09E-01 | -2.89 |
| 1440981_PM_at   | Pak7           | PAK5     | -0.61 | 3.42 | -3.19 | 9.21E-03 | 1.09E-01 | -2.89 |
| 1456091_PM_at   | Sec22c         | SEC22C   | -0.42 | 2.78 | -3.19 | 9.22E-03 | 1.09E-01 | -2.89 |
| 1416963_PM_at   | Ubac1          | UBAC1    | -0.38 | 2.99 | -3.19 | 9.20E-03 | 1.09E-01 | -2.89 |
| 1444325_PM_at   | ---            | NA       | 0.44  | 2.37 | 3.19  | 9.21E-03 | 1.09E-01 | -2.89 |
| 1439298_PM_at   | ---            | NA       | 0.45  | 3.15 | 3.19  | 9.21E-03 | 1.09E-01 | -2.89 |
| 1432140_PM_at   | Gsdma2         | GSDMA    | 0.62  | 2.46 | 3.19  | 9.20E-03 | 1.09E-01 | -2.89 |
| 1453124_PM_at   | Tnpo3          | TNPO3    | 1.21  | 7.51 | 3.19  | 9.21E-03 | 1.09E-01 | -2.89 |
| 1422091_PM_at   | Pfkfb2         | PFKFB2   | 0.64  | 2.90 | 3.19  | 9.23E-03 | 1.09E-01 | -2.90 |
| 1422615_PM_at   | Map4k4         | MAP4K4   | 1.69  | 4.94 | 3.19  | 9.23E-03 | 1.09E-01 | -2.90 |
| 1454730_PM_at   | Tap1           | TAPT1    | -0.83 | 3.61 | -3.19 | 9.24E-03 | 1.09E-01 | -2.90 |
| 1438052_PM_at   | ---            | NA       | 0.47  | 3.23 | 3.19  | 9.24E-03 | 1.09E-01 | -2.90 |
| 1434339_PM_at   | Fnbp1l         | FNBP1L   | -1.22 | 4.58 | -3.19 | 9.24E-03 | 1.09E-01 | -2.90 |
| 1451216_PM_at   | Zfp330         | ZNF330   | -0.53 | 4.98 | -3.19 | 9.24E-03 | 1.09E-01 | -2.90 |
| 1427687_PM_at   | Pcdha10        | PCDHA7   | 0.34  | 2.69 | 3.19  | 9.25E-03 | 1.09E-01 | -2.90 |
| 1421025_PM_at   | Agpat1         | AGPAT1   | 0.59  | 5.22 | 3.19  | 9.25E-03 | 1.09E-01 | -2.90 |
| 1449847_PM_a_at | Col4a3bp       | COL4A3BP | 0.88  | 4.35 | 3.19  | 9.26E-03 | 1.09E-01 | -2.90 |
| 1458633_PM_at   | Srx8           | NA       | 0.36  | 2.52 | 3.19  | 9.27E-03 | 1.09E-01 | -2.90 |
| 1454360_PM_at   | LOC102637283   | NA       | 0.31  | 2.30 | 3.19  | 9.27E-03 | 1.09E-01 | -2.90 |
| 1437023_PM_at   | Zfp12          | NA       | -0.34 | 2.54 | -3.19 | 9.28E-03 | 1.09E-01 | -2.90 |
| 1440157_PM_at   | ---            | NA       | -0.65 | 2.95 | -3.19 | 9.29E-03 | 1.09E-01 | -2.90 |
| 1417268_PM_at   | Cd14           | CD14     | 0.29  | 2.34 | 3.19  | 9.29E-03 | 1.09E-01 | -2.90 |
| 1458517_PM_at   | ---            | NA       | 0.38  | 2.51 | 3.19  | 9.29E-03 | 1.09E-01 | -2.90 |
| 1432263_PM_a_at | Cox7a2l        | COX7A2L  | -1.09 | 7.06 | -3.19 | 9.30E-03 | 1.09E-01 | -2.90 |
| 1415688_PM_at   | Ube2g1         | UBE2G1   | -0.85 | 3.39 | -3.19 | 9.30E-03 | 1.09E-01 | -2.90 |
| 1435993_PM_at   | Zkscan4        | ZKSCAN4  | -0.34 | 2.33 | -3.19 | 9.30E-03 | 1.09E-01 | -2.90 |
| 1439281_PM_at   | Slc26a8        | SLC26A8  | -0.49 | 2.57 | -3.19 | 9.31E-03 | 1.09E-01 | -2.90 |
| 1417210_PM_at   | Eif2s3y        | NA       | -0.87 | 5.36 | -3.18 | 9.33E-03 | 1.09E-01 | -2.91 |
| 1423157_PM_at   | Gnpnat1        | GNPNAT1  | -0.77 | 5.99 | -3.18 | 9.32E-03 | 1.09E-01 | -2.91 |
| 1426531_PM_at   | Zmynd11        | ZMYND11  | -0.70 | 4.99 | -3.18 | 9.32E-03 | 1.09E-01 | -2.91 |
| 1444199_PM_at   | Mfsd4          | NA       | 0.63  | 4.32 | 3.18  | 9.32E-03 | 1.09E-01 | -2.91 |
| 1454843_PM_at   | Prps2          | PRPS2    | -0.77 | 3.40 | -3.18 | 9.34E-03 | 1.09E-01 | -2.91 |
| 1451122_PM_at   | Gm38481///idi1 | ID11     | -0.97 | 6.63 | -3.18 | 9.34E-03 | 1.09E-01 | -2.91 |
| 1446548_PM_at   | ---            | NA       | 0.41  | 2.45 | 3.18  | 9.35E-03 | 1.10E-01 | -2.91 |
| 1427157_PM_at   | Ccdc85a        | CCDC85A  | -1.21 | 4.96 | -3.18 | 9.36E-03 | 1.10E-01 | -2.91 |
| 1446440_PM_at   | ---            | NA       | 0.27  | 2.33 | 3.18  | 9.36E-03 | 1.10E-01 | -2.91 |
| 1433114_PM_at   | ---            | NA       | 0.30  | 2.37 | 3.18  | 9.37E-03 | 1.10E-01 | -2.91 |
| 1449615_PM_s_at | Hdlbp          | HDLBP    | 0.50  | 2.65 | 3.18  | 9.36E-03 | 1.10E-01 | -2.91 |
| 1429261_PM_at   | Tmem238        | TMEM238  | 0.56  | 2.89 | 3.18  | 9.37E-03 | 1.10E-01 | -2.91 |
| 1447695_PM_at   | ---            | NA       | 0.90  | 3.01 | 3.18  | 9.37E-03 | 1.10E-01 | -2.91 |
| 1427314_PM_at   | Tmed7          | TMED7    | -1.11 | 4.18 | -3.18 | 9.38E-03 | 1.10E-01 | -2.91 |
| 1455955_PM_s_at | Srx17          | SNX17    | -1.00 | 6.56 | -3.18 | 9.38E-03 | 1.10E-01 | -2.91 |
| 1452071_PM_at   | Slc4a4         | SLC4A4   | 0.40  | 2.94 | 3.18  | 9.40E-03 | 1.10E-01 | -2.91 |
| 1453580_PM_at   | Mettl13        | METTL13  | 0.48  | 3.44 | 3.18  | 9.40E-03 | 1.10E-01 | -2.91 |
| 1442047_PM_at   | Rreb1          | RREB1    | 0.42  | 3.04 | 3.18  | 9.40E-03 | 1.10E-01 | -2.91 |
| 1443547_PM_at   | ---            | NA       | 0.65  | 3.37 | 3.18  | 9.41E-03 | 1.10E-01 | -2.92 |
| 1430997_PM_at   | Cd47           | CD47     | -0.82 | 5.10 | -3.18 | 9.42E-03 | 1.10E-01 | -2.92 |
| 1434073_PM_at   | Gprasp2        | GPRASP2  | -0.77 | 4.89 | -3.18 | 9.42E-03 | 1.10E-01 | -2.92 |
| 1449471_PM_at   | Kcnmb4         | KCNMB4   | -0.72 | 4.52 | -3.18 | 9.43E-03 | 1.10E-01 | -2.92 |
| 1433493_PM_at   | Fam73b         | MIGA2    | 0.68  | 2.68 | 3.18  | 9.42E-03 | 1.10E-01 | -2.92 |
| 1451012_PM_a_at | Ybx3           | YBX3     | 0.77  | 4.76 | 3.18  | 9.42E-03 | 1.10E-01 | -2.92 |
| 1422621_PM_at   | Ranbp2         | RANBP2   | -1.21 | 5.76 | -3.18 | 9.45E-03 | 1.10E-01 | -2.92 |
| 1416422_PM_a_at | Ssb            | SSB      | -0.78 | 4.88 | -3.18 | 9.45E-03 | 1.10E-01 | -2.92 |

|                 |               |            |       |       |       |          |          |       |
|-----------------|---------------|------------|-------|-------|-------|----------|----------|-------|
| 1417296_PM_at   | Atf1          | ATF1       | -0.67 | 4.25  | -3.18 | 9.45E-03 | 1.10E-01 | -2.92 |
| 1426556_PM_at   | Zfp280d       | ZNF280D    | -0.63 | 3.08  | -3.18 | 9.44E-03 | 1.10E-01 | -2.92 |
| 1443321_PM_at   | ---           | NA         | 0.49  | 3.34  | 3.18  | 9.44E-03 | 1.10E-01 | -2.92 |
| 1416140_PM_a_at | Dhx30         | DHX30      | -0.54 | 2.95  | -3.18 | 9.47E-03 | 1.10E-01 | -2.92 |
| 1434929_PM_at   | BC035044      | NA         | 0.27  | 2.81  | 3.18  | 9.47E-03 | 1.10E-01 | -2.92 |
| 1428518_PM_at   | Cenpu         | CENPU      | 0.36  | 2.30  | 3.18  | 9.47E-03 | 1.10E-01 | -2.92 |
| 1425022_PM_at   | Usp3          | USP3       | 0.37  | 3.07  | 3.18  | 9.46E-03 | 1.10E-01 | -2.92 |
| 1460152_PM_at   | ---           | NA         | 0.43  | 2.29  | 3.18  | 9.47E-03 | 1.10E-01 | -2.92 |
| 1450579_PM_x_at | Sry           | SRY        | 0.61  | 4.57  | 3.18  | 9.47E-03 | 1.10E-01 | -2.92 |
| 1459860_PM_x_at | Trim2         | TRIM2      | 0.72  | 10.66 | 3.18  | 9.47E-03 | 1.10E-01 | -2.92 |
| 1431949_PM_at   | ---           | NA         | -0.88 | 2.34  | -3.17 | 9.48E-03 | 1.10E-01 | -2.92 |
| 1446305_PM_at   | ---           | NA         | 0.36  | 2.59  | 3.17  | 9.48E-03 | 1.10E-01 | -2.92 |
| 1417770_PM_s_at | Psmc6         | NA         | -0.98 | 4.41  | -3.17 | 9.50E-03 | 1.10E-01 | -2.92 |
| 1422570_PM_at   | Yy1           | NA         | -0.66 | 4.32  | -3.17 | 9.49E-03 | 1.10E-01 | -2.92 |
| 1428616_PM_at   | Zfp131        | ZNF131     | -0.47 | 3.44  | -3.17 | 9.49E-03 | 1.10E-01 | -2.92 |
| 1431392_PM_at   | Hoxa3         | HOXA3      | 0.47  | 2.76  | 3.17  | 9.49E-03 | 1.10E-01 | -2.92 |
| 1438132_PM_at   | Gm5089        | NA         | 0.57  | 3.19  | 3.17  | 9.50E-03 | 1.10E-01 | -2.92 |
| 1432606_PM_at   | ---           | NA         | 0.31  | 2.69  | 3.17  | 9.50E-03 | 1.10E-01 | -2.92 |
| 1433627_PM_at   | Sec23ip       | SEC23IP    | -1.26 | 5.24  | -3.17 | 9.51E-03 | 1.10E-01 | -2.93 |
| 1423759_PM_a_at | Tmc01         | TMCO1      | -0.54 | 3.84  | -3.17 | 9.51E-03 | 1.10E-01 | -2.93 |
| 1459353_PM_at   | Kctd3         | KCTD3      | 0.49  | 2.82  | 3.17  | 9.52E-03 | 1.10E-01 | -2.93 |
| 1421406_PM_at   | ---           | NA         | 0.33  | 2.38  | 3.17  | 9.52E-03 | 1.10E-01 | -2.93 |
| 1451159_PM_at   | Arhgef12      | ARHGEF12   | -1.69 | 6.16  | -3.17 | 9.54E-03 | 1.11E-01 | -2.93 |
| 1455750_PM_at   | Ralgapa2      | RALGAPA2   | -0.26 | 2.49  | -3.17 | 9.54E-03 | 1.11E-01 | -2.93 |
| 1431569_PM_a_at | Lypd1         | LYPD1      | 1.18  | 5.30  | 3.17  | 9.55E-03 | 1.11E-01 | -2.93 |
| 1426924_PM_at   | Rc3h2         | RC3H2      | -0.40 | 3.15  | -3.17 | 9.56E-03 | 1.11E-01 | -2.93 |
| 1417794_PM_at   | Zmym3         | ZMYM3      | -0.37 | 2.95  | -3.17 | 9.56E-03 | 1.11E-01 | -2.93 |
| 1439873_PM_at   | Dgkd          | DGKD       | 0.54  | 3.08  | 3.17  | 9.56E-03 | 1.11E-01 | -2.93 |
| 1442777_PM_at   | ---           | NA         | 0.52  | 2.66  | 3.17  | 9.57E-03 | 1.11E-01 | -2.93 |
| 1426597_PM_s_at | Iffo2         | AL080251.1 | 0.57  | 2.97  | 3.17  | 9.58E-03 | 1.11E-01 | -2.93 |
| 1429589_PM_at   | Gad2          | GAD2       | -1.12 | 6.71  | -3.17 | 9.58E-03 | 1.11E-01 | -2.93 |
| 1455278_PM_at   | Wdr37         | WDR37      | -0.64 | 4.97  | -3.17 | 9.58E-03 | 1.11E-01 | -2.93 |
| 1421431_PM_at   | Ptrf          | CAVIN1     | 0.29  | 2.54  | 3.17  | 9.58E-03 | 1.11E-01 | -2.93 |
| 1458479_PM_at   | ---           | NA         | 0.60  | 3.47  | 3.17  | 9.59E-03 | 1.11E-01 | -2.93 |
| 1452217_PM_at   | Ahnak         | AHNAK      | -1.44 | 6.55  | -3.17 | 9.60E-03 | 1.11E-01 | -2.94 |
| 1418318_PM_at   | Rnf128        | RNF128     | -1.18 | 3.37  | -3.17 | 9.63E-03 | 1.11E-01 | -2.94 |
| 1421751_PM_a_at | Psmd14        | PSMD14     | -0.94 | 7.85  | -3.17 | 9.63E-03 | 1.11E-01 | -2.94 |
| 1428958_PM_at   | Paqr8         | PAQR8      | -0.78 | 6.51  | -3.17 | 9.63E-03 | 1.11E-01 | -2.94 |
| 1453240_PM_a_at | Ccser2        | CCSER2     | -0.66 | 6.17  | -3.17 | 9.63E-03 | 1.11E-01 | -2.94 |
| 1435928_PM_at   | 6430548M08Rik | KIAA0513   | -0.63 | 2.75  | -3.17 | 9.61E-03 | 1.11E-01 | -2.94 |
| 1450950_PM_at   | Smc3          | SMC3       | -0.58 | 3.07  | -3.17 | 9.63E-03 | 1.11E-01 | -2.94 |
| 1415775_PM_at   | Rbbp7         | RBBP7      | -0.55 | 7.19  | -3.17 | 9.61E-03 | 1.11E-01 | -2.94 |
| 1450388_PM_s_at | Twsg1         | TWSG1      | -0.47 | 3.13  | -3.17 | 9.62E-03 | 1.11E-01 | -2.94 |
| 1430732_PM_at   | ---           | NA         | 0.28  | 2.47  | 3.17  | 9.61E-03 | 1.11E-01 | -2.94 |
| 1459607_PM_at   | Gm15938       | NA         | 0.36  | 2.45  | 3.17  | 9.62E-03 | 1.11E-01 | -2.94 |
| 1456260_PM_at   | Rbbp4         | RBBP4      | 0.65  | 3.02  | 3.17  | 9.62E-03 | 1.11E-01 | -2.94 |
| 1458051_PM_at   | ---           | NA         | 1.03  | 2.72  | 3.17  | 9.61E-03 | 1.11E-01 | -2.94 |
| 1422675_PM_at   | Smarce1       | SMARCE1    | 1.21  | 7.65  | 3.17  | 9.62E-03 | 1.11E-01 | -2.94 |
| 1459774_PM_at   | ---           | NA         | 0.63  | 3.08  | 3.17  | 9.63E-03 | 1.11E-01 | -2.94 |
| 1457678_PM_at   | 2310035C23Rik | KIAA1468   | 0.51  | 3.62  | 3.17  | 9.64E-03 | 1.11E-01 | -2.94 |
| 1446172_PM_at   | ---           | NA         | 0.96  | 3.97  | 3.17  | 9.64E-03 | 1.11E-01 | -2.94 |
| 1449997_PM_at   | Tpm3          | TPM3       | 0.32  | 5.74  | 3.16  | 9.65E-03 | 1.11E-01 | -2.94 |
| 1441511_PM_at   | Kcnt1         | KCNT1      | 0.42  | 2.35  | 3.16  | 9.65E-03 | 1.11E-01 | -2.94 |
| 1457671_PM_at   | Homer2        | HOMER2     | -0.67 | 4.26  | -3.16 | 9.67E-03 | 1.11E-01 | -2.94 |
| 1434818_PM_at   | Gm15663       | NA         | -0.39 | 3.95  | -3.16 | 9.66E-03 | 1.11E-01 | -2.94 |
| 1441486_PM_at   | Fkbp15        | FKBP15     | 0.43  | 2.52  | 3.16  | 9.66E-03 | 1.11E-01 | -2.94 |
| 1449827_PM_at   | Acan          | ACAN       | 0.44  | 3.26  | 3.16  | 9.67E-03 | 1.11E-01 | -2.94 |
| 1439579_PM_at   | ---           | NA         | 0.64  | 2.74  | 3.16  | 9.66E-03 | 1.11E-01 | -2.94 |
| 1415785_PM_a_at | Cct8          | CCT8       | -1.10 | 5.25  | -3.16 | 9.68E-03 | 1.11E-01 | -2.94 |
| 1424828_PM_a_at | Fh1           | FH         | -1.03 | 5.44  | -3.16 | 9.69E-03 | 1.11E-01 | -2.94 |
| 1441277_PM_s_at | Ptprk         | PTPRK      | -0.98 | 4.38  | -3.16 | 9.69E-03 | 1.11E-01 | -2.94 |
| 1451432_PM_x_at | Alkbh4        | ALKBH4     | 0.45  | 3.10  | 3.16  | 9.69E-03 | 1.11E-01 | -2.94 |
| 1419686_PM_at   | Cep41         | CEP41      | 0.29  | 2.28  | 3.16  | 9.70E-03 | 1.11E-01 | -2.95 |
| 1417454_PM_at   | Cui4b         | NA         | -0.54 | 3.04  | -3.16 | 9.71E-03 | 1.11E-01 | -2.95 |
| 1433644_PM_at   | Pomt2         | POMT2      | -1.14 | 2.64  | -3.16 | 9.72E-03 | 1.11E-01 | -2.95 |
| 1438909_PM_at   | Sccpdh        | SCCPDH     | 0.43  | 2.35  | 3.16  | 9.72E-03 | 1.11E-01 | -2.95 |
| 1433945_PM_at   | Fam189a1      | FAM189A1   | -1.76 | 6.66  | -3.16 | 9.73E-03 | 1.11E-01 | -2.95 |
| 1438849_PM_at   | Krt78         | KRT78      | 0.26  | 2.39  | 3.16  | 9.73E-03 | 1.11E-01 | -2.95 |
| 1446088_PM_at   | ---           | NA         | 0.33  | 3.19  | 3.16  | 9.73E-03 | 1.11E-01 | -2.95 |
| 1417964_PM_at   | Ap3d1         | AP3D1      | -0.77 | 5.34  | -3.16 | 9.74E-03 | 1.12E-01 | -2.95 |
| 1454376_PM_at   | 4833410I11Rik | NA         | 0.59  | 2.66  | 3.16  | 9.75E-03 | 1.12E-01 | -2.95 |
| 1437999_PM_x_at | Pigq          | PIGQ       | 0.65  | 7.86  | 3.16  | 9.75E-03 | 1.12E-01 | -2.95 |
| 1428583_PM_at   | Nufip2        | NA         | -0.87 | 5.55  | -3.16 | 9.76E-03 | 1.12E-01 | -2.95 |
| 1433350_PM_at   | ---           | NA         | 0.27  | 2.91  | 3.16  | 9.76E-03 | 1.12E-01 | -2.95 |
| 1433441_PM_at   | Fbx5          | FBXL5      | -1.21 | 5.39  | -3.16 | 9.76E-03 | 1.12E-01 | -2.95 |

|                 |                                                                               |              |       |       |       |          |          |       |
|-----------------|-------------------------------------------------------------------------------|--------------|-------|-------|-------|----------|----------|-------|
| 1422442_PM_at   | Smu1                                                                          | SMU1         | -0.68 | 4.70  | -3.16 | 9.76E-03 | 1.12E-01 | -2.95 |
| 1435851_PM_at   | Lgi1                                                                          | LGI1         | -1.71 | 7.16  | -3.16 | 9.77E-03 | 1.12E-01 | -2.95 |
| 1425827_PM_at   | Nkx2-3                                                                        | NKX2-3       | 0.30  | 3.06  | 3.16  | 9.78E-03 | 1.12E-01 | -2.95 |
| 1430696_PM_at   | Eif2ak1                                                                       | EIF2AK1      | 0.42  | 2.91  | 3.16  | 9.79E-03 | 1.12E-01 | -2.95 |
| 1456137_PM_at   | Nrxn3                                                                         | NRXN3        | -1.30 | 4.58  | -3.16 | 9.80E-03 | 1.12E-01 | -2.95 |
| 1425599_PM_a_at | Gatad1                                                                        | GATAD1       | -0.72 | 5.21  | -3.16 | 9.79E-03 | 1.12E-01 | -2.95 |
| 1456132_PM_x_at | Tsc22d1                                                                       | TSC22D1      | -0.31 | 2.19  | -3.16 | 9.80E-03 | 1.12E-01 | -2.96 |
| 1423697_PM_at   | Psmd6                                                                         | PSMD6        | -1.37 | 4.29  | -3.16 | 9.81E-03 | 1.12E-01 | -2.96 |
| 1428084_PM_at   | Krr1                                                                          | KRR1         | -0.96 | 5.19  | -3.15 | 9.82E-03 | 1.12E-01 | -2.96 |
| 1451571_PM_s_at | 9130019O22Rik ///<br>E430018J23Rik ///<br>LOC105243102 ///Zfp747<br>///Zfp764 | AC002310.5   | -0.66 | 4.11  | -3.16 | 9.81E-03 | 1.12E-01 | -2.96 |
| 1451108_PM_at   | Rnf185                                                                        | RNF185       | -0.65 | 3.75  | -3.16 | 9.81E-03 | 1.12E-01 | -2.96 |
| 1435632_PM_at   | Nufip2                                                                        | NUFIP2       | -0.53 | 2.60  | -3.15 | 9.82E-03 | 1.12E-01 | -2.96 |
| 1427003_PM_at   | Ppp2r5c                                                                       | NA           | -0.80 | 6.23  | -3.15 | 9.82E-03 | 1.12E-01 | -2.96 |
| 1458710_PM_at   | ---                                                                           | NA           | 0.80  | 4.60  | 3.15  | 9.83E-03 | 1.12E-01 | -2.96 |
| 1448851_PM_a_at | Dnajc5                                                                        | DNAJC5       | -1.26 | 4.84  | -3.15 | 9.83E-03 | 1.12E-01 | -2.96 |
| 1457587_PM_at   | Kcng5                                                                         | KCNQ5        | -1.42 | 6.71  | -3.15 | 9.84E-03 | 1.12E-01 | -2.96 |
| 1439329_PM_a_at | Brsk2                                                                         | NA           | 0.56  | 2.60  | 3.15  | 9.85E-03 | 1.12E-01 | -2.96 |
| 1432449_PM_at   | Erich6b                                                                       | NA           | 0.32  | 2.60  | 3.15  | 9.86E-03 | 1.12E-01 | -2.96 |
| 1426071_PM_at   | Tiaf2                                                                         | NA           | 0.36  | 2.53  | 3.15  | 9.86E-03 | 1.12E-01 | -2.96 |
| 1448148_PM_at   | Grn                                                                           | GRN          | -0.91 | 4.71  | -3.15 | 9.87E-03 | 1.12E-01 | -2.96 |
| 1424187_PM_at   | Ccdc80                                                                        | CCDC80       | 0.40  | 2.58  | 3.15  | 9.88E-03 | 1.12E-01 | -2.96 |
| 1415981_PM_at   | Herpud2                                                                       | HERPUD2      | -1.61 | 5.59  | -3.15 | 9.90E-03 | 1.12E-01 | -2.97 |
| 1452519_PM_a_at | Zfp36                                                                         | ZFP36        | -1.03 | 2.78  | -3.15 | 9.89E-03 | 1.12E-01 | -2.96 |
| 1428890_PM_at   | Fem1c                                                                         | FEM1C        | -0.87 | 3.66  | -3.15 | 9.89E-03 | 1.12E-01 | -2.96 |
| 1441892_PM_x_at | ---                                                                           | NA           | -0.65 | 2.51  | -3.15 | 9.91E-03 | 1.12E-01 | -2.97 |
| 1428650_PM_at   | Tns1                                                                          | TNS1         | -0.65 | 3.97  | -3.15 | 9.88E-03 | 1.12E-01 | -2.96 |
| 1455727_PM_at   | Zrsr2                                                                         | ZRSR2        | -0.62 | 3.92  | -3.15 | 9.92E-03 | 1.12E-01 | -2.97 |
| 1437259_PM_at   | Slc9a2                                                                        | SLC9A2       | -0.54 | 3.07  | -3.15 | 9.92E-03 | 1.12E-01 | -2.97 |
| 1434763_PM_at   | Orai2                                                                         | ORAI2        | -0.53 | 2.97  | -3.15 | 9.92E-03 | 1.12E-01 | -2.97 |
| 1416828_PM_at   | Snap25                                                                        | SNAP25       | -0.42 | 11.69 | -3.15 | 9.91E-03 | 1.12E-01 | -2.97 |
| 1447135_PM_at   | ---                                                                           | NA           | 0.25  | 2.22  | 3.15  | 9.91E-03 | 1.12E-01 | -2.97 |
| 1418920_PM_at   | Cldn15                                                                        | CLDN15       | 0.27  | 3.02  | 3.15  | 9.90E-03 | 1.12E-01 | -2.96 |
| 1454268_PM_a_at | Cyba                                                                          | CYBA         | 0.34  | 2.98  | 3.15  | 9.90E-03 | 1.12E-01 | -2.97 |
| 1459411_PM_at   | ---                                                                           | NA           | 0.47  | 2.79  | 3.15  | 9.92E-03 | 1.12E-01 | -2.97 |
| 1455184_PM_at   | Mob1b                                                                         | MOB1B        | 0.53  | 5.09  | 3.15  | 9.92E-03 | 1.12E-01 | -2.97 |
| 1430264_PM_at   | ---                                                                           | NA           | 0.61  | 3.37  | 3.15  | 9.90E-03 | 1.12E-01 | -2.97 |
| 1428719_PM_at   | Igk2                                                                          | NA           | 0.62  | 3.65  | 3.15  | 9.89E-03 | 1.12E-01 | -2.96 |
| 1431353_PM_at   | Pabpc4l                                                                       | NA           | 0.75  | 3.90  | 3.15  | 9.90E-03 | 1.12E-01 | -2.97 |
| 1434553_PM_at   | Tmem56                                                                        | TMEM56-RWDD3 | -0.79 | 4.53  | -3.15 | 9.93E-03 | 1.12E-01 | -2.97 |
| 1435045_PM_s_at | Mapk8ip2                                                                      | MAPK8IP2     | -0.62 | 3.48  | -3.15 | 9.94E-03 | 1.12E-01 | -2.97 |
| 1434162_PM_at   | Cacul1                                                                        | CACUL1       | -0.61 | 4.85  | -3.15 | 9.94E-03 | 1.12E-01 | -2.97 |
| 1426408_PM_at   | Celf1                                                                         | CELF1        | -0.59 | 5.33  | -3.15 | 9.94E-03 | 1.12E-01 | -2.97 |
| 1455067_PM_at   | Psd4                                                                          | PSD4         | 0.35  | 2.87  | 3.15  | 9.94E-03 | 1.12E-01 | -2.97 |
| 1426931_PM_s_at | Pum3                                                                          | PUM3         | 0.47  | 2.54  | 3.15  | 9.94E-03 | 1.12E-01 | -2.97 |
| 1441769_PM_at   | ---                                                                           | NA           | 0.63  | 2.35  | 3.15  | 9.94E-03 | 1.12E-01 | -2.97 |
| 1451711_PM_at   | Wnt9b                                                                         | WNT9B        | 0.27  | 2.87  | 3.15  | 9.95E-03 | 1.12E-01 | -2.97 |
| 1441838_PM_at   | Erc1                                                                          | ERCC1        | 0.87  | 3.43  | 3.15  | 9.95E-03 | 1.12E-01 | -2.97 |
| 1415759_PM_a_at | Lamtor5                                                                       | LAMTORS      | -1.14 | 4.36  | -3.15 | 9.96E-03 | 1.12E-01 | -2.97 |
| 1460640_PM_at   | Atox1                                                                         | ATOX1        | 0.37  | 2.59  | 3.15  | 9.96E-03 | 1.12E-01 | -2.97 |
| 1447056_PM_at   | Sucla2                                                                        | SUCLA2       | 0.40  | 2.32  | 3.15  | 9.97E-03 | 1.12E-01 | -2.97 |
| 1449611_PM_at   | Cd82                                                                          | CD82         | 0.49  | 3.05  | 3.15  | 9.96E-03 | 1.12E-01 | -2.97 |
| 1438627_PM_x_at | Pgd                                                                           | PGD          | 1.33  | 5.57  | 3.15  | 9.97E-03 | 1.12E-01 | -2.97 |
| 1451129_PM_at   | Calb2                                                                         | CALB2        | 1.46  | 3.14  | 3.15  | 9.97E-03 | 1.12E-01 | -2.97 |
| 1458370_PM_at   | Bmp2k                                                                         | BMP2K        | -0.34 | 2.53  | -3.15 | 9.97E-03 | 1.12E-01 | -2.97 |
| 1426432_PM_a_at | Slc4a4                                                                        | SLC4A4       | 1.11  | 3.42  | 3.15  | 9.98E-03 | 1.13E-01 | -2.97 |
| 1448387_PM_at   | Gm9840 /// Rbx1                                                               | RBX1         | -0.81 | 5.15  | -3.14 | 9.99E-03 | 1.13E-01 | -2.97 |
| 1440956_PM_at   | ---                                                                           | NA           | 0.41  | 5.19  | 3.14  | 9.99E-03 | 1.13E-01 | -2.97 |
| 1438654_PM_x_at | Mmd2                                                                          | MMD2         | -1.56 | 6.66  | -3.14 | 1.00E-02 | 1.13E-01 | -2.97 |
| 1435465_PM_at   | Kbtbd11                                                                       | KBTBD11      | -1.08 | 6.25  | -3.14 | 9.99E-03 | 1.13E-01 | -2.97 |
| 1453018_PM_at   | Nvl                                                                           | NVL          | -0.87 | 4.59  | -3.14 | 1.00E-02 | 1.13E-01 | -2.98 |
| 1450391_PM_a_at | Mgll                                                                          | MGLL         | -0.78 | 4.46  | -3.14 | 1.00E-02 | 1.13E-01 | -2.98 |
| 1455213_PM_at   | Tmsb15b2 /// Tmsb15l                                                          | TMSB15B      | -0.59 | 3.44  | -3.14 | 1.00E-02 | 1.13E-01 | -2.98 |
| 1451822_PM_a_at | Scrn2                                                                         | SCRN2        | 0.37  | 3.05  | 3.14  | 1.00E-02 | 1.13E-01 | -2.98 |
| 1430117_PM_a_at | Zfp64                                                                         | ZFP64        | 0.30  | 2.87  | 3.14  | 1.00E-02 | 1.13E-01 | -2.98 |
| 1452964_PM_at   | Tll11                                                                         | TLL11        | -1.04 | 4.24  | -3.14 | 1.00E-02 | 1.13E-01 | -2.98 |
| 1423645_PM_a_at | Ddx5                                                                          | DDX5         | -0.50 | 9.60  | -3.14 | 1.00E-02 | 1.13E-01 | -2.98 |
| 1434136_PM_at   | Tmem229a                                                                      | TMEM229A     | -0.38 | 2.35  | -3.14 | 1.00E-02 | 1.13E-01 | -2.98 |
| 1441680_PM_at   | ---                                                                           | NA           | 0.44  | 2.56  | 3.14  | 1.00E-02 | 1.13E-01 | -2.98 |
| 1429781_PM_s_at | Ccdc39                                                                        | CCDC39       | -0.83 | 4.84  | -3.14 | 1.00E-02 | 1.13E-01 | -2.98 |
| 1419100_PM_at   | Serpina3n                                                                     | SERPINA3     | -0.75 | 3.44  | -3.14 | 1.00E-02 | 1.13E-01 | -2.98 |
| 1416672_PM_s_at | Mcoln1                                                                        | MCOLN1       | -0.73 | 3.64  | -3.14 | 1.00E-02 | 1.13E-01 | -2.98 |
| 1452033_PM_at   | Gle1                                                                          | GLE1         | 0.31  | 2.71  | 3.14  | 1.01E-02 | 1.13E-01 | -2.98 |



|                 |               |          |       |      |       |          |          |       |
|-----------------|---------------|----------|-------|------|-------|----------|----------|-------|
| 1459916_PM_at   | Pax5          | PAX5     | 0.42  | 3.27 | 3.14  | 1.00E-02 | 1.13E-01 | -2.98 |
| 1417034_PM_at   | Trappc6a      | TRAPPC6A | 0.43  | 3.38 | 3.14  | 1.00E-02 | 1.13E-01 | -2.98 |
| 1417029_PM_a_at | Trim2         | TRIM2    | 0.60  | 3.11 | 3.14  | 1.00E-02 | 1.13E-01 | -2.98 |
| 1455386_PM_at   | ---           | NA       | -0.42 | 2.76 | -3.14 | 1.01E-02 | 1.13E-01 | -2.98 |
| 1423532_PM_at   | Rnf44         | RNF44    | -0.86 | 5.88 | -3.14 | 1.01E-02 | 1.13E-01 | -2.98 |
| 1448502_PM_at   | Slc16a7       | SLC16A7  | -0.48 | 3.17 | -3.14 | 1.01E-02 | 1.13E-01 | -2.98 |
| 1425235_PM_s_at | Col20a1       | COL20A1  | 0.49  | 4.30 | 3.14  | 1.01E-02 | 1.13E-01 | -2.98 |
| 1421869_PM_at   | Trim44        | TRIM44   | 1.06  | 3.82 | 3.14  | 1.01E-02 | 1.13E-01 | -2.98 |
| 1456083_PM_x_at | Eif3c         | EIF3C    | -1.63 | 6.67 | -3.14 | 1.01E-02 | 1.13E-01 | -2.98 |
| 1447776_PM_x_at | Rab6a         | RAB6C    | -1.52 | 7.44 | -3.14 | 1.01E-02 | 1.13E-01 | -2.98 |
| 1449304_PM_at   | Zbtb11os1     | NA       | -0.82 | 4.55 | -3.14 | 1.01E-02 | 1.13E-01 | -2.98 |
| 1436738_PM_at   | Pif1          | PIF1     | 0.27  | 2.62 | 3.14  | 1.01E-02 | 1.13E-01 | -2.98 |
| 1435327_PM_at   | Lpgat1        | LPGAT1   | -0.71 | 4.54 | -3.14 | 1.01E-02 | 1.13E-01 | -2.98 |
| 1460473_PM_at   | 6230400D17Rik | NA       | -0.84 | 3.30 | -3.14 | 1.01E-02 | 1.13E-01 | -2.99 |
| 1438015_PM_at   | Dkc1          | DKC1     | 0.83  | 3.91 | 3.14  | 1.01E-02 | 1.13E-01 | -2.99 |
| 1434105_PM_at   | Epm2aip1      | EPM2AI1  | -0.82 | 3.20 | -3.14 | 1.01E-02 | 1.13E-01 | -2.99 |
| 1418409_PM_at   | Jrk           | JRK      | 0.28  | 3.15 | 3.14  | 1.01E-02 | 1.13E-01 | -2.99 |
| 1428629_PM_at   | Zfp518a       | ZNF518A  | -0.41 | 3.12 | -3.14 | 1.01E-02 | 1.13E-01 | -2.99 |
| 1437354_PM_at   | Ube3a         | UBE3A    | -0.86 | 3.72 | -3.13 | 1.02E-02 | 1.14E-01 | -2.99 |
| 1435058_PM_x_at | Stxbp3        | STXBP3   | -0.73 | 3.51 | -3.13 | 1.02E-02 | 1.14E-01 | -2.99 |
| 1446903_PM_at   | ---           | NA       | 0.28  | 2.54 | 3.13  | 1.02E-02 | 1.14E-01 | -2.99 |
| 1441461_PM_at   | ---           | NA       | 0.35  | 2.33 | 3.13  | 1.02E-02 | 1.14E-01 | -2.99 |
| 1456935_PM_at   | Al606473      | NA       | 0.46  | 2.94 | 3.13  | 1.02E-02 | 1.14E-01 | -2.99 |
| 1430828_PM_at   | ---           | NA       | 0.35  | 2.23 | 3.13  | 1.02E-02 | 1.14E-01 | -2.99 |
| 1460403_PM_at   | Psp1          | PSIP1    | -0.49 | 4.34 | -3.13 | 1.02E-02 | 1.14E-01 | -3.00 |
| 1424566_PM_s_at | Polr3d        | POLR3D   | 0.62  | 3.76 | 3.13  | 1.02E-02 | 1.14E-01 | -3.00 |
| 1422110_PM_at   | Hr            | HR       | 0.27  | 2.62 | 3.13  | 1.02E-02 | 1.14E-01 | -3.00 |
| 1439073_PM_at   | ---           | NA       | -0.67 | 3.37 | -3.13 | 1.02E-02 | 1.14E-01 | -3.00 |
| 1438049_PM_at   | Gm26853       | NA       | 0.47  | 4.09 | 3.13  | 1.02E-02 | 1.14E-01 | -3.00 |
| 1454396_PM_at   | 4632409D06Rik | NA       | 0.29  | 2.80 | 3.13  | 1.02E-02 | 1.14E-01 | -3.00 |
| 1447432_PM_s_at | Zfp263        | ZNF263   | -1.16 | 5.23 | -3.13 | 1.03E-02 | 1.14E-01 | -3.00 |
| 1459864_PM_at   | Gpr146        | GPR146   | 0.41  | 2.21 | 3.13  | 1.03E-02 | 1.14E-01 | -3.00 |
| 1427404_PM_x_at | Eno1///Eno1b  | ENO1     | -0.96 | 5.24 | -3.13 | 1.03E-02 | 1.14E-01 | -3.00 |
| 1424568_PM_at   | Tspan2        | TSPAN2   | -0.45 | 3.31 | -3.13 | 1.03E-02 | 1.14E-01 | -3.00 |
| 1425647_PM_at   | Trim60        | TRIM60   | -0.40 | 2.24 | -3.13 | 1.03E-02 | 1.14E-01 | -3.00 |
| 1425311_PM_at   | 4930432F04Rik | NA       | 0.35  | 2.88 | 3.13  | 1.03E-02 | 1.14E-01 | -3.00 |
| 1416205_PM_at   | Glb1          | GLB1     | -0.38 | 2.86 | -3.13 | 1.03E-02 | 1.14E-01 | -3.00 |
| 1436209_PM_at   | Dnajc16       | DNAI16   | -0.54 | 2.63 | -3.13 | 1.03E-02 | 1.14E-01 | -3.00 |
| 1416423_PM_x_at | Ssb           | SSB      | -0.55 | 4.48 | -3.13 | 1.03E-02 | 1.14E-01 | -3.00 |
| 1436795_PM_at   | Cnst          | CNST     | -0.47 | 4.03 | -3.13 | 1.03E-02 | 1.14E-01 | -3.00 |
| 1424459_PM_at   | Lpcat1        | LPCAT1   | 0.37  | 4.02 | 3.13  | 1.03E-02 | 1.15E-01 | -3.00 |
| 1432943_PM_at   | 2900046L07Rik | NA       | 0.40  | 2.21 | 3.13  | 1.03E-02 | 1.15E-01 | -3.01 |
| 1418262_PM_at   | Syk           | SYK      | 0.48  | 2.79 | 3.13  | 1.03E-02 | 1.15E-01 | -3.01 |
| 1457161_PM_at   | ---           | NA       | -0.74 | 2.53 | -3.12 | 1.03E-02 | 1.15E-01 | -3.01 |
| 1420404_PM_at   | Cd86          | CD86     | 0.28  | 2.07 | 3.13  | 1.03E-02 | 1.15E-01 | -3.01 |
| 1417562_PM_at   | Eif4ebp1      | EIF4EBP1 | 0.40  | 2.96 | 3.12  | 1.03E-02 | 1.15E-01 | -3.01 |
| 1421635_PM_at   | Cnnm4         | CNNM4    | 0.50  | 3.33 | 3.13  | 1.03E-02 | 1.15E-01 | -3.01 |
| 1459420_PM_at   | ---           | NA       | 1.22  | 4.29 | 3.13  | 1.03E-02 | 1.15E-01 | -3.01 |
| 1449157_PM_at   | Nr2c1         | NR2C1    | -0.65 | 2.47 | -3.12 | 1.03E-02 | 1.15E-01 | -3.01 |
| 1428772_PM_at   | Xpot          | XPOT     | -0.63 | 2.89 | -3.12 | 1.04E-02 | 1.15E-01 | -3.01 |
| 1456429_PM_at   | ---           | NA       | 0.63  | 3.45 | 3.12  | 1.04E-02 | 1.15E-01 | -3.01 |
| 1455526_PM_at   | Diras1        | DIRAS1   | 1.30  | 4.52 | 3.12  | 1.04E-02 | 1.15E-01 | -3.01 |
| 1454136_PM_a_at | 4921524J17Rik | C16orf87 | -0.63 | 3.07 | -3.12 | 1.04E-02 | 1.15E-01 | -3.01 |
| 1456868_PM_at   | ---           | NA       | 0.56  | 6.81 | 3.12  | 1.04E-02 | 1.15E-01 | -3.01 |
| 1421733_PM_a_at | Tpst1         | TPST1    | -1.05 | 4.68 | -3.12 | 1.04E-02 | 1.15E-01 | -3.01 |
| 1448527_PM_at   | Pdcd10        | PDCD10   | -0.72 | 3.59 | -3.12 | 1.04E-02 | 1.15E-01 | -3.01 |
| 1453312_PM_at   | Dcaf6         | DCAF6    | -0.84 | 8.27 | -3.12 | 1.04E-02 | 1.15E-01 | -3.01 |
| 1459991_PM_at   | Myo9a         | MYO9A    | -0.82 | 2.92 | -3.12 | 1.04E-02 | 1.15E-01 | -3.01 |
| 1440309_PM_at   | ---           | NA       | 0.47  | 3.12 | 3.12  | 1.04E-02 | 1.15E-01 | -3.01 |
| 1436320_PM_at   | ---           | NA       | 0.56  | 2.23 | 3.12  | 1.04E-02 | 1.15E-01 | -3.01 |
| 1426503_PM_a_at | Rnf121        | RNF121   | 0.29  | 2.73 | 3.12  | 1.04E-02 | 1.15E-01 | -3.01 |
| 1444086_PM_at   | Nckap5        | NCKAP5   | 0.68  | 3.57 | 3.12  | 1.04E-02 | 1.15E-01 | -3.02 |
| 1457317_PM_at   | ---           | NA       | -0.50 | 2.35 | -3.12 | 1.04E-02 | 1.15E-01 | -3.02 |
| 1446933_PM_at   | ---           | NA       | 0.23  | 2.07 | 3.12  | 1.04E-02 | 1.15E-01 | -3.02 |
| 1419784_PM_x_at | ---           | NA       | 0.30  | 2.58 | 3.12  | 1.04E-02 | 1.15E-01 | -3.02 |
| 1427366_PM_at   | Krtap3-1      | KRTAP3-1 | 0.36  | 3.49 | 3.12  | 1.05E-02 | 1.16E-01 | -3.02 |
| 1429146_PM_at   | Svip          | SVIP     | -0.98 | 5.17 | -3.12 | 1.05E-02 | 1.16E-01 | -3.02 |
| 1436772_PM_at   | ---           | NA       | 0.55  | 7.19 | 3.12  | 1.05E-02 | 1.16E-01 | -3.02 |
| 1434642_PM_at   | Hsd17b11      | HSD17B11 | -1.31 | 5.28 | -3.12 | 1.05E-02 | 1.16E-01 | -3.02 |
| 1448628_PM_at   | Scg3          | SCG3     | -0.66 | 6.78 | -3.12 | 1.05E-02 | 1.16E-01 | -3.02 |
| 1445431_PM_at   | ---           | NA       | 0.33  | 2.35 | 3.12  | 1.05E-02 | 1.16E-01 | -3.02 |
| 1443993_PM_at   | Zc3h12a       | ZC3H12A  | 0.37  | 2.51 | 3.12  | 1.05E-02 | 1.16E-01 | -3.02 |
| 1428495_PM_at   | Malsu1        | MALSU1   | -0.76 | 3.84 | -3.12 | 1.05E-02 | 1.16E-01 | -3.02 |
| 1458743_PM_at   | ---           | NA       | -0.56 | 2.63 | -3.12 | 1.05E-02 | 1.16E-01 | -3.02 |
| 1436098_PM_at   | Bche          | BCHE     | -0.28 | 2.25 | -3.11 | 1.05E-02 | 1.16E-01 | -3.03 |

|                 |                       |         |       |      |       |          |          |       |
|-----------------|-----------------------|---------|-------|------|-------|----------|----------|-------|
| 1453633_PM_a_at | Rnf41                 | RNF41   | 0.34  | 2.38 | 3.11  | 1.05E-02 | 1.16E-01 | -3.03 |
| 1456964_PM_at   | Rbm12                 | RBM12   | 0.96  | 4.21 | 3.11  | 1.05E-02 | 1.16E-01 | -3.03 |
| 1440654_PM_at   | ---                   | NA      | 0.32  | 2.35 | 3.11  | 1.05E-02 | 1.16E-01 | -3.03 |
| 1444191_PM_at   | ---                   | NA      | 0.31  | 2.67 | 3.11  | 1.05E-02 | 1.16E-01 | -3.03 |
| 1435376_PM_at   | Ddhd2                 | DDHD2   | -0.65 | 4.48 | -3.11 | 1.05E-02 | 1.16E-01 | -3.03 |
| 1447115_PM_at   | Slc26a10              | NA      | -1.30 | 2.52 | -3.11 | 1.06E-02 | 1.16E-01 | -3.03 |
| 1434694_PM_at   | Lrrc8a                | LRRC8A  | -0.59 | 3.74 | -3.11 | 1.06E-02 | 1.16E-01 | -3.03 |
| 1445635_PM_at   | ---                   | NA      | -0.40 | 2.58 | -3.11 | 1.06E-02 | 1.16E-01 | -3.03 |
| 1418800_PM_at   | Bhlha15               | BHLHA15 | 0.30  | 2.07 | 3.11  | 1.06E-02 | 1.16E-01 | -3.03 |
| 1436194_PM_at   | Prelid2               | PRELID2 | 0.31  | 2.17 | 3.11  | 1.06E-02 | 1.17E-01 | -3.03 |
| 1424769_PM_s_at | Cald1                 | CALD1   | -1.80 | 5.51 | -3.11 | 1.06E-02 | 1.17E-01 | -3.03 |
| 1458892_PM_at   | ---                   | NA      | 0.41  | 2.32 | 3.11  | 1.06E-02 | 1.17E-01 | -3.03 |
| 1443550_PM_at   | ---                   | NA      | 0.28  | 2.24 | 3.11  | 1.06E-02 | 1.17E-01 | -3.04 |
| 1429711_PM_at   | Styx                  | NA      | -0.68 | 5.49 | -3.11 | 1.06E-02 | 1.17E-01 | -3.04 |
| 1452894_PM_at   | Elav4                 | ELAVL4  | -0.58 | 4.38 | -3.11 | 1.06E-02 | 1.17E-01 | -3.04 |
| 1444481_PM_at   | ---                   | NA      | 1.15  | 3.20 | 3.11  | 1.06E-02 | 1.17E-01 | -3.04 |
| 1456511_PM_x_at | Eras                  | ERAS    | -0.74 | 2.55 | -3.11 | 1.07E-02 | 1.17E-01 | -3.04 |
| 1454179_PM_at   | 4933406K04Rik         | NA      | 0.38  | 2.53 | 3.11  | 1.07E-02 | 1.17E-01 | -3.04 |
| 1429567_PM_at   | Rassf10               | RASSF10 | 0.42  | 3.61 | 3.11  | 1.07E-02 | 1.17E-01 | -3.04 |
| 1453821_PM_at   | N6amt1                | N6AMT1  | 0.69  | 3.43 | 3.11  | 1.07E-02 | 1.17E-01 | -3.04 |
| 1416276_PM_a_at | Rps4x                 | RPS4X   | -0.71 | 7.20 | -3.11 | 1.07E-02 | 1.17E-01 | -3.04 |
| 1451595_PM_a_at | Kcng2                 | KCNQ2   | -0.54 | 6.14 | -3.11 | 1.07E-02 | 1.17E-01 | -3.04 |
| 1422353_PM_at   | Pou4f3                | POU4F3  | 0.29  | 2.24 | 3.11  | 1.07E-02 | 1.17E-01 | -3.04 |
| 1443127_PM_at   | ---                   | NA      | 0.61  | 2.82 | 3.11  | 1.07E-02 | 1.17E-01 | -3.04 |
| 1418459_PM_at   | Ccdc91                | CCDC91  | 0.80  | 3.47 | 3.11  | 1.07E-02 | 1.17E-01 | -3.04 |
| 1416043_PM_at   | Nasp                  | NASP    | 0.87  | 3.07 | 3.11  | 1.07E-02 | 1.17E-01 | -3.04 |
| 1420139_PM_s_at | Krr1                  | KRR1    | -0.80 | 4.90 | -3.11 | 1.07E-02 | 1.17E-01 | -3.04 |
| 1443308_PM_at   | Unc13b                | UNC13B  | 0.39  | 2.69 | 3.10  | 1.07E-02 | 1.17E-01 | -3.04 |
| 1416780_PM_at   | Pfkm                  | PFKM    | -0.47 | 4.80 | -3.10 | 1.07E-02 | 1.17E-01 | -3.04 |
| 1448612_PM_at   | Sfn                   | SFN     | 0.44  | 3.05 | 3.10  | 1.07E-02 | 1.17E-01 | -3.04 |
| 1452042_PM_a_at | Tmem144               | TMEM144 | 0.26  | 2.17 | 3.10  | 1.07E-02 | 1.17E-01 | -3.04 |
| 1441314_PM_at   | Incepn                | INCENP  | 0.39  | 3.26 | 3.10  | 1.07E-02 | 1.17E-01 | -3.05 |
| 1430619_PM_a_at | Mvk                   | MVK     | 0.30  | 3.39 | 3.10  | 1.07E-02 | 1.17E-01 | -3.05 |
| 1418306_PM_at   | Crybb1                | CRYBB1  | 0.32  | 3.09 | 3.10  | 1.07E-02 | 1.17E-01 | -3.05 |
| 1447043_PM_at   | ---                   | NA      | 0.36  | 2.57 | 3.10  | 1.08E-02 | 1.18E-01 | -3.05 |
| 1443204_PM_at   | ---                   | NA      | 0.36  | 2.23 | 3.10  | 1.08E-02 | 1.18E-01 | -3.05 |
| 1418791_PM_at   | Sh3gl2                | SH3GL2  | -1.90 | 7.05 | -3.10 | 1.08E-02 | 1.18E-01 | -3.05 |
| 1422569_PM_at   | Yy1                   | NA      | -0.98 | 6.56 | -3.10 | 1.08E-02 | 1.18E-01 | -3.05 |
| 1450142_PM_a_at | Card14                | CARD14  | 0.35  | 3.54 | 3.10  | 1.08E-02 | 1.18E-01 | -3.05 |
| 1438553_PM_x_at | 4930453N24Rik         | C3orf38 | 0.71  | 4.40 | 3.10  | 1.08E-02 | 1.18E-01 | -3.05 |
| 1430183_PM_at   | Gm39695               | NA      | 1.34  | 3.17 | 3.10  | 1.08E-02 | 1.18E-01 | -3.05 |
| 1428917_PM_at   | Stx17                 | STX17   | -0.52 | 3.22 | -3.10 | 1.08E-02 | 1.18E-01 | -3.05 |
| 1454640_PM_at   | Chchd7                | CHCHD7  | -0.35 | 2.81 | -3.10 | 1.08E-02 | 1.18E-01 | -3.05 |
| 1438262_PM_at   | Slc8a2                | SLC8A2  | -0.23 | 3.72 | -3.10 | 1.08E-02 | 1.18E-01 | -3.05 |
| 1428447_PM_at   | Tmem14a               | TMEM14A | -0.83 | 3.61 | -3.10 | 1.08E-02 | 1.18E-01 | -3.05 |
| 1453726_PM_s_at | Selt                  | SELENOT | -0.97 | 6.38 | -3.10 | 1.08E-02 | 1.18E-01 | -3.05 |
| 1440029_PM_at   | St8sia3               | ST8SIA3 | -0.82 | 4.19 | -3.10 | 1.08E-02 | 1.18E-01 | -3.05 |
| 1427910_PM_at   | Cst6                  | CST6    | 0.28  | 2.68 | 3.10  | 1.08E-02 | 1.18E-01 | -3.05 |
| 1423076_PM_at   | ---                   | NA      | 0.49  | 3.57 | 3.10  | 1.08E-02 | 1.18E-01 | -3.05 |
| 1421743_PM_a_at | Pcbp2                 | PCBP2   | -1.14 | 5.92 | -3.10 | 1.08E-02 | 1.18E-01 | -3.05 |
| 1449668_PM_s_at | Fnip1                 | FNIP1   | -0.77 | 3.34 | -3.10 | 1.08E-02 | 1.18E-01 | -3.05 |
| 1430451_PM_at   | ---                   | NA      | 0.27  | 2.80 | 3.10  | 1.08E-02 | 1.18E-01 | -3.05 |
| 1439900_PM_at   | Zfhx2                 | ZFHX2   | 0.44  | 3.00 | 3.10  | 1.08E-02 | 1.18E-01 | -3.05 |
| 1434337_PM_at   | Cmtm4                 | CMTM4   | -1.01 | 5.30 | -3.10 | 1.09E-02 | 1.18E-01 | -3.06 |
| 1438167_PM_x_at | Fln                   | FLCN    | -1.68 | 6.18 | -3.10 | 1.09E-02 | 1.18E-01 | -3.06 |
| 1425914_PM_a_at | Armxc1                | ARMCX1  | -0.84 | 5.08 | -3.10 | 1.09E-02 | 1.18E-01 | -3.06 |
| 1442045_PM_at   | ---                   | NA      | 0.30  | 2.22 | 3.10  | 1.09E-02 | 1.18E-01 | -3.06 |
| 1417082_PM_at   | Anp32b                | ANP32B  | -0.86 | 8.07 | -3.10 | 1.09E-02 | 1.18E-01 | -3.06 |
| 1431483_PM_at   | 4930544M13Rik         | NA      | 0.28  | 2.37 | 3.10  | 1.09E-02 | 1.18E-01 | -3.06 |
| 1416945_PM_at   | Ptov1                 | PTOV1   | 0.54  | 3.51 | 3.10  | 1.09E-02 | 1.18E-01 | -3.06 |
| 1434360_PM_s_at | Ptprg                 | PTPRG   | -1.72 | 9.06 | -3.10 | 1.09E-02 | 1.18E-01 | -3.06 |
| 1416972_PM_at   | LOC100862468///Nhp2l1 | SNU13   | -0.90 | 5.07 | -3.09 | 1.09E-02 | 1.18E-01 | -3.06 |
| 1422094_PM_a_at | Zfp329                | ZNF329  | 0.97  | 6.03 | 3.09  | 1.09E-02 | 1.18E-01 | -3.06 |
| 1438292_PM_x_at | Adk                   | ADK     | -0.57 | 4.51 | -3.09 | 1.09E-02 | 1.18E-01 | -3.06 |
| 1440455_PM_at   | Camk2n1               | CAMK2N1 | -0.46 | 5.62 | -3.09 | 1.09E-02 | 1.18E-01 | -3.06 |
| 1433962_PM_at   | Trmt61a               | TRMT61A | -1.36 | 4.93 | -3.09 | 1.09E-02 | 1.18E-01 | -3.06 |
| 1460452_PM_at   | Mospd3                | MOSPD3  | 0.55  | 3.77 | 3.09  | 1.09E-02 | 1.18E-01 | -3.06 |
| 1422313_PM_a_at | Igfbp5                | IGFBP5  | 2.61  | 4.40 | 3.09  | 1.09E-02 | 1.18E-01 | -3.06 |
| 1444849_PM_at   | C76872                | NA      | 0.65  | 3.43 | 3.09  | 1.09E-02 | 1.19E-01 | -3.06 |
| 1420142_PM_s_at | Pa2g4                 | PA2G4   | -1.55 | 7.61 | -3.09 | 1.10E-02 | 1.19E-01 | -3.07 |
| 1434014_PM_at   | Atg4c                 | ATG4C   | -0.66 | 4.42 | -3.09 | 1.10E-02 | 1.19E-01 | -3.07 |
| 1449303_PM_at   | Sesn3                 | NA      | -0.62 | 5.71 | -3.09 | 1.10E-02 | 1.19E-01 | -3.07 |
| 1439076_PM_at   | Dhx29                 | DHX29   | 0.37  | 3.26 | 3.09  | 1.10E-02 | 1.19E-01 | -3.07 |
| 1457529_PM_x_at | ---                   | NA      | 0.78  | 7.68 | 3.09  | 1.10E-02 | 1.19E-01 | -3.07 |

|                   |                          |            |       |       |       |          |          |       |
|-------------------|--------------------------|------------|-------|-------|-------|----------|----------|-------|
| AFFX-MURINE_b1_at | ---                      | NA         | 0.65  | 10.59 | 3.09  | 1.10E-02 | 1.19E-01 | -3.07 |
| 1435538_PM_at     | 0610030E20Rik            | C2orf68    | -0.84 | 4.41  | -3.09 | 1.10E-02 | 1.19E-01 | -3.07 |
| 1436131_PM_at     | Siglech                  | SIGLEC6    | 0.46  | 3.00  | 3.09  | 1.10E-02 | 1.19E-01 | -3.07 |
| 1453929_PM_at     | Rnf24                    | RNF24      | 0.48  | 3.25  | 3.09  | 1.10E-02 | 1.19E-01 | -3.07 |
| 1455189_PM_at     | Trim33                   | TRIM33     | -0.62 | 2.77  | -3.09 | 1.10E-02 | 1.19E-01 | -3.07 |
| 1456972_PM_at     | C80256                   | NA         | 0.34  | 2.28  | 3.09  | 1.10E-02 | 1.19E-01 | -3.07 |
| 1428652_PM_at     | 0610010F05Rik            | KIAA1841   | -1.06 | 4.88  | -3.09 | 1.10E-02 | 1.19E-01 | -3.07 |
| 1448172_PM_at     | Mdh1                     | MDH1       | -0.68 | 7.94  | -3.09 | 1.10E-02 | 1.19E-01 | -3.07 |
| 1423925_PM_at     | Dhx16                    | DHX16      | -0.64 | 2.81  | -3.09 | 1.10E-02 | 1.19E-01 | -3.07 |
| 1458436_PM_at     | Auh                      | AUH        | -0.33 | 2.29  | -3.09 | 1.10E-02 | 1.19E-01 | -3.07 |
| 1447930_PM_at     | Baz1a                    | BAZ1A      | 0.37  | 2.54  | 3.09  | 1.10E-02 | 1.19E-01 | -3.07 |
| 1425390_PM_at     | Adat1                    | ADAT1      | 0.45  | 2.92  | 3.09  | 1.10E-02 | 1.19E-01 | -3.07 |
| 1456477_PM_at     | Ccnt1                    | CCNT1      | -0.79 | 4.75  | -3.09 | 1.10E-02 | 1.19E-01 | -3.07 |
| 1418381_PM_at     | Zfp148                   | ZNF148     | -0.71 | 3.70  | -3.09 | 1.10E-02 | 1.19E-01 | -3.07 |
| 1422740_PM_at     | Tnfrsf21                 | TNFRSF21   | -0.48 | 2.89  | -3.09 | 1.10E-02 | 1.19E-01 | -3.07 |
| 1420009_PM_at     | Wwc1                     | NA         | -1.04 | 5.80  | -3.09 | 1.10E-02 | 1.19E-01 | -3.07 |
| 1419342_PM_at     | Tram2                    | TRAM2      | 0.41  | 2.70  | 3.09  | 1.10E-02 | 1.19E-01 | -3.07 |
| 1459101_PM_at     | C78760                   | NA         | 1.49  | 3.94  | 3.09  | 1.11E-02 | 1.19E-01 | -3.07 |
| 1427955_PM_a_at   | Deb1                     | SS18L2     | -1.31 | 6.66  | -3.09 | 1.11E-02 | 1.19E-01 | -3.07 |
| 1442154_PM_at     | Zrsr2                    | ZRSR2      | -0.65 | 4.22  | -3.09 | 1.11E-02 | 1.19E-01 | -3.07 |
| 1437734_PM_at     | Ppp1r12a                 | NA         | -0.56 | 4.67  | -3.09 | 1.11E-02 | 1.19E-01 | -3.07 |
| 1428252_PM_at     | Chmp2b                   | CHMP2B     | -0.83 | 4.04  | -3.09 | 1.11E-02 | 1.19E-01 | -3.08 |
| 1436883_PM_at     | Mbtps2                   | MBTPS2     | -0.67 | 4.84  | -3.09 | 1.11E-02 | 1.19E-01 | -3.08 |
| 1417407_PM_at     | Fbxl14                   | FBXL14     | -0.82 | 6.00  | -3.09 | 1.11E-02 | 1.19E-01 | -3.08 |
| 1429124_PM_s_at   | REXO1                    | REXO1      | -0.38 | 3.67  | -3.09 | 1.11E-02 | 1.19E-01 | -3.08 |
| 1453290_PM_at     | Hmgxb4                   | HMGXB4     | 0.28  | 2.32  | 3.09  | 1.11E-02 | 1.19E-01 | -3.08 |
| 1457650_PM_x_at   | Atg4a /// Atg4a-ps       | ATG4A      | 0.51  | 2.63  | 3.08  | 1.11E-02 | 1.19E-01 | -3.08 |
| 1439974_PM_at     | Fkbp15                   | FKBP15     | 1.01  | 3.32  | 3.08  | 1.11E-02 | 1.19E-01 | -3.08 |
| 1445713_PM_at     | ---                      | NA         | -2.15 | 7.43  | -3.08 | 1.11E-02 | 1.19E-01 | -3.08 |
| 1441475_PM_at     | ---                      | NA         | 0.34  | 2.51  | 3.08  | 1.11E-02 | 1.19E-01 | -3.08 |
| 1455509_PM_at     | Nacad                    | NACAD      | 0.42  | 2.64  | 3.08  | 1.11E-02 | 1.20E-01 | -3.08 |
| 1432807_PM_at     | ---                      | NA         | 0.62  | 3.73  | 3.08  | 1.11E-02 | 1.20E-01 | -3.08 |
| 1460220_PM_a_at   | Csf1                     | CSF1       | -1.66 | 3.66  | -3.08 | 1.12E-02 | 1.20E-01 | -3.08 |
| 1422128_PM_at     | Rpl14                    | RPL14      | -1.61 | 3.37  | -3.08 | 1.12E-02 | 1.20E-01 | -3.08 |
| 1422470_PM_at     | Bnip3                    | BNIP3      | -1.10 | 5.24  | -3.08 | 1.12E-02 | 1.20E-01 | -3.08 |
| 1418602_PM_at     | Cdh15                    | CDH15      | 0.39  | 3.05  | 3.08  | 1.12E-02 | 1.20E-01 | -3.08 |
| 1446700_PM_at     | ---                      | NA         | 0.78  | 3.17  | 3.08  | 1.12E-02 | 1.20E-01 | -3.09 |
| 1436326_PM_at     | Rora                     | RORA       | 0.82  | 3.64  | 3.08  | 1.12E-02 | 1.20E-01 | -3.09 |
| 1423641_PM_s_at   | Cnot7                    | CNOT7      | -1.57 | 5.32  | -3.08 | 1.12E-02 | 1.20E-01 | -3.09 |
| 1423166_PM_at     | Cd36                     | CD36       | 0.32  | 2.72  | 3.08  | 1.12E-02 | 1.20E-01 | -3.09 |
| 1460426_PM_at     | Pde4dip                  | PDE4DIP    | 1.01  | 4.13  | 3.08  | 1.12E-02 | 1.20E-01 | -3.09 |
| 1451225_PM_at     | Ptpn11                   | PTPN11     | -1.17 | 6.27  | -3.08 | 1.12E-02 | 1.20E-01 | -3.09 |
| 1459833_PM_x_at   | Cib2                     | CIB2       | 0.27  | 2.24  | 3.08  | 1.12E-02 | 1.20E-01 | -3.09 |
| 1417847_PM_at     | Ulk2                     | ULK2       | -0.68 | 3.94  | -3.08 | 1.12E-02 | 1.20E-01 | -3.09 |
| 1460519_PM_a_at   | Mettl5                   | METTL5     | -0.42 | 2.77  | -3.08 | 1.12E-02 | 1.20E-01 | -3.09 |
| 1446214_PM_at     | D430018E03Rik            | NA         | 0.42  | 3.10  | 3.08  | 1.12E-02 | 1.20E-01 | -3.09 |
| 1436904_PM_at     | Med13                    | MED13      | 0.62  | 3.25  | 3.08  | 1.12E-02 | 1.20E-01 | -3.09 |
| 1459771_PM_x_at   | Acer3                    | ACER3      | 0.43  | 3.63  | 3.08  | 1.12E-02 | 1.20E-01 | -3.09 |
| 1418836_PM_at     | Qprt                     | ACO09086.2 | 0.25  | 2.33  | 3.08  | 1.13E-02 | 1.20E-01 | -3.09 |
| 1445947_PM_at     | ---                      | NA         | 0.33  | 2.27  | 3.08  | 1.13E-02 | 1.21E-01 | -3.09 |
| 1431419_PM_at     | LOC102641161 /// Prelid1 | NA         | 0.33  | 3.65  | 3.07  | 1.13E-02 | 1.21E-01 | -3.09 |
| 1420054_PM_s_at   | Slc35c2                  | SLC35C2    | -0.88 | 2.93  | -3.07 | 1.13E-02 | 1.21E-01 | -3.10 |
| 1450800_PM_at     | Syt8                     | SYT8       | 0.34  | 2.77  | 3.07  | 1.13E-02 | 1.21E-01 | -3.10 |
| 1459769_PM_at     | BC048609                 | TMEM262    | 0.48  | 3.24  | 3.07  | 1.13E-02 | 1.21E-01 | -3.10 |
| 1443697_PM_at     | ---                      | NA         | 0.66  | 3.86  | 3.07  | 1.13E-02 | 1.21E-01 | -3.10 |
| 1458932_PM_at     | Pex5l                    | PEX5L      | 0.64  | 2.77  | 3.07  | 1.13E-02 | 1.21E-01 | -3.10 |
| 1447894_PM_x_at   | Vps52                    | VPS52      | -0.85 | 3.69  | -3.07 | 1.13E-02 | 1.21E-01 | -3.10 |
| 1426763_PM_at     | Oaz2                     | OAZ2       | -1.03 | 8.03  | -3.07 | 1.13E-02 | 1.21E-01 | -3.10 |
| 1436387_PM_at     | Homer1                   | HOMER1     | -1.05 | 4.22  | -3.07 | 1.13E-02 | 1.21E-01 | -3.10 |
| 1450064_PM_at     | Fmn2                     | FMN2       | -0.97 | 4.10  | -3.07 | 1.13E-02 | 1.21E-01 | -3.10 |
| 1442029_PM_at     | Kcng1ot1                 | NA         | 0.91  | 6.80  | 3.07  | 1.13E-02 | 1.21E-01 | -3.10 |
| 1431307_PM_at     | Fam184a                  | FAM184A    | 1.29  | 3.24  | 3.07  | 1.13E-02 | 1.21E-01 | -3.10 |
| 1457167_PM_at     | ---                      | NA         | 0.40  | 2.33  | 3.07  | 1.13E-02 | 1.21E-01 | -3.10 |
| 1442194_PM_at     | AU018552                 | NA         | 0.40  | 2.37  | 3.07  | 1.13E-02 | 1.21E-01 | -3.10 |
| 1435167_PM_at     | Ranbp6                   | RANBP6     | -0.86 | 6.07  | -3.07 | 1.14E-02 | 1.21E-01 | -3.10 |
| 1447670_PM_at     | Psm9                     | ACO69503.2 | -0.87 | 3.02  | -3.07 | 1.14E-02 | 1.21E-01 | -3.10 |
| 1455014_PM_at     | Gm20300                  | NA         | -0.70 | 5.68  | -3.07 | 1.14E-02 | 1.21E-01 | -3.10 |
| 1422906_PM_at     | Abcg2                    | ABCG2      | -0.39 | 2.43  | -3.07 | 1.14E-02 | 1.21E-01 | -3.10 |
| 1453594_PM_at     | 4930451G09Rik            | NA         | 0.28  | 2.36  | 3.07  | 1.14E-02 | 1.21E-01 | -3.10 |
| 1452551_PM_at     | ---                      | NA         | 0.53  | 2.42  | 3.07  | 1.14E-02 | 1.21E-01 | -3.10 |
| 1419140_PM_at     | Acvr2b                   | ACVR2B     | 0.30  | 2.41  | 3.07  | 1.14E-02 | 1.21E-01 | -3.10 |
| 1441603_PM_at     | Sstr3                    | SSTR3      | -0.98 | 5.43  | -3.07 | 1.14E-02 | 1.21E-01 | -3.10 |
| 1426779_PM_x_at   | Dag1                     | DAG1       | -0.46 | 3.04  | -3.07 | 1.14E-02 | 1.21E-01 | -3.11 |
| 1422845_PM_at     | Canx                     | CANX       | -0.96 | 6.53  | -3.07 | 1.14E-02 | 1.22E-01 | -3.11 |

|                 |                     |            |       |      |       |          |          |       |
|-----------------|---------------------|------------|-------|------|-------|----------|----------|-------|
| 1456234_PM_at   | Limk1               | LIMK1      | 0.42  | 3.67 | 3.07  | 1.14E-02 | 1.22E-01 | -3.11 |
| 1449702_PM_at   | Zfand2a             | ZFAND2A    | -1.00 | 4.79 | -3.07 | 1.15E-02 | 1.22E-01 | -3.11 |
| 1452758_PM_s_at | Eif4g2              | EIF4G2     | -0.65 | 9.89 | -3.07 | 1.14E-02 | 1.22E-01 | -3.11 |
| 1417424_PM_at   | Ier3ip1             | ACO12254.2 | -0.45 | 3.43 | -3.07 | 1.15E-02 | 1.22E-01 | -3.11 |
| 1446634_PM_at   | ---                 | NA         | -0.35 | 2.54 | -3.07 | 1.14E-02 | 1.22E-01 | -3.11 |
| 1436070_PM_at   | ---                 | NA         | -0.32 | 2.47 | -3.07 | 1.15E-02 | 1.22E-01 | -3.11 |
| 1431840_PM_at   | Dennd1c             | NA         | 0.35  | 3.19 | 3.07  | 1.15E-02 | 1.22E-01 | -3.11 |
| 1434592_PM_at   | Slc16a10            | SLC16A10   | 0.40  | 2.80 | 3.07  | 1.14E-02 | 1.22E-01 | -3.11 |
| 1421267_PM_a_at | Cited2              | CITED2     | 0.49  | 3.52 | 3.07  | 1.15E-02 | 1.22E-01 | -3.11 |
| 1425335_PM_at   | Cd8a                | CD8A       | 0.52  | 3.12 | 3.07  | 1.15E-02 | 1.22E-01 | -3.11 |
| 1441715_PM_at   | ---                 | NA         | 0.57  | 2.21 | 3.07  | 1.14E-02 | 1.22E-01 | -3.11 |
| 1416932_PM_at   | Cog2                | COG2       | 0.34  | 2.47 | 3.06  | 1.15E-02 | 1.22E-01 | -3.11 |
| 1445146_PM_at   | 1700008O03Rik       | C19orf81   | 0.73  | 4.11 | 3.06  | 1.15E-02 | 1.22E-01 | -3.11 |
| 1456320_PM_at   | Fam126b             | FAM126B    | -1.17 | 6.74 | -3.06 | 1.15E-02 | 1.22E-01 | -3.11 |
| 1428637_PM_at   | Dyrk2               | NA         | -0.74 | 7.28 | -3.06 | 1.15E-02 | 1.22E-01 | -3.11 |
| 1423882_PM_at   | Rfwd3               | RFWD3      | -0.71 | 4.67 | -3.06 | 1.15E-02 | 1.22E-01 | -3.11 |
| 1417543_PM_at   | Rps6ka2             | RPS6KA2    | 0.49  | 2.85 | 3.06  | 1.15E-02 | 1.22E-01 | -3.11 |
| 1458247_PM_s_at | Dctn5               | DCTN5      | -0.61 | 5.58 | -3.06 | 1.15E-02 | 1.22E-01 | -3.11 |
| 1432399_PM_a_at | Epha1               | EPHA1      | 0.34  | 4.04 | 3.06  | 1.15E-02 | 1.22E-01 | -3.11 |
| 1418000_PM_a_at | Iitm2b              | ITM2B      | -1.68 | 7.35 | -3.06 | 1.15E-02 | 1.22E-01 | -3.12 |
| 1429010_PM_at   | Snrnp70             | SNRNP70    | 0.47  | 4.04 | 3.06  | 1.15E-02 | 1.22E-01 | -3.12 |
| 1422103_PM_a_at | Stat5b              | STAT5B     | 0.33  | 2.67 | 3.06  | 1.15E-02 | 1.22E-01 | -3.12 |
| 1457739_PM_at   | Ilf3                | ILF3       | 0.36  | 2.35 | 3.06  | 1.15E-02 | 1.22E-01 | -3.12 |
| 1458123_PM_at   | ---                 | NA         | 0.45  | 2.29 | 3.06  | 1.15E-02 | 1.22E-01 | -3.12 |
| 1453182_PM_a_at | Smpd4               | SMPD4      | 0.86  | 4.92 | 3.06  | 1.15E-02 | 1.22E-01 | -3.12 |
| 1460737_PM_at   | Igbp1               | IGBP1      | -0.56 | 3.17 | -3.06 | 1.16E-02 | 1.22E-01 | -3.12 |
| 1453934_PM_at   | ---                 | NA         | 0.32  | 2.69 | 3.06  | 1.16E-02 | 1.22E-01 | -3.12 |
| 1436438_PM_s_at | Dcaf5               | DCAF5      | -1.14 | 5.99 | -3.06 | 1.16E-02 | 1.22E-01 | -3.12 |
| 1437802_PM_x_at | Morf41l ///Morf41lb | MORF41L    | -0.56 | 8.33 | -3.06 | 1.16E-02 | 1.22E-01 | -3.12 |
| 1449941_PM_at   | ---                 | NA         | 0.33  | 2.15 | 3.06  | 1.16E-02 | 1.22E-01 | -3.12 |
| 1427471_PM_at   | Fbxl3               | FBXL3      | -1.77 | 6.44 | -3.06 | 1.16E-02 | 1.22E-01 | -3.12 |
| 1416577_PM_a_at | Gm9840 ///Rbx1      | RBX1       | 0.66  | 9.98 | 3.06  | 1.16E-02 | 1.23E-01 | -3.12 |
| 1455817_PM_x_at | Zxdb                | ZXDB       | -0.81 | 2.92 | -3.06 | 1.16E-02 | 1.23E-01 | -3.12 |
| 1455342_PM_at   | Prune2              | PRUNE2     | -0.78 | 4.09 | -3.06 | 1.16E-02 | 1.23E-01 | -3.12 |
| 1419596_PM_at   | Eda                 | EDA        | 0.39  | 3.00 | 3.06  | 1.16E-02 | 1.23E-01 | -3.12 |
| 1427448_PM_at   | Rabep1              | RABEP1     | -0.96 | 3.92 | -3.06 | 1.16E-02 | 1.23E-01 | -3.12 |
| 1419451_PM_at   | Fzr1                | FZR1       | 0.37  | 2.99 | 3.06  | 1.16E-02 | 1.23E-01 | -3.12 |
| 1435922_PM_at   | Fbxl19              | FBXL19     | 0.33  | 4.21 | 3.06  | 1.16E-02 | 1.23E-01 | -3.13 |
| 1422762_PM_at   | Kif17               | KIF17      | 0.56  | 2.92 | 3.06  | 1.17E-02 | 1.23E-01 | -3.13 |
| 1430605_PM_at   | ---                 | NA         | 0.27  | 2.47 | 3.05  | 1.17E-02 | 1.23E-01 | -3.13 |
| 1448416_PM_at   | Mgp                 | MGP        | -1.49 | 4.95 | -3.05 | 1.17E-02 | 1.23E-01 | -3.13 |
| 1454872_PM_at   | Pds5a               | PDS5A      | -0.60 | 3.32 | -3.05 | 1.17E-02 | 1.23E-01 | -3.13 |
| 1419307_PM_at   | Tnfrsf13c           | TNFRSF13C  | 0.50  | 3.53 | 3.05  | 1.17E-02 | 1.23E-01 | -3.13 |
| 1456852_PM_at   | Paip1               | NA         | 0.52  | 3.30 | 3.05  | 1.17E-02 | 1.23E-01 | -3.13 |
| 1423600_PM_a_at | Tcof1               | TCOF1      | 0.55  | 4.56 | 3.05  | 1.17E-02 | 1.23E-01 | -3.13 |
| 1450236_PM_at   | Foxo3               | FOXO3      | 0.64  | 4.40 | 3.05  | 1.17E-02 | 1.23E-01 | -3.13 |
| 1439507_PM_at   | ---                 | NA         | 0.48  | 3.05 | 3.05  | 1.17E-02 | 1.23E-01 | -3.13 |
| 1451688_PM_s_at | Cant1               | CANT1      | 0.34  | 2.51 | 3.05  | 1.17E-02 | 1.23E-01 | -3.13 |
| 1418388_PM_s_at | Mphosph8            | MPHOSPH8   | -0.76 | 5.44 | -3.05 | 1.17E-02 | 1.23E-01 | -3.13 |
| 1442600_PM_at   | ---                 | NA         | 0.30  | 2.48 | 3.05  | 1.17E-02 | 1.23E-01 | -3.13 |
| 1429959_PM_at   | ---                 | NA         | 0.44  | 3.06 | 3.05  | 1.17E-02 | 1.23E-01 | -3.13 |
| 1449618_PM_s_at | Pagr1a              | PAGR1      | 0.46  | 5.08 | 3.05  | 1.17E-02 | 1.23E-01 | -3.13 |
| 1454106_PM_a_at | Cxcl1               | CXCL1      | 0.37  | 2.35 | 3.05  | 1.17E-02 | 1.23E-01 | -3.13 |
| 1445070_PM_at   | ---                 | NA         | 0.29  | 2.36 | 3.05  | 1.17E-02 | 1.23E-01 | -3.13 |
| 1426969_PM_at   | Trim23              | TRIM23     | -0.50 | 2.73 | -3.05 | 1.17E-02 | 1.23E-01 | -3.13 |
| 1429759_PM_at   | Rps6ka6             | RPS6KA6    | -0.34 | 2.41 | -3.05 | 1.18E-02 | 1.23E-01 | -3.14 |
| 1456632_PM_at   | Bcl11a              | BCL11A     | -0.75 | 3.93 | -3.05 | 1.18E-02 | 1.24E-01 | -3.14 |
| 1437152_PM_at   | Mex3b               | MEX3B      | -0.85 | 4.02 | -3.05 | 1.18E-02 | 1.24E-01 | -3.14 |
| 1416789_PM_at   | Ildh3g              | IDH3G      | -1.39 | 6.27 | -3.05 | 1.18E-02 | 1.24E-01 | -3.14 |
| 1434823_PM_x_at | Myeov2              | COP59      | -0.63 | 9.34 | -3.05 | 1.18E-02 | 1.24E-01 | -3.14 |
| 1451220_PM_at   | Wdr20               | WDR20      | -1.22 | 3.71 | -3.05 | 1.18E-02 | 1.24E-01 | -3.14 |
| 1427521_PM_a_at | Plekhs1             | PLEKHS1    | 0.48  | 2.87 | 3.05  | 1.18E-02 | 1.24E-01 | -3.14 |
| 1452039_PM_a_at | Bap1                | BAP1       | -1.49 | 7.50 | -3.05 | 1.18E-02 | 1.24E-01 | -3.14 |
| 1440594_PM_at   | ---                 | NA         | 0.26  | 2.19 | 3.05  | 1.18E-02 | 1.24E-01 | -3.14 |
| 1423706_PM_a_at | Pgd                 | PGD        | 0.53  | 2.80 | 3.05  | 1.18E-02 | 1.24E-01 | -3.14 |
| 1443974_PM_at   | Plcl1               | PLCL1      | -0.82 | 3.30 | -3.05 | 1.19E-02 | 1.24E-01 | -3.14 |
| 1424650_PM_at   | Pdia5               | PDIA5      | 0.36  | 2.68 | 3.05  | 1.19E-02 | 1.24E-01 | -3.14 |
| 1431745_PM_a_at | Zc3h14              | ZC3H14     | -0.46 | 3.82 | -3.04 | 1.19E-02 | 1.24E-01 | -3.15 |
| 1446268_PM_at   | Cyth3               | CYTH3      | 0.67  | 3.01 | 3.04  | 1.19E-02 | 1.24E-01 | -3.15 |
| 1419217_PM_at   | Sergef              | SERGEF     | 0.29  | 2.45 | 3.04  | 1.19E-02 | 1.24E-01 | -3.15 |
| 1454217_PM_at   | 4930556N09Rik       | NA         | 0.32  | 2.57 | 3.04  | 1.19E-02 | 1.24E-01 | -3.15 |
| 1460535_PM_at   | ---                 | NA         | 0.40  | 2.19 | 3.04  | 1.19E-02 | 1.24E-01 | -3.15 |
| 1422468_PM_at   | Ppt1                | PPT1       | -0.90 | 4.04 | -3.04 | 1.19E-02 | 1.25E-01 | -3.15 |
| 1424683_PM_at   | Fam134b             | RETREG1    | -0.59 | 6.92 | -3.04 | 1.19E-02 | 1.25E-01 | -3.15 |
| 1417117_PM_at   | Cstf1               | CSTF1      | 0.22  | 2.58 | 3.04  | 1.19E-02 | 1.25E-01 | -3.15 |

|                 |                                                |            |       |      |       |          |          |       |
|-----------------|------------------------------------------------|------------|-------|------|-------|----------|----------|-------|
| 1449626_PM_s_at | Acbd4                                          | ACBD4      | 0.64  | 3.93 | 3.04  | 1.19E-02 | 1.25E-01 | -3.15 |
| 1454642_PM_a_at | CommD3                                         | COMMMD3    | -1.52 | 4.35 | -3.04 | 1.19E-02 | 1.25E-01 | -3.15 |
| 1416156_PM_at   | Vcl                                            | VCL        | -1.24 | 3.59 | -3.04 | 1.19E-02 | 1.25E-01 | -3.15 |
| 1433332_PM_at   | C030004M13Rik                                  | NA         | -1.02 | 2.92 | -3.04 | 1.19E-02 | 1.25E-01 | -3.15 |
| 1424714_PM_at   | Aldoc                                          | ALDOC      | -0.92 | 5.58 | -3.04 | 1.19E-02 | 1.25E-01 | -3.15 |
| 1451308_PM_at   | Elov14                                         | ELOVL4     | -0.89 | 3.28 | -3.04 | 1.19E-02 | 1.25E-01 | -3.15 |
| 1429096_PM_at   | ---                                            | NA         | -0.76 | 3.41 | -3.04 | 1.19E-02 | 1.25E-01 | -3.15 |
| 1422298_PM_at   | Krtap28-13                                     | NA         | 0.28  | 2.53 | 3.04  | 1.19E-02 | 1.25E-01 | -3.15 |
| 1436466_PM_at   | Khyn                                           | NA         | 0.29  | 2.34 | 3.04  | 1.19E-02 | 1.25E-01 | -3.15 |
| 1434334_PM_at   | Prkd2                                          | PRKD2      | 0.48  | 2.85 | 3.04  | 1.19E-02 | 1.25E-01 | -3.15 |
| 1430640_PM_a_at | Prkar2b                                        | PRKAR2B    | 0.60  | 3.39 | 3.04  | 1.19E-02 | 1.25E-01 | -3.15 |
| 1448938_PM_at   | Rpa3                                           | RPA3       | -0.57 | 2.80 | -3.04 | 1.19E-02 | 1.25E-01 | -3.15 |
| 1430561_PM_at   | Dnajb14                                        | DNAJB14    | -0.83 | 3.39 | -3.04 | 1.20E-02 | 1.25E-01 | -3.15 |
| 1454734_PM_at   | Lef1                                           | LEF1       | 0.56  | 3.21 | 3.04  | 1.20E-02 | 1.25E-01 | -3.15 |
| 1416555_PM_at   | Ei24                                           | EI24       | -1.34 | 5.54 | -3.04 | 1.20E-02 | 1.25E-01 | -3.15 |
| 1418690_PM_at   | Ptprz1                                         | PTPRZ1     | -1.00 | 4.71 | -3.04 | 1.20E-02 | 1.25E-01 | -3.15 |
| 1450456_PM_at   | Il21r                                          | IL21R      | 0.43  | 2.81 | 3.04  | 1.20E-02 | 1.25E-01 | -3.15 |
| 1418784_PM_at   | Grik5                                          | GRIK5      | -0.38 | 2.62 | -3.04 | 1.20E-02 | 1.25E-01 | -3.16 |
| 1420117_PM_at   | ---                                            | NA         | -0.95 | 5.03 | -3.04 | 1.20E-02 | 1.25E-01 | -3.16 |
| 1417491_PM_at   | Ctsb                                           | CTSB       | -0.74 | 2.96 | -3.04 | 1.20E-02 | 1.25E-01 | -3.16 |
| 1450655_PM_at   | Pten                                           | PTEN       | -0.63 | 3.77 | -3.04 | 1.20E-02 | 1.25E-01 | -3.16 |
| 1436031_PM_at   | Cachd1                                         | CACHD1     | -0.50 | 4.39 | -3.04 | 1.20E-02 | 1.25E-01 | -3.16 |
| 1439088_PM_at   | ---                                            | NA         | -0.47 | 3.01 | -3.04 | 1.20E-02 | 1.25E-01 | -3.16 |
| 1437003_PM_at   | ---                                            | NA         | -0.79 | 3.16 | -3.04 | 1.20E-02 | 1.25E-01 | -3.16 |
| 1435706_PM_at   | Btbd9                                          | BTBD9      | -0.45 | 2.79 | -3.04 | 1.20E-02 | 1.25E-01 | -3.16 |
| 1419181_PM_at   | Zfp326                                         | ZNF326     | -0.64 | 4.07 | -3.04 | 1.20E-02 | 1.25E-01 | -3.16 |
| 1434688_PM_x_at | Drg1                                           | DRG1       | -1.45 | 6.08 | -3.04 | 1.20E-02 | 1.25E-01 | -3.16 |
| 1426710_PM_at   | Calm3                                          | CALM3      | -0.84 | 4.65 | -3.04 | 1.20E-02 | 1.25E-01 | -3.16 |
| 1436290_PM_at   | ---                                            | NA         | 0.37  | 2.96 | 3.04  | 1.20E-02 | 1.25E-01 | -3.16 |
| 1429414_PM_at   | D7Erd443e                                      | C10orf90   | 0.40  | 3.41 | 3.04  | 1.20E-02 | 1.25E-01 | -3.16 |
| 1419374_PM_at   | Wbp4                                           | WBP4       | 0.51  | 3.97 | 3.04  | 1.20E-02 | 1.25E-01 | -3.16 |
| 1426630_PM_at   | Exosc2                                         | EXOSC2     | 0.41  | 2.40 | 3.04  | 1.20E-02 | 1.25E-01 | -3.16 |
| 1419063_PM_at   | Ugt8a                                          | UGT8       | -0.58 | 3.03 | -3.04 | 1.21E-02 | 1.25E-01 | -3.16 |
| 1457672_PM_at   | Chd9                                           | CHD9       | -1.19 | 7.04 | -3.04 | 1.21E-02 | 1.25E-01 | -3.16 |
| 1429052_PM_at   | Ptprd                                          | PTPRD      | -0.89 | 7.02 | -3.04 | 1.21E-02 | 1.25E-01 | -3.16 |
| 1447538_PM_at   | ---                                            | NA         | 0.46  | 4.97 | 3.04  | 1.21E-02 | 1.25E-01 | -3.16 |
| 1448600_PM_s_at | Vav3                                           | VAV3       | -0.92 | 3.37 | -3.03 | 1.21E-02 | 1.25E-01 | -3.16 |
| 1442504_PM_at   | ---                                            | NA         | 0.33  | 2.37 | 3.03  | 1.21E-02 | 1.25E-01 | -3.16 |
| 1445272_PM_at   | ---                                            | NA         | -0.59 | 3.25 | -3.03 | 1.21E-02 | 1.25E-01 | -3.16 |
| 1457319_PM_at   | ---                                            | NA         | 0.38  | 2.90 | 3.03  | 1.21E-02 | 1.25E-01 | -3.16 |
| 1436327_PM_a_at | Vps53                                          | VPS53      | -0.72 | 5.57 | -3.03 | 1.21E-02 | 1.25E-01 | -3.16 |
| 1429034_PM_at   | Eme2                                           | MAPK8IP3   | 0.45  | 3.69 | 3.03  | 1.21E-02 | 1.25E-01 | -3.17 |
| 1432593_PM_at   | Kif1bp                                         | KIF1BP     | 0.54  | 2.81 | 3.03  | 1.21E-02 | 1.25E-01 | -3.17 |
| 1433802_PM_at   | Tmem151a                                       | TMEM151A   | -1.09 | 4.19 | -3.03 | 1.21E-02 | 1.26E-01 | -3.17 |
| 1452199_PM_at   | Tmem209                                        | TMEM209    | -0.52 | 3.17 | -3.03 | 1.21E-02 | 1.26E-01 | -3.17 |
| 1450500_PM_at   | Uhmk1                                          | UHMK1      | -1.01 | 6.27 | -3.03 | 1.21E-02 | 1.26E-01 | -3.17 |
| 1441102_PM_at   | Prlr                                           | PRLR       | -0.63 | 2.47 | -3.03 | 1.22E-02 | 1.26E-01 | -3.17 |
| 1438701_PM_at   | Bicd1                                          | BICD1      | -0.53 | 3.95 | -3.03 | 1.22E-02 | 1.26E-01 | -3.17 |
| 1437515_PM_at   | Gm7040///Prl2c2///Prl2c3<br>///Prl2c4///Prl2c5 | PRL        | -0.73 | 2.67 | -3.03 | 1.22E-02 | 1.26E-01 | -3.17 |
| 1426184_PM_a_at | Pdc61p                                         | PD6D61P    | -0.47 | 2.51 | -3.03 | 1.22E-02 | 1.26E-01 | -3.17 |
| 1426311_PM_s_at | Zdhc5                                          | ZDHHC5     | -0.70 | 3.34 | -3.03 | 1.22E-02 | 1.26E-01 | -3.17 |
| 1459593_PM_x_at | Ppp1r13l                                       | PPP1R13L   | 0.28  | 2.43 | 3.03  | 1.22E-02 | 1.26E-01 | -3.17 |
| 1421381_PM_a_at | Col9a1                                         | COL9A1     | 0.31  | 2.35 | 3.03  | 1.22E-02 | 1.26E-01 | -3.17 |
| 1457743_PM_at   | Rgs7bp                                         | NA         | -0.73 | 5.57 | -3.03 | 1.22E-02 | 1.26E-01 | -3.17 |
| 1442408_PM_at   | Sulf2                                          | SULF2      | -0.70 | 3.89 | -3.03 | 1.22E-02 | 1.26E-01 | -3.17 |
| 1452152_PM_at   | Clint1                                         | CLINT1     | -1.24 | 5.71 | -3.03 | 1.22E-02 | 1.26E-01 | -3.17 |
| 1420725_PM_at   | Tmlhe                                          | TMLHE      | -0.69 | 4.32 | -3.03 | 1.22E-02 | 1.26E-01 | -3.17 |
| AFFX-DapX-5_at  | ---                                            | NA         | 0.23  | 2.18 | 3.03  | 1.22E-02 | 1.26E-01 | -3.17 |
| 1442178_PM_at   | ---                                            | NA         | 0.26  | 2.37 | 3.03  | 1.22E-02 | 1.26E-01 | -3.18 |
| 1448709_PM_at   | Arid1a                                         | ARID1A     | -0.87 | 3.58 | -3.03 | 1.23E-02 | 1.26E-01 | -3.18 |
| 1437936_PM_at   | Ccdc160                                        | CCDC160    | -0.45 | 2.52 | -3.03 | 1.23E-02 | 1.26E-01 | -3.18 |
| 1454585_PM_at   | Enho                                           | NA         | 0.35  | 3.13 | 3.03  | 1.23E-02 | 1.26E-01 | -3.18 |
| 1415970_PM_at   | Cox6c                                          | COX6C      | -1.27 | 8.80 | -3.03 | 1.23E-02 | 1.26E-01 | -3.18 |
| 1443188_PM_at   | Ube2w                                          | AC022826.2 | 0.42  | 3.64 | 3.03  | 1.23E-02 | 1.26E-01 | -3.18 |
| 1460026_PM_s_at | Zfyve27                                        | ZFYVE27    | 1.07  | 7.21 | 3.03  | 1.23E-02 | 1.26E-01 | -3.18 |
| 1455507_PM_s_at | Atxn1l                                         | ATXN1L     | -1.26 | 4.07 | -3.02 | 1.23E-02 | 1.26E-01 | -3.18 |
| 1438385_PM_s_at | Gpt2                                           | GPT2       | -1.13 | 5.58 | -3.03 | 1.23E-02 | 1.26E-01 | -3.18 |
| 1454901_PM_at   | Ypel2                                          | YPEL2      | -0.72 | 3.36 | -3.02 | 1.23E-02 | 1.26E-01 | -3.18 |
| 1455092_PM_at   | Zfp207                                         | ZNF207     | -0.71 | 7.68 | -3.02 | 1.23E-02 | 1.26E-01 | -3.18 |
| 1419023_PM_x_at | Eno1                                           | ENO1       | -0.68 | 5.08 | -3.02 | 1.23E-02 | 1.26E-01 | -3.18 |
| 1441443_PM_at   | ---                                            | NA         | 0.26  | 2.72 | 3.02  | 1.23E-02 | 1.26E-01 | -3.18 |
| 1441372_PM_at   | ---                                            | NA         | 0.33  | 2.62 | 3.02  | 1.23E-02 | 1.26E-01 | -3.18 |
| 1432112_PM_at   | 4930589L23Rik                                  | NA         | 0.42  | 2.17 | 3.02  | 1.23E-02 | 1.26E-01 | -3.18 |

|                 |                                |           |       |       |       |          |          |       |
|-----------------|--------------------------------|-----------|-------|-------|-------|----------|----------|-------|
| 1424742_PM_at   | Creb3                          | CREB3     | 0.51  | 3.03  | 3.02  | 1.23E-02 | 1.26E-01 | -3.18 |
| 1454616_PM_at   | Ubr7                           | UBR7      | -0.65 | 3.76  | -3.02 | 1.23E-02 | 1.27E-01 | -3.18 |
| 1436998_PM_at   | Sowaha                         | SOWAHA    | -1.59 | 6.81  | -3.02 | 1.23E-02 | 1.27E-01 | -3.18 |
| 1419175_PM_a_at | Btn1a1                         | BTN1A1    | 0.35  | 2.74  | 3.02  | 1.23E-02 | 1.27E-01 | -3.18 |
| 1420782_PM_at   | Tnfrsf17                       | TNFRSF17  | 0.27  | 2.12  | 3.02  | 1.24E-02 | 1.27E-01 | -3.18 |
| 1430020_PM_x_at | Gm10052 /// Gm5803 /// Hnrnpa1 | HNRNPA1   | 0.50  | 8.52  | 3.02  | 1.24E-02 | 1.27E-01 | -3.19 |
| 1438092_PM_x_at | H2afz                          | H2AFZ     | -1.08 | 7.35  | -3.02 | 1.24E-02 | 1.27E-01 | -3.19 |
| 1435887_PM_at   | Serpina11                      | SERPINA11 | 0.32  | 2.58  | 3.02  | 1.24E-02 | 1.27E-01 | -3.19 |
| 1441125_PM_at   | Setd5                          | SETD5     | 0.43  | 2.48  | 3.02  | 1.24E-02 | 1.27E-01 | -3.19 |
| 1456493_PM_at   | Sp110                          | SP110     | -0.31 | 2.61  | -3.02 | 1.24E-02 | 1.27E-01 | -3.19 |
| 1416842_PM_at   | Gstm5                          | GSTM3     | -0.95 | 4.72  | -3.02 | 1.24E-02 | 1.28E-01 | -3.19 |
| 1430542_PM_a_at | Slc25a5                        | SLC25A5   | -0.67 | 5.85  | -3.02 | 1.24E-02 | 1.28E-01 | -3.19 |
| 1441040_PM_at   | Klf12                          | NA        | -0.24 | 2.18  | -3.02 | 1.24E-02 | 1.28E-01 | -3.19 |
| 1439027_PM_at   | Naa25                          | NAA25     | -1.01 | 4.10  | -3.02 | 1.25E-02 | 1.28E-01 | -3.19 |
| 1419720_PM_at   | Gp9                            | GP9       | 0.35  | 2.46  | 3.02  | 1.25E-02 | 1.28E-01 | -3.19 |
| 1457183_PM_at   | Slc6a1                         | SLC6A1    | 0.39  | 2.60  | 3.02  | 1.25E-02 | 1.28E-01 | -3.19 |
| 1420395_PM_a_at | Kif9                           | KIF9      | 0.63  | 2.89  | 3.02  | 1.25E-02 | 1.28E-01 | -3.19 |
| 1451640_PM_a_at | Rsrc2                          | RSRC2     | 0.85  | 7.52  | 3.02  | 1.25E-02 | 1.28E-01 | -3.19 |
| 1441595_PM_at   | ---                            | NA        | -0.38 | 2.37  | -3.02 | 1.25E-02 | 1.28E-01 | -3.19 |
| 1458685_PM_at   | Ralgapa1                       | RALGAP1   | 0.63  | 3.29  | 3.02  | 1.25E-02 | 1.28E-01 | -3.19 |
| 1429314_PM_at   | Syt11                          | SYT11     | -1.17 | 8.49  | -3.02 | 1.25E-02 | 1.28E-01 | -3.20 |
| 1448993_PM_at   | Atg3                           | ATG3      | -1.05 | 5.41  | -3.02 | 1.25E-02 | 1.28E-01 | -3.20 |
| 1438207_PM_at   | Gbf1                           | GBF1      | -0.75 | 2.92  | -3.02 | 1.25E-02 | 1.28E-01 | -3.20 |
| 1442572_PM_at   | ---                            | NA        | 0.46  | 2.84  | 3.01  | 1.25E-02 | 1.28E-01 | -3.20 |
| 1427724_PM_at   | Top2a                          | NA        | 0.29  | 2.58  | 3.01  | 1.25E-02 | 1.28E-01 | -3.20 |
| 1450266_PM_at   | Scn10a                         | SCN10A    | 0.48  | 2.86  | 3.01  | 1.25E-02 | 1.28E-01 | -3.20 |
| 1445837_PM_at   | ---                            | NA        | 0.85  | 3.87  | 3.01  | 1.25E-02 | 1.28E-01 | -3.20 |
| 1438540_PM_at   | Col25a1                        | COL25A1   | -0.97 | 6.21  | -3.01 | 1.25E-02 | 1.28E-01 | -3.20 |
| 1458775_PM_at   | ---                            | NA        | 0.33  | 2.51  | 3.01  | 1.25E-02 | 1.28E-01 | -3.20 |
| 1420747_PM_at   | Ppnr                           | NA        | 0.35  | 2.77  | 3.01  | 1.25E-02 | 1.28E-01 | -3.20 |
| 1423378_PM_at   | Adam23                         | ADAM23    | -0.98 | 3.76  | -3.01 | 1.26E-02 | 1.28E-01 | -3.20 |
| 1458390_PM_at   | ---                            | NA        | 0.36  | 3.03  | 3.01  | 1.26E-02 | 1.28E-01 | -3.20 |
| 1439208_PM_at   | Chek1                          | CHEK1     | 0.44  | 2.32  | 3.01  | 1.26E-02 | 1.28E-01 | -3.20 |
| 1446320_PM_at   | Chmp4c                         | CHMP4C    | 0.38  | 2.53  | 3.01  | 1.26E-02 | 1.28E-01 | -3.20 |
| 1424768_PM_at   | Cald1                          | CALD1     | -1.45 | 5.01  | -3.01 | 1.26E-02 | 1.28E-01 | -3.20 |
| 1453682_PM_at   | Gm16740                        | NA        | -0.52 | 2.94  | -3.01 | 1.26E-02 | 1.28E-01 | -3.20 |
| 1444457_PM_at   | ---                            | NA        | 0.44  | 2.66  | 3.01  | 1.26E-02 | 1.28E-01 | -3.20 |
| 1423956_PM_at   | Smap1                          | SMAP1     | -1.02 | 6.67  | -3.01 | 1.26E-02 | 1.28E-01 | -3.20 |
| 1447904_PM_s_at | Fnta                           | FNTA      | -1.30 | 7.21  | -3.01 | 1.26E-02 | 1.28E-01 | -3.20 |
| 1454536_PM_at   | Tmem30c                        | NA        | 0.25  | 2.30  | 3.01  | 1.26E-02 | 1.28E-01 | -3.20 |
| 1443674_PM_at   | ---                            | NA        | 0.28  | 2.15  | 3.01  | 1.26E-02 | 1.28E-01 | -3.20 |
| 1419975_PM_at   | Scp2                           | NA        | -0.68 | 4.77  | -3.01 | 1.26E-02 | 1.29E-01 | -3.21 |
| 1435092_PM_at   | Arl4a                          | ARL4A     | -0.85 | 6.86  | -3.01 | 1.26E-02 | 1.29E-01 | -3.21 |
| 1452700_PM_s_at | Kbtbd7                         | KBTBD6    | -1.11 | 5.71  | -3.01 | 1.26E-02 | 1.29E-01 | -3.21 |
| 1452747_PM_at   | Atp13a2                        | ATP13A2   | 0.29  | 2.84  | 3.01  | 1.26E-02 | 1.29E-01 | -3.21 |
| 1430442_PM_at   | Nos1ap                         | NOS1AP    | 0.67  | 3.74  | 3.01  | 1.27E-02 | 1.29E-01 | -3.21 |
| 1434731_PM_x_at | Prdx1                          | PRDX1     | -1.05 | 7.12  | -3.01 | 1.27E-02 | 1.29E-01 | -3.21 |
| 1436248_PM_at   | Rasal2                         | RASAL2    | -0.87 | 4.74  | -3.01 | 1.27E-02 | 1.29E-01 | -3.21 |
| 1415705_PM_at   | Smim7                          | SMIM7     | -0.86 | 3.56  | -3.01 | 1.27E-02 | 1.29E-01 | -3.21 |
| 1444992_PM_at   | Al120166                       | NA        | 0.28  | 2.81  | 3.01  | 1.27E-02 | 1.29E-01 | -3.21 |
| 1436626_PM_at   | Tspan11                        | TSPAN11   | 0.36  | 2.45  | 3.01  | 1.27E-02 | 1.29E-01 | -3.21 |
| 1433510_PM_x_at | Gm4604 /// Rpl36 /// Rpl36-ps2 | RPL36     | 0.49  | 8.93  | 3.01  | 1.27E-02 | 1.29E-01 | -3.21 |
| 1426125_PM_a_at | Casp9                          | CASP9     | 0.37  | 2.62  | 3.00  | 1.27E-02 | 1.29E-01 | -3.21 |
| 1456415_PM_at   | Zfp451                         | ZNF451    | -0.74 | 3.97  | -3.00 | 1.28E-02 | 1.29E-01 | -3.22 |
| 1420998_PM_at   | Etv5                           | ETV5      | 0.37  | 2.53  | 3.00  | 1.28E-02 | 1.29E-01 | -3.22 |
| 1417753_PM_at   | Pkd2                           | PKD2      | -1.11 | 4.18  | -3.00 | 1.28E-02 | 1.29E-01 | -3.22 |
| 1435582_PM_at   | Wdfy4                          | WDFY4     | 0.32  | 2.66  | 3.00  | 1.28E-02 | 1.29E-01 | -3.22 |
| 1424634_PM_at   | Tceal1                         | TCEAL1    | -0.62 | 4.32  | -3.00 | 1.28E-02 | 1.30E-01 | -3.22 |
| 1416184_PM_s_at | Hmga1 /// Hmga1-rs1            | HMG1      | 0.78  | 4.01  | 3.00  | 1.28E-02 | 1.30E-01 | -3.22 |
| 1449876_PM_at   | Prkg1                          | PRKG1     | -0.90 | 3.66  | -3.00 | 1.28E-02 | 1.30E-01 | -3.22 |
| 1435793_PM_at   | Aph1b                          | APH1B     | -0.76 | 4.76  | -3.00 | 1.28E-02 | 1.30E-01 | -3.22 |
| 1440516_PM_at   | Slitrk4                        | SLITRK4   | -0.61 | 3.67  | -3.00 | 1.28E-02 | 1.30E-01 | -3.22 |
| 1431674_PM_at   | ---                            | NA        | 0.30  | 3.10  | 3.00  | 1.28E-02 | 1.30E-01 | -3.22 |
| 1460469_PM_at   | Tnfrsf9                        | TNFRSF9   | 0.31  | 2.78  | 3.00  | 1.28E-02 | 1.30E-01 | -3.22 |
| 1428756_PM_at   | Aasdhppt                       | AASDHPPT  | -0.53 | 3.04  | -3.00 | 1.28E-02 | 1.30E-01 | -3.22 |
| 1421754_PM_at   | AY036118                       | NA        | 0.94  | 10.66 | 3.00  | 1.28E-02 | 1.30E-01 | -3.22 |
| 1435849_PM_at   | Jakmp3                         | NA        | -1.30 | 4.39  | -3.00 | 1.28E-02 | 1.30E-01 | -3.22 |
| 1434533_PM_x_at | Ceacam11                       | CEACAM3   | 0.25  | 2.36  | 3.00  | 1.28E-02 | 1.30E-01 | -3.22 |
| 1458948_PM_at   | D630013N20Rik /// Phyhipl      | PHYHIP1L  | 0.27  | 2.34  | 3.00  | 1.28E-02 | 1.30E-01 | -3.22 |
| 1457053_PM_at   | ---                            | NA        | 0.53  | 3.06  | 3.00  | 1.28E-02 | 1.30E-01 | -3.22 |
| 1452221_PM_a_at | Cxhc1                          | CXHC1     | 0.84  | 5.11  | 3.00  | 1.28E-02 | 1.30E-01 | -3.22 |
| 1424597_PM_at   | Wash1                          | WASHC1    | -0.36 | 3.01  | -3.00 | 1.29E-02 | 1.30E-01 | -3.22 |

|                 |                                    |            |       |       |       |          |          |       |
|-----------------|------------------------------------|------------|-------|-------|-------|----------|----------|-------|
| 1425555_PM_at   | Cdk12                              | CDK12      | 0.35  | 2.87  | 3.00  | 1.29E-02 | 1.30E-01 | -3.22 |
| 1436884_PM_x_at | Ewrs1                              | EWSR1      | 0.42  | 9.77  | 3.00  | 1.29E-02 | 1.30E-01 | -3.22 |
| 1432676_PM_at   | ---                                | NA         | 0.44  | 2.60  | 3.00  | 1.29E-02 | 1.30E-01 | -3.22 |
| 1420444_PM_at   | Slc22a3                            | SLC22A3    | 0.40  | 2.70  | 3.00  | 1.29E-02 | 1.30E-01 | -3.22 |
| 1428808_PM_at   | Prickle2                           | PRICKLE2   | -1.20 | 8.31  | -3.00 | 1.29E-02 | 1.30E-01 | -3.23 |
| 1418922_PM_at   | Cadm3                              | CADM3      | -1.31 | 8.74  | -3.00 | 1.29E-02 | 1.30E-01 | -3.23 |
| 1434369_PM_a_at | Cryab                              | CRYAB      | -1.62 | 5.92  | -3.00 | 1.29E-02 | 1.30E-01 | -3.23 |
| 1423406_PM_at   | Sv2a                               | SV2A       | -1.15 | 5.75  | -3.00 | 1.29E-02 | 1.30E-01 | -3.23 |
| 1458244_PM_at   | ---                                | NA         | -0.78 | 2.33  | -3.00 | 1.29E-02 | 1.30E-01 | -3.23 |
| 1427057_PM_at   | Nt5dc3                             | NT5DC3     | -0.34 | 3.62  | -3.00 | 1.29E-02 | 1.30E-01 | -3.23 |
| 1459508_PM_at   | ---                                | NA         | -0.32 | 2.11  | -3.00 | 1.29E-02 | 1.30E-01 | -3.23 |
| 1418257_PM_at   | Slc12a7                            | SLC12A7    | 0.27  | 2.31  | 3.00  | 1.29E-02 | 1.30E-01 | -3.23 |
| 1458672_PM_at   | Gm16049                            | NA         | 0.29  | 2.51  | 3.00  | 1.29E-02 | 1.30E-01 | -3.23 |
| 1430714_PM_at   | Lrrc74b                            | LRRC74B    | 0.31  | 4.86  | 3.00  | 1.29E-02 | 1.30E-01 | -3.23 |
| 1421405_PM_at   | Zim1                               | ZNF485     | 0.37  | 2.68  | 3.00  | 1.29E-02 | 1.30E-01 | -3.23 |
| 1445097_PM_at   | ---                                | NA         | 0.49  | 3.06  | 3.00  | 1.29E-02 | 1.30E-01 | -3.23 |
| 1450100_PM_a_at | Tcerg1                             | TCERG1     | 0.54  | 4.74  | 3.00  | 1.29E-02 | 1.30E-01 | -3.23 |
| 1449180_PM_at   | Kcmf1                              | KCMF1      | 0.54  | 3.22  | 3.00  | 1.29E-02 | 1.30E-01 | -3.23 |
| 1422085_PM_at   | Tbx19                              | TBX19      | 0.34  | 2.59  | 3.00  | 1.30E-02 | 1.30E-01 | -3.23 |
| 1451806_PM_at   | Frbp1                              | FRBP1      | 1.41  | 4.84  | 2.99  | 1.30E-02 | 1.31E-01 | -3.23 |
| 1424324_PM_at   | Escr1                              | ESCO1      | -0.94 | 3.57  | -2.99 | 1.30E-02 | 1.31E-01 | -3.23 |
| 1439745_PM_at   | Cacng7                             | CACNG7     | 0.50  | 2.49  | 2.99  | 1.30E-02 | 1.31E-01 | -3.23 |
| 1446501_PM_at   | Bhlha9                             | BHLHA9     | -0.63 | 2.50  | -2.99 | 1.30E-02 | 1.31E-01 | -3.23 |
| 1443955_PM_at   | 1700094D03Rik ///<br>4933434E20Rik | C1orf43    | 0.30  | 3.06  | 2.99  | 1.30E-02 | 1.31E-01 | -3.23 |
| 1448403_PM_at   | Lars                               | LARS       | -0.69 | 4.51  | -2.99 | 1.30E-02 | 1.31E-01 | -3.23 |
| 1458182_PM_at   | Rbm18                              | RBM18      | 0.31  | 2.48  | 2.99  | 1.30E-02 | 1.31E-01 | -3.23 |
| 1447000_PM_at   | LOC102640451                       | NA         | 0.60  | 3.45  | 2.99  | 1.30E-02 | 1.31E-01 | -3.23 |
| 1437039_PM_at   | Cops2                              | COPS2      | -0.79 | 4.88  | -2.99 | 1.30E-02 | 1.31E-01 | -3.24 |
| 1455944_PM_at   | Zfp516                             | ZNF516     | 0.35  | 2.31  | 2.99  | 1.30E-02 | 1.31E-01 | -3.24 |
| 1438221_PM_at   | Fam126b                            | FAM126B    | -0.74 | 6.19  | -2.99 | 1.30E-02 | 1.31E-01 | -3.24 |
| 1418948_PM_at   | Fscn3                              | FSCN3      | 0.25  | 2.53  | 2.99  | 1.31E-02 | 1.31E-01 | -3.24 |
| 1426616_PM_at   | Tlcd1                              | TLCD1      | 0.31  | 2.59  | 2.99  | 1.31E-02 | 1.31E-01 | -3.24 |
| 1449241_PM_at   | Khl1                               | KLHL1      | 0.34  | 3.31  | 2.99  | 1.31E-02 | 1.31E-01 | -3.24 |
| 1433972_PM_at   | Camta1                             | CAMTA1     | -1.33 | 4.81  | -2.99 | 1.31E-02 | 1.31E-01 | -3.24 |
| 1451090_PM_a_at | Eif2s3x                            | EIF2S3     | -1.18 | 6.66  | -2.99 | 1.31E-02 | 1.31E-01 | -3.24 |
| 1453954_PM_a_at | Mrp5                               | MRP5       | 1.44  | 5.13  | 2.99  | 1.31E-02 | 1.31E-01 | -3.24 |
| 1421951_PM_at   | Lhx1                               | LHX1       | 0.26  | 2.40  | 2.99  | 1.31E-02 | 1.31E-01 | -3.24 |
| 1439328_PM_at   | ---                                | NA         | 0.43  | 2.94  | 2.99  | 1.31E-02 | 1.31E-01 | -3.24 |
| 1445436_PM_at   | ---                                | NA         | 0.52  | 2.88  | 2.99  | 1.31E-02 | 1.31E-01 | -3.24 |
| 1435075_PM_at   | Tmem106b                           | TMEM106B   | -0.99 | 4.31  | -2.99 | 1.31E-02 | 1.31E-01 | -3.24 |
| 1445457_PM_at   | Il2ra1                             | NA         | 0.27  | 3.32  | 2.99  | 1.31E-02 | 1.31E-01 | -3.24 |
| 1452662_PM_a_at | Eif2s1                             | EIF2S1     | -1.11 | 4.85  | -2.99 | 1.31E-02 | 1.32E-01 | -3.24 |
| 1456709_PM_at   | Ophn1                              | OPHN1      | -0.30 | 2.23  | -2.99 | 1.31E-02 | 1.32E-01 | -3.24 |
| 1420605_PM_at   | Mtag2                              | NA         | 0.34  | 2.51  | 2.99  | 1.31E-02 | 1.32E-01 | -3.24 |
| 1432514_PM_at   | Fam219aos                          | NA         | 0.60  | 3.94  | 2.99  | 1.31E-02 | 1.32E-01 | -3.24 |
| 1455160_PM_at   | 3110039I08Rik                      | NA         | -0.50 | 2.66  | -2.99 | 1.32E-02 | 1.32E-01 | -3.25 |
| 1456286_PM_at   | ---                                | NA         | 0.34  | 2.65  | 2.99  | 1.32E-02 | 1.32E-01 | -3.25 |
| 1456204_PM_at   | Smin4                              | SMIN4      | -1.52 | 6.13  | -2.98 | 1.32E-02 | 1.32E-01 | -3.25 |
| 1418297_PM_at   | Dpysl4                             | DPYSL4     | 0.27  | 2.74  | 2.98  | 1.32E-02 | 1.32E-01 | -3.25 |
| 1425903_PM_at   | Sema6a                             | SEMA6A     | 0.61  | 2.64  | 2.98  | 1.32E-02 | 1.32E-01 | -3.25 |
| 1434052_PM_at   | A1593442                           | C11orf87   | -1.32 | 3.42  | -2.98 | 1.32E-02 | 1.32E-01 | -3.25 |
| 1433788_PM_at   | Nrxn3                              | NRXN3      | -0.86 | 7.22  | -2.98 | 1.32E-02 | 1.32E-01 | -3.25 |
| 1443062_PM_at   | Auts2                              | NA         | 1.08  | 3.39  | 2.98  | 1.32E-02 | 1.32E-01 | -3.25 |
| 1421629_PM_at   | Gabre                              | GABRE      | 0.33  | 2.49  | 2.98  | 1.32E-02 | 1.32E-01 | -3.25 |
| 1445125_PM_at   | D8Erd107e                          | NA         | 0.37  | 3.50  | 2.98  | 1.32E-02 | 1.32E-01 | -3.25 |
| 1426359_PM_at   | Zbed6 /// Zc3h11a                  | ZC3H11B    | 0.61  | 3.09  | 2.98  | 1.32E-02 | 1.32E-01 | -3.25 |
| 1434427_PM_a_at | Rnf157                             | RNF157     | -0.48 | 10.77 | -2.98 | 1.32E-02 | 1.32E-01 | -3.25 |
| 1441332_PM_at   | ---                                | NA         | 0.23  | 2.32  | 2.98  | 1.32E-02 | 1.32E-01 | -3.25 |
| 1454210_PM_at   | 4933428M09Rik                      | NA         | 0.21  | 2.65  | 2.98  | 1.33E-02 | 1.32E-01 | -3.25 |
| 1455594_PM_at   | Exoc3                              | EXOC3      | -1.38 | 5.06  | -2.98 | 1.33E-02 | 1.32E-01 | -3.26 |
| 1424431_PM_at   | Csgalnact2                         | CSGALNACT2 | -0.63 | 2.90  | -2.98 | 1.33E-02 | 1.32E-01 | -3.25 |
| 1421074_PM_at   | Cyp7b1                             | CYP7B1     | -0.57 | 2.61  | -2.98 | 1.33E-02 | 1.32E-01 | -3.25 |
| 1422501_PM_s_at | Idh3a                              | IDH3A      | -0.36 | 3.31  | -2.98 | 1.33E-02 | 1.32E-01 | -3.25 |
| 1444679_PM_at   | ---                                | NA         | 0.41  | 4.19  | 2.98  | 1.33E-02 | 1.32E-01 | -3.26 |
| 1422272_PM_at   | Phxr4                              | NA         | 0.59  | 2.74  | 2.98  | 1.33E-02 | 1.32E-01 | -3.25 |
| 1434751_PM_at   | Ids                                | IDS        | -1.92 | 5.90  | -2.98 | 1.33E-02 | 1.32E-01 | -3.26 |
| 1425712_PM_at   | BC025446                           | NA         | 0.32  | 2.37  | 2.98  | 1.33E-02 | 1.32E-01 | -3.26 |
| 1428065_PM_at   | Slc44a2                            | SLC44A2    | -0.97 | 4.90  | -2.98 | 1.33E-02 | 1.33E-01 | -3.26 |
| 1444039_PM_at   | Disp2                              | DISP2      | -0.30 | 2.59  | -2.98 | 1.33E-02 | 1.33E-01 | -3.26 |
| 1441261_PM_at   | Zfp771                             | ZNF771     | 0.25  | 2.40  | 2.98  | 1.33E-02 | 1.33E-01 | -3.26 |
| 1420623_PM_x_at | Hspa8                              | HSPA8      | -0.42 | 10.48 | -2.98 | 1.33E-02 | 1.33E-01 | -3.26 |
| 1458310_PM_at   | A230056J06Rik /// Agtppb1          | AGTPBP1    | 0.28  | 2.60  | 2.98  | 1.33E-02 | 1.33E-01 | -3.26 |
| 1454553_PM_at   | 4930509E22Rik                      | NA         | 0.35  | 3.41  | 2.98  | 1.33E-02 | 1.33E-01 | -3.26 |

|                 |               |          |       |       |       |          |          |       |
|-----------------|---------------|----------|-------|-------|-------|----------|----------|-------|
| 1447985_PM_s_at | Ank1b1        | ANK1B1   | -1.07 | 3.74  | -2.98 | 1.33E-02 | 1.33E-01 | -3.26 |
| 1427876_PM_at   | Zc3h15        | ZC3H15   | -0.96 | 4.98  | -2.98 | 1.33E-02 | 1.33E-01 | -3.26 |
| 1422244_PM_at   | Pkdrej        | PKDREJ   | 0.30  | 2.74  | 2.98  | 1.33E-02 | 1.33E-01 | -3.26 |
| 1416204_PM_at   | Gpd1          | GPD1     | 0.58  | 3.40  | 2.98  | 1.34E-02 | 1.33E-01 | -3.26 |
| 1432984_PM_at   | LOC102636340  | NA       | 0.31  | 2.38  | 2.98  | 1.34E-02 | 1.33E-01 | -3.26 |
| 1453434_PM_at   | 1110019D14Rik | NA       | 0.52  | 2.71  | 2.98  | 1.34E-02 | 1.33E-01 | -3.26 |
| 1437784_PM_at   | Runx1t1       | RUNX1T1  | -1.42 | 5.38  | -2.98 | 1.34E-02 | 1.33E-01 | -3.26 |
| 1436761_PM_s_at | Fam13c        | FAM13C   | -1.27 | 7.40  | -2.98 | 1.34E-02 | 1.33E-01 | -3.26 |
| 1456197_PM_x_at | Ajap1         | NA       | -1.07 | 7.59  | -2.98 | 1.34E-02 | 1.33E-01 | -3.26 |
| 1419184_PM_a_at | Fhl2          | FHL2     | -0.40 | 3.07  | -2.98 | 1.34E-02 | 1.33E-01 | -3.26 |
| 1457488_PM_at   | ---           | NA       | 1.29  | 3.57  | 2.98  | 1.34E-02 | 1.33E-01 | -3.26 |
| 1455248_PM_at   | Ccdc127       | CCDC127  | -0.63 | 3.93  | -2.98 | 1.34E-02 | 1.33E-01 | -3.26 |
| 1444339_PM_at   | Gm26641       | NA       | 0.28  | 2.25  | 2.98  | 1.34E-02 | 1.33E-01 | -3.26 |
| 1457610_PM_at   | ---           | NA       | 0.43  | 4.92  | 2.98  | 1.34E-02 | 1.33E-01 | -3.26 |
| 1429860_PM_at   | Ticrr         | TICRR    | 0.33  | 3.13  | 2.97  | 1.34E-02 | 1.33E-01 | -3.27 |
| 1436010_PM_at   | Lrrc16b       | CARMIL3  | 0.43  | 4.27  | 2.97  | 1.34E-02 | 1.33E-01 | -3.27 |
| 1440977_PM_at   | ---           | NA       | 0.42  | 2.91  | 2.97  | 1.34E-02 | 1.33E-01 | -3.27 |
| 1420622_PM_a_at | Hspa8         | HSPA8    | -0.45 | 10.72 | -2.97 | 1.34E-02 | 1.33E-01 | -3.27 |
| 1455538_PM_at   | Igip///Pura   | PURA     | -0.43 | 4.27  | -2.97 | 1.35E-02 | 1.33E-01 | -3.27 |
| 1456381_PM_x_at | Mc1l          | MCL1     | -0.97 | 5.98  | -2.97 | 1.35E-02 | 1.34E-01 | -3.27 |
| 1441792_PM_at   | Zfp945        | NA       | -0.68 | 4.05  | -2.97 | 1.35E-02 | 1.34E-01 | -3.27 |
| 1460380_PM_at   | Dsg2          | DSG2     | 0.28  | 2.33  | 2.97  | 1.35E-02 | 1.34E-01 | -3.27 |
| 1417290_PM_at   | Lrg1          | LRG1     | 0.37  | 2.83  | 2.97  | 1.35E-02 | 1.34E-01 | -3.27 |
| 1431937_PM_at   | Kif24         | KIF24    | 0.36  | 2.92  | 2.97  | 1.35E-02 | 1.34E-01 | -3.27 |
| 1433425_PM_at   | ---           | NA       | 0.41  | 2.99  | 2.97  | 1.35E-02 | 1.34E-01 | -3.27 |
| 1454446_PM_at   | 4930564B12Rik | NA       | 0.27  | 2.93  | 2.97  | 1.35E-02 | 1.34E-01 | -3.27 |
| 1418757_PM_at   | Trim69        | TRIM69   | 0.27  | 2.65  | 2.97  | 1.35E-02 | 1.34E-01 | -3.27 |
| 1421542_PM_at   | Dzip1         | NA       | 0.33  | 2.40  | 2.97  | 1.35E-02 | 1.34E-01 | -3.27 |
| 1448751_PM_at   | Ap3m2         | AP3M2    | -0.70 | 4.01  | -2.97 | 1.35E-02 | 1.34E-01 | -3.27 |
| 1428313_PM_at   | Zswim3        | ZSWIM3   | 0.32  | 2.40  | 2.97  | 1.36E-02 | 1.34E-01 | -3.28 |
| 1438758_PM_at   | Adi1          | ADI1     | 0.59  | 4.00  | 2.97  | 1.36E-02 | 1.34E-01 | -3.28 |
| 1446061_PM_at   | ---           | NA       | 0.55  | 2.74  | 2.97  | 1.36E-02 | 1.34E-01 | -3.28 |
| 1456741_PM_s_at | Gpm6a         | GPM6A    | -0.38 | 11.53 | -2.97 | 1.36E-02 | 1.34E-01 | -3.28 |
| 1457635_PM_s_at | Nr3c1         | NR3C1    | -0.85 | 3.92  | -2.97 | 1.36E-02 | 1.34E-01 | -3.28 |
| 1424661_PM_at   | Pmpca         | PMPCA    | -0.60 | 4.61  | -2.97 | 1.36E-02 | 1.34E-01 | -3.28 |
| 1458416_PM_at   | A330048O09Rik | NA       | 0.26  | 2.33  | 2.97  | 1.36E-02 | 1.34E-01 | -3.28 |
| 1425160_PM_at   | AF067063      | NA       | 0.30  | 2.16  | 2.97  | 1.36E-02 | 1.35E-01 | -3.28 |
| 1421100_PM_a_at | Dab1          | DAB1     | 1.01  | 3.79  | 2.97  | 1.36E-02 | 1.35E-01 | -3.28 |
| 1447989_PM_at   | ---           | NA       | 0.30  | 2.46  | 2.97  | 1.36E-02 | 1.35E-01 | -3.28 |
| 1435268_PM_at   | Gnaz          | GNAZ     | -0.86 | 3.58  | -2.96 | 1.37E-02 | 1.35E-01 | -3.28 |
| 1452733_PM_at   | Pank2         | PANK2    | -0.55 | 3.16  | -2.96 | 1.37E-02 | 1.35E-01 | -3.28 |
| 1451604_PM_a_at | Acvr1         | ACVRL1   | 0.30  | 2.22  | 2.96  | 1.37E-02 | 1.35E-01 | -3.29 |
| 1438559_PM_x_at | Slc44a2       | SLC44A2  | -0.96 | 7.32  | -2.96 | 1.37E-02 | 1.35E-01 | -3.29 |
| 1442385_PM_at   | ---           | NA       | 0.29  | 2.79  | 2.96  | 1.37E-02 | 1.35E-01 | -3.29 |
| 1449843_PM_at   | St8sia2       | ST8SIA2  | 0.35  | 2.67  | 2.96  | 1.37E-02 | 1.35E-01 | -3.29 |
| 1418660_PM_at   | Clock         | CLOCK    | -0.39 | 3.54  | -2.96 | 1.37E-02 | 1.35E-01 | -3.29 |
| 1451332_PM_at   | Zfp521        | ZNF521   | 0.43  | 2.58  | 2.96  | 1.37E-02 | 1.35E-01 | -3.29 |
| 1421737_PM_at   | Alx4          | ALX4     | 0.31  | 2.44  | 2.96  | 1.38E-02 | 1.35E-01 | -3.29 |
| 1422827_PM_x_at | Slc35a2       | SLC35A2  | 0.43  | 2.99  | 2.96  | 1.38E-02 | 1.35E-01 | -3.29 |
| 1448732_PM_at   | Ctsb          | CTSB     | -0.73 | 4.31  | -2.96 | 1.38E-02 | 1.35E-01 | -3.29 |
| 1447108_PM_at   | ---           | NA       | -0.50 | 2.33  | -2.96 | 1.38E-02 | 1.35E-01 | -3.29 |
| 1430899_PM_at   | Muc5ac        | MUC5AC   | 0.28  | 3.08  | 2.96  | 1.38E-02 | 1.35E-01 | -3.29 |
| 1454931_PM_at   | Eid2          | EID2     | -0.77 | 4.65  | -2.96 | 1.38E-02 | 1.35E-01 | -3.29 |
| 1442609_PM_at   | ---           | NA       | 1.24  | 4.59  | 2.96  | 1.38E-02 | 1.36E-01 | -3.29 |
| 1420083_PM_at   | AU016916      | NA       | 0.56  | 2.88  | 2.96  | 1.38E-02 | 1.36E-01 | -3.29 |
| 1425112_PM_at   | Ankrd27       | ANKRD27  | 0.44  | 2.84  | 2.96  | 1.38E-02 | 1.36E-01 | -3.29 |
| 1439291_PM_at   | ---           | NA       | 0.35  | 2.77  | 2.96  | 1.38E-02 | 1.36E-01 | -3.29 |
| 1441322_PM_at   | Skap1         | SKAP1    | 0.39  | 2.82  | 2.96  | 1.38E-02 | 1.36E-01 | -3.29 |
| 1422752_PM_at   | Polr3k        | POLR3K   | -0.38 | 2.66  | -2.96 | 1.38E-02 | 1.36E-01 | -3.29 |
| 1434494_PM_at   | Zar1          | ZAR1     | 0.28  | 2.63  | 2.96  | 1.38E-02 | 1.36E-01 | -3.30 |
| 1430224_PM_at   | Wfdc3         | WFDC3    | 0.37  | 2.61  | 2.96  | 1.38E-02 | 1.36E-01 | -3.30 |
| 1449389_PM_at   | Tal1          | TAL1     | 0.26  | 2.80  | 2.96  | 1.39E-02 | 1.36E-01 | -3.30 |
| 1447120_PM_at   | ---           | NA       | 0.32  | 2.91  | 2.96  | 1.39E-02 | 1.36E-01 | -3.30 |
| 1422992_PM_s_at | Pik3cd        | PIK3CD   | 0.32  | 2.43  | 2.96  | 1.39E-02 | 1.36E-01 | -3.30 |
| 1420380_PM_at   | Ccl2          | CCL13    | 0.28  | 2.73  | 2.96  | 1.39E-02 | 1.36E-01 | -3.30 |
| 1438438_PM_at   | Rip1          | NA       | -1.22 | 7.49  | -2.95 | 1.39E-02 | 1.36E-01 | -3.30 |
| 1427456_PM_at   | Wdfy3         | WDFY3    | -0.71 | 4.86  | -2.95 | 1.39E-02 | 1.36E-01 | -3.30 |
| 1419124_PM_at   | Mfsd6         | MFS6     | -0.65 | 3.57  | -2.95 | 1.39E-02 | 1.36E-01 | -3.30 |
| 1439686_PM_at   | ---           | NA       | 0.33  | 2.53  | 2.95  | 1.39E-02 | 1.36E-01 | -3.30 |
| 1454384_PM_at   | ---           | NA       | 0.34  | 2.65  | 2.95  | 1.39E-02 | 1.36E-01 | -3.30 |
| 1441047_PM_at   | Slc45a4       | SLC45A4  | 0.52  | 3.88  | 2.95  | 1.39E-02 | 1.36E-01 | -3.30 |
| 1436725_PM_at   | Arhgef39      | ARHGEF39 | 0.27  | 2.38  | 2.95  | 1.39E-02 | 1.36E-01 | -3.30 |
| 1457642_PM_at   | Skida1        | SKIDA1   | 0.84  | 3.79  | 2.95  | 1.39E-02 | 1.36E-01 | -3.30 |
| 1440132_PM_s_at | Prkar1b       | PRKAR1B  | -0.92 | 7.11  | -2.95 | 1.39E-02 | 1.36E-01 | -3.30 |
| 1435719_PM_at   | ---           | NA       | -0.70 | 4.50  | -2.95 | 1.40E-02 | 1.37E-01 | -3.30 |



|                 |                                                                |           |       |       |       |          |          |       |
|-----------------|----------------------------------------------------------------|-----------|-------|-------|-------|----------|----------|-------|
| 1423773_PM_at   | Gpbb1                                                          | GPBP1     | -0.93 | 5.30  | -2.95 | 1.40E-02 | 1.37E-01 | -3.30 |
| 1457311_PM_at   | Camk2a                                                         | CAMK2A    | -0.67 | 8.94  | -2.95 | 1.40E-02 | 1.37E-01 | -3.30 |
| 1444125_PM_at   | ---                                                            | NA        | 0.63  | 2.88  | 2.95  | 1.40E-02 | 1.37E-01 | -3.30 |
| 1454653_PM_at   | Cpne9                                                          | CPNE9     | -0.71 | 3.71  | -2.95 | 1.40E-02 | 1.37E-01 | -3.31 |
| 1415870_PM_at   | Calu                                                           | CALU      | -0.60 | 3.72  | -2.95 | 1.40E-02 | 1.37E-01 | -3.31 |
| 1459783_PM_s_at | Bloc1s4                                                        | BLOC1S4   | -1.18 | 4.03  | -2.95 | 1.40E-02 | 1.37E-01 | -3.31 |
| 1449804_PM_at   | Pnmt                                                           | PNMT      | 0.29  | 2.82  | 2.95  | 1.40E-02 | 1.37E-01 | -3.31 |
| 1438804_PM_at   | Sept10                                                         | SEPT10    | 1.33  | 3.08  | 2.95  | 1.40E-02 | 1.37E-01 | -3.31 |
| 1456179_PM_at   | Gm13212 ///<br>Gt(pU21)140Imeg                                 | NA        | -0.48 | 2.56  | -2.95 | 1.40E-02 | 1.37E-01 | -3.31 |
| 1457871_PM_at   | Colec10                                                        | COLEC10   | 0.44  | 2.49  | 2.95  | 1.40E-02 | 1.37E-01 | -3.31 |
| 1444430_PM_at   | ---                                                            | NA        | 0.70  | 2.58  | 2.95  | 1.40E-02 | 1.37E-01 | -3.31 |
| 1436348_PM_at   | Sprtn                                                          | NA        | -0.89 | 3.33  | -2.95 | 1.40E-02 | 1.37E-01 | -3.31 |
| 1419040_PM_at   | Cyp2d22                                                        | CYP2D6    | -0.44 | 3.62  | -2.95 | 1.40E-02 | 1.37E-01 | -3.31 |
| 1449300_PM_at   | Ctnnbp2nl                                                      | CTTNBP2NL | -0.53 | 3.30  | -2.95 | 1.40E-02 | 1.37E-01 | -3.31 |
| 1452472_PM_at   | Rtp3                                                           | RTP3      | -0.51 | 4.14  | -2.95 | 1.41E-02 | 1.37E-01 | -3.31 |
| 1416421_PM_a_at | Ssb                                                            | SSB       | -1.21 | 5.76  | -2.95 | 1.41E-02 | 1.37E-01 | -3.31 |
| 1434595_PM_at   | Trim9                                                          | NA        | -0.61 | 4.47  | -2.95 | 1.41E-02 | 1.37E-01 | -3.31 |
| 1415820_PM_x_at | Nono                                                           | NONO      | -0.65 | 7.70  | -2.95 | 1.41E-02 | 1.37E-01 | -3.31 |
| 1444782_PM_at   | 4930417H01Rik                                                  | NA        | 0.34  | 2.62  | 2.95  | 1.41E-02 | 1.37E-01 | -3.31 |
| 1450944_PM_at   | Cspg4                                                          | CSPG4     | 0.40  | 2.46  | 2.95  | 1.41E-02 | 1.37E-01 | -3.31 |
| 1436228_PM_at   | Zranb1                                                         | ZRANB1    | -0.60 | 3.92  | -2.95 | 1.41E-02 | 1.37E-01 | -3.31 |
| 1429763_PM_at   | Cnih4                                                          | CNIH4     | -0.48 | 3.40  | -2.95 | 1.41E-02 | 1.37E-01 | -3.31 |
| 1435443_PM_at   | Eya3                                                           | EYA3      | 0.37  | 3.07  | 2.95  | 1.41E-02 | 1.37E-01 | -3.32 |
| 1451133_PM_s_at | Tmem168                                                        | TMEM168   | -0.63 | 3.16  | -2.95 | 1.41E-02 | 1.38E-01 | -3.32 |
| 1460400_PM_at   | Spast                                                          | SPAST     | -0.81 | 4.17  | -2.94 | 1.41E-02 | 1.38E-01 | -3.32 |
| 1439884_PM_at   | Nudt16                                                         | NUDT16    | -0.68 | 3.87  | -2.94 | 1.42E-02 | 1.38E-01 | -3.32 |
| 1456684_PM_at   | ---                                                            | NA        | -0.87 | 4.08  | -2.94 | 1.42E-02 | 1.38E-01 | -3.32 |
| 1455256_PM_at   | Tnik                                                           | TNIK      | -0.62 | 3.76  | -2.94 | 1.42E-02 | 1.38E-01 | -3.32 |
| 1452009_PM_at   | Ttc39b                                                         | TTC39B    | -0.67 | 2.67  | -2.94 | 1.42E-02 | 1.38E-01 | -3.32 |
| 1421275_PM_s_at | Socs4                                                          | SOCS4     | -0.41 | 2.27  | -2.94 | 1.42E-02 | 1.38E-01 | -3.32 |
| 1429924_PM_at   | 1700019O17Rik                                                  | TEX44     | 0.36  | 3.13  | 2.94  | 1.42E-02 | 1.38E-01 | -3.32 |
| 1424059_PM_at   | Suv420h2                                                       | KMT5C     | 0.39  | 3.31  | 2.94  | 1.42E-02 | 1.38E-01 | -3.32 |
| 1459666_PM_at   | Trak1                                                          | NA        | -0.50 | 2.55  | -2.94 | 1.42E-02 | 1.38E-01 | -3.32 |
| 1417683_PM_at   | Diablo                                                         | DIABLO    | 0.82  | 4.76  | 2.94  | 1.42E-02 | 1.38E-01 | -3.32 |
| 1447602_PM_x_at | Sulf2                                                          | SULF2     | -0.89 | 7.20  | -2.94 | 1.42E-02 | 1.38E-01 | -3.32 |
| 1452393_PM_at   | Akna                                                           | AKNA      | 0.40  | 4.00  | 2.94  | 1.42E-02 | 1.38E-01 | -3.32 |
| 1450416_PM_at   | Cbx5                                                           | CBX5      | 0.67  | 3.67  | 2.94  | 1.42E-02 | 1.38E-01 | -3.32 |
| 1445723_PM_at   | Plcl1                                                          | PLCL1     | -0.23 | 2.42  | -2.94 | 1.43E-02 | 1.38E-01 | -3.32 |
| 1422844_PM_a_at | Wdr77                                                          | WDR77     | -0.83 | 3.08  | -2.94 | 1.43E-02 | 1.38E-01 | -3.33 |
| 1444818_PM_at   | ---                                                            | NA        | -0.56 | 2.93  | -2.94 | 1.43E-02 | 1.38E-01 | -3.33 |
| 1430357_PM_at   | Gm10257 /// Gm12657 ///<br>H3f3b /// H3f3c ///<br>LOC102642045 | NA        | 0.27  | 2.60  | 2.94  | 1.43E-02 | 1.39E-01 | -3.33 |
| 1417973_PM_at   | Itih1                                                          | ITIH1     | 0.37  | 3.33  | 2.94  | 1.43E-02 | 1.39E-01 | -3.33 |
| 1448040_PM_at   | Tfpt                                                           | TFPT      | -0.99 | 4.02  | -2.94 | 1.43E-02 | 1.39E-01 | -3.33 |
| 1454609_PM_x_at | Irf2bpl                                                        | IRF2BPL   | -0.34 | 3.26  | -2.94 | 1.43E-02 | 1.39E-01 | -3.33 |
| 1444844_PM_at   | Fabp3                                                          | FABP3     | 0.33  | 3.10  | 2.94  | 1.43E-02 | 1.39E-01 | -3.33 |
| 1451132_PM_at   | Pbxip1                                                         | PBXIP1    | 0.55  | 4.09  | 2.94  | 1.43E-02 | 1.39E-01 | -3.33 |
| 1444670_PM_at   | ---                                                            | NA        | 0.40  | 2.72  | 2.94  | 1.43E-02 | 1.39E-01 | -3.33 |
| 1438071_PM_at   | Pms1                                                           | PMS1      | 0.43  | 2.78  | 2.94  | 1.43E-02 | 1.39E-01 | -3.33 |
| 1445456_PM_at   | ---                                                            | NA        | 0.51  | 4.11  | 2.94  | 1.43E-02 | 1.39E-01 | -3.33 |
| 1440175_PM_at   | ---                                                            | NA        | 0.58  | 2.47  | 2.94  | 1.43E-02 | 1.39E-01 | -3.33 |
| 1423718_PM_at   | Ak3                                                            | AK3       | -0.37 | 2.42  | -2.94 | 1.43E-02 | 1.39E-01 | -3.33 |
| 1432552_PM_at   | Tmem89                                                         | TMEM89    | 0.30  | 2.59  | 2.94  | 1.44E-02 | 1.39E-01 | -3.33 |
| 1433942_PM_at   | Myo6                                                           | MYO6      | -1.03 | 3.17  | -2.94 | 1.44E-02 | 1.39E-01 | -3.33 |
| 1429166_PM_s_at | Clmn                                                           | CLMN      | -0.93 | 3.58  | -2.94 | 1.44E-02 | 1.39E-01 | -3.33 |
| 1420829_PM_a_at | Cdk5rap2 /// Ywhaq                                             | YWHAQ     | -0.71 | 4.97  | -2.94 | 1.44E-02 | 1.39E-01 | -3.33 |
| 1444657_PM_at   | N4bp2                                                          | N4BP2     | 0.39  | 2.58  | 2.94  | 1.44E-02 | 1.39E-01 | -3.33 |
| 1421111_PM_at   | Rybp                                                           | RYBP      | 0.67  | 3.61  | 2.93  | 1.44E-02 | 1.39E-01 | -3.33 |
| 1422849_PM_a_at | Pabpn1                                                         | PABPN1    | 0.61  | 10.38 | 2.93  | 1.44E-02 | 1.39E-01 | -3.33 |
| 1418744_PM_s_at | Tesc                                                           | TESC      | -1.45 | 4.78  | -2.93 | 1.44E-02 | 1.39E-01 | -3.34 |
| 1423785_PM_at   | Egln1                                                          | EGLN1     | -1.16 | 5.80  | -2.93 | 1.44E-02 | 1.39E-01 | -3.34 |
| 1426887_PM_at   | Nudt10 /// Nudt11                                              | NUDT10    | -0.80 | 3.80  | -2.93 | 1.44E-02 | 1.39E-01 | -3.33 |
| 1415780_PM_a_at | Armcx2                                                         | ARMCX2    | -0.67 | 3.29  | -2.93 | 1.44E-02 | 1.39E-01 | -3.34 |
| 1427307_PM_a_at | Dab1                                                           | DAB1      | 0.90  | 4.89  | 2.93  | 1.44E-02 | 1.39E-01 | -3.34 |
| 1425380_PM_at   | Rasgrp4                                                        | RASGRP4   | 0.27  | 2.55  | 2.93  | 1.44E-02 | 1.39E-01 | -3.34 |
| 1423303_PM_at   | Paxip1                                                         | PAXIP1    | -0.52 | 2.51  | -2.93 | 1.44E-02 | 1.39E-01 | -3.34 |
| 1425677_PM_a_at | Ank1                                                           | ANK1      | 0.68  | 4.07  | 2.93  | 1.44E-02 | 1.39E-01 | -3.34 |
| 1434581_PM_at   | Mturn                                                          | MTURN     | -0.75 | 6.48  | -2.93 | 1.44E-02 | 1.39E-01 | -3.34 |
| 1436875_PM_at   | Dnm3                                                           | DNM3      | -0.39 | 2.77  | -2.93 | 1.44E-02 | 1.39E-01 | -3.34 |
| 1459815_PM_at   | Zmynd12                                                        | ZMYND12   | 0.36  | 2.22  | 2.93  | 1.44E-02 | 1.39E-01 | -3.34 |
| 1419335_PM_at   | Zfp85os                                                        | NA        | 0.39  | 2.49  | 2.93  | 1.44E-02 | 1.39E-01 | -3.34 |
| 1419145_PM_at   | Smtnl1                                                         | SMTNL1    | 0.24  | 2.57  | 2.93  | 1.45E-02 | 1.39E-01 | -3.34 |
| 1420578_PM_at   | Optc                                                           | OPTC      | 0.25  | 2.75  | 2.93  | 1.45E-02 | 1.39E-01 | -3.34 |

|                 |                     |               |       |       |       |          |          |       |
|-----------------|---------------------|---------------|-------|-------|-------|----------|----------|-------|
| 1438014_PM_at   | ---                 | NA            | 0.37  | 3.86  | 2.93  | 1.45E-02 | 1.39E-01 | -3.34 |
| 1441069_PM_at   | Zdhhc23             | NA            | -0.84 | 6.51  | -2.93 | 1.45E-02 | 1.39E-01 | -3.34 |
| 1416859_PM_at   | Fkbp3               | FKBP3         | -0.79 | 8.64  | -2.93 | 1.45E-02 | 1.39E-01 | -3.34 |
| 1429919_PM_at   | Ankrd36             | NA            | 0.26  | 2.45  | 2.93  | 1.45E-02 | 1.39E-01 | -3.34 |
| 1441424_PM_at   | ---                 | NA            | 0.27  | 2.57  | 2.93  | 1.45E-02 | 1.39E-01 | -3.34 |
| 1417550_PM_a_at | Gsg1                | GSG1          | 0.33  | 2.71  | 2.93  | 1.45E-02 | 1.39E-01 | -3.34 |
| 1459782_PM_x_at | Abcc5               | ABCC5         | 0.35  | 2.45  | 2.93  | 1.45E-02 | 1.39E-01 | -3.34 |
| 1420952_PM_at   | Son                 | SON           | 0.45  | 9.81  | 2.93  | 1.45E-02 | 1.39E-01 | -3.34 |
| 1432294_PM_at   | 9330177L23Rik       | NA            | 0.48  | 2.48  | 2.93  | 1.45E-02 | 1.39E-01 | -3.34 |
| 1456780_PM_at   | Gm41855             | NA            | 0.54  | 2.42  | 2.93  | 1.45E-02 | 1.39E-01 | -3.34 |
| 1451020_PM_at   | Gsk3b               | GSK3B         | 0.72  | 4.04  | 2.93  | 1.45E-02 | 1.40E-01 | -3.34 |
| 1456047_PM_at   | Gm28042 /// Pla2g4b | JMJD7-PLA2G4B | 0.33  | 2.47  | 2.93  | 1.45E-02 | 1.40E-01 | -3.34 |
| 1429560_PM_at   | Zfp955b             | NA            | 0.27  | 2.71  | 2.93  | 1.45E-02 | 1.40E-01 | -3.34 |
| 1421328_PM_at   | Map2                | MAP2          | -1.29 | 4.75  | -2.93 | 1.45E-02 | 1.40E-01 | -3.34 |
| 1426725_PM_s_at | Ets1                | ETS1          | -0.42 | 3.50  | -2.93 | 1.45E-02 | 1.40E-01 | -3.34 |
| 1439805_PM_at   | Nfat5               | NFAT5         | 0.35  | 2.46  | 2.93  | 1.45E-02 | 1.40E-01 | -3.34 |
| 1451188_PM_at   | Wdr26               | WDR26         | -1.01 | 4.27  | -2.93 | 1.46E-02 | 1.40E-01 | -3.35 |
| 1436609_PM_a_at | Lrpap1              | LRPAP1        | -2.02 | 6.64  | -2.93 | 1.46E-02 | 1.40E-01 | -3.35 |
| 1436764_PM_at   | Pard3               | PARD3         | 0.26  | 2.18  | 2.93  | 1.46E-02 | 1.40E-01 | -3.35 |
| 1424407_PM_s_at | Cbx6                | CBX6          | -0.51 | 6.42  | -2.93 | 1.46E-02 | 1.40E-01 | -3.35 |
| 1434216_PM_a_at | Nudt19              | NUDT19        | -0.56 | 4.20  | -2.93 | 1.46E-02 | 1.40E-01 | -3.35 |
| 1451011_PM_at   | Zfp358              | ZNF358        | 0.32  | 3.06  | 2.93  | 1.46E-02 | 1.40E-01 | -3.35 |
| 1436382_PM_at   | Zbtb12              | ZBTB12        | 0.32  | 2.56  | 2.93  | 1.46E-02 | 1.40E-01 | -3.35 |
| 1415806_PM_at   | Plat                | PLAT          | -0.66 | 2.72  | -2.93 | 1.46E-02 | 1.40E-01 | -3.35 |
| 1431200_PM_a_at | Dph3                | DPH3          | 0.34  | 3.04  | 2.93  | 1.46E-02 | 1.40E-01 | -3.35 |
| 1451599_PM_at   | Sesn2               | SESN2         | 0.40  | 3.73  | 2.93  | 1.46E-02 | 1.40E-01 | -3.35 |
| 1443608_PM_at   | ---                 | NA            | 0.26  | 2.11  | 2.93  | 1.46E-02 | 1.40E-01 | -3.35 |
| 1436489_PM_x_at | Pomgnt2             | POMGNT2       | -1.42 | 3.90  | -2.92 | 1.46E-02 | 1.40E-01 | -3.35 |
| 1417373_PM_a_at | Tuba4a              | TUBA4A        | -0.37 | 11.99 | -2.92 | 1.46E-02 | 1.40E-01 | -3.35 |
| 1422917_PM_at   | Epha1               | EPHA1         | 0.30  | 2.25  | 2.92  | 1.46E-02 | 1.40E-01 | -3.35 |
| 1448820_PM_a_at | Eif2s2              | EIF2S2        | 0.56  | 9.03  | 2.92  | 1.46E-02 | 1.40E-01 | -3.35 |
| 1419591_PM_at   | Gsdmc               | GSDMC         | 0.61  | 4.65  | 2.92  | 1.46E-02 | 1.40E-01 | -3.35 |
| 1457793_PM_a_at | Whsc11              | NSD3          | 1.98  | 3.89  | 2.92  | 1.46E-02 | 1.40E-01 | -3.35 |
| 1421990_PM_at   | Syt1                | SYT1          | -1.42 | 8.50  | -2.92 | 1.47E-02 | 1.40E-01 | -3.35 |
| 1452686_PM_s_at | Tmem222             | TMEM222       | -0.70 | 4.29  | -2.92 | 1.47E-02 | 1.40E-01 | -3.35 |
| 1451333_PM_a_at | Acrbp               | ACRBP         | 0.41  | 3.18  | 2.92  | 1.47E-02 | 1.40E-01 | -3.35 |
| 1425339_PM_at   | Plcb4               | PLCB4         | 0.84  | 2.49  | 2.92  | 1.47E-02 | 1.40E-01 | -3.35 |
| 1455028_PM_at   | Mapt                | MAPT          | -0.81 | 5.44  | -2.92 | 1.47E-02 | 1.40E-01 | -3.35 |
| 1449020_PM_at   | Plscr3              | PLSCR3        | 0.34  | 2.85  | 2.92  | 1.47E-02 | 1.40E-01 | -3.35 |
| 1416148_PM_at   | Laptm4b             | LAPTM4B       | -0.62 | 4.88  | -2.92 | 1.47E-02 | 1.40E-01 | -3.36 |
| 1448104_PM_at   | Aldh6a1             | ALDH6A1       | -0.90 | 3.56  | -2.92 | 1.47E-02 | 1.40E-01 | -3.36 |
| 1416787_PM_at   | Acvr1               | NA            | 0.36  | 2.71  | 2.92  | 1.47E-02 | 1.40E-01 | -3.36 |
| 1422247_PM_a_at | Uty                 | UTY           | -0.37 | 2.41  | -2.92 | 1.47E-02 | 1.41E-01 | -3.36 |
| 1460453_PM_at   | Tagap /// Tagap1    | TAGAP         | -0.61 | 3.76  | -2.92 | 1.47E-02 | 1.41E-01 | -3.36 |
| 1439858_PM_at   | Pgpep1              | PGPEP1        | 0.28  | 2.35  | 2.92  | 1.47E-02 | 1.41E-01 | -3.36 |
| 1416661_PM_at   | Eif3a               | EIF3A         | 1.22  | 6.95  | 2.92  | 1.47E-02 | 1.41E-01 | -3.36 |
| 1444028_PM_s_at | Dock9               | DOCK9         | -1.82 | 8.24  | -2.92 | 1.48E-02 | 1.41E-01 | -3.36 |
| 1459775_PM_at   | Gm33409             | NA            | 0.57  | 3.94  | 2.92  | 1.48E-02 | 1.41E-01 | -3.36 |
| 1444781_PM_at   | Gpn1                | GPN1          | 0.31  | 2.20  | 2.92  | 1.48E-02 | 1.41E-01 | -3.36 |
| 1439634_PM_at   | Tbc1d30             | TBC1D30       | 0.98  | 3.28  | 2.92  | 1.48E-02 | 1.41E-01 | -3.36 |
| 1438370_PM_x_at | Cbarp               | CBARP         | -0.99 | 8.50  | -2.92 | 1.48E-02 | 1.41E-01 | -3.36 |
| 1453201_PM_at   | Rassf10             | RASSF10       | -0.34 | 2.53  | -2.92 | 1.48E-02 | 1.41E-01 | -3.36 |
| 1437977_PM_at   | Sgtb                | NA            | -0.99 | 5.55  | -2.92 | 1.48E-02 | 1.41E-01 | -3.36 |
| 1457835_PM_at   | Gm4814              | NA            | 0.32  | 2.31  | 2.92  | 1.48E-02 | 1.41E-01 | -3.36 |
| 1459891_PM_at   | C78444              | NA            | 0.28  | 2.61  | 2.92  | 1.48E-02 | 1.41E-01 | -3.36 |
| 1441436_PM_at   | Dusp12              | DUSP12        | 0.42  | 3.52  | 2.92  | 1.48E-02 | 1.41E-01 | -3.36 |
| 1450063_PM_at   | Fmn2                | FMN2          | -1.44 | 7.44  | -2.92 | 1.48E-02 | 1.41E-01 | -3.36 |
| 1418372_PM_at   | Adsl                | ALO22238.4    | -0.49 | 3.76  | -2.92 | 1.48E-02 | 1.41E-01 | -3.36 |
| 1456000_PM_at   | Ddx18               | DDX18         | -0.45 | 2.61  | -2.92 | 1.48E-02 | 1.41E-01 | -3.36 |
| 1453980_PM_at   | 5330434G04Rik       | NA            | 0.66  | 2.84  | 2.92  | 1.49E-02 | 1.41E-01 | -3.37 |
| 1417514_PM_at   | Ssx2ip              | SSX2IP        | 0.71  | 2.93  | 2.92  | 1.49E-02 | 1.41E-01 | -3.37 |
| 1437991_PM_x_at | Rusc1               | NA            | 1.23  | 6.47  | 2.92  | 1.49E-02 | 1.41E-01 | -3.37 |
| 1444825_PM_at   | ---                 | NA            | 0.38  | 2.73  | 2.92  | 1.49E-02 | 1.41E-01 | -3.37 |
| 1443339_PM_at   | ---                 | NA            | 0.29  | 2.50  | 2.91  | 1.49E-02 | 1.42E-01 | -3.37 |
| 1447051_PM_at   | 1110028F11Rik       | NA            | 0.30  | 2.16  | 2.91  | 1.49E-02 | 1.42E-01 | -3.37 |
| 1460038_PM_at   | Pou3f1              | POU3F1        | -0.64 | 3.26  | -2.91 | 1.49E-02 | 1.42E-01 | -3.37 |
| 1435220_PM_s_at | Cdc42se2            | CD42SE2       | -0.52 | 3.77  | -2.91 | 1.49E-02 | 1.42E-01 | -3.37 |
| 1419232_PM_a_at | Apoa1               | APOA1         | 0.36  | 2.32  | 2.91  | 1.49E-02 | 1.42E-01 | -3.37 |
| 1458707_PM_at   | E430016F16Rik       | NA            | 0.34  | 2.81  | 2.91  | 1.49E-02 | 1.42E-01 | -3.37 |
| 1446126_PM_at   | Gm40308             | NA            | 0.39  | 2.51  | 2.91  | 1.49E-02 | 1.42E-01 | -3.37 |
| 1442728_PM_at   | ---                 | NA            | 0.60  | 4.21  | 2.91  | 1.49E-02 | 1.42E-01 | -3.37 |
| 1423613_PM_at   | Ssfa2               | SSFA2         | -0.70 | 2.89  | -2.91 | 1.49E-02 | 1.42E-01 | -3.37 |
| 1445324_PM_s_at | Greb1               | GREB1         | -0.37 | 2.01  | -2.91 | 1.49E-02 | 1.42E-01 | -3.37 |
| 1432103_PM_a_at | Sh3gl3              | NA            | -0.30 | 3.25  | -2.91 | 1.49E-02 | 1.42E-01 | -3.37 |
| 1454351_PM_at   | 4933435C09Rik       | NA            | 0.28  | 2.32  | 2.91  | 1.50E-02 | 1.42E-01 | -3.37 |

|                 |                                                                                      |            |       |      |       |          |          |       |
|-----------------|--------------------------------------------------------------------------------------|------------|-------|------|-------|----------|----------|-------|
| 1446327_PM_at   | ---                                                                                  | NA         | 0.37  | 2.86 | 2.91  | 1.50E-02 | 1.42E-01 | -3.37 |
| 1425876_PM_a_at | Glce                                                                                 | GLCE       | 0.28  | 2.04 | 2.91  | 1.50E-02 | 1.42E-01 | -3.37 |
| 1449880_PM_s_at | Bglap /// Bglap2 /// Bglap3                                                          | BGLAP      | 0.35  | 2.55 | 2.91  | 1.50E-02 | 1.42E-01 | -3.37 |
| 1437426_PM_at   | Wac                                                                                  | NA         | 0.36  | 2.69 | 2.91  | 1.50E-02 | 1.42E-01 | -3.37 |
| 1450323_PM_at   | ---                                                                                  | NA         | 0.39  | 2.52 | 2.91  | 1.50E-02 | 1.42E-01 | -3.37 |
| 1437941_PM_at   | Phka2                                                                                | PHKA2      | 0.27  | 2.41 | 2.91  | 1.50E-02 | 1.42E-01 | -3.37 |
| 1427529_PM_at   | Fzd9                                                                                 | FZD9       | 0.27  | 2.41 | 2.91  | 1.50E-02 | 1.42E-01 | -3.37 |
| 1452854_PM_at   | Sec63                                                                                | SEC63      | -1.04 | 3.19 | -2.91 | 1.50E-02 | 1.42E-01 | -3.37 |
| 1447465_PM_at   | ---                                                                                  | NA         | -0.66 | 2.44 | -2.91 | 1.50E-02 | 1.42E-01 | -3.37 |
| 1428936_PM_at   | Atp2b1                                                                               | ATP2B1     | -0.61 | 9.41 | -2.91 | 1.50E-02 | 1.42E-01 | -3.38 |
| 1416833_PM_at   | Keg1                                                                                 | NA         | -0.60 | 2.27 | -2.91 | 1.50E-02 | 1.42E-01 | -3.38 |
| 1416112_PM_at   | Cox8a                                                                                | COX8A      | -0.40 | 3.98 | -2.91 | 1.50E-02 | 1.42E-01 | -3.38 |
| 1438697_PM_at   | Tmem132c                                                                             | TMEM132C   | 0.28  | 2.62 | 2.91  | 1.50E-02 | 1.42E-01 | -3.38 |
| 1446662_PM_at   | 4930562C15Rik                                                                        | C16orf96   | 0.37  | 3.06 | 2.91  | 1.50E-02 | 1.42E-01 | -3.38 |
| 1420426_PM_at   | Myo7b                                                                                | MYO7B      | 0.37  | 3.35 | 2.91  | 1.50E-02 | 1.42E-01 | -3.38 |
| 1458984_PM_at   | ---                                                                                  | NA         | 0.42  | 3.86 | 2.91  | 1.50E-02 | 1.42E-01 | -3.38 |
| 1436704_PM_x_at | Mthfd1                                                                               | MTHFD1     | -0.65 | 3.10 | -2.91 | 1.50E-02 | 1.42E-01 | -3.38 |
| 1428339_PM_at   | Nudt21                                                                               | NA         | -0.46 | 4.28 | -2.91 | 1.51E-02 | 1.42E-01 | -3.38 |
| 1417851_PM_at   | Cxcl13                                                                               | CXCL13     | 0.27  | 2.50 | 2.91  | 1.51E-02 | 1.42E-01 | -3.38 |
| 1427567_PM_a_at | Tpm3                                                                                 | TPM3       | 1.22  | 5.35 | 2.91  | 1.51E-02 | 1.42E-01 | -3.38 |
| 1458107_PM_at   | ---                                                                                  | NA         | 0.29  | 2.77 | 2.91  | 1.51E-02 | 1.42E-01 | -3.38 |
| 1421157_PM_at   | Fzd3                                                                                 | FZD3       | 1.03  | 4.28 | 2.91  | 1.51E-02 | 1.42E-01 | -3.38 |
| 1446722_PM_at   | ---                                                                                  | NA         | 0.39  | 2.55 | 2.91  | 1.51E-02 | 1.42E-01 | -3.38 |
| 1449147_PM_at   | Chst1                                                                                | CHST1      | -0.71 | 8.34 | -2.91 | 1.51E-02 | 1.42E-01 | -3.38 |
| 1442305_PM_at   | Gtpbp2                                                                               | GTPBP2     | 0.30  | 3.00 | 2.91  | 1.51E-02 | 1.43E-01 | -3.38 |
| 1451598_PM_at   | Pax4                                                                                 | PAX4       | 0.35  | 2.41 | 2.91  | 1.51E-02 | 1.43E-01 | -3.38 |
| 1455850_PM_at   | Faap100                                                                              | FAAP100    | 0.52  | 3.81 | 2.91  | 1.51E-02 | 1.43E-01 | -3.38 |
| 1429492_PM_x_at | Ptdss2                                                                               | PTDSS2     | 0.36  | 2.67 | 2.91  | 1.51E-02 | 1.43E-01 | -3.38 |
| 1442956_PM_at   | ---                                                                                  | NA         | 0.41  | 2.40 | 2.91  | 1.51E-02 | 1.43E-01 | -3.38 |
| 1450960_PM_at   | Igfbpl1                                                                              | IGFBPL1    | 0.30  | 2.24 | 2.91  | 1.51E-02 | 1.43E-01 | -3.38 |
| 1458583_PM_at   | 1700123O12Rik                                                                        | NA         | 0.33  | 2.63 | 2.91  | 1.51E-02 | 1.43E-01 | -3.38 |
| 1425458_PM_a_at | Grb10                                                                                | GRB10      | 1.13  | 5.94 | 2.90  | 1.52E-02 | 1.43E-01 | -3.39 |
| 1451366_PM_at   | Cops6                                                                                | COP6       | -0.91 | 5.16 | -2.90 | 1.52E-02 | 1.43E-01 | -3.39 |
| 1432232_PM_at   | ---                                                                                  | NA         | -0.72 | 2.56 | -2.90 | 1.52E-02 | 1.43E-01 | -3.39 |
| 1459457_PM_at   | Camk2d                                                                               | NA         | 0.25  | 2.19 | 2.90  | 1.52E-02 | 1.43E-01 | -3.39 |
| 1441718_PM_at   | ---                                                                                  | NA         | 0.39  | 2.49 | 2.90  | 1.52E-02 | 1.43E-01 | -3.39 |
| 1460724_PM_at   | Ap2a1                                                                                | AP2A1      | 0.39  | 3.17 | 2.90  | 1.52E-02 | 1.43E-01 | -3.39 |
| 1454914_PM_at   | U2surp                                                                               | U2SURP     | 0.95  | 5.54 | 2.90  | 1.52E-02 | 1.43E-01 | -3.39 |
| 1426195_PM_a_at | Cst3                                                                                 | CST3       | -1.60 | 7.15 | -2.90 | 1.52E-02 | 1.43E-01 | -3.39 |
| 1440110_PM_at   | ---                                                                                  | NA         | -0.86 | 2.40 | -2.90 | 1.52E-02 | 1.43E-01 | -3.39 |
| 1459154_PM_at   | ---                                                                                  | NA         | 0.52  | 3.64 | 2.90  | 1.52E-02 | 1.43E-01 | -3.39 |
| 1428582_PM_at   | Mettl10                                                                              | ACO68896.1 | 0.96  | 5.23 | 2.90  | 1.52E-02 | 1.43E-01 | -3.39 |
| 1419229_PM_at   | Rhox4a /// Rhox4a2 /// Rhox4b /// Rhox4c /// Rhox4d /// Rhox4e /// Rhox4f /// Rhox4g | NA         | 0.29  | 2.96 | 2.90  | 1.52E-02 | 1.43E-01 | -3.39 |
| 1453522_PM_at   | Dtd2                                                                                 | AL139353.1 | 0.34  | 2.97 | 2.90  | 1.52E-02 | 1.43E-01 | -3.39 |
| 1440106_PM_at   | ---                                                                                  | NA         | 0.64  | 2.60 | 2.90  | 1.52E-02 | 1.43E-01 | -3.39 |
| 1439514_PM_at   | A930004D18Rik                                                                        | NA         | -1.14 | 2.92 | -2.90 | 1.53E-02 | 1.43E-01 | -3.39 |
| 1429876_PM_at   | Supt7l                                                                               | SUPT7L     | -0.78 | 3.95 | -2.90 | 1.53E-02 | 1.43E-01 | -3.39 |
| 1430978_PM_at   | ---                                                                                  | NA         | 1.42  | 3.65 | 2.90  | 1.53E-02 | 1.43E-01 | -3.39 |
| 1451749_PM_at   | Irak4                                                                                | IRAK4      | 0.28  | 2.53 | 2.90  | 1.53E-02 | 1.43E-01 | -3.39 |
| 1424175_PM_at   | Tef                                                                                  | TEF        | -0.45 | 5.64 | -2.90 | 1.53E-02 | 1.44E-01 | -3.39 |
| 1423058_PM_at   | Capza2                                                                               | CAPZA2     | -1.09 | 6.15 | -2.90 | 1.53E-02 | 1.44E-01 | -3.39 |
| 1434692_PM_at   | Tyw5                                                                                 | TYW5       | -1.75 | 5.22 | -2.90 | 1.53E-02 | 1.44E-01 | -3.40 |
| 1435796_PM_at   | Wscd2                                                                                | WSCD2      | -1.02 | 4.32 | -2.90 | 1.53E-02 | 1.44E-01 | -3.40 |
| 1425993_PM_a_at | Hsph1                                                                                | HSPH1      | -0.79 | 8.43 | -2.90 | 1.53E-02 | 1.44E-01 | -3.40 |
| 1457077_PM_at   | ---                                                                                  | NA         | -0.58 | 3.33 | -2.90 | 1.53E-02 | 1.44E-01 | -3.40 |
| 1430307_PM_a_at | Me1                                                                                  | ME1        | -0.48 | 3.33 | -2.90 | 1.53E-02 | 1.44E-01 | -3.40 |
| 1455865_PM_at   | Insm1                                                                                | INSM1      | -0.32 | 2.57 | -2.90 | 1.53E-02 | 1.44E-01 | -3.40 |
| 1454014_PM_a_at | Mkks                                                                                 | MKKS       | -0.24 | 2.15 | -2.90 | 1.53E-02 | 1.44E-01 | -3.40 |
| 1446232_PM_at   | ---                                                                                  | NA         | 0.32  | 2.48 | 2.90  | 1.53E-02 | 1.44E-01 | -3.40 |
| 1418756_PM_at   | Trh                                                                                  | TRH        | 0.33  | 2.42 | 2.90  | 1.53E-02 | 1.44E-01 | -3.40 |
| 1417607_PM_at   | Cox6a2                                                                               | COX6A2     | 0.38  | 3.86 | 2.90  | 1.53E-02 | 1.44E-01 | -3.40 |
| 1438770_PM_at   | Gm266                                                                                | NA         | 0.38  | 2.92 | 2.90  | 1.53E-02 | 1.44E-01 | -3.40 |
| 1431769_PM_at   | 2210406O10Rik                                                                        | NA         | 0.42  | 3.31 | 2.90  | 1.53E-02 | 1.44E-01 | -3.40 |
| 1450635_PM_at   | Alpl2                                                                                | ALPPL2     | 0.51  | 3.68 | 2.90  | 1.53E-02 | 1.44E-01 | -3.39 |
| 1458954_PM_at   | Fam205a1                                                                             | NA         | 0.60  | 5.77 | 2.90  | 1.53E-02 | 1.44E-01 | -3.40 |
| 1450754_PM_at   | Cacna2d2                                                                             | CACNA2D2   | 1.02  | 7.72 | 2.90  | 1.53E-02 | 1.44E-01 | -3.40 |
| 1435422_PM_at   | Gskip                                                                                | GSKIP      | 1.14  | 4.50 | 2.90  | 1.53E-02 | 1.44E-01 | -3.40 |
| 1457258_PM_at   | 1700017L05Rik                                                                        | NA         | 0.38  | 3.03 | 2.90  | 1.54E-02 | 1.44E-01 | -3.40 |
| 1444989_PM_at   | ---                                                                                  | NA         | 0.63  | 3.19 | 2.90  | 1.54E-02 | 1.44E-01 | -3.40 |
| 1435356_PM_at   | Fbxo42                                                                               | FBXO42     | 0.35  | 3.26 | 2.90  | 1.54E-02 | 1.44E-01 | -3.40 |
| 1445065_PM_at   | ---                                                                                  | NA         | 0.34  | 2.34 | 2.90  | 1.54E-02 | 1.44E-01 | -3.40 |

|                 |                                                                                                  |            |       |      |       |          |          |       |
|-----------------|--------------------------------------------------------------------------------------------------|------------|-------|------|-------|----------|----------|-------|
| 1419067_PM_a_at | Rabgef1                                                                                          | RABGEF1    | -0.55 | 2.94 | -2.90 | 1.54E-02 | 1.44E-01 | -3.40 |
| 1421565_PM_at   | Robo3                                                                                            | NA         | 0.23  | 2.31 | 2.90  | 1.54E-02 | 1.44E-01 | -3.40 |
| 1443613_PM_x_at | ---                                                                                              | NA         | 0.38  | 3.48 | 2.90  | 1.54E-02 | 1.44E-01 | -3.40 |
| 1448206_PM_at   | Psm2                                                                                             | PSMA2      | -0.60 | 6.98 | -2.89 | 1.54E-02 | 1.44E-01 | -3.40 |
| 1454665_PM_at   | Irf2bp2                                                                                          | IRF2BP2    | 0.86  | 5.27 | 2.89  | 1.54E-02 | 1.44E-01 | -3.40 |
| 1432786_PM_at   | ---                                                                                              | NA         | 0.49  | 2.75 | 2.89  | 1.55E-02 | 1.44E-01 | -3.40 |
| 1441532_PM_at   | ---                                                                                              | NA         | 0.31  | 2.45 | 2.89  | 1.55E-02 | 1.44E-01 | -3.41 |
| 1416368_PM_at   | Gsta4                                                                                            | NA         | -1.21 | 5.23 | -2.89 | 1.55E-02 | 1.44E-01 | -3.41 |
| 1451205_PM_at   | Psm4                                                                                             | PSMB4      | -0.92 | 5.23 | -2.89 | 1.55E-02 | 1.44E-01 | -3.41 |
| 1448100_PM_at   | 4833439L19Rik                                                                                    | KIAA1191   | -0.68 | 5.73 | -2.89 | 1.55E-02 | 1.44E-01 | -3.41 |
| 1428353_PM_at   | Foxk2                                                                                            | FOKK2      | -0.62 | 3.25 | -2.89 | 1.55E-02 | 1.44E-01 | -3.41 |
| 1415941_PM_s_at | Zfand2a                                                                                          | ZFAND2A    | -0.56 | 4.64 | -2.89 | 1.55E-02 | 1.44E-01 | -3.41 |
| 1430914_PM_at   | 5330426L24Rik                                                                                    | NA         | 0.46  | 2.68 | 2.89  | 1.55E-02 | 1.44E-01 | -3.41 |
| 1442064_PM_at   | AW556556                                                                                         | NA         | 0.35  | 2.56 | 2.89  | 1.55E-02 | 1.45E-01 | -3.41 |
| 1416925_PM_at   | Kpnb1                                                                                            | KPNB1      | -1.35 | 6.53 | -2.89 | 1.55E-02 | 1.45E-01 | -3.41 |
| 1434280_PM_at   | ---                                                                                              | NA         | -0.76 | 3.92 | -2.89 | 1.55E-02 | 1.45E-01 | -3.41 |
| 1429904_PM_at   | ---                                                                                              | NA         | 0.28  | 2.68 | 2.89  | 1.55E-02 | 1.45E-01 | -3.41 |
| 1427252_PM_at   | Dmrtb1                                                                                           | DMRTB1     | 0.30  | 2.65 | 2.89  | 1.55E-02 | 1.45E-01 | -3.41 |
| 1426260_PM_a_at | Ugt1a1 /// Ugt1a10 ///<br>Ugt1a2 /// Ugt1a5 ///<br>Ugt1a6a /// Ugt1a6b ///<br>Ugt1a7c /// Ugt1a9 | UGT1A6     | -0.65 | 2.69 | -2.89 | 1.55E-02 | 1.45E-01 | -3.41 |
| 1433189_PM_at   | 4933433N18Rik                                                                                    | NA         | 0.27  | 2.37 | 2.89  | 1.55E-02 | 1.45E-01 | -3.41 |
| 1421535_PM_a_at | Pde4a                                                                                            | PDE4A      | 0.28  | 3.33 | 2.89  | 1.56E-02 | 1.45E-01 | -3.41 |
| 1457135_PM_at   | Fat2                                                                                             | FAT2       | 0.50  | 3.11 | 2.89  | 1.55E-02 | 1.45E-01 | -3.41 |
| 1427408_PM_a_at | Thrap3                                                                                           | THRAP3     | 0.96  | 7.00 | 2.89  | 1.56E-02 | 1.45E-01 | -3.41 |
| 1423899_PM_at   | Trip12                                                                                           | TRIP12     | -1.73 | 6.75 | -2.89 | 1.56E-02 | 1.45E-01 | -3.41 |
| 1421292_PM_a_at | Nelfb                                                                                            | NELFB      | -0.80 | 5.19 | -2.89 | 1.56E-02 | 1.45E-01 | -3.41 |
| 1439548_PM_at   | Rap2b                                                                                            | RAP2B      | -0.78 | 5.74 | -2.89 | 1.56E-02 | 1.45E-01 | -3.41 |
| 1436684_PM_a_at | Riok2                                                                                            | NA         | -0.77 | 3.83 | -2.89 | 1.56E-02 | 1.45E-01 | -3.41 |
| 1452980_PM_at   | 2810468N07Rik                                                                                    | NA         | -0.61 | 2.99 | -2.89 | 1.56E-02 | 1.45E-01 | -3.41 |
| 1419146_PM_a_at | Gck                                                                                              | GCK        | 0.24  | 2.32 | 2.89  | 1.56E-02 | 1.45E-01 | -3.41 |
| 1431181_PM_a_at | Luc7l                                                                                            | LUC7L      | 0.64  | 2.96 | 2.89  | 1.56E-02 | 1.45E-01 | -3.41 |
| 1420104_PM_at   | ---                                                                                              | NA         | 0.39  | 3.80 | 2.89  | 1.56E-02 | 1.45E-01 | -3.41 |
| 1453671_PM_at   | 9430041J12Rik                                                                                    | NA         | 0.48  | 3.01 | 2.89  | 1.56E-02 | 1.45E-01 | -3.41 |
| 1417923_PM_at   | Pak3                                                                                             | PAK3       | -0.90 | 3.99 | -2.89 | 1.56E-02 | 1.45E-01 | -3.41 |
| 1437454_PM_a_at | Tmx2                                                                                             | TMX2       | -0.70 | 7.85 | -2.89 | 1.56E-02 | 1.45E-01 | -3.41 |
| 1430130_PM_at   | Vvce                                                                                             | VVCE       | 0.30  | 2.42 | 2.89  | 1.56E-02 | 1.45E-01 | -3.41 |
| 1457745_PM_at   | Gpr4                                                                                             | GPR4       | 0.46  | 3.04 | 2.89  | 1.56E-02 | 1.45E-01 | -3.41 |
| 1431492_PM_at   | Lipn                                                                                             | LIPN       | 0.47  | 2.82 | 2.89  | 1.56E-02 | 1.45E-01 | -3.41 |
| 1442965_PM_at   | ---                                                                                              | NA         | 0.50  | 3.09 | 2.89  | 1.56E-02 | 1.45E-01 | -3.41 |
| 1440908_PM_at   | ---                                                                                              | NA         | 0.34  | 3.50 | 2.89  | 1.56E-02 | 1.45E-01 | -3.41 |
| 1430970_PM_a_at | Morn3                                                                                            | MORN3      | 0.34  | 2.46 | 2.89  | 1.56E-02 | 1.45E-01 | -3.41 |
| 1424150_PM_at   | Gdpd5                                                                                            | GDPD5      | 0.58  | 3.93 | 2.89  | 1.57E-02 | 1.45E-01 | -3.42 |
| 1457386_PM_at   | ---                                                                                              | NA         | 0.81  | 3.28 | 2.89  | 1.57E-02 | 1.45E-01 | -3.42 |
| 1416884_PM_at   | Cbx3                                                                                             | CBX3       | -0.94 | 6.05 | -2.89 | 1.57E-02 | 1.45E-01 | -3.42 |
| 1430858_PM_at   | 4632433K11Rik                                                                                    | NA         | 0.36  | 2.77 | 2.89  | 1.57E-02 | 1.45E-01 | -3.42 |
| 1449172_PM_a_at | Lin7b                                                                                            | LIN7B      | -0.98 | 6.93 | -2.88 | 1.57E-02 | 1.45E-01 | -3.42 |
| 1422592_PM_at   | Ctnnd2                                                                                           | CTNND2     | -1.33 | 6.87 | -2.88 | 1.57E-02 | 1.46E-01 | -3.42 |
| 1455826_PM_a_at | Bace1                                                                                            | BACE1      | -0.84 | 3.20 | -2.88 | 1.57E-02 | 1.46E-01 | -3.42 |
| 1430388_PM_a_at | Sulf2                                                                                            | SULF2      | -0.81 | 3.38 | -2.88 | 1.57E-02 | 1.46E-01 | -3.42 |
| 1455243_PM_at   | Brpf3                                                                                            | BRPF3      | 0.53  | 4.91 | 2.88  | 1.58E-02 | 1.46E-01 | -3.42 |
| 1454047_PM_a_at | Cep57l1                                                                                          | CEP57L1    | 0.40  | 2.49 | 2.88  | 1.58E-02 | 1.46E-01 | -3.42 |
| 1451234_PM_at   | Fam193b                                                                                          | FAM193B    | 0.69  | 3.76 | 2.88  | 1.58E-02 | 1.46E-01 | -3.42 |
| 1435559_PM_at   | Myo6                                                                                             | MYO6       | -0.92 | 4.02 | -2.88 | 1.58E-02 | 1.46E-01 | -3.42 |
| 1426342_PM_at   | Stt3b                                                                                            | STT3B      | -0.76 | 4.94 | -2.88 | 1.58E-02 | 1.46E-01 | -3.43 |
| 1438506_PM_s_at | Abi1                                                                                             | ABI1       | -1.22 | 5.02 | -2.88 | 1.58E-02 | 1.46E-01 | -3.43 |
| 1453123_PM_at   | Sf3b2                                                                                            | NA         | 0.34  | 2.76 | 2.88  | 1.58E-02 | 1.46E-01 | -3.43 |
| 1449939_PM_s_at | Dlk1                                                                                             | DLK1       | 0.29  | 2.47 | 2.88  | 1.58E-02 | 1.46E-01 | -3.43 |
| 1415859_PM_at   | Eif3c                                                                                            | EIF3CL     | 0.60  | 8.91 | 2.88  | 1.58E-02 | 1.46E-01 | -3.43 |
| 1437502_PM_x_at | Cd24a                                                                                            | CD24       | 1.17  | 4.83 | 2.88  | 1.58E-02 | 1.46E-01 | -3.43 |
| 1424915_PM_s_at | Cipc                                                                                             | CIPC       | -0.91 | 7.03 | -2.88 | 1.58E-02 | 1.46E-01 | -3.43 |
| 1456030_PM_at   | Klf13                                                                                            | NA         | 0.29  | 2.26 | 2.88  | 1.58E-02 | 1.46E-01 | -3.43 |
| 1449204_PM_at   | Gjb5                                                                                             | GJB5       | 0.39  | 3.04 | 2.88  | 1.58E-02 | 1.46E-01 | -3.43 |
| 1441481_PM_at   | Mfap3l                                                                                           | MFAP3L     | -0.43 | 2.82 | -2.88 | 1.58E-02 | 1.46E-01 | -3.43 |
| 1451257_PM_at   | Acsl6                                                                                            | ACSL6      | -0.86 | 6.31 | -2.88 | 1.58E-02 | 1.46E-01 | -3.43 |
| 1460706_PM_s_at | Rer1                                                                                             | RER1       | -0.88 | 5.95 | -2.88 | 1.59E-02 | 1.46E-01 | -3.43 |
| 1456343_PM_at   | Slc35f1                                                                                          | SLC35F1    | -1.43 | 5.58 | -2.88 | 1.59E-02 | 1.46E-01 | -3.43 |
| 1456796_PM_at   | Snai3                                                                                            | SNAI3      | 0.29  | 2.39 | 2.88  | 1.59E-02 | 1.46E-01 | -3.43 |
| 1451676_PM_at   | Drp1                                                                                             | DRAP1      | 0.87  | 3.82 | 2.88  | 1.59E-02 | 1.46E-01 | -3.43 |
| 1428504_PM_at   | Xrcc6                                                                                            | XRCC6      | 0.24  | 2.51 | 2.88  | 1.59E-02 | 1.46E-01 | -3.43 |
| 1433180_PM_at   | Morn1                                                                                            | NA         | 0.28  | 2.27 | 2.88  | 1.59E-02 | 1.46E-01 | -3.43 |
| 1424420_PM_at   | Ccpg1                                                                                            | CCPG1      | -0.63 | 5.90 | -2.88 | 1.59E-02 | 1.47E-01 | -3.43 |
| 1457928_PM_at   | 4930435E12Rik                                                                                    | AC083800.1 | -0.28 | 2.30 | -2.88 | 1.59E-02 | 1.47E-01 | -3.43 |
| 1451522_PM_s_at | Gm20605 /// Lrch4                                                                                | LRCH4      | 0.37  | 2.43 | 2.88  | 1.59E-02 | 1.47E-01 | -3.43 |

|                 |                           |             |       |      |       |          |          |       |
|-----------------|---------------------------|-------------|-------|------|-------|----------|----------|-------|
| 1439872_PM_at   | Kcna2                     | KCNA2       | -1.05 | 5.74 | -2.88 | 1.59E-02 | 1.47E-01 | -3.43 |
| 1454183_PM_at   | Rbm42                     | RBM42       | 0.31  | 2.46 | 2.88  | 1.59E-02 | 1.47E-01 | -3.43 |
| 1460007_PM_at   | Thyn1                     | THYN1       | -0.40 | 2.72 | -2.88 | 1.59E-02 | 1.47E-01 | -3.44 |
| 1432615_PM_at   | Wdr37                     | WDR37       | 0.44  | 2.57 | 2.88  | 1.60E-02 | 1.47E-01 | -3.44 |
| 1453743_PM_x_at | Phf14                     | PHF14       | 0.99  | 5.04 | 2.88  | 1.60E-02 | 1.47E-01 | -3.44 |
| 1433811_PM_at   | Mllt6                     | MLLT6       | -0.44 | 4.23 | -2.87 | 1.60E-02 | 1.47E-01 | -3.44 |
| 1459472_PM_at   | Irgb3bp                   | ITGB3BP     | 0.37  | 2.74 | 2.87  | 1.60E-02 | 1.47E-01 | -3.44 |
| 1448122_PM_at   | Tcp1                      | TCP1        | -0.90 | 7.70 | -2.87 | 1.60E-02 | 1.47E-01 | -3.44 |
| 1454652_PM_at   | Zranb2                    | ZRANB2      | -1.29 | 6.16 | -2.87 | 1.60E-02 | 1.47E-01 | -3.44 |
| 1428702_PM_at   | Ddx28                     | DDX28       | -0.45 | 2.42 | -2.87 | 1.60E-02 | 1.47E-01 | -3.44 |
| 1427718_PM_a_at | Mdm2                      | MDM2        | 0.84  | 3.52 | 2.87  | 1.60E-02 | 1.47E-01 | -3.44 |
| 1437947_PM_x_at | Vdac1                     | VDAC1       | -0.55 | 9.93 | -2.87 | 1.60E-02 | 1.47E-01 | -3.44 |
| 1421462_PM_a_at | P3h1                      | P3H1        | 0.24  | 2.77 | 2.87  | 1.60E-02 | 1.47E-01 | -3.44 |
| 1438073_PM_at   | Spry3                     | SPRY3       | -0.48 | 2.54 | -2.87 | 1.60E-02 | 1.47E-01 | -3.44 |
| 1417715_PM_a_at | Got2                      | GOT2        | -1.10 | 5.64 | -2.87 | 1.60E-02 | 1.47E-01 | -3.44 |
| 1440655_PM_at   | Sgip1                     | SGIP1       | -0.48 | 4.59 | -2.87 | 1.61E-02 | 1.47E-01 | -3.44 |
| 1459992_PM_x_at | Chn8                      | KBTBD11-OT1 | -0.43 | 4.56 | -2.87 | 1.60E-02 | 1.47E-01 | -3.44 |
| 1454991_PM_at   | Slc7a1                    | SLC7A1      | -0.90 | 7.26 | -2.87 | 1.61E-02 | 1.48E-01 | -3.44 |
| 1425044_PM_at   | Kcnj6                     | NA          | 0.35  | 3.31 | 2.87  | 1.61E-02 | 1.48E-01 | -3.44 |
| 1429309_PM_at   | Prdm16                    | PRDM16      | 0.44  | 3.56 | 2.87  | 1.61E-02 | 1.48E-01 | -3.44 |
| 1418843_PM_at   | Slc30a4                   | SLC30A4     | -1.07 | 7.23 | -2.87 | 1.61E-02 | 1.48E-01 | -3.44 |
| 1421444_PM_at   | Pgr                       | PGR         | -0.79 | 2.30 | -2.87 | 1.61E-02 | 1.48E-01 | -3.44 |
| 1419137_PM_at   | Shank3                    | SHANK3      | -0.54 | 4.11 | -2.87 | 1.61E-02 | 1.48E-01 | -3.44 |
| 1416375_PM_at   | Ap3m1                     | AP3M1       | -0.40 | 3.41 | -2.87 | 1.61E-02 | 1.48E-01 | -3.44 |
| 1420001_PM_at   | D7Ert1e                   | NA          | 0.26  | 2.42 | 2.87  | 1.61E-02 | 1.48E-01 | -3.44 |
| 1416994_PM_at   | Ttc1                      | TTC1        | 1.23  | 5.58 | 2.87  | 1.61E-02 | 1.48E-01 | -3.44 |
| 1444973_PM_at   | ---                       | NA          | 0.51  | 3.25 | 2.87  | 1.61E-02 | 1.48E-01 | -3.45 |
| 1458931_PM_at   | ---                       | NA          | 0.35  | 2.34 | 2.87  | 1.61E-02 | 1.48E-01 | -3.45 |
| 1430097_PM_at   | ---                       | NA          | -0.46 | 2.72 | -2.87 | 1.62E-02 | 1.48E-01 | -3.45 |
| 1428163_PM_at   | Sar1b                     | SAR1B       | -1.03 | 5.27 | -2.87 | 1.62E-02 | 1.48E-01 | -3.45 |
| 1439424_PM_x_at | Herpud2                   | HERPUD2     | -0.86 | 3.08 | -2.87 | 1.62E-02 | 1.48E-01 | -3.45 |
| 1430031_PM_at   | Ipmk                      | IPMK        | 0.20  | 2.13 | 2.87  | 1.62E-02 | 1.48E-01 | -3.45 |
| 1445478_PM_at   | ---                       | NA          | 0.28  | 2.79 | 2.87  | 1.62E-02 | 1.48E-01 | -3.45 |
| 1441103_PM_at   | Esy2                      | NA          | 0.31  | 2.81 | 2.87  | 1.62E-02 | 1.48E-01 | -3.45 |
| 1445576_PM_at   | Pms2                      | RSPH10B     | 0.32  | 2.55 | 2.87  | 1.62E-02 | 1.48E-01 | -3.45 |
| 1450750_PM_a_at | Nr4a2                     | NR4A2       | 1.39  | 3.90 | 2.87  | 1.62E-02 | 1.48E-01 | -3.45 |
| 1425085_PM_at   | Zfp944                    | NA          | 0.25  | 2.73 | 2.87  | 1.62E-02 | 1.48E-01 | -3.45 |
| 1458998_PM_at   | Obfc1                     | STN1        | 0.30  | 2.97 | 2.87  | 1.62E-02 | 1.48E-01 | -3.45 |
| 1434373_PM_at   | Fam168a                   | FAM168A     | -0.69 | 4.42 | -2.87 | 1.62E-02 | 1.48E-01 | -3.45 |
| 1426559_PM_at   | Sbno1                     | SBNO1       | -0.44 | 8.18 | -2.87 | 1.62E-02 | 1.48E-01 | -3.45 |
| 1434100_PM_x_at | Ppargc1a                  | PPARGC1A    | -0.86 | 5.51 | -2.86 | 1.63E-02 | 1.48E-01 | -3.45 |
| 1426514_PM_at   | Chst15                    | CHST15      | -0.35 | 2.29 | -2.86 | 1.63E-02 | 1.48E-01 | -3.45 |
| 1420551_PM_at   | Murc                      | CAVIN4      | 0.45  | 2.59 | 2.86  | 1.63E-02 | 1.48E-01 | -3.45 |
| 1422090_PM_a_at | Pfkfb2                    | PFKFB2      | 0.87  | 3.96 | 2.86  | 1.63E-02 | 1.48E-01 | -3.45 |
| 1442319_PM_at   | Usp4                      | USP4        | 1.08  | 4.87 | 2.86  | 1.63E-02 | 1.48E-01 | -3.45 |
| 1432465_PM_at   | ---                       | NA          | 0.35  | 3.19 | 2.86  | 1.63E-02 | 1.49E-01 | -3.46 |
| 1440346_PM_at   | ---                       | NA          | 0.68  | 4.60 | 2.86  | 1.63E-02 | 1.49E-01 | -3.46 |
| 1459548_PM_at   | Spire1                    | SPIRE1      | 0.28  | 2.57 | 2.86  | 1.63E-02 | 1.49E-01 | -3.46 |
| 1417151_PM_a_at | Ntsr2                     | NTSR2       | -0.43 | 4.14 | -2.86 | 1.63E-02 | 1.49E-01 | -3.46 |
| 1431237_PM_at   | Nr2f2                     | NR2F2       | 0.33  | 2.48 | 2.86  | 1.63E-02 | 1.49E-01 | -3.46 |
| 1417893_PM_at   | Sfxn3                     | SFXN3       | -0.99 | 6.47 | -2.86 | 1.63E-02 | 1.49E-01 | -3.46 |
| 1424301_PM_at   | Zfp219                    | ZNF219      | 0.42  | 4.74 | 2.86  | 1.63E-02 | 1.49E-01 | -3.46 |
| 1427133_PM_s_at | Lrp2                      | LRP2        | 0.25  | 2.41 | 2.86  | 1.63E-02 | 1.49E-01 | -3.46 |
| 1434601_PM_at   | Amigo2                    | AMIGO2      | -1.18 | 3.68 | -2.86 | 1.64E-02 | 1.49E-01 | -3.46 |
| 1449108_PM_at   | Fdx1                      | FDX1        | -0.51 | 4.67 | -2.86 | 1.64E-02 | 1.49E-01 | -3.46 |
| 1447234_PM_s_at | Srx6                      | SNX6        | -0.49 | 3.40 | -2.86 | 1.64E-02 | 1.49E-01 | -3.46 |
| 1447390_PM_at   | ---                       | NA          | -0.27 | 2.84 | -2.86 | 1.64E-02 | 1.49E-01 | -3.46 |
| 1429400_PM_at   | Clcn5                     | CLCN5       | 0.42  | 2.86 | 2.86  | 1.64E-02 | 1.49E-01 | -3.46 |
| 1420328_PM_at   | Rep15                     | REP15       | 0.44  | 3.58 | 2.86  | 1.64E-02 | 1.49E-01 | -3.46 |
| 1443883_PM_at   | Sys1                      | NA          | 0.62  | 3.08 | 2.86  | 1.64E-02 | 1.49E-01 | -3.46 |
| 1456011_PM_x_at | Acaa1a                    | ACAA1       | 0.84  | 6.74 | 2.86  | 1.64E-02 | 1.49E-01 | -3.46 |
| 1415956_PM_a_at | Cdk16                     | CDK16       | -0.82 | 6.05 | -2.86 | 1.64E-02 | 1.49E-01 | -3.46 |
| 1432408_PM_a_at | A230006K03Rik /// Gm31445 | NA          | 1.44  | 3.95 | 2.86  | 1.64E-02 | 1.49E-01 | -3.46 |
| 1456740_PM_x_at | Cog1 /// LOC102641618     | COG1        | -0.74 | 3.64 | -2.86 | 1.64E-02 | 1.49E-01 | -3.46 |
| 1440643_PM_at   | ---                       | NA          | 0.38  | 3.38 | 2.86  | 1.64E-02 | 1.49E-01 | -3.46 |
| 1426486_PM_at   | Ubxn4                     | UBXN4       | -0.63 | 7.62 | -2.86 | 1.64E-02 | 1.49E-01 | -3.46 |
| 1416763_PM_at   | Cdc123                    | CDC123      | -0.61 | 5.16 | -2.86 | 1.64E-02 | 1.49E-01 | -3.46 |
| 1443026_PM_at   | ---                       | NA          | 0.75  | 4.51 | 2.86  | 1.65E-02 | 1.49E-01 | -3.47 |
| 1438947_PM_x_at | Sema3f                    | SEMA3F      | 0.41  | 2.66 | 2.86  | 1.65E-02 | 1.50E-01 | -3.47 |
| 1457269_PM_at   | Gm1123                    | CXADR       | 0.30  | 2.74 | 2.86  | 1.65E-02 | 1.50E-01 | -3.47 |
| 1416603_PM_at   | LOC102642602 /// Rpl22    | RPL22       | 0.82  | 5.98 | 2.86  | 1.65E-02 | 1.50E-01 | -3.47 |
| 1443008_PM_at   | ---                       | NA          | 0.36  | 2.40 | 2.86  | 1.65E-02 | 1.50E-01 | -3.47 |
| 1446661_PM_at   | ---                       | NA          | 0.76  | 5.36 | 2.86  | 1.65E-02 | 1.50E-01 | -3.47 |
| 1449284_PM_at   | Tescl                     | NA          | 0.32  | 2.89 | 2.86  | 1.65E-02 | 1.50E-01 | -3.47 |

|                 |               |           |       |      |       |          |          |       |
|-----------------|---------------|-----------|-------|------|-------|----------|----------|-------|
| 1431473_PM_at   | ---           | NA        | 0.42  | 2.57 | 2.86  | 1.65E-02 | 1.50E-01 | -3.47 |
| 1448458_PM_at   | Top2b         | TOP2B     | -0.80 | 3.96 | -2.86 | 1.65E-02 | 1.50E-01 | -3.47 |
| 1438294_PM_at   | Atxn1         | ATXN1     | -1.25 | 4.71 | -2.85 | 1.65E-02 | 1.50E-01 | -3.47 |
| 1436581_PM_at   | Ttc14         | TTC14     | -1.04 | 7.40 | -2.85 | 1.65E-02 | 1.50E-01 | -3.47 |
| 1439673_PM_at   | ---           | NA        | 0.37  | 2.51 | 2.85  | 1.65E-02 | 1.50E-01 | -3.47 |
| 1447896_PM_s_at | Snhg8         | NA        | 0.44  | 9.65 | 2.85  | 1.65E-02 | 1.50E-01 | -3.47 |
| 1458428_PM_at   | Kcnt1         | KCNT1     | 0.68  | 3.09 | 2.85  | 1.66E-02 | 1.50E-01 | -3.47 |
| 1441870_PM_s_at | Pkd2          | PKD2      | -1.20 | 6.84 | -2.85 | 1.66E-02 | 1.50E-01 | -3.47 |
| 1448602_PM_at   | Pygm          | PYGM      | 0.29  | 2.66 | 2.85  | 1.66E-02 | 1.50E-01 | -3.47 |
| 1428647_PM_at   | Pbx1          | PBX1      | -1.30 | 5.33 | -2.85 | 1.66E-02 | 1.50E-01 | -3.47 |
| 1416782_PM_s_at | Praf2         | PRAF2     | -0.77 | 3.70 | -2.85 | 1.66E-02 | 1.50E-01 | -3.47 |
| 1437644_PM_at   | B3galt2       | B3GALT2   | -0.25 | 2.28 | -2.85 | 1.66E-02 | 1.50E-01 | -3.47 |
| 1445416_PM_at   | Cep41         | CEP41     | 0.32  | 3.13 | 2.85  | 1.66E-02 | 1.50E-01 | -3.47 |
| 1432755_PM_at   | ---           | NA        | 0.39  | 2.27 | 2.85  | 1.66E-02 | 1.50E-01 | -3.47 |
| 1442121_PM_at   | Arpp21        | NA        | 0.54  | 2.65 | 2.85  | 1.66E-02 | 1.50E-01 | -3.47 |
| 1425154_PM_a_at | Csf1          | CSF1      | 0.37  | 3.24 | 2.85  | 1.66E-02 | 1.50E-01 | -3.47 |
| 1436865_PM_at   | Slc26a11      | SLC26A11  | 0.23  | 2.70 | 2.85  | 1.66E-02 | 1.50E-01 | -3.47 |
| 1434661_PM_at   | Syng1         | SYNG1     | -0.80 | 6.57 | -2.85 | 1.66E-02 | 1.50E-01 | -3.48 |
| 1430114_PM_at   | Tprg          | TPRG1     | 0.25  | 2.29 | 2.85  | 1.66E-02 | 1.50E-01 | -3.48 |
| 1418537_PM_at   | Isoc2b        | ISOC2     | 0.34  | 3.57 | 2.85  | 1.66E-02 | 1.50E-01 | -3.48 |
| 1441317_PM_x_at | Jakmip1       | JAKMIP1   | -1.48 | 6.72 | -2.85 | 1.66E-02 | 1.50E-01 | -3.48 |
| 1443833_PM_at   | ---           | NA        | -1.24 | 5.29 | -2.85 | 1.67E-02 | 1.50E-01 | -3.48 |
| 1452108_PM_at   | Igf1r         | NA        | -0.72 | 5.27 | -2.85 | 1.67E-02 | 1.50E-01 | -3.48 |
| 1457251_PM_x_at | ---           | NA        | 0.45  | 3.11 | 2.85  | 1.67E-02 | 1.50E-01 | -3.48 |
| 1426282_PM_at   | Ntm           | NTM       | 1.00  | 4.44 | 2.85  | 1.67E-02 | 1.50E-01 | -3.48 |
| 1451100_PM_a_at | Cdv3          | CDV3      | 0.69  | 6.62 | 2.85  | 1.67E-02 | 1.50E-01 | -3.48 |
| 1456692_PM_at   | Brd1          | NA        | 0.30  | 2.28 | 2.85  | 1.67E-02 | 1.51E-01 | -3.48 |
| 1424978_PM_at   | Odf4          | ODF4      | 0.33  | 2.40 | 2.85  | 1.67E-02 | 1.51E-01 | -3.48 |
| 1451275_PM_at   | Uhrf1bp1l     | UHRF1BP1L | -0.53 | 5.72 | -2.85 | 1.67E-02 | 1.51E-01 | -3.48 |
| 1421857_PM_at   | Adam17        | ADAM17    | 0.24  | 2.68 | 2.85  | 1.67E-02 | 1.51E-01 | -3.48 |
| 1418747_PM_at   | Spi1          | SPI1      | 0.27  | 2.65 | 2.85  | 1.67E-02 | 1.51E-01 | -3.48 |
| 1418289_PM_at   | Nes           | NES       | 0.30  | 2.26 | 2.85  | 1.67E-02 | 1.51E-01 | -3.48 |
| 1423373_PM_at   | Rpp30         | RPP30     | -0.55 | 2.86 | -2.85 | 1.67E-02 | 1.51E-01 | -3.48 |
| 1450021_PM_at   | Ubqln2        | UBQLN2    | -0.95 | 8.65 | -2.85 | 1.68E-02 | 1.51E-01 | -3.49 |
| 1429296_PM_at   | Rab10         | RAB10     | -0.78 | 5.72 | -2.85 | 1.68E-02 | 1.51E-01 | -3.49 |
| 1427331_PM_at   | Adora1        | ADORA1    | -0.61 | 3.66 | -2.85 | 1.68E-02 | 1.51E-01 | -3.48 |
| 1416024_PM_x_at | Cct3          | CCT3      | -0.61 | 7.94 | -2.85 | 1.68E-02 | 1.51E-01 | -3.49 |
| 1457076_PM_at   | Fam131c       | FAM131C   | 0.28  | 3.30 | 2.85  | 1.68E-02 | 1.51E-01 | -3.48 |
| 1420657_PM_at   | Ucp3          | UCP3      | 0.32  | 2.48 | 2.85  | 1.68E-02 | 1.51E-01 | -3.48 |
| 1442962_PM_at   | AU022052      | NA        | 0.36  | 3.30 | 2.85  | 1.68E-02 | 1.51E-01 | -3.49 |
| 1429214_PM_at   | Adamtsl2      | ADAMTSL2  | 0.40  | 2.63 | 2.85  | 1.68E-02 | 1.51E-01 | -3.48 |
| 1438270_PM_at   | Al846148      | C11orf84  | 0.40  | 2.38 | 2.85  | 1.68E-02 | 1.51E-01 | -3.49 |
| 1437618_PM_x_at | Gpr85         | GPR85     | -0.89 | 4.49 | -2.85 | 1.68E-02 | 1.51E-01 | -3.49 |
| 1423573_PM_at   | Srd5a3        | SRD5A3    | -0.45 | 2.21 | -2.85 | 1.68E-02 | 1.51E-01 | -3.49 |
| 1452518_PM_a_at | Itk           | ITK       | 0.29  | 2.35 | 2.84  | 1.68E-02 | 1.51E-01 | -3.49 |
| 1415979_PM_x_at | Rpl7          | NA        | -1.15 | 5.36 | -2.84 | 1.68E-02 | 1.51E-01 | -3.49 |
| 1456324_PM_at   | Zfp748        | ZNF208    | -0.41 | 2.46 | -2.84 | 1.68E-02 | 1.51E-01 | -3.49 |
| 1453659_PM_at   | Cenpo         | CENPO     | 0.34  | 3.08 | 2.84  | 1.68E-02 | 1.51E-01 | -3.49 |
| 1450309_PM_at   | Astn2         | ASTN2     | 0.48  | 2.60 | 2.84  | 1.68E-02 | 1.51E-01 | -3.49 |
| 1445843_PM_at   | Chd2          | CHD2      | 1.05  | 5.06 | 2.84  | 1.68E-02 | 1.51E-01 | -3.49 |
| 1456763_PM_at   | Mpr1p         | MPRIP     | -0.64 | 5.71 | -2.84 | 1.69E-02 | 1.51E-01 | -3.49 |
| 1419330_PM_a_at | Gpa33         | GPA33     | 0.36  | 2.93 | 2.84  | 1.69E-02 | 1.51E-01 | -3.49 |
| 1446044_PM_at   | Gm12503       | NA        | 0.25  | 2.22 | 2.84  | 1.69E-02 | 1.52E-01 | -3.49 |
| 1458256_PM_at   | Isy1          | NA        | 0.23  | 2.64 | 2.84  | 1.69E-02 | 1.52E-01 | -3.49 |
| 1453458_PM_at   | 9430019C24Rik | NA        | 0.36  | 2.03 | 2.84  | 1.69E-02 | 1.52E-01 | -3.49 |
| 1435898_PM_x_at | Gdi2          | GDI2      | -0.92 | 8.30 | -2.84 | 1.69E-02 | 1.52E-01 | -3.49 |
| 1436525_PM_at   | Ap3s2         | AP3S2     | -0.36 | 3.64 | -2.84 | 1.69E-02 | 1.52E-01 | -3.49 |
| 1420602_PM_a_at | Esx1          | ESX1      | 0.31  | 2.30 | 2.84  | 1.69E-02 | 1.52E-01 | -3.49 |
| 1454698_PM_at   | Hacd3         | HACD3     | -0.97 | 6.94 | -2.84 | 1.69E-02 | 1.52E-01 | -3.49 |
| 1437565_PM_a_at | Gnl2          | GNL2      | 0.42  | 8.92 | 2.84  | 1.69E-02 | 1.52E-01 | -3.49 |
| 1448461_PM_a_at | Thoc7         | THOC7     | -0.94 | 4.63 | -2.84 | 1.69E-02 | 1.52E-01 | -3.49 |
| 1440765_PM_at   | Fras1         | FRAS1     | 0.99  | 3.34 | 2.84  | 1.69E-02 | 1.52E-01 | -3.49 |
| 1416354_PM_at   | Rbmx          | RBMX      | 0.77  | 5.81 | 2.84  | 1.70E-02 | 1.52E-01 | -3.50 |
| 1442386_PM_at   | ---           | NA        | 0.25  | 2.49 | 2.84  | 1.70E-02 | 1.52E-01 | -3.50 |
| 1451222_PM_at   | Btf34         | BTF3L4    | -0.55 | 3.06 | -2.84 | 1.70E-02 | 1.52E-01 | -3.50 |
| 1444173_PM_at   | LOC105244993  | NA        | 0.28  | 2.66 | 2.84  | 1.70E-02 | 1.52E-01 | -3.50 |
| 1454165_PM_at   | ---           | NA        | 0.43  | 2.96 | 2.84  | 1.70E-02 | 1.52E-01 | -3.50 |
| 1428197_PM_at   | Tspan9        | TSPAN9    | 0.60  | 3.20 | 2.84  | 1.70E-02 | 1.52E-01 | -3.50 |
| 1436899_PM_at   | Zufsp         | ZUFSP     | -0.37 | 2.56 | -2.84 | 1.70E-02 | 1.52E-01 | -3.50 |
| 1457777_PM_at   | Gsdma         | GSDMA     | 0.28  | 3.08 | 2.84  | 1.70E-02 | 1.52E-01 | -3.50 |
| 1457933_PM_at   | Mfsd2b        | MFSD2B    | 0.46  | 2.94 | 2.84  | 1.70E-02 | 1.52E-01 | -3.50 |
| 1447759_PM_x_at | Ccdc22        | CCDC22    | 0.62  | 4.60 | 2.84  | 1.70E-02 | 1.52E-01 | -3.50 |
| 1457505_PM_at   | ---           | NA        | 0.31  | 2.35 | 2.84  | 1.70E-02 | 1.52E-01 | -3.50 |
| 1453720_PM_at   | Rnf157        | RNF157    | 0.57  | 3.25 | 2.84  | 1.71E-02 | 1.53E-01 | -3.50 |
| 1440948_PM_at   | ---           | NA        | 0.36  | 2.85 | 2.84  | 1.71E-02 | 1.53E-01 | -3.50 |

|                 |                                      |            |       |      |       |          |          |       |
|-----------------|--------------------------------------|------------|-------|------|-------|----------|----------|-------|
| 1417194_PM_at   | Sod2                                 | SOD2       | -0.67 | 2.89 | -2.84 | 1.71E-02 | 1.53E-01 | -3.50 |
| 1430060_PM_at   | 1700034G24Rik                        | NA         | 0.30  | 2.86 | 2.84  | 1.71E-02 | 1.53E-01 | -3.50 |
| 1443038_PM_at   | ---                                  | NA         | 0.82  | 3.26 | 2.84  | 1.71E-02 | 1.53E-01 | -3.50 |
| 1437111_PM_at   | Zc3h12c                              | NA         | -0.52 | 2.58 | -2.84 | 1.71E-02 | 1.53E-01 | -3.50 |
| 1423005_PM_a_at | Espn                                 | ESPN       | 0.39  | 3.06 | 2.84  | 1.71E-02 | 1.53E-01 | -3.50 |
| 1438760_PM_x_at | Adam15                               | ADAM15     | 0.44  | 4.12 | 2.84  | 1.71E-02 | 1.53E-01 | -3.50 |
| 1429980_PM_x_at | Slc38a10                             | SLC38A10   | 0.34  | 3.40 | 2.84  | 1.71E-02 | 1.53E-01 | -3.50 |
| 1444032_PM_at   | ---                                  | NA         | 0.36  | 2.14 | 2.84  | 1.71E-02 | 1.53E-01 | -3.50 |
| 1453722_PM_s_at | Srsf1                                | SRSF1      | 0.48  | 8.58 | 2.84  | 1.71E-02 | 1.53E-01 | -3.50 |
| 1419177_PM_at   | Vps37a                               | VPS37A     | -0.78 | 7.57 | -2.83 | 1.71E-02 | 1.53E-01 | -3.50 |
| 1421389_PM_a_at | Eif2ak4                              | EIF2AK4    | -0.49 | 2.99 | -2.83 | 1.71E-02 | 1.53E-01 | -3.51 |
| 1417948_PM_s_at | Ilf2                                 | ILF2       | -1.06 | 5.15 | -2.83 | 1.71E-02 | 1.53E-01 | -3.51 |
| 1460336_PM_at   | Ppargc1a                             | PPARGC1A   | -0.92 | 4.69 | -2.83 | 1.72E-02 | 1.53E-01 | -3.51 |
| 1456828_PM_at   | C030023E24Rik                        | NA         | -0.87 | 3.87 | -2.83 | 1.72E-02 | 1.53E-01 | -3.51 |
| 1436123_PM_at   | Bsn                                  | BSN        | -0.36 | 6.82 | -2.83 | 1.72E-02 | 1.53E-01 | -3.51 |
| 1444372_PM_at   | ---                                  | NA         | 0.25  | 2.36 | 2.83  | 1.72E-02 | 1.53E-01 | -3.51 |
| 1440023_PM_at   | Pcdh12                               | PCDH12     | 0.26  | 2.65 | 2.83  | 1.72E-02 | 1.53E-01 | -3.51 |
| 1425377_PM_at   | Wnt1                                 | WNT1       | 0.28  | 2.19 | 2.83  | 1.72E-02 | 1.53E-01 | -3.51 |
| 1438950_PM_x_at | Ric8                                 | RIC8A      | 0.35  | 2.88 | 2.83  | 1.72E-02 | 1.53E-01 | -3.51 |
| 1439164_PM_at   | ---                                  | NA         | 0.27  | 2.42 | 2.83  | 1.72E-02 | 1.53E-01 | -3.51 |
| 1418779_PM_at   | Rce1                                 | RCE1       | 0.56  | 3.36 | 2.83  | 1.72E-02 | 1.53E-01 | -3.51 |
| 1434331_PM_at   | Ago1                                 | AGO1       | -1.09 | 5.21 | -2.83 | 1.72E-02 | 1.53E-01 | -3.51 |
| 1433558_PM_at   | Dab2ip                               | DAB2IP     | -0.70 | 5.31 | -2.83 | 1.72E-02 | 1.53E-01 | -3.51 |
| 1439446_PM_at   | BC048507                             | NA         | 0.45  | 3.48 | 2.83  | 1.72E-02 | 1.53E-01 | -3.51 |
| 1439533_PM_at   | Fam229a                              | FAM229A    | 0.25  | 2.35 | 2.83  | 1.72E-02 | 1.53E-01 | -3.51 |
| 1441843_PM_s_at | ---                                  | NA         | 0.95  | 3.86 | 2.83  | 1.72E-02 | 1.53E-01 | -3.51 |
| 1444020_PM_at   | Ncan                                 | NA         | -1.37 | 6.41 | -2.83 | 1.72E-02 | 1.53E-01 | -3.51 |
| 1423666_PM_s_at | Rpl5                                 | RPL5       | -0.97 | 6.03 | -2.83 | 1.72E-02 | 1.53E-01 | -3.51 |
| 1442591_PM_at   | ---                                  | NA         | 0.49  | 2.81 | 2.83  | 1.72E-02 | 1.53E-01 | -3.51 |
| 1429657_PM_at   | Zfand5                               | ZFAND5     | -0.85 | 3.25 | -2.83 | 1.73E-02 | 1.53E-01 | -3.51 |
| 1455077_PM_a_at | Morf41l /// Morf41l-ps1 /// Morf41lb | MORF4L1    | -0.60 | 9.22 | -2.83 | 1.73E-02 | 1.53E-01 | -3.51 |
| 1442675_PM_at   | LOC102643251                         | NA         | 0.27  | 2.27 | 2.83  | 1.73E-02 | 1.53E-01 | -3.51 |
| 1435892_PM_at   | Asxl3                                | ASXL3      | 0.54  | 2.81 | 2.83  | 1.73E-02 | 1.53E-01 | -3.51 |
| 1445237_PM_at   | ---                                  | NA         | 0.57  | 2.66 | 2.83  | 1.73E-02 | 1.53E-01 | -3.51 |
| 1444661_PM_at   | Gpr26                                | GPR26      | 0.37  | 2.73 | 2.83  | 1.73E-02 | 1.54E-01 | -3.51 |
| 1449049_PM_at   | Tlr1                                 | TLR1       | 0.27  | 2.06 | 2.83  | 1.73E-02 | 1.54E-01 | -3.51 |
| 1434303_PM_at   | Raph1                                | RAPH1      | -0.52 | 4.34 | -2.83 | 1.73E-02 | 1.54E-01 | -3.52 |
| 1441858_PM_at   | ---                                  | NA         | 0.65  | 2.71 | 2.83  | 1.73E-02 | 1.54E-01 | -3.52 |
| 1446168_PM_at   | ---                                  | NA         | 0.38  | 2.86 | 2.83  | 1.73E-02 | 1.54E-01 | -3.52 |
| 1427330_PM_at   | Cars                                 | CARS       | 0.27  | 2.49 | 2.83  | 1.73E-02 | 1.54E-01 | -3.52 |
| 1424017_PM_a_at | Hint1                                | HINT1      | -0.83 | 8.62 | -2.83 | 1.73E-02 | 1.54E-01 | -3.52 |
| 1424588_PM_at   | Srgap3                               | SRGAP3     | -0.99 | 5.36 | -2.83 | 1.74E-02 | 1.54E-01 | -3.52 |
| 1434133_PM_s_at | Dcaf8                                | AL139011.2 | 0.20  | 2.63 | 2.83  | 1.74E-02 | 1.54E-01 | -3.52 |
| 1429151_PM_at   | Dcaf7                                | DCAF7      | -1.09 | 7.26 | -2.83 | 1.74E-02 | 1.54E-01 | -3.52 |
| 1422511_PM_a_at | Ogfr                                 | OGFR       | 0.26  | 3.05 | 2.83  | 1.74E-02 | 1.54E-01 | -3.52 |
| 1458858_PM_at   | ---                                  | NA         | 0.33  | 2.40 | 2.83  | 1.74E-02 | 1.54E-01 | -3.52 |
| 1432667_PM_at   | ---                                  | NA         | 0.38  | 2.33 | 2.83  | 1.74E-02 | 1.54E-01 | -3.52 |
| 1428668_PM_at   | Acbd3                                | ACBD3      | -0.65 | 5.64 | -2.83 | 1.74E-02 | 1.54E-01 | -3.52 |
| 1418049_PM_at   | Ltbp3                                | LTBP3      | 0.67  | 3.66 | 2.83  | 1.74E-02 | 1.54E-01 | -3.52 |
| 1419748_PM_at   | Abcd2                                | ABCD2      | -0.56 | 3.24 | -2.83 | 1.74E-02 | 1.54E-01 | -3.52 |
| 1446447_PM_at   | ---                                  | NA         | 0.39  | 2.81 | 2.82  | 1.74E-02 | 1.54E-01 | -3.52 |
| 1421486_PM_at   | Egr3                                 | EGR3       | 0.35  | 2.96 | 2.82  | 1.74E-02 | 1.54E-01 | -3.52 |
| 1434207_PM_at   | Rnf169                               | RNF169     | -0.63 | 5.72 | -2.82 | 1.74E-02 | 1.54E-01 | -3.52 |
| 1436216_PM_s_at | Inf2                                 | INF2       | -1.43 | 6.04 | -2.82 | 1.74E-02 | 1.54E-01 | -3.52 |
| 1441266_PM_at   | ---                                  | NA         | -0.63 | 2.92 | -2.82 | 1.74E-02 | 1.54E-01 | -3.52 |
| 1415734_PM_at   | Rab7                                 | RAB7A      | -0.69 | 7.94 | -2.82 | 1.75E-02 | 1.54E-01 | -3.52 |
| 1459488_PM_at   | ---                                  | NA         | -0.73 | 2.60 | -2.82 | 1.75E-02 | 1.54E-01 | -3.52 |
| 1425495_PM_at   | Zfp62                                | ZFP62      | -0.64 | 3.29 | -2.82 | 1.75E-02 | 1.54E-01 | -3.52 |
| 1444026_PM_at   | AI593442                             | C11orf87   | -0.45 | 5.67 | -2.82 | 1.75E-02 | 1.54E-01 | -3.52 |
| 1436410_PM_at   | Arhgef33                             | ARHGEF33   | 0.25  | 2.36 | 2.82  | 1.75E-02 | 1.54E-01 | -3.52 |
| 1443277_PM_at   | Ndst3                                | NDST3      | 0.29  | 3.10 | 2.82  | 1.75E-02 | 1.54E-01 | -3.53 |
| 1459497_PM_at   | ---                                  | NA         | 0.22  | 2.55 | 2.82  | 1.75E-02 | 1.54E-01 | -3.53 |
| 1423551_PM_at   | Cdh13                                | CDH13      | 0.37  | 2.49 | 2.82  | 1.75E-02 | 1.54E-01 | -3.53 |
| 1458404_PM_at   | Ndufb8                               | NDUFB8     | 0.28  | 2.52 | 2.82  | 1.75E-02 | 1.54E-01 | -3.53 |
| 1450540_PM_x_at | Krtap5-1                             | NA         | 0.45  | 2.75 | 2.82  | 1.75E-02 | 1.54E-01 | -3.53 |
| 1423198_PM_a_at | Smek2                                | PPP4R3B    | -0.59 | 4.43 | -2.82 | 1.75E-02 | 1.55E-01 | -3.53 |
| 1457134_PM_at   | Cyfp1                                | CYFIP1     | -0.30 | 2.18 | -2.82 | 1.75E-02 | 1.55E-01 | -3.53 |
| 1418014_PM_a_at | B4galt1                              | B4GALT1    | 0.24  | 2.91 | 2.82  | 1.75E-02 | 1.55E-01 | -3.53 |
| 1431629_PM_at   | Arhgef38                             | ARHGEF38   | 0.25  | 2.47 | 2.82  | 1.75E-02 | 1.55E-01 | -3.53 |
| 1428059_PM_at   | ---                                  | NA         | 0.25  | 2.18 | 2.82  | 1.75E-02 | 1.55E-01 | -3.53 |
| 1439812_PM_at   | 4930402H24Rik                        | C20orf194  | 0.38  | 2.71 | 2.82  | 1.75E-02 | 1.55E-01 | -3.53 |
| 1442052_PM_at   | ---                                  | NA         | 0.52  | 2.40 | 2.82  | 1.75E-02 | 1.55E-01 | -3.53 |
| 1416959_PM_at   | Nr1d2                                | NR1D2      | -0.81 | 4.28 | -2.82 | 1.75E-02 | 1.55E-01 | -3.53 |
| 1450875_PM_at   | Gpr37                                | GPR37      | -0.46 | 3.83 | -2.82 | 1.75E-02 | 1.55E-01 | -3.53 |

|                            |                               |           |       |       |       |          |          |       |
|----------------------------|-------------------------------|-----------|-------|-------|-------|----------|----------|-------|
| 1454389_PM_at              | Lrch4                         | NA        | 0.59  | 4.05  | 2.82  | 1.75E-02 | 1.55E-01 | -3.53 |
| 1450668_PM_s_at            | Hspe1                         | HSPE1     | -0.92 | 7.13  | -2.82 | 1.76E-02 | 1.55E-01 | -3.53 |
| 1460688_PM_s_at            | Unc119b                       | UNC119B   | 0.32  | 2.60  | 2.82  | 1.76E-02 | 1.55E-01 | -3.53 |
| 1441804_PM_at              | ---                           | NA        | 0.23  | 2.41  | 2.82  | 1.76E-02 | 1.55E-01 | -3.53 |
| 1443359_PM_at              | ---                           | NA        | 0.35  | 2.79  | 2.82  | 1.76E-02 | 1.55E-01 | -3.53 |
| 1455057_PM_at              | Gmps                          | GMPS      | -0.96 | 3.67  | -2.82 | 1.76E-02 | 1.55E-01 | -3.53 |
| 1427316_PM_s_at            | Brat1                         | BRAT1     | -0.65 | 3.11  | -2.82 | 1.76E-02 | 1.55E-01 | -3.53 |
| 1451411_PM_at              | Gprc5b                        | GPRC5B    | -0.64 | 3.67  | -2.82 | 1.76E-02 | 1.55E-01 | -3.53 |
| 1436102_PM_at              | Sec22c                        | SEC22C    | -0.62 | 4.59  | -2.82 | 1.76E-02 | 1.55E-01 | -3.53 |
| 1460391_PM_at              | Ola1                          | OLA1      | -0.59 | 6.16  | -2.82 | 1.76E-02 | 1.55E-01 | -3.53 |
| 1445169_PM_at              | ---                           | NA        | 0.22  | 2.91  | 2.82  | 1.76E-02 | 1.55E-01 | -3.53 |
| 1449134_PM_s_at            | Spic                          | SPIC      | 0.23  | 2.15  | 2.82  | 1.76E-02 | 1.55E-01 | -3.53 |
| 1439530_PM_a_at            | Ppp1r13l                      | PPP1R13L  | 0.33  | 3.12  | 2.82  | 1.76E-02 | 1.55E-01 | -3.53 |
| 1429814_PM_at              | Pank1                         | NA        | 0.37  | 2.37  | 2.82  | 1.76E-02 | 1.55E-01 | -3.53 |
| 1425648_PM_at              | Trim60                        | TRIM60    | 0.38  | 2.63  | 2.82  | 1.76E-02 | 1.55E-01 | -3.53 |
| 1433269_PM_at              | ---                           | NA        | 0.28  | 3.06  | 2.82  | 1.76E-02 | 1.55E-01 | -3.53 |
| 1436193_PM_at              | Man1c1                        | MAN1C1    | -0.33 | 4.11  | -2.82 | 1.76E-02 | 1.55E-01 | -3.53 |
| AFFX-18SRNAMur/X00686_3_at | ---                           | NA        | 0.90  | 10.95 | 2.82  | 1.76E-02 | 1.55E-01 | -3.53 |
| 1454873_PM_at              | Zfp775                        | ZNF775    | -0.60 | 3.87  | -2.82 | 1.76E-02 | 1.55E-01 | -3.53 |
| 1418134_PM_at              | Slc25a46                      | SLC25A46  | -1.20 | 8.62  | -2.82 | 1.77E-02 | 1.55E-01 | -3.54 |
| 1454511_PM_at              | 9430018C23Rik                 | NA        | -0.57 | 2.82  | -2.82 | 1.77E-02 | 1.55E-01 | -3.54 |
| 1422433_PM_s_at            | Idh1                          | IDH1      | -0.51 | 3.44  | -2.82 | 1.77E-02 | 1.55E-01 | -3.54 |
| 1429454_PM_at              | Gapvd1                        | GAPVD1    | -1.27 | 6.46  | -2.82 | 1.77E-02 | 1.55E-01 | -3.54 |
| 1448903_PM_at              | Sep15                         | SELENOF   | -0.91 | 3.90  | -2.82 | 1.77E-02 | 1.55E-01 | -3.54 |
| 1447032_PM_at              | ---                           | NA        | 0.43  | 3.34  | 2.82  | 1.77E-02 | 1.55E-01 | -3.54 |
| 1433710_PM_at              | Edc3                          | EDC3      | -0.89 | 2.76  | -2.82 | 1.77E-02 | 1.55E-01 | -3.54 |
| 1448222_PM_x_at            | Cox8a                         | COX8A     | -0.61 | 4.64  | -2.82 | 1.77E-02 | 1.55E-01 | -3.54 |
| 1440660_PM_at              | ---                           | NA        | 0.75  | 3.01  | 2.82  | 1.77E-02 | 1.55E-01 | -3.54 |
| 1439933_PM_at              | ---                           | NA        | 0.56  | 2.60  | 2.82  | 1.77E-02 | 1.55E-01 | -3.54 |
| 1428593_PM_at              | Tex30                         | TEX30     | -0.36 | 3.96  | -2.81 | 1.77E-02 | 1.55E-01 | -3.54 |
| 1423422_PM_at              | Asb4                          | ASB4      | 0.52  | 2.37  | 2.81  | 1.77E-02 | 1.55E-01 | -3.54 |
| 1445952_PM_at              | ---                           | NA        | 0.28  | 2.03  | 2.81  | 1.78E-02 | 1.55E-01 | -3.54 |
| 1445119_PM_at              | D7Ert661e                     | NA        | 0.47  | 2.98  | 2.81  | 1.78E-02 | 1.56E-01 | -3.54 |
| 1459638_PM_at              | ---                           | NA        | 0.56  | 2.86  | 2.81  | 1.78E-02 | 1.56E-01 | -3.54 |
| 1416905_PM_at              | Guca2a                        | GUCA2A    | 0.35  | 2.66  | 2.81  | 1.78E-02 | 1.56E-01 | -3.54 |
| 1442491_PM_at              | ---                           | NA        | 0.36  | 2.58  | 2.81  | 1.78E-02 | 1.56E-01 | -3.54 |
| 1446288_PM_at              | C78692                        | NA        | 0.40  | 2.87  | 2.81  | 1.78E-02 | 1.56E-01 | -3.54 |
| 1424184_PM_at              | Acadvl                        | ACADVL    | -0.55 | 4.97  | -2.81 | 1.78E-02 | 1.56E-01 | -3.54 |
| 1457603_PM_at              | Ppp1r9a                       | PPP1R9A   | 0.78  | 7.64  | 2.81  | 1.78E-02 | 1.56E-01 | -3.54 |
| 1445915_PM_at              | ---                           | NA        | 0.41  | 3.26  | 2.81  | 1.78E-02 | 1.56E-01 | -3.54 |
| 1418439_PM_at              | Mrpl42                        | MRPL42    | -1.25 | 5.10  | -2.81 | 1.78E-02 | 1.56E-01 | -3.54 |
| 1433369_PM_at              | ---                           | NA        | 0.45  | 2.84  | 2.81  | 1.78E-02 | 1.56E-01 | -3.54 |
| 1417216_PM_at              | Pim2                          | PIM2      | 0.25  | 2.21  | 2.81  | 1.78E-02 | 1.56E-01 | -3.55 |
| 1416017_PM_at              | Cogp1                         | COPG1     | -1.00 | 4.79  | -2.81 | 1.79E-02 | 1.56E-01 | -3.55 |
| 1459524_PM_at              | Mcc                           | MCC       | 0.35  | 3.39  | 2.81  | 1.79E-02 | 1.56E-01 | -3.55 |
| 1443419_PM_at              | D5Ert525e                     | NA        | 0.42  | 2.67  | 2.81  | 1.79E-02 | 1.56E-01 | -3.55 |
| 1423853_PM_at              | Lamp5                         | LAMP5     | -1.86 | 5.93  | -2.81 | 1.79E-02 | 1.56E-01 | -3.55 |
| 1446101_PM_at              | ---                           | NA        | 0.49  | 2.94  | 2.81  | 1.79E-02 | 1.56E-01 | -3.55 |
| 1447852_PM_x_at            | Rilpl1                        | RILPL1    | -1.36 | 7.17  | -2.81 | 1.79E-02 | 1.56E-01 | -3.55 |
| 1415985_PM_at              | Sf3b3                         | SF3B3     | -0.89 | 3.57  | -2.81 | 1.79E-02 | 1.56E-01 | -3.55 |
| 1452927_PM_x_at            | Tpi1                          | TPI1      | -0.47 | 7.59  | -2.81 | 1.79E-02 | 1.56E-01 | -3.55 |
| 1419302_PM_at              | Heyl                          | HEYL      | -0.45 | 2.58  | -2.81 | 1.79E-02 | 1.56E-01 | -3.55 |
| 1420397_PM_a_at            | Spen                          | SPEN      | 0.23  | 2.48  | 2.81  | 1.79E-02 | 1.56E-01 | -3.55 |
| 1417747_PM_at              | Cplx1                         | CPLX1     | 0.38  | 3.81  | 2.81  | 1.79E-02 | 1.56E-01 | -3.55 |
| 1428963_PM_at              | Rwdd2a                        | RWDD2A    | -0.65 | 5.21  | -2.81 | 1.79E-02 | 1.56E-01 | -3.55 |
| 1443186_PM_at              | ---                           | NA        | -0.44 | 2.42  | -2.81 | 1.79E-02 | 1.56E-01 | -3.55 |
| 1434047_PM_x_at            | Hnrnpa2b1 ///<br>LOC102642938 | HNRNPA2B1 | -0.43 | 7.07  | -2.81 | 1.80E-02 | 1.56E-01 | -3.55 |
| 1416896_PM_at              | Rps6ka1                       | RPS6KA1   | 0.28  | 2.63  | 2.81  | 1.79E-02 | 1.56E-01 | -3.55 |
| 1423501_PM_at              | Max                           | MAX       | 0.33  | 3.60  | 2.81  | 1.80E-02 | 1.56E-01 | -3.55 |
| 1457579_PM_at              | ---                           | NA        | 0.34  | 3.95  | 2.81  | 1.80E-02 | 1.56E-01 | -3.55 |
| 1430278_PM_a_at            | Dqx1                          | DOX1      | 0.34  | 3.22  | 2.81  | 1.79E-02 | 1.56E-01 | -3.55 |
| 1420778_PM_at              | Tas1r3                        | TAS1R3    | 0.49  | 3.56  | 2.81  | 1.80E-02 | 1.56E-01 | -3.55 |
| 1433884_PM_at              | Syt1                          | SYT1      | -0.86 | 8.17  | -2.81 | 1.80E-02 | 1.56E-01 | -3.55 |
| 1435367_PM_at              | Mapk4                         | MAPK4     | -0.75 | 3.31  | -2.81 | 1.80E-02 | 1.56E-01 | -3.55 |
| 1419994_PM_s_at            | Anapc16                       | ANAPC16   | -0.61 | 3.29  | -2.81 | 1.80E-02 | 1.56E-01 | -3.55 |
| 1448021_PM_at              | Fam46c                        | FAM46C    | -0.34 | 2.60  | -2.81 | 1.80E-02 | 1.56E-01 | -3.55 |
| 1437237_PM_x_at            | Zfp110                        | ZNF274    | -0.31 | 2.32  | -2.81 | 1.80E-02 | 1.56E-01 | -3.55 |
| 1458836_PM_at              | Calb1                         | CALB1     | -0.30 | 2.19  | -2.81 | 1.80E-02 | 1.56E-01 | -3.55 |
| 1457511_PM_at              | Rgs12                         | RG512     | 0.24  | 2.56  | 2.81  | 1.80E-02 | 1.56E-01 | -3.55 |
| 1425051_PM_at              | Isoc1                         | ISOC1     | 0.36  | 2.73  | 2.81  | 1.80E-02 | 1.56E-01 | -3.55 |
| 1432949_PM_at              | 5330421F21Rik                 | NA        | 0.60  | 2.81  | 2.81  | 1.80E-02 | 1.56E-01 | -3.55 |
| 1418525_PM_at              | Pcm1                          | PCM1      | -0.90 | 3.93  | -2.81 | 1.80E-02 | 1.56E-01 | -3.55 |
| 1448692_PM_at              | Ubqln4                        | UBQLN4    | 0.34  | 2.75  | 2.81  | 1.80E-02 | 1.56E-01 | -3.55 |
| 1459552_PM_at              | Lurap1l                       | LURAP1L   | -1.18 | 4.25  | -2.81 | 1.80E-02 | 1.56E-01 | -3.55 |



|                 |                               |           |       |       |       |          |          |       |
|-----------------|-------------------------------|-----------|-------|-------|-------|----------|----------|-------|
| 1421915_PM_a_at | St3gal3                       | ST3GAL3   | 0.45  | 2.91  | 2.81  | 1.80E-02 | 1.56E-01 | -3.55 |
| 1431430_PM_s_at | Trim59                        | TRIM59    | -0.88 | 3.03  | -2.80 | 1.80E-02 | 1.57E-01 | -3.56 |
| 1435857_PM_s_at | Ap1p1                         | APLP1     | -0.58 | 10.00 | -2.80 | 1.81E-02 | 1.57E-01 | -3.56 |
| 1424839_PM_a_at | Nsun4                         | NSUN4     | 0.28  | 2.42  | 2.80  | 1.81E-02 | 1.57E-01 | -3.56 |
| 1456700_PM_x_at | Marcks                        | MARCKS    | -0.93 | 6.73  | -2.80 | 1.81E-02 | 1.57E-01 | -3.56 |
| 1449436_PM_s_at | Gm1821 /// Ubb                | UBB       | -0.58 | 10.74 | -2.80 | 1.81E-02 | 1.57E-01 | -3.56 |
| 1443028_PM_at   | Larp6                         | LARP6     | 0.32  | 2.62  | 2.80  | 1.81E-02 | 1.57E-01 | -3.56 |
| 1444375_PM_at   | ---                           | NA        | 0.36  | 2.80  | 2.80  | 1.81E-02 | 1.57E-01 | -3.56 |
| 1437730_PM_at   | Ppp2r2a                       | PPP2R2A   | -1.06 | 6.01  | -2.80 | 1.81E-02 | 1.57E-01 | -3.56 |
| 1416410_PM_at   | Pafah1b3                      | PAFAH1B3  | 0.33  | 2.89  | 2.80  | 1.81E-02 | 1.57E-01 | -3.56 |
| 1424972_PM_at   | Jdp2                          | NA        | 0.29  | 2.72  | 2.80  | 1.81E-02 | 1.57E-01 | -3.56 |
| 1430594_PM_at   | Rab11fip1                     | RAB11FIP1 | 0.32  | 2.58  | 2.80  | 1.81E-02 | 1.57E-01 | -3.56 |
| 1436441_PM_at   | ---                           | NA        | -0.90 | 3.30  | -2.80 | 1.81E-02 | 1.57E-01 | -3.56 |
| 1433527_PM_at   | Ireb2                         | IREB2     | -0.79 | 3.72  | -2.80 | 1.81E-02 | 1.57E-01 | -3.56 |
| 1426647_PM_at   | Smim7                         | SMIM7     | -0.45 | 2.73  | -2.80 | 1.82E-02 | 1.57E-01 | -3.56 |
| 1417459_PM_at   | Dcpp1                         | NA        | 0.25  | 2.47  | 2.80  | 1.82E-02 | 1.57E-01 | -3.56 |
| 1446322_PM_at   | C78568                        | NA        | 0.34  | 2.45  | 2.80  | 1.82E-02 | 1.57E-01 | -3.56 |
| 1432095_PM_at   | ---                           | NA        | 0.39  | 2.31  | 2.80  | 1.82E-02 | 1.57E-01 | -3.56 |
| 1444830_PM_at   | ---                           | NA        | 0.42  | 2.58  | 2.80  | 1.82E-02 | 1.57E-01 | -3.56 |
| 1453258_PM_at   | Wbscr25                       | NA        | 0.42  | 4.19  | 2.80  | 1.82E-02 | 1.57E-01 | -3.56 |
| 1437355_PM_at   | Zcchc5                        | RTL3      | 0.42  | 2.71  | 2.80  | 1.82E-02 | 1.57E-01 | -3.56 |
| 1439083_PM_at   | Ah1                           | AH1       | 0.58  | 3.56  | 2.80  | 1.82E-02 | 1.57E-01 | -3.56 |
| 1454756_PM_at   | Lrch3                         | LRCH3     | -0.39 | 3.06  | -2.80 | 1.82E-02 | 1.57E-01 | -3.56 |
| 1459650_PM_at   | ---                           | NA        | 0.29  | 2.24  | 2.80  | 1.82E-02 | 1.57E-01 | -3.56 |
| 1422475_PM_a_at | Rps3a1 /// Rps3a2 /// Rps3a3  | RPS3A     | -1.28 | 6.58  | -2.80 | 1.82E-02 | 1.57E-01 | -3.56 |
| 1435336_PM_at   | Celsr2                        | CELSR2    | -1.15 | 9.55  | -2.80 | 1.82E-02 | 1.57E-01 | -3.56 |
| 1452791_PM_at   | Coq2                          | COQ2      | -1.02 | 3.74  | -2.80 | 1.82E-02 | 1.57E-01 | -3.56 |
| 1438463_PM_x_at | Zdhhc6                        | ZDHHHC6   | -0.86 | 3.05  | -2.80 | 1.82E-02 | 1.57E-01 | -3.57 |
| 1437474_PM_at   | Gata2b                        | GATAD2B   | -0.74 | 8.57  | -2.80 | 1.82E-02 | 1.57E-01 | -3.56 |
| 1440767_PM_at   | Defb41 /// Gm15386            | DEFB110   | 0.22  | 2.34  | 2.80  | 1.82E-02 | 1.57E-01 | -3.57 |
| 1450290_PM_at   | Pdc1lg2                       | PDCC1LG2  | 0.26  | 2.16  | 2.80  | 1.82E-02 | 1.57E-01 | -3.57 |
| 1445310_PM_at   | Gm29719 /// Gm29721 /// Sytl3 | SYTL3     | 0.37  | 3.03  | 2.80  | 1.82E-02 | 1.57E-01 | -3.56 |
| 1416940_PM_at   | Ppif                          | PPIF      | 0.54  | 3.16  | 2.80  | 1.82E-02 | 1.57E-01 | -3.57 |
| 1419651_PM_at   | Nkain1                        | NA        | 0.62  | 3.05  | 2.80  | 1.82E-02 | 1.57E-01 | -3.56 |
| 1418263_PM_at   | Ddx25                         | DDX25     | -0.83 | 3.75  | -2.80 | 1.82E-02 | 1.57E-01 | -3.57 |
| 1448392_PM_at   | Sparc                         | SPARC     | -1.00 | 6.29  | -2.80 | 1.82E-02 | 1.57E-01 | -3.57 |
| 1437711_PM_x_at | Gm9115 /// Odc1               | ODC1      | -0.95 | 9.60  | -2.80 | 1.83E-02 | 1.57E-01 | -3.57 |
| 1421158_PM_at   | Cgn1                          | CGNL1     | 0.33  | 2.68  | 2.80  | 1.82E-02 | 1.57E-01 | -3.57 |
| 1450146_PM_at   | Ncs1                          | NCS1      | 0.44  | 2.51  | 2.80  | 1.83E-02 | 1.57E-01 | -3.57 |
| 1447526_PM_at   | D5Ert255e                     | NA        | 0.49  | 4.30  | 2.80  | 1.83E-02 | 1.57E-01 | -3.57 |
| 1446632_PM_at   | ---                           | NA        | 0.52  | 3.90  | 2.80  | 1.83E-02 | 1.57E-01 | -3.57 |
| 1436343_PM_at   | Chd4                          | CHD4      | 0.56  | 2.90  | 2.80  | 1.83E-02 | 1.57E-01 | -3.57 |
| 1428712_PM_at   | Mon1b                         | MON1B     | -0.57 | 4.13  | -2.80 | 1.83E-02 | 1.58E-01 | -3.57 |
| 1446984_PM_at   | ---                           | NA        | 0.37  | 2.90  | 2.80  | 1.83E-02 | 1.58E-01 | -3.57 |
| 1436871_PM_at   | Srsf7                         | SRSF7     | 0.75  | 3.68  | 2.80  | 1.83E-02 | 1.58E-01 | -3.57 |
| 1451920_PM_a_at | Rfc1                          | RFC1      | 0.86  | 3.71  | 2.80  | 1.83E-02 | 1.58E-01 | -3.57 |
| 1416607_PM_at   | 4931406C07Rik                 | C11orf54  | -0.51 | 2.73  | -2.80 | 1.83E-02 | 1.58E-01 | -3.57 |
| 1442711_PM_at   | ---                           | NA        | 1.02  | 5.43  | 2.80  | 1.83E-02 | 1.58E-01 | -3.57 |
| 1426593_PM_a_at | Fbxo22                        | FBXO22    | -0.93 | 7.17  | -2.80 | 1.83E-02 | 1.58E-01 | -3.57 |
| 1454801_PM_at   | Ankrd28                       | NA        | -0.37 | 2.88  | -2.80 | 1.83E-02 | 1.58E-01 | -3.57 |
| 1436125_PM_at   | D16Ert472e                    | NA        | -1.20 | 4.86  | -2.80 | 1.83E-02 | 1.58E-01 | -3.57 |
| 1456631_PM_at   | Mroh2a                        | MROH2A    | 0.53  | 5.72  | 2.80  | 1.83E-02 | 1.58E-01 | -3.57 |
| 1417405_PM_at   | Stard3                        | STARD3    | -0.26 | 3.12  | -2.80 | 1.84E-02 | 1.58E-01 | -3.57 |
| 1421727_PM_at   | Eya1                          | EYA1      | 0.42  | 2.71  | 2.80  | 1.83E-02 | 1.58E-01 | -3.57 |
| 1438018_PM_at   | Hook1                         | HOOK1     | -0.85 | 4.64  | -2.79 | 1.84E-02 | 1.58E-01 | -3.57 |
| 1448321_PM_at   | Smoc1                         | SMOC1     | 0.25  | 2.61  | 2.79  | 1.84E-02 | 1.58E-01 | -3.57 |
| 1417062_PM_at   | Armc10                        | ARMC10    | -0.51 | 2.97  | -2.79 | 1.84E-02 | 1.58E-01 | -3.57 |
| 1426101_PM_at   | Gm10997                       | NA        | 0.34  | 2.51  | 2.79  | 1.84E-02 | 1.58E-01 | -3.57 |
| 1459731_PM_at   | ---                           | NA        | 0.42  | 2.94  | 2.79  | 1.84E-02 | 1.58E-01 | -3.57 |
| 1459303_PM_at   | ---                           | NA        | 0.68  | 2.83  | 2.79  | 1.84E-02 | 1.58E-01 | -3.57 |
| 1436134_PM_at   | Scn2b                         | SCN2B     | -0.70 | 4.92  | -2.79 | 1.84E-02 | 1.58E-01 | -3.57 |
| 1459338_PM_at   | ---                           | NA        | 0.78  | 2.71  | 2.79  | 1.84E-02 | 1.58E-01 | -3.58 |
| 1439452_PM_x_at | Dnpep                         | DNPEP     | 1.06  | 7.58  | 2.79  | 1.84E-02 | 1.58E-01 | -3.58 |
| 1452866_PM_at   | Nars                          | NARS      | -0.64 | 8.01  | -2.79 | 1.84E-02 | 1.58E-01 | -3.58 |
| 1417087_PM_at   | Glg1                          | GLG1      | -0.48 | 4.09  | -2.79 | 1.84E-02 | 1.58E-01 | -3.58 |
| 1445488_PM_at   | Ranbp17                       | RANBP17   | 0.29  | 2.55  | 2.79  | 1.84E-02 | 1.58E-01 | -3.58 |
| 1447330_PM_at   | Zbtb32                        | ZBTB32    | 0.32  | 2.58  | 2.79  | 1.84E-02 | 1.58E-01 | -3.58 |
| 1458601_PM_at   | ---                           | NA        | 0.53  | 2.91  | 2.79  | 1.85E-02 | 1.58E-01 | -3.58 |
| 1458325_PM_x_at | Bmf                           | NA        | 0.50  | 4.89  | 2.79  | 1.85E-02 | 1.58E-01 | -3.58 |
| 1416707_PM_a_at | Pmf1                          | PMF1      | 0.30  | 2.59  | 2.79  | 1.85E-02 | 1.58E-01 | -3.58 |
| 1425666_PM_at   | Zic5                          | ZIC5      | 0.30  | 2.44  | 2.79  | 1.85E-02 | 1.58E-01 | -3.58 |
| 1441634_PM_at   | Ntng1                         | NTNG1     | 0.32  | 2.99  | 2.79  | 1.85E-02 | 1.58E-01 | -3.58 |
| 1426787_PM_at   | LOC100861749 /// Sfi1         | SFI1      | 0.40  | 3.92  | 2.79  | 1.85E-02 | 1.58E-01 | -3.58 |

|                 |                  |          |       |       |       |          |          |       |
|-----------------|------------------|----------|-------|-------|-------|----------|----------|-------|
| 1444893_PM_at   | ---              | NA       | 0.41  | 3.86  | 2.79  | 1.85E-02 | 1.58E-01 | -3.58 |
| 1454135_PM_at   | ---              | NA       | 0.24  | 2.71  | 2.79  | 1.85E-02 | 1.58E-01 | -3.58 |
| 1424944_PM_at   | Pcp2             | PCP2     | -0.48 | 2.59  | -2.79 | 1.85E-02 | 1.58E-01 | -3.58 |
| 1416225_PM_at   | Adh1             | ADH1A    | 0.45  | 2.93  | 2.79  | 1.85E-02 | 1.58E-01 | -3.58 |
| 1424474_PM_a_at | Camkk2           | CAMKK2   | 0.46  | 9.26  | 2.79  | 1.85E-02 | 1.58E-01 | -3.58 |
| 1439322_PM_at   | Gm33298          | NA       | -0.85 | 4.08  | -2.79 | 1.85E-02 | 1.58E-01 | -3.58 |
| 1422898_PM_s_at | Slc22a12         | SLC22A12 | 0.47  | 3.43  | 2.79  | 1.85E-02 | 1.58E-01 | -3.58 |
| 1456228_PM_x_at | Mbp              | MBP      | -0.78 | 10.92 | -2.79 | 1.85E-02 | 1.58E-01 | -3.58 |
| 1450744_PM_at   | Elf2             | ELL2     | -0.60 | 2.92  | -2.79 | 1.85E-02 | 1.58E-01 | -3.58 |
| 1425464_PM_at   | Gata6            | GATA6    | 0.24  | 2.46  | 2.79  | 1.85E-02 | 1.58E-01 | -3.58 |
| 1453113_PM_at   | Wdsub1           | WDSUB1   | 0.33  | 2.54  | 2.79  | 1.85E-02 | 1.58E-01 | -3.58 |
| 1445515_PM_at   | ---              | NA       | 0.26  | 2.48  | 2.79  | 1.85E-02 | 1.58E-01 | -3.58 |
| 1450268_PM_at   | Figl             | FIGN     | -0.52 | 2.42  | -2.79 | 1.85E-02 | 1.58E-01 | -3.58 |
| 1452851_PM_at   | Celf3            | CELF3    | 0.32  | 2.86  | 2.79  | 1.86E-02 | 1.58E-01 | -3.58 |
| 1432151_PM_at   | Ola1             | OLA1     | 0.32  | 2.38  | 2.79  | 1.86E-02 | 1.58E-01 | -3.58 |
| 1420221_PM_at   | Dnajc21          | NA       | 0.33  | 2.66  | 2.79  | 1.86E-02 | 1.58E-01 | -3.58 |
| 1449152_PM_at   | Cdkn2b           | CDKN2B   | 0.36  | 2.79  | 2.79  | 1.86E-02 | 1.58E-01 | -3.58 |
| 1424809_PM_at   | Crb3             | CRB3     | 0.27  | 3.02  | 2.79  | 1.86E-02 | 1.58E-01 | -3.58 |
| 1445342_PM_at   | ---              | NA       | -0.73 | 3.36  | -2.79 | 1.86E-02 | 1.59E-01 | -3.58 |
| 1420532_PM_at   | Magi2            | MAGI2    | 0.72  | 4.85  | 2.79  | 1.86E-02 | 1.59E-01 | -3.58 |
| 1459504_PM_at   | AU022121         | NA       | 0.46  | 2.65  | 2.79  | 1.86E-02 | 1.59E-01 | -3.59 |
| 1437322_PM_at   | Gm21992 /// Rbm4 | RBM4     | 0.64  | 3.40  | 2.79  | 1.86E-02 | 1.59E-01 | -3.59 |
| 1453344_PM_at   | 1810032O08Rik    | NA       | 0.35  | 2.59  | 2.79  | 1.86E-02 | 1.59E-01 | -3.59 |
| 1420788_PM_at   | Klrg1            | KLRG1    | 0.45  | 3.22  | 2.79  | 1.86E-02 | 1.59E-01 | -3.59 |
| 1435161_PM_at   | Sepecs           | SEPECS   | 0.53  | 3.58  | 2.79  | 1.86E-02 | 1.59E-01 | -3.59 |
| 1459494_PM_at   | ---              | NA       | 0.68  | 2.98  | 2.79  | 1.86E-02 | 1.59E-01 | -3.59 |
| 1452672_PM_at   | Thoc5            | THOC5    | -0.59 | 3.57  | -2.79 | 1.86E-02 | 1.59E-01 | -3.59 |
| 1415975_PM_at   | Carhsp1          | CARHSP1  | -0.41 | 2.60  | -2.79 | 1.86E-02 | 1.59E-01 | -3.59 |
| 1421167_PM_at   | Atp11a           | ATP11A   | 0.74  | 4.31  | 2.79  | 1.86E-02 | 1.59E-01 | -3.59 |
| 1439201_PM_at   | Usp14            | USP14    | 0.61  | 3.30  | 2.79  | 1.87E-02 | 1.59E-01 | -3.59 |
| 1416885_PM_at   | 1110038F14Rik    | C8orf33  | 0.46  | 3.28  | 2.79  | 1.87E-02 | 1.59E-01 | -3.59 |
| 1453006_PM_at   | Fgfbp3           | FGFBP3   | -0.60 | 2.87  | -2.79 | 1.87E-02 | 1.59E-01 | -3.59 |
| 1432097_PM_a_at | Dclre1a          | DCLRE1A  | 0.36  | 2.46  | 2.79  | 1.87E-02 | 1.59E-01 | -3.59 |
| 1457881_PM_at   | Osbpl6           | OSBPL6   | -0.61 | 3.25  | -2.78 | 1.87E-02 | 1.59E-01 | -3.59 |
| 1432459_PM_a_at | Zbtb32           | ZBTB32   | 0.26  | 2.90  | 2.78  | 1.87E-02 | 1.59E-01 | -3.59 |
| 1420528_PM_at   | Gpatc2           | GPATC2   | 0.26  | 2.82  | 2.78  | 1.87E-02 | 1.59E-01 | -3.59 |
| 1435694_PM_at   | Arhgap26         | ARHGAP26 | 0.28  | 2.23  | 2.78  | 1.87E-02 | 1.59E-01 | -3.59 |
| 1422012_PM_at   | Crhr2            | CRHR2    | 0.33  | 2.59  | 2.78  | 1.87E-02 | 1.59E-01 | -3.59 |
| 1433010_PM_at   | 5530400N10Rik    | NA       | 0.36  | 2.47  | 2.78  | 1.87E-02 | 1.59E-01 | -3.59 |
| 1453446_PM_at   | 6430411K18Rik    | NA       | 1.09  | 2.85  | 2.78  | 1.87E-02 | 1.59E-01 | -3.59 |
| 1455194_PM_at   | Mapk8ip2         | MAPK8IP2 | -1.43 | 3.90  | -2.78 | 1.87E-02 | 1.59E-01 | -3.59 |
| 1453035_PM_at   | Lnp              | LNPK     | -0.56 | 3.44  | -2.78 | 1.87E-02 | 1.59E-01 | -3.59 |
| 1436306_PM_at   | Ppp6r1           | PPP6R1   | 0.36  | 3.00  | 2.78  | 1.87E-02 | 1.59E-01 | -3.59 |
| 1436722_PM_a_at | Actb             | ACTB     | -0.97 | 6.87  | -2.78 | 1.87E-02 | 1.59E-01 | -3.59 |
| 1452972_PM_at   | Ttc32            | TTC32    | 0.54  | 2.50  | 2.78  | 1.87E-02 | 1.59E-01 | -3.59 |
| 1426827_PM_at   | Ythdc1           | YTHDC1   | -0.59 | 4.20  | -2.78 | 1.88E-02 | 1.59E-01 | -3.59 |
| 1420090_PM_at   | Mkrrn2           | MKRN2    | -0.26 | 2.15  | -2.78 | 1.88E-02 | 1.59E-01 | -3.59 |
| 1456108_PM_x_at | Rnf112           | RNF112   | -0.52 | 10.74 | -2.78 | 1.88E-02 | 1.59E-01 | -3.60 |
| 1459464_PM_at   | ---              | NA       | 0.27  | 2.69  | 2.78  | 1.88E-02 | 1.59E-01 | -3.60 |
| 1419880_PM_x_at | ---              | NA       | 0.72  | 4.31  | 2.78  | 1.89E-02 | 1.60E-01 | -3.60 |
| 1425702_PM_a_at | Enpp5            | ENPP5    | 0.26  | 2.17  | 2.78  | 1.89E-02 | 1.60E-01 | -3.60 |
| 1447026_PM_at   | ---              | NA       | 0.41  | 2.99  | 2.78  | 1.89E-02 | 1.60E-01 | -3.60 |
| 1434756_PM_at   | Fzd4             | NA       | -0.51 | 2.59  | -2.78 | 1.89E-02 | 1.60E-01 | -3.60 |
| 1460478_PM_at   | 2200002J24Rik    | NA       | 0.25  | 2.43  | 2.78  | 1.89E-02 | 1.60E-01 | -3.60 |
| 1421479_PM_at   | Zfp318           | ZNF318   | -0.55 | 3.34  | -2.78 | 1.89E-02 | 1.60E-01 | -3.60 |
| 1452678_PM_a_at | Ccbl1            | KYAT1    | 0.43  | 3.03  | 2.78  | 1.89E-02 | 1.60E-01 | -3.60 |
| 1422636_PM_at   | Dmtf1            | DMTF1    | -0.73 | 4.45  | -2.78 | 1.89E-02 | 1.60E-01 | -3.60 |
| 1437507_PM_at   | Gata2b           | GATAD2B  | -0.27 | 2.83  | -2.78 | 1.89E-02 | 1.60E-01 | -3.60 |
| 1459788_PM_at   | Gpr107           | GPR107   | 0.25  | 2.42  | 2.78  | 1.89E-02 | 1.60E-01 | -3.60 |
| 1423844_PM_s_at | Cbs              | CBSL     | 0.28  | 2.93  | 2.78  | 1.89E-02 | 1.60E-01 | -3.60 |
| 1434534_PM_at   | Dsc3             | DSC3     | 0.30  | 2.84  | 2.78  | 1.89E-02 | 1.60E-01 | -3.60 |
| 1430880_PM_at   | Psd3             | PSD3     | 0.35  | 2.71  | 2.78  | 1.89E-02 | 1.60E-01 | -3.60 |
| 1444957_PM_at   | ---              | NA       | 0.43  | 2.39  | 2.78  | 1.89E-02 | 1.60E-01 | -3.60 |
| 1445226_PM_at   | BC023969         | NA       | 0.47  | 2.42  | 2.78  | 1.89E-02 | 1.60E-01 | -3.60 |
| 1434258_PM_s_at | Phactr4          | PHACTR4  | -0.37 | 2.29  | -2.78 | 1.89E-02 | 1.60E-01 | -3.60 |
| 1431642_PM_at   | Eif2s3y          | NA       | -1.49 | 4.59  | -2.78 | 1.89E-02 | 1.60E-01 | -3.60 |
| 1452141_PM_a_at | Sepp1            | SELENOP  | -1.60 | 7.22  | -2.78 | 1.90E-02 | 1.60E-01 | -3.60 |
| 1433208_PM_at   | 2210017G18Rik    | NA       | 0.22  | 2.25  | 2.78  | 1.90E-02 | 1.60E-01 | -3.60 |
| 1448188_PM_at   | Ucp2             | UCP2     | 0.57  | 2.94  | 2.78  | 1.90E-02 | 1.60E-01 | -3.60 |
| 1439627_PM_at   | Zic1             | ZIC1     | 1.82  | 6.33  | 2.78  | 1.90E-02 | 1.60E-01 | -3.61 |
| 1425033_PM_at   | Slc17a2          | SLC17A2  | 0.31  | 2.76  | 2.78  | 1.90E-02 | 1.60E-01 | -3.61 |
| 1450080_PM_at   | Cxcl1c           | NA       | 0.85  | 3.81  | 2.78  | 1.90E-02 | 1.60E-01 | -3.61 |
| 1443511_PM_at   | ---              | NA       | 0.94  | 4.02  | 2.78  | 1.90E-02 | 1.60E-01 | -3.61 |
| 1439717_PM_at   | Gabrg3           | GABRG3   | 0.24  | 2.17  | 2.77  | 1.90E-02 | 1.61E-01 | -3.61 |
| 1451519_PM_at   | Rnf2             | RNF2     | -1.12 | 3.91  | -2.77 | 1.90E-02 | 1.61E-01 | -3.61 |

|                 |                                                                                                                                                                                    |          |       |       |       |          |          |       |
|-----------------|------------------------------------------------------------------------------------------------------------------------------------------------------------------------------------|----------|-------|-------|-------|----------|----------|-------|
| 1416315_PM_at   | Abhd4                                                                                                                                                                              | ABHD4    | -0.96 | 2.69  | -2.77 | 1.90E-02 | 1.61E-01 | -3.61 |
| 1454651_PM_x_at | Mbp                                                                                                                                                                                | MBP      | -0.80 | 10.07 | -2.77 | 1.90E-02 | 1.61E-01 | -3.61 |
| 1456025_PM_at   | Dclk2                                                                                                                                                                              | NA       | 0.22  | 2.32  | 2.77  | 1.90E-02 | 1.61E-01 | -3.61 |
| 1446279_PM_at   | ---                                                                                                                                                                                | NA       | 0.98  | 3.09  | 2.77  | 1.90E-02 | 1.61E-01 | -3.61 |
| 1423994_PM_at   | Kif1b                                                                                                                                                                              | KIF1B    | -1.54 | 8.24  | -2.77 | 1.91E-02 | 1.61E-01 | -3.61 |
| 1459043_PM_at   | ---                                                                                                                                                                                | NA       | 0.42  | 2.59  | 2.77  | 1.91E-02 | 1.61E-01 | -3.61 |
| 1419205_PM_x_at | Gpatch4                                                                                                                                                                            | GPATCH4  | 0.81  | 6.22  | 2.77  | 1.91E-02 | 1.61E-01 | -3.61 |
| 1424183_PM_at   | Acat1                                                                                                                                                                              | ACAT1    | -0.77 | 5.80  | -2.77 | 1.91E-02 | 1.61E-01 | -3.61 |
| 1416003_PM_at   | Cldn11                                                                                                                                                                             | CLDN11   | -1.69 | 6.26  | -2.77 | 1.91E-02 | 1.61E-01 | -3.61 |
| 1417502_PM_at   | Tspan7                                                                                                                                                                             | TSPAN7   | -0.99 | 5.97  | -2.77 | 1.91E-02 | 1.61E-01 | -3.61 |
| 1434659_PM_at   | Avl9                                                                                                                                                                               | AVL9     | -0.70 | 4.15  | -2.77 | 1.91E-02 | 1.61E-01 | -3.61 |
| 1453994_PM_at   | ---                                                                                                                                                                                | NA       | 0.27  | 2.25  | 2.77  | 1.91E-02 | 1.61E-01 | -3.61 |
| 1422777_PM_at   | C1ql1                                                                                                                                                                              | C1QL1    | 0.34  | 2.99  | 2.77  | 1.91E-02 | 1.61E-01 | -3.61 |
| 1452684_PM_at   | Akt1s1                                                                                                                                                                             | AKT1S1   | 0.36  | 2.99  | 2.77  | 1.91E-02 | 1.61E-01 | -3.61 |
| 1459691_PM_at   | ---                                                                                                                                                                                | NA       | 0.41  | 2.34  | 2.77  | 1.91E-02 | 1.61E-01 | -3.61 |
| 1440861_PM_a_at | Kcnc3                                                                                                                                                                              | KCNC3    | 0.43  | 3.45  | 2.77  | 1.91E-02 | 1.61E-01 | -3.61 |
| 1431289_PM_at   | Tspan32                                                                                                                                                                            | TSPAN32  | 0.44  | 3.19  | 2.77  | 1.91E-02 | 1.61E-01 | -3.61 |
| 1444617_PM_at   | ---                                                                                                                                                                                | NA       | 0.64  | 2.64  | 2.77  | 1.91E-02 | 1.61E-01 | -3.61 |
| 1442333_PM_a_at | Scn9a                                                                                                                                                                              | SCN9A    | 0.88  | 2.58  | 2.77  | 1.91E-02 | 1.61E-01 | -3.61 |
| 1430220_PM_at   | 4833420G17Rik                                                                                                                                                                      | CSorf34  | 0.68  | 4.53  | 2.77  | 1.91E-02 | 1.61E-01 | -3.61 |
| 1446830_PM_at   | AU015892                                                                                                                                                                           | NA       | 0.88  | 2.73  | 2.77  | 1.91E-02 | 1.61E-01 | -3.61 |
| 1433191_PM_at   | A430105P17Rik                                                                                                                                                                      | NA       | -0.42 | 2.47  | -2.77 | 1.92E-02 | 1.61E-01 | -3.61 |
| 1447635_PM_at   | Prkar1a                                                                                                                                                                            | PRKAR1A  | -0.22 | 2.12  | -2.77 | 1.92E-02 | 1.61E-01 | -3.61 |
| 1445373_PM_at   | ---                                                                                                                                                                                | NA       | 0.21  | 2.08  | 2.77  | 1.92E-02 | 1.61E-01 | -3.61 |
| 1434620_PM_s_at | Fam13b                                                                                                                                                                             | NA       | -1.23 | 5.04  | -2.77 | 1.92E-02 | 1.61E-01 | -3.62 |
| 1426990_PM_at   | Cubn                                                                                                                                                                               | CUBN     | 0.51  | 2.97  | 2.77  | 1.92E-02 | 1.61E-01 | -3.62 |
| 1418305_PM_s_at | Gar1                                                                                                                                                                               | GAR1     | 0.64  | 6.25  | 2.77  | 1.92E-02 | 1.61E-01 | -3.62 |
| 1430119_PM_at   | Fndc1                                                                                                                                                                              | FNDC1    | 0.22  | 2.33  | 2.77  | 1.92E-02 | 1.61E-01 | -3.62 |
| 1437221_PM_at   | Rrm2b                                                                                                                                                                              | RRM2B    | -0.93 | 2.84  | -2.77 | 1.92E-02 | 1.62E-01 | -3.62 |
| 1438423_PM_at   | Ssbp2                                                                                                                                                                              | NA       | -0.47 | 3.49  | -2.77 | 1.93E-02 | 1.62E-01 | -3.62 |
| 1444005_PM_at   | Mvb12b                                                                                                                                                                             | NA       | 0.44  | 2.66  | 2.77  | 1.93E-02 | 1.62E-01 | -3.62 |
| 1416632_PM_at   | Me1                                                                                                                                                                                | ME1      | -1.00 | 3.51  | -2.77 | 1.93E-02 | 1.62E-01 | -3.62 |
| 1428189_PM_at   | Tpgs2                                                                                                                                                                              | TPGS2    | -0.83 | 3.94  | -2.77 | 1.93E-02 | 1.62E-01 | -3.62 |
| 1419955_PM_at   | Zfand3                                                                                                                                                                             | NA       | -0.36 | 3.57  | -2.77 | 1.93E-02 | 1.62E-01 | -3.62 |
| 1456608_PM_at   | Sac3d1                                                                                                                                                                             | NA       | 0.22  | 2.81  | 2.77  | 1.93E-02 | 1.62E-01 | -3.62 |
| 1437782_PM_at   | Cntnap2                                                                                                                                                                            | CNTNAP2  | -1.05 | 9.08  | -2.77 | 1.93E-02 | 1.62E-01 | -3.62 |
| 1442436_PM_at   | Fn3k                                                                                                                                                                               | FN3K     | 0.31  | 2.34  | 2.77  | 1.93E-02 | 1.62E-01 | -3.62 |
| 1447703_PM_x_at | Zfp593                                                                                                                                                                             | ZNF593   | 0.47  | 4.32  | 2.77  | 1.93E-02 | 1.62E-01 | -3.62 |
| 1436028_PM_at   | Tmem33                                                                                                                                                                             | TMEM33   | -1.00 | 2.85  | -2.77 | 1.93E-02 | 1.62E-01 | -3.62 |
| 1443388_PM_at   | ---                                                                                                                                                                                | NA       | 0.89  | 4.34  | 2.77  | 1.93E-02 | 1.62E-01 | -3.62 |
| 1455493_PM_at   | Syne1                                                                                                                                                                              | SYNE1    | -0.51 | 2.86  | -2.76 | 1.94E-02 | 1.62E-01 | -3.62 |
| 1422543_PM_at   | Ropn1                                                                                                                                                                              | ROPN1B   | 0.32  | 3.35  | 2.76  | 1.94E-02 | 1.62E-01 | -3.62 |
| 1449933_PM_a_at | Tsen15                                                                                                                                                                             | TSEN15   | -0.38 | 2.75  | -2.76 | 1.94E-02 | 1.62E-01 | -3.63 |
| 1429809_PM_at   | Tmtc2                                                                                                                                                                              | TMTC2    | -0.24 | 2.48  | -2.76 | 1.94E-02 | 1.62E-01 | -3.63 |
| 1446223_PM_at   | Gm12289                                                                                                                                                                            | NA       | 0.24  | 2.20  | 2.76  | 1.94E-02 | 1.62E-01 | -3.63 |
| 1446113_PM_at   | ---                                                                                                                                                                                | NA       | 0.32  | 4.44  | 2.76  | 1.94E-02 | 1.62E-01 | -3.63 |
| 1444903_PM_at   | ---                                                                                                                                                                                | NA       | 0.42  | 3.23  | 2.76  | 1.94E-02 | 1.62E-01 | -3.63 |
| 1452552_PM_at   | Npn2                                                                                                                                                                               | NA       | 0.57  | 2.63  | 2.76  | 1.94E-02 | 1.62E-01 | -3.63 |
| 1425322_PM_at   | Gm13271 /// Gm13272 ///<br>Gm13275 /// Gm13276 ///<br>Gm13277 /// Gm13278 ///<br>Gm13279 /// Gm13283 ///<br>Gm13285 /// Gm13286 ///<br>Gm13288 /// Gm13289 ///<br>Gm13290 /// Ifnz | NA       | 0.31  | 2.56  | 2.76  | 1.94E-02 | 1.62E-01 | -3.63 |
| 1445107_PM_at   | Gm7265                                                                                                                                                                             | NA       | 0.36  | 2.85  | 2.76  | 1.94E-02 | 1.62E-01 | -3.63 |
| 1459222_PM_x_at | ---                                                                                                                                                                                | NA       | 0.44  | 3.90  | 2.76  | 1.94E-02 | 1.63E-01 | -3.63 |
| 1448052_PM_at   | Cgnl1                                                                                                                                                                              | CGNL1    | 0.78  | 4.80  | 2.76  | 1.94E-02 | 1.63E-01 | -3.63 |
| 1447371_PM_at   | 9430037G07Rik                                                                                                                                                                      | NA       | 0.21  | 2.22  | 2.76  | 1.94E-02 | 1.63E-01 | -3.63 |
| 1446890_PM_at   | Gm5891                                                                                                                                                                             | NA       | 0.46  | 2.85  | 2.76  | 1.94E-02 | 1.63E-01 | -3.63 |
| 1435484_PM_at   | Slc5a3                                                                                                                                                                             | SLC5A3   | -0.62 | 3.49  | -2.76 | 1.95E-02 | 1.63E-01 | -3.63 |
| 1422530_PM_at   | Prph                                                                                                                                                                               | PRPH     | 0.21  | 2.42  | 2.76  | 1.95E-02 | 1.63E-01 | -3.63 |
| 1455330_PM_at   | Nol9                                                                                                                                                                               | NOL9     | 0.24  | 3.05  | 2.76  | 1.95E-02 | 1.63E-01 | -3.63 |
| 1459403_PM_at   | ---                                                                                                                                                                                | NA       | 0.41  | 3.53  | 2.76  | 1.95E-02 | 1.63E-01 | -3.63 |
| 1451759_PM_at   | Masp2                                                                                                                                                                              | MASP2    | -0.46 | 3.84  | -2.76 | 1.95E-02 | 1.63E-01 | -3.63 |
| 1458737_PM_at   | C77097                                                                                                                                                                             | NA       | -0.30 | 2.58  | -2.76 | 1.95E-02 | 1.63E-01 | -3.63 |
| 1416005_PM_at   | Psmc1                                                                                                                                                                              | PSMC1    | -1.53 | 6.10  | -2.76 | 1.95E-02 | 1.63E-01 | -3.63 |
| 1448072_PM_at   | ---                                                                                                                                                                                | NA       | 0.30  | 4.75  | 2.76  | 1.95E-02 | 1.63E-01 | -3.63 |
| 1442005_PM_at   | ---                                                                                                                                                                                | NA       | 0.27  | 3.21  | 2.76  | 1.95E-02 | 1.63E-01 | -3.63 |
| 1420230_PM_at   | AA414993                                                                                                                                                                           | NA       | 0.42  | 2.35  | 2.76  | 1.95E-02 | 1.63E-01 | -3.63 |
| 1446774_PM_at   | ---                                                                                                                                                                                | NA       | 0.28  | 3.08  | 2.76  | 1.95E-02 | 1.63E-01 | -3.63 |
| 1449770_PM_x_at | Tmem19c                                                                                                                                                                            | TMEM191C | -1.36 | 7.28  | -2.76 | 1.95E-02 | 1.63E-01 | -3.63 |
| 1436597_PM_at   | Ankhd1                                                                                                                                                                             | ANKHD1   | -0.50 | 3.27  | -2.76 | 1.95E-02 | 1.63E-01 | -3.63 |

|                 |                                                             |          |       |       |       |          |          |       |
|-----------------|-------------------------------------------------------------|----------|-------|-------|-------|----------|----------|-------|
| 1437192_PM_x_at | Vdac1                                                       | VDAC1    | -0.38 | 11.29 | -2.76 | 1.95E-02 | 1.63E-01 | -3.63 |
| 1422975_PM_at   | Mme                                                         | MME      | 0.25  | 2.46  | 2.76  | 1.95E-02 | 1.63E-01 | -3.63 |
| 1429796_PM_at   | Kalrn                                                       | KALRN    | 0.76  | 5.19  | 2.76  | 1.95E-02 | 1.63E-01 | -3.63 |
| 1443656_PM_at   | Fut8                                                        | FUT8     | 0.35  | 2.71  | 2.76  | 1.96E-02 | 1.63E-01 | -3.63 |
| 1457248_PM_x_at | Hsd17b7                                                     | HSD17B7  | -0.84 | 5.77  | -2.76 | 1.96E-02 | 1.63E-01 | -3.63 |
| 1433992_PM_at   | Shroom2                                                     | SHROOM2  | -1.42 | 5.08  | -2.76 | 1.96E-02 | 1.63E-01 | -3.64 |
| 1442206_PM_at   | Mdga2                                                       | MDGA2    | -0.83 | 4.51  | -2.76 | 1.96E-02 | 1.63E-01 | -3.64 |
| 1449878_PM_a_at | Slc12a6                                                     | SLC12A6  | -0.57 | 3.79  | -2.76 | 1.96E-02 | 1.63E-01 | -3.64 |
| 1433482_PM_a_at | Fubp1                                                       | FUBP1    | -0.46 | 4.03  | -2.76 | 1.96E-02 | 1.63E-01 | -3.64 |
| 1439553_PM_s_at | Nutf2 /// Nutf2-ps1 ///<br>Nutf2-ps2                        | NUTF2    | -0.53 | 6.04  | -2.76 | 1.96E-02 | 1.63E-01 | -3.64 |
| 1421876_PM_at   | Mapk9                                                       | MAPK9    | 0.60  | 5.84  | 2.76  | 1.96E-02 | 1.63E-01 | -3.64 |
| 1444340_PM_at   | ---                                                         | NA       | 0.35  | 2.83  | 2.76  | 1.96E-02 | 1.63E-01 | -3.64 |
| 1438309_PM_at   | Acvr1c                                                      | ACVR1C   | -0.51 | 4.49  | -2.76 | 1.96E-02 | 1.63E-01 | -3.64 |
| 1451454_PM_at   | Pcdh20                                                      | PCDH20   | -1.19 | 4.72  | -2.76 | 1.96E-02 | 1.63E-01 | -3.64 |
| 1454107_PM_a_at | Kif2a                                                       | KIF2A    | -1.52 | 5.16  | -2.76 | 1.96E-02 | 1.63E-01 | -3.64 |
| 1428110_PM_x_at | Vps11                                                       | VPS11    | -0.29 | 2.86  | -2.76 | 1.96E-02 | 1.63E-01 | -3.64 |
| 1453690_PM_at   | Mpp7                                                        | NA       | 0.31  | 3.13  | 2.76  | 1.97E-02 | 1.63E-01 | -3.64 |
| 1437821_PM_at   | ---                                                         | NA       | 0.31  | 2.44  | 2.76  | 1.97E-02 | 1.63E-01 | -3.64 |
| 1418913_PM_at   | Bhmt2                                                       | BHMT2    | 0.34  | 2.80  | 2.76  | 1.97E-02 | 1.63E-01 | -3.64 |
| 1418186_PM_at   | Gstt1                                                       | NA       | 0.43  | 3.62  | 2.76  | 1.97E-02 | 1.63E-01 | -3.64 |
| 1452235_PM_at   | Man1b1                                                      | MAN1B1   | -0.39 | 3.10  | -2.75 | 1.97E-02 | 1.63E-01 | -3.64 |
| 1436481_PM_at   | Atp7b                                                       | ATP7B    | 0.32  | 3.27  | 2.75  | 1.97E-02 | 1.63E-01 | -3.64 |
| 1458700_PM_at   | ---                                                         | NA       | 0.52  | 2.19  | 2.75  | 1.97E-02 | 1.63E-01 | -3.64 |
| 1451523_PM_a_at | Mif4gd                                                      | MIF4GD   | 0.31  | 3.54  | 2.75  | 1.97E-02 | 1.64E-01 | -3.64 |
| 1456927_PM_at   | ---                                                         | NA       | 0.56  | 2.64  | 2.75  | 1.97E-02 | 1.64E-01 | -3.64 |
| 1445207_PM_at   | ---                                                         | NA       | 0.42  | 2.55  | 2.75  | 1.97E-02 | 1.64E-01 | -3.64 |
| 1443715_PM_at   | Rbm24                                                       | RBM24    | 0.49  | 3.09  | 2.75  | 1.97E-02 | 1.64E-01 | -3.64 |
| 1428716_PM_at   | Pex1                                                        | PEX1     | -0.58 | 4.49  | -2.75 | 1.97E-02 | 1.64E-01 | -3.64 |
| 1458159_PM_at   | ---                                                         | NA       | -0.42 | 2.80  | -2.75 | 1.97E-02 | 1.64E-01 | -3.64 |
| 1437327_PM_x_at | Enoph1                                                      | ENOPH1   | -1.28 | 4.70  | -2.75 | 1.97E-02 | 1.64E-01 | -3.64 |
| 1444808_PM_at   | ---                                                         | NA       | 0.47  | 2.94  | 2.75  | 1.97E-02 | 1.64E-01 | -3.64 |
| 1433935_PM_at   | ---                                                         | NA       | 0.45  | 3.24  | 2.75  | 1.97E-02 | 1.64E-01 | -3.64 |
| 1433494_PM_at   | Cbarp                                                       | CBARP    | -0.66 | 4.89  | -2.75 | 1.98E-02 | 1.64E-01 | -3.64 |
| 1431662_PM_at   | ---                                                         | NA       | 0.31  | 2.35  | 2.75  | 1.98E-02 | 1.64E-01 | -3.65 |
| 1421611_PM_at   | AB041806                                                    | NA       | -0.34 | 2.55  | -2.75 | 1.98E-02 | 1.64E-01 | -3.65 |
| 1433356_PM_at   | 2610021J01Rik                                               | NA       | 0.31  | 2.52  | 2.75  | 1.98E-02 | 1.64E-01 | -3.65 |
| 1454773_PM_at   | Rxra                                                        | RXRA     | 0.24  | 2.58  | 2.75  | 1.98E-02 | 1.64E-01 | -3.65 |
| AFX-DapX-3_at   | ---                                                         | NA       | 0.21  | 2.21  | 2.75  | 1.98E-02 | 1.64E-01 | -3.65 |
| 1427533_PM_at   | Als2cl                                                      | ALS2CL   | 0.23  | 2.17  | 2.75  | 1.98E-02 | 1.64E-01 | -3.65 |
| 1453551_PM_at   | Polq                                                        | POLQ     | 0.24  | 2.51  | 2.75  | 1.98E-02 | 1.64E-01 | -3.65 |
| 1429817_PM_at   | Sohlh2                                                      | SOHLH2   | 0.42  | 2.73  | 2.75  | 1.98E-02 | 1.64E-01 | -3.65 |
| 1447260_PM_at   | Gm38417 /// H2-BI /// H2-D4 /// H2-T3-like ///<br>LOC547349 | NA       | 0.23  | 2.55  | 2.75  | 1.98E-02 | 1.64E-01 | -3.65 |
| 1422680_PM_at   | Ctr9                                                        | CTR9     | 0.54  | 3.76  | 2.75  | 1.98E-02 | 1.64E-01 | -3.65 |
| 1419168_PM_at   | Mapk6                                                       | MAPK6    | 1.11  | 4.55  | 2.75  | 1.99E-02 | 1.64E-01 | -3.65 |
| 1444160_PM_at   | ---                                                         | NA       | 0.36  | 2.72  | 2.75  | 1.99E-02 | 1.64E-01 | -3.65 |
| 1425732_PM_a_at | Mxi1                                                        | MXI1     | 0.56  | 4.72  | 2.75  | 1.99E-02 | 1.64E-01 | -3.65 |
| 1456272_PM_at   | ---                                                         | NA       | 0.42  | 2.83  | 2.75  | 1.99E-02 | 1.64E-01 | -3.65 |
| 1437384_PM_at   | 1700015E13Rik                                               | SPATA46  | 0.32  | 2.99  | 2.75  | 1.99E-02 | 1.65E-01 | -3.65 |
| 1436185_PM_at   | AI314180                                                    | KIAA0368 | -0.56 | 3.68  | -2.75 | 1.99E-02 | 1.65E-01 | -3.65 |
| 1435574_PM_at   | ---                                                         | NA       | -0.49 | 2.56  | -2.75 | 1.99E-02 | 1.65E-01 | -3.65 |
| 1430465_PM_at   | Raly                                                        | RALY     | 0.89  | 2.99  | 2.75  | 1.99E-02 | 1.65E-01 | -3.65 |
| 1442146_PM_at   | ---                                                         | NA       | 0.31  | 3.11  | 2.75  | 1.99E-02 | 1.65E-01 | -3.65 |
| 1430882_PM_at   | ---                                                         | NA       | 0.29  | 2.67  | 2.75  | 2.00E-02 | 1.65E-01 | -3.65 |
| 1416778_PM_at   | Sdpr                                                        | CAVIN2   | -0.77 | 4.57  | -2.75 | 2.00E-02 | 1.65E-01 | -3.65 |
| 1435340_PM_at   | Kdm4a                                                       | KDM4A    | -0.37 | 2.74  | -2.75 | 2.00E-02 | 1.65E-01 | -3.65 |
| 1421443_PM_at   | Adgrf1                                                      | NA       | 0.24  | 2.51  | 2.75  | 2.00E-02 | 1.65E-01 | -3.65 |
| 1433133_PM_at   | Edaradd                                                     | EDARADD  | 0.38  | 2.22  | 2.75  | 2.00E-02 | 1.65E-01 | -3.66 |
| 1459725_PM_s_at | Dcpp1 /// Dcpp2 /// Dcpp3                                   | NA       | -0.79 | 2.96  | -2.75 | 2.00E-02 | 1.65E-01 | -3.66 |
| 1417124_PM_at   | Dstn                                                        | DSTN     | -0.73 | 3.73  | -2.75 | 2.00E-02 | 1.65E-01 | -3.66 |
| 1424880_PM_at   | Trib1                                                       | TRIB1    | 0.27  | 2.21  | 2.75  | 2.00E-02 | 1.65E-01 | -3.66 |
| 1431880_PM_at   | 3100003M19Rik                                               | NA       | 0.61  | 3.13  | 2.75  | 2.00E-02 | 1.65E-01 | -3.66 |
| 1421270_PM_at   | Sh3rf1                                                      | SH3RF1   | 0.60  | 3.33  | 2.75  | 2.00E-02 | 1.65E-01 | -3.66 |
| 1435788_PM_at   | Actr10                                                      | ACTR10   | -0.85 | 6.04  | -2.75 | 2.00E-02 | 1.65E-01 | -3.66 |
| 1417307_PM_at   | Dmd                                                         | DMD      | -0.83 | 6.62  | -2.74 | 2.00E-02 | 1.65E-01 | -3.66 |
| 1416180_PM_a_at | Rdx                                                         | RDX      | -0.48 | 5.21  | -2.74 | 2.00E-02 | 1.65E-01 | -3.66 |
| 1422116_PM_at   | Aff2                                                        | AFF2     | 0.35  | 2.78  | 2.74  | 2.00E-02 | 1.65E-01 | -3.66 |
| 1416944_PM_a_at | Tlk2                                                        | TLK2     | -1.35 | 5.23  | -2.74 | 2.00E-02 | 1.65E-01 | -3.66 |
| 1435626_PM_a_at | Herpud1                                                     | HERPUD1  | -0.47 | 3.45  | -2.74 | 2.00E-02 | 1.65E-01 | -3.66 |
| 1454687_PM_at   | Lfn5                                                        | LRFN5    | -0.91 | 4.27  | -2.74 | 2.01E-02 | 1.65E-01 | -3.66 |
| 1431607_PM_at   | Lypla1                                                      | LYPLA1   | 0.25  | 2.29  | 2.74  | 2.01E-02 | 1.65E-01 | -3.66 |
| 1435929_PM_at   | Tigar                                                       | TIGAR    | 0.39  | 3.09  | 2.74  | 2.01E-02 | 1.65E-01 | -3.66 |

|                 |                                                                                                                      |          |       |      |       |          |          |       |
|-----------------|----------------------------------------------------------------------------------------------------------------------|----------|-------|------|-------|----------|----------|-------|
| 1455687_PM_at   | Ick                                                                                                                  | ICK      | -0.44 | 3.09 | -2.74 | 2.01E-02 | 1.65E-01 | -3.66 |
| 1420932_PM_at   | Mapk8                                                                                                                | MAPK8    | -0.34 | 3.55 | -2.74 | 2.01E-02 | 1.65E-01 | -3.66 |
| 1442703_PM_at   | Greb1l                                                                                                               | GREB1L   | 0.33  | 2.86 | 2.74  | 2.01E-02 | 1.65E-01 | -3.66 |
| 1421254_PM_a_at | Sgcg                                                                                                                 | SGCG     | 0.32  | 2.64 | 2.74  | 2.01E-02 | 1.65E-01 | -3.66 |
| 1435435_PM_at   | Cttnbp2                                                                                                              | CTTNBP2  | -0.75 | 3.78 | -2.74 | 2.01E-02 | 1.65E-01 | -3.66 |
| 1440686_PM_at   | Prss27                                                                                                               | PRSS27   | 0.27  | 2.21 | 2.74  | 2.01E-02 | 1.65E-01 | -3.66 |
| 1422605_PM_at   | Ppp1r1a                                                                                                              | PPP1R1A  | 0.75  | 4.94 | 2.74  | 2.01E-02 | 1.65E-01 | -3.66 |
| 1453296_PM_at   | Elp6                                                                                                                 | ELP6     | -0.55 | 4.12 | -2.74 | 2.01E-02 | 1.65E-01 | -3.66 |
| 1432720_PM_at   | 4833412K13Rik                                                                                                        | NA       | 0.48  | 2.60 | 2.74  | 2.01E-02 | 1.65E-01 | -3.66 |
| 1459120_PM_at   | Epb415                                                                                                               | EPB41L5  | 0.56  | 4.47 | 2.74  | 2.01E-02 | 1.65E-01 | -3.66 |
| 1451907_PM_a_at | Plekha4                                                                                                              | PLEKHA4  | 0.30  | 4.07 | 2.74  | 2.02E-02 | 1.66E-01 | -3.66 |
| 1416097_PM_at   | Lrrc4                                                                                                                | LRRC4    | -0.92 | 4.43 | -2.74 | 2.02E-02 | 1.66E-01 | -3.66 |
| 1437200_PM_at   | Fcho2                                                                                                                | FCHO2    | -0.72 | 2.79 | -2.74 | 2.02E-02 | 1.66E-01 | -3.67 |
| 1447850_PM_x_at | Zfand3                                                                                                               | ZFAND3   | -0.30 | 2.32 | -2.74 | 2.02E-02 | 1.66E-01 | -3.67 |
| 1432991_PM_at   | 4930519E07Rik                                                                                                        | NA       | 0.22  | 2.17 | 2.74  | 2.02E-02 | 1.66E-01 | -3.67 |
| 1448538_PM_a_at | Rsrp1                                                                                                                | RSRP1    | 0.22  | 2.37 | 2.74  | 2.02E-02 | 1.66E-01 | -3.67 |
| 1460236_PM_at   | Klk10                                                                                                                | KLK10    | 0.31  | 2.32 | 2.74  | 2.02E-02 | 1.66E-01 | -3.67 |
| 1428239_PM_at   | Ankrd16                                                                                                              | ANKRD16  | 0.36  | 2.43 | 2.74  | 2.02E-02 | 1.66E-01 | -3.67 |
| 1456024_PM_at   | Gtf3c1                                                                                                               | GTF3C1   | 0.52  | 3.09 | 2.74  | 2.02E-02 | 1.66E-01 | -3.67 |
| 1444502_PM_at   | Gatb                                                                                                                 | NA       | 0.22  | 2.13 | 2.74  | 2.02E-02 | 1.66E-01 | -3.67 |
| 1417197_PM_at   | Wwc2                                                                                                                 | WWC2     | 0.27  | 3.03 | 2.74  | 2.02E-02 | 1.66E-01 | -3.67 |
| 1444136_PM_at   | ---                                                                                                                  | NA       | 0.46  | 2.51 | 2.74  | 2.02E-02 | 1.66E-01 | -3.67 |
| 1419760_PM_a_at | Rwdd2b                                                                                                               | RWDD2B   | -0.36 | 2.87 | -2.74 | 2.02E-02 | 1.66E-01 | -3.67 |
| 1442756_PM_at   | ---                                                                                                                  | NA       | 0.28  | 2.15 | 2.74  | 2.02E-02 | 1.66E-01 | -3.67 |
| 1418977_PM_at   | LOC102643099 /// Sap30bp                                                                                             | SAP30BP  | 0.29  | 2.85 | 2.74  | 2.02E-02 | 1.66E-01 | -3.67 |
| 1430272_PM_at   | Mtg2                                                                                                                 | NA       | 0.45  | 2.65 | 2.74  | 2.02E-02 | 1.66E-01 | -3.67 |
| 1455069_PM_x_at | Slc25a4                                                                                                              | SLC25A4  | -0.67 | 8.53 | -2.74 | 2.02E-02 | 1.66E-01 | -3.67 |
| 1440823_PM_x_at | Smtnl2                                                                                                               | SMTNL2   | 0.65  | 3.16 | 2.74  | 2.02E-02 | 1.66E-01 | -3.67 |
| 1440232_PM_at   | Tmem200c                                                                                                             | TMEM200C | 0.26  | 2.26 | 2.74  | 2.02E-02 | 1.66E-01 | -3.67 |
| 1454009_PM_at   | 1700008O03Rik                                                                                                        | C19orf81 | 0.19  | 2.30 | 2.74  | 2.03E-02 | 1.66E-01 | -3.67 |
| 1457086_PM_at   | D930028M14Rik                                                                                                        | NA       | 0.26  | 2.33 | 2.74  | 2.03E-02 | 1.66E-01 | -3.67 |
| 1458208_PM_s_at | Mccc1                                                                                                                | MCCC1    | 0.35  | 2.40 | 2.74  | 2.03E-02 | 1.66E-01 | -3.67 |
| 1443867_PM_at   | Ankrd12                                                                                                              | ANKRD12  | 0.68  | 8.87 | 2.74  | 2.03E-02 | 1.66E-01 | -3.67 |
| 1441135_PM_at   | Zfp672                                                                                                               | ZNF672   | -0.56 | 2.93 | -2.74 | 2.03E-02 | 1.66E-01 | -3.67 |
| 1444945_PM_at   | AU024605                                                                                                             | NA       | -0.53 | 2.33 | -2.74 | 2.03E-02 | 1.66E-01 | -3.67 |
| 1449978_PM_at   | Zfy2                                                                                                                 | ZFY      | 0.60  | 3.48 | 2.74  | 2.03E-02 | 1.66E-01 | -3.67 |
| 1420275_PM_at   | ---                                                                                                                  | NA       | 0.39  | 3.00 | 2.74  | 2.03E-02 | 1.66E-01 | -3.67 |
| 1446068_PM_at   | ---                                                                                                                  | NA       | 0.62  | 2.97 | 2.74  | 2.03E-02 | 1.66E-01 | -3.67 |
| 1445948_PM_at   | ---                                                                                                                  | NA       | 0.23  | 2.26 | 2.74  | 2.03E-02 | 1.66E-01 | -3.67 |
| 1419315_PM_at   | Slamf9                                                                                                               | SLAMF9   | 0.31  | 2.60 | 2.74  | 2.03E-02 | 1.66E-01 | -3.67 |
| 1459699_PM_at   | ---                                                                                                                  | NA       | 0.30  | 2.40 | 2.74  | 2.03E-02 | 1.66E-01 | -3.67 |
| 1446862_PM_at   | LOC102632031                                                                                                         | NA       | 0.37  | 2.60 | 2.74  | 2.03E-02 | 1.66E-01 | -3.67 |
| 1425118_PM_at   | Spire2                                                                                                               | SPIRE2   | 0.44  | 2.95 | 2.74  | 2.03E-02 | 1.66E-01 | -3.67 |
| 1446148_PM_x_at | Gm39971                                                                                                              | NA       | 0.54  | 3.47 | 2.74  | 2.03E-02 | 1.66E-01 | -3.67 |
| 1454890_PM_at   | Amot                                                                                                                 | AMOT     | -1.15 | 6.90 | -2.74 | 2.03E-02 | 1.66E-01 | -3.67 |
| 1454719_PM_at   | Rhbdd3                                                                                                               | RHBDD3   | 0.37  | 3.08 | 2.74  | 2.04E-02 | 1.66E-01 | -3.67 |
| 1457262_PM_at   | Smg1                                                                                                                 | SMG1     | -1.20 | 3.37 | -2.74 | 2.04E-02 | 1.66E-01 | -3.67 |
| 1430624_PM_at   | 4921511M17Rik ///<br>Gm10057 /// Gm15140 ///<br>Gm15143 /// Gm16445 ///<br>Gm5645 /// Gm5646 ///<br>Gm5947 /// Samt1 | NA       | 0.25  | 2.55 | 2.73  | 2.04E-02 | 1.66E-01 | -3.68 |
| 1456374_PM_x_at | Eif3c                                                                                                                | EIF3CL   | -1.31 | 6.81 | -2.73 | 2.04E-02 | 1.67E-01 | -3.68 |
| 1456389_PM_at   | Zeb2                                                                                                                 | ZEB2     | -0.51 | 4.46 | -2.73 | 2.04E-02 | 1.67E-01 | -3.68 |
| 1418217_PM_at   | Nme7                                                                                                                 | NME7     | -0.44 | 2.87 | -2.73 | 2.04E-02 | 1.67E-01 | -3.68 |
| 1441180_PM_at   | C330024D21Rik                                                                                                        | NA       | 0.26  | 2.59 | 2.73  | 2.04E-02 | 1.67E-01 | -3.68 |
| 1426730_PM_a_at | Pr12b1                                                                                                               | PRL      | 0.69  | 2.44 | 2.73  | 2.04E-02 | 1.67E-01 | -3.68 |
| 1455696_PM_a_at | Prpf4b                                                                                                               | NA       | -0.91 | 7.25 | -2.73 | 2.04E-02 | 1.67E-01 | -3.68 |
| 1435025_PM_at   | Ogfd1                                                                                                                | OGFOD1   | -0.57 | 3.67 | -2.73 | 2.04E-02 | 1.67E-01 | -3.68 |
| 1450812_PM_at   | Bcl2a1a /// Bcl2a1b ///<br>Bcl2a1c /// Bcl2a1d                                                                       | BCL2A1   | 0.29  | 2.48 | 2.73  | 2.04E-02 | 1.67E-01 | -3.68 |
| 1453958_PM_at   | 2610203C22Rik                                                                                                        | NA       | 0.35  | 2.61 | 2.73  | 2.04E-02 | 1.67E-01 | -3.68 |
| 1439905_PM_at   | Lhx4                                                                                                                 | LHX4     | 0.38  | 2.38 | 2.73  | 2.05E-02 | 1.67E-01 | -3.68 |
| 1429306_PM_at   | Lzic                                                                                                                 | LZIC     | 0.39  | 3.76 | 2.73  | 2.04E-02 | 1.67E-01 | -3.68 |
| 1444624_PM_at   | Ubp1                                                                                                                 | UBAP1    | 0.59  | 3.36 | 2.73  | 2.04E-02 | 1.67E-01 | -3.68 |
| 1423566_PM_a_at | Hsph1                                                                                                                | HSPH1    | -0.67 | 9.24 | -2.73 | 2.05E-02 | 1.67E-01 | -3.68 |
| 1454690_PM_at   | Ikbkg                                                                                                                | IKBKG    | -0.96 | 3.64 | -2.73 | 2.05E-02 | 1.67E-01 | -3.68 |
| 1456214_PM_at   | Pcdh7                                                                                                                | PCDH7    | -0.62 | 2.92 | -2.73 | 2.05E-02 | 1.67E-01 | -3.68 |
| 1423642_PM_at   | Tubb4b                                                                                                               | TUBB4B   | -0.57 | 4.88 | -2.73 | 2.05E-02 | 1.67E-01 | -3.68 |
| 1420744_PM_at   | Chrn2                                                                                                                | CHRN2    | 0.35  | 3.42 | 2.73  | 2.05E-02 | 1.67E-01 | -3.68 |
| 1432234_PM_at   | 4933438B17Rik                                                                                                        | NA       | 0.37  | 3.23 | 2.73  | 2.05E-02 | 1.67E-01 | -3.68 |
| 1426855_PM_at   | Arhgef25                                                                                                             | ARHGEF25 | 0.63  | 4.65 | 2.73  | 2.05E-02 | 1.67E-01 | -3.68 |
| 1423375_PM_at   | Cir1                                                                                                                 | CIR1     | 0.81  | 3.74 | 2.73  | 2.05E-02 | 1.67E-01 | -3.68 |

|                 |               |           |       |      |       |          |          |       |
|-----------------|---------------|-----------|-------|------|-------|----------|----------|-------|
| 1430147_PM_a_at | Taf1d         | TAF1D     | 1.01  | 4.16 | 2.73  | 2.05E-02 | 1.67E-01 | -3.68 |
| 1415926_PM_at   | Nup62         | NA        | -0.90 | 4.59 | -2.73 | 2.05E-02 | 1.67E-01 | -3.68 |
| 1455638_PM_at   | ---           | NA        | -1.10 | 2.52 | -2.73 | 2.05E-02 | 1.67E-01 | -3.68 |
| 1459172_PM_at   | ---           | NA        | 0.27  | 2.44 | 2.73  | 2.05E-02 | 1.67E-01 | -3.68 |
| 1445577_PM_at   | Ppfibp1       | NA        | 0.21  | 2.27 | 2.73  | 2.06E-02 | 1.67E-01 | -3.68 |
| 1458825_PM_at   | ---           | NA        | 0.24  | 2.23 | 2.73  | 2.06E-02 | 1.67E-01 | -3.68 |
| 1445655_PM_at   | ---           | NA        | 0.28  | 2.82 | 2.73  | 2.06E-02 | 1.67E-01 | -3.68 |
| 1434939_PM_at   | Foxf1         | FOXF1     | 0.29  | 2.92 | 2.73  | 2.06E-02 | 1.67E-01 | -3.68 |
| 1453389_PM_a_at | Sh2b2         | SH2B2     | 0.36  | 3.51 | 2.73  | 2.06E-02 | 1.67E-01 | -3.68 |
| 1420756_PM_at   | Fut7          | FUT7      | 0.36  | 2.77 | 2.73  | 2.06E-02 | 1.67E-01 | -3.68 |
| 1432879_PM_at   | Gm39656       | NA        | 0.42  | 2.78 | 2.73  | 2.06E-02 | 1.67E-01 | -3.68 |
| 1433970_PM_at   | Bola3         | BOLA3     | 0.53  | 3.60 | 2.73  | 2.06E-02 | 1.67E-01 | -3.68 |
| 1449292_PM_at   | Rb1cc1        | RB1CC1    | -0.88 | 4.75 | -2.73 | 2.06E-02 | 1.67E-01 | -3.68 |
| 1456307_PM_s_at | Adcy7         | ADCY7     | -0.85 | 3.87 | -2.73 | 2.06E-02 | 1.67E-01 | -3.68 |
| 1431141_PM_at   | Z610507101Rik | NA        | 0.21  | 2.41 | 2.73  | 2.06E-02 | 1.67E-01 | -3.68 |
| 1452818_PM_at   | Ttf2          | TTF2      | 0.29  | 2.72 | 2.73  | 2.06E-02 | 1.67E-01 | -3.68 |
| 1418174_PM_at   | Dusp8         | DUSP8     | -0.52 | 2.90 | -2.73 | 2.06E-02 | 1.67E-01 | -3.69 |
| 1416185_PM_a_at | Adh5          | ADH5      | -0.88 | 6.18 | -2.73 | 2.06E-02 | 1.67E-01 | -3.69 |
| 1426917_PM_s_at | Scrn3         | SCRN3     | -0.47 | 2.97 | -2.73 | 2.06E-02 | 1.67E-01 | -3.69 |
| 1446576_PM_at   | ---           | NA        | 0.37  | 2.85 | 2.73  | 2.06E-02 | 1.67E-01 | -3.69 |
| 1459642_PM_at   | Adam23        | NA        | -0.37 | 3.58 | -2.73 | 2.06E-02 | 1.67E-01 | -3.69 |
| 1418476_PM_at   | Crlf1         | CRLF1     | -0.23 | 2.86 | -2.73 | 2.06E-02 | 1.67E-01 | -3.69 |
| 1443275_PM_at   | ---           | NA        | 0.24  | 2.16 | 2.73  | 2.06E-02 | 1.67E-01 | -3.69 |
| 1445566_PM_at   | ---           | NA        | 0.26  | 3.25 | 2.73  | 2.06E-02 | 1.67E-01 | -3.69 |
| 1446405_PM_at   | Kat6a         | KAT6A     | 0.27  | 2.20 | 2.73  | 2.06E-02 | 1.67E-01 | -3.69 |
| 1441447_PM_at   | ---           | NA        | 0.40  | 2.50 | 2.73  | 2.07E-02 | 1.67E-01 | -3.69 |
| 1455988_PM_a_at | Cct6a         | NA        | -1.13 | 7.60 | -2.73 | 2.07E-02 | 1.67E-01 | -3.69 |
| 1451668_PM_at   | Fam20b        | FAM20B    | -0.39 | 3.08 | -2.73 | 2.07E-02 | 1.67E-01 | -3.69 |
| 1448571_PM_a_at | Gmfb          | GMFB      | -1.16 | 4.93 | -2.73 | 2.07E-02 | 1.67E-01 | -3.69 |
| 1447551_PM_x_at | Adgrl3        | NA        | -0.96 | 3.68 | -2.73 | 2.07E-02 | 1.67E-01 | -3.69 |
| 1433228_PM_at   | ---           | NA        | 0.34  | 2.20 | 2.73  | 2.07E-02 | 1.67E-01 | -3.69 |
| 1417115_PM_at   | Map3k12       | MAP3K12   | -0.52 | 3.71 | -2.73 | 2.07E-02 | 1.67E-01 | -3.69 |
| 1423385_PM_at   | Actr8         | ACTR8     | -0.49 | 3.95 | -2.73 | 2.07E-02 | 1.67E-01 | -3.69 |
| 1437450_PM_x_at | Z700060E02Rik | C14orf166 | -1.26 | 6.06 | -2.73 | 2.07E-02 | 1.67E-01 | -3.69 |
| 1419162_PM_s_at | Dnajc3        | DNAJC3    | -0.37 | 4.08 | -2.73 | 2.07E-02 | 1.67E-01 | -3.69 |
| 1439487_PM_at   | Lig4          | LIG4      | -0.77 | 2.98 | -2.73 | 2.07E-02 | 1.67E-01 | -3.69 |
| 1435881_PM_at   | Pcbp2         | PCBP2     | -0.95 | 4.06 | -2.73 | 2.07E-02 | 1.67E-01 | -3.69 |
| 1428486_PM_at   | Z700123L14Rik | NA        | 0.89  | 2.63 | 2.73  | 2.07E-02 | 1.67E-01 | -3.69 |
| 1438192_PM_s_at | Baz2a         | BAZ2A     | -0.75 | 4.68 | -2.73 | 2.07E-02 | 1.67E-01 | -3.69 |
| 1431147_PM_at   | Rint1         | RINT1     | 0.33  | 2.89 | 2.73  | 2.07E-02 | 1.67E-01 | -3.69 |
| 1418446_PM_at   | Slc16a2       | SLC16A2   | 0.26  | 2.70 | 2.72  | 2.08E-02 | 1.68E-01 | -3.69 |
| 1447573_PM_at   | ---           | NA        | 0.30  | 2.36 | 2.72  | 2.08E-02 | 1.68E-01 | -3.69 |
| 1439751_PM_at   | Zfp708        | ZNF720    | 0.35  | 2.86 | 2.72  | 2.08E-02 | 1.68E-01 | -3.69 |
| 1426961_PM_at   | Phf20         | PHF20     | -1.08 | 4.38 | -2.72 | 2.08E-02 | 1.68E-01 | -3.69 |
| 1429865_PM_at   | Fancd2os      | FANCD2OS  | 0.46  | 3.28 | 2.72  | 2.08E-02 | 1.68E-01 | -3.69 |
| 1455293_PM_at   | Leo1          | LEO1      | 0.45  | 3.12 | 2.72  | 2.08E-02 | 1.68E-01 | -3.69 |
| 1419888_PM_at   | ---           | NA        | 0.27  | 2.54 | 2.72  | 2.08E-02 | 1.68E-01 | -3.69 |
| 1436283_PM_at   | Tmem52b       | TMEM52B   | 0.31  | 2.39 | 2.72  | 2.08E-02 | 1.68E-01 | -3.70 |
| 1420872_PM_at   | Gucy1b3       | GUCY1B3   | -0.60 | 5.61 | -2.72 | 2.08E-02 | 1.68E-01 | -3.70 |
| 1440617_PM_at   | Cpa6          | CPA6      | -0.53 | 2.60 | -2.72 | 2.08E-02 | 1.68E-01 | -3.70 |
| 1454619_PM_at   | Lmf2          | LMF2      | 0.30  | 2.36 | 2.72  | 2.08E-02 | 1.68E-01 | -3.70 |
| 1450782_PM_at   | Wnt4          | WNT4      | 0.31  | 2.59 | 2.72  | 2.08E-02 | 1.68E-01 | -3.70 |
| 1434908_PM_at   | Scaf1         | SCAF1     | 0.36  | 3.20 | 2.72  | 2.08E-02 | 1.68E-01 | -3.70 |
| 1431487_PM_at   | Gm30840       | NA        | 0.38  | 2.87 | 2.72  | 2.08E-02 | 1.68E-01 | -3.70 |
| 1455791_PM_at   | Cdt1          | CDT1      | 0.25  | 2.51 | 2.72  | 2.09E-02 | 1.68E-01 | -3.70 |
| 1437269_PM_at   | Ttc38         | TTC38     | 0.28  | 3.11 | 2.72  | 2.09E-02 | 1.68E-01 | -3.70 |
| 1443663_PM_at   | ---           | NA        | 0.66  | 2.66 | 2.72  | 2.09E-02 | 1.68E-01 | -3.70 |
| 1450644_PM_at   | Zfp36l1       | ZFP36L1   | -0.71 | 4.68 | -2.72 | 2.09E-02 | 1.68E-01 | -3.70 |
| 1423109_PM_s_at | Slc25a20      | SLC25A20  | -0.47 | 2.94 | -2.72 | 2.09E-02 | 1.68E-01 | -3.70 |
| 1424865_PM_at   | Pyy           | PYY       | 0.26  | 2.47 | 2.72  | 2.09E-02 | 1.68E-01 | -3.70 |
| 1453092_PM_at   | Crc1          | NA        | 0.26  | 2.54 | 2.72  | 2.09E-02 | 1.68E-01 | -3.70 |
| 1449818_PM_at   | Abcb4         | ABCB4     | 0.29  | 2.73 | 2.72  | 2.09E-02 | 1.68E-01 | -3.70 |
| 1435819_PM_at   | Ttc39aos1     | NA        | 0.31  | 2.60 | 2.72  | 2.09E-02 | 1.68E-01 | -3.70 |
| 1458957_PM_at   | ---           | NA        | 0.39  | 2.61 | 2.72  | 2.09E-02 | 1.68E-01 | -3.70 |
| 1457420_PM_at   | Lmtk3         | LMTK3     | 0.58  | 2.76 | 2.72  | 2.09E-02 | 1.68E-01 | -3.70 |
| 1454960_PM_at   | Smad3         | SMAD3     | 0.62  | 4.47 | 2.72  | 2.09E-02 | 1.68E-01 | -3.70 |
| 1443504_PM_at   | ---           | NA        | 0.74  | 3.05 | 2.72  | 2.09E-02 | 1.68E-01 | -3.70 |
| 1455218_PM_at   | Ccp110        | CCP110    | -1.05 | 3.29 | -2.72 | 2.09E-02 | 1.68E-01 | -3.70 |
| 1424814_PM_a_at | Bcl2l14       | BCL2L14   | 0.40  | 2.52 | 2.72  | 2.09E-02 | 1.68E-01 | -3.70 |
| 1457977_PM_at   | Meaf6         | NA        | 0.42  | 2.80 | 2.72  | 2.09E-02 | 1.68E-01 | -3.70 |
| 1436523_PM_s_at | Z810022K09Rik | C8orf59   | -0.71 | 7.29 | -2.72 | 2.09E-02 | 1.68E-01 | -3.70 |
| 1429927_PM_at   | ---           | NA        | 0.28  | 2.39 | 2.72  | 2.09E-02 | 1.68E-01 | -3.70 |
| 1434158_PM_at   | Gmnds         | GMDS      | 0.34  | 2.81 | 2.72  | 2.09E-02 | 1.68E-01 | -3.70 |
| 1417493_PM_at   | Bmi1          | BMI1      | -0.42 | 3.47 | -2.72 | 2.10E-02 | 1.68E-01 | -3.70 |
| 1448111_PM_at   | Ctps2         | CTPS2     | -0.78 | 4.32 | -2.72 | 2.10E-02 | 1.68E-01 | -3.70 |

|                 |                                                                                         |            |       |       |       |          |          |       |
|-----------------|-----------------------------------------------------------------------------------------|------------|-------|-------|-------|----------|----------|-------|
| 1428343_PM_at   | Rcor3                                                                                   | RCOR3      | 0.25  | 2.34  | 2.72  | 2.10E-02 | 1.68E-01 | -3.70 |
| 1448727_PM_at   | Tle6                                                                                    | TLE6       | 0.35  | 3.25  | 2.72  | 2.10E-02 | 1.68E-01 | -3.70 |
| 1448871_PM_at   | Mapk13                                                                                  | MAPK13     | 0.40  | 2.87  | 2.72  | 2.10E-02 | 1.68E-01 | -3.70 |
| 1436275_PM_at   | Kcnp2                                                                                   | KCNP2      | -0.96 | 4.82  | -2.72 | 2.10E-02 | 1.68E-01 | -3.70 |
| 1420449_PM_at   | Heatr5b                                                                                 | NA         | -0.32 | 2.44  | -2.72 | 2.10E-02 | 1.68E-01 | -3.70 |
| 1451766_PM_at   | Hmgcr                                                                                   | HMGCR      | 0.31  | 2.90  | 2.72  | 2.10E-02 | 1.68E-01 | -3.70 |
| 1441995_PM_at   | ---                                                                                     | NA         | 0.48  | 3.28  | 2.72  | 2.10E-02 | 1.68E-01 | -3.70 |
| 1429623_PM_at   | Zfp644                                                                                  | ZNF644     | -0.81 | 3.50  | -2.72 | 2.10E-02 | 1.68E-01 | -3.70 |
| 1449214_PM_a_at | Opa1                                                                                    | OPA1       | -0.81 | 5.39  | -2.72 | 2.10E-02 | 1.68E-01 | -3.70 |
| 1449231_PM_at   | Zfp296                                                                                  | ZNF296     | 0.38  | 3.30  | 2.72  | 2.10E-02 | 1.68E-01 | -3.70 |
| 1436746_PM_at   | Wnk1                                                                                    | WNK1       | -0.95 | 5.78  | -2.72 | 2.10E-02 | 1.68E-01 | -3.70 |
| 1422348_PM_at   | H2-D1 /// H2-K1 /// H2-L ///<br>H2-Q2 /// H2-Q6 ///<br>LOC100862431 ///<br>LOC102641613 | NA         | 0.37  | 3.04  | 2.72  | 2.10E-02 | 1.68E-01 | -3.71 |
| 1426796_PM_at   | Kpna6                                                                                   | KPNA6      | -0.50 | 5.03  | -2.72 | 2.11E-02 | 1.69E-01 | -3.71 |
| 1454844_PM_at   | Mchr1                                                                                   | MCHR1      | -0.39 | 3.18  | -2.72 | 2.11E-02 | 1.69E-01 | -3.71 |
| 1458582_PM_at   | Lin54                                                                                   | LIN54      | -0.88 | 2.73  | -2.72 | 2.11E-02 | 1.69E-01 | -3.71 |
| 1446808_PM_at   | ---                                                                                     | NA         | 0.25  | 2.61  | 2.72  | 2.11E-02 | 1.69E-01 | -3.71 |
| 1449717_PM_at   | ---                                                                                     | NA         | 0.29  | 2.86  | 2.71  | 2.11E-02 | 1.69E-01 | -3.71 |
| 1453482_PM_at   | Cflar                                                                                   | CFLAR      | 0.27  | 2.27  | 2.71  | 2.11E-02 | 1.69E-01 | -3.71 |
| 1443965_PM_at   | ---                                                                                     | NA         | 0.33  | 2.78  | 2.71  | 2.11E-02 | 1.69E-01 | -3.71 |
| 1439459_PM_x_at | Acly                                                                                    | ACLY       | -1.49 | 7.07  | -2.71 | 2.11E-02 | 1.69E-01 | -3.71 |
| 1428661_PM_at   | Tonsl /// Vps28                                                                         | TONSL      | 0.34  | 2.80  | 2.71  | 2.11E-02 | 1.69E-01 | -3.71 |
| 1432275_PM_at   | Ikbkb                                                                                   | IKBKB      | 0.36  | 3.60  | 2.71  | 2.11E-02 | 1.69E-01 | -3.71 |
| 1438549_PM_a_at | Srr                                                                                     | SRR        | -1.00 | 4.19  | -2.71 | 2.11E-02 | 1.69E-01 | -3.71 |
| 1423353_PM_at   | Crispld1                                                                                | CRISPLD1   | -0.62 | 3.15  | -2.71 | 2.11E-02 | 1.69E-01 | -3.71 |
| 1459561_PM_at   | Gm3924                                                                                  | NA         | 0.27  | 2.75  | 2.71  | 2.11E-02 | 1.69E-01 | -3.71 |
| 1458941_PM_at   | Zeb2                                                                                    | ZEB2       | 0.45  | 2.61  | 2.71  | 2.12E-02 | 1.69E-01 | -3.71 |
| 1446752_PM_at   | C78200                                                                                  | NA         | -0.66 | 3.22  | -2.71 | 2.12E-02 | 1.69E-01 | -3.71 |
| 1437754_PM_at   | Kpna7                                                                                   | KPNA7      | 0.45  | 4.95  | 2.71  | 2.12E-02 | 1.69E-01 | -3.71 |
| 1420178_PM_at   | ---                                                                                     | NA         | 0.46  | 3.14  | 2.71  | 2.12E-02 | 1.69E-01 | -3.71 |
| 1454538_PM_at   | ---                                                                                     | NA         | 0.37  | 2.46  | 2.71  | 2.12E-02 | 1.69E-01 | -3.71 |
| 1432844_PM_at   | Phactr4                                                                                 | NA         | 0.31  | 3.07  | 2.71  | 2.12E-02 | 1.69E-01 | -3.71 |
| 1417252_PM_at   | Nt5c                                                                                    | NT5C       | 0.41  | 4.19  | 2.71  | 2.12E-02 | 1.69E-01 | -3.71 |
| 1437407_PM_at   | Rnf222                                                                                  | RNF222     | 0.22  | 2.68  | 2.71  | 2.12E-02 | 1.69E-01 | -3.71 |
| 1439022_PM_at   | Phactr1                                                                                 | PHACTR1    | 0.60  | 6.36  | 2.71  | 2.12E-02 | 1.69E-01 | -3.71 |
| 1429643_PM_a_at | Pde1c                                                                                   | PDE1C      | 0.57  | 3.42  | 2.71  | 2.12E-02 | 1.69E-01 | -3.72 |
| 1417809_PM_at   | Slc22a18                                                                                | SLC22A18   | 0.34  | 3.40  | 2.71  | 2.13E-02 | 1.69E-01 | -3.72 |
| 1458693_PM_at   | Scn8a                                                                                   | SCN8A      | 0.31  | 2.43  | 2.71  | 2.13E-02 | 1.70E-01 | -3.72 |
| 1459987_PM_s_at | Cct3                                                                                    | CCT3       | -0.71 | 7.40  | -2.71 | 2.13E-02 | 1.70E-01 | -3.72 |
| 1451080_PM_at   | Usp1                                                                                    | USP1       | -0.57 | 4.64  | -2.71 | 2.13E-02 | 1.70E-01 | -3.72 |
| 1447359_PM_at   | Zfp575                                                                                  | ZNF575     | 0.26  | 2.38  | 2.71  | 2.13E-02 | 1.70E-01 | -3.72 |
| 1419957_PM_at   | C77144                                                                                  | NA         | 0.37  | 2.83  | 2.71  | 2.13E-02 | 1.70E-01 | -3.72 |
| 1439532_PM_s_at | Kif13a                                                                                  | KIF13A     | 0.42  | 2.63  | 2.71  | 2.13E-02 | 1.70E-01 | -3.72 |
| 1423749_PM_s_at | Rangap1                                                                                 | RANGAP1    | -0.97 | 4.08  | -2.71 | 2.14E-02 | 1.70E-01 | -3.72 |
| 1455600_PM_at   | Rps3                                                                                    | RPS3       | -0.69 | 3.22  | -2.71 | 2.14E-02 | 1.70E-01 | -3.72 |
| 1452812_PM_at   | Adgr1                                                                                   | ADGRL1     | -0.48 | 3.26  | -2.71 | 2.14E-02 | 1.70E-01 | -3.72 |
| 1425358_PM_at   | ---                                                                                     | NA         | -0.26 | 2.60  | -2.71 | 2.14E-02 | 1.70E-01 | -3.72 |
| 1416212_PM_at   | Magoh                                                                                   | MAGOH      | -0.73 | 3.42  | -2.71 | 2.14E-02 | 1.70E-01 | -3.72 |
| 1419678_PM_at   | Lats2                                                                                   | LATS2      | 0.52  | 3.54  | 2.71  | 2.14E-02 | 1.70E-01 | -3.72 |
| 1416653_PM_at   | Stxbp3                                                                                  | STXBP3     | -0.97 | 4.51  | -2.71 | 2.14E-02 | 1.70E-01 | -3.72 |
| 1438720_PM_at   | 9330159F19Rik                                                                           | KIAA0408   | -0.58 | 2.96  | -2.71 | 2.14E-02 | 1.70E-01 | -3.72 |
| 1449559_PM_at   | Msx2                                                                                    | MSX2       | 0.26  | 2.87  | 2.71  | 2.14E-02 | 1.70E-01 | -3.72 |
| 1450039_PM_at   | Usp9x                                                                                   | USP9X      | -1.60 | 6.10  | -2.71 | 2.14E-02 | 1.70E-01 | -3.72 |
| 1457254_PM_x_at | Tmem229b                                                                                | NA         | -1.12 | 3.48  | -2.71 | 2.14E-02 | 1.70E-01 | -3.72 |
| 1435197_PM_at   | Pou3f3                                                                                  | POU3F3     | -0.96 | 5.78  | -2.71 | 2.15E-02 | 1.70E-01 | -3.73 |
| 1434892_PM_x_at | Rbbp4                                                                                   | RBBP4      | -0.42 | 9.99  | -2.71 | 2.15E-02 | 1.70E-01 | -3.73 |
| 1430083_PM_at   | Z610307P16Rik                                                                           | NA         | 0.25  | 2.56  | 2.71  | 2.15E-02 | 1.70E-01 | -3.72 |
| 1452538_PM_at   | Ighm                                                                                    | NA         | 0.26  | 3.06  | 2.71  | 2.15E-02 | 1.70E-01 | -3.72 |
| 1436270_PM_at   | Cyb5d1                                                                                  | NA         | 0.32  | 2.78  | 2.71  | 2.15E-02 | 1.70E-01 | -3.73 |
| 1449004_PM_at   | Mrp46                                                                                   | MRPL46     | 0.39  | 3.78  | 2.71  | 2.15E-02 | 1.70E-01 | -3.72 |
| 1429345_PM_at   | Tubgcp4                                                                                 | TUBGCP4    | 0.46  | 3.15  | 2.71  | 2.15E-02 | 1.70E-01 | -3.73 |
| 1458113_PM_at   | ---                                                                                     | NA         | 0.56  | 3.17  | 2.71  | 2.14E-02 | 1.70E-01 | -3.72 |
| 1421950_PM_at   | Pfdn2                                                                                   | PFDN2      | 0.75  | 5.73  | 2.71  | 2.14E-02 | 1.70E-01 | -3.72 |
| 1450450_PM_at   | Rcan3                                                                                   | RCAN3      | 0.47  | 3.03  | 2.70  | 2.15E-02 | 1.70E-01 | -3.73 |
| 1436176_PM_at   | 1500004A13Rik                                                                           | NA         | 0.88  | 3.92  | 2.70  | 2.15E-02 | 1.70E-01 | -3.73 |
| 1433592_PM_at   | Calm1                                                                                   | NA         | -0.59 | 10.40 | -2.70 | 2.15E-02 | 1.70E-01 | -3.73 |
| 1442011_PM_at   | A230065H16Rik                                                                           | AL161669.4 | 0.26  | 2.37  | 2.70  | 2.15E-02 | 1.70E-01 | -3.73 |
| 1453546_PM_at   | Actl9                                                                                   | ACTL9      | 0.27  | 2.34  | 2.70  | 2.15E-02 | 1.70E-01 | -3.73 |
| 1447945_PM_at   | Maf                                                                                     | MAF        | 0.39  | 3.18  | 2.70  | 2.15E-02 | 1.70E-01 | -3.73 |
| 1442241_PM_at   | ---                                                                                     | NA         | 0.49  | 2.82  | 2.70  | 2.15E-02 | 1.70E-01 | -3.73 |
| 1441139_PM_at   | Gm10336 /// Mtr                                                                         | NA         | -0.58 | 3.30  | -2.70 | 2.15E-02 | 1.70E-01 | -3.73 |
| 1442182_PM_at   | Dnajc19 /// Dnajc19-ps                                                                  | DNAI/C19   | 0.59  | 3.89  | 2.70  | 2.15E-02 | 1.70E-01 | -3.73 |
| 1453891_PM_at   | ---                                                                                     | NA         | 0.28  | 2.44  | 2.70  | 2.15E-02 | 1.71E-01 | -3.73 |

|                 |                                             |            |       |       |       |          |          |       |
|-----------------|---------------------------------------------|------------|-------|-------|-------|----------|----------|-------|
| 1420022_PM_s_at | ---                                         | NA         | -0.81 | 4.93  | -2.70 | 2.16E-02 | 1.71E-01 | -3.73 |
| 1417593_PM_at   | Tusc2                                       | TUSC2      | -0.25 | 3.06  | -2.70 | 2.16E-02 | 1.71E-01 | -3.73 |
| 1438961_PM_s_at | Blmh                                        | BLMH       | -0.69 | 6.27  | -2.70 | 2.16E-02 | 1.71E-01 | -3.73 |
| 1418246_PM_at   | Rbfox2                                      | RBFOX2     | 0.38  | 3.06  | 2.70  | 2.16E-02 | 1.71E-01 | -3.73 |
| 1433021_PM_at   | ---                                         | NA         | 0.60  | 2.71  | 2.70  | 2.16E-02 | 1.71E-01 | -3.73 |
| 1444576_PM_at   | ---                                         | NA         | 0.30  | 2.64  | 2.70  | 2.16E-02 | 1.71E-01 | -3.73 |
| 1433535_PM_x_at | Cct2                                        | CCT2       | -1.18 | 7.59  | -2.70 | 2.16E-02 | 1.71E-01 | -3.73 |
| 1450914_PM_at   | Ppp1r14b                                    | PPP1R14B   | -0.63 | 3.06  | -2.70 | 2.16E-02 | 1.71E-01 | -3.73 |
| 1440226_PM_at   | Zfp760                                      | NA         | -0.50 | 3.13  | -2.70 | 2.16E-02 | 1.71E-01 | -3.73 |
| 1446612_PM_at   | ---                                         | NA         | -0.27 | 2.33  | -2.70 | 2.16E-02 | 1.71E-01 | -3.73 |
| 1442983_PM_at   | ---                                         | NA         | 0.27  | 2.68  | 2.70  | 2.16E-02 | 1.71E-01 | -3.73 |
| 1429765_PM_at   | Fam101b                                     | RFLNB      | 0.37  | 3.01  | 2.70  | 2.16E-02 | 1.71E-01 | -3.73 |
| 1418338_PM_at   | Wdr33                                       | WDR33      | 0.46  | 2.82  | 2.70  | 2.16E-02 | 1.71E-01 | -3.73 |
| 1433363_PM_at   | A93003615Rik                                | NA         | 0.63  | 2.48  | 2.70  | 2.16E-02 | 1.71E-01 | -3.73 |
| 1434584_PM_a_at | Gm13102 /// Pramel4 /// Pramel5             | PRAMEF9    | 0.74  | 4.63  | 2.70  | 2.16E-02 | 1.71E-01 | -3.73 |
| 1416597_PM_at   | Hdgfrp2                                     | ACO11498.1 | 0.87  | 4.50  | 2.70  | 2.16E-02 | 1.71E-01 | -3.73 |
| 1420941_PM_at   | Rgs5                                        | RGS5       | -0.74 | 3.74  | -2.70 | 2.16E-02 | 1.71E-01 | -3.73 |
| 1455419_PM_at   | D63004512Rik                                | KIAA1549   | -0.65 | 4.46  | -2.70 | 2.16E-02 | 1.71E-01 | -3.73 |
| 1438649_PM_x_at | Pebp1                                       | PEBP1      | -0.30 | 11.37 | -2.70 | 2.16E-02 | 1.71E-01 | -3.73 |
| 1420658_PM_at   | Ucp3                                        | UCP3       | 0.32  | 2.67  | 2.70  | 2.16E-02 | 1.71E-01 | -3.73 |
| 1455550_PM_x_at | Serinc3                                     | SERINC3    | -0.75 | 8.16  | -2.70 | 2.17E-02 | 1.71E-01 | -3.73 |
| 1418988_PM_at   | Pex7                                        | PEX7       | -0.57 | 3.31  | -2.70 | 2.17E-02 | 1.71E-01 | -3.73 |
| 1456928_PM_at   | ---                                         | NA         | 0.27  | 2.46  | 2.70  | 2.17E-02 | 1.71E-01 | -3.73 |
| 1449723_PM_at   | ---                                         | NA         | 0.33  | 2.52  | 2.70  | 2.17E-02 | 1.71E-01 | -3.73 |
| 1429968_PM_at   | ---                                         | NA         | -0.43 | 2.43  | -2.70 | 2.17E-02 | 1.71E-01 | -3.73 |
| 1431755_PM_a_at | Cwc25                                       | CWC25      | 0.26  | 2.63  | 2.70  | 2.17E-02 | 1.71E-01 | -3.74 |
| 1444699_PM_at   | ---                                         | NA         | 0.28  | 2.53  | 2.70  | 2.17E-02 | 1.71E-01 | -3.74 |
| 1453964_PM_at   | ---                                         | NA         | 0.33  | 3.19  | 2.70  | 2.17E-02 | 1.71E-01 | -3.74 |
| 1431663_PM_a_at | Cntfr                                       | CNTFR      | 0.45  | 3.09  | 2.70  | 2.17E-02 | 1.71E-01 | -3.74 |
| 1445627_PM_at   | ---                                         | NA         | 0.96  | 3.44  | 2.70  | 2.17E-02 | 1.71E-01 | -3.74 |
| 1447863_PM_s_at | Nr4a2                                       | NR4A2      | 1.42  | 4.59  | 2.70  | 2.17E-02 | 1.71E-01 | -3.74 |
| 1437746_PM_at   | Lrrtm1                                      | LRRTM1     | -0.80 | 4.18  | -2.70 | 2.17E-02 | 1.71E-01 | -3.74 |
| 1442768_PM_at   | Arhgef40                                    | NA         | 0.37  | 2.59  | 2.70  | 2.17E-02 | 1.71E-01 | -3.74 |
| 1433643_PM_at   | Cacna2d1                                    | CACNA2D1   | -1.28 | 5.85  | -2.70 | 2.17E-02 | 1.71E-01 | -3.74 |
| 1444988_PM_at   | ---                                         | NA         | 0.30  | 2.63  | 2.70  | 2.17E-02 | 1.71E-01 | -3.74 |
| 1424870_PM_at   | Osbpl10                                     | OSBPL10    | 0.39  | 2.95  | 2.70  | 2.17E-02 | 1.71E-01 | -3.74 |
| 1457029_PM_at   | Ppp4r1-ps                                   | NA         | 0.40  | 3.11  | 2.70  | 2.17E-02 | 1.71E-01 | -3.74 |
| 1450649_PM_at   | Gng10                                       | GNG10      | -1.03 | 4.98  | -2.70 | 2.17E-02 | 1.71E-01 | -3.74 |
| 1428872_PM_at   | Msl1                                        | MSL1       | -0.80 | 3.59  | -2.70 | 2.18E-02 | 1.71E-01 | -3.74 |
| 1439701_PM_at   | ---                                         | NA         | -0.79 | 4.37  | -2.70 | 2.18E-02 | 1.71E-01 | -3.74 |
| 1436876_PM_at   | Rgs7bp                                      | RGS7BP     | -0.72 | 5.65  | -2.70 | 2.18E-02 | 1.71E-01 | -3.74 |
| 1428610_PM_at   | Atg7                                        | ATG7       | -0.32 | 2.51  | -2.70 | 2.18E-02 | 1.71E-01 | -3.74 |
| 1427710_PM_at   | Ccdc114                                     | CCDC114    | 0.32  | 2.67  | 2.70  | 2.18E-02 | 1.71E-01 | -3.74 |
| 1425605_PM_a_at | Lmbr1                                       | LMBR1      | 0.33  | 2.48  | 2.70  | 2.18E-02 | 1.71E-01 | -3.74 |
| 1452450_PM_at   | Atp8b2                                      | ATP8B2     | 0.44  | 2.43  | 2.70  | 2.18E-02 | 1.71E-01 | -3.74 |
| 1416471_PM_at   | Cept1                                       | CEPT1      | -0.42 | 3.05  | -2.70 | 2.18E-02 | 1.71E-01 | -3.74 |
| 1450657_PM_at   | Ppie                                        | PPIE       | 0.25  | 2.49  | 2.70  | 2.18E-02 | 1.71E-01 | -3.74 |
| 1453242_PM_x_at | 2810047C21Rik1 /// Gm20482 /// LOC105242405 | NA         | 0.53  | 4.02  | 2.70  | 2.18E-02 | 1.71E-01 | -3.74 |
| 1452361_PM_at   | Rnf20                                       | RNF20      | 1.25  | 4.86  | 2.70  | 2.18E-02 | 1.71E-01 | -3.74 |
| 1457628_PM_at   | Ccdc53                                      | WASHC3     | -0.80 | 2.94  | -2.70 | 2.18E-02 | 1.71E-01 | -3.74 |
| 1426039_PM_a_at | Alox12e                                     | NA         | 0.32  | 2.88  | 2.70  | 2.18E-02 | 1.71E-01 | -3.74 |
| 1450098_PM_at   | Hoga1                                       | HOGA1      | 0.33  | 2.69  | 2.70  | 2.18E-02 | 1.71E-01 | -3.74 |
| 1434987_PM_at   | Aldh2                                       | ACO02996.1 | -1.88 | 5.05  | -2.70 | 2.18E-02 | 1.71E-01 | -3.74 |
| 1457377_PM_at   | ---                                         | NA         | 0.42  | 2.48  | 2.70  | 2.18E-02 | 1.71E-01 | -3.74 |
| 1417734_PM_at   | Akap8l                                      | AKAP8L     | 0.83  | 3.32  | 2.70  | 2.18E-02 | 1.71E-01 | -3.74 |
| 1439901_PM_at   | Aida                                        | AIDA       | -0.44 | 4.44  | -2.69 | 2.18E-02 | 1.71E-01 | -3.74 |
| 1459165_PM_at   | D4Erttd179e                                 | NA         | 0.44  | 2.63  | 2.69  | 2.18E-02 | 1.71E-01 | -3.74 |
| 1439856_PM_at   | Acvr2b                                      | NA         | 0.53  | 2.83  | 2.70  | 2.18E-02 | 1.71E-01 | -3.74 |
| 1422456_PM_at   | Nsf                                         | NSF        | -1.29 | 5.90  | -2.69 | 2.19E-02 | 1.71E-01 | -3.74 |
| 1446545_PM_at   | ---                                         | NA         | 0.51  | 2.66  | 2.69  | 2.19E-02 | 1.71E-01 | -3.74 |
| 1419174_PM_at   | 2410004B18Rik                               | C1orf52    | -0.97 | 5.36  | -2.69 | 2.19E-02 | 1.71E-01 | -3.74 |
| 1430369_PM_at   | Epb41                                       | NA         | 0.60  | 3.30  | 2.69  | 2.19E-02 | 1.72E-01 | -3.74 |
| 1420143_PM_at   | Rc3h2                                       | RC3H2      | -0.50 | 2.63  | -2.69 | 2.19E-02 | 1.72E-01 | -3.74 |
| 1436562_PM_at   | Ddx58                                       | DDX58      | 0.31  | 2.61  | 2.69  | 2.19E-02 | 1.72E-01 | -3.75 |
| 1430582_PM_at   | Shprh                                       | SHPRH      | 0.43  | 3.32  | 2.69  | 2.19E-02 | 1.72E-01 | -3.75 |
| 1460179_PM_at   | Dnaja1                                      | DNAJA1     | -1.04 | 7.22  | -2.69 | 2.19E-02 | 1.72E-01 | -3.75 |
| 1425260_PM_at   | Alb                                         | ALB        | 0.52  | 3.33  | 2.69  | 2.19E-02 | 1.72E-01 | -3.75 |
| 1425304_PM_s_at | Prima1                                      | PRIMA1     | 0.34  | 3.73  | 2.69  | 2.19E-02 | 1.72E-01 | -3.75 |
| 1445482_PM_at   | Gle1                                        | GLE1       | 0.24  | 2.53  | 2.69  | 2.19E-02 | 1.72E-01 | -3.75 |
| 1431941_PM_at   | ---                                         | NA         | 0.25  | 2.67  | 2.69  | 2.19E-02 | 1.72E-01 | -3.75 |
| 1439522_PM_at   | ---                                         | NA         | 0.32  | 2.30  | 2.69  | 2.20E-02 | 1.72E-01 | -3.75 |
| 1420949_PM_at   | Znrf1                                       | ZNRF1      | 0.47  | 3.18  | 2.69  | 2.20E-02 | 1.72E-01 | -3.75 |



|                 |                                                                                                                                    |           |       |       |       |          |          |       |
|-----------------|------------------------------------------------------------------------------------------------------------------------------------|-----------|-------|-------|-------|----------|----------|-------|
| 1434488_PM_at   | Arfrp1                                                                                                                             | ARFRP1    | -0.88 | 3.73  | -2.69 | 2.20E-02 | 1.72E-01 | -3.75 |
| 1457146_PM_at   | ---                                                                                                                                | NA        | -0.33 | 2.36  | -2.69 | 2.20E-02 | 1.72E-01 | -3.75 |
| 1432229_PM_a_at | Cdy12                                                                                                                              | CDYL2     | 0.32  | 2.91  | 2.69  | 2.20E-02 | 1.72E-01 | -3.75 |
| 1438024_PM_at   | Mcur1                                                                                                                              | MCUR1     | -0.71 | 3.57  | -2.69 | 2.20E-02 | 1.72E-01 | -3.75 |
| 1432832_PM_at   | 4933435G04Rik                                                                                                                      | NA        | 0.25  | 2.48  | 2.69  | 2.20E-02 | 1.72E-01 | -3.75 |
| 1458953_PM_at   | D5Ert215e                                                                                                                          | NA        | 0.29  | 2.40  | 2.69  | 2.20E-02 | 1.72E-01 | -3.75 |
| 1425864_PM_a_at | Sorcs1                                                                                                                             | SORCS1    | 0.30  | 3.46  | 2.69  | 2.20E-02 | 1.72E-01 | -3.75 |
| 1455954_PM_x_at | Gpaa1                                                                                                                              | GPA1      | 0.36  | 3.52  | 2.69  | 2.20E-02 | 1.72E-01 | -3.75 |
| 1449252_PM_at   | Fam110c                                                                                                                            | FAM110C   | 0.41  | 2.69  | 2.69  | 2.20E-02 | 1.72E-01 | -3.75 |
| 1441455_PM_at   | ---                                                                                                                                | NA        | 0.69  | 3.05  | 2.69  | 2.20E-02 | 1.72E-01 | -3.75 |
| 1444650_PM_at   | Arhgef18                                                                                                                           | ARHGEF18  | 0.27  | 2.60  | 2.69  | 2.20E-02 | 1.72E-01 | -3.75 |
| 1429487_PM_at   | Ppp1r12a                                                                                                                           | PPP1R12A  | 0.85  | 5.61  | 2.69  | 2.20E-02 | 1.72E-01 | -3.75 |
| 1424956_PM_at   | Ahd1                                                                                                                               | AHD1      | 0.37  | 3.24  | 2.69  | 2.21E-02 | 1.72E-01 | -3.75 |
| 1417782_PM_at   | Cers4                                                                                                                              | CERS4     | 0.67  | 7.36  | 2.69  | 2.21E-02 | 1.72E-01 | -3.75 |
| 1420755_PM_a_at | Park2                                                                                                                              | PRKN      | 0.86  | 3.29  | 2.69  | 2.21E-02 | 1.72E-01 | -3.75 |
| 1447763_PM_at   | Snap25                                                                                                                             | NA        | -0.44 | 11.66 | -2.69 | 2.21E-02 | 1.72E-01 | -3.75 |
| 1429399_PM_at   | Rnf125                                                                                                                             | RNF125    | -0.37 | 2.59  | -2.69 | 2.21E-02 | 1.72E-01 | -3.75 |
| 1438819_PM_at   | Nab1                                                                                                                               | NA        | 0.32  | 2.28  | 2.69  | 2.21E-02 | 1.72E-01 | -3.75 |
| 1427273_PM_at   | Rnf214                                                                                                                             | RNF214    | -0.61 | 3.57  | -2.69 | 2.21E-02 | 1.72E-01 | -3.75 |
| 1424096_PM_at   | Krt5                                                                                                                               | KRT5      | 0.25  | 3.08  | 2.69  | 2.21E-02 | 1.72E-01 | -3.75 |
| 1445200_PM_at   | ---                                                                                                                                | NA        | 0.48  | 2.74  | 2.69  | 2.21E-02 | 1.72E-01 | -3.75 |
| 1434304_PM_s_at | Nus1                                                                                                                               | NUS1      | -0.51 | 5.40  | -2.69 | 2.21E-02 | 1.72E-01 | -3.75 |
| 1432557_PM_at   | 1700045111Rik                                                                                                                      | NA        | 0.31  | 2.63  | 2.69  | 2.21E-02 | 1.72E-01 | -3.75 |
| 1423876_PM_at   | Fam160b1                                                                                                                           | FAM160B1  | 0.33  | 2.68  | 2.69  | 2.21E-02 | 1.72E-01 | -3.75 |
| 1416109_PM_at   | Fuca1                                                                                                                              | FUCA1     | -0.55 | 3.51  | -2.69 | 2.21E-02 | 1.72E-01 | -3.75 |
| 1457831_PM_at   | Apela /// Trim61                                                                                                                   | APELA     | 0.27  | 3.25  | 2.69  | 2.21E-02 | 1.72E-01 | -3.76 |
| 1446460_PM_at   | Tmem61                                                                                                                             | NA        | 0.35  | 2.74  | 2.69  | 2.21E-02 | 1.72E-01 | -3.76 |
| 1425120_PM_x_at | Ifi272b                                                                                                                            | NA        | 0.40  | 3.92  | 2.69  | 2.21E-02 | 1.72E-01 | -3.76 |
| 1417623_PM_at   | Slc12a2                                                                                                                            | SLC12A2   | -0.95 | 4.94  | -2.69 | 2.22E-02 | 1.72E-01 | -3.76 |
| 1422510_PM_at   | Ctdspl                                                                                                                             | CTDSPL    | 0.44  | 3.92  | 2.69  | 2.22E-02 | 1.72E-01 | -3.76 |
| 1424927_PM_at   | Glpr1                                                                                                                              | GLIPR1    | 0.38  | 2.80  | 2.69  | 2.22E-02 | 1.73E-01 | -3.76 |
| 1436708_PM_x_at | Mcm4                                                                                                                               | MCM4      | -1.05 | 5.28  | -2.69 | 2.22E-02 | 1.73E-01 | -3.76 |
| 1446817_PM_at   | D10Ert43e                                                                                                                          | NA        | -0.37 | 2.20  | -2.69 | 2.22E-02 | 1.73E-01 | -3.76 |
| 1435232_PM_x_at | Mrp15                                                                                                                              | MRP15     | -0.59 | 3.10  | -2.69 | 2.22E-02 | 1.73E-01 | -3.76 |
| 1435563_PM_at   | Mrp5                                                                                                                               | MRP5      | -0.42 | 2.95  | -2.69 | 2.22E-02 | 1.73E-01 | -3.76 |
| 1437974_PM_a_at | Hk1                                                                                                                                | HK1       | -0.42 | 4.71  | -2.69 | 2.22E-02 | 1.73E-01 | -3.76 |
| 1451189_PM_at   | Zswim1                                                                                                                             | ZSWIM1    | -0.37 | 2.42  | -2.69 | 2.22E-02 | 1.73E-01 | -3.76 |
| 1425696_PM_at   | LOC102643259 /// Nxn1l                                                                                                             | NXNL1     | 0.24  | 2.65  | 2.69  | 2.22E-02 | 1.73E-01 | -3.76 |
| 1427576_PM_at   | Igk-V21 /// Igk-V28 /// Igk-V8 /// Igkc /// Igkv3-4 /// Igkv6-14 /// Igkv6-17 /// Igkv6-23 /// Igkv6-25 /// Igkv8-19 /// LOC672450 | NA        | 0.31  | 3.83  | 2.69  | 2.22E-02 | 1.73E-01 | -3.76 |
| 1433387_PM_at   | 2900022M07Rik                                                                                                                      | NA        | 0.37  | 3.15  | 2.69  | 2.22E-02 | 1.73E-01 | -3.76 |
| 1454655_PM_at   | Dgkd                                                                                                                               | DGKD      | 0.71  | 4.97  | 2.69  | 2.22E-02 | 1.73E-01 | -3.76 |
| 1433508_PM_at   | Klf6                                                                                                                               | KLF6      | -0.69 | 3.99  | -2.68 | 2.22E-02 | 1.73E-01 | -3.76 |
| 1435293_PM_at   | Adam22                                                                                                                             | ADAM22    | -0.44 | 6.93  | -2.68 | 2.22E-02 | 1.73E-01 | -3.76 |
| 1445014_PM_at   | AU019157                                                                                                                           | NA        | 0.37  | 2.67  | 2.68  | 2.23E-02 | 1.73E-01 | -3.76 |
| 1416878_PM_at   | Mrp51                                                                                                                              | MRP51     | 0.49  | 2.61  | 2.68  | 2.22E-02 | 1.73E-01 | -3.76 |
| 1459113_PM_at   | ---                                                                                                                                | NA        | 0.24  | 2.16  | 2.68  | 2.23E-02 | 1.73E-01 | -3.76 |
| 1435801_PM_at   | Fktn                                                                                                                               | FKTN      | -0.56 | 2.79  | -2.68 | 2.23E-02 | 1.73E-01 | -3.76 |
| 1444751_PM_at   | ---                                                                                                                                | NA        | 0.34  | 2.38  | 2.68  | 2.23E-02 | 1.73E-01 | -3.76 |
| 1434724_PM_at   | Usp31                                                                                                                              | USP31     | -0.52 | 4.95  | -2.68 | 2.23E-02 | 1.73E-01 | -3.76 |
| 1449821_PM_a_at | Memo1                                                                                                                              | MEMO1     | -0.63 | 3.82  | -2.68 | 2.23E-02 | 1.73E-01 | -3.76 |
| 1442843_PM_at   | ---                                                                                                                                | NA        | -0.40 | 3.97  | -2.68 | 2.23E-02 | 1.73E-01 | -3.76 |
| 1443069_PM_at   | ---                                                                                                                                | NA        | 0.22  | 2.22  | 2.68  | 2.23E-02 | 1.73E-01 | -3.76 |
| 1419214_PM_at   | Tnfrsf11a                                                                                                                          | TNFRSF11A | 0.29  | 2.09  | 2.68  | 2.23E-02 | 1.73E-01 | -3.76 |
| 1437493_PM_at   | ---                                                                                                                                | NA        | 0.42  | 4.21  | 2.68  | 2.23E-02 | 1.73E-01 | -3.76 |
| 1426023_PM_a_at | Rabep1                                                                                                                             | RABEP1    | 0.55  | 3.50  | 2.68  | 2.23E-02 | 1.73E-01 | -3.76 |
| 1421819_PM_a_at | Set                                                                                                                                | SET       | 0.71  | 4.99  | 2.68  | 2.23E-02 | 1.73E-01 | -3.76 |
| 1439018_PM_at   | Fhd1                                                                                                                               | FHD1      | 0.31  | 2.54  | 2.68  | 2.24E-02 | 1.73E-01 | -3.77 |
| 1444958_PM_at   | C79017                                                                                                                             | NA        | 0.38  | 3.57  | 2.68  | 2.24E-02 | 1.73E-01 | -3.77 |
| 1459653_PM_at   | ---                                                                                                                                | NA        | -0.27 | 2.43  | -2.68 | 2.24E-02 | 1.73E-01 | -3.77 |
| 1423619_PM_at   | Rasd1                                                                                                                              | RASD1     | 0.22  | 2.59  | 2.68  | 2.24E-02 | 1.73E-01 | -3.77 |
| 1445796_PM_at   | ---                                                                                                                                | NA        | 0.45  | 2.87  | 2.68  | 2.24E-02 | 1.73E-01 | -3.77 |
| 1445813_PM_at   | Wdr27                                                                                                                              | WDR27     | 0.39  | 3.45  | 2.68  | 2.24E-02 | 1.73E-01 | -3.77 |
| 1426519_PM_at   | P4ha1                                                                                                                              | P4HA1     | 0.79  | 2.89  | 2.68  | 2.24E-02 | 1.73E-01 | -3.77 |
| 1422825_PM_at   | Cartpt                                                                                                                             | CARTPT    | 0.72  | 2.55  | 2.68  | 2.24E-02 | 1.73E-01 | -3.77 |
| 1444158_PM_at   | Kdm5c                                                                                                                              | KDM5C     | -1.05 | 3.55  | -2.68 | 2.24E-02 | 1.73E-01 | -3.77 |
| 1446973_PM_at   | ---                                                                                                                                | NA        | -0.37 | 2.58  | -2.68 | 2.24E-02 | 1.73E-01 | -3.77 |
| 1450752_PM_at   | Cyct                                                                                                                               | NA        | 0.29  | 2.51  | 2.68  | 2.24E-02 | 1.74E-01 | -3.77 |
| 1458903_PM_at   | Miat                                                                                                                               | NA        | 1.05  | 3.18  | 2.68  | 2.24E-02 | 1.74E-01 | -3.77 |
| 1421176_PM_at   | Rasgrp1                                                                                                                            | RASGRP1   | -0.81 | 4.98  | -2.68 | 2.25E-02 | 1.74E-01 | -3.77 |
| 1457062_PM_at   | Kans1                                                                                                                              | NA        | 0.56  | 4.44  | 2.68  | 2.25E-02 | 1.74E-01 | -3.77 |

|                 |                       |           |       |      |       |          |          |       |
|-----------------|-----------------------|-----------|-------|------|-------|----------|----------|-------|
| 1417791_PM_a_at | Zfp638                | ZNF638    | -0.68 | 5.43 | -2.68 | 2.25E-02 | 1.74E-01 | -3.77 |
| 1452291_PM_at   | Arap2                 | ARAP2     | -0.61 | 4.33 | -2.68 | 2.25E-02 | 1.74E-01 | -3.77 |
| 1425492_PM_at   | Bmpr1a                | BMPR1A    | -0.49 | 4.37 | -2.68 | 2.25E-02 | 1.74E-01 | -3.77 |
| 1416851_PM_at   | St13                  | ST13      | 0.36  | 3.90 | 2.68  | 2.25E-02 | 1.74E-01 | -3.77 |
| 1445469_PM_at   | ---                   | NA        | 0.37  | 2.61 | 2.68  | 2.25E-02 | 1.74E-01 | -3.77 |
| 1437522_PM_x_at | Gh                    | CSH2      | 0.39  | 2.66 | 2.68  | 2.25E-02 | 1.74E-01 | -3.77 |
| 1457744_PM_at   | Ddx46                 | DDX46     | 0.53  | 2.92 | 2.68  | 2.25E-02 | 1.74E-01 | -3.77 |
| 1449953_PM_at   | Irgb3bp               | ITGB3BP   | -0.53 | 2.62 | -2.68 | 2.25E-02 | 1.74E-01 | -3.77 |
| 1416776_PM_at   | Crym                  | CRYM      | -0.65 | 3.52 | -2.68 | 2.25E-02 | 1.74E-01 | -3.77 |
| 1417313_PM_at   | Lsm7                  | LSM7      | 0.45  | 5.45 | 2.68  | 2.25E-02 | 1.74E-01 | -3.77 |
| 1434150_PM_a_at | Mettl7a1 /// Mettl7a2 | METTL7A   | -1.21 | 7.22 | -2.68 | 2.26E-02 | 1.74E-01 | -3.77 |
| 1460589_PM_at   | Zfp597                | ZNF597    | -0.33 | 2.64 | -2.68 | 2.26E-02 | 1.74E-01 | -3.77 |
| 1458162_PM_at   | Gm11267               | NA        | 0.29  | 2.77 | 2.68  | 2.26E-02 | 1.74E-01 | -3.77 |
| 1432259_PM_s_at | LOC105243122          | NA        | 0.34  | 2.40 | 2.68  | 2.26E-02 | 1.74E-01 | -3.77 |
| 1418803_PM_a_at | Fasl                  | FASLG     | 0.25  | 2.14 | 2.68  | 2.26E-02 | 1.74E-01 | -3.78 |
| 1427100_PM_at   | Metrn                 | METRN     | 0.31  | 2.87 | 2.68  | 2.26E-02 | 1.74E-01 | -3.78 |
| 1426333_PM_a_at | Ikbkb                 | IKBKB     | 0.49  | 2.23 | 2.68  | 2.26E-02 | 1.74E-01 | -3.78 |
| 1455275_PM_at   | E530001K10Rik         | NA        | 0.56  | 2.29 | 2.68  | 2.26E-02 | 1.74E-01 | -3.78 |
| 1443538_PM_at   | Gm2164                | NA        | 0.26  | 2.77 | 2.67  | 2.26E-02 | 1.74E-01 | -3.78 |
| 1432313_PM_at   | 4933433F19Rik         | NA        | 0.27  | 2.36 | 2.67  | 2.26E-02 | 1.74E-01 | -3.78 |
| 1435859_PM_x_at | Psmc2                 | PSMC2     | -2.12 | 6.90 | -2.67 | 2.27E-02 | 1.74E-01 | -3.78 |
| 1448240_PM_at   | Mbtps1                | MBTPS1    | -0.45 | 3.45 | -2.67 | 2.27E-02 | 1.74E-01 | -3.78 |
| 1425998_PM_at   | Sytl4                 | SYTL4     | 0.24  | 3.67 | 2.67  | 2.27E-02 | 1.74E-01 | -3.78 |
| 1455212_PM_at   | Wdr24                 | WDR24     | 0.26  | 2.95 | 2.67  | 2.27E-02 | 1.74E-01 | -3.78 |
| 1446828_PM_at   | ---                   | NA        | 0.35  | 2.95 | 2.67  | 2.27E-02 | 1.74E-01 | -3.78 |
| 1439119_PM_a_at | Fam120a               | FAM120A   | 0.64  | 2.89 | 2.67  | 2.27E-02 | 1.74E-01 | -3.78 |
| 1426247_PM_at   | Stk24                 | STK24     | -1.32 | 6.23 | -2.67 | 2.27E-02 | 1.74E-01 | -3.78 |
| 1438402_PM_at   | Fam171a1              | FAM171A1  | -1.03 | 4.02 | -2.67 | 2.27E-02 | 1.74E-01 | -3.78 |
| 1435032_PM_at   | Golgb1                | GOLGB1    | -0.75 | 5.08 | -2.67 | 2.27E-02 | 1.74E-01 | -3.78 |
| 1428063_PM_at   | Ankrd46               | ANKRD46   | -0.95 | 3.72 | -2.67 | 2.27E-02 | 1.75E-01 | -3.78 |
| 1458857_PM_at   | ---                   | NA        | 0.23  | 2.97 | 2.67  | 2.27E-02 | 1.75E-01 | -3.78 |
| 1422317_PM_a_at | Ilr1l1                | IL1RL1    | 0.26  | 2.25 | 2.67  | 2.27E-02 | 1.75E-01 | -3.78 |
| 1445932_PM_at   | ---                   | NA        | 0.37  | 2.39 | 2.67  | 2.27E-02 | 1.75E-01 | -3.78 |
| 1451139_PM_at   | Slc39a4               | SLC39A4   | 0.28  | 2.59 | 2.67  | 2.27E-02 | 1.75E-01 | -3.78 |
| 1458674_PM_at   | ---                   | NA        | 0.59  | 2.81 | 2.67  | 2.27E-02 | 1.75E-01 | -3.78 |
| 1426493_PM_a_at | Kifc2                 | KIFC2     | -0.84 | 7.51 | -2.67 | 2.28E-02 | 1.75E-01 | -3.78 |
| 1417901_PM_a_at | Ica1                  | ICA1      | -0.68 | 4.41 | -2.67 | 2.28E-02 | 1.75E-01 | -3.78 |
| 1423533_PM_a_at | Rhot1                 | RHOT1     | -0.64 | 3.20 | -2.67 | 2.27E-02 | 1.75E-01 | -3.78 |
| 1452212_PM_at   | Lmna                  | LMNA      | 0.24  | 2.67 | 2.67  | 2.28E-02 | 1.75E-01 | -3.78 |
| 1433164_PM_at   | 4930570E01Rik         | NA        | 0.29  | 2.52 | 2.67  | 2.27E-02 | 1.75E-01 | -3.78 |
| 1448090_PM_at   | ---                   | NA        | 0.43  | 2.84 | 2.67  | 2.28E-02 | 1.75E-01 | -3.78 |
| 1442418_PM_at   | ---                   | NA        | 0.50  | 2.59 | 2.67  | 2.28E-02 | 1.75E-01 | -3.78 |
| 1450766_PM_at   | Pde6h                 | PDE6H     | -0.36 | 2.33 | -2.67 | 2.28E-02 | 1.75E-01 | -3.78 |
| 1453536_PM_at   | Lrrc69                | LRRC69    | 0.23  | 2.82 | 2.67  | 2.28E-02 | 1.75E-01 | -3.78 |
| 1456650_PM_at   | ---                   | NA        | 0.35  | 2.51 | 2.67  | 2.28E-02 | 1.75E-01 | -3.78 |
| 1459751_PM_s_at | Ppp1r16a              | PPP1R16A  | -1.14 | 4.07 | -2.67 | 2.28E-02 | 1.75E-01 | -3.78 |
| 1426234_PM_s_at | Ap1ar                 | AP1AR     | -0.90 | 3.89 | -2.67 | 2.28E-02 | 1.75E-01 | -3.79 |
| 1452122_PM_at   | Al314180              | KIAA0368  | -0.53 | 6.69 | -2.67 | 2.28E-02 | 1.75E-01 | -3.79 |
| 1434579_PM_x_at | Ndufs8                | NDUFS8    | -1.56 | 5.07 | -2.67 | 2.28E-02 | 1.75E-01 | -3.79 |
| 1430473_PM_at   | ---                   | NA        | 0.59  | 2.41 | 2.67  | 2.29E-02 | 1.75E-01 | -3.79 |
| 1460593_PM_at   | Susd4                 | SUSD4     | -0.54 | 5.30 | -2.67 | 2.29E-02 | 1.75E-01 | -3.79 |
| 1434641_PM_x_at | Sez6l2                | SEZ6L2    | -0.80 | 9.83 | -2.67 | 2.29E-02 | 1.75E-01 | -3.79 |
| 1434160_PM_at   | Zfp592                | ZNF592    | 0.32  | 2.83 | 2.67  | 2.29E-02 | 1.75E-01 | -3.79 |
| 1445269_PM_at   | ---                   | NA        | 0.27  | 2.44 | 2.67  | 2.29E-02 | 1.75E-01 | -3.79 |
| 1431207_PM_at   | Mblac2                | MBLAC2    | 0.27  | 2.47 | 2.67  | 2.29E-02 | 1.75E-01 | -3.79 |
| 1421614_PM_at   | Zan                   | ZAN       | 0.37  | 2.68 | 2.67  | 2.29E-02 | 1.75E-01 | -3.79 |
| 1455169_PM_at   | Rab11fip2             | RAB11FIP2 | -0.78 | 5.12 | -2.67 | 2.29E-02 | 1.75E-01 | -3.79 |
| 1434549_PM_at   | Rab11a                | RAB11A    | -0.57 | 3.16 | -2.67 | 2.29E-02 | 1.75E-01 | -3.79 |
| 1444763_PM_at   | ---                   | NA        | -0.38 | 2.70 | -2.67 | 2.29E-02 | 1.75E-01 | -3.79 |
| 1431862_PM_x_at | Odf2l                 | ODF2L     | 0.28  | 2.42 | 2.67  | 2.29E-02 | 1.75E-01 | -3.79 |
| 1444373_PM_at   | Tiam1                 | TIAM1     | 0.28  | 2.20 | 2.67  | 2.29E-02 | 1.75E-01 | -3.79 |
| 1458387_PM_at   | Ptdss2                | PTDSS2    | 0.54  | 3.00 | 2.67  | 2.29E-02 | 1.75E-01 | -3.79 |
| 1455651_PM_at   | Terf2                 | TERF2     | 0.62  | 5.77 | 2.67  | 2.29E-02 | 1.75E-01 | -3.79 |
| 1420374_PM_at   | Foxj2                 | FOXJ2     | 0.43  | 4.48 | 2.67  | 2.30E-02 | 1.76E-01 | -3.79 |
| 1460028_PM_at   | Grip2                 | GRI2      | 0.44  | 2.46 | 2.67  | 2.30E-02 | 1.76E-01 | -3.79 |
| 1454748_PM_at   | Naprt                 | NAPRT     | 0.27  | 2.79 | 2.67  | 2.30E-02 | 1.76E-01 | -3.79 |
| 1419971_PM_s_at | Slc35a5               | SLC35A5   | -0.99 | 5.88 | -2.67 | 2.30E-02 | 1.76E-01 | -3.79 |
| 1449354_PM_at   | Zrsr2                 | ZRSR2     | -0.66 | 5.60 | -2.67 | 2.30E-02 | 1.76E-01 | -3.79 |
| 1416314_PM_at   | Mllt11                | MLLT11    | 0.43  | 2.68 | 2.66  | 2.30E-02 | 1.76E-01 | -3.79 |
| 1443253_PM_at   | ---                   | NA        | -0.22 | 2.18 | -2.66 | 2.30E-02 | 1.76E-01 | -3.79 |
| 1457547_PM_at   | ---                   | NA        | 0.20  | 2.34 | 2.66  | 2.30E-02 | 1.76E-01 | -3.79 |
| 1435344_PM_at   | Tfdp2                 | TFDP2     | -0.48 | 4.00 | -2.66 | 2.30E-02 | 1.76E-01 | -3.79 |
| 1427556_PM_at   | Myk2                  | MYLK2     | 0.42  | 4.52 | 2.66  | 2.31E-02 | 1.76E-01 | -3.79 |
| 1439225_PM_at   | Lars2                 | LARS2     | 0.65  | 4.34 | 2.66  | 2.31E-02 | 1.76E-01 | -3.79 |
| 1426654_PM_at   | Zc3hc1                | ZC3HC1    | 0.32  | 3.23 | 2.66  | 2.31E-02 | 1.76E-01 | -3.80 |

|                 |                                                                                               |          |       |      |       |          |          |       |
|-----------------|-----------------------------------------------------------------------------------------------|----------|-------|------|-------|----------|----------|-------|
| 1455377_PM_at   | Ttl7                                                                                          | TLL7     | -1.85 | 6.68 | -2.66 | 2.31E-02 | 1.76E-01 | -3.80 |
| 1450180_PM_a_at | Rara                                                                                          | RARA     | 0.41  | 3.45 | 2.66  | 2.31E-02 | 1.76E-01 | -3.80 |
| 1441419_PM_at   | 6030443J06Rik                                                                                 | NA       | 0.58  | 5.13 | 2.66  | 2.31E-02 | 1.76E-01 | -3.80 |
| 1456885_PM_at   | Sept8                                                                                         | SEPT8    | -0.59 | 8.73 | -2.66 | 2.31E-02 | 1.76E-01 | -3.80 |
| 1416348_PM_at   | Men1                                                                                          | MEN1     | 0.31  | 2.81 | 2.66  | 2.31E-02 | 1.76E-01 | -3.80 |
| 1416345_PM_at   | Timm8a1                                                                                       | TIMM8A   | -0.79 | 6.22 | -2.66 | 2.32E-02 | 1.76E-01 | -3.80 |
| 1460177_PM_at   | Cndp2                                                                                         | CNDP2    | -0.55 | 3.86 | -2.66 | 2.32E-02 | 1.76E-01 | -3.80 |
| 1419492_PM_s_at | Defb1                                                                                         | DEFB1    | -0.32 | 2.76 | -2.66 | 2.32E-02 | 1.76E-01 | -3.80 |
| 1421348_PM_a_at | Cend1                                                                                         | CEND1    | 0.37  | 7.41 | 2.66  | 2.32E-02 | 1.76E-01 | -3.80 |
| 1449514_PM_at   | Grk5                                                                                          | GRK5     | 0.37  | 2.29 | 2.66  | 2.32E-02 | 1.76E-01 | -3.80 |
| 1442709_PM_at   | ---                                                                                           | NA       | 0.44  | 2.64 | 2.66  | 2.32E-02 | 1.76E-01 | -3.80 |
| 1425865_PM_a_at | Lig3                                                                                          | LIG3     | 0.49  | 2.98 | 2.66  | 2.32E-02 | 1.76E-01 | -3.80 |
| 1420612_PM_s_at | Ptp4a2                                                                                        | PTP4A2   | -0.54 | 4.57 | -2.66 | 2.32E-02 | 1.77E-01 | -3.80 |
| 1454978_PM_at   | Ttyh3                                                                                         | TTYH3    | -0.36 | 3.78 | -2.66 | 2.32E-02 | 1.77E-01 | -3.80 |
| 1426535_PM_at   | Poglut1                                                                                       | POGLUT1  | -0.33 | 2.73 | -2.66 | 2.32E-02 | 1.77E-01 | -3.80 |
| 1416915_PM_at   | Msh6                                                                                          | MSH6     | -1.05 | 3.34 | -2.66 | 2.32E-02 | 1.77E-01 | -3.80 |
| 1417054_PM_a_at | Sf3b6                                                                                         | SF3B6    | -0.82 | 3.53 | -2.66 | 2.32E-02 | 1.77E-01 | -3.80 |
| 1421853_PM_at   | Psen1                                                                                         | PSEN1    | -0.57 | 3.24 | -2.66 | 2.32E-02 | 1.77E-01 | -3.80 |
| 1433251_PM_at   | Hsp90aa1                                                                                      | HSP90AA1 | 0.24  | 2.22 | 2.66  | 2.32E-02 | 1.77E-01 | -3.80 |
| 1453249_PM_a_at | Tex21                                                                                         | NA       | 0.29  | 2.39 | 2.66  | 2.32E-02 | 1.77E-01 | -3.80 |
| 1459380_PM_at   | Tada1                                                                                         | TADA1    | 0.54  | 4.10 | 2.66  | 2.32E-02 | 1.77E-01 | -3.80 |
| 1428778_PM_at   | Sf1                                                                                           | SF1      | 0.87  | 6.10 | 2.66  | 2.32E-02 | 1.77E-01 | -3.80 |
| 1455556_PM_at   | Notch2                                                                                        | NOTCH2   | -1.61 | 5.33 | -2.66 | 2.33E-02 | 1.77E-01 | -3.80 |
| 1428715_PM_at   | Gfpt1                                                                                         | GFPT1    | -0.57 | 4.86 | -2.66 | 2.33E-02 | 1.77E-01 | -3.80 |
| 1420280_PM_x_at | Col9a3                                                                                        | COL9A3   | 0.33  | 2.83 | 2.66  | 2.33E-02 | 1.77E-01 | -3.80 |
| 1429315_PM_at   | Syt11                                                                                         | SYT11    | -1.16 | 7.86 | -2.66 | 2.33E-02 | 1.77E-01 | -3.80 |
| 1454320_PM_at   | 5830420C07Rik                                                                                 | NA       | 0.38  | 2.50 | 2.66  | 2.33E-02 | 1.77E-01 | -3.80 |
| 1424336_PM_at   | Ppcdc                                                                                         | PPCDC    | -0.54 | 3.86 | -2.66 | 2.33E-02 | 1.77E-01 | -3.80 |
| 1455140_PM_at   | Pitpnm3                                                                                       | PITPNM3  | -0.88 | 5.93 | -2.66 | 2.33E-02 | 1.77E-01 | -3.81 |
| 1424252_PM_at   | Hnrnpdl                                                                                       | HNRNPDL  | -0.68 | 3.40 | -2.66 | 2.33E-02 | 1.77E-01 | -3.81 |
| 1432363_PM_at   | Gm3336                                                                                        | NA       | 0.35  | 2.76 | 2.66  | 2.33E-02 | 1.77E-01 | -3.81 |
| 1451156_PM_s_at | Vldlr                                                                                         | LDLR     | 0.59  | 3.01 | 2.66  | 2.33E-02 | 1.77E-01 | -3.81 |
| 1455823_PM_at   | Bbs4                                                                                          | BBS4     | -0.45 | 3.33 | -2.66 | 2.33E-02 | 1.77E-01 | -3.81 |
| 1443615_PM_at   | Ldah                                                                                          | NA       | 0.45  | 2.79 | 2.66  | 2.33E-02 | 1.77E-01 | -3.81 |
| 1443397_PM_at   | ---                                                                                           | NA       | 0.24  | 2.22 | 2.66  | 2.34E-02 | 1.77E-01 | -3.81 |
| 1438845_PM_at   | Ip6k1                                                                                         | IP6K1    | 0.48  | 3.13 | 2.66  | 2.34E-02 | 1.77E-01 | -3.81 |
| 1451512_PM_s_at | Hibch                                                                                         | HIBCH    | -0.55 | 3.52 | -2.66 | 2.34E-02 | 1.77E-01 | -3.81 |
| 1444414_PM_at   | ---                                                                                           | NA       | 0.28  | 2.73 | 2.66  | 2.34E-02 | 1.77E-01 | -3.81 |
| 1440014_PM_at   | ---                                                                                           | NA       | 0.30  | 3.75 | 2.66  | 2.34E-02 | 1.77E-01 | -3.81 |
| 1457139_PM_at   | Auts2                                                                                         | NA       | -0.88 | 7.53 | -2.66 | 2.34E-02 | 1.77E-01 | -3.81 |
| 1417321_PM_at   | Zcchc7                                                                                        | ZCCHC7   | 0.68  | 6.95 | 2.65  | 2.34E-02 | 1.78E-01 | -3.81 |
| 1416737_PM_at   | Gys1                                                                                          | GYS1     | 0.31  | 2.77 | 2.65  | 2.35E-02 | 1.78E-01 | -3.81 |
| 1455636_PM_at   | Lsamp                                                                                         | LSAMP    | -0.83 | 3.80 | -2.65 | 2.35E-02 | 1.78E-01 | -3.81 |
| 1436606_PM_at   | ---                                                                                           | NA       | -0.70 | 3.15 | -2.65 | 2.35E-02 | 1.78E-01 | -3.81 |
| 1428903_PM_at   | Exo5                                                                                          | EXO5     | -0.61 | 4.15 | -2.65 | 2.35E-02 | 1.78E-01 | -3.81 |
| 1448313_PM_at   | Tpp1                                                                                          | TPP1     | -0.51 | 4.69 | -2.65 | 2.35E-02 | 1.78E-01 | -3.81 |
| 1452311_PM_at   | Dmgdh                                                                                         | DMGDH    | 0.22  | 2.24 | 2.65  | 2.35E-02 | 1.78E-01 | -3.81 |
| 1432498_PM_at   | Spata25                                                                                       | SPATA25  | 0.27  | 2.80 | 2.65  | 2.35E-02 | 1.78E-01 | -3.81 |
| 1427021_PM_s_at | Fth1                                                                                          | FTH1     | -1.18 | 4.35 | -2.65 | 2.35E-02 | 1.78E-01 | -3.81 |
| 1416022_PM_at   | Fabp5                                                                                         | FABP5    | -0.52 | 5.30 | -2.65 | 2.35E-02 | 1.78E-01 | -3.81 |
| 1455045_PM_at   | Srr                                                                                           | SRR      | -0.28 | 3.29 | -2.65 | 2.35E-02 | 1.78E-01 | -3.81 |
| 1453918_PM_at   | Ccbe1                                                                                         | CCBE1    | -0.33 | 2.66 | -2.65 | 2.35E-02 | 1.78E-01 | -3.81 |
| 1459386_PM_at   | Zfp709                                                                                        | NA       | 0.36  | 2.36 | 2.65  | 2.36E-02 | 1.78E-01 | -3.82 |
| 1444984_PM_at   | C77649                                                                                        | NA       | 0.24  | 2.14 | 2.65  | 2.36E-02 | 1.78E-01 | -3.82 |
| 1437038_PM_x_at | Act9                                                                                          | ACTL9    | 0.52  | 2.76 | 2.65  | 2.36E-02 | 1.78E-01 | -3.82 |
| 1439755_PM_at   | Sipa1l1                                                                                       | SIPAL11  | -0.97 | 6.82 | -2.65 | 2.36E-02 | 1.78E-01 | -3.82 |
| 1455325_PM_at   | Miat                                                                                          | NA       | -1.19 | 7.60 | -2.65 | 2.36E-02 | 1.78E-01 | -3.82 |
| 1442186_PM_at   | Atxn7                                                                                         | ATXN7    | -0.61 | 2.56 | -2.65 | 2.36E-02 | 1.78E-01 | -3.82 |
| 1423905_PM_at   | Pvr                                                                                           | PVR      | 0.25  | 2.21 | 2.65  | 2.36E-02 | 1.79E-01 | -3.82 |
| 1448906_PM_at   | Cdh16                                                                                         | CDH16    | 0.29  | 2.64 | 2.65  | 2.37E-02 | 1.79E-01 | -3.82 |
| 1449921_PM_s_at | Cpne6                                                                                         | CPNE6    | -1.01 | 7.26 | -2.65 | 2.37E-02 | 1.79E-01 | -3.82 |
| 1450857_PM_a_at | Col1a2                                                                                        | COL1A2   | -1.01 | 4.33 | -2.65 | 2.37E-02 | 1.79E-01 | -3.82 |
| 1423263_PM_at   | Gm10257 /// Gm12657 ///<br>H3f3a /// H3f3a-ps1 ///<br>H3f3b /// H3f3c ///<br>LOC102642045 /// | H3F3A    | -0.55 | 5.00 | -2.65 | 2.37E-02 | 1.79E-01 | -3.82 |
| 1437654_PM_at   | Fam35a                                                                                        | FAM35A   | 0.39  | 2.93 | 2.65  | 2.37E-02 | 1.79E-01 | -3.82 |
| 1423630_PM_at   | Cygb                                                                                          | CYGB     | 0.44  | 3.40 | 2.65  | 2.37E-02 | 1.79E-01 | -3.82 |
| 1419397_PM_at   | Pola1                                                                                         | POLA1    | 0.34  | 2.44 | 2.65  | 2.37E-02 | 1.79E-01 | -3.82 |
| 1448193_PM_at   | Cdip1                                                                                         | CDIP1    | -0.60 | 3.26 | -2.65 | 2.37E-02 | 1.79E-01 | -3.82 |
| 1419973_PM_at   | Oxsm                                                                                          | NA       | 0.22  | 2.40 | 2.65  | 2.37E-02 | 1.79E-01 | -3.82 |
| 1433787_PM_at   | Nell1                                                                                         | NELL1    | -1.54 | 7.66 | -2.65 | 2.37E-02 | 1.79E-01 | -3.82 |
| 1434657_PM_at   | Gls                                                                                           | GLS      | -1.22 | 8.48 | -2.65 | 2.38E-02 | 1.79E-01 | -3.82 |
| 1450853_PM_at   | Tle4                                                                                          | TLE4     | -0.86 | 6.88 | -2.65 | 2.37E-02 | 1.79E-01 | -3.82 |

|                 |               |            |       |      |       |          |          |       |
|-----------------|---------------|------------|-------|------|-------|----------|----------|-------|
| 1423673_PM_at   | Ldoc1l        | RTL6       | -0.61 | 3.03 | -2.65 | 2.37E-02 | 1.79E-01 | -3.82 |
| 1448684_PM_at   | Ppp1r2        | PPP1R2     | -0.60 | 5.78 | -2.65 | 2.38E-02 | 1.79E-01 | -3.82 |
| 1447261_PM_at   | ---           | NA         | 0.23  | 2.10 | 2.65  | 2.37E-02 | 1.79E-01 | -3.82 |
| 1448891_PM_at   | Fcr1s         | FCRL2      | 0.31  | 3.52 | 2.65  | 2.37E-02 | 1.79E-01 | -3.82 |
| 1432995_PM_at   | ---           | NA         | 0.32  | 2.60 | 2.65  | 2.38E-02 | 1.79E-01 | -3.82 |
| 1443366_PM_at   | Napg          | NAPG       | 0.40  | 3.75 | 2.65  | 2.38E-02 | 1.79E-01 | -3.82 |
| 1456939_PM_at   | Saxo2         | SAXO2      | 0.49  | 4.02 | 2.65  | 2.38E-02 | 1.79E-01 | -3.82 |
| 1447472_PM_at   | ---           | NA         | 0.31  | 2.34 | 2.65  | 2.38E-02 | 1.79E-01 | -3.82 |
| 1433505_PM_a_at | Lrrc8d        | LRRC8D     | -0.44 | 5.33 | -2.65 | 2.38E-02 | 1.79E-01 | -3.82 |
| 1446505_PM_at   | Cd84          | CD84       | 0.51  | 2.64 | 2.65  | 2.38E-02 | 1.79E-01 | -3.82 |
| 1456444_PM_at   | Fbxo41        | FBXO41     | 0.67  | 4.39 | 2.65  | 2.38E-02 | 1.79E-01 | -3.82 |
| 1428256_PM_at   | Txndc15       | TXNDC15    | -1.10 | 5.22 | -2.65 | 2.38E-02 | 1.79E-01 | -3.83 |
| 1458429_PM_at   | Arhgap30      | ARHGAP30   | 0.32  | 2.68 | 2.65  | 2.38E-02 | 1.79E-01 | -3.83 |
| 1428948_PM_at   | Kcnma1        | NA         | -0.65 | 3.65 | -2.65 | 2.38E-02 | 1.79E-01 | -3.83 |
| 1449907_PM_at   | Bco1          | BCO1       | 0.24  | 2.31 | 2.65  | 2.38E-02 | 1.79E-01 | -3.83 |
| 1433069_PM_at   | ---           | NA         | 0.25  | 2.37 | 2.65  | 2.38E-02 | 1.79E-01 | -3.83 |
| 1416837_PM_at   | Bax           | BAX        | 0.38  | 2.84 | 2.65  | 2.38E-02 | 1.79E-01 | -3.83 |
| 1460138_PM_at   | ---           | NA         | -0.45 | 2.31 | -2.64 | 2.38E-02 | 1.79E-01 | -3.83 |
| 1443535_PM_at   | ---           | NA         | 0.21  | 2.25 | 2.64  | 2.38E-02 | 1.79E-01 | -3.83 |
| 1439883_PM_at   | ---           | NA         | 0.24  | 3.08 | 2.64  | 2.39E-02 | 1.79E-01 | -3.83 |
| 1451267_PM_at   | Sharpin       | SHARPIN    | 0.32  | 3.15 | 2.64  | 2.39E-02 | 1.79E-01 | -3.83 |
| 1456402_PM_at   | A330076H08Rik | NA         | 1.03  | 5.18 | 2.64  | 2.39E-02 | 1.79E-01 | -3.83 |
| 1451762_PM_a_at | Kif1b         | KIF1B      | -1.18 | 6.94 | -2.64 | 2.39E-02 | 1.79E-01 | -3.83 |
| 1438510_PM_a_at | Hars          | HARS       | -0.93 | 6.88 | -2.64 | 2.39E-02 | 1.79E-01 | -3.83 |
| 1443025_PM_at   | ---           | NA         | 0.28  | 3.25 | 2.64  | 2.39E-02 | 1.79E-01 | -3.83 |
| 1457451_PM_at   | ---           | NA         | 0.41  | 3.56 | 2.64  | 2.39E-02 | 1.79E-01 | -3.83 |
| 1442557_PM_at   | ---           | NA         | 0.75  | 5.29 | 2.64  | 2.39E-02 | 1.79E-01 | -3.83 |
| 1457383_PM_at   | ---           | NA         | -0.37 | 1.94 | -2.64 | 2.39E-02 | 1.79E-01 | -3.83 |
| 1436633_PM_at   | LOC105246895  | NA         | -0.50 | 2.36 | -2.64 | 2.39E-02 | 1.79E-01 | -3.83 |
| 1424720_PM_at   | Mgat4b        | MGAT4B     | -0.41 | 2.72 | -2.64 | 2.39E-02 | 1.79E-01 | -3.83 |
| 1423800_PM_at   | Dars          | DARS       | -0.37 | 3.21 | -2.64 | 2.39E-02 | 1.79E-01 | -3.83 |
| 1424678_PM_at   | Act17b        | ACTL7B     | 0.27  | 2.61 | 2.64  | 2.39E-02 | 1.79E-01 | -3.83 |
| 1421501_PM_a_at | Erc1          | ERC1       | 0.30  | 3.10 | 2.64  | 2.39E-02 | 1.79E-01 | -3.83 |
| 1442106_PM_at   | Fancm         | FANCM      | 0.34  | 2.84 | 2.64  | 2.39E-02 | 1.79E-01 | -3.83 |
| 1458788_PM_at   | ---           | NA         | 0.60  | 3.17 | 2.64  | 2.39E-02 | 1.79E-01 | -3.83 |
| 1424958_PM_at   | Car8          | CAB        | 1.09  | 3.44 | 2.64  | 2.39E-02 | 1.79E-01 | -3.83 |
| 1452416_PM_at   | Il6ra         | IL6R       | 0.36  | 3.99 | 2.64  | 2.39E-02 | 1.79E-01 | -3.83 |
| 1444210_PM_at   | Mb21d2        | NA         | 0.26  | 2.41 | 2.64  | 2.40E-02 | 1.80E-01 | -3.83 |
| 1419891_PM_s_at | C77545        | NA         | 0.55  | 2.87 | 2.64  | 2.40E-02 | 1.80E-01 | -3.83 |
| 1430331_PM_at   | Mett23        | NA         | 0.27  | 2.47 | 2.64  | 2.40E-02 | 1.80E-01 | -3.83 |
| 1441699_PM_at   | Atp8b2        | ATP8B2     | 0.36  | 2.55 | 2.64  | 2.40E-02 | 1.80E-01 | -3.83 |
| 1436844_PM_at   | Pura          | PURA       | -0.70 | 4.61 | -2.64 | 2.40E-02 | 1.80E-01 | -3.83 |
| 1426216_PM_at   | Cog6          | COG6       | -0.39 | 2.60 | -2.64 | 2.40E-02 | 1.80E-01 | -3.83 |
| 1452226_PM_at   | Rcc2          | RCC2       | 0.36  | 3.44 | 2.64  | 2.40E-02 | 1.80E-01 | -3.83 |
| 1453361_PM_at   | Hells         | NA         | 0.54  | 2.43 | 2.64  | 2.40E-02 | 1.80E-01 | -3.83 |
| 1431548_PM_at   | 4933424G05Rik | NA         | 0.45  | 3.82 | 2.64  | 2.40E-02 | 1.80E-01 | -3.83 |
| 1448779_PM_at   | Ciz1          | CIZ1       | 0.96  | 6.05 | 2.64  | 2.40E-02 | 1.80E-01 | -3.84 |
| 1433893_PM_s_at | Spag5         | ACO05726.2 | -0.45 | 2.77 | -2.64 | 2.41E-02 | 1.80E-01 | -3.84 |
| 1423914_PM_at   | Hid1          | HID1       | -0.42 | 3.04 | -2.64 | 2.41E-02 | 1.80E-01 | -3.84 |
| 1444049_PM_at   | Adat1         | ADAT1      | 0.27  | 2.23 | 2.64  | 2.41E-02 | 1.80E-01 | -3.84 |
| 1427805_PM_at   | ---           | NA         | 0.31  | 2.57 | 2.64  | 2.40E-02 | 1.80E-01 | -3.84 |
| 1447307_PM_at   | Gm39283       | NA         | 0.37  | 2.80 | 2.64  | 2.41E-02 | 1.80E-01 | -3.84 |
| 1416911_PM_a_at | Akirin1       | AKIRIN1    | -1.49 | 6.39 | -2.64 | 2.41E-02 | 1.80E-01 | -3.84 |
| 1433834_PM_at   | March6        | MARCH6     | -0.43 | 6.77 | -2.64 | 2.41E-02 | 1.80E-01 | -3.84 |
| 1427913_PM_at   | Rwdd1         | RWDD1      | -0.81 | 4.78 | -2.64 | 2.41E-02 | 1.80E-01 | -3.84 |
| 1450993_PM_at   | Pask          | PASK       | 0.40  | 2.88 | 2.64  | 2.41E-02 | 1.80E-01 | -3.84 |
| 1434826_PM_at   | Rfesd         | RFESD      | -0.38 | 2.36 | -2.64 | 2.41E-02 | 1.80E-01 | -3.84 |
| 1427435_PM_at   | ---           | NA         | 0.23  | 2.46 | 2.64  | 2.41E-02 | 1.80E-01 | -3.84 |
| 1453311_PM_at   | ---           | NA         | 0.30  | 2.48 | 2.64  | 2.41E-02 | 1.80E-01 | -3.84 |
| 1417745_PM_at   | Cpn1          | CPN1       | 0.24  | 2.88 | 2.64  | 2.41E-02 | 1.80E-01 | -3.84 |
| 1458059_PM_at   | ---           | NA         | 0.36  | 2.90 | 2.64  | 2.41E-02 | 1.80E-01 | -3.84 |
| 1430675_PM_at   | 2900055J20Rik | NA         | 0.54  | 4.90 | 2.64  | 2.41E-02 | 1.80E-01 | -3.84 |
| 1439986_PM_at   | Dgki          | DGKI       | 0.85  | 2.87 | 2.64  | 2.41E-02 | 1.80E-01 | -3.84 |
| 1433886_PM_at   | Eif2b5        | EIF2B5     | -0.50 | 3.41 | -2.64 | 2.42E-02 | 1.80E-01 | -3.84 |
| 1434986_PM_a_at | Sec61a1       | SEC61A1    | -0.39 | 5.24 | -2.64 | 2.42E-02 | 1.80E-01 | -3.84 |
| 1458194_PM_at   | ---           | NA         | 0.23  | 2.38 | 2.64  | 2.42E-02 | 1.80E-01 | -3.84 |
| 1416428_PM_at   | Thap11        | THAP11     | -0.60 | 3.07 | -2.64 | 2.42E-02 | 1.80E-01 | -3.84 |
| 1444285_PM_at   | ---           | NA         | 0.95  | 2.61 | 2.64  | 2.42E-02 | 1.80E-01 | -3.84 |
| 1451001_PM_at   | 1700019N19Rik | C10orf82   | 0.33  | 2.46 | 2.64  | 2.42E-02 | 1.80E-01 | -3.84 |
| 1425715_PM_at   | Il1f8         | IL36B      | 0.48  | 2.43 | 2.64  | 2.42E-02 | 1.80E-01 | -3.84 |
| 1450741_PM_at   | Stau1         | STAU1      | -0.65 | 3.58 | -2.64 | 2.42E-02 | 1.80E-01 | -3.84 |
| 1429544_PM_at   | Fam209        | FAM209A    | 0.24  | 2.78 | 2.64  | 2.42E-02 | 1.80E-01 | -3.84 |
| 1430123_PM_a_at | Akr1a1        | AKR1A1     | -0.58 | 8.49 | -2.64 | 2.42E-02 | 1.80E-01 | -3.84 |
| 1422469_PM_at   | Tbk1          | TBK1       | -0.96 | 3.53 | -2.64 | 2.42E-02 | 1.80E-01 | -3.84 |
| 1437698_PM_at   | Myo5b         | MYO5B      | -0.84 | 2.71 | -2.64 | 2.42E-02 | 1.80E-01 | -3.84 |

|                 |               |           |       |       |       |          |          |       |
|-----------------|---------------|-----------|-------|-------|-------|----------|----------|-------|
| 1435884_PM_at   | Itns1         | ITSN1     | -0.66 | 3.60  | -2.64 | 2.42E-02 | 1.80E-01 | -3.84 |
| 1425524_PM_at   | Rbm25         | RBM25     | 0.25  | 2.41  | 2.64  | 2.42E-02 | 1.80E-01 | -3.84 |
| 1432549_PM_s_at | ---           | NA        | 0.40  | 2.63  | 2.64  | 2.42E-02 | 1.80E-01 | -3.84 |
| 1420704_PM_at   | Csf2ra        | CSF2RA    | 0.86  | 4.49  | 2.64  | 2.42E-02 | 1.80E-01 | -3.84 |
| 1452900_PM_at   | Dgcr6         | NA        | 0.35  | 3.10  | 2.64  | 2.43E-02 | 1.80E-01 | -3.84 |
| 1438050_PM_x_at | ---           | NA        | -0.54 | 3.47  | -2.63 | 2.43E-02 | 1.80E-01 | -3.84 |
| 1449954_PM_at   | Hyal1///Nat6  | HYAL1     | 0.31  | 3.27  | 2.63  | 2.43E-02 | 1.80E-01 | -3.84 |
| 1443487_PM_at   | AU022238      | NA        | 0.38  | 2.56  | 2.63  | 2.43E-02 | 1.80E-01 | -3.84 |
| 1435415_PM_x_at | Marcks1       | MARCKSL1  | 0.55  | 3.71  | 2.63  | 2.43E-02 | 1.80E-01 | -3.84 |
| 1431287_PM_at   | ---           | NA        | -0.90 | 2.34  | -2.63 | 2.43E-02 | 1.81E-01 | -3.84 |
| 1451459_PM_at   | Ahctf1        | AHCTF1    | -0.72 | 5.26  | -2.63 | 2.43E-02 | 1.81E-01 | -3.85 |
| 1429738_PM_at   | Myt1          | MYT1L     | -0.67 | 3.64  | -2.63 | 2.43E-02 | 1.81E-01 | -3.85 |
| 1428517_PM_at   | Wdfy3         | WDFY3     | -1.25 | 6.20  | -2.63 | 2.43E-02 | 1.81E-01 | -3.85 |
| 1452521_PM_a_at | Plaur         | PLAUR     | 0.29  | 2.52  | 2.63  | 2.43E-02 | 1.81E-01 | -3.85 |
| 1418887_PM_a_at | Fam104a       | FAM104A   | -1.11 | 4.18  | -2.63 | 2.43E-02 | 1.81E-01 | -3.85 |
| 1448039_PM_at   | E430024108Rik | NA        | -0.74 | 6.36  | -2.63 | 2.44E-02 | 1.81E-01 | -3.85 |
| 1428178_PM_s_at | Trappc6b      | TRAPPC6B  | -0.92 | 6.11  | -2.63 | 2.44E-02 | 1.81E-01 | -3.85 |
| 1421668_PM_x_at | Speer3        | NA        | 0.28  | 2.59  | 2.63  | 2.44E-02 | 1.81E-01 | -3.85 |
| 1438681_PM_at   | Alkbh1///Nrp  | ALKBH1    | 0.29  | 2.30  | 2.63  | 2.44E-02 | 1.81E-01 | -3.85 |
| 1435286_PM_at   | Epha5         | EPHA5     | -1.03 | 5.05  | -2.63 | 2.44E-02 | 1.81E-01 | -3.85 |
| 1449478_PM_at   | Mmp7          | MMP7      | 0.21  | 2.33  | 2.63  | 2.44E-02 | 1.81E-01 | -3.85 |
| 1458811_PM_at   | 9430047L24Rik | NA        | 0.35  | 2.34  | 2.63  | 2.44E-02 | 1.81E-01 | -3.85 |
| 1455007_PM_s_at | Gpt2          | GPT2      | 0.44  | 3.26  | 2.63  | 2.44E-02 | 1.81E-01 | -3.85 |
| 1457318_PM_at   | A330008L17Rik | NA        | 0.28  | 3.49  | 2.63  | 2.44E-02 | 1.81E-01 | -3.85 |
| 1441851_PM_x_at | Ly6g6c        | LY6G6C    | 0.34  | 2.51  | 2.63  | 2.44E-02 | 1.81E-01 | -3.85 |
| 1426350_PM_at   | Mgat2         | MGAT2     | -0.76 | 2.40  | -2.63 | 2.44E-02 | 1.81E-01 | -3.85 |
| 1447421_PM_at   | ---           | NA        | 0.75  | 2.76  | 2.63  | 2.44E-02 | 1.81E-01 | -3.85 |
| 1455548_PM_at   | Dlgap4        | DLGAP4    | 0.71  | 5.93  | 2.63  | 2.44E-02 | 1.81E-01 | -3.85 |
| 1420103_PM_at   | ---           | NA        | 0.35  | 4.54  | 2.63  | 2.45E-02 | 1.81E-01 | -3.85 |
| 1423084_PM_at   | B3gat2        | B3GALT2   | -0.65 | 2.87  | -2.63 | 2.45E-02 | 1.81E-01 | -3.85 |
| 1424570_PM_at   | Ddx46         | DDX46     | 0.43  | 2.86  | 2.63  | 2.45E-02 | 1.81E-01 | -3.85 |
| 1417275_PM_at   | Mal           | MAL       | -1.46 | 6.10  | -2.63 | 2.45E-02 | 1.81E-01 | -3.85 |
| 1446778_PM_at   | ---           | NA        | 0.29  | 2.66  | 2.63  | 2.45E-02 | 1.82E-01 | -3.85 |
| 1449713_PM_at   | Cbx7          | NA        | 0.47  | 3.47  | 2.63  | 2.45E-02 | 1.82E-01 | -3.85 |
| 1431365_PM_at   | ---           | NA        | 0.76  | 3.01  | 2.63  | 2.45E-02 | 1.82E-01 | -3.85 |
| 1427543_PM_s_at | Uba1y         | NA        | 0.21  | 2.42  | 2.63  | 2.45E-02 | 1.82E-01 | -3.86 |
| 1455864_PM_at   | Trim75        | NA        | 0.36  | 2.42  | 2.63  | 2.45E-02 | 1.82E-01 | -3.86 |
| 1417684_PM_at   | Thumpd3       | THUMPD3   | -0.61 | 2.59  | -2.63 | 2.45E-02 | 1.82E-01 | -3.86 |
| 1460146_PM_at   | ---           | NA        | 0.23  | 2.24  | 2.63  | 2.46E-02 | 1.82E-01 | -3.86 |
| 1447333_PM_at   | ---           | NA        | 0.33  | 2.50  | 2.63  | 2.46E-02 | 1.82E-01 | -3.86 |
| 1418244_PM_at   | Naa20         | NAA20     | -0.66 | 4.57  | -2.63 | 2.46E-02 | 1.82E-01 | -3.86 |
| 1439765_PM_x_at | Krt42         | NA        | 0.40  | 3.19  | 2.63  | 2.46E-02 | 1.82E-01 | -3.86 |
| 1460617_PM_s_at | Rab6b         | RAB6B     | -0.92 | 4.34  | -2.63 | 2.46E-02 | 1.82E-01 | -3.86 |
| 1421066_PM_at   | Jak2          | JAK2      | -0.87 | 4.45  | -2.63 | 2.46E-02 | 1.82E-01 | -3.86 |
| 1455789_PM_x_at | Hspa8         | HSPA8     | -0.40 | 11.28 | -2.63 | 2.46E-02 | 1.82E-01 | -3.86 |
| 1419780_PM_at   | ---           | NA        | 0.22  | 2.27  | 2.63  | 2.46E-02 | 1.82E-01 | -3.86 |
| 1452324_PM_at   | Pvt1          | NA        | -0.57 | 2.55  | -2.63 | 2.46E-02 | 1.82E-01 | -3.86 |
| 1432575_PM_at   | 4930548F15Rik | NA        | 0.37  | 2.74  | 2.63  | 2.46E-02 | 1.82E-01 | -3.86 |
| 1434593_PM_at   | Eif5a2        | EIF5A2    | -1.05 | 4.65  | -2.63 | 2.47E-02 | 1.82E-01 | -3.86 |
| 1415928_PM_a_at | Map1lc3b      | MAP1LC3B2 | -0.56 | 9.59  | -2.63 | 2.47E-02 | 1.82E-01 | -3.86 |
| 1454189_PM_at   | 4930557J02Rik | NA        | 0.21  | 2.47  | 2.62  | 2.47E-02 | 1.82E-01 | -3.86 |
| 1450360_PM_at   | Plcg1         | NA        | 0.43  | 3.04  | 2.62  | 2.47E-02 | 1.82E-01 | -3.86 |
| 1417768_PM_at   | Pnpla8        | PNPLA8    | -0.78 | 4.73  | -2.62 | 2.47E-02 | 1.82E-01 | -3.86 |
| 1424522_PM_at   | Heatr1        | NA        | -0.68 | 3.60  | -2.62 | 2.47E-02 | 1.82E-01 | -3.86 |
| 1454214_PM_a_at | Znhit6        | ZNHIT6    | -0.56 | 2.50  | -2.62 | 2.47E-02 | 1.82E-01 | -3.86 |
| 1423605_PM_a_at | Mdm2          | MDM2      | -0.25 | 3.01  | -2.62 | 2.47E-02 | 1.82E-01 | -3.86 |
| 1459301_PM_at   | ---           | NA        | 0.54  | 2.68  | 2.62  | 2.47E-02 | 1.82E-01 | -3.86 |
| 1456209_PM_x_at | ---           | NA        | 1.24  | 7.17  | 2.62  | 2.47E-02 | 1.82E-01 | -3.86 |
| 1435079_PM_at   | Pnlsr         | PNISR     | -0.55 | 8.66  | -2.62 | 2.48E-02 | 1.83E-01 | -3.86 |
| 1446902_PM_at   | AU022538      | NA        | 0.23  | 2.71  | 2.62  | 2.48E-02 | 1.83E-01 | -3.86 |
| 1427872_PM_at   | Ptafr         | NA        | 0.34  | 3.17  | 2.62  | 2.48E-02 | 1.83E-01 | -3.86 |
| 1454348_PM_at   | ---           | NA        | 0.35  | 3.15  | 2.62  | 2.48E-02 | 1.83E-01 | -3.86 |
| 1455200_PM_at   | Pak6          | PAK6      | 0.38  | 3.01  | 2.62  | 2.48E-02 | 1.83E-01 | -3.86 |
| 1433784_PM_at   | Zfp871        | NA        | -0.80 | 5.91  | -2.62 | 2.48E-02 | 1.83E-01 | -3.87 |
| 1431711_PM_a_at | Kazn          | KAZN      | 0.34  | 2.74  | 2.62  | 2.48E-02 | 1.83E-01 | -3.87 |
| 1460303_PM_at   | Nr3c1         | NR3C1     | -0.87 | 4.54  | -2.62 | 2.48E-02 | 1.83E-01 | -3.87 |
| 1438764_PM_at   | Anxa7         | NA        | 0.23  | 2.49  | 2.62  | 2.48E-02 | 1.83E-01 | -3.87 |
| 1442087_PM_at   | ---           | NA        | 0.28  | 2.66  | 2.62  | 2.48E-02 | 1.83E-01 | -3.87 |
| 1423049_PM_a_at | Tpm1          | TPM1      | 0.56  | 8.91  | 2.62  | 2.48E-02 | 1.83E-01 | -3.87 |
| 1417386_PM_at   | Npepps        | NPEPPS    | -0.61 | 4.12  | -2.62 | 2.49E-02 | 1.83E-01 | -3.87 |
| 1423854_PM_a_at | Rasl11b       | RASL11B   | -0.43 | 4.90  | -2.62 | 2.49E-02 | 1.83E-01 | -3.87 |
| 1444348_PM_at   | ---           | NA        | -0.21 | 2.25  | -2.62 | 2.49E-02 | 1.83E-01 | -3.87 |
| 1433341_PM_at   | 5730416F02Rik | NA        | 0.23  | 2.65  | 2.62  | 2.49E-02 | 1.83E-01 | -3.87 |
| 1446285_PM_at   | ---           | NA        | 0.27  | 2.71  | 2.62  | 2.49E-02 | 1.83E-01 | -3.87 |
| 1458688_PM_at   | Arhgap28      | NA        | 0.28  | 2.62  | 2.62  | 2.49E-02 | 1.83E-01 | -3.87 |

|                 |                                                       |              |       |       |       |          |          |       |
|-----------------|-------------------------------------------------------|--------------|-------|-------|-------|----------|----------|-------|
| 1427895_PM_at   | Ten1                                                  | TEN1         | 0.29  | 2.50  | 2.62  | 2.49E-02 | 1.83E-01 | -3.87 |
| 1442758_PM_at   | Cc9                                                   | NA           | 0.35  | 4.35  | 2.62  | 2.49E-02 | 1.83E-01 | -3.87 |
| 1428213_PM_at   | Nsmce4a                                               | NSMCE4A      | 0.39  | 3.91  | 2.62  | 2.49E-02 | 1.83E-01 | -3.87 |
| 1456568_PM_at   | Gsn                                                   | NA           | 0.30  | 2.81  | 2.62  | 2.49E-02 | 1.83E-01 | -3.87 |
| 1456581_PM_x_at | Gdi2                                                  | GDI2         | -1.11 | 7.98  | -2.62 | 2.49E-02 | 1.83E-01 | -3.87 |
| 1443668_PM_x_at | Mis18bp1                                              | MIS18BP1     | 0.29  | 3.07  | 2.62  | 2.49E-02 | 1.83E-01 | -3.87 |
| 1445158_PM_at   | Sypl                                                  | SYPL1        | 0.35  | 2.45  | 2.62  | 2.49E-02 | 1.83E-01 | -3.87 |
| 1416440_PM_at   | Cd164                                                 | CD164        | -0.78 | 2.98  | -2.62 | 2.49E-02 | 1.83E-01 | -3.87 |
| 1421512_PM_at   | Cep250                                                | CEP250       | 0.20  | 2.61  | 2.62  | 2.49E-02 | 1.83E-01 | -3.87 |
| 1458109_PM_at   | ---                                                   | NA           | 0.44  | 2.63  | 2.62  | 2.49E-02 | 1.83E-01 | -3.87 |
| 1438340_PM_at   | Zfp385c                                               | ZNF385C      | 0.45  | 2.89  | 2.62  | 2.49E-02 | 1.83E-01 | -3.87 |
| 1445315_PM_at   | ---                                                   | NA           | 0.41  | 3.28  | 2.62  | 2.50E-02 | 1.83E-01 | -3.87 |
| 1427988_PM_s_at | Safb2                                                 | SAFB2        | 0.67  | 3.27  | 2.62  | 2.50E-02 | 1.83E-01 | -3.87 |
| 1453564_PM_a_at | Chmp3                                                 | RNF103-CHMP3 | 0.79  | 5.37  | 2.62  | 2.50E-02 | 1.83E-01 | -3.87 |
| 1420525_PM_a_at | Otc                                                   | OTC          | 0.22  | 2.15  | 2.62  | 2.50E-02 | 1.83E-01 | -3.87 |
| 1443544_PM_at   | ---                                                   | NA           | 0.79  | 5.00  | 2.62  | 2.50E-02 | 1.83E-01 | -3.87 |
| 1441980_PM_at   | Tbck                                                  | TBCK         | -0.93 | 5.41  | -2.62 | 2.50E-02 | 1.84E-01 | -3.87 |
| 1417850_PM_at   | Rb1                                                   | RB1          | -0.51 | 4.15  | -2.62 | 2.50E-02 | 1.84E-01 | -3.88 |
| 1445179_PM_at   | D10Ert494e                                            | NA           | -0.33 | 2.25  | -2.62 | 2.50E-02 | 1.84E-01 | -3.87 |
| 1425882_PM_at   | Gdf2                                                  | GDF2         | 0.24  | 2.56  | 2.62  | 2.51E-02 | 1.84E-01 | -3.88 |
| 1444609_PM_at   | ---                                                   | NA           | 0.53  | 3.77  | 2.62  | 2.51E-02 | 1.84E-01 | -3.88 |
| 1447367_PM_at   | Scfd2                                                 | SCFD2        | -0.45 | 2.52  | -2.62 | 2.51E-02 | 1.84E-01 | -3.88 |
| 1426183_PM_a_at | Cd209d                                                | CD209        | 0.24  | 2.19  | 2.62  | 2.51E-02 | 1.84E-01 | -3.88 |
| 1459050_PM_at   | ---                                                   | NA           | 0.28  | 2.32  | 2.62  | 2.51E-02 | 1.84E-01 | -3.88 |
| 1423301_PM_at   | Cop1                                                  | COP1         | -1.11 | 4.71  | -2.62 | 2.51E-02 | 1.84E-01 | -3.88 |
| 1460388_PM_at   | Acot6                                                 | NA           | 0.38  | 2.62  | 2.61  | 2.51E-02 | 1.84E-01 | -3.88 |
| 1451677_PM_at   | Narf                                                  | NARF         | 0.67  | 2.52  | 2.61  | 2.51E-02 | 1.84E-01 | -3.88 |
| 1444321_PM_at   | ---                                                   | NA           | -0.63 | 3.14  | -2.61 | 2.52E-02 | 1.84E-01 | -3.88 |
| 1427073_PM_at   | Lace1                                                 | AFG1L        | 0.22  | 2.24  | 2.61  | 2.52E-02 | 1.84E-01 | -3.88 |
| 1458383_PM_at   | ---                                                   | NA           | 1.25  | 4.07  | 2.61  | 2.52E-02 | 1.84E-01 | -3.88 |
| 1417208_PM_at   | Amacr                                                 | AMACR        | -0.40 | 2.69  | -2.61 | 2.52E-02 | 1.84E-01 | -3.88 |
| 1424823_PM_s_at | Slain1                                                | SLAIN1       | 0.24  | 2.76  | 2.61  | 2.52E-02 | 1.84E-01 | -3.88 |
| 1460680_PM_a_at | Gm9794 /// LOC100044627<br>/// LOC100862455 /// Rpl23 | RPL23        | 0.57  | 6.98  | 2.61  | 2.52E-02 | 1.84E-01 | -3.88 |
| 1433831_PM_at   | Dcaf17                                                | DCAF17       | -0.30 | 2.43  | -2.61 | 2.52E-02 | 1.84E-01 | -3.88 |
| 1458749_PM_at   | ---                                                   | NA           | 0.58  | 3.28  | 2.61  | 2.52E-02 | 1.85E-01 | -3.88 |
| 1444667_PM_at   | Brdt                                                  | BRDT         | 1.28  | 4.56  | 2.61  | 2.52E-02 | 1.85E-01 | -3.88 |
| 1435383_PM_x_at | Ndn                                                   | NDN          | -1.02 | 7.39  | -2.61 | 2.53E-02 | 1.85E-01 | -3.88 |
| 1445604_PM_at   | ---                                                   | NA           | -0.44 | 3.58  | -2.61 | 2.53E-02 | 1.85E-01 | -3.88 |
| 1446840_PM_at   | ---                                                   | NA           | -0.33 | 2.66  | -2.61 | 2.53E-02 | 1.85E-01 | -3.88 |
| 1445789_PM_at   | Gm24175                                               | NA           | 0.34  | 2.51  | 2.61  | 2.53E-02 | 1.85E-01 | -3.88 |
| 1439295_PM_x_at | Gm5595                                                | NA           | 0.49  | 2.80  | 2.61  | 2.53E-02 | 1.85E-01 | -3.88 |
| 1433172_PM_at   | ---                                                   | NA           | 0.21  | 1.98  | 2.61  | 2.53E-02 | 1.85E-01 | -3.88 |
| 1429252_PM_at   | O610010K14Rik                                         | C17orf49     | 0.40  | 2.80  | 2.61  | 2.53E-02 | 1.85E-01 | -3.89 |
| 1426599_PM_a_at | Slc2a1                                                | SLC2A1       | -0.85 | 6.01  | -2.61 | 2.53E-02 | 1.85E-01 | -3.89 |
| 1439206_PM_at   | Gna12                                                 | NA           | 0.25  | 2.62  | 2.61  | 2.53E-02 | 1.85E-01 | -3.89 |
| 1451955_PM_a_at | Cacna2d2                                              | CACNA2D2     | 0.91  | 3.96  | 2.61  | 2.53E-02 | 1.85E-01 | -3.89 |
| 1440465_PM_at   | ---                                                   | NA           | 0.33  | 2.16  | 2.61  | 2.53E-02 | 1.85E-01 | -3.89 |
| 1437252_PM_at   | Gatsl2                                                | CASTOR2      | 0.31  | 3.43  | 2.61  | 2.53E-02 | 1.85E-01 | -3.89 |
| 1440149_PM_at   | ---                                                   | NA           | 0.67  | 3.68  | 2.61  | 2.54E-02 | 1.85E-01 | -3.89 |
| 1448065_PM_at   | Ppox                                                  | PPOX         | 0.76  | 2.90  | 2.61  | 2.54E-02 | 1.85E-01 | -3.89 |
| 1420714_PM_at   | Lbx2                                                  | LBX2         | 0.24  | 2.37  | 2.61  | 2.54E-02 | 1.85E-01 | -3.89 |
| 1452057_PM_at   | Actr1b                                                | ACTR1B       | -0.89 | 3.72  | -2.61 | 2.54E-02 | 1.85E-01 | -3.89 |
| 1423846_PM_x_at | Tuba1b                                                | TUBA1B       | -0.41 | 11.39 | -2.61 | 2.54E-02 | 1.85E-01 | -3.89 |
| 1446744_PM_at   | Sorbs2                                                | SORBS2       | 0.25  | 2.24  | 2.61  | 2.54E-02 | 1.85E-01 | -3.89 |
| 1417933_PM_at   | Igfbp6                                                | IGFBP6       | 0.32  | 2.90  | 2.61  | 2.54E-02 | 1.85E-01 | -3.89 |
| 1443236_PM_at   | B230118H07Rik                                         | C11orf74     | 0.43  | 2.80  | 2.61  | 2.54E-02 | 1.85E-01 | -3.89 |
| 1452784_PM_at   | Itgav                                                 | ITGAV        | -1.10 | 7.13  | -2.61 | 2.54E-02 | 1.85E-01 | -3.89 |
| 1418885_PM_a_at | Idh3b                                                 | IDH3B        | -0.72 | 5.78  | -2.61 | 2.54E-02 | 1.85E-01 | -3.89 |
| 1458849_PM_at   | ---                                                   | NA           | -0.28 | 2.21  | -2.61 | 2.54E-02 | 1.85E-01 | -3.89 |
| 1435163_PM_at   | Zfp871                                                | NA           | 0.79  | 5.07  | 2.61  | 2.54E-02 | 1.85E-01 | -3.89 |
| 1416152_PM_a_at | Srsf3                                                 | SRSF3        | -0.63 | 3.53  | -2.61 | 2.55E-02 | 1.85E-01 | -3.89 |
| 1447024_PM_at   | ---                                                   | NA           | 0.30  | 2.34  | 2.61  | 2.55E-02 | 1.85E-01 | -3.89 |
| 1443683_PM_at   | ---                                                   | NA           | 0.48  | 2.82  | 2.61  | 2.55E-02 | 1.85E-01 | -3.89 |
| 1457568_PM_at   | Hnrnpd                                                | HNRNPD       | -0.38 | 7.08  | -2.61 | 2.55E-02 | 1.86E-01 | -3.89 |
| 1444706_PM_at   | Nav2                                                  | NAV2         | 0.44  | 2.60  | 2.61  | 2.55E-02 | 1.86E-01 | -3.89 |
| 1434575_PM_at   | Epb411                                                | EPB41L1      | -0.98 | 8.19  | -2.61 | 2.55E-02 | 1.86E-01 | -3.89 |
| 1416481_PM_s_at | Higd1a                                                | ACO99329.3   | -0.73 | 6.97  | -2.61 | 2.55E-02 | 1.86E-01 | -3.89 |
| 1441061_PM_at   | ---                                                   | NA           | 0.26  | 2.31  | 2.61  | 2.55E-02 | 1.86E-01 | -3.89 |
| 1423208_PM_at   | Tmem167                                               | TMEM167A     | -0.70 | 3.18  | -2.61 | 2.55E-02 | 1.86E-01 | -3.89 |
| 1455128_PM_x_at | Tnrc6a                                                | TNRC6A       | 1.21  | 3.39  | 2.61  | 2.55E-02 | 1.86E-01 | -3.89 |
| 1445839_PM_at   | ---                                                   | NA           | 0.53  | 3.87  | 2.61  | 2.55E-02 | 1.86E-01 | -3.89 |
| 1423397_PM_at   | Ugt2b38                                               | UGT2B15      | -0.21 | 2.03  | -2.61 | 2.56E-02 | 1.86E-01 | -3.89 |
| 1432467_PM_at   | Lrch3                                                 | LRCH3        | 0.29  | 2.25  | 2.61  | 2.56E-02 | 1.86E-01 | -3.89 |

|                 |                                               |         |       |       |       |          |          |       |
|-----------------|-----------------------------------------------|---------|-------|-------|-------|----------|----------|-------|
| 1416294_PM_at   | Clk2-scamp3 /// Scamp3                        | SCAMP3  | 0.34  | 4.15  | 2.61  | 2.56E-02 | 1.86E-01 | -3.89 |
| 1431131_PM_s_at | Ccdc186                                       | CCDC186 | -0.60 | 3.40  | -2.60 | 2.56E-02 | 1.86E-01 | -3.89 |
| 1431868_PM_at   | Gm33301                                       | NA      | 0.27  | 2.42  | 2.60  | 2.56E-02 | 1.86E-01 | -3.89 |
| 1415906_PM_at   | Tmsb4x                                        | NA      | -0.94 | 8.30  | -2.60 | 2.56E-02 | 1.86E-01 | -3.90 |
| 1438089_PM_a_at | Bclaf1                                        | BCLAF1  | -0.80 | 6.43  | -2.60 | 2.56E-02 | 1.86E-01 | -3.90 |
| 1433995_PM_s_at | Ccdc50                                        | CCDC50  | -0.59 | 5.66  | -2.60 | 2.56E-02 | 1.86E-01 | -3.90 |
| 1418967_PM_a_at | St7                                           | ST7     | -0.38 | 2.33  | -2.60 | 2.56E-02 | 1.86E-01 | -3.90 |
| 1424295_PM_at   | Dppa3                                         | DPPA3   | 0.26  | 2.48  | 2.60  | 2.56E-02 | 1.86E-01 | -3.90 |
| 1432837_PM_at   | 2700080J24Rik                                 | NA      | 0.21  | 2.42  | 2.60  | 2.56E-02 | 1.86E-01 | -3.90 |
| 1451462_PM_a_at | Ifnar2                                        | IFNAR2  | -0.79 | 3.93  | -2.60 | 2.56E-02 | 1.86E-01 | -3.90 |
| 1416038_PM_at   | Snd1                                          | SND1    | -0.51 | 3.51  | -2.60 | 2.56E-02 | 1.86E-01 | -3.90 |
| 1433502_PM_s_at | Tsr1                                          | TSR1    | -0.39 | 3.15  | -2.60 | 2.56E-02 | 1.86E-01 | -3.90 |
| 1435284_PM_at   | ---                                           | NA      | -0.29 | 2.68  | -2.60 | 2.56E-02 | 1.86E-01 | -3.90 |
| 1459913_PM_at   | Tnfsf10                                       | TNFSF10 | 0.32  | 2.76  | 2.60  | 2.56E-02 | 1.86E-01 | -3.90 |
| 1434287_PM_at   | Agpat5                                        | AGPAT5  | 0.35  | 3.72  | 2.60  | 2.56E-02 | 1.86E-01 | -3.90 |
| 1447561_PM_at   | ---                                           | NA      | 0.46  | 2.38  | 2.60  | 2.56E-02 | 1.86E-01 | -3.90 |
| 1433199_PM_at   | B230114A03Rik                                 | NA      | 1.56  | 4.06  | 2.60  | 2.56E-02 | 1.86E-01 | -3.90 |
| 1460117_PM_at   | ---                                           | NA      | 0.42  | 2.56  | 2.60  | 2.57E-02 | 1.86E-01 | -3.90 |
| 1445616_PM_at   | ---                                           | NA      | 0.23  | 2.20  | 2.60  | 2.57E-02 | 1.86E-01 | -3.90 |
| 1447364_PM_x_at | Myo1b                                         | MYO1B   | -0.42 | 2.99  | -2.60 | 2.57E-02 | 1.86E-01 | -3.90 |
| 1417997_PM_at   | Ngb                                           | NGB     | 0.25  | 2.81  | 2.60  | 2.57E-02 | 1.86E-01 | -3.90 |
| 1456817_PM_at   | ---                                           | NA      | 0.30  | 3.29  | 2.60  | 2.57E-02 | 1.86E-01 | -3.90 |
| 1428051_PM_a_at | Cacna1d                                       | CACNA1D | 0.40  | 2.43  | 2.60  | 2.57E-02 | 1.86E-01 | -3.90 |
| 1450143_PM_at   | Rasgrp1                                       | RASGRP1 | -1.47 | 8.67  | -2.60 | 2.57E-02 | 1.86E-01 | -3.90 |
| 1452222_PM_at   | Utrn                                          | UTRN    | -1.32 | 5.44  | -2.60 | 2.57E-02 | 1.86E-01 | -3.90 |
| 1418497_PM_at   | Fgf13                                         | FGF13   | -1.25 | 8.24  | -2.60 | 2.58E-02 | 1.86E-01 | -3.90 |
| 1434285_PM_at   | Frm4a                                         | FRMD4A  | -1.11 | 5.45  | -2.60 | 2.57E-02 | 1.86E-01 | -3.90 |
| 1450449_PM_a_at | Rilpl1                                        | RILPL1  | -0.60 | 3.41  | -2.60 | 2.57E-02 | 1.86E-01 | -3.90 |
| 1416931_PM_at   | Nif3l1                                        | NIF3L1  | -0.47 | 2.72  | -2.60 | 2.58E-02 | 1.86E-01 | -3.90 |
| 1438149_PM_at   | Pif1                                          | PIF1    | 0.21  | 2.25  | 2.60  | 2.58E-02 | 1.86E-01 | -3.90 |
| 1440834_PM_at   | Slc5a10                                       | SLC5A10 | 0.24  | 2.50  | 2.60  | 2.58E-02 | 1.86E-01 | -3.90 |
| 1441762_PM_at   | Gm19576                                       | NA      | 0.38  | 3.97  | 2.60  | 2.58E-02 | 1.86E-01 | -3.90 |
| 1419113_PM_at   | Ap1g2                                         | AP1G2   | 0.41  | 2.41  | 2.60  | 2.58E-02 | 1.86E-01 | -3.90 |
| 1432446_PM_at   | Sept14                                        | SEPT14  | 0.41  | 2.63  | 2.60  | 2.57E-02 | 1.86E-01 | -3.90 |
| 1447145_PM_at   | ---                                           | NA      | 0.42  | 2.92  | 2.60  | 2.58E-02 | 1.86E-01 | -3.90 |
| 1424657_PM_at   | Taok1                                         | TAOK1   | 0.46  | 3.44  | 2.60  | 2.57E-02 | 1.86E-01 | -3.90 |
| 1445238_PM_at   | ---                                           | NA      | 0.54  | 2.77  | 2.60  | 2.58E-02 | 1.86E-01 | -3.90 |
| 1444796_PM_at   | C76876                                        | NA      | 0.55  | 2.74  | 2.60  | 2.57E-02 | 1.86E-01 | -3.90 |
| 1442822_PM_at   | ---                                           | NA      | 0.63  | 2.71  | 2.60  | 2.57E-02 | 1.86E-01 | -3.90 |
| 1431506_PM_s_at | Ppih                                          | NA      | 0.25  | 2.34  | 2.60  | 2.58E-02 | 1.86E-01 | -3.90 |
| 1418453_PM_a_at | Atp1b1                                        | ATP1B1  | -0.81 | 11.12 | -2.60 | 2.58E-02 | 1.86E-01 | -3.90 |
| 1418875_PM_at   | Syng4                                         | SYNG4   | 0.24  | 2.22  | 2.60  | 2.58E-02 | 1.86E-01 | -3.90 |
| 1438194_PM_at   | Slc1a2                                        | SLC1A2  | -1.25 | 7.81  | -2.60 | 2.58E-02 | 1.86E-01 | -3.90 |
| 1421735_PM_a_at | St8sia5                                       | ST8SIA5 | -0.67 | 4.27  | -2.60 | 2.58E-02 | 1.86E-01 | -3.90 |
| 1424860_PM_at   | D930016D06Rik                                 | NA      | -0.46 | 5.96  | -2.60 | 2.58E-02 | 1.86E-01 | -3.90 |
| 1455023_PM_at   | Phf24                                         | PHF24   | -0.45 | 3.33  | -2.60 | 2.58E-02 | 1.86E-01 | -3.90 |
| 1424937_PM_at   | Plin5                                         | PLIN5   | 0.21  | 2.33  | 2.60  | 2.58E-02 | 1.86E-01 | -3.90 |
| 1453487_PM_at   | Dhdh                                          | DHDH    | 1.31  | 4.14  | 2.60  | 2.58E-02 | 1.86E-01 | -3.90 |
| 1422479_PM_at   | Acss2                                         | ACSS2   | -0.45 | 2.72  | -2.60 | 2.58E-02 | 1.86E-01 | -3.90 |
| 1434586_PM_a_at | Ptdss2                                        | PTDSS2  | -0.35 | 2.82  | -2.60 | 2.59E-02 | 1.86E-01 | -3.91 |
| 1451148_PM_at   | Pink1                                         | PINK1   | -0.83 | 8.94  | -2.60 | 2.59E-02 | 1.86E-01 | -3.91 |
| 1423798_PM_a_at | Eif1                                          | EIF1    | -0.58 | 9.05  | -2.60 | 2.59E-02 | 1.86E-01 | -3.91 |
| 1415787_PM_at   | Ganab                                         | GANAB   | -0.38 | 3.21  | -2.60 | 2.59E-02 | 1.86E-01 | -3.91 |
| 1456004_PM_x_at | Iapp                                          | IAPP    | 0.21  | 2.38  | 2.60  | 2.59E-02 | 1.86E-01 | -3.91 |
| 1441656_PM_at   | ---                                           | NA      | 0.32  | 2.44  | 2.60  | 2.59E-02 | 1.86E-01 | -3.91 |
| 1435460_PM_at   | Prkg2                                         | PRKG2   | 0.73  | 3.13  | 2.60  | 2.59E-02 | 1.86E-01 | -3.91 |
| 1429555_PM_at   | Cldnd1                                        | CLDND1  | 0.89  | 3.66  | 2.60  | 2.59E-02 | 1.86E-01 | -3.91 |
| 1450127_PM_a_at | Gcgr                                          | GCGR    | 0.37  | 3.30  | 2.60  | 2.59E-02 | 1.87E-01 | -3.91 |
| 1447800_PM_x_at | Tcn2                                          | TCN2    | 1.68  | 5.81  | 2.60  | 2.59E-02 | 1.87E-01 | -3.91 |
| 1450994_PM_at   | Rock1                                         | ROCK1   | -0.98 | 4.07  | -2.60 | 2.60E-02 | 1.87E-01 | -3.91 |
| 1449708_PM_s_at | Chek1                                         | CHEK1   | -0.30 | 2.28  | -2.60 | 2.60E-02 | 1.87E-01 | -3.91 |
| 1431360_PM_s_at | Dmrtc1a                                       | DMRTC1  | 0.24  | 2.50  | 2.60  | 2.60E-02 | 1.87E-01 | -3.91 |
| 1460312_PM_at   | Olf157                                        | NA      | 0.26  | 2.55  | 2.60  | 2.60E-02 | 1.87E-01 | -3.91 |
| 1450311_PM_at   | Slc8a3                                        | SLC8A3  | 0.29  | 2.37  | 2.60  | 2.59E-02 | 1.87E-01 | -3.91 |
| 1415809_PM_at   | Tpbpa                                         | NA      | 0.43  | 2.59  | 2.60  | 2.60E-02 | 1.87E-01 | -3.91 |
| 1452547_PM_s_at | Gm38417 /// H2-T18 /// H2-T3 /// LOC102642168 | NA      | 0.38  | 2.79  | 2.60  | 2.60E-02 | 1.87E-01 | -3.91 |
| 1443922_PM_at   | Rcor3                                         | RCOR3   | -0.44 | 2.72  | -2.60 | 2.60E-02 | 1.87E-01 | -3.91 |
| 1449746_PM_s_at | Glipr1                                        | GLIPR1  | -0.59 | 4.90  | -2.60 | 2.60E-02 | 1.87E-01 | -3.91 |
| 1460206_PM_at   | Grasp                                         | GRASP   | 0.55  | 3.49  | 2.60  | 2.60E-02 | 1.87E-01 | -3.91 |
| 1437916_PM_at   | ---                                           | NA      | 1.30  | 7.68  | 2.59  | 2.60E-02 | 1.87E-01 | -3.91 |
| 1438446_PM_x_at | Inpp5k                                        | INPP5K  | 0.29  | 2.84  | 2.59  | 2.60E-02 | 1.87E-01 | -3.91 |
| 1446475_PM_at   | ---                                           | NA      | 1.09  | 3.48  | 2.59  | 2.61E-02 | 1.87E-01 | -3.91 |
| 1455764_PM_at   | Vprbp                                         | DCAF1   | 0.37  | 2.60  | 2.59  | 2.61E-02 | 1.87E-01 | -3.91 |
| 1427486_PM_at   | Ptprb                                         | PTPRB   | -0.92 | 3.19  | -2.59 | 2.61E-02 | 1.87E-01 | -3.91 |

|                 |               |             |       |      |       |          |          |       |
|-----------------|---------------|-------------|-------|------|-------|----------|----------|-------|
| 1439851_PM_at   | Ift22         | IFT22       | 0.94  | 4.64 | 2.59  | 2.61E-02 | 1.87E-01 | -3.91 |
| 1428414_PM_at   | Ccny          | CCNY        | -1.26 | 3.53 | -2.59 | 2.61E-02 | 1.88E-01 | -3.92 |
| 1416270_PM_at   | Polr2g        | POLR2G      | -0.98 | 5.63 | -2.59 | 2.61E-02 | 1.88E-01 | -3.92 |
| 1418876_PM_at   | Foxd1         | FOXD1       | -0.76 | 2.77 | -2.59 | 2.61E-02 | 1.88E-01 | -3.92 |
| 1453847_PM_at   | ---           | NA          | -0.66 | 2.26 | -2.59 | 2.61E-02 | 1.88E-01 | -3.92 |
| 1453055_PM_at   | Sema6d        | SEMA6D      | -0.61 | 5.09 | -2.59 | 2.61E-02 | 1.88E-01 | -3.92 |
| 1426309_PM_at   | Asb9          | ASB9        | 0.23  | 2.45 | 2.59  | 2.61E-02 | 1.88E-01 | -3.92 |
| 1441489_PM_at   | ---           | NA          | 0.24  | 2.36 | 2.59  | 2.61E-02 | 1.88E-01 | -3.92 |
| 1425751_PM_at   | Slc22a26      | SLC22A9     | 0.27  | 2.85 | 2.59  | 2.61E-02 | 1.88E-01 | -3.92 |
| 1453075_PM_at   | Pappa2        | NA          | 0.37  | 2.80 | 2.59  | 2.61E-02 | 1.88E-01 | -3.92 |
| 1421049_PM_at   | 0610009O2ORik | NA          | 0.50  | 2.68 | 2.59  | 2.61E-02 | 1.88E-01 | -3.92 |
| 1452249_PM_at   | Prickle1      | PRICKLE1    | -0.83 | 3.64 | -2.59 | 2.62E-02 | 1.88E-01 | -3.92 |
| 1459476_PM_s_at | Csrp2bp       | KAT14       | 0.56  | 3.70 | 2.59  | 2.62E-02 | 1.88E-01 | -3.92 |
| 1428038_PM_at   | Gm568         | NA          | 0.29  | 2.84 | 2.59  | 2.62E-02 | 1.88E-01 | -3.92 |
| 1459736_PM_at   | ---           | NA          | 0.45  | 3.63 | 2.59  | 2.62E-02 | 1.88E-01 | -3.92 |
| 1445645_PM_at   | ---           | NA          | 1.34  | 4.87 | 2.59  | 2.62E-02 | 1.88E-01 | -3.92 |
| 1457106_PM_at   | Thada         | THADA       | 0.27  | 2.27 | 2.59  | 2.62E-02 | 1.88E-01 | -3.92 |
| 1443099_PM_at   | ---           | NA          | 0.38  | 2.31 | 2.59  | 2.62E-02 | 1.88E-01 | -3.92 |
| 1432877_PM_at   | 4930544N03Rik | NA          | 0.22  | 2.32 | 2.59  | 2.63E-02 | 1.88E-01 | -3.92 |
| 1429699_PM_at   | Oxsm          | OXSM        | 0.54  | 3.09 | 2.59  | 2.63E-02 | 1.88E-01 | -3.92 |
| 1429680_PM_at   | Tra2a         | TRA2A       | 0.48  | 3.13 | 2.59  | 2.63E-02 | 1.88E-01 | -3.92 |
| 1432409_PM_at   | Prkar2a       | PRKAR2A     | 0.43  | 2.53 | 2.59  | 2.63E-02 | 1.88E-01 | -3.92 |
| 1438949_PM_at   | Ric8          | RIC8A       | 0.44  | 2.31 | 2.59  | 2.63E-02 | 1.88E-01 | -3.92 |
| 1455283_PM_x_at | Ndufs8        | NDUFS8      | -1.66 | 5.14 | -2.59 | 2.63E-02 | 1.88E-01 | -3.92 |
| 1440712_PM_at   | ---           | NA          | 0.31  | 2.88 | 2.59  | 2.63E-02 | 1.88E-01 | -3.92 |
| 1450081_PM_x_at | Gpi1          | GPI         | -0.45 | 6.05 | -2.59 | 2.63E-02 | 1.88E-01 | -3.92 |
| 1450033_PM_a_at | Stat1         | STAT1       | 0.56  | 2.57 | 2.59  | 2.63E-02 | 1.88E-01 | -3.92 |
| 1446084_PM_at   | ---           | NA          | 0.30  | 2.66 | 2.59  | 2.63E-02 | 1.88E-01 | -3.92 |
| 1454551_PM_at   | ---           | NA          | 0.55  | 2.92 | 2.59  | 2.63E-02 | 1.88E-01 | -3.92 |
| 1442701_PM_at   | ---           | NA          | 0.59  | 3.41 | 2.59  | 2.63E-02 | 1.88E-01 | -3.92 |
| 1427931_PM_s_at | Pdxk          | PDXK        | 0.31  | 2.48 | 2.59  | 2.63E-02 | 1.88E-01 | -3.92 |
| 1457434_PM_s_at | Hacd1         | HACD1       | -1.16 | 4.38 | -2.59 | 2.63E-02 | 1.88E-01 | -3.92 |
| 1417730_PM_at   | Ext1          | EXT1        | -0.80 | 3.46 | -2.59 | 2.64E-02 | 1.88E-01 | -3.92 |
| 1427759_PM_a_at | Art5          | ART5        | 0.25  | 2.43 | 2.59  | 2.64E-02 | 1.88E-01 | -3.92 |
| 1451298_PM_at   | Plekhh3       | PLEKHH3     | 0.37  | 3.44 | 2.59  | 2.64E-02 | 1.88E-01 | -3.92 |
| 1435461_PM_at   | Mag3          | MAG3        | -0.96 | 4.55 | -2.59 | 2.64E-02 | 1.88E-01 | -3.92 |
| 1421679_PM_a_at | Cdkn1a        | CDKN1A      | 0.26  | 2.20 | 2.59  | 2.64E-02 | 1.88E-01 | -3.92 |
| 1456229_PM_at   | Hoxb3         | HOXB3       | 0.30  | 2.77 | 2.59  | 2.64E-02 | 1.88E-01 | -3.92 |
| 1439653_PM_at   | Adam6a        | NA          | -0.29 | 2.26 | -2.59 | 2.64E-02 | 1.88E-01 | -3.93 |
| 1416934_PM_at   | Mtm1          | MTM1        | 0.39  | 2.99 | 2.59  | 2.64E-02 | 1.88E-01 | -3.93 |
| 1442127_PM_at   | ---           | NA          | 0.40  | 3.36 | 2.59  | 2.64E-02 | 1.89E-01 | -3.93 |
| 1424786_PM_s_at | Wdr45         | WDR45       | -1.24 | 4.34 | -2.59 | 2.64E-02 | 1.89E-01 | -3.93 |
| 1435767_PM_at   | Scn3b         | SCN3B       | -1.20 | 5.51 | -2.59 | 2.65E-02 | 1.89E-01 | -3.93 |
| 1443170_PM_at   | Cnrm1         | CNNM1       | -0.88 | 5.31 | -2.59 | 2.64E-02 | 1.89E-01 | -3.93 |
| 1424037_PM_at   | Itpka         | ITPKA       | -0.42 | 3.26 | -2.59 | 2.64E-02 | 1.89E-01 | -3.93 |
| 1430725_PM_at   | 4933432I09Rik | NA          | 0.25  | 2.74 | 2.59  | 2.65E-02 | 1.89E-01 | -3.93 |
| 1446780_PM_at   | ---           | NA          | 0.30  | 2.53 | 2.59  | 2.64E-02 | 1.89E-01 | -3.93 |
| 1428150_PM_at   | Coro7         | CORO7-PAM16 | 0.34  | 2.82 | 2.59  | 2.64E-02 | 1.89E-01 | -3.93 |
| 1457356_PM_at   | ---           | NA          | 0.35  | 2.64 | 2.59  | 2.64E-02 | 1.89E-01 | -3.93 |
| 1438121_PM_at   | Sec24a        | SEC24A      | 0.78  | 3.70 | 2.59  | 2.64E-02 | 1.89E-01 | -3.93 |
| 1426242_PM_at   | Polr2a        | POLR2A      | -0.71 | 4.41 | -2.59 | 2.65E-02 | 1.89E-01 | -3.93 |
| 1456892_PM_at   | ---           | NA          | 0.33  | 3.02 | 2.58  | 2.65E-02 | 1.89E-01 | -3.93 |
| 1443208_PM_at   | ---           | NA          | 0.40  | 3.18 | 2.58  | 2.65E-02 | 1.89E-01 | -3.93 |
| 1455643_PM_s_at | Tsr1          | TSR1        | -1.58 | 6.20 | -2.58 | 2.65E-02 | 1.89E-01 | -3.93 |
| 1445657_PM_at   | AW111846      | NA          | 0.24  | 2.29 | 2.58  | 2.65E-02 | 1.89E-01 | -3.93 |
| 1447264_PM_at   | Rab11fip1     | RAB11FIP1   | 0.29  | 2.34 | 2.58  | 2.65E-02 | 1.89E-01 | -3.93 |
| 1436619_PM_at   | D630045M09Rik | NA          | 0.33  | 2.46 | 2.58  | 2.65E-02 | 1.89E-01 | -3.93 |
| 1444382_PM_at   | Nupr1l        | NA          | 0.39  | 3.64 | 2.58  | 2.65E-02 | 1.89E-01 | -3.93 |
| 1417573_PM_at   | Mmadhc        | MMADHC      | -0.84 | 4.88 | -2.58 | 2.65E-02 | 1.89E-01 | -3.93 |
| 1435924_PM_at   | Tfb1m         | TFB1M       | 0.20  | 2.44 | 2.58  | 2.65E-02 | 1.89E-01 | -3.93 |
| 1442472_PM_at   | ---           | NA          | 0.22  | 2.52 | 2.58  | 2.65E-02 | 1.89E-01 | -3.93 |
| 1435557_PM_at   | Fhod1         | FHOD1       | 0.34  | 2.61 | 2.58  | 2.65E-02 | 1.89E-01 | -3.93 |
| 1444021_PM_at   | Sqstm1        | SQSTM1      | 0.34  | 2.35 | 2.58  | 2.65E-02 | 1.89E-01 | -3.93 |
| 1422769_PM_at   | Syncrip       | SYNCRIP     | 0.58  | 5.42 | 2.58  | 2.65E-02 | 1.89E-01 | -3.93 |
| 1424177_PM_at   | Tmem38a       | TMEM38A     | -0.86 | 7.91 | -2.58 | 2.66E-02 | 1.89E-01 | -3.93 |
| 1448292_PM_at   | Uqcr11        | UQCR11      | -0.65 | 4.09 | -2.58 | 2.66E-02 | 1.89E-01 | -3.93 |
| 1446307_PM_at   | ---           | NA          | -0.90 | 4.99 | -2.58 | 2.66E-02 | 1.89E-01 | -3.93 |
| 1452843_PM_at   | Il6st         | IL6ST       | -0.55 | 4.36 | -2.58 | 2.66E-02 | 1.89E-01 | -3.93 |
| 1422093_PM_at   | Wnt3a         | WNT3A       | 0.26  | 2.80 | 2.58  | 2.66E-02 | 1.89E-01 | -3.93 |
| 1431849_PM_at   | Fam227a       | FAM227A     | 0.55  | 3.12 | 2.58  | 2.66E-02 | 1.89E-01 | -3.93 |
| 1445757_PM_at   | Tbx3          | TBX3        | 0.30  | 2.63 | 2.58  | 2.66E-02 | 1.89E-01 | -3.93 |
| 1452093_PM_at   | Tmem185b      | TMEM185B    | -0.55 | 2.52 | -2.58 | 2.66E-02 | 1.89E-01 | -3.93 |
| 1422800_PM_at   | Prrc2a        | PRRC2A      | 1.14  | 4.50 | 2.58  | 2.66E-02 | 1.89E-01 | -3.93 |
| 1442787_PM_at   | Abi2          | NA          | -0.43 | 7.75 | -2.58 | 2.66E-02 | 1.89E-01 | -3.93 |
| 1447289_PM_at   | AA763521      | NA          | 0.27  | 2.56 | 2.58  | 2.66E-02 | 1.89E-01 | -3.93 |



|                 |                       |           |       |       |       |          |          |       |
|-----------------|-----------------------|-----------|-------|-------|-------|----------|----------|-------|
| 1417846_PM_at   | Ulk2                  | ULK2      | -0.59 | 3.24  | -2.58 | 2.66E-02 | 1.89E-01 | -3.93 |
| 1423747_PM_a_at | Pdk1                  | PDK1      | -1.52 | 3.95  | -2.58 | 2.67E-02 | 1.89E-01 | -3.94 |
| 1423042_PM_at   | Ddx3x                 | DDX3X     | -0.97 | 6.28  | -2.58 | 2.67E-02 | 1.89E-01 | -3.94 |
| 1450550_PM_at   | Ils                   | IL5       | 0.43  | 2.78  | 2.58  | 2.67E-02 | 1.89E-01 | -3.94 |
| 1426865_PM_a_at | Ncam1                 | NCAM1     | -0.54 | 6.81  | -2.58 | 2.67E-02 | 1.89E-01 | -3.94 |
| 1418874_PM_a_at | Psm4                  | PSMD4     | 0.45  | 4.18  | 2.58  | 2.67E-02 | 1.89E-01 | -3.94 |
| 1450124_PM_a_at | Atp2a3                | ATP2A3    | 0.25  | 2.30  | 2.58  | 2.67E-02 | 1.89E-01 | -3.94 |
| 1449542_PM_at   | Pbx1                  | PBX1      | 0.30  | 2.37  | 2.58  | 2.67E-02 | 1.89E-01 | -3.94 |
| 1453420_PM_at   | Pou5f2                | POU5F2    | 0.74  | 3.31  | 2.58  | 2.67E-02 | 1.89E-01 | -3.94 |
| 1455109_PM_at   | Tbl1xr1               | TBL1XR1   | -0.65 | 4.96  | -2.58 | 2.67E-02 | 1.89E-01 | -3.94 |
| 1449236_PM_at   | Dll3                  | DLL3      | 0.23  | 2.43  | 2.58  | 2.67E-02 | 1.89E-01 | -3.94 |
| 1423258_PM_at   | Syt9                  | SYT9      | 0.33  | 2.41  | 2.58  | 2.67E-02 | 1.89E-01 | -3.94 |
| 1454103_PM_at   | ---                   | NA        | 0.34  | 2.17  | 2.58  | 2.67E-02 | 1.89E-01 | -3.94 |
| 1435206_PM_at   | Slc24a4               | SLC24A4   | 0.37  | 3.42  | 2.58  | 2.67E-02 | 1.89E-01 | -3.94 |
| 1425980_PM_at   | Wdr54                 | WDR54     | 0.38  | 3.18  | 2.58  | 2.67E-02 | 1.89E-01 | -3.94 |
| 1437519_PM_x_at | Hagh                  | HAGH      | 0.45  | 6.46  | 2.58  | 2.67E-02 | 1.89E-01 | -3.94 |
| 1427156_PM_s_at | Asc2                  | ASCC2     | 0.58  | 3.99  | 2.58  | 2.67E-02 | 1.89E-01 | -3.94 |
| 1456532_PM_at   | Pdgfd                 | PDGFD     | -0.51 | 2.69  | -2.58 | 2.68E-02 | 1.89E-01 | -3.94 |
| 1418065_PM_at   | Rag2                  | RAG2      | -0.31 | 2.88  | -2.58 | 2.68E-02 | 1.89E-01 | -3.94 |
| 1420948_PM_s_at | Atrx                  | ATRX      | -0.66 | 3.46  | -2.58 | 2.68E-02 | 1.90E-01 | -3.94 |
| 1453224_PM_at   | Zfand5                | ZFAND5    | 0.28  | 2.31  | 2.58  | 2.68E-02 | 1.90E-01 | -3.94 |
| 1419047_PM_at   | Pcnx                  | PCNX1     | -0.90 | 3.41  | -2.58 | 2.68E-02 | 1.90E-01 | -3.94 |
| 1416215_PM_at   | Gosr1                 | GOSR1     | -0.59 | 3.74  | -2.58 | 2.68E-02 | 1.90E-01 | -3.94 |
| 1435742_PM_at   | Smek1                 | PPP4R3A   | -0.50 | 3.01  | -2.58 | 2.68E-02 | 1.90E-01 | -3.94 |
| 1449473_PM_s_at | Cd40                  | CD40      | 0.48  | 2.99  | 2.58  | 2.68E-02 | 1.90E-01 | -3.94 |
| 1447259_PM_at   | Ank3                  | ANK3      | 0.38  | 2.50  | 2.58  | 2.68E-02 | 1.90E-01 | -3.94 |
| 1431652_PM_at   | ---                   | NA        | 0.34  | 2.27  | 2.58  | 2.68E-02 | 1.90E-01 | -3.94 |
| 1453088_PM_at   | 6430628N08Rik         | NA        | 0.26  | 2.61  | 2.58  | 2.68E-02 | 1.90E-01 | -3.94 |
| 1431388_PM_at   | Mphosph10             | NA        | 0.27  | 2.30  | 2.58  | 2.68E-02 | 1.90E-01 | -3.94 |
| 1452394_PM_at   | Cars                  | CARS      | 0.78  | 3.23  | 2.58  | 2.68E-02 | 1.90E-01 | -3.94 |
| 1422182_PM_at   | Hnf4g                 | HNF4G     | 0.25  | 2.34  | 2.58  | 2.69E-02 | 1.90E-01 | -3.94 |
| 1438968_PM_x_at | Spint2                | SPINT2    | 0.54  | 4.15  | 2.58  | 2.69E-02 | 1.90E-01 | -3.94 |
| 1433513_PM_x_at | Ndufa12               | NDUFA12   | -0.70 | 5.60  | -2.58 | 2.69E-02 | 1.90E-01 | -3.94 |
| 1441228_PM_at   | Apold1                | APOLD1    | 0.26  | 2.62  | 2.58  | 2.69E-02 | 1.90E-01 | -3.94 |
| 1454557_PM_at   | ---                   | NA        | 0.75  | 3.53  | 2.58  | 2.69E-02 | 1.90E-01 | -3.94 |
| 1434660_PM_at   | Alkbh1 /// Nrp        | ALKBH1    | -0.88 | 4.61  | -2.58 | 2.69E-02 | 1.90E-01 | -3.94 |
| 1454917_PM_at   | ---                   | NA        | -0.82 | 3.41  | -2.58 | 2.69E-02 | 1.90E-01 | -3.94 |
| 1447207_PM_at   | Zyg11b                | ZYG11B    | -0.42 | 3.14  | -2.58 | 2.69E-02 | 1.90E-01 | -3.94 |
| 1459199_PM_at   | ---                   | NA        | 0.28  | 2.77  | 2.58  | 2.69E-02 | 1.90E-01 | -3.94 |
| 1457982_PM_at   | ---                   | NA        | 0.20  | 2.49  | 2.58  | 2.69E-02 | 1.90E-01 | -3.94 |
| 1419003_PM_at   | Bves                  | BVES      | 0.36  | 3.06  | 2.58  | 2.69E-02 | 1.90E-01 | -3.94 |
| 1456078_PM_x_at | Tubb4b /// Tubb4b-ps1 | TUBB4B    | -0.21 | 2.07  | -2.57 | 2.69E-02 | 1.90E-01 | -3.95 |
| 1423089_PM_at   | Tmod3                 | TMOD3     | 0.26  | 2.09  | 2.57  | 2.69E-02 | 1.90E-01 | -3.95 |
| 1416840_PM_at   | Mid1ip1               | MID1IP1   | -0.57 | 3.50  | -2.57 | 2.70E-02 | 1.90E-01 | -3.95 |
| 1424085_PM_at   | Ndufa4                | NDUFA4    | -0.48 | 9.59  | -2.57 | 2.70E-02 | 1.90E-01 | -3.95 |
| 1415852_PM_at   | Gm15210 /// Impdh2    | IMPDH2    | -0.48 | 3.09  | -2.57 | 2.70E-02 | 1.90E-01 | -3.95 |
| 1444838_PM_at   | Gm9946                | NA        | 0.22  | 2.58  | 2.57  | 2.70E-02 | 1.90E-01 | -3.95 |
| 1433138_PM_at   | 5230401M06Rik         | NA        | 0.28  | 2.82  | 2.57  | 2.70E-02 | 1.90E-01 | -3.95 |
| 1442936_PM_at   | ---                   | NA        | 0.28  | 2.51  | 2.57  | 2.70E-02 | 1.90E-01 | -3.95 |
| 1451340_PM_at   | Arid5a                | ARID5A    | 0.29  | 2.38  | 2.57  | 2.70E-02 | 1.90E-01 | -3.95 |
| 1422414_PM_a_at | Calm2                 | CALM3     | 0.32  | 11.05 | 2.57  | 2.70E-02 | 1.90E-01 | -3.95 |
| 1433771_PM_at   | Abhd17b               | ABHD17B   | -0.80 | 4.44  | -2.57 | 2.70E-02 | 1.90E-01 | -3.95 |
| 1451022_PM_at   | Lrp6                  | LRP6      | 0.42  | 2.66  | 2.57  | 2.70E-02 | 1.90E-01 | -3.95 |
| 1438597_PM_x_at | Morf411 /// Morf41b   | MORF4L1   | -0.34 | 8.62  | -2.57 | 2.70E-02 | 1.90E-01 | -3.95 |
| 1451797_PM_at   | Smg5                  | SMG5      | 0.47  | 3.35  | 2.57  | 2.70E-02 | 1.90E-01 | -3.95 |
| 1423952_PM_a_at | Krt7                  | KRT7      | 0.39  | 2.68  | 2.57  | 2.70E-02 | 1.90E-01 | -3.95 |
| 1441850_PM_x_at | Tcn2                  | TCN2      | 0.41  | 2.84  | 2.57  | 2.70E-02 | 1.90E-01 | -3.95 |
| 1423374_PM_at   | Ncoa6                 | NCOA6     | -0.55 | 3.37  | -2.57 | 2.71E-02 | 1.90E-01 | -3.95 |
| 1433671_PM_at   | Eogt                  | EOGT      | 0.42  | 4.42  | 2.57  | 2.71E-02 | 1.90E-01 | -3.95 |
| 1460573_PM_at   | Suco                  | SUCO      | 0.51  | 4.26  | 2.57  | 2.71E-02 | 1.90E-01 | -3.95 |
| 1458069_PM_at   | ---                   | NA        | -0.55 | 2.56  | -2.57 | 2.71E-02 | 1.90E-01 | -3.95 |
| 1431953_PM_at   | Atp8a2                | ATP8A2    | 0.28  | 2.60  | 2.57  | 2.71E-02 | 1.90E-01 | -3.95 |
| 1430241_PM_at   | Fbx17                 | NA        | 0.60  | 5.40  | 2.57  | 2.71E-02 | 1.90E-01 | -3.95 |
| 1417705_PM_at   | Otub1                 | OTUB1     | 0.74  | 3.90  | 2.57  | 2.71E-02 | 1.90E-01 | -3.95 |
| 1420381_PM_a_at | Rp31                  | NA        | -0.56 | 4.47  | -2.57 | 2.71E-02 | 1.90E-01 | -3.95 |
| 1422886_PM_a_at | Clk4                  | CLK4      | -0.51 | 4.15  | -2.57 | 2.71E-02 | 1.90E-01 | -3.95 |
| 1415735_PM_at   | Ddb1                  | DDB1      | -0.45 | 4.35  | -2.57 | 2.71E-02 | 1.90E-01 | -3.95 |
| 1434502_PM_x_at | Slc4a1                | SLC4A1    | -0.36 | 2.28  | -2.57 | 2.71E-02 | 1.90E-01 | -3.95 |
| 1421555_PM_at   | Adrb3                 | ADRB3     | 0.26  | 2.21  | 2.57  | 2.71E-02 | 1.90E-01 | -3.95 |
| 1425818_PM_at   | ---                   | NA        | 0.27  | 2.13  | 2.57  | 2.71E-02 | 1.90E-01 | -3.95 |
| 1452888_PM_at   | 1110034G24Rik         | C20orf196 | 0.29  | 2.28  | 2.57  | 2.71E-02 | 1.90E-01 | -3.95 |
| 1444064_PM_at   | Samhd1                | SAMHD1    | 0.45  | 2.98  | 2.57  | 2.71E-02 | 1.90E-01 | -3.95 |
| 1459924_PM_at   | Atp6v0a1              | NA        | 0.49  | 3.49  | 2.57  | 2.71E-02 | 1.90E-01 | -3.95 |
| 1440805_PM_at   | Baz1b                 | BAZ1B     | 0.68  | 4.11  | 2.57  | 2.71E-02 | 1.90E-01 | -3.95 |
| 1442201_PM_at   | ---                   | NA        | 0.38  | 2.77  | 2.57  | 2.72E-02 | 1.91E-01 | -3.95 |

|                 |                                         |            |       |       |       |          |          |       |
|-----------------|-----------------------------------------|------------|-------|-------|-------|----------|----------|-------|
| 1450577_PM_at   | Sstr3                                   | SSTR3      | 0.48  | 4.36  | 2.57  | 2.72E-02 | 1.91E-01 | -3.95 |
| 1417134_PM_at   | Srpk2                                   | SRPK2      | -0.89 | 5.59  | -2.57 | 2.72E-02 | 1.91E-01 | -3.95 |
| 1459134_PM_at   | ---                                     | NA         | 0.28  | 2.88  | 2.57  | 2.72E-02 | 1.91E-01 | -3.95 |
| 1432533_PM_a_at | Slc35a2                                 | SLC35A2    | 0.30  | 2.84  | 2.57  | 2.72E-02 | 1.91E-01 | -3.95 |
| 1457165_PM_at   | Ick                                     | ICK        | 0.31  | 2.24  | 2.57  | 2.72E-02 | 1.91E-01 | -3.95 |
| 1418644_PM_a_at | Stk11                                   | STK11      | 0.35  | 2.91  | 2.57  | 2.72E-02 | 1.91E-01 | -3.96 |
| 1448056_PM_at   | Huwe1                                   | HUWE1      | 0.36  | 4.21  | 2.57  | 2.72E-02 | 1.91E-01 | -3.96 |
| 1416146_PM_at   | Hspa4                                   | HSPA4      | -0.31 | 8.54  | -2.57 | 2.72E-02 | 1.91E-01 | -3.96 |
| 1442438_PM_at   | ---                                     | NA         | -0.37 | 2.39  | -2.57 | 2.72E-02 | 1.91E-01 | -3.96 |
| 1441830_PM_x_at | Akap10                                  | AKAP10     | 0.60  | 2.51  | 2.57  | 2.72E-02 | 1.91E-01 | -3.96 |
| 1426823_PM_s_at | Psme4                                   | PSME4      | -0.42 | 3.32  | -2.57 | 2.72E-02 | 1.91E-01 | -3.96 |
| 1416228_PM_at   | Pin1                                    | PIN1       | 0.27  | 3.53  | 2.57  | 2.72E-02 | 1.91E-01 | -3.96 |
| 1446802_PM_at   | ---                                     | NA         | 0.30  | 2.86  | 2.57  | 2.73E-02 | 1.91E-01 | -3.96 |
| 1439099_PM_at   | Nova2                                   | NOVA2      | 0.32  | 2.78  | 2.57  | 2.73E-02 | 1.91E-01 | -3.96 |
| 1459702_PM_at   | ---                                     | NA         | 0.38  | 2.24  | 2.57  | 2.72E-02 | 1.91E-01 | -3.96 |
| 1430463_PM_a_at | Srncaip                                 | SNCAIP     | 0.51  | 2.89  | 2.57  | 2.72E-02 | 1.91E-01 | -3.96 |
| 1423736_PM_a_at | Dym                                     | DYM        | -0.36 | 2.24  | -2.57 | 2.73E-02 | 1.91E-01 | -3.96 |
| 1416343_PM_a_at | Lamp2                                   | LAMP2      | -0.78 | 3.14  | -2.57 | 2.73E-02 | 1.91E-01 | -3.96 |
| 1428670_PM_at   | Gm40022                                 | NA         | 0.31  | 2.48  | 2.57  | 2.73E-02 | 1.91E-01 | -3.96 |
| 1444736_PM_at   | Cdh7                                    | CDH7       | 0.39  | 2.79  | 2.57  | 2.73E-02 | 1.91E-01 | -3.96 |
| 1422920_PM_at   | Cldn13                                  | NA         | 0.21  | 2.72  | 2.57  | 2.73E-02 | 1.91E-01 | -3.96 |
| 1437241_PM_at   | Klf11                                   | KLF11      | 0.30  | 2.97  | 2.57  | 2.73E-02 | 1.91E-01 | -3.96 |
| 1421427_PM_at   | Col25a1                                 | COL25A1    | 0.29  | 2.60  | 2.57  | 2.74E-02 | 1.91E-01 | -3.96 |
| 1445227_PM_at   | Tnfrsf13os                              | NA         | 0.31  | 2.73  | 2.57  | 2.74E-02 | 1.91E-01 | -3.96 |
| 1443637_PM_at   | Slc25a42                                | SLC25A42   | 0.33  | 3.12  | 2.57  | 2.74E-02 | 1.91E-01 | -3.96 |
| 1430006_PM_x_at | 1700024B05Rik ///<br>Gm10378 /// Gm7995 | NA         | 0.47  | 4.14  | 2.56  | 2.74E-02 | 1.91E-01 | -3.96 |
| 1439658_PM_at   | Lmod3                                   | LMOD3      | 0.34  | 2.54  | 2.56  | 2.74E-02 | 1.92E-01 | -3.96 |
| 1434972_PM_x_at | Srsf1                                   | SRSF1      | 0.43  | 9.08  | 2.56  | 2.74E-02 | 1.92E-01 | -3.96 |
| 1434988_PM_x_at | Alkh2                                   | ACO02996.1 | -1.63 | 5.76  | -2.56 | 2.74E-02 | 1.92E-01 | -3.96 |
| 1458599_PM_at   | ---                                     | NA         | -0.38 | 2.52  | -2.56 | 2.74E-02 | 1.92E-01 | -3.96 |
| 1439787_PM_at   | P2rx7                                   | P2RX7      | -0.35 | 3.34  | -2.56 | 2.75E-02 | 1.92E-01 | -3.96 |
| 1437572_PM_at   | Dcp1b                                   | DCP1B      | 0.33  | 2.67  | 2.56  | 2.75E-02 | 1.92E-01 | -3.96 |
| 1439662_PM_at   | Homer1                                  | NA         | -0.80 | 5.56  | -2.56 | 2.75E-02 | 1.92E-01 | -3.97 |
| 1424613_PM_at   | Gprc5b                                  | GPRC5B     | -0.70 | 4.91  | -2.56 | 2.75E-02 | 1.92E-01 | -3.97 |
| 1427228_PM_at   | Palll                                   | PALLD      | -0.48 | 4.52  | -2.56 | 2.75E-02 | 1.92E-01 | -3.97 |
| 1428472_PM_at   | Spsb1                                   | SPSB1      | 0.30  | 3.18  | 2.56  | 2.75E-02 | 1.92E-01 | -3.97 |
| 1456110_PM_at   | Ankrd11                                 | ANKRD11    | 0.95  | 10.00 | 2.56  | 2.75E-02 | 1.92E-01 | -3.97 |
| 1439838_PM_a_at | Tmie                                    | TMIE       | 0.35  | 2.99  | 2.56  | 2.75E-02 | 1.92E-01 | -3.97 |
| 1435865_PM_at   | Hist3h2a /// Trim17                     | TRIM17     | 0.48  | 3.10  | 2.56  | 2.75E-02 | 1.92E-01 | -3.97 |
| 1440021_PM_at   | Gpr20                                   | GPR20      | 0.33  | 2.67  | 2.56  | 2.76E-02 | 1.92E-01 | -3.97 |
| 1441853_PM_at   | Dpp10                                   | DPP10      | 0.53  | 2.46  | 2.56  | 2.76E-02 | 1.92E-01 | -3.97 |
| 1443530_PM_at   | ---                                     | NA         | 0.35  | 2.67  | 2.56  | 2.76E-02 | 1.92E-01 | -3.97 |
| 1431238_PM_at   | Pqlc1                                   | PQLC1      | 0.26  | 2.42  | 2.56  | 2.76E-02 | 1.92E-01 | -3.97 |
| 1415707_PM_at   | Anapc2                                  | ANAPC2     | -0.36 | 3.08  | -2.56 | 2.76E-02 | 1.92E-01 | -3.97 |
| 1432116_PM_at   | 1700031F05Rik                           | NA         | 0.27  | 2.59  | 2.56  | 2.76E-02 | 1.92E-01 | -3.97 |
| 1459745_PM_at   | ---                                     | NA         | 0.53  | 2.86  | 2.56  | 2.76E-02 | 1.92E-01 | -3.97 |
| 1417369_PM_at   | Hsd17b4                                 | HSD17B4    | -0.54 | 4.45  | -2.56 | 2.76E-02 | 1.92E-01 | -3.97 |
| 1453764_PM_at   | 3110021N24Rik                           | NA         | 0.28  | 2.47  | 2.56  | 2.76E-02 | 1.92E-01 | -3.97 |
| 1430431_PM_at   | Uvssa                                   | UVSSA      | 0.31  | 3.74  | 2.56  | 2.76E-02 | 1.92E-01 | -3.97 |
| 1439808_PM_at   | Ipcf1                                   | IPCEF1     | 0.60  | 2.79  | 2.56  | 2.76E-02 | 1.92E-01 | -3.97 |
| 1456456_PM_x_at | Mela                                    | NA         | 0.29  | 2.08  | 2.56  | 2.76E-02 | 1.92E-01 | -3.97 |
| 1427581_PM_at   | Hic2                                    | HIC2       | 0.32  | 2.54  | 2.56  | 2.77E-02 | 1.92E-01 | -3.97 |
| 1435885_PM_s_at | Itns1                                   | ITSN1      | 0.76  | 4.37  | 2.56  | 2.77E-02 | 1.92E-01 | -3.97 |
| 1426833_PM_at   | Eif4g3                                  | EIF4G3     | -0.69 | 7.45  | -2.56 | 2.77E-02 | 1.92E-01 | -3.97 |
| 1456942_PM_x_at | Gm9112                                  | NA         | 0.32  | 3.30  | 2.56  | 2.77E-02 | 1.93E-01 | -3.97 |
| 1447755_PM_at   | ---                                     | NA         | 0.70  | 4.49  | 2.56  | 2.77E-02 | 1.93E-01 | -3.97 |
| 1443622_PM_at   | ---                                     | NA         | 0.39  | 3.00  | 2.56  | 2.77E-02 | 1.93E-01 | -3.97 |
| 1427946_PM_s_at | Dpyd                                    | DPYD       | -0.69 | 2.70  | -2.56 | 2.77E-02 | 1.93E-01 | -3.97 |
| 1452560_PM_a_at | Nfya                                    | NFYA       | -0.40 | 2.64  | -2.56 | 2.77E-02 | 1.93E-01 | -3.97 |
| 1447124_PM_at   | ---                                     | NA         | 0.51  | 4.00  | 2.56  | 2.77E-02 | 1.93E-01 | -3.97 |
| 1456227_PM_x_at | Rbbp7                                   | RBBP7      | -0.57 | 8.10  | -2.56 | 2.77E-02 | 1.93E-01 | -3.97 |
| 1435491_PM_at   | Zfp963                                  | NA         | 0.37  | 2.21  | 2.56  | 2.77E-02 | 1.93E-01 | -3.97 |
| 1428468_PM_at   | 3110043O21Rik                           | C9orf72    | -0.49 | 2.74  | -2.56 | 2.77E-02 | 1.93E-01 | -3.97 |
| 1430408_PM_at   | Cacna1a                                 | CACNA1A    | 0.49  | 3.43  | 2.56  | 2.78E-02 | 1.93E-01 | -3.97 |
| 1436333_PM_a_at | Synj1                                   | SYNJ1      | -1.30 | 8.10  | -2.56 | 2.78E-02 | 1.93E-01 | -3.98 |
| 1417902_PM_at   | Slc19a2                                 | SLC19A2    | -0.64 | 3.18  | -2.56 | 2.78E-02 | 1.93E-01 | -3.98 |
| 1442530_PM_at   | ---                                     | NA         | 0.25  | 2.18  | 2.56  | 2.78E-02 | 1.93E-01 | -3.97 |
| 1457988_PM_at   | ---                                     | NA         | 0.29  | 3.28  | 2.56  | 2.78E-02 | 1.93E-01 | -3.97 |
| 1458909_PM_at   | 1810010D01Rik                           | NA         | 0.39  | 3.08  | 2.56  | 2.78E-02 | 1.93E-01 | -3.98 |
| 1458668_PM_at   | Tpd52                                   | TPD52      | 0.43  | 2.61  | 2.56  | 2.78E-02 | 1.93E-01 | -3.98 |
| 1446339_PM_at   | ---                                     | NA         | 0.53  | 3.01  | 2.56  | 2.78E-02 | 1.93E-01 | -3.97 |
| 1446764_PM_at   | ---                                     | NA         | 0.31  | 2.43  | 2.56  | 2.78E-02 | 1.93E-01 | -3.98 |
| 1437859_PM_x_at | Eif5a                                   | EIF5A      | 1.44  | 3.54  | 2.56  | 2.78E-02 | 1.93E-01 | -3.98 |
| 1439998_PM_at   | Jmjd1c                                  | JMJD1C     | 0.80  | 3.11  | 2.56  | 2.78E-02 | 1.93E-01 | -3.98 |

|                 |                      |          |       |      |       |          |          |       |
|-----------------|----------------------|----------|-------|------|-------|----------|----------|-------|
| 1418152_PM_at   | Hmgn5                | HMGNS    | -0.73 | 3.90 | -2.56 | 2.79E-02 | 1.93E-01 | -3.98 |
| 1425253_PM_a_at | Madcaml              | MADCAM1  | 0.20  | 2.45 | 2.56  | 2.79E-02 | 1.93E-01 | -3.98 |
| 1420635_PM_a_at | Tcirg1               | TCIRG1   | 0.29  | 4.43 | 2.55  | 2.79E-02 | 1.93E-01 | -3.98 |
| 1442845_PM_at   | ---                  | NA       | 0.29  | 2.62 | 2.55  | 2.79E-02 | 1.93E-01 | -3.98 |
| 1447084_PM_at   | Nfatc1               | NFATC1   | 0.20  | 3.87 | 2.55  | 2.79E-02 | 1.94E-01 | -3.98 |
| 1425644_PM_at   | Lepr                 | LEPR     | -0.33 | 2.45 | -2.55 | 2.80E-02 | 1.94E-01 | -3.98 |
| 1458495_PM_at   | ---                  | NA       | 0.93  | 3.63 | 2.55  | 2.79E-02 | 1.94E-01 | -3.98 |
| 1459213_PM_at   | Gm12159              | NA       | 0.26  | 2.40 | 2.55  | 2.80E-02 | 1.94E-01 | -3.98 |
| 1442407_PM_at   | Zkscan7              | NA       | 0.20  | 2.48 | 2.55  | 2.80E-02 | 1.94E-01 | -3.98 |
| 1433837_PM_at   | 8430408G22Rik        | C10orf10 | 0.22  | 2.27 | 2.55  | 2.80E-02 | 1.94E-01 | -3.98 |
| 1434452_PM_x_at | Eif2a                | EIF2A    | -0.48 | 4.31 | -2.55 | 2.80E-02 | 1.94E-01 | -3.98 |
| 1437973_PM_at   | Lingo2               | LINGO2   | -0.27 | 2.29 | -2.55 | 2.80E-02 | 1.94E-01 | -3.98 |
| 1417119_PM_at   | Zfpl1                | ZFPL1    | 0.41  | 3.79 | 2.55  | 2.80E-02 | 1.94E-01 | -3.98 |
| 1450523_PM_at   | Cntn2                | CNTN2    | 0.40  | 2.66 | 2.55  | 2.80E-02 | 1.94E-01 | -3.98 |
| 1450720_PM_at   | Acpl1///LOC102642088 | ACP1     | -0.38 | 9.03 | -2.55 | 2.80E-02 | 1.94E-01 | -3.98 |
| 1451107_PM_at   | Tbc1d22a             | TBC1D22A | 0.28  | 3.01 | 2.55  | 2.80E-02 | 1.94E-01 | -3.98 |
| 1420977_PM_at   | Man1a2               | MAN1A2   | -0.74 | 3.67 | -2.55 | 2.81E-02 | 1.94E-01 | -3.98 |
| 1436208_PM_at   | Asb1                 | ASB1     | 0.69  | 3.60 | 2.55  | 2.81E-02 | 1.94E-01 | -3.99 |
| 1456937_PM_at   | Cdh26                | CDH26    | 0.26  | 2.23 | 2.55  | 2.81E-02 | 1.94E-01 | -3.99 |
| 1459268_PM_at   | Gpr179               | GPR179   | 0.37  | 3.51 | 2.55  | 2.81E-02 | 1.94E-01 | -3.99 |
| 1415713_PM_a_at | Ddx24                | DDX24    | 1.09  | 4.95 | 2.55  | 2.81E-02 | 1.94E-01 | -3.99 |
| 1426991_PM_at   | Pcnx4                | PCNX4    | -0.49 | 3.32 | -2.55 | 2.81E-02 | 1.94E-01 | -3.99 |
| 1435068_PM_at   | Pip4k2b              | PIP4K2B  | -0.86 | 4.83 | -2.55 | 2.81E-02 | 1.94E-01 | -3.99 |
| 1455098_PM_a_at | Vtn                  | VTN      | -1.07 | 3.86 | -2.55 | 2.81E-02 | 1.94E-01 | -3.99 |
| 1430405_PM_at   | 1700061117Rik        | NA       | 0.19  | 2.16 | 2.55  | 2.81E-02 | 1.94E-01 | -3.99 |
| 1459676_PM_at   | Trappc12             | TRAPPC12 | 0.32  | 2.41 | 2.55  | 2.81E-02 | 1.94E-01 | -3.99 |
| 1415795_PM_at   | Spin1                | SPIN1    | 1.30  | 5.93 | 2.55  | 2.81E-02 | 1.94E-01 | -3.99 |
| 1419826_PM_at   | Kif17                | KIF17    | -0.28 | 2.48 | -2.55 | 2.82E-02 | 1.94E-01 | -3.99 |
| 1452104_PM_at   | Arl16                | ARL16    | 0.27  | 2.44 | 2.55  | 2.82E-02 | 1.94E-01 | -3.99 |
| 1453515_PM_at   | Ppp2r3c              | NA       | 0.43  | 2.96 | 2.55  | 2.82E-02 | 1.94E-01 | -3.99 |
| 1456352_PM_a_at | Sf3b2                | SF3B2    | 1.08  | 3.59 | 2.55  | 2.82E-02 | 1.95E-01 | -3.99 |
| 1419562_PM_at   | Birc6                | BIRC6    | -0.83 | 7.93 | -2.55 | 2.82E-02 | 1.95E-01 | -3.99 |
| 1448575_PM_at   | Il7r                 | IL7R     | 0.28  | 2.39 | 2.55  | 2.82E-02 | 1.95E-01 | -3.99 |
| 1444468_PM_at   | Paqr8                | PAQR8    | -1.19 | 5.90 | -2.55 | 2.82E-02 | 1.95E-01 | -3.99 |
| 1428464_PM_at   | Ndufa3               | NDUFA3   | -1.12 | 5.11 | -2.55 | 2.82E-02 | 1.95E-01 | -3.99 |
| 1456576_PM_x_at | Cnot2                | CNOT2    | -0.72 | 4.08 | -2.55 | 2.82E-02 | 1.95E-01 | -3.99 |
| 1424960_PM_at   | Epn3                 | EPN3     | 0.21  | 2.25 | 2.55  | 2.82E-02 | 1.95E-01 | -3.99 |
| 1445150_PM_at   | ---                  | NA       | 0.32  | 2.80 | 2.55  | 2.82E-02 | 1.95E-01 | -3.99 |
| 1443172_PM_at   | Orc1                 | ORC1     | 0.35  | 3.72 | 2.55  | 2.82E-02 | 1.95E-01 | -3.99 |
| 1421487_PM_a_at | Nck1                 | NCK1     | 0.37  | 3.08 | 2.55  | 2.82E-02 | 1.95E-01 | -3.99 |
| 1448064_PM_at   | ---                  | NA       | 0.38  | 3.10 | 2.55  | 2.82E-02 | 1.95E-01 | -3.99 |
| 1456529_PM_at   | ---                  | NA       | 0.31  | 2.68 | 2.55  | 2.83E-02 | 1.95E-01 | -3.99 |
| 1430709_PM_at   | ---                  | NA       | 0.36  | 2.78 | 2.55  | 2.83E-02 | 1.95E-01 | -3.99 |
| 1436680_PM_s_at | Ddb2                 | DDB2     | -0.73 | 5.07 | -2.55 | 2.83E-02 | 1.95E-01 | -3.99 |
| 1435527_PM_at   | Nfic                 | NFIC     | 0.49  | 3.62 | 2.55  | 2.83E-02 | 1.95E-01 | -3.99 |
| 1457264_PM_at   | Phf20l1              | NA       | 0.64  | 4.54 | 2.55  | 2.83E-02 | 1.95E-01 | -3.99 |
| 1442059_PM_at   | Fxr1                 | FXR1     | 0.86  | 4.11 | 2.55  | 2.83E-02 | 1.95E-01 | -3.99 |
| 1433941_PM_at   | Inpp5j               | INPP5J   | 0.40  | 3.53 | 2.55  | 2.83E-02 | 1.95E-01 | -3.99 |
| 1427551_PM_at   | Usp29                | NA       | 0.46  | 2.60 | 2.55  | 2.83E-02 | 1.95E-01 | -3.99 |
| 1429696_PM_at   | Adgra1               | ADGRA1   | 0.70  | 3.99 | 2.55  | 2.83E-02 | 1.95E-01 | -3.99 |
| 1424083_PM_at   | Ptbp3                | PTBP3    | -0.78 | 3.55 | -2.54 | 2.84E-02 | 1.95E-01 | -4.00 |
| 1419808_PM_at   | Cog4                 | COG4     | 0.27  | 2.89 | 2.54  | 2.84E-02 | 1.95E-01 | -4.00 |
| 1441509_PM_at   | ---                  | NA       | 0.28  | 2.24 | 2.54  | 2.84E-02 | 1.95E-01 | -4.00 |
| 1459656_PM_at   | ---                  | NA       | 0.28  | 2.80 | 2.54  | 2.84E-02 | 1.95E-01 | -4.00 |
| 1435424_PM_x_at | Shisa9               | SHISA9   | -1.22 | 3.26 | -2.54 | 2.84E-02 | 1.95E-01 | -4.00 |
| 1419593_PM_at   | Greb1                | GREB1    | 0.27  | 2.12 | 2.54  | 2.84E-02 | 1.95E-01 | -4.00 |
| 1419385_PM_a_at | Ubqln1               | UBQLN1   | 0.41  | 3.01 | 2.54  | 2.84E-02 | 1.95E-01 | -4.00 |
| 1455842_PM_x_at | Usp15                | NA       | -0.43 | 2.26 | -2.54 | 2.84E-02 | 1.96E-01 | -4.00 |
| 1453295_PM_at   | Asxl2                | ASXL2    | 0.81  | 3.53 | 2.54  | 2.84E-02 | 1.96E-01 | -4.00 |
| 1458488_PM_at   | Dclk2                | DCLK2    | 0.27  | 2.65 | 2.54  | 2.85E-02 | 1.96E-01 | -4.00 |
| 1456392_PM_at   | Negr1                | NEGR1    | -0.81 | 7.53 | -2.54 | 2.85E-02 | 1.96E-01 | -4.00 |
| 1427329_PM_a_at | Ighm                 | NA       | -0.53 | 3.19 | -2.54 | 2.85E-02 | 1.96E-01 | -4.00 |
| 1455417_PM_at   | Kcnj11               | NA       | 0.38  | 3.55 | 2.54  | 2.85E-02 | 1.96E-01 | -4.00 |
| 1438522_PM_at   | Pom121l12            | NA       | 0.41  | 2.81 | 2.54  | 2.85E-02 | 1.96E-01 | -4.00 |
| 1422261_PM_a_at | Msh3                 | MSH3     | -0.52 | 2.53 | -2.54 | 2.85E-02 | 1.96E-01 | -4.00 |
| 1439947_PM_at   | Cyp11a1              | CYP11A1  | 0.40  | 3.56 | 2.54  | 2.85E-02 | 1.96E-01 | -4.00 |
| 1454175_PM_at   | Iqcf3                | NA       | 0.21  | 2.55 | 2.54  | 2.85E-02 | 1.96E-01 | -4.00 |
| 1416000_PM_a_at | Prdx1                | PRDX1    | -0.82 | 3.54 | -2.54 | 2.85E-02 | 1.96E-01 | -4.00 |
| 1430597_PM_at   | Jakmip1              | JAKMIP1  | 0.50  | 3.30 | 2.54  | 2.85E-02 | 1.96E-01 | -4.00 |
| 1458401_PM_at   | 4932438A13Rik        | KIAA1109 | -0.60 | 2.83 | -2.54 | 2.86E-02 | 1.96E-01 | -4.00 |
| 1460592_PM_at   | Epb41l1              | EPB41L1  | -0.51 | 5.04 | -2.54 | 2.86E-02 | 1.96E-01 | -4.00 |
| 1425878_PM_at   | Cabp4                | CABP4    | 0.25  | 2.52 | 2.54  | 2.86E-02 | 1.96E-01 | -4.00 |
| 1456761_PM_at   | ---                  | NA       | 0.31  | 2.74 | 2.54  | 2.86E-02 | 1.96E-01 | -4.00 |
| 1453896_PM_at   | Pdxd2                | PDXD2    | 0.33  | 2.35 | 2.54  | 2.86E-02 | 1.96E-01 | -4.00 |
| 1440416_PM_at   | Usp46                | USP46    | 0.42  | 2.72 | 2.54  | 2.86E-02 | 1.96E-01 | -4.00 |

|                 |                         |          |       |       |       |          |          |       |
|-----------------|-------------------------|----------|-------|-------|-------|----------|----------|-------|
| 1419180_PM_at   | Bc19l                   | BCL9L    | 0.45  | 3.03  | 2.54  | 2.86E-02 | 1.96E-01 | -4.00 |
| 1420075_PM_at   | ---                     | NA       | 0.59  | 3.34  | 2.54  | 2.86E-02 | 1.96E-01 | -4.00 |
| 1420876_PM_a_at | Sept6                   | SEPT6    | 1.17  | 5.37  | 2.54  | 2.86E-02 | 1.96E-01 | -4.00 |
| 1439560_PM_x_at | Smim22                  | SMIM22   | -0.56 | 2.50  | -2.54 | 2.86E-02 | 1.96E-01 | -4.00 |
| 1445632_PM_at   | Ogdh                    | NA       | -0.65 | 3.52  | -2.54 | 2.86E-02 | 1.96E-01 | -4.00 |
| 1444473_PM_at   | ---                     | NA       | 0.31  | 2.49  | 2.54  | 2.86E-02 | 1.96E-01 | -4.00 |
| 1442452_PM_at   | Stradb                  | STRADB   | -0.38 | 2.55  | -2.54 | 2.86E-02 | 1.96E-01 | -4.00 |
| 1458595_PM_at   | Intu                    | INTU     | -0.30 | 2.33  | -2.54 | 2.86E-02 | 1.96E-01 | -4.00 |
| 1415681_PM_at   | Mrp143                  | MRPL43   | -0.35 | 2.76  | -2.54 | 2.86E-02 | 1.96E-01 | -4.00 |
| 1415782_PM_at   | Sumo2                   | NA       | -0.54 | 7.26  | -2.54 | 2.86E-02 | 1.96E-01 | -4.00 |
| 1436988_PM_at   | Ism1                    | ISM1     | 0.32  | 3.26  | 2.54  | 2.87E-02 | 1.96E-01 | -4.00 |
| 1445203_PM_at   | Pdxd1                   | PDXD1    | 0.23  | 2.48  | 2.54  | 2.87E-02 | 1.96E-01 | -4.01 |
| 1453281_PM_at   | Pik3cd                  | PIK3CD   | 0.33  | 2.54  | 2.54  | 2.87E-02 | 1.96E-01 | -4.01 |
| 1442076_PM_at   | Cobl                    | COBL     | 0.33  | 2.70  | 2.54  | 2.87E-02 | 1.96E-01 | -4.01 |
| 1418008_PM_at   | Paxbp1                  | PAXBP1   | -1.11 | 6.03  | -2.54 | 2.87E-02 | 1.96E-01 | -4.01 |
| 1422407_PM_s_at | Hras                    | HRAS     | -0.55 | 3.29  | -2.54 | 2.87E-02 | 1.96E-01 | -4.01 |
| 1437223_PM_s_at | Xbp1                    | XBP1     | -0.57 | 2.97  | -2.54 | 2.87E-02 | 1.96E-01 | -4.01 |
| 1459985_PM_at   | Wdr61                   | WDR61    | -0.29 | 3.34  | -2.54 | 2.87E-02 | 1.96E-01 | -4.01 |
| 1432069_PM_at   | 1700023G09Rik           | NA       | 0.24  | 2.26  | 2.54  | 2.87E-02 | 1.96E-01 | -4.01 |
| 1458831_PM_at   | ---                     | NA       | 0.24  | 2.15  | 2.54  | 2.87E-02 | 1.96E-01 | -4.01 |
| 1460514_PM_s_at | Ascl2                   | ASCL2    | 0.24  | 2.47  | 2.54  | 2.87E-02 | 1.96E-01 | -4.01 |
| 1433728_PM_at   | Glb1l2                  | GLB1L2   | 0.27  | 2.66  | 2.54  | 2.87E-02 | 1.96E-01 | -4.01 |
| 1443309_PM_at   | Pdzrn3                  | PDZRN3   | 0.33  | 2.38  | 2.54  | 2.87E-02 | 1.96E-01 | -4.01 |
| 1439649_PM_at   | Azin2                   | AZIN2    | 0.40  | 2.92  | 2.54  | 2.87E-02 | 1.96E-01 | -4.01 |
| 1450707_PM_at   | Doc2g                   | NA       | 0.32  | 2.55  | 2.54  | 2.87E-02 | 1.96E-01 | -4.01 |
| 1434498_PM_at   | Gm1673                  | C4orf48  | 0.33  | 2.69  | 2.54  | 2.87E-02 | 1.96E-01 | -4.01 |
| 1456484_PM_at   | Dhrsx                   | DHRSX    | 0.24  | 2.51  | 2.54  | 2.88E-02 | 1.96E-01 | -4.01 |
| 1459696_PM_at   | Fry                     | NA       | 0.29  | 3.00  | 2.54  | 2.88E-02 | 1.96E-01 | -4.01 |
| 1418514_PM_at   | Mtf2                    | MTF2     | 1.29  | 4.23  | 2.54  | 2.87E-02 | 1.96E-01 | -4.01 |
| 1443502_PM_at   | Birc7                   | BIRC7    | 0.23  | 2.48  | 2.54  | 2.88E-02 | 1.96E-01 | -4.01 |
| 1431494_PM_at   | ---                     | NA       | 0.25  | 3.70  | 2.54  | 2.88E-02 | 1.96E-01 | -4.01 |
| 1459243_PM_at   | ---                     | NA       | 0.32  | 2.80  | 2.54  | 2.88E-02 | 1.96E-01 | -4.01 |
| 1431314_PM_a_at | 583041710Rik ///Gon4l   | YY1AP1   | 0.74  | 3.92  | 2.54  | 2.88E-02 | 1.96E-01 | -4.01 |
| 1417279_PM_at   | Itp1                    | ITPR1    | -0.87 | 4.47  | -2.54 | 2.88E-02 | 1.97E-01 | -4.01 |
| 1454261_PM_at   | E130304I02Rik           | NA       | 0.23  | 2.34  | 2.54  | 2.88E-02 | 1.97E-01 | -4.01 |
| 1452951_PM_at   | 2410089E03Rik           | C5orf42  | -0.71 | 3.32  | -2.54 | 2.88E-02 | 1.97E-01 | -4.01 |
| 1458438_PM_at   | Ccdc122                 | CCDC122  | 0.36  | 2.57  | 2.54  | 2.88E-02 | 1.97E-01 | -4.01 |
| 1435048_PM_at   | Al854703                | NA       | -0.84 | 3.25  | -2.54 | 2.89E-02 | 1.97E-01 | -4.01 |
| 1453670_PM_at   | Usp50                   | USP50    | -0.41 | 2.48  | -2.54 | 2.89E-02 | 1.97E-01 | -4.01 |
| 1431706_PM_at   | ---                     | NA       | 0.52  | 3.14  | 2.54  | 2.89E-02 | 1.97E-01 | -4.01 |
| 1425435_PM_at   | Msr1                    | MSR1     | -0.89 | 2.71  | -2.54 | 2.89E-02 | 1.97E-01 | -4.01 |
| 1417471_PM_s_at | D1Ert622e               | C5orf30  | -0.93 | 3.51  | -2.54 | 2.89E-02 | 1.97E-01 | -4.01 |
| 1449635_PM_at   | Prpf19                  | PRPF19   | -0.63 | 10.35 | -2.53 | 2.89E-02 | 1.97E-01 | -4.01 |
| 1415858_PM_at   | Eif3c                   | EIF3CL   | -0.49 | 4.98  | -2.53 | 2.89E-02 | 1.97E-01 | -4.01 |
| 1427433_PM_s_at | Hoxa3                   | HOXA3    | 0.22  | 2.32  | 2.53  | 2.89E-02 | 1.97E-01 | -4.01 |
| 1427574_PM_s_at | Sh3d19                  | SH3D19   | 0.33  | 2.55  | 2.53  | 2.89E-02 | 1.97E-01 | -4.01 |
| 1419387_PM_s_at | Muc13                   | MUC13    | 0.34  | 2.86  | 2.53  | 2.89E-02 | 1.97E-01 | -4.01 |
| 1450581_PM_at   | Galr3 ///Gcat           | GCAT     | 0.40  | 2.81  | 2.53  | 2.89E-02 | 1.97E-01 | -4.01 |
| 1442271_PM_at   | ---                     | NA       | 0.45  | 3.10  | 2.53  | 2.89E-02 | 1.97E-01 | -4.01 |
| 1435787_PM_at   | Ppm1l                   | PPM1L    | -0.87 | 5.20  | -2.53 | 2.89E-02 | 1.97E-01 | -4.01 |
| 1419624_PM_a_at | 1700010I14Rik           | C6orf118 | -0.69 | 2.68  | -2.53 | 2.89E-02 | 1.97E-01 | -4.01 |
| 1428846_PM_at   | Ttc14                   | TTC14    | -0.62 | 4.99  | -2.53 | 2.89E-02 | 1.97E-01 | -4.01 |
| 1451678_PM_at   | Narf                    | NARF     | -0.25 | 2.82  | -2.53 | 2.89E-02 | 1.97E-01 | -4.01 |
| 1453638_PM_at   | Arhgap42                | ARHGAP42 | 0.20  | 2.17  | 2.53  | 2.89E-02 | 1.97E-01 | -4.01 |
| 1441614_PM_at   | ---                     | NA       | 0.35  | 2.54  | 2.53  | 2.89E-02 | 1.97E-01 | -4.01 |
| 1434267_PM_at   | Nek1                    | NEK1     | -0.49 | 4.43  | -2.53 | 2.89E-02 | 1.97E-01 | -4.01 |
| 1443532_PM_at   | ---                     | NA       | 0.39  | 3.87  | 2.53  | 2.90E-02 | 1.97E-01 | -4.02 |
| 1458897_PM_at   | Ust                     | UST      | -0.29 | 2.29  | -2.53 | 2.90E-02 | 1.97E-01 | -4.02 |
| 1459306_PM_at   | ---                     | NA       | 0.32  | 3.31  | 2.53  | 2.90E-02 | 1.97E-01 | -4.02 |
| 1446980_PM_at   | ---                     | NA       | 0.42  | 3.10  | 2.53  | 2.90E-02 | 1.97E-01 | -4.02 |
| 1433489_PM_s_at | Fgfr2                   | FGFR2    | -0.98 | 4.87  | -2.53 | 2.90E-02 | 1.97E-01 | -4.02 |
| 1418955_PM_at   | Zfp93                   | ZNF235   | -0.75 | 3.21  | -2.53 | 2.90E-02 | 1.97E-01 | -4.02 |
| 1418281_PM_at   | Rad51                   | RAD51    | 0.21  | 2.33  | 2.53  | 2.90E-02 | 1.97E-01 | -4.02 |
| 1447078_PM_at   | ---                     | NA       | 0.20  | 2.70  | 2.53  | 2.90E-02 | 1.97E-01 | -4.02 |
| 1432983_PM_at   | ---                     | NA       | 0.41  | 2.51  | 2.53  | 2.90E-02 | 1.97E-01 | -4.02 |
| 1419894_PM_at   | Gm6787                  | NA       | -0.48 | 5.44  | -2.53 | 2.91E-02 | 1.97E-01 | -4.02 |
| 1442937_PM_at   | C77190                  | NA       | 0.32  | 2.33  | 2.53  | 2.91E-02 | 1.97E-01 | -4.02 |
| 1442613_PM_at   | Spon1                   | SPON1    | 0.29  | 2.47  | 2.53  | 2.91E-02 | 1.98E-01 | -4.02 |
| 1436867_PM_at   | Srl                     | SRL      | 0.72  | 3.35  | 2.53  | 2.91E-02 | 1.98E-01 | -4.02 |
| 1445895_PM_at   | ---                     | NA       | -0.28 | 2.38  | -2.53 | 2.91E-02 | 1.98E-01 | -4.02 |
| 1428385_PM_at   | March8                  | MARCH8   | -0.68 | 6.84  | -2.53 | 2.91E-02 | 1.98E-01 | -4.02 |
| 1449295_PM_at   | LOC102643099 ///Sap30bp | SAP30BP  | 0.39  | 2.60  | 2.53  | 2.92E-02 | 1.98E-01 | -4.02 |
| 1430857_PM_s_at | Pex11g                  | PEX11G   | 0.20  | 2.44  | 2.53  | 2.92E-02 | 1.98E-01 | -4.02 |
| 1416118_PM_at   | Trim59                  | TRIM59   | -0.84 | 4.00  | -2.53 | 2.92E-02 | 1.98E-01 | -4.02 |

|                 |                                                                                                                                                                  |          |       |      |       |          |          |       |
|-----------------|------------------------------------------------------------------------------------------------------------------------------------------------------------------|----------|-------|------|-------|----------|----------|-------|
| 1418053_PM_at   | Sncb                                                                                                                                                             | SNCB     | 0.76  | 3.97 | 2.53  | 2.92E-02 | 1.98E-01 | -4.02 |
| 1459726_PM_at   | ---                                                                                                                                                              | NA       | 0.31  | 2.24 | 2.53  | 2.92E-02 | 1.98E-01 | -4.02 |
| 1456288_PM_at   | Sln5                                                                                                                                                             | SLFN5    | -0.47 | 2.56 | -2.53 | 2.92E-02 | 1.98E-01 | -4.02 |
| 1442480_PM_at   | ---                                                                                                                                                              | NA       | 0.35  | 3.11 | 2.53  | 2.92E-02 | 1.98E-01 | -4.02 |
| 1433699_PM_at   | Tnfai3                                                                                                                                                           | TNFAP3   | -0.45 | 2.83 | -2.53 | 2.92E-02 | 1.98E-01 | -4.02 |
| 1446923_PM_at   | ---                                                                                                                                                              | NA       | -0.31 | 2.82 | -2.53 | 2.92E-02 | 1.98E-01 | -4.02 |
| 1449741_PM_at   | Dsg2                                                                                                                                                             | NA       | 0.31  | 3.01 | 2.53  | 2.92E-02 | 1.98E-01 | -4.02 |
| 1441610_PM_at   | Phf24                                                                                                                                                            | PHF24    | -0.56 | 2.95 | -2.53 | 2.93E-02 | 1.98E-01 | -4.02 |
| 1459471_PM_at   | ---                                                                                                                                                              | NA       | -0.30 | 2.52 | -2.53 | 2.93E-02 | 1.98E-01 | -4.03 |
| 1459625_PM_at   | ---                                                                                                                                                              | NA       | 0.30  | 2.70 | 2.53  | 2.93E-02 | 1.98E-01 | -4.03 |
| 1456142_PM_x_at | Morf4l1 /// Morf4l1-ps1 /// Morf4l1b                                                                                                                             | MORF4L1  | -0.67 | 8.66 | -2.53 | 2.93E-02 | 1.98E-01 | -4.03 |
| 1445135_PM_at   | ---                                                                                                                                                              | NA       | 0.36  | 3.41 | 2.53  | 2.93E-02 | 1.98E-01 | -4.03 |
| 1436731_PM_at   | Zfp385b                                                                                                                                                          | ZNF385B  | -0.72 | 3.61 | -2.53 | 2.93E-02 | 1.98E-01 | -4.03 |
| 1434172_PM_at   | Cnr1                                                                                                                                                             | CNR1     | -0.35 | 2.81 | -2.53 | 2.93E-02 | 1.98E-01 | -4.03 |
| 1432923_PM_at   | 2810404i24Rik                                                                                                                                                    | NA       | 0.21  | 2.18 | 2.53  | 2.93E-02 | 1.98E-01 | -4.03 |
| 1433282_PM_at   | ---                                                                                                                                                              | NA       | 0.24  | 2.09 | 2.53  | 2.93E-02 | 1.98E-01 | -4.03 |
| 1427989_PM_at   | Amhr2                                                                                                                                                            | AMHR2    | 0.32  | 2.51 | 2.53  | 2.93E-02 | 1.98E-01 | -4.03 |
| 1459005_PM_at   | ---                                                                                                                                                              | NA       | 0.44  | 2.43 | 2.53  | 2.93E-02 | 1.98E-01 | -4.03 |
| 1451634_PM_at   | Airn                                                                                                                                                             | NA       | 0.58  | 3.19 | 2.53  | 2.93E-02 | 1.98E-01 | -4.03 |
| 1415744_PM_at   | Pfdn6                                                                                                                                                            | PFDN6    | 0.59  | 3.72 | 2.53  | 2.93E-02 | 1.98E-01 | -4.03 |
| 1416312_PM_at   | Rars                                                                                                                                                             | RARS     | -0.54 | 3.10 | -2.53 | 2.94E-02 | 1.98E-01 | -4.03 |
| 1460015_PM_at   | Sohl1                                                                                                                                                            | SOHL1    | 0.24  | 3.92 | 2.52  | 2.94E-02 | 1.99E-01 | -4.03 |
| 1441744_PM_at   | ---                                                                                                                                                              | NA       | 0.28  | 2.74 | 2.52  | 2.94E-02 | 1.99E-01 | -4.03 |
| 1427527_PM_a_at | Pthlh                                                                                                                                                            | PTHLH    | 0.34  | 3.78 | 2.52  | 2.94E-02 | 1.99E-01 | -4.03 |
| 1422672_PM_at   | Sprr1b                                                                                                                                                           | SPRR1A   | 0.21  | 2.16 | 2.52  | 2.94E-02 | 1.99E-01 | -4.03 |
| 1423650_PM_at   | Rnf26                                                                                                                                                            | RNF26    | -0.67 | 3.83 | -2.52 | 2.94E-02 | 1.99E-01 | -4.03 |
| 1417652_PM_a_at | Tbca                                                                                                                                                             | TBCA     | -1.17 | 6.58 | -2.52 | 2.94E-02 | 1.99E-01 | -4.03 |
| 1421510_PM_at   | Tmprss15                                                                                                                                                         | TMPRSS15 | -1.10 | 3.06 | -2.52 | 2.94E-02 | 1.99E-01 | -4.03 |
| 1438368_PM_a_at | Matr3                                                                                                                                                            | MATR3    | -0.45 | 9.68 | -2.52 | 2.95E-02 | 1.99E-01 | -4.03 |
| 1418426_PM_at   | Gtf2a1l                                                                                                                                                          | GTF2A1L  | 0.26  | 2.26 | 2.52  | 2.94E-02 | 1.99E-01 | -4.03 |
| 1443116_PM_at   | Psme4                                                                                                                                                            | NA       | 0.29  | 2.28 | 2.52  | 2.95E-02 | 1.99E-01 | -4.03 |
| 1444415_PM_at   | ---                                                                                                                                                              | NA       | 0.31  | 2.70 | 2.52  | 2.94E-02 | 1.99E-01 | -4.03 |
| 1446169_PM_at   | ---                                                                                                                                                              | NA       | 0.32  | 2.58 | 2.52  | 2.94E-02 | 1.99E-01 | -4.03 |
| 1436338_PM_at   | Sik2                                                                                                                                                             | NA       | 0.29  | 2.63 | 2.52  | 2.95E-02 | 1.99E-01 | -4.03 |
| 1428701_PM_at   | Pvr14                                                                                                                                                            | NECTIN4  | -0.43 | 2.80 | -2.52 | 2.95E-02 | 1.99E-01 | -4.03 |
| 1436243_PM_at   | Frmd5                                                                                                                                                            | FRMD5    | 0.70  | 4.61 | 2.52  | 2.95E-02 | 1.99E-01 | -4.03 |
| 1444658_PM_at   | Tedd2                                                                                                                                                            | NA       | 0.29  | 2.44 | 2.52  | 2.95E-02 | 1.99E-01 | -4.03 |
| 1456666_PM_at   | 2610020C07Rik                                                                                                                                                    | NA       | 0.36  | 2.81 | 2.52  | 2.95E-02 | 1.99E-01 | -4.03 |
| 1456598_PM_at   | Gm16367 /// Gm16427 /// Gm16513 /// Gm3106 /// Gm3139 /// Gm3183 /// Gm7792 /// LOC100038995 /// LOC100039010 /// LOC100041712 /// LOC100862115 /// LOC100862245 | PRAMEF9  | -0.73 | 2.95 | -2.52 | 2.95E-02 | 1.99E-01 | -4.03 |
| 1433100_PM_at   | 9030419F21Rik                                                                                                                                                    | NA       | 0.43  | 2.99 | 2.52  | 2.95E-02 | 1.99E-01 | -4.03 |
| 1441745_PM_at   | ---                                                                                                                                                              | NA       | 0.25  | 3.45 | 2.52  | 2.95E-02 | 1.99E-01 | -4.03 |
| 1437022_PM_at   | Ubn2                                                                                                                                                             | UBN2     | 0.35  | 2.77 | 2.52  | 2.95E-02 | 1.99E-01 | -4.03 |
| 1441050_PM_at   | ---                                                                                                                                                              | NA       | 0.47  | 3.69 | 2.52  | 2.95E-02 | 1.99E-01 | -4.03 |
| 1447931_PM_at   | Whsc11                                                                                                                                                           | NSD3     | -0.58 | 3.36 | -2.52 | 2.96E-02 | 1.99E-01 | -4.04 |
| 1456371_PM_a_at | Shroom1                                                                                                                                                          | SHROOM1  | 0.23  | 2.58 | 2.52  | 2.96E-02 | 1.99E-01 | -4.04 |
| 1438454_PM_at   | Pten                                                                                                                                                             | NA       | 0.58  | 3.40 | 2.52  | 2.96E-02 | 1.99E-01 | -4.04 |
| 1421435_PM_at   | Grid2                                                                                                                                                            | GRID2    | 0.75  | 3.38 | 2.52  | 2.96E-02 | 1.99E-01 | -4.04 |
| 1438643_PM_at   | ---                                                                                                                                                              | NA       | 1.40  | 5.34 | 2.52  | 2.96E-02 | 1.99E-01 | -4.04 |
| 1442000_PM_at   | Mfsd2b                                                                                                                                                           | MFSD2B   | 0.31  | 2.28 | 2.52  | 2.96E-02 | 1.99E-01 | -4.04 |
| 1430944_PM_at   | ---                                                                                                                                                              | NA       | 0.23  | 2.37 | 2.52  | 2.96E-02 | 1.99E-01 | -4.04 |
| 1442017_PM_at   | Nfs1                                                                                                                                                             | NFS1     | 0.32  | 2.35 | 2.52  | 2.96E-02 | 1.99E-01 | -4.04 |
| 1455153_PM_at   | Zfp236                                                                                                                                                           | ZNF236   | -0.68 | 4.30 | -2.52 | 2.96E-02 | 1.99E-01 | -4.04 |
| 1460728_PM_s_at | Ing4                                                                                                                                                             | ING4     | 0.36  | 3.79 | 2.52  | 2.96E-02 | 1.99E-01 | -4.04 |
| 1427396_PM_a_at | Csde1                                                                                                                                                            | CSDE1    | -1.16 | 7.19 | -2.52 | 2.96E-02 | 1.99E-01 | -4.04 |
| 1441625_PM_at   | Rimbp2                                                                                                                                                           | RIMBP2   | -0.95 | 6.40 | -2.52 | 2.97E-02 | 1.99E-01 | -4.04 |
| 1457936_PM_at   | Mapk8                                                                                                                                                            | MAPK8    | -0.64 | 3.46 | -2.52 | 2.97E-02 | 1.99E-01 | -4.04 |
| 1432660_PM_at   | ---                                                                                                                                                              | NA       | 0.27  | 2.63 | 2.52  | 2.97E-02 | 1.99E-01 | -4.04 |
| 1447177_PM_at   | ---                                                                                                                                                              | NA       | 0.30  | 2.37 | 2.52  | 2.97E-02 | 1.99E-01 | -4.04 |
| 1420442_PM_at   | Cacna1s                                                                                                                                                          | CACNA1S  | 0.38  | 2.48 | 2.52  | 2.97E-02 | 1.99E-01 | -4.04 |
| 1437048_PM_x_at | Stxbp2                                                                                                                                                           | STXBP2   | 0.51  | 4.50 | 2.52  | 2.97E-02 | 1.99E-01 | -4.04 |
| 1458883_PM_at   | ---                                                                                                                                                              | NA       | 0.35  | 2.83 | 2.52  | 2.97E-02 | 1.99E-01 | -4.04 |
| 1421080_PM_at   | Nr4a3                                                                                                                                                            | NR4A3    | 1.22  | 3.58 | 2.52  | 2.97E-02 | 1.99E-01 | -4.04 |
| 1417659_PM_at   | Vps29                                                                                                                                                            | VPS29    | -0.67 | 3.69 | -2.52 | 2.97E-02 | 1.99E-01 | -4.04 |
| 1423110_PM_at   | Col1a2                                                                                                                                                           | COL1A2   | -0.44 | 2.43 | -2.52 | 2.97E-02 | 2.00E-01 | -4.04 |
| 1448875_PM_at   | Zhx1                                                                                                                                                             | ZHX1     | -0.57 | 4.57 | -2.52 | 2.98E-02 | 2.00E-01 | -4.04 |
| 1434260_PM_at   | Fchsd2                                                                                                                                                           | FCHSD2   | -0.39 | 3.12 | -2.52 | 2.98E-02 | 2.00E-01 | -4.04 |

|                 |                                     |            |       |      |       |          |          |       |
|-----------------|-------------------------------------|------------|-------|------|-------|----------|----------|-------|
| 1436403_PM_at   | Fam171a2                            | FAM171A2   | -0.29 | 2.68 | -2.52 | 2.98E-02 | 2.00E-01 | -4.04 |
| 1424426_PM_at   | Mtap                                | AL359922.1 | 0.20  | 2.37 | 2.52  | 2.98E-02 | 2.00E-01 | -4.04 |
| 1458785_PM_at   | ---                                 | NA         | 0.33  | 3.20 | 2.52  | 2.98E-02 | 2.00E-01 | -4.04 |
| 1427784_PM_at   | Defb13                              | DEFB107A   | 0.35  | 3.38 | 2.52  | 2.97E-02 | 2.00E-01 | -4.04 |
| 1441371_PM_at   | Plxna4                              | PLXNA4     | 0.37  | 2.81 | 2.52  | 2.98E-02 | 2.00E-01 | -4.04 |
| 1447218_PM_at   | ---                                 | NA         | 0.43  | 2.73 | 2.52  | 2.98E-02 | 2.00E-01 | -4.04 |
| 1458563_PM_at   | Zfp668                              | ZNF668     | 0.50  | 3.16 | 2.52  | 2.98E-02 | 2.00E-01 | -4.04 |
| 1438100_PM_at   | ---                                 | NA         | 0.50  | 2.74 | 2.52  | 2.98E-02 | 2.00E-01 | -4.04 |
| 1419101_PM_at   | Sin3a                               | SIN3A      | 0.53  | 5.55 | 2.52  | 2.97E-02 | 2.00E-01 | -4.04 |
| 1437056_PM_x_at | Crispld2                            | CRISPLD2   | 0.63  | 3.77 | 2.52  | 2.98E-02 | 2.00E-01 | -4.04 |
| 1421975_PM_a_at | Add2                                | ADD2       | 0.81  | 6.97 | 2.52  | 2.98E-02 | 2.00E-01 | -4.04 |
| 1433845_PM_x_at | Dusp9                               | DUSP9      | 0.18  | 2.25 | 2.52  | 2.98E-02 | 2.00E-01 | -4.04 |
| 1458306_PM_at   | Pigz                                | PIGZ       | 0.32  | 3.07 | 2.52  | 2.98E-02 | 2.00E-01 | -4.04 |
| 1455021_PM_at   | Gabbr1                              | GABBR1     | -0.99 | 8.69 | -2.52 | 2.98E-02 | 2.00E-01 | -4.04 |
| 1416990_PM_at   | Rxrb                                | RXRB       | -0.47 | 3.84 | -2.52 | 2.98E-02 | 2.00E-01 | -4.04 |
| 1422574_PM_at   | Mxd4                                | MXD4       | 0.38  | 2.39 | 2.52  | 2.98E-02 | 2.00E-01 | -4.04 |
| 1445699_PM_at   | ---                                 | NA         | 0.40  | 2.67 | 2.52  | 2.98E-02 | 2.00E-01 | -4.04 |
| 1430945_PM_at   | ---                                 | NA         | 0.98  | 3.28 | 2.52  | 2.98E-02 | 2.00E-01 | -4.04 |
| 1433475_PM_a_at | Fam8a1                              | FAM8A1     | -1.83 | 6.61 | -2.52 | 2.99E-02 | 2.00E-01 | -4.04 |
| 1444236_PM_at   | AW552393                            | NA         | -0.51 | 2.82 | -2.52 | 2.99E-02 | 2.00E-01 | -4.04 |
| 1428303_PM_at   | Btdb17                              | BTBD17     | 0.22  | 2.83 | 2.52  | 2.99E-02 | 2.00E-01 | -4.04 |
| 1433542_PM_at   | Inpp5f                              | INPP5F     | -1.14 | 5.93 | -2.51 | 3.00E-02 | 2.00E-01 | -4.05 |
| 1450149_PM_a_at | Gm5601 /// Ppp1cc                   | PPP1CC     | -1.12 | 8.17 | -2.51 | 3.00E-02 | 2.00E-01 | -4.05 |
| 1428323_PM_at   | Gpd2                                | GPD2       | -0.93 | 4.05 | -2.51 | 2.99E-02 | 2.00E-01 | -4.05 |
| 1419637_PM_s_at | 4833420G17Rik                       | C5orf34    | -0.83 | 3.67 | -2.51 | 2.99E-02 | 2.00E-01 | -4.05 |
| 1450871_PM_a_at | Bcat1                               | BCAT1      | -0.82 | 5.62 | -2.51 | 2.99E-02 | 2.00E-01 | -4.05 |
| 1453020_PM_at   | Pcnx4                               | PCNX4      | -0.56 | 5.14 | -2.51 | 3.00E-02 | 2.00E-01 | -4.05 |
| 1451702_PM_at   | Cmtm7                               | NA         | -0.28 | 2.60 | -2.51 | 2.99E-02 | 2.00E-01 | -4.05 |
| 1425286_PM_at   | Crygn                               | CRYGN      | 0.22  | 2.44 | 2.51  | 2.99E-02 | 2.00E-01 | -4.05 |
| 1434109_PM_at   | Sh3bgrl2                            | SH3BGR2    | 0.22  | 2.41 | 2.51  | 2.99E-02 | 2.00E-01 | -4.05 |
| 1419696_PM_at   | Cd4                                 | CD4        | 0.27  | 2.32 | 2.51  | 2.99E-02 | 2.00E-01 | -4.05 |
| 1448055_PM_at   | Fndc7                               | FNDC7      | 0.28  | 2.29 | 2.51  | 2.99E-02 | 2.00E-01 | -4.05 |
| 1443623_PM_a_at | 6430571L13Rik                       | C3orf18    | 0.31  | 2.58 | 2.51  | 2.99E-02 | 2.00E-01 | -4.05 |
| 1458141_PM_at   | ---                                 | NA         | 0.33  | 2.38 | 2.51  | 2.99E-02 | 2.00E-01 | -4.05 |
| 1459314_PM_at   | ---                                 | NA         | 0.33  | 2.28 | 2.51  | 2.99E-02 | 2.00E-01 | -4.05 |
| 1441270_PM_at   | ---                                 | NA         | 0.33  | 2.82 | 2.52  | 2.99E-02 | 2.00E-01 | -4.05 |
| 1444513_PM_at   | Cnksr2                              | CNKS2      | 0.34  | 4.06 | 2.51  | 2.99E-02 | 2.00E-01 | -4.05 |
| 1426102_PM_at   | Cyp2j13                             | CYP2J2     | 0.34  | 2.83 | 2.51  | 3.00E-02 | 2.00E-01 | -4.05 |
| 1438573_PM_at   | Rmi1                                | RMI1       | 0.37  | 3.78 | 2.52  | 2.99E-02 | 2.00E-01 | -4.05 |
| 1429003_PM_at   | Srnw1                               | SNW1       | 0.44  | 3.08 | 2.51  | 3.00E-02 | 2.00E-01 | -4.05 |
| 1417934_PM_at   | Dnajc4                              | DNAJC4     | 0.47  | 3.78 | 2.51  | 2.99E-02 | 2.00E-01 | -4.05 |
| 1421077_PM_at   | Sertad3                             | SERTAD3    | 0.48  | 2.56 | 2.51  | 2.99E-02 | 2.00E-01 | -4.05 |
| 1434377_PM_x_at | LOC105244208 /// Rps6               | NA         | -0.51 | 8.81 | -2.51 | 3.00E-02 | 2.00E-01 | -4.05 |
| 1456136_PM_at   | ---                                 | NA         | 0.26  | 2.13 | 2.51  | 3.00E-02 | 2.00E-01 | -4.05 |
| 1427636_PM_at   | Tspy-ps                             | NA         | 0.32  | 2.37 | 2.51  | 3.00E-02 | 2.00E-01 | -4.05 |
| 1458856_PM_at   | ---                                 | NA         | 0.33  | 2.62 | 2.51  | 3.00E-02 | 2.00E-01 | -4.05 |
| 1427420_PM_at   | Nkx6-2                              | NKX6-2     | 0.58  | 3.23 | 2.51  | 3.00E-02 | 2.00E-01 | -4.05 |
| 1416941_PM_s_at | Eif4h                               | EIF4H      | -1.48 | 6.21 | -2.51 | 3.00E-02 | 2.00E-01 | -4.05 |
| 1422054_PM_a_at | Skil                                | SKIL       | 0.75  | 3.29 | 2.51  | 3.00E-02 | 2.00E-01 | -4.05 |
| 1431579_PM_at   | ---                                 | NA         | 0.38  | 2.94 | 2.51  | 3.00E-02 | 2.00E-01 | -4.05 |
| 1431123_PM_s_at | Dnajc8                              | DNAJC8     | 0.41  | 3.77 | 2.51  | 3.01E-02 | 2.00E-01 | -4.05 |
| 1426861_PM_at   | Aftph                               | AFTPH      | -1.16 | 6.07 | -2.51 | 3.01E-02 | 2.00E-01 | -4.05 |
| 1415720_PM_s_at | Mad2l1bp                            | MAD2L1BP   | -0.23 | 2.57 | -2.51 | 3.01E-02 | 2.00E-01 | -4.05 |
| 1432197_PM_at   | 4933417D19Rik                       | NA         | 0.24  | 2.16 | 2.51  | 3.01E-02 | 2.00E-01 | -4.05 |
| 1449706_PM_s_at | Nr5a2                               | NRS2       | 0.29  | 2.76 | 2.51  | 3.01E-02 | 2.00E-01 | -4.05 |
| 1418238_PM_at   | Ivd                                 | IVD        | 0.37  | 2.91 | 2.51  | 3.01E-02 | 2.00E-01 | -4.05 |
| 1424249_PM_a_at | Arhgap9                             | ARHGAP9    | 0.80  | 4.04 | 2.51  | 3.01E-02 | 2.00E-01 | -4.05 |
| 1456914_PM_at   | ---                                 | NA         | -0.43 | 2.84 | -2.51 | 3.01E-02 | 2.01E-01 | -4.05 |
| 1418746_PM_at   | Pnkf                                | PNKD       | 0.47  | 4.04 | 2.51  | 3.01E-02 | 2.01E-01 | -4.05 |
| 1459379_PM_at   | ---                                 | NA         | 0.40  | 3.28 | 2.51  | 3.02E-02 | 2.01E-01 | -4.05 |
| 1454566_PM_at   | ---                                 | NA         | 0.44  | 3.14 | 2.51  | 3.02E-02 | 2.01E-01 | -4.05 |
| 1433871_PM_at   | R3hdm1                              | R3HDM1     | 0.45  | 8.05 | 2.51  | 3.02E-02 | 2.01E-01 | -4.05 |
| 1434485_PM_a_at | Ugp2                                | UGP2       | -0.85 | 4.18 | -2.51 | 3.02E-02 | 2.01E-01 | -4.05 |
| 1456620_PM_at   | Gnptab                              | GNPTAB     | -0.63 | 3.34 | -2.51 | 3.02E-02 | 2.01E-01 | -4.05 |
| 1434952_PM_at   | Emc8                                | EMC8       | -0.66 | 3.44 | -2.51 | 3.02E-02 | 2.01E-01 | -4.06 |
| 1450344_PM_a_at | Ptger3                              | PTGER3     | -0.60 | 2.21 | -2.51 | 3.02E-02 | 2.01E-01 | -4.06 |
| 1427240_PM_at   | Dock6                               | DOCK6      | 0.29  | 3.30 | 2.51  | 3.02E-02 | 2.01E-01 | -4.06 |
| 1456612_PM_at   | Il17d                               | NA         | 0.22  | 2.49 | 2.51  | 3.02E-02 | 2.01E-01 | -4.06 |
| 1423456_PM_at   | Bzw2                                | BZW2       | 0.62  | 3.22 | 2.51  | 3.02E-02 | 2.01E-01 | -4.06 |
| 1431364_PM_a_at | Gm20482 /// Gm3912 /// LOC105242405 | NA         | 0.70  | 3.84 | 2.51  | 3.02E-02 | 2.01E-01 | -4.06 |
| 1417434_PM_at   | Gpd2                                | GPD2       | -1.09 | 7.31 | -2.51 | 3.03E-02 | 2.01E-01 | -4.06 |
| 1439218_PM_at   | ---                                 | NA         | 0.33  | 2.63 | 2.51  | 3.03E-02 | 2.01E-01 | -4.06 |
| 1446053_PM_at   | ---                                 | NA         | 0.40  | 2.57 | 2.51  | 3.03E-02 | 2.01E-01 | -4.06 |
| 1423967_PM_at   | Palm                                | PALM       | 0.27  | 4.14 | 2.51  | 3.03E-02 | 2.01E-01 | -4.06 |

|                 |                                                                                                                                                                                                                        |            |       |       |       |          |          |       |
|-----------------|------------------------------------------------------------------------------------------------------------------------------------------------------------------------------------------------------------------------|------------|-------|-------|-------|----------|----------|-------|
| 144556_PM_at    | ---                                                                                                                                                                                                                    | NA         | 0.28  | 2.53  | 2.51  | 3.03E-02 | 2.01E-01 | -4.06 |
| 1437489_PM_x_at | Sdhd                                                                                                                                                                                                                   | SDHD       | -0.73 | 8.07  | -2.51 | 3.03E-02 | 2.01E-01 | -4.06 |
| 1435446_PM_a_at | Chpt1                                                                                                                                                                                                                  | CHPT1      | -0.43 | 4.33  | -2.51 | 3.03E-02 | 2.01E-01 | -4.06 |
| 1457801_PM_at   | ---                                                                                                                                                                                                                    | NA         | 0.40  | 2.47  | 2.51  | 3.03E-02 | 2.01E-01 | -4.06 |
| 1441124_PM_at   | Vezt                                                                                                                                                                                                                   | VEZT       | 0.47  | 3.27  | 2.51  | 3.03E-02 | 2.01E-01 | -4.06 |
| 1429630_PM_at   | Ezh1                                                                                                                                                                                                                   | EZH1       | 0.49  | 2.81  | 2.51  | 3.03E-02 | 2.01E-01 | -4.06 |
| 1417547_PM_at   | Sart3                                                                                                                                                                                                                  | SART3      | -0.59 | 3.72  | -2.51 | 3.03E-02 | 2.01E-01 | -4.06 |
| 1438575_PM_a_at | Kantr                                                                                                                                                                                                                  | NA         | -0.42 | 2.66  | -2.51 | 3.04E-02 | 2.01E-01 | -4.06 |
| 1442626_PM_at   | ---                                                                                                                                                                                                                    | NA         | 0.32  | 2.25  | 2.51  | 3.04E-02 | 2.01E-01 | -4.06 |
| 1458722_PM_at   | ---                                                                                                                                                                                                                    | NA         | 0.46  | 2.51  | 2.51  | 3.04E-02 | 2.01E-01 | -4.06 |
| 1449039_PM_a_at | Hnrnpdl                                                                                                                                                                                                                | HNRNPDL    | 0.61  | 8.95  | 2.51  | 3.04E-02 | 2.01E-01 | -4.06 |
| 1416562_PM_at   | Gad1                                                                                                                                                                                                                   | GAD1       | 0.65  | 3.22  | 2.51  | 3.04E-02 | 2.01E-01 | -4.06 |
| 1436201_PM_x_at | Mbp                                                                                                                                                                                                                    | MBP        | -0.82 | 10.73 | -2.51 | 3.04E-02 | 2.01E-01 | -4.06 |
| 1436799_PM_at   | Enox1                                                                                                                                                                                                                  | ENOX1      | -0.30 | 3.43  | -2.50 | 3.05E-02 | 2.02E-01 | -4.06 |
| 1453163_PM_at   | Ppp1r12a                                                                                                                                                                                                               | NA         | 0.69  | 3.12  | 2.50  | 3.05E-02 | 2.02E-01 | -4.06 |
| 1460150_PM_at   | 6330409D20Rik                                                                                                                                                                                                          | NA         | 0.27  | 2.54  | 2.50  | 3.05E-02 | 2.02E-01 | -4.06 |
| 1425014_PM_at   | Nr2c2                                                                                                                                                                                                                  | NR2C2      | 0.46  | 3.15  | 2.50  | 3.05E-02 | 2.02E-01 | -4.06 |
| 1456674_PM_at   | Fsbp /// Rad54b                                                                                                                                                                                                        | RAD54B     | 0.34  | 2.97  | 2.50  | 3.05E-02 | 2.02E-01 | -4.06 |
| 1424604_PM_s_at | Sumf1                                                                                                                                                                                                                  | SUMF1      | -0.76 | 6.80  | -2.50 | 3.05E-02 | 2.02E-01 | -4.07 |
| 1427831_PM_s_at | Zfp260                                                                                                                                                                                                                 | ZNF260     | -0.74 | 2.65  | -2.50 | 3.05E-02 | 2.02E-01 | -4.07 |
| 1434023_PM_at   | Cep120                                                                                                                                                                                                                 | CEP120     | -0.24 | 3.34  | -2.50 | 3.05E-02 | 2.02E-01 | -4.07 |
| 1458570_PM_at   | ---                                                                                                                                                                                                                    | NA         | 0.21  | 2.17  | 2.50  | 3.05E-02 | 2.02E-01 | -4.07 |
| 1448479_PM_at   | Psmd3                                                                                                                                                                                                                  | PSMD3      | 0.23  | 3.17  | 2.50  | 3.05E-02 | 2.02E-01 | -4.07 |
| 1442583_PM_a_at | Al854703                                                                                                                                                                                                               | NA         | 0.25  | 4.01  | 2.50  | 3.05E-02 | 2.02E-01 | -4.07 |
| 1425633_PM_at   | Cfhr2                                                                                                                                                                                                                  | CFH        | 0.38  | 2.80  | 2.50  | 3.05E-02 | 2.02E-01 | -4.07 |
| 1438918_PM_at   | Fdft1                                                                                                                                                                                                                  | FDFT1      | 0.39  | 2.87  | 2.50  | 3.05E-02 | 2.02E-01 | -4.07 |
| 1443415_PM_at   | ---                                                                                                                                                                                                                    | NA         | 0.39  | 2.35  | 2.50  | 3.05E-02 | 2.02E-01 | -4.07 |
| 1434220_PM_at   | Nup98                                                                                                                                                                                                                  | NA         | -0.69 | 3.50  | -2.50 | 3.06E-02 | 2.02E-01 | -4.07 |
| 1421580_PM_at   | Cntnap1                                                                                                                                                                                                                | CNTNAP1    | -0.94 | 3.17  | -2.50 | 3.06E-02 | 2.02E-01 | -4.07 |
| 1437649_PM_x_at | Ppib                                                                                                                                                                                                                   | PPIB       | -1.01 | 5.86  | -2.50 | 3.06E-02 | 2.02E-01 | -4.07 |
| 1433186_PM_at   | ---                                                                                                                                                                                                                    | NA         | 0.81  | 3.68  | 2.50  | 3.06E-02 | 2.02E-01 | -4.07 |
| 1425412_PM_at   | Nlrp3                                                                                                                                                                                                                  | NLRP3      | 0.24  | 2.57  | 2.50  | 3.06E-02 | 2.02E-01 | -4.07 |
| 1448764_PM_a_at | Fabp1                                                                                                                                                                                                                  | FABP1      | -0.36 | 2.28  | -2.50 | 3.06E-02 | 2.02E-01 | -4.07 |
| 1427807_PM_at   | ---                                                                                                                                                                                                                    | NA         | 0.31  | 2.95  | 2.50  | 3.07E-02 | 2.03E-01 | -4.07 |
| 1415695_PM_at   | Psm1                                                                                                                                                                                                                   | ACO18523.2 | -0.68 | 3.94  | -2.50 | 3.07E-02 | 2.03E-01 | -4.07 |
| 1421316_PM_at   | Lce1g                                                                                                                                                                                                                  | NA         | -0.41 | 2.26  | -2.50 | 3.07E-02 | 2.03E-01 | -4.07 |
| 1444413_PM_at   | Ap3s2                                                                                                                                                                                                                  | AP3S2      | 0.29  | 2.52  | 2.50  | 3.07E-02 | 2.03E-01 | -4.07 |
| 1455704_PM_at   | Xkr8                                                                                                                                                                                                                   | XKR8       | 0.32  | 3.28  | 2.50  | 3.07E-02 | 2.03E-01 | -4.07 |
| 1445057_PM_at   | ---                                                                                                                                                                                                                    | NA         | 0.47  | 2.98  | 2.50  | 3.07E-02 | 2.03E-01 | -4.07 |
| 1432015_PM_a_at | Kbtbd12                                                                                                                                                                                                                | KBTBD12    | 0.46  | 2.66  | 2.50  | 3.07E-02 | 2.03E-01 | -4.07 |
| 1449512_PM_a_at | Zfx                                                                                                                                                                                                                    | ZFY        | 0.44  | 2.56  | 2.50  | 3.08E-02 | 2.03E-01 | -4.07 |
| 1417736_PM_at   | Smc6                                                                                                                                                                                                                   | SMC6       | -0.80 | 5.69  | -2.50 | 3.08E-02 | 2.03E-01 | -4.07 |
| 1455480_PM_s_at | Ube2d3                                                                                                                                                                                                                 | UBE2D3     | -0.66 | 8.60  | -2.50 | 3.08E-02 | 2.03E-01 | -4.07 |
| 1419839_PM_x_at | Prpf19                                                                                                                                                                                                                 | PRPF19     | -0.63 | 10.55 | -2.50 | 3.08E-02 | 2.03E-01 | -4.07 |
| 1435388_PM_at   | Ndor1                                                                                                                                                                                                                  | NDOR1      | 0.36  | 2.86  | 2.50  | 3.08E-02 | 2.03E-01 | -4.07 |
| 1454544_PM_at   | 9530078B04Rik                                                                                                                                                                                                          | NA         | 0.40  | 2.30  | 2.50  | 3.08E-02 | 2.03E-01 | -4.07 |
| 1438652_PM_x_at | Pigq                                                                                                                                                                                                                   | PIGQ       | 0.70  | 9.20  | 2.50  | 3.08E-02 | 2.03E-01 | -4.07 |
| 1417795_PM_at   | Chl1                                                                                                                                                                                                                   | CHL1       | -0.60 | 3.63  | -2.50 | 3.08E-02 | 2.03E-01 | -4.08 |
| 1425578_PM_a_at | Gfra2                                                                                                                                                                                                                  | GFRA2      | 0.58  | 3.14  | 2.50  | 3.08E-02 | 2.03E-01 | -4.08 |
| 1424838_PM_at   | Ncm1                                                                                                                                                                                                                   | NCMAP      | 0.25  | 2.38  | 2.50  | 3.09E-02 | 2.03E-01 | -4.08 |
| 1439730_PM_at   | Gm15941                                                                                                                                                                                                                | NA         | 0.23  | 2.90  | 2.50  | 3.09E-02 | 2.04E-01 | -4.08 |
| 1457217_PM_at   | ---                                                                                                                                                                                                                    | NA         | 0.37  | 2.47  | 2.50  | 3.09E-02 | 2.04E-01 | -4.08 |
| 1451958_PM_at   | Igh-VJ558 /// Ighv1-50 ///<br>Ighv1-52 /// Ighv1-53 ///<br>Ighv1-55 /// Ighv1-59 ///<br>Ighv1-61 /// Ighv1-62 ///<br>Ighv1-62-3 /// Ighv1-63 ///<br>Ighv1-64 /// Ighv1-69 ///<br>Ighv1-72 /// Ighv1-73 ///<br>Ighv1-74 | NA         | 0.29  | 2.31  | 2.50  | 3.09E-02 | 2.04E-01 | -4.08 |
| 1421153_PM_at   | Lox4                                                                                                                                                                                                                   | LOXL4      | 0.32  | 2.92  | 2.50  | 3.09E-02 | 2.04E-01 | -4.08 |
| 1449556_PM_at   | C920025E04Rik /// H2-T23                                                                                                                                                                                               | NA         | -1.55 | 4.43  | -2.49 | 3.10E-02 | 2.04E-01 | -4.08 |
| 1456607_PM_at   | Vcpi1                                                                                                                                                                                                                  | VCPI1      | -0.97 | 4.23  | -2.49 | 3.10E-02 | 2.04E-01 | -4.08 |
| 1436299_PM_at   | Gls                                                                                                                                                                                                                    | GLS        | -0.66 | 3.94  | -2.49 | 3.10E-02 | 2.04E-01 | -4.08 |
| 1452302_PM_at   | Arhgef10                                                                                                                                                                                                               | ARHGEF10   | -0.38 | 2.95  | -2.49 | 3.10E-02 | 2.04E-01 | -4.08 |
| 1435653_PM_at   | Abhd2                                                                                                                                                                                                                  | ABHD2      | -0.38 | 6.76  | -2.49 | 3.10E-02 | 2.04E-01 | -4.08 |
| 1428538_PM_s_at | Rarres2                                                                                                                                                                                                                | RARRES2    | 0.36  | 3.40  | 2.49  | 3.10E-02 | 2.04E-01 | -4.08 |
| 1454415_PM_at   | Safb                                                                                                                                                                                                                   | SAFB       | 0.39  | 3.04  | 2.49  | 3.10E-02 | 2.04E-01 | -4.08 |
| 1457934_PM_at   | ---                                                                                                                                                                                                                    | NA         | 0.50  | 2.57  | 2.49  | 3.10E-02 | 2.04E-01 | -4.08 |
| 1448088_PM_at   | C78228                                                                                                                                                                                                                 | NA         | 0.32  | 3.55  | 2.49  | 3.11E-02 | 2.04E-01 | -4.08 |
| 1431396_PM_at   | Iqgap1                                                                                                                                                                                                                 | IQGAP1     | 0.32  | 2.68  | 2.49  | 3.11E-02 | 2.04E-01 | -4.08 |
| 1445695_PM_at   | ---                                                                                                                                                                                                                    | NA         | 0.64  | 2.92  | 2.49  | 3.11E-02 | 2.04E-01 | -4.08 |
| 1451858_PM_at   | Mrgpra2a /// Mrgpra2b                                                                                                                                                                                                  | NA         | 0.29  | 2.57  | 2.49  | 3.11E-02 | 2.04E-01 | -4.08 |
| 1458978_PM_at   | Pax5                                                                                                                                                                                                                   | PAX5       | 0.31  | 2.92  | 2.49  | 3.11E-02 | 2.04E-01 | -4.08 |

|                 |                   |            |       |      |       |          |          |       |
|-----------------|-------------------|------------|-------|------|-------|----------|----------|-------|
| 1438206_PM_a_at | Sys1              | NA         | -0.34 | 4.08 | -2.49 | 3.11E-02 | 2.04E-01 | -4.08 |
| 1443065_PM_at   | ---               | NA         | 0.26  | 2.42 | 2.49  | 3.11E-02 | 2.04E-01 | -4.08 |
| 1454324_PM_at   | ---               | NA         | 0.29  | 2.75 | 2.49  | 3.11E-02 | 2.04E-01 | -4.08 |
| 1424514_PM_at   | Rnf126            | RNF126     | 0.51  | 5.16 | 2.49  | 3.11E-02 | 2.04E-01 | -4.08 |
| 1440341_PM_at   | ---               | NA         | 0.54  | 2.65 | 2.49  | 3.11E-02 | 2.04E-01 | -4.08 |
| 1436987_PM_at   | Ism1              | ISM1       | -1.11 | 2.74 | -2.49 | 3.11E-02 | 2.04E-01 | -4.08 |
| 1438706_PM_at   | Brinp2            | BRINP2     | -0.53 | 3.93 | -2.49 | 3.11E-02 | 2.04E-01 | -4.08 |
| 1417727_PM_at   | Srsf9             | SRSF9      | -0.46 | 5.12 | -2.49 | 3.11E-02 | 2.05E-01 | -4.08 |
| 1430173_PM_x_at | Cyp4f16           | NA         | 0.24  | 2.29 | 2.49  | 3.12E-02 | 2.05E-01 | -4.09 |
| 1458216_PM_at   | ---               | NA         | 0.28  | 2.62 | 2.49  | 3.12E-02 | 2.05E-01 | -4.09 |
| 1459557_PM_at   | ---               | NA         | 0.34  | 2.40 | 2.49  | 3.12E-02 | 2.05E-01 | -4.09 |
| 1416352_PM_s_at | Tecr              | TECR       | -0.56 | 6.26 | -2.49 | 3.12E-02 | 2.05E-01 | -4.09 |
| 1434403_PM_at   | Spred2            | SPRED2     | -1.22 | 5.49 | -2.49 | 3.12E-02 | 2.05E-01 | -4.09 |
| 1435179_PM_at   | C130071C03Rik     | NA         | -0.76 | 3.02 | -2.49 | 3.12E-02 | 2.05E-01 | -4.09 |
| 1429031_PM_at   | Zfp626            | NA         | -0.39 | 2.46 | -2.49 | 3.13E-02 | 2.05E-01 | -4.09 |
| 1453058_PM_at   | Wdr5b             | WDR5B      | 0.24  | 2.49 | 2.49  | 3.12E-02 | 2.05E-01 | -4.09 |
| 1425447_PM_at   | Dkk4              | DKK4       | 0.39  | 2.58 | 2.49  | 3.12E-02 | 2.05E-01 | -4.09 |
| 1422464_PM_at   | Mrp3              | MRP3       | -0.86 | 5.82 | -2.49 | 3.13E-02 | 2.05E-01 | -4.09 |
| 1437874_PM_s_at | Hexb              | HEXB       | -1.23 | 7.27 | -2.49 | 3.13E-02 | 2.05E-01 | -4.09 |
| 1448743_PM_at   | Ssx2ip            | SSX2IP     | -0.79 | 5.75 | -2.49 | 3.13E-02 | 2.05E-01 | -4.09 |
| 1417463_PM_a_at | Lamtor1           | LAMTOR1    | 0.35  | 9.65 | 2.49  | 3.13E-02 | 2.05E-01 | -4.09 |
| 1457214_PM_at   | ---               | NA         | 0.78  | 3.07 | 2.49  | 3.13E-02 | 2.05E-01 | -4.09 |
| 1431056_PM_a_at | Lpl               | LPL        | -0.58 | 3.61 | -2.49 | 3.14E-02 | 2.06E-01 | -4.09 |
| 1450265_PM_at   | Smad9             | SMAD9      | 0.23  | 2.66 | 2.49  | 3.14E-02 | 2.06E-01 | -4.09 |
| 1424997_PM_at   | Sfswap            | SFSWAP     | 1.69  | 4.62 | 2.49  | 3.14E-02 | 2.06E-01 | -4.09 |
| 1434506_PM_at   | Arid2             | ARID2      | -0.32 | 2.59 | -2.49 | 3.14E-02 | 2.06E-01 | -4.09 |
| 1455360_PM_at   | Slc38a9           | SLC38A9    | -0.34 | 2.81 | -2.49 | 3.14E-02 | 2.06E-01 | -4.09 |
| 1453457_PM_at   | Sri               | SRI        | 0.41  | 2.76 | 2.49  | 3.14E-02 | 2.06E-01 | -4.09 |
| 1425539_PM_a_at | Rtn3              | RTN3       | -0.78 | 4.86 | -2.49 | 3.15E-02 | 2.06E-01 | -4.09 |
| 1446947_PM_at   | ---               | NA         | 2.01  | 5.36 | 2.49  | 3.15E-02 | 2.06E-01 | -4.09 |
| 1425206_PM_a_at | Ube3a             | UBE3A      | -1.13 | 4.33 | -2.49 | 3.15E-02 | 2.06E-01 | -4.10 |
| 1417663_PM_a_at | Ndr3              | NDRG3      | -0.96 | 6.26 | -2.48 | 3.15E-02 | 2.06E-01 | -4.10 |
| 1438782_PM_at   | Cntn4             | CNTN4      | -0.59 | 2.91 | -2.48 | 3.16E-02 | 2.06E-01 | -4.10 |
| 1436130_PM_s_at | Adam6a /// Adam6b | NA         | -0.38 | 2.41 | -2.48 | 3.15E-02 | 2.06E-01 | -4.10 |
| 1427305_PM_at   | Piga              | PIGA       | -0.32 | 2.75 | -2.48 | 3.15E-02 | 2.06E-01 | -4.10 |
| 1428428_PM_at   | Abhd11            | ABHD11     | -0.23 | 2.91 | -2.48 | 3.16E-02 | 2.06E-01 | -4.10 |
| 1415944_PM_at   | Sdc1              | SDC1       | 0.22  | 2.79 | 2.48  | 3.15E-02 | 2.06E-01 | -4.10 |
| 1459889_PM_at   | Ckca1             | CLCA1      | 0.22  | 2.57 | 2.48  | 3.15E-02 | 2.06E-01 | -4.10 |
| 1430885_PM_at   | Myadml2           | MYADML2    | 0.23  | 2.84 | 2.48  | 3.16E-02 | 2.06E-01 | -4.10 |
| 1460523_PM_at   | Gm9777            | NA         | 0.25  | 2.52 | 2.48  | 3.16E-02 | 2.06E-01 | -4.10 |
| 1427387_PM_a_at | Irgb4             | ITGB4      | 0.27  | 2.58 | 2.48  | 3.15E-02 | 2.06E-01 | -4.10 |
| 1423279_PM_at   | Slc34a1           | SLC34A1    | 0.27  | 2.67 | 2.48  | 3.15E-02 | 2.06E-01 | -4.10 |
| 1451773_PM_s_at | Polr3f            | POLR3F     | 0.27  | 2.36 | 2.48  | 3.16E-02 | 2.06E-01 | -4.10 |
| 1438275_PM_at   | C130046K22Rik     | NA         | 0.37  | 2.72 | 2.48  | 3.16E-02 | 2.06E-01 | -4.10 |
| 1434319_PM_at   | Mdh1              | MDH1       | 0.21  | 2.46 | 2.48  | 3.16E-02 | 2.06E-01 | -4.10 |
| 1427930_PM_at   | Pdxx              | PDXK       | 0.35  | 2.45 | 2.48  | 3.16E-02 | 2.06E-01 | -4.10 |
| 1425389_PM_a_at | Runx2             | RUNX2      | 0.40  | 2.23 | 2.48  | 3.16E-02 | 2.06E-01 | -4.10 |
| 1434587_PM_x_at | Ptdss2            | PTDSS2     | -0.33 | 3.04 | -2.48 | 3.16E-02 | 2.06E-01 | -4.10 |
| 1418829_PM_a_at | Eno2              | ENO2       | -1.16 | 8.67 | -2.48 | 3.16E-02 | 2.06E-01 | -4.10 |
| 1422776_PM_at   | Serpinb8          | SERPINB8   | 0.29  | 2.87 | 2.48  | 3.16E-02 | 2.06E-01 | -4.10 |
| 1451894_PM_a_at | Scn8a             | SCN8A      | -0.84 | 5.89 | -2.48 | 3.16E-02 | 2.07E-01 | -4.10 |
| 1453837_PM_at   | Fam65b            | RIPOR2     | -0.55 | 3.19 | -2.48 | 3.16E-02 | 2.07E-01 | -4.10 |
| 1459597_PM_at   | Mtpn              | NA         | -0.67 | 2.88 | -2.48 | 3.17E-02 | 2.07E-01 | -4.10 |
| 1438557_PM_x_at | Dnpep             | DNPEP      | 1.02  | 7.61 | 2.48  | 3.17E-02 | 2.07E-01 | -4.10 |
| 1428919_PM_at   | Fgfr1op           | FGFR1OP    | 0.30  | 5.40 | 2.48  | 3.17E-02 | 2.07E-01 | -4.10 |
| 1454842_PM_a_at | B3galnt2          | B3GALNT2   | -0.47 | 2.37 | -2.48 | 3.17E-02 | 2.07E-01 | -4.10 |
| 1418607_PM_at   | Zkscan14          | ZNF394     | 0.89  | 4.08 | 2.48  | 3.17E-02 | 2.07E-01 | -4.10 |
| 1451089_PM_a_at | Arcn1             | ARCN1      | -0.53 | 3.33 | -2.48 | 3.18E-02 | 2.07E-01 | -4.10 |
| 1424573_PM_at   | Tmed5             | TMED5      | -0.29 | 2.57 | -2.48 | 3.18E-02 | 2.07E-01 | -4.10 |
| 1430005_PM_a_at | Batf2             | BATF2      | 0.30  | 3.37 | 2.48  | 3.18E-02 | 2.07E-01 | -4.10 |
| 1420882_PM_a_at | Acd               | ACD        | 0.39  | 3.24 | 2.48  | 3.18E-02 | 2.07E-01 | -4.10 |
| 1460050_PM_x_at | Klk1              | NA         | 0.56  | 4.49 | 2.48  | 3.18E-02 | 2.07E-01 | -4.10 |
| 1454677_PM_at   | Timp2             | TIMP2      | -0.87 | 5.40 | -2.48 | 3.18E-02 | 2.07E-01 | -4.10 |
| 1443949_PM_at   | ---               | NA         | 0.90  | 3.84 | 2.48  | 3.18E-02 | 2.07E-01 | -4.11 |
| 1430835_PM_at   | Ccdc125           | CCDC125    | 0.37  | 2.46 | 2.48  | 3.18E-02 | 2.07E-01 | -4.11 |
| 1452182_PM_at   | Galnt2            | GALNT2     | -0.40 | 2.57 | -2.48 | 3.18E-02 | 2.07E-01 | -4.11 |
| 1419543_PM_a_at | Tra2b             | TRA2B      | -0.58 | 4.71 | -2.48 | 3.19E-02 | 2.07E-01 | -4.11 |
| 1454795_PM_at   | Cobl1             | COBL1      | -0.56 | 3.06 | -2.48 | 3.19E-02 | 2.07E-01 | -4.11 |
| 1437055_PM_x_at | Mfsd1             | MFSD1      | -0.35 | 2.46 | -2.48 | 3.19E-02 | 2.07E-01 | -4.11 |
| 1421511_PM_at   | Irgb3             | ACO68234.1 | 0.21  | 2.80 | 2.48  | 3.19E-02 | 2.07E-01 | -4.11 |
| 1444731_PM_at   | Pde4b             | PDE4B      | 0.24  | 2.27 | 2.48  | 3.19E-02 | 2.07E-01 | -4.11 |
| 1445763_PM_at   | 1700013F07Rik     | C1orf194   | 0.27  | 2.85 | 2.48  | 3.19E-02 | 2.07E-01 | -4.11 |
| 1434137_PM_x_at | Zg16              | ZG16       | 0.28  | 2.67 | 2.48  | 3.19E-02 | 2.07E-01 | -4.11 |
| 1429964_PM_at   | ---               | NA         | 0.33  | 2.18 | 2.48  | 3.19E-02 | 2.07E-01 | -4.11 |
| 1456878_PM_at   | Lrrc75b           | LRRC75B    | 0.36  | 2.53 | 2.48  | 3.19E-02 | 2.07E-01 | -4.11 |



|                 |                       |           |       |      |       |          |          |       |
|-----------------|-----------------------|-----------|-------|------|-------|----------|----------|-------|
| 1451913_PM_a_at | Hyou1                 | HYOU1     | 0.42  | 2.51 | 2.48  | 3.19E-02 | 2.07E-01 | -4.11 |
| 1450723_PM_at   | Isl1                  | ISL1      | 0.37  | 2.86 | 2.48  | 3.19E-02 | 2.07E-01 | -4.11 |
| 1417049_PM_at   | Rhd                   | RHD       | 0.27  | 2.63 | 2.48  | 3.19E-02 | 2.08E-01 | -4.11 |
| 1456944_PM_at   | Kcnc1                 | KCNC1     | 0.65  | 3.64 | 2.48  | 3.19E-02 | 2.08E-01 | -4.11 |
| 1419967_PM_at   | Seh1l                 | NA        | -0.44 | 5.49 | -2.48 | 3.19E-02 | 2.08E-01 | -4.11 |
| 1430689_PM_at   | Syncrip               | SYNCRIP   | -0.41 | 2.46 | -2.48 | 3.19E-02 | 2.08E-01 | -4.11 |
| 1436018_PM_at   | Mex3a                 | MEX3A     | 0.44  | 2.87 | 2.48  | 3.19E-02 | 2.08E-01 | -4.11 |
| 1435299_PM_at   | Cdk7                  | CDK7      | -0.46 | 4.18 | -2.48 | 3.20E-02 | 2.08E-01 | -4.11 |
| 1442344_PM_at   | ---                   | NA        | -1.00 | 4.22 | -2.48 | 3.20E-02 | 2.08E-01 | -4.11 |
| 1448178_PM_a_at | Cct3                  | CCT3      | -0.98 | 8.22 | -2.48 | 3.20E-02 | 2.08E-01 | -4.11 |
| 1424802_PM_a_at | Luc7l3                | LUC7L3    | -0.96 | 7.34 | -2.48 | 3.20E-02 | 2.08E-01 | -4.11 |
| 1449686_PM_s_at | Scp2                  | SCP2      | -0.40 | 4.78 | -2.48 | 3.20E-02 | 2.08E-01 | -4.11 |
| 1447415_PM_at   | ---                   | NA        | 0.80  | 3.48 | 2.48  | 3.20E-02 | 2.08E-01 | -4.11 |
| 1453737_PM_at   | Wipf2                 | WIPF2     | -0.76 | 3.85 | -2.48 | 3.20E-02 | 2.08E-01 | -4.11 |
| 1451211_PM_a_at | Eif2d                 | EIF2D     | 0.24  | 2.67 | 2.48  | 3.20E-02 | 2.08E-01 | -4.11 |
| 1453852_PM_at   | ---                   | NA        | -0.54 | 2.88 | -2.48 | 3.20E-02 | 2.08E-01 | -4.11 |
| 1419836_PM_at   | ---                   | NA        | 0.22  | 2.43 | 2.48  | 3.20E-02 | 2.08E-01 | -4.11 |
| 1417536_PM_at   | Zmat2                 | ZMAT2     | 0.47  | 6.43 | 2.48  | 3.20E-02 | 2.08E-01 | -4.11 |
| 1424534_PM_at   | Mmd2                  | MMD2      | -0.77 | 4.12 | -2.47 | 3.21E-02 | 2.08E-01 | -4.11 |
| 1421092_PM_at   | Serpina12             | SERPINA12 | 0.21  | 2.29 | 2.47  | 3.21E-02 | 2.08E-01 | -4.11 |
| 1458496_PM_at   | Cyb56l                | NA        | 0.58  | 2.70 | 2.47  | 3.21E-02 | 2.08E-01 | -4.11 |
| 1436292_PM_a_at | Oaz1                  | OAZ1      | -0.56 | 8.22 | -2.47 | 3.22E-02 | 2.09E-01 | -4.12 |
| 1418916_PM_a_at | Spp2                  | SPP2      | 0.30  | 2.54 | 2.47  | 3.22E-02 | 2.09E-01 | -4.12 |
| 1426903_PM_at   | Fndc3a                | FNDC3A    | -1.14 | 5.13 | -2.47 | 3.22E-02 | 2.09E-01 | -4.12 |
| 1440244_PM_at   | Erg                   | ERG       | -0.63 | 3.32 | -2.47 | 3.22E-02 | 2.09E-01 | -4.12 |
| 1423960_PM_at   | Lpcat3                | LPCAT3    | -0.58 | 2.73 | -2.47 | 3.22E-02 | 2.09E-01 | -4.12 |
| 1460074_PM_x_at | Epdr1                 | EPDR1     | -0.51 | 3.57 | -2.47 | 3.22E-02 | 2.09E-01 | -4.12 |
| 1442955_PM_at   | ---                   | NA        | 0.21  | 2.32 | 2.47  | 3.22E-02 | 2.09E-01 | -4.12 |
| 1453919_PM_at   | Z610028H24Rik         | C21orf58  | 0.23  | 2.46 | 2.47  | 3.22E-02 | 2.09E-01 | -4.12 |
| 1442042_PM_at   | Gm20324               | NA        | 0.46  | 2.68 | 2.47  | 3.22E-02 | 2.09E-01 | -4.12 |
| 1449751_PM_at   | Slc6a6                | NA        | 0.34  | 2.66 | 2.47  | 3.22E-02 | 2.09E-01 | -4.12 |
| 1451461_PM_a_at | Aldoc                 | ALDOC     | -1.07 | 6.57 | -2.47 | 3.22E-02 | 2.09E-01 | -4.12 |
| 1416415_PM_a_at | Gm8203 /// H2afz      | H2AFZ     | -0.91 | 7.16 | -2.47 | 3.22E-02 | 2.09E-01 | -4.12 |
| 1430889_PM_a_at | Tpmt                  | TPMT      | 0.27  | 2.31 | 2.47  | 3.23E-02 | 2.09E-01 | -4.12 |
| 1432024_PM_at   | Ttc28                 | TTC28     | -0.35 | 2.95 | -2.47 | 3.23E-02 | 2.09E-01 | -4.12 |
| 1417427_PM_at   | Rnaseh2c              | RNASEH2C  | 0.30  | 2.71 | 2.47  | 3.23E-02 | 2.09E-01 | -4.12 |
| 1425967_PM_a_at | Mcpt4                 | NA        | 0.18  | 2.28 | 2.47  | 3.23E-02 | 2.09E-01 | -4.12 |
| 1458017_PM_at   | ---                   | NA        | 0.24  | 2.27 | 2.47  | 3.23E-02 | 2.09E-01 | -4.12 |
| 1440801_PM_s_at | Adrbk2                | GRK3      | 1.06  | 3.99 | 2.47  | 3.23E-02 | 2.09E-01 | -4.12 |
| 1416141_PM_a_at | LOC105244208 /// Rps6 | NA        | -0.55 | 9.16 | -2.47 | 3.23E-02 | 2.09E-01 | -4.12 |
| 1450784_PM_at   | Reck                  | RECK      | -0.66 | 3.02 | -2.47 | 3.23E-02 | 2.09E-01 | -4.12 |
| 1418667_PM_at   | Trappc13              | TRAPPC13  | -0.54 | 2.71 | -2.47 | 3.23E-02 | 2.09E-01 | -4.12 |
| 1420730_PM_a_at | Tcp11                 | TCP11     | 0.21  | 2.59 | 2.47  | 3.23E-02 | 2.09E-01 | -4.12 |
| 1457375_PM_at   | Z210016F16Rik         | NA        | 0.95  | 3.60 | 2.47  | 3.23E-02 | 2.09E-01 | -4.12 |
| 1458740_PM_at   | ---                   | NA        | 0.21  | 2.10 | 2.47  | 3.24E-02 | 2.09E-01 | -4.12 |
| 1424501_PM_at   | Utp6                  | UTP6      | -0.59 | 3.19 | -2.47 | 3.24E-02 | 2.09E-01 | -4.12 |
| 1457737_PM_at   | Gm4792                | NA        | 0.29  | 2.45 | 2.47  | 3.24E-02 | 2.09E-01 | -4.12 |
| 1433041_PM_at   | Rabepk                | NA        | 0.30  | 4.47 | 2.47  | 3.24E-02 | 2.09E-01 | -4.12 |
| 1430354_PM_x_at | Scyl1                 | NA        | 0.22  | 2.91 | 2.47  | 3.24E-02 | 2.09E-01 | -4.12 |
| 1440756_PM_at   | ---                   | NA        | -0.61 | 3.44 | -2.47 | 3.24E-02 | 2.09E-01 | -4.12 |
| 1460512_PM_a_at | Lrriq4                | LRRIQ4    | -0.39 | 2.40 | -2.47 | 3.24E-02 | 2.09E-01 | -4.12 |
| 1427111_PM_s_at | Gm38431 /// Raver1    | RAVER1    | 0.28  | 3.15 | 2.47  | 3.24E-02 | 2.09E-01 | -4.12 |
| 1458025_PM_at   | Ttc7                  | NA        | 0.19  | 2.20 | 2.47  | 3.24E-02 | 2.09E-01 | -4.12 |
| 1424206_PM_at   | Smarca5               | SMARCA5   | -0.86 | 6.20 | -2.47 | 3.24E-02 | 2.09E-01 | -4.12 |
| 1433087_PM_at   | ---                   | NA        | 0.43  | 2.61 | 2.47  | 3.24E-02 | 2.09E-01 | -4.12 |
| 1442513_PM_at   | Fam208b               | NA        | -0.24 | 2.25 | -2.47 | 3.24E-02 | 2.09E-01 | -4.12 |
| 1452098_PM_at   | Chtf18                | CHTF18    | 0.19  | 2.65 | 2.47  | 3.24E-02 | 2.09E-01 | -4.12 |
| 1442111_PM_at   | ---                   | NA        | 0.25  | 2.65 | 2.47  | 3.24E-02 | 2.09E-01 | -4.12 |
| 1451967_PM_x_at | Kpnb1                 | KPNB1     | -1.14 | 7.67 | -2.47 | 3.25E-02 | 2.09E-01 | -4.13 |
| 1438005_PM_at   | Slc25a40              | SLC25A40  | -0.58 | 3.20 | -2.47 | 3.25E-02 | 2.09E-01 | -4.13 |
| 1420135_PM_at   | ---                   | NA        | -0.48 | 2.74 | -2.47 | 3.25E-02 | 2.09E-01 | -4.12 |
| 1439364_PM_a_at | Mmp2                  | MMP2      | 0.28  | 2.61 | 2.47  | 3.25E-02 | 2.09E-01 | -4.13 |
| 1422820_PM_at   | Lipe                  | LIPE      | 0.28  | 2.45 | 2.47  | 3.25E-02 | 2.09E-01 | -4.13 |
| 1433147_PM_at   | Cald1                 | CALD1     | 0.39  | 3.14 | 2.47  | 3.25E-02 | 2.09E-01 | -4.12 |
| 1424888_PM_at   | March2                | MARCH2    | -0.37 | 5.54 | -2.47 | 3.25E-02 | 2.09E-01 | -4.13 |
| 1435239_PM_at   | Gria1                 | GRIA1     | -1.18 | 6.39 | -2.47 | 3.25E-02 | 2.09E-01 | -4.13 |
| 1420611_PM_at   | Prkacb                | PRKACB    | -0.83 | 6.61 | -2.47 | 3.25E-02 | 2.09E-01 | -4.13 |
| 1456395_PM_at   | Ppargc1a              | PPARGC1A  | -0.33 | 2.77 | -2.47 | 3.25E-02 | 2.10E-01 | -4.13 |
| 1449685_PM_s_at | Oxsm                  | OXSM      | 0.33  | 2.48 | 2.47  | 3.25E-02 | 2.10E-01 | -4.13 |
| 1447293_PM_x_at | Actr1b                | ACTR1B    | 0.25  | 2.57 | 2.47  | 3.25E-02 | 2.10E-01 | -4.13 |
| 1439273_PM_at   | Ripk1                 | RIPK1     | 0.33  | 2.86 | 2.47  | 3.26E-02 | 2.10E-01 | -4.13 |
| 1441516_PM_a_at | C130050018Rik         | NA        | 0.39  | 2.63 | 2.47  | 3.26E-02 | 2.10E-01 | -4.13 |
| 1447204_PM_at   | ---                   | NA        | 0.47  | 3.56 | 2.47  | 3.26E-02 | 2.10E-01 | -4.13 |
| 1458960_PM_at   | ---                   | NA        | 1.19  | 3.10 | 2.47  | 3.26E-02 | 2.10E-01 | -4.13 |
| 1429832_PM_at   | Ppih                  | NA        | -0.52 | 3.08 | -2.47 | 3.26E-02 | 2.10E-01 | -4.13 |

|                 |               |          |       |      |       |          |          |       |
|-----------------|---------------|----------|-------|------|-------|----------|----------|-------|
| 1458706_PM_at   | ---           | NA       | 0.25  | 2.46 | 2.47  | 3.26E-02 | 2.10E-01 | -4.13 |
| 1424503_PM_at   | Rab22a        | RAB22A   | -0.41 | 4.02 | -2.47 | 3.26E-02 | 2.10E-01 | -4.13 |
| 1444269_PM_at   | ---           | NA       | 0.31  | 2.42 | 2.47  | 3.26E-02 | 2.10E-01 | -4.13 |
| 1447013_PM_at   | ---           | NA       | 0.39  | 2.70 | 2.46  | 3.26E-02 | 2.10E-01 | -4.13 |
| 1460528_PM_at   | 4930413G21Rik | NA       | 0.21  | 2.31 | 2.46  | 3.27E-02 | 2.10E-01 | -4.13 |
| 1427438_PM_at   | Pip4k2b       | NA       | 0.35  | 2.46 | 2.46  | 3.27E-02 | 2.10E-01 | -4.13 |
| 1458443_PM_at   | Crtc1         | CRTC1    | 0.71  | 2.80 | 2.46  | 3.27E-02 | 2.10E-01 | -4.13 |
| 1448636_PM_at   | Myoz1         | MYOZ1    | 0.30  | 2.24 | 2.46  | 3.27E-02 | 2.10E-01 | -4.13 |
| 1430650_PM_at   | Zfp24         | ZNF24    | 0.21  | 2.40 | 2.46  | 3.27E-02 | 2.10E-01 | -4.13 |
| 1455995_PM_at   | Arfgef3       | ARFGEF3  | -1.58 | 6.45 | -2.46 | 3.27E-02 | 2.10E-01 | -4.13 |
| 1433663_PM_s_at | Ncbp1         | NCBP1    | -0.52 | 4.04 | -2.46 | 3.27E-02 | 2.10E-01 | -4.13 |
| 1455816_PM_a_at | Kctd3         | KCTD3    | -1.38 | 6.04 | -2.46 | 3.27E-02 | 2.10E-01 | -4.13 |
| 1423909_PM_at   | Tmem176a      | TMEM176A | -0.26 | 2.05 | -2.46 | 3.28E-02 | 2.10E-01 | -4.13 |
| 1424051_PM_at   | Col4a2        | COL4A2   | 0.43  | 3.48 | 2.46  | 3.28E-02 | 2.10E-01 | -4.13 |
| 1441768_PM_at   | ---           | NA       | 0.58  | 3.77 | 2.46  | 3.28E-02 | 2.10E-01 | -4.13 |
| 1435534_PM_a_at | Tomm20        | TOMM20   | -0.76 | 6.93 | -2.46 | 3.28E-02 | 2.11E-01 | -4.13 |
| 1457675_PM_at   | 2510002D24Rik | C22orf39 | 0.46  | 2.64 | 2.46  | 3.28E-02 | 2.11E-01 | -4.13 |
| 1427098_PM_at   | Wwp1          | WWP1     | -0.66 | 4.37 | -2.46 | 3.28E-02 | 2.11E-01 | -4.13 |
| 1450012_PM_x_at | Ywhag         | YWHAG    | -0.61 | 9.34 | -2.46 | 3.28E-02 | 2.11E-01 | -4.14 |
| 1423620_PM_at   | Cenpq         | CENPQ    | 0.33  | 2.36 | 2.46  | 3.28E-02 | 2.11E-01 | -4.14 |
| 1449698_PM_at   | C330027C09Rik | KIAA1524 | 0.29  | 2.56 | 2.46  | 3.28E-02 | 2.11E-01 | -4.14 |
| 1430527_PM_a_at | Rnf167        | RNF167   | -0.64 | 2.87 | -2.46 | 3.28E-02 | 2.11E-01 | -4.14 |
| 1432147_PM_at   | 4930447F24Rik | NA       | 0.25  | 2.16 | 2.46  | 3.28E-02 | 2.11E-01 | -4.14 |
| 1454489_PM_at   | ---           | NA       | 0.38  | 2.74 | 2.46  | 3.29E-02 | 2.11E-01 | -4.14 |
| 1426393_PM_a_at | Sdf4          | SDF4     | -0.56 | 5.67 | -2.46 | 3.29E-02 | 2.11E-01 | -4.14 |
| 1449460_PM_at   | Asb13         | ASB13    | 0.34  | 2.71 | 2.46  | 3.29E-02 | 2.11E-01 | -4.14 |
| 1428950_PM_s_at | Nol8          | NOL8     | -0.76 | 3.73 | -2.46 | 3.29E-02 | 2.11E-01 | -4.14 |
| 1451000_PM_at   | Tmem126a      | TMEM126A | -0.73 | 3.09 | -2.46 | 3.29E-02 | 2.11E-01 | -4.14 |
| 1419493_PM_a_at | Tpd52         | TPD52    | -0.46 | 5.27 | -2.46 | 3.29E-02 | 2.11E-01 | -4.14 |
| 1458226_PM_at   | Flnb          | FLNB     | 0.30  | 4.78 | 2.46  | 3.29E-02 | 2.11E-01 | -4.14 |
| 1451966_PM_at   | Mrap          | NA       | 0.20  | 2.60 | 2.46  | 3.29E-02 | 2.11E-01 | -4.14 |
| 1439470_PM_at   | ---           | NA       | 0.20  | 2.21 | 2.46  | 3.29E-02 | 2.11E-01 | -4.14 |
| 1419718_PM_at   | 4921530L21Rik | NA       | 0.25  | 2.52 | 2.46  | 3.30E-02 | 2.11E-01 | -4.14 |
| 1450490_PM_at   | Kcna7         | KCNA7    | 0.36  | 2.73 | 2.46  | 3.30E-02 | 2.11E-01 | -4.14 |
| 1426788_PM_a_at | Ssrp1         | SSRP1    | -0.37 | 3.84 | -2.46 | 3.30E-02 | 2.11E-01 | -4.14 |
| 1449207_PM_a_at | Kif20a        | KIF20A   | 0.35  | 2.73 | 2.46  | 3.30E-02 | 2.11E-01 | -4.14 |
| 1421243_PM_at   | Rnf144a       | RNF144A  | 0.44  | 2.85 | 2.46  | 3.30E-02 | 2.11E-01 | -4.14 |
| 1432987_PM_at   | ---           | NA       | 0.28  | 3.20 | 2.46  | 3.30E-02 | 2.11E-01 | -4.14 |
| 1428289_PM_at   | Klf9          | KL F9    | -1.30 | 7.06 | -2.46 | 3.30E-02 | 2.11E-01 | -4.14 |
| 1453195_PM_at   | Sdccag3       | SDCCAG3  | 0.24  | 2.80 | 2.46  | 3.30E-02 | 2.11E-01 | -4.14 |
| 1422766_PM_at   | Stau1         | STAU1    | 0.48  | 3.11 | 2.46  | 3.30E-02 | 2.11E-01 | -4.14 |
| 1417699_PM_at   | Gtf2f1        | GTF2F1   | 1.42  | 5.15 | 2.46  | 3.30E-02 | 2.11E-01 | -4.14 |
| 1456064_PM_at   | Al504432      | NA       | 0.32  | 2.95 | 2.46  | 3.31E-02 | 2.11E-01 | -4.14 |
| 1438181_PM_x_at | Tm2d2         | TM2D2    | -0.44 | 5.03 | -2.46 | 3.31E-02 | 2.12E-01 | -4.14 |
| 1423004_PM_at   | Vipr1         | VIPR1    | 0.29  | 2.58 | 2.46  | 3.31E-02 | 2.12E-01 | -4.14 |
| 1440301_PM_at   | ---           | NA       | 0.33  | 3.58 | 2.46  | 3.31E-02 | 2.12E-01 | -4.14 |
| 1453889_PM_at   | 4930461C15Rik | NA       | 0.39  | 3.14 | 2.46  | 3.31E-02 | 2.12E-01 | -4.14 |
| 1424747_PM_at   | Kif1c         | KIF1C    | 0.43  | 3.07 | 2.46  | 3.31E-02 | 2.12E-01 | -4.14 |
| 1456007_PM_at   | Arf3          | ARF3     | 0.54  | 2.63 | 2.46  | 3.31E-02 | 2.12E-01 | -4.14 |
| 1423537_PM_at   | Gap43         | GAP43    | 0.89  | 4.30 | 2.46  | 3.31E-02 | 2.12E-01 | -4.14 |
| 1452852_PM_at   | Twistnb       | TWISTNB  | -0.50 | 4.06 | -2.46 | 3.31E-02 | 2.12E-01 | -4.14 |
| 1453465_PM_x_at | Gm14057       | NA       | 0.23  | 2.40 | 2.46  | 3.31E-02 | 2.12E-01 | -4.14 |
| 1431196_PM_at   | Atp2c1        | ATP2C1   | 0.79  | 3.18 | 2.46  | 3.31E-02 | 2.12E-01 | -4.14 |
| 1447486_PM_at   | ---           | NA       | 0.27  | 2.76 | 2.46  | 3.31E-02 | 2.12E-01 | -4.14 |
| 1440285_PM_at   | Ppp1r9a       | PPP1R9A  | -0.72 | 4.36 | -2.46 | 3.32E-02 | 2.12E-01 | -4.15 |
| 1459605_PM_at   | Apba1         | APBA1    | 0.23  | 2.84 | 2.46  | 3.31E-02 | 2.12E-01 | -4.14 |
| 1453763_PM_at   | Txndc11       | TXNDC11  | 0.27  | 2.30 | 2.46  | 3.32E-02 | 2.12E-01 | -4.14 |
| 1416047_PM_at   | Fuca2         | FUCA2    | 0.34  | 2.89 | 2.46  | 3.32E-02 | 2.12E-01 | -4.15 |
| 1457567_PM_at   | Paip2b        | PAIP2B   | 0.39  | 2.62 | 2.46  | 3.31E-02 | 2.12E-01 | -4.14 |
| 1436214_PM_at   | Kansl1        | KANSL1L  | -0.52 | 3.06 | -2.46 | 3.32E-02 | 2.12E-01 | -4.15 |
| 1427571_PM_at   | Shh           | SHH      | 0.23  | 2.68 | 2.46  | 3.32E-02 | 2.12E-01 | -4.15 |
| 1439479_PM_at   | Lct           | LCT      | -0.28 | 2.38 | -2.45 | 3.32E-02 | 2.12E-01 | -4.15 |
| 1416488_PM_at   | Ccng2         | CCNG2    | -0.74 | 4.48 | -2.45 | 3.32E-02 | 2.12E-01 | -4.15 |
| 1448541_PM_at   | Klc1          | KL C1    | 0.95  | 3.88 | 2.45  | 3.32E-02 | 2.12E-01 | -4.15 |
| 1433428_PM_x_at | Tgm2          | TGM2     | -1.29 | 4.48 | -2.45 | 3.32E-02 | 2.12E-01 | -4.15 |
| 1417188_PM_s_at | Ube2k         | UBE2K    | -0.45 | 2.99 | -2.45 | 3.32E-02 | 2.12E-01 | -4.15 |
| 1447181_PM_s_at | Slc7a7        | SL C7A7  | 0.19  | 2.27 | 2.45  | 3.32E-02 | 2.12E-01 | -4.15 |
| 1440566_PM_at   | ---           | NA       | 0.22  | 2.61 | 2.45  | 3.32E-02 | 2.12E-01 | -4.15 |
| 1442165_PM_at   | Arm9          | ARM9     | 0.37  | 2.95 | 2.45  | 3.32E-02 | 2.12E-01 | -4.15 |
| 1455258_PM_at   | Kcnc2         | KCNC2    | -1.47 | 7.21 | -2.45 | 3.32E-02 | 2.12E-01 | -4.15 |
| 1457455_PM_at   | Zfp280d       | ZNF280D  | -0.43 | 3.08 | -2.45 | 3.32E-02 | 2.12E-01 | -4.15 |
| 1427824_PM_at   | ---           | NA       | 0.29  | 3.22 | 2.45  | 3.33E-02 | 2.12E-01 | -4.15 |
| 1421598_PM_at   | ---           | NA       | 0.32  | 2.87 | 2.45  | 3.33E-02 | 2.12E-01 | -4.15 |
| 1434741_PM_at   | Rreb1         | RREB1    | 0.29  | 2.34 | 2.45  | 3.33E-02 | 2.12E-01 | -4.15 |
| 1449073_PM_at   | Flnc          | FLNC     | 0.25  | 2.56 | 2.45  | 3.33E-02 | 2.12E-01 | -4.15 |

|                 |               |            |       |       |       |          |          |       |
|-----------------|---------------|------------|-------|-------|-------|----------|----------|-------|
| 1435636_PM_at   | Ago2          | AGO2       | -1.96 | 6.22  | -2.45 | 3.33E-02 | 2.12E-01 | -4.15 |
| 1451911_PM_a_at | Ace           | AC113554.2 | 0.38  | 2.72  | 2.45  | 3.33E-02 | 2.12E-01 | -4.15 |
| 1422513_PM_at   | Ccnf          | CCNF       | 0.23  | 2.36  | 2.45  | 3.34E-02 | 2.12E-01 | -4.15 |
| 1456187_PM_at   | Slc7a14       | SLC7A14    | -1.55 | 6.65  | -2.45 | 3.34E-02 | 2.13E-01 | -4.15 |
| 1452193_PM_a_at | Wasl          | WASL       | -0.86 | 8.74  | -2.45 | 3.34E-02 | 2.13E-01 | -4.15 |
| 1416641_PM_at   | Lig1          | LIG1       | 0.39  | 2.59  | 2.45  | 3.34E-02 | 2.13E-01 | -4.15 |
| 1420237_PM_at   | ---           | NA         | 0.42  | 3.47  | 2.45  | 3.34E-02 | 2.13E-01 | -4.15 |
| 1425056_PM_s_at | Ppp6r2        | PPP6R2     | 0.64  | 3.95  | 2.45  | 3.34E-02 | 2.13E-01 | -4.15 |
| 1420748_PM_a_at | Adat1         | ADAT1      | 0.17  | 2.15  | 2.45  | 3.35E-02 | 2.13E-01 | -4.15 |
| 1439726_PM_at   | ---           | NA         | 0.39  | 2.62  | 2.45  | 3.34E-02 | 2.13E-01 | -4.15 |
| 1432159_PM_a_at | Tex13         | TEX13B     | 0.40  | 2.50  | 2.45  | 3.35E-02 | 2.13E-01 | -4.15 |
| 1439275_PM_s_at | ---           | NA         | 0.63  | 2.67  | 2.45  | 3.34E-02 | 2.13E-01 | -4.15 |
| 1432675_PM_at   | Mdn1          | NA         | 0.22  | 2.34  | 2.45  | 3.35E-02 | 2.13E-01 | -4.15 |
| 1436144_PM_at   | Rpl31         | NA         | -0.63 | 2.54  | -2.45 | 3.36E-02 | 2.13E-01 | -4.16 |
| 1451410_PM_a_at | Crip3         | CRIP3      | 0.25  | 2.95  | 2.45  | 3.35E-02 | 2.13E-01 | -4.16 |
| 1424945_PM_at   | Chrdl1        | CHRD1      | 0.30  | 2.36  | 2.45  | 3.35E-02 | 2.13E-01 | -4.16 |
| 1438346_PM_at   | 4930525G2ORik | NA         | 0.36  | 2.61  | 2.45  | 3.35E-02 | 2.13E-01 | -4.16 |
| 1416820_PM_at   | Cdc37         | CD37       | 0.45  | 2.90  | 2.45  | 3.36E-02 | 2.13E-01 | -4.16 |
| 1447453_PM_x_at | ---           | NA         | 0.65  | 2.90  | 2.45  | 3.36E-02 | 2.13E-01 | -4.16 |
| 1456936_PM_at   | Cabp4         | CABP4      | 0.21  | 2.16  | 2.45  | 3.36E-02 | 2.13E-01 | -4.16 |
| 1460032_PM_at   | ---           | NA         | 0.82  | 2.87  | 2.45  | 3.36E-02 | 2.13E-01 | -4.16 |
| 1434012_PM_at   | Ints5         | INTS5      | 0.32  | 3.12  | 2.45  | 3.36E-02 | 2.13E-01 | -4.16 |
| 1440579_PM_at   | ---           | NA         | 0.24  | 2.32  | 2.45  | 3.36E-02 | 2.13E-01 | -4.16 |
| 1422864_PM_at   | Runx1         | RUNX1      | 0.46  | 2.74  | 2.45  | 3.36E-02 | 2.13E-01 | -4.16 |
| 1435766_PM_at   | Pphl1         | PPHLN1     | 0.68  | 5.54  | 2.45  | 3.36E-02 | 2.13E-01 | -4.16 |
| 1423671_PM_at   | Dner          | DNER       | -0.84 | 8.03  | -2.45 | 3.37E-02 | 2.13E-01 | -4.16 |
| 1423416_PM_at   | Smarcc1       | SMARCC1    | -0.73 | 4.38  | -2.45 | 3.37E-02 | 2.13E-01 | -4.16 |
| 1455032_PM_at   | Ccny1         | CCNY1      | -0.69 | 3.62  | -2.45 | 3.37E-02 | 2.13E-01 | -4.16 |
| 1417389_PM_at   | Gpc1          | GPC1       | -0.55 | 4.11  | -2.45 | 3.37E-02 | 2.13E-01 | -4.16 |
| 1428596_PM_at   | Tbc1d9b       | TBC1D9B    | -0.53 | 3.59  | -2.45 | 3.36E-02 | 2.13E-01 | -4.16 |
| 1424003_PM_at   | Pomk          | POMK       | -0.48 | 2.48  | -2.45 | 3.37E-02 | 2.13E-01 | -4.16 |
| 1426067_PM_x_at | Cct3          | NA         | -0.27 | 3.58  | -2.45 | 3.37E-02 | 2.13E-01 | -4.16 |
| 1422444_PM_at   | Itga6         | ITGA6      | 0.22  | 2.27  | 2.45  | 3.37E-02 | 2.13E-01 | -4.16 |
| 1460213_PM_at   | Golga4        | GOLGA4     | 0.25  | 2.74  | 2.45  | 3.37E-02 | 2.13E-01 | -4.16 |
| 1450587_PM_at   | H2-M10.1      | HLA-A      | 0.27  | 2.70  | 2.45  | 3.37E-02 | 2.13E-01 | -4.16 |
| 1430572_PM_at   | Psmg3         | PSMG3      | 0.28  | 2.97  | 2.45  | 3.37E-02 | 2.13E-01 | -4.16 |
| 1416075_PM_at   | Sav1          | SAV1       | 0.28  | 2.64  | 2.45  | 3.36E-02 | 2.13E-01 | -4.16 |
| 1456134_PM_x_at | Yif1a         | YIF1A      | 0.32  | 2.49  | 2.45  | 3.37E-02 | 2.13E-01 | -4.16 |
| 1459685_PM_at   | C77683        | NA         | 0.35  | 2.66  | 2.45  | 3.37E-02 | 2.13E-01 | -4.16 |
| 1430367_PM_at   | Stambpl1      | STAMBPL1   | 0.38  | 2.37  | 2.45  | 3.37E-02 | 2.13E-01 | -4.16 |
| 1458647_PM_at   | ---           | NA         | 0.42  | 2.53  | 2.45  | 3.37E-02 | 2.13E-01 | -4.16 |
| 1428615_PM_at   | Lpar6         | LPAR6      | 0.43  | 2.70  | 2.45  | 3.37E-02 | 2.13E-01 | -4.16 |
| 1440043_PM_at   | Ank2          | ANK2       | 0.53  | 3.29  | 2.45  | 3.37E-02 | 2.13E-01 | -4.16 |
| 1440392_PM_at   | Akap13        | AKAP13     | 0.53  | 3.50  | 2.45  | 3.37E-02 | 2.13E-01 | -4.16 |
| 1427351_PM_s_at | Ighm          | NA         | -1.63 | 4.31  | -2.45 | 3.38E-02 | 2.14E-01 | -4.16 |
| 1428911_PM_at   | Ttl4          | TTL4       | -0.75 | 3.21  | -2.44 | 3.38E-02 | 2.14E-01 | -4.16 |
| 1445270_PM_at   | Zfp759        | NA         | -0.32 | 2.25  | -2.44 | 3.38E-02 | 2.14E-01 | -4.16 |
| 1448988_PM_at   | Acadl         | NA         | 0.24  | 2.34  | 2.44  | 3.38E-02 | 2.14E-01 | -4.16 |
| 1449949_PM_a_at | Cxadr         | NA         | 0.34  | 2.58  | 2.44  | 3.38E-02 | 2.14E-01 | -4.16 |
| 1452739_PM_at   | Fbxo7         | FBXO7      | 0.31  | 3.25  | 2.44  | 3.38E-02 | 2.14E-01 | -4.16 |
| 1452378_PM_at   | Malat1        | NA         | 0.42  | 11.19 | 2.44  | 3.38E-02 | 2.14E-01 | -4.16 |
| 1417919_PM_at   | Ppp1r7        | PPP1R7     | -0.85 | 4.59  | -2.44 | 3.38E-02 | 2.14E-01 | -4.16 |
| 1450452_PM_a_at | Narf1         | NARF1      | -0.83 | 4.20  | -2.44 | 3.38E-02 | 2.14E-01 | -4.16 |
| 1424106_PM_at   | Jkamp         | JKAMP      | -0.42 | 3.28  | -2.44 | 3.38E-02 | 2.14E-01 | -4.16 |
| 1423495_PM_at   | Decr2         | DEC2       | -0.30 | 2.50  | -2.44 | 3.38E-02 | 2.14E-01 | -4.16 |
| 1430304_PM_at   | Wdr76         | WDR76      | 0.22  | 2.31  | 2.44  | 3.38E-02 | 2.14E-01 | -4.16 |
| 1456797_PM_at   | Cltb          | CLTB       | 0.29  | 3.41  | 2.44  | 3.38E-02 | 2.14E-01 | -4.16 |
| 1419846_PM_at   | ---           | NA         | 0.59  | 3.51  | 2.44  | 3.38E-02 | 2.14E-01 | -4.16 |
| 1428742_PM_at   | Fbxo45        | FBXO45     | -0.81 | 3.05  | -2.44 | 3.38E-02 | 2.14E-01 | -4.16 |
| 1457520_PM_at   | ---           | NA         | 0.42  | 2.82  | 2.44  | 3.39E-02 | 2.14E-01 | -4.16 |
| 1447837_PM_x_at | Polh          | NA         | -1.05 | 2.57  | -2.44 | 3.39E-02 | 2.14E-01 | -4.17 |
| 1427648_PM_at   | ---           | NA         | 0.20  | 2.29  | 2.44  | 3.39E-02 | 2.14E-01 | -4.17 |
| 1445885_PM_at   | Ube2d2a       | NA         | 0.23  | 2.23  | 2.44  | 3.39E-02 | 2.14E-01 | -4.17 |
| 1431957_PM_at   | Lrriq3        | LRRIQ3     | 0.27  | 2.30  | 2.44  | 3.39E-02 | 2.14E-01 | -4.17 |
| 1430862_PM_at   | ---           | NA         | 0.39  | 2.67  | 2.44  | 3.39E-02 | 2.14E-01 | -4.17 |
| 1435963_PM_at   | Sema5b        | SEMA5B     | -0.78 | 6.49  | -2.44 | 3.39E-02 | 2.14E-01 | -4.17 |
| 1445159_PM_at   | ---           | NA         | 0.24  | 2.42  | 2.44  | 3.39E-02 | 2.14E-01 | -4.17 |
| 1456177_PM_x_at | Zfp706        | ZNF706     | -0.57 | 8.56  | -2.44 | 3.39E-02 | 2.14E-01 | -4.17 |
| 1416727_PM_a_at | Cyb5a         | CY5A       | -0.88 | 3.42  | -2.44 | 3.39E-02 | 2.14E-01 | -4.17 |
| 1447566_PM_at   | Hdac4         | HDAC4      | 0.39  | 2.58  | 2.44  | 3.39E-02 | 2.14E-01 | -4.17 |
| 1437188_PM_at   | Gabbr1        | GABBR1     | -0.83 | 7.42  | -2.44 | 3.39E-02 | 2.14E-01 | -4.17 |
| 1433767_PM_at   | Arel1         | AREL1      | -0.36 | 2.71  | -2.44 | 3.39E-02 | 2.14E-01 | -4.17 |
| 1421554_PM_at   | Lmx1a         | LMX1A      | 0.27  | 2.61  | 2.44  | 3.39E-02 | 2.14E-01 | -4.17 |
| 1445760_PM_at   | Bpifb3        | BPIFB3     | 0.29  | 2.50  | 2.44  | 3.39E-02 | 2.14E-01 | -4.17 |
| 1435180_PM_at   | Podn          | PODN       | 0.31  | 2.54  | 2.44  | 3.39E-02 | 2.14E-01 | -4.17 |

|                 |               |            |       |       |       |          |          |       |
|-----------------|---------------|------------|-------|-------|-------|----------|----------|-------|
| 1417047_PM_at   | Prom2         | PROM2      | 0.39  | 3.72  | 2.44  | 3.39E-02 | 2.14E-01 | -4.17 |
| 1423002_PM_at   | Pag1          | PAG1       | 0.31  | 3.01  | 2.44  | 3.40E-02 | 2.14E-01 | -4.17 |
| 1445766_PM_at   | Ppfia2        | NA         | -0.51 | 2.53  | -2.44 | 3.40E-02 | 2.14E-01 | -4.17 |
| 1428562_PM_at   | Mir22hg       | NA         | -0.32 | 5.16  | -2.44 | 3.40E-02 | 2.14E-01 | -4.17 |
| 1424779_PM_at   | Reep3         | REEP3      | 0.47  | 2.77  | 2.44  | 3.40E-02 | 2.14E-01 | -4.17 |
| 1458422_PM_at   | ---           | NA         | 0.34  | 3.17  | 2.44  | 3.40E-02 | 2.14E-01 | -4.17 |
| 1421459_PM_a_at | Lrp8          | LRP8       | 0.37  | 3.59  | 2.44  | 3.40E-02 | 2.14E-01 | -4.17 |
| 1447075_PM_at   | ---           | NA         | 0.22  | 2.14  | 2.44  | 3.40E-02 | 2.14E-01 | -4.17 |
| 1434434_PM_s_at | Tcerg1        | TCERG1     | -1.11 | 4.88  | -2.44 | 3.41E-02 | 2.14E-01 | -4.17 |
| 1424750_PM_at   | Zbtb1         | ZBTB1      | -0.38 | 3.30  | -2.44 | 3.40E-02 | 2.14E-01 | -4.17 |
| 1429602_PM_at   | Cd164l2       | CD164L2    | 0.27  | 2.55  | 2.44  | 3.40E-02 | 2.14E-01 | -4.17 |
| 1447016_PM_at   | Tbc1d1        | TBC1D1     | 0.40  | 2.37  | 2.44  | 3.40E-02 | 2.14E-01 | -4.17 |
| 1455912_PM_x_at | Unc45a        | NA         | 0.54  | 5.99  | 2.44  | 3.41E-02 | 2.14E-01 | -4.17 |
| 1440856_PM_at   | Mapk8         | MAPK8      | -0.61 | 3.95  | -2.44 | 3.41E-02 | 2.14E-01 | -4.17 |
| 1429485_PM_a_at | Utp11l        | UTP11      | -0.58 | 4.31  | -2.44 | 3.41E-02 | 2.14E-01 | -4.17 |
| 1416766_PM_at   | Marc2         | MARC2      | -0.54 | 3.46  | -2.44 | 3.41E-02 | 2.14E-01 | -4.17 |
| 1416770_PM_at   | Stk25         | STK25      | -0.54 | 3.68  | -2.44 | 3.41E-02 | 2.14E-01 | -4.17 |
| 1457204_PM_at   | ---           | NA         | 0.23  | 2.22  | 2.44  | 3.41E-02 | 2.14E-01 | -4.17 |
| 1449981_PM_a_at | Nat2          | NAT1       | 0.43  | 2.72  | 2.44  | 3.41E-02 | 2.14E-01 | -4.17 |
| 1453751_PM_at   | Dhx38         | DHX38      | 0.77  | 3.77  | 2.44  | 3.41E-02 | 2.14E-01 | -4.17 |
| 1436152_PM_a_at | Lamtor5       | LAMTORS    | -1.09 | 6.03  | -2.44 | 3.42E-02 | 2.14E-01 | -4.17 |
| 1449365_PM_at   | S1pr5         | S1PR5      | -0.92 | 5.35  | -2.44 | 3.42E-02 | 2.14E-01 | -4.17 |
| 1433519_PM_at   | Nucks1        | NUCKS1     | -0.89 | 5.92  | -2.44 | 3.42E-02 | 2.14E-01 | -4.17 |
| 1433507_PM_a_at | Hmgn2         | HMGN4      | -0.73 | 4.47  | -2.44 | 3.41E-02 | 2.14E-01 | -4.17 |
| 1416174_PM_at   | Rbbp9         | RBBP9      | -0.52 | 2.92  | -2.44 | 3.42E-02 | 2.14E-01 | -4.17 |
| 1416866_PM_at   | Bet1          | BET1       | -0.36 | 2.57  | -2.44 | 3.42E-02 | 2.14E-01 | -4.17 |
| 1438324_PM_at   | 9330182L06Rik | KIAA1324L  | -0.35 | 2.58  | -2.44 | 3.42E-02 | 2.14E-01 | -4.17 |
| 1437800_PM_at   | Edaradd       | EDARADD    | 0.25  | 2.30  | 2.44  | 3.42E-02 | 2.14E-01 | -4.17 |
| 1444807_PM_at   | ---           | NA         | 0.25  | 2.65  | 2.44  | 3.41E-02 | 2.14E-01 | -4.17 |
| 1451788_PM_at   | F11           | F11        | 0.28  | 2.68  | 2.44  | 3.42E-02 | 2.14E-01 | -4.17 |
| 1430787_PM_at   | ---           | NA         | 0.28  | 2.59  | 2.44  | 3.42E-02 | 2.14E-01 | -4.17 |
| 1417845_PM_at   | Cldn6         | CLDN6      | 0.30  | 2.40  | 2.44  | 3.42E-02 | 2.14E-01 | -4.17 |
| 1431776_PM_at   | Tob2          | TOB2       | 0.34  | 2.39  | 2.44  | 3.42E-02 | 2.14E-01 | -4.17 |
| 1456727_PM_a_at | Csnk1d        | CSNK1D     | 0.43  | 4.02  | 2.44  | 3.42E-02 | 2.14E-01 | -4.17 |
| 1422568_PM_at   | Ndel1         | NDEL1      | -0.41 | 3.50  | -2.44 | 3.42E-02 | 2.15E-01 | -4.18 |
| 1433500_PM_at   | Dennd2a       | DENND2A    | -0.76 | 3.08  | -2.44 | 3.43E-02 | 2.15E-01 | -4.18 |
| 1455228_PM_at   | Whsc1         | NSD2       | -0.53 | 3.60  | -2.44 | 3.43E-02 | 2.15E-01 | -4.18 |
| 1419257_PM_at   | Tcea1         | TCEA1      | -0.53 | 5.76  | -2.44 | 3.42E-02 | 2.15E-01 | -4.18 |
| 1442510_PM_at   | 5830473C10Rik | NA         | 0.24  | 2.50  | 2.44  | 3.43E-02 | 2.15E-01 | -4.18 |
| 1419386_PM_at   | Muc13         | MUC13      | 0.25  | 2.42  | 2.44  | 3.43E-02 | 2.15E-01 | -4.18 |
| 1442471_PM_at   | ---           | NA         | 0.27  | 2.23  | 2.44  | 3.43E-02 | 2.15E-01 | -4.18 |
| 1447146_PM_s_at | Slu7          | SLU7       | -0.78 | 3.41  | -2.44 | 3.43E-02 | 2.15E-01 | -4.18 |
| 1417480_PM_at   | Fbxo9         | FBXO9      | -0.36 | 8.71  | -2.44 | 3.43E-02 | 2.15E-01 | -4.18 |
| 1420304_PM_x_at | ---           | NA         | 0.24  | 3.72  | 2.44  | 3.43E-02 | 2.15E-01 | -4.18 |
| 1454925_PM_x_at | Mdh1          | MDH1       | -0.32 | 10.28 | -2.44 | 3.43E-02 | 2.15E-01 | -4.18 |
| 1416340_PM_a_at | Man2b1        | ACO10422.5 | -0.78 | 3.40  | -2.44 | 3.43E-02 | 2.15E-01 | -4.18 |
| 1451207_PM_at   | Micu1         | MICU1      | 0.37  | 3.21  | 2.44  | 3.43E-02 | 2.15E-01 | -4.18 |
| 1434467_PM_at   | Atcay         | ATCAY      | 0.54  | 3.32  | 2.43  | 3.43E-02 | 2.15E-01 | -4.18 |
| 1416359_PM_at   | Snx18         | SNX18      | -0.67 | 5.50  | -2.43 | 3.44E-02 | 2.15E-01 | -4.18 |
| 1446671_PM_at   | ---           | NA         | 0.24  | 2.96  | 2.43  | 3.44E-02 | 2.15E-01 | -4.18 |
| 1449607_PM_at   | A230070E04Rik | NA         | 0.38  | 3.66  | 2.43  | 3.44E-02 | 2.15E-01 | -4.18 |
| 1455022_PM_at   | Strn          | STRN       | -0.82 | 5.70  | -2.43 | 3.44E-02 | 2.15E-01 | -4.18 |
| 1431310_PM_s_at | Tll10         | TLL10      | -0.39 | 2.17  | -2.43 | 3.44E-02 | 2.15E-01 | -4.18 |
| 1444966_PM_at   | ---           | NA         | 0.34  | 2.52  | 2.43  | 3.44E-02 | 2.15E-01 | -4.18 |
| 1417416_PM_at   | Kcna1         | KCNA1      | -1.09 | 5.28  | -2.43 | 3.44E-02 | 2.15E-01 | -4.18 |
| 1431172_PM_at   | Orc4          | ORC4       | -0.53 | 2.41  | -2.43 | 3.44E-02 | 2.15E-01 | -4.18 |
| 1423955_PM_a_at | Cers2         | CERS2      | -0.39 | 2.68  | -2.43 | 3.44E-02 | 2.15E-01 | -4.18 |
| 1425622_PM_at   | Edil3         | EDIL3      | -0.38 | 2.84  | -2.43 | 3.44E-02 | 2.15E-01 | -4.18 |
| 1440457_PM_at   | ---           | NA         | 0.24  | 2.45  | 2.43  | 3.44E-02 | 2.15E-01 | -4.18 |
| 1459947_PM_at   | ---           | NA         | 0.36  | 3.12  | 2.43  | 3.44E-02 | 2.15E-01 | -4.18 |
| 1421974_PM_at   | Dnaaf1        | DNAAF1     | 0.46  | 3.45  | 2.43  | 3.44E-02 | 2.15E-01 | -4.18 |
| 1450399_PM_at   | Psen1         | PSEN1      | -0.97 | 3.45  | -2.43 | 3.44E-02 | 2.15E-01 | -4.18 |
| 1425724_PM_at   | Ptprn2        | PTPRN2     | 0.82  | 3.09  | 2.43  | 3.44E-02 | 2.15E-01 | -4.18 |
| 1419396_PM_at   | Arid3a        | ARID3A     | 0.35  | 3.12  | 2.43  | 3.44E-02 | 2.15E-01 | -4.18 |
| 1433795_PM_at   | Tgfbr3        | TGFBR3     | -0.61 | 3.44  | -2.43 | 3.45E-02 | 2.15E-01 | -4.18 |
| 1432300_PM_at   | 1190003K10Rik | FAM240B    | 0.20  | 2.08  | 2.43  | 3.45E-02 | 2.15E-01 | -4.18 |
| 1420966_PM_at   | Skc25a15      | NA         | 0.36  | 2.35  | 2.43  | 3.45E-02 | 2.15E-01 | -4.18 |
| 1439800_PM_at   | Clip1         | CLIP1      | 0.43  | 2.85  | 2.43  | 3.45E-02 | 2.15E-01 | -4.18 |
| 1416244_PM_a_at | Cnbp          | CNBP       | -0.79 | 7.95  | -2.43 | 3.46E-02 | 2.16E-01 | -4.18 |
| 1447832_PM_x_at | Ankrd10       | NA         | 0.24  | 2.26  | 2.43  | 3.46E-02 | 2.16E-01 | -4.19 |
| 1423352_PM_at   | Crispld1      | CRISPLD1   | -0.57 | 2.92  | -2.43 | 3.46E-02 | 2.16E-01 | -4.19 |
| 1460017_PM_at   | Gm5595        | NA         | 0.50  | 2.56  | 2.43  | 3.46E-02 | 2.16E-01 | -4.19 |
| 1439443_PM_x_at | Tkt           | TKT        | -0.60 | 8.46  | -2.43 | 3.46E-02 | 2.16E-01 | -4.19 |
| 1452296_PM_at   | Slit3         | SLIT3      | -0.52 | 2.60  | -2.43 | 3.46E-02 | 2.16E-01 | -4.19 |
| 1439663_PM_at   | ---           | NA         | 0.21  | 2.79  | 2.43  | 3.46E-02 | 2.16E-01 | -4.19 |

|                 |                                                                 |         |       |      |       |          |          |       |
|-----------------|-----------------------------------------------------------------|---------|-------|------|-------|----------|----------|-------|
| 1454997_PM_at   | MsrB3                                                           | MSRB3   | -0.62 | 2.96 | -2.43 | 3.47E-02 | 2.16E-01 | -4.19 |
| 1457320_PM_at   | Wapl                                                            | NA      | -0.22 | 2.23 | -2.43 | 3.47E-02 | 2.16E-01 | -4.19 |
| 1460417_PM_at   | Lncpint                                                         | NA      | 0.29  | 2.46 | 2.43  | 3.47E-02 | 2.16E-01 | -4.19 |
| 1438484_PM_at   | Ado                                                             | NA      | 0.32  | 2.64 | 2.43  | 3.47E-02 | 2.16E-01 | -4.19 |
| 1451938_PM_a_at | Sntb1                                                           | SNTB1   | 0.19  | 2.17 | 2.43  | 3.47E-02 | 2.16E-01 | -4.19 |
| 1422955_PM_at   | Syt17                                                           | SYT17   | 0.32  | 3.06 | 2.43  | 3.47E-02 | 2.16E-01 | -4.19 |
| 1438955_PM_x_at | Ppif                                                            | PPIF    | 0.55  | 7.71 | 2.43  | 3.47E-02 | 2.16E-01 | -4.19 |
| 1426578_PM_s_at | Snapin                                                          | SNAPIN  | -0.82 | 6.64 | -2.43 | 3.47E-02 | 2.16E-01 | -4.19 |
| 1441386_PM_at   | ---                                                             | NA      | 0.24  | 2.64 | 2.43  | 3.47E-02 | 2.16E-01 | -4.19 |
| 1459610_PM_at   | C87490                                                          | NA      | 0.37  | 2.95 | 2.43  | 3.47E-02 | 2.16E-01 | -4.19 |
| 1443878_PM_at   | Rapgef6                                                         | RAPGEF6 | -0.70 | 3.22 | -2.43 | 3.47E-02 | 2.16E-01 | -4.19 |
| 1441572_PM_at   | Dcc                                                             | NA      | -0.50 | 2.91 | -2.43 | 3.47E-02 | 2.16E-01 | -4.19 |
| 1433915_PM_s_at | Epn2                                                            | EPN2    | -0.53 | 2.98 | -2.43 | 3.48E-02 | 2.16E-01 | -4.19 |
| 1435176_PM_a_at | Id2                                                             | ID2     | -0.68 | 3.82 | -2.43 | 3.48E-02 | 2.16E-01 | -4.19 |
| 1458395_PM_at   | Gm4129                                                          | NA      | 0.26  | 2.56 | 2.43  | 3.48E-02 | 2.16E-01 | -4.19 |
| 1457185_PM_at   | Zfp111                                                          | NA      | 0.34  | 3.80 | 2.43  | 3.48E-02 | 2.16E-01 | -4.19 |
| 1448218_PM_s_at | Ywhaz                                                           | YWHAZ   | -1.23 | 9.00 | -2.43 | 3.48E-02 | 2.16E-01 | -4.19 |
| 1440647_PM_at   | ---                                                             | NA      | 0.43  | 2.77 | 2.43  | 3.48E-02 | 2.16E-01 | -4.19 |
| 1422616_PM_s_at | Wdr54                                                           | WDR54   | 0.49  | 2.97 | 2.43  | 3.48E-02 | 2.16E-01 | -4.19 |
| 1443657_PM_at   | ---                                                             | NA      | 0.65  | 2.36 | 2.43  | 3.48E-02 | 2.16E-01 | -4.19 |
| 1453473_PM_a_at | Dynt1-ps1 /// Dynlt1a ///<br>Dynlt1b /// Dynlt1c ///<br>Dynlt1f | DYNLT1  | 1.07  | 3.58 | 2.43  | 3.49E-02 | 2.17E-01 | -4.19 |
| 1423341_PM_at   | Cspg4                                                           | CSPG4   | -0.27 | 3.07 | -2.43 | 3.49E-02 | 2.17E-01 | -4.19 |
| 1458303_PM_at   | Rnf165                                                          | RNF165  | 0.22  | 2.55 | 2.43  | 3.49E-02 | 2.17E-01 | -4.19 |
| 1433640_PM_at   | Fubp1                                                           | FUBP1   | -0.56 | 2.72 | -2.43 | 3.49E-02 | 2.17E-01 | -4.19 |
| 1432277_PM_at   | 4930565D16Rik                                                   | NA      | 0.47  | 3.71 | 2.43  | 3.49E-02 | 2.17E-01 | -4.19 |
| 1422136_PM_at   | Uhmk1                                                           | UHMK1   | 0.60  | 4.19 | 2.43  | 3.49E-02 | 2.17E-01 | -4.19 |
| 1444894_PM_at   | Gm32566                                                         | NA      | 0.21  | 3.04 | 2.43  | 3.49E-02 | 2.17E-01 | -4.19 |
| 1444637_PM_at   | E230016M11Rik                                                   | NA      | 0.31  | 2.56 | 2.43  | 3.49E-02 | 2.17E-01 | -4.19 |
| 1420845_PM_at   | Mrps2                                                           | MRPS2   | 0.44  | 4.21 | 2.43  | 3.49E-02 | 2.17E-01 | -4.19 |
| 1425506_PM_at   | Myk                                                             | MYLK    | -1.44 | 5.80 | -2.42 | 3.50E-02 | 2.17E-01 | -4.20 |
| 1435886_PM_at   | Dnajb12                                                         | DNAJB12 | -0.51 | 2.88 | -2.42 | 3.50E-02 | 2.17E-01 | -4.20 |
| 1432460_PM_at   | Pldi                                                            | NA      | 0.18  | 2.53 | 2.42  | 3.50E-02 | 2.17E-01 | -4.20 |
| 1449748_PM_at   | AA517023                                                        | NA      | 1.24  | 4.46 | 2.42  | 3.50E-02 | 2.17E-01 | -4.20 |
| 1424429_PM_s_at | Ino80e                                                          | INO80E  | 0.26  | 2.78 | 2.42  | 3.50E-02 | 2.17E-01 | -4.20 |
| 1432776_PM_at   | 9430087J23Rik                                                   | NA      | 0.22  | 2.18 | 2.42  | 3.50E-02 | 2.17E-01 | -4.20 |
| 1444250_PM_at   | ---                                                             | NA      | 0.33  | 2.85 | 2.42  | 3.50E-02 | 2.17E-01 | -4.20 |
| 1421520_PM_at   | Jph1                                                            | JPH1    | 0.34  | 3.43 | 2.42  | 3.50E-02 | 2.17E-01 | -4.20 |
| 1423766_PM_at   | Pak1ip1                                                         | PAK1IP1 | -0.39 | 4.70 | -2.42 | 3.50E-02 | 2.17E-01 | -4.20 |
| 1435611_PM_x_at | Cela3b                                                          | CELA3B  | 0.23  | 2.87 | 2.42  | 3.50E-02 | 2.17E-01 | -4.20 |
| 1456095_PM_at   | Tyr                                                             | NA      | -0.26 | 2.13 | -2.42 | 3.50E-02 | 2.17E-01 | -4.20 |
| 1445309_PM_at   | ---                                                             | NA      | 0.29  | 2.16 | 2.42  | 3.50E-02 | 2.17E-01 | -4.20 |
| 1421230_PM_a_at | Msi2                                                            | MSI2    | 0.91  | 4.99 | 2.42  | 3.50E-02 | 2.17E-01 | -4.20 |
| 1433258_PM_at   | ---                                                             | NA      | -0.96 | 2.97 | -2.42 | 3.50E-02 | 2.17E-01 | -4.20 |
| 1457796_PM_at   | ---                                                             | NA      | -0.22 | 2.22 | -2.42 | 3.50E-02 | 2.17E-01 | -4.20 |
| 1419409_PM_at   | Lce1b                                                           | NA      | 0.27  | 2.38 | 2.42  | 3.50E-02 | 2.17E-01 | -4.20 |
| 1440673_PM_at   | ---                                                             | NA      | 0.22  | 2.19 | 2.42  | 3.51E-02 | 2.17E-01 | -4.20 |
| 1451705_PM_a_at | Oprm1                                                           | OPRM1   | 0.23  | 2.59 | 2.42  | 3.51E-02 | 2.17E-01 | -4.20 |
| 1432493_PM_at   | ---                                                             | NA      | 0.19  | 3.12 | 2.42  | 3.51E-02 | 2.17E-01 | -4.20 |
| 1443775_PM_x_at | Zfat                                                            | ZFAT    | 0.79  | 3.25 | 2.42  | 3.51E-02 | 2.17E-01 | -4.20 |
| 1449956_PM_at   | Prkce                                                           | PRKCE   | -1.28 | 7.21 | -2.42 | 3.51E-02 | 2.17E-01 | -4.20 |
| 1429162_PM_at   | 1500015A07Rik                                                   | NA      | -0.53 | 2.96 | -2.42 | 3.51E-02 | 2.17E-01 | -4.20 |
| 1453170_PM_at   | ---                                                             | NA      | 0.40  | 2.71 | 2.42  | 3.51E-02 | 2.17E-01 | -4.20 |
| 1418808_PM_at   | Rdh5                                                            | RDH5    | -0.21 | 2.43 | -2.42 | 3.51E-02 | 2.17E-01 | -4.20 |
| 1441154_PM_at   | ---                                                             | NA      | 0.32  | 2.41 | 2.42  | 3.51E-02 | 2.17E-01 | -4.20 |
| 1452206_PM_at   | Sucla2                                                          | SUCLA2  | -0.74 | 5.87 | -2.42 | 3.52E-02 | 2.18E-01 | -4.20 |
| 1442581_PM_at   | Ksr1                                                            | NA      | 0.33  | 2.95 | 2.42  | 3.52E-02 | 2.18E-01 | -4.20 |
| 1447167_PM_at   | ---                                                             | NA      | 0.52  | 2.71 | 2.42  | 3.52E-02 | 2.18E-01 | -4.20 |
| 1426832_PM_at   | Ddx26b                                                          | INTS6L  | 1.03  | 4.71 | 2.42  | 3.52E-02 | 2.18E-01 | -4.20 |
| 1451187_PM_at   | Fopnl                                                           | FOPNL   | -1.44 | 6.16 | -2.42 | 3.52E-02 | 2.18E-01 | -4.20 |
| 1439249_PM_at   | Wac                                                             | WAC     | -0.27 | 2.88 | -2.42 | 3.52E-02 | 2.18E-01 | -4.20 |
| 1431173_PM_at   | Fam53b                                                          | FAM53B  | 0.25  | 2.39 | 2.42  | 3.52E-02 | 2.18E-01 | -4.20 |
| 1460686_PM_at   | Cntd1                                                           | CNTD1   | 0.27  | 4.65 | 2.42  | 3.52E-02 | 2.18E-01 | -4.20 |
| 1438003_PM_at   | Papd7                                                           | PAPD7   | 0.27  | 3.01 | 2.42  | 3.52E-02 | 2.18E-01 | -4.20 |
| 1455182_PM_at   | Kif1b                                                           | KIF1B   | 0.31  | 3.24 | 2.42  | 3.52E-02 | 2.18E-01 | -4.20 |
| 1457900_PM_at   | Ascc3                                                           | ASCC3   | 0.49  | 4.19 | 2.42  | 3.52E-02 | 2.18E-01 | -4.20 |
| 1438091_PM_a_at | H2afz                                                           | H2AFZ   | -0.93 | 7.44 | -2.42 | 3.53E-02 | 2.18E-01 | -4.20 |
| 1418515_PM_at   | Mtf2                                                            | MTF2    | -0.59 | 4.26 | -2.42 | 3.53E-02 | 2.18E-01 | -4.20 |
| 1453029_PM_s_at | Ubr3                                                            | UBR3    | -0.58 | 6.47 | -2.42 | 3.53E-02 | 2.18E-01 | -4.20 |
| 1425896_PM_a_at | Fbn1                                                            | FBN1    | -0.35 | 2.46 | -2.42 | 3.53E-02 | 2.18E-01 | -4.20 |
| 1440086_PM_at   | Rnf182                                                          | RNF182  | -0.34 | 3.22 | -2.42 | 3.53E-02 | 2.18E-01 | -4.20 |
| 1441017_PM_at   | Zcchc14                                                         | ZCCHC14 | 0.29  | 2.40 | 2.42  | 3.53E-02 | 2.18E-01 | -4.20 |
| 1421417_PM_s_at | Elac1                                                           | ELAC1   | 0.35  | 2.80 | 2.42  | 3.53E-02 | 2.18E-01 | -4.20 |
| 1459054_PM_at   | Cas1                                                            | CAS1    | 0.45  | 4.32 | 2.42  | 3.53E-02 | 2.18E-01 | -4.20 |

|                 |                                                                |              |       |      |       |          |          |       |
|-----------------|----------------------------------------------------------------|--------------|-------|------|-------|----------|----------|-------|
| 1426684_PM_at   | Cnot6                                                          | CNOT6        | 0.48  | 2.88 | 2.42  | 3.53E-02 | 2.18E-01 | -4.20 |
| 1430702_PM_at   | ---                                                            | NA           | 0.60  | 3.30 | 2.42  | 3.53E-02 | 2.18E-01 | -4.20 |
| 1415728_PM_at   | Pabpn1                                                         | NA           | 0.77  | 7.60 | 2.42  | 3.53E-02 | 2.18E-01 | -4.20 |
| 1419458_PM_at   | Arhgef28                                                       | ARHGEF28     | -0.83 | 3.52 | -2.42 | 3.53E-02 | 2.18E-01 | -4.21 |
| 1429064_PM_at   | Dip2c                                                          | DIP2C        | -0.81 | 6.09 | -2.42 | 3.54E-02 | 2.18E-01 | -4.21 |
| 1437873_PM_at   | Zfp799                                                         | NA           | -0.47 | 3.64 | -2.42 | 3.54E-02 | 2.18E-01 | -4.21 |
| 1441026_PM_at   | Parp4                                                          | PARP4        | -0.27 | 2.37 | -2.42 | 3.54E-02 | 2.18E-01 | -4.21 |
| 1447827_PM_x_at | Spop                                                           | SPOP         | 0.51  | 4.81 | 2.42  | 3.54E-02 | 2.18E-01 | -4.21 |
| 1447467_PM_at   | ---                                                            | NA           | 0.55  | 3.15 | 2.42  | 3.54E-02 | 2.18E-01 | -4.21 |
| 1430823_PM_at   | ---                                                            | NA           | 0.62  | 3.25 | 2.42  | 3.54E-02 | 2.18E-01 | -4.21 |
| 1419110_PM_at   | Riok1                                                          | RIOK1        | 0.33  | 3.16 | 2.42  | 3.54E-02 | 2.18E-01 | -4.21 |
| 1454805_PM_at   | Wtap                                                           | WTAP         | -0.35 | 3.11 | -2.42 | 3.54E-02 | 2.18E-01 | -4.21 |
| 1451320_PM_at   | Arhgap8                                                        | PRR5-ARHGAP8 | 0.22  | 2.25 | 2.42  | 3.54E-02 | 2.18E-01 | -4.21 |
| 1441120_PM_at   | Gm19345                                                        | NA           | 0.32  | 3.52 | 2.42  | 3.54E-02 | 2.18E-01 | -4.21 |
| 1446636_PM_at   | Tns3                                                           | TNS3         | 0.34  | 2.89 | 2.42  | 3.54E-02 | 2.18E-01 | -4.21 |
| 1438321_PM_x_at | Fam63a                                                         | MINDY1       | -0.23 | 2.31 | -2.42 | 3.54E-02 | 2.18E-01 | -4.21 |
| 1439759_PM_x_at | Sult6b1                                                        | SULT6B1      | 0.31  | 3.14 | 2.42  | 3.54E-02 | 2.18E-01 | -4.21 |
| 1435154_PM_at   | AU018091                                                       | NA           | 0.32  | 2.51 | 2.42  | 3.54E-02 | 2.18E-01 | -4.21 |
| 1449996_PM_a_at | Tpm3                                                           | TPM3         | 0.59  | 3.11 | 2.42  | 3.55E-02 | 2.18E-01 | -4.21 |
| 1425597_PM_a_at | Qk                                                             | QKI          | -0.60 | 3.62 | -2.42 | 3.55E-02 | 2.18E-01 | -4.21 |
| 1460305_PM_at   | Itga3                                                          | ITGA3        | 0.40  | 3.27 | 2.42  | 3.55E-02 | 2.18E-01 | -4.21 |
| 1416893_PM_at   | Fam107b                                                        | FAM107B      | 0.93  | 3.95 | 2.42  | 3.55E-02 | 2.18E-01 | -4.21 |
| 1419404_PM_s_at | Siah1a /// Siah1b                                              | NA           | -0.45 | 2.73 | -2.42 | 3.55E-02 | 2.19E-01 | -4.21 |
| 1441620_PM_at   | ---                                                            | NA           | 0.36  | 2.85 | 2.42  | 3.55E-02 | 2.19E-01 | -4.21 |
| 1456622_PM_at   | Camsap1                                                        | CAMSAP1      | 0.49  | 3.19 | 2.42  | 3.55E-02 | 2.19E-01 | -4.21 |
| 1434296_PM_at   | Zfp961                                                         | NA           | -0.99 | 2.49 | -2.41 | 3.56E-02 | 2.19E-01 | -4.21 |
| 1446099_PM_at   | ---                                                            | NA           | 0.45  | 2.33 | 2.41  | 3.56E-02 | 2.19E-01 | -4.21 |
| 1438832_PM_x_at | Dhx30                                                          | DHX30        | -0.77 | 4.86 | -2.41 | 3.56E-02 | 2.19E-01 | -4.21 |
| 1442336_PM_at   | ---                                                            | NA           | 0.44  | 2.58 | 2.41  | 3.56E-02 | 2.19E-01 | -4.21 |
| 1432058_PM_at   | 4930474H20Rik                                                  | NA           | 0.26  | 2.17 | 2.41  | 3.56E-02 | 2.19E-01 | -4.21 |
| 1437020_PM_at   | Ep400                                                          | EP400        | 0.28  | 2.74 | 2.41  | 3.56E-02 | 2.19E-01 | -4.21 |
| 1458454_PM_at   | ---                                                            | NA           | 0.19  | 2.25 | 2.41  | 3.56E-02 | 2.19E-01 | -4.21 |
| 1444526_PM_at   | Gm31655                                                        | NA           | -0.97 | 5.06 | -2.41 | 3.56E-02 | 2.19E-01 | -4.21 |
| 1435818_PM_at   | Klh15                                                          | KLHL15       | -0.40 | 2.69 | -2.41 | 3.56E-02 | 2.19E-01 | -4.21 |
| 1436542_PM_at   | ---                                                            | NA           | 0.35  | 3.33 | 2.41  | 3.56E-02 | 2.19E-01 | -4.21 |
| 1429220_PM_at   | Dph7                                                           | DPH7         | -0.24 | 2.91 | -2.41 | 3.56E-02 | 2.19E-01 | -4.21 |
| 1419016_PM_at   | 1700034I23Rik                                                  | NA           | 0.26  | 2.58 | 2.41  | 3.56E-02 | 2.19E-01 | -4.21 |
| 1453257_PM_at   | Agpat5                                                         | AGPAT5       | -0.48 | 4.54 | -2.41 | 3.57E-02 | 2.19E-01 | -4.22 |
| 1421659_PM_at   | Adra1a                                                         | ADRA1A       | 0.24  | 2.40 | 2.41  | 3.57E-02 | 2.19E-01 | -4.22 |
| 1445971_PM_at   | ---                                                            | NA           | 0.30  | 2.37 | 2.41  | 3.57E-02 | 2.19E-01 | -4.22 |
| 1416035_PM_at   | Hif1a                                                          | HIF1A        | -0.65 | 4.59 | -2.41 | 3.57E-02 | 2.19E-01 | -4.22 |
| 1421543_PM_at   | Fbxo4                                                          | FBXO4        | 0.23  | 2.19 | 2.41  | 3.57E-02 | 2.19E-01 | -4.22 |
| 1451057_PM_x_at | Dnm2                                                           | DNM2         | 0.25  | 2.34 | 2.41  | 3.57E-02 | 2.19E-01 | -4.22 |
| 1452629_PM_at   | Safb2                                                          | SAFB2        | 0.89  | 4.14 | 2.41  | 3.57E-02 | 2.19E-01 | -4.22 |
| 1458534_PM_at   | Rgs7bp                                                         | RGS7BP       | -0.69 | 4.69 | -2.41 | 3.57E-02 | 2.19E-01 | -4.22 |
| 1455668_PM_at   | Whsc11                                                         | NSD3         | -0.84 | 5.04 | -2.41 | 3.58E-02 | 2.19E-01 | -4.22 |
| 1426344_PM_at   | Gle1                                                           | GLE1         | -0.36 | 6.21 | -2.41 | 3.58E-02 | 2.19E-01 | -4.22 |
| 1446029_PM_at   | Tanc1                                                          | TANC1        | 0.29  | 2.51 | 2.41  | 3.57E-02 | 2.19E-01 | -4.22 |
| 1458116_PM_at   | Spaca6                                                         | SPACA6       | 0.51  | 3.15 | 2.41  | 3.57E-02 | 2.19E-01 | -4.22 |
| 1457299_PM_at   | Grm4                                                           | GRM4         | 0.80  | 4.39 | 2.41  | 3.58E-02 | 2.19E-01 | -4.22 |
| 1423179_PM_at   | Kcnb1                                                          | KCNB1        | -0.55 | 2.87 | -2.41 | 3.58E-02 | 2.19E-01 | -4.22 |
| 1454172_PM_at   | Bcor1                                                          | BCOR1        | 0.25  | 2.51 | 2.41  | 3.58E-02 | 2.19E-01 | -4.22 |
| 1455632_PM_at   | LOC102636700                                                   | NA           | 0.26  | 2.50 | 2.41  | 3.58E-02 | 2.19E-01 | -4.22 |
| 1453441_PM_at   | ---                                                            | NA           | 0.32  | 2.19 | 2.41  | 3.58E-02 | 2.19E-01 | -4.22 |
| 1458322_PM_x_at | Ccdc180                                                        | CCDC180      | 0.32  | 2.27 | 2.41  | 3.58E-02 | 2.19E-01 | -4.22 |
| 1431773_PM_at   | Cbx1                                                           | CBX1         | 0.40  | 2.49 | 2.41  | 3.58E-02 | 2.19E-01 | -4.22 |
| 1423864_PM_at   | Nrbp1                                                          | NRBP1        | 0.45  | 3.25 | 2.41  | 3.58E-02 | 2.19E-01 | -4.22 |
| 1428141_PM_at   | Gga2                                                           | GGA2         | -0.72 | 3.11 | -2.41 | 3.58E-02 | 2.19E-01 | -4.22 |
| 1423355_PM_at   | Snap29                                                         | SNAP29       | 0.34  | 2.48 | 2.41  | 3.58E-02 | 2.19E-01 | -4.22 |
| 1433736_PM_at   | Hcfc1                                                          | HCFC1        | -0.42 | 3.56 | -2.41 | 3.59E-02 | 2.19E-01 | -4.22 |
| 1432349_PM_a_at | Sync                                                           | SYNC         | 0.22  | 2.66 | 2.41  | 3.58E-02 | 2.19E-01 | -4.22 |
| 1431827_PM_a_at | Tlk2                                                           | TLK2         | 0.26  | 2.73 | 2.41  | 3.59E-02 | 2.19E-01 | -4.22 |
| 1448740_PM_at   | Rangrf                                                         | RANGRF       | 0.27  | 2.69 | 2.41  | 3.59E-02 | 2.19E-01 | -4.22 |
| 1440737_PM_at   | Inadl                                                          | PATJ         | 0.28  | 2.15 | 2.41  | 3.59E-02 | 2.19E-01 | -4.22 |
| 1431892_PM_a_at | Plcd3                                                          | PLCD3        | 0.34  | 3.12 | 2.41  | 3.59E-02 | 2.19E-01 | -4.22 |
| 1433658_PM_x_at | Pcbp4                                                          | PCBP4        | 0.49  | 3.99 | 2.41  | 3.58E-02 | 2.19E-01 | -4.22 |
| 1452099_PM_at   | Diexf                                                          | DIEXF        | -0.77 | 2.88 | -2.41 | 3.59E-02 | 2.19E-01 | -4.22 |
| 1445646_PM_at   | ---                                                            | NA           | 0.30  | 2.28 | 2.41  | 3.59E-02 | 2.19E-01 | -4.22 |
| 1455725_PM_a_at | Gm10257 /// Gm12657 ///<br>H3f3b /// H3f3c ///<br>LOC102642045 | NA           | 0.38  | 5.28 | 2.41  | 3.59E-02 | 2.20E-01 | -4.22 |
| 1439932_PM_at   | Ubxn2b                                                         | UBXN2B       | -0.43 | 3.93 | -2.41 | 3.59E-02 | 2.20E-01 | -4.22 |
| 1427434_PM_at   | Naip6 /// Naip7                                                | NAIP         | 0.29  | 3.21 | 2.41  | 3.59E-02 | 2.20E-01 | -4.22 |
| 1450992_PM_a_at | Meis1                                                          | MEIS1        | 0.25  | 2.23 | 2.41  | 3.59E-02 | 2.20E-01 | -4.22 |
| 1437235_PM_x_at | Lpp                                                            | LPP          | -0.22 | 2.53 | -2.41 | 3.59E-02 | 2.20E-01 | -4.22 |

|                 |                   |          |       |      |       |          |          |       |
|-----------------|-------------------|----------|-------|------|-------|----------|----------|-------|
| 1451048_PM_at   | Metap2            | METAP2   | 0.86  | 3.44 | 2.41  | 3.59E-02 | 2.20E-01 | -4.22 |
| 1426770_PM_at   | Pex5              | PEX5     | -0.57 | 2.95 | -2.41 | 3.60E-02 | 2.20E-01 | -4.22 |
| 1459029_PM_at   | Pak1              | NA       | 0.23  | 2.74 | 2.41  | 3.60E-02 | 2.20E-01 | -4.22 |
| 1429776_PM_a_at | Dnajb6            | DNAJB6   | -0.52 | 5.41 | -2.41 | 3.60E-02 | 2.20E-01 | -4.22 |
| 1436758_PM_at   | Hdac4             | HDAC4    | 0.36  | 4.60 | 2.41  | 3.60E-02 | 2.20E-01 | -4.22 |
| 1457393_PM_at   | ---               | NA       | 0.45  | 3.10 | 2.41  | 3.60E-02 | 2.20E-01 | -4.22 |
| 1455389_PM_s_at | Ago2              | AGO2     | -1.25 | 5.89 | -2.41 | 3.60E-02 | 2.20E-01 | -4.22 |
| 1430235_PM_at   | 4933424G06Rik     | NA       | 0.24  | 2.32 | 2.41  | 3.60E-02 | 2.20E-01 | -4.22 |
| 1430586_PM_at   | Arl14ep           | ARL14EP  | 0.26  | 2.41 | 2.41  | 3.60E-02 | 2.20E-01 | -4.22 |
| 1438565_PM_at   | A830010M20Rik     | KIAA1107 | -0.89 | 5.38 | -2.41 | 3.60E-02 | 2.20E-01 | -4.23 |
| 1425847_PM_a_at | Zak               | MAP3K20  | -0.31 | 2.37 | -2.41 | 3.61E-02 | 2.20E-01 | -4.23 |
| 1454364_PM_at   | ---               | NA       | 0.24  | 2.97 | 2.41  | 3.61E-02 | 2.20E-01 | -4.23 |
| 1442779_PM_at   | 1700071K01Rik     | NA       | 0.33  | 2.61 | 2.41  | 3.61E-02 | 2.20E-01 | -4.23 |
| 1437208_PM_at   | Sept10            | SEPT10   | 0.32  | 2.68 | 2.41  | 3.61E-02 | 2.20E-01 | -4.23 |
| 1433989_PM_at   | Slc6a11           | SLC6A11  | -0.45 | 3.25 | -2.41 | 3.61E-02 | 2.20E-01 | -4.23 |
| 1456639_PM_at   | Zfp398            | ZNF398   | 0.33  | 3.03 | 2.41  | 3.61E-02 | 2.20E-01 | -4.23 |
| 1440982_PM_at   | ---               | NA       | 0.60  | 3.42 | 2.41  | 3.62E-02 | 2.20E-01 | -4.23 |
| 1450467_PM_at   | Bsn               | BSN      | -0.72 | 7.82 | -2.41 | 3.62E-02 | 2.20E-01 | -4.23 |
| 1460283_PM_at   | Mefv              | MEFV     | 0.20  | 2.34 | 2.41  | 3.62E-02 | 2.20E-01 | -4.23 |
| 1444094_PM_at   | ---               | NA       | 0.24  | 2.30 | 2.41  | 3.62E-02 | 2.20E-01 | -4.23 |
| 1431242_PM_at   | ---               | NA       | 0.29  | 2.46 | 2.41  | 3.62E-02 | 2.20E-01 | -4.23 |
| 1452595_PM_at   | Adamts4           | ADAMTS4  | -0.87 | 5.01 | -2.40 | 3.62E-02 | 2.21E-01 | -4.23 |
| 1439008_PM_at   | Zfp319            | ZNF319   | -0.46 | 2.36 | -2.40 | 3.62E-02 | 2.21E-01 | -4.23 |
| 1453437_PM_at   | Tcaf1             | TCAF1    | 0.23  | 2.47 | 2.40  | 3.62E-02 | 2.21E-01 | -4.23 |
| 1443566_PM_at   | ---               | NA       | 0.30  | 2.20 | 2.40  | 3.63E-02 | 2.21E-01 | -4.23 |
| 1418653_PM_at   | Cyp2c50///Cyp2c54 | NA       | 0.29  | 2.36 | 2.40  | 3.63E-02 | 2.21E-01 | -4.23 |
| 1431740_PM_at   | Slc7a13           | SLC7A13  | 0.46  | 3.61 | 2.40  | 3.63E-02 | 2.21E-01 | -4.23 |
| 1436332_PM_at   | Hspb6             | HSPB6    | 0.74  | 3.50 | 2.40  | 3.63E-02 | 2.21E-01 | -4.23 |
| 1428666_PM_at   | Nars              | NARS     | -0.59 | 7.03 | -2.40 | 3.63E-02 | 2.21E-01 | -4.23 |
| 1444499_PM_at   | ---               | NA       | -0.90 | 5.52 | -2.40 | 3.63E-02 | 2.21E-01 | -4.23 |
| 1430398_PM_at   | ---               | NA       | 0.26  | 2.80 | 2.40  | 3.63E-02 | 2.21E-01 | -4.23 |
| 1422473_PM_at   | Pde4b             | PDE4B    | 0.30  | 2.53 | 2.40  | 3.63E-02 | 2.21E-01 | -4.23 |
| 1437224_PM_at   | Rtn4              | RTN4     | -1.22 | 9.08 | -2.40 | 3.63E-02 | 2.21E-01 | -4.23 |
| 1439549_PM_at   | Prg3              | PRRG3    | -0.49 | 2.97 | -2.40 | 3.63E-02 | 2.21E-01 | -4.23 |
| 1432780_PM_at   | ---               | NA       | 0.60  | 3.08 | 2.40  | 3.63E-02 | 2.21E-01 | -4.23 |
| 1434961_PM_at   | Asb1              | ASB1     | -0.67 | 3.85 | -2.40 | 3.64E-02 | 2.21E-01 | -4.23 |
| 1453027_PM_at   | Dlgap1            | DLGAP1   | -0.67 | 5.87 | -2.40 | 3.64E-02 | 2.21E-01 | -4.23 |
| 1430038_PM_at   | Gphn              | NA       | -0.66 | 2.81 | -2.40 | 3.64E-02 | 2.21E-01 | -4.24 |
| 1454207_PM_at   | ---               | NA       | -0.19 | 2.13 | -2.40 | 3.64E-02 | 2.21E-01 | -4.24 |
| 1434033_PM_at   | Tle1              | TLE1     | 0.22  | 3.04 | 2.40  | 3.64E-02 | 2.21E-01 | -4.23 |
| 1459267_PM_at   | ---               | NA       | 0.23  | 2.26 | 2.40  | 3.64E-02 | 2.21E-01 | -4.24 |
| 1459413_PM_at   | ---               | NA       | 0.24  | 2.20 | 2.40  | 3.64E-02 | 2.21E-01 | -4.23 |
| 1446533_PM_at   | ---               | NA       | 0.24  | 2.72 | 2.40  | 3.64E-02 | 2.21E-01 | -4.23 |
| 1451443_PM_at   | Nfix              | NFIX     | 0.25  | 2.77 | 2.40  | 3.64E-02 | 2.21E-01 | -4.23 |
| 1423599_PM_a_at | Pdcl              | PDCL     | 0.25  | 2.91 | 2.40  | 3.64E-02 | 2.21E-01 | -4.23 |
| 1444854_PM_at   | ---               | NA       | 0.26  | 2.39 | 2.40  | 3.64E-02 | 2.21E-01 | -4.23 |
| 1447008_PM_at   | ---               | NA       | 0.26  | 3.72 | 2.40  | 3.64E-02 | 2.21E-01 | -4.23 |
| 1433299_PM_at   | ---               | NA       | 0.36  | 2.30 | 2.40  | 3.64E-02 | 2.21E-01 | -4.23 |
| 1445606_PM_a_at | 2900009J06Rik     | NA       | 0.41  | 3.05 | 2.40  | 3.64E-02 | 2.21E-01 | -4.23 |
| 1452699_PM_at   | Mettl17           | METTL17  | 0.63  | 2.76 | 2.40  | 3.64E-02 | 2.21E-01 | -4.23 |
| 1456319_PM_at   | X83313            | NA       | 0.98  | 2.99 | 2.40  | 3.64E-02 | 2.21E-01 | -4.23 |
| 1455569_PM_at   | Ube2f             | UBE2F    | 0.46  | 3.54 | 2.40  | 3.64E-02 | 2.21E-01 | -4.24 |
| 1446682_PM_at   | ---               | NA       | 0.71  | 2.96 | 2.40  | 3.64E-02 | 2.21E-01 | -4.24 |
| 1427293_PM_a_at | Auts2             | NA       | -0.46 | 2.74 | -2.40 | 3.65E-02 | 2.21E-01 | -4.24 |
| 1455784_PM_at   | Sec1              | NA       | 0.30  | 2.55 | 2.40  | 3.65E-02 | 2.21E-01 | -4.24 |
| 1440287_PM_at   | ---               | NA       | 0.31  | 2.26 | 2.40  | 3.65E-02 | 2.21E-01 | -4.24 |
| 1443560_PM_at   | Gm10941           | NA       | 0.32  | 2.63 | 2.40  | 3.65E-02 | 2.21E-01 | -4.24 |
| 1416742_PM_at   | Cfdp1             | CFDP1    | -0.73 | 5.17 | -2.40 | 3.65E-02 | 2.22E-01 | -4.24 |
| 1457154_PM_at   | ---               | NA       | 0.43  | 2.66 | 2.40  | 3.65E-02 | 2.22E-01 | -4.24 |
| 1447535_PM_at   | ---               | NA       | 0.30  | 2.51 | 2.40  | 3.66E-02 | 2.22E-01 | -4.24 |
| 1447842_PM_x_at | Tcn2              | TCN2     | 0.54  | 5.60 | 2.40  | 3.66E-02 | 2.22E-01 | -4.24 |
| 1435397_PM_at   | Zbtb44            | ZBTB44   | -0.46 | 2.30 | -2.40 | 3.66E-02 | 2.22E-01 | -4.24 |
| 1449587_PM_a_at | Prol1             | NA       | -0.31 | 2.30 | -2.40 | 3.66E-02 | 2.22E-01 | -4.24 |
| 1426620_PM_at   | Chst10            | CHST10   | -0.44 | 2.81 | -2.40 | 3.66E-02 | 2.22E-01 | -4.24 |
| 1434705_PM_at   | Ctbp2             | NA       | -0.38 | 3.18 | -2.40 | 3.66E-02 | 2.22E-01 | -4.24 |
| 1426780_PM_at   | Atg14             | ATG14    | -0.26 | 2.72 | -2.40 | 3.66E-02 | 2.22E-01 | -4.24 |
| 1453903_PM_at   | 4930503B20Rik     | NA       | 0.25  | 2.08 | 2.40  | 3.66E-02 | 2.22E-01 | -4.24 |
| 1450688_PM_at   | Rgl2              | RLG2     | 0.43  | 3.02 | 2.40  | 3.66E-02 | 2.22E-01 | -4.24 |
| 1437461_PM_s_at | Rnpc3             | RNPC3    | -0.98 | 6.42 | -2.40 | 3.66E-02 | 2.22E-01 | -4.24 |
| 1442537_PM_at   | Cyp2u1            | CYP2U1   | -0.37 | 2.79 | -2.40 | 3.66E-02 | 2.22E-01 | -4.24 |
| 1458135_PM_at   | ---               | NA       | 0.53  | 2.97 | 2.40  | 3.66E-02 | 2.22E-01 | -4.24 |
| 1429303_PM_at   | Klf17             | KLF17    | 0.17  | 2.18 | 2.40  | 3.67E-02 | 2.22E-01 | -4.24 |
| 1442349_PM_at   | Hykk              | HYKK     | 0.24  | 2.15 | 2.40  | 3.67E-02 | 2.22E-01 | -4.24 |
| 1460489_PM_at   | ---               | NA       | 0.25  | 2.35 | 2.40  | 3.67E-02 | 2.22E-01 | -4.24 |
| 1438094_PM_x_at | Ola1              | OLA1     | -1.27 | 7.62 | -2.40 | 3.67E-02 | 2.22E-01 | -4.24 |

|                 |                                     |          |       |      |       |          |          |       |
|-----------------|-------------------------------------|----------|-------|------|-------|----------|----------|-------|
| 1443103_PM_at   | D830046C22Rik /// Gpr146            | GPR146   | 0.27  | 2.34 | 2.40  | 3.67E-02 | 2.22E-01 | -4.24 |
| 1418493_PM_a_at | SncA                                | SNCA     | -1.36 | 5.53 | -2.40 | 3.67E-02 | 2.22E-01 | -4.24 |
| 1437668_PM_at   | AcKr4                               | NA       | -1.04 | 7.26 | -2.40 | 3.67E-02 | 2.22E-01 | -4.24 |
| 1418084_PM_at   | Nrp1                                | NRP1     | -1.04 | 5.77 | -2.40 | 3.68E-02 | 2.22E-01 | -4.24 |
| 1454661_PM_at   | Atp5g3                              | ATP5G3   | -0.79 | 7.76 | -2.40 | 3.67E-02 | 2.22E-01 | -4.24 |
| 1443063_PM_at   | Clv2                                | CLV2     | -0.24 | 2.94 | -2.40 | 3.67E-02 | 2.22E-01 | -4.24 |
| 1441280_PM_at   | Kcnk12                              | KCNK12   | 0.22  | 2.50 | 2.40  | 3.68E-02 | 2.22E-01 | -4.24 |
| 1448105_PM_at   | Prm2                                | NA       | 0.23  | 2.87 | 2.40  | 3.67E-02 | 2.22E-01 | -4.24 |
| 1442949_PM_at   | ---                                 | NA       | 0.29  | 2.43 | 2.40  | 3.68E-02 | 2.22E-01 | -4.24 |
| 1443406_PM_at   | Plscr4                              | PLSCR4   | 0.33  | 2.74 | 2.40  | 3.67E-02 | 2.22E-01 | -4.24 |
| 1443340_PM_at   | ---                                 | NA       | 0.35  | 2.58 | 2.40  | 3.67E-02 | 2.22E-01 | -4.24 |
| 1447418_PM_at   | ---                                 | NA       | 0.36  | 3.20 | 2.40  | 3.68E-02 | 2.22E-01 | -4.24 |
| 1440679_PM_at   | ---                                 | NA       | 0.39  | 4.11 | 2.40  | 3.68E-02 | 2.22E-01 | -4.24 |
| 1444821_PM_at   | D8ErtD82e                           | PRAG1    | 0.42  | 2.94 | 2.40  | 3.67E-02 | 2.22E-01 | -4.24 |
| 1448219_PM_a_at | Ywhaz                               | YWHAZ    | -0.64 | 9.32 | -2.40 | 3.68E-02 | 2.22E-01 | -4.24 |
| 1450612_PM_a_at | Pemt                                | PEMT     | 0.26  | 2.12 | 2.40  | 3.68E-02 | 2.22E-01 | -4.24 |
| 1451968_PM_at   | Xrcc5                               | XRCC5    | 0.34  | 2.87 | 2.40  | 3.68E-02 | 2.22E-01 | -4.24 |
| 1443890_PM_at   | PsmD5                               | PSMD5    | -0.41 | 4.04 | -2.39 | 3.68E-02 | 2.22E-01 | -4.25 |
| 1451681_PM_at   | BC089597                            | RDH16    | 0.23  | 2.69 | 2.39  | 3.68E-02 | 2.22E-01 | -4.25 |
| 1432899_PM_at   | 4833408G04Rik                       | NA       | 0.35  | 3.94 | 2.39  | 3.68E-02 | 2.22E-01 | -4.25 |
| 1454209_PM_at   | Fam57b                              | NA       | 0.23  | 2.98 | 2.39  | 3.68E-02 | 2.22E-01 | -4.25 |
| 1435082_PM_at   | Sypl                                | SYPL1    | 0.38  | 2.65 | 2.39  | 3.68E-02 | 2.22E-01 | -4.25 |
| 1439131_PM_at   | Txlng                               | TXLNG    | 0.35  | 3.30 | 2.39  | 3.69E-02 | 2.22E-01 | -4.25 |
| 1452895_PM_at   | Fbxo45                              | FBXO45   | -0.84 | 4.79 | -2.39 | 3.69E-02 | 2.22E-01 | -4.25 |
| 1438115_PM_a_at | Slc9a3r1                            | SLC9A3R1 | -0.57 | 3.62 | -2.39 | 3.69E-02 | 2.23E-01 | -4.25 |
| 1423162_PM_s_at | Spred1                              | SPRED1   | -0.54 | 3.79 | -2.39 | 3.69E-02 | 2.23E-01 | -4.25 |
| 1430423_PM_s_at | Cmss1                               | CMSS1    | 0.20  | 2.11 | 2.39  | 3.69E-02 | 2.23E-01 | -4.25 |
| 1417630_PM_at   | Mknk1                               | MKNK1    | 0.31  | 3.07 | 2.39  | 3.69E-02 | 2.23E-01 | -4.25 |
| 1449357_PM_at   | 2310030G06Rik                       | C11orf52 | 0.49  | 2.60 | 2.39  | 3.69E-02 | 2.23E-01 | -4.25 |
| 1416162_PM_at   | Rad21                               | RAD21    | 0.77  | 3.56 | 2.39  | 3.69E-02 | 2.23E-01 | -4.25 |
| 1444592_PM_at   | Osgep                               | OSGEP    | 1.02  | 3.62 | 2.39  | 3.69E-02 | 2.23E-01 | -4.25 |
| 1431754_PM_at   | Ccdc173                             | CCDC173  | 1.21  | 4.07 | 2.39  | 3.69E-02 | 2.23E-01 | -4.25 |
| 1416201_PM_at   | Crk                                 | CRK      | -0.70 | 4.98 | -2.39 | 3.70E-02 | 2.23E-01 | -4.25 |
| 1459217_PM_at   | Osmr                                | OSMR     | 0.21  | 2.64 | 2.39  | 3.70E-02 | 2.23E-01 | -4.25 |
| 1432737_PM_at   | Gm32930                             | NA       | 0.23  | 2.52 | 2.39  | 3.70E-02 | 2.23E-01 | -4.25 |
| 1446806_PM_at   | ---                                 | NA       | 0.25  | 2.66 | 2.39  | 3.70E-02 | 2.23E-01 | -4.25 |
| 1451910_PM_a_at | Cd6                                 | CD6      | 0.27  | 2.81 | 2.39  | 3.70E-02 | 2.23E-01 | -4.25 |
| 1431761_PM_at   | Gm21464 /// Gm27177 ///<br>Slc25a37 | SLC25A37 | 0.38  | 2.81 | 2.39  | 3.70E-02 | 2.23E-01 | -4.25 |
| 1424006_PM_at   | Aarsd1                              | AARSD1   | 0.55  | 3.03 | 2.39  | 3.70E-02 | 2.23E-01 | -4.25 |
| 1454863_PM_at   | Ankrd11                             | NA       | 0.36  | 3.11 | 2.39  | 3.70E-02 | 2.23E-01 | -4.25 |
| 1436726_PM_s_at | Sptlc1                              | SPTLC1   | -0.56 | 3.15 | -2.39 | 3.70E-02 | 2.23E-01 | -4.25 |
| 1420595_PM_at   | Dlx4                                | DLX4     | 0.22  | 2.04 | 2.39  | 3.70E-02 | 2.23E-01 | -4.25 |
| 1439486_PM_at   | Kcnt1                               | KCNT1    | 0.31  | 2.72 | 2.39  | 3.71E-02 | 2.23E-01 | -4.25 |
| 1450119_PM_at   | Dst                                 | DST      | 0.43  | 2.42 | 2.39  | 3.71E-02 | 2.23E-01 | -4.25 |
| 1431421_PM_x_at | LOC102641161 /// Prelid1            | NA       | 0.44  | 3.44 | 2.39  | 3.71E-02 | 2.23E-01 | -4.25 |
| 1447414_PM_at   | ---                                 | NA       | 0.26  | 3.09 | 2.39  | 3.71E-02 | 2.23E-01 | -4.25 |
| 1450028_PM_a_at | Lanc12                              | LANCL2   | -0.87 | 4.80 | -2.39 | 3.71E-02 | 2.23E-01 | -4.25 |
| 1432576_PM_at   | Gm38431 /// Raver1                  | RAVER1   | 0.42  | 2.69 | 2.39  | 3.71E-02 | 2.23E-01 | -4.25 |
| 1440499_PM_at   | D9ErtD26e                           | NA       | 0.48  | 2.79 | 2.39  | 3.71E-02 | 2.23E-01 | -4.25 |
| 1454019_PM_at   | Gm16982                             | NA       | 0.65  | 2.97 | 2.39  | 3.71E-02 | 2.23E-01 | -4.25 |
| 1448676_PM_at   | Camk2b                              | CAMK2B   | -0.56 | 5.03 | -2.39 | 3.71E-02 | 2.23E-01 | -4.25 |
| 1444074_PM_at   | Syne2                               | SYNE2    | 0.34  | 2.47 | 2.39  | 3.71E-02 | 2.23E-01 | -4.25 |
| 1450905_PM_at   | Plxn1                               | PLXN1    | -0.67 | 3.29 | -2.39 | 3.71E-02 | 2.23E-01 | -4.25 |
| 1457205_PM_at   | Nsf                                 | NSF      | 0.29  | 2.60 | 2.39  | 3.71E-02 | 2.23E-01 | -4.25 |
| 1459550_PM_at   | ---                                 | NA       | 0.52  | 2.73 | 2.39  | 3.71E-02 | 2.23E-01 | -4.25 |
| 1438759_PM_x_at | Adi1                                | ADI1     | 0.43  | 6.05 | 2.39  | 3.72E-02 | 2.23E-01 | -4.25 |
| 1457003_PM_at   | Grin2b                              | GRIN2B   | -0.38 | 7.75 | -2.39 | 3.72E-02 | 2.23E-01 | -4.25 |
| 1427348_PM_at   | Zc3h12a                             | ZC3H12A  | 0.19  | 2.50 | 2.39  | 3.72E-02 | 2.23E-01 | -4.25 |
| 1445299_PM_at   | ---                                 | NA       | 0.25  | 2.04 | 2.39  | 3.72E-02 | 2.23E-01 | -4.25 |
| 1454767_PM_at   | D2Bwg1423e /// Gm20071              | NA       | 0.21  | 3.28 | 2.39  | 3.72E-02 | 2.23E-01 | -4.26 |
| 1440300_PM_at   | Vav1                                | NA       | 0.24  | 3.05 | 2.39  | 3.72E-02 | 2.23E-01 | -4.26 |
| 1449505_PM_at   | Kpna1                               | KPNA1    | -0.56 | 5.55 | -2.39 | 3.72E-02 | 2.24E-01 | -4.26 |
| 1427764_PM_a_at | Tcf3                                | TCF3     | 0.53  | 2.63 | 2.39  | 3.73E-02 | 2.24E-01 | -4.26 |
| 1416721_PM_s_at | Srsf6                               | SRSF6    | -0.99 | 6.02 | -2.39 | 3.73E-02 | 2.24E-01 | -4.26 |
| 1448185_PM_at   | Herpud1                             | HERPUD1  | -0.28 | 2.89 | -2.39 | 3.73E-02 | 2.24E-01 | -4.26 |
| 1448186_PM_at   | Pnliprp2                            | PNLIPRP2 | 0.22  | 2.54 | 2.39  | 3.73E-02 | 2.24E-01 | -4.26 |
| 1419288_PM_at   | Jam2                                | JAM2     | 0.22  | 2.63 | 2.39  | 3.73E-02 | 2.24E-01 | -4.26 |
| 1459547_PM_at   | ---                                 | NA       | 0.31  | 2.60 | 2.39  | 3.73E-02 | 2.24E-01 | -4.26 |
| 1454999_PM_at   | Phf21b                              | PHF21B   | 0.42  | 2.77 | 2.39  | 3.73E-02 | 2.24E-01 | -4.26 |
| 1429243_PM_at   | Inip                                | INIP     | 0.52  | 3.76 | 2.39  | 3.73E-02 | 2.24E-01 | -4.26 |
| 1448705_PM_at   | Zbtb22                              | ZBTB22   | -0.51 | 4.02 | -2.39 | 3.74E-02 | 2.24E-01 | -4.26 |



|                 |                        |          |       |      |       |          |          |       |
|-----------------|------------------------|----------|-------|------|-------|----------|----------|-------|
| 1415770_PM_at   | Wdr6                   | WDR6     | -0.32 | 6.66 | -2.39 | 3.74E-02 | 2.24E-01 | -4.26 |
| 1438029_PM_at   | Rprd2                  | RPRD2    | -0.62 | 4.73 | -2.39 | 3.74E-02 | 2.24E-01 | -4.26 |
| 1428521_PM_at   | Thap3                  | THAP3    | 0.29  | 3.96 | 2.39  | 3.74E-02 | 2.24E-01 | -4.26 |
| 1419489_PM_at   | Fam19a5                | FAM19A5  | -0.74 | 3.66 | -2.39 | 3.74E-02 | 2.24E-01 | -4.26 |
| 1451983_PM_at   | Irx1                   | IRX1     | 0.32  | 2.40 | 2.39  | 3.74E-02 | 2.24E-01 | -4.26 |
| 1442760_PM_x_at | ---                    | NA       | 1.01  | 4.03 | 2.39  | 3.74E-02 | 2.24E-01 | -4.26 |
| 1426449_PM_a_at | Pja1                   | PJA1     | -0.53 | 3.80 | -2.39 | 3.74E-02 | 2.24E-01 | -4.26 |
| 1420508_PM_at   | Sema3f                 | SEMA3F   | 0.22  | 2.39 | 2.39  | 3.74E-02 | 2.24E-01 | -4.26 |
| 1420875_PM_at   | Gm4887 /// Twf1        | TWF1     | -0.70 | 3.95 | -2.38 | 3.75E-02 | 2.24E-01 | -4.26 |
| 1424484_PM_at   | Mob1a                  | MOB1A    | -0.63 | 2.49 | -2.38 | 3.75E-02 | 2.24E-01 | -4.26 |
| 1439929_PM_at   | ---                    | NA       | -0.50 | 2.60 | -2.38 | 3.75E-02 | 2.24E-01 | -4.26 |
| 1437890_PM_at   | Btdb17                 | NA       | 0.25  | 2.59 | 2.38  | 3.75E-02 | 2.24E-01 | -4.26 |
| 1425845_PM_a_at | Shoc2                  | SHOC2    | 0.48  | 3.20 | 2.38  | 3.75E-02 | 2.24E-01 | -4.26 |
| 1456544_PM_at   | Tmem38b                | TMEM38B  | -0.48 | 2.75 | -2.38 | 3.75E-02 | 2.24E-01 | -4.26 |
| 1452811_PM_at   | Atic                   | ATIC     | 0.23  | 2.71 | 2.38  | 3.75E-02 | 2.24E-01 | -4.26 |
| 1421705_PM_at   | Scn3a                  | SCN3A    | 0.26  | 2.18 | 2.38  | 3.75E-02 | 2.24E-01 | -4.26 |
| 1451313_PM_a_at | Lgalbl                 | LGALS1   | -1.03 | 5.15 | -2.38 | 3.76E-02 | 2.24E-01 | -4.26 |
| 1455437_PM_at   | Sik3                   | SIK3     | -0.77 | 3.80 | -2.38 | 3.76E-02 | 2.24E-01 | -4.26 |
| 1456041_PM_at   | Snx16                  | SNX16    | -0.47 | 3.43 | -2.38 | 3.76E-02 | 2.24E-01 | -4.26 |
| 1417827_PM_at   | Ngly1                  | NGLY1    | -0.46 | 3.36 | -2.38 | 3.75E-02 | 2.24E-01 | -4.26 |
| 1452374_PM_at   | Zfp322a                | ZNF322   | -0.39 | 2.98 | -2.38 | 3.76E-02 | 2.24E-01 | -4.26 |
| 1459017_PM_at   | ---                    | NA       | 0.17  | 2.09 | 2.38  | 3.76E-02 | 2.24E-01 | -4.26 |
| 1450279_PM_at   | Prokr1                 | PROKR1   | 0.22  | 2.51 | 2.38  | 3.76E-02 | 2.24E-01 | -4.26 |
| 1452722_PM_a_at | Cul5                   | CUL5     | 0.61  | 3.77 | 2.38  | 3.75E-02 | 2.24E-01 | -4.26 |
| 1417749_PM_a_at | Tjp1                   | TJP1     | -1.29 | 6.11 | -2.38 | 3.76E-02 | 2.25E-01 | -4.26 |
| 1429983_PM_at   | ---                    | NA       | 0.20  | 2.87 | 2.38  | 3.76E-02 | 2.25E-01 | -4.27 |
| 1426691_PM_at   | LOC105242488 /// Tjap1 | TJAP1    | 0.34  | 3.07 | 2.38  | 3.76E-02 | 2.25E-01 | -4.27 |
| 1427077_PM_a_at | Ap2b1                  | AP2B1    | -0.63 | 3.44 | -2.38 | 3.76E-02 | 2.25E-01 | -4.27 |
| 1416509_PM_at   | Tm9sf3                 | TM9SF3   | -0.53 | 7.18 | -2.38 | 3.76E-02 | 2.25E-01 | -4.27 |
| 1422904_PM_at   | Fmo2                   | FMO2     | 0.24  | 2.01 | 2.38  | 3.76E-02 | 2.25E-01 | -4.27 |
| 1421340_PM_at   | Map3k5                 | MAP3K5   | -0.87 | 3.71 | -2.38 | 3.77E-02 | 2.25E-01 | -4.27 |
| 1438826_PM_x_at | Calm3                  | CALM3    | 0.21  | 1.84 | 2.38  | 3.77E-02 | 2.25E-01 | -4.27 |
| 1427781_PM_at   | Usmg2                  | NA       | 0.54  | 3.23 | 2.38  | 3.77E-02 | 2.25E-01 | -4.27 |
| 1422413_PM_at   | Cramp1l                | CRAMP1   | 0.24  | 2.41 | 2.38  | 3.77E-02 | 2.25E-01 | -4.27 |
| 1427185_PM_at   | Mef2a                  | MEF2A    | -1.06 | 5.40 | -2.38 | 3.77E-02 | 2.25E-01 | -4.27 |
| 1432270_PM_a_at | Chmp5                  | CHMP5    | -0.74 | 8.52 | -2.38 | 3.77E-02 | 2.25E-01 | -4.27 |
| 1445674_PM_at   | Atg9b                  | NA       | 0.27  | 2.71 | 2.38  | 3.77E-02 | 2.25E-01 | -4.27 |
| 1424304_PM_at   | Tpcn2                  | TPCN2    | 0.29  | 2.69 | 2.38  | 3.77E-02 | 2.25E-01 | -4.27 |
| 1427253_PM_s_at | Suz12                  | SUZ12    | 0.45  | 3.59 | 2.38  | 3.77E-02 | 2.25E-01 | -4.27 |
| 1418801_PM_at   | Zkscan1                | ZKSCAN1  | -0.78 | 5.09 | -2.38 | 3.78E-02 | 2.25E-01 | -4.27 |
| 1424807_PM_at   | Lama4                  | LAMA4    | -0.20 | 2.29 | -2.38 | 3.78E-02 | 2.25E-01 | -4.27 |
| 1418245_PM_a_at | Rbfox2                 | RBFOX2   | 0.47  | 2.90 | 2.38  | 3.78E-02 | 2.25E-01 | -4.27 |
| 1448493_PM_at   | Paip2                  | PAIP2    | -0.83 | 7.75 | -2.38 | 3.78E-02 | 2.25E-01 | -4.27 |
| 1426811_PM_at   | Ppp2r5b                | PPP2R5B  | 0.20  | 2.74 | 2.38  | 3.78E-02 | 2.25E-01 | -4.27 |
| 1448757_PM_at   | Pml                    | PML      | 0.32  | 3.14 | 2.38  | 3.78E-02 | 2.25E-01 | -4.27 |
| 1416016_PM_at   | Tap1                   | TAP1     | 0.36  | 3.90 | 2.38  | 3.78E-02 | 2.25E-01 | -4.27 |
| 1451578_PM_at   | Ccdc65                 | CCDC65   | 0.37  | 2.83 | 2.38  | 3.78E-02 | 2.25E-01 | -4.27 |
| 1420853_PM_at   | Sdc3                   | NA       | 0.44  | 5.34 | 2.38  | 3.78E-02 | 2.25E-01 | -4.27 |
| 1458185_PM_at   | Thap4                  | THAP4    | 0.23  | 2.72 | 2.38  | 3.78E-02 | 2.25E-01 | -4.27 |
| 1433552_PM_a_at | Polr2b                 | POLR2B   | -0.99 | 5.35 | -2.38 | 3.78E-02 | 2.25E-01 | -4.27 |
| 1453024_PM_at   | Wdr37                  | WDR37    | -0.31 | 3.39 | -2.38 | 3.78E-02 | 2.25E-01 | -4.27 |
| 1449535_PM_at   | Znrf4                  | ZNRF4    | 0.24  | 2.76 | 2.38  | 3.79E-02 | 2.25E-01 | -4.27 |
| 1442959_PM_at   | Birc6                  | BIRC6    | 0.45  | 2.35 | 2.38  | 3.79E-02 | 2.25E-01 | -4.27 |
| 1442791_PM_x_at | Fgf11                  | NA       | 0.70  | 2.90 | 2.38  | 3.79E-02 | 2.25E-01 | -4.27 |
| 1451125_PM_at   | Paip2b                 | PAIP2B   | -0.90 | 5.04 | -2.38 | 3.79E-02 | 2.25E-01 | -4.27 |
| 1437506_PM_at   | Adamts6                | NA       | 0.20  | 3.05 | 2.38  | 3.79E-02 | 2.25E-01 | -4.27 |
| 1439913_PM_at   | Pabpc1l                | PABPC1L  | 0.42  | 2.77 | 2.38  | 3.79E-02 | 2.25E-01 | -4.27 |
| 1431395_PM_a_at | Iqgap1                 | IQGAP1   | 0.31  | 2.87 | 2.38  | 3.79E-02 | 2.25E-01 | -4.27 |
| 1446215_PM_at   | Zfx2os                 | NA       | 0.84  | 2.77 | 2.38  | 3.79E-02 | 2.26E-01 | -4.27 |
| 1422426_PM_at   | ---                    | NA       | 0.20  | 2.33 | 2.38  | 3.80E-02 | 2.26E-01 | -4.27 |
| 1439352_PM_at   | Trim7                  | TRIM7    | 0.27  | 2.43 | 2.38  | 3.80E-02 | 2.26E-01 | -4.27 |
| 1418573_PM_a_at | Raly                   | RALY     | 0.61  | 3.00 | 2.38  | 3.79E-02 | 2.26E-01 | -4.27 |
| 1458464_PM_at   | Hecw2                  | HECW2    | -0.55 | 2.94 | -2.38 | 3.80E-02 | 2.26E-01 | -4.28 |
| 1451199_PM_at   | Qtrt1                  | QTRT2    | -0.52 | 3.94 | -2.38 | 3.80E-02 | 2.26E-01 | -4.27 |
| 1453468_PM_at   | 4930430F08Rik          | C12orf29 | -0.47 | 2.91 | -2.38 | 3.81E-02 | 2.26E-01 | -4.28 |
| 1443693_PM_at   | ---                    | NA       | 0.20  | 2.00 | 2.38  | 3.81E-02 | 2.26E-01 | -4.28 |
| 1457178_PM_at   | ---                    | NA       | 0.21  | 2.53 | 2.38  | 3.80E-02 | 2.26E-01 | -4.27 |
| 1435831_PM_at   | Upk1b                  | UPK1B    | 0.23  | 2.72 | 2.38  | 3.81E-02 | 2.26E-01 | -4.28 |
| 1418494_PM_at   | Ebf2                   | EBF2     | 0.25  | 2.34 | 2.38  | 3.80E-02 | 2.26E-01 | -4.28 |
| 1430864_PM_at   | Ttl9                   | TTL9     | 0.25  | 2.70 | 2.38  | 3.81E-02 | 2.26E-01 | -4.28 |
| 1444109_PM_at   | ---                    | NA       | 0.28  | 2.45 | 2.38  | 3.80E-02 | 2.26E-01 | -4.27 |
| 1459283_PM_at   | Git2                   | GIT2     | 0.28  | 2.52 | 2.38  | 3.81E-02 | 2.26E-01 | -4.28 |
| 1442534_PM_at   | ---                    | NA       | 0.28  | 2.68 | 2.38  | 3.81E-02 | 2.26E-01 | -4.28 |
| 1417265_PM_s_at | Coq5                   | COQ5     | 0.30  | 2.39 | 2.38  | 3.80E-02 | 2.26E-01 | -4.28 |
| 1445050_PM_at   | AU015247               | NA       | 0.31  | 2.85 | 2.38  | 3.80E-02 | 2.26E-01 | -4.28 |

|                 |                                                                                   |            |       |       |       |          |          |       |
|-----------------|-----------------------------------------------------------------------------------|------------|-------|-------|-------|----------|----------|-------|
| 1427859_PM_at   | Igkv6-15                                                                          | NA         | 0.36  | 2.80  | 2.38  | 3.80E-02 | 2.26E-01 | -4.28 |
| 1440044_PM_at   | ---                                                                               | NA         | 0.37  | 3.14  | 2.38  | 3.80E-02 | 2.26E-01 | -4.28 |
| 1458192_PM_at   | ---                                                                               | NA         | 0.41  | 3.03  | 2.38  | 3.81E-02 | 2.26E-01 | -4.28 |
| 1443260_PM_at   | Meis1                                                                             | MEIS1      | 0.42  | 2.65  | 2.38  | 3.81E-02 | 2.26E-01 | -4.28 |
| 1444659_PM_at   | ---                                                                               | NA         | 0.43  | 2.38  | 2.38  | 3.80E-02 | 2.26E-01 | -4.28 |
| 1434085_PM_at   | Zfp523                                                                            | ZNF76      | 0.46  | 3.70  | 2.38  | 3.80E-02 | 2.26E-01 | -4.28 |
| 1447977_PM_x_at | 0610010B08Rik ///<br>Gm11007 /// Gm14308 ///<br>Gm14430 /// Gm14434 ///<br>Gm4724 | NA         | 0.54  | 5.86  | 2.38  | 3.80E-02 | 2.26E-01 | -4.28 |
| 1421068_PM_at   | Phf2                                                                              | PHF2       | 0.55  | 2.99  | 2.38  | 3.80E-02 | 2.26E-01 | -4.28 |
| 1432911_PM_at   | Safb                                                                              | NA         | 0.41  | 2.55  | 2.38  | 3.81E-02 | 2.26E-01 | -4.28 |
| 1434629_PM_at   | Zbtb26                                                                            | ZBTB26     | 0.45  | 2.78  | 2.38  | 3.81E-02 | 2.26E-01 | -4.28 |
| 1434482_PM_at   | Szrd1                                                                             | SZRD1      | 0.51  | 3.41  | 2.37  | 3.81E-02 | 2.26E-01 | -4.28 |
| 1460561_PM_x_at | Sepw1                                                                             | SELENOW    | 0.42  | 11.17 | 2.37  | 3.81E-02 | 2.26E-01 | -4.28 |
| 1427374_PM_at   | Muc3                                                                              | NA         | 0.20  | 2.35  | 2.37  | 3.81E-02 | 2.26E-01 | -4.28 |
| 1433638_PM_s_at | Hoxd8                                                                             | HOXD8      | 0.20  | 2.22  | 2.37  | 3.81E-02 | 2.26E-01 | -4.28 |
| 1421044_PM_at   | Mrc2                                                                              | MRC2       | 0.21  | 2.49  | 2.37  | 3.81E-02 | 2.26E-01 | -4.28 |
| 1430776_PM_s_at | Ankrd24                                                                           | ANKRD24    | 0.55  | 10.15 | 2.37  | 3.82E-02 | 2.26E-01 | -4.28 |
| 1456121_PM_at   | Cep97                                                                             | CEP97      | 0.60  | 4.81  | 2.37  | 3.82E-02 | 2.26E-01 | -4.28 |
| 1447346_PM_s_at | Dusp8                                                                             | DUSP8      | 0.25  | 3.01  | 2.37  | 3.82E-02 | 2.26E-01 | -4.28 |
| 1436206_PM_at   | Fbxo10                                                                            | FBXO10     | -0.79 | 5.19  | -2.37 | 3.82E-02 | 2.26E-01 | -4.28 |
| 1450294_PM_a_at | Kcnj6                                                                             | KCNJ6      | -0.55 | 3.70  | -2.37 | 3.82E-02 | 2.26E-01 | -4.28 |
| 1443980_PM_at   | Agrn                                                                              | AGRN       | 0.38  | 2.46  | 2.37  | 3.82E-02 | 2.26E-01 | -4.28 |
| 1456418_PM_at   | Kcnj13                                                                            | KCNJ13     | -0.72 | 3.23  | -2.37 | 3.82E-02 | 2.26E-01 | -4.28 |
| 1450595_PM_at   | Vmn1r10 /// Vmn1r9                                                                | NA         | 0.27  | 2.78  | 2.37  | 3.82E-02 | 2.26E-01 | -4.28 |
| 1451135_PM_at   | Gtf2b                                                                             | GTF2B      | -0.49 | 3.21  | -2.37 | 3.83E-02 | 2.26E-01 | -4.28 |
| 1458065_PM_at   | ---                                                                               | NA         | 0.22  | 2.26  | 2.37  | 3.83E-02 | 2.26E-01 | -4.28 |
| 1455262_PM_at   | Thsd4                                                                             | THSD4      | -0.64 | 4.24  | -2.37 | 3.83E-02 | 2.26E-01 | -4.28 |
| 1451550_PM_at   | Ephb3                                                                             | NA         | -0.35 | 2.62  | -2.37 | 3.83E-02 | 2.26E-01 | -4.28 |
| 1445329_PM_at   | Dtnb                                                                              | DTNB       | 0.35  | 2.21  | 2.37  | 3.83E-02 | 2.26E-01 | -4.28 |
| 1422077_PM_at   | Acot4                                                                             | ACOT4      | 0.28  | 2.28  | 2.37  | 3.83E-02 | 2.26E-01 | -4.28 |
| 1445049_PM_at   | C80893                                                                            | NA         | 0.85  | 3.08  | 2.37  | 3.83E-02 | 2.26E-01 | -4.28 |
| 1422466_PM_at   | Nxn                                                                               | NXN        | 0.25  | 2.22  | 2.37  | 3.83E-02 | 2.27E-01 | -4.28 |
| 1459142_PM_at   | Spag17                                                                            | SPAG17     | 0.23  | 2.90  | 2.37  | 3.83E-02 | 2.27E-01 | -4.28 |
| 1434228_PM_at   | Pdp1                                                                              | PDP1       | -0.57 | 3.41  | -2.37 | 3.83E-02 | 2.27E-01 | -4.28 |
| 1459227_PM_at   | ---                                                                               | NA         | 0.31  | 2.46  | 2.37  | 3.83E-02 | 2.27E-01 | -4.28 |
| 1422500_PM_at   | Idh3a                                                                             | IDH3A      | -0.69 | 3.33  | -2.37 | 3.83E-02 | 2.27E-01 | -4.28 |
| 1448329_PM_at   | Adam3                                                                             | NA         | 0.24  | 2.44  | 2.37  | 3.84E-02 | 2.27E-01 | -4.28 |
| 1450666_PM_s_at | Atxn10                                                                            | ATXN10     | -0.48 | 5.66  | -2.37 | 3.84E-02 | 2.27E-01 | -4.28 |
| 1446757_PM_at   | ---                                                                               | NA         | 0.26  | 2.62  | 2.37  | 3.84E-02 | 2.27E-01 | -4.28 |
| 1453549_PM_at   | ---                                                                               | NA         | 0.28  | 2.41  | 2.37  | 3.84E-02 | 2.27E-01 | -4.28 |
| 1419872_PM_at   | Csf1r                                                                             | CSF1R      | -1.74 | 5.70  | -2.37 | 3.84E-02 | 2.27E-01 | -4.28 |
| 1437595_PM_at   | Tmem252                                                                           | TMEM252    | 0.25  | 3.43  | 2.37  | 3.84E-02 | 2.27E-01 | -4.29 |
| 1445631_PM_at   | Ano3                                                                              | ANO3       | -1.19 | 3.64  | -2.37 | 3.84E-02 | 2.27E-01 | -4.29 |
| 1416968_PM_a_at | Hsd3b7                                                                            | HSD3B7     | 0.21  | 2.22  | 2.37  | 3.84E-02 | 2.27E-01 | -4.29 |
| 1428540_PM_at   | Tcaf1                                                                             | TCAF1      | -0.75 | 5.01  | -2.37 | 3.84E-02 | 2.27E-01 | -4.29 |
| 1422033_PM_a_at | Cntf /// Zfp91 /// Zfp91Cntf                                                      | ZFP91-CNTF | 0.45  | 2.55  | 2.37  | 3.84E-02 | 2.27E-01 | -4.29 |
| 1440880_PM_at   | Mppe1                                                                             | NA         | -0.89 | 4.70  | -2.37 | 3.84E-02 | 2.27E-01 | -4.29 |
| 1434608_PM_at   | Ddx52                                                                             | DDX52      | -0.31 | 2.98  | -2.37 | 3.85E-02 | 2.27E-01 | -4.29 |
| 1454940_PM_at   | Psm5                                                                              | PSMA5      | 0.27  | 2.48  | 2.37  | 3.85E-02 | 2.27E-01 | -4.29 |
| 1422564_PM_at   | Actl6b                                                                            | ACTL6B     | 0.76  | 3.70  | 2.37  | 3.85E-02 | 2.27E-01 | -4.29 |
| 1425817_PM_a_at | Slc8a1                                                                            | SLC8A1     | 1.27  | 3.79  | 2.37  | 3.85E-02 | 2.27E-01 | -4.29 |
| 1453326_PM_at   | C2cd4b                                                                            | C2CD4B     | 0.21  | 2.24  | 2.37  | 3.85E-02 | 2.27E-01 | -4.29 |
| 1438097_PM_at   | Rab20                                                                             | RAB20      | 0.27  | 2.74  | 2.37  | 3.85E-02 | 2.27E-01 | -4.29 |
| 1444167_PM_at   | ---                                                                               | NA         | 0.60  | 3.12  | 2.37  | 3.85E-02 | 2.27E-01 | -4.29 |
| 1454503_PM_at   | ---                                                                               | NA         | 0.21  | 2.20  | 2.37  | 3.85E-02 | 2.27E-01 | -4.29 |
| 1458702_PM_at   | 2610316D01Rik                                                                     | NA         | 0.23  | 2.14  | 2.37  | 3.86E-02 | 2.27E-01 | -4.29 |
| 1444300_PM_at   | Adgra3                                                                            | NA         | 0.31  | 2.44  | 2.37  | 3.86E-02 | 2.27E-01 | -4.29 |
| 1429002_PM_at   | Snrw1                                                                             | SNW1       | -0.49 | 6.34  | -2.37 | 3.86E-02 | 2.27E-01 | -4.29 |
| 1434320_PM_at   | Gtf3c4                                                                            | GTF3C4     | -0.46 | 4.10  | -2.37 | 3.86E-02 | 2.27E-01 | -4.29 |
| 1446072_PM_at   | 4632415L05Rik                                                                     | NA         | -0.37 | 2.48  | -2.37 | 3.86E-02 | 2.27E-01 | -4.29 |
| 1427535_PM_s_at | Obsl1                                                                             | OBSL1      | 0.26  | 2.39  | 2.37  | 3.86E-02 | 2.27E-01 | -4.29 |
| 1423801_PM_a_at | Aprt                                                                              | APRT       | 0.27  | 2.93  | 2.37  | 3.86E-02 | 2.27E-01 | -4.29 |
| 1421119_PM_at   | Kif21b                                                                            | KIF21B     | 0.38  | 3.08  | 2.37  | 3.86E-02 | 2.27E-01 | -4.29 |
| 1439907_PM_at   | ---                                                                               | NA         | 0.31  | 2.46  | 2.37  | 3.86E-02 | 2.27E-01 | -4.29 |
| 1459900_PM_at   | C79468                                                                            | NA         | 0.65  | 3.36  | 2.37  | 3.86E-02 | 2.27E-01 | -4.29 |
| 1428476_PM_a_at | Elac2                                                                             | ELAC2      | 0.38  | 3.59  | 2.37  | 3.87E-02 | 2.27E-01 | -4.29 |
| 1434138_PM_at   | Prune                                                                             | PRUNE1     | 0.59  | 5.34  | 2.37  | 3.87E-02 | 2.27E-01 | -4.29 |
| 1427148_PM_at   | Pja2                                                                              | PJA2       | -0.95 | 3.40  | -2.37 | 3.87E-02 | 2.28E-01 | -4.29 |
| 1429818_PM_at   | Prr23a3                                                                           | PRR23C     | 0.23  | 2.44  | 2.37  | 3.87E-02 | 2.28E-01 | -4.29 |
| 1431690_PM_at   | ---                                                                               | NA         | 0.25  | 2.99  | 2.37  | 3.87E-02 | 2.28E-01 | -4.29 |
| 1423099_PM_a_at | Mettl3                                                                            | METTL3     | -1.13 | 5.28  | -2.37 | 3.87E-02 | 2.28E-01 | -4.29 |
| 1416323_PM_at   | Kctd20                                                                            | KCTD20     | -0.79 | 3.72  | -2.37 | 3.87E-02 | 2.28E-01 | -4.29 |

|                 |                         |                 |       |      |       |          |          |       |
|-----------------|-------------------------|-----------------|-------|------|-------|----------|----------|-------|
| 1421840_PM_at   | Abca1                   | ABCA1           | -0.98 | 3.71 | -2.37 | 3.88E-02 | 2.28E-01 | -4.29 |
| 1423272_PM_at   | Polg                    | POLG            | -0.37 | 3.97 | -2.36 | 3.88E-02 | 2.28E-01 | -4.29 |
| 1427422_PM_at   | Angptl8                 | ANGPTL8         | 0.29  | 2.71 | 2.36  | 3.88E-02 | 2.28E-01 | -4.29 |
| 1425360_PM_at   | Mllt6                   | MLLT6           | 0.47  | 2.86 | 2.36  | 3.88E-02 | 2.28E-01 | -4.29 |
| 1438223_PM_at   | ---                     | NA              | 0.96  | 6.93 | 2.37  | 3.88E-02 | 2.28E-01 | -4.29 |
| 1438864_PM_at   | ---                     | NA              | -0.37 | 2.94 | -2.36 | 3.88E-02 | 2.28E-01 | -4.30 |
| 1431646_PM_a_at | Stx6                    | STX6            | 0.41  | 3.21 | 2.36  | 3.88E-02 | 2.28E-01 | -4.30 |
| 1423852_PM_at   | Shisa2                  | SHISA2          | -0.38 | 3.21 | -2.36 | 3.88E-02 | 2.28E-01 | -4.30 |
| 1423762_PM_at   | Adck1                   | ADCK1           | -0.26 | 3.15 | -2.36 | 3.89E-02 | 2.28E-01 | -4.30 |
| 1449212_PM_at   | Pip                     | PIP             | 0.30  | 2.32 | 2.36  | 3.88E-02 | 2.28E-01 | -4.30 |
| 1443135_PM_at   | ---                     | NA              | 0.35  | 2.65 | 2.36  | 3.89E-02 | 2.28E-01 | -4.30 |
| 1458305_PM_at   | Tmtc3                   | TMTC3           | 0.40  | 2.79 | 2.36  | 3.88E-02 | 2.28E-01 | -4.30 |
| 1429729_PM_at   | 1500004A13Rik /// Syt11 | NA              | 0.50  | 3.02 | 2.36  | 3.88E-02 | 2.28E-01 | -4.30 |
| 1423063_PM_at   | Dnm3a                   | DNMT3A          | 0.74  | 3.60 | 2.36  | 3.89E-02 | 2.28E-01 | -4.30 |
| 1433554_PM_at   | Cc21                    | CC21B           | -0.38 | 3.94 | -2.36 | 3.89E-02 | 2.28E-01 | -4.30 |
| 1439061_PM_at   | Ccdc84                  | CCDC84          | -0.32 | 2.78 | -2.36 | 3.89E-02 | 2.28E-01 | -4.30 |
| 1454535_PM_at   | A430110A21Rik           | NA              | 0.64  | 3.80 | 2.36  | 3.89E-02 | 2.28E-01 | -4.30 |
| 1417799_PM_at   | Atp6v1g2                | ATP6V1G2-DDX39B | -0.72 | 7.36 | -2.36 | 3.89E-02 | 2.28E-01 | -4.30 |
| 1445774_PM_at   | ---                     | NA              | 0.34  | 3.15 | 2.36  | 3.89E-02 | 2.28E-01 | -4.30 |
| 1434676_PM_at   | Mttr9                   | NA              | -0.93 | 5.86 | -2.36 | 3.90E-02 | 2.29E-01 | -4.30 |
| 1424748_PM_at   | Galnt11                 | GALNT11         | -0.54 | 3.41 | -2.36 | 3.90E-02 | 2.29E-01 | -4.30 |
| 1456173_PM_at   | Il10ra                  | IL10RA          | 0.31  | 2.70 | 2.36  | 3.90E-02 | 2.29E-01 | -4.30 |
| 1450283_PM_at   | Atp7b                   | ATP7B           | 0.27  | 3.42 | 2.36  | 3.90E-02 | 2.29E-01 | -4.30 |
| 1450916_PM_at   | Stau2                   | STAU2           | -0.72 | 3.85 | -2.36 | 3.91E-02 | 2.29E-01 | -4.30 |
| 1423542_PM_at   | Klk7                    | KLK7            | -0.41 | 2.73 | -2.36 | 3.90E-02 | 2.29E-01 | -4.30 |
| 1426440_PM_at   | Dhrs7                   | DHRS7           | -0.31 | 3.35 | -2.36 | 3.90E-02 | 2.29E-01 | -4.30 |
| 1452846_PM_at   | Ppfia4                  | PPFIA4          | 0.23  | 2.65 | 2.36  | 3.90E-02 | 2.29E-01 | -4.30 |
| 1439749_PM_at   | Zap70                   | ZAP70           | 0.39  | 2.83 | 2.36  | 3.91E-02 | 2.29E-01 | -4.30 |
| 1437267_PM_x_at | Hnrph1                  | NA              | 0.39  | 7.19 | 2.36  | 3.91E-02 | 2.29E-01 | -4.30 |
| 1450817_PM_at   | Capn15                  | CAPN15          | 0.55  | 2.76 | 2.36  | 3.90E-02 | 2.29E-01 | -4.30 |
| 1428405_PM_at   | Hcfc1r1                 | HCFC1R1         | 1.31  | 7.04 | 2.36  | 3.91E-02 | 2.29E-01 | -4.30 |
| 1446461_PM_at   | ---                     | NA              | 0.32  | 2.57 | 2.36  | 3.91E-02 | 2.29E-01 | -4.30 |
| 1453577_PM_at   | Ube2cbp                 | UBE3D           | 0.26  | 3.09 | 2.36  | 3.91E-02 | 2.29E-01 | -4.30 |
| 1448583_PM_at   | Usb1                    | USB1            | 0.25  | 2.49 | 2.36  | 3.91E-02 | 2.29E-01 | -4.30 |
| 1417485_PM_at   | Ibsp                    | IBSP            | 0.24  | 2.79 | 2.36  | 3.91E-02 | 2.29E-01 | -4.30 |
| 1442423_PM_at   | ---                     | NA              | 1.48  | 3.89 | 2.36  | 3.91E-02 | 2.29E-01 | -4.30 |
| 1417527_PM_at   | Ap3m2                   | AP3M2           | -1.09 | 4.98 | -2.36 | 3.92E-02 | 2.29E-01 | -4.30 |
| 1449281_PM_at   | Nrtn                    | NRTN            | 0.21  | 2.71 | 2.36  | 3.92E-02 | 2.29E-01 | -4.30 |
| 1424339_PM_at   | Oasl1                   | OASL            | 0.22  | 2.11 | 2.36  | 3.92E-02 | 2.29E-01 | -4.30 |
| 1436036_PM_at   | Whsc1                   | NSD2            | 0.30  | 3.30 | 2.36  | 3.92E-02 | 2.29E-01 | -4.30 |
| 1445244_PM_at   | ---                     | NA              | 0.35  | 3.29 | 2.36  | 3.92E-02 | 2.29E-01 | -4.30 |
| 1455568_PM_at   | Ccdc74a                 | NA              | 0.36  | 2.50 | 2.36  | 3.92E-02 | 2.29E-01 | -4.30 |
| 1442507_PM_at   | Whrn                    | WHRN            | 0.38  | 2.72 | 2.36  | 3.92E-02 | 2.29E-01 | -4.30 |
| 1452962_PM_at   | Tmem25                  | TMEM25          | -0.27 | 3.15 | -2.36 | 3.92E-02 | 2.29E-01 | -4.31 |
| 1424879_PM_at   | Gm20605 /// Lrch4 ///   | SAP25           | 0.23  | 3.81 | 2.36  | 3.92E-02 | 2.29E-01 | -4.31 |
| 1418889_PM_a_at | Csnk1d                  | CSNK1D          | 0.65  | 3.52 | 2.36  | 3.92E-02 | 2.29E-01 | -4.31 |
| 1418890_PM_a_at | Rab3d                   | RAB3D           | 0.30  | 2.49 | 2.36  | 3.92E-02 | 2.29E-01 | -4.31 |
| 1451631_PM_at   | Rprd1a                  | RPRD1A          | 0.42  | 3.81 | 2.36  | 3.92E-02 | 2.29E-01 | -4.31 |
| 1452790_PM_x_at | Ndufa3                  | NDUFA3          | -1.05 | 5.59 | -2.36 | 3.93E-02 | 2.29E-01 | -4.31 |
| 1428653_PM_x_at | Elavl1                  | ELAVL1          | -0.92 | 3.47 | -2.36 | 3.93E-02 | 2.29E-01 | -4.31 |
| 1453070_PM_at   | Pcdh17                  | PCDH17          | -0.74 | 3.68 | -2.36 | 3.93E-02 | 2.29E-01 | -4.31 |
| 1434910_PM_at   | A830080D01Rik           | CXorf23         | -0.43 | 2.74 | -2.36 | 3.93E-02 | 2.29E-01 | -4.31 |
| 1455901_PM_at   | Chpt1                   | CHPT1           | -0.28 | 2.79 | -2.36 | 3.93E-02 | 2.29E-01 | -4.31 |
| 1436591_PM_at   | Vsig10                  | VSIG10          | 0.19  | 2.07 | 2.36  | 3.93E-02 | 2.29E-01 | -4.31 |
| 1451478_PM_at   | Angptl7                 | ANGPTL7         | 0.24  | 2.77 | 2.36  | 3.93E-02 | 2.29E-01 | -4.31 |
| 1418998_PM_at   | Kmo                     | KMO             | 0.26  | 2.71 | 2.36  | 3.93E-02 | 2.29E-01 | -4.31 |
| 1432423_PM_a_at | C530008M17Rik           | KIAA1211        | 0.30  | 2.53 | 2.36  | 3.93E-02 | 2.29E-01 | -4.31 |
| 1439193_PM_at   | Prrx1                   | DRGX            | 0.31  | 2.81 | 2.36  | 3.93E-02 | 2.29E-01 | -4.31 |
| 1445222_PM_at   | ---                     | NA              | 0.31  | 2.95 | 2.36  | 3.93E-02 | 2.29E-01 | -4.31 |
| 1440166_PM_x_at | Htr1d                   | HTR1D           | 0.33  | 2.54 | 2.36  | 3.93E-02 | 2.29E-01 | -4.31 |
| 1427611_PM_at   | Ghrhr                   | GHRHR           | 0.34  | 3.07 | 2.36  | 3.93E-02 | 2.29E-01 | -4.31 |
| 1457654_PM_at   | Osgep                   | OSGEP           | 0.41  | 4.35 | 2.36  | 3.93E-02 | 2.29E-01 | -4.31 |
| 1451586_PM_at   | Tmbim6                  | TMBIM6          | -0.80 | 6.04 | -2.36 | 3.93E-02 | 2.29E-01 | -4.31 |
| 1432410_PM_a_at | Bmp7                    | BMP7            | 0.21  | 2.28 | 2.36  | 3.93E-02 | 2.29E-01 | -4.31 |
| 1440198_PM_at   | ---                     | NA              | 0.25  | 2.24 | 2.36  | 3.93E-02 | 2.29E-01 | -4.31 |
| 1433268_PM_at   | ---                     | NA              | 0.19  | 2.39 | 2.36  | 3.94E-02 | 2.29E-01 | -4.31 |
| 1431757_PM_s_at | 5033417F24Rik           | NA              | 0.20  | 2.02 | 2.36  | 3.94E-02 | 2.29E-01 | -4.31 |
| 1459703_PM_at   | ---                     | NA              | -0.57 | 5.48 | -2.36 | 3.94E-02 | 2.29E-01 | -4.31 |
| 1444798_PM_at   | ---                     | NA              | 0.52  | 2.35 | 2.36  | 3.94E-02 | 2.29E-01 | -4.31 |
| 1423444_PM_at   | Rock1                   | ROCK1           | 0.90  | 7.56 | 2.36  | 3.94E-02 | 2.29E-01 | -4.31 |
| 1422692_PM_at   | Sub1                    | SUB1            | -0.55 | 4.55 | -2.36 | 3.94E-02 | 2.29E-01 | -4.31 |
| 1437356_PM_at   | Gpr183                  | GPR183          | 0.23  | 2.61 | 2.36  | 3.94E-02 | 2.29E-01 | -4.31 |
| 1457519_PM_at   | ---                     | NA              | 0.30  | 2.58 | 2.36  | 3.94E-02 | 2.29E-01 | -4.31 |
| 1458186_PM_at   | ---                     | NA              | 0.37  | 3.93 | 2.36  | 3.94E-02 | 2.29E-01 | -4.31 |

|                 |                       |            |       |      |       |          |          |       |
|-----------------|-----------------------|------------|-------|------|-------|----------|----------|-------|
| 1455433_PM_at   | Zfp942                | NA         | -0.40 | 2.54 | -2.36 | 3.94E-02 | 2.29E-01 | -4.31 |
| 1417822_PM_at   | D17H6S56E-5           | NA         | 0.30  | 3.49 | 2.36  | 3.94E-02 | 2.29E-01 | -4.31 |
| 1418770_PM_at   | Cd2                   | CD2        | 0.24  | 2.29 | 2.36  | 3.94E-02 | 2.30E-01 | -4.31 |
| 1432729_PM_at   | ---                   | NA         | 0.25  | 2.81 | 2.36  | 3.94E-02 | 2.30E-01 | -4.31 |
| 1450982_PM_at   | Slc9a3r1              | SLC9A3R1   | 0.29  | 2.45 | 2.36  | 3.94E-02 | 2.30E-01 | -4.31 |
| 1455979_PM_at   | Arid1b                | ARID1B     | -0.71 | 6.11 | -2.35 | 3.95E-02 | 2.30E-01 | -4.31 |
| 1427229_PM_at   | Hmgcr                 | HMGCR      | -0.56 | 3.51 | -2.35 | 3.95E-02 | 2.30E-01 | -4.31 |
| 1446999_PM_at   | ---                   | NA         | 0.20  | 3.15 | 2.35  | 3.95E-02 | 2.30E-01 | -4.31 |
| 1455201_PM_x_at | Apoa1                 | APOA1      | 0.26  | 2.43 | 2.35  | 3.95E-02 | 2.30E-01 | -4.31 |
| 1458862_PM_at   | C78704                | NA         | 0.28  | 2.37 | 2.35  | 3.95E-02 | 2.30E-01 | -4.31 |
| 1425103_PM_at   | Ace2                  | ACE2       | 0.39  | 3.21 | 2.35  | 3.95E-02 | 2.30E-01 | -4.31 |
| 1442112_PM_at   | ---                   | NA         | 0.39  | 3.13 | 2.35  | 3.95E-02 | 2.30E-01 | -4.31 |
| 1424425_PM_a_at | Mtap                  | AL359922.1 | 0.32  | 2.82 | 2.35  | 3.95E-02 | 2.30E-01 | -4.31 |
| 1424799_PM_a_at | Gcc1                  | GCC1       | 0.44  | 2.46 | 2.35  | 3.95E-02 | 2.30E-01 | -4.31 |
| 1416816_PM_at   | Nek7                  | NEK7       | -1.04 | 5.42 | -2.35 | 3.95E-02 | 2.30E-01 | -4.31 |
| 1428565_PM_at   | Unkl                  | UNKL       | -0.44 | 5.03 | -2.35 | 3.95E-02 | 2.30E-01 | -4.31 |
| 1450427_PM_at   | Chrna6                | CHRNA6     | 0.25  | 2.09 | 2.35  | 3.95E-02 | 2.30E-01 | -4.31 |
| 1448567_PM_at   | Tmem115               | TMEM115    | 0.26  | 3.25 | 2.35  | 3.96E-02 | 2.30E-01 | -4.31 |
| 1437563_PM_at   | Phf20l1               | PHF20L1    | -0.48 | 3.60 | -2.35 | 3.96E-02 | 2.30E-01 | -4.31 |
| 1427898_PM_at   | Rnf6                  | RNF6       | -0.76 | 5.26 | -2.35 | 3.96E-02 | 2.30E-01 | -4.31 |
| 1442328_PM_at   | Grin2d                | GRIN2D     | 1.11  | 4.76 | 2.35  | 3.96E-02 | 2.30E-01 | -4.31 |
| 1443076_PM_at   | ---                   | NA         | 0.29  | 2.62 | 2.35  | 3.96E-02 | 2.30E-01 | -4.31 |
| 1435497_PM_at   | Ticrr                 | TICRR      | 0.22  | 2.88 | 2.35  | 3.96E-02 | 2.30E-01 | -4.31 |
| 1428120_PM_at   | Fbxw9                 | FBXW9      | 0.35  | 3.28 | 2.35  | 3.96E-02 | 2.30E-01 | -4.31 |
| 1434865_PM_a_at | Exoc7                 | EXOC7      | 0.37  | 3.68 | 2.35  | 3.96E-02 | 2.30E-01 | -4.32 |
| 1421691_PM_at   | Krtap21-1             | NA         | 0.26  | 2.72 | 2.35  | 3.96E-02 | 2.30E-01 | -4.32 |
| 1434255_PM_at   | Pacs2                 | PACS2      | 0.36  | 2.47 | 2.35  | 3.97E-02 | 2.30E-01 | -4.32 |
| 1422668_PM_at   | Serpib9b              | SERPINB9   | 0.57  | 2.57 | 2.35  | 3.97E-02 | 2.30E-01 | -4.32 |
| 1449798_PM_at   | Rab3c                 | NA         | 0.66  | 5.49 | 2.35  | 3.97E-02 | 2.30E-01 | -4.32 |
| 1453887_PM_a_at | Tiam1                 | TIAM1      | 0.40  | 3.07 | 2.35  | 3.97E-02 | 2.30E-01 | -4.32 |
| 1426871_PM_at   | Fbxo33                | FBXO33     | -0.67 | 3.30 | -2.35 | 3.97E-02 | 2.30E-01 | -4.32 |
| 1424491_PM_at   | Gm39062               | NA         | 0.20  | 2.24 | 2.35  | 3.97E-02 | 2.30E-01 | -4.32 |
| 1441262_PM_at   | ---                   | NA         | 0.28  | 2.42 | 2.35  | 3.97E-02 | 2.30E-01 | -4.32 |
| 1427037_PM_at   | Eif4g1                | EIF4G1     | -0.46 | 4.32 | -2.35 | 3.97E-02 | 2.30E-01 | -4.32 |
| 1460504_PM_at   | ---                   | NA         | 0.23  | 2.89 | 2.35  | 3.97E-02 | 2.30E-01 | -4.32 |
| 1448045_PM_at   | Gm10658               | NA         | 0.20  | 2.26 | 2.35  | 3.98E-02 | 2.30E-01 | -4.32 |
| 1452210_PM_at   | Dna2                  | DNA2       | 0.32  | 3.05 | 2.35  | 3.98E-02 | 2.30E-01 | -4.32 |
| 1421782_PM_a_at | Smr2                  | NA         | 0.72  | 2.82 | 2.35  | 3.98E-02 | 2.30E-01 | -4.32 |
| 1420897_PM_at   | Snap23                | SNAP23     | 1.09  | 4.86 | 2.35  | 3.98E-02 | 2.30E-01 | -4.32 |
| 1433532_PM_a_at | Mbp                   | MBP        | -1.11 | 9.77 | -2.35 | 3.98E-02 | 2.30E-01 | -4.32 |
| 1429319_PM_at   | Rhoh                  | RHOH       | 0.26  | 2.47 | 2.35  | 3.98E-02 | 2.30E-01 | -4.32 |
| 1418611_PM_at   | Gpr162                | GPR162     | 0.34  | 2.99 | 2.35  | 3.98E-02 | 2.30E-01 | -4.32 |
| 1433071_PM_at   | 6430605C03Rik         | NA         | 0.51  | 2.75 | 2.35  | 3.98E-02 | 2.30E-01 | -4.32 |
| 1460431_PM_at   | Gcnt1                 | GCNT1      | 0.35  | 3.10 | 2.35  | 3.98E-02 | 2.30E-01 | -4.32 |
| 1454644_PM_at   | Strip1                | STRIP1     | -0.34 | 3.53 | -2.35 | 3.98E-02 | 2.31E-01 | -4.32 |
| 1432916_PM_at   | ---                   | NA         | 0.89  | 2.66 | 2.35  | 3.98E-02 | 2.31E-01 | -4.32 |
| 1417366_PM_s_at | Calm1                 | NA         | -0.81 | 4.47 | -2.35 | 3.98E-02 | 2.31E-01 | -4.32 |
| 1445374_PM_at   | ---                   | NA         | 0.57  | 3.90 | 2.35  | 3.98E-02 | 2.31E-01 | -4.32 |
| 1417341_PM_a_at | Ppp1r2                | PPP1R2     | -0.64 | 5.42 | -2.35 | 3.98E-02 | 2.31E-01 | -4.32 |
| 1422782_PM_s_at | Tlr3                  | TLR3       | -1.06 | 4.09 | -2.35 | 3.98E-02 | 2.31E-01 | -4.32 |
| 1449298_PM_a_at | Pde1a                 | PDE1A      | -0.80 | 5.69 | -2.35 | 3.99E-02 | 2.31E-01 | -4.32 |
| 1460731_PM_at   | Slc35c2               | SLC35C2    | 0.32  | 2.68 | 2.35  | 3.99E-02 | 2.31E-01 | -4.32 |
| 1440070_PM_at   | ---                   | NA         | 0.44  | 2.63 | 2.35  | 3.99E-02 | 2.31E-01 | -4.32 |
| 1434503_PM_s_at | Lamp2                 | LAMP2      | -1.16 | 6.42 | -2.35 | 3.99E-02 | 2.31E-01 | -4.32 |
| 1437047_PM_at   | Zfp664                | ZNF664     | 0.22  | 2.52 | 2.35  | 3.99E-02 | 2.31E-01 | -4.32 |
| 1428023_PM_at   | 3110009E18Rik         | C2orf76    | 0.45  | 2.43 | 2.35  | 3.99E-02 | 2.31E-01 | -4.32 |
| 1452428_PM_a_at | B2m                   | B2M        | -1.55 | 5.86 | -2.35 | 4.00E-02 | 2.31E-01 | -4.32 |
| 1448360_PM_s_at | Angel2                | ANGEL2     | -0.92 | 3.93 | -2.35 | 4.00E-02 | 2.31E-01 | -4.32 |
| 1448780_PM_at   | Slc12a2               | SLC12A2    | -0.66 | 3.38 | -2.35 | 4.00E-02 | 2.31E-01 | -4.32 |
| 1448511_PM_at   | Ptprcap               | PTPRCAP    | 0.30  | 2.50 | 2.35  | 4.00E-02 | 2.31E-01 | -4.32 |
| 1454813_PM_at   | Tma7                  | TMA7       | -1.00 | 8.20 | -2.35 | 4.00E-02 | 2.31E-01 | -4.32 |
| 1450350_PM_a_at | Jdp2                  | JDP2       | -0.68 | 3.54 | -2.35 | 4.00E-02 | 2.31E-01 | -4.32 |
| 1444223_PM_at   | Hcrr2                 | HCRR2      | 0.21  | 2.24 | 2.35  | 4.00E-02 | 2.31E-01 | -4.32 |
| 1419179_PM_at   | Txnla                 | TXNLA      | 0.35  | 2.93 | 2.35  | 4.00E-02 | 2.31E-01 | -4.32 |
| 1450147_PM_at   | Npcd /// Nptxr        | NPTXR      | 0.92  | 4.88 | 2.35  | 4.00E-02 | 2.31E-01 | -4.32 |
| 1415914_PM_at   | Hnrnpab               | HNRNPAB    | -0.79 | 5.55 | -2.35 | 4.00E-02 | 2.31E-01 | -4.32 |
| 1432895_PM_at   | 9030409K20Rik         | NA         | 0.19  | 2.17 | 2.35  | 4.00E-02 | 2.31E-01 | -4.32 |
| 1417286_PM_at   | Ndufa5                | NDUFAS     | -0.60 | 6.42 | -2.35 | 4.00E-02 | 2.31E-01 | -4.32 |
| 1435586_PM_at   | Pcid2                 | PCID2      | 0.39  | 2.83 | 2.35  | 4.01E-02 | 2.31E-01 | -4.33 |
| 1447910_PM_x_at | BC052688              | NA         | 0.39  | 3.47 | 2.35  | 4.01E-02 | 2.31E-01 | -4.33 |
| 1416023_PM_at   | Fabp3                 | FABP3      | 0.43  | 4.81 | 2.35  | 4.01E-02 | 2.31E-01 | -4.33 |
| 1456135_PM_s_at | Pxn                   | PXN        | 0.96  | 4.63 | 2.35  | 4.01E-02 | 2.31E-01 | -4.33 |
| 1456772_PM_at   | Ncf1                  | NCF1       | 0.50  | 2.89 | 2.35  | 4.01E-02 | 2.31E-01 | -4.33 |
| 1441707_PM_at   | Psm3                  | PSMA3      | 0.74  | 3.18 | 2.35  | 4.01E-02 | 2.31E-01 | -4.33 |
| 1456012_PM_x_at | Rnaset2a /// Rnaset2b | AL159163.1 | -1.15 | 5.07 | -2.35 | 4.01E-02 | 2.31E-01 | -4.33 |

|                 |                               |         |       |      |       |          |          |       |
|-----------------|-------------------------------|---------|-------|------|-------|----------|----------|-------|
| 1426190_PM_at   | Aym1                          | NA      | 0.32  | 2.82 | 2.35  | 4.01E-02 | 2.31E-01 | -4.33 |
| 1430046_PM_at   | Otud3                         | OTUD3   | 0.36  | 2.52 | 2.35  | 4.01E-02 | 2.31E-01 | -4.33 |
| 1427863_PM_at   | Hist1h3b///Hist1h3h           | NA      | 0.56  | 3.90 | 2.35  | 4.01E-02 | 2.31E-01 | -4.33 |
| 1427267_PM_at   | Tnrc18                        | TNRC18  | 0.79  | 3.97 | 2.35  | 4.01E-02 | 2.31E-01 | -4.33 |
| 1426176_PM_a_at | Prok2                         | PROK2   | 0.23  | 2.71 | 2.34  | 4.01E-02 | 2.31E-01 | -4.33 |
| 1438430_PM_at   | ---                           | NA      | -0.30 | 3.56 | -2.34 | 4.02E-02 | 2.31E-01 | -4.33 |
| 1428965_PM_at   | Ccdc54                        | CCDC54  | 0.26  | 2.46 | 2.34  | 4.02E-02 | 2.32E-01 | -4.33 |
| 1420900_PM_a_at | Rab18                         | RAB18   | -0.40 | 4.83 | -2.34 | 4.02E-02 | 2.32E-01 | -4.33 |
| 1433735_PM_a_at | Tmem64                        | TMEM64  | -1.11 | 3.40 | -2.34 | 4.02E-02 | 2.32E-01 | -4.33 |
| 1458906_PM_at   | Clns1a                        | NA      | 0.32  | 2.76 | 2.34  | 4.02E-02 | 2.32E-01 | -4.33 |
| 1447110_PM_at   | ---                           | NA      | 0.32  | 2.50 | 2.34  | 4.03E-02 | 2.32E-01 | -4.33 |
| 1427416_PM_x_at | Dusp7                         | NA      | -0.29 | 3.58 | -2.34 | 4.03E-02 | 2.32E-01 | -4.33 |
| 1427445_PM_a_at | Ttn                           | TTN     | 0.27  | 2.42 | 2.34  | 4.03E-02 | 2.32E-01 | -4.33 |
| 1429098_PM_s_at | Nhej1                         | NA      | 0.27  | 3.67 | 2.34  | 4.03E-02 | 2.32E-01 | -4.33 |
| 1447341_PM_at   | ---                           | NA      | -0.52 | 2.67 | -2.34 | 4.04E-02 | 2.32E-01 | -4.33 |
| 1457935_PM_at   | ---                           | NA      | 0.25  | 2.76 | 2.34  | 4.04E-02 | 2.32E-01 | -4.33 |
| 1421604_PM_a_at | Klf3                          | KLf3    | 1.45  | 3.97 | 2.34  | 4.03E-02 | 2.32E-01 | -4.33 |
| 1415730_PM_at   | Cpsf7                         | CPSF7   | -1.00 | 4.87 | -2.34 | 4.04E-02 | 2.32E-01 | -4.33 |
| 1454037_PM_a_at | Ft1                           | FLT1    | -0.38 | 3.43 | -2.34 | 4.04E-02 | 2.32E-01 | -4.33 |
| 1425020_PM_at   | Ubxn2a                        | NA      | -1.12 | 5.66 | -2.34 | 4.04E-02 | 2.32E-01 | -4.33 |
| 1416452_PM_at   | Oat                           | OAT     | -0.50 | 4.81 | -2.34 | 4.04E-02 | 2.32E-01 | -4.33 |
| 1442334_PM_at   | Gm13040///Gm13043///Gm13057   | PRAMEF9 | -0.27 | 2.78 | -2.34 | 4.04E-02 | 2.32E-01 | -4.33 |
| 1430768_PM_at   | ---                           | NA      | 0.25  | 2.29 | 2.34  | 4.04E-02 | 2.32E-01 | -4.33 |
| 1457593_PM_at   | ---                           | NA      | 0.30  | 2.23 | 2.34  | 4.04E-02 | 2.32E-01 | -4.33 |
| 1441765_PM_at   | Pank1                         | NA      | -0.80 | 3.97 | -2.34 | 4.04E-02 | 2.32E-01 | -4.33 |
| 1457969_PM_at   | Rabif                         | RABIF   | 0.19  | 2.49 | 2.34  | 4.04E-02 | 2.32E-01 | -4.33 |
| 1433085_PM_at   | 5930427J20Rik                 | NA      | 0.29  | 2.25 | 2.34  | 4.04E-02 | 2.32E-01 | -4.33 |
| 1449621_PM_s_at | Thsd1                         | THSD1   | 0.31  | 2.34 | 2.34  | 4.05E-02 | 2.33E-01 | -4.33 |
| 1453408_PM_s_at | 4930519G04Rik                 | NA      | 0.26  | 2.54 | 2.34  | 4.05E-02 | 2.33E-01 | -4.34 |
| 1441431_PM_at   | ---                           | NA      | 0.31  | 2.31 | 2.34  | 4.05E-02 | 2.33E-01 | -4.34 |
| 1457339_PM_at   | ---                           | NA      | -1.19 | 3.44 | -2.34 | 4.05E-02 | 2.33E-01 | -4.34 |
| 1453745_PM_at   | 2700038G22Rik                 | NA      | -0.32 | 2.38 | -2.34 | 4.05E-02 | 2.33E-01 | -4.34 |
| 1433262_PM_at   | ---                           | NA      | 0.19  | 2.40 | 2.34  | 4.05E-02 | 2.33E-01 | -4.34 |
| 1445814_PM_at   | Gm11269                       | NA      | 0.21  | 2.37 | 2.34  | 4.05E-02 | 2.33E-01 | -4.34 |
| 1453042_PM_at   | Anks4b                        | ANKS4B  | 0.22  | 2.51 | 2.34  | 4.05E-02 | 2.33E-01 | -4.34 |
| 1425446_PM_at   | Uevld                         | NA      | 0.28  | 2.63 | 2.34  | 4.05E-02 | 2.33E-01 | -4.34 |
| 1454069_PM_at   | ---                           | NA      | 0.29  | 2.76 | 2.34  | 4.05E-02 | 2.33E-01 | -4.34 |
| 1448530_PM_at   | Gmpr                          | GMPR    | 0.33  | 4.23 | 2.34  | 4.05E-02 | 2.33E-01 | -4.34 |
| 1437794_PM_at   | Cabin1                        | CABIN1  | 0.39  | 2.79 | 2.34  | 4.05E-02 | 2.33E-01 | -4.34 |
| 1437118_PM_at   | Usp7                          | USP7    | 0.50  | 4.24 | 2.34  | 4.05E-02 | 2.33E-01 | -4.34 |
| 1434367_PM_s_at | Nutf2///Nutf2-ps1///Nutf2-ps2 | NUTF2   | 0.46  | 8.68 | 2.34  | 4.06E-02 | 2.33E-01 | -4.34 |
| 1425579_PM_at   | Gfra2                         | GFRA2   | 1.93  | 5.23 | 2.34  | 4.06E-02 | 2.33E-01 | -4.34 |
| 1440117_PM_at   | Lrrc48                        | DRC3    | 0.35  | 2.98 | 2.34  | 4.06E-02 | 2.33E-01 | -4.34 |
| 1428255_PM_at   | Luc7l                         | LUC7L   | 0.46  | 4.09 | 2.34  | 4.06E-02 | 2.33E-01 | -4.34 |
| 1435475_PM_at   | Lman2l                        | LMAN2L  | -0.83 | 5.27 | -2.34 | 4.06E-02 | 2.33E-01 | -4.34 |
| 1434408_PM_at   | Atxn3                         | ATXN3L  | -0.56 | 4.15 | -2.34 | 4.06E-02 | 2.33E-01 | -4.34 |
| 1432126_PM_at   | 1700072H12Rik                 | NA      | 0.19  | 2.11 | 2.34  | 4.06E-02 | 2.33E-01 | -4.34 |
| 1426809_PM_at   | Tprm                          | TPRN    | 0.35  | 3.45 | 2.34  | 4.06E-02 | 2.33E-01 | -4.34 |
| 1418691_PM_at   | Rgs9                          | RG9     | 0.32  | 2.82 | 2.34  | 4.06E-02 | 2.33E-01 | -4.34 |
| 1431073_PM_at   | Ptar1                         | PTAR1   | 1.26  | 5.89 | 2.34  | 4.07E-02 | 2.33E-01 | -4.34 |
| 1435564_PM_at   | Neurl1b                       | NEURL1B | -1.36 | 4.66 | -2.34 | 4.07E-02 | 2.33E-01 | -4.34 |
| 1418587_PM_at   | Traf3                         | TRAF3   | -1.12 | 3.21 | -2.34 | 4.07E-02 | 2.33E-01 | -4.34 |
| 1417873_PM_at   | Pwp1                          | PWP1    | -0.51 | 3.32 | -2.34 | 4.07E-02 | 2.33E-01 | -4.34 |
| 1436408_PM_at   | Rprml                         | RPRML   | 0.23  | 2.40 | 2.34  | 4.07E-02 | 2.33E-01 | -4.34 |
| 1447419_PM_at   | ---                           | NA      | 0.24  | 2.32 | 2.34  | 4.07E-02 | 2.33E-01 | -4.34 |
| 1417249_PM_at   | Polm                          | POLM    | 0.29  | 2.62 | 2.34  | 4.07E-02 | 2.33E-01 | -4.34 |
| 1456520_PM_at   | Zfp652                        | ZNF652  | 0.46  | 3.26 | 2.34  | 4.07E-02 | 2.33E-01 | -4.34 |
| 1419237_PM_at   | Usp29                         | USP29   | 0.52  | 3.44 | 2.34  | 4.07E-02 | 2.33E-01 | -4.34 |
| 1457920_PM_at   | ---                           | NA      | 0.21  | 2.56 | 2.34  | 4.07E-02 | 2.33E-01 | -4.34 |
| 1442881_PM_at   | Neat1                         | NA      | 0.27  | 2.48 | 2.34  | 4.07E-02 | 2.33E-01 | -4.34 |
| 1444916_PM_at   | Gm1305                        | NA      | -0.38 | 2.32 | -2.34 | 4.07E-02 | 2.33E-01 | -4.34 |
| 1440083_PM_at   | ---                           | NA      | 0.41  | 2.76 | 2.34  | 4.07E-02 | 2.33E-01 | -4.34 |
| 1422694_PM_at   | Ttyh1                         | TTYH1   | -0.93 | 8.29 | -2.34 | 4.08E-02 | 2.33E-01 | -4.34 |
| 1442274_PM_at   | Zdhc15                        | ZDHHC15 | -0.49 | 2.55 | -2.34 | 4.07E-02 | 2.33E-01 | -4.34 |
| 1424415_PM_s_at | Spon1                         | SPON1   | 0.32  | 2.64 | 2.34  | 4.08E-02 | 2.33E-01 | -4.34 |
| 1427639_PM_a_at | Nek4                          | NEK4    | 0.41  | 2.91 | 2.34  | 4.08E-02 | 2.33E-01 | -4.34 |
| 1455733_PM_at   | Taok3                         | TAOK3   | 0.54  | 4.22 | 2.34  | 4.07E-02 | 2.33E-01 | -4.34 |
| 1437311_PM_at   | Snhg11                        | NA      | 0.46  | 2.78 | 2.34  | 4.08E-02 | 2.33E-01 | -4.34 |
| 1455356_PM_at   | Camsap1                       | CAMSAP1 | -0.37 | 3.21 | -2.34 | 4.08E-02 | 2.33E-01 | -4.34 |
| 1459325_PM_at   | ---                           | NA      | -0.21 | 2.42 | -2.34 | 4.08E-02 | 2.33E-01 | -4.34 |
| 1432583_PM_at   | ---                           | NA      | 0.26  | 2.15 | 2.34  | 4.08E-02 | 2.33E-01 | -4.34 |
| 1426551_PM_at   | Sidt1                         | SIDT1   | 0.18  | 2.02 | 2.34  | 4.08E-02 | 2.33E-01 | -4.34 |
| 1458922_PM_at   | Map3k9                        | NA      | 0.20  | 2.34 | 2.33  | 4.08E-02 | 2.33E-01 | -4.34 |

|                 |                      |           |       |      |       |          |          |       |
|-----------------|----------------------|-----------|-------|------|-------|----------|----------|-------|
| 1431705_PM_a_at | Mcoln2               | MCOLN2    | 0.21  | 2.35 | 2.34  | 4.08E-02 | 2.33E-01 | -4.34 |
| 1427045_PM_at   | Synpo                | SYNPO     | 0.35  | 3.38 | 2.34  | 4.08E-02 | 2.33E-01 | -4.34 |
| 1432851_PM_at   | Phactr1              | NA        | 0.52  | 3.31 | 2.33  | 4.08E-02 | 2.33E-01 | -4.34 |
| 1437642_PM_at   | Agfg2                | AGFG2     | 0.31  | 3.20 | 2.33  | 4.09E-02 | 2.33E-01 | -4.34 |
| 1423647_PM_a_at | Zdhhc3               | ZDHHC3    | 0.33  | 2.66 | 2.33  | 4.09E-02 | 2.34E-01 | -4.35 |
| 1448584_PM_at   | Rsrc1                | RSRC1     | -0.33 | 2.79 | -2.33 | 4.09E-02 | 2.34E-01 | -4.35 |
| 1444243_PM_at   | Wasf3                | NA        | 0.41  | 3.45 | 2.33  | 4.09E-02 | 2.34E-01 | -4.35 |
| 1441497_PM_at   | AA388235             | NA        | 0.50  | 2.99 | 2.33  | 4.09E-02 | 2.34E-01 | -4.35 |
| 1460611_PM_at   | C87499               | PRAMEF9   | 0.20  | 2.38 | 2.33  | 4.09E-02 | 2.34E-01 | -4.35 |
| 1419379_PM_x_at | Fxyd2                | FXYD2     | 0.30  | 2.69 | 2.33  | 4.10E-02 | 2.34E-01 | -4.35 |
| 1434438_PM_at   | Samhd1               | SAMHD1    | 0.40  | 3.40 | 2.33  | 4.10E-02 | 2.34E-01 | -4.35 |
| 1435368_PM_a_at | Parp1                | PARP1     | -0.84 | 6.22 | -2.33 | 4.10E-02 | 2.34E-01 | -4.35 |
| 1445943_PM_at   | ---                  | NA        | 0.21  | 2.31 | 2.33  | 4.10E-02 | 2.34E-01 | -4.35 |
| 1431730_PM_at   | Ttc6                 | NA        | 0.24  | 2.49 | 2.33  | 4.10E-02 | 2.34E-01 | -4.35 |
| 1436918_PM_at   | Dyrk2                | NA        | -0.27 | 2.99 | -2.33 | 4.10E-02 | 2.34E-01 | -4.35 |
| 1430681_PM_at   | Cryl1                | NA        | 0.29  | 2.79 | 2.33  | 4.10E-02 | 2.34E-01 | -4.35 |
| 1432565_PM_at   | LOC105243826         | NA        | 0.20  | 2.42 | 2.33  | 4.11E-02 | 2.34E-01 | -4.35 |
| 1428485_PM_at   | Car12                | CA12      | -0.94 | 3.98 | -2.33 | 4.11E-02 | 2.34E-01 | -4.35 |
| 1458394_PM_at   | Slc6a17              | SLC6A17   | -0.50 | 4.18 | -2.33 | 4.11E-02 | 2.34E-01 | -4.35 |
| 1437244_PM_at   | Gas2l3               | GAS2L3    | 0.39  | 2.71 | 2.33  | 4.11E-02 | 2.34E-01 | -4.35 |
| 1443459_PM_at   | ---                  | NA        | 0.24  | 2.23 | 2.33  | 4.11E-02 | 2.34E-01 | -4.35 |
| 1451994_PM_s_at | Glyr1                | GLYR1     | -0.56 | 4.09 | -2.33 | 4.11E-02 | 2.34E-01 | -4.35 |
| 1425379_PM_at   | Hgf                  | HGF       | 0.34  | 2.71 | 2.33  | 4.11E-02 | 2.34E-01 | -4.35 |
| 1446016_PM_at   | ---                  | NA        | -0.25 | 2.76 | -2.33 | 4.11E-02 | 2.34E-01 | -4.35 |
| 1442162_PM_at   | Wwp2                 | WWP2      | 0.34  | 2.39 | 2.33  | 4.11E-02 | 2.34E-01 | -4.35 |
| 1453956_PM_a_at | Cdk14                | CDK14     | 0.57  | 5.28 | 2.33  | 4.11E-02 | 2.34E-01 | -4.35 |
| 1436711_PM_at   | Actr5                | ACTR5     | 0.38  | 3.85 | 2.33  | 4.11E-02 | 2.34E-01 | -4.35 |
| 1455635_PM_at   | ---                  | NA        | 0.20  | 2.26 | 2.33  | 4.12E-02 | 2.34E-01 | -4.35 |
| 1428052_PM_a_at | Zmym1                | ZMYM1     | -0.37 | 2.39 | -2.33 | 4.12E-02 | 2.34E-01 | -4.35 |
| 1434747_PM_at   | Ctrc                 | CTRC      | 0.23  | 2.60 | 2.33  | 4.12E-02 | 2.34E-01 | -4.35 |
| 1456960_PM_at   | ---                  | NA        | 0.31  | 2.61 | 2.33  | 4.12E-02 | 2.35E-01 | -4.35 |
| 1448151_PM_at   | Elavl1               | ELAVL1    | 0.30  | 3.50 | 2.33  | 4.12E-02 | 2.35E-01 | -4.35 |
| 1420264_PM_at   | ---                  | NA        | 0.32  | 3.18 | 2.33  | 4.12E-02 | 2.35E-01 | -4.35 |
| 1432206_PM_at   | 9030404E10Rik        | NA        | 0.19  | 2.26 | 2.33  | 4.13E-02 | 2.35E-01 | -4.35 |
| 1446048_PM_at   | ---                  | NA        | 0.20  | 2.15 | 2.33  | 4.13E-02 | 2.35E-01 | -4.35 |
| 1459492_PM_at   | ---                  | NA        | 0.60  | 2.52 | 2.33  | 4.13E-02 | 2.35E-01 | -4.35 |
| 1435023_PM_at   | Itns2                | NA        | -0.58 | 5.48 | -2.33 | 4.13E-02 | 2.35E-01 | -4.35 |
| 1437477_PM_at   | Lrrfp1               | LRRFP1    | 0.45  | 4.91 | 2.33  | 4.13E-02 | 2.35E-01 | -4.35 |
| 1434181_PM_at   | Fermt2               | FERMT2    | -0.94 | 4.20 | -2.33 | 4.13E-02 | 2.35E-01 | -4.36 |
| 1416832_PM_at   | Slc39a8              | SLC39A8   | -0.65 | 2.60 | -2.33 | 4.14E-02 | 2.35E-01 | -4.36 |
| 1453263_PM_at   | Naa35                | NAA35     | -0.48 | 4.27 | -2.33 | 4.13E-02 | 2.35E-01 | -4.36 |
| 1441780_PM_at   | ---                  | NA        | -0.30 | 2.45 | -2.33 | 4.13E-02 | 2.35E-01 | -4.35 |
| 1436802_PM_at   | Ilf3                 | ILF3      | -0.26 | 3.46 | -2.33 | 4.13E-02 | 2.35E-01 | -4.35 |
| 1451161_PM_a_at | Adgre1               | ADGRE1    | -0.24 | 2.44 | -2.33 | 4.13E-02 | 2.35E-01 | -4.35 |
| 1449210_PM_at   | Igf2bp1              | IGF2BP1   | 0.20  | 2.40 | 2.33  | 4.13E-02 | 2.35E-01 | -4.36 |
| 1451871_PM_a_at | Ghr                  | GHR       | 0.33  | 2.45 | 2.33  | 4.13E-02 | 2.35E-01 | -4.35 |
| 1432618_PM_at   | ---                  | NA        | 0.41  | 2.62 | 2.33  | 4.13E-02 | 2.35E-01 | -4.36 |
| 1428575_PM_at   | Fcho1                | FCHO1     | 0.48  | 3.17 | 2.33  | 4.13E-02 | 2.35E-01 | -4.35 |
| 1447242_PM_at   | ---                  | NA        | 0.55  | 2.71 | 2.33  | 4.13E-02 | 2.35E-01 | -4.36 |
| 1432304_PM_a_at | 9030624J02Rik        | C16orf62  | 0.90  | 3.14 | 2.33  | 4.13E-02 | 2.35E-01 | -4.36 |
| 1444690_PM_at   | Epha5                | EPHA5     | -1.65 | 7.18 | -2.33 | 4.14E-02 | 2.35E-01 | -4.36 |
| 1460070_PM_at   | Chst2                | CHST2     | -0.83 | 4.62 | -2.33 | 4.14E-02 | 2.35E-01 | -4.36 |
| 1434895_PM_s_at | Ppp1r13b             | PPP1R13B  | -0.37 | 3.59 | -2.33 | 4.14E-02 | 2.35E-01 | -4.36 |
| 1438261_PM_at   | Cited4               | NA        | 0.17  | 2.20 | 2.33  | 4.14E-02 | 2.35E-01 | -4.36 |
| 1450836_PM_at   | Neurog1              | NEUROG1   | 0.19  | 2.21 | 2.33  | 4.14E-02 | 2.35E-01 | -4.36 |
| 1432407_PM_at   | Prkag2os1            | NA        | 0.23  | 2.09 | 2.33  | 4.14E-02 | 2.35E-01 | -4.36 |
| 1453691_PM_at   | 4921528I07Rik        | NA        | 0.23  | 2.56 | 2.33  | 4.14E-02 | 2.35E-01 | -4.36 |
| 1423886_PM_at   | Lamc1                | LAMC1     | -1.04 | 3.25 | -2.33 | 4.14E-02 | 2.35E-01 | -4.36 |
| 1416758_PM_at   | Arhgap27             | ARHGAP27  | 0.19  | 2.14 | 2.33  | 4.14E-02 | 2.35E-01 | -4.36 |
| 1432291_PM_at   | ---                  | NA        | 0.20  | 2.33 | 2.33  | 4.14E-02 | 2.35E-01 | -4.36 |
| 1439309_PM_at   | ---                  | NA        | 0.25  | 2.51 | 2.33  | 4.14E-02 | 2.35E-01 | -4.36 |
| 1415839_PM_a_at | LOC102643093 ///Npm1 | NA        | -0.75 | 6.30 | -2.33 | 4.14E-02 | 2.35E-01 | -4.36 |
| 1436100_PM_at   | Sh2d5                | SH2D5     | -0.47 | 4.08 | -2.33 | 4.14E-02 | 2.35E-01 | -4.36 |
| 1428855_PM_at   | H13                  | HM13      | 0.41  | 3.53 | 2.33  | 4.14E-02 | 2.35E-01 | -4.36 |
| 1443274_PM_at   | 4932435O22Rik        | NA        | 0.37  | 2.37 | 2.33  | 4.15E-02 | 2.35E-01 | -4.36 |
| 1440176_PM_x_at | 1700003F12Rik        | C20orf144 | 0.44  | 2.30 | 2.33  | 4.15E-02 | 2.35E-01 | -4.36 |
| 1443881_PM_at   | Pofut1               | POFUT1    | 0.28  | 2.58 | 2.33  | 4.15E-02 | 2.35E-01 | -4.36 |
| 1425682_PM_a_at | Tprkb                | TPRKB     | 0.63  | 3.03 | 2.33  | 4.15E-02 | 2.35E-01 | -4.36 |
| 1452183_PM_a_at | Meg3                 | NA        | -0.56 | 5.98 | -2.33 | 4.15E-02 | 2.35E-01 | -4.36 |
| 1423924_PM_s_at | Tspan14              | TSPAN14   | -0.33 | 2.78 | -2.33 | 4.15E-02 | 2.35E-01 | -4.36 |
| 1452065_PM_at   | Vstm2a               | VSTM2A    | -0.70 | 3.63 | -2.33 | 4.15E-02 | 2.35E-01 | -4.36 |
| 1437808_PM_x_at | Il10ra               | IL10RA    | 0.29  | 2.75 | 2.33  | 4.15E-02 | 2.35E-01 | -4.36 |
| 1416137_PM_at   | Anxa7                | ANXA7     | -0.49 | 3.36 | -2.32 | 4.16E-02 | 2.35E-01 | -4.36 |
| 1438039_PM_at   | Hectd1               | HECTD1    | -0.56 | 5.70 | -2.32 | 4.16E-02 | 2.35E-01 | -4.36 |
| 1429121_PM_at   | Spopl                | SPOPL     | -0.44 | 2.55 | -2.32 | 4.16E-02 | 2.35E-01 | -4.36 |

|                 |                                     |          |       |      |       |          |          |       |
|-----------------|-------------------------------------|----------|-------|------|-------|----------|----------|-------|
| 1423908_PM_at   | Ndufs8                              | NDUFS8   | -0.42 | 2.69 | -2.32 | 4.16E-02 | 2.35E-01 | -4.36 |
| 1443299_PM_at   | ---                                 | NA       | 0.23  | 2.26 | 2.32  | 4.16E-02 | 2.35E-01 | -4.36 |
| 1450190_PM_at   | Zfp106                              | NA       | 0.28  | 2.34 | 2.32  | 4.16E-02 | 2.35E-01 | -4.36 |
| 1419095_PM_a_at | Apom                                | APOM     | 0.29  | 2.61 | 2.32  | 4.16E-02 | 2.35E-01 | -4.36 |
| 1449898_PM_at   | Sept1                               | SEPT1    | 0.31  | 2.42 | 2.32  | 4.16E-02 | 2.36E-01 | -4.36 |
| 1446276_PM_at   | ---                                 | NA       | 0.30  | 2.24 | 2.32  | 4.16E-02 | 2.36E-01 | -4.36 |
| 1458990_PM_at   | ---                                 | NA       | -0.38 | 2.57 | -2.32 | 4.17E-02 | 2.36E-01 | -4.36 |
| 1442880_PM_at   | ---                                 | NA       | 0.25  | 2.42 | 2.32  | 4.17E-02 | 2.36E-01 | -4.36 |
| 1418346_PM_at   | Insl6                               | INSL6    | 0.29  | 2.30 | 2.32  | 4.17E-02 | 2.36E-01 | -4.36 |
| 1446813_PM_s_at | D5Erttd560e                         | NA       | 0.37  | 2.91 | 2.32  | 4.17E-02 | 2.36E-01 | -4.36 |
| 1459195_PM_at   | ---                                 | NA       | 0.35  | 2.87 | 2.32  | 4.17E-02 | 2.36E-01 | -4.36 |
| 1417244_PM_a_at | Irf7                                | IRF7     | 0.24  | 2.23 | 2.32  | 4.17E-02 | 2.36E-01 | -4.36 |
| 1416187_PM_s_at | Pnrc2                               | PNRC2    | -0.68 | 6.72 | -2.32 | 4.18E-02 | 2.36E-01 | -4.37 |
| 1416357_PM_a_at | Mcam                                | MCAM     | -0.44 | 3.50 | -2.32 | 4.17E-02 | 2.36E-01 | -4.36 |
| 1437037_PM_x_at | Snd1                                | SND1     | -0.25 | 3.38 | -2.32 | 4.18E-02 | 2.36E-01 | -4.37 |
| 1416190_PM_a_at | Sec61a1                             | SEC61A1  | 0.27  | 2.21 | 2.32  | 4.18E-02 | 2.36E-01 | -4.37 |
| 1446929_PM_at   | D130062J21Rik                       | NA       | 0.32  | 2.49 | 2.32  | 4.18E-02 | 2.36E-01 | -4.37 |
| 1449743_PM_a_at | ---                                 | NA       | 0.32  | 2.33 | 2.32  | 4.18E-02 | 2.36E-01 | -4.36 |
| 1453962_PM_at   | Pfn3                                | NA       | 0.32  | 4.25 | 2.32  | 4.18E-02 | 2.36E-01 | -4.37 |
| 1423540_PM_at   | Rbms2                               | RBMS2    | 0.44  | 2.77 | 2.32  | 4.18E-02 | 2.36E-01 | -4.37 |
| 1418504_PM_at   | Hspa9                               | HSPA9    | 0.71  | 6.78 | 2.32  | 4.18E-02 | 2.36E-01 | -4.37 |
| 1429230_PM_at   | Klk5                                | KLK5     | 0.25  | 2.60 | 2.32  | 4.18E-02 | 2.36E-01 | -4.37 |
| 1436836_PM_x_at | Cnn3                                | CNN3     | -0.95 | 5.00 | -2.32 | 4.18E-02 | 2.36E-01 | -4.37 |
| 1441004_PM_at   | ---                                 | NA       | 0.46  | 2.27 | 2.32  | 4.18E-02 | 2.36E-01 | -4.37 |
| 1451029_PM_at   | Bcl2l2                              | NA       | -0.37 | 2.77 | -2.32 | 4.19E-02 | 2.36E-01 | -4.37 |
| 1436537_PM_at   | Zfp629                              | ZNF629   | 0.42  | 2.69 | 2.32  | 4.19E-02 | 2.36E-01 | -4.37 |
| 1432545_PM_at   | Dcst1                               | DCST1    | 0.22  | 2.25 | 2.32  | 4.19E-02 | 2.36E-01 | -4.37 |
| 1455096_PM_at   | Flrt2                               | FLRT2    | -0.56 | 4.07 | -2.32 | 4.19E-02 | 2.36E-01 | -4.37 |
| 1438860_PM_a_at | Slc44a2                             | SLC44A2  | 0.35  | 2.83 | 2.32  | 4.19E-02 | 2.36E-01 | -4.37 |
| 1429254_PM_at   | Aqp11                               | AQP11    | -0.54 | 3.40 | -2.32 | 4.19E-02 | 2.36E-01 | -4.37 |
| 1417353_PM_x_at | Snrpa1                              | SNRPA1   | -0.32 | 3.29 | -2.32 | 4.19E-02 | 2.36E-01 | -4.37 |
| 1450460_PM_at   | Aqp3                                | NA       | 0.26  | 3.13 | 2.32  | 4.19E-02 | 2.36E-01 | -4.37 |
| 1452831_PM_s_at | Ppat                                | PPAT     | 0.50  | 3.76 | 2.32  | 4.19E-02 | 2.36E-01 | -4.37 |
| 1435325_PM_at   | Usp46                               | USP46    | -1.47 | 4.46 | -2.32 | 4.20E-02 | 2.36E-01 | -4.37 |
| 1440286_PM_at   | Fbxl16                              | FBXL16   | -0.91 | 7.76 | -2.32 | 4.20E-02 | 2.36E-01 | -4.37 |
| 1454724_PM_x_at | Abhd17b                             | ABHD17B  | -0.72 | 4.43 | -2.32 | 4.20E-02 | 2.36E-01 | -4.37 |
| 1429649_PM_at   | Slc35a3                             | SLC35A3  | -0.68 | 3.49 | -2.32 | 4.20E-02 | 2.36E-01 | -4.37 |
| 1429685_PM_at   | Gabbr2                              | NA       | -0.64 | 5.44 | -2.32 | 4.20E-02 | 2.36E-01 | -4.37 |
| 1452702_PM_at   | Cln7                                | CLCN7    | -0.48 | 3.72 | -2.32 | 4.20E-02 | 2.36E-01 | -4.37 |
| 1416151_PM_at   | Srsf3                               | SRSF3    | -0.34 | 3.35 | -2.32 | 4.20E-02 | 2.36E-01 | -4.37 |
| 1445407_PM_at   | ---                                 | NA       | 0.19  | 2.53 | 2.32  | 4.20E-02 | 2.36E-01 | -4.37 |
| 1418490_PM_at   | Sdsl                                | SDSL     | 0.25  | 2.57 | 2.32  | 4.20E-02 | 2.36E-01 | -4.37 |
| 1445967_PM_at   | AU022331                            | NA       | 0.23  | 2.11 | 2.32  | 4.20E-02 | 2.37E-01 | -4.37 |
| 1446733_PM_at   | ---                                 | NA       | 0.24  | 2.45 | 2.32  | 4.20E-02 | 2.37E-01 | -4.37 |
| 1426742_PM_at   | Atp5f1                              | ATP5F1   | -1.20 | 6.40 | -2.32 | 4.20E-02 | 2.37E-01 | -4.37 |
| 1423330_PM_at   | Ensa                                | ENSA     | -0.28 | 8.04 | -2.32 | 4.20E-02 | 2.37E-01 | -4.37 |
| 1422929_PM_s_at | Atoh7                               | NA       | 0.53  | 2.83 | 2.32  | 4.20E-02 | 2.37E-01 | -4.37 |
| 1424967_PM_x_at | Tnnt2                               | TNNT2    | 0.47  | 3.10 | 2.32  | 4.21E-02 | 2.37E-01 | -4.37 |
| 1430587_PM_at   | ---                                 | NA       | 0.27  | 2.46 | 2.32  | 4.21E-02 | 2.37E-01 | -4.37 |
| 1429596_PM_at   | Slc7a6os                            | SLC7A6OS | -0.46 | 4.88 | -2.32 | 4.21E-02 | 2.37E-01 | -4.37 |
| 1429393_PM_at   | Dcaf12                              | DCAF12   | 0.81  | 3.44 | 2.32  | 4.21E-02 | 2.37E-01 | -4.37 |
| 1424929_PM_a_at | Trim26                              | TRIM26   | -0.78 | 2.24 | -2.32 | 4.21E-02 | 2.37E-01 | -4.37 |
| 1429145_PM_at   | Nhlrc2                              | NHLRC2   | -0.68 | 3.68 | -2.32 | 4.21E-02 | 2.37E-01 | -4.37 |
| 1423304_PM_a_at | Rnf111                              | RNF111   | -0.65 | 5.36 | -2.32 | 4.21E-02 | 2.37E-01 | -4.37 |
| 1449104_PM_at   | Upk3a                               | UPK3A    | 0.22  | 3.33 | 2.32  | 4.21E-02 | 2.37E-01 | -4.37 |
| 1458455_PM_at   | Abra                                | ABRA     | 0.56  | 2.51 | 2.32  | 4.21E-02 | 2.37E-01 | -4.37 |
| 1432416_PM_a_at | Gm9118 /// LOC102643093<br>/// Npm1 | NA       | 0.37  | 9.50 | 2.32  | 4.22E-02 | 2.37E-01 | -4.37 |
| 1458573_PM_at   | ---                                 | NA       | 0.65  | 3.07 | 2.32  | 4.22E-02 | 2.37E-01 | -4.37 |
| 1430981_PM_s_at | Gbbp1                               | GPBP1    | -1.07 | 5.91 | -2.32 | 4.22E-02 | 2.37E-01 | -4.38 |
| 1455841_PM_s_at | Grwd1                               | GRWD1    | -0.73 | 4.23 | -2.32 | 4.22E-02 | 2.37E-01 | -4.37 |
| 1452830_PM_s_at | Cad                                 | CAD      | -0.41 | 2.57 | -2.32 | 4.22E-02 | 2.37E-01 | -4.38 |
| 1421166_PM_at   | Atrn                                | ATRN     | -0.33 | 3.70 | -2.32 | 4.22E-02 | 2.37E-01 | -4.38 |
| 1419125_PM_at   | Ptpn18                              | PTPN18   | 0.25  | 2.80 | 2.32  | 4.22E-02 | 2.37E-01 | -4.38 |
| 1442857_PM_at   | ---                                 | NA       | 0.30  | 2.76 | 2.32  | 4.22E-02 | 2.37E-01 | -4.38 |
| 1443752_PM_at   | Ccdc180                             | CCDC180  | 0.20  | 2.38 | 2.32  | 4.22E-02 | 2.37E-01 | -4.38 |
| 1454923_PM_at   | Iws1                                | IWS1     | -0.64 | 4.45 | -2.32 | 4.23E-02 | 2.37E-01 | -4.38 |
| 1456018_PM_at   | Brd9                                | BRD9     | -0.56 | 4.75 | -2.32 | 4.23E-02 | 2.37E-01 | -4.38 |
| 1440502_PM_at   | Cfap54                              | NA       | 0.20  | 2.46 | 2.32  | 4.23E-02 | 2.37E-01 | -4.38 |
| 1449613_PM_at   | Gm14965                             | NA       | 0.22  | 2.42 | 2.32  | 4.22E-02 | 2.37E-01 | -4.38 |
| 1439132_PM_at   | Phf8                                | PHF8     | 0.30  | 2.93 | 2.32  | 4.23E-02 | 2.37E-01 | -4.38 |
| 1459672_PM_at   | ---                                 | NA       | 0.52  | 2.96 | 2.32  | 4.22E-02 | 2.37E-01 | -4.38 |
| 1447224_PM_at   | ---                                 | NA       | 0.19  | 2.12 | 2.31  | 4.23E-02 | 2.37E-01 | -4.38 |
| 1435741_PM_at   | Pde8b                               | PDE8B    | -0.68 | 5.84 | -2.31 | 4.23E-02 | 2.37E-01 | -4.38 |
| 1460727_PM_at   | Ercc2                               | ERCC2    | 0.49  | 4.70 | 2.31  | 4.23E-02 | 2.37E-01 | -4.38 |

|                 |                                                       |          |       |      |       |          |          |       |
|-----------------|-------------------------------------------------------|----------|-------|------|-------|----------|----------|-------|
| 1452389_PM_at   | Cd27                                                  | CD27     | 0.30  | 2.19 | 2.31  | 4.23E-02 | 2.37E-01 | -4.38 |
| 1422096_PM_at   | Mgat4d                                                | MGAT4D   | 0.19  | 2.52 | 2.31  | 4.23E-02 | 2.37E-01 | -4.38 |
| 1419867_PM_a_at | Ankhd1                                                | ANKHD1   | 0.87  | 5.63 | 2.31  | 4.23E-02 | 2.37E-01 | -4.38 |
| 1421678_PM_at   | Itpr2                                                 | ITPR2    | 0.53  | 2.78 | 2.31  | 4.23E-02 | 2.37E-01 | -4.38 |
| 1429794_PM_a_at | P2rx1                                                 | P2RX1    | 0.27  | 2.24 | 2.31  | 4.24E-02 | 2.37E-01 | -4.38 |
| 1444374_PM_at   | ---                                                   | NA       | 0.27  | 2.48 | 2.31  | 4.24E-02 | 2.37E-01 | -4.38 |
| 1454292_PM_at   | Gmcl1                                                 | GMCL1    | 0.36  | 2.63 | 2.31  | 4.24E-02 | 2.37E-01 | -4.38 |
| 1424854_PM_at   | Hist1h4i///LOC102641229                               | HIST1H4C | 0.27  | 2.64 | 2.31  | 4.24E-02 | 2.37E-01 | -4.38 |
| 1460436_PM_at   | Ndst1                                                 | NDST1    | -0.60 | 3.48 | -2.31 | 4.24E-02 | 2.37E-01 | -4.38 |
| 1426773_PM_at   | Mfn1                                                  | MFN1     | 1.19  | 4.30 | 2.31  | 4.24E-02 | 2.38E-01 | -4.38 |
| 1429329_PM_at   | Cox10                                                 | COX10    | 0.27  | 2.65 | 2.31  | 4.24E-02 | 2.38E-01 | -4.38 |
| 1454912_PM_at   | Pbx4                                                  | PBX4     | 0.27  | 3.09 | 2.31  | 4.24E-02 | 2.38E-01 | -4.38 |
| 1426992_PM_at   | Xpr1                                                  | XPR1     | -0.61 | 4.83 | -2.31 | 4.25E-02 | 2.38E-01 | -4.38 |
| 1418833_PM_at   | Agxt                                                  | AGXT     | 0.31  | 2.90 | 2.31  | 4.25E-02 | 2.38E-01 | -4.38 |
| 1447900_PM_x_at | Entpd4///Gm21685                                      | ENTPD4   | -0.64 | 4.32 | -2.31 | 4.25E-02 | 2.38E-01 | -4.38 |
| 1433605_PM_at   | Inpp5a                                                | INPP5A   | 0.50  | 3.05 | 2.31  | 4.25E-02 | 2.38E-01 | -4.38 |
| 1445677_PM_x_at | Slc35f2                                               | SLC35F2  | 0.29  | 3.11 | 2.31  | 4.25E-02 | 2.38E-01 | -4.38 |
| 1438581_PM_at   | Specc1l                                               | NA       | 0.23  | 2.40 | 2.31  | 4.25E-02 | 2.38E-01 | -4.38 |
| 1428847_PM_a_at | Macf1                                                 | MACF1    | -0.68 | 8.71 | -2.31 | 4.26E-02 | 2.38E-01 | -4.38 |
| 1453757_PM_at   | Herc6                                                 | HERC6    | 0.18  | 2.04 | 2.31  | 4.25E-02 | 2.38E-01 | -4.38 |
| 1428017_PM_at   | Pknox2                                                | PKNOX2   | 0.25  | 2.36 | 2.31  | 4.26E-02 | 2.38E-01 | -4.38 |
| 1454578_PM_at   | 6030458A19Rik                                         | NA       | 0.33  | 3.13 | 2.31  | 4.26E-02 | 2.38E-01 | -4.38 |
| 1448615_PM_at   | Ccs                                                   | CCS      | 0.24  | 2.72 | 2.31  | 4.26E-02 | 2.38E-01 | -4.38 |
| 1432792_PM_at   | ---                                                   | NA       | 0.29  | 2.44 | 2.31  | 4.26E-02 | 2.38E-01 | -4.38 |
| 1460216_PM_at   | Acads                                                 | ACADS    | 0.34  | 3.31 | 2.31  | 4.26E-02 | 2.38E-01 | -4.38 |
| 1423742_PM_at   | Gm15455///Rbm10                                       | RBM10    | 0.29  | 2.44 | 2.31  | 4.26E-02 | 2.38E-01 | -4.38 |
| 1424271_PM_at   | Dclk1                                                 | DCLK1    | 0.55  | 3.34 | 2.31  | 4.26E-02 | 2.38E-01 | -4.38 |
| 1427059_PM_at   | Tmem184b                                              | TMEM184B | -0.48 | 2.98 | -2.31 | 4.26E-02 | 2.38E-01 | -4.38 |
| 1422209_PM_s_at | Gm11559///Gm11567///Gm11568///Krtap9-1///LOC102641710 | KRTAP9-1 | 0.29  | 3.36 | 2.31  | 4.26E-02 | 2.38E-01 | -4.38 |
| 1429451_PM_at   | Z610301B2ORik                                         | C8orf37  | -0.27 | 2.55 | -2.31 | 4.26E-02 | 2.38E-01 | -4.39 |
| 1447038_PM_x_at | Phip                                                  | PHIP     | 0.45  | 2.77 | 2.31  | 4.27E-02 | 2.38E-01 | -4.39 |
| 1452254_PM_at   | Mtmr9                                                 | MTMR9    | 0.29  | 2.42 | 2.31  | 4.27E-02 | 2.38E-01 | -4.39 |
| 1424384_PM_a_at | Znrf1                                                 | ZNRF1    | 0.40  | 2.84 | 2.31  | 4.27E-02 | 2.38E-01 | -4.39 |
| 1441566_PM_at   | ---                                                   | NA       | 0.31  | 2.49 | 2.31  | 4.27E-02 | 2.38E-01 | -4.39 |
| 1445021_PM_at   | Spg11                                                 | SPG11    | 0.97  | 3.15 | 2.31  | 4.27E-02 | 2.38E-01 | -4.39 |
| 1436106_PM_x_at | Ccdc74a                                               | NA       | 0.28  | 2.52 | 2.31  | 4.27E-02 | 2.39E-01 | -4.39 |
| 1425665_PM_a_at | Srp54a///Srp54b///Srp54c                              | SRP54    | -0.93 | 5.53 | -2.31 | 4.27E-02 | 2.39E-01 | -4.39 |
| 1421235_PM_s_at | Recql5                                                | RECQL5   | 0.23  | 2.10 | 2.31  | 4.27E-02 | 2.39E-01 | -4.39 |
| 1458803_PM_at   | Slfm9                                                 | SLFN13   | 0.29  | 2.51 | 2.31  | 4.28E-02 | 2.39E-01 | -4.39 |
| 1434400_PM_at   | Tgif2                                                 | TGIF2    | 0.37  | 3.44 | 2.31  | 4.28E-02 | 2.39E-01 | -4.39 |
| 1451003_PM_at   | Tab2                                                  | TAB2     | -0.38 | 3.03 | -2.31 | 4.28E-02 | 2.39E-01 | -4.39 |
| 1422310_PM_at   | Snn                                                   | NA       | 0.32  | 2.46 | 2.31  | 4.28E-02 | 2.39E-01 | -4.39 |
| 1417422_PM_at   | Gnmt                                                  | GNMT     | 0.24  | 2.60 | 2.31  | 4.28E-02 | 2.39E-01 | -4.39 |
| 1438352_PM_at   | ---                                                   | NA       | 0.25  | 2.94 | 2.31  | 4.28E-02 | 2.39E-01 | -4.39 |
| 1425992_PM_at   | Slc6a5                                                | NA       | -0.68 | 2.32 | -2.31 | 4.28E-02 | 2.39E-01 | -4.39 |
| 1439786_PM_at   | Gab2                                                  | GAB4     | 0.27  | 2.72 | 2.31  | 4.28E-02 | 2.39E-01 | -4.39 |
| 1429984_PM_at   | Fra10ac1                                              | FRA10AC1 | 0.32  | 2.66 | 2.31  | 4.28E-02 | 2.39E-01 | -4.39 |
| 1431861_PM_a_at | Odf2l                                                 | ODF2L    | 0.40  | 3.45 | 2.31  | 4.28E-02 | 2.39E-01 | -4.39 |
| 1420192_PM_at   | Tmem191c                                              | NA       | -1.39 | 7.77 | -2.31 | 4.29E-02 | 2.39E-01 | -4.39 |
| 1453293_PM_a_at | Z810408A11Rik                                         | NA       | 0.18  | 2.09 | 2.31  | 4.29E-02 | 2.39E-01 | -4.39 |
| 1446438_PM_at   | Ubr1                                                  | UBR1     | 0.29  | 2.43 | 2.31  | 4.29E-02 | 2.39E-01 | -4.39 |
| 1417954_PM_at   | Sst                                                   | SST      | 1.37  | 6.30 | 2.31  | 4.29E-02 | 2.39E-01 | -4.39 |
| 1435492_PM_at   | Socs6                                                 | SOCS6    | -0.34 | 2.34 | -2.31 | 4.29E-02 | 2.39E-01 | -4.39 |
| 1423538_PM_at   | Ntan1                                                 | NTAN1    | -0.24 | 2.27 | -2.31 | 4.29E-02 | 2.39E-01 | -4.39 |
| 1454090_PM_at   | Pdss1                                                 | PDSS1    | 0.20  | 2.19 | 2.31  | 4.29E-02 | 2.39E-01 | -4.39 |
| 1417033_PM_at   | Ube2g2                                                | UBE2G2   | 0.22  | 2.28 | 2.31  | 4.29E-02 | 2.39E-01 | -4.39 |
| 1433421_PM_at   | 4930527J03Rik                                         | NA       | 0.29  | 2.98 | 2.31  | 4.29E-02 | 2.39E-01 | -4.39 |
| 1439709_PM_at   | ---                                                   | NA       | 1.13  | 3.91 | 2.31  | 4.29E-02 | 2.39E-01 | -4.39 |
| 1423906_PM_at   | Hsbp1                                                 | HSBP1    | -1.14 | 5.86 | -2.31 | 4.29E-02 | 2.39E-01 | -4.39 |
| 1424322_PM_at   | Apex2                                                 | APEX2    | 0.23  | 2.43 | 2.31  | 4.29E-02 | 2.39E-01 | -4.39 |
| 1441767_PM_at   | Zfp142                                                | ZNF142   | 0.32  | 2.73 | 2.31  | 4.29E-02 | 2.39E-01 | -4.39 |
| 1425997_PM_a_at | Pign                                                  | PIGN     | 0.28  | 2.61 | 2.31  | 4.30E-02 | 2.39E-01 | -4.39 |
| 1432904_PM_at   | 3110037C07Rik                                         | NA       | 0.28  | 2.51 | 2.31  | 4.30E-02 | 2.39E-01 | -4.39 |
| 1433108_PM_at   | Tcrb-J///Trbj2-6///Trbj2-7///Trbv13-2///Trbv29        | NA       | 0.21  | 2.42 | 2.31  | 4.30E-02 | 2.39E-01 | -4.39 |
| 1452867_PM_at   | Col4a3bp                                              | COL4A3BP | -0.60 | 7.38 | -2.30 | 4.30E-02 | 2.39E-01 | -4.39 |
| 1415827_PM_a_at | Serp1                                                 | SERP1    | -0.49 | 3.69 | -2.30 | 4.30E-02 | 2.39E-01 | -4.39 |
| 1450426_PM_at   | Chrna6                                                | CHRNA6   | 0.25  | 2.50 | 2.30  | 4.30E-02 | 2.39E-01 | -4.39 |
| 1443728_PM_at   | ---                                                   | NA       | 1.05  | 3.83 | 2.30  | 4.30E-02 | 2.39E-01 | -4.39 |
| 1443578_PM_at   | ---                                                   | NA       | 0.40  | 3.09 | 2.30  | 4.31E-02 | 2.40E-01 | -4.39 |



|                 |                                   |            |       |       |       |          |          |       |
|-----------------|-----------------------------------|------------|-------|-------|-------|----------|----------|-------|
| 1444341_PM_at   | Mybpc1                            | MYBPC1     | 0.22  | 2.28  | 2.30  | 4.31E-02 | 2.40E-01 | -4.39 |
| 1417912_PM_at   | Emc6                              | EMC6       | 0.30  | 2.69  | 2.30  | 4.31E-02 | 2.40E-01 | -4.40 |
| 1433327_PM_at   | LOC102642664                      | NA         | 0.57  | 5.23  | 2.30  | 4.31E-02 | 2.40E-01 | -4.40 |
| 1456385_PM_x_at | Ubxn10                            | UBXN10     | 0.41  | 3.55  | 2.30  | 4.31E-02 | 2.40E-01 | -4.40 |
| 1428849_PM_at   | Rps6kb1                           | RPS6KB1    | -0.85 | 2.90  | -2.30 | 4.32E-02 | 2.40E-01 | -4.40 |
| 1425078_PM_x_at | C130026121Rik ///<br>LOC102638047 | SP110      | 0.24  | 3.30  | 2.30  | 4.32E-02 | 2.40E-01 | -4.40 |
| 1455292_PM_x_at | Rsl1                              | NA         | -0.71 | 3.72  | -2.30 | 4.32E-02 | 2.40E-01 | -4.40 |
| 1420570_PM_x_at | LOC100041483 ///Tcl1b3            | TCL1B      | 0.37  | 3.47  | 2.30  | 4.32E-02 | 2.40E-01 | -4.40 |
| 1418632_PM_at   | Ube2h                             | UBE2H      | 0.40  | 2.75  | 2.30  | 4.32E-02 | 2.40E-01 | -4.40 |
| 1454504_PM_at   | Kcnp1                             | NA         | 0.40  | 2.85  | 2.30  | 4.32E-02 | 2.40E-01 | -4.40 |
| 1431037_PM_a_at | Elav1                             | ELAVL1     | 0.76  | 3.87  | 2.30  | 4.32E-02 | 2.40E-01 | -4.40 |
| 1420484_PM_a_at | Vtn                               | VTN        | -0.83 | 5.20  | -2.30 | 4.32E-02 | 2.40E-01 | -4.40 |
| 1417837_PM_at   | Phlda2                            | PHLDA2     | 0.27  | 3.36  | 2.30  | 4.32E-02 | 2.40E-01 | -4.40 |
| 1426163_PM_x_at | Rpl7                              | NA         | -0.28 | 2.76  | -2.30 | 4.32E-02 | 2.40E-01 | -4.40 |
| 1422563_PM_at   | Cr1l                              | CR1L       | -1.29 | 5.91  | -2.30 | 4.33E-02 | 2.40E-01 | -4.40 |
| 1419833_PM_s_at | Arap3                             | ARAP3      | -0.87 | 3.09  | -2.30 | 4.32E-02 | 2.40E-01 | -4.40 |
| 1450913_PM_at   | B4galt6                           | B4GALT6    | -0.80 | 4.52  | -2.30 | 4.32E-02 | 2.40E-01 | -4.40 |
| 1418861_PM_at   | Pias4                             | PIAS4      | 0.22  | 2.71  | 2.30  | 4.32E-02 | 2.40E-01 | -4.40 |
| 1443991_PM_at   | Dock1                             | DOCK1      | 0.30  | 2.37  | 2.30  | 4.32E-02 | 2.40E-01 | -4.40 |
| 1428873_PM_a_at | Msl1                              | MSL1       | 0.62  | 2.83  | 2.30  | 4.32E-02 | 2.40E-01 | -4.40 |
| 1458937_PM_at   | Tspy4                             | NA         | 0.29  | 2.37  | 2.30  | 4.33E-02 | 2.40E-01 | -4.40 |
| 1439697_PM_at   | Il1rap                            | IL1RAP     | -0.85 | 2.84  | -2.30 | 4.33E-02 | 2.40E-01 | -4.40 |
| 1420284_PM_at   | Gpank1                            | GPANK1     | 0.19  | 2.18  | 2.30  | 4.33E-02 | 2.40E-01 | -4.40 |
| 1433589_PM_at   | Fam21                             | WASHC2C    | 0.64  | 5.21  | 2.30  | 4.33E-02 | 2.40E-01 | -4.40 |
| 1426403_PM_at   | Actr1b                            | ACTR1B     | 0.76  | 4.90  | 2.30  | 4.33E-02 | 2.40E-01 | -4.40 |
| 1451072_PM_a_at | Rnf4                              | RNF4       | 0.57  | 3.22  | 2.30  | 4.33E-02 | 2.40E-01 | -4.40 |
| 1441167_PM_at   | ---                               | NA         | 0.22  | 2.42  | 2.30  | 4.33E-02 | 2.40E-01 | -4.40 |
| 1429675_PM_at   | Smco2                             | SMCO2      | 0.20  | 2.34  | 2.30  | 4.34E-02 | 2.40E-01 | -4.40 |
| 1453955_PM_a_at | Fam122c                           | NA         | 0.19  | 2.19  | 2.30  | 4.34E-02 | 2.40E-01 | -4.40 |
| 1439347_PM_at   | Tns4                              | TNS4       | 0.22  | 2.76  | 2.30  | 4.34E-02 | 2.40E-01 | -4.40 |
| 1429787_PM_x_at | Zwint                             | ZWINT      | 0.70  | 3.99  | 2.30  | 4.34E-02 | 2.40E-01 | -4.40 |
| 1451261_PM_s_at | Stap2                             | STAP2      | 0.23  | 2.21  | 2.30  | 4.34E-02 | 2.40E-01 | -4.40 |
| 1419948_PM_at   | D4Erttd117e                       | NA         | 0.27  | 2.56  | 2.30  | 4.34E-02 | 2.40E-01 | -4.40 |
| 1419036_PM_at   | Csnk2a1                           | CSNK2A3    | 0.55  | 4.65  | 2.30  | 4.34E-02 | 2.40E-01 | -4.40 |
| 1422202_PM_at   | Thrb                              | THRB       | 0.37  | 3.17  | 2.30  | 4.34E-02 | 2.40E-01 | -4.40 |
| 1427965_PM_at   | Ssbp1                             | SSBP1      | -0.50 | 8.23  | -2.30 | 4.35E-02 | 2.41E-01 | -4.40 |
| 1457726_PM_at   | Rps15a                            | RPS15A     | -0.39 | 3.70  | -2.30 | 4.34E-02 | 2.41E-01 | -4.40 |
| 1438359_PM_at   | Smrl1                             | SMLR1      | 0.20  | 2.69  | 2.30  | 4.34E-02 | 2.41E-01 | -4.40 |
| 1442741_PM_at   | Mcc                               | MCC        | 0.30  | 2.96  | 2.30  | 4.35E-02 | 2.41E-01 | -4.40 |
| 1447950_PM_at   | A730011C13Rik                     | NA         | 0.40  | 2.69  | 2.30  | 4.35E-02 | 2.41E-01 | -4.40 |
| 1440567_PM_at   | ---                               | NA         | 0.84  | 3.99  | 2.30  | 4.35E-02 | 2.41E-01 | -4.40 |
| 1428196_PM_a_at | Rmdn3                             | RMDN3      | 1.01  | 7.91  | 2.30  | 4.35E-02 | 2.41E-01 | -4.40 |
| 1450900_PM_at   | Smek2                             | PPP4R3B    | -0.43 | 3.38  | -2.30 | 4.35E-02 | 2.41E-01 | -4.40 |
| 1449513_PM_at   | Adam24                            | NA         | 0.25  | 2.41  | 2.30  | 4.35E-02 | 2.41E-01 | -4.40 |
| 1435228_PM_at   | BC023829                          | TMEM185A   | -0.51 | 4.14  | -2.30 | 4.35E-02 | 2.41E-01 | -4.40 |
| 1446104_PM_at   | ---                               | NA         | 0.62  | 3.00  | 2.30  | 4.35E-02 | 2.41E-01 | -4.40 |
| 1429318_PM_a_at | Qk                                | QKI        | -0.65 | 3.35  | -2.30 | 4.35E-02 | 2.41E-01 | -4.40 |
| 1455673_PM_at   | Alkbh2                            | ALKBH2     | 0.27  | 2.35  | 2.30  | 4.35E-02 | 2.41E-01 | -4.40 |
| 1459240_PM_at   | ---                               | NA         | 0.33  | 3.63  | 2.30  | 4.35E-02 | 2.41E-01 | -4.40 |
| 1445208_PM_at   | ---                               | NA         | 0.32  | 2.48  | 2.30  | 4.36E-02 | 2.41E-01 | -4.41 |
| 1448921_PM_a_at | Mrrps9                            | MRPS9      | 0.51  | 5.04  | 2.30  | 4.36E-02 | 2.41E-01 | -4.41 |
| 1425488_PM_at   | Slu7                              | SLU7       | -0.64 | 3.27  | -2.30 | 4.36E-02 | 2.41E-01 | -4.41 |
| 1426926_PM_at   | Plcg2                             | PLCG2      | 0.29  | 2.68  | 2.30  | 4.36E-02 | 2.41E-01 | -4.41 |
| 1419951_PM_at   | Lman1                             | NA         | -0.36 | 3.11  | -2.30 | 4.37E-02 | 2.41E-01 | -4.41 |
| 1455521_PM_at   | Klf12                             | NA         | -0.28 | 4.16  | -2.30 | 4.36E-02 | 2.41E-01 | -4.41 |
| 1440855_PM_at   | Atxn3                             | ATXN3L     | 0.18  | 2.20  | 2.30  | 4.36E-02 | 2.41E-01 | -4.41 |
| 1419327_PM_at   | Pdxdc1                            | NA         | 0.21  | 2.27  | 2.30  | 4.36E-02 | 2.41E-01 | -4.41 |
| 1445093_PM_at   | ---                               | NA         | 0.27  | 2.82  | 2.30  | 4.36E-02 | 2.41E-01 | -4.41 |
| 1425406_PM_at   | Clec4a2                           | CLEC4A     | 0.29  | 3.39  | 2.30  | 4.36E-02 | 2.41E-01 | -4.41 |
| 1425156_PM_at   | Gbp7                              | GBP4       | 0.48  | 2.57  | 2.30  | 4.37E-02 | 2.41E-01 | -4.41 |
| 1440195_PM_at   | Serbp1                            | SERBP1     | -0.38 | 3.07  | -2.30 | 4.37E-02 | 2.41E-01 | -4.41 |
| 1459765_PM_s_at | Sf1                               | SF1        | 0.36  | 11.56 | 2.30  | 4.37E-02 | 2.41E-01 | -4.41 |
| 1420093_PM_s_at | Hnrnpdl                           | HNRNPDL    | -0.74 | 3.87  | -2.30 | 4.37E-02 | 2.41E-01 | -4.41 |
| 1435549_PM_at   | Trpm4                             | TRPM4      | 0.32  | 2.54  | 2.30  | 4.37E-02 | 2.41E-01 | -4.41 |
| 1460735_PM_at   | Svil                              | SVIL       | 0.30  | 2.21  | 2.30  | 4.37E-02 | 2.41E-01 | -4.41 |
| 1438648_PM_x_at | Gkn3                              | AC097495.1 | -0.26 | 2.28  | -2.30 | 4.37E-02 | 2.41E-01 | -4.41 |
| 1443631_PM_at   | ---                               | NA         | 0.49  | 3.38  | 2.30  | 4.37E-02 | 2.41E-01 | -4.41 |
| 1434129_PM_s_at | Lhfpl2                            | LHFPL2     | -0.55 | 3.20  | -2.29 | 4.38E-02 | 2.41E-01 | -4.41 |
| 1460700_PM_at   | Stat3                             | STAT3      | 0.58  | 5.13  | 2.29  | 4.38E-02 | 2.41E-01 | -4.41 |
| 1445574_PM_at   | Ppargc1b                          | NA         | -0.65 | 3.36  | -2.29 | 4.38E-02 | 2.41E-01 | -4.41 |
| 1420606_PM_at   | Npff                              | NPFF       | 0.77  | 3.03  | 2.29  | 4.38E-02 | 2.41E-01 | -4.41 |
| 1437569_PM_at   | Tmem132e                          | TMEM132E   | 0.37  | 2.61  | 2.29  | 4.38E-02 | 2.41E-01 | -4.41 |
| 1423838_PM_s_at | Ist1                              | IST1       | -0.37 | 3.40  | -2.29 | 4.38E-02 | 2.41E-01 | -4.41 |

|                 |               |          |       |      |       |          |          |       |
|-----------------|---------------|----------|-------|------|-------|----------|----------|-------|
| 1416158_PM_at   | Nr2f2         | NR2F2    | -0.49 | 3.13 | -2.29 | 4.38E-02 | 2.41E-01 | -4.41 |
| 1418100_PM_at   | Chd3os        | NA       | -0.33 | 3.31 | -2.29 | 4.39E-02 | 2.42E-01 | -4.41 |
| 1434484_PM_at   | Wfdc21        | NA       | 0.23  | 2.34 | 2.29  | 4.39E-02 | 2.42E-01 | -4.41 |
| 1442564_PM_at   | ---           | NA       | 0.35  | 2.82 | 2.29  | 4.39E-02 | 2.42E-01 | -4.41 |
| 1452454_PM_at   | Sdad1         | SDAD1    | 0.82  | 5.06 | 2.29  | 4.39E-02 | 2.42E-01 | -4.41 |
| 1451731_PM_at   | Abca3         | ABCA3    | -0.92 | 4.60 | -2.29 | 4.39E-02 | 2.42E-01 | -4.41 |
| 1443797_PM_at   | ---           | NA       | -0.98 | 2.90 | -2.29 | 4.39E-02 | 2.42E-01 | -4.41 |
| 1452735_PM_at   | Pcnp          | PCNP     | -0.38 | 4.94 | -2.29 | 4.39E-02 | 2.42E-01 | -4.41 |
| 1448080_PM_at   | LOC545966     | NA       | 0.26  | 2.73 | 2.29  | 4.39E-02 | 2.42E-01 | -4.41 |
| 1432331_PM_a_at | Prrx2         | PRRX2    | 0.16  | 2.20 | 2.29  | 4.39E-02 | 2.42E-01 | -4.41 |
| 1442941_PM_at   | C77027        | NA       | 0.17  | 2.69 | 2.29  | 4.39E-02 | 2.42E-01 | -4.41 |
| 1420277_PM_at   | ---           | NA       | -0.18 | 2.66 | -2.29 | 4.39E-02 | 2.42E-01 | -4.41 |
| 1428364_PM_at   | Scnm1         | SCNM1    | 0.58  | 4.26 | 2.29  | 4.40E-02 | 2.42E-01 | -4.41 |
| 1420258_PM_at   | 1700073E17Rik | NA       | 0.17  | 2.36 | 2.29  | 4.40E-02 | 2.42E-01 | -4.41 |
| 1436262_PM_x_at | Otud5         | OTUD5    | 0.56  | 5.47 | 2.29  | 4.40E-02 | 2.42E-01 | -4.41 |
| 1416255_PM_at   | Gja4          | GJA4     | 0.28  | 2.71 | 2.29  | 4.40E-02 | 2.42E-01 | -4.41 |
| 1447946_PM_at   | Adam23        | ADAM23   | -0.47 | 7.83 | -2.29 | 4.40E-02 | 2.42E-01 | -4.41 |
| 1422129_PM_at   | Apc2          | APC2     | 0.24  | 3.70 | 2.29  | 4.40E-02 | 2.42E-01 | -4.41 |
| 1420542_PM_at   | Dnajc28       | DNAJC28  | 0.20  | 2.32 | 2.29  | 4.40E-02 | 2.42E-01 | -4.41 |
| 1434015_PM_at   | Slc2a6        | SLC2A6   | 0.23  | 3.11 | 2.29  | 4.40E-02 | 2.42E-01 | -4.42 |
| 1422109_PM_at   | Rfx1          | RFX1     | 0.25  | 2.61 | 2.29  | 4.41E-02 | 2.42E-01 | -4.42 |
| 1432648_PM_at   | 4930466F19Rik | NA       | 0.39  | 3.14 | 2.29  | 4.41E-02 | 2.42E-01 | -4.42 |
| 1449327_PM_at   | 1600015I10Rik | AOC1     | 0.20  | 2.47 | 2.29  | 4.41E-02 | 2.42E-01 | -4.42 |
| 1444409_PM_at   | Rph3al        | RPH3AL   | 0.22  | 2.31 | 2.29  | 4.41E-02 | 2.42E-01 | -4.42 |
| 1444195_PM_at   | ---           | NA       | 0.23  | 2.63 | 2.29  | 4.41E-02 | 2.42E-01 | -4.42 |
| 1426003_PM_at   | Ntrk3         | NA       | 0.33  | 2.44 | 2.29  | 4.41E-02 | 2.42E-01 | -4.42 |
| 1433718_PM_a_at | Cbx1          | CBX1     | -0.63 | 4.84 | -2.29 | 4.41E-02 | 2.42E-01 | -4.42 |
| 1436862_PM_at   | Doc2a         | DOC2A    | -0.76 | 3.25 | -2.29 | 4.41E-02 | 2.42E-01 | -4.42 |
| 1427030_PM_at   | Spice1        | SPICE1   | -0.54 | 2.64 | -2.29 | 4.41E-02 | 2.42E-01 | -4.42 |
| 1425551_PM_at   | Hip1r         | HIP1R    | 0.32  | 2.84 | 2.29  | 4.41E-02 | 2.42E-01 | -4.42 |
| 1434087_PM_at   | Mthfr         | MTHFR    | -0.27 | 2.83 | -2.29 | 4.42E-02 | 2.43E-01 | -4.42 |
| 1420282_PM_s_at | Prss29        | NA       | 0.20  | 2.67 | 2.29  | 4.42E-02 | 2.43E-01 | -4.42 |
| 1444848_PM_at   | ---           | NA       | 0.27  | 2.64 | 2.29  | 4.42E-02 | 2.43E-01 | -4.42 |
| 1451110_PM_at   | Egln1         | EGLN1    | 0.49  | 3.35 | 2.29  | 4.42E-02 | 2.43E-01 | -4.42 |
| 1416271_PM_at   | Perp          | PERP     | -0.95 | 2.80 | -2.29 | 4.42E-02 | 2.43E-01 | -4.42 |
| 1430412_PM_at   | ---           | NA       | -0.43 | 3.08 | -2.29 | 4.42E-02 | 2.43E-01 | -4.42 |
| 1434394_PM_at   | N4bp2         | N4BP2    | 1.05  | 3.49 | 2.29  | 4.42E-02 | 2.43E-01 | -4.42 |
| 1435893_PM_at   | Vldlr         | VLDLR    | -0.64 | 4.71 | -2.29 | 4.42E-02 | 2.43E-01 | -4.42 |
| 1454589_PM_at   | ---           | NA       | 0.37  | 3.27 | 2.29  | 4.42E-02 | 2.43E-01 | -4.42 |
| 1454190_PM_at   | 9630013K17Rik | NA       | 0.20  | 2.30 | 2.29  | 4.43E-02 | 2.43E-01 | -4.42 |
| 1423280_PM_at   | Stmn2         | STMN2    | -0.69 | 4.80 | -2.29 | 4.43E-02 | 2.43E-01 | -4.42 |
| 1424471_PM_at   | Rapgaf3       | RAPGEF3  | 0.20  | 2.17 | 2.29  | 4.43E-02 | 2.43E-01 | -4.42 |
| 1437583_PM_x_at | Acss1         | ACSS1    | 0.49  | 3.03 | 2.29  | 4.43E-02 | 2.43E-01 | -4.42 |
| 1460055_PM_at   | ---           | NA       | 0.22  | 2.44 | 2.29  | 4.43E-02 | 2.43E-01 | -4.42 |
| 1432342_PM_at   | Nmnat3        | NMNA3    | 0.33  | 2.80 | 2.29  | 4.43E-02 | 2.43E-01 | -4.42 |
| 1456869_PM_at   | Zfp787        | ZNF787   | 0.28  | 2.48 | 2.29  | 4.43E-02 | 2.43E-01 | -4.42 |
| 1444453_PM_at   | Trp53rkb      | TP53RK   | 0.20  | 2.41 | 2.29  | 4.44E-02 | 2.43E-01 | -4.42 |
| 1433848_PM_at   | Cdc27         | CDC27    | -0.65 | 3.05 | -2.29 | 4.44E-02 | 2.43E-01 | -4.42 |
| 1426912_PM_at   | Rfwd2         | RFWD2    | -0.45 | 6.41 | -2.29 | 4.44E-02 | 2.43E-01 | -4.42 |
| 1460457_PM_at   | ---           | NA       | 1.03  | 4.82 | 2.29  | 4.44E-02 | 2.43E-01 | -4.42 |
| 1432730_PM_at   | 5830415G21Rik | NA       | 0.22  | 2.31 | 2.29  | 4.44E-02 | 2.43E-01 | -4.42 |
| 1421591_PM_at   | Cylc1         | CYLC1    | -0.29 | 2.89 | -2.29 | 4.44E-02 | 2.43E-01 | -4.42 |
| 1458188_PM_at   | ---           | NA       | 0.34  | 2.54 | 2.29  | 4.44E-02 | 2.43E-01 | -4.42 |
| 1431948_PM_a_at | Pank2         | PANK2    | -0.61 | 4.94 | -2.29 | 4.44E-02 | 2.43E-01 | -4.42 |
| 1446432_PM_at   | ---           | NA       | 0.41  | 3.88 | 2.29  | 4.44E-02 | 2.43E-01 | -4.42 |
| 1456186_PM_at   | Prdm11        | PRDM11   | -0.72 | 4.02 | -2.29 | 4.45E-02 | 2.43E-01 | -4.42 |
| 1450314_PM_at   | Dqx1          | DQX1     | 0.24  | 2.43 | 2.29  | 4.44E-02 | 2.43E-01 | -4.42 |
| 1437776_PM_at   | Tmcc1         | TMCC1    | 0.32  | 2.69 | 2.29  | 4.45E-02 | 2.43E-01 | -4.42 |
| 1445100_PM_at   | ---           | NA       | 0.35  | 2.41 | 2.29  | 4.45E-02 | 2.43E-01 | -4.42 |
| 1444100_PM_at   | ---           | NA       | 0.29  | 2.41 | 2.29  | 4.45E-02 | 2.43E-01 | -4.42 |
| 1452164_PM_at   | Fam134a       | RETREG2  | -0.77 | 7.21 | -2.29 | 4.45E-02 | 2.43E-01 | -4.43 |
| 1459242_PM_at   | ---           | NA       | 0.17  | 2.15 | 2.29  | 4.45E-02 | 2.43E-01 | -4.43 |
| 1423944_PM_at   | Hpx           | HPX      | 0.18  | 2.18 | 2.29  | 4.45E-02 | 2.43E-01 | -4.43 |
| 1453561_PM_x_at | 8430431K14Rik | NA       | 0.28  | 2.35 | 2.29  | 4.45E-02 | 2.43E-01 | -4.43 |
| 1431046_PM_at   | Ppfia3        | PPFIA3   | 0.38  | 5.25 | 2.29  | 4.45E-02 | 2.43E-01 | -4.43 |
| 1452082_PM_at   | 6430548M08Rik | KIAA0513 | 0.48  | 2.66 | 2.28  | 4.45E-02 | 2.43E-01 | -4.43 |
| 1450804_PM_at   | Kif5c         | KIF5C    | 0.65  | 5.04 | 2.29  | 4.45E-02 | 2.43E-01 | -4.43 |
| 1422946_PM_a_at | Dnm1          | DNMT1    | 0.33  | 5.13 | 2.28  | 4.45E-02 | 2.43E-01 | -4.43 |
| 1457601_PM_at   | Gm20319       | NA       | -0.72 | 3.82 | -2.28 | 4.46E-02 | 2.44E-01 | -4.43 |
| 1430134_PM_a_at | Yars2         | YARS2    | -0.43 | 2.54 | -2.28 | 4.46E-02 | 2.44E-01 | -4.43 |
| 1418609_PM_at   | Il1f6         | IL36A    | 0.20  | 2.22 | 2.28  | 4.46E-02 | 2.44E-01 | -4.43 |
| 1438101_PM_at   | Fzd3          | FZD3     | -0.81 | 3.64 | -2.28 | 4.46E-02 | 2.44E-01 | -4.43 |
| 1458972_PM_at   | ---           | NA       | 0.29  | 2.36 | 2.28  | 4.46E-02 | 2.44E-01 | -4.43 |
| 1448798_PM_at   | Eps8l3        | EPS8L3   | 0.31  | 2.92 | 2.28  | 4.46E-02 | 2.44E-01 | -4.43 |
| 1448621_PM_a_at | Smpd1         | SMPD1    | -0.72 | 4.35 | -2.28 | 4.46E-02 | 2.44E-01 | -4.43 |

|                 |               |            |       |      |       |          |          |       |
|-----------------|---------------|------------|-------|------|-------|----------|----------|-------|
| 1444327_PM_at   | Ubr5          | UBR5       | 0.53  | 3.47 | 2.28  | 4.46E-02 | 2.44E-01 | -4.43 |
| 1426452_PM_a_at | Rab30         | RAB30      | -0.32 | 3.29 | -2.28 | 4.46E-02 | 2.44E-01 | -4.43 |
| 1415844_PM_at   | Syt4          | SYT4       | -0.75 | 6.07 | -2.28 | 4.47E-02 | 2.44E-01 | -4.43 |
| 1422961_PM_at   | Nat3          | NAT2       | 0.23  | 2.23 | 2.28  | 4.47E-02 | 2.44E-01 | -4.43 |
| 1460393_PM_a_at | Dusp7         | DUSP7      | 0.26  | 2.34 | 2.28  | 4.47E-02 | 2.44E-01 | -4.43 |
| 1442409_PM_at   | ---           | NA         | 0.48  | 2.77 | 2.28  | 4.47E-02 | 2.44E-01 | -4.43 |
| 1440896_PM_at   | ---           | NA         | -0.55 | 3.12 | -2.28 | 4.47E-02 | 2.44E-01 | -4.43 |
| 1448359_PM_a_at | Higd1a        | AC099329.3 | -1.09 | 5.89 | -2.28 | 4.47E-02 | 2.44E-01 | -4.43 |
| 1428493_PM_at   | Sipa1l3       | SIP1L3     | -0.42 | 6.17 | -2.28 | 4.48E-02 | 2.44E-01 | -4.43 |
| 1420249_PM_s_at | Ccl6          | CCL15      | -0.21 | 2.03 | -2.28 | 4.48E-02 | 2.44E-01 | -4.43 |
| 1420554_PM_a_at | Rac3          | RAC3       | 0.19  | 2.51 | 2.28  | 4.48E-02 | 2.44E-01 | -4.43 |
| 1436253_PM_at   | Pex16         | PEX16      | 0.26  | 2.88 | 2.28  | 4.48E-02 | 2.44E-01 | -4.43 |
| 1456941_PM_at   | Tert          | NA         | 0.26  | 2.25 | 2.28  | 4.48E-02 | 2.44E-01 | -4.43 |
| 1447219_PM_at   | ---           | NA         | 0.34  | 2.43 | 2.28  | 4.48E-02 | 2.44E-01 | -4.43 |
| 1454512_PM_at   | ---           | NA         | 0.50  | 3.37 | 2.28  | 4.48E-02 | 2.44E-01 | -4.43 |
| 1426638_PM_at   | Six3          | NA         | 0.30  | 3.19 | 2.28  | 4.48E-02 | 2.44E-01 | -4.43 |
| 1443910_PM_at   | 6330408A02Rik | C19orf68   | 0.24  | 2.79 | 2.28  | 4.48E-02 | 2.44E-01 | -4.43 |
| 1426993_PM_at   | Xpr1          | XPR1       | -0.78 | 3.78 | -2.28 | 4.49E-02 | 2.44E-01 | -4.43 |
| 1434775_PM_at   | Pard3         | PARD3      | -0.55 | 2.53 | -2.28 | 4.49E-02 | 2.44E-01 | -4.43 |
| 1453084_PM_s_at | Col22a1       | COL22A1    | 0.18  | 2.31 | 2.28  | 4.49E-02 | 2.44E-01 | -4.43 |
| 1431582_PM_at   | Eif6          | AL121753.1 | 0.29  | 3.03 | 2.28  | 4.49E-02 | 2.44E-01 | -4.43 |
| 1444358_PM_at   | Kdm2a         | KDM2A      | 0.32  | 2.48 | 2.28  | 4.49E-02 | 2.44E-01 | -4.43 |
| 1433226_PM_at   | ---           | NA         | 0.48  | 3.97 | 2.28  | 4.49E-02 | 2.44E-01 | -4.43 |
| 1439691_PM_at   | D5Erttd579e   | KIAA0232   | 0.63  | 2.66 | 2.28  | 4.49E-02 | 2.44E-01 | -4.43 |
| 1452128_PM_a_at | Brc3          | BRCC3      | 0.68  | 4.81 | 2.28  | 4.49E-02 | 2.44E-01 | -4.43 |
| 1417776_PM_at   | Azgp1         | AZGP1      | -0.78 | 2.78 | -2.28 | 4.49E-02 | 2.44E-01 | -4.43 |
| 1425145_PM_at   | Ilr1          | IL1RL1     | 0.27  | 2.25 | 2.28  | 4.49E-02 | 2.44E-01 | -4.43 |
| 1431370_PM_at   | ---           | NA         | 0.19  | 3.66 | 2.28  | 4.49E-02 | 2.44E-01 | -4.43 |
| 1446891_PM_at   | Fam117b       | NA         | 0.21  | 2.41 | 2.28  | 4.49E-02 | 2.44E-01 | -4.43 |
| 1436855_PM_at   | ---           | NA         | 0.30  | 6.06 | 2.28  | 4.49E-02 | 2.44E-01 | -4.43 |
| 1420232_PM_at   | ---           | NA         | 0.29  | 2.78 | 2.28  | 4.50E-02 | 2.45E-01 | -4.43 |
| 1427286_PM_at   | Rbfox3        | RBFOX3     | -0.74 | 3.77 | -2.28 | 4.50E-02 | 2.45E-01 | -4.44 |
| 1423396_PM_at   | Agt           | AGT        | 0.31  | 2.71 | 2.28  | 4.50E-02 | 2.45E-01 | -4.44 |
| 1447385_PM_at   | Grin2a        | GRIN2A     | -0.94 | 6.20 | -2.28 | 4.50E-02 | 2.45E-01 | -4.44 |
| 1443009_PM_at   | ---           | NA         | 0.23  | 2.91 | 2.28  | 4.50E-02 | 2.45E-01 | -4.44 |
| 1416267_PM_at   | Scoc          | SCOC       | -0.56 | 4.31 | -2.28 | 4.50E-02 | 2.45E-01 | -4.44 |
| 1449740_PM_s_at | Dsg2          | DSG2       | 0.46  | 5.16 | 2.28  | 4.50E-02 | 2.45E-01 | -4.44 |
| 1439587_PM_at   | Lemd3         | LEMD3      | 0.45  | 4.19 | 2.28  | 4.50E-02 | 2.45E-01 | -4.44 |
| 1450658_PM_at   | Adamts5       | ADAMTS5    | 0.25  | 2.99 | 2.28  | 4.50E-02 | 2.45E-01 | -4.44 |
| 1426843_PM_at   | Atg2a         | ATG2A      | -0.37 | 2.43 | -2.28 | 4.51E-02 | 2.45E-01 | -4.44 |
| 1460132_PM_at   | ---           | NA         | 0.34  | 3.16 | 2.28  | 4.51E-02 | 2.45E-01 | -4.44 |
| 1438761_PM_a_at | Odc1          | ODC1       | -0.43 | 7.55 | -2.28 | 4.51E-02 | 2.45E-01 | -4.44 |
| 1446182_PM_at   | ---           | NA         | 0.18  | 2.31 | 2.28  | 4.51E-02 | 2.45E-01 | -4.44 |
| 1455846_PM_at   | Aqp11         | AQP11      | 0.27  | 2.38 | 2.28  | 4.51E-02 | 2.45E-01 | -4.44 |
| 1424874_PM_a_at | Ptbp1         | PTBP1      | 0.32  | 2.72 | 2.28  | 4.51E-02 | 2.45E-01 | -4.44 |
| 1441717_PM_at   | D9Erttd596e   | NA         | 0.33  | 3.34 | 2.28  | 4.51E-02 | 2.45E-01 | -4.44 |
| 1424066_PM_at   | Dus3l         | DUS3L      | 0.77  | 4.40 | 2.28  | 4.51E-02 | 2.45E-01 | -4.44 |
| 1422217_PM_a_at | Cyp1a1        | CYP1A1     | 0.25  | 2.39 | 2.28  | 4.51E-02 | 2.45E-01 | -4.44 |
| 1439732_PM_at   | ---           | NA         | 0.50  | 3.09 | 2.28  | 4.51E-02 | 2.45E-01 | -4.44 |
| 1415895_PM_at   | Snrpn///Snurf | SNRPN      | -0.96 | 6.15 | -2.28 | 4.52E-02 | 2.45E-01 | -4.44 |
| 1426716_PM_at   | Tdrd7         | TDRD7      | -0.43 | 3.45 | -2.28 | 4.52E-02 | 2.45E-01 | -4.44 |
| 1428202_PM_at   | Fam3a         | FAM3A      | -0.43 | 3.61 | -2.28 | 4.52E-02 | 2.45E-01 | -4.44 |
| 1444112_PM_at   | Gm15417       | NA         | 0.33  | 2.57 | 2.28  | 4.52E-02 | 2.45E-01 | -4.44 |
| 1424465_PM_at   | Ccdc58        | CCDC58     | -0.61 | 4.17 | -2.28 | 4.52E-02 | 2.45E-01 | -4.44 |
| 1454992_PM_at   | Slc7a1        | SLC7A1     | -0.36 | 3.00 | -2.28 | 4.52E-02 | 2.45E-01 | -4.44 |
| 1435150_PM_at   | ---           | NA         | -0.23 | 2.35 | -2.28 | 4.52E-02 | 2.45E-01 | -4.44 |
| 1438416_PM_at   | Med16         | MED16      | 0.34  | 2.79 | 2.28  | 4.52E-02 | 2.45E-01 | -4.44 |
| 1419844_PM_a_at | LOC545086     | NA         | 0.24  | 2.59 | 2.28  | 4.52E-02 | 2.45E-01 | -4.44 |
| 1418319_PM_at   | Ufsp2         | UFSP2      | -0.52 | 4.31 | -2.28 | 4.53E-02 | 2.45E-01 | -4.44 |
| 1429302_PM_at   | Csnk2a2       | NA         | -0.45 | 4.32 | -2.28 | 4.53E-02 | 2.45E-01 | -4.44 |
| 1439706_PM_at   | ---           | NA         | 0.26  | 2.29 | 2.28  | 4.53E-02 | 2.45E-01 | -4.44 |
| 1447882_PM_x_at | Ddx54         | DDX54      | 0.35  | 3.80 | 2.28  | 4.53E-02 | 2.45E-01 | -4.44 |
| 1431885_PM_a_at | Mus81         | MUS81      | 0.21  | 2.69 | 2.27  | 4.53E-02 | 2.46E-01 | -4.44 |
| 1456412_PM_a_at | Inpp5k        | INPP5K     | 0.26  | 2.57 | 2.27  | 4.53E-02 | 2.46E-01 | -4.44 |
| 1449065_PM_at   | Acot1         | ACOT1      | -0.40 | 3.33 | -2.27 | 4.53E-02 | 2.46E-01 | -4.44 |
| 1458612_PM_at   | ---           | NA         | 0.34  | 2.17 | 2.27  | 4.54E-02 | 2.46E-01 | -4.44 |
| 1450434_PM_s_at | Pcyt1a        | PCYT1A     | 0.28  | 2.78 | 2.27  | 4.54E-02 | 2.46E-01 | -4.44 |
| 1441983_PM_at   | ---           | NA         | -0.64 | 4.79 | -2.27 | 4.55E-02 | 2.46E-01 | -4.45 |
| 1455584_PM_at   | Sdf4          | SDF4       | -0.59 | 4.81 | -2.27 | 4.55E-02 | 2.46E-01 | -4.45 |
| 1431065_PM_at   | Eaf1          | EAF1       | 0.21  | 2.49 | 2.27  | 4.55E-02 | 2.46E-01 | -4.45 |
| 1437673_PM_at   | Wnt5a         | WNT5A      | -0.24 | 3.00 | -2.27 | 4.55E-02 | 2.46E-01 | -4.45 |
| 1445305_PM_at   | ---           | NA         | 0.29  | 2.91 | 2.27  | 4.55E-02 | 2.46E-01 | -4.45 |
| 1459053_PM_at   | Gm41914       | NA         | 0.33  | 2.61 | 2.27  | 4.55E-02 | 2.46E-01 | -4.45 |
| 1439583_PM_x_at | Ritpr         | CARMIL2    | 0.27  | 2.57 | 2.27  | 4.55E-02 | 2.46E-01 | -4.45 |
| 1426004_PM_a_at | Tgm2          | TGM2       | 0.28  | 2.73 | 2.27  | 4.55E-02 | 2.46E-01 | -4.45 |

|                 |               |            |       |      |       |          |          |       |
|-----------------|---------------|------------|-------|------|-------|----------|----------|-------|
| 1446711_PM_at   | ---           | NA         | 0.29  | 2.56 | 2.27  | 4.55E-02 | 2.46E-01 | -4.45 |
| 1429855_PM_at   | Ppp1r2-ps7    | NA         | 0.21  | 2.39 | 2.27  | 4.56E-02 | 2.46E-01 | -4.45 |
| 1457645_PM_at   | C130079G13Rik | NA         | 0.34  | 4.58 | 2.27  | 4.56E-02 | 2.47E-01 | -4.45 |
| 1417670_PM_at   | Timm44        | TIMM44     | 0.61  | 4.15 | 2.27  | 4.56E-02 | 2.47E-01 | -4.45 |
| 1447424_PM_at   | ---           | NA         | 0.21  | 2.39 | 2.27  | 4.56E-02 | 2.47E-01 | -4.45 |
| 1449491_PM_at   | Card10        | CARD10     | 0.26  | 3.71 | 2.27  | 4.56E-02 | 2.47E-01 | -4.45 |
| 1439023_PM_at   | Ddx55         | DDX55      | 0.45  | 2.99 | 2.27  | 4.56E-02 | 2.47E-01 | -4.45 |
| 1440722_PM_at   | ---           | NA         | 0.21  | 2.42 | 2.27  | 4.56E-02 | 2.47E-01 | -4.45 |
| 1441122_PM_at   | ---           | NA         | 0.20  | 2.41 | 2.27  | 4.56E-02 | 2.47E-01 | -4.45 |
| 1451467_PM_s_at | Mtg2          | MTG2       | 0.40  | 2.63 | 2.27  | 4.56E-02 | 2.47E-01 | -4.45 |
| 1436608_PM_at   | Pced1b        | PCED1B     | 0.50  | 3.27 | 2.27  | 4.56E-02 | 2.47E-01 | -4.45 |
| 1440940_PM_at   | Cacnb1        | CACNB1     | -0.19 | 2.67 | -2.27 | 4.57E-02 | 2.47E-01 | -4.45 |
| 1457153_PM_at   | ---           | NA         | 0.23  | 2.19 | 2.27  | 4.57E-02 | 2.47E-01 | -4.45 |
| 1441192_PM_at   | Scly          | SCLY       | 0.85  | 3.47 | 2.27  | 4.57E-02 | 2.47E-01 | -4.45 |
| 1456865_PM_x_at | Rrs1          | RRS1       | -0.62 | 7.86 | -2.27 | 4.57E-02 | 2.47E-01 | -4.45 |
| 1460086_PM_at   | Rc3h2         | RC3H2      | 0.23  | 1.91 | 2.27  | 4.57E-02 | 2.47E-01 | -4.45 |
| 1437702_PM_at   | Tgm6          | TGM6       | 0.23  | 3.29 | 2.27  | 4.57E-02 | 2.47E-01 | -4.45 |
| 1419481_PM_at   | Sell          | SELL       | 0.24  | 2.43 | 2.27  | 4.57E-02 | 2.47E-01 | -4.45 |
| 1429698_PM_at   | Mterf1a       | MTERF1     | 0.39  | 2.96 | 2.27  | 4.58E-02 | 2.47E-01 | -4.45 |
| 1434254_PM_at   | Gna11         | GNA11      | 0.45  | 3.89 | 2.27  | 4.58E-02 | 2.47E-01 | -4.45 |
| 1418729_PM_at   | Star          | NA         | 0.50  | 3.26 | 2.27  | 4.58E-02 | 2.47E-01 | -4.45 |
| 1434095_PM_at   | Unc5a         | UNC5A      | -0.46 | 3.53 | -2.27 | 4.58E-02 | 2.47E-01 | -4.45 |
| 1454876_PM_at   | Rab23         | RAB23      | -0.93 | 3.44 | -2.27 | 4.58E-02 | 2.47E-01 | -4.45 |
| 1443155_PM_at   | ---           | NA         | 0.35  | 2.76 | 2.27  | 4.58E-02 | 2.47E-01 | -4.45 |
| 1457124_PM_at   | ---           | NA         | -0.31 | 2.30 | -2.27 | 4.58E-02 | 2.47E-01 | -4.45 |
| 1426287_PM_at   | Atxn7         | ATXN7      | 0.55  | 4.05 | 2.27  | 4.58E-02 | 2.47E-01 | -4.45 |
| 1457517_PM_at   | ---           | NA         | 0.25  | 3.17 | 2.27  | 4.59E-02 | 2.47E-01 | -4.45 |
| 1439053_PM_at   | ---           | NA         | 0.28  | 2.64 | 2.27  | 4.59E-02 | 2.47E-01 | -4.45 |
| 1449709_PM_s_at | Ate1          | ATE1       | -0.62 | 3.44 | -2.27 | 4.59E-02 | 2.48E-01 | -4.45 |
| 1424141_PM_at   | Hectd1        | HECTD1     | -0.45 | 5.10 | -2.27 | 4.60E-02 | 2.48E-01 | -4.46 |
| 1417464_PM_at   | Tnnc2         | TNNC2      | 0.35  | 3.70 | 2.27  | 4.60E-02 | 2.48E-01 | -4.46 |
| 1428736_PM_at   | Gramd3        | GRAMD3     | -0.21 | 2.23 | -2.27 | 4.60E-02 | 2.48E-01 | -4.46 |
| 1418880_PM_at   | Gfra3         | GFR3       | 0.20  | 2.34 | 2.27  | 4.60E-02 | 2.48E-01 | -4.46 |
| 1430838_PM_x_at | Mbd1          | NA         | 0.21  | 2.45 | 2.27  | 4.60E-02 | 2.48E-01 | -4.46 |
| 1429935_PM_at   | Lcn12         | LCN12      | 0.24  | 2.91 | 2.27  | 4.60E-02 | 2.48E-01 | -4.46 |
| 1457431_PM_at   | ---           | NA         | 0.52  | 2.24 | 2.27  | 4.60E-02 | 2.48E-01 | -4.46 |
| 1447280_PM_at   | ---           | NA         | 0.69  | 2.84 | 2.27  | 4.60E-02 | 2.48E-01 | -4.46 |
| 1422714_PM_at   | Ube2i         | NA         | -0.28 | 8.70 | -2.27 | 4.60E-02 | 2.48E-01 | -4.46 |
| 1431519_PM_at   | ---           | NA         | 0.19  | 2.75 | 2.27  | 4.60E-02 | 2.48E-01 | -4.46 |
| 1453664_PM_at   | ---           | NA         | 0.26  | 2.38 | 2.27  | 4.60E-02 | 2.48E-01 | -4.46 |
| 1416177_PM_at   | Rbmx1l        | NA         | -0.54 | 4.45 | -2.27 | 4.60E-02 | 2.48E-01 | -4.46 |
| 1420125_PM_at   | Tcta          | NA         | -0.49 | 3.40 | -2.27 | 4.61E-02 | 2.48E-01 | -4.46 |
| 1417624_PM_at   | Nab1          | NAB1       | -0.85 | 5.04 | -2.26 | 4.61E-02 | 2.48E-01 | -4.46 |
| 1420981_PM_a_at | Lmo4          | LMO4       | -1.31 | 4.80 | -2.26 | 4.61E-02 | 2.48E-01 | -4.46 |
| 1428086_PM_at   | Dnm1l         | DNM1L      | -0.63 | 6.18 | -2.26 | 4.61E-02 | 2.48E-01 | -4.46 |
| 1419471_PM_a_at | Nudc          | NUDC       | 0.61  | 5.06 | 2.26  | 4.62E-02 | 2.48E-01 | -4.46 |
| 1419216_PM_at   | Cep131        | CEP131     | 0.45  | 4.59 | 2.26  | 4.62E-02 | 2.49E-01 | -4.46 |
| 1437783_PM_x_at | Cnpy2         | ACO73896.1 | -1.15 | 5.50 | -2.26 | 4.62E-02 | 2.49E-01 | -4.46 |
| 1420172_PM_at   | Myh9          | NA         | -0.44 | 8.20 | -2.26 | 4.62E-02 | 2.49E-01 | -4.46 |
| 1434973_PM_at   | Car7          | CA7        | 0.19  | 2.26 | 2.26  | 4.62E-02 | 2.49E-01 | -4.46 |
| 1449905_PM_at   | Clec4f        | CLEC4F     | -0.22 | 2.40 | -2.26 | 4.62E-02 | 2.49E-01 | -4.46 |
| 1416010_PM_a_at | Ehd1          | EHD1       | -1.31 | 8.23 | -2.26 | 4.63E-02 | 2.49E-01 | -4.46 |
| 1456933_PM_at   | ---           | NA         | 0.28  | 2.77 | 2.26  | 4.63E-02 | 2.49E-01 | -4.46 |
| 1431497_PM_at   | C330022C24Rik | NA         | 0.29  | 2.74 | 2.26  | 4.63E-02 | 2.49E-01 | -4.46 |
| 1436895_PM_at   | Arap2         | ARAP2      | 1.08  | 5.18 | 2.26  | 4.63E-02 | 2.49E-01 | -4.46 |
| 1437676_PM_at   | Spag9         | SPAG9      | 0.29  | 2.17 | 2.26  | 4.63E-02 | 2.49E-01 | -4.46 |
| 1420335_PM_at   | Dmc1          | DMC1       | 0.24  | 2.58 | 2.26  | 4.63E-02 | 2.49E-01 | -4.46 |
| 1432093_PM_at   | 2310005A03Rik | NA         | 0.33  | 2.89 | 2.26  | 4.63E-02 | 2.49E-01 | -4.46 |
| 1445929_PM_at   | ---           | NA         | -0.58 | 2.63 | -2.26 | 4.63E-02 | 2.49E-01 | -4.46 |
| 1440458_PM_at   | ---           | NA         | 0.32  | 2.29 | 2.26  | 4.64E-02 | 2.49E-01 | -4.46 |
| 1427261_PM_at   | Wwc1          | WWC1       | -1.28 | 5.14 | -2.26 | 4.64E-02 | 2.49E-01 | -4.46 |
| 1426665_PM_at   | Katnb1        | KATNB1     | 0.30  | 3.35 | 2.26  | 4.64E-02 | 2.49E-01 | -4.46 |
| 1450276_PM_a_at | Scin          | SCIN       | 0.22  | 2.20 | 2.26  | 4.64E-02 | 2.49E-01 | -4.47 |
| 1448606_PM_at   | Lpar1         | LPAR1      | -0.63 | 3.86 | -2.26 | 4.65E-02 | 2.49E-01 | -4.47 |
| 1433544_PM_at   | Stradb        | STRADB     | -0.62 | 2.95 | -2.26 | 4.64E-02 | 2.49E-01 | -4.47 |
| 1446943_PM_at   | ---           | NA         | 0.29  | 2.86 | 2.26  | 4.64E-02 | 2.49E-01 | -4.47 |
| 1456681_PM_at   | Ptchd1        | NA         | 0.31  | 2.54 | 2.26  | 4.64E-02 | 2.49E-01 | -4.47 |
| 1453155_PM_at   | Tmem50a       | TMEM50A    | -1.03 | 4.39 | -2.26 | 4.65E-02 | 2.50E-01 | -4.47 |
| 1458531_PM_at   | D6Ert588e     | NA         | 0.24  | 2.47 | 2.26  | 4.65E-02 | 2.50E-01 | -4.47 |
| 1436267_PM_a_at | Mtor          | MTOR       | 0.54  | 3.74 | 2.26  | 4.65E-02 | 2.50E-01 | -4.47 |
| 1415721_PM_a_at | Naa60         | NAA60      | 0.48  | 3.05 | 2.26  | 4.65E-02 | 2.50E-01 | -4.47 |
| 1443966_PM_at   | Ric1          | RIC1       | -0.42 | 7.03 | -2.26 | 4.66E-02 | 2.50E-01 | -4.47 |
| 1451721_PM_a_at | H2-Ab1        | HLA-DQB2   | 0.20  | 2.32 | 2.26  | 4.66E-02 | 2.50E-01 | -4.47 |
| 1451359_PM_at   | Lpcat1        | LPCAT1     | -0.60 | 4.88 | -2.26 | 4.66E-02 | 2.50E-01 | -4.47 |
| 1434126_PM_at   | 4930402H24Rik | C20orf194  | -0.47 | 3.52 | -2.26 | 4.66E-02 | 2.50E-01 | -4.47 |

|                             |                                                                          |         |       |       |       |          |          |       |
|-----------------------------|--------------------------------------------------------------------------|---------|-------|-------|-------|----------|----------|-------|
| 1438418_PM_at               | Ap5m1                                                                    | NA      | -0.37 | 2.45  | -2.26 | 4.66E-02 | 2.50E-01 | -4.47 |
| 1453679_PM_at               | 1700100110Rik                                                            | NA      | 0.17  | 2.64  | 2.26  | 4.66E-02 | 2.50E-01 | -4.47 |
| 1422373_PM_at               | Olfr71                                                                   | OR13J1  | 0.18  | 2.85  | 2.26  | 4.66E-02 | 2.50E-01 | -4.47 |
| 1435297_PM_at               | Gjd2                                                                     | GJD2    | 0.25  | 2.90  | 2.26  | 4.66E-02 | 2.50E-01 | -4.47 |
| 1420567_PM_at               | Prkd3                                                                    | PRKD3   | 0.25  | 2.47  | 2.26  | 4.66E-02 | 2.50E-01 | -4.47 |
| 1416995_PM_at               | Pacsin3                                                                  | PAC3IN3 | 0.27  | 2.31  | 2.26  | 4.66E-02 | 2.50E-01 | -4.47 |
| 1430578_PM_at               | Eif4g3                                                                   | EIF4G3  | 0.28  | 2.43  | 2.26  | 4.66E-02 | 2.50E-01 | -4.47 |
| 1432684_PM_at               | ---                                                                      | NA      | 0.34  | 3.18  | 2.26  | 4.66E-02 | 2.50E-01 | -4.47 |
| 1425581_PM_s_at             | Galnt7                                                                   | GALNT7  | 0.57  | 2.80  | 2.26  | 4.67E-02 | 2.50E-01 | -4.47 |
| 1439405_PM_x_at             | Cntd1                                                                    | NA      | 0.30  | 10.81 | 2.26  | 4.67E-02 | 2.50E-01 | -4.47 |
| 1451718_PM_at               | Plp1                                                                     | PLP1    | -1.45 | 6.44  | -2.26 | 4.67E-02 | 2.50E-01 | -4.47 |
| AFFX-b-ActinMur/M12481_M_at | Actb                                                                     | NA      | -0.62 | 4.71  | -2.26 | 4.67E-02 | 2.50E-01 | -4.47 |
| 1440696_PM_at               | Trmp1                                                                    | NA      | 0.24  | 2.42  | 2.26  | 4.67E-02 | 2.50E-01 | -4.47 |
| 1439147_PM_at               | Cdhr3                                                                    | CDHR3   | 0.39  | 3.87  | 2.26  | 4.67E-02 | 2.50E-01 | -4.47 |
| 1458372_PM_at               | Tmc8                                                                     | TMC8    | 0.53  | 3.45  | 2.26  | 4.67E-02 | 2.50E-01 | -4.47 |
| 1422188_PM_s_at             | Tcrg-C1 /// Tcrg-C2                                                      | NA      | 1.24  | 3.35  | 2.26  | 4.67E-02 | 2.50E-01 | -4.47 |
| 1448895_PM_a_at             | Ctnna2                                                                   | NA      | -0.92 | 5.85  | -2.26 | 4.68E-02 | 2.50E-01 | -4.47 |
| 1433642_PM_at               | Arl15                                                                    | ARL15   | -0.35 | 4.83  | -2.26 | 4.68E-02 | 2.50E-01 | -4.47 |
| 1456916_PM_at               | ---                                                                      | NA      | -0.21 | 2.45  | -2.26 | 4.68E-02 | 2.50E-01 | -4.47 |
| 1459002_PM_at               | Gm10045 /// Gm12618 /// Rpl21 /// Rpl21-ps1 /// Rpl21-ps15 /// Rpl21-ps8 | NA      | 0.17  | 2.15  | 2.26  | 4.68E-02 | 2.50E-01 | -4.47 |
| 1438799_PM_at               | Dlx6os1                                                                  | NA      | 0.17  | 2.12  | 2.26  | 4.68E-02 | 2.50E-01 | -4.47 |
| 1425924_PM_at               | Mdf1                                                                     | MDF1    | 0.23  | 2.23  | 2.26  | 4.68E-02 | 2.50E-01 | -4.47 |
| 1458671_PM_at               | Gm36012                                                                  | NA      | 0.25  | 2.53  | 2.26  | 4.68E-02 | 2.50E-01 | -4.47 |
| 1427741_PM_x_at             | Nkx2-3                                                                   | NA      | 0.25  | 2.46  | 2.26  | 4.68E-02 | 2.50E-01 | -4.47 |
| 1440604_PM_at               | 8030494B02Rik                                                            | NA      | 0.26  | 2.66  | 2.26  | 4.68E-02 | 2.50E-01 | -4.47 |
| 1435013_PM_at               | Dnaaf5                                                                   | DNAAF5  | 0.30  | 3.18  | 2.26  | 4.68E-02 | 2.50E-01 | -4.47 |
| 1452140_PM_at               | Tbc1d20                                                                  | TBC1D20 | 0.36  | 2.62  | 2.26  | 4.68E-02 | 2.50E-01 | -4.47 |
| 1457366_PM_at               | ---                                                                      | NA      | 0.37  | 2.96  | 2.26  | 4.68E-02 | 2.50E-01 | -4.47 |
| 1433200_PM_at               | ---                                                                      | NA      | 1.01  | 4.47  | 2.26  | 4.68E-02 | 2.50E-01 | -4.47 |
| 1459451_PM_at               | ---                                                                      | NA      | 0.26  | 2.31  | 2.26  | 4.68E-02 | 2.50E-01 | -4.47 |
| 1448221_PM_at               | Ddx39b                                                                   | DDX39B  | -0.68 | 4.81  | -2.26 | 4.69E-02 | 2.50E-01 | -4.47 |
| 1454241_PM_at               | Rwdd1                                                                    | RWDD1   | 0.21  | 2.13  | 2.26  | 4.69E-02 | 2.50E-01 | -4.47 |
| 1422241_PM_a_at             | Ndufa1                                                                   | NDUFA1  | -1.13 | 7.24  | -2.25 | 4.69E-02 | 2.50E-01 | -4.47 |
| 1420342_PM_at               | Gdap10                                                                   | NA      | -1.00 | 3.42  | -2.25 | 4.69E-02 | 2.50E-01 | -4.47 |
| 1434077_PM_at               | Wdr37                                                                    | WDR37   | -0.72 | 4.10  | -2.25 | 4.69E-02 | 2.50E-01 | -4.47 |
| 1421184_PM_a_at             | Higd1c /// Methig1 /// Mett17a1 /// Mett17a2 /// Mett17a3                | METTL7A | 0.45  | 4.48  | 2.25  | 4.69E-02 | 2.50E-01 | -4.47 |
| 1422756_PM_at               | Slc32a1                                                                  | SLC32A1 | -1.01 | 4.66  | -2.25 | 4.69E-02 | 2.51E-01 | -4.48 |
| 1432353_PM_at               | Gm30289 /// Larp1b                                                       | LARP1B  | 0.17  | 2.14  | 2.25  | 4.69E-02 | 2.51E-01 | -4.48 |
| 1448661_PM_at               | Plcb3                                                                    | PLCB3   | 0.33  | 3.14  | 2.25  | 4.69E-02 | 2.51E-01 | -4.48 |
| 1439438_PM_a_at             | Sarnp                                                                    | SARNP   | 0.67  | 4.64  | 2.25  | 4.69E-02 | 2.51E-01 | -4.48 |
| 1416996_PM_at               | Tbc1d8                                                                   | TBC1D8  | -0.51 | 3.52  | -2.25 | 4.70E-02 | 2.51E-01 | -4.48 |
| 1442549_PM_at               | Mbnl3                                                                    | MBNL3   | 0.18  | 2.26  | 2.25  | 4.70E-02 | 2.51E-01 | -4.48 |
| 1435976_PM_at               | ---                                                                      | NA      | 0.25  | 2.83  | 2.25  | 4.69E-02 | 2.51E-01 | -4.48 |
| 1458818_PM_at               | D3Erttd162e                                                              | NA      | 0.27  | 2.60  | 2.25  | 4.70E-02 | 2.51E-01 | -4.48 |
| 1438505_PM_s_at             | Drosha                                                                   | DROSHA  | 0.28  | 10.41 | 2.25  | 4.70E-02 | 2.51E-01 | -4.48 |
| 1457872_PM_at               | ---                                                                      | NA      | 0.32  | 3.36  | 2.25  | 4.69E-02 | 2.51E-01 | -4.48 |
| 1451655_PM_at               | Sfn8                                                                     | SLFN13  | 0.46  | 3.48  | 2.25  | 4.70E-02 | 2.51E-01 | -4.48 |
| 1443488_PM_at               | ---                                                                      | NA      | 0.56  | 3.88  | 2.25  | 4.70E-02 | 2.51E-01 | -4.48 |
| 1425452_PM_s_at             | Fam84a                                                                   | FAM84A  | -0.60 | 3.09  | -2.25 | 4.70E-02 | 2.51E-01 | -4.48 |
| 1418177_PM_at               | Gabrg2                                                                   | GABRG2  | -0.55 | 4.22  | -2.25 | 4.70E-02 | 2.51E-01 | -4.48 |
| 1459961_PM_a_at             | Dpm1                                                                     | DPM1    | 0.24  | 3.31  | 2.25  | 4.70E-02 | 2.51E-01 | -4.48 |
| 1418492_PM_at               | Grem2                                                                    | GREM2   | -0.60 | 3.37  | -2.25 | 4.70E-02 | 2.51E-01 | -4.48 |
| 1451120_PM_at               | Polr1d                                                                   | POLR1D  | -0.30 | 1.91  | -2.25 | 4.71E-02 | 2.51E-01 | -4.48 |
| 1417009_PM_at               | C1ra                                                                     | C1R     | 0.22  | 2.27  | 2.25  | 4.70E-02 | 2.51E-01 | -4.48 |
| 1442562_PM_at               | Zfp827                                                                   | ZNF827  | -0.50 | 3.98  | -2.25 | 4.71E-02 | 2.51E-01 | -4.48 |
| 1459164_PM_at               | AU014678                                                                 | NA      | 0.33  | 2.68  | 2.25  | 4.71E-02 | 2.51E-01 | -4.48 |
| 1457805_PM_at               | ---                                                                      | NA      | -1.35 | 4.28  | -2.25 | 4.71E-02 | 2.51E-01 | -4.48 |
| 1417010_PM_at               | Zbtb18                                                                   | ZBTB18  | -0.80 | 10.51 | -2.25 | 4.71E-02 | 2.51E-01 | -4.48 |
| 1437767_PM_s_at             | Aktip                                                                    | AKTIP   | -0.69 | 4.57  | -2.25 | 4.71E-02 | 2.51E-01 | -4.48 |
| 1451221_PM_at               | Ice1                                                                     | ICE1    | -0.49 | 2.96  | -2.25 | 4.71E-02 | 2.51E-01 | -4.48 |
| 1420572_PM_at               | Ms4a3                                                                    | MS4A3   | 0.20  | 2.63  | 2.25  | 4.71E-02 | 2.51E-01 | -4.48 |
| 1445701_PM_at               | ---                                                                      | NA      | 0.27  | 2.22  | 2.25  | 4.71E-02 | 2.51E-01 | -4.48 |
| 1442164_PM_at               | Blzf1                                                                    | BLZF1   | 0.63  | 3.07  | 2.25  | 4.71E-02 | 2.51E-01 | -4.48 |
| 1448214_PM_at               | Pdhh                                                                     | PDHB    | 0.27  | 2.97  | 2.25  | 4.71E-02 | 2.51E-01 | -4.48 |
| 1426996_PM_at               | Fam83h                                                                   | FAM83H  | 0.18  | 2.09  | 2.25  | 4.71E-02 | 2.51E-01 | -4.48 |
| 1446603_PM_at               | ---                                                                      | NA      | 1.11  | 6.59  | 2.25  | 4.71E-02 | 2.51E-01 | -4.48 |
| 1419218_PM_at               | Vangl2                                                                   | VANGL2  | 0.28  | 2.91  | 2.25  | 4.72E-02 | 2.51E-01 | -4.48 |
| 1452541_PM_at               | Epb412                                                                   | NA      | 0.26  | 2.62  | 2.25  | 4.72E-02 | 2.51E-01 | -4.48 |
| 1434829_PM_at               | ---                                                                      | NA      | -0.52 | 3.43  | -2.25 | 4.72E-02 | 2.51E-01 | -4.48 |
| 1448771_PM_a_at             | Fth1                                                                     | FTH1    | -0.50 | 10.80 | -2.25 | 4.72E-02 | 2.51E-01 | -4.48 |

|                 |                                                                                          |           |       |      |       |          |          |       |
|-----------------|------------------------------------------------------------------------------------------|-----------|-------|------|-------|----------|----------|-------|
| 1416917_PM_at   | 1700123O20Rik                                                                            | C14orf119 | -0.32 | 3.32 | -2.25 | 4.72E-02 | 2.51E-01 | -4.48 |
| 1422148_PM_at   | Matn3                                                                                    | MATN3     | -0.22 | 2.37 | -2.25 | 4.72E-02 | 2.51E-01 | -4.48 |
| 1426778_PM_at   | Dag1                                                                                     | DAG1      | -0.54 | 4.28 | -2.25 | 4.73E-02 | 2.51E-01 | -4.48 |
| 1444069_PM_at   | ---                                                                                      | NA        | 0.27  | 2.47 | 2.25  | 4.73E-02 | 2.51E-01 | -4.48 |
| 1435258_PM_at   | Tmem141                                                                                  | TMEM141   | 0.40  | 3.07 | 2.25  | 4.73E-02 | 2.51E-01 | -4.48 |
| 1451924_PM_a_at | Edn1                                                                                     | EDN1      | 0.53  | 3.17 | 2.25  | 4.73E-02 | 2.51E-01 | -4.48 |
| 1438473_PM_at   | Arl15                                                                                    | ARL15     | -0.52 | 2.90 | -2.25 | 4.73E-02 | 2.51E-01 | -4.48 |
| 1439618_PM_at   | Pde10a                                                                                   | PDE10A    | -0.83 | 3.83 | -2.25 | 4.73E-02 | 2.51E-01 | -4.48 |
| 1429070_PM_at   | Naif1                                                                                    | NAIF1     | -0.28 | 2.70 | -2.25 | 4.73E-02 | 2.51E-01 | -4.48 |
| 1429894_PM_a_at | Map7                                                                                     | MAP7      | 0.82  | 3.47 | 2.25  | 4.73E-02 | 2.51E-01 | -4.48 |
| 1440862_PM_at   | ---                                                                                      | NA        | 0.90  | 6.34 | 2.25  | 4.73E-02 | 2.51E-01 | -4.48 |
| 1439393_PM_x_at | Ppp2r4                                                                                   | PTPA      | 0.49  | 7.94 | 2.25  | 4.73E-02 | 2.51E-01 | -4.48 |
| 1452530_PM_a_at | Runx1                                                                                    | RUNX1     | 0.38  | 2.99 | 2.25  | 4.73E-02 | 2.51E-01 | -4.48 |
| 1453393_PM_a_at | Chst4                                                                                    | CHST4     | 0.19  | 2.46 | 2.25  | 4.74E-02 | 2.52E-01 | -4.48 |
| 1418614_PM_at   | Kcnj1                                                                                    | KCNJ1     | 0.32  | 2.69 | 2.25  | 4.74E-02 | 2.52E-01 | -4.48 |
| 1442268_PM_a_at | Gm26910                                                                                  | NA        | 0.84  | 5.30 | 2.25  | 4.74E-02 | 2.52E-01 | -4.48 |
| 1451015_PM_at   | Tkt                                                                                      | TKT       | -0.55 | 4.40 | -2.25 | 4.74E-02 | 2.52E-01 | -4.48 |
| 1438428_PM_at   | Jph1                                                                                     | JPH1      | -0.50 | 4.94 | -2.25 | 4.74E-02 | 2.52E-01 | -4.48 |
| 1455104_PM_at   | Mxd1                                                                                     | MXD1      | 0.34  | 4.20 | 2.25  | 4.74E-02 | 2.52E-01 | -4.49 |
| 1444855_PM_at   | ---                                                                                      | NA        | 0.18  | 2.39 | 2.25  | 4.74E-02 | 2.52E-01 | -4.49 |
| 1432281_PM_a_at | Itgb6                                                                                    | ITGB6     | 0.22  | 2.45 | 2.25  | 4.74E-02 | 2.52E-01 | -4.49 |
| 1430782_PM_at   | Ncapd3                                                                                   | NCAPD3    | 0.29  | 2.21 | 2.25  | 4.74E-02 | 2.52E-01 | -4.49 |
| 1425456_PM_a_at | Map2k3                                                                                   | MAP2K3    | 0.31  | 2.48 | 2.25  | 4.74E-02 | 2.52E-01 | -4.49 |
| 1418792_PM_at   | Sh3gl2                                                                                   | SH3GL2    | -1.50 | 7.95 | -2.25 | 4.75E-02 | 2.52E-01 | -4.49 |
| 1449273_PM_at   | Cyfp2                                                                                    | CYFIP2    | -1.09 | 7.14 | -2.25 | 4.75E-02 | 2.52E-01 | -4.49 |
| 1433394_PM_at   | Mast4                                                                                    | MAST4     | 0.20  | 2.45 | 2.25  | 4.75E-02 | 2.52E-01 | -4.49 |
| 1430289_PM_a_at | Wdr77                                                                                    | WDR77     | 0.25  | 2.62 | 2.25  | 4.75E-02 | 2.52E-01 | -4.49 |
| 1428350_PM_at   | Ctu2                                                                                     | CTU2      | 0.25  | 2.73 | 2.25  | 4.75E-02 | 2.52E-01 | -4.49 |
| 1426539_PM_at   | Usp11                                                                                    | USP11     | 0.84  | 6.74 | 2.25  | 4.75E-02 | 2.52E-01 | -4.49 |
| 1443673_PM_x_at | ---                                                                                      | NA        | 0.67  | 2.85 | 2.25  | 4.75E-02 | 2.52E-01 | -4.49 |
| 1443182_PM_at   | ---                                                                                      | NA        | 0.17  | 2.25 | 2.25  | 4.75E-02 | 2.52E-01 | -4.49 |
| 1450524_PM_at   | Cldn9                                                                                    | CLDN9     | 0.20  | 2.18 | 2.25  | 4.75E-02 | 2.52E-01 | -4.49 |
| 1427508_PM_at   | Arsi                                                                                     | ARSI      | 0.23  | 2.40 | 2.25  | 4.75E-02 | 2.52E-01 | -4.49 |
| 1427654_PM_a_at | Htr4                                                                                     | HTR4      | 0.24  | 2.39 | 2.25  | 4.75E-02 | 2.52E-01 | -4.49 |
| 1450600_PM_at   | Olf1508                                                                                  | NA        | 0.30  | 2.49 | 2.25  | 4.75E-02 | 2.52E-01 | -4.49 |
| 1430441_PM_at   | 4933438K21Rik                                                                            | NA        | 0.77  | 5.10 | 2.25  | 4.75E-02 | 2.52E-01 | -4.49 |
| 1419176_PM_at   | Vps37a                                                                                   | VPS37A    | -0.49 | 3.53 | -2.25 | 4.76E-02 | 2.52E-01 | -4.49 |
| 1447019_PM_at   | Cmah                                                                                     | NA        | 0.35  | 2.64 | 2.25  | 4.76E-02 | 2.52E-01 | -4.49 |
| 1450335_PM_at   | ---                                                                                      | NA        | 0.36  | 3.39 | 2.25  | 4.76E-02 | 2.52E-01 | -4.49 |
| 1419423_PM_at   | Stab2                                                                                    | STAB2     | 0.32  | 2.91 | 2.25  | 4.76E-02 | 2.52E-01 | -4.49 |
| 1423103_PM_at   | Rfx5                                                                                     | RFX5      | 0.65  | 3.56 | 2.25  | 4.76E-02 | 2.52E-01 | -4.49 |
| 1417192_PM_at   | Tom70a                                                                                   | TOMM70    | -0.67 | 5.18 | -2.25 | 4.77E-02 | 2.52E-01 | -4.49 |
| 1418693_PM_at   | Hnrnp44                                                                                  | HNRNP44   | -0.45 | 2.93 | -2.25 | 4.77E-02 | 2.52E-01 | -4.49 |
| 1416324_PM_s_at | Kctd20                                                                                   | KCTD20    | -0.44 | 5.28 | -2.25 | 4.76E-02 | 2.52E-01 | -4.49 |
| 1458782_PM_at   | ---                                                                                      | NA        | 0.17  | 2.32 | 2.25  | 4.76E-02 | 2.52E-01 | -4.49 |
| 1419151_PM_at   | 4930449124Rik /// Gm3402<br>/// Gm3404 /// Gm3409 ///<br>Gm3415 /// Gm6309 ///<br>Gm6370 | NA        | 0.22  | 2.39 | 2.25  | 4.77E-02 | 2.52E-01 | -4.49 |
| 1428174_PM_x_at | Khsrp                                                                                    | KHSRP     | 0.28  | 5.95 | 2.25  | 4.77E-02 | 2.52E-01 | -4.49 |
| 1449358_PM_at   | M1ap                                                                                     | M1AP      | 0.28  | 2.56 | 2.25  | 4.77E-02 | 2.52E-01 | -4.49 |
| 1458280_PM_at   | ---                                                                                      | NA        | 0.29  | 3.24 | 2.25  | 4.77E-02 | 2.52E-01 | -4.49 |
| 1439082_PM_at   | Ddx50                                                                                    | NA        | 0.42  | 3.44 | 2.25  | 4.77E-02 | 2.52E-01 | -4.49 |
| 1431604_PM_a_at | Ccdc97                                                                                   | CCDC97    | 0.49  | 2.78 | 2.25  | 4.76E-02 | 2.52E-01 | -4.49 |
| 1431751_PM_a_at | Mpped2                                                                                   | MPPED2    | -0.62 | 3.60 | -2.24 | 4.77E-02 | 2.52E-01 | -4.49 |
| 1455020_PM_at   | Snx25                                                                                    | SNX25     | -0.34 | 4.94 | -2.24 | 4.77E-02 | 2.52E-01 | -4.49 |
| 1445365_PM_at   | Ms4a7                                                                                    | MS4A7     | 0.18  | 2.39 | 2.24  | 4.77E-02 | 2.52E-01 | -4.49 |
| 1441485_PM_at   | ---                                                                                      | NA        | 0.19  | 2.42 | 2.24  | 4.77E-02 | 2.52E-01 | -4.49 |
| 1427657_PM_at   | Ccdc134                                                                                  | NA        | 0.23  | 2.63 | 2.24  | 4.77E-02 | 2.52E-01 | -4.49 |
| 1435172_PM_at   | Eomes                                                                                    | EOMES     | 0.27  | 2.32 | 2.24  | 4.77E-02 | 2.52E-01 | -4.49 |
| 1422200_PM_at   | Omp                                                                                      | OMP       | 0.40  | 3.11 | 2.24  | 4.77E-02 | 2.52E-01 | -4.49 |
| 1433084_PM_at   | ---                                                                                      | NA        | 0.30  | 2.26 | 2.24  | 4.77E-02 | 2.52E-01 | -4.49 |
| 1448561_PM_at   | Ncf2                                                                                     | NCF2      | 0.32  | 3.55 | 2.24  | 4.77E-02 | 2.52E-01 | -4.49 |
| 1451991_PM_at   | Epha7                                                                                    | EPHA7     | -0.79 | 3.41 | -2.24 | 4.78E-02 | 2.52E-01 | -4.49 |
| 1436715_PM_s_at | Cdipt                                                                                    | CDIPT     | -0.96 | 8.19 | -2.24 | 4.78E-02 | 2.52E-01 | -4.49 |
| 1429547_PM_at   | 4930578106Rik                                                                            | C8orf74   | 0.16  | 2.53 | 2.24  | 4.78E-02 | 2.52E-01 | -4.49 |
| 1418351_PM_a_at | Dnmt3b                                                                                   | DNMT3B    | 0.22  | 2.12 | 2.24  | 4.78E-02 | 2.52E-01 | -4.49 |
| 1458203_PM_at   | Spire1                                                                                   | NA        | 0.21  | 2.52 | 2.24  | 4.78E-02 | 2.52E-01 | -4.49 |
| 1433480_PM_at   | Swi5                                                                                     | SWI5      | -0.36 | 3.91 | -2.24 | 4.78E-02 | 2.52E-01 | -4.49 |
| 1448464_PM_at   | Ykt6                                                                                     | YKT6      | -0.37 | 4.39 | -2.24 | 4.79E-02 | 2.53E-01 | -4.49 |
| 1422872_PM_at   | Bmpr1b                                                                                   | BMPR1B    | 0.30  | 2.29 | 2.24  | 4.79E-02 | 2.53E-01 | -4.49 |
| 1445027_PM_at   | Cdr2l                                                                                    | CDR2L     | 0.35  | 3.55 | 2.24  | 4.79E-02 | 2.53E-01 | -4.49 |
| 1452011_PM_a_at | Uxs1                                                                                     | UXS1      | 0.57  | 4.43 | 2.24  | 4.79E-02 | 2.53E-01 | -4.49 |
| 1455867_PM_at   | ---                                                                                      | NA        | 0.26  | 2.27 | 2.24  | 4.79E-02 | 2.53E-01 | -4.49 |
| 1432504_PM_at   | Camkmt                                                                                   | CAMKMT    | 0.38  | 2.56 | 2.24  | 4.79E-02 | 2.53E-01 | -4.50 |

|                 |                                          |            |       |      |       |          |          |       |
|-----------------|------------------------------------------|------------|-------|------|-------|----------|----------|-------|
| 1452008_PM_at   | Ttc39b                                   | TTC39B     | -0.87 | 5.09 | -2.24 | 4.79E-02 | 2.53E-01 | -4.50 |
| 1443073_PM_at   | Gm12992                                  | NA         | 0.26  | 2.70 | 2.24  | 4.79E-02 | 2.53E-01 | -4.50 |
| 1436486_PM_x_at | Whrn                                     | WHRN       | 0.49  | 2.79 | 2.24  | 4.79E-02 | 2.53E-01 | -4.50 |
| 1422230_PM_s_at | Cyp2a4 /// Cyp2a5                        | CYP2A6     | 0.33  | 2.49 | 2.24  | 4.80E-02 | 2.53E-01 | -4.50 |
| 1452602_PM_a_at | 1700001C19Rik                            | AL096814.1 | 0.17  | 2.32 | 2.24  | 4.80E-02 | 2.53E-01 | -4.50 |
| 1455760_PM_at   | Slc9a5                                   | SLC9A5     | 0.37  | 2.45 | 2.24  | 4.80E-02 | 2.53E-01 | -4.50 |
| 1455778_PM_at   | Zkscan8                                  | ZKSCAN8    | -0.62 | 4.43 | -2.24 | 4.80E-02 | 2.53E-01 | -4.50 |
| 1441672_PM_at   | D3Erttd547e                              | NA         | 0.22  | 2.34 | 2.24  | 4.80E-02 | 2.53E-01 | -4.50 |
| 1433634_PM_at   | Irf2bp2                                  | IRF2BP2    | 0.24  | 2.52 | 2.24  | 4.80E-02 | 2.53E-01 | -4.50 |
| 1459586_PM_at   | C78452                                   | NA         | 0.35  | 5.42 | 2.24  | 4.80E-02 | 2.53E-01 | -4.50 |
| 1460508_PM_at   | Mrp1                                     | MRPL1      | 0.36  | 2.29 | 2.24  | 4.80E-02 | 2.53E-01 | -4.50 |
| 1445804_PM_at   | ---                                      | NA         | 0.48  | 2.33 | 2.24  | 4.80E-02 | 2.53E-01 | -4.50 |
| 1438657_PM_x_at | Gm13363 ///<br>LOC102643131 /// Ptp4a1   | PTP4A1     | 0.41  | 9.14 | 2.24  | 4.80E-02 | 2.53E-01 | -4.50 |
| 1457137_PM_at   | LOC102634132                             | NA         | -0.68 | 2.89 | -2.24 | 4.81E-02 | 2.53E-01 | -4.50 |
| 1437773_PM_x_at | Ddx17                                    | DDX17      | -0.38 | 8.96 | -2.24 | 4.81E-02 | 2.53E-01 | -4.50 |
| 1446448_PM_at   | Pias1                                    | PIAS1      | 0.38  | 3.11 | 2.24  | 4.81E-02 | 2.53E-01 | -4.50 |
| 1449712_PM_s_at | Atp6v1e1                                 | ATP6V1E1   | -0.45 | 7.88 | -2.24 | 4.81E-02 | 2.53E-01 | -4.50 |
| 1449074_PM_at   | Tex40                                    | CATSPERZ   | -0.29 | 2.54 | -2.24 | 4.81E-02 | 2.53E-01 | -4.50 |
| 1460407_PM_at   | Spib                                     | ACO20909.1 | 0.18  | 2.20 | 2.24  | 4.81E-02 | 2.53E-01 | -4.50 |
| 1417474_PM_at   | Ift46                                    | IFT46      | 0.37  | 3.18 | 2.24  | 4.81E-02 | 2.53E-01 | -4.50 |
| 1442122_PM_at   | Al451458                                 | NA         | 0.30  | 2.59 | 2.24  | 4.81E-02 | 2.53E-01 | -4.50 |
| 1427287_PM_s_at | Itp2                                     | ITPR2      | 0.28  | 3.61 | 2.24  | 4.81E-02 | 2.53E-01 | -4.50 |
| 1424979_PM_at   | Aph1a                                    | APH1A      | 0.37  | 2.60 | 2.24  | 4.81E-02 | 2.53E-01 | -4.50 |
| 1449418_PM_s_at | Fbxo36                                   | FBXO36     | 0.23  | 2.71 | 2.24  | 4.82E-02 | 2.53E-01 | -4.50 |
| 1445411_PM_at   | ---                                      | NA         | -0.38 | 3.21 | -2.24 | 4.82E-02 | 2.53E-01 | -4.50 |
| 1430881_PM_at   | 7630403G23Rik                            | NA         | 0.47  | 3.10 | 2.24  | 4.82E-02 | 2.53E-01 | -4.50 |
| 1440589_PM_at   | Samd12                                   | NA         | -0.71 | 4.11 | -2.24 | 4.82E-02 | 2.54E-01 | -4.50 |
| 1441691_PM_at   | Gm33257                                  | NA         | -0.28 | 2.17 | -2.24 | 4.82E-02 | 2.54E-01 | -4.50 |
| 1430061_PM_at   | 1700105P06Rik                            | NA         | 0.19  | 2.17 | 2.24  | 4.82E-02 | 2.54E-01 | -4.50 |
| 1441641_PM_at   | Appbp2os                                 | NA         | 0.27  | 4.09 | 2.24  | 4.82E-02 | 2.54E-01 | -4.50 |
| 1438868_PM_at   | Phf11c /// Phf11d                        | PHF11      | 0.27  | 2.27 | 2.24  | 4.82E-02 | 2.54E-01 | -4.50 |
| 1422308_PM_a_at | Lgals7                                   | LGALS7B    | 0.28  | 2.60 | 2.24  | 4.83E-02 | 2.54E-01 | -4.50 |
| 1457723_PM_at   | ---                                      | NA         | 0.69  | 3.39 | 2.24  | 4.82E-02 | 2.54E-01 | -4.50 |
| 1418396_PM_at   | Gpsm3                                    | GPSM3      | 0.23  | 2.88 | 2.24  | 4.83E-02 | 2.54E-01 | -4.50 |
| 1442968_PM_at   | D9Erttd241e                              | NA         | 0.19  | 2.41 | 2.24  | 4.83E-02 | 2.54E-01 | -4.50 |
| 1419795_PM_at   | AA517631                                 | NA         | 0.23  | 2.66 | 2.24  | 4.83E-02 | 2.54E-01 | -4.50 |
| 1424863_PM_a_at | Hipk2                                    | HIPK2      | 0.27  | 2.71 | 2.24  | 4.83E-02 | 2.54E-01 | -4.50 |
| 1459569_PM_at   | ---                                      | NA         | 0.29  | 2.48 | 2.24  | 4.83E-02 | 2.54E-01 | -4.50 |
| 1458078_PM_at   | Chd9                                     | NA         | 0.51  | 2.66 | 2.24  | 4.83E-02 | 2.54E-01 | -4.50 |
| 1417388_PM_at   | Bex2                                     | BEX2       | 0.98  | 5.34 | 2.24  | 4.83E-02 | 2.54E-01 | -4.50 |
| 1420566_PM_at   | ---                                      | NA         | 0.20  | 2.48 | 2.24  | 4.83E-02 | 2.54E-01 | -4.50 |
| 1422613_PM_a_at | LOC105245385 /// Rpl7a ///<br>Rpl7a-ps11 | RPL7A      | -0.75 | 7.22 | -2.24 | 4.84E-02 | 2.54E-01 | -4.50 |
| 1422532_PM_at   | Xpc                                      | XPC        | -0.47 | 2.51 | -2.24 | 4.84E-02 | 2.54E-01 | -4.50 |
| 1420947_PM_at   | Atrx                                     | ATRX       | 0.90  | 7.48 | 2.24  | 4.84E-02 | 2.54E-01 | -4.50 |
| 1429914_PM_at   | Epc1                                     | NA         | 0.28  | 2.26 | 2.24  | 4.84E-02 | 2.54E-01 | -4.50 |
| 1436304_PM_at   | Tmem200a                                 | TMEM200A   | -0.65 | 2.97 | -2.24 | 4.84E-02 | 2.54E-01 | -4.50 |
| 1460551_PM_at   | LOC102641332 /// Ran                     | RAN        | -0.53 | 7.09 | -2.24 | 4.84E-02 | 2.54E-01 | -4.50 |
| 1438195_PM_at   | Gpd1l                                    | GPD1L      | -0.64 | 3.33 | -2.24 | 4.84E-02 | 2.54E-01 | -4.50 |
| 1437189_PM_x_at | Eif3m                                    | EIF3M      | -0.64 | 4.25 | -2.24 | 4.84E-02 | 2.54E-01 | -4.50 |
| 1419051_PM_at   | Ovol1                                    | OVOL1      | 0.19  | 2.41 | 2.24  | 4.84E-02 | 2.54E-01 | -4.51 |
| 1448863_PM_a_at | Tnfaip1                                  | TNFAIP1    | -1.31 | 4.63 | -2.24 | 4.85E-02 | 2.54E-01 | -4.51 |
| 1452466_PM_a_at | Rbm6                                     | RBM6       | 1.05  | 3.88 | 2.24  | 4.85E-02 | 2.54E-01 | -4.51 |
| 1422333_PM_at   | Cyp21a1                                  | CYP21A2    | 0.27  | 2.64 | 2.23  | 4.85E-02 | 2.54E-01 | -4.51 |
| 1420171_PM_s_at | Myh9                                     | MYH9       | -0.48 | 7.66 | -2.23 | 4.86E-02 | 2.55E-01 | -4.51 |
| 1415856_PM_at   | Emb                                      | EMB        | -1.06 | 3.74 | -2.23 | 4.86E-02 | 2.55E-01 | -4.51 |
| 1416861_PM_at   | Stam                                     | STAM       | -0.33 | 3.56 | -2.23 | 4.86E-02 | 2.55E-01 | -4.51 |
| 1426704_PM_at   | Gak                                      | GAK        | -0.19 | 2.03 | -2.23 | 4.86E-02 | 2.55E-01 | -4.51 |
| 1453403_PM_at   | 2210019111Rik                            | NA         | 0.28  | 3.61 | 2.23  | 4.86E-02 | 2.55E-01 | -4.51 |
| 1446537_PM_at   | ---                                      | NA         | 0.36  | 2.77 | 2.23  | 4.86E-02 | 2.55E-01 | -4.51 |
| 1417357_PM_at   | Emd                                      | EMD        | 0.30  | 3.23 | 2.23  | 4.86E-02 | 2.55E-01 | -4.51 |
| 1449075_PM_at   | Exd2                                     | EXD2       | -1.25 | 3.94 | -2.23 | 4.86E-02 | 2.55E-01 | -4.51 |
| 1439624_PM_at   | Ugt2b35                                  | UGT2B15    | 0.17  | 1.99 | 2.23  | 4.86E-02 | 2.55E-01 | -4.51 |
| 1456818_PM_at   | Stk32a                                   | STK32A     | 0.34  | 3.25 | 2.23  | 4.86E-02 | 2.55E-01 | -4.51 |
| 1457774_PM_at   | Ntpcr                                    | NTPCR      | 0.49  | 3.85 | 2.23  | 4.87E-02 | 2.55E-01 | -4.51 |
| 1454202_PM_a_at | Tex33                                    | TEX33      | 0.20  | 2.23 | 2.23  | 4.87E-02 | 2.55E-01 | -4.51 |
| 1440646_PM_at   | ---                                      | NA         | 0.23  | 2.54 | 2.23  | 4.87E-02 | 2.55E-01 | -4.51 |
| 1428590_PM_at   | Mrp41                                    | NA         | 0.31  | 2.53 | 2.23  | 4.87E-02 | 2.55E-01 | -4.51 |
| 1424070_PM_at   | Napg                                     | NAPG       | 0.58  | 4.38 | 2.23  | 4.87E-02 | 2.55E-01 | -4.51 |
| 1424393_PM_s_at | Adhfe1                                   | ADHFE1     | 0.69  | 4.28 | 2.23  | 4.87E-02 | 2.55E-01 | -4.51 |
| 1446618_PM_at   | ---                                      | NA         | 0.34  | 3.61 | 2.23  | 4.87E-02 | 2.55E-01 | -4.51 |
| 1424639_PM_a_at | Hmgcl                                    | HMGCL      | 0.33  | 3.54 | 2.23  | 4.87E-02 | 2.55E-01 | -4.51 |
| 1444433_PM_at   | ---                                      | NA         | 0.37  | 2.43 | 2.23  | 4.87E-02 | 2.55E-01 | -4.51 |

|                   |                                     |          |       |       |       |          |          |       |
|-------------------|-------------------------------------|----------|-------|-------|-------|----------|----------|-------|
| 1437277_PM_x_at   | Tgm2                                | TGM2     | -1.36 | 5.50  | -2.23 | 4.87E-02 | 2.55E-01 | -4.51 |
| 1438665_PM_at     | Smpd3                               | SMPD3    | -0.29 | 2.81  | -2.23 | 4.87E-02 | 2.55E-01 | -4.51 |
| 1431027_PM_at     | Ccsap                               | NA       | 0.30  | 2.79  | 2.23  | 4.87E-02 | 2.55E-01 | -4.51 |
| 1416394_PM_at     | Bag1                                | BAG1     | -0.68 | 5.89  | -2.23 | 4.87E-02 | 2.55E-01 | -4.51 |
| 1423008_PM_at     | Art2a-ps///LOC102642787             | NA       | 0.29  | 2.28  | 2.23  | 4.88E-02 | 2.55E-01 | -4.51 |
| 1448796_PM_s_at   | LOC105242484///Tbrg4                | NA       | 0.21  | 2.15  | 2.23  | 4.88E-02 | 2.55E-01 | -4.51 |
| 1459458_PM_at     | D9Erttd338e                         | NA       | 0.30  | 2.16  | 2.23  | 4.88E-02 | 2.55E-01 | -4.51 |
| 1440155_PM_at     | Fstl4                               | FSTL4    | 0.31  | 2.43  | 2.23  | 4.88E-02 | 2.55E-01 | -4.51 |
| 1439401_PM_x_at   | Ppp2r5e                             | PPP2R5E  | -0.53 | 2.80  | -2.23 | 4.88E-02 | 2.55E-01 | -4.51 |
| 1446934_PM_at     | ---                                 | NA       | 0.96  | 2.56  | 2.23  | 4.88E-02 | 2.55E-01 | -4.51 |
| 1417036_PM_at     | Sac3d1                              | SAC3D1   | 0.19  | 2.12  | 2.23  | 4.89E-02 | 2.55E-01 | -4.51 |
| 1433289_PM_at     | ---                                 | NA       | 0.21  | 2.08  | 2.23  | 4.89E-02 | 2.55E-01 | -4.51 |
| 1423006_PM_at     | Pim1                                | PIM1     | 0.23  | 2.30  | 2.23  | 4.89E-02 | 2.55E-01 | -4.51 |
| 1422300_PM_at     | Nog                                 | NOG      | 0.23  | 2.13  | 2.23  | 4.89E-02 | 2.55E-01 | -4.51 |
| 1430318_PM_at     | Sat2                                | SAT2     | 0.33  | 2.76  | 2.23  | 4.89E-02 | 2.55E-01 | -4.51 |
| 1444220_PM_at     | 2410089E03Rik                       | NA       | 0.53  | 2.75  | 2.23  | 4.89E-02 | 2.55E-01 | -4.51 |
| 1422811_PM_at     | Slc27a1                             | SLC27A1  | 0.56  | 4.45  | 2.23  | 4.88E-02 | 2.55E-01 | -4.51 |
| 1453063_PM_at     | Cltb                                | CLTB     | 0.79  | 5.15  | 2.23  | 4.89E-02 | 2.55E-01 | -4.51 |
| 1431462_PM_at     | Ppp1r12b                            | PPP1R12B | 0.20  | 2.71  | 2.23  | 4.89E-02 | 2.55E-01 | -4.51 |
| 1434827_PM_at     | Thoc6                               | THOC6    | 0.26  | 2.79  | 2.23  | 4.89E-02 | 2.55E-01 | -4.51 |
| 1420720_PM_at     | Nptx2                               | NPTX2    | -0.58 | 3.48  | -2.23 | 4.89E-02 | 2.55E-01 | -4.52 |
| 1430720_PM_at     | Ybx1                                | NA       | 0.21  | 2.46  | 2.23  | 4.89E-02 | 2.55E-01 | -4.51 |
| 1429132_PM_at     | Ube2v2                              | NA       | 0.30  | 2.58  | 2.23  | 4.89E-02 | 2.55E-01 | -4.52 |
| 1444298_PM_at     | Ipcef1                              | IPCEF1   | 0.39  | 2.57  | 2.23  | 4.89E-02 | 2.55E-01 | -4.52 |
| 1434338_PM_at     | Rgp1                                | RGP1     | -0.65 | 3.94  | -2.23 | 4.90E-02 | 2.55E-01 | -4.52 |
| 1444101_PM_at     | ---                                 | NA       | 0.23  | 2.44  | 2.23  | 4.90E-02 | 2.55E-01 | -4.52 |
| 1439940_PM_at     | Slc1a2                              | SLC1A2   | -0.85 | 5.12  | -2.23 | 4.90E-02 | 2.55E-01 | -4.52 |
| 1451980_PM_at     | Casd1                               | CASD1    | -0.52 | 5.63  | -2.23 | 4.90E-02 | 2.55E-01 | -4.52 |
| 1442202_PM_at     | Hjrp                                | NA       | 0.18  | 2.62  | 2.23  | 4.90E-02 | 2.55E-01 | -4.52 |
| 1432910_PM_at     | Btdb7                               | NA       | 0.30  | 2.81  | 2.23  | 4.90E-02 | 2.55E-01 | -4.52 |
| 1430837_PM_a_at   | Mbd1                                | MBD1     | 0.35  | 2.38  | 2.23  | 4.90E-02 | 2.55E-01 | -4.52 |
| 1431007_PM_at     | 9030025P20Rik///Ermard<br>///Gm3435 | NA       | 0.76  | 3.12  | 2.23  | 4.90E-02 | 2.55E-01 | -4.52 |
| 1448237_PM_x_at   | Ldhb                                | LDHB     | -1.05 | 7.99  | -2.23 | 4.90E-02 | 2.55E-01 | -4.52 |
| 1421952_PM_at     | Capn6                               | CAPN6    | 0.19  | 2.44  | 2.23  | 4.90E-02 | 2.55E-01 | -4.52 |
| 1440186_PM_s_at   | Psap1                               | PSAP1    | 0.23  | 2.24  | 2.23  | 4.90E-02 | 2.55E-01 | -4.52 |
| 1430036_PM_at     | Mrln                                | NA       | 0.28  | 2.70  | 2.23  | 4.91E-02 | 2.55E-01 | -4.52 |
| 1457974_PM_at     | ---                                 | NA       | 0.29  | 2.51  | 2.23  | 4.91E-02 | 2.55E-01 | -4.52 |
| 1432925_PM_at     | ---                                 | NA       | 0.29  | 2.65  | 2.23  | 4.91E-02 | 2.55E-01 | -4.52 |
| 1445908_PM_at     | Eif2b5                              | NA       | 0.31  | 2.41  | 2.23  | 4.91E-02 | 2.55E-01 | -4.52 |
| 1424856_PM_at     | Atp1a3                              | ATP1A3   | 0.35  | 3.00  | 2.23  | 4.90E-02 | 2.55E-01 | -4.52 |
| 1416954_PM_at     | Slc25a10                            | SLC25A10 | 0.38  | 2.50  | 2.23  | 4.91E-02 | 2.55E-01 | -4.52 |
| 1447037_PM_at     | Phip                                | PHIP     | 0.48  | 2.68  | 2.23  | 4.90E-02 | 2.55E-01 | -4.52 |
| 1432152_PM_at     | Draxin                              | DRAXIN   | 0.49  | 2.44  | 2.23  | 4.90E-02 | 2.55E-01 | -4.52 |
| 1444835_PM_at     | BC030499                            | NA       | 0.24  | 2.37  | 2.23  | 4.91E-02 | 2.55E-01 | -4.52 |
| 1448356_PM_at     | Ube2d2a                             | UBE2D2   | -0.79 | 7.73  | -2.23 | 4.91E-02 | 2.56E-01 | -4.52 |
| 1427426_PM_at     | Kcng5                               | KCNQ5    | -0.46 | 3.44  | -2.23 | 4.91E-02 | 2.56E-01 | -4.52 |
| 1451782_PM_a_at   | Slc29a1                             | SLC29A1  | 0.21  | 2.45  | 2.23  | 4.92E-02 | 2.56E-01 | -4.52 |
| 1416378_PM_at     | Pnkp                                | PNKP     | 0.26  | 3.13  | 2.23  | 4.92E-02 | 2.56E-01 | -4.52 |
| 1432047_PM_at     | Prex2                               | PREX2    | 0.44  | 2.60  | 2.23  | 4.92E-02 | 2.56E-01 | -4.52 |
| 1457485_PM_at     | ---                                 | NA       | 0.62  | 3.92  | 2.23  | 4.92E-02 | 2.56E-01 | -4.52 |
| 1422822_PM_at     | Stard5                              | STARD5   | 1.13  | 3.99  | 2.23  | 4.92E-02 | 2.56E-01 | -4.52 |
| 1426567_PM_a_at   | Pqlc1                               | PQLC1    | 0.25  | 2.72  | 2.23  | 4.92E-02 | 2.56E-01 | -4.52 |
| 1415824_PM_at     | Scd2                                | SCD      | 0.69  | 3.72  | 2.23  | 4.92E-02 | 2.56E-01 | -4.52 |
| AFFX-MURINE_B2_at | ---                                 | NA       | -0.17 | 12.55 | -2.23 | 4.92E-02 | 2.56E-01 | -4.52 |
| 1452293_PM_at     | Snx19                               | SNX19    | -0.54 | 3.62  | -2.23 | 4.92E-02 | 2.56E-01 | -4.52 |
| 1439828_PM_at     | ---                                 | NA       | 0.42  | 3.75  | 2.23  | 4.92E-02 | 2.56E-01 | -4.52 |
| 1419656_PM_at     | Slc25a36                            | SLC25A36 | -0.56 | 3.71  | -2.23 | 4.93E-02 | 2.56E-01 | -4.52 |
| 1449190_PM_a_at   | Entpd4///Gm21685                    | ENTPD4   | -0.34 | 3.88  | -2.23 | 4.93E-02 | 2.56E-01 | -4.52 |
| 1456954_PM_at     | Kcna6                               | NA       | -0.22 | 2.46  | -2.23 | 4.93E-02 | 2.56E-01 | -4.52 |
| 1434516_PM_at     | Pstk                                | PSTK     | 0.19  | 3.50  | 2.23  | 4.93E-02 | 2.56E-01 | -4.52 |
| 1436323_PM_at     | ---                                 | NA       | 0.21  | 2.74  | 2.23  | 4.93E-02 | 2.56E-01 | -4.52 |
| 1457452_PM_at     | AA407782                            | NA       | 0.22  | 2.11  | 2.23  | 4.93E-02 | 2.56E-01 | -4.52 |
| 1446344_PM_at     | Nyx                                 | NYX      | 0.23  | 2.37  | 2.23  | 4.93E-02 | 2.56E-01 | -4.52 |
| 1447328_PM_at     | ---                                 | NA       | 0.24  | 3.04  | 2.23  | 4.93E-02 | 2.56E-01 | -4.52 |
| 1457879_PM_at     | ---                                 | NA       | 0.25  | 3.03  | 2.23  | 4.93E-02 | 2.56E-01 | -4.52 |
| 1444464_PM_at     | ---                                 | NA       | 0.25  | 2.20  | 2.23  | 4.93E-02 | 2.56E-01 | -4.52 |
| 1419731_PM_at     | Cyp2b19                             | CYP2B6   | 0.51  | 2.49  | 2.23  | 4.93E-02 | 2.56E-01 | -4.52 |
| 1420084_PM_at     | ---                                 | NA       | 0.19  | 2.12  | 2.23  | 4.93E-02 | 2.56E-01 | -4.52 |
| 1451498_PM_at     | Lrrc26                              | LRRC26   | 0.22  | 2.48  | 2.23  | 4.93E-02 | 2.56E-01 | -4.52 |
| 1457834_PM_at     | ---                                 | NA       | -0.63 | 2.99  | -2.22 | 4.94E-02 | 2.56E-01 | -4.52 |
| 1442143_PM_at     | Ano4                                | ANO4     | -0.26 | 3.47  | -2.22 | 4.94E-02 | 2.56E-01 | -4.52 |
| 1426088_PM_at     | ND5                                 | MT-ND5   | -0.17 | 12.34 | -2.22 | 4.94E-02 | 2.56E-01 | -4.52 |
| 1428770_PM_at     | Dip2a                               | DIP2A    | 0.17  | 1.97  | 2.23  | 4.93E-02 | 2.56E-01 | -4.52 |



|                           |                    |             |       |       |       |          |          |       |
|---------------------------|--------------------|-------------|-------|-------|-------|----------|----------|-------|
| 1431823_PM_at             | Itpk1              | NA          | 0.23  | 2.89  | 2.22  | 4.94E-02 | 2.56E-01 | -4.52 |
| 1452542_PM_x_at           | Tcf3               | TCF3        | 0.30  | 2.34  | 2.22  | 4.94E-02 | 2.56E-01 | -4.52 |
| 1459363_PM_at             | Atxn2              | ATXN2       | 0.39  | 2.86  | 2.23  | 4.93E-02 | 2.56E-01 | -4.52 |
| 1459776_PM_x_at           | Gm33409            | NA          | 0.40  | 3.70  | 2.22  | 4.94E-02 | 2.56E-01 | -4.52 |
| 1444554_PM_at             | ---                | NA          | 0.64  | 2.71  | 2.22  | 4.94E-02 | 2.56E-01 | -4.52 |
| 1448400_PM_a_at           | Smarcd2            | SMARCD2     | -1.09 | 6.43  | -2.22 | 4.94E-02 | 2.56E-01 | -4.52 |
| 1417867_PM_at             | Cfd                | CFD         | 0.16  | 2.59  | 2.22  | 4.94E-02 | 2.56E-01 | -4.52 |
| 1427458_PM_at             | Bmp1               | BMP1        | 0.21  | 2.42  | 2.22  | 4.95E-02 | 2.56E-01 | -4.52 |
| 1453260_PM_a_at           | Ppp2r2a            | PPP2R2A     | -0.63 | 4.16  | -2.22 | 4.95E-02 | 2.56E-01 | -4.53 |
| 1455831_PM_at             | Fus                | FUS         | -0.71 | 4.38  | -2.22 | 4.95E-02 | 2.56E-01 | -4.53 |
| 1448517_PM_at             | Timm22             | TIMM22      | 0.24  | 3.68  | 2.22  | 4.95E-02 | 2.56E-01 | -4.53 |
| 1459001_PM_at             | ---                | NA          | 0.25  | 2.48  | 2.22  | 4.95E-02 | 2.56E-01 | -4.53 |
| 1457477_PM_at             | ---                | NA          | 0.20  | 2.62  | 2.22  | 4.95E-02 | 2.57E-01 | -4.53 |
| 1432836_PM_at             | ---                | NA          | 1.15  | 9.70  | 2.22  | 4.95E-02 | 2.57E-01 | -4.53 |
| 1420871_PM_at             | Gucy1b3            | GUCY1B3     | -1.05 | 5.06  | -2.22 | 4.96E-02 | 2.57E-01 | -4.53 |
| 1432642_PM_at             | ---                | NA          | -0.24 | 2.02  | -2.22 | 4.96E-02 | 2.57E-01 | -4.53 |
| 1430741_PM_at             | 4933433G08Rik      | NA          | 0.27  | 2.74  | 2.22  | 4.96E-02 | 2.57E-01 | -4.53 |
| 1448068_PM_at             | Soat1              | SOAT1       | 0.29  | 3.89  | 2.22  | 4.96E-02 | 2.57E-01 | -4.53 |
| 1425301_PM_at             | Ncam2              | NCAM2       | -1.14 | 5.76  | -2.22 | 4.96E-02 | 2.57E-01 | -4.53 |
| 1442487_PM_at             | D14Ert24e          | NA          | 0.55  | 2.36  | 2.22  | 4.96E-02 | 2.57E-01 | -4.53 |
| 1416438_PM_at             | Puf60              | PUF60       | -0.51 | 8.10  | -2.22 | 4.96E-02 | 2.57E-01 | -4.53 |
| 1431574_PM_at             | 4930465M20Rik      | NA          | 0.35  | 3.19  | 2.22  | 4.96E-02 | 2.57E-01 | -4.53 |
| 1431076_PM_at             | Add2               | ADD2        | -0.90 | 6.32  | -2.22 | 4.97E-02 | 2.57E-01 | -4.53 |
| 1434306_PM_at             | Rab3ip             | ACO25263.2  | -0.58 | 3.06  | -2.22 | 4.97E-02 | 2.57E-01 | -4.53 |
| 1442073_PM_at             | Inpp1              | INPP1       | -0.46 | 2.68  | -2.22 | 4.97E-02 | 2.57E-01 | -4.53 |
| 1420112_PM_at             | ---                | NA          | 0.22  | 2.16  | 2.22  | 4.97E-02 | 2.57E-01 | -4.53 |
| 1450270_PM_at             | Pcdhb11            | NA          | 0.27  | 2.68  | 2.22  | 4.97E-02 | 2.57E-01 | -4.53 |
| 1436686_PM_at             | Zfp706             | ZNF706      | 0.36  | 2.35  | 2.22  | 4.97E-02 | 2.57E-01 | -4.53 |
| 1424266_PM_s_at           | Ces1f              | CES1        | 0.17  | 2.13  | 2.22  | 4.97E-02 | 2.57E-01 | -4.53 |
| 1431057_PM_a_at           | Prss23             | PRSS23      | -0.91 | 3.23  | -2.22 | 4.97E-02 | 2.57E-01 | -4.53 |
| 1457814_PM_at             | ---                | NA          | -0.59 | 2.92  | -2.22 | 4.97E-02 | 2.57E-01 | -4.53 |
| 1449616_PM_s_at           | Golga3             | GOLGA3      | -0.42 | 2.89  | -2.22 | 4.97E-02 | 2.57E-01 | -4.53 |
| AFFX-GapdhMur/M32599_3_at | Gapdh              | NA          | -0.36 | 10.38 | -2.22 | 4.98E-02 | 2.57E-01 | -4.53 |
| 1425094_PM_a_at           | Lhx6               | LHX6        | 0.42  | 2.99  | 2.22  | 4.98E-02 | 2.57E-01 | -4.53 |
| 1442660_PM_at             | Ppil2              | PPIL2       | -0.24 | 3.02  | -2.22 | 4.98E-02 | 2.57E-01 | -4.53 |
| 1454263_PM_at             | Gsc2               | GSC2        | 0.20  | 2.19  | 2.22  | 4.98E-02 | 2.57E-01 | -4.53 |
| 1418751_PM_at             | Sit1               | SIT1        | 0.24  | 2.82  | 2.22  | 4.98E-02 | 2.57E-01 | -4.53 |
| 1447512_PM_at             | ---                | NA          | 0.30  | 2.41  | 2.22  | 4.98E-02 | 2.57E-01 | -4.53 |
| 1459124_PM_at             | ---                | NA          | 0.30  | 2.54  | 2.22  | 4.98E-02 | 2.57E-01 | -4.53 |
| 1429347_PM_at             | Bcl2l14            | BCL2L14     | 0.31  | 2.34  | 2.22  | 4.98E-02 | 2.57E-01 | -4.53 |
| 1446026_PM_at             | ---                | NA          | 0.54  | 3.40  | 2.22  | 4.98E-02 | 2.57E-01 | -4.53 |
| 1431860_PM_at             | BC026513           | NA          | 0.91  | 3.77  | 2.22  | 4.98E-02 | 2.57E-01 | -4.53 |
| 1425066_PM_a_at           | Mtmr14             | MTMR14      | -0.43 | 3.79  | -2.22 | 4.98E-02 | 2.57E-01 | -4.53 |
| 1442478_PM_at             | ---                | NA          | 0.84  | 2.49  | 2.22  | 4.99E-02 | 2.57E-01 | -4.53 |
| 1424382_PM_at             | Rcn3               | RCN3        | 0.49  | 3.43  | 2.22  | 4.99E-02 | 2.57E-01 | -4.53 |
| 1455479_PM_a_at           | Ube2d3             | UBE2D3      | -0.69 | 7.95  | -2.22 | 5.00E-02 | 2.57E-01 | -4.53 |
| 1420087_PM_at             | Fzd3               | NA          | -0.52 | 4.12  | -2.22 | 4.99E-02 | 2.57E-01 | -4.53 |
| 1417602_PM_at             | Per2               | PER2        | -0.47 | 2.59  | -2.22 | 4.99E-02 | 2.57E-01 | -4.53 |
| 1426001_PM_at             | Eomes              | EOMES       | 0.17  | 1.96  | 2.22  | 4.99E-02 | 2.57E-01 | -4.53 |
| 1457195_PM_at             | Plekhl1            | PLEKHM1     | 0.19  | 2.08  | 2.22  | 5.00E-02 | 2.57E-01 | -4.53 |
| 1449964_PM_a_at           | Mlycd              | ACO09119.2  | 0.20  | 2.66  | 2.22  | 5.00E-02 | 2.57E-01 | -4.53 |
| 1421006_PM_at             | Col4a6             | COL4A6      | 0.20  | 2.29  | 2.22  | 5.00E-02 | 2.57E-01 | -4.53 |
| 1430340_PM_at             | Lca5               | LCA5        | 0.22  | 2.29  | 2.22  | 4.99E-02 | 2.57E-01 | -4.53 |
| 1431292_PM_a_at           | Twf2               | TWF2        | 0.22  | 2.53  | 2.22  | 5.00E-02 | 2.57E-01 | -4.53 |
| 1440766_PM_at             | Glt8d1             | GLT8D1      | 0.24  | 2.05  | 2.22  | 4.99E-02 | 2.57E-01 | -4.53 |
| 1440194_PM_at             | 2210011C24Rik      | MISP3       | 0.25  | 2.86  | 2.22  | 4.99E-02 | 2.57E-01 | -4.53 |
| 1451959_PM_a_at           | Vegfa              | VEGFA       | 0.26  | 2.66  | 2.22  | 5.00E-02 | 2.57E-01 | -4.53 |
| 1458486_PM_at             | ---                | NA          | 0.28  | 3.55  | 2.22  | 4.99E-02 | 2.57E-01 | -4.53 |
| 1423526_PM_at             | Arid3b             | ARID3B      | 0.31  | 3.24  | 2.22  | 4.99E-02 | 2.57E-01 | -4.53 |
| 1431325_PM_at             | Cml3               | NAT8        | 0.33  | 3.00  | 2.22  | 5.00E-02 | 2.57E-01 | -4.53 |
| 1425366_PM_a_at           | Hus1               | HUS1        | 0.34  | 2.89  | 2.22  | 5.00E-02 | 2.57E-01 | -4.53 |
| 1420556_PM_at             | Oxt                | OXT         | 0.47  | 4.29  | 2.22  | 5.00E-02 | 2.57E-01 | -4.53 |
| 1446192_PM_at             | ---                | NA          | 0.54  | 2.74  | 2.22  | 5.00E-02 | 2.57E-01 | -4.53 |
| 1446255_PM_at             | Kcng1ot1           | NA          | 0.99  | 3.50  | 2.22  | 5.00E-02 | 2.57E-01 | -4.53 |
| 1450440_PM_at             | Gfra1              | GFRA1       | -1.03 | 3.10  | -2.22 | 5.00E-02 | 2.57E-01 | -4.54 |
| 1448335_PM_s_at           | Ccni               | CCNI        | -0.73 | 5.18  | -2.22 | 5.00E-02 | 2.57E-01 | -4.54 |
| 1454927_PM_at             | Zfp41              | ZFP41       | 0.20  | 2.49  | 2.22  | 5.00E-02 | 2.57E-01 | -4.54 |
| 1436723_PM_at             | Cenpi              | CENPI       | 0.24  | 2.48  | 2.22  | 5.00E-02 | 2.57E-01 | -4.54 |
| 1420709_PM_s_at           | Dao                | DAO         | 0.25  | 2.28  | 2.22  | 5.01E-02 | 2.57E-01 | -4.54 |
| 1433422_PM_at             | Nr4a2              | NA          | 0.27  | 2.98  | 2.22  | 5.01E-02 | 2.57E-01 | -4.54 |
| 1456391_PM_at             | Tdrd5              | TDRD5       | 0.28  | 2.76  | 2.22  | 5.00E-02 | 2.57E-01 | -4.54 |
| 1442417_PM_at             | Med8               | MED8        | 0.31  | 3.62  | 2.22  | 5.00E-02 | 2.57E-01 | -4.54 |
| 1423025_PM_a_at           | Gm21949 /// Schip1 | IQCJ-SCHIP1 | 0.59  | 7.40  | 2.22  | 5.00E-02 | 2.57E-01 | -4.54 |
| 1432845_PM_at             | ---                | NA          | 0.59  | 3.41  | 2.22  | 5.00E-02 | 2.57E-01 | -4.54 |
| 1430533_PM_a_at           | Ctnnb1             | CTNNB1      | 0.61  | 2.87  | 2.22  | 5.00E-02 | 2.57E-01 | -4.54 |

|                 |                             |           |       |      |       |          |          |       |
|-----------------|-----------------------------|-----------|-------|------|-------|----------|----------|-------|
| 1425420_PM_s_at | Lats2                       | LATS2     | 0.29  | 2.75 | 2.22  | 5.01E-02 | 2.57E-01 | -4.54 |
| 1429080_PM_at   | Mphosph10                   | MPHOSPH10 | -0.53 | 4.68 | -2.22 | 5.01E-02 | 2.57E-01 | -4.54 |
| 1448050_PM_s_at | Map4k4                      | MAP4K4    | 0.85  | 3.34 | 2.22  | 5.01E-02 | 2.58E-01 | -4.54 |
| 1420712_PM_a_at | Hpn                         | HPN       | 0.21  | 2.82 | 2.22  | 5.01E-02 | 2.58E-01 | -4.54 |
| 1426922_PM_s_at | Agfg1                       | AGFG1     | -0.71 | 3.28 | -2.22 | 5.01E-02 | 2.58E-01 | -4.54 |
| 1435770_PM_at   | Tmx4                        | TMX4      | -0.69 | 4.11 | -2.22 | 5.01E-02 | 2.58E-01 | -4.54 |
| 1430338_PM_at   | ---                         | NA        | 0.30  | 3.69 | 2.22  | 5.01E-02 | 2.58E-01 | -4.54 |
| 1426028_PM_a_at | Cit                         | CIT       | 0.77  | 2.96 | 2.22  | 5.01E-02 | 2.58E-01 | -4.54 |
| 1426439_PM_at   | Ddx3y                       | DDX3Y     | -0.60 | 2.79 | -2.22 | 5.02E-02 | 2.58E-01 | -4.54 |
| 1451318_PM_a_at | Lyn                         | LYN       | -0.37 | 3.04 | -2.22 | 5.02E-02 | 2.58E-01 | -4.54 |
| 1430620_PM_at   | Tex26                       | TEX26     | 0.22  | 2.15 | 2.22  | 5.02E-02 | 2.58E-01 | -4.54 |
| 1453780_PM_at   | ---                         | NA        | 0.31  | 2.57 | 2.22  | 5.02E-02 | 2.58E-01 | -4.54 |
| 1459566_PM_at   | ---                         | NA        | 0.23  | 2.47 | 2.22  | 5.02E-02 | 2.58E-01 | -4.54 |
| 1424443_PM_at   | Tm6sf1                      | TM6SF1    | -0.52 | 2.67 | -2.21 | 5.02E-02 | 2.58E-01 | -4.54 |
| 1450503_PM_at   | Kcnj2                       | KCNJ2     | -0.36 | 2.38 | -2.21 | 5.02E-02 | 2.58E-01 | -4.54 |
| 1449762_PM_at   | Gm9112                      | NA        | 0.18  | 2.51 | 2.21  | 5.02E-02 | 2.58E-01 | -4.54 |
| 1421600_PM_a_at | Trim26                      | TRIM26    | 0.31  | 2.24 | 2.21  | 5.02E-02 | 2.58E-01 | -4.54 |
| 1448889_PM_at   | Slc38a4                     | SLC38A4   | 0.33  | 2.65 | 2.21  | 5.02E-02 | 2.58E-01 | -4.54 |
| 1421524_PM_at   | Cfc1                        | CFC1B     | 0.36  | 2.63 | 2.21  | 5.02E-02 | 2.58E-01 | -4.54 |
| 1419264_PM_at   | Poc5                        | POC5      | 0.43  | 3.57 | 2.21  | 5.02E-02 | 2.58E-01 | -4.54 |
| 1421125_PM_at   | Strbp                       | STRBP     | 1.17  | 3.35 | 2.21  | 5.02E-02 | 2.58E-01 | -4.54 |
| 1448769_PM_at   | Slc35b1                     | SLC35B1   | -0.88 | 3.21 | -2.21 | 5.03E-02 | 2.58E-01 | -4.54 |
| 1420236_PM_at   | ---                         | NA        | 0.26  | 3.97 | 2.21  | 5.03E-02 | 2.58E-01 | -4.54 |
| 1420472_PM_at   | Mtpn                        | MTPN      | -0.67 | 5.14 | -2.21 | 5.03E-02 | 2.58E-01 | -4.54 |
| 1416358_PM_at   | Mfsd10                      | MFSD10    | 0.32  | 2.58 | 2.21  | 5.03E-02 | 2.58E-01 | -4.54 |
| 1457899_PM_at   | Kalrn                       | KALRN     | 0.39  | 2.98 | 2.21  | 5.03E-02 | 2.58E-01 | -4.54 |
| 1427341_PM_at   | Bbs9                        | BBS9      | 0.23  | 2.78 | 2.21  | 5.03E-02 | 2.58E-01 | -4.54 |
| 1437827_PM_s_at | Pfpl                        | MPEG1     | 0.20  | 2.14 | 2.21  | 5.04E-02 | 2.58E-01 | -4.54 |
| 1431544_PM_at   | 4930524B17Rik               | NA        | 0.20  | 2.30 | 2.21  | 5.04E-02 | 2.58E-01 | -4.54 |
| 1435919_PM_at   | Atp1a1                      | ATP1A1    | 0.21  | 2.50 | 2.21  | 5.04E-02 | 2.58E-01 | -4.54 |
| 1427967_PM_at   | Srgap2                      | SRGAP2B   | 0.55  | 2.91 | 2.21  | 5.04E-02 | 2.58E-01 | -4.54 |
| 1451836_PM_at   | Tmem150b                    | TMEM150B  | 0.30  | 2.60 | 2.21  | 5.04E-02 | 2.58E-01 | -4.54 |
| 1445026_PM_at   | ---                         | NA        | 0.36  | 2.17 | 2.21  | 5.04E-02 | 2.58E-01 | -4.54 |
| 1431676_PM_x_at | Gtf2i                       | GTF2I     | 0.40  | 4.60 | 2.21  | 5.04E-02 | 2.58E-01 | -4.54 |
| 1451272_PM_a_at | Ube2f                       | UBE2F     | 0.86  | 4.03 | 2.21  | 5.04E-02 | 2.58E-01 | -4.54 |
| 1428242_PM_at   | Hmha1                       | ARHGAP45  | 0.27  | 3.17 | 2.21  | 5.04E-02 | 2.58E-01 | -4.54 |
| 1417440_PM_at   | Arid1a                      | ARID1A    | 0.34  | 4.86 | 2.21  | 5.04E-02 | 2.58E-01 | -4.54 |
| 1434654_PM_at   | Cog3                        | COG3      | -0.64 | 4.11 | -2.21 | 5.05E-02 | 2.58E-01 | -4.54 |
| 1430129_PM_a_at | CommD8                      | COMMMD8   | -0.61 | 4.14 | -2.21 | 5.05E-02 | 2.58E-01 | -4.54 |
| 1459418_PM_at   | ---                         | NA        | 0.61  | 2.78 | 2.21  | 5.05E-02 | 2.58E-01 | -4.54 |
| 1419578_PM_at   | Mbl1                        | NA        | 0.21  | 2.29 | 2.21  | 5.05E-02 | 2.58E-01 | -4.54 |
| 1420451_PM_at   | Asic5                       | ASIC5     | 0.25  | 3.13 | 2.21  | 5.05E-02 | 2.58E-01 | -4.54 |
| 1447295_PM_at   | ---                         | NA        | 0.39  | 2.52 | 2.21  | 5.05E-02 | 2.58E-01 | -4.54 |
| 1431841_PM_at   | Wdr95                       | NA        | 0.17  | 2.43 | 2.21  | 5.05E-02 | 2.58E-01 | -4.54 |
| 1448309_PM_at   | Ap3m1                       | AP3M1     | 0.37  | 2.80 | 2.21  | 5.05E-02 | 2.58E-01 | -4.54 |
| 1448247_PM_at   | Bcl7b                       | BCL7B     | 0.29  | 3.04 | 2.21  | 5.06E-02 | 2.59E-01 | -4.55 |
| 1426330_PM_at   | Cacng5                      | CACNG5    | 0.33  | 2.73 | 2.21  | 5.06E-02 | 2.59E-01 | -4.55 |
| 1438867_PM_at   | Gm1070                      | NA        | 0.24  | 2.30 | 2.21  | 5.06E-02 | 2.59E-01 | -4.55 |
| 1419988_PM_at   | Map3k7                      | MAP3K7    | -0.62 | 4.20 | -2.21 | 5.06E-02 | 2.59E-01 | -4.55 |
| 1431197_PM_at   | Atl2                        | ATL2      | 0.47  | 3.32 | 2.21  | 5.06E-02 | 2.59E-01 | -4.55 |
| 1426919_PM_at   | Iitgb1                      | NA        | 0.17  | 2.11 | 2.21  | 5.07E-02 | 2.59E-01 | -4.55 |
| 1449247_PM_at   | Actr2                       | ACTRT2    | 0.27  | 2.54 | 2.21  | 5.07E-02 | 2.59E-01 | -4.55 |
| 1433498_PM_at   | Urgcp                       | URGCP     | -0.58 | 3.56 | -2.21 | 5.07E-02 | 2.59E-01 | -4.55 |
| 1433272_PM_at   | ---                         | NA        | 0.23  | 2.49 | 2.21  | 5.07E-02 | 2.59E-01 | -4.55 |
| 1425026_PM_at   | Sft2d2                      | SFT2D2    | -0.72 | 2.56 | -2.21 | 5.07E-02 | 2.59E-01 | -4.55 |
| 1442661_PM_at   | Dhrs7b                      | DHRS7B    | 0.23  | 2.51 | 2.21  | 5.07E-02 | 2.59E-01 | -4.55 |
| 1446367_PM_at   | ---                         | NA        | 0.26  | 2.53 | 2.21  | 5.07E-02 | 2.59E-01 | -4.55 |
| 1432096_PM_at   | Gm35595 /// Snrpn /// Snurf | SNRPN     | 0.26  | 2.94 | 2.21  | 5.08E-02 | 2.59E-01 | -4.55 |
| 1453729_PM_a_at | Rpl37 /// Rpl37rt           | RPL37     | -1.23 | 3.98 | -2.21 | 5.08E-02 | 2.60E-01 | -4.55 |
| 1421719_PM_at   | Vmn2r26                     | NA        | 0.24  | 3.42 | 2.21  | 5.08E-02 | 2.60E-01 | -4.55 |
| 1454318_PM_at   | ---                         | NA        | 0.24  | 2.16 | 2.21  | 5.08E-02 | 2.60E-01 | -4.55 |
| 1436757_PM_a_at | Cox6b1                      | COX6B1    | -0.90 | 8.56 | -2.21 | 5.08E-02 | 2.60E-01 | -4.55 |
| 1431323_PM_at   | Lztf1                       | NA        | -0.46 | 3.43 | -2.21 | 5.08E-02 | 2.60E-01 | -4.55 |
| 1444246_PM_at   | ---                         | NA        | 0.29  | 2.41 | 2.21  | 5.09E-02 | 2.60E-01 | -4.55 |
| 1435566_PM_s_at | Araf                        | ARAF      | 0.48  | 3.01 | 2.21  | 5.09E-02 | 2.60E-01 | -4.55 |
| 1450462_PM_at   | Chr2                        | CRHR2     | 0.26  | 2.77 | 2.21  | 5.09E-02 | 2.60E-01 | -4.55 |
| 1429185_PM_at   | Arhgef26                    | ARHGEF26  | -0.73 | 3.04 | -2.21 | 5.09E-02 | 2.60E-01 | -4.55 |
| 1455012_PM_s_at | Trim37                      | TRIM37    | -0.64 | 7.32 | -2.21 | 5.09E-02 | 2.60E-01 | -4.55 |
| 1443732_PM_at   | ---                         | NA        | -0.27 | 2.64 | -2.21 | 5.09E-02 | 2.60E-01 | -4.55 |
| 1445311_PM_at   | ---                         | NA        | 0.23  | 2.54 | 2.21  | 5.09E-02 | 2.60E-01 | -4.55 |
| 1452516_PM_at   | Smok3a                      | NA        | 0.50  | 3.47 | 2.21  | 5.09E-02 | 2.60E-01 | -4.55 |
| 1443737_PM_at   | ---                         | NA        | -0.41 | 3.05 | -2.21 | 5.10E-02 | 2.60E-01 | -4.55 |
| 1438392_PM_at   | ---                         | NA        | 0.22  | 2.43 | 2.21  | 5.10E-02 | 2.60E-01 | -4.55 |
| 1425639_PM_at   | Adap2                       | ADAP2     | 0.31  | 2.91 | 2.21  | 5.10E-02 | 2.60E-01 | -4.55 |

|                 |                       |            |       |      |       |          |          |       |
|-----------------|-----------------------|------------|-------|------|-------|----------|----------|-------|
| 1441149_PM_at   | ---                   | NA         | 0.32  | 2.47 | 2.21  | 5.10E-02 | 2.60E-01 | -4.55 |
| 1447469_PM_at   | Ccdc66                | CCDC66     | 0.50  | 2.66 | 2.21  | 5.10E-02 | 2.60E-01 | -4.55 |
| 1415781_PM_a_at | LOC102636299 ///Sumo2 | NA         | 0.36  | 9.05 | 2.21  | 5.10E-02 | 2.60E-01 | -4.55 |
| 1458876_PM_at   | ---                   | NA         | 0.38  | 3.25 | 2.21  | 5.10E-02 | 2.60E-01 | -4.55 |
| 1459007_PM_at   | ---                   | NA         | 0.28  | 2.65 | 2.21  | 5.11E-02 | 2.60E-01 | -4.56 |
| 1448679_PM_at   | Hyal2                 | HYAL2      | 0.27  | 3.03 | 2.20  | 5.11E-02 | 2.60E-01 | -4.56 |
| 1451753_PM_at   | Pkna2                 | PLXNA2     | -0.72 | 4.19 | -2.20 | 5.11E-02 | 2.60E-01 | -4.56 |
| 1422959_PM_s_at | Rnf114                | RNF114     | 0.21  | 2.31 | 2.20  | 5.11E-02 | 2.60E-01 | -4.56 |
| 1420399_PM_at   | Gfi1b                 | GFI1B      | 0.22  | 2.37 | 2.20  | 5.11E-02 | 2.60E-01 | -4.56 |
| 1451981_PM_at   | Tpgs1                 | TPGS1      | 0.26  | 2.70 | 2.20  | 5.11E-02 | 2.60E-01 | -4.56 |
| 1434546_PM_at   | Smg5                  | SMG5       | 0.31  | 4.18 | 2.20  | 5.11E-02 | 2.60E-01 | -4.56 |
| 1452911_PM_at   | Spred1                | SPRED1     | -0.48 | 4.12 | -2.20 | 5.11E-02 | 2.61E-01 | -4.56 |
| 1439747_PM_at   | Ptges                 | PTGES      | 0.28  | 2.86 | 2.20  | 5.12E-02 | 2.61E-01 | -4.56 |
| 1459828_PM_at   | Srrm1                 | SRRM1      | 0.63  | 3.47 | 2.20  | 5.12E-02 | 2.61E-01 | -4.56 |
| 1440355_PM_at   | Kctd12b               | NA         | 0.18  | 2.29 | 2.20  | 5.12E-02 | 2.61E-01 | -4.56 |
| 1449517_PM_at   | Qpctl                 | QPCTL      | 0.23  | 2.41 | 2.20  | 5.12E-02 | 2.61E-01 | -4.56 |
| 1454586_PM_at   | ---                   | NA         | 0.20  | 2.20 | 2.20  | 5.12E-02 | 2.61E-01 | -4.56 |
| 1446073_PM_at   | ---                   | NA         | 0.22  | 2.71 | 2.20  | 5.12E-02 | 2.61E-01 | -4.56 |
| 1419274_PM_at   | Uri1                  | URI1       | 0.60  | 3.38 | 2.20  | 5.12E-02 | 2.61E-01 | -4.56 |
| 1420696_PM_at   | Sema3c                | SEMA3C     | 0.70  | 3.49 | 2.20  | 5.13E-02 | 2.61E-01 | -4.56 |
| 1460203_PM_at   | Itpr1                 | ITPR1      | -1.31 | 6.53 | -2.20 | 5.13E-02 | 2.61E-01 | -4.56 |
| 1423055_PM_at   | Nsg1                  | AC110814.1 | -0.43 | 6.73 | -2.20 | 5.13E-02 | 2.61E-01 | -4.56 |
| 1460169_PM_a_at | Cdk16                 | CDK16      | -0.40 | 4.70 | -2.20 | 5.13E-02 | 2.61E-01 | -4.56 |
| 1429545_PM_at   | LOC102641751 ///Ube2i | UBE2I      | 0.43  | 2.75 | 2.20  | 5.13E-02 | 2.61E-01 | -4.56 |
| 1427498_PM_a_at | Spag5                 | ACO05726.2 | 0.35  | 2.41 | 2.20  | 5.13E-02 | 2.61E-01 | -4.56 |
| 1419914_PM_s_at | Nus1                  | NUS1       | -0.47 | 4.24 | -2.20 | 5.14E-02 | 2.61E-01 | -4.56 |
| 1425265_PM_a_at | Eri3                  | ERI3       | 0.41  | 3.33 | 2.20  | 5.14E-02 | 2.61E-01 | -4.56 |
| 1416715_PM_at   | Gjb3                  | GJB3       | 0.27  | 2.44 | 2.20  | 5.14E-02 | 2.61E-01 | -4.56 |
| 1443940_PM_at   | Lrit2                 | LRI2       | 0.18  | 2.23 | 2.20  | 5.14E-02 | 2.61E-01 | -4.56 |
| 1435429_PM_x_at | Rps27l                | RPS27L     | -0.63 | 2.94 | -2.20 | 5.14E-02 | 2.61E-01 | -4.56 |
| 1436593_PM_at   | 1700016K19Rik         | C17orf97   | 0.26  | 2.31 | 2.20  | 5.14E-02 | 2.61E-01 | -4.56 |
| 1453435_PM_a_at | Fmo2                  | FMO2       | 0.38  | 3.18 | 2.20  | 5.14E-02 | 2.61E-01 | -4.56 |
| 1428219_PM_at   | Rybp                  | RYBP       | -0.43 | 3.26 | -2.20 | 5.15E-02 | 2.61E-01 | -4.56 |
| 1445266_PM_at   | Erc1                  | NA         | 0.22  | 2.57 | 2.20  | 5.15E-02 | 2.61E-01 | -4.56 |
| 1444426_PM_at   | Cass4                 | CASS4      | 0.27  | 2.40 | 2.20  | 5.14E-02 | 2.61E-01 | -4.56 |
| 1458066_PM_at   | ---                   | NA         | 0.30  | 3.03 | 2.20  | 5.14E-02 | 2.61E-01 | -4.56 |
| 1438920_PM_x_at | Cr1l                  | CR1L       | -0.28 | 2.38 | -2.20 | 5.15E-02 | 2.62E-01 | -4.56 |
| 1429051_PM_s_at | Sox11                 | SOX11      | 0.29  | 2.80 | 2.20  | 5.15E-02 | 2.62E-01 | -4.56 |
| 1423674_PM_at   | Usp1                  | USP1       | -0.63 | 2.80 | -2.20 | 5.15E-02 | 2.62E-01 | -4.56 |
| 1418067_PM_at   | Cfl2                  | CFL2       | -0.63 | 6.10 | -2.20 | 5.15E-02 | 2.62E-01 | -4.56 |
| 1425673_PM_at   | Lpp                   | NA         | 0.18  | 2.47 | 2.20  | 5.15E-02 | 2.62E-01 | -4.56 |
| 1421351_PM_at   | Gria4                 | GRIA4      | 0.44  | 3.42 | 2.20  | 5.16E-02 | 2.62E-01 | -4.56 |
| 1440450_PM_at   | ---                   | NA         | -0.24 | 2.21 | -2.20 | 5.16E-02 | 2.62E-01 | -4.56 |
| 1439187_PM_at   | Vps13d                | VPS13D     | -0.72 | 4.58 | -2.20 | 5.16E-02 | 2.62E-01 | -4.56 |
| 1448521_PM_at   | Brd7                  | BRD7       | -0.36 | 2.93 | -2.20 | 5.16E-02 | 2.62E-01 | -4.56 |
| 1427795_PM_s_at | ---                   | NA         | -0.26 | 2.71 | -2.20 | 5.16E-02 | 2.62E-01 | -4.56 |
| 1441453_PM_at   | 8030453O22Rik         | NA         | 0.24  | 2.42 | 2.20  | 5.16E-02 | 2.62E-01 | -4.56 |
| 1453630_PM_at   | Galnt14               | GALNT14    | -0.20 | 2.16 | -2.20 | 5.16E-02 | 2.62E-01 | -4.57 |
| 1450071_PM_at   | Ash1l                 | ASH1L      | -1.68 | 7.63 | -2.20 | 5.18E-02 | 2.62E-01 | -4.57 |
| 1453207_PM_at   | Pet100                | PET100     | -1.16 | 5.71 | -2.20 | 5.17E-02 | 2.62E-01 | -4.57 |
| 1426696_PM_at   | Lrpap1                | LRPAP1     | -0.96 | 4.59 | -2.20 | 5.17E-02 | 2.62E-01 | -4.57 |
| 1428327_PM_at   | Trak1                 | TRAK1      | -0.56 | 8.29 | -2.20 | 5.17E-02 | 2.62E-01 | -4.57 |
| 1439014_PM_at   | Mb21d2                | MB21D2     | -0.42 | 2.88 | -2.20 | 5.17E-02 | 2.62E-01 | -4.57 |
| 1423824_PM_at   | Wls                   | WLS        | -0.19 | 2.17 | -2.20 | 5.17E-02 | 2.62E-01 | -4.57 |
| 1454408_PM_at   | 4930544L18Rik         | NA         | 0.19  | 2.87 | 2.20  | 5.17E-02 | 2.62E-01 | -4.57 |
| 1430116_PM_at   | Cyp4f41-ps            | NA         | 0.19  | 2.65 | 2.20  | 5.17E-02 | 2.62E-01 | -4.57 |
| 1419887_PM_at   | ---                   | NA         | 0.20  | 2.20 | 2.20  | 5.17E-02 | 2.62E-01 | -4.57 |
| 1452026_PM_a_at | Pla2g12a              | PLA2G12A   | 0.21  | 2.56 | 2.20  | 5.17E-02 | 2.62E-01 | -4.57 |
| 1430544_PM_at   | C2cd2                 | NA         | 0.21  | 2.54 | 2.20  | 5.18E-02 | 2.62E-01 | -4.57 |
| 1420450_PM_at   | Mmp10                 | MMP10      | 0.24  | 2.30 | 2.20  | 5.17E-02 | 2.62E-01 | -4.57 |
| 1430078_PM_a_at | Ogg1                  | OGG1       | 0.26  | 3.26 | 2.20  | 5.17E-02 | 2.62E-01 | -4.57 |
| 1431217_PM_at   | Lrrc27                | LRRC27     | 0.26  | 2.69 | 2.20  | 5.18E-02 | 2.62E-01 | -4.57 |
| 1446140_PM_at   | ---                   | NA         | 0.26  | 2.65 | 2.20  | 5.18E-02 | 2.62E-01 | -4.57 |
| 1418013_PM_at   | Cml1                  | NAT8       | 0.31  | 2.60 | 2.20  | 5.17E-02 | 2.62E-01 | -4.57 |
| 1434305_PM_at   | U2af1l4               | U2AF1L4    | 0.31  | 2.58 | 2.20  | 5.17E-02 | 2.62E-01 | -4.57 |
| 1453566_PM_at   | Rbm33                 | RBM33      | 0.37  | 2.97 | 2.20  | 5.17E-02 | 2.62E-01 | -4.57 |
| 1446803_PM_at   | Dock9                 | NA         | 0.54  | 2.94 | 2.20  | 5.17E-02 | 2.62E-01 | -4.57 |
| 1447443_PM_at   | ---                   | NA         | 0.68  | 3.07 | 2.20  | 5.17E-02 | 2.62E-01 | -4.57 |
| 1444252_PM_at   | ---                   | NA         | 1.16  | 4.42 | 2.20  | 5.18E-02 | 2.62E-01 | -4.57 |
| 1450983_PM_at   | Akap8                 | AKAP8      | 1.41  | 4.56 | 2.20  | 5.17E-02 | 2.62E-01 | -4.57 |
| 1419628_PM_at   | Vsx2                  | VSX2       | 0.23  | 2.29 | 2.20  | 5.18E-02 | 2.62E-01 | -4.57 |
| 1434930_PM_at   | Tpcn1                 | TPCN1      | 0.41  | 4.15 | 2.20  | 5.18E-02 | 2.62E-01 | -4.57 |
| 1433047_PM_at   | ---                   | NA         | 0.37  | 2.67 | 2.20  | 5.18E-02 | 2.62E-01 | -4.57 |
| 1425977_PM_a_at | Slk                   | SLK        | -0.61 | 4.13 | -2.20 | 5.18E-02 | 2.62E-01 | -4.57 |

|                 |                           |          |       |      |       |          |          |       |
|-----------------|---------------------------|----------|-------|------|-------|----------|----------|-------|
| 1430043_PM_at   | Ttc19                     | TTC19    | 0.80  | 3.46 | 2.20  | 5.18E-02 | 2.62E-01 | -4.57 |
| 1450042_PM_at   | Arx                       | ARX      | -0.47 | 2.66 | -2.20 | 5.19E-02 | 2.62E-01 | -4.57 |
| 1434091_PM_at   | Faah                      | FAAH     | -0.83 | 4.35 | -2.20 | 5.19E-02 | 2.62E-01 | -4.57 |
| 1416432_PM_at   | Pfkfb3                    | PFKFB3   | -0.62 | 3.16 | -2.20 | 5.19E-02 | 2.62E-01 | -4.57 |
| 1448857_PM_a_at | Zdhhc12                   | ZDHHHC12 | 0.23  | 3.27 | 2.20  | 5.19E-02 | 2.62E-01 | -4.57 |
| 1422699_PM_at   | Alox12                    | ALOX12   | 0.27  | 2.28 | 2.20  | 5.19E-02 | 2.62E-01 | -4.57 |
| 1440049_PM_at   | Paupar                    | NA       | 0.30  | 2.47 | 2.20  | 5.19E-02 | 2.62E-01 | -4.57 |
| 1435779_PM_at   | Cntrl                     | CNTRL    | -0.39 | 2.43 | -2.20 | 5.19E-02 | 2.62E-01 | -4.57 |
| 1433738_PM_at   | Papd5                     | PAPD5    | -0.61 | 7.26 | -2.20 | 5.19E-02 | 2.62E-01 | -4.57 |
| 1450625_PM_at   | Col5a2                    | COL5A2   | -0.33 | 2.41 | -2.20 | 5.19E-02 | 2.62E-01 | -4.57 |
| 1460002_PM_at   | Tlk1                      | TLK1     | 0.25  | 2.56 | 2.20  | 5.19E-02 | 2.62E-01 | -4.57 |
| 1420006_PM_at   | Bmp15                     | NA       | 0.26  | 2.22 | 2.20  | 5.19E-02 | 2.62E-01 | -4.57 |
| 1437339_PM_s_at | Pcsk5                     | PCSK5    | -1.52 | 4.32 | -2.19 | 5.20E-02 | 2.62E-01 | -4.57 |
| AFFX-Lyx-M_at   | ---                       | NA       | 0.17  | 2.19 | 2.19  | 5.20E-02 | 2.62E-01 | -4.57 |
| 1423122_PM_at   | Avpi1                     | AVPI1    | 0.39  | 3.30 | 2.19  | 5.20E-02 | 2.62E-01 | -4.57 |
| 1426520_PM_at   | Btg4                      | BTG4     | 0.19  | 2.61 | 2.19  | 5.20E-02 | 2.63E-01 | -4.57 |
| 1444638_PM_at   | Ttn                       | TTN      | 0.25  | 2.98 | 2.19  | 5.20E-02 | 2.63E-01 | -4.57 |
| 1444662_PM_at   | Pla2g4c                   | PLA2G4C  | 0.27  | 2.64 | 2.19  | 5.20E-02 | 2.63E-01 | -4.57 |
| 1444130_PM_at   | ---                       | NA       | 0.69  | 4.45 | 2.19  | 5.20E-02 | 2.63E-01 | -4.57 |
| 1439539_PM_at   | Tram2                     | TRAM2    | 0.34  | 2.82 | 2.19  | 5.21E-02 | 2.63E-01 | -4.57 |
| 1425974_PM_a_at | Trim25                    | TRIM25   | -0.60 | 3.55 | -2.19 | 5.21E-02 | 2.63E-01 | -4.57 |
| 1434236_PM_at   | Zdhhc20                   | ZDHHHC20 | -0.40 | 3.23 | -2.19 | 5.21E-02 | 2.63E-01 | -4.57 |
| 1419163_PM_s_at | Dnajc3                    | DNAJC3   | -0.31 | 3.08 | -2.19 | 5.21E-02 | 2.63E-01 | -4.57 |
| 1451327_PM_a_at | Tmed1                     | TMED1    | 0.22  | 3.03 | 2.19  | 5.21E-02 | 2.63E-01 | -4.57 |
| 1442833_PM_at   | D15Ert30e                 | NA       | 0.26  | 2.11 | 2.19  | 5.21E-02 | 2.63E-01 | -4.57 |
| 1454365_PM_at   | 4930554P06Rik             | NA       | 0.28  | 2.91 | 2.19  | 5.21E-02 | 2.63E-01 | -4.57 |
| 1442900_PM_at   | ---                       | NA       | 0.34  | 2.52 | 2.19  | 5.21E-02 | 2.63E-01 | -4.57 |
| 1458267_PM_at   | Gm38885                   | NA       | 0.37  | 3.16 | 2.19  | 5.21E-02 | 2.63E-01 | -4.57 |
| 1422558_PM_at   | Gamt                      | GAMT     | 0.26  | 2.45 | 2.19  | 5.21E-02 | 2.63E-01 | -4.57 |
| 1458359_PM_at   | ---                       | NA       | 0.55  | 3.08 | 2.19  | 5.22E-02 | 2.63E-01 | -4.57 |
| 1426937_PM_at   | Medag                     | MEDAG    | -0.79 | 3.14 | -2.19 | 5.22E-02 | 2.63E-01 | -4.57 |
| 1437308_PM_s_at | F2r                       | F2R      | -0.57 | 2.40 | -2.19 | 5.22E-02 | 2.63E-01 | -4.58 |
| 1452105_PM_a_at | Tsc2                      | TSC2     | -0.45 | 2.73 | -2.19 | 5.22E-02 | 2.63E-01 | -4.58 |
| 1451802_PM_at   | Tpsb2                     | NA       | 0.46  | 2.80 | 2.19  | 5.22E-02 | 2.63E-01 | -4.58 |
| 1422061_PM_at   | Akr1c20                   | AKR1C2   | 0.19  | 2.47 | 2.19  | 5.22E-02 | 2.63E-01 | -4.58 |
| 1441970_PM_at   | ---                       | NA       | -0.81 | 3.27 | -2.19 | 5.22E-02 | 2.63E-01 | -4.58 |
| 1448519_PM_at   | Tead2                     | TEAD2    | 0.27  | 2.52 | 2.19  | 5.23E-02 | 2.63E-01 | -4.58 |
| 1453037_PM_at   | Usp49                     | USP49    | 0.33  | 2.87 | 2.19  | 5.23E-02 | 2.63E-01 | -4.58 |
| 1438363_PM_at   | Pnmal2                    | PNMA8B   | 0.60  | 3.86 | 2.19  | 5.23E-02 | 2.63E-01 | -4.58 |
| 1418866_PM_at   | Cyp24a1                   | CYP24A1  | 0.15  | 2.46 | 2.19  | 5.23E-02 | 2.63E-01 | -4.58 |
| 1425004_PM_s_at | Mocs1                     | MOC51    | 0.51  | 3.06 | 2.19  | 5.23E-02 | 2.63E-01 | -4.58 |
| 1438686_PM_at   | Eif4g1                    | EIF4G1   | 0.58  | 3.02 | 2.19  | 5.23E-02 | 2.63E-01 | -4.58 |
| 1454807_PM_a_at | Snx12                     | SNX12    | -0.71 | 6.65 | -2.19 | 5.23E-02 | 2.63E-01 | -4.58 |
| 1429187_PM_at   | Tmed7                     | TMED7    | -0.59 | 3.05 | -2.19 | 5.23E-02 | 2.63E-01 | -4.58 |
| 1430164_PM_a_at | Grb10                     | GRB10    | 0.24  | 2.18 | 2.19  | 5.23E-02 | 2.63E-01 | -4.58 |
| 1445560_PM_at   | ---                       | NA       | 0.29  | 3.29 | 2.19  | 5.23E-02 | 2.63E-01 | -4.58 |
| 1444946_PM_at   | ---                       | NA       | 0.33  | 2.54 | 2.19  | 5.23E-02 | 2.63E-01 | -4.58 |
| 1442140_PM_at   | Tnn                       | TNN      | -0.38 | 2.41 | -2.19 | 5.24E-02 | 2.63E-01 | -4.58 |
| 1451031_PM_at   | Sfrp4                     | SFRP4    | 0.19  | 2.50 | 2.19  | 5.24E-02 | 2.63E-01 | -4.58 |
| 1436687_PM_x_at | Zfp706                    | ZNF706   | 0.30  | 2.52 | 2.19  | 5.24E-02 | 2.63E-01 | -4.58 |
| 1435219_PM_x_at | Becn1                     | BECN1    | 0.38  | 4.36 | 2.19  | 5.24E-02 | 2.63E-01 | -4.58 |
| 1440850_PM_at   | Rlim                      | RLIM     | 0.39  | 2.72 | 2.19  | 5.24E-02 | 2.63E-01 | -4.58 |
| 1420896_PM_at   | Snap23                    | SNAP23   | 0.46  | 3.68 | 2.19  | 5.24E-02 | 2.63E-01 | -4.58 |
| 1428226_PM_at   | Ngdn                      | NGDN     | 0.47  | 3.33 | 2.19  | 5.24E-02 | 2.63E-01 | -4.58 |
| 1437041_PM_at   | Pnlsr                     | PNISR    | -1.03 | 5.48 | -2.19 | 5.24E-02 | 2.63E-01 | -4.58 |
| 1436969_PM_at   | Erich3                    | ERICH3   | 0.37  | 2.59 | 2.19  | 5.24E-02 | 2.63E-01 | -4.58 |
| 1450436_PM_s_at | Dnajb5                    | DNAJB5   | -0.58 | 7.54 | -2.19 | 5.24E-02 | 2.63E-01 | -4.58 |
| 1422891_PM_at   | H2-Ea-ps                  | NA       | 0.21  | 2.99 | 2.19  | 5.25E-02 | 2.63E-01 | -4.58 |
| 1451713_PM_a_at | Fcer2a                    | FCER2    | 0.26  | 2.25 | 2.19  | 5.24E-02 | 2.63E-01 | -4.58 |
| 1446650_PM_at   | ---                       | NA       | 0.28  | 2.52 | 2.19  | 5.25E-02 | 2.63E-01 | -4.58 |
| 1441956_PM_s_at | Cux1                      | CUX1     | 0.38  | 2.53 | 2.19  | 5.24E-02 | 2.63E-01 | -4.58 |
| 1432007_PM_s_at | Ap2a2                     | AP2A2    | 0.50  | 3.48 | 2.19  | 5.24E-02 | 2.63E-01 | -4.58 |
| 1456739_PM_x_at | Armxc2                    | ARMCX2   | -0.90 | 8.72 | -2.19 | 5.25E-02 | 2.64E-01 | -4.58 |
| 1416136_PM_at   | Mmp2                      | MMP2     | 0.20  | 2.38 | 2.19  | 5.25E-02 | 2.64E-01 | -4.58 |
| 1439103_PM_at   | Cdc73                     | CDC73    | -0.27 | 2.61 | -2.19 | 5.25E-02 | 2.64E-01 | -4.58 |
| 1448831_PM_at   | Angpt2                    | ANGPT2   | 0.22  | 2.25 | 2.19  | 5.25E-02 | 2.64E-01 | -4.58 |
| 1432501_PM_at   | ---                       | NA       | 0.20  | 2.53 | 2.19  | 5.26E-02 | 2.64E-01 | -4.58 |
| 1421792_PM_s_at | Trem2                     | TREM2    | 0.25  | 2.69 | 2.19  | 5.26E-02 | 2.64E-01 | -4.58 |
| 1443494_PM_at   | Polr3b                    | POLR3B   | 0.50  | 3.04 | 2.19  | 5.26E-02 | 2.64E-01 | -4.58 |
| 1448264_PM_a_at | Eif3i                     | EIF3I    | 0.29  | 9.60 | 2.19  | 5.26E-02 | 2.64E-01 | -4.58 |
| 1418536_PM_at   | H2-D4 /// H2-Q7 /// H2-Q9 | NA       | 0.31  | 3.36 | 2.19  | 5.26E-02 | 2.64E-01 | -4.58 |
| 1435275_PM_at   | Cox6b2                    | COX6B2   | 0.34  | 3.38 | 2.19  | 5.26E-02 | 2.64E-01 | -4.58 |
| 1447663_PM_at   | ---                       | NA       | 0.30  | 3.50 | 2.19  | 5.26E-02 | 2.64E-01 | -4.58 |
| 1429405_PM_at   | Sapcd2                    | SAPCD2   | 0.34  | 2.62 | 2.19  | 5.26E-02 | 2.64E-01 | -4.58 |

|                 |               |          |       |      |       |          |          |       |
|-----------------|---------------|----------|-------|------|-------|----------|----------|-------|
| 1427411_PM_s_at | Dleu2         | NA       | 0.21  | 2.31 | 2.19  | 5.27E-02 | 2.64E-01 | -4.58 |
| 1424060_PM_at   | Neil3         | NEIL3    | 0.36  | 3.24 | 2.19  | 5.27E-02 | 2.64E-01 | -4.58 |
| 1416566_PM_at   | Strap         | STRAP    | -0.56 | 4.88 | -2.19 | 5.27E-02 | 2.64E-01 | -4.58 |
| 1424214_PM_at   | Parm1         | PARM1    | 0.46  | 3.62 | 2.19  | 5.27E-02 | 2.64E-01 | -4.58 |
| 1458828_PM_at   | ---           | NA       | 0.53  | 2.84 | 2.19  | 5.27E-02 | 2.64E-01 | -4.58 |
| 1446429_PM_at   | P2rx4         | P2RX4    | 0.37  | 3.14 | 2.19  | 5.27E-02 | 2.64E-01 | -4.59 |
| 1436180_PM_at   | Dnajc5        | DNAJC5   | -0.76 | 6.55 | -2.19 | 5.28E-02 | 2.64E-01 | -4.59 |
| 1451154_PM_a_at | Celf2         | CELF2    | -0.48 | 9.32 | -2.19 | 5.28E-02 | 2.64E-01 | -4.59 |
| 1451679_PM_at   | Arxes1        | NA       | -0.45 | 2.66 | -2.19 | 5.28E-02 | 2.64E-01 | -4.59 |
| 1424696_PM_at   | Gpr89         | GPR89B   | -0.24 | 4.22 | -2.19 | 5.28E-02 | 2.64E-01 | -4.59 |
| 1460264_PM_at   | C81600        | NA       | 0.21  | 2.21 | 2.19  | 5.28E-02 | 2.64E-01 | -4.59 |
| 1447562_PM_at   | Foxf2         | FOXF2    | 0.23  | 2.58 | 2.19  | 5.28E-02 | 2.64E-01 | -4.59 |
| 1455473_PM_at   | Usp13         | USP13    | 0.35  | 2.80 | 2.19  | 5.28E-02 | 2.64E-01 | -4.59 |
| 1424536_PM_at   | Oas1e         | OAS1     | 0.77  | 6.85 | 2.19  | 5.27E-02 | 2.64E-01 | -4.59 |
| 1424582_PM_at   | Agk           | AGK      | 0.34  | 2.64 | 2.19  | 5.28E-02 | 2.64E-01 | -4.59 |
| 1452718_PM_at   | Ubr5          | UBR5     | -0.78 | 6.97 | -2.19 | 5.28E-02 | 2.64E-01 | -4.59 |
| 1448297_PM_a_at | Tnk2          | TNK2     | -0.39 | 9.46 | -2.19 | 5.28E-02 | 2.64E-01 | -4.59 |
| 1438325_PM_at   | Mecom         | MECOM    | -0.32 | 2.42 | -2.19 | 5.28E-02 | 2.64E-01 | -4.59 |
| 1449226_PM_at   | Hic1          | HIC1     | 0.25  | 2.34 | 2.19  | 5.28E-02 | 2.64E-01 | -4.59 |
| 1418041_PM_at   | Tmem186       | TMEM186  | 0.30  | 2.46 | 2.19  | 5.28E-02 | 2.64E-01 | -4.59 |
| 1447237_PM_at   | ---           | NA       | 0.47  | 2.98 | 2.19  | 5.28E-02 | 2.64E-01 | -4.59 |
| 1428015_PM_at   | Synj2bp       | NA       | 0.23  | 2.53 | 2.19  | 5.28E-02 | 2.64E-01 | -4.59 |
| 1423338_PM_at   | Zfp830        | ZNF830   | 0.36  | 4.28 | 2.18  | 5.29E-02 | 2.64E-01 | -4.59 |
| 1442124_PM_at   | AU022252      | C1orf50  | 0.34  | 2.47 | 2.18  | 5.29E-02 | 2.65E-01 | -4.59 |
| 1422556_PM_at   | Gna13         | GNA13    | 1.02  | 3.56 | 2.18  | 5.29E-02 | 2.65E-01 | -4.59 |
| 1456837_PM_at   | Asphd1        | ASPHD1   | -0.66 | 3.62 | -2.18 | 5.29E-02 | 2.65E-01 | -4.59 |
| 1440064_PM_at   | Et4           | KIAA1217 | 0.21  | 2.27 | 2.18  | 5.29E-02 | 2.65E-01 | -4.59 |
| 1418269_PM_at   | Lox3          | LOXL3    | 0.22  | 2.43 | 2.18  | 5.29E-02 | 2.65E-01 | -4.59 |
| 1428820_PM_at   | Mapre1        | MAPRE1   | 0.25  | 2.36 | 2.18  | 5.29E-02 | 2.65E-01 | -4.59 |
| 1416702_PM_at   | Serpini1      | SERPINI1 | -0.74 | 5.43 | -2.18 | 5.29E-02 | 2.65E-01 | -4.59 |
| 1432111_PM_at   | 4930542D17Rik | NA       | 0.43  | 4.20 | 2.18  | 5.29E-02 | 2.65E-01 | -4.59 |
| 1423247_PM_at   | Erp44         | ERP44    | -0.55 | 3.21 | -2.18 | 5.29E-02 | 2.65E-01 | -4.59 |
| 1444041_PM_at   | AU041133      | NA       | 0.46  | 3.22 | 2.18  | 5.29E-02 | 2.65E-01 | -4.59 |
| 1422674_PM_s_at | Crygb///Crygc | CRYGC    | 0.21  | 2.92 | 2.18  | 5.29E-02 | 2.65E-01 | -4.59 |
| 1435466_PM_at   | Sarm1         | SARM1    | 0.28  | 3.22 | 2.18  | 5.30E-02 | 2.65E-01 | -4.59 |
| 1445090_PM_at   | ---           | NA       | 0.50  | 3.46 | 2.18  | 5.29E-02 | 2.65E-01 | -4.59 |
| 1455144_PM_s_at | Arhgap44      | ARHGAP44 | -0.69 | 5.27 | -2.18 | 5.30E-02 | 2.65E-01 | -4.59 |
| 1452327_PM_at   | Iqsec1        | IQSEC1   | -0.34 | 3.58 | -2.18 | 5.30E-02 | 2.65E-01 | -4.59 |
| 1431081_PM_a_at | Plscr3        | PLSCR3   | 0.25  | 2.99 | 2.18  | 5.30E-02 | 2.65E-01 | -4.59 |
| 1440100_PM_at   | ---           | NA       | 0.40  | 3.84 | 2.18  | 5.30E-02 | 2.65E-01 | -4.59 |
| 1421717_PM_at   | Vmn1r58       | NA       | -0.27 | 2.70 | -2.18 | 5.30E-02 | 2.65E-01 | -4.59 |
| 1433435_PM_at   | AW551984      | VWASA    | 0.28  | 2.57 | 2.18  | 5.30E-02 | 2.65E-01 | -4.59 |
| 1428371_PM_at   | Ttbk2         | TTBK2    | -0.88 | 5.52 | -2.18 | 5.31E-02 | 2.65E-01 | -4.59 |
| 1426681_PM_at   | Unk           | UNK      | -0.36 | 3.11 | -2.18 | 5.31E-02 | 2.65E-01 | -4.59 |
| 1444079_PM_at   | ---           | NA       | 0.30  | 2.25 | 2.18  | 5.31E-02 | 2.65E-01 | -4.59 |
| 1425731_PM_at   | Ankrd24       | ANKRD24  | 0.47  | 2.65 | 2.18  | 5.31E-02 | 2.65E-01 | -4.59 |
| 1429971_PM_at   | Txnrd2        | TXNRD2   | 0.67  | 2.69 | 2.18  | 5.31E-02 | 2.65E-01 | -4.59 |
| 1427899_PM_at   | Rnf6          | RNF6     | -0.43 | 4.03 | -2.18 | 5.31E-02 | 2.65E-01 | -4.59 |
| 1422986_PM_at   | Esrrb         | ESRRB    | 0.30  | 2.85 | 2.18  | 5.32E-02 | 2.65E-01 | -4.59 |
| 1426544_PM_a_at | Ttc14         | TTC14    | -0.96 | 5.45 | -2.18 | 5.32E-02 | 2.65E-01 | -4.59 |
| 1417364_PM_at   | Eef1g         | EEF1G    | -1.42 | 6.52 | -2.18 | 5.32E-02 | 2.65E-01 | -4.59 |
| 1456058_PM_at   | Rbm27         | RBM27    | -0.71 | 3.37 | -2.18 | 5.32E-02 | 2.65E-01 | -4.59 |
| 1416361_PM_a_at | Dync111       | DYNC111  | -0.50 | 5.50 | -2.18 | 5.32E-02 | 2.65E-01 | -4.59 |
| 1439762_PM_x_at | Adra2c        | ADRA2C   | -0.23 | 2.59 | -2.18 | 5.32E-02 | 2.65E-01 | -4.59 |
| 1439216_PM_at   | ---           | NA       | -0.82 | 2.90 | -2.18 | 5.32E-02 | 2.65E-01 | -4.59 |
| 1435841_PM_s_at | Suclg2        | SUCLG2   | -0.50 | 2.62 | -2.18 | 5.32E-02 | 2.65E-01 | -4.59 |
| 1458512_PM_at   | Tle3          | TLE3     | 0.31  | 2.97 | 2.18  | 5.32E-02 | 2.65E-01 | -4.59 |
| 1458958_PM_at   | Igdcc4        | NA       | 0.25  | 3.35 | 2.18  | 5.33E-02 | 2.65E-01 | -4.59 |
| 1455854_PM_a_at | Ssh1          | SSH1     | 1.25  | 5.79 | 2.18  | 5.33E-02 | 2.65E-01 | -4.59 |
| 1431338_PM_at   | ---           | NA       | 1.08  | 3.14 | 2.18  | 5.33E-02 | 2.65E-01 | -4.59 |
| 1449003_PM_a_at | Vti1b         | VTI1B    | -0.84 | 5.74 | -2.18 | 5.33E-02 | 2.65E-01 | -4.59 |
| 1445290_PM_at   | ---           | NA       | 0.21  | 2.44 | 2.18  | 5.33E-02 | 2.66E-01 | -4.60 |
| 1457523_PM_at   | ---           | NA       | 0.26  | 2.24 | 2.18  | 5.33E-02 | 2.66E-01 | -4.60 |
| 1442003_PM_at   | Diaph2        | DIAPH2   | -0.40 | 3.08 | -2.18 | 5.34E-02 | 2.66E-01 | -4.60 |
| 1439176_PM_at   | Zfp953        | ZNF720   | 0.20  | 2.21 | 2.18  | 5.34E-02 | 2.66E-01 | -4.60 |
| 1439896_PM_at   | ---           | NA       | 0.40  | 3.57 | 2.18  | 5.34E-02 | 2.66E-01 | -4.60 |
| 1436564_PM_at   | Rims4         | RIMS4    | 0.27  | 2.37 | 2.18  | 5.34E-02 | 2.66E-01 | -4.60 |
| 1437652_PM_at   | Sema6c        | NA       | 0.27  | 2.47 | 2.18  | 5.34E-02 | 2.66E-01 | -4.60 |
| 1446301_PM_at   | ---           | NA       | 0.30  | 3.07 | 2.18  | 5.34E-02 | 2.66E-01 | -4.60 |
| 1445880_PM_at   | ---           | NA       | 0.97  | 4.03 | 2.18  | 5.34E-02 | 2.66E-01 | -4.60 |
| 1447839_PM_x_at | Adm           | ADM      | 0.95  | 8.45 | 2.18  | 5.34E-02 | 2.66E-01 | -4.60 |
| 1452877_PM_at   | 2700029M09Rik | HPF1     | -0.69 | 5.19 | -2.18 | 5.35E-02 | 2.66E-01 | -4.60 |
| 1436143_PM_at   | Nbas          | NBAS     | -0.28 | 2.64 | -2.18 | 5.35E-02 | 2.66E-01 | -4.60 |
| 1428125_PM_at   | Atxn7l3b      | ATXN7L3B | -0.35 | 3.65 | -2.18 | 5.35E-02 | 2.66E-01 | -4.60 |
| 1460172_PM_at   | Cdip1         | CDIP1    | -0.48 | 3.62 | -2.18 | 5.35E-02 | 2.66E-01 | -4.60 |

|                              |                                |           |       |      |       |          |          |       |
|------------------------------|--------------------------------|-----------|-------|------|-------|----------|----------|-------|
| 1427827_PM_at                | ---                            | NA        | 0.21  | 2.47 | 2.18  | 5.35E-02 | 2.66E-01 | -4.60 |
| 1451093_PM_at                | Polr2e                         | POLR2E    | 0.21  | 2.42 | 2.18  | 5.35E-02 | 2.66E-01 | -4.60 |
| 1451070_PM_at                | Gdi1                           | GDI1      | -0.80 | 7.68 | -2.18 | 5.35E-02 | 2.66E-01 | -4.60 |
| 1438322_PM_x_at              | Fdft1                          | FDFT1     | -1.13 | 5.97 | -2.18 | 5.36E-02 | 2.66E-01 | -4.60 |
| 1442617_PM_at                | ---                            | NA        | 0.19  | 2.27 | 2.18  | 5.36E-02 | 2.66E-01 | -4.60 |
| 1422225_PM_s_at              | Tcp10a ///Tcp10b ///<br>Tcp10c | NA        | 0.22  | 2.69 | 2.18  | 5.36E-02 | 2.66E-01 | -4.60 |
| 1444190_PM_at                | ---                            | NA        | 0.18  | 2.29 | 2.18  | 5.36E-02 | 2.66E-01 | -4.60 |
| 1421498_PM_a_at              | 2010204K13Rik                  | NA        | 0.38  | 2.93 | 2.18  | 5.36E-02 | 2.66E-01 | -4.60 |
| 1456375_PM_x_at              | Trim27                         | TRIM27    | -0.67 | 4.48 | -2.18 | 5.36E-02 | 2.66E-01 | -4.60 |
| 1450205_PM_at                | Fgf22                          | FGF22     | 0.25  | 2.67 | 2.18  | 5.36E-02 | 2.66E-01 | -4.60 |
| 1457946_PM_at                | Sebox                          | SEBOX     | 0.26  | 3.13 | 2.18  | 5.36E-02 | 2.66E-01 | -4.60 |
| 1447401_PM_at                | Wbp11                          | WBP11     | 0.29  | 3.42 | 2.18  | 5.36E-02 | 2.66E-01 | -4.60 |
| 1433308_PM_at                | ---                            | NA        | 0.37  | 2.71 | 2.18  | 5.36E-02 | 2.66E-01 | -4.60 |
| 1435329_PM_at                | Kdm2a                          | KDM2A     | 1.27  | 6.67 | 2.18  | 5.36E-02 | 2.66E-01 | -4.60 |
| 1416183_PM_a_at              | Ldhb                           | LDHB      | -0.89 | 7.70 | -2.18 | 5.37E-02 | 2.66E-01 | -4.60 |
| 1424283_PM_at                | Jtb                            | JTB       | -0.68 | 2.99 | -2.18 | 5.37E-02 | 2.66E-01 | -4.60 |
| 1454195_PM_at                | 4933433G19Rik                  | NA        | -0.25 | 3.66 | -2.18 | 5.36E-02 | 2.66E-01 | -4.60 |
| 1419724_PM_at                | Edar                           | EDAR      | 0.20  | 2.33 | 2.18  | 5.37E-02 | 2.66E-01 | -4.60 |
| 1419802_PM_at                | Ccdc12                         | CCDC12    | 0.24  | 2.36 | 2.18  | 5.37E-02 | 2.66E-01 | -4.60 |
| 1444777_PM_at                | Gm41270                        | NA        | 0.28  | 2.56 | 2.18  | 5.37E-02 | 2.66E-01 | -4.60 |
| 1441005_PM_at                | Rprd1b                         | RPRD1B    | 0.23  | 2.63 | 2.18  | 5.37E-02 | 2.66E-01 | -4.60 |
| 1445756_PM_at                | ---                            | NA        | 0.22  | 2.85 | 2.18  | 5.37E-02 | 2.66E-01 | -4.60 |
| 1436839_PM_at                | Ccdc71l                        | CCDC71L   | -0.57 | 3.31 | -2.18 | 5.37E-02 | 2.67E-01 | -4.60 |
| 1426839_PM_at                | PolD3                          | POLD3     | 0.48  | 2.40 | 2.18  | 5.37E-02 | 2.67E-01 | -4.60 |
| 1437061_PM_at                | Mbd1                           | NA        | -0.43 | 3.17 | -2.18 | 5.37E-02 | 2.67E-01 | -4.60 |
| 1451420_PM_at                | Ccdc47                         | CCDC47    | -0.59 | 6.78 | -2.18 | 5.38E-02 | 2.67E-01 | -4.60 |
| 1438754_PM_at                | ---                            | NA        | -0.49 | 2.63 | -2.17 | 5.38E-02 | 2.67E-01 | -4.60 |
| 1438242_PM_at                | Usp40                          | USP40     | 0.24  | 2.79 | 2.17  | 5.38E-02 | 2.67E-01 | -4.60 |
| 1447320_PM_x_at              | Polr1d                         | POLR1D    | -0.39 | 6.10 | -2.17 | 5.38E-02 | 2.67E-01 | -4.60 |
| 1450508_PM_at                | Foxn1                          | FOXN1     | 0.24  | 2.57 | 2.17  | 5.38E-02 | 2.67E-01 | -4.60 |
| 1433257_PM_at                | A330102K18Rik                  | NA        | -0.71 | 3.75 | -2.17 | 5.39E-02 | 2.67E-01 | -4.61 |
| 1454465_PM_at                | ---                            | NA        | 0.19  | 2.49 | 2.17  | 5.39E-02 | 2.67E-01 | -4.61 |
| 1424308_PM_at                | Slc24a3                        | SLC24A3   | -0.93 | 5.28 | -2.17 | 5.39E-02 | 2.67E-01 | -4.61 |
| 1454900_PM_s_at              | Mycbp2                         | MYCBP2    | -0.83 | 6.29 | -2.17 | 5.39E-02 | 2.67E-01 | -4.61 |
| AFFX-PyruCarbMur/L09192_3_at | Pcx                            | NA        | 0.17  | 2.69 | 2.17  | 5.39E-02 | 2.67E-01 | -4.61 |
| 1432100_PM_a_at              | 4930478P22Rik                  | NA        | 0.23  | 2.70 | 2.17  | 5.39E-02 | 2.67E-01 | -4.61 |
| 1447574_PM_s_at              | ---                            | NA        | 0.25  | 2.82 | 2.17  | 5.39E-02 | 2.67E-01 | -4.61 |
| 1425367_PM_at                | Itgal                          | ITGAL     | 0.25  | 2.23 | 2.17  | 5.39E-02 | 2.67E-01 | -4.61 |
| 1447351_PM_x_at              | ---                            | NA        | 0.27  | 2.64 | 2.17  | 5.39E-02 | 2.67E-01 | -4.61 |
| 1449259_PM_at                | Rab3d                          | RAB3D     | 0.29  | 2.71 | 2.17  | 5.39E-02 | 2.67E-01 | -4.61 |
| 1440438_PM_at                | ---                            | NA        | 0.31  | 2.33 | 2.17  | 5.39E-02 | 2.67E-01 | -4.61 |
| 1451648_PM_a_at              | Folr2                          | FOLR2     | 0.32  | 2.99 | 2.17  | 5.39E-02 | 2.67E-01 | -4.61 |
| 1435248_PM_a_at              | Btaf1                          | BTAF1     | 0.81  | 3.48 | 2.17  | 5.39E-02 | 2.67E-01 | -4.61 |
| 1457720_PM_at                | Gm12789                        | NA        | 0.23  | 2.06 | 2.17  | 5.40E-02 | 2.67E-01 | -4.61 |
| 1421945_PM_a_at              | Rpf2                           | RPF2      | -0.59 | 3.48 | -2.17 | 5.40E-02 | 2.67E-01 | -4.61 |
| 1449382_PM_at                | Slc6a12                        | SLC6A12   | 0.17  | 2.17 | 2.17  | 5.40E-02 | 2.67E-01 | -4.61 |
| 1434241_PM_at                | Tbc1d31                        | TBC1D31   | 0.46  | 3.72 | 2.17  | 5.40E-02 | 2.67E-01 | -4.61 |
| 1424226_PM_at                | 9030617O03Rik                  | C14orf159 | 0.50  | 2.93 | 2.17  | 5.40E-02 | 2.67E-01 | -4.61 |
| 1438749_PM_at                | Fuz                            | FUZ       | 0.20  | 2.63 | 2.17  | 5.40E-02 | 2.67E-01 | -4.61 |
| 1437585_PM_x_at              | Zbtb14                         | ZBTB14    | -0.90 | 5.51 | -2.17 | 5.40E-02 | 2.67E-01 | -4.61 |
| 1455630_PM_at                | Dnal1                          | DNAL1     | -0.82 | 5.05 | -2.17 | 5.40E-02 | 2.67E-01 | -4.61 |
| 1455025_PM_at                | Paqr9                          | PAQR9     | -0.58 | 6.19 | -2.17 | 5.40E-02 | 2.67E-01 | -4.61 |
| 1419828_PM_at                | Usp31                          | USP31     | -0.37 | 2.55 | -2.17 | 5.40E-02 | 2.67E-01 | -4.61 |
| 1434411_PM_at                | Col12a1                        | COL12A1   | -0.25 | 2.76 | -2.17 | 5.40E-02 | 2.67E-01 | -4.61 |
| 1456720_PM_at                | ---                            | NA        | 0.42  | 3.25 | 2.17  | 5.40E-02 | 2.67E-01 | -4.61 |
| 1434542_PM_at                | Gpt2                           | GPT2      | -0.39 | 2.94 | -2.17 | 5.41E-02 | 2.67E-01 | -4.61 |
| 1419364_PM_a_at              | Rps7                           | RPS7      | -0.72 | 5.91 | -2.17 | 5.41E-02 | 2.67E-01 | -4.61 |
| 1423061_PM_at                | Arvcf                          | ARVCF     | -0.30 | 3.16 | -2.17 | 5.41E-02 | 2.67E-01 | -4.61 |
| 1442788_PM_at                | Afap1                          | AFAP1     | 0.22  | 2.30 | 2.17  | 5.41E-02 | 2.67E-01 | -4.61 |
| 1440491_PM_at                | Slc1a3                         | SLC1A3    | 0.25  | 2.54 | 2.17  | 5.41E-02 | 2.67E-01 | -4.61 |
| 1426046_PM_a_at              | Rabggta                        | RABGGTA   | 0.32  | 3.15 | 2.17  | 5.41E-02 | 2.67E-01 | -4.61 |
| 1450129_PM_a_at              | Socs6                          | SOCS6     | 0.33  | 2.33 | 2.17  | 5.41E-02 | 2.68E-01 | -4.61 |
| 1428482_PM_at                | Akap10                         | AKAP10    | 0.24  | 2.45 | 2.17  | 5.42E-02 | 2.68E-01 | -4.61 |
| 1458254_PM_at                | Prrt4                          | PRRT4     | 0.26  | 2.65 | 2.17  | 5.42E-02 | 2.68E-01 | -4.61 |
| 1417574_PM_at                | Cxcl12                         | CXCL12    | -0.66 | 2.88 | -2.17 | 5.42E-02 | 2.68E-01 | -4.61 |
| 1437014_PM_x_at              | Prdx1                          | PRDX1     | -0.33 | 6.50 | -2.17 | 5.42E-02 | 2.68E-01 | -4.61 |
| 1443070_PM_at                | ---                            | NA        | 0.50  | 2.87 | 2.17  | 5.42E-02 | 2.68E-01 | -4.61 |
| 1421468_PM_at                | Kcnj3                          | KCNJ3     | -0.53 | 3.35 | -2.17 | 5.42E-02 | 2.68E-01 | -4.61 |
| 1434297_PM_at                | Nim1k                          | NIM1K     | -0.29 | 2.56 | -2.17 | 5.42E-02 | 2.68E-01 | -4.61 |
| 1422254_PM_a_at              | Dyrk1b                         | DYRK1B    | 0.29  | 2.65 | 2.17  | 5.42E-02 | 2.68E-01 | -4.61 |
| 1449211_PM_at                | Bpnt1                          | BPNT1     | -0.53 | 3.42 | -2.17 | 5.42E-02 | 2.68E-01 | -4.61 |
| 1457526_PM_at                | Grb14                          | GRB14     | 0.20  | 2.52 | 2.17  | 5.42E-02 | 2.68E-01 | -4.61 |
| 1417664_PM_a_at              | NdrG3                          | NDRG3     | 0.68  | 5.12 | 2.17  | 5.42E-02 | 2.68E-01 | -4.61 |
| 1429019_PM_s_at              | Pon2                           | PON2      | -0.49 | 3.49 | -2.17 | 5.43E-02 | 2.68E-01 | -4.61 |

|                 |                                |            |       |      |       |          |          |       |
|-----------------|--------------------------------|------------|-------|------|-------|----------|----------|-------|
| 1427274_PM_at   | Rnf214                         | RNF214     | -0.43 | 3.88 | -2.17 | 5.43E-02 | 2.68E-01 | -4.61 |
| 1427804_PM_at   | ---                            | NA         | 0.29  | 3.65 | 2.17  | 5.43E-02 | 2.68E-01 | -4.61 |
| 1422525_PM_at   | Atp5k                          | ATP5I      | 0.52  | 5.86 | 2.17  | 5.43E-02 | 2.68E-01 | -4.61 |
| 1442620_PM_at   | ---                            | NA         | 0.27  | 2.57 | 2.17  | 5.43E-02 | 2.68E-01 | -4.61 |
| 1448302_PM_at   | Kctd20                         | KCTD20     | 0.23  | 3.31 | 2.17  | 5.43E-02 | 2.68E-01 | -4.61 |
| 1447441_PM_at   | Arhgef17                       | ARHGEF17   | 0.34  | 2.81 | 2.17  | 5.43E-02 | 2.68E-01 | -4.61 |
| 1460557_PM_at   | Supv3l1                        | SUPV3L1    | -0.18 | 2.11 | -2.17 | 5.44E-02 | 2.68E-01 | -4.61 |
| 1442782_PM_at   | ---                            | NA         | 0.63  | 4.06 | 2.17  | 5.44E-02 | 2.68E-01 | -4.61 |
| 1450461_PM_at   | Tcf7                           | TCF7       | 0.19  | 2.70 | 2.17  | 5.44E-02 | 2.68E-01 | -4.61 |
| 1445954_PM_at   | ---                            | NA         | 0.22  | 2.46 | 2.17  | 5.44E-02 | 2.68E-01 | -4.61 |
| 1460232_PM_s_at | Hsd3b2 ///Hsd3b3 ///<br>Hsd3b6 | HSD3B2     | 0.60  | 2.33 | 2.17  | 5.44E-02 | 2.68E-01 | -4.61 |
| 1435935_PM_at   | 2410131K14Rik                  | C12orf49   | -0.28 | 2.64 | -2.17 | 5.44E-02 | 2.68E-01 | -4.61 |
| 1421616_PM_at   | Grin2a                         | GRIN2A     | -0.63 | 3.31 | -2.17 | 5.44E-02 | 2.68E-01 | -4.62 |
| 1418051_PM_at   | Ephb6                          | NA         | -0.17 | 2.30 | -2.17 | 5.45E-02 | 2.68E-01 | -4.62 |
| 1429746_PM_at   | Efcab9                         | EFCA9      | 0.22  | 2.88 | 2.17  | 5.45E-02 | 2.68E-01 | -4.62 |
| 1443016_PM_at   | ---                            | NA         | 0.28  | 2.57 | 2.17  | 5.45E-02 | 2.68E-01 | -4.62 |
| 1426999_PM_at   | Zc3h14                         | ZC3H14     | 0.41  | 7.90 | 2.17  | 5.45E-02 | 2.68E-01 | -4.62 |
| 1432497_PM_at   | Ccdc93                         | CCDC93     | 0.44  | 2.43 | 2.17  | 5.45E-02 | 2.68E-01 | -4.62 |
| 1437609_PM_at   | Ube2u                          | UBE2U      | 0.44  | 4.32 | 2.17  | 5.45E-02 | 2.68E-01 | -4.62 |
| 1453137_PM_at   | Fbxo30                         | FBXO30     | -0.26 | 2.97 | -2.17 | 5.45E-02 | 2.69E-01 | -4.62 |
| 1453422_PM_a_at | Nadk2                          | NADK2      | 0.34  | 2.85 | 2.17  | 5.46E-02 | 2.69E-01 | -4.62 |
| 1439265_PM_at   | ---                            | NA         | 0.99  | 4.64 | 2.17  | 5.46E-02 | 2.69E-01 | -4.62 |
| 1434714_PM_at   | Ero1b                          | ERO1B      | -0.54 | 2.83 | -2.17 | 5.46E-02 | 2.69E-01 | -4.62 |
| 1428777_PM_at   | Spred1                         | SPRED1     | -0.39 | 5.62 | -2.17 | 5.46E-02 | 2.69E-01 | -4.62 |
| 1443492_PM_at   | ---                            | NA         | 0.31  | 2.40 | 2.17  | 5.46E-02 | 2.69E-01 | -4.62 |
| 1436932_PM_at   | Grh13                          | GRHL3      | -0.26 | 2.18 | -2.17 | 5.46E-02 | 2.69E-01 | -4.62 |
| 1435518_PM_at   | Rap1b                          | AC113404.3 | -0.50 | 3.29 | -2.17 | 5.47E-02 | 2.69E-01 | -4.62 |
| 1452355_PM_at   | Rd3                            | RD3        | 0.21  | 2.66 | 2.17  | 5.47E-02 | 2.69E-01 | -4.62 |
| 1420260_PM_at   | Phf7                           | NA         | 0.46  | 2.59 | 2.17  | 5.47E-02 | 2.69E-01 | -4.62 |
| 1448010_PM_at   | Mir142                         | NA         | 0.26  | 3.32 | 2.17  | 5.47E-02 | 2.69E-01 | -4.62 |
| 1436532_PM_at   | Dclk3                          | DCLK3      | -0.34 | 2.53 | -2.16 | 5.47E-02 | 2.69E-01 | -4.62 |
| 1434004_PM_at   | Dhps                           | DHPS       | -0.25 | 2.87 | -2.16 | 5.47E-02 | 2.69E-01 | -4.62 |
| 1419025_PM_at   | Sag                            | SAG        | 0.19  | 2.39 | 2.16  | 5.47E-02 | 2.69E-01 | -4.62 |
| 1428101_PM_at   | Rnf38                          | RNF38      | -0.70 | 8.36 | -2.16 | 5.47E-02 | 2.69E-01 | -4.62 |
| 1428913_PM_at   | Dnlz                           | DNLZ       | 0.28  | 2.46 | 2.16  | 5.47E-02 | 2.69E-01 | -4.62 |
| 1432364_PM_at   | 4930556N13Rik                  | NA         | 0.34  | 3.91 | 2.16  | 5.48E-02 | 2.69E-01 | -4.62 |
| 1429679_PM_at   | Lrrc17                         | LRRC17     | 0.20  | 2.20 | 2.16  | 5.48E-02 | 2.69E-01 | -4.62 |
| 1460194_PM_at   | Phyh                           | PHYH       | -0.42 | 7.23 | -2.16 | 5.48E-02 | 2.69E-01 | -4.62 |
| 1449693_PM_at   | Map3k7                         | NA         | -0.36 | 3.25 | -2.16 | 5.48E-02 | 2.69E-01 | -4.62 |
| 1458588_PM_at   | ---                            | NA         | 0.38  | 2.61 | 2.16  | 5.48E-02 | 2.69E-01 | -4.62 |
| 1443907_PM_at   | Lnpep                          | LNPEP      | -0.62 | 3.09 | -2.16 | 5.48E-02 | 2.69E-01 | -4.62 |
| 1447696_PM_x_at | Adcy5                          | ADCY5      | -0.32 | 5.05 | -2.16 | 5.49E-02 | 2.69E-01 | -4.62 |
| 1417604_PM_at   | Camk1                          | CAMK1      | 0.64  | 4.20 | 2.16  | 5.49E-02 | 2.70E-01 | -4.62 |
| 1454460_PM_at   | ---                            | NA         | 0.32  | 2.11 | 2.16  | 5.49E-02 | 2.70E-01 | -4.62 |
| 1432178_PM_at   | Ofir180                        | OR5K4      | 0.25  | 2.99 | 2.16  | 5.49E-02 | 2.70E-01 | -4.62 |
| 1457266_PM_at   | Slc38a6                        | SLC38A6    | 0.30  | 2.77 | 2.16  | 5.49E-02 | 2.70E-01 | -4.62 |
| 1426064_PM_at   | Cyp3a44                        | CYP3A4     | 0.36  | 2.56 | 2.16  | 5.50E-02 | 2.70E-01 | -4.62 |
| 1418452_PM_at   | Gng2                           | GNG2       | 0.74  | 3.81 | 2.16  | 5.50E-02 | 2.70E-01 | -4.62 |
| 1429276_PM_at   | Trank1                         | TRANK1     | -0.94 | 6.37 | -2.16 | 5.50E-02 | 2.70E-01 | -4.62 |
| 1419714_PM_at   | Cd274                          | CD274      | 0.28  | 3.60 | 2.16  | 5.50E-02 | 2.70E-01 | -4.62 |
| 1456256_PM_at   | ---                            | NA         | 0.55  | 3.55 | 2.16  | 5.50E-02 | 2.70E-01 | -4.62 |
| 1438047_PM_at   | Zfp384                         | ZNF384     | -0.37 | 3.92 | -2.16 | 5.51E-02 | 2.70E-01 | -4.63 |
| 1425583_PM_at   | ---                            | NA         | 0.19  | 2.76 | 2.16  | 5.50E-02 | 2.70E-01 | -4.63 |
| 1420562_PM_at   | Slurp1                         | SLURP1     | 0.24  | 2.43 | 2.16  | 5.51E-02 | 2.70E-01 | -4.63 |
| 1425802_PM_a_at | Fcrla                          | FCRLA      | 0.25  | 2.96 | 2.16  | 5.51E-02 | 2.70E-01 | -4.63 |
| 1419648_PM_at   | Myo1c                          | MYO1C      | 0.32  | 2.32 | 2.16  | 5.51E-02 | 2.70E-01 | -4.63 |
| 1444643_PM_at   | Ckm                            | NA         | 0.33  | 2.47 | 2.16  | 5.51E-02 | 2.70E-01 | -4.63 |
| 1422163_PM_at   | Sh3pxd2a                       | SH3PXD2A   | 0.46  | 2.52 | 2.16  | 5.51E-02 | 2.70E-01 | -4.63 |
| 1437095_PM_at   | Tspan18                        | TSPAN18    | 0.22  | 2.39 | 2.16  | 5.51E-02 | 2.70E-01 | -4.63 |
| 1457560_PM_at   | ---                            | NA         | 0.47  | 3.04 | 2.16  | 5.51E-02 | 2.70E-01 | -4.63 |
| 1438756_PM_at   | Ankrd29                        | ANKRD29    | -0.52 | 3.11 | -2.16 | 5.51E-02 | 2.70E-01 | -4.63 |
| 1423951_PM_at   | Tm2d3                          | TM2D3      | -0.20 | 3.98 | -2.16 | 5.51E-02 | 2.70E-01 | -4.63 |
| 1417146_PM_at   | Mri1                           | MRI1       | 0.29  | 2.49 | 2.16  | 5.51E-02 | 2.70E-01 | -4.63 |
| 1423823_PM_at   | Mrto4                          | MRTO4      | -0.48 | 4.60 | -2.16 | 5.52E-02 | 2.70E-01 | -4.63 |
| 1421071_PM_at   | Vhl                            | VHL        | -0.37 | 2.96 | -2.16 | 5.52E-02 | 2.70E-01 | -4.63 |
| 1423769_PM_at   | Ptcd2                          | PTCD2      | 0.22  | 2.59 | 2.16  | 5.52E-02 | 2.70E-01 | -4.63 |
| 1460466_PM_at   | 1700047117Rik2 ///<br>Fam177a  | FAM177A1   | 0.69  | 3.71 | 2.16  | 5.52E-02 | 2.70E-01 | -4.63 |
| 1419325_PM_at   | Nmu                            | NMU        | 0.17  | 2.17 | 2.16  | 5.52E-02 | 2.70E-01 | -4.63 |
| 1419190_PM_at   | Vti1a                          | VTI1A      | 0.45  | 3.21 | 2.16  | 5.52E-02 | 2.70E-01 | -4.63 |
| 1425307_PM_at   | Dnah1                          | DNAH1      | 0.20  | 2.23 | 2.16  | 5.52E-02 | 2.70E-01 | -4.63 |
| 1426714_PM_at   | Slc46a1                        | SLC46A1    | 0.22  | 2.68 | 2.16  | 5.52E-02 | 2.70E-01 | -4.63 |
| 1423485_PM_at   | Rad54l2                        | RAD54L2    | 0.23  | 2.45 | 2.16  | 5.53E-02 | 2.71E-01 | -4.63 |
| 1444001_PM_at   | ---                            | NA         | 0.42  | 2.84 | 2.16  | 5.53E-02 | 2.71E-01 | -4.63 |

|                 |               |          |       |      |       |          |          |       |
|-----------------|---------------|----------|-------|------|-------|----------|----------|-------|
| 1428709_PM_a_at | Mrp24         | MRPL24   | 0.52  | 4.17 | 2.16  | 5.53E-02 | 2.71E-01 | -4.63 |
| 1433850_PM_at   | Ppp4r2        | PPP4R2   | -0.61 | 4.91 | -2.16 | 5.53E-02 | 2.71E-01 | -4.63 |
| 1457770_PM_at   | ---           | NA       | 0.20  | 2.19 | 2.16  | 5.53E-02 | 2.71E-01 | -4.63 |
| 1455181_PM_at   | Rasa2         | RASA2    | -0.69 | 3.21 | -2.16 | 5.53E-02 | 2.71E-01 | -4.63 |
| 1442442_PM_at   | ---           | NA       | -0.39 | 2.62 | -2.16 | 5.53E-02 | 2.71E-01 | -4.63 |
| 1448616_PM_at   | Dvl2          | DVL2     | 0.22  | 2.68 | 2.16  | 5.53E-02 | 2.71E-01 | -4.63 |
| 1442589_PM_at   | ---           | NA       | 0.30  | 2.28 | 2.16  | 5.53E-02 | 2.71E-01 | -4.63 |
| 1458474_PM_at   | Abhd17a       | NA       | 0.32  | 2.72 | 2.16  | 5.53E-02 | 2.71E-01 | -4.63 |
| 1416847_PM_s_at | Oas1d///Oas1e | OAS1     | 0.26  | 2.35 | 2.16  | 5.53E-02 | 2.71E-01 | -4.63 |
| 1428098_PM_a_at | Tm7sf3        | TM7SF3   | 0.29  | 2.53 | 2.16  | 5.54E-02 | 2.71E-01 | -4.63 |
| 1423124_PM_x_at | Rad54l        | RAD54L   | 1.04  | 3.87 | 2.16  | 5.54E-02 | 2.71E-01 | -4.63 |
| 1424016_PM_at   | Aagab         | AAGAB    | -0.47 | 3.49 | -2.16 | 5.54E-02 | 2.71E-01 | -4.63 |
| 1416435_PM_at   | Ltbr          | LTBR     | 0.31  | 3.87 | 2.16  | 5.54E-02 | 2.71E-01 | -4.63 |
| 1426167_PM_a_at | Camk4         | CAMK4    | 0.41  | 4.52 | 2.16  | 5.54E-02 | 2.71E-01 | -4.63 |
| 1458193_PM_at   | Pmp2          | PMP2     | 0.62  | 2.90 | 2.16  | 5.54E-02 | 2.71E-01 | -4.63 |
| 1431614_PM_at   | 2810049E08Rik | NA       | -0.30 | 2.58 | -2.16 | 5.54E-02 | 2.71E-01 | -4.63 |
| 1444395_PM_at   | Dixdc1        | DIXDC1   | 0.59  | 5.99 | 2.16  | 5.54E-02 | 2.71E-01 | -4.63 |
| 1421439_PM_at   | Wnt8b         | WNT8B    | 0.20  | 2.30 | 2.16  | 5.55E-02 | 2.71E-01 | -4.63 |
| 1435871_PM_at   | Elav3         | ELAVL3   | 0.96  | 6.85 | 2.16  | 5.54E-02 | 2.71E-01 | -4.63 |
| 1447669_PM_s_at | Gng4          | GNNG4    | 1.42  | 4.15 | 2.16  | 5.55E-02 | 2.71E-01 | -4.63 |
| 1449552_PM_at   | Zfr           | ZFR      | -1.25 | 5.84 | -2.16 | 5.55E-02 | 2.71E-01 | -4.63 |
| 1429081_PM_at   | Gcc2          | GCC2     | -0.80 | 5.30 | -2.16 | 5.55E-02 | 2.71E-01 | -4.63 |
| 1429253_PM_at   | Zmym4         | ZMYM4    | -0.55 | 3.30 | -2.16 | 5.55E-02 | 2.71E-01 | -4.63 |
| 1452215_PM_at   | 9130401M01Rik | C8orf76  | -0.31 | 3.33 | -2.16 | 5.55E-02 | 2.71E-01 | -4.63 |
| 1422876_PM_at   | Capn9         | CAPN9    | 0.19  | 2.30 | 2.16  | 5.55E-02 | 2.71E-01 | -4.63 |
| 1460130_PM_at   | Gm5544        | NA       | 0.19  | 2.38 | 2.16  | 5.55E-02 | 2.71E-01 | -4.63 |
| 1444205_PM_at   | ---           | NA       | 0.22  | 3.34 | 2.16  | 5.55E-02 | 2.71E-01 | -4.63 |
| 1458581_PM_at   | ---           | NA       | 0.23  | 2.06 | 2.16  | 5.55E-02 | 2.71E-01 | -4.63 |
| 1420401_PM_a_at | Ramp3         | RAMP3    | 0.27  | 2.52 | 2.16  | 5.55E-02 | 2.71E-01 | -4.63 |
| 1429931_PM_at   | 4930553P18Rik | NA       | 0.27  | 2.87 | 2.16  | 5.55E-02 | 2.71E-01 | -4.63 |
| 1454820_PM_at   | BC037034      | C7orf43  | 0.29  | 2.82 | 2.16  | 5.55E-02 | 2.71E-01 | -4.63 |
| 1430045_PM_at   | ---           | NA       | -0.22 | 2.54 | -2.16 | 5.56E-02 | 2.71E-01 | -4.63 |
| 1447279_PM_at   | E130308A19Rik | KIAA1958 | 0.19  | 2.46 | 2.16  | 5.56E-02 | 2.71E-01 | -4.63 |
| 1428877_PM_at   | Srp72         | SRP72    | -0.56 | 4.05 | -2.16 | 5.56E-02 | 2.71E-01 | -4.63 |
| 1435039_PM_a_at | Pip5k1a       | PIP5K1A  | 0.32  | 6.05 | 2.16  | 5.56E-02 | 2.71E-01 | -4.64 |
| 1448422_PM_at   | Tmed4         | TMED4    | -0.75 | 5.36 | -2.15 | 5.57E-02 | 2.71E-01 | -4.64 |
| 1417228_PM_at   | Capn1         | CAPN1    | 0.20  | 2.51 | 2.15  | 5.56E-02 | 2.71E-01 | -4.64 |
| 1456397_PM_at   | Cdh4          | CDH4     | 0.27  | 2.79 | 2.15  | 5.56E-02 | 2.71E-01 | -4.64 |
| 1457005_PM_at   | Mtfmt         | MTFMT    | 0.31  | 2.81 | 2.15  | 5.57E-02 | 2.71E-01 | -4.64 |
| 1424552_PM_at   | Casp8         | CASP8    | 0.41  | 3.27 | 2.15  | 5.57E-02 | 2.71E-01 | -4.64 |
| 1456698_PM_s_at | Hnrnpdl       | HNRNPDL  | -0.91 | 5.67 | -2.15 | 5.57E-02 | 2.71E-01 | -4.64 |
| 1438238_PM_at   | 2010315B03Rik | NA       | -0.61 | 4.21 | -2.15 | 5.57E-02 | 2.71E-01 | -4.64 |
| 1456258_PM_at   | Emx2          | EMX2     | -0.61 | 3.94 | -2.15 | 5.57E-02 | 2.71E-01 | -4.64 |
| 1432862_PM_at   | Nkx2-4        | NA       | 0.15  | 2.15 | 2.15  | 5.57E-02 | 2.71E-01 | -4.64 |
| 1451447_PM_at   | Cuedc1        | CUEDC1   | 0.19  | 2.37 | 2.15  | 5.57E-02 | 2.71E-01 | -4.64 |
| 1442232_PM_at   | ---           | NA       | 0.24  | 2.27 | 2.15  | 5.57E-02 | 2.71E-01 | -4.64 |
| 1432863_PM_a_at | Nkx2-4        | NKX2-4   | 0.26  | 2.53 | 2.15  | 5.57E-02 | 2.71E-01 | -4.64 |
| 1444099_PM_at   | ---           | NA       | 0.43  | 3.20 | 2.15  | 5.57E-02 | 2.71E-01 | -4.64 |
| 1459302_PM_at   | ---           | NA       | 0.17  | 2.39 | 2.15  | 5.57E-02 | 2.71E-01 | -4.64 |
| 1416191_PM_at   | Sec61a1       | SEC61A1  | 0.18  | 2.31 | 2.15  | 5.57E-02 | 2.71E-01 | -4.64 |
| 1431373_PM_at   | Pop5          | POP5     | 0.21  | 2.43 | 2.15  | 5.58E-02 | 2.71E-01 | -4.64 |
| 1450109_PM_s_at | Abcc2         | ABCC2    | 0.26  | 2.70 | 2.15  | 5.58E-02 | 2.71E-01 | -4.64 |
| 1444582_PM_at   | Dcun1d5       | NA       | -0.28 | 2.12 | -2.15 | 5.58E-02 | 2.71E-01 | -4.64 |
| 1450513_PM_at   | Cd33          | SIGLEC6  | 0.28  | 3.03 | 2.15  | 5.58E-02 | 2.71E-01 | -4.64 |
| 1432343_PM_at   | 4930419G24Rik | NA       | 0.30  | 3.75 | 2.15  | 5.58E-02 | 2.71E-01 | -4.64 |
| 1432060_PM_at   | Iqca          | IQCA1    | 0.34  | 2.52 | 2.15  | 5.58E-02 | 2.72E-01 | -4.64 |
| 1439093_PM_at   | Hspa4l        | HSPA4L   | -0.90 | 7.45 | -2.15 | 5.58E-02 | 2.72E-01 | -4.64 |
| 1425364_PM_a_at | Slc3a2        | SLC3A2   | -0.60 | 4.72 | -2.15 | 5.59E-02 | 2.72E-01 | -4.64 |
| 1440212_PM_at   | ---           | NA       | 0.22  | 2.43 | 2.15  | 5.59E-02 | 2.72E-01 | -4.64 |
| 1430053_PM_a_at | Ola1          | OLA1     | -0.87 | 3.47 | -2.15 | 5.59E-02 | 2.72E-01 | -4.64 |
| 1458516_PM_at   | ---           | NA       | 0.27  | 2.29 | 2.15  | 5.59E-02 | 2.72E-01 | -4.64 |
| 1452478_PM_at   | Alpk2         | ALPK2    | 0.17  | 2.23 | 2.15  | 5.59E-02 | 2.72E-01 | -4.64 |
| 1459709_PM_at   | ---           | NA       | 0.20  | 2.54 | 2.15  | 5.59E-02 | 2.72E-01 | -4.64 |
| 1460211_PM_a_at | Kdelr1        | KDELRL1  | -0.29 | 3.59 | -2.15 | 5.60E-02 | 2.72E-01 | -4.64 |
| 1427001_PM_s_at | Hnf4a         | HNF4A    | 0.23  | 2.09 | 2.15  | 5.60E-02 | 2.72E-01 | -4.64 |
| 1446319_PM_at   | Asb7          | ASB7     | 0.33  | 2.43 | 2.15  | 5.60E-02 | 2.72E-01 | -4.64 |
| 1452175_PM_at   | 1810026J23Rik | TIMM29   | 0.44  | 3.24 | 2.15  | 5.60E-02 | 2.72E-01 | -4.64 |
| 1421059_PM_a_at | Alg2          | ALG2     | 0.76  | 7.88 | 2.15  | 5.60E-02 | 2.72E-01 | -4.64 |
| 1426370_PM_at   | Far1          | FAR1     | -0.41 | 3.56 | -2.15 | 5.60E-02 | 2.72E-01 | -4.64 |
| 1418742_PM_at   | Krt34         | KRT33B   | 0.18  | 2.45 | 2.15  | 5.60E-02 | 2.72E-01 | -4.64 |
| 1422286_PM_a_at | Tgif1         | TGIF1    | 0.19  | 2.40 | 2.15  | 5.60E-02 | 2.72E-01 | -4.64 |
| 1418740_PM_at   | Spert         | SPERT    | 0.22  | 2.87 | 2.15  | 5.60E-02 | 2.72E-01 | -4.64 |
| 1456008_PM_at   | Lrrc8e        | LRRC8E   | 0.27  | 2.62 | 2.15  | 5.60E-02 | 2.72E-01 | -4.64 |
| 1424977_PM_at   | Ppp1r42       | PPP1R42  | 0.30  | 2.40 | 2.15  | 5.60E-02 | 2.72E-01 | -4.64 |
| 1431342_PM_at   | ---           | NA       | 0.24  | 2.52 | 2.15  | 5.60E-02 | 2.72E-01 | -4.64 |



|                 |                     |         |       |       |       |          |          |       |
|-----------------|---------------------|---------|-------|-------|-------|----------|----------|-------|
| 1418872_PM_at   | Abcb1b              | ABCB1   | -0.50 | 2.80  | -2.15 | 5.60E-02 | 2.72E-01 | -4.64 |
| 1440075_PM_at   | Pias4               | PIAS4   | 0.17  | 2.32  | 2.15  | 5.61E-02 | 2.72E-01 | -4.64 |
| 1424357_PM_at   | Tmem45b             | TMEM45B | 0.26  | 2.34  | 2.15  | 5.61E-02 | 2.72E-01 | -4.64 |
| 1442658_PM_at   | Ndufb2              | NDUFB2  | 0.39  | 3.86  | 2.15  | 5.61E-02 | 2.72E-01 | -4.64 |
| 1437312_PM_at   | Bmpr1b              | BMPR1B  | -0.29 | 3.09  | -2.15 | 5.61E-02 | 2.72E-01 | -4.64 |
| 1459990_PM_at   | Ddr1                | NA      | 0.31  | 3.19  | 2.15  | 5.61E-02 | 2.72E-01 | -4.64 |
| 1452202_PM_at   | Pde2a               | PDE2A   | -0.41 | 3.01  | -2.15 | 5.62E-02 | 2.72E-01 | -4.64 |
| 1428139_PM_at   | Tmem180             | MFSD13A | 0.40  | 2.67  | 2.15  | 5.62E-02 | 2.73E-01 | -4.64 |
| 1442501_PM_at   | Nrxn1               | NRXN1   | 0.49  | 2.97  | 2.15  | 5.62E-02 | 2.73E-01 | -4.64 |
| 1446295_PM_at   | Trim24              | TRIM24  | 0.59  | 2.64  | 2.15  | 5.62E-02 | 2.73E-01 | -4.64 |
| 1438279_PM_at   | Dpp4                | DPP4    | 0.20  | 2.13  | 2.15  | 5.62E-02 | 2.73E-01 | -4.65 |
| 1418483_PM_a_at | Ggta1               | NA      | -0.78 | 2.79  | -2.15 | 5.62E-02 | 2.73E-01 | -4.65 |
| 1434687_PM_at   | Zbtb38              | ZBTB38  | -0.62 | 8.51  | -2.15 | 5.63E-02 | 2.73E-01 | -4.65 |
| 1438546_PM_x_at | Slc25a5             | SLC25A5 | -0.39 | 3.34  | -2.15 | 5.63E-02 | 2.73E-01 | -4.65 |
| 1431201_PM_at   | Slc25a27            | NA      | 0.19  | 2.13  | 2.15  | 5.63E-02 | 2.73E-01 | -4.65 |
| 1441667_PM_s_at | Smyd1               | SMYD1   | 0.30  | 2.64  | 2.15  | 5.63E-02 | 2.73E-01 | -4.65 |
| 1442204_PM_at   | ---                 | NA      | 0.50  | 4.16  | 2.15  | 5.63E-02 | 2.73E-01 | -4.65 |
| 1446613_PM_at   | ---                 | NA      | 0.21  | 2.28  | 2.15  | 5.64E-02 | 2.73E-01 | -4.65 |
| 1432636_PM_at   | ---                 | NA      | 0.22  | 2.37  | 2.15  | 5.64E-02 | 2.73E-01 | -4.65 |
| 1440836_PM_at   | Setd1b              | SETD1B  | -0.33 | 4.20  | -2.15 | 5.64E-02 | 2.73E-01 | -4.65 |
| 1420063_PM_at   | ---                 | NA      | 0.31  | 2.89  | 2.15  | 5.64E-02 | 2.73E-01 | -4.65 |
| 1439125_PM_at   | ---                 | NA      | 0.29  | 2.86  | 2.15  | 5.64E-02 | 2.73E-01 | -4.65 |
| 1436979_PM_x_at | Rbm14               | RBM14   | 0.78  | 5.66  | 2.15  | 5.64E-02 | 2.73E-01 | -4.65 |
| 1443241_PM_at   | ---                 | NA      | 1.19  | 4.44  | 2.15  | 5.64E-02 | 2.73E-01 | -4.65 |
| 1450055_PM_at   | Vsnl1               | VSNL1   | -0.63 | 10.91 | -2.15 | 5.64E-02 | 2.73E-01 | -4.65 |
| 1456257_PM_at   | Fam126b             | FAM126B | -0.36 | 2.90  | -2.15 | 5.64E-02 | 2.73E-01 | -4.65 |
| 1424579_PM_at   | Slc35a3             | SLC35A3 | -0.34 | 2.67  | -2.15 | 5.64E-02 | 2.73E-01 | -4.65 |
| 1431748_PM_a_at | Rffl                | RFFL    | 0.26  | 2.48  | 2.15  | 5.65E-02 | 2.73E-01 | -4.65 |
| 1416793_PM_at   | Atl2                | ATL2    | -0.44 | 4.17  | -2.15 | 5.65E-02 | 2.73E-01 | -4.65 |
| 1432186_PM_at   | 1700028J19Rik       | NA      | 0.18  | 2.24  | 2.15  | 5.65E-02 | 2.73E-01 | -4.65 |
| 1421895_PM_at   | Eif2s3x             | EIF2S3  | -0.61 | 4.74  | -2.15 | 5.65E-02 | 2.74E-01 | -4.65 |
| 1424943_PM_at   | Cyp4a31             | NA      | 0.31  | 2.13  | 2.15  | 5.65E-02 | 2.74E-01 | -4.65 |
| 1424094_PM_at   | Nek9                | NEK9    | -0.33 | 4.84  | -2.15 | 5.66E-02 | 2.74E-01 | -4.65 |
| 1448675_PM_at   | Ankzf1              | ANKZF1  | 0.35  | 2.80  | 2.15  | 5.66E-02 | 2.74E-01 | -4.65 |
| 1460269_PM_at   | Pnmt                | NA      | 0.20  | 2.07  | 2.14  | 5.66E-02 | 2.74E-01 | -4.65 |
| 1457997_PM_at   | Mboat7              | MBOAT7  | 0.36  | 2.13  | 2.14  | 5.66E-02 | 2.74E-01 | -4.65 |
| 1433418_PM_at   | ---                 | NA      | 0.33  | 2.79  | 2.14  | 5.67E-02 | 2.74E-01 | -4.65 |
| 1440554_PM_at   | ---                 | NA      | 0.30  | 3.30  | 2.14  | 5.67E-02 | 2.74E-01 | -4.65 |
| 1440277_PM_at   | AU041474            | NA      | 0.21  | 2.88  | 2.14  | 5.67E-02 | 2.74E-01 | -4.65 |
| 1431426_PM_at   | Rprd2               | RPRD2   | 0.25  | 2.50  | 2.14  | 5.67E-02 | 2.74E-01 | -4.65 |
| 1436300_PM_at   | Dsty                | DSTYK   | 0.50  | 2.74  | 2.14  | 5.67E-02 | 2.74E-01 | -4.65 |
| 1449232_PM_at   | Gata1               | GATA1   | 0.22  | 2.16  | 2.14  | 5.67E-02 | 2.74E-01 | -4.65 |
| 1428935_PM_at   | Canx                | CANX    | -0.56 | 2.59  | -2.14 | 5.68E-02 | 2.74E-01 | -4.65 |
| 1436353_PM_at   | A230046K03Rik       | WASHC4  | -0.54 | 3.04  | -2.14 | 5.68E-02 | 2.75E-01 | -4.65 |
| 1455208_PM_at   | Pex19               | PEX19   | -0.43 | 3.82  | -2.14 | 5.68E-02 | 2.75E-01 | -4.66 |
| 1415841_PM_at   | Dync1i2             | DYNC1I2 | 0.34  | 7.53  | 2.14  | 5.69E-02 | 2.75E-01 | -4.66 |
| 1445415_PM_at   | ---                 | NA      | -0.26 | 2.47  | -2.14 | 5.69E-02 | 2.75E-01 | -4.66 |
| 1419105_PM_at   | Nr1h4               | NR1H4   | 0.31  | 3.22  | 2.14  | 5.69E-02 | 2.75E-01 | -4.66 |
| 1421716_PM_at   | Vmn1r65             | NA      | 0.18  | 2.40  | 2.14  | 5.69E-02 | 2.75E-01 | -4.66 |
| 1445525_PM_at   | Kif14               | KIF14   | 0.23  | 2.09  | 2.14  | 5.69E-02 | 2.75E-01 | -4.66 |
| 1426527_PM_at   | Toe1                | TOE1    | -0.36 | 2.87  | -2.14 | 5.69E-02 | 2.75E-01 | -4.66 |
| 1421531_PM_at   | Akap3               | AKAP3   | 0.20  | 3.20  | 2.14  | 5.69E-02 | 2.75E-01 | -4.66 |
| 1425179_PM_at   | Shmt1               | SHMT1   | 0.35  | 2.75  | 2.14  | 5.69E-02 | 2.75E-01 | -4.66 |
| 1431965_PM_at   | 4933411E08Rik       | NA      | 0.18  | 2.28  | 2.14  | 5.70E-02 | 2.75E-01 | -4.66 |
| 1448270_PM_at   | Ddx21               | DDX21   | -1.06 | 4.43  | -2.14 | 5.70E-02 | 2.75E-01 | -4.66 |
| 1451162_PM_at   | Hsbp1               | HSBP1   | -0.83 | 5.52  | -2.14 | 5.70E-02 | 2.75E-01 | -4.66 |
| 1423234_PM_at   | Psm5                | PSMD5   | -0.69 | 4.51  | -2.14 | 5.70E-02 | 2.75E-01 | -4.66 |
| 1447919_PM_x_at | Gm17257 /// Ndufab1 | NA      | -0.63 | 6.96  | -2.14 | 5.70E-02 | 2.75E-01 | -4.66 |
| 1435641_PM_at   | Mgat4a              | MGAT4A  | -0.43 | 4.56  | -2.14 | 5.70E-02 | 2.75E-01 | -4.66 |
| 1444406_PM_at   | ---                 | NA      | -0.36 | 2.65  | -2.14 | 5.70E-02 | 2.75E-01 | -4.66 |
| 1433467_PM_at   | Slc7a6              | SLC7A6  | -0.35 | 2.36  | -2.14 | 5.70E-02 | 2.75E-01 | -4.66 |
| 1422554_PM_at   | Ndn2                | NA      | -0.27 | 2.78  | -2.14 | 5.70E-02 | 2.75E-01 | -4.66 |
| 1427957_PM_at   | Adtrp               | ADTRP   | 0.16  | 2.31  | 2.14  | 5.70E-02 | 2.75E-01 | -4.66 |
| 1440496_PM_at   | Samm50              | NA      | 0.22  | 2.44  | 2.14  | 5.70E-02 | 2.75E-01 | -4.66 |
| 1415939_PM_at   | Fmod                | FMOD    | 0.39  | 2.61  | 2.14  | 5.70E-02 | 2.75E-01 | -4.66 |
| 1453625_PM_at   | Dtna                | NA      | 0.41  | 2.49  | 2.14  | 5.70E-02 | 2.75E-01 | -4.66 |
| 1433573_PM_x_at | Prss2               | PRSS2   | 0.23  | 2.42  | 2.14  | 5.71E-02 | 2.75E-01 | -4.66 |
| 1435873_PM_a_at | Gm11478 /// Rpl13a  | RPL13A  | 0.25  | 10.69 | 2.14  | 5.71E-02 | 2.75E-01 | -4.66 |
| 1435412_PM_at   | Syce3               | SYCE3   | 0.28  | 2.37  | 2.14  | 5.71E-02 | 2.75E-01 | -4.66 |
| 1421409_PM_at   | Msi1                | MSI1    | 0.41  | 3.15  | 2.14  | 5.71E-02 | 2.75E-01 | -4.66 |
| 1420396_PM_at   | Cd160               | CD160   | 0.24  | 2.47  | 2.14  | 5.71E-02 | 2.75E-01 | -4.66 |
| 1419170_PM_at   | Fam174a             | FAM174A | -0.63 | 4.41  | -2.14 | 5.71E-02 | 2.75E-01 | -4.66 |
| 1458260_PM_at   | ---                 | NA      | 0.19  | 2.24  | 2.14  | 5.71E-02 | 2.75E-01 | -4.66 |
| 1457330_PM_at   | Gm31881             | NA      | 0.23  | 3.82  | 2.14  | 5.71E-02 | 2.75E-01 | -4.66 |
| 1437862_PM_at   | Rbm25               | RBM25   | 0.36  | 3.95  | 2.14  | 5.71E-02 | 2.75E-01 | -4.66 |

|                 |                      |            |       |      |       |          |          |       |
|-----------------|----------------------|------------|-------|------|-------|----------|----------|-------|
| 1429821_PM_at   | Proser1              | PROSER1    | 0.17  | 2.34 | 2.14  | 5.71E-02 | 2.75E-01 | -4.66 |
| 1458955_PM_at   | Eef1g                | EEF1G      | 0.26  | 2.78 | 2.14  | 5.71E-02 | 2.75E-01 | -4.66 |
| 1420792_PM_at   | 4930433N12Rik        | NA         | 0.41  | 2.93 | 2.14  | 5.71E-02 | 2.75E-01 | -4.66 |
| 1457360_PM_at   | ---                  | NA         | 0.21  | 2.81 | 2.14  | 5.72E-02 | 2.75E-01 | -4.66 |
| 1450515_PM_at   | Kcnj11               | KCNJ11     | 0.17  | 2.24 | 2.14  | 5.72E-02 | 2.75E-01 | -4.66 |
| 1423520_PM_at   | Lmnb1                | LMNB1      | 0.21  | 2.61 | 2.14  | 5.72E-02 | 2.75E-01 | -4.66 |
| 1436146_PM_at   | 4930481A15Rik        | NA         | 0.24  | 2.34 | 2.14  | 5.72E-02 | 2.75E-01 | -4.66 |
| 1420270_PM_at   | ---                  | NA         | 0.17  | 2.14 | 2.14  | 5.72E-02 | 2.75E-01 | -4.66 |
| 1441234_PM_at   | Serhl                | SERHL2     | 0.20  | 2.17 | 2.14  | 5.73E-02 | 2.76E-01 | -4.66 |
| 1450108_PM_at   | Kif1a                | KIF1A      | -0.61 | 5.42 | -2.14 | 5.73E-02 | 2.76E-01 | -4.66 |
| 1454731_PM_at   | Myo10                | MYO10      | -0.54 | 4.16 | -2.14 | 5.73E-02 | 2.76E-01 | -4.66 |
| 1454868_PM_at   | Tmem201              | TMEM201    | -0.46 | 3.70 | -2.14 | 5.73E-02 | 2.76E-01 | -4.66 |
| 1435315_PM_s_at | Far1                 | FAR1       | -0.45 | 7.74 | -2.14 | 5.73E-02 | 2.76E-01 | -4.66 |
| 1445000_PM_at   | ---                  | NA         | 0.27  | 2.75 | 2.14  | 5.73E-02 | 2.76E-01 | -4.66 |
| 1437043_PM_a_at | Mvb12a               | MVB12A     | 0.28  | 3.10 | 2.14  | 5.73E-02 | 2.76E-01 | -4.66 |
| 1428373_PM_at   | Ip6k2                | IP6K2      | 0.49  | 3.28 | 2.14  | 5.73E-02 | 2.76E-01 | -4.66 |
| 1419171_PM_at   | Fam174a              | FAM174A    | -0.77 | 3.58 | -2.14 | 5.74E-02 | 2.76E-01 | -4.66 |
| 1423402_PM_at   | Creb1                | CREB1      | -0.39 | 3.22 | -2.14 | 5.74E-02 | 2.76E-01 | -4.66 |
| 1428962_PM_at   | 1700013F07Rik        | C1orf194   | 0.19  | 2.30 | 2.14  | 5.74E-02 | 2.76E-01 | -4.66 |
| 1444356_PM_at   | ---                  | NA         | 0.21  | 2.45 | 2.14  | 5.74E-02 | 2.76E-01 | -4.66 |
| 1454470_PM_at   | ---                  | NA         | 0.29  | 2.88 | 2.14  | 5.74E-02 | 2.76E-01 | -4.66 |
| 1432822_PM_at   | 4930557B21Rik        | NA         | 0.37  | 2.48 | 2.14  | 5.74E-02 | 2.76E-01 | -4.66 |
| 1426129_PM_at   | Brms1                | NA         | 0.38  | 3.58 | 2.14  | 5.74E-02 | 2.76E-01 | -4.66 |
| 1457364_PM_at   | ---                  | NA         | 0.42  | 4.39 | 2.14  | 5.74E-02 | 2.76E-01 | -4.66 |
| 1435055_PM_a_at | Tom1                 | TOM1       | 0.44  | 4.59 | 2.14  | 5.74E-02 | 2.76E-01 | -4.66 |
| 1448486_PM_at   | Mut                  | MUT        | -0.78 | 4.29 | -2.14 | 5.74E-02 | 2.76E-01 | -4.66 |
| 1430396_PM_at   | 5730403I07Rik        | NA         | -0.24 | 2.19 | -2.14 | 5.74E-02 | 2.76E-01 | -4.66 |
| 1418960_PM_at   | Phf20l1              | PHF20L1    | -0.49 | 3.02 | -2.14 | 5.75E-02 | 2.76E-01 | -4.67 |
| 1437919_PM_at   | Bdp1                 | BDP1       | -0.39 | 3.53 | -2.14 | 5.75E-02 | 2.76E-01 | -4.67 |
| 1429614_PM_at   | Prpf18               | AL157392.5 | -0.24 | 2.77 | -2.14 | 5.75E-02 | 2.76E-01 | -4.67 |
| 1419011_PM_at   | Cryba2               | CRYBA2     | 0.20  | 2.73 | 2.14  | 5.75E-02 | 2.76E-01 | -4.67 |
| 1416226_PM_at   | Arpc1b               | ARPC1B     | 0.20  | 2.63 | 2.14  | 5.75E-02 | 2.76E-01 | -4.67 |
| 1426044_PM_a_at | Prkcq                | PRKCQ      | 0.21  | 2.86 | 2.14  | 5.75E-02 | 2.76E-01 | -4.67 |
| 1459424_PM_at   | D3Ertd108e           | NA         | 0.23  | 2.53 | 2.14  | 5.75E-02 | 2.76E-01 | -4.67 |
| 1454417_PM_at   | 4933408M05Rik        | NA         | 0.24  | 2.21 | 2.14  | 5.75E-02 | 2.76E-01 | -4.67 |
| 1446293_PM_at   | ---                  | NA         | 0.26  | 2.31 | 2.14  | 5.75E-02 | 2.76E-01 | -4.67 |
| 1456701_PM_at   | Rab6                 | RABL6      | 0.27  | 3.66 | 2.14  | 5.75E-02 | 2.76E-01 | -4.67 |
| 1449511_PM_a_at | Ssbp4                | SSBP4      | 0.34  | 4.08 | 2.14  | 5.75E-02 | 2.76E-01 | -4.67 |
| 1420098_PM_s_at | D13Ertdd787e         | NA         | 0.36  | 2.95 | 2.14  | 5.75E-02 | 2.76E-01 | -4.67 |
| 1423440_PM_at   | Ska2                 | SKA2       | 0.40  | 5.10 | 2.14  | 5.75E-02 | 2.76E-01 | -4.67 |
| 1438605_PM_at   | ---                  | NA         | 0.51  | 2.42 | 2.14  | 5.75E-02 | 2.76E-01 | -4.67 |
| 1452100_PM_at   | Ctdnep1              | CTDNBP1    | 0.52  | 3.54 | 2.14  | 5.75E-02 | 2.76E-01 | -4.67 |
| 1434432_PM_at   | Rffl                 | RFFL       | -0.72 | 4.02 | -2.14 | 5.75E-02 | 2.76E-01 | -4.67 |
| 1429863_PM_at   | Lonrf3               | LONRF3     | 0.23  | 2.58 | 2.14  | 5.75E-02 | 2.76E-01 | -4.67 |
| 1430366_PM_at   | 5430405H02Rik        | NA         | 0.28  | 2.40 | 2.14  | 5.75E-02 | 2.76E-01 | -4.67 |
| 1457087_PM_at   | Srrm3                | SRRM3      | 0.29  | 3.26 | 2.13  | 5.76E-02 | 2.76E-01 | -4.67 |
| 1429250_PM_at   | Dync2h1              | DYNC2H1    | -0.23 | 2.33 | -2.13 | 5.76E-02 | 2.76E-01 | -4.67 |
| 1436464_PM_at   | LOC102632463         | NA         | 0.22  | 2.44 | 2.13  | 5.76E-02 | 2.76E-01 | -4.67 |
| 1445613_PM_at   | ---                  | NA         | 0.40  | 3.30 | 2.13  | 5.76E-02 | 2.76E-01 | -4.67 |
| 1455657_PM_at   | Smg1                 | SMG1       | 0.25  | 2.33 | 2.13  | 5.76E-02 | 2.76E-01 | -4.67 |
| 1431356_PM_at   | 6430710C18Rik        | NA         | 0.36  | 2.83 | 2.13  | 5.76E-02 | 2.76E-01 | -4.67 |
| 1455279_PM_at   | Drc1                 | DRC1       | 0.21  | 2.34 | 2.13  | 5.76E-02 | 2.76E-01 | -4.67 |
| 1427146_PM_at   | Carns1               | CARNS1     | 0.50  | 3.08 | 2.13  | 5.77E-02 | 2.76E-01 | -4.67 |
| 1451147_PM_x_at | Csdc2                | CSDC2      | 0.73  | 3.56 | 2.13  | 5.77E-02 | 2.76E-01 | -4.67 |
| 1448028_PM_at   | Ntn3///Tbc1d24       | NTN3       | -1.04 | 7.82 | -2.13 | 5.78E-02 | 2.76E-01 | -4.67 |
| 1434967_PM_at   | Zswim6               | ZSWIM6     | -0.85 | 3.82 | -2.13 | 5.77E-02 | 2.76E-01 | -4.67 |
| 1419575_PM_s_at | Zfp292               | ZNF292     | -0.71 | 4.09 | -2.13 | 5.78E-02 | 2.76E-01 | -4.67 |
| 1455939_PM_x_at | LOC102642637///Srp14 | SRP14      | -0.43 | 7.83 | -2.13 | 5.77E-02 | 2.76E-01 | -4.67 |
| 1428040_PM_at   | Onecut3              | ONECUT3    | 0.15  | 2.30 | 2.13  | 5.78E-02 | 2.76E-01 | -4.67 |
| 1417419_PM_at   | Ccnd1                | CCND1      | 0.20  | 2.58 | 2.13  | 5.77E-02 | 2.76E-01 | -4.67 |
| 1458098_PM_at   | ---                  | NA         | 0.21  | 2.50 | 2.13  | 5.77E-02 | 2.76E-01 | -4.67 |
| 1454498_PM_at   | 9230118N17Rik        | NA         | 0.22  | 2.75 | 2.13  | 5.77E-02 | 2.76E-01 | -4.67 |
| 1417909_PM_at   | Serpinc1             | SERPINC1   | 0.25  | 2.35 | 2.13  | 5.78E-02 | 2.76E-01 | -4.67 |
| 1441344_PM_at   | Erlin1               | ERLIN1     | 0.43  | 2.67 | 2.13  | 5.77E-02 | 2.76E-01 | -4.67 |
| 1431641_PM_at   | ---                  | NA         | 0.49  | 3.14 | 2.13  | 5.77E-02 | 2.76E-01 | -4.67 |
| 1437828_PM_s_at | Wdr46                | WDR46      | 0.82  | 3.64 | 2.13  | 5.77E-02 | 2.76E-01 | -4.67 |
| 1436985_PM_at   | Zfp644               | ZNF644     | 0.84  | 5.05 | 2.13  | 5.78E-02 | 2.76E-01 | -4.67 |
| 1431335_PM_a_at | Wfdc1                | WFDC1      | 0.27  | 3.00 | 2.13  | 5.78E-02 | 2.76E-01 | -4.67 |
| 1453094_PM_at   | Foxn3                | FOXN3      | 0.39  | 2.72 | 2.13  | 5.78E-02 | 2.76E-01 | -4.67 |
| 1435467_PM_at   | Fgd6                 | FGD6       | -0.37 | 2.97 | -2.13 | 5.78E-02 | 2.76E-01 | -4.67 |
| 1420660_PM_at   | Lrrc6                | LRRC6      | 0.22  | 2.37 | 2.13  | 5.78E-02 | 2.76E-01 | -4.67 |
| 1425000_PM_s_at | Proser2              | PROSER2    | 0.26  | 2.63 | 2.13  | 5.78E-02 | 2.76E-01 | -4.67 |
| 1424688_PM_at   | Creb3l3              | CREB3L3    | 0.32  | 2.63 | 2.13  | 5.78E-02 | 2.76E-01 | -4.67 |
| 1433381_PM_at   | ---                  | NA         | 0.19  | 2.23 | 2.13  | 5.78E-02 | 2.76E-01 | -4.67 |
| 1420684_PM_at   | Acox3                | ACOX3      | 0.32  | 2.37 | 2.13  | 5.78E-02 | 2.76E-01 | -4.67 |

|                 |                         |            |       |      |       |          |          |       |
|-----------------|-------------------------|------------|-------|------|-------|----------|----------|-------|
| 1458271_PM_at   | Cntn5                   | NA         | 0.18  | 2.13 | 2.13  | 5.79E-02 | 2.76E-01 | -4.67 |
| 1419262_PM_at   | Acad8                   | ACAD8      | 0.22  | 2.37 | 2.13  | 5.78E-02 | 2.76E-01 | -4.67 |
| 1458910_PM_at   | ---                     | NA         | 0.25  | 2.54 | 2.13  | 5.79E-02 | 2.76E-01 | -4.67 |
| 1448136_PM_at   | Enpp2                   | ENPP2      | -1.76 | 6.08 | -2.13 | 5.79E-02 | 2.76E-01 | -4.67 |
| 1442707_PM_at   | Camk2a                  | CAMK2A     | -0.87 | 8.14 | -2.13 | 5.79E-02 | 2.76E-01 | -4.67 |
| 1422487_PM_at   | Smad4                   | SMAD4      | -0.77 | 6.15 | -2.13 | 5.79E-02 | 2.76E-01 | -4.67 |
| 1416163_PM_at   | Cops4                   | COPS4      | -0.63 | 5.33 | -2.13 | 5.79E-02 | 2.76E-01 | -4.67 |
| 1421466_PM_at   | Asb10                   | ASB10      | 0.20  | 2.83 | 2.13  | 5.80E-02 | 2.76E-01 | -4.67 |
| 1452644_PM_at   | Mbd3l2                  | MBD3L2B    | 0.20  | 2.23 | 2.13  | 5.79E-02 | 2.76E-01 | -4.67 |
| 1444487_PM_at   | Lrat                    | LRAT       | 0.21  | 2.32 | 2.13  | 5.79E-02 | 2.76E-01 | -4.67 |
| 1431194_PM_at   | 6030468B19Rik           | C17orf99   | 0.24  | 2.16 | 2.13  | 5.79E-02 | 2.76E-01 | -4.67 |
| 1432979_PM_at   | Gatad2b                 | GATAD2B    | 0.25  | 2.54 | 2.13  | 5.79E-02 | 2.76E-01 | -4.67 |
| 1431704_PM_a_at | Ralgs2                  | RALGPS2    | 0.29  | 3.18 | 2.13  | 5.79E-02 | 2.76E-01 | -4.67 |
| 1425203_PM_at   | Ddx19b                  | DDX19B     | 0.35  | 2.41 | 2.13  | 5.79E-02 | 2.76E-01 | -4.67 |
| 1426187_PM_a_at | Hax1                    | HAX1       | 0.37  | 5.93 | 2.13  | 5.79E-02 | 2.76E-01 | -4.67 |
| 1421196_PM_at   | Ptpn11                  | PTPN11     | 0.50  | 4.26 | 2.13  | 5.79E-02 | 2.76E-01 | -4.67 |
| 1428181_PM_at   | Etfb                    | ETFB       | 0.51  | 3.26 | 2.13  | 5.80E-02 | 2.76E-01 | -4.67 |
| 1458414_PM_at   | ---                     | NA         | 0.57  | 4.99 | 2.13  | 5.79E-02 | 2.76E-01 | -4.67 |
| 1444412_PM_at   | ---                     | NA         | 0.25  | 2.92 | 2.13  | 5.80E-02 | 2.76E-01 | -4.67 |
| 1459794_PM_at   | ---                     | NA         | 0.26  | 2.53 | 2.13  | 5.80E-02 | 2.76E-01 | -4.67 |
| 1428203_PM_at   | Gabrb2                  | NA         | -0.67 | 8.03 | -2.13 | 5.80E-02 | 2.76E-01 | -4.67 |
| 1456900_PM_at   | ---                     | NA         | -0.60 | 4.38 | -2.13 | 5.80E-02 | 2.77E-01 | -4.67 |
| 1450876_PM_at   | Cfh                     | CFH        | -0.59 | 3.37 | -2.13 | 5.80E-02 | 2.77E-01 | -4.67 |
| 1418825_PM_at   | Irgm1                   | IRGM       | -0.27 | 2.31 | -2.13 | 5.80E-02 | 2.77E-01 | -4.67 |
| 1425230_PM_at   | Nags                    | NAGS       | 0.27  | 2.42 | 2.13  | 5.80E-02 | 2.77E-01 | -4.67 |
| 1428168_PM_at   | Mpz1                    | MPZ1       | 0.34  | 2.80 | 2.13  | 5.80E-02 | 2.77E-01 | -4.67 |
| 1423189_PM_at   | Brk1                    | BRK1       | -0.79 | 5.00 | -2.13 | 5.80E-02 | 2.77E-01 | -4.67 |
| 1436217_PM_at   | Zfp148                  | ZNF148     | -0.39 | 2.69 | -2.13 | 5.81E-02 | 2.77E-01 | -4.68 |
| 1426577_PM_a_at | Lin37                   | LIN37      | 0.43  | 3.67 | 2.13  | 5.81E-02 | 2.77E-01 | -4.68 |
| 1443482_PM_at   | ---                     | NA         | 0.19  | 2.30 | 2.13  | 5.81E-02 | 2.77E-01 | -4.68 |
| 1451903_PM_at   | Kynu                    | KYNU       | 0.28  | 2.34 | 2.13  | 5.81E-02 | 2.77E-01 | -4.68 |
| 1447316_PM_at   | ---                     | NA         | 0.25  | 3.06 | 2.13  | 5.81E-02 | 2.77E-01 | -4.68 |
| 1430145_PM_at   | Lrrc28                  | LRRC28     | 0.30  | 2.20 | 2.13  | 5.81E-02 | 2.77E-01 | -4.68 |
| 1433093_PM_at   | 2900092N22Rik           | NA         | 0.57  | 2.92 | 2.13  | 5.82E-02 | 2.77E-01 | -4.68 |
| 1437788_PM_at   | Sp6                     | SP6        | 0.29  | 2.77 | 2.13  | 5.82E-02 | 2.77E-01 | -4.68 |
| 1431248_PM_at   | 5031426D15Rik           | NA         | 0.56  | 7.66 | 2.13  | 5.82E-02 | 2.77E-01 | -4.68 |
| 1420288_PM_at   | ---                     | NA         | 0.56  | 3.03 | 2.13  | 5.82E-02 | 2.77E-01 | -4.68 |
| 1419950_PM_s_at | Tnpo3                   | TNPO3      | -0.42 | 3.30 | -2.13 | 5.82E-02 | 2.77E-01 | -4.68 |
| 1432184_PM_a_at | Inf2                    | INF2       | 0.28  | 2.94 | 2.13  | 5.82E-02 | 2.77E-01 | -4.68 |
| 1441294_PM_at   | ---                     | NA         | 0.33  | 2.61 | 2.13  | 5.82E-02 | 2.77E-01 | -4.68 |
| 1419815_PM_at   | Mettl17                 | METTL17    | 0.32  | 2.85 | 2.13  | 5.82E-02 | 2.77E-01 | -4.68 |
| 1439490_PM_at   | Nr2c1                   | NR2C1      | -0.27 | 2.53 | -2.13 | 5.82E-02 | 2.77E-01 | -4.68 |
| 1424488_PM_a_at | Ppa2                    | PPA2       | -0.52 | 5.32 | -2.13 | 5.83E-02 | 2.77E-01 | -4.68 |
| 1423115_PM_at   | St6galnac6              | ST6GALNAC6 | -0.52 | 4.02 | -2.13 | 5.83E-02 | 2.77E-01 | -4.68 |
| 1426750_PM_at   | Flnb                    | FLNB       | -0.31 | 3.68 | -2.13 | 5.83E-02 | 2.77E-01 | -4.68 |
| 1435535_PM_at   | Depdc5                  | DEPDC5     | -0.19 | 2.98 | -2.13 | 5.83E-02 | 2.77E-01 | -4.68 |
| 1435992_PM_at   | Iqca                    | IQCA1      | 0.19  | 2.02 | 2.13  | 5.83E-02 | 2.77E-01 | -4.68 |
| 1436671_PM_at   | Vsig8                   | VSIG8      | 0.19  | 2.69 | 2.13  | 5.83E-02 | 2.77E-01 | -4.68 |
| 1436149_PM_at   | Cox5b /// LOC102641600  | COX5B      | 0.24  | 2.74 | 2.13  | 5.83E-02 | 2.77E-01 | -4.68 |
| 1426103_PM_a_at | Esr2                    | ESR2       | 0.33  | 3.08 | 2.13  | 5.83E-02 | 2.77E-01 | -4.68 |
| 1448393_PM_at   | Cldn7                   | CLDN7      | 0.36  | 2.19 | 2.13  | 5.82E-02 | 2.77E-01 | -4.68 |
| 1446779_PM_at   | ---                     | NA         | 0.38  | 2.72 | 2.13  | 5.83E-02 | 2.77E-01 | -4.68 |
| 1438783_PM_at   | ---                     | NA         | 0.41  | 3.51 | 2.13  | 5.82E-02 | 2.77E-01 | -4.68 |
| 1433324_PM_at   | 9330154F10Rik           | NA         | 0.57  | 2.70 | 2.13  | 5.83E-02 | 2.77E-01 | -4.68 |
| 1446570_PM_at   | ---                     | NA         | 0.60  | 2.35 | 2.13  | 5.83E-02 | 2.77E-01 | -4.68 |
| 1434441_PM_at   | Aaed1                   | NA         | -0.46 | 3.37 | -2.13 | 5.83E-02 | 2.77E-01 | -4.68 |
| 1428224_PM_at   | Hnrnpdl                 | HNRNPDL    | -0.45 | 2.82 | -2.13 | 5.83E-02 | 2.77E-01 | -4.68 |
| 1417156_PM_at   | Krt19                   | KRT19      | 0.19  | 2.28 | 2.13  | 5.83E-02 | 2.77E-01 | -4.68 |
| 1416625_PM_at   | Serping1                | SERPING1   | -0.34 | 2.67 | -2.13 | 5.84E-02 | 2.77E-01 | -4.68 |
| 1425521_PM_at   | Paip1                   | PAIP1      | -0.35 | 5.38 | -2.13 | 5.84E-02 | 2.77E-01 | -4.68 |
| 1444639_PM_at   | ---                     | NA         | 0.32  | 2.68 | 2.13  | 5.84E-02 | 2.77E-01 | -4.68 |
| 1417971_PM_at   | Nrm                     | NRM        | 0.18  | 2.57 | 2.13  | 5.84E-02 | 2.77E-01 | -4.68 |
| 1441160_PM_at   | D330050G23Rik           | NA         | 0.23  | 2.81 | 2.13  | 5.84E-02 | 2.77E-01 | -4.68 |
| 1417075_PM_at   | Fam136a                 | FAM136A    | -0.30 | 4.21 | -2.13 | 5.84E-02 | 2.77E-01 | -4.68 |
| 1423226_PM_at   | Ms4a1                   | MS4A1      | 0.23  | 2.49 | 2.13  | 5.84E-02 | 2.77E-01 | -4.68 |
| 1447477_PM_at   | Ube2ql1                 | NA         | 0.19  | 2.29 | 2.13  | 5.85E-02 | 2.78E-01 | -4.68 |
| 1419972_PM_at   | Skc35a5                 | NA         | -0.45 | 4.46 | -2.13 | 5.85E-02 | 2.78E-01 | -4.68 |
| 1445847_PM_at   | Ntrk2                   | NA         | 0.38  | 2.91 | 2.13  | 5.85E-02 | 2.78E-01 | -4.68 |
| 1445615_PM_at   | Chrna9 /// LOC102635442 | CHRNA9     | 0.17  | 2.66 | 2.13  | 5.85E-02 | 2.78E-01 | -4.68 |
| 1424392_PM_at   | Adhfe1                  | ADHFE1     | 0.46  | 2.61 | 2.13  | 5.85E-02 | 2.78E-01 | -4.68 |
| 1430327_PM_at   | Adat3                   | ADAT3      | 0.31  | 3.29 | 2.13  | 5.85E-02 | 2.78E-01 | -4.68 |
| 1422089_PM_at   | Ncr1                    | NCR1       | 0.19  | 2.18 | 2.13  | 5.86E-02 | 2.78E-01 | -4.68 |
| 1429144_PM_at   | Gpcpd1                  | GPCPD1     | -0.52 | 4.62 | -2.12 | 5.86E-02 | 2.78E-01 | -4.68 |
| 1419699_PM_at   | Scgb3a1                 | SCGB3A1    | 0.27  | 2.79 | 2.12  | 5.86E-02 | 2.78E-01 | -4.68 |

|                 |                             |            |       |      |       |          |          |       |
|-----------------|-----------------------------|------------|-------|------|-------|----------|----------|-------|
| 1437743_PM_at   | Aebp2                       | AEBP2      | 0.49  | 3.14 | 2.12  | 5.86E-02 | 2.78E-01 | -4.68 |
| 1452157_PM_at   | Eprs                        | EPRS       | -0.52 | 5.01 | -2.12 | 5.86E-02 | 2.78E-01 | -4.68 |
| 1427137_PM_at   | Ces2e                       | CES2       | 0.21  | 3.68 | 2.12  | 5.87E-02 | 2.78E-01 | -4.68 |
| 1454118_PM_at   | ---                         | NA         | 0.24  | 3.10 | 2.12  | 5.87E-02 | 2.78E-01 | -4.68 |
| 1438187_PM_at   | Slc25a29                    | SLC25A29   | 0.25  | 2.93 | 2.12  | 5.87E-02 | 2.78E-01 | -4.68 |
| 1439150_PM_x_at | Grtp1                       | GRTP1      | 0.26  | 2.22 | 2.12  | 5.87E-02 | 2.78E-01 | -4.69 |
| 1446993_PM_at   | ---                         | NA         | 0.33  | 2.66 | 2.12  | 5.87E-02 | 2.78E-01 | -4.69 |
| 1425025_PM_at   | Tmem106a                    | TMEM106A   | 0.26  | 2.19 | 2.12  | 5.87E-02 | 2.78E-01 | -4.69 |
| 1442303_PM_at   | LOC102638888                | NA         | 0.25  | 3.33 | 2.12  | 5.87E-02 | 2.78E-01 | -4.69 |
| 1418225_PM_at   | Orc2                        | ORC2       | 0.59  | 5.35 | 2.12  | 5.88E-02 | 2.78E-01 | -4.69 |
| 1419344_PM_at   | Tcte1                       | TCTE1      | -0.51 | 4.02 | -2.12 | 5.88E-02 | 2.78E-01 | -4.69 |
| 1416282_PM_at   | Psmc3                       | PSMC3      | -0.44 | 4.94 | -2.12 | 5.88E-02 | 2.78E-01 | -4.69 |
| 1422213_PM_s_at | Foxh1                       | FOXH1      | 0.21  | 2.66 | 2.12  | 5.88E-02 | 2.78E-01 | -4.69 |
| 1459442_PM_at   | ---                         | NA         | 0.22  | 2.99 | 2.12  | 5.88E-02 | 2.78E-01 | -4.69 |
| 1451821_PM_a_at | Sp100                       | SP140L     | 0.28  | 2.42 | 2.12  | 5.88E-02 | 2.78E-01 | -4.69 |
| 1460626_PM_at   | Sept11                      | SEPT11     | 0.35  | 6.49 | 2.12  | 5.88E-02 | 2.78E-01 | -4.69 |
| 1426643_PM_at   | Elp3                        | ELP3       | -0.45 | 3.11 | -2.12 | 5.88E-02 | 2.79E-01 | -4.69 |
| 1446607_PM_at   | ---                         | NA         | 0.91  | 5.92 | 2.12  | 5.89E-02 | 2.79E-01 | -4.69 |
| 1436155_PM_at   | Nmnat2                      | NMNAT2     | -0.53 | 6.41 | -2.12 | 5.89E-02 | 2.79E-01 | -4.69 |
| 1445856_PM_at   | ---                         | NA         | -0.45 | 2.57 | -2.12 | 5.89E-02 | 2.79E-01 | -4.69 |
| 1448216_PM_at   | Syng3                       | SYNGR3     | 0.24  | 2.36 | 2.12  | 5.89E-02 | 2.79E-01 | -4.69 |
| 1455233_PM_at   | Mpr3                        | MRP3       | 0.24  | 2.38 | 2.12  | 5.89E-02 | 2.79E-01 | -4.69 |
| 1439928_PM_at   | ---                         | NA         | 0.48  | 3.67 | 2.12  | 5.89E-02 | 2.79E-01 | -4.69 |
| 1424194_PM_at   | Rcsd1                       | RCSD1      | 0.22  | 2.89 | 2.12  | 5.90E-02 | 2.79E-01 | -4.69 |
| 1422779_PM_at   | Smpd3                       | SMPD3      | -0.31 | 2.39 | -2.12 | 5.90E-02 | 2.79E-01 | -4.69 |
| 1419719_PM_at   | Gabbr1                      | GABRB1     | -0.94 | 6.80 | -2.12 | 5.90E-02 | 2.79E-01 | -4.69 |
| 1456194_PM_a_at | Park7                       | PARK7      | -0.99 | 6.45 | -2.12 | 5.90E-02 | 2.79E-01 | -4.69 |
| 1426506_PM_at   | Evi2a /// Evi2b /// Gm21975 | EVI2B      | 0.27  | 2.16 | 2.12  | 5.90E-02 | 2.79E-01 | -4.69 |
| 1445096_PM_at   | ---                         | NA         | 0.35  | 2.74 | 2.12  | 5.91E-02 | 2.79E-01 | -4.69 |
| 1418684_PM_at   | Zfp33b                      | NA         | 0.38  | 3.18 | 2.12  | 5.91E-02 | 2.79E-01 | -4.69 |
| 1448338_PM_at   | Cpq                         | CPQ        | 0.27  | 2.42 | 2.12  | 5.91E-02 | 2.79E-01 | -4.69 |
| 1459025_PM_at   | LOC102633312                | NA         | 0.18  | 3.26 | 2.12  | 5.91E-02 | 2.79E-01 | -4.69 |
| 1421061_PM_at   | Guca1a                      | GUCA1A     | 0.19  | 2.30 | 2.12  | 5.91E-02 | 2.79E-01 | -4.69 |
| 1459904_PM_at   | BC030870                    | NA         | 0.22  | 2.28 | 2.12  | 5.91E-02 | 2.79E-01 | -4.69 |
| 1459443_PM_at   | ---                         | NA         | 0.57  | 3.10 | 2.12  | 5.91E-02 | 2.79E-01 | -4.69 |
| 1458299_PM_s_at | Nfkbi                       | NFKB1      | 0.39  | 2.41 | 2.12  | 5.91E-02 | 2.79E-01 | -4.69 |
| 1435361_PM_at   | Sema3g                      | SEMA3G     | -0.37 | 2.49 | -2.12 | 5.92E-02 | 2.79E-01 | -4.69 |
| 1431216_PM_s_at | Dnajc6                      | DNAJC6     | -0.67 | 3.92 | -2.12 | 5.92E-02 | 2.79E-01 | -4.69 |
| 1457992_PM_at   | ---                         | NA         | 0.19  | 2.40 | 2.12  | 5.92E-02 | 2.79E-01 | -4.69 |
| 1452320_PM_at   | Lrp2                        | LRP2       | -0.22 | 2.27 | -2.12 | 5.92E-02 | 2.79E-01 | -4.69 |
| 1417944_PM_at   | Gng4                        | GNG4       | 0.31  | 3.14 | 2.12  | 5.92E-02 | 2.80E-01 | -4.69 |
| 1436642_PM_x_at | AW047730                    | NA         | 0.30  | 3.85 | 2.12  | 5.92E-02 | 2.80E-01 | -4.69 |
| 1416502_PM_a_at | Preb                        | PREB       | 0.63  | 3.67 | 2.12  | 5.92E-02 | 2.80E-01 | -4.69 |
| 1431696_PM_at   | Gm16491                     | NA         | 0.23  | 2.52 | 2.12  | 5.92E-02 | 2.80E-01 | -4.69 |
| 1454762_PM_at   | Xkrx                        | XKRX       | 0.26  | 3.13 | 2.12  | 5.92E-02 | 2.80E-01 | -4.69 |
| 1427489_PM_at   | Irga8                       | ITGA8      | -1.41 | 3.31 | -2.12 | 5.93E-02 | 2.80E-01 | -4.69 |
| 1443677_PM_at   | Zbtb38                      | ZBTB38     | 0.35  | 3.83 | 2.12  | 5.93E-02 | 2.80E-01 | -4.70 |
| 1440012_PM_at   | ---                         | NA         | 1.00  | 5.23 | 2.12  | 5.93E-02 | 2.80E-01 | -4.70 |
| 1454751_PM_at   | Mettl14                     | METTL14    | -0.73 | 5.82 | -2.12 | 5.93E-02 | 2.80E-01 | -4.70 |
| 1428340_PM_s_at | Atp13a2                     | ATP13A2    | -0.42 | 3.78 | -2.12 | 5.94E-02 | 2.80E-01 | -4.70 |
| 1421568_PM_at   | Kcna6                       | ACO05833.1 | 0.24  | 2.46 | 2.12  | 5.94E-02 | 2.80E-01 | -4.70 |
| 1432790_PM_at   | ---                         | NA         | 0.26  | 2.47 | 2.12  | 5.94E-02 | 2.80E-01 | -4.70 |
| 1458800_PM_at   | ---                         | NA         | 0.74  | 2.55 | 2.12  | 5.93E-02 | 2.80E-01 | -4.70 |
| 1415815_PM_at   | Trim27                      | TRIM27     | 0.22  | 2.39 | 2.12  | 5.94E-02 | 2.80E-01 | -4.70 |
| 1443144_PM_at   | ---                         | NA         | 0.26  | 2.08 | 2.12  | 5.94E-02 | 2.80E-01 | -4.70 |
| 1427803_PM_at   | ---                         | NA         | -0.43 | 2.67 | -2.12 | 5.94E-02 | 2.80E-01 | -4.70 |
| 1454490_PM_at   | 4930423C22Rik               | NA         | 0.25  | 2.37 | 2.12  | 5.94E-02 | 2.80E-01 | -4.70 |
| 1450565_PM_at   | Il9                         | IL9        | 0.28  | 2.65 | 2.12  | 5.94E-02 | 2.80E-01 | -4.70 |
| 1421502_PM_at   | Usp26                       | USP26      | 0.38  | 2.41 | 2.12  | 5.94E-02 | 2.80E-01 | -4.70 |
| 1446287_PM_at   | Prss41                      | PRSS41     | -0.16 | 2.09 | -2.12 | 5.94E-02 | 2.80E-01 | -4.70 |
| 1423869_PM_s_at | Txnrd3                      | TXNRD3     | 0.25  | 2.38 | 2.12  | 5.94E-02 | 2.80E-01 | -4.70 |
| 1429871_PM_at   | Hmmr                        | HMMR       | 0.23  | 2.71 | 2.12  | 5.95E-02 | 2.80E-01 | -4.70 |
| 1429000_PM_at   | Phf3                        | PHF3       | -1.01 | 6.20 | -2.12 | 5.95E-02 | 2.80E-01 | -4.70 |
| 1424645_PM_at   | Tnrc6c                      | TNRC6C     | -0.59 | 4.41 | -2.12 | 5.95E-02 | 2.80E-01 | -4.70 |
| 1427207_PM_s_at | Afg3l2                      | AFG3L2     | -0.62 | 4.22 | -2.12 | 5.96E-02 | 2.80E-01 | -4.70 |
| 1436148_PM_at   | Tnr                         | TNR        | -0.48 | 3.04 | -2.11 | 5.96E-02 | 2.80E-01 | -4.70 |
| 1446619_PM_at   | ---                         | NA         | 0.18  | 2.55 | 2.12  | 5.95E-02 | 2.80E-01 | -4.70 |
| 1453710_PM_at   | Tmem116                     | TMEM116    | 0.18  | 2.71 | 2.11  | 5.96E-02 | 2.80E-01 | -4.70 |
| 1442102_PM_at   | ---                         | NA         | 0.22  | 2.24 | 2.11  | 5.96E-02 | 2.80E-01 | -4.70 |
| 1453797_PM_at   | Phospho2                    | PHOSPHO2   | 0.26  | 2.54 | 2.11  | 5.96E-02 | 2.80E-01 | -4.70 |
| 1418340_PM_at   | Fcer1g                      | FCER1G     | 0.26  | 2.91 | 2.11  | 5.96E-02 | 2.80E-01 | -4.70 |
| 1457692_PM_at   | ---                         | NA         | 0.30  | 2.76 | 2.11  | 5.96E-02 | 2.80E-01 | -4.70 |
| 1417952_PM_at   | Cyp2j6                      | CYP2J2     | 0.31  | 3.27 | 2.12  | 5.96E-02 | 2.80E-01 | -4.70 |
| 1445708_PM_x_at | 3110021A11Rik               | NA         | 0.56  | 4.37 | 2.12  | 5.95E-02 | 2.80E-01 | -4.70 |

|                 |                                        |          |       |      |       |          |          |       |
|-----------------|----------------------------------------|----------|-------|------|-------|----------|----------|-------|
| 1427301_PM_at   | Cd48                                   | CD48     | 0.20  | 2.47 | 2.11  | 5.96E-02 | 2.80E-01 | -4.70 |
| 1415746_PM_at   | Cic                                    | CIC      | 0.35  | 2.87 | 2.11  | 5.96E-02 | 2.80E-01 | -4.70 |
| 1439566_PM_at   | Gprin3                                 | GPRIN3   | -0.36 | 3.17 | -2.11 | 5.97E-02 | 2.81E-01 | -4.70 |
| 1443484_PM_at   | Rpap1                                  | RPAP1    | 0.34  | 3.22 | 2.11  | 5.97E-02 | 2.81E-01 | -4.70 |
| 1424664_PM_at   | Fam222b                                | NA       | 0.35  | 3.18 | 2.11  | 5.97E-02 | 2.81E-01 | -4.70 |
| 1425182_PM_x_at | Klk1b22 /// Klk1b9                     | KLK3     | 0.36  | 3.09 | 2.11  | 5.97E-02 | 2.81E-01 | -4.70 |
| 1426636_PM_a_at | Xiap                                   | BIRC8    | 0.38  | 3.20 | 2.11  | 5.97E-02 | 2.81E-01 | -4.70 |
| 1436392_PM_s_at | Tfap2c                                 | TFAP2C   | 0.96  | 3.20 | 2.11  | 5.97E-02 | 2.81E-01 | -4.70 |
| 1455857_PM_a_at | Rab2b                                  | RAB2B    | -0.45 | 2.38 | -2.11 | 5.97E-02 | 2.81E-01 | -4.70 |
| 1433336_PM_at   | ---                                    | NA       | 0.34  | 3.73 | 2.11  | 5.97E-02 | 2.81E-01 | -4.70 |
| 1446100_PM_at   | ---                                    | NA       | 0.35  | 2.57 | 2.11  | 5.97E-02 | 2.81E-01 | -4.70 |
| 1429960_PM_at   | 4930438A08Rik                          | NA       | 0.23  | 2.64 | 2.11  | 5.97E-02 | 2.81E-01 | -4.70 |
| 1431631_PM_at   | 2900057B20Rik                          | NA       | 0.25  | 3.07 | 2.11  | 5.97E-02 | 2.81E-01 | -4.70 |
| 1440462_PM_at   | ---                                    | NA       | 0.39  | 2.77 | 2.11  | 5.98E-02 | 2.81E-01 | -4.70 |
| 1422453_PM_at   | Prpf8                                  | PRPF8    | -0.48 | 4.11 | -2.11 | 5.98E-02 | 2.81E-01 | -4.70 |
| 1432756_PM_at   | 2210409O19Rik                          | NA       | 0.22  | 2.52 | 2.11  | 5.98E-02 | 2.81E-01 | -4.70 |
| 1436611_PM_at   | Slc39a12                               | SLC39A12 | -0.46 | 2.98 | -2.11 | 5.98E-02 | 2.81E-01 | -4.70 |
| 1459677_PM_at   | ---                                    | NA       | -0.25 | 2.31 | -2.11 | 5.98E-02 | 2.81E-01 | -4.70 |
| 1423833_PM_a_at | Mpc2                                   | MPC2     | -1.13 | 7.23 | -2.11 | 5.99E-02 | 2.81E-01 | -4.70 |
| 1450340_PM_a_at | Clnkb                                  | NA       | 0.16  | 2.22 | 2.11  | 5.98E-02 | 2.81E-01 | -4.70 |
| 1422933_PM_at   | Xlr5a /// Xlr5b /// Xlr5c              | NA       | 0.18  | 2.20 | 2.11  | 5.99E-02 | 2.81E-01 | -4.70 |
| 1451926_PM_at   | Mrgpra4                                | NA       | 0.27  | 2.41 | 2.11  | 5.98E-02 | 2.81E-01 | -4.70 |
| 1434300_PM_at   | U2surp                                 | U2SURP   | 0.65  | 6.23 | 2.11  | 5.99E-02 | 2.81E-01 | -4.70 |
| 1433711_PM_s_at | Sesn1                                  | SESN1    | -0.62 | 5.45 | -2.11 | 5.99E-02 | 2.81E-01 | -4.70 |
| 1444578_PM_at   | ---                                    | NA       | 0.20  | 2.50 | 2.11  | 5.99E-02 | 2.81E-01 | -4.70 |
| 1452995_PM_at   | Nudt17                                 | NUDT17   | 0.23  | 2.89 | 2.11  | 5.99E-02 | 2.81E-01 | -4.70 |
| 1424300_PM_at   | Gemin6                                 | GEMIN6   | 0.25  | 2.66 | 2.11  | 5.99E-02 | 2.81E-01 | -4.70 |
| 1422041_PM_at   | Pilrb1                                 | PILRA    | 0.28  | 3.13 | 2.11  | 5.99E-02 | 2.81E-01 | -4.70 |
| 1440631_PM_at   | ---                                    | NA       | 0.29  | 2.10 | 2.11  | 5.99E-02 | 2.81E-01 | -4.70 |
| 1451021_PM_a_at | Klf5                                   | KLf5     | 0.34  | 2.54 | 2.11  | 5.99E-02 | 2.81E-01 | -4.70 |
| 1459639_PM_at   | Brsk2                                  | BRSK2    | 0.82  | 2.97 | 2.11  | 5.99E-02 | 2.81E-01 | -4.70 |
| 1420141_PM_at   | AA517023                               | NA       | 0.99  | 3.83 | 2.11  | 5.99E-02 | 2.81E-01 | -4.70 |
| 1423289_PM_a_at | Tma16                                  | TMA16    | -0.55 | 3.33 | -2.11 | 5.99E-02 | 2.81E-01 | -4.70 |
| 1439810_PM_s_at | Pramel7                                | PRAMEF9  | 0.22  | 2.24 | 2.11  | 6.00E-02 | 2.81E-01 | -4.71 |
| 1430921_PM_at   | ---                                    | NA       | 0.22  | 3.10 | 2.11  | 6.00E-02 | 2.81E-01 | -4.71 |
| 1433899_PM_x_at | Tsc22d1                                | TSC22D1  | -0.52 | 4.13 | -2.11 | 6.00E-02 | 2.81E-01 | -4.71 |
| 1423062_PM_at   | Igf1bp3                                | IGFBP3   | 0.21  | 2.26 | 2.11  | 6.00E-02 | 2.81E-01 | -4.71 |
| 1456512_PM_at   | Pdzrn4                                 | PDZRN4   | 0.29  | 2.55 | 2.11  | 6.00E-02 | 2.81E-01 | -4.71 |
| 1425053_PM_at   | Isoc1                                  | ISOC1    | 0.65  | 3.29 | 2.11  | 6.00E-02 | 2.81E-01 | -4.71 |
| 1423394_PM_at   | Pcyox1                                 | PCYOX1   | -1.01 | 5.23 | -2.11 | 6.00E-02 | 2.81E-01 | -4.71 |
| 1418006_PM_at   | Zc3h18                                 | ZC3H18   | 0.19  | 2.92 | 2.11  | 6.01E-02 | 2.81E-01 | -4.71 |
| 1441574_PM_at   | ---                                    | NA       | 0.24  | 3.44 | 2.11  | 6.01E-02 | 2.81E-01 | -4.71 |
| 1437532_PM_at   | Rnf216                                 | RNF216   | -0.22 | 2.26 | -2.11 | 6.01E-02 | 2.81E-01 | -4.71 |
| 1436767_PM_at   | ---                                    | NA       | -0.75 | 4.96 | -2.11 | 6.01E-02 | 2.81E-01 | -4.71 |
| 1442536_PM_at   | 6430590A07Rik                          | NA       | -0.53 | 4.09 | -2.11 | 6.01E-02 | 2.81E-01 | -4.71 |
| 1453069_PM_at   | Pik3cb                                 | PIK3CB   | -0.24 | 2.75 | -2.11 | 6.01E-02 | 2.81E-01 | -4.71 |
| 1422780_PM_at   | Pxmp4                                  | PXMP4    | 0.30  | 2.56 | 2.11  | 6.01E-02 | 2.81E-01 | -4.71 |
| 1416796_PM_at   | Nck2                                   | NCK2     | -0.60 | 6.04 | -2.11 | 6.01E-02 | 2.82E-01 | -4.71 |
| 1447241_PM_at   | ---                                    | NA       | 0.38  | 2.45 | 2.11  | 6.01E-02 | 2.82E-01 | -4.71 |
| 1435722_PM_at   | Gria4                                  | GRIA4    | 0.80  | 4.40 | 2.11  | 6.01E-02 | 2.82E-01 | -4.71 |
| 1423978_PM_at   | Sbk1                                   | SBK1     | -0.29 | 3.15 | -2.11 | 6.02E-02 | 2.82E-01 | -4.71 |
| 1421946_PM_at   | Crp                                    | CRP      | 0.19  | 2.66 | 2.11  | 6.02E-02 | 2.82E-01 | -4.71 |
| 1453818_PM_a_at | 9030025P20Rik /// Ermard<br>/// Gm3435 | ERMARD   | 0.22  | 2.63 | 2.11  | 6.02E-02 | 2.82E-01 | -4.71 |
| 1442950_PM_at   | ---                                    | NA       | 0.48  | 3.14 | 2.11  | 6.02E-02 | 2.82E-01 | -4.71 |
| 1425852_PM_at   | Catsperg1                              | CATSPERG | 0.48  | 3.03 | 2.11  | 6.02E-02 | 2.82E-01 | -4.71 |
| 1439196_PM_at   | Hook3                                  | HOO3     | 0.28  | 3.46 | 2.11  | 6.02E-02 | 2.82E-01 | -4.71 |
| 1432248_PM_at   | ---                                    | NA       | 0.21  | 2.53 | 2.11  | 6.02E-02 | 2.82E-01 | -4.71 |
| 1439820_PM_at   | ---                                    | NA       | 0.22  | 2.59 | 2.11  | 6.02E-02 | 2.82E-01 | -4.71 |
| 1427625_PM_a_at | Herc2                                  | HERC2    | 0.61  | 3.86 | 2.11  | 6.02E-02 | 2.82E-01 | -4.71 |
| 1449426_PM_a_at | Anxa10                                 | ANXA10   | 0.22  | 2.24 | 2.11  | 6.02E-02 | 2.82E-01 | -4.71 |
| 1426238_PM_at   | Bmp1                                   | BMP1     | 0.22  | 2.63 | 2.11  | 6.03E-02 | 2.82E-01 | -4.71 |
| 1432671_PM_at   | ---                                    | NA       | 0.26  | 2.89 | 2.11  | 6.03E-02 | 2.82E-01 | -4.71 |
| 1430957_PM_at   | Arhgap26                               | ARHGAP26 | 0.28  | 2.54 | 2.11  | 6.03E-02 | 2.82E-01 | -4.71 |
| 1454035_PM_at   | ---                                    | NA       | 0.41  | 2.26 | 2.11  | 6.03E-02 | 2.82E-01 | -4.71 |
| 1440407_PM_at   | ---                                    | NA       | 0.16  | 2.08 | 2.11  | 6.03E-02 | 2.82E-01 | -4.71 |
| 1443716_PM_at   | Gm2102                                 | NA       | 0.21  | 2.59 | 2.11  | 6.03E-02 | 2.82E-01 | -4.71 |
| 1428266_PM_at   | Myb                                    | MYL3     | 0.25  | 3.59 | 2.11  | 6.03E-02 | 2.82E-01 | -4.71 |
| 1424009_PM_at   | Reg3d                                  | NA       | 0.25  | 2.25 | 2.11  | 6.03E-02 | 2.82E-01 | -4.71 |
| 1460025_PM_at   | Lrig2                                  | LRI2     | 0.33  | 2.44 | 2.11  | 6.03E-02 | 2.82E-01 | -4.71 |
| 1447933_PM_at   | Kif26a                                 | KIF26A   | 0.42  | 3.45 | 2.11  | 6.03E-02 | 2.82E-01 | -4.71 |
| 1441650_PM_at   | Arhgap15                               | ARHGAP15 | -0.18 | 2.03 | -2.11 | 6.04E-02 | 2.82E-01 | -4.71 |
| 1445175_PM_at   | ---                                    | NA       | 0.21  | 2.04 | 2.11  | 6.04E-02 | 2.82E-01 | -4.71 |
| 1450073_PM_at   | Kif3b                                  | KIF3B    | 0.46  | 3.55 | 2.11  | 6.04E-02 | 2.82E-01 | -4.71 |
| 1433932_PM_x_at | R3hdm4                                 | R3HDM4   | -0.38 | 9.27 | -2.11 | 6.04E-02 | 2.82E-01 | -4.71 |

|                 |                                                                                           |            |       |      |       |          |          |       |
|-----------------|-------------------------------------------------------------------------------------------|------------|-------|------|-------|----------|----------|-------|
| 1455531_PM_at   | Mfsd4                                                                                     | MFS4A      | -0.30 | 3.47 | -2.11 | 6.04E-02 | 2.82E-01 | -4.71 |
| 1445112_PM_at   | ---                                                                                       | NA         | 0.19  | 2.82 | 2.11  | 6.04E-02 | 2.82E-01 | -4.71 |
| 1422743_PM_at   | Phka1                                                                                     | PHKA1      | 0.33  | 2.33 | 2.11  | 6.04E-02 | 2.82E-01 | -4.71 |
| 1422722_PM_at   | 1700001K19Rik                                                                             | NA         | 0.41  | 2.65 | 2.11  | 6.05E-02 | 2.82E-01 | -4.71 |
| 1453467_PM_s_at | Rps15a                                                                                    | RPS15A     | -0.93 | 4.36 | -2.11 | 6.05E-02 | 2.82E-01 | -4.71 |
| 1424530_PM_at   | Sec14l2                                                                                   | SEC14L2    | -0.76 | 4.46 | -2.11 | 6.05E-02 | 2.82E-01 | -4.71 |
| 1445182_PM_at   | ---                                                                                       | NA         | 0.27  | 2.52 | 2.11  | 6.05E-02 | 2.82E-01 | -4.71 |
| 1429258_PM_at   | ---                                                                                       | NA         | 0.42  | 2.80 | 2.11  | 6.05E-02 | 2.82E-01 | -4.71 |
| 1448568_PM_a_at | Slc20a1                                                                                   | SLC20A1    | -0.58 | 6.31 | -2.11 | 6.05E-02 | 2.82E-01 | -4.71 |
| 1434607_PM_at   | Ddx52                                                                                     | DDX52      | -0.27 | 2.57 | -2.11 | 6.05E-02 | 2.82E-01 | -4.71 |
| 1421453_PM_at   | Jph2                                                                                      | JPH2       | 0.22  | 2.86 | 2.11  | 6.05E-02 | 2.82E-01 | -4.71 |
| 1446452_PM_at   | ---                                                                                       | NA         | 0.26  | 2.89 | 2.11  | 6.05E-02 | 2.82E-01 | -4.71 |
| 1425853_PM_s_at | Prlr                                                                                      | PRLR       | 0.28  | 2.65 | 2.11  | 6.05E-02 | 2.82E-01 | -4.71 |
| 1453266_PM_at   | Zbtb4                                                                                     | ZBTB4      | -0.53 | 7.26 | -2.11 | 6.05E-02 | 2.82E-01 | -4.71 |
| 1454245_PM_at   | Csm3                                                                                      | CSMD3      | 0.29  | 2.58 | 2.11  | 6.05E-02 | 2.82E-01 | -4.71 |
| 1435556_PM_at   | Zfp597                                                                                    | ZNF597     | -0.52 | 2.96 | -2.10 | 6.06E-02 | 2.82E-01 | -4.71 |
| 1434765_PM_at   | Ep300                                                                                     | EP300      | -0.41 | 3.50 | -2.10 | 6.06E-02 | 2.82E-01 | -4.71 |
| 1427225_PM_at   | Epn2                                                                                      | EPN2       | -0.40 | 3.27 | -2.10 | 6.06E-02 | 2.82E-01 | -4.72 |
| 1436769_PM_at   | Pma1                                                                                      | ACO18523.2 | -0.35 | 2.19 | -2.10 | 6.06E-02 | 2.82E-01 | -4.72 |
| 1421823_PM_a_at | Ppp2cb                                                                                    | PPP2CB     | -0.34 | 3.28 | -2.10 | 6.06E-02 | 2.82E-01 | -4.71 |
| 1430606_PM_at   | Klrg2                                                                                     | KLRG2      | 0.26  | 2.58 | 2.10  | 6.06E-02 | 2.82E-01 | -4.72 |
| 1457162_PM_at   | Ldlrap1                                                                                   | LDLRAP1    | 0.27  | 2.20 | 2.10  | 6.06E-02 | 2.82E-01 | -4.72 |
| 1440144_PM_x_at | ---                                                                                       | NA         | 0.31  | 5.74 | 2.10  | 6.06E-02 | 2.82E-01 | -4.72 |
| 1433065_PM_at   | 6330510M09Rik                                                                             | NA         | 0.37  | 2.55 | 2.10  | 6.06E-02 | 2.82E-01 | -4.72 |
| 1439204_PM_at   | Scn3a                                                                                     | SCN3A      | -0.90 | 5.06 | -2.10 | 6.06E-02 | 2.82E-01 | -4.72 |
| 1458249_PM_at   | ---                                                                                       | NA         | -0.48 | 2.23 | -2.10 | 6.06E-02 | 2.82E-01 | -4.72 |
| 1456759_PM_at   | Lrrc4c                                                                                    | NA         | 0.59  | 2.99 | 2.10  | 6.07E-02 | 2.82E-01 | -4.72 |
| 1438803_PM_s_at | Srx16                                                                                     | SNX16      | -0.57 | 5.43 | -2.10 | 6.07E-02 | 2.83E-01 | -4.72 |
| 1423248_PM_at   | Nktr                                                                                      | NKTR       | -0.50 | 2.98 | -2.10 | 6.07E-02 | 2.83E-01 | -4.72 |
| 1418677_PM_at   | Actn3                                                                                     | ACTN3      | 0.18  | 2.29 | 2.10  | 6.07E-02 | 2.83E-01 | -4.72 |
| 1454466_PM_at   | Gramd2                                                                                    | GRAMD2     | 0.21  | 3.30 | 2.10  | 6.07E-02 | 2.83E-01 | -4.72 |
| 1459117_PM_at   | ---                                                                                       | NA         | 0.22  | 2.95 | 2.10  | 6.07E-02 | 2.83E-01 | -4.72 |
| 1432846_PM_at   | ---                                                                                       | NA         | 0.27  | 2.73 | 2.10  | 6.07E-02 | 2.83E-01 | -4.72 |
| 1453475_PM_at   | LOC105244413                                                                              | NA         | 0.27  | 2.62 | 2.10  | 6.07E-02 | 2.83E-01 | -4.72 |
| 1416749_PM_at   | Htra1                                                                                     | HTRA1      | -0.47 | 2.90 | -2.10 | 6.07E-02 | 2.83E-01 | -4.72 |
| 1431766_PM_x_at | LOC105242669 ///<br>LOC105243270 /// Rps2 ///<br>Rps2-ps10 /// Rps2-ps11 ///<br>Rps2-ps13 | NA         | -0.25 | 8.03 | -2.10 | 6.07E-02 | 2.83E-01 | -4.72 |
| 1451756_PM_at   | Flt1                                                                                      | FLT1       | -0.29 | 2.69 | -2.10 | 6.08E-02 | 2.83E-01 | -4.72 |
| 1458021_PM_at   | ---                                                                                       | NA         | 0.29  | 2.37 | 2.10  | 6.08E-02 | 2.83E-01 | -4.72 |
| 1438059_PM_at   | Ctn3                                                                                      | CTXN3      | 0.38  | 3.45 | 2.10  | 6.08E-02 | 2.83E-01 | -4.72 |
| 1432695_PM_at   | 4921527H02Rik                                                                             | NA         | 0.52  | 4.73 | 2.10  | 6.08E-02 | 2.83E-01 | -4.72 |
| 1443861_PM_at   | Cgnl1                                                                                     | CGNL1      | 0.45  | 3.72 | 2.10  | 6.08E-02 | 2.83E-01 | -4.72 |
| 1428439_PM_at   | Nub1                                                                                      | NUB1       | 0.18  | 2.67 | 2.10  | 6.08E-02 | 2.83E-01 | -4.72 |
| 1416962_PM_at   | Rcc1                                                                                      | RCC1       | 0.19  | 2.27 | 2.10  | 6.08E-02 | 2.83E-01 | -4.72 |
| 1457081_PM_at   | ---                                                                                       | NA         | 0.30  | 2.22 | 2.10  | 6.08E-02 | 2.83E-01 | -4.72 |
| 1425610_PM_s_at | Galnt2                                                                                    | GALNT2     | 0.32  | 2.63 | 2.10  | 6.08E-02 | 2.83E-01 | -4.72 |
| 1442939_PM_at   | Rif1                                                                                      | RIF1       | 0.67  | 3.74 | 2.10  | 6.08E-02 | 2.83E-01 | -4.72 |
| 1425664_PM_at   | Klhl20                                                                                    | KLHL20     | 0.34  | 2.95 | 2.10  | 6.09E-02 | 2.83E-01 | -4.72 |
| 1432127_PM_at   | ---                                                                                       | NA         | -0.28 | 2.25 | -2.10 | 6.09E-02 | 2.83E-01 | -4.72 |
| 1450019_PM_at   | Cx3cr1                                                                                    | CX3CR1     | 0.18  | 2.76 | 2.10  | 6.09E-02 | 2.83E-01 | -4.72 |
| 1423655_PM_a_at | Ctc1                                                                                      | CTC1       | 0.25  | 2.67 | 2.10  | 6.09E-02 | 2.83E-01 | -4.72 |
| 1451153_PM_a_at | Cyhr1                                                                                     | CYHR1      | 0.22  | 3.17 | 2.10  | 6.09E-02 | 2.83E-01 | -4.72 |
| 1428162_PM_at   | Lrif1                                                                                     | LRF1       | -0.66 | 3.66 | -2.10 | 6.09E-02 | 2.83E-01 | -4.72 |
| 1433062_PM_at   | Wdr66                                                                                     | NA         | 0.26  | 2.25 | 2.10  | 6.09E-02 | 2.83E-01 | -4.72 |
| 1433123_PM_at   | ---                                                                                       | NA         | 0.20  | 2.03 | 2.10  | 6.10E-02 | 2.83E-01 | -4.72 |
| 1418976_PM_s_at | Cideb                                                                                     | CIDEB      | 0.21  | 2.58 | 2.10  | 6.10E-02 | 2.83E-01 | -4.72 |
| 1427070_PM_at   | Srx21                                                                                     | SNX21      | 0.23  | 3.44 | 2.10  | 6.10E-02 | 2.83E-01 | -4.72 |
| 1455552_PM_at   | Snopc4                                                                                    | SNAPC4     | 0.29  | 2.48 | 2.10  | 6.10E-02 | 2.83E-01 | -4.72 |
| 1457841_PM_at   | Gm20362                                                                                   | NA         | -0.54 | 3.86 | -2.10 | 6.10E-02 | 2.83E-01 | -4.72 |
| 1431797_PM_at   | 4921518K17Rik                                                                             | NA         | 0.20  | 1.89 | 2.10  | 6.10E-02 | 2.83E-01 | -4.72 |
| 1427923_PM_at   | Zmpste24                                                                                  | ZMPSTE24   | -0.39 | 3.30 | -2.10 | 6.10E-02 | 2.83E-01 | -4.72 |
| 1440718_PM_at   | Fam105a                                                                                   | FAM105A    | -0.24 | 2.04 | -2.10 | 6.10E-02 | 2.83E-01 | -4.72 |
| 1453313_PM_at   | Sesn3                                                                                     | SESN3      | 0.40  | 4.39 | 2.10  | 6.10E-02 | 2.83E-01 | -4.72 |
| 1418348_PM_a_at | Asc2                                                                                      | ASCC2      | 0.47  | 3.16 | 2.10  | 6.10E-02 | 2.83E-01 | -4.72 |
| 1447675_PM_x_at | Myod1                                                                                     | MYOD1      | 0.24  | 2.35 | 2.10  | 6.10E-02 | 2.83E-01 | -4.72 |
| 1440092_PM_at   | ---                                                                                       | NA         | 0.36  | 2.81 | 2.10  | 6.11E-02 | 2.83E-01 | -4.72 |
| 1436750_PM_a_at | Oxct1                                                                                     | OXCT1      | -1.07 | 7.74 | -2.10 | 6.11E-02 | 2.83E-01 | -4.72 |
| 1427622_PM_at   | Tmed8                                                                                     | NA         | 0.19  | 2.45 | 2.10  | 6.11E-02 | 2.83E-01 | -4.72 |
| 1439171_PM_at   | C530008M17Rik                                                                             | KIAA1211   | 0.21  | 2.78 | 2.10  | 6.11E-02 | 2.83E-01 | -4.72 |
| 1453116_PM_at   | Zfp689                                                                                    | ZNF689     | 0.23  | 2.25 | 2.10  | 6.11E-02 | 2.83E-01 | -4.72 |
| 1440357_PM_at   | Lincppara                                                                                 | NA         | 0.26  | 2.52 | 2.10  | 6.11E-02 | 2.83E-01 | -4.72 |
| 1421508_PM_at   | Tenm1                                                                                     | TENM1      | 0.79  | 3.80 | 2.10  | 6.11E-02 | 2.83E-01 | -4.72 |
| 1451361_PM_a_at | Pnpla7                                                                                    | PNPLA7     | -0.28 | 2.46 | -2.10 | 6.12E-02 | 2.84E-01 | -4.72 |

|                 |                                       |            |       |      |       |          |          |       |
|-----------------|---------------------------------------|------------|-------|------|-------|----------|----------|-------|
| 1442892_PM_at   | Mcc                                   | MCC        | -0.26 | 2.44 | -2.10 | 6.12E-02 | 2.84E-01 | -4.72 |
| 1457425_PM_at   | Mtus2                                 | MTUS2      | 0.33  | 2.61 | 2.10  | 6.12E-02 | 2.84E-01 | -4.72 |
| 1453534_PM_at   | Mettl25                               | NA         | 0.65  | 3.17 | 2.10  | 6.12E-02 | 2.84E-01 | -4.72 |
| 1425525_PM_a_at | P2rx4                                 | P2RX4      | 0.49  | 3.62 | 2.10  | 6.12E-02 | 2.84E-01 | -4.72 |
| 1434151_PM_at   | Mettl7a1                              | METTL7A    | -0.26 | 7.49 | -2.10 | 6.12E-02 | 2.84E-01 | -4.72 |
| 1419157_PM_at   | Sox4                                  | SOX4       | 0.22  | 2.02 | 2.10  | 6.12E-02 | 2.84E-01 | -4.72 |
| 1445117_PM_at   | ---                                   | NA         | 0.61  | 2.61 | 2.10  | 6.12E-02 | 2.84E-01 | -4.73 |
| 1444813_PM_at   | ---                                   | NA         | 0.99  | 3.24 | 2.10  | 6.12E-02 | 2.84E-01 | -4.72 |
| 1433805_PM_at   | Jak1                                  | JAK1       | -0.78 | 3.45 | -2.10 | 6.13E-02 | 2.84E-01 | -4.73 |
| 1458275_PM_at   | Sel1l3                                | NA         | 0.24  | 2.68 | 2.10  | 6.13E-02 | 2.84E-01 | -4.73 |
| 1425774_PM_at   | Srrm4                                 | SRRM4      | 0.54  | 2.87 | 2.10  | 6.13E-02 | 2.84E-01 | -4.73 |
| 1415731_PM_at   | Angel2                                | ANGEL2     | -0.39 | 4.68 | -2.10 | 6.13E-02 | 2.84E-01 | -4.73 |
| 1458398_PM_at   | 1700027F06Rik                         | NA         | 0.27  | 3.22 | 2.10  | 6.13E-02 | 2.84E-01 | -4.73 |
| 1433078_PM_at   | 5830435N06Rik                         | NA         | 0.27  | 2.41 | 2.10  | 6.13E-02 | 2.84E-01 | -4.73 |
| 1422370_PM_at   | Olfra49                               | NA         | 0.36  | 2.76 | 2.10  | 6.13E-02 | 2.84E-01 | -4.73 |
| 1441183_PM_at   | ---                                   | NA         | 0.34  | 3.09 | 2.10  | 6.13E-02 | 2.84E-01 | -4.73 |
| 1449444_PM_a_at | LOC102643023 /// Mfap1a<br>/// Mfap1b | MFAP1      | -0.28 | 5.48 | -2.10 | 6.14E-02 | 2.84E-01 | -4.73 |
| 1456138_PM_at   | Lypd6                                 | LYPD6      | 0.18  | 2.54 | 2.10  | 6.14E-02 | 2.84E-01 | -4.73 |
| 1425218_PM_a_at | Scgb3a2                               | SCGB3A2    | 0.22  | 2.43 | 2.10  | 6.14E-02 | 2.84E-01 | -4.73 |
| 1417824_PM_at   | Galr3 /// Gcat                        | GCAT       | 0.25  | 2.22 | 2.10  | 6.14E-02 | 2.84E-01 | -4.73 |
| 1434090_PM_at   | Dis3l2                                | DIS3L2     | 0.26  | 2.36 | 2.10  | 6.14E-02 | 2.84E-01 | -4.73 |
| 1439561_PM_at   | Borcs7                                | BORCS7     | -0.32 | 2.83 | -2.10 | 6.14E-02 | 2.84E-01 | -4.73 |
| 1424557_PM_at   | Zcchc9                                | ZCCHC9     | -0.29 | 6.60 | -2.10 | 6.14E-02 | 2.84E-01 | -4.73 |
| 1452776_PM_a_at | Nub1                                  | NUB1       | -0.35 | 3.66 | -2.10 | 6.14E-02 | 2.84E-01 | -4.73 |
| 1454896_PM_at   | Rbpj                                  | RBPJ       | -0.47 | 3.35 | -2.10 | 6.15E-02 | 2.84E-01 | -4.73 |
| 1448640_PM_at   | Slc14a1                               | SLC14A1    | 0.28  | 2.78 | 2.10  | 6.15E-02 | 2.84E-01 | -4.73 |
| 1438480_PM_a_at | Thyn1                                 | THYN1      | -0.81 | 4.42 | -2.10 | 6.15E-02 | 2.84E-01 | -4.73 |
| 1446825_PM_at   | ---                                   | NA         | 0.33  | 2.27 | 2.10  | 6.15E-02 | 2.84E-01 | -4.73 |
| 1437258_PM_at   | Sprr2a1 /// Sprr2a2 ///<br>Sprr2a3    | NA         | 0.50  | 3.13 | 2.10  | 6.15E-02 | 2.84E-01 | -4.73 |
| 1440461_PM_at   | ---                                   | NA         | -0.43 | 2.43 | -2.10 | 6.15E-02 | 2.84E-01 | -4.73 |
| 1420049_PM_at   | C78859                                | NA         | -0.27 | 2.61 | -2.10 | 6.15E-02 | 2.84E-01 | -4.73 |
| 1430315_PM_at   | Gm28453 /// Gm42380                   | NA         | 0.34  | 2.70 | 2.10  | 6.15E-02 | 2.84E-01 | -4.73 |
| 1449070_PM_x_at | Apcdd1                                | NA         | -0.54 | 3.41 | -2.10 | 6.16E-02 | 2.84E-01 | -4.73 |
| 1445896_PM_at   | 2810433D01Rik                         | NA         | 0.24  | 2.34 | 2.10  | 6.16E-02 | 2.84E-01 | -4.73 |
| 1420045_PM_at   | ---                                   | NA         | 0.27  | 2.33 | 2.10  | 6.16E-02 | 2.84E-01 | -4.73 |
| 1417859_PM_at   | Gas7                                  | GAS7       | 0.64  | 4.22 | 2.10  | 6.16E-02 | 2.84E-01 | -4.73 |
| 1437154_PM_at   | Cep170                                | CEP170     | -0.86 | 6.88 | -2.10 | 6.16E-02 | 2.84E-01 | -4.73 |
| 1416992_PM_at   | Mfng                                  | MFNG       | 0.16  | 2.98 | 2.10  | 6.16E-02 | 2.84E-01 | -4.73 |
| 1427122_PM_at   | Copg2os2                              | NA         | 1.24  | 7.03 | 2.10  | 6.16E-02 | 2.84E-01 | -4.73 |
| 1423250_PM_a_at | Tgfb2                                 | TGFB2      | -0.38 | 2.93 | -2.10 | 6.16E-02 | 2.84E-01 | -4.73 |
| 1455150_PM_at   | Hecw2                                 | HECW2      | -0.52 | 4.50 | -2.09 | 6.16E-02 | 2.84E-01 | -4.73 |
| 1440214_PM_at   | A630001G21Rik                         | SP140L     | 0.18  | 2.11 | 2.09  | 6.17E-02 | 2.84E-01 | -4.73 |
| 1432932_PM_at   | ---                                   | NA         | 0.45  | 3.32 | 2.09  | 6.17E-02 | 2.84E-01 | -4.73 |
| 1455471_PM_at   | Cnpy1                                 | CNPY1      | 1.90  | 4.78 | 2.09  | 6.17E-02 | 2.84E-01 | -4.73 |
| 1435721_PM_at   | Kcna4                                 | KCNQ4      | 0.28  | 2.96 | 2.09  | 6.17E-02 | 2.85E-01 | -4.73 |
| 1438633_PM_x_at | Laspl                                 | LASP1      | 0.53  | 6.09 | 2.09  | 6.17E-02 | 2.85E-01 | -4.73 |
| 1451860_PM_a_at | Trim30a                               | TRIM5      | 0.21  | 2.73 | 2.09  | 6.17E-02 | 2.85E-01 | -4.73 |
| 1423241_PM_a_at | Tfdp1                                 | NA         | -0.62 | 5.06 | -2.09 | 6.18E-02 | 2.85E-01 | -4.73 |
| 1416822_PM_at   | Dgcr14                                | DGCR14     | 0.23  | 2.72 | 2.09  | 6.18E-02 | 2.85E-01 | -4.73 |
| 1449077_PM_at   | Ahsp                                  | NA         | 0.25  | 2.30 | 2.09  | 6.18E-02 | 2.85E-01 | -4.73 |
| 1447080_PM_at   | Aco1                                  | NA         | 0.25  | 2.21 | 2.09  | 6.18E-02 | 2.85E-01 | -4.73 |
| 1450912_PM_at   | Ms4a1                                 | MS4A1      | 0.86  | 2.77 | 2.09  | 6.18E-02 | 2.85E-01 | -4.73 |
| 1434625_PM_at   | Zfp943                                | NA         | -0.45 | 3.09 | -2.09 | 6.18E-02 | 2.85E-01 | -4.73 |
| 1457540_PM_at   | ---                                   | NA         | 0.23  | 2.37 | 2.09  | 6.18E-02 | 2.85E-01 | -4.73 |
| 1431581_PM_at   | LOC105243282                          | NA         | 0.23  | 2.47 | 2.09  | 6.18E-02 | 2.85E-01 | -4.73 |
| 1459644_PM_at   | C2cd3                                 | C2CD3      | 0.33  | 2.42 | 2.09  | 6.18E-02 | 2.85E-01 | -4.73 |
| 1453191_PM_at   | Col27a1                               | COL27A1    | 0.56  | 2.49 | 2.09  | 6.18E-02 | 2.85E-01 | -4.73 |
| 1432027_PM_a_at | LOC102641289 /// Tbc1d14              | TBC1D14    | 0.23  | 2.08 | 2.09  | 6.19E-02 | 2.85E-01 | -4.73 |
| 1435249_PM_at   | Btaf1                                 | BTAF1      | 0.48  | 3.87 | 2.09  | 6.20E-02 | 2.85E-01 | -4.74 |
| 1448787_PM_at   | Gm20604 /// Moap1                     | GON7       | -0.45 | 3.34 | -2.09 | 6.20E-02 | 2.86E-01 | -4.74 |
| 1435669_PM_at   | Zfp532                                | ZNF532     | -0.33 | 3.04 | -2.09 | 6.21E-02 | 2.86E-01 | -4.74 |
| 1450980_PM_at   | Gtpbp3 /// LOC102642476               | GTPBP3     | -0.25 | 2.65 | -2.09 | 6.21E-02 | 2.86E-01 | -4.74 |
| 1438517_PM_at   | Wwox                                  | WWOX       | 0.28  | 2.66 | 2.09  | 6.21E-02 | 2.86E-01 | -4.74 |
| 1457057_PM_at   | 1700042G07Rik                         | AL672043.1 | 0.31  | 2.79 | 2.09  | 6.20E-02 | 2.86E-01 | -4.74 |
| 1420263_PM_at   | ---                                   | NA         | 0.36  | 3.18 | 2.09  | 6.20E-02 | 2.86E-01 | -4.74 |
| 1434633_PM_at   | Crebbp                                | CREBBP     | -0.50 | 4.06 | -2.09 | 6.21E-02 | 2.86E-01 | -4.74 |
| 1426848_PM_at   | Sec24b                                | SEC24B     | 0.64  | 4.17 | 2.09  | 6.21E-02 | 2.86E-01 | -4.74 |
| 1443061_PM_at   | Ddx10                                 | NA         | -0.50 | 3.52 | -2.09 | 6.21E-02 | 2.86E-01 | -4.74 |
| 1432762_PM_at   | 9130001E16Rik                         | NA         | 0.26  | 4.25 | 2.09  | 6.21E-02 | 2.86E-01 | -4.74 |
| 1428009_PM_a_at | Abcc10                                | ABCC10     | 0.28  | 2.65 | 2.09  | 6.22E-02 | 2.86E-01 | -4.74 |
| 1447128_PM_at   | C330013J21Rik                         | NA         | 0.35  | 3.41 | 2.09  | 6.22E-02 | 2.86E-01 | -4.74 |

|                 |                 |            |       |      |       |          |          |       |
|-----------------|-----------------|------------|-------|------|-------|----------|----------|-------|
| 1436399_PM_s_at | Nrk             | NRK        | 0.95  | 3.28 | 2.09  | 6.22E-02 | 2.86E-01 | -4.74 |
| 1427308_PM_at   | Dab1            | DAB1       | -0.41 | 3.02 | -2.09 | 6.22E-02 | 2.86E-01 | -4.74 |
| 1442952_PM_at   | ---             | NA         | 0.22  | 2.37 | 2.09  | 6.22E-02 | 2.86E-01 | -4.74 |
| 1442556_PM_at   | ---             | NA         | 0.44  | 3.98 | 2.09  | 6.22E-02 | 2.86E-01 | -4.74 |
| 1430326_PM_s_at | Uqcrq           | UQCRQ      | -1.21 | 3.85 | -2.09 | 6.22E-02 | 2.86E-01 | -4.74 |
| 1425277_PM_at   | Slit1           | SLIT1      | 0.28  | 3.81 | 2.09  | 6.22E-02 | 2.86E-01 | -4.74 |
| 1418507_PM_s_at | Socs2           | SOCS2      | 0.54  | 3.89 | 2.09  | 6.23E-02 | 2.86E-01 | -4.74 |
| 1442652_PM_at   | Ankub1          | ANKUB1     | 0.21  | 2.50 | 2.09  | 6.23E-02 | 2.86E-01 | -4.74 |
| 1418131_PM_at   | Samhd1          | SAMHD1     | 0.60  | 3.73 | 2.09  | 6.23E-02 | 2.87E-01 | -4.74 |
| 1420922_PM_at   | Usp9x           | USP9X      | -0.83 | 6.79 | -2.09 | 6.24E-02 | 2.87E-01 | -4.74 |
| 1445279_PM_at   | ---             | NA         | 0.21  | 2.14 | 2.09  | 6.24E-02 | 2.87E-01 | -4.74 |
| 1444528_PM_at   | Zfp316          | ZNF316     | 0.36  | 2.79 | 2.09  | 6.24E-02 | 2.87E-01 | -4.74 |
| 1436023_PM_at   | Bclaf1          | BCLAF1     | 0.47  | 5.35 | 2.09  | 6.24E-02 | 2.87E-01 | -4.74 |
| 1428617_PM_at   | Hcfc2           | HCF2       | -0.44 | 2.96 | -2.09 | 6.24E-02 | 2.87E-01 | -4.74 |
| 1431371_PM_at   | Slc16a7         | NA         | 0.19  | 2.52 | 2.09  | 6.24E-02 | 2.87E-01 | -4.74 |
| 1421593_PM_at   | Ncam2           | NCAM2      | -0.48 | 2.90 | -2.09 | 6.24E-02 | 2.87E-01 | -4.74 |
| 1419969_PM_at   | C77370          | NA         | -0.63 | 4.67 | -2.09 | 6.25E-02 | 2.87E-01 | -4.74 |
| 1453399_PM_at   | Ccnt2           | CCNT2      | -0.46 | 4.65 | -2.09 | 6.25E-02 | 2.87E-01 | -4.74 |
| 1458518_PM_at   | Cpeb2           | CPEB2      | -0.40 | 3.44 | -2.09 | 6.25E-02 | 2.87E-01 | -4.74 |
| 1439017_PM_x_at | Adipor1         | ADIPOR1    | -0.32 | 3.17 | -2.09 | 6.25E-02 | 2.87E-01 | -4.74 |
| 1422381_PM_at   | Olf1511//Olf160 | OR8A1      | -0.25 | 2.60 | -2.09 | 6.25E-02 | 2.87E-01 | -4.74 |
| 1423358_PM_at   | Ece2            | ECE2       | 0.19  | 2.50 | 2.09  | 6.25E-02 | 2.87E-01 | -4.74 |
| 1440694_PM_at   | ---             | NA         | 0.19  | 2.10 | 2.09  | 6.25E-02 | 2.87E-01 | -4.74 |
| 1449440_PM_at   | Lpin3           | LPIN3      | 0.19  | 2.70 | 2.09  | 6.25E-02 | 2.87E-01 | -4.74 |
| 1425501_PM_at   | ---             | NA         | 0.20  | 2.22 | 2.09  | 6.25E-02 | 2.87E-01 | -4.74 |
| 1456192_PM_x_at | Cypt3           | NA         | 0.21  | 2.50 | 2.09  | 6.25E-02 | 2.87E-01 | -4.74 |
| 1443914_PM_at   | Lipk            | LIPK       | 0.22  | 2.21 | 2.09  | 6.25E-02 | 2.87E-01 | -4.74 |
| 1456221_PM_at   | ---             | NA         | 0.22  | 2.61 | 2.09  | 6.25E-02 | 2.87E-01 | -4.74 |
| 1447003_PM_at   | ---             | NA         | 0.24  | 2.34 | 2.09  | 6.26E-02 | 2.87E-01 | -4.74 |
| 1460651_PM_at   | Lat             | LAT        | 0.27  | 2.64 | 2.09  | 6.25E-02 | 2.87E-01 | -4.74 |
| 1440622_PM_at   | ---             | NA         | 0.32  | 2.86 | 2.09  | 6.25E-02 | 2.87E-01 | -4.74 |
| 1424533_PM_a_at | Ccdc137         | CCDC137    | 0.53  | 3.01 | 2.09  | 6.25E-02 | 2.87E-01 | -4.74 |
| 1457073_PM_at   | ---             | NA         | 0.81  | 3.89 | 2.09  | 6.25E-02 | 2.87E-01 | -4.74 |
| 1433732_PM_x_at | Igf2bp3         | IGF2BP3    | 0.22  | 2.37 | 2.09  | 6.26E-02 | 2.87E-01 | -4.75 |
| 1418411_PM_at   | Fbxl8           | ACO74143.1 | 0.23  | 2.30 | 2.09  | 6.26E-02 | 2.87E-01 | -4.75 |
| 1437278_PM_a_at | Uba2            | UBA2       | -0.80 | 5.74 | -2.09 | 6.26E-02 | 2.87E-01 | -4.75 |
| 1428440_PM_at   | Slc25a12        | SLC25A12   | -0.47 | 4.35 | -2.09 | 6.26E-02 | 2.87E-01 | -4.75 |
| 1427635_PM_at   | Kif5a           | NA         | 0.52  | 3.62 | 2.09  | 6.26E-02 | 2.87E-01 | -4.75 |
| 1428333_PM_at   | Arxes2          | NA         | -0.35 | 4.24 | -2.09 | 6.26E-02 | 2.87E-01 | -4.75 |
| 1439165_PM_at   | Arih1///Gm20199 | NA         | 0.65  | 3.16 | 2.09  | 6.27E-02 | 2.87E-01 | -4.75 |
| 1451521_PM_x_at | Eif4h           | EIF4H      | -0.51 | 5.56 | -2.09 | 6.27E-02 | 2.87E-01 | -4.75 |
| 1433419_PM_at   | ---             | NA         | 0.21  | 2.97 | 2.09  | 6.27E-02 | 2.87E-01 | -4.75 |
| 1444085_PM_at   | Pdss2           | PDSS2      | -0.82 | 4.56 | -2.08 | 6.27E-02 | 2.87E-01 | -4.75 |
| 1435597_PM_at   | Atad5           | ATAD5      | -0.45 | 2.79 | -2.09 | 6.27E-02 | 2.87E-01 | -4.75 |
| 1428576_PM_at   | Hif1an          | HIF1AN     | -0.72 | 4.25 | -2.08 | 6.27E-02 | 2.87E-01 | -4.75 |
| 1434230_PM_at   | Polb            | POLB       | -0.48 | 4.55 | -2.08 | 6.27E-02 | 2.87E-01 | -4.75 |
| 1417183_PM_at   | Dnaja2          | DNAJA2     | -0.47 | 5.47 | -2.08 | 6.28E-02 | 2.87E-01 | -4.75 |
| 1457072_PM_at   | Bcl11a          | BCL11A     | -0.41 | 4.98 | -2.08 | 6.27E-02 | 2.87E-01 | -4.75 |
| 1447753_PM_at   | Cdc37l1         | NA         | -0.25 | 2.33 | -2.08 | 6.28E-02 | 2.87E-01 | -4.75 |
| 1424632_PM_a_at | Rev3l           | REV3L      | -0.25 | 3.46 | -2.08 | 6.27E-02 | 2.87E-01 | -4.75 |
| 1441028_PM_at   | D2Erttd210e     | NA         | -0.21 | 2.24 | -2.08 | 6.27E-02 | 2.87E-01 | -4.75 |
| 1430039_PM_at   | Cdkal1          | CDKAL1     | 0.22  | 2.28 | 2.08  | 6.28E-02 | 2.87E-01 | -4.75 |
| 1459090_PM_at   | ---             | NA         | 0.37  | 3.78 | 2.08  | 6.28E-02 | 2.87E-01 | -4.75 |
| 1430633_PM_s_at | ---             | NA         | 0.41  | 4.04 | 2.08  | 6.28E-02 | 2.87E-01 | -4.75 |
| 1426191_PM_a_at | Bcl2l1          | BCL2L1     | 0.42  | 2.93 | 2.08  | 6.27E-02 | 2.87E-01 | -4.75 |
| 1441194_PM_at   | ---             | NA         | 0.53  | 3.42 | 2.08  | 6.28E-02 | 2.87E-01 | -4.75 |
| 1450773_PM_at   | Kcnd2           | KCND2      | -1.35 | 5.59 | -2.08 | 6.28E-02 | 2.87E-01 | -4.75 |
| 1419355_PM_at   | Klf7            | KLF7       | -0.70 | 4.02 | -2.08 | 6.28E-02 | 2.87E-01 | -4.75 |
| 1427210_PM_at   | Baz2a           | BAZZA      | 0.23  | 2.83 | 2.08  | 6.28E-02 | 2.87E-01 | -4.75 |
| 1443945_PM_at   | C130073F10Rik   | NA         | 0.30  | 2.65 | 2.08  | 6.28E-02 | 2.87E-01 | -4.75 |
| 1423658_PM_at   | Splb3           | SPPL3      | 0.33  | 2.97 | 2.08  | 6.29E-02 | 2.87E-01 | -4.75 |
| 1441229_PM_at   | ---             | NA         | 0.66  | 3.22 | 2.08  | 6.29E-02 | 2.87E-01 | -4.75 |
| 1426031_PM_a_at | Nfatc2          | NFATC2     | 0.37  | 2.83 | 2.08  | 6.29E-02 | 2.87E-01 | -4.75 |
| 1421357_PM_at   | Gtf2a1          | GTF2A1     | 0.36  | 4.16 | 2.08  | 6.29E-02 | 2.88E-01 | -4.75 |
| 1455925_PM_at   | Prdm8           | PRDM8      | -1.15 | 8.31 | -2.08 | 6.29E-02 | 2.88E-01 | -4.75 |
| 1456895_PM_at   | Cd209b          | CD209      | 0.27  | 2.49 | 2.08  | 6.29E-02 | 2.88E-01 | -4.75 |
| 1451076_PM_s_at | Eif3m           | EIF3M      | -0.82 | 4.98 | -2.08 | 6.30E-02 | 2.88E-01 | -4.75 |
| 1453830_PM_at   | ---             | NA         | 0.17  | 2.14 | 2.08  | 6.30E-02 | 2.88E-01 | -4.75 |
| 1460346_PM_at   | Arsa            | ARSA       | -0.46 | 4.41 | -2.08 | 6.30E-02 | 2.88E-01 | -4.75 |
| 1455833_PM_at   | Afap1l2         | AFAP1L2    | 0.17  | 2.29 | 2.08  | 6.30E-02 | 2.88E-01 | -4.75 |
| 1429203_PM_at   | Rec114          | REC114     | 0.23  | 2.48 | 2.08  | 6.30E-02 | 2.88E-01 | -4.75 |
| 1454541_PM_at   | ---             | NA         | 0.24  | 2.89 | 2.08  | 6.30E-02 | 2.88E-01 | -4.75 |
| 1448853_PM_at   | Synj2bp         | SYNJ2BP    | 0.43  | 4.31 | 2.08  | 6.30E-02 | 2.88E-01 | -4.75 |
| 1420481_PM_at   | Cnm3            | CNNM3      | -1.08 | 5.15 | -2.08 | 6.31E-02 | 2.88E-01 | -4.75 |
| 1454921_PM_at   | Gm561           | SMIM26     | -0.43 | 3.38 | -2.08 | 6.31E-02 | 2.88E-01 | -4.75 |



|                 |                       |          |       |      |       |          |          |       |
|-----------------|-----------------------|----------|-------|------|-------|----------|----------|-------|
| 1443583_PM_at   | Ppp4r1-ps             | NA       | 0.27  | 2.43 | 2.08  | 6.31E-02 | 2.88E-01 | -4.75 |
| 1440561_PM_at   | ---                   | NA       | 0.23  | 2.48 | 2.08  | 6.31E-02 | 2.88E-01 | -4.75 |
| 1438515_PM_at   | ---                   | NA       | -0.40 | 2.99 | -2.08 | 6.31E-02 | 2.88E-01 | -4.75 |
| 1457271_PM_at   | Cym                   | NA       | 0.18  | 2.40 | 2.08  | 6.31E-02 | 2.88E-01 | -4.75 |
| 1421085_PM_at   | Rs1                   | RS1      | 0.32  | 2.41 | 2.08  | 6.31E-02 | 2.88E-01 | -4.75 |
| 1444580_PM_at   | Gm40228               | NA       | 0.26  | 2.74 | 2.08  | 6.31E-02 | 2.88E-01 | -4.75 |
| 1440480_PM_at   | Nacad                 | NACAD    | 0.27  | 2.60 | 2.08  | 6.31E-02 | 2.88E-01 | -4.75 |
| 1446602_PM_at   | ---                   | NA       | 0.23  | 2.71 | 2.08  | 6.32E-02 | 2.88E-01 | -4.75 |
| 1444050_PM_at   | ---                   | NA       | 0.24  | 2.31 | 2.08  | 6.32E-02 | 2.88E-01 | -4.75 |
| 1447502_PM_at   | ---                   | NA       | 0.17  | 2.26 | 2.08  | 6.32E-02 | 2.88E-01 | -4.75 |
| 1457343_PM_at   | ---                   | NA       | 0.23  | 2.32 | 2.08  | 6.32E-02 | 2.88E-01 | -4.75 |
| 1431331_PM_at   | Mgll                  | MGLL     | 0.34  | 2.71 | 2.08  | 6.32E-02 | 2.88E-01 | -4.75 |
| 1444455_PM_at   | Cacna1a               | CACNA1A  | 0.56  | 3.28 | 2.08  | 6.32E-02 | 2.88E-01 | -4.75 |
| 1432076_PM_at   | 4933430H16Rik         | NA       | 0.18  | 2.34 | 2.08  | 6.32E-02 | 2.88E-01 | -4.75 |
| 1453223_PM_s_at | Dppa2                 | DPPA2    | 0.50  | 2.90 | 2.08  | 6.32E-02 | 2.88E-01 | -4.75 |
| 1424614_PM_at   | Pgap2                 | PGAP2    | 0.54  | 2.59 | 2.08  | 6.32E-02 | 2.88E-01 | -4.75 |
| 1442466_PM_a_at | Ppip5k1               | PPIP5K1  | 1.10  | 4.43 | 2.08  | 6.32E-02 | 2.88E-01 | -4.75 |
| 1453036_PM_at   | Mett4                 | NA       | 0.22  | 2.92 | 2.08  | 6.33E-02 | 2.88E-01 | -4.75 |
| 1451904_PM_a_at | Adam33                | ADAM33   | 0.24  | 2.66 | 2.08  | 6.33E-02 | 2.88E-01 | -4.76 |
| 1430273_PM_at   | ---                   | NA       | 0.46  | 4.42 | 2.08  | 6.33E-02 | 2.89E-01 | -4.76 |
| 1421327_PM_at   | Map2                  | MAP2     | -0.79 | 4.97 | -2.08 | 6.33E-02 | 2.89E-01 | -4.76 |
| 1419587_PM_s_at | Rp2                   | RP2      | -0.47 | 3.14 | -2.08 | 6.34E-02 | 2.89E-01 | -4.76 |
| 1441909_PM_s_at | Nipa4                 | NIPAL4   | 0.43  | 5.27 | 2.08  | 6.34E-02 | 2.89E-01 | -4.76 |
| 1460277_PM_at   | Dmbx1                 | DMBX1    | 0.27  | 2.69 | 2.08  | 6.34E-02 | 2.89E-01 | -4.76 |
| 1447206_PM_at   | ---                   | NA       | 0.19  | 2.37 | 2.08  | 6.34E-02 | 2.89E-01 | -4.76 |
| 1441113_PM_at   | Rptoros               | NA       | 0.20  | 2.07 | 2.08  | 6.34E-02 | 2.89E-01 | -4.76 |
| 1446513_PM_at   | ---                   | NA       | 0.26  | 2.38 | 2.08  | 6.34E-02 | 2.89E-01 | -4.76 |
| 1429127_PM_at   | Nradd                 | NA       | 0.24  | 2.30 | 2.08  | 6.35E-02 | 2.89E-01 | -4.76 |
| 1447654_PM_at   | Nrg2                  | NA       | 0.20  | 2.80 | 2.08  | 6.35E-02 | 2.89E-01 | -4.76 |
| 1427756_PM_x_at | Ighg1                 | NA       | 0.29  | 2.93 | 2.08  | 6.35E-02 | 2.89E-01 | -4.76 |
| 1443417_PM_at   | C87122                | NA       | 0.43  | 3.17 | 2.08  | 6.35E-02 | 2.89E-01 | -4.76 |
| 1435960_PM_at   | Pnmal2                | PNMA8B   | -0.29 | 4.97 | -2.08 | 6.35E-02 | 2.89E-01 | -4.76 |
| 1417226_PM_at   | Fbxw4                 | FBXW4    | 0.37  | 2.55 | 2.08  | 6.35E-02 | 2.89E-01 | -4.76 |
| 1448450_PM_at   | Ak2                   | AK2      | -0.79 | 4.17 | -2.08 | 6.35E-02 | 2.89E-01 | -4.76 |
| 1424574_PM_at   | Tmed5                 | TMED5    | -0.32 | 4.02 | -2.08 | 6.35E-02 | 2.89E-01 | -4.76 |
| 1420467_PM_at   | Psors1c2              | PSORS1C2 | -0.20 | 2.18 | -2.08 | 6.36E-02 | 2.89E-01 | -4.76 |
| 1445816_PM_at   | ---                   | NA       | 0.21  | 2.53 | 2.08  | 6.36E-02 | 2.89E-01 | -4.76 |
| 1445432_PM_at   | ---                   | NA       | 0.25  | 2.58 | 2.08  | 6.36E-02 | 2.89E-01 | -4.76 |
| 1441001_PM_at   | ---                   | NA       | 0.32  | 2.66 | 2.08  | 6.35E-02 | 2.89E-01 | -4.76 |
| 1458786_PM_at   | C79250                | NA       | 0.32  | 2.52 | 2.08  | 6.36E-02 | 2.89E-01 | -4.76 |
| 1440925_PM_at   | Gm19773               | NA       | 0.39  | 2.61 | 2.08  | 6.35E-02 | 2.89E-01 | -4.76 |
| 1449130_PM_at   | Cd1d1                 | CD1D     | 0.54  | 2.58 | 2.08  | 6.35E-02 | 2.89E-01 | -4.76 |
| 1418314_PM_a_at | Rbfox1                | RBFOX1   | -0.56 | 7.63 | -2.08 | 6.36E-02 | 2.89E-01 | -4.76 |
| 1449694_PM_s_at | Comm5                 | COMM5    | 0.28  | 2.89 | 2.08  | 6.36E-02 | 2.89E-01 | -4.76 |
| 1459297_PM_at   | ---                   | NA       | 0.21  | 2.26 | 2.08  | 6.36E-02 | 2.89E-01 | -4.76 |
| 1448873_PM_at   | Ocln                  | OCLN     | -0.26 | 2.59 | -2.08 | 6.36E-02 | 2.89E-01 | -4.76 |
| 1457070_PM_at   | Gm36258               | NA       | -0.24 | 2.14 | -2.08 | 6.36E-02 | 2.89E-01 | -4.76 |
| 1445544_PM_x_at | Obfc1                 | STN1     | 0.25  | 2.56 | 2.08  | 6.36E-02 | 2.89E-01 | -4.76 |
| 1445273_PM_at   | D10Ert638e            | NA       | 0.71  | 2.56 | 2.08  | 6.37E-02 | 2.89E-01 | -4.76 |
| 1451017_PM_at   | Ergic3                | ERGIC3   | 0.76  | 3.50 | 2.08  | 6.37E-02 | 2.89E-01 | -4.76 |
| 1430300_PM_at   | Sco1                  | NA       | -0.21 | 2.75 | -2.08 | 6.37E-02 | 2.89E-01 | -4.76 |
| 1431296_PM_at   | Gpr15                 | GPR15    | 0.20  | 2.26 | 2.08  | 6.37E-02 | 2.89E-01 | -4.76 |
| 1437624_PM_x_at | Nudt16l1              | NUDT16L1 | 0.31  | 9.77 | 2.08  | 6.37E-02 | 2.89E-01 | -4.76 |
| 1435496_PM_at   | Fam213a               | FAM213A  | 0.34  | 2.47 | 2.08  | 6.37E-02 | 2.89E-01 | -4.76 |
| 1456453_PM_at   | ---                   | NA       | 0.39  | 3.67 | 2.08  | 6.37E-02 | 2.89E-01 | -4.76 |
| 1451262_PM_a_at | Aimp2                 | AIMP2    | 0.52  | 2.89 | 2.08  | 6.37E-02 | 2.89E-01 | -4.76 |
| 1432174_PM_a_at | Slc9b1                | SLC9B1   | 0.26  | 2.73 | 2.08  | 6.37E-02 | 2.89E-01 | -4.76 |
| 1452850_PM_s_at | Brms1l                | BRMS1L   | -0.68 | 3.53 | -2.07 | 6.38E-02 | 2.90E-01 | -4.76 |
| 1441084_PM_at   | Cacna2d4              | CACNA2D4 | 0.21  | 2.55 | 2.07  | 6.38E-02 | 2.90E-01 | -4.76 |
| 1424728_PM_at   | Rrp36                 | RRP36    | 0.36  | 2.66 | 2.07  | 6.38E-02 | 2.90E-01 | -4.76 |
| 1452555_PM_at   | Gm8479                | NA       | 0.20  | 2.62 | 2.07  | 6.38E-02 | 2.90E-01 | -4.76 |
| 1451026_PM_at   | Ftsj3                 | FTSJ3    | 0.81  | 3.37 | 2.07  | 6.38E-02 | 2.90E-01 | -4.76 |
| 1416720_PM_at   | Srsf6                 | SRSF6    | 0.49  | 3.89 | 2.07  | 6.38E-02 | 2.90E-01 | -4.76 |
| 1444010_PM_at   | Eif4e                 | EIF4E    | 0.22  | 2.41 | 2.07  | 6.39E-02 | 2.90E-01 | -4.76 |
| 1418862_PM_at   | Echdc3                | ECHDC3   | 0.27  | 2.53 | 2.07  | 6.39E-02 | 2.90E-01 | -4.76 |
| 1435860_PM_at   | Slc5a6                | SLC5A6   | -0.27 | 2.17 | -2.07 | 6.39E-02 | 2.90E-01 | -4.76 |
| 1420496_PM_at   | F12                   | F12      | 0.18  | 2.77 | 2.07  | 6.39E-02 | 2.90E-01 | -4.76 |
| 1435816_PM_at   | LOC105244208 /// Rps6 | NA       | -0.41 | 4.49 | -2.07 | 6.39E-02 | 2.90E-01 | -4.77 |
| 1433572_PM_a_at | Fam120a               | FAM120A  | -0.33 | 9.82 | -2.07 | 6.39E-02 | 2.90E-01 | -4.76 |
| 1442980_PM_at   | ---                   | NA       | 0.15  | 2.13 | 2.07  | 6.39E-02 | 2.90E-01 | -4.76 |
| 1431964_PM_at   | LOC102637966          | NA       | 0.21  | 2.75 | 2.07  | 6.39E-02 | 2.90E-01 | -4.77 |
| 1428054_PM_at   | Slc8a2                | SLC8A2   | 0.23  | 2.26 | 2.07  | 6.40E-02 | 2.90E-01 | -4.77 |
| 1449836_PM_x_at | Bik                   | BIK      | 0.25  | 2.23 | 2.07  | 6.40E-02 | 2.90E-01 | -4.77 |
| 1456112_PM_at   | Tpr                   | TPR      | -1.06 | 5.13 | -2.07 | 6.40E-02 | 2.90E-01 | -4.77 |
| 1422931_PM_at   | Fosl2                 | FOSL2    | 0.20  | 2.58 | 2.07  | 6.40E-02 | 2.90E-01 | -4.77 |

|                 |               |           |       |      |       |          |          |       |
|-----------------|---------------|-----------|-------|------|-------|----------|----------|-------|
| 1444469_PM_at   | Ubr3          | UBR3      | -0.33 | 2.50 | -2.07 | 6.40E-02 | 2.90E-01 | -4.77 |
| 1440403_PM_at   | Arhgef1       | ARHGEF1   | 0.20  | 2.29 | 2.07  | 6.40E-02 | 2.90E-01 | -4.77 |
| 1454372_PM_at   | Cd80          | NA        | 0.27  | 2.69 | 2.07  | 6.40E-02 | 2.90E-01 | -4.77 |
| 1447480_PM_at   | ---           | NA        | 0.46  | 2.83 | 2.07  | 6.41E-02 | 2.90E-01 | -4.77 |
| 1429419_PM_at   | Riad1         | RIAD1     | 0.30  | 2.73 | 2.07  | 6.41E-02 | 2.90E-01 | -4.77 |
| 1425394_PM_at   | BC023105      | NA        | 0.23  | 2.09 | 2.07  | 6.41E-02 | 2.90E-01 | -4.77 |
| 1443592_PM_at   | ---           | NA        | 0.27  | 3.24 | 2.07  | 6.41E-02 | 2.90E-01 | -4.77 |
| 1434404_PM_at   | Fam73a        | MIGA1     | -0.45 | 4.00 | -2.07 | 6.41E-02 | 2.90E-01 | -4.77 |
| 1419514_PM_at   | Pitx1         | PITX1     | 0.14  | 2.18 | 2.07  | 6.41E-02 | 2.90E-01 | -4.77 |
| 1422833_PM_at   | Foxa2         | FOXA2     | 0.18  | 2.25 | 2.07  | 6.41E-02 | 2.90E-01 | -4.77 |
| 1427095_PM_at   | Cdcp1         | CDCP1     | 0.21  | 2.29 | 2.07  | 6.41E-02 | 2.90E-01 | -4.77 |
| 1449994_PM_at   | Epgn          | EPGN      | 0.45  | 2.80 | 2.07  | 6.41E-02 | 2.90E-01 | -4.77 |
| 1434718_PM_at   | Cul3          | CUL3      | -0.47 | 3.38 | -2.07 | 6.42E-02 | 2.90E-01 | -4.77 |
| 1455629_PM_at   | Drd1          | DRD1      | -0.30 | 2.53 | -2.07 | 6.42E-02 | 2.90E-01 | -4.77 |
| 1424920_PM_at   | Slc37a3       | SLC37A3   | -0.52 | 3.34 | -2.07 | 6.42E-02 | 2.90E-01 | -4.77 |
| 1427651_PM_x_at | H2-D1         | NA        | -0.28 | 3.60 | -2.07 | 6.42E-02 | 2.91E-01 | -4.77 |
| 1427452_PM_at   | ---           | NA        | 0.30  | 2.67 | 2.07  | 6.42E-02 | 2.91E-01 | -4.77 |
| 1440758_PM_at   | ---           | NA        | 0.50  | 2.92 | 2.07  | 6.42E-02 | 2.91E-01 | -4.77 |
| 1419193_PM_a_at | Gmfg          | GMFG      | 0.26  | 2.67 | 2.07  | 6.43E-02 | 2.91E-01 | -4.77 |
| 1423631_PM_at   | Nr2e3         | NR2E3     | 0.15  | 2.39 | 2.07  | 6.43E-02 | 2.91E-01 | -4.77 |
| 1420220_PM_x_at | Dnajc21       | DNAJC21   | 0.18  | 2.88 | 2.07  | 6.43E-02 | 2.91E-01 | -4.77 |
| 1424626_PM_at   | 2010003K11Rik | C11orf86  | 0.21  | 2.20 | 2.07  | 6.43E-02 | 2.91E-01 | -4.77 |
| 1423583_PM_at   | Fem1a         | FEM1A     | 0.30  | 4.60 | 2.07  | 6.43E-02 | 2.91E-01 | -4.77 |
| 1421121_PM_at   | Akap10        | AKAP10    | 0.36  | 3.15 | 2.07  | 6.43E-02 | 2.91E-01 | -4.77 |
| 1427569_PM_a_at | Utrn          | UTRN      | 0.41  | 3.33 | 2.07  | 6.43E-02 | 2.91E-01 | -4.77 |
| 1445020_PM_at   | ---           | NA        | 0.44  | 2.82 | 2.07  | 6.43E-02 | 2.91E-01 | -4.77 |
| 1423795_PM_at   | Sfpq          | SFPQ      | 0.57  | 6.71 | 2.07  | 6.43E-02 | 2.91E-01 | -4.77 |
| 1426673_PM_at   | Cdh3          | CDH3      | 0.36  | 2.79 | 2.07  | 6.43E-02 | 2.91E-01 | -4.77 |
| 1440907_PM_at   | H2-Eb2        | NA        | 0.21  | 2.78 | 2.07  | 6.43E-02 | 2.91E-01 | -4.77 |
| 1456751_PM_x_at | A530021J07Rik | NA        | -0.15 | 2.12 | -2.07 | 6.44E-02 | 2.91E-01 | -4.77 |
| 1425072_PM_at   | Skp2          | SKP2      | 0.18  | 2.44 | 2.07  | 6.44E-02 | 2.91E-01 | -4.77 |
| 1430199_PM_at   | 1700007E05Rik | NA        | 0.28  | 2.20 | 2.07  | 6.44E-02 | 2.91E-01 | -4.77 |
| 1424584_PM_a_at | Ranbp10       | RANBP10   | 0.51  | 4.07 | 2.07  | 6.44E-02 | 2.91E-01 | -4.77 |
| 1431433_PM_at   | Sbf2          | SBF2      | 0.46  | 2.95 | 2.07  | 6.44E-02 | 2.91E-01 | -4.77 |
| 1418103_PM_at   | Slc12a9       | SLC12A9   | 0.27  | 4.17 | 2.07  | 6.45E-02 | 2.91E-01 | -4.77 |
| 1426075_PM_at   | Klb           | KLB       | 0.25  | 2.78 | 2.07  | 6.45E-02 | 2.91E-01 | -4.77 |
| 1460118_PM_at   | Pde5a         | NA        | 0.69  | 2.97 | 2.07  | 6.45E-02 | 2.91E-01 | -4.77 |
| 1450664_PM_at   | Gabpa         | GABPA     | -0.47 | 2.94 | -2.07 | 6.45E-02 | 2.91E-01 | -4.77 |
| 1420536_PM_at   | Crybb2        | CRYBB2    | 0.24  | 2.48 | 2.07  | 6.46E-02 | 2.91E-01 | -4.77 |
| 1429694_PM_at   | 4930402H24Rik | C20orf194 | 0.29  | 2.96 | 2.07  | 6.46E-02 | 2.91E-01 | -4.77 |
| 1417045_PM_at   | Bid           | BID       | -0.30 | 2.69 | -2.07 | 6.46E-02 | 2.92E-01 | -4.77 |
| 1435973_PM_at   | ---           | NA        | 0.73  | 3.08 | 2.07  | 6.46E-02 | 2.92E-01 | -4.77 |
| 1421169_PM_at   | Zfp46         | NA        | 0.31  | 2.73 | 2.07  | 6.46E-02 | 2.92E-01 | -4.77 |
| 1418315_PM_at   | Nr5a1         | NR5A1     | 0.16  | 2.62 | 2.07  | 6.47E-02 | 2.92E-01 | -4.78 |
| 1458539_PM_at   | R3hdm1        | R3HDM1    | 0.90  | 9.01 | 2.07  | 6.47E-02 | 2.92E-01 | -4.78 |
| 1452885_PM_at   | Scaf11        | SCAF11    | 0.77  | 4.40 | 2.07  | 6.47E-02 | 2.92E-01 | -4.78 |
| 1454024_PM_at   | Lrrc9         | LRRC9     | 0.21  | 2.24 | 2.07  | 6.48E-02 | 2.92E-01 | -4.78 |
| 1438442_PM_at   | Si1e1         | SIKE1     | -0.41 | 3.20 | -2.07 | 6.48E-02 | 2.92E-01 | -4.78 |
| 1458132_PM_at   | ---           | NA        | -0.37 | 2.96 | -2.07 | 6.48E-02 | 2.92E-01 | -4.78 |
| 1432115_PM_a_at | Pign          | PIGN      | 0.17  | 2.28 | 2.07  | 6.48E-02 | 2.92E-01 | -4.78 |
| 1418291_PM_at   | Zfp87         | ZNF141    | -0.37 | 3.02 | -2.07 | 6.48E-02 | 2.92E-01 | -4.78 |
| 1437728_PM_at   | Alkbh5        | ALKBH5    | 0.26  | 3.49 | 2.07  | 6.48E-02 | 2.92E-01 | -4.78 |
| 1446186_PM_at   | ---           | NA        | -0.52 | 2.35 | -2.06 | 6.49E-02 | 2.92E-01 | -4.78 |
| 1415690_PM_at   | Mrip27        | MRPL27    | -0.28 | 2.82 | -2.06 | 6.49E-02 | 2.92E-01 | -4.78 |
| 1451785_PM_at   | Rpgrip1       | RPGRIP1   | 0.21  | 2.20 | 2.06  | 6.49E-02 | 2.93E-01 | -4.78 |
| 1444758_PM_at   | ---           | NA        | 0.17  | 2.06 | 2.06  | 6.49E-02 | 2.93E-01 | -4.78 |
| 1432811_PM_at   | 9530025L08Rik | NA        | 0.26  | 2.38 | 2.06  | 6.49E-02 | 2.93E-01 | -4.78 |
| 1430384_PM_at   | Tle4          | NA        | 0.83  | 3.02 | 2.06  | 6.49E-02 | 2.93E-01 | -4.78 |
| 1440443_PM_at   | ---           | NA        | -0.29 | 3.78 | -2.06 | 6.50E-02 | 2.93E-01 | -4.78 |
| 1445261_PM_at   | D17ErtD763e   | NA        | 0.20  | 2.57 | 2.06  | 6.50E-02 | 2.93E-01 | -4.78 |
| 1438273_PM_at   | Btdb18        | BTBD18    | 0.24  | 2.44 | 2.06  | 6.50E-02 | 2.93E-01 | -4.78 |
| 1439750_PM_at   | Cntnap2       | CNTNAP2   | -0.67 | 5.33 | -2.06 | 6.51E-02 | 2.93E-01 | -4.78 |
| 1419821_PM_s_at | Idh1          | IDH1      | -0.66 | 3.58 | -2.06 | 6.51E-02 | 2.93E-01 | -4.78 |
| 1434604_PM_at   | Eif5b         | EIF5B     | -0.63 | 3.51 | -2.06 | 6.51E-02 | 2.93E-01 | -4.78 |
| 1454905_PM_at   | Ibtk          | IBTK      | -0.43 | 3.75 | -2.06 | 6.51E-02 | 2.93E-01 | -4.78 |
| 1456589_PM_x_at | Allc          | ALLC      | 0.16  | 2.29 | 2.06  | 6.51E-02 | 2.93E-01 | -4.78 |
| 1428143_PM_a_at | Pnpla2        | PNPLA2    | 0.19  | 2.46 | 2.06  | 6.51E-02 | 2.93E-01 | -4.78 |
| 1419337_PM_at   | 1700080E11Rik | NA        | 0.21  | 2.40 | 2.06  | 6.51E-02 | 2.93E-01 | -4.78 |
| 1443104_PM_at   | ---           | NA        | 0.24  | 2.46 | 2.06  | 6.51E-02 | 2.93E-01 | -4.78 |
| 1433080_PM_at   | ---           | NA        | 0.26  | 2.31 | 2.06  | 6.51E-02 | 2.93E-01 | -4.78 |
| 1441058_PM_at   | Itpkb         | ITPKB     | 0.29  | 3.03 | 2.06  | 6.51E-02 | 2.93E-01 | -4.78 |
| 1453868_PM_at   | Cfap53        | CFAP53    | 0.34  | 2.85 | 2.06  | 6.51E-02 | 2.93E-01 | -4.78 |
| 1458285_PM_at   | ---           | NA        | 0.34  | 2.77 | 2.06  | 6.51E-02 | 2.93E-01 | -4.78 |
| 1458290_PM_at   | ---           | NA        | 0.39  | 2.55 | 2.06  | 6.50E-02 | 2.93E-01 | -4.78 |
| 1460214_PM_at   | Pcp4          | PCP4      | 0.85  | 9.23 | 2.06  | 6.51E-02 | 2.93E-01 | -4.78 |

|                 |                                |            |       |      |       |          |          |       |
|-----------------|--------------------------------|------------|-------|------|-------|----------|----------|-------|
| 1439386_PM_x_at | Mat2a                          | NA         | -0.34 | 6.94 | -2.06 | 6.51E-02 | 2.93E-01 | -4.78 |
| 1422818_PM_at   | Nedd9                          | NEDD9      | -0.32 | 2.63 | -2.06 | 6.52E-02 | 2.93E-01 | -4.78 |
| 1442215_PM_at   | Smo                            | SMO        | 0.20  | 2.92 | 2.06  | 6.52E-02 | 2.93E-01 | -4.78 |
| 1435879_PM_at   | Akt3                           | AKT3       | -0.74 | 4.39 | -2.06 | 6.52E-02 | 2.93E-01 | -4.78 |
| 1455716_PM_at   | ---                            | NA         | -0.28 | 2.58 | -2.06 | 6.52E-02 | 2.93E-01 | -4.78 |
| 1449521_PM_at   | Cd93                           | CD93       | 0.25  | 3.32 | 2.06  | 6.52E-02 | 2.93E-01 | -4.78 |
| 1441604_PM_at   | Esd                            | ESD        | 0.30  | 4.48 | 2.06  | 6.52E-02 | 2.93E-01 | -4.78 |
| 1416998_PM_at   | Rrs1                           | RRS1       | -1.03 | 4.19 | -2.06 | 6.52E-02 | 2.93E-01 | -4.78 |
| 1455881_PM_at   | Ier5l                          | IER5L      | 0.25  | 2.76 | 2.06  | 6.52E-02 | 2.93E-01 | -4.78 |
| 1425927_PM_a_at | Atf5                           | ATF5       | 0.41  | 3.13 | 2.06  | 6.52E-02 | 2.93E-01 | -4.78 |
| 1417733_PM_at   | Rnf146                         | RNF146     | -0.39 | 6.86 | -2.06 | 6.52E-02 | 2.93E-01 | -4.78 |
| 1457956_PM_at   | Camta1 /// LOC105247640        | CAMTA1     | 0.33  | 3.04 | 2.06  | 6.53E-02 | 2.93E-01 | -4.78 |
| 1428570_PM_at   | Ccnc                           | CCNC       | -0.43 | 3.80 | -2.06 | 6.53E-02 | 2.93E-01 | -4.78 |
| 1459750_PM_s_at | Adgra1                         | ADGRA1     | 1.48  | 4.32 | 2.06  | 6.53E-02 | 2.93E-01 | -4.78 |
| 1441290_PM_at   | ---                            | NA         | 0.43  | 3.79 | 2.06  | 6.53E-02 | 2.93E-01 | -4.78 |
| 1425476_PM_at   | Col4a5                         | COL4A5     | -0.41 | 2.34 | -2.06 | 6.54E-02 | 2.93E-01 | -4.79 |
| 1431570_PM_at   | ---                            | NA         | 0.28  | 2.67 | 2.06  | 6.54E-02 | 2.93E-01 | -4.79 |
| 1435998_PM_at   | Ccnb1p1                        | CCNB1P1    | 0.36  | 2.41 | 2.06  | 6.54E-02 | 2.93E-01 | -4.79 |
| 1451882_PM_a_at | Fgf8                           | FGF8       | 0.18  | 2.24 | 2.06  | 6.54E-02 | 2.93E-01 | -4.79 |
| 1424910_PM_at   | Kif12                          | KIF12      | 0.19  | 2.38 | 2.06  | 6.54E-02 | 2.94E-01 | -4.79 |
| 1453419_PM_at   | Mras                           | MRAS       | 0.31  | 6.04 | 2.06  | 6.54E-02 | 2.94E-01 | -4.79 |
| 1454517_PM_at   | ---                            | NA         | 0.35  | 2.39 | 2.06  | 6.54E-02 | 2.94E-01 | -4.79 |
| 1429363_PM_at   | Vps37a                         | VPS37A     | -0.64 | 4.18 | -2.06 | 6.55E-02 | 2.94E-01 | -4.79 |
| 1436247_PM_at   | Ints2                          | INTS2      | -0.49 | 3.38 | -2.06 | 6.55E-02 | 2.94E-01 | -4.79 |
| 1449169_PM_at   | Has2                           | HAS2       | 0.17  | 2.46 | 2.06  | 6.55E-02 | 2.94E-01 | -4.79 |
| 1440067_PM_at   | ---                            | NA         | 0.25  | 2.40 | 2.06  | 6.55E-02 | 2.94E-01 | -4.79 |
| 1418145_PM_at   | Tfip11                         | TFIP11     | 0.25  | 2.54 | 2.06  | 6.55E-02 | 2.94E-01 | -4.79 |
| 1428627_PM_at   | Zbtb49                         | ZBTB49     | 0.29  | 3.24 | 2.06  | 6.55E-02 | 2.94E-01 | -4.79 |
| 1429293_PM_at   | Gpc2                           | GPC2       | 0.41  | 2.70 | 2.06  | 6.55E-02 | 2.94E-01 | -4.79 |
| 1459886_PM_at   | ---                            | NA         | 0.47  | 6.26 | 2.06  | 6.55E-02 | 2.94E-01 | -4.79 |
| 1430415_PM_at   | Phf6                           | PHF6       | 0.48  | 2.53 | 2.06  | 6.55E-02 | 2.94E-01 | -4.79 |
| 1456536_PM_at   | Thap6                          | NA         | -0.20 | 2.28 | -2.06 | 6.56E-02 | 2.94E-01 | -4.79 |
| 1420698_PM_at   | Gpx5                           | GPX5       | 0.18  | 2.65 | 2.06  | 6.56E-02 | 2.94E-01 | -4.79 |
| 1453193_PM_s_at | Kif12                          | KIF12      | 0.22  | 2.49 | 2.06  | 6.55E-02 | 2.94E-01 | -4.79 |
| 1458784_PM_at   | C78148                         | NA         | 0.25  | 2.66 | 2.06  | 6.56E-02 | 2.94E-01 | -4.79 |
| 1456618_PM_at   | Mark4                          | NA         | 0.26  | 2.63 | 2.06  | 6.55E-02 | 2.94E-01 | -4.79 |
| 1449501_PM_a_at | Gzmm                           | GZMM       | 0.31  | 2.50 | 2.06  | 6.56E-02 | 2.94E-01 | -4.79 |
| 1456879_PM_at   | Ccdc174                        | CCDC174    | 0.43  | 3.66 | 2.06  | 6.56E-02 | 2.94E-01 | -4.79 |
| 1444389_PM_at   | ---                            | NA         | 0.27  | 2.68 | 2.06  | 6.56E-02 | 2.94E-01 | -4.79 |
| 1423627_PM_at   | Nqo1                           | NQO1       | 0.27  | 2.46 | 2.06  | 6.56E-02 | 2.94E-01 | -4.79 |
| 1451326_PM_at   | Abhd14b                        | ABHD14B    | -0.36 | 2.51 | -2.06 | 6.56E-02 | 2.94E-01 | -4.79 |
| 1438666_PM_at   | Ldlrad3                        | LDLRAD3    | -0.69 | 4.72 | -2.06 | 6.56E-02 | 2.94E-01 | -4.79 |
| 1439120_PM_at   | Fam120a                        | FAM120A    | -0.23 | 2.11 | -2.06 | 6.56E-02 | 2.94E-01 | -4.79 |
| 1437365_PM_at   | Nsun3                          | NSUN3      | 0.22  | 2.46 | 2.06  | 6.56E-02 | 2.94E-01 | -4.79 |
| 1427138_PM_at   | Ccdc88c                        | NA         | 0.48  | 3.21 | 2.06  | 6.57E-02 | 2.94E-01 | -4.79 |
| 1428924_PM_at   | Mocs3                          | MOCS3      | -0.27 | 3.39 | -2.06 | 6.57E-02 | 2.94E-01 | -4.79 |
| 1415694_PM_at   | Wars                           | WARS       | 0.25  | 3.11 | 2.06  | 6.57E-02 | 2.94E-01 | -4.79 |
| 1417486_PM_at   | Shd                            | SHD        | 0.28  | 2.86 | 2.06  | 6.57E-02 | 2.94E-01 | -4.79 |
| 1454407_PM_at   | 4930435N07Rik                  | NA         | 0.53  | 2.52 | 2.06  | 6.57E-02 | 2.94E-01 | -4.79 |
| 1459076_PM_at   | ---                            | NA         | 0.26  | 2.64 | 2.06  | 6.57E-02 | 2.94E-01 | -4.79 |
| 1435901_PM_at   | Usp40                          | USP40      | -0.70 | 3.03 | -2.06 | 6.57E-02 | 2.94E-01 | -4.79 |
| 1446883_PM_at   | 4933427D06Rik                  | NA         | 0.35  | 2.83 | 2.06  | 6.58E-02 | 2.94E-01 | -4.79 |
| 1437891_PM_at   | Frs2                           | FRS2       | -0.47 | 3.15 | -2.06 | 6.58E-02 | 2.94E-01 | -4.79 |
| 1419009_PM_at   | Act17a                         | ACTL7A     | 0.19  | 2.41 | 2.06  | 6.58E-02 | 2.94E-01 | -4.79 |
| 1431020_PM_a_at | Fgfr1op2                       | FGFR1OP2   | -0.86 | 5.75 | -2.06 | 6.58E-02 | 2.94E-01 | -4.79 |
| 1456293_PM_s_at | Ccnh                           | CCNH       | -0.76 | 6.94 | -2.06 | 6.58E-02 | 2.94E-01 | -4.79 |
| 1436585_PM_at   | Rif1                           | NA         | -0.58 | 2.74 | -2.06 | 6.59E-02 | 2.94E-01 | -4.79 |
| 1444211_PM_at   | ---                            | NA         | -0.57 | 2.21 | -2.06 | 6.59E-02 | 2.94E-01 | -4.79 |
| 1430344_PM_at   | Zbtb25                         | NA         | 0.23  | 2.10 | 2.06  | 6.58E-02 | 2.94E-01 | -4.79 |
| 1432742_PM_at   | ---                            | NA         | 0.26  | 2.40 | 2.06  | 6.58E-02 | 2.94E-01 | -4.79 |
| 1453769_PM_at   | Ckap2l                         | CKAP2L     | 0.27  | 3.04 | 2.06  | 6.58E-02 | 2.94E-01 | -4.79 |
| 1450711_PM_at   | Brd4                           | BRD4       | 0.38  | 6.04 | 2.06  | 6.58E-02 | 2.94E-01 | -4.79 |
| 1421994_PM_a_at | Hs1bp3                         | HS1BP3     | 0.39  | 3.44 | 2.06  | 6.58E-02 | 2.94E-01 | -4.79 |
| 1415801_PM_at   | Gja1                           | GJA1       | 0.43  | 2.72 | 2.06  | 6.58E-02 | 2.94E-01 | -4.79 |
| 1458493_PM_a_at | 2410089E03Rik                  | NA         | 0.50  | 2.82 | 2.06  | 6.59E-02 | 2.94E-01 | -4.79 |
| 1444785_PM_at   | ---                            | NA         | 0.66  | 3.05 | 2.06  | 6.59E-02 | 2.94E-01 | -4.79 |
| 1453735_PM_at   | 5730455P16Rik                  | C17orf75   | 0.81  | 3.88 | 2.06  | 6.59E-02 | 2.94E-01 | -4.79 |
| 1448091_PM_at   | D15Ert50e                      | NA         | 0.96  | 4.10 | 2.06  | 6.59E-02 | 2.94E-01 | -4.79 |
| 1425039_PM_at   | Itgbl1                         | ITGBL1     | -0.70 | 3.92 | -2.06 | 6.59E-02 | 2.94E-01 | -4.79 |
| 1455217_PM_at   | Lrig2                          | LRIG2      | -0.50 | 5.17 | -2.06 | 6.59E-02 | 2.94E-01 | -4.79 |
| 1454785_PM_at   | Dusp11                         | DUSP11     | -0.50 | 6.23 | -2.06 | 6.59E-02 | 2.94E-01 | -4.79 |
| 1425024_PM_at   | E430018J23Rik /// LOC105243102 | ACO02310.5 | 0.15  | 2.29 | 2.06  | 6.59E-02 | 2.94E-01 | -4.79 |
| 1455923_PM_at   | Kctd8                          | KCTD8      | 0.19  | 2.30 | 2.06  | 6.59E-02 | 2.94E-01 | -4.79 |

|                 |                                                                                                                                                  |          |       |       |       |          |          |       |
|-----------------|--------------------------------------------------------------------------------------------------------------------------------------------------|----------|-------|-------|-------|----------|----------|-------|
| 1458864_PM_at   | ---                                                                                                                                              | NA       | 0.22  | 2.42  | 2.06  | 6.59E-02 | 2.94E-01 | -4.79 |
| 1446463_PM_at   | Adnp2                                                                                                                                            | NA       | 0.23  | 2.15  | 2.06  | 6.59E-02 | 2.94E-01 | -4.79 |
| 1459028_PM_at   | ---                                                                                                                                              | NA       | 0.23  | 2.51  | 2.06  | 6.59E-02 | 2.94E-01 | -4.79 |
| 1435726_PM_at   | Lima1                                                                                                                                            | LIMA1    | 0.18  | 2.49  | 2.05  | 6.60E-02 | 2.95E-01 | -4.79 |
| 1423363_PM_at   | Sort1                                                                                                                                            | SORT1    | -0.49 | 6.66  | -2.05 | 6.60E-02 | 2.95E-01 | -4.79 |
| 1421860_PM_at   | Clstn1                                                                                                                                           | CLSTN1   | -0.59 | 5.83  | -2.05 | 6.60E-02 | 2.95E-01 | -4.79 |
| 1456938_PM_at   | Smarcb1                                                                                                                                          | NA       | 0.29  | 3.35  | 2.05  | 6.60E-02 | 2.95E-01 | -4.79 |
| 1458314_PM_at   | ---                                                                                                                                              | NA       | -0.96 | 4.38  | -2.05 | 6.61E-02 | 2.95E-01 | -4.80 |
| 1442461_PM_at   | Gfod1                                                                                                                                            | NA       | 0.21  | 2.56  | 2.05  | 6.61E-02 | 2.95E-01 | -4.80 |
| 1422422_PM_at   | Defa4                                                                                                                                            | NA       | 0.26  | 2.48  | 2.05  | 6.61E-02 | 2.95E-01 | -4.80 |
| 1428271_PM_at   | Acbd4                                                                                                                                            | ACBD4    | 0.32  | 2.54  | 2.05  | 6.61E-02 | 2.95E-01 | -4.80 |
| 1422990_PM_at   | Met                                                                                                                                              | MET      | 0.38  | 2.59  | 2.05  | 6.61E-02 | 2.95E-01 | -4.80 |
| 1431622_PM_at   | 4933406K04Rik                                                                                                                                    | NA       | 0.26  | 2.38  | 2.05  | 6.61E-02 | 2.95E-01 | -4.80 |
| 1416794_PM_at   | Atl2                                                                                                                                             | ATL2     | 0.43  | 3.19  | 2.05  | 6.61E-02 | 2.95E-01 | -4.80 |
| 1446313_PM_at   | Zfp30                                                                                                                                            | ZFP30    | 0.19  | 2.47  | 2.05  | 6.62E-02 | 2.95E-01 | -4.80 |
| 1449703_PM_at   | Zfand2a                                                                                                                                          | NA       | -0.50 | 4.40  | -2.05 | 6.62E-02 | 2.95E-01 | -4.80 |
| 1440829_PM_x_at | Ttl11                                                                                                                                            | TTL11    | -0.36 | 2.30  | -2.05 | 6.62E-02 | 2.95E-01 | -4.80 |
| 1446677_PM_at   | A830029E22Rik                                                                                                                                    | NA       | 0.28  | 2.98  | 2.05  | 6.62E-02 | 2.95E-01 | -4.80 |
| 1450382_PM_at   | Nf2                                                                                                                                              | NF2      | 0.34  | 2.46  | 2.05  | 6.62E-02 | 2.95E-01 | -4.80 |
| 1447982_PM_at   | 1110008P14Rik                                                                                                                                    | C9orf16  | 0.36  | 3.03  | 2.05  | 6.62E-02 | 2.95E-01 | -4.80 |
| 1425287_PM_at   | Zfp189                                                                                                                                           | ZNF189   | -0.41 | 2.44  | -2.05 | 6.62E-02 | 2.95E-01 | -4.80 |
| 1438539_PM_at   | ---                                                                                                                                              | NA       | 0.19  | 2.26  | 2.05  | 6.62E-02 | 2.95E-01 | -4.80 |
| 1417081_PM_a_at | Syng2                                                                                                                                            | SYNG2    | 0.27  | 2.30  | 2.05  | 6.62E-02 | 2.95E-01 | -4.80 |
| 1435381_PM_at   | Atat1                                                                                                                                            | NA       | 0.26  | 2.32  | 2.05  | 6.62E-02 | 2.95E-01 | -4.80 |
| 1416874_PM_a_at | Paf1                                                                                                                                             | PAF1     | 0.62  | 7.84  | 2.05  | 6.63E-02 | 2.95E-01 | -4.80 |
| 1420859_PM_at   | Pkia                                                                                                                                             | PKIA     | -0.93 | 6.74  | -2.05 | 6.63E-02 | 2.95E-01 | -4.80 |
| 1418625_PM_s_at | 3000002C10Rik /// Gapdh<br>/// Gapdh-ps15 ///<br>Gm10313 /// Gm12070 ///<br>Gm5523 /// Gm6317 ///<br>Gm8055 /// LOC102641387<br>/// LOC105242507 | NA       | -0.40 | 10.90 | -2.05 | 6.63E-02 | 2.95E-01 | -4.80 |
| 1455461_PM_at   | ---                                                                                                                                              | NA       | -0.44 | 4.64  | -2.05 | 6.63E-02 | 2.95E-01 | -4.80 |
| 1436516_PM_at   | Abhd13                                                                                                                                           | ABHD13   | -0.41 | 3.43  | -2.05 | 6.63E-02 | 2.95E-01 | -4.80 |
| 1448417_PM_at   | Ninj1                                                                                                                                            | NINJ1    | 0.26  | 2.47  | 2.05  | 6.64E-02 | 2.95E-01 | -4.80 |
| 1419990_PM_at   | A830082K12Rik                                                                                                                                    | NA       | 0.33  | 5.35  | 2.05  | 6.64E-02 | 2.96E-01 | -4.80 |
| 1436056_PM_at   | Kif13b                                                                                                                                           | NA       | -0.70 | 4.31  | -2.05 | 6.64E-02 | 2.96E-01 | -4.80 |
| 1437722_PM_x_at | Pcbp3                                                                                                                                            | NA       | 0.91  | 7.65  | 2.05  | 6.64E-02 | 2.96E-01 | -4.80 |
| 1445818_PM_at   | 4930544M13Rik                                                                                                                                    | NA       | 0.18  | 2.24  | 2.05  | 6.64E-02 | 2.96E-01 | -4.80 |
| 1432608_PM_at   | Nnt                                                                                                                                              | NNT      | 0.18  | 2.76  | 2.05  | 6.65E-02 | 2.96E-01 | -4.80 |
| 1450458_PM_at   | Ncoa2                                                                                                                                            | NCOA2    | 0.31  | 2.57  | 2.05  | 6.65E-02 | 2.96E-01 | -4.80 |
| 1450313_PM_at   | Tas1r2                                                                                                                                           | TAS1R2   | 0.27  | 2.94  | 2.05  | 6.65E-02 | 2.96E-01 | -4.80 |
| 1456961_PM_at   | Eny2                                                                                                                                             | NA       | -0.35 | 4.17  | -2.05 | 6.65E-02 | 2.96E-01 | -4.80 |
| 1441514_PM_at   | ---                                                                                                                                              | NA       | 0.16  | 2.07  | 2.05  | 6.65E-02 | 2.96E-01 | -4.80 |
| 1430198_PM_at   | 3110009F21Rik                                                                                                                                    | NA       | 0.30  | 2.54  | 2.05  | 6.65E-02 | 2.96E-01 | -4.80 |
| 1436766_PM_at   | Luc7l2                                                                                                                                           | LUC7L2   | -0.38 | 4.59  | -2.05 | 6.66E-02 | 2.96E-01 | -4.80 |
| 1424546_PM_at   | BC003965                                                                                                                                         | C16orf91 | -0.35 | 3.76  | -2.05 | 6.66E-02 | 2.96E-01 | -4.80 |
| 1431175_PM_at   | 1810019D21Rik                                                                                                                                    | NA       | 0.21  | 2.35  | 2.05  | 6.66E-02 | 2.96E-01 | -4.80 |
| 1454272_PM_at   | 9630015K15Rik                                                                                                                                    | NA       | 0.25  | 2.47  | 2.05  | 6.66E-02 | 2.96E-01 | -4.80 |
| 1431459_PM_at   | ---                                                                                                                                              | NA       | 0.26  | 2.50  | 2.05  | 6.66E-02 | 2.96E-01 | -4.80 |
| 1457307_PM_at   | Apol11b                                                                                                                                          | APOL1    | 0.31  | 2.29  | 2.05  | 6.66E-02 | 2.96E-01 | -4.80 |
| 1450200_PM_s_at | Csf2rb /// Csf2rb2                                                                                                                               | CSF2RB   | 0.36  | 4.14  | 2.05  | 6.66E-02 | 2.96E-01 | -4.80 |
| 1437315_PM_at   | Slc52a2                                                                                                                                          | SLC52A1  | 0.26  | 3.18  | 2.05  | 6.66E-02 | 2.96E-01 | -4.80 |
| 1419879_PM_s_at | Trim25                                                                                                                                           | TRIM25   | -1.44 | 4.39  | -2.05 | 6.67E-02 | 2.96E-01 | -4.80 |
| 1425101_PM_a_at | Fkbp6                                                                                                                                            | FKBP6    | 0.21  | 2.67  | 2.05  | 6.66E-02 | 2.96E-01 | -4.80 |
| 1444569_PM_at   | Gm8273                                                                                                                                           | NA       | 0.31  | 2.91  | 2.05  | 6.67E-02 | 2.96E-01 | -4.80 |
| 1431146_PM_a_at | Cpne8                                                                                                                                            | CPNE8    | 0.44  | 3.84  | 2.05  | 6.67E-02 | 2.96E-01 | -4.80 |
| 1417468_PM_at   | Nit1                                                                                                                                             | NIT1     | -0.37 | 3.22  | -2.05 | 6.67E-02 | 2.96E-01 | -4.80 |
| 1416257_PM_at   | Capn2                                                                                                                                            | CAPN2    | -0.61 | 4.21  | -2.05 | 6.67E-02 | 2.96E-01 | -4.80 |
| 1428341_PM_at   | Zfp655                                                                                                                                           | ZNF655   | -0.60 | 3.68  | -2.05 | 6.67E-02 | 2.96E-01 | -4.80 |
| 1439778_PM_at   | ---                                                                                                                                              | NA       | 0.17  | 2.20  | 2.05  | 6.68E-02 | 2.96E-01 | -4.80 |
| 1457803_PM_at   | ---                                                                                                                                              | NA       | 0.25  | 2.58  | 2.05  | 6.68E-02 | 2.96E-01 | -4.80 |
| 1454804_PM_at   | Nploc4                                                                                                                                           | NPLOC4   | 0.28  | 7.75  | 2.05  | 6.67E-02 | 2.96E-01 | -4.80 |
| 1445975_PM_at   | Gm8709                                                                                                                                           | NA       | 0.21  | 2.74  | 2.05  | 6.68E-02 | 2.96E-01 | -4.81 |
| 1434704_PM_at   | Kmt2e                                                                                                                                            | KMT2E    | -0.45 | 8.20  | -2.05 | 6.68E-02 | 2.96E-01 | -4.81 |
| 1446594_PM_at   | Gm4371                                                                                                                                           | NA       | -0.19 | 2.16  | -2.05 | 6.68E-02 | 2.96E-01 | -4.81 |
| 1443996_PM_at   | ---                                                                                                                                              | NA       | 0.32  | 2.55  | 2.05  | 6.68E-02 | 2.96E-01 | -4.81 |
| 1457424_PM_at   | Eya1                                                                                                                                             | EYA1     | -0.37 | 2.25  | -2.05 | 6.68E-02 | 2.97E-01 | -4.81 |
| 1444953_PM_at   | Nucks1                                                                                                                                           | NUCKS1   | 0.18  | 2.05  | 2.05  | 6.68E-02 | 2.97E-01 | -4.81 |
| 1426325_PM_at   | Kif1c                                                                                                                                            | KIF1C    | 0.19  | 2.38  | 2.05  | 6.68E-02 | 2.97E-01 | -4.81 |
| 1445868_PM_at   | Cpeb3                                                                                                                                            | CPEB3    | 0.28  | 2.66  | 2.05  | 6.69E-02 | 2.97E-01 | -4.81 |
| 1434176_PM_x_at | Poldip3                                                                                                                                          | POLDIP3  | 0.28  | 6.67  | 2.05  | 6.69E-02 | 2.97E-01 | -4.81 |
| 1442421_PM_at   | Srrm3                                                                                                                                            | SRRM3    | 0.55  | 3.49  | 2.05  | 6.68E-02 | 2.97E-01 | -4.81 |
| 1447951_PM_at   | ---                                                                                                                                              | NA       | 0.68  | 4.70  | 2.05  | 6.69E-02 | 2.97E-01 | -4.81 |

|                 |                                                              |          |       |      |       |          |          |       |
|-----------------|--------------------------------------------------------------|----------|-------|------|-------|----------|----------|-------|
|                 | Gm34650 /// Gm34733 ///<br>Gm35004 /// Gm35174 ///<br>Gm9789 | NA       | 0.16  | 2.33 | 2.05  | 6.69E-02 | 2.97E-01 | -4.81 |
| 1431798_PM_a_at | Syde1                                                        | SYDE1    | 0.21  | 2.73 | 2.05  | 6.69E-02 | 2.97E-01 | -4.81 |
| 1450819_PM_at   | Pvr1l                                                        | NECTIN1  | 0.28  | 3.90 | 2.05  | 6.69E-02 | 2.97E-01 | -4.81 |
| 1426754_PM_x_at | Ckap4                                                        | CKAP4    | -0.53 | 3.33 | -2.05 | 6.69E-02 | 2.97E-01 | -4.81 |
| 1459847_PM_x_at | Gfra2                                                        | GFRA2    | -0.25 | 3.03 | -2.05 | 6.69E-02 | 2.97E-01 | -4.81 |
| 1441658_PM_at   | ---                                                          | NA       | 0.20  | 2.65 | 2.05  | 6.69E-02 | 2.97E-01 | -4.81 |
| 1439803_PM_at   | Zfp865                                                       | ZNF865   | 0.28  | 2.59 | 2.05  | 6.69E-02 | 2.97E-01 | -4.81 |
| 1450226_PM_at   | Prlr                                                         | PRLR     | 0.19  | 2.69 | 2.05  | 6.70E-02 | 2.97E-01 | -4.81 |
| 1448101_PM_s_at | Trim27                                                       | TRIM27   | -0.26 | 2.58 | -2.05 | 6.70E-02 | 2.97E-01 | -4.81 |
| 1451071_PM_a_at | Atp1a1                                                       | ATP1A1   | -1.20 | 4.79 | -2.05 | 6.70E-02 | 2.97E-01 | -4.81 |
| 1420038_PM_at   | Slc25a18                                                     | NA       | -0.53 | 5.39 | -2.05 | 6.70E-02 | 2.97E-01 | -4.81 |
| 1440076_PM_at   | ---                                                          | NA       | 0.27  | 2.96 | 2.05  | 6.70E-02 | 2.97E-01 | -4.81 |
| 1456981_PM_at   | Tmc7                                                         | TMC7     | 0.33  | 4.19 | 2.05  | 6.70E-02 | 2.97E-01 | -4.81 |
| 1421144_PM_at   | Rpgrip1                                                      | RPGRIP1  | 0.39  | 3.83 | 2.05  | 6.70E-02 | 2.97E-01 | -4.81 |
| 1447168_PM_at   | ---                                                          | NA       | 0.22  | 2.54 | 2.05  | 6.70E-02 | 2.97E-01 | -4.81 |
| 1443777_PM_at   | ---                                                          | NA       | 0.91  | 2.72 | 2.05  | 6.70E-02 | 2.97E-01 | -4.81 |
| 1453231_PM_at   | Cdk1l                                                        | CDKL1    | 0.19  | 2.21 | 2.05  | 6.70E-02 | 2.97E-01 | -4.81 |
| 1446633_PM_at   | Atg7                                                         | ATG7     | 0.22  | 2.58 | 2.05  | 6.71E-02 | 2.97E-01 | -4.81 |
| 1451989_PM_a_at | Mapre2                                                       | MAPRE2   | 1.03  | 8.89 | 2.05  | 6.71E-02 | 2.97E-01 | -4.81 |
| 1439198_PM_at   | ---                                                          | NA       | 0.30  | 3.28 | 2.05  | 6.71E-02 | 2.97E-01 | -4.81 |
| 1424601_PM_at   | Xrcc4                                                        | XRCC4    | 0.33  | 2.31 | 2.04  | 6.71E-02 | 2.97E-01 | -4.81 |
| 1421082_PM_s_at | Banf1                                                        | BANF1    | 0.30  | 2.81 | 2.04  | 6.71E-02 | 2.97E-01 | -4.81 |
| 1419629_PM_at   | Mesp2                                                        | MESP2    | 0.21  | 2.31 | 2.04  | 6.72E-02 | 2.97E-01 | -4.81 |
| 1421516_PM_at   | Nr6a1                                                        | NR6A1    | 0.21  | 2.23 | 2.04  | 6.72E-02 | 2.97E-01 | -4.81 |
| 1450990_PM_at   | Gpc3                                                         | GPC3     | 0.27  | 2.69 | 2.04  | 6.71E-02 | 2.97E-01 | -4.81 |
| 1447436_PM_at   | Al451250                                                     | NA       | 0.40  | 3.26 | 2.04  | 6.72E-02 | 2.97E-01 | -4.81 |
| 1445114_PM_at   | ---                                                          | NA       | 0.58  | 2.63 | 2.04  | 6.71E-02 | 2.97E-01 | -4.81 |
| 1424121_PM_at   | Commd1                                                       | COMMD1   | -0.38 | 3.87 | -2.04 | 6.72E-02 | 2.97E-01 | -4.81 |
| 1433029_PM_at   | Kcnj9                                                        | NA       | 0.16  | 3.11 | 2.04  | 6.72E-02 | 2.97E-01 | -4.81 |
| 1444834_PM_at   | ---                                                          | NA       | 0.33  | 2.33 | 2.04  | 6.72E-02 | 2.97E-01 | -4.81 |
| 1422843_PM_at   | Xrn2                                                         | XRN2     | -0.26 | 3.17 | -2.04 | 6.72E-02 | 2.97E-01 | -4.81 |
| 1450955_PM_s_at | Sort1                                                        | SORT1    | -0.70 | 7.79 | -2.04 | 6.72E-02 | 2.97E-01 | -4.81 |
| 1459944_PM_at   | Utp11l                                                       | UTP11    | 0.22  | 2.13 | 2.04  | 6.72E-02 | 2.97E-01 | -4.81 |
| 1420963_PM_at   | Hapln2                                                       | HAPLN2   | 0.20  | 2.14 | 2.04  | 6.73E-02 | 2.97E-01 | -4.81 |
| 1420303_PM_x_at | Rps4x                                                        | RPS4X    | 0.30  | 3.67 | 2.04  | 6.73E-02 | 2.97E-01 | -4.81 |
| 1424128_PM_x_at | Aurkb                                                        | AURKB    | 0.22  | 2.35 | 2.04  | 6.73E-02 | 2.97E-01 | -4.81 |
| 1422104_PM_at   | Vsx1                                                         | VSX1     | 0.34  | 3.75 | 2.04  | 6.73E-02 | 2.97E-01 | -4.81 |
| 1418576_PM_at   | Yipf5                                                        | YIPF5    | -0.62 | 3.48 | -2.04 | 6.73E-02 | 2.97E-01 | -4.81 |
| 1446718_PM_at   | Nfkbib                                                       | NFKBIB   | 0.19  | 2.41 | 2.04  | 6.73E-02 | 2.97E-01 | -4.81 |
| 1416524_PM_at   | Spop                                                         | SPOP     | -0.45 | 6.64 | -2.04 | 6.73E-02 | 2.97E-01 | -4.81 |
| 1421880_PM_at   | Mtmr1                                                        | MTMR1    | -0.27 | 3.40 | -2.04 | 6.74E-02 | 2.98E-01 | -4.81 |
| 1457022_PM_at   | ---                                                          | NA       | 0.31  | 2.43 | 2.04  | 6.74E-02 | 2.98E-01 | -4.81 |
| 1424845_PM_a_at | Cep68                                                        | CEP68    | 0.42  | 3.75 | 2.04  | 6.74E-02 | 2.98E-01 | -4.81 |
| 1444342_PM_at   | ---                                                          | NA       | -0.98 | 3.36 | -2.04 | 6.74E-02 | 2.98E-01 | -4.81 |
| 1430994_PM_at   | March5                                                       | MARCH5   | 0.17  | 2.49 | 2.04  | 6.74E-02 | 2.98E-01 | -4.81 |
| 1442713_PM_at   | Gm4665                                                       | NA       | 0.23  | 2.35 | 2.04  | 6.74E-02 | 2.98E-01 | -4.81 |
| 1417400_PM_at   | Rai14                                                        | RAI14    | 0.24  | 2.76 | 2.04  | 6.74E-02 | 2.98E-01 | -4.81 |
| 1443198_PM_at   | Gm19461                                                      | NA       | 0.38  | 3.47 | 2.04  | 6.74E-02 | 2.98E-01 | -4.81 |
| 1440852_PM_at   | Idi2                                                         | IDI2     | 0.44  | 2.30 | 2.04  | 6.74E-02 | 2.98E-01 | -4.81 |
| 1427935_PM_at   | Lym2                                                         | LYRM2    | -0.29 | 2.49 | -2.04 | 6.75E-02 | 2.98E-01 | -4.82 |
| 1459108_PM_a_at | Yeats2                                                       | YEATS2   | 0.18  | 2.49 | 2.04  | 6.75E-02 | 2.98E-01 | -4.82 |
| 1440775_PM_at   | 1700054K19Rik                                                | NA       | 0.18  | 2.01 | 2.04  | 6.75E-02 | 2.98E-01 | -4.82 |
| 1450447_PM_at   | Hnf4a                                                        | HNF4A    | 0.22  | 3.23 | 2.04  | 6.75E-02 | 2.98E-01 | -4.82 |
| 1445170_PM_at   | 2700012120Rik                                                | NA       | 0.26  | 2.82 | 2.04  | 6.75E-02 | 2.98E-01 | -4.82 |
| 1453164_PM_a_at | Ptdss2                                                       | PTDSS2   | 0.29  | 2.45 | 2.04  | 6.75E-02 | 2.98E-01 | -4.82 |
| 1441016_PM_at   | ---                                                          | NA       | 0.31  | 2.28 | 2.04  | 6.75E-02 | 2.98E-01 | -4.82 |
| 1423514_PM_at   | Gyk1l                                                        | NA       | 0.15  | 2.16 | 2.04  | 6.75E-02 | 2.98E-01 | -4.82 |
| 1422025_PM_at   | Mitf                                                         | MITF     | 0.20  | 2.73 | 2.04  | 6.75E-02 | 2.98E-01 | -4.82 |
| 1452956_PM_a_at | Ifi27                                                        | IFI27    | 0.32  | 3.50 | 2.04  | 6.75E-02 | 2.98E-01 | -4.82 |
| 1435810_PM_at   | Fra10ac1                                                     | FRA10AC1 | 0.39  | 3.28 | 2.04  | 6.75E-02 | 2.98E-01 | -4.82 |
| 1455574_PM_at   | Smg7                                                         | SMG7     | 0.74  | 6.72 | 2.04  | 6.75E-02 | 2.98E-01 | -4.82 |
| 1421897_PM_at   | Elk1                                                         | ELK1     | -0.40 | 3.14 | -2.04 | 6.76E-02 | 2.98E-01 | -4.82 |
| 1432396_PM_at   | ---                                                          | NA       | 0.27  | 2.24 | 2.04  | 6.76E-02 | 2.98E-01 | -4.82 |
| 1442054_PM_at   | ---                                                          | NA       | -0.35 | 2.79 | -2.04 | 6.76E-02 | 2.98E-01 | -4.82 |
| 1439996_PM_at   | ---                                                          | NA       | 0.23  | 3.37 | 2.04  | 6.76E-02 | 2.98E-01 | -4.82 |
| 1437669_PM_x_at | Acrr4                                                        | NA       | -0.63 | 7.12 | -2.04 | 6.76E-02 | 2.98E-01 | -4.82 |
| 1459578_PM_at   | AA407175                                                     | NA       | 0.17  | 2.02 | 2.04  | 6.77E-02 | 2.98E-01 | -4.82 |
| 1444550_PM_at   | Ccdc167                                                      | NA       | -0.30 | 2.70 | -2.04 | 6.77E-02 | 2.98E-01 | -4.82 |
| 1425003_PM_at   | Uroc1                                                        | UROC1    | 0.18  | 2.04 | 2.04  | 6.77E-02 | 2.98E-01 | -4.82 |
| 1425720_PM_at   | ---                                                          | NA       | 0.22  | 2.37 | 2.04  | 6.77E-02 | 2.98E-01 | -4.82 |
| 1432624_PM_at   | ---                                                          | NA       | 0.24  | 3.14 | 2.04  | 6.77E-02 | 2.98E-01 | -4.82 |
| 1428378_PM_at   | Zc3hav1                                                      | ZC3HAV1  | 0.19  | 2.47 | 2.04  | 6.77E-02 | 2.98E-01 | -4.82 |
| 1419599_PM_s_at | Ms4a6d                                                       | MS4A6E   | 0.27  | 2.44 | 2.04  | 6.77E-02 | 2.98E-01 | -4.82 |

|                 |                                                                                            |          |       |      |       |          |          |       |
|-----------------|--------------------------------------------------------------------------------------------|----------|-------|------|-------|----------|----------|-------|
| 1440950_PM_at   | Akt1                                                                                       | AKT1     | 0.36  | 3.05 | 2.04  | 6.77E-02 | 2.98E-01 | -4.82 |
| 1416743_PM_at   | Uap1                                                                                       | UAP1     | -0.54 | 5.11 | -2.04 | 6.78E-02 | 2.98E-01 | -4.82 |
| 1455290_PM_at   | Znrf2                                                                                      | ZNRF2    | 0.38  | 2.45 | 2.04  | 6.78E-02 | 2.98E-01 | -4.82 |
| 1418651_PM_at   | Spata6                                                                                     | SPATA6   | 0.20  | 2.52 | 2.04  | 6.78E-02 | 2.98E-01 | -4.82 |
| 1426757_PM_at   | Ampd2                                                                                      | AMPD2    | 0.41  | 3.44 | 2.04  | 6.78E-02 | 2.98E-01 | -4.82 |
| 1434681_PM_at   | Txlng                                                                                      | TXLNG    | 0.49  | 2.53 | 2.04  | 6.78E-02 | 2.98E-01 | -4.82 |
| 1455754_PM_at   | Lmo3                                                                                       | LMO3     | -0.71 | 5.96 | -2.04 | 6.78E-02 | 2.98E-01 | -4.82 |
| 1429778_PM_at   | Optrn                                                                                      | OPTN     | 0.43  | 3.05 | 2.04  | 6.78E-02 | 2.98E-01 | -4.82 |
| 1451124_PM_at   | Sod1                                                                                       | SOD1     | -0.67 | 7.11 | -2.04 | 6.79E-02 | 2.99E-01 | -4.82 |
| 1433636_PM_at   | Bms1                                                                                       | BMS1     | 0.66  | 3.75 | 2.04  | 6.79E-02 | 2.99E-01 | -4.82 |
| 1445755_PM_at   | ---                                                                                        | NA       | 0.24  | 2.24 | 2.04  | 6.79E-02 | 2.99E-01 | -4.82 |
| 1456086_PM_x_at | Pqbp1                                                                                      | PQBP1    | -0.93 | 4.11 | -2.04 | 6.79E-02 | 2.99E-01 | -4.82 |
| 1440653_PM_at   | Phip                                                                                       | PHIP     | -0.33 | 2.76 | -2.04 | 6.79E-02 | 2.99E-01 | -4.82 |
| 1450352_PM_at   | Mtnr1a                                                                                     | NA       | 0.18  | 2.04 | 2.04  | 6.79E-02 | 2.99E-01 | -4.82 |
| 1445919_PM_at   | AA409261                                                                                   | NA       | 0.26  | 2.84 | 2.04  | 6.79E-02 | 2.99E-01 | -4.82 |
| 1434414_PM_at   | Foxred2                                                                                    | FOXRED2  | 0.28  | 2.86 | 2.04  | 6.79E-02 | 2.99E-01 | -4.82 |
| 1426043_PM_a_at | Capn3                                                                                      | CAPN3    | 0.34  | 2.60 | 2.04  | 6.79E-02 | 2.99E-01 | -4.82 |
| 1453774_PM_at   | Amer1                                                                                      | AMER1    | 0.35  | 2.74 | 2.04  | 6.79E-02 | 2.99E-01 | -4.82 |
| 1419737_PM_a_at | Ldha                                                                                       | LDHA     | -0.49 | 6.76 | -2.04 | 6.81E-02 | 2.99E-01 | -4.82 |
| 1429351_PM_at   | Klhl24                                                                                     | KLHL24   | -0.47 | 2.85 | -2.04 | 6.80E-02 | 2.99E-01 | -4.82 |
| 1423750_PM_a_at | Sf1                                                                                        | SF1      | -0.45 | 5.27 | -2.04 | 6.81E-02 | 2.99E-01 | -4.82 |
| 1435333_PM_at   | Ndufaf4                                                                                    | NDUF4F4  | -0.43 | 4.29 | -2.04 | 6.81E-02 | 2.99E-01 | -4.82 |
| 1440999_PM_at   | Zfp697                                                                                     | ZNF697   | -0.41 | 3.37 | -2.04 | 6.80E-02 | 2.99E-01 | -4.82 |
| 1421763_PM_at   | Bmp10                                                                                      | BMP10    | 0.17  | 2.11 | 2.04  | 6.80E-02 | 2.99E-01 | -4.82 |
| 1432438_PM_at   | 4930597L12Rik                                                                              | NA       | 0.23  | 2.49 | 2.04  | 6.80E-02 | 2.99E-01 | -4.82 |
| 1441490_PM_at   | Tmem39a                                                                                    | TMEM39A  | 0.23  | 2.58 | 2.04  | 6.80E-02 | 2.99E-01 | -4.82 |
| 1430836_PM_at   | ---                                                                                        | NA       | 0.24  | 2.94 | 2.04  | 6.80E-02 | 2.99E-01 | -4.82 |
| 1420410_PM_at   | Nr5a2                                                                                      | NR5A2    | 0.27  | 2.25 | 2.04  | 6.80E-02 | 2.99E-01 | -4.82 |
| 1459724_PM_at   | ---                                                                                        | NA       | 0.28  | 2.42 | 2.04  | 6.80E-02 | 2.99E-01 | -4.82 |
| 1456956_PM_at   | Ikzf2                                                                                      | IKZF2    | 0.28  | 2.33 | 2.04  | 6.81E-02 | 2.99E-01 | -4.82 |
| 1420448_PM_at   | Rhox2a /// Rhox2b /// Rhox2e                                                               | NA       | 0.31  | 2.37 | 2.04  | 6.80E-02 | 2.99E-01 | -4.82 |
| 1448071_PM_at   | ---                                                                                        | NA       | 0.32  | 2.60 | 2.04  | 6.80E-02 | 2.99E-01 | -4.82 |
| 1438508_PM_at   | ---                                                                                        | NA       | 0.37  | 3.28 | 2.04  | 6.80E-02 | 2.99E-01 | -4.82 |
| 1455335_PM_at   | Xrcc2                                                                                      | XRCC2    | 0.41  | 2.73 | 2.04  | 6.80E-02 | 2.99E-01 | -4.82 |
| 1459423_PM_at   | Meis1                                                                                      | MEIS1    | 0.46  | 3.35 | 2.04  | 6.80E-02 | 2.99E-01 | -4.82 |
| 1428746_PM_a_at | Trnau1ap                                                                                   | TRNAU1AP | 0.65  | 4.82 | 2.04  | 6.80E-02 | 2.99E-01 | -4.82 |
| 1448347_PM_a_at | Caprin1                                                                                    | CAPRIN1  | -0.56 | 6.81 | -2.04 | 6.81E-02 | 2.99E-01 | -4.82 |
| 1417632_PM_at   | Atp6v0a1                                                                                   | ATP6V0A1 | -0.49 | 5.91 | -2.04 | 6.81E-02 | 2.99E-01 | -4.82 |
| 1445692_PM_x_at | ---                                                                                        | NA       | 0.30  | 2.42 | 2.04  | 6.81E-02 | 2.99E-01 | -4.82 |
| 1440985_PM_at   | ---                                                                                        | NA       | 0.37  | 2.63 | 2.04  | 6.81E-02 | 2.99E-01 | -4.82 |
| 1441244_PM_at   | ---                                                                                        | NA       | 0.41  | 2.24 | 2.04  | 6.81E-02 | 2.99E-01 | -4.82 |
| 1457826_PM_a_at | 1810043H04Rik                                                                              | NDUF4F8  | 0.60  | 5.28 | 2.04  | 6.81E-02 | 2.99E-01 | -4.82 |
| 1458136_PM_at   | Msi2                                                                                       | MSI2     | 0.18  | 2.41 | 2.04  | 6.81E-02 | 2.99E-01 | -4.82 |
| 1427983_PM_at   | Zfp280c                                                                                    | ZNF280C  | -0.25 | 2.74 | -2.04 | 6.82E-02 | 2.99E-01 | -4.82 |
| 1427216_PM_at   | ---                                                                                        | NA       | 0.22  | 2.44 | 2.04  | 6.82E-02 | 2.99E-01 | -4.82 |
| 1417238_PM_at   | Ewsr1                                                                                      | EWSR1    | 0.34  | 3.42 | 2.04  | 6.82E-02 | 2.99E-01 | -4.82 |
| 1445979_PM_at   | ---                                                                                        | NA       | 0.51  | 2.44 | 2.04  | 6.82E-02 | 2.99E-01 | -4.82 |
| 1428543_PM_at   | Ppat                                                                                       | PPAT     | -0.69 | 3.05 | -2.04 | 6.82E-02 | 2.99E-01 | -4.82 |
| 1419166_PM_at   | Slc5a2                                                                                     | SLC5A2   | 0.26  | 3.66 | 2.04  | 6.82E-02 | 2.99E-01 | -4.82 |
| 1449757_PM_x_at | Dntt                                                                                       | DNTT     | 0.18  | 2.45 | 2.03  | 6.82E-02 | 2.99E-01 | -4.83 |
| 1454500_PM_at   | 6330419E04Rik                                                                              | NA       | 0.42  | 2.69 | 2.03  | 6.82E-02 | 2.99E-01 | -4.83 |
| 1435732_PM_x_at | Atp6v0c /// Atp6v0c-ps2                                                                    | ATP6V0C  | -0.88 | 6.79 | -2.03 | 6.83E-02 | 2.99E-01 | -4.83 |
| 1423403_PM_at   | Mapkbp1                                                                                    | MAPKBP1  | -0.50 | 3.77 | -2.03 | 6.83E-02 | 2.99E-01 | -4.83 |
| 1422830_PM_s_at | Drd4                                                                                       | DRD4     | 0.21  | 2.71 | 2.03  | 6.83E-02 | 2.99E-01 | -4.83 |
| 1453826_PM_at   | Pard3b                                                                                     | PARD3B   | 0.23  | 2.32 | 2.03  | 6.83E-02 | 2.99E-01 | -4.83 |
| 1435792_PM_at   | Csprs /// Gm15433 /// Gm2666 /// Gm7609 /// LOC100041903 /// LOC100503923 /// LOC101055758 | NA       | 0.40  | 3.63 | 2.03  | 6.83E-02 | 2.99E-01 | -4.83 |
| 1432537_PM_at   | Csmd2os                                                                                    | NA       | 0.18  | 2.39 | 2.03  | 6.83E-02 | 2.99E-01 | -4.83 |
| 1431969_PM_at   | ---                                                                                        | NA       | 0.22  | 2.38 | 2.03  | 6.83E-02 | 2.99E-01 | -4.83 |
| 1446290_PM_at   | ---                                                                                        | NA       | 0.29  | 2.66 | 2.03  | 6.83E-02 | 2.99E-01 | -4.83 |
| 1457765_PM_at   | ---                                                                                        | NA       | 0.32  | 2.63 | 2.03  | 6.83E-02 | 2.99E-01 | -4.83 |
| 1421369_PM_a_at | Mab21l1                                                                                    | MAB21L1  | 0.29  | 2.27 | 2.03  | 6.84E-02 | 2.99E-01 | -4.83 |
| 1455375_PM_at   | Enah                                                                                       | ENAH     | -0.41 | 3.06 | -2.03 | 6.84E-02 | 2.99E-01 | -4.83 |
| 1415935_PM_at   | Smoc2                                                                                      | SMOC2    | -0.33 | 3.04 | -2.03 | 6.84E-02 | 2.99E-01 | -4.83 |
| 1428446_PM_at   | Dync2l1                                                                                    | DYNC2L1  | -0.19 | 2.55 | -2.03 | 6.84E-02 | 2.99E-01 | -4.83 |
| 1459182_PM_at   | ---                                                                                        | NA       | 0.41  | 3.20 | 2.03  | 6.84E-02 | 2.99E-01 | -4.83 |
| 1449934_PM_at   | Pura                                                                                       | PURA     | 0.75  | 6.38 | 2.03  | 6.84E-02 | 2.99E-01 | -4.83 |
| 1459232_PM_at   | ---                                                                                        | NA       | 0.20  | 2.55 | 2.03  | 6.84E-02 | 2.99E-01 | -4.83 |
| 1457312_PM_at   | ---                                                                                        | NA       | 0.30  | 3.89 | 2.03  | 6.84E-02 | 2.99E-01 | -4.83 |
| 1456109_PM_a_at | Mrps15                                                                                     | MRPS15   | -0.76 | 4.41 | -2.03 | 6.84E-02 | 2.99E-01 | -4.83 |
| 1442506_PM_at   | ---                                                                                        | NA       | 0.18  | 2.12 | 2.03  | 6.84E-02 | 2.99E-01 | -4.83 |

|                            |                          |          |       |       |       |          |          |       |
|----------------------------|--------------------------|----------|-------|-------|-------|----------|----------|-------|
| 1426114_PM_at              | Hnrnpab                  | NA       | 0.42  | 10.56 | 2.03  | 6.85E-02 | 2.99E-01 | -4.83 |
| 1452278_PM_a_at            | Hace1                    | HACE1    | -0.46 | 2.92  | -2.03 | 6.85E-02 | 3.00E-01 | -4.83 |
| 1446132_PM_at              | ---                      | NA       | 0.24  | 2.43  | 2.03  | 6.85E-02 | 3.00E-01 | -4.83 |
| 1422765_PM_at              | Mapre1                   | MAPRE1   | 0.44  | 3.17  | 2.03  | 6.85E-02 | 3.00E-01 | -4.83 |
| 1416246_PM_a_at            | Coro1a                   | CORO1A   | -0.65 | 3.48  | -2.03 | 6.86E-02 | 3.00E-01 | -4.83 |
| 1419739_PM_at              | Tpm2                     | TPM2     | 0.78  | 3.00  | 2.03  | 6.86E-02 | 3.00E-01 | -4.83 |
| 1446334_PM_at              | ---                      | NA       | 0.33  | 2.21  | 2.03  | 6.86E-02 | 3.00E-01 | -4.83 |
| 1423149_PM_at              | Skp1a                    | SKP1     | -0.55 | 7.87  | -2.03 | 6.86E-02 | 3.00E-01 | -4.83 |
| 1436002_PM_at              | Scube3                   | SCUBE3   | -0.24 | 2.67  | -2.03 | 6.86E-02 | 3.00E-01 | -4.83 |
| 1451639_PM_at              | Cebpg                    | CEBPG    | -0.71 | 3.53  | -2.03 | 6.86E-02 | 3.00E-01 | -4.83 |
| 1428355_PM_at              | Osbp2                    | OSBP2    | 0.53  | 5.76  | 2.03  | 6.87E-02 | 3.00E-01 | -4.83 |
| 1450596_PM_at              | Ofrr66                   | OR51B4   | 0.19  | 2.30  | 2.03  | 6.87E-02 | 3.00E-01 | -4.83 |
| 1420127_PM_s_at            | Ccpg1                    | CCPG1    | -0.79 | 5.85  | -2.03 | 6.87E-02 | 3.00E-01 | -4.83 |
| 1420802_PM_at              | Il13                     | IL13     | 0.24  | 2.49  | 2.03  | 6.87E-02 | 3.00E-01 | -4.83 |
| AFFX-18SRNAMur/X00686_M_at | ---                      | NA       | 0.40  | 11.49 | 2.03  | 6.87E-02 | 3.00E-01 | -4.83 |
| 1426131_PM_at              | Prss44                   | NA       | 0.18  | 2.17  | 2.03  | 6.87E-02 | 3.00E-01 | -4.83 |
| 1448696_PM_at              | Heph                     | HEPH     | -0.41 | 2.52  | -2.03 | 6.88E-02 | 3.00E-01 | -4.83 |
| 1434647_PM_at              | Egflam                   | EGFLAM   | 0.20  | 2.45  | 2.03  | 6.88E-02 | 3.00E-01 | -4.83 |
| 1433652_PM_at              | Igsf1                    | IGSF1    | 0.21  | 2.25  | 2.03  | 6.88E-02 | 3.00E-01 | -4.83 |
| 1428420_PM_a_at            | Exoc3l4                  | EXOC3L4  | 0.26  | 2.77  | 2.03  | 6.88E-02 | 3.00E-01 | -4.83 |
| 1432686_PM_at              | ---                      | NA       | -0.41 | 3.55  | -2.03 | 6.88E-02 | 3.00E-01 | -4.83 |
| 1456801_PM_at              | Gm38582                  | NA       | 0.18  | 2.42  | 2.03  | 6.88E-02 | 3.00E-01 | -4.83 |
| 1419963_PM_at              | Deptor                   | DEPTOR   | 0.32  | 3.40  | 2.03  | 6.88E-02 | 3.00E-01 | -4.83 |
| 1445389_PM_at              | ---                      | NA       | 0.39  | 7.06  | 2.03  | 6.88E-02 | 3.00E-01 | -4.83 |
| 1415937_PM_s_at            | Pdc61p                   | PDC61P   | -0.34 | 2.95  | -2.03 | 6.88E-02 | 3.00E-01 | -4.83 |
| 1448814_PM_at              | Gab1                     | GAB1     | -0.35 | 2.38  | -2.03 | 6.89E-02 | 3.00E-01 | -4.83 |
| 1436749_PM_at              | Mesdc2                   | MESDC2   | -0.20 | 2.32  | -2.03 | 6.89E-02 | 3.00E-01 | -4.83 |
| 1450428_PM_at              | Lhx1                     | LHX1     | 0.18  | 2.22  | 2.03  | 6.89E-02 | 3.00E-01 | -4.83 |
| 1425709_PM_at              | Rnf17                    | NA       | 0.19  | 2.23  | 2.03  | 6.89E-02 | 3.00E-01 | -4.83 |
| 1421588_PM_at              | Tnfsf14                  | TNFSF14  | 0.20  | 2.37  | 2.03  | 6.89E-02 | 3.00E-01 | -4.83 |
| 1460415_PM_a_at            | Cd40                     | CD40     | 0.21  | 2.34  | 2.03  | 6.89E-02 | 3.00E-01 | -4.83 |
| 1428007_PM_at              | Krtap13-1                | NA       | 0.21  | 2.50  | 2.03  | 6.89E-02 | 3.00E-01 | -4.83 |
| 1428571_PM_at              | Col9a1                   | COL9A1   | 0.21  | 2.83  | 2.03  | 6.89E-02 | 3.00E-01 | -4.83 |
| 1418753_PM_at              | Gfpt2                    | GFPT2    | 0.23  | 2.51  | 2.03  | 6.89E-02 | 3.00E-01 | -4.83 |
| 1415849_PM_s_at            | Stmn1                    | STMN1    | 0.41  | 8.03  | 2.03  | 6.89E-02 | 3.00E-01 | -4.83 |
| 1440090_PM_at              | Slc25a27                 | NA       | 0.42  | 2.62  | 2.03  | 6.89E-02 | 3.00E-01 | -4.83 |
| 1458824_PM_at              | Unc45a                   | UNC45A   | 0.56  | 3.26  | 2.03  | 6.89E-02 | 3.00E-01 | -4.83 |
| 1454742_PM_at              | Rasgef1b                 | NA       | 0.59  | 3.43  | 2.03  | 6.89E-02 | 3.00E-01 | -4.83 |
| 1452906_PM_at              | Meg3                     | NA       | 0.93  | 5.61  | 2.03  | 6.89E-02 | 3.00E-01 | -4.83 |
| 1440826_PM_s_at            | Elp6                     | ELP6     | -0.57 | 3.12  | -2.03 | 6.89E-02 | 3.00E-01 | -4.83 |
| 1454835_PM_at              | Epm2aip1                 | EPM2AI1  | -0.76 | 3.13  | -2.03 | 6.90E-02 | 3.00E-01 | -4.83 |
| 1443231_PM_at              | ---                      | NA       | 0.28  | 2.56  | 2.03  | 6.90E-02 | 3.00E-01 | -4.84 |
| 1442254_PM_at              | ---                      | NA       | 0.55  | 3.08  | 2.03  | 6.90E-02 | 3.01E-01 | -4.84 |
| 1439923_PM_at              | Tubgcp5                  | NA       | 0.24  | 2.26  | 2.03  | 6.90E-02 | 3.01E-01 | -4.84 |
| 1432019_PM_at              | Trub1                    | TRUB1    | 0.32  | 2.34  | 2.03  | 6.90E-02 | 3.01E-01 | -4.84 |
| 1453599_PM_at              | Trim71                   | TRIM71   | 0.37  | 2.72  | 2.03  | 6.90E-02 | 3.01E-01 | -4.84 |
| 1416989_PM_at              | Vps53                    | VPS53    | -0.47 | 3.99  | -2.03 | 6.90E-02 | 3.01E-01 | -4.84 |
| 1433477_PM_at              | Abr                      | ABR      | -0.42 | 3.36  | -2.03 | 6.91E-02 | 3.01E-01 | -4.84 |
| 1445634_PM_at              | ---                      | NA       | 0.37  | 3.79  | 2.03  | 6.91E-02 | 3.01E-01 | -4.84 |
| 1419470_PM_at              | Gnb4                     | GNB4     | 0.45  | 3.95  | 2.03  | 6.91E-02 | 3.01E-01 | -4.84 |
| 1430091_PM_at              | 1700001P01Rik            | C17orf98 | 0.16  | 2.25  | 2.03  | 6.91E-02 | 3.01E-01 | -4.84 |
| 1432945_PM_at              | 5230400M06Rik            | NA       | 0.48  | 2.55  | 2.03  | 6.91E-02 | 3.01E-01 | -4.84 |
| 1433496_PM_at              | Colgalt1                 | COLGALT1 | 0.44  | 3.84  | 2.03  | 6.92E-02 | 3.01E-01 | -4.84 |
| 1417320_PM_at              | Grpel1                   | GRPEL1   | -0.70 | 4.04  | -2.03 | 6.92E-02 | 3.01E-01 | -4.84 |
| 1445968_PM_at              | ---                      | NA       | 0.22  | 2.95  | 2.03  | 6.92E-02 | 3.01E-01 | -4.84 |
| 1444091_PM_a_at            | 6430571L13Rik            | C3orf18  | 0.22  | 2.40  | 2.03  | 6.92E-02 | 3.01E-01 | -4.84 |
| 1456119_PM_at              | Grm5                     | GRM5     | -0.99 | 6.78  | -2.03 | 6.92E-02 | 3.01E-01 | -4.84 |
| 1451895_PM_a_at            | Dhcr24                   | DHCR24   | -0.56 | 4.05  | -2.03 | 6.93E-02 | 3.01E-01 | -4.84 |
| 1424897_PM_at              | Gpr85                    | GPR85    | -0.39 | 3.99  | -2.03 | 6.93E-02 | 3.01E-01 | -4.84 |
| 1441623_PM_at              | Gm7967                   | NA       | 0.15  | 2.43  | 2.03  | 6.93E-02 | 3.01E-01 | -4.84 |
| 1445925_PM_at              | D15Ert492e               | NA       | 0.24  | 2.53  | 2.03  | 6.93E-02 | 3.01E-01 | -4.84 |
| 1456992_PM_at              | Ube3c                    | UBE3C    | -0.31 | 2.50  | -2.03 | 6.93E-02 | 3.01E-01 | -4.84 |
| 1428297_PM_at              | Map4k2                   | MAP4K2   | 0.36  | 3.11  | 2.03  | 6.93E-02 | 3.01E-01 | -4.84 |
| 1453862_PM_at              | 4930465K10Rik            | NA       | 0.16  | 2.27  | 2.03  | 6.93E-02 | 3.01E-01 | -4.84 |
| 1435099_PM_at              | Utp14a                   | UTP14C   | 0.39  | 3.97  | 2.03  | 6.94E-02 | 3.01E-01 | -4.84 |
| 1422667_PM_at              | Krt15                    | KRT15    | 0.19  | 2.55  | 2.02  | 6.94E-02 | 3.02E-01 | -4.84 |
| 1422256_PM_at              | Sstr2                    | SSTR2    | 0.25  | 2.47  | 2.02  | 6.94E-02 | 3.02E-01 | -4.84 |
| 1457209_PM_at              | Ddhd2                    | DDHD2    | 0.34  | 3.17  | 2.02  | 6.94E-02 | 3.02E-01 | -4.84 |
| 1453078_PM_at              | 2610002M06Rik /// Chmp1b | NA       | -0.42 | 5.48  | -2.02 | 6.94E-02 | 3.02E-01 | -4.84 |
| 1435080_PM_x_at            | Pnlsr                    | PNLSR    | -0.38 | 8.36  | -2.02 | 6.94E-02 | 3.02E-01 | -4.84 |
| 1438721_PM_a_at            | Irf3                     | IRF3     | -0.42 | 2.81  | -2.02 | 6.95E-02 | 3.02E-01 | -4.84 |
| 1440378_PM_at              | ---                      | NA       | 0.31  | 2.46  | 2.02  | 6.95E-02 | 3.02E-01 | -4.84 |
| 1450044_PM_at              | Fzd7                     | FZD7     | -0.70 | 4.05  | -2.02 | 6.95E-02 | 3.02E-01 | -4.84 |
| 1429256_PM_at              | Meg3                     | NA       | 0.57  | 7.34  | 2.02  | 6.95E-02 | 3.02E-01 | -4.84 |

|                 |                                                                                        |          |       |      |       |          |          |       |
|-----------------|----------------------------------------------------------------------------------------|----------|-------|------|-------|----------|----------|-------|
| 1449412_PM_at   | Mien1                                                                                  | MIEN1    | -0.78 | 3.87 | -2.02 | 6.95E-02 | 3.02E-01 | -4.84 |
| 1445830_PM_at   | Ctndd1                                                                                 | NA       | 0.24  | 2.83 | 2.02  | 6.95E-02 | 3.02E-01 | -4.84 |
| 1440990_PM_at   | Klf26b                                                                                 | KIF26B   | 0.42  | 2.75 | 2.02  | 6.95E-02 | 3.02E-01 | -4.84 |
| 1451005_PM_at   | Sumo1                                                                                  | SUMO1    | -0.86 | 5.71 | -2.02 | 6.96E-02 | 3.02E-01 | -4.84 |
| 1423608_PM_at   | Itm2a                                                                                  | ITM2A    | -0.54 | 4.46 | -2.02 | 6.96E-02 | 3.02E-01 | -4.84 |
| 1417336_PM_a_at | Sytl4                                                                                  | SYTL4    | 0.16  | 2.33 | 2.02  | 6.96E-02 | 3.02E-01 | -4.84 |
| 1454101_PM_at   | Ppp2r2cos                                                                              | NA       | 0.20  | 2.63 | 2.02  | 6.96E-02 | 3.02E-01 | -4.84 |
| 1438555_PM_x_at | Muc4                                                                                   | MUC4     | 0.26  | 3.96 | 2.02  | 6.96E-02 | 3.02E-01 | -4.84 |
| 1417121_PM_at   | Gabra6                                                                                 | GABRA6   | 1.44  | 3.34 | 2.02  | 6.96E-02 | 3.02E-01 | -4.84 |
| 1429908_PM_at   | Snmp48                                                                                 | SNRNP48  | 0.22  | 2.93 | 2.02  | 6.96E-02 | 3.02E-01 | -4.84 |
| 1443874_PM_at   | Zc2hc1c                                                                                | ZC2HC1C  | 0.24  | 2.69 | 2.02  | 6.96E-02 | 3.02E-01 | -4.84 |
| 1440962_PM_at   | Slc8a3                                                                                 | SLC8A3   | 0.35  | 2.96 | 2.02  | 6.96E-02 | 3.02E-01 | -4.84 |
| 1444240_PM_at   | Shank1                                                                                 | SHANK1   | 0.49  | 3.11 | 2.02  | 6.96E-02 | 3.02E-01 | -4.84 |
| 1415825_PM_s_at | Csnk1d                                                                                 | CSNK1D   | -0.41 | 2.77 | -2.02 | 6.97E-02 | 3.02E-01 | -4.84 |
| 1438316_PM_a_at | Ccdc102a                                                                               | CCDC102A | 0.41  | 2.80 | 2.02  | 6.97E-02 | 3.02E-01 | -4.84 |
| 1435411_PM_at   | Neurod2                                                                                | NEUROD2  | -1.09 | 5.96 | -2.02 | 6.98E-02 | 3.02E-01 | -4.85 |
| 1423734_PM_at   | Rac1                                                                                   | RAC1     | -0.91 | 6.95 | -2.02 | 6.97E-02 | 3.02E-01 | -4.85 |
| 1419381_PM_at   | Terf2ip                                                                                | TERF2IP  | -0.60 | 4.14 | -2.02 | 6.98E-02 | 3.02E-01 | -4.85 |
| 1416830_PM_at   | Gimp                                                                                   | GLMP     | 0.18  | 2.21 | 2.02  | 6.97E-02 | 3.02E-01 | -4.85 |
| 1445009_PM_at   | ---                                                                                    | NA       | 0.24  | 2.46 | 2.02  | 6.98E-02 | 3.02E-01 | -4.85 |
| 1454016_PM_at   | ---                                                                                    | NA       | 0.27  | 2.73 | 2.02  | 6.98E-02 | 3.02E-01 | -4.85 |
| 1442805_PM_at   | ---                                                                                    | NA       | 0.46  | 2.92 | 2.02  | 6.98E-02 | 3.02E-01 | -4.85 |
| 1446599_PM_at   | ---                                                                                    | NA       | 0.45  | 2.07 | 2.02  | 6.98E-02 | 3.02E-01 | -4.85 |
| 1450525_PM_at   | Gli3                                                                                   | GLI3     | 0.29  | 2.80 | 2.02  | 6.98E-02 | 3.02E-01 | -4.85 |
| 1437018_PM_at   | Pnma2                                                                                  | PNMA2    | -0.58 | 3.12 | -2.02 | 6.98E-02 | 3.02E-01 | -4.85 |
| 1421633_PM_a_at | Hapl1                                                                                  | HAPLN1   | 0.26  | 2.74 | 2.02  | 6.98E-02 | 3.02E-01 | -4.85 |
| 1434461_PM_at   | Zfp715                                                                                 | ZNF175   | -0.55 | 3.47 | -2.02 | 6.98E-02 | 3.02E-01 | -4.85 |
| 1446251_PM_at   | Gm20611                                                                                | NA       | 0.20  | 2.64 | 2.02  | 6.98E-02 | 3.02E-01 | -4.85 |
| 1420645_PM_at   | Pcgf2                                                                                  | PCGF2    | 0.67  | 4.77 | 2.02  | 6.98E-02 | 3.02E-01 | -4.85 |
| 1436594_PM_at   | Zfp719                                                                                 | ZNF175   | -0.33 | 2.75 | -2.02 | 6.99E-02 | 3.02E-01 | -4.85 |
| 1454066_PM_at   | Mina                                                                                   | RIOX2    | 0.17  | 2.12 | 2.02  | 6.99E-02 | 3.02E-01 | -4.85 |
| 1430137_PM_at   | 1300002E11Rik                                                                          | NA       | 0.23  | 2.54 | 2.02  | 6.99E-02 | 3.02E-01 | -4.85 |
| 1416827_PM_at   | Tbxas1                                                                                 | TBXAS1   | 0.26  | 3.49 | 2.02  | 6.99E-02 | 3.02E-01 | -4.85 |
| 1458874_PM_at   | ---                                                                                    | NA       | 0.20  | 2.70 | 2.02  | 6.99E-02 | 3.02E-01 | -4.85 |
| 1436852_PM_at   | E130308A19Rik                                                                          | KIAA1958 | 0.24  | 2.52 | 2.02  | 6.99E-02 | 3.03E-01 | -4.85 |
| 1456316_PM_a_at | Acbd3                                                                                  | ACBD3    | 0.75  | 3.09 | 2.02  | 6.99E-02 | 3.03E-01 | -4.85 |
| 1457033_PM_at   | LOC100862413 ///<br>LOC100862415 /// Zscan4a<br>/// Zscan4c /// Zscan4d ///<br>Zscan4f | ZSCAN4   | 0.20  | 2.67 | 2.02  | 6.99E-02 | 3.03E-01 | -4.85 |
| 1416154_PM_at   | Srp54a /// Srp54b /// Srp54c                                                           | SRP54    | 0.58  | 4.61 | 2.02  | 6.99E-02 | 3.03E-01 | -4.85 |
| 1451375_PM_at   | Ehf                                                                                    | EHF      | -0.30 | 2.49 | -2.02 | 6.99E-02 | 3.03E-01 | -4.85 |
| 1437675_PM_at   | Slc8a1                                                                                 | NA       | -0.31 | 2.84 | -2.02 | 7.00E-02 | 3.03E-01 | -4.85 |
| 1445221_PM_at   | ---                                                                                    | NA       | 0.17  | 2.25 | 2.02  | 7.00E-02 | 3.03E-01 | -4.85 |
| 1426966_PM_at   | Axin1                                                                                  | AXIN1    | 0.24  | 2.82 | 2.02  | 7.00E-02 | 3.03E-01 | -4.85 |
| 1442683_PM_at   | Hmg20a                                                                                 | NA       | 0.23  | 2.95 | 2.02  | 7.00E-02 | 3.03E-01 | -4.85 |
| 1430639_PM_at   | Ppp1r3fos                                                                              | NA       | 0.26  | 2.35 | 2.02  | 7.00E-02 | 3.03E-01 | -4.85 |
| 1416843_PM_at   | Pde6d                                                                                  | PDE6D    | 0.51  | 3.43 | 2.02  | 7.00E-02 | 3.03E-01 | -4.85 |
| 1429440_PM_at   | 1810041L15Rik                                                                          | KIAA1644 | -0.57 | 3.68 | -2.02 | 7.01E-02 | 3.03E-01 | -4.85 |
| 1421393_PM_at   | Grin2d                                                                                 | GRIN2D   | 0.21  | 2.63 | 2.02  | 7.01E-02 | 3.03E-01 | -4.85 |
| 1417942_PM_at   | Lypd3                                                                                  | LYPD3    | 0.22  | 2.71 | 2.02  | 7.01E-02 | 3.03E-01 | -4.85 |
| 1458997_PM_at   | Iglon5                                                                                 | IGLON5   | 0.24  | 3.11 | 2.02  | 7.01E-02 | 3.03E-01 | -4.85 |
| 1422520_PM_at   | Nefm                                                                                   | NEFM     | -0.98 | 5.15 | -2.02 | 7.01E-02 | 3.03E-01 | -4.85 |
| 1435545_PM_at   | Gltscr1l                                                                               | NA       | -0.52 | 3.14 | -2.02 | 7.01E-02 | 3.03E-01 | -4.85 |
| 1448210_PM_at   | Rab1a                                                                                  | RAB1A    | -0.46 | 3.51 | -2.02 | 7.01E-02 | 3.03E-01 | -4.85 |
| 1435817_PM_x_at | LOC105244208 /// Rps6                                                                  | NA       | -0.35 | 5.46 | -2.02 | 7.01E-02 | 3.03E-01 | -4.85 |
| 1446878_PM_at   | ---                                                                                    | NA       | 0.20  | 2.86 | 2.02  | 7.01E-02 | 3.03E-01 | -4.85 |
| 1442058_PM_s_at | Psmc3ip                                                                                | PSMC3IP  | 0.33  | 3.55 | 2.02  | 7.01E-02 | 3.03E-01 | -4.85 |
| 1440200_PM_at   | Fam184b                                                                                | FAM184B  | 0.23  | 2.55 | 2.02  | 7.02E-02 | 3.03E-01 | -4.85 |
| 1427628_PM_at   | Trbv13-2                                                                               | NA       | 0.22  | 2.44 | 2.02  | 7.02E-02 | 3.03E-01 | -4.85 |
| 1447840_PM_x_at | E2f1                                                                                   | E2F1     | 0.27  | 2.79 | 2.02  | 7.02E-02 | 3.03E-01 | -4.85 |
| 1429991_PM_at   | Fezf1                                                                                  | FEZF1    | 0.21  | 2.61 | 2.02  | 7.02E-02 | 3.03E-01 | -4.85 |
| 1426165_PM_a_at | Casp3                                                                                  | CASP3    | 0.28  | 2.27 | 2.02  | 7.02E-02 | 3.03E-01 | -4.85 |
| 1447711_PM_x_at | ---                                                                                    | NA       | 0.40  | 3.03 | 2.02  | 7.02E-02 | 3.03E-01 | -4.85 |
| 1444997_PM_at   | ---                                                                                    | NA       | 0.17  | 2.25 | 2.02  | 7.03E-02 | 3.03E-01 | -4.85 |
| 1451303_PM_at   | Nrde2                                                                                  | NRDE2    | 0.21  | 2.40 | 2.02  | 7.03E-02 | 3.03E-01 | -4.85 |
| 1435989_PM_x_at | Krt8                                                                                   | NA       | 0.26  | 2.57 | 2.02  | 7.03E-02 | 3.03E-01 | -4.85 |
| 1452391_PM_at   | Cxadr                                                                                  | NA       | 0.43  | 2.73 | 2.02  | 7.03E-02 | 3.03E-01 | -4.85 |
| 1450571_PM_a_at | Bfsp1                                                                                  | BFSP1    | 0.22  | 2.68 | 2.02  | 7.03E-02 | 3.03E-01 | -4.85 |
| 1424647_PM_at   | Gabrp                                                                                  | GABRP    | 0.42  | 2.73 | 2.02  | 7.04E-02 | 3.04E-01 | -4.85 |
| 1421414_PM_a_at | Sema6a                                                                                 | SEMA6A   | 0.36  | 2.72 | 2.02  | 7.04E-02 | 3.04E-01 | -4.85 |
| 1439162_PM_at   | Sp3os                                                                                  | NA       | 0.23  | 2.86 | 2.02  | 7.04E-02 | 3.04E-01 | -4.85 |
| 1453989_PM_at   | Stxbp4                                                                                 | STXBP4   | 0.25  | 2.37 | 2.02  | 7.04E-02 | 3.04E-01 | -4.85 |
| 1460124_PM_at   | Nccrp1                                                                                 | NCCRP1   | 0.24  | 2.24 | 2.02  | 7.04E-02 | 3.04E-01 | -4.85 |



|                 |                    |          |       |       |       |          |          |       |
|-----------------|--------------------|----------|-------|-------|-------|----------|----------|-------|
| 1426517_PM_at   | Gnaz               | GNAZ     | 0.45  | 3.32  | 2.02  | 7.04E-02 | 3.04E-01 | -4.85 |
| 1433470_PM_a_at | Immt               | IMMT     | -0.77 | 4.24  | -2.02 | 7.05E-02 | 3.04E-01 | -4.85 |
| 1415816_PM_at   | Cct7               | CCT7     | -1.34 | 7.90  | -2.01 | 7.06E-02 | 3.04E-01 | -4.86 |
| 1429060_PM_at   | Malat1             | NA       | -0.42 | 11.09 | -2.02 | 7.06E-02 | 3.04E-01 | -4.86 |
| 1438354_PM_x_at | Cnn3               | CNN3     | -0.26 | 2.53  | -2.02 | 7.05E-02 | 3.04E-01 | -4.86 |
| 1455191_PM_x_at | Pip5k1a            | PIP5K1A  | -0.22 | 6.20  | -2.02 | 7.06E-02 | 3.04E-01 | -4.86 |
| 1445156_PM_at   | C81001             | NA       | 0.18  | 2.43  | 2.01  | 7.06E-02 | 3.04E-01 | -4.86 |
| 1458163_PM_at   | Zfp941             | ZNF519   | 0.18  | 2.25  | 2.01  | 7.06E-02 | 3.04E-01 | -4.86 |
| 1447165_PM_at   | ---                | NA       | 0.28  | 2.51  | 2.01  | 7.06E-02 | 3.04E-01 | -4.86 |
| 1433095_PM_at   | LOC102637542       | NA       | 0.66  | 2.78  | 2.02  | 7.05E-02 | 3.04E-01 | -4.86 |
| 1420476_PM_a_at | Nap1l1             | NAP1L1   | 0.69  | 6.82  | 2.02  | 7.06E-02 | 3.04E-01 | -4.86 |
| 1441272_PM_at   | ---                | NA       | 0.86  | 3.01  | 2.02  | 7.05E-02 | 3.04E-01 | -4.86 |
| 1447510_PM_at   | ---                | NA       | 1.11  | 3.69  | 2.01  | 7.06E-02 | 3.04E-01 | -4.86 |
| 1445248_PM_at   | ---                | NA       | 0.28  | 2.65  | 2.01  | 7.06E-02 | 3.04E-01 | -4.86 |
| 1423203_PM_a_at | Cetn1              | CETN1    | 0.30  | 2.60  | 2.01  | 7.06E-02 | 3.04E-01 | -4.86 |
| 1451573_PM_a_at | Stx4a              | STX4     | 0.49  | 4.10  | 2.01  | 7.06E-02 | 3.04E-01 | -4.86 |
| 1427047_PM_at   | Nup188             | NUP188   | 0.24  | 3.07  | 2.01  | 7.06E-02 | 3.04E-01 | -4.86 |
| 1459396_PM_at   | Tmem241            | TMEM241  | 0.27  | 2.41  | 2.01  | 7.06E-02 | 3.04E-01 | -4.86 |
| 1450494_PM_x_at | Ceacam1            | PSG7     | 0.35  | 2.94  | 2.01  | 7.06E-02 | 3.04E-01 | -4.86 |
| 1454041_PM_at   | ---                | NA       | 0.36  | 2.32  | 2.01  | 7.06E-02 | 3.04E-01 | -4.86 |
| 1459867_PM_x_at | Unc45a             | UNC45A   | 0.38  | 3.17  | 2.01  | 7.06E-02 | 3.04E-01 | -4.86 |
| 1421170_PM_a_at | Plcb1              | PLCB1    | -0.29 | 2.68  | -2.01 | 7.07E-02 | 3.04E-01 | -4.86 |
| 1449873_PM_at   | Bmp8a              | BMP8B    | 0.21  | 2.63  | 2.01  | 7.07E-02 | 3.04E-01 | -4.86 |
| 1429367_PM_at   | Wipi2              | WIPI2    | 0.22  | 3.71  | 2.01  | 7.07E-02 | 3.04E-01 | -4.86 |
| 1446521_PM_at   | ---                | NA       | 0.33  | 3.45  | 2.01  | 7.07E-02 | 3.04E-01 | -4.86 |
| 1431520_PM_at   | LOC102639979       | NA       | 0.33  | 2.74  | 2.01  | 7.07E-02 | 3.04E-01 | -4.86 |
| 1447105_PM_at   | ---                | NA       | 0.20  | 2.91  | 2.01  | 7.08E-02 | 3.04E-01 | -4.86 |
| 1421949_PM_a_at | Cep89              | CEP89    | 0.26  | 2.51  | 2.01  | 7.08E-02 | 3.04E-01 | -4.86 |
| 1444648_PM_at   | Fam178b            | FAM178B  | 0.27  | 2.87  | 2.01  | 7.08E-02 | 3.04E-01 | -4.86 |
| 1453254_PM_at   | 1700034O15Rik      | C7orf34  | 0.21  | 2.36  | 2.01  | 7.08E-02 | 3.04E-01 | -4.86 |
| 1445441_PM_at   | Gm5142             | NA       | 0.17  | 2.57  | 2.01  | 7.08E-02 | 3.04E-01 | -4.86 |
| 1460160_PM_at   | ---                | NA       | 0.20  | 2.35  | 2.01  | 7.08E-02 | 3.04E-01 | -4.86 |
| 1427649_PM_at   | ---                | NA       | 0.28  | 2.63  | 2.01  | 7.08E-02 | 3.04E-01 | -4.86 |
| 1416926_PM_at   | Trp53inp1          | TP53INP1 | -0.67 | 5.05  | -2.01 | 7.08E-02 | 3.04E-01 | -4.86 |
| 1415850_PM_at   | Rasa3              | RASA3    | -0.46 | 4.87  | -2.01 | 7.08E-02 | 3.04E-01 | -4.86 |
| 1421846_PM_at   | Wsb2               | WSB2     | 0.24  | 2.46  | 2.01  | 7.08E-02 | 3.04E-01 | -4.86 |
| 1430797_PM_at   | Xpo4               | XPO4     | 0.50  | 3.28  | 2.01  | 7.08E-02 | 3.04E-01 | -4.86 |
| 1427748_PM_at   | Igkv1-117          | NA       | 0.15  | 1.97  | 2.01  | 7.09E-02 | 3.05E-01 | -4.86 |
| 1424245_PM_at   | Ces2c /// Ces2d-ps | CES2     | 0.25  | 2.74  | 2.01  | 7.09E-02 | 3.05E-01 | -4.86 |
| 1432340_PM_at   | 1700121N20Rik      | NA       | 0.22  | 2.49  | 2.01  | 7.09E-02 | 3.05E-01 | -4.86 |
| 1434365_PM_a_at | BC055324           | C1orf112 | 0.26  | 3.07  | 2.01  | 7.09E-02 | 3.05E-01 | -4.86 |
| 1416591_PM_at   | Rab34              | RAB34    | 0.26  | 2.66  | 2.01  | 7.09E-02 | 3.05E-01 | -4.86 |
| 1447976_PM_at   | Zfp442             | NA       | 0.26  | 2.52  | 2.01  | 7.10E-02 | 3.05E-01 | -4.86 |
| 1444981_PM_at   | Igdcc3             | NA       | 0.37  | 3.55  | 2.01  | 7.09E-02 | 3.05E-01 | -4.86 |
| 1426622_PM_a_at | Qpct               | QPCT     | -0.33 | 2.87  | -2.01 | 7.10E-02 | 3.05E-01 | -4.86 |
| 1446799_PM_at   | ---                | NA       | -0.28 | 2.38  | -2.01 | 7.10E-02 | 3.05E-01 | -4.86 |
| 1449201_PM_at   | Star               | STAR     | 0.17  | 2.42  | 2.01  | 7.10E-02 | 3.05E-01 | -4.86 |
| 1441523_PM_at   | NF1                | NF1      | 0.26  | 2.59  | 2.01  | 7.10E-02 | 3.05E-01 | -4.86 |
| 1437770_PM_at   | ---                | NA       | 0.27  | 2.75  | 2.01  | 7.10E-02 | 3.05E-01 | -4.86 |
| 1418391_PM_at   | Phf21a             | PHF21A   | 0.47  | 5.94  | 2.01  | 7.10E-02 | 3.05E-01 | -4.86 |
| 1438813_PM_at   | Gm19395            | NA       | 0.18  | 2.10  | 2.01  | 7.11E-02 | 3.05E-01 | -4.86 |
| 1443444_PM_at   | ---                | NA       | 0.20  | 2.42  | 2.01  | 7.10E-02 | 3.05E-01 | -4.86 |
| 1432435_PM_s_at | Fam118b            | FAM118B  | -0.35 | 2.57  | -2.01 | 7.11E-02 | 3.05E-01 | -4.86 |
| 1419069_PM_at   | Rabgef1            | RABGEF1  | -0.27 | 2.83  | -2.01 | 7.11E-02 | 3.05E-01 | -4.86 |
| 1443575_PM_at   | 2310040G24Rik      | NA       | 0.32  | 2.61  | 2.01  | 7.11E-02 | 3.05E-01 | -4.86 |
| 1447624_PM_s_at | Stox2              | STOX2    | -0.67 | 6.92  | -2.01 | 7.11E-02 | 3.05E-01 | -4.86 |
| 1429488_PM_at   | Zdhc21             | ZDHHC21  | -0.38 | 2.78  | -2.01 | 7.11E-02 | 3.05E-01 | -4.86 |
| 1438896_PM_at   | ---                | NA       | 0.40  | 3.45  | 2.01  | 7.11E-02 | 3.05E-01 | -4.86 |
| 1433647_PM_s_at | Rhobtb3            | RHOBTB3  | -0.33 | 2.90  | -2.01 | 7.11E-02 | 3.05E-01 | -4.86 |
| 1427214_PM_at   | Agmat              | AGMAT    | 0.21  | 3.30  | 2.01  | 7.11E-02 | 3.05E-01 | -4.86 |
| 1430017_PM_at   | Lmntd2             | LMNTD2   | 0.20  | 2.78  | 2.01  | 7.11E-02 | 3.05E-01 | -4.86 |
| 1451202_PM_at   | C330007P06Rik      | CXorf56  | -0.61 | 4.71  | -2.01 | 7.12E-02 | 3.05E-01 | -4.86 |
| 1435471_PM_at   | Zfp708             | ZNF720   | -0.26 | 2.87  | -2.01 | 7.12E-02 | 3.05E-01 | -4.86 |
| 1447964_PM_at   | Ttl                | TTL      | 0.27  | 2.81  | 2.01  | 7.12E-02 | 3.05E-01 | -4.86 |
| 1417408_PM_at   | F3                 | F3       | -0.24 | 3.29  | -2.01 | 7.12E-02 | 3.05E-01 | -4.86 |
| 1450582_PM_at   | H2-Q5              | NA       | 0.25  | 2.79  | 2.01  | 7.12E-02 | 3.05E-01 | -4.86 |
| 1429681_PM_a_at | Tecr               | TECR     | -0.83 | 8.52  | -2.01 | 7.12E-02 | 3.05E-01 | -4.86 |
| 1445587_PM_at   | ---                | NA       | 0.24  | 2.58  | 2.01  | 7.13E-02 | 3.05E-01 | -4.87 |
| 1423954_PM_at   | C3                 | C3       | 0.30  | 2.86  | 2.01  | 7.13E-02 | 3.05E-01 | -4.87 |
| 1417856_PM_at   | Relb               | RELB     | 0.18  | 2.35  | 2.01  | 7.13E-02 | 3.06E-01 | -4.87 |
| 1422354_PM_at   | Olfir544           | NA       | 0.20  | 2.45  | 2.01  | 7.13E-02 | 3.06E-01 | -4.87 |
| 1451516_PM_at   | Rheb1l             | RHEBL1   | 0.26  | 2.44  | 2.01  | 7.13E-02 | 3.06E-01 | -4.87 |
| 1452588_PM_at   | Zfp688             | ZNF688   | 0.30  | 3.54  | 2.01  | 7.14E-02 | 3.06E-01 | -4.87 |
| 1446139_PM_at   | ---                | NA       | 0.39  | 2.95  | 2.01  | 7.14E-02 | 3.06E-01 | -4.87 |
| 1451105_PM_at   | Vash2              | VASH2    | 0.25  | 2.51  | 2.01  | 7.14E-02 | 3.06E-01 | -4.87 |

|                 |                     |          |       |      |       |          |          |       |
|-----------------|---------------------|----------|-------|------|-------|----------|----------|-------|
| 1439702_PM_at   | ---                 | NA       | 0.48  | 3.27 | 2.01  | 7.14E-02 | 3.06E-01 | -4.87 |
| 1426026_PM_at   | Prpf6               | PRPF6    | 0.19  | 2.47 | 2.01  | 7.14E-02 | 3.06E-01 | -4.87 |
| 1440609_PM_at   | Map4k4              | MAP4K4   | 0.19  | 2.22 | 2.01  | 7.14E-02 | 3.06E-01 | -4.87 |
| 1421708_PM_a_at | Stat6               | STAT6    | 0.20  | 2.45 | 2.01  | 7.14E-02 | 3.06E-01 | -4.87 |
| 1424679_PM_at   | Mab211l             | MAB211L  | 0.24  | 2.44 | 2.01  | 7.14E-02 | 3.06E-01 | -4.87 |
| 1446544_PM_at   | ---                 | NA       | 0.34  | 3.56 | 2.01  | 7.14E-02 | 3.06E-01 | -4.87 |
| 1459482_PM_at   | Trpm2               | TRPM2    | 0.34  | 2.60 | 2.01  | 7.14E-02 | 3.06E-01 | -4.87 |
| 1449681_PM_at   | Hdgf                | NA       | -0.72 | 5.83 | -2.01 | 7.15E-02 | 3.06E-01 | -4.87 |
| 1439960_PM_at   | Rpsud2              | NA       | 0.49  | 2.64 | 2.01  | 7.14E-02 | 3.06E-01 | -4.87 |
| 1448154_PM_at   | Ndrp2               | NDRG2    | -0.87 | 9.05 | -2.01 | 7.15E-02 | 3.06E-01 | -4.87 |
| 1447924_PM_at   | Nucks1              | NUCKS1   | 0.55  | 2.68 | 2.01  | 7.16E-02 | 3.06E-01 | -4.87 |
| 1458161_PM_at   | Kcnq1ot1            | NA       | 0.26  | 2.65 | 2.01  | 7.16E-02 | 3.06E-01 | -4.87 |
| 1446659_PM_at   | ---                 | NA       | -0.31 | 2.31 | -2.01 | 7.17E-02 | 3.07E-01 | -4.87 |
| 1449781_PM_at   | AA517650            | NA       | -0.29 | 2.17 | -2.01 | 7.17E-02 | 3.07E-01 | -4.87 |
| 1446262_PM_at   | ---                 | NA       | 0.15  | 2.24 | 2.01  | 7.17E-02 | 3.07E-01 | -4.87 |
| 1454425_PM_at   | 5830495A06Rik       | NA       | 0.17  | 2.58 | 2.01  | 7.17E-02 | 3.07E-01 | -4.87 |
| 1436321_PM_at   | B3gnt7              | B3GNT7   | 0.23  | 2.58 | 2.01  | 7.17E-02 | 3.07E-01 | -4.87 |
| 1450547_PM_x_at | Usp17lc /// Usp17ld | USP17L15 | 0.33  | 2.79 | 2.01  | 7.17E-02 | 3.07E-01 | -4.87 |
| 1441558_PM_at   | ---                 | NA       | 0.40  | 2.34 | 2.01  | 7.17E-02 | 3.07E-01 | -4.87 |
| 1459942_PM_at   | ---                 | NA       | 0.20  | 2.67 | 2.01  | 7.17E-02 | 3.07E-01 | -4.87 |
| 1451559_PM_a_at | Dhrs4               | DHRS4L2  | -0.21 | 2.67 | -2.01 | 7.17E-02 | 3.07E-01 | -4.87 |
| 1416134_PM_at   | Ap1p1               | APLP1    | -0.85 | 5.90 | -2.00 | 7.18E-02 | 3.07E-01 | -4.87 |
| 1455245_PM_x_at | Rpl13               | RPL13    | -0.40 | 8.72 | -2.00 | 7.18E-02 | 3.07E-01 | -4.87 |
| 1452988_PM_at   | 2610306M01Rik       | NA       | 0.31  | 2.94 | 2.00  | 7.18E-02 | 3.07E-01 | -4.87 |
| 1432596_PM_at   | ---                 | NA       | 0.25  | 2.64 | 2.00  | 7.18E-02 | 3.07E-01 | -4.87 |
| 1435503_PM_at   | Ap5z1               | AP5Z1    | 0.26  | 2.61 | 2.00  | 7.18E-02 | 3.07E-01 | -4.87 |
| 1430655_PM_at   | 4631405K08Rik       | NA       | 0.30  | 2.69 | 2.00  | 7.18E-02 | 3.07E-01 | -4.87 |
| 1455504_PM_a_at | Mkrrn1              | MKRN1    | 0.52  | 3.26 | 2.00  | 7.18E-02 | 3.07E-01 | -4.87 |
| 1440842_PM_at   | ---                 | NA       | 0.19  | 2.40 | 2.00  | 7.19E-02 | 3.07E-01 | -4.87 |
| 1439551_PM_at   | ---                 | NA       | 0.31  | 2.31 | 2.00  | 7.19E-02 | 3.07E-01 | -4.87 |
| 1449334_PM_at   | Timp3               | TIMP3    | -0.85 | 5.44 | -2.00 | 7.19E-02 | 3.07E-01 | -4.87 |
| 1451649_PM_a_at | Wdr75               | WDR75    | -0.54 | 5.71 | -2.00 | 7.19E-02 | 3.07E-01 | -4.87 |
| 1451796_PM_s_at | Hdc                 | HDC      | 0.26  | 2.53 | 2.00  | 7.19E-02 | 3.07E-01 | -4.87 |
| 1424311_PM_at   | Carkd               | NAXD     | -0.43 | 3.34 | -2.00 | 7.20E-02 | 3.07E-01 | -4.87 |
| 1429265_PM_a_at | Rnf130              | RNF130   | -0.43 | 4.05 | -2.00 | 7.20E-02 | 3.07E-01 | -4.87 |
| 1432761_PM_at   | 4930551115Rik       | NA       | 0.21  | 2.40 | 2.00  | 7.20E-02 | 3.07E-01 | -4.87 |
| 1437761_PM_at   | Luc7l2              | NA       | -0.65 | 4.21 | -2.00 | 7.20E-02 | 3.07E-01 | -4.87 |
| 1457648_PM_x_at | Fam20c              | FAM20C   | 0.20  | 2.69 | 2.00  | 7.20E-02 | 3.07E-01 | -4.87 |
| 1433009_PM_at   | LOC105244793        | NA       | 0.28  | 3.00 | 2.00  | 7.20E-02 | 3.07E-01 | -4.87 |
| 1444123_PM_at   | Prdm2               | PRDM2    | 0.32  | 2.67 | 2.00  | 7.20E-02 | 3.07E-01 | -4.87 |
| 1418590_PM_at   | Kpna6               | KPNA6    | 0.37  | 3.24 | 2.00  | 7.20E-02 | 3.07E-01 | -4.87 |
| 1460517_PM_at   | 9130409J20Rik       | NA       | 0.16  | 2.27 | 2.00  | 7.20E-02 | 3.07E-01 | -4.88 |
| 1454072_PM_at   | 4731417B20Rik       | NA       | 0.23  | 2.48 | 2.00  | 7.20E-02 | 3.07E-01 | -4.88 |
| 1453350_PM_at   | Urgcp               | URGCP    | 0.41  | 2.83 | 2.00  | 7.20E-02 | 3.07E-01 | -4.88 |
| 1438984_PM_x_at | Psmb4               | PSMB4    | 0.59  | 7.65 | 2.00  | 7.20E-02 | 3.07E-01 | -4.88 |
| 1445870_PM_at   | ---                 | NA       | 0.21  | 2.45 | 2.00  | 7.21E-02 | 3.07E-01 | -4.88 |
| 1456573_PM_x_at | Nnt                 | NNT      | 0.40  | 9.40 | 2.00  | 7.21E-02 | 3.07E-01 | -4.88 |
| 1427692_PM_a_at | Cask                | CASK     | -0.70 | 5.58 | -2.00 | 7.22E-02 | 3.08E-01 | -4.88 |
| 1446173_PM_at   | ---                 | NA       | 0.16  | 2.19 | 2.00  | 7.22E-02 | 3.08E-01 | -4.88 |
| 1457512_PM_at   | Gm40568             | NA       | 0.18  | 2.15 | 2.00  | 7.22E-02 | 3.08E-01 | -4.88 |
| 1446170_PM_at   | Abcc12              | ABCC12   | 0.23  | 2.31 | 2.00  | 7.22E-02 | 3.08E-01 | -4.88 |
| 1445988_PM_at   | ---                 | NA       | 0.31  | 2.43 | 2.00  | 7.21E-02 | 3.08E-01 | -4.88 |
| 1456571_PM_at   | Dcps                | DCPS     | 0.34  | 2.62 | 2.00  | 7.22E-02 | 3.08E-01 | -4.88 |
| 1416674_PM_at   | Ptpu                | PTPRU    | 0.43  | 5.40 | 2.00  | 7.22E-02 | 3.08E-01 | -4.88 |
| 1428483_PM_a_at | Mis18a              | MIS18A   | -0.42 | 3.16 | -2.00 | 7.22E-02 | 3.08E-01 | -4.88 |
| 1453874_PM_at   | 4933401B06Rik       | NA       | 0.20  | 2.31 | 2.00  | 7.22E-02 | 3.08E-01 | -4.88 |
| 1443923_PM_at   | Akap13              | AKAP13   | 0.67  | 3.46 | 2.00  | 7.22E-02 | 3.08E-01 | -4.88 |
| 1423808_PM_at   | Wrap53              | WRAP53   | 0.15  | 2.54 | 2.00  | 7.22E-02 | 3.08E-01 | -4.88 |
| 1450319_PM_at   | Gabbr2              | GABRB2   | 0.36  | 2.63 | 2.00  | 7.22E-02 | 3.08E-01 | -4.88 |
| 1451284_PM_at   | Yipf3               | YIPF3    | 0.33  | 2.96 | 2.00  | 7.22E-02 | 3.08E-01 | -4.88 |
| 1448542_PM_at   | Bccip               | BCCIP    | -0.49 | 5.28 | -2.00 | 7.23E-02 | 3.08E-01 | -4.88 |
| 1435598_PM_at   | BB319198            | NA       | -0.36 | 3.91 | -2.00 | 7.23E-02 | 3.08E-01 | -4.88 |
| 1427369_PM_at   | Nlrp6               | NLRP6    | 0.19  | 2.36 | 2.00  | 7.23E-02 | 3.08E-01 | -4.88 |
| 1444280_PM_at   | Tmem215             | TMEM215  | 0.24  | 2.85 | 2.00  | 7.23E-02 | 3.08E-01 | -4.88 |
| 1458489_PM_at   | ---                 | NA       | 0.65  | 3.21 | 2.00  | 7.23E-02 | 3.08E-01 | -4.88 |
| 1435410_PM_at   | Tcam1               | NA       | 0.17  | 2.52 | 2.00  | 7.23E-02 | 3.08E-01 | -4.88 |
| 1456735_PM_x_at | Pxylp1              | PXYL1    | -1.19 | 4.23 | -2.00 | 7.23E-02 | 3.08E-01 | -4.88 |
| 1437885_PM_at   | ---                 | NA       | -0.69 | 3.89 | -2.00 | 7.24E-02 | 3.08E-01 | -4.88 |
| 1454987_PM_a_at | H2-Ke6              | HSD17B8  | -0.52 | 3.66 | -2.00 | 7.24E-02 | 3.08E-01 | -4.88 |
| 1426938_PM_at   | Novap1              | NOVA1    | -0.37 | 2.89 | -2.00 | 7.24E-02 | 3.08E-01 | -4.88 |
| 1429496_PM_x_at | 2300002M23Rik       | C6orf15  | 0.18  | 2.17 | 2.00  | 7.23E-02 | 3.08E-01 | -4.88 |
| 1430948_PM_at   | Slain1os            | NA       | 0.19  | 2.41 | 2.00  | 7.23E-02 | 3.08E-01 | -4.88 |
| 1457759_PM_at   | ---                 | NA       | 0.22  | 2.92 | 2.00  | 7.24E-02 | 3.08E-01 | -4.88 |
| 1442861_PM_at   | ---                 | NA       | 0.23  | 2.43 | 2.00  | 7.23E-02 | 3.08E-01 | -4.88 |
| 1459515_PM_at   | ---                 | NA       | 0.26  | 3.39 | 2.00  | 7.23E-02 | 3.08E-01 | -4.88 |

|                 |               |          |       |      |       |          |          |       |
|-----------------|---------------|----------|-------|------|-------|----------|----------|-------|
| 1450327_PM_at   | P2rx6         | P2RX6    | 0.31  | 2.79 | 2.00  | 7.24E-02 | 3.08E-01 | -4.88 |
| 1442518_PM_at   | ---           | NA       | 1.00  | 4.20 | 2.00  | 7.23E-02 | 3.08E-01 | -4.88 |
| 1460039_PM_at   | Clec1a        | CLEC1A   | 0.15  | 2.31 | 2.00  | 7.24E-02 | 3.08E-01 | -4.88 |
| 1421227_PM_at   | Gzmd///Gzme   | GZMB     | 0.17  | 1.80 | 2.00  | 7.24E-02 | 3.08E-01 | -4.88 |
| 1458966_PM_at   | C80278        | NA       | 0.18  | 2.38 | 2.00  | 7.24E-02 | 3.08E-01 | -4.88 |
| 1446380_PM_at   | Creb5         | CREB5    | 0.27  | 2.59 | 2.00  | 7.24E-02 | 3.08E-01 | -4.88 |
| 1454985_PM_at   | Ambra1        | AMBRA1   | 0.21  | 4.15 | 2.00  | 7.24E-02 | 3.08E-01 | -4.88 |
| 1425563_PM_s_at | Pcdh10        | NA       | -0.52 | 4.38 | -2.00 | 7.24E-02 | 3.08E-01 | -4.88 |
| 1441313_PM_x_at | Lhx9          | LHX9     | -0.63 | 2.58 | -2.00 | 7.24E-02 | 3.08E-01 | -4.88 |
| 1437418_PM_at   | ---           | NA       | -0.52 | 2.60 | -2.00 | 7.25E-02 | 3.08E-01 | -4.88 |
| 1428548_PM_at   | Pak4///Samd4b | PAK4     | -0.52 | 3.51 | -2.00 | 7.25E-02 | 3.08E-01 | -4.88 |
| 1437422_PM_at   | Sema5a        | SEMA5A   | -0.50 | 2.80 | -2.00 | 7.25E-02 | 3.08E-01 | -4.88 |
| 1440645_PM_at   | BB114814      | NA       | 0.20  | 2.40 | 2.00  | 7.24E-02 | 3.08E-01 | -4.88 |
| 1456077_PM_x_at | Cdc25c        | CD25C    | 0.28  | 2.97 | 2.00  | 7.25E-02 | 3.08E-01 | -4.88 |
| 1443092_PM_at   | ---           | NA       | 0.28  | 2.50 | 2.00  | 7.25E-02 | 3.08E-01 | -4.88 |
| 1450244_PM_a_at | Map4k2        | MAP4K2   | 0.32  | 3.20 | 2.00  | 7.25E-02 | 3.08E-01 | -4.88 |
| 1421647_PM_at   | Cd1d2         | NA       | 0.34  | 2.58 | 2.00  | 7.25E-02 | 3.08E-01 | -4.88 |
| 1423528_PM_at   | Bcas3         | BCAS3    | 0.35  | 3.40 | 2.00  | 7.25E-02 | 3.08E-01 | -4.88 |
| 1432123_PM_at   | 4930455H04Rik | NA       | 0.39  | 2.56 | 2.00  | 7.25E-02 | 3.08E-01 | -4.88 |
| 1445343_PM_at   | Tmed5         | TMED5    | 0.25  | 2.41 | 2.00  | 7.25E-02 | 3.08E-01 | -4.88 |
| 1421366_PM_at   | Clec5a        | CLECSA   | 0.17  | 2.39 | 2.00  | 7.25E-02 | 3.08E-01 | -4.88 |
| 1425733_PM_a_at | Eps8          | EPS8     | 0.21  | 2.28 | 2.00  | 7.25E-02 | 3.08E-01 | -4.88 |
| 1418012_PM_at   | Sh3glb1       | SH3GLB1  | -0.60 | 4.32 | -2.00 | 7.26E-02 | 3.08E-01 | -4.88 |
| 1451842_PM_a_at | Chrb3         | CHRN3    | 0.15  | 2.04 | 2.00  | 7.26E-02 | 3.08E-01 | -4.88 |
| 1458590_PM_at   | ---           | NA       | 0.21  | 2.11 | 2.00  | 7.26E-02 | 3.08E-01 | -4.88 |
| 1427650_PM_a_at | Runx1         | RUNX1    | 0.25  | 2.75 | 2.00  | 7.26E-02 | 3.08E-01 | -4.88 |
| 1439584_PM_at   | Zfp526        | NA       | 0.20  | 2.62 | 2.00  | 7.26E-02 | 3.08E-01 | -4.88 |
| 1417328_PM_at   | Erc1          | ERCC1    | 0.19  | 2.55 | 2.00  | 7.26E-02 | 3.08E-01 | -4.88 |
| 1424188_PM_at   | Rabgap1       | RABGAP1  | -0.48 | 4.12 | -2.00 | 7.26E-02 | 3.08E-01 | -4.88 |
| 1426415_PM_a_at | Trim25        | TRIM25   | 0.33  | 3.01 | 2.00  | 7.26E-02 | 3.08E-01 | -4.88 |
| 1427035_PM_at   | Slc39a14      | SLC39A14 | -0.33 | 2.56 | -2.00 | 7.27E-02 | 3.08E-01 | -4.88 |
| 1428319_PM_at   | Pdlim7        | PDLIM7   | 0.21  | 2.40 | 2.00  | 7.27E-02 | 3.08E-01 | -4.88 |
| 1432106_PM_at   | ---           | NA       | 0.37  | 3.69 | 2.00  | 7.27E-02 | 3.08E-01 | -4.88 |
| 1452208_PM_at   | Prdm4         | PRDM4    | -0.59 | 2.98 | -2.00 | 7.27E-02 | 3.08E-01 | -4.88 |
| 1459543_PM_at   | AA407787      | NA       | 0.29  | 2.91 | 2.00  | 7.27E-02 | 3.08E-01 | -4.88 |
| 1442717_PM_at   | ---           | NA       | 0.28  | 2.87 | 2.00  | 7.28E-02 | 3.09E-01 | -4.88 |
| 1427787_PM_at   | Sp6           | SP6      | 0.15  | 2.36 | 2.00  | 7.28E-02 | 3.09E-01 | -4.89 |
| 1427106_PM_at   | Zbtb3         | ZBTB3    | 0.21  | 2.46 | 2.00  | 7.28E-02 | 3.09E-01 | -4.89 |
| 1416249_PM_at   | Nadk          | NADK     | 0.28  | 2.69 | 2.00  | 7.28E-02 | 3.09E-01 | -4.89 |
| 1457322_PM_at   | ---           | NA       | 0.30  | 2.78 | 2.00  | 7.28E-02 | 3.09E-01 | -4.89 |
| 1445809_PM_at   | ---           | NA       | 0.24  | 2.60 | 2.00  | 7.29E-02 | 3.09E-01 | -4.89 |
| 1448721_PM_at   | D1Erd622e     | CSorf30  | -0.54 | 3.03 | -2.00 | 7.29E-02 | 3.09E-01 | -4.89 |
| 1433626_PM_at   | Plscr4        | PLSCR4   | -0.21 | 2.31 | -2.00 | 7.29E-02 | 3.09E-01 | -4.89 |
| 1455373_PM_at   | Pclo          | PCLO     | -0.68 | 3.99 | -2.00 | 7.29E-02 | 3.09E-01 | -4.89 |
| 1448478_PM_at   | Med20         | MED20    | -0.64 | 3.53 | -2.00 | 7.30E-02 | 3.09E-01 | -4.89 |
| 1423676_PM_at   | Atp5h         | ATP5H    | -0.56 | 6.32 | -2.00 | 7.29E-02 | 3.09E-01 | -4.89 |
| 1435696_PM_s_at | Srek1ip1      | SREK1IP1 | -0.29 | 3.05 | -2.00 | 7.29E-02 | 3.09E-01 | -4.89 |
| 1451282_PM_at   | Arap3         | ARAP3    | 0.29  | 2.38 | 2.00  | 7.30E-02 | 3.09E-01 | -4.89 |
| 1440323_PM_at   | Syt2          | SYT2     | 0.40  | 3.18 | 2.00  | 7.29E-02 | 3.09E-01 | -4.89 |
| 1431153_PM_at   | ---           | NA       | 0.42  | 2.67 | 2.00  | 7.29E-02 | 3.09E-01 | -4.89 |
| 1446000_PM_at   | ---           | NA       | 0.23  | 2.91 | 2.00  | 7.30E-02 | 3.09E-01 | -4.89 |
| 1425255_PM_s_at | Hnrnp11       | HNRNP11  | -0.67 | 4.27 | -1.99 | 7.31E-02 | 3.09E-01 | -4.89 |
| 1455728_PM_at   | Pten          | PTEN     | -0.61 | 5.60 | -1.99 | 7.31E-02 | 3.09E-01 | -4.89 |
| 1448654_PM_at   | Mtch2         | MTCH2    | -0.38 | 3.01 | -1.99 | 7.31E-02 | 3.09E-01 | -4.89 |
| 1436943_PM_at   | Cyb5d2        | CYB5D2   | -0.28 | 3.44 | -1.99 | 7.31E-02 | 3.09E-01 | -4.89 |
| 1423473_PM_at   | Sept2         | SEPT2    | 0.16  | 2.17 | 1.99  | 7.30E-02 | 3.09E-01 | -4.89 |
| 1439680_PM_at   | Tnfsf10       | TNFSF10  | 0.18  | 2.70 | 1.99  | 7.30E-02 | 3.09E-01 | -4.89 |
| 1418897_PM_at   | F2            | F2       | 0.18  | 2.09 | 1.99  | 7.31E-02 | 3.09E-01 | -4.89 |
| 1428932_PM_at   | Ttc21a        | TTC21A   | 0.18  | 2.61 | 1.99  | 7.30E-02 | 3.09E-01 | -4.89 |
| 1442144_PM_at   | ---           | NA       | 0.20  | 2.32 | 1.99  | 7.31E-02 | 3.09E-01 | -4.89 |
| 1447094_PM_at   | ---           | NA       | 0.21  | 2.22 | 1.99  | 7.31E-02 | 3.09E-01 | -4.89 |
| 1433410_PM_at   | ---           | NA       | 0.22  | 2.09 | 1.99  | 7.30E-02 | 3.09E-01 | -4.89 |
| 1457943_PM_at   | ---           | NA       | 0.23  | 2.42 | 1.99  | 7.31E-02 | 3.09E-01 | -4.89 |
| 1441311_PM_at   | ---           | NA       | 0.23  | 2.89 | 1.99  | 7.31E-02 | 3.09E-01 | -4.89 |
| 1450976_PM_at   | Ndr1          | NDRG1    | 0.26  | 2.90 | 1.99  | 7.31E-02 | 3.09E-01 | -4.89 |
| 1446950_PM_at   | ---           | NA       | 0.28  | 2.86 | 1.99  | 7.30E-02 | 3.09E-01 | -4.89 |
| 1433366_PM_at   | ---           | NA       | 0.29  | 3.34 | 1.99  | 7.31E-02 | 3.09E-01 | -4.89 |
| 1458376_PM_at   | B930025B16Rik | NA       | 0.31  | 2.51 | 1.99  | 7.31E-02 | 3.09E-01 | -4.89 |
| 1454215_PM_at   | Platr10       | NA       | 0.32  | 2.81 | 1.99  | 7.31E-02 | 3.09E-01 | -4.89 |
| 1422999_PM_at   | Map3k14       | MAP3K14  | 0.32  | 3.06 | 1.99  | 7.31E-02 | 3.09E-01 | -4.89 |
| 1439655_PM_at   | ---           | NA       | 0.33  | 2.67 | 1.99  | 7.31E-02 | 3.09E-01 | -4.89 |
| 1430158_PM_at   | 3110021A11Rik | NA       | 0.33  | 3.11 | 1.99  | 7.31E-02 | 3.09E-01 | -4.89 |
| 1446108_PM_at   | ---           | NA       | 0.50  | 2.81 | 1.99  | 7.31E-02 | 3.09E-01 | -4.89 |
| 1427588_PM_a_at | Dtna          | DTNA     | 0.57  | 3.45 | 1.99  | 7.32E-02 | 3.09E-01 | -4.89 |
| 1429030_PM_at   | C1qtnf7       | C1QTNF7  | 0.22  | 2.53 | 1.99  | 7.32E-02 | 3.09E-01 | -4.89 |

|                               |                              |            |       |      |       |          |          |       |
|-------------------------------|------------------------------|------------|-------|------|-------|----------|----------|-------|
| 1430641_PM_at                 | Gsdmc2///Gsdmc4              | GSDMC      | -0.74 | 2.23 | -1.99 | 7.32E-02 | 3.09E-01 | -4.89 |
| 1453335_PM_a_at               | Spata3                       | SPATA3     | 0.32  | 2.96 | 1.99  | 7.32E-02 | 3.09E-01 | -4.89 |
| 1451577_PM_at                 | Zbtb20                       | ZBTB20     | 0.33  | 2.62 | 1.99  | 7.32E-02 | 3.09E-01 | -4.89 |
| 1440103_PM_at                 | ---                          | NA         | 0.21  | 2.35 | 1.99  | 7.32E-02 | 3.09E-01 | -4.89 |
| 1443401_PM_at                 | ---                          | NA         | -0.37 | 2.72 | -1.99 | 7.33E-02 | 3.09E-01 | -4.89 |
| 1451078_PM_at                 | 2510039O18Rik                | KIAA2013   | -0.41 | 2.75 | -1.99 | 7.33E-02 | 3.09E-01 | -4.89 |
| 1416262_PM_at                 | Tmem19                       | TMEM19     | -0.34 | 2.30 | -1.99 | 7.33E-02 | 3.09E-01 | -4.89 |
| 1416247_PM_at                 | Dctn3                        | DCTN3      | -0.55 | 3.34 | -1.99 | 7.33E-02 | 3.09E-01 | -4.89 |
| 1436132_PM_at                 | Soga1                        | NA         | 0.31  | 2.79 | 1.99  | 7.34E-02 | 3.10E-01 | -4.89 |
| 1445428_PM_at                 | ---                          | NA         | 0.58  | 3.77 | 1.99  | 7.34E-02 | 3.10E-01 | -4.89 |
| 1421998_PM_at                 | Tor3a                        | TOR3A      | 0.30  | 3.13 | 1.99  | 7.34E-02 | 3.10E-01 | -4.89 |
| 1417648_PM_s_at               | Srx5                         | SNX5       | -0.32 | 3.33 | -1.99 | 7.34E-02 | 3.10E-01 | -4.89 |
| 1425899_PM_a_at               | Its1n1                       | ITSN1      | 0.87  | 3.51 | 1.99  | 7.34E-02 | 3.10E-01 | -4.89 |
| 1425870_PM_a_at               | Kcnp2                        | KCNP2      | 0.56  | 3.10 | 1.99  | 7.34E-02 | 3.10E-01 | -4.89 |
| 1455082_PM_at                 | Cblb                         | CBLB       | -0.71 | 3.50 | -1.99 | 7.35E-02 | 3.10E-01 | -4.89 |
| 1450209_PM_at                 | Hoxd4                        | HOXD4      | 0.19  | 2.82 | 1.99  | 7.36E-02 | 3.10E-01 | -4.89 |
| 1452512_PM_a_at               | Ank1                         | ANK1       | 0.21  | 2.47 | 1.99  | 7.36E-02 | 3.10E-01 | -4.90 |
| 1453938_PM_at                 | 9330198N18Rik ///<br>Gm38458 | NA         | 0.24  | 2.44 | 1.99  | 7.36E-02 | 3.10E-01 | -4.90 |
| 1447528_PM_at                 | ---                          | NA         | 0.21  | 2.35 | 1.99  | 7.37E-02 | 3.11E-01 | -4.90 |
| 1416468_PM_at                 | Aldh1a1                      | ALDH1A1    | -0.76 | 3.94 | -1.99 | 7.38E-02 | 3.11E-01 | -4.90 |
| 1416011_PM_x_at               | Ehd1                         | EHD1       | -0.45 | 3.87 | -1.99 | 7.38E-02 | 3.11E-01 | -4.90 |
| 1450038_PM_s_at               | Usp9x                        | USP9X      | -0.64 | 4.61 | -1.99 | 7.38E-02 | 3.11E-01 | -4.90 |
| 1424873_PM_at                 | Rnf2                         | RNF2       | -0.39 | 3.87 | -1.99 | 7.39E-02 | 3.11E-01 | -4.90 |
| 1422376_PM_at                 | Vmn1r50                      | NA         | -0.18 | 2.29 | -1.99 | 7.39E-02 | 3.11E-01 | -4.90 |
| 1458293_PM_at                 | ---                          | NA         | 0.24  | 2.43 | 1.99  | 7.39E-02 | 3.11E-01 | -4.90 |
| 1452031_PM_at                 | Slc1a3                       | SLC1A3     | -1.07 | 5.94 | -1.99 | 7.39E-02 | 3.11E-01 | -4.90 |
| 1438487_PM_s_at               | Zzz3                         | ZZZ3       | -0.82 | 4.50 | -1.99 | 7.39E-02 | 3.11E-01 | -4.90 |
| 1418400_PM_at                 | Larp6                        | LARP6      | -0.63 | 4.30 | -1.99 | 7.39E-02 | 3.11E-01 | -4.90 |
| 1431576_PM_at                 | 4933404K08Rik                | NA         | 0.32  | 3.13 | 1.99  | 7.40E-02 | 3.11E-01 | -4.90 |
| 1419295_PM_at                 | Creb3l1                      | CREB3L1    | 0.34  | 2.76 | 1.99  | 7.39E-02 | 3.11E-01 | -4.90 |
| 1441301_PM_at                 | ---                          | NA         | 0.38  | 3.26 | 1.99  | 7.40E-02 | 3.11E-01 | -4.90 |
| 1446538_PM_at                 | ---                          | NA         | 0.29  | 2.67 | 1.99  | 7.40E-02 | 3.12E-01 | -4.90 |
| 1422596_PM_at                 | Nkain4                       | NKAIN4     | 0.39  | 2.94 | 1.99  | 7.40E-02 | 3.12E-01 | -4.90 |
| 1445964_PM_at                 | ---                          | NA         | 0.19  | 2.21 | 1.99  | 7.40E-02 | 3.12E-01 | -4.90 |
| 1453946_PM_a_at               | Sdccag8                      | SDCCAG8    | 0.28  | 2.32 | 1.99  | 7.41E-02 | 3.12E-01 | -4.90 |
| 1448670_PM_at                 | Ube2e3                       | UBE2E3     | -0.38 | 5.99 | -1.99 | 7.41E-02 | 3.12E-01 | -4.90 |
| 1457705_PM_at                 | ---                          | NA         | 0.19  | 2.30 | 1.99  | 7.41E-02 | 3.12E-01 | -4.90 |
| 1431799_PM_at                 | Milt4                        | AFDN       | 0.24  | 2.83 | 1.99  | 7.41E-02 | 3.12E-01 | -4.90 |
| 1419713_PM_at                 | Atp8b3                       | NA         | 0.27  | 2.30 | 1.99  | 7.41E-02 | 3.12E-01 | -4.90 |
| 1446867_PM_at                 | Wdfy4                        | WDFY4      | 0.25  | 2.34 | 1.99  | 7.41E-02 | 3.12E-01 | -4.90 |
| 1457932_PM_at                 | ---                          | NA         | 0.28  | 2.71 | 1.99  | 7.41E-02 | 3.12E-01 | -4.90 |
| 1417911_PM_at                 | Ccna2                        | CCNA2      | 0.29  | 3.57 | 1.99  | 7.41E-02 | 3.12E-01 | -4.90 |
| 1421821_PM_at                 | Ldlr                         | LDLR       | -0.64 | 5.38 | -1.99 | 7.41E-02 | 3.12E-01 | -4.90 |
| 1445301_PM_at                 | BC028528                     | NA         | 0.48  | 3.51 | 1.99  | 7.41E-02 | 3.12E-01 | -4.90 |
| 1458918_PM_at                 | Slc12a8                      | SLC12A8    | 0.24  | 2.35 | 1.99  | 7.42E-02 | 3.12E-01 | -4.90 |
| 1421726_PM_at                 | Ap4b1                        | NA         | 0.26  | 2.37 | 1.99  | 7.42E-02 | 3.12E-01 | -4.90 |
| 1433813_PM_at                 | Ndc1                         | ND1        | -0.37 | 3.85 | -1.99 | 7.42E-02 | 3.12E-01 | -4.90 |
| 1440404_PM_at                 | ---                          | NA         | -0.27 | 2.84 | -1.98 | 7.42E-02 | 3.12E-01 | -4.90 |
| AFFX-PyruCarbMur/L09192_MA_at | Pcx                          | NA         | 0.19  | 2.72 | 1.98  | 7.43E-02 | 3.12E-01 | -4.90 |
| 1445780_PM_at                 | ---                          | NA         | 0.22  | 2.46 | 1.98  | 7.43E-02 | 3.12E-01 | -4.90 |
| 1440973_PM_at                 | St6galnac5                   | ST6GALNAC5 | -0.98 | 5.38 | -1.98 | 7.44E-02 | 3.12E-01 | -4.90 |
| 1437503_PM_a_at               | Shisa5                       | SHISA5     | -0.78 | 4.93 | -1.98 | 7.44E-02 | 3.12E-01 | -4.90 |
| 1435235_PM_at                 | Txn1l                        | TXNL1      | -0.71 | 5.63 | -1.98 | 7.43E-02 | 3.12E-01 | -4.90 |
| 1445852_PM_at                 | D19Ert200e                   | NA         | 0.17  | 2.27 | 1.98  | 7.44E-02 | 3.12E-01 | -4.90 |
| 1446756_PM_at                 | Ghsr                         | GHSR       | 0.19  | 2.26 | 1.98  | 7.43E-02 | 3.12E-01 | -4.90 |
| 1423731_PM_at                 | Aldh16a1                     | ALDH16A1   | 0.20  | 2.50 | 1.98  | 7.43E-02 | 3.12E-01 | -4.90 |
| 1423733_PM_a_at               | Fiz1                         | FIZ1       | 0.30  | 2.49 | 1.98  | 7.44E-02 | 3.12E-01 | -4.90 |
| 1417385_PM_at                 | Npepps                       | NPEPPS     | -0.50 | 5.31 | -1.98 | 7.44E-02 | 3.12E-01 | -4.90 |
| 1439760_PM_x_at               | Upk1b                        | UPK1B      | 0.17  | 2.48 | 1.98  | 7.44E-02 | 3.12E-01 | -4.90 |
| 1439744_PM_at                 | ---                          | NA         | 0.17  | 2.73 | 1.98  | 7.44E-02 | 3.12E-01 | -4.90 |
| 1431699_PM_at                 | Fut4-ps1                     | NA         | 0.26  | 2.40 | 1.98  | 7.44E-02 | 3.12E-01 | -4.90 |
| 1417937_PM_at                 | Dact1                        | DACT1      | 0.30  | 2.79 | 1.98  | 7.44E-02 | 3.12E-01 | -4.90 |
| 1418903_PM_at                 | Aqp2                         | AQP2       | 0.30  | 2.92 | 1.98  | 7.44E-02 | 3.12E-01 | -4.90 |
| 1448058_PM_s_at               | ---                          | NA         | 0.35  | 2.60 | 1.98  | 7.44E-02 | 3.12E-01 | -4.90 |
| 1451768_PM_a_at               | Slc20a2                      | SLC20A2    | 0.35  | 3.83 | 1.98  | 7.44E-02 | 3.12E-01 | -4.91 |
| 1431945_PM_at                 | Arl13a                       | ARL13A     | 0.41  | 2.21 | 1.98  | 7.44E-02 | 3.12E-01 | -4.91 |
| 1426425_PM_at                 | Sugt1                        | SUGT1      | -0.37 | 4.05 | -1.98 | 7.45E-02 | 3.12E-01 | -4.91 |
| 1459104_PM_at                 | ---                          | NA         | -0.17 | 2.25 | -1.98 | 7.45E-02 | 3.13E-01 | -4.91 |
| 1446953_PM_at                 | ---                          | NA         | 0.52  | 3.48 | 1.98  | 7.45E-02 | 3.13E-01 | -4.91 |
| 1457152_PM_at                 | ---                          | NA         | 0.68  | 4.05 | 1.98  | 7.45E-02 | 3.13E-01 | -4.91 |
| 1424701_PM_at                 | Pcdh20                       | PCDH20     | -1.56 | 5.56 | -1.98 | 7.45E-02 | 3.13E-01 | -4.91 |
| 1450065_PM_at                 | Adcy7                        | ADCY7      | -0.21 | 2.08 | -1.98 | 7.45E-02 | 3.13E-01 | -4.91 |
| 1420804_PM_s_at               | Clec4d                       | CLEC4D     | 0.21  | 2.36 | 1.98  | 7.45E-02 | 3.13E-01 | -4.91 |
| 1427986_PM_a_at               | Col16a1                      | COL16A1    | 0.21  | 2.44 | 1.98  | 7.46E-02 | 3.13E-01 | -4.91 |

|                 |                  |          |       |      |       |          |          |       |
|-----------------|------------------|----------|-------|------|-------|----------|----------|-------|
| 1428235_PM_at   | Sdhd             | SDHD     | -0.57 | 4.28 | -1.98 | 7.46E-02 | 3.13E-01 | -4.91 |
| 1418968_PM_at   | Rb1cc1           | RB1CC1   | -0.42 | 4.46 | -1.98 | 7.46E-02 | 3.13E-01 | -4.91 |
| 1455332_PM_x_at | Fcgr2b           | FCGR2A   | 0.31  | 2.30 | 1.98  | 7.46E-02 | 3.13E-01 | -4.91 |
| 1459150_PM_at   | ---              | NA       | 0.46  | 2.55 | 1.98  | 7.47E-02 | 3.13E-01 | -4.91 |
| 1434784_PM_s_at | Tmem106c         | TMEM106C | 0.30  | 2.86 | 1.98  | 7.47E-02 | 3.13E-01 | -4.91 |
| 1421981_PM_at   | Kcnc3            | KCNC3    | 0.28  | 2.61 | 1.98  | 7.47E-02 | 3.13E-01 | -4.91 |
| 1429639_PM_at   | Gpcpd1           | GPCPD1   | 0.72  | 4.47 | 1.98  | 7.47E-02 | 3.13E-01 | -4.91 |
| 1450919_PM_at   | Mpp1             | MPP1     | -0.70 | 4.35 | -1.98 | 7.47E-02 | 3.13E-01 | -4.91 |
| 1451249_PM_at   | Trmt1            | TRMT1    | -0.42 | 2.87 | -1.98 | 7.47E-02 | 3.13E-01 | -4.91 |
| 1418099_PM_at   | Tnfrsf1b         | TNFRSF1B | 0.59  | 4.49 | 1.98  | 7.47E-02 | 3.13E-01 | -4.91 |
| 1426858_PM_at   | Inhbb            | INHBB    | 0.20  | 2.29 | 1.98  | 7.47E-02 | 3.13E-01 | -4.91 |
| 1434527_PM_at   | Nlrp4b           | NLRP4    | 0.26  | 2.58 | 1.98  | 7.47E-02 | 3.13E-01 | -4.91 |
| 1427074_PM_at   | Pcmt2            | PCMTD2   | -0.61 | 3.31 | -1.98 | 7.48E-02 | 3.13E-01 | -4.91 |
| 1420068_PM_at   | ---              | NA       | 0.22  | 2.44 | 1.98  | 7.48E-02 | 3.13E-01 | -4.91 |
| 1423710_PM_at   | Dlst             | DLST     | -0.34 | 4.73 | -1.98 | 7.48E-02 | 3.13E-01 | -4.91 |
| 1458759_PM_at   | ---              | NA       | 0.19  | 2.23 | 1.98  | 7.48E-02 | 3.13E-01 | -4.91 |
| 1443055_PM_at   | ---              | NA       | 0.20  | 2.11 | 1.98  | 7.49E-02 | 3.13E-01 | -4.91 |
| 1428771_PM_at   | Klhdc10          | KLHDC10  | 0.68  | 3.71 | 1.98  | 7.49E-02 | 3.13E-01 | -4.91 |
| 1443289_PM_at   | ---              | NA       | 0.31  | 2.53 | 1.98  | 7.49E-02 | 3.13E-01 | -4.91 |
| 1430485_PM_at   | ---              | NA       | 0.23  | 2.23 | 1.98  | 7.49E-02 | 3.13E-01 | -4.91 |
| 1435350_PM_at   | Traf6            | TRAF6    | 0.28  | 2.90 | 1.98  | 7.49E-02 | 3.13E-01 | -4.91 |
| 1417431_PM_a_at | Sphk2            | SPHK2    | -0.25 | 3.03 | -1.98 | 7.49E-02 | 3.14E-01 | -4.91 |
| 1448006_PM_at   | Zc3h7b           | ZC3H7B   | 0.35  | 2.78 | 1.98  | 7.49E-02 | 3.14E-01 | -4.91 |
| 1425983_PM_x_at | Hipk2            | HIPK2    | 0.38  | 3.03 | 1.98  | 7.50E-02 | 3.14E-01 | -4.91 |
| 1439710_PM_at   | ---              | NA       | 0.17  | 2.35 | 1.98  | 7.50E-02 | 3.14E-01 | -4.91 |
| 1459549_PM_at   | ---              | NA       | 0.24  | 2.44 | 1.98  | 7.50E-02 | 3.14E-01 | -4.91 |
| 1427283_PM_at   | Kmt2a            | KMT2A    | -0.68 | 3.96 | -1.98 | 7.50E-02 | 3.14E-01 | -4.91 |
| 1442527_PM_at   | ---              | NA       | 0.20  | 2.47 | 1.98  | 7.51E-02 | 3.14E-01 | -4.91 |
| 1456830_PM_at   | Ppp1r2           | PPP1R2   | -1.15 | 4.73 | -1.98 | 7.51E-02 | 3.14E-01 | -4.91 |
| 1443970_PM_at   | Ntrk3            | NTRK3    | 0.50  | 3.30 | 1.98  | 7.51E-02 | 3.14E-01 | -4.91 |
| 1432052_PM_at   | Exosc1           | EXOSC1   | -0.33 | 2.63 | -1.98 | 7.51E-02 | 3.14E-01 | -4.91 |
| 1430984_PM_at   | Azin1            | AZIN1    | 0.18  | 2.08 | 1.98  | 7.52E-02 | 3.14E-01 | -4.91 |
| 1454510_PM_at   | ---              | NA       | 0.90  | 3.48 | 1.98  | 7.51E-02 | 3.14E-01 | -4.91 |
| 1441333_PM_at   | ---              | NA       | -0.88 | 3.78 | -1.98 | 7.52E-02 | 3.14E-01 | -4.91 |
| 1416628_PM_at   | Nxf1///Tmem223   | NXF1     | -0.62 | 4.64 | -1.98 | 7.52E-02 | 3.14E-01 | -4.91 |
| 1453233_PM_s_at | Calr3            | CALR3    | 0.24  | 2.89 | 1.98  | 7.52E-02 | 3.14E-01 | -4.91 |
| 1427513_PM_at   | BC024137///Nudt7 | NUDT7    | 0.25  | 2.48 | 1.98  | 7.52E-02 | 3.14E-01 | -4.91 |
| 1429751_PM_at   | Zswim2           | ZSWIM2   | 0.30  | 3.32 | 1.98  | 7.52E-02 | 3.14E-01 | -4.92 |
| 1443849_PM_x_at | Urod             | UROD     | -0.62 | 5.91 | -1.98 | 7.53E-02 | 3.14E-01 | -4.92 |
| 1423756_PM_s_at | Igfbp4           | IGFBP4   | -0.51 | 3.08 | -1.98 | 7.53E-02 | 3.15E-01 | -4.92 |
| 1422813_PM_at   | Cacng1           | CACNG1   | 0.26  | 2.95 | 1.98  | 7.53E-02 | 3.15E-01 | -4.92 |
| 1423669_PM_at   | Col1a1           | COL1A1   | -0.73 | 2.97 | -1.98 | 7.53E-02 | 3.15E-01 | -4.92 |
| 1454812_PM_at   | Zfp266           | ZNF561   | -0.33 | 2.62 | -1.98 | 7.54E-02 | 3.15E-01 | -4.92 |
| 1445004_PM_a_at | Pitpnm3          | PITPNM3  | 0.18  | 2.33 | 1.98  | 7.53E-02 | 3.15E-01 | -4.92 |
| 1440052_PM_at   | ---              | NA       | 0.20  | 2.22 | 1.98  | 7.53E-02 | 3.15E-01 | -4.92 |
| 1421646_PM_a_at | Pias3            | PIAS3    | 0.22  | 2.57 | 1.98  | 7.54E-02 | 3.15E-01 | -4.92 |
| 1433210_PM_at   | Rptn             | NA       | 0.23  | 2.72 | 1.98  | 7.54E-02 | 3.15E-01 | -4.92 |
| 1427662_PM_at   | BC025933         | NA       | 0.24  | 2.76 | 1.98  | 7.54E-02 | 3.15E-01 | -4.92 |
| 1436362_PM_x_at | Noct             | NA       | 0.30  | 8.36 | 1.98  | 7.54E-02 | 3.15E-01 | -4.92 |
| 1431456_PM_at   | 4931439C15Rik    | NA       | 0.32  | 2.36 | 1.98  | 7.54E-02 | 3.15E-01 | -4.92 |
| 1447238_PM_at   | ---              | NA       | 0.15  | 1.83 | 1.98  | 7.54E-02 | 3.15E-01 | -4.92 |
| 1433107_PM_at   | ---              | NA       | 0.21  | 2.37 | 1.98  | 7.54E-02 | 3.15E-01 | -4.92 |
| 1418169_PM_at   | Zcchc14          | ZCCHC14  | 0.39  | 3.02 | 1.98  | 7.54E-02 | 3.15E-01 | -4.92 |
| 1430673_PM_a_at | Slx4ip           | SLX4IP   | 0.48  | 2.83 | 1.98  | 7.54E-02 | 3.15E-01 | -4.92 |
| 1435744_PM_at   | Firre            | NA       | 0.60  | 3.66 | 1.98  | 7.54E-02 | 3.15E-01 | -4.92 |
| 1437102_PM_at   | Ythdf1           | YTHDF1   | -0.62 | 4.06 | -1.98 | 7.54E-02 | 3.15E-01 | -4.92 |
| 1419042_PM_at   | Igfp1            | NA       | 0.36  | 3.20 | 1.98  | 7.55E-02 | 3.15E-01 | -4.92 |
| 1431571_PM_at   | ---              | NA       | 0.30  | 2.55 | 1.98  | 7.55E-02 | 3.15E-01 | -4.92 |
| 1437883_PM_s_at | Pan3             | PAN3     | 0.72  | 4.85 | 1.98  | 7.55E-02 | 3.15E-01 | -4.92 |
| 1450231_PM_a_at | Xiap             | BIRC8    | 0.27  | 2.23 | 1.97  | 7.55E-02 | 3.15E-01 | -4.92 |
| 1434486_PM_x_at | Ugp2             | UGP2     | -0.95 | 4.67 | -1.97 | 7.55E-02 | 3.15E-01 | -4.92 |
| 1421104_PM_at   | Gbp4             | NA       | 0.25  | 2.46 | 1.97  | 7.55E-02 | 3.15E-01 | -4.92 |
| 1428287_PM_at   | Cul5             | CUL5     | -0.47 | 2.60 | -1.97 | 7.56E-02 | 3.15E-01 | -4.92 |
| 1450014_PM_at   | Clon1            | CLDN1    | -0.14 | 2.12 | -1.97 | 7.56E-02 | 3.15E-01 | -4.92 |
| 1427858_PM_at   | Igk-v21          | NA       | 0.16  | 2.16 | 1.97  | 7.56E-02 | 3.15E-01 | -4.92 |
| 1446701_PM_at   | Abcb1b           | ABCB1    | 0.20  | 2.33 | 1.97  | 7.56E-02 | 3.15E-01 | -4.92 |
| 1453647_PM_at   | Vamp1            | VAMP1    | 0.24  | 2.25 | 1.97  | 7.56E-02 | 3.15E-01 | -4.92 |
| 1428151_PM_x_at | Ccb1             | KYAT1    | 0.26  | 2.41 | 1.97  | 7.56E-02 | 3.15E-01 | -4.92 |
| 1420678_PM_a_at | Il17rb           | IL17RB   | 0.27  | 2.93 | 1.97  | 7.56E-02 | 3.15E-01 | -4.92 |
| 1422707_PM_at   | Pik3cg           | PIK3CG   | 0.27  | 2.76 | 1.97  | 7.56E-02 | 3.15E-01 | -4.92 |
| 1448746_PM_at   | Nbn              | NBN      | 0.39  | 3.00 | 1.97  | 7.56E-02 | 3.15E-01 | -4.92 |
| 1426490_PM_at   | Bfar             | BFAR     | -0.36 | 3.94 | -1.97 | 7.57E-02 | 3.15E-01 | -4.92 |
| 1427338_PM_at   | Crocc            | CROCC    | 0.22  | 2.68 | 1.97  | 7.57E-02 | 3.15E-01 | -4.92 |
| 1445761_PM_at   | Mob3b            | NA       | 0.19  | 2.03 | 1.97  | 7.57E-02 | 3.15E-01 | -4.92 |
| 1459531_PM_at   | ---              | NA       | 0.27  | 2.40 | 1.97  | 7.57E-02 | 3.15E-01 | -4.92 |

|                 |                                 |          |       |       |       |          |          |       |
|-----------------|---------------------------------|----------|-------|-------|-------|----------|----------|-------|
| 1424164_PM_at   | Mrp50                           | MRPL50   | 0.23  | 2.91  | 1.97  | 7.57E-02 | 3.15E-01 | -4.92 |
| 1436053_PM_at   | Tbc1d22b                        | TBC1D22B | 0.23  | 2.95  | 1.97  | 7.57E-02 | 3.15E-01 | -4.92 |
| 1446433_PM_at   | ---                             | NA       | 0.37  | 3.64  | 1.97  | 7.57E-02 | 3.15E-01 | -4.92 |
| 1449030_PM_at   | Syn2                            | SYN2     | -0.82 | 5.27  | -1.97 | 7.58E-02 | 3.15E-01 | -4.92 |
| 1439323_PM_a_at | Map4k1                          | MAP4K1   | 0.34  | 3.53  | 1.97  | 7.58E-02 | 3.15E-01 | -4.92 |
| 1450116_PM_at   | Supt20                          | SUPT20H  | 1.01  | 3.97  | 1.97  | 7.58E-02 | 3.15E-01 | -4.92 |
| 1449215_PM_at   | Slc22a21                        | SLC22A5  | 0.27  | 2.68  | 1.97  | 7.58E-02 | 3.15E-01 | -4.92 |
| 1459835_PM_s_at | Dnaja1                          | DNAJA1   | -0.72 | 9.42  | -1.97 | 7.58E-02 | 3.15E-01 | -4.92 |
| 1457219_PM_at   | Arhgef18                        | ARHGEF18 | 0.15  | 2.01  | 1.97  | 7.58E-02 | 3.15E-01 | -4.92 |
| 1424765_PM_at   | Eps15l1                         | NA       | 0.26  | 2.73  | 1.97  | 7.58E-02 | 3.15E-01 | -4.92 |
| 1456422_PM_at   | Dennd5b                         | DENND5B  | 0.36  | 2.72  | 1.97  | 7.58E-02 | 3.15E-01 | -4.92 |
| 1420106_PM_at   | Siah1a                          | NA       | -0.66 | 5.84  | -1.97 | 7.58E-02 | 3.15E-01 | -4.92 |
| 1436880_PM_at   | Afp                             | NA       | 0.24  | 2.61  | 1.97  | 7.58E-02 | 3.15E-01 | -4.92 |
| 1419745_PM_at   | Arhgap23                        | ARHGAP23 | -0.45 | 4.31  | -1.97 | 7.59E-02 | 3.15E-01 | -4.92 |
| 1445721_PM_at   | ---                             | NA       | 0.39  | 2.95  | 1.97  | 7.58E-02 | 3.15E-01 | -4.92 |
| 1460736_PM_at   | Bod1l                           | BOD1L1   | 0.34  | 2.69  | 1.97  | 7.59E-02 | 3.15E-01 | -4.92 |
| 1425399_PM_at   | Mfsd7b                          | FLVCR1   | 0.25  | 3.15  | 1.97  | 7.59E-02 | 3.16E-01 | -4.92 |
| 1419654_PM_at   | Tle3                            | TLE3     | 0.21  | 2.93  | 1.97  | 7.59E-02 | 3.16E-01 | -4.92 |
| 1422712_PM_a_at | LOC102641751 ///Ube2i           | UBE2I    | 0.41  | 5.43  | 1.97  | 7.59E-02 | 3.16E-01 | -4.92 |
| 1422594_PM_at   | Sike1                           | SIKE1    | 0.19  | 2.18  | 1.97  | 7.59E-02 | 3.16E-01 | -4.92 |
| 1443856_PM_at   | Rabep1                          | RABEP1   | -0.83 | 4.39  | -1.97 | 7.60E-02 | 3.16E-01 | -4.92 |
| 1427463_PM_at   | Casd1                           | CASD1    | 0.40  | 3.27  | 1.97  | 7.60E-02 | 3.16E-01 | -4.92 |
| 1440001_PM_at   | Rian                            | NA       | 0.63  | 3.75  | 1.97  | 7.60E-02 | 3.16E-01 | -4.92 |
| 1448481_PM_at   | Neu1                            | NA       | -0.67 | 4.94  | -1.97 | 7.60E-02 | 3.16E-01 | -4.92 |
| 1460003_PM_at   | Al956758                        | NA       | -0.48 | 3.22  | -1.97 | 7.60E-02 | 3.16E-01 | -4.92 |
| 1424973_PM_at   | Cyp3a25                         | CYP3A4   | 0.16  | 2.22  | 1.97  | 7.60E-02 | 3.16E-01 | -4.92 |
| 1442545_PM_at   | ---                             | NA       | 0.22  | 2.27  | 1.97  | 7.60E-02 | 3.16E-01 | -4.92 |
| 1451286_PM_s_at | Fus                             | FUS      | 0.61  | 7.91  | 1.97  | 7.60E-02 | 3.16E-01 | -4.92 |
| 1439054_PM_at   | Zfp36l2                         | NA       | 0.25  | 4.27  | 1.97  | 7.61E-02 | 3.16E-01 | -4.93 |
| 1432587_PM_at   | 5730596P11Rik                   | NA       | 0.22  | 2.74  | 1.97  | 7.61E-02 | 3.16E-01 | -4.93 |
| 1434496_PM_at   | Plk3                            | PLK3     | 0.19  | 2.61  | 1.97  | 7.61E-02 | 3.16E-01 | -4.93 |
| 1453767_PM_a_at | Nt5m                            | NT5M     | 0.39  | 4.08  | 1.97  | 7.61E-02 | 3.16E-01 | -4.93 |
| 1435514_PM_at   | Lztf1                           | LZTF1    | -0.68 | 3.58  | -1.97 | 7.61E-02 | 3.16E-01 | -4.93 |
| 1452604_PM_at   | Stard13                         | STARD13  | -0.31 | 2.82  | -1.97 | 7.61E-02 | 3.16E-01 | -4.93 |
| 1443122_PM_at   | LOC105247423                    | NA       | 0.24  | 2.12  | 1.97  | 7.61E-02 | 3.16E-01 | -4.93 |
| 1452207_PM_at   | Cited2                          | CITED2   | 1.50  | 5.09  | 1.97  | 7.61E-02 | 3.16E-01 | -4.93 |
| 1438922_PM_x_at | Slc25a5                         | SLC25A5  | -1.34 | 6.66  | -1.97 | 7.62E-02 | 3.16E-01 | -4.93 |
| 1433856_PM_at   | Ppip5k2                         | PPP5K2   | -0.45 | 2.57  | -1.97 | 7.62E-02 | 3.16E-01 | -4.93 |
| 1448406_PM_at   | Eid1                            | EID1     | -0.34 | 8.48  | -1.97 | 7.62E-02 | 3.16E-01 | -4.93 |
| 1435029_PM_at   | Zak                             | MAP3K20  | -0.21 | 2.64  | -1.97 | 7.62E-02 | 3.16E-01 | -4.93 |
| 1433414_PM_at   | ---                             | NA       | 0.18  | 2.03  | 1.97  | 7.62E-02 | 3.16E-01 | -4.93 |
| 1446225_PM_at   | ---                             | NA       | 0.20  | 2.20  | 1.97  | 7.62E-02 | 3.16E-01 | -4.93 |
| 1456298_PM_at   | Fam170b                         | FAM170B  | 0.26  | 3.95  | 1.97  | 7.62E-02 | 3.16E-01 | -4.93 |
| 1457797_PM_at   | ---                             | NA       | 0.40  | 2.98  | 1.97  | 7.62E-02 | 3.16E-01 | -4.93 |
| 1430293_PM_a_at | Fdx1 ///Gm38431                 | NA       | 0.43  | 5.35  | 1.97  | 7.62E-02 | 3.16E-01 | -4.93 |
| 1449586_PM_at   | Pkp1                            | PKP1     | 0.23  | 2.93  | 1.97  | 7.62E-02 | 3.16E-01 | -4.93 |
| 1444567_PM_at   | 1700066j03Rik                   | NA       | 0.24  | 2.60  | 1.97  | 7.62E-02 | 3.16E-01 | -4.93 |
| 1438625_PM_s_at | Cdk16                           | CDK16    | -0.35 | 11.68 | -1.97 | 7.62E-02 | 3.16E-01 | -4.93 |
| 1438462_PM_x_at | Khdrbs1                         | KHDRBS1  | -0.59 | 6.01  | -1.97 | 7.63E-02 | 3.16E-01 | -4.93 |
| 1454297_PM_at   | 4631402F24Rik                   | NA       | 0.17  | 2.92  | 1.97  | 7.63E-02 | 3.16E-01 | -4.93 |
| 1429340_PM_at   | Hrasl5                          | HRASL5   | 0.21  | 2.61  | 1.97  | 7.63E-02 | 3.16E-01 | -4.93 |
| 1423588_PM_at   | Arpc4                           | ARPC4    | 0.42  | 2.99  | 1.97  | 7.63E-02 | 3.16E-01 | -4.93 |
| 1426856_PM_at   | Hsd12                           | HSDL2    | -0.67 | 4.80  | -1.97 | 7.63E-02 | 3.16E-01 | -4.93 |
| 1432380_PM_s_at | Gsdmcl-ps ///Gsdmcl1 ///Gsdmcl2 | NA       | 0.17  | 2.40  | 1.97  | 7.63E-02 | 3.16E-01 | -4.93 |
| 1417595_PM_at   | Meox1                           | MEOX1    | 0.30  | 2.74  | 1.97  | 7.64E-02 | 3.16E-01 | -4.93 |
| 1433384_PM_at   | 9330199C07Rik                   | NA       | -0.56 | 2.36  | -1.97 | 7.64E-02 | 3.16E-01 | -4.93 |
| 1457904_PM_at   | Car8                            | NA       | 1.32  | 3.05  | 1.97  | 7.64E-02 | 3.16E-01 | -4.93 |
| 1432352_PM_at   | Ccny                            | NA       | 0.46  | 3.27  | 1.97  | 7.64E-02 | 3.17E-01 | -4.93 |
| 1415861_PM_at   | Tyrrp1                          | TYRPP1   | 0.24  | 2.37  | 1.97  | 7.64E-02 | 3.17E-01 | -4.93 |
| 1433330_PM_at   | ---                             | NA       | -0.18 | 2.34  | -1.97 | 7.65E-02 | 3.17E-01 | -4.93 |
| 1449971_PM_a_at | Cd209f                          | NA       | 0.24  | 2.26  | 1.97  | 7.65E-02 | 3.17E-01 | -4.93 |
| 1448396_PM_at   | Tmem131                         | TMEM131  | -0.37 | 4.98  | -1.97 | 7.65E-02 | 3.17E-01 | -4.93 |
| 1444775_PM_at   | Gpr107                          | GPR107   | 0.19  | 2.20  | 1.97  | 7.65E-02 | 3.17E-01 | -4.93 |
| 1431587_PM_at   | Ccdc7a                          | CCDC7    | 0.21  | 2.33  | 1.97  | 7.65E-02 | 3.17E-01 | -4.93 |
| 1445286_PM_at   | Vmn2r29                         | NA       | 0.56  | 3.16  | 1.97  | 7.65E-02 | 3.17E-01 | -4.93 |
| 1426085_PM_a_at | Pxn                             | PXN      | 0.63  | 3.55  | 1.97  | 7.65E-02 | 3.17E-01 | -4.93 |
| 1443257_PM_at   | ---                             | NA       | 0.19  | 2.21  | 1.97  | 7.65E-02 | 3.17E-01 | -4.93 |
| 1437084_PM_at   | Pad16                           | PADI6    | 0.22  | 2.86  | 1.97  | 7.66E-02 | 3.17E-01 | -4.93 |
| 1435462_PM_at   | Plxcd2                          | PLCXD2   | -0.93 | 3.21  | -1.97 | 7.66E-02 | 3.17E-01 | -4.93 |
| 1425796_PM_a_at | Fgfr3                           | FGFR3    | 0.16  | 2.61  | 1.97  | 7.66E-02 | 3.17E-01 | -4.93 |
| 1436705_PM_at   | Mmg11                           | MMGT1    | -1.20 | 4.26  | -1.97 | 7.67E-02 | 3.17E-01 | -4.93 |
| 1418046_PM_at   | Nap1l2                          | NAP1L2   | -0.87 | 3.92  | -1.97 | 7.66E-02 | 3.17E-01 | -4.93 |
| 1430073_PM_at   | Kbtbd11                         | KBTBD11  | -0.49 | 5.63  | -1.97 | 7.66E-02 | 3.17E-01 | -4.93 |
| 1435061_PM_at   | Nudt10                          | NUDT10   | -0.34 | 2.95  | -1.97 | 7.66E-02 | 3.17E-01 | -4.93 |

|                 |                                              |          |       |      |       |          |          |       |
|-----------------|----------------------------------------------|----------|-------|------|-------|----------|----------|-------|
| 1453543_PM_at   | ---                                          | NA       | 0.16  | 1.96 | 1.97  | 7.66E-02 | 3.17E-01 | -4.93 |
| 1440510_PM_at   | C430002N11Rik                                | NA       | 0.17  | 2.44 | 1.97  | 7.66E-02 | 3.17E-01 | -4.93 |
| 1425430_PM_at   | Krtap19-3                                    | NA       | 0.19  | 2.45 | 1.97  | 7.67E-02 | 3.17E-01 | -4.93 |
| 1447088_PM_at   | ---                                          | NA       | 0.19  | 2.76 | 1.97  | 7.67E-02 | 3.17E-01 | -4.93 |
| 1444084_PM_at   | Prrg4                                        | PRRG4    | 0.22  | 2.45 | 1.97  | 7.67E-02 | 3.17E-01 | -4.93 |
| 1442828_PM_at   | ---                                          | NA       | 0.23  | 2.52 | 1.97  | 7.66E-02 | 3.17E-01 | -4.93 |
| 1432495_PM_at   | Sox7                                         | SOX7     | 0.27  | 2.61 | 1.97  | 7.67E-02 | 3.17E-01 | -4.93 |
| 1419031_PM_at   | Fads2                                        | FADS2    | 0.31  | 2.75 | 1.97  | 7.67E-02 | 3.17E-01 | -4.93 |
| 1422242_PM_at   | Defa-rs10                                    | NA       | 0.31  | 3.38 | 1.97  | 7.67E-02 | 3.17E-01 | -4.93 |
| 1439288_PM_at   | Pnma1                                        | PNMA8A   | 0.72  | 5.72 | 1.97  | 7.67E-02 | 3.17E-01 | -4.93 |
| 1454028_PM_at   | ---                                          | NA       | 0.22  | 2.33 | 1.97  | 7.67E-02 | 3.17E-01 | -4.93 |
| 1452094_PM_at   | P4ha1                                        | P4HA1    | -0.67 | 3.84 | -1.97 | 7.67E-02 | 3.17E-01 | -4.93 |
| 1460258_PM_at   | Lect1                                        | CNMD     | 0.22  | 2.61 | 1.97  | 7.67E-02 | 3.17E-01 | -4.93 |
| 1428248_PM_at   | Nfx1                                         | NFX1     | -0.56 | 5.99 | -1.97 | 7.68E-02 | 3.17E-01 | -4.93 |
| 1416182_PM_at   | Apba3                                        | APBA3    | 0.24  | 2.76 | 1.96  | 7.68E-02 | 3.17E-01 | -4.93 |
| 1437284_PM_at   | Fzd1                                         | FZD1     | 0.41  | 4.91 | 1.97  | 7.68E-02 | 3.17E-01 | -4.93 |
| 1444231_PM_at   | ---                                          | NA       | 0.51  | 2.78 | 1.96  | 7.68E-02 | 3.17E-01 | -4.93 |
| 1418980_PM_a_at | Cnp                                          | CNP      | -0.55 | 3.44 | -1.96 | 7.68E-02 | 3.17E-01 | -4.93 |
| 1432714_PM_at   | 6430709C05Rik                                | NA       | 0.20  | 2.44 | 1.96  | 7.68E-02 | 3.17E-01 | -4.93 |
| 1457440_PM_at   | ---                                          | NA       | -0.66 | 3.28 | -1.96 | 7.68E-02 | 3.17E-01 | -4.93 |
| 1428497_PM_at   | Secisbp2                                     | SECISBP2 | 0.19  | 2.04 | 1.96  | 7.68E-02 | 3.17E-01 | -4.93 |
| 1416425_PM_at   | Pex19                                        | PEX19    | 0.31  | 2.79 | 1.96  | 7.68E-02 | 3.17E-01 | -4.93 |
| 1440872_PM_at   | ---                                          | NA       | 0.29  | 2.86 | 1.96  | 7.69E-02 | 3.17E-01 | -4.93 |
| 1428563_PM_at   | Ddx10                                        | DDX10    | 0.50  | 3.58 | 1.96  | 7.69E-02 | 3.17E-01 | -4.94 |
| 1422440_PM_at   | Cdk4 /// LOC102641469                        | CDK4     | 0.19  | 2.20 | 1.96  | 7.69E-02 | 3.17E-01 | -4.94 |
| 1423646_PM_at   | Zdhc3                                        | ZDHHC3   | -0.58 | 3.99 | -1.96 | 7.69E-02 | 3.17E-01 | -4.94 |
| 1454480_PM_at   | ---                                          | NA       | 0.22  | 2.89 | 1.96  | 7.69E-02 | 3.17E-01 | -4.94 |
| 1436330_PM_x_at | 2210404009Rik /// Gm7072<br>/// LOC102641260 | NA       | -0.77 | 4.06 | -1.96 | 7.70E-02 | 3.18E-01 | -4.94 |
| 1422292_PM_at   | ---                                          | NA       | 0.18  | 2.21 | 1.96  | 7.70E-02 | 3.18E-01 | -4.94 |
| 1425105_PM_at   | Rbp3                                         | RBP3     | 0.23  | 2.72 | 1.96  | 7.70E-02 | 3.18E-01 | -4.94 |
| 1419269_PM_at   | Dut                                          | DUT      | 0.27  | 2.78 | 1.96  | 7.70E-02 | 3.18E-01 | -4.94 |
| 1447086_PM_at   | ---                                          | NA       | 0.30  | 2.88 | 1.96  | 7.70E-02 | 3.18E-01 | -4.94 |
| 1460636_PM_at   | Map2k2                                       | MAP2K2   | 0.61  | 2.78 | 1.96  | 7.70E-02 | 3.18E-01 | -4.94 |
| 1440921_PM_at   | Nlrp12                                       | NLRP12   | 0.33  | 2.38 | 1.96  | 7.70E-02 | 3.18E-01 | -4.94 |
| 1445776_PM_at   | ---                                          | NA       | 0.21  | 2.35 | 1.96  | 7.70E-02 | 3.18E-01 | -4.94 |
| 1460294_PM_at   | Atp8a2                                       | ATP8A2   | -0.56 | 4.01 | -1.96 | 7.71E-02 | 3.18E-01 | -4.94 |
| 1456034_PM_at   | Cfap70                                       | CFAP70   | 0.29  | 2.51 | 1.96  | 7.71E-02 | 3.18E-01 | -4.94 |
| 1457426_PM_at   | 1700048O20Rik                                | NA       | 0.38  | 2.81 | 1.96  | 7.71E-02 | 3.18E-01 | -4.94 |
| 1417348_PM_at   | 2310039H08Rik                                | C6orf226 | -0.34 | 2.73 | -1.96 | 7.71E-02 | 3.18E-01 | -4.94 |
| 1453760_PM_at   | Mier1                                        | MIER1    | 0.19  | 2.23 | 1.96  | 7.71E-02 | 3.18E-01 | -4.94 |
| 1437168_PM_at   | Srsf12                                       | SRSF12   | -0.74 | 2.88 | -1.96 | 7.72E-02 | 3.18E-01 | -4.94 |
| 1450223_PM_at   | Apaf1                                        | APAF1    | -0.33 | 2.53 | -1.96 | 7.72E-02 | 3.18E-01 | -4.94 |
| 1420241_PM_at   | ---                                          | NA       | 0.18  | 2.29 | 1.96  | 7.72E-02 | 3.18E-01 | -4.94 |
| 1432022_PM_at   | Arhgap31                                     | ARHGAP31 | 0.19  | 2.58 | 1.96  | 7.72E-02 | 3.18E-01 | -4.94 |
| 1458770_PM_at   | D11Ert4e                                     | NA       | 0.25  | 2.49 | 1.96  | 7.72E-02 | 3.18E-01 | -4.94 |
| 1421570_PM_at   | Il9r                                         | IL9R     | 0.15  | 1.98 | 1.96  | 7.72E-02 | 3.18E-01 | -4.94 |
| 1442128_PM_at   | ---                                          | NA       | 0.18  | 2.45 | 1.96  | 7.72E-02 | 3.18E-01 | -4.94 |
| 1430018_PM_at   | Cdc42ep5                                     | NA       | 0.23  | 2.28 | 1.96  | 7.72E-02 | 3.18E-01 | -4.94 |
| 1445909_PM_at   | ---                                          | NA       | 0.24  | 2.44 | 1.96  | 7.72E-02 | 3.18E-01 | -4.94 |
| 1443803_PM_x_at | Hoxa5                                        | HOXAS    | 0.27  | 2.34 | 1.96  | 7.72E-02 | 3.18E-01 | -4.94 |
| 1431375_PM_s_at | Parva                                        | PARVA    | -0.85 | 3.58 | -1.96 | 7.73E-02 | 3.18E-01 | -4.94 |
| 1456533_PM_at   | Dpy19l1                                      | DPY19L1  | 0.28  | 4.00 | 1.96  | 7.73E-02 | 3.18E-01 | -4.94 |
| 1425187_PM_at   | Sel1l                                        | SEL1L    | -0.64 | 4.78 | -1.96 | 7.73E-02 | 3.18E-01 | -4.94 |
| 1416469_PM_at   | Luzp1                                        | LUZP1    | -0.35 | 2.95 | -1.96 | 7.73E-02 | 3.18E-01 | -4.94 |
| 1441588_PM_at   | Kcna1ot1                                     | NA       | 0.28  | 2.38 | 1.96  | 7.73E-02 | 3.18E-01 | -4.94 |
| 1438320_PM_s_at | Mcm7                                         | MCM7     | -0.79 | 3.06 | -1.96 | 7.74E-02 | 3.18E-01 | -4.94 |
| 1417719_PM_at   | Sap30                                        | SAP30    | -0.66 | 3.90 | -1.96 | 7.74E-02 | 3.18E-01 | -4.94 |
| 1460726_PM_at   | Adss                                         | ADSS     | -0.27 | 4.22 | -1.96 | 7.74E-02 | 3.18E-01 | -4.94 |
| 1430953_PM_at   | ---                                          | NA       | 0.17  | 2.35 | 1.96  | 7.74E-02 | 3.18E-01 | -4.94 |
| 1453823_PM_a_at | Trmt13                                       | TRMT13   | 0.33  | 2.47 | 1.96  | 7.74E-02 | 3.18E-01 | -4.94 |
| 1438355_PM_at   | Syndig1l                                     | SYNDIG1L | 0.42  | 2.54 | 1.96  | 7.74E-02 | 3.18E-01 | -4.94 |
| 1437379_PM_x_at | ---                                          | NA       | -0.61 | 4.72 | -1.96 | 7.74E-02 | 3.18E-01 | -4.94 |
| 1420169_PM_at   | AA517841                                     | NA       | 0.20  | 2.22 | 1.96  | 7.74E-02 | 3.18E-01 | -4.94 |
| 1450511_PM_at   | Musk                                         | MUSK     | 0.20  | 2.21 | 1.96  | 7.75E-02 | 3.18E-01 | -4.94 |
| 1432192_PM_at   | 4930483K19Rik                                | NA       | 0.21  | 2.53 | 1.96  | 7.75E-02 | 3.18E-01 | -4.94 |
| 1430814_PM_at   | Cyp2d40                                      | CYP2D6   | 0.34  | 2.96 | 1.96  | 7.75E-02 | 3.18E-01 | -4.94 |
| 1436335_PM_at   | Plch2                                        | PLCH2    | 0.57  | 4.68 | 1.96  | 7.75E-02 | 3.18E-01 | -4.94 |
| 1438979_PM_s_at | 1700029I15Rik                                | C11orf94 | 0.80  | 5.26 | 1.96  | 7.75E-02 | 3.18E-01 | -4.94 |
| 1459395_PM_at   | ---                                          | NA       | 0.91  | 3.33 | 1.96  | 7.75E-02 | 3.18E-01 | -4.94 |
| 1447774_PM_x_at | Fam213a                                      | FAM213A  | -0.20 | 3.80 | -1.96 | 7.75E-02 | 3.18E-01 | -4.94 |
| 1445609_PM_at   | ---                                          | NA       | 0.21  | 2.27 | 1.96  | 7.75E-02 | 3.18E-01 | -4.94 |
| 1419224_PM_at   | Cecr6                                        | CECR6    | -1.03 | 3.48 | -1.96 | 7.75E-02 | 3.18E-01 | -4.94 |
| 1424349_PM_a_at | Lpgat1                                       | LPGAT1   | -0.95 | 4.06 | -1.96 | 7.76E-02 | 3.19E-01 | -4.94 |

|                 |                                     |          |       |       |       |          |          |       |
|-----------------|-------------------------------------|----------|-------|-------|-------|----------|----------|-------|
| 1441006_PM_at   | ---                                 | NA       | 0.49  | 2.67  | 1.96  | 7.76E-02 | 3.19E-01 | -4.94 |
| 1458402_PM_at   | Pts                                 | PTS      | 0.20  | 2.83  | 1.96  | 7.76E-02 | 3.19E-01 | -4.94 |
| 1437832_PM_x_at | Wars                                | WARS     | 0.23  | 2.91  | 1.96  | 7.76E-02 | 3.19E-01 | -4.94 |
| 1455367_PM_at   | Dnd1                                | DND1     | 0.24  | 2.38  | 1.96  | 7.76E-02 | 3.19E-01 | -4.94 |
| 1435100_PM_at   | Ybey                                | YBEY     | 0.29  | 2.72  | 1.96  | 7.76E-02 | 3.19E-01 | -4.94 |
| 1456886_PM_at   | Zfp839                              | ZNF839   | -0.34 | 4.57  | -1.96 | 7.76E-02 | 3.19E-01 | -4.94 |
| 1445072_PM_at   | Gm33560                             | NA       | 0.65  | 2.55  | 1.96  | 7.76E-02 | 3.19E-01 | -4.94 |
| 1431930_PM_x_at | Crls1                               | CRLS1    | -0.88 | 7.80  | -1.96 | 7.76E-02 | 3.19E-01 | -4.94 |
| 1417687_PM_at   | Lgals12                             | LGALS12  | 0.27  | 2.39  | 1.96  | 7.77E-02 | 3.19E-01 | -4.94 |
| 1437940_PM_at   | Apba1                               | NA       | 0.40  | 2.53  | 1.96  | 7.77E-02 | 3.19E-01 | -4.94 |
| 1423598_PM_at   | Atp8a1                              | ATP8A1   | -0.69 | 5.15  | -1.96 | 7.77E-02 | 3.19E-01 | -4.95 |
| 1434037_PM_s_at | Kat2b                               | KAT2B    | -0.58 | 3.91  | -1.96 | 7.77E-02 | 3.19E-01 | -4.95 |
| 1448168_PM_a_at | Muc12                               | NA       | -0.25 | 2.34  | -1.96 | 7.77E-02 | 3.19E-01 | -4.95 |
| 1419889_PM_at   | ---                                 | NA       | 0.19  | 2.54  | 1.96  | 7.77E-02 | 3.19E-01 | -4.95 |
| 1438485_PM_at   | Arhgef40                            | ARHGEF40 | 0.22  | 2.97  | 1.96  | 7.77E-02 | 3.19E-01 | -4.95 |
| 1429223_PM_a_at | Hfe2                                | HFE2     | 0.29  | 2.51  | 1.96  | 7.77E-02 | 3.19E-01 | -4.95 |
| 1447812_PM_x_at | Fhnc                                | FLNC     | 0.30  | 4.09  | 1.96  | 7.77E-02 | 3.19E-01 | -4.94 |
| 1443675_PM_at   | ---                                 | NA       | -0.44 | 2.69  | -1.96 | 7.78E-02 | 3.19E-01 | -4.95 |
| 1450615_PM_at   | Ear4                                | NA       | 0.15  | 1.90  | 1.96  | 7.78E-02 | 3.19E-01 | -4.95 |
| 1456175_PM_a_at | Copb2                               | COPB2    | -0.40 | 9.16  | -1.96 | 7.78E-02 | 3.19E-01 | -4.95 |
| 1445048_PM_at   | Baz2b                               | BAZ2B    | 0.37  | 2.33  | 1.96  | 7.78E-02 | 3.19E-01 | -4.95 |
| 1417285_PM_a_at | Ndufa5                              | NDUFAS   | 0.40  | 10.15 | 1.96  | 7.78E-02 | 3.19E-01 | -4.95 |
| 1433874_PM_at   | Ssh1                                | SSH1     | 0.18  | 2.63  | 1.96  | 7.79E-02 | 3.19E-01 | -4.95 |
| 1429644_PM_at   | 1700011103Rik                       | CCDC192  | 0.20  | 2.17  | 1.96  | 7.78E-02 | 3.19E-01 | -4.95 |
| 1436257_PM_at   | ---                                 | NA       | 0.22  | 2.18  | 1.96  | 7.79E-02 | 3.19E-01 | -4.95 |
| 1425948_PM_a_at | Slc25a30                            | SLC25A30 | 0.25  | 2.66  | 1.96  | 7.79E-02 | 3.19E-01 | -4.95 |
| 1431970_PM_at   | Dcstamp                             | DCSTAMP  | 0.45  | 2.59  | 1.96  | 7.78E-02 | 3.19E-01 | -4.95 |
| 1442925_PM_at   | Smg1                                | SMG1     | 0.52  | 3.58  | 1.96  | 7.79E-02 | 3.19E-01 | -4.95 |
| 1415918_PM_a_at | Tpi1                                | TPI1     | -0.40 | 3.65  | -1.96 | 7.79E-02 | 3.19E-01 | -4.95 |
| 1452497_PM_a_at | Nfatc3                              | NFATC3   | 0.23  | 2.18  | 1.96  | 7.79E-02 | 3.19E-01 | -4.95 |
| 1425016_PM_at   | Ephb2                               | EPHB1    | -0.30 | 4.65  | -1.96 | 7.79E-02 | 3.19E-01 | -4.95 |
| 1443200_PM_at   | Fgf2os                              | NA       | 0.22  | 2.26  | 1.96  | 7.79E-02 | 3.19E-01 | -4.95 |
| 1458084_PM_at   | ---                                 | NA       | 0.41  | 3.33  | 1.96  | 7.79E-02 | 3.19E-01 | -4.95 |
| 1435115_PM_at   | Fndc5                               | FNDC5    | -0.76 | 4.49  | -1.96 | 7.81E-02 | 3.19E-01 | -4.95 |
| 1450561_PM_a_at | Surf1                               | SURF1    | -0.63 | 5.30  | -1.96 | 7.79E-02 | 3.19E-01 | -4.95 |
| 1428542_PM_at   | Eif1ad                              | EIF1AD   | -0.33 | 2.89  | -1.96 | 7.81E-02 | 3.19E-01 | -4.95 |
| 1430964_PM_at   | 2310034005Rik                       | NA       | -0.29 | 2.66  | -1.96 | 7.80E-02 | 3.19E-01 | -4.95 |
| 1443258_PM_at   | ---                                 | NA       | 0.18  | 2.27  | 1.96  | 7.80E-02 | 3.19E-01 | -4.95 |
| 1448969_PM_at   | Ftsj2                               | MRM2     | 0.18  | 2.50  | 1.96  | 7.80E-02 | 3.19E-01 | -4.95 |
| 1445034_PM_at   | ---                                 | NA       | 0.20  | 2.31  | 1.96  | 7.80E-02 | 3.19E-01 | -4.95 |
| 1447373_PM_at   | ---                                 | NA       | 0.21  | 2.48  | 1.96  | 7.80E-02 | 3.19E-01 | -4.95 |
| 1426941_PM_at   | Muc15                               | MUC15    | 0.22  | 2.11  | 1.96  | 7.80E-02 | 3.19E-01 | -4.95 |
| 1417078_PM_at   | Lgals2                              | LGALS2   | 0.24  | 2.82  | 1.96  | 7.80E-02 | 3.19E-01 | -4.95 |
| 1457444_PM_at   | Gm30173                             | NA       | 0.24  | 2.92  | 1.96  | 7.80E-02 | 3.19E-01 | -4.95 |
| 1444881_PM_at   | Taok3                               | TAOK3    | 0.26  | 2.80  | 1.96  | 7.80E-02 | 3.19E-01 | -4.95 |
| 1436162_PM_at   | Slc22a30                            | SLC22A9  | 0.29  | 2.58  | 1.96  | 7.80E-02 | 3.19E-01 | -4.95 |
| 1440395_PM_at   | ---                                 | NA       | 0.31  | 2.85  | 1.96  | 7.79E-02 | 3.19E-01 | -4.95 |
| 1419520_PM_at   | Nat8                                | NAT8     | 0.37  | 2.62  | 1.96  | 7.80E-02 | 3.19E-01 | -4.95 |
| 1453539_PM_at   | Alkbh8                              | NA       | 0.54  | 3.89  | 1.96  | 7.80E-02 | 3.19E-01 | -4.95 |
| 1416074_PM_a_at | Gm10051 /// Rpl28 /// Rpl28-ps1     | RPL28    | 0.62  | 6.48  | 1.96  | 7.80E-02 | 3.19E-01 | -4.95 |
| 1454174_PM_a_at | C330007P06Rik                       | CXorf56  | 0.72  | 3.32  | 1.96  | 7.80E-02 | 3.19E-01 | -4.95 |
| 1438103_PM_at   | Pcdhgc4                             | NA       | 0.75  | 3.74  | 1.96  | 7.80E-02 | 3.19E-01 | -4.95 |
| 1416636_PM_at   | Rheb                                | RHEB     | -0.60 | 5.07  | -1.95 | 7.81E-02 | 3.19E-01 | -4.95 |
| 1426766_PM_at   | 6330403K07Rik                       | NA       | -1.19 | 6.22  | -1.95 | 7.81E-02 | 3.19E-01 | -4.95 |
| 1432276_PM_at   | 4930519F16Rik                       | NA       | 0.30  | 2.71  | 1.95  | 7.81E-02 | 3.19E-01 | -4.95 |
| 1437704_PM_at   | Mblac2                              | MBLAC2   | -0.44 | 3.19  | -1.95 | 7.81E-02 | 3.19E-01 | -4.95 |
| 1417322_PM_at   | Dohh                                | DOHH     | 0.35  | 4.29  | 1.95  | 7.82E-02 | 3.19E-01 | -4.95 |
| 1459717_PM_at   | Gm16532                             | NA       | -0.50 | 4.60  | -1.95 | 7.82E-02 | 3.20E-01 | -4.95 |
| 1457930_PM_at   | ---                                 | NA       | 0.19  | 2.59  | 1.95  | 7.82E-02 | 3.20E-01 | -4.95 |
| 1420028_PM_s_at | Mcm3                                | MCM3     | 0.32  | 4.07  | 1.95  | 7.82E-02 | 3.20E-01 | -4.95 |
| 1433116_PM_at   | ---                                 | NA       | 0.19  | 2.38  | 1.95  | 7.82E-02 | 3.20E-01 | -4.95 |
| 1458790_PM_at   | ---                                 | NA       | 0.46  | 3.75  | 1.95  | 7.82E-02 | 3.20E-01 | -4.95 |
| 1430574_PM_at   | Cdkn3                               | CDKN3    | 0.31  | 2.03  | 1.95  | 7.83E-02 | 3.20E-01 | -4.95 |
| 1457034_PM_at   | Fam208a                             | FAM208A  | -0.57 | 4.77  | -1.95 | 7.83E-02 | 3.20E-01 | -4.95 |
| 1457963_PM_at   | Gm34784                             | NA       | 0.18  | 2.26  | 1.95  | 7.83E-02 | 3.20E-01 | -4.95 |
| 1419504_PM_at   | Mogat1                              | MOGAT1   | 0.16  | 2.56  | 1.95  | 7.83E-02 | 3.20E-01 | -4.95 |
| 1460496_PM_at   | Bpif9b                              | NA       | 0.28  | 2.57  | 1.95  | 7.83E-02 | 3.20E-01 | -4.95 |
| 1439363_PM_at   | Ncbp3                               | NCBP3    | 0.30  | 3.57  | 1.95  | 7.83E-02 | 3.20E-01 | -4.95 |
| 1433737_PM_at   | Uhmk1                               | UHMK1    | -1.51 | 7.91  | -1.95 | 7.83E-02 | 3.20E-01 | -4.95 |
| 1427968_PM_at   | Tgif2k1 /// Tgif2k2                 | TGIF2LY  | 0.20  | 2.13  | 1.95  | 7.83E-02 | 3.20E-01 | -4.95 |
| 1453082_PM_at   | Tulp3                               | TULP3    | 0.25  | 2.60  | 1.95  | 7.84E-02 | 3.20E-01 | -4.95 |
| 1455068_PM_at   | Psd4                                | PSD4     | 0.27  | 2.43  | 1.95  | 7.84E-02 | 3.20E-01 | -4.95 |
| 1451567_PM_a_at | Gm16340 /// Ifi203 /// LOC102641031 | NA       | -0.30 | 2.25  | -1.95 | 7.84E-02 | 3.20E-01 | -4.95 |



|                 |               |            |       |       |       |          |          |       |
|-----------------|---------------|------------|-------|-------|-------|----------|----------|-------|
| 1448893_PM_at   | Ncor2         | NCOR2      | -0.20 | 2.96  | -1.95 | 7.84E-02 | 3.20E-01 | -4.95 |
| 1446638_PM_at   | Ptpru         | PTPRU      | 0.24  | 2.72  | 1.95  | 7.85E-02 | 3.20E-01 | -4.95 |
| 1426299_PM_at   | Snx20         | SNX20      | 0.16  | 2.51  | 1.95  | 7.85E-02 | 3.20E-01 | -4.95 |
| 1439698_PM_at   | Zfp276        | NA         | 0.27  | 2.70  | 1.95  | 7.85E-02 | 3.20E-01 | -4.95 |
| 1420094_PM_at   | ---           | NA         | -0.57 | 3.68  | -1.95 | 7.85E-02 | 3.20E-01 | -4.95 |
| 1438188_PM_x_at | Slc25a29      | SLC25A29   | 0.21  | 2.68  | 1.95  | 7.85E-02 | 3.20E-01 | -4.95 |
| 1426722_PM_at   | Slc38a2       | SLC38A2    | -0.76 | 6.41  | -1.95 | 7.86E-02 | 3.21E-01 | -4.96 |
| 1444102_PM_at   | LOC102634683  | NA         | 0.31  | 3.27  | 1.95  | 7.86E-02 | 3.21E-01 | -4.96 |
| 1420210_PM_at   | Slc8a1        | NA         | 0.15  | 2.16  | 1.95  | 7.86E-02 | 3.21E-01 | -4.96 |
| 1427092_PM_at   | InsB /// Jak3 | JAK3       | 0.33  | 2.38  | 1.95  | 7.86E-02 | 3.21E-01 | -4.96 |
| 1441328_PM_at   | ---           | NA         | 0.35  | 3.20  | 1.95  | 7.87E-02 | 3.21E-01 | -4.96 |
| 1451675_PM_a_at | Alas2         | ALAS2      | 0.18  | 2.22  | 1.95  | 7.87E-02 | 3.21E-01 | -4.96 |
| 1424234_PM_s_at | Meox2         | MEOX2      | 0.19  | 2.18  | 1.95  | 7.87E-02 | 3.21E-01 | -4.96 |
| 1424235_PM_at   | Ormdl2        | ORMDL2     | 0.23  | 2.14  | 1.95  | 7.87E-02 | 3.21E-01 | -4.96 |
| 1419383_PM_at   | S100b         | S100B      | 0.51  | 2.84  | 1.95  | 7.87E-02 | 3.21E-01 | -4.96 |
| 1453062_PM_at   | ---           | NA         | -0.64 | 2.97  | -1.95 | 7.87E-02 | 3.21E-01 | -4.96 |
| 1432679_PM_at   | Itgav         | NA         | -0.44 | 2.87  | -1.95 | 7.87E-02 | 3.21E-01 | -4.96 |
| 1418933_PM_at   | Slc1a6        | SLC1A6     | 0.43  | 3.34  | 1.95  | 7.88E-02 | 3.21E-01 | -4.96 |
| 1428655_PM_at   | Ppp1r21       | PPP1R21    | -0.50 | 3.87  | -1.95 | 7.88E-02 | 3.21E-01 | -4.96 |
| 1426468_PM_at   | 0610037L13Rik | C1orf123   | -0.32 | 2.58  | -1.95 | 7.88E-02 | 3.21E-01 | -4.96 |
| 1459356_PM_at   | ---           | NA         | 0.19  | 2.31  | 1.95  | 7.88E-02 | 3.21E-01 | -4.96 |
| 1439186_PM_at   | Bend7         | BEND7      | 0.24  | 1.99  | 1.95  | 7.88E-02 | 3.21E-01 | -4.96 |
| 1419391_PM_at   | Myog          | MYOG       | 0.34  | 2.74  | 1.95  | 7.88E-02 | 3.21E-01 | -4.96 |
| 1438310_PM_at   | Dgkh          | NA         | -0.52 | 4.62  | -1.95 | 7.88E-02 | 3.21E-01 | -4.96 |
| 1453617_PM_at   | Zranb3        | ZRANB3     | 0.18  | 2.41  | 1.95  | 7.88E-02 | 3.21E-01 | -4.96 |
| 1459166_PM_at   | ---           | NA         | 0.24  | 2.58  | 1.95  | 7.88E-02 | 3.21E-01 | -4.96 |
| 1432090_PM_at   | Ccdc83        | CCDC83     | 0.32  | 2.86  | 1.95  | 7.88E-02 | 3.21E-01 | -4.96 |
| 1450719_PM_at   | Mep1a         | MEP1A      | 0.34  | 3.26  | 1.95  | 7.88E-02 | 3.21E-01 | -4.96 |
| 1428311_PM_at   | Ccdc6         | CCDC6      | -0.90 | 4.16  | -1.95 | 7.89E-02 | 3.21E-01 | -4.96 |
| 1415905_PM_at   | Reg1          | REG1B      | 0.16  | 2.21  | 1.95  | 7.89E-02 | 3.21E-01 | -4.96 |
| 1453385_PM_at   | Xiap          | BIRC8      | 0.28  | 2.83  | 1.95  | 7.89E-02 | 3.21E-01 | -4.96 |
| 1427933_PM_at   | Vps33b        | VPS33B     | -0.66 | 4.96  | -1.95 | 7.89E-02 | 3.21E-01 | -4.96 |
| 1426135_PM_a_at | Park2         | PRKN       | 0.19  | 3.53  | 1.95  | 7.89E-02 | 3.21E-01 | -4.96 |
| 1432619_PM_at   | ---           | NA         | 0.21  | 2.65  | 1.95  | 7.89E-02 | 3.21E-01 | -4.96 |
| 1447644_PM_at   | ---           | NA         | 0.24  | 2.14  | 1.95  | 7.89E-02 | 3.21E-01 | -4.96 |
| 1429994_PM_s_at | Cyp2c65       | NA         | 0.18  | 2.19  | 1.95  | 7.90E-02 | 3.21E-01 | -4.96 |
| 1449179_PM_at   | Pdc           | PDC        | 0.20  | 2.59  | 1.95  | 7.89E-02 | 3.21E-01 | -4.96 |
| 1439631_PM_at   | Zcchc11       | ZCCHC11    | 0.27  | 2.74  | 1.95  | 7.90E-02 | 3.21E-01 | -4.96 |
| 1450351_PM_a_at | Clip1         | CLIP1      | 0.65  | 4.65  | 1.95  | 7.90E-02 | 3.21E-01 | -4.96 |
| 1458835_PM_at   | ---           | NA         | 0.19  | 2.39  | 1.95  | 7.90E-02 | 3.21E-01 | -4.96 |
| 1436691_PM_x_at | Prdx1         | PRDX1      | -0.72 | 7.15  | -1.95 | 7.90E-02 | 3.21E-01 | -4.96 |
| 1425059_PM_at   | Prmt6         | PRMT6      | -0.36 | 3.44  | -1.95 | 7.90E-02 | 3.21E-01 | -4.96 |
| 1429683_PM_at   | Ttpal         | TTPAL      | -0.18 | 2.50  | -1.95 | 7.90E-02 | 3.21E-01 | -4.96 |
| 1428928_PM_at   | Cacnb4        | ACO68547.1 | -0.58 | 6.46  | -1.95 | 7.91E-02 | 3.21E-01 | -4.96 |
| 1425527_PM_at   | Prrx1         | PRRX1      | -0.42 | 2.64  | -1.95 | 7.91E-02 | 3.21E-01 | -4.96 |
| 1424569_PM_at   | Ddx46         | DDX46      | 0.92  | 4.99  | 1.95  | 7.91E-02 | 3.21E-01 | -4.96 |
| 1452245_PM_at   | Nova1         | NOVA1      | 0.28  | 3.29  | 1.95  | 7.91E-02 | 3.21E-01 | -4.96 |
| 1417495_PM_x_at | Cp            | CP         | -0.39 | 3.21  | -1.95 | 7.91E-02 | 3.22E-01 | -4.96 |
| 1451368_PM_at   | Alg1          | ALG1L      | -0.37 | 3.94  | -1.95 | 7.91E-02 | 3.22E-01 | -4.96 |
| 1456752_PM_at   | ---           | NA         | 0.24  | 2.37  | 1.95  | 7.92E-02 | 3.22E-01 | -4.96 |
| 1420494_PM_x_at | Ubc           | UBC        | -0.16 | 11.45 | -1.95 | 7.92E-02 | 3.22E-01 | -4.96 |
| 1456448_PM_at   | ---           | NA         | -0.25 | 2.55  | -1.95 | 7.92E-02 | 3.22E-01 | -4.96 |
| 1431130_PM_at   | Chp2          | CHP2       | 0.26  | 2.51  | 1.95  | 7.92E-02 | 3.22E-01 | -4.96 |
| 1455485_PM_x_at | Rpl13a        | RPL13A     | 0.27  | 10.44 | 1.95  | 7.92E-02 | 3.22E-01 | -4.96 |
| 1457102_PM_at   | Mc5r          | NA         | 0.28  | 2.39  | 1.95  | 7.92E-02 | 3.22E-01 | -4.96 |
| 1416716_PM_at   | Efs           | EFS        | 0.31  | 3.33  | 1.95  | 7.92E-02 | 3.22E-01 | -4.96 |
| 1419735_PM_at   | Csn3          | CSN3       | 0.35  | 2.81  | 1.95  | 7.92E-02 | 3.22E-01 | -4.96 |
| 1441773_PM_at   | LOC105243184  | NA         | 0.23  | 2.63  | 1.95  | 7.93E-02 | 3.22E-01 | -4.96 |
| 1454187_PM_at   | Pkd1l2        | NA         | 0.25  | 2.63  | 1.95  | 7.93E-02 | 3.22E-01 | -4.96 |
| 1434885_PM_at   | Spty2d1       | SPTY2D1    | 0.63  | 2.81  | 1.95  | 7.93E-02 | 3.22E-01 | -4.96 |
| 1429316_PM_at   | Rasgef1a      | RASGEF1A   | -0.76 | 7.10  | -1.95 | 7.93E-02 | 3.22E-01 | -4.96 |
| 1429786_PM_a_at | Zwint         | ZWINT      | 0.65  | 3.94  | 1.95  | 7.93E-02 | 3.22E-01 | -4.96 |
| 1416922_PM_a_at | Bnip3l        | BNIP3L     | -0.72 | 4.33  | -1.95 | 7.93E-02 | 3.22E-01 | -4.96 |
| 1428967_PM_at   | Igf1r         | NA         | -0.67 | 4.24  | -1.95 | 7.93E-02 | 3.22E-01 | -4.96 |
| 1453933_PM_at   | ---           | NA         | 0.14  | 2.90  | 1.95  | 7.93E-02 | 3.22E-01 | -4.96 |
| 1433178_PM_at   | ---           | NA         | 0.16  | 2.47  | 1.95  | 7.94E-02 | 3.22E-01 | -4.96 |
| 1430510_PM_at   | Evi5l         | EVI5L      | 0.29  | 2.68  | 1.95  | 7.93E-02 | 3.22E-01 | -4.96 |
| 1422171_PM_at   | Ptldr         | PTGDR      | 0.36  | 2.87  | 1.95  | 7.94E-02 | 3.22E-01 | -4.96 |
| 1429999_PM_at   | Tlk2          | TLK2       | 0.46  | 2.68  | 1.95  | 7.94E-02 | 3.22E-01 | -4.96 |
| 1419449_PM_a_at | Gnai2         | GNAI2      | 0.64  | 4.43  | 1.95  | 7.94E-02 | 3.22E-01 | -4.96 |
| 1450370_PM_a_at | Kcni4         | KCNI4      | 0.87  | 3.64  | 1.95  | 7.94E-02 | 3.22E-01 | -4.96 |
| 1428471_PM_at   | Sorbs1        | NA         | -0.41 | 7.22  | -1.94 | 7.95E-02 | 3.22E-01 | -4.97 |
| 1457917_PM_at   | ---           | NA         | -0.21 | 2.69  | -1.94 | 7.95E-02 | 3.22E-01 | -4.97 |
| 1452305_PM_s_at | Cenpn         | CENPN      | 0.18  | 2.40  | 1.94  | 7.94E-02 | 3.22E-01 | -4.96 |
| 1421083_PM_x_at | Banf1         | BANF1      | 0.19  | 2.33  | 1.94  | 7.94E-02 | 3.22E-01 | -4.96 |

|                 |                                                                           |          |       |      |       |          |          |       |
|-----------------|---------------------------------------------------------------------------|----------|-------|------|-------|----------|----------|-------|
| 1440693_PM_at   | Palld                                                                     | PALLD    | 0.22  | 2.19 | 1.94  | 7.94E-02 | 3.22E-01 | -4.96 |
| 1427926_PM_at   | Maml2                                                                     | MAML2    | 0.25  | 2.61 | 1.94  | 7.95E-02 | 3.22E-01 | -4.97 |
| 1438341_PM_at   | Tgm4                                                                      | TGM4     | 0.26  | 2.54 | 1.94  | 7.94E-02 | 3.22E-01 | -4.96 |
| 1450506_PM_a_at | Aen                                                                       | AEN      | 0.28  | 2.40 | 1.94  | 7.94E-02 | 3.22E-01 | -4.96 |
| 1453817_PM_at   | Abca6                                                                     | NA       | 0.29  | 2.49 | 1.94  | 7.94E-02 | 3.22E-01 | -4.96 |
| 1459251_PM_at   | ---                                                                       | NA       | 0.29  | 2.64 | 1.94  | 7.95E-02 | 3.22E-01 | -4.97 |
| 1432853_PM_at   | 2900057C01Rik                                                             | NA       | 0.33  | 2.81 | 1.94  | 7.94E-02 | 3.22E-01 | -4.96 |
| 1424040_PM_at   | Map7d1                                                                    | MAP7D1   | 0.82  | 7.36 | 1.94  | 7.94E-02 | 3.22E-01 | -4.96 |
| 1416367_PM_at   | 1110001J03Rik                                                             | FMC1     | -0.33 | 2.89 | -1.94 | 7.95E-02 | 3.22E-01 | -4.97 |
| 1444401_PM_at   | ---                                                                       | NA       | 0.49  | 3.22 | 1.94  | 7.95E-02 | 3.22E-01 | -4.97 |
| 1459190_PM_at   | D3Erttd258e                                                               | NA       | 0.28  | 3.05 | 1.94  | 7.95E-02 | 3.22E-01 | -4.97 |
| 1447430_PM_at   | ---                                                                       | NA       | 0.21  | 2.24 | 1.94  | 7.95E-02 | 3.22E-01 | -4.97 |
| 1442875_PM_at   | Gm31875                                                                   | NA       | 0.19  | 2.18 | 1.94  | 7.96E-02 | 3.22E-01 | -4.97 |
| 1445521_PM_at   | Elav1                                                                     | ELAVL1   | 0.62  | 4.00 | 1.94  | 7.96E-02 | 3.22E-01 | -4.97 |
| 1433534_PM_a_at | Cct2                                                                      | CCT2     | -0.89 | 6.39 | -1.94 | 7.96E-02 | 3.22E-01 | -4.97 |
| 1452568_PM_at   | Gcap8                                                                     | NA       | 0.33  | 2.46 | 1.94  | 7.96E-02 | 3.22E-01 | -4.97 |
| 1432079_PM_at   | ---                                                                       | NA       | 0.24  | 2.30 | 1.94  | 7.96E-02 | 3.22E-01 | -4.97 |
| 1428346_PM_at   | Traf1                                                                     | TRAFD1   | -0.59 | 5.52 | -1.94 | 7.97E-02 | 3.22E-01 | -4.97 |
| 1422648_PM_at   | Slc7a2                                                                    | SLC7A2   | -0.30 | 2.42 | -1.94 | 7.97E-02 | 3.22E-01 | -4.97 |
| 1432698_PM_at   | ---                                                                       | NA       | 0.20  | 2.88 | 1.94  | 7.97E-02 | 3.22E-01 | -4.97 |
| 1441252_PM_at   | ---                                                                       | NA       | 0.29  | 3.58 | 1.94  | 7.97E-02 | 3.22E-01 | -4.97 |
| 1428104_PM_at   | Tpx2                                                                      | TPX2     | 0.37  | 2.69 | 1.94  | 7.97E-02 | 3.22E-01 | -4.97 |
| 1440508_PM_at   | ---                                                                       | NA       | -0.34 | 3.30 | -1.94 | 7.97E-02 | 3.23E-01 | -4.97 |
| 1423902_PM_s_at | Arhgef12                                                                  | ARHGEF12 | -1.30 | 6.82 | -1.94 | 7.98E-02 | 3.23E-01 | -4.97 |
| 1427534_PM_at   | ---                                                                       | NA       | 0.21  | 2.64 | 1.94  | 7.98E-02 | 3.23E-01 | -4.97 |
| 1431565_PM_at   | ---                                                                       | NA       | 0.21  | 2.39 | 1.94  | 7.98E-02 | 3.23E-01 | -4.97 |
| 1422467_PM_at   | Ppt1                                                                      | PPT1     | -0.54 | 3.77 | -1.94 | 7.98E-02 | 3.23E-01 | -4.97 |
| 1440221_PM_at   | AA408650                                                                  | NA       | 0.59  | 4.69 | 1.94  | 7.98E-02 | 3.23E-01 | -4.97 |
| 1456166_PM_at   | ---                                                                       | NA       | 0.21  | 2.35 | 1.94  | 7.98E-02 | 3.23E-01 | -4.97 |
| 1418945_PM_at   | Mmp3                                                                      | NA       | 0.17  | 2.40 | 1.94  | 7.98E-02 | 3.23E-01 | -4.97 |
| 1423113_PM_a_at | Ube2d3                                                                    | UBE2D3   | -1.00 | 6.11 | -1.94 | 7.99E-02 | 3.23E-01 | -4.97 |
| 1436478_PM_at   | ---                                                                       | NA       | -0.57 | 5.52 | -1.94 | 7.99E-02 | 3.23E-01 | -4.97 |
| 1427688_PM_a_at | Ptprs                                                                     | PTPRS    | -0.48 | 3.43 | -1.94 | 7.99E-02 | 3.23E-01 | -4.97 |
| 1424004_PM_x_at | Pomk                                                                      | POMK     | -0.40 | 3.95 | -1.94 | 7.99E-02 | 3.23E-01 | -4.97 |
| 1443464_PM_at   | ---                                                                       | NA       | 0.23  | 2.14 | 1.94  | 7.99E-02 | 3.23E-01 | -4.97 |
| 1446028_PM_at   | ---                                                                       | NA       | 0.28  | 2.32 | 1.94  | 7.99E-02 | 3.23E-01 | -4.97 |
| 1426126_PM_a_at | Igflr1 /// U2af14                                                         | IGFLR1   | 0.30  | 2.98 | 1.94  | 7.99E-02 | 3.23E-01 | -4.97 |
| 1422451_PM_at   | Mmps21                                                                    | MRPS21   | -0.67 | 4.06 | -1.94 | 8.00E-02 | 3.23E-01 | -4.97 |
| 1427972_PM_at   | Cdc73                                                                     | CDC73    | 0.36  | 5.95 | 1.94  | 8.00E-02 | 3.23E-01 | -4.97 |
| 1452321_PM_at   | Brwd1                                                                     | NA       | 0.55  | 2.93 | 1.94  | 8.00E-02 | 3.23E-01 | -4.97 |
| 1416578_PM_at   | Gm9840 /// Rbx1                                                           | RBX1     | -0.54 | 4.90 | -1.94 | 8.01E-02 | 3.23E-01 | -4.97 |
| 1456870_PM_at   | Rasa3                                                                     | RASAL3   | -0.34 | 2.31 | -1.94 | 8.01E-02 | 3.23E-01 | -4.97 |
| 1452126_PM_at   | Zfp160                                                                    | ZNF665   | -0.23 | 2.50 | -1.94 | 8.01E-02 | 3.23E-01 | -4.97 |
| 1457942_PM_at   | ---                                                                       | NA       | 0.16  | 2.32 | 1.94  | 8.01E-02 | 3.23E-01 | -4.97 |
| 1429157_PM_at   | Hhip2                                                                     | HHIP2    | 0.19  | 2.28 | 1.94  | 8.01E-02 | 3.23E-01 | -4.97 |
| 1434487_PM_at   | Mef2d                                                                     | MEF2D    | 0.23  | 5.10 | 1.94  | 8.00E-02 | 3.23E-01 | -4.97 |
| 1429806_PM_at   | Eral1                                                                     | ERAL1    | 0.29  | 2.58 | 1.94  | 8.01E-02 | 3.23E-01 | -4.97 |
| 1420414_PM_at   | Hoxa11                                                                    | HOXA11   | 0.31  | 2.82 | 1.94  | 8.00E-02 | 3.23E-01 | -4.97 |
| 1457288_PM_at   | Ank3                                                                      | ANK3     | 0.20  | 2.31 | 1.94  | 8.02E-02 | 3.23E-01 | -4.97 |
| 1422725_PM_at   | Mak                                                                       | MAK      | 0.21  | 2.16 | 1.94  | 8.02E-02 | 3.23E-01 | -4.97 |
| 1457906_PM_at   | Tti2                                                                      | TTI2     | 0.21  | 2.96 | 1.94  | 8.01E-02 | 3.23E-01 | -4.97 |
| 1433993_PM_at   | 4931406P16Rik                                                             | KIAA0355 | 0.22  | 2.61 | 1.94  | 8.01E-02 | 3.23E-01 | -4.97 |
| 1449570_PM_at   | Klrb1c                                                                    | KLRB1    | 0.24  | 2.98 | 1.94  | 8.01E-02 | 3.23E-01 | -4.97 |
| 1457967_PM_at   | ---                                                                       | NA       | 0.26  | 2.60 | 1.94  | 8.01E-02 | 3.23E-01 | -4.97 |
| 1449202_PM_at   | Sema4g                                                                    | SEMA4G   | 0.31  | 2.76 | 1.94  | 8.01E-02 | 3.23E-01 | -4.97 |
| 1440425_PM_at   | ---                                                                       | NA       | 0.33  | 2.26 | 1.94  | 8.02E-02 | 3.23E-01 | -4.97 |
| 1416888_PM_at   | Fadd                                                                      | FADD     | 0.37  | 2.59 | 1.94  | 8.01E-02 | 3.23E-01 | -4.97 |
| 1460595_PM_at   | Syt14                                                                     | SYT14    | -0.41 | 2.81 | -1.94 | 8.02E-02 | 3.23E-01 | -4.97 |
| 1422548_PM_at   | Dhdds                                                                     | DHDDS    | 0.28  | 2.76 | 1.94  | 8.02E-02 | 3.23E-01 | -4.97 |
| 1432821_PM_at   | Nfatc4                                                                    | NA       | 0.17  | 2.15 | 1.94  | 8.02E-02 | 3.23E-01 | -4.97 |
| 1418325_PM_at   | Sephs2                                                                    | NA       | 0.22  | 3.54 | 1.94  | 8.02E-02 | 3.23E-01 | -4.97 |
| 1420211_PM_at   | ---                                                                       | NA       | 0.27  | 2.33 | 1.94  | 8.02E-02 | 3.23E-01 | -4.97 |
| 1427950_PM_at   | Ltn1                                                                      | LTN1     | 0.30  | 2.74 | 1.94  | 8.02E-02 | 3.23E-01 | -4.97 |
| 1446839_PM_at   | ---                                                                       | NA       | 0.29  | 3.94 | 1.94  | 8.03E-02 | 3.24E-01 | -4.97 |
| 1455562_PM_at   | Sox12                                                                     | SOX12    | 0.43  | 3.17 | 1.94  | 8.03E-02 | 3.24E-01 | -4.97 |
| 1453685_PM_at   | Nudt7                                                                     | NUDT7    | 0.25  | 2.83 | 1.94  | 8.03E-02 | 3.24E-01 | -4.97 |
| 1434982_PM_at   | Rnf182                                                                    | RNF182   | -1.32 | 6.94 | -1.94 | 8.03E-02 | 3.24E-01 | -4.98 |
| 1449183_PM_at   | Comt                                                                      | COMT     | -0.45 | 3.98 | -1.94 | 8.03E-02 | 3.24E-01 | -4.97 |
| 1429990_PM_at   | Hyal4                                                                     | HYAL4    | 0.16  | 2.66 | 1.94  | 8.03E-02 | 3.24E-01 | -4.98 |
| 1420224_PM_at   | ---                                                                       | NA       | 0.19  | 2.50 | 1.94  | 8.03E-02 | 3.24E-01 | -4.98 |
| 1421901_PM_at   | Eif2ak1                                                                   | EIF2AK1  | -0.68 | 3.96 | -1.94 | 8.04E-02 | 3.24E-01 | -4.98 |
| 1436822_PM_x_at | Gm10362 /// Hk1 /// Rpl17<br>/// Rpl17-ps5 /// Rpl17-ps8<br>/// Rpl17-ps9 | NA       | 0.30  | 9.48 | 1.94  | 8.04E-02 | 3.24E-01 | -4.98 |
| 1436448_PM_a_at | Ptgs1                                                                     | PTGS1    | -0.28 | 2.35 | -1.94 | 8.04E-02 | 3.24E-01 | -4.98 |

|                 |                      |            |       |      |       |          |          |       |
|-----------------|----------------------|------------|-------|------|-------|----------|----------|-------|
| 1457622_PM_at   | ---                  | NA         | 0.19  | 2.67 | 1.94  | 8.04E-02 | 3.24E-01 | -4.98 |
| 1423953_PM_at   | Cdkal1               | CDKAL1     | 0.43  | 4.97 | 1.94  | 8.04E-02 | 3.24E-01 | -4.98 |
| 1450975_PM_at   | Cacng4               | CACNG4     | 0.20  | 2.62 | 1.94  | 8.04E-02 | 3.24E-01 | -4.98 |
| 1422497_PM_at   | Slc30a5              | SLC30A5    | -0.53 | 4.83 | -1.94 | 8.05E-02 | 3.24E-01 | -4.98 |
| 1431657_PM_at   | 9230112D13Rik        | NA         | 0.19  | 2.11 | 1.94  | 8.05E-02 | 3.24E-01 | -4.98 |
| 1416666_PM_at   | Serpine2             | SERPINE2   | -0.76 | 7.72 | -1.94 | 8.05E-02 | 3.24E-01 | -4.98 |
| 1431383_PM_at   | 1110028F11Rik        | NA         | 0.21  | 2.24 | 1.94  | 8.05E-02 | 3.24E-01 | -4.98 |
| 1439155_PM_at   | Mettl1               | METTL1     | 0.23  | 2.95 | 1.94  | 8.05E-02 | 3.24E-01 | -4.98 |
| 1460401_PM_at   | Edem3                | EDEM3      | -0.92 | 4.20 | -1.94 | 8.07E-02 | 3.24E-01 | -4.98 |
| 1416528_PM_at   | Sh3bgrl3             | SH3BGR3    | -0.84 | 3.89 | -1.94 | 8.07E-02 | 3.24E-01 | -4.98 |
| 1455324_PM_at   | Plcx2                | PLCX2      | -0.71 | 6.00 | -1.94 | 8.05E-02 | 3.24E-01 | -4.98 |
| 1452874_PM_at   | Kif1bp               | KIF1BP     | -0.71 | 6.71 | -1.94 | 8.06E-02 | 3.24E-01 | -4.98 |
| 1436552_PM_at   | Jakmip2              | JAKMIP2    | -0.70 | 4.67 | -1.93 | 8.08E-02 | 3.24E-01 | -4.98 |
| 1440636_PM_at   | Mrp3                 | MRP3       | -0.65 | 2.69 | -1.94 | 8.06E-02 | 3.24E-01 | -4.98 |
| 1457891_PM_at   | ---                  | NA         | -0.56 | 2.96 | -1.94 | 8.05E-02 | 3.24E-01 | -4.98 |
| 1417186_PM_at   | Ube2k                | UBE2K      | -0.55 | 6.24 | -1.94 | 8.07E-02 | 3.24E-01 | -4.98 |
| 1436560_PM_at   | Kif3a                | NA         | -0.41 | 4.25 | -1.94 | 8.07E-02 | 3.24E-01 | -4.98 |
| 1415733_PM_a_at | Gm8069 /// Tomm5     | TOMM5      | -0.41 | 3.78 | -1.94 | 8.07E-02 | 3.24E-01 | -4.98 |
| 1454845_PM_x_at | Mchr1                | MCHR1      | -0.40 | 3.34 | -1.94 | 8.07E-02 | 3.24E-01 | -4.98 |
| 1443595_PM_at   | ---                  | NA         | -0.38 | 2.80 | -1.94 | 8.06E-02 | 3.24E-01 | -4.98 |
| 1455917_PM_at   | Ntrk3                | NTRK3      | -0.33 | 3.47 | -1.94 | 8.07E-02 | 3.24E-01 | -4.98 |
| 1418424_PM_at   | Tnfrap6              | NA         | -0.31 | 2.62 | -1.93 | 8.08E-02 | 3.24E-01 | -4.98 |
| 1433569_PM_x_at | LOC102641332 /// Ran | RAN        | -0.27 | 9.34 | -1.93 | 8.08E-02 | 3.24E-01 | -4.98 |
| 1449612_PM_x_at | Kif20b               | KIF20B     | 0.15  | 2.17 | 1.93  | 8.08E-02 | 3.24E-01 | -4.98 |
| 1453436_PM_at   | Insm2                | INSM2      | 0.16  | 2.16 | 1.94  | 8.06E-02 | 3.24E-01 | -4.98 |
| 1451594_PM_s_at | Serpinc6c            | SERPINC6   | 0.17  | 2.37 | 1.94  | 8.06E-02 | 3.24E-01 | -4.98 |
| 1445709_PM_at   | ---                  | NA         | 0.18  | 2.11 | 1.94  | 8.07E-02 | 3.24E-01 | -4.98 |
| 1417772_PM_at   | Grhpr                | GRHPR      | 0.19  | 3.73 | 1.93  | 8.07E-02 | 3.24E-01 | -4.98 |
| 1442884_PM_at   | Hgf                  | HGF        | 0.20  | 2.53 | 1.94  | 8.06E-02 | 3.24E-01 | -4.98 |
| 1425100_PM_a_at | Pde6g                | PDE6G      | 0.20  | 2.23 | 1.94  | 8.06E-02 | 3.24E-01 | -4.98 |
| 1430853_PM_a_at | Pear1                | PEAR1      | 0.21  | 5.02 | 1.94  | 8.07E-02 | 3.24E-01 | -4.98 |
| 1431660_PM_at   | 4930564D02Rik        | NA         | 0.23  | 3.58 | 1.93  | 8.07E-02 | 3.24E-01 | -4.98 |
| 1427757_PM_at   | Igk-v21              | NA         | 0.26  | 2.70 | 1.94  | 8.06E-02 | 3.24E-01 | -4.98 |
| 1453786_PM_at   | Lrrc71 /// Pear1     | LRRC71     | 0.27  | 2.53 | 1.94  | 8.06E-02 | 3.24E-01 | -4.98 |
| 1446836_PM_at   | Gm34666              | NA         | 0.29  | 2.50 | 1.93  | 8.07E-02 | 3.24E-01 | -4.98 |
| 1459945_PM_at   | ---                  | NA         | 0.30  | 2.41 | 1.94  | 8.07E-02 | 3.24E-01 | -4.98 |
| 1425209_PM_at   | Zfp84                | ZNF461     | 0.30  | 3.01 | 1.94  | 8.06E-02 | 3.24E-01 | -4.98 |
| 1448029_PM_at   | Tbx3                 | TBX3       | 0.33  | 2.95 | 1.94  | 8.06E-02 | 3.24E-01 | -4.98 |
| 1417039_PM_a_at | Cul7                 | CUL7       | 0.41  | 2.93 | 1.94  | 8.07E-02 | 3.24E-01 | -4.98 |
| 1458778_PM_at   | ---                  | NA         | 0.44  | 3.17 | 1.94  | 8.05E-02 | 3.24E-01 | -4.98 |
| 1421298_PM_a_at | Hipk1                | HIPK1      | 0.45  | 2.29 | 1.94  | 8.06E-02 | 3.24E-01 | -4.98 |
| 1417254_PM_at   | Spat5                | SPAT5      | 0.47  | 3.82 | 1.94  | 8.06E-02 | 3.24E-01 | -4.98 |
| 1424770_PM_at   | Cald1                | CALD1      | 0.48  | 4.57 | 1.94  | 8.05E-02 | 3.24E-01 | -4.98 |
| 1445151_PM_at   | Mtf2                 | MTF2       | 0.59  | 3.67 | 1.93  | 8.08E-02 | 3.24E-01 | -4.98 |
| 1420173_PM_at   | D11Ert326e           | NA         | 0.18  | 2.38 | 1.93  | 8.08E-02 | 3.24E-01 | -4.98 |
| 1425061_PM_at   | Waf3                 | WASF3      | 0.43  | 2.83 | 1.93  | 8.08E-02 | 3.24E-01 | -4.98 |
| 1457445_PM_at   | Trps1                | TRPS1      | 0.76  | 4.94 | 1.93  | 8.08E-02 | 3.24E-01 | -4.98 |
| 1416406_PM_at   | Pea15a               | PEA15      | -0.72 | 5.62 | -1.93 | 8.08E-02 | 3.24E-01 | -4.98 |
| 1430089_PM_at   | ---                  | NA         | -0.56 | 2.91 | -1.93 | 8.09E-02 | 3.24E-01 | -4.98 |
| 1456241_PM_a_at | Slc38a10             | SLC38A10   | -0.94 | 8.28 | -1.93 | 8.09E-02 | 3.24E-01 | -4.98 |
| 1436623_PM_at   | ---                  | NA         | -0.33 | 3.23 | -1.93 | 8.09E-02 | 3.24E-01 | -4.98 |
| 1431280_PM_at   | Tmem263              | NA         | -0.22 | 2.53 | -1.93 | 8.09E-02 | 3.24E-01 | -4.98 |
| 1454662_PM_at   | Fam109a              | FAM109A    | 0.26  | 3.06 | 1.93  | 8.09E-02 | 3.24E-01 | -4.98 |
| 1446673_PM_at   | ---                  | NA         | -0.53 | 3.42 | -1.93 | 8.09E-02 | 3.24E-01 | -4.98 |
| 1445369_PM_at   | B230359F08Rik        | NA         | 0.24  | 2.24 | 1.93  | 8.09E-02 | 3.24E-01 | -4.98 |
| 1458030_PM_at   | ---                  | NA         | 0.43  | 2.93 | 1.93  | 8.09E-02 | 3.24E-01 | -4.98 |
| 1433320_PM_at   | ---                  | NA         | 0.21  | 2.73 | 1.93  | 8.10E-02 | 3.24E-01 | -4.98 |
| 1419164_PM_at   | Zfp260               | ZNF260     | -0.46 | 4.89 | -1.93 | 8.10E-02 | 3.24E-01 | -4.98 |
| 1446247_PM_at   | Adams18              | NA         | 0.15  | 2.09 | 1.93  | 8.10E-02 | 3.24E-01 | -4.98 |
| 1454022_PM_at   | Ephb2                | EPHB1      | 0.17  | 2.53 | 1.93  | 8.10E-02 | 3.24E-01 | -4.98 |
| 1457700_PM_at   | Cyp4f39              | NA         | 0.18  | 2.24 | 1.93  | 8.10E-02 | 3.24E-01 | -4.98 |
| 1424404_PM_at   | 0610040J01Rik        | C4orf19    | 0.23  | 3.02 | 1.93  | 8.10E-02 | 3.24E-01 | -4.98 |
| 1446614_PM_at   | ---                  | NA         | 0.24  | 2.94 | 1.93  | 8.10E-02 | 3.24E-01 | -4.98 |
| 1454013_PM_at   | 1810062O18Rik        | NA         | 0.25  | 2.21 | 1.93  | 8.10E-02 | 3.24E-01 | -4.98 |
| 1454280_PM_at   | Gm32497              | NA         | 0.34  | 3.37 | 1.93  | 8.10E-02 | 3.24E-01 | -4.98 |
| 1439114_PM_at   | Ddx60                | DDX60      | 0.54  | 2.58 | 1.93  | 8.10E-02 | 3.24E-01 | -4.98 |
| 1426747_PM_at   | Abcf3                | ABCF3      | -0.45 | 3.57 | -1.93 | 8.11E-02 | 3.25E-01 | -4.98 |
| 1459238_PM_at   | ---                  | NA         | -0.24 | 2.56 | -1.93 | 8.11E-02 | 3.25E-01 | -4.98 |
| 1446233_PM_at   | ---                  | NA         | 0.33  | 2.65 | 1.93  | 8.11E-02 | 3.25E-01 | -4.98 |
| 1449199_PM_at   | Muc1                 | MUC1       | 0.29  | 2.67 | 1.93  | 8.11E-02 | 3.25E-01 | -4.98 |
| 1451628_PM_a_at | Ank3                 | ANK3       | 0.56  | 7.43 | 1.93  | 8.12E-02 | 3.25E-01 | -4.98 |
| 1447746_PM_at   | ---                  | NA         | 0.17  | 2.16 | 1.93  | 8.12E-02 | 3.25E-01 | -4.98 |
| 1455276_PM_x_at | 1110004E09Rik        | AP000275.2 | 0.24  | 2.71 | 1.93  | 8.12E-02 | 3.25E-01 | -4.99 |
| 1446057_PM_at   | ---                  | NA         | 0.25  | 2.76 | 1.93  | 8.12E-02 | 3.25E-01 | -4.99 |
| 1455615_PM_at   | Cklf                 | CKLF       | 0.20  | 2.17 | 1.93  | 8.12E-02 | 3.25E-01 | -4.99 |

|                 |                         |           |       |      |       |          |          |       |
|-----------------|-------------------------|-----------|-------|------|-------|----------|----------|-------|
| 1432687_PM_at   | 4833406M21Rik           | NA        | 0.31  | 2.40 | 1.93  | 8.12E-02 | 3.25E-01 | -4.99 |
| 1433432_PM_x_at | Rps12 /// Rps12-ps9 /// |           |       |      |       |          |          |       |
| 1423319_PM_at   | Rps12l1                 | RPS12     | 0.46  | 8.67 | 1.93  | 8.13E-02 | 3.25E-01 | -4.99 |
| 1452501_PM_at   | Hhex                    | HHEX      | -0.25 | 2.17 | -1.93 | 8.13E-02 | 3.25E-01 | -4.99 |
| 1432474_PM_a_at | Cyp2c38                 | NA        | 0.31  | 3.13 | 1.93  | 8.13E-02 | 3.25E-01 | -4.99 |
| 1420502_PM_at   | Krtcap3                 | KRTCAP3   | 0.23  | 2.64 | 1.93  | 8.13E-02 | 3.25E-01 | -4.99 |
| 1420502_PM_at   | Sat1                    | SAT1      | -0.89 | 4.38 | -1.93 | 8.13E-02 | 3.25E-01 | -4.99 |
| 1437995_PM_x_at | Sept7                   | SEPT7     | -0.68 | 6.27 | -1.93 | 8.14E-02 | 3.25E-01 | -4.99 |
| 1450770_PM_at   | 3632451O06Rik           | C14orf37  | -0.68 | 4.42 | -1.93 | 8.14E-02 | 3.25E-01 | -4.99 |
| 1420201_PM_at   | ---                     | NA        | -0.19 | 2.57 | -1.93 | 8.13E-02 | 3.25E-01 | -4.99 |
| 1443404_PM_s_at | D13Ert94e               | NA        | 0.17  | 2.19 | 1.93  | 8.14E-02 | 3.25E-01 | -4.99 |
| 1449451_PM_at   | Serpnb11                | SERPINB11 | 0.19  | 2.14 | 1.93  | 8.14E-02 | 3.25E-01 | -4.99 |
| 1430424_PM_at   | 4933433C11Rik           | STPG3     | 0.22  | 2.49 | 1.93  | 8.14E-02 | 3.25E-01 | -4.99 |
| 1452460_PM_at   | Ankrd26                 | ANKRD26   | 0.44  | 3.10 | 1.93  | 8.14E-02 | 3.25E-01 | -4.99 |
| 1457080_PM_at   | Jakmp1                  | NA        | 0.79  | 4.38 | 1.93  | 8.14E-02 | 3.25E-01 | -4.99 |
| 1428875_PM_at   | Golim4                  | GOLIM4    | -0.20 | 2.61 | -1.93 | 8.14E-02 | 3.25E-01 | -4.99 |
| 1460699_PM_at   | Rps27                   | RPS27     | -0.17 | 2.27 | -1.93 | 8.14E-02 | 3.25E-01 | -4.99 |
| 1458589_PM_at   | ---                     | NA        | 0.19  | 2.44 | 1.93  | 8.14E-02 | 3.25E-01 | -4.99 |
| 1438842_PM_at   | Mtch2                   | MTCH2     | 0.37  | 3.88 | 1.93  | 8.14E-02 | 3.25E-01 | -4.99 |
| 1459743_PM_at   | ---                     | NA        | 0.60  | 3.37 | 1.93  | 8.14E-02 | 3.25E-01 | -4.99 |
| 1418647_PM_at   | Gnl1                    | GNL1      | -0.35 | 4.04 | -1.93 | 8.14E-02 | 3.25E-01 | -4.99 |
| 1419857_PM_at   | ---                     | NA        | 0.19  | 2.52 | 1.93  | 8.14E-02 | 3.25E-01 | -4.99 |
| 1433287_PM_at   | ---                     | NA        | 0.25  | 2.97 | 1.93  | 8.15E-02 | 3.25E-01 | -4.99 |
| 1460347_PM_at   | Krt14                   | KRT14     | 0.19  | 2.43 | 1.93  | 8.15E-02 | 3.25E-01 | -4.99 |
| 1422133_PM_at   | Spn                     | SPN       | 0.25  | 2.57 | 1.93  | 8.15E-02 | 3.25E-01 | -4.99 |
| 1456124_PM_x_at | Svs5                    | NA        | 0.26  | 3.12 | 1.93  | 8.15E-02 | 3.25E-01 | -4.99 |
| 1431105_PM_a_at | Tmem33                  | TMEM33    | 0.43  | 3.30 | 1.93  | 8.15E-02 | 3.25E-01 | -4.99 |
| 1441545_PM_at   | Zcchc11                 | ZCCHC11   | 0.54  | 4.15 | 1.93  | 8.15E-02 | 3.25E-01 | -4.99 |
| 1438862_PM_at   | ---                     | NA        | 0.25  | 2.90 | 1.93  | 8.15E-02 | 3.25E-01 | -4.99 |
| 1451689_PM_a_at | Sox10                   | SOX10     | 0.45  | 3.36 | 1.93  | 8.15E-02 | 3.25E-01 | -4.99 |
| 1435421_PM_at   | Fsd1                    | FSD1      | 0.37  | 3.11 | 1.93  | 8.16E-02 | 3.25E-01 | -4.99 |
| 1448109_PM_a_at | Rpl26                   | RPL26     | -0.27 | 5.41 | -1.93 | 8.16E-02 | 3.26E-01 | -4.99 |
| 1445462_PM_at   | ---                     | NA        | 0.22  | 2.55 | 1.93  | 8.16E-02 | 3.26E-01 | -4.99 |
| 1419621_PM_at   | Ankrd2                  | ANKRD2    | 0.25  | 2.56 | 1.93  | 8.16E-02 | 3.26E-01 | -4.99 |
| 1432888_PM_at   | 4930455M05Rik           | NA        | 0.19  | 2.25 | 1.93  | 8.16E-02 | 3.26E-01 | -4.99 |
| 1448155_PM_at   | Pdc6ip                  | PD6D6IP   | -0.50 | 3.10 | -1.93 | 8.17E-02 | 3.26E-01 | -4.99 |
| 1457665_PM_x_at | Cyp27a1                 | CYP27A1   | -0.24 | 6.65 | -1.93 | 8.17E-02 | 3.26E-01 | -4.99 |
| 1439942_PM_at   | Prep                    | NA        | -0.30 | 2.43 | -1.93 | 8.17E-02 | 3.26E-01 | -4.99 |
| 1452939_PM_a_at | Pitpnc1                 | PITPNC1   | 0.43  | 3.28 | 1.93  | 8.18E-02 | 3.26E-01 | -4.99 |
| 1420429_PM_at   | Pcdhb3                  | NA        | -0.30 | 3.06 | -1.93 | 8.18E-02 | 3.26E-01 | -4.99 |
| 1419502_PM_at   | Ghdc                    | GHDC      | 0.21  | 2.61 | 1.93  | 8.18E-02 | 3.26E-01 | -4.99 |
| 1444315_PM_at   | D630024D03Rik           | NA        | 0.24  | 2.54 | 1.93  | 8.18E-02 | 3.26E-01 | -4.99 |
| 1437908_PM_a_at | Ergic1                  | ERGIC1    | -0.61 | 7.56 | -1.93 | 8.19E-02 | 3.26E-01 | -4.99 |
| 1423839_PM_a_at | Btf3                    | BTF3      | -0.36 | 6.78 | -1.93 | 8.19E-02 | 3.26E-01 | -4.99 |
| 1434076_PM_at   | Wdr37                   | WDR37     | -0.34 | 4.89 | -1.93 | 8.19E-02 | 3.26E-01 | -4.99 |
| 1427412_PM_s_at | Rapgef6                 | RAPGEF6   | -0.24 | 2.31 | -1.93 | 8.19E-02 | 3.26E-01 | -4.99 |
| 1432217_PM_a_at | Cfap52                  | CFAP52    | 0.20  | 2.34 | 1.93  | 8.19E-02 | 3.26E-01 | -4.99 |
| 1431894_PM_at   | ---                     | NA        | 0.24  | 2.12 | 1.93  | 8.19E-02 | 3.26E-01 | -4.99 |
| 1446528_PM_at   | ---                     | NA        | 0.30  | 2.66 | 1.93  | 8.19E-02 | 3.26E-01 | -4.99 |
| 1443978_PM_at   | Ankle1                  | ANKLE1    | 0.39  | 2.87 | 1.93  | 8.19E-02 | 3.26E-01 | -4.99 |
| 1446997_PM_at   | ---                     | NA        | 0.39  | 3.35 | 1.93  | 8.19E-02 | 3.26E-01 | -4.99 |
| 1416713_PM_at   | Tppp3                   | TPPP3     | 0.46  | 2.97 | 1.93  | 8.19E-02 | 3.26E-01 | -4.99 |
| 1420954_PM_a_at | Add1                    | ADD1      | 0.59  | 6.29 | 1.93  | 8.19E-02 | 3.26E-01 | -4.99 |
| 1418456_PM_a_at | Cxcl14                  | CXCL14    | -0.66 | 3.33 | -1.93 | 8.19E-02 | 3.26E-01 | -4.99 |
| 1431535_PM_at   | Plb1                    | PLB1      | 0.17  | 2.41 | 1.93  | 8.20E-02 | 3.26E-01 | -4.99 |
| 1432125_PM_at   | Ap3m2                   | NA        | 0.44  | 2.71 | 1.93  | 8.20E-02 | 3.26E-01 | -4.99 |
| 1442148_PM_at   | ---                     | NA        | -0.62 | 3.30 | -1.93 | 8.20E-02 | 3.26E-01 | -4.99 |
| 1457326_PM_at   | Gm16386                 | NA        | -0.39 | 2.58 | -1.93 | 8.20E-02 | 3.26E-01 | -4.99 |
| 1453998_PM_at   | Smap1                   | SMAP1     | -0.37 | 2.67 | -1.93 | 8.20E-02 | 3.26E-01 | -4.99 |
| 1448809_PM_at   | Cse1l                   | CSE1L     | -0.35 | 3.72 | -1.93 | 8.20E-02 | 3.26E-01 | -4.99 |
| 1425923_PM_at   | Mycn                    | NA        | 0.13  | 2.31 | 1.93  | 8.20E-02 | 3.26E-01 | -4.99 |
| 1417288_PM_at   | Plekha2                 | PLEKHA2   | 0.20  | 2.21 | 1.93  | 8.20E-02 | 3.26E-01 | -4.99 |
| 1445394_PM_at   | Gm21093 /// Gm21158 /// |           |       |      |       |          |          |       |
| 1450643_PM_s_at | Gm2192 /// Gm3883 ///   |           |       |      |       |          |          |       |
| 1439183_PM_at   | LOC100041536            | NA        | 0.56  | 5.20 | 1.93  | 8.20E-02 | 3.26E-01 | -4.99 |
| 1450643_PM_s_at | Acs1                    | ACSL1     | 0.37  | 3.49 | 1.93  | 8.21E-02 | 3.26E-01 | -4.99 |
| 1439183_PM_at   | Acer1                   | ACER1     | 0.25  | 2.16 | 1.93  | 8.21E-02 | 3.26E-01 | -4.99 |
| 1417938_PM_at   | Rad51ap1                | RAD51AP1  | -0.21 | 2.14 | -1.92 | 8.21E-02 | 3.26E-01 | -4.99 |
| 1435453_PM_at   | Mir124a-1hg             | NA        | -0.50 | 6.67 | -1.92 | 8.22E-02 | 3.27E-01 | -5.00 |
| 1423472_PM_at   | Sept2                   | SEPT2     | -0.28 | 5.54 | -1.92 | 8.22E-02 | 3.27E-01 | -5.00 |
| 1431092_PM_at   | Ppp1r12c                | PPP1R12C  | 0.17  | 2.91 | 1.92  | 8.22E-02 | 3.27E-01 | -5.00 |
| 1427753_PM_at   | Igkv1-135               | NA        | 0.19  | 2.41 | 1.92  | 8.21E-02 | 3.27E-01 | -5.00 |
| 1437665_PM_at   | Il22ra2                 | IL22RA2   | 0.22  | 2.63 | 1.92  | 8.22E-02 | 3.27E-01 | -5.00 |
| 1420351_PM_at   | Tnfrsf4                 | TNFRSF4   | 0.23  | 2.10 | 1.92  | 8.21E-02 | 3.27E-01 | -5.00 |
| 1427010_PM_s_at | Lama5                   | LAMA5     | 0.32  | 3.63 | 1.92  | 8.22E-02 | 3.27E-01 | -5.00 |

|                           |                      |                 |       |      |       |          |          |       |
|---------------------------|----------------------|-----------------|-------|------|-------|----------|----------|-------|
| 1433386_PM_at             | ---                  | NA              | 0.37  | 2.08 | 1.92  | 8.21E-02 | 3.27E-01 | -5.00 |
| 1430941_PM_at             | Bbs7                 | BBS7            | 0.41  | 2.80 | 1.92  | 8.22E-02 | 3.27E-01 | -5.00 |
| 1452824_PM_at             | Cnot11               | CNOT11          | 0.48  | 2.94 | 1.92  | 8.22E-02 | 3.27E-01 | -5.00 |
| 1445570_PM_at             | Nsun4                | NSUN4           | 0.69  | 4.38 | 1.92  | 8.22E-02 | 3.27E-01 | -5.00 |
| 1446289_PM_at             | ---                  | NA              | 0.92  | 4.59 | 1.92  | 8.22E-02 | 3.27E-01 | -5.00 |
| 1426946_PM_at             | Ipo5                 | IPO5            | -0.51 | 4.31 | -1.92 | 8.22E-02 | 3.27E-01 | -5.00 |
| 1430638_PM_at             | Ccdc30               | NA              | 0.20  | 2.49 | 1.92  | 8.22E-02 | 3.27E-01 | -5.00 |
| 1422280_PM_at             | Gzmk                 | GZMK            | 0.23  | 3.24 | 1.92  | 8.22E-02 | 3.27E-01 | -5.00 |
| 1416819_PM_at             | Cdc37                | CDC37           | 0.63  | 2.81 | 1.92  | 8.22E-02 | 3.27E-01 | -5.00 |
| 1432896_PM_at             | ---                  | NA              | 0.30  | 2.56 | 1.92  | 8.22E-02 | 3.27E-01 | -5.00 |
| 1425990_PM_a_at           | Nfatc2               | NFATC2          | 0.28  | 2.53 | 1.92  | 8.23E-02 | 3.27E-01 | -5.00 |
| 1418168_PM_at             | Zcchc14              | ZCCHC14         | -0.50 | 4.17 | -1.92 | 8.23E-02 | 3.27E-01 | -5.00 |
| 1427360_PM_at             | 4930507D05Rik        | NA              | 0.25  | 2.30 | 1.92  | 8.23E-02 | 3.27E-01 | -5.00 |
| 1436492_PM_x_at           | Gm29695 /// Lemd1    | LEMD1           | 0.15  | 2.22 | 1.92  | 8.23E-02 | 3.27E-01 | -5.00 |
| 1426974_PM_at             | Os9                  | OS9             | 0.43  | 5.18 | 1.92  | 8.23E-02 | 3.27E-01 | -5.00 |
| 1431278_PM_s_at           | Pla2g6               | PLA2G6          | 0.21  | 2.72 | 1.92  | 8.24E-02 | 3.27E-01 | -5.00 |
| 1424496_PM_at             | Idnk                 | IDNK            | 0.53  | 3.31 | 1.92  | 8.24E-02 | 3.27E-01 | -5.00 |
| 1422913_PM_at             | Prm3                 | PRM3            | 0.23  | 2.18 | 1.92  | 8.24E-02 | 3.27E-01 | -5.00 |
| 1433024_PM_at             | 4930421C12Rik        | NA              | -0.32 | 2.23 | -1.92 | 8.24E-02 | 3.27E-01 | -5.00 |
| 1459688_PM_at             | ---                  | NA              | 0.22  | 2.44 | 1.92  | 8.25E-02 | 3.27E-01 | -5.00 |
| 1446675_PM_at             | Adk                  | NA              | 0.80  | 3.85 | 1.92  | 8.25E-02 | 3.27E-01 | -5.00 |
| 1428599_PM_at             | Kndc1                | KNDC1           | -0.57 | 6.85 | -1.92 | 8.25E-02 | 3.27E-01 | -5.00 |
| 1428750_PM_at             | Cdc42ep2             | CDC42EP2        | 0.19  | 2.55 | 1.92  | 8.25E-02 | 3.27E-01 | -5.00 |
| 1420992_PM_at             | Ankr1                | ANKRD1          | 0.21  | 2.59 | 1.92  | 8.25E-02 | 3.27E-01 | -5.00 |
| 1423145_PM_a_at           | Tcap                 | TCAP            | 0.26  | 2.78 | 1.92  | 8.25E-02 | 3.27E-01 | -5.00 |
| 1454403_PM_at             | ---                  | NA              | 0.28  | 2.90 | 1.92  | 8.25E-02 | 3.27E-01 | -5.00 |
| 1428789_PM_at             | Ralgs2               | RALGPS2         | -0.63 | 5.43 | -1.92 | 8.26E-02 | 3.28E-01 | -5.00 |
| 1432961_PM_at             | 2610024D14Rik        | NA              | -0.25 | 2.30 | -1.92 | 8.26E-02 | 3.28E-01 | -5.00 |
| 1428838_PM_a_at           | Dck                  | DCK             | 0.21  | 2.66 | 1.92  | 8.26E-02 | 3.28E-01 | -5.00 |
| 1456483_PM_at             | Zfp9                 | ZNF25           | 0.28  | 2.66 | 1.92  | 8.26E-02 | 3.28E-01 | -5.00 |
| 1449408_PM_at             | Jam2                 | JAM2            | 0.32  | 2.62 | 1.92  | 8.26E-02 | 3.28E-01 | -5.00 |
| 1418345_PM_at             | Tnfsf13 /// Tnfsfm13 | TNFSF12-TNFSF13 | 0.60  | 2.91 | 1.92  | 8.26E-02 | 3.28E-01 | -5.00 |
| 1452007_PM_at             | Vamp7                | VAMP7           | -0.46 | 3.13 | -1.92 | 8.27E-02 | 3.28E-01 | -5.00 |
| 1451013_PM_at             | Slc29a3              | SLC29A3         | 0.23  | 2.62 | 1.92  | 8.27E-02 | 3.28E-01 | -5.00 |
| 1434238_PM_at             | Taf2                 | TAF2            | -0.66 | 4.43 | -1.92 | 8.27E-02 | 3.28E-01 | -5.00 |
| 1425403_PM_at             | Dnm3                 | DNM3            | 0.27  | 2.87 | 1.92  | 8.27E-02 | 3.28E-01 | -5.00 |
| 1428020_PM_at             | Rpf1                 | RPF1            | -0.41 | 2.68 | -1.92 | 8.27E-02 | 3.28E-01 | -5.00 |
| 1449800_PM_x_at           | Phf7                 | PHF7            | 0.47  | 3.08 | 1.92  | 8.27E-02 | 3.28E-01 | -5.00 |
| 1453981_PM_at             | ---                  | NA              | 0.49  | 2.96 | 1.92  | 8.27E-02 | 3.28E-01 | -5.00 |
| 1428351_PM_at             | Ppm1m                | PPM1M           | 0.28  | 2.72 | 1.92  | 8.27E-02 | 3.28E-01 | -5.00 |
| 1415819_PM_a_at           | Ppp2r1a              | PPP2R1A         | -0.71 | 3.90 | -1.92 | 8.28E-02 | 3.28E-01 | -5.00 |
| 1425892_PM_a_at           | Pnoc                 | PNOC            | 0.19  | 2.44 | 1.92  | 8.28E-02 | 3.28E-01 | -5.00 |
| 1427204_PM_at             | Rd3                  | RD3             | 0.26  | 2.43 | 1.92  | 8.28E-02 | 3.28E-01 | -5.00 |
| 1457351_PM_at             | Taf2                 | TAF2            | -0.35 | 3.36 | -1.92 | 8.29E-02 | 3.28E-01 | -5.00 |
| 1441993_PM_at             | Ap3s2                | AP3S2           | 0.17  | 3.02 | 1.92  | 8.29E-02 | 3.28E-01 | -5.00 |
| 1451504_PM_at             | Chchd3               | CHCHD3          | 0.43  | 2.75 | 1.92  | 8.29E-02 | 3.28E-01 | -5.00 |
| 1448289_PM_at             | Crmp1                | CRMP1           | -0.48 | 5.17 | -1.92 | 8.29E-02 | 3.28E-01 | -5.00 |
| 1424022_PM_at             | Osgin1               | OSGIN1          | 0.26  | 2.61 | 1.92  | 8.29E-02 | 3.28E-01 | -5.00 |
| 1453987_PM_at             | Klhl28               | KLHL28          | 0.39  | 2.50 | 1.92  | 8.29E-02 | 3.28E-01 | -5.00 |
| 1423324_PM_at             | Pnn                  | PNN             | 0.87  | 7.07 | 1.92  | 8.29E-02 | 3.28E-01 | -5.00 |
| AFFX-GapdhMur/M32599_M_at | Gapdh                | NA              | -0.64 | 5.91 | -1.92 | 8.30E-02 | 3.28E-01 | -5.00 |
| 1439807_PM_at             | Tmem74               | NA              | -0.59 | 2.53 | -1.92 | 8.30E-02 | 3.28E-01 | -5.00 |
| 1421675_PM_at             | 1700123K08Rik        | NA              | 0.19  | 1.98 | 1.92  | 8.29E-02 | 3.28E-01 | -5.00 |
| 1450329_PM_a_at           | Arr3                 | ARR3            | 0.20  | 2.22 | 1.92  | 8.30E-02 | 3.28E-01 | -5.00 |
| 1438122_PM_at             | Bbof1                | BBOF1           | 0.43  | 3.05 | 1.92  | 8.30E-02 | 3.28E-01 | -5.00 |
| 1438771_PM_at             | Brd1                 | BRD1            | 0.46  | 3.31 | 1.92  | 8.29E-02 | 3.28E-01 | -5.00 |
| 1433014_PM_at             | 6330436F06Rik        | NA              | 0.49  | 2.02 | 1.92  | 8.29E-02 | 3.28E-01 | -5.00 |
| 1434446_PM_at             | Insr                 | INSR            | -0.36 | 4.09 | -1.92 | 8.30E-02 | 3.28E-01 | -5.01 |
| 1420218_PM_at             | ---                  | NA              | 0.25  | 2.94 | 1.92  | 8.30E-02 | 3.28E-01 | -5.01 |
| 1457691_PM_at             | Gpr183               | GPR183          | 0.30  | 2.92 | 1.92  | 8.30E-02 | 3.28E-01 | -5.00 |
| 1450030_PM_at             | Dctn4                | DCTN4           | 0.37  | 2.96 | 1.92  | 8.30E-02 | 3.28E-01 | -5.00 |
| 1443587_PM_at             | Ttc37                | TTC37           | 0.23  | 2.45 | 1.92  | 8.30E-02 | 3.28E-01 | -5.01 |
| 1456206_PM_at             | Gm13889              | NA              | 0.19  | 2.20 | 1.92  | 8.30E-02 | 3.28E-01 | -5.01 |
| 1422971_PM_at             | Kat2a                | KAT2A           | 0.41  | 3.42 | 1.92  | 8.31E-02 | 3.28E-01 | -5.01 |
| 1439641_PM_at             | Papolg               | NA              | -0.29 | 2.96 | -1.92 | 8.31E-02 | 3.28E-01 | -5.01 |
| 1418211_PM_at             | Oca2                 | OCA2            | 0.19  | 2.18 | 1.92  | 8.31E-02 | 3.28E-01 | -5.01 |
| 1436240_PM_at             | ---                  | NA              | 0.35  | 3.07 | 1.92  | 8.31E-02 | 3.28E-01 | -5.01 |
| 1423938_PM_at             | Llgl2                | LLGL2           | 0.24  | 3.70 | 1.92  | 8.31E-02 | 3.28E-01 | -5.01 |
| 1434639_PM_at             | Klhl29               | KLHL29          | -0.36 | 2.85 | -1.92 | 8.31E-02 | 3.29E-01 | -5.01 |
| 1455149_PM_at             | Sh3rf1               | SH3RF1          | -0.42 | 4.50 | -1.92 | 8.32E-02 | 3.29E-01 | -5.01 |
| 1440983_PM_at             | Trappc12             | NA              | 0.29  | 2.88 | 1.92  | 8.32E-02 | 3.29E-01 | -5.01 |
| 1429702_PM_at             | ---                  | NA              | 0.94  | 3.61 | 1.92  | 8.32E-02 | 3.29E-01 | -5.01 |
| 1442252_PM_at             | ---                  | NA              | 0.19  | 2.23 | 1.92  | 8.32E-02 | 3.29E-01 | -5.01 |
| 1453550_PM_a_at           | Far1                 | FAR1            | 0.62  | 3.35 | 1.92  | 8.32E-02 | 3.29E-01 | -5.01 |
| 1445029_PM_at             | ---                  | NA              | -0.29 | 2.36 | -1.92 | 8.32E-02 | 3.29E-01 | -5.01 |

|                 |                                          |            |       |      |       |          |          |       |
|-----------------|------------------------------------------|------------|-------|------|-------|----------|----------|-------|
| 1429471_PM_at   | 1110017D15Rik                            | C9orf24    | 0.33  | 2.40 | 1.92  | 8.32E-02 | 3.29E-01 | -5.01 |
| 1436775_PM_a_at | Ankrd17                                  | ANKRD17    | -0.74 | 5.59 | -1.92 | 8.33E-02 | 3.29E-01 | -5.01 |
| 1442173_PM_at   | Phf3                                     | PHF3       | -0.25 | 2.32 | -1.92 | 8.33E-02 | 3.29E-01 | -5.01 |
| 1439574_PM_at   | 1110020A21Rik                            | NA         | 0.19  | 2.61 | 1.92  | 8.33E-02 | 3.29E-01 | -5.01 |
| 1430816_PM_at   | ---                                      | NA         | 0.25  | 2.66 | 1.92  | 8.33E-02 | 3.29E-01 | -5.01 |
| 1460521_PM_a_at | Nabp1                                    | NABP1      | 0.45  | 3.74 | 1.92  | 8.33E-02 | 3.29E-01 | -5.01 |
| 1443554_PM_at   | ---                                      | NA         | 0.53  | 2.94 | 1.92  | 8.33E-02 | 3.29E-01 | -5.01 |
| 1436067_PM_at   | Zbtb10                                   | ZBTB10     | -0.41 | 3.91 | -1.92 | 8.33E-02 | 3.29E-01 | -5.01 |
| 1446626_PM_at   | Tango2                                   | TANGO2     | 0.23  | 2.90 | 1.92  | 8.33E-02 | 3.29E-01 | -5.01 |
| 1447035_PM_at   | ---                                      | NA         | -0.25 | 2.72 | -1.92 | 8.33E-02 | 3.29E-01 | -5.01 |
| 1450985_PM_a_at | Tjp2                                     | TJP2       | 1.12  | 3.69 | 1.92  | 8.34E-02 | 3.29E-01 | -5.01 |
| 1431623_PM_at   | ---                                      | NA         | 0.19  | 2.27 | 1.92  | 8.34E-02 | 3.29E-01 | -5.01 |
| 1447034_PM_at   | ---                                      | NA         | 0.22  | 2.27 | 1.92  | 8.34E-02 | 3.29E-01 | -5.01 |
| 1449279_PM_at   | Gpx2                                     | GPX2       | 0.21  | 2.36 | 1.91  | 8.35E-02 | 3.29E-01 | -5.01 |
| 1440762_PM_at   | Syn2                                     | SYN2       | 0.72  | 3.02 | 1.91  | 8.35E-02 | 3.29E-01 | -5.01 |
| 1425714_PM_a_at | Nfam1                                    | NFAM1      | -0.19 | 2.20 | -1.91 | 8.35E-02 | 3.29E-01 | -5.01 |
| 1425423_PM_at   | Glis1                                    | GLIS1      | 0.19  | 2.61 | 1.91  | 8.35E-02 | 3.29E-01 | -5.01 |
| 1419652_PM_s_at | Nkain1                                   | NA         | 0.19  | 2.51 | 1.91  | 8.35E-02 | 3.29E-01 | -5.01 |
| 1424755_PM_at   | Hip1                                     | HIP1       | -0.60 | 3.64 | -1.91 | 8.36E-02 | 3.29E-01 | -5.01 |
| 1458504_PM_at   | Zc3h12d                                  | ZC3H12D    | -0.20 | 2.24 | -1.91 | 8.36E-02 | 3.29E-01 | -5.01 |
| 1418925_PM_at   | Celsr1                                   | CELSR1     | 0.17  | 2.12 | 1.91  | 8.36E-02 | 3.29E-01 | -5.01 |
| 1428630_PM_x_at | Haghl                                    | HAGHL      | 0.19  | 2.42 | 1.91  | 8.36E-02 | 3.29E-01 | -5.01 |
| 1420524_PM_a_at | Masp2                                    | MASP2      | 0.20  | 2.36 | 1.91  | 8.36E-02 | 3.29E-01 | -5.01 |
| 1415984_PM_at   | Acadm                                    | ACADM      | -0.62 | 2.96 | -1.91 | 8.36E-02 | 3.30E-01 | -5.01 |
| 1433933_PM_s_at | Sko2b1                                   | SLCO2B1    | -0.74 | 3.16 | -1.91 | 8.36E-02 | 3.30E-01 | -5.01 |
| 1451140_PM_s_at | Prkag2                                   | PRKAG2     | -0.61 | 7.04 | -1.91 | 8.37E-02 | 3.30E-01 | -5.01 |
| 1456022_PM_at   | Hipk2                                    | NA         | -0.52 | 3.14 | -1.91 | 8.37E-02 | 3.30E-01 | -5.01 |
| 1437348_PM_at   | Fbxo28                                   | FBXO28     | -0.46 | 2.72 | -1.91 | 8.37E-02 | 3.30E-01 | -5.01 |
| 1428646_PM_at   | Pbx1                                     | PBX1       | -0.37 | 3.11 | -1.91 | 8.38E-02 | 3.30E-01 | -5.01 |
| 1438667_PM_at   | Sybu                                     | SYBU       | -0.30 | 3.09 | -1.91 | 8.38E-02 | 3.30E-01 | -5.01 |
| 1454306_PM_at   | Prrc1                                    | NA         | 0.14  | 2.35 | 1.91  | 8.37E-02 | 3.30E-01 | -5.01 |
| 1449943_PM_at   | Lfng                                     | LFNG       | 0.16  | 2.49 | 1.91  | 8.37E-02 | 3.30E-01 | -5.01 |
| 1453645_PM_at   | 2700046A07Rik                            | NA         | 0.17  | 2.21 | 1.91  | 8.38E-02 | 3.30E-01 | -5.01 |
| 1419698_PM_at   | Cxcl11                                   | CXCL11     | 0.17  | 2.48 | 1.91  | 8.38E-02 | 3.30E-01 | -5.01 |
| 1443692_PM_at   | Fam222a                                  | NA         | 0.19  | 2.26 | 1.91  | 8.37E-02 | 3.30E-01 | -5.01 |
| 1421541_PM_a_at | 2310045n01rik-mef2b///<br>Borcs8///Mef2b | MEF2B      | 0.19  | 2.62 | 1.91  | 8.37E-02 | 3.30E-01 | -5.01 |
| 1451786_PM_at   | Muc20                                    | MUC20      | 0.19  | 2.73 | 1.91  | 8.38E-02 | 3.30E-01 | -5.01 |
| 1439797_PM_at   | Ppard                                    | PPARD      | 0.19  | 2.55 | 1.91  | 8.37E-02 | 3.30E-01 | -5.01 |
| 1431682_PM_at   | 4930594C11Rik                            | NA         | 0.22  | 2.93 | 1.91  | 8.38E-02 | 3.30E-01 | -5.01 |
| 1439798_PM_at   | Hoxc10                                   | HOXC10     | 0.22  | 2.29 | 1.91  | 8.37E-02 | 3.30E-01 | -5.01 |
| 1445832_PM_at   | ---                                      | NA         | 0.24  | 2.19 | 1.91  | 8.37E-02 | 3.30E-01 | -5.01 |
| 1457097_PM_at   | Skap2                                    | SKAP2      | 0.26  | 3.22 | 1.91  | 8.37E-02 | 3.30E-01 | -5.01 |
| 1441432_PM_at   | ---                                      | NA         | 0.26  | 2.23 | 1.91  | 8.38E-02 | 3.30E-01 | -5.01 |
| 1419253_PM_at   | Mthfd2                                   | MTHFD2     | 0.27  | 2.84 | 1.91  | 8.38E-02 | 3.30E-01 | -5.01 |
| 1451136_PM_a_at | Eif2b2                                   | EIF2B2     | 0.30  | 5.44 | 1.91  | 8.38E-02 | 3.30E-01 | -5.01 |
| 1435279_PM_at   | Szt2                                     | SZT2       | 0.34  | 2.60 | 1.91  | 8.37E-02 | 3.30E-01 | -5.01 |
| 1459977_PM_x_at | Cox10                                    | COX10      | 0.42  | 4.98 | 1.91  | 8.38E-02 | 3.30E-01 | -5.01 |
| 1421218_PM_at   | Bche                                     | BCHE       | -0.54 | 2.61 | -1.91 | 8.38E-02 | 3.30E-01 | -5.01 |
| 1439789_PM_at   | Ebf1                                     | EBF1       | 0.47  | 2.89 | 1.91  | 8.38E-02 | 3.30E-01 | -5.01 |
| 1437345_PM_a_at | Bcl2                                     | BSCL2      | -0.93 | 5.63 | -1.91 | 8.39E-02 | 3.30E-01 | -5.01 |
| 1424847_PM_at   | Nefh                                     | NEFH       | -0.51 | 2.71 | -1.91 | 8.39E-02 | 3.30E-01 | -5.01 |
| 1445585_PM_at   | Rnf114                                   | RNF114     | -0.26 | 2.95 | -1.91 | 8.39E-02 | 3.30E-01 | -5.01 |
| 1445183_PM_s_at | D7Erttd523e                              | NA         | 0.17  | 1.98 | 1.91  | 8.39E-02 | 3.30E-01 | -5.01 |
| 1422812_PM_at   | Cxcr6                                    | CXCR6      | 0.17  | 2.25 | 1.91  | 8.39E-02 | 3.30E-01 | -5.01 |
| 1432155_PM_at   | Wasl                                     | WASL       | 0.19  | 2.78 | 1.91  | 8.39E-02 | 3.30E-01 | -5.01 |
| 1446979_PM_at   | Dcps                                     | NA         | 0.24  | 2.24 | 1.91  | 8.39E-02 | 3.30E-01 | -5.01 |
| 1439936_PM_at   | BE949265                                 | NA         | 0.25  | 2.21 | 1.91  | 8.38E-02 | 3.30E-01 | -5.01 |
| 1437398_PM_a_at | Aldh9a1                                  | ALDH9A1    | 0.35  | 3.05 | 1.91  | 8.39E-02 | 3.30E-01 | -5.01 |
| 1429120_PM_at   | Lnp                                      | NA         | 0.79  | 3.71 | 1.91  | 8.39E-02 | 3.30E-01 | -5.01 |
| 1429948_PM_x_at | Crygf                                    | CRYGD      | 0.19  | 2.39 | 1.91  | 8.39E-02 | 3.30E-01 | -5.01 |
| 1446988_PM_at   | ---                                      | NA         | 0.30  | 3.63 | 1.91  | 8.39E-02 | 3.30E-01 | -5.01 |
| 1427502_PM_at   | Adam4                                    | NA         | 0.52  | 3.11 | 1.91  | 8.39E-02 | 3.30E-01 | -5.01 |
| 1431645_PM_a_at | Gdi2                                     | GDI2       | -0.54 | 4.67 | -1.91 | 8.39E-02 | 3.30E-01 | -5.01 |
| 1425487_PM_at   | Slu7                                     | SLU7       | 0.26  | 2.85 | 1.91  | 8.40E-02 | 3.30E-01 | -5.02 |
| 1426947_PM_x_at | Col6a2                                   | COL6A2     | 0.35  | 2.76 | 1.91  | 8.40E-02 | 3.30E-01 | -5.02 |
| 1459996_PM_at   | Cacna1a                                  | NA         | -0.75 | 9.00 | -1.91 | 8.41E-02 | 3.30E-01 | -5.02 |
| 1435529_PM_at   | Ifit1b1                                  | IFIT1B     | -0.71 | 3.76 | -1.91 | 8.41E-02 | 3.30E-01 | -5.02 |
| 1420903_PM_at   | St6galnac3                               | ST6GALNAC3 | -0.57 | 4.06 | -1.91 | 8.40E-02 | 3.30E-01 | -5.02 |
| 1460712_PM_s_at | Ap1g1                                    | AP1G1      | -0.40 | 4.97 | -1.91 | 8.41E-02 | 3.30E-01 | -5.02 |
| 1444065_PM_at   | Cyb5d2                                   | CYB5D2     | 0.17  | 2.13 | 1.91  | 8.41E-02 | 3.30E-01 | -5.02 |
| 1450448_PM_at   | Stc1                                     | STC1       | 0.17  | 2.35 | 1.91  | 8.41E-02 | 3.30E-01 | -5.02 |
| 1430313_PM_at   | Adamts1                                  | ADAMTSL1   | 0.38  | 2.73 | 1.91  | 8.41E-02 | 3.30E-01 | -5.02 |
| 1451772_PM_at   | Tpcn1                                    | TPCN1      | 0.18  | 2.33 | 1.91  | 8.41E-02 | 3.30E-01 | -5.02 |
| 1434444_PM_s_at | Anapc1                                   | ANAPC1     | -0.34 | 2.84 | -1.91 | 8.42E-02 | 3.30E-01 | -5.02 |

|                 |               |            |       |      |       |          |          |       |
|-----------------|---------------|------------|-------|------|-------|----------|----------|-------|
| 1458432_PM_at   | ---           | NA         | -0.20 | 2.44 | -1.91 | 8.41E-02 | 3.30E-01 | -5.02 |
| 1437731_PM_at   | C2cd2         | C2CD2      | 0.19  | 2.62 | 1.91  | 8.42E-02 | 3.30E-01 | -5.02 |
| 1421942_PM_s_at | Tgfa          | TGFA       | 0.33  | 2.93 | 1.91  | 8.41E-02 | 3.30E-01 | -5.02 |
| 1432868_PM_at   | Dzip3         | NA         | 0.22  | 2.68 | 1.91  | 8.42E-02 | 3.30E-01 | -5.02 |
| 1436654_PM_at   | Gen1          | NA         | 0.23  | 3.14 | 1.91  | 8.42E-02 | 3.30E-01 | -5.02 |
| 1430483_PM_a_at | Tmem79        | TMEM79     | 0.26  | 2.86 | 1.91  | 8.42E-02 | 3.30E-01 | -5.02 |
| 1422789_PM_at   | Aldh1a2       | ALDH1A2    | -0.80 | 3.05 | -1.91 | 8.42E-02 | 3.30E-01 | -5.02 |
| 1441731_PM_at   | ---           | NA         | 0.22  | 2.78 | 1.91  | 8.42E-02 | 3.30E-01 | -5.02 |
| 1429334_PM_at   | Lyg1          | LYG1       | 0.21  | 2.54 | 1.91  | 8.42E-02 | 3.30E-01 | -5.02 |
| 1449639_PM_at   | ---           | NA         | 0.24  | 2.67 | 1.91  | 8.43E-02 | 3.30E-01 | -5.02 |
| 1451868_PM_at   | Kcnj6         | KCNJ6      | 0.31  | 2.22 | 1.91  | 8.43E-02 | 3.30E-01 | -5.02 |
| 1457229_PM_at   | Gpr173        | GPR173     | -0.56 | 2.92 | -1.91 | 8.43E-02 | 3.31E-01 | -5.02 |
| 1427151_PM_at   | Qser1         | QSER1      | -0.39 | 2.44 | -1.91 | 8.43E-02 | 3.31E-01 | -5.02 |
| 1415715_PM_at   | Tmem129       | TMEM129    | -0.30 | 3.48 | -1.91 | 8.44E-02 | 3.31E-01 | -5.02 |
| 1452275_PM_at   | Zfand3        | ZFAND3     | 0.20  | 2.59 | 1.91  | 8.44E-02 | 3.31E-01 | -5.02 |
| 1416573_PM_at   | Pofut2        | POFUT2     | 0.24  | 2.56 | 1.91  | 8.43E-02 | 3.31E-01 | -5.02 |
| 1427693_PM_at   | Itpr2         | NA         | 0.29  | 3.69 | 1.91  | 8.43E-02 | 3.31E-01 | -5.02 |
| 1434522_PM_at   | Wdr4          | WDR4       | 0.31  | 3.03 | 1.91  | 8.44E-02 | 3.31E-01 | -5.02 |
| 1450469_PM_at   | BC100451      | CEP295NL   | 0.19  | 2.41 | 1.91  | 8.44E-02 | 3.31E-01 | -5.02 |
| 1425295_PM_at   | Rnase2a       | RNASE2     | 0.23  | 2.17 | 1.91  | 8.44E-02 | 3.31E-01 | -5.02 |
| 1443305_PM_at   | ---           | NA         | 0.34  | 3.31 | 1.91  | 8.44E-02 | 3.31E-01 | -5.02 |
| 1436265_PM_at   | Gm10419       | NA         | -0.52 | 4.62 | -1.91 | 8.44E-02 | 3.31E-01 | -5.02 |
| 1449938_PM_at   | Endou         | ENDOU      | -0.26 | 2.82 | -1.91 | 8.44E-02 | 3.31E-01 | -5.02 |
| 1447534_PM_at   | ---           | NA         | 0.24  | 2.22 | 1.91  | 8.44E-02 | 3.31E-01 | -5.02 |
| 1421622_PM_a_at | Rapgef4       | RAPGEF4    | -0.68 | 4.69 | -1.91 | 8.45E-02 | 3.31E-01 | -5.02 |
| 1431115_PM_at   | Tgif2         | TGIF2      | 0.15  | 2.30 | 1.91  | 8.44E-02 | 3.31E-01 | -5.02 |
| 1427589_PM_at   | Fam234b       | FAM234B    | 0.47  | 2.80 | 1.91  | 8.44E-02 | 3.31E-01 | -5.02 |
| 1421703_PM_at   | Zfp59         | NA         | 0.26  | 3.92 | 1.91  | 8.45E-02 | 3.31E-01 | -5.02 |
| 1430678_PM_at   | 5730457N03Rik | NA         | 0.19  | 2.52 | 1.91  | 8.45E-02 | 3.31E-01 | -5.02 |
| 1444027_PM_at   | Slc30a8       | SLC30A8    | 0.21  | 2.27 | 1.91  | 8.45E-02 | 3.31E-01 | -5.02 |
| 1443348_PM_at   | ---           | NA         | 0.25  | 2.24 | 1.91  | 8.45E-02 | 3.31E-01 | -5.02 |
| 1456158_PM_at   | Draxin        | DRAXIN     | 0.31  | 2.74 | 1.91  | 8.45E-02 | 3.31E-01 | -5.02 |
| 1437849_PM_x_at | Armcx2        | ARMCX2     | -0.88 | 6.61 | -1.91 | 8.46E-02 | 3.31E-01 | -5.02 |
| 1428857_PM_at   | Sap130        | SAP130     | -0.56 | 3.46 | -1.91 | 8.46E-02 | 3.31E-01 | -5.02 |
| 1436681_PM_x_at | Sf3b6         | SF3B6      | -0.48 | 3.16 | -1.91 | 8.46E-02 | 3.31E-01 | -5.02 |
| 1438881_PM_at   | Vezt          | VEZT       | 0.20  | 2.03 | 1.91  | 8.45E-02 | 3.31E-01 | -5.02 |
| 1453117_PM_at   | Surf2         | SURF2      | 0.22  | 3.00 | 1.91  | 8.45E-02 | 3.31E-01 | -5.02 |
| 1436845_PM_at   | Axin2         | AXIN2      | 0.27  | 2.92 | 1.91  | 8.45E-02 | 3.31E-01 | -5.02 |
| 1446236_PM_at   | C230072F16Rik | NA         | 0.37  | 2.71 | 1.91  | 8.45E-02 | 3.31E-01 | -5.02 |
| 1421855_PM_at   | Fgl2          | FGL2       | -0.27 | 2.25 | -1.91 | 8.46E-02 | 3.31E-01 | -5.02 |
| 1453236_PM_at   | Nipsnap3a     | NIPSNAP3A  | 0.21  | 2.28 | 1.91  | 8.46E-02 | 3.31E-01 | -5.02 |
| 1439804_PM_at   | 2310015A10Rik | NA         | 0.30  | 2.68 | 1.91  | 8.46E-02 | 3.31E-01 | -5.02 |
| 1419293_PM_at   | Dscam         | DSCAM      | 0.42  | 2.71 | 1.91  | 8.46E-02 | 3.31E-01 | -5.02 |
| 1422053_PM_at   | Inhba         | INHBA      | -0.68 | 4.45 | -1.91 | 8.46E-02 | 3.31E-01 | -5.02 |
| 1450660_PM_at   | Pts           | PTS        | -0.52 | 3.96 | -1.91 | 8.46E-02 | 3.31E-01 | -5.02 |
| 1459575_PM_at   | ---           | NA         | 0.59  | 2.74 | 1.91  | 8.46E-02 | 3.31E-01 | -5.02 |
| 1444088_PM_at   | ---           | NA         | 0.14  | 2.10 | 1.91  | 8.47E-02 | 3.31E-01 | -5.02 |
| 1422446_PM_x_at | Ins2          | INS        | 0.18  | 2.94 | 1.91  | 8.47E-02 | 3.31E-01 | -5.02 |
| 1421437_PM_x_at | Pcdhb14       | NA         | -0.29 | 2.67 | -1.91 | 8.47E-02 | 3.31E-01 | -5.02 |
| 1453759_PM_at   | ---           | NA         | 0.20  | 2.44 | 1.91  | 8.47E-02 | 3.31E-01 | -5.02 |
| 1416676_PM_at   | Kng1          | KNG1       | 0.25  | 2.17 | 1.91  | 8.47E-02 | 3.31E-01 | -5.02 |
| 1454929_PM_s_at | Safb          | SAFB       | 0.31  | 6.24 | 1.91  | 8.47E-02 | 3.31E-01 | -5.02 |
| 1417967_PM_at   | Mms19         | MMS19      | -0.28 | 2.55 | -1.91 | 8.48E-02 | 3.31E-01 | -5.02 |
| 1433599_PM_at   | Baz1a         | BAZ1A      | 0.37  | 2.94 | 1.91  | 8.48E-02 | 3.31E-01 | -5.02 |
| 1427191_PM_at   | Npr2          | NPR2       | 0.36  | 3.08 | 1.91  | 8.48E-02 | 3.31E-01 | -5.02 |
| 1453380_PM_a_at | Xrcc6bp1      | ATP23      | -0.24 | 2.35 | -1.91 | 8.48E-02 | 3.31E-01 | -5.02 |
| 1440081_PM_at   | Cep192        | NA         | -0.19 | 2.46 | -1.91 | 8.48E-02 | 3.31E-01 | -5.02 |
| 1419416_PM_a_at | Rarg          | RARG       | 0.17  | 2.45 | 1.91  | 8.48E-02 | 3.31E-01 | -5.02 |
| 1448079_PM_at   | ---           | NA         | 0.96  | 4.11 | 1.91  | 8.48E-02 | 3.31E-01 | -5.02 |
| 1421581_PM_at   | Kcnj6         | KCNJ6      | 0.42  | 3.17 | 1.91  | 8.48E-02 | 3.31E-01 | -5.02 |
| 1439965_PM_at   | Slc43a2       | SLC43A2    | -1.12 | 8.36 | -1.90 | 8.49E-02 | 3.31E-01 | -5.03 |
| 1437057_PM_at   | Megf6         | MEGF6      | 0.19  | 2.42 | 1.90  | 8.49E-02 | 3.31E-01 | -5.03 |
| 1422678_PM_at   | Dgat2         | DGAT2      | 0.37  | 4.23 | 1.90  | 8.49E-02 | 3.31E-01 | -5.03 |
| 1429275_PM_at   | ---           | NA         | -0.35 | 2.40 | -1.90 | 8.50E-02 | 3.32E-01 | -5.03 |
| 1460585_PM_x_at | Pisd          | NA         | -0.43 | 3.10 | -1.90 | 8.50E-02 | 3.32E-01 | -5.03 |
| 1437085_PM_at   | D630039A03Rik | C9orf152   | 0.24  | 2.15 | 1.90  | 8.50E-02 | 3.32E-01 | -5.03 |
| 1449446_PM_at   | Ccdc59        | CCDC59     | 0.43  | 3.73 | 1.90  | 8.50E-02 | 3.32E-01 | -5.03 |
| 1450564_PM_x_at | Ifna1         | IFNA6      | 0.25  | 3.20 | 1.90  | 8.50E-02 | 3.32E-01 | -5.03 |
| 1442468_PM_at   | Gm27230       | NA         | 0.38  | 3.70 | 1.90  | 8.50E-02 | 3.32E-01 | -5.03 |
| 1458625_PM_at   | Dscam         | NA         | -0.42 | 2.80 | -1.90 | 8.51E-02 | 3.32E-01 | -5.03 |
| 1430618_PM_at   | ---           | NA         | -0.31 | 2.27 | -1.90 | 8.51E-02 | 3.32E-01 | -5.03 |
| 1427034_PM_at   | Ace           | AC113554.2 | -0.21 | 2.38 | -1.90 | 8.51E-02 | 3.32E-01 | -5.03 |
| 1445455_PM_at   | D3Erttd270e   | NA         | 0.16  | 2.29 | 1.90  | 8.51E-02 | 3.32E-01 | -5.03 |
| 1430824_PM_at   | 4933428G20Rik | NA         | 0.18  | 2.42 | 1.90  | 8.51E-02 | 3.32E-01 | -5.03 |
| 1447201_PM_at   | Gm12784       | NA         | 0.21  | 2.71 | 1.90  | 8.51E-02 | 3.32E-01 | -5.03 |

|                 |                          |           |       |       |       |          |          |       |
|-----------------|--------------------------|-----------|-------|-------|-------|----------|----------|-------|
| 1445850_PM_at   | Ppp1r12b                 | PPP1R12B  | 0.21  | 2.59  | 1.90  | 8.51E-02 | 3.32E-01 | -5.03 |
| 1453269_PM_at   | Unc5b                    | UNCSB     | 0.22  | 2.45  | 1.90  | 8.51E-02 | 3.32E-01 | -5.03 |
| 1459061_PM_at   | ---                      | NA        | 0.23  | 2.71  | 1.90  | 8.51E-02 | 3.32E-01 | -5.03 |
| 1441441_PM_at   | Prg1                     | PRRG1     | 0.24  | 2.73  | 1.90  | 8.51E-02 | 3.32E-01 | -5.03 |
| 1445098_PM_at   | AU022706                 | NA        | 0.26  | 2.38  | 1.90  | 8.51E-02 | 3.32E-01 | -5.03 |
| 1441346_PM_at   | ---                      | NA        | 0.27  | 2.65  | 1.90  | 8.51E-02 | 3.32E-01 | -5.03 |
| 1420668_PM_a_at | Yipf2                    | YIPF2     | 0.31  | 4.45  | 1.90  | 8.50E-02 | 3.32E-01 | -5.03 |
| 1452146_PM_a_at | Cox15                    | COX15     | -0.38 | 2.78  | -1.90 | 8.51E-02 | 3.32E-01 | -5.03 |
| 1453394_PM_at   | 2410017117Rik            | NA        | 0.20  | 2.45  | 1.90  | 8.51E-02 | 3.32E-01 | -5.03 |
| 1450610_PM_at   | Ucn                      | UCN       | 0.23  | 2.73  | 1.90  | 8.51E-02 | 3.32E-01 | -5.03 |
| 1426894_PM_s_at | Fam102a                  | FAM102A   | -0.48 | 4.33  | -1.90 | 8.52E-02 | 3.32E-01 | -5.03 |
| 1457785_PM_at   | ---                      | NA        | -0.28 | 2.96  | -1.90 | 8.52E-02 | 3.32E-01 | -5.03 |
| 1422114_PM_at   | Erf                      | ERF       | 0.20  | 2.27  | 1.90  | 8.52E-02 | 3.32E-01 | -5.03 |
| 1433005_PM_at   | ---                      | NA        | 0.26  | 4.05  | 1.90  | 8.52E-02 | 3.32E-01 | -5.03 |
| 1445253_PM_at   | Gm41810                  | NA        | 0.26  | 2.42  | 1.90  | 8.52E-02 | 3.32E-01 | -5.03 |
| 1443644_PM_at   | ---                      | NA        | 0.28  | 2.39  | 1.90  | 8.52E-02 | 3.32E-01 | -5.03 |
| 1422787_PM_at   | Fkbp1                    | FKBP1     | 0.20  | 2.53  | 1.90  | 8.52E-02 | 3.32E-01 | -5.03 |
| 1441077_PM_at   | AW124847                 | NA        | 0.32  | 2.86  | 1.90  | 8.52E-02 | 3.32E-01 | -5.03 |
| 1454302_PM_at   | ---                      | NA        | 0.16  | 2.31  | 1.90  | 8.52E-02 | 3.32E-01 | -5.03 |
| 1431749_PM_a_at | Rasgrp1                  | RASGRP1   | -0.72 | 7.49  | -1.90 | 8.52E-02 | 3.32E-01 | -5.03 |
| 1431210_PM_at   | Agb3                     | AGBL3     | 0.15  | 2.17  | 1.90  | 8.53E-02 | 3.32E-01 | -5.03 |
| 1440725_PM_at   | Gpr63                    | GPR63     | -0.54 | 3.73  | -1.90 | 8.53E-02 | 3.32E-01 | -5.03 |
| 1425867_PM_at   | Plekha4                  | PLEKHA4   | 0.20  | 2.87  | 1.90  | 8.54E-02 | 3.32E-01 | -5.03 |
| 1421388_PM_at   | Mef2d                    | MEF2D     | 0.22  | 3.25  | 1.90  | 8.54E-02 | 3.32E-01 | -5.03 |
| 1426715_PM_s_at | Slc46a1                  | SLC46A1   | 0.23  | 2.80  | 1.90  | 8.54E-02 | 3.32E-01 | -5.03 |
| 1431958_PM_at   | Spag16                   | SPAG16    | 0.23  | 2.50  | 1.90  | 8.54E-02 | 3.32E-01 | -5.03 |
| 1429553_PM_at   | Cilp2                    | CILP2     | 0.25  | 3.31  | 1.90  | 8.53E-02 | 3.32E-01 | -5.03 |
| 1442647_PM_at   | Yipf1                    | YIPF1     | 0.28  | 2.45  | 1.90  | 8.54E-02 | 3.32E-01 | -5.03 |
| 1437994_PM_x_at | Mier2                    | MIER2     | 0.34  | 6.74  | 1.90  | 8.53E-02 | 3.32E-01 | -5.03 |
| 1427320_PM_at   | ---                      | NA        | 0.52  | 10.55 | 1.90  | 8.54E-02 | 3.32E-01 | -5.03 |
| 1429590_PM_at   | Tacc1                    | TACC1     | 0.49  | 4.73  | 1.90  | 8.54E-02 | 3.32E-01 | -5.03 |
| 1428216_PM_s_at | Tomm7                    | TOMM7     | 0.66  | 3.30  | 1.90  | 8.54E-02 | 3.32E-01 | -5.03 |
| 1427883_PM_a_at | Col3a1                   | COL3A1    | -0.76 | 3.56  | -1.90 | 8.55E-02 | 3.32E-01 | -5.03 |
| 1423568_PM_at   | Psm1                     | PSMA1     | -0.52 | 5.49  | -1.90 | 8.55E-02 | 3.32E-01 | -5.03 |
| 1453579_PM_at   | Phf12                    | PHF12     | 0.58  | 2.97  | 1.90  | 8.55E-02 | 3.32E-01 | -5.03 |
| 1455095_PM_at   | Hist2h2be                | HIST1H2BJ | -0.60 | 3.99  | -1.90 | 8.55E-02 | 3.32E-01 | -5.03 |
| 1443219_PM_at   | Sgcd                     | NA        | 0.29  | 2.64  | 1.90  | 8.55E-02 | 3.32E-01 | -5.03 |
| 1439466_PM_s_at | Bud31 /// LOC102642043   | BUD31     | -1.21 | 4.81  | -1.90 | 8.55E-02 | 3.32E-01 | -5.03 |
| 1459967_PM_at   | ---                      | NA        | 0.23  | 3.22  | 1.90  | 8.56E-02 | 3.32E-01 | -5.03 |
| 1431744_PM_a_at | Smap1                    | SMAP1     | 0.24  | 2.72  | 1.90  | 8.56E-02 | 3.32E-01 | -5.03 |
| 1444682_PM_at   | ---                      | NA        | 0.40  | 2.27  | 1.90  | 8.56E-02 | 3.32E-01 | -5.03 |
| 1424822_PM_at   | Slain1                   | SLAIN1    | 0.43  | 3.24  | 1.90  | 8.56E-02 | 3.32E-01 | -5.03 |
| 1420818_PM_at   | Sla                      | SLA       | -0.27 | 2.43  | -1.90 | 8.56E-02 | 3.32E-01 | -5.03 |
| 1452368_PM_at   | Bcr                      | BCR       | 0.30  | 2.41  | 1.90  | 8.56E-02 | 3.32E-01 | -5.03 |
| 1454555_PM_at   | Zfp572                   | NA        | -0.18 | 2.20  | -1.90 | 8.56E-02 | 3.33E-01 | -5.03 |
| 1421551_PM_s_at | Ifi202b /// LOC100044068 | NA        | 0.31  | 3.12  | 1.90  | 8.56E-02 | 3.33E-01 | -5.03 |
| 1449028_PM_at   | Rhou                     | RHOU      | 0.40  | 3.03  | 1.90  | 8.56E-02 | 3.33E-01 | -5.03 |
| 1440011_PM_at   | ---                      | NA        | 0.23  | 2.49  | 1.90  | 8.56E-02 | 3.33E-01 | -5.03 |
| 1434266_PM_at   | Fam185a                  | FAM185A   | 0.28  | 2.96  | 1.90  | 8.57E-02 | 3.33E-01 | -5.03 |
| 1457030_PM_at   | Mirg                     | NA        | 0.67  | 2.81  | 1.90  | 8.57E-02 | 3.33E-01 | -5.03 |
| 1439831_PM_at   | Gm4951                   | NA        | 0.35  | 3.05  | 1.90  | 8.57E-02 | 3.33E-01 | -5.03 |
| 1431944_PM_at   | 4930484H19Rik            | NA        | 0.30  | 2.48  | 1.90  | 8.57E-02 | 3.33E-01 | -5.03 |
| 1424964_PM_at   | Rp1                      | RP1       | -0.21 | 2.73  | -1.90 | 8.58E-02 | 3.33E-01 | -5.03 |
| 1441378_PM_at   | ---                      | NA        | 0.21  | 2.61  | 1.90  | 8.58E-02 | 3.33E-01 | -5.03 |
| 1432677_PM_at   | Gbf1                     | NA        | 0.23  | 2.26  | 1.90  | 8.58E-02 | 3.33E-01 | -5.03 |
| 1454326_PM_at   | ---                      | NA        | 0.30  | 2.50  | 1.90  | 8.58E-02 | 3.33E-01 | -5.04 |
| 1426328_PM_a_at | Scn3b                    | SCN3B     | -1.08 | 3.91  | -1.90 | 8.58E-02 | 3.33E-01 | -5.04 |
| 1438493_PM_at   | Pld6                     | PLD6      | 0.17  | 2.50  | 1.90  | 8.58E-02 | 3.33E-01 | -5.04 |
| 1436782_PM_at   | Svs3a /// Svs3b          | NA        | 0.18  | 2.32  | 1.90  | 8.58E-02 | 3.33E-01 | -5.04 |
| 1419989_PM_at   | ---                      | NA        | 0.39  | 3.45  | 1.90  | 8.58E-02 | 3.33E-01 | -5.04 |
| 1427769_PM_x_at | Myb                      | MYL3      | 0.33  | 3.43  | 1.90  | 8.59E-02 | 3.33E-01 | -5.04 |
| 1455859_PM_at   | Cfap69                   | CFAP69    | 0.76  | 3.67  | 1.90  | 8.59E-02 | 3.33E-01 | -5.04 |
| 1460427_PM_a_at | Adam28                   | ADAM28    | 0.35  | 3.10  | 1.90  | 8.60E-02 | 3.33E-01 | -5.04 |
| 1457867_PM_at   | Sgpp2                    | SGPP2     | 0.31  | 2.81  | 1.90  | 8.60E-02 | 3.33E-01 | -5.04 |
| 1417957_PM_a_at | Tspan1                   | TSPAN1    | 0.20  | 2.94  | 1.90  | 8.60E-02 | 3.33E-01 | -5.04 |
| 1417746_PM_at   | Cplx1                    | CPLX1     | -0.54 | 7.06  | -1.90 | 8.60E-02 | 3.33E-01 | -5.04 |
| 1445955_PM_at   | ---                      | NA        | 0.28  | 2.97  | 1.90  | 8.60E-02 | 3.33E-01 | -5.04 |
| 1416080_PM_at   | Adam15                   | ADAM15    | 0.28  | 2.35  | 1.90  | 8.61E-02 | 3.34E-01 | -5.04 |
| 1449790_PM_at   | ---                      | NA        | -0.19 | 2.37  | -1.90 | 8.61E-02 | 3.34E-01 | -5.04 |
| 1453426_PM_a_at | Wdfy1                    | WDFY1     | 0.35  | 3.51  | 1.90  | 8.61E-02 | 3.34E-01 | -5.04 |
| 1417718_PM_at   | Eif3g                    | EIF3G     | -0.55 | 3.94  | -1.90 | 8.62E-02 | 3.34E-01 | -5.04 |
| 1431228_PM_s_at | 4930526I15Rik            | NA        | 0.78  | 4.60  | 1.90  | 8.62E-02 | 3.34E-01 | -5.04 |
| 1420706_PM_at   | Srcin1                   | SRCIN1    | 0.35  | 3.18  | 1.90  | 8.62E-02 | 3.34E-01 | -5.04 |
| 1417566_PM_at   | Abhd5                    | ABHD5     | 0.39  | 2.85  | 1.90  | 8.62E-02 | 3.34E-01 | -5.04 |



|                 |                         |          |       |       |       |          |          |       |
|-----------------|-------------------------|----------|-------|-------|-------|----------|----------|-------|
| 1435952_PM_at   | Tsc22d1                 | TSC22D1  | -0.67 | 2.98  | -1.90 | 8.62E-02 | 3.34E-01 | -5.04 |
| 1447122_PM_at   | ---                     | NA       | 0.20  | 2.32  | 1.90  | 8.62E-02 | 3.34E-01 | -5.04 |
| 1441822_PM_at   | ---                     | NA       | 0.23  | 2.51  | 1.90  | 8.62E-02 | 3.34E-01 | -5.04 |
| 1440752_PM_at   | ---                     | NA       | 0.45  | 3.64  | 1.90  | 8.62E-02 | 3.34E-01 | -5.04 |
| 1449229_PM_a_at | Cdkl2                   | CDKL2    | -0.56 | 3.32  | -1.90 | 8.62E-02 | 3.34E-01 | -5.04 |
| 1460660_PM_x_at | Rer1                    | RER1     | -0.65 | 5.29  | -1.90 | 8.63E-02 | 3.34E-01 | -5.04 |
| 1434128_PM_a_at | Zfp574                  | ZNF574   | -0.56 | 2.81  | -1.89 | 8.63E-02 | 3.34E-01 | -5.04 |
| 1437850_PM_a_at | Cnbp                    | CNBP     | -0.43 | 8.39  | -1.89 | 8.63E-02 | 3.34E-01 | -5.04 |
| 1446556_PM_at   | Kcnd1                   | KCND1    | -0.28 | 2.90  | -1.89 | 8.63E-02 | 3.34E-01 | -5.04 |
| 1424620_PM_at   | Nop16                   | NOP16    | 0.14  | 2.49  | 1.89  | 8.63E-02 | 3.34E-01 | -5.04 |
| 1430962_PM_at   | Ube2s                   | UBE2S    | 0.19  | 2.14  | 1.89  | 8.63E-02 | 3.34E-01 | -5.04 |
| 1429059_PM_s_at | Tmem107                 | TMEM107  | 0.19  | 2.56  | 1.89  | 8.63E-02 | 3.34E-01 | -5.04 |
| 1433245_PM_at   | 6720475M21Rik           | NA       | 0.23  | 2.10  | 1.89  | 8.63E-02 | 3.34E-01 | -5.04 |
| 1432447_PM_a_at | Meaf6                   | MEAF6    | 0.35  | 3.14  | 1.89  | 8.63E-02 | 3.34E-01 | -5.04 |
| 1448904_PM_at   | Fam3c                   | FAM3C    | 0.58  | 6.63  | 1.90  | 8.63E-02 | 3.34E-01 | -5.04 |
| 1434891_PM_at   | Ptgfrn                  | PTGFRN   | -0.31 | 2.63  | -1.89 | 8.63E-02 | 3.34E-01 | -5.04 |
| 1440748_PM_at   | ---                     | NA       | -0.20 | 2.30  | -1.89 | 8.63E-02 | 3.34E-01 | -5.04 |
| 1454629_PM_at   | Iffo1                   | IFFO1    | 0.21  | 2.72  | 1.89  | 8.64E-02 | 3.34E-01 | -5.04 |
| 1445234_PM_at   | C130030K03Rik /// Grik2 | NA       | -0.18 | 2.27  | -1.89 | 8.64E-02 | 3.34E-01 | -5.04 |
| 1425842_PM_at   | Edil3                   | EDIL3    | 0.24  | 2.60  | 1.89  | 8.64E-02 | 3.34E-01 | -5.04 |
| 1438773_PM_at   | Steap2                  | STEAP2   | 0.17  | 2.61  | 1.89  | 8.65E-02 | 3.34E-01 | -5.04 |
| 1439488_PM_at   | Dot1l                   | DOT1L    | 0.23  | 3.47  | 1.89  | 8.65E-02 | 3.34E-01 | -5.04 |
| 1434523_PM_x_at | Eif3e                   | EIF3E    | -0.67 | 7.99  | -1.89 | 8.65E-02 | 3.34E-01 | -5.04 |
| 1452081_PM_a_at | Misp                    | MISP     | 0.23  | 2.60  | 1.89  | 8.65E-02 | 3.34E-01 | -5.04 |
| 1456737_PM_x_at | Acaa1a                  | ACA1     | 0.28  | 4.57  | 1.89  | 8.65E-02 | 3.34E-01 | -5.04 |
| 1417393_PM_a_at | Fam132a                 | C1QTNF12 | 0.31  | 2.98  | 1.89  | 8.65E-02 | 3.34E-01 | -5.04 |
| 1433073_PM_at   | Gstt2                   | NA       | 0.17  | 2.34  | 1.89  | 8.65E-02 | 3.34E-01 | -5.04 |
| 1433057_PM_at   | ---                     | NA       | 0.24  | 2.48  | 1.89  | 8.66E-02 | 3.35E-01 | -5.04 |
| 1422237_PM_at   | Mc3r                    | MC3R     | 0.18  | 2.55  | 1.89  | 8.66E-02 | 3.35E-01 | -5.04 |
| 1440562_PM_at   | Gm17597                 | NA       | 0.15  | 2.16  | 1.89  | 8.66E-02 | 3.35E-01 | -5.04 |
| 1420435_PM_at   | 1700011A15Rik           | NA       | 0.16  | 2.46  | 1.89  | 8.66E-02 | 3.35E-01 | -5.04 |
| 1417469_PM_at   | Nit1                    | NIT1     | 0.24  | 2.30  | 1.89  | 8.67E-02 | 3.35E-01 | -5.04 |
| 1418616_PM_at   | Mafk                    | MAFK     | 0.27  | 3.19  | 1.89  | 8.66E-02 | 3.35E-01 | -5.04 |
| 1445092_PM_at   | ---                     | NA       | 0.33  | 2.08  | 1.89  | 8.67E-02 | 3.35E-01 | -5.04 |
| 1417537_PM_at   | Zmat2                   | ZMAT2    | 0.35  | 3.19  | 1.89  | 8.67E-02 | 3.35E-01 | -5.04 |
| 1435603_PM_at   | Sned1                   | SNED1    | 0.42  | 2.82  | 1.89  | 8.67E-02 | 3.35E-01 | -5.04 |
| 1418983_PM_at   | Inadl                   | PATJ     | 0.78  | 2.88  | 1.89  | 8.67E-02 | 3.35E-01 | -5.04 |
| 1451081_PM_a_at | Tcf25                   | TCF25    | -1.34 | 4.97  | -1.89 | 8.67E-02 | 3.35E-01 | -5.04 |
| 1444175_PM_at   | ---                     | NA       | 0.18  | 2.39  | 1.89  | 8.67E-02 | 3.35E-01 | -5.04 |
| 1416808_PM_at   | Nid1                    | NID1     | -0.81 | 3.55  | -1.89 | 8.67E-02 | 3.35E-01 | -5.05 |
| 1421305_PM_x_at | Rabep1                  | RABEP1   | -0.57 | 4.26  | -1.89 | 8.68E-02 | 3.35E-01 | -5.05 |
| 1425866_PM_a_at | Plekha4                 | PLEKHA4  | 0.18  | 2.42  | 1.89  | 8.68E-02 | 3.35E-01 | -5.05 |
| 1459988_PM_at   | Mbd3l2                  | MBD3L2B  | 0.19  | 2.32  | 1.89  | 8.67E-02 | 3.35E-01 | -5.04 |
| 1458071_PM_at   | ---                     | NA       | 0.22  | 2.48  | 1.89  | 8.67E-02 | 3.35E-01 | -5.05 |
| 1459651_PM_s_at | Nup54                   | NUP54    | 0.24  | 2.18  | 1.89  | 8.67E-02 | 3.35E-01 | -5.05 |
| 1439462_PM_x_at | Gm4024 /// Tmed10       | TMED10   | -0.43 | 3.66  | -1.89 | 8.68E-02 | 3.35E-01 | -5.05 |
| 1426032_PM_at   | Nfatc2                  | NFATC2   | 0.21  | 3.00  | 1.89  | 8.68E-02 | 3.35E-01 | -5.05 |
| 1420457_PM_at   | Dvl3                    | DVL3     | 0.22  | 2.74  | 1.89  | 8.68E-02 | 3.35E-01 | -5.05 |
| 1419429_PM_at   | Cntfr                   | CNTFR    | 0.27  | 2.89  | 1.89  | 8.68E-02 | 3.35E-01 | -5.05 |
| 1426595_PM_at   | Slc18a1                 | SLC18A1  | 0.29  | 3.16  | 1.89  | 8.68E-02 | 3.35E-01 | -5.05 |
| 1440031_PM_at   | Dact3                   | DACT3    | 0.27  | 2.74  | 1.89  | 8.68E-02 | 3.35E-01 | -5.05 |
| 1452652_PM_at   | Tmem158                 | TMEM158  | 0.19  | 2.08  | 1.89  | 8.69E-02 | 3.35E-01 | -5.05 |
| 1424729_PM_at   | Adig                    | ADIG     | 0.15  | 2.27  | 1.89  | 8.69E-02 | 3.35E-01 | -5.05 |
| 1426372_PM_a_at | Bet1l                   | BET1L    | 0.21  | 2.69  | 1.89  | 8.69E-02 | 3.35E-01 | -5.05 |
| 1453214_PM_at   | Lrrc15                  | LRRC15   | 0.18  | 2.17  | 1.89  | 8.69E-02 | 3.35E-01 | -5.05 |
| 1445694_PM_at   | ---                     | NA       | -0.49 | 3.16  | -1.89 | 8.70E-02 | 3.35E-01 | -5.05 |
| 1439448_PM_x_at | Tmed9                   | TMED9    | -0.31 | 11.26 | -1.89 | 8.70E-02 | 3.35E-01 | -5.05 |
| 1442238_PM_a_at | Kif6                    | KIF6     | -0.28 | 2.38  | -1.89 | 8.70E-02 | 3.35E-01 | -5.05 |
| 1422889_PM_at   | Pcdh18                  | PCDH18   | -0.18 | 2.31  | -1.89 | 8.70E-02 | 3.35E-01 | -5.05 |
| 1419614_PM_at   | Pla2g12b                | PLA2G12B | 0.19  | 2.43  | 1.89  | 8.70E-02 | 3.35E-01 | -5.05 |
| 1446309_PM_at   | ---                     | NA       | 0.19  | 2.06  | 1.89  | 8.70E-02 | 3.35E-01 | -5.05 |
| 1418066_PM_at   | Cfl2                    | CFL2     | -0.59 | 5.50  | -1.89 | 8.71E-02 | 3.35E-01 | -5.05 |
| 1416161_PM_at   | Rad21                   | RAD21    | -0.32 | 2.76  | -1.89 | 8.71E-02 | 3.35E-01 | -5.05 |
| 1439881_PM_at   | ---                     | NA       | -0.16 | 2.40  | -1.89 | 8.70E-02 | 3.35E-01 | -5.05 |
| 1425207_PM_at   | Slc22a22                | NA       | 0.15  | 2.22  | 1.89  | 8.70E-02 | 3.35E-01 | -5.05 |
| 1420576_PM_at   | Lpar2                   | LPAR2    | 0.20  | 2.75  | 1.89  | 8.70E-02 | 3.35E-01 | -5.05 |
| 1447366_PM_at   | ---                     | NA       | 0.29  | 2.21  | 1.89  | 8.70E-02 | 3.35E-01 | -5.05 |
| 1449296_PM_a_at | Cnp                     | CNP      | 0.41  | 3.51  | 1.89  | 8.70E-02 | 3.35E-01 | -5.05 |
| 1450710_PM_at   | Jarid2                  | JARID2   | 0.63  | 3.86  | 1.89  | 8.71E-02 | 3.35E-01 | -5.05 |
| 1439158_PM_at   | Tlk1                    | TLK1     | -0.72 | 5.44  | -1.89 | 8.71E-02 | 3.35E-01 | -5.05 |
| 1441764_PM_at   | Prdm10                  | PRDM10   | -0.26 | 3.85  | -1.89 | 8.71E-02 | 3.35E-01 | -5.05 |
| 1454075_PM_s_at | Nudt13                  | NUDT13   | 0.25  | 2.83  | 1.89  | 8.71E-02 | 3.35E-01 | -5.05 |
| 1437554_PM_at   | Plec                    | PLEC     | 0.43  | 3.35  | 1.89  | 8.71E-02 | 3.35E-01 | -5.05 |
| 1448667_PM_x_at | Tob2                    | TOB2     | 0.48  | 7.72  | 1.89  | 8.71E-02 | 3.35E-01 | -5.05 |
| 1443842_PM_at   | Arfgef2                 | ARFGEF2  | 0.54  | 3.10  | 1.89  | 8.71E-02 | 3.35E-01 | -5.05 |

|                 |               |          |       |       |       |          |          |       |
|-----------------|---------------|----------|-------|-------|-------|----------|----------|-------|
| 1449218_PM_at   | Cox8b         | NA       | 0.20  | 2.89  | 1.89  | 8.71E-02 | 3.35E-01 | -5.05 |
| 1455724_PM_at   | Prg1          | PRRG1    | -0.44 | 2.65  | -1.89 | 8.72E-02 | 3.35E-01 | -5.05 |
| 1440228_PM_at   | Ranbp6        | RANBP6   | -0.38 | 2.72  | -1.89 | 8.72E-02 | 3.35E-01 | -5.05 |
| 1433630_PM_at   | Map6d1        | MAP6D1   | -0.23 | 3.01  | -1.89 | 8.72E-02 | 3.35E-01 | -5.05 |
| 1431713_PM_at   | Sufu          | SUFU     | 0.17  | 2.37  | 1.89  | 8.72E-02 | 3.35E-01 | -5.05 |
| 1444166_PM_at   | ---           | NA       | 0.29  | 2.69  | 1.89  | 8.72E-02 | 3.35E-01 | -5.05 |
| 1440827_PM_x_at | Sox5          | SOX5     | -0.44 | 3.44  | -1.89 | 8.72E-02 | 3.35E-01 | -5.05 |
| 1443474_PM_at   | D7Erttd495e   | NA       | 0.22  | 2.40  | 1.89  | 8.72E-02 | 3.35E-01 | -5.05 |
| 1456990_PM_at   | ---           | NA       | 0.25  | 2.41  | 1.89  | 8.72E-02 | 3.35E-01 | -5.05 |
| 1426036_PM_a_at | Pde1c         | PDE1C    | 0.38  | 2.52  | 1.89  | 8.72E-02 | 3.35E-01 | -5.05 |
| 1444880_PM_at   | ---           | NA       | 0.61  | 2.61  | 1.89  | 8.72E-02 | 3.35E-01 | -5.05 |
| 1424053_PM_a_at | Tcf25         | TCF25    | 0.82  | 6.52  | 1.89  | 8.72E-02 | 3.35E-01 | -5.05 |
| 1431268_PM_at   | Gm9802        | NA       | 0.16  | 2.12  | 1.89  | 8.73E-02 | 3.35E-01 | -5.05 |
| 1443217_PM_at   | Gm13398       | NA       | 0.16  | 2.09  | 1.89  | 8.73E-02 | 3.35E-01 | -5.05 |
| 1421640_PM_a_at | Tank          | TANK     | -0.29 | 2.29  | -1.89 | 8.73E-02 | 3.35E-01 | -5.05 |
| 1451470_PM_s_at | Eif5a         | EIF5A    | 0.55  | 8.89  | 1.89  | 8.73E-02 | 3.36E-01 | -5.05 |
| 1437670_PM_x_at | Cd151         | CD151    | -1.05 | 3.70  | -1.89 | 8.74E-02 | 3.36E-01 | -5.05 |
| 1450650_PM_at   | Myo10         | MYO10    | -0.40 | 2.69  | -1.89 | 8.73E-02 | 3.36E-01 | -5.05 |
| 1456625_PM_at   | Aasdhppt      | AASDHPPT | -0.26 | 3.01  | -1.89 | 8.73E-02 | 3.36E-01 | -5.05 |
| 1455720_PM_at   | Adamts2       | ADAMTS2  | -0.16 | 2.10  | -1.89 | 8.74E-02 | 3.36E-01 | -5.05 |
| 1421781_PM_at   | Upk2          | NA       | 0.20  | 4.26  | 1.89  | 8.73E-02 | 3.36E-01 | -5.05 |
| 1433042_PM_at   | ---           | NA       | 0.21  | 2.36  | 1.89  | 8.74E-02 | 3.36E-01 | -5.05 |
| 1421143_PM_at   | Diaph1        | DIAPH1   | 0.25  | 3.19  | 1.89  | 8.74E-02 | 3.36E-01 | -5.05 |
| 1443075_PM_at   | ---           | NA       | 0.25  | 2.41  | 1.89  | 8.74E-02 | 3.36E-01 | -5.05 |
| 1446069_PM_at   | ---           | NA       | 0.31  | 2.39  | 1.89  | 8.74E-02 | 3.36E-01 | -5.05 |
| 1444677_PM_at   | C77673        | NA       | 0.32  | 3.40  | 1.89  | 8.74E-02 | 3.36E-01 | -5.05 |
| 1440429_PM_at   | Arpp21        | ARPP21   | 0.43  | 2.84  | 1.89  | 8.73E-02 | 3.36E-01 | -5.05 |
| 1440464_PM_at   | ---           | NA       | 0.43  | 2.50  | 1.89  | 8.74E-02 | 3.36E-01 | -5.05 |
| 1460515_PM_at   | 8430419K02Rik | NA       | 0.61  | 2.77  | 1.89  | 8.74E-02 | 3.36E-01 | -5.05 |
| 1416092_PM_a_at | Map4          | MAP4     | 1.02  | 6.32  | 1.89  | 8.74E-02 | 3.36E-01 | -5.05 |
| 1431630_PM_a_at | Klf3          | KLf3     | 0.39  | 2.76  | 1.89  | 8.74E-02 | 3.36E-01 | -5.05 |
| 1453851_PM_a_at | Gadd45g       | GADD45G  | 0.26  | 2.86  | 1.89  | 8.74E-02 | 3.36E-01 | -5.05 |
| 1419362_PM_at   | MrpB5         | MRPL35   | 0.27  | 2.39  | 1.89  | 8.74E-02 | 3.36E-01 | -5.05 |
| 1438376_PM_s_at | Trim27        | TRIM27   | -1.03 | 5.14  | -1.89 | 8.75E-02 | 3.36E-01 | -5.05 |
| 1437372_PM_at   | Cpsf6         | CPSF6    | -0.55 | 3.49  | -1.89 | 8.75E-02 | 3.36E-01 | -5.05 |
| 1427920_PM_at   | Phf19         | PHF19    | 0.17  | 2.30  | 1.89  | 8.75E-02 | 3.36E-01 | -5.05 |
| 1433375_PM_at   | ---           | NA       | 0.17  | 2.52  | 1.89  | 8.75E-02 | 3.36E-01 | -5.05 |
| 1457442_PM_at   | AW125324      | NA       | 0.19  | 2.46  | 1.89  | 8.75E-02 | 3.36E-01 | -5.05 |
| 1450255_PM_at   | Arhgap31      | ARHGAP31 | 0.19  | 2.34  | 1.89  | 8.75E-02 | 3.36E-01 | -5.05 |
| 1429706_PM_at   | Iqcf5         | IQCF5    | 0.24  | 2.96  | 1.89  | 8.75E-02 | 3.36E-01 | -5.05 |
| 1424287_PM_at   | Prkx          | PRKX     | 0.34  | 4.85  | 1.89  | 8.75E-02 | 3.36E-01 | -5.05 |
| 1443083_PM_at   | ---           | NA       | 0.35  | 3.22  | 1.89  | 8.75E-02 | 3.36E-01 | -5.05 |
| 1451501_PM_a_at | Ghr           | GHR      | 0.40  | 2.95  | 1.89  | 8.75E-02 | 3.36E-01 | -5.05 |
| 1441760_PM_at   | ---           | NA       | 0.15  | 2.20  | 1.89  | 8.75E-02 | 3.36E-01 | -5.05 |
| 1456050_PM_at   | C80998        | NA       | 0.17  | 2.42  | 1.89  | 8.76E-02 | 3.36E-01 | -5.05 |
| 1419631_PM_at   | Was           | WAS      | 0.15  | 2.96  | 1.89  | 8.76E-02 | 3.36E-01 | -5.05 |
| 1443605_PM_at   | ---           | NA       | 0.16  | 2.25  | 1.89  | 8.76E-02 | 3.36E-01 | -5.05 |
| 1421607_PM_at   | Vgll1         | VGLL1    | 0.32  | 3.05  | 1.89  | 8.76E-02 | 3.36E-01 | -5.05 |
| 1457067_PM_at   | Vps4b         | VPS4B    | 0.35  | 2.47  | 1.89  | 8.76E-02 | 3.36E-01 | -5.05 |
| 1435643_PM_x_at | Gm1821///Ubb  | UBB      | -0.58 | 10.37 | -1.89 | 8.77E-02 | 3.36E-01 | -5.05 |
| 1426842_PM_at   | Ythdf3        | YTHDF3   | -0.36 | 3.14  | -1.89 | 8.77E-02 | 3.36E-01 | -5.05 |
| 1416139_PM_at   | Reg2          | REG1B    | 0.18  | 2.75  | 1.89  | 8.77E-02 | 3.36E-01 | -5.05 |
| 1432526_PM_a_at | Snf8          | SNF8     | -1.07 | 3.64  | -1.89 | 8.77E-02 | 3.36E-01 | -5.05 |
| 1440069_PM_at   | ---           | NA       | 0.18  | 2.44  | 1.89  | 8.77E-02 | 3.36E-01 | -5.05 |
| 1457621_PM_at   | Rpain         | RPAIN    | 0.31  | 2.68  | 1.89  | 8.77E-02 | 3.36E-01 | -5.05 |
| 1449862_PM_a_at | Pi4k2b        | PI4K2B   | 0.16  | 2.37  | 1.89  | 8.77E-02 | 3.36E-01 | -5.06 |
| 1434739_PM_at   | Fmr1nb        | FMR1NB   | 0.18  | 2.36  | 1.88  | 8.77E-02 | 3.36E-01 | -5.06 |
| 1455156_PM_at   | Strn          | STRN     | -0.45 | 4.19  | -1.88 | 8.78E-02 | 3.36E-01 | -5.06 |
| 1439292_PM_at   | ---           | NA       | 0.27  | 2.73  | 1.88  | 8.78E-02 | 3.36E-01 | -5.06 |
| 1441376_PM_at   | ---           | NA       | 0.30  | 5.97  | 1.88  | 8.78E-02 | 3.36E-01 | -5.06 |
| 1445120_PM_at   | AU021977      | NA       | 0.21  | 3.12  | 1.88  | 8.78E-02 | 3.36E-01 | -5.06 |
| 1434449_PM_at   | Aqp4          | AQP4     | -0.79 | 5.90  | -1.88 | 8.78E-02 | 3.36E-01 | -5.06 |
| 1431264_PM_at   | ---           | NA       | 0.26  | 2.48  | 1.88  | 8.79E-02 | 3.36E-01 | -5.06 |
| 1439478_PM_at   | Acot2         | ACOT1    | -0.54 | 4.13  | -1.88 | 8.79E-02 | 3.36E-01 | -5.06 |
| 1430716_PM_at   | Nav2          | NAV2     | 0.19  | 2.63  | 1.88  | 8.79E-02 | 3.36E-01 | -5.06 |
| 1445172_PM_at   | Eif2d         | NA       | 0.22  | 2.58  | 1.88  | 8.79E-02 | 3.36E-01 | -5.06 |
| 1420864_PM_at   | Zbtb14        | ZBTB14   | 0.23  | 2.60  | 1.88  | 8.79E-02 | 3.36E-01 | -5.06 |
| 1418118_PM_at   | Slc22a1       | SLC22A1  | 0.15  | 2.31  | 1.88  | 8.79E-02 | 3.36E-01 | -5.06 |
| 1459704_PM_at   | ---           | NA       | 0.72  | 3.94  | 1.88  | 8.79E-02 | 3.36E-01 | -5.06 |
| 1460049_PM_s_at | 1500015O10Rik | C2orf40  | -1.04 | 2.93  | -1.88 | 8.80E-02 | 3.37E-01 | -5.06 |
| 1423031_PM_at   | Maea          | MAEA     | -0.45 | 3.86  | -1.88 | 8.80E-02 | 3.37E-01 | -5.06 |
| 1460555_PM_at   | Fam65b        | RIPOR2   | -0.33 | 3.67  | -1.88 | 8.80E-02 | 3.37E-01 | -5.06 |
| 1418163_PM_at   | Tlr4          | TLR4     | 0.16  | 2.64  | 1.88  | 8.80E-02 | 3.37E-01 | -5.06 |
| 1416708_PM_a_at | Gramd1a       | GRAMD1A  | 0.35  | 4.33  | 1.88  | 8.80E-02 | 3.37E-01 | -5.06 |
| 1424757_PM_at   | Plpp2         | PLPP2    | -0.37 | 3.89  | -1.88 | 8.80E-02 | 3.37E-01 | -5.06 |

|                 |                     |         |       |      |       |          |          |       |
|-----------------|---------------------|---------|-------|------|-------|----------|----------|-------|
| 1427552_PM_a_at | Gstz1               | GSTZ1   | 0.33  | 2.80 | 1.88  | 8.80E-02 | 3.37E-01 | -5.06 |
| 1443805_PM_at   | Dact3               | DACT3   | 0.17  | 2.36 | 1.88  | 8.81E-02 | 3.37E-01 | -5.06 |
| 1441933_PM_x_at | Pigz                | PIGZ    | 0.20  | 2.74 | 1.88  | 8.81E-02 | 3.37E-01 | -5.06 |
| 1444471_PM_at   | Nxpe2               | NXPE2   | 0.23  | 2.60 | 1.88  | 8.81E-02 | 3.37E-01 | -5.06 |
| 1453416_PM_at   | Gas2l3              | GAS2L3  | 0.32  | 2.60 | 1.88  | 8.81E-02 | 3.37E-01 | -5.06 |
| 1454021_PM_a_at | Exosc10             | EXOSC10 | 0.79  | 3.03 | 1.88  | 8.81E-02 | 3.37E-01 | -5.06 |
| 1416668_PM_at   | Emc2                | EMC2    | -0.45 | 3.32 | -1.88 | 8.81E-02 | 3.37E-01 | -5.06 |
| 1454291_PM_at   | ---                 | NA      | 0.22  | 2.27 | 1.88  | 8.81E-02 | 3.37E-01 | -5.06 |
| 1428899_PM_at   | Tmem182             | TMEM182 | 0.28  | 3.88 | 1.88  | 8.81E-02 | 3.37E-01 | -5.06 |
| 1445391_PM_at   | Diaph1              | DIAPH1  | 0.54  | 4.24 | 1.88  | 8.82E-02 | 3.37E-01 | -5.06 |
| 1458553_PM_at   | ---                 | NA      | -0.34 | 2.61 | -1.88 | 8.82E-02 | 3.37E-01 | -5.06 |
| 1447660_PM_at   | Tbl3                | TBL3    | 0.19  | 2.24 | 1.88  | 8.82E-02 | 3.37E-01 | -5.06 |
| 1433309_PM_at   | Zfp572              | NA      | 0.21  | 2.44 | 1.88  | 8.82E-02 | 3.37E-01 | -5.06 |
| 1442168_PM_at   | ---                 | NA      | 0.32  | 2.58 | 1.88  | 8.82E-02 | 3.37E-01 | -5.06 |
| 1452266_PM_at   | Las1l               | LAS1L   | 0.41  | 5.91 | 1.88  | 8.82E-02 | 3.37E-01 | -5.06 |
| 1451946_PM_a_at | Cabyr               | CABYR   | 0.58  | 5.18 | 1.88  | 8.82E-02 | 3.37E-01 | -5.06 |
| 1456875_PM_at   | ---                 | NA      | -0.55 | 7.93 | -1.88 | 8.83E-02 | 3.37E-01 | -5.06 |
| 1458900_PM_at   | ---                 | NA      | 0.39  | 2.33 | 1.88  | 8.83E-02 | 3.37E-01 | -5.06 |
| 1453089_PM_at   | 3110079O15Rik       | CZorf82 | 0.27  | 2.39 | 1.88  | 8.83E-02 | 3.37E-01 | -5.06 |
| 1438302_PM_at   | ---                 | NA      | 0.29  | 2.76 | 1.88  | 8.84E-02 | 3.37E-01 | -5.06 |
| 1458199_PM_at   | ---                 | NA      | 0.44  | 2.52 | 1.88  | 8.84E-02 | 3.37E-01 | -5.06 |
| 1419636_PM_at   | 4833420G17Rik       | CSorf34 | -0.46 | 3.60 | -1.88 | 8.84E-02 | 3.37E-01 | -5.06 |
| 1419116_PM_at   | Alg14               | ALG14   | 0.19  | 2.34 | 1.88  | 8.84E-02 | 3.37E-01 | -5.06 |
| 1422914_PM_at   | Sp5                 | SP5     | 0.26  | 2.80 | 1.88  | 8.84E-02 | 3.37E-01 | -5.06 |
| 1435062_PM_at   | Srrm4               | SRRM4   | 0.38  | 3.05 | 1.88  | 8.84E-02 | 3.37E-01 | -5.06 |
| 1458011_PM_s_at | D4Erttd117e         | NA      | 0.23  | 3.17 | 1.88  | 8.85E-02 | 3.38E-01 | -5.06 |
| 1448085_PM_at   | D5Erttd102e         | NA      | 0.29  | 2.92 | 1.88  | 8.85E-02 | 3.38E-01 | -5.06 |
| 1442137_PM_at   | Jpx                 | NA      | 0.46  | 3.11 | 1.88  | 8.85E-02 | 3.38E-01 | -5.06 |
| 1426601_PM_at   | Slc37a1             | SLC37A1 | 0.22  | 2.52 | 1.88  | 8.85E-02 | 3.38E-01 | -5.06 |
| 1423291_PM_s_at | Hyou1               | HYOU1   | -0.93 | 7.64 | -1.88 | 8.85E-02 | 3.38E-01 | -5.06 |
| 1449315_PM_at   | Tenm3               | TENM3   | -0.48 | 3.18 | -1.88 | 8.86E-02 | 3.38E-01 | -5.06 |
| 1459372_PM_at   | Npas4               | NPAS4   | 0.14  | 2.12 | 1.88  | 8.86E-02 | 3.38E-01 | -5.06 |
| 1450075_PM_at   | Polh                | POLH    | 0.17  | 2.69 | 1.88  | 8.85E-02 | 3.38E-01 | -5.06 |
| 1456619_PM_at   | Liph                | LIPH    | 0.19  | 2.11 | 1.88  | 8.86E-02 | 3.38E-01 | -5.06 |
| 1453544_PM_at   | Dmrtd1c1///Dmrtd1c2 | NA      | 0.23  | 2.40 | 1.88  | 8.85E-02 | 3.38E-01 | -5.06 |
| 1426581_PM_at   | Ptmt1               | NA      | 0.39  | 3.23 | 1.88  | 8.85E-02 | 3.38E-01 | -5.06 |
| 1450651_PM_at   | Myo10               | MYO10   | 0.93  | 3.58 | 1.88  | 8.85E-02 | 3.38E-01 | -5.06 |
| 1423135_PM_at   | Thy1                | THY1    | -0.50 | 7.17 | -1.88 | 8.86E-02 | 3.38E-01 | -5.06 |
| 1421129_PM_a_at | Atp2a3              | ATP2A3  | 0.33  | 2.55 | 1.88  | 8.86E-02 | 3.38E-01 | -5.06 |
| 1434251_PM_at   | Cnot1               | CNOT1   | -0.66 | 4.57 | -1.88 | 8.87E-02 | 3.38E-01 | -5.06 |
| 1459965_PM_at   | Dyx1c1              | DNAAF4  | -0.29 | 2.59 | -1.88 | 8.87E-02 | 3.38E-01 | -5.06 |
| 1460655_PM_a_at | Ubp1                | UBP1    | 0.23  | 2.66 | 1.88  | 8.87E-02 | 3.38E-01 | -5.07 |
| 1450806_PM_at   | Tlx3                | TLX3    | 0.18  | 2.61 | 1.88  | 8.87E-02 | 3.38E-01 | -5.07 |
| 1452329_PM_at   | Plekhn1             | KLHL17  | 0.19  | 2.34 | 1.88  | 8.87E-02 | 3.38E-01 | -5.07 |
| 1457468_PM_at   | ---                 | NA      | 0.41  | 3.47 | 1.88  | 8.87E-02 | 3.38E-01 | -5.07 |
| 1447628_PM_x_at | Mrp5                | MRP5    | 0.54  | 2.97 | 1.88  | 8.88E-02 | 3.38E-01 | -5.07 |
| 1460238_PM_at   | Msln                | MSLN    | 0.20  | 2.45 | 1.88  | 8.88E-02 | 3.38E-01 | -5.07 |
| 1420184_PM_at   | Lor                 | NA      | 0.28  | 2.37 | 1.88  | 8.88E-02 | 3.38E-01 | -5.07 |
| 1445714_PM_at   | ---                 | NA      | 0.36  | 2.87 | 1.88  | 8.88E-02 | 3.38E-01 | -5.07 |
| 1426831_PM_at   | Ahcy1               | AHCYL1  | -0.65 | 3.53 | -1.88 | 8.88E-02 | 3.38E-01 | -5.07 |
| 1447202_PM_at   | Ikbip               | IKBIP   | 0.16  | 3.37 | 1.88  | 8.88E-02 | 3.38E-01 | -5.07 |
| 1432768_PM_at   | 6430710M23Rik       | NA      | 0.24  | 2.70 | 1.88  | 8.88E-02 | 3.38E-01 | -5.07 |
| 1428208_PM_at   | Bcl7a               | BCL7A   | 0.28  | 3.07 | 1.88  | 8.89E-02 | 3.38E-01 | -5.07 |
| 1428018_PM_a_at | AF251705            | CD300A  | -0.22 | 3.12 | -1.88 | 8.89E-02 | 3.38E-01 | -5.07 |
| 1446807_PM_at   | ---                 | NA      | -0.50 | 2.80 | -1.88 | 8.89E-02 | 3.38E-01 | -5.07 |
| 1441936_PM_x_at | 4930447M23Rik       | NA      | 0.40  | 3.14 | 1.88  | 8.89E-02 | 3.38E-01 | -5.07 |
| 1455074_PM_at   | Efcab1              | EFCAB1  | 0.23  | 2.59 | 1.88  | 8.89E-02 | 3.38E-01 | -5.07 |
| 1439984_PM_at   | Ptdss2              | PTDSS2  | 0.19  | 2.46 | 1.88  | 8.89E-02 | 3.38E-01 | -5.07 |
| 1438614_PM_x_at | ---                 | NA      | 0.17  | 2.84 | 1.88  | 8.89E-02 | 3.38E-01 | -5.07 |
| 1446306_PM_at   | ---                 | NA      | 0.20  | 2.32 | 1.88  | 8.90E-02 | 3.39E-01 | -5.07 |
| 1455690_PM_at   | ---                 | NA      | -0.28 | 2.46 | -1.88 | 8.90E-02 | 3.39E-01 | -5.07 |
| 1452994_PM_at   | Pikfyve             | PIKFYVE | -0.83 | 4.26 | -1.88 | 8.90E-02 | 3.39E-01 | -5.07 |
| 1424348_PM_at   | Mcmbp               | MCMBP   | 0.34  | 2.76 | 1.88  | 8.90E-02 | 3.39E-01 | -5.07 |
| 1443860_PM_at   | Ptprd               | PTPRD   | 0.46  | 3.67 | 1.88  | 8.90E-02 | 3.39E-01 | -5.07 |
| 1441938_PM_x_at | Cables1             | CABLES1 | -0.42 | 2.31 | -1.88 | 8.91E-02 | 3.39E-01 | -5.07 |
| 1419028_PM_at   | Arpp21              | ARPP21  | -0.32 | 3.92 | -1.88 | 8.90E-02 | 3.39E-01 | -5.07 |
| 1448383_PM_at   | Mmp14               | MMMP14  | 0.18  | 2.83 | 1.88  | 8.91E-02 | 3.39E-01 | -5.07 |
| 1440857_PM_at   | Cad                 | CAD     | 0.21  | 2.55 | 1.88  | 8.91E-02 | 3.39E-01 | -5.07 |
| 1446085_PM_at   | Socs2               | SOCS2   | 0.25  | 2.44 | 1.88  | 8.91E-02 | 3.39E-01 | -5.07 |
| 1439596_PM_at   | ---                 | NA      | 0.19  | 2.37 | 1.88  | 8.91E-02 | 3.39E-01 | -5.07 |
| 1452211_PM_at   | Psme4               | PSME4   | -0.43 | 2.87 | -1.88 | 8.91E-02 | 3.39E-01 | -5.07 |
| 1440795_PM_x_at | Rabep2              | RABEP2  | -1.07 | 3.20 | -1.88 | 8.92E-02 | 3.39E-01 | -5.07 |
| 1446972_PM_at   | D15Wsu126e          | NA      | -0.51 | 2.65 | -1.88 | 8.92E-02 | 3.39E-01 | -5.07 |
| 1425074_PM_at   | LOC105242468///Wrn  | WRN     | -0.61 | 2.93 | -1.87 | 8.92E-02 | 3.39E-01 | -5.07 |
| 1440597_PM_at   | ---                 | NA      | 0.17  | 2.12 | 1.87  | 8.92E-02 | 3.39E-01 | -5.07 |

|                 |                                                                                                                                    |         |       |      |       |          |          |       |
|-----------------|------------------------------------------------------------------------------------------------------------------------------------|---------|-------|------|-------|----------|----------|-------|
| 1439308_PM_at   | Got1l1                                                                                                                             | GOT1L1  | 0.19  | 3.16 | 1.87  | 8.93E-02 | 3.39E-01 | -5.07 |
| 1425419_PM_a_at | Raf1                                                                                                                               | RAF1    | 0.21  | 2.57 | 1.87  | 8.93E-02 | 3.39E-01 | -5.07 |
| 1427577_PM_x_at | Igk-V21 /// Igk-V28 /// Igk-V8 /// Igkc /// Igkv3-4 /// Igkv6-14 /// Igkv6-17 /// Igkv6-23 /// Igkv6-25 /// Igkv8-19 /// LOC672450 | NA      | 0.23  | 2.91 | 1.87  | 8.92E-02 | 3.39E-01 | -5.07 |
| 1451336_PM_at   | Lgals4                                                                                                                             | LGALS4  | 0.23  | 3.40 | 1.87  | 8.93E-02 | 3.39E-01 | -5.07 |
| 1458632_PM_at   | ---                                                                                                                                | NA      | 0.44  | 2.69 | 1.87  | 8.92E-02 | 3.39E-01 | -5.07 |
| 1453288_PM_at   | Atf6                                                                                                                               | ATF6    | -0.65 | 3.83 | -1.87 | 8.93E-02 | 3.39E-01 | -5.07 |
| 1437853_PM_x_at | Ndn                                                                                                                                | NDN     | -0.47 | 9.09 | -1.87 | 8.93E-02 | 3.39E-01 | -5.07 |
| 1421872_PM_at   | Rab24                                                                                                                              | RAB24   | -0.43 | 2.70 | -1.87 | 8.93E-02 | 3.39E-01 | -5.07 |
| 1442115_PM_at   | Piez2                                                                                                                              | PIEZO2  | 0.25  | 2.56 | 1.87  | 8.93E-02 | 3.39E-01 | -5.07 |
| 1446915_PM_at   | D7Erttd316e                                                                                                                        | NA      | 0.28  | 3.13 | 1.87  | 8.93E-02 | 3.39E-01 | -5.07 |
| 1449393_PM_at   | Sh2d1a                                                                                                                             | SH2D1A  | 0.15  | 2.46 | 1.87  | 8.93E-02 | 3.39E-01 | -5.07 |
| 1418404_PM_at   | Rad9a                                                                                                                              | RAD9A   | 0.21  | 2.49 | 1.87  | 8.93E-02 | 3.39E-01 | -5.07 |
| 1443251_PM_at   | ---                                                                                                                                | NA      | 0.21  | 2.57 | 1.87  | 8.93E-02 | 3.39E-01 | -5.07 |
| 1444927_PM_at   | D11Erttd729e                                                                                                                       | NA      | 0.22  | 2.25 | 1.87  | 8.93E-02 | 3.39E-01 | -5.07 |
| 1451582_PM_at   | Tulp1                                                                                                                              | TULP1   | 0.19  | 2.44 | 1.87  | 8.94E-02 | 3.39E-01 | -5.07 |
| 1450023_PM_at   | Gtpbp1                                                                                                                             | GTPBP1  | 0.26  | 2.75 | 1.87  | 8.94E-02 | 3.39E-01 | -5.07 |
| 1453067_PM_at   | Aptd1                                                                                                                              | CENPS   | 0.29  | 3.10 | 1.87  | 8.94E-02 | 3.39E-01 | -5.07 |
| 1455543_PM_at   | Klh18                                                                                                                              | KLHL18  | 0.38  | 4.35 | 1.87  | 8.94E-02 | 3.39E-01 | -5.07 |
| 1423367_PM_at   | Wnt7a                                                                                                                              | WNT7A   | 0.28  | 2.65 | 1.87  | 8.94E-02 | 3.39E-01 | -5.07 |
| 1444229_PM_at   | ---                                                                                                                                | NA      | 0.31  | 2.24 | 1.87  | 8.94E-02 | 3.39E-01 | -5.07 |
| 1458328_PM_x_at | ---                                                                                                                                | NA      | 0.63  | 2.57 | 1.87  | 8.94E-02 | 3.39E-01 | -5.07 |
| 1416855_PM_at   | Gas1                                                                                                                               | GAS1    | -0.69 | 3.54 | -1.87 | 8.95E-02 | 3.39E-01 | -5.07 |
| 1434398_PM_at   | Nkrf                                                                                                                               | NKRF    | -0.50 | 3.37 | -1.87 | 8.95E-02 | 3.39E-01 | -5.07 |
| 1439121_PM_at   | H2-T10 /// H2-T22 /// H2-T9                                                                                                        | NA      | 0.18  | 2.26 | 1.87  | 8.95E-02 | 3.39E-01 | -5.07 |
| 1424695_PM_at   | Fam210b                                                                                                                            | FAM210B | 0.19  | 2.40 | 1.87  | 8.95E-02 | 3.39E-01 | -5.07 |
| 1459155_PM_at   | AU015696                                                                                                                           | NA      | 0.20  | 2.53 | 1.87  | 8.95E-02 | 3.39E-01 | -5.07 |
| 1430274_PM_a_at | Stard3nl                                                                                                                           | STAR3NL | -0.97 | 4.26 | -1.87 | 8.95E-02 | 3.39E-01 | -5.07 |
| 1434762_PM_at   | Orai2                                                                                                                              | ORAI2   | -0.33 | 2.67 | -1.87 | 8.96E-02 | 3.39E-01 | -5.07 |
| 1443572_PM_at   | ---                                                                                                                                | NA      | 0.19  | 2.16 | 1.87  | 8.96E-02 | 3.39E-01 | -5.07 |
| 1418806_PM_at   | Csf3r                                                                                                                              | CSF3R   | 0.19  | 2.27 | 1.87  | 8.95E-02 | 3.39E-01 | -5.07 |
| 1447710_PM_at   | 1700019P21Rik                                                                                                                      | NA      | 0.21  | 2.42 | 1.87  | 8.96E-02 | 3.39E-01 | -5.07 |
| 1440197_PM_at   | Gltscr1l                                                                                                                           | NA      | 0.22  | 2.32 | 1.87  | 8.96E-02 | 3.39E-01 | -5.07 |
| 1440324_PM_at   | Mrp19                                                                                                                              | MRPL19  | 0.22  | 2.67 | 1.87  | 8.96E-02 | 3.39E-01 | -5.07 |
| 1437781_PM_at   | Insm2                                                                                                                              | INSM2   | 0.23  | 1.96 | 1.87  | 8.96E-02 | 3.39E-01 | -5.07 |
| 1429198_PM_at   | 1810030007Rik                                                                                                                      | CXorf38 | 0.26  | 2.60 | 1.87  | 8.95E-02 | 3.39E-01 | -5.07 |
| 1444532_PM_at   | Ncstn                                                                                                                              | NCTN    | 0.29  | 3.00 | 1.87  | 8.96E-02 | 3.39E-01 | -5.07 |
| 1439169_PM_at   | ---                                                                                                                                | NA      | 0.34  | 2.41 | 1.87  | 8.95E-02 | 3.39E-01 | -5.07 |
| 1438844_PM_x_at | Spata5                                                                                                                             | SPATA5  | -0.44 | 3.25 | -1.87 | 8.96E-02 | 3.39E-01 | -5.07 |
| 1421086_PM_at   | Per3                                                                                                                               | PER3    | 0.27  | 2.73 | 1.87  | 8.96E-02 | 3.39E-01 | -5.07 |
| 1457639_PM_at   | Atp6v1h                                                                                                                            | ATP6V1H | -0.71 | 2.60 | -1.87 | 8.96E-02 | 3.39E-01 | -5.07 |
| 1453447_PM_at   | 1700109H08Rik                                                                                                                      | NA      | 0.35  | 2.62 | 1.87  | 8.97E-02 | 3.40E-01 | -5.08 |
| 1459358_PM_at   | ---                                                                                                                                | NA      | -0.56 | 2.99 | -1.87 | 8.97E-02 | 3.40E-01 | -5.08 |
| 1447082_PM_at   | C630004L07Rik                                                                                                                      | NA      | 0.22  | 3.52 | 1.87  | 8.97E-02 | 3.40E-01 | -5.08 |
| 1443641_PM_at   | ---                                                                                                                                | NA      | 0.23  | 2.45 | 1.87  | 8.97E-02 | 3.40E-01 | -5.08 |
| 1417628_PM_at   | Supt6                                                                                                                              | SUPT6H  | -0.46 | 3.50 | -1.87 | 8.97E-02 | 3.40E-01 | -5.08 |
| 1457201_PM_at   | ---                                                                                                                                | NA      | 0.16  | 2.15 | 1.87  | 8.97E-02 | 3.40E-01 | -5.08 |
| 1421323_PM_a_at | G3bp2                                                                                                                              | G3BP2   | -0.72 | 7.79 | -1.87 | 8.97E-02 | 3.40E-01 | -5.08 |
| 1445265_PM_at   | ---                                                                                                                                | NA      | 0.33  | 3.11 | 1.87  | 8.98E-02 | 3.40E-01 | -5.08 |
| 1441089_PM_at   | Ago3                                                                                                                               | AGO3    | 0.28  | 2.37 | 1.87  | 8.98E-02 | 3.40E-01 | -5.08 |
| 1421213_PM_at   | Edaradd                                                                                                                            | EDARADD | 0.15  | 2.40 | 1.87  | 8.99E-02 | 3.40E-01 | -5.08 |
| 1418709_PM_at   | Cox7a1                                                                                                                             | COX7A1  | 0.16  | 2.34 | 1.87  | 8.99E-02 | 3.40E-01 | -5.08 |
| 1434031_PM_at   | Zfp692                                                                                                                             | ZNF692  | 0.24  | 2.66 | 1.87  | 8.99E-02 | 3.40E-01 | -5.08 |
| 1446616_PM_at   | ---                                                                                                                                | NA      | 0.17  | 2.21 | 1.87  | 8.99E-02 | 3.40E-01 | -5.08 |
| 1441921_PM_x_at | Esrrb                                                                                                                              | ESRRB   | 0.30  | 3.17 | 1.87  | 8.99E-02 | 3.40E-01 | -5.08 |
| 1458691_PM_at   | ---                                                                                                                                | NA      | 0.18  | 2.36 | 1.87  | 8.99E-02 | 3.40E-01 | -5.08 |
| 1451456_PM_at   | A730008H23Rik /// Hjurp                                                                                                            | HJURP   | -0.14 | 2.31 | -1.87 | 9.00E-02 | 3.40E-01 | -5.08 |
| 1425700_PM_at   | Grm1                                                                                                                               | GRM1    | 0.37  | 3.12 | 1.87  | 9.00E-02 | 3.40E-01 | -5.08 |
| 1460109_PM_at   | ---                                                                                                                                | NA      | 0.23  | 3.14 | 1.87  | 9.00E-02 | 3.40E-01 | -5.08 |
| 1418518_PM_at   | Furin                                                                                                                              | FURIN   | -0.49 | 3.84 | -1.87 | 9.00E-02 | 3.40E-01 | -5.08 |
| 1432224_PM_at   | 4831407H17Rik                                                                                                                      | NA      | 0.17  | 2.26 | 1.87  | 9.00E-02 | 3.40E-01 | -5.08 |
| 1415766_PM_at   | Sec22b                                                                                                                             | SEC22B  | 0.18  | 3.09 | 1.87  | 9.00E-02 | 3.40E-01 | -5.08 |
| 1436097_PM_x_at | Arhgap9                                                                                                                            | ARHGAP9 | 0.27  | 2.61 | 1.87  | 9.00E-02 | 3.40E-01 | -5.08 |
| 1458522_PM_at   | ---                                                                                                                                | NA      | -0.87 | 3.01 | -1.87 | 9.01E-02 | 3.41E-01 | -5.08 |
| 1420148_PM_at   | Slc6a6                                                                                                                             | SLC6A6  | 0.27  | 2.48 | 1.87  | 9.01E-02 | 3.41E-01 | -5.08 |
| 1425285_PM_a_at | Rab27a                                                                                                                             | RAB27A  | 0.32  | 2.46 | 1.87  | 9.01E-02 | 3.41E-01 | -5.08 |
| 1421960_PM_at   | Adcy3                                                                                                                              | ADCY3   | -0.39 | 2.58 | -1.87 | 9.01E-02 | 3.41E-01 | -5.08 |
| 1443143_PM_at   | Flrt1                                                                                                                              | FLRT1   | 0.72  | 3.69 | 1.87  | 9.01E-02 | 3.41E-01 | -5.08 |
| 1435703_PM_at   | Ubash3b                                                                                                                            | UBASH3B | -1.03 | 4.65 | -1.87 | 9.01E-02 | 3.41E-01 | -5.08 |
| 1444204_PM_at   | LOC102632302                                                                                                                       | NA      | 0.16  | 2.69 | 1.87  | 9.01E-02 | 3.41E-01 | -5.08 |

|                 |                |            |       |      |       |          |          |       |
|-----------------|----------------|------------|-------|------|-------|----------|----------|-------|
| 1429116_PM_at   | Slc17a5        | SLC17A5    | -0.30 | 3.01 | -1.87 | 9.02E-02 | 3.41E-01 | -5.08 |
| 1459974_PM_x_at | ---            | NA         | 0.24  | 2.94 | 1.87  | 9.02E-02 | 3.41E-01 | -5.08 |
| 1436598_PM_at   | Icos           | ICOS       | 0.27  | 2.82 | 1.87  | 9.02E-02 | 3.41E-01 | -5.08 |
| 1441789_PM_at   | ---            | NA         | 0.33  | 2.45 | 1.87  | 9.02E-02 | 3.41E-01 | -5.08 |
| 1438579_PM_at   | Utp14b         | UTP14C     | 0.36  | 3.62 | 1.87  | 9.02E-02 | 3.41E-01 | -5.08 |
| 1418004_PM_a_at | Tmem176b       | TMEM176B   | 0.41  | 3.36 | 1.87  | 9.02E-02 | 3.41E-01 | -5.08 |
| 1433050_PM_at   | ---            | NA         | 0.81  | 3.14 | 1.87  | 9.02E-02 | 3.41E-01 | -5.08 |
| 1424268_PM_at   | Smox           | SMOX       | -0.27 | 2.46 | -1.87 | 9.02E-02 | 3.41E-01 | -5.08 |
| 1455734_PM_at   | Crbn           | NA         | -0.59 | 5.58 | -1.87 | 9.02E-02 | 3.41E-01 | -5.08 |
| 1436587_PM_at   | Wdr38          | WDR38      | 0.16  | 2.49 | 1.87  | 9.03E-02 | 3.41E-01 | -5.08 |
| 1454345_PM_at   | 1700081H04Rik  | NA         | 0.17  | 2.60 | 1.87  | 9.03E-02 | 3.41E-01 | -5.08 |
| 1445941_PM_at   | ---            | NA         | 0.20  | 2.25 | 1.87  | 9.03E-02 | 3.41E-01 | -5.08 |
| 1459391_PM_at   | Abca5          | ABCA5      | 0.47  | 3.01 | 1.87  | 9.03E-02 | 3.41E-01 | -5.08 |
| 1453809_PM_at   | Lypd5          | LYPD5      | 0.17  | 2.62 | 1.87  | 9.03E-02 | 3.41E-01 | -5.08 |
| 1460433_PM_at   | Entpd6         | ENTPD6     | -0.38 | 3.35 | -1.87 | 9.03E-02 | 3.41E-01 | -5.08 |
| 1419519_PM_at   | Igf1           | IGF1       | 0.22  | 2.46 | 1.87  | 9.03E-02 | 3.41E-01 | -5.08 |
| 1454754_PM_a_at | Aamp           | AAMP       | 0.27  | 2.64 | 1.87  | 9.03E-02 | 3.41E-01 | -5.08 |
| 1432264_PM_x_at | Cox7a2l        | COX7A2L    | -0.49 | 6.70 | -1.87 | 9.04E-02 | 3.41E-01 | -5.08 |
| 1444441_PM_at   | Rapgef1l       | RAPGEFL1   | -0.51 | 3.29 | -1.87 | 9.04E-02 | 3.41E-01 | -5.08 |
| 1418278_PM_at   | Apoc3          | APOC3      | 0.16  | 2.16 | 1.87  | 9.05E-02 | 3.41E-01 | -5.08 |
| 1455837_PM_at   | Trim36         | TRIM36     | 0.19  | 2.55 | 1.87  | 9.05E-02 | 3.41E-01 | -5.08 |
| 1425719_PM_a_at | Nmi            | NMI        | 0.26  | 2.54 | 1.87  | 9.05E-02 | 3.41E-01 | -5.08 |
| 1428907_PM_at   | Rbm25          | RBM25      | 0.52  | 5.79 | 1.87  | 9.05E-02 | 3.41E-01 | -5.08 |
| 1446586_PM_at   | ---            | NA         | 0.27  | 3.24 | 1.87  | 9.05E-02 | 3.41E-01 | -5.08 |
| 1456032_PM_x_at | Gm8203///H2afz | H2AFZ      | -0.33 | 7.34 | -1.87 | 9.05E-02 | 3.41E-01 | -5.08 |
| 1416506_PM_at   | PsmA6          | PSMA6      | -0.63 | 5.44 | -1.87 | 9.05E-02 | 3.41E-01 | -5.08 |
| 1436317_PM_at   | Pgap1          | PGAP1      | -0.41 | 3.44 | -1.87 | 9.05E-02 | 3.41E-01 | -5.08 |
| 1446860_PM_at   | ---            | NA         | 0.36  | 5.31 | 1.87  | 9.05E-02 | 3.41E-01 | -5.08 |
| 1459071_PM_at   | ---            | NA         | 0.26  | 2.88 | 1.87  | 9.05E-02 | 3.41E-01 | -5.08 |
| 1446199_PM_at   | Rgs20          | RGS20      | 0.28  | 2.50 | 1.87  | 9.06E-02 | 3.41E-01 | -5.08 |
| 1459291_PM_at   | Ptgr2          | ACO05520.1 | 0.23  | 2.47 | 1.87  | 9.06E-02 | 3.41E-01 | -5.08 |
| 1443105_PM_at   | Zfp398         | NA         | 0.20  | 2.25 | 1.87  | 9.06E-02 | 3.41E-01 | -5.08 |
| 1452679_PM_at   | Tubb2b         | TUBB2B     | -0.27 | 9.43 | -1.87 | 9.06E-02 | 3.41E-01 | -5.08 |
| 1447836_PM_x_at | 4921525O09Rik  | NA         | 0.25  | 2.68 | 1.87  | 9.06E-02 | 3.41E-01 | -5.08 |
| 1450733_PM_at   | Bicd2          | BICD2      | 0.24  | 2.41 | 1.87  | 9.06E-02 | 3.41E-01 | -5.08 |
| 1456042_PM_s_at | Cramp1l        | CRAMP1     | -0.72 | 4.00 | -1.87 | 9.06E-02 | 3.41E-01 | -5.08 |
| 1438032_PM_at   | Lrch1          | LRCH1      | -0.44 | 3.68 | -1.87 | 9.06E-02 | 3.41E-01 | -5.08 |
| 1444006_PM_at   | ---            | NA         | 0.17  | 2.17 | 1.87  | 9.07E-02 | 3.41E-01 | -5.09 |
| 1418316_PM_a_at | Mark3          | MARK3      | -0.47 | 3.52 | -1.87 | 9.07E-02 | 3.41E-01 | -5.09 |
| 1422498_PM_at   | Mageh1         | MAGEH1     | -0.26 | 3.65 | -1.87 | 9.07E-02 | 3.42E-01 | -5.09 |
| 1425018_PM_at   | Mcts1          | MCTS1      | -0.43 | 3.53 | -1.86 | 9.07E-02 | 3.42E-01 | -5.09 |
| 1419234_PM_at   | Helb           | HELB       | 0.23  | 2.23 | 1.86  | 9.07E-02 | 3.42E-01 | -5.09 |
| 1457484_PM_at   | ---            | NA         | 0.33  | 2.39 | 1.86  | 9.07E-02 | 3.42E-01 | -5.09 |
| 1447898_PM_s_at | Srsf6          | SRSF6      | -0.91 | 6.33 | -1.86 | 9.08E-02 | 3.42E-01 | -5.09 |
| 1444991_PM_at   | ---            | NA         | 0.19  | 2.55 | 1.86  | 9.08E-02 | 3.42E-01 | -5.09 |
| 1423399_PM_a_at | Yaf2           | YAF2       | -0.64 | 3.35 | -1.86 | 9.08E-02 | 3.42E-01 | -5.09 |
| 1433027_PM_at   | ---            | NA         | 0.40  | 2.78 | 1.86  | 9.08E-02 | 3.42E-01 | -5.09 |
| 1423829_PM_at   | Fam49b         | FAM49B     | 0.33  | 5.57 | 1.86  | 9.08E-02 | 3.42E-01 | -5.09 |
| 1453687_PM_at   | Slc4a3         | SLC4A3     | -0.52 | 2.76 | -1.86 | 9.09E-02 | 3.42E-01 | -5.09 |
| 1417443_PM_at   | Fam151a        | FAM151A    | 0.19  | 4.17 | 1.86  | 9.09E-02 | 3.42E-01 | -5.09 |
| 1428349_PM_s_at | Ebf3           | EBF3       | 0.19  | 2.70 | 1.86  | 9.09E-02 | 3.42E-01 | -5.09 |
| 1416997_PM_a_at | Hap1           | HAP1       | 0.23  | 2.43 | 1.86  | 9.09E-02 | 3.42E-01 | -5.09 |
| 1442331_PM_at   | ---            | NA         | 0.27  | 2.34 | 1.86  | 9.09E-02 | 3.42E-01 | -5.09 |
| 1452160_PM_at   | Tiparp         | TIPARP     | -0.63 | 2.80 | -1.86 | 9.09E-02 | 3.42E-01 | -5.09 |
| 1444444_PM_at   | Akap6          | NA         | -0.19 | 2.56 | -1.86 | 9.09E-02 | 3.42E-01 | -5.09 |
| 1443454_PM_at   | Sctr           | SCTR       | 0.16  | 2.38 | 1.86  | 9.09E-02 | 3.42E-01 | -5.09 |
| 1432216_PM_s_at | Mpp7           | MPP7       | 0.20  | 2.59 | 1.86  | 9.09E-02 | 3.42E-01 | -5.09 |
| 1437984_PM_x_at | Ddx39b         | DDX39B     | -0.30 | 6.84 | -1.86 | 9.09E-02 | 3.42E-01 | -5.09 |
| 1459361_PM_at   | ---            | NA         | -0.18 | 2.88 | -1.86 | 9.09E-02 | 3.42E-01 | -5.09 |
| 1418776_PM_at   | Gbp8           | GBP6       | -0.15 | 2.15 | -1.86 | 9.09E-02 | 3.42E-01 | -5.09 |
| 1438743_PM_at   | Cyp7a1         | CYP7A1     | 0.27  | 2.36 | 1.86  | 9.10E-02 | 3.42E-01 | -5.09 |
| 1425532_PM_a_at | Bin1           | BIN1       | 0.52  | 3.83 | 1.86  | 9.10E-02 | 3.42E-01 | -5.09 |
| 1454862_PM_at   | Phldb2         | PHLDB2     | -0.86 | 3.39 | -1.86 | 9.10E-02 | 3.42E-01 | -5.09 |
| 1436186_PM_at   | E2f8           | E2F8       | 0.22  | 3.42 | 1.86  | 9.10E-02 | 3.42E-01 | -5.09 |
| 1418506_PM_a_at | Prdx2          | PRDX2      | -0.76 | 5.74 | -1.86 | 9.11E-02 | 3.42E-01 | -5.09 |
| 1448866_PM_at   | Senp3          | SENP3      | -0.20 | 7.92 | -1.86 | 9.11E-02 | 3.42E-01 | -5.09 |
| 1429773_PM_at   | Dnajc22        | DNAJC22    | 0.26  | 3.26 | 1.86  | 9.11E-02 | 3.42E-01 | -5.09 |
| 1460178_PM_at   | Lonp2          | LONP2      | -0.27 | 3.05 | -1.86 | 9.12E-02 | 3.42E-01 | -5.09 |
| 1450482_PM_a_at | Pitx2          | PITX2      | 0.19  | 2.44 | 1.86  | 9.12E-02 | 3.42E-01 | -5.09 |
| 1417899_PM_at   | Zp3r           | NA         | 0.19  | 2.30 | 1.86  | 9.12E-02 | 3.42E-01 | -5.09 |
| 1420526_PM_at   | DcblD2         | DCBLD2     | 0.37  | 3.69 | 1.86  | 9.12E-02 | 3.42E-01 | -5.09 |
| 1429233_PM_at   | Sept11         | SEPT11     | 0.52  | 4.24 | 1.86  | 9.12E-02 | 3.42E-01 | -5.09 |
| 1445969_PM_at   | ---            | NA         | 0.25  | 2.28 | 1.86  | 9.12E-02 | 3.43E-01 | -5.09 |
| 1433896_PM_at   | Tmem127        | TMEM127    | 0.25  | 2.72 | 1.86  | 9.12E-02 | 3.43E-01 | -5.09 |
| 1454462_PM_at   | ---            | NA         | 0.20  | 2.28 | 1.86  | 9.13E-02 | 3.43E-01 | -5.09 |

|                 |                                 |           |       |      |       |          |          |       |
|-----------------|---------------------------------|-----------|-------|------|-------|----------|----------|-------|
| 1432109_PM_at   | 4930578I07Rik                   | NA        | 0.22  | 2.41 | 1.86  | 9.14E-02 | 3.43E-01 | -5.09 |
| 1449675_PM_at   | Ccnb1 /// Gm12856 /// Gm5593    | CCNB1     | 0.18  | 2.24 | 1.86  | 9.14E-02 | 3.43E-01 | -5.09 |
| 1432368_PM_at   | ---                             | NA        | 0.18  | 2.27 | 1.86  | 9.14E-02 | 3.43E-01 | -5.09 |
| 1435762_PM_at   | Pacs1                           | PACS1     | 0.28  | 3.37 | 1.86  | 9.14E-02 | 3.43E-01 | -5.09 |
| 1457760_PM_at   | ---                             | NA        | 0.34  | 2.59 | 1.86  | 9.14E-02 | 3.43E-01 | -5.09 |
| 1440037_PM_at   | Gm39695 /// Pbx1                | PBX1      | 0.86  | 5.86 | 1.86  | 9.15E-02 | 3.43E-01 | -5.09 |
| 1457046_PM_s_at | C77370                          | KIAA2022  | -0.54 | 4.10 | -1.86 | 9.15E-02 | 3.43E-01 | -5.09 |
| 1447754_PM_x_at | Thap4                           | THAP4     | -0.37 | 3.51 | -1.86 | 9.15E-02 | 3.43E-01 | -5.09 |
| 1422586_PM_at   | Ecel1                           | ECEL1     | 0.24  | 3.15 | 1.86  | 9.15E-02 | 3.43E-01 | -5.09 |
| 1457136_PM_at   | Srsf1                           | SRSF1     | 0.25  | 2.79 | 1.86  | 9.15E-02 | 3.43E-01 | -5.09 |
| 1440274_PM_at   | Raggef4                         | NA        | 0.35  | 2.83 | 1.86  | 9.15E-02 | 3.43E-01 | -5.09 |
| 1428466_PM_at   | Chd3                            | CHD3      | 0.53  | 4.21 | 1.86  | 9.15E-02 | 3.43E-01 | -5.09 |
| 1423505_PM_at   | Tagln                           | TAGLN     | -0.98 | 3.69 | -1.86 | 9.16E-02 | 3.43E-01 | -5.09 |
| 1434055_PM_at   | Galnt9                          | GALNT9    | -0.77 | 3.17 | -1.86 | 9.16E-02 | 3.43E-01 | -5.09 |
| 1439032_PM_at   | Haus2                           | HAUS2     | -0.68 | 3.49 | -1.86 | 9.17E-02 | 3.43E-01 | -5.10 |
| 1431818_PM_at   | Rab10os                         | NA        | -0.67 | 6.45 | -1.86 | 9.17E-02 | 3.43E-01 | -5.10 |
| 1438572_PM_at   | Csm3                            | CSMD3     | -0.63 | 4.14 | -1.86 | 9.17E-02 | 3.43E-01 | -5.09 |
| 1426847_PM_at   | Sirt4                           | SIRT4     | -0.51 | 2.51 | -1.86 | 9.16E-02 | 3.43E-01 | -5.09 |
| 1417830_PM_at   | Smc1a                           | SMC1A     | -0.35 | 3.11 | -1.86 | 9.16E-02 | 3.43E-01 | -5.09 |
| 1439262_PM_x_at | Apmap                           | APMAP     | -0.29 | 5.11 | -1.86 | 9.17E-02 | 3.43E-01 | -5.10 |
| 1417415_PM_at   | Slc6a3                          | SLC6A3    | 0.17  | 2.30 | 1.86  | 9.16E-02 | 3.43E-01 | -5.09 |
| 1444491_PM_at   | Nrg2                            | NA        | 0.18  | 2.63 | 1.86  | 9.16E-02 | 3.43E-01 | -5.09 |
| 1454854_PM_at   | Slc51b                          | SLC51B    | 0.19  | 2.55 | 1.86  | 9.17E-02 | 3.43E-01 | -5.10 |
| 1457026_PM_at   | Liph                            | LIPH      | 0.19  | 2.45 | 1.86  | 9.17E-02 | 3.43E-01 | -5.10 |
| 1446822_PM_at   | ---                             | NA        | 0.20  | 2.65 | 1.86  | 9.16E-02 | 3.43E-01 | -5.09 |
| 1452027_PM_a_at | Trp63                           | TP63      | 0.22  | 2.56 | 1.86  | 9.16E-02 | 3.43E-01 | -5.09 |
| 1432356_PM_at   | ---                             | NA        | 0.24  | 2.67 | 1.86  | 9.16E-02 | 3.43E-01 | -5.09 |
| 1420425_PM_at   | Prdm1                           | PRDM1     | 0.29  | 2.88 | 1.86  | 9.17E-02 | 3.43E-01 | -5.10 |
| 1456106_PM_x_at | Sdccag3                         | NA        | 0.35  | 4.72 | 1.86  | 9.16E-02 | 3.43E-01 | -5.09 |
| 1455107_PM_at   | Srpk1                           | SRPK1     | 0.61  | 4.38 | 1.86  | 9.16E-02 | 3.43E-01 | -5.09 |
| 1422911_PM_at   | Cbln3                           | CBLN3     | 1.43  | 3.58 | 1.86  | 9.17E-02 | 3.43E-01 | -5.10 |
| 1458789_PM_at   | ---                             | NA        | 0.19  | 2.32 | 1.86  | 9.17E-02 | 3.43E-01 | -5.10 |
| 1429274_PM_at   | Lypd6b                          | LYPD6B    | -0.46 | 2.80 | -1.86 | 9.17E-02 | 3.43E-01 | -5.10 |
| 1449988_PM_at   | Gimap1                          | GIMAP1    | 0.22  | 2.55 | 1.86  | 9.17E-02 | 3.43E-01 | -5.10 |
| 1451737_PM_at   | Pik3r1                          | PIK3R1    | 0.52  | 2.54 | 1.86  | 9.17E-02 | 3.43E-01 | -5.10 |
| 1426968_PM_a_at | Rdh10                           | RDH10     | -0.38 | 4.22 | -1.86 | 9.17E-02 | 3.43E-01 | -5.10 |
| 1421584_PM_at   | Opn4                            | OPN4      | 0.19  | 2.17 | 1.86  | 9.18E-02 | 3.44E-01 | -5.10 |
| 1430579_PM_at   | Tnik                            | TNIK      | -0.44 | 3.34 | -1.86 | 9.18E-02 | 3.44E-01 | -5.10 |
| 1457602_PM_at   | ---                             | NA        | 0.20  | 2.75 | 1.86  | 9.18E-02 | 3.44E-01 | -5.10 |
| 1445104_PM_at   | ---                             | NA        | 0.24  | 2.75 | 1.86  | 9.18E-02 | 3.44E-01 | -5.10 |
| 1447556_PM_x_at | 1700094D03Rik /// 4933434E20Rik | C1orf43   | 0.27  | 4.55 | 1.86  | 9.18E-02 | 3.44E-01 | -5.10 |
| 1421721_PM_a_at | Arnt                            | ARNT      | 0.38  | 2.50 | 1.86  | 9.18E-02 | 3.44E-01 | -5.10 |
| 1445716_PM_at   | ---                             | NA        | 0.16  | 2.49 | 1.86  | 9.19E-02 | 3.44E-01 | -5.10 |
| 1449457_PM_at   | Acot12                          | ACOT12    | 0.17  | 2.39 | 1.86  | 9.19E-02 | 3.44E-01 | -5.10 |
| 1443897_PM_at   | ---                             | NA        | 0.29  | 2.62 | 1.86  | 9.19E-02 | 3.44E-01 | -5.10 |
| 1434156_PM_at   | Rab11fip4                       | RAB11FIP4 | 0.23  | 3.59 | 1.86  | 9.19E-02 | 3.44E-01 | -5.10 |
| 1442476_PM_at   | Ift81                           | IFT81     | 0.24  | 2.44 | 1.86  | 9.19E-02 | 3.44E-01 | -5.10 |
| 1434099_PM_at   | Ppargc1a                        | PPARGC1A  | -0.66 | 5.99 | -1.86 | 9.19E-02 | 3.44E-01 | -5.10 |
| 1435965_PM_at   | Cnot3                           | CNOT3     | 0.44  | 2.88 | 1.86  | 9.19E-02 | 3.44E-01 | -5.10 |
| 1432163_PM_at   | 4930567K12Rik                   | NA        | 0.23  | 2.58 | 1.86  | 9.20E-02 | 3.44E-01 | -5.10 |
| 1432508_PM_at   | Ptges3l                         | PTGES3L   | 0.28  | 3.01 | 1.86  | 9.20E-02 | 3.44E-01 | -5.10 |
| 1441129_PM_at   | ---                             | NA        | 0.23  | 2.53 | 1.86  | 9.20E-02 | 3.44E-01 | -5.10 |
| 1460627_PM_at   | Thsd7b                          | THSD7B    | -0.64 | 2.84 | -1.86 | 9.21E-02 | 3.44E-01 | -5.10 |
| 1453484_PM_at   | Pebp4                           | PEBP4     | 0.18  | 2.91 | 1.86  | 9.21E-02 | 3.44E-01 | -5.10 |
| 1458043_PM_at   | ---                             | NA        | 0.31  | 2.57 | 1.86  | 9.21E-02 | 3.44E-01 | -5.10 |
| 1438836_PM_at   | Eftud2                          | EFTUD2    | 0.22  | 2.93 | 1.86  | 9.21E-02 | 3.44E-01 | -5.10 |
| 1419902_PM_at   | ---                             | NA        | 0.44  | 3.63 | 1.86  | 9.21E-02 | 3.44E-01 | -5.10 |
| 1430785_PM_at   | Sdr9c7                          | SDR9C7    | 0.23  | 2.49 | 1.86  | 9.21E-02 | 3.44E-01 | -5.10 |
| 1456522_PM_at   | Gm38829                         | NA        | 0.20  | 2.85 | 1.86  | 9.21E-02 | 3.44E-01 | -5.10 |
| 1448201_PM_at   | Sfrp2                           | SFRP2     | 0.64  | 2.65 | 1.86  | 9.21E-02 | 3.44E-01 | -5.10 |
| 1434139_PM_at   | Parp11                          | PARP11    | 0.19  | 2.56 | 1.86  | 9.22E-02 | 3.44E-01 | -5.10 |
| 1450339_PM_a_at | Bcl11b                          | BCL11B    | 0.21  | 2.64 | 1.86  | 9.22E-02 | 3.44E-01 | -5.10 |
| 1448790_PM_at   | Sema6b                          | SEMA6B    | 0.37  | 4.39 | 1.86  | 9.22E-02 | 3.44E-01 | -5.10 |
| 1427538_PM_at   | Zfp369                          | ZNF274    | 0.83  | 4.60 | 1.86  | 9.22E-02 | 3.44E-01 | -5.10 |
| 1425482_PM_s_at | Ankmy2                          | ANKMY2    | -1.11 | 5.41 | -1.86 | 9.22E-02 | 3.44E-01 | -5.10 |
| 1441264_PM_x_at | A930005H10Rik                   | NA        | 0.15  | 3.12 | 1.86  | 9.22E-02 | 3.44E-01 | -5.10 |
| 1431205_PM_at   | Slc9a8                          | SLC9A8    | 0.25  | 2.47 | 1.86  | 9.22E-02 | 3.44E-01 | -5.10 |
| 1436398_PM_at   | ---                             | NA        | 0.32  | 3.03 | 1.86  | 9.22E-02 | 3.44E-01 | -5.10 |
| 1428909_PM_at   | ---                             | NA        | -1.06 | 5.48 | -1.85 | 9.23E-02 | 3.44E-01 | -5.10 |
| 1435267_PM_at   | LOC105243204                    | NA        | -0.50 | 6.01 | -1.85 | 9.23E-02 | 3.44E-01 | -5.10 |
| 1434905_PM_at   | Ndufa4l2                        | NDUFA4L2  | 0.21  | 2.49 | 1.85  | 9.23E-02 | 3.44E-01 | -5.10 |
| 1434046_PM_at   | AA67197                         | C15orf48  | 0.22  | 2.47 | 1.85  | 9.23E-02 | 3.44E-01 | -5.10 |
| 1446620_PM_at   | ---                             | NA        | 0.22  | 2.24 | 1.85  | 9.23E-02 | 3.44E-01 | -5.10 |

|                 |                                                         |            |       |      |       |          |          |       |
|-----------------|---------------------------------------------------------|------------|-------|------|-------|----------|----------|-------|
| 1456564_PM_at   | R3hdm4                                                  | R3HDM4     | 0.25  | 3.32 | 1.85  | 9.23E-02 | 3.44E-01 | -5.10 |
| 1416764_PM_at   | Fis1                                                    | FIS1       | 0.56  | 3.52 | 1.85  | 9.23E-02 | 3.44E-01 | -5.10 |
| 1425803_PM_a_at | Mbd2                                                    | MBD2       | 1.09  | 5.80 | 1.85  | 9.23E-02 | 3.44E-01 | -5.10 |
| 1417163_PM_at   | Dusp10                                                  | DUSP10     | 0.34  | 3.24 | 1.85  | 9.23E-02 | 3.45E-01 | -5.10 |
| 1428365_PM_a_at | Lonp1                                                   | LONP1      | -0.30 | 3.51 | -1.85 | 9.24E-02 | 3.45E-01 | -5.10 |
| 1445872_PM_at   | Nr6a1                                                   | NR6A1      | 0.13  | 1.82 | 1.85  | 9.24E-02 | 3.45E-01 | -5.10 |
| 1453724_PM_a_at | Serpinf1                                                | SERPINF1   | 0.17  | 2.31 | 1.85  | 9.24E-02 | 3.45E-01 | -5.10 |
| 1437117_PM_at   | Acap1                                                   | ACAP1      | 0.24  | 2.44 | 1.85  | 9.24E-02 | 3.45E-01 | -5.10 |
| 1418115_PM_s_at | Tor1aip2                                                | TOR1AIP2   | -1.12 | 4.70 | -1.85 | 9.24E-02 | 3.45E-01 | -5.10 |
| 1441334_PM_at   | ---                                                     | NA         | -0.43 | 3.08 | -1.85 | 9.24E-02 | 3.45E-01 | -5.10 |
| 1424086_PM_at   | Oaf                                                     | OAF        | 0.16  | 2.51 | 1.85  | 9.24E-02 | 3.45E-01 | -5.10 |
| 1446904_PM_at   | ---                                                     | NA         | 0.26  | 2.26 | 1.85  | 9.24E-02 | 3.45E-01 | -5.10 |
| 1443154_PM_at   | ---                                                     | NA         | 0.35  | 2.62 | 1.85  | 9.24E-02 | 3.45E-01 | -5.10 |
| 1436307_PM_at   | Myo9a                                                   | MYO9A      | -0.32 | 4.57 | -1.85 | 9.25E-02 | 3.45E-01 | -5.10 |
| 1445614_PM_at   | ---                                                     | NA         | 0.16  | 2.08 | 1.85  | 9.25E-02 | 3.45E-01 | -5.10 |
| 1427709_PM_at   | Grik3                                                   | GRIK3      | 0.24  | 2.54 | 1.85  | 9.25E-02 | 3.45E-01 | -5.10 |
| 1430931_PM_at   | Dux /// LOC100504180                                    | NA         | 0.60  | 2.99 | 1.85  | 9.25E-02 | 3.45E-01 | -5.10 |
| 1443150_PM_at   | ---                                                     | NA         | 0.17  | 2.54 | 1.85  | 9.25E-02 | 3.45E-01 | -5.10 |
| 1433483_PM_s_at | C86187                                                  | NA         | 0.28  | 2.69 | 1.85  | 9.26E-02 | 3.45E-01 | -5.10 |
| 1423527_PM_at   | Ccer1                                                   | CCER1      | 0.23  | 2.21 | 1.85  | 9.26E-02 | 3.45E-01 | -5.10 |
| 1442853_PM_at   | Eme2                                                    | EME2       | 0.16  | 2.54 | 1.85  | 9.26E-02 | 3.45E-01 | -5.10 |
| 1419187_PM_at   | 1700012L04Rik ///<br>Gm14474 /// Gm14484 ///<br>Gm14501 | NA         | 0.18  | 2.17 | 1.85  | 9.27E-02 | 3.45E-01 | -5.10 |
| 1452940_PM_x_at | Pitpnc1                                                 | PITPNC1    | 0.59  | 3.51 | 1.85  | 9.27E-02 | 3.45E-01 | -5.11 |
| 1446788_PM_at   | ---                                                     | NA         | 0.21  | 2.30 | 1.85  | 9.27E-02 | 3.45E-01 | -5.11 |
| 1448972_PM_at   | Gria1                                                   | GRIA1      | -0.60 | 7.34 | -1.85 | 9.28E-02 | 3.46E-01 | -5.11 |
| 1455706_PM_at   | Stxbp4                                                  | STXBP4     | -0.47 | 3.68 | -1.85 | 9.28E-02 | 3.46E-01 | -5.11 |
| 1451798_PM_at   | Il1rn                                                   | IL1RN      | 0.23  | 2.24 | 1.85  | 9.28E-02 | 3.46E-01 | -5.11 |
| 1429210_PM_at   | Col23a1                                                 | COL23A1    | 0.21  | 2.65 | 1.85  | 9.28E-02 | 3.46E-01 | -5.11 |
| 1442360_PM_at   | ---                                                     | NA         | 0.17  | 2.03 | 1.85  | 9.28E-02 | 3.46E-01 | -5.11 |
| 1425400_PM_a_at | Cited4                                                  | CITED4     | 0.20  | 1.99 | 1.85  | 9.29E-02 | 3.46E-01 | -5.11 |
| 1443746_PM_x_at | Dmp1                                                    | DMP1       | 0.76  | 3.43 | 1.85  | 9.28E-02 | 3.46E-01 | -5.11 |
| 1455815_PM_a_at | Ywhab                                                   | YWHAB      | -1.49 | 8.97 | -1.85 | 9.29E-02 | 3.46E-01 | -5.11 |
| 1458754_PM_at   | ---                                                     | NA         | -0.21 | 2.58 | -1.85 | 9.29E-02 | 3.46E-01 | -5.11 |
| 1451403_PM_at   | Ppp1r37                                                 | PPP1R37    | 0.16  | 2.33 | 1.85  | 9.29E-02 | 3.46E-01 | -5.11 |
| 1422029_PM_at   | Ccl20                                                   | CCL20      | 0.18  | 2.46 | 1.85  | 9.29E-02 | 3.46E-01 | -5.11 |
| 1450545_PM_a_at | Dntt                                                    | DNTT       | 0.20  | 2.65 | 1.85  | 9.29E-02 | 3.46E-01 | -5.11 |
| 1422184_PM_a_at | Ak1                                                     | AK1        | 0.23  | 2.40 | 1.85  | 9.29E-02 | 3.46E-01 | -5.11 |
| 1440730_PM_at   | ---                                                     | NA         | 0.28  | 3.29 | 1.85  | 9.29E-02 | 3.46E-01 | -5.11 |
| 1438904_PM_at   | Nhsl1                                                   | NHSL1      | 0.39  | 4.36 | 1.85  | 9.29E-02 | 3.46E-01 | -5.11 |
| 1415674_PM_a_at | Trappc4                                                 | TRAPPC4    | 0.45  | 3.30 | 1.85  | 9.29E-02 | 3.46E-01 | -5.11 |
| 1433150_PM_at   | 4933415b22rik                                           | NA         | 0.52  | 3.76 | 1.85  | 9.29E-02 | 3.46E-01 | -5.11 |
| 1457206_PM_at   | ---                                                     | NA         | 0.67  | 3.46 | 1.85  | 9.29E-02 | 3.46E-01 | -5.11 |
| 1434612_PM_s_at | Sbno1                                                   | SBNO1      | -0.43 | 3.21 | -1.85 | 9.30E-02 | 3.46E-01 | -5.11 |
| 1424200_PM_s_at | Seh1l                                                   | SEH1L      | -0.24 | 4.82 | -1.85 | 9.30E-02 | 3.46E-01 | -5.11 |
| 1450415_PM_at   | Pde6a                                                   | PDE6A      | 0.19  | 2.13 | 1.85  | 9.30E-02 | 3.46E-01 | -5.11 |
| 1441477_PM_at   | ---                                                     | NA         | 0.17  | 2.42 | 1.85  | 9.30E-02 | 3.46E-01 | -5.11 |
| 1454126_PM_at   | ---                                                     | NA         | 0.25  | 2.60 | 1.85  | 9.31E-02 | 3.46E-01 | -5.11 |
| 1446498_PM_at   | Il20ra                                                  | IL20RA     | -0.25 | 2.55 | -1.85 | 9.31E-02 | 3.46E-01 | -5.11 |
| 1441902_PM_x_at | Cenpw /// Slc29a4                                       | SLC29A4    | 0.53  | 3.54 | 1.85  | 9.31E-02 | 3.46E-01 | -5.11 |
| 1447658_PM_x_at | Synpo2l                                                 | SYNPO2L    | -0.19 | 2.62 | -1.85 | 9.31E-02 | 3.46E-01 | -5.11 |
| 1459686_PM_at   | ---                                                     | NA         | 0.30  | 2.39 | 1.85  | 9.31E-02 | 3.46E-01 | -5.11 |
| 1417996_PM_at   | Ngb                                                     | NGB        | 0.45  | 3.46 | 1.85  | 9.31E-02 | 3.46E-01 | -5.11 |
| 1417340_PM_at   | Glrx3                                                   | GLRX3      | -0.74 | 4.07 | -1.85 | 9.32E-02 | 3.46E-01 | -5.11 |
| 1455252_PM_at   | Tsc1                                                    | TSC1       | -0.51 | 6.40 | -1.85 | 9.32E-02 | 3.46E-01 | -5.11 |
| 1420174_PM_s_at | Tax1bp1                                                 | TAX1BP1    | -0.46 | 5.03 | -1.85 | 9.32E-02 | 3.46E-01 | -5.11 |
| 1448641_PM_at   | Mbtd1                                                   | MBTD1      | -0.41 | 2.94 | -1.85 | 9.32E-02 | 3.46E-01 | -5.11 |
| 1447971_PM_at   | ---                                                     | NA         | -0.30 | 3.15 | -1.85 | 9.32E-02 | 3.46E-01 | -5.11 |
| 1435648_PM_at   | Lrrn4                                                   | LRRN4      | 0.18  | 2.59 | 1.85  | 9.32E-02 | 3.46E-01 | -5.11 |
| 1453717_PM_s_at | Ttll10                                                  | TLL10      | 0.23  | 2.72 | 1.85  | 9.32E-02 | 3.46E-01 | -5.11 |
| 1457379_PM_at   | Pl4ka                                                   | PI4KA      | 0.26  | 2.82 | 1.85  | 9.32E-02 | 3.46E-01 | -5.11 |
| 1425081_PM_at   | Zfp286                                                  | ACO05324.4 | 0.17  | 2.10 | 1.85  | 9.33E-02 | 3.46E-01 | -5.11 |
| 1438358_PM_x_at | Pfdn5                                                   | PFDN5      | 0.26  | 3.43 | 1.85  | 9.33E-02 | 3.46E-01 | -5.11 |
| 1454273_PM_at   | ---                                                     | NA         | 0.23  | 3.27 | 1.85  | 9.33E-02 | 3.46E-01 | -5.11 |
| 1424290_PM_at   | Osgin2                                                  | OSGIN2     | 0.28  | 2.40 | 1.85  | 9.33E-02 | 3.46E-01 | -5.11 |
| 1457944_PM_at   | ---                                                     | NA         | 0.30  | 2.74 | 1.85  | 9.33E-02 | 3.46E-01 | -5.11 |
| 1423707_PM_at   | Tmem50b                                                 | TMEM50B    | -0.39 | 4.00 | -1.85 | 9.33E-02 | 3.46E-01 | -5.11 |
| 1443774_PM_at   | Zfat                                                    | ZFAT       | 0.79  | 3.01 | 1.85  | 9.34E-02 | 3.47E-01 | -5.11 |
| 1440714_PM_at   | ---                                                     | NA         | 0.16  | 2.12 | 1.85  | 9.34E-02 | 3.47E-01 | -5.11 |
| 1427558_PM_s_at | Alg12                                                   | ALG12      | 0.20  | 3.00 | 1.85  | 9.34E-02 | 3.47E-01 | -5.11 |
| 1422063_PM_a_at | Pex5                                                    | PEX5       | 0.20  | 2.40 | 1.85  | 9.34E-02 | 3.47E-01 | -5.11 |
| 1437131_PM_x_at | Mrp11                                                   | MRPL11     | 0.39  | 7.18 | 1.85  | 9.34E-02 | 3.47E-01 | -5.11 |
| 1438796_PM_at   | Nr4a3                                                   | NR4A3      | -1.45 | 7.00 | -1.85 | 9.34E-02 | 3.47E-01 | -5.11 |
| 1451049_PM_at   | Bcap31                                                  | BCAP31     | -0.49 | 5.14 | -1.85 | 9.34E-02 | 3.47E-01 | -5.11 |

|                 |                                |          |       |       |       |          |          |       |
|-----------------|--------------------------------|----------|-------|-------|-------|----------|----------|-------|
| 1434141_PM_at   | Gucy1a3                        | GUCY1A3  | -0.59 | 4.19  | -1.85 | 9.35E-02 | 3.47E-01 | -5.11 |
| 1417090_PM_at   | Rcn1                           | RCN1     | -0.37 | 3.38  | -1.85 | 9.35E-02 | 3.47E-01 | -5.11 |
| 1454305_PM_at   | Cbx3                           | CBX3     | 0.15  | 2.22  | 1.85  | 9.35E-02 | 3.47E-01 | -5.11 |
| 1445007_PM_at   | ---                            | NA       | 0.24  | 3.89  | 1.85  | 9.35E-02 | 3.47E-01 | -5.11 |
| 1428753_PM_a_at | Dgcr6                          | DGCR6    | 0.28  | 2.62  | 1.85  | 9.35E-02 | 3.47E-01 | -5.11 |
| 1447066_PM_at   | ---                            | NA       | 0.35  | 3.05  | 1.85  | 9.35E-02 | 3.47E-01 | -5.11 |
| 1424033_PM_at   | Srsf7                          | SRSF7    | -0.44 | 5.57  | -1.85 | 9.35E-02 | 3.47E-01 | -5.11 |
| 1415742_PM_at   | Aup1                           | AUP1     | 0.54  | 5.28  | 1.85  | 9.35E-02 | 3.47E-01 | -5.11 |
| 1425132_PM_at   | Neto1                          | NETO1    | -0.55 | 6.27  | -1.85 | 9.36E-02 | 3.47E-01 | -5.11 |
| 1417692_PM_at   | Drp2                           | DRG2     | -0.24 | 2.84  | -1.85 | 9.36E-02 | 3.47E-01 | -5.11 |
| 1445986_PM_at   | ---                            | NA       | 0.21  | 2.38  | 1.85  | 9.36E-02 | 3.47E-01 | -5.11 |
| 1450499_PM_at   | Atxn1                          | ATXN1    | 0.21  | 3.25  | 1.85  | 9.36E-02 | 3.47E-01 | -5.11 |
| 1424284_PM_at   | Pomt1                          | POMT1    | 0.24  | 2.42  | 1.85  | 9.36E-02 | 3.47E-01 | -5.11 |
| 1441316_PM_at   | Wnt8b                          | WNT8B    | 0.27  | 2.58  | 1.85  | 9.36E-02 | 3.47E-01 | -5.11 |
| 1442495_PM_at   | Birc6                          | NA       | 0.77  | 4.87  | 1.85  | 9.36E-02 | 3.47E-01 | -5.11 |
| 1442832_PM_at   | Ankrd52                        | ANKRD52  | 0.81  | 3.56  | 1.85  | 9.36E-02 | 3.47E-01 | -5.11 |
| 1457218_PM_at   | Strbp                          | STRBP    | -0.38 | 7.14  | -1.85 | 9.37E-02 | 3.47E-01 | -5.11 |
| 1427203_PM_at   | Myo15b                         | NA       | 0.24  | 2.78  | 1.85  | 9.37E-02 | 3.47E-01 | -5.11 |
| 1429836_PM_at   | Ugg2                           | NA       | 0.29  | 3.38  | 1.85  | 9.37E-02 | 3.47E-01 | -5.11 |
| 1456630_PM_x_at | Son                            | SON      | -0.32 | 3.01  | -1.85 | 9.37E-02 | 3.47E-01 | -5.11 |
| 1447033_PM_at   | Gm829                          | NA       | 0.15  | 2.12  | 1.85  | 9.37E-02 | 3.47E-01 | -5.12 |
| 1453324_PM_at   | Nip7                           | NIP7     | -0.66 | 3.91  | -1.85 | 9.37E-02 | 3.47E-01 | -5.12 |
| 1418718_PM_at   | Cxcl16                         | CXCL16   | 0.28  | 3.46  | 1.84  | 9.38E-02 | 3.47E-01 | -5.12 |
| 1425110_PM_at   | Sorc3                          | SORCS3   | 0.58  | 4.25  | 1.84  | 9.38E-02 | 3.47E-01 | -5.12 |
| 1450814_PM_a_at | Ipo4                           | IPO4     | -0.22 | 3.13  | -1.84 | 9.38E-02 | 3.47E-01 | -5.12 |
| 1451117_PM_a_at | Tom1l1                         | TOM1L1   | 0.16  | 2.22  | 1.84  | 9.38E-02 | 3.47E-01 | -5.12 |
| 1453632_PM_at   | 4930538K18Rik /// AUJ022252    | TMEM269  | 0.17  | 2.33  | 1.84  | 9.38E-02 | 3.47E-01 | -5.12 |
| 1440006_PM_at   | ---                            | NA       | 0.27  | 3.00  | 1.84  | 9.38E-02 | 3.47E-01 | -5.12 |
| 1450052_PM_at   | Kif2a                          | KIF2A    | 0.47  | 4.76  | 1.84  | 9.38E-02 | 3.47E-01 | -5.12 |
| 1438360_PM_x_at | Slc25a5                        | SLC25A5  | -1.19 | 6.79  | -1.84 | 9.38E-02 | 3.47E-01 | -5.12 |
| 1457856_PM_at   | Nr2e3                          | NR2E3    | 0.20  | 2.36  | 1.84  | 9.38E-02 | 3.47E-01 | -5.12 |
| 1432795_PM_at   | 2310058F05Rik                  | NA       | 0.20  | 2.27  | 1.84  | 9.38E-02 | 3.47E-01 | -5.12 |
| 1423438_PM_at   | Kptn                           | KPTN     | 0.26  | 2.62  | 1.84  | 9.38E-02 | 3.47E-01 | -5.12 |
| 1416745_PM_x_at | Uap1                           | NA       | 0.18  | 2.25  | 1.84  | 9.39E-02 | 3.47E-01 | -5.12 |
| 1445658_PM_at   | Gm38962                        | NA       | 0.29  | 2.63  | 1.84  | 9.39E-02 | 3.47E-01 | -5.12 |
| 1442769_PM_at   | Mybpc1                         | MYBPC1   | 0.15  | 2.21  | 1.84  | 9.39E-02 | 3.47E-01 | -5.12 |
| 1457981_PM_x_at | Gins1                          | GINS1    | 0.14  | 2.12  | 1.84  | 9.39E-02 | 3.47E-01 | -5.12 |
| 1419527_PM_at   | Comp                           | COMP     | 0.16  | 2.27  | 1.84  | 9.39E-02 | 3.47E-01 | -5.12 |
| 1447258_PM_at   | ---                            | NA       | 0.26  | 2.57  | 1.84  | 9.39E-02 | 3.47E-01 | -5.12 |
| 1452205_PM_x_at | LOC665506 /// Trcb-1 /// Trbc2 | NA       | 0.18  | 2.67  | 1.84  | 9.40E-02 | 3.47E-01 | -5.12 |
| 1451299_PM_at   | Prkx                           | PRKX     | 0.31  | 3.08  | 1.84  | 9.40E-02 | 3.47E-01 | -5.12 |
| 1419085_PM_at   | Pcp2                           | PCP2     | 0.95  | 2.96  | 1.84  | 9.40E-02 | 3.47E-01 | -5.12 |
| 1418037_PM_at   | C4bp                           | C4BPA    | 0.20  | 2.63  | 1.84  | 9.40E-02 | 3.47E-01 | -5.12 |
| 1422398_PM_at   | Hist1h1e                       | HIST1H1E | 0.31  | 2.92  | 1.84  | 9.40E-02 | 3.47E-01 | -5.12 |
| 1416681_PM_at   | Ube3a                          | UBE3A    | 0.73  | 4.34  | 1.84  | 9.40E-02 | 3.47E-01 | -5.12 |
| 1439515_PM_at   | Setd5                          | SETD5    | -0.30 | 2.85  | -1.84 | 9.40E-02 | 3.48E-01 | -5.12 |
| 1456085_PM_x_at | Cd151                          | CD151    | -0.93 | 3.90  | -1.84 | 9.41E-02 | 3.48E-01 | -5.12 |
| 1429627_PM_at   | Ppil3                          | PPIL3    | -0.82 | 3.57  | -1.84 | 9.41E-02 | 3.48E-01 | -5.12 |
| 1422664_PM_at   | Rab10                          | RAB10    | -0.58 | 7.70  | -1.84 | 9.41E-02 | 3.48E-01 | -5.12 |
| 1446250_PM_at   | ---                            | NA       | 0.16  | 2.22  | 1.84  | 9.41E-02 | 3.48E-01 | -5.12 |
| 1421464_PM_at   | Nkx3-2                         | NA       | 0.16  | 2.21  | 1.84  | 9.41E-02 | 3.48E-01 | -5.12 |
| 1427477_PM_at   | Tmprss13                       | TMPRSS13 | 0.19  | 2.67  | 1.84  | 9.41E-02 | 3.48E-01 | -5.12 |
| 1454359_PM_at   | Slc12a6                        | NA       | 0.27  | 2.46  | 1.84  | 9.41E-02 | 3.48E-01 | -5.12 |
| 1440320_PM_at   | ---                            | NA       | 0.27  | 2.54  | 1.84  | 9.41E-02 | 3.48E-01 | -5.12 |
| 1426332_PM_a_at | Cldn3                          | CLDN3    | 0.32  | 2.72  | 1.84  | 9.41E-02 | 3.48E-01 | -5.12 |
| 1425494_PM_s_at | Bmpr1a                         | BMPRI1A  | -0.42 | 2.87  | -1.84 | 9.42E-02 | 3.48E-01 | -5.12 |
| 1444583_PM_at   | Nasp                           | NASP     | -0.25 | 2.45  | -1.84 | 9.42E-02 | 3.48E-01 | -5.12 |
| 1451732_PM_at   | Prpf4b                         | NA       | 0.22  | 2.53  | 1.84  | 9.42E-02 | 3.48E-01 | -5.12 |
| 1460048_PM_at   | ---                            | NA       | -0.37 | 2.56  | -1.84 | 9.42E-02 | 3.48E-01 | -5.12 |
| 1421681_PM_at   | Nrg4                           | NRG4     | 0.13  | 2.30  | 1.84  | 9.42E-02 | 3.48E-01 | -5.12 |
| 1420637_PM_at   | Prps2                          | PRPS2    | 0.19  | 2.69  | 1.84  | 9.42E-02 | 3.48E-01 | -5.12 |
| 1442358_PM_at   | Rnf169                         | NA       | 0.30  | 2.40  | 1.84  | 9.42E-02 | 3.48E-01 | -5.12 |
| 1451922_PM_at   | Lman1l                         | LMAN1L   | 0.18  | 2.28  | 1.84  | 9.43E-02 | 3.48E-01 | -5.12 |
| 1440311_PM_at   | ---                            | NA       | -0.17 | 2.36  | -1.84 | 9.43E-02 | 3.48E-01 | -5.12 |
| 1457163_PM_at   | ---                            | NA       | 0.24  | 2.38  | 1.84  | 9.43E-02 | 3.48E-01 | -5.12 |
| 1435583_PM_at   | ---                            | NA       | -0.43 | 4.81  | -1.84 | 9.43E-02 | 3.48E-01 | -5.12 |
| 1416838_PM_at   | Mut                            | MUT      | -0.38 | 3.89  | -1.84 | 9.43E-02 | 3.48E-01 | -5.12 |
| 1425915_PM_at   | Slc26a8                        | SLC26A8  | 0.23  | 3.09  | 1.84  | 9.43E-02 | 3.48E-01 | -5.12 |
| 1442985_PM_at   | ---                            | NA       | 0.24  | 2.28  | 1.84  | 9.43E-02 | 3.48E-01 | -5.12 |
| 1440329_PM_s_at | Gpatch2                        | GPATCH2  | 0.20  | 1.98  | 1.84  | 9.44E-02 | 3.48E-01 | -5.12 |
| 1442855_PM_at   | Dopey1                         | DOPEY1   | 0.22  | 2.24  | 1.84  | 9.44E-02 | 3.48E-01 | -5.12 |
| 1456670_PM_at   | A930007A09Rik                  | NA       | 0.31  | 2.67  | 1.84  | 9.44E-02 | 3.48E-01 | -5.12 |
| 1423896_PM_a_at | Rnf187                         | RNF187   | 0.40  | 10.01 | 1.84  | 9.44E-02 | 3.48E-01 | -5.12 |



|                 |                            |            |       |      |       |          |          |       |
|-----------------|----------------------------|------------|-------|------|-------|----------|----------|-------|
| 1457478_PM_at   | ---                        | NA         | 0.27  | 2.60 | 1.84  | 9.44E-02 | 3.48E-01 | -5.12 |
| 1446571_PM_at   | ---                        | NA         | 0.29  | 2.68 | 1.84  | 9.44E-02 | 3.48E-01 | -5.12 |
| 1452670_PM_at   | MyI9                       | MYL9       | -1.14 | 3.75 | -1.84 | 9.44E-02 | 3.48E-01 | -5.12 |
| 1456060_PM_at   | Maf                        | MAF        | 0.45  | 5.39 | 1.84  | 9.44E-02 | 3.48E-01 | -5.12 |
| 1429152_PM_at   | Zkscan1                    | ZKSCAN1    | -0.44 | 3.35 | -1.84 | 9.45E-02 | 3.48E-01 | -5.12 |
| 1450532_PM_at   | Cysrt1                     | CYSRT1     | 0.26  | 2.82 | 1.84  | 9.45E-02 | 3.48E-01 | -5.12 |
| 1423834_PM_s_at | Gga1                       | GGA1       | 0.33  | 3.29 | 1.84  | 9.45E-02 | 3.48E-01 | -5.12 |
| 1454330_PM_at   | 4933415J04Rik              | NA         | 0.22  | 2.50 | 1.84  | 9.45E-02 | 3.48E-01 | -5.12 |
| 1452665_PM_at   | Ttc27                      | TTC27      | -0.90 | 3.66 | -1.84 | 9.45E-02 | 3.48E-01 | -5.12 |
| 1455011_PM_at   | Stard4                     | STARD4     | -0.64 | 4.37 | -1.84 | 9.46E-02 | 3.49E-01 | -5.12 |
| 1417297_PM_at   | Itpr3                      | ITPR3      | 0.15  | 2.16 | 1.84  | 9.46E-02 | 3.49E-01 | -5.12 |
| 1450620_PM_at   | Pdia4                      | NA         | 0.19  | 2.12 | 1.84  | 9.46E-02 | 3.49E-01 | -5.12 |
| 1460042_PM_at   | Slc23a3                    | SLC23A3    | 0.20  | 2.48 | 1.84  | 9.46E-02 | 3.49E-01 | -5.12 |
| 1441606_PM_at   | ---                        | NA         | 0.29  | 2.52 | 1.84  | 9.46E-02 | 3.49E-01 | -5.12 |
| 1459095_PM_at   | ---                        | NA         | 0.40  | 2.38 | 1.84  | 9.46E-02 | 3.49E-01 | -5.12 |
| 1430111_PM_a_at | Bcat1                      | BCAT1      | 0.65  | 3.06 | 1.84  | 9.46E-02 | 3.49E-01 | -5.12 |
| 1451799_PM_at   | ---                        | NA         | 0.36  | 2.61 | 1.84  | 9.47E-02 | 3.49E-01 | -5.12 |
| 1447282_PM_at   | Gng13                      | GNG13      | 0.17  | 2.37 | 1.84  | 9.47E-02 | 3.49E-01 | -5.12 |
| 1458037_PM_at   | ---                        | NA         | 0.24  | 2.50 | 1.84  | 9.47E-02 | 3.49E-01 | -5.12 |
| 1453742_PM_at   | Vps33a                     | VPS33A     | 0.20  | 2.63 | 1.84  | 9.47E-02 | 3.49E-01 | -5.12 |
| 1458313_PM_at   | Cdk13                      | NA         | 0.21  | 2.40 | 1.84  | 9.47E-02 | 3.49E-01 | -5.12 |
| 1442705_PM_at   | C76938                     | NA         | 0.22  | 2.38 | 1.84  | 9.47E-02 | 3.49E-01 | -5.12 |
| 1417170_PM_at   | Lztf1                      | LZTF1      | 0.41  | 3.43 | 1.84  | 9.47E-02 | 3.49E-01 | -5.12 |
| 1441358_PM_at   | Pcdhb16                    | NA         | 0.63  | 3.76 | 1.84  | 9.47E-02 | 3.49E-01 | -5.12 |
| 1434478_PM_at   | Heca                       | NA         | -0.28 | 2.72 | -1.84 | 9.48E-02 | 3.49E-01 | -5.13 |
| 1416077_PM_at   | Adm                        | ADM        | 0.14  | 2.39 | 1.84  | 9.48E-02 | 3.49E-01 | -5.13 |
| 1452968_PM_at   | Cthrc1                     | CTHRC1     | 0.41  | 2.71 | 1.84  | 9.48E-02 | 3.49E-01 | -5.13 |
| 1421278_PM_s_at | Spta1                      | SPTA1      | -0.25 | 2.66 | -1.84 | 9.48E-02 | 3.49E-01 | -5.13 |
| 1446095_PM_at   | ---                        | NA         | 0.17  | 2.59 | 1.84  | 9.48E-02 | 3.49E-01 | -5.13 |
| 1421041_PM_s_at | Gm3776 /// Gsta1 /// Gsta2 | NA         | -0.40 | 2.52 | -1.84 | 9.48E-02 | 3.49E-01 | -5.13 |
| 1433385_PM_at   | Trim66                     | NA         | 0.15  | 2.28 | 1.84  | 9.49E-02 | 3.49E-01 | -5.13 |
| 1417959_PM_at   | Pdlim7                     | PDLIM7     | 0.26  | 2.66 | 1.84  | 9.49E-02 | 3.49E-01 | -5.13 |
| 1419182_PM_at   | Svep1                      | SVEP1      | 0.25  | 2.74 | 1.84  | 9.49E-02 | 3.49E-01 | -5.13 |
| 1423746_PM_at   | Txndc5                     | TXNDC5     | -0.29 | 2.67 | -1.84 | 9.49E-02 | 3.49E-01 | -5.13 |
| 1446787_PM_at   | ---                        | NA         | 0.18  | 2.62 | 1.84  | 9.50E-02 | 3.49E-01 | -5.13 |
| 1427963_PM_s_at | Rdh9                       | RDH16      | 0.20  | 2.66 | 1.84  | 9.50E-02 | 3.49E-01 | -5.13 |
| 1444265_PM_at   | ---                        | NA         | 0.23  | 2.45 | 1.84  | 9.50E-02 | 3.49E-01 | -5.13 |
| 1452597_PM_at   | Cmc2                       | CMC2       | 1.02  | 4.58 | 1.84  | 9.50E-02 | 3.49E-01 | -5.13 |
| 1446074_PM_at   | Marc1                      | MARC1      | 0.20  | 2.63 | 1.84  | 9.50E-02 | 3.49E-01 | -5.13 |
| 1434242_PM_at   | Usp37                      | USP37      | 0.23  | 3.23 | 1.84  | 9.50E-02 | 3.49E-01 | -5.13 |
| 1422058_PM_at   | Nodal                      | NODAL      | 0.29  | 3.62 | 1.84  | 9.50E-02 | 3.49E-01 | -5.13 |
| 1456093_PM_at   | Zfp536                     | ZNF536     | 0.53  | 2.92 | 1.84  | 9.50E-02 | 3.49E-01 | -5.13 |
| 1428115_PM_a_at | Rab2b                      | RAB2B      | -0.29 | 2.29 | -1.84 | 9.50E-02 | 3.49E-01 | -5.13 |
| 1440580_PM_at   | ---                        | NA         | 0.26  | 2.98 | 1.84  | 9.51E-02 | 3.49E-01 | -5.13 |
| 1450230_PM_at   | Vva7                       | VVA7       | 0.19  | 2.33 | 1.84  | 9.51E-02 | 3.49E-01 | -5.13 |
| 1445519_PM_at   | Kcns3                      | KCNS3      | 0.19  | 2.44 | 1.84  | 9.52E-02 | 3.50E-01 | -5.13 |
| 1431263_PM_at   | Prkag2                     | PRKAG2     | 0.23  | 2.49 | 1.84  | 9.52E-02 | 3.50E-01 | -5.13 |
| 1424766_PM_at   | Erc66                      | ERCC62     | 0.31  | 2.54 | 1.84  | 9.52E-02 | 3.50E-01 | -5.13 |
| 1429094_PM_at   | Ddi2                       | RSC1A1     | -0.60 | 4.61 | -1.84 | 9.52E-02 | 3.50E-01 | -5.13 |
| 1440926_PM_at   | Flt1                       | FLT1       | -0.61 | 3.03 | -1.84 | 9.52E-02 | 3.50E-01 | -5.13 |
| 1420634_PM_a_at | Smad2                      | SMAD2      | -0.54 | 3.08 | -1.84 | 9.52E-02 | 3.50E-01 | -5.13 |
| 1419866_PM_s_at | Atxn2                      | ATXN2      | -0.50 | 2.76 | -1.84 | 9.52E-02 | 3.50E-01 | -5.13 |
| 1429449_PM_at   | Samd4                      | SAMD4A     | 0.30  | 2.65 | 1.84  | 9.52E-02 | 3.50E-01 | -5.13 |
| 1449381_PM_a_at | Pacsin1                    | PACSN1     | -0.40 | 4.93 | -1.84 | 9.53E-02 | 3.50E-01 | -5.13 |
| 1458485_PM_at   | Fbx17                      | NA         | -0.26 | 2.58 | -1.84 | 9.53E-02 | 3.50E-01 | -5.13 |
| 1420574_PM_at   | Tex43                      | TEX43      | 0.16  | 2.42 | 1.84  | 9.53E-02 | 3.50E-01 | -5.13 |
| 1452977_PM_at   | Zhx3                       | ZHX3       | -0.35 | 3.31 | -1.84 | 9.53E-02 | 3.50E-01 | -5.13 |
| 1458758_PM_at   | ---                        | NA         | 0.27  | 3.06 | 1.84  | 9.53E-02 | 3.50E-01 | -5.13 |
| 1460059_PM_at   | Upp2                       | UPP2       | 0.18  | 2.50 | 1.84  | 9.53E-02 | 3.50E-01 | -5.13 |
| 1453976_PM_at   | ---                        | NA         | 0.36  | 3.31 | 1.83  | 9.53E-02 | 3.50E-01 | -5.13 |
| 1459112_PM_at   | Gm12440                    | NA         | 0.25  | 2.45 | 1.83  | 9.54E-02 | 3.50E-01 | -5.13 |
| 1445514_PM_at   | ---                        | NA         | 0.20  | 2.26 | 1.83  | 9.54E-02 | 3.50E-01 | -5.13 |
| 1459209_PM_at   | Rnf10                      | RNF10      | 0.49  | 2.63 | 1.83  | 9.54E-02 | 3.50E-01 | -5.13 |
| 1447044_PM_at   | ---                        | NA         | -0.55 | 5.06 | -1.83 | 9.55E-02 | 3.50E-01 | -5.13 |
| 1428897_PM_at   | Tstd3                      | TSTD3      | -0.37 | 4.41 | -1.83 | 9.55E-02 | 3.50E-01 | -5.13 |
| 1427578_PM_a_at | Eif6                       | AL121753.1 | -0.36 | 4.10 | -1.83 | 9.55E-02 | 3.50E-01 | -5.13 |
| 1439302_PM_at   | ---                        | NA         | -0.36 | 2.45 | -1.83 | 9.55E-02 | 3.50E-01 | -5.13 |
| 1444436_PM_at   | ---                        | NA         | 0.18  | 2.19 | 1.83  | 9.55E-02 | 3.50E-01 | -5.13 |
| 1439985_PM_at   | Abcc12                     | ABCC12     | 0.19  | 2.81 | 1.83  | 9.55E-02 | 3.50E-01 | -5.13 |
| 1446326_PM_at   | Col1a2                     | COL1A2     | 0.20  | 2.19 | 1.83  | 9.55E-02 | 3.50E-01 | -5.13 |
| 1439529_PM_at   | Ssc5d                      | SSC5D      | 0.22  | 3.04 | 1.83  | 9.55E-02 | 3.50E-01 | -5.13 |
| 1455567_PM_at   | Cdk12                      | CDK12      | 0.23  | 2.50 | 1.83  | 9.55E-02 | 3.50E-01 | -5.13 |
| 1454259_PM_s_at | Agbl4                      | AGBL4      | 0.40  | 2.75 | 1.83  | 9.55E-02 | 3.50E-01 | -5.13 |
| 1417394_PM_at   | Klf4                       | KLF4       | -0.40 | 2.96 | -1.83 | 9.56E-02 | 3.50E-01 | -5.13 |

|                 |                              |          |       |      |       |          |          |       |
|-----------------|------------------------------|----------|-------|------|-------|----------|----------|-------|
| 1434770_PM_at   | Iqcb1                        | IQCB1    | -0.43 | 3.07 | -1.83 | 9.57E-02 | 3.50E-01 | -5.13 |
| 1419002_PM_s_at | Baat                         | BAAT     | -0.19 | 2.30 | -1.83 | 9.56E-02 | 3.50E-01 | -5.13 |
| 1432388_PM_at   | 5430440P10Rik                | NA       | 0.13  | 2.32 | 1.83  | 9.57E-02 | 3.50E-01 | -5.13 |
| 1441694_PM_at   | ---                          | NA       | 0.21  | 3.27 | 1.83  | 9.57E-02 | 3.50E-01 | -5.13 |
| 1429245_PM_at   | ---                          | NA       | 0.22  | 3.91 | 1.83  | 9.56E-02 | 3.50E-01 | -5.13 |
| 1459034_PM_at   | Wdr19                        | WDR19    | 0.23  | 2.96 | 1.83  | 9.56E-02 | 3.50E-01 | -5.13 |
| 1421093_PM_at   | Slc7a10                      | SLC7A10  | 0.23  | 2.46 | 1.83  | 9.56E-02 | 3.50E-01 | -5.13 |
| 1422222_PM_at   | Ivl                          | IVL      | 0.24  | 3.42 | 1.83  | 9.56E-02 | 3.50E-01 | -5.13 |
| 1429676_PM_at   | ---                          | NA       | 0.26  | 2.66 | 1.83  | 9.57E-02 | 3.50E-01 | -5.13 |
| 1439209_PM_at   | Tcf12                        | TCF12    | 0.35  | 2.15 | 1.83  | 9.56E-02 | 3.50E-01 | -5.13 |
| 1427820_PM_at   | ---                          | NA       | 0.91  | 7.29 | 1.83  | 9.56E-02 | 3.50E-01 | -5.13 |
| 1417931_PM_at   | Ndst2                        | NDST2    | -0.22 | 2.33 | -1.83 | 9.57E-02 | 3.50E-01 | -5.13 |
| 1425912_PM_at   | Cep164                       | CEP164   | 0.16  | 2.21 | 1.83  | 9.58E-02 | 3.50E-01 | -5.13 |
| 1439431_PM_x_at | Bicd1                        | BICD1    | 0.17  | 2.16 | 1.83  | 9.58E-02 | 3.50E-01 | -5.13 |
| 1452528_PM_a_at | Nkx2-3                       | NKX2-3   | 0.22  | 2.72 | 1.83  | 9.57E-02 | 3.50E-01 | -5.13 |
| 1429037_PM_at   | 1700019A02Rik                | NA       | 0.23  | 2.28 | 1.83  | 9.57E-02 | 3.50E-01 | -5.13 |
| 1454111_PM_at   | Meikin                       | MEIKIN   | 0.26  | 2.42 | 1.83  | 9.58E-02 | 3.50E-01 | -5.13 |
| 1424476_PM_at   | Camkk2                       | CAMKK2   | 0.27  | 2.60 | 1.83  | 9.57E-02 | 3.50E-01 | -5.13 |
| 1422035_PM_at   | Serpinb9c                    | SERPINB9 | 0.28  | 2.58 | 1.83  | 9.58E-02 | 3.50E-01 | -5.13 |
| 1420175_PM_at   | Tax1bp1                      | NA       | -0.41 | 5.66 | -1.83 | 9.58E-02 | 3.51E-01 | -5.13 |
| 1443306_PM_at   | ---                          | NA       | 0.18  | 3.04 | 1.83  | 9.58E-02 | 3.51E-01 | -5.13 |
| 1455801_PM_x_at | Tbcd                         | TBCD     | 0.47  | 4.92 | 1.83  | 9.58E-02 | 3.51E-01 | -5.13 |
| 1441168_PM_at   | ---                          | NA       | 0.17  | 2.20 | 1.83  | 9.58E-02 | 3.51E-01 | -5.13 |
| 1433594_PM_at   | Comm2                        | COMM2    | -0.47 | 3.47 | -1.83 | 9.58E-02 | 3.51E-01 | -5.14 |
| 1418551_PM_at   | Mybpc3                       | MYBPC3   | 0.26  | 2.95 | 1.83  | 9.58E-02 | 3.51E-01 | -5.14 |
| 1420968_PM_at   | Nacc1                        | NACC1    | 0.34  | 2.79 | 1.83  | 9.59E-02 | 3.51E-01 | -5.14 |
| 1436175_PM_at   | Atxn7                        | ATXN7    | -0.44 | 2.90 | -1.83 | 9.59E-02 | 3.51E-01 | -5.14 |
| 1429570_PM_at   | Mkl                          | MLKL     | 0.21  | 2.57 | 1.83  | 9.59E-02 | 3.51E-01 | -5.14 |
| 1416984_PM_at   | Mrops18a                     | MRPS18A  | 0.54  | 3.24 | 1.83  | 9.59E-02 | 3.51E-01 | -5.14 |
| 1437298_PM_at   | Wipf2                        | WIPF2    | -0.49 | 4.66 | -1.83 | 9.59E-02 | 3.51E-01 | -5.14 |
| 1441065_PM_at   | ---                          | NA       | -0.96 | 4.01 | -1.83 | 9.60E-02 | 3.51E-01 | -5.14 |
| 1445822_PM_at   | Cc2d2b                       | NA       | 0.15  | 2.10 | 1.83  | 9.60E-02 | 3.51E-01 | -5.14 |
| 1460044_PM_at   | Onecut2                      | ONECUT2  | -0.27 | 2.38 | -1.83 | 9.60E-02 | 3.51E-01 | -5.14 |
| 1426017_PM_a_at | Aar2                         | AAR2     | -0.17 | 2.17 | -1.83 | 9.60E-02 | 3.51E-01 | -5.14 |
| 1421793_PM_at   | Fgf11                        | FGF11    | 0.17  | 2.36 | 1.83  | 9.60E-02 | 3.51E-01 | -5.14 |
| 1419561_PM_at   | Cc1b                         | CCL18    | 0.18  | 2.54 | 1.83  | 9.60E-02 | 3.51E-01 | -5.14 |
| 1450364_PM_a_at | Havcr1                       | HAVCR1   | 0.24  | 2.81 | 1.83  | 9.61E-02 | 3.51E-01 | -5.14 |
| 1443576_PM_at   | ---                          | NA       | 0.28  | 2.42 | 1.83  | 9.60E-02 | 3.51E-01 | -5.14 |
| 1445659_PM_at   | ---                          | NA       | 0.43  | 3.00 | 1.83  | 9.60E-02 | 3.51E-01 | -5.14 |
| 1444177_PM_at   | ---                          | NA       | 0.57  | 2.45 | 1.83  | 9.61E-02 | 3.51E-01 | -5.14 |
| 1421216_PM_a_at | Ids                          | IDS      | 0.64  | 4.23 | 1.83  | 9.61E-02 | 3.51E-01 | -5.14 |
| 1452590_PM_a_at | Gm9780 /// Plac9a /// Plac9b | PLAC9    | -0.40 | 4.79 | -1.83 | 9.61E-02 | 3.51E-01 | -5.14 |
| 1432765_PM_at   | ---                          | NA       | -0.17 | 2.08 | -1.83 | 9.61E-02 | 3.51E-01 | -5.14 |
| 1440058_PM_at   | Slc22a14                     | SLC22A14 | 0.16  | 2.62 | 1.83  | 9.61E-02 | 3.51E-01 | -5.14 |
| 1455804_PM_x_at | Oxct1                        | OXCT1    | -0.38 | 4.41 | -1.83 | 9.61E-02 | 3.51E-01 | -5.14 |
| 1420821_PM_at   | Sgpp1                        | SGPP1    | -0.75 | 3.99 | -1.83 | 9.62E-02 | 3.51E-01 | -5.14 |
| 1452599_PM_s_at | Al413582                     | NA       | 0.30  | 2.46 | 1.83  | 9.62E-02 | 3.51E-01 | -5.14 |
| 1444450_PM_at   | Rab42                        | NA       | -0.27 | 2.88 | -1.83 | 9.62E-02 | 3.51E-01 | -5.14 |
| 1440420_PM_at   | ---                          | NA       | 0.30  | 2.70 | 1.83  | 9.62E-02 | 3.51E-01 | -5.14 |
| 1448539_PM_a_at | Acy3                         | ACY3     | 0.14  | 2.53 | 1.83  | 9.62E-02 | 3.51E-01 | -5.14 |
| 1443291_PM_at   | Ank1                         | ANK1     | 0.14  | 2.64 | 1.83  | 9.62E-02 | 3.51E-01 | -5.14 |
| 1432306_PM_at   | ---                          | NA       | 0.19  | 2.23 | 1.83  | 9.62E-02 | 3.51E-01 | -5.14 |
| 1447062_PM_at   | ---                          | NA       | 0.26  | 2.05 | 1.83  | 9.62E-02 | 3.51E-01 | -5.14 |
| 1419545_PM_a_at | Atp6v1c1                     | ATP6V1C1 | -0.86 | 8.53 | -1.83 | 9.63E-02 | 3.51E-01 | -5.14 |
| 1428222_PM_at   | Dclk2                        | DCLK2    | -0.33 | 3.29 | -1.83 | 9.63E-02 | 3.51E-01 | -5.14 |
| 1457133_PM_at   | Tcerg1l                      | TCERG1L  | -0.28 | 2.88 | -1.83 | 9.63E-02 | 3.51E-01 | -5.14 |
| 1430735_PM_at   | Patl2                        | PATL2    | 0.17  | 2.56 | 1.83  | 9.63E-02 | 3.51E-01 | -5.14 |
| 1421559_PM_at   | Abo                          | ABO      | 0.18  | 2.20 | 1.83  | 9.63E-02 | 3.51E-01 | -5.14 |
| 1445425_PM_at   | Gm20740                      | NA       | 0.24  | 3.21 | 1.83  | 9.63E-02 | 3.51E-01 | -5.14 |
| 1439420_PM_x_at | Ggt5                         | GGT5     | 0.35  | 3.27 | 1.83  | 9.63E-02 | 3.51E-01 | -5.14 |
| 1449086_PM_at   | Rnf141                       | RNF141   | 0.35  | 3.79 | 1.83  | 9.63E-02 | 3.51E-01 | -5.14 |
| 1419776_PM_at   | ---                          | NA       | 0.35  | 2.88 | 1.83  | 9.63E-02 | 3.51E-01 | -5.14 |
| 1457978_PM_at   | ---                          | NA       | 0.20  | 2.06 | 1.83  | 9.64E-02 | 3.51E-01 | -5.14 |
| 1437482_PM_at   | Tecrl                        | TECRL    | 0.30  | 2.53 | 1.83  | 9.64E-02 | 3.51E-01 | -5.14 |
| 1454235_PM_a_at | Ing5                         | ING5     | 0.33  | 2.99 | 1.83  | 9.64E-02 | 3.51E-01 | -5.14 |
| 1419642_PM_at   | Purb                         | PURB     | -0.71 | 5.64 | -1.83 | 9.65E-02 | 3.51E-01 | -5.14 |
| 1434544_PM_at   | Bola2                        | BOLA2    | -0.53 | 3.59 | -1.83 | 9.64E-02 | 3.51E-01 | -5.14 |
| 1456218_PM_at   | Snx22                        | SNX22    | -0.32 | 3.21 | -1.83 | 9.64E-02 | 3.51E-01 | -5.14 |
| 1434476_PM_at   | Crtc1                        | CRTC1    | -0.21 | 2.96 | -1.83 | 9.64E-02 | 3.51E-01 | -5.14 |
| 1434211_PM_at   | Sh3bgrl2                     | SH3BGR2  | 0.16  | 2.58 | 1.83  | 9.65E-02 | 3.51E-01 | -5.14 |
| 1421465_PM_at   | Wnt2b                        | WNT2B    | 0.21  | 2.83 | 1.83  | 9.64E-02 | 3.51E-01 | -5.14 |
| 1458060_PM_at   | Ldlrap1                      | LDLRAP1  | 0.21  | 2.33 | 1.83  | 9.64E-02 | 3.51E-01 | -5.14 |
| 1435283_PM_s_at | Fam189a2                     | FAM189A2 | 0.33  | 3.13 | 1.83  | 9.64E-02 | 3.51E-01 | -5.14 |
| 1443067_PM_at   | ---                          | NA       | 0.20  | 2.34 | 1.83  | 9.65E-02 | 3.51E-01 | -5.14 |

|                 |                   |            |       |      |       |          |          |       |
|-----------------|-------------------|------------|-------|------|-------|----------|----------|-------|
| 1426400_PM_a_at | Capns1            | CAPNS1     | 0.46  | 5.56 | 1.83  | 9.65E-02 | 3.52E-01 | -5.14 |
| 1445505_PM_at   | Ndst1             | NA         | 0.71  | 3.18 | 1.83  | 9.65E-02 | 3.52E-01 | -5.14 |
| 1457084_PM_at   | Nlrp9b            | NLRP9      | 0.19  | 2.54 | 1.83  | 9.65E-02 | 3.52E-01 | -5.14 |
| 1455800_PM_x_at | Samm50            | SAMM50     | -0.63 | 7.61 | -1.83 | 9.65E-02 | 3.52E-01 | -5.14 |
| 1436753_PM_at   | Adck5             | ADCK5      | 0.21  | 2.86 | 1.83  | 9.66E-02 | 3.52E-01 | -5.14 |
| 1424563_PM_at   | Slc25a4           | SLC25A4    | 0.22  | 2.59 | 1.83  | 9.66E-02 | 3.52E-01 | -5.14 |
| 1428613_PM_at   | Ldhd              | LDHD       | 0.23  | 2.40 | 1.83  | 9.66E-02 | 3.52E-01 | -5.14 |
| 1416933_PM_at   | Por               | POR        | 0.20  | 3.08 | 1.83  | 9.66E-02 | 3.52E-01 | -5.14 |
| 1453480_PM_at   | Tmem213           | TMEM213    | 0.26  | 3.03 | 1.83  | 9.66E-02 | 3.52E-01 | -5.14 |
| 1440243_PM_at   | Cpne7             | CPNE7      | 0.26  | 2.86 | 1.83  | 9.66E-02 | 3.52E-01 | -5.14 |
| 1441716_PM_at   | ---               | NA         | -0.57 | 3.97 | -1.83 | 9.66E-02 | 3.52E-01 | -5.14 |
| 1418025_PM_at   | Bhlhe40           | BHLHE40    | -0.34 | 3.56 | -1.83 | 9.66E-02 | 3.52E-01 | -5.14 |
| 1416579_PM_a_at | Epcam             | EPCAM      | 0.28  | 3.03 | 1.83  | 9.66E-02 | 3.52E-01 | -5.14 |
| 1455253_PM_at   | Rprd2             | RPRD2      | 0.32  | 2.20 | 1.83  | 9.66E-02 | 3.52E-01 | -5.14 |
| 1424078_PM_s_at | Pex6              | PEX6       | 0.40  | 4.92 | 1.83  | 9.66E-02 | 3.52E-01 | -5.14 |
| 1416556_PM_at   | Tspan31           | TSPAN31    | -0.69 | 5.74 | -1.83 | 9.66E-02 | 3.52E-01 | -5.14 |
| 1422186_PM_s_at | Cyb5r3            | CYB5R3     | -0.24 | 2.91 | -1.83 | 9.67E-02 | 3.52E-01 | -5.14 |
| 1452829_PM_at   | Cad               | CAD        | -0.21 | 2.21 | -1.83 | 9.67E-02 | 3.52E-01 | -5.14 |
| 1449520_PM_at   | Ttc28             | TTC28      | 0.20  | 2.42 | 1.83  | 9.67E-02 | 3.52E-01 | -5.14 |
| 1440384_PM_at   | Tmcc1             | TMCC1      | 0.26  | 2.56 | 1.83  | 9.67E-02 | 3.52E-01 | -5.14 |
| 1452889_PM_at   | Lhpp              | LHPP       | 0.30  | 2.65 | 1.83  | 9.67E-02 | 3.52E-01 | -5.14 |
| 1429285_PM_at   | Serpina9          | SERPINA9   | 0.20  | 2.36 | 1.83  | 9.67E-02 | 3.52E-01 | -5.14 |
| 1430611_PM_at   | Zdhc25            | NA         | 0.21  | 2.29 | 1.83  | 9.67E-02 | 3.52E-01 | -5.14 |
| 1417858_PM_at   | Rasa1             | RASAL1     | 0.28  | 3.24 | 1.83  | 9.67E-02 | 3.52E-01 | -5.14 |
| 1451158_PM_at   | Trip12            | TRIP12     | 0.33  | 5.73 | 1.83  | 9.67E-02 | 3.52E-01 | -5.14 |
| 1429742_PM_at   | Rcvtb2            | RCVTB2     | 0.14  | 2.43 | 1.83  | 9.67E-02 | 3.52E-01 | -5.14 |
| 1416834_PM_x_at | Ndufb2            | NDUFB2     | 0.30  | 4.75 | 1.83  | 9.67E-02 | 3.52E-01 | -5.14 |
| 1448287_PM_at   | Polr1d            | POLR1D     | -0.27 | 4.12 | -1.83 | 9.68E-02 | 3.52E-01 | -5.14 |
| 1420577_PM_at   | Aicda             | AICDA      | -0.24 | 3.05 | -1.83 | 9.68E-02 | 3.52E-01 | -5.14 |
| 1441692_PM_at   | ---               | NA         | 0.21  | 2.73 | 1.83  | 9.68E-02 | 3.52E-01 | -5.14 |
| 1427728_PM_at   | Chrng             | CHRNG      | 0.20  | 2.26 | 1.83  | 9.68E-02 | 3.52E-01 | -5.14 |
| 1425857_PM_at   | Fbxw9             | NA         | 0.25  | 2.47 | 1.83  | 9.68E-02 | 3.52E-01 | -5.14 |
| 1430497_PM_at   | Rxra              | RXRA       | 0.16  | 2.27 | 1.83  | 9.69E-02 | 3.52E-01 | -5.14 |
| 1419490_PM_at   | Fam19a5           | FAM19A5    | -0.43 | 3.87 | -1.83 | 9.69E-02 | 3.52E-01 | -5.14 |
| 1422382_PM_at   | Orf16             | OR10J5     | 0.18  | 2.67 | 1.83  | 9.69E-02 | 3.52E-01 | -5.14 |
| 1424477_PM_at   | Tmem184a          | TMEM184A   | 0.15  | 1.99 | 1.82  | 9.69E-02 | 3.52E-01 | -5.15 |
| 1452150_PM_at   | AU040320          | KIAA0319L  | -0.47 | 4.67 | -1.82 | 9.69E-02 | 3.52E-01 | -5.15 |
| 1440406_PM_at   | Gpatch3           | GPATCH3    | 0.18  | 2.55 | 1.82  | 9.70E-02 | 3.52E-01 | -5.15 |
| 1415748_PM_a_at | Dctn5             | DCTN5      | -0.39 | 4.33 | -1.82 | 9.70E-02 | 3.52E-01 | -5.15 |
| 1416176_PM_at   | Gm21596 /// Hmgb1 | HMGB1      | -0.28 | 6.31 | -1.82 | 9.70E-02 | 3.52E-01 | -5.15 |
| 1453886_PM_a_at | Slc25a26          | SLC25A26   | 0.18  | 2.65 | 1.82  | 9.70E-02 | 3.52E-01 | -5.15 |
| 1450369_PM_at   | Figla             | FIGLA      | 0.21  | 2.23 | 1.82  | 9.70E-02 | 3.52E-01 | -5.15 |
| 1450218_PM_at   | Ccl28             | CCL28      | 0.16  | 2.34 | 1.82  | 9.70E-02 | 3.52E-01 | -5.15 |
| 1453966_PM_at   | Map3k7            | NA         | 0.18  | 2.10 | 1.82  | 9.71E-02 | 3.52E-01 | -5.15 |
| 1438048_PM_at   | Myc11             | MYCT1      | 0.25  | 2.24 | 1.82  | 9.71E-02 | 3.52E-01 | -5.15 |
| 1426574_PM_a_at | Add3              | ADD3       | 0.44  | 4.28 | 1.82  | 9.71E-02 | 3.52E-01 | -5.15 |
| 1421988_PM_at   | Paps2             | PAPSS2     | 0.21  | 2.82 | 1.82  | 9.71E-02 | 3.52E-01 | -5.15 |
| 1425225_PM_at   | Fcgr4             | FCGR3A     | 0.25  | 2.90 | 1.82  | 9.71E-02 | 3.52E-01 | -5.15 |
| 1441021_PM_at   | Letmd1            | NA         | 0.40  | 3.01 | 1.82  | 9.71E-02 | 3.53E-01 | -5.15 |
| 1455073_PM_at   | Cdadc1            | NA         | -0.75 | 5.49 | -1.82 | 9.71E-02 | 3.53E-01 | -5.15 |
| 1429895_PM_at   | Z310010G23Rik     | NA         | 0.22  | 2.48 | 1.82  | 9.72E-02 | 3.53E-01 | -5.15 |
| 1434627_PM_at   | Nrf1              | NRF1       | 0.37  | 2.61 | 1.82  | 9.72E-02 | 3.53E-01 | -5.15 |
| 1439427_PM_at   | Cldn9             | CLDN9      | 0.25  | 2.11 | 1.82  | 9.72E-02 | 3.53E-01 | -5.15 |
| 1435423_PM_x_at | Gskip             | GSKIP      | 1.19  | 6.61 | 1.82  | 9.72E-02 | 3.53E-01 | -5.15 |
| 1460215_PM_at   | Polr1a            | POLR1A     | -0.33 | 3.41 | -1.82 | 9.72E-02 | 3.53E-01 | -5.15 |
| 1439766_PM_x_at | Vegfc             | VEGFC      | -0.45 | 2.45 | -1.82 | 9.72E-02 | 3.53E-01 | -5.15 |
| 1417605_PM_s_at | Camk1             | CAMK1      | 0.40  | 3.58 | 1.82  | 9.72E-02 | 3.53E-01 | -5.15 |
| 1448697_PM_s_at | Rpl36al           | NA         | -0.67 | 6.78 | -1.82 | 9.73E-02 | 3.53E-01 | -5.15 |
| 1425653_PM_at   | Atf7              | ACO23509.3 | 0.32  | 2.99 | 1.82  | 9.73E-02 | 3.53E-01 | -5.15 |
| 1445637_PM_at   | ---               | NA         | 0.28  | 2.66 | 1.82  | 9.73E-02 | 3.53E-01 | -5.15 |
| 1444200_PM_at   | R3hcc1l           | R3HCC1L    | 0.29  | 2.67 | 1.82  | 9.73E-02 | 3.53E-01 | -5.15 |
| 1456963_PM_at   | Tmem214           | TMEM214    | 0.17  | 2.34 | 1.82  | 9.73E-02 | 3.53E-01 | -5.15 |
| 1418406_PM_at   | Pde8a             | PDE8A      | -0.66 | 2.71 | -1.82 | 9.74E-02 | 3.53E-01 | -5.15 |
| 1450413_PM_at   | Pdgfb             | PDGFB      | 0.17  | 2.57 | 1.82  | 9.73E-02 | 3.53E-01 | -5.15 |
| 1422718_PM_at   | Ap32              | AP32       | 0.26  | 3.06 | 1.82  | 9.73E-02 | 3.53E-01 | -5.15 |
| 1454572_PM_at   | LOC102640772      | NA         | 0.30  | 2.88 | 1.82  | 9.73E-02 | 3.53E-01 | -5.15 |
| 1460710_PM_at   | Adora2a           | ADORA2A    | 0.98  | 4.63 | 1.82  | 9.74E-02 | 3.53E-01 | -5.15 |
| 1428397_PM_at   | B3gal5            | B3GALT5    | -0.63 | 3.17 | -1.82 | 9.74E-02 | 3.53E-01 | -5.15 |
| 1440524_PM_at   | Kdm6a             | KDM6A      | 0.26  | 2.92 | 1.82  | 9.74E-02 | 3.53E-01 | -5.15 |
| 1443245_PM_at   | Gm4349            | NA         | 0.26  | 2.92 | 1.82  | 9.75E-02 | 3.53E-01 | -5.15 |
| 1421261_PM_at   | Lipg              | LIPG       | 0.16  | 2.05 | 1.82  | 9.75E-02 | 3.53E-01 | -5.15 |
| 1454649_PM_at   | Srd5a1            | SRD5A1     | 0.18  | 2.56 | 1.82  | 9.75E-02 | 3.53E-01 | -5.15 |
| 1444599_PM_at   | Herc4             | HERC4      | 0.61  | 2.72 | 1.82  | 9.75E-02 | 3.53E-01 | -5.15 |
| 1457111_PM_at   | AA15038           | NA         | 0.46  | 3.15 | 1.82  | 9.75E-02 | 3.53E-01 | -5.15 |
| 1426248_PM_at   | Stk24             | NA         | -0.66 | 4.92 | -1.82 | 9.76E-02 | 3.53E-01 | -5.15 |

|                 |                                                                       |            |       |      |       |          |          |       |
|-----------------|-----------------------------------------------------------------------|------------|-------|------|-------|----------|----------|-------|
| 1415767_PM_at   | Ythdf1                                                                | YTHDF1     | -0.43 | 3.45 | -1.82 | 9.76E-02 | 3.53E-01 | -5.15 |
| 1450772_PM_at   | Wnt11                                                                 | WNT11      | 0.15  | 2.85 | 1.82  | 9.76E-02 | 3.53E-01 | -5.15 |
| 1424705_PM_at   | Rbmx2                                                                 | RBMX2      | 0.19  | 2.17 | 1.82  | 9.76E-02 | 3.53E-01 | -5.15 |
| 1436956_PM_at   | ---                                                                   | NA         | 0.23  | 3.38 | 1.82  | 9.76E-02 | 3.53E-01 | -5.15 |
| 1426081_PM_a_at | Dio2                                                                  | DIO2       | 0.26  | 2.59 | 1.82  | 9.76E-02 | 3.53E-01 | -5.15 |
| 1420407_PM_at   | Ltb4r1                                                                | LTB4R      | 0.30  | 3.36 | 1.82  | 9.76E-02 | 3.53E-01 | -5.15 |
| 1429573_PM_at   | Dmrtc1a                                                               | DMRTC1     | 0.36  | 3.58 | 1.82  | 9.76E-02 | 3.53E-01 | -5.15 |
| 1456292_PM_a_at | Vim                                                                   | VM         | -1.51 | 6.62 | -1.82 | 9.76E-02 | 3.53E-01 | -5.15 |
| 1432743_PM_at   | ---                                                                   | NA         | 0.17  | 2.18 | 1.82  | 9.76E-02 | 3.53E-01 | -5.15 |
| 1454527_PM_at   | 8430437B07Rik                                                         | NA         | 0.18  | 2.25 | 1.82  | 9.76E-02 | 3.53E-01 | -5.15 |
| 1421912_PM_at   | Slc23a1                                                               | SLC23A1    | 0.24  | 2.47 | 1.82  | 9.77E-02 | 3.54E-01 | -5.15 |
| 1454275_PM_at   | LOC102637942                                                          | NA         | 0.17  | 2.22 | 1.82  | 9.77E-02 | 3.54E-01 | -5.15 |
| 1438393_PM_at   | Gm19325                                                               | NA         | 0.19  | 2.35 | 1.82  | 9.77E-02 | 3.54E-01 | -5.15 |
| 1416558_PM_at   | Melk                                                                  | MELK       | 0.21  | 2.36 | 1.82  | 9.77E-02 | 3.54E-01 | -5.15 |
| 1421339_PM_at   | Extl3                                                                 | EXTL3      | -0.58 | 3.55 | -1.82 | 9.78E-02 | 3.54E-01 | -5.15 |
| 1454266_PM_at   | Cldnd2                                                                | ACO08750.8 | 0.15  | 2.54 | 1.82  | 9.78E-02 | 3.54E-01 | -5.15 |
| 1444080_PM_at   | Nav2                                                                  | NAV2       | 0.60  | 2.93 | 1.82  | 9.78E-02 | 3.54E-01 | -5.15 |
| 1444403_PM_at   | ---                                                                   | NA         | 0.27  | 2.60 | 1.82  | 9.78E-02 | 3.54E-01 | -5.15 |
| 1431176_PM_at   | Chmp4c                                                                | CHMP4C     | 0.34  | 3.91 | 1.82  | 9.78E-02 | 3.54E-01 | -5.15 |
| 1455420_PM_at   | Rad23b                                                                | RAD23B     | -0.62 | 4.60 | -1.82 | 9.78E-02 | 3.54E-01 | -5.15 |
| 1459483_PM_at   | ---                                                                   | NA         | 0.15  | 2.17 | 1.82  | 9.78E-02 | 3.54E-01 | -5.15 |
| 1441729_PM_at   | Lmx1b                                                                 | LMX1B      | 0.23  | 2.51 | 1.82  | 9.78E-02 | 3.54E-01 | -5.15 |
| 1442320_PM_at   | ---                                                                   | NA         | 0.36  | 2.63 | 1.82  | 9.78E-02 | 3.54E-01 | -5.15 |
| 1421748_PM_a_at | Tubd1                                                                 | TUBD1      | 0.29  | 2.74 | 1.82  | 9.79E-02 | 3.54E-01 | -5.15 |
| 1451316_PM_a_at | Picalm                                                                | PICALM     | -0.41 | 5.29 | -1.82 | 9.79E-02 | 3.54E-01 | -5.15 |
| 1441754_PM_at   | ---                                                                   | NA         | 0.14  | 1.93 | 1.82  | 9.79E-02 | 3.54E-01 | -5.15 |
| 1425711_PM_a_at | Akt1                                                                  | AKT1       | 0.28  | 2.89 | 1.82  | 9.79E-02 | 3.54E-01 | -5.15 |
| 1447160_PM_at   | Nono                                                                  | NONO       | -0.16 | 3.07 | -1.82 | 9.80E-02 | 3.54E-01 | -5.16 |
| 1451494_PM_at   | Wac                                                                   | WAC        | 0.48  | 3.44 | 1.82  | 9.80E-02 | 3.54E-01 | -5.15 |
| 1421033_PM_a_at | Tcerg1                                                                | TCERG1     | 0.59  | 3.79 | 1.82  | 9.80E-02 | 3.54E-01 | -5.16 |
| 1445165_PM_at   | ---                                                                   | NA         | -0.28 | 3.03 | -1.82 | 9.80E-02 | 3.54E-01 | -5.16 |
| 1455977_PM_x_at | Klk1                                                                  | KLK3       | 0.21  | 2.37 | 1.82  | 9.80E-02 | 3.54E-01 | -5.16 |
| 1420806_PM_at   | Fgf16                                                                 | FGF16      | 0.15  | 2.25 | 1.82  | 9.80E-02 | 3.54E-01 | -5.16 |
| 1428016_PM_a_at | Rasip1                                                                | RASIP1     | 0.23  | 2.32 | 1.82  | 9.80E-02 | 3.54E-01 | -5.16 |
| 1423728_PM_at   | Eif3l                                                                 | EIF3L      | -0.40 | 3.68 | -1.82 | 9.81E-02 | 3.54E-01 | -5.16 |
| 1417354_PM_at   | Sil1                                                                  | SIL1       | 0.30  | 4.62 | 1.82  | 9.81E-02 | 3.54E-01 | -5.16 |
| 1455652_PM_at   | Kif3a                                                                 | NA         | -0.39 | 6.47 | -1.82 | 9.82E-02 | 3.54E-01 | -5.16 |
| 1421354_PM_at   | Prkg2                                                                 | PRKG2      | 0.26  | 2.56 | 1.82  | 9.82E-02 | 3.55E-01 | -5.16 |
| 1423926_PM_at   | Slc39a13                                                              | SLC39A13   | 0.23  | 2.64 | 1.82  | 9.82E-02 | 3.55E-01 | -5.16 |
| 1426876_PM_at   | Pm20d1                                                                | NA         | -0.47 | 2.40 | -1.82 | 9.82E-02 | 3.55E-01 | -5.16 |
| 1418962_PM_at   | Necap2                                                                | NECAP2     | -0.27 | 2.31 | -1.82 | 9.82E-02 | 3.55E-01 | -5.16 |
| 1417596_PM_at   | B9d1                                                                  | B9D1       | 0.29  | 2.59 | 1.82  | 9.82E-02 | 3.55E-01 | -5.16 |
| 1441123_PM_at   | Fam120c                                                               | FAM120C    | 0.27  | 2.80 | 1.82  | 9.83E-02 | 3.55E-01 | -5.16 |
| 1450748_PM_at   | Smpd3                                                                 | SMPD3      | 0.22  | 2.08 | 1.82  | 9.83E-02 | 3.55E-01 | -5.16 |
| 1442481_PM_at   | ---                                                                   | NA         | 0.21  | 2.60 | 1.82  | 9.83E-02 | 3.55E-01 | -5.16 |
| 1448781_PM_at   | Nab1                                                                  | NAB1       | 0.26  | 2.81 | 1.82  | 9.83E-02 | 3.55E-01 | -5.16 |
| 1424126_PM_at   | Alas1                                                                 | ALAS1      | 0.24  | 2.88 | 1.82  | 9.84E-02 | 3.55E-01 | -5.16 |
| 1422140_PM_at   | Gm15433 /// Gm2666 ///<br>Gm7609 /// LOC100041903<br>/// LOC100503923 | NA         | 0.43  | 3.69 | 1.82  | 9.84E-02 | 3.55E-01 | -5.16 |
| 1423085_PM_at   | Efnb3                                                                 | EFNB3      | -0.26 | 2.78 | -1.82 | 9.84E-02 | 3.55E-01 | -5.16 |
| 1442181_PM_at   | ---                                                                   | NA         | 0.33  | 2.90 | 1.82  | 9.84E-02 | 3.55E-01 | -5.16 |
| 1425352_PM_at   | Rcor3                                                                 | RCOR3      | 0.44  | 3.60 | 1.82  | 9.84E-02 | 3.55E-01 | -5.16 |
| 1417425_PM_at   | Prkrip1                                                               | PRKRIP1    | 0.43  | 4.06 | 1.82  | 9.84E-02 | 3.55E-01 | -5.16 |
| 1420629_PM_a_at | Dnaja3                                                                | DNAJA3     | 0.36  | 2.94 | 1.82  | 9.85E-02 | 3.55E-01 | -5.16 |
| 1428759_PM_s_at | Cwc25                                                                 | CWC25      | 0.42  | 2.87 | 1.82  | 9.85E-02 | 3.55E-01 | -5.16 |
| 1440227_PM_at   | Slc5a3                                                                | SLC5A3     | -0.53 | 5.53 | -1.82 | 9.85E-02 | 3.55E-01 | -5.16 |
| 1456673_PM_at   | Trim71                                                                | TRIM71     | 0.22  | 2.77 | 1.82  | 9.85E-02 | 3.55E-01 | -5.16 |
| 1450805_PM_at   | Sgcd                                                                  | SGCD       | 0.16  | 2.27 | 1.81  | 9.85E-02 | 3.55E-01 | -5.16 |
| 1434526_PM_at   | Ephx4                                                                 | EPHX4      | -0.31 | 4.98 | -1.81 | 9.85E-02 | 3.55E-01 | -5.16 |
| 1441763_PM_at   | ---                                                                   | NA         | 0.28  | 2.67 | 1.81  | 9.85E-02 | 3.55E-01 | -5.16 |
| 1454993_PM_a_at | Srsf3                                                                 | SRSF3      | -0.98 | 5.66 | -1.81 | 9.86E-02 | 3.55E-01 | -5.16 |
| 1460689_PM_at   | Desi1                                                                 | DESI1      | -0.47 | 3.10 | -1.81 | 9.86E-02 | 3.55E-01 | -5.16 |
| 1460078_PM_at   | Zfp771                                                                | ZNF771     | 0.15  | 2.77 | 1.81  | 9.86E-02 | 3.55E-01 | -5.16 |
| 1439123_PM_at   | ---                                                                   | NA         | 0.35  | 2.68 | 1.81  | 9.86E-02 | 3.55E-01 | -5.16 |
| 1459592_PM_a_at | Ppp1r13l                                                              | PPP1R13L   | 0.15  | 2.45 | 1.81  | 9.87E-02 | 3.55E-01 | -5.16 |
| 1440239_PM_at   | ---                                                                   | NA         | 0.16  | 2.48 | 1.81  | 9.87E-02 | 3.56E-01 | -5.16 |
| 1437887_PM_at   | Samd5                                                                 | SAMD5      | 0.30  | 2.34 | 1.81  | 9.87E-02 | 3.56E-01 | -5.16 |
| 1420089_PM_at   | Nfkbia                                                                | NA         | -0.36 | 6.69 | -1.81 | 9.87E-02 | 3.56E-01 | -5.16 |
| 1440265_PM_at   | Jund                                                                  | JUND       | 0.31  | 2.87 | 1.81  | 9.87E-02 | 3.56E-01 | -5.16 |
| 1429249_PM_at   | Plppr5                                                                | PLPPR5     | -0.68 | 4.23 | -1.81 | 9.87E-02 | 3.56E-01 | -5.16 |
| 1448961_PM_at   | Plscr2                                                                | NA         | -0.58 | 2.70 | -1.81 | 9.88E-02 | 3.56E-01 | -5.16 |
| 1424403_PM_a_at | Rufy3                                                                 | RUFY3      | -0.55 | 7.07 | -1.81 | 9.88E-02 | 3.56E-01 | -5.16 |
| 1439453_PM_x_at | Rnaseh2c                                                              | RNASEH2C   | -0.54 | 3.29 | -1.81 | 9.88E-02 | 3.56E-01 | -5.16 |

|                 |               |          |       |      |       |          |          |       |
|-----------------|---------------|----------|-------|------|-------|----------|----------|-------|
| 1441865_PM_at   | ---           | NA       | 0.25  | 2.22 | 1.81  | 9.88E-02 | 3.56E-01 | -5.16 |
| 1439396_PM_x_at | Gpd1          | GPD1     | 0.20  | 2.38 | 1.81  | 9.88E-02 | 3.56E-01 | -5.16 |
| 1419964_PM_s_at | Hdgf          | HDGF     | -0.53 | 5.28 | -1.81 | 9.88E-02 | 3.56E-01 | -5.16 |
| 1446958_PM_at   | D13Erttd150e  | NA       | 0.27  | 2.73 | 1.81  | 9.88E-02 | 3.56E-01 | -5.16 |
| 1453894_PM_at   | ---           | NA       | 0.26  | 2.81 | 1.81  | 9.89E-02 | 3.56E-01 | -5.16 |
| 1436660_PM_at   | Rrbp1         | RBBP1    | 0.58  | 2.96 | 1.81  | 9.89E-02 | 3.56E-01 | -5.16 |
| 1430003_PM_at   | ---           | NA       | 0.47  | 3.56 | 1.81  | 9.89E-02 | 3.56E-01 | -5.16 |
| 1432556_PM_a_at | Fam183b       | FAM183A  | 0.15  | 2.15 | 1.81  | 9.89E-02 | 3.56E-01 | -5.16 |
| 1429837_PM_at   | ---           | NA       | 0.18  | 2.20 | 1.81  | 9.90E-02 | 3.56E-01 | -5.16 |
| 1437895_PM_at   | Ano8          | ANO8     | 0.21  | 2.29 | 1.81  | 9.90E-02 | 3.56E-01 | -5.16 |
| 1436674_PM_at   | Rundc3a       | RUNDCA3A | -0.27 | 6.80 | -1.81 | 9.90E-02 | 3.56E-01 | -5.16 |
| 1450725_PM_s_at | Car14         | CA14     | 0.30  | 2.83 | 1.81  | 9.90E-02 | 3.56E-01 | -5.16 |
| 1445940_PM_at   | D4Erttd298e   | NA       | 0.45  | 2.62 | 1.81  | 9.91E-02 | 3.56E-01 | -5.16 |
| 1423107_PM_at   | Ube2b         | UBE2B    | -0.83 | 4.63 | -1.81 | 9.91E-02 | 3.56E-01 | -5.17 |
| 1427601_PM_at   | Gjd4          | GJD4     | 0.17  | 2.87 | 1.81  | 9.91E-02 | 3.56E-01 | -5.17 |
| 1458411_PM_at   | Kndc1         | KNDC1    | 0.22  | 2.55 | 1.81  | 9.91E-02 | 3.56E-01 | -5.17 |
| 1438785_PM_at   | Enpp6         | ENPP6    | 0.19  | 2.94 | 1.81  | 9.91E-02 | 3.56E-01 | -5.17 |
| 1418934_PM_at   | Mab21l2       | MAB21L2  | 0.24  | 2.64 | 1.81  | 9.91E-02 | 3.56E-01 | -5.17 |
| 1433132_PM_at   | Edaradd       | NA       | 0.26  | 2.41 | 1.81  | 9.91E-02 | 3.56E-01 | -5.17 |
| 1432884_PM_at   | Tmem236       | NA       | 0.28  | 2.82 | 1.81  | 9.91E-02 | 3.56E-01 | -5.17 |
| 1438731_PM_at   | Sgsh          | SGSH     | 0.35  | 3.43 | 1.81  | 9.92E-02 | 3.57E-01 | -5.17 |
| 1418915_PM_at   | Mmachc        | MMACHC   | -0.30 | 2.54 | -1.81 | 9.92E-02 | 3.57E-01 | -5.17 |
| 1425770_PM_at   | ---           | NA       | 0.18  | 2.15 | 1.81  | 9.92E-02 | 3.57E-01 | -5.17 |
| 1451256_PM_at   | Slc52a2       | SLC52A1  | 0.21  | 2.82 | 1.81  | 9.92E-02 | 3.57E-01 | -5.17 |
| 1426068_PM_at   | Slc7a4        | SLC7A4   | -0.21 | 3.14 | -1.81 | 9.93E-02 | 3.57E-01 | -5.17 |
| 1417671_PM_at   | Scly          | SCLY     | 0.16  | 2.26 | 1.81  | 9.93E-02 | 3.57E-01 | -5.17 |
| 1419817_PM_s_at | Ankzf1        | ANKZF1   | 0.22  | 2.52 | 1.81  | 9.93E-02 | 3.57E-01 | -5.17 |
| 1452897_PM_at   | Cdk13         | CDK13    | 0.31  | 3.65 | 1.81  | 9.93E-02 | 3.57E-01 | -5.17 |
| 1458089_PM_at   | ---           | NA       | 0.17  | 2.44 | 1.81  | 9.93E-02 | 3.57E-01 | -5.17 |
| 1454158_PM_at   | Mpp7          | MPP7     | 0.20  | 2.36 | 1.81  | 9.93E-02 | 3.57E-01 | -5.17 |
| 1431997_PM_at   | 3000002C10Rik | NA       | 0.41  | 4.70 | 1.81  | 9.93E-02 | 3.57E-01 | -5.17 |
| 1420651_PM_at   | Ate1          | ATE1     | 0.48  | 3.54 | 1.81  | 9.93E-02 | 3.57E-01 | -5.17 |
| 1458995_PM_at   | Diexf         | NA       | 0.50  | 3.25 | 1.81  | 9.93E-02 | 3.57E-01 | -5.17 |
| 1417518_PM_at   | Plagl2        | PLAGL2   | 0.23  | 2.61 | 1.81  | 9.94E-02 | 3.57E-01 | -5.17 |
| 1425413_PM_at   | Rfx3          | RFX3     | 0.30  | 2.63 | 1.81  | 9.94E-02 | 3.57E-01 | -5.17 |
| 1433849_PM_at   | Cdc27         | CD27     | 0.60  | 2.94 | 1.81  | 9.94E-02 | 3.57E-01 | -5.17 |
| 1448941_PM_at   | B4galt2       | B4GALT2  | 0.20  | 2.46 | 1.81  | 9.94E-02 | 3.57E-01 | -5.17 |
| 1440828_PM_x_at | Phf7          | PHF7     | 0.20  | 2.30 | 1.81  | 9.95E-02 | 3.57E-01 | -5.17 |
| 1427490_PM_at   | Abcb7         | ABCB7    | 0.63  | 4.28 | 1.81  | 9.95E-02 | 3.57E-01 | -5.17 |
| 1446887_PM_at   | ---           | NA       | -0.70 | 6.19 | -1.81 | 9.95E-02 | 3.57E-01 | -5.17 |
| 1416473_PM_a_at | Igdcc4        | IGDCC4   | -0.46 | 5.82 | -1.81 | 9.96E-02 | 3.57E-01 | -5.17 |
| 1454255_PM_at   | ---           | NA       | -0.30 | 4.76 | -1.81 | 9.96E-02 | 3.57E-01 | -5.17 |
| 1416178_PM_a_at | Plekhhb1      | PLEKHB1  | -1.06 | 5.96 | -1.81 | 9.96E-02 | 3.58E-01 | -5.17 |
| 1455495_PM_at   | Abl2          | ABL2     | -0.66 | 4.68 | -1.81 | 9.96E-02 | 3.58E-01 | -5.17 |
| 1457584_PM_at   | Suco          | SUCO     | -0.55 | 2.81 | -1.81 | 9.96E-02 | 3.58E-01 | -5.17 |
| 1449346_PM_s_at | Rlok1         | RLOK1    | -0.22 | 2.49 | -1.81 | 9.96E-02 | 3.58E-01 | -5.17 |
| 1449759_PM_at   | D11Erttd326e  | NA       | 0.21  | 2.66 | 1.81  | 9.97E-02 | 3.58E-01 | -5.17 |
| 1441706_PM_at   | Dscam1        | NA       | -0.51 | 4.50 | -1.81 | 9.97E-02 | 3.58E-01 | -5.17 |
| 1455585_PM_at   | Rnf168        | RNF168   | -0.89 | 5.12 | -1.81 | 9.97E-02 | 3.58E-01 | -5.17 |
| 1442931_PM_at   | ---           | NA       | 0.18  | 2.31 | 1.81  | 9.97E-02 | 3.58E-01 | -5.17 |
| 1458624_PM_at   | Rbm24         | RBM24    | 0.22  | 2.56 | 1.81  | 9.97E-02 | 3.58E-01 | -5.17 |
| 1415893_PM_at   | Sgpl1         | SGPL1    | 0.39  | 2.70 | 1.81  | 9.97E-02 | 3.58E-01 | -5.17 |
| 1440659_PM_at   | ---           | NA       | 0.54  | 2.48 | 1.81  | 9.97E-02 | 3.58E-01 | -5.17 |
| 1427879_PM_at   | Cnppd1        | CNPPD1   | -0.41 | 3.49 | -1.81 | 9.98E-02 | 3.58E-01 | -5.17 |
| 1436460_PM_at   | Tmem194       | NEMP1    | 0.20  | 2.97 | 1.81  | 9.98E-02 | 3.58E-01 | -5.17 |
| 1437250_PM_at   | Mreg          | NA       | 0.36  | 3.98 | 1.81  | 9.98E-02 | 3.58E-01 | -5.17 |
| 1437573_PM_at   | ---           | NA       | -0.26 | 2.29 | -1.81 | 9.98E-02 | 3.58E-01 | -5.17 |
| 1456765_PM_at   | Nhsl2         | NHSL2    | -0.59 | 5.17 | -1.81 | 9.99E-02 | 3.58E-01 | -5.17 |
| 1423523_PM_at   | Aass          | AASS     | -0.42 | 2.80 | -1.81 | 9.98E-02 | 3.58E-01 | -5.17 |
| 1445879_PM_at   | Zfp507        | ZNF507   | 0.22  | 2.81 | 1.81  | 9.99E-02 | 3.58E-01 | -5.17 |
| 1420970_PM_at   | Adcy7         | NA       | 0.32  | 2.88 | 1.81  | 9.98E-02 | 3.58E-01 | -5.17 |
| 1436890_PM_at   | Uap1l1        | UAP1L1   | 0.34  | 2.54 | 1.81  | 9.99E-02 | 3.58E-01 | -5.17 |
| 1455186_PM_a_at | Urah          | NA       | 0.21  | 3.82 | 1.81  | 9.99E-02 | 3.58E-01 | -5.17 |
| 1427163_PM_at   | Ubr2          | UBR2     | -0.32 | 3.15 | -1.81 | 9.99E-02 | 3.58E-01 | -5.17 |
| 1450922_PM_a_at | Tgfb2         | TGFB2    | -0.36 | 2.98 | -1.81 | 9.99E-02 | 3.58E-01 | -5.17 |
| 1434640_PM_at   | Nrsn2         | NRSN2    | 0.30  | 3.19 | 1.81  | 1.00E-01 | 3.58E-01 | -5.17 |
| 1434574_PM_at   | Snhg17        | NA       | 0.19  | 2.81 | 1.81  | 1.00E-01 | 3.58E-01 | -5.17 |
| 1448841_PM_at   | Pfpl          | MPEG1    | 0.21  | 2.31 | 1.81  | 1.00E-01 | 3.58E-01 | -5.17 |
| 1432406_PM_at   | Ces5a         | CESSA    | 0.36  | 2.32 | 1.81  | 1.00E-01 | 3.58E-01 | -5.17 |
| 1417982_PM_at   | Insig2        | INSIG2   | -0.30 | 3.14 | -1.81 | 1.00E-01 | 3.58E-01 | -5.17 |
| 1460530_PM_at   | 4933416A02Rik | NA       | 0.20  | 2.15 | 1.81  | 1.00E-01 | 3.58E-01 | -5.17 |
| 1445578_PM_at   | ---           | NA       | 0.36  | 2.72 | 1.81  | 1.00E-01 | 3.58E-01 | -5.17 |
| 1426606_PM_at   | Crtac1        | CRTAC1   | -0.45 | 3.44 | -1.81 | 1.00E-01 | 3.58E-01 | -5.17 |
| 1434536_PM_at   | Gpr75         | GPR75    | -0.34 | 3.41 | -1.81 | 1.00E-01 | 3.58E-01 | -5.17 |
| 1442840_PM_at   | D4Erttd69e    | NA       | 0.15  | 2.50 | 1.81  | 1.00E-01 | 3.58E-01 | -5.17 |

|                 |                                   |                |       |      |       |          |          |       |
|-----------------|-----------------------------------|----------------|-------|------|-------|----------|----------|-------|
| 1448117_PM_at   | Kitl                              | KITLG          | 0.54  | 3.52 | 1.81  | 1.00E-01 | 3.58E-01 | -5.17 |
| 1427482_PM_a_at | Car8                              | CAB            | 1.46  | 3.13 | 1.81  | 1.00E-01 | 3.58E-01 | -5.17 |
| 1453030_PM_at   | Msl2                              | MSL2           | -1.02 | 4.87 | -1.81 | 1.00E-01 | 3.58E-01 | -5.17 |
| 1416333_PM_at   | Dok2                              | DOK2           | 0.21  | 2.77 | 1.81  | 1.00E-01 | 3.58E-01 | -5.17 |
| 1460246_PM_at   | MeCP2                             | MECP2          | -0.45 | 3.97 | -1.80 | 1.00E-01 | 3.58E-01 | -5.17 |
| 1443480_PM_at   | ---                               | NA             | 0.18  | 3.10 | 1.80  | 1.00E-01 | 3.58E-01 | -5.17 |
| 1447389_PM_at   | Al662168                          | NA             | 0.18  | 2.46 | 1.80  | 1.00E-01 | 3.58E-01 | -5.18 |
| 1445827_PM_at   | Zmynd8                            | ZMYND8         | 0.23  | 3.03 | 1.80  | 1.00E-01 | 3.58E-01 | -5.17 |
| 1437630_PM_at   | Lsg1                              | LSG1           | 0.25  | 2.92 | 1.80  | 1.00E-01 | 3.58E-01 | -5.18 |
| 1440225_PM_at   | Adgrf5                            | ADGRF5         | -0.37 | 2.69 | -1.80 | 1.00E-01 | 3.58E-01 | -5.18 |
| 1419700_PM_a_at | Prom1                             | PROM1          | 0.50  | 3.21 | 1.80  | 1.00E-01 | 3.58E-01 | -5.18 |
| 1447998_PM_at   | Ighg3                             | NA             | 0.24  | 2.72 | 1.80  | 1.00E-01 | 3.58E-01 | -5.18 |
| 1449872_PM_at   | Hspb3                             | HSPB3          | 0.31  | 3.30 | 1.80  | 1.00E-01 | 3.58E-01 | -5.18 |
| 1450995_PM_at   | Folr1                             | FOLR1          | 0.34  | 2.26 | 1.80  | 1.00E-01 | 3.58E-01 | -5.18 |
| 1441825_PM_x_at | Ighmbp2                           | NA             | 0.38  | 3.86 | 1.80  | 1.00E-01 | 3.58E-01 | -5.18 |
| 1447410_PM_at   | ---                               | NA             | 0.61  | 4.38 | 1.80  | 1.00E-01 | 3.58E-01 | -5.18 |
| 1421574_PM_at   | Rap2a                             | RAP2A          | 0.22  | 2.90 | 1.80  | 1.00E-01 | 3.58E-01 | -5.18 |
| 1417766_PM_at   | Cyb5b                             | CY5B           | -0.48 | 3.80 | -1.80 | 1.00E-01 | 3.59E-01 | -5.18 |
| 1439111_PM_at   | Tsc22d1                           | TSC22D1        | -0.38 | 3.48 | -1.80 | 1.00E-01 | 3.59E-01 | -5.18 |
| 1450892_PM_a_at | Usp4                              | USP4           | 0.73  | 5.59 | 1.80  | 1.00E-01 | 3.59E-01 | -5.18 |
| 1437341_PM_x_at | Cnp                               | CNP            | -1.17 | 7.19 | -1.80 | 1.00E-01 | 3.59E-01 | -5.18 |
| 1445142_PM_at   | ---                               | NA             | 0.26  | 2.44 | 1.80  | 1.00E-01 | 3.59E-01 | -5.18 |
| 1444524_PM_at   | Gm14005                           | NA             | 0.29  | 2.64 | 1.80  | 1.00E-01 | 3.59E-01 | -5.18 |
| 1458999_PM_at   | Mpr510                            | MRPS10         | 0.20  | 2.25 | 1.80  | 1.00E-01 | 3.59E-01 | -5.18 |
| 1434215_PM_at   | Pds5a                             | PDS5A          | 0.58  | 4.55 | 1.80  | 1.00E-01 | 3.59E-01 | -5.18 |
| 1424697_PM_at   | Dtwd1                             | DTWD1          | -0.40 | 3.17 | -1.80 | 1.01E-01 | 3.59E-01 | -5.18 |
| 1446769_PM_at   | Ttc39c                            | NA             | -0.47 | 3.27 | -1.80 | 1.01E-01 | 3.59E-01 | -5.18 |
| 1451754_PM_a_at | Wdr45                             | WDR45          | -0.64 | 3.62 | -1.80 | 1.01E-01 | 3.59E-01 | -5.18 |
| 1460420_PM_a_at | Egfr                              | EGFR           | 0.24  | 3.46 | 1.80  | 1.01E-01 | 3.59E-01 | -5.18 |
| 1456140_PM_at   | Zic5                              | ZIC5           | 0.33  | 2.30 | 1.80  | 1.01E-01 | 3.59E-01 | -5.18 |
| 1418846_PM_at   | Ap4m1                             | AP4M1          | 0.21  | 2.83 | 1.80  | 1.01E-01 | 3.59E-01 | -5.18 |
| 1425921_PM_a_at | 1810055G02Rik                     | C11orf24       | 0.31  | 2.63 | 1.80  | 1.01E-01 | 3.59E-01 | -5.18 |
| 1423998_PM_at   | Gtf3c5                            | GTF3C5         | 0.34  | 2.91 | 1.80  | 1.01E-01 | 3.59E-01 | -5.18 |
| 1459522_PM_s_at | Gyg1                              | GYG1           | -0.62 | 4.03 | -1.80 | 1.01E-01 | 3.59E-01 | -5.18 |
| 1443336_PM_at   | Kdm2a                             | KDM2A          | -0.28 | 2.90 | -1.80 | 1.01E-01 | 3.59E-01 | -5.18 |
| 1429324_PM_at   | Shcbp1l                           | SHCBP1L        | 0.38  | 3.59 | 1.80  | 1.01E-01 | 3.59E-01 | -5.18 |
| 1454743_PM_at   | Nup205                            | NUP205         | -0.36 | 2.68 | -1.80 | 1.01E-01 | 3.59E-01 | -5.18 |
| 1445772_PM_at   | D16Ert550e                        | NA             | -0.19 | 2.36 | -1.80 | 1.01E-01 | 3.59E-01 | -5.18 |
| 1435946_PM_at   | Sepsecs                           | SEPECS         | 0.17  | 2.62 | 1.80  | 1.01E-01 | 3.59E-01 | -5.18 |
| 1459862_PM_at   | ---                               | NA             | -0.22 | 2.34 | -1.80 | 1.01E-01 | 3.59E-01 | -5.18 |
| 1444784_PM_at   | Rbm46os                           | NA             | 0.27  | 2.82 | 1.80  | 1.01E-01 | 3.59E-01 | -5.18 |
| 1435073_PM_a_at | Arm9                              | ARM9           | 0.31  | 3.37 | 1.80  | 1.01E-01 | 3.59E-01 | -5.18 |
| 1423564_PM_a_at | Paics                             | PAICS          | -0.64 | 4.91 | -1.80 | 1.01E-01 | 3.59E-01 | -5.18 |
| 1450457_PM_at   | Cbl                               | CBL            | 0.25  | 2.68 | 1.80  | 1.01E-01 | 3.59E-01 | -5.18 |
| 1435103_PM_x_at | Farsb                             | FARSB          | -0.71 | 4.47 | -1.80 | 1.01E-01 | 3.59E-01 | -5.18 |
| 1438841_PM_s_at | Arg2                              | ARG2           | -0.58 | 3.21 | -1.80 | 1.01E-01 | 3.59E-01 | -5.18 |
| 1436204_PM_at   | ---                               | NA             | -0.44 | 2.56 | -1.80 | 1.01E-01 | 3.59E-01 | -5.18 |
| 1415989_PM_at   | Vcam1                             | VCAM1          | -0.24 | 3.24 | -1.80 | 1.01E-01 | 3.59E-01 | -5.18 |
| 1442295_PM_at   | Arpc2                             | NA             | 0.17  | 2.20 | 1.80  | 1.01E-01 | 3.59E-01 | -5.18 |
| 1458971_PM_at   | ---                               | NA             | 0.18  | 2.16 | 1.80  | 1.01E-01 | 3.59E-01 | -5.18 |
| 1424173_PM_at   | Ndc1                              | NDC1           | 0.22  | 2.46 | 1.80  | 1.01E-01 | 3.59E-01 | -5.18 |
| 1425656_PM_a_at | Baiap2                            | BAIAP2         | 0.24  | 2.82 | 1.80  | 1.01E-01 | 3.59E-01 | -5.18 |
| 1424631_PM_a_at | Ighg /// Ighg2b                   | NA             | 0.31  | 2.51 | 1.80  | 1.01E-01 | 3.59E-01 | -5.18 |
| 1431120_PM_a_at | Golga1                            | GOLGA1         | 0.36  | 2.92 | 1.80  | 1.01E-01 | 3.59E-01 | -5.18 |
| 1434436_PM_at   | Morc4                             | MORC4          | 0.38  | 3.02 | 1.80  | 1.01E-01 | 3.59E-01 | -5.18 |
| 1454078_PM_a_at | Gal3st1                           | GAL3ST1        | 0.19  | 2.27 | 1.80  | 1.01E-01 | 3.59E-01 | -5.18 |
| 1440726_PM_at   | ---                               | NA             | 0.95  | 2.86 | 1.80  | 1.01E-01 | 3.60E-01 | -5.18 |
| 1440942_PM_at   | ---                               | NA             | 0.16  | 2.01 | 1.80  | 1.01E-01 | 3.60E-01 | -5.18 |
| 1459498_PM_at   | ---                               | NA             | 0.22  | 2.51 | 1.80  | 1.01E-01 | 3.60E-01 | -5.18 |
| 1432251_PM_at   | ---                               | NA             | 0.18  | 2.43 | 1.80  | 1.01E-01 | 3.60E-01 | -5.18 |
| 1440271_PM_at   | ---                               | NA             | 0.40  | 3.76 | 1.80  | 1.01E-01 | 3.60E-01 | -5.18 |
| 1453222_PM_at   | Gse1                              | GSE1           | -0.36 | 3.10 | -1.80 | 1.01E-01 | 3.60E-01 | -5.18 |
| 1437101_PM_at   | Lats2                             | LATS2          | -0.85 | 4.93 | -1.80 | 1.01E-01 | 3.60E-01 | -5.18 |
| 1438433_PM_at   | Whamm                             | WHAMM          | 0.60  | 3.32 | 1.80  | 1.01E-01 | 3.60E-01 | -5.18 |
| 1431819_PM_at   | ---                               | NA             | 0.32  | 2.73 | 1.80  | 1.01E-01 | 3.60E-01 | -5.18 |
| 1433657_PM_at   | Fam78a                            | FAM78A         | 0.18  | 2.57 | 1.80  | 1.01E-01 | 3.60E-01 | -5.18 |
| 1450526_PM_at   | Tlx1                              | TLX1           | 0.24  | 2.54 | 1.80  | 1.01E-01 | 3.60E-01 | -5.18 |
| 1427402_PM_at   | Polr2f                            | NA             | 0.24  | 2.95 | 1.80  | 1.01E-01 | 3.60E-01 | -5.18 |
| 1458375_PM_at   | Klhl32                            | KLHL32         | 0.25  | 2.64 | 1.80  | 1.01E-01 | 3.60E-01 | -5.18 |
| 1460175_PM_at   | Rps23 /// Rps23-ps1 /// Rps23-ps2 | RPS23          | 0.59  | 5.62 | 1.80  | 1.01E-01 | 3.60E-01 | -5.18 |
| 1440960_PM_at   | ---                               | NA             | 1.09  | 4.56 | 1.80  | 1.01E-01 | 3.60E-01 | -5.18 |
| 1425404_PM_a_at | Tmem110                           | TMEM110-MUSTN1 | 0.19  | 2.41 | 1.80  | 1.01E-01 | 3.60E-01 | -5.18 |
| 1433847_PM_at   | Strip2                            | STRIP2         | -0.39 | 4.44 | -1.80 | 1.01E-01 | 3.60E-01 | -5.18 |
| 1460125_PM_at   | Ccdc141                           | CCDC141        | 0.17  | 2.32 | 1.80  | 1.01E-01 | 3.60E-01 | -5.18 |

|                 |                   |           |       |      |       |          |          |       |
|-----------------|-------------------|-----------|-------|------|-------|----------|----------|-------|
| 1445989_PM_at   | ---               | NA        | 0.24  | 2.44 | 1.80  | 1.01E-01 | 3.60E-01 | -5.18 |
| 1449531_PM_at   | P3h3              | P3H3      | 0.27  | 2.62 | 1.80  | 1.01E-01 | 3.60E-01 | -5.18 |
| 1445530_PM_at   | ---               | NA        | -0.18 | 2.13 | -1.80 | 1.01E-01 | 3.60E-01 | -5.18 |
| 1444920_PM_at   | ---               | NA        | 0.36  | 2.70 | 1.80  | 1.01E-01 | 3.60E-01 | -5.18 |
| 1441373_PM_at   | ---               | NA        | -0.24 | 2.52 | -1.80 | 1.01E-01 | 3.60E-01 | -5.18 |
| 1449663_PM_at   | ---               | NA        | -0.49 | 6.09 | -1.80 | 1.01E-01 | 3.60E-01 | -5.19 |
| 1437280_PM_s_at | Serbp1            | SERBP1    | -0.26 | 8.29 | -1.80 | 1.01E-01 | 3.60E-01 | -5.19 |
| 1430466_PM_at   | Tmem45a2          | TMEM45A   | -0.24 | 2.45 | -1.80 | 1.01E-01 | 3.60E-01 | -5.19 |
| 1439821_PM_at   | Lrp2bp            | LRP2BP    | 0.18  | 2.57 | 1.80  | 1.01E-01 | 3.60E-01 | -5.19 |
| 1425828_PM_at   | Nkx6-1            | NKX6-1    | 0.19  | 2.66 | 1.80  | 1.01E-01 | 3.60E-01 | -5.19 |
| 1449331_PM_a_at | Rapsn             | RAPSN     | 0.22  | 2.68 | 1.80  | 1.01E-01 | 3.60E-01 | -5.19 |
| 1435118_PM_at   | Tsen2             | TSEN2     | 0.28  | 3.55 | 1.80  | 1.01E-01 | 3.60E-01 | -5.19 |
| 1450758_PM_at   | Cntnap2           | CNTNAP2   | -0.22 | 2.71 | -1.80 | 1.01E-01 | 3.60E-01 | -5.19 |
| 1418857_PM_at   | Slc13a2           | SLC13A2   | 0.14  | 2.00 | 1.80  | 1.01E-01 | 3.60E-01 | -5.19 |
| 1443031_PM_at   | ---               | NA        | 0.15  | 2.25 | 1.80  | 1.01E-01 | 3.60E-01 | -5.19 |
| 1460423_PM_x_at | Igkv1-117         | NA        | 0.21  | 2.24 | 1.80  | 1.01E-01 | 3.60E-01 | -5.19 |
| 1434780_PM_at   | Mtus2             | MTUS2     | -0.19 | 2.61 | -1.80 | 1.01E-01 | 3.60E-01 | -5.19 |
| 1442218_PM_at   | Map3k9            | MAP3K9    | 0.59  | 3.18 | 1.80  | 1.01E-01 | 3.60E-01 | -5.19 |
| 1421115_PM_a_at | Zdhc16            | ZDHHC16   | -0.64 | 4.10 | -1.80 | 1.01E-01 | 3.60E-01 | -5.19 |
| 1429608_PM_at   | Adh6a             | ADH6      | 0.22  | 2.96 | 1.80  | 1.01E-01 | 3.60E-01 | -5.19 |
| 1450702_PM_at   | Hfe               | HFE       | 0.33  | 2.63 | 1.80  | 1.01E-01 | 3.60E-01 | -5.19 |
| 1436303_PM_at   | Milt4             | AFDN      | -0.71 | 4.50 | -1.80 | 1.01E-01 | 3.60E-01 | -5.19 |
| 1448581_PM_at   | Zfp346            | ZNF346    | 0.22  | 2.35 | 1.80  | 1.01E-01 | 3.60E-01 | -5.19 |
| 1449237_PM_at   | Alox3             | ALOXE3    | 0.22  | 2.82 | 1.80  | 1.01E-01 | 3.60E-01 | -5.19 |
| 1443060_PM_at   | Gm11738           | NA        | 0.32  | 3.26 | 1.80  | 1.01E-01 | 3.60E-01 | -5.19 |
| 1431550_PM_at   | 4930488B22Rik     | NA        | 0.19  | 2.36 | 1.80  | 1.01E-01 | 3.60E-01 | -5.19 |
| 1456814_PM_at   | Rrp7a             | RRP7A     | 0.24  | 2.49 | 1.80  | 1.01E-01 | 3.60E-01 | -5.19 |
| 1441556_PM_at   | ---               | NA        | -0.26 | 2.39 | -1.80 | 1.02E-01 | 3.60E-01 | -5.19 |
| 1441257_PM_x_at | ---               | NA        | 0.16  | 2.01 | 1.80  | 1.02E-01 | 3.60E-01 | -5.19 |
| 1460606_PM_at   | Hsd17b13          | HSD17B13  | 0.18  | 2.20 | 1.80  | 1.02E-01 | 3.60E-01 | -5.19 |
| 1433161_PM_at   | ---               | NA        | 0.19  | 2.30 | 1.80  | 1.02E-01 | 3.60E-01 | -5.19 |
| 1428657_PM_at   | Rreb1             | RREB1     | 0.53  | 3.70 | 1.80  | 1.02E-01 | 3.60E-01 | -5.19 |
| 1450537_PM_at   | Mid2              | MID2      | 0.14  | 2.06 | 1.80  | 1.02E-01 | 3.60E-01 | -5.19 |
| 1426950_PM_at   | Parp16            | PARP16    | 0.22  | 2.37 | 1.80  | 1.02E-01 | 3.60E-01 | -5.19 |
| 1437839_PM_x_at | Mrp11             | MRPL11    | 0.36  | 6.02 | 1.80  | 1.02E-01 | 3.60E-01 | -5.19 |
| 1454875_PM_a_at | Rbbp4             | RBBP4     | 0.60  | 3.85 | 1.80  | 1.02E-01 | 3.60E-01 | -5.19 |
| 1438615_PM_x_at | Sapcd2            | SAPCD2    | 0.25  | 6.69 | 1.80  | 1.02E-01 | 3.61E-01 | -5.19 |
| 1449186_PM_at   | Bag4              | BAG4      | -0.40 | 3.52 | -1.80 | 1.02E-01 | 3.61E-01 | -5.19 |
| 1426462_PM_at   | Gphn              | GPHN      | -0.31 | 4.60 | -1.80 | 1.02E-01 | 3.61E-01 | -5.19 |
| 1438833_PM_at   | Casc5             | KNL1      | 0.16  | 2.49 | 1.80  | 1.02E-01 | 3.61E-01 | -5.19 |
| 1458711_PM_at   | ---               | NA        | 0.17  | 2.66 | 1.80  | 1.02E-01 | 3.61E-01 | -5.19 |
| 1430628_PM_at   | ---               | NA        | 0.18  | 2.21 | 1.80  | 1.02E-01 | 3.61E-01 | -5.19 |
| 1449589_PM_x_at | Nkap              | NKAP      | 0.31  | 2.57 | 1.80  | 1.02E-01 | 3.61E-01 | -5.19 |
| 1428901_PM_at   | Dtwd2             | DTWD2     | 0.34  | 2.47 | 1.80  | 1.02E-01 | 3.61E-01 | -5.19 |
| 1424571_PM_at   | Ddx46             | DDX46     | 0.55  | 4.69 | 1.80  | 1.02E-01 | 3.61E-01 | -5.19 |
| 1432510_PM_at   | 4930512M02Rik     | NA        | 0.27  | 2.81 | 1.80  | 1.02E-01 | 3.61E-01 | -5.19 |
| 1431669_PM_at   | 4930583I09Rik     | NA        | 0.15  | 2.27 | 1.80  | 1.02E-01 | 3.61E-01 | -5.19 |
| 1417248_PM_at   | Ralbp1            | RALBP1    | 0.34  | 2.88 | 1.79  | 1.02E-01 | 3.61E-01 | -5.19 |
| 1421212_PM_at   | Abcc6             | NA        | 0.26  | 2.41 | 1.79  | 1.02E-01 | 3.61E-01 | -5.19 |
| 1440954_PM_at   | ---               | NA        | 0.18  | 3.11 | 1.79  | 1.02E-01 | 3.61E-01 | -5.19 |
| 1420466_PM_at   | Muc11             | NA        | 0.20  | 3.10 | 1.79  | 1.02E-01 | 3.61E-01 | -5.19 |
| 1450455_PM_s_at | Akr1c12///Akr1c13 | AKR1C2    | 0.22  | 2.17 | 1.79  | 1.02E-01 | 3.61E-01 | -5.19 |
| 1419022_PM_a_at | Eno1///Eno1b      | ENO1      | -0.25 | 3.03 | -1.79 | 1.02E-01 | 3.61E-01 | -5.19 |
| 1416353_PM_at   | Nr1h2             | NR1H2     | 0.19  | 2.40 | 1.79  | 1.02E-01 | 3.61E-01 | -5.19 |
| 1430647_PM_at   | Ckap5             | CKAP5     | 0.19  | 2.51 | 1.79  | 1.02E-01 | 3.61E-01 | -5.19 |
| 1431554_PM_a_at | Anxa9             | ANXA9     | 0.22  | 2.33 | 1.79  | 1.02E-01 | 3.61E-01 | -5.19 |
| 1431781_PM_at   | Ypel1             | YPEL1     | 0.24  | 2.71 | 1.79  | 1.02E-01 | 3.61E-01 | -5.19 |
| 1433358_PM_at   | A230102O21Rik     | NA        | 0.27  | 3.30 | 1.79  | 1.02E-01 | 3.61E-01 | -5.19 |
| 1436655_PM_at   | Lonp2             | LONP2     | 0.34  | 3.03 | 1.79  | 1.02E-01 | 3.61E-01 | -5.19 |
| 1446776_PM_at   | C77581            | NA        | 0.36  | 2.90 | 1.79  | 1.02E-01 | 3.61E-01 | -5.19 |
| 1428127_PM_at   | Atxn7l3b          | ATXN7L3B  | -0.66 | 4.46 | -1.79 | 1.02E-01 | 3.61E-01 | -5.19 |
| 1419054_PM_a_at | Ptpn21            | PTPN21    | 0.23  | 2.59 | 1.79  | 1.02E-01 | 3.61E-01 | -5.19 |
| 1446387_PM_at   | ---               | NA        | 0.20  | 2.14 | 1.79  | 1.02E-01 | 3.61E-01 | -5.19 |
| 1429180_PM_at   | ---               | NA        | 0.28  | 2.58 | 1.79  | 1.02E-01 | 3.61E-01 | -5.19 |
| 1439464_PM_s_at | Tex10             | TEX10     | 0.71  | 5.85 | 1.79  | 1.02E-01 | 3.61E-01 | -5.19 |
| 1459365_PM_at   | Dis3l2            | DIS3L2    | -0.28 | 2.69 | -1.79 | 1.02E-01 | 3.61E-01 | -5.19 |
| 1421451_PM_at   | Crb1              | CRB1      | 0.16  | 2.56 | 1.79  | 1.02E-01 | 3.61E-01 | -5.19 |
| 1458847_PM_at   | ---               | NA        | -0.40 | 3.53 | -1.79 | 1.02E-01 | 3.61E-01 | -5.19 |
| 1429756_PM_at   | 4931428F04Rik     | KIAA0895L | 0.19  | 2.33 | 1.79  | 1.02E-01 | 3.61E-01 | -5.19 |
| 1450717_PM_at   | Ang               | ANG       | 0.23  | 3.29 | 1.79  | 1.02E-01 | 3.61E-01 | -5.19 |
| 1441939_PM_x_at | LOC102633190      | NA        | 0.24  | 2.59 | 1.79  | 1.02E-01 | 3.61E-01 | -5.19 |
| 1442374_PM_at   | ---               | NA        | 0.18  | 2.36 | 1.79  | 1.02E-01 | 3.61E-01 | -5.19 |
| 1422638_PM_s_at | Rassf5            | RASSF5    | 0.72  | 4.81 | 1.79  | 1.02E-01 | 3.61E-01 | -5.19 |
| 1445325_PM_at   | ---               | NA        | 0.17  | 2.26 | 1.79  | 1.02E-01 | 3.62E-01 | -5.19 |
| 1417796_PM_at   | Gps2              | GPS2      | 0.31  | 3.12 | 1.79  | 1.02E-01 | 3.62E-01 | -5.19 |

|                 |                   |         |       |      |       |          |          |       |
|-----------------|-------------------|---------|-------|------|-------|----------|----------|-------|
| 1420257_PM_at   | 1700073E17Rik     | NA      | 0.19  | 2.25 | 1.79  | 1.02E-01 | 3.62E-01 | -5.19 |
| 1451560_PM_at   | Prr12             | PRR12   | 0.22  | 2.58 | 1.79  | 1.02E-01 | 3.62E-01 | -5.19 |
| 1422807_PM_at   | Arf5              | ARF5    | 0.23  | 2.75 | 1.79  | 1.02E-01 | 3.62E-01 | -5.19 |
| 1460446_PM_at   | Wrb               | WRB     | -0.41 | 4.52 | -1.79 | 1.02E-01 | 3.62E-01 | -5.19 |
| 1432843_PM_at   | ---               | NA      | 0.49  | 3.40 | 1.79  | 1.02E-01 | 3.62E-01 | -5.19 |
| 1431640_PM_at   | 4933431J24Rik     | NA      | 0.25  | 2.69 | 1.79  | 1.02E-01 | 3.62E-01 | -5.19 |
| 1415951_PM_at   | Fkbp10            | FKBP10  | 0.17  | 2.84 | 1.79  | 1.02E-01 | 3.62E-01 | -5.19 |
| 1423621_PM_a_at | Slc33a1           | SLC33A1 | -0.37 | 4.71 | -1.79 | 1.02E-01 | 3.62E-01 | -5.19 |
| 1424630_PM_a_at | Brca1             | BRCA1   | 0.18  | 2.26 | 1.79  | 1.02E-01 | 3.62E-01 | -5.19 |
| 1421185_PM_at   | Mettl7a1          | NA      | 0.33  | 3.86 | 1.79  | 1.02E-01 | 3.62E-01 | -5.19 |
| 1456071_PM_a_at | Cycs              | CYCS    | -1.13 | 6.16 | -1.79 | 1.02E-01 | 3.62E-01 | -5.20 |
| 1436222_PM_at   | Gas5              | NA      | -0.49 | 3.81 | -1.79 | 1.02E-01 | 3.62E-01 | -5.20 |
| 1435014_PM_at   | Rab39b            | RAB39B  | -0.40 | 2.94 | -1.79 | 1.02E-01 | 3.62E-01 | -5.20 |
| 1423038_PM_at   | Stx6              | STX6    | -0.27 | 2.84 | -1.79 | 1.02E-01 | 3.62E-01 | -5.20 |
| 1460041_PM_at   | Flrt1             | FLRT1   | 0.15  | 2.31 | 1.79  | 1.02E-01 | 3.62E-01 | -5.20 |
| 1439739_PM_at   | Prss50            | PRSS50  | 0.17  | 2.16 | 1.79  | 1.02E-01 | 3.62E-01 | -5.20 |
| 1445643_PM_at   | ---               | NA      | 0.14  | 2.23 | 1.79  | 1.02E-01 | 3.62E-01 | -5.20 |
| 1430297_PM_a_at | Aplf              | APLF    | 0.32  | 3.36 | 1.79  | 1.02E-01 | 3.62E-01 | -5.20 |
| 1437793_PM_at   | ---               | NA      | 0.32  | 2.70 | 1.79  | 1.02E-01 | 3.62E-01 | -5.20 |
| 1456848_PM_at   | Cep89             | CEP89   | 0.15  | 2.56 | 1.79  | 1.03E-01 | 3.62E-01 | -5.20 |
| 1459323_PM_at   | ---               | NA      | 0.20  | 2.17 | 1.79  | 1.03E-01 | 3.62E-01 | -5.20 |
| 1456280_PM_at   | Clspn             | CLSPN   | 0.21  | 2.57 | 1.79  | 1.03E-01 | 3.62E-01 | -5.20 |
| 1423433_PM_at   | Trove2            | TROVE2  | -0.63 | 3.34 | -1.79 | 1.03E-01 | 3.62E-01 | -5.20 |
| 1434571_PM_at   | Vps13b            | VPS13B  | -0.55 | 3.72 | -1.79 | 1.03E-01 | 3.62E-01 | -5.20 |
| 1458362_PM_at   | D730005E14Rik     | NA      | 0.14  | 2.87 | 1.79  | 1.03E-01 | 3.62E-01 | -5.20 |
| 1443136_PM_at   | ---               | NA      | 0.19  | 2.60 | 1.79  | 1.03E-01 | 3.62E-01 | -5.20 |
| 1431486_PM_at   | 4930503E24Rik     | NA      | 0.18  | 2.31 | 1.79  | 1.03E-01 | 3.62E-01 | -5.20 |
| 1459016_PM_at   | Malsu1            | NA      | 0.20  | 2.74 | 1.79  | 1.03E-01 | 3.62E-01 | -5.20 |
| 1419456_PM_at   | Dcxr              | DCXR    | 0.24  | 2.29 | 1.79  | 1.03E-01 | 3.62E-01 | -5.20 |
| 1442656_PM_at   | Elov6             | ELOVL6  | 0.46  | 2.87 | 1.79  | 1.03E-01 | 3.62E-01 | -5.20 |
| 1422361_PM_at   | Tlm               | NA      | 0.22  | 2.69 | 1.79  | 1.03E-01 | 3.62E-01 | -5.20 |
| 1444732_PM_at   | ---               | NA      | 0.18  | 2.32 | 1.79  | 1.03E-01 | 3.63E-01 | -5.20 |
| 1431975_PM_at   | 4930521O11Rik     | NA      | 0.22  | 2.55 | 1.79  | 1.03E-01 | 3.63E-01 | -5.20 |
| 1417423_PM_at   | Grina             | GRINA   | -0.58 | 4.56 | -1.79 | 1.03E-01 | 3.63E-01 | -5.20 |
| 1446656_PM_at   | ---               | NA      | 0.14  | 2.02 | 1.79  | 1.03E-01 | 3.63E-01 | -5.20 |
| 1445928_PM_at   | March6            | MARCH6  | 0.28  | 3.26 | 1.79  | 1.03E-01 | 3.63E-01 | -5.20 |
| 1450929_PM_at   | Zfp57             | ZFP57   | 0.29  | 2.36 | 1.79  | 1.03E-01 | 3.63E-01 | -5.20 |
| 1454477_PM_at   | ---               | NA      | 0.30  | 2.82 | 1.79  | 1.03E-01 | 3.63E-01 | -5.20 |
| 1425119_PM_at   | Oas1b             | OAS1    | 0.32  | 3.03 | 1.79  | 1.03E-01 | 3.63E-01 | -5.20 |
| 1452849_PM_at   | Sin3b             | SIN3B   | 0.38  | 4.18 | 1.79  | 1.03E-01 | 3.63E-01 | -5.20 |
| 1423477_PM_at   | Zic1              | ZIC1    | 0.97  | 5.81 | 1.79  | 1.03E-01 | 3.63E-01 | -5.20 |
| 1450058_PM_at   | Asph              | ASPH    | -0.45 | 2.70 | -1.79 | 1.03E-01 | 3.63E-01 | -5.20 |
| 1451481_PM_s_at | Slc51a            | SLC51A  | 0.17  | 2.63 | 1.79  | 1.03E-01 | 3.63E-01 | -5.20 |
| 1416001_PM_a_at | Cotl1             | COTL1   | 0.31  | 2.99 | 1.79  | 1.03E-01 | 3.63E-01 | -5.20 |
| 1444033_PM_at   | ---               | NA      | 0.73  | 4.21 | 1.79  | 1.03E-01 | 3.63E-01 | -5.20 |
| 1426826_PM_at   | Scaf8             | SCAF8   | -0.56 | 4.03 | -1.79 | 1.03E-01 | 3.63E-01 | -5.20 |
| 1430133_PM_at   | Tbc1d8b           | NA      | -0.35 | 3.00 | -1.79 | 1.03E-01 | 3.63E-01 | -5.20 |
| 1458236_PM_at   | Gm41724           | NA      | 0.21  | 2.70 | 1.79  | 1.03E-01 | 3.63E-01 | -5.20 |
| 1434860_PM_at   | Dpy194            | DPY19L4 | -0.43 | 5.00 | -1.79 | 1.03E-01 | 3.63E-01 | -5.20 |
| 1417450_PM_a_at | Tacc3             | TACC3   | 0.30  | 2.93 | 1.79  | 1.03E-01 | 3.63E-01 | -5.20 |
| 1451638_PM_s_at | Armc1             | ARMC1   | -0.38 | 3.73 | -1.79 | 1.03E-01 | 3.63E-01 | -5.20 |
| 1433017_PM_at   | Tmem159           | TMEM159 | 0.14  | 2.34 | 1.79  | 1.03E-01 | 3.63E-01 | -5.20 |
| 1444059_PM_at   | 6330415G19Rik     | NA      | 0.27  | 2.92 | 1.79  | 1.03E-01 | 3.63E-01 | -5.20 |
| 1437352_PM_at   | Acox3             | ACOX3   | 0.30  | 3.19 | 1.79  | 1.03E-01 | 3.63E-01 | -5.20 |
| 1449654_PM_s_at | C77545            | NA      | 0.59  | 2.67 | 1.79  | 1.03E-01 | 3.63E-01 | -5.20 |
| 1431311_PM_at   | ---               | NA      | 0.23  | 2.29 | 1.79  | 1.03E-01 | 3.63E-01 | -5.20 |
| 1417324_PM_at   | Mast2             | MAST2   | 0.46  | 6.19 | 1.79  | 1.03E-01 | 3.63E-01 | -5.20 |
| 1445773_PM_at   | ---               | NA      | 0.18  | 2.32 | 1.79  | 1.03E-01 | 3.63E-01 | -5.20 |
| 1456377_PM_x_at | Limd2             | LIMD2   | -0.99 | 7.71 | -1.79 | 1.03E-01 | 3.63E-01 | -5.20 |
| 1458086_PM_at   | Simc1             | SIMC1   | -0.18 | 2.48 | -1.79 | 1.03E-01 | 3.63E-01 | -5.20 |
| 1458556_PM_at   | ---               | NA      | 0.58  | 2.75 | 1.79  | 1.03E-01 | 3.63E-01 | -5.20 |
| 1450795_PM_at   | Lhb               | CGB1    | 0.19  | 2.07 | 1.79  | 1.03E-01 | 3.63E-01 | -5.20 |
| 1426304_PM_x_at | B4galt7           | B4GALT7 | -0.38 | 4.24 | -1.79 | 1.03E-01 | 3.63E-01 | -5.20 |
| 1423741_PM_at   | Gm15455 /// Rbm10 | RBM10   | -0.34 | 3.34 | -1.79 | 1.03E-01 | 3.63E-01 | -5.20 |
| 1454979_PM_at   | Diaph1            | DIAPH1  | -0.32 | 3.76 | -1.79 | 1.03E-01 | 3.63E-01 | -5.20 |
| 1423391_PM_at   | Git2              | GIT2    | 0.38  | 2.75 | 1.79  | 1.03E-01 | 3.63E-01 | -5.20 |
| 1443868_PM_at   | Atp13a3           | ATP13A3 | 0.32  | 3.43 | 1.79  | 1.03E-01 | 3.63E-01 | -5.20 |
| 1421476_PM_a_at | Cant1             | CANT1   | 0.15  | 2.09 | 1.79  | 1.03E-01 | 3.63E-01 | -5.20 |
| 1449648_PM_s_at | Polr1c            | POLR1C  | -0.65 | 5.98 | -1.79 | 1.03E-01 | 3.63E-01 | -5.20 |
| 1445405_PM_at   | ---               | NA      | 0.18  | 2.46 | 1.79  | 1.03E-01 | 3.63E-01 | -5.20 |
| 1436976_PM_a_at | Yod1              | YOD1    | -0.41 | 5.50 | -1.79 | 1.03E-01 | 3.64E-01 | -5.20 |
| 1456672_PM_at   | ---               | NA      | 0.23  | 2.51 | 1.79  | 1.03E-01 | 3.64E-01 | -5.20 |
| 1449833_PM_at   | Sprr2f            | NA      | 0.21  | 2.31 | 1.79  | 1.03E-01 | 3.64E-01 | -5.20 |
| 1441389_PM_at   | ---               | NA      | 0.17  | 1.99 | 1.79  | 1.03E-01 | 3.64E-01 | -5.20 |
| 1453169_PM_a_at | Gtf2h1            | GTF2H1  | -0.40 | 2.86 | -1.79 | 1.03E-01 | 3.64E-01 | -5.20 |



|                 |                              |            |       |      |       |          |          |       |
|-----------------|------------------------------|------------|-------|------|-------|----------|----------|-------|
| 1452338_PM_s_at | Itns1                        | ITSN1      | -0.49 | 2.94 | -1.79 | 1.03E-01 | 3.64E-01 | -5.20 |
| 1443960_PM_at   | Aarg1                        | ASRGL1     | -0.46 | 2.67 | -1.79 | 1.03E-01 | 3.64E-01 | -5.20 |
| 1434793_PM_at   | Wdr78                        | WDR78      | -0.20 | 4.62 | -1.79 | 1.03E-01 | 3.64E-01 | -5.20 |
| 1444832_PM_at   | ---                          | NA         | 0.18  | 2.34 | 1.79  | 1.03E-01 | 3.64E-01 | -5.20 |
| 1440034_PM_at   | Stam2                        | STAM2      | 0.23  | 2.56 | 1.79  | 1.03E-01 | 3.64E-01 | -5.20 |
| 1448599_PM_s_at | Mip                          | MIP        | 0.24  | 2.99 | 1.79  | 1.03E-01 | 3.64E-01 | -5.20 |
| 1417076_PM_at   | Fabp9                        | FABP9      | 0.29  | 2.52 | 1.79  | 1.03E-01 | 3.64E-01 | -5.20 |
| 1438183_PM_x_at | Sord                         | SORD       | -0.24 | 2.24 | -1.78 | 1.04E-01 | 3.64E-01 | -5.20 |
| 1443741_PM_x_at | Whsc1                        | NSD2       | 0.15  | 2.03 | 1.78  | 1.04E-01 | 3.64E-01 | -5.20 |
| 1450777_PM_at   | Xrn2                         | XRN2       | 0.17  | 2.64 | 1.78  | 1.04E-01 | 3.64E-01 | -5.20 |
| 1451034_PM_at   | Zfp36l2                      | ZFP36L2    | 0.22  | 2.43 | 1.78  | 1.04E-01 | 3.64E-01 | -5.20 |
| 1421321_PM_a_at | Net1                         | NET1       | 0.32  | 2.72 | 1.78  | 1.04E-01 | 3.64E-01 | -5.20 |
| 1418974_PM_at   | Blf1                         | BLZF1      | 0.47  | 2.84 | 1.78  | 1.04E-01 | 3.64E-01 | -5.20 |
| 1421281_PM_at   | Gabra1                       | GABRA1     | -0.63 | 6.92 | -1.78 | 1.04E-01 | 3.64E-01 | -5.20 |
| 1454659_PM_at   | Dctd                         | DCTD       | 0.15  | 2.15 | 1.78  | 1.04E-01 | 3.64E-01 | -5.20 |
| 1427531_PM_a_at | Slc22a18                     | SLC22A18   | 0.25  | 2.57 | 1.78  | 1.04E-01 | 3.64E-01 | -5.20 |
| 1445060_PM_at   | ---                          | NA         | 0.30  | 3.71 | 1.78  | 1.04E-01 | 3.64E-01 | -5.20 |
| 1421274_PM_at   | Socs4                        | SOCS4      | -0.29 | 2.37 | -1.78 | 1.04E-01 | 3.64E-01 | -5.21 |
| 1432105_PM_at   | Sirt5                        | SIRT5      | 0.21  | 2.72 | 1.78  | 1.04E-01 | 3.64E-01 | -5.21 |
| 1419275_PM_at   | Dazap1                       | DAZAP1     | 0.22  | 5.88 | 1.78  | 1.04E-01 | 3.64E-01 | -5.21 |
| 1439550_PM_at   | Tnrc18                       | TNRC18     | -0.68 | 3.97 | -1.78 | 1.04E-01 | 3.64E-01 | -5.21 |
| 1449067_PM_at   | Slc2a2                       | SLC2A2     | 0.17  | 2.44 | 1.78  | 1.04E-01 | 3.64E-01 | -5.21 |
| 1419818_PM_x_at | Ankzf1                       | ANKZF1     | 0.38  | 2.59 | 1.78  | 1.04E-01 | 3.64E-01 | -5.21 |
| 1435472_PM_at   | Kremen1                      | KREMEN1    | -0.26 | 2.78 | -1.78 | 1.04E-01 | 3.64E-01 | -5.21 |
| 1458728_PM_at   | ---                          | NA         | 0.21  | 2.43 | 1.78  | 1.04E-01 | 3.64E-01 | -5.21 |
| 1444244_PM_at   | ---                          | NA         | -0.24 | 3.53 | -1.78 | 1.04E-01 | 3.64E-01 | -5.21 |
| 1421091_PM_at   | Serpina12                    | SERPINA12  | 0.18  | 2.49 | 1.78  | 1.04E-01 | 3.64E-01 | -5.21 |
| 1426087_PM_at   | Icosl                        | NA         | 0.24  | 2.42 | 1.78  | 1.04E-01 | 3.64E-01 | -5.21 |
| 1442942_PM_at   | Eif4h                        | NA         | 0.25  | 2.77 | 1.78  | 1.04E-01 | 3.64E-01 | -5.21 |
| 1415876_PM_a_at | LOC102642963 /// Rps26       | RPS26      | -0.45 | 3.98 | -1.78 | 1.04E-01 | 3.64E-01 | -5.21 |
| 1419143_PM_at   | Cypt1 /// Cypt7 /// Cypt8    | NA         | 0.18  | 2.35 | 1.78  | 1.04E-01 | 3.64E-01 | -5.21 |
| 1437964_PM_at   | Nxph2                        | NXP2       | -0.24 | 2.48 | -1.78 | 1.04E-01 | 3.64E-01 | -5.21 |
| 1419622_PM_at   | Ugt2b5                       | UGT2B5     | 0.25  | 2.04 | 1.78  | 1.04E-01 | 3.64E-01 | -5.21 |
| 1454924_PM_at   | Fut10                        | FUT10      | 0.26  | 2.76 | 1.78  | 1.04E-01 | 3.64E-01 | -5.21 |
| 1440428_PM_at   | Sfxn5                        | SFXN5      | 0.21  | 2.34 | 1.78  | 1.04E-01 | 3.64E-01 | -5.21 |
| 1458483_PM_at   | A330102110Rik                | NA         | 0.24  | 2.32 | 1.78  | 1.04E-01 | 3.64E-01 | -5.21 |
| 1418597_PM_at   | Top3a                        | TOP3A      | 0.20  | 2.44 | 1.78  | 1.04E-01 | 3.64E-01 | -5.21 |
| 1451041_PM_at   | Rock2                        | ROCK2      | 0.99  | 5.86 | 1.78  | 1.04E-01 | 3.64E-01 | -5.21 |
| 1443461_PM_at   | C79130                       | NA         | -0.82 | 3.42 | -1.78 | 1.04E-01 | 3.64E-01 | -5.21 |
| 1446244_PM_at   | Zyg11b                       | NA         | -0.71 | 2.80 | -1.78 | 1.04E-01 | 3.64E-01 | -5.21 |
| 1438702_PM_at   | Flrt2                        | FLRT2      | -0.60 | 4.55 | -1.78 | 1.04E-01 | 3.64E-01 | -5.21 |
| 1442369_PM_at   | 9330159F19Rik                | NA         | -0.56 | 3.02 | -1.78 | 1.04E-01 | 3.64E-01 | -5.21 |
| 1433568_PM_at   | Papd4                        | NA         | -0.25 | 2.30 | -1.78 | 1.04E-01 | 3.64E-01 | -5.21 |
| 1449464_PM_at   | Kcng1                        | KCNQ1      | -0.16 | 2.36 | -1.78 | 1.04E-01 | 3.64E-01 | -5.21 |
| 1456980_PM_at   | Rab44                        | RAB44      | 0.17  | 3.21 | 1.78  | 1.04E-01 | 3.64E-01 | -5.21 |
| 1444268_PM_at   | BC004004 /// Gm38522         | Cgorf89    | 0.18  | 2.21 | 1.78  | 1.04E-01 | 3.64E-01 | -5.21 |
| 1444719_PM_at   | ---                          | NA         | 0.31  | 2.53 | 1.78  | 1.04E-01 | 3.64E-01 | -5.21 |
| 1427317_PM_at   | Kin                          | KIN        | 0.68  | 4.87 | 1.78  | 1.04E-01 | 3.64E-01 | -5.21 |
| 1417881_PM_at   | Slc39a3                      | SLC39A3    | -0.30 | 4.25 | -1.78 | 1.04E-01 | 3.64E-01 | -5.21 |
| 1417276_PM_at   | Tulp2                        | TULP2      | 0.16  | 2.26 | 1.78  | 1.04E-01 | 3.64E-01 | -5.21 |
| 1443013_PM_at   | ---                          | NA         | 0.18  | 2.66 | 1.78  | 1.04E-01 | 3.64E-01 | -5.21 |
| 1459431_PM_at   | ---                          | NA         | 0.27  | 2.50 | 1.78  | 1.04E-01 | 3.64E-01 | -5.21 |
| 1420987_PM_at   | Kif3b                        | KIF3B      | 0.62  | 2.74 | 1.78  | 1.04E-01 | 3.64E-01 | -5.21 |
| 1452090_PM_a_at | Olfm3                        | OLFM3      | 1.06  | 4.16 | 1.78  | 1.04E-01 | 3.64E-01 | -5.21 |
| 1445297_PM_at   | Stxbp5l                      | NA         | -0.71 | 4.99 | -1.78 | 1.04E-01 | 3.64E-01 | -5.21 |
| 1438116_PM_x_at | Slc9a3r1                     | SLC9A3R1   | -0.62 | 4.04 | -1.78 | 1.04E-01 | 3.64E-01 | -5.21 |
| 1433773_PM_at   | Rrm2b                        | RRM2B      | -0.39 | 5.35 | -1.78 | 1.04E-01 | 3.64E-01 | -5.21 |
| 1449458_PM_at   | Foxl1                        | FOX1       | 0.12  | 2.16 | 1.78  | 1.04E-01 | 3.64E-01 | -5.21 |
| 1430873_PM_at   | ---                          | NA         | 0.15  | 2.51 | 1.78  | 1.04E-01 | 3.64E-01 | -5.21 |
| 1441042_PM_at   | Fgf1                         | FGF1       | 0.23  | 2.31 | 1.78  | 1.04E-01 | 3.64E-01 | -5.21 |
| 1446818_PM_at   | ---                          | NA         | 0.23  | 2.98 | 1.78  | 1.04E-01 | 3.64E-01 | -5.21 |
| 1443512_PM_at   | ---                          | NA         | 0.26  | 2.41 | 1.78  | 1.04E-01 | 3.64E-01 | -5.21 |
| 1424554_PM_at   | Ppp1r8                       | PPP1R8     | 0.28  | 3.14 | 1.78  | 1.04E-01 | 3.64E-01 | -5.21 |
| 1443271_PM_at   | ---                          | NA         | 0.42  | 2.92 | 1.78  | 1.04E-01 | 3.64E-01 | -5.21 |
| 1423559_PM_at   | Kcnc1                        | KCNC1      | -0.35 | 2.42 | -1.78 | 1.04E-01 | 3.64E-01 | -5.21 |
| 1437182_PM_at   | Did1                         | DIDO1      | -0.19 | 2.15 | -1.78 | 1.04E-01 | 3.64E-01 | -5.21 |
| 1418328_PM_at   | Chkb /// ChkbCpt1b /// Cpt1b | CHKB-CPT1B | 0.22  | 2.60 | 1.78  | 1.04E-01 | 3.64E-01 | -5.21 |
| 1439110_PM_at   | A930012016Rik                | NA         | 0.24  | 2.70 | 1.78  | 1.04E-01 | 3.64E-01 | -5.21 |
| 1440952_PM_at   | ---                          | NA         | 0.31  | 2.57 | 1.78  | 1.04E-01 | 3.64E-01 | -5.21 |
| 1446335_PM_at   | ---                          | NA         | 0.32  | 2.72 | 1.78  | 1.04E-01 | 3.64E-01 | -5.21 |
| 1451328_PM_at   | Pcnx3                        | PCNX3      | 0.34  | 2.84 | 1.78  | 1.04E-01 | 3.64E-01 | -5.21 |
| 1442094_PM_at   | Ing5                         | ING5       | 0.35  | 2.58 | 1.78  | 1.04E-01 | 3.64E-01 | -5.21 |
| 1426098_PM_a_at | Cast                         | CAST       | 0.42  | 3.01 | 1.78  | 1.04E-01 | 3.64E-01 | -5.21 |
| 1450202_PM_at   | Grin1                        | GRIN1      | 0.53  | 2.88 | 1.78  | 1.04E-01 | 3.64E-01 | -5.21 |

|                 |                         |          |       |       |       |          |          |       |
|-----------------|-------------------------|----------|-------|-------|-------|----------|----------|-------|
| 1439976_PM_at   | Alg11                   | ALG11    | -0.87 | 3.95  | -1.78 | 1.04E-01 | 3.65E-01 | -5.21 |
| 1426269_PM_at   | Vamp7                   | VAMP7    | -0.27 | 3.89  | -1.78 | 1.04E-01 | 3.65E-01 | -5.21 |
| 1422940_PM_x_at | Serpinb3b /// Serpinb3c | SERPINB4 | 0.15  | 2.55  | 1.78  | 1.04E-01 | 3.65E-01 | -5.21 |
| 1436742_PM_a_at | Accsl                   | ACCSL    | 0.17  | 2.31  | 1.78  | 1.04E-01 | 3.65E-01 | -5.21 |
| 1421884_PM_at   | Sos1                    | SOS1     | 0.21  | 2.82  | 1.78  | 1.04E-01 | 3.65E-01 | -5.21 |
| 1438274_PM_at   | Ikzf4                   | IKZF4    | 0.23  | 2.32  | 1.78  | 1.04E-01 | 3.65E-01 | -5.21 |
| 1449034_PM_at   | Klkb1                   | NA       | 0.23  | 2.90  | 1.78  | 1.04E-01 | 3.65E-01 | -5.21 |
| 1453890_PM_at   | LOC102637286            | NA       | 0.16  | 2.16  | 1.78  | 1.04E-01 | 3.65E-01 | -5.21 |
| 1458368_PM_at   | Myh4                    | MYH4     | 0.17  | 2.30  | 1.78  | 1.04E-01 | 3.65E-01 | -5.21 |
| 1429135_PM_at   | Prr32                   | PRR32    | 0.22  | 2.38  | 1.78  | 1.04E-01 | 3.65E-01 | -5.21 |
| 1417545_PM_at   | Trpv4                   | TRPV4    | 0.24  | 2.39  | 1.78  | 1.04E-01 | 3.65E-01 | -5.21 |
| 1424564_PM_at   | Rtfcd1                  | RTFDC1   | 0.37  | 3.32  | 1.78  | 1.04E-01 | 3.65E-01 | -5.21 |
| 1420837_PM_at   | Ntrk2                   | NTRK2    | -0.62 | 3.19  | -1.78 | 1.04E-01 | 3.65E-01 | -5.21 |
| 1452181_PM_at   | Ckap4                   | CKAP4    | -0.26 | 3.08  | -1.78 | 1.04E-01 | 3.65E-01 | -5.21 |
| 1416110_PM_at   | Slc35a4                 | SLC35A4  | -0.23 | 2.55  | -1.78 | 1.04E-01 | 3.65E-01 | -5.21 |
| 1419991_PM_at   | Rab31l1                 | NA       | 0.14  | 2.26  | 1.78  | 1.04E-01 | 3.65E-01 | -5.21 |
| 1458007_PM_at   | Myo1b                   | MYO1B    | 0.14  | 2.31  | 1.78  | 1.04E-01 | 3.65E-01 | -5.21 |
| 1451112_PM_s_at | Dap                     | NA       | 0.16  | 2.94  | 1.78  | 1.04E-01 | 3.65E-01 | -5.21 |
| 1459059_PM_at   | Z010308F09Rik           | NA       | 0.16  | 2.64  | 1.78  | 1.04E-01 | 3.65E-01 | -5.21 |
| 1429325_PM_at   | Poc1b                   | POC1B    | 0.20  | 2.43  | 1.78  | 1.04E-01 | 3.65E-01 | -5.21 |
| 1446462_PM_at   | ---                     | NA       | 0.21  | 2.60  | 1.78  | 1.04E-01 | 3.65E-01 | -5.21 |
| 1448984_PM_at   | Erc4                    | ERCC4    | 0.22  | 3.56  | 1.78  | 1.04E-01 | 3.65E-01 | -5.21 |
| 1457748_PM_at   | Pogz                    | NA       | 0.24  | 2.29  | 1.78  | 1.04E-01 | 3.65E-01 | -5.21 |
| 1440532_PM_a_at | ---                     | NA       | 0.25  | 2.28  | 1.78  | 1.04E-01 | 3.65E-01 | -5.21 |
| 1434711_PM_at   | BC030867                | C17orf53 | 0.38  | 4.05  | 1.78  | 1.04E-01 | 3.65E-01 | -5.21 |
| 1437888_PM_at   | Wnk1                    | WNK1     | 0.18  | 2.36  | 1.78  | 1.05E-01 | 3.65E-01 | -5.21 |
| 1436461_PM_at   | ---                     | NA       | -0.42 | 2.61  | -1.78 | 1.05E-01 | 3.65E-01 | -5.21 |
| 1427104_PM_at   | Zfp612                  | ZNF23    | 0.61  | 5.09  | 1.78  | 1.05E-01 | 3.65E-01 | -5.21 |
| 1428324_PM_at   | ---                     | NA       | 0.21  | 2.43  | 1.78  | 1.05E-01 | 3.65E-01 | -5.21 |
| 1440911_PM_at   | Col23a1                 | COL23A1  | -0.18 | 2.39  | -1.78 | 1.05E-01 | 3.65E-01 | -5.21 |
| 1456946_PM_at   | Sh3rf3                  | SH3RF3   | 0.18  | 3.04  | 1.78  | 1.05E-01 | 3.65E-01 | -5.21 |
| 1440876_PM_at   | ---                     | NA       | 0.49  | 3.37  | 1.78  | 1.05E-01 | 3.65E-01 | -5.21 |
| 1441735_PM_at   | ---                     | NA       | 0.16  | 2.47  | 1.78  | 1.05E-01 | 3.65E-01 | -5.21 |
| 1438588_PM_at   | Plagl1                  | NA       | 0.54  | 3.93  | 1.78  | 1.05E-01 | 3.65E-01 | -5.21 |
| 1427172_PM_at   | Ofd1                    | OFD1     | 0.59  | 3.87  | 1.78  | 1.05E-01 | 3.65E-01 | -5.21 |
| 1429271_PM_at   | 9130011E15Rik           | NA       | 0.18  | 2.34  | 1.78  | 1.05E-01 | 3.65E-01 | -5.21 |
| 1422857_PM_at   | Trip4                   | TRIP4    | 0.17  | 2.47  | 1.78  | 1.05E-01 | 3.65E-01 | -5.21 |
| 1457773_PM_at   | Slamf6                  | SLAMF6   | 0.16  | 2.29  | 1.78  | 1.05E-01 | 3.65E-01 | -5.22 |
| 1435951_PM_at   | Grip1                   | GRP1     | 0.40  | 3.46  | 1.78  | 1.05E-01 | 3.65E-01 | -5.22 |
| 1424244_PM_at   | Rwdd4a                  | RWDD4    | 0.35  | 2.68  | 1.78  | 1.05E-01 | 3.65E-01 | -5.22 |
| 1449782_PM_at   | AA517650                | NA       | -0.19 | 2.73  | -1.78 | 1.05E-01 | 3.66E-01 | -5.22 |
| 1452493_PM_s_at | Hoxb7 /// Hoxb8         | HOXB8    | 0.33  | 2.00  | 1.78  | 1.05E-01 | 3.66E-01 | -5.22 |
| 1423748_PM_at   | Pdk1                    | PDK1     | -0.40 | 3.17  | -1.78 | 1.05E-01 | 3.66E-01 | -5.22 |
| 1449676_PM_at   | Rab2a                   | NA       | -0.30 | 9.85  | -1.78 | 1.05E-01 | 3.66E-01 | -5.22 |
| 1435573_PM_at   | Otud5                   | OTUD5    | -0.25 | 2.75  | -1.78 | 1.05E-01 | 3.66E-01 | -5.22 |
| 1430013_PM_at   | 2210008F06Rik           | NA       | -0.19 | 2.47  | -1.78 | 1.05E-01 | 3.66E-01 | -5.22 |
| 1426795_PM_at   | Ptprs                   | PTPRS    | 0.15  | 2.37  | 1.78  | 1.05E-01 | 3.66E-01 | -5.22 |
| 1459710_PM_at   | ---                     | NA       | 0.22  | 2.55  | 1.78  | 1.05E-01 | 3.66E-01 | -5.22 |
| 1448951_PM_at   | Tnfrsf1b                | TNFRSF1B | 0.24  | 2.44  | 1.78  | 1.05E-01 | 3.66E-01 | -5.22 |
| 1443302_PM_at   | ---                     | NA       | 0.32  | 2.83  | 1.78  | 1.05E-01 | 3.66E-01 | -5.22 |
| 1437174_PM_at   | Tfdp2                   | TFDP2    | 0.39  | 2.79  | 1.78  | 1.05E-01 | 3.66E-01 | -5.22 |
| 1449691_PM_at   | Zfp644                  | NA       | -0.23 | 3.12  | -1.78 | 1.05E-01 | 3.66E-01 | -5.22 |
| 1425617_PM_at   | Dhx9                    | DHX9     | -0.75 | 6.68  | -1.78 | 1.05E-01 | 3.66E-01 | -5.22 |
| 1436071_PM_at   | Ankrd26                 | ANKRD26  | -0.27 | 2.56  | -1.78 | 1.05E-01 | 3.66E-01 | -5.22 |
| 1458829_PM_at   | Gm38679                 | NA       | 0.14  | 2.29  | 1.78  | 1.05E-01 | 3.66E-01 | -5.22 |
| 1416012_PM_at   | Ehd1                    | EHD1     | 0.24  | 2.57  | 1.78  | 1.05E-01 | 3.66E-01 | -5.22 |
| 1459501_PM_at   | ---                     | NA       | 0.24  | 2.59  | 1.78  | 1.05E-01 | 3.66E-01 | -5.22 |
| 1418975_PM_at   | Nckipsd                 | NCKIPSD  | 0.34  | 3.84  | 1.78  | 1.05E-01 | 3.66E-01 | -5.22 |
| 1438629_PM_x_at | Grn                     | GRN      | 0.37  | 10.93 | 1.78  | 1.05E-01 | 3.66E-01 | -5.22 |
| 1433583_PM_at   | Zfp365                  | ZNF365   | -1.12 | 7.90  | -1.78 | 1.05E-01 | 3.66E-01 | -5.22 |
| 1427344_PM_s_at | Rasd2                   | RASD2    | -0.53 | 3.03  | -1.78 | 1.05E-01 | 3.66E-01 | -5.22 |
| 1453870_PM_at   | 1810018F18Rik           | NA       | -0.25 | 2.41  | -1.78 | 1.05E-01 | 3.66E-01 | -5.22 |
| 1442176_PM_at   | Arid5b                  | ARID5B   | 0.15  | 2.75  | 1.78  | 1.05E-01 | 3.66E-01 | -5.22 |
| 1450216_PM_at   | Pcdhb16                 | NA       | 0.18  | 3.26  | 1.78  | 1.05E-01 | 3.66E-01 | -5.22 |
| 1449132_PM_at   | Opn1sw                  | OPN1SW   | 0.20  | 2.49  | 1.78  | 1.05E-01 | 3.66E-01 | -5.22 |
| 1441172_PM_at   | ---                     | NA       | 0.22  | 2.31  | 1.78  | 1.05E-01 | 3.66E-01 | -5.22 |
| 1450935_PM_at   | Erc5                    | ERCC5    | 0.40  | 4.61  | 1.78  | 1.05E-01 | 3.66E-01 | -5.22 |
| 1418480_PM_at   | Ppbp                    | PPBP     | -0.21 | 2.31  | -1.77 | 1.05E-01 | 3.66E-01 | -5.22 |
| 1439170_PM_at   | ---                     | NA       | -0.52 | 3.93  | -1.77 | 1.05E-01 | 3.66E-01 | -5.22 |
| 1434712_PM_at   | Mief1                   | MIEF1    | -0.33 | 2.68  | -1.77 | 1.05E-01 | 3.66E-01 | -5.22 |
| 1441086_PM_at   | 4930451111Rik           | C16orf92 | 0.30  | 3.17  | 1.77  | 1.05E-01 | 3.66E-01 | -5.22 |
| 1432064_PM_at   | Fastkd5 /// Ubox5       | FASTKD5  | 0.21  | 3.46  | 1.77  | 1.05E-01 | 3.66E-01 | -5.22 |
| 1418374_PM_at   | Fxyd3                   | FXD3     | 0.18  | 2.26  | 1.77  | 1.05E-01 | 3.66E-01 | -5.22 |
| 1449777_PM_at   | Dus4l                   | NA       | 0.14  | 2.16  | 1.77  | 1.05E-01 | 3.67E-01 | -5.22 |
| 1417052_PM_at   | Psmb3                   | PSMB3    | 0.30  | 2.58  | 1.77  | 1.05E-01 | 3.67E-01 | -5.22 |

|                 |                         |            |       |      |       |          |          |       |
|-----------------|-------------------------|------------|-------|------|-------|----------|----------|-------|
| 1455661_PM_at   | Gm9958                  | NA         | 0.33  | 2.44 | 1.77  | 1.05E-01 | 3.67E-01 | -5.22 |
| 1453243_PM_at   | 0610030E20Rik           | C2orf68    | 0.22  | 2.47 | 1.77  | 1.05E-01 | 3.67E-01 | -5.22 |
| 1424633_PM_at   | Camk1g                  | CAMK1G     | 0.13  | 2.67 | 1.77  | 1.05E-01 | 3.67E-01 | -5.22 |
| 1449310_PM_at   | Ptger2                  | PTGER2     | 0.19  | 2.32 | 1.77  | 1.05E-01 | 3.67E-01 | -5.22 |
| 1441446_PM_at   | ---                     | NA         | 0.24  | 2.32 | 1.77  | 1.05E-01 | 3.67E-01 | -5.22 |
| 1430520_PM_at   | Cpne8                   | CPNE8      | 0.42  | 2.49 | 1.77  | 1.05E-01 | 3.67E-01 | -5.22 |
| 1425698_PM_a_at | Crebzf                  | CREBZF     | 0.21  | 3.05 | 1.77  | 1.05E-01 | 3.67E-01 | -5.22 |
| 1428299_PM_at   | Dyrk1a                  | DYRK1A     | -0.44 | 5.02 | -1.77 | 1.06E-01 | 3.67E-01 | -5.22 |
| 1439097_PM_at   | ---                     | NA         | 0.24  | 2.80 | 1.77  | 1.06E-01 | 3.67E-01 | -5.22 |
| 1430472_PM_at   | ---                     | NA         | 0.33  | 2.50 | 1.77  | 1.06E-01 | 3.67E-01 | -5.22 |
| 1434576_PM_at   | Cep41                   | CEP41      | 0.15  | 2.32 | 1.77  | 1.06E-01 | 3.67E-01 | -5.22 |
| 1456541_PM_x_at | Atad3a                  | ATAD3C     | 0.25  | 3.62 | 1.77  | 1.06E-01 | 3.67E-01 | -5.22 |
| 1434472_PM_at   | Dusp3                   | DUSP3      | -0.49 | 6.57 | -1.77 | 1.06E-01 | 3.67E-01 | -5.22 |
| 1427897_PM_s_at | Suds3                   | SUDS3      | -0.38 | 3.77 | -1.77 | 1.06E-01 | 3.67E-01 | -5.22 |
| 1451085_PM_at   | C030006K11Rik ///Lrrc24 | LRRC24     | 0.38  | 2.70 | 1.77  | 1.06E-01 | 3.67E-01 | -5.22 |
| 1425258_PM_at   | Cst11                   | CST11      | 0.15  | 2.42 | 1.77  | 1.06E-01 | 3.67E-01 | -5.22 |
| 1426314_PM_at   | Ednrb                   | EDNRB      | 0.18  | 2.51 | 1.77  | 1.06E-01 | 3.67E-01 | -5.22 |
| 1423842_PM_a_at | Rnf41                   | RNF41      | 0.23  | 3.00 | 1.77  | 1.06E-01 | 3.67E-01 | -5.22 |
| 1417334_PM_at   | Stk19                   | STK19      | 0.27  | 3.19 | 1.77  | 1.06E-01 | 3.67E-01 | -5.22 |
| 1418048_PM_at   | 1110059G10Rik           | KIAA1143   | -0.38 | 3.22 | -1.77 | 1.06E-01 | 3.67E-01 | -5.22 |
| 1416111_PM_at   | Cd83                    | CD83       | -0.32 | 3.67 | -1.77 | 1.06E-01 | 3.67E-01 | -5.22 |
| 1446716_PM_at   | ---                     | NA         | 0.20  | 2.67 | 1.77  | 1.06E-01 | 3.67E-01 | -5.22 |
| 1424509_PM_at   | Cd177                   | CD177      | 0.23  | 2.31 | 1.77  | 1.06E-01 | 3.67E-01 | -5.22 |
| 1416515_PM_at   | Fscn1                   | FSCN1      | 0.24  | 2.26 | 1.77  | 1.06E-01 | 3.67E-01 | -5.22 |
| 1417653_PM_at   | Pvalb                   | PVALB      | 1.16  | 4.24 | 1.77  | 1.06E-01 | 3.67E-01 | -5.22 |
| 1422364_PM_at   | Olf68                   | ORS2A5     | 1.14  | 3.30 | 1.77  | 1.06E-01 | 3.67E-01 | -5.22 |
| 1444007_PM_at   | A830082K12Rik           | NA         | 0.70  | 5.09 | 1.77  | 1.06E-01 | 3.67E-01 | -5.22 |
| 1452676_PM_a_at | Pnpt1                   | PNPT1      | -0.88 | 3.80 | -1.77 | 1.06E-01 | 3.67E-01 | -5.22 |
| 1417001_PM_a_at | Rsrp1                   | RSRP1      | -0.37 | 7.18 | -1.77 | 1.06E-01 | 3.67E-01 | -5.22 |
| 1443206_PM_at   | ---                     | NA         | 0.18  | 2.58 | 1.77  | 1.06E-01 | 3.67E-01 | -5.22 |
| 1425246_PM_at   | Hnf4aos                 | NA         | 0.21  | 2.78 | 1.77  | 1.06E-01 | 3.67E-01 | -5.22 |
| 1417043_PM_at   | Lcat                    | LCAT       | 0.30  | 3.20 | 1.77  | 1.06E-01 | 3.67E-01 | -5.22 |
| 1438858_PM_x_at | H2-Aa                   | HLA-DQA2   | 0.34  | 3.96 | 1.77  | 1.06E-01 | 3.67E-01 | -5.22 |
| 1444628_PM_at   | Adam33                  | ADAM33     | 0.47  | 3.37 | 1.77  | 1.06E-01 | 3.67E-01 | -5.22 |
| 1420021_PM_s_at | Suz12                   | SUZ12      | -0.60 | 4.67 | -1.77 | 1.06E-01 | 3.67E-01 | -5.22 |
| 1444563_PM_at   | ---                     | NA         | 0.26  | 2.52 | 1.77  | 1.06E-01 | 3.67E-01 | -5.22 |
| 1425690_PM_at   | B3gat1                  | B3GAT1     | -0.90 | 3.73 | -1.77 | 1.06E-01 | 3.67E-01 | -5.23 |
| 1451151_PM_s_at | Zfp410                  | ZNF410     | -0.30 | 2.74 | -1.77 | 1.06E-01 | 3.67E-01 | -5.23 |
| 1430014_PM_at   | 5430419D17Rik           | NA         | 0.19  | 2.69 | 1.77  | 1.06E-01 | 3.67E-01 | -5.23 |
| 1425573_PM_a_at | Asap1                   | ASAP1      | 0.25  | 2.44 | 1.77  | 1.06E-01 | 3.67E-01 | -5.23 |
| 1426474_PM_at   | Atpa2                   | ATPAF2     | 0.32  | 2.88 | 1.77  | 1.06E-01 | 3.67E-01 | -5.23 |
| 1428795_PM_at   | Slc18b1                 | SLC18B1    | -0.47 | 3.11 | -1.77 | 1.06E-01 | 3.67E-01 | -5.23 |
| 1428144_PM_at   | Lrwd1                   | LRWD1      | 0.44  | 3.03 | 1.77  | 1.06E-01 | 3.67E-01 | -5.23 |
| 1446297_PM_at   | Hibadh                  | HIBADH     | 0.17  | 2.24 | 1.77  | 1.06E-01 | 3.67E-01 | -5.23 |
| 1430523_PM_s_at | Iglv1                   | NA         | 0.15  | 2.18 | 1.77  | 1.06E-01 | 3.67E-01 | -5.23 |
| 1418224_PM_at   | Sec11a                  | SEC11A     | 0.32  | 2.71 | 1.77  | 1.06E-01 | 3.67E-01 | -5.23 |
| 1415883_PM_a_at | Cela3b                  | CELA3B     | 0.16  | 2.32 | 1.77  | 1.06E-01 | 3.67E-01 | -5.23 |
| 1428320_PM_at   | Kdm3b                   | KDM3B      | -0.30 | 2.68 | -1.77 | 1.06E-01 | 3.68E-01 | -5.23 |
| 1457950_PM_at   | ---                     | NA         | 0.12  | 2.02 | 1.77  | 1.06E-01 | 3.68E-01 | -5.23 |
| 1424108_PM_at   | Glo1                    | GLO1       | -0.29 | 5.48 | -1.77 | 1.06E-01 | 3.68E-01 | -5.23 |
| 1446093_PM_at   | ---                     | NA         | 0.17  | 2.20 | 1.77  | 1.06E-01 | 3.68E-01 | -5.23 |
| 1439645_PM_at   | Adra2b                  | ADRA2B     | 0.29  | 2.58 | 1.77  | 1.06E-01 | 3.68E-01 | -5.23 |
| 1419688_PM_at   | Gpc6                    | GPC6       | 0.18  | 2.39 | 1.77  | 1.06E-01 | 3.68E-01 | -5.23 |
| 1434281_PM_at   | Dda1                    | DDA1       | 0.20  | 4.04 | 1.77  | 1.06E-01 | 3.68E-01 | -5.23 |
| 1439914_PM_at   | 4932416H05Rik           | NA         | 0.37  | 3.02 | 1.77  | 1.06E-01 | 3.68E-01 | -5.23 |
| 1421713_PM_at   | Pramel1                 | PRAMEF9    | 0.26  | 2.69 | 1.77  | 1.06E-01 | 3.68E-01 | -5.23 |
| 1422763_PM_at   | Gipc1                   | GIPC1      | 0.37  | 3.22 | 1.77  | 1.06E-01 | 3.68E-01 | -5.23 |
| 1445038_PM_at   | Gm41693                 | NA         | 0.17  | 2.14 | 1.77  | 1.06E-01 | 3.68E-01 | -5.23 |
| 1445550_PM_at   | Klh32                   | KLHL32     | 0.20  | 3.67 | 1.77  | 1.06E-01 | 3.68E-01 | -5.23 |
| 1429615_PM_at   | Zfp91                   | ZFP91-CNTF | -0.45 | 5.33 | -1.77 | 1.06E-01 | 3.68E-01 | -5.23 |
| 1431133_PM_at   | Arhgap18                | ARHGAP18   | 0.24  | 2.29 | 1.77  | 1.06E-01 | 3.68E-01 | -5.23 |
| 1418895_PM_at   | Skap2                   | SKAP2      | -0.50 | 4.41 | -1.77 | 1.06E-01 | 3.68E-01 | -5.23 |
| 1434454_PM_at   | Adcy9                   | NA         | -0.47 | 3.55 | -1.77 | 1.06E-01 | 3.68E-01 | -5.23 |
| 1431909_PM_at   | Zc3hav1                 | NA         | 0.16  | 3.21 | 1.77  | 1.06E-01 | 3.68E-01 | -5.23 |
| 1441527_PM_at   | 4930558J18Rik           | NA         | 0.20  | 2.50 | 1.77  | 1.06E-01 | 3.68E-01 | -5.23 |
| 1431316_PM_at   | Itch                    | ITCH       | 0.29  | 2.83 | 1.77  | 1.06E-01 | 3.68E-01 | -5.23 |
| 1438069_PM_a_at | Rbm5                    | RBMS       | -0.82 | 4.13 | -1.77 | 1.06E-01 | 3.68E-01 | -5.23 |
| 1450520_PM_at   | Cacng3                  | CACNG3     | -0.58 | 4.15 | -1.77 | 1.06E-01 | 3.68E-01 | -5.23 |
| 1443610_PM_at   | ---                     | NA         | -0.35 | 2.42 | -1.77 | 1.06E-01 | 3.68E-01 | -5.23 |
| 1444519_PM_at   | Lgr5                    | LGR5       | 0.16  | 2.81 | 1.77  | 1.06E-01 | 3.68E-01 | -5.23 |
| 1457188_PM_at   | ---                     | NA         | 0.21  | 2.13 | 1.77  | 1.06E-01 | 3.68E-01 | -5.23 |
| 1445520_PM_at   | ---                     | NA         | 0.18  | 2.34 | 1.77  | 1.07E-01 | 3.68E-01 | -5.23 |
| 1458642_PM_at   | Klf1                    | NA         | 0.14  | 2.53 | 1.77  | 1.07E-01 | 3.68E-01 | -5.23 |
| 1459734_PM_at   | ---                     | NA         | 0.36  | 3.00 | 1.77  | 1.07E-01 | 3.68E-01 | -5.23 |

|                 |                 |           |       |      |       |          |          |       |
|-----------------|-----------------|-----------|-------|------|-------|----------|----------|-------|
| 1450473_PM_at   | Pcdh12          | PCDH12    | 0.17  | 2.54 | 1.77  | 1.07E-01 | 3.68E-01 | -5.23 |
| 1456859_PM_at   | Lnp             | NA        | -0.32 | 2.90 | -1.77 | 1.07E-01 | 3.68E-01 | -5.23 |
| 1444767_PM_at   | ---             | NA        | 0.20  | 2.45 | 1.77  | 1.07E-01 | 3.68E-01 | -5.23 |
| 1418415_PM_at   | Hoxb5           | HOXB5     | 0.22  | 2.34 | 1.77  | 1.07E-01 | 3.68E-01 | -5.23 |
| 1442012_PM_at   | AU015791        | NA        | 0.24  | 2.50 | 1.77  | 1.07E-01 | 3.68E-01 | -5.23 |
| 1445923_PM_at   | ---             | NA        | 0.25  | 3.60 | 1.77  | 1.07E-01 | 3.68E-01 | -5.23 |
| 1448710_PM_at   | Cxcr4           | CXCR4     | 0.49  | 3.08 | 1.77  | 1.07E-01 | 3.68E-01 | -5.23 |
| 1454390_PM_at   | Gm20605///Lrch4 | NA        | 0.33  | 3.22 | 1.77  | 1.07E-01 | 3.68E-01 | -5.23 |
| 1455122_PM_at   | Ptchd2          | DISP3     | 0.33  | 2.66 | 1.77  | 1.07E-01 | 3.68E-01 | -5.23 |
| 1437912_PM_at   | Iqsec3          | IQSEC3    | -0.57 | 3.55 | -1.77 | 1.07E-01 | 3.68E-01 | -5.23 |
| 1427056_PM_at   | Adamts15        | ADAMTS15  | -0.30 | 2.96 | -1.77 | 1.07E-01 | 3.68E-01 | -5.23 |
| 1425334_PM_at   | Gorasp1         | GORASP1   | 0.16  | 2.31 | 1.77  | 1.07E-01 | 3.68E-01 | -5.23 |
| 1429016_PM_at   | Glb1l           | GLB1L     | 0.20  | 2.56 | 1.77  | 1.07E-01 | 3.68E-01 | -5.23 |
| 1424483_PM_at   | Mob1a           | MOB1A     | 0.24  | 2.65 | 1.77  | 1.07E-01 | 3.68E-01 | -5.23 |
| 1425598_PM_a_at | Lyn             | LYN       | 0.29  | 3.73 | 1.77  | 1.07E-01 | 3.68E-01 | -5.23 |
| 1427150_PM_at   | Kmt2c           | KMT2C     | 0.48  | 4.48 | 1.77  | 1.07E-01 | 3.68E-01 | -5.23 |
| 1446708_PM_at   | Hif3a           | NA        | 0.30  | 3.75 | 1.77  | 1.07E-01 | 3.69E-01 | -5.23 |
| 1433241_PM_at   | ---             | NA        | 0.15  | 2.43 | 1.77  | 1.07E-01 | 3.69E-01 | -5.23 |
| 1430577_PM_at   | Haus2           | HAUS2     | 0.25  | 3.10 | 1.77  | 1.07E-01 | 3.69E-01 | -5.23 |
| 1456561_PM_s_at | Kif17           | NA        | -0.29 | 2.50 | -1.77 | 1.07E-01 | 3.69E-01 | -5.23 |
| 1430207_PM_at   | Aknaos          | NA        | 0.22  | 2.59 | 1.77  | 1.07E-01 | 3.69E-01 | -5.23 |
| 1436727_PM_x_at | Sptlc1          | SPTLC1    | -0.35 | 2.49 | -1.77 | 1.07E-01 | 3.69E-01 | -5.23 |
| 1436789_PM_at   | Ccnj            | CCNJL     | 0.23  | 2.48 | 1.77  | 1.07E-01 | 3.69E-01 | -5.23 |
| 1424325_PM_at   | Esco1           | ESCO1     | 0.80  | 5.49 | 1.77  | 1.07E-01 | 3.69E-01 | -5.23 |
| 1454328_PM_at   | ---             | NA        | 0.13  | 2.21 | 1.77  | 1.07E-01 | 3.69E-01 | -5.23 |
| 1431816_PM_at   | Tex9            | TEX9      | 0.17  | 2.21 | 1.77  | 1.07E-01 | 3.69E-01 | -5.23 |
| 1447131_PM_at   | ---             | NA        | 0.15  | 2.38 | 1.77  | 1.07E-01 | 3.69E-01 | -5.23 |
| 1452483_PM_a_at | Cd44            | CD44      | 0.22  | 2.71 | 1.77  | 1.07E-01 | 3.69E-01 | -5.23 |
| 1417728_PM_at   | Mbd3            | MBD3      | 0.32  | 2.74 | 1.77  | 1.07E-01 | 3.69E-01 | -5.23 |
| 1460502_PM_at   | ---             | NA        | -0.18 | 2.21 | -1.76 | 1.07E-01 | 3.69E-01 | -5.23 |
| 1417755_PM_at   | Topors          | TOPORS    | 0.21  | 3.36 | 1.77  | 1.07E-01 | 3.69E-01 | -5.23 |
| 1430723_PM_at   | Pds2            | PDSS2     | 0.29  | 3.45 | 1.76  | 1.07E-01 | 3.69E-01 | -5.23 |
| 1430963_PM_at   | Gcnt3           | GCNT3     | 0.31  | 2.19 | 1.76  | 1.07E-01 | 3.69E-01 | -5.23 |
| 1440156_PM_s_at | Tox2            | TOX2      | 0.48  | 4.44 | 1.76  | 1.07E-01 | 3.69E-01 | -5.23 |
| 1417470_PM_at   | Apobec3         | APOBEC3H  | 0.34  | 2.71 | 1.76  | 1.07E-01 | 3.69E-01 | -5.23 |
| 1457679_PM_at   | Dclre1c         | DCLRE1C   | -0.19 | 2.45 | -1.76 | 1.07E-01 | 3.69E-01 | -5.23 |
| 1438974_PM_x_at | Pitpnm1         | PITPNM1   | 0.21  | 3.91 | 1.76  | 1.07E-01 | 3.69E-01 | -5.23 |
| 1422634_PM_a_at | Vsig2           | VSIG2     | 0.21  | 2.34 | 1.76  | 1.07E-01 | 3.69E-01 | -5.23 |
| 1448165_PM_at   | Casp2           | CASP2     | 0.22  | 3.04 | 1.76  | 1.07E-01 | 3.69E-01 | -5.23 |
| 1440494_PM_at   | ---             | NA        | 0.32  | 2.82 | 1.76  | 1.07E-01 | 3.69E-01 | -5.23 |
| 1419316_PM_s_at | Gnb1l           | GNB1L     | 0.16  | 2.15 | 1.76  | 1.07E-01 | 3.69E-01 | -5.23 |
| 1440354_PM_at   | Elov17          | ELOVL7    | 0.19  | 2.47 | 1.76  | 1.07E-01 | 3.69E-01 | -5.24 |
| 1438434_PM_at   | Arhgap11a       | ARHGAP11A | 0.30  | 2.87 | 1.76  | 1.07E-01 | 3.69E-01 | -5.24 |
| 1445905_PM_at   | C79206          | NA        | 0.21  | 2.10 | 1.76  | 1.07E-01 | 3.69E-01 | -5.24 |
| 1433305_PM_at   | 9530034D02Rik   | NA        | 0.32  | 3.36 | 1.76  | 1.07E-01 | 3.69E-01 | -5.24 |
| 1430197_PM_a_at | Pitpnm2         | PITPNM2   | 0.83  | 3.13 | 1.76  | 1.07E-01 | 3.69E-01 | -5.24 |
| 1458853_PM_at   | ---             | NA        | 0.16  | 2.27 | 1.76  | 1.07E-01 | 3.69E-01 | -5.24 |
| 1459870_PM_x_at | ---             | NA        | -0.59 | 2.62 | -1.76 | 1.07E-01 | 3.69E-01 | -5.24 |
| 1420561_PM_at   | Trpc7           | TRPC7     | 0.19  | 2.27 | 1.76  | 1.07E-01 | 3.69E-01 | -5.24 |
| 1418387_PM_at   | Mphosph8        | MPHOSPH8  | -0.39 | 3.49 | -1.76 | 1.07E-01 | 3.70E-01 | -5.24 |
| 1458150_PM_at   | Ambra1          | AMBRA1    | 0.22  | 2.23 | 1.76  | 1.07E-01 | 3.70E-01 | -5.24 |
| 1449163_PM_at   | Sigirr          | SIGIRR    | 0.14  | 2.24 | 1.76  | 1.07E-01 | 3.70E-01 | -5.24 |
| 1447798_PM_at   | 1700123O21Rik   | NA        | -0.20 | 2.11 | -1.76 | 1.07E-01 | 3.70E-01 | -5.24 |
| 1448619_PM_at   | Dhcr7           | DHCR7     | -0.47 | 4.95 | -1.76 | 1.07E-01 | 3.70E-01 | -5.24 |
| 1452754_PM_at   | Creld2          | CRELD2    | -0.50 | 4.71 | -1.76 | 1.07E-01 | 3.70E-01 | -5.24 |
| 1460106_PM_at   | Hydin           | HYDIN     | 0.14  | 2.16 | 1.76  | 1.07E-01 | 3.70E-01 | -5.24 |
| 1437494_PM_at   | Mapkapk3        | MAPKAPK3  | 0.19  | 2.79 | 1.76  | 1.07E-01 | 3.70E-01 | -5.24 |
| 1441685_PM_at   | Prosc           | PLPBP     | 0.21  | 2.27 | 1.76  | 1.07E-01 | 3.70E-01 | -5.24 |
| 1446012_PM_at   | ---             | NA        | 0.33  | 2.33 | 1.76  | 1.07E-01 | 3.70E-01 | -5.24 |
| 1418214_PM_at   | Klc2            | KLC2      | 0.40  | 2.74 | 1.76  | 1.07E-01 | 3.70E-01 | -5.24 |
| 1447508_PM_at   | ---             | NA        | 0.42  | 3.50 | 1.76  | 1.07E-01 | 3.70E-01 | -5.24 |
| 1431047_PM_at   | Chd6            | CHD6      | 0.93  | 4.18 | 1.76  | 1.07E-01 | 3.70E-01 | -5.24 |
| 1451963_PM_at   | Ighv6-6         | NA        | 0.19  | 2.15 | 1.76  | 1.07E-01 | 3.70E-01 | -5.24 |
| 1456832_PM_at   | ---             | NA        | 0.34  | 2.43 | 1.76  | 1.07E-01 | 3.70E-01 | -5.24 |
| 1420614_PM_at   | Dynlt3          | DYNLT3    | -0.71 | 6.41 | -1.76 | 1.08E-01 | 3.70E-01 | -5.24 |
| 1418207_PM_at   | Fxyd4           | FXYD4     | 0.17  | 2.39 | 1.76  | 1.08E-01 | 3.70E-01 | -5.24 |
| 1423606_PM_at   | Postn           | POSTN     | 0.17  | 2.93 | 1.76  | 1.08E-01 | 3.70E-01 | -5.24 |
| 1443391_PM_at   | ---             | NA        | 0.20  | 3.00 | 1.76  | 1.08E-01 | 3.70E-01 | -5.24 |
| 1453301_PM_a_at | Alkbh4          | ALKBH4    | 0.22  | 3.50 | 1.76  | 1.08E-01 | 3.70E-01 | -5.24 |
| 1452636_PM_x_at | Mtg2            | NA        | 0.23  | 3.03 | 1.76  | 1.08E-01 | 3.70E-01 | -5.24 |
| 1456976_PM_at   | BB055853        | NA        | 0.26  | 2.44 | 1.76  | 1.08E-01 | 3.70E-01 | -5.24 |
| 1439897_PM_at   | Nebi            | NA        | 0.27  | 2.72 | 1.76  | 1.08E-01 | 3.70E-01 | -5.24 |
| 1446075_PM_at   | ---             | NA        | 0.28  | 3.23 | 1.76  | 1.08E-01 | 3.70E-01 | -5.24 |
| 1442040_PM_at   | ---             | NA        | 0.29  | 2.47 | 1.76  | 1.08E-01 | 3.70E-01 | -5.24 |
| 1458469_PM_at   | ---             | NA        | 0.74  | 3.27 | 1.76  | 1.08E-01 | 3.70E-01 | -5.24 |

|                 |                                       |          |       |      |       |          |          |       |
|-----------------|---------------------------------------|----------|-------|------|-------|----------|----------|-------|
| 1453888_PM_at   | Cpne4                                 | CPNE4    | -0.29 | 2.58 | -1.76 | 1.08E-01 | 3.70E-01 | -5.24 |
| 1451804_PM_a_at | Lrrc16a                               | CARMIL1  | 0.23  | 2.91 | 1.76  | 1.08E-01 | 3.70E-01 | -5.24 |
| 1431189_PM_a_at | Fahd2a                                | FAHD2B   | 0.35  | 4.33 | 1.76  | 1.08E-01 | 3.70E-01 | -5.24 |
| 1420114_PM_s_at | Coprs                                 | NA       | 0.48  | 7.98 | 1.76  | 1.08E-01 | 3.70E-01 | -5.24 |
| 1443660_PM_at   | ---                                   | NA       | 0.45  | 4.09 | 1.76  | 1.08E-01 | 3.70E-01 | -5.24 |
| 1420036_PM_at   | Ate1                                  | NA       | -0.29 | 3.54 | -1.76 | 1.08E-01 | 3.70E-01 | -5.24 |
| 1457931_PM_at   | ---                                   | NA       | 0.21  | 2.16 | 1.76  | 1.08E-01 | 3.70E-01 | -5.24 |
| 1441420_PM_at   | Igsf9                                 | IGSF9    | 0.32  | 2.78 | 1.76  | 1.08E-01 | 3.70E-01 | -5.24 |
| 1416465_PM_a_at | Vapa                                  | VAPA     | -0.66 | 7.74 | -1.76 | 1.08E-01 | 3.70E-01 | -5.24 |
| 1416981_PM_at   | Foxo1                                 | FOXO1    | 0.20  | 2.68 | 1.76  | 1.08E-01 | 3.70E-01 | -5.24 |
| 1442548_PM_at   | ---                                   | NA       | 0.25  | 2.65 | 1.76  | 1.08E-01 | 3.70E-01 | -5.24 |
| 1431825_PM_at   | Srp3                                  | SRPK3    | 0.39  | 3.18 | 1.76  | 1.08E-01 | 3.70E-01 | -5.24 |
| 1438656_PM_x_at | Timm17b                               | TIMM17B  | 0.62  | 3.22 | 1.76  | 1.08E-01 | 3.70E-01 | -5.24 |
| 1443702_PM_at   | Map4                                  | MAP4     | 0.78  | 3.17 | 1.76  | 1.08E-01 | 3.70E-01 | -5.24 |
| 1459857_PM_at   | ---                                   | NA       | 0.35  | 2.43 | 1.76  | 1.08E-01 | 3.70E-01 | -5.24 |
| 1432412_PM_at   | 9530004P13Rik                         | NA       | 0.15  | 2.40 | 1.76  | 1.08E-01 | 3.70E-01 | -5.24 |
| 1415811_PM_at   | Uhrf1                                 | UHRF1    | 0.19  | 3.54 | 1.76  | 1.08E-01 | 3.70E-01 | -5.24 |
| 1457784_PM_at   | ---                                   | NA       | 0.15  | 2.18 | 1.76  | 1.08E-01 | 3.70E-01 | -5.24 |
| 1432087_PM_at   | 4933406G16Rik                         | NA       | 0.15  | 2.14 | 1.76  | 1.08E-01 | 3.70E-01 | -5.24 |
| 1420165_PM_s_at | Dnajc17                               | DNAJC17  | 0.45  | 2.73 | 1.76  | 1.08E-01 | 3.70E-01 | -5.24 |
| 1436294_PM_at   | Ankrd29                               | ANKRD29  | -0.81 | 4.29 | -1.76 | 1.08E-01 | 3.70E-01 | -5.24 |
| 1449891_PM_a_at | Dcbl2                                 | DCBLD2   | 0.23  | 2.65 | 1.76  | 1.08E-01 | 3.70E-01 | -5.24 |
| 1445362_PM_at   | Ptpdc1                                | PTPDC1   | 0.24  | 2.63 | 1.76  | 1.08E-01 | 3.70E-01 | -5.24 |
| 1446697_PM_at   | ---                                   | NA       | 0.22  | 2.54 | 1.76  | 1.08E-01 | 3.70E-01 | -5.24 |
| 1446811_PM_at   | ---                                   | NA       | 0.50  | 2.88 | 1.76  | 1.08E-01 | 3.70E-01 | -5.24 |
| 1457190_PM_at   | Tbc1d19                               | NA       | -0.44 | 3.62 | -1.76 | 1.08E-01 | 3.71E-01 | -5.24 |
| 1454448_PM_at   | 2900018E21Rik                         | NA       | 0.99  | 3.46 | 1.76  | 1.08E-01 | 3.71E-01 | -5.24 |
| 1435551_PM_at   | Fhod3                                 | FHOD3    | -0.26 | 2.67 | -1.76 | 1.08E-01 | 3.71E-01 | -5.24 |
| 1445534_PM_at   | ---                                   | NA       | -0.40 | 3.65 | -1.76 | 1.08E-01 | 3.71E-01 | -5.24 |
| 1449323_PM_a_at | LOC105242500 /// Rpl3 ///<br>Rpl3-ps1 | RPL3     | -0.50 | 7.28 | -1.76 | 1.08E-01 | 3.71E-01 | -5.24 |
| 1421529_PM_a_at | Txnr1                                 | TXNRD1   | -0.24 | 3.37 | -1.76 | 1.08E-01 | 3.71E-01 | -5.24 |
| 1455165_PM_at   | Rora                                  | RORA     | -0.23 | 2.89 | -1.76 | 1.08E-01 | 3.71E-01 | -5.24 |
| 1446324_PM_at   | ---                                   | NA       | 0.28  | 2.66 | 1.76  | 1.08E-01 | 3.71E-01 | -5.24 |
| 1416365_PM_at   | Hsp90ab1                              | HSP90AB1 | 0.45  | 7.37 | 1.76  | 1.08E-01 | 3.71E-01 | -5.24 |
| 1456359_PM_at   | Ppwd1                                 | PPWD1    | -0.34 | 2.88 | -1.76 | 1.08E-01 | 3.71E-01 | -5.24 |
| 1443475_PM_at   | ---                                   | NA       | 0.20  | 2.20 | 1.76  | 1.08E-01 | 3.71E-01 | -5.24 |
| 1459637_PM_at   | ---                                   | NA       | 0.33  | 2.48 | 1.76  | 1.08E-01 | 3.71E-01 | -5.24 |
| 1426953_PM_at   | Hmgxb4                                | HMGXB4   | -0.24 | 2.72 | -1.76 | 1.08E-01 | 3.71E-01 | -5.24 |
| 1451059_PM_at   | Zfp474                                | ZNF474   | 0.21  | 2.80 | 1.76  | 1.08E-01 | 3.71E-01 | -5.25 |
| 1424690_PM_at   | Cacfd1                                | CACFD1   | 0.24  | 2.60 | 1.76  | 1.08E-01 | 3.71E-01 | -5.25 |
| 1434029_PM_at   | Fbrs1                                 | FBRSL1   | 0.25  | 2.92 | 1.76  | 1.08E-01 | 3.71E-01 | -5.25 |
| 1430185_PM_at   | ---                                   | NA       | 0.49  | 3.71 | 1.76  | 1.08E-01 | 3.71E-01 | -5.25 |
| 1456847_PM_at   | Cd160                                 | CD160    | 0.32  | 2.54 | 1.76  | 1.08E-01 | 3.72E-01 | -5.25 |
| 1441659_PM_at   | Dpf3                                  | DPF3     | 0.27  | 3.73 | 1.76  | 1.08E-01 | 3.72E-01 | -5.25 |
| 1457979_PM_at   | ---                                   | NA       | -0.52 | 5.14 | -1.76 | 1.08E-01 | 3.72E-01 | -5.25 |
| 1435870_PM_at   | Chpt1                                 | CHPT1    | -0.44 | 5.33 | -1.76 | 1.09E-01 | 3.72E-01 | -5.25 |
| 1455608_PM_at   | Sclt1                                 | SCLT1    | -0.44 | 2.86 | -1.76 | 1.09E-01 | 3.72E-01 | -5.25 |
| 1417769_PM_at   | Psmc6                                 | NA       | -0.30 | 2.58 | -1.76 | 1.09E-01 | 3.72E-01 | -5.25 |
| 1448463_PM_at   | 1700094D03Rik ///<br>4933434E20Rik    | C1orf43  | -0.22 | 3.87 | -1.76 | 1.09E-01 | 3.72E-01 | -5.25 |
| 1439718_PM_at   | ---                                   | NA       | 0.15  | 1.91 | 1.76  | 1.09E-01 | 3.72E-01 | -5.25 |
| 1431702_PM_at   | ---                                   | NA       | 0.23  | 2.84 | 1.76  | 1.09E-01 | 3.72E-01 | -5.25 |
| 1417217_PM_at   | Magel2                                | MAGEL2   | 0.24  | 2.60 | 1.76  | 1.09E-01 | 3.72E-01 | -5.25 |
| 1449578_PM_at   | Supt16                                | SUPT16H  | -0.52 | 4.61 | -1.76 | 1.09E-01 | 3.72E-01 | -5.25 |
| 1439941_PM_at   | ---                                   | NA       | 0.21  | 2.21 | 1.76  | 1.09E-01 | 3.72E-01 | -5.25 |
| 1430556_PM_at   | Spag9                                 | SPAG9    | 0.22  | 2.26 | 1.76  | 1.09E-01 | 3.72E-01 | -5.25 |
| 1422024_PM_at   | Fl1                                   | FL11     | 0.37  | 2.38 | 1.76  | 1.09E-01 | 3.72E-01 | -5.25 |
| 1426293_PM_at   | Zfp790                                | ZNF790   | -0.55 | 3.34 | -1.76 | 1.09E-01 | 3.72E-01 | -5.25 |
| 1418156_PM_at   | Kcne4                                 | KCNE4    | -0.45 | 3.08 | -1.76 | 1.09E-01 | 3.72E-01 | -5.25 |
| 1459252_PM_at   | Gm4981                                | NA       | 0.15  | 2.26 | 1.76  | 1.09E-01 | 3.72E-01 | -5.25 |
| 1435303_PM_at   | Taf4b                                 | TAF4B    | 0.15  | 2.15 | 1.76  | 1.09E-01 | 3.72E-01 | -5.25 |
| 1457372_PM_at   | LOC102641785 /// Tcf20                | NA       | 0.19  | 2.51 | 1.76  | 1.09E-01 | 3.72E-01 | -5.25 |
| 1416253_PM_at   | Cdkn2d                                | CDKN2D   | 0.20  | 3.71 | 1.76  | 1.09E-01 | 3.72E-01 | -5.25 |
| 1428457_PM_at   | Ttpal                                 | TTPAL    | -0.23 | 2.40 | -1.75 | 1.09E-01 | 3.72E-01 | -5.25 |
| 1426739_PM_at   | Donson                                | DONSON   | -0.69 | 3.08 | -1.75 | 1.09E-01 | 3.72E-01 | -5.25 |
| 1442599_PM_at   | Slc12a9                               | SLC12A9  | 0.37  | 3.40 | 1.75  | 1.09E-01 | 3.72E-01 | -5.25 |
| 1417281_PM_a_at | Mmp23                                 | MMP23B   | 0.86  | 3.38 | 1.75  | 1.09E-01 | 3.72E-01 | -5.25 |
| 1418208_PM_at   | Pax8                                  | PAX8     | 0.15  | 2.35 | 1.75  | 1.09E-01 | 3.72E-01 | -5.25 |
| 1445010_PM_at   | ---                                   | NA       | 0.23  | 2.72 | 1.75  | 1.09E-01 | 3.72E-01 | -5.25 |
| 1451228_PM_a_at | Sycn                                  | SYCN     | 0.23  | 2.70 | 1.75  | 1.09E-01 | 3.72E-01 | -5.25 |
| 1459399_PM_at   | ---                                   | NA       | 0.17  | 2.69 | 1.75  | 1.09E-01 | 3.72E-01 | -5.25 |
| 1426944_PM_at   | Fbxw8                                 | FBXW8    | 0.23  | 2.77 | 1.75  | 1.09E-01 | 3.72E-01 | -5.25 |
| 1434879_PM_at   | Cdc34                                 | CDC34    | 0.22  | 2.80 | 1.75  | 1.09E-01 | 3.72E-01 | -5.25 |
| 1441117_PM_at   | ---                                   | NA       | 0.30  | 2.59 | 1.75  | 1.09E-01 | 3.72E-01 | -5.25 |

|                 |                                                                                                                                               |          |       |      |       |          |          |       |
|-----------------|-----------------------------------------------------------------------------------------------------------------------------------------------|----------|-------|------|-------|----------|----------|-------|
| 1460144_PM_at   | ---                                                                                                                                           | NA       | 0.33  | 2.78 | 1.75  | 1.09E-01 | 3.72E-01 | -5.25 |
| 1422948_PM_s_at | Hist1h4a /// Hist1h4b ///<br>Hist1h4c /// Hist1h4h ///<br>Hist1h4i /// Hist1h4j ///<br>Hist1h4k /// Hist1h4m ///<br>Hist1h4n /// LOC102641229 | HIST1H4J | 0.60  | 3.46 | 1.75  | 1.09E-01 | 3.72E-01 | -5.25 |
| 1421469_PM_a_at | Stat5a                                                                                                                                        | STAT5A   | 0.25  | 2.24 | 1.75  | 1.09E-01 | 3.72E-01 | -5.25 |
| 1428388_PM_at   | Tnks2                                                                                                                                         | TNKS2    | -0.72 | 7.55 | -1.75 | 1.09E-01 | 3.72E-01 | -5.25 |
| 1454721_PM_at   | Arel1                                                                                                                                         | AREL1    | -0.53 | 4.11 | -1.75 | 1.09E-01 | 3.72E-01 | -5.25 |
| 1428372_PM_at   | St5                                                                                                                                           | ST5      | -0.35 | 5.32 | -1.75 | 1.09E-01 | 3.72E-01 | -5.25 |
| 1452705_PM_at   | Pdxdc1                                                                                                                                        | PDXDC1   | -0.23 | 3.45 | -1.75 | 1.09E-01 | 3.72E-01 | -5.25 |
| 1446826_PM_at   | Xpo7                                                                                                                                          | NA       | 0.25  | 2.57 | 1.75  | 1.09E-01 | 3.72E-01 | -5.25 |
| 1459129_PM_at   | Gm20616                                                                                                                                       | NA       | 0.26  | 2.71 | 1.75  | 1.09E-01 | 3.72E-01 | -5.25 |
| 1453744_PM_a_at | Ankrd40                                                                                                                                       | ANKRD40  | 0.33  | 2.21 | 1.75  | 1.09E-01 | 3.72E-01 | -5.25 |
| 1418298_PM_s_at | Dpysl4                                                                                                                                        | DPYSL4   | 0.47  | 3.16 | 1.75  | 1.09E-01 | 3.72E-01 | -5.25 |
| 1449581_PM_at   | Emid1                                                                                                                                         | EMID1    | -0.59 | 3.76 | -1.75 | 1.09E-01 | 3.72E-01 | -5.25 |
| 1424887_PM_at   | Klhdc4                                                                                                                                        | KLHDC4   | 0.38  | 4.04 | 1.75  | 1.09E-01 | 3.72E-01 | -5.25 |
| 1424057_PM_at   | Gdap2                                                                                                                                         | GDAP2    | -0.50 | 3.35 | -1.75 | 1.09E-01 | 3.72E-01 | -5.25 |
| 1429202_PM_at   | Dync2h1                                                                                                                                       | NA       | -0.46 | 2.70 | -1.75 | 1.09E-01 | 3.72E-01 | -5.25 |
| 1428433_PM_at   | Hipk2                                                                                                                                         | NA       | -0.48 | 7.36 | -1.75 | 1.09E-01 | 3.72E-01 | -5.25 |
| 1441573_PM_at   | Scmh1                                                                                                                                         | NA       | -0.47 | 2.68 | -1.75 | 1.09E-01 | 3.72E-01 | -5.25 |
| 1439647_PM_at   | Fam205a1 /// Fam205a2 ///<br>Fam205a3 /// Fam205a4 ///<br>LOC100862043 ///                                                                    | FAM205A  | 0.19  | 2.30 | 1.75  | 1.09E-01 | 3.72E-01 | -5.25 |
| 1447582_PM_x_at | ---                                                                                                                                           | NA       | 0.17  | 2.64 | 1.75  | 1.09E-01 | 3.72E-01 | -5.25 |
| 1424710_PM_a_at | Gorasp2                                                                                                                                       | GORASP2  | -0.37 | 3.01 | -1.75 | 1.09E-01 | 3.73E-01 | -5.25 |
| 1416100_PM_at   | Eif3d                                                                                                                                         | EIF3D    | -0.42 | 3.70 | -1.75 | 1.09E-01 | 3.73E-01 | -5.25 |
| 1431321_PM_at   | P2rx3                                                                                                                                         | P2RX3    | 0.16  | 2.27 | 1.75  | 1.09E-01 | 3.73E-01 | -5.25 |
| 1453834_PM_at   | LOC102636313                                                                                                                                  | NA       | 0.19  | 2.32 | 1.75  | 1.09E-01 | 3.73E-01 | -5.25 |
| 1459972_PM_x_at | Sez6                                                                                                                                          | SEZ6     | 0.20  | 2.38 | 1.75  | 1.09E-01 | 3.73E-01 | -5.25 |
| 1424122_PM_s_at | Commd1                                                                                                                                        | COMMD1   | 0.30  | 3.00 | 1.75  | 1.09E-01 | 3.73E-01 | -5.25 |
| 1421862_PM_a_at | Vamp1                                                                                                                                         | VAMP1    | 0.50  | 3.00 | 1.75  | 1.09E-01 | 3.73E-01 | -5.25 |
| 1417542_PM_at   | Rps6ka2                                                                                                                                       | RPS6KA2  | -0.53 | 3.97 | -1.75 | 1.09E-01 | 3.73E-01 | -5.25 |
| 1449063_PM_at   | Sec22b                                                                                                                                        | SEC22B   | -0.35 | 3.45 | -1.75 | 1.09E-01 | 3.73E-01 | -5.25 |
| 1454533_PM_at   | 9430085L16Rik                                                                                                                                 | NA       | 0.14  | 2.08 | 1.75  | 1.09E-01 | 3.73E-01 | -5.25 |
| 1423504_PM_at   | Jam3                                                                                                                                          | JAM3     | 0.14  | 2.60 | 1.75  | 1.09E-01 | 3.73E-01 | -5.25 |
| 1431090_PM_at   | ---                                                                                                                                           | NA       | 0.17  | 2.01 | 1.75  | 1.09E-01 | 3.73E-01 | -5.25 |
| 1454852_PM_at   | Sp1                                                                                                                                           | SP1      | 0.17  | 2.65 | 1.75  | 1.09E-01 | 3.73E-01 | -5.25 |
| 1446469_PM_at   | Gm5082                                                                                                                                        | NA       | 0.27  | 2.30 | 1.75  | 1.09E-01 | 3.73E-01 | -5.25 |
| 1456526_PM_at   | ---                                                                                                                                           | NA       | 0.29  | 2.56 | 1.75  | 1.09E-01 | 3.73E-01 | -5.25 |
| 1444586_PM_at   | ---                                                                                                                                           | NA       | 0.29  | 2.26 | 1.75  | 1.09E-01 | 3.73E-01 | -5.25 |
| 1426464_PM_at   | Nr1d1                                                                                                                                         | NR1D1    | 0.34  | 2.94 | 1.75  | 1.09E-01 | 3.73E-01 | -5.25 |
| 1416559_PM_at   | Rrp8                                                                                                                                          | RRP8     | 0.40  | 2.67 | 1.75  | 1.09E-01 | 3.73E-01 | -5.25 |
| 1421301_PM_at   | Zic2                                                                                                                                          | ZIC2     | 0.74  | 3.86 | 1.75  | 1.09E-01 | 3.73E-01 | -5.25 |
| 1444644_PM_x_at | Tatdn1                                                                                                                                        | TATDN1   | -0.54 | 3.62 | -1.75 | 1.09E-01 | 3.73E-01 | -5.25 |
| 1456767_PM_at   | Lfn3                                                                                                                                          | LRFN3    | 0.29  | 2.63 | 1.75  | 1.09E-01 | 3.73E-01 | -5.25 |
| 1452445_PM_at   | Slc41a2                                                                                                                                       | SLC41A2  | -0.24 | 3.57 | -1.75 | 1.09E-01 | 3.73E-01 | -5.25 |
| 1460584_PM_at   | Ppip5k1                                                                                                                                       | PIPIP5K1 | -0.19 | 2.63 | -1.75 | 1.09E-01 | 3.73E-01 | -5.25 |
| 1448828_PM_at   | Smc6                                                                                                                                          | SMC6     | -0.32 | 5.24 | -1.75 | 1.09E-01 | 3.73E-01 | -5.25 |
| 1431451_PM_at   | Gltd1                                                                                                                                         | GLT6D1   | 0.16  | 2.27 | 1.75  | 1.09E-01 | 3.73E-01 | -5.25 |
| 1451916_PM_s_at | Trim15                                                                                                                                        | TRIM15   | 0.23  | 2.36 | 1.75  | 1.09E-01 | 3.73E-01 | -5.25 |
| 1455414_PM_at   | Ttc16                                                                                                                                         | TTC16    | 0.13  | 2.22 | 1.75  | 1.09E-01 | 3.73E-01 | -5.25 |
| 1419610_PM_at   | Ccr1                                                                                                                                          | CCR1     | 0.23  | 2.15 | 1.75  | 1.09E-01 | 3.73E-01 | -5.25 |
| 1426957_PM_at   | Trp53bp1                                                                                                                                      | TP53BP1  | -0.27 | 3.07 | -1.75 | 1.10E-01 | 3.73E-01 | -5.25 |
| 1418045_PM_at   | Inpp1                                                                                                                                         | INPP1    | -0.21 | 2.98 | -1.75 | 1.10E-01 | 3.73E-01 | -5.25 |
| 1446458_PM_at   | Rnase1                                                                                                                                        | RNASEL   | 0.19  | 2.29 | 1.75  | 1.10E-01 | 3.73E-01 | -5.25 |
| 1425071_PM_s_at | Ntrk3                                                                                                                                         | NA       | -0.85 | 3.36 | -1.75 | 1.10E-01 | 3.73E-01 | -5.26 |
| 1454796_PM_at   | Ficd                                                                                                                                          | FICD     | -0.68 | 3.63 | -1.75 | 1.10E-01 | 3.73E-01 | -5.26 |
| 1454877_PM_at   | Sertad4                                                                                                                                       | SERTAD4  | -0.45 | 2.97 | -1.75 | 1.10E-01 | 3.73E-01 | -5.26 |
| 1443859_PM_at   | Rsb1                                                                                                                                          | RSB1     | -0.43 | 2.78 | -1.75 | 1.10E-01 | 3.73E-01 | -5.26 |
| 1418745_PM_at   | Omd                                                                                                                                           | OMD      | -0.17 | 2.26 | -1.75 | 1.10E-01 | 3.73E-01 | -5.26 |
| 1425603_PM_at   | Tmem176a                                                                                                                                      | TMEM176A | 0.18  | 2.78 | 1.75  | 1.10E-01 | 3.73E-01 | -5.26 |
| 1454501_PM_at   | ---                                                                                                                                           | NA       | 0.30  | 2.28 | 1.75  | 1.10E-01 | 3.73E-01 | -5.26 |
| 1421714_PM_at   | Tmprss3                                                                                                                                       | TMPPRSS3 | 0.45  | 2.48 | 1.75  | 1.10E-01 | 3.73E-01 | -5.26 |
| 1443068_PM_at   | ---                                                                                                                                           | NA       | 0.17  | 2.36 | 1.75  | 1.10E-01 | 3.73E-01 | -5.26 |
| 1425417_PM_x_at | Klra21 /// Klra3 /// Klra8                                                                                                                    | NA       | 0.14  | 2.12 | 1.75  | 1.10E-01 | 3.73E-01 | -5.26 |
| 1416197_PM_at   | Snrpc                                                                                                                                         | SNRPC    | -0.54 | 4.19 | -1.75 | 1.10E-01 | 3.73E-01 | -5.26 |
| 1419627_PM_s_at | Clec4n                                                                                                                                        | CLEC4A   | 0.18  | 1.99 | 1.75  | 1.10E-01 | 3.73E-01 | -5.26 |
| 1452817_PM_at   | Smyd3                                                                                                                                         | SMYD3    | 0.21  | 2.77 | 1.75  | 1.10E-01 | 3.73E-01 | -5.26 |
| 1450568_PM_at   | Galr1                                                                                                                                         | GALR1    | 0.17  | 2.54 | 1.75  | 1.10E-01 | 3.73E-01 | -5.26 |
| 1439454_PM_x_at | Tm2d2                                                                                                                                         | TM2D2    | -0.32 | 3.24 | -1.75 | 1.10E-01 | 3.73E-01 | -5.26 |
| 1422462_PM_at   | Ube2t                                                                                                                                         | UBE2T    | 0.20  | 2.15 | 1.75  | 1.10E-01 | 3.73E-01 | -5.26 |

|                 |               |         |       |      |       |          |          |       |
|-----------------|---------------|---------|-------|------|-------|----------|----------|-------|
| 1459654_PM_at   | ---           | NA      | 0.23  | 2.47 | 1.75  | 1.10E-01 | 3.73E-01 | -5.26 |
| 1429376_PM_s_at | Anapc10       | ANAPC10 | -0.60 | 2.56 | -1.75 | 1.10E-01 | 3.73E-01 | -5.26 |
| 1416033_PM_at   | Tmem109       | TMEM109 | 0.21  | 2.79 | 1.75  | 1.10E-01 | 3.73E-01 | -5.26 |
| 1444161_PM_at   | A530020G2ORik | NA      | 0.14  | 1.92 | 1.75  | 1.10E-01 | 3.73E-01 | -5.26 |
| 1436108_PM_at   | Txndc9        | TXNDC9  | -0.24 | 2.69 | -1.75 | 1.10E-01 | 3.74E-01 | -5.26 |
| 1449126_PM_at   | Zfp90         | ZFP90   | 0.45  | 3.13 | 1.75  | 1.10E-01 | 3.74E-01 | -5.26 |
| 1452344_PM_at   | Synj2         | SYNJ2   | -0.60 | 2.96 | -1.75 | 1.10E-01 | 3.74E-01 | -5.26 |
| 1434193_PM_at   | Gm12942       | TMEM35B | 0.22  | 2.37 | 1.75  | 1.10E-01 | 3.74E-01 | -5.26 |
| 1417872_PM_at   | Fhl1          | FHL1    | -0.67 | 6.99 | -1.75 | 1.10E-01 | 3.74E-01 | -5.26 |
| 1433904_PM_at   | Ggnbp1        | NA      | 0.17  | 2.06 | 1.75  | 1.10E-01 | 3.74E-01 | -5.26 |
| 1453395_PM_at   | ---           | NA      | -0.43 | 2.82 | -1.75 | 1.10E-01 | 3.74E-01 | -5.26 |
| 1436571_PM_at   | Otud3         | NA      | -0.97 | 4.19 | -1.75 | 1.10E-01 | 3.74E-01 | -5.26 |
| 1440843_PM_at   | A230051N06Rik | NA      | -0.66 | 3.01 | -1.75 | 1.10E-01 | 3.74E-01 | -5.26 |
| 1421784_PM_a_at | Efn4          | EFNA4   | 0.20  | 2.22 | 1.75  | 1.10E-01 | 3.74E-01 | -5.26 |
| 1432241_PM_at   | Dlgap2        | DLGAP2  | 0.36  | 3.94 | 1.75  | 1.10E-01 | 3.74E-01 | -5.26 |
| 1438051_PM_at   | Ttc14         | TTC14   | -0.47 | 3.66 | -1.75 | 1.10E-01 | 3.74E-01 | -5.26 |
| 1419313_PM_at   | Ccnt1         | CCNT1   | -0.44 | 3.22 | -1.75 | 1.10E-01 | 3.74E-01 | -5.26 |
| 1455203_PM_at   | A930003A15Rik | NA      | 0.25  | 2.82 | 1.75  | 1.10E-01 | 3.74E-01 | -5.26 |
| 1443987_PM_at   | Khl18         | KLHL18  | 0.31  | 4.05 | 1.75  | 1.10E-01 | 3.74E-01 | -5.26 |
| 1423716_PM_s_at | Atp5d         | ATP5D   | 0.44  | 3.82 | 1.75  | 1.10E-01 | 3.74E-01 | -5.26 |
| 1438342_PM_at   | Pced1a        | NA      | 0.28  | 2.99 | 1.75  | 1.10E-01 | 3.74E-01 | -5.26 |
| 1439840_PM_at   | Polb          | NA      | -0.81 | 3.66 | -1.75 | 1.10E-01 | 3.74E-01 | -5.26 |
| 1426849_PM_at   | Sec24b        | SEC24B  | -0.69 | 3.78 | -1.75 | 1.10E-01 | 3.74E-01 | -5.26 |
| 1460701_PM_a_at | Mrp52         | MRPL52  | -0.56 | 5.10 | -1.75 | 1.10E-01 | 3.74E-01 | -5.26 |
| 1449733_PM_s_at | Siah1a        | NA      | -0.42 | 6.09 | -1.75 | 1.10E-01 | 3.74E-01 | -5.26 |
| 1458456_PM_x_at | 6430571L13Rik | C3orf18 | 0.13  | 2.25 | 1.75  | 1.10E-01 | 3.74E-01 | -5.26 |
| 1449599_PM_at   | ---           | NA      | 0.15  | 1.98 | 1.75  | 1.10E-01 | 3.74E-01 | -5.26 |
| 1450341_PM_at   | Pcdhb8        | NA      | 0.17  | 2.07 | 1.75  | 1.10E-01 | 3.74E-01 | -5.26 |
| 1420412_PM_at   | Tnfsf10       | TNFSF10 | 0.20  | 2.50 | 1.75  | 1.10E-01 | 3.74E-01 | -5.26 |
| 1460065_PM_at   | AA763515      | NA      | 0.20  | 2.17 | 1.75  | 1.10E-01 | 3.74E-01 | -5.26 |
| 1436666_PM_at   | ---           | NA      | 0.24  | 2.51 | 1.75  | 1.10E-01 | 3.74E-01 | -5.26 |
| 1441000_PM_at   | Gm4926        | NA      | 0.28  | 2.98 | 1.75  | 1.10E-01 | 3.74E-01 | -5.26 |
| 1447729_PM_s_at | Prss44        | NA      | 0.28  | 3.72 | 1.75  | 1.10E-01 | 3.74E-01 | -5.26 |
| 1457391_PM_at   | Gm38529       | NA      | 0.29  | 2.92 | 1.75  | 1.10E-01 | 3.74E-01 | -5.26 |
| 1456160_PM_at   | ---           | NA      | 0.30  | 3.21 | 1.75  | 1.10E-01 | 3.74E-01 | -5.26 |
| 1459074_PM_at   | ---           | NA      | 0.32  | 3.47 | 1.75  | 1.10E-01 | 3.74E-01 | -5.26 |
| 1419633_PM_at   | Uncx          | UNCX    | 0.34  | 2.40 | 1.75  | 1.10E-01 | 3.74E-01 | -5.26 |
| 1430231_PM_a_at | Cep70         | CEP70   | 0.47  | 2.87 | 1.75  | 1.10E-01 | 3.74E-01 | -5.26 |
| 1416336_PM_s_at | Snrpd1        | SNRPD1  | 0.50  | 5.45 | 1.75  | 1.10E-01 | 3.74E-01 | -5.26 |
| 1445561_PM_at   | ---           | NA      | 0.85  | 3.21 | 1.75  | 1.10E-01 | 3.74E-01 | -5.26 |
| 1424562_PM_a_at | Slc25a4       | SLC25A4 | -0.62 | 7.35 | -1.75 | 1.10E-01 | 3.74E-01 | -5.26 |
| 1426482_PM_at   | Prkrir        | THAP12  | -0.25 | 3.26 | -1.75 | 1.10E-01 | 3.74E-01 | -5.26 |
| 1421282_PM_at   | Bmp5          | BMP5    | 0.14  | 2.46 | 1.75  | 1.10E-01 | 3.74E-01 | -5.26 |
| 1430609_PM_at   | Morn1         | MORN1   | 0.19  | 2.38 | 1.75  | 1.10E-01 | 3.74E-01 | -5.26 |
| 1447249_PM_at   | ---           | NA      | 0.39  | 2.44 | 1.75  | 1.10E-01 | 3.74E-01 | -5.26 |
| 1445690_PM_at   | ---           | NA      | 0.19  | 2.20 | 1.75  | 1.10E-01 | 3.74E-01 | -5.26 |
| 1448190_PM_at   | MrpB3         | MRPL33  | -0.58 | 3.53 | -1.75 | 1.10E-01 | 3.74E-01 | -5.26 |
| 1426002_PM_a_at | Cdc7          | CD7     | -0.27 | 4.07 | -1.75 | 1.10E-01 | 3.74E-01 | -5.26 |
| 1422627_PM_a_at | Mkks          | MKKS    | 0.33  | 4.09 | 1.75  | 1.10E-01 | 3.74E-01 | -5.26 |
| 1452359_PM_at   | Rel1          | RELL1   | 0.48  | 3.99 | 1.75  | 1.10E-01 | 3.74E-01 | -5.26 |
| 1452808_PM_at   | Snupn         | SNUPN   | -0.43 | 3.96 | -1.75 | 1.10E-01 | 3.74E-01 | -5.26 |
| 1447995_PM_x_at | Snhg10        | NA      | -0.33 | 3.78 | -1.75 | 1.10E-01 | 3.74E-01 | -5.26 |
| 1459153_PM_at   | Ston2         | STON2   | 0.15  | 2.51 | 1.75  | 1.10E-01 | 3.74E-01 | -5.26 |
| 1429890_PM_at   | A930007D18Rik | NA      | 0.48  | 3.22 | 1.75  | 1.10E-01 | 3.74E-01 | -5.26 |
| 1446593_PM_at   | ---           | NA      | 0.17  | 2.89 | 1.75  | 1.10E-01 | 3.74E-01 | -5.26 |
| 1442368_PM_at   | Kctd12b       | NA      | 0.19  | 2.09 | 1.75  | 1.10E-01 | 3.74E-01 | -5.26 |
| 1454959_PM_s_at | Gnai1         | GNAI1   | -0.63 | 7.36 | -1.74 | 1.11E-01 | 3.74E-01 | -5.26 |
| 1417377_PM_at   | Cadm1         | CADM1   | -0.62 | 3.55 | -1.74 | 1.11E-01 | 3.74E-01 | -5.26 |
| 1426478_PM_at   | Rasa1         | RASA1   | -0.47 | 4.04 | -1.74 | 1.11E-01 | 3.74E-01 | -5.26 |
| 1418927_PM_a_at | Habp4         | HABP4   | -0.22 | 2.72 | -1.74 | 1.11E-01 | 3.74E-01 | -5.26 |
| 1442533_PM_at   | ---           | NA      | -0.15 | 2.01 | -1.74 | 1.11E-01 | 3.74E-01 | -5.26 |
| 1421696_PM_at   | Pkhd11        | PKHD11  | 0.14  | 2.03 | 1.74  | 1.11E-01 | 3.74E-01 | -5.26 |
| 1447773_PM_x_at | 6330409D2ORik | NA      | 0.16  | 2.83 | 1.74  | 1.11E-01 | 3.74E-01 | -5.26 |
| 1449239_PM_at   | Rnf138rt1     | NA      | 0.16  | 2.05 | 1.74  | 1.11E-01 | 3.74E-01 | -5.26 |
| 1449119_PM_at   | Arih2         | ARIH2   | 0.19  | 2.75 | 1.74  | 1.11E-01 | 3.74E-01 | -5.26 |
| 1459282_PM_at   | LOC105246765  | NA      | 0.21  | 2.39 | 1.74  | 1.11E-01 | 3.74E-01 | -5.26 |
| 1445350_PM_at   | ---           | NA      | 0.38  | 2.68 | 1.74  | 1.11E-01 | 3.74E-01 | -5.26 |
| 1458598_PM_at   | ---           | NA      | 0.43  | 3.37 | 1.74  | 1.11E-01 | 3.74E-01 | -5.26 |
| 1448622_PM_at   | Lsm4          | LSM4    | 0.35  | 4.00 | 1.74  | 1.11E-01 | 3.74E-01 | -5.26 |
| 1427275_PM_at   | Smc4          | SMC4    | 0.69  | 3.79 | 1.74  | 1.11E-01 | 3.74E-01 | -5.26 |
| 1421445_PM_at   | Slc26a3       | SLC26A3 | 0.14  | 2.20 | 1.74  | 1.11E-01 | 3.74E-01 | -5.26 |
| 1419769_PM_at   | Cd22          | CD22    | 0.16  | 2.41 | 1.74  | 1.11E-01 | 3.74E-01 | -5.26 |
| 1416472_PM_at   | Syap1         | SYAP1   | -0.36 | 2.77 | -1.74 | 1.11E-01 | 3.74E-01 | -5.26 |
| 1452637_PM_a_at | Bola1         | BOLA1   | 0.18  | 2.42 | 1.74  | 1.11E-01 | 3.74E-01 | -5.26 |
| 1449375_PM_at   | Ces2a         | CES2    | 0.25  | 2.52 | 1.74  | 1.11E-01 | 3.74E-01 | -5.26 |

|                 |                                                                  |            |       |      |       |          |          |       |
|-----------------|------------------------------------------------------------------|------------|-------|------|-------|----------|----------|-------|
| 1420549_PM_at   | Gbp2b                                                            | GBP2       | 0.15  | 2.19 | 1.74  | 1.11E-01 | 3.74E-01 | -5.26 |
| 1428690_PM_at   | Tysnd1                                                           | TYSND1     | 0.20  | 2.13 | 1.74  | 1.11E-01 | 3.74E-01 | -5.26 |
| 1451417_PM_at   | Brca1                                                            | BRCA1      | 0.24  | 2.48 | 1.74  | 1.11E-01 | 3.74E-01 | -5.26 |
| 1451669_PM_at   | Ppm1b                                                            | PPM1B      | -0.42 | 8.05 | -1.74 | 1.11E-01 | 3.74E-01 | -5.26 |
| 1451664_PM_x_at | Klra7                                                            | NA         | 0.20  | 2.48 | 1.74  | 1.11E-01 | 3.74E-01 | -5.26 |
| 1445063_PM_at   | D1Erttd228e                                                      | NA         | 0.36  | 2.39 | 1.74  | 1.11E-01 | 3.74E-01 | -5.26 |
| AFFX-ThrX-3_at  | ---                                                              | NA         | 0.17  | 2.36 | 1.74  | 1.11E-01 | 3.74E-01 | -5.26 |
| 1427492_PM_at   | Pof1b                                                            | POF1B      | 0.13  | 1.96 | 1.74  | 1.11E-01 | 3.74E-01 | -5.27 |
| 1449282_PM_at   | Cysl1r1                                                          | CYSLTR1    | 0.17  | 2.31 | 1.74  | 1.11E-01 | 3.74E-01 | -5.26 |
| 1416894_PM_at   | Hspbp1                                                           | HSPBP1     | 0.19  | 2.71 | 1.74  | 1.11E-01 | 3.74E-01 | -5.27 |
| 1456481_PM_at   | Esyt3                                                            | ESYT3      | 0.21  | 2.78 | 1.74  | 1.11E-01 | 3.74E-01 | -5.26 |
| 1451383_PM_a_at | Chuk                                                             | CHUK       | 0.31  | 3.31 | 1.74  | 1.11E-01 | 3.74E-01 | -5.27 |
| 1426095_PM_a_at | Tnfrsf22                                                         | NA         | 0.45  | 3.27 | 1.74  | 1.11E-01 | 3.74E-01 | -5.27 |
| 1431684_PM_at   | Cv1s1                                                            | CLV51      | -0.39 | 3.31 | -1.74 | 1.11E-01 | 3.75E-01 | -5.27 |
| 1448980_PM_at   | Ghrl                                                             | GHRL       | 0.23  | 2.76 | 1.74  | 1.11E-01 | 3.75E-01 | -5.27 |
| 1428246_PM_at   | Vps26b                                                           | VPS26B     | -0.99 | 5.80 | -1.74 | 1.11E-01 | 3.75E-01 | -5.27 |
| 1453303_PM_at   | ---                                                              | NA         | 0.16  | 2.45 | 1.74  | 1.11E-01 | 3.75E-01 | -5.27 |
| 1455488_PM_at   | Haus6                                                            | HAUS6      | -0.29 | 3.62 | -1.74 | 1.11E-01 | 3.75E-01 | -5.27 |
| 1451121_PM_a_at | Gtscr2                                                           | NOP53      | 0.33  | 3.70 | 1.74  | 1.11E-01 | 3.75E-01 | -5.27 |
| 1442353_PM_at   | Itpa                                                             | NA         | 0.15  | 2.31 | 1.74  | 1.11E-01 | 3.75E-01 | -5.27 |
| 1440245_PM_at   | Ccdc88b                                                          | CCDC88B    | 0.15  | 2.30 | 1.74  | 1.11E-01 | 3.75E-01 | -5.27 |
| 1448662_PM_at   | Fzd6                                                             | FZD6       | 0.22  | 2.33 | 1.74  | 1.11E-01 | 3.75E-01 | -5.27 |
| 1423333_PM_at   | Ergic1                                                           | ERGIC1     | 0.40  | 2.55 | 1.74  | 1.11E-01 | 3.75E-01 | -5.27 |
| 1429234_PM_s_at | Sept11                                                           | SEPT11     | 0.31  | 3.47 | 1.74  | 1.11E-01 | 3.75E-01 | -5.27 |
| 1437615_PM_s_at | Vps37c                                                           | NA         | 0.59  | 4.78 | 1.74  | 1.11E-01 | 3.75E-01 | -5.27 |
| 1430813_PM_at   | Ppcdc                                                            | PPCDC      | 0.17  | 2.20 | 1.74  | 1.11E-01 | 3.76E-01 | -5.27 |
| 1420969_PM_at   | Nacc1                                                            | NACC1      | 0.22  | 2.63 | 1.74  | 1.11E-01 | 3.76E-01 | -5.27 |
| 1427962_PM_at   | Ccdc102a                                                         | CCDC102A   | 0.15  | 2.96 | 1.74  | 1.11E-01 | 3.76E-01 | -5.27 |
| 1438174_PM_x_at | Ppp2r1a                                                          | PPP2R1A    | -0.29 | 5.70 | -1.74 | 1.11E-01 | 3.76E-01 | -5.27 |
| 1422483_PM_a_at | Cycs                                                             | CYCS       | -0.56 | 6.69 | -1.74 | 1.11E-01 | 3.76E-01 | -5.27 |
| 1427440_PM_a_at | Afm                                                              | AFM        | 0.15  | 2.32 | 1.74  | 1.11E-01 | 3.76E-01 | -5.27 |
| 1420974_PM_at   | Mdp1                                                             | NA         | 0.19  | 2.26 | 1.74  | 1.11E-01 | 3.76E-01 | -5.27 |
| 1454725_PM_at   | Tra2a                                                            | TRA2A      | -0.35 | 7.10 | -1.74 | 1.11E-01 | 3.76E-01 | -5.27 |
| 1415912_PM_a_at | LOC102642137 /// Rps13 /// Rps13-ps1 /// Rps13-ps2 /// Rps13-ps4 | RPS13      | -0.34 | 3.06 | -1.74 | 1.11E-01 | 3.76E-01 | -5.27 |
| 1416595_PM_at   | Mrops22                                                          | MRPS22     | -0.31 | 4.14 | -1.74 | 1.11E-01 | 3.76E-01 | -5.27 |
| 1444378_PM_at   | ---                                                              | NA         | -0.23 | 2.54 | -1.74 | 1.11E-01 | 3.76E-01 | -5.27 |
| 1439541_PM_at   | Partic1                                                          | NA         | -0.22 | 2.41 | -1.74 | 1.11E-01 | 3.76E-01 | -5.27 |
| 1418705_PM_at   | Crx                                                              | CRX        | 0.13  | 2.20 | 1.74  | 1.11E-01 | 3.76E-01 | -5.27 |
| 1448522_PM_at   | Sars2                                                            | AC011455.3 | 0.19  | 2.52 | 1.74  | 1.11E-01 | 3.76E-01 | -5.27 |
| 1422890_PM_at   | Pcdh18                                                           | PCDH18     | 0.21  | 2.42 | 1.74  | 1.11E-01 | 3.76E-01 | -5.27 |
| 1439001_PM_at   | 6030419C18Rik                                                    | NA         | 0.25  | 2.95 | 1.74  | 1.11E-01 | 3.76E-01 | -5.27 |
| 1440547_PM_at   | ---                                                              | NA         | 0.27  | 2.59 | 1.74  | 1.11E-01 | 3.76E-01 | -5.27 |
| 1459332_PM_at   | Itch                                                             | ITCH       | 0.43  | 2.72 | 1.74  | 1.11E-01 | 3.76E-01 | -5.27 |
| 1447935_PM_at   | Fancm                                                            | FANCM      | -0.35 | 2.70 | -1.74 | 1.12E-01 | 3.76E-01 | -5.27 |
| 1428796_PM_at   | Bbx                                                              | BBX        | -0.27 | 2.93 | -1.74 | 1.12E-01 | 3.76E-01 | -5.27 |
| 1424233_PM_at   | Meox2                                                            | MEOX2      | 0.18  | 2.28 | 1.74  | 1.12E-01 | 3.76E-01 | -5.27 |
| 1460328_PM_at   | Brd3                                                             | BRD3       | 0.22  | 2.89 | 1.74  | 1.12E-01 | 3.76E-01 | -5.27 |
| 1460610_PM_at   | Agbl5                                                            | AGBL5      | 0.22  | 2.35 | 1.74  | 1.12E-01 | 3.76E-01 | -5.27 |
| 1420988_PM_at   | Polh                                                             | NA         | 0.24  | 2.36 | 1.74  | 1.12E-01 | 3.76E-01 | -5.27 |
| 1444127_PM_at   | Asb1                                                             | NA         | 0.16  | 2.21 | 1.74  | 1.12E-01 | 3.76E-01 | -5.27 |
| 1453466_PM_at   | LOC105244208 /// Rps6                                            | NA         | 0.22  | 2.43 | 1.74  | 1.12E-01 | 3.76E-01 | -5.27 |
| 1418405_PM_at   | Hgf1ac                                                           | HGFAC      | 0.23  | 2.30 | 1.74  | 1.12E-01 | 3.76E-01 | -5.27 |
| 1423841_PM_at   | Brix1                                                            | BRX1       | 0.13  | 2.75 | 1.74  | 1.12E-01 | 3.76E-01 | -5.27 |
| 1450607_PM_s_at | Ucn2                                                             | UCN2       | 0.18  | 2.31 | 1.74  | 1.12E-01 | 3.76E-01 | -5.27 |
| 1443379_PM_at   | A430033K04Rik                                                    | NA         | 0.21  | 2.51 | 1.74  | 1.12E-01 | 3.76E-01 | -5.27 |
| 1422107_PM_at   | Mturn                                                            | MTURN      | 0.33  | 2.36 | 1.74  | 1.12E-01 | 3.76E-01 | -5.27 |
| 1438415_PM_s_at | Yipf2                                                            | YIPF2      | 0.77  | 5.92 | 1.74  | 1.12E-01 | 3.76E-01 | -5.27 |
| 1427497_PM_at   | Ccdc191                                                          | CCDC191    | 0.20  | 2.17 | 1.74  | 1.12E-01 | 3.76E-01 | -5.27 |
| 1454479_PM_at   | 4933439N06Rik                                                    | NA         | 0.21  | 2.54 | 1.74  | 1.12E-01 | 3.76E-01 | -5.27 |
| 1433323_PM_at   | ---                                                              | NA         | 0.24  | 3.26 | 1.74  | 1.12E-01 | 3.76E-01 | -5.27 |
| 1417629_PM_at   | Prodh                                                            | PRODH      | 0.29  | 2.95 | 1.74  | 1.12E-01 | 3.76E-01 | -5.27 |
| 1425735_PM_at   | Madd                                                             | MADD       | 0.33  | 3.20 | 1.74  | 1.12E-01 | 3.76E-01 | -5.27 |
| 1458230_PM_at   | ---                                                              | NA         | 0.29  | 3.78 | 1.74  | 1.12E-01 | 3.76E-01 | -5.27 |
| 1427785_PM_x_at | Capn15                                                           | NA         | 0.58  | 4.76 | 1.74  | 1.12E-01 | 3.76E-01 | -5.27 |
| 1459874_PM_s_at | Mtmr4                                                            | MTMR4      | -1.02 | 6.74 | -1.74 | 1.12E-01 | 3.76E-01 | -5.27 |
| 1450006_PM_at   | Ncoa4                                                            | NCOA4      | -0.48 | 2.81 | -1.74 | 1.12E-01 | 3.76E-01 | -5.27 |
| 1457858_PM_at   | Gm4850                                                           | NA         | 0.14  | 2.44 | 1.74  | 1.12E-01 | 3.76E-01 | -5.27 |
| 1431905_PM_s_at | 4933427G17Rik                                                    | NA         | 0.16  | 2.34 | 1.74  | 1.12E-01 | 3.76E-01 | -5.27 |
| 1456432_PM_at   | ---                                                              | NA         | 0.20  | 2.21 | 1.74  | 1.12E-01 | 3.76E-01 | -5.27 |
| 1447412_PM_at   | Gm996                                                            | C9orf172   | 0.26  | 2.45 | 1.74  | 1.12E-01 | 3.76E-01 | -5.27 |
| 1420109_PM_at   | ---                                                              | NA         | 0.29  | 2.66 | 1.74  | 1.12E-01 | 3.76E-01 | -5.27 |
| 1438367_PM_x_at | Ddr1                                                             | DDR1       | -0.16 | 2.94 | -1.74 | 1.12E-01 | 3.76E-01 | -5.27 |
| 1416691_PM_at   | Gtpbp2                                                           | GTPBP2     | 0.16  | 3.26 | 1.74  | 1.12E-01 | 3.76E-01 | -5.27 |



|                 |                        |            |       |      |       |          |          |       |
|-----------------|------------------------|------------|-------|------|-------|----------|----------|-------|
| 1419285_PM_s_at | Cyhr1                  | CYHR1      | 0.24  | 3.13 | 1.74  | 1.12E-01 | 3.76E-01 | -5.27 |
| 1446145_PM_at   | Eif4g3                 | EIF4G3     | 0.24  | 3.62 | 1.74  | 1.12E-01 | 3.76E-01 | -5.27 |
| 1433360_PM_at   | ---                    | NA         | 0.23  | 2.41 | 1.74  | 1.12E-01 | 3.76E-01 | -5.27 |
| 1416007_PM_at   | Satb1                  | SATB1      | -0.45 | 3.07 | -1.74 | 1.12E-01 | 3.76E-01 | -5.27 |
| 1416516_PM_at   | Fscn1                  | FSCN1      | 0.20  | 2.49 | 1.74  | 1.12E-01 | 3.76E-01 | -5.27 |
| 1460428_PM_at   | Ankrd13a               | ANKRD13A   | -0.29 | 3.93 | -1.74 | 1.12E-01 | 3.76E-01 | -5.27 |
| 1445435_PM_at   | Gm732                  | NA         | 0.19  | 2.70 | 1.74  | 1.12E-01 | 3.76E-01 | -5.27 |
| 1448441_PM_at   | Cks1b                  | CKS1B      | 0.23  | 3.06 | 1.74  | 1.12E-01 | 3.76E-01 | -5.27 |
| 1439809_PM_at   | Pramef7                | PRAMEF9    | 0.24  | 2.81 | 1.74  | 1.12E-01 | 3.76E-01 | -5.27 |
| 1447233_PM_at   | Prrt4                  | NA         | 0.18  | 2.46 | 1.74  | 1.12E-01 | 3.76E-01 | -5.27 |
| 1453306_PM_at   | ---                    | NA         | -0.49 | 6.29 | -1.74 | 1.12E-01 | 3.76E-01 | -5.27 |
| 1436414_PM_at   | Obsl1                  | OBSL1      | 0.20  | 2.67 | 1.74  | 1.12E-01 | 3.77E-01 | -5.28 |
| 1455136_PM_at   | Atp1a2                 | ATP1A2     | -0.54 | 3.35 | -1.74 | 1.12E-01 | 3.77E-01 | -5.28 |
| 1456427_PM_at   | Gp1bb                  | NA         | 0.18  | 2.90 | 1.74  | 1.12E-01 | 3.77E-01 | -5.28 |
| 1418178_PM_at   | Ina                    | INA        | -0.61 | 5.72 | -1.74 | 1.12E-01 | 3.77E-01 | -5.28 |
| 1437739_PM_a_at | Mamstr                 | MAMSTR     | 0.23  | 2.18 | 1.74  | 1.12E-01 | 3.77E-01 | -5.28 |
| 1423153_PM_x_at | Cfh                    | CFH        | -0.53 | 3.24 | -1.74 | 1.12E-01 | 3.77E-01 | -5.28 |
| 1420346_PM_at   | Asb12                  | ASB12      | 0.14  | 2.38 | 1.74  | 1.12E-01 | 3.77E-01 | -5.28 |
| 1452486_PM_a_at | Cryaa                  | FP236240.1 | 0.26  | 2.52 | 1.74  | 1.12E-01 | 3.77E-01 | -5.28 |
| 1430777_PM_a_at | Golph3                 | GOLPH3     | 0.28  | 3.31 | 1.74  | 1.12E-01 | 3.77E-01 | -5.28 |
| 1451106_PM_at   | Tut1                   | TUT1       | 0.36  | 4.46 | 1.74  | 1.12E-01 | 3.77E-01 | -5.28 |
| 1457467_PM_at   | ---                    | NA         | 0.41  | 2.77 | 1.74  | 1.12E-01 | 3.77E-01 | -5.28 |
| 1430569_PM_at   | Ttc9c                  | TTC9C      | 0.66  | 5.61 | 1.74  | 1.12E-01 | 3.77E-01 | -5.28 |
| 1435317_PM_x_at | PsmA6                  | PSMA6      | -0.21 | 6.74 | -1.74 | 1.12E-01 | 3.77E-01 | -5.28 |
| 1448078_PM_at   | C76533                 | NA         | 0.32  | 2.47 | 1.74  | 1.12E-01 | 3.77E-01 | -5.28 |
| 1439586_PM_at   | ---                    | NA         | -0.52 | 2.88 | -1.74 | 1.12E-01 | 3.77E-01 | -5.28 |
| 1440417_PM_at   | D19Erttd409e           | NA         | 0.23  | 2.52 | 1.74  | 1.12E-01 | 3.77E-01 | -5.28 |
| 1429866_PM_at   | Ahnak                  | NA         | 0.23  | 2.62 | 1.74  | 1.12E-01 | 3.77E-01 | -5.28 |
| 1447148_PM_at   | ---                    | NA         | -0.49 | 4.31 | -1.73 | 1.12E-01 | 3.77E-01 | -5.28 |
| 1449968_PM_s_at | Acot10 /// Acot9       | ACOT9      | -0.24 | 3.23 | -1.73 | 1.12E-01 | 3.77E-01 | -5.28 |
| 1419882_PM_at   | ---                    | NA         | 0.12  | 1.98 | 1.73  | 1.12E-01 | 3.77E-01 | -5.28 |
| 1459940_PM_at   | Sdhaf3                 | SDHAF3     | 0.21  | 3.13 | 1.73  | 1.12E-01 | 3.77E-01 | -5.28 |
| 1424479_PM_at   | Cst8                   | CST8       | 0.34  | 3.00 | 1.73  | 1.12E-01 | 3.77E-01 | -5.28 |
| 1416389_PM_a_at | Rcvtb2                 | RCVTB2     | -0.34 | 2.24 | -1.73 | 1.12E-01 | 3.77E-01 | -5.28 |
| 1419768_PM_at   | Cd22                   | CD22       | 0.21  | 2.82 | 1.73  | 1.12E-01 | 3.77E-01 | -5.28 |
| 1457210_PM_at   | 1700092E19Rik          | NA         | 0.21  | 2.44 | 1.73  | 1.12E-01 | 3.77E-01 | -5.28 |
| 1451684_PM_a_at | Bicd1                  | BICD1      | 0.48  | 4.15 | 1.73  | 1.12E-01 | 3.77E-01 | -5.28 |
| 1420041_PM_at   | ---                    | NA         | 0.19  | 2.20 | 1.73  | 1.12E-01 | 3.77E-01 | -5.28 |
| 1425224_PM_at   | Slmo1                  | PRELID3A   | 0.26  | 2.87 | 1.73  | 1.12E-01 | 3.77E-01 | -5.28 |
| 1448223_PM_at   | Fto                    | FTO        | -0.66 | 4.86 | -1.73 | 1.12E-01 | 3.77E-01 | -5.28 |
| 1453697_PM_at   | 6530402F18Rik          | NA         | 0.23  | 2.45 | 1.73  | 1.12E-01 | 3.77E-01 | -5.28 |
| 1433154_PM_at   | B230204H03Rik          | NA         | 0.23  | 2.96 | 1.73  | 1.12E-01 | 3.77E-01 | -5.28 |
| 1424277_PM_at   | Haus7 /// LOC102642054 | HAUS7      | 0.17  | 2.19 | 1.73  | 1.12E-01 | 3.77E-01 | -5.28 |
| 1432800_PM_at   | C030011G24Rik          | NA         | 0.41  | 2.39 | 1.73  | 1.13E-01 | 3.77E-01 | -5.28 |
| 1431139_PM_at   | Cdy2                   | CDYL2      | 0.40  | 2.55 | 1.73  | 1.13E-01 | 3.77E-01 | -5.28 |
| 1446455_PM_at   | ---                    | NA         | 0.15  | 2.15 | 1.73  | 1.13E-01 | 3.77E-01 | -5.28 |
| 1417890_PM_at   | Pdxp /// Sh3bp1        | SH3BP1     | -0.48 | 4.25 | -1.73 | 1.13E-01 | 3.77E-01 | -5.28 |
| 1435990_PM_at   | Adamts2                | ADAMTS2    | -0.23 | 2.30 | -1.73 | 1.13E-01 | 3.77E-01 | -5.28 |
| 1426683_PM_at   | Cnot6                  | CNOT6      | -0.23 | 2.56 | -1.73 | 1.13E-01 | 3.77E-01 | -5.28 |
| 1429359_PM_s_at | Rbpms                  | RBPMS      | -0.22 | 2.69 | -1.73 | 1.13E-01 | 3.77E-01 | -5.28 |
| 1420492_PM_s_at | Smr3a                  | NA         | -0.15 | 2.62 | -1.73 | 1.13E-01 | 3.77E-01 | -5.28 |
| 1427948_PM_a_at | Zkscan14               | ZNF394     | 0.15  | 2.81 | 1.73  | 1.13E-01 | 3.77E-01 | -5.28 |
| 1428722_PM_at   | Ckmt2                  | CKMT2      | 0.16  | 2.17 | 1.73  | 1.13E-01 | 3.77E-01 | -5.28 |
| 1453877_PM_at   | 4930467D21Rik          | NA         | 0.17  | 2.24 | 1.73  | 1.13E-01 | 3.77E-01 | -5.28 |
| 1446991_PM_at   | ---                    | NA         | 0.21  | 2.74 | 1.73  | 1.13E-01 | 3.77E-01 | -5.28 |
| 1443731_PM_at   | ---                    | NA         | 0.22  | 2.77 | 1.73  | 1.13E-01 | 3.77E-01 | -5.28 |
| 1433023_PM_at   | ---                    | NA         | 0.25  | 2.38 | 1.73  | 1.13E-01 | 3.77E-01 | -5.28 |
| 1419461_PM_at   | Rpp14                  | RPP14      | 0.25  | 4.13 | 1.73  | 1.13E-01 | 3.77E-01 | -5.28 |
| 1447542_PM_at   | AY702102               | NA         | 0.26  | 2.55 | 1.73  | 1.13E-01 | 3.77E-01 | -5.28 |
| 1440467_PM_at   | Cep162                 | CEP162     | 0.33  | 3.10 | 1.73  | 1.13E-01 | 3.77E-01 | -5.28 |
| 1435480_PM_at   | ---                    | NA         | 0.37  | 3.48 | 1.73  | 1.13E-01 | 3.77E-01 | -5.28 |
| 1446391_PM_at   | ---                    | NA         | 0.42  | 2.75 | 1.73  | 1.13E-01 | 3.77E-01 | -5.28 |
| 1452403_PM_a_at | Oc90                   | AC100868.1 | 0.22  | 2.63 | 1.73  | 1.13E-01 | 3.77E-01 | -5.28 |
| 1460219_PM_at   | Mag                    | MAG        | -0.28 | 2.38 | -1.73 | 1.13E-01 | 3.78E-01 | -5.28 |
| 1419927_PM_s_at | Rabif                  | RABIF      | -0.78 | 3.09 | -1.73 | 1.13E-01 | 3.78E-01 | -5.28 |
| 1438041_PM_at   | Pde7a                  | PDE7A      | -0.69 | 4.01 | -1.73 | 1.13E-01 | 3.78E-01 | -5.28 |
| 1418970_PM_a_at | Bcl10                  | BCL10      | -0.41 | 2.80 | -1.73 | 1.13E-01 | 3.78E-01 | -5.28 |
| 1457533_PM_at   | ---                    | NA         | -0.13 | 2.02 | -1.73 | 1.13E-01 | 3.78E-01 | -5.28 |
| 1438583_PM_at   | Ern1                   | NA         | 0.17  | 3.14 | 1.73  | 1.13E-01 | 3.78E-01 | -5.28 |
| 1447250_PM_a_at | Ccdc141                | CCDC141    | 0.88  | 4.03 | 1.73  | 1.13E-01 | 3.78E-01 | -5.28 |
| 1421595_PM_at   | Fam184b                | NA         | -0.56 | 4.26 | -1.73 | 1.13E-01 | 3.78E-01 | -5.28 |
| 1436737_PM_a_at | Sorbs1                 | NA         | -0.52 | 6.99 | -1.73 | 1.13E-01 | 3.78E-01 | -5.28 |
| 1417695_PM_a_at | Soat1                  | SOAT1      | -0.48 | 3.02 | -1.73 | 1.13E-01 | 3.78E-01 | -5.28 |
| 1457276_PM_at   | Sik2                   | SIK2       | 0.27  | 2.49 | 1.73  | 1.13E-01 | 3.78E-01 | -5.28 |
| 1418267_PM_at   | Mst1                   | MST1       | 0.34  | 2.53 | 1.73  | 1.13E-01 | 3.78E-01 | -5.28 |

|                 |                                               |                |       |      |       |          |          |       |
|-----------------|-----------------------------------------------|----------------|-------|------|-------|----------|----------|-------|
| 1420902_PM_at   | St6galnac3                                    | ST6GALNAC3     | 0.40  | 3.07 | 1.73  | 1.13E-01 | 3.78E-01 | -5.28 |
| 1441066_PM_at   | ---                                           | NA             | -0.24 | 2.29 | -1.73 | 1.13E-01 | 3.78E-01 | -5.28 |
| 1423483_PM_s_at | Taf1c                                         | TAF1C          | 0.37  | 4.59 | 1.73  | 1.13E-01 | 3.78E-01 | -5.28 |
| 1422538_PM_at   | Extl2                                         | EXTL2          | -0.71 | 7.72 | -1.73 | 1.13E-01 | 3.78E-01 | -5.28 |
| 1449885_PM_at   | Tmem47                                        | TMEM47         | -1.15 | 6.25 | -1.73 | 1.13E-01 | 3.78E-01 | -5.28 |
| 1430998_PM_at   | Sqrdl                                         | AC090527.2     | 0.23  | 2.29 | 1.73  | 1.13E-01 | 3.78E-01 | -5.28 |
| 1451927_PM_a_at | Mapk14                                        | MAPK14         | 0.26  | 2.70 | 1.73  | 1.13E-01 | 3.78E-01 | -5.28 |
| 1449462_PM_at   | Pbld1 /// Pbld2                               | PBLD           | 0.28  | 3.10 | 1.73  | 1.13E-01 | 3.78E-01 | -5.28 |
| 1456975_PM_at   | ---                                           | NA             | 0.39  | 2.82 | 1.73  | 1.13E-01 | 3.78E-01 | -5.28 |
| 1421441_PM_at   | Angpt1                                        | ANGPT1         | 0.17  | 2.43 | 1.73  | 1.13E-01 | 3.78E-01 | -5.28 |
| 1448272_PM_at   | Btg2                                          | BTG2           | 0.18  | 2.46 | 1.73  | 1.13E-01 | 3.78E-01 | -5.28 |
| 1458692_PM_at   | ---                                           | NA             | 0.26  | 2.67 | 1.73  | 1.13E-01 | 3.78E-01 | -5.28 |
| 1451698_PM_at   | Prsc1                                         | PSRC1          | 0.29  | 2.56 | 1.73  | 1.13E-01 | 3.78E-01 | -5.28 |
| 1436603_PM_at   | Tbl2                                          | TBL2           | 0.32  | 3.27 | 1.73  | 1.13E-01 | 3.78E-01 | -5.28 |
| 1454276_PM_at   | Clnkos                                        | NA             | 0.17  | 2.48 | 1.73  | 1.13E-01 | 3.78E-01 | -5.28 |
| 1454705_PM_at   | D15Ert621e                                    | FAM91A1        | -0.43 | 3.40 | -1.73 | 1.13E-01 | 3.78E-01 | -5.28 |
| 1450661_PM_x_at | Nfic                                          | NFIC           | 0.18  | 2.45 | 1.73  | 1.13E-01 | 3.78E-01 | -5.28 |
| 1441281_PM_s_at | Ninj1                                         | NINJ1          | 0.19  | 2.43 | 1.73  | 1.13E-01 | 3.78E-01 | -5.28 |
| 1444960_PM_at   | Cyp2u1                                        | CYP2U1         | 0.23  | 2.80 | 1.73  | 1.13E-01 | 3.78E-01 | -5.28 |
| 1459369_PM_at   | ---                                           | NA             | 0.91  | 2.84 | 1.73  | 1.13E-01 | 3.78E-01 | -5.28 |
| 1427028_PM_at   | Lgr6                                          | LGR6           | 0.23  | 2.37 | 1.73  | 1.13E-01 | 3.78E-01 | -5.28 |
| 1430084_PM_at   | Tlcd1                                         | TLCD1          | 0.23  | 2.28 | 1.73  | 1.13E-01 | 3.78E-01 | -5.28 |
| 1418902_PM_at   | Chid1                                         | CHID1          | -0.25 | 2.47 | -1.73 | 1.13E-01 | 3.78E-01 | -5.28 |
| 1444788_PM_x_at | ---                                           | NA             | 0.19  | 2.20 | 1.73  | 1.13E-01 | 3.78E-01 | -5.28 |
| 1427768_PM_s_at | MyI3                                          | MYL3           | 0.20  | 2.80 | 1.73  | 1.13E-01 | 3.78E-01 | -5.29 |
| 1441537_PM_at   | Recql5                                        | RECQL5         | 0.26  | 2.55 | 1.73  | 1.13E-01 | 3.78E-01 | -5.29 |
| 1438504_PM_x_at | Tm7sf3                                        | NA             | -0.58 | 3.88 | -1.73 | 1.13E-01 | 3.78E-01 | -5.29 |
| 1424328_PM_s_at | Anapc15                                       | ANAPC15        | 0.66  | 3.03 | 1.73  | 1.13E-01 | 3.78E-01 | -5.29 |
| 1433227_PM_at   | 9430081G06Rik                                 | NA             | 0.17  | 2.17 | 1.73  | 1.13E-01 | 3.78E-01 | -5.29 |
| 1453547_PM_at   | 1810046K07Rik                                 | C11orf53       | 0.15  | 2.50 | 1.73  | 1.13E-01 | 3.79E-01 | -5.29 |
| 1426542_PM_at   | Endod1                                        | ENDOD1         | 0.17  | 2.14 | 1.73  | 1.13E-01 | 3.79E-01 | -5.29 |
| 1448286_PM_at   | Hsd17b10                                      | HSD17B10       | -0.61 | 2.96 | -1.73 | 1.13E-01 | 3.79E-01 | -5.29 |
| 1431214_PM_at   | Gm3579 /// Gm40514 ///<br>Gm40991 /// Gm42035 | NA             | 0.44  | 3.78 | 1.73  | 1.14E-01 | 3.79E-01 | -5.29 |
| 1434382_PM_at   | Serinc2                                       | SERINC2        | 0.22  | 2.74 | 1.73  | 1.14E-01 | 3.79E-01 | -5.29 |
| 1440030_PM_at   | ---                                           | NA             | 0.17  | 2.48 | 1.73  | 1.14E-01 | 3.79E-01 | -5.29 |
| 1425729_PM_at   | Best2                                         | NA             | 0.14  | 2.08 | 1.73  | 1.14E-01 | 3.79E-01 | -5.29 |
| 1417032_PM_at   | Ube2g2                                        | UBE2G2         | -0.36 | 5.77 | -1.73 | 1.14E-01 | 3.79E-01 | -5.29 |
| 1445529_PM_at   | ---                                           | NA             | 0.18  | 2.89 | 1.73  | 1.14E-01 | 3.79E-01 | -5.29 |
| 1458821_PM_at   | ---                                           | NA             | 0.19  | 3.18 | 1.73  | 1.14E-01 | 3.79E-01 | -5.29 |
| 1422231_PM_a_at | Tnfrsf25                                      | TNFRSF25       | 0.19  | 2.39 | 1.73  | 1.14E-01 | 3.79E-01 | -5.29 |
| 1417236_PM_at   | Ehd3                                          | EHD3           | 0.43  | 3.53 | 1.73  | 1.14E-01 | 3.79E-01 | -5.29 |
| 1419321_PM_at   | F7                                            | F7             | 0.13  | 2.36 | 1.73  | 1.14E-01 | 3.79E-01 | -5.29 |
| 1449453_PM_at   | Bst1                                          | BST1           | 0.13  | 2.29 | 1.73  | 1.14E-01 | 3.79E-01 | -5.29 |
| 1441599_PM_at   | Micu3                                         | MICU3          | 0.13  | 2.99 | 1.73  | 1.14E-01 | 3.79E-01 | -5.29 |
| 1431212_PM_a_at | Trmt6                                         | TRMT6          | 0.27  | 3.25 | 1.73  | 1.14E-01 | 3.79E-01 | -5.29 |
| 1427885_PM_at   | Clcf1-pold4 /// Pold4                         | POLD4          | 0.18  | 2.67 | 1.73  | 1.14E-01 | 3.79E-01 | -5.29 |
| 1447314_PM_at   | ---                                           | NA             | -0.25 | 2.38 | -1.73 | 1.14E-01 | 3.79E-01 | -5.29 |
| 1421890_PM_at   | St3gal2                                       | ST3GAL2        | 0.22  | 2.62 | 1.73  | 1.14E-01 | 3.79E-01 | -5.29 |
| 1434984_PM_at   | Plk5                                          | PLK5           | 0.26  | 3.83 | 1.73  | 1.14E-01 | 3.79E-01 | -5.29 |
| 1430362_PM_at   | ---                                           | NA             | -0.49 | 2.34 | -1.73 | 1.14E-01 | 3.79E-01 | -5.29 |
| 1429505_PM_at   | Nbeal1                                        | NBEAL1         | -0.40 | 3.60 | -1.73 | 1.14E-01 | 3.79E-01 | -5.29 |
| 1452240_PM_at   | Celf4                                         | CELF4          | -0.36 | 9.72 | -1.73 | 1.14E-01 | 3.79E-01 | -5.29 |
| 1451863_PM_at   | Uts2r                                         | UTS2R          | -0.20 | 3.08 | -1.73 | 1.14E-01 | 3.79E-01 | -5.29 |
| 1425710_PM_a_at | Homer1                                        | HOMER1         | 0.25  | 2.90 | 1.73  | 1.14E-01 | 3.79E-01 | -5.29 |
| 1450880_PM_at   | Mrpl16                                        | MRPL16         | -0.65 | 5.47 | -1.73 | 1.14E-01 | 3.79E-01 | -5.29 |
| 1435591_PM_at   | ---                                           | NA             | -0.40 | 2.76 | -1.73 | 1.14E-01 | 3.79E-01 | -5.29 |
| 1423668_PM_at   | Zdhhc14                                       | ZDHHC14        | -0.39 | 3.29 | -1.73 | 1.14E-01 | 3.79E-01 | -5.29 |
| 1427279_PM_at   | Clip4                                         | CLIP4          | 0.33  | 3.35 | 1.73  | 1.14E-01 | 3.79E-01 | -5.29 |
| 1436806_PM_at   | Trim62                                        | TRIM62         | 0.17  | 2.51 | 1.73  | 1.14E-01 | 3.79E-01 | -5.29 |
| 1427288_PM_at   | Apba2                                         | APBA2          | -0.52 | 3.84 | -1.73 | 1.14E-01 | 3.80E-01 | -5.29 |
| 1444281_PM_at   | ---                                           | NA             | 0.68  | 3.01 | 1.73  | 1.14E-01 | 3.80E-01 | -5.29 |
| 1450940_PM_at   | Gdap1                                         | GDAP1          | -0.51 | 4.74 | -1.73 | 1.14E-01 | 3.80E-01 | -5.29 |
| 1446328_PM_at   | ---                                           | NA             | 0.14  | 2.16 | 1.73  | 1.14E-01 | 3.80E-01 | -5.29 |
| 1438693_PM_at   | Tmem110                                       | TMEM110-MUSTN1 | 0.29  | 3.07 | 1.73  | 1.14E-01 | 3.80E-01 | -5.29 |
| 1443173_PM_at   | Ptn                                           | PTN            | 0.22  | 2.67 | 1.73  | 1.14E-01 | 3.80E-01 | -5.29 |
| 1444466_PM_at   | ---                                           | NA             | 0.25  | 2.50 | 1.73  | 1.14E-01 | 3.80E-01 | -5.29 |
| 1439983_PM_a_at | Asic3                                         | ASIC3          | 0.15  | 2.04 | 1.72  | 1.14E-01 | 3.80E-01 | -5.29 |
| 1430251_PM_at   | LOC105246062                                  | NA             | 0.28  | 3.29 | 1.72  | 1.14E-01 | 3.80E-01 | -5.29 |
| 1424829_PM_at   | Tor4a                                         | TOR4A          | 0.38  | 2.57 | 1.73  | 1.14E-01 | 3.80E-01 | -5.29 |
| 1427087_PM_at   | Luc7l2                                        | LUC7L2         | 0.46  | 5.34 | 1.73  | 1.14E-01 | 3.80E-01 | -5.29 |
| 1453771_PM_at   | Gulp1                                         | GULP1          | 0.50  | 2.57 | 1.73  | 1.14E-01 | 3.80E-01 | -5.29 |
| 1422304_PM_at   | Lcn4                                          | OBP2A          | 0.32  | 2.63 | 1.72  | 1.14E-01 | 3.80E-01 | -5.29 |
| 1438113_PM_at   | Zmat4                                         | ZMAT4          | 0.19  | 3.23 | 1.72  | 1.14E-01 | 3.80E-01 | -5.29 |
| 1454436_PM_at   | ---                                           | NA             | 0.19  | 2.49 | 1.72  | 1.14E-01 | 3.80E-01 | -5.29 |

|                 |                            |           |       |      |       |          |          |       |
|-----------------|----------------------------|-----------|-------|------|-------|----------|----------|-------|
| 1448856_PM_a_at | Msra                       | MSRA      | -0.29 | 4.04 | -1.72 | 1.14E-01 | 3.80E-01 | -5.29 |
| 1446850_PM_at   | ---                        | NA        | 0.16  | 2.50 | 1.72  | 1.14E-01 | 3.80E-01 | -5.29 |
| 1450097_PM_s_at | Gna12                      | GNA12     | 0.17  | 2.46 | 1.72  | 1.14E-01 | 3.80E-01 | -5.29 |
| 1453320_PM_at   | Pifo                       | PIFO      | 0.15  | 2.23 | 1.72  | 1.14E-01 | 3.80E-01 | -5.29 |
| 1423126_PM_at   | Atp1b3                     | ATP1B3    | -0.62 | 6.11 | -1.72 | 1.14E-01 | 3.80E-01 | -5.29 |
| 1437922_PM_at   | Mrp42                      | MRPL42    | -0.15 | 2.01 | -1.72 | 1.14E-01 | 3.80E-01 | -5.29 |
| 1427290_PM_at   | Krt81                      | KRT86     | 0.15  | 2.16 | 1.72  | 1.14E-01 | 3.81E-01 | -5.29 |
| 1446166_PM_at   | ---                        | NA        | 0.15  | 2.19 | 1.72  | 1.14E-01 | 3.81E-01 | -5.29 |
| 1424675_PM_at   | Slc39a6                    | SLC39A6   | -0.42 | 3.29 | -1.72 | 1.14E-01 | 3.81E-01 | -5.29 |
| 1440363_PM_at   | Panx1                      | NA        | -0.20 | 2.71 | -1.72 | 1.14E-01 | 3.81E-01 | -5.29 |
| 1454406_PM_at   | ---                        | NA        | 0.34  | 2.48 | 1.72  | 1.14E-01 | 3.81E-01 | -5.29 |
| 1460021_PM_at   | Gm6658                     | NA        | 0.46  | 2.30 | 1.72  | 1.14E-01 | 3.81E-01 | -5.29 |
| 1449250_PM_at   | Prc                        | PRCC      | 0.48  | 3.75 | 1.72  | 1.14E-01 | 3.81E-01 | -5.29 |
| 1453325_PM_at   | Ppp6r2                     | NA        | 0.21  | 2.70 | 1.72  | 1.15E-01 | 3.81E-01 | -5.29 |
| 1432382_PM_at   | 4930434B07Rik              | NA        | 0.16  | 2.13 | 1.72  | 1.15E-01 | 3.81E-01 | -5.29 |
| 1438264_PM_a_at | Tpp2                       | TPP2      | -0.70 | 4.40 | -1.72 | 1.15E-01 | 3.81E-01 | -5.29 |
| 1449433_PM_at   | P2rx5                      | P2RX5     | 0.19  | 2.47 | 1.72  | 1.15E-01 | 3.81E-01 | -5.29 |
| 1421893_PM_a_at | Tpp2                       | TPP2      | -0.15 | 2.25 | -1.72 | 1.15E-01 | 3.81E-01 | -5.30 |
| 1429205_PM_at   | Milt3                      | MLLT3     | -0.54 | 3.20 | -1.72 | 1.15E-01 | 3.81E-01 | -5.30 |
| 1438960_PM_at   | ---                        | NA        | 0.30  | 2.49 | 1.72  | 1.15E-01 | 3.81E-01 | -5.30 |
| 1443745_PM_s_at | Dmp1                       | DMP1      | 0.23  | 2.61 | 1.72  | 1.15E-01 | 3.81E-01 | -5.30 |
| 1453038_PM_at   | Zgrf1                      | ZGRF1     | -0.21 | 2.69 | -1.72 | 1.15E-01 | 3.81E-01 | -5.30 |
| 1435212_PM_at   | P2rx2                      | P2RX2     | 0.14  | 2.31 | 1.72  | 1.15E-01 | 3.81E-01 | -5.30 |
| 1436863_PM_at   | 1700010114Rik              | Cgorf118  | 0.22  | 2.47 | 1.72  | 1.15E-01 | 3.81E-01 | -5.30 |
| 1442684_PM_x_at | Hmg20a                     | NA        | 0.24  | 3.13 | 1.72  | 1.15E-01 | 3.81E-01 | -5.30 |
| 1453202_PM_at   | Mb21d1                     | MB21D1    | 0.23  | 3.53 | 1.72  | 1.15E-01 | 3.81E-01 | -5.30 |
| 1455013_PM_at   | Arih2                      | ARIH2     | -0.39 | 3.63 | -1.72 | 1.15E-01 | 3.81E-01 | -5.30 |
| 1429915_PM_at   | 4930426L09Rik              | NA        | 0.19  | 2.00 | 1.72  | 1.15E-01 | 3.81E-01 | -5.30 |
| 1427656_PM_at   | Tcrb-j                     | NA        | 0.21  | 2.57 | 1.72  | 1.15E-01 | 3.81E-01 | -5.30 |
| 1442852_PM_at   | ---                        | NA        | 0.78  | 3.88 | 1.72  | 1.15E-01 | 3.81E-01 | -5.30 |
| 1448876_PM_at   | Evc                        | EVC       | 0.29  | 2.72 | 1.72  | 1.15E-01 | 3.81E-01 | -5.30 |
| 1427904_PM_s_at | Ndufaf7                    | NDUFAF7   | -0.27 | 3.40 | -1.72 | 1.15E-01 | 3.81E-01 | -5.30 |
| 1419207_PM_at   | Zfp37                      | ZFP37     | -0.24 | 3.98 | -1.72 | 1.15E-01 | 3.81E-01 | -5.30 |
| 1440971_PM_x_at | Zfp771                     | ZNF771    | 0.16  | 2.25 | 1.72  | 1.15E-01 | 3.81E-01 | -5.30 |
| 1453736_PM_s_at | B230219D22Rik              | C5orf24   | 0.19  | 3.26 | 1.72  | 1.15E-01 | 3.81E-01 | -5.30 |
| 1445787_PM_at   | Ccdc162                    | NA        | 0.22  | 2.68 | 1.72  | 1.15E-01 | 3.81E-01 | -5.30 |
| 1422902_PM_s_at | Mgea5                      | MGEA5     | -0.46 | 4.59 | -1.72 | 1.15E-01 | 3.81E-01 | -5.30 |
| 1419141_PM_at   | Crygd                      | CRYGD     | 0.18  | 2.44 | 1.72  | 1.15E-01 | 3.81E-01 | -5.30 |
| 1448998_PM_at   | Lpo                        | LPO       | 0.19  | 2.46 | 1.72  | 1.15E-01 | 3.81E-01 | -5.30 |
| 1451386_PM_at   | Btvr                       | BLVRB     | 0.17  | 2.92 | 1.72  | 1.15E-01 | 3.81E-01 | -5.30 |
| 1430817_PM_at   | Samd7                      | SAMD7     | 0.17  | 3.30 | 1.72  | 1.15E-01 | 3.81E-01 | -5.30 |
| 1445103_PM_at   | ---                        | NA        | 0.20  | 2.66 | 1.72  | 1.15E-01 | 3.81E-01 | -5.30 |
| 1437492_PM_at   | Mkx                        | MKX       | 0.26  | 2.28 | 1.72  | 1.15E-01 | 3.81E-01 | -5.30 |
| 1448745_PM_s_at | Lor                        | NA        | 0.18  | 2.24 | 1.72  | 1.15E-01 | 3.81E-01 | -5.30 |
| 1457922_PM_at   | Ung                        | UNG       | 0.26  | 2.36 | 1.72  | 1.15E-01 | 3.81E-01 | -5.30 |
| 1439991_PM_a_at | Pabpn1l                    | PABPN1L   | 0.15  | 2.42 | 1.72  | 1.15E-01 | 3.81E-01 | -5.30 |
| 1433623_PM_at   | Zfp367                     | ZNF367    | -0.33 | 3.37 | -1.72 | 1.15E-01 | 3.81E-01 | -5.30 |
| 1459792_PM_at   | ---                        | NA        | 0.21  | 2.47 | 1.72  | 1.15E-01 | 3.81E-01 | -5.30 |
| 1444704_PM_at   | Sept11                     | NA        | 0.21  | 2.89 | 1.72  | 1.15E-01 | 3.82E-01 | -5.30 |
| 1431495_PM_at   | 6030440G07Rik              | NA        | -0.14 | 2.11 | -1.72 | 1.15E-01 | 3.82E-01 | -5.30 |
| 1425777_PM_at   | Cacnb1                     | CACNB1    | 0.32  | 2.48 | 1.72  | 1.15E-01 | 3.82E-01 | -5.30 |
| 1438532_PM_at   | Hmcn1                      | HMCN1     | -0.15 | 2.01 | -1.72 | 1.15E-01 | 3.82E-01 | -5.30 |
| 1453684_PM_s_at | Zc3h15                     | ZC3H15    | -0.35 | 5.32 | -1.72 | 1.15E-01 | 3.82E-01 | -5.30 |
| 1449486_PM_at   | Ces1g                      | CES1      | -0.13 | 2.39 | -1.72 | 1.15E-01 | 3.82E-01 | -5.30 |
| 1446365_PM_at   | ---                        | NA        | 0.17  | 2.08 | 1.72  | 1.15E-01 | 3.82E-01 | -5.30 |
| 1453606_PM_at   | 4931403G20Rik              | NA        | 0.21  | 2.38 | 1.72  | 1.15E-01 | 3.82E-01 | -5.30 |
| 1458817_PM_at   | ---                        | NA        | 0.25  | 2.59 | 1.72  | 1.15E-01 | 3.82E-01 | -5.30 |
| 1448569_PM_at   | Mlec                       | MLEC      | 0.51  | 4.05 | 1.72  | 1.15E-01 | 3.82E-01 | -5.30 |
| 1434314_PM_s_at | Rab11fip5                  | RAB11FIP5 | -1.28 | 7.34 | -1.72 | 1.15E-01 | 3.82E-01 | -5.30 |
| 1439735_PM_at   | Gm31981                    | NA        | 0.21  | 2.30 | 1.72  | 1.15E-01 | 3.82E-01 | -5.30 |
| 1460732_PM_a_at | Ppl                        | PPL       | 0.47  | 2.76 | 1.72  | 1.15E-01 | 3.82E-01 | -5.30 |
| 1435897_PM_at   | LOC102642864 /// Rpl32 /// | RPL32     | -0.40 | 4.16 | -1.72 | 1.15E-01 | 3.82E-01 | -5.30 |
| 1423717_PM_at   | Ak3                        | AK3       | -0.35 | 2.94 | -1.72 | 1.15E-01 | 3.82E-01 | -5.30 |
| 1421983_PM_s_at | Hnf4a                      | HNF4A     | 0.15  | 2.23 | 1.72  | 1.15E-01 | 3.82E-01 | -5.30 |
| 1415983_PM_at   | Lcp1                       | LCP1      | 0.29  | 2.31 | 1.72  | 1.15E-01 | 3.82E-01 | -5.30 |
| 1426421_PM_s_at | Gm17066 /// Rbm26          | RBM26     | -0.43 | 3.46 | -1.72 | 1.15E-01 | 3.82E-01 | -5.30 |
| 1439636_PM_at   | Nlrp9c                     | NLRP9     | 0.14  | 2.30 | 1.72  | 1.15E-01 | 3.82E-01 | -5.30 |
| 1428058_PM_at   | Ahnak                      | NA        | 0.17  | 2.35 | 1.72  | 1.15E-01 | 3.82E-01 | -5.30 |
| 1425838_PM_at   | Atp9a                      | NA        | 0.21  | 3.29 | 1.72  | 1.15E-01 | 3.82E-01 | -5.30 |
| 1424273_PM_at   | Cyp2c70                    | NA        | 0.24  | 2.49 | 1.72  | 1.15E-01 | 3.82E-01 | -5.30 |
| 1418259_PM_a_at | Entpd2                     | ENTPD2    | 0.26  | 3.13 | 1.72  | 1.15E-01 | 3.82E-01 | -5.30 |
| 1447290_PM_at   | ---                        | NA        | 0.28  | 2.67 | 1.72  | 1.15E-01 | 3.82E-01 | -5.30 |
| 1431159_PM_at   | Macro2                     | MACROD2   | 0.29  | 3.01 | 1.72  | 1.15E-01 | 3.82E-01 | -5.30 |
| 1458003_PM_at   | Zfp398                     | ZNF398    | 0.46  | 2.97 | 1.72  | 1.15E-01 | 3.82E-01 | -5.30 |

|                 |                  |            |       |      |       |          |          |       |
|-----------------|------------------|------------|-------|------|-------|----------|----------|-------|
| 1439419_PM_at   | 2310057M21Rik    | NA         | 0.88  | 2.98 | 1.72  | 1.15E-01 | 3.82E-01 | -5.30 |
| 1445542_PM_at   | ---              | NA         | 0.21  | 2.49 | 1.72  | 1.15E-01 | 3.82E-01 | -5.30 |
| 1435102_PM_a_at | Stx18            | STX18      | 0.24  | 2.26 | 1.72  | 1.15E-01 | 3.82E-01 | -5.30 |
| 1431155_PM_at   | Camsap2          | CAMSAP2    | 0.31  | 2.70 | 1.72  | 1.15E-01 | 3.82E-01 | -5.30 |
| 1424740_PM_at   | Creb3            | CREB3      | 0.33  | 2.92 | 1.72  | 1.15E-01 | 3.82E-01 | -5.30 |
| 1430791_PM_at   | 6330415B21Rik    | NA         | 0.37  | 2.71 | 1.72  | 1.15E-01 | 3.82E-01 | -5.30 |
| 1437684_PM_at   | Cmtr2            | NA         | -0.48 | 2.64 | -1.72 | 1.16E-01 | 3.82E-01 | -5.30 |
| 1417126_PM_a_at | Rpl22l1          | RPL22L1    | -0.39 | 3.72 | -1.72 | 1.16E-01 | 3.82E-01 | -5.30 |
| 1435903_PM_at   | Cd300a           | CD300A     | 0.24  | 2.67 | 1.72  | 1.16E-01 | 3.82E-01 | -5.30 |
| 1443684_PM_at   | ---              | NA         | 0.39  | 3.44 | 1.72  | 1.16E-01 | 3.82E-01 | -5.30 |
| 1421724_PM_at   | Vmn1r171         | NA         | 0.59  | 2.81 | 1.72  | 1.16E-01 | 3.82E-01 | -5.30 |
| 1439057_PM_x_at | Zdhhc6           | ZDHHC6     | -0.75 | 4.29 | -1.72 | 1.16E-01 | 3.82E-01 | -5.30 |
| 1429835_PM_at   | Pinlyp           | PINLYP     | 0.14  | 2.51 | 1.72  | 1.16E-01 | 3.82E-01 | -5.30 |
| 1437601_PM_at   | Otx1             | OTX1       | 0.14  | 2.18 | 1.72  | 1.16E-01 | 3.82E-01 | -5.30 |
| 1460057_PM_at   | Gdf3             | GDF3       | 0.20  | 2.46 | 1.72  | 1.16E-01 | 3.82E-01 | -5.30 |
| 1443768_PM_at   | Rhoa             | RHOA       | 0.23  | 2.13 | 1.72  | 1.16E-01 | 3.82E-01 | -5.30 |
| 1425730_PM_at   | Cacng6           | CACNG6     | 0.23  | 2.71 | 1.72  | 1.16E-01 | 3.82E-01 | -5.30 |
| 1457948_PM_at   | ---              | NA         | 0.55  | 4.91 | 1.72  | 1.16E-01 | 3.82E-01 | -5.30 |
| 1448043_PM_x_at | Gm36527 /// Rnf2 | RNF2       | 0.18  | 2.64 | 1.72  | 1.16E-01 | 3.82E-01 | -5.30 |
| 1447404_PM_at   | Rnf165           | RNF165     | -0.17 | 2.33 | -1.72 | 1.16E-01 | 3.82E-01 | -5.30 |
| 1438118_PM_x_at | Vim              | VIM        | -1.33 | 7.12 | -1.72 | 1.16E-01 | 3.82E-01 | -5.30 |
| 1456208_PM_at   | Gpat2            | GPAT2      | 0.17  | 2.30 | 1.72  | 1.16E-01 | 3.82E-01 | -5.30 |
| 1433895_PM_at   | Tmem127          | TMEM127    | -0.54 | 9.04 | -1.72 | 1.16E-01 | 3.82E-01 | -5.30 |
| 1452151_PM_at   | Gramd4           | GRAMD4     | -0.35 | 3.50 | -1.72 | 1.16E-01 | 3.82E-01 | -5.30 |
| 1452924_PM_at   | Fam83d           | FAM83D     | 0.21  | 2.86 | 1.72  | 1.16E-01 | 3.82E-01 | -5.30 |
| 1425318_PM_a_at | Tmem116          | TMEM116    | 0.14  | 2.34 | 1.72  | 1.16E-01 | 3.82E-01 | -5.30 |
| 1450192_PM_at   | Lhcgr            | ACO73082.1 | -0.13 | 2.00 | -1.72 | 1.16E-01 | 3.82E-01 | -5.30 |
| 1438128_PM_at   | Gm12500          | NA         | 0.17  | 2.13 | 1.72  | 1.16E-01 | 3.82E-01 | -5.30 |
| 1447015_PM_at   | ---              | NA         | 0.20  | 2.76 | 1.72  | 1.16E-01 | 3.82E-01 | -5.30 |
| 1458170_PM_at   | ---              | NA         | 0.24  | 2.22 | 1.72  | 1.16E-01 | 3.82E-01 | -5.30 |
| 1422177_PM_at   | Il13ra2          | IL13RA2    | 0.26  | 3.59 | 1.72  | 1.16E-01 | 3.82E-01 | -5.30 |
| 1416680_PM_at   | Ube3a            | UBE3A      | -0.46 | 8.31 | -1.72 | 1.16E-01 | 3.83E-01 | -5.30 |
| 1449048_PM_s_at | Rab4a            | RAB4A      | 0.29  | 6.96 | 1.72  | 1.16E-01 | 3.83E-01 | -5.31 |
| 1453686_PM_x_at | Nphp1            | NPHP1      | 0.18  | 2.28 | 1.72  | 1.16E-01 | 3.83E-01 | -5.31 |
| 1424445_PM_at   | Tm4sf5           | TM4SF5     | 0.26  | 2.57 | 1.72  | 1.16E-01 | 3.83E-01 | -5.31 |
| 1440165_PM_at   | Ptprc            | PTPRC      | -0.57 | 3.59 | -1.72 | 1.16E-01 | 3.83E-01 | -5.31 |
| 1452933_PM_at   | Ankrd39          | ANKRD39    | 0.15  | 2.09 | 1.72  | 1.16E-01 | 3.83E-01 | -5.31 |
| 1456800_PM_a_at | Ritpr            | CARMIL2    | 0.23  | 2.18 | 1.72  | 1.16E-01 | 3.83E-01 | -5.31 |
| 1456105_PM_at   | Rc3h2            | RC3H2      | 0.48  | 2.93 | 1.72  | 1.16E-01 | 3.83E-01 | -5.31 |
| 1416626_PM_at   | Pla2g1b          | PLA2G1B    | 0.21  | 2.51 | 1.72  | 1.16E-01 | 3.83E-01 | -5.31 |
| 1453464_PM_at   | ---              | NA         | 0.24  | 2.40 | 1.72  | 1.16E-01 | 3.83E-01 | -5.31 |
| 1428077_PM_at   | Tmem163          | TMEM163    | 0.53  | 3.48 | 1.72  | 1.16E-01 | 3.83E-01 | -5.31 |
| 1456724_PM_x_at | Wrap53           | WRAP53     | -0.14 | 2.10 | -1.71 | 1.16E-01 | 3.83E-01 | -5.31 |
| 1441772_PM_at   | P2rx4            | P2RX4      | 0.16  | 2.54 | 1.71  | 1.16E-01 | 3.83E-01 | -5.31 |
| 1428886_PM_at   | Rbbp5            | RBBP5      | 0.41  | 4.09 | 1.72  | 1.16E-01 | 3.83E-01 | -5.31 |
| 1433025_PM_x_at | Bnip2            | BNIP2      | 0.18  | 2.38 | 1.71  | 1.16E-01 | 3.83E-01 | -5.31 |
| 1439259_PM_x_at | Abhd4            | ABHD4      | -0.96 | 3.01 | -1.71 | 1.16E-01 | 3.83E-01 | -5.31 |
| 1417235_PM_at   | Ehd3             | EHD3       | -0.39 | 3.20 | -1.71 | 1.16E-01 | 3.83E-01 | -5.31 |
| 1416321_PM_s_at | Prelp            | PRELP      | -0.37 | 3.43 | -1.71 | 1.16E-01 | 3.83E-01 | -5.31 |
| 1456329_PM_at   | Prtg             | PRTG       | 0.22  | 2.43 | 1.71  | 1.16E-01 | 3.83E-01 | -5.31 |
| 1451887_PM_at   | Lrba             | LRBA       | 0.32  | 2.75 | 1.71  | 1.16E-01 | 3.83E-01 | -5.31 |
| 1437677_PM_at   | Tamm41           | TAMM41     | 0.16  | 2.63 | 1.71  | 1.16E-01 | 3.83E-01 | -5.31 |
| 1426808_PM_at   | Lgals3           | LGALS3     | 0.28  | 2.28 | 1.71  | 1.16E-01 | 3.83E-01 | -5.31 |
| 1424531_PM_a_at | Tcea3            | TCEA3      | 0.30  | 3.24 | 1.71  | 1.16E-01 | 3.83E-01 | -5.31 |
| 1453532_PM_at   | ---              | NA         | 0.25  | 3.32 | 1.71  | 1.16E-01 | 3.83E-01 | -5.31 |
| 1428021_PM_at   | Mccc2            | MCCC2      | 0.23  | 2.79 | 1.71  | 1.16E-01 | 3.83E-01 | -5.31 |
| 1455532_PM_at   | Atxn7l2          | ATXN7L2    | 0.19  | 2.29 | 1.71  | 1.16E-01 | 3.83E-01 | -5.31 |
| 1451497_PM_at   | Csnk1a1          | CSNK1A1L   | 0.19  | 5.14 | 1.71  | 1.16E-01 | 3.83E-01 | -5.31 |
| 1428298_PM_at   | Sh3d21           | SH3D21     | 0.19  | 3.21 | 1.71  | 1.16E-01 | 3.83E-01 | -5.31 |
| 1454399_PM_at   | Tmem236          | TMEM236    | 0.17  | 2.36 | 1.71  | 1.16E-01 | 3.83E-01 | -5.31 |
| 1434122_PM_at   | Fbxo27           | FBXO27     | 0.23  | 3.14 | 1.71  | 1.16E-01 | 3.83E-01 | -5.31 |
| 1448505_PM_at   | C1d              | C1D        | -0.59 | 6.98 | -1.71 | 1.16E-01 | 3.84E-01 | -5.31 |
| 1426804_PM_at   | Smarca4          | SMARCA4    | -0.64 | 4.52 | -1.71 | 1.16E-01 | 3.84E-01 | -5.31 |
| 1418766_PM_s_at | Timd2            | HAVCR1     | 0.22  | 2.39 | 1.71  | 1.17E-01 | 3.84E-01 | -5.31 |
| 1431966_PM_at   | ---              | NA         | 0.15  | 2.20 | 1.71  | 1.17E-01 | 3.84E-01 | -5.31 |
| 1441204_PM_at   | ---              | NA         | 0.17  | 2.71 | 1.71  | 1.17E-01 | 3.84E-01 | -5.31 |
| 1446909_PM_at   | ---              | NA         | 0.37  | 2.25 | 1.71  | 1.17E-01 | 3.84E-01 | -5.31 |
| 1417000_PM_at   | Abtb1            | ABTB1      | 0.14  | 2.65 | 1.71  | 1.17E-01 | 3.84E-01 | -5.31 |
| 1446484_PM_at   | LOC105245934     | NA         | 0.28  | 2.68 | 1.71  | 1.17E-01 | 3.84E-01 | -5.31 |
| 1419978_PM_s_at | Arhgef25         | ARHGEF25   | -0.39 | 7.25 | -1.71 | 1.17E-01 | 3.84E-01 | -5.31 |
| 1423309_PM_at   | Tgoh1 /// Tgoh2  | TGOLN2     | -0.54 | 5.36 | -1.71 | 1.17E-01 | 3.84E-01 | -5.31 |
| 1456918_PM_at   | Raph1            | RAPH1      | -0.47 | 3.22 | -1.71 | 1.17E-01 | 3.84E-01 | -5.31 |
| 1417164_PM_at   | Dusp10           | DUSP10     | 0.27  | 3.46 | 1.71  | 1.17E-01 | 3.84E-01 | -5.31 |
| 1422144_PM_at   | Inhbe            | INHBE      | 0.16  | 2.58 | 1.71  | 1.17E-01 | 3.84E-01 | -5.31 |
| 1432670_PM_at   | 9030420N05Rik    | NA         | 0.20  | 2.17 | 1.71  | 1.17E-01 | 3.84E-01 | -5.31 |

|                    |                                        |              |       |      |       |          |          |       |
|--------------------|----------------------------------------|--------------|-------|------|-------|----------|----------|-------|
| 1425813_PM_at      | Pign                                   | PIGN         | 0.25  | 2.22 | 1.71  | 1.17E-01 | 3.84E-01 | -5.31 |
| 1442266_PM_at      | ---                                    | NA           | 0.46  | 2.81 | 1.71  | 1.17E-01 | 3.84E-01 | -5.31 |
| 1432238_PM_at      | Spats1                                 | SPATS1       | 0.43  | 2.78 | 1.71  | 1.17E-01 | 3.84E-01 | -5.31 |
| 1442619_PM_at      | ---                                    | NA           | 0.18  | 2.19 | 1.71  | 1.17E-01 | 3.84E-01 | -5.31 |
| 1430636_PM_at      | Ppp4r1-ps                              | NA           | 0.24  | 2.51 | 1.71  | 1.17E-01 | 3.84E-01 | -5.31 |
| 1458281_PM_at      | ---                                    | NA           | 0.32  | 3.92 | 1.71  | 1.17E-01 | 3.84E-01 | -5.31 |
| 1433931_PM_at      | R3hdm4                                 | R3HDM4       | -0.37 | 9.29 | -1.71 | 1.17E-01 | 3.84E-01 | -5.31 |
| 1427902_PM_at      | Srrm2                                  | SRRM2        | -0.40 | 4.28 | -1.71 | 1.17E-01 | 3.84E-01 | -5.31 |
| 1438809_PM_at      | Atp5c1                                 | ATP5C1       | -0.27 | 3.79 | -1.71 | 1.17E-01 | 3.84E-01 | -5.31 |
| 1424142_PM_at      | Ikbkap                                 | IKBKAP       | 0.27  | 2.58 | 1.71  | 1.17E-01 | 3.84E-01 | -5.31 |
| 1451169_PM_at      | Nomo1                                  | NOMO3        | 0.29  | 2.02 | 1.71  | 1.17E-01 | 3.84E-01 | -5.31 |
| 1431720_PM_at      | ---                                    | NA           | 0.16  | 2.26 | 1.71  | 1.17E-01 | 3.84E-01 | -5.31 |
| 1453190_PM_at      | Usp19                                  | USP19        | 0.18  | 2.57 | 1.71  | 1.17E-01 | 3.84E-01 | -5.31 |
| 1429175_PM_at      | Tmem178                                | TMEM178A     | -0.94 | 7.14 | -1.71 | 1.17E-01 | 3.85E-01 | -5.31 |
| 1459072_PM_at      | Gm41227                                | NA           | 1.15  | 3.97 | 1.71  | 1.17E-01 | 3.85E-01 | -5.31 |
| 1433061_PM_at      | 4933423L19Rik                          | NA           | 0.26  | 2.73 | 1.71  | 1.17E-01 | 3.85E-01 | -5.31 |
| 1418919_PM_at      | Sgol1                                  | SGO1         | 0.22  | 2.43 | 1.71  | 1.17E-01 | 3.85E-01 | -5.31 |
| 1437822_PM_at      | Yme1l1                                 | YME1L1       | -0.27 | 3.23 | -1.71 | 1.17E-01 | 3.85E-01 | -5.31 |
| 1444368_PM_at      | Chrna3                                 | NA           | 0.18  | 2.16 | 1.71  | 1.17E-01 | 3.85E-01 | -5.31 |
| AFFX-r2-TagIN-M_at | ---                                    | NA           | 0.24  | 2.50 | 1.71  | 1.17E-01 | 3.85E-01 | -5.31 |
| 1421384_PM_at      | Lyst                                   | LYST         | -0.19 | 2.53 | -1.71 | 1.17E-01 | 3.85E-01 | -5.32 |
| 1421596_PM_s_at    | Ifi44l                                 | NA           | 0.15  | 2.31 | 1.71  | 1.17E-01 | 3.85E-01 | -5.31 |
| 1457938_PM_at      | ---                                    | NA           | 0.58  | 4.81 | 1.71  | 1.17E-01 | 3.85E-01 | -5.32 |
| 1458418_PM_at      | ---                                    | NA           | -0.28 | 3.66 | -1.71 | 1.17E-01 | 3.85E-01 | -5.32 |
| 1438441_PM_at      | ---                                    | NA           | -0.57 | 3.85 | -1.71 | 1.17E-01 | 3.85E-01 | -5.32 |
| 1459539_PM_at      | ---                                    | NA           | -0.15 | 2.47 | -1.71 | 1.17E-01 | 3.85E-01 | -5.32 |
| 1447674_PM_at      | ---                                    | NA           | 0.16  | 2.43 | 1.71  | 1.17E-01 | 3.85E-01 | -5.32 |
| 1455861_PM_at      | Epb415                                 | EPB41L5      | 0.22  | 2.16 | 1.71  | 1.17E-01 | 3.85E-01 | -5.32 |
| 1445801_PM_at      | Cep126                                 | NA           | 0.42  | 2.93 | 1.71  | 1.17E-01 | 3.85E-01 | -5.32 |
| 1435070_PM_at      | Aebp2                                  | AEBP2        | -0.41 | 2.92 | -1.71 | 1.17E-01 | 3.85E-01 | -5.32 |
| 1437817_PM_at      | Snap91                                 | SNAP91       | -0.38 | 2.80 | -1.71 | 1.17E-01 | 3.85E-01 | -5.32 |
| 1455942_PM_at      | Kdm2a                                  | KDM2A        | 0.48  | 2.95 | 1.71  | 1.17E-01 | 3.85E-01 | -5.32 |
| 1460379_PM_at      | Hoxb4                                  | HOXB4        | -0.17 | 2.29 | -1.71 | 1.17E-01 | 3.85E-01 | -5.32 |
| 1431086_PM_s_at    | Pcmt1                                  | PCMT1        | -0.92 | 5.08 | -1.71 | 1.17E-01 | 3.85E-01 | -5.32 |
| 1455698_PM_at      | Sec62                                  | SEC62        | -0.51 | 3.78 | -1.71 | 1.17E-01 | 3.85E-01 | -5.32 |
| 1419233_PM_x_at    | Apoa1                                  | APOA1        | 0.16  | 2.49 | 1.71  | 1.17E-01 | 3.85E-01 | -5.32 |
| 1420445_PM_at      | Slc16a8                                | SLC16A8      | 0.17  | 3.13 | 1.71  | 1.17E-01 | 3.86E-01 | -5.32 |
| 1422282_PM_at      | Tacr1                                  | TACR1        | 0.23  | 2.65 | 1.71  | 1.17E-01 | 3.86E-01 | -5.32 |
| 1459876_PM_at      | ---                                    | NA           | -0.95 | 3.28 | -1.71 | 1.18E-01 | 3.86E-01 | -5.32 |
| 1440191_PM_s_at    | Leng9                                  | LENG9        | 0.18  | 2.88 | 1.71  | 1.18E-01 | 3.86E-01 | -5.32 |
| 1441907_PM_s_at    | Cd93                                   | CD93         | 0.20  | 2.18 | 1.71  | 1.18E-01 | 3.86E-01 | -5.32 |
| 1419567_PM_at      | Fank1                                  | FANK1        | 0.20  | 2.80 | 1.71  | 1.18E-01 | 3.86E-01 | -5.32 |
| 1421795_PM_s_at    | Klrc2 /// Klrc3                        | KLRC4-KLRK1  | 0.23  | 2.15 | 1.71  | 1.18E-01 | 3.86E-01 | -5.32 |
| 1458962_PM_at      | Rnf103                                 | RNF103       | 0.26  | 3.04 | 1.71  | 1.18E-01 | 3.86E-01 | -5.32 |
| 1436207_PM_at      | Tcf7l1                                 | TCF7L1       | 0.26  | 2.18 | 1.71  | 1.18E-01 | 3.86E-01 | -5.32 |
| 1428072_PM_a_at    | Dolpp1                                 | DOLPP1       | 0.30  | 2.77 | 1.71  | 1.18E-01 | 3.86E-01 | -5.32 |
| 1421749_PM_at      | ---                                    | NA           | 0.40  | 2.91 | 1.71  | 1.18E-01 | 3.86E-01 | -5.32 |
| 1443908_PM_at      | Gm19696                                | NA           | 0.20  | 2.31 | 1.71  | 1.18E-01 | 3.86E-01 | -5.32 |
| 1436337_PM_at      | Tmem243                                | TMEM243      | 0.63  | 3.76 | 1.71  | 1.18E-01 | 3.86E-01 | -5.32 |
| 1419032_PM_at      | Stk26                                  | STK26        | 0.19  | 2.75 | 1.71  | 1.18E-01 | 3.86E-01 | -5.32 |
| 1446486_PM_at      | Dtw2                                   | DTWD2        | 0.20  | 2.42 | 1.71  | 1.18E-01 | 3.86E-01 | -5.32 |
| 1453873_PM_at      | ---                                    | NA           | 0.16  | 2.34 | 1.71  | 1.18E-01 | 3.86E-01 | -5.32 |
| 1443969_PM_at      | Irs2                                   | IRS2         | 0.24  | 2.63 | 1.71  | 1.18E-01 | 3.86E-01 | -5.32 |
| 1427663_PM_a_at    | Clk4                                   | CLK4         | -0.74 | 6.39 | -1.71 | 1.18E-01 | 3.86E-01 | -5.32 |
| 1429750_PM_at      | Minpp1                                 | MINPP1       | 0.14  | 2.04 | 1.71  | 1.18E-01 | 3.86E-01 | -5.32 |
| 1431545_PM_at      | LOC102640241                           | NA           | 0.22  | 2.61 | 1.71  | 1.18E-01 | 3.86E-01 | -5.32 |
| 1422682_PM_s_at    | Gm10334 /// Gm5771 /// Prss1 /// Prss3 | PRSS2        | 0.22  | 2.37 | 1.71  | 1.18E-01 | 3.86E-01 | -5.32 |
| 1416224_PM_at      | Zbtb17                                 | ZBTB17       | 0.28  | 2.77 | 1.71  | 1.18E-01 | 3.86E-01 | -5.32 |
| 1457818_PM_at      | ---                                    | NA           | 0.51  | 2.57 | 1.71  | 1.18E-01 | 3.86E-01 | -5.32 |
| 1454729_PM_at      | Tmem108                                | TMEM108      | -0.21 | 2.42 | -1.71 | 1.18E-01 | 3.86E-01 | -5.32 |
| 1436712_PM_at      | Pla2g4c                                | PLA2G4C      | 0.32  | 2.34 | 1.71  | 1.18E-01 | 3.86E-01 | -5.32 |
| 1445825_PM_at      | ---                                    | NA           | 0.13  | 2.13 | 1.71  | 1.18E-01 | 3.86E-01 | -5.32 |
| 1417294_PM_at      | Akr7a5                                 | AKR7L        | 0.18  | 2.42 | 1.71  | 1.18E-01 | 3.86E-01 | -5.32 |
| 1460186_PM_at      | Tm9sf3                                 | TM9SF3       | -0.61 | 4.81 | -1.71 | 1.18E-01 | 3.86E-01 | -5.32 |
| 1458228_PM_at      | ---                                    | NA           | 0.25  | 1.99 | 1.71  | 1.18E-01 | 3.86E-01 | -5.32 |
| 1434336_PM_s_at    | Rcor1                                  | RCOR1        | -0.54 | 3.01 | -1.70 | 1.18E-01 | 3.86E-01 | -5.32 |
| 1436088_PM_at      | Fam49b                                 | FAM49B       | -0.39 | 4.17 | -1.70 | 1.18E-01 | 3.86E-01 | -5.32 |
| 1431303_PM_at      | Stk38                                  | STK38        | 0.17  | 2.70 | 1.70  | 1.18E-01 | 3.86E-01 | -5.32 |
| 1417138_PM_s_at    | Polr2e                                 | POLR2E       | 0.31  | 3.11 | 1.70  | 1.18E-01 | 3.87E-01 | -5.32 |
| 1455544_PM_at      | Zranb3                                 | ZRANB3       | 0.14  | 2.58 | 1.70  | 1.18E-01 | 3.87E-01 | -5.32 |
| 1425613_PM_at      | Pcdha11                                | PCDHA11      | 0.20  | 2.29 | 1.70  | 1.18E-01 | 3.87E-01 | -5.32 |
| 1446668_PM_at      | ---                                    | NA           | 0.23  | 2.67 | 1.70  | 1.18E-01 | 3.87E-01 | -5.32 |
| 1443232_PM_at      | Vax2os                                 | NA           | 0.23  | 2.70 | 1.70  | 1.18E-01 | 3.87E-01 | -5.32 |
| 1420919_PM_at      | Sgk3                                   | C8orf44-SGK3 | -0.25 | 2.78 | -1.70 | 1.18E-01 | 3.87E-01 | -5.32 |

|                 |                     |            |       |      |       |          |          |       |
|-----------------|---------------------|------------|-------|------|-------|----------|----------|-------|
| 1444996_PM_at   | Depdc5              | NA         | 0.15  | 2.28 | 1.70  | 1.18E-01 | 3.87E-01 | -5.32 |
| 1435459_PM_at   | Fmo2                | FMO2       | 0.19  | 2.36 | 1.70  | 1.18E-01 | 3.87E-01 | -5.32 |
| 1431675_PM_a_at | Gtf2i               | GTF2I      | 0.28  | 4.30 | 1.70  | 1.18E-01 | 3.87E-01 | -5.32 |
| 1431832_PM_x_at | Exosc10             | EXOSC10    | 0.38  | 2.82 | 1.70  | 1.18E-01 | 3.87E-01 | -5.32 |
| 1434893_PM_at   | Atp1a2              | ATP1A2     | -0.71 | 4.32 | -1.70 | 1.18E-01 | 3.87E-01 | -5.32 |
| 1421294_PM_at   | Hdgfl1              | HDGFL1     | 0.29  | 2.55 | 1.70  | 1.18E-01 | 3.87E-01 | -5.32 |
| 1447520_PM_at   | Lbp                 | LBP        | 0.29  | 3.50 | 1.70  | 1.18E-01 | 3.87E-01 | -5.32 |
| 1456230_PM_at   | Trim80              | NA         | 0.13  | 2.33 | 1.70  | 1.18E-01 | 3.87E-01 | -5.32 |
| 1434455_PM_at   | Fbxo44              | FBXO44     | 0.24  | 3.43 | 1.70  | 1.18E-01 | 3.87E-01 | -5.32 |
| 1420418_PM_at   | Syt2                | SYT2       | 0.27  | 3.00 | 1.70  | 1.18E-01 | 3.87E-01 | -5.32 |
| 1441684_PM_at   | Ttc3                | TTC3       | 0.49  | 3.54 | 1.70  | 1.18E-01 | 3.87E-01 | -5.32 |
| 1460195_PM_at   | Mrps11              | MRPS11     | 0.16  | 2.44 | 1.70  | 1.18E-01 | 3.87E-01 | -5.32 |
| 1430954_PM_at   | Ppil3               | PPIL3      | 0.40  | 2.63 | 1.70  | 1.18E-01 | 3.87E-01 | -5.32 |
| 1420592_PM_a_at | Anp32e              | ANP32E     | 0.34  | 6.74 | 1.70  | 1.18E-01 | 3.87E-01 | -5.32 |
| 1454307_PM_at   | ---                 | NA         | 0.19  | 2.37 | 1.70  | 1.18E-01 | 3.87E-01 | -5.32 |
| 1421919_PM_a_at | Ccr9                | CCR9       | 0.23  | 2.80 | 1.70  | 1.18E-01 | 3.87E-01 | -5.32 |
| 1445678_PM_at   | ---                 | NA         | 0.22  | 2.56 | 1.70  | 1.18E-01 | 3.87E-01 | -5.32 |
| 1438913_PM_x_at | Hdgfrp2             | ACO11498.1 | 0.29  | 3.95 | 1.70  | 1.18E-01 | 3.87E-01 | -5.32 |
| 1452787_PM_a_at | Prmt1               | NA         | -0.56 | 4.00 | -1.70 | 1.19E-01 | 3.87E-01 | -5.33 |
| 1457012_PM_at   | Dbx1                | DBX1       | 0.16  | 2.37 | 1.70  | 1.19E-01 | 3.87E-01 | -5.33 |
| 1445126_PM_at   | ---                 | NA         | 0.18  | 2.29 | 1.70  | 1.19E-01 | 3.87E-01 | -5.32 |
| 1443628_PM_at   | ---                 | NA         | 0.18  | 2.17 | 1.70  | 1.19E-01 | 3.87E-01 | -5.33 |
| 1453285_PM_at   | Tmem88              | TMEM88     | 0.19  | 2.84 | 1.70  | 1.19E-01 | 3.87E-01 | -5.32 |
| 1453910_PM_at   | 4930500A05Rik       | NA         | 0.22  | 2.32 | 1.70  | 1.19E-01 | 3.87E-01 | -5.32 |
| 1428927_PM_at   | Shq1                | SHQ1       | 0.23  | 2.99 | 1.70  | 1.19E-01 | 3.87E-01 | -5.33 |
| 1433748_PM_at   | Zdhc18              | ZDHHC18    | 0.30  | 3.90 | 1.70  | 1.19E-01 | 3.87E-01 | -5.32 |
| 1419389_PM_at   | Pde10a              | PDE10A     | 0.36  | 4.67 | 1.70  | 1.19E-01 | 3.87E-01 | -5.33 |
| 1443303_PM_at   | ---                 | NA         | 0.20  | 2.15 | 1.70  | 1.19E-01 | 3.87E-01 | -5.33 |
| 1421712_PM_at   | Sele                | SELE       | 0.22  | 2.31 | 1.70  | 1.19E-01 | 3.87E-01 | -5.33 |
| 1431312_PM_at   | Fbxl2os             | NA         | 0.31  | 2.39 | 1.70  | 1.19E-01 | 3.87E-01 | -5.33 |
| 1445664_PM_at   | ---                 | NA         | 0.20  | 2.21 | 1.70  | 1.19E-01 | 3.87E-01 | -5.33 |
| 1421226_PM_at   | Trem2               | NA         | 0.24  | 3.11 | 1.70  | 1.19E-01 | 3.87E-01 | -5.33 |
| 1430008_PM_x_at | Speer5-ps1          | NA         | 0.26  | 2.79 | 1.70  | 1.19E-01 | 3.87E-01 | -5.33 |
| 1440607_PM_at   | Gm19929             | NA         | 0.28  | 2.27 | 1.70  | 1.19E-01 | 3.87E-01 | -5.33 |
| 1444357_PM_at   | Akap6               | AKAP6      | -0.35 | 5.77 | -1.70 | 1.19E-01 | 3.88E-01 | -5.33 |
| 1443216_PM_at   | ---                 | NA         | 0.20  | 2.29 | 1.70  | 1.19E-01 | 3.88E-01 | -5.33 |
| 1422255_PM_at   | Kcna4               | KCNA4      | 0.29  | 2.47 | 1.70  | 1.19E-01 | 3.88E-01 | -5.33 |
| 1456225_PM_x_at | Trib3               | TRIB3      | -0.27 | 3.26 | -1.70 | 1.19E-01 | 3.88E-01 | -5.33 |
| 1442990_PM_at   | ---                 | NA         | 0.21  | 2.30 | 1.70  | 1.19E-01 | 3.88E-01 | -5.33 |
| 1418355_PM_at   | Nucb2               | NUCB2      | -0.60 | 3.14 | -1.70 | 1.19E-01 | 3.88E-01 | -5.33 |
| 1424418_PM_at   | Slc25a38            | SLC25A38   | 0.16  | 2.40 | 1.70  | 1.19E-01 | 3.88E-01 | -5.33 |
| 1438030_PM_at   | Rasgrp3             | RASGRP3    | 0.17  | 2.73 | 1.70  | 1.19E-01 | 3.88E-01 | -5.33 |
| 1451851_PM_a_at | Csn3                | CSN3       | 0.17  | 2.36 | 1.70  | 1.19E-01 | 3.88E-01 | -5.33 |
| 1424054_PM_at   | Btdb2               | BTBD2      | 0.31  | 2.92 | 1.70  | 1.19E-01 | 3.88E-01 | -5.33 |
| 1438468_PM_at   | Gm13102 /// Pramel4 | PRAMEF9    | 0.14  | 2.38 | 1.70  | 1.19E-01 | 3.88E-01 | -5.33 |
| 1441081_PM_a_at | 1110038B12Rik       | NA         | -0.51 | 4.14 | -1.70 | 1.19E-01 | 3.88E-01 | -5.33 |
| 1430310_PM_at   | Tspan11             | TSPAN11    | 0.15  | 2.10 | 1.70  | 1.19E-01 | 3.88E-01 | -5.33 |
| 1428781_PM_at   | Dmkn                | DMKN       | 0.18  | 2.26 | 1.70  | 1.19E-01 | 3.88E-01 | -5.33 |
| 1425510_PM_at   | Mark1               | MARK1      | -0.27 | 2.23 | -1.70 | 1.19E-01 | 3.88E-01 | -5.33 |
| 1423751_PM_at   | Sf1                 | SF1        | 0.19  | 2.30 | 1.70  | 1.19E-01 | 3.88E-01 | -5.33 |
| 1423761_PM_at   | Mettl13             | METTL13    | 0.14  | 2.48 | 1.70  | 1.19E-01 | 3.88E-01 | -5.33 |
| 1419467_PM_at   | Clec14a             | CLEC14A    | 0.18  | 2.88 | 1.70  | 1.19E-01 | 3.88E-01 | -5.33 |
| 1431488_PM_at   | 4833428L15Rik       | NA         | 0.26  | 2.53 | 1.70  | 1.19E-01 | 3.88E-01 | -5.33 |
| 1425213_PM_at   | Fam81a              | FAM81A     | 0.94  | 4.04 | 1.70  | 1.19E-01 | 3.88E-01 | -5.33 |
| 1442055_PM_at   | ---                 | NA         | 0.26  | 3.12 | 1.70  | 1.19E-01 | 3.88E-01 | -5.33 |
| 1416870_PM_at   | Dnal4               | DNAL4      | 0.28  | 2.88 | 1.70  | 1.19E-01 | 3.88E-01 | -5.33 |
| 1433334_PM_at   | ---                 | NA         | 0.29  | 3.17 | 1.70  | 1.19E-01 | 3.88E-01 | -5.33 |
| 1451492_PM_at   | Sla2                | SLA2       | 0.15  | 2.59 | 1.70  | 1.19E-01 | 3.88E-01 | -5.33 |
| 1427856_PM_a_at | Igk /// Igkv19-93   | NA         | 0.15  | 2.03 | 1.70  | 1.19E-01 | 3.88E-01 | -5.33 |
| 1420951_PM_a_at | Son                 | SON        | 0.73  | 5.39 | 1.70  | 1.19E-01 | 3.88E-01 | -5.33 |
| 1418926_PM_at   | Zeb1                | ZEB1       | -0.61 | 5.62 | -1.70 | 1.19E-01 | 3.88E-01 | -5.33 |
| 1431764_PM_at   | ---                 | NA         | -0.15 | 2.23 | -1.70 | 1.19E-01 | 3.88E-01 | -5.33 |
| 1420958_PM_at   | Sys1                | NA         | 0.13  | 2.60 | 1.70  | 1.19E-01 | 3.88E-01 | -5.33 |
| 1446798_PM_at   | ---                 | NA         | -0.46 | 2.70 | -1.70 | 1.19E-01 | 3.88E-01 | -5.33 |
| 1421309_PM_at   | Mgmt                | NA         | 0.12  | 2.40 | 1.70  | 1.19E-01 | 3.88E-01 | -5.33 |
| 1436057_PM_at   | Meg3                | NA         | 0.21  | 3.60 | 1.70  | 1.19E-01 | 3.88E-01 | -5.33 |
| 1455091_PM_at   | Ppp2r3a             | PPP2R3A    | -0.67 | 5.82 | -1.70 | 1.19E-01 | 3.89E-01 | -5.33 |
| 1436367_PM_at   | Ptprb               | PTPRB      | -0.55 | 4.48 | -1.70 | 1.19E-01 | 3.89E-01 | -5.33 |
| 1432222_PM_at   | ---                 | NA         | 0.18  | 2.25 | 1.70  | 1.19E-01 | 3.89E-01 | -5.33 |
| 1423949_PM_at   | Ube2z               | UBE2Z      | -0.26 | 3.63 | -1.70 | 1.19E-01 | 3.89E-01 | -5.33 |
| 1450881_PM_s_at | Gpr137b             | GPR137B    | -0.40 | 2.77 | -1.70 | 1.19E-01 | 3.89E-01 | -5.33 |
| 1443268_PM_at   | Gm765               | AC134025.1 | 0.36  | 3.18 | 1.70  | 1.19E-01 | 3.89E-01 | -5.33 |
| 1458902_PM_at   | ---                 | NA         | 0.42  | 2.42 | 1.70  | 1.19E-01 | 3.89E-01 | -5.33 |
| 1429005_PM_at   | Mfhas1              | MFHAS1     | -0.48 | 5.61 | -1.70 | 1.19E-01 | 3.89E-01 | -5.33 |
| 1443853_PM_x_at | Sfmbt1              | SFMBT1     | -0.33 | 2.32 | -1.70 | 1.19E-01 | 3.89E-01 | -5.33 |

|                 |                                                                                       |           |       |      |       |          |          |       |
|-----------------|---------------------------------------------------------------------------------------|-----------|-------|------|-------|----------|----------|-------|
| 1420569_PM_at   | Chad                                                                                  | CHAD      | 0.16  | 2.38 | 1.70  | 1.19E-01 | 3.89E-01 | -5.33 |
| 1448562_PM_at   | Upp1                                                                                  | UPP1      | 0.21  | 2.84 | 1.70  | 1.19E-01 | 3.89E-01 | -5.33 |
| 1447965_PM_at   | C80012                                                                                | NA        | 0.23  | 2.49 | 1.70  | 1.19E-01 | 3.89E-01 | -5.33 |
| 1453454_PM_at   | ---                                                                                   | NA        | 0.23  | 2.71 | 1.70  | 1.19E-01 | 3.89E-01 | -5.33 |
| 1417397_PM_at   | Slc9a1                                                                                | SLC9A1    | -0.36 | 4.34 | -1.70 | 1.20E-01 | 3.89E-01 | -5.33 |
| 1426295_PM_at   | Haplh1                                                                                | HAPLN1    | -0.27 | 2.50 | -1.70 | 1.20E-01 | 3.89E-01 | -5.33 |
| 1431464_PM_a_at | Pmm2                                                                                  | PMM2      | 0.17  | 2.23 | 1.70  | 1.20E-01 | 3.89E-01 | -5.33 |
| 1447668_PM_x_at | Efemp2                                                                                | EFEMP2    | 0.22  | 2.74 | 1.70  | 1.20E-01 | 3.89E-01 | -5.33 |
| 1419370_PM_a_at | Mfap1a                                                                                | MFAP1     | 0.74  | 3.37 | 1.70  | 1.20E-01 | 3.89E-01 | -5.33 |
| 1443781_PM_at   | Dgkd                                                                                  | DGKD      | -0.18 | 2.46 | -1.70 | 1.20E-01 | 3.89E-01 | -5.33 |
| 1419265_PM_at   | Poc5                                                                                  | POC5      | 0.23  | 3.06 | 1.70  | 1.20E-01 | 3.89E-01 | -5.33 |
| 1416251_PM_at   | Mcm6                                                                                  | MCM6      | -0.34 | 3.10 | -1.70 | 1.20E-01 | 3.89E-01 | -5.33 |
| 1425571_PM_at   | Slamf1                                                                                | SLAMF1    | 0.26  | 2.39 | 1.70  | 1.20E-01 | 3.89E-01 | -5.33 |
| 1434630_PM_at   | Ankrd28                                                                               | ANKRD28   | -0.67 | 4.44 | -1.70 | 1.20E-01 | 3.89E-01 | -5.33 |
| 1458974_PM_at   | ---                                                                                   | NA        | 0.36  | 3.28 | 1.70  | 1.20E-01 | 3.89E-01 | -5.33 |
| 1430708_PM_a_at | Usp45                                                                                 | USP45     | 0.46  | 2.67 | 1.70  | 1.20E-01 | 3.89E-01 | -5.33 |
| 1435594_PM_at   | Atl2                                                                                  | ATL2      | -0.67 | 4.95 | -1.70 | 1.20E-01 | 3.89E-01 | -5.33 |
| 1443437_PM_at   | Rbm46                                                                                 | RBM46     | 0.20  | 2.42 | 1.70  | 1.20E-01 | 3.89E-01 | -5.33 |
| 1456315_PM_a_at | Hacd1                                                                                 | HACD1     | -0.48 | 3.55 | -1.70 | 1.20E-01 | 3.89E-01 | -5.33 |
| 1453150_PM_at   | Psmb11                                                                                | PSMB11    | 0.23  | 2.57 | 1.70  | 1.20E-01 | 3.89E-01 | -5.33 |
| 1444330_PM_at   | ---                                                                                   | NA        | 0.50  | 2.95 | 1.70  | 1.20E-01 | 3.89E-01 | -5.33 |
| 1438276_PM_at   | ---                                                                                   | NA        | 0.46  | 4.06 | 1.70  | 1.20E-01 | 3.89E-01 | -5.33 |
| 1452024_PM_a_at | Ldb1                                                                                  | LDB1      | 0.75  | 3.18 | 1.70  | 1.20E-01 | 3.89E-01 | -5.33 |
| 1443961_PM_at   | Gm20765 /// Gm21293 ///<br>Gm21304 /// Gm21312 ///<br>Gm4340 /// Gm6763 ///<br>Gm8764 | ALYREF    | 0.37  | 2.92 | 1.70  | 1.20E-01 | 3.89E-01 | -5.33 |
| 1438277_PM_at   | E130308A19Rik                                                                         | KIAA1958  | 0.35  | 2.91 | 1.70  | 1.20E-01 | 3.89E-01 | -5.33 |
| 1433447_PM_x_at | Cct4                                                                                  | CCT4      | -0.78 | 6.64 | -1.69 | 1.20E-01 | 3.90E-01 | -5.33 |
| 1423281_PM_at   | Stmn2                                                                                 | STMN2     | 0.43  | 5.03 | 1.69  | 1.20E-01 | 3.90E-01 | -5.33 |
| 1456587_PM_x_at | Urgcp                                                                                 | URGCP     | -0.39 | 5.70 | -1.69 | 1.20E-01 | 3.90E-01 | -5.34 |
| 1418755_PM_at   | Tbx15                                                                                 | TBX15     | -0.40 | 3.08 | -1.69 | 1.20E-01 | 3.90E-01 | -5.34 |
| 1442720_PM_at   | Efcab8 /// Gm38434                                                                    | NA        | 0.21  | 2.44 | 1.69  | 1.20E-01 | 3.90E-01 | -5.34 |
| 1425911_PM_a_at | Fgfr1                                                                                 | FGFR1     | -0.31 | 5.12 | -1.69 | 1.20E-01 | 3.90E-01 | -5.34 |
| 1456342_PM_at   | Pax6                                                                                  | NA        | 0.15  | 2.25 | 1.69  | 1.20E-01 | 3.90E-01 | -5.34 |
| 1455230_PM_at   | Cacng4                                                                                | CACNG4    | 0.18  | 2.00 | 1.69  | 1.20E-01 | 3.90E-01 | -5.34 |
| 1431151_PM_at   | Lipo1 /// LOC101055671                                                                | LIPJ      | 0.18  | 2.40 | 1.69  | 1.20E-01 | 3.90E-01 | -5.34 |
| 1441134_PM_at   | Zfp518b                                                                               | ZNF518B   | 0.21  | 2.49 | 1.69  | 1.20E-01 | 3.90E-01 | -5.34 |
| 1423821_PM_at   | Tmem168                                                                               | TMEM168   | -0.26 | 3.35 | -1.69 | 1.20E-01 | 3.90E-01 | -5.34 |
| 1455930_PM_at   | ---                                                                                   | NA        | 1.19  | 6.76 | 1.69  | 1.20E-01 | 3.90E-01 | -5.34 |
| 1440586_PM_at   | ---                                                                                   | NA        | -0.30 | 2.59 | -1.69 | 1.20E-01 | 3.90E-01 | -5.34 |
| 1422915_PM_at   | Gast                                                                                  | GAST      | 0.14  | 2.47 | 1.69  | 1.20E-01 | 3.90E-01 | -5.34 |
| 1429420_PM_at   | 4931414P19Rik                                                                         | C14orf93  | 0.18  | 2.30 | 1.69  | 1.20E-01 | 3.90E-01 | -5.34 |
| 1446427_PM_at   | Zglp1                                                                                 | ZGLP1     | 0.21  | 2.68 | 1.69  | 1.20E-01 | 3.90E-01 | -5.34 |
| 1422151_PM_at   | Gatsl2                                                                                | CASTOR2   | 0.23  | 2.55 | 1.69  | 1.20E-01 | 3.90E-01 | -5.34 |
| 1418295_PM_s_at | Dgat1                                                                                 | DGAT1     | 0.31  | 5.04 | 1.69  | 1.20E-01 | 3.90E-01 | -5.34 |
| 1434372_PM_at   | AW112010                                                                              | NA        | 0.13  | 2.41 | 1.69  | 1.20E-01 | 3.90E-01 | -5.34 |
| 1446036_PM_at   | Ppp2r2b                                                                               | PPP2R2B   | 0.21  | 2.51 | 1.69  | 1.20E-01 | 3.90E-01 | -5.34 |
| 1448683_PM_at   | Cyp2d26                                                                               | CYP2D6    | 0.26  | 2.41 | 1.69  | 1.20E-01 | 3.90E-01 | -5.34 |
| 1424693_PM_at   | Erecl1                                                                                | ERLEC1    | -0.51 | 3.72 | -1.69 | 1.20E-01 | 3.90E-01 | -5.34 |
| 1437166_PM_at   | Tmf2                                                                                  | NA        | -0.31 | 2.59 | -1.69 | 1.20E-01 | 3.90E-01 | -5.34 |
| 1424810_PM_at   | Tasp1                                                                                 | TASP1     | -0.28 | 3.60 | -1.69 | 1.20E-01 | 3.90E-01 | -5.34 |
| 1442753_PM_at   | Tnfaip8                                                                               | NA        | 0.14  | 2.04 | 1.69  | 1.20E-01 | 3.90E-01 | -5.34 |
| 1419346_PM_a_at | Svs5                                                                                  | NA        | 0.25  | 5.44 | 1.69  | 1.20E-01 | 3.90E-01 | -5.34 |
| 1426077_PM_at   | Moxd2                                                                                 | NA        | 0.19  | 2.25 | 1.69  | 1.20E-01 | 3.90E-01 | -5.34 |
| 1428894_PM_at   | Selo                                                                                  | SELENOO   | 0.19  | 2.85 | 1.69  | 1.20E-01 | 3.90E-01 | -5.34 |
| 1438680_PM_at   | Auts2                                                                                 | NA        | -0.47 | 6.09 | -1.69 | 1.20E-01 | 3.90E-01 | -5.34 |
| 1439240_PM_x_at | Lin7b                                                                                 | LIN7B     | -0.35 | 4.83 | -1.69 | 1.20E-01 | 3.90E-01 | -5.34 |
| 1418682_PM_at   | Adad1                                                                                 | ADAD1     | 0.18  | 2.02 | 1.69  | 1.20E-01 | 3.90E-01 | -5.34 |
| 1435539_PM_at   | Htt                                                                                   | HTT       | -0.46 | 3.27 | -1.69 | 1.20E-01 | 3.90E-01 | -5.34 |
| 1430263_PM_at   | Hoxd3os1                                                                              | NA        | 0.29  | 2.44 | 1.69  | 1.20E-01 | 3.90E-01 | -5.34 |
| 1416083_PM_at   | Zfand5                                                                                | ZFAND5    | -0.44 | 6.76 | -1.69 | 1.20E-01 | 3.90E-01 | -5.34 |
| 1421883_PM_at   | Elavl2                                                                                | ELAVL2    | -0.83 | 7.94 | -1.69 | 1.20E-01 | 3.90E-01 | -5.34 |
| 1447557_PM_at   | Rabf1                                                                                 | NA        | 0.13  | 2.14 | 1.69  | 1.20E-01 | 3.90E-01 | -5.34 |
| 1448912_PM_at   | C1qtnf1                                                                               | C1QTNF1   | 0.19  | 2.80 | 1.69  | 1.20E-01 | 3.90E-01 | -5.34 |
| 1416233_PM_at   | Eif3i                                                                                 | EIF3I     | 0.30  | 6.76 | 1.69  | 1.20E-01 | 3.90E-01 | -5.34 |
| 1422998_PM_a_at | Glrx2                                                                                 | GLRX2     | -0.51 | 5.32 | -1.69 | 1.21E-01 | 3.91E-01 | -5.34 |
| 1452066_PM_a_at | Ndfip2                                                                                | NDFIP2    | -0.30 | 3.89 | -1.69 | 1.21E-01 | 3.91E-01 | -5.34 |
| 1435345_PM_at   | Cercam                                                                                | CERCAM    | -0.17 | 2.52 | -1.69 | 1.21E-01 | 3.91E-01 | -5.34 |
| 1419057_PM_at   | Slc5a1                                                                                | SLC5A1    | -0.36 | 3.11 | -1.69 | 1.21E-01 | 3.91E-01 | -5.34 |
| 1416073_PM_a_at | Nup85                                                                                 | NUP85     | -0.18 | 3.88 | -1.69 | 1.21E-01 | 3.91E-01 | -5.34 |
| 1443766_PM_x_at | Rab11fip4                                                                             | RAB11FIP4 | 0.18  | 2.36 | 1.69  | 1.21E-01 | 3.91E-01 | -5.34 |
| 1424671_PM_at   | Plekhf1                                                                               | PLEKHF1   | 0.24  | 2.60 | 1.69  | 1.21E-01 | 3.91E-01 | -5.34 |
| 1441362_PM_at   | ---                                                                                   | NA        | 0.36  | 2.70 | 1.69  | 1.21E-01 | 3.91E-01 | -5.34 |
| 1452553_PM_at   | ---                                                                                   | NA        | 0.17  | 2.51 | 1.69  | 1.21E-01 | 3.91E-01 | -5.34 |

|                 |                          |           |       |      |       |          |          |       |
|-----------------|--------------------------|-----------|-------|------|-------|----------|----------|-------|
| 1440270_PM_at   | Fgf12                    | FGF12     | -0.52 | 3.86 | -1.69 | 1.21E-01 | 3.91E-01 | -5.34 |
| 1446138_PM_at   | ---                      | NA        | -0.33 | 2.96 | -1.69 | 1.21E-01 | 3.91E-01 | -5.34 |
| 1425728_PM_at   | Gm12185                  | NA        | 0.22  | 2.61 | 1.69  | 1.21E-01 | 3.91E-01 | -5.34 |
| 1436832_PM_at   | Smim20                   | SMIM20    | 0.31  | 2.60 | 1.69  | 1.21E-01 | 3.91E-01 | -5.34 |
| 1429829_PM_at   | 9530003J23Rik            | LYZ       | 0.35  | 2.60 | 1.69  | 1.21E-01 | 3.91E-01 | -5.34 |
| 1434384_PM_at   | Nrip1                    | NRIP1     | -0.35 | 3.69 | -1.69 | 1.21E-01 | 3.91E-01 | -5.34 |
| 1431877_PM_a_at | Grhl2                    | GRHL2     | 0.21  | 2.32 | 1.69  | 1.21E-01 | 3.91E-01 | -5.34 |
| 1447595_PM_x_at | 1810012K16Rik            | NA        | 0.15  | 2.04 | 1.69  | 1.21E-01 | 3.91E-01 | -5.34 |
| 1442814_PM_at   | Gm16055                  | NA        | 0.19  | 3.32 | 1.69  | 1.21E-01 | 3.91E-01 | -5.34 |
| 1438567_PM_at   | Vwa2                     | VWA2      | 0.17  | 2.80 | 1.69  | 1.21E-01 | 3.91E-01 | -5.34 |
| 1460665_PM_a_at | Cnot7                    | CNOT7     | -0.27 | 3.17 | -1.69 | 1.21E-01 | 3.91E-01 | -5.34 |
| 1457405_PM_at   | Dnm3                     | DNM3      | 0.14  | 2.24 | 1.69  | 1.21E-01 | 3.91E-01 | -5.34 |
| 1427017_PM_at   | Satb2                    | SATB2     | -0.40 | 2.68 | -1.69 | 1.21E-01 | 3.91E-01 | -5.34 |
| 1424047_PM_at   | Dera                     | DERA      | 0.26  | 2.72 | 1.69  | 1.21E-01 | 3.91E-01 | -5.34 |
| 1429410_PM_at   | Eny2                     | ENY2      | -0.69 | 3.13 | -1.69 | 1.21E-01 | 3.91E-01 | -5.34 |
| 1456877_PM_at   | Duox1                    | DUOX1     | 0.15  | 2.26 | 1.69  | 1.21E-01 | 3.91E-01 | -5.34 |
| 1430752_PM_at   | Birc2                    | BIRC2     | 0.18  | 2.21 | 1.69  | 1.21E-01 | 3.91E-01 | -5.34 |
| 1423348_PM_at   | Fzd8                     | FZD8      | 0.38  | 2.68 | 1.69  | 1.21E-01 | 3.91E-01 | -5.34 |
| 1451276_PM_at   | Uhrf1bp1l                | UHRF1BP1L | -0.61 | 4.19 | -1.69 | 1.21E-01 | 3.91E-01 | -5.34 |
| 1423158_PM_at   | Gnpnat1                  | GNPNAT1   | 0.18  | 2.76 | 1.69  | 1.21E-01 | 3.91E-01 | -5.34 |
| 1434768_PM_at   | Tpp1                     | TPP1      | -0.30 | 3.13 | -1.69 | 1.21E-01 | 3.91E-01 | -5.34 |
| 1459500_PM_at   | C85351                   | NA        | 0.21  | 2.39 | 1.69  | 1.21E-01 | 3.92E-01 | -5.34 |
| 1434875_PM_a_at | Hmgn3                    | HMG3      | 0.31  | 8.81 | 1.69  | 1.21E-01 | 3.92E-01 | -5.34 |
| 1454327_PM_at   | 4933430H06Rik            | NA        | 0.23  | 2.25 | 1.69  | 1.21E-01 | 3.92E-01 | -5.34 |
| 1439754_PM_at   | Sox12                    | SOX12     | -0.33 | 2.60 | -1.69 | 1.21E-01 | 3.92E-01 | -5.34 |
| 1439604_PM_at   | Adamts16                 | ADAMTS16  | 0.17  | 2.35 | 1.69  | 1.21E-01 | 3.92E-01 | -5.34 |
| 1426934_PM_at   | Nhsl1                    | NHSL1     | -0.76 | 5.39 | -1.69 | 1.21E-01 | 3.92E-01 | -5.34 |
| 1416085_PM_s_at | Zfand5                   | ZFAND5    | -0.58 | 7.61 | -1.69 | 1.21E-01 | 3.92E-01 | -5.34 |
| 1418070_PM_at   | Cdyl                     | CDYL      | -0.28 | 2.67 | -1.69 | 1.21E-01 | 3.92E-01 | -5.34 |
| 1423305_PM_at   | Extl1                    | EXTL1     | 0.25  | 3.07 | 1.69  | 1.21E-01 | 3.92E-01 | -5.35 |
| 1429137_PM_at   | Mettl18                  | METTL18   | -0.30 | 2.59 | -1.69 | 1.21E-01 | 3.92E-01 | -5.35 |
| 1448975_PM_s_at | LOC102643057 ///Ren1 /// |           |       |      |       |          |          |       |
|                 | Ren2                     | REN       | 0.14  | 2.49 | 1.69  | 1.21E-01 | 3.92E-01 | -5.35 |
| 1422590_PM_at   | Cdk5                     | CDK5      | 0.21  | 2.81 | 1.69  | 1.21E-01 | 3.92E-01 | -5.35 |
| 1456881_PM_at   | Nbeal2                   | NBEAL2    | 0.28  | 2.56 | 1.69  | 1.21E-01 | 3.92E-01 | -5.35 |
| 1416593_PM_at   | Glrx                     | GLRX      | -0.29 | 2.84 | -1.69 | 1.21E-01 | 3.92E-01 | -5.35 |
| 1454108_PM_at   | 4930524O08Rik            | NA        | 0.20  | 2.32 | 1.69  | 1.21E-01 | 3.92E-01 | -5.35 |
| 1417637_PM_a_at | Hmg20b                   | HMG20B    | 0.23  | 3.14 | 1.69  | 1.21E-01 | 3.92E-01 | -5.35 |
| 1458287_PM_at   | ---                      | NA        | 0.16  | 2.50 | 1.69  | 1.21E-01 | 3.92E-01 | -5.35 |
| 1455746_PM_at   | Kif13a                   | KIF13A    | -0.29 | 2.30 | -1.69 | 1.21E-01 | 3.92E-01 | -5.35 |
| 1441467_PM_at   | ---                      | NA        | 0.33  | 2.51 | 1.69  | 1.21E-01 | 3.92E-01 | -5.35 |
| 1432657_PM_at   | Adam1b                   | NA        | 0.15  | 2.90 | 1.69  | 1.21E-01 | 3.92E-01 | -5.35 |
| 1424400_PM_a_at | Aldh1l1                  | ALDH1L1   | 0.25  | 2.51 | 1.69  | 1.21E-01 | 3.92E-01 | -5.35 |
| 1425192_PM_at   | Klh25                    | NA        | 0.32  | 3.59 | 1.69  | 1.21E-01 | 3.92E-01 | -5.35 |
| 1453585_PM_at   | 1600010M07Rik            | NA        | 0.35  | 2.84 | 1.69  | 1.21E-01 | 3.92E-01 | -5.35 |
| 1420520_PM_x_at | Eral1                    | ERAL1     | 0.15  | 2.51 | 1.69  | 1.22E-01 | 3.92E-01 | -5.35 |
| 1437215_PM_at   | LOC105242521 ///Nudt15   | NUDT15    | 0.30  | 2.68 | 1.69  | 1.22E-01 | 3.92E-01 | -5.35 |
| 1442890_PM_at   | ---                      | NA        | 0.14  | 2.35 | 1.69  | 1.22E-01 | 3.92E-01 | -5.35 |
| 1457280_PM_at   | ---                      | NA        | 0.20  | 2.27 | 1.69  | 1.22E-01 | 3.92E-01 | -5.35 |
| 1446910_PM_at   | ---                      | NA        | 0.34  | 2.34 | 1.69  | 1.22E-01 | 3.92E-01 | -5.35 |
| 1448445_PM_at   | Acp6                     | ACP6      | 0.44  | 3.19 | 1.69  | 1.22E-01 | 3.92E-01 | -5.35 |
| 1441642_PM_at   | ---                      | NA        | -0.27 | 2.90 | -1.69 | 1.22E-01 | 3.92E-01 | -5.35 |
| 1437077_PM_at   | Dcun1d2                  | DCUN1D2   | -0.25 | 4.11 | -1.69 | 1.22E-01 | 3.92E-01 | -5.35 |
| 1460435_PM_at   | Smg9                     | SMG9      | 0.17  | 2.46 | 1.69  | 1.22E-01 | 3.92E-01 | -5.35 |
| 1423463_PM_a_at | Knstrn                   | KNSTRN    | 0.31  | 2.70 | 1.69  | 1.22E-01 | 3.92E-01 | -5.35 |
| 1420758_PM_at   | ---                      | NA        | 0.36  | 2.69 | 1.69  | 1.22E-01 | 3.92E-01 | -5.35 |
| 1438248_PM_at   | Pcsk5                    | PCSK5     | 0.56  | 3.50 | 1.69  | 1.22E-01 | 3.92E-01 | -5.35 |
| 1417065_PM_at   | Egr1                     | EGR1      | -0.38 | 7.31 | -1.69 | 1.22E-01 | 3.93E-01 | -5.35 |
| 1434652_PM_at   | Cdc42bbp                 | CDC42BPP  | 0.19  | 2.69 | 1.69  | 1.22E-01 | 3.93E-01 | -5.35 |
| 1457241_PM_at   | ---                      | NA        | 0.20  | 2.62 | 1.69  | 1.22E-01 | 3.93E-01 | -5.35 |
| 1437809_PM_x_at | Ets2                     | ETS2      | 0.49  | 3.13 | 1.69  | 1.22E-01 | 3.93E-01 | -5.35 |
| 1458899_PM_at   | Usp53                    | USP53     | -0.74 | 5.96 | -1.69 | 1.22E-01 | 3.93E-01 | -5.35 |
| 1433290_PM_at   | C030045M22Rik            | NA        | 0.17  | 2.14 | 1.68  | 1.22E-01 | 3.93E-01 | -5.35 |
| 1458726_PM_at   | C87033                   | NA        | 0.40  | 3.80 | 1.68  | 1.22E-01 | 3.93E-01 | -5.35 |
| 1456439_PM_x_at | Mical1                   | MICAL1    | -0.57 | 3.86 | -1.68 | 1.22E-01 | 3.93E-01 | -5.35 |
| 1431406_PM_at   | Etnppl                   | ETNPPL    | 0.16  | 2.38 | 1.68  | 1.22E-01 | 3.93E-01 | -5.35 |
| 1449705_PM_x_at | Mcm3                     | MCM3      | 0.18  | 2.79 | 1.68  | 1.22E-01 | 3.93E-01 | -5.35 |
| 1418852_PM_at   | Chrna1                   | CHRNA1    | 0.21  | 2.36 | 1.68  | 1.22E-01 | 3.93E-01 | -5.35 |
| 1442177_PM_at   | Slc6a5                   | SLC6A5    | 0.29  | 2.64 | 1.68  | 1.22E-01 | 3.93E-01 | -5.35 |
| 1439987_PM_at   | ---                      | NA        | 0.40  | 3.04 | 1.68  | 1.22E-01 | 3.93E-01 | -5.35 |
| 1451263_PM_a_at | Fabp4                    | FABP4     | 0.73  | 2.36 | 1.68  | 1.22E-01 | 3.93E-01 | -5.35 |
| 1445897_PM_s_at | Ifi35                    | IFI35     | 1.02  | 3.79 | 1.68  | 1.22E-01 | 3.93E-01 | -5.35 |
| 1422037_PM_at   | Dlx3                     | DLX3      | 0.15  | 3.06 | 1.68  | 1.22E-01 | 3.93E-01 | -5.35 |
| 1422016_PM_a_at | Cenph                    | CENPH     | 0.25  | 2.34 | 1.68  | 1.22E-01 | 3.93E-01 | -5.35 |



|                 |                                                                                        |             |       |      |       |          |          |       |
|-----------------|----------------------------------------------------------------------------------------|-------------|-------|------|-------|----------|----------|-------|
| 1428199_PM_at   | Adal                                                                                   | ADAL        | -0.40 | 2.76 | -1.68 | 1.22E-01 | 3.93E-01 | -5.35 |
| 1434038_PM_at   | Dnajc13                                                                                | DNAI3       | -0.35 | 3.40 | -1.68 | 1.22E-01 | 3.93E-01 | -5.35 |
| 1449525_PM_at   | Fmo3                                                                                   | FMO3        | 0.15  | 2.01 | 1.68  | 1.22E-01 | 3.93E-01 | -5.35 |
| 1450304_PM_at   | Klrc2 /// Klrc3                                                                        | KLRC2-KLRC1 | 0.16  | 2.34 | 1.68  | 1.22E-01 | 3.93E-01 | -5.35 |
| 1452524_PM_a_at | Elavl3                                                                                 | ELAVL3      | 0.20  | 3.29 | 1.68  | 1.22E-01 | 3.93E-01 | -5.35 |
| 1421505_PM_at   | Mixl1                                                                                  | MIXL1       | 0.21  | 3.19 | 1.68  | 1.22E-01 | 3.93E-01 | -5.35 |
| 1453168_PM_at   | 1700029J07Rik                                                                          | C4orf47     | 0.22  | 2.46 | 1.68  | 1.22E-01 | 3.93E-01 | -5.35 |
| 1430938_PM_at   | Zfp64                                                                                  | ZFP64       | 0.25  | 3.51 | 1.68  | 1.22E-01 | 3.93E-01 | -5.35 |
| 1446349_PM_at   | Zfp78                                                                                  | NA          | 0.27  | 2.51 | 1.68  | 1.22E-01 | 3.93E-01 | -5.35 |
| 1443114_PM_at   | ---                                                                                    | NA          | 0.28  | 2.54 | 1.68  | 1.22E-01 | 3.93E-01 | -5.35 |
| 1453712_PM_a_at | Map2k5                                                                                 | MAP2K5      | 0.58  | 2.58 | 1.68  | 1.22E-01 | 3.93E-01 | -5.35 |
| 1455078_PM_at   | Ssh2                                                                                   | SSH2        | -0.50 | 3.97 | -1.68 | 1.22E-01 | 3.93E-01 | -5.35 |
| 1422566_PM_at   | Tfeb                                                                                   | TFEB        | 0.21  | 2.73 | 1.68  | 1.22E-01 | 3.93E-01 | -5.35 |
| 1444385_PM_at   | ---                                                                                    | NA          | 0.26  | 2.84 | 1.68  | 1.22E-01 | 3.93E-01 | -5.35 |
| 1440476_PM_at   | D6Ert474e                                                                              | NA          | 0.21  | 2.76 | 1.68  | 1.22E-01 | 3.93E-01 | -5.35 |
| 1445081_PM_at   | Scai                                                                                   | SCAI        | -0.82 | 4.93 | -1.68 | 1.22E-01 | 3.93E-01 | -5.35 |
| 1437514_PM_at   | B430306N03Rik                                                                          | NA          | 0.15  | 1.96 | 1.68  | 1.22E-01 | 3.93E-01 | -5.35 |
| 1440218_PM_at   | Cdhr2                                                                                  | CDHR2       | 0.20  | 2.87 | 1.68  | 1.22E-01 | 3.93E-01 | -5.35 |
| 1430188_PM_at   | 1700037C18Rik                                                                          | C16orf90    | 0.24  | 2.40 | 1.68  | 1.22E-01 | 3.93E-01 | -5.35 |
| 1443029_PM_at   | Ppfibp1                                                                                | PPFIBP1     | 0.25  | 2.72 | 1.68  | 1.22E-01 | 3.93E-01 | -5.35 |
| 1442067_PM_at   | ---                                                                                    | NA          | 0.26  | 2.28 | 1.68  | 1.22E-01 | 3.93E-01 | -5.35 |
| 1443801_PM_at   | ---                                                                                    | NA          | 0.33  | 2.26 | 1.68  | 1.22E-01 | 3.93E-01 | -5.35 |
| 1429834_PM_a_at | Vps51                                                                                  | VPS51       | 0.29  | 2.70 | 1.68  | 1.22E-01 | 3.93E-01 | -5.35 |
| 1448825_PM_at   | Pdk2                                                                                   | PDK2        | -0.64 | 6.30 | -1.68 | 1.22E-01 | 3.93E-01 | -5.35 |
| 1436129_PM_at   | Adam6b                                                                                 | NA          | -0.22 | 2.72 | -1.68 | 1.22E-01 | 3.93E-01 | -5.35 |
| 1452561_PM_at   | ---                                                                                    | NA          | -0.21 | 2.48 | -1.68 | 1.22E-01 | 3.93E-01 | -5.35 |
| 1448227_PM_at   | Grb7                                                                                   | GRB7        | 0.14  | 2.31 | 1.68  | 1.22E-01 | 3.93E-01 | -5.35 |
| 1457333_PM_at   | Sdk2                                                                                   | SDK2        | 0.17  | 2.75 | 1.68  | 1.22E-01 | 3.93E-01 | -5.35 |
| 1459660_PM_at   | Gm32219                                                                                | NA          | 0.19  | 2.29 | 1.68  | 1.22E-01 | 3.93E-01 | -5.35 |
| 1450586_PM_at   | Bdkrb1                                                                                 | BDKRB1      | 0.20  | 2.62 | 1.68  | 1.22E-01 | 3.93E-01 | -5.35 |
| 1454222_PM_a_at | Ccdc13                                                                                 | CCDC13      | 0.21  | 2.72 | 1.68  | 1.22E-01 | 3.93E-01 | -5.35 |
| 1436077_PM_a_at | Fcho1                                                                                  | FCHO1       | 0.26  | 3.56 | 1.68  | 1.22E-01 | 3.93E-01 | -5.35 |
| 1445419_PM_at   | ---                                                                                    | NA          | 0.26  | 2.50 | 1.68  | 1.22E-01 | 3.93E-01 | -5.35 |
| 1420458_PM_at   | Tac4                                                                                   | TAC4        | 0.29  | 2.65 | 1.68  | 1.22E-01 | 3.93E-01 | -5.35 |
| 1416765_PM_s_at | Gm9803 /// Pam16                                                                       | PAM16       | 0.59  | 5.35 | 1.68  | 1.22E-01 | 3.93E-01 | -5.35 |
| 1454289_PM_at   | Zhx3                                                                                   | ZHX3        | -0.31 | 2.97 | -1.68 | 1.22E-01 | 3.93E-01 | -5.35 |
| 1422306_PM_at   | Lcn3                                                                                   | NA          | 0.17  | 2.51 | 1.68  | 1.22E-01 | 3.93E-01 | -5.35 |
| 1440292_PM_at   | ---                                                                                    | NA          | 0.18  | 2.34 | 1.68  | 1.22E-01 | 3.93E-01 | -5.35 |
| 1434027_PM_at   | Rcan3                                                                                  | RCAN3       | 0.19  | 2.27 | 1.68  | 1.22E-01 | 3.93E-01 | -5.35 |
| 1421745_PM_at   | Plag1                                                                                  | PLAG1       | 0.24  | 2.63 | 1.68  | 1.22E-01 | 3.93E-01 | -5.35 |
| 1436078_PM_at   | Fcho1                                                                                  | FCHO1       | 0.23  | 2.86 | 1.68  | 1.22E-01 | 3.93E-01 | -5.35 |
| 1426711_PM_at   | Tmco3                                                                                  | TMCO3       | 0.26  | 3.05 | 1.68  | 1.22E-01 | 3.93E-01 | -5.35 |
| 1445876_PM_at   | ---                                                                                    | NA          | 0.32  | 2.82 | 1.68  | 1.22E-01 | 3.93E-01 | -5.35 |
| 1434013_PM_at   | Ablim3                                                                                 | ABLIM3      | 0.42  | 4.29 | 1.68  | 1.22E-01 | 3.93E-01 | -5.35 |
| 1436308_PM_at   | Zfp292                                                                                 | ZNF292      | -0.30 | 5.41 | -1.68 | 1.23E-01 | 3.93E-01 | -5.35 |
| 1441329_PM_at   | Galr1                                                                                  | GALR1       | 0.13  | 1.97 | 1.68  | 1.23E-01 | 3.93E-01 | -5.35 |
| 1416552_PM_at   | Dppa5a                                                                                 | DPPA5       | 0.20  | 2.48 | 1.68  | 1.23E-01 | 3.93E-01 | -5.35 |
| 1456926_PM_at   | Rims4                                                                                  | RIMS4       | 0.28  | 2.21 | 1.68  | 1.23E-01 | 3.93E-01 | -5.35 |
| 1448845_PM_at   | Rpp25                                                                                  | RPP25       | -0.23 | 3.22 | -1.68 | 1.23E-01 | 3.94E-01 | -5.35 |
| 1458843_PM_at   | Depdc5                                                                                 | DEPDC5      | -0.55 | 2.80 | -1.68 | 1.23E-01 | 3.94E-01 | -5.36 |
| 1427385_PM_s_at | Actn1                                                                                  | ACTN1       | -0.53 | 2.77 | -1.68 | 1.23E-01 | 3.94E-01 | -5.36 |
| 1417955_PM_at   | Ccdc71                                                                                 | CCDC71      | -0.46 | 3.57 | -1.68 | 1.23E-01 | 3.94E-01 | -5.35 |
| 1450767_PM_at   | Nedd9                                                                                  | NEDD9       | 0.15  | 2.12 | 1.68  | 1.23E-01 | 3.94E-01 | -5.35 |
| 1430098_PM_at   | 6330409D20Rik                                                                          | NA          | 0.16  | 2.37 | 1.68  | 1.23E-01 | 3.94E-01 | -5.36 |
| 1444322_PM_at   | Lcn11                                                                                  | NA          | 0.16  | 2.39 | 1.68  | 1.23E-01 | 3.94E-01 | -5.36 |
| 1427653_PM_at   | Tnpo3 /// Trac /// Traj15 ///<br>Trav6-7-dv9 /// Trav6d-6 ///<br>Trav6d-7 /// Trav6n-7 | NA          | 0.22  | 2.65 | 1.68  | 1.23E-01 | 3.94E-01 | -5.35 |
| 1415830_PM_at   | Orc5                                                                                   | ORC5        | -0.32 | 3.17 | -1.68 | 1.23E-01 | 3.94E-01 | -5.36 |
| 1455313_PM_at   | Ablim2                                                                                 | ABLIM2      | 0.23  | 2.94 | 1.68  | 1.23E-01 | 3.94E-01 | -5.36 |
| 1441131_PM_at   | ---                                                                                    | NA          | 0.18  | 2.42 | 1.68  | 1.23E-01 | 3.94E-01 | -5.36 |
| 1454506_PM_at   | Tgfbrap1                                                                               | TGFBRAP1    | 0.20  | 3.25 | 1.68  | 1.23E-01 | 3.94E-01 | -5.36 |
| 1453805_PM_at   | ---                                                                                    | NA          | 0.21  | 2.30 | 1.68  | 1.23E-01 | 3.94E-01 | -5.36 |
| 1440760_PM_at   | ---                                                                                    | NA          | 0.23  | 2.69 | 1.68  | 1.23E-01 | 3.94E-01 | -5.36 |
| 1421810_PM_at   | Dgcr2                                                                                  | DGCR2       | -0.24 | 3.15 | -1.68 | 1.23E-01 | 3.94E-01 | -5.36 |
| 1420994_PM_at   | B3gnt5                                                                                 | B3GNT5      | 0.18  | 2.28 | 1.68  | 1.23E-01 | 3.94E-01 | -5.36 |
| 1443139_PM_at   | ---                                                                                    | NA          | 0.27  | 3.14 | 1.68  | 1.23E-01 | 3.94E-01 | -5.36 |
| 1441148_PM_at   | ---                                                                                    | NA          | 0.13  | 2.68 | 1.68  | 1.23E-01 | 3.94E-01 | -5.36 |
| 1442689_PM_at   | 1700017B05Rik                                                                          | NA          | 0.16  | 2.07 | 1.68  | 1.23E-01 | 3.94E-01 | -5.36 |
| 1441859_PM_x_at | ---                                                                                    | NA          | 0.24  | 3.57 | 1.68  | 1.23E-01 | 3.94E-01 | -5.36 |
| 1453017_PM_at   | Ankle2                                                                                 | ANKLE2      | 0.65  | 3.62 | 1.68  | 1.23E-01 | 3.94E-01 | -5.36 |
| 1438455_PM_at   | Pabpc4l                                                                                | PABPC4L     | 0.21  | 2.15 | 1.68  | 1.23E-01 | 3.94E-01 | -5.36 |
| 1432641_PM_at   | 5830490A12Rik                                                                          | NA          | 0.18  | 2.26 | 1.68  | 1.23E-01 | 3.94E-01 | -5.36 |
| 1458560_PM_at   | Aspm                                                                                   | ASPM        | 0.28  | 2.48 | 1.68  | 1.23E-01 | 3.94E-01 | -5.36 |

|                 |               |          |       |      |       |          |          |       |
|-----------------|---------------|----------|-------|------|-------|----------|----------|-------|
| 1417960_PM_at   | Cpeb1         | CPEB1    | -0.40 | 2.73 | -1.68 | 1.23E-01 | 3.94E-01 | -5.36 |
| 1451033_PM_a_at | Trpc4         | TRPC4    | -0.55 | 3.74 | -1.68 | 1.23E-01 | 3.94E-01 | -5.36 |
| 1447189_PM_at   | ---           | NA       | 0.38  | 2.71 | 1.68  | 1.23E-01 | 3.94E-01 | -5.36 |
| 1437552_PM_at   | Carmmt1       | CARNMT1  | 0.21  | 2.30 | 1.68  | 1.23E-01 | 3.94E-01 | -5.36 |
| 1449704_PM_at   | C80171        | NA       | 0.28  | 2.83 | 1.68  | 1.23E-01 | 3.94E-01 | -5.36 |
| 1442459_PM_at   | ---           | NA       | -0.19 | 3.18 | -1.68 | 1.23E-01 | 3.94E-01 | -5.36 |
| 1447834_PM_at   | Copz1         | NA       | 0.21  | 2.15 | 1.68  | 1.23E-01 | 3.94E-01 | -5.36 |
| 1455500_PM_at   | Rnf213        | RNF213   | 0.45  | 3.46 | 1.68  | 1.23E-01 | 3.94E-01 | -5.36 |
| 1444110_PM_at   | ---           | NA       | 0.19  | 2.62 | 1.68  | 1.23E-01 | 3.95E-01 | -5.36 |
| 1439407_PM_x_at | Tagln2        | TAGLN2   | 0.24  | 2.42 | 1.68  | 1.23E-01 | 3.95E-01 | -5.36 |
| 1428602_PM_at   | Kcnj9         | KCNJ9    | 0.18  | 2.49 | 1.68  | 1.23E-01 | 3.95E-01 | -5.36 |
| 1425953_PM_at   | ---           | NA       | 0.20  | 2.43 | 1.68  | 1.23E-01 | 3.95E-01 | -5.36 |
| 1449027_PM_at   | Rhou          | RHO      | -0.46 | 4.30 | -1.68 | 1.23E-01 | 3.95E-01 | -5.36 |
| 1433271_PM_at   | ---           | NA       | 0.19  | 2.62 | 1.68  | 1.23E-01 | 3.95E-01 | -5.36 |
| 1425161_PM_a_at | Trabd         | TRABD    | 0.23  | 2.53 | 1.68  | 1.23E-01 | 3.95E-01 | -5.36 |
| 1459520_PM_at   | Gnb5          | NA       | 0.22  | 2.38 | 1.68  | 1.23E-01 | 3.95E-01 | -5.36 |
| 1429267_PM_at   | Acot11        | ACOT11   | -0.32 | 2.84 | -1.68 | 1.23E-01 | 3.95E-01 | -5.36 |
| 1439241_PM_x_at | Srd5a3        | SRD5A3   | -0.25 | 2.39 | -1.68 | 1.23E-01 | 3.95E-01 | -5.36 |
| 1416319_PM_at   | Adk           | ADK      | -0.79 | 2.85 | -1.68 | 1.24E-01 | 3.95E-01 | -5.36 |
| 1427112_PM_at   | Ttl           | TTL      | -0.78 | 3.76 | -1.68 | 1.24E-01 | 3.95E-01 | -5.36 |
| 1415700_PM_a_at | Ssr3          | SSR3     | -0.48 | 7.23 | -1.68 | 1.24E-01 | 3.95E-01 | -5.36 |
| 1455298_PM_at   | ---           | NA       | -0.37 | 3.26 | -1.68 | 1.23E-01 | 3.95E-01 | -5.36 |
| 1432288_PM_at   | ---           | NA       | -0.31 | 2.46 | -1.68 | 1.23E-01 | 3.95E-01 | -5.36 |
| 1416105_PM_at   | Nnt           | NNT      | -0.25 | 2.90 | -1.68 | 1.23E-01 | 3.95E-01 | -5.36 |
| 1457884_PM_at   | ---           | NA       | -0.23 | 2.37 | -1.68 | 1.24E-01 | 3.95E-01 | -5.36 |
| 1457923_PM_at   | ---           | NA       | 0.18  | 2.34 | 1.68  | 1.23E-01 | 3.95E-01 | -5.36 |
| 1437051_PM_at   | Dffb          | DFFB     | 0.20  | 2.61 | 1.68  | 1.23E-01 | 3.95E-01 | -5.36 |
| 1445278_PM_at   | Ggn           | GGN      | 0.20  | 2.75 | 1.68  | 1.24E-01 | 3.95E-01 | -5.36 |
| 1442940_PM_at   | BC002059      | NA       | 0.23  | 2.44 | 1.68  | 1.24E-01 | 3.95E-01 | -5.36 |
| 1458224_PM_at   | ---           | NA       | 0.23  | 3.21 | 1.68  | 1.23E-01 | 3.95E-01 | -5.36 |
| 1439590_PM_at   | Xkr8          | XKR8     | 0.24  | 2.61 | 1.68  | 1.24E-01 | 3.95E-01 | -5.36 |
| 1459289_PM_at   | ---           | NA       | 0.26  | 2.69 | 1.68  | 1.24E-01 | 3.95E-01 | -5.36 |
| 1448631_PM_a_at | Hipk2         | HIPK2    | 0.28  | 2.50 | 1.68  | 1.23E-01 | 3.95E-01 | -5.36 |
| 1457395_PM_at   | Nav2          | NAV2     | 0.28  | 2.86 | 1.68  | 1.24E-01 | 3.95E-01 | -5.36 |
| 1456774_PM_at   | Ppp1r13l      | PPP1R13L | 0.28  | 3.10 | 1.68  | 1.24E-01 | 3.95E-01 | -5.36 |
| 1458198_PM_at   | Map3k12       | NA       | 0.31  | 2.65 | 1.68  | 1.23E-01 | 3.95E-01 | -5.36 |
| 1436595_PM_at   | Rbm34         | RBM34    | 0.43  | 4.82 | 1.68  | 1.23E-01 | 3.95E-01 | -5.36 |
| 1418140_PM_at   | Dcx           | DCX      | 0.44  | 3.01 | 1.68  | 1.24E-01 | 3.95E-01 | -5.36 |
| 1426137_PM_at   | Rex2          | NA       | -0.49 | 4.13 | -1.68 | 1.24E-01 | 3.95E-01 | -5.36 |
| 1419476_PM_at   | Adamdec1      | ADAMDEC1 | 0.20  | 2.78 | 1.68  | 1.24E-01 | 3.95E-01 | -5.36 |
| 1435395_PM_s_at | Atp5j2        | ATP5J2   | -0.77 | 7.85 | -1.68 | 1.24E-01 | 3.95E-01 | -5.36 |
| 1416335_PM_at   | Mif           | MIF      | -0.53 | 4.01 | -1.68 | 1.24E-01 | 3.95E-01 | -5.36 |
| 1450973_PM_s_at | Mapkbp1       | MAPKBP1  | -0.49 | 4.35 | -1.68 | 1.24E-01 | 3.95E-01 | -5.36 |
| 1453723_PM_x_at | Gm1821///Ubb  | UBB      | -0.65 | 9.97 | -1.68 | 1.24E-01 | 3.95E-01 | -5.36 |
| 1442159_PM_at   | D2Ert48e      | NA       | 0.29  | 2.87 | 1.68  | 1.24E-01 | 3.95E-01 | -5.36 |
| 1431721_PM_a_at | Proz          | PROZ     | 0.26  | 2.60 | 1.68  | 1.24E-01 | 3.95E-01 | -5.36 |
| 1452281_PM_at   | Sos2          | SOS2     | -0.48 | 3.24 | -1.68 | 1.24E-01 | 3.95E-01 | -5.36 |
| 1454496_PM_at   | ---           | NA       | 0.27  | 2.43 | 1.68  | 1.24E-01 | 3.95E-01 | -5.36 |
| 1426866_PM_at   | Chst14        | CHST14   | 0.30  | 2.91 | 1.67  | 1.24E-01 | 3.95E-01 | -5.36 |
| 1441056_PM_at   | Usp3          | USP3     | 0.29  | 2.58 | 1.67  | 1.24E-01 | 3.95E-01 | -5.36 |
| 1444120_PM_at   | Bin1          | NA       | 0.31  | 2.34 | 1.67  | 1.24E-01 | 3.95E-01 | -5.36 |
| 1420743_PM_a_at | Ppp3cc        | PPP3CC   | 0.17  | 2.83 | 1.67  | 1.24E-01 | 3.96E-01 | -5.36 |
| 1459437_PM_at   | Stard9        | STARD9   | 0.24  | 2.29 | 1.67  | 1.24E-01 | 3.96E-01 | -5.36 |
| 1455407_PM_at   | Zfp236        | ZNF236   | -0.20 | 2.73 | -1.67 | 1.24E-01 | 3.96E-01 | -5.36 |
| 1458201_PM_at   | ---           | NA       | 0.47  | 3.35 | 1.67  | 1.24E-01 | 3.96E-01 | -5.36 |
| 1454081_PM_at   | ---           | NA       | 0.44  | 3.24 | 1.67  | 1.24E-01 | 3.96E-01 | -5.36 |
| 1438853_PM_x_at | Ddx54         | DDX54    | -0.72 | 3.66 | -1.67 | 1.24E-01 | 3.96E-01 | -5.36 |
| 1434645_PM_at   | C530008M17Rik | KIAA1211 | -0.31 | 2.80 | -1.67 | 1.24E-01 | 3.96E-01 | -5.36 |
| 1434423_PM_at   | Gulp1         | GULP1    | -0.24 | 2.15 | -1.67 | 1.24E-01 | 3.96E-01 | -5.36 |
| 1418620_PM_at   | Phox2a        | PHOX2A   | 0.16  | 2.40 | 1.67  | 1.24E-01 | 3.96E-01 | -5.36 |
| 1458424_PM_at   | ---           | NA       | 0.18  | 2.55 | 1.67  | 1.24E-01 | 3.96E-01 | -5.36 |
| 1445427_PM_at   | ---           | NA       | 0.19  | 2.28 | 1.67  | 1.24E-01 | 3.96E-01 | -5.36 |
| 1442197_PM_at   | ---           | NA       | 0.43  | 3.51 | 1.67  | 1.24E-01 | 3.96E-01 | -5.36 |
| 1456191_PM_x_at | Pacsin3       | PAC SIN3 | 0.16  | 2.49 | 1.67  | 1.24E-01 | 3.96E-01 | -5.36 |
| 1438256_PM_at   | Eif5a2        | EIF5A2   | 0.19  | 2.28 | 1.67  | 1.24E-01 | 3.96E-01 | -5.36 |
| 1416892_PM_s_at | Fam107b       | FAM107B  | 0.65  | 3.05 | 1.67  | 1.24E-01 | 3.96E-01 | -5.36 |
| 1449577_PM_x_at | Tpm2          | TPM2     | -0.80 | 4.14 | -1.67 | 1.24E-01 | 3.96E-01 | -5.37 |
| 1416924_PM_at   | Bri3          | BRI3     | 0.24  | 5.29 | 1.67  | 1.24E-01 | 3.96E-01 | -5.37 |
| 1459405_PM_at   | Iqgap3        | IQGAP3   | 0.16  | 2.29 | 1.67  | 1.24E-01 | 3.96E-01 | -5.37 |
| 1439917_PM_at   | ---           | NA       | 0.21  | 2.74 | 1.67  | 1.24E-01 | 3.96E-01 | -5.37 |
| 1422735_PM_at   | Foxq1         | FOXQ1    | 0.23  | 2.39 | 1.67  | 1.24E-01 | 3.96E-01 | -5.37 |
| 1421859_PM_at   | Adam17        | ADAM17   | 0.28  | 2.76 | 1.67  | 1.24E-01 | 3.96E-01 | -5.37 |
| 1433907_PM_at   | Pknox2        | PKNOX2   | -0.77 | 4.45 | -1.67 | 1.24E-01 | 3.96E-01 | -5.37 |
| 1450144_PM_at   | Pla2r1        | PLA2R1   | 0.16  | 2.27 | 1.67  | 1.24E-01 | 3.96E-01 | -5.37 |
| 1459069_PM_at   | ---           | NA       | 0.23  | 2.46 | 1.67  | 1.24E-01 | 3.96E-01 | -5.37 |

|                      |                 |             |       |      |       |          |          |       |
|----------------------|-----------------|-------------|-------|------|-------|----------|----------|-------|
| 1445218_PM_at        | ---             | NA          | 0.29  | 3.63 | 1.67  | 1.24E-01 | 3.96E-01 | -5.37 |
| 1456405_PM_at        | Dido1           | DIDO1       | -0.52 | 5.10 | -1.67 | 1.24E-01 | 3.96E-01 | -5.37 |
| 1430547_PM_s_at      | Cryz1           | CRYZ1       | -0.45 | 3.89 | -1.67 | 1.24E-01 | 3.96E-01 | -5.37 |
| 1457382_PM_at        | ---             | NA          | 0.20  | 2.35 | 1.67  | 1.24E-01 | 3.96E-01 | -5.37 |
| 1440007_PM_at        | LOC105244220    | NA          | -0.14 | 1.94 | -1.67 | 1.24E-01 | 3.96E-01 | -5.37 |
| 1439400_PM_x_at      | Kbtbd13         | KBTBD13     | 0.17  | 2.22 | 1.67  | 1.24E-01 | 3.96E-01 | -5.37 |
| 1428149_PM_at        | Coro7           | CORO7-PAM16 | 0.33  | 3.00 | 1.67  | 1.24E-01 | 3.96E-01 | -5.37 |
| 1422017_PM_s_at      | 4833439L19Rik   | KIAA1191    | 0.20  | 2.97 | 1.67  | 1.24E-01 | 3.96E-01 | -5.37 |
| 1435682_PM_at        | Lars2           | LARS2       | -0.45 | 3.54 | -1.67 | 1.24E-01 | 3.96E-01 | -5.37 |
| 1458926_PM_at        | Fam133b         | FAM133B     | 0.16  | 2.35 | 1.67  | 1.24E-01 | 3.96E-01 | -5.37 |
| 1445596_PM_at        | ---             | NA          | 0.24  | 2.37 | 1.67  | 1.24E-01 | 3.96E-01 | -5.37 |
| 1420703_PM_at        | Csf2ra          | CSF2RA      | -0.39 | 2.88 | -1.67 | 1.24E-01 | 3.96E-01 | -5.37 |
| 1456314_PM_x_at      | Cdk2ap1         | CDK2AP1     | -0.36 | 6.19 | -1.67 | 1.24E-01 | 3.96E-01 | -5.37 |
| 1447791_PM_s_at      | Gna14           | GNA14       | 0.15  | 2.07 | 1.67  | 1.24E-01 | 3.96E-01 | -5.37 |
| 1424931_PM_s_at      | Igk1///Igw1     | NA          | 0.17  | 2.30 | 1.67  | 1.24E-01 | 3.96E-01 | -5.37 |
| 1448281_PM_a_at      | Cela2a          | CELA2A      | 0.17  | 2.39 | 1.67  | 1.24E-01 | 3.96E-01 | -5.37 |
| 1445357_PM_at        | Al851613        | NA          | 0.26  | 2.44 | 1.67  | 1.24E-01 | 3.96E-01 | -5.37 |
| 1431226_PM_a_at      | Fndc4           | FNDC4       | 0.48  | 3.75 | 1.67  | 1.24E-01 | 3.96E-01 | -5.37 |
| 1449683_PM_x_at      | Tubb2a-ps2      | NA          | 0.14  | 2.18 | 1.67  | 1.24E-01 | 3.96E-01 | -5.37 |
| 1441639_PM_at        | Zcchc8          | ZCCHC8      | 0.22  | 2.91 | 1.67  | 1.24E-01 | 3.96E-01 | -5.37 |
| 1434859_PM_at        | Umps            | UMPS        | -0.25 | 2.37 | -1.67 | 1.24E-01 | 3.96E-01 | -5.37 |
| 1457119_PM_at        | Gm38465///Rita1 | RITA1       | 0.24  | 2.51 | 1.67  | 1.24E-01 | 3.96E-01 | -5.37 |
| 1431654_PM_at        | ---             | NA          | 0.19  | 2.32 | 1.67  | 1.24E-01 | 3.96E-01 | -5.37 |
| 1422224_PM_at        | Tcp10b///Tcp10c | NA          | 0.60  | 2.58 | 1.67  | 1.25E-01 | 3.96E-01 | -5.37 |
| 1448738_PM_at        | Calb1           | CALB1       | 0.49  | 2.47 | 1.67  | 1.25E-01 | 3.96E-01 | -5.37 |
| 1428888_PM_at        | Tmem33          | TMEM33      | -0.43 | 3.32 | -1.67 | 1.25E-01 | 3.96E-01 | -5.37 |
| 1455113_PM_at        | Armc8           | ARMC8       | -0.36 | 3.67 | -1.67 | 1.25E-01 | 3.96E-01 | -5.37 |
| 1454898_PM_s_at      | Iah1            | IAH1        | -0.35 | 3.18 | -1.67 | 1.25E-01 | 3.96E-01 | -5.37 |
| 1425557_PM_x_at      | Tsc22d3         | NA          | 0.14  | 3.28 | 1.67  | 1.25E-01 | 3.96E-01 | -5.37 |
| 1450739_PM_at        | Tbl1xr1         | TBL1XR1     | -0.92 | 3.32 | -1.67 | 1.25E-01 | 3.96E-01 | -5.37 |
| 1440362_PM_at        | Pitpnm3         | NA          | 0.18  | 2.15 | 1.67  | 1.25E-01 | 3.96E-01 | -5.37 |
| 1448777_PM_at        | Mcm2            | MCM2        | 0.19  | 2.49 | 1.67  | 1.25E-01 | 3.96E-01 | -5.37 |
| 1430325_PM_at        | AV039307        | NA          | -0.37 | 2.49 | -1.67 | 1.25E-01 | 3.96E-01 | -5.37 |
| 1423610_PM_at        | Metap2          | METAP2      | -0.73 | 5.60 | -1.67 | 1.25E-01 | 3.96E-01 | -5.37 |
| 1415737_PM_at        | Rfk             | RFK         | -0.40 | 5.49 | -1.67 | 1.25E-01 | 3.96E-01 | -5.37 |
| 1439779_PM_at        | Rgs17           | RG517       | -0.40 | 2.65 | -1.67 | 1.25E-01 | 3.96E-01 | -5.37 |
| 1416714_PM_at        | Irf8            | IRF8        | 0.18  | 2.13 | 1.67  | 1.25E-01 | 3.96E-01 | -5.37 |
| 1432784_PM_at        | 4930556A17Rik   | NA          | 0.18  | 2.37 | 1.67  | 1.25E-01 | 3.96E-01 | -5.37 |
| 1416306_PM_at        | Clca1           | CLCA1       | 0.17  | 2.17 | 1.67  | 1.25E-01 | 3.96E-01 | -5.37 |
| 1420353_PM_at        | Lta             | LTA         | 0.20  | 2.49 | 1.67  | 1.25E-01 | 3.97E-01 | -5.37 |
| 1428083_PM_at        | Neat1           | NA          | -0.79 | 5.09 | -1.67 | 1.25E-01 | 3.97E-01 | -5.37 |
| 1435625_PM_at        | Entpd7          | ENTPD7      | -0.71 | 2.84 | -1.67 | 1.25E-01 | 3.97E-01 | -5.37 |
| 1437876_PM_at        | Il20rb          | IL20RB      | 0.24  | 2.46 | 1.67  | 1.25E-01 | 3.97E-01 | -5.37 |
| 1418797_PM_at        | Ms4a8a          | MS4A8       | 0.28  | 2.38 | 1.67  | 1.25E-01 | 3.97E-01 | -5.37 |
| 1438744_PM_at        | Asb7            | ASB7        | 0.36  | 4.52 | 1.67  | 1.25E-01 | 3.97E-01 | -5.37 |
| 1437292_PM_at        | Cvs2            | CLVS2       | -0.73 | 3.63 | -1.67 | 1.25E-01 | 3.97E-01 | -5.37 |
| 1421036_PM_at        | Npas2           | NPAS2       | 0.29  | 3.00 | 1.67  | 1.25E-01 | 3.97E-01 | -5.37 |
| 1439246_PM_x_at      | Tnrc6a          | TNRC6A      | 0.21  | 2.40 | 1.67  | 1.25E-01 | 3.97E-01 | -5.37 |
| 1454314_PM_at        | Gm2163///Gm7819 | NA          | 0.35  | 3.64 | 1.67  | 1.25E-01 | 3.97E-01 | -5.37 |
| 1447061_PM_at        | Hif3a           | HIF3A       | 0.50  | 2.88 | 1.67  | 1.25E-01 | 3.97E-01 | -5.37 |
| 1417576_PM_a_at      | Otub2           | OTUB2       | -0.63 | 2.75 | -1.67 | 1.25E-01 | 3.97E-01 | -5.37 |
| 1425662_PM_at        | Cdadc1          | NA          | -0.58 | 3.45 | -1.67 | 1.25E-01 | 3.97E-01 | -5.37 |
| 1425834_PM_a_at      | Gpam            | GPAM        | 0.21  | 2.60 | 1.67  | 1.25E-01 | 3.97E-01 | -5.37 |
| 1458487_PM_at        | Klf3            | KLF3        | 0.22  | 2.49 | 1.67  | 1.25E-01 | 3.97E-01 | -5.37 |
| 1424416_PM_at        | Nkiras2         | NKIRAS2     | 0.28  | 4.45 | 1.67  | 1.25E-01 | 3.97E-01 | -5.37 |
| 1440886_PM_at        | Cdc37l1         | NA          | 0.36  | 2.96 | 1.67  | 1.25E-01 | 3.97E-01 | -5.37 |
| 1429044_PM_at        | Camsap2         | CAMSAP2     | -0.61 | 7.92 | -1.67 | 1.25E-01 | 3.97E-01 | -5.37 |
| 1433066_PM_at        | ---             | NA          | 0.45  | 2.84 | 1.67  | 1.25E-01 | 3.97E-01 | -5.37 |
| 1439271_PM_x_at      | Ik              | IK          | -0.57 | 7.39 | -1.67 | 1.25E-01 | 3.97E-01 | -5.37 |
| 1443619_PM_at        | Tmem30a         | TMEM30A     | 0.28  | 2.54 | 1.67  | 1.25E-01 | 3.97E-01 | -5.37 |
| 1441528_PM_at        | Trappc12        | NA          | 0.31  | 3.22 | 1.67  | 1.25E-01 | 3.97E-01 | -5.37 |
| 1419310_PM_s_at      | Rfxank          | RFXANK      | 0.25  | 2.54 | 1.67  | 1.25E-01 | 3.97E-01 | -5.37 |
| 1435832_PM_at        | Lrrc4           | LRRC4       | -0.73 | 6.12 | -1.67 | 1.25E-01 | 3.97E-01 | -5.37 |
| 1450646_PM_at        | Cyp51           | CYP51A1     | -0.64 | 5.52 | -1.67 | 1.25E-01 | 3.97E-01 | -5.37 |
| AFFX-r2-Ec-bioB-5_at | ---             | NA          | 0.15  | 7.40 | 1.67  | 1.25E-01 | 3.97E-01 | -5.37 |
| 1451803_PM_a_at      | Vegfb           | VEGFB       | 0.17  | 2.69 | 1.67  | 1.25E-01 | 3.97E-01 | -5.37 |
| 1427335_PM_at        | Tmem260         | NA          | 0.20  | 3.83 | 1.67  | 1.25E-01 | 3.97E-01 | -5.37 |
| 1418192_PM_at        | Mnt             | MNT         | -0.41 | 5.19 | -1.67 | 1.25E-01 | 3.97E-01 | -5.37 |
| 1432951_PM_at        | 4930448E22Rik   | NA          | 0.18  | 2.91 | 1.67  | 1.25E-01 | 3.97E-01 | -5.37 |
| 1428988_PM_at        | Abcc3           | ABCC3       | 0.23  | 2.47 | 1.67  | 1.25E-01 | 3.97E-01 | -5.37 |
| 1430074_PM_x_at      | Zfp935          | NA          | -0.30 | 2.58 | -1.67 | 1.25E-01 | 3.97E-01 | -5.37 |
| 1439837_PM_at        | Gigyf2          | GIGYF2      | -0.25 | 2.76 | -1.67 | 1.25E-01 | 3.97E-01 | -5.37 |
| 1453553_PM_at        | LOC102643054    | NA          | 0.17  | 3.67 | 1.67  | 1.25E-01 | 3.97E-01 | -5.37 |
| 1437555_PM_at        | Barhl2          | BARHL2      | 0.65  | 2.99 | 1.67  | 1.25E-01 | 3.97E-01 | -5.37 |
| 1459364_PM_at        | Eml6            | EML6        | 0.32  | 2.38 | 1.67  | 1.25E-01 | 3.97E-01 | -5.37 |

|                    |                  |           |       |      |       |          |          |       |
|--------------------|------------------|-----------|-------|------|-------|----------|----------|-------|
| 1439712_PM_at      | Ints10           | INTS10    | 0.19  | 2.18 | 1.67  | 1.25E-01 | 3.97E-01 | -5.37 |
| 1430480_PM_at      | Wdr86            | NA        | 0.41  | 3.59 | 1.67  | 1.25E-01 | 3.97E-01 | -5.37 |
| 1446506_PM_at      | Frmpd3           | FRMPD3    | 0.18  | 2.33 | 1.67  | 1.25E-01 | 3.98E-01 | -5.37 |
| 1456195_PM_x_at    | Itgb5            | ITGB5     | -0.35 | 2.47 | -1.67 | 1.26E-01 | 3.98E-01 | -5.38 |
| 1426156_PM_at      | Lats2            | LATS2     | 0.22  | 3.38 | 1.67  | 1.26E-01 | 3.98E-01 | -5.38 |
| 1417152_PM_at      | Nacc2            | NACC2     | 0.28  | 5.09 | 1.67  | 1.26E-01 | 3.98E-01 | -5.38 |
| 1419823_PM_s_at    | Ksr1             | KSR1      | 0.35  | 3.14 | 1.67  | 1.26E-01 | 3.98E-01 | -5.38 |
| 1422295_PM_at      | Mecom            | MECOM     | 0.13  | 2.08 | 1.67  | 1.26E-01 | 3.98E-01 | -5.38 |
| 1419987_PM_at      | ---              | NA        | 0.36  | 5.08 | 1.67  | 1.26E-01 | 3.98E-01 | -5.38 |
| 1432691_PM_at      | 9030407C09Rik    | NA        | -0.26 | 2.67 | -1.67 | 1.26E-01 | 3.98E-01 | -5.38 |
| 1445922_PM_at      | ---              | NA        | -0.13 | 2.19 | -1.67 | 1.26E-01 | 3.98E-01 | -5.38 |
| 1428005_PM_at      | Marc1            | MARC1     | 0.13  | 2.02 | 1.67  | 1.26E-01 | 3.98E-01 | -5.38 |
| 1445413_PM_at      | Bmpr1a           | NA        | 0.14  | 2.17 | 1.67  | 1.26E-01 | 3.98E-01 | -5.38 |
| 1447023_PM_at      | ---              | NA        | 0.15  | 2.10 | 1.67  | 1.26E-01 | 3.98E-01 | -5.38 |
| 1450325_PM_at      | Angpt4           | ANGPT4    | 0.16  | 2.90 | 1.67  | 1.26E-01 | 3.98E-01 | -5.38 |
| 1439567_PM_at      | Tbx3             | NA        | 0.19  | 2.46 | 1.67  | 1.26E-01 | 3.98E-01 | -5.38 |
| 1445388_PM_at      | Cd226            | CD226     | 0.21  | 2.38 | 1.67  | 1.26E-01 | 3.98E-01 | -5.38 |
| 1444507_PM_at      | Usp53            | USP53     | 0.28  | 2.59 | 1.67  | 1.26E-01 | 3.98E-01 | -5.38 |
| 1423137_PM_at      | Rala             | RALA      | 0.41  | 3.38 | 1.67  | 1.26E-01 | 3.98E-01 | -5.38 |
| 1453229_PM_s_at    | Uqcrh            | UQCRHL    | -0.43 | 5.84 | -1.67 | 1.26E-01 | 3.98E-01 | -5.38 |
| 1432731_PM_at      | ---              | NA        | 0.19  | 3.33 | 1.67  | 1.26E-01 | 3.98E-01 | -5.38 |
| 1426047_PM_a_at    | Ptprr            | PTPRR     | -0.99 | 4.82 | -1.67 | 1.26E-01 | 3.98E-01 | -5.38 |
| 1450693_PM_at      | Rgs17            | RGS17     | -0.53 | 4.02 | -1.67 | 1.26E-01 | 3.98E-01 | -5.38 |
| 1454358_PM_at      | ---              | NA        | 0.34  | 3.12 | 1.67  | 1.26E-01 | 3.98E-01 | -5.38 |
| 1436068_PM_at      | Zbtb10           | ZBTB10    | 0.31  | 3.73 | 1.67  | 1.26E-01 | 3.98E-01 | -5.38 |
| 1423582_PM_at      | Dmrt1            | DMRT1     | 0.21  | 2.61 | 1.66  | 1.26E-01 | 3.98E-01 | -5.38 |
| 1427221_PM_at      | Slc6a20a         | SLC6A20   | -1.22 | 3.79 | -1.66 | 1.26E-01 | 3.98E-01 | -5.38 |
| 1442856_PM_at      | Adm2             | ADM2      | 0.17  | 2.39 | 1.66  | 1.26E-01 | 3.98E-01 | -5.38 |
| 1455052_PM_a_at    | Mzt1             | MZT1      | -0.67 | 6.30 | -1.66 | 1.26E-01 | 3.98E-01 | -5.38 |
| 1441959_PM_s_at    | Jkamp            | JKAMP     | -0.58 | 4.75 | -1.66 | 1.26E-01 | 3.98E-01 | -5.38 |
| 1459229_PM_at      | ---              | NA        | 0.17  | 2.08 | 1.66  | 1.26E-01 | 3.98E-01 | -5.38 |
| 1459976_PM_s_at    | Sod1             | SOD1      | 0.25  | 9.56 | 1.66  | 1.26E-01 | 3.98E-01 | -5.38 |
| 1458673_PM_at      | ---              | NA        | 0.25  | 2.70 | 1.66  | 1.26E-01 | 3.98E-01 | -5.38 |
| 1419251_PM_at      | Eps15            | EPS15     | 0.37  | 4.02 | 1.66  | 1.26E-01 | 3.98E-01 | -5.38 |
| 1452503_PM_a_at    | Brwd1            | BRWD1     | 0.45  | 3.83 | 1.66  | 1.26E-01 | 3.98E-01 | -5.38 |
| 1445838_PM_at      | Galnt5           | NA        | -0.15 | 2.33 | -1.66 | 1.26E-01 | 3.98E-01 | -5.38 |
| 1443423_PM_at      | Wnk2             | WNK2      | 0.15  | 2.11 | 1.66  | 1.26E-01 | 3.98E-01 | -5.38 |
| 1448508_PM_at      | Traf3ip2         | TRAF3IP2  | 0.30  | 3.36 | 1.66  | 1.26E-01 | 3.99E-01 | -5.38 |
| 1438888_PM_at      | Gmcl1            | GMCL1     | 0.17  | 2.57 | 1.66  | 1.26E-01 | 3.99E-01 | -5.38 |
| 1444568_PM_at      | Arcp5            | NA        | 0.26  | 2.64 | 1.66  | 1.26E-01 | 3.99E-01 | -5.38 |
| 1447141_PM_at      | AW107722         | NA        | 0.14  | 2.53 | 1.66  | 1.26E-01 | 3.99E-01 | -5.38 |
| 1422900_PM_at      | Mgea5            | MGEA5     | 0.21  | 3.25 | 1.66  | 1.26E-01 | 3.99E-01 | -5.38 |
| 1429603_PM_at      | Atat1            | ATAT1     | 0.24  | 2.92 | 1.66  | 1.26E-01 | 3.99E-01 | -5.38 |
| 1439756_PM_at      | Slc25a41         | SLC25A41  | 0.21  | 2.97 | 1.66  | 1.26E-01 | 3.99E-01 | -5.38 |
| 1440143_PM_at      | Pigz             | PIGZ      | 0.21  | 2.46 | 1.66  | 1.26E-01 | 3.99E-01 | -5.38 |
| 1416311_PM_s_at    | Tuba3a ///Tuba3b | TUBA3E    | 0.29  | 2.86 | 1.66  | 1.26E-01 | 3.99E-01 | -5.38 |
| 1415682_PM_at      | Xpo7             | XPO7      | -0.30 | 4.22 | -1.66 | 1.26E-01 | 3.99E-01 | -5.38 |
| 1425474_PM_a_at    | Vps39            | VPS39     | 0.31  | 2.31 | 1.66  | 1.26E-01 | 3.99E-01 | -5.38 |
| 1454707_PM_at      | 2310035C23Rik    | KIAA1468  | 0.18  | 2.26 | 1.66  | 1.26E-01 | 3.99E-01 | -5.38 |
| 1436435_PM_at      | 9530026P05Rik    | NA        | 0.16  | 2.42 | 1.66  | 1.26E-01 | 3.99E-01 | -5.38 |
| AFFX-r2-TagIN-5_at | ---              | NA        | 0.21  | 2.22 | 1.66  | 1.26E-01 | 3.99E-01 | -5.38 |
| 1422713_PM_a_at    | Ube2i            | NA        | -0.34 | 3.07 | -1.66 | 1.26E-01 | 3.99E-01 | -5.38 |
| 1430213_PM_at      | Rcctb1           | RCCTB1    | -0.29 | 2.48 | -1.66 | 1.26E-01 | 3.99E-01 | -5.38 |
| 1457663_PM_at      | 1700006F04Rik    | NA        | 0.15  | 2.06 | 1.66  | 1.26E-01 | 3.99E-01 | -5.38 |
| 1457724_PM_at      | Ctsl             | NA        | 0.23  | 3.26 | 1.66  | 1.26E-01 | 3.99E-01 | -5.38 |
| 1428662_PM_a_at    | Hopx             | HOPX      | -0.38 | 2.85 | -1.66 | 1.26E-01 | 3.99E-01 | -5.38 |
| 1440281_PM_at      | ---              | NA        | 0.25  | 2.68 | 1.66  | 1.26E-01 | 3.99E-01 | -5.38 |
| 1429032_PM_at      | Micalcl          | MI CAL CL | 0.38  | 3.25 | 1.66  | 1.26E-01 | 3.99E-01 | -5.38 |
| 1448865_PM_at      | Hsd17b7          | HSD17B7   | 0.43  | 4.02 | 1.66  | 1.26E-01 | 3.99E-01 | -5.38 |
| 1439694_PM_at      | Fbxw16           | FBXW12    | 0.19  | 2.54 | 1.66  | 1.26E-01 | 3.99E-01 | -5.38 |
| 1449869_PM_at      | Vpreb1           | VPREB1    | 0.32  | 3.13 | 1.66  | 1.26E-01 | 3.99E-01 | -5.38 |
| 1426465_PM_at      | Dlgap4           | DLGAP4    | -0.36 | 4.17 | -1.66 | 1.26E-01 | 3.99E-01 | -5.38 |
| 1424032_PM_at      | Hvcn1            | HVCN1     | 0.15  | 2.39 | 1.66  | 1.26E-01 | 3.99E-01 | -5.38 |
| 1429242_PM_at      | Inip             | INIP      | -0.68 | 3.90 | -1.66 | 1.27E-01 | 3.99E-01 | -5.38 |
| 1442659_PM_at      | Pcdh9            | PCDH9     | -0.24 | 6.83 | -1.66 | 1.27E-01 | 3.99E-01 | -5.38 |
| 1439832_PM_at      | ---              | NA        | 0.18  | 2.83 | 1.66  | 1.27E-01 | 3.99E-01 | -5.38 |
| 1456189_PM_x_at    | Ltbp3            | LTBP3     | 0.22  | 2.18 | 1.66  | 1.27E-01 | 4.00E-01 | -5.38 |
| 1452703_PM_at      | Ahcy12           | AHCYL2    | -0.45 | 3.61 | -1.66 | 1.27E-01 | 4.00E-01 | -5.38 |
| 1422101_PM_at      | Tnfrsf23         | NA        | 0.15  | 2.16 | 1.66  | 1.27E-01 | 4.00E-01 | -5.38 |
| 1426169_PM_a_at    | Lat2             | LAT2      | 0.25  | 2.67 | 1.66  | 1.27E-01 | 4.00E-01 | -5.38 |
| 1454935_PM_at      | Fitm2            | FITM2     | -0.41 | 3.75 | -1.66 | 1.27E-01 | 4.00E-01 | -5.38 |
| 1443079_PM_at      | ---              | NA        | -0.16 | 2.16 | -1.66 | 1.27E-01 | 4.00E-01 | -5.38 |
| 1454770_PM_at      | Cckbr            | CCKBR     | -0.53 | 3.77 | -1.66 | 1.27E-01 | 4.00E-01 | -5.38 |
| 1425759_PM_at      | Nobox            | NOBOX     | -0.14 | 1.95 | -1.66 | 1.27E-01 | 4.00E-01 | -5.38 |
| 1422379_PM_x_at    | Vmn1r41          | NA        | 0.15  | 2.11 | 1.66  | 1.27E-01 | 4.00E-01 | -5.38 |

|                 |                                        |         |       |      |       |          |          |       |
|-----------------|----------------------------------------|---------|-------|------|-------|----------|----------|-------|
| 1419708_PM_at   | Wnt6                                   | WNT6    | 0.18  | 2.31 | 1.66  | 1.27E-01 | 4.00E-01 | -5.38 |
| 1450419_PM_at   | Serhl                                  | NA      | 0.21  | 2.45 | 1.66  | 1.27E-01 | 4.00E-01 | -5.38 |
| 1432157_PM_at   | 4930515G13Rik                          | NA      | 0.13  | 2.27 | 1.66  | 1.27E-01 | 4.00E-01 | -5.38 |
| 1429263_PM_at   | ---                                    | NA      | 0.14  | 2.34 | 1.66  | 1.27E-01 | 4.00E-01 | -5.38 |
| 1444771_PM_at   | ---                                    | NA      | 0.15  | 2.03 | 1.66  | 1.27E-01 | 4.00E-01 | -5.38 |
| 1440442_PM_at   | Map2k7 /// Tgfb3l                      | MAP2K7  | 0.22  | 3.40 | 1.66  | 1.27E-01 | 4.00E-01 | -5.38 |
| 1420636_PM_a_at | Dusp12                                 | DUSP12  | 0.40  | 2.90 | 1.66  | 1.27E-01 | 4.00E-01 | -5.38 |
| 1421152_PM_a_at | Gnao1                                  | GNAO1   | -0.41 | 5.92 | -1.66 | 1.27E-01 | 4.00E-01 | -5.38 |
| 1446794_PM_at   | ---                                    | NA      | 0.19  | 2.47 | 1.66  | 1.27E-01 | 4.00E-01 | -5.38 |
| 1422360_PM_at   | Olfrr672                               | NA      | 0.30  | 2.52 | 1.66  | 1.27E-01 | 4.00E-01 | -5.38 |
| 1459729_PM_at   | Slc13a5                                | SLC13A5 | 0.16  | 2.35 | 1.66  | 1.27E-01 | 4.00E-01 | -5.38 |
| 1447857_PM_at   | Enox1                                  | ENOX1   | 0.83  | 4.42 | 1.66  | 1.27E-01 | 4.00E-01 | -5.38 |
| 1447300_PM_at   | AW551984                               | VWASA   | 0.19  | 2.10 | 1.66  | 1.27E-01 | 4.00E-01 | -5.38 |
| 1445689_PM_at   | ---                                    | NA      | 0.27  | 2.71 | 1.66  | 1.27E-01 | 4.00E-01 | -5.38 |
| 1448576_PM_at   | Il7r                                   | IL7R    | 0.15  | 3.55 | 1.66  | 1.27E-01 | 4.00E-01 | -5.39 |
| 1419119_PM_at   | Hcst                                   | HCST    | 0.17  | 2.47 | 1.66  | 1.27E-01 | 4.00E-01 | -5.39 |
| 1452816_PM_at   | Cenpu                                  | CENPU   | 0.17  | 2.24 | 1.66  | 1.27E-01 | 4.00E-01 | -5.39 |
| 1459568_PM_at   | Gm15735                                | NA      | 0.19  | 2.81 | 1.66  | 1.27E-01 | 4.00E-01 | -5.39 |
| 1432418_PM_a_at | Ckmt1                                  | CKMT1A  | 0.22  | 3.12 | 1.66  | 1.27E-01 | 4.00E-01 | -5.39 |
| 1450466_PM_at   | Cdk5r2                                 | CDK5R2  | -0.53 | 8.24 | -1.66 | 1.27E-01 | 4.00E-01 | -5.39 |
| 1442245_PM_at   | ---                                    | NA      | -0.42 | 3.14 | -1.66 | 1.27E-01 | 4.00E-01 | -5.39 |
| 1433858_PM_at   | Lrrc28                                 | LRRC28  | -0.44 | 3.29 | -1.66 | 1.27E-01 | 4.00E-01 | -5.39 |
| 1460259_PM_s_at | Cla1 /// Cla2 /// Cla3a1<br>/// Cla3a2 | NA      | 0.15  | 2.14 | 1.66  | 1.27E-01 | 4.00E-01 | -5.39 |
| 1456239_PM_at   | Fgf17                                  | FGF17   | 0.16  | 2.17 | 1.66  | 1.27E-01 | 4.00E-01 | -5.39 |
| 1450791_PM_at   | Nppb                                   | NA      | 0.16  | 2.27 | 1.66  | 1.27E-01 | 4.00E-01 | -5.39 |
| 1444297_PM_at   | Serpina4-ps1                           | NA      | 0.13  | 2.01 | 1.66  | 1.27E-01 | 4.00E-01 | -5.39 |
| 1419604_PM_at   | Zbp1                                   | ZBP1    | 0.16  | 2.71 | 1.66  | 1.27E-01 | 4.00E-01 | -5.39 |
| 1442754_PM_at   | C030013G03Rik                          | NA      | 0.13  | 1.97 | 1.66  | 1.27E-01 | 4.01E-01 | -5.39 |
| 1417302_PM_at   | Rcor2                                  | RCOR2   | 0.18  | 2.37 | 1.66  | 1.27E-01 | 4.01E-01 | -5.39 |
| 1426492_PM_at   | Tdp1                                   | TDP1    | 0.23  | 2.60 | 1.66  | 1.27E-01 | 4.01E-01 | -5.39 |
| 1448744_PM_at   | Gals                                   | GALNS   | 0.24  | 2.78 | 1.66  | 1.27E-01 | 4.01E-01 | -5.39 |
| 1430481_PM_at   | 4930545L23Rik                          | NA      | 0.33  | 2.27 | 1.66  | 1.27E-01 | 4.01E-01 | -5.39 |
| 1428509_PM_at   | Myo1e                                  | MYO1E   | -0.27 | 3.13 | -1.66 | 1.27E-01 | 4.01E-01 | -5.39 |
| 1441530_PM_at   | ---                                    | NA      | 0.19  | 2.05 | 1.66  | 1.27E-01 | 4.01E-01 | -5.39 |
| 1433786_PM_x_at | Serf2                                  | SERF2   | 0.23  | 5.40 | 1.66  | 1.27E-01 | 4.01E-01 | -5.39 |
| 1447456_PM_x_at | Dcpp3                                  | NA      | 0.23  | 2.68 | 1.66  | 1.27E-01 | 4.01E-01 | -5.39 |
| 1432819_PM_at   | Prc1                                   | NA      | 0.24  | 2.17 | 1.66  | 1.27E-01 | 4.01E-01 | -5.39 |
| 1422187_PM_at   | Gabrg3                                 | GABRG3  | 0.48  | 4.21 | 1.66  | 1.27E-01 | 4.01E-01 | -5.39 |
| 1435638_PM_at   | Gsk3a                                  | GSK3A   | -0.60 | 4.97 | -1.66 | 1.27E-01 | 4.01E-01 | -5.39 |
| 1441437_PM_at   | ---                                    | NA      | 0.16  | 2.82 | 1.66  | 1.27E-01 | 4.01E-01 | -5.39 |
| 1457606_PM_x_at | AJ015228                               | NA      | 0.18  | 2.61 | 1.66  | 1.27E-01 | 4.01E-01 | -5.39 |
| 1432934_PM_at   | ---                                    | NA      | 0.20  | 2.87 | 1.66  | 1.27E-01 | 4.01E-01 | -5.39 |
| 1457337_PM_at   | Airn                                   | NA      | 0.26  | 3.00 | 1.66  | 1.27E-01 | 4.01E-01 | -5.39 |
| 1446422_PM_at   | March3                                 | NA      | 0.16  | 2.26 | 1.66  | 1.27E-01 | 4.01E-01 | -5.39 |
| 1438880_PM_at   | ---                                    | NA      | 0.21  | 2.36 | 1.66  | 1.27E-01 | 4.01E-01 | -5.39 |
| 1418129_PM_at   | Dhcr24                                 | DHCR24  | 0.30  | 2.25 | 1.66  | 1.27E-01 | 4.01E-01 | -5.39 |
| 1430851_PM_at   | Zfp444                                 | ZNF444  | 0.28  | 2.66 | 1.66  | 1.27E-01 | 4.01E-01 | -5.39 |
| 1442147_PM_at   | ---                                    | NA      | -0.18 | 2.88 | -1.66 | 1.27E-01 | 4.01E-01 | -5.39 |
| 1416371_PM_at   | Apod                                   | APOD    | -0.85 | 7.28 | -1.66 | 1.27E-01 | 4.01E-01 | -5.39 |
| 1454546_PM_at   | ---                                    | NA      | 0.26  | 3.42 | 1.66  | 1.28E-01 | 4.01E-01 | -5.39 |
| 1434863_PM_at   | Dnajc18                                | DNAJC18 | -0.48 | 3.53 | -1.66 | 1.28E-01 | 4.01E-01 | -5.39 |
| 1452778_PM_x_at | Nap1l1                                 | NAP1L1  | -0.38 | 7.46 | -1.66 | 1.28E-01 | 4.01E-01 | -5.39 |
| 1423231_PM_at   | Nrgn                                   | NRGN    | -0.61 | 5.51 | -1.66 | 1.28E-01 | 4.01E-01 | -5.39 |
| 1434213_PM_x_at | Ndufs8                                 | NDUFS8  | -0.45 | 3.57 | -1.66 | 1.28E-01 | 4.01E-01 | -5.39 |
| 1416517_PM_at   | Pnpla6                                 | PNPLA6  | -0.40 | 3.71 | -1.66 | 1.28E-01 | 4.01E-01 | -5.39 |
| 1432506_PM_at   | ---                                    | NA      | 0.15  | 2.45 | 1.66  | 1.28E-01 | 4.01E-01 | -5.39 |
| 1429920_PM_at   | Ifitd1                                 | LMNTD1  | 0.38  | 2.42 | 1.66  | 1.28E-01 | 4.01E-01 | -5.39 |
| 1453246_PM_at   | Rab39b                                 | RAB39B  | -0.54 | 4.81 | -1.66 | 1.28E-01 | 4.01E-01 | -5.39 |
| 1427043_PM_s_at | Enox2                                  | ENOX2   | -0.18 | 3.13 | -1.66 | 1.28E-01 | 4.01E-01 | -5.39 |
| 1424608_PM_a_at | Bzw4                                   | NA      | 0.32  | 8.76 | 1.66  | 1.28E-01 | 4.01E-01 | -5.39 |
| 1416331_PM_a_at | Nfe2l1                                 | NFE2L1  | -0.34 | 5.19 | -1.66 | 1.28E-01 | 4.01E-01 | -5.39 |
| 1457631_PM_at   | ---                                    | NA      | 0.82  | 3.08 | 1.66  | 1.28E-01 | 4.01E-01 | -5.39 |
| 1458214_PM_at   | Zfp786                                 | ZNF786  | 0.12  | 2.34 | 1.66  | 1.28E-01 | 4.01E-01 | -5.39 |
| 1434802_PM_s_at | Ntf3                                   | NTF3    | 0.25  | 2.31 | 1.65  | 1.28E-01 | 4.02E-01 | -5.39 |
| 1449098_PM_a_at | Poli                                   | POLI    | 0.38  | 3.19 | 1.65  | 1.28E-01 | 4.02E-01 | -5.39 |
| 1454628_PM_at   | Iffo1                                  | IFFO1   | -0.35 | 2.61 | -1.65 | 1.28E-01 | 4.02E-01 | -5.39 |
| 1457752_PM_at   | AJ014876                               | NA      | 0.18  | 2.81 | 1.65  | 1.28E-01 | 4.02E-01 | -5.39 |
| 1460099_PM_at   | ---                                    | NA      | 0.31  | 2.31 | 1.65  | 1.28E-01 | 4.02E-01 | -5.39 |
| 1456212_PM_x_at | Socs3                                  | SOCS3   | 0.19  | 2.19 | 1.65  | 1.28E-01 | 4.02E-01 | -5.39 |
| 1418329_PM_at   | Pgpep1                                 | PGPEP1  | 0.22  | 2.50 | 1.65  | 1.28E-01 | 4.02E-01 | -5.39 |
| 1438628_PM_x_at | Cntn3                                  | CNTN3   | -0.62 | 5.44 | -1.65 | 1.28E-01 | 4.02E-01 | -5.39 |
| 1448582_PM_at   | Ctnnbl1                                | CTNBNL1 | -0.35 | 3.58 | -1.65 | 1.28E-01 | 4.02E-01 | -5.39 |
| 1432555_PM_at   | Whrn                                   | WHRN    | 0.23  | 2.79 | 1.65  | 1.28E-01 | 4.02E-01 | -5.39 |
| 1459194_PM_at   | ---                                    | NA      | 0.31  | 2.88 | 1.65  | 1.28E-01 | 4.02E-01 | -5.39 |

|                 |                                                                                                                                                  |           |       |      |       |          |          |       |
|-----------------|--------------------------------------------------------------------------------------------------------------------------------------------------|-----------|-------|------|-------|----------|----------|-------|
| 1439582_PM_at   | ---                                                                                                                                              | NA        | 0.70  | 3.11 | 1.65  | 1.28E-01 | 4.02E-01 | -5.39 |
| 1421206_PM_at   | Gm11959                                                                                                                                          | NA        | 0.19  | 1.98 | 1.65  | 1.28E-01 | 4.02E-01 | -5.39 |
| 1441298_PM_at   | ---                                                                                                                                              | NA        | -0.36 | 2.57 | -1.65 | 1.28E-01 | 4.02E-01 | -5.39 |
| 1417969_PM_at   | Fbxo31                                                                                                                                           | FBXO31    | 0.14  | 2.43 | 1.65  | 1.28E-01 | 4.02E-01 | -5.39 |
| 1433879_PM_a_at | Mapk1ip1l                                                                                                                                        | MAPK1IP1L | -0.38 | 4.10 | -1.65 | 1.28E-01 | 4.02E-01 | -5.39 |
| 1453159_PM_at   | Efhc1                                                                                                                                            | EFHC1     | 0.25  | 2.12 | 1.65  | 1.28E-01 | 4.02E-01 | -5.39 |
| 1447010_PM_at   | ---                                                                                                                                              | NA        | 0.33  | 3.53 | 1.65  | 1.28E-01 | 4.02E-01 | -5.39 |
| 1443279_PM_at   | ---                                                                                                                                              | NA        | 0.33  | 2.20 | 1.65  | 1.28E-01 | 4.02E-01 | -5.39 |
| 1447537_PM_at   | ---                                                                                                                                              | NA        | 0.52  | 2.57 | 1.65  | 1.28E-01 | 4.02E-01 | -5.39 |
| 1422074_PM_at   | Cdx2                                                                                                                                             | CDX2      | 0.31  | 3.27 | 1.65  | 1.28E-01 | 4.02E-01 | -5.39 |
| 1442439_PM_at   | W91776                                                                                                                                           | NA        | 0.15  | 2.60 | 1.65  | 1.28E-01 | 4.02E-01 | -5.39 |
| 1422831_PM_at   | Fbn2 /// LOC102642295                                                                                                                            | FBN2      | 0.47  | 2.44 | 1.65  | 1.28E-01 | 4.02E-01 | -5.39 |
| 1443174_PM_at   | ---                                                                                                                                              | NA        | 0.16  | 2.53 | 1.65  | 1.28E-01 | 4.02E-01 | -5.39 |
| 1440374_PM_at   | Pde1c                                                                                                                                            | PDE1C     | 0.75  | 4.36 | 1.65  | 1.28E-01 | 4.02E-01 | -5.39 |
| 1421304_PM_at   | Klra2                                                                                                                                            | NA        | 0.28  | 2.50 | 1.65  | 1.28E-01 | 4.02E-01 | -5.39 |
| 1457130_PM_at   | ---                                                                                                                                              | NA        | 0.18  | 2.05 | 1.65  | 1.28E-01 | 4.02E-01 | -5.39 |
| 1422383_PM_at   | ---                                                                                                                                              | NA        | 0.20  | 2.38 | 1.65  | 1.28E-01 | 4.02E-01 | -5.40 |
| 1440130_PM_at   | ---                                                                                                                                              | NA        | -0.39 | 3.21 | -1.65 | 1.28E-01 | 4.02E-01 | -5.40 |
| 1419419_PM_at   | Fam50b                                                                                                                                           | FAM50B    | 0.15  | 2.05 | 1.65  | 1.28E-01 | 4.03E-01 | -5.40 |
| 1459421_PM_at   | Hkdc1                                                                                                                                            | HKDC1     | 0.16  | 2.33 | 1.65  | 1.28E-01 | 4.03E-01 | -5.40 |
| 1437951_PM_at   | Dis3l2                                                                                                                                           | DIS3L2    | 0.18  | 2.28 | 1.65  | 1.28E-01 | 4.03E-01 | -5.40 |
| 1443304_PM_at   | Mt5                                                                                                                                              | TESMIN    | 0.27  | 2.53 | 1.65  | 1.28E-01 | 4.03E-01 | -5.40 |
| 1440310_PM_at   | Runx1t1                                                                                                                                          | NA        | -0.37 | 3.66 | -1.65 | 1.28E-01 | 4.03E-01 | -5.40 |
| 1443976_PM_at   | Cdk5rap2                                                                                                                                         | CDK5RAP2  | 0.22  | 3.27 | 1.65  | 1.28E-01 | 4.03E-01 | -5.40 |
| 1429977_PM_at   | ---                                                                                                                                              | NA        | 0.20  | 2.48 | 1.65  | 1.28E-01 | 4.03E-01 | -5.40 |
| 1434838_PM_at   | Kcng2                                                                                                                                            | KCNG2     | 0.20  | 2.55 | 1.65  | 1.29E-01 | 4.03E-01 | -5.40 |
| 1431677_PM_at   | ---                                                                                                                                              | NA        | 0.23  | 2.31 | 1.65  | 1.29E-01 | 4.03E-01 | -5.40 |
| 1432805_PM_at   | 8030431A06Rik                                                                                                                                    | NA        | 0.20  | 2.28 | 1.65  | 1.29E-01 | 4.03E-01 | -5.40 |
| 1419283_PM_s_at | Tns1                                                                                                                                             | TNS1      | -0.27 | 2.40 | -1.65 | 1.29E-01 | 4.03E-01 | -5.40 |
| 1420123_PM_at   | Tcta                                                                                                                                             | TCTA      | -0.51 | 2.41 | -1.65 | 1.29E-01 | 4.03E-01 | -5.40 |
| 1426558_PM_x_at | 0610010B08Rik ///<br>Gm11007 /// Gm14295 ///<br>Gm14305 /// Gm14308 ///<br>Gm14419 /// Gm14432 ///<br>Gm14434 /// Gm4724 ///<br>LOC102633156 /// | NA        | -0.41 | 6.11 | -1.65 | 1.29E-01 | 4.03E-01 | -5.40 |
| 1421854_PM_at   | Fgl2                                                                                                                                             | FGL2      | -0.18 | 1.87 | -1.65 | 1.29E-01 | 4.03E-01 | -5.40 |
| 1453789_PM_at   | 4933440N22Rik                                                                                                                                    | NA        | 0.16  | 2.67 | 1.65  | 1.29E-01 | 4.03E-01 | -5.40 |
| 1443449_PM_at   | ---                                                                                                                                              | NA        | 0.17  | 2.10 | 1.65  | 1.29E-01 | 4.03E-01 | -5.40 |
| 1431628_PM_at   | D5Ert615e                                                                                                                                        | NA        | 0.18  | 2.37 | 1.65  | 1.29E-01 | 4.03E-01 | -5.40 |
| 1452922_PM_at   | Ppp1r3d                                                                                                                                          | PPP1R3D   | 0.26  | 2.43 | 1.65  | 1.29E-01 | 4.03E-01 | -5.40 |
| 1422288_PM_at   | Htr1b                                                                                                                                            | HTR1B     | 0.30  | 2.66 | 1.65  | 1.29E-01 | 4.03E-01 | -5.40 |
| 1459603_PM_at   | Prelid2                                                                                                                                          | PRELID2   | 0.34  | 2.72 | 1.65  | 1.29E-01 | 4.03E-01 | -5.40 |
| 1421272_PM_at   | Vav2                                                                                                                                             | VAV2      | 0.24  | 2.95 | 1.65  | 1.29E-01 | 4.03E-01 | -5.40 |
| 1445533_PM_at   | ---                                                                                                                                              | NA        | 0.24  | 2.24 | 1.65  | 1.29E-01 | 4.03E-01 | -5.40 |
| 1454836_PM_at   | Tmem18                                                                                                                                           | TMEM18    | -0.35 | 3.81 | -1.65 | 1.29E-01 | 4.03E-01 | -5.40 |
| 1440923_PM_at   | ---                                                                                                                                              | NA        | 0.15  | 2.27 | 1.65  | 1.29E-01 | 4.03E-01 | -5.40 |
| 1419535_PM_at   | Skc6b1                                                                                                                                           | NA        | 0.22  | 2.45 | 1.65  | 1.29E-01 | 4.03E-01 | -5.40 |
| 1446147_PM_at   | Gm39971                                                                                                                                          | NA        | 0.71  | 3.53 | 1.65  | 1.29E-01 | 4.03E-01 | -5.40 |
| 1422034_PM_a_at | Palm                                                                                                                                             | PALM      | 0.32  | 3.06 | 1.65  | 1.29E-01 | 4.03E-01 | -5.40 |
| 1452148_PM_at   | Lrpap1                                                                                                                                           | LRPAP1    | -0.33 | 3.71 | -1.65 | 1.29E-01 | 4.03E-01 | -5.40 |
| 1443802_PM_at   | ---                                                                                                                                              | NA        | 0.16  | 2.32 | 1.65  | 1.29E-01 | 4.03E-01 | -5.40 |
| 1456368_PM_at   | Gm4787                                                                                                                                           | NA        | -0.59 | 2.82 | -1.65 | 1.29E-01 | 4.03E-01 | -5.40 |
| 1438396_PM_at   | Ocr1                                                                                                                                             | OCL1      | -0.30 | 4.04 | -1.65 | 1.29E-01 | 4.03E-01 | -5.40 |
| 1431692_PM_a_at | Cblc                                                                                                                                             | CBLC      | 0.19  | 3.10 | 1.65  | 1.29E-01 | 4.03E-01 | -5.40 |
| 1453900_PM_at   | 1700018A14Rik                                                                                                                                    | NA        | 0.24  | 2.79 | 1.65  | 1.29E-01 | 4.03E-01 | -5.40 |
| 1454683_PM_at   | Sfswap                                                                                                                                           | SFSWAP    | 0.42  | 2.90 | 1.65  | 1.29E-01 | 4.03E-01 | -5.40 |
| 1422981_PM_at   | Dgcr8                                                                                                                                            | DGCR8     | 0.31  | 4.67 | 1.65  | 1.29E-01 | 4.03E-01 | -5.40 |
| 1417649_PM_at   | Cdkn1c                                                                                                                                           | CDKN1C    | 0.34  | 2.46 | 1.65  | 1.29E-01 | 4.03E-01 | -5.40 |
| 1443717_PM_at   | Dpyd                                                                                                                                             | DPYD      | -0.15 | 1.92 | -1.65 | 1.29E-01 | 4.03E-01 | -5.40 |
| 1440573_PM_at   | Gm2590                                                                                                                                           | NA        | 0.25  | 2.41 | 1.65  | 1.29E-01 | 4.03E-01 | -5.40 |
| 1432719_PM_at   | ---                                                                                                                                              | NA        | 0.18  | 2.21 | 1.65  | 1.29E-01 | 4.03E-01 | -5.40 |
| 1455935_PM_at   | 2410131K14Rik                                                                                                                                    | C12orf49  | 0.32  | 2.82 | 1.65  | 1.29E-01 | 4.03E-01 | -5.40 |
| 1445141_PM_at   | Ikbkb                                                                                                                                            | IKBKB     | -0.50 | 5.89 | -1.65 | 1.29E-01 | 4.03E-01 | -5.40 |
| 1421284_PM_at   | Pign                                                                                                                                             | PIGN      | 0.19  | 2.20 | 1.65  | 1.29E-01 | 4.03E-01 | -5.40 |
| 1442234_PM_at   | Gm35915                                                                                                                                          | NA        | -0.41 | 3.75 | -1.65 | 1.29E-01 | 4.03E-01 | -5.40 |
| 1457031_PM_at   | Fsd2                                                                                                                                             | FSD2      | 0.19  | 2.51 | 1.65  | 1.29E-01 | 4.03E-01 | -5.40 |
| 1427818_PM_at   | ---                                                                                                                                              | NA        | 0.24  | 2.80 | 1.65  | 1.29E-01 | 4.04E-01 | -5.40 |
| 1458600_PM_at   | ---                                                                                                                                              | NA        | 0.24  | 3.12 | 1.65  | 1.29E-01 | 4.04E-01 | -5.40 |
| 1454332_PM_at   | 6030442H21Rik                                                                                                                                    | NA        | 0.17  | 2.25 | 1.65  | 1.29E-01 | 4.04E-01 | -5.40 |
| 1440291_PM_at   | ---                                                                                                                                              | NA        | -0.51 | 2.77 | -1.65 | 1.29E-01 | 4.04E-01 | -5.40 |
| 1446689_PM_at   | Nlrc3                                                                                                                                            | NLRC3     | 0.15  | 2.49 | 1.65  | 1.29E-01 | 4.04E-01 | -5.40 |
| 1457887_PM_at   | Sspo                                                                                                                                             | NA        | 0.29  | 2.86 | 1.65  | 1.29E-01 | 4.04E-01 | -5.40 |

|                 |                                  |             |       |      |       |          |          |       |
|-----------------|----------------------------------|-------------|-------|------|-------|----------|----------|-------|
| 1459241_PM_at   | ---                              | NA          | 0.60  | 3.23 | 1.65  | 1.29E-01 | 4.04E-01 | -5.40 |
| 1457905_PM_at   | ---                              | NA          | 0.20  | 2.43 | 1.65  | 1.29E-01 | 4.04E-01 | -5.40 |
| 1443905_PM_at   | ---                              | NA          | 0.17  | 2.39 | 1.65  | 1.29E-01 | 4.04E-01 | -5.40 |
| 1432886_PM_at   | 5730488B01Rik                    | NA          | 0.29  | 2.14 | 1.65  | 1.29E-01 | 4.04E-01 | -5.40 |
| 1448176_PM_a_at | Hnrnpk                           | HNRNPK      | -0.68 | 7.06 | -1.65 | 1.29E-01 | 4.04E-01 | -5.40 |
| 1437588_PM_at   | Pou4f2                           | POU4F2      | 0.15  | 2.37 | 1.65  | 1.29E-01 | 4.04E-01 | -5.40 |
| 1423323_PM_at   | Tacstd2                          | TACSTD2     | 0.16  | 2.14 | 1.65  | 1.29E-01 | 4.04E-01 | -5.40 |
| 1450032_PM_at   | Slco2a1                          | SLCO2A1     | 0.17  | 2.46 | 1.65  | 1.29E-01 | 4.04E-01 | -5.40 |
| 1437863_PM_at   | Bche                             | BCHE        | 0.19  | 2.25 | 1.65  | 1.29E-01 | 4.04E-01 | -5.40 |
| 1431742_PM_at   | 1810053B23Rik                    | NA          | 0.21  | 2.34 | 1.65  | 1.29E-01 | 4.04E-01 | -5.40 |
| 1451960_PM_a_at | Rev3l                            | REV3L       | 0.26  | 2.57 | 1.65  | 1.29E-01 | 4.04E-01 | -5.40 |
| 1456554_PM_at   | ---                              | NA          | 0.18  | 2.11 | 1.65  | 1.30E-01 | 4.04E-01 | -5.40 |
| 1418991_PM_at   | Bak1                             | BAK1        | 0.23  | 2.87 | 1.65  | 1.30E-01 | 4.04E-01 | -5.40 |
| 1453926_PM_at   | Rad54l                           | RAD54L      | 0.25  | 2.74 | 1.65  | 1.30E-01 | 4.04E-01 | -5.40 |
| 1436042_PM_at   | Tln1                             | TLN1        | -0.48 | 3.17 | -1.65 | 1.30E-01 | 4.04E-01 | -5.40 |
| 1441725_PM_at   | 6530402F18Rik                    | NA          | 0.15  | 2.26 | 1.65  | 1.30E-01 | 4.04E-01 | -5.40 |
| 1422214_PM_at   | Npffr2                           | NPFFR2      | 0.18  | 2.54 | 1.65  | 1.30E-01 | 4.04E-01 | -5.40 |
| 1442735_PM_at   | ---                              | NA          | -0.26 | 2.46 | -1.65 | 1.30E-01 | 4.04E-01 | -5.40 |
| 1453218_PM_at   | Lce1c                            | NA          | 0.15  | 2.34 | 1.65  | 1.30E-01 | 4.04E-01 | -5.40 |
| 1417391_PM_a_at | Il16                             | IL16        | -0.33 | 3.13 | -1.65 | 1.30E-01 | 4.04E-01 | -5.40 |
| 1447585_PM_s_at | Mrp56                            | MRP56       | 0.42  | 3.95 | 1.65  | 1.30E-01 | 4.05E-01 | -5.40 |
| 1420005_PM_s_at | Bmp15                            | BMP15       | 0.14  | 2.19 | 1.65  | 1.30E-01 | 4.05E-01 | -5.40 |
| 1437932_PM_a_at | Cldn1                            | CLDN1       | 0.13  | 2.00 | 1.65  | 1.30E-01 | 4.05E-01 | -5.40 |
| 1415988_PM_at   | Hdlbp                            | HDLBP       | 0.81  | 4.56 | 1.65  | 1.30E-01 | 4.05E-01 | -5.40 |
| 1416405_PM_at   | Bgn                              | BGN         | -1.19 | 4.83 | -1.65 | 1.30E-01 | 4.05E-01 | -5.40 |
| 1452016_PM_at   | Alox5ap                          | ALOX5AP     | 0.13  | 2.42 | 1.65  | 1.30E-01 | 4.05E-01 | -5.40 |
| 1444761_PM_at   | Ccdc8                            | CCDC8       | 0.14  | 2.22 | 1.65  | 1.30E-01 | 4.05E-01 | -5.40 |
| 1422897_PM_at   | Slc22a12                         | SLC22A12    | 0.27  | 3.53 | 1.65  | 1.30E-01 | 4.05E-01 | -5.40 |
| 1450491_PM_at   | Ptger1                           | PTGER1      | 0.17  | 2.56 | 1.65  | 1.30E-01 | 4.05E-01 | -5.40 |
| 1432212_PM_at   | Atcf                             | NA          | 0.12  | 1.97 | 1.65  | 1.30E-01 | 4.05E-01 | -5.40 |
| 1456971_PM_at   | Slc1a7                           | SLC1A7      | 0.19  | 2.55 | 1.65  | 1.30E-01 | 4.05E-01 | -5.40 |
| 1445132_PM_at   | ---                              | NA          | 0.25  | 3.29 | 1.65  | 1.30E-01 | 4.05E-01 | -5.41 |
| 1425271_PM_at   | Psmc3ip                          | PSMC3IP     | 0.34  | 3.13 | 1.65  | 1.30E-01 | 4.05E-01 | -5.41 |
| 1417836_PM_at   | Gpx7                             | GPX7        | 0.17  | 2.24 | 1.65  | 1.30E-01 | 4.05E-01 | -5.41 |
| 1423636_PM_at   | Wdr31                            | WDR31       | 0.22  | 2.34 | 1.64  | 1.30E-01 | 4.05E-01 | -5.41 |
| 1429194_PM_at   | Tigd2                            | TIGD2       | -0.49 | 3.81 | -1.64 | 1.30E-01 | 4.05E-01 | -5.41 |
| 1418788_PM_at   | Tek                              | TEK         | -0.63 | 3.52 | -1.64 | 1.30E-01 | 4.05E-01 | -5.41 |
| 1433817_PM_at   | Agpat3                           | AGPAT3      | -0.43 | 3.60 | -1.64 | 1.30E-01 | 4.05E-01 | -5.41 |
| 1449555_PM_a_at | Fetub                            | FETUB       | 0.19  | 2.29 | 1.64  | 1.30E-01 | 4.05E-01 | -5.41 |
| 1441884_PM_x_at | Cx3c1l                           | CX3CL1      | 0.21  | 4.16 | 1.64  | 1.30E-01 | 4.05E-01 | -5.41 |
| 1451893_PM_s_at | Mag1l                            | MAG1L       | 0.53  | 3.11 | 1.64  | 1.30E-01 | 4.05E-01 | -5.41 |
| 1453765_PM_at   | ---                              | NA          | 0.38  | 2.71 | 1.64  | 1.30E-01 | 4.05E-01 | -5.41 |
| 1443088_PM_at   | ---                              | NA          | 0.17  | 2.69 | 1.64  | 1.30E-01 | 4.05E-01 | -5.41 |
| 1438854_PM_x_at | Pitpnm1                          | PITPNM1     | 0.33  | 3.34 | 1.64  | 1.30E-01 | 4.05E-01 | -5.41 |
| 1430393_PM_at   | ---                              | NA          | 0.34  | 4.02 | 1.64  | 1.30E-01 | 4.05E-01 | -5.41 |
| 1451554_PM_a_at | Aph1a                            | APH1A       | 0.48  | 3.33 | 1.64  | 1.30E-01 | 4.05E-01 | -5.41 |
| 1426899_PM_at   | Tbc1d23                          | TBC1D23     | -0.16 | 2.44 | -1.64 | 1.30E-01 | 4.05E-01 | -5.41 |
| 1439895_PM_at   | AU021025                         | NA          | 0.18  | 2.72 | 1.64  | 1.30E-01 | 4.05E-01 | -5.41 |
| 1453431_PM_at   | 2610206C17Rik                    | NA          | 0.20  | 2.23 | 1.64  | 1.30E-01 | 4.05E-01 | -5.41 |
| 1424709_PM_at   | Sc5d                             | NA          | 0.20  | 2.61 | 1.64  | 1.30E-01 | 4.05E-01 | -5.41 |
| 1454225_PM_s_at | D3Ert751e                        | C4orf33     | 0.36  | 3.11 | 1.64  | 1.30E-01 | 4.05E-01 | -5.41 |
| 1418371_PM_at   | Dynll2                           | DYNLL2      | 0.62  | 4.14 | 1.64  | 1.30E-01 | 4.05E-01 | -5.41 |
| 1435913_PM_at   | B4galnt4                         | NA          | -0.35 | 2.80 | -1.64 | 1.30E-01 | 4.05E-01 | -5.41 |
| 1424862_PM_s_at | Mib2                             | MI2         | -0.16 | 4.41 | -1.64 | 1.30E-01 | 4.05E-01 | -5.41 |
| 1459383_PM_at   | Zfp948                           | NA          | 0.17  | 2.28 | 1.64  | 1.30E-01 | 4.05E-01 | -5.41 |
| 1454102_PM_at   | LOC102635844 ///<br>LOC105247647 | NA          | 0.27  | 2.39 | 1.64  | 1.30E-01 | 4.05E-01 | -5.41 |
| 1460495_PM_s_at | Htra2                            | HTRA2       | -0.33 | 3.80 | -1.64 | 1.30E-01 | 4.05E-01 | -5.41 |
| 1440927_PM_x_at | Apol11b                          | APOL1       | 0.30  | 2.31 | 1.64  | 1.30E-01 | 4.05E-01 | -5.41 |
| 1421676_PM_at   | Samt4                            | NA          | 0.14  | 2.11 | 1.64  | 1.30E-01 | 4.05E-01 | -5.41 |
| 1427171_PM_at   | Rlf                              | RLF         | -0.47 | 4.00 | -1.64 | 1.30E-01 | 4.05E-01 | -5.41 |
| 1419049_PM_at   | Pcnx                             | PCNX1       | -0.47 | 3.55 | -1.64 | 1.30E-01 | 4.05E-01 | -5.41 |
| 1432462_PM_a_at | Med27                            | MED27       | 0.25  | 2.38 | 1.64  | 1.30E-01 | 4.06E-01 | -5.41 |
| 1448023_PM_at   | Kalrn                            | KALRN       | -0.36 | 3.33 | -1.64 | 1.30E-01 | 4.06E-01 | -5.41 |
| 1454457_PM_at   | 4930439G18Rik                    | NA          | 0.18  | 3.31 | 1.64  | 1.30E-01 | 4.06E-01 | -5.41 |
| 1450544_PM_at   | Efcc1                            | EFCC1       | 0.22  | 2.50 | 1.64  | 1.30E-01 | 4.06E-01 | -5.41 |
| 1457910_PM_at   | ---                              | NA          | 0.17  | 1.99 | 1.64  | 1.30E-01 | 4.06E-01 | -5.41 |
| 1452701_PM_x_at | Uba52                            | KXD1        | -0.55 | 7.60 | -1.64 | 1.30E-01 | 4.06E-01 | -5.41 |
| 1444573_PM_at   | Lmtk3                            | NA          | 0.21  | 2.84 | 1.64  | 1.30E-01 | 4.06E-01 | -5.41 |
| 1444722_PM_at   | Psme4                            | PSME4       | 0.26  | 2.78 | 1.64  | 1.30E-01 | 4.06E-01 | -5.41 |
| 1443848_PM_at   | ---                              | NA          | 0.34  | 5.55 | 1.64  | 1.30E-01 | 4.06E-01 | -5.41 |
| 1426182_PM_a_at | Klrc1                            | KLRC4-KLRK1 | 0.14  | 2.10 | 1.64  | 1.31E-01 | 4.06E-01 | -5.41 |
| 1442104_PM_at   | ---                              | NA          | 0.17  | 2.25 | 1.64  | 1.31E-01 | 4.06E-01 | -5.41 |
| 1441807_PM_s_at | Fam228b                          | NA          | -0.49 | 3.18 | -1.64 | 1.31E-01 | 4.06E-01 | -5.41 |
| 1459174_PM_at   | ---                              | NA          | 0.41  | 3.43 | 1.64  | 1.31E-01 | 4.06E-01 | -5.41 |

|                 |                        |            |       |      |       |          |          |       |
|-----------------|------------------------|------------|-------|------|-------|----------|----------|-------|
| 144390_PM_at    | Ntrk1                  | NTRK1      | 0.19  | 2.45 | 1.64  | 1.31E-01 | 4.06E-01 | -5.41 |
| 1427822_PM_a_at | Copg2os2               | NA         | 1.03  | 6.82 | 1.64  | 1.31E-01 | 4.06E-01 | -5.41 |
| 1417128_PM_at   | Plekho1                | PLEKHO1    | 0.32  | 2.80 | 1.64  | 1.31E-01 | 4.06E-01 | -5.41 |
| 1416395_PM_at   | Guk1                   | GUK1       | -0.45 | 5.28 | -1.64 | 1.31E-01 | 4.06E-01 | -5.41 |
| 1442335_PM_at   | Has1                   | NA         | 0.30  | 2.49 | 1.64  | 1.31E-01 | 4.06E-01 | -5.41 |
| 1450656_PM_at   | Gna13                  | GNA13      | 0.22  | 2.58 | 1.64  | 1.31E-01 | 4.06E-01 | -5.41 |
| 1460096_PM_at   | ---                    | NA         | 0.18  | 2.10 | 1.64  | 1.31E-01 | 4.06E-01 | -5.41 |
| 1455352_PM_at   | U2surp                 | U2SURP     | -0.42 | 3.58 | -1.64 | 1.31E-01 | 4.06E-01 | -5.41 |
| 1425178_PM_s_at | Shmt1                  | SHMT1      | -0.32 | 2.96 | -1.64 | 1.31E-01 | 4.06E-01 | -5.41 |
| 1447046_PM_at   | ---                    | NA         | -0.17 | 2.27 | -1.64 | 1.31E-01 | 4.06E-01 | -5.41 |
| 1425457_PM_a_at | Grb10                  | GRB10      | 0.21  | 2.16 | 1.64  | 1.31E-01 | 4.06E-01 | -5.41 |
| 1458889_PM_at   | Evl                    | NA         | 0.23  | 2.47 | 1.64  | 1.31E-01 | 4.06E-01 | -5.41 |
| 1416800_PM_at   | Trpm7                  | TRPM7      | 0.24  | 3.17 | 1.64  | 1.31E-01 | 4.06E-01 | -5.41 |
| 1442354_PM_at   | B230325K18Rik          | NA         | 0.29  | 2.87 | 1.64  | 1.31E-01 | 4.06E-01 | -5.41 |
| 1440796_PM_at   | Cfap69                 | CFAP69     | 0.50  | 3.06 | 1.64  | 1.31E-01 | 4.06E-01 | -5.41 |
| 1440513_PM_at   | C80258                 | NA         | 0.48  | 3.28 | 1.64  | 1.31E-01 | 4.06E-01 | -5.41 |
| 1438682_PM_at   | Pik3r1                 | PIK3R1     | -0.49 | 5.22 | -1.64 | 1.31E-01 | 4.06E-01 | -5.41 |
| 1419361_PM_at   | Ss18                   | SS18       | 0.23  | 2.50 | 1.64  | 1.31E-01 | 4.06E-01 | -5.41 |
| 1427727_PM_x_at | Psg19                  | CEACAM3    | -0.25 | 2.11 | -1.64 | 1.31E-01 | 4.06E-01 | -5.41 |
| 1424097_PM_at   | Elov17                 | ELOVL7     | -0.21 | 2.43 | -1.64 | 1.31E-01 | 4.06E-01 | -5.41 |
| 1437016_PM_x_at | Rap2c                  | RAP2C      | -0.50 | 4.43 | -1.64 | 1.31E-01 | 4.06E-01 | -5.41 |
| 1428882_PM_at   | Wipi2                  | WIPI2      | 0.22  | 3.13 | 1.64  | 1.31E-01 | 4.06E-01 | -5.41 |
| 1451846_PM_at   | Nebl                   | NA         | -0.58 | 2.80 | -1.64 | 1.31E-01 | 4.06E-01 | -5.41 |
| 1425490_PM_a_at | Wdr13                  | WDR13      | 0.24  | 2.50 | 1.64  | 1.31E-01 | 4.06E-01 | -5.41 |
| 1459441_PM_at   | ---                    | NA         | 0.19  | 2.15 | 1.64  | 1.31E-01 | 4.07E-01 | -5.41 |
| 1420964_PM_at   | Enc1                   | ENC1       | -0.65 | 4.67 | -1.64 | 1.31E-01 | 4.07E-01 | -5.41 |
| 1438004_PM_at   | Papd7                  | PAPD7      | -0.28 | 3.71 | -1.64 | 1.31E-01 | 4.07E-01 | -5.41 |
| 1452074_PM_at   | Tmem135                | TMEM135    | -0.23 | 2.85 | -1.64 | 1.31E-01 | 4.07E-01 | -5.41 |
| 1416955_PM_at   | Slc25a10               | SLC25A10   | 0.15  | 2.42 | 1.64  | 1.31E-01 | 4.07E-01 | -5.41 |
| 1446413_PM_at   | ---                    | NA         | 0.15  | 2.40 | 1.64  | 1.31E-01 | 4.07E-01 | -5.41 |
| 1460205_PM_at   | Dcakd                  | DCAKD      | 0.16  | 2.46 | 1.64  | 1.31E-01 | 4.07E-01 | -5.41 |
| 1431186_PM_at   | Dlg5                   | DLG5       | 0.17  | 2.21 | 1.64  | 1.31E-01 | 4.07E-01 | -5.41 |
| 1447549_PM_x_at | Ninj1                  | NINJ1      | 0.17  | 2.80 | 1.64  | 1.31E-01 | 4.07E-01 | -5.41 |
| 1439230_PM_at   | Ccdc185                | CCDC185    | 0.18  | 2.95 | 1.64  | 1.31E-01 | 4.07E-01 | -5.41 |
| 1459480_PM_at   | D6Ert90e               | NA         | 0.19  | 2.65 | 1.64  | 1.31E-01 | 4.07E-01 | -5.41 |
| 1425971_PM_at   | ---                    | NA         | 0.20  | 2.34 | 1.64  | 1.31E-01 | 4.07E-01 | -5.41 |
| 1429600_PM_at   | Mthfd2l                | MTHFD2L    | 0.40  | 2.40 | 1.64  | 1.31E-01 | 4.07E-01 | -5.41 |
| 1420631_PM_a_at | Bkcap                  | BLCAP      | -0.52 | 5.06 | -1.64 | 1.31E-01 | 4.07E-01 | -5.41 |
| 1429197_PM_s_at | Rabgap1l               | RABGAP1L   | -0.36 | 2.63 | -1.64 | 1.31E-01 | 4.07E-01 | -5.41 |
| 1421412_PM_at   | Gsc                    | GSC        | 0.13  | 2.38 | 1.64  | 1.31E-01 | 4.07E-01 | -5.41 |
| 1457436_PM_at   | Tbc1d7                 | TBC1D7     | 0.39  | 3.38 | 1.64  | 1.31E-01 | 4.07E-01 | -5.41 |
| 1416102_PM_at   | Ywhaz                  | YWHAZ      | -0.54 | 8.89 | -1.64 | 1.31E-01 | 4.07E-01 | -5.41 |
| 1451330_PM_a_at | Inpp5b                 | INPP5B     | 0.37  | 3.51 | 1.64  | 1.31E-01 | 4.07E-01 | -5.41 |
| 1434106_PM_at   | Epm2aip1               | EPM2AI1    | -0.85 | 4.70 | -1.64 | 1.31E-01 | 4.07E-01 | -5.41 |
| 1445231_PM_at   | Gm41028                | NA         | 0.17  | 2.24 | 1.64  | 1.31E-01 | 4.07E-01 | -5.41 |
| 1457018_PM_at   | ---                    | NA         | 0.18  | 2.17 | 1.64  | 1.31E-01 | 4.07E-01 | -5.42 |
| 1416621_PM_at   | Llg1                   | LLGL1      | 0.30  | 3.02 | 1.64  | 1.31E-01 | 4.07E-01 | -5.41 |
| 1437106_PM_at   | Kdm5a                  | KDM5A      | 0.52  | 4.67 | 1.64  | 1.31E-01 | 4.07E-01 | -5.42 |
| 1445584_PM_at   | ---                    | NA         | 0.18  | 2.08 | 1.64  | 1.31E-01 | 4.07E-01 | -5.42 |
| 1436781_PM_at   | Man2b1                 | ACO10422.5 | 0.18  | 2.51 | 1.64  | 1.31E-01 | 4.07E-01 | -5.42 |
| 1434322_PM_at   | Mical2                 | MICAL2     | 0.19  | 2.34 | 1.64  | 1.31E-01 | 4.07E-01 | -5.42 |
| 1428481_PM_s_at | Cdc8                   | CDC8       | 0.37  | 2.58 | 1.64  | 1.31E-01 | 4.07E-01 | -5.42 |
| 1426483_PM_at   | Prkrir                 | THAP12     | -0.38 | 4.13 | -1.64 | 1.31E-01 | 4.07E-01 | -5.42 |
| 1444495_PM_at   | ---                    | NA         | 0.25  | 2.61 | 1.64  | 1.31E-01 | 4.07E-01 | -5.42 |
| 1416965_PM_at   | Pcsk1n                 | PCSK1N     | 0.33  | 3.19 | 1.64  | 1.31E-01 | 4.07E-01 | -5.42 |
| 1416369_PM_at   | Hiat1                  | MFSD14B    | -0.55 | 4.41 | -1.64 | 1.31E-01 | 4.07E-01 | -5.42 |
| 1447246_PM_at   | Gm9873                 | NA         | 0.28  | 2.71 | 1.64  | 1.31E-01 | 4.07E-01 | -5.42 |
| 1448224_PM_at   | Tfam                   | TFAM       | -0.35 | 3.11 | -1.64 | 1.32E-01 | 4.07E-01 | -5.42 |
| 1449838_PM_at   | Crisp3                 | CRISP2     | 0.15  | 1.97 | 1.64  | 1.32E-01 | 4.07E-01 | -5.42 |
| 1451761_PM_at   | Hoxb4                  | HOXB4      | 0.15  | 2.15 | 1.64  | 1.32E-01 | 4.07E-01 | -5.42 |
| 1452954_PM_at   | Ube2c                  | UBE2C      | 0.32  | 2.94 | 1.64  | 1.32E-01 | 4.07E-01 | -5.42 |
| 1417679_PM_at   | Gfi1                   | GFI1       | 0.33  | 2.28 | 1.64  | 1.32E-01 | 4.07E-01 | -5.42 |
| 1457890_PM_at   | D6Ert234e              | NA         | 0.36  | 3.16 | 1.64  | 1.32E-01 | 4.07E-01 | -5.42 |
| 1458543_PM_at   | ---                    | NA         | -0.43 | 4.46 | -1.64 | 1.32E-01 | 4.07E-01 | -5.42 |
| 1459885_PM_s_at | Cox7c /// LOC102642884 | COX7C      | -0.22 | 2.35 | -1.64 | 1.32E-01 | 4.07E-01 | -5.42 |
| 1437612_PM_at   | Ili1                   | NA         | 0.18  | 2.29 | 1.64  | 1.32E-01 | 4.07E-01 | -5.42 |
| 1454667_PM_at   | Snx8                   | SNX8       | 0.24  | 3.98 | 1.64  | 1.32E-01 | 4.07E-01 | -5.42 |
| 1458585_PM_at   | ---                    | NA         | 0.16  | 2.14 | 1.64  | 1.32E-01 | 4.07E-01 | -5.42 |
| 1433963_PM_a_at | Fermt3                 | FERMT3     | 0.16  | 2.49 | 1.64  | 1.32E-01 | 4.07E-01 | -5.42 |
| 1449376_PM_at   | Nicn1                  | NICN1      | 0.32  | 2.89 | 1.64  | 1.32E-01 | 4.07E-01 | -5.42 |
| 1436245_PM_at   | Usp20                  | USP20      | 0.49  | 2.74 | 1.64  | 1.32E-01 | 4.07E-01 | -5.42 |
| 1450141_PM_at   | Abcg3                  | ABCG2      | 0.15  | 2.40 | 1.64  | 1.32E-01 | 4.07E-01 | -5.42 |
| 1434291_PM_a_at | Serf1                  | SERF1B     | -0.63 | 3.66 | -1.64 | 1.32E-01 | 4.07E-01 | -5.42 |
| 1436841_PM_at   | Fam63b                 | MINDY2     | -0.56 | 4.03 | -1.64 | 1.32E-01 | 4.07E-01 | -5.42 |
| 1421237_PM_at   | Tmpo                   | TMPO       | -0.23 | 2.25 | -1.64 | 1.32E-01 | 4.07E-01 | -5.42 |



|                     |               |                |       |      |       |          |          |       |
|---------------------|---------------|----------------|-------|------|-------|----------|----------|-------|
| 1420273_PM_x_at     | Samhd1        | SAMHD1         | 0.15  | 2.17 | 1.64  | 1.32E-01 | 4.07E-01 | -5.42 |
| 1447631_PM_at       | Kat7          | KAT7           | 0.25  | 2.67 | 1.64  | 1.32E-01 | 4.07E-01 | -5.42 |
| 1457844_PM_a_at     | Nol4l         | NOL4L          | 0.38  | 2.47 | 1.64  | 1.32E-01 | 4.07E-01 | -5.42 |
| 1440098_PM_at       | D030018L15Rik | NA             | 0.16  | 2.42 | 1.64  | 1.32E-01 | 4.07E-01 | -5.42 |
| 1417445_PM_at       | Ndc80         | NDC80          | 0.16  | 2.59 | 1.64  | 1.32E-01 | 4.07E-01 | -5.42 |
| 1436227_PM_at       | Lefty2        | LEFTY1         | 0.25  | 3.79 | 1.64  | 1.32E-01 | 4.07E-01 | -5.42 |
| 1444558_PM_at       | ---           | NA             | 0.33  | 2.72 | 1.64  | 1.32E-01 | 4.07E-01 | -5.42 |
| 1456199_PM_x_at     | Ranbp9        | RANBP9         | -0.89 | 8.37 | -1.64 | 1.32E-01 | 4.07E-01 | -5.42 |
| 1448326_PM_a_at     | Crabp1        | CRABP1         | 0.16  | 2.21 | 1.64  | 1.32E-01 | 4.07E-01 | -5.42 |
| 1422770_PM_at       | Rad51d        | RAD51D         | 0.19  | 2.98 | 1.64  | 1.32E-01 | 4.07E-01 | -5.42 |
| 1440208_PM_at       | Rac2          | RAC2           | 0.23  | 2.48 | 1.64  | 1.32E-01 | 4.07E-01 | -5.42 |
| 1453238_PM_s_at     | ---           | NA             | 0.56  | 6.83 | 1.64  | 1.32E-01 | 4.07E-01 | -5.42 |
| 1416291_PM_at       | Psmc4         | PSMC4          | -0.57 | 5.44 | -1.64 | 1.32E-01 | 4.07E-01 | -5.42 |
| 1428389_PM_s_at     | Wdr43         | WDR43          | -0.34 | 3.06 | -1.64 | 1.32E-01 | 4.07E-01 | -5.42 |
| 1431558_PM_at       | Z310016D03Rik | NA             | 0.18  | 2.42 | 1.64  | 1.32E-01 | 4.07E-01 | -5.42 |
| 1437183_PM_at       | Lrrc4b        | LRRC4B         | 0.25  | 2.75 | 1.64  | 1.32E-01 | 4.07E-01 | -5.42 |
| 1442540_PM_at       | C77609        | NA             | 0.51  | 2.84 | 1.64  | 1.32E-01 | 4.07E-01 | -5.42 |
| 1457941_PM_at       | Gmeb2         | GMEB2          | 0.15  | 2.23 | 1.64  | 1.32E-01 | 4.07E-01 | -5.42 |
| 1418720_PM_at       | Cops7b        | COPS7B         | 0.17  | 2.72 | 1.64  | 1.32E-01 | 4.07E-01 | -5.42 |
| 1445890_PM_at       | Gm36901       | NA             | 0.18  | 2.28 | 1.64  | 1.32E-01 | 4.07E-01 | -5.42 |
| 1449302_PM_at       | Abca2         | ABCA2          | 0.19  | 2.26 | 1.64  | 1.32E-01 | 4.07E-01 | -5.42 |
| 1439546_PM_at       | Golga7b       | GOLGA7B        | 0.25  | 2.86 | 1.64  | 1.32E-01 | 4.07E-01 | -5.42 |
| 1455106_PM_a_at     | Ckb           | CKB            | -0.61 | 7.25 | -1.63 | 1.32E-01 | 4.08E-01 | -5.42 |
| 1450013_PM_at       | My12a         | MYL12A         | 0.15  | 2.56 | 1.63  | 1.32E-01 | 4.08E-01 | -5.42 |
| AFFX-r2-Bs-lys-3_at | ---           | NA             | 0.15  | 2.13 | 1.63  | 1.32E-01 | 4.08E-01 | -5.42 |
| 1457951_PM_at       | ---           | NA             | 0.36  | 2.46 | 1.63  | 1.32E-01 | 4.08E-01 | -5.42 |
| 1448418_PM_s_at     | Dcaf11        | AL136295.3     | 0.38  | 5.31 | 1.63  | 1.32E-01 | 4.08E-01 | -5.42 |
| 1442904_PM_at       | Chst2         | NA             | 0.13  | 2.24 | 1.63  | 1.32E-01 | 4.08E-01 | -5.42 |
| 1418871_PM_a_at     | Phgr1         | NA             | 0.13  | 2.15 | 1.63  | 1.32E-01 | 4.08E-01 | -5.42 |
| 1459388_PM_at       | ---           | NA             | 0.29  | 2.27 | 1.63  | 1.32E-01 | 4.08E-01 | -5.42 |
| 1459810_PM_at       | 1110008F13Rik | TGIF2-C20orf24 | -0.14 | 3.11 | -1.63 | 1.32E-01 | 4.08E-01 | -5.42 |
| 1452716_PM_at       | Fam213a       | FAM213A        | -0.70 | 8.39 | -1.63 | 1.32E-01 | 4.08E-01 | -5.42 |
| 1443138_PM_at       | ---           | NA             | 0.27  | 2.81 | 1.63  | 1.32E-01 | 4.08E-01 | -5.42 |
| 1424081_PM_at       | Pcgf6         | PCGF6          | -0.41 | 3.36 | -1.63 | 1.32E-01 | 4.08E-01 | -5.42 |
| 1444314_PM_at       | ---           | NA             | 0.20  | 2.40 | 1.63  | 1.32E-01 | 4.08E-01 | -5.42 |
| 1458255_PM_at       | ---           | NA             | 0.31  | 2.84 | 1.63  | 1.32E-01 | 4.08E-01 | -5.42 |
| 1434208_PM_at       | Rnf169        | RNF169         | -0.32 | 2.53 | -1.63 | 1.32E-01 | 4.08E-01 | -5.42 |
| 1444215_PM_at       | Gm33298       | NA             | -0.51 | 3.39 | -1.63 | 1.32E-01 | 4.08E-01 | -5.42 |
| 1425534_PM_at       | Stau2         | STAU2          | -0.40 | 2.63 | -1.63 | 1.32E-01 | 4.08E-01 | -5.42 |
| 1454184_PM_a_at     | Ikbbk         | IKBKB          | 0.30  | 3.06 | 1.63  | 1.32E-01 | 4.08E-01 | -5.42 |
| 1438675_PM_at       | Sfswap        | SFSWAP         | -0.53 | 4.56 | -1.63 | 1.32E-01 | 4.08E-01 | -5.42 |
| 1416221_PM_at       | Fstl1         | FSTL1          | -0.26 | 2.66 | -1.63 | 1.32E-01 | 4.08E-01 | -5.42 |
| 1436668_PM_at       | Eef2kmt       | FAM86B2        | -0.15 | 2.37 | -1.63 | 1.32E-01 | 4.08E-01 | -5.42 |
| 1456769_PM_at       | Dusp3         | DUSP3          | 0.57  | 4.59 | 1.63  | 1.32E-01 | 4.08E-01 | -5.42 |
| 1424907_PM_a_at     | Farsa         | FARSA          | -0.14 | 2.25 | -1.63 | 1.32E-01 | 4.08E-01 | -5.42 |
| 1425284_PM_a_at     | Rab27a        | RAB27A         | 0.16  | 2.03 | 1.63  | 1.32E-01 | 4.08E-01 | -5.42 |
| 1450321_PM_at       | Zfp354c       | ZNF354C        | 0.27  | 2.59 | 1.63  | 1.32E-01 | 4.08E-01 | -5.42 |
| 1448408_PM_at       | Hps1          | HPS1           | 0.19  | 2.64 | 1.63  | 1.32E-01 | 4.08E-01 | -5.42 |
| 1436960_PM_at       | Brd3          | BRD3           | -0.46 | 4.51 | -1.63 | 1.32E-01 | 4.08E-01 | -5.42 |
| 1418019_PM_at       | Cpd           | CPD            | -0.21 | 2.49 | -1.63 | 1.32E-01 | 4.08E-01 | -5.42 |
| 1451814_PM_a_at     | Htatip2       | HTATIP2        | -0.16 | 2.50 | -1.63 | 1.32E-01 | 4.08E-01 | -5.42 |
| 1441776_PM_at       | Tspan11       | TSPAN11        | 0.22  | 2.36 | 1.63  | 1.32E-01 | 4.08E-01 | -5.42 |
| 1438551_PM_at       | Neurog1       | NEUROG1        | 0.22  | 2.26 | 1.63  | 1.32E-01 | 4.08E-01 | -5.42 |
| 1458893_PM_at       | ---           | NA             | 0.19  | 2.32 | 1.63  | 1.32E-01 | 4.08E-01 | -5.42 |
| 1437969_PM_s_at     | Tsr3          | TSR3           | -0.23 | 2.37 | -1.63 | 1.32E-01 | 4.08E-01 | -5.42 |
| 1434746_PM_at       | Mga           | MGA            | -0.72 | 5.01 | -1.63 | 1.32E-01 | 4.08E-01 | -5.42 |
| 1441072_PM_at       | ---           | NA             | -0.40 | 4.97 | -1.63 | 1.32E-01 | 4.08E-01 | -5.42 |
| 1452028_PM_a_at     | Cdh23         | CDH23          | 0.23  | 2.60 | 1.63  | 1.32E-01 | 4.08E-01 | -5.42 |
| 1457921_PM_at       | Fam3a         | FAM3A          | 0.28  | 2.70 | 1.63  | 1.33E-01 | 4.08E-01 | -5.42 |
| 1429828_PM_at       | 1700024P04Rik | NA             | 0.12  | 2.09 | 1.63  | 1.33E-01 | 4.08E-01 | -5.42 |
| 1417127_PM_at       | Msx1          | MSX1           | 0.28  | 2.71 | 1.63  | 1.33E-01 | 4.08E-01 | -5.42 |
| 1458980_PM_at       | ---           | NA             | 0.67  | 2.19 | 1.63  | 1.33E-01 | 4.08E-01 | -5.42 |
| 1439939_PM_at       | ---           | NA             | -0.23 | 2.38 | -1.63 | 1.33E-01 | 4.08E-01 | -5.42 |
| 1434497_PM_at       | 4933431E20Rik | NA             | -0.28 | 4.34 | -1.63 | 1.33E-01 | 4.08E-01 | -5.42 |
| 1422652_PM_at       | Cryga         | CRYGA          | 0.14  | 2.12 | 1.63  | 1.33E-01 | 4.08E-01 | -5.42 |
| 1420749_PM_a_at     | Pou6f1        | POU6F1         | 0.14  | 2.31 | 1.63  | 1.33E-01 | 4.08E-01 | -5.42 |
| 1423191_PM_at       | Fnbp4         | FNBP4          | 0.21  | 3.21 | 1.63  | 1.33E-01 | 4.08E-01 | -5.42 |
| 1429143_PM_at       | Tekt3         | TEKT3          | 0.22  | 2.59 | 1.63  | 1.33E-01 | 4.08E-01 | -5.42 |
| 1446927_PM_at       | ---           | NA             | 0.23  | 2.37 | 1.63  | 1.33E-01 | 4.08E-01 | -5.42 |
| 1459157_PM_at       | ---           | NA             | 0.23  | 2.44 | 1.63  | 1.33E-01 | 4.08E-01 | -5.42 |
| 1436729_PM_at       | Afap1         | AFAP1          | 0.45  | 4.31 | 1.63  | 1.33E-01 | 4.08E-01 | -5.42 |
| 1417635_PM_at       | Spa17         | SPA17          | 0.62  | 3.09 | 1.63  | 1.33E-01 | 4.08E-01 | -5.42 |
| 1425561_PM_at       | Trnt1         | TRNT1          | -0.47 | 4.66 | -1.63 | 1.33E-01 | 4.08E-01 | -5.42 |
| 1420777_PM_a_at     | 4933400A11Rik | NA             | 0.12  | 2.04 | 1.63  | 1.33E-01 | 4.08E-01 | -5.42 |
| 1434178_PM_at       | Kmt2c         | KMT2C          | -0.51 | 2.91 | -1.63 | 1.33E-01 | 4.08E-01 | -5.42 |

|                 |                                                              |         |       |      |       |          |          |       |
|-----------------|--------------------------------------------------------------|---------|-------|------|-------|----------|----------|-------|
| 1420067_PM_at   | Cd160                                                        | NA      | 0.16  | 2.78 | 1.63  | 1.33E-01 | 4.08E-01 | -5.42 |
| 1418710_PM_at   | Cd59a                                                        | CD59    | 0.54  | 3.57 | 1.63  | 1.33E-01 | 4.08E-01 | -5.42 |
| 1442679_PM_at   | ---                                                          | NA      | 0.15  | 2.41 | 1.63  | 1.33E-01 | 4.08E-01 | -5.42 |
| 1458773_PM_at   | ---                                                          | NA      | 0.29  | 2.81 | 1.63  | 1.33E-01 | 4.08E-01 | -5.42 |
| 1445949_PM_at   | ---                                                          | NA      | 0.17  | 2.38 | 1.63  | 1.33E-01 | 4.09E-01 | -5.43 |
| 1430685_PM_at   | Fam131b                                                      | FAM131B | 0.36  | 3.62 | 1.63  | 1.33E-01 | 4.09E-01 | -5.43 |
| 1436710_PM_at   | Zswim4                                                       | ZSWIM4  | 0.20  | 2.56 | 1.63  | 1.33E-01 | 4.09E-01 | -5.43 |
| 1442310_PM_at   | Pip4k2a                                                      | NA      | 0.25  | 2.85 | 1.63  | 1.33E-01 | 4.09E-01 | -5.43 |
| 1427343_PM_at   | Rasd2                                                        | RASD2   | -0.18 | 2.36 | -1.63 | 1.33E-01 | 4.09E-01 | -5.43 |
| 1454445_PM_at   | ---                                                          | NA      | 0.24  | 2.44 | 1.63  | 1.33E-01 | 4.09E-01 | -5.43 |
| 1421920_PM_a_at | Ccr9                                                         | CCR9    | 0.22  | 2.45 | 1.63  | 1.33E-01 | 4.09E-01 | -5.43 |
| 1454953_PM_at   | Rnf157                                                       | RNF157  | -0.47 | 3.36 | -1.63 | 1.33E-01 | 4.09E-01 | -5.43 |
| 1434396_PM_a_at | Myf6                                                         | MYL6    | -0.33 | 8.83 | -1.63 | 1.33E-01 | 4.09E-01 | -5.43 |
| 1436558_PM_at   | Taf1d                                                        | NA      | 0.34  | 3.19 | 1.63  | 1.33E-01 | 4.09E-01 | -5.43 |
| 1423377_PM_at   | Igfbpl1                                                      | IGFBPL1 | 0.18  | 3.16 | 1.63  | 1.33E-01 | 4.09E-01 | -5.43 |
| 1425175_PM_at   | C1qf3                                                        | C1QL3   | -0.91 | 3.69 | -1.63 | 1.33E-01 | 4.09E-01 | -5.43 |
| 1439299_PM_at   | ---                                                          | NA      | 0.25  | 2.31 | 1.63  | 1.33E-01 | 4.09E-01 | -5.43 |
| 1441181_PM_at   | ---                                                          | NA      | 0.37  | 3.80 | 1.63  | 1.33E-01 | 4.09E-01 | -5.43 |
| 1447940_PM_a_at | Braf                                                         | NA      | 0.62  | 2.41 | 1.63  | 1.33E-01 | 4.09E-01 | -5.43 |
| 1422609_PM_at   | Arpp19                                                       | ARPP19  | -0.60 | 5.36 | -1.63 | 1.33E-01 | 4.09E-01 | -5.43 |
| 1455900_PM_x_at | Tgm2                                                         | TGM2    | -0.77 | 5.75 | -1.63 | 1.33E-01 | 4.09E-01 | -5.43 |
| 1441009_PM_at   | 4732491K20Rik                                                | NA      | 0.15  | 2.26 | 1.63  | 1.33E-01 | 4.09E-01 | -5.43 |
| 1458079_PM_at   | Usp40                                                        | USP40   | 0.20  | 3.32 | 1.63  | 1.33E-01 | 4.09E-01 | -5.43 |
| 1422870_PM_at   | Hoxc4                                                        | HOXC4   | 0.17  | 2.32 | 1.63  | 1.33E-01 | 4.09E-01 | -5.43 |
| 1445352_PM_at   | ---                                                          | NA      | 0.23  | 2.96 | 1.63  | 1.33E-01 | 4.09E-01 | -5.43 |
| 1447394_PM_at   | Cka4c-ps                                                     | NA      | 0.25  | 2.24 | 1.63  | 1.33E-01 | 4.09E-01 | -5.43 |
| 1455946_PM_x_at | Tmsb10                                                       | TMSB10  | 0.69  | 7.73 | 1.63  | 1.33E-01 | 4.09E-01 | -5.43 |
| 1445066_PM_at   | ---                                                          | NA      | 0.15  | 2.31 | 1.63  | 1.33E-01 | 4.09E-01 | -5.43 |
| 1450593_PM_at   | Ifna13 /// Ifna15 /// Ifna6                                  | IFNA6   | 0.19  | 2.45 | 1.63  | 1.33E-01 | 4.09E-01 | -5.43 |
| 1443427_PM_at   | ---                                                          | NA      | 0.20  | 2.31 | 1.63  | 1.33E-01 | 4.09E-01 | -5.43 |
| 1450675_PM_at   | Smap2                                                        | SMAP2   | -0.73 | 5.71 | -1.63 | 1.33E-01 | 4.09E-01 | -5.43 |
| 1437543_PM_at   | Fubp1                                                        | FUBP1   | 0.24  | 3.18 | 1.63  | 1.33E-01 | 4.09E-01 | -5.43 |
| 1453241_PM_a_at | 2810047C21Rik1 ///<br>Gm20482 /// Gm3912 ///<br>LOC105242405 | NA      | 0.42  | 3.67 | 1.63  | 1.33E-01 | 4.09E-01 | -5.43 |
| 1453304_PM_s_at | Ly6e                                                         | LY6E    | -0.78 | 4.43 | -1.63 | 1.33E-01 | 4.09E-01 | -5.43 |
| 1451024_PM_at   | S1pr4                                                        | S1PR4   | 0.21  | 2.62 | 1.63  | 1.33E-01 | 4.09E-01 | -5.43 |
| 1443203_PM_at   | ---                                                          | NA      | 0.25  | 2.60 | 1.63  | 1.33E-01 | 4.09E-01 | -5.43 |
| 1450640_PM_x_at | Atp5k                                                        | ATP5I   | 0.41  | 5.96 | 1.63  | 1.33E-01 | 4.09E-01 | -5.43 |
| 1416040_PM_at   | Lipf                                                         | LIPF    | 0.16  | 2.49 | 1.63  | 1.33E-01 | 4.09E-01 | -5.43 |
| 1429801_PM_at   | Fam219a                                                      | FAM219A | 0.17  | 2.25 | 1.63  | 1.33E-01 | 4.09E-01 | -5.43 |
| 1442347_PM_at   | Lrp8                                                         | LRP8    | -0.30 | 2.97 | -1.63 | 1.33E-01 | 4.09E-01 | -5.43 |
| 1425054_PM_a_at | Tmem234                                                      | TMEM234 | 0.17  | 2.29 | 1.63  | 1.33E-01 | 4.09E-01 | -5.43 |
| 1433974_PM_at   | Sephs1                                                       | SEPHS1  | 0.20  | 2.95 | 1.63  | 1.33E-01 | 4.09E-01 | -5.43 |
| 1429397_PM_a_at | Fam71d                                                       | FAM71D  | 0.15  | 2.29 | 1.63  | 1.34E-01 | 4.09E-01 | -5.43 |
| 1452239_PM_at   | Gt(ROSA)26Sor                                                | NA      | -0.42 | 4.45 | -1.63 | 1.34E-01 | 4.10E-01 | -5.43 |
| 1447728_PM_x_at | Hspa9                                                        | HSPA9   | 0.14  | 2.79 | 1.63  | 1.34E-01 | 4.10E-01 | -5.43 |
| 1438001_PM_x_at | Reep5                                                        | REEP5   | -0.83 | 6.93 | -1.63 | 1.34E-01 | 4.10E-01 | -5.43 |
| 1423744_PM_x_at | Eif2s3x                                                      | EIF2S3  | -0.48 | 6.28 | -1.63 | 1.34E-01 | 4.10E-01 | -5.43 |
| 1421928_PM_at   | Epha4                                                        | EPHA4   | -0.40 | 2.97 | -1.63 | 1.34E-01 | 4.10E-01 | -5.43 |
| 1443545_PM_at   | ---                                                          | NA      | -0.39 | 3.44 | -1.63 | 1.34E-01 | 4.10E-01 | -5.43 |
| 1426735_PM_at   | Iars2                                                        | IARS2   | -0.35 | 4.53 | -1.63 | 1.34E-01 | 4.10E-01 | -5.43 |
| 1438710_PM_at   | Htr1a                                                        | HTR1A   | -0.28 | 2.84 | -1.63 | 1.34E-01 | 4.10E-01 | -5.43 |
| 1444963_PM_at   | ---                                                          | NA      | 0.13  | 2.49 | 1.63  | 1.34E-01 | 4.10E-01 | -5.43 |
| 1449645_PM_s_at | Cct3                                                         | CCT3    | -0.38 | 3.06 | -1.63 | 1.34E-01 | 4.10E-01 | -5.43 |
| 1432727_PM_at   | Psm11                                                        | PSMD11  | 0.29  | 3.01 | 1.63  | 1.34E-01 | 4.10E-01 | -5.43 |
| 1455472_PM_at   | Vezt                                                         | VEZT    | -0.40 | 3.67 | -1.63 | 1.34E-01 | 4.10E-01 | -5.43 |
| 1453991_PM_at   | Cenpo                                                        | CENPO   | 0.16  | 2.35 | 1.63  | 1.34E-01 | 4.10E-01 | -5.43 |
| 1417447_PM_at   | Tcf21                                                        | TCF21   | 0.19  | 1.95 | 1.63  | 1.34E-01 | 4.10E-01 | -5.43 |
| 1424198_PM_at   | Dlg5                                                         | DLG5    | -0.45 | 4.04 | -1.63 | 1.34E-01 | 4.10E-01 | -5.43 |
| 1438524_PM_x_at | Pnrc1                                                        | PNRC1   | -0.20 | 2.28 | -1.63 | 1.34E-01 | 4.10E-01 | -5.43 |
| 1439476_PM_at   | Dsg2                                                         | DSG2    | 0.17  | 2.46 | 1.63  | 1.34E-01 | 4.10E-01 | -5.43 |
| 1440635_PM_at   | Palld                                                        | PALLD   | 0.17  | 2.33 | 1.63  | 1.34E-01 | 4.10E-01 | -5.43 |
| 1443224_PM_at   | ---                                                          | NA      | 0.18  | 2.15 | 1.63  | 1.34E-01 | 4.10E-01 | -5.43 |
| 1440138_PM_at   | Ahd1                                                         | AHDC1   | 0.21  | 2.50 | 1.63  | 1.34E-01 | 4.10E-01 | -5.43 |
| 1439849_PM_at   | Trabd2b                                                      | TRABD2B | 0.32  | 2.71 | 1.63  | 1.34E-01 | 4.10E-01 | -5.43 |
| 1416050_PM_a_at | Scarb1                                                       | SCARB1  | 0.19  | 2.60 | 1.63  | 1.34E-01 | 4.10E-01 | -5.43 |
| 1431428_PM_a_at | Nosip                                                        | NOSIP   | 0.30  | 2.98 | 1.63  | 1.34E-01 | 4.10E-01 | -5.43 |
| 1419571_PM_at   | Slc28a3                                                      | NA      | 0.19  | 2.30 | 1.63  | 1.34E-01 | 4.10E-01 | -5.43 |
| 1425466_PM_at   | Senp2                                                        | SENP2   | 0.17  | 2.33 | 1.63  | 1.34E-01 | 4.10E-01 | -5.43 |
| 1428839_PM_at   | Wdr53                                                        | WDR53   | 0.38  | 2.63 | 1.63  | 1.34E-01 | 4.10E-01 | -5.43 |
| 1421886_PM_at   | Sos1                                                         | SOS1    | 0.40  | 4.63 | 1.63  | 1.34E-01 | 4.10E-01 | -5.43 |
| 1433774_PM_x_at | Cog1                                                         | COG1    | 0.44  | 3.98 | 1.63  | 1.34E-01 | 4.10E-01 | -5.43 |
| 1444071_PM_at   | 9630013A20Rik                                                | NA      | -0.22 | 2.33 | -1.63 | 1.34E-01 | 4.10E-01 | -5.43 |
| 1441563_PM_at   | Cep57l1                                                      | CEP57L1 | 0.25  | 3.77 | 1.63  | 1.34E-01 | 4.10E-01 | -5.43 |

|                 |                                |          |       |      |       |          |          |       |
|-----------------|--------------------------------|----------|-------|------|-------|----------|----------|-------|
| 1453460_PM_at   | 1700012111Rik                  | NA       | -0.14 | 2.39 | -1.63 | 1.34E-01 | 4.10E-01 | -5.43 |
| 1422143_PM_at   | Akap7                          | NA       | 0.14  | 2.22 | 1.63  | 1.34E-01 | 4.10E-01 | -5.43 |
| 1451547_PM_at   | Iyd                            | IYD      | -0.26 | 2.73 | -1.63 | 1.34E-01 | 4.10E-01 | -5.43 |
| 1427599_PM_at   | Boll                           | BOLL     | -0.24 | 2.34 | -1.63 | 1.34E-01 | 4.10E-01 | -5.43 |
| 1425444_PM_a_at | Tgfbr2                         | TGFBR2   | 0.27  | 2.26 | 1.63  | 1.34E-01 | 4.10E-01 | -5.43 |
| 1416546_PM_a_at | Rpl6                           | RPL6     | -0.32 | 7.48 | -1.63 | 1.34E-01 | 4.10E-01 | -5.43 |
| 1421984_PM_at   | Stc1                           | NA       | 0.17  | 2.44 | 1.62  | 1.34E-01 | 4.10E-01 | -5.43 |
| 1455975_PM_x_at | Rnf114                         | RNF114   | -0.57 | 5.10 | -1.62 | 1.34E-01 | 4.10E-01 | -5.43 |
| 1447701_PM_x_at | Idh3a                          | IDH3A    | -0.23 | 5.45 | -1.62 | 1.34E-01 | 4.10E-01 | -5.43 |
| 1449747_PM_at   | Ppp1r35                        | NA       | -0.20 | 3.04 | -1.62 | 1.34E-01 | 4.10E-01 | -5.43 |
| 1447336_PM_at   | Gm10658                        | NA       | 0.13  | 2.32 | 1.62  | 1.34E-01 | 4.10E-01 | -5.43 |
| 1452072_PM_at   | Myct1                          | MYCT1    | 0.17  | 2.29 | 1.62  | 1.34E-01 | 4.10E-01 | -5.43 |
| 1430947_PM_at   | 4930549C15Rik                  | NA       | 0.18  | 2.45 | 1.62  | 1.34E-01 | 4.10E-01 | -5.43 |
| 1431903_PM_at   | 4930524C18Rik                  | NA       | 0.19  | 2.28 | 1.62  | 1.34E-01 | 4.10E-01 | -5.43 |
| 1421796_PM_a_at | Efna5                          | EFNA5    | 0.20  | 2.32 | 1.62  | 1.34E-01 | 4.10E-01 | -5.43 |
| 1421248_PM_at   | Syn3                           | SYN3     | 0.21  | 2.67 | 1.62  | 1.34E-01 | 4.10E-01 | -5.43 |
| 1422997_PM_s_at | Acot1 /// Acot2                | ACOT1    | 0.36  | 3.50 | 1.62  | 1.34E-01 | 4.11E-01 | -5.43 |
| 1419539_PM_at   | Irx4                           | IRX4     | 0.11  | 1.96 | 1.62  | 1.34E-01 | 4.11E-01 | -5.43 |
| 1428850_PM_x_at | Cd99                           | NA       | 0.18  | 2.19 | 1.62  | 1.34E-01 | 4.11E-01 | -5.43 |
| 1457002_PM_at   | Zfp408                         | ZNF408   | -0.48 | 4.26 | -1.62 | 1.34E-01 | 4.11E-01 | -5.43 |
| 1422949_PM_at   | Nos1                           | NOS1     | -0.19 | 2.45 | -1.62 | 1.34E-01 | 4.11E-01 | -5.43 |
| 1438250_PM_s_at | Ak6 /// LOC105247169 /// Taf9  | TAF9     | -0.49 | 8.16 | -1.62 | 1.34E-01 | 4.11E-01 | -5.44 |
| 1459162_PM_at   | ---                            | NA       | -0.42 | 3.59 | -1.62 | 1.34E-01 | 4.11E-01 | -5.44 |
| 1456546_PM_at   | 1700097N02Rik                  | NA       | 0.20  | 2.42 | 1.62  | 1.34E-01 | 4.11E-01 | -5.44 |
| 1444909_PM_at   | ---                            | NA       | 0.20  | 2.52 | 1.62  | 1.34E-01 | 4.11E-01 | -5.44 |
| 1455665_PM_at   | Lonrf1                         | LONRF1   | -0.51 | 6.30 | -1.62 | 1.34E-01 | 4.11E-01 | -5.44 |
| 1446572_PM_at   | ---                            | NA       | -0.31 | 2.61 | -1.62 | 1.34E-01 | 4.11E-01 | -5.44 |
| 1444316_PM_at   | ---                            | NA       | 0.14  | 2.28 | 1.62  | 1.34E-01 | 4.11E-01 | -5.44 |
| 1454115_PM_at   | 4930572J10Rik /// LOC102642103 | NA       | 0.15  | 2.13 | 1.62  | 1.34E-01 | 4.11E-01 | -5.44 |
| 1446577_PM_at   | ---                            | NA       | 0.21  | 2.54 | 1.62  | 1.34E-01 | 4.11E-01 | -5.44 |
| 1456979_PM_at   | ---                            | NA       | 0.27  | 2.40 | 1.62  | 1.34E-01 | 4.11E-01 | -5.44 |
| 1452965_PM_at   | Ankrd13d                       | ANKRD13D | 0.47  | 3.71 | 1.62  | 1.34E-01 | 4.11E-01 | -5.44 |
| 1427058_PM_at   | Eif4a-ps4 /// Eif4a1           | EIF4A1   | -0.68 | 4.68 | -1.62 | 1.35E-01 | 4.11E-01 | -5.44 |
| 1421903_PM_at   | Med29                          | MED29    | 0.16  | 2.34 | 1.62  | 1.35E-01 | 4.11E-01 | -5.44 |
| 1419712_PM_at   | Il3ra                          | IL3RA    | 0.22  | 2.70 | 1.62  | 1.35E-01 | 4.11E-01 | -5.44 |
| 1440806_PM_x_at | ---                            | NA       | 0.23  | 2.56 | 1.62  | 1.35E-01 | 4.11E-01 | -5.44 |
| 1458762_PM_at   | AU015230                       | NA       | 0.26  | 2.12 | 1.62  | 1.35E-01 | 4.11E-01 | -5.44 |
| 1447861_PM_x_at | Meis2                          | MEIS2    | -0.31 | 2.33 | -1.62 | 1.35E-01 | 4.11E-01 | -5.44 |
| 1442885_PM_at   | Scap                           | SCAP     | 0.13  | 2.24 | 1.62  | 1.35E-01 | 4.11E-01 | -5.44 |
| 1430113_PM_at   | Sh2d6                          | SH2D6    | 0.20  | 2.49 | 1.62  | 1.35E-01 | 4.11E-01 | -5.44 |
| 1443670_PM_at   | Odf3b                          | ODF3B    | 0.32  | 3.46 | 1.62  | 1.35E-01 | 4.11E-01 | -5.44 |
| 1445410_PM_at   | Naa35                          | NA       | 0.36  | 2.48 | 1.62  | 1.35E-01 | 4.11E-01 | -5.44 |
| 1444323_PM_at   | Ccnd3                          | CCND3    | 0.15  | 2.02 | 1.62  | 1.35E-01 | 4.11E-01 | -5.44 |
| 1446299_PM_at   | ---                            | NA       | 0.21  | 2.11 | 1.62  | 1.35E-01 | 4.11E-01 | -5.44 |
| 1436972_PM_at   | Gpr61                          | GPR61    | 0.28  | 2.85 | 1.62  | 1.35E-01 | 4.11E-01 | -5.44 |
| 1460037_PM_at   | Fam98b                         | FAM98B   | -0.44 | 6.61 | -1.62 | 1.35E-01 | 4.11E-01 | -5.44 |
| 1459333_PM_at   | ---                            | NA       | 0.18  | 2.34 | 1.62  | 1.35E-01 | 4.11E-01 | -5.44 |
| 1452294_PM_at   | Pcdh1                          | PCDH1    | 0.18  | 2.47 | 1.62  | 1.35E-01 | 4.11E-01 | -5.44 |
| 1446961_PM_at   | ---                            | NA       | 0.29  | 5.60 | 1.62  | 1.35E-01 | 4.11E-01 | -5.44 |
| 1431977_PM_at   | 4933402J15Rik                  | NA       | 0.15  | 2.19 | 1.62  | 1.35E-01 | 4.11E-01 | -5.44 |
| 1429874_PM_at   | Spat17                         | SPATA17  | 0.20  | 2.72 | 1.62  | 1.35E-01 | 4.11E-01 | -5.44 |
| 1418418_PM_a_at | Pri8a6                         | NA       | 0.16  | 2.59 | 1.62  | 1.35E-01 | 4.11E-01 | -5.44 |
| 1429494_PM_at   | Trim35                         | NA       | 0.26  | 2.77 | 1.62  | 1.35E-01 | 4.11E-01 | -5.44 |
| 1455483_PM_at   | Zfp148                         | ZNF148   | -0.40 | 3.02 | -1.62 | 1.35E-01 | 4.11E-01 | -5.44 |
| 1436809_PM_a_at | Spin1                          | SPIN1    | -0.59 | 8.03 | -1.62 | 1.35E-01 | 4.11E-01 | -5.44 |
| 1423141_PM_at   | Lipa                           | LIPA     | -0.52 | 3.56 | -1.62 | 1.35E-01 | 4.11E-01 | -5.44 |
| 1422277_PM_at   | Gira1                          | GLRA1    | 0.17  | 2.34 | 1.62  | 1.35E-01 | 4.11E-01 | -5.44 |
| 1443048_PM_at   | ---                            | NA       | 0.26  | 3.13 | 1.62  | 1.35E-01 | 4.11E-01 | -5.44 |
| 1431874_PM_at   | 4931429L15Rik                  | NA       | 0.15  | 2.42 | 1.62  | 1.35E-01 | 4.11E-01 | -5.44 |
| 1423793_PM_at   | Atg13                          | ATG13    | 0.22  | 2.89 | 1.62  | 1.35E-01 | 4.12E-01 | -5.44 |
| 1436479_PM_a_at | Dpp7                           | DPP7     | 0.18  | 2.39 | 1.62  | 1.35E-01 | 4.12E-01 | -5.44 |
| 1435837_PM_at   | Cryab                          | CRYAB    | 0.19  | 2.45 | 1.62  | 1.35E-01 | 4.12E-01 | -5.44 |
| 1431496_PM_at   | B230104F01Rik                  | NA       | 0.20  | 2.81 | 1.62  | 1.35E-01 | 4.12E-01 | -5.44 |
| 1460266_PM_at   | 1700094J05Rik                  | NA       | 0.22  | 3.18 | 1.62  | 1.35E-01 | 4.12E-01 | -5.44 |
| 1430201_PM_at   | ---                            | NA       | 0.16  | 2.36 | 1.62  | 1.35E-01 | 4.12E-01 | -5.44 |
| 1432319_PM_at   | 1700085C21Rik                  | NA       | 0.17  | 2.62 | 1.62  | 1.35E-01 | 4.12E-01 | -5.44 |
| 1420708_PM_at   | Traip                          | TRAIIP   | 0.18  | 2.53 | 1.62  | 1.35E-01 | 4.12E-01 | -5.44 |
| 1441012_PM_at   | ---                            | NA       | 0.26  | 2.33 | 1.62  | 1.35E-01 | 4.12E-01 | -5.44 |
| 1428744_PM_s_at | Bri3bp                         | BRI3BP   | -0.59 | 4.05 | -1.62 | 1.35E-01 | 4.12E-01 | -5.44 |
| 1435521_PM_at   | Msi2                           | MSI2     | -0.56 | 4.90 | -1.62 | 1.35E-01 | 4.12E-01 | -5.44 |
| 1422950_PM_at   | Hes7                           | HES7     | 0.16  | 2.45 | 1.62  | 1.35E-01 | 4.12E-01 | -5.44 |
| 1425158_PM_at   | Tbx20                          | TBX20    | 0.17  | 2.70 | 1.62  | 1.35E-01 | 4.12E-01 | -5.44 |
| 1458245_PM_at   | Susd1                          | SUSD1    | 0.19  | 2.31 | 1.62  | 1.35E-01 | 4.12E-01 | -5.44 |

|                 |                                                                                                           |            |       |      |       |          |          |       |
|-----------------|-----------------------------------------------------------------------------------------------------------|------------|-------|------|-------|----------|----------|-------|
| 1422083_PM_at   | Tlr9                                                                                                      | AC097637.1 | 0.19  | 2.79 | 1.62  | 1.35E-01 | 4.12E-01 | -5.44 |
| 1430765_PM_at   | Adck5                                                                                                     | ADCK5      | 0.24  | 2.68 | 1.62  | 1.35E-01 | 4.12E-01 | -5.44 |
| 1425766_PM_x_at | LOC101055727                                                                                              | NA         | 0.25  | 2.83 | 1.62  | 1.35E-01 | 4.12E-01 | -5.44 |
| 1452794_PM_x_at | 4933402N22Rik /// Gm5861<br>/// Gm6460 /// Gm6465 ///<br>Gm8922 /// Gm8926 ///<br>LOC101055912 /// Speer1 | NA         | 0.30  | 2.82 | 1.62  | 1.35E-01 | 4.12E-01 | -5.44 |
| 1450114_PM_at   | Ksr1                                                                                                      | KSR1       | 0.36  | 3.29 | 1.62  | 1.35E-01 | 4.12E-01 | -5.44 |
| 1455674_PM_at   | Wdr76                                                                                                     | WDR76      | 0.36  | 3.12 | 1.62  | 1.35E-01 | 4.12E-01 | -5.44 |
| 1418015_PM_at   | Pum2                                                                                                      | PUM2       | -0.52 | 3.53 | -1.62 | 1.35E-01 | 4.12E-01 | -5.44 |
| 1416759_PM_at   | Mical1                                                                                                    | MICAL1     | 0.57  | 3.07 | 1.62  | 1.35E-01 | 4.12E-01 | -5.44 |
| 1438704_PM_at   | Trim63                                                                                                    | TRIM63     | 0.13  | 2.10 | 1.62  | 1.35E-01 | 4.12E-01 | -5.44 |
| 1460011_PM_at   | Cyp26b1                                                                                                   | CYP26B1    | 0.80  | 3.78 | 1.62  | 1.35E-01 | 4.12E-01 | -5.44 |
| 1420971_PM_at   | Ubr1                                                                                                      | UBR1       | -0.30 | 2.30 | -1.62 | 1.35E-01 | 4.12E-01 | -5.44 |
| 1431049_PM_at   | Ica1l                                                                                                     | ICAIL      | -0.30 | 3.33 | -1.62 | 1.35E-01 | 4.12E-01 | -5.44 |
| 1416817_PM_at   | Nek7                                                                                                      | NEK7       | 0.19  | 2.49 | 1.62  | 1.36E-01 | 4.12E-01 | -5.44 |
| 1458009_PM_at   | ---                                                                                                       | NA         | 0.18  | 2.08 | 1.62  | 1.36E-01 | 4.12E-01 | -5.44 |
| 1434648_PM_a_at | Ccm2                                                                                                      | CCM2       | -0.72 | 4.46 | -1.62 | 1.36E-01 | 4.12E-01 | -5.44 |
| 1425918_PM_at   | ---                                                                                                       | NA         | 0.27  | 2.86 | 1.62  | 1.36E-01 | 4.12E-01 | -5.44 |
| 1437303_PM_at   | Il6st                                                                                                     | IL6ST      | 0.29  | 2.92 | 1.62  | 1.36E-01 | 4.12E-01 | -5.44 |
| 1429356_PM_s_at | Ggps1                                                                                                     | NA         | 0.44  | 4.56 | 1.62  | 1.36E-01 | 4.12E-01 | -5.44 |
| 1444247_PM_at   | ---                                                                                                       | NA         | 0.29  | 2.24 | 1.62  | 1.36E-01 | 4.12E-01 | -5.44 |
| 1455093_PM_a_at | Ahsg                                                                                                      | AHSG       | 0.16  | 2.41 | 1.62  | 1.36E-01 | 4.12E-01 | -5.44 |
| 1444748_PM_at   | ---                                                                                                       | NA         | 0.42  | 2.81 | 1.62  | 1.36E-01 | 4.12E-01 | -5.44 |
| 1431802_PM_a_at | Ept1                                                                                                      | SELENOI    | -0.18 | 2.34 | -1.62 | 1.36E-01 | 4.13E-01 | -5.44 |
| 1450825_PM_at   | Acer1                                                                                                     | ACER1      | 0.16  | 2.55 | 1.62  | 1.36E-01 | 4.13E-01 | -5.44 |
| 1452719_PM_at   | Zdhhc24                                                                                                   | ZDHHC24    | -0.63 | 6.17 | -1.62 | 1.36E-01 | 4.13E-01 | -5.44 |
| 1450047_PM_at   | Hs6st2                                                                                                    | HS6ST2     | -0.52 | 3.63 | -1.62 | 1.36E-01 | 4.13E-01 | -5.44 |
| 1420357_PM_s_at | Xlr3a /// Xlr3b /// Xlr3c                                                                                 | NA         | -0.23 | 2.33 | -1.62 | 1.36E-01 | 4.13E-01 | -5.44 |
| 1460516_PM_at   | Zhx1                                                                                                      | NA         | 0.15  | 2.19 | 1.62  | 1.36E-01 | 4.13E-01 | -5.44 |
| 1448374_PM_at   | Med28                                                                                                     | MED28      | 0.19  | 2.40 | 1.62  | 1.36E-01 | 4.13E-01 | -5.44 |
| 1457807_PM_at   | ---                                                                                                       | NA         | 0.19  | 3.39 | 1.62  | 1.36E-01 | 4.13E-01 | -5.44 |
| 1432215_PM_s_at | 4930417O22Rik                                                                                             | NA         | 0.21  | 2.41 | 1.62  | 1.36E-01 | 4.13E-01 | -5.44 |
| 1432993_PM_at   | ---                                                                                                       | NA         | 0.14  | 2.22 | 1.62  | 1.36E-01 | 4.13E-01 | -5.44 |
| 1431245_PM_at   | 1700063H04Rik                                                                                             | NA         | 0.21  | 2.76 | 1.62  | 1.36E-01 | 4.13E-01 | -5.44 |
| 1448011_PM_at   | Vps13c                                                                                                    | NA         | 0.32  | 2.41 | 1.62  | 1.36E-01 | 4.13E-01 | -5.44 |
| 1424351_PM_at   | Wfdc2                                                                                                     | WFDC2      | 0.32  | 2.46 | 1.62  | 1.36E-01 | 4.13E-01 | -5.44 |
| 1447941_PM_x_at | Braf                                                                                                      | NA         | 0.39  | 2.47 | 1.62  | 1.36E-01 | 4.13E-01 | -5.44 |
| 1416673_PM_at   | Bace2                                                                                                     | BACE2      | 0.13  | 2.22 | 1.62  | 1.36E-01 | 4.13E-01 | -5.44 |
| 1442350_PM_at   | ---                                                                                                       | NA         | 0.18  | 2.31 | 1.62  | 1.36E-01 | 4.13E-01 | -5.44 |
| 1423856_PM_at   | Popdc3                                                                                                    | POPDC3     | -0.76 | 2.89 | -1.62 | 1.36E-01 | 4.13E-01 | -5.45 |
| 1431374_PM_at   | 6330407A03Rik                                                                                             | NA         | 0.18  | 2.35 | 1.62  | 1.36E-01 | 4.13E-01 | -5.44 |
| 1455464_PM_x_at | Upk1b                                                                                                     | UPK1B      | 0.23  | 2.72 | 1.62  | 1.36E-01 | 4.13E-01 | -5.45 |
| 1425084_PM_at   | Gimap7                                                                                                    | GIMAP7     | 0.33  | 2.77 | 1.62  | 1.36E-01 | 4.13E-01 | -5.45 |
| 1441928_PM_x_at | Ell                                                                                                       | ELL        | 0.33  | 3.51 | 1.62  | 1.36E-01 | 4.13E-01 | -5.45 |
| 1437490_PM_x_at | Uap1                                                                                                      | UAP1       | -0.46 | 4.85 | -1.62 | 1.36E-01 | 4.13E-01 | -5.45 |
| 1427177_PM_at   | Fyc01                                                                                                     | FYCO1      | -0.45 | 4.03 | -1.62 | 1.36E-01 | 4.13E-01 | -5.45 |
| 1420575_PM_at   | Mt3                                                                                                       | MT3        | 0.30  | 3.96 | 1.62  | 1.36E-01 | 4.13E-01 | -5.45 |
| 1425895_PM_a_at | Id1                                                                                                       | ID1        | 0.17  | 2.47 | 1.62  | 1.36E-01 | 4.13E-01 | -5.45 |
| 1423387_PM_at   | Psmid9                                                                                                    | ACO69503.2 | 0.14  | 2.36 | 1.62  | 1.36E-01 | 4.13E-01 | -5.45 |
| 1432968_PM_at   | ---                                                                                                       | NA         | 0.29  | 3.06 | 1.62  | 1.36E-01 | 4.13E-01 | -5.45 |
| 1434525_PM_at   | Pkn3                                                                                                      | PKN3       | 0.19  | 3.36 | 1.62  | 1.36E-01 | 4.13E-01 | -5.45 |
| 1423813_PM_at   | Kif22                                                                                                     | KIF22      | 0.22  | 3.32 | 1.62  | 1.36E-01 | 4.13E-01 | -5.45 |
| 1452284_PM_at   | Ptprz1                                                                                                    | PTPRZ1     | -0.42 | 2.62 | -1.62 | 1.36E-01 | 4.14E-01 | -5.45 |
| 1452992_PM_at   | Cdc26                                                                                                     | CDC26      | -0.28 | 2.33 | -1.62 | 1.36E-01 | 4.14E-01 | -5.45 |
| 1439489_PM_at   | Ffar4                                                                                                     | FFAR4      | 0.15  | 2.08 | 1.62  | 1.36E-01 | 4.14E-01 | -5.45 |
| 1442308_PM_at   | Smyd4                                                                                                     | SMYD4      | 0.19  | 2.52 | 1.62  | 1.36E-01 | 4.14E-01 | -5.45 |
| 1430189_PM_at   | Nol4                                                                                                      | NOL4       | 0.35  | 2.95 | 1.62  | 1.36E-01 | 4.14E-01 | -5.45 |
| 1457898_PM_at   | ---                                                                                                       | NA         | 0.49  | 2.63 | 1.62  | 1.36E-01 | 4.14E-01 | -5.45 |
| 1431531_PM_at   | Tex13a                                                                                                    | TEX13B     | 0.13  | 2.20 | 1.61  | 1.36E-01 | 4.14E-01 | -5.45 |
| 1453275_PM_at   | Dynap                                                                                                     | NA         | 0.14  | 2.11 | 1.61  | 1.36E-01 | 4.14E-01 | -5.45 |
| 1448807_PM_at   | Hrh3                                                                                                      | HRH3       | 0.14  | 2.12 | 1.61  | 1.36E-01 | 4.14E-01 | -5.45 |
| 1423651_PM_at   | Iscal                                                                                                     | ISCA1      | -0.56 | 5.73 | -1.61 | 1.36E-01 | 4.14E-01 | -5.45 |
| 1425620_PM_at   | Tgfbr3                                                                                                    | TGFBR3     | -0.37 | 3.42 | -1.61 | 1.36E-01 | 4.14E-01 | -5.45 |
| 1422517_PM_a_at | Znrd1                                                                                                     | ZNRD1      | -0.22 | 3.13 | -1.61 | 1.36E-01 | 4.14E-01 | -5.45 |
| 1433165_PM_at   | ---                                                                                                       | NA         | 0.13  | 1.98 | 1.61  | 1.36E-01 | 4.14E-01 | -5.45 |
| 1435476_PM_a_at | Fcgr2b                                                                                                    | FCGR2A     | 0.16  | 2.26 | 1.61  | 1.36E-01 | 4.14E-01 | -5.45 |
| 1423464_PM_at   | Knstrn                                                                                                    | KNSTRN     | 0.17  | 2.34 | 1.61  | 1.36E-01 | 4.14E-01 | -5.45 |
| 1450220_PM_a_at | Spdef                                                                                                     | SPDEF      | 0.17  | 2.52 | 1.61  | 1.36E-01 | 4.14E-01 | -5.45 |
| 1417433_PM_at   | Lypla2                                                                                                    | LYPLA2     | 0.17  | 4.45 | 1.61  | 1.36E-01 | 4.14E-01 | -5.45 |
| 1420166_PM_at   | Dnrtt                                                                                                     | NA         | 0.19  | 2.57 | 1.61  | 1.36E-01 | 4.14E-01 | -5.45 |
| 1420800_PM_a_at | Kcnq2                                                                                                     | KCNQ2      | 0.24  | 3.61 | 1.61  | 1.36E-01 | 4.14E-01 | -5.45 |
| 1436621_PM_at   | Srcin1                                                                                                    | SRCIN1     | 0.27  | 6.87 | 1.61  | 1.36E-01 | 4.14E-01 | -5.45 |

|                 |                          |          |       |      |       |          |          |       |
|-----------------|--------------------------|----------|-------|------|-------|----------|----------|-------|
| 1430319_PM_at   | 4833411C07Rik            | NA       | 0.30  | 2.26 | 1.61  | 1.36E-01 | 4.14E-01 | -5.45 |
| 1447063_PM_at   | ---                      | NA       | 0.31  | 2.87 | 1.61  | 1.36E-01 | 4.14E-01 | -5.45 |
| 1455960_PM_at   | Megf9                    | MEGF9    | -0.47 | 3.51 | -1.61 | 1.36E-01 | 4.14E-01 | -5.45 |
| 1456642_PM_x_at | LOC105242999 /// S100a10 | S100A10  | -0.70 | 6.38 | -1.61 | 1.37E-01 | 4.14E-01 | -5.45 |
| 1436859_PM_at   | Arl14ep                  | ARL14EP  | -0.42 | 6.12 | -1.61 | 1.37E-01 | 4.14E-01 | -5.45 |
| 1427570_PM_at   | Srpr                     | NA       | -0.24 | 2.47 | -1.61 | 1.37E-01 | 4.14E-01 | -5.45 |
| 1450257_PM_at   | Cer1                     | CER1     | 0.15  | 2.59 | 1.61  | 1.37E-01 | 4.14E-01 | -5.45 |
| 1427368_PM_x_at | Fes                      | FES      | 0.15  | 2.02 | 1.61  | 1.37E-01 | 4.14E-01 | -5.45 |
| 1437672_PM_at   | Irs3                     | NA       | 0.19  | 2.52 | 1.61  | 1.37E-01 | 4.14E-01 | -5.45 |
| 1460151_PM_at   | ---                      | NA       | 0.36  | 3.10 | 1.61  | 1.37E-01 | 4.14E-01 | -5.45 |
| 1439440_PM_x_at | Twf2                     | TWF2     | 0.60  | 5.89 | 1.61  | 1.37E-01 | 4.14E-01 | -5.45 |
| 1428621_PM_a_at | Ramp2 /// Vps25          | RAMP2    | -0.92 | 3.09 | -1.61 | 1.37E-01 | 4.14E-01 | -5.45 |
| 1429575_PM_at   | Copg1                    | COPG1    | -0.18 | 2.81 | -1.61 | 1.37E-01 | 4.14E-01 | -5.45 |
| 1444857_PM_at   | C87312                   | NA       | 0.15  | 2.29 | 1.61  | 1.37E-01 | 4.14E-01 | -5.45 |
| 1431728_PM_at   | Chmp4c                   | NA       | 0.15  | 2.32 | 1.61  | 1.37E-01 | 4.14E-01 | -5.45 |
| 1421663_PM_at   | Dhrs2                    | DHRS2    | 0.24  | 2.64 | 1.61  | 1.37E-01 | 4.14E-01 | -5.45 |
| 1426801_PM_at   | Sept8                    | SEPT8    | 1.09  | 2.95 | 1.61  | 1.37E-01 | 4.14E-01 | -5.45 |
| 1433183_PM_at   | 6720477C19Rik            | NA       | 0.32  | 2.89 | 1.61  | 1.37E-01 | 4.14E-01 | -5.45 |
| 1449848_PM_at   | Gna14                    | GNA14    | 0.29  | 2.48 | 1.61  | 1.37E-01 | 4.14E-01 | -5.45 |
| 1442986_PM_at   | ---                      | NA       | 0.14  | 2.61 | 1.61  | 1.37E-01 | 4.14E-01 | -5.45 |
| 1444122_PM_at   | Sycp2                    | SYCP2    | 0.28  | 2.64 | 1.61  | 1.37E-01 | 4.14E-01 | -5.45 |
| 1424636_PM_at   | Ccdc47                   | CCDC47   | -0.29 | 2.96 | -1.61 | 1.37E-01 | 4.14E-01 | -5.45 |
| 1444999_PM_at   | C77651                   | NA       | 0.20  | 2.66 | 1.61  | 1.37E-01 | 4.14E-01 | -5.45 |
| 1459127_PM_at   | Gm36365                  | NA       | 0.26  | 2.62 | 1.61  | 1.37E-01 | 4.14E-01 | -5.45 |
| 1432237_PM_at   | 5730522E02Rik            | NA       | 0.19  | 2.31 | 1.61  | 1.37E-01 | 4.14E-01 | -5.45 |
| 1448470_PM_at   | Fbp1                     | FBP1     | 0.15  | 2.30 | 1.61  | 1.37E-01 | 4.14E-01 | -5.45 |
| 1430513_PM_at   | Alh3b3                   | ALDH3B2  | 0.16  | 2.34 | 1.61  | 1.37E-01 | 4.14E-01 | -5.45 |
| 1427780_PM_at   | Defb35                   | DEFB105A | 0.19  | 2.90 | 1.61  | 1.37E-01 | 4.14E-01 | -5.45 |
| 1449852_PM_a_at | Ehd4                     | EHD4     | 0.25  | 2.93 | 1.61  | 1.37E-01 | 4.14E-01 | -5.45 |
| 1450685_PM_at   | Arpp19                   | ARPP19   | -0.43 | 3.86 | -1.61 | 1.37E-01 | 4.14E-01 | -5.45 |
| 1422589_PM_at   | Rab3a                    | RAB3A    | -0.41 | 4.70 | -1.61 | 1.37E-01 | 4.14E-01 | -5.45 |
| 1421455_PM_at   | Sntb1                    | SNTB1    | 0.16  | 2.49 | 1.61  | 1.37E-01 | 4.14E-01 | -5.45 |
| 1433692_PM_at   | Nat10                    | NAT10    | 0.19  | 2.94 | 1.61  | 1.37E-01 | 4.14E-01 | -5.45 |
| 1448672_PM_a_at | Arfgap2                  | ARFGAP2  | 0.26  | 3.14 | 1.61  | 1.37E-01 | 4.14E-01 | -5.45 |
| 1428134_PM_at   | Coq9                     | COQ9     | 0.21  | 4.41 | 1.61  | 1.37E-01 | 4.14E-01 | -5.45 |
| 1449349_PM_at   | Nudt1                    | NUDT1    | 0.26  | 2.51 | 1.61  | 1.37E-01 | 4.14E-01 | -5.45 |
| 1431002_PM_x_at | Fahd2a                   | FAHD2B   | 0.28  | 2.83 | 1.61  | 1.37E-01 | 4.14E-01 | -5.45 |
| 1418949_PM_at   | Gdf15                    | GDF15    | 0.17  | 2.63 | 1.61  | 1.37E-01 | 4.14E-01 | -5.45 |
| 1422048_PM_at   | Trpc5                    | TRPC5    | -0.75 | 6.12 | -1.61 | 1.37E-01 | 4.14E-01 | -5.45 |
| 1428990_PM_at   | ---                      | NA       | -0.14 | 1.95 | -1.61 | 1.37E-01 | 4.14E-01 | -5.45 |
| 1427932_PM_s_at | 1200015M12Rik            | NA       | -0.46 | 5.64 | -1.61 | 1.37E-01 | 4.14E-01 | -5.45 |
| 1426141_PM_at   | Mrgpra1                  | NA       | 0.13  | 2.06 | 1.61  | 1.37E-01 | 4.14E-01 | -5.45 |
| 1444299_PM_at   | A430093F15Rik            | NA       | 0.14  | 2.12 | 1.61  | 1.37E-01 | 4.14E-01 | -5.45 |
| 1459389_PM_at   | ---                      | NA       | 0.16  | 2.60 | 1.61  | 1.37E-01 | 4.14E-01 | -5.45 |
| 1449161_PM_at   | Edn2                     | EDN2     | 0.16  | 2.50 | 1.61  | 1.37E-01 | 4.14E-01 | -5.45 |
| 1460497_PM_a_at | Sept12                   | SEPT12   | 0.18  | 2.39 | 1.61  | 1.37E-01 | 4.14E-01 | -5.45 |
| 1446966_PM_at   | Slc25a48                 | NA       | 0.19  | 2.82 | 1.61  | 1.37E-01 | 4.14E-01 | -5.45 |
| 1459905_PM_at   | Gm3764                   | NA       | 0.20  | 2.67 | 1.61  | 1.37E-01 | 4.14E-01 | -5.45 |
| 1430152_PM_at   | ---                      | NA       | 0.31  | 2.36 | 1.61  | 1.37E-01 | 4.14E-01 | -5.45 |
| 1416592_PM_at   | Glrx                     | GLRX     | -0.45 | 3.68 | -1.61 | 1.37E-01 | 4.14E-01 | -5.45 |
| 1449524_PM_at   | Eda                      | EDA      | 0.15  | 2.30 | 1.61  | 1.37E-01 | 4.14E-01 | -5.45 |
| 1457414_PM_at   | LOC102639987             | NA       | 0.36  | 2.55 | 1.61  | 1.37E-01 | 4.14E-01 | -5.45 |
| 1438201_PM_at   | Pdp1                     | PDP1     | -0.46 | 4.61 | -1.61 | 1.37E-01 | 4.14E-01 | -5.45 |
| 1454658_PM_at   | Ilvbl                    | ILVBL    | -0.41 | 4.70 | -1.61 | 1.37E-01 | 4.14E-01 | -5.45 |
| 1457850_PM_at   | Gm15496                  | NA       | -0.39 | 2.75 | -1.61 | 1.37E-01 | 4.14E-01 | -5.45 |
| 1439024_PM_at   | Bag4                     | BAG4     | -0.35 | 3.26 | -1.61 | 1.37E-01 | 4.14E-01 | -5.45 |
| 1459755_PM_x_at | 1700082C02Rik            | NA       | 0.15  | 2.33 | 1.61  | 1.37E-01 | 4.14E-01 | -5.45 |
| 1445798_PM_at   | ---                      | NA       | 0.17  | 2.13 | 1.61  | 1.37E-01 | 4.14E-01 | -5.45 |
| 1435748_PM_at   | Gda                      | GDA      | 0.36  | 3.45 | 1.61  | 1.37E-01 | 4.14E-01 | -5.45 |
| 1441596_PM_at   | ---                      | NA       | 0.36  | 2.44 | 1.61  | 1.37E-01 | 4.14E-01 | -5.45 |
| 1426748_PM_s_at | Abcf3                    | ABCF3    | 0.60  | 2.74 | 1.61  | 1.37E-01 | 4.14E-01 | -5.45 |
| 1447399_PM_at   | ---                      | NA       | -0.49 | 5.54 | -1.61 | 1.37E-01 | 4.14E-01 | -5.45 |
| 1425757_PM_a_at | Impg1                    | IMPG1    | 0.17  | 2.65 | 1.61  | 1.37E-01 | 4.14E-01 | -5.45 |
| 1445002_PM_at   | ---                      | NA       | 0.27  | 2.42 | 1.61  | 1.37E-01 | 4.14E-01 | -5.45 |
| 1436513_PM_at   | Tanc2                    | TANC2    | 0.34  | 2.65 | 1.61  | 1.37E-01 | 4.14E-01 | -5.45 |
| 1459449_PM_at   | ---                      | NA       | -0.23 | 2.75 | -1.61 | 1.37E-01 | 4.14E-01 | -5.45 |
| 1437361_PM_at   | Gm11545                  | NA       | 0.13  | 2.17 | 1.61  | 1.37E-01 | 4.14E-01 | -5.45 |
| 1430966_PM_at   | Cml3 /// Gm4477 /// Nat8 | NA       | 0.18  | 3.03 | 1.61  | 1.37E-01 | 4.14E-01 | -5.45 |
| 1437424_PM_at   | Syde2                    | SYDE2    | 0.25  | 2.66 | 1.61  | 1.37E-01 | 4.14E-01 | -5.45 |
| 1421364_PM_at   | Lrfn1                    | LRFN1    | 0.27  | 2.28 | 1.61  | 1.37E-01 | 4.14E-01 | -5.45 |
| 1430995_PM_at   | Tmx3                     | TMX3     | -0.27 | 2.80 | -1.61 | 1.37E-01 | 4.14E-01 | -5.45 |
| 1453624_PM_at   | Trim6                    | TRIM6    | 0.15  | 2.01 | 1.61  | 1.37E-01 | 4.14E-01 | -5.45 |
| 1432982_PM_at   | ---                      | NA       | 0.24  | 2.01 | 1.61  | 1.37E-01 | 4.14E-01 | -5.45 |

|                 |                             |            |       |      |       |          |          |       |
|-----------------|-----------------------------|------------|-------|------|-------|----------|----------|-------|
| 1437158_PM_at   | Nipbl                       | NIPBL      | 0.67  | 5.35 | 1.61  | 1.37E-01 | 4.14E-01 | -5.45 |
| 1448143_PM_at   | Alh2                        | ACO02996.1 | -0.79 | 5.92 | -1.61 | 1.37E-01 | 4.15E-01 | -5.45 |
| 1429867_PM_at   | ---                         | NA         | 0.17  | 3.04 | 1.61  | 1.37E-01 | 4.15E-01 | -5.45 |
| 1434311_PM_at   | Cnot6l                      | CNOT6L     | -0.50 | 3.66 | -1.61 | 1.37E-01 | 4.15E-01 | -5.45 |
| 1459901_PM_at   | Zfp646                      | ZNF646     | 0.21  | 2.33 | 1.61  | 1.37E-01 | 4.15E-01 | -5.45 |
| 1450286_PM_at   | Npr3                        | NPR3       | 0.14  | 2.47 | 1.61  | 1.37E-01 | 4.15E-01 | -5.45 |
| 1426713_PM_s_at | Eprs                        | EPRS       | -0.49 | 5.38 | -1.61 | 1.38E-01 | 4.15E-01 | -5.46 |
| 1458339_PM_at   | ---                         | NA         | 0.15  | 2.17 | 1.61  | 1.38E-01 | 4.15E-01 | -5.46 |
| 1453728_PM_a_at | Mrps17                      | AC092647.5 | -0.53 | 2.76 | -1.61 | 1.38E-01 | 4.15E-01 | -5.46 |
| 1444135_PM_at   | Tmem229a                    | NA         | -0.54 | 5.69 | -1.61 | 1.38E-01 | 4.15E-01 | -5.46 |
| 1445853_PM_at   | ---                         | NA         | 0.19  | 2.52 | 1.61  | 1.38E-01 | 4.15E-01 | -5.46 |
| 1418911_PM_s_at | Acsl4                       | ACSL4      | -0.45 | 3.05 | -1.61 | 1.38E-01 | 4.15E-01 | -5.46 |
| 1423809_PM_at   | Tcf19                       | TCF19      | 0.15  | 2.33 | 1.61  | 1.38E-01 | 4.15E-01 | -5.46 |
| 1429388_PM_at   | Nanog                       | NANOG      | 0.17  | 2.79 | 1.61  | 1.38E-01 | 4.15E-01 | -5.46 |
| 1424181_PM_at   | Sept6                       | SEPT6      | 0.38  | 2.23 | 1.61  | 1.38E-01 | 4.15E-01 | -5.46 |
| 1416712_PM_at   | Pepd                        | PEPD       | -0.24 | 2.88 | -1.61 | 1.38E-01 | 4.15E-01 | -5.46 |
| 1439644_PM_at   | 9630023C09Rik               | NA         | 0.14  | 2.14 | 1.61  | 1.38E-01 | 4.15E-01 | -5.46 |
| 1457327_PM_at   | Shprh                       | SHPRH      | -0.42 | 2.56 | -1.61 | 1.38E-01 | 4.15E-01 | -5.46 |
| 1451780_PM_at   | Blnk                        | BLNK       | -0.16 | 2.30 | -1.61 | 1.38E-01 | 4.15E-01 | -5.46 |
| 1424689_PM_at   | Prss32                      | NA         | 0.17  | 2.16 | 1.61  | 1.38E-01 | 4.15E-01 | -5.46 |
| 1429682_PM_at   | Fam46c                      | FAM46C     | 0.21  | 2.34 | 1.61  | 1.38E-01 | 4.15E-01 | -5.46 |
| 1458760_PM_at   | ---                         | NA         | 0.31  | 3.43 | 1.61  | 1.38E-01 | 4.15E-01 | -5.46 |
| 1432113_PM_at   | Ccdc18                      | CCDC18     | 0.17  | 2.28 | 1.61  | 1.38E-01 | 4.15E-01 | -5.46 |
| 1426227_PM_s_at | Vps37c                      | VPS37C     | 0.18  | 2.81 | 1.61  | 1.38E-01 | 4.15E-01 | -5.46 |
| 1451771_PM_at   | Tpcn1                       | TPCN1      | -0.25 | 2.41 | -1.61 | 1.38E-01 | 4.15E-01 | -5.46 |
| 1445844_PM_at   | Gm36793                     | NA         | -0.20 | 2.88 | -1.61 | 1.38E-01 | 4.15E-01 | -5.46 |
| 1455920_PM_x_at | Lyzl6                       | LYZL6      | 0.18  | 2.95 | 1.61  | 1.38E-01 | 4.15E-01 | -5.46 |
| 1441259_PM_s_at | Ift122                      | IFT122     | -0.58 | 4.05 | -1.61 | 1.38E-01 | 4.15E-01 | -5.46 |
| 1431940_PM_at   | ---                         | NA         | 0.15  | 2.25 | 1.61  | 1.38E-01 | 4.15E-01 | -5.46 |
| 1442522_PM_at   | ---                         | NA         | 0.17  | 2.46 | 1.61  | 1.38E-01 | 4.15E-01 | -5.46 |
| 1426650_PM_at   | Myh8                        | MYH3       | 0.38  | 3.21 | 1.61  | 1.38E-01 | 4.15E-01 | -5.46 |
| 1433796_PM_at   | Endod1                      | ENDOD1     | -0.51 | 5.40 | -1.61 | 1.38E-01 | 4.15E-01 | -5.46 |
| 1442670_PM_at   | ---                         | NA         | 0.17  | 2.42 | 1.61  | 1.38E-01 | 4.15E-01 | -5.46 |
| 1426557_PM_at   | Mesp1                       | MESP1      | 0.21  | 2.52 | 1.61  | 1.38E-01 | 4.15E-01 | -5.46 |
| 1431836_PM_x_at | Mamstr                      | MAMSTR     | 0.14  | 2.15 | 1.61  | 1.38E-01 | 4.15E-01 | -5.46 |
| 1432233_PM_at   | 1110020C17Rik               | NA         | 0.16  | 2.36 | 1.61  | 1.38E-01 | 4.15E-01 | -5.46 |
| 1456059_PM_at   | Psmd11                      | PSMD11     | 0.23  | 4.00 | 1.61  | 1.38E-01 | 4.15E-01 | -5.46 |
| 1440293_PM_at   | Peak1                       | PEAK1      | 0.39  | 3.17 | 1.61  | 1.38E-01 | 4.15E-01 | -5.46 |
| 1420497_PM_a_at | Cebpz                       | CEBPZ      | -0.46 | 5.81 | -1.61 | 1.38E-01 | 4.15E-01 | -5.46 |
| 1438117_PM_x_at | Tmem41b                     | TMEM41B    | -0.43 | 3.71 | -1.61 | 1.38E-01 | 4.15E-01 | -5.46 |
| 1429521_PM_at   | Alkbh8                      | ALKBH8     | -0.41 | 2.88 | -1.61 | 1.38E-01 | 4.15E-01 | -5.46 |
| 1426525_PM_at   | Arid2                       | ARID2      | -0.35 | 3.09 | -1.61 | 1.38E-01 | 4.15E-01 | -5.46 |
| 1460098_PM_at   | Gm34220                     | NA         | -0.22 | 2.33 | -1.61 | 1.38E-01 | 4.15E-01 | -5.46 |
| 1453644_PM_at   | Obp1a                       | NA         | 0.13  | 2.25 | 1.61  | 1.38E-01 | 4.15E-01 | -5.46 |
| 1454583_PM_at   | Gm41540 ///<br>LOC105243103 | NA         | 0.15  | 2.33 | 1.61  | 1.38E-01 | 4.15E-01 | -5.46 |
| 1458574_PM_at   | ---                         | NA         | 0.15  | 2.61 | 1.61  | 1.38E-01 | 4.15E-01 | -5.46 |
| 1425443_PM_at   | Tfap2d                      | TFAP2D     | 0.17  | 2.52 | 1.61  | 1.38E-01 | 4.15E-01 | -5.46 |
| 1421898_PM_a_at | Mr1                         | MR1        | 0.20  | 2.61 | 1.61  | 1.38E-01 | 4.15E-01 | -5.46 |
| 1460532_PM_at   | 2900011F02Rik               | NA         | 0.20  | 2.25 | 1.61  | 1.38E-01 | 4.15E-01 | -5.46 |
| 1442426_PM_at   | ---                         | NA         | 0.21  | 2.22 | 1.61  | 1.38E-01 | 4.15E-01 | -5.46 |
| 1460306_PM_at   | Myoc                        | MYOC       | 0.21  | 2.75 | 1.61  | 1.38E-01 | 4.15E-01 | -5.46 |
| 1449127_PM_at   | Selplg                      | SELPLG     | 0.25  | 3.09 | 1.61  | 1.38E-01 | 4.15E-01 | -5.46 |
| 1420787_PM_at   | 4933436101Rik               | NA         | 0.28  | 2.92 | 1.61  | 1.38E-01 | 4.15E-01 | -5.46 |
| 1444892_PM_at   | Nup160                      | NUP160     | 0.36  | 2.52 | 1.61  | 1.38E-01 | 4.15E-01 | -5.46 |
| 1449980_PM_a_at | Gabrd                       | GABRD      | 0.48  | 3.02 | 1.61  | 1.38E-01 | 4.15E-01 | -5.46 |
| 1442665_PM_at   | C77874                      | NA         | 0.16  | 2.83 | 1.61  | 1.38E-01 | 4.15E-01 | -5.46 |
| 1444179_PM_at   | Gm38525 ///Trim30b          | NA         | 0.17  | 2.82 | 1.61  | 1.38E-01 | 4.15E-01 | -5.46 |
| 1453439_PM_at   | Amtn                        | AMTN       | 0.18  | 2.53 | 1.61  | 1.38E-01 | 4.15E-01 | -5.46 |
| 1435568_PM_at   | Ttc37                       | NA         | 0.35  | 4.07 | 1.61  | 1.38E-01 | 4.15E-01 | -5.46 |
| 1449734_PM_s_at | Bbs4                        | BBS4       | -0.29 | 5.18 | -1.61 | 1.38E-01 | 4.16E-01 | -5.46 |
| 1441835_PM_x_at | Mtmr11                      | MTMR11     | 0.24  | 3.06 | 1.61  | 1.38E-01 | 4.16E-01 | -5.46 |
| 1443946_PM_s_at | AU040972                    | NA         | 0.41  | 2.80 | 1.61  | 1.38E-01 | 4.16E-01 | -5.46 |
| 1424026_PM_s_at | Gimn1                       | GINM1      | -0.52 | 4.57 | -1.61 | 1.38E-01 | 4.16E-01 | -5.46 |
| 1450386_PM_at   | Kpna3                       | KPNA3      | -0.43 | 4.01 | -1.61 | 1.38E-01 | 4.16E-01 | -5.46 |
| 1435221_PM_at   | Foxp1                       | FOXP1      | -0.32 | 3.34 | -1.61 | 1.38E-01 | 4.16E-01 | -5.46 |
| 1444489_PM_at   | ---                         | NA         | 0.12  | 2.17 | 1.61  | 1.38E-01 | 4.16E-01 | -5.46 |
| 1426501_PM_a_at | Tifa                        | TIFA       | 0.14  | 2.31 | 1.61  | 1.38E-01 | 4.16E-01 | -5.46 |
| 1430487_PM_at   | Auh                         | AUH        | 0.20  | 2.23 | 1.61  | 1.38E-01 | 4.16E-01 | -5.46 |
| 1435439_PM_at   | Dgcr8                       | DGCR8      | 0.21  | 4.13 | 1.61  | 1.38E-01 | 4.16E-01 | -5.46 |
| 1444239_PM_at   | ---                         | NA         | 0.26  | 2.54 | 1.61  | 1.38E-01 | 4.16E-01 | -5.46 |
| 1447958_PM_at   | ---                         | NA         | 0.34  | 2.45 | 1.61  | 1.38E-01 | 4.16E-01 | -5.46 |
| 1418511_PM_at   | Dpt                         | DPT        | 0.36  | 2.61 | 1.61  | 1.38E-01 | 4.16E-01 | -5.46 |
| 1434155_PM_a_at | 2310061104Rik               | Cgorf136   | 0.39  | 4.13 | 1.61  | 1.38E-01 | 4.16E-01 | -5.46 |
| 1457047_PM_at   | ---                         | NA         | 0.23  | 2.95 | 1.60  | 1.39E-01 | 4.16E-01 | -5.46 |

|                              |                                        |          |       |      |       |          |          |       |
|------------------------------|----------------------------------------|----------|-------|------|-------|----------|----------|-------|
| 1422258_PM_at                | Chrm3                                  | CHRM3    | 0.31  | 3.09 | 1.60  | 1.39E-01 | 4.16E-01 | -5.46 |
| 1456953_PM_at                | Col19a1                                | NA       | 0.42  | 3.04 | 1.60  | 1.39E-01 | 4.16E-01 | -5.46 |
| 1428479_PM_at                | Nfatc1                                 | NFATC1   | 0.23  | 2.39 | 1.60  | 1.39E-01 | 4.16E-01 | -5.46 |
| 1452029_PM_a_at              | Purg                                   | PURG     | 0.46  | 4.45 | 1.60  | 1.39E-01 | 4.16E-01 | -5.46 |
| 1428010_PM_at                | ---                                    | NA       | 0.37  | 2.66 | 1.60  | 1.39E-01 | 4.16E-01 | -5.46 |
| 1452893_PM_s_at              | Enho                                   | ENHO     | 0.17  | 2.40 | 1.60  | 1.39E-01 | 4.16E-01 | -5.46 |
| 1428803_PM_at                | Acot6                                  | ACOT6    | -0.28 | 2.99 | -1.60 | 1.39E-01 | 4.16E-01 | -5.46 |
| 1456778_PM_at                | Nrp2                                   | NRP2     | -0.72 | 4.85 | -1.60 | 1.39E-01 | 4.16E-01 | -5.46 |
| 1420091_PM_s_at              | Morc3                                  | MORC3    | -0.38 | 3.85 | -1.60 | 1.39E-01 | 4.16E-01 | -5.46 |
| 1426225_PM_at                | Rbp4                                   | RBP4     | -0.33 | 2.65 | -1.60 | 1.39E-01 | 4.16E-01 | -5.46 |
| 1434669_PM_at                | Ralgps1                                | RALGPS1  | -0.27 | 2.51 | -1.60 | 1.39E-01 | 4.16E-01 | -5.46 |
| 1421288_PM_at                | F2rl3                                  | F2RL3    | 0.18  | 2.69 | 1.60  | 1.39E-01 | 4.16E-01 | -5.46 |
| 1446691_PM_at                | ---                                    | NA       | 0.19  | 2.95 | 1.60  | 1.39E-01 | 4.16E-01 | -5.46 |
| 1446228_PM_at                | Ermp1                                  | ERMP1    | 0.20  | 2.64 | 1.60  | 1.39E-01 | 4.16E-01 | -5.46 |
| 1439545_PM_at                | ---                                    | NA       | 0.29  | 2.34 | 1.60  | 1.39E-01 | 4.16E-01 | -5.46 |
| 1442532_PM_at                | ---                                    | NA       | 0.19  | 2.28 | 1.60  | 1.39E-01 | 4.16E-01 | -5.46 |
| 1448734_PM_at                | Cp                                     | CP       | -0.35 | 2.67 | -1.60 | 1.39E-01 | 4.17E-01 | -5.46 |
| 1442498_PM_at                | C78662                                 | NA       | 0.27  | 2.40 | 1.60  | 1.39E-01 | 4.17E-01 | -5.46 |
| 1440128_PM_s_at              | Sez6l                                  | SEZ6L    | -0.55 | 3.54 | -1.60 | 1.39E-01 | 4.17E-01 | -5.46 |
| 1455408_PM_at                | Pla2g4f                                | PLA2G4F  | 0.18  | 2.66 | 1.60  | 1.39E-01 | 4.17E-01 | -5.46 |
| 1451268_PM_at                | Tram11                                 | TRAM11   | -0.58 | 4.50 | -1.60 | 1.39E-01 | 4.17E-01 | -5.46 |
| 1455366_PM_at                | Mrp52                                  | MRPL52   | 0.12  | 2.81 | 1.60  | 1.39E-01 | 4.17E-01 | -5.46 |
| 1453462_PM_at                | Chst13                                 | CHST13   | 0.17  | 2.43 | 1.60  | 1.39E-01 | 4.17E-01 | -5.46 |
| 1443405_PM_at                | ---                                    | NA       | 0.36  | 2.67 | 1.60  | 1.39E-01 | 4.17E-01 | -5.46 |
| 1442010_PM_at                | Casz1                                  | CASZ1    | 0.21  | 2.43 | 1.60  | 1.39E-01 | 4.17E-01 | -5.47 |
| 1447536_PM_at                | Lysmd2                                 | NA       | 0.22  | 2.49 | 1.60  | 1.39E-01 | 4.17E-01 | -5.47 |
| 1416935_PM_at                | Trpv2                                  | TRPV2    | 0.26  | 3.17 | 1.60  | 1.39E-01 | 4.17E-01 | -5.47 |
| 1432738_PM_at                | Snhg5                                  | NA       | 0.27  | 2.34 | 1.60  | 1.39E-01 | 4.17E-01 | -5.47 |
| 1449638_PM_at                | C920021L13Rik                          | NA       | 0.17  | 2.38 | 1.60  | 1.39E-01 | 4.17E-01 | -5.47 |
| 1421765_PM_at                | Pax5                                   | PAX5     | 0.15  | 2.57 | 1.60  | 1.39E-01 | 4.17E-01 | -5.47 |
| 1438173_PM_x_at              | Pmf1                                   | PMF1     | -0.81 | 3.31 | -1.60 | 1.39E-01 | 4.17E-01 | -5.47 |
| 1425463_PM_at                | Gata6                                  | GATA6    | 0.13  | 2.24 | 1.60  | 1.39E-01 | 4.17E-01 | -5.47 |
| 1454412_PM_at                | ---                                    | NA       | 0.14  | 2.55 | 1.60  | 1.39E-01 | 4.17E-01 | -5.47 |
| 1450010_PM_at                | Hsd17b12                               | HSD17B12 | -0.54 | 3.18 | -1.60 | 1.39E-01 | 4.17E-01 | -5.47 |
| 1454636_PM_at                | Cbx5                                   | CBX5     | -0.25 | 2.97 | -1.60 | 1.39E-01 | 4.17E-01 | -5.47 |
| 1416624_PM_a_at              | Kxd1///Uba52                           | KXD1     | -0.57 | 8.95 | -1.60 | 1.39E-01 | 4.17E-01 | -5.47 |
| 1443408_PM_at                | ---                                    | NA       | 0.14  | 2.39 | 1.60  | 1.39E-01 | 4.17E-01 | -5.47 |
| 1443233_PM_at                | ---                                    | NA       | 0.20  | 2.43 | 1.60  | 1.39E-01 | 4.17E-01 | -5.47 |
| 1447012_PM_at                | Gm10791                                | NA       | 0.24  | 2.30 | 1.60  | 1.39E-01 | 4.17E-01 | -5.47 |
| 1426772_PM_x_at              | LOC665506///Tcrb-1///<br>Trbc1///Trbc2 | NA       | 0.27  | 2.74 | 1.60  | 1.39E-01 | 4.17E-01 | -5.47 |
| 1439379_PM_x_at              | Prm1                                   | NA       | 0.17  | 2.29 | 1.60  | 1.39E-01 | 4.17E-01 | -5.47 |
| 1457976_PM_at                | Ifit1b2                                | IFIT1B   | 0.39  | 2.89 | 1.60  | 1.39E-01 | 4.17E-01 | -5.47 |
| 1450909_PM_at                | Eif4e                                  | EIF4E    | -0.23 | 2.29 | -1.60 | 1.39E-01 | 4.18E-01 | -5.47 |
| 1453568_PM_at                | Dapl1                                  | DAPL1    | 0.21  | 3.56 | 1.60  | 1.39E-01 | 4.18E-01 | -5.47 |
| 1442435_PM_at                | ---                                    | NA       | 0.32  | 2.96 | 1.60  | 1.40E-01 | 4.18E-01 | -5.47 |
| 1432864_PM_at                | ---                                    | NA       | 0.23  | 2.25 | 1.60  | 1.40E-01 | 4.18E-01 | -5.47 |
| 1421991_PM_a_at              | Igfbp4                                 | IGFBP4   | 0.17  | 2.74 | 1.60  | 1.40E-01 | 4.18E-01 | -5.47 |
| 1441880_PM_x_at              | Igflr1///U2af14                        | IGFLR1   | -0.45 | 2.87 | -1.60 | 1.40E-01 | 4.18E-01 | -5.47 |
| 1456231_PM_at                | Pla2g3                                 | PLA2G3   | 0.18  | 2.19 | 1.60  | 1.40E-01 | 4.18E-01 | -5.47 |
| 1431399_PM_at                | Adamts9                                | ADAMTS9  | 0.18  | 2.38 | 1.60  | 1.40E-01 | 4.18E-01 | -5.47 |
| 1457886_PM_at                | ---                                    | NA       | -0.46 | 3.17 | -1.60 | 1.40E-01 | 4.18E-01 | -5.47 |
| 1434925_PM_at                | Plppr5                                 | PLPPR5   | -0.24 | 2.44 | -1.60 | 1.40E-01 | 4.18E-01 | -5.47 |
| 1459158_PM_at                | ---                                    | NA       | -0.14 | 2.21 | -1.60 | 1.40E-01 | 4.18E-01 | -5.47 |
| 1425836_PM_a_at              | Limk1                                  | LIMK1    | 0.15  | 2.43 | 1.60  | 1.40E-01 | 4.18E-01 | -5.47 |
| 1452345_PM_at                | Lmod2                                  | NA       | 0.17  | 2.18 | 1.60  | 1.40E-01 | 4.18E-01 | -5.47 |
| 1415952_PM_at                | Mark2                                  | MARK2    | 0.20  | 2.65 | 1.60  | 1.40E-01 | 4.18E-01 | -5.47 |
| 1451469_PM_at                | Cntln                                  | CNTLN    | 0.21  | 2.27 | 1.60  | 1.40E-01 | 4.18E-01 | -5.47 |
| 1438533_PM_at                | Myo9b                                  | NA       | 0.23  | 2.17 | 1.60  | 1.40E-01 | 4.18E-01 | -5.47 |
| 1459941_PM_at                | Cvsv1                                  | CLVS1    | 0.34  | 2.85 | 1.60  | 1.40E-01 | 4.18E-01 | -5.47 |
| 1458651_PM_at                | ---                                    | NA       | 0.47  | 5.37 | 1.60  | 1.40E-01 | 4.18E-01 | -5.47 |
| 1423672_PM_at                | Ttc30b                                 | TTC30A   | -0.32 | 3.23 | -1.60 | 1.40E-01 | 4.18E-01 | -5.47 |
| 1422278_PM_at                | Drd3                                   | DRD3     | 0.17  | 2.30 | 1.60  | 1.40E-01 | 4.18E-01 | -5.47 |
| 1457532_PM_at                | ---                                    | NA       | 0.41  | 3.29 | 1.60  | 1.40E-01 | 4.18E-01 | -5.47 |
| 1433616_PM_a_at              | Minos1                                 | MINOS1   | -0.55 | 4.99 | -1.60 | 1.40E-01 | 4.18E-01 | -5.47 |
| AFFX-PyruCarbMur/L09192_5_at | Pcx                                    | NA       | 0.15  | 3.00 | 1.60  | 1.40E-01 | 4.18E-01 | -5.47 |
| 1445820_PM_at                | ---                                    | NA       | 0.22  | 3.26 | 1.60  | 1.40E-01 | 4.18E-01 | -5.47 |
| 1438703_PM_at                | Ankrd26                                | ANKRD26  | 0.32  | 2.82 | 1.60  | 1.40E-01 | 4.18E-01 | -5.47 |
| 1444462_PM_at                | ---                                    | NA       | 0.23  | 3.52 | 1.60  | 1.40E-01 | 4.18E-01 | -5.47 |
| 1419623_PM_at                | Prss21                                 | PRSS21   | 0.22  | 2.43 | 1.60  | 1.40E-01 | 4.18E-01 | -5.47 |
| 1457955_PM_at                | ---                                    | NA       | 0.37  | 2.35 | 1.60  | 1.40E-01 | 4.18E-01 | -5.47 |
| 1429133_PM_at                | Nxn12                                  | NXNL2    | 0.13  | 2.38 | 1.60  | 1.40E-01 | 4.18E-01 | -5.47 |
| 1449177_PM_at                | Ccna1                                  | CCNA1    | 0.15  | 2.74 | 1.60  | 1.40E-01 | 4.18E-01 | -5.47 |
| 1441336_PM_at                | Nutm1                                  | NUTM1    | 0.18  | 2.50 | 1.60  | 1.40E-01 | 4.18E-01 | -5.47 |
| 1419474_PM_a_at              | Ehf                                    | EHF      | 0.18  | 2.39 | 1.60  | 1.40E-01 | 4.18E-01 | -5.47 |

|                 |                   |              |       |      |       |          |          |       |
|-----------------|-------------------|--------------|-------|------|-------|----------|----------|-------|
| 1421517_PM_at   | St6galnac1        | ST6GALNAC1   | 0.21  | 2.21 | 1.60  | 1.40E-01 | 4.18E-01 | -5.47 |
| 1446726_PM_at   | Gm31005           | NA           | 0.22  | 2.51 | 1.60  | 1.40E-01 | 4.18E-01 | -5.47 |
| 1452638_PM_s_at | Dnm1l             | DNM1L        | 0.41  | 3.38 | 1.60  | 1.40E-01 | 4.18E-01 | -5.47 |
| 1459310_PM_at   | ---               | NA           | 0.19  | 2.48 | 1.60  | 1.40E-01 | 4.18E-01 | -5.47 |
| 1442886_PM_at   | Tra2a             | TRA2A        | -0.31 | 2.72 | -1.60 | 1.40E-01 | 4.19E-01 | -5.47 |
| 1437826_PM_at   | Pfpl              | MPEG1        | -0.22 | 2.31 | -1.60 | 1.40E-01 | 4.19E-01 | -5.47 |
| 1422205_PM_at   | Sox1              | SOX1         | 0.14  | 2.17 | 1.60  | 1.40E-01 | 4.19E-01 | -5.47 |
| 1428827_PM_at   | Whsc1             | NSD2         | 0.29  | 2.59 | 1.60  | 1.40E-01 | 4.19E-01 | -5.47 |
| 1440040_PM_at   | ---               | NA           | -0.17 | 2.18 | -1.60 | 1.40E-01 | 4.19E-01 | -5.47 |
| 1427488_PM_a_at | Birc6             | BIRC6        | -0.32 | 2.34 | -1.60 | 1.40E-01 | 4.19E-01 | -5.47 |
| 1418655_PM_at   | B4galnt1          | B4GALNT1     | -0.50 | 4.87 | -1.60 | 1.40E-01 | 4.19E-01 | -5.47 |
| 1449823_PM_at   | Dach2             | DACH2        | 0.16  | 2.02 | 1.60  | 1.40E-01 | 4.19E-01 | -5.47 |
| 1430446_PM_at   | ---               | NA           | 0.20  | 2.59 | 1.60  | 1.40E-01 | 4.19E-01 | -5.47 |
| 1423116_PM_at   | Dxo               | DXO          | -0.26 | 3.64 | -1.60 | 1.40E-01 | 4.19E-01 | -5.47 |
| 1437945_PM_x_at | Gm4204 /// Nap1l1 | NAP1L1       | -0.40 | 6.71 | -1.60 | 1.40E-01 | 4.19E-01 | -5.47 |
| 1423112_PM_at   | Ube2d3            | UBE2D3       | -0.34 | 5.57 | -1.60 | 1.40E-01 | 4.19E-01 | -5.47 |
| 1425743_PM_at   | Trim7             | TRIM7        | 0.20  | 2.44 | 1.60  | 1.40E-01 | 4.19E-01 | -5.47 |
| 1426259_PM_at   | Pank3             | PANK3        | 0.32  | 3.07 | 1.60  | 1.40E-01 | 4.19E-01 | -5.47 |
| 1456934_PM_at   | Calb1             | CALB1        | 1.23  | 3.34 | 1.60  | 1.40E-01 | 4.19E-01 | -5.47 |
| 1434807_PM_s_at | Mtx3              | MTX3         | -0.84 | 4.38 | -1.60 | 1.40E-01 | 4.19E-01 | -5.47 |
| 1430925_PM_at   | 4930556L07Rik     | NA           | 0.27  | 2.44 | 1.60  | 1.40E-01 | 4.19E-01 | -5.47 |
| 1440689_PM_at   | Foxk2             | NA           | 0.19  | 2.84 | 1.60  | 1.40E-01 | 4.19E-01 | -5.47 |
| 1429873_PM_at   | 1700125H20Rik     | C17orf64     | 0.16  | 2.98 | 1.60  | 1.40E-01 | 4.19E-01 | -5.47 |
| 1455915_PM_at   | Galnt4            | POC1B-GALNT4 | -0.17 | 2.30 | -1.60 | 1.40E-01 | 4.19E-01 | -5.47 |
| 1417929_PM_at   | Slc7a8            | SLC7A8       | 0.24  | 2.60 | 1.60  | 1.41E-01 | 4.19E-01 | -5.47 |
| 1449468_PM_at   | St6galnac5        | ST6GALNAC5   | -1.03 | 7.85 | -1.60 | 1.41E-01 | 4.19E-01 | -5.47 |
| 1446395_PM_at   | ---               | NA           | 0.42  | 2.60 | 1.60  | 1.41E-01 | 4.19E-01 | -5.47 |
| 1454096_PM_a_at | Stpg1             | STPG1        | -0.18 | 2.47 | -1.60 | 1.41E-01 | 4.19E-01 | -5.47 |
| 1422482_PM_at   | Ruvbl2            | RUVBL2       | 0.47  | 2.61 | 1.60  | 1.41E-01 | 4.19E-01 | -5.47 |
| 1444889_PM_at   | Rassf2            | RASSF2       | 0.18  | 2.11 | 1.60  | 1.41E-01 | 4.19E-01 | -5.47 |
| 1422471_PM_at   | Pex13             | PEX13        | 0.47  | 4.36 | 1.60  | 1.41E-01 | 4.19E-01 | -5.47 |
| 1451312_PM_at   | Ndufs7            | NDUFS7       | -0.24 | 4.29 | -1.60 | 1.41E-01 | 4.19E-01 | -5.47 |
| 1430257_PM_at   | Card11            | CARD11       | 0.17  | 2.31 | 1.59  | 1.41E-01 | 4.19E-01 | -5.48 |
| 1429352_PM_at   | Mocos             | MOCOS        | 0.19  | 2.52 | 1.59  | 1.41E-01 | 4.19E-01 | -5.48 |
| 1447770_PM_at   | Cib2              | CIB2         | 0.27  | 2.23 | 1.59  | 1.41E-01 | 4.19E-01 | -5.48 |
| 1441912_PM_x_at | C2                | C2           | 0.51  | 3.44 | 1.59  | 1.41E-01 | 4.19E-01 | -5.48 |
| 1459759_PM_s_at | Tex43             | TEX43        | -0.16 | 2.19 | -1.59 | 1.41E-01 | 4.20E-01 | -5.48 |
| 1425547_PM_a_at | Klc4              | KL4          | 0.24  | 3.00 | 1.59  | 1.41E-01 | 4.20E-01 | -5.48 |
| 1418868_PM_at   | En2               | EN2          | 0.46  | 2.37 | 1.59  | 1.41E-01 | 4.20E-01 | -5.48 |
| 1425529_PM_s_at | Wbp1l             | WBP1L        | 0.66  | 3.71 | 1.59  | 1.41E-01 | 4.20E-01 | -5.48 |
| 1429412_PM_at   | Eny2              | ENY2         | 0.50  | 2.56 | 1.59  | 1.41E-01 | 4.20E-01 | -5.48 |
| 1433377_PM_at   | ---               | NA           | 0.17  | 2.32 | 1.59  | 1.41E-01 | 4.20E-01 | -5.48 |
| 1430059_PM_at   | ---               | NA           | 0.24  | 2.94 | 1.59  | 1.41E-01 | 4.20E-01 | -5.48 |
| 1417721_PM_s_at | Laptm5            | LAPTM5       | 0.15  | 2.35 | 1.59  | 1.41E-01 | 4.20E-01 | -5.48 |
| 1428853_PM_at   | Ptch1             | PTCH1        | -0.62 | 4.70 | -1.59 | 1.41E-01 | 4.20E-01 | -5.48 |
| 1455037_PM_at   | Plxna2            | PLXNA2       | -0.55 | 4.71 | -1.59 | 1.41E-01 | 4.20E-01 | -5.48 |
| 1456178_PM_at   | Bambi-ps1         | NA           | 0.22  | 3.31 | 1.59  | 1.41E-01 | 4.20E-01 | -5.48 |
| 1429730_PM_at   | 1810009N02Rik     | NA           | 0.22  | 4.36 | 1.59  | 1.41E-01 | 4.20E-01 | -5.48 |
| 1433618_PM_at   | C330006A16Rik     | NA           | 0.40  | 4.42 | 1.59  | 1.41E-01 | 4.20E-01 | -5.48 |
| 1434202_PM_a_at | Fam107a           | FAM107A      | -0.89 | 7.67 | -1.59 | 1.41E-01 | 4.20E-01 | -5.48 |
| 1452092_PM_at   | Chst15            | CHST15       | -0.42 | 6.83 | -1.59 | 1.41E-01 | 4.20E-01 | -5.48 |
| 1439444_PM_x_at | Tmed10            | TMED10       | -0.41 | 3.90 | -1.59 | 1.41E-01 | 4.20E-01 | -5.48 |
| 1455392_PM_at   | Prr18             | PRR18        | -0.24 | 2.70 | -1.59 | 1.41E-01 | 4.20E-01 | -5.48 |
| 1447846_PM_x_at | Mboat7            | MBOAT7       | -0.15 | 2.71 | -1.59 | 1.41E-01 | 4.20E-01 | -5.48 |
| 1430394_PM_a_at | Abcb9             | ABCB9        | 0.13  | 2.53 | 1.59  | 1.41E-01 | 4.20E-01 | -5.48 |
| 1451714_PM_a_at | Map2k3            | MAP2K3       | 0.14  | 3.24 | 1.59  | 1.41E-01 | 4.20E-01 | -5.48 |
| 1438234_PM_at   | Wdr26             | NA           | 0.15  | 2.38 | 1.59  | 1.41E-01 | 4.20E-01 | -5.48 |
| 1446466_PM_at   | ---               | NA           | 0.15  | 2.53 | 1.59  | 1.41E-01 | 4.20E-01 | -5.48 |
| 1460273_PM_a_at | Naip2             | NAP          | 0.16  | 2.31 | 1.59  | 1.41E-01 | 4.20E-01 | -5.48 |
| 1446191_PM_at   | ---               | NA           | 0.18  | 2.19 | 1.59  | 1.41E-01 | 4.20E-01 | -5.48 |
| 1459598_PM_at   | Hps1              | NA           | 0.18  | 2.43 | 1.59  | 1.41E-01 | 4.20E-01 | -5.48 |
| 1444753_PM_at   | Nek7              | NEK7         | 0.18  | 2.04 | 1.59  | 1.41E-01 | 4.20E-01 | -5.48 |
| 1443106_PM_at   | 4930562C15Rik     | C16orf96     | 0.19  | 2.36 | 1.59  | 1.41E-01 | 4.20E-01 | -5.48 |
| 1427436_PM_at   | Six2              | SIX2         | 0.19  | 2.53 | 1.59  | 1.41E-01 | 4.20E-01 | -5.48 |
| 1425050_PM_at   | Isoc1             | ISOC1        | 0.27  | 2.77 | 1.59  | 1.41E-01 | 4.20E-01 | -5.48 |
| 1425989_PM_a_at | Eya3              | EYA3         | 0.39  | 2.74 | 1.59  | 1.41E-01 | 4.20E-01 | -5.48 |
| 1431999_PM_at   | Polr3f            | POLR3F       | 0.18  | 2.41 | 1.59  | 1.41E-01 | 4.20E-01 | -5.48 |
| 1445043_PM_at   | ---               | NA           | 0.13  | 2.21 | 1.59  | 1.41E-01 | 4.20E-01 | -5.48 |
| 1444930_PM_at   | ---               | NA           | 0.31  | 3.05 | 1.59  | 1.41E-01 | 4.20E-01 | -5.48 |
| 1418748_PM_at   | Casp14            | CASP14       | -0.33 | 2.93 | -1.59 | 1.41E-01 | 4.20E-01 | -5.48 |
| 1452055_PM_at   | Ctdsp1            | CTDSP1       | 0.30  | 2.84 | 1.59  | 1.41E-01 | 4.20E-01 | -5.48 |
| 1455379_PM_at   | Dnal1             | DNAL1        | 0.14  | 2.05 | 1.59  | 1.41E-01 | 4.20E-01 | -5.48 |
| 1441539_PM_at   | ---               | NA           | 0.17  | 2.36 | 1.59  | 1.41E-01 | 4.20E-01 | -5.48 |
| 1439669_PM_at   | 6430571L13Rik     | C3orf18      | 0.35  | 2.93 | 1.59  | 1.41E-01 | 4.20E-01 | -5.48 |
| 1455575_PM_at   | ---               | NA           | 0.19  | 2.41 | 1.59  | 1.41E-01 | 4.20E-01 | -5.48 |



|                 |                  |           |       |      |       |          |          |       |
|-----------------|------------------|-----------|-------|------|-------|----------|----------|-------|
| 1417487_PM_at   | Fosl1            | FOSL1     | 0.23  | 2.44 | 1.59  | 1.41E-01 | 4.20E-01 | -5.48 |
| 1422484_PM_at   | Cycs             | CYCS      | -0.52 | 5.39 | -1.59 | 1.41E-01 | 4.20E-01 | -5.48 |
| 1419081_PM_at   | Atg10            | ATG10     | -0.65 | 4.15 | -1.59 | 1.41E-01 | 4.20E-01 | -5.48 |
| 1442397_PM_at   | Nfx1             | NFX1      | -0.46 | 3.13 | -1.59 | 1.41E-01 | 4.20E-01 | -5.48 |
| 1423244_PM_at   | Cyp2c68          | NA        | 0.33  | 2.96 | 1.59  | 1.41E-01 | 4.20E-01 | -5.48 |
| 1421637_PM_at   | Slc5a4a          | SLC5A4    | 0.14  | 2.16 | 1.59  | 1.41E-01 | 4.20E-01 | -5.48 |
| 1418031_PM_at   | Myo9b            | MYO9B     | -0.28 | 4.85 | -1.59 | 1.41E-01 | 4.20E-01 | -5.48 |
| 1422821_PM_s_at | Stard5           | STARD5    | 0.17  | 2.69 | 1.59  | 1.41E-01 | 4.20E-01 | -5.48 |
| 1431591_PM_s_at | Gm9706 /// Isg15 | ISG15     | 0.29  | 2.73 | 1.59  | 1.41E-01 | 4.20E-01 | -5.48 |
| 1427187_PM_at   | B3gntf1          | B3GNTL1   | -0.20 | 3.76 | -1.59 | 1.41E-01 | 4.20E-01 | -5.48 |
| 1457781_PM_at   | Kcng1ot1         | NA        | -0.38 | 5.25 | -1.59 | 1.42E-01 | 4.20E-01 | -5.48 |
| 1440536_PM_at   | ---              | NA        | -0.24 | 2.30 | -1.59 | 1.42E-01 | 4.20E-01 | -5.48 |
| 1428012_PM_at   | C8a              | C8A       | 0.16  | 2.21 | 1.59  | 1.42E-01 | 4.20E-01 | -5.48 |
| 1425249_PM_a_at | Tyro3            | TYRO3     | 0.25  | 2.30 | 1.59  | 1.41E-01 | 4.20E-01 | -5.48 |
| 1439704_PM_at   | Hdac2            | HDAC2     | 0.33  | 2.46 | 1.59  | 1.42E-01 | 4.20E-01 | -5.48 |
| 1437769_PM_at   | ---              | NA        | 0.16  | 2.53 | 1.59  | 1.42E-01 | 4.20E-01 | -5.48 |
| 1439423_PM_x_at | Bpifb1           | BPIFB1    | 0.23  | 4.01 | 1.59  | 1.42E-01 | 4.20E-01 | -5.48 |
| 1419693_PM_at   | Colec12          | COLEC12   | -0.25 | 2.83 | -1.59 | 1.42E-01 | 4.21E-01 | -5.48 |
| 1427998_PM_at   | Lsm12            | LSM12     | 0.31  | 4.47 | 1.59  | 1.42E-01 | 4.21E-01 | -5.48 |
| 1452262_PM_at   | Grpel2           | GRPEL2    | -0.42 | 4.66 | -1.59 | 1.42E-01 | 4.21E-01 | -5.48 |
| 1441085_PM_at   | Rora             | NA        | 0.13  | 2.13 | 1.59  | 1.42E-01 | 4.21E-01 | -5.48 |
| 1448767_PM_s_at | Gjb1             | GJB1      | 0.15  | 2.11 | 1.59  | 1.42E-01 | 4.21E-01 | -5.48 |
| 1454887_PM_at   | Pak2             | PAK2      | -0.54 | 4.51 | -1.59 | 1.42E-01 | 4.21E-01 | -5.48 |
| 1423665_PM_a_at | Rpl5             | RPL5      | -0.42 | 9.20 | -1.59 | 1.42E-01 | 4.21E-01 | -5.48 |
| 1421547_PM_at   | Cd180            | NA        | -0.19 | 2.52 | -1.59 | 1.42E-01 | 4.21E-01 | -5.48 |
| 1458445_PM_at   | ---              | NA        | 0.18  | 2.46 | 1.59  | 1.42E-01 | 4.21E-01 | -5.48 |
| 1415796_PM_at   | Dazap2           | DAZAP2    | 0.19  | 4.28 | 1.59  | 1.42E-01 | 4.21E-01 | -5.48 |
| 1421097_PM_at   | Endog            | ENDOG     | 0.21  | 3.31 | 1.59  | 1.42E-01 | 4.21E-01 | -5.48 |
| 1426337_PM_a_at | Tead4            | TEAD4     | 0.18  | 2.34 | 1.59  | 1.42E-01 | 4.21E-01 | -5.48 |
| 1424149_PM_at   | Nsmce2           | NSMCE2    | 0.34  | 4.77 | 1.59  | 1.42E-01 | 4.21E-01 | -5.48 |
| 1456449_PM_at   | ---              | NA        | 0.16  | 2.24 | 1.59  | 1.42E-01 | 4.21E-01 | -5.48 |
| 1420138_PM_at   | Slc19a1          | SLC19A1   | -0.30 | 3.02 | -1.59 | 1.42E-01 | 4.21E-01 | -5.48 |
| 1417448_PM_at   | Fam207a          | FAM207A   | -0.29 | 2.25 | -1.59 | 1.42E-01 | 4.21E-01 | -5.48 |
| 1441662_PM_at   | Cyp4x1           | CYP4X1    | -0.22 | 2.23 | -1.59 | 1.42E-01 | 4.21E-01 | -5.48 |
| 1432919_PM_at   | ---              | NA        | 0.13  | 2.29 | 1.59  | 1.42E-01 | 4.21E-01 | -5.48 |
| 1420715_PM_a_at | Pparg            | PPARG     | 0.26  | 2.59 | 1.59  | 1.42E-01 | 4.21E-01 | -5.48 |
| 1437064_PM_at   | Ar               | AR        | 0.27  | 2.79 | 1.59  | 1.42E-01 | 4.21E-01 | -5.48 |
| 1435098_PM_at   | ---              | NA        | -0.22 | 2.73 | -1.59 | 1.42E-01 | 4.21E-01 | -5.48 |
| 1448030_PM_at   | LOC102640359     | NA        | 0.15  | 2.12 | 1.59  | 1.42E-01 | 4.21E-01 | -5.48 |
| 1426278_PM_at   | Ifi272a          | NA        | 0.16  | 2.56 | 1.59  | 1.42E-01 | 4.21E-01 | -5.48 |
| 1454329_PM_at   | ---              | NA        | 0.17  | 2.66 | 1.59  | 1.42E-01 | 4.21E-01 | -5.48 |
| 1430475_PM_at   | ---              | NA        | 0.17  | 2.56 | 1.59  | 1.42E-01 | 4.21E-01 | -5.48 |
| 1448378_PM_at   | Fscn1            | FSCN1     | -0.45 | 3.62 | -1.59 | 1.42E-01 | 4.21E-01 | -5.48 |
| 1420565_PM_at   | Hoxa1            | HOXA1     | 0.18  | 2.60 | 1.59  | 1.42E-01 | 4.21E-01 | -5.48 |
| 1458523_PM_at   | Zfp638           | ZNF638    | 0.19  | 2.50 | 1.59  | 1.42E-01 | 4.21E-01 | -5.48 |
| 1446310_PM_at   | Sptlc3           | SPTLC3    | 0.20  | 2.55 | 1.59  | 1.42E-01 | 4.21E-01 | -5.48 |
| 1424088_PM_at   | Myg1             | C12orf10  | 0.22  | 2.96 | 1.59  | 1.42E-01 | 4.21E-01 | -5.48 |
| 1416977_PM_at   | Stam2            | STAM2     | 0.22  | 3.16 | 1.59  | 1.42E-01 | 4.21E-01 | -5.48 |
| 1453073_PM_at   | 5830403F22Rik    | NA        | 0.23  | 2.52 | 1.59  | 1.42E-01 | 4.21E-01 | -5.48 |
| 1431052_PM_at   | Arhgap12         | ARHGAP12  | 0.29  | 2.95 | 1.59  | 1.42E-01 | 4.21E-01 | -5.48 |
| 1433867_PM_at   | 1810030007Rik    | CXorf38   | 0.31  | 4.51 | 1.59  | 1.42E-01 | 4.21E-01 | -5.48 |
| 1418183_PM_a_at | Cyth1            | CYTH1     | 0.31  | 4.78 | 1.59  | 1.42E-01 | 4.21E-01 | -5.48 |
| 1428426_PM_s_at | Tgfbrap1         | TGFBRAP1  | -0.57 | 4.12 | -1.59 | 1.42E-01 | 4.21E-01 | -5.48 |
| 1445864_PM_at   | ---              | NA        | 0.15  | 2.35 | 1.59  | 1.42E-01 | 4.21E-01 | -5.48 |
| 1454419_PM_at   | ---              | NA        | 0.19  | 2.48 | 1.59  | 1.42E-01 | 4.21E-01 | -5.48 |
| 1442568_PM_at   | ---              | NA        | 0.20  | 2.37 | 1.59  | 1.42E-01 | 4.21E-01 | -5.48 |
| 1437789_PM_at   | Birc6            | BIRC6     | 0.38  | 3.97 | 1.59  | 1.42E-01 | 4.21E-01 | -5.48 |
| 1437861_PM_s_at | Prkce            | PRKCE     | 0.45  | 5.24 | 1.59  | 1.42E-01 | 4.21E-01 | -5.48 |
| 1445144_PM_at   | ---              | NA        | 0.32  | 2.64 | 1.59  | 1.42E-01 | 4.21E-01 | -5.48 |
| 1434999_PM_at   | Suv420h1         | KMT5B     | -0.37 | 3.14 | -1.59 | 1.42E-01 | 4.21E-01 | -5.48 |
| 1425984_PM_at   | Col5a3           | COL5A3    | 0.15  | 3.31 | 1.59  | 1.42E-01 | 4.21E-01 | -5.48 |
| 1455570_PM_x_at | Cnn3             | CNN3      | -0.68 | 4.79 | -1.59 | 1.42E-01 | 4.21E-01 | -5.49 |
| 1415799_PM_at   | Wbp11            | WBP11     | -0.50 | 4.14 | -1.59 | 1.42E-01 | 4.21E-01 | -5.49 |
| 1440062_PM_at   | ---              | NA        | 0.12  | 2.65 | 1.59  | 1.42E-01 | 4.21E-01 | -5.49 |
| 1430106_PM_at   | Trp53tg5         | TP53TG5   | 0.17  | 2.19 | 1.59  | 1.42E-01 | 4.21E-01 | -5.49 |
| 1447406_PM_at   | Luc7l            | NA        | 0.41  | 3.12 | 1.59  | 1.42E-01 | 4.21E-01 | -5.49 |
| 1447907_PM_x_at | Necab3           | NECAB3    | 0.15  | 2.36 | 1.59  | 1.42E-01 | 4.22E-01 | -5.49 |
| 1458537_PM_at   | ---              | NA        | 0.48  | 2.54 | 1.59  | 1.42E-01 | 4.22E-01 | -5.49 |
| 1433119_PM_at   | 4930456G14Rik    | NA        | 0.15  | 2.39 | 1.59  | 1.42E-01 | 4.22E-01 | -5.49 |
| 1435936_PM_at   | Slc13a5          | SLC13A5   | 0.31  | 3.10 | 1.59  | 1.43E-01 | 4.22E-01 | -5.49 |
| 1458930_PM_at   | A4gnt            | A4GNT     | 0.16  | 2.40 | 1.59  | 1.43E-01 | 4.22E-01 | -5.49 |
| 1425093_PM_at   | P2rx3            | P2RX3     | 0.19  | 2.35 | 1.59  | 1.43E-01 | 4.22E-01 | -5.49 |
| 1428812_PM_at   | 1700040L02Rik    | C10orf107 | -0.21 | 3.00 | -1.59 | 1.43E-01 | 4.22E-01 | -5.49 |
| 1433333_PM_at   | ---              | NA        | 0.16  | 2.05 | 1.59  | 1.43E-01 | 4.22E-01 | -5.49 |
| 1449736_PM_at   | ---              | NA        | 0.22  | 2.24 | 1.59  | 1.43E-01 | 4.22E-01 | -5.49 |

|                 |                           |            |       |      |       |          |          |       |
|-----------------|---------------------------|------------|-------|------|-------|----------|----------|-------|
| 1446314_PM_at   | Gcnt7                     | GCNT7      | 0.24  | 2.61 | 1.59  | 1.43E-01 | 4.22E-01 | -5.49 |
| 1455159_PM_at   | Appl1                     | APPL1      | -0.40 | 3.80 | -1.59 | 1.43E-01 | 4.22E-01 | -5.49 |
| 1417196_PM_s_at | Wwc2                      | WWC2       | -0.38 | 3.78 | -1.59 | 1.43E-01 | 4.22E-01 | -5.49 |
| 1431227_PM_at   | Wdr20                     | WDR20      | 0.14  | 2.50 | 1.59  | 1.43E-01 | 4.22E-01 | -5.49 |
| 1451274_PM_at   | Ogdh                      | OGDH       | -0.15 | 2.61 | -1.59 | 1.43E-01 | 4.22E-01 | -5.49 |
| 1440501_PM_at   | E430024P14Rik             | NA         | 0.18  | 2.59 | 1.59  | 1.43E-01 | 4.22E-01 | -5.49 |
| 1444800_PM_at   | ---                       | NA         | 0.53  | 3.87 | 1.59  | 1.43E-01 | 4.22E-01 | -5.49 |
| 1434909_PM_at   | Rragd                     | RRAGD      | -0.50 | 7.53 | -1.59 | 1.43E-01 | 4.22E-01 | -5.49 |
| 1432240_PM_at   | 4930533L02Rik             | NA         | -0.15 | 2.39 | -1.59 | 1.43E-01 | 4.22E-01 | -5.49 |
| 1456171_PM_at   | March10                   | MARCH10    | 0.16  | 2.49 | 1.59  | 1.43E-01 | 4.22E-01 | -5.49 |
| 1431257_PM_at   | Faxc                      | FAXC       | 0.19  | 2.30 | 1.59  | 1.43E-01 | 4.22E-01 | -5.49 |
| 1443606_PM_at   | ---                       | NA         | 0.21  | 2.79 | 1.59  | 1.43E-01 | 4.22E-01 | -5.49 |
| 1424275_PM_s_at | Trim41                    | TRIM41     | -0.50 | 2.65 | -1.58 | 1.43E-01 | 4.22E-01 | -5.49 |
| 1424389_PM_at   | Nupl1                     | NUP58      | -0.32 | 3.31 | -1.58 | 1.43E-01 | 4.22E-01 | -5.49 |
| 1450785_PM_at   | Trip4                     | TRIP4      | 0.14  | 2.65 | 1.58  | 1.43E-01 | 4.22E-01 | -5.49 |
| 1440026_PM_at   | ---                       | NA         | 0.23  | 2.70 | 1.58  | 1.43E-01 | 4.22E-01 | -5.49 |
| 1448250_PM_at   | Clmp                      | CLMP       | 0.40  | 3.26 | 1.58  | 1.43E-01 | 4.22E-01 | -5.49 |
| 1423316_PM_at   | Tmem39a                   | TMEM39A    | 0.42  | 3.81 | 1.59  | 1.43E-01 | 4.22E-01 | -5.49 |
| 1421269_PM_at   | Ugcg                      | UGCG       | 0.65  | 3.34 | 1.58  | 1.43E-01 | 4.22E-01 | -5.49 |
| 1454113_PM_at   | 4930512B01Rik             | NA         | 0.14  | 2.11 | 1.58  | 1.43E-01 | 4.22E-01 | -5.49 |
| 1433294_PM_at   | Lcorl                     | NA         | 0.12  | 2.32 | 1.58  | 1.43E-01 | 4.23E-01 | -5.49 |
| 1455220_PM_at   | Frat2                     | FRAT1      | -0.34 | 4.84 | -1.58 | 1.43E-01 | 4.23E-01 | -5.49 |
| 1450667_PM_a_at | Cs                        | CS         | -0.51 | 7.95 | -1.58 | 1.43E-01 | 4.23E-01 | -5.49 |
| 1425572_PM_a_at | Asap1                     | ASAP1      | -0.32 | 3.17 | -1.58 | 1.43E-01 | 4.23E-01 | -5.49 |
| 1451667_PM_at   | Fam20b                    | FAM20B     | 0.22  | 2.96 | 1.58  | 1.43E-01 | 4.23E-01 | -5.49 |
| 1460559_PM_at   | Kank2                     | KANK2      | -1.19 | 5.01 | -1.58 | 1.43E-01 | 4.23E-01 | -5.49 |
| 1454610_PM_at   | Sept7                     | SEPT7      | -0.80 | 6.75 | -1.58 | 1.43E-01 | 4.23E-01 | -5.49 |
| 1430773_PM_a_at | Tcte2                     | NA         | -0.29 | 2.49 | -1.58 | 1.43E-01 | 4.23E-01 | -5.49 |
| 1445465_PM_at   | Phf24                     | PHF24      | -0.19 | 2.66 | -1.58 | 1.43E-01 | 4.23E-01 | -5.49 |
| 1443140_PM_at   | ---                       | NA         | 0.15  | 2.45 | 1.58  | 1.43E-01 | 4.23E-01 | -5.49 |
| 1442149_PM_at   | Tbc1d16                   | TBC1D16    | 0.19  | 2.39 | 1.58  | 1.43E-01 | 4.23E-01 | -5.49 |
| 1437664_PM_at   | Hoxd3                     | HOXD3      | 0.26  | 2.38 | 1.58  | 1.43E-01 | 4.23E-01 | -5.49 |
| 1431402_PM_at   | ---                       | NA         | 0.28  | 2.53 | 1.58  | 1.43E-01 | 4.23E-01 | -5.49 |
| 1440316_PM_at   | Zfp865                    | NA         | 0.34  | 2.50 | 1.58  | 1.43E-01 | 4.23E-01 | -5.49 |
| 1441669_PM_at   | Gm41441                   | NA         | 0.60  | 2.85 | 1.58  | 1.43E-01 | 4.23E-01 | -5.49 |
| 1449459_PM_s_at | Asb13                     | ASB13      | -0.56 | 3.20 | -1.58 | 1.43E-01 | 4.23E-01 | -5.49 |
| 1420648_PM_at   | Trim12a                   | TRIM5      | -0.24 | 2.55 | -1.58 | 1.43E-01 | 4.23E-01 | -5.49 |
| 1430631_PM_at   | Ppm1f                     | PPM1F      | 0.12  | 2.39 | 1.58  | 1.43E-01 | 4.23E-01 | -5.49 |
| 1433099_PM_at   | ---                       | NA         | 0.16  | 2.11 | 1.58  | 1.43E-01 | 4.23E-01 | -5.49 |
| 1445731_PM_at   | ---                       | NA         | 0.21  | 3.04 | 1.58  | 1.43E-01 | 4.23E-01 | -5.49 |
| 1428688_PM_at   | Pdcd11                    | PDCD11     | 0.32  | 3.07 | 1.58  | 1.43E-01 | 4.23E-01 | -5.49 |
| 1433070_PM_at   | ---                       | NA         | 0.22  | 2.38 | 1.58  | 1.43E-01 | 4.23E-01 | -5.49 |
| 1432230_PM_at   | Hip1                      | HIP1       | 0.14  | 2.32 | 1.58  | 1.43E-01 | 4.23E-01 | -5.49 |
| 1430383_PM_at   | Ceacam20                  | CEACAM20   | -0.35 | 2.37 | -1.58 | 1.43E-01 | 4.23E-01 | -5.49 |
| 1433195_PM_at   | 9530006O14Rik             | NA         | 0.17  | 2.57 | 1.58  | 1.43E-01 | 4.23E-01 | -5.49 |
| 1460624_PM_at   | Yod1                      | YOD1       | -0.82 | 6.91 | -1.58 | 1.43E-01 | 4.23E-01 | -5.49 |
| 1417099_PM_at   | Ftsj1                     | FTSJ1      | 0.23  | 2.76 | 1.58  | 1.43E-01 | 4.23E-01 | -5.49 |
| 1424319_PM_at   | Oraov1                    | ORAOV1     | 0.25  | 4.06 | 1.58  | 1.43E-01 | 4.23E-01 | -5.49 |
| 1426431_PM_at   | Jag2                      | JAG2       | 0.28  | 3.62 | 1.58  | 1.43E-01 | 4.23E-01 | -5.49 |
| 1428352_PM_at   | Arrdc2                    | ARRDC2     | 0.20  | 2.82 | 1.58  | 1.43E-01 | 4.23E-01 | -5.49 |
| 1418809_PM_at   | Pira1 /// Pira2 /// Pira6 | NA         | -0.22 | 2.54 | -1.58 | 1.43E-01 | 4.23E-01 | -5.49 |
| 1437086_PM_at   | Ascl1                     | ASCL1      | 0.13  | 2.04 | 1.58  | 1.44E-01 | 4.23E-01 | -5.49 |
| 1417372_PM_a_at | Pel1                      | PEL1       | -0.48 | 4.90 | -1.58 | 1.44E-01 | 4.23E-01 | -5.49 |
| 1426810_PM_at   | Kdm3a                     | KDM3A      | -0.28 | 3.09 | -1.58 | 1.44E-01 | 4.23E-01 | -5.49 |
| 1439741_PM_x_at | Uck2                      | UCK2       | 0.14  | 2.32 | 1.58  | 1.44E-01 | 4.23E-01 | -5.49 |
| 1440048_PM_at   | ---                       | NA         | 0.25  | 4.48 | 1.58  | 1.44E-01 | 4.23E-01 | -5.49 |
| 1435266_PM_at   | Scal                      | SCAI       | -0.61 | 3.64 | -1.58 | 1.44E-01 | 4.23E-01 | -5.49 |
| 1430529_PM_at   | Csnk1a1                   | CSNK1A1L   | 0.19  | 2.55 | 1.58  | 1.44E-01 | 4.23E-01 | -5.49 |
| 1443642_PM_at   | Taok2                     | TAOK2      | 0.20  | 2.92 | 1.58  | 1.44E-01 | 4.23E-01 | -5.49 |
| 1419715_PM_at   | 1700029F12Rik             | NA         | 0.13  | 2.50 | 1.58  | 1.44E-01 | 4.23E-01 | -5.49 |
| 1418110_PM_a_at | Inpp5d                    | INPP5D     | 0.14  | 2.06 | 1.58  | 1.44E-01 | 4.23E-01 | -5.49 |
| 1437091_PM_at   | Asic4                     | ASIC4      | 0.19  | 2.64 | 1.58  | 1.44E-01 | 4.23E-01 | -5.49 |
| 1441618_PM_at   | Arhgap29                  | ARHGAP29   | 0.31  | 2.66 | 1.58  | 1.44E-01 | 4.23E-01 | -5.49 |
| 1415896_PM_x_at | Snrpn /// Snurf           | SNRPN      | -0.46 | 5.98 | -1.58 | 1.44E-01 | 4.23E-01 | -5.49 |
| 1448318_PM_at   | Plin2                     | PLIN2      | 0.32  | 3.65 | 1.58  | 1.44E-01 | 4.23E-01 | -5.49 |
| 1426598_PM_at   | Uty                       | UTY        | 0.22  | 2.37 | 1.58  | 1.44E-01 | 4.23E-01 | -5.49 |
| 1419831_PM_at   | AA416453                  | NA         | -0.32 | 2.71 | -1.58 | 1.44E-01 | 4.23E-01 | -5.49 |
| 1427432_PM_a_at | Tra2b                     | TRA2B      | -0.36 | 3.78 | -1.58 | 1.44E-01 | 4.23E-01 | -5.49 |
| 1443754_PM_x_at | ---                       | NA         | 0.13  | 2.34 | 1.58  | 1.44E-01 | 4.23E-01 | -5.49 |
| 1417176_PM_at   | Csnk1e                    | CSNK1E     | 0.16  | 2.31 | 1.58  | 1.44E-01 | 4.23E-01 | -5.49 |
| 1425535_PM_at   | Repin1                    | REPIN1     | 0.16  | 2.57 | 1.58  | 1.44E-01 | 4.23E-01 | -5.49 |
| 1424434_PM_at   | Mettl22                   | METTL22    | 0.34  | 2.71 | 1.58  | 1.44E-01 | 4.23E-01 | -5.49 |
| 1439782_PM_s_at | D930048N14Rik             | NA         | 0.13  | 2.72 | 1.58  | 1.44E-01 | 4.23E-01 | -5.49 |
| 1444154_PM_at   | Gm4943 /// Ndufa11        | ACO24592.3 | 0.17  | 2.36 | 1.58  | 1.44E-01 | 4.24E-01 | -5.49 |
| 1446510_PM_at   | ---                       | NA         | 0.26  | 2.52 | 1.58  | 1.44E-01 | 4.24E-01 | -5.49 |

|                     |                     |          |       |      |       |          |          |       |
|---------------------|---------------------|----------|-------|------|-------|----------|----------|-------|
| 1449178_PM_at       | Pdlim3              | PDLIM3   | 0.27  | 3.04 | 1.58  | 1.44E-01 | 4.24E-01 | -5.49 |
| 1453334_PM_at       | B230216N24Rik       | NA       | 0.31  | 4.20 | 1.58  | 1.44E-01 | 4.24E-01 | -5.49 |
| 1418505_PM_at       | Nudt4               | NUDT4P1  | -0.43 | 2.99 | -1.58 | 1.44E-01 | 4.24E-01 | -5.50 |
| 1445196_PM_at       | C79595              | NA       | 0.16  | 2.16 | 1.58  | 1.44E-01 | 4.24E-01 | -5.50 |
| 1420568_PM_at       | Stra8               | STRA8    | 0.21  | 2.52 | 1.58  | 1.44E-01 | 4.24E-01 | -5.50 |
| 1417785_PM_at       | Pla1a               | PLA1A    | 0.24  | 2.60 | 1.58  | 1.44E-01 | 4.24E-01 | -5.50 |
| 1447087_PM_at       | ---                 | NA       | 0.28  | 3.06 | 1.58  | 1.44E-01 | 4.24E-01 | -5.50 |
| 1451341_PM_s_at     | Tmem189             | TMEM189  | 0.28  | 2.88 | 1.58  | 1.44E-01 | 4.24E-01 | -5.50 |
| 1453810_PM_at       | Aftph               | AFTPH    | 0.30  | 3.20 | 1.58  | 1.44E-01 | 4.24E-01 | -5.50 |
| 1420373_PM_at       | Foxj2               | FOXJ2    | 0.36  | 3.10 | 1.58  | 1.44E-01 | 4.24E-01 | -5.50 |
| 1418064_PM_at       | Tfpt                | TFPT     | 0.54  | 3.00 | 1.58  | 1.44E-01 | 4.24E-01 | -5.50 |
| 1423209_PM_at       | Tmem167             | TMEM167A | 0.18  | 2.87 | 1.58  | 1.44E-01 | 4.24E-01 | -5.50 |
| 1453643_PM_at       | 1700001L19Rik       | CSorf49  | 0.26  | 2.62 | 1.58  | 1.44E-01 | 4.24E-01 | -5.50 |
| 1433270_PM_at       | 9530004M16Rik       | NA       | 0.24  | 2.93 | 1.58  | 1.44E-01 | 4.24E-01 | -5.50 |
| 1458794_PM_at       | ---                 | NA       | 0.36  | 2.57 | 1.58  | 1.44E-01 | 4.24E-01 | -5.50 |
| 1441214_PM_at       | Exph5               | NA       | -0.68 | 4.12 | -1.58 | 1.44E-01 | 4.24E-01 | -5.50 |
| 1437556_PM_at       | Zfhx4               | ZFHx4    | -0.21 | 2.35 | -1.58 | 1.44E-01 | 4.24E-01 | -5.50 |
| 1460136_PM_at       | ---                 | NA       | 0.16  | 2.51 | 1.58  | 1.44E-01 | 4.24E-01 | -5.50 |
| 1454211_PM_a_at     | Shroom3             | SHROOM3  | 0.19  | 2.46 | 1.58  | 1.44E-01 | 4.24E-01 | -5.50 |
| 1453703_PM_at       | Dnah17              | DNAH17   | 0.33  | 2.53 | 1.58  | 1.44E-01 | 4.24E-01 | -5.50 |
| 1430411_PM_at       | ---                 | NA       | 0.34  | 2.70 | 1.58  | 1.44E-01 | 4.24E-01 | -5.50 |
| 1458888_PM_at       | Gm11696             | NA       | -0.22 | 2.44 | -1.58 | 1.44E-01 | 4.24E-01 | -5.50 |
| 1433391_PM_at       | A930018O16Rik       | NA       | 0.14  | 2.99 | 1.58  | 1.44E-01 | 4.24E-01 | -5.50 |
| 1458769_PM_at       | D7Erttd558e         | NA       | 0.20  | 2.19 | 1.58  | 1.44E-01 | 4.24E-01 | -5.50 |
| 1457408_PM_at       | ---                 | NA       | 0.21  | 2.10 | 1.58  | 1.44E-01 | 4.24E-01 | -5.50 |
| 1445942_PM_at       | AU015858            | NA       | 0.19  | 2.66 | 1.58  | 1.44E-01 | 4.24E-01 | -5.50 |
| 1455757_PM_at       | D3Erttd254e         | ZNF267   | -0.39 | 2.52 | -1.58 | 1.44E-01 | 4.24E-01 | -5.50 |
| 1448917_PM_at       | Med30               | MED30    | -0.17 | 2.90 | -1.58 | 1.44E-01 | 4.24E-01 | -5.50 |
| 1448120_PM_at       | Gdf9                | GDF9     | 0.15  | 2.22 | 1.58  | 1.44E-01 | 4.24E-01 | -5.50 |
| 1429056_PM_at       | Naa16               | NAA16    | 0.19  | 2.48 | 1.58  | 1.44E-01 | 4.24E-01 | -5.50 |
| 1429161_PM_at       | Arv1                | ARV1     | 0.21  | 3.14 | 1.58  | 1.44E-01 | 4.24E-01 | -5.50 |
| 1453613_PM_at       | ---                 | NA       | 0.28  | 2.71 | 1.58  | 1.44E-01 | 4.24E-01 | -5.50 |
| 1435245_PM_at       | GlS2                | GLS2     | 0.32  | 4.77 | 1.58  | 1.44E-01 | 4.24E-01 | -5.50 |
| 1420817_PM_at       | Ywhag               | YWHAG    | -0.68 | 8.37 | -1.58 | 1.44E-01 | 4.24E-01 | -5.50 |
| 1437132_PM_x_at     | Nedd9               | NEDD9    | -0.85 | 3.25 | -1.58 | 1.45E-01 | 4.24E-01 | -5.50 |
| 1424703_PM_at       | Hemk1               | HEMK1    | 0.25  | 3.52 | 1.58  | 1.45E-01 | 4.24E-01 | -5.50 |
| 1443924_PM_at       | Wnk3                | WNK3     | -0.44 | 3.69 | -1.58 | 1.45E-01 | 4.24E-01 | -5.50 |
| 1449064_PM_at       | Tdh                 | NA       | 0.22  | 2.87 | 1.58  | 1.45E-01 | 4.24E-01 | -5.50 |
| 1439555_PM_at       | Rlf                 | RLF      | -0.34 | 3.68 | -1.58 | 1.45E-01 | 4.25E-01 | -5.50 |
| 1429731_PM_at       | Gimn1               | GINM1    | -0.14 | 2.22 | -1.58 | 1.45E-01 | 4.25E-01 | -5.50 |
| 1437191_PM_at       | Zbbx                | ZBBX     | 0.21  | 2.16 | 1.58  | 1.45E-01 | 4.25E-01 | -5.50 |
| 1443594_PM_at       | AI043046            | NA       | 0.26  | 2.50 | 1.58  | 1.45E-01 | 4.25E-01 | -5.50 |
| 1446120_PM_at       | ---                 | NA       | 0.40  | 2.59 | 1.58  | 1.45E-01 | 4.25E-01 | -5.50 |
| 1436266_PM_x_at     | Cbx1                | CBX1     | -0.18 | 2.47 | -1.58 | 1.45E-01 | 4.25E-01 | -5.50 |
| 1429513_PM_at       | 1700019M22Rik       | NA       | 0.33  | 2.60 | 1.58  | 1.45E-01 | 4.25E-01 | -5.50 |
| 1423210_PM_a_at     | Nop10               | NOP10    | -0.48 | 5.53 | -1.58 | 1.45E-01 | 4.25E-01 | -5.50 |
| 1442065_PM_at       | Arhgap17            | NA       | 0.15  | 2.47 | 1.58  | 1.45E-01 | 4.25E-01 | -5.50 |
| 1433096_PM_at       | ---                 | NA       | 0.19  | 2.64 | 1.58  | 1.45E-01 | 4.25E-01 | -5.50 |
| 1459730_PM_at       | ---                 | NA       | 0.36  | 2.82 | 1.58  | 1.45E-01 | 4.25E-01 | -5.50 |
| 1433515_PM_s_at     | Etnk1               | ETNK1    | -0.61 | 6.47 | -1.58 | 1.45E-01 | 4.25E-01 | -5.50 |
| AFFX-r2-Bs-dap-5_at | ---                 | NA       | 0.15  | 2.17 | 1.58  | 1.45E-01 | 4.25E-01 | -5.50 |
| 1433701_PM_at       | Mpped1              | MPPED1   | 0.17  | 2.32 | 1.58  | 1.45E-01 | 4.25E-01 | -5.50 |
| 1456966_PM_at       | C920021L13Rik       | NA       | 0.72  | 4.33 | 1.58  | 1.45E-01 | 4.25E-01 | -5.50 |
| 1420895_PM_at       | Tgfb1               | TGFBR1   | -0.65 | 3.23 | -1.58 | 1.45E-01 | 4.25E-01 | -5.50 |
| 1418020_PM_s_at     | Cpd                 | CPD      | -0.43 | 3.78 | -1.58 | 1.45E-01 | 4.25E-01 | -5.50 |
| 1447859_PM_at       | Adck2               | ADCK2    | 0.18  | 2.40 | 1.58  | 1.45E-01 | 4.25E-01 | -5.50 |
| 1450156_PM_a_at     | Hmmr                | HMMR     | 0.20  | 4.34 | 1.58  | 1.45E-01 | 4.25E-01 | -5.50 |
| 1451767_PM_at       | Ncf1                | NCF1     | 0.21  | 2.43 | 1.58  | 1.45E-01 | 4.25E-01 | -5.50 |
| 1437194_PM_x_at     | Lrwd1               | LRWD1    | 0.74  | 5.95 | 1.58  | 1.45E-01 | 4.25E-01 | -5.50 |
| 1450035_PM_a_at     | Prpf40a             | PRPF40A  | 0.19  | 2.30 | 1.58  | 1.45E-01 | 4.25E-01 | -5.50 |
| 1446479_PM_at       | Tnni3k              | TNNI3K   | -0.18 | 2.81 | -1.58 | 1.45E-01 | 4.25E-01 | -5.50 |
| 1416457_PM_at       | Ddah2               | DDAH2    | 0.16  | 3.07 | 1.58  | 1.45E-01 | 4.25E-01 | -5.50 |
| 1444370_PM_at       | C77058              | NA       | -0.31 | 2.90 | -1.58 | 1.45E-01 | 4.25E-01 | -5.50 |
| 1458915_PM_at       | C77949              | NA       | 0.16  | 2.33 | 1.58  | 1.45E-01 | 4.25E-01 | -5.50 |
| 1419982_PM_s_at     | ---                 | NA       | 0.16  | 2.11 | 1.58  | 1.45E-01 | 4.25E-01 | -5.50 |
| 1452316_PM_at       | Ints12              | INTS12   | 0.22  | 2.35 | 1.58  | 1.45E-01 | 4.25E-01 | -5.50 |
| 1458810_PM_at       | ---                 | NA       | 0.32  | 4.44 | 1.58  | 1.45E-01 | 4.25E-01 | -5.50 |
| 1458868_PM_at       | ---                 | NA       | 0.12  | 1.93 | 1.58  | 1.45E-01 | 4.25E-01 | -5.50 |
| 1426037_PM_a_at     | Rgs16               | RGS16    | 0.25  | 2.65 | 1.58  | 1.45E-01 | 4.25E-01 | -5.50 |
| 1428367_PM_at       | Ndst1               | NA       | -0.22 | 3.77 | -1.58 | 1.45E-01 | 4.25E-01 | -5.50 |
| 1435399_PM_at       | Synpo2              | SYNPO2   | -0.27 | 3.86 | -1.58 | 1.45E-01 | 4.25E-01 | -5.50 |
| 1428342_PM_at       | Rcor3               | RCOR3    | -0.24 | 2.77 | -1.57 | 1.45E-01 | 4.26E-01 | -5.50 |
| 1442841_PM_at       | ---                 | NA       | 0.24  | 3.70 | 1.57  | 1.45E-01 | 4.26E-01 | -5.50 |
| 1442818_PM_at       | Gm40139 /// Gm40190 | NA       | 0.36  | 2.43 | 1.57  | 1.45E-01 | 4.26E-01 | -5.50 |
| 1434547_PM_at       | Cpd                 | CPD      | -0.35 | 3.25 | -1.57 | 1.45E-01 | 4.26E-01 | -5.50 |

|                 |                           |          |       |      |       |          |          |       |
|-----------------|---------------------------|----------|-------|------|-------|----------|----------|-------|
| 1428863_PM_at   | Ankrd39                   | ANKRD39  | 0.15  | 2.82 | 1.57  | 1.45E-01 | 4.26E-01 | -5.50 |
| 1431043_PM_at   | Klhl40                    | KLHL40   | 0.16  | 2.38 | 1.57  | 1.45E-01 | 4.26E-01 | -5.50 |
| 1452594_PM_at   | Dusp11                    | DUSP11   | 0.46  | 3.35 | 1.57  | 1.45E-01 | 4.26E-01 | -5.50 |
| 1439968_PM_x_at | Dbndd2                    | DBNDD2   | 0.65  | 6.15 | 1.57  | 1.45E-01 | 4.26E-01 | -5.50 |
| 1416729_PM_at   | Plg                       | PLG      | 0.16  | 2.73 | 1.57  | 1.45E-01 | 4.26E-01 | -5.50 |
| 1416132_PM_at   | Efr3a                     | EFR3A    | -0.71 | 5.60 | -1.57 | 1.45E-01 | 4.26E-01 | -5.50 |
| 1420272_PM_at   | Samhd1                    | SAMHD1   | 0.17  | 2.33 | 1.57  | 1.45E-01 | 4.26E-01 | -5.50 |
| 1441043_PM_at   | Gm26844                   | NA       | 0.18  | 2.29 | 1.57  | 1.45E-01 | 4.26E-01 | -5.50 |
| 1444873_PM_at   | ---                       | NA       | 0.21  | 2.67 | 1.57  | 1.45E-01 | 4.26E-01 | -5.50 |
| 1426853_PM_at   | Set                       | SET      | -0.82 | 7.12 | -1.57 | 1.46E-01 | 4.26E-01 | -5.50 |
| 1452315_PM_at   | Kif11                     | KIF11    | 0.21  | 2.35 | 1.57  | 1.46E-01 | 4.26E-01 | -5.50 |
| 1446117_PM_at   | ---                       | NA       | 0.41  | 2.90 | 1.57  | 1.46E-01 | 4.26E-01 | -5.50 |
| 1432138_PM_at   | 170080N15Rik              | NA       | 0.18  | 2.19 | 1.57  | 1.46E-01 | 4.26E-01 | -5.50 |
| 1433908_PM_a_at | Ctn                       | CTTN     | -0.84 | 7.15 | -1.57 | 1.46E-01 | 4.26E-01 | -5.50 |
| 1441109_PM_at   | LOC105244061              | NA       | 0.20  | 3.08 | 1.57  | 1.46E-01 | 4.26E-01 | -5.50 |
| 1418997_PM_at   | Lym5                      | NA       | -0.36 | 3.53 | -1.57 | 1.46E-01 | 4.26E-01 | -5.50 |
| 1444332_PM_at   | Gm34125                   | NA       | 0.12  | 2.05 | 1.57  | 1.46E-01 | 4.26E-01 | -5.50 |
| 1424785_PM_at   | Angptl6                   | ANGPTL6  | 0.27  | 2.74 | 1.57  | 1.46E-01 | 4.26E-01 | -5.50 |
| 1458687_PM_at   | Gm9564                    | NA       | 0.12  | 2.07 | 1.57  | 1.46E-01 | 4.26E-01 | -5.50 |
| 1455871_PM_s_at | Tax1bp3                   | TAX1BP3  | 0.77  | 5.22 | 1.57  | 1.46E-01 | 4.26E-01 | -5.50 |
| 1434700_PM_at   | G2e3                      | G2E3     | -0.12 | 2.44 | -1.57 | 1.46E-01 | 4.26E-01 | -5.51 |
| 1458708_PM_at   | ---                       | NA       | 0.27  | 3.00 | 1.57  | 1.46E-01 | 4.26E-01 | -5.51 |
| 1450726_PM_at   | Asah2                     | NA       | -0.22 | 2.34 | -1.57 | 1.46E-01 | 4.26E-01 | -5.51 |
| 1451503_PM_at   | No3                       | NOL3     | 0.17  | 2.42 | 1.57  | 1.46E-01 | 4.26E-01 | -5.51 |
| 1438716_PM_at   | Trim30d                   | TRIM5    | 0.18  | 2.33 | 1.57  | 1.46E-01 | 4.26E-01 | -5.51 |
| 1425590_PM_s_at | Aipl1                     | AIP1     | 0.26  | 2.73 | 1.57  | 1.46E-01 | 4.26E-01 | -5.51 |
| 1423001_PM_at   | Spred2                    | SPRED2   | 0.36  | 3.03 | 1.57  | 1.46E-01 | 4.26E-01 | -5.51 |
| 1419706_PM_a_at | Akap12                    | AKAP12   | 0.40  | 4.08 | 1.57  | 1.46E-01 | 4.26E-01 | -5.51 |
| 1422450_PM_at   | Ctnnd1                    | CTNND1   | 0.60  | 7.02 | 1.57  | 1.46E-01 | 4.26E-01 | -5.51 |
| 1430011_PM_at   | ---                       | NA       | 0.37  | 2.77 | 1.57  | 1.46E-01 | 4.26E-01 | -5.51 |
| 1424853_PM_s_at | Cyp4a10 /// Cyp4a31       | CYP4A11  | 0.41  | 2.71 | 1.57  | 1.46E-01 | 4.26E-01 | -5.51 |
| 1441955_PM_s_at | Paip1                     | PAIP1    | -0.70 | 2.80 | -1.57 | 1.46E-01 | 4.26E-01 | -5.51 |
| 1420144_PM_x_at | Rc3h2                     | RC3H2    | -0.22 | 2.51 | -1.57 | 1.46E-01 | 4.26E-01 | -5.51 |
| 1460574_PM_at   | Fat4                      | FAT4     | -0.37 | 2.73 | -1.57 | 1.46E-01 | 4.26E-01 | -5.51 |
| 1446415_PM_at   | ---                       | NA       | 0.17  | 2.07 | 1.57  | 1.46E-01 | 4.26E-01 | -5.51 |
| 1437931_PM_at   | Tlr12                     | NA       | 0.19  | 2.42 | 1.57  | 1.46E-01 | 4.26E-01 | -5.51 |
| 1438589_PM_at   | Igsf1                     | IGSF1    | 0.37  | 2.60 | 1.57  | 1.46E-01 | 4.26E-01 | -5.51 |
| 1456534_PM_at   | Man1a2                    | NA       | 0.20  | 3.00 | 1.57  | 1.46E-01 | 4.26E-01 | -5.51 |
| 1434830_PM_at   | Mxd1                      | MXD1     | -0.36 | 4.19 | -1.57 | 1.46E-01 | 4.26E-01 | -5.51 |
| 1455303_PM_at   | Rfxap                     | RFXAP    | 0.21  | 2.55 | 1.57  | 1.46E-01 | 4.26E-01 | -5.51 |
| 1439908_PM_at   | Zkscan1                   | ZKSCAN1  | 0.32  | 2.45 | 1.57  | 1.46E-01 | 4.26E-01 | -5.51 |
| 1445319_PM_at   | Gm36617                   | NA       | 0.13  | 2.35 | 1.57  | 1.46E-01 | 4.26E-01 | -5.51 |
| 1447525_PM_at   | ---                       | NA       | -0.28 | 3.26 | -1.57 | 1.46E-01 | 4.26E-01 | -5.51 |
| 1416106_PM_at   | Kti12                     | KTI12    | 0.14  | 2.16 | 1.57  | 1.46E-01 | 4.26E-01 | -5.51 |
| 1423980_PM_at   | Slc25a29                  | SLC25A29 | 0.17  | 2.14 | 1.57  | 1.46E-01 | 4.26E-01 | -5.51 |
| 1457010_PM_at   | 3010001F23Rik /// Gm41902 | NA       | 0.21  | 2.71 | 1.57  | 1.46E-01 | 4.26E-01 | -5.51 |
| 1450797_PM_a_at | Cbx1                      | CBX1     | 0.30  | 2.65 | 1.57  | 1.46E-01 | 4.26E-01 | -5.51 |
| 1436315_PM_at   | Kat6a                     | KAT6A    | -0.55 | 5.47 | -1.57 | 1.46E-01 | 4.27E-01 | -5.51 |
| 1434348_PM_at   | Fez2                      | FEZ2     | -0.26 | 3.29 | -1.57 | 1.46E-01 | 4.27E-01 | -5.51 |
| 1446550_PM_at   | ---                       | NA       | 0.14  | 2.28 | 1.57  | 1.46E-01 | 4.27E-01 | -5.51 |
| 1427118_PM_at   | 5430421N21Rik             | KRT86    | 0.15  | 2.26 | 1.57  | 1.46E-01 | 4.27E-01 | -5.51 |
| 1435309_PM_at   | Tti2                      | TTI2     | 0.18  | 2.38 | 1.57  | 1.46E-01 | 4.27E-01 | -5.51 |
| 1443719_PM_x_at | ---                       | NA       | 0.24  | 2.46 | 1.57  | 1.46E-01 | 4.27E-01 | -5.51 |
| 1456565_PM_s_at | Map3k12                   | MAP3K12  | -0.69 | 3.91 | -1.57 | 1.46E-01 | 4.27E-01 | -5.51 |
| 1418248_PM_at   | Gla                       | GLA      | -0.39 | 3.06 | -1.57 | 1.46E-01 | 4.27E-01 | -5.51 |
| 1454247_PM_a_at | Gpa33                     | GPA33    | 0.20  | 2.54 | 1.57  | 1.46E-01 | 4.27E-01 | -5.51 |
| 1439194_PM_at   | Ccdc187                   | NA       | 0.38  | 3.05 | 1.57  | 1.46E-01 | 4.27E-01 | -5.51 |
| 1423414_PM_at   | Ptgs1                     | PTGS1    | -0.19 | 3.10 | -1.57 | 1.46E-01 | 4.27E-01 | -5.51 |
| 1445894_PM_at   | ---                       | NA       | 0.31  | 3.13 | 1.57  | 1.46E-01 | 4.27E-01 | -5.51 |
| 1421601_PM_at   | Gsx2                      | GSX2     | 0.16  | 2.22 | 1.57  | 1.46E-01 | 4.27E-01 | -5.51 |
| 1422181_PM_at   | Cnga2                     | CNGA2    | 0.15  | 2.07 | 1.57  | 1.46E-01 | 4.27E-01 | -5.51 |
| 1449185_PM_at   | Crx                       | CRX      | 0.12  | 1.91 | 1.57  | 1.46E-01 | 4.27E-01 | -5.51 |
| 1444226_PM_at   | Foxo3 /// Gm38485         | FOXO3    | 0.14  | 2.51 | 1.57  | 1.46E-01 | 4.27E-01 | -5.51 |
| 1445526_PM_at   | AY512915                  | NA       | 0.17  | 2.57 | 1.57  | 1.46E-01 | 4.27E-01 | -5.51 |
| 1456154_PM_at   | ---                       | NA       | 0.21  | 3.66 | 1.57  | 1.46E-01 | 4.27E-01 | -5.51 |
| 1460536_PM_at   | ---                       | NA       | 0.40  | 3.50 | 1.57  | 1.46E-01 | 4.27E-01 | -5.51 |
| 1431498_PM_at   | ---                       | NA       | -0.14 | 2.32 | -1.57 | 1.46E-01 | 4.27E-01 | -5.51 |
| 1428787_PM_at   | Nckap1l                   | NCKAP1L  | 0.13  | 3.14 | 1.57  | 1.46E-01 | 4.27E-01 | -5.51 |
| 1457667_PM_x_at | Dyrk2                     | NA       | -0.22 | 2.34 | -1.57 | 1.46E-01 | 4.27E-01 | -5.51 |
| 1422919_PM_at   | Hrasls                    | HRASLS   | 0.17  | 2.35 | 1.57  | 1.46E-01 | 4.27E-01 | -5.51 |
| 1421461_PM_at   | Mpl                       | MPL      | 0.13  | 2.49 | 1.57  | 1.46E-01 | 4.27E-01 | -5.51 |
| 1454673_PM_at   | Wasf2                     | WASF2    | 0.26  | 2.53 | 1.57  | 1.46E-01 | 4.27E-01 | -5.51 |
| 1445742_PM_at   | ---                       | NA       | 0.35  | 2.68 | 1.57  | 1.47E-01 | 4.27E-01 | -5.51 |
| 1433248_PM_at   | 2310075M01Rik             | NA       | 0.18  | 2.36 | 1.57  | 1.47E-01 | 4.27E-01 | -5.51 |

|                 |                               |            |       |      |       |          |          |       |
|-----------------|-------------------------------|------------|-------|------|-------|----------|----------|-------|
| 1443795_PM_at   | Tcf19                         | TCF19      | 0.19  | 2.62 | 1.57  | 1.47E-01 | 4.27E-01 | -5.51 |
| 1428375_PM_at   | Cep83os                       | NA         | -0.46 | 2.85 | -1.57 | 1.47E-01 | 4.27E-01 | -5.51 |
| 1427049_PM_s_at | Smo                           | SMO        | 0.16  | 2.37 | 1.57  | 1.47E-01 | 4.27E-01 | -5.51 |
| 1424213_PM_at   | Ubiad1                        | UBIAD1     | 0.17  | 2.31 | 1.57  | 1.47E-01 | 4.27E-01 | -5.51 |
| 1450709_PM_at   | Defa5 /// Gm10104 /// Gm15315 | NA         | 0.24  | 2.38 | 1.57  | 1.47E-01 | 4.27E-01 | -5.51 |
| 1453015_PM_at   | Cmip                          | CMIP       | 0.36  | 8.61 | 1.57  | 1.47E-01 | 4.27E-01 | -5.51 |
| 1422178_PM_a_at | Rab17                         | RAB17      | 0.16  | 2.23 | 1.57  | 1.47E-01 | 4.27E-01 | -5.51 |
| 1418108_PM_at   | Rtkn2                         | RTKN2      | 0.17  | 2.31 | 1.57  | 1.47E-01 | 4.27E-01 | -5.51 |
| 1420088_PM_at   | Nfkbia                        | NFKBIA     | 0.62  | 6.76 | 1.57  | 1.47E-01 | 4.27E-01 | -5.51 |
| 1428741_PM_at   | Elav4                         | ELAVL4     | -0.37 | 3.90 | -1.57 | 1.47E-01 | 4.27E-01 | -5.51 |
| 1447352_PM_at   | ---                           | NA         | 0.16  | 2.08 | 1.57  | 1.47E-01 | 4.27E-01 | -5.51 |
| 1426059_PM_at   | Gckr                          | GCKR       | 0.16  | 2.07 | 1.57  | 1.47E-01 | 4.27E-01 | -5.51 |
| 1433261_PM_at   | 9430052A13Rik                 | NA         | 0.15  | 2.36 | 1.57  | 1.47E-01 | 4.27E-01 | -5.51 |
| 1427350_PM_a_at | Gtpbp6                        | GTPBP6     | 0.20  | 3.06 | 1.57  | 1.47E-01 | 4.27E-01 | -5.51 |
| 1423819_PM_s_at | Arl6ip1                       | ARL6IP1    | -0.59 | 5.58 | -1.57 | 1.47E-01 | 4.27E-01 | -5.51 |
| 1427232_PM_at   | Tshz1                         | TSHZ1      | 0.20  | 2.39 | 1.57  | 1.47E-01 | 4.27E-01 | -5.51 |
| 1448966_PM_a_at | Nfat5                         | NFAT5      | 0.28  | 2.48 | 1.57  | 1.47E-01 | 4.27E-01 | -5.51 |
| 1427400_PM_at   | Lbx1                          | LBX1       | 0.13  | 2.44 | 1.57  | 1.47E-01 | 4.28E-01 | -5.51 |
| 1432470_PM_at   | 1700016A09Rik                 | NA         | 0.20  | 3.24 | 1.57  | 1.47E-01 | 4.28E-01 | -5.51 |
| 1427097_PM_at   | Wwp1                          | WWP1       | -0.69 | 4.86 | -1.57 | 1.47E-01 | 4.28E-01 | -5.51 |
| 1456437_PM_x_at | C1ra /// C1rb                 | C1R        | -0.65 | 4.98 | -1.57 | 1.47E-01 | 4.28E-01 | -5.51 |
| 1439105_PM_at   | Cdadc1                        | CDADC1     | -0.25 | 3.70 | -1.57 | 1.47E-01 | 4.28E-01 | -5.51 |
| 1420101_PM_at   | 2610020H08Rik                 | REXO5      | -0.13 | 1.86 | -1.57 | 1.47E-01 | 4.28E-01 | -5.51 |
| 1447485_PM_at   | Gpr150                        | NA         | 0.15  | 2.43 | 1.57  | 1.47E-01 | 4.28E-01 | -5.51 |
| 1448296_PM_x_at | Tuba3a                        | TUBA3E     | 0.15  | 2.62 | 1.57  | 1.47E-01 | 4.28E-01 | -5.51 |
| 1435143_PM_at   | Elk3                          | ELK3       | 0.19  | 2.60 | 1.57  | 1.47E-01 | 4.28E-01 | -5.51 |
| 1416307_PM_at   | Ap1m1                         | AP1M1      | 0.24  | 3.31 | 1.57  | 1.47E-01 | 4.28E-01 | -5.51 |
| 1456398_PM_at   | ---                           | NA         | -0.38 | 4.89 | -1.57 | 1.47E-01 | 4.28E-01 | -5.51 |
| 1442362_PM_at   | Becn2                         | BECN2      | 0.12  | 2.16 | 1.57  | 1.47E-01 | 4.28E-01 | -5.51 |
| 1449990_PM_at   | Il2                           | IL2        | 0.24  | 2.93 | 1.57  | 1.47E-01 | 4.28E-01 | -5.51 |
| 1449352_PM_at   | Poll                          | POLL       | 0.16  | 2.43 | 1.57  | 1.47E-01 | 4.28E-01 | -5.51 |
| 1437428_PM_x_at | Eif2b2                        | EIF2B2     | 0.20  | 3.10 | 1.57  | 1.47E-01 | 4.28E-01 | -5.51 |
| 1421296_PM_at   | Tnfrsf10b                     | TNFRSF10D  | 0.17  | 2.13 | 1.57  | 1.47E-01 | 4.28E-01 | -5.51 |
| 1460534_PM_at   | 9430078G10Rik                 | NA         | 0.19  | 2.65 | 1.57  | 1.47E-01 | 4.28E-01 | -5.51 |
| 1429820_PM_at   | Sgsm1                         | SGSM1      | 0.22  | 2.47 | 1.57  | 1.47E-01 | 4.28E-01 | -5.51 |
| 1449828_PM_at   | Ptgfr                         | PTGFR      | 0.22  | 2.40 | 1.57  | 1.47E-01 | 4.28E-01 | -5.51 |
| 1446663_PM_at   | ---                           | NA         | 0.43  | 3.51 | 1.57  | 1.47E-01 | 4.28E-01 | -5.51 |
| 1450928_PM_at   | Id4                           | ID4        | -0.71 | 5.19 | -1.57 | 1.47E-01 | 4.28E-01 | -5.51 |
| 1424428_PM_at   | Ino80e                        | INO80E     | -0.28 | 3.92 | -1.57 | 1.47E-01 | 4.28E-01 | -5.51 |
| 1438486_PM_at   | Tsk4                          | TSSK4      | -0.13 | 2.18 | -1.57 | 1.47E-01 | 4.28E-01 | -5.51 |
| 1426306_PM_a_at | Maged2                        | MAGED2     | 0.16  | 2.69 | 1.57  | 1.47E-01 | 4.28E-01 | -5.51 |
| 1455803_PM_at   | Slco4a1                       | SLCO4A1    | 0.18  | 2.68 | 1.57  | 1.47E-01 | 4.28E-01 | -5.51 |
| 1454168_PM_a_at | Clpb                          | CLPB       | 0.20  | 2.36 | 1.57  | 1.47E-01 | 4.28E-01 | -5.51 |
| 1448632_PM_at   | Psmb10                        | ACO40162.1 | 0.28  | 4.59 | 1.57  | 1.47E-01 | 4.28E-01 | -5.51 |
| 1416079_PM_a_at | Arpc1a                        | ACO04922.1 | 0.28  | 4.20 | 1.57  | 1.47E-01 | 4.28E-01 | -5.51 |
| 1448765_PM_at   | Fyn                           | FYN        | -0.70 | 4.12 | -1.57 | 1.47E-01 | 4.28E-01 | -5.51 |
| 1456785_PM_at   | Med14                         | MED14      | -0.36 | 5.78 | -1.57 | 1.47E-01 | 4.28E-01 | -5.51 |
| 1440677_PM_at   | ---                           | NA         | 0.17  | 2.56 | 1.57  | 1.47E-01 | 4.28E-01 | -5.51 |
| 1443223_PM_at   | ---                           | NA         | 0.17  | 2.41 | 1.57  | 1.47E-01 | 4.28E-01 | -5.51 |
| 1440517_PM_x_at | Cmah                          | NA         | 0.20  | 2.78 | 1.57  | 1.47E-01 | 4.28E-01 | -5.51 |
| 1436371_PM_at   | Recql                         | RECQL      | 0.21  | 2.36 | 1.57  | 1.47E-01 | 4.28E-01 | -5.51 |
| 1428954_PM_at   | Slc9a3r2                      | SLC9A3R2   | 0.39  | 3.93 | 1.57  | 1.47E-01 | 4.28E-01 | -5.51 |
| 1428247_PM_at   | Vps26b                        | VPS26B     | 0.47  | 3.27 | 1.57  | 1.47E-01 | 4.28E-01 | -5.51 |
| 1455061_PM_a_at | Acaa2                         | ACAA2      | 0.25  | 2.71 | 1.57  | 1.47E-01 | 4.28E-01 | -5.51 |
| 1441170_PM_a_at | Dab2ip                        | DAB2IP     | 0.48  | 3.23 | 1.57  | 1.47E-01 | 4.28E-01 | -5.51 |
| 1435181_PM_at   | Lin54                         | LIN54      | -0.22 | 2.80 | -1.57 | 1.47E-01 | 4.28E-01 | -5.51 |
| 1415866_PM_at   | Unc45a                        | UNC45A     | 0.26  | 3.03 | 1.57  | 1.47E-01 | 4.28E-01 | -5.51 |
| 1425165_PM_at   | Gzmn                          | GZMB       | 0.12  | 2.10 | 1.57  | 1.47E-01 | 4.28E-01 | -5.51 |
| 1453971_PM_at   | Ccdc191                       | CCDC191    | 0.20  | 2.57 | 1.57  | 1.47E-01 | 4.28E-01 | -5.52 |
| 1444715_PM_at   | Asap3                         | NA         | 0.31  | 2.76 | 1.57  | 1.47E-01 | 4.28E-01 | -5.52 |
| 1418634_PM_at   | Notch1                        | NOTCH1     | 0.37  | 4.55 | 1.57  | 1.47E-01 | 4.28E-01 | -5.52 |
| 1439398_PM_x_at | Nsmf                          | NSMF       | -0.13 | 5.60 | -1.57 | 1.47E-01 | 4.28E-01 | -5.52 |
| 1436121_PM_a_at | Nsmce1                        | NSMCE1     | 0.22  | 2.46 | 1.57  | 1.47E-01 | 4.28E-01 | -5.52 |
| 1433136_PM_at   | ---                           | NA         | 0.14  | 2.32 | 1.57  | 1.47E-01 | 4.28E-01 | -5.52 |
| 1440498_PM_at   | ---                           | NA         | 0.15  | 2.23 | 1.57  | 1.48E-01 | 4.28E-01 | -5.52 |
| 1453199_PM_at   | Acbd6                         | ACBD6      | -0.24 | 3.59 | -1.57 | 1.48E-01 | 4.28E-01 | -5.52 |
| 1422165_PM_at   | Pou3f4                        | POU3F4     | 0.14  | 2.27 | 1.56  | 1.48E-01 | 4.28E-01 | -5.52 |
| 1432445_PM_at   | 2310016G11Rik                 | NA         | 0.18  | 2.31 | 1.56  | 1.48E-01 | 4.28E-01 | -5.52 |
| 1460115_PM_at   | ---                           | NA         | 0.25  | 3.45 | 1.56  | 1.48E-01 | 4.28E-01 | -5.52 |
| 1449548_PM_at   | Efnb2                         | EFNB2      | 0.47  | 3.41 | 1.56  | 1.48E-01 | 4.28E-01 | -5.52 |
| 1451352_PM_s_at | Mta3                          | MTA3       | 0.18  | 2.74 | 1.56  | 1.48E-01 | 4.28E-01 | -5.52 |
| 1452246_PM_at   | Ostf1                         | OSTF1      | 0.58  | 3.16 | 1.56  | 1.48E-01 | 4.28E-01 | -5.52 |
| 1448870_PM_at   | Ltbp1                         | LTBP1      | -0.69 | 3.57 | -1.56 | 1.48E-01 | 4.28E-01 | -5.52 |
| 1423569_PM_at   | Gatm                          | GATM       | -0.67 | 4.06 | -1.56 | 1.48E-01 | 4.28E-01 | -5.52 |

|                 |                 |          |       |      |       |          |          |       |
|-----------------|-----------------|----------|-------|------|-------|----------|----------|-------|
| 1434532_PM_at   | Csrnp2          | CSRNP2   | -0.52 | 3.00 | -1.56 | 1.48E-01 | 4.28E-01 | -5.52 |
| 1416269_PM_at   | Atp5j2          | ATP5J2   | -0.45 | 4.83 | -1.56 | 1.48E-01 | 4.28E-01 | -5.52 |
| 1458569_PM_at   | ElI2            | ELI2     | 0.12  | 2.24 | 1.56  | 1.48E-01 | 4.28E-01 | -5.52 |
| 1432088_PM_at   | Veph1           | VEPH1    | 0.14  | 2.12 | 1.56  | 1.48E-01 | 4.28E-01 | -5.52 |
| 1441426_PM_at   | ---             | NA       | 0.16  | 2.36 | 1.56  | 1.48E-01 | 4.28E-01 | -5.52 |
| 1415884_PM_at   | Cela3b          | CELA3B   | 0.18  | 2.46 | 1.56  | 1.48E-01 | 4.28E-01 | -5.52 |
| 1452837_PM_at   | Lpin2           | LPIN2    | 0.18  | 2.74 | 1.56  | 1.48E-01 | 4.28E-01 | -5.52 |
| 1460695_PM_a_at | 2010111101Rik   | C9orf3   | 0.20  | 2.86 | 1.56  | 1.48E-01 | 4.28E-01 | -5.52 |
| 1448913_PM_at   | Smarcd1         | SMARCD1  | 0.29  | 2.69 | 1.56  | 1.48E-01 | 4.28E-01 | -5.52 |
| 1434416_PM_a_at | Capn15          | NA       | 0.65  | 4.15 | 1.56  | 1.48E-01 | 4.28E-01 | -5.52 |
| 1435967_PM_s_at | Hibadh          | HIBADH   | -0.63 | 4.47 | -1.56 | 1.48E-01 | 4.29E-01 | -5.52 |
| 1460196_PM_at   | Cbr1            | CBR1     | -0.48 | 3.96 | -1.56 | 1.48E-01 | 4.29E-01 | -5.52 |
| 1426584_PM_a_at | Sord            | SORD     | 0.17  | 2.25 | 1.56  | 1.48E-01 | 4.29E-01 | -5.52 |
| 1420434_PM_at   | Cldn16          | CLDN16   | 0.17  | 2.33 | 1.56  | 1.48E-01 | 4.29E-01 | -5.52 |
| 1437314_PM_a_at | Trmt1           | TRMT1    | 0.36  | 4.16 | 1.56  | 1.48E-01 | 4.29E-01 | -5.52 |
| 1456656_PM_at   | Lin7a           | LIN7A    | -0.65 | 3.16 | -1.56 | 1.48E-01 | 4.29E-01 | -5.52 |
| 1444629_PM_at   | Fam117b         | FAM117B  | 0.13  | 2.21 | 1.56  | 1.48E-01 | 4.29E-01 | -5.52 |
| 1424507_PM_at   | Rin1            | RIN1     | 0.19  | 2.70 | 1.56  | 1.48E-01 | 4.29E-01 | -5.52 |
| 1421992_PM_a_at | Igfbp4          | IGFBP4   | 0.38  | 3.10 | 1.56  | 1.48E-01 | 4.29E-01 | -5.52 |
| 1421042_PM_at   | Arhgef2         | ARHGEF2  | -0.36 | 3.58 | -1.56 | 1.48E-01 | 4.29E-01 | -5.52 |
| 1430788_PM_at   | ---             | NA       | 0.19  | 2.39 | 1.56  | 1.48E-01 | 4.29E-01 | -5.52 |
| 1448467_PM_a_at | Ehbp11          | EHBP11L1 | 0.27  | 2.45 | 1.56  | 1.48E-01 | 4.29E-01 | -5.52 |
| 1432413_PM_at   | Trappc9         | TRAPPC9  | 0.13  | 2.21 | 1.56  | 1.48E-01 | 4.29E-01 | -5.52 |
| 1431838_PM_at   | ---             | NA       | 0.13  | 2.72 | 1.56  | 1.48E-01 | 4.29E-01 | -5.52 |
| 1430825_PM_at   | ---             | NA       | 0.14  | 2.14 | 1.56  | 1.48E-01 | 4.29E-01 | -5.52 |
| 1440627_PM_at   | Atp8a2          | ATP8A2   | 0.22  | 2.97 | 1.56  | 1.48E-01 | 4.29E-01 | -5.52 |
| 1424297_PM_at   | Zfp282          | ZNF282   | -0.16 | 2.40 | -1.56 | 1.48E-01 | 4.29E-01 | -5.52 |
| 1449519_PM_at   | Gadd45a         | GADD45A  | 0.40  | 2.30 | 1.56  | 1.48E-01 | 4.29E-01 | -5.52 |
| 1451416_PM_a_at | Tgm1            | TGM1     | 0.14  | 2.40 | 1.56  | 1.48E-01 | 4.29E-01 | -5.52 |
| 1425981_PM_a_at | Rbl2            | RBL2     | -0.29 | 2.74 | -1.56 | 1.48E-01 | 4.29E-01 | -5.52 |
| 1434614_PM_at   | ---             | NA       | 0.27  | 2.67 | 1.56  | 1.48E-01 | 4.29E-01 | -5.52 |
| 1457242_PM_at   | Ubox5           | UBOX5    | 0.28  | 2.63 | 1.56  | 1.48E-01 | 4.29E-01 | -5.52 |
| 1456566_PM_x_at | Rbm14           | RBM14    | 0.46  | 5.03 | 1.56  | 1.48E-01 | 4.29E-01 | -5.52 |
| 1435382_PM_at   | Ndn             | NDN      | -0.48 | 7.40 | -1.56 | 1.48E-01 | 4.29E-01 | -5.52 |
| 1429066_PM_at   | Tctn1           | TCTN1    | -0.46 | 4.57 | -1.56 | 1.48E-01 | 4.29E-01 | -5.52 |
| 1435022_PM_at   | Alx1            | ALX1     | -0.29 | 2.47 | -1.56 | 1.48E-01 | 4.29E-01 | -5.52 |
| 1442259_PM_at   | Rnf38           | RNF38    | 0.23  | 2.32 | 1.56  | 1.48E-01 | 4.29E-01 | -5.52 |
| 1417979_PM_at   | Tnmd            | TNMD     | 0.20  | 2.15 | 1.56  | 1.48E-01 | 4.29E-01 | -5.52 |
| 1418032_PM_at   | Iffg2           | ITFG2    | 0.37  | 2.72 | 1.56  | 1.48E-01 | 4.30E-01 | -5.52 |
| 1421040_PM_a_at | Gsta2           | NA       | 0.26  | 2.82 | 1.56  | 1.48E-01 | 4.30E-01 | -5.52 |
| 1435052_PM_at   | Ccdc181         | CCDC181  | 0.70  | 5.55 | 1.56  | 1.48E-01 | 4.30E-01 | -5.52 |
| 1448121_PM_at   | Wbp2            | WBP2     | -0.38 | 3.41 | -1.56 | 1.49E-01 | 4.30E-01 | -5.52 |
| 1444969_PM_at   | Pid1            | PID1     | 0.14  | 2.47 | 1.56  | 1.49E-01 | 4.30E-01 | -5.52 |
| 1426537_PM_at   | Ice2            | ICE2     | 0.22  | 2.92 | 1.56  | 1.49E-01 | 4.30E-01 | -5.52 |
| 1457583_PM_at   | St6galnac3      | NA       | 0.38  | 2.19 | 1.56  | 1.49E-01 | 4.30E-01 | -5.52 |
| 1456983_PM_at   | ---             | NA       | -0.52 | 3.30 | -1.56 | 1.49E-01 | 4.30E-01 | -5.52 |
| 1437596_PM_at   | Lypd4           | LYPD4    | 0.12  | 2.26 | 1.56  | 1.49E-01 | 4.30E-01 | -5.52 |
| 1423413_PM_at   | Ndrp1           | NDRG1    | 0.19  | 2.14 | 1.56  | 1.49E-01 | 4.30E-01 | -5.52 |
| 1453428_PM_at   | Shisa9          | SHISA9   | 0.24  | 2.59 | 1.56  | 1.49E-01 | 4.30E-01 | -5.52 |
| 1457589_PM_at   | Fat3            | FAT3     | -0.82 | 6.81 | -1.56 | 1.49E-01 | 4.30E-01 | -5.52 |
| 1455359_PM_at   | Ptpn14          | PTPN14   | -0.28 | 2.55 | -1.56 | 1.49E-01 | 4.30E-01 | -5.52 |
| 1453674_PM_at   | Gcnt2           | NA       | 0.20  | 2.47 | 1.56  | 1.49E-01 | 4.30E-01 | -5.52 |
| 1442130_PM_at   | Hsh2d           | NA       | 0.15  | 2.28 | 1.56  | 1.49E-01 | 4.30E-01 | -5.52 |
| 1418413_PM_at   | Cav3            | CAV3     | 0.27  | 3.31 | 1.56  | 1.49E-01 | 4.30E-01 | -5.52 |
| 1457892_PM_at   | ---             | NA       | 0.13  | 2.20 | 1.56  | 1.49E-01 | 4.30E-01 | -5.52 |
| 1457718_PM_at   | Srcap///Tmem265 | NA       | 0.25  | 3.01 | 1.56  | 1.49E-01 | 4.30E-01 | -5.52 |
| 1423442_PM_a_at | Fbxw2           | FBXW2    | 0.31  | 3.73 | 1.56  | 1.49E-01 | 4.30E-01 | -5.52 |
| 1422329_PM_a_at | Ntrk3           | NTRK3    | -0.34 | 3.81 | -1.56 | 1.49E-01 | 4.30E-01 | -5.52 |
| 1421420_PM_at   | Ccr10           | CCR10    | 0.18  | 3.13 | 1.56  | 1.49E-01 | 4.30E-01 | -5.52 |
| 1432578_PM_at   | Naif1           | NAIF1    | 0.18  | 2.56 | 1.56  | 1.49E-01 | 4.30E-01 | -5.52 |
| 1430871_PM_at   | Plcb4           | PLCB4    | 0.21  | 2.32 | 1.56  | 1.49E-01 | 4.30E-01 | -5.52 |
| 1443361_PM_at   | ---             | NA       | 0.26  | 2.72 | 1.56  | 1.49E-01 | 4.30E-01 | -5.52 |
| 1452884_PM_at   | Scaf11          | SCAF11   | -0.31 | 3.41 | -1.56 | 1.49E-01 | 4.30E-01 | -5.52 |
| 1431298_PM_at   | Rhno1           | NA       | 0.14  | 2.05 | 1.56  | 1.49E-01 | 4.30E-01 | -5.52 |
| 1421207_PM_at   | Lif             | LIF      | 0.19  | 2.63 | 1.56  | 1.49E-01 | 4.30E-01 | -5.52 |
| 1437921_PM_x_at | Zfp516          | ZNF516   | 0.34  | 3.72 | 1.56  | 1.49E-01 | 4.30E-01 | -5.52 |
| 1417708_PM_at   | Syt3            | SYT3     | 0.23  | 2.74 | 1.56  | 1.49E-01 | 4.30E-01 | -5.52 |
| 1425975_PM_a_at | Mapk8ip3        | MAPK8IP3 | 0.14  | 2.73 | 1.56  | 1.49E-01 | 4.31E-01 | -5.52 |
| 1436221_PM_at   | Ildr2           | ILDR2    | -0.73 | 4.00 | -1.56 | 1.49E-01 | 4.31E-01 | -5.52 |
| 1447393_PM_at   | ---             | NA       | 0.19  | 2.66 | 1.56  | 1.49E-01 | 4.31E-01 | -5.52 |
| 1433297_PM_at   | 1700039M15Rik   | NA       | 0.20  | 2.52 | 1.56  | 1.49E-01 | 4.31E-01 | -5.52 |
| 1457415_PM_a_at | 4930513N10Rik   | NA       | 0.30  | 2.35 | 1.56  | 1.49E-01 | 4.31E-01 | -5.53 |
| 1418882_PM_at   | Nlrp5           | NLRP5    | -0.15 | 3.10 | -1.56 | 1.49E-01 | 4.31E-01 | -5.53 |
| 1455663_PM_at   | Olfml1          | OLFML1   | 0.13  | 2.23 | 1.56  | 1.49E-01 | 4.31E-01 | -5.53 |
| 1440122_PM_at   | Gm8140          | NA       | 0.15  | 2.66 | 1.56  | 1.49E-01 | 4.31E-01 | -5.53 |

|                 |                                                              |           |       |      |       |          |          |       |
|-----------------|--------------------------------------------------------------|-----------|-------|------|-------|----------|----------|-------|
| 1448398_PM_s_at | LOC102642602///Rpl22                                         | RPL22     | -0.21 | 3.69 | -1.56 | 1.49E-01 | 4.31E-01 | -5.53 |
| 1447083_PM_at   | ---                                                          | NA        | 0.42  | 2.85 | 1.56  | 1.49E-01 | 4.31E-01 | -5.53 |
| 1427864_PM_at   | Hist1h3d///Hist1h3e///<br>Hist1h3g///Hist1h3h///<br>Hist1h3i | HIST1H3B  | 0.17  | 2.57 | 1.56  | 1.49E-01 | 4.31E-01 | -5.53 |
| 1416210_PM_at   | Imp3                                                         | IMP3      | -0.48 | 3.54 | -1.56 | 1.49E-01 | 4.31E-01 | -5.53 |
| 1429913_PM_at   | Kcnk16                                                       | KCNK16    | 0.13  | 2.44 | 1.56  | 1.49E-01 | 4.31E-01 | -5.53 |
| 1455154_PM_at   | Gli3                                                         | GLI3      | 0.14  | 2.54 | 1.56  | 1.49E-01 | 4.31E-01 | -5.53 |
| 1454689_PM_at   | Srrm1                                                        | SRRM1     | 0.33  | 3.21 | 1.56  | 1.49E-01 | 4.31E-01 | -5.53 |
| 1436879_PM_x_at | Afp                                                          | AFP       | 0.14  | 1.92 | 1.56  | 1.49E-01 | 4.31E-01 | -5.53 |
| 1439333_PM_at   | Kcnv1                                                        | KCNV1     | -0.37 | 3.88 | -1.56 | 1.49E-01 | 4.31E-01 | -5.53 |
| 1417565_PM_at   | Abhd5                                                        | ABHD5     | -0.34 | 2.76 | -1.56 | 1.49E-01 | 4.31E-01 | -5.53 |
| 1445882_PM_at   | Cd300lb                                                      | CD300LB   | 0.15  | 2.37 | 1.56  | 1.49E-01 | 4.31E-01 | -5.53 |
| 1435122_PM_x_at | Dnmt1                                                        | DNMT1     | 0.50  | 7.70 | 1.56  | 1.49E-01 | 4.31E-01 | -5.53 |
| 1440583_PM_at   | ---                                                          | NA        | 0.16  | 2.47 | 1.56  | 1.49E-01 | 4.31E-01 | -5.53 |
| 1449182_PM_at   | Retn                                                         | RETN      | 0.22  | 2.87 | 1.56  | 1.49E-01 | 4.31E-01 | -5.53 |
| 1459463_PM_at   | ---                                                          | NA        | 0.23  | 2.52 | 1.56  | 1.49E-01 | 4.31E-01 | -5.53 |
| 1443287_PM_at   | Ankrd63                                                      | ANKRD63   | 0.31  | 2.51 | 1.56  | 1.49E-01 | 4.31E-01 | -5.53 |
| 1448252_PM_a_at | Eef1b2                                                       | EEF1B2    | -0.55 | 7.33 | -1.56 | 1.50E-01 | 4.31E-01 | -5.53 |
| 1444482_PM_at   | ---                                                          | NA        | 0.20  | 2.66 | 1.56  | 1.50E-01 | 4.31E-01 | -5.53 |
| 1422703_PM_at   | Gk                                                           | GK        | -0.22 | 2.74 | -1.56 | 1.50E-01 | 4.31E-01 | -5.53 |
| 1446687_PM_at   | ---                                                          | NA        | 0.36  | 3.20 | 1.56  | 1.50E-01 | 4.32E-01 | -5.53 |
| 1446819_PM_at   | ---                                                          | NA        | 0.15  | 2.79 | 1.56  | 1.50E-01 | 4.32E-01 | -5.53 |
| 1432475_PM_at   | LOC102641619                                                 | NA        | 0.17  | 2.52 | 1.56  | 1.50E-01 | 4.32E-01 | -5.53 |
| 1454379_PM_at   | ---                                                          | NA        | 0.20  | 2.83 | 1.56  | 1.50E-01 | 4.32E-01 | -5.53 |
| 1434217_PM_at   | Prr14l                                                       | PRR14L    | -0.48 | 3.48 | -1.56 | 1.50E-01 | 4.32E-01 | -5.53 |
| 1426771_PM_at   | Tug1                                                         | NA        | 0.14  | 2.97 | 1.56  | 1.50E-01 | 4.32E-01 | -5.53 |
| 1436375_PM_at   | Srbd1                                                        | SRBD1     | 0.14  | 2.41 | 1.56  | 1.50E-01 | 4.32E-01 | -5.53 |
| 1457534_PM_at   | Gm19710                                                      | NA        | 0.17  | 2.77 | 1.56  | 1.50E-01 | 4.32E-01 | -5.53 |
| 1457078_PM_at   | Zfp473                                                       | ZNF473    | -0.16 | 2.47 | -1.56 | 1.50E-01 | 4.32E-01 | -5.53 |
| 1442823_PM_at   | ---                                                          | NA        | 0.33  | 4.10 | 1.56  | 1.50E-01 | 4.32E-01 | -5.53 |
| 1460413_PM_s_at | Zdhhc1                                                       | ZDHHC1    | 0.17  | 2.76 | 1.56  | 1.50E-01 | 4.32E-01 | -5.53 |
| 1451619_PM_at   | Golph3l                                                      | GOLPH3L   | 0.23  | 2.39 | 1.56  | 1.50E-01 | 4.32E-01 | -5.53 |
| 1447546_PM_s_at | ---                                                          | NA        | -0.44 | 2.16 | -1.56 | 1.50E-01 | 4.32E-01 | -5.53 |
| 1436584_PM_at   | Spry2                                                        | SPRY2     | -0.54 | 4.33 | -1.55 | 1.50E-01 | 4.32E-01 | -5.53 |
| 1459875_PM_x_at | Tpgs2                                                        | TPGS2     | -0.38 | 2.87 | -1.55 | 1.50E-01 | 4.32E-01 | -5.53 |
| 1430308_PM_at   | ---                                                          | NA        | 0.14  | 2.21 | 1.55  | 1.50E-01 | 4.32E-01 | -5.53 |
| 1420573_PM_at   | Hoxd1                                                        | HOXD1     | 0.15  | 2.04 | 1.55  | 1.50E-01 | 4.32E-01 | -5.53 |
| 1432717_PM_at   | ---                                                          | NA        | 0.16  | 2.37 | 1.55  | 1.50E-01 | 4.32E-01 | -5.53 |
| 1452386_PM_at   | Sall3                                                        | SALL3     | 0.17  | 2.21 | 1.55  | 1.50E-01 | 4.32E-01 | -5.53 |
| 1424987_PM_at   | Rab7b                                                        | RAB7B     | 0.17  | 2.69 | 1.55  | 1.50E-01 | 4.32E-01 | -5.53 |
| 1457173_PM_at   | ---                                                          | NA        | 0.21  | 2.68 | 1.55  | 1.50E-01 | 4.32E-01 | -5.53 |
| 1419890_PM_at   | ---                                                          | NA        | 0.25  | 2.35 | 1.55  | 1.50E-01 | 4.32E-01 | -5.53 |
| 1441915_PM_s_at | Plin5                                                        | PLIN5     | 0.27  | 3.51 | 1.55  | 1.50E-01 | 4.32E-01 | -5.53 |
| 1415732_PM_at   | Abhd16a                                                      | ABHD16A   | 0.34  | 3.95 | 1.55  | 1.50E-01 | 4.32E-01 | -5.53 |
| 1442203_PM_at   | Gm2a                                                         | GM2A      | 0.31  | 2.55 | 1.55  | 1.50E-01 | 4.32E-01 | -5.53 |
| 1432074_PM_at   | 4930517E11Rik                                                | NA        | 0.15  | 2.67 | 1.55  | 1.50E-01 | 4.32E-01 | -5.53 |
| 1418563_PM_at   | Serbp1                                                       | SERBP1    | -0.43 | 4.84 | -1.55 | 1.50E-01 | 4.32E-01 | -5.53 |
| 1435413_PM_x_at | 2700060E02Rik                                                | C14orf166 | -0.30 | 6.37 | -1.55 | 1.50E-01 | 4.32E-01 | -5.53 |
| 1445724_PM_at   | ---                                                          | NA        | 0.15  | 2.40 | 1.55  | 1.50E-01 | 4.32E-01 | -5.53 |
| 1440657_PM_at   | ---                                                          | NA        | 0.30  | 3.40 | 1.55  | 1.50E-01 | 4.32E-01 | -5.53 |
| 1428066_PM_at   | Ccdc120                                                      | CCDC120   | -0.27 | 2.67 | -1.55 | 1.50E-01 | 4.32E-01 | -5.53 |
| 1426761_PM_at   | Kdm1a                                                        | KDM1A     | -0.38 | 4.56 | -1.55 | 1.50E-01 | 4.32E-01 | -5.53 |
| 1423443_PM_at   | Slc4a8                                                       | SLC4A8    | -0.38 | 2.89 | -1.55 | 1.50E-01 | 4.32E-01 | -5.53 |
| 1438542_PM_at   | ---                                                          | NA        | -0.33 | 2.81 | -1.55 | 1.50E-01 | 4.32E-01 | -5.53 |
| 1431438_PM_at   | Sh2b1                                                        | NA        | 0.16  | 2.72 | 1.55  | 1.50E-01 | 4.32E-01 | -5.53 |
| 1453495_PM_at   | Klk12                                                        | KLK12     | 0.16  | 2.25 | 1.55  | 1.50E-01 | 4.32E-01 | -5.53 |
| 1432572_PM_at   | 4931406H21Rik                                                | NA        | 0.17  | 2.78 | 1.55  | 1.50E-01 | 4.32E-01 | -5.53 |
| 1436622_PM_at   | Iqsec2                                                       | IQSEC2    | 0.19  | 2.38 | 1.55  | 1.50E-01 | 4.32E-01 | -5.53 |
| 1446854_PM_at   | ---                                                          | NA        | 0.32  | 5.28 | 1.55  | 1.50E-01 | 4.32E-01 | -5.53 |
| 1458118_PM_at   | ---                                                          | NA        | 0.33  | 2.30 | 1.55  | 1.50E-01 | 4.32E-01 | -5.53 |
| 1423481_PM_at   | Rlok2                                                        | NA        | 0.40  | 3.31 | 1.55  | 1.50E-01 | 4.32E-01 | -5.53 |
| 1440628_PM_at   | ---                                                          | NA        | 0.97  | 5.22 | 1.55  | 1.50E-01 | 4.32E-01 | -5.53 |
| 1423912_PM_at   | Aspscr1                                                      | ASPSCR1   | 0.15  | 2.14 | 1.55  | 1.50E-01 | 4.32E-01 | -5.53 |
| 1441310_PM_at   | ---                                                          | NA        | 0.16  | 2.50 | 1.55  | 1.50E-01 | 4.32E-01 | -5.53 |
| 1429552_PM_at   | Cfap52                                                       | CFAP52    | 0.15  | 2.64 | 1.55  | 1.50E-01 | 4.32E-01 | -5.53 |
| 1459284_PM_at   | Gm37125                                                      | NA        | 0.24  | 2.83 | 1.55  | 1.50E-01 | 4.32E-01 | -5.53 |
| 1426340_PM_at   | Slc1a3                                                       | SLC1A3    | -0.79 | 4.99 | -1.55 | 1.50E-01 | 4.32E-01 | -5.53 |
| 1423277_PM_at   | Ptprk                                                        | PTPRK     | -0.25 | 4.24 | -1.55 | 1.50E-01 | 4.32E-01 | -5.53 |
| 1446105_PM_at   | Exoc1                                                        | EXOC1     | 0.26  | 2.57 | 1.55  | 1.50E-01 | 4.32E-01 | -5.53 |
| 1436996_PM_x_at | Lyz1                                                         | LYZ       | -0.94 | 3.64 | -1.55 | 1.50E-01 | 4.32E-01 | -5.53 |
| 1416268_PM_at   | Ets2                                                         | ETS2      | -0.50 | 3.84 | -1.55 | 1.50E-01 | 4.32E-01 | -5.53 |
| 1440920_PM_at   | Mmp14                                                        | MMP14     | 0.20  | 2.68 | 1.55  | 1.50E-01 | 4.32E-01 | -5.53 |
| 1441775_PM_at   | ---                                                          | NA        | 0.26  | 2.54 | 1.55  | 1.50E-01 | 4.32E-01 | -5.53 |
| 1447961_PM_s_at | Mrpb8                                                        | MRPL38    | 0.27  | 3.04 | 1.55  | 1.50E-01 | 4.32E-01 | -5.53 |

|                 |                                   |            |       |      |       |          |          |       |
|-----------------|-----------------------------------|------------|-------|------|-------|----------|----------|-------|
| 1431610_PM_at   | 5330439A09Rik                     | NA         | -0.20 | 2.19 | -1.55 | 1.50E-01 | 4.32E-01 | -5.53 |
| 1435561_PM_at   | Erf                               | ERF        | 0.16  | 2.23 | 1.55  | 1.51E-01 | 4.33E-01 | -5.53 |
| 1457121_PM_at   | Obsl1                             | OBSL1      | 0.15  | 2.78 | 1.55  | 1.51E-01 | 4.33E-01 | -5.53 |
| 1450958_PM_at   | Tm4sf1                            | TM4SF1     | -0.21 | 2.97 | -1.55 | 1.51E-01 | 4.33E-01 | -5.53 |
| 1441067_PM_at   | ---                               | NA         | 0.14  | 2.38 | 1.55  | 1.51E-01 | 4.33E-01 | -5.53 |
| 1428043_PM_a_at | Cmah                              | NA         | 0.15  | 2.47 | 1.55  | 1.51E-01 | 4.33E-01 | -5.53 |
| 1432043_PM_at   | Smu1                              | SMU1       | 0.16  | 2.48 | 1.55  | 1.51E-01 | 4.33E-01 | -5.53 |
| 1457441_PM_at   | ---                               | NA         | 0.16  | 2.26 | 1.55  | 1.51E-01 | 4.33E-01 | -5.53 |
| 1449867_PM_at   | Hoxc9                             | HOXC9      | 0.18  | 2.36 | 1.55  | 1.51E-01 | 4.33E-01 | -5.53 |
| 1458388_PM_at   | Ccdc110                           | CCDC110    | 0.20  | 2.46 | 1.55  | 1.51E-01 | 4.33E-01 | -5.53 |
| 1440183_PM_x_at | Apopt1                            | NA         | 0.20  | 2.20 | 1.55  | 1.51E-01 | 4.33E-01 | -5.53 |
| 1432625_PM_at   | 5830487K18Rik                     | NA         | 0.23  | 2.46 | 1.55  | 1.51E-01 | 4.33E-01 | -5.53 |
| 1459440_PM_at   | ---                               | NA         | 0.26  | 2.42 | 1.55  | 1.51E-01 | 4.33E-01 | -5.53 |
| 1419816_PM_s_at | Errf1                             | ERRF1      | 0.26  | 3.20 | 1.55  | 1.51E-01 | 4.33E-01 | -5.53 |
| 1436083_PM_at   | Lrp3                              | LRP3       | 0.33  | 3.46 | 1.55  | 1.51E-01 | 4.33E-01 | -5.53 |
| 1424603_PM_at   | Sumf1                             | SUMF1      | 0.49  | 3.97 | 1.55  | 1.51E-01 | 4.33E-01 | -5.53 |
| 1443866_PM_at   | Lrtm1                             | LRTM1      | 0.16  | 2.05 | 1.55  | 1.51E-01 | 4.33E-01 | -5.53 |
| 1440181_PM_at   | Ccdc177                           | CCDC177    | -0.71 | 7.26 | -1.55 | 1.51E-01 | 4.33E-01 | -5.53 |
| 1454429_PM_at   | 5830462O15Rik                     | NA         | 0.13  | 2.96 | 1.55  | 1.51E-01 | 4.33E-01 | -5.53 |
| 1433156_PM_at   | Kcnp1                             | NA         | 0.21  | 2.84 | 1.55  | 1.51E-01 | 4.33E-01 | -5.53 |
| 1419536_PM_a_at | Rela                              | RELA       | 0.24  | 2.53 | 1.55  | 1.51E-01 | 4.33E-01 | -5.53 |
| 1417866_PM_at   | Tnfaip1                           | TNFAIP1    | -0.27 | 2.80 | -1.55 | 1.51E-01 | 4.33E-01 | -5.53 |
| 1448435_PM_at   | Med15                             | MED15      | -0.47 | 5.03 | -1.55 | 1.51E-01 | 4.33E-01 | -5.53 |
| 1416532_PM_at   | Trrap                             | TRRAP      | -0.46 | 4.32 | -1.55 | 1.51E-01 | 4.33E-01 | -5.54 |
| 1429950_PM_at   | Unc5cl                            | UNC5CL     | 0.13  | 2.10 | 1.55  | 1.51E-01 | 4.33E-01 | -5.54 |
| 1432385_PM_a_at | Agtpbp1                           | AGTPBP1    | -0.52 | 4.95 | -1.55 | 1.51E-01 | 4.33E-01 | -5.54 |
| 1439161_PM_at   | Ppp6r3                            | NA         | 0.19  | 2.84 | 1.55  | 1.51E-01 | 4.33E-01 | -5.54 |
| 1455445_PM_at   | Cbln3                             | CBLN3      | 1.17  | 3.05 | 1.55  | 1.51E-01 | 4.33E-01 | -5.54 |
| 1419371_PM_s_at | Gosr2                             | AC005670.2 | -0.47 | 4.56 | -1.55 | 1.51E-01 | 4.33E-01 | -5.54 |
| 1427772_PM_at   | Defb15                            | DEFB106B   | 0.17  | 2.83 | 1.55  | 1.51E-01 | 4.33E-01 | -5.54 |
| 1459467_PM_at   | AA986715                          | NA         | 0.21  | 2.39 | 1.55  | 1.51E-01 | 4.33E-01 | -5.54 |
| 1455443_PM_at   | Gdap1l1                           | GDAP1L1    | 0.66  | 4.14 | 1.55  | 1.51E-01 | 4.33E-01 | -5.54 |
| 1429757_PM_at   | Spaca7                            | SPACA7     | 0.23  | 2.74 | 1.55  | 1.51E-01 | 4.33E-01 | -5.54 |
| 1418174_PM_at   | Dbp                               | DBP        | 0.71  | 3.57 | 1.55  | 1.51E-01 | 4.33E-01 | -5.54 |
| 1418567_PM_a_at | LOC102642637 /// Srp14            | SRP14      | -0.29 | 4.22 | -1.55 | 1.51E-01 | 4.33E-01 | -5.54 |
| 1445924_PM_at   | Gm13242 /// Gm13247 /// LOC383940 | NA         | -0.20 | 3.07 | -1.55 | 1.51E-01 | 4.33E-01 | -5.54 |
| 1448053_PM_at   | B4galt3                           | NA         | 0.16  | 2.40 | 1.55  | 1.51E-01 | 4.33E-01 | -5.54 |
| 1427427_PM_at   | Ryr3                              | RYR3       | -0.61 | 4.48 | -1.55 | 1.51E-01 | 4.33E-01 | -5.54 |
| 1418382_PM_at   | Apccd1                            | NA         | -0.19 | 2.66 | -1.55 | 1.51E-01 | 4.33E-01 | -5.54 |
| 1432355_PM_at   | 2210039B01Rik                     | NA         | 0.12  | 2.34 | 1.55  | 1.51E-01 | 4.33E-01 | -5.54 |
| 1418641_PM_at   | Lcp2                              | LCP2       | 0.15  | 2.79 | 1.55  | 1.51E-01 | 4.33E-01 | -5.54 |
| 1429921_PM_at   | 9530068E07Rik                     | C5orf15    | 0.16  | 2.40 | 1.55  | 1.51E-01 | 4.33E-01 | -5.54 |
| 1456062_PM_at   | Nppa                              | NPPA       | 0.17  | 2.31 | 1.55  | 1.51E-01 | 4.33E-01 | -5.54 |
| 1437958_PM_at   | Xpr1                              | XPR1       | 0.18  | 2.31 | 1.55  | 1.51E-01 | 4.33E-01 | -5.54 |
| 1423067_PM_at   | Cdk5rap3                          | CDK5RAP3   | 0.24  | 3.44 | 1.55  | 1.51E-01 | 4.33E-01 | -5.54 |
| 1431710_PM_at   | Cmtm1                             | CMTM1      | 0.26  | 3.07 | 1.55  | 1.51E-01 | 4.33E-01 | -5.54 |
| 1434600_PM_at   | Tjp2                              | TJP2       | 0.30  | 2.75 | 1.55  | 1.51E-01 | 4.33E-01 | -5.54 |
| 1431330_PM_at   | 3110002H16Rik                     | C18orf8    | 0.30  | 2.43 | 1.55  | 1.51E-01 | 4.33E-01 | -5.54 |
| 1449053_PM_s_at | Cog1 /// LOC102641618             | COG1       | -0.19 | 2.97 | -1.55 | 1.51E-01 | 4.33E-01 | -5.54 |
| 1440809_PM_at   | ---                               | NA         | 0.15  | 2.62 | 1.55  | 1.51E-01 | 4.33E-01 | -5.54 |
| 1435651_PM_a_at | Smarcad1                          | SMARCAD1   | 0.25  | 2.50 | 1.55  | 1.51E-01 | 4.33E-01 | -5.54 |
| 1456731_PM_x_at | Polr3k                            | POLR3K     | -0.16 | 2.25 | -1.55 | 1.51E-01 | 4.33E-01 | -5.54 |
| 1418711_PM_at   | Pdgfa                             | PDGFA      | 0.17  | 3.12 | 1.55  | 1.51E-01 | 4.33E-01 | -5.54 |
| 1450705_PM_at   | Nelfe                             | NELFE      | 0.40  | 2.98 | 1.55  | 1.51E-01 | 4.33E-01 | -5.54 |
| 1453286_PM_at   | Plkna2                            | PLXNA2     | -0.47 | 4.84 | -1.55 | 1.51E-01 | 4.33E-01 | -5.54 |
| 1456545_PM_at   | Il18rap                           | IL18RAP    | 0.19  | 2.50 | 1.55  | 1.51E-01 | 4.33E-01 | -5.54 |
| 1420691_PM_at   | Il2ra                             | NA         | 0.20  | 2.67 | 1.55  | 1.51E-01 | 4.33E-01 | -5.54 |
| 1418116_PM_at   | Tor1aip2                          | TOR1AIP2   | -0.25 | 3.82 | -1.55 | 1.51E-01 | 4.33E-01 | -5.54 |
| 1417917_PM_at   | Cnn1                              | CNN1       | -0.17 | 2.44 | -1.55 | 1.52E-01 | 4.33E-01 | -5.54 |
| 1424793_PM_a_at | Pbp2                              | PEBP1      | 0.14  | 3.29 | 1.55  | 1.52E-01 | 4.33E-01 | -5.54 |
| 1430876_PM_at   | ---                               | NA         | 0.15  | 2.35 | 1.55  | 1.52E-01 | 4.33E-01 | -5.54 |
| 1453773_PM_at   | Rnf220                            | RNF220     | 0.16  | 2.47 | 1.55  | 1.51E-01 | 4.33E-01 | -5.54 |
| 1446970_PM_at   | ---                               | NA         | 0.17  | 2.52 | 1.55  | 1.51E-01 | 4.33E-01 | -5.54 |
| 1420732_PM_at   | Rwdd3                             | RWDD3      | 0.18  | 2.59 | 1.55  | 1.51E-01 | 4.33E-01 | -5.54 |
| 1433264_PM_at   | ---                               | NA         | 0.21  | 4.45 | 1.55  | 1.51E-01 | 4.33E-01 | -5.54 |
| 1438189_PM_s_at | Dmtn                              | DMTN       | 0.25  | 2.35 | 1.55  | 1.51E-01 | 4.33E-01 | -5.54 |
| 1431534_PM_at   | ---                               | NA         | 0.28  | 2.41 | 1.55  | 1.51E-01 | 4.33E-01 | -5.54 |
| 1429540_PM_at   | Cnfn                              | CNFN       | 0.29  | 2.49 | 1.55  | 1.51E-01 | 4.33E-01 | -5.54 |
| 1440649_PM_at   | Gm4876                            | NA         | 0.31  | 2.72 | 1.55  | 1.52E-01 | 4.33E-01 | -5.54 |
| 1451226_PM_at   | Pex6                              | PEX6       | 0.55  | 5.28 | 1.55  | 1.51E-01 | 4.33E-01 | -5.54 |
| 1422031_PM_a_at | Zfand6                            | ZFAND6     | 0.27  | 3.04 | 1.55  | 1.52E-01 | 4.33E-01 | -5.54 |
| 1449403_PM_at   | Pde9a                             | PDE9A      | 0.24  | 2.54 | 1.55  | 1.52E-01 | 4.33E-01 | -5.54 |
| 1421664_PM_a_at | Styx                              | NA         | 0.51  | 2.70 | 1.55  | 1.52E-01 | 4.33E-01 | -5.54 |
| 1423907_PM_a_at | Ndufs8                            | NDUFS8     | -0.56 | 3.68 | -1.55 | 1.52E-01 | 4.34E-01 | -5.54 |



|                   |                              |            |       |      |       |          |          |       |
|-------------------|------------------------------|------------|-------|------|-------|----------|----------|-------|
| 1443280_PM_at     | ---                          | NA         | 0.11  | 2.07 | 1.55  | 1.52E-01 | 4.34E-01 | -5.54 |
| 1435761_PM_at     | BC100530 /// Stfa1 /// Stfa3 | CSTA       | 0.18  | 2.39 | 1.55  | 1.52E-01 | 4.34E-01 | -5.54 |
| 1452273_PM_at     | Fam83h                       | FAM83H     | 0.19  | 3.02 | 1.55  | 1.52E-01 | 4.34E-01 | -5.54 |
| 1460284_PM_at     | Letm1                        | LETM1      | 0.31  | 3.06 | 1.55  | 1.52E-01 | 4.34E-01 | -5.54 |
| 1422338_PM_at     | Gpr63                        | GPR63      | 0.40  | 2.51 | 1.55  | 1.52E-01 | 4.34E-01 | -5.54 |
| 1453297_PM_at     | Golga7b                      | GOLGA7B    | -0.27 | 3.61 | -1.55 | 1.52E-01 | 4.34E-01 | -5.54 |
| 1458266_PM_at     | ---                          | NA         | 0.40  | 3.02 | 1.55  | 1.52E-01 | 4.34E-01 | -5.54 |
| 1434945_PM_at     | Lpcat2                       | LPCAT2     | -0.38 | 3.24 | -1.55 | 1.52E-01 | 4.34E-01 | -5.54 |
| AFFX-r2-TagQ-3_at | ---                          | NA         | 0.14  | 2.06 | 1.55  | 1.52E-01 | 4.34E-01 | -5.54 |
| 1432434_PM_at     | ---                          | NA         | 0.14  | 2.12 | 1.55  | 1.52E-01 | 4.34E-01 | -5.54 |
| 1421902_PM_at     | Med29                        | MED29      | 0.19  | 2.27 | 1.55  | 1.52E-01 | 4.34E-01 | -5.54 |
| 1416213_PM_x_at   | Surf4                        | SURF4      | -0.45 | 3.31 | -1.55 | 1.52E-01 | 4.34E-01 | -5.54 |
| 1437271_PM_at     | Ckcf1                        | CLCF1      | 0.17  | 2.64 | 1.55  | 1.52E-01 | 4.34E-01 | -5.54 |
| 1450160_PM_at     | Lif                          | LIF        | 0.17  | 2.56 | 1.55  | 1.52E-01 | 4.34E-01 | -5.54 |
| 1423180_PM_at     | Kcnb1                        | NA         | 0.38  | 4.27 | 1.55  | 1.52E-01 | 4.34E-01 | -5.54 |
| 1428645_PM_at     | Gnai3                        | GNAI3      | -0.46 | 3.37 | -1.55 | 1.52E-01 | 4.34E-01 | -5.54 |
| 1427643_PM_at     | Gm16499                      | NA         | 0.15  | 2.85 | 1.55  | 1.52E-01 | 4.34E-01 | -5.54 |
| 1447509_PM_at     | Mxra7                        | NA         | 0.19  | 2.69 | 1.55  | 1.52E-01 | 4.34E-01 | -5.54 |
| 1454562_PM_at     | ---                          | NA         | 0.22  | 2.78 | 1.55  | 1.52E-01 | 4.34E-01 | -5.54 |
| 1450901_PM_a_at   | Smek2                        | PPP4R3B    | 0.32  | 3.54 | 1.55  | 1.52E-01 | 4.34E-01 | -5.54 |
| 1449283_PM_a_at   | Mapk12                       | MAPK12     | 0.35  | 2.71 | 1.55  | 1.52E-01 | 4.34E-01 | -5.54 |
| 1456096_PM_at     | 6430573F11Rik                | KIAA1456   | 0.23  | 2.55 | 1.55  | 1.52E-01 | 4.34E-01 | -5.54 |
| 1432307_PM_at     | 1700086D15Rik                | NA         | 0.29  | 2.33 | 1.55  | 1.52E-01 | 4.34E-01 | -5.54 |
| 1441413_PM_at     | ---                          | NA         | 0.14  | 2.46 | 1.55  | 1.52E-01 | 4.34E-01 | -5.54 |
| 1425468_PM_at     | Plp1                         | PLP1       | -0.86 | 8.82 | -1.55 | 1.52E-01 | 4.34E-01 | -5.54 |
| 1451372_PM_a_at   | Art1                         | ART1       | 0.18  | 2.69 | 1.55  | 1.52E-01 | 4.34E-01 | -5.54 |
| 1434421_PM_at     | Islr2                        | ISLR2      | 0.24  | 2.79 | 1.55  | 1.52E-01 | 4.34E-01 | -5.54 |
| 1427829_PM_at     | Abcd4                        | NA         | 0.18  | 2.55 | 1.55  | 1.52E-01 | 4.34E-01 | -5.54 |
| 1434948_PM_at     | Rab11fip2                    | RAB11FIP2  | -0.42 | 3.89 | -1.55 | 1.52E-01 | 4.34E-01 | -5.54 |
| 1429093_PM_at     | Ddi2                         | RSC1A1     | -0.30 | 3.02 | -1.55 | 1.52E-01 | 4.34E-01 | -5.54 |
| 1453699_PM_at     | ---                          | NA         | 0.13  | 2.16 | 1.55  | 1.52E-01 | 4.34E-01 | -5.54 |
| 1420511_PM_at     | Prph2                        | PRPH2      | 0.13  | 2.20 | 1.55  | 1.52E-01 | 4.34E-01 | -5.54 |
| 1457422_PM_at     | Unc79                        | NA         | 0.53  | 5.01 | 1.55  | 1.52E-01 | 4.34E-01 | -5.54 |
| 1445439_PM_at     | Dmtn                         | DMTN       | 0.33  | 3.26 | 1.55  | 1.52E-01 | 4.34E-01 | -5.54 |
| 1425384_PM_a_at   | Ube4a                        | UBE4A      | -0.83 | 4.08 | -1.55 | 1.52E-01 | 4.34E-01 | -5.54 |
| 1453366_PM_at     | Tdrkh                        | TDRKH      | 0.19  | 2.82 | 1.55  | 1.52E-01 | 4.34E-01 | -5.54 |
| 1435257_PM_at     | Klhl17                       | NA         | 0.48  | 3.81 | 1.55  | 1.52E-01 | 4.34E-01 | -5.54 |
| 1453610_PM_at     | 4931406B18Rik                | NA         | 0.16  | 2.53 | 1.55  | 1.52E-01 | 4.34E-01 | -5.54 |
| 1417820_PM_at     | Tor1b                        | TOR1B      | 0.24  | 3.10 | 1.55  | 1.52E-01 | 4.34E-01 | -5.54 |
| 1442744_PM_at     | Gm39971                      | NA         | 0.63  | 3.55 | 1.55  | 1.52E-01 | 4.34E-01 | -5.54 |
| 1442784_PM_at     | ---                          | NA         | 0.16  | 2.37 | 1.55  | 1.52E-01 | 4.34E-01 | -5.54 |
| 1449244_PM_at     | Cdh2                         | CDH2       | -0.58 | 5.34 | -1.55 | 1.52E-01 | 4.34E-01 | -5.54 |
| 1439327_PM_at     | Ccbe1                        | CCBE1      | -0.44 | 2.81 | -1.55 | 1.52E-01 | 4.34E-01 | -5.54 |
| 1458860_PM_at     | ---                          | NA         | 0.13  | 2.16 | 1.55  | 1.52E-01 | 4.34E-01 | -5.54 |
| 1415940_PM_at     | Zfand2a                      | ZFAND2A    | -0.60 | 3.58 | -1.54 | 1.52E-01 | 4.34E-01 | -5.54 |
| 1428557_PM_a_at   | Osgep1                       | OSGEPL1    | -0.47 | 3.98 | -1.54 | 1.52E-01 | 4.34E-01 | -5.54 |
| 1439376_PM_x_at   | Dmtf1                        | DMTF1      | -0.44 | 3.16 | -1.54 | 1.52E-01 | 4.34E-01 | -5.54 |
| 1429251_PM_at     | Prdm2                        | NA         | -0.37 | 3.80 | -1.54 | 1.52E-01 | 4.34E-01 | -5.54 |
| 1439846_PM_at     | Klf12                        | NA         | -0.30 | 2.87 | -1.54 | 1.52E-01 | 4.34E-01 | -5.54 |
| 1436770_PM_x_at   | Pma1                         | ACO18523.2 | -0.25 | 3.13 | -1.55 | 1.52E-01 | 4.34E-01 | -5.54 |
| 1456382_PM_at     | ---                          | NA         | 0.16  | 2.29 | 1.54  | 1.52E-01 | 4.34E-01 | -5.54 |
| 1455932_PM_at     | Gm41291                      | NA         | 0.17  | 2.38 | 1.54  | 1.52E-01 | 4.34E-01 | -5.54 |
| 1419518_PM_at     | Tuba8                        | TUBA8      | 0.18  | 2.77 | 1.54  | 1.52E-01 | 4.34E-01 | -5.54 |
| 1442375_PM_at     | ---                          | NA         | 0.19  | 2.19 | 1.54  | 1.52E-01 | 4.34E-01 | -5.54 |
| 1454537_PM_at     | Gm10505                      | NA         | 0.20  | 2.44 | 1.54  | 1.52E-01 | 4.34E-01 | -5.54 |
| 1442109_PM_at     | Fubp1                        | FUBP1      | 0.27  | 2.78 | 1.54  | 1.52E-01 | 4.34E-01 | -5.54 |
| 1435231_PM_at     | Coq4                         | COQ4       | 0.35  | 3.91 | 1.54  | 1.52E-01 | 4.34E-01 | -5.54 |
| 1431304_PM_a_at   | Tmem183a                     | TMEM183A   | 0.52  | 3.76 | 1.54  | 1.52E-01 | 4.34E-01 | -5.54 |
| 1452343_PM_at     | Ldlrad4                      | LDLRAD4    | 0.22  | 2.90 | 1.54  | 1.52E-01 | 4.34E-01 | -5.54 |
| 1453189_PM_at     | LOC102641751 /// Ube2i       | UBE2I      | 0.52  | 4.92 | 1.54  | 1.52E-01 | 4.34E-01 | -5.54 |
| 1431680_PM_a_at   | Ptprk                        | PTPRK      | -0.30 | 3.82 | -1.54 | 1.52E-01 | 4.34E-01 | -5.54 |
| 1427890_PM_a_at   | Lrrc56                       | LRRC56     | 0.15  | 2.49 | 1.54  | 1.52E-01 | 4.34E-01 | -5.54 |
| 1438283_PM_at     | 3110057O12Rik                | ABHD18     | 0.34  | 2.57 | 1.54  | 1.52E-01 | 4.34E-01 | -5.54 |
| 1458369_PM_at     | ---                          | NA         | 0.36  | 2.81 | 1.54  | 1.52E-01 | 4.34E-01 | -5.54 |
| 1447450_PM_at     | ---                          | NA         | 0.85  | 6.14 | 1.54  | 1.52E-01 | 4.34E-01 | -5.54 |
| 1446908_PM_at     | ---                          | NA         | 0.17  | 2.52 | 1.54  | 1.53E-01 | 4.34E-01 | -5.54 |
| 1432975_PM_at     | Ces2f                        | NA         | 0.25  | 3.16 | 1.54  | 1.53E-01 | 4.34E-01 | -5.54 |
| 1426349_PM_s_at   | Tmpo                         | TMPO       | 0.15  | 3.58 | 1.54  | 1.53E-01 | 4.34E-01 | -5.54 |
| 1447925_PM_at     | D630033A02Rik                | NA         | 0.22  | 2.73 | 1.54  | 1.53E-01 | 4.34E-01 | -5.54 |
| 1426301_PM_at     | Alcam                        | ALCAM      | -0.74 | 6.81 | -1.54 | 1.53E-01 | 4.35E-01 | -5.54 |
| 1430364_PM_at     | Atf7ip2                      | ATF7IP2    | 0.16  | 2.21 | 1.54  | 1.53E-01 | 4.35E-01 | -5.55 |
| 1433857_PM_at     | Fat1                         | FAT1       | -0.64 | 5.25 | -1.54 | 1.53E-01 | 4.35E-01 | -5.55 |
| 1460240_PM_a_at   | Hnrnpc                       | HNRNPCL4   | -0.52 | 7.54 | -1.54 | 1.53E-01 | 4.35E-01 | -5.55 |
| 1457990_PM_at     | Anks1b                       | ANKS1B     | -0.51 | 3.33 | -1.54 | 1.53E-01 | 4.35E-01 | -5.55 |

|                 |               |              |       |      |       |          |          |       |
|-----------------|---------------|--------------|-------|------|-------|----------|----------|-------|
| 1420911_PM_a_at | Mfge8         | MFGE8        | -0.47 | 5.69 | -1.54 | 1.53E-01 | 4.35E-01 | -5.55 |
| 1439300_PM_at   | Chic1         | CHIC1        | -0.41 | 2.88 | -1.54 | 1.53E-01 | 4.35E-01 | -5.55 |
| 1426524_PM_at   | Gnpda2        | GNPDA2       | -0.23 | 2.63 | -1.54 | 1.53E-01 | 4.35E-01 | -5.55 |
| 1446907_PM_at   | ---           | NA           | -0.17 | 2.69 | -1.54 | 1.53E-01 | 4.35E-01 | -5.55 |
| 1439353_PM_x_at | Tmem56        | TMEM56-RWDD3 | -0.12 | 2.22 | -1.54 | 1.53E-01 | 4.35E-01 | -5.55 |
| 1431847_PM_at   | ---           | NA           | 0.14  | 2.09 | 1.54  | 1.53E-01 | 4.35E-01 | -5.55 |
| 1453878_PM_at   | Ubr2          | NA           | 0.14  | 2.46 | 1.54  | 1.53E-01 | 4.35E-01 | -5.55 |
| 1455455_PM_at   | Glt28d2       | NA           | 0.14  | 2.30 | 1.54  | 1.53E-01 | 4.35E-01 | -5.55 |
| 1432825_PM_at   | LOC102643017  | NA           | 0.15  | 1.99 | 1.54  | 1.53E-01 | 4.35E-01 | -5.55 |
| 1453689_PM_at   | Fance         | NA           | 0.16  | 2.77 | 1.54  | 1.53E-01 | 4.35E-01 | -5.55 |
| 1432348_PM_at   | ---           | NA           | 0.17  | 2.39 | 1.54  | 1.53E-01 | 4.35E-01 | -5.55 |
| 1431778_PM_at   | Cars2         | CARS2        | 0.19  | 2.56 | 1.54  | 1.53E-01 | 4.35E-01 | -5.55 |
| 1444735_PM_at   | ---           | NA           | 0.21  | 2.72 | 1.54  | 1.53E-01 | 4.35E-01 | -5.55 |
| 1419744_PM_at   | H2-DMb2       | AL645941.2   | 0.22  | 2.54 | 1.54  | 1.53E-01 | 4.35E-01 | -5.55 |
| 1455884_PM_at   | Dpp9          | DPP9         | 0.24  | 2.64 | 1.54  | 1.53E-01 | 4.35E-01 | -5.55 |
| 1419524_PM_at   | Tph1          | TPH1         | 0.26  | 2.67 | 1.54  | 1.53E-01 | 4.35E-01 | -5.55 |
| 1448402_PM_at   | Tln1          | TLN1         | 0.31  | 2.99 | 1.54  | 1.53E-01 | 4.35E-01 | -5.55 |
| 1445211_PM_at   | ---           | NA           | 0.32  | 3.93 | 1.54  | 1.53E-01 | 4.35E-01 | -5.55 |
| 1455699_PM_at   | Bcat1         | BCAT1        | 0.42  | 3.99 | 1.54  | 1.53E-01 | 4.35E-01 | -5.55 |
| 1430214_PM_a_at | 2610020H08Rik | REXO5        | 0.48  | 2.63 | 1.54  | 1.53E-01 | 4.35E-01 | -5.55 |
| 1437621_PM_x_at | Phgdh         | PHGDH        | 0.74  | 6.97 | 1.54  | 1.53E-01 | 4.35E-01 | -5.55 |
| 1453676_PM_at   | ---           | NA           | 0.18  | 2.36 | 1.54  | 1.53E-01 | 4.35E-01 | -5.55 |
| 1431230_PM_a_at | Btbd9         | BTBD9        | 0.49  | 3.39 | 1.54  | 1.53E-01 | 4.35E-01 | -5.55 |
| 1437169_PM_at   | Pdlim1        | PDLIM1       | 0.13  | 2.10 | 1.54  | 1.53E-01 | 4.35E-01 | -5.55 |
| 1460148_PM_at   | ---           | NA           | 0.20  | 2.77 | 1.54  | 1.53E-01 | 4.35E-01 | -5.55 |
| 1425217_PM_a_at | Synj2         | SYNJ2        | 0.23  | 2.17 | 1.54  | 1.53E-01 | 4.35E-01 | -5.55 |
| 1430449_PM_at   | Kidins220     | KIDINS220    | -0.68 | 5.22 | -1.54 | 1.53E-01 | 4.35E-01 | -5.55 |
| 1419992_PM_x_at | Rab31l1       | NA           | 0.14  | 2.34 | 1.54  | 1.53E-01 | 4.35E-01 | -5.55 |
| 1439025_PM_at   | Zfp446        | ZNF446       | 0.23  | 3.06 | 1.54  | 1.53E-01 | 4.35E-01 | -5.55 |
| 1439069_PM_a_at | Pisd-ps3      | NA           | 0.72  | 5.72 | 1.54  | 1.53E-01 | 4.35E-01 | -5.55 |
| 1422641_PM_at   | Dok5          | DOK5         | 0.21  | 2.74 | 1.54  | 1.53E-01 | 4.35E-01 | -5.55 |
| 1449429_PM_at   | Fkbp1b        | FKBP1B       | -0.47 | 4.08 | -1.54 | 1.53E-01 | 4.35E-01 | -5.55 |
| 1456217_PM_at   | Ubfd1         | UBFD1        | -0.26 | 2.63 | -1.54 | 1.53E-01 | 4.35E-01 | -5.55 |
| 1450484_PM_a_at | Cmpk2         | CMPK2        | -0.45 | 2.84 | -1.54 | 1.53E-01 | 4.35E-01 | -5.55 |
| 1431829_PM_a_at | Rgl3          | RGL3         | 0.13  | 2.40 | 1.54  | 1.53E-01 | 4.35E-01 | -5.55 |
| 1432873_PM_at   | ---           | NA           | 0.15  | 2.47 | 1.54  | 1.53E-01 | 4.35E-01 | -5.55 |
| 1438139_PM_at   | Arhgap28      | ARHGAP28     | 0.18  | 2.70 | 1.54  | 1.53E-01 | 4.35E-01 | -5.55 |
| 1433380_PM_at   | 4921509A06Rik | NA           | 0.21  | 2.78 | 1.54  | 1.53E-01 | 4.35E-01 | -5.55 |
| 1446596_PM_at   | ---           | NA           | 0.18  | 2.56 | 1.54  | 1.53E-01 | 4.35E-01 | -5.55 |
| 1458099_PM_at   | ---           | NA           | 0.22  | 2.51 | 1.54  | 1.53E-01 | 4.35E-01 | -5.55 |
| 1433034_PM_at   | 2310007H11Rik | NA           | 0.35  | 2.93 | 1.54  | 1.53E-01 | 4.35E-01 | -5.55 |
| 1451464_PM_at   | Mfap3         | MFAP3        | 0.36  | 2.55 | 1.54  | 1.53E-01 | 4.35E-01 | -5.55 |
| 1456569_PM_x_at | Gsn           | GSN          | -0.22 | 4.42 | -1.54 | 1.53E-01 | 4.35E-01 | -5.55 |
| 1423711_PM_at   | Ndufaf1       | NDUFAF1      | -0.17 | 2.51 | -1.54 | 1.53E-01 | 4.35E-01 | -5.55 |
| 1419222_PM_at   | Tbxa2r        | TBXA2R       | 0.16  | 2.98 | 1.54  | 1.53E-01 | 4.35E-01 | -5.55 |
| 1456264_PM_at   | Comm7         | COMM7        | 0.27  | 3.38 | 1.54  | 1.53E-01 | 4.35E-01 | -5.55 |
| 1447021_PM_at   | Lncenc1       | NA           | 0.31  | 2.83 | 1.54  | 1.53E-01 | 4.35E-01 | -5.55 |
| 1423009_PM_at   | Sec1          | NA           | 0.14  | 2.53 | 1.54  | 1.53E-01 | 4.35E-01 | -5.55 |
| 1457555_PM_at   | Gpr151        | GPR151       | 0.15  | 2.04 | 1.54  | 1.53E-01 | 4.35E-01 | -5.55 |
| 1455422_PM_x_at | Sept4         | SEPT4        | -0.74 | 6.76 | -1.54 | 1.53E-01 | 4.36E-01 | -5.55 |
| 1441352_PM_at   | ---           | NA           | -0.23 | 2.32 | -1.54 | 1.54E-01 | 4.36E-01 | -5.55 |
| 1419061_PM_at   | Rhod          | NA           | 0.13  | 2.12 | 1.54  | 1.54E-01 | 4.36E-01 | -5.55 |
| 1454357_PM_at   | ---           | NA           | 0.17  | 2.46 | 1.54  | 1.54E-01 | 4.36E-01 | -5.55 |
| 1450454_PM_at   | Tor3a         | TOR3A        | 0.53  | 2.57 | 1.54  | 1.54E-01 | 4.36E-01 | -5.55 |
| 1445448_PM_at   | ---           | NA           | 0.21  | 2.53 | 1.54  | 1.54E-01 | 4.36E-01 | -5.55 |
| 1431206_PM_at   | Zfp266        | ZNF561       | 0.37  | 2.69 | 1.54  | 1.54E-01 | 4.36E-01 | -5.55 |
| 1442370_PM_at   | Grin2b        | GRIN2B       | -0.60 | 6.79 | -1.54 | 1.54E-01 | 4.36E-01 | -5.55 |
| 1442243_PM_at   | Per3          | PER3         | 0.45  | 3.20 | 1.54  | 1.54E-01 | 4.36E-01 | -5.55 |
| 1456351_PM_at   | Brd8          | BRD8         | -0.46 | 5.50 | -1.54 | 1.54E-01 | 4.36E-01 | -5.55 |
| 1440282_PM_at   | Tulp4         | TULP4        | -0.46 | 5.43 | -1.54 | 1.54E-01 | 4.36E-01 | -5.55 |
| 1457093_PM_at   | Gapvd1        | GAPVD1       | -0.13 | 2.35 | -1.54 | 1.54E-01 | 4.36E-01 | -5.55 |
| 1453711_PM_at   | Rspo4         | RSP04        | 0.16  | 2.44 | 1.54  | 1.54E-01 | 4.36E-01 | -5.55 |
| 1429798_PM_s_at | Cmtm5         | CMTM5        | 0.20  | 2.78 | 1.54  | 1.54E-01 | 4.36E-01 | -5.55 |
| 1425552_PM_at   | Hip1r         | HIP1R        | 0.41  | 5.47 | 1.54  | 1.54E-01 | 4.36E-01 | -5.55 |
| 1419663_PM_at   | Ogn           | OGN          | -0.97 | 3.20 | -1.54 | 1.54E-01 | 4.36E-01 | -5.55 |
| 1426918_PM_at   | Itgbl1        | ITGB1        | -0.26 | 2.92 | -1.54 | 1.54E-01 | 4.36E-01 | -5.55 |
| 1423929_PM_at   | Ubac2         | UBAC2        | 0.24  | 3.06 | 1.54  | 1.54E-01 | 4.36E-01 | -5.55 |
| 1425593_PM_at   | Tnpo2         | TNPO2        | 0.32  | 2.39 | 1.54  | 1.54E-01 | 4.36E-01 | -5.55 |
| 1446982_PM_at   | ---           | NA           | -0.29 | 2.56 | -1.54 | 1.54E-01 | 4.36E-01 | -5.55 |
| 1417476_PM_at   | Fbxw5         | FBXW5        | -0.78 | 6.05 | -1.54 | 1.54E-01 | 4.36E-01 | -5.55 |
| 1415978_PM_at   | Tubb3         | AC092143.1   | -0.58 | 5.22 | -1.54 | 1.54E-01 | 4.36E-01 | -5.55 |
| 1423125_PM_at   | Dcl1          | DCL1         | 0.62  | 3.59 | 1.54  | 1.54E-01 | 4.36E-01 | -5.55 |
| 1427750_PM_at   | Igkv9-120     | NA           | 0.16  | 2.71 | 1.54  | 1.54E-01 | 4.36E-01 | -5.55 |
| 1425325_PM_at   | Ms4a4b        | NA           | 0.14  | 2.33 | 1.54  | 1.54E-01 | 4.36E-01 | -5.55 |
| 1452264_PM_at   | Tns2          | TNS2         | 0.28  | 2.49 | 1.54  | 1.54E-01 | 4.36E-01 | -5.55 |

|                             |                  |             |       |      |       |          |          |       |
|-----------------------------|------------------|-------------|-------|------|-------|----------|----------|-------|
| 1437749_PM_s_at             | Mrp9             | MRPL9       | -0.78 | 3.96 | -1.54 | 1.54E-01 | 4.36E-01 | -5.55 |
| 1428843_PM_at               | March5           | MARCH5      | -0.62 | 4.41 | -1.54 | 1.54E-01 | 4.36E-01 | -5.55 |
| 1451131_PM_at               | Arl6ip1          | ARL6IP1     | -0.48 | 5.40 | -1.54 | 1.54E-01 | 4.36E-01 | -5.55 |
| 1450740_PM_a_at             | Mapre1           | MAPRE1      | -0.42 | 4.66 | -1.54 | 1.54E-01 | 4.36E-01 | -5.55 |
| 1428354_PM_at               | Foxk2            | FOXK2       | -0.27 | 5.91 | -1.54 | 1.54E-01 | 4.36E-01 | -5.55 |
| 1432278_PM_at               | 4930471M09Rik    | NA          | 0.14  | 2.49 | 1.54  | 1.54E-01 | 4.36E-01 | -5.55 |
| 1420389_PM_at               | Pax3             | PAX3        | 0.15  | 2.09 | 1.54  | 1.54E-01 | 4.36E-01 | -5.55 |
| 1433595_PM_at               | Slc35d1          | SLC35D1     | 0.17  | 2.43 | 1.54  | 1.54E-01 | 4.36E-01 | -5.55 |
| 1433040_PM_at               | ---              | NA          | 0.19  | 2.72 | 1.54  | 1.54E-01 | 4.36E-01 | -5.55 |
| 1456361_PM_at               | Afap1            | AFAP1       | 0.21  | 2.39 | 1.54  | 1.54E-01 | 4.36E-01 | -5.55 |
| 1423326_PM_at               | Entpd1           | ENTPD1      | 0.22  | 2.43 | 1.54  | 1.54E-01 | 4.36E-01 | -5.55 |
| 1437090_PM_at               | Ccdc63           | CCDC63      | 0.22  | 2.51 | 1.54  | 1.54E-01 | 4.36E-01 | -5.55 |
| 1440664_PM_at               | Cecr5            | HDHD5       | 0.29  | 2.50 | 1.54  | 1.54E-01 | 4.36E-01 | -5.55 |
| 1426142_PM_a_at             | Trdn             | TRDN        | 0.34  | 3.94 | 1.54  | 1.54E-01 | 4.36E-01 | -5.55 |
| 1417504_PM_at               | Calb1            | CALB1       | 1.01  | 3.51 | 1.54  | 1.54E-01 | 4.36E-01 | -5.55 |
| 1456366_PM_at               | 1700015F17Rik    | NA          | 0.13  | 2.26 | 1.54  | 1.54E-01 | 4.36E-01 | -5.55 |
| 1446503_PM_at               | ---              | NA          | 0.14  | 2.27 | 1.54  | 1.54E-01 | 4.36E-01 | -5.55 |
| 1443096_PM_at               | Lca5l            | LCA5L       | 0.26  | 2.43 | 1.54  | 1.54E-01 | 4.36E-01 | -5.55 |
| 1441758_PM_at               | Rhot1            | RHOT1       | 0.37  | 2.74 | 1.54  | 1.54E-01 | 4.36E-01 | -5.55 |
| 1428396_PM_at               | Smurf1           | SMURF1      | 0.40  | 2.79 | 1.54  | 1.54E-01 | 4.36E-01 | -5.55 |
| 1437626_PM_at               | Zfp36l2          | ZFP36L2     | -0.24 | 3.25 | -1.54 | 1.54E-01 | 4.36E-01 | -5.55 |
| 1442240_PM_at               | Ctr9             | CTR9        | 0.17  | 2.53 | 1.54  | 1.54E-01 | 4.36E-01 | -5.55 |
| 1453681_PM_at               | Atpif1           | ATPIF1      | 0.21  | 2.77 | 1.54  | 1.54E-01 | 4.36E-01 | -5.55 |
| 1428037_PM_at               | Otoa             | OTOA        | 0.22  | 2.32 | 1.54  | 1.54E-01 | 4.36E-01 | -5.55 |
| 1455340_PM_at               | Dennd5b          | DENND5B     | -0.35 | 4.67 | -1.54 | 1.54E-01 | 4.36E-01 | -5.55 |
| 1427557_PM_at               | Alg12            | ALG12       | 0.18  | 2.62 | 1.54  | 1.54E-01 | 4.36E-01 | -5.55 |
| 1459450_PM_at               | ---              | NA          | 0.45  | 3.18 | 1.54  | 1.54E-01 | 4.36E-01 | -5.55 |
| 1459231_PM_at               | Pkn1             | PKN1        | 0.64  | 3.55 | 1.54  | 1.54E-01 | 4.36E-01 | -5.55 |
| 1458718_PM_at               | Tmem156          | NA          | 0.17  | 2.58 | 1.54  | 1.54E-01 | 4.36E-01 | -5.55 |
| 1448427_PM_at               | Ndufa6           | NDUFA6      | -0.41 | 4.27 | -1.54 | 1.54E-01 | 4.36E-01 | -5.55 |
| 1442698_PM_at               | Gm32688          | NA          | 0.13  | 2.64 | 1.54  | 1.54E-01 | 4.36E-01 | -5.55 |
| AFFX-b-ActinMur/M12481_3_at | Actb             | NA          | -0.73 | 6.72 | -1.54 | 1.54E-01 | 4.37E-01 | -5.55 |
| 1415960_PM_at               | Mpo              | MPO         | 0.17  | 2.42 | 1.54  | 1.54E-01 | 4.37E-01 | -5.55 |
| 1421927_PM_at               | Tbl2             | TBL2        | 0.19  | 2.87 | 1.54  | 1.54E-01 | 4.37E-01 | -5.55 |
| 1460202_PM_at               | Myo21            | MYO21       | 0.12  | 2.29 | 1.54  | 1.54E-01 | 4.37E-01 | -5.55 |
| 1459770_PM_at               | Taok1            | TAOK1       | 0.13  | 2.15 | 1.54  | 1.54E-01 | 4.37E-01 | -5.56 |
| 1454119_PM_at               | Mknk1            | MKNK1       | 0.13  | 2.26 | 1.54  | 1.54E-01 | 4.37E-01 | -5.56 |
| 1425483_PM_at               | Tox              | TOX         | 0.20  | 2.59 | 1.54  | 1.54E-01 | 4.37E-01 | -5.56 |
| 1427610_PM_at               | Dsp              | DSP         | -0.12 | 1.96 | -1.54 | 1.55E-01 | 4.37E-01 | -5.56 |
| 1440249_PM_at               | Aknad1           | AL449266.1  | 0.15  | 2.14 | 1.54  | 1.55E-01 | 4.37E-01 | -5.56 |
| 1444400_PM_at               | Rb1              | RB1         | 0.16  | 2.35 | 1.54  | 1.54E-01 | 4.37E-01 | -5.56 |
| 1442633_PM_at               | ---              | NA          | 0.17  | 2.41 | 1.54  | 1.55E-01 | 4.37E-01 | -5.56 |
| 1442910_PM_at               | ---              | NA          | 0.17  | 2.03 | 1.54  | 1.55E-01 | 4.37E-01 | -5.56 |
| 1457949_PM_at               | Nt5c2            | NA          | 0.18  | 2.53 | 1.54  | 1.55E-01 | 4.37E-01 | -5.56 |
| 1438886_PM_at               | Heyl             | HEYL        | 0.21  | 2.59 | 1.54  | 1.55E-01 | 4.37E-01 | -5.56 |
| 1448455_PM_at               | Chn8             | KBTBD11-OT1 | 0.22  | 2.88 | 1.54  | 1.54E-01 | 4.37E-01 | -5.56 |
| 1459307_PM_at               | ---              | NA          | 0.22  | 2.38 | 1.54  | 1.55E-01 | 4.37E-01 | -5.56 |
| 1444363_PM_at               | Mkln1os          | NA          | 0.23  | 2.59 | 1.54  | 1.55E-01 | 4.37E-01 | -5.56 |
| 1424759_PM_at               | Arrdc4           | ARRDC4      | 0.27  | 3.08 | 1.54  | 1.55E-01 | 4.37E-01 | -5.56 |
| 1437902_PM_s_at             | Rarres2          | RARRES2     | 0.38  | 2.67 | 1.54  | 1.55E-01 | 4.37E-01 | -5.56 |
| 1439163_PM_at               | Zbtb16           | ZBTB16      | 0.45  | 3.13 | 1.54  | 1.55E-01 | 4.37E-01 | -5.56 |
| 1433870_PM_at               | Prr15l           | PRR15L      | 0.16  | 2.41 | 1.54  | 1.55E-01 | 4.37E-01 | -5.56 |
| 1450011_PM_at               | Hsd17b12         | HSD17B12    | -0.47 | 3.76 | -1.54 | 1.55E-01 | 4.37E-01 | -5.56 |
| 1446129_PM_at               | ---              | NA          | 0.28  | 2.42 | 1.54  | 1.55E-01 | 4.37E-01 | -5.56 |
| 1442183_PM_at               | ---              | NA          | 0.35  | 3.85 | 1.54  | 1.55E-01 | 4.37E-01 | -5.56 |
| 1441964_PM_at               | Qk               | NA          | -0.14 | 2.71 | -1.53 | 1.55E-01 | 4.37E-01 | -5.56 |
| 1451290_PM_at               | Map1k3a          | MAP1K3A     | 0.23  | 2.71 | 1.53  | 1.55E-01 | 4.37E-01 | -5.56 |
| 1452788_PM_at               | Ppp2r5e          | PPP2R5E     | 0.24  | 2.93 | 1.53  | 1.55E-01 | 4.37E-01 | -5.56 |
| 1427798_PM_x_at             | ---              | NA          | 0.43  | 4.48 | 1.53  | 1.55E-01 | 4.37E-01 | -5.56 |
| 1425296_PM_a_at             | Rgs3             | RGS3        | 0.15  | 2.77 | 1.53  | 1.55E-01 | 4.37E-01 | -5.56 |
| 1431810_PM_a_at             | Tmco4            | TMCO4       | 0.20  | 2.25 | 1.53  | 1.55E-01 | 4.37E-01 | -5.56 |
| 1433785_PM_at               | Mobp             | MOBP        | -0.85 | 8.58 | -1.53 | 1.55E-01 | 4.37E-01 | -5.56 |
| 1436210_PM_at               | Gk5              | GK5         | 0.14  | 2.43 | 1.53  | 1.55E-01 | 4.37E-01 | -5.56 |
| 1433417_PM_at               | ---              | NA          | 0.17  | 2.48 | 1.53  | 1.55E-01 | 4.37E-01 | -5.56 |
| 1444600_PM_at               | ---              | NA          | 0.16  | 2.20 | 1.53  | 1.55E-01 | 4.37E-01 | -5.56 |
| 1424686_PM_at               | Heatr6           | HEATR6      | 0.19  | 2.53 | 1.53  | 1.55E-01 | 4.37E-01 | -5.56 |
| 1449062_PM_at               | Khk              | KHK         | 0.28  | 3.09 | 1.53  | 1.55E-01 | 4.37E-01 | -5.56 |
| 1423565_PM_at               | Paics            | PAICS       | -0.48 | 5.05 | -1.53 | 1.55E-01 | 4.37E-01 | -5.56 |
| 1436730_PM_at               | Cclc1            | CLCC1       | -0.41 | 4.25 | -1.53 | 1.55E-01 | 4.37E-01 | -5.56 |
| 1422710_PM_a_at             | Cacna1h          | CACNA1H     | -0.30 | 3.07 | -1.53 | 1.55E-01 | 4.37E-01 | -5.56 |
| 1456905_PM_at               | B4galt2///Ccdc24 | B4GALT2     | 0.14  | 3.53 | 1.53  | 1.55E-01 | 4.37E-01 | -5.56 |
| 1449359_PM_at               | Pax1             | PAX1        | 0.14  | 2.58 | 1.53  | 1.55E-01 | 4.37E-01 | -5.56 |
| 1421263_PM_at               | Gabra3           | GABRA3      | 0.19  | 2.34 | 1.53  | 1.55E-01 | 4.37E-01 | -5.56 |
| 1437004_PM_at               | Trim43a          | TRIM43      | 0.51  | 2.62 | 1.53  | 1.55E-01 | 4.37E-01 | -5.56 |
| 1426128_PM_a_at             | Kcnq2            | KCNQ2       | -0.66 | 3.96 | -1.53 | 1.55E-01 | 4.37E-01 | -5.56 |

|                     |                                                       |          |       |      |       |          |          |       |
|---------------------|-------------------------------------------------------|----------|-------|------|-------|----------|----------|-------|
| 1456380_PM_x_at     | Cnn3                                                  | CNN3     | -0.71 | 4.59 | -1.53 | 1.55E-01 | 4.37E-01 | -5.56 |
| 1447281_PM_at       | ---                                                   | NA       | 0.17  | 2.36 | 1.53  | 1.55E-01 | 4.37E-01 | -5.56 |
| 1435852_PM_at       | Spred3                                                | SPRED3   | 0.23  | 2.49 | 1.53  | 1.55E-01 | 4.37E-01 | -5.56 |
| 1450101_PM_a_at     | Magi3                                                 | MAGI3    | 0.24  | 2.52 | 1.53  | 1.55E-01 | 4.37E-01 | -5.56 |
| 1442221_PM_at       | ---                                                   | NA       | 0.39  | 4.10 | 1.53  | 1.55E-01 | 4.37E-01 | -5.56 |
| 1450746_PM_at       | Keap1                                                 | KEAP1    | -0.42 | 4.91 | -1.53 | 1.55E-01 | 4.38E-01 | -5.56 |
| 1442450_PM_at       | D2Ertd501e                                            | NA       | 0.16  | 2.30 | 1.53  | 1.55E-01 | 4.38E-01 | -5.56 |
| 1443402_PM_at       | ---                                                   | NA       | 0.16  | 2.00 | 1.53  | 1.55E-01 | 4.38E-01 | -5.56 |
| 1425569_PM_a_at     | Slamf1                                                | SLAMF1   | 0.18  | 2.83 | 1.53  | 1.55E-01 | 4.38E-01 | -5.56 |
| 1448328_PM_at       | Sh3bp2                                                | SH3BP2   | 0.17  | 3.04 | 1.53  | 1.55E-01 | 4.38E-01 | -5.56 |
| 1417327_PM_at       | Cav2                                                  | CAV2     | -0.31 | 2.76 | -1.53 | 1.55E-01 | 4.38E-01 | -5.56 |
| 1431556_PM_at       | ---                                                   | NA       | 0.14  | 2.02 | 1.53  | 1.55E-01 | 4.38E-01 | -5.56 |
| 1436759_PM_x_at     | Cnn3                                                  | CNN3     | -0.62 | 4.57 | -1.53 | 1.55E-01 | 4.38E-01 | -5.56 |
| 1436948_PM_a_at     | Tmem255a                                              | TMEM255A | 0.67  | 5.00 | 1.53  | 1.55E-01 | 4.38E-01 | -5.56 |
| 1433090_PM_at       | ---                                                   | NA       | 0.12  | 2.26 | 1.53  | 1.55E-01 | 4.38E-01 | -5.56 |
| 1426410_PM_at       | Pdk3                                                  | PDK3     | -0.33 | 3.01 | -1.53 | 1.55E-01 | 4.38E-01 | -5.56 |
| 1422658_PM_at       | Plcz1                                                 | PLCZ1    | 0.13  | 2.07 | 1.53  | 1.55E-01 | 4.38E-01 | -5.56 |
| 1434469_PM_at       | Otud4                                                 | OTUD4    | 0.38  | 3.33 | 1.53  | 1.55E-01 | 4.38E-01 | -5.56 |
| 1418369_PM_at       | Prim1                                                 | PRIM1    | 0.38  | 2.34 | 1.53  | 1.55E-01 | 4.38E-01 | -5.56 |
| 1433912_PM_at       | Tiprl                                                 | TIPRL    | -0.27 | 3.66 | -1.53 | 1.56E-01 | 4.38E-01 | -5.56 |
| 1458336_PM_at       | ---                                                   | NA       | 0.14  | 2.09 | 1.53  | 1.56E-01 | 4.38E-01 | -5.56 |
| 1415953_PM_s_at     | Mark2                                                 | MARK2    | 0.15  | 2.34 | 1.53  | 1.56E-01 | 4.38E-01 | -5.56 |
| 1435830_PM_a_at     | Rab7b                                                 | RAB7B    | 0.23  | 3.54 | 1.53  | 1.56E-01 | 4.38E-01 | -5.56 |
| 1427181_PM_at       | Ldlrad4                                               | LDLRAD4  | 0.31  | 2.82 | 1.53  | 1.56E-01 | 4.38E-01 | -5.56 |
| 1417760_PM_at       | NroB1                                                 | NROB1    | 0.14  | 2.46 | 1.53  | 1.56E-01 | 4.38E-01 | -5.56 |
| 1450840_PM_a_at     | Gm32211 ///<br>LOC102636101 /// Rpl39 ///<br>Rpl39-ps | NA       | -0.41 | 7.89 | -1.53 | 1.56E-01 | 4.38E-01 | -5.56 |
| 1441187_PM_at       | ---                                                   | NA       | -0.48 | 5.72 | -1.53 | 1.56E-01 | 4.38E-01 | -5.56 |
| 1439180_PM_at       | Ino80d                                                | INO80D   | -0.43 | 4.01 | -1.53 | 1.56E-01 | 4.38E-01 | -5.56 |
| 1442326_PM_at       | Pcdh15                                                | PCDH15   | 0.17  | 1.84 | 1.53  | 1.56E-01 | 4.38E-01 | -5.56 |
| 1447369_PM_at       | Trmt1l                                                | TRMT1L   | 0.23  | 2.71 | 1.53  | 1.56E-01 | 4.38E-01 | -5.56 |
| 1422180_PM_a_at     | Tpsb2                                                 | TPSB2    | 0.29  | 2.28 | 1.53  | 1.56E-01 | 4.38E-01 | -5.56 |
| 1416683_PM_at       | Pknb2                                                 | PLXNB2   | 0.13  | 2.19 | 1.53  | 1.56E-01 | 4.38E-01 | -5.56 |
| 1456838_PM_at       | Lingo3                                                | LINGO3   | -0.34 | 3.93 | -1.53 | 1.56E-01 | 4.38E-01 | -5.56 |
| 1421615_PM_at       | Myo15                                                 | MYO15A   | 0.24  | 2.64 | 1.53  | 1.56E-01 | 4.38E-01 | -5.56 |
| 1435015_PM_at       | Zfp787                                                | ZNF787   | 0.18  | 2.59 | 1.53  | 1.56E-01 | 4.38E-01 | -5.56 |
| 1448429_PM_at       | Gyg1                                                  | GYG1     | -0.33 | 2.95 | -1.53 | 1.56E-01 | 4.38E-01 | -5.56 |
| 1419192_PM_at       | Gm21948 /// Il4i1                                     | IL4I1    | 0.17  | 2.35 | 1.53  | 1.56E-01 | 4.38E-01 | -5.56 |
| 1421707_PM_at       | Tmc2                                                  | TMC2     | 0.15  | 2.14 | 1.53  | 1.56E-01 | 4.38E-01 | -5.56 |
| 1428183_PM_at       | Ankrd23                                               | ANKRD23  | 0.18  | 2.76 | 1.53  | 1.56E-01 | 4.39E-01 | -5.56 |
| 1450188_PM_s_at     | Lipg                                                  | LIPG     | -0.23 | 2.97 | -1.53 | 1.56E-01 | 4.39E-01 | -5.56 |
| 1448713_PM_at       | Stat4                                                 | STAT4    | 0.14  | 1.98 | 1.53  | 1.56E-01 | 4.39E-01 | -5.56 |
| 1457715_PM_at       | Gm26808                                               | NA       | 0.23  | 2.52 | 1.53  | 1.56E-01 | 4.39E-01 | -5.56 |
| 1442830_PM_at       | ---                                                   | NA       | 0.18  | 2.33 | 1.53  | 1.56E-01 | 4.39E-01 | -5.56 |
| AFFX-r2-Bs-phe-5_at | ---                                                   | NA       | 0.12  | 2.11 | 1.53  | 1.56E-01 | 4.39E-01 | -5.56 |
| 1454542_PM_at       | ---                                                   | NA       | 0.18  | 2.80 | 1.53  | 1.56E-01 | 4.39E-01 | -5.56 |
| 1448164_PM_at       | Klhdc3                                                | KLHDC3   | 0.40  | 2.77 | 1.53  | 1.56E-01 | 4.39E-01 | -5.56 |
| 1420069_PM_at       | ---                                                   | NA       | -0.18 | 2.31 | -1.53 | 1.56E-01 | 4.39E-01 | -5.56 |
| 1417207_PM_at       | Dvl2                                                  | DVL2     | 0.14  | 2.17 | 1.53  | 1.56E-01 | 4.39E-01 | -5.56 |
| 1447102_PM_at       | ---                                                   | NA       | 0.24  | 2.24 | 1.53  | 1.56E-01 | 4.39E-01 | -5.56 |
| 1436544_PM_at       | Atp10d                                                | ATP10D   | -0.29 | 2.24 | -1.53 | 1.56E-01 | 4.39E-01 | -5.56 |
| 1429963_PM_at       | Mapk6                                                 | MAPK6    | -0.25 | 2.59 | -1.53 | 1.56E-01 | 4.39E-01 | -5.56 |
| 1454401_PM_at       | Pax5                                                  | NA       | -0.24 | 2.21 | -1.53 | 1.56E-01 | 4.39E-01 | -5.56 |
| 1433670_PM_at       | Emp2                                                  | EMP2     | -0.19 | 2.93 | -1.53 | 1.56E-01 | 4.39E-01 | -5.56 |
| 1442631_PM_at       | 2700070H01Rik /// Defb42                              | DEFB136  | 0.13  | 2.22 | 1.53  | 1.56E-01 | 4.39E-01 | -5.56 |
| 1444362_PM_at       | Neurod2                                               | NEUROD2  | 0.16  | 2.06 | 1.53  | 1.56E-01 | 4.39E-01 | -5.56 |
| 1433958_PM_at       | Cntrob                                                | CNTROB   | 0.19  | 3.17 | 1.53  | 1.56E-01 | 4.39E-01 | -5.56 |
| 1424512_PM_a_at     | Txndc9                                                | TXNDC9   | -0.43 | 3.43 | -1.53 | 1.56E-01 | 4.39E-01 | -5.56 |
| 1454702_PM_at       | 4930503L19Rik                                         | C18orf54 | -0.40 | 2.46 | -1.53 | 1.56E-01 | 4.39E-01 | -5.56 |
| 1422741_PM_a_at     | Bbx                                                   | BBX      | -0.12 | 2.38 | -1.53 | 1.56E-01 | 4.39E-01 | -5.56 |
| 1459587_PM_at       | ---                                                   | NA       | 0.12  | 2.16 | 1.53  | 1.56E-01 | 4.39E-01 | -5.56 |
| 1450531_PM_at       | H2-bl                                                 | NA       | 0.14  | 2.95 | 1.53  | 1.56E-01 | 4.39E-01 | -5.56 |
| 1459604_PM_at       | ---                                                   | NA       | 0.19  | 2.39 | 1.53  | 1.56E-01 | 4.39E-01 | -5.56 |
| 1427591_PM_at       | Cln1                                                  | CLCN1    | 0.15  | 2.05 | 1.53  | 1.56E-01 | 4.39E-01 | -5.57 |
| 1449899_PM_at       | Grin3b                                                | GRIN3B   | 0.19  | 3.72 | 1.53  | 1.56E-01 | 4.39E-01 | -5.57 |
| 1428574_PM_a_at     | Chn2                                                  | CHN2     | 0.82  | 4.00 | 1.53  | 1.56E-01 | 4.39E-01 | -5.57 |
| 1456092_PM_at       | Kctd7                                                 | KCTD7    | 0.22  | 2.82 | 1.53  | 1.56E-01 | 4.39E-01 | -5.57 |
| 1430225_PM_at       | Exo1                                                  | EXO1     | -0.11 | 2.08 | -1.53 | 1.56E-01 | 4.39E-01 | -5.57 |
| 1425894_PM_at       | Mrgprf                                                | MRGPRF   | 0.16  | 2.42 | 1.53  | 1.56E-01 | 4.39E-01 | -5.57 |
| 1428624_PM_at       | Magt1                                                 | MAGT1    | -0.32 | 4.44 | -1.53 | 1.56E-01 | 4.39E-01 | -5.57 |
| 1428994_PM_s_at     | Ucma                                                  | UCMA     | 0.29  | 2.58 | 1.53  | 1.56E-01 | 4.39E-01 | -5.57 |
| 1450015_PM_x_at     | Sgpp1                                                 | SGPP1    | -0.13 | 2.33 | -1.53 | 1.56E-01 | 4.39E-01 | -5.57 |
| 1458660_PM_at       | Al414330                                              | NA       | 0.26  | 3.25 | 1.53  | 1.56E-01 | 4.39E-01 | -5.57 |

|                 |                                                                                               |          |       |      |       |          |          |       |
|-----------------|-----------------------------------------------------------------------------------------------|----------|-------|------|-------|----------|----------|-------|
| 1429153_PM_at   | Brf1                                                                                          | NA       | 0.35  | 3.68 | 1.53  | 1.56E-01 | 4.39E-01 | -5.57 |
| 1433068_PM_at   | ---                                                                                           | NA       | 0.19  | 2.44 | 1.53  | 1.56E-01 | 4.39E-01 | -5.57 |
| 1457614_PM_at   | ---                                                                                           | NA       | 0.22  | 2.38 | 1.53  | 1.56E-01 | 4.39E-01 | -5.57 |
| 1437533_PM_at   | Xiap                                                                                          | BIRC8    | -0.25 | 4.01 | -1.53 | 1.56E-01 | 4.39E-01 | -5.57 |
| 1460533_PM_at   | ---                                                                                           | NA       | -0.18 | 2.19 | -1.53 | 1.56E-01 | 4.39E-01 | -5.57 |
| 1419634_PM_a_at | Ghrh                                                                                          | GHRH     | 0.21  | 3.18 | 1.53  | 1.56E-01 | 4.39E-01 | -5.57 |
| 1442224_PM_at   | ---                                                                                           | NA       | 0.16  | 3.07 | 1.53  | 1.57E-01 | 4.39E-01 | -5.57 |
| 1450431_PM_a_at | Nedd4                                                                                         | NEDD4    | -0.63 | 6.62 | -1.53 | 1.57E-01 | 4.39E-01 | -5.57 |
| 1433969_PM_at   | Cdk4                                                                                          | CDKL4    | -0.24 | 2.95 | -1.53 | 1.57E-01 | 4.39E-01 | -5.57 |
| 1458333_PM_x_at | Utf1                                                                                          | UTF1     | 0.12  | 2.04 | 1.53  | 1.57E-01 | 4.39E-01 | -5.57 |
| 1441014_PM_at   | ---                                                                                           | NA       | -0.33 | 4.88 | -1.53 | 1.57E-01 | 4.39E-01 | -5.57 |
| 1448489_PM_at   | Pafah2                                                                                        | PAFAH2   | -0.29 | 3.24 | -1.53 | 1.57E-01 | 4.39E-01 | -5.57 |
| 1441422_PM_at   | Gas2l1                                                                                        | GAS2L1   | -0.13 | 2.22 | -1.53 | 1.57E-01 | 4.39E-01 | -5.57 |
| 1425955_PM_at   | Cav2                                                                                          | CAV2     | 0.19  | 2.46 | 1.53  | 1.57E-01 | 4.39E-01 | -5.57 |
| 1457418_PM_at   | Gm32266 /// Gm32554 ///<br>Gm33468 /// Gm38694 ///<br>Gm4047                                  | NA       | 0.26  | 2.47 | 1.53  | 1.57E-01 | 4.39E-01 | -5.57 |
| 1417643_PM_at   | RspH1                                                                                         | RSPH1    | 0.58  | 3.61 | 1.53  | 1.57E-01 | 4.39E-01 | -5.57 |
| 1419876_PM_at   | ---                                                                                           | NA       | 0.15  | 2.97 | 1.53  | 1.57E-01 | 4.39E-01 | -5.57 |
| 1444081_PM_at   | ---                                                                                           | NA       | 0.12  | 2.30 | 1.53  | 1.57E-01 | 4.39E-01 | -5.57 |
| 1459020_PM_at   | Amigo1                                                                                        | AMIGO1   | -0.38 | 2.93 | -1.53 | 1.57E-01 | 4.39E-01 | -5.57 |
| 1457365_PM_at   | ---                                                                                           | NA       | 0.34  | 2.40 | 1.53  | 1.57E-01 | 4.39E-01 | -5.57 |
| 1459999_PM_at   | Scaf4                                                                                         | SCAF4    | 0.27  | 3.95 | 1.53  | 1.57E-01 | 4.39E-01 | -5.57 |
| 1426759_PM_at   | Map4k3                                                                                        | MAP4K3   | -0.68 | 6.88 | -1.53 | 1.57E-01 | 4.39E-01 | -5.57 |
| 1451809_PM_s_at | Rwdd3                                                                                         | RWDD3    | -0.29 | 3.08 | -1.53 | 1.57E-01 | 4.39E-01 | -5.57 |
| 1435585_PM_at   | Tceal7                                                                                        | TCEAL7   | -0.19 | 2.35 | -1.53 | 1.57E-01 | 4.39E-01 | -5.57 |
| 1420071_PM_at   | ---                                                                                           | NA       | 0.14  | 2.22 | 1.53  | 1.57E-01 | 4.39E-01 | -5.57 |
| 1425931_PM_a_at | Arntl2                                                                                        | ARNTL2   | 0.14  | 2.92 | 1.53  | 1.57E-01 | 4.39E-01 | -5.57 |
| 1453779_PM_at   | 1700020L24Rik                                                                                 | C17orf50 | 0.16  | 2.39 | 1.53  | 1.57E-01 | 4.39E-01 | -5.57 |
| 1442919_PM_at   | Sh3pxd2b                                                                                      | NA       | 0.21  | 2.74 | 1.53  | 1.57E-01 | 4.39E-01 | -5.57 |
| 1440380_PM_at   | ---                                                                                           | NA       | 0.22  | 2.21 | 1.53  | 1.57E-01 | 4.39E-01 | -5.57 |
| 1457498_PM_at   | ---                                                                                           | NA       | 0.24  | 2.65 | 1.53  | 1.57E-01 | 4.39E-01 | -5.57 |
| 1454316_PM_at   | ---                                                                                           | NA       | 0.25  | 2.19 | 1.53  | 1.57E-01 | 4.39E-01 | -5.57 |
| 1448046_PM_at   | ---                                                                                           | NA       | 0.34  | 3.03 | 1.53  | 1.57E-01 | 4.39E-01 | -5.57 |
| 1454451_PM_at   | 5330430B06Rik                                                                                 | NA       | 0.38  | 2.64 | 1.53  | 1.57E-01 | 4.39E-01 | -5.57 |
| 1428656_PM_at   | Drosha                                                                                        | DROSHA   | 0.38  | 3.85 | 1.53  | 1.57E-01 | 4.39E-01 | -5.57 |
| 1421319_PM_at   | Ptgfrn                                                                                        | PTGFRN   | 0.22  | 2.46 | 1.53  | 1.57E-01 | 4.39E-01 | -5.57 |
| 1441743_PM_at   | Pax3                                                                                          | PAX3     | 0.18  | 2.61 | 1.53  | 1.57E-01 | 4.40E-01 | -5.57 |
| 1425680_PM_a_at | Btrc                                                                                          | BTRC     | 0.40  | 4.90 | 1.53  | 1.57E-01 | 4.40E-01 | -5.57 |
| 1435570_PM_s_at | D630029K05Rik                                                                                 | NA       | 0.13  | 2.43 | 1.53  | 1.57E-01 | 4.40E-01 | -5.57 |
| 1420740_PM_at   | Il25                                                                                          | IL25     | 0.15  | 2.22 | 1.53  | 1.57E-01 | 4.40E-01 | -5.57 |
| 1432312_PM_a_at | Prss41                                                                                        | PRSS41   | 0.16  | 3.10 | 1.53  | 1.57E-01 | 4.40E-01 | -5.57 |
| 1460095_PM_at   | Slx1b                                                                                         | NA       | 0.43  | 2.92 | 1.53  | 1.57E-01 | 4.40E-01 | -5.57 |
| 1427797_PM_s_at | Gm37416 /// Gm39743 ///<br>Gm40611 /// Gm40814 ///<br>Gm41035 /// Gm41476 ///<br>LOC105244034 | NA       | 1.02  | 3.74 | 1.53  | 1.57E-01 | 4.40E-01 | -5.57 |
| 1417676_PM_a_at | Ptpro                                                                                         | PTPRO    | -0.62 | 4.26 | -1.53 | 1.57E-01 | 4.40E-01 | -5.57 |
| 1453916_PM_at   | LOC105243223                                                                                  | NA       | 0.13  | 2.45 | 1.53  | 1.57E-01 | 4.40E-01 | -5.57 |
| 1442577_PM_at   | Ap5z1                                                                                         | AP5Z1    | 0.17  | 2.52 | 1.53  | 1.57E-01 | 4.40E-01 | -5.57 |
| 1457939_PM_at   | Ccdc173                                                                                       | NA       | 0.25  | 2.22 | 1.53  | 1.57E-01 | 4.40E-01 | -5.57 |
| 1422989_PM_a_at | Dmpk                                                                                          | DMPK     | 0.19  | 2.69 | 1.53  | 1.57E-01 | 4.40E-01 | -5.57 |
| 1438780_PM_at   | Stx1b                                                                                         | STX1B    | -0.56 | 6.07 | -1.53 | 1.57E-01 | 4.40E-01 | -5.57 |
| 1448883_PM_at   | Lgmn                                                                                          | LGMN     | -0.27 | 2.49 | -1.53 | 1.57E-01 | 4.40E-01 | -5.57 |
| 1436289_PM_x_at | 1600014C10Rik                                                                                 | C19orf12 | 0.14  | 2.27 | 1.53  | 1.57E-01 | 4.40E-01 | -5.57 |
| 1430920_PM_at   | Trmt11                                                                                        | TRMT11   | 0.22  | 2.39 | 1.53  | 1.57E-01 | 4.40E-01 | -5.57 |
| 1417611_PM_at   | Tmem37                                                                                        | TMEM37   | 0.34  | 3.10 | 1.53  | 1.57E-01 | 4.40E-01 | -5.57 |
| 1446500_PM_at   | ---                                                                                           | NA       | 0.37  | 2.41 | 1.53  | 1.57E-01 | 4.40E-01 | -5.57 |
| 1437336_PM_x_at | Prickle4 /// Tomm6                                                                            | TOMM6    | 0.54  | 5.30 | 1.52  | 1.57E-01 | 4.40E-01 | -5.57 |
| 1442016_PM_at   | D630004N19Rik /// Mrpl48                                                                      | MRPL48   | -0.61 | 3.94 | -1.52 | 1.57E-01 | 4.40E-01 | -5.57 |
| 1434919_PM_at   | Agps                                                                                          | AGPS     | -0.33 | 3.42 | -1.52 | 1.57E-01 | 4.40E-01 | -5.57 |
| 1436891_PM_at   | Usp15                                                                                         | NA       | -0.27 | 2.29 | -1.52 | 1.57E-01 | 4.40E-01 | -5.57 |
| 1416744_PM_at   | Uap1                                                                                          | NA       | 0.14  | 2.01 | 1.52  | 1.57E-01 | 4.40E-01 | -5.57 |
| 1437580_PM_s_at | Nek2                                                                                          | NEK2     | 0.14  | 2.19 | 1.52  | 1.57E-01 | 4.40E-01 | -5.57 |
| 1427446_PM_s_at | Ttn                                                                                           | TTN      | 0.15  | 2.66 | 1.52  | 1.57E-01 | 4.40E-01 | -5.57 |
| 1424335_PM_at   | Ppcdc                                                                                         | PPCDC    | 0.16  | 2.47 | 1.52  | 1.57E-01 | 4.40E-01 | -5.57 |
| 1458202_PM_at   | Fam65b                                                                                        | RIPOR2   | 0.18  | 2.28 | 1.52  | 1.57E-01 | 4.40E-01 | -5.57 |
| 1444188_PM_at   | ---                                                                                           | NA       | 0.22  | 2.71 | 1.52  | 1.57E-01 | 4.40E-01 | -5.57 |
| 1428133_PM_at   | Snip1                                                                                         | SNIP1    | 0.25  | 3.37 | 1.52  | 1.57E-01 | 4.40E-01 | -5.57 |
| 1428678_PM_s_at | Wdr73                                                                                         | WDR73    | 0.31  | 2.97 | 1.52  | 1.57E-01 | 4.40E-01 | -5.57 |
| 1451442_PM_at   | Cfap36                                                                                        | CFAP36   | 0.39  | 4.98 | 1.52  | 1.57E-01 | 4.40E-01 | -5.57 |
| 1453840_PM_at   | Pabpc1                                                                                        | PABPC1   | 0.39  | 2.73 | 1.52  | 1.57E-01 | 4.40E-01 | -5.57 |
| 1455766_PM_at   | Gabra1                                                                                        | GABRA1   | -0.40 | 6.26 | -1.52 | 1.57E-01 | 4.40E-01 | -5.57 |

|                 |                              |            |       |      |       |          |          |       |
|-----------------|------------------------------|------------|-------|------|-------|----------|----------|-------|
| 1419158_PM_a_at | Hars2                        | HARS2      | -0.20 | 2.15 | -1.52 | 1.57E-01 | 4.40E-01 | -5.57 |
| 1454567_PM_at   | 4933404K13Rik                | NA         | 0.13  | 2.39 | 1.52  | 1.57E-01 | 4.40E-01 | -5.57 |
| 1422802_PM_at   | Defa3                        | NA         | -0.14 | 2.01 | -1.52 | 1.57E-01 | 4.40E-01 | -5.57 |
| 1445857_PM_at   | BC026585 ///<br>LOC105243988 | NA         | -0.14 | 2.16 | -1.52 | 1.57E-01 | 4.40E-01 | -5.57 |
| 1420250_PM_at   | ---                          | NA         | 0.15  | 2.14 | 1.52  | 1.57E-01 | 4.40E-01 | -5.57 |
| 1449839_PM_at   | Casp3                        | NA         | 0.20  | 3.26 | 1.52  | 1.57E-01 | 4.40E-01 | -5.57 |
| 1426080_PM_a_at | Kcnq2                        | KCNQ2      | 0.22  | 2.78 | 1.52  | 1.57E-01 | 4.40E-01 | -5.57 |
| 1441321_PM_at   | ---                          | NA         | 0.27  | 2.18 | 1.52  | 1.57E-01 | 4.40E-01 | -5.57 |
| 1456559_PM_at   | Emx2os                       | NA         | 0.44  | 4.45 | 1.52  | 1.57E-01 | 4.40E-01 | -5.57 |
| 1448739_PM_x_at | Rps18                        | RPS18      | 0.28  | 4.62 | 1.52  | 1.58E-01 | 4.40E-01 | -5.57 |
| 1426580_PM_at   | Plk4                         | PLK4       | 0.23  | 2.80 | 1.52  | 1.58E-01 | 4.40E-01 | -5.57 |
| 1455199_PM_at   | Al429214                     | C8orf48    | 0.53  | 4.17 | 1.52  | 1.58E-01 | 4.40E-01 | -5.57 |
| 1457832_PM_at   | ---                          | NA         | -0.30 | 2.75 | -1.52 | 1.58E-01 | 4.40E-01 | -5.57 |
| 1437709_PM_x_at | Ttc13                        | TTC13      | 0.36  | 8.66 | 1.52  | 1.58E-01 | 4.40E-01 | -5.57 |
| 1422008_PM_a_at | Aqp3                         | AQP3       | 0.15  | 2.05 | 1.52  | 1.58E-01 | 4.40E-01 | -5.57 |
| 1422742_PM_at   | Hivep1                       | HIVEP1     | -0.42 | 3.17 | -1.52 | 1.58E-01 | 4.40E-01 | -5.57 |
| 1453951_PM_a_at | Cfap43 ///lttrip             | CFAP43     | 0.15  | 2.39 | 1.52  | 1.58E-01 | 4.40E-01 | -5.57 |
| 1454865_PM_at   | Slc9a8                       | SLC9A8     | 0.28  | 3.56 | 1.52  | 1.58E-01 | 4.40E-01 | -5.57 |
| 1451406_PM_a_at | Pcsk5                        | PCSK5      | -0.23 | 2.78 | -1.52 | 1.58E-01 | 4.40E-01 | -5.57 |
| 1416466_PM_at   | Vapa                         | VAPA       | -0.72 | 6.07 | -1.52 | 1.58E-01 | 4.40E-01 | -5.57 |
| 1444919_PM_at   | ---                          | NA         | -0.21 | 2.85 | -1.52 | 1.58E-01 | 4.40E-01 | -5.57 |
| 1448315_PM_a_at | Pycr2                        | AL117348.2 | -0.36 | 3.62 | -1.52 | 1.58E-01 | 4.40E-01 | -5.57 |
| 1440624_PM_at   | ---                          | NA         | -0.26 | 2.46 | -1.52 | 1.58E-01 | 4.40E-01 | -5.57 |
| 1447240_PM_at   | ---                          | NA         | 0.28  | 3.08 | 1.52  | 1.58E-01 | 4.40E-01 | -5.57 |
| 1459027_PM_at   | ---                          | NA         | -0.19 | 2.96 | -1.52 | 1.58E-01 | 4.41E-01 | -5.57 |
| 1459545_PM_at   | ---                          | NA         | 0.20  | 2.69 | 1.52  | 1.58E-01 | 4.41E-01 | -5.57 |
| 1431804_PM_a_at | Sp3                          | SP3        | -0.40 | 2.88 | -1.52 | 1.58E-01 | 4.41E-01 | -5.57 |
| 1423590_PM_at   | Napsa                        | NAPSA      | 0.14  | 2.32 | 1.52  | 1.58E-01 | 4.41E-01 | -5.57 |
| 1416339_PM_a_at | Prkcsh                       | PRKCSH     | 0.15  | 2.84 | 1.52  | 1.58E-01 | 4.41E-01 | -5.57 |
| 1425269_PM_at   | Apbb1p                       | APBB1P     | 0.16  | 2.21 | 1.52  | 1.58E-01 | 4.41E-01 | -5.57 |
| 1428968_PM_at   | Cep57                        | CEP57      | -0.30 | 3.23 | -1.52 | 1.58E-01 | 4.41E-01 | -5.57 |
| 1419280_PM_at   | Pip4k2a                      | PIP4K2A    | -0.28 | 2.68 | -1.52 | 1.58E-01 | 4.41E-01 | -5.57 |
| 1443533_PM_at   | ---                          | NA         | 0.51  | 2.80 | 1.52  | 1.58E-01 | 4.41E-01 | -5.57 |
| 1447475_PM_at   | Fam189a2                     | FAM189A2   | 0.22  | 2.88 | 1.52  | 1.58E-01 | 4.41E-01 | -5.57 |
| 1434480_PM_at   | Pdpr                         | PDPR       | -0.32 | 3.00 | -1.52 | 1.58E-01 | 4.41E-01 | -5.58 |
| 1434458_PM_at   | Fst                          | FST        | 0.15  | 2.17 | 1.52  | 1.58E-01 | 4.41E-01 | -5.58 |
| 1417083_PM_at   | Sec61b                       | SEC61B     | -0.36 | 3.40 | -1.52 | 1.58E-01 | 4.41E-01 | -5.58 |
| 1451620_PM_at   | C1qb                         | NA         | -0.95 | 3.73 | -1.52 | 1.58E-01 | 4.41E-01 | -5.58 |
| 1433665_PM_at   | Vps41                        | VPS41      | -0.34 | 3.77 | -1.52 | 1.58E-01 | 4.41E-01 | -5.58 |
| 1452285_PM_a_at | Eif3f                        | EIF3F      | -0.32 | 5.33 | -1.52 | 1.58E-01 | 4.41E-01 | -5.58 |
| 1445128_PM_at   | ---                          | NA         | 0.18  | 2.41 | 1.52  | 1.58E-01 | 4.41E-01 | -5.58 |
| 1436817_PM_at   | Exoc5                        | EXOC5      | -0.37 | 6.63 | -1.52 | 1.58E-01 | 4.41E-01 | -5.58 |
| 1438303_PM_at   | Tgfb2                        | TGFB2      | -0.43 | 3.96 | -1.52 | 1.58E-01 | 4.41E-01 | -5.58 |
| 1429519_PM_at   | Fpgt                         | FPGT       | -0.27 | 2.79 | -1.52 | 1.58E-01 | 4.41E-01 | -5.58 |
| 1446136_PM_at   | ---                          | NA         | 0.19  | 3.39 | 1.52  | 1.58E-01 | 4.41E-01 | -5.58 |
| 1447917_PM_x_at | Ii2 ///Ntan1                 | NTAN1      | 0.20  | 5.60 | 1.52  | 1.58E-01 | 4.41E-01 | -5.58 |
| 1425121_PM_a_at | BC006965                     | NA         | 0.15  | 2.14 | 1.52  | 1.58E-01 | 4.41E-01 | -5.58 |
| 1427638_PM_at   | Zbtb16                       | ZBTB16     | 0.18  | 2.43 | 1.52  | 1.58E-01 | 4.41E-01 | -5.58 |
| 1437401_PM_at   | Igf1                         | IGF1       | 0.35  | 2.35 | 1.52  | 1.58E-01 | 4.41E-01 | -5.58 |
| 1448927_PM_at   | Kcnn2                        | KCNN2      | -0.51 | 4.61 | -1.52 | 1.58E-01 | 4.41E-01 | -5.58 |
| 1437751_PM_at   | Ppargc1a                     | PPARGC1A   | -0.44 | 3.78 | -1.52 | 1.58E-01 | 4.41E-01 | -5.58 |
| 1420737_PM_at   | Pmfbp1                       | PMFBP1     | 0.11  | 2.07 | 1.52  | 1.58E-01 | 4.41E-01 | -5.58 |
| 1438900_PM_at   | ---                          | NA         | 0.16  | 2.01 | 1.52  | 1.58E-01 | 4.41E-01 | -5.58 |
| 1460072_PM_at   | ---                          | NA         | 0.17  | 2.65 | 1.52  | 1.58E-01 | 4.41E-01 | -5.58 |
| 1418287_PM_a_at | Dmbt1                        | DMBT1      | 0.20  | 2.30 | 1.52  | 1.58E-01 | 4.41E-01 | -5.58 |
| 1427395_PM_a_at | Aldh1a3                      | ALDH1A3    | 0.22  | 2.29 | 1.52  | 1.58E-01 | 4.41E-01 | -5.58 |
| 1450476_PM_at   | Cnr2                         | CNR2       | 0.14  | 2.36 | 1.52  | 1.58E-01 | 4.41E-01 | -5.58 |
| 1439220_PM_at   | ---                          | NA         | 0.23  | 2.33 | 1.52  | 1.58E-01 | 4.41E-01 | -5.58 |
| 1458865_PM_at   | ---                          | NA         | 0.27  | 3.08 | 1.52  | 1.58E-01 | 4.41E-01 | -5.58 |
| 1458151_PM_at   | ---                          | NA         | 0.64  | 2.89 | 1.52  | 1.58E-01 | 4.41E-01 | -5.58 |
| 1459806_PM_x_at | Mrp523                       | MRP523     | -0.44 | 4.34 | -1.52 | 1.58E-01 | 4.41E-01 | -5.58 |
| 1431087_PM_at   | Spc24                        | SPC24      | 0.16  | 2.45 | 1.52  | 1.58E-01 | 4.41E-01 | -5.58 |
| 1443313_PM_at   | A530058N18Rik                | NA         | 0.19  | 2.81 | 1.52  | 1.59E-01 | 4.41E-01 | -5.58 |
| 1458798_PM_at   | ---                          | NA         | 0.22  | 2.44 | 1.52  | 1.58E-01 | 4.41E-01 | -5.58 |
| 1439955_PM_at   | Rad9b                        | RAD9B      | 0.29  | 2.30 | 1.52  | 1.59E-01 | 4.41E-01 | -5.58 |
| 1417647_PM_at   | Snx5                         | SNX5       | 0.30  | 3.82 | 1.52  | 1.59E-01 | 4.41E-01 | -5.58 |
| 1451564_PM_at   | Parp14                       | PARP14     | 0.49  | 2.86 | 1.52  | 1.59E-01 | 4.42E-01 | -5.58 |
| 1424294_PM_at   | Ppp4r1                       | PPP4R1     | -0.35 | 2.95 | -1.52 | 1.59E-01 | 4.42E-01 | -5.58 |
| 1445782_PM_at   | ---                          | NA         | 0.15  | 2.57 | 1.52  | 1.59E-01 | 4.42E-01 | -5.58 |
| 1443821_PM_at   | ---                          | NA         | -0.48 | 2.93 | -1.52 | 1.59E-01 | 4.42E-01 | -5.58 |
| 1440315_PM_at   | Mbml1                        | MBNL1      | -0.40 | 3.09 | -1.52 | 1.59E-01 | 4.42E-01 | -5.58 |
| 1451097_PM_at   | Vasp                         | VASP       | -0.29 | 3.04 | -1.52 | 1.59E-01 | 4.42E-01 | -5.58 |
| 1439733_PM_at   | ---                          | NA         | -0.25 | 2.24 | -1.52 | 1.59E-01 | 4.42E-01 | -5.58 |
| 1457376_PM_at   | ---                          | NA         | 0.14  | 2.19 | 1.52  | 1.59E-01 | 4.42E-01 | -5.58 |

|                 |                                                             |            |       |      |       |          |          |       |
|-----------------|-------------------------------------------------------------|------------|-------|------|-------|----------|----------|-------|
| 1451185_PM_at   | Sf3b5                                                       | SF3B5      | 0.31  | 3.41 | 1.52  | 1.59E-01 | 4.42E-01 | -5.58 |
| 1455183_PM_at   | Stk38l                                                      | STK38L     | 0.33  | 3.26 | 1.52  | 1.59E-01 | 4.42E-01 | -5.58 |
| 1454004_PM_at   | Pid1                                                        | PID1       | 0.50  | 2.67 | 1.52  | 1.59E-01 | 4.42E-01 | -5.58 |
| 1457049_PM_at   | Atp6v1e1                                                    | ATP6V1E1   | 0.61  | 3.11 | 1.52  | 1.59E-01 | 4.42E-01 | -5.58 |
| 1428914_PM_at   | Sh3pxd2a                                                    | SH3PXD2A   | -0.58 | 3.53 | -1.52 | 1.59E-01 | 4.42E-01 | -5.58 |
| 1422315_PM_x_at | Phkg1                                                       | PHKG1      | -0.47 | 4.72 | -1.52 | 1.59E-01 | 4.42E-01 | -5.58 |
| 1421926_PM_at   | Mapk11                                                      | MAPK11     | -0.29 | 3.08 | -1.52 | 1.59E-01 | 4.42E-01 | -5.58 |
| 1441250_PM_at   | Enthd1                                                      | NA         | 0.12  | 2.30 | 1.52  | 1.59E-01 | 4.42E-01 | -5.58 |
| 1435302_PM_at   | Taf4b                                                       | TAF4B      | 0.18  | 2.26 | 1.52  | 1.59E-01 | 4.42E-01 | -5.58 |
| 1427503_PM_at   | Ighg3                                                       | NA         | 0.23  | 2.47 | 1.52  | 1.59E-01 | 4.42E-01 | -5.58 |
| 1434501_PM_at   | Ypel4                                                       | YPEL4      | 0.38  | 5.18 | 1.52  | 1.59E-01 | 4.42E-01 | -5.58 |
| 1432592_PM_at   | Pappa                                                       | NA         | 0.22  | 2.40 | 1.52  | 1.59E-01 | 4.42E-01 | -5.58 |
| 1460501_PM_at   | ---                                                         | NA         | -0.17 | 2.25 | -1.52 | 1.59E-01 | 4.42E-01 | -5.58 |
| 1424158_PM_at   | Ehd2                                                        | EHD2       | 0.15  | 2.44 | 1.52  | 1.59E-01 | 4.42E-01 | -5.58 |
| 1425411_PM_at   | Arl4a                                                       | ARL4A      | 0.20  | 2.67 | 1.52  | 1.59E-01 | 4.42E-01 | -5.58 |
| 1459341_PM_at   | ---                                                         | NA         | 0.22  | 2.60 | 1.52  | 1.59E-01 | 4.42E-01 | -5.58 |
| 1459928_PM_at   | Lcor                                                        | NA         | 0.28  | 2.60 | 1.52  | 1.59E-01 | 4.42E-01 | -5.58 |
| 1417346_PM_at   | Pycard                                                      | PYCARD     | 0.22  | 2.57 | 1.52  | 1.59E-01 | 4.42E-01 | -5.58 |
| 1422477_PM_at   | Cables1                                                     | CABLES1    | -0.23 | 2.60 | -1.52 | 1.59E-01 | 4.42E-01 | -5.58 |
| 1417906_PM_at   | 170001F09Rik ///<br>Gm10375 /// Gm10377 ///<br>LOC102639037 | NA         | -0.35 | 2.53 | -1.52 | 1.59E-01 | 4.42E-01 | -5.58 |
| 1430537_PM_at   | Trmt12                                                      | TRMT12     | 0.16  | 2.24 | 1.52  | 1.59E-01 | 4.42E-01 | -5.58 |
| 1431319_PM_at   | Ulk4                                                        | ULK4       | 0.15  | 2.58 | 1.52  | 1.59E-01 | 4.42E-01 | -5.58 |
| 1418365_PM_at   | Ctsh                                                        | CTSH       | -0.36 | 2.80 | -1.52 | 1.59E-01 | 4.42E-01 | -5.58 |
| 1453452_PM_at   | ---                                                         | NA         | 0.15  | 2.59 | 1.52  | 1.59E-01 | 4.42E-01 | -5.58 |
| 1442110_PM_at   | ---                                                         | NA         | 0.21  | 2.48 | 1.52  | 1.59E-01 | 4.42E-01 | -5.58 |
| 1439633_PM_at   | Syt7                                                        | SYT7       | 0.22  | 4.27 | 1.52  | 1.59E-01 | 4.42E-01 | -5.58 |
| 1427969_PM_s_at | Zfp654                                                      | ZNF654     | -0.36 | 3.04 | -1.52 | 1.59E-01 | 4.43E-01 | -5.58 |
| 1449405_PM_at   | Tns1                                                        | TNS1       | -0.20 | 3.20 | -1.52 | 1.59E-01 | 4.43E-01 | -5.58 |
| 1422359_PM_at   | Ofirg90                                                     | NA         | 0.13  | 2.72 | 1.52  | 1.59E-01 | 4.43E-01 | -5.58 |
| 1419881_PM_x_at | ---                                                         | NA         | 0.13  | 2.21 | 1.52  | 1.59E-01 | 4.43E-01 | -5.58 |
| 1416696_PM_at   | Mydgf                                                       | MYDGF      | 0.17  | 2.45 | 1.52  | 1.59E-01 | 4.43E-01 | -5.58 |
| 1429077_PM_x_at | Gm10045 /// Rpl21 /// Rpl21-<br>ps15 /// Rpl21-ps6          | RPL21      | 0.28  | 8.83 | 1.52  | 1.59E-01 | 4.43E-01 | -5.58 |
| 1435755_PM_at   | Cebpzos                                                     | CEBPZOS    | -0.17 | 2.73 | -1.52 | 1.59E-01 | 4.43E-01 | -5.58 |
| 1431106_PM_a_at | 9530053H05Rik                                               | NA         | 0.19  | 3.31 | 1.52  | 1.59E-01 | 4.43E-01 | -5.58 |
| 1451010_PM_at   | Nol11                                                       | NOL11      | 0.15  | 2.29 | 1.52  | 1.59E-01 | 4.43E-01 | -5.58 |
| 1418390_PM_at   | Phf21a                                                      | PHF21A     | 0.31  | 2.63 | 1.52  | 1.59E-01 | 4.43E-01 | -5.58 |
| 1454162_PM_at   | 4930518P08Rik                                               | NA         | 0.14  | 2.33 | 1.52  | 1.59E-01 | 4.43E-01 | -5.58 |
| 1447864_PM_s_at | Pogk                                                        | POGK       | 0.85  | 3.96 | 1.52  | 1.59E-01 | 4.43E-01 | -5.58 |
| 1444045_PM_at   | ---                                                         | NA         | 0.19  | 2.99 | 1.52  | 1.59E-01 | 4.43E-01 | -5.58 |
| 1452423_PM_at   | Pclo                                                        | PCLO       | 0.30  | 2.55 | 1.52  | 1.60E-01 | 4.43E-01 | -5.58 |
| 1430361_PM_at   | 2610005M20Rik                                               | NA         | 0.15  | 2.29 | 1.52  | 1.60E-01 | 4.43E-01 | -5.58 |
| 1458081_PM_at   | ---                                                         | NA         | 0.19  | 2.31 | 1.52  | 1.60E-01 | 4.43E-01 | -5.58 |
| 1447040_PM_at   | ---                                                         | NA         | 0.14  | 2.58 | 1.52  | 1.60E-01 | 4.43E-01 | -5.58 |
| 1425829_PM_a_at | Steap4                                                      | STEAP4     | 0.15  | 2.37 | 1.52  | 1.60E-01 | 4.43E-01 | -5.58 |
| 1418147_PM_at   | Tfap2c                                                      | TFAP2C     | 0.25  | 2.74 | 1.52  | 1.60E-01 | 4.43E-01 | -5.58 |
| 1443725_PM_at   | ---                                                         | NA         | 0.12  | 2.14 | 1.51  | 1.60E-01 | 4.43E-01 | -5.58 |
| 1457227_PM_at   | LOC102635783                                                | NA         | -0.21 | 3.48 | -1.51 | 1.60E-01 | 4.43E-01 | -5.58 |
| 1452879_PM_at   | Synpo2                                                      | SYNPO2     | -0.48 | 3.30 | -1.51 | 1.60E-01 | 4.43E-01 | -5.58 |
| 1420767_PM_at   | 1700019G17Rik                                               | NAT8       | 0.20  | 2.63 | 1.51  | 1.60E-01 | 4.43E-01 | -5.58 |
| 1439337_PM_at   | Tom1l1                                                      | TOM1L1     | 0.25  | 2.36 | 1.51  | 1.60E-01 | 4.43E-01 | -5.58 |
| 1422068_PM_at   | Pou3f1                                                      | POU3F1     | 0.20  | 2.34 | 1.51  | 1.60E-01 | 4.43E-01 | -5.58 |
| 1455609_PM_at   | Cit                                                         | CIT        | 0.32  | 5.66 | 1.51  | 1.60E-01 | 4.43E-01 | -5.58 |
| 1427676_PM_a_at | Grik1                                                       | GRIK1      | -0.30 | 2.47 | -1.51 | 1.60E-01 | 4.43E-01 | -5.58 |
| 1420421_PM_s_at | Klrb1b                                                      | KLRB1B     | 0.12  | 2.73 | 1.51  | 1.60E-01 | 4.43E-01 | -5.58 |
| 1419649_PM_s_at | Myo1c                                                       | MYO1C      | 0.19  | 2.65 | 1.51  | 1.60E-01 | 4.43E-01 | -5.58 |
| 1418844_PM_at   | Alg9                                                        | AP001781.3 | -0.22 | 2.55 | -1.51 | 1.60E-01 | 4.43E-01 | -5.58 |
| 1444277_PM_at   | ---                                                         | NA         | 0.14  | 2.60 | 1.51  | 1.60E-01 | 4.43E-01 | -5.58 |
| 1445377_PM_at   | ---                                                         | NA         | 0.14  | 2.23 | 1.51  | 1.60E-01 | 4.44E-01 | -5.59 |
| 1437899_PM_at   | Lyg2                                                        | LYG2       | 0.14  | 2.07 | 1.51  | 1.60E-01 | 4.44E-01 | -5.59 |
| 1428532_PM_at   | Ints7                                                       | INTS7      | 0.17  | 2.81 | 1.51  | 1.60E-01 | 4.44E-01 | -5.59 |
| 1453507_PM_at   | Mbd5                                                        | MBD5       | -0.27 | 2.87 | -1.51 | 1.60E-01 | 4.44E-01 | -5.59 |
| 1427836_PM_at   | Erc6l2                                                      | NA         | 0.17  | 2.35 | 1.51  | 1.60E-01 | 4.44E-01 | -5.59 |
| 1439084_PM_at   | Cxcl12                                                      | CXCL12     | 0.17  | 2.34 | 1.51  | 1.60E-01 | 4.44E-01 | -5.59 |
| 1446096_PM_at   | ---                                                         | NA         | 0.12  | 2.06 | 1.51  | 1.60E-01 | 4.44E-01 | -5.59 |
| 1451116_PM_at   | Aacs                                                        | AACS       | 0.16  | 2.84 | 1.51  | 1.60E-01 | 4.44E-01 | -5.59 |
| 1442088_PM_at   | Gm14321                                                     | NA         | 0.19  | 2.96 | 1.51  | 1.60E-01 | 4.44E-01 | -5.59 |
| 1430288_PM_x_at | Rps21                                                       | RPS21      | -0.89 | 7.51 | -1.51 | 1.60E-01 | 4.44E-01 | -5.59 |
| 1460362_PM_at   | Rtfdc1                                                      | RTFDC1     | 0.31  | 2.66 | 1.51  | 1.60E-01 | 4.44E-01 | -5.59 |
| 1416332_PM_at   | Cirbp                                                       | CIRBP      | 0.33  | 3.19 | 1.51  | 1.60E-01 | 4.44E-01 | -5.59 |
| 1453802_PM_at   | Limch1                                                      | LIMCH1     | 1.04  | 4.03 | 1.51  | 1.60E-01 | 4.44E-01 | -5.59 |
| 1428527_PM_at   | Snx7                                                        | SNX7       | -0.39 | 3.33 | -1.51 | 1.60E-01 | 4.44E-01 | -5.59 |
| 1420613_PM_at   | Ptp4a2                                                      | PTP4A2     | -0.33 | 5.22 | -1.51 | 1.60E-01 | 4.44E-01 | -5.59 |

|                 |                                     |          |       |      |       |          |          |       |
|-----------------|-------------------------------------|----------|-------|------|-------|----------|----------|-------|
| 1418971_PM_x_at | Bcl10                               | BCL10    | -0.30 | 3.72 | -1.51 | 1.60E-01 | 4.44E-01 | -5.59 |
| 1447098_PM_at   | ---                                 | NA       | 0.12  | 2.03 | 1.51  | 1.60E-01 | 4.44E-01 | -5.59 |
| 1422496_PM_at   | Hmgn1 /// LOC102641809              | NA       | 0.14  | 2.15 | 1.51  | 1.60E-01 | 4.44E-01 | -5.59 |
| 1440939_PM_at   | Sept6                               | SEPT6    | 0.16  | 2.43 | 1.51  | 1.60E-01 | 4.44E-01 | -5.59 |
| 1416325_PM_at   | Crisp1                              | CRISP2   | 0.16  | 1.98 | 1.51  | 1.60E-01 | 4.44E-01 | -5.59 |
| 1456722_PM_at   | Chrdl1                              | CHRD1    | 0.21  | 3.28 | 1.51  | 1.60E-01 | 4.44E-01 | -5.59 |
| 1459982_PM_a_at | Aqp6                                | AQP6     | 0.23  | 3.01 | 1.51  | 1.60E-01 | 4.44E-01 | -5.59 |
| 1417479_PM_at   | Ppp2r3c                             | PPP2R3C  | 0.23  | 3.16 | 1.51  | 1.60E-01 | 4.44E-01 | -5.59 |
| 1425211_PM_at   | Gatc                                | GATC     | 0.30  | 3.75 | 1.51  | 1.60E-01 | 4.44E-01 | -5.59 |
| 1427878_PM_at   | Cystm1                              | CYSTM1   | -0.25 | 5.42 | -1.51 | 1.60E-01 | 4.44E-01 | -5.59 |
| 1423028_PM_at   | Ifna2                               | IFNA6    | 0.12  | 2.12 | 1.51  | 1.60E-01 | 4.44E-01 | -5.59 |
| 1417868_PM_a_at | Ctsz                                | CTSZ     | -0.37 | 2.67 | -1.51 | 1.60E-01 | 4.44E-01 | -5.59 |
| 1438451_PM_at   | Arhgap32                            | ARHGAP32 | 0.39  | 4.44 | 1.51  | 1.60E-01 | 4.44E-01 | -5.59 |
| 1448518_PM_at   | Timm22                              | TIMM22   | 0.13  | 2.44 | 1.51  | 1.60E-01 | 4.44E-01 | -5.59 |
| 1424156_PM_at   | Rbl1                                | RBL1     | 0.22  | 2.25 | 1.51  | 1.60E-01 | 4.44E-01 | -5.59 |
| 1420867_PM_at   | Gm21540 /// Tmed2                   | TMED2    | 0.50  | 4.01 | 1.51  | 1.60E-01 | 4.44E-01 | -5.59 |
| 1440877_PM_at   | Gm40811                             | NA       | 0.18  | 2.38 | 1.51  | 1.60E-01 | 4.44E-01 | -5.59 |
| 1442286_PM_at   | ---                                 | NA       | 0.18  | 2.28 | 1.51  | 1.60E-01 | 4.44E-01 | -5.59 |
| 1454097_PM_at   | Rbms3 /// Zcwpw2                    | NA       | 0.20  | 2.30 | 1.51  | 1.60E-01 | 4.44E-01 | -5.59 |
| 1433838_PM_at   | Dars2                               | DARS2    | 0.28  | 2.59 | 1.51  | 1.60E-01 | 4.44E-01 | -5.59 |
| 1436224_PM_at   | Kif1c                               | KIF1C    | 0.38  | 2.91 | 1.51  | 1.60E-01 | 4.44E-01 | -5.59 |
| 1428376_PM_at   | Cep83os                             | NA       | 0.40  | 3.36 | 1.51  | 1.60E-01 | 4.44E-01 | -5.59 |
| 1416521_PM_at   | Sepw1                               | SELENOW  | -1.06 | 6.59 | -1.51 | 1.61E-01 | 4.44E-01 | -5.59 |
| 1457432_PM_at   | Prox1                               | PROX1    | -0.29 | 2.21 | -1.51 | 1.61E-01 | 4.44E-01 | -5.59 |
| 1420047_PM_at   | Maf1                                | NA       | -0.19 | 3.61 | -1.51 | 1.61E-01 | 4.44E-01 | -5.59 |
| 1446402_PM_at   | Churc1                              | CHURC1   | 0.10  | 2.08 | 1.51  | 1.61E-01 | 4.44E-01 | -5.59 |
| 1453930_PM_at   | Dcdc2c                              | DCDC2C   | 0.14  | 2.29 | 1.51  | 1.61E-01 | 4.44E-01 | -5.59 |
| 1449758_PM_at   | ---                                 | NA       | 0.16  | 2.07 | 1.51  | 1.61E-01 | 4.44E-01 | -5.59 |
| 1457170_PM_at   | Lrrc36                              | LRRC36   | 0.17  | 2.33 | 1.51  | 1.61E-01 | 4.44E-01 | -5.59 |
| 1442323_PM_at   | ---                                 | NA       | 0.18  | 2.47 | 1.51  | 1.61E-01 | 4.44E-01 | -5.59 |
| 1451739_PM_at   | Klf5                                | NA       | 0.20  | 2.50 | 1.51  | 1.61E-01 | 4.44E-01 | -5.59 |
| 1440263_PM_at   | Alkbh1 /// Nrp                      | ALKBH1   | 0.20  | 1.98 | 1.51  | 1.61E-01 | 4.44E-01 | -5.59 |
| 1436310_PM_at   | Gemin5                              | GEMIN5   | 0.24  | 3.58 | 1.51  | 1.61E-01 | 4.44E-01 | -5.59 |
| 1433713_PM_at   | Gcn1l1                              | GCN1     | 0.26  | 3.62 | 1.51  | 1.61E-01 | 4.44E-01 | -5.59 |
| 1423601_PM_s_at | Tcof1                               | TCOF1    | 0.43  | 3.25 | 1.51  | 1.61E-01 | 4.44E-01 | -5.59 |
| 1441869_PM_x_at | ---                                 | NA       | 0.51  | 3.06 | 1.51  | 1.61E-01 | 4.44E-01 | -5.59 |
| 1443765_PM_at   | Rap1gapos                           | NA       | -0.14 | 2.28 | -1.51 | 1.61E-01 | 4.44E-01 | -5.59 |
| 1418279_PM_a_at | Akap1                               | AKAP1    | 0.20  | 2.63 | 1.51  | 1.61E-01 | 4.44E-01 | -5.59 |
| 1429366_PM_at   | Lrrc34                              | LRRC34   | 0.14  | 2.28 | 1.51  | 1.61E-01 | 4.44E-01 | -5.59 |
| 1432517_PM_a_at | Nnmt                                | NNMT     | 0.15  | 2.76 | 1.51  | 1.61E-01 | 4.44E-01 | -5.59 |
| 1452379_PM_at   | Auts2                               | NA       | 0.25  | 2.66 | 1.51  | 1.61E-01 | 4.44E-01 | -5.59 |
| 1420016_PM_at   | Ppt1                                | NA       | -0.43 | 3.29 | -1.51 | 1.61E-01 | 4.44E-01 | -5.59 |
| 1449322_PM_at   | Gm13363 /// LOC102643131 /// Ptp4a1 | PTP4A1   | -0.39 | 4.73 | -1.51 | 1.61E-01 | 4.44E-01 | -5.59 |
| 1432242_PM_at   | 4930447N08Rk                        | NA       | -0.24 | 2.59 | -1.51 | 1.61E-01 | 4.44E-01 | -5.59 |
| 1439665_PM_at   | Lpar4                               | LPAR4    | -0.16 | 2.10 | -1.51 | 1.61E-01 | 4.44E-01 | -5.59 |
| 1441255_PM_at   | Cdh3                                | CDH3     | 0.14  | 2.28 | 1.51  | 1.61E-01 | 4.44E-01 | -5.59 |
| 1445640_PM_at   | ---                                 | NA       | 0.16  | 2.92 | 1.51  | 1.61E-01 | 4.44E-01 | -5.59 |
| 1438482_PM_at   | Wwp2                                | WWP2     | 0.19  | 2.47 | 1.51  | 1.61E-01 | 4.44E-01 | -5.59 |
| 1455983_PM_at   | Cdca2                               | CDCA2    | 0.19  | 3.62 | 1.51  | 1.61E-01 | 4.44E-01 | -5.59 |
| 1453970_PM_at   | Abca12                              | ABCA12   | 0.20  | 2.10 | 1.51  | 1.61E-01 | 4.44E-01 | -5.59 |
| 1432605_PM_at   | Rbl1                                | NA       | 0.21  | 2.41 | 1.51  | 1.61E-01 | 4.44E-01 | -5.59 |
| 1449785_PM_at   | AA414993                            | NA       | 0.22  | 2.29 | 1.51  | 1.61E-01 | 4.44E-01 | -5.59 |
| 1436020_PM_at   | Champ1                              | CHAMP1   | 0.26  | 2.93 | 1.51  | 1.61E-01 | 4.44E-01 | -5.59 |
| 1433807_PM_at   | Bora                                | BORA     | 0.26  | 2.25 | 1.51  | 1.61E-01 | 4.44E-01 | -5.59 |
| 1433283_PM_s_at | ---                                 | NA       | 0.35  | 6.80 | 1.51  | 1.61E-01 | 4.44E-01 | -5.59 |
| 1428156_PM_at   | Gng2                                | GNG2     | 0.42  | 6.26 | 1.51  | 1.61E-01 | 4.44E-01 | -5.59 |
| 1437437_PM_x_at | Dnpep                               | DNPEP    | 0.49  | 4.25 | 1.51  | 1.61E-01 | 4.44E-01 | -5.59 |
| 1456738_PM_s_at | Hgh1                                | HGH1     | 0.90  | 3.04 | 1.51  | 1.61E-01 | 4.44E-01 | -5.59 |
| 1423270_PM_at   | Nedd4l                              | NEDD4L   | -0.67 | 5.72 | -1.51 | 1.61E-01 | 4.44E-01 | -5.59 |
| 1435149_PM_at   | Plcg1                               | PLCG1    | -0.40 | 7.40 | -1.51 | 1.61E-01 | 4.44E-01 | -5.59 |
| 1446133_PM_at   | ---                                 | NA       | -0.17 | 2.42 | -1.51 | 1.61E-01 | 4.44E-01 | -5.59 |
| 1447860_PM_x_at | Cog8                                | COG8     | 0.14  | 2.44 | 1.51  | 1.61E-01 | 4.44E-01 | -5.59 |
| 1419807_PM_at   | D4Ert4335e                          | NA       | 0.15  | 2.38 | 1.51  | 1.61E-01 | 4.44E-01 | -5.59 |
| 1437816_PM_at   | ---                                 | NA       | 0.39  | 2.78 | 1.51  | 1.61E-01 | 4.44E-01 | -5.59 |
| 1437185_PM_s_at | Tmsb10                              | TMSB10   | 0.90  | 7.34 | 1.51  | 1.61E-01 | 4.44E-01 | -5.59 |
| 1425361_PM_at   | Zfp397                              | ZNF397   | -0.46 | 3.01 | -1.51 | 1.61E-01 | 4.44E-01 | -5.59 |
| 1445991_PM_at   | ---                                 | NA       | -0.15 | 2.24 | -1.51 | 1.61E-01 | 4.44E-01 | -5.59 |
| 1442808_PM_at   | Txn14a                              | NA       | 0.17  | 2.58 | 1.51  | 1.61E-01 | 4.44E-01 | -5.59 |
| 1425945_PM_at   | Zfp626                              | NA       | 0.20  | 2.55 | 1.51  | 1.61E-01 | 4.44E-01 | -5.59 |
| 1433094_PM_at   | Slc1a2                              | SLC1A2   | 0.29  | 3.15 | 1.51  | 1.61E-01 | 4.44E-01 | -5.59 |
| 1417042_PM_at   | Slc37a4                             | SLC37A4  | -0.40 | 2.92 | -1.51 | 1.61E-01 | 4.44E-01 | -5.59 |
| 1427604_PM_a_at | Atp9a                               | ATP9A    | -0.40 | 3.88 | -1.51 | 1.61E-01 | 4.44E-01 | -5.59 |



|                 |                         |          |       |      |       |          |          |       |
|-----------------|-------------------------|----------|-------|------|-------|----------|----------|-------|
| 1446379_PM_at   | ---                     | NA       | 0.14  | 2.24 | 1.51  | 1.61E-01 | 4.44E-01 | -5.59 |
| 1442209_PM_at   | Gm39121                 | NA       | 0.14  | 3.68 | 1.51  | 1.61E-01 | 4.44E-01 | -5.59 |
| 1445438_PM_at   | ---                     | NA       | 0.26  | 2.77 | 1.51  | 1.61E-01 | 4.44E-01 | -5.59 |
| 1420553_PM_x_at | Serpina1a /// Serpina1d | SERPINA1 | 0.14  | 2.11 | 1.51  | 1.61E-01 | 4.44E-01 | -5.59 |
| 1432827_PM_x_at | Ubc                     | UBC      | -0.35 | 8.08 | -1.51 | 1.61E-01 | 4.45E-01 | -5.59 |
| 1446588_PM_at   | ---                     | NA       | 0.26  | 3.17 | 1.51  | 1.61E-01 | 4.45E-01 | -5.59 |
| 1422194_PM_at   | Scn5a                   | SCN5A    | 0.12  | 2.38 | 1.51  | 1.61E-01 | 4.45E-01 | -5.59 |
| 1426505_PM_at   | Evi2b /// Gm21975       | EVI2B    | 0.19  | 2.41 | 1.51  | 1.61E-01 | 4.45E-01 | -5.59 |
| 1432440_PM_at   | ---                     | NA       | 0.46  | 2.84 | 1.51  | 1.61E-01 | 4.45E-01 | -5.59 |
| 1431332_PM_a_at | Terf1                   | TERF1    | 0.21  | 2.65 | 1.51  | 1.61E-01 | 4.45E-01 | -5.59 |
| 1418277_PM_at   | Rp9                     | RP9      | 0.54  | 4.55 | 1.51  | 1.61E-01 | 4.45E-01 | -5.59 |
| 1422235_PM_at   | Htr7                    | HTR7     | 0.23  | 3.69 | 1.51  | 1.61E-01 | 4.45E-01 | -5.59 |
| 1435298_PM_at   | Cog5                    | COG5     | -0.38 | 2.93 | -1.51 | 1.61E-01 | 4.45E-01 | -5.59 |
| 1436376_PM_s_at | Srbd1                   | SRBD1    | 0.17  | 2.15 | 1.51  | 1.61E-01 | 4.45E-01 | -5.59 |
| 1453739_PM_at   | Tmem126b                | TMEM126B | 0.40  | 4.81 | 1.51  | 1.61E-01 | 4.45E-01 | -5.59 |
| 1434032_PM_at   | Agap3                   | AGAP3    | -0.37 | 2.82 | -1.51 | 1.61E-01 | 4.45E-01 | -5.59 |
| 1416243_PM_a_at | Rpl35                   | RPL35    | -1.09 | 5.38 | -1.51 | 1.62E-01 | 4.45E-01 | -5.59 |
| 1426972_PM_at   | Sec24d                  | SEC24D   | -0.45 | 3.61 | -1.51 | 1.62E-01 | 4.45E-01 | -5.59 |
| 1434831_PM_a_at | Foxo3                   | FOXO3    | -0.35 | 6.05 | -1.51 | 1.62E-01 | 4.45E-01 | -5.59 |
| 1431320_PM_a_at | Myo5a                   | MYO5A    | -0.27 | 3.37 | -1.51 | 1.61E-01 | 4.45E-01 | -5.59 |
| 1455834_PM_x_at | Tacc3                   | NA       | -0.16 | 2.40 | -1.51 | 1.62E-01 | 4.45E-01 | -5.59 |
| 1453567_PM_s_at | Tmem216                 | TMEM216  | 0.16  | 2.93 | 1.51  | 1.62E-01 | 4.45E-01 | -5.59 |
| 1456989_PM_at   | Oxgr1                   | OXGR1    | 0.16  | 2.14 | 1.51  | 1.62E-01 | 4.45E-01 | -5.59 |
| 1425601_PM_a_at | Rtkn                    | RTKN     | 0.18  | 2.91 | 1.51  | 1.62E-01 | 4.45E-01 | -5.59 |
| 1459507_PM_at   | ---                     | NA       | 0.19  | 2.19 | 1.51  | 1.62E-01 | 4.45E-01 | -5.59 |
| 1443230_PM_at   | ---                     | NA       | 0.20  | 2.66 | 1.51  | 1.62E-01 | 4.45E-01 | -5.59 |
| 1422972_PM_s_at | Kat2a                   | KAT2A    | 0.21  | 2.53 | 1.51  | 1.62E-01 | 4.45E-01 | -5.59 |
| 1447495_PM_at   | Fank1                   | FANK1    | 0.26  | 2.43 | 1.51  | 1.62E-01 | 4.45E-01 | -5.59 |
| 1459330_PM_at   | ---                     | NA       | 0.27  | 2.57 | 1.51  | 1.62E-01 | 4.45E-01 | -5.59 |
| 1417309_PM_at   | Tob2                    | TOB2     | 0.30  | 2.49 | 1.51  | 1.62E-01 | 4.45E-01 | -5.59 |
| 1428501_PM_at   | 1110051M2ORik           | C11orf49 | 0.32  | 4.38 | 1.51  | 1.62E-01 | 4.45E-01 | -5.59 |
| 1422002_PM_at   | Mxd1                    | MXD1     | 0.33  | 3.62 | 1.51  | 1.62E-01 | 4.45E-01 | -5.59 |
| 1422759_PM_a_at | Xpo6                    | XPO6     | 0.38  | 2.96 | 1.51  | 1.62E-01 | 4.45E-01 | -5.59 |
| 1421239_PM_at   | Il6st                   | IL6ST    | 0.46  | 4.30 | 1.51  | 1.62E-01 | 4.45E-01 | -5.59 |
| 1415903_PM_at   | Slc38a1                 | SLC38A1  | 0.51  | 4.57 | 1.51  | 1.62E-01 | 4.45E-01 | -5.59 |
| 1450301_PM_at   | Ifi44l                  | NA       | -0.15 | 2.22 | -1.51 | 1.62E-01 | 4.45E-01 | -5.59 |
| 1452310_PM_at   | Tada2a                  | TADA2A   | -0.34 | 4.61 | -1.51 | 1.62E-01 | 4.45E-01 | -5.59 |
| 1457334_PM_at   | ---                     | NA       | 0.30  | 2.75 | 1.51  | 1.62E-01 | 4.45E-01 | -5.59 |
| 1435600_PM_s_at | Ccm2l                   | CCM2L    | 0.25  | 3.13 | 1.51  | 1.62E-01 | 4.45E-01 | -5.59 |
| 1415882_PM_at   | Ghitm                   | GHI1M    | -0.38 | 5.34 | -1.51 | 1.62E-01 | 4.45E-01 | -5.59 |
| 1417145_PM_at   | Nfxl1                   | NFXL1    | -0.24 | 5.61 | -1.51 | 1.62E-01 | 4.45E-01 | -5.60 |
| 1436635_PM_at   | Ube2z                   | UBE2Z    | -0.22 | 2.20 | -1.51 | 1.62E-01 | 4.45E-01 | -5.60 |
| 1432890_PM_at   | Z610011E03Rik           | NA       | 0.42  | 2.49 | 1.51  | 1.62E-01 | 4.45E-01 | -5.60 |
| 1434943_PM_at   | Morn4                   | MORN4    | 0.50  | 3.53 | 1.51  | 1.62E-01 | 4.45E-01 | -5.60 |
| 1436318_PM_at   | Tardbp                  | TARDBP   | -0.66 | 4.68 | -1.51 | 1.62E-01 | 4.45E-01 | -5.60 |
| 1439087_PM_a_at | Pik3ip1                 | PIK3IP1  | 0.24  | 2.52 | 1.51  | 1.62E-01 | 4.45E-01 | -5.60 |
| 1456476_PM_at   | Atxn2l                  | ATXN2L   | 0.26  | 2.68 | 1.51  | 1.62E-01 | 4.45E-01 | -5.60 |
| 1438855_PM_x_at | Tnfai2                  | TNFAIP2  | 0.92  | 3.57 | 1.51  | 1.62E-01 | 4.45E-01 | -5.60 |
| 1453702_PM_at   | Ccdc105                 | CCDC105  | 0.16  | 2.30 | 1.51  | 1.62E-01 | 4.45E-01 | -5.60 |
| 1452244_PM_at   | Medag                   | MEDAG    | -0.24 | 3.71 | -1.51 | 1.62E-01 | 4.45E-01 | -5.60 |
| 1449856_PM_at   | Rgs18                   | RGS18    | 0.15  | 2.21 | 1.51  | 1.62E-01 | 4.45E-01 | -5.60 |
| 1453880_PM_s_at | Ccdc30                  | CCDC30   | 0.21  | 2.41 | 1.51  | 1.62E-01 | 4.45E-01 | -5.60 |
| 1440097_PM_at   | ---                     | NA       | 0.23  | 3.50 | 1.51  | 1.62E-01 | 4.45E-01 | -5.60 |
| 1452919_PM_a_at | Pgp                     | PGP      | 0.38  | 3.43 | 1.51  | 1.62E-01 | 4.45E-01 | -5.60 |
| 1450626_PM_at   | Manba                   | MANBA    | -0.26 | 2.74 | -1.51 | 1.62E-01 | 4.45E-01 | -5.60 |
| 1447576_PM_at   | ---                     | NA       | 0.17  | 2.59 | 1.51  | 1.62E-01 | 4.45E-01 | -5.60 |
| 1428001_PM_at   | Tshr                    | TSHR     | 0.18  | 2.18 | 1.51  | 1.62E-01 | 4.45E-01 | -5.60 |
| 1442912_PM_at   | ---                     | NA       | 0.26  | 2.48 | 1.51  | 1.62E-01 | 4.45E-01 | -5.60 |
| 1456662_PM_at   | AA386476                | NA       | 0.28  | 2.15 | 1.51  | 1.62E-01 | 4.45E-01 | -5.60 |
| 1424383_PM_at   | Tmem51                  | TMEM51   | -0.30 | 4.46 | -1.51 | 1.62E-01 | 4.45E-01 | -5.60 |
| 1451323_PM_at   | Zfp7                    | ZNF7     | 0.24  | 2.60 | 1.51  | 1.62E-01 | 4.46E-01 | -5.60 |
| 1438245_PM_at   | ---                     | NA       | 0.19  | 3.56 | 1.50  | 1.62E-01 | 4.46E-01 | -5.60 |
| 1439215_PM_at   | Atp2c1                  | ATP2C1   | 0.28  | 3.10 | 1.50  | 1.62E-01 | 4.46E-01 | -5.60 |
| 1456364_PM_at   | C230057M02Rik           | NA       | 0.19  | 2.23 | 1.50  | 1.62E-01 | 4.46E-01 | -5.60 |
| 1444625_PM_at   | Gm15408                 | NA       | 0.26  | 2.79 | 1.50  | 1.62E-01 | 4.46E-01 | -5.60 |
| 1418799_PM_a_at | Col17a1                 | COL17A1  | 0.39  | 2.50 | 1.50  | 1.62E-01 | 4.46E-01 | -5.60 |
| 1424195_PM_a_at | Inpp5d                  | INPP5D   | 0.17  | 2.96 | 1.50  | 1.62E-01 | 4.46E-01 | -5.60 |
| 1459448_PM_at   | Cyb5r2                  | CYB5R2   | 0.17  | 2.47 | 1.50  | 1.62E-01 | 4.46E-01 | -5.60 |
| 1426484_PM_at   | Ubxn4                   | UBXN4    | -0.41 | 4.27 | -1.50 | 1.62E-01 | 4.46E-01 | -5.60 |
| 1418982_PM_at   | Cebpa                   | CEBPA    | -0.22 | 2.84 | -1.50 | 1.62E-01 | 4.46E-01 | -5.60 |
| 1429674_PM_at   | 1700113H08Rik           | C12orf42 | -0.21 | 2.11 | -1.50 | 1.62E-01 | 4.46E-01 | -5.60 |
| 1459493_PM_at   | LOC102643220            | NA       | 0.16  | 2.29 | 1.50  | 1.62E-01 | 4.46E-01 | -5.60 |
| 1423503_PM_at   | Jam3                    | JAM3     | 0.19  | 2.73 | 1.50  | 1.62E-01 | 4.46E-01 | -5.60 |
| 1419270_PM_a_at | Dut                     | DUT      | 0.32  | 3.39 | 1.50  | 1.62E-01 | 4.46E-01 | -5.60 |
| 1416049_PM_at   | Gldc                    | GLDC     | -0.28 | 2.71 | -1.50 | 1.63E-01 | 4.46E-01 | -5.60 |

|                 |                                      |          |       |      |       |          |          |       |
|-----------------|--------------------------------------|----------|-------|------|-------|----------|----------|-------|
| 1460141_PM_at   | Frrs1                                | FRRS1    | 0.16  | 2.17 | 1.50  | 1.63E-01 | 4.46E-01 | -5.60 |
| 1433072_PM_at   | 4933425E08Rik                        | NA       | 0.17  | 2.50 | 1.50  | 1.62E-01 | 4.46E-01 | -5.60 |
| 1415853_PM_at   | Def8                                 | DEF8     | 0.18  | 2.80 | 1.50  | 1.63E-01 | 4.46E-01 | -5.60 |
| 1436402_PM_at   | Dohh                                 | DOHH     | 0.19  | 2.78 | 1.50  | 1.62E-01 | 4.46E-01 | -5.60 |
| 1449026_PM_at   | Ifnar1                               | IFNAR1   | 0.67  | 5.20 | 1.50  | 1.62E-01 | 4.46E-01 | -5.60 |
| 1449795_PM_at   | D2Rtd63e                             | NA       | 0.18  | 2.84 | 1.50  | 1.63E-01 | 4.46E-01 | -5.60 |
| 1418831_PM_at   | Pkp3                                 | PKP3     | 0.15  | 2.27 | 1.50  | 1.63E-01 | 4.46E-01 | -5.60 |
| 1454043_PM_a_at | Kcnab1                               | KCNAB1   | 0.26  | 2.54 | 1.50  | 1.63E-01 | 4.46E-01 | -5.60 |
| 1437203_PM_at   | Cbll1                                | CBLL1    | -0.26 | 3.04 | -1.50 | 1.63E-01 | 4.46E-01 | -5.60 |
| 1423342_PM_at   | Barx1                                | BARX1    | 0.14  | 2.33 | 1.50  | 1.63E-01 | 4.46E-01 | -5.60 |
| 1433326_PM_at   | 4930488N24Rik                        | NA       | 0.16  | 2.85 | 1.50  | 1.63E-01 | 4.46E-01 | -5.60 |
| 1450130_PM_at   | Xpr1                                 | XPR1     | -0.41 | 3.72 | -1.50 | 1.63E-01 | 4.46E-01 | -5.60 |
| 1446767_PM_at   | ---                                  | NA       | 0.15  | 2.12 | 1.50  | 1.63E-01 | 4.46E-01 | -5.60 |
| 1426612_PM_at   | Tipin                                | TIPIN    | -0.32 | 3.48 | -1.50 | 1.63E-01 | 4.47E-01 | -5.60 |
| 1442062_PM_at   | Smad2                                | NA       | 0.27  | 4.06 | 1.50  | 1.63E-01 | 4.47E-01 | -5.60 |
| 1436500_PM_at   | LOC102642752 /// Rps24 /// Rps24-ps3 | RPS24    | 0.16  | 2.08 | 1.50  | 1.63E-01 | 4.47E-01 | -5.60 |
| 1427183_PM_at   | Efemp1                               | EFEMP1   | -0.86 | 4.76 | -1.50 | 1.63E-01 | 4.47E-01 | -5.60 |
| 1453627_PM_at   | ---                                  | NA       | 0.20  | 2.66 | 1.50  | 1.63E-01 | 4.47E-01 | -5.60 |
| 1423101_PM_at   | Paqr4                                | PAQR4    | 0.35  | 4.58 | 1.50  | 1.63E-01 | 4.47E-01 | -5.60 |
| 1434344_PM_at   | Gpkow                                | GPKOW    | -0.26 | 3.72 | -1.50 | 1.63E-01 | 4.47E-01 | -5.60 |
| 1447493_PM_at   | Pirt                                 | PIRT     | 0.26  | 2.45 | 1.50  | 1.63E-01 | 4.47E-01 | -5.60 |
| 1447326_PM_s_at | Zmym3                                | ZMYM3    | 0.28  | 3.27 | 1.50  | 1.63E-01 | 4.47E-01 | -5.60 |
| 1426275_PM_a_at | Uxs1                                 | UXS1     | 0.43  | 3.60 | 1.50  | 1.63E-01 | 4.47E-01 | -5.60 |
| 1423939_PM_a_at | Yif1a                                | YIF1A    | 0.96  | 3.57 | 1.50  | 1.63E-01 | 4.47E-01 | -5.60 |
| 1419120_PM_at   | Lyl1                                 | LYL1     | 0.16  | 2.27 | 1.50  | 1.63E-01 | 4.47E-01 | -5.60 |
| 1428035_PM_at   | Fsip1                                | FSIP1    | 0.18  | 2.23 | 1.50  | 1.63E-01 | 4.47E-01 | -5.60 |
| 1446494_PM_at   | Kis2                                 | NA       | 0.18  | 2.13 | 1.50  | 1.63E-01 | 4.47E-01 | -5.60 |
| 1450856_PM_at   | Arvcf                                | ARVCF    | 0.19  | 2.93 | 1.50  | 1.63E-01 | 4.47E-01 | -5.60 |
| 1424685_PM_at   | Exosc4                               | EXOSC4   | -0.14 | 2.23 | -1.50 | 1.63E-01 | 4.47E-01 | -5.60 |
| 1420656_PM_at   | Abcg8                                | ABCG8    | 0.18  | 4.05 | 1.50  | 1.63E-01 | 4.47E-01 | -5.60 |
| 1445321_PM_at   | ---                                  | NA       | -0.20 | 2.13 | -1.50 | 1.63E-01 | 4.47E-01 | -5.60 |
| 1425184_PM_at   | Ska1                                 | SKA1     | 0.12  | 2.09 | 1.50  | 1.63E-01 | 4.47E-01 | -5.60 |
| 1419424_PM_at   | Ptf1a                                | PTF1A    | 0.14  | 2.15 | 1.50  | 1.63E-01 | 4.47E-01 | -5.60 |
| 1457598_PM_at   | Glr3                                 | NA       | 0.14  | 2.15 | 1.50  | 1.63E-01 | 4.47E-01 | -5.60 |
| 1431272_PM_at   | 5430405H02Rik                        | NA       | 0.20  | 3.01 | 1.50  | 1.63E-01 | 4.47E-01 | -5.60 |
| 1435450_PM_at   | Cpne3                                | CPNE3    | 0.23  | 3.17 | 1.50  | 1.63E-01 | 4.47E-01 | -5.60 |
| 1434887_PM_at   | Ncs1                                 | NCS1     | -0.38 | 3.69 | -1.50 | 1.63E-01 | 4.47E-01 | -5.60 |
| 1434634_PM_at   | Ccdc189                              | CCDC189  | 0.14  | 2.01 | 1.50  | 1.63E-01 | 4.47E-01 | -5.60 |
| 1442166_PM_at   | Cpne5                                | CPNE5    | 0.31  | 2.85 | 1.50  | 1.63E-01 | 4.47E-01 | -5.60 |
| 1457222_PM_at   | Creb5                                | CREB5    | 0.20  | 2.31 | 1.50  | 1.63E-01 | 4.47E-01 | -5.60 |
| 1440168_PM_x_at | Kctd7                                | KCTD7    | 0.23  | 3.30 | 1.50  | 1.63E-01 | 4.47E-01 | -5.60 |
| 1431444_PM_at   | Spint4                               | SPINT4   | 0.15  | 2.43 | 1.50  | 1.63E-01 | 4.47E-01 | -5.60 |
| 1453332_PM_at   | Trappc13                             | TRAPPC13 | -0.36 | 2.73 | -1.50 | 1.63E-01 | 4.47E-01 | -5.60 |
| 1459339_PM_at   | 1700049G17Rik                        | NA       | 0.16  | 2.64 | 1.50  | 1.63E-01 | 4.47E-01 | -5.60 |
| 1448656_PM_at   | Cacnb3                               | CACNB3   | -0.91 | 4.24 | -1.50 | 1.63E-01 | 4.47E-01 | -5.60 |
| 1416718_PM_at   | Bcan                                 | BCAN     | 0.24  | 2.67 | 1.50  | 1.63E-01 | 4.47E-01 | -5.60 |
| 1445348_PM_at   | ---                                  | NA       | 0.22  | 2.88 | 1.50  | 1.63E-01 | 4.48E-01 | -5.60 |
| 1418908_PM_at   | Pam                                  | PAM      | 0.50  | 5.10 | 1.50  | 1.63E-01 | 4.48E-01 | -5.60 |
| 1451770_PM_s_at | Dhx9                                 | DHX9     | -0.68 | 7.47 | -1.50 | 1.64E-01 | 4.48E-01 | -5.60 |
| 1444355_PM_at   | Atp8a1                               | ATP8A1   | 0.13  | 2.12 | 1.50  | 1.64E-01 | 4.48E-01 | -5.60 |
| 1441433_PM_at   | ---                                  | NA       | 0.19  | 2.78 | 1.50  | 1.64E-01 | 4.48E-01 | -5.60 |
| 1431561_PM_a_at | Dhx34                                | DHX34    | 0.21  | 2.71 | 1.50  | 1.63E-01 | 4.48E-01 | -5.60 |
| 1452531_PM_at   | Runx1                                | NA       | 0.22  | 2.64 | 1.50  | 1.64E-01 | 4.48E-01 | -5.60 |
| 1443738_PM_at   | ---                                  | NA       | 0.25  | 3.10 | 1.50  | 1.64E-01 | 4.48E-01 | -5.60 |
| 1415702_PM_a_at | Ctbp1                                | CTBP1    | 0.30  | 4.00 | 1.50  | 1.63E-01 | 4.48E-01 | -5.60 |
| 1438594_PM_at   | ---                                  | NA       | 0.32  | 2.42 | 1.50  | 1.64E-01 | 4.48E-01 | -5.60 |
| 1424363_PM_at   | Mycbpap                              | MYCBPAP  | 0.45  | 2.58 | 1.50  | 1.64E-01 | 4.48E-01 | -5.60 |
| 1444776_PM_at   | Gm31633                              | NA       | 0.21  | 2.59 | 1.50  | 1.64E-01 | 4.48E-01 | -5.60 |
| 1428802_PM_at   | Mgat3                                | MGAT3    | 0.22  | 2.47 | 1.50  | 1.64E-01 | 4.48E-01 | -5.60 |
| 1457148_PM_at   | Csm2                                 | NA       | -0.40 | 3.87 | -1.50 | 1.64E-01 | 4.48E-01 | -5.60 |
| 1423767_PM_at   | Dpy30                                | DPY30    | -0.29 | 3.86 | -1.50 | 1.64E-01 | 4.48E-01 | -5.60 |
| 1439191_PM_at   | Fstl1                                | FSTL1    | 0.13  | 2.41 | 1.50  | 1.64E-01 | 4.48E-01 | -5.60 |
| 1432077_PM_at   | Pot1a                                | POT1     | 0.25  | 2.37 | 1.50  | 1.64E-01 | 4.48E-01 | -5.61 |
| 1428201_PM_at   | 2310036O22Rik                        | C19orf43 | -0.61 | 4.62 | -1.50 | 1.64E-01 | 4.48E-01 | -5.61 |
| 1444448_PM_at   | ---                                  | NA       | 0.19  | 2.58 | 1.50  | 1.64E-01 | 4.48E-01 | -5.61 |
| 1443553_PM_at   | LOC102633357                         | NA       | 0.79  | 3.84 | 1.50  | 1.64E-01 | 4.48E-01 | -5.61 |
| 1416458_PM_at   | Arf2                                 | NA       | -0.44 | 4.19 | -1.50 | 1.64E-01 | 4.48E-01 | -5.61 |
| 1436872_PM_at   | Tacc3                                | NA       | -0.18 | 2.49 | -1.50 | 1.64E-01 | 4.48E-01 | -5.61 |
| 1441868_PM_x_at | Dcst2                                | NA       | 0.13  | 2.28 | 1.50  | 1.64E-01 | 4.48E-01 | -5.61 |
| 1457865_PM_at   | A730011C13Rik                        | NA       | 0.29  | 2.37 | 1.50  | 1.64E-01 | 4.48E-01 | -5.61 |
| 1440153_PM_at   | ---                                  | NA       | -0.71 | 5.67 | -1.50 | 1.64E-01 | 4.48E-01 | -5.61 |
| 1455204_PM_at   | Pitpnc1                              | PITPNC1  | -0.28 | 3.51 | -1.50 | 1.64E-01 | 4.48E-01 | -5.61 |
| 1449166_PM_at   | S100a14                              | S100A14  | 0.14  | 2.62 | 1.50  | 1.64E-01 | 4.48E-01 | -5.61 |
| 1442090_PM_at   | ---                                  | NA       | 0.18  | 2.78 | 1.50  | 1.64E-01 | 4.48E-01 | -5.61 |

|                 |                                                                                                                          |           |       |      |       |          |          |       |
|-----------------|--------------------------------------------------------------------------------------------------------------------------|-----------|-------|------|-------|----------|----------|-------|
| 1421597_PM_a_at | Msx3                                                                                                                     | NA        | 0.17  | 2.66 | 1.50  | 1.64E-01 | 4.48E-01 | -5.61 |
| 1452059_PM_at   | Slc35f5                                                                                                                  | SLC35F5   | -0.44 | 2.65 | -1.50 | 1.64E-01 | 4.48E-01 | -5.61 |
| 1446103_PM_at   | ---                                                                                                                      | NA        | 0.14  | 2.07 | 1.50  | 1.64E-01 | 4.48E-01 | -5.61 |
| 1446153_PM_at   | ---                                                                                                                      | NA        | 0.55  | 3.69 | 1.50  | 1.64E-01 | 4.48E-01 | -5.61 |
| 1432117_PM_at   | 4933422A05Rik                                                                                                            | NA        | 0.12  | 2.29 | 1.50  | 1.64E-01 | 4.48E-01 | -5.61 |
| 1433609_PM_s_at | Surf2                                                                                                                    | SURF2     | 0.53  | 3.15 | 1.50  | 1.64E-01 | 4.48E-01 | -5.61 |
| 1436150_PM_at   | Fam219a                                                                                                                  | FAM219A   | 0.23  | 3.91 | 1.50  | 1.64E-01 | 4.48E-01 | -5.61 |
| 1440804_PM_at   | ---                                                                                                                      | NA        | 0.50  | 6.31 | 1.50  | 1.64E-01 | 4.48E-01 | -5.61 |
| 1457486_PM_at   | ---                                                                                                                      | NA        | 0.18  | 2.50 | 1.50  | 1.64E-01 | 4.48E-01 | -5.61 |
| 1456843_PM_at   | Yes1                                                                                                                     | YES1      | 0.38  | 2.80 | 1.50  | 1.64E-01 | 4.48E-01 | -5.61 |
| 1426760_PM_at   | Ipo8                                                                                                                     | IPO8      | -0.34 | 5.83 | -1.50 | 1.64E-01 | 4.48E-01 | -5.61 |
| 1453560_PM_at   | Fem1a                                                                                                                    | NA        | 0.12  | 2.31 | 1.50  | 1.64E-01 | 4.48E-01 | -5.61 |
| 1451255_PM_at   | Lsr                                                                                                                      | LSR       | 0.23  | 2.88 | 1.50  | 1.64E-01 | 4.48E-01 | -5.61 |
| 1416813_PM_at   | Tia1                                                                                                                     | TIA1      | -0.67 | 5.28 | -1.50 | 1.64E-01 | 4.48E-01 | -5.61 |
| 1430373_PM_at   | 5430427O19Rik                                                                                                            | CXorf21   | 0.13  | 2.01 | 1.50  | 1.64E-01 | 4.48E-01 | -5.61 |
| 1453527_PM_a_at | Neur1a                                                                                                                   | NEUR1     | 0.16  | 2.71 | 1.50  | 1.64E-01 | 4.48E-01 | -5.61 |
| 1419483_PM_at   | C3ar1                                                                                                                    | C3AR1     | 0.21  | 2.41 | 1.50  | 1.64E-01 | 4.48E-01 | -5.61 |
| 1423694_PM_at   | Kctd10                                                                                                                   | KCTD10    | -0.28 | 2.41 | -1.50 | 1.64E-01 | 4.48E-01 | -5.61 |
| 1428322_PM_a_at | Ndufb10                                                                                                                  | NDUFB10   | -0.72 | 7.05 | -1.50 | 1.64E-01 | 4.48E-01 | -5.61 |
| 1442668_PM_at   | ---                                                                                                                      | NA        | 0.17  | 2.24 | 1.50  | 1.64E-01 | 4.48E-01 | -5.61 |
| 1452883_PM_a_at | Bbip1                                                                                                                    | NA        | -0.69 | 4.70 | -1.50 | 1.65E-01 | 4.48E-01 | -5.61 |
| 1432391_PM_at   | Cep85                                                                                                                    | CEP85     | -0.60 | 5.53 | -1.50 | 1.64E-01 | 4.48E-01 | -5.61 |
| 1442205_PM_at   | ---                                                                                                                      | NA        | -0.46 | 4.70 | -1.50 | 1.64E-01 | 4.48E-01 | -5.61 |
| 1418072_PM_at   | Hist1h2bc                                                                                                                | HIST1H2BI | -0.43 | 6.19 | -1.50 | 1.65E-01 | 4.48E-01 | -5.61 |
| 1426016_PM_a_at | Tro                                                                                                                      | TRO       | -0.38 | 4.63 | -1.50 | 1.64E-01 | 4.48E-01 | -5.61 |
| 1449277_PM_at   | Ccl19 /// Gm12407 ///<br>Gm13309 /// Gm2023 ///<br>Gm21104 /// Gm2457 ///<br>Gm2564 /// LOC100043921<br>/// LOC100861618 | CCL19     | -0.19 | 2.79 | -1.50 | 1.64E-01 | 4.48E-01 | -5.61 |
| 1441428_PM_at   | ---                                                                                                                      | NA        | -0.12 | 2.21 | -1.50 | 1.64E-01 | 4.48E-01 | -5.61 |
| 1425073_PM_at   | Plekhg6                                                                                                                  | PLEKHG6   | 0.12  | 2.28 | 1.50  | 1.65E-01 | 4.48E-01 | -5.61 |
| 1415886_PM_at   | Sh2d3c                                                                                                                   | SH2D3C    | 0.13  | 2.53 | 1.50  | 1.64E-01 | 4.48E-01 | -5.61 |
| 1454386_PM_at   | ---                                                                                                                      | NA        | 0.14  | 2.13 | 1.50  | 1.64E-01 | 4.48E-01 | -5.61 |
| 1429424_PM_at   | Cst13                                                                                                                    | NA        | 0.14  | 2.47 | 1.50  | 1.64E-01 | 4.48E-01 | -5.61 |
| 1417735_PM_at   | LOC105242475 /// Mptx1                                                                                                   | NA        | 0.14  | 2.55 | 1.50  | 1.65E-01 | 4.48E-01 | -5.61 |
| 1441824_PM_at   | Mboat1                                                                                                                   | MBOAT1    | 0.14  | 2.74 | 1.50  | 1.65E-01 | 4.48E-01 | -5.61 |
| 1442737_PM_at   | Gm32926                                                                                                                  | NA        | 0.15  | 2.25 | 1.50  | 1.64E-01 | 4.48E-01 | -5.61 |
| 1450134_PM_at   | Lox4                                                                                                                     | LOXL4     | 0.16  | 2.27 | 1.50  | 1.64E-01 | 4.48E-01 | -5.61 |
| 1443440_PM_at   | ---                                                                                                                      | NA        | 0.17  | 2.43 | 1.50  | 1.64E-01 | 4.48E-01 | -5.61 |
| 1443787_PM_x_at | Casp14                                                                                                                   | CASP14    | 0.17  | 2.49 | 1.50  | 1.65E-01 | 4.48E-01 | -5.61 |
| 1446831_PM_at   | D5Ert521e                                                                                                                | NA        | 0.18  | 2.14 | 1.50  | 1.65E-01 | 4.48E-01 | -5.61 |
| 1451396_PM_at   | Pomt2                                                                                                                    | POMT2     | 0.18  | 2.75 | 1.50  | 1.65E-01 | 4.48E-01 | -5.61 |
| 1433217_PM_at   | 4930566N20Rik                                                                                                            | NA        | 0.18  | 2.24 | 1.50  | 1.65E-01 | 4.48E-01 | -5.61 |
| 1430707_PM_s_at | Pebp4                                                                                                                    | PEBP4     | 0.19  | 2.56 | 1.50  | 1.65E-01 | 4.48E-01 | -5.61 |
| 1456358_PM_at   | Etv3                                                                                                                     | ETV3      | 0.20  | 3.19 | 1.50  | 1.64E-01 | 4.48E-01 | -5.61 |
| 1454131_PM_at   | 4931413K12Rik                                                                                                            | NA        | 0.21  | 3.11 | 1.50  | 1.64E-01 | 4.48E-01 | -5.61 |
| 1438204_PM_at   | Hist1hc                                                                                                                  | NA        | 0.21  | 2.96 | 1.50  | 1.65E-01 | 4.48E-01 | -5.61 |
| 1437173_PM_at   | S1pr3                                                                                                                    | S1PR3     | 0.22  | 3.20 | 1.50  | 1.65E-01 | 4.48E-01 | -5.61 |
| 1425950_PM_at   | Slc17a9                                                                                                                  | SLC17A9   | 0.22  | 3.85 | 1.50  | 1.64E-01 | 4.48E-01 | -5.61 |
| 1446815_PM_at   | ---                                                                                                                      | NA        | 0.24  | 2.65 | 1.50  | 1.64E-01 | 4.48E-01 | -5.61 |
| 1451291_PM_at   | Nabp2                                                                                                                    | NABP2     | 0.26  | 5.22 | 1.50  | 1.64E-01 | 4.48E-01 | -5.61 |
| 1417370_PM_at   | Tff3                                                                                                                     | TFF3      | 0.26  | 3.11 | 1.50  | 1.64E-01 | 4.48E-01 | -5.61 |
| 1440046_PM_at   | Fam199x                                                                                                                  | FAM199X   | 0.28  | 3.24 | 1.50  | 1.65E-01 | 4.48E-01 | -5.61 |
| 1432550_PM_at   | Tmem190                                                                                                                  | TMEM190   | 0.29  | 2.33 | 1.50  | 1.64E-01 | 4.48E-01 | -5.61 |
| 1428045_PM_a_at | Elf2                                                                                                                     | ELF2      | 0.34  | 3.13 | 1.50  | 1.64E-01 | 4.48E-01 | -5.61 |
| 1422531_PM_at   | Syt5                                                                                                                     | SYT5      | 0.41  | 4.79 | 1.50  | 1.64E-01 | 4.48E-01 | -5.61 |
| 1445630_PM_at   | Gm29538                                                                                                                  | NA        | 0.13  | 1.98 | 1.50  | 1.65E-01 | 4.49E-01 | -5.61 |
| 1420312_PM_s_at | ---                                                                                                                      | NA        | 0.16  | 2.02 | 1.50  | 1.65E-01 | 4.49E-01 | -5.61 |
| 1449374_PM_at   | Pipox                                                                                                                    | PIPOX     | 0.16  | 2.25 | 1.50  | 1.65E-01 | 4.49E-01 | -5.61 |
| 1458839_PM_at   | Exoc8                                                                                                                    | EXOC8     | 0.21  | 2.59 | 1.50  | 1.65E-01 | 4.49E-01 | -5.61 |
| 1430860_PM_at   | 4833422M21Rik                                                                                                            | NA        | 0.15  | 1.95 | 1.49  | 1.65E-01 | 4.49E-01 | -5.61 |
| 1440779_PM_s_at | Slc5a9                                                                                                                   | SLC5A9    | -0.28 | 2.32 | -1.49 | 1.65E-01 | 4.49E-01 | -5.61 |
| 1430099_PM_at   | 4930509E16Rik                                                                                                            | NA        | -0.40 | 2.95 | -1.49 | 1.65E-01 | 4.49E-01 | -5.61 |
| 1459183_PM_at   | ---                                                                                                                      | NA        | 0.19  | 3.28 | 1.49  | 1.65E-01 | 4.49E-01 | -5.61 |
| 1450617_PM_at   | ---                                                                                                                      | NA        | 0.21  | 2.47 | 1.49  | 1.65E-01 | 4.49E-01 | -5.61 |
| 1454053_PM_at   | Slc9a9                                                                                                                   | SLC9A9    | -0.15 | 2.62 | -1.49 | 1.65E-01 | 4.49E-01 | -5.61 |
| 1422923_PM_at   | Fgf3                                                                                                                     | FGF3      | 0.15  | 2.47 | 1.49  | 1.65E-01 | 4.49E-01 | -5.61 |
| 1454495_PM_at   | ---                                                                                                                      | NA        | 0.20  | 2.25 | 1.49  | 1.65E-01 | 4.49E-01 | -5.61 |
| 1439593_PM_s_at | Ppp4r1l-ps                                                                                                               | NA        | 0.20  | 2.10 | 1.49  | 1.65E-01 | 4.49E-01 | -5.61 |
| 1458963_PM_at   | Ttc39b                                                                                                                   | TTC39B    | 0.21  | 2.25 | 1.49  | 1.65E-01 | 4.49E-01 | -5.61 |
| 1432432_PM_a_at | Rab3c                                                                                                                    | RAB3C     | -0.82 | 3.31 | -1.49 | 1.65E-01 | 4.50E-01 | -5.61 |
| 1447384_PM_at   | Abcc5                                                                                                                    | ABCC5     | 0.26  | 2.46 | 1.49  | 1.65E-01 | 4.50E-01 | -5.61 |
| 1431993_PM_a_at | Rnf38                                                                                                                    | RNF38     | 0.35  | 3.97 | 1.49  | 1.65E-01 | 4.50E-01 | -5.61 |

|                 |                                  |         |       |      |       |          |          |       |
|-----------------|----------------------------------|---------|-------|------|-------|----------|----------|-------|
| 1441482_PM_at   | Map2k6                           | NA      | 0.36  | 2.60 | 1.49  | 1.65E-01 | 4.50E-01 | -5.61 |
| 1423192_PM_at   | Pspc1                            | PSPC1   | -0.49 | 6.16 | -1.49 | 1.65E-01 | 4.50E-01 | -5.61 |
| 1454032_PM_at   | Neto2                            | NETO2   | -0.38 | 3.69 | -1.49 | 1.65E-01 | 4.50E-01 | -5.61 |
| 1453825_PM_at   | 4933421O10Rik                    | NA      | -0.13 | 2.18 | -1.49 | 1.65E-01 | 4.50E-01 | -5.61 |
| 1426655_PM_a_at | Fam63a                           | MINDY1  | 0.22  | 3.55 | 1.49  | 1.65E-01 | 4.50E-01 | -5.61 |
| 1438846_PM_x_at | Ip6k1                            | IP6K1   | 0.23  | 3.02 | 1.49  | 1.65E-01 | 4.50E-01 | -5.61 |
| 1438474_PM_at   | Ankrd35                          | ANKRD35 | 0.40  | 3.41 | 1.49  | 1.65E-01 | 4.50E-01 | -5.61 |
| 1423510_PM_at   | Iapp                             | IAPP    | 0.15  | 2.16 | 1.49  | 1.65E-01 | 4.50E-01 | -5.61 |
| 1457885_PM_at   | ---                              | NA      | 0.15  | 2.30 | 1.49  | 1.65E-01 | 4.50E-01 | -5.61 |
| 1450621_PM_a_at | Hbb-y                            | HBE1    | 0.20  | 2.39 | 1.49  | 1.65E-01 | 4.50E-01 | -5.61 |
| 1448369_PM_at   | Pola2                            | POLA2   | 0.14  | 2.36 | 1.49  | 1.65E-01 | 4.50E-01 | -5.61 |
| 1432639_PM_at   | ---                              | NA      | 0.15  | 2.10 | 1.49  | 1.65E-01 | 4.50E-01 | -5.61 |
| 1424594_PM_at   | Samd4                            | SAMD4A  | -0.37 | 2.92 | -1.49 | 1.65E-01 | 4.50E-01 | -5.61 |
| 1438252_PM_at   | Qsox1                            | QSOX1   | 0.13  | 2.06 | 1.49  | 1.65E-01 | 4.50E-01 | -5.61 |
| 1444369_PM_at   | ---                              | NA      | 0.13  | 3.03 | 1.49  | 1.65E-01 | 4.50E-01 | -5.61 |
| 1454349_PM_at   | 2810487C13Rik                    | NA      | 0.16  | 2.52 | 1.49  | 1.65E-01 | 4.50E-01 | -5.61 |
| 1445359_PM_at   | Adcy1                            | ADCY1   | 0.81  | 3.70 | 1.49  | 1.65E-01 | 4.50E-01 | -5.61 |
| 1458809_PM_at   | ---                              | NA      | -0.52 | 3.32 | -1.49 | 1.65E-01 | 4.50E-01 | -5.61 |
| 1455849_PM_at   | Nav1                             | NAV1    | 0.51  | 3.30 | 1.49  | 1.65E-01 | 4.50E-01 | -5.61 |
| 1419612_PM_at   | 4632415L05Rik                    | NA      | 0.14  | 2.47 | 1.49  | 1.65E-01 | 4.50E-01 | -5.61 |
| 1455888_PM_at   | Lingo2                           | LINGO2  | -0.36 | 2.50 | -1.49 | 1.66E-01 | 4.50E-01 | -5.61 |
| 1431504_PM_at   | 2310061N02Rik                    | NA      | 0.14  | 2.36 | 1.49  | 1.66E-01 | 4.50E-01 | -5.61 |
| 1415689_PM_s_at | Zkscan3                          | ZKSCAN4 | -0.61 | 3.01 | -1.49 | 1.66E-01 | 4.50E-01 | -5.61 |
| 1456804_PM_at   | Gm6792                           | EDDM13  | 0.21  | 2.87 | 1.49  | 1.66E-01 | 4.50E-01 | -5.61 |
| 1442413_PM_at   | Kcna1                            | NA      | 0.26  | 2.56 | 1.49  | 1.66E-01 | 4.50E-01 | -5.61 |
| 1437251_PM_at   | Cdca2                            | CDCA2   | -0.17 | 2.71 | -1.49 | 1.66E-01 | 4.50E-01 | -5.61 |
| 1448205_PM_at   | Ccnb1                            | CCNB1   | -0.11 | 2.57 | -1.49 | 1.66E-01 | 4.50E-01 | -5.62 |
| 1450576_PM_a_at | Sf3a2                            | SF3A2   | 0.14  | 2.30 | 1.49  | 1.66E-01 | 4.50E-01 | -5.62 |
| 1439973_PM_at   | Crxos                            | NA      | 0.18  | 2.52 | 1.49  | 1.66E-01 | 4.50E-01 | -5.62 |
| 1427539_PM_a_at | Zwint                            | ZWINT   | 0.68  | 3.69 | 1.49  | 1.66E-01 | 4.50E-01 | -5.62 |
| 1417644_PM_at   | Sspn                             | SSPN    | -0.28 | 2.48 | -1.49 | 1.66E-01 | 4.50E-01 | -5.62 |
| 1421814_PM_at   | Msn                              | MSN     | -0.21 | 2.89 | -1.49 | 1.66E-01 | 4.50E-01 | -5.62 |
| 1436683_PM_at   | 1700011M02Rik                    | NA      | 0.15  | 2.34 | 1.49  | 1.66E-01 | 4.50E-01 | -5.62 |
| 1454723_PM_at   | Fam172a                          | FAM172A | -0.19 | 2.53 | -1.49 | 1.66E-01 | 4.50E-01 | -5.62 |
| 1421771_PM_a_at | Ipp                              | IPP     | -0.21 | 2.50 | -1.49 | 1.66E-01 | 4.50E-01 | -5.62 |
| 1419775_PM_at   | ---                              | NA      | 0.24  | 2.39 | 1.49  | 1.66E-01 | 4.50E-01 | -5.62 |
| 1447408_PM_at   | ---                              | NA      | 0.21  | 2.17 | 1.49  | 1.66E-01 | 4.50E-01 | -5.62 |
| 1420547_PM_at   | Galc                             | GALC    | 0.24  | 2.59 | 1.49  | 1.66E-01 | 4.51E-01 | -5.62 |
| 1418867_PM_at   | Cyp24a1                          | CYP24A1 | 0.25  | 2.71 | 1.49  | 1.66E-01 | 4.51E-01 | -5.62 |
| 1448514_PM_at   | Cox5b                            | NA      | 0.26  | 2.74 | 1.49  | 1.66E-01 | 4.51E-01 | -5.62 |
| 1442712_PM_at   | ---                              | NA      | 0.19  | 3.22 | 1.49  | 1.66E-01 | 4.51E-01 | -5.62 |
| 1420938_PM_at   | Hs6st2                           | HS6ST2  | 0.41  | 3.04 | 1.49  | 1.66E-01 | 4.51E-01 | -5.62 |
| 1440892_PM_at   | ---                              | NA      | 0.48  | 3.08 | 1.49  | 1.66E-01 | 4.51E-01 | -5.62 |
| 1441478_PM_at   | Cemip                            | CEMIP   | 0.18  | 2.64 | 1.49  | 1.66E-01 | 4.51E-01 | -5.62 |
| 1451581_PM_at   | Ppp6r2                           | PPP6R2  | 0.52  | 3.76 | 1.49  | 1.66E-01 | 4.51E-01 | -5.62 |
| 1437067_PM_at   | Phtf2                            | PHTF2   | -0.53 | 3.78 | -1.49 | 1.66E-01 | 4.51E-01 | -5.62 |
| 1450681_PM_at   | Zfp143                           | ZNF143  | -0.19 | 2.14 | -1.49 | 1.66E-01 | 4.51E-01 | -5.62 |
| 1422212_PM_at   | Foxh1                            | FOXH1   | 0.15  | 2.15 | 1.49  | 1.66E-01 | 4.51E-01 | -5.62 |
| 1431864_PM_at   | Fbxo24                           | FBXO24  | 0.17  | 2.36 | 1.49  | 1.66E-01 | 4.51E-01 | -5.62 |
| 1449488_PM_at   | Pitx1                            | PITX1   | 0.21  | 3.19 | 1.49  | 1.66E-01 | 4.51E-01 | -5.62 |
| 1440555_PM_at   | ---                              | NA      | 0.22  | 2.17 | 1.49  | 1.66E-01 | 4.51E-01 | -5.62 |
| 1453794_PM_at   | Fer1l4                           | NA      | 0.26  | 3.14 | 1.49  | 1.66E-01 | 4.51E-01 | -5.62 |
| 1455767_PM_x_at | Gm10045 /// Rpl21 /// Rpl21-ps15 | RPL21   | 0.29  | 8.97 | 1.49  | 1.66E-01 | 4.51E-01 | -5.62 |
| 1433454_PM_at   | Abtb2                            | ABTB2   | 0.14  | 2.46 | 1.49  | 1.66E-01 | 4.51E-01 | -5.62 |
| 1433511_PM_at   | Gtf2a1                           | NA      | -0.27 | 2.79 | -1.49 | 1.66E-01 | 4.51E-01 | -5.62 |
| 1445944_PM_at   | ---                              | NA      | 0.17  | 2.60 | 1.49  | 1.66E-01 | 4.51E-01 | -5.62 |
| 1427164_PM_at   | Ili3ra1                          | IL13RA1 | -0.56 | 3.07 | -1.49 | 1.66E-01 | 4.51E-01 | -5.62 |
| 1429501_PM_s_at | Ppm1a                            | NA      | -0.42 | 2.78 | -1.49 | 1.66E-01 | 4.51E-01 | -5.62 |
| 1458605_PM_at   | ---                              | NA      | -0.26 | 2.78 | -1.49 | 1.66E-01 | 4.51E-01 | -5.62 |
| 1416456_PM_a_at | Chia1                            | CHIA    | -0.21 | 2.54 | -1.49 | 1.66E-01 | 4.51E-01 | -5.62 |
| 1423018_PM_at   | Kcna3                            | KCNA3   | 0.11  | 2.18 | 1.49  | 1.66E-01 | 4.51E-01 | -5.62 |
| 1432107_PM_at   | Smco1                            | SMCO1   | 0.12  | 2.21 | 1.49  | 1.66E-01 | 4.51E-01 | -5.62 |
| 1431881_PM_at   | ---                              | NA      | 0.14  | 2.05 | 1.49  | 1.66E-01 | 4.51E-01 | -5.62 |
| 1431902_PM_at   | Ttc23l                           | TTC23L  | 0.16  | 2.38 | 1.49  | 1.66E-01 | 4.51E-01 | -5.62 |
| 1418787_PM_at   | Mbl2                             | MBL2    | 0.19  | 2.31 | 1.49  | 1.66E-01 | 4.51E-01 | -5.62 |
| 1449449_PM_at   | Ptges                            | PTGES   | 0.20  | 2.82 | 1.49  | 1.66E-01 | 4.51E-01 | -5.62 |
| 1430374_PM_at   | Gm21464                          | NA      | 0.21  | 2.41 | 1.49  | 1.66E-01 | 4.51E-01 | -5.62 |
| 1421553_PM_at   | Epm2a                            | NA      | 0.22  | 3.09 | 1.49  | 1.66E-01 | 4.51E-01 | -5.62 |
| 1429191_PM_at   | Dhx33                            | DHX33   | 0.29  | 3.96 | 1.49  | 1.66E-01 | 4.51E-01 | -5.62 |
| 1426588_PM_at   | Tspan10                          | SPAN10  | 0.18  | 2.83 | 1.49  | 1.66E-01 | 4.51E-01 | -5.62 |
| 1450633_PM_at   | Calml4                           | CALML5  | 0.14  | 2.34 | 1.49  | 1.66E-01 | 4.51E-01 | -5.62 |
| 1441388_PM_at   | ---                              | NA      | 0.19  | 2.68 | 1.49  | 1.66E-01 | 4.51E-01 | -5.62 |
| 1430070_PM_at   | 1500035N22Rik                    | NA      | 0.18  | 2.82 | 1.49  | 1.66E-01 | 4.51E-01 | -5.62 |
| 1436284_PM_s_at | ---                              | NA      | 0.26  | 2.81 | 1.49  | 1.66E-01 | 4.51E-01 | -5.62 |

|                         |                        |          |       |      |       |          |          |       |
|-------------------------|------------------------|----------|-------|------|-------|----------|----------|-------|
| 1415761_PM_at           | Mrp52                  | MRPL52   | 0.31  | 3.08 | 1.49  | 1.66E-01 | 4.51E-01 | -5.62 |
| 1421834_PM_at           | Pip5k1b                | PIP5K1B  | 0.21  | 2.40 | 1.49  | 1.67E-01 | 4.51E-01 | -5.62 |
| 1440036_PM_x_at         | ---                    | NA       | 0.16  | 2.81 | 1.49  | 1.67E-01 | 4.51E-01 | -5.62 |
| 1446560_PM_at           | Prss23                 | PRSS23   | 0.39  | 2.91 | 1.49  | 1.67E-01 | 4.51E-01 | -5.62 |
| 1436818_PM_a_at         | Msi2                   | MSI2     | -0.64 | 4.76 | -1.49 | 1.67E-01 | 4.51E-01 | -5.62 |
| 1453675_PM_at           | Slc16a10               | SLC16A10 | 0.15  | 2.27 | 1.49  | 1.67E-01 | 4.51E-01 | -5.62 |
| 1422014_PM_at           | Foxp2                  | FOXP2    | 0.20  | 2.61 | 1.49  | 1.67E-01 | 4.51E-01 | -5.62 |
| 1444029_PM_at           | Parp11                 | PARP11   | 0.16  | 2.69 | 1.49  | 1.67E-01 | 4.52E-01 | -5.62 |
| 1457513_PM_at           | ---                    | NA       | 0.20  | 2.60 | 1.49  | 1.67E-01 | 4.52E-01 | -5.62 |
| 1446553_PM_at           | ---                    | NA       | 0.29  | 2.27 | 1.49  | 1.67E-01 | 4.52E-01 | -5.62 |
| 1459126_PM_at           | ---                    | NA       | 0.64  | 3.21 | 1.49  | 1.67E-01 | 4.52E-01 | -5.62 |
| 1458992_PM_at           | ---                    | NA       | 0.16  | 2.56 | 1.49  | 1.67E-01 | 4.52E-01 | -5.62 |
| 1444655_PM_at           | Snrpc                  | SNRPC    | 0.18  | 2.34 | 1.49  | 1.67E-01 | 4.52E-01 | -5.62 |
| 1447615_PM_at           | ---                    | NA       | 0.20  | 2.17 | 1.49  | 1.67E-01 | 4.52E-01 | -5.62 |
| 1431830_PM_at           | Zfp329                 | ZNF329   | -0.35 | 5.32 | -1.49 | 1.67E-01 | 4.52E-01 | -5.62 |
| 1427200_PM_at           | Zranb1                 | ZRANB1   | -0.29 | 2.81 | -1.49 | 1.67E-01 | 4.52E-01 | -5.62 |
| 1440581_PM_at           | Pirt                   | PIRT     | 0.15  | 2.52 | 1.49  | 1.67E-01 | 4.52E-01 | -5.62 |
| 1459838_PM_s_at         | Btbd11                 | BTBD11   | 1.04  | 4.62 | 1.49  | 1.67E-01 | 4.52E-01 | -5.62 |
| 1446541_PM_at           | Wdr95                  | NA       | 0.14  | 2.31 | 1.49  | 1.67E-01 | 4.52E-01 | -5.62 |
| 1442681_PM_at           | ---                    | NA       | 0.21  | 2.37 | 1.49  | 1.67E-01 | 4.52E-01 | -5.62 |
| 1453501_PM_at           | Hoxb1                  | HOXB1    | 0.15  | 2.26 | 1.49  | 1.67E-01 | 4.52E-01 | -5.62 |
| 1419832_PM_s_at         | Acpp                   | ACPP     | 0.22  | 2.37 | 1.49  | 1.67E-01 | 4.52E-01 | -5.62 |
| 1416437_PM_a_at         | Mapk8ip3               | MAPK8IP3 | -0.48 | 4.69 | -1.49 | 1.67E-01 | 4.52E-01 | -5.62 |
| 1436557_PM_at           | Krt73                  | KRT73    | -0.16 | 2.68 | -1.49 | 1.67E-01 | 4.52E-01 | -5.62 |
| 1427704_PM_a_at         | Galr1                  | GALR1    | 0.12  | 2.12 | 1.49  | 1.67E-01 | 4.52E-01 | -5.62 |
| 1453327_PM_at           | Krt24                  | KRT24    | 0.18  | 3.42 | 1.49  | 1.67E-01 | 4.52E-01 | -5.62 |
| 1445131_PM_at           | Fbxl13                 | FBXL13   | 0.19  | 2.54 | 1.49  | 1.67E-01 | 4.52E-01 | -5.62 |
| 1459273_PM_at           | Gm31513                | NA       | 0.11  | 2.20 | 1.49  | 1.67E-01 | 4.52E-01 | -5.62 |
| 1443761_PM_at           | Nrm                    | NRM      | 0.15  | 2.20 | 1.49  | 1.67E-01 | 4.52E-01 | -5.62 |
| 1454894_PM_at           | Smurf2                 | SMURF2   | 0.20  | 4.03 | 1.49  | 1.67E-01 | 4.52E-01 | -5.62 |
| 1450945_PM_at           | Prkca                  | PRKCA    | -1.12 | 6.50 | -1.49 | 1.67E-01 | 4.52E-01 | -5.62 |
| 1459938_PM_at           | C330024D21Rik          | NA       | 0.22  | 3.84 | 1.49  | 1.67E-01 | 4.52E-01 | -5.62 |
| 1440118_PM_at           | Slc25a39               | SLC25A39 | 0.13  | 2.40 | 1.49  | 1.67E-01 | 4.52E-01 | -5.62 |
| 1430285_PM_at           | Gm14057                | NA       | 0.19  | 1.99 | 1.49  | 1.67E-01 | 4.52E-01 | -5.62 |
| 1442475_PM_at           | D14Erttd574e           | NA       | 0.25  | 2.97 | 1.49  | 1.67E-01 | 4.52E-01 | -5.62 |
| 1447629_PM_at           | ---                    | NA       | 0.11  | 1.84 | 1.49  | 1.67E-01 | 4.52E-01 | -5.62 |
| 1429827_PM_at           | 1700010B08Rik          | NA       | 0.13  | 2.41 | 1.48  | 1.67E-01 | 4.52E-01 | -5.62 |
| 1425694_PM_at           | Tbx5                   | TBX5     | 0.15  | 2.30 | 1.49  | 1.67E-01 | 4.52E-01 | -5.62 |
| 1443084_PM_at           | Ctso                   | CTSO     | 0.27  | 2.42 | 1.48  | 1.67E-01 | 4.52E-01 | -5.62 |
| 1452622_PM_a_at         | LOC105242493 /// Tradd | TRADD    | 0.30  | 3.59 | 1.49  | 1.67E-01 | 4.52E-01 | -5.62 |
| 1443212_PM_at           | ---                    | NA       | 0.38  | 3.09 | 1.49  | 1.67E-01 | 4.52E-01 | -5.62 |
| 1424388_PM_at           | Cluap1                 | CLUAP1   | -0.57 | 6.11 | -1.48 | 1.67E-01 | 4.52E-01 | -5.62 |
| 1447580_PM_at           | ---                    | NA       | 1.03  | 7.32 | 1.48  | 1.67E-01 | 4.52E-01 | -5.62 |
| 1459004_PM_at           | ---                    | NA       | 0.16  | 2.24 | 1.48  | 1.67E-01 | 4.52E-01 | -5.62 |
| 1443632_PM_at           | Obscn                  | OBSCN    | 0.14  | 2.04 | 1.48  | 1.67E-01 | 4.52E-01 | -5.62 |
| 1454450_PM_at           | ---                    | NA       | 0.18  | 2.62 | 1.48  | 1.67E-01 | 4.52E-01 | -5.62 |
| 1445507_PM_at           | ---                    | NA       | 0.23  | 2.71 | 1.48  | 1.67E-01 | 4.53E-01 | -5.62 |
| 1451463_PM_at           | Prr5                   | PRR5     | 0.28  | 2.86 | 1.48  | 1.67E-01 | 4.53E-01 | -5.62 |
| 1439324_PM_at           | Tet3                   | TET3     | -0.25 | 3.22 | -1.48 | 1.68E-01 | 4.53E-01 | -5.62 |
| 1438797_PM_at           | Chst7                  | NA       | -0.21 | 3.22 | -1.48 | 1.68E-01 | 4.53E-01 | -5.62 |
| 1432678_PM_at           | ---                    | NA       | 0.12  | 2.12 | 1.48  | 1.68E-01 | 4.53E-01 | -5.62 |
| 1430262_PM_at           | 5330411111Rik          | NA       | 0.16  | 2.26 | 1.48  | 1.68E-01 | 4.53E-01 | -5.62 |
| 1439708_PM_at           | Myom3                  | MYOM3    | 0.17  | 2.52 | 1.48  | 1.68E-01 | 4.53E-01 | -5.62 |
| 1421048_PM_a_at         | Ypel1                  | YPEL1    | 0.27  | 3.20 | 1.48  | 1.68E-01 | 4.53E-01 | -5.62 |
| 1422015_PM_a_at         | Abcb8                  | ABCB8    | 0.31  | 2.95 | 1.48  | 1.68E-01 | 4.53E-01 | -5.62 |
| 1441030_PM_at           | ---                    | NA       | 0.19  | 2.22 | 1.48  | 1.68E-01 | 4.53E-01 | -5.62 |
| 1459780_PM_at           | Trp53                  | TP53     | 0.15  | 2.15 | 1.48  | 1.68E-01 | 4.53E-01 | -5.63 |
| 1427918_PM_a_at         | Rhoq                   | RHOQ     | -0.46 | 3.21 | -1.48 | 1.68E-01 | 4.53E-01 | -5.63 |
| 1436467_PM_at           | 3110039108Rik          | NA       | -0.32 | 3.00 | -1.48 | 1.68E-01 | 4.53E-01 | -5.63 |
| 1423614_PM_at           | Lrrc8c                 | LRRC8C   | -0.24 | 2.54 | -1.48 | 1.68E-01 | 4.53E-01 | -5.63 |
| 1447041_PM_at           | Nipa4                  | NIPAL4   | 0.16  | 2.21 | 1.48  | 1.68E-01 | 4.53E-01 | -5.63 |
| 1430522_PM_a_at         | Vamp5                  | VAMP5    | 0.19  | 3.54 | 1.48  | 1.68E-01 | 4.53E-01 | -5.63 |
| 1444212_PM_at           | ---                    | NA       | 0.21  | 2.51 | 1.48  | 1.68E-01 | 4.53E-01 | -5.63 |
| 1447162_PM_at           | ---                    | NA       | 0.23  | 2.98 | 1.48  | 1.68E-01 | 4.53E-01 | -5.63 |
| 1438180_PM_x_at         | Hax1                   | HAX1     | -0.96 | 6.14 | -1.48 | 1.68E-01 | 4.53E-01 | -5.63 |
| 1416070_PM_a_at         | Ddx18                  | DDX18    | -0.56 | 5.86 | -1.48 | 1.68E-01 | 4.53E-01 | -5.63 |
| 1446835_PM_at           | ---                    | NA       | 0.18  | 2.52 | 1.48  | 1.68E-01 | 4.53E-01 | -5.63 |
| 1447874_PM_x_at         | Smpd1                  | SMPD1    | -0.11 | 2.01 | -1.48 | 1.68E-01 | 4.53E-01 | -5.63 |
| AFFX-NonspecificGC18_at | ---                    | NA       | 0.11  | 2.15 | 1.48  | 1.68E-01 | 4.53E-01 | -5.63 |
| 1444766_PM_at           | Atxn7l1                | ATXN7L1  | 0.13  | 2.47 | 1.48  | 1.68E-01 | 4.53E-01 | -5.63 |
| 1458603_PM_at           | ---                    | NA       | 0.16  | 2.15 | 1.48  | 1.68E-01 | 4.53E-01 | -5.63 |
| 1425070_PM_at           | Ntrk3                  | NA       | 0.40  | 3.70 | 1.48  | 1.68E-01 | 4.53E-01 | -5.63 |
| 1422441_PM_x_at         | Cdk4                   | CDK4     | 0.21  | 2.83 | 1.48  | 1.68E-01 | 4.53E-01 | -5.63 |
| 1435280_PM_at           | Pde4d                  | NA       | -0.39 | 3.22 | -1.48 | 1.68E-01 | 4.53E-01 | -5.63 |
| 1427723_PM_at           | Gdf11                  | NA       | 0.27  | 2.68 | 1.48  | 1.68E-01 | 4.53E-01 | -5.63 |

|                 |                               |          |       |      |       |          |          |       |
|-----------------|-------------------------------|----------|-------|------|-------|----------|----------|-------|
| 1441549_PM_at   | ---                           | NA       | 0.13  | 2.45 | 1.48  | 1.68E-01 | 4.53E-01 | -5.63 |
| 1453650_PM_at   | 4930413F20Rik                 | NA       | 0.15  | 2.21 | 1.48  | 1.68E-01 | 4.53E-01 | -5.63 |
| 1439796_PM_at   | Clca4b                        | CLCA4    | 0.16  | 2.34 | 1.48  | 1.68E-01 | 4.53E-01 | -5.63 |
| 1452351_PM_at   | Parp4                         | PARP4    | 0.16  | 2.35 | 1.48  | 1.68E-01 | 4.53E-01 | -5.63 |
| 1445783_PM_at   | ---                           | NA       | 0.12  | 2.10 | 1.48  | 1.68E-01 | 4.53E-01 | -5.63 |
| 1444910_PM_at   | ---                           | NA       | 0.20  | 2.35 | 1.48  | 1.68E-01 | 4.53E-01 | -5.63 |
| 1428614_PM_at   | Ldhd                          | LDHD     | 0.28  | 2.71 | 1.48  | 1.68E-01 | 4.53E-01 | -5.63 |
| 1437765_PM_at   | Cpeb3                         | CPEB3    | -0.51 | 5.32 | -1.48 | 1.68E-01 | 4.53E-01 | -5.63 |
| 1430987_PM_s_at | Wbp11                         | WBP11    | -0.39 | 7.33 | -1.48 | 1.68E-01 | 4.53E-01 | -5.63 |
| 1426576_PM_at   | Sgms1                         | SGMS1    | -0.34 | 3.09 | -1.48 | 1.68E-01 | 4.53E-01 | -5.63 |
| 1450927_PM_at   | Lztr1                         | LZTR1    | -0.29 | 2.94 | -1.48 | 1.68E-01 | 4.53E-01 | -5.63 |
| 1450630_PM_at   | Qtrt1                         | QTRT1    | -0.23 | 2.71 | -1.48 | 1.68E-01 | 4.53E-01 | -5.63 |
| 1452527_PM_a_at | P2rx4                         | P2RX4    | 0.14  | 2.45 | 1.48  | 1.68E-01 | 4.53E-01 | -5.63 |
| 1452038_PM_at   | Capz1                         | NA       | 0.15  | 2.92 | 1.48  | 1.68E-01 | 4.53E-01 | -5.63 |
| 1449290_PM_at   | Dpys5                         | DPYSL5   | 0.16  | 2.51 | 1.48  | 1.68E-01 | 4.53E-01 | -5.63 |
| 1450284_PM_at   | Pde3a                         | PDE3A    | 0.16  | 3.17 | 1.48  | 1.68E-01 | 4.53E-01 | -5.63 |
| 1416664_PM_at   | Cdc20                         | CDC20    | 0.16  | 2.39 | 1.48  | 1.68E-01 | 4.53E-01 | -5.63 |
| 1449689_PM_at   | C81600                        | NA       | 0.18  | 2.80 | 1.48  | 1.68E-01 | 4.53E-01 | -5.63 |
| 1460666_PM_a_at | Ebf3                          | EBF3     | 0.18  | 2.14 | 1.48  | 1.68E-01 | 4.53E-01 | -5.63 |
| 1420456_PM_at   | Gcm2                          | GCM2     | 0.21  | 2.46 | 1.48  | 1.68E-01 | 4.53E-01 | -5.63 |
| 1445736_PM_at   | ---                           | NA       | 0.24  | 2.44 | 1.48  | 1.68E-01 | 4.53E-01 | -5.63 |
| 1436693_PM_x_at | Slc35e4                       | SLC35E4  | 0.34  | 4.63 | 1.48  | 1.68E-01 | 4.53E-01 | -5.63 |
| 1421521_PM_at   | 4930430A15Rik                 | NA       | 0.35  | 2.38 | 1.48  | 1.68E-01 | 4.53E-01 | -5.63 |
| 1456338_PM_at   | Slc38a9                       | SLC38A9  | -0.29 | 3.31 | -1.48 | 1.68E-01 | 4.53E-01 | -5.63 |
| 1422879_PM_at   | Sypl                          | SYPL1    | 0.15  | 2.74 | 1.48  | 1.68E-01 | 4.53E-01 | -5.63 |
| 1418995_PM_at   | Neurod2                       | NEUROD2  | 0.31  | 4.02 | 1.48  | 1.68E-01 | 4.54E-01 | -5.63 |
| 1439033_PM_at   | Zcchc7                        | ZCCHC7   | -0.69 | 3.57 | -1.48 | 1.68E-01 | 4.54E-01 | -5.63 |
| 1441713_PM_at   | Anapc7                        | ANAPC7   | 0.36  | 2.50 | 1.48  | 1.68E-01 | 4.54E-01 | -5.63 |
| 1415723_PM_at   | Eif5 /// LOC102641436         | EIF5     | -0.72 | 7.59 | -1.48 | 1.68E-01 | 4.54E-01 | -5.63 |
| 1435012_PM_x_at | Cela3a /// Cela3b             | CELA3B   | 0.13  | 2.11 | 1.48  | 1.68E-01 | 4.54E-01 | -5.63 |
| 1419247_PM_at   | Rgs2                          | RGS2     | -0.66 | 4.68 | -1.48 | 1.68E-01 | 4.54E-01 | -5.63 |
| 1456183_PM_at   | Oog4                          | PRAMEF9  | 0.16  | 2.08 | 1.48  | 1.69E-01 | 4.54E-01 | -5.63 |
| 1432532_PM_at   | 0610025J13Rik                 | NA       | 0.16  | 2.43 | 1.48  | 1.69E-01 | 4.54E-01 | -5.63 |
| 1455449_PM_at   | 2010107G12Rik                 | NA       | 0.14  | 2.23 | 1.48  | 1.69E-01 | 4.54E-01 | -5.63 |
| 1437304_PM_at   | Cblb                          | CBLB     | 0.23  | 2.74 | 1.48  | 1.69E-01 | 4.54E-01 | -5.63 |
| 1455678_PM_at   | Sema4b                        | SEMA4B   | -0.28 | 2.98 | -1.48 | 1.69E-01 | 4.54E-01 | -5.63 |
| 1430266_PM_at   | 1700003D09Rik                 | NA       | 0.16  | 2.24 | 1.48  | 1.69E-01 | 4.54E-01 | -5.63 |
| 1440630_PM_at   | Nlgn1                         | NLGN1    | -0.46 | 2.34 | -1.48 | 1.69E-01 | 4.54E-01 | -5.63 |
| 1422259_PM_a_at | Ccr5                          | CCR2     | 0.14  | 2.06 | 1.48  | 1.69E-01 | 4.54E-01 | -5.63 |
| 1423959_PM_at   | Ropn1                         | ROPN1L   | 0.21  | 2.57 | 1.48  | 1.69E-01 | 4.54E-01 | -5.63 |
| 1450560_PM_a_at | Ppp2r5d                       | PPP2R5D  | 0.26  | 3.67 | 1.48  | 1.69E-01 | 4.54E-01 | -5.63 |
| 1426706_PM_s_at | Xylb                          | XYLB     | 0.37  | 3.52 | 1.48  | 1.69E-01 | 4.54E-01 | -5.63 |
| 1442838_PM_at   | Gm11691                       | NA       | 0.11  | 2.25 | 1.48  | 1.69E-01 | 4.54E-01 | -5.63 |
| 1450745_PM_at   | C1galt1                       | C1GALT1  | -0.58 | 3.42 | -1.48 | 1.69E-01 | 4.54E-01 | -5.63 |
| 1451760_PM_s_at | 2010001E11Rik ///<br>A1317395 | MFSD4B   | 0.19  | 2.21 | 1.48  | 1.69E-01 | 4.54E-01 | -5.63 |
| 1456957_PM_at   | ---                           | NA       | 0.36  | 2.77 | 1.48  | 1.69E-01 | 4.54E-01 | -5.63 |
| 1430831_PM_at   | Lymr1                         | NA       | 0.14  | 2.64 | 1.48  | 1.69E-01 | 4.54E-01 | -5.63 |
| 1453605_PM_s_at | Ccdc91                        | CCDC91   | 0.32  | 2.56 | 1.48  | 1.69E-01 | 4.54E-01 | -5.63 |
| 1424427_PM_at   | Tada1                         | TADA1    | -0.44 | 3.06 | -1.48 | 1.69E-01 | 4.54E-01 | -5.63 |
| 1430793_PM_at   | 4931429I11Rik                 | C11orf63 | 0.13  | 2.47 | 1.48  | 1.69E-01 | 4.54E-01 | -5.63 |
| 1446389_PM_at   | ---                           | NA       | 0.17  | 2.10 | 1.48  | 1.69E-01 | 4.54E-01 | -5.63 |
| 1450921_PM_at   | Aptx                          | APTX     | 0.18  | 2.03 | 1.48  | 1.69E-01 | 4.54E-01 | -5.63 |
| 1454727_PM_at   | Afap1l1                       | AFAP1L1  | 0.21  | 3.01 | 1.48  | 1.69E-01 | 4.54E-01 | -5.63 |
| 1419329_PM_at   | Sorbs3                        | SORBS3   | 0.21  | 2.88 | 1.48  | 1.69E-01 | 4.54E-01 | -5.63 |
| 1440139_PM_at   | ---                           | NA       | 0.22  | 2.54 | 1.48  | 1.69E-01 | 4.54E-01 | -5.63 |
| 1444700_PM_at   | ---                           | NA       | 0.23  | 3.14 | 1.48  | 1.69E-01 | 4.54E-01 | -5.63 |
| 1434606_PM_at   | Erbp3                         | ERBP3    | 0.25  | 2.76 | 1.48  | 1.69E-01 | 4.54E-01 | -5.63 |
| 1453476_PM_at   | ---                           | NA       | 0.26  | 2.77 | 1.48  | 1.69E-01 | 4.54E-01 | -5.63 |
| 1432468_PM_at   | Lcn9                          | LCN9     | 0.27  | 4.08 | 1.48  | 1.69E-01 | 4.54E-01 | -5.63 |
| 1460448_PM_s_at | LOC102641273 ///Ttc14         | TTC14    | -0.41 | 3.48 | -1.48 | 1.69E-01 | 4.55E-01 | -5.63 |
| 1444827_PM_at   | ---                           | NA       | 0.16  | 2.57 | 1.48  | 1.69E-01 | 4.55E-01 | -5.63 |
| 1459316_PM_at   | ---                           | NA       | 0.24  | 3.26 | 1.48  | 1.69E-01 | 4.55E-01 | -5.63 |
| 1436401_PM_at   | Ankdd1b                       | NA       | -0.43 | 3.11 | -1.48 | 1.69E-01 | 4.55E-01 | -5.63 |
| 1431249_PM_at   | ---                           | NA       | 0.15  | 2.83 | 1.48  | 1.69E-01 | 4.55E-01 | -5.63 |
| 1459556_PM_at   | ---                           | NA       | 0.18  | 2.38 | 1.48  | 1.69E-01 | 4.55E-01 | -5.63 |
| 1456611_PM_at   | Fam13a                        | FAM13A   | 0.26  | 3.36 | 1.48  | 1.69E-01 | 4.55E-01 | -5.63 |
| 1446846_PM_at   | Gm11944                       | NA       | 0.14  | 2.68 | 1.48  | 1.69E-01 | 4.55E-01 | -5.63 |
| 1440610_PM_at   | ---                           | NA       | 0.13  | 2.22 | 1.48  | 1.69E-01 | 4.55E-01 | -5.63 |
| 1451397_PM_at   | Gigyf2                        | GIGYF2   | -0.26 | 2.30 | -1.48 | 1.69E-01 | 4.55E-01 | -5.63 |
| 1432816_PM_s_at | Rbbp6                         | RBBP6    | 0.13  | 3.31 | 1.48  | 1.69E-01 | 4.55E-01 | -5.63 |
| 1419202_PM_at   | Cst7                          | CST7     | 0.14  | 2.31 | 1.48  | 1.69E-01 | 4.55E-01 | -5.63 |
| 1440529_PM_at   | ---                           | NA       | 0.14  | 2.49 | 1.48  | 1.69E-01 | 4.55E-01 | -5.63 |
| 1446567_PM_at   | ---                           | NA       | 0.19  | 2.68 | 1.48  | 1.69E-01 | 4.55E-01 | -5.63 |
| 1438231_PM_at   | Foxp2                         | FOXP2    | 0.26  | 2.90 | 1.48  | 1.69E-01 | 4.55E-01 | -5.63 |

|                 |                  |          |       |      |       |          |          |       |
|-----------------|------------------|----------|-------|------|-------|----------|----------|-------|
| 1437938_PM_x_at | Dnm2             | DNM2     | 0.18  | 2.83 | 1.48  | 1.69E-01 | 4.55E-01 | -5.63 |
| 1426414_PM_a_at | Rnf7             | RNF7     | 0.33  | 3.60 | 1.48  | 1.69E-01 | 4.55E-01 | -5.63 |
| 1419753_PM_at   | Nfx1             | NFX1     | -0.15 | 2.29 | -1.48 | 1.69E-01 | 4.55E-01 | -5.63 |
| 1428947_PM_at   | Mzb1             | MZB1     | 0.14  | 2.63 | 1.48  | 1.69E-01 | 4.55E-01 | -5.63 |
| 1427735_PM_a_at | Acta1            | ACTA1    | 0.19  | 2.56 | 1.48  | 1.69E-01 | 4.55E-01 | -5.63 |
| 1460691_PM_at   | Zfp598           | ZNF598   | 0.26  | 4.86 | 1.48  | 1.69E-01 | 4.55E-01 | -5.63 |
| 1421503_PM_at   | Pcdh15           | PCDH15   | 0.27  | 2.32 | 1.48  | 1.69E-01 | 4.55E-01 | -5.63 |
| 1426118_PM_a_at | Tomm40           | TOMM40   | 0.34  | 3.18 | 1.48  | 1.69E-01 | 4.55E-01 | -5.63 |
| 1432452_PM_at   | 1700054019Rik    | NA       | 0.21  | 2.73 | 1.48  | 1.69E-01 | 4.55E-01 | -5.63 |
| 1438114_PM_x_at | Efs              | NA       | 0.64  | 3.43 | 1.48  | 1.69E-01 | 4.55E-01 | -5.63 |
| 1456126_PM_at   | Malt1            | MALT1    | 0.12  | 2.85 | 1.48  | 1.69E-01 | 4.55E-01 | -5.63 |
| 1444789_PM_at   | ---              | NA       | 0.17  | 2.18 | 1.48  | 1.69E-01 | 4.55E-01 | -5.63 |
| 1454284_PM_at   | Slc25a25         | SLC25A25 | 0.13  | 2.38 | 1.48  | 1.70E-01 | 4.55E-01 | -5.63 |
| 1419764_PM_at   | Chi3             | CHIA     | 0.12  | 2.16 | 1.48  | 1.70E-01 | 4.55E-01 | -5.63 |
| 1459752_PM_at   | Mcc              | MCC      | 0.12  | 2.69 | 1.48  | 1.70E-01 | 4.55E-01 | -5.63 |
| 1426632_PM_at   | Kctd14           | KCTD14   | 0.19  | 2.50 | 1.48  | 1.70E-01 | 4.55E-01 | -5.63 |
| 1436970_PM_a_at | Pdgfrb           | PDGFRB   | -0.98 | 3.15 | -1.48 | 1.70E-01 | 4.55E-01 | -5.63 |
| 1434035_PM_at   | Dnajb6           | DNAJB6   | -0.21 | 2.76 | -1.48 | 1.70E-01 | 4.55E-01 | -5.64 |
| 1419956_PM_at   | C77144           | NA       | 0.13  | 2.32 | 1.48  | 1.70E-01 | 4.55E-01 | -5.64 |
| 1434997_PM_at   | Cdk19            | CDK19    | -0.20 | 2.64 | -1.48 | 1.70E-01 | 4.55E-01 | -5.64 |
| 1446998_PM_at   | ---              | NA       | 0.33  | 2.72 | 1.48  | 1.70E-01 | 4.55E-01 | -5.64 |
| 1457272_PM_at   | ---              | NA       | -0.37 | 3.66 | -1.48 | 1.70E-01 | 4.55E-01 | -5.64 |
| 1444876_PM_at   | ---              | NA       | 0.13  | 3.17 | 1.48  | 1.70E-01 | 4.55E-01 | -5.64 |
| 1422803_PM_at   | Fstl3            | FSTL3    | 0.14  | 3.22 | 1.48  | 1.70E-01 | 4.55E-01 | -5.64 |
| 1455878_PM_at   | Dancr            | NA       | -0.25 | 2.48 | -1.48 | 1.70E-01 | 4.55E-01 | -5.64 |
| 1442304_PM_at   | Gm35438          | NA       | 0.18  | 2.28 | 1.48  | 1.70E-01 | 4.55E-01 | -5.64 |
| 1444525_PM_at   | ---              | NA       | 0.26  | 2.76 | 1.48  | 1.70E-01 | 4.55E-01 | -5.64 |
| 1445676_PM_at   | Kcnn2            | NA       | 0.25  | 2.76 | 1.48  | 1.70E-01 | 4.55E-01 | -5.64 |
| 1446635_PM_at   | D13Ert476e       | NA       | 0.21  | 2.19 | 1.48  | 1.70E-01 | 4.55E-01 | -5.64 |
| 1444634_PM_at   | Nsun3            | NSUN3    | -0.24 | 2.31 | -1.48 | 1.70E-01 | 4.55E-01 | -5.64 |
| 1430165_PM_at   | Stk17b           | STK17B   | 0.22  | 2.69 | 1.48  | 1.70E-01 | 4.55E-01 | -5.64 |
| 1439598_PM_at   | ---              | NA       | 0.16  | 2.56 | 1.47  | 1.70E-01 | 4.56E-01 | -5.64 |
| 1420650_PM_at   | Zfhx3            | ZFHX3    | 0.34  | 2.41 | 1.47  | 1.70E-01 | 4.56E-01 | -5.64 |
| 1427086_PM_at   | ---              | NA       | -0.31 | 5.26 | -1.47 | 1.70E-01 | 4.56E-01 | -5.64 |
| 1443895_PM_at   | Gm6225           | NA       | 0.14  | 2.28 | 1.47  | 1.70E-01 | 4.56E-01 | -5.64 |
| 1430079_PM_at   | 5033406O09Rik    | NA       | 0.24  | 2.45 | 1.47  | 1.70E-01 | 4.56E-01 | -5.64 |
| 1438768_PM_at   | ---              | NA       | 0.26  | 3.59 | 1.47  | 1.70E-01 | 4.56E-01 | -5.64 |
| 1454432_PM_at   | ---              | NA       | 0.20  | 2.46 | 1.47  | 1.70E-01 | 4.56E-01 | -5.64 |
| 1434845_PM_at   | Gan              | GAN      | -0.38 | 3.35 | -1.47 | 1.70E-01 | 4.56E-01 | -5.64 |
| 1455964_PM_at   | Cdk12            | NA       | -0.31 | 5.42 | -1.47 | 1.70E-01 | 4.56E-01 | -5.64 |
| 1449977_PM_at   | Egr4             | EGR4     | 0.17  | 2.33 | 1.47  | 1.70E-01 | 4.56E-01 | -5.64 |
| 1453390_PM_at   | ---              | NA       | 0.27  | 2.78 | 1.47  | 1.70E-01 | 4.56E-01 | -5.64 |
| 1443027_PM_at   | ---              | NA       | 0.15  | 2.31 | 1.47  | 1.70E-01 | 4.56E-01 | -5.64 |
| 1440537_PM_at   | Kcnn2            | KCNV2    | 0.12  | 2.07 | 1.47  | 1.70E-01 | 4.56E-01 | -5.64 |
| 1441500_PM_at   | ---              | NA       | -0.17 | 2.27 | -1.47 | 1.70E-01 | 4.56E-01 | -5.64 |
| 1422250_PM_at   | Map3k2           | MAP3K2   | -0.14 | 2.62 | -1.47 | 1.70E-01 | 4.56E-01 | -5.64 |
| 1427431_PM_at   | ---              | NA       | 0.19  | 2.50 | 1.47  | 1.70E-01 | 4.56E-01 | -5.64 |
| 1419052_PM_at   | Ovol1            | OVOL1    | 0.26  | 2.79 | 1.47  | 1.70E-01 | 4.56E-01 | -5.64 |
| 1435622_PM_at   | Hs3st3a1         | HS3ST3B1 | 0.20  | 2.30 | 1.47  | 1.70E-01 | 4.56E-01 | -5.64 |
| 1426298_PM_at   | Irx2             | IRX2     | 0.15  | 2.57 | 1.47  | 1.70E-01 | 4.56E-01 | -5.64 |
| 1421361_PM_at   | Grk1             | GRK1     | 0.20  | 2.58 | 1.47  | 1.70E-01 | 4.56E-01 | -5.64 |
| 1429292_PM_a_at | Slc52a3          | SLC52A3  | 0.21  | 3.19 | 1.47  | 1.70E-01 | 4.56E-01 | -5.64 |
| 1451724_PM_at   | Ankmy2           | ANKMY2   | 0.37  | 3.00 | 1.47  | 1.70E-01 | 4.56E-01 | -5.64 |
| 1424468_PM_s_at | Phldb1           | PHLDB1   | 0.21  | 2.94 | 1.47  | 1.70E-01 | 4.56E-01 | -5.64 |
| 1421979_PM_at   | Phex             | PEHEX    | 0.19  | 2.15 | 1.47  | 1.70E-01 | 4.56E-01 | -5.64 |
| 1456691_PM_s_at | Srd5a3           | SRD5A3   | -0.18 | 2.40 | -1.47 | 1.70E-01 | 4.56E-01 | -5.64 |
| 1433765_PM_at   | Ube2o            | UBE2O    | -0.16 | 2.37 | -1.47 | 1.70E-01 | 4.56E-01 | -5.64 |
| 1431150_PM_at   | Prr30            | PRR30    | 0.13  | 2.14 | 1.47  | 1.70E-01 | 4.56E-01 | -5.64 |
| 1435229_PM_at   | Gramd1b          | GRAMD1B  | -0.31 | 7.64 | -1.47 | 1.71E-01 | 4.56E-01 | -5.64 |
| 1435623_PM_at   | Rnft2            | RNFT2    | -0.26 | 4.71 | -1.47 | 1.71E-01 | 4.56E-01 | -5.64 |
| 1439173_PM_at   | Hook1            | HOK1     | 0.41  | 2.88 | 1.47  | 1.71E-01 | 4.57E-01 | -5.64 |
| 1440563_PM_at   | ---              | NA       | 0.28  | 2.25 | 1.47  | 1.71E-01 | 4.57E-01 | -5.64 |
| 1429344_PM_at   | ---              | NA       | -0.30 | 3.20 | -1.47 | 1.71E-01 | 4.57E-01 | -5.64 |
| 1450423_PM_s_at | Rpf2             | RPF2     | -0.60 | 5.27 | -1.47 | 1.71E-01 | 4.57E-01 | -5.64 |
| 1428049_PM_a_at | Nudt16l1         | NUDT16L1 | -0.30 | 2.88 | -1.47 | 1.71E-01 | 4.57E-01 | -5.64 |
| 1424012_PM_at   | Ttc30a1          | TTC30A   | -0.14 | 2.55 | -1.47 | 1.71E-01 | 4.57E-01 | -5.64 |
| 1416298_PM_at   | Mmp9             | MMP9     | 0.19  | 2.38 | 1.47  | 1.71E-01 | 4.57E-01 | -5.64 |
| 1421373_PM_at   | Cox4i2           | COX4I2   | 0.20  | 2.45 | 1.47  | 1.71E-01 | 4.57E-01 | -5.64 |
| 1436287_PM_at   | Apela /// Trim61 | APELA    | 0.22  | 2.19 | 1.47  | 1.71E-01 | 4.57E-01 | -5.64 |
| 1443569_PM_at   | Fam161a          | FAM161A  | 0.43  | 5.31 | 1.47  | 1.71E-01 | 4.57E-01 | -5.64 |
| 1440644_PM_at   | ---              | NA       | -0.18 | 2.92 | -1.47 | 1.71E-01 | 4.57E-01 | -5.64 |
| 1456781_PM_at   | ---              | NA       | 0.26  | 2.83 | 1.47  | 1.71E-01 | 4.57E-01 | -5.64 |
| 1422215_PM_at   | ---              | NA       | 0.31  | 2.74 | 1.47  | 1.71E-01 | 4.57E-01 | -5.64 |
| 1451118_PM_a_at | Fam53a           | FAM53A   | 0.17  | 2.84 | 1.47  | 1.71E-01 | 4.57E-01 | -5.64 |
| 1417148_PM_at   | Pdgfrb           | PDGFRB   | 0.32  | 4.13 | 1.47  | 1.71E-01 | 4.57E-01 | -5.64 |

|                 |                      |          |       |       |       |          |          |       |
|-----------------|----------------------|----------|-------|-------|-------|----------|----------|-------|
| 1418850_PM_at   | Epc1                 | EPC1     | -0.76 | 4.85  | -1.47 | 1.71E-01 | 4.57E-01 | -5.64 |
| 1435278_PM_at   | Sft2d3               | SFT2D3   | -0.50 | 2.93  | -1.47 | 1.71E-01 | 4.57E-01 | -5.64 |
| 1420945_PM_at   | Atrx                 | ATRX     | -0.48 | 6.04  | -1.47 | 1.71E-01 | 4.57E-01 | -5.64 |
| 1425567_PM_a_at | Anxa5                | ANXA5    | -0.46 | 3.69  | -1.47 | 1.71E-01 | 4.57E-01 | -5.64 |
| 1455818_PM_at   | 4930427A07Rik        | C14orf80 | -0.24 | 2.60  | -1.47 | 1.71E-01 | 4.57E-01 | -5.64 |
| 1439620_PM_at   | Car13                | CA13     | -0.19 | 2.26  | -1.47 | 1.71E-01 | 4.57E-01 | -5.64 |
| 1443023_PM_at   | Ears2                | NA       | -0.17 | 2.18  | -1.47 | 1.71E-01 | 4.57E-01 | -5.64 |
| 1446600_PM_at   | ---                  | NA       | 0.11  | 2.20  | 1.47  | 1.71E-01 | 4.57E-01 | -5.64 |
| 1432040_PM_at   | 4933417013Rik        | NA       | 0.12  | 2.14  | 1.47  | 1.71E-01 | 4.57E-01 | -5.64 |
| 1427921_PM_s_at | Cmc2                 | CMC2     | 0.19  | 2.49  | 1.47  | 1.71E-01 | 4.57E-01 | -5.64 |
| 1430843_PM_at   | Gad1                 | GADL1    | 0.21  | 2.41  | 1.47  | 1.71E-01 | 4.57E-01 | -5.64 |
| 1441342_PM_at   | Dpp4                 | DPP4     | 0.23  | 2.62  | 1.47  | 1.71E-01 | 4.57E-01 | -5.64 |
| 1452562_PM_at   | Kdm5d                | NA       | 0.36  | 4.63  | 1.47  | 1.71E-01 | 4.57E-01 | -5.64 |
| 1421324_PM_a_at | Akt2                 | AKT2     | 0.67  | 4.27  | 1.47  | 1.71E-01 | 4.57E-01 | -5.64 |
| 1426322_PM_a_at | Kcnmb2               | KCNMB2   | 0.18  | 2.27  | 1.47  | 1.71E-01 | 4.57E-01 | -5.64 |
| 1420652_PM_at   | Ate1                 | ATE1     | -0.49 | 3.27  | -1.47 | 1.71E-01 | 4.57E-01 | -5.64 |
| 1425481_PM_at   | Cnot6l               | CNOT6L   | -0.48 | 4.16  | -1.47 | 1.71E-01 | 4.57E-01 | -5.64 |
| 1421589_PM_at   | Krt31                | KRT33B   | 0.15  | 2.50  | 1.47  | 1.71E-01 | 4.57E-01 | -5.64 |
| 1446790_PM_at   | C78948               | NA       | 0.15  | 2.39  | 1.47  | 1.71E-01 | 4.57E-01 | -5.64 |
| 1432854_PM_at   | ---                  | NA       | 0.16  | 2.26  | 1.47  | 1.71E-01 | 4.57E-01 | -5.64 |
| 1444709_PM_at   | Inv5                 | INVS     | 0.17  | 2.40  | 1.47  | 1.71E-01 | 4.57E-01 | -5.64 |
| 1446762_PM_at   | ---                  | NA       | 0.17  | 2.83  | 1.47  | 1.71E-01 | 4.57E-01 | -5.64 |
| 1453066_PM_at   | 2510022D24Rik        | NA       | 0.18  | 2.38  | 1.47  | 1.71E-01 | 4.57E-01 | -5.64 |
| 1455115_PM_a_at | Crb3                 | CRB3     | 0.20  | 3.15  | 1.47  | 1.71E-01 | 4.57E-01 | -5.64 |
| 1417104_PM_at   | Emp3                 | EMP3     | 0.20  | 2.87  | 1.47  | 1.71E-01 | 4.57E-01 | -5.64 |
| 1422303_PM_a_at | Tnfrsf18             | TNFRSF18 | 0.23  | 2.36  | 1.47  | 1.71E-01 | 4.57E-01 | -5.64 |
| 1452656_PM_at   | Zdhc2                | ZDHC2    | 0.49  | 2.83  | 1.47  | 1.71E-01 | 4.57E-01 | -5.64 |
| 1429583_PM_at   | Pet100               | PET100   | -0.36 | 2.87  | -1.47 | 1.71E-01 | 4.57E-01 | -5.64 |
| 1416338_PM_at   | Sh3gl1               | SH3GL1   | 0.17  | 2.59  | 1.47  | 1.71E-01 | 4.57E-01 | -5.64 |
| 1446992_PM_at   | ---                  | NA       | 0.20  | 2.17  | 1.47  | 1.71E-01 | 4.57E-01 | -5.64 |
| 1440671_PM_at   | ---                  | NA       | 0.14  | 2.12  | 1.47  | 1.71E-01 | 4.57E-01 | -5.64 |
| 1425716_PM_s_at | Bak1                 | BAK1     | 0.28  | 2.43  | 1.47  | 1.71E-01 | 4.57E-01 | -5.64 |
| 1451144_PM_at   | Brix1                | BRX1     | -0.57 | 3.83  | -1.47 | 1.71E-01 | 4.57E-01 | -5.64 |
| 1458627_PM_at   | ---                  | NA       | 0.31  | 3.09  | 1.47  | 1.71E-01 | 4.57E-01 | -5.64 |
| 1430691_PM_at   | ---                  | NA       | 0.18  | 2.25  | 1.47  | 1.71E-01 | 4.57E-01 | -5.64 |
| 1418068_PM_at   | Ndufa10              | NDUFA10  | -0.22 | 3.89  | -1.47 | 1.71E-01 | 4.57E-01 | -5.64 |
| 1435839_PM_at   | Gm7694               | C1orf226 | -0.20 | 2.85  | -1.47 | 1.71E-01 | 4.57E-01 | -5.64 |
| 1442485_PM_at   | ---                  | NA       | 0.38  | 2.65  | 1.47  | 1.71E-01 | 4.57E-01 | -5.64 |
| 1434273_PM_at   | Fam174b              | FAM174B  | -0.28 | 4.42  | -1.47 | 1.71E-01 | 4.57E-01 | -5.64 |
| 1418191_PM_at   | Usp18                | USP41    | 0.16  | 2.31  | 1.47  | 1.71E-01 | 4.57E-01 | -5.64 |
| 1418336_PM_at   | Afg3l1               | NA       | 0.16  | 3.72  | 1.47  | 1.71E-01 | 4.57E-01 | -5.64 |
| 1436035_PM_at   | Plekhd1              | PLEKHD1  | 0.27  | 3.01  | 1.47  | 1.71E-01 | 4.57E-01 | -5.64 |
| 1419035_PM_s_at | Csnk2a1 /// Gm10031  | CSNK2A3  | 0.35  | 3.91  | 1.47  | 1.72E-01 | 4.57E-01 | -5.64 |
| 1417477_PM_at   | Natd1                | NATD1    | -0.44 | 3.11  | -1.47 | 1.72E-01 | 4.58E-01 | -5.64 |
| 1445702_PM_x_at | Plpp6                | PLPP6    | -0.15 | 2.37  | -1.47 | 1.72E-01 | 4.58E-01 | -5.64 |
| 1424621_PM_at   | Krcc1                | KRCC1    | -0.53 | 3.24  | -1.47 | 1.72E-01 | 4.58E-01 | -5.64 |
| 1432939_PM_at   | Gm31395              | NA       | 0.14  | 2.29  | 1.47  | 1.72E-01 | 4.58E-01 | -5.64 |
| 1453171_PM_s_at | Ppm1a                | NA       | -0.30 | 2.54  | -1.47 | 1.72E-01 | 4.58E-01 | -5.64 |
| 1431355_PM_s_at | Trpm7                | TRPM7    | 0.75  | 6.53  | 1.47  | 1.72E-01 | 4.58E-01 | -5.65 |
| 1456111_PM_at   | Nxpe4                | NXPE4    | -0.49 | 3.17  | -1.47 | 1.72E-01 | 4.58E-01 | -5.65 |
| 1425013_PM_at   | Slc25a2              | SLC25A2  | 0.25  | 2.32  | 1.47  | 1.72E-01 | 4.58E-01 | -5.65 |
| 1424820_PM_a_at | Ndfip1               | NA       | -0.41 | 10.67 | -1.47 | 1.72E-01 | 4.58E-01 | -5.65 |
| 1449216_PM_at   | Itgae                | ITGAE    | -0.18 | 2.75  | -1.47 | 1.72E-01 | 4.58E-01 | -5.65 |
| 1442933_PM_at   | ---                  | NA       | 0.20  | 2.74  | 1.47  | 1.72E-01 | 4.58E-01 | -5.65 |
| 1455006_PM_at   | Cox14                | COX14    | 0.23  | 5.76  | 1.47  | 1.72E-01 | 4.58E-01 | -5.65 |
| 1422792_PM_at   | Pafah1b2             | PAFAH1B2 | -0.50 | 7.04  | -1.47 | 1.72E-01 | 4.58E-01 | -5.65 |
| 1448127_PM_at   | Rrm1                 | RRM1     | 0.29  | 2.78  | 1.47  | 1.72E-01 | 4.58E-01 | -5.65 |
| 1435507_PM_x_at | Prss2                | PRSS2    | 0.14  | 2.34  | 1.47  | 1.72E-01 | 4.58E-01 | -5.65 |
| 1454635_PM_at   | Fbxl3                | FBXL3    | -0.45 | 7.13  | -1.47 | 1.72E-01 | 4.58E-01 | -5.65 |
| 1430128_PM_a_at | Reep6                | REEP6    | 0.30  | 4.12  | 1.47  | 1.72E-01 | 4.58E-01 | -5.65 |
| 1420738_PM_at   | Mzf1                 | NA       | 0.14  | 2.53  | 1.47  | 1.72E-01 | 4.58E-01 | -5.65 |
| 1430952_PM_at   | ---                  | NA       | 0.44  | 3.48  | 1.47  | 1.72E-01 | 4.58E-01 | -5.65 |
| 1428048_PM_at   | LOC269472 /// Olfml3 | OLFML3   | -0.15 | 2.41  | -1.47 | 1.72E-01 | 4.58E-01 | -5.65 |
| 1459347_PM_at   | Gm11190              | NA       | 0.12  | 2.42  | 1.47  | 1.72E-01 | 4.58E-01 | -5.65 |
| 1457980_PM_x_at | Uck2                 | UCK2     | 0.27  | 2.50  | 1.47  | 1.72E-01 | 4.58E-01 | -5.65 |
| 1458283_PM_at   | ---                  | NA       | 0.17  | 2.27  | 1.47  | 1.72E-01 | 4.58E-01 | -5.65 |
| 1416404_PM_s_at | Rps16 /// Rps16-ps2  | RPS16    | -0.49 | 4.84  | -1.47 | 1.72E-01 | 4.58E-01 | -5.65 |
| 1426310_PM_at   | Zdhc5                | ZDHC5    | 0.16  | 3.01  | 1.47  | 1.72E-01 | 4.58E-01 | -5.65 |
| 1446308_PM_at   | Ccdc182              | CCDC182  | 0.11  | 2.27  | 1.47  | 1.72E-01 | 4.58E-01 | -5.65 |
| 1421770_PM_a_at | Tlx2                 | TLX2     | 0.15  | 2.20  | 1.47  | 1.72E-01 | 4.58E-01 | -5.65 |
| 1441136_PM_at   | Hhipl2               | NA       | 0.18  | 2.55  | 1.47  | 1.72E-01 | 4.58E-01 | -5.65 |
| 1454251_PM_at   | 1700034J04Rik        | NA       | 0.20  | 2.33  | 1.47  | 1.72E-01 | 4.58E-01 | -5.65 |
| 1422351_PM_at   | Olfra480             | ORSP3    | 0.30  | 2.17  | 1.47  | 1.72E-01 | 4.58E-01 | -5.65 |
| 1448212_PM_at   | Psmg2                | PSMG2    | -0.40 | 3.01  | -1.47 | 1.72E-01 | 4.58E-01 | -5.65 |
| 1454283_PM_at   | ---                  | NA       | 0.16  | 2.44  | 1.47  | 1.72E-01 | 4.58E-01 | -5.65 |



|                         |                                                                                   |          |       |      |       |          |          |       |
|-------------------------|-----------------------------------------------------------------------------------|----------|-------|------|-------|----------|----------|-------|
| 1421642_PM_a_at         | Cysltr2                                                                           | CYSLTR2  | 0.24  | 2.61 | 1.47  | 1.72E-01 | 4.58E-01 | -5.65 |
| 1433102_PM_at           | ---                                                                               | NA       | 0.24  | 2.46 | 1.47  | 1.72E-01 | 4.58E-01 | -5.65 |
| 1434835_PM_at           | Wapl                                                                              | WAPL     | -0.27 | 3.25 | -1.47 | 1.72E-01 | 4.58E-01 | -5.65 |
| 1459171_PM_at           | Emp1                                                                              | EMP1     | 0.12  | 2.21 | 1.47  | 1.72E-01 | 4.58E-01 | -5.65 |
| 1453969_PM_at           | Prl8a1                                                                            | PRL      | 0.19  | 2.64 | 1.47  | 1.72E-01 | 4.58E-01 | -5.65 |
| 1421210_PM_at           | Ciita                                                                             | CIITA    | 0.17  | 2.64 | 1.47  | 1.72E-01 | 4.58E-01 | -5.65 |
| 1450150_PM_a_at         | Rpl13 /// Rpl13-ps6                                                               | RPL13    | -0.47 | 4.26 | -1.47 | 1.72E-01 | 4.58E-01 | -5.65 |
| 1432878_PM_at           | ---                                                                               | NA       | 0.17  | 2.44 | 1.47  | 1.72E-01 | 4.58E-01 | -5.65 |
| 1417961_PM_a_at         | Trim30a                                                                           | TRIM5    | -0.35 | 2.55 | -1.47 | 1.72E-01 | 4.58E-01 | -5.65 |
| 1439945_PM_at           | Zfp449                                                                            | ZNF449   | 0.27  | 2.81 | 1.47  | 1.72E-01 | 4.58E-01 | -5.65 |
| 1445620_PM_at           | ---                                                                               | NA       | 0.65  | 3.40 | 1.47  | 1.72E-01 | 4.58E-01 | -5.65 |
| 1430065_PM_at           | ---                                                                               | NA       | 0.25  | 2.40 | 1.47  | 1.72E-01 | 4.59E-01 | -5.65 |
| 1421013_PM_at           | Pitpnb                                                                            | PITPNB   | 0.40  | 2.93 | 1.47  | 1.72E-01 | 4.59E-01 | -5.65 |
| 1450328_PM_at           | LOC100043315                                                                      | NA       | -0.22 | 2.50 | -1.47 | 1.72E-01 | 4.59E-01 | -5.65 |
| 1429279_PM_at           | Wars2                                                                             | WARS2    | 0.13  | 3.09 | 1.47  | 1.72E-01 | 4.59E-01 | -5.65 |
| 1430722_PM_at           | Henmt1                                                                            | HENMT1   | 0.17  | 2.73 | 1.47  | 1.72E-01 | 4.59E-01 | -5.65 |
| 1457940_PM_at           | ---                                                                               | NA       | 0.17  | 2.24 | 1.47  | 1.72E-01 | 4.59E-01 | -5.65 |
| 1433464_PM_at           | Ipo13                                                                             | IPO13    | 0.17  | 3.25 | 1.47  | 1.72E-01 | 4.59E-01 | -5.65 |
| 1433134_PM_at           | ---                                                                               | NA       | -0.32 | 2.62 | -1.47 | 1.73E-01 | 4.59E-01 | -5.65 |
| 1419506_PM_at           | Gggs1                                                                             | NA       | -0.62 | 3.73 | -1.46 | 1.73E-01 | 4.59E-01 | -5.65 |
| 1445330_PM_at           | Pdia3                                                                             | PDIA3    | -0.32 | 3.36 | -1.46 | 1.73E-01 | 4.59E-01 | -5.65 |
| 1432357_PM_at           | ---                                                                               | NA       | 0.15  | 2.24 | 1.46  | 1.73E-01 | 4.59E-01 | -5.65 |
| 1454181_PM_at           | Zc2hc1b                                                                           | ZC2HC1B  | 0.16  | 2.98 | 1.46  | 1.73E-01 | 4.59E-01 | -5.65 |
| 1446124_PM_at           | ---                                                                               | NA       | 0.19  | 2.77 | 1.47  | 1.73E-01 | 4.59E-01 | -5.65 |
| 1429764_PM_at           | Fam101b                                                                           | RFLNB    | 0.23  | 2.94 | 1.46  | 1.73E-01 | 4.59E-01 | -5.65 |
| 1428752_PM_at           | Slc5a11                                                                           | SLC5A11  | 0.24  | 2.69 | 1.46  | 1.73E-01 | 4.59E-01 | -5.65 |
| 1441273_PM_at           | ---                                                                               | NA       | 0.25  | 2.82 | 1.46  | 1.73E-01 | 4.59E-01 | -5.65 |
| 1449631_PM_at           | ---                                                                               | NA       | 0.33  | 2.68 | 1.46  | 1.73E-01 | 4.59E-01 | -5.65 |
| 1423991_PM_at           | Nop14                                                                             | NOP14    | 0.40  | 3.95 | 1.47  | 1.73E-01 | 4.59E-01 | -5.65 |
| 1418650_PM_at           | Spata6                                                                            | SPATA6   | 0.17  | 2.31 | 1.46  | 1.73E-01 | 4.59E-01 | -5.65 |
| 1427113_PM_s_at         | Ttl                                                                               | TTL      | 0.44  | 6.12 | 1.46  | 1.73E-01 | 4.59E-01 | -5.65 |
| AFFX-NonspecificGC19_at | ---                                                                               | NA       | 0.11  | 2.17 | 1.46  | 1.73E-01 | 4.59E-01 | -5.65 |
| 1453152_PM_at           | Mamdc2                                                                            | MAMDC2   | 0.16  | 2.04 | 1.46  | 1.73E-01 | 4.59E-01 | -5.65 |
| 1443499_PM_at           | Gm20556                                                                           | NA       | 0.15  | 2.44 | 1.46  | 1.73E-01 | 4.59E-01 | -5.65 |
| 1460298_PM_at           | 4930483J18Rik                                                                     | NA       | -0.16 | 2.35 | -1.46 | 1.73E-01 | 4.59E-01 | -5.65 |
| 1445858_PM_at           | ---                                                                               | NA       | 0.12  | 2.02 | 1.46  | 1.73E-01 | 4.59E-01 | -5.65 |
| 1416899_PM_at           | Utf1                                                                              | UTF1     | 0.13  | 2.46 | 1.46  | 1.73E-01 | 4.59E-01 | -5.65 |
| 1429945_PM_at           | Klh35                                                                             | KLHL35   | 0.14  | 3.15 | 1.46  | 1.73E-01 | 4.59E-01 | -5.65 |
| 1431477_PM_at           | ---                                                                               | NA       | 0.15  | 2.24 | 1.46  | 1.73E-01 | 4.59E-01 | -5.65 |
| 1430243_PM_at           | Prox2                                                                             | PROX2    | 0.16  | 2.42 | 1.46  | 1.73E-01 | 4.59E-01 | -5.65 |
| 1445115_PM_at           | Thsd7b                                                                            | THSD7B   | 0.17  | 2.50 | 1.46  | 1.73E-01 | 4.59E-01 | -5.65 |
| 1430491_PM_at           | ---                                                                               | NA       | 0.18  | 2.29 | 1.46  | 1.73E-01 | 4.59E-01 | -5.65 |
| 1445271_PM_at           | Trim12c                                                                           | TRIM5    | 0.21  | 2.98 | 1.46  | 1.73E-01 | 4.59E-01 | -5.65 |
| 1433376_PM_at           | 5830445D09Rik                                                                     | NA       | 0.24  | 2.67 | 1.46  | 1.73E-01 | 4.59E-01 | -5.65 |
| 1433129_PM_at           | ---                                                                               | NA       | 0.28  | 3.28 | 1.46  | 1.73E-01 | 4.59E-01 | -5.65 |
| 1431655_PM_a_at         | Agk                                                                               | AGK      | 0.19  | 2.43 | 1.46  | 1.73E-01 | 4.59E-01 | -5.65 |
| 1426027_PM_a_at         | Arhgap10                                                                          | ARHGAP10 | 0.19  | 2.93 | 1.46  | 1.73E-01 | 4.59E-01 | -5.65 |
| 1452457_PM_a_at         | Prkab1                                                                            | PRKAB1   | 0.26  | 3.42 | 1.46  | 1.73E-01 | 4.59E-01 | -5.65 |
| 1444860_PM_at           | Gm29200                                                                           | NA       | 0.16  | 3.14 | 1.46  | 1.73E-01 | 4.59E-01 | -5.65 |
| 1455560_PM_at           | Gm16845                                                                           | NA       | 0.21  | 2.55 | 1.46  | 1.73E-01 | 4.59E-01 | -5.65 |
| 1460442_PM_at           | Rps19 /// Rps19-ps1 ///<br>Rps19-ps2 /// Rps19-ps3 ///<br>Rps19-ps6 /// Rps19-ps7 | RPS19    | 0.17  | 3.57 | 1.46  | 1.73E-01 | 4.59E-01 | -5.65 |
| 1444542_PM_at           | ---                                                                               | NA       | 0.18  | 2.57 | 1.46  | 1.73E-01 | 4.59E-01 | -5.65 |
| 1460091_PM_at           | Ppp1r12b                                                                          | PPP1R12B | 0.39  | 2.94 | 1.46  | 1.73E-01 | 4.59E-01 | -5.65 |
| 1442262_PM_at           | ---                                                                               | NA       | -0.19 | 2.30 | -1.46 | 1.73E-01 | 4.59E-01 | -5.65 |
| 1431927_PM_at           | 5033417F24Rik                                                                     | NA       | 0.13  | 3.47 | 1.46  | 1.73E-01 | 4.59E-01 | -5.65 |
| 1449230_PM_at           | Idua                                                                              | IDUA     | 0.24  | 2.91 | 1.46  | 1.73E-01 | 4.59E-01 | -5.65 |
| 1423708_PM_a_at         | Farsb                                                                             | FARSB    | 0.44  | 2.92 | 1.46  | 1.73E-01 | 4.59E-01 | -5.65 |
| 1417410_PM_s_at         | Prkci                                                                             | PRKCI    | -0.33 | 4.80 | -1.46 | 1.73E-01 | 4.59E-01 | -5.65 |
| 1440782_PM_at           | Skap1                                                                             | SKAP1    | 0.16  | 2.15 | 1.46  | 1.73E-01 | 4.59E-01 | -5.65 |
| 1431340_PM_a_at         | Bbip1                                                                             | NA       | -0.40 | 3.73 | -1.46 | 1.73E-01 | 4.59E-01 | -5.65 |
| 1442520_PM_at           | ---                                                                               | NA       | 0.13  | 2.41 | 1.46  | 1.73E-01 | 4.59E-01 | -5.65 |
| 1440217_PM_at           | Fam169b                                                                           | NA       | 0.14  | 2.42 | 1.46  | 1.73E-01 | 4.59E-01 | -5.65 |
| 1445406_PM_at           | C77494                                                                            | NA       | 0.15  | 2.47 | 1.46  | 1.73E-01 | 4.59E-01 | -5.65 |
| 1442571_PM_at           | ---                                                                               | NA       | 0.16  | 2.33 | 1.46  | 1.73E-01 | 4.59E-01 | -5.65 |
| 1443342_PM_at           | ---                                                                               | NA       | 0.18  | 2.85 | 1.46  | 1.73E-01 | 4.59E-01 | -5.65 |
| 1433423_PM_at           | LOC105244150                                                                      | NA       | 0.19  | 2.24 | 1.46  | 1.73E-01 | 4.59E-01 | -5.65 |
| 1450140_PM_a_at         | Cdkn2a                                                                            | NA       | 0.21  | 2.61 | 1.46  | 1.73E-01 | 4.59E-01 | -5.65 |
| 1419147_PM_at           | Rec8                                                                              | REC8     | 0.22  | 2.38 | 1.46  | 1.73E-01 | 4.59E-01 | -5.65 |
| 1453248_PM_at           | 2810039B14Rik                                                                     | NA       | 0.31  | 2.47 | 1.46  | 1.73E-01 | 4.59E-01 | -5.65 |
| 1456303_PM_at           | ---                                                                               | NA       | -0.51 | 4.21 | -1.46 | 1.73E-01 | 4.59E-01 | -5.65 |
| 1435168_PM_at           | Zfp710                                                                            | ZNF710   | -0.19 | 2.36 | -1.46 | 1.73E-01 | 4.59E-01 | -5.65 |
| 1429126_PM_at           | Nudt5                                                                             | NUDT5    | 0.34  | 2.74 | 1.46  | 1.73E-01 | 4.59E-01 | -5.65 |

|                      |                                                                                                                                                                                                                                                                                                                                                                                                                                                                                        |          |       |      |       |          |          |       |
|----------------------|----------------------------------------------------------------------------------------------------------------------------------------------------------------------------------------------------------------------------------------------------------------------------------------------------------------------------------------------------------------------------------------------------------------------------------------------------------------------------------------|----------|-------|------|-------|----------|----------|-------|
| 1447446_PM_at        | ---                                                                                                                                                                                                                                                                                                                                                                                                                                                                                    | NA       | 0.37  | 2.17 | 1.46  | 1.73E-01 | 4.59E-01 | -5.65 |
| 1422003_PM_at        | Cxcr5                                                                                                                                                                                                                                                                                                                                                                                                                                                                                  | CXCR5    | 0.15  | 2.27 | 1.46  | 1.73E-01 | 4.59E-01 | -5.65 |
|                      | Gm20738 /// Gm20747 ///<br>Gm20806 /// Gm20809 ///<br>Gm20815 /// Gm20816 ///<br>Gm20823 /// Gm20842 ///<br>Gm20852 /// Gm20854 ///<br>Gm20865 /// Gm20867 ///<br>Gm20868 /// Gm20898 ///<br>Gm20907 /// Gm20917 ///<br>Gm20921 /// Gm20934 ///<br>Gm21118 /// Gm21180 ///<br>Gm21242 /// Gm21245 ///<br>Gm21248 /// Gm21292 ///<br>Gm21350 /// Gm21394 ///<br>Gm21658 /// Gm21672 ///<br>Gm21683 /// Gm21790 ///<br>Gm21799 /// Gm21835 ///<br>Gm21845 /// Gm21943 ///<br>Gm29024 /// |          |       |      |       |          |          |       |
| 1417838_PM_at        | LOC101056308 /// Ssty2                                                                                                                                                                                                                                                                                                                                                                                                                                                                 | NA       | -0.41 | 7.32 | -1.46 | 1.73E-01 | 4.60E-01 | -5.65 |
| 1441278_PM_at        | 4930513N10Rik                                                                                                                                                                                                                                                                                                                                                                                                                                                                          | NA       | 0.13  | 2.23 | 1.46  | 1.73E-01 | 4.60E-01 | -5.65 |
| 1456993_PM_at        | ---                                                                                                                                                                                                                                                                                                                                                                                                                                                                                    | NA       | 0.16  | 2.24 | 1.46  | 1.73E-01 | 4.60E-01 | -5.65 |
| 1429617_PM_at        | Cyld                                                                                                                                                                                                                                                                                                                                                                                                                                                                                   | CYLD     | 0.18  | 2.49 | 1.46  | 1.73E-01 | 4.60E-01 | -5.65 |
| 1425514_PM_at        | Pik3r1                                                                                                                                                                                                                                                                                                                                                                                                                                                                                 | PIK3R1   | 0.43  | 2.45 | 1.46  | 1.73E-01 | 4.60E-01 | -5.65 |
| 1430382_PM_at        | ---                                                                                                                                                                                                                                                                                                                                                                                                                                                                                    | NA       | 0.38  | 2.76 | 1.46  | 1.73E-01 | 4.60E-01 | -5.65 |
| 1431326_PM_a_at      | Tmod2                                                                                                                                                                                                                                                                                                                                                                                                                                                                                  | TMOD2    | -0.41 | 4.54 | -1.46 | 1.73E-01 | 4.60E-01 | -5.65 |
| 1431651_PM_at        | Ccdc151                                                                                                                                                                                                                                                                                                                                                                                                                                                                                | NA       | 0.12  | 2.18 | 1.46  | 1.73E-01 | 4.60E-01 | -5.65 |
| 1421329_PM_a_at      | Smyd1                                                                                                                                                                                                                                                                                                                                                                                                                                                                                  | SMYD1    | 0.23  | 2.68 | 1.46  | 1.73E-01 | 4.60E-01 | -5.65 |
| 1417028_PM_a_at      | Trim2                                                                                                                                                                                                                                                                                                                                                                                                                                                                                  | TRIM2    | -0.49 | 3.64 | -1.46 | 1.74E-01 | 4.60E-01 | -5.65 |
| 1418813_PM_at        | Serpina5                                                                                                                                                                                                                                                                                                                                                                                                                                                                               | SERPINA5 | 0.19  | 2.10 | 1.46  | 1.73E-01 | 4.60E-01 | -5.65 |
| 1434002_PM_at        | Foxn3                                                                                                                                                                                                                                                                                                                                                                                                                                                                                  | NA       | -0.47 | 5.88 | -1.46 | 1.74E-01 | 4.60E-01 | -5.65 |
| 1427843_PM_at        | Tmem189                                                                                                                                                                                                                                                                                                                                                                                                                                                                                | TMEM189  | 0.13  | 2.31 | 1.46  | 1.74E-01 | 4.60E-01 | -5.65 |
| 1429413_PM_at        | Cpm                                                                                                                                                                                                                                                                                                                                                                                                                                                                                    | CPM      | 0.13  | 2.55 | 1.46  | 1.74E-01 | 4.60E-01 | -5.65 |
| 1445300_PM_at        | ---                                                                                                                                                                                                                                                                                                                                                                                                                                                                                    | NA       | 0.14  | 2.47 | 1.46  | 1.74E-01 | 4.60E-01 | -5.65 |
| 1439609_PM_at        | Gm2102                                                                                                                                                                                                                                                                                                                                                                                                                                                                                 | NA       | 0.17  | 2.30 | 1.46  | 1.74E-01 | 4.60E-01 | -5.65 |
| 1456236_PM_s_at      | CommD10                                                                                                                                                                                                                                                                                                                                                                                                                                                                                | COMMMD10 | 0.22  | 3.04 | 1.46  | 1.74E-01 | 4.60E-01 | -5.65 |
| 1436447_PM_at        | ---                                                                                                                                                                                                                                                                                                                                                                                                                                                                                    | NA       | 0.30  | 2.90 | 1.46  | 1.74E-01 | 4.60E-01 | -5.65 |
| 1442031_PM_at        | Mcu                                                                                                                                                                                                                                                                                                                                                                                                                                                                                    | MCU      | 0.59  | 2.73 | 1.46  | 1.74E-01 | 4.60E-01 | -5.65 |
| 1445728_PM_at        | Rdh16 /// Rdh18-ps                                                                                                                                                                                                                                                                                                                                                                                                                                                                     | RDH16    | -0.18 | 2.62 | -1.46 | 1.74E-01 | 4.60E-01 | -5.66 |
| 1440661_PM_at        | A430010J10Rik                                                                                                                                                                                                                                                                                                                                                                                                                                                                          | NA       | 0.18  | 2.42 | 1.46  | 1.74E-01 | 4.60E-01 | -5.66 |
| 1456300_PM_at        | Ilvbl                                                                                                                                                                                                                                                                                                                                                                                                                                                                                  | NA       | 0.18  | 2.39 | 1.46  | 1.74E-01 | 4.60E-01 | -5.66 |
| 1446905_PM_at        | ---                                                                                                                                                                                                                                                                                                                                                                                                                                                                                    | NA       | 0.20  | 3.24 | 1.46  | 1.74E-01 | 4.60E-01 | -5.66 |
| 1449656_PM_at        | Gm30058                                                                                                                                                                                                                                                                                                                                                                                                                                                                                | NA       | 0.16  | 2.86 | 1.46  | 1.74E-01 | 4.60E-01 | -5.66 |
| 1434552_PM_at        | Wdr77                                                                                                                                                                                                                                                                                                                                                                                                                                                                                  | WDR77    | -0.31 | 2.42 | -1.46 | 1.74E-01 | 4.60E-01 | -5.66 |
| 1417555_PM_at        | Atad1                                                                                                                                                                                                                                                                                                                                                                                                                                                                                  | ATAD1    | -0.23 | 2.46 | -1.46 | 1.74E-01 | 4.60E-01 | -5.66 |
| 1450694_PM_at        | Fkbp2                                                                                                                                                                                                                                                                                                                                                                                                                                                                                  | FKBP2    | 0.50  | 5.90 | 1.46  | 1.74E-01 | 4.60E-01 | -5.66 |
| 1430026_PM_at        | Hspa13                                                                                                                                                                                                                                                                                                                                                                                                                                                                                 | HSPA13   | 0.13  | 2.45 | 1.46  | 1.74E-01 | 4.60E-01 | -5.66 |
| 1455259_PM_a_at      | Utp23                                                                                                                                                                                                                                                                                                                                                                                                                                                                                  | UTP23    | 0.16  | 2.23 | 1.46  | 1.74E-01 | 4.60E-01 | -5.66 |
| 1425306_PM_at        | BC2orf72                                                                                                                                                                                                                                                                                                                                                                                                                                                                               | C2orf71  | 0.22  | 2.64 | 1.46  | 1.74E-01 | 4.60E-01 | -5.66 |
| 1436821_PM_at        | Plcxd3                                                                                                                                                                                                                                                                                                                                                                                                                                                                                 | PLCXD3   | 0.51  | 2.93 | 1.46  | 1.74E-01 | 4.60E-01 | -5.66 |
| 1442714_PM_at        | D130037M23Rik                                                                                                                                                                                                                                                                                                                                                                                                                                                                          | NA       | 0.18  | 2.39 | 1.46  | 1.74E-01 | 4.60E-01 | -5.66 |
| 1452479_PM_at        | Copg2os2                                                                                                                                                                                                                                                                                                                                                                                                                                                                               | NA       | 0.63  | 7.47 | 1.46  | 1.74E-01 | 4.60E-01 | -5.66 |
| 1425194_PM_a_at      | Sfr1                                                                                                                                                                                                                                                                                                                                                                                                                                                                                   | SFR1     | 0.38  | 5.46 | 1.46  | 1.74E-01 | 4.61E-01 | -5.66 |
| 1446212_PM_at        | ---                                                                                                                                                                                                                                                                                                                                                                                                                                                                                    | NA       | 0.61  | 2.39 | 1.46  | 1.74E-01 | 4.61E-01 | -5.66 |
| 1425890_PM_at        | Ly6i                                                                                                                                                                                                                                                                                                                                                                                                                                                                                   | NA       | 0.15  | 2.41 | 1.46  | 1.74E-01 | 4.61E-01 | -5.66 |
| 1423224_PM_at        | Tctn2                                                                                                                                                                                                                                                                                                                                                                                                                                                                                  | NA       | 0.20  | 2.37 | 1.46  | 1.74E-01 | 4.61E-01 | -5.66 |
| 1448303_PM_at        | Gpnmb                                                                                                                                                                                                                                                                                                                                                                                                                                                                                  | GNPMB    | 0.17  | 2.94 | 1.46  | 1.74E-01 | 4.61E-01 | -5.66 |
| 1427528_PM_a_at      | Epha7                                                                                                                                                                                                                                                                                                                                                                                                                                                                                  | EPHA7    | -0.72 | 5.01 | -1.46 | 1.74E-01 | 4.61E-01 | -5.66 |
| 1440410_PM_at        | Gm38691                                                                                                                                                                                                                                                                                                                                                                                                                                                                                | NA       | 0.15  | 2.24 | 1.46  | 1.74E-01 | 4.61E-01 | -5.66 |
| 1446451_PM_at        | ---                                                                                                                                                                                                                                                                                                                                                                                                                                                                                    | NA       | 0.33  | 2.30 | 1.46  | 1.74E-01 | 4.61E-01 | -5.66 |
| 1419787_PM_a_at      | Zfp628                                                                                                                                                                                                                                                                                                                                                                                                                                                                                 | ZNF628   | 0.13  | 2.24 | 1.46  | 1.74E-01 | 4.61E-01 | -5.66 |
| 1440616_PM_at        | AU042410                                                                                                                                                                                                                                                                                                                                                                                                                                                                               | NA       | 0.14  | 2.27 | 1.46  | 1.74E-01 | 4.61E-01 | -5.66 |
| 1459042_PM_at        | Rims3                                                                                                                                                                                                                                                                                                                                                                                                                                                                                  | RIMS3    | 0.17  | 2.12 | 1.46  | 1.74E-01 | 4.61E-01 | -5.66 |
| 1450519_PM_a_at      | Prkaca                                                                                                                                                                                                                                                                                                                                                                                                                                                                                 | PRKACA   | -0.48 | 5.39 | -1.46 | 1.74E-01 | 4.61E-01 | -5.66 |
| 1427480_PM_at        | Leap2                                                                                                                                                                                                                                                                                                                                                                                                                                                                                  | LEAP2    | 0.13  | 2.20 | 1.46  | 1.74E-01 | 4.61E-01 | -5.66 |
| AFFX-r2-Ec-bioB-M_at | ---                                                                                                                                                                                                                                                                                                                                                                                                                                                                                    | NA       | 0.21  | 7.49 | 1.46  | 1.74E-01 | 4.61E-01 | -5.66 |
| 1442015_PM_at        | 2500002B13Rik                                                                                                                                                                                                                                                                                                                                                                                                                                                                          | NA       | 0.22  | 2.60 | 1.46  | 1.74E-01 | 4.61E-01 | -5.66 |

|                 |                              |          |       |      |       |          |          |       |
|-----------------|------------------------------|----------|-------|------|-------|----------|----------|-------|
| 1442812_PM_at   | ---                          | NA       | 0.41  | 5.47 | 1.46  | 1.74E-01 | 4.61E-01 | -5.66 |
| 1421331_PM_at   | Hs3st3b1                     | HS3ST3B1 | 0.14  | 2.23 | 1.46  | 1.74E-01 | 4.61E-01 | -5.66 |
| 1418832_PM_at   | Pkp3                         | PKP3     | 0.14  | 2.29 | 1.46  | 1.75E-01 | 4.61E-01 | -5.66 |
| 1446374_PM_at   | Arhgef10                     | ARHGEF10 | 0.21  | 2.71 | 1.46  | 1.75E-01 | 4.61E-01 | -5.66 |
| 1458125_PM_at   | ---                          | NA       | 0.29  | 3.25 | 1.46  | 1.75E-01 | 4.61E-01 | -5.66 |
| 1422432_PM_at   | Dbi                          | DBI      | -0.89 | 6.15 | -1.46 | 1.75E-01 | 4.61E-01 | -5.66 |
| 1455083_PM_at   | Atp11c                       | ATP11C   | -0.38 | 3.01 | -1.46 | 1.75E-01 | 4.61E-01 | -5.66 |
| 1433452_PM_at   | B630019K06Rik                | NA       | -0.23 | 2.96 | -1.46 | 1.75E-01 | 4.61E-01 | -5.66 |
| 1441836_PM_x_at | Gtsf1                        | NA       | -0.15 | 2.28 | -1.46 | 1.75E-01 | 4.61E-01 | -5.66 |
| 1447395_PM_at   | Defb21                       | DEFB118  | 0.14  | 2.21 | 1.46  | 1.75E-01 | 4.61E-01 | -5.66 |
| 1435705_PM_at   | Zscan18                      | ZSCAN18  | -0.25 | 3.13 | -1.46 | 1.75E-01 | 4.61E-01 | -5.66 |
| 1447031_PM_at   | ---                          | NA       | 0.59  | 2.63 | 1.46  | 1.75E-01 | 4.61E-01 | -5.66 |
| 1422637_PM_at   | Rassf5                       | RASSF5   | 0.35  | 2.29 | 1.46  | 1.75E-01 | 4.61E-01 | -5.66 |
| 1431008_PM_at   | H2-Q6 /// H2-Q8 /// LOC68395 | NA       | -0.38 | 3.47 | -1.46 | 1.75E-01 | 4.61E-01 | -5.66 |
| 1456563_PM_at   | ---                          | NA       | 0.26  | 2.40 | 1.46  | 1.75E-01 | 4.61E-01 | -5.66 |
| 1445841_PM_at   | ---                          | NA       | 0.30  | 3.74 | 1.46  | 1.75E-01 | 4.61E-01 | -5.66 |
| 1446351_PM_at   | Gm20555                      | NA       | 0.49  | 4.18 | 1.46  | 1.75E-01 | 4.61E-01 | -5.66 |
| 1456473_PM_x_at | Arf2                         | NA       | 0.56  | 3.09 | 1.46  | 1.75E-01 | 4.61E-01 | -5.66 |
| 1448497_PM_at   | Erc3                         | ERCC3    | -0.33 | 3.14 | -1.46 | 1.75E-01 | 4.61E-01 | -5.66 |
| 1453103_PM_at   | Ablim1                       | ABLIM1   | 0.23  | 3.29 | 1.46  | 1.75E-01 | 4.61E-01 | -5.66 |
| 1460474_PM_at   | ---                          | NA       | 0.34  | 4.38 | 1.46  | 1.75E-01 | 4.61E-01 | -5.66 |
| 1430172_PM_a_at | Cyp4f16 /// Cyp4f37          | NA       | 0.25  | 2.59 | 1.46  | 1.75E-01 | 4.62E-01 | -5.66 |
| 1437448_PM_s_at | Ctndd1                       | CTNND1   | 0.64  | 3.22 | 1.46  | 1.75E-01 | 4.62E-01 | -5.66 |
| 1460056_PM_at   | Hoxd3os1                     | NA       | -0.39 | 2.92 | -1.46 | 1.75E-01 | 4.62E-01 | -5.66 |
| 1424550_PM_at   | Zfyve27                      | ZFYVE27  | -0.24 | 3.13 | -1.46 | 1.75E-01 | 4.62E-01 | -5.66 |
| 1431345_PM_a_at | Taf1b                        | TAF1B    | 0.31  | 3.38 | 1.46  | 1.75E-01 | 4.62E-01 | -5.66 |
| 1421843_PM_at   | Il1rap                       | IL1RAP   | 0.26  | 2.58 | 1.46  | 1.75E-01 | 4.62E-01 | -5.66 |
| 1460103_PM_at   | ---                          | NA       | 0.19  | 3.05 | 1.46  | 1.75E-01 | 4.62E-01 | -5.66 |
| 1446187_PM_at   | ---                          | NA       | 0.14  | 2.46 | 1.46  | 1.75E-01 | 4.62E-01 | -5.66 |
| 1447235_PM_at   | ---                          | NA       | 0.14  | 2.41 | 1.46  | 1.75E-01 | 4.62E-01 | -5.66 |
| 1436728_PM_s_at | Rtel1                        | RTEL1    | -0.16 | 2.45 | -1.46 | 1.75E-01 | 4.62E-01 | -5.66 |
| 1424962_PM_at   | Tm4sf4                       | TM4SF4   | 0.21  | 2.80 | 1.46  | 1.75E-01 | 4.62E-01 | -5.66 |
| 1429933_PM_at   | ---                          | NA       | 0.17  | 2.43 | 1.46  | 1.75E-01 | 4.62E-01 | -5.66 |
| 1441191_PM_at   | 2810454H06Rik                | NA       | 0.17  | 2.26 | 1.46  | 1.75E-01 | 4.62E-01 | -5.66 |
| 1439315_PM_at   | Satb1                        | SATB1    | 0.15  | 2.21 | 1.46  | 1.75E-01 | 4.62E-01 | -5.66 |
| 1429877_PM_at   | Lrriq3                       | LRRIQ3   | 0.12  | 2.15 | 1.46  | 1.75E-01 | 4.62E-01 | -5.66 |
| 1444588_PM_at   | ---                          | NA       | 0.19  | 2.46 | 1.46  | 1.75E-01 | 4.62E-01 | -5.66 |
| 1431833_PM_a_at | Hmgcs2                       | HMGCS2   | 0.19  | 2.37 | 1.46  | 1.75E-01 | 4.62E-01 | -5.66 |
| 1445712_PM_at   | Gm34344                      | NA       | 0.29  | 2.57 | 1.46  | 1.75E-01 | 4.62E-01 | -5.66 |
| 1446785_PM_at   | Gm35497                      | NA       | 0.31  | 2.80 | 1.46  | 1.75E-01 | 4.62E-01 | -5.66 |
| 1450242_PM_at   | Tlr5                         | NA       | 0.18  | 2.35 | 1.46  | 1.75E-01 | 4.62E-01 | -5.66 |
| 1449918_PM_at   | Cd209g                       | NA       | 0.18  | 2.40 | 1.46  | 1.75E-01 | 4.62E-01 | -5.66 |
| 1455605_PM_at   | Rufy3                        | RUFY3    | 0.42  | 5.11 | 1.46  | 1.75E-01 | 4.62E-01 | -5.66 |
| 1455345_PM_at   | Jade2                        | JADE2    | -0.40 | 4.81 | -1.46 | 1.75E-01 | 4.62E-01 | -5.66 |
| 1445745_PM_at   | Rbm17                        | RBM17    | -0.15 | 2.41 | -1.46 | 1.75E-01 | 4.62E-01 | -5.66 |
| 1452848_PM_at   | Tmem181a                     | TMEM181  | -0.36 | 9.17 | -1.45 | 1.75E-01 | 4.62E-01 | -5.66 |
| 1458115_PM_at   | 4930512H18Rik                | NA       | 0.12  | 2.21 | 1.45  | 1.75E-01 | 4.62E-01 | -5.66 |
| 1441712_PM_at   | Usp49                        | NA       | 0.17  | 2.39 | 1.45  | 1.75E-01 | 4.62E-01 | -5.66 |
| 1429735_PM_at   | Qk                           | NA       | 0.24  | 2.80 | 1.45  | 1.75E-01 | 4.62E-01 | -5.66 |
| 1415899_PM_at   | Junb                         | JUNB     | 0.16  | 2.41 | 1.45  | 1.75E-01 | 4.62E-01 | -5.66 |
| 1442216_PM_at   | ---                          | NA       | 0.14  | 2.49 | 1.45  | 1.75E-01 | 4.62E-01 | -5.66 |
| 1441429_PM_at   | Irs4                         | IRS4     | 0.14  | 2.32 | 1.45  | 1.76E-01 | 4.62E-01 | -5.66 |
| 1446975_PM_at   | Casz1                        | NA       | 0.17  | 2.62 | 1.45  | 1.76E-01 | 4.62E-01 | -5.66 |
| 1433479_PM_at   | Ubr7                         | UBR7     | 0.18  | 2.10 | 1.45  | 1.76E-01 | 4.62E-01 | -5.66 |
| 1451500_PM_at   | Ushbp1                       | USHBP1   | 0.22  | 2.75 | 1.45  | 1.76E-01 | 4.62E-01 | -5.66 |
| 1445765_PM_at   | ---                          | NA       | 0.23  | 3.29 | 1.45  | 1.76E-01 | 4.62E-01 | -5.66 |
| 1452390_PM_at   | Brat1                        | BRAT1    | 0.24  | 2.67 | 1.45  | 1.76E-01 | 4.62E-01 | -5.66 |
| 1422372_PM_at   | Olf15                        | OR2C1    | 0.25  | 2.61 | 1.45  | 1.76E-01 | 4.62E-01 | -5.66 |
| 1454061_PM_at   | Thumpd3                      | THUMPD3  | 0.29  | 2.82 | 1.45  | 1.76E-01 | 4.62E-01 | -5.66 |
| 1448385_PM_at   | Slc15a4                      | SLC15A4  | -0.17 | 2.59 | -1.45 | 1.76E-01 | 4.62E-01 | -5.66 |
| 1429299_PM_at   | Ddah1                        | DDAH1    | 0.23  | 2.83 | 1.45  | 1.76E-01 | 4.62E-01 | -5.66 |
| 1427243_PM_at   | Rel1                         | RELL1    | -0.34 | 2.99 | -1.45 | 1.76E-01 | 4.62E-01 | -5.66 |
| 1456950_PM_at   | Alms1                        | ALMS1    | 0.20  | 2.41 | 1.45  | 1.76E-01 | 4.62E-01 | -5.66 |
| 1445886_PM_at   | Elk3                         | ELK3     | 0.22  | 3.07 | 1.45  | 1.76E-01 | 4.62E-01 | -5.66 |
| 1447068_PM_at   | ---                          | NA       | -0.32 | 2.98 | -1.45 | 1.76E-01 | 4.63E-01 | -5.66 |
| 1454094_PM_at   | ---                          | NA       | 0.19  | 2.29 | 1.45  | 1.76E-01 | 4.63E-01 | -5.66 |
| 1429822_PM_at   | ---                          | NA       | -0.32 | 3.06 | -1.45 | 1.76E-01 | 4.63E-01 | -5.66 |
| 1439792_PM_at   | ---                          | NA       | -0.23 | 3.89 | -1.45 | 1.76E-01 | 4.63E-01 | -5.66 |
| 1427729_PM_at   | Ehd2                         | NA       | 0.32  | 3.59 | 1.45  | 1.76E-01 | 4.63E-01 | -5.66 |
| 1428982_PM_at   | Atad2b                       | NA       | -0.72 | 6.12 | -1.45 | 1.76E-01 | 4.63E-01 | -5.67 |
| 1437639_PM_at   | Tcaf1                        | TCAF1    | -0.52 | 6.63 | -1.45 | 1.76E-01 | 4.63E-01 | -5.67 |
| 1435758_PM_at   | B4galt6                      | B4GALT6  | -0.45 | 5.23 | -1.45 | 1.76E-01 | 4.63E-01 | -5.67 |
| 1426592_PM_a_at | Fbxo22                       | FBXO22   | -0.39 | 4.47 | -1.45 | 1.76E-01 | 4.63E-01 | -5.67 |
| 1429438_PM_at   | Bcor                         | BCOR     | -0.30 | 5.87 | -1.45 | 1.76E-01 | 4.63E-01 | -5.66 |

|                 |                     |          |       |      |       |          |          |       |
|-----------------|---------------------|----------|-------|------|-------|----------|----------|-------|
| 1457473_PM_at   | Chd1                | CHD1     | -0.29 | 2.74 | -1.45 | 1.76E-01 | 4.63E-01 | -5.67 |
| 1448813_PM_at   | Aadac               | AADAC    | 0.12  | 2.10 | 1.45  | 1.76E-01 | 4.63E-01 | -5.66 |
| 1457096_PM_at   | Bhlhe41             | BHLHE41  | 0.13  | 2.32 | 1.45  | 1.76E-01 | 4.63E-01 | -5.67 |
| 1436249_PM_at   | Ttl4                | TTL4     | 0.15  | 2.76 | 1.45  | 1.76E-01 | 4.63E-01 | -5.67 |
| 1447079_PM_at   | ---                 | NA       | 0.15  | 2.02 | 1.45  | 1.76E-01 | 4.63E-01 | -5.67 |
| 1421285_PM_at   | Pik3ap1             | PIK3AP1  | 0.15  | 2.26 | 1.45  | 1.76E-01 | 4.63E-01 | -5.67 |
| 1453253_PM_a_at | Rpusd1              | RPUSD1   | 0.16  | 2.42 | 1.45  | 1.76E-01 | 4.63E-01 | -5.67 |
| 1445336_PM_at   | 1110032A03Rik       | NA       | 0.17  | 3.06 | 1.45  | 1.76E-01 | 4.63E-01 | -5.67 |
| 1427782_PM_a_at | Crhr1               | CRHR1    | 0.56  | 2.96 | 1.45  | 1.76E-01 | 4.63E-01 | -5.67 |
| 1436582_PM_at   | Zdhhc15             | ZDHHHC15 | 0.25  | 2.55 | 1.45  | 1.76E-01 | 4.63E-01 | -5.67 |
| 1416370_PM_at   | Zscan21             | ZSCAN21  | 0.29  | 2.70 | 1.45  | 1.76E-01 | 4.63E-01 | -5.67 |
| 1445670_PM_at   | ---                 | NA       | 0.16  | 2.05 | 1.45  | 1.76E-01 | 4.63E-01 | -5.67 |
| 1435581_PM_at   | Bace2               | BACE2    | -0.21 | 2.47 | -1.45 | 1.76E-01 | 4.63E-01 | -5.67 |
| 1440987_PM_at   | ---                 | NA       | 0.12  | 2.10 | 1.45  | 1.76E-01 | 4.63E-01 | -5.67 |
| 1428811_PM_at   | Wfikkn2             | WFIKKN2  | 0.16  | 2.61 | 1.45  | 1.76E-01 | 4.63E-01 | -5.67 |
| 1460052_PM_at   | Gm39079             | NA       | 0.20  | 2.78 | 1.45  | 1.76E-01 | 4.63E-01 | -5.67 |
| 1428294_PM_at   | Zpr1                | ZPR1     | 0.28  | 2.41 | 1.45  | 1.76E-01 | 4.63E-01 | -5.67 |
| 1458139_PM_at   | ---                 | NA       | 0.29  | 2.88 | 1.45  | 1.76E-01 | 4.63E-01 | -5.67 |
| 1455649_PM_at   | Ttc9                | TTC9     | 0.20  | 2.37 | 1.45  | 1.76E-01 | 4.63E-01 | -5.67 |
| 1451791_PM_at   | Tfpi                | NA       | -0.24 | 2.28 | -1.45 | 1.76E-01 | 4.63E-01 | -5.67 |
| 1441083_PM_at   | Clptm1              | CLPTM1   | -0.17 | 2.59 | -1.45 | 1.76E-01 | 4.63E-01 | -5.67 |
| 1424595_PM_at   | F11r                | F11R     | -0.11 | 2.32 | -1.45 | 1.76E-01 | 4.63E-01 | -5.67 |
| 1450438_PM_at   | Ncam1               | NA       | 0.13  | 2.91 | 1.45  | 1.76E-01 | 4.63E-01 | -5.67 |
| 1459518_PM_at   | ---                 | NA       | 0.14  | 2.20 | 1.45  | 1.76E-01 | 4.63E-01 | -5.67 |
| 1437952_PM_at   | AU040096            | NA       | 0.15  | 3.27 | 1.45  | 1.76E-01 | 4.63E-01 | -5.67 |
| 1421355_PM_at   | Tgm3                | TGM3     | 0.16  | 2.63 | 1.45  | 1.76E-01 | 4.63E-01 | -5.67 |
| 1422229_PM_at   | Usp17lc /// Usp17ld | USP17L15 | 0.17  | 2.41 | 1.45  | 1.76E-01 | 4.63E-01 | -5.67 |
| 1438897_PM_at   | Zdhhc3              | ZDHHHC3  | 0.19  | 2.42 | 1.45  | 1.76E-01 | 4.63E-01 | -5.67 |
| 1445956_PM_at   | ---                 | NA       | 0.32  | 2.75 | 1.45  | 1.76E-01 | 4.63E-01 | -5.67 |
| 1453210_PM_at   | 5730507C01Rik       | NA       | 0.40  | 4.69 | 1.45  | 1.76E-01 | 4.63E-01 | -5.67 |
| 1419323_PM_at   | Pad1                | PAD1     | 0.13  | 2.28 | 1.45  | 1.76E-01 | 4.63E-01 | -5.67 |
| 1458896_PM_at   | Gmeb1               | GMEB1    | 0.21  | 3.24 | 1.45  | 1.76E-01 | 4.63E-01 | -5.67 |
| 1419347_PM_x_at | Svs5                | NA       | 0.15  | 2.24 | 1.45  | 1.76E-01 | 4.63E-01 | -5.67 |
| 1433927_PM_at   | Uspl1               | USPL1    | 0.21  | 4.29 | 1.45  | 1.76E-01 | 4.63E-01 | -5.67 |
| 1452484_PM_at   | Car7                | CA7      | 0.25  | 2.92 | 1.45  | 1.76E-01 | 4.63E-01 | -5.67 |
| 1429035_PM_at   | Dpep3               | DPEP3    | 0.19  | 3.02 | 1.45  | 1.76E-01 | 4.63E-01 | -5.67 |
| 1439963_PM_x_at | Saxo2               | SAXO2    | 0.26  | 3.95 | 1.45  | 1.76E-01 | 4.63E-01 | -5.67 |
| 1431166_PM_at   | Chd1                | CHD1     | 0.23  | 2.41 | 1.45  | 1.76E-01 | 4.63E-01 | -5.67 |
| 1419537_PM_at   | Tfec                | TFEC     | 0.30  | 2.54 | 1.45  | 1.76E-01 | 4.63E-01 | -5.67 |
| 1415934_PM_at   | Cops8               | COPS8    | -0.24 | 4.67 | -1.45 | 1.76E-01 | 4.63E-01 | -5.67 |
| 1454982_PM_at   | Arfgef2             | ARFGEF2  | -0.20 | 2.90 | -1.45 | 1.76E-01 | 4.63E-01 | -5.67 |
| 1432722_PM_at   | ---                 | NA       | 0.17  | 2.41 | 1.45  | 1.76E-01 | 4.63E-01 | -5.67 |
| 1456551_PM_at   | Klf15               | NA       | 0.17  | 2.46 | 1.45  | 1.76E-01 | 4.63E-01 | -5.67 |
| 1457151_PM_at   | LOC102632821        | NA       | 0.18  | 2.91 | 1.45  | 1.76E-01 | 4.63E-01 | -5.67 |
| 1435609_PM_at   | Trp53bp1            | TP53BP1  | -0.28 | 2.86 | -1.45 | 1.76E-01 | 4.63E-01 | -5.67 |
| 1451191_PM_at   | Crabp2              | CRABP2   | -0.22 | 3.53 | -1.45 | 1.76E-01 | 4.63E-01 | -5.67 |
| 1421766_PM_at   | Uchl4               | UHL3     | 0.15  | 2.48 | 1.45  | 1.77E-01 | 4.63E-01 | -5.67 |
| 1434442_PM_at   | Stbd1               | STBD1    | 0.20  | 2.48 | 1.45  | 1.77E-01 | 4.63E-01 | -5.67 |
| 1444933_PM_at   | ---                 | NA       | 0.11  | 2.01 | 1.45  | 1.77E-01 | 4.63E-01 | -5.67 |
| 1424753_PM_at   | Nudt14              | NUDT14   | 0.17  | 2.38 | 1.45  | 1.77E-01 | 4.63E-01 | -5.67 |
| 1457736_PM_at   | Vps37d              | VPS37D   | 0.18  | 2.63 | 1.45  | 1.77E-01 | 4.63E-01 | -5.67 |
| 1443672_PM_at   | Lars2               | LARS2    | 0.23  | 3.15 | 1.45  | 1.77E-01 | 4.63E-01 | -5.67 |
| 1434044_PM_at   | Repin1              | REPIN1   | -0.42 | 3.59 | -1.45 | 1.77E-01 | 4.64E-01 | -5.67 |
| 1427793_PM_at   | ---                 | NA       | 0.15  | 2.58 | 1.45  | 1.77E-01 | 4.64E-01 | -5.67 |
| 1423343_PM_at   | Skolc1              | SLCO1C1  | -0.71 | 4.03 | -1.45 | 1.77E-01 | 4.64E-01 | -5.67 |
| 1434839_PM_s_at | Tbl1xr1             | TBL1XR1  | -0.49 | 4.81 | -1.45 | 1.77E-01 | 4.64E-01 | -5.67 |
| 1441055_PM_at   | Paln2               | NA       | -0.27 | 3.06 | -1.45 | 1.77E-01 | 4.64E-01 | -5.67 |
| 1432131_PM_at   | 4930404N11Rik       | C19orf71 | 0.15  | 2.34 | 1.45  | 1.77E-01 | 4.64E-01 | -5.67 |
| 1419440_PM_at   | Trim54              | TRIM54   | 0.16  | 2.96 | 1.45  | 1.77E-01 | 4.64E-01 | -5.67 |
| 1443903_PM_at   | Ppm1a               | PPM1A    | 0.23  | 2.33 | 1.45  | 1.77E-01 | 4.64E-01 | -5.67 |
| 1458243_PM_at   | ---                 | NA       | 0.42  | 4.85 | 1.45  | 1.77E-01 | 4.64E-01 | -5.67 |
| 1433187_PM_at   | B230112124Rik       | NA       | 0.46  | 3.01 | 1.45  | 1.77E-01 | 4.64E-01 | -5.67 |
| 1418477_PM_at   | Matn1               | MATN1    | 0.14  | 2.11 | 1.45  | 1.77E-01 | 4.64E-01 | -5.67 |
| 1441445_PM_at   | Per3                | NA       | 0.15  | 2.19 | 1.45  | 1.77E-01 | 4.64E-01 | -5.67 |
| 1446772_PM_at   | ---                 | NA       | 0.14  | 2.10 | 1.45  | 1.77E-01 | 4.64E-01 | -5.67 |
| 1443894_PM_at   | Evi2b /// Gm21975   | EVI2B    | 0.20  | 2.01 | 1.45  | 1.77E-01 | 4.64E-01 | -5.67 |
| 1430082_PM_at   | Wdr64               | WDR64    | 0.26  | 2.60 | 1.45  | 1.77E-01 | 4.64E-01 | -5.67 |
| 1425006_PM_a_at | Vrk1                | VRK1     | 0.39  | 3.57 | 1.45  | 1.77E-01 | 4.64E-01 | -5.67 |
| 1417953_PM_at   | Fam3c               | FAM3C    | -0.42 | 3.53 | -1.45 | 1.77E-01 | 4.64E-01 | -5.67 |
| 1422138_PM_at   | Plau                | PLAU     | 0.17  | 2.17 | 1.45  | 1.77E-01 | 4.64E-01 | -5.67 |
| 1455346_PM_at   | Masp1               | NA       | 0.19  | 2.28 | 1.45  | 1.77E-01 | 4.64E-01 | -5.67 |
| 1418877_PM_at   | ---                 | NA       | 0.29  | 2.33 | 1.45  | 1.77E-01 | 4.64E-01 | -5.67 |
| 1426852_PM_x_at | Nov                 | NOV      | -0.79 | 4.12 | -1.45 | 1.77E-01 | 4.64E-01 | -5.67 |
| 1425954_PM_a_at | Apex2               | APEX2    | 0.17  | 2.52 | 1.45  | 1.77E-01 | 4.64E-01 | -5.67 |
| 1448334_PM_a_at | Ccni                | CCNI     | -0.56 | 7.12 | -1.45 | 1.77E-01 | 4.64E-01 | -5.67 |

|                   |                        |           |       |      |       |          |          |       |
|-------------------|------------------------|-----------|-------|------|-------|----------|----------|-------|
| 1421043_PM_s_at   | Arhgef2                | ARHGEF2   | -0.47 | 4.84 | -1.45 | 1.77E-01 | 4.64E-01 | -5.67 |
| 1430219_PM_at     | Aktip                  | AKTIP     | -0.34 | 2.42 | -1.45 | 1.77E-01 | 4.64E-01 | -5.67 |
| 1460591_PM_at     | Esr1                   | ESR1      | 0.14  | 2.14 | 1.45  | 1.77E-01 | 4.64E-01 | -5.67 |
| 1443510_PM_at     | Obsl1                  | OBSL1     | 0.16  | 2.30 | 1.45  | 1.77E-01 | 4.64E-01 | -5.67 |
| 1422775_PM_at     | Blk                    | BLK       | 0.12  | 2.22 | 1.45  | 1.77E-01 | 4.64E-01 | -5.67 |
| 1428093_PM_at     | Trabd                  | TRABD     | 0.15  | 2.28 | 1.45  | 1.77E-01 | 4.64E-01 | -5.67 |
| 1425910_PM_at     | Dnajc2                 | NA        | 0.50  | 3.93 | 1.45  | 1.77E-01 | 4.64E-01 | -5.67 |
| 1422706_PM_at     | Pmepa1                 | PMPEA1    | -0.56 | 4.63 | -1.45 | 1.77E-01 | 4.64E-01 | -5.67 |
| 1445623_PM_at     | ---                    | NA        | 0.11  | 2.46 | 1.45  | 1.77E-01 | 4.64E-01 | -5.67 |
| 1417577_PM_at     | Trpc3                  | TRPC3     | 0.21  | 2.98 | 1.45  | 1.77E-01 | 4.64E-01 | -5.67 |
| 1426257_PM_a_at   | Sars                   | SARS      | -0.71 | 5.09 | -1.45 | 1.77E-01 | 4.64E-01 | -5.67 |
| 1458988_PM_at     | ---                    | NA        | 0.15  | 2.36 | 1.45  | 1.77E-01 | 4.64E-01 | -5.67 |
| 1429509_PM_at     | Lsm12                  | LSM12     | 0.16  | 2.49 | 1.45  | 1.77E-01 | 4.64E-01 | -5.67 |
| 1448556_PM_at     | Prlr                   | PRLR      | 0.31  | 2.59 | 1.45  | 1.77E-01 | 4.64E-01 | -5.67 |
| 1429703_PM_at     | ---                    | NA        | 0.31  | 2.78 | 1.45  | 1.77E-01 | 4.64E-01 | -5.67 |
| 1430863_PM_at     | ---                    | NA        | -0.19 | 2.58 | -1.45 | 1.77E-01 | 4.64E-01 | -5.67 |
| 1459205_PM_at     | ---                    | NA        | 0.16  | 2.29 | 1.45  | 1.77E-01 | 4.64E-01 | -5.67 |
| 1447444_PM_at     | Ubxn11                 | UBXN11    | 0.25  | 2.40 | 1.45  | 1.77E-01 | 4.64E-01 | -5.67 |
| 1460244_PM_at     | Upb1                   | UPB1      | 0.22  | 2.39 | 1.45  | 1.77E-01 | 4.64E-01 | -5.67 |
| 1436314_PM_at     | Scyl2                  | SCYL2     | -0.41 | 4.92 | -1.45 | 1.77E-01 | 4.64E-01 | -5.67 |
| 1443126_PM_at     | ---                    | NA        | -0.18 | 2.30 | -1.45 | 1.77E-01 | 4.64E-01 | -5.67 |
| 1441176_PM_at     | ---                    | NA        | 0.13  | 2.59 | 1.45  | 1.77E-01 | 4.64E-01 | -5.67 |
| 1441296_PM_at     | ---                    | NA        | 0.24  | 3.14 | 1.45  | 1.77E-01 | 4.64E-01 | -5.67 |
| 1442329_PM_at     | Dclre1a                | DCLRE1A   | -0.16 | 2.26 | -1.45 | 1.77E-01 | 4.64E-01 | -5.67 |
| 1428931_PM_a_at   | Parp6                  | PARP6     | -0.38 | 3.77 | -1.45 | 1.78E-01 | 4.64E-01 | -5.67 |
| 1458950_PM_at     | ---                    | NA        | 0.14  | 2.45 | 1.45  | 1.78E-01 | 4.64E-01 | -5.67 |
| 1443080_PM_at     | ---                    | NA        | 0.15  | 2.37 | 1.45  | 1.78E-01 | 4.64E-01 | -5.67 |
| 1432492_PM_a_at   | Haa0                   | HAAO      | 0.17  | 2.10 | 1.45  | 1.78E-01 | 4.64E-01 | -5.67 |
| 1416095_PM_x_at   | Sarnp                  | SARNP     | 0.26  | 4.71 | 1.45  | 1.78E-01 | 4.64E-01 | -5.67 |
| 1416522_PM_a_at   | Grcc10                 | C12orf57  | -0.46 | 3.44 | -1.45 | 1.78E-01 | 4.64E-01 | -5.67 |
| 1444714_PM_at     | ---                    | NA        | 0.20  | 2.35 | 1.45  | 1.78E-01 | 4.65E-01 | -5.67 |
| 1457120_PM_at     | Itk                    | ITK       | 0.13  | 2.12 | 1.45  | 1.78E-01 | 4.65E-01 | -5.67 |
| 1452729_PM_at     | Dpm3                   | DPM3      | 0.16  | 2.28 | 1.45  | 1.78E-01 | 4.65E-01 | -5.67 |
| 1430855_PM_at     | Col20a1                | COL20A1   | 0.21  | 2.77 | 1.45  | 1.78E-01 | 4.65E-01 | -5.67 |
| 1442793_PM_s_at   | LOC105242484 /// Tbrg4 | TBRG4     | 0.37  | 4.87 | 1.45  | 1.78E-01 | 4.65E-01 | -5.67 |
| 1453796_PM_a_at   | Ergic2                 | ERGI2     | -0.29 | 2.54 | -1.45 | 1.78E-01 | 4.65E-01 | -5.67 |
| 1445396_PM_at     | ---                    | NA        | -0.25 | 3.24 | -1.45 | 1.78E-01 | 4.65E-01 | -5.67 |
| 1450421_PM_at     | Tgfa                   | TGFA      | 0.13  | 2.24 | 1.45  | 1.78E-01 | 4.65E-01 | -5.67 |
| 1451898_PM_a_at   | Sema6c                 | SEMA6C    | 0.14  | 2.24 | 1.45  | 1.78E-01 | 4.65E-01 | -5.67 |
| 1437981_PM_x_at   | Ldah                   | LDHA      | 0.15  | 3.04 | 1.45  | 1.78E-01 | 4.65E-01 | -5.67 |
| 1435108_PM_at     | Arhgap22               | ARHGAP22  | 0.23  | 2.68 | 1.45  | 1.78E-01 | 4.65E-01 | -5.67 |
| 1451992_PM_at     | Adrbk1                 | GRK2      | 0.36  | 3.10 | 1.45  | 1.78E-01 | 4.65E-01 | -5.67 |
| 1423989_PM_at     | Tecpr1                 | TECPR1    | 0.37  | 6.34 | 1.45  | 1.78E-01 | 4.65E-01 | -5.67 |
| 1419248_PM_at     | Rgs2                   | RGS2      | -0.34 | 5.60 | -1.45 | 1.78E-01 | 4.65E-01 | -5.67 |
| 1429775_PM_a_at   | Gpr137b /// Gpr137b-ps | GPR137B   | -0.50 | 2.42 | -1.45 | 1.78E-01 | 4.65E-01 | -5.67 |
| 1430585_PM_at     | ---                    | NA        | 0.15  | 2.35 | 1.45  | 1.78E-01 | 4.65E-01 | -5.68 |
| 1435109_PM_at     | Tmem175                | TMEM175   | 0.27  | 3.11 | 1.45  | 1.78E-01 | 4.65E-01 | -5.68 |
| 1459224_PM_at     | ---                    | NA        | 0.35  | 2.83 | 1.45  | 1.78E-01 | 4.65E-01 | -5.68 |
| 1421768_PM_a_at   | Homer1                 | HOMER1    | 0.45  | 4.95 | 1.45  | 1.78E-01 | 4.65E-01 | -5.68 |
| 1455447_PM_at     | D430019H16Rik          | C14orf132 | -0.29 | 6.14 | -1.45 | 1.78E-01 | 4.65E-01 | -5.68 |
| 1442025_PM_a_at   | Zbtb16                 | NA        | -0.57 | 5.02 | -1.44 | 1.78E-01 | 4.65E-01 | -5.68 |
| 1450768_PM_at     | Dlg1                   | DLG1      | -0.19 | 2.90 | -1.44 | 1.78E-01 | 4.65E-01 | -5.68 |
| 1444446_PM_at     | ---                    | NA        | 0.34  | 2.44 | 1.44  | 1.78E-01 | 4.65E-01 | -5.68 |
| 1433076_PM_at     | 5430402O13Rik          | NA        | 0.15  | 2.22 | 1.44  | 1.78E-01 | 4.65E-01 | -5.68 |
| 1433160_PM_at     | 1700008N17Rik          | NA        | 0.14  | 2.27 | 1.44  | 1.78E-01 | 4.65E-01 | -5.68 |
| 1447362_PM_at     | Bub1b                  | BUB1B     | 0.17  | 2.48 | 1.44  | 1.78E-01 | 4.65E-01 | -5.68 |
| 1452896_PM_at     | Cfap20                 | CFAP20    | 0.45  | 2.78 | 1.44  | 1.78E-01 | 4.65E-01 | -5.68 |
| 1450310_PM_at     | Grid2ip                | GRID2IP   | 0.17  | 2.59 | 1.44  | 1.78E-01 | 4.65E-01 | -5.68 |
| 1420222_PM_at     | ---                    | NA        | 0.17  | 2.75 | 1.44  | 1.78E-01 | 4.65E-01 | -5.68 |
| 1457350_PM_at     | Per2                   | PER2      | 0.25  | 2.57 | 1.44  | 1.78E-01 | 4.65E-01 | -5.68 |
| 1429181_PM_at     | Cfap126                | CFAP126   | 0.39  | 2.87 | 1.44  | 1.78E-01 | 4.65E-01 | -5.68 |
| 1418204_PM_s_at   | Aif1                   | AIF1      | 0.36  | 2.74 | 1.44  | 1.78E-01 | 4.65E-01 | -5.68 |
| 1437708_PM_x_at   | Vamp3                  | VAMP3     | -0.44 | 4.65 | -1.44 | 1.78E-01 | 4.65E-01 | -5.68 |
| 1450001_PM_a_at   | Ush1c                  | USH1C     | 0.16  | 2.46 | 1.44  | 1.78E-01 | 4.65E-01 | -5.68 |
| 1431627_PM_at     | Gm26555                | NA        | 0.12  | 2.08 | 1.44  | 1.78E-01 | 4.65E-01 | -5.68 |
| 1417691_PM_at     | Bin3                   | BIN3      | 0.20  | 2.74 | 1.44  | 1.78E-01 | 4.66E-01 | -5.68 |
| 1456172_PM_at     | ---                    | NA        | 0.16  | 2.74 | 1.44  | 1.78E-01 | 4.66E-01 | -5.68 |
| 1420885_PM_a_at   | Sez6                   | SEZ6      | 0.20  | 2.74 | 1.44  | 1.78E-01 | 4.66E-01 | -5.68 |
| 1428956_PM_at     | Tmem177                | TMEM177   | 0.24  | 3.94 | 1.44  | 1.78E-01 | 4.66E-01 | -5.68 |
| 1434261_PM_at     | Sipa1l2                | SIPA1L2   | 0.37  | 3.79 | 1.44  | 1.78E-01 | 4.66E-01 | -5.68 |
| 1444328_PM_at     | Ctla                   | NA        | -0.29 | 2.65 | -1.44 | 1.78E-01 | 4.66E-01 | -5.68 |
| 1460013_PM_at     | Nlgn2                  | NLGN2     | 0.16  | 2.71 | 1.44  | 1.79E-01 | 4.66E-01 | -5.68 |
| 1450507_PM_at     | Pou2f3                 | POU2F3    | 0.14  | 2.13 | 1.44  | 1.79E-01 | 4.66E-01 | -5.68 |
| 1424812_PM_at     | BC017158               | C16orf58  | 0.43  | 3.32 | 1.44  | 1.79E-01 | 4.66E-01 | -5.68 |
| AFFX-r2-TagO-5_at | ---                    | NA        | 0.17  | 2.59 | 1.44  | 1.79E-01 | 4.66E-01 | -5.68 |

|                 |                                                                                                                                                                                                                                                                                                                                                                          |          |       |      |       |          |          |       |
|-----------------|--------------------------------------------------------------------------------------------------------------------------------------------------------------------------------------------------------------------------------------------------------------------------------------------------------------------------------------------------------------------------|----------|-------|------|-------|----------|----------|-------|
| 1454404_PM_at   | ---                                                                                                                                                                                                                                                                                                                                                                      | NA       | 0.29  | 3.79 | 1.44  | 1.79E-01 | 4.66E-01 | -5.68 |
| 1441299_PM_at   | Lurap1l                                                                                                                                                                                                                                                                                                                                                                  | LURAP1L  | -0.26 | 2.43 | -1.44 | 1.79E-01 | 4.66E-01 | -5.68 |
| 1457857_PM_at   | ---                                                                                                                                                                                                                                                                                                                                                                      | NA       | 0.21  | 2.30 | 1.44  | 1.79E-01 | 4.66E-01 | -5.68 |
| 1448395_PM_at   | Sfrp1                                                                                                                                                                                                                                                                                                                                                                    | SFRP1    | 0.22  | 2.38 | 1.44  | 1.79E-01 | 4.66E-01 | -5.68 |
| 1449109_PM_at   | Socs2                                                                                                                                                                                                                                                                                                                                                                    | Socs2    | 0.41  | 3.39 | 1.44  | 1.79E-01 | 4.66E-01 | -5.68 |
| 1438290_PM_x_at | Sftpc                                                                                                                                                                                                                                                                                                                                                                    | NA       | 0.13  | 2.34 | 1.44  | 1.79E-01 | 4.66E-01 | -5.68 |
| 1458594_PM_at   | Shprh                                                                                                                                                                                                                                                                                                                                                                    | SHPRH    | 0.37  | 3.26 | 1.44  | 1.79E-01 | 4.66E-01 | -5.68 |
| 1420558_PM_at   | Selp                                                                                                                                                                                                                                                                                                                                                                     | SELP     | 0.12  | 2.12 | 1.44  | 1.79E-01 | 4.66E-01 | -5.68 |
| 1436755_PM_at   | Itih5                                                                                                                                                                                                                                                                                                                                                                    | ITIH5    | -0.18 | 2.57 | -1.44 | 1.79E-01 | 4.66E-01 | -5.68 |
| 1416656_PM_at   | Clc1                                                                                                                                                                                                                                                                                                                                                                     | CLIC1    | 0.28  | 2.66 | 1.44  | 1.79E-01 | 4.66E-01 | -5.68 |
| 1444866_PM_at   | E230006M18Rik                                                                                                                                                                                                                                                                                                                                                            | NA       | -0.41 | 2.71 | -1.44 | 1.79E-01 | 4.66E-01 | -5.68 |
| 1421830_PM_at   | Ak4                                                                                                                                                                                                                                                                                                                                                                      | AK4      | -0.40 | 2.83 | -1.44 | 1.79E-01 | 4.66E-01 | -5.68 |
| 1436555_PM_at   | Slc7a2                                                                                                                                                                                                                                                                                                                                                                   | SLC7A2   | -0.28 | 2.81 | -1.44 | 1.79E-01 | 4.66E-01 | -5.68 |
| 1445921_PM_at   | D2Ert397e                                                                                                                                                                                                                                                                                                                                                                | NA       | 0.13  | 2.01 | 1.44  | 1.79E-01 | 4.66E-01 | -5.68 |
| 1442899_PM_at   | Ift22                                                                                                                                                                                                                                                                                                                                                                    | IFT22    | 0.31  | 2.58 | 1.44  | 1.79E-01 | 4.66E-01 | -5.68 |
|                 | Gm10921 /// Gm10922 ///<br>Gm14345 /// Gm14346 ///<br>Gm14347 /// Gm14351 ///<br>Gm14367 /// Gm14374 ///<br>Gm21608 /// Gm21645 ///<br>Gm21681 /// Gm21699 ///<br>Gm21950 /// Gm21951 ///<br>Gm2777 /// Gm2784 ///<br>Gm2799 /// Gm2825 ///<br>Gm2863 /// Gm2913 ///<br>Gm2927 /// Gm2964 ///<br>Gm3701 /// Gm3706 ///<br>Gm3750 /// Gm3763 ///<br>Gm5925 /// Gmcl11 /// |          |       |      |       |          |          |       |
| 1424537_PM_at   | LOC100048813                                                                                                                                                                                                                                                                                                                                                             | NA       | 0.35  | 2.87 | 1.44  | 1.79E-01 | 4.66E-01 | -5.68 |
| 1432857_PM_at   | 6430500D05Rik                                                                                                                                                                                                                                                                                                                                                            | NA       | 0.16  | 2.16 | 1.44  | 1.79E-01 | 4.66E-01 | -5.68 |
| 1458681_PM_at   | ---                                                                                                                                                                                                                                                                                                                                                                      | NA       | 0.13  | 2.38 | 1.44  | 1.79E-01 | 4.66E-01 | -5.68 |
| 1446356_PM_at   | ---                                                                                                                                                                                                                                                                                                                                                                      | NA       | 0.19  | 2.61 | 1.44  | 1.79E-01 | 4.66E-01 | -5.68 |
| 1440505_PM_at   | Plxcd1                                                                                                                                                                                                                                                                                                                                                                   | PLCXD1   | 0.32  | 2.81 | 1.44  | 1.79E-01 | 4.66E-01 | -5.68 |
| 1416746_PM_at   | H2afx                                                                                                                                                                                                                                                                                                                                                                    | H2AFX    | -0.56 | 4.24 | -1.44 | 1.79E-01 | 4.66E-01 | -5.68 |
| 1424961_PM_at   | Tapbpl                                                                                                                                                                                                                                                                                                                                                                   | TAPBPL   | 0.13  | 2.80 | 1.44  | 1.79E-01 | 4.66E-01 | -5.68 |
| 1448687_PM_at   | Fam132a                                                                                                                                                                                                                                                                                                                                                                  | C1QTNF12 | 0.13  | 2.10 | 1.44  | 1.79E-01 | 4.66E-01 | -5.68 |
| 1449309_PM_at   | Cyp8b1                                                                                                                                                                                                                                                                                                                                                                   | CYP8B1   | 0.13  | 2.26 | 1.44  | 1.79E-01 | 4.66E-01 | -5.68 |
| 1454310_PM_at   | ---                                                                                                                                                                                                                                                                                                                                                                      | NA       | 0.13  | 2.27 | 1.44  | 1.79E-01 | 4.66E-01 | -5.68 |
| 1455553_PM_at   | Tmem194b                                                                                                                                                                                                                                                                                                                                                                 | NEMP2    | 0.17  | 2.54 | 1.44  | 1.79E-01 | 4.66E-01 | -5.68 |
| 1451016_PM_at   | Ifrd2                                                                                                                                                                                                                                                                                                                                                                    | IFRD2    | 0.22  | 2.84 | 1.44  | 1.79E-01 | 4.66E-01 | -5.68 |
| 1417201_PM_at   | Nt5c2                                                                                                                                                                                                                                                                                                                                                                    | NT5C2    | 0.34  | 3.34 | 1.44  | 1.79E-01 | 4.66E-01 | -5.68 |
| 1457882_PM_at   | Etaa1                                                                                                                                                                                                                                                                                                                                                                    | ETAA1    | 0.22  | 2.55 | 1.44  | 1.79E-01 | 4.66E-01 | -5.68 |
| 1439455_PM_x_at | Capza1                                                                                                                                                                                                                                                                                                                                                                   | NA       | 0.64  | 4.71 | 1.44  | 1.79E-01 | 4.66E-01 | -5.68 |
| 1424682_PM_at   | Gpn3                                                                                                                                                                                                                                                                                                                                                                     | GPN3     | -0.36 | 2.74 | -1.44 | 1.79E-01 | 4.66E-01 | -5.68 |
| 1453593_PM_at   | Vgl3                                                                                                                                                                                                                                                                                                                                                                     | VGLL3    | -0.25 | 2.18 | -1.44 | 1.79E-01 | 4.66E-01 | -5.68 |
| 1450424_PM_a_at | Il18bp                                                                                                                                                                                                                                                                                                                                                                   | IL18BP   | 0.26  | 2.64 | 1.44  | 1.79E-01 | 4.66E-01 | -5.68 |
| 1418367_PM_x_at | Hist2h2aa2                                                                                                                                                                                                                                                                                                                                                               | NA       | 0.30  | 4.35 | 1.44  | 1.79E-01 | 4.66E-01 | -5.68 |
| 1438608_PM_at   | Tnni2                                                                                                                                                                                                                                                                                                                                                                    | TNNI2    | 0.14  | 2.47 | 1.44  | 1.79E-01 | 4.66E-01 | -5.68 |
| 1460600_PM_at   | AA14768                                                                                                                                                                                                                                                                                                                                                                  | NA       | -0.33 | 3.28 | -1.44 | 1.79E-01 | 4.66E-01 | -5.68 |
| 1437368_PM_at   | Gtf2h4                                                                                                                                                                                                                                                                                                                                                                   | GTF2H4   | -0.14 | 2.22 | -1.44 | 1.79E-01 | 4.66E-01 | -5.68 |
| 1446011_PM_at   | ---                                                                                                                                                                                                                                                                                                                                                                      | NA       | 0.51  | 2.79 | 1.44  | 1.79E-01 | 4.66E-01 | -5.68 |
| 1423404_PM_at   | Gkn1                                                                                                                                                                                                                                                                                                                                                                     | GKN1     | 0.15  | 2.13 | 1.44  | 1.79E-01 | 4.67E-01 | -5.68 |
| 1420586_PM_at   | Zfp493                                                                                                                                                                                                                                                                                                                                                                   | ZNF141   | 0.13  | 2.64 | 1.44  | 1.79E-01 | 4.67E-01 | -5.68 |
| 1451585_PM_x_at | Spsb2                                                                                                                                                                                                                                                                                                                                                                    | SPSB2    | 0.18  | 2.54 | 1.44  | 1.79E-01 | 4.67E-01 | -5.68 |
| 1418687_PM_at   | Arc                                                                                                                                                                                                                                                                                                                                                                      | ARC      | 0.25  | 3.77 | 1.44  | 1.79E-01 | 4.67E-01 | -5.68 |
| 1451412_PM_a_at | Ift20                                                                                                                                                                                                                                                                                                                                                                    | IFT20    | 0.28  | 4.42 | 1.44  | 1.79E-01 | 4.67E-01 | -5.68 |
| 1421837_PM_at   | ---                                                                                                                                                                                                                                                                                                                                                                      | NA       | 0.37  | 3.02 | 1.44  | 1.79E-01 | 4.67E-01 | -5.68 |
| 1429810_PM_at   | ---                                                                                                                                                                                                                                                                                                                                                                      | NA       | -0.18 | 2.15 | -1.44 | 1.79E-01 | 4.67E-01 | -5.68 |
| 1438281_PM_x_at | Smkr-ps                                                                                                                                                                                                                                                                                                                                                                  | NA       | 0.12  | 2.32 | 1.44  | 1.79E-01 | 4.67E-01 | -5.68 |
| 1455100_PM_at   | Akr1d1                                                                                                                                                                                                                                                                                                                                                                   | AKR1D1   | 0.13  | 2.15 | 1.44  | 1.79E-01 | 4.67E-01 | -5.68 |
| 1455612_PM_at   | Slc38a9                                                                                                                                                                                                                                                                                                                                                                  | SLC38A9  | 0.14  | 2.62 | 1.44  | 1.79E-01 | 4.67E-01 | -5.68 |
| 1429797_PM_at   | Atl3                                                                                                                                                                                                                                                                                                                                                                     | ATL3     | 0.14  | 2.26 | 1.44  | 1.79E-01 | 4.67E-01 | -5.68 |
| 1454088_PM_at   | ---                                                                                                                                                                                                                                                                                                                                                                      | NA       | 0.19  | 2.75 | 1.44  | 1.79E-01 | 4.67E-01 | -5.68 |
| 1428031_PM_at   | Mchr1                                                                                                                                                                                                                                                                                                                                                                    | MCHR1    | 0.20  | 2.36 | 1.44  | 1.79E-01 | 4.67E-01 | -5.68 |
| 1429660_PM_s_at | Smc2                                                                                                                                                                                                                                                                                                                                                                     | SMC2     | 0.59  | 3.44 | 1.44  | 1.79E-01 | 4.67E-01 | -5.68 |
| 1442632_PM_at   | ---                                                                                                                                                                                                                                                                                                                                                                      | NA       | 0.23  | 2.58 | 1.44  | 1.79E-01 | 4.67E-01 | -5.68 |
| 1449927_PM_at   | S100a5                                                                                                                                                                                                                                                                                                                                                                   | S100A5   | 0.47  | 2.20 | 1.44  | 1.79E-01 | 4.67E-01 | -5.68 |
| 1451683_PM_x_at | H2-D1                                                                                                                                                                                                                                                                                                                                                                    | NA       | -0.14 | 2.05 | -1.44 | 1.79E-01 | 4.67E-01 | -5.68 |
| 1418943_PM_at   | Zak                                                                                                                                                                                                                                                                                                                                                                      | MAP3K20  | -0.28 | 2.52 | -1.44 | 1.80E-01 | 4.67E-01 | -5.68 |
| 1433538_PM_at   | Marveld1                                                                                                                                                                                                                                                                                                                                                                 | MARVELD1 | -0.19 | 2.43 | -1.44 | 1.80E-01 | 4.67E-01 | -5.68 |
| 1427472_PM_a_at | C8b                                                                                                                                                                                                                                                                                                                                                                      | C8B      | 0.14  | 2.68 | 1.44  | 1.80E-01 | 4.67E-01 | -5.68 |
| 1421326_PM_at   | Csf2rb                                                                                                                                                                                                                                                                                                                                                                   | CSF2RB   | 0.20  | 3.31 | 1.44  | 1.80E-01 | 4.67E-01 | -5.68 |

|                 |                       |          |       |      |       |          |          |       |
|-----------------|-----------------------|----------|-------|------|-------|----------|----------|-------|
| 1416876_PM_at   | Parvg                 | PARVG    | 0.21  | 2.96 | 1.44  | 1.80E-01 | 4.67E-01 | -5.68 |
| 1445177_PM_at   | ---                   | NA       | 0.11  | 2.81 | 1.44  | 1.80E-01 | 4.67E-01 | -5.68 |
| 1433368_PM_x_at | 8430401P03Rik         | NA       | 0.18  | 3.73 | 1.44  | 1.80E-01 | 4.67E-01 | -5.68 |
| 1455981_PM_at   | LOC105244208 /// Rps6 | NA       | -0.17 | 2.30 | -1.44 | 1.80E-01 | 4.67E-01 | -5.68 |
| 1458602_PM_at   | Bbx                   | BBX      | -0.47 | 3.51 | -1.44 | 1.80E-01 | 4.67E-01 | -5.68 |
| 1449858_PM_at   | Cd86                  | CD86     | 0.13  | 2.25 | 1.44  | 1.80E-01 | 4.67E-01 | -5.68 |
| 1417689_PM_a_at | Pdzk1ip1              | PDZK1IP1 | 0.21  | 2.84 | 1.44  | 1.80E-01 | 4.67E-01 | -5.68 |
| 1420307_PM_a_at | Pitpnb                | PITPNB   | 0.71  | 3.13 | 1.44  | 1.80E-01 | 4.67E-01 | -5.68 |
| 1430105_PM_at   | 1700042010Rik         | NA       | 0.20  | 2.42 | 1.44  | 1.80E-01 | 4.67E-01 | -5.68 |
| 1450774_PM_at   | Ly6g6d                | LY6G6D   | 0.13  | 2.73 | 1.44  | 1.80E-01 | 4.67E-01 | -5.68 |
| 1433983_PM_at   | Cnksr3                | CNKS3    | 0.17  | 2.29 | 1.44  | 1.80E-01 | 4.67E-01 | -5.68 |
| 1431560_PM_at   | ---                   | NA       | 0.16  | 2.68 | 1.44  | 1.80E-01 | 4.67E-01 | -5.68 |
| 1425168_PM_at   | Gngt1                 | GNGT1    | 0.12  | 2.08 | 1.44  | 1.80E-01 | 4.67E-01 | -5.68 |
| 1455735_PM_at   | Ap1s3                 | AP1S3    | 0.11  | 1.79 | 1.44  | 1.80E-01 | 4.67E-01 | -5.68 |
| 1448801_PM_a_at | Timm44                | TIMM44   | 0.58  | 4.76 | 1.44  | 1.80E-01 | 4.67E-01 | -5.68 |
| 1423976_PM_at   | 4930453N24Rik         | C3orf38  | -0.34 | 2.49 | -1.44 | 1.80E-01 | 4.68E-01 | -5.69 |
| 1416862_PM_at   | Stam                  | STAM     | -0.25 | 2.92 | -1.44 | 1.80E-01 | 4.68E-01 | -5.69 |
| 1433407_PM_at   | Mcm10                 | NA       | 0.13  | 2.53 | 1.44  | 1.80E-01 | 4.68E-01 | -5.69 |
| 1441924_PM_x_at | Edn3                  | EDN3     | 0.14  | 2.23 | 1.44  | 1.80E-01 | 4.68E-01 | -5.69 |
| 1439614_PM_at   | ---                   | NA       | 0.15  | 2.57 | 1.44  | 1.80E-01 | 4.68E-01 | -5.69 |
| 1451997_PM_at   | Zfp426                | ZNF426   | 0.16  | 3.28 | 1.44  | 1.80E-01 | 4.68E-01 | -5.69 |
| 1419242_PM_at   | 9530002B09Rik         | NA       | 0.18  | 2.22 | 1.44  | 1.80E-01 | 4.68E-01 | -5.69 |
| 1421229_PM_at   | Dffb                  | DFFB     | 0.21  | 2.35 | 1.44  | 1.80E-01 | 4.68E-01 | -5.69 |
| 1457696_PM_at   | Rilp                  | RILP     | 0.22  | 2.50 | 1.44  | 1.80E-01 | 4.68E-01 | -5.69 |
| 1454312_PM_at   | ---                   | NA       | 0.37  | 4.55 | 1.44  | 1.80E-01 | 4.68E-01 | -5.69 |
| 1445079_PM_at   | ---                   | NA       | 0.16  | 2.31 | 1.44  | 1.80E-01 | 4.68E-01 | -5.69 |
| 1424470_PM_a_at | Rapgef3               | RAPGEF3  | -0.73 | 6.43 | -1.44 | 1.80E-01 | 4.68E-01 | -5.69 |
| 1445240_PM_at   | AU019796              | NA       | 0.15  | 2.06 | 1.44  | 1.80E-01 | 4.68E-01 | -5.69 |
| 1431723_PM_at   | ---                   | NA       | 0.23  | 2.53 | 1.44  | 1.80E-01 | 4.68E-01 | -5.69 |
| 1418366_PM_at   | Hist2h2aa2            | NA       | 0.27  | 3.10 | 1.44  | 1.80E-01 | 4.68E-01 | -5.69 |
| 1448016_PM_at   | Sass6                 | SASS6    | 0.11  | 2.12 | 1.44  | 1.80E-01 | 4.68E-01 | -5.69 |
| 1427951_PM_s_at | Ccdc28a               | CCDC28A  | -0.14 | 2.25 | -1.44 | 1.80E-01 | 4.68E-01 | -5.69 |
| 1421202_PM_at   | Chrna4                | CHRNA4   | 0.18  | 3.30 | 1.44  | 1.80E-01 | 4.68E-01 | -5.69 |
| 1434920_PM_a_at | Evl                   | EVL      | -0.97 | 5.56 | -1.44 | 1.80E-01 | 4.68E-01 | -5.69 |
| 1416443_PM_a_at | Sae1                  | SAE1     | -0.27 | 3.20 | -1.44 | 1.80E-01 | 4.68E-01 | -5.69 |
| 1446185_PM_at   | Mtor                  | MTOR     | 0.17  | 2.17 | 1.44  | 1.80E-01 | 4.68E-01 | -5.69 |
| 1448135_PM_at   | Atf4                  | ATF4     | 0.24  | 5.69 | 1.44  | 1.80E-01 | 4.68E-01 | -5.69 |
| 1449551_PM_at   | Myo1c                 | MYO1C    | -0.39 | 2.75 | -1.44 | 1.80E-01 | 4.68E-01 | -5.69 |
| 1457962_PM_at   | ---                   | NA       | 0.21  | 2.63 | 1.44  | 1.80E-01 | 4.68E-01 | -5.69 |
| 1457813_PM_at   | ---                   | NA       | 0.22  | 2.24 | 1.44  | 1.80E-01 | 4.68E-01 | -5.69 |
| 1423169_PM_at   | Taf7                  | TAF7     | 0.15  | 2.66 | 1.44  | 1.80E-01 | 4.68E-01 | -5.69 |
| 1453200_PM_at   | Rai1                  | RAI1     | -0.20 | 2.62 | -1.44 | 1.80E-01 | 4.68E-01 | -5.69 |
| 1438019_PM_at   | Ippk                  | IPPK     | -0.32 | 4.01 | -1.44 | 1.80E-01 | 4.68E-01 | -5.69 |
| 1436843_PM_at   | Rbm12b2               | RBM12B   | -0.33 | 3.98 | -1.44 | 1.81E-01 | 4.68E-01 | -5.69 |
| 1442796_PM_at   | Atf7ip2               | ATF7IP2  | -0.13 | 2.18 | -1.44 | 1.81E-01 | 4.68E-01 | -5.69 |
| 1444186_PM_at   | Phykpl                | PHYKPL   | 0.39  | 4.15 | 1.44  | 1.80E-01 | 4.68E-01 | -5.69 |
| 1452168_PM_x_at | Gspt1                 | GSPT1    | -0.63 | 3.77 | -1.44 | 1.81E-01 | 4.68E-01 | -5.69 |
| 1421606_PM_a_at | Sult4a1               | SULT4A1  | -0.17 | 2.73 | -1.44 | 1.81E-01 | 4.68E-01 | -5.69 |
| 1434152_PM_at   | Apol7c /// Gm8221     | NA       | 0.18  | 2.41 | 1.44  | 1.81E-01 | 4.68E-01 | -5.69 |
| 1432075_PM_a_at | Tekt1                 | TEKT1    | 0.24  | 2.95 | 1.44  | 1.81E-01 | 4.68E-01 | -5.69 |
| 1422060_PM_at   | Parvb                 | PARVB    | 0.11  | 2.74 | 1.44  | 1.81E-01 | 4.68E-01 | -5.69 |
| 1417382_PM_at   | Entpd5                | ENTPD5   | 0.33  | 2.59 | 1.44  | 1.81E-01 | 4.68E-01 | -5.69 |
| 1434944_PM_at   | Dmpk                  | DMPK     | 0.30  | 3.30 | 1.44  | 1.81E-01 | 4.68E-01 | -5.69 |
| 1437651_PM_a_at | Dtnb                  | DTNB     | 0.19  | 3.37 | 1.44  | 1.81E-01 | 4.68E-01 | -5.69 |
| 1431922_PM_at   | Ix                    | ISX      | 0.21  | 2.31 | 1.44  | 1.81E-01 | 4.68E-01 | -5.69 |
| 1455805_PM_x_at | Ccdc22                | CCDC22   | 0.89  | 5.81 | 1.44  | 1.81E-01 | 4.68E-01 | -5.69 |
| 1420843_PM_at   | Ptprf                 | PTPRF    | -0.28 | 2.84 | -1.44 | 1.81E-01 | 4.68E-01 | -5.69 |
| 1456322_PM_at   | Gas1                  | NA       | 0.19  | 2.70 | 1.44  | 1.81E-01 | 4.68E-01 | -5.69 |
| 1415835_PM_at   | Pr3b1                 | PRL      | 0.30  | 2.90 | 1.44  | 1.81E-01 | 4.68E-01 | -5.69 |
| 1427761_PM_at   | Eri3                  | ERI3     | 0.32  | 2.51 | 1.44  | 1.81E-01 | 4.68E-01 | -5.69 |
| 1449711_PM_at   | Atp6v1e1              | ATP6V1E1 | -0.23 | 4.14 | -1.43 | 1.81E-01 | 4.68E-01 | -5.69 |
| 1435943_PM_at   | Dpep1                 | DPEP1    | 0.19  | 2.56 | 1.43  | 1.81E-01 | 4.68E-01 | -5.69 |
| 1445143_PM_at   | ---                   | NA       | -0.58 | 5.54 | -1.43 | 1.81E-01 | 4.68E-01 | -5.69 |
| 1443704_PM_at   | Gm30752               | NA       | 0.17  | 2.28 | 1.43  | 1.81E-01 | 4.69E-01 | -5.69 |
| 1446032_PM_at   | ---                   | NA       | 0.17  | 2.08 | 1.43  | 1.81E-01 | 4.69E-01 | -5.69 |
| 1433861_PM_at   | Cc2d1b                | CC2D1B   | 0.20  | 2.45 | 1.43  | 1.81E-01 | 4.69E-01 | -5.69 |
| 1428726_PM_at   | Thumpd2               | THUMPD2  | 0.20  | 2.68 | 1.43  | 1.81E-01 | 4.69E-01 | -5.69 |
| 1436531_PM_at   | Metap2                | METAP2   | 0.22  | 2.88 | 1.43  | 1.81E-01 | 4.69E-01 | -5.69 |
| 1453607_PM_at   | Mfap3l                | MFAP3L   | 0.24  | 2.34 | 1.43  | 1.81E-01 | 4.69E-01 | -5.69 |
| 1423368_PM_at   | Laptm4a               | LAPTM4A  | 0.34  | 7.01 | 1.43  | 1.81E-01 | 4.69E-01 | -5.69 |
| 1417833_PM_at   | Zc3h10                | ZC3H10   | 0.37  | 3.77 | 1.43  | 1.81E-01 | 4.69E-01 | -5.69 |
| 1437377_PM_a_at | Polrmt                | POLRMT   | -0.79 | 4.44 | -1.43 | 1.81E-01 | 4.69E-01 | -5.69 |
| 1442089_PM_at   | Gm11563               | NA       | 0.18  | 2.75 | 1.43  | 1.81E-01 | 4.69E-01 | -5.69 |
| 1430929_PM_at   | ---                   | NA       | 0.19  | 2.38 | 1.43  | 1.81E-01 | 4.69E-01 | -5.69 |
| 1449726_PM_at   | Glr3 /// Gm12669      | GLRX3    | 1.28  | 4.17 | 1.43  | 1.81E-01 | 4.69E-01 | -5.69 |

|                 |               |          |       |      |       |          |          |       |
|-----------------|---------------|----------|-------|------|-------|----------|----------|-------|
| 1450996_PM_at   | Fshb          | FSHB     | 0.15  | 2.12 | 1.43  | 1.81E-01 | 4.69E-01 | -5.69 |
| 1441496_PM_at   | Tdrd3         | TDRD3    | 0.21  | 2.80 | 1.43  | 1.81E-01 | 4.69E-01 | -5.69 |
| 1438700_PM_at   | Fnbp4         | NA       | 0.22  | 2.42 | 1.43  | 1.81E-01 | 4.69E-01 | -5.69 |
| 1432560_PM_at   | Klk1b7-ps     | NA       | 0.13  | 2.41 | 1.43  | 1.81E-01 | 4.69E-01 | -5.69 |
| 1439388_PM_s_at | Bcar1         | BCAR1    | -0.50 | 5.07 | -1.43 | 1.81E-01 | 4.69E-01 | -5.69 |
| 1424421_PM_at   | Flad1         | FLAD1    | 0.12  | 2.72 | 1.43  | 1.81E-01 | 4.69E-01 | -5.69 |
| 1426122_PM_a_at | Coro6         | CORO6    | 0.19  | 2.37 | 1.43  | 1.81E-01 | 4.69E-01 | -5.69 |
| 1422978_PM_at   | Cybb          | CYBB     | 0.14  | 2.27 | 1.43  | 1.81E-01 | 4.69E-01 | -5.69 |
| 1437647_PM_at   | Dido1         | DIDO1    | 0.12  | 2.81 | 1.43  | 1.81E-01 | 4.69E-01 | -5.69 |
| 1425800_PM_at   | Rad9b         | RAD9B    | 0.14  | 2.73 | 1.43  | 1.81E-01 | 4.69E-01 | -5.69 |
| 1422066_PM_x_at | Klrb1b        | KL RB1   | 0.10  | 1.97 | 1.43  | 1.81E-01 | 4.69E-01 | -5.69 |
| 1418148_PM_at   | Abhd1         | NA       | 0.17  | 3.32 | 1.43  | 1.81E-01 | 4.69E-01 | -5.69 |
| 1438141_PM_at   | Lactbl1       | LACTBL1  | 0.17  | 2.82 | 1.43  | 1.81E-01 | 4.69E-01 | -5.69 |
| 1426436_PM_at   | Tmem159       | TMEM159  | -0.22 | 2.46 | -1.43 | 1.81E-01 | 4.69E-01 | -5.69 |
| 1441355_PM_at   | ---           | NA       | 0.21  | 2.85 | 1.43  | 1.81E-01 | 4.69E-01 | -5.69 |
| 1452375_PM_at   | Alhd4a1       | ALDH4A1  | 0.12  | 2.26 | 1.43  | 1.81E-01 | 4.69E-01 | -5.69 |
| 1416277_PM_a_at | Rplp1         | RPLP1    | 0.42  | 3.29 | 1.43  | 1.81E-01 | 4.69E-01 | -5.69 |
| 1427554_PM_at   | Helq          | NA       | 0.17  | 2.08 | 1.43  | 1.81E-01 | 4.69E-01 | -5.69 |
| 1421649_PM_at   | Tnfrsf8       | TNFRSF8  | 0.13  | 2.32 | 1.43  | 1.82E-01 | 4.70E-01 | -5.69 |
| 1436199_PM_at   | Trim14        | NA       | 0.14  | 2.33 | 1.43  | 1.82E-01 | 4.70E-01 | -5.69 |
| 1423587_PM_a_at | Exosc10       | EXOSC10  | 0.37  | 3.74 | 1.43  | 1.82E-01 | 4.70E-01 | -5.69 |
| 1433755_PM_at   | Mier1         | MIER1    | -0.35 | 3.06 | -1.43 | 1.82E-01 | 4.70E-01 | -5.69 |
| 1429568_PM_x_at | Ube2f         | UBE2F    | -0.38 | 3.00 | -1.43 | 1.82E-01 | 4.70E-01 | -5.69 |
| 1446727_PM_at   | ---           | NA       | 0.20  | 2.68 | 1.43  | 1.82E-01 | 4.70E-01 | -5.69 |
| 1453049_PM_at   | Svip          | SVIP     | 0.24  | 2.35 | 1.43  | 1.82E-01 | 4.70E-01 | -5.69 |
| 1456302_PM_at   | Pex6          | PEX6     | 0.18  | 2.45 | 1.43  | 1.82E-01 | 4.70E-01 | -5.69 |
| 1448284_PM_a_at | Ndufc1        | NDUFC1   | 0.22  | 9.57 | 1.43  | 1.82E-01 | 4.70E-01 | -5.69 |
| 1427959_PM_at   | Abhd10        | ABHD10   | 0.24  | 2.34 | 1.43  | 1.82E-01 | 4.70E-01 | -5.69 |
| 1428191_PM_s_at | Mettl17       | METTL17  | 0.28  | 2.75 | 1.43  | 1.82E-01 | 4.70E-01 | -5.69 |
| 1437007_PM_x_at | Usp39         | USP39    | 0.34  | 4.50 | 1.43  | 1.82E-01 | 4.70E-01 | -5.69 |
| 1437613_PM_s_at | Ptpdc1        | PTPDC1   | 0.19  | 2.73 | 1.43  | 1.82E-01 | 4.70E-01 | -5.69 |
| 1431875_PM_a_at | E2f1          | E2F1     | 0.30  | 3.33 | 1.43  | 1.82E-01 | 4.70E-01 | -5.69 |
| 1450037_PM_at   | Usp9x         | USP9X    | 0.47  | 4.29 | 1.43  | 1.82E-01 | 4.70E-01 | -5.69 |
| 1442405_PM_at   | ---           | NA       | 0.17  | 2.42 | 1.43  | 1.82E-01 | 4.70E-01 | -5.69 |
| 1430271_PM_x_at | Taf1d         | NA       | -0.26 | 4.23 | -1.43 | 1.82E-01 | 4.70E-01 | -5.69 |
| 1450269_PM_a_at | Pfk1          | PFKL     | -0.42 | 3.89 | -1.43 | 1.82E-01 | 4.70E-01 | -5.69 |
| 1432346_PM_a_at | Cdh23         | CDH23    | 0.14  | 2.24 | 1.43  | 1.82E-01 | 4.70E-01 | -5.69 |
| 1439138_PM_at   | ---           | NA       | -0.17 | 2.53 | -1.43 | 1.82E-01 | 4.70E-01 | -5.69 |
| 1418026_PM_at   | Exo1          | EXO1     | 0.15  | 2.23 | 1.43  | 1.82E-01 | 4.70E-01 | -5.69 |
| 1437242_PM_at   | Ttl12         | TTL12    | 0.22  | 2.86 | 1.43  | 1.82E-01 | 4.70E-01 | -5.69 |
| 1448484_PM_at   | Amd1          | AMD1     | -0.46 | 5.65 | -1.43 | 1.82E-01 | 4.70E-01 | -5.69 |
| 1432515_PM_at   | 2410124H12Rik | NA       | 0.12  | 2.37 | 1.43  | 1.82E-01 | 4.70E-01 | -5.69 |
| 1456157_PM_at   | ---           | NA       | 0.22  | 3.02 | 1.43  | 1.82E-01 | 4.70E-01 | -5.69 |
| 1441617_PM_at   | ---           | NA       | 0.24  | 2.41 | 1.43  | 1.82E-01 | 4.70E-01 | -5.69 |
| 1449731_PM_s_at | Nfkbia        | NFKBIA   | -0.36 | 5.53 | -1.43 | 1.82E-01 | 4.70E-01 | -5.69 |
| 1454042_PM_a_at | Srpk1         | SRPK1    | -0.33 | 5.36 | -1.43 | 1.82E-01 | 4.70E-01 | -5.69 |
| 1416654_PM_at   | Slc31a2       | SLC31A2  | -0.19 | 3.13 | -1.43 | 1.82E-01 | 4.70E-01 | -5.69 |
| 1434825_PM_at   | Tnrc18        | TNRC18   | 0.60  | 5.20 | 1.43  | 1.82E-01 | 4.70E-01 | -5.69 |
| 1429065_PM_at   | Ikbip         | IKBIP    | -0.37 | 2.36 | -1.43 | 1.82E-01 | 4.70E-01 | -5.70 |
| 1459064_PM_at   | ---           | NA       | -0.19 | 2.27 | -1.43 | 1.82E-01 | 4.70E-01 | -5.70 |
| 1441999_PM_at   | ---           | NA       | 0.13  | 2.17 | 1.43  | 1.82E-01 | 4.70E-01 | -5.70 |
| 1431247_PM_at   | ---           | NA       | 0.14  | 2.21 | 1.43  | 1.82E-01 | 4.70E-01 | -5.70 |
| 1450158_PM_at   | Rem1          | REM1     | 0.15  | 2.72 | 1.43  | 1.82E-01 | 4.70E-01 | -5.70 |
| 1419691_PM_at   | Camp          | CAMP     | 0.16  | 2.21 | 1.43  | 1.82E-01 | 4.70E-01 | -5.70 |
| 1437472_PM_at   | Unc13a        | UNC13A   | 0.16  | 3.74 | 1.43  | 1.82E-01 | 4.70E-01 | -5.70 |
| 1442275_PM_at   | 4933402J07Rik | C16orf78 | 0.17  | 2.27 | 1.43  | 1.82E-01 | 4.70E-01 | -5.70 |
| 1419130_PM_at   | Adat2         | ADAT2    | 0.21  | 2.75 | 1.43  | 1.82E-01 | 4.70E-01 | -5.70 |
| 1423170_PM_at   | Taf7          | TAF7     | 0.16  | 2.22 | 1.43  | 1.82E-01 | 4.70E-01 | -5.70 |
| 1438838_PM_at   | Ftx           | NA       | -0.28 | 3.21 | -1.43 | 1.82E-01 | 4.70E-01 | -5.70 |
| 1432902_PM_at   | Gm6086        | GAL3ST2  | 0.15  | 2.06 | 1.43  | 1.82E-01 | 4.70E-01 | -5.70 |
| 1437021_PM_at   | Arl13b        | ARL13B   | -0.35 | 3.10 | -1.43 | 1.82E-01 | 4.70E-01 | -5.70 |
| 1427015_PM_at   | Nckap5l       | NCKAP5L  | 0.16  | 2.32 | 1.43  | 1.82E-01 | 4.71E-01 | -5.70 |
| 1442411_PM_at   | ---           | NA       | 0.17  | 2.10 | 1.43  | 1.82E-01 | 4.71E-01 | -5.70 |
| 1418038_PM_s_at | Dusp19        | DUSP19   | 0.28  | 2.73 | 1.43  | 1.82E-01 | 4.71E-01 | -5.70 |
| 1417139_PM_at   | Dsn1          | DSN1     | -0.22 | 2.59 | -1.43 | 1.82E-01 | 4.71E-01 | -5.70 |
| 1436702_PM_at   | Nat8l         | NAT8L    | -0.40 | 4.77 | -1.43 | 1.83E-01 | 4.71E-01 | -5.70 |
| 1438408_PM_at   | Sowahb        | SOWAHB   | 0.28  | 3.54 | 1.43  | 1.83E-01 | 4.71E-01 | -5.70 |
| 1436630_PM_at   | ---           | NA       | 0.17  | 2.70 | 1.43  | 1.83E-01 | 4.71E-01 | -5.70 |
| 1459932_PM_at   | D8Ert28e      | NA       | 0.15  | 2.26 | 1.43  | 1.83E-01 | 4.71E-01 | -5.70 |
| 1458421_PM_at   | Kcnq3         | KCNQ3    | -0.42 | 2.95 | -1.43 | 1.83E-01 | 4.71E-01 | -5.70 |
| 1453424_PM_at   | Fyco1         | FYCO1    | -0.70 | 3.37 | -1.43 | 1.83E-01 | 4.71E-01 | -5.70 |
| 1457851_PM_at   | ---           | NA       | 0.11  | 2.25 | 1.43  | 1.83E-01 | 4.71E-01 | -5.70 |
| 1415982_PM_at   | Herpud2       | HERPUD2  | 0.34  | 4.25 | 1.43  | 1.83E-01 | 4.71E-01 | -5.70 |
| 1423287_PM_at   | Cbln1         | CBLN1    | 1.14  | 2.89 | 1.43  | 1.83E-01 | 4.71E-01 | -5.70 |
| 1457750_PM_at   | D16Ert28e     | NA       | 0.16  | 2.44 | 1.43  | 1.83E-01 | 4.71E-01 | -5.70 |



|                 |                 |          |       |      |       |          |          |       |
|-----------------|-----------------|----------|-------|------|-------|----------|----------|-------|
| 1429113_PM_at   | Pagr1a ///Prrt2 | PRRT2    | 0.53  | 3.46 | 1.43  | 1.83E-01 | 4.71E-01 | -5.70 |
| 1422956_PM_at   | D1Pas1          | DDX3X    | 0.12  | 2.03 | 1.43  | 1.83E-01 | 4.71E-01 | -5.70 |
| 1454910_PM_at   | Rad54l2         | RAD54L2  | 0.21  | 2.66 | 1.43  | 1.83E-01 | 4.71E-01 | -5.70 |
| 1452934_PM_at   | Tmc5            | TMCS     | -0.27 | 2.56 | -1.43 | 1.83E-01 | 4.72E-01 | -5.70 |
| 1450106_PM_a_at | Evl             | EVL      | 0.38  | 5.89 | 1.43  | 1.83E-01 | 4.72E-01 | -5.70 |
| 1450904_PM_at   | Tmem167         | TMEM167A | -0.30 | 3.27 | -1.43 | 1.83E-01 | 4.72E-01 | -5.70 |
| 1457416_PM_at   | ---             | NA       | 0.14  | 2.63 | 1.43  | 1.83E-01 | 4.72E-01 | -5.70 |
| 1433122_PM_at   | 2900069G24Rik   | NA       | 0.13  | 1.96 | 1.43  | 1.83E-01 | 4.72E-01 | -5.70 |
| 1454218_PM_at   | 4930405D01Rik   | NA       | 0.14  | 2.12 | 1.43  | 1.83E-01 | 4.72E-01 | -5.70 |
| 1445603_PM_at   | ---             | NA       | 0.16  | 3.14 | 1.43  | 1.83E-01 | 4.72E-01 | -5.70 |
| 1424774_PM_s_at | Ears2           | EARS2    | 0.43  | 3.14 | 1.43  | 1.83E-01 | 4.72E-01 | -5.70 |
| 1428992_PM_at   | Unc13d          | UNC13D   | 0.20  | 2.53 | 1.43  | 1.83E-01 | 4.72E-01 | -5.70 |
| 1443077_PM_at   | ---             | NA       | 0.29  | 2.74 | 1.43  | 1.83E-01 | 4.72E-01 | -5.70 |
| 1452431_PM_s_at | H2-Aa           | NA       | 0.12  | 2.33 | 1.43  | 1.83E-01 | 4.72E-01 | -5.70 |
| 1445157_PM_at   | LOC102643228    | NA       | 0.22  | 2.37 | 1.43  | 1.83E-01 | 4.72E-01 | -5.70 |
| 1425550_PM_a_at | Prkar1a         | PRKAR1A  | 0.39  | 3.93 | 1.43  | 1.83E-01 | 4.72E-01 | -5.70 |
| 1445722_PM_at   | ---             | NA       | 0.37  | 2.83 | 1.43  | 1.83E-01 | 4.72E-01 | -5.70 |
| 1455969_PM_at   | Nudt15          | NUDT15   | -0.16 | 2.35 | -1.43 | 1.83E-01 | 4.72E-01 | -5.70 |
| 1434844_PM_at   | Hexdc           | HEXDC    | -0.15 | 2.80 | -1.43 | 1.83E-01 | 4.72E-01 | -5.70 |
| 1455124_PM_at   | Trim68          | TRIM68   | 0.21  | 2.66 | 1.43  | 1.83E-01 | 4.72E-01 | -5.70 |
| 1445186_PM_at   | Stc2            | STC2     | 0.23  | 2.86 | 1.43  | 1.83E-01 | 4.72E-01 | -5.70 |
| 1428338_PM_at   | Spata2l         | SPATA2L  | 0.34  | 3.27 | 1.43  | 1.83E-01 | 4.72E-01 | -5.70 |
| 1436230_PM_at   | Adgrg5          | ADGRG5   | 0.13  | 2.57 | 1.43  | 1.83E-01 | 4.72E-01 | -5.70 |
| 1427500_PM_at   | Spcs1           | SPCS1    | -0.22 | 2.35 | -1.43 | 1.83E-01 | 4.72E-01 | -5.70 |
| 1447057_PM_at   | ---             | NA       | -0.17 | 2.87 | -1.43 | 1.84E-01 | 4.72E-01 | -5.70 |
| 1439868_PM_at   | ---             | NA       | 0.16  | 3.11 | 1.43  | 1.84E-01 | 4.72E-01 | -5.70 |
| 1458881_PM_at   | ---             | NA       | 0.16  | 2.31 | 1.43  | 1.84E-01 | 4.72E-01 | -5.70 |
| 1454341_PM_at   | ---             | NA       | 0.14  | 2.40 | 1.42  | 1.84E-01 | 4.72E-01 | -5.70 |
| 1442849_PM_at   | Lrp1            | LRP1     | 0.75  | 6.11 | 1.42  | 1.84E-01 | 4.72E-01 | -5.70 |
| 1435827_PM_at   | 4933404O12Rik   | NA       | -0.23 | 2.60 | -1.42 | 1.84E-01 | 4.72E-01 | -5.70 |
| 1449411_PM_at   | Dscam           | DSCAM    | -0.19 | 3.45 | -1.42 | 1.84E-01 | 4.73E-01 | -5.70 |
| 1456687_PM_at   | Gm3556          | NA       | -0.18 | 2.42 | -1.42 | 1.84E-01 | 4.73E-01 | -5.70 |
| 1445648_PM_at   | ---             | NA       | 0.12  | 2.23 | 1.42  | 1.84E-01 | 4.73E-01 | -5.70 |
| 1420415_PM_at   | Krtap19-9b      | NA       | 0.12  | 2.10 | 1.42  | 1.84E-01 | 4.73E-01 | -5.70 |
| 1442288_PM_at   | ---             | NA       | 0.17  | 2.40 | 1.42  | 1.84E-01 | 4.73E-01 | -5.70 |
| 1421426_PM_at   | Hhip            | HHIP     | 0.20  | 2.52 | 1.42  | 1.84E-01 | 4.73E-01 | -5.70 |
| 1435394_PM_s_at | Rhoc            | RHOC     | 0.22  | 2.76 | 1.42  | 1.84E-01 | 4.73E-01 | -5.70 |
| 1425576_PM_at   | Ahcy1l          | AHCYL1   | -0.44 | 5.32 | -1.42 | 1.84E-01 | 4.73E-01 | -5.70 |
| 1417983_PM_a_at | Ube2v2          | UBE2V2   | -0.20 | 5.28 | -1.42 | 1.84E-01 | 4.73E-01 | -5.70 |
| 1450967_PM_at   | Hacd4           | HACD4    | 0.16  | 2.50 | 1.42  | 1.84E-01 | 4.73E-01 | -5.70 |
| 1454988_PM_s_at | Rab22a          | RAB22A   | -0.36 | 3.39 | -1.42 | 1.84E-01 | 4.73E-01 | -5.70 |
| 1416526_PM_a_at | Park7           | PARK7    | -0.28 | 5.14 | -1.42 | 1.84E-01 | 4.73E-01 | -5.70 |
| 1452949_PM_at   | Polr3b          | POLR3B   | 0.11  | 3.02 | 1.42  | 1.84E-01 | 4.73E-01 | -5.70 |
| 1443559_PM_at   | ---             | NA       | 0.13  | 2.51 | 1.42  | 1.84E-01 | 4.73E-01 | -5.70 |
| 1422198_PM_a_at | Shmt1           | SHMT1    | 0.16  | 2.36 | 1.42  | 1.84E-01 | 4.73E-01 | -5.70 |
| 1445625_PM_at   | ---             | NA       | 0.22  | 2.34 | 1.42  | 1.84E-01 | 4.73E-01 | -5.70 |
| 1422848_PM_a_at | Pabpn1          | PABPN1   | 0.35  | 7.01 | 1.42  | 1.84E-01 | 4.73E-01 | -5.70 |
| 1450866_PM_a_at | Mrpl17          | MRPL17   | 0.21  | 4.18 | 1.42  | 1.84E-01 | 4.73E-01 | -5.70 |
| 1433301_PM_at   | ---             | NA       | -0.16 | 2.39 | -1.42 | 1.84E-01 | 4.73E-01 | -5.70 |
| 1433635_PM_at   | Wdr18           | WDR18    | 0.13  | 2.58 | 1.42  | 1.84E-01 | 4.73E-01 | -5.70 |
| 1418436_PM_at   | Stx7            | STX7     | -0.32 | 4.44 | -1.42 | 1.84E-01 | 4.73E-01 | -5.70 |
| 1445650_PM_at   | ---             | NA       | 0.17  | 2.64 | 1.42  | 1.84E-01 | 4.73E-01 | -5.70 |
| 1445753_PM_at   | ---             | NA       | -0.12 | 2.19 | -1.42 | 1.84E-01 | 4.73E-01 | -5.70 |
| 1453545_PM_at   | ---             | NA       | 0.17  | 2.35 | 1.42  | 1.84E-01 | 4.73E-01 | -5.70 |
| 1453614_PM_a_at | Nfe2l3          | NFE2L3   | 0.30  | 2.81 | 1.42  | 1.84E-01 | 4.73E-01 | -5.70 |
| 1435400_PM_at   | Micu3           | MICU3    | -0.70 | 7.23 | -1.42 | 1.84E-01 | 4.73E-01 | -5.70 |
| 1416761_PM_at   | Hsd11b2         | HSD11B2  | 0.15  | 2.52 | 1.42  | 1.84E-01 | 4.73E-01 | -5.70 |
| 1442851_PM_at   | C79818          | NA       | 0.14  | 2.61 | 1.42  | 1.84E-01 | 4.73E-01 | -5.70 |
| 1425964_PM_x_at | Hspb1           | HSPB1    | -0.25 | 2.71 | -1.42 | 1.84E-01 | 4.73E-01 | -5.70 |
| 1422047_PM_at   | Cdh5            | CDH5     | 0.26  | 2.49 | 1.42  | 1.84E-01 | 4.73E-01 | -5.70 |
| 1419646_PM_a_at | Mbp             | MBP      | -0.97 | 6.83 | -1.42 | 1.84E-01 | 4.73E-01 | -5.70 |
| 1459962_PM_at   | 4930523C07Rik   | NA       | 0.12  | 2.17 | 1.42  | 1.84E-01 | 4.73E-01 | -5.70 |
| 1444124_PM_a_at | E330017L17Rik   | NA       | 0.15  | 2.30 | 1.42  | 1.84E-01 | 4.73E-01 | -5.70 |
| 1457649_PM_x_at | Ptchd1          | NA       | 0.21  | 2.41 | 1.42  | 1.84E-01 | 4.73E-01 | -5.70 |
| 1417627_PM_a_at | Limk1           | LIMK1    | 0.42  | 5.82 | 1.42  | 1.84E-01 | 4.73E-01 | -5.70 |
| 1449687_PM_at   | Arhgef25        | ARHGEF25 | -0.23 | 2.82 | -1.42 | 1.84E-01 | 4.73E-01 | -5.71 |
| 1438852_PM_x_at | Mcm6            | MCM6     | -1.05 | 3.89 | -1.42 | 1.84E-01 | 4.73E-01 | -5.71 |
| 1436413_PM_at   | Frk             | FRK      | -0.21 | 2.36 | -1.42 | 1.84E-01 | 4.73E-01 | -5.71 |
| 1422355_PM_at   | Taar1           | TAAR1    | -0.17 | 2.19 | -1.42 | 1.84E-01 | 4.73E-01 | -5.71 |
| 1453282_PM_at   | Cxadr           | NA       | 0.28  | 2.89 | 1.42  | 1.84E-01 | 4.73E-01 | -5.71 |
| 1428916_PM_s_at | Sirt5           | SIRT5    | 0.20  | 3.07 | 1.42  | 1.84E-01 | 4.73E-01 | -5.71 |
| 1438222_PM_at   | D2Ertd612e      | NA       | 0.54  | 4.27 | 1.42  | 1.84E-01 | 4.74E-01 | -5.71 |
| 1428603_PM_at   | Umad1           | UMAD1    | -0.42 | 3.16 | -1.42 | 1.84E-01 | 4.74E-01 | -5.71 |
| 1443796_PM_at   | Il16            | IL16     | 0.21  | 2.62 | 1.42  | 1.84E-01 | 4.74E-01 | -5.71 |
| 1442541_PM_at   | Oaz2            | NA       | 0.28  | 2.70 | 1.42  | 1.85E-01 | 4.74E-01 | -5.71 |

|                 |               |                |       |      |       |          |          |       |
|-----------------|---------------|----------------|-------|------|-------|----------|----------|-------|
| 1436379_PM_at   | Crtc3         | CRTC3          | -0.24 | 2.93 | -1.42 | 1.85E-01 | 4.74E-01 | -5.71 |
| 1416128_PM_at   | Tuba1c        | TUBA1C         | -0.20 | 3.55 | -1.42 | 1.85E-01 | 4.74E-01 | -5.71 |
| AFFX-r2-TagF_at | ---           | NA             | 0.13  | 2.06 | 1.42  | 1.85E-01 | 4.74E-01 | -5.71 |
| 1450157_PM_a_at | Hmmr          | HMMR           | 0.14  | 2.51 | 1.42  | 1.85E-01 | 4.74E-01 | -5.71 |
| 1419334_PM_at   | Ctla4         | CTLA4          | 0.16  | 2.28 | 1.42  | 1.85E-01 | 4.74E-01 | -5.71 |
| 1431908_PM_at   | 4933408J17Rik | NA             | 0.17  | 2.26 | 1.42  | 1.85E-01 | 4.74E-01 | -5.71 |
| 1458126_PM_at   | ---           | NA             | 0.17  | 2.54 | 1.42  | 1.85E-01 | 4.74E-01 | -5.71 |
| 1441592_PM_at   | ---           | NA             | 0.25  | 2.29 | 1.42  | 1.85E-01 | 4.74E-01 | -5.71 |
| 1434570_PM_at   | Bend3         | BEND3          | 0.34  | 3.25 | 1.42  | 1.85E-01 | 4.74E-01 | -5.71 |
| 1446585_PM_at   | ---           | NA             | 0.55  | 3.25 | 1.42  | 1.85E-01 | 4.74E-01 | -5.71 |
| 1448480_PM_at   | Nip7          | NIP7           | 0.81  | 3.56 | 1.42  | 1.85E-01 | 4.74E-01 | -5.71 |
| 1437445_PM_at   | ---           | NA             | 0.23  | 2.33 | 1.42  | 1.85E-01 | 4.74E-01 | -5.71 |
| 1454478_PM_at   | 3100002H20Rik | NA             | 0.13  | 2.13 | 1.42  | 1.85E-01 | 4.74E-01 | -5.71 |
| 1434008_PM_at   | Scn4b         | SCN4B          | -0.66 | 4.87 | -1.42 | 1.85E-01 | 4.74E-01 | -5.71 |
| 1441297_PM_at   | ---           | NA             | 0.15  | 2.48 | 1.42  | 1.85E-01 | 4.74E-01 | -5.71 |
| 1442099_PM_at   | Usp31         | USP31          | -0.29 | 2.99 | -1.42 | 1.85E-01 | 4.74E-01 | -5.71 |
| 1416078_PM_s_at | Raf1          | RAF1           | -0.14 | 2.97 | -1.42 | 1.85E-01 | 4.74E-01 | -5.71 |
| 1427377_PM_x_at | Hsd3b3        | HSD3B2         | 0.11  | 2.30 | 1.42  | 1.85E-01 | 4.74E-01 | -5.71 |
| 1429277_PM_at   | ---           | NA             | 0.26  | 2.97 | 1.42  | 1.85E-01 | 4.74E-01 | -5.71 |
| 1434856_PM_at   | Ankrd44       | ANKRD44        | -0.27 | 2.54 | -1.42 | 1.85E-01 | 4.74E-01 | -5.71 |
| 1437228_PM_at   | Fam71f1       | FAM71F1        | 0.15  | 2.52 | 1.42  | 1.85E-01 | 4.74E-01 | -5.71 |
| 1454173_PM_at   | Sh2d4b        | SH2D4B         | 0.29  | 2.72 | 1.42  | 1.85E-01 | 4.74E-01 | -5.71 |
| 1452461_PM_a_at | Gnptab        | GNPTAB         | -0.19 | 2.33 | -1.42 | 1.85E-01 | 4.74E-01 | -5.71 |
| 1457399_PM_at   | ---           | NA             | 0.21  | 2.52 | 1.42  | 1.85E-01 | 4.74E-01 | -5.71 |
| 1443840_PM_x_at | 1700010H22Rik | NA             | 0.20  | 2.50 | 1.42  | 1.85E-01 | 4.74E-01 | -5.71 |
| 1430798_PM_x_at | Mrpl15        | MRPL15         | -0.84 | 3.05 | -1.42 | 1.85E-01 | 4.74E-01 | -5.71 |
| 1451614_PM_a_at | Amelx         | AMELY          | 0.12  | 2.33 | 1.42  | 1.85E-01 | 4.74E-01 | -5.71 |
| 1446996_PM_at   | ---           | NA             | 0.17  | 2.48 | 1.42  | 1.85E-01 | 4.75E-01 | -5.71 |
| 1419296_PM_at   | Arhgap4       | ARHGAP4        | 0.20  | 2.61 | 1.42  | 1.85E-01 | 4.75E-01 | -5.71 |
| 1427652_PM_x_at | Synj2         | SYNJ2          | -0.29 | 3.40 | -1.42 | 1.85E-01 | 4.75E-01 | -5.71 |
| 1448862_PM_at   | Icam2         | ICAM2          | -0.13 | 3.12 | -1.42 | 1.85E-01 | 4.75E-01 | -5.71 |
| 1456657_PM_at   | AA415437      | NA             | -0.12 | 2.05 | -1.42 | 1.85E-01 | 4.75E-01 | -5.71 |
| 1430351_PM_at   | Spat18        | SPATA18        | 0.14  | 2.34 | 1.42  | 1.85E-01 | 4.75E-01 | -5.71 |
| 1425761_PM_a_at | Nfatc1        | NFATC1         | 0.15  | 2.30 | 1.42  | 1.85E-01 | 4.75E-01 | -5.71 |
| 1438475_PM_at   | AB124611      | C19orf38       | 0.21  | 2.21 | 1.42  | 1.85E-01 | 4.75E-01 | -5.71 |
| 1449245_PM_at   | Grin2c        | GRIN2C         | 0.27  | 2.71 | 1.42  | 1.85E-01 | 4.75E-01 | -5.71 |
| 1451740_PM_at   | Paip1         | PAIP1          | -0.25 | 4.50 | -1.42 | 1.85E-01 | 4.75E-01 | -5.71 |
| 1443145_PM_at   | Apbb1ip       | APBB1IP        | -0.18 | 2.33 | -1.42 | 1.85E-01 | 4.75E-01 | -5.71 |
| 1418636_PM_at   | Etv3          | ETV3           | 0.11  | 2.22 | 1.42  | 1.85E-01 | 4.75E-01 | -5.71 |
| 1434345_PM_at   | Clrn3         | CLRN3          | 0.14  | 2.25 | 1.42  | 1.85E-01 | 4.75E-01 | -5.71 |
| 1451535_PM_at   | Ilb1ra        | IL13RA         | 0.17  | 2.69 | 1.42  | 1.85E-01 | 4.75E-01 | -5.71 |
| 1430874_PM_at   | 9430085M18Rik | NA             | 0.20  | 2.68 | 1.42  | 1.85E-01 | 4.75E-01 | -5.71 |
| 1419834_PM_x_at | Mark1         | MARK1          | 0.23  | 3.82 | 1.42  | 1.85E-01 | 4.75E-01 | -5.71 |
| 1424600_PM_at   | Aoc1          | AOC1           | 0.24  | 2.19 | 1.42  | 1.85E-01 | 4.75E-01 | -5.71 |
| 1441816_PM_at   | ---           | NA             | 0.62  | 3.57 | 1.42  | 1.85E-01 | 4.75E-01 | -5.71 |
| 1430700_PM_a_at | Pla2g7        | PLA2G7         | -0.52 | 3.90 | -1.42 | 1.85E-01 | 4.75E-01 | -5.71 |
| 1421777_PM_at   | Olf73         | OR5D18         | 0.15  | 2.31 | 1.42  | 1.85E-01 | 4.75E-01 | -5.71 |
| 1432915_PM_at   | 5730407I07Rik | NA             | 0.15  | 2.23 | 1.42  | 1.85E-01 | 4.75E-01 | -5.71 |
| 1454058_PM_at   | ---           | NA             | 0.55  | 2.56 | 1.42  | 1.85E-01 | 4.75E-01 | -5.71 |
| 1439699_PM_at   | ---           | NA             | -0.16 | 2.39 | -1.42 | 1.85E-01 | 4.75E-01 | -5.71 |
| 1448379_PM_at   | Pot1a         | POT1           | -0.26 | 4.07 | -1.42 | 1.85E-01 | 4.75E-01 | -5.71 |
| 1450207_PM_at   | Lifr          | LIFR           | -0.16 | 2.71 | -1.42 | 1.85E-01 | 4.75E-01 | -5.71 |
| 1429782_PM_at   | Grc10         | C12orf57       | 0.22  | 3.75 | 1.42  | 1.85E-01 | 4.75E-01 | -5.71 |
| 1435616_PM_at   | Cyp20a1       | CYP20A1        | -0.56 | 3.19 | -1.42 | 1.86E-01 | 4.75E-01 | -5.71 |
| 1441409_PM_at   | Ttc41         | NA             | 0.11  | 2.31 | 1.42  | 1.86E-01 | 4.75E-01 | -5.71 |
| 1448572_PM_at   | Prl4a1        | PRL            | 0.18  | 2.33 | 1.42  | 1.86E-01 | 4.75E-01 | -5.71 |
| 1431900_PM_a_at | Foxa3         | FOXA3          | 0.18  | 2.14 | 1.42  | 1.85E-01 | 4.75E-01 | -5.71 |
| 1453611_PM_at   | ---           | NA             | -0.19 | 2.89 | -1.42 | 1.86E-01 | 4.75E-01 | -5.71 |
| 1431982_PM_at   | Arhgap19      | ARHGAP19-SLIT1 | 0.17  | 2.42 | 1.42  | 1.86E-01 | 4.75E-01 | -5.71 |
| 1453940_PM_at   | 2810404M03Rik | NA             | 0.20  | 2.70 | 1.42  | 1.86E-01 | 4.75E-01 | -5.71 |
| 1454455_PM_at   | 6530413G14Rik | NA             | 0.16  | 2.55 | 1.42  | 1.86E-01 | 4.75E-01 | -5.71 |
| 1459621_PM_at   | Itns1         | ITSN1          | 0.24  | 3.94 | 1.42  | 1.86E-01 | 4.75E-01 | -5.71 |
| 1453314_PM_x_at | Mis18a        | MIS18A         | -0.46 | 4.05 | -1.42 | 1.86E-01 | 4.75E-01 | -5.71 |
| 1422962_PM_a_at | Psmb8         | PSMB8          | -0.32 | 2.45 | -1.42 | 1.86E-01 | 4.75E-01 | -5.71 |
| 1420697_PM_at   | Slc15a3       | SLC15A3        | -0.15 | 2.32 | -1.42 | 1.86E-01 | 4.75E-01 | -5.71 |
| 1419142_PM_at   | Ctsr          | CTSL           | 0.11  | 2.07 | 1.42  | 1.86E-01 | 4.75E-01 | -5.71 |
| 1420400_PM_at   | Sval1         | NA             | 0.14  | 2.11 | 1.42  | 1.86E-01 | 4.75E-01 | -5.71 |
| 1421561_PM_at   | Bhlhe23       | NA             | 0.14  | 2.28 | 1.42  | 1.86E-01 | 4.75E-01 | -5.71 |
| 1425176_PM_at   | C1ql3         | C1QL3          | -0.26 | 3.44 | -1.42 | 1.86E-01 | 4.75E-01 | -5.71 |
| 1416057_PM_at   | Ndufb11       | NDUFB11        | -0.17 | 2.97 | -1.42 | 1.86E-01 | 4.75E-01 | -5.71 |
| 1452537_PM_at   | Igk-v1        | NA             | 0.13  | 2.12 | 1.42  | 1.86E-01 | 4.75E-01 | -5.71 |
| 1432239_PM_at   | 1700102J08Rik | NA             | 0.19  | 2.28 | 1.42  | 1.86E-01 | 4.75E-01 | -5.71 |
| 1430252_PM_at   | ---           | NA             | -0.22 | 2.40 | -1.42 | 1.86E-01 | 4.75E-01 | -5.71 |
| 1451483_PM_s_at | Ccsap         | CCSAP          | -0.21 | 3.84 | -1.42 | 1.86E-01 | 4.75E-01 | -5.71 |
| 1451495_PM_at   | Wac           | WAC            | -0.44 | 6.84 | -1.42 | 1.86E-01 | 4.75E-01 | -5.71 |

|                 |                                |          |       |      |       |          |          |       |
|-----------------|--------------------------------|----------|-------|------|-------|----------|----------|-------|
| 1459712_PM_at   | Zfp182                         | NA       | 0.15  | 2.29 | 1.42  | 1.86E-01 | 4.75E-01 | -5.71 |
| 1430844_PM_at   | ---                            | NA       | 0.26  | 2.75 | 1.42  | 1.86E-01 | 4.75E-01 | -5.71 |
| 1429777_PM_at   | Dnajb6                         | DNAJB6   | 0.29  | 2.86 | 1.42  | 1.86E-01 | 4.75E-01 | -5.71 |
| 1441112_PM_at   | ---                            | NA       | -0.46 | 3.22 | -1.42 | 1.86E-01 | 4.75E-01 | -5.71 |
| 1448879_PM_at   | Gm10145 /// Gm10705 /// Ube2l3 | UBE2L5P  | -0.25 | 6.24 | -1.42 | 1.86E-01 | 4.75E-01 | -5.71 |
| 1422985_PM_at   | Fzd1                           | FZD1     | 0.13  | 2.19 | 1.42  | 1.86E-01 | 4.75E-01 | -5.71 |
| 1459727_PM_at   | AW125646                       | NA       | 0.14  | 2.29 | 1.42  | 1.86E-01 | 4.75E-01 | -5.71 |
| 1440716_PM_at   | Dgki                           | NA       | 0.24  | 2.61 | 1.42  | 1.86E-01 | 4.75E-01 | -5.71 |
| 1446059_PM_at   | ---                            | NA       | 0.25  | 2.79 | 1.42  | 1.86E-01 | 4.75E-01 | -5.71 |
| 1460677_PM_at   | Spats2                         | SPATS2   | -0.29 | 3.28 | -1.42 | 1.86E-01 | 4.75E-01 | -5.71 |
| 1428451_PM_at   | Lrrc47                         | LRRC47   | -0.20 | 2.57 | -1.42 | 1.86E-01 | 4.75E-01 | -5.71 |
| 1443056_PM_at   | ---                            | NA       | 0.17  | 2.48 | 1.42  | 1.86E-01 | 4.75E-01 | -5.71 |
| 1424365_PM_at   | 1810037117Rik /// Gm2036       | C4orf3   | -0.60 | 5.74 | -1.42 | 1.86E-01 | 4.75E-01 | -5.71 |
| 1420726_PM_x_at | Tmlhe                          | TMLHE    | -0.40 | 3.81 | -1.42 | 1.86E-01 | 4.75E-01 | -5.71 |
| 1458721_PM_at   | Pcdhga6                        | PCDHGA2  | -0.35 | 2.63 | -1.42 | 1.86E-01 | 4.75E-01 | -5.71 |
| 1451663_PM_a_at | Trim3                          | TRIM3    | -0.32 | 5.55 | -1.42 | 1.86E-01 | 4.75E-01 | -5.71 |
| 1435431_PM_at   | Psmg4                          | PSMG4    | -0.15 | 2.16 | -1.42 | 1.86E-01 | 4.75E-01 | -5.71 |
| 1448506_PM_at   | Serpina6                       | SERPINA6 | 0.12  | 2.11 | 1.42  | 1.86E-01 | 4.75E-01 | -5.71 |
| 1454564_PM_at   | 4933401J01Rik                  | NA       | 0.13  | 2.28 | 1.42  | 1.86E-01 | 4.75E-01 | -5.71 |
| 1457525_PM_at   | ---                            | NA       | 0.20  | 2.32 | 1.42  | 1.86E-01 | 4.75E-01 | -5.71 |
| 1432944_PM_at   | ---                            | NA       | 0.36  | 3.02 | 1.42  | 1.86E-01 | 4.75E-01 | -5.71 |
| 1430554_PM_at   | Lrig3                          | LRIG3    | -0.18 | 2.06 | -1.42 | 1.86E-01 | 4.75E-01 | -5.71 |
| 1444712_PM_at   | Hsf5                           | HSF5     | 0.13  | 1.97 | 1.42  | 1.86E-01 | 4.75E-01 | -5.71 |
| 1438295_PM_at   | ---                            | NA       | -0.48 | 3.52 | -1.42 | 1.86E-01 | 4.75E-01 | -5.71 |
| 1439317_PM_at   | Krit1                          | KRIT1    | 0.14  | 2.28 | 1.42  | 1.86E-01 | 4.75E-01 | -5.71 |
| 1456038_PM_at   | Fbxl4                          | FBXL4    | -0.22 | 2.50 | -1.42 | 1.86E-01 | 4.75E-01 | -5.71 |
| 1428257_PM_s_at | Dynlrb1                        | DYNLRB1  | -0.57 | 8.04 | -1.42 | 1.86E-01 | 4.75E-01 | -5.71 |
| 1427906_PM_at   | 1110037F02Rik                  | KIAA1429 | -0.46 | 3.63 | -1.42 | 1.86E-01 | 4.75E-01 | -5.71 |
| 1438636_PM_s_at | Susd5                          | SUSD5    | -0.86 | 5.03 | -1.42 | 1.86E-01 | 4.75E-01 | -5.71 |
| 1429107_PM_at   | Ubr3                           | UBR3     | -0.54 | 5.65 | -1.42 | 1.86E-01 | 4.75E-01 | -5.71 |
| 1416658_PM_at   | Frzb                           | FRZB     | -0.52 | 2.78 | -1.42 | 1.86E-01 | 4.75E-01 | -5.71 |
| 1433564_PM_at   | Dgkd                           | DGKD     | -0.39 | 4.55 | -1.42 | 1.86E-01 | 4.75E-01 | -5.71 |
| 1432455_PM_a_at | Prl8a1                         | PRL      | 0.12  | 2.34 | 1.42  | 1.86E-01 | 4.75E-01 | -5.71 |
| 1431974_PM_at   | Slc25a54                       | NA       | 0.13  | 2.47 | 1.41  | 1.86E-01 | 4.75E-01 | -5.71 |
| 1453601_PM_at   | ---                            | NA       | 0.50  | 4.54 | 1.42  | 1.86E-01 | 4.75E-01 | -5.71 |
| 1425889_PM_at   | Wnt9a                          | WNT9A    | 0.11  | 2.12 | 1.41  | 1.86E-01 | 4.76E-01 | -5.71 |
| 1439450_PM_x_at | A230046K03Rik                  | WASHC4   | 0.51  | 2.86 | 1.41  | 1.86E-01 | 4.76E-01 | -5.71 |
| 1436454_PM_x_at | Fen1                           | FEN1     | -0.33 | 7.82 | -1.41 | 1.87E-01 | 4.76E-01 | -5.71 |
| 1438607_PM_at   | Zdhc19                         | ZDHC19   | 0.17  | 2.35 | 1.41  | 1.87E-01 | 4.76E-01 | -5.72 |
| 1441770_PM_at   | Ppat                           | PPAT     | 0.12  | 2.07 | 1.41  | 1.87E-01 | 4.76E-01 | -5.72 |
| 1427000_PM_at   | Hnf4a                          | HNF4A    | 0.11  | 2.27 | 1.41  | 1.87E-01 | 4.76E-01 | -5.72 |
| 1434361_PM_at   | Snx33                          | SNX33    | 0.12  | 2.53 | 1.41  | 1.87E-01 | 4.76E-01 | -5.72 |
| 1437737_PM_at   | Dis3l                          | DIS3L    | 0.23  | 3.79 | 1.41  | 1.87E-01 | 4.76E-01 | -5.72 |
| 1426977_PM_at   | Usp47                          | USP47    | -0.46 | 4.64 | -1.41 | 1.87E-01 | 4.76E-01 | -5.72 |
| 1433145_PM_at   | 4933431C10Rik                  | NA       | -0.16 | 2.54 | -1.41 | 1.87E-01 | 4.76E-01 | -5.72 |
| 1419082_PM_at   | Serpnb2                        | SERPINB2 | 0.11  | 1.83 | 1.41  | 1.87E-01 | 4.76E-01 | -5.72 |
| 1431978_PM_at   | 8430437L04Rik                  | NA       | 0.20  | 2.36 | 1.41  | 1.87E-01 | 4.76E-01 | -5.72 |
| 1455151_PM_at   | Akap9                          | AKAP9    | 0.37  | 7.52 | 1.41  | 1.87E-01 | 4.76E-01 | -5.72 |
| 1426509_PM_s_at | Gfap                           | GFAP     | -0.68 | 5.75 | -1.41 | 1.87E-01 | 4.76E-01 | -5.72 |
| 1439268_PM_x_at | Eif3e                          | EIF3E    | -0.56 | 7.45 | -1.41 | 1.87E-01 | 4.76E-01 | -5.72 |
| 1422275_PM_at   | Ptldr2                         | PTGDR2   | 0.16  | 2.54 | 1.41  | 1.87E-01 | 4.76E-01 | -5.72 |
| 1425290_PM_at   | Stx19                          | STX19    | 0.20  | 2.29 | 1.41  | 1.87E-01 | 4.76E-01 | -5.72 |
| 1435807_PM_at   | Cdc42                          | CDC42    | -0.39 | 9.23 | -1.41 | 1.87E-01 | 4.76E-01 | -5.72 |
| 1443428_PM_at   | D8Ert67e                       | NA       | 0.14  | 2.35 | 1.41  | 1.87E-01 | 4.76E-01 | -5.72 |
| 1444683_PM_at   | Gm17250                        | NA       | 0.20  | 2.76 | 1.41  | 1.87E-01 | 4.76E-01 | -5.72 |
| 1427215_PM_at   | Acsm2                          | ACSM2B   | 0.45  | 3.41 | 1.41  | 1.87E-01 | 4.76E-01 | -5.72 |
| 1429006_PM_s_at | Atat1                          | ATAT1    | -0.30 | 2.66 | -1.41 | 1.87E-01 | 4.76E-01 | -5.72 |
| 1429717_PM_at   | Ipo11                          | IPO11    | 0.13  | 2.41 | 1.41  | 1.87E-01 | 4.77E-01 | -5.72 |
| 1444508_PM_s_at | Arrdc1                         | ARRDC1   | 0.22  | 2.35 | 1.41  | 1.87E-01 | 4.77E-01 | -5.72 |
| 1456285_PM_at   | ---                            | NA       | 0.11  | 2.27 | 1.41  | 1.87E-01 | 4.77E-01 | -5.72 |
| 1431772_PM_a_at | Itns2                          | ITSN2    | 0.19  | 2.89 | 1.41  | 1.87E-01 | 4.77E-01 | -5.72 |
| 1428946_PM_at   | Uba6                           | UBA6     | -0.54 | 3.42 | -1.41 | 1.87E-01 | 4.77E-01 | -5.72 |
| 1454216_PM_at   | Spin2d                         | SPIN2B   | -0.42 | 3.03 | -1.41 | 1.87E-01 | 4.77E-01 | -5.72 |
| 1458739_PM_at   | ---                            | NA       | -0.30 | 2.37 | -1.41 | 1.87E-01 | 4.77E-01 | -5.72 |
| 1445386_PM_at   | ---                            | NA       | 0.17  | 2.21 | 1.41  | 1.87E-01 | 4.77E-01 | -5.72 |
| 1441967_PM_at   | Pdcc1                          | GATD1    | -0.20 | 2.45 | -1.41 | 1.87E-01 | 4.77E-01 | -5.72 |
| 1433714_PM_at   | Sult4a1                        | SULT4A1  | -0.26 | 3.86 | -1.41 | 1.87E-01 | 4.77E-01 | -5.72 |
| 1444294_PM_at   | ---                            | NA       | 0.21  | 2.73 | 1.41  | 1.87E-01 | 4.77E-01 | -5.72 |
| 1446955_PM_at   | ---                            | NA       | 0.21  | 3.41 | 1.41  | 1.87E-01 | 4.77E-01 | -5.72 |
| 1432431_PM_s_at | Macrod2                        | MACROD2  | -0.17 | 2.54 | -1.41 | 1.87E-01 | 4.77E-01 | -5.72 |
| 1426161_PM_at   | ---                            | NA       | 0.12  | 2.35 | 1.41  | 1.87E-01 | 4.77E-01 | -5.72 |
| 1426653_PM_at   | Mcm3                           | MCM3     | 0.12  | 2.55 | 1.41  | 1.87E-01 | 4.77E-01 | -5.72 |
| 1431427_PM_at   | 5430427M07Rik                  | NA       | 0.13  | 2.37 | 1.41  | 1.87E-01 | 4.77E-01 | -5.72 |

|                 |                        |          |       |      |       |          |          |       |
|-----------------|------------------------|----------|-------|------|-------|----------|----------|-------|
| 1430015_PM_at   | Pxt1                   | PXT1     | 0.13  | 2.13 | 1.41  | 1.87E-01 | 4.77E-01 | -5.72 |
| 1454387_PM_at   | Panx3                  | NA       | 0.13  | 2.62 | 1.41  | 1.87E-01 | 4.77E-01 | -5.72 |
| 1436244_PM_a_at | Tle2                   | TLE2     | 0.16  | 3.42 | 1.41  | 1.87E-01 | 4.77E-01 | -5.72 |
| 1443097_PM_at   | D130012P04Rik          | NA       | 0.16  | 2.04 | 1.41  | 1.87E-01 | 4.77E-01 | -5.72 |
| 1442729_PM_at   | ---                    | NA       | 0.16  | 2.60 | 1.41  | 1.87E-01 | 4.77E-01 | -5.72 |
| 1448884_PM_at   | Gtf2e2                 | GTF2E2   | 0.22  | 2.81 | 1.41  | 1.87E-01 | 4.77E-01 | -5.72 |
| 1452559_PM_at   | ---                    | NA       | 0.24  | 2.99 | 1.41  | 1.87E-01 | 4.77E-01 | -5.72 |
| 1421626_PM_at   | Tmc1                   | NA       | -0.18 | 2.25 | -1.41 | 1.87E-01 | 4.77E-01 | -5.72 |
| 1420713_PM_a_at | Mdf1                   | MDF1     | 0.12  | 3.17 | 1.41  | 1.87E-01 | 4.77E-01 | -5.72 |
| 1438911_PM_at   | ---                    | NA       | 0.14  | 3.26 | 1.41  | 1.87E-01 | 4.77E-01 | -5.72 |
| 1448702_PM_at   | Ier3p1                 | HDHD2    | -0.33 | 2.88 | -1.41 | 1.88E-01 | 4.77E-01 | -5.72 |
| 1432149_PM_at   | Dph1                   | DPH1     | 0.19  | 2.67 | 1.41  | 1.87E-01 | 4.77E-01 | -5.72 |
| 1443168_PM_at   | ---                    | NA       | 0.21  | 3.14 | 1.41  | 1.87E-01 | 4.77E-01 | -5.72 |
| 1452186_PM_at   | Rbm5                   | RBM5     | 0.27  | 4.84 | 1.41  | 1.87E-01 | 4.77E-01 | -5.72 |
| 1440871_PM_at   | Mag1                   | MAG1     | 0.72  | 5.03 | 1.41  | 1.87E-01 | 4.77E-01 | -5.72 |
| 1435113_PM_x_at | Stmn3                  | STMN3    | 0.41  | 8.26 | 1.41  | 1.88E-01 | 4.77E-01 | -5.72 |
| 1419709_PM_at   | Stfa3                  | CSTA     | -0.16 | 2.58 | -1.41 | 1.88E-01 | 4.77E-01 | -5.72 |
| 1435888_PM_at   | Egfr                   | EGFR     | 0.20  | 3.70 | 1.41  | 1.88E-01 | 4.77E-01 | -5.72 |
| 1430610_PM_at   | MrpB8                  | MRPL38   | 0.27  | 2.60 | 1.41  | 1.88E-01 | 4.77E-01 | -5.72 |
| 1418498_PM_at   | Fgf13                  | FGF13    | -0.72 | 4.68 | -1.41 | 1.88E-01 | 4.77E-01 | -5.72 |
| 1438998_PM_at   | ---                    | NA       | -0.14 | 2.42 | -1.41 | 1.88E-01 | 4.77E-01 | -5.72 |
| 1440370_PM_at   | Abca13                 | ABCA13   | 0.15  | 2.22 | 1.41  | 1.88E-01 | 4.77E-01 | -5.72 |
| 1419661_PM_at   | Yae1d1                 | YAE1D1   | 0.19  | 3.62 | 1.41  | 1.88E-01 | 4.77E-01 | -5.72 |
| 1422552_PM_at   | Rprm                   | RPRM     | 0.34  | 3.24 | 1.41  | 1.88E-01 | 4.77E-01 | -5.72 |
| 1423737_PM_at   | Ndufs3                 | NDUFS3   | -0.24 | 4.49 | -1.41 | 1.88E-01 | 4.77E-01 | -5.72 |
| 1451687_PM_a_at | Hnf1b                  | HNF1B    | 0.16  | 2.46 | 1.41  | 1.88E-01 | 4.77E-01 | -5.72 |
| 1445738_PM_at   | ---                    | NA       | 0.18  | 2.98 | 1.41  | 1.88E-01 | 4.77E-01 | -5.72 |
| 1416363_PM_at   | Fkbp4 /// LOC102642559 | FKBP4    | 0.26  | 2.85 | 1.41  | 1.88E-01 | 4.77E-01 | -5.72 |
| 1441820_PM_at   | Cdkl2                  | CDKL2    | 0.25  | 2.02 | 1.41  | 1.88E-01 | 4.77E-01 | -5.72 |
| 1429085_PM_at   | VeZF1                  | VEZF1    | 0.30  | 3.40 | 1.41  | 1.88E-01 | 4.77E-01 | -5.72 |
| 1417376_PM_a_at | Cadm1                  | CADM1    | -0.37 | 7.48 | -1.41 | 1.88E-01 | 4.77E-01 | -5.72 |
| 1435339_PM_at   | Kctd15                 | KCTD15   | 0.22  | 2.74 | 1.41  | 1.88E-01 | 4.77E-01 | -5.72 |
| 1421564_PM_at   | Serpina3c              | SERPINA3 | 0.12  | 2.30 | 1.41  | 1.88E-01 | 4.77E-01 | -5.72 |
| 1433607_PM_at   | Cbln4                  | CBLN4    | -0.33 | 4.14 | -1.41 | 1.88E-01 | 4.78E-01 | -5.72 |
| 1420889_PM_at   | Hccs                   | HCCS     | 0.15  | 2.25 | 1.41  | 1.88E-01 | 4.78E-01 | -5.72 |
| 1444828_PM_at   | ---                    | NA       | 0.23  | 3.64 | 1.41  | 1.88E-01 | 4.78E-01 | -5.72 |
| 1438818_PM_at   | Nmd3                   | NMD3     | -0.19 | 2.29 | -1.41 | 1.88E-01 | 4.78E-01 | -5.72 |
| 1434953_PM_at   | Ccdc93                 | CCDC93   | -0.23 | 3.10 | -1.41 | 1.88E-01 | 4.78E-01 | -5.72 |
| 1448485_PM_at   | Ggt1                   | GGTLC3   | 0.18  | 2.69 | 1.41  | 1.88E-01 | 4.78E-01 | -5.72 |
| 1446810_PM_at   | A730062M13Rik          | NA       | 0.12  | 2.17 | 1.41  | 1.88E-01 | 4.78E-01 | -5.72 |
| 1456766_PM_at   | Ccdc151                | CCDC151  | 0.13  | 2.61 | 1.41  | 1.88E-01 | 4.78E-01 | -5.72 |
| 1424361_PM_at   | Tti2                   | TTI2     | 0.13  | 2.26 | 1.41  | 1.88E-01 | 4.78E-01 | -5.72 |
| 1436637_PM_at   | ---                    | NA       | 0.17  | 2.81 | 1.41  | 1.88E-01 | 4.78E-01 | -5.72 |
| 1453299_PM_a_at | Pnp /// Pnp2           | PNP      | 0.34  | 2.98 | 1.41  | 1.88E-01 | 4.78E-01 | -5.72 |
| 1443218_PM_at   | ---                    | NA       | 0.54  | 3.04 | 1.41  | 1.88E-01 | 4.78E-01 | -5.72 |
| 1434882_PM_at   | Mtdh                   | MTDH     | -0.32 | 2.95 | -1.41 | 1.88E-01 | 4.78E-01 | -5.72 |
| 1450562_PM_at   | Ly6f                   | NA       | 0.14  | 2.27 | 1.41  | 1.88E-01 | 4.78E-01 | -5.72 |
| 1430409_PM_at   | ---                    | NA       | 0.16  | 2.30 | 1.41  | 1.88E-01 | 4.78E-01 | -5.72 |
| 1418087_PM_at   | Ufd1l                  | UFD1     | -0.31 | 3.58 | -1.41 | 1.88E-01 | 4.78E-01 | -5.72 |
| 1420294_PM_at   | Lpcat1                 | NA       | -0.19 | 2.33 | -1.41 | 1.88E-01 | 4.78E-01 | -5.72 |
| 1422132_PM_at   | Mthfr                  | MTHFR    | 0.12  | 2.37 | 1.41  | 1.88E-01 | 4.78E-01 | -5.72 |
| 1417707_PM_at   | N4bp2l1                | N4BP2L1  | 0.14  | 2.47 | 1.41  | 1.88E-01 | 4.78E-01 | -5.72 |
| 1449498_PM_at   | Marco                  | MARCO    | 0.14  | 2.52 | 1.41  | 1.88E-01 | 4.78E-01 | -5.72 |
| 1447677_PM_x_at | Dtd1                   | DTD1     | 0.12  | 2.19 | 1.41  | 1.88E-01 | 4.78E-01 | -5.72 |
| 1430661_PM_at   | ---                    | NA       | 0.24  | 3.41 | 1.41  | 1.88E-01 | 4.78E-01 | -5.72 |
| 1455527_PM_at   | Cd163l1                | SCART1   | 0.19  | 3.11 | 1.41  | 1.88E-01 | 4.78E-01 | -5.72 |
| 1454012_PM_a_at | Parp6                  | PARP6    | -0.59 | 3.83 | -1.41 | 1.89E-01 | 4.78E-01 | -5.72 |
| 1433866_PM_x_at | Prdx1                  | PRDX1    | -0.40 | 7.11 | -1.41 | 1.88E-01 | 4.78E-01 | -5.72 |
| 1448363_PM_at   | Yap1                   | YAP1     | -0.35 | 3.79 | -1.41 | 1.88E-01 | 4.78E-01 | -5.72 |
| 1433567_PM_at   | Gmps                   | GMPS     | -0.35 | 3.22 | -1.41 | 1.88E-01 | 4.78E-01 | -5.72 |
| 1460581_PM_a_at | Rpl13                  | RPL13    | -0.30 | 8.56 | -1.41 | 1.89E-01 | 4.78E-01 | -5.72 |
| 1459433_PM_at   | Fam172a                | NA       | -0.28 | 2.67 | -1.41 | 1.88E-01 | 4.78E-01 | -5.72 |
| 1420489_PM_at   | Mrps14                 | MRPS14   | -0.27 | 3.84 | -1.41 | 1.88E-01 | 4.78E-01 | -5.72 |
| 1441593_PM_at   | ---                    | NA       | -0.24 | 2.26 | -1.41 | 1.89E-01 | 4.78E-01 | -5.72 |
| 1428829_PM_at   | Dennd1b                | DENND1B  | -0.22 | 3.68 | -1.41 | 1.89E-01 | 4.78E-01 | -5.72 |
| 1433292_PM_at   | Sdha                   | NA       | 0.13  | 2.54 | 1.41  | 1.89E-01 | 4.78E-01 | -5.72 |
| 1434726_PM_at   | Catsperd               | CATSPERD | 0.14  | 2.40 | 1.41  | 1.89E-01 | 4.78E-01 | -5.72 |
| 1444147_PM_at   | ---                    | NA       | 0.15  | 2.11 | 1.41  | 1.88E-01 | 4.78E-01 | -5.72 |
| 1442123_PM_at   | Tnfsf13os              | NA       | 0.16  | 2.48 | 1.41  | 1.89E-01 | 4.78E-01 | -5.72 |
| 1430790_PM_at   | ---                    | NA       | 0.19  | 2.27 | 1.41  | 1.89E-01 | 4.78E-01 | -5.72 |
| 1425281_PM_a_at | Tsc22d3                | TSC22D3  | 0.19  | 3.29 | 1.41  | 1.88E-01 | 4.78E-01 | -5.72 |
| 1434391_PM_at   | Hrnpu                  | NA       | 0.20  | 7.21 | 1.41  | 1.89E-01 | 4.78E-01 | -5.72 |
| 1426502_PM_s_at | Gpt                    | GPT      | 0.21  | 3.01 | 1.41  | 1.89E-01 | 4.78E-01 | -5.72 |
| 1419114_PM_at   | Alg14                  | ALG14    | 0.23  | 2.62 | 1.41  | 1.88E-01 | 4.78E-01 | -5.72 |
| 1426500_PM_at   | Icmt                   | ICMT     | 0.28  | 2.98 | 1.41  | 1.89E-01 | 4.78E-01 | -5.72 |

|                 |                          |          |       |      |       |          |          |       |
|-----------------|--------------------------|----------|-------|------|-------|----------|----------|-------|
| 1440994_PM_at   | Shprh                    | SHPRH    | -0.13 | 2.66 | -1.41 | 1.89E-01 | 4.78E-01 | -5.72 |
| 1429110_PM_a_at | Nsun4                    | NSUN4    | 0.18  | 2.11 | 1.41  | 1.89E-01 | 4.78E-01 | -5.72 |
| 1455510_PM_at   | ---                      | NA       | 0.27  | 2.45 | 1.41  | 1.89E-01 | 4.78E-01 | -5.72 |
| 1439990_PM_at   | ---                      | NA       | -0.43 | 2.99 | -1.41 | 1.89E-01 | 4.78E-01 | -5.72 |
| 1454492_PM_at   | ---                      | NA       | 0.12  | 1.98 | 1.41  | 1.89E-01 | 4.78E-01 | -5.72 |
| 1432279_PM_at   | Cdrt4os1                 | NA       | 0.15  | 2.11 | 1.41  | 1.89E-01 | 4.78E-01 | -5.72 |
| 1444566_PM_at   | ---                      | NA       | 0.25  | 3.01 | 1.41  | 1.89E-01 | 4.78E-01 | -5.72 |
| 1451301_PM_at   | Tmod2                    | TMOD2    | 0.48  | 3.33 | 1.41  | 1.89E-01 | 4.78E-01 | -5.72 |
| 1426434_PM_at   | Tmem43                   | TMEM43   | -0.38 | 3.66 | -1.41 | 1.89E-01 | 4.78E-01 | -5.72 |
| 1460355_PM_at   | Bud13                    | BUD13    | 0.13  | 2.14 | 1.41  | 1.89E-01 | 4.78E-01 | -5.72 |
| 1434960_PM_at   | Taf9b                    | TAF9B    | 0.26  | 2.57 | 1.41  | 1.89E-01 | 4.78E-01 | -5.72 |
| 1442607_PM_a_at | ---                      | NA       | 0.13  | 2.66 | 1.41  | 1.89E-01 | 4.78E-01 | -5.73 |
| 1429431_PM_at   | Ikzf5                    | IKZF5    | -0.22 | 2.99 | -1.41 | 1.89E-01 | 4.78E-01 | -5.73 |
| 1418036_PM_at   | Prim2                    | PRIM2    | 0.19  | 3.06 | 1.41  | 1.89E-01 | 4.78E-01 | -5.73 |
| 1446386_PM_at   | ---                      | NA       | 0.24  | 2.84 | 1.41  | 1.89E-01 | 4.78E-01 | -5.73 |
| 1442928_PM_at   | ---                      | NA       | 0.17  | 2.65 | 1.41  | 1.89E-01 | 4.78E-01 | -5.73 |
| 1458100_PM_at   | ---                      | NA       | 0.15  | 2.35 | 1.41  | 1.89E-01 | 4.78E-01 | -5.73 |
| 1450316_PM_at   | Pcdhb13                  | NA       | -0.32 | 2.48 | -1.41 | 1.89E-01 | 4.79E-01 | -5.73 |
| 1451855_PM_at   | Bcl7a                    | BCL7A    | -0.17 | 2.63 | -1.41 | 1.89E-01 | 4.79E-01 | -5.73 |
| 1457816_PM_at   | Casp9                    | CASP9    | 0.21  | 2.62 | 1.41  | 1.89E-01 | 4.79E-01 | -5.73 |
| 1422167_PM_at   | Sema5a                   | SEMA5A   | -0.43 | 2.69 | -1.41 | 1.89E-01 | 4.79E-01 | -5.73 |
| 1426746_PM_at   | 1810026J23Rik            | TIMM29   | -0.42 | 6.90 | -1.41 | 1.89E-01 | 4.79E-01 | -5.73 |
| 1440970_PM_at   | Kalrn                    | NA       | -0.29 | 4.63 | -1.41 | 1.89E-01 | 4.79E-01 | -5.73 |
| 1447983_PM_at   | ---                      | NA       | -0.19 | 2.11 | -1.41 | 1.89E-01 | 4.79E-01 | -5.73 |
| 1449499_PM_at   | Hoxa7                    | HOXA7    | 0.13  | 2.42 | 1.41  | 1.89E-01 | 4.79E-01 | -5.73 |
| 1427609_PM_at   | Sox14                    | SOX14    | 0.16  | 2.57 | 1.41  | 1.89E-01 | 4.79E-01 | -5.73 |
| 1424726_PM_at   | Tmem150a                 | TMEM150A | 0.19  | 3.08 | 1.41  | 1.89E-01 | 4.79E-01 | -5.73 |
| 1458923_PM_at   | ---                      | NA       | 0.19  | 2.35 | 1.41  | 1.89E-01 | 4.79E-01 | -5.73 |
| 1443751_PM_at   | ---                      | NA       | 0.24  | 2.68 | 1.41  | 1.89E-01 | 4.79E-01 | -5.73 |
| 1450824_PM_at   | Ptch1                    | PTCH1    | 0.30  | 2.32 | 1.41  | 1.89E-01 | 4.79E-01 | -5.73 |
| 1433581_PM_at   | 1190002N15Rik            | C3orf58  | 0.38  | 2.98 | 1.41  | 1.89E-01 | 4.79E-01 | -5.73 |
| 1446010_PM_at   | ---                      | NA       | 0.20  | 2.71 | 1.40  | 1.89E-01 | 4.79E-01 | -5.73 |
| 1430192_PM_at   | ---                      | NA       | 0.20  | 2.79 | 1.40  | 1.89E-01 | 4.79E-01 | -5.73 |
| 1421452_PM_at   | Cdon                     | CDON     | 0.25  | 2.55 | 1.40  | 1.89E-01 | 4.79E-01 | -5.73 |
| 1441833_PM_at   | ---                      | NA       | -0.23 | 6.41 | -1.40 | 1.89E-01 | 4.79E-01 | -5.73 |
| 1419133_PM_at   | Evpl                     | EVPL     | 0.12  | 2.80 | 1.40  | 1.89E-01 | 4.79E-01 | -5.73 |
| 1428784_PM_at   | Gmip                     | GMIP     | 0.16  | 3.06 | 1.40  | 1.89E-01 | 4.79E-01 | -5.73 |
| 1450567_PM_a_at | Col2a1                   | COL2A1   | 0.36  | 2.69 | 1.40  | 1.89E-01 | 4.79E-01 | -5.73 |
| 1417754_PM_at   | Topors                   | TOPORS   | 0.39  | 4.65 | 1.40  | 1.89E-01 | 4.79E-01 | -5.73 |
| 1429061_PM_at   | Gm17296                  | NA       | 0.49  | 4.24 | 1.40  | 1.89E-01 | 4.79E-01 | -5.73 |
| 1428263_PM_a_at | Tceb2                    | ELOB     | -0.58 | 3.88 | -1.40 | 1.90E-01 | 4.79E-01 | -5.73 |
| 1440115_PM_at   | ---                      | NA       | -0.23 | 2.45 | -1.40 | 1.90E-01 | 4.79E-01 | -5.73 |
| 1453041_PM_at   | Ano9                     | ANO9     | -0.12 | 2.31 | -1.40 | 1.90E-01 | 4.79E-01 | -5.73 |
| 1426268_PM_at   | Cwh43                    | CWH43    | 0.17  | 2.36 | 1.40  | 1.90E-01 | 4.79E-01 | -5.73 |
| 1423988_PM_at   | Ak1                      | AK1      | 0.17  | 2.35 | 1.40  | 1.89E-01 | 4.79E-01 | -5.73 |
| 1447781_PM_s_at | LOC102641477 /// Trmt10a | TRMT10A  | 0.23  | 4.11 | 1.40  | 1.90E-01 | 4.79E-01 | -5.73 |
| 1458500_PM_at   | Fam216b                  | FAM216B  | 0.26  | 2.56 | 1.40  | 1.90E-01 | 4.79E-01 | -5.73 |
| 1435188_PM_at   | Ciart                    | CIART    | 0.26  | 2.60 | 1.40  | 1.90E-01 | 4.79E-01 | -5.73 |
| 1443681_PM_at   | Fbl1                     | NA       | 0.16  | 3.04 | 1.40  | 1.90E-01 | 4.79E-01 | -5.73 |
| 1457859_PM_at   | ---                      | NA       | 0.29  | 3.56 | 1.40  | 1.90E-01 | 4.79E-01 | -5.73 |
| 1450442_PM_at   | Add2                     | ADD2     | 0.34  | 2.43 | 1.40  | 1.90E-01 | 4.79E-01 | -5.73 |
| 1424202_PM_at   | Seh1l                    | SEH1L    | 0.16  | 2.22 | 1.40  | 1.90E-01 | 4.79E-01 | -5.73 |
| 1445116_PM_at   | ---                      | NA       | 0.14  | 2.15 | 1.40  | 1.90E-01 | 4.79E-01 | -5.73 |
| 1454290_PM_at   | 4930573O21Rik            | NA       | 0.14  | 2.41 | 1.40  | 1.90E-01 | 4.79E-01 | -5.73 |
| 1435223_PM_at   | Erlin2                   | ERLIN2   | -0.28 | 3.80 | -1.40 | 1.90E-01 | 4.79E-01 | -5.73 |
| 1421634_PM_at   | Capn8                    | CAPN8    | 0.15  | 2.12 | 1.40  | 1.90E-01 | 4.79E-01 | -5.73 |
| 1431275_PM_at   | Chaf1b                   | CHAF1B   | 0.15  | 2.43 | 1.40  | 1.90E-01 | 4.79E-01 | -5.73 |
| 1445118_PM_at   | Gm36463                  | NA       | 0.16  | 2.50 | 1.40  | 1.90E-01 | 4.79E-01 | -5.73 |
| 1453372_PM_at   | Dnajc1                   | DNAJC1   | -0.20 | 2.41 | -1.40 | 1.90E-01 | 4.80E-01 | -5.73 |
| 1455648_PM_at   | Gm7072                   | NA       | -0.23 | 2.30 | -1.40 | 1.90E-01 | 4.80E-01 | -5.73 |
| 1444942_PM_at   | Helz                     | HELZ     | -0.20 | 3.44 | -1.40 | 1.90E-01 | 4.80E-01 | -5.73 |
| 1430902_PM_at   | Ankrd24                  | ANKRD24  | 0.19  | 2.23 | 1.40  | 1.90E-01 | 4.80E-01 | -5.73 |
| 1445317_PM_at   | ---                      | NA       | 0.25  | 2.88 | 1.40  | 1.90E-01 | 4.80E-01 | -5.73 |
| 1436658_PM_at   | B130024G19Rik            | NA       | 0.12  | 2.18 | 1.40  | 1.90E-01 | 4.80E-01 | -5.73 |
| 1416320_PM_at   | Sec22a                   | SEC22A   | 0.18  | 3.13 | 1.40  | 1.90E-01 | 4.80E-01 | -5.73 |
| 1458780_PM_at   | D8Ert620e                | NA       | 0.23  | 2.74 | 1.40  | 1.90E-01 | 4.80E-01 | -5.73 |
| 1455951_PM_at   | Mars                     | MARS     | 0.36  | 7.06 | 1.40  | 1.90E-01 | 4.80E-01 | -5.73 |
| 1458459_PM_a_at | E230029C05Rik            | NA       | 0.18  | 2.40 | 1.40  | 1.90E-01 | 4.80E-01 | -5.73 |
| 1446280_PM_at   | ---                      | NA       | 0.18  | 2.54 | 1.40  | 1.90E-01 | 4.80E-01 | -5.73 |
| 1444381_PM_at   | A830005F24Rik            | NA       | 0.21  | 2.57 | 1.40  | 1.90E-01 | 4.80E-01 | -5.73 |
| 1419495_PM_at   | Immp2l                   | IMMP2L   | 0.19  | 3.18 | 1.40  | 1.90E-01 | 4.80E-01 | -5.73 |
| 1431142_PM_s_at | Aifm2                    | AIFM2    | 0.13  | 2.42 | 1.40  | 1.90E-01 | 4.80E-01 | -5.73 |
| 1418470_PM_at   | Yes1                     | YES1     | 0.29  | 2.46 | 1.40  | 1.90E-01 | 4.80E-01 | -5.73 |
| 1428184_PM_at   | 3110035E14Rik            | C8orf46  | 0.40  | 4.66 | 1.40  | 1.90E-01 | 4.80E-01 | -5.73 |

|                               |                |          |       |      |       |          |          |       |
|-------------------------------|----------------|----------|-------|------|-------|----------|----------|-------|
| 1445130_PM_at                 | AA407111       | NA       | -0.14 | 2.23 | -1.40 | 1.90E-01 | 4.80E-01 | -5.73 |
| 1416030_PM_a_at               | Mcm7           | MCM7     | 0.37  | 3.44 | 1.40  | 1.90E-01 | 4.80E-01 | -5.73 |
| 1432476_PM_at                 | ---            | NA       | 0.11  | 2.31 | 1.40  | 1.90E-01 | 4.80E-01 | -5.73 |
| 1422988_PM_at                 | Sgsh           | SGSH     | 0.17  | 2.51 | 1.40  | 1.90E-01 | 4.80E-01 | -5.73 |
| 1437719_PM_x_at               | A230046K03Rik  | WASHC4   | 0.47  | 2.78 | 1.40  | 1.90E-01 | 4.80E-01 | -5.73 |
| 1458218_PM_s_at               | Pde7a          | PDE7A    | -0.56 | 3.60 | -1.40 | 1.90E-01 | 4.80E-01 | -5.73 |
| 1443017_PM_at                 | Cpeb2          | CPEB2    | 0.14  | 2.55 | 1.40  | 1.90E-01 | 4.80E-01 | -5.73 |
| 1421993_PM_a_at               | Tmem134        | NA       | 0.19  | 2.67 | 1.40  | 1.90E-01 | 4.80E-01 | -5.73 |
| 1450477_PM_at                 | Htr2c          | HTR2C    | 0.27  | 2.71 | 1.40  | 1.90E-01 | 4.80E-01 | -5.73 |
| 1452782_PM_a_at               | Txn2           | TXN2     | 0.31  | 3.96 | 1.40  | 1.90E-01 | 4.80E-01 | -5.73 |
| 1443393_PM_at                 | ---            | NA       | 0.25  | 2.48 | 1.40  | 1.90E-01 | 4.80E-01 | -5.73 |
| 1428748_PM_at                 | Zfp950         | NA       | -0.43 | 2.70 | -1.40 | 1.90E-01 | 4.80E-01 | -5.73 |
| 1428377_PM_at                 | Btbd11         | BTBD11   | -0.26 | 3.15 | -1.40 | 1.90E-01 | 4.80E-01 | -5.73 |
| 1448267_PM_at                 | Stx5a          | STX5     | 0.14  | 2.38 | 1.40  | 1.90E-01 | 4.80E-01 | -5.73 |
| 1423093_PM_at                 | Incenp         | INCENP   | 0.14  | 2.39 | 1.40  | 1.90E-01 | 4.80E-01 | -5.73 |
| 1425037_PM_at                 | Fgd4           | FGD4     | -0.26 | 2.89 | -1.40 | 1.91E-01 | 4.80E-01 | -5.73 |
| 1422536_PM_at                 | Tnni3          | TNNI3    | 0.12  | 2.51 | 1.40  | 1.91E-01 | 4.80E-01 | -5.73 |
| 1441062_PM_at                 | Ddx11          | DDX11    | 0.17  | 2.40 | 1.40  | 1.90E-01 | 4.80E-01 | -5.73 |
| 1422269_PM_at                 | Insm2          | INSM2    | 0.19  | 2.53 | 1.40  | 1.91E-01 | 4.80E-01 | -5.73 |
| 1457433_PM_x_at               | Zfp120         | NA       | 0.21  | 2.78 | 1.40  | 1.90E-01 | 4.80E-01 | -5.73 |
| 1445978_PM_at                 | ---            | NA       | -0.13 | 2.25 | -1.40 | 1.91E-01 | 4.80E-01 | -5.73 |
| 1424917_PM_a_at               | Wipi1          | WIP1     | 0.16  | 2.44 | 1.40  | 1.91E-01 | 4.80E-01 | -5.73 |
| 1455152_PM_at                 | Uqcc3          | UQCC3    | 0.16  | 3.29 | 1.40  | 1.91E-01 | 4.80E-01 | -5.73 |
| 1432254_PM_at                 | ---            | NA       | 0.20  | 2.26 | 1.40  | 1.91E-01 | 4.80E-01 | -5.73 |
| 1435106_PM_at                 | Limch1         | LIMCH1   | -0.38 | 3.38 | -1.40 | 1.91E-01 | 4.81E-01 | -5.73 |
| 1421099_PM_at                 | Bhlhe41        | BHLHE41  | 0.13  | 2.11 | 1.40  | 1.91E-01 | 4.81E-01 | -5.73 |
| AFFX-TrpnX-3_at               | ---            | NA       | 0.13  | 2.09 | 1.40  | 1.91E-01 | 4.81E-01 | -5.73 |
| 1431943_PM_at                 | 2210011K15Rik  | NA       | 0.19  | 2.36 | 1.40  | 1.91E-01 | 4.81E-01 | -5.73 |
| 1419278_PM_at                 | Usp48          | USP48    | 0.28  | 4.11 | 1.40  | 1.91E-01 | 4.81E-01 | -5.73 |
| 1416482_PM_at                 | Ttc3           | TTC3     | -0.35 | 5.28 | -1.40 | 1.91E-01 | 4.81E-01 | -5.73 |
| 1417761_PM_at                 | Apoa4          | APOA4    | 0.18  | 2.70 | 1.40  | 1.91E-01 | 4.81E-01 | -5.73 |
| 1447838_PM_x_at               | Eml4           | EML4     | 0.38  | 4.34 | 1.40  | 1.91E-01 | 4.81E-01 | -5.73 |
| 1429502_PM_at                 | Hspa13         | HSPA13   | 0.51  | 4.92 | 1.40  | 1.91E-01 | 4.81E-01 | -5.73 |
| 1434066_PM_at                 | Gtf3c1         | GTF3C1   | -0.18 | 4.36 | -1.40 | 1.91E-01 | 4.81E-01 | -5.73 |
| 1448386_PM_a_at               | Wap            | NA       | 0.20  | 2.49 | 1.40  | 1.91E-01 | 4.81E-01 | -5.73 |
| 1417330_PM_at                 | Slc23a2        | SLC23A2  | 0.28  | 2.63 | 1.40  | 1.91E-01 | 4.81E-01 | -5.73 |
| 1445769_PM_at                 | Gm29702        | NA       | 0.21  | 2.61 | 1.40  | 1.91E-01 | 4.81E-01 | -5.73 |
| 1441648_PM_at                 | C1qtnf4        | NA       | 0.17  | 2.34 | 1.40  | 1.91E-01 | 4.81E-01 | -5.73 |
| 1423919_PM_at                 | Haus3          | HAUS3    | -0.51 | 4.47 | -1.40 | 1.91E-01 | 4.81E-01 | -5.73 |
| 1452592_PM_at                 | Mgst2          | MGST2    | 0.13  | 1.98 | 1.40  | 1.91E-01 | 4.81E-01 | -5.73 |
| 1431876_PM_at                 | 4931429P17Rik  | NA       | 0.14  | 2.18 | 1.40  | 1.91E-01 | 4.81E-01 | -5.73 |
| 1453623_PM_a_at               | Rad23a         | RAD23A   | 0.29  | 2.08 | 1.40  | 1.91E-01 | 4.81E-01 | -5.73 |
| 1438371_PM_x_at               | Ddx5           | DDX5     | -0.45 | 8.25 | -1.40 | 1.91E-01 | 4.81E-01 | -5.74 |
| 1450753_PM_at                 | Nkg7           | NKG7     | 0.14  | 2.66 | 1.40  | 1.91E-01 | 4.81E-01 | -5.74 |
| 1423715_PM_a_at               | Nedd8          | NEDD8    | 0.63  | 4.33 | 1.40  | 1.91E-01 | 4.81E-01 | -5.74 |
| 1431485_PM_at                 | 4833447115Rik  | NA       | 0.15  | 2.62 | 1.40  | 1.91E-01 | 4.81E-01 | -5.74 |
| 1451641_PM_at                 | Dbr1           | DBR1     | -0.46 | 5.09 | -1.40 | 1.91E-01 | 4.81E-01 | -5.74 |
| 1445068_PM_at                 | Malt1          | NA       | -0.23 | 2.55 | -1.40 | 1.91E-01 | 4.81E-01 | -5.74 |
| 1453131_PM_at                 | Cd300lg        | CD300LG  | 0.15  | 2.44 | 1.40  | 1.91E-01 | 4.81E-01 | -5.74 |
| 1431518_PM_at                 | Ptchd3         | PTCHD3   | 0.20  | 2.74 | 1.40  | 1.91E-01 | 4.81E-01 | -5.74 |
| 1438762_PM_at                 | ---            | NA       | 0.23  | 2.32 | 1.40  | 1.91E-01 | 4.81E-01 | -5.74 |
| 1454928_PM_at                 | Safb           | SAFB     | 0.30  | 4.27 | 1.40  | 1.91E-01 | 4.81E-01 | -5.74 |
| 1459026_PM_at                 | ---            | NA       | 0.20  | 2.50 | 1.40  | 1.91E-01 | 4.82E-01 | -5.74 |
| 1425634_PM_a_at               | Trnk1          | TNK1     | 0.12  | 2.21 | 1.40  | 1.91E-01 | 4.82E-01 | -5.74 |
| 1435708_PM_at                 | ---            | NA       | 0.21  | 2.15 | 1.40  | 1.91E-01 | 4.82E-01 | -5.74 |
| 1456644_PM_at                 | Msantd3        | NA       | 0.19  | 2.46 | 1.40  | 1.91E-01 | 4.82E-01 | -5.74 |
| 1432450_PM_at                 | 8030423J24Rik  | NA       | 0.13  | 2.26 | 1.40  | 1.91E-01 | 4.82E-01 | -5.74 |
| 1457417_PM_at                 | ---            | NA       | 0.27  | 2.70 | 1.40  | 1.91E-01 | 4.82E-01 | -5.74 |
| 1457717_PM_at                 | Tmem254a       | NA       | -0.36 | 3.29 | -1.40 | 1.91E-01 | 4.82E-01 | -5.74 |
| 1432693_PM_at                 | 4930517G19Rik  | NA       | 0.15  | 2.19 | 1.40  | 1.91E-01 | 4.82E-01 | -5.74 |
| 1426045_PM_at                 | Kng1           | KNG1     | 0.14  | 2.26 | 1.40  | 1.92E-01 | 4.82E-01 | -5.74 |
| 1460475_PM_at                 | Ppp6r3         | PPP6R3   | 0.18  | 2.18 | 1.40  | 1.92E-01 | 4.82E-01 | -5.74 |
| 1426657_PM_s_at               | Gm8096///Phgdh | PHGDH    | 0.18  | 2.54 | 1.40  | 1.92E-01 | 4.82E-01 | -5.74 |
| 1432597_PM_at                 | 4930599N24Rik  | NA       | 0.18  | 2.27 | 1.40  | 1.92E-01 | 4.82E-01 | -5.74 |
| 1437813_PM_at                 | Aim1l          | CRYBG2   | 0.19  | 2.76 | 1.40  | 1.92E-01 | 4.82E-01 | -5.74 |
| 1421141_PM_a_at               | Foxp1          | FOXP1    | 0.24  | 2.19 | 1.40  | 1.92E-01 | 4.82E-01 | -5.74 |
| 1418337_PM_at                 | Rpia           | RPIA     | 0.31  | 3.44 | 1.40  | 1.92E-01 | 4.82E-01 | -5.74 |
| 1444596_PM_at                 | Pax7           | PAX7     | 0.12  | 2.18 | 1.40  | 1.92E-01 | 4.82E-01 | -5.74 |
| 1438893_PM_at                 | 5530601H04Rik  | NA       | -0.14 | 2.75 | -1.40 | 1.92E-01 | 4.82E-01 | -5.74 |
| 1416913_PM_at                 | Ces1c          | CES1     | -0.14 | 2.77 | -1.40 | 1.92E-01 | 4.82E-01 | -5.74 |
| 1452589_PM_at                 | Ptk7           | PTK7     | 0.16  | 2.42 | 1.40  | 1.92E-01 | 4.82E-01 | -5.74 |
| 1419129_PM_at                 | Slc22a13       | SLC22A13 | 0.20  | 3.09 | 1.40  | 1.92E-01 | 4.82E-01 | -5.74 |
| AFFX-PyruCarbMur/L09192_MB_at | Pcx            | NA       | 0.22  | 2.50 | 1.40  | 1.92E-01 | 4.82E-01 | -5.74 |
| 1422969_PM_s_at               | Ip6k1          | IP6K1    | 0.36  | 3.28 | 1.40  | 1.92E-01 | 4.82E-01 | -5.74 |
| 1419747_PM_at                 | Asgr2          | ASGR2    | 0.18  | 2.50 | 1.40  | 1.92E-01 | 4.82E-01 | -5.74 |

|                 |                          |          |       |       |       |          |          |       |
|-----------------|--------------------------|----------|-------|-------|-------|----------|----------|-------|
| 1430536_PM_a_at | Erh                      | NA       | -0.55 | 3.99  | -1.40 | 1.92E-01 | 4.82E-01 | -5.74 |
| 1421576_PM_at   | 4930524B15Rik            | C5orf47  | 0.14  | 2.56  | 1.40  | 1.92E-01 | 4.82E-01 | -5.74 |
| 1422251_PM_at   | ---                      | NA       | 0.18  | 2.78  | 1.40  | 1.92E-01 | 4.82E-01 | -5.74 |
| 1451429_PM_at   | Gfod2                    | GFOD2    | 0.24  | 2.86  | 1.40  | 1.92E-01 | 4.82E-01 | -5.74 |
| 1447993_PM_a_at | Snhg10                   | NA       | -0.76 | 4.48  | -1.40 | 1.92E-01 | 4.82E-01 | -5.74 |
| 1448918_PM_at   | Slco3a1                  | SLCO3A1  | -0.78 | 3.94  | -1.40 | 1.92E-01 | 4.82E-01 | -5.74 |
| 1417771_PM_a_at | Psmc6                    | PSMC6    | -0.44 | 5.51  | -1.40 | 1.92E-01 | 4.82E-01 | -5.74 |
| 1454874_PM_at   | Btbd7                    | NA       | -0.30 | 2.83  | -1.40 | 1.92E-01 | 4.82E-01 | -5.74 |
| 1446363_PM_at   | ---                      | NA       | 0.13  | 2.37  | 1.40  | 1.92E-01 | 4.82E-01 | -5.74 |
| 1445464_PM_at   | Tmem63b                  | TMEM63B  | 0.13  | 2.50  | 1.40  | 1.92E-01 | 4.82E-01 | -5.74 |
| 1450371_PM_at   | Tshb                     | TSHB     | 0.16  | 2.41  | 1.40  | 1.92E-01 | 4.82E-01 | -5.74 |
| 1432547_PM_at   | ---                      | NA       | 0.17  | 2.40  | 1.40  | 1.92E-01 | 4.82E-01 | -5.74 |
| 1442160_PM_at   | Fam19a3                  | FAM19A3  | 0.20  | 2.79  | 1.40  | 1.92E-01 | 4.82E-01 | -5.74 |
| 1419135_PM_at   | Ltb                      | LTB      | 0.21  | 2.34  | 1.40  | 1.92E-01 | 4.82E-01 | -5.74 |
| 1442984_PM_at   | C80060                   | NA       | 0.21  | 2.57  | 1.40  | 1.92E-01 | 4.83E-01 | -5.74 |
| 1435709_PM_at   | Ssr4                     | SSR4     | 0.43  | 4.85  | 1.40  | 1.92E-01 | 4.83E-01 | -5.74 |
| 1438330_PM_at   | BC065397                 | NA       | 0.16  | 2.80  | 1.40  | 1.92E-01 | 4.83E-01 | -5.74 |
| 1417677_PM_at   | Opn3                     | OPN3     | 0.18  | 2.61  | 1.40  | 1.92E-01 | 4.83E-01 | -5.74 |
| 1453948_PM_at   | ---                      | NA       | 0.19  | 2.25  | 1.40  | 1.92E-01 | 4.83E-01 | -5.74 |
| 1442824_PM_at   | ---                      | NA       | 0.27  | 3.68  | 1.39  | 1.92E-01 | 4.83E-01 | -5.74 |
| 1433917_PM_x_at | D2Bwg1423e /// Gm20071   | NA       | 0.17  | 2.81  | 1.39  | 1.92E-01 | 4.83E-01 | -5.74 |
| 1424042_PM_at   | Tmem5                    | TMEM5    | -0.34 | 4.74  | -1.39 | 1.92E-01 | 4.83E-01 | -5.74 |
| 1438501_PM_at   | Rps17                    | RPS17    | 0.31  | 4.12  | 1.39  | 1.92E-01 | 4.83E-01 | -5.74 |
| 1436443_PM_a_at | Kdek1                    | KDEL1    | -0.63 | 3.48  | -1.39 | 1.92E-01 | 4.83E-01 | -5.74 |
| 1432395_PM_at   | 1700039E15Rik            | NA       | 0.15  | 2.45  | 1.39  | 1.92E-01 | 4.83E-01 | -5.74 |
| 1430740_PM_at   | Gm11651                  | NA       | 0.15  | 2.28  | 1.39  | 1.92E-01 | 4.83E-01 | -5.74 |
| 1457875_PM_at   | AU015105                 | NA       | 0.15  | 2.79  | 1.39  | 1.92E-01 | 4.83E-01 | -5.74 |
| 1438314_PM_at   | Cdk16                    | NA       | -0.21 | 3.48  | -1.39 | 1.92E-01 | 4.83E-01 | -5.74 |
| 1443769_PM_at   | Enam                     | ENAM     | -0.15 | 2.29  | -1.39 | 1.92E-01 | 4.83E-01 | -5.74 |
| 1455522_PM_at   | Arhgef15                 | ARHGEF15 | 0.12  | 2.82  | 1.39  | 1.92E-01 | 4.83E-01 | -5.74 |
| 1452425_PM_at   | Tnfrsf14                 | TNFRSF14 | 0.14  | 2.50  | 1.39  | 1.92E-01 | 4.83E-01 | -5.74 |
| 1454163_PM_at   | 5730420D15Rik            | NA       | 0.15  | 2.33  | 1.39  | 1.92E-01 | 4.83E-01 | -5.74 |
| 1455730_PM_at   | Dlgap5                   | DLGAP5   | 0.17  | 2.54  | 1.39  | 1.92E-01 | 4.83E-01 | -5.74 |
| 1455990_PM_at   | Kif23                    | KIF23    | 0.14  | 3.33  | 1.39  | 1.92E-01 | 4.83E-01 | -5.74 |
| 1438602_PM_s_at | Masp1                    | NA       | 0.16  | 2.52  | 1.39  | 1.93E-01 | 4.83E-01 | -5.74 |
| 1458380_PM_at   | Asx1                     | ASXL1    | 0.34  | 3.05  | 1.39  | 1.93E-01 | 4.83E-01 | -5.74 |
| 1417284_PM_at   | Mapkap1                  | MAPKAP1  | 0.24  | 3.15  | 1.39  | 1.93E-01 | 4.83E-01 | -5.74 |
| 1445517_PM_at   | ---                      | NA       | 0.26  | 2.09  | 1.39  | 1.93E-01 | 4.83E-01 | -5.74 |
| 1417199_PM_at   | Tmem183a                 | TMEM183A | 0.38  | 4.73  | 1.39  | 1.93E-01 | 4.83E-01 | -5.74 |
| 1423692_PM_at   | Ndufa8                   | NDUFA8   | -0.25 | 5.51  | -1.39 | 1.93E-01 | 4.83E-01 | -5.74 |
| 1450170_PM_x_at | H2-D1                    | NA       | 0.12  | 2.49  | 1.39  | 1.93E-01 | 4.83E-01 | -5.74 |
| 1421289_PM_at   | Hspb7                    | HSPB7    | 0.12  | 2.39  | 1.39  | 1.93E-01 | 4.83E-01 | -5.74 |
| 1445647_PM_at   | I830077J02Rik            | C1orf162 | 0.15  | 2.41  | 1.39  | 1.93E-01 | 4.83E-01 | -5.74 |
| 1421785_PM_at   | Uevld                    | UEVLD    | 0.16  | 2.31  | 1.39  | 1.93E-01 | 4.83E-01 | -5.74 |
| 1444725_PM_at   | Mastl                    | MASTL    | 0.20  | 3.08  | 1.39  | 1.93E-01 | 4.83E-01 | -5.74 |
| 1419658_PM_at   | C920025E04Rik /// H2-T23 | NA       | 0.14  | 2.22  | 1.39  | 1.93E-01 | 4.83E-01 | -5.74 |
| 1450334_PM_at   | IL21                     | IL21     | 0.23  | 2.63  | 1.39  | 1.93E-01 | 4.83E-01 | -5.74 |
| 1447990_PM_at   | C76332                   | NA       | -0.10 | 2.67  | -1.39 | 1.93E-01 | 4.83E-01 | -5.74 |
| 1450333_PM_a_at | Gata2                    | GATA2    | 0.22  | 2.73  | 1.39  | 1.93E-01 | 4.83E-01 | -5.74 |
| 1444421_PM_at   | ---                      | NA       | 0.16  | 2.67  | 1.39  | 1.93E-01 | 4.83E-01 | -5.74 |
| 1449274_PM_at   | Mettl21a                 | METTL21A | 0.41  | 3.49  | 1.39  | 1.93E-01 | 4.83E-01 | -5.74 |
| 1440202_PM_at   | ---                      | NA       | -0.34 | 3.62  | -1.39 | 1.93E-01 | 4.83E-01 | -5.74 |
| 1437659_PM_at   | Als2cr11                 | CZCD6    | 0.19  | 2.60  | 1.39  | 1.93E-01 | 4.83E-01 | -5.74 |
| 1434005_PM_at   | Rbms1                    | RBMS1    | -0.64 | 4.85  | -1.39 | 1.93E-01 | 4.84E-01 | -5.74 |
| 1437222_PM_x_at | Rrm2b                    | RRM2B    | -0.51 | 2.69  | -1.39 | 1.93E-01 | 4.84E-01 | -5.74 |
| 1436297_PM_a_at | Grina                    | GRI1A    | -0.24 | 10.88 | -1.39 | 1.93E-01 | 4.84E-01 | -5.74 |
| 1455369_PM_at   | Apba1                    | APBA1    | -0.19 | 3.96  | -1.39 | 1.93E-01 | 4.84E-01 | -5.74 |
| 1418798_PM_s_at | Srpk3                    | SRPK3    | 0.17  | 2.37  | 1.39  | 1.93E-01 | 4.84E-01 | -5.74 |
| 1446773_PM_at   | E230025N22Rik            | NA       | 0.18  | 2.35  | 1.39  | 1.93E-01 | 4.84E-01 | -5.74 |
| 1434316_PM_at   | Chsy1                    | CHSY1    | -0.52 | 5.27  | -1.39 | 1.93E-01 | 4.84E-01 | -5.74 |
| 1420359_PM_at   | Sva                      | NA       | 0.16  | 2.22  | 1.39  | 1.93E-01 | 4.84E-01 | -5.74 |
| 1422515_PM_at   | Pate4                    | PATE4    | 0.18  | 2.35  | 1.39  | 1.93E-01 | 4.84E-01 | -5.74 |
| 1458879_PM_at   | C76798                   | NA       | 0.32  | 2.74  | 1.39  | 1.93E-01 | 4.84E-01 | -5.74 |
| 1416460_PM_at   | Miox                     | MIOX     | 0.13  | 2.31  | 1.39  | 1.93E-01 | 4.84E-01 | -5.74 |
| 1457771_PM_at   | ---                      | NA       | 0.21  | 2.80  | 1.39  | 1.93E-01 | 4.84E-01 | -5.74 |
| 1453777_PM_a_at | Ndst3                    | NDST3    | 0.18  | 2.25  | 1.39  | 1.93E-01 | 4.84E-01 | -5.74 |
| 1416788_PM_a_at | Idh3g                    | IDH3G    | -0.48 | 5.96  | -1.39 | 1.93E-01 | 4.84E-01 | -5.74 |
| 1450636_PM_s_at | Alpp2                    | ALPPL2   | -0.13 | 2.40  | -1.39 | 1.93E-01 | 4.84E-01 | -5.74 |
| 1427626_PM_at   | Muc5b                    | MUC5B    | 0.15  | 2.47  | 1.39  | 1.93E-01 | 4.84E-01 | -5.74 |
| 1447722_PM_at   | 9330198N18Rik            | NA       | 0.23  | 2.67  | 1.39  | 1.93E-01 | 4.84E-01 | -5.74 |
| 1426845_PM_at   | Pdc2l                    | PDCD2L   | 0.27  | 3.53  | 1.39  | 1.93E-01 | 4.84E-01 | -5.74 |
| 1440511_PM_at   | ---                      | NA       | 0.69  | 4.97  | 1.39  | 1.93E-01 | 4.84E-01 | -5.74 |
| 1434070_PM_at   | Jag1                     | JAG1     | -0.40 | 2.80  | -1.39 | 1.93E-01 | 4.84E-01 | -5.74 |

|                 |               |            |       |      |       |          |          |       |
|-----------------|---------------|------------|-------|------|-------|----------|----------|-------|
| 1440932_PM_at   | Trim17        | TRIM17     | -0.20 | 2.25 | -1.39 | 1.93E-01 | 4.84E-01 | -5.74 |
| 1431988_PM_at   | 1700112E06Rik | LRMDA      | 0.12  | 2.10 | 1.39  | 1.93E-01 | 4.84E-01 | -5.74 |
| 1418856_PM_a_at | Fanca         | FANCA      | 0.13  | 2.75 | 1.39  | 1.93E-01 | 4.84E-01 | -5.74 |
| 1432252_PM_a_at | 4933406K04Rik | NA         | 0.13  | 2.69 | 1.39  | 1.93E-01 | 4.84E-01 | -5.74 |
| 1430226_PM_at   | Xlr4c         | NA         | 0.16  | 2.53 | 1.39  | 1.93E-01 | 4.84E-01 | -5.74 |
| 1424577_PM_at   | Msto1         | MSTO1      | 0.18  | 3.77 | 1.39  | 1.93E-01 | 4.84E-01 | -5.74 |
| 1444928_PM_at   | ---           | NA         | 0.21  | 2.36 | 1.39  | 1.93E-01 | 4.84E-01 | -5.74 |
| 1434289_PM_at   | Nsun5         | NSUN5      | 0.25  | 2.59 | 1.39  | 1.93E-01 | 4.84E-01 | -5.74 |
| 1453456_PM_at   | ---           | NA         | 0.51  | 3.77 | 1.39  | 1.93E-01 | 4.84E-01 | -5.74 |
| 1437986_PM_x_at | Fuk           | FUK        | -0.85 | 5.35 | -1.39 | 1.93E-01 | 4.84E-01 | -5.74 |
| 1459579_PM_at   | Cacng8        | CACNG8     | 0.38  | 4.20 | 1.39  | 1.93E-01 | 4.84E-01 | -5.75 |
| 1424237_PM_at   | Zfp639        | ZNF639     | -0.33 | 3.66 | -1.39 | 1.93E-01 | 4.84E-01 | -5.75 |
| 1444486_PM_at   | Klh5          | KLHL5      | 0.16  | 3.59 | 1.39  | 1.93E-01 | 4.84E-01 | -5.75 |
| 1432689_PM_at   | 4631422I05Rik | NA         | 0.27  | 2.52 | 1.39  | 1.93E-01 | 4.84E-01 | -5.75 |
| 1452242_PM_at   | Cep55         | CEP55      | -0.10 | 2.31 | -1.39 | 1.94E-01 | 4.84E-01 | -5.75 |
| 1421959_PM_s_at | Adcy3         | ADCY3      | 0.22  | 2.85 | 1.39  | 1.94E-01 | 4.84E-01 | -5.75 |
| 1424246_PM_a_at | Tes           | TES        | 0.15  | 2.68 | 1.39  | 1.94E-01 | 4.84E-01 | -5.75 |
| 1416407_PM_at   | Pea15a        | PEA15      | -0.41 | 5.17 | -1.39 | 1.94E-01 | 4.84E-01 | -5.75 |
| 1430632_PM_at   | Asb1          | ASB1       | 0.14  | 2.56 | 1.39  | 1.94E-01 | 4.84E-01 | -5.75 |
| 1435489_PM_at   | Rnf130        | NA         | -0.71 | 6.66 | -1.39 | 1.94E-01 | 4.84E-01 | -5.75 |
| 1452037_PM_at   | Mgat2         | MGAT2      | -0.66 | 3.49 | -1.39 | 1.94E-01 | 4.84E-01 | -5.75 |
| 1451995_PM_at   | Taf11         | AC106774.8 | -0.31 | 3.32 | -1.39 | 1.94E-01 | 4.84E-01 | -5.75 |
| 1428923_PM_at   | Ppp1r3g       | PPP1R3G    | 0.13  | 2.36 | 1.39  | 1.94E-01 | 4.84E-01 | -5.75 |
| 1418114_PM_at   | Rbpj          | RBPJ       | 0.29  | 2.67 | 1.39  | 1.94E-01 | 4.84E-01 | -5.75 |
| 1459989_PM_at   | ---           | NA         | 0.65  | 2.68 | 1.39  | 1.94E-01 | 4.84E-01 | -5.75 |
| 1444197_PM_at   | Rnl           | NA         | 0.18  | 2.62 | 1.39  | 1.94E-01 | 4.84E-01 | -5.75 |
| 1421376_PM_at   | Traf6         | TRAF6      | 0.17  | 2.40 | 1.39  | 1.94E-01 | 4.84E-01 | -5.75 |
| 1423698_PM_at   | Ncapb2        | NCAPH2     | 0.15  | 3.12 | 1.39  | 1.94E-01 | 4.84E-01 | -5.75 |
| 1431575_PM_at   | Clec4g        | CLEC4G     | 0.11  | 2.39 | 1.39  | 1.94E-01 | 4.84E-01 | -5.75 |
| 1444213_PM_at   | ---           | NA         | 0.13  | 2.14 | 1.39  | 1.94E-01 | 4.84E-01 | -5.75 |
| 1440976_PM_at   | Zfp652os      | NA         | 0.19  | 2.44 | 1.39  | 1.94E-01 | 4.84E-01 | -5.75 |
| 1445697_PM_at   | ---           | NA         | 0.20  | 2.53 | 1.39  | 1.94E-01 | 4.85E-01 | -5.75 |
| 1434950_PM_a_at | Arm8          | ARMC8      | 0.45  | 3.65 | 1.39  | 1.94E-01 | 4.85E-01 | -5.75 |
| 1427952_PM_at   | Aipl1         | AIP1       | 0.14  | 2.26 | 1.39  | 1.94E-01 | 4.85E-01 | -5.75 |
| 1456153_PM_at   | Ssh2          | SSH2       | 0.21  | 2.84 | 1.39  | 1.94E-01 | 4.85E-01 | -5.75 |
| 1423659_PM_a_at | Tbc1d17       | TBC1D17    | 0.19  | 3.26 | 1.39  | 1.94E-01 | 4.85E-01 | -5.75 |
| 1429619_PM_a_at | Mgme1         | MGME1      | 0.12  | 2.55 | 1.39  | 1.94E-01 | 4.85E-01 | -5.75 |
| 1422689_PM_at   | Toporsl       | NA         | 0.15  | 2.24 | 1.39  | 1.94E-01 | 4.85E-01 | -5.75 |
| 1447353_PM_at   | Gpr161        | GPR161     | 0.14  | 2.47 | 1.39  | 1.94E-01 | 4.85E-01 | -5.75 |
| 1421806_PM_at   | Defb3         | NA         | 0.13  | 2.29 | 1.39  | 1.94E-01 | 4.85E-01 | -5.75 |
| 1442283_PM_at   | ---           | NA         | 0.16  | 2.37 | 1.39  | 1.94E-01 | 4.85E-01 | -5.75 |
| 1442390_PM_at   | ---           | NA         | 0.20  | 2.08 | 1.39  | 1.94E-01 | 4.85E-01 | -5.75 |
| 1451575_PM_a_at | Nudt3         | NUDT3      | 0.26  | 5.69 | 1.39  | 1.94E-01 | 4.85E-01 | -5.75 |
| 1434185_PM_at   | Acaca         | ACACA      | -0.29 | 4.85 | -1.39 | 1.94E-01 | 4.85E-01 | -5.75 |
| 1449415_PM_at   | Chd1l         | CHD1L      | 0.16  | 2.53 | 1.39  | 1.94E-01 | 4.85E-01 | -5.75 |
| 1441425_PM_at   | ---           | NA         | 0.19  | 2.25 | 1.39  | 1.94E-01 | 4.85E-01 | -5.75 |
| 1427789_PM_s_at | Gnas          | GNAS       | 0.25  | 2.59 | 1.39  | 1.94E-01 | 4.85E-01 | -5.75 |
| 1438138_PM_a_at | Pex6          | PEX6       | 0.75  | 2.77 | 1.39  | 1.94E-01 | 4.85E-01 | -5.75 |
| 1436101_PM_at   | Rnf24         | RNF24      | -0.32 | 3.13 | -1.39 | 1.94E-01 | 4.85E-01 | -5.75 |
| 1426232_PM_at   | Msantd2       | MSANTD2    | -0.26 | 3.00 | -1.39 | 1.94E-01 | 4.85E-01 | -5.75 |
| 1419393_PM_at   | Abcg5         | ABCG5      | -0.14 | 2.30 | -1.39 | 1.94E-01 | 4.85E-01 | -5.75 |
| 1459188_PM_at   | ---           | NA         | 0.17  | 2.32 | 1.39  | 1.94E-01 | 4.85E-01 | -5.75 |
| 1456277_PM_at   | ---           | NA         | 0.19  | 2.57 | 1.39  | 1.94E-01 | 4.85E-01 | -5.75 |
| 1421780_PM_a_at | Cabp5         | CABP5      | 0.23  | 2.93 | 1.39  | 1.94E-01 | 4.85E-01 | -5.75 |
| 1429635_PM_at   | Ccdc89        | CCDC89     | 0.28  | 2.62 | 1.39  | 1.94E-01 | 4.85E-01 | -5.75 |
| 1452539_PM_a_at | Cd247         | CD247      | 0.18  | 2.67 | 1.39  | 1.94E-01 | 4.85E-01 | -5.75 |
| 1438159_PM_x_at | Ndufv2        | NDUFV2     | -0.31 | 6.75 | -1.39 | 1.94E-01 | 4.85E-01 | -5.75 |
| 1424592_PM_a_at | Dnase1        | DNASE1     | 0.12  | 2.51 | 1.39  | 1.94E-01 | 4.85E-01 | -5.75 |
| 1428636_PM_at   | Steap2        | STEAP2     | 0.17  | 2.36 | 1.39  | 1.95E-01 | 4.85E-01 | -5.75 |
| 1451899_PM_a_at | Gtf2ird1      | GTF2IRD1   | 0.21  | 2.75 | 1.39  | 1.95E-01 | 4.85E-01 | -5.75 |
| 1449534_PM_at   | Sycp3         | SYCP3      | -0.21 | 2.81 | -1.39 | 1.95E-01 | 4.85E-01 | -5.75 |
| 1442963_PM_at   | Plcg1         | NA         | 0.22  | 3.08 | 1.39  | 1.95E-01 | 4.85E-01 | -5.75 |
| 1419322_PM_at   | Fgd6          | FGD6       | 0.21  | 2.29 | 1.39  | 1.95E-01 | 4.85E-01 | -5.75 |
| 1428088_PM_at   | Enthd2        | TEPSIN     | 0.12  | 2.62 | 1.39  | 1.95E-01 | 4.86E-01 | -5.75 |
| 1450401_PM_at   | Tgs1          | TGS1       | -0.67 | 5.09 | -1.39 | 1.95E-01 | 4.86E-01 | -5.75 |
| 1423745_PM_at   | Snape47       | SNAP47     | -0.39 | 6.17 | -1.39 | 1.95E-01 | 4.86E-01 | -5.75 |
| 1451861_PM_at   | Nxn2          | NXNL2      | 0.11  | 2.25 | 1.39  | 1.95E-01 | 4.86E-01 | -5.75 |
| 1439320_PM_at   | Wscd1         | WSCD1      | 0.12  | 2.41 | 1.39  | 1.95E-01 | 4.86E-01 | -5.75 |
| 1417686_PM_at   | Lgals12       | LGALS12    | 0.14  | 2.29 | 1.39  | 1.95E-01 | 4.86E-01 | -5.75 |
| 1458055_PM_at   | ---           | NA         | 0.15  | 2.02 | 1.39  | 1.95E-01 | 4.86E-01 | -5.75 |
| 1450148_PM_at   | Mcoln3        | MCOLN3     | 0.15  | 2.78 | 1.39  | 1.95E-01 | 4.86E-01 | -5.75 |
| 1446058_PM_at   | Gm16619       | NA         | 0.17  | 2.07 | 1.39  | 1.95E-01 | 4.86E-01 | -5.75 |
| 1447095_PM_at   | Gm32743       | NA         | 0.17  | 2.53 | 1.39  | 1.95E-01 | 4.86E-01 | -5.75 |
| 1447817_PM_at   | Hif1an        | HIF1AN     | 0.18  | 2.67 | 1.39  | 1.95E-01 | 4.86E-01 | -5.75 |
| 1432398_PM_at   | 1700084J12Rik | NA         | 0.20  | 2.37 | 1.39  | 1.95E-01 | 4.86E-01 | -5.75 |



|                        |                 |          |       |      |       |          |          |       |
|------------------------|-----------------|----------|-------|------|-------|----------|----------|-------|
| 1419340_PM_at          | Mov10l1         | MOV10L1  | 0.22  | 2.73 | 1.39  | 1.95E-01 | 4.86E-01 | -5.75 |
| 1458767_PM_at          | ---             | NA       | 0.22  | 2.54 | 1.39  | 1.95E-01 | 4.86E-01 | -5.75 |
| 1416821_PM_at          | Dgcr14          | DGCR14   | 0.22  | 2.72 | 1.39  | 1.95E-01 | 4.86E-01 | -5.75 |
| 1450324_PM_a_at        | Tctn3           | TCTN3    | 0.23  | 2.90 | 1.39  | 1.95E-01 | 4.86E-01 | -5.75 |
| 1428425_PM_at          | Tgfbra1         | TGFBRAP1 | 0.38  | 3.89 | 1.39  | 1.95E-01 | 4.86E-01 | -5.75 |
| 1422268_PM_a_at        | Rps6kb2         | RPS6KB2  | 0.40  | 3.93 | 1.39  | 1.95E-01 | 4.86E-01 | -5.75 |
| 1445160_PM_at          | ---             | NA       | -0.41 | 3.36 | -1.39 | 1.95E-01 | 4.86E-01 | -5.75 |
| 1428160_PM_at          | ---             | NA       | -0.28 | 4.70 | -1.39 | 1.95E-01 | 4.86E-01 | -5.75 |
| 1420807_PM_a_at        | Dlk2            | DLK2     | 0.18  | 2.28 | 1.39  | 1.95E-01 | 4.86E-01 | -5.75 |
| 1436898_PM_at          | Sfpq            | SFPQ     | 0.49  | 3.74 | 1.39  | 1.95E-01 | 4.86E-01 | -5.75 |
| 1440870_PM_at          | Prdm16          | PRDM16   | 0.71  | 4.77 | 1.39  | 1.95E-01 | 4.86E-01 | -5.75 |
| 1452882_PM_at          | Pgrmc2          | PGRMC2   | -0.34 | 7.16 | -1.39 | 1.95E-01 | 4.86E-01 | -5.75 |
| 1453346_PM_at          | 1700011L22Rik   | C4orf51  | 0.14  | 2.34 | 1.39  | 1.95E-01 | 4.86E-01 | -5.75 |
| 1418002_PM_at          | Higd2a          | HIGD2A   | -0.36 | 5.26 | -1.39 | 1.95E-01 | 4.86E-01 | -5.75 |
| 1457685_PM_at          | ---             | NA       | 0.26  | 3.29 | 1.39  | 1.95E-01 | 4.86E-01 | -5.75 |
| 1423553_PM_at          | Dnajb3          | NA       | 0.18  | 1.94 | 1.39  | 1.95E-01 | 4.86E-01 | -5.75 |
| 1431750_PM_at          | Ush2a           | USH2A    | 0.20  | 2.59 | 1.39  | 1.95E-01 | 4.86E-01 | -5.75 |
| 1456051_PM_at          | Drd1            | DRD1     | 0.39  | 3.37 | 1.39  | 1.95E-01 | 4.86E-01 | -5.75 |
| 1443435_PM_at          | ---             | NA       | 0.17  | 2.39 | 1.39  | 1.95E-01 | 4.86E-01 | -5.75 |
| 1422579_PM_at          | Hspe1           | HSPE1    | -0.43 | 2.85 | -1.38 | 1.95E-01 | 4.86E-01 | -5.75 |
| 1448869_PM_a_at        | Mrops16         | MRPS16   | -0.38 | 3.12 | -1.38 | 1.95E-01 | 4.86E-01 | -5.75 |
| 1441621_PM_at          | ---             | NA       | 0.12  | 2.62 | 1.38  | 1.95E-01 | 4.86E-01 | -5.75 |
| 1421306_PM_a_at        | Hdac9           | HDAC9    | 0.15  | 3.15 | 1.38  | 1.95E-01 | 4.86E-01 | -5.75 |
| 1425128_PM_at          | B3gnt8          | B3GNT8   | 0.15  | 2.37 | 1.38  | 1.95E-01 | 4.86E-01 | -5.75 |
| 1445451_PM_at          | Tll12           | TLL12    | 0.16  | 2.58 | 1.38  | 1.95E-01 | 4.86E-01 | -5.75 |
| 1434531_PM_at          | Mgat5b          | MGAT5B   | 0.16  | 2.49 | 1.38  | 1.95E-01 | 4.86E-01 | -5.75 |
| 1434686_PM_at          | Supt20          | SUPT20H  | 0.18  | 2.70 | 1.38  | 1.95E-01 | 4.86E-01 | -5.75 |
| 1419525_PM_at          | Car5a           | CASA     | 0.20  | 2.53 | 1.38  | 1.95E-01 | 4.86E-01 | -5.75 |
| 1456799_PM_at          | ---             | NA       | 0.21  | 2.46 | 1.38  | 1.95E-01 | 4.86E-01 | -5.75 |
| 1450826_PM_a_at        | Saa3            | NA       | 0.36  | 2.46 | 1.39  | 1.95E-01 | 4.86E-01 | -5.75 |
| 1421238_PM_a_at        | Ptpst1          | PTPST1   | -0.32 | 2.49 | -1.38 | 1.95E-01 | 4.86E-01 | -5.75 |
| 1439311_PM_at          | ---             | NA       | 0.13  | 2.28 | 1.38  | 1.95E-01 | 4.86E-01 | -5.75 |
| 1445592_PM_at          | ---             | NA       | 0.14  | 2.31 | 1.38  | 1.95E-01 | 4.86E-01 | -5.75 |
| 1439062_PM_at          | Kbtbd3          | KBTBD3   | 0.18  | 2.26 | 1.38  | 1.95E-01 | 4.86E-01 | -5.75 |
| 1427979_PM_at          | Efcab14         | EFCAB14  | 0.18  | 2.90 | 1.38  | 1.95E-01 | 4.86E-01 | -5.75 |
| 1450095_PM_a_at        | Acyp1           | ACYP1    | -0.74 | 4.45 | -1.38 | 1.95E-01 | 4.86E-01 | -5.75 |
| 1419725_PM_at          | Slc26a4         | SLC26A4  | -0.37 | 3.79 | -1.38 | 1.95E-01 | 4.86E-01 | -5.75 |
| 1429282_PM_at          | Thap1           | THAP1    | -0.17 | 2.63 | -1.38 | 1.95E-01 | 4.86E-01 | -5.75 |
| AFX-NonspecificGC22_at | ---             | NA       | 0.11  | 2.14 | 1.38  | 1.95E-01 | 4.86E-01 | -5.75 |
| 1450374_PM_at          | Pth2            | NA       | 0.13  | 2.44 | 1.38  | 1.95E-01 | 4.86E-01 | -5.75 |
| 1442932_PM_at          | C79709          | NA       | 0.19  | 2.47 | 1.38  | 1.95E-01 | 4.86E-01 | -5.75 |
| 1436041_PM_at          | Hand2           | HAND2    | 0.20  | 2.43 | 1.38  | 1.95E-01 | 4.86E-01 | -5.75 |
| 1432713_PM_at          | ---             | NA       | 0.27  | 2.53 | 1.38  | 1.95E-01 | 4.86E-01 | -5.75 |
| 1422092_PM_at          | Pfkfb2          | PFKFB2   | 0.39  | 2.49 | 1.38  | 1.95E-01 | 4.86E-01 | -5.75 |
| 1435630_PM_s_at        | Acat2           | ACAT2    | 0.53  | 8.45 | 1.38  | 1.95E-01 | 4.86E-01 | -5.75 |
| 1452692_PM_a_at        | Ndufv2          | NDUFV2   | -0.45 | 7.74 | -1.38 | 1.96E-01 | 4.86E-01 | -5.75 |
| 1429237_PM_at          | Stx16           | STX16    | -0.23 | 6.30 | -1.38 | 1.96E-01 | 4.86E-01 | -5.75 |
| 1429355_PM_at          | Tekt5           | TEKT5    | 0.12  | 2.50 | 1.38  | 1.96E-01 | 4.86E-01 | -5.75 |
| 1444155_PM_at          | Nin             | NIN      | -0.40 | 2.79 | -1.38 | 1.96E-01 | 4.86E-01 | -5.75 |
| 1425195_PM_a_at        | Acat2 /// Acat3 | ACAT2    | 0.30  | 5.56 | 1.38  | 1.96E-01 | 4.86E-01 | -5.75 |
| 1429039_PM_s_at        | Dda1            | DDA1     | 0.39  | 3.49 | 1.38  | 1.96E-01 | 4.87E-01 | -5.75 |
| 1441153_PM_at          | ---             | NA       | 0.43  | 2.84 | 1.38  | 1.96E-01 | 4.87E-01 | -5.75 |
| 1454164_PM_at          | LOC105245060    | NA       | 0.13  | 2.50 | 1.38  | 1.96E-01 | 4.87E-01 | -5.76 |
| 1417621_PM_at          | Nfatc1          | NFATC1   | 0.16  | 2.30 | 1.38  | 1.96E-01 | 4.87E-01 | -5.76 |
| 1452844_PM_at          | Pou6f1          | POU6F1   | 0.70  | 4.77 | 1.38  | 1.96E-01 | 4.87E-01 | -5.76 |
| 1416383_PM_a_at        | Pcx             | PC       | -0.17 | 2.80 | -1.38 | 1.96E-01 | 4.87E-01 | -5.76 |
| 1459208_PM_at          | AU021889        | NA       | 0.18  | 2.35 | 1.38  | 1.96E-01 | 4.87E-01 | -5.76 |
| 1455235_PM_x_at        | Ldhd            | LDHD     | -0.48 | 7.63 | -1.38 | 1.96E-01 | 4.87E-01 | -5.76 |
| 1423931_PM_s_at        | Anapc4          | ANAPC4   | -0.24 | 7.64 | -1.38 | 1.96E-01 | 4.87E-01 | -5.76 |
| 1458481_PM_at          | Gm614           | CXorf65  | 0.13  | 2.37 | 1.38  | 1.96E-01 | 4.87E-01 | -5.76 |
| 1445459_PM_at          | Sstr5           | SSTR5    | 0.14  | 2.38 | 1.38  | 1.96E-01 | 4.87E-01 | -5.76 |
| 1444107_PM_at          | Elmsan1         | ELMSAN1  | 0.15  | 2.20 | 1.38  | 1.96E-01 | 4.87E-01 | -5.76 |
| 1422055_PM_at          | Mid1            | MID1     | 0.22  | 2.77 | 1.38  | 1.96E-01 | 4.87E-01 | -5.76 |
| 1434426_PM_at          | Ncapd3          | NCAPD3   | 0.29  | 4.08 | 1.38  | 1.96E-01 | 4.87E-01 | -5.76 |
| 1423968_PM_at          | Ugt3a2          | UGT3A2   | 0.45  | 2.54 | 1.38  | 1.96E-01 | 4.87E-01 | -5.76 |
| 1426664_PM_x_at        | Slc45a3         | SLC45A3  | 0.11  | 2.28 | 1.38  | 1.96E-01 | 4.87E-01 | -5.76 |
| 1420116_PM_s_at        | Golph3          | NA       | -0.32 | 5.67 | -1.38 | 1.96E-01 | 4.87E-01 | -5.76 |
| 1448752_PM_at          | Car2            | CA2      | -0.77 | 5.95 | -1.38 | 1.96E-01 | 4.87E-01 | -5.76 |
| 1434766_PM_at          | Prkaa2          | PRKAA2   | -0.24 | 3.00 | -1.38 | 1.96E-01 | 4.87E-01 | -5.76 |
| 1438742_PM_at          | Zfp629          | ZNF629   | 0.12  | 2.16 | 1.38  | 1.96E-01 | 4.87E-01 | -5.76 |
| 1457491_PM_at          | ---             | NA       | -0.16 | 2.35 | -1.38 | 1.96E-01 | 4.87E-01 | -5.76 |
| 1453963_PM_at          | 1600014C23Rik   | NA       | 0.12  | 2.61 | 1.38  | 1.96E-01 | 4.87E-01 | -5.76 |
| 1457947_PM_at          | Ddx49           | DDX49    | 0.23  | 3.11 | 1.38  | 1.96E-01 | 4.87E-01 | -5.76 |

|                 |                                                                                                                                                                                                                                           |          |       |      |       |          |          |       |
|-----------------|-------------------------------------------------------------------------------------------------------------------------------------------------------------------------------------------------------------------------------------------|----------|-------|------|-------|----------|----------|-------|
| 1430261_PM_at   | Gm12206 ///<br>LOC105244158 ///<br>LOC105244164                                                                                                                                                                                           | NA       | -0.38 | 2.58 | -1.38 | 1.96E-01 | 4.87E-01 | -5.76 |
| 1458476_PM_at   | Ago3                                                                                                                                                                                                                                      | AGO3     | -0.31 | 2.24 | -1.38 | 1.96E-01 | 4.87E-01 | -5.76 |
| 1438527_PM_at   | Gm5879 /// LOC105242500<br>/// RplB /// RplB-ps1 /// RplB-<br>ps2                                                                                                                                                                         | RPL3     | 0.21  | 2.30 | 1.38  | 1.96E-01 | 4.87E-01 | -5.76 |
| 1442455_PM_at   | C79845                                                                                                                                                                                                                                    | NA       | 0.18  | 3.35 | 1.38  | 1.96E-01 | 4.87E-01 | -5.76 |
| 1437591_PM_a_at | Wdr1                                                                                                                                                                                                                                      | WDR1     | 0.95  | 4.06 | 1.38  | 1.96E-01 | 4.87E-01 | -5.76 |
| 1448253_PM_at   | Glud1                                                                                                                                                                                                                                     | GLUD1    | -0.26 | 2.85 | -1.38 | 1.96E-01 | 4.87E-01 | -5.76 |
| 1436449_PM_at   | Pcdh11x                                                                                                                                                                                                                                   | PCDH11Y  | -0.54 | 4.49 | -1.38 | 1.96E-01 | 4.87E-01 | -5.76 |
| 1435479_PM_at   | Bmp7                                                                                                                                                                                                                                      | BMP7     | -0.16 | 3.22 | -1.38 | 1.96E-01 | 4.87E-01 | -5.76 |
| 1436920_PM_at   | Pcdh17                                                                                                                                                                                                                                    | PCDH17   | -0.83 | 6.21 | -1.38 | 1.96E-01 | 4.87E-01 | -5.76 |
| 1446343_PM_at   | ---                                                                                                                                                                                                                                       | NA       | 0.18  | 2.64 | 1.38  | 1.96E-01 | 4.87E-01 | -5.76 |
| 1457632_PM_s_at | Meis2                                                                                                                                                                                                                                     | MEIS2    | -0.95 | 3.41 | -1.38 | 1.97E-01 | 4.87E-01 | -5.76 |
| 1449294_PM_at   | Mrps15                                                                                                                                                                                                                                    | MRPS15   | -0.62 | 3.44 | -1.38 | 1.96E-01 | 4.87E-01 | -5.76 |
| 1426378_PM_at   | Eif4b                                                                                                                                                                                                                                     | EIF4B    | -0.35 | 4.18 | -1.38 | 1.97E-01 | 4.87E-01 | -5.76 |
| 1443171_PM_at   | Mad2l1                                                                                                                                                                                                                                    | MAD2L1   | -0.29 | 2.56 | -1.38 | 1.96E-01 | 4.87E-01 | -5.76 |
| 1458684_PM_at   | ---                                                                                                                                                                                                                                       | NA       | -0.27 | 2.95 | -1.38 | 1.97E-01 | 4.87E-01 | -5.76 |
| 1426927_PM_at   | Ap3b2                                                                                                                                                                                                                                     | AP3B2    | -0.23 | 3.23 | -1.38 | 1.97E-01 | 4.87E-01 | -5.76 |
| 1448290_PM_at   | Reg3b                                                                                                                                                                                                                                     | REG3G    | 0.10  | 2.27 | 1.38  | 1.97E-01 | 4.87E-01 | -5.76 |
| 1422927_PM_at   | Yipf7                                                                                                                                                                                                                                     | YIPF7    | 0.12  | 2.43 | 1.38  | 1.96E-01 | 4.87E-01 | -5.76 |
| 1418994_PM_at   | Gtsf1l                                                                                                                                                                                                                                    | GTSF1L   | 0.13  | 2.39 | 1.38  | 1.97E-01 | 4.87E-01 | -5.76 |
| 1457459_PM_at   | AU014973                                                                                                                                                                                                                                  | NA       | 0.14  | 2.27 | 1.38  | 1.97E-01 | 4.87E-01 | -5.76 |
| 1420333_PM_at   | Txndc8                                                                                                                                                                                                                                    | TXNDC8   | 0.14  | 2.23 | 1.38  | 1.97E-01 | 4.87E-01 | -5.76 |
| 1421513_PM_at   | Tdrd1                                                                                                                                                                                                                                     | TDRD1    | 0.14  | 2.27 | 1.38  | 1.96E-01 | 4.87E-01 | -5.76 |
| 1458823_PM_at   | ---                                                                                                                                                                                                                                       | NA       | 0.14  | 2.27 | 1.38  | 1.96E-01 | 4.87E-01 | -5.76 |
| 1452019_PM_at   | Cyrr1                                                                                                                                                                                                                                     | CYR1     | 0.16  | 2.86 | 1.38  | 1.97E-01 | 4.87E-01 | -5.76 |
| 1430592_PM_at   | Tmem106b                                                                                                                                                                                                                                  | TMEM106B | 0.16  | 2.75 | 1.38  | 1.97E-01 | 4.87E-01 | -5.76 |
| 1447205_PM_x_at | Rps12 /// Rps12-ps10 ///<br>Rps12-ps11 /// Rps12-ps12<br>/// Rps12-ps13 /// Rps12-<br>ps14 /// Rps12-ps15 ///<br>Rps12-ps16 /// Rps12-ps17<br>/// Rps12-ps18 /// Rps12-<br>ps24 /// Rps12-ps5 /// Rps12-<br>ps6 /// Rps12-ps9 /// Rps12l1 | RPS12    | 0.17  | 2.72 | 1.38  | 1.97E-01 | 4.87E-01 | -5.76 |
| 1432948_PM_at   | ---                                                                                                                                                                                                                                       | NA       | 0.17  | 2.76 | 1.38  | 1.97E-01 | 4.87E-01 | -5.76 |
| 1445285_PM_at   | ---                                                                                                                                                                                                                                       | NA       | 0.20  | 3.11 | 1.38  | 1.97E-01 | 4.87E-01 | -5.76 |
| 1440732_PM_at   | D030018L15Rik                                                                                                                                                                                                                             | NA       | 0.21  | 2.38 | 1.38  | 1.97E-01 | 4.87E-01 | -5.76 |
| 1444344_PM_at   | ---                                                                                                                                                                                                                                       | NA       | 0.28  | 2.90 | 1.38  | 1.97E-01 | 4.87E-01 | -5.76 |
| 1426409_PM_at   | Lzts2                                                                                                                                                                                                                                     | LZTS2    | 0.28  | 3.17 | 1.38  | 1.97E-01 | 4.87E-01 | -5.76 |
| 1438753_PM_at   | ---                                                                                                                                                                                                                                       | NA       | 0.30  | 3.19 | 1.38  | 1.97E-01 | 4.87E-01 | -5.76 |
| 1419526_PM_at   | Fgr                                                                                                                                                                                                                                       | FGR      | 0.31  | 2.92 | 1.38  | 1.97E-01 | 4.87E-01 | -5.76 |
| 1437479_PM_x_at | Tbx3                                                                                                                                                                                                                                      | TBX3     | 0.40  | 3.10 | 1.38  | 1.97E-01 | 4.87E-01 | -5.76 |
| 1447916_PM_at   | ---                                                                                                                                                                                                                                       | NA       | 0.42  | 2.33 | 1.38  | 1.97E-01 | 4.87E-01 | -5.76 |
| 1416290_PM_a_at | Psmc4                                                                                                                                                                                                                                     | PSMC4    | 0.48  | 6.87 | 1.38  | 1.97E-01 | 4.87E-01 | -5.76 |
| 1450225_PM_at   | Insr                                                                                                                                                                                                                                      | INSR     | -0.24 | 2.87 | -1.38 | 1.97E-01 | 4.87E-01 | -5.76 |
| 1457578_PM_at   | Ppargc1b                                                                                                                                                                                                                                  | NA       | 0.12  | 2.72 | 1.38  | 1.97E-01 | 4.87E-01 | -5.76 |
| 1424456_PM_at   | Pvrl2                                                                                                                                                                                                                                     | NECTIN2  | 0.18  | 2.71 | 1.38  | 1.97E-01 | 4.87E-01 | -5.76 |
| 1454464_PM_at   | 2700078F05Rik                                                                                                                                                                                                                             | NA       | 0.20  | 2.32 | 1.38  | 1.97E-01 | 4.87E-01 | -5.76 |
| 1438659_PM_x_at | Chchd6                                                                                                                                                                                                                                    | CHCHD6   | 1.19  | 5.60 | 1.38  | 1.97E-01 | 4.87E-01 | -5.76 |
| 1433894_PM_at   | Jazf1                                                                                                                                                                                                                                     | NA       | -0.23 | 3.13 | -1.38 | 1.97E-01 | 4.88E-01 | -5.76 |
| 1451854_PM_a_at | Shroom3                                                                                                                                                                                                                                   | SHROOM3  | 0.15  | 2.43 | 1.38  | 1.97E-01 | 4.88E-01 | -5.76 |
| 1425116_PM_a_at | Sptbn4                                                                                                                                                                                                                                    | SPTBN4   | 0.16  | 2.19 | 1.38  | 1.97E-01 | 4.88E-01 | -5.76 |
| 1443481_PM_at   | Tube1                                                                                                                                                                                                                                     | NA       | 0.15  | 2.18 | 1.38  | 1.97E-01 | 4.88E-01 | -5.76 |
| 1454007_PM_a_at | Zfp142                                                                                                                                                                                                                                    | ZNF142   | 0.30  | 2.74 | 1.38  | 1.97E-01 | 4.88E-01 | -5.76 |
| 1451247_PM_at   | Mfsd1                                                                                                                                                                                                                                     | MFSD1    | -0.24 | 4.28 | -1.38 | 1.97E-01 | 4.88E-01 | -5.76 |
| 1418786_PM_at   | Mapk8ip2                                                                                                                                                                                                                                  | MAPK8IP2 | -0.21 | 2.46 | -1.38 | 1.97E-01 | 4.88E-01 | -5.76 |
| 1441960_PM_x_at | Tpgs2                                                                                                                                                                                                                                     | TPGS2    | -0.21 | 5.45 | -1.38 | 1.97E-01 | 4.88E-01 | -5.76 |
| 1444905_PM_at   | D1Erttd705e                                                                                                                                                                                                                               | NA       | 0.20  | 2.99 | 1.38  | 1.97E-01 | 4.88E-01 | -5.76 |
| 1458928_PM_at   | ---                                                                                                                                                                                                                                       | NA       | 0.22  | 2.34 | 1.38  | 1.97E-01 | 4.88E-01 | -5.76 |
| 1455049_PM_at   | Igsf3                                                                                                                                                                                                                                     | IGSF3    | 0.27  | 2.74 | 1.38  | 1.97E-01 | 4.88E-01 | -5.76 |
| 1444705_PM_at   | ---                                                                                                                                                                                                                                       | NA       | 0.34  | 2.94 | 1.38  | 1.97E-01 | 4.88E-01 | -5.76 |
| 1437943_PM_s_at | Mea1                                                                                                                                                                                                                                      | MEA1     | 0.49  | 4.23 | 1.38  | 1.97E-01 | 4.88E-01 | -5.76 |
| 1449925_PM_at   | Cxcr3                                                                                                                                                                                                                                     | CXCR3    | 0.15  | 2.23 | 1.38  | 1.97E-01 | 4.88E-01 | -5.76 |
| 1448509_PM_at   | Fam107b                                                                                                                                                                                                                                   | FAM107B  | -0.23 | 2.52 | -1.38 | 1.97E-01 | 4.88E-01 | -5.76 |
| 1421081_PM_a_at | Banf1                                                                                                                                                                                                                                     | BANF1    | 0.22  | 2.77 | 1.38  | 1.97E-01 | 4.88E-01 | -5.76 |
| 1459146_PM_at   | Mapk6                                                                                                                                                                                                                                     | MAPK6    | 0.16  | 2.24 | 1.38  | 1.97E-01 | 4.88E-01 | -5.76 |
| 1418820_PM_s_at | Zcchc10                                                                                                                                                                                                                                   | ZCCHC10  | 0.32  | 3.29 | 1.38  | 1.97E-01 | 4.88E-01 | -5.76 |
| 1443438_PM_at   | ---                                                                                                                                                                                                                                       | NA       | 0.23  | 2.34 | 1.38  | 1.97E-01 | 4.88E-01 | -5.76 |
| 1416293_PM_at   | Nfib                                                                                                                                                                                                                                      | NFIB     | 0.36  | 3.16 | 1.38  | 1.97E-01 | 4.88E-01 | -5.76 |
| 1448431_PM_at   | Asb6                                                                                                                                                                                                                                      | ASB6     | 0.17  | 2.57 | 1.38  | 1.97E-01 | 4.88E-01 | -5.76 |
| 1434926_PM_at   | Arhgef11                                                                                                                                                                                                                                  | ARHGEF11 | 0.54  | 2.89 | 1.38  | 1.97E-01 | 4.88E-01 | -5.76 |

|                 |                                   |                |       |      |       |          |          |       |
|-----------------|-----------------------------------|----------------|-------|------|-------|----------|----------|-------|
| 1421009_PM_at   | Rsad2                             | RSAD2          | 0.13  | 2.22 | 1.38  | 1.97E-01 | 4.88E-01 | -5.76 |
| 1434911_PM_s_at | Arhgap19                          | ARHGAP19-SLIT1 | 0.12  | 2.27 | 1.38  | 1.97E-01 | 4.88E-01 | -5.76 |
| 1437032_PM_x_at | Rbm14                             | RBM14          | 0.28  | 4.03 | 1.38  | 1.97E-01 | 4.88E-01 | -5.76 |
| 1451807_PM_at   | Nr1i2                             | NR1I2          | 0.11  | 2.48 | 1.38  | 1.97E-01 | 4.88E-01 | -5.76 |
| 1422137_PM_at   | Duoxa2                            | DUOXA2         | 0.12  | 2.13 | 1.38  | 1.97E-01 | 4.88E-01 | -5.76 |
| 1456446_PM_at   | 4930523C07Rik                     | KIAA0040       | 0.16  | 2.21 | 1.38  | 1.97E-01 | 4.88E-01 | -5.76 |
| 1437134_PM_at   | ---                               | NA             | 0.13  | 2.01 | 1.38  | 1.97E-01 | 4.88E-01 | -5.76 |
| 1460171_PM_at   | Cops5                             | COP55          | -0.40 | 3.86 | -1.38 | 1.97E-01 | 4.88E-01 | -5.76 |
| 1455429_PM_at   | Fam160b1                          | FAM160B1       | -0.32 | 2.64 | -1.38 | 1.98E-01 | 4.88E-01 | -5.76 |
| 1435455_PM_at   | Iffo2                             | AL080251.1     | 0.19  | 2.88 | 1.38  | 1.98E-01 | 4.88E-01 | -5.76 |
| 1451864_PM_at   | Cacng8                            | CACNG8         | 0.23  | 3.00 | 1.38  | 1.98E-01 | 4.88E-01 | -5.76 |
| 1427925_PM_at   | Stx17                             | STX17          | 0.23  | 3.96 | 1.38  | 1.98E-01 | 4.88E-01 | -5.76 |
| 1457896_PM_at   | ---                               | NA             | 0.38  | 2.27 | 1.38  | 1.98E-01 | 4.88E-01 | -5.76 |
| 1432082_PM_at   | ---                               | NA             | 0.15  | 2.19 | 1.38  | 1.98E-01 | 4.88E-01 | -5.76 |
| 1448742_PM_at   | Snai1                             | SNAI1          | 0.13  | 2.19 | 1.38  | 1.98E-01 | 4.88E-01 | -5.76 |
| 1449148_PM_a_at | Phtf1                             | PHTF1          | -0.21 | 3.18 | -1.38 | 1.98E-01 | 4.89E-01 | -5.76 |
| 1425689_PM_at   | Dpys                              | DPYS           | 0.19  | 3.68 | 1.38  | 1.98E-01 | 4.89E-01 | -5.76 |
| 1418220_PM_at   | Foxf2                             | FOXF2          | 0.19  | 2.73 | 1.38  | 1.98E-01 | 4.89E-01 | -5.76 |
| 1457158_PM_at   | Setd6                             | SETD6          | 0.21  | 2.58 | 1.38  | 1.98E-01 | 4.89E-01 | -5.76 |
| 1441724_PM_at   | Stag1                             | NA             | 0.30  | 2.66 | 1.38  | 1.98E-01 | 4.89E-01 | -5.76 |
| 1458509_PM_at   | ---                               | NA             | 0.13  | 2.73 | 1.38  | 1.98E-01 | 4.89E-01 | -5.76 |
| 1451293_PM_at   | Rrp9                              | RRP9           | 0.16  | 2.40 | 1.38  | 1.98E-01 | 4.89E-01 | -5.76 |
| 1436952_PM_at   | Klf9                              | KL F9          | 0.12  | 2.40 | 1.38  | 1.98E-01 | 4.89E-01 | -5.76 |
| 1438755_PM_at   | C80068                            | NA             | 0.34  | 3.37 | 1.38  | 1.98E-01 | 4.89E-01 | -5.76 |
| 1420579_PM_s_at | Cftr                              | CFTR           | -0.31 | 2.28 | -1.38 | 1.98E-01 | 4.89E-01 | -5.76 |
| 1449263_PM_at   | Ufm1                              | UFM1           | 0.35  | 3.53 | 1.38  | 1.98E-01 | 4.89E-01 | -5.76 |
| 1443513_PM_at   | ---                               | NA             | -0.35 | 2.89 | -1.38 | 1.98E-01 | 4.89E-01 | -5.76 |
| 1454127_PM_at   | 1010001108Rik                     | NA             | 0.12  | 2.56 | 1.38  | 1.98E-01 | 4.89E-01 | -5.76 |
| 1455302_PM_at   | Vps29                             | VPS29          | 0.16  | 2.12 | 1.38  | 1.98E-01 | 4.89E-01 | -5.76 |
| 1417271_PM_a_at | Eng                               | ENG            | 0.21  | 2.95 | 1.38  | 1.98E-01 | 4.89E-01 | -5.76 |
| 1444931_PM_at   | ---                               | NA             | 0.23  | 2.67 | 1.38  | 1.98E-01 | 4.89E-01 | -5.76 |
| 1455751_PM_at   | Cand1                             | CAND1          | -0.32 | 3.00 | -1.38 | 1.98E-01 | 4.89E-01 | -5.76 |
| 1436092_PM_at   | ---                               | NA             | -0.61 | 4.41 | -1.38 | 1.98E-01 | 4.89E-01 | -5.76 |
| 1437412_PM_at   | Prdx6b                            | PRDX6          | 0.11  | 2.38 | 1.38  | 1.98E-01 | 4.89E-01 | -5.76 |
| 1427309_PM_at   | Pars2                             | PARS2          | 0.13  | 2.52 | 1.38  | 1.98E-01 | 4.89E-01 | -5.76 |
| 1456668_PM_at   | ---                               | NA             | 0.17  | 2.41 | 1.38  | 1.98E-01 | 4.89E-01 | -5.76 |
| 1451817_PM_at   | Suv420h1                          | KMT5B          | 0.20  | 3.12 | 1.38  | 1.98E-01 | 4.89E-01 | -5.76 |
| 1435171_PM_at   | 2810416G20Rik ///<br>LOC102642487 | NA             | 0.27  | 3.01 | 1.38  | 1.98E-01 | 4.89E-01 | -5.76 |
| 1417500_PM_a_at | Tgm2                              | TGM2           | 0.30  | 3.04 | 1.38  | 1.98E-01 | 4.89E-01 | -5.76 |
| 1454151_PM_at   | Gm38508 /// Tmem167               | TMEM167A       | 0.15  | 2.13 | 1.37  | 1.98E-01 | 4.89E-01 | -5.76 |
| 1450521_PM_a_at | Tcrg-C1                           | NA             | -0.17 | 2.59 | -1.37 | 1.98E-01 | 4.89E-01 | -5.77 |
| 1451697_PM_a_at | Evc                               | EVC            | 0.13  | 2.72 | 1.37  | 1.98E-01 | 4.89E-01 | -5.77 |
| 1418464_PM_at   | Matn4                             | MATN4          | 0.18  | 2.39 | 1.37  | 1.98E-01 | 4.89E-01 | -5.77 |
| 1456787_PM_at   | ---                               | NA             | 0.32  | 2.63 | 1.37  | 1.98E-01 | 4.89E-01 | -5.77 |
| 1460147_PM_at   | ---                               | NA             | 0.24  | 2.41 | 1.37  | 1.98E-01 | 4.89E-01 | -5.77 |
| 1456281_PM_at   | Fbxl18                            | FBXL18         | 0.15  | 2.62 | 1.37  | 1.98E-01 | 4.89E-01 | -5.77 |
| 1443240_PM_at   | ---                               | NA             | 0.13  | 2.11 | 1.37  | 1.98E-01 | 4.89E-01 | -5.77 |
| 1445351_PM_at   | ---                               | NA             | 0.12  | 2.55 | 1.37  | 1.98E-01 | 4.90E-01 | -5.77 |
| 1420365_PM_a_at | Hnrnpa2b1 ///<br>LOC102642938     | HNRNPA2B1      | -0.22 | 9.46 | -1.37 | 1.98E-01 | 4.90E-01 | -5.77 |
| 1457937_PM_at   | A430088P11Rik                     | NA             | 0.11  | 2.16 | 1.37  | 1.98E-01 | 4.90E-01 | -5.77 |
| 1431165_PM_at   | Krtap10-10 /// Krtap10-4          | NA             | 0.12  | 2.96 | 1.37  | 1.98E-01 | 4.90E-01 | -5.77 |
| 1449892_PM_at   | Lyz1                              | LYZL1          | 0.15  | 2.68 | 1.37  | 1.98E-01 | 4.90E-01 | -5.77 |
| 1443015_PM_at   | Rhoh                              | RHOH           | 0.17  | 2.83 | 1.37  | 1.98E-01 | 4.90E-01 | -5.77 |
| 1439307_PM_at   | ---                               | NA             | 0.21  | 2.37 | 1.37  | 1.98E-01 | 4.90E-01 | -5.77 |
| 1437371_PM_at   | Fam160a1                          | FAM160A1       | 0.14  | 2.80 | 1.37  | 1.98E-01 | 4.90E-01 | -5.77 |
| 1429475_PM_at   | Ubash3b                           | UBASH3B        | 0.20  | 2.58 | 1.37  | 1.98E-01 | 4.90E-01 | -5.77 |
| 1443892_PM_at   | Zfp936                            | NA             | -0.31 | 2.56 | -1.37 | 1.99E-01 | 4.90E-01 | -5.77 |
| 1458996_PM_at   | Irga5                             | ITGA5          | 0.14  | 2.57 | 1.37  | 1.99E-01 | 4.90E-01 | -5.77 |
| 1431727_PM_at   | Smgc                              | NA             | 0.14  | 2.21 | 1.37  | 1.99E-01 | 4.90E-01 | -5.77 |
| 1432305_PM_at   | ---                               | NA             | -0.27 | 2.84 | -1.37 | 1.99E-01 | 4.90E-01 | -5.77 |
| 1453920_PM_a_at | Mospd2                            | MOSPD2         | 0.17  | 2.68 | 1.37  | 1.99E-01 | 4.90E-01 | -5.77 |
| 1442250_PM_at   | ---                               | NA             | 0.25  | 2.30 | 1.37  | 1.99E-01 | 4.90E-01 | -5.77 |
| 1421422_PM_at   | Sugct                             | SUGCT          | 0.34  | 2.89 | 1.37  | 1.99E-01 | 4.90E-01 | -5.77 |
| 1435974_PM_at   | Arhgef9                           | ARHGEF9        | -0.52 | 6.48 | -1.37 | 1.99E-01 | 4.90E-01 | -5.77 |
| 1453936_PM_at   | ---                               | NA             | 0.18  | 2.80 | 1.37  | 1.99E-01 | 4.90E-01 | -5.77 |
| 1426419_PM_at   | Rbm26                             | NA             | -0.33 | 2.96 | -1.37 | 1.99E-01 | 4.90E-01 | -5.77 |
| 1448503_PM_at   | Mcl1                              | MCL1           | -0.27 | 3.16 | -1.37 | 1.99E-01 | 4.90E-01 | -5.77 |
| 1427370_PM_at   | Amdhd1                            | AMDHD1         | 0.13  | 2.17 | 1.37  | 1.99E-01 | 4.90E-01 | -5.77 |
| 1431918_PM_at   | ---                               | NA             | 0.11  | 2.38 | 1.37  | 1.99E-01 | 4.90E-01 | -5.77 |
| 1425267_PM_a_at | Pear1                             | PEAR1          | 0.12  | 3.03 | 1.37  | 1.99E-01 | 4.90E-01 | -5.77 |
| 1417885_PM_at   | Mapt                              | MAPT           | 0.19  | 2.62 | 1.37  | 1.99E-01 | 4.90E-01 | -5.77 |
| 1456054_PM_a_at | Pum1                              | PUM1           | -0.53 | 2.56 | -1.37 | 1.99E-01 | 4.90E-01 | -5.77 |
| 1426695_PM_at   | 9030624J02Rik                     | C16orf62       | -0.44 | 2.92 | -1.37 | 1.99E-01 | 4.90E-01 | -5.77 |

|                 |                     |          |       |      |       |          |          |       |
|-----------------|---------------------|----------|-------|------|-------|----------|----------|-------|
| 1455603_PM_at   | ---                 | NA       | -0.38 | 5.61 | -1.37 | 1.99E-01 | 4.90E-01 | -5.77 |
| 1448962_PM_at   | Myh11               | MYH11    | -1.05 | 4.67 | -1.37 | 1.99E-01 | 4.90E-01 | -5.77 |
| 1456393_PM_at   | Bbip1               | NA       | -0.42 | 8.44 | -1.37 | 1.99E-01 | 4.90E-01 | -5.77 |
| 1459514_PM_at   | ---                 | NA       | 0.12  | 2.38 | 1.37  | 1.99E-01 | 4.90E-01 | -5.77 |
| 1418939_PM_at   | Hlx                 | HLX      | 0.21  | 2.39 | 1.37  | 1.99E-01 | 4.90E-01 | -5.77 |
| 1425363_PM_at   | B4galnt1            | NA       | 0.25  | 3.15 | 1.37  | 1.99E-01 | 4.90E-01 | -5.77 |
| 1439089_PM_at   | Zbtb41              | ZBTB41   | 0.30  | 3.15 | 1.37  | 1.99E-01 | 4.90E-01 | -5.77 |
| 1426197_PM_at   | Ighv1-12            | NA       | 0.14  | 2.33 | 1.37  | 1.99E-01 | 4.90E-01 | -5.77 |
| 1435773_PM_at   | Parbp               | PARBP    | 0.16  | 2.74 | 1.37  | 1.99E-01 | 4.90E-01 | -5.77 |
| 1448789_PM_at   | Aldh1a3             | ALDH1A3  | 0.20  | 2.29 | 1.37  | 1.99E-01 | 4.90E-01 | -5.77 |
| 1434637_PM_x_at | Sin3b               | SIN3B    | 0.51  | 5.15 | 1.37  | 1.99E-01 | 4.90E-01 | -5.77 |
| 1440391_PM_at   | Gcn1l1              | GCN1     | 0.13  | 2.33 | 1.37  | 1.99E-01 | 4.90E-01 | -5.77 |
| 1437263_PM_at   | A730089K16Rik       | NA       | -0.26 | 2.48 | -1.37 | 1.99E-01 | 4.90E-01 | -5.77 |
| 1428910_PM_at   | Z310022B05Rik       | C1orf198 | 0.19  | 2.56 | 1.37  | 1.99E-01 | 4.90E-01 | -5.77 |
| 1430684_PM_s_at | Lrp2bp              | LRP2BP   | -0.11 | 2.36 | -1.37 | 1.99E-01 | 4.90E-01 | -5.77 |
| 1440089_PM_at   | ---                 | NA       | 0.27  | 2.79 | 1.37  | 1.99E-01 | 4.90E-01 | -5.77 |
| 1458019_PM_at   | ---                 | NA       | 0.20  | 2.41 | 1.37  | 1.99E-01 | 4.90E-01 | -5.77 |
| 1438457_PM_at   | Dact3               | NA       | 0.50  | 5.18 | 1.37  | 1.99E-01 | 4.90E-01 | -5.77 |
| 1440678_PM_at   | ---                 | NA       | 0.22  | 3.03 | 1.37  | 1.99E-01 | 4.91E-01 | -5.77 |
| 1426058_PM_a_at | Kcnk3               | KCNK3    | 0.20  | 2.44 | 1.37  | 1.99E-01 | 4.91E-01 | -5.77 |
| 1420199_PM_at   | E230025N22Rik       | NA       | -0.22 | 2.69 | -1.37 | 1.99E-01 | 4.91E-01 | -5.77 |
| 1456574_PM_at   | Zfp800              | ZNF800   | -0.22 | 4.07 | -1.37 | 1.99E-01 | 4.91E-01 | -5.77 |
| 1441690_PM_at   | Cdh8                | CDH8     | -0.20 | 2.60 | -1.37 | 1.99E-01 | 4.91E-01 | -5.77 |
| 1417444_PM_at   | E2f5                | E2F5     | -0.16 | 2.44 | -1.37 | 1.99E-01 | 4.91E-01 | -5.77 |
| 1418093_PM_a_at | Egf                 | EGF      | 0.14  | 2.33 | 1.37  | 1.99E-01 | 4.91E-01 | -5.77 |
| 1439146_PM_s_at | Lck                 | LCK      | 0.14  | 2.36 | 1.37  | 1.99E-01 | 4.91E-01 | -5.77 |
| 1431143_PM_x_at | Aifm2               | AIFM2    | 0.19  | 2.46 | 1.37  | 1.99E-01 | 4.91E-01 | -5.77 |
| 1444950_PM_at   | Zbtb49              | ZBTB49   | 0.13  | 2.42 | 1.37  | 1.99E-01 | 4.91E-01 | -5.77 |
| 1416627_PM_at   | Spint1              | SPINT1   | 0.20  | 2.36 | 1.37  | 1.99E-01 | 4.91E-01 | -5.77 |
| 1453076_PM_at   | Batf3               | BATF3    | 0.28  | 3.17 | 1.37  | 1.99E-01 | 4.91E-01 | -5.77 |
| 1445447_PM_at   | ---                 | NA       | 0.29  | 3.21 | 1.37  | 1.99E-01 | 4.91E-01 | -5.77 |
| 1415879_PM_a_at | Rplp2               | RPLP2    | 0.35  | 4.02 | 1.37  | 1.99E-01 | 4.91E-01 | -5.77 |
| 1422629_PM_s_at | Shroom3             | SHROOM3  | 0.31  | 3.78 | 1.37  | 1.99E-01 | 4.91E-01 | -5.77 |
| 1441236_PM_at   | Slc9a3              | NA       | 0.21  | 2.42 | 1.37  | 1.99E-01 | 4.91E-01 | -5.77 |
| 1455945_PM_at   | Zfp58               | ZNF141   | 0.14  | 2.12 | 1.37  | 1.99E-01 | 4.91E-01 | -5.77 |
| 1427564_PM_at   | Diaph2              | DIAPH2   | -0.63 | 4.11 | -1.37 | 2.00E-01 | 4.91E-01 | -5.77 |
| 1451288_PM_s_at | 1810043G02Rik       | C21orf2  | -0.51 | 3.08 | -1.37 | 2.00E-01 | 4.91E-01 | -5.77 |
| 1441256_PM_at   | ---                 | NA       | 0.14  | 2.10 | 1.37  | 2.00E-01 | 4.91E-01 | -5.77 |
| 1451930_PM_at   | ---                 | NA       | 0.16  | 2.57 | 1.37  | 2.00E-01 | 4.91E-01 | -5.77 |
| 1446994_PM_at   | Exosc2              | NA       | 0.25  | 2.40 | 1.37  | 2.00E-01 | 4.91E-01 | -5.77 |
| 1443626_PM_at   | ---                 | NA       | 0.46  | 2.59 | 1.37  | 2.00E-01 | 4.91E-01 | -5.77 |
| 1417848_PM_at   | Zfp704              | ZNF704   | -0.26 | 3.38 | -1.37 | 2.00E-01 | 4.91E-01 | -5.77 |
| 1437075_PM_at   | FrmD3               | FRMD3    | -0.11 | 2.25 | -1.37 | 2.00E-01 | 4.91E-01 | -5.77 |
| 1430892_PM_at   | Tex37               | TEX37    | 0.13  | 2.40 | 1.37  | 2.00E-01 | 4.91E-01 | -5.77 |
| 1429270_PM_a_at | Syce2               | SYCE2    | 0.43  | 3.09 | 1.37  | 2.00E-01 | 4.91E-01 | -5.77 |
| 1455215_PM_at   | Pianp               | PIANP    | -0.50 | 6.00 | -1.37 | 2.00E-01 | 4.91E-01 | -5.77 |
| 1439643_PM_at   | ---                 | NA       | -0.11 | 1.94 | -1.37 | 2.00E-01 | 4.91E-01 | -5.77 |
| 1458895_PM_at   | Naa11               | NAA11    | 0.13  | 2.53 | 1.37  | 2.00E-01 | 4.91E-01 | -5.77 |
| 1437323_PM_a_at | Iapp                | IAPP     | 0.15  | 2.12 | 1.37  | 2.00E-01 | 4.91E-01 | -5.77 |
| 1419071_PM_at   | Cys1                | CYS1     | 0.19  | 2.50 | 1.37  | 2.00E-01 | 4.91E-01 | -5.77 |
| 1439066_PM_at   | Angpt1              | ANGPT1   | 0.21  | 2.14 | 1.37  | 2.00E-01 | 4.91E-01 | -5.77 |
| 1436518_PM_at   | Usp46               | USP46    | 0.27  | 3.33 | 1.37  | 2.00E-01 | 4.91E-01 | -5.77 |
| 1443255_PM_s_at | Arhgap31            | ARHGAP31 | 0.20  | 2.15 | 1.37  | 2.00E-01 | 4.91E-01 | -5.77 |
| 1437843_PM_s_at | Nup1                | NA       | 1.00  | 4.54 | 1.37  | 2.00E-01 | 4.91E-01 | -5.77 |
| 1425674_PM_a_at | Ssu72               | SSU72    | -0.56 | 5.49 | -1.37 | 2.00E-01 | 4.91E-01 | -5.77 |
| 1417251_PM_at   | Palmd               | PALMD    | -0.42 | 4.03 | -1.37 | 2.00E-01 | 4.91E-01 | -5.77 |
| 1429392_PM_at   | Dcaf12              | DCAF12   | -0.37 | 2.37 | -1.37 | 2.00E-01 | 4.91E-01 | -5.77 |
| 1451174_PM_at   | Nrros               | NRROS    | -0.15 | 2.48 | -1.37 | 2.00E-01 | 4.91E-01 | -5.77 |
| 1422871_PM_at   | Kcnj12              | KCNJ12   | 0.15  | 2.78 | 1.37  | 2.00E-01 | 4.91E-01 | -5.77 |
| 1440010_PM_at   | Cab39               | CAB39    | 0.18  | 2.39 | 1.37  | 2.00E-01 | 4.91E-01 | -5.77 |
| 1449085_PM_at   | Phf10               | PHF10    | 0.34  | 2.90 | 1.37  | 2.00E-01 | 4.91E-01 | -5.77 |
| 1429421_PM_at   | Accs                | ACCS     | 0.15  | 2.53 | 1.37  | 2.00E-01 | 4.91E-01 | -5.77 |
| 1422153_PM_a_at | Asb11               | ASB11    | 0.18  | 2.51 | 1.37  | 2.00E-01 | 4.91E-01 | -5.77 |
| 1458282_PM_at   | ---                 | NA       | 0.21  | 2.06 | 1.37  | 2.00E-01 | 4.91E-01 | -5.77 |
| 1446055_PM_at   | ---                 | NA       | 0.25  | 3.68 | 1.37  | 2.00E-01 | 4.91E-01 | -5.77 |
| 1428818_PM_at   | Mon2                | MON2     | -0.37 | 2.67 | -1.37 | 2.00E-01 | 4.91E-01 | -5.77 |
| 1424794_PM_at   | Rnf186              | RNF186   | 0.12  | 2.19 | 1.37  | 2.00E-01 | 4.91E-01 | -5.77 |
| 1451322_PM_at   | Cmb1                | CMBL     | -0.32 | 3.16 | -1.37 | 2.00E-01 | 4.91E-01 | -5.77 |
| 1425752_PM_at   | Slc22a26            | SLC22A9  | 0.13  | 1.93 | 1.37  | 2.00E-01 | 4.91E-01 | -5.77 |
| 1422874_PM_at   | Acrbp               | ACRBP    | 0.16  | 2.08 | 1.37  | 2.00E-01 | 4.91E-01 | -5.77 |
| 1439519_PM_at   | Slc34a3             | SLC34A3  | 0.18  | 2.77 | 1.37  | 2.00E-01 | 4.91E-01 | -5.77 |
| 1442516_PM_at   | D2Ert623e           | NA       | 0.23  | 2.50 | 1.37  | 2.00E-01 | 4.91E-01 | -5.77 |
| 1420594_PM_at   | Bard1               | BARD1    | 0.13  | 2.33 | 1.37  | 2.00E-01 | 4.91E-01 | -5.77 |
| 1434206_PM_s_at | Ppp2r5c             | PPP2R5C  | 0.14  | 2.14 | 1.37  | 2.00E-01 | 4.91E-01 | -5.77 |
| 1456447_PM_at   | Rpl18 /// Rpl18-ps2 | RPL18    | 0.14  | 2.55 | 1.37  | 2.00E-01 | 4.91E-01 | -5.77 |

|                 |                        |            |       |      |       |          |          |       |
|-----------------|------------------------|------------|-------|------|-------|----------|----------|-------|
| 1452271_PM_at   | Xpr1                   | XPR1       | 0.47  | 7.05 | 1.37  | 2.00E-01 | 4.91E-01 | -5.77 |
| 1416623_PM_at   | Thbs3                  | THBS3      | 0.17  | 2.38 | 1.37  | 2.00E-01 | 4.91E-01 | -5.77 |
| 1441381_PM_at   | ---                    | NA         | 0.18  | 2.40 | 1.37  | 2.00E-01 | 4.91E-01 | -5.77 |
| 1430365_PM_at   | Nfxl1                  | NFXL1      | 0.20  | 3.77 | 1.37  | 2.00E-01 | 4.91E-01 | -5.77 |
| 1432204_PM_at   | ---                    | NA         | 0.21  | 2.99 | 1.37  | 2.00E-01 | 4.91E-01 | -5.77 |
| 1427430_PM_at   | Suco                   | SUCO       | -0.65 | 3.37 | -1.37 | 2.00E-01 | 4.91E-01 | -5.77 |
| 1423452_PM_at   | Stk17b                 | STK17B     | -0.49 | 4.10 | -1.37 | 2.00E-01 | 4.91E-01 | -5.77 |
| 1451381_PM_at   | Aamdc                  | AAMDC      | -0.43 | 4.73 | -1.37 | 2.00E-01 | 4.91E-01 | -5.77 |
| 1452861_PM_at   | 2010300C02Rik          | KIAA1211L  | -0.26 | 5.85 | -1.37 | 2.00E-01 | 4.91E-01 | -5.77 |
| 1431524_PM_at   | 4933427122Rik          | NA         | 0.13  | 2.26 | 1.37  | 2.00E-01 | 4.91E-01 | -5.77 |
| 1458745_PM_at   | D18ErtD201e            | NA         | 0.19  | 2.53 | 1.37  | 2.00E-01 | 4.91E-01 | -5.77 |
| 1452613_PM_at   | Uqcrq                  | UQCRQ      | 0.19  | 2.71 | 1.37  | 2.00E-01 | 4.91E-01 | -5.77 |
| 1421509_PM_at   | Sorcs1                 | SORCS1     | 0.19  | 2.45 | 1.37  | 2.00E-01 | 4.91E-01 | -5.77 |
| 1446739_PM_at   | ---                    | NA         | 0.22  | 2.73 | 1.37  | 2.00E-01 | 4.91E-01 | -5.77 |
| 1424034_PM_at   | Rora                   | RORA       | 0.31  | 4.64 | 1.37  | 2.00E-01 | 4.91E-01 | -5.77 |
| 1457091_PM_at   | Lkaaear1               | LKAAEAR1   | 0.11  | 2.04 | 1.37  | 2.00E-01 | 4.91E-01 | -5.77 |
| 1446546_PM_at   | Rhno1                  | NA         | 0.13  | 2.28 | 1.37  | 2.00E-01 | 4.91E-01 | -5.77 |
| 1456745_PM_x_at | Ergic3                 | ERGIC3     | 0.40  | 3.96 | 1.37  | 2.00E-01 | 4.92E-01 | -5.77 |
| 1455081_PM_at   | Txn14b                 | TXNL4B     | 0.21  | 2.67 | 1.37  | 2.01E-01 | 4.92E-01 | -5.77 |
| 1436169_PM_at   | Paqr9                  | PAQR9      | -0.28 | 2.75 | -1.37 | 2.01E-01 | 4.92E-01 | -5.77 |
| 1416769_PM_s_at | Atp6v0b                | ATP6V0B    | -0.30 | 2.95 | -1.37 | 2.01E-01 | 4.92E-01 | -5.77 |
| 1433181_PM_at   | Agb3                   | NA         | 0.22  | 2.63 | 1.37  | 2.01E-01 | 4.92E-01 | -5.78 |
| 1434690_PM_at   | Lclat1                 | LCLAT1     | -0.19 | 2.35 | -1.37 | 2.01E-01 | 4.92E-01 | -5.78 |
| 1453521_PM_at   | 4933405L10Rik          | C16orf86   | 0.10  | 2.17 | 1.37  | 2.01E-01 | 4.92E-01 | -5.78 |
| 1437934_PM_at   | Tia1                   | TIA1       | -0.23 | 2.54 | -1.37 | 2.01E-01 | 4.92E-01 | -5.78 |
| 1452942_PM_at   | Tmem65                 | TMEM65     | -0.32 | 5.10 | -1.37 | 2.01E-01 | 4.92E-01 | -5.78 |
| 1418941_PM_at   | Pcdhb22                | PCDHB15    | -0.32 | 2.87 | -1.37 | 2.01E-01 | 4.92E-01 | -5.78 |
| 1418685_PM_at   | Tirap                  | TIRAP      | 0.15  | 2.30 | 1.37  | 2.01E-01 | 4.92E-01 | -5.78 |
| 1458101_PM_at   | Lrrc56                 | LRRCS6     | 0.15  | 2.32 | 1.37  | 2.01E-01 | 4.92E-01 | -5.78 |
| 1429611_PM_at   | 1700034E13Rik          | ACO10255.3 | 0.20  | 2.52 | 1.37  | 2.01E-01 | 4.92E-01 | -5.78 |
| 1460702_PM_at   | Triap1                 | TRIAP1     | -0.24 | 3.32 | -1.37 | 2.01E-01 | 4.92E-01 | -5.78 |
| 1429087_PM_at   | Inip                   | INIP       | -0.35 | 2.78 | -1.37 | 2.01E-01 | 4.92E-01 | -5.78 |
| 1421709_PM_a_at | Fmo5                   | FMO5       | 0.15  | 2.21 | 1.37  | 2.01E-01 | 4.92E-01 | -5.78 |
| 1432766_PM_at   | ---                    | NA         | 0.19  | 2.37 | 1.37  | 2.01E-01 | 4.92E-01 | -5.78 |
| 1450648_PM_s_at | H2-Ab1                 | HLA-DQB2   | -0.49 | 3.31 | -1.37 | 2.01E-01 | 4.92E-01 | -5.78 |
| 1437584_PM_at   | ---                    | NA         | 0.16  | 2.70 | 1.37  | 2.01E-01 | 4.92E-01 | -5.78 |
| 1458952_PM_at   | Wdfy3                  | NA         | 0.20  | 2.50 | 1.37  | 2.01E-01 | 4.92E-01 | -5.78 |
| 1446167_PM_at   | ---                    | NA         | -0.33 | 2.74 | -1.37 | 2.01E-01 | 4.92E-01 | -5.78 |
| 1440472_PM_at   | Spag17                 | SPAG17     | 0.11  | 2.33 | 1.37  | 2.01E-01 | 4.92E-01 | -5.78 |
| 1459121_PM_at   | ---                    | NA         | 0.17  | 2.58 | 1.37  | 2.01E-01 | 4.92E-01 | -5.78 |
| 1453578_PM_at   | Pter                   | PTER       | -1.16 | 4.90 | -1.37 | 2.01E-01 | 4.92E-01 | -5.78 |
| 1420925_PM_at   | Tub                    | TUB        | -0.53 | 6.25 | -1.37 | 2.01E-01 | 4.92E-01 | -5.78 |
| 1444850_PM_at   | Gm12169                | HAVCR1     | -0.12 | 2.50 | -1.37 | 2.01E-01 | 4.92E-01 | -5.78 |
| 1439867_PM_at   | Ubox5                  | UBOX5      | 0.15  | 2.14 | 1.37  | 2.01E-01 | 4.92E-01 | -5.78 |
| 1454147_PM_at   | 1700024F13Rik          | NA         | 0.15  | 2.37 | 1.37  | 2.01E-01 | 4.92E-01 | -5.78 |
| 1431590_PM_at   | ---                    | NA         | 0.17  | 2.34 | 1.37  | 2.01E-01 | 4.92E-01 | -5.78 |
| 1439468_PM_at   | ---                    | NA         | 0.17  | 2.55 | 1.37  | 2.01E-01 | 4.92E-01 | -5.78 |
| 1430414_PM_at   | ---                    | NA         | 0.21  | 2.34 | 1.37  | 2.01E-01 | 4.92E-01 | -5.78 |
| 1428275_PM_at   | Abhd13                 | ABHD13     | 0.23  | 6.12 | 1.37  | 2.01E-01 | 4.92E-01 | -5.78 |
| 1439412_PM_at   | ---                    | NA         | 0.80  | 5.31 | 1.37  | 2.01E-01 | 4.92E-01 | -5.78 |
| 1441942_PM_x_at | Snupn                  | SNUPN      | -0.29 | 3.06 | -1.36 | 2.01E-01 | 4.92E-01 | -5.78 |
| 1454526_PM_at   | ---                    | NA         | 0.18  | 2.55 | 1.36  | 2.01E-01 | 4.92E-01 | -5.78 |
| 1431169_PM_at   | Pgap1                  | PGAP1      | -0.21 | 2.84 | -1.36 | 2.01E-01 | 4.93E-01 | -5.78 |
| 1454159_PM_a_at | Igfbp2                 | IGFBP2     | 0.27  | 2.67 | 1.36  | 2.01E-01 | 4.93E-01 | -5.78 |
| 1433110_PM_at   | ---                    | NA         | 0.47  | 4.13 | 1.36  | 2.01E-01 | 4.93E-01 | -5.78 |
| 1435606_PM_at   | Gal3st4                | GAL3ST4    | -0.18 | 2.22 | -1.36 | 2.01E-01 | 4.93E-01 | -5.78 |
| 1429422_PM_at   | 4933412E12Rik          | NA         | 0.27  | 2.56 | 1.36  | 2.01E-01 | 4.93E-01 | -5.78 |
| 1415894_PM_at   | Enpp2                  | NA         | -0.37 | 6.00 | -1.36 | 2.01E-01 | 4.93E-01 | -5.78 |
| 1457848_PM_at   | ---                    | NA         | 0.19  | 2.40 | 1.36  | 2.01E-01 | 4.93E-01 | -5.78 |
| 1458345_PM_s_at | Colec11                | COLEC11    | -0.29 | 2.46 | -1.36 | 2.01E-01 | 4.93E-01 | -5.78 |
| 1441552_PM_at   | Traj49                 | NA         | 0.12  | 2.30 | 1.36  | 2.01E-01 | 4.93E-01 | -5.78 |
| 1426777_PM_a_at | Wasl                   | WASL       | 0.39  | 3.58 | 1.36  | 2.01E-01 | 4.93E-01 | -5.78 |
| 1454949_PM_at   | Usp7                   | NA         | -0.40 | 2.89 | -1.36 | 2.02E-01 | 4.93E-01 | -5.78 |
| 1429733_PM_at   | Ccdc94                 | NA         | 0.14  | 3.53 | 1.36  | 2.02E-01 | 4.93E-01 | -5.78 |
| 1454212_PM_x_at | Gsdmcl-ps///Gsdmcl1/// | Gsdmcl2    | 0.19  | 2.52 | 1.36  | 2.02E-01 | 4.93E-01 | -5.78 |
| 1436104_PM_a_at | Ccdc74a                | CCDC74B    | 0.26  | 3.09 | 1.36  | 2.02E-01 | 4.93E-01 | -5.78 |
| 1439371_PM_x_at | Timm44                 | TIMM44     | 0.31  | 3.91 | 1.36  | 2.02E-01 | 4.93E-01 | -5.78 |
| 1429007_PM_at   | ---                    | NA         | 0.38  | 2.83 | 1.36  | 2.02E-01 | 4.93E-01 | -5.78 |
| 1450502_PM_at   | Dpysl2                 | DPYSL2     | 0.44  | 5.52 | 1.36  | 2.02E-01 | 4.93E-01 | -5.78 |
| 1421801_PM_at   | ---                    | NA         | 0.14  | 2.48 | 1.36  | 2.02E-01 | 4.93E-01 | -5.78 |
| 1453640_PM_at   | ---                    | NA         | 0.22  | 2.58 | 1.36  | 2.02E-01 | 4.93E-01 | -5.78 |
| 1437562_PM_at   | ---                    | NA         | 0.13  | 2.43 | 1.36  | 2.02E-01 | 4.93E-01 | -5.78 |
| 1431539_PM_at   | Caps2                  | CAPS2      | 0.15  | 2.30 | 1.36  | 2.02E-01 | 4.93E-01 | -5.78 |
| 1423730_PM_at   | Clptm1l                | CLPTM1L    | -0.28 | 4.89 | -1.36 | 2.02E-01 | 4.93E-01 | -5.78 |

|                 |                                                                       |          |       |      |       |          |          |       |
|-----------------|-----------------------------------------------------------------------|----------|-------|------|-------|----------|----------|-------|
| 1416999_PM_at   | Smpd2                                                                 | SMPD2    | 0.11  | 2.18 | 1.36  | 2.02E-01 | 4.93E-01 | -5.78 |
| 1448433_PM_a_at | Pcolce                                                                | PCOLCE   | 0.16  | 2.41 | 1.36  | 2.02E-01 | 4.93E-01 | -5.78 |
| 1442592_PM_at   | ---                                                                   | NA       | 0.18  | 2.28 | 1.36  | 2.02E-01 | 4.93E-01 | -5.78 |
| 1425369_PM_a_at | Sox10                                                                 | SOX10    | 0.22  | 2.66 | 1.36  | 2.02E-01 | 4.93E-01 | -5.78 |
| 1424727_PM_at   | CCR5                                                                  | CCR2     | -0.16 | 2.26 | -1.36 | 2.02E-01 | 4.93E-01 | -5.78 |
| 1456760_PM_at   | Gbx1                                                                  | GBX1     | 0.18  | 2.63 | 1.36  | 2.02E-01 | 4.93E-01 | -5.78 |
| 1424971_PM_at   | Spdl1                                                                 | SPDL1    | 0.14  | 2.22 | 1.36  | 2.02E-01 | 4.93E-01 | -5.78 |
| 1432772_PM_at   | 1700081H04Rik                                                         | NA       | 0.18  | 2.32 | 1.36  | 2.02E-01 | 4.93E-01 | -5.78 |
| 1422170_PM_at   | Slc5a3                                                                | SLC5A3   | 0.41  | 3.63 | 1.36  | 2.02E-01 | 4.93E-01 | -5.78 |
| 1428135_PM_a_at | Eef1d                                                                 | EEF1D    | -0.23 | 2.73 | -1.36 | 2.02E-01 | 4.93E-01 | -5.78 |
| 1442037_PM_at   | Tnrc6a                                                                | NA       | 0.15  | 2.09 | 1.36  | 2.02E-01 | 4.93E-01 | -5.78 |
| 1457998_PM_at   | ---                                                                   | NA       | 0.17  | 2.96 | 1.36  | 2.02E-01 | 4.93E-01 | -5.78 |
| 1459200_PM_at   | ---                                                                   | NA       | 0.25  | 3.43 | 1.36  | 2.02E-01 | 4.93E-01 | -5.78 |
| 1431447_PM_at   | Prr27                                                                 | PRR27    | 0.18  | 2.23 | 1.36  | 2.02E-01 | 4.93E-01 | -5.78 |
| 1442400_PM_at   | ---                                                                   | NA       | 0.41  | 2.86 | 1.36  | 2.02E-01 | 4.93E-01 | -5.78 |
| 1448323_PM_a_at | Bgn                                                                   | BGN      | -0.38 | 3.14 | -1.36 | 2.02E-01 | 4.93E-01 | -5.78 |
| 1434459_PM_at   | Zc3h4                                                                 | ZC3H4    | -0.25 | 4.14 | -1.36 | 2.02E-01 | 4.93E-01 | -5.78 |
| 1453707_PM_at   | 4930480G23Rik                                                         | NA       | -0.10 | 2.07 | -1.36 | 2.02E-01 | 4.93E-01 | -5.78 |
| AFFX-TrpnX-M_at | ---                                                                   | NA       | 0.10  | 2.48 | 1.36  | 2.02E-01 | 4.93E-01 | -5.78 |
| 1457470_PM_at   | ---                                                                   | NA       | 0.11  | 2.10 | 1.36  | 2.02E-01 | 4.93E-01 | -5.78 |
| 1456549_PM_at   | Gm550                                                                 | NA       | 0.20  | 2.43 | 1.36  | 2.02E-01 | 4.93E-01 | -5.78 |
| 1445422_PM_at   | Gm11783                                                               | NA       | 0.30  | 3.00 | 1.36  | 2.02E-01 | 4.93E-01 | -5.78 |
| 1416026_PM_a_at | Rpl12                                                                 | RPL12    | 0.55  | 3.00 | 1.36  | 2.02E-01 | 4.93E-01 | -5.78 |
| 1421145_PM_at   | Slc26a2                                                               | SLC26A2  | 0.13  | 2.33 | 1.36  | 2.02E-01 | 4.93E-01 | -5.78 |
| 1433846_PM_s_at | Fam175b                                                               | FAM175B  | -0.37 | 3.89 | -1.36 | 2.02E-01 | 4.93E-01 | -5.78 |
| 1419774_PM_at   | D2Erttd239e                                                           | NA       | 0.21  | 2.34 | 1.36  | 2.02E-01 | 4.93E-01 | -5.78 |
| 1415798_PM_at   | Ddr1                                                                  | DDR1     | 0.18  | 2.46 | 1.36  | 2.02E-01 | 4.93E-01 | -5.78 |
| 1423090_PM_x_at | Gm10177 /// Gm4184 ///<br>LOC102637269 ///<br>LOC102642071 /// Sec61g | SEC61G   | -0.42 | 4.75 | -1.36 | 2.02E-01 | 4.94E-01 | -5.78 |
| 1457627_PM_x_at | Ropn1l                                                                | ROPN1L   | 0.18  | 2.49 | 1.36  | 2.02E-01 | 4.94E-01 | -5.78 |
| 1458644_PM_at   | Ccdc62                                                                | CCDC62   | 0.18  | 3.10 | 1.36  | 2.02E-01 | 4.94E-01 | -5.78 |
| 1448844_PM_at   | Cyb5b                                                                 | CYB5B    | 0.47  | 2.98 | 1.36  | 2.02E-01 | 4.94E-01 | -5.78 |
| 1433956_PM_at   | Cdh5                                                                  | CDH5     | -0.18 | 2.46 | -1.36 | 2.02E-01 | 4.94E-01 | -5.78 |
| 1428359_PM_s_at | Zg16                                                                  | ZG16     | 0.10  | 2.17 | 1.36  | 2.02E-01 | 4.94E-01 | -5.78 |
| 1427175_PM_at   | Syne4                                                                 | SYNE4    | 0.12  | 2.16 | 1.36  | 2.02E-01 | 4.94E-01 | -5.78 |
| 1451932_PM_a_at | Adamtsl4                                                              | ADAMTSL4 | 0.36  | 2.72 | 1.36  | 2.02E-01 | 4.94E-01 | -5.78 |
| 1416076_PM_at   | Ccnb1 /// Gm5593                                                      | CCNB1    | 0.20  | 2.52 | 1.36  | 2.02E-01 | 4.94E-01 | -5.78 |
| 1416730_PM_at   | Rcl1                                                                  | RCL1     | 0.17  | 3.29 | 1.36  | 2.02E-01 | 4.94E-01 | -5.78 |
| 1443826_PM_x_at | Men1                                                                  | MEN1     | 0.18  | 3.81 | 1.36  | 2.02E-01 | 4.94E-01 | -5.78 |
| 1441324_PM_at   | ---                                                                   | NA       | 0.24  | 3.15 | 1.36  | 2.02E-01 | 4.94E-01 | -5.78 |
| 1449174_PM_at   | Art4                                                                  | ART4     | 0.11  | 2.26 | 1.36  | 2.02E-01 | 4.94E-01 | -5.78 |
| 1433804_PM_at   | Jak1                                                                  | JAK1     | 0.40  | 3.91 | 1.36  | 2.02E-01 | 4.94E-01 | -5.78 |
| 1420589_PM_at   | Has3                                                                  | HAS3     | -0.21 | 2.43 | -1.36 | 2.02E-01 | 4.94E-01 | -5.78 |
| 1416599_PM_at   | Gli2                                                                  | GLIS2    | 0.21  | 2.54 | 1.36  | 2.02E-01 | 4.94E-01 | -5.78 |
| 1432817_PM_x_at | Rbbp6                                                                 | RBBP6    | 0.18  | 2.88 | 1.36  | 2.03E-01 | 4.94E-01 | -5.78 |
| 1457597_PM_at   | Arhgap32                                                              | ARHGAP32 | -0.27 | 2.73 | -1.36 | 2.03E-01 | 4.94E-01 | -5.78 |
| 1441020_PM_at   | ---                                                                   | NA       | 0.12  | 2.60 | 1.36  | 2.03E-01 | 4.94E-01 | -5.78 |
| 1441010_PM_at   | Gm15972                                                               | NA       | 0.11  | 2.11 | 1.36  | 2.03E-01 | 4.94E-01 | -5.78 |
| 1443190_PM_at   | Gm14133                                                               | NA       | 0.14  | 2.78 | 1.36  | 2.03E-01 | 4.94E-01 | -5.78 |
| 1452362_PM_at   | Trim16                                                                | TRIM16   | 0.10  | 2.24 | 1.36  | 2.03E-01 | 4.94E-01 | -5.78 |
| 1421372_PM_at   | Klk1b4                                                                | KLK1B4   | 0.13  | 2.33 | 1.36  | 2.03E-01 | 4.94E-01 | -5.78 |
| 1419653_PM_a_at | Ddx5                                                                  | DDX5     | -0.36 | 6.91 | -1.36 | 2.03E-01 | 4.94E-01 | -5.78 |
| 1444723_PM_at   | Fam212b                                                               | FAM212B  | -0.65 | 4.64 | -1.36 | 2.03E-01 | 4.94E-01 | -5.78 |
| 1442951_PM_at   | ---                                                                   | NA       | 0.24  | 2.49 | 1.36  | 2.03E-01 | 4.94E-01 | -5.78 |
| 1423806_PM_at   | Ints4                                                                 | INTS4    | -0.38 | 3.26 | -1.36 | 2.03E-01 | 4.94E-01 | -5.78 |
| 1439611_PM_at   | Chrm1                                                                 | CHRM1    | -0.35 | 3.67 | -1.36 | 2.03E-01 | 4.94E-01 | -5.78 |
| 1428430_PM_at   | Rgmb                                                                  | RGMB     | -0.29 | 2.66 | -1.36 | 2.03E-01 | 4.94E-01 | -5.78 |
| 1430035_PM_at   | Vps50                                                                 | VPS50    | -0.23 | 2.31 | -1.36 | 2.03E-01 | 4.94E-01 | -5.78 |
| 1438083_PM_at   | Hhip                                                                  | HHIP     | 0.13  | 2.14 | 1.36  | 2.03E-01 | 4.94E-01 | -5.78 |
| 1418951_PM_at   | Txlnb                                                                 | TXLNB    | 0.13  | 2.12 | 1.36  | 2.03E-01 | 4.94E-01 | -5.78 |
| 1426913_PM_at   | Lss                                                                   | LSS      | 0.13  | 2.79 | 1.36  | 2.03E-01 | 4.94E-01 | -5.78 |
| 1426496_PM_at   | Wdr55                                                                 | WDR55    | 0.14  | 2.67 | 1.36  | 2.03E-01 | 4.94E-01 | -5.78 |
| 1424617_PM_at   | Ifi35                                                                 | IFI35    | 0.18  | 2.71 | 1.36  | 2.03E-01 | 4.94E-01 | -5.78 |
| 1425356_PM_at   | Zfp142                                                                | ZNF142   | 0.22  | 2.81 | 1.36  | 2.03E-01 | 4.94E-01 | -5.78 |
| 1437648_PM_at   | Pcyt1b                                                                | PCYT1B   | 0.38  | 2.84 | 1.36  | 2.03E-01 | 4.94E-01 | -5.78 |
| 1444680_PM_at   | Med15                                                                 | NA       | 0.23  | 2.91 | 1.36  | 2.03E-01 | 4.94E-01 | -5.78 |
| 1422723_PM_at   | Stra6                                                                 | STRA6    | -0.13 | 2.44 | -1.36 | 2.03E-01 | 4.94E-01 | -5.78 |
| 1426430_PM_at   | Jag2                                                                  | NA       | 0.22  | 3.15 | 1.36  | 2.03E-01 | 4.94E-01 | -5.79 |
| 1422650_PM_a_at | Riok3                                                                 | RIOK3    | 0.24  | 3.19 | 1.36  | 2.03E-01 | 4.94E-01 | -5.78 |
| 1456141_PM_x_at | Brc3                                                                  | BRCC3    | 0.31  | 3.13 | 1.36  | 2.03E-01 | 4.94E-01 | -5.79 |
| 1460133_PM_at   | ---                                                                   | NA       | 0.25  | 2.37 | 1.36  | 2.03E-01 | 4.95E-01 | -5.79 |
| 1437812_PM_x_at | Ganab                                                                 | GANAB    | 0.34  | 6.12 | 1.36  | 2.03E-01 | 4.95E-01 | -5.79 |
| 1423828_PM_at   | Fasn                                                                  | FASN     | -0.29 | 5.28 | -1.36 | 2.03E-01 | 4.95E-01 | -5.79 |

|                 |                |            |       |      |       |          |          |       |
|-----------------|----------------|------------|-------|------|-------|----------|----------|-------|
| 1433074_PM_at   | 493141215Rik   | NA         | 0.13  | 2.10 | 1.36  | 2.03E-01 | 4.95E-01 | -5.79 |
| 1449752_PM_at   | Spsb1          | NA         | -0.27 | 4.28 | -1.36 | 2.03E-01 | 4.95E-01 | -5.79 |
| 1416235_PM_at   | Lrrc59         | LRRC59     | 0.13  | 2.78 | 1.36  | 2.03E-01 | 4.95E-01 | -5.79 |
| 1452276_PM_at   | Smarcad1       | SMARCAD1   | -0.21 | 2.71 | -1.36 | 2.03E-01 | 4.95E-01 | -5.79 |
| 1447705_PM_at   | Nsl1           | NSL1       | 0.12  | 2.09 | 1.36  | 2.03E-01 | 4.95E-01 | -5.79 |
| 1425587_PM_a_at | Ptpnj          | PTPRJ      | -0.54 | 4.29 | -1.36 | 2.03E-01 | 4.95E-01 | -5.79 |
| 1448372_PM_a_at | Cnpj2          | ACO73896.1 | -0.47 | 3.95 | -1.36 | 2.03E-01 | 4.95E-01 | -5.79 |
| 1434490_PM_at   | Scarf1         | SCARF1     | 0.18  | 3.09 | 1.36  | 2.03E-01 | 4.95E-01 | -5.79 |
| 1416903_PM_at   | Nucb1          | NUCB1      | -0.35 | 3.05 | -1.36 | 2.03E-01 | 4.95E-01 | -5.79 |
| 1456237_PM_x_at | Dnaaf5         | DNAAF5     | -0.17 | 2.36 | -1.36 | 2.03E-01 | 4.95E-01 | -5.79 |
| 1457443_PM_at   | Gpatch2        | NA         | 0.12  | 2.20 | 1.36  | 2.03E-01 | 4.95E-01 | -5.79 |
| 1448643_PM_at   | Sna1           | SSNA1      | 0.14  | 2.62 | 1.36  | 2.03E-01 | 4.95E-01 | -5.79 |
| 1449052_PM_a_at | Dnmt3b         | DNMT3B     | 0.17  | 2.27 | 1.36  | 2.03E-01 | 4.95E-01 | -5.79 |
| 1445775_PM_at   | ---            | NA         | 0.13  | 2.36 | 1.36  | 2.03E-01 | 4.95E-01 | -5.79 |
| 1444184_PM_at   | ---            | NA         | 0.21  | 2.48 | 1.36  | 2.03E-01 | 4.95E-01 | -5.79 |
| 1445318_PM_at   | Klh4           | NA         | 0.17  | 2.28 | 1.36  | 2.03E-01 | 4.95E-01 | -5.79 |
| 1424899_PM_at   | Nmnat3         | NMNAT3     | -0.14 | 2.38 | -1.36 | 2.03E-01 | 4.95E-01 | -5.79 |
| 1427184_PM_at   | Tcrb-J///Trbc1 | NA         | 0.17  | 2.19 | 1.36  | 2.03E-01 | 4.95E-01 | -5.79 |
| 1418645_PM_at   | Hal            | HAL        | 0.13  | 2.11 | 1.36  | 2.03E-01 | 4.95E-01 | -5.79 |
| 1431668_PM_at   | Capzb          | CAPZB      | 0.11  | 2.31 | 1.36  | 2.04E-01 | 4.95E-01 | -5.79 |
| 1441003_PM_at   | ErcC4          | ERCC4      | 0.22  | 2.86 | 1.36  | 2.04E-01 | 4.95E-01 | -5.79 |
| 1452814_PM_at   | Cpne3          | CPNE3      | -0.33 | 3.34 | -1.36 | 2.04E-01 | 4.95E-01 | -5.79 |
| 1459898_PM_at   | Sbsn           | SBSN       | 0.21  | 2.39 | 1.36  | 2.04E-01 | 4.95E-01 | -5.79 |
| 1434030_PM_at   | Gtpbp10        | GTPBP10    | 0.30  | 3.64 | 1.36  | 2.04E-01 | 4.95E-01 | -5.79 |
| 1426375_PM_s_at | Oxnad1         | OXNAD1     | 0.20  | 3.40 | 1.36  | 2.04E-01 | 4.95E-01 | -5.79 |
| 1451830_PM_a_at | Sptbn1         | SPTBN1     | 0.42  | 5.31 | 1.36  | 2.04E-01 | 4.95E-01 | -5.79 |
| 1432525_PM_at   | 1700001C02Rik  | CZorf70    | 0.11  | 2.35 | 1.36  | 2.04E-01 | 4.95E-01 | -5.79 |
| AFFX-ThrX-M_at  | ---            | NA         | 0.12  | 2.40 | 1.36  | 2.04E-01 | 4.95E-01 | -5.79 |
| 1431753_PM_x_at | Urm1           | URM1       | 0.15  | 2.43 | 1.36  | 2.04E-01 | 4.95E-01 | -5.79 |
| 1451509_PM_at   | Ak6///Taf9     | TAF9       | 0.26  | 3.51 | 1.36  | 2.04E-01 | 4.95E-01 | -5.79 |
| 1433708_PM_at   | Srp68          | SRP68      | -0.19 | 2.78 | -1.36 | 2.04E-01 | 4.95E-01 | -5.79 |
| 1434563_PM_at   | Rps6kc1        | RPS6KC1    | -0.27 | 2.73 | -1.36 | 2.04E-01 | 4.95E-01 | -5.79 |
| 1435805_PM_at   | Lin7a          | LIN7A      | 0.47  | 3.51 | 1.36  | 2.04E-01 | 4.95E-01 | -5.79 |
| 1435675_PM_at   | Tbc1d12        | TBC1D12    | -0.25 | 2.89 | -1.36 | 2.04E-01 | 4.95E-01 | -5.79 |
| 1437576_PM_at   | ---            | NA         | 0.23  | 3.13 | 1.36  | 2.04E-01 | 4.95E-01 | -5.79 |
| 1415803_PM_at   | Cx3c1          | CX3CL1     | 0.28  | 2.96 | 1.36  | 2.04E-01 | 4.96E-01 | -5.79 |
| 1438912_PM_at   | Hdgfrp2        | ACO11498.1 | 0.39  | 3.23 | 1.36  | 2.04E-01 | 4.96E-01 | -5.79 |
| 1440544_PM_at   | ---            | NA         | 0.16  | 2.75 | 1.36  | 2.04E-01 | 4.96E-01 | -5.79 |
| 1423120_PM_at   | Ide            | IDE        | -0.49 | 3.79 | -1.36 | 2.04E-01 | 4.96E-01 | -5.79 |
| 1435184_PM_at   | Npr3           | NPR3       | -0.45 | 3.54 | -1.36 | 2.04E-01 | 4.96E-01 | -5.79 |
| 1453859_PM_at   | Uqc1           | UQC1       | 0.23  | 2.25 | 1.36  | 2.04E-01 | 4.96E-01 | -5.79 |
| 1455015_PM_at   | Tbc1d9         | TBC1D9     | -0.51 | 3.70 | -1.36 | 2.04E-01 | 4.96E-01 | -5.79 |
| 1441849_PM_at   | ---            | NA         | 0.26  | 2.77 | 1.36  | 2.04E-01 | 4.96E-01 | -5.79 |
| 1437811_PM_x_at | Cotl1          | NA         | 0.37  | 3.76 | 1.35  | 2.04E-01 | 4.96E-01 | -5.79 |
| 1442608_PM_at   | Layn           | LAYN       | 0.22  | 2.85 | 1.35  | 2.04E-01 | 4.96E-01 | -5.79 |
| 1440763_PM_at   | Gm26974        | NA         | 0.28  | 3.00 | 1.35  | 2.04E-01 | 4.96E-01 | -5.79 |
| 1447980_PM_s_at | Sgsm1          | SGSM1      | -0.25 | 3.08 | -1.35 | 2.04E-01 | 4.96E-01 | -5.79 |
| 1428032_PM_at   | Acvr1c         | ACVR1C     | -0.19 | 3.25 | -1.35 | 2.04E-01 | 4.96E-01 | -5.79 |
| 1454196_PM_at   | ---            | NA         | -0.10 | 1.83 | -1.35 | 2.04E-01 | 4.96E-01 | -5.79 |
| 1433218_PM_at   | 4930566N20Rik  | NA         | 0.12  | 2.21 | 1.35  | 2.04E-01 | 4.96E-01 | -5.79 |
| 1427093_PM_at   | Zfp707         | ZNF707     | 0.13  | 2.35 | 1.35  | 2.04E-01 | 4.96E-01 | -5.79 |
| 1426391_PM_at   | Arf1           | ARF1       | 0.23  | 2.66 | 1.35  | 2.04E-01 | 4.96E-01 | -5.79 |
| 1452495_PM_at   | Adam28         | ADAM28     | 0.25  | 2.64 | 1.35  | 2.04E-01 | 4.96E-01 | -5.79 |
| 1416052_PM_at   | Prps1          | PRPS1      | -0.30 | 4.04 | -1.35 | 2.04E-01 | 4.96E-01 | -5.79 |
| 1457104_PM_at   | ---            | NA         | 0.14  | 2.48 | 1.35  | 2.04E-01 | 4.96E-01 | -5.79 |
| 1449923_PM_at   | 1700018F24Rik  | NA         | 0.21  | 2.68 | 1.35  | 2.04E-01 | 4.96E-01 | -5.79 |
| 1419243_PM_at   | Rab14          | RAB14      | -0.37 | 3.59 | -1.35 | 2.04E-01 | 4.96E-01 | -5.79 |
| 1431432_PM_at   | Cfi2           | NA         | 0.17  | 2.40 | 1.35  | 2.04E-01 | 4.96E-01 | -5.79 |
| 1443823_PM_s_at | Atp1a2         | ATP1A2     | -0.53 | 8.11 | -1.35 | 2.04E-01 | 4.96E-01 | -5.79 |
| 1429169_PM_at   | Rbm3           | RBM3       | 0.12  | 2.19 | 1.35  | 2.05E-01 | 4.96E-01 | -5.79 |
| 1449714_PM_at   | Fam73b         | MIGA2      | 0.30  | 6.46 | 1.35  | 2.05E-01 | 4.96E-01 | -5.79 |
| 1448805_PM_at   | Usf1           | USF1       | 0.21  | 2.95 | 1.35  | 2.05E-01 | 4.96E-01 | -5.79 |
| 1436114_PM_at   | Rnf165         | RNF165     | -0.44 | 6.50 | -1.35 | 2.05E-01 | 4.96E-01 | -5.79 |
| 1444396_PM_at   | ---            | NA         | 0.13  | 2.09 | 1.35  | 2.05E-01 | 4.96E-01 | -5.79 |
| 1417118_PM_a_at | Naa10          | NAA10      | 0.16  | 2.84 | 1.35  | 2.05E-01 | 4.96E-01 | -5.79 |
| 1459248_PM_at   | ---            | NA         | 0.13  | 2.08 | 1.35  | 2.05E-01 | 4.96E-01 | -5.79 |
| 1417585_PM_at   | Nup210         | NUP210     | 0.20  | 2.68 | 1.35  | 2.05E-01 | 4.96E-01 | -5.79 |
| 1434350_PM_at   | Csrnp1         | CSRNP1     | 0.22  | 3.31 | 1.35  | 2.05E-01 | 4.96E-01 | -5.79 |
| 1429360_PM_at   | Klf3           | KLf3       | 0.27  | 2.91 | 1.35  | 2.05E-01 | 4.97E-01 | -5.79 |
| 1418966_PM_a_at | Dcbl1          | DCBLD1     | 0.42  | 2.93 | 1.35  | 2.05E-01 | 4.97E-01 | -5.79 |
| 1449140_PM_at   | Nudcd2         | NUDCD2     | 0.41  | 2.77 | 1.35  | 2.05E-01 | 4.97E-01 | -5.79 |
| 1460564_PM_at   | Zfp280b        | ZNF280B    | -0.33 | 2.96 | -1.35 | 2.05E-01 | 4.97E-01 | -5.79 |
| 1438823_PM_at   | ---            | NA         | 0.16  | 2.08 | 1.35  | 2.05E-01 | 4.97E-01 | -5.79 |
| 1421495_PM_a_at | Armt1          | ARMT1      | 0.18  | 2.26 | 1.35  | 2.05E-01 | 4.97E-01 | -5.79 |
| 1453843_PM_at   | Thap6          | NA         | 0.11  | 2.38 | 1.35  | 2.05E-01 | 4.97E-01 | -5.79 |

|                        |                         |            |       |      |       |          |          |       |
|------------------------|-------------------------|------------|-------|------|-------|----------|----------|-------|
| 1449533_PM_at          | Tmem100                 | TMEM100    | 0.17  | 2.47 | 1.35  | 2.05E-01 | 4.97E-01 | -5.79 |
| 1460405_PM_at          | Arhgef10l               | ARHGEF10L  | 0.17  | 2.71 | 1.35  | 2.05E-01 | 4.97E-01 | -5.79 |
| 1430141_PM_at          | Fam13c                  | NA         | 0.23  | 2.76 | 1.35  | 2.05E-01 | 4.97E-01 | -5.79 |
| 1456664_PM_x_at        | Hnrnpf                  | HNRNPF     | 0.36  | 9.54 | 1.35  | 2.05E-01 | 4.97E-01 | -5.79 |
| 1424242_PM_at          | Bphl                    | BPHL       | -0.19 | 2.73 | -1.35 | 2.05E-01 | 4.97E-01 | -5.79 |
| 1426815_PM_s_at        | Sec16a                  | SEC16A     | -0.43 | 5.33 | -1.35 | 2.05E-01 | 4.97E-01 | -5.79 |
| 1439255_PM_s_at        | Gpr137b///Gpr137b-ps    | GPR137B    | -0.66 | 2.89 | -1.35 | 2.05E-01 | 4.97E-01 | -5.79 |
| 1452233_PM_at          | Abcc1                   | ABCC1      | -0.51 | 3.36 | -1.35 | 2.05E-01 | 4.97E-01 | -5.79 |
| 1423321_PM_at          | Myadm                   | MYADM      | -0.46 | 3.84 | -1.35 | 2.05E-01 | 4.97E-01 | -5.79 |
| 1434656_PM_at          | Ralgapb                 | RALGAPB    | -0.38 | 4.02 | -1.35 | 2.05E-01 | 4.97E-01 | -5.79 |
| AFX-NonspecificGC23_at | ---                     | NA         | 0.10  | 2.12 | 1.35  | 2.05E-01 | 4.97E-01 | -5.79 |
| 1444636_PM_at          | 4930592I03Rik           | NA         | 0.13  | 2.31 | 1.35  | 2.05E-01 | 4.97E-01 | -5.79 |
| 1433038_PM_at          | ---                     | NA         | 0.13  | 2.46 | 1.35  | 2.05E-01 | 4.97E-01 | -5.79 |
| 1450342_PM_at          | Bmp8b                   | BMP8B      | 0.14  | 2.22 | 1.35  | 2.05E-01 | 4.97E-01 | -5.79 |
| 1447517_PM_at          | Skiv2l2                 | SKIV2L2    | 0.15  | 2.13 | 1.35  | 2.05E-01 | 4.97E-01 | -5.79 |
| 1432017_PM_at          | Hip1                    | HIP1       | 0.15  | 2.41 | 1.35  | 2.05E-01 | 4.97E-01 | -5.79 |
| 1443199_PM_at          | ---                     | NA         | 0.18  | 2.32 | 1.35  | 2.05E-01 | 4.97E-01 | -5.79 |
| 1449791_PM_x_at        | Slc38a9                 | SLC38A9    | 0.21  | 2.48 | 1.35  | 2.05E-01 | 4.97E-01 | -5.79 |
| 1420633_PM_a_at        | Csn1s2a                 | NA         | 0.12  | 2.32 | 1.35  | 2.05E-01 | 4.97E-01 | -5.79 |
| 1446646_PM_at          | Gm13262                 | NA         | 0.17  | 2.82 | 1.35  | 2.05E-01 | 4.97E-01 | -5.79 |
| 1438787_PM_at          | Zscan10                 | ZSCAN10    | -0.35 | 2.74 | -1.35 | 2.05E-01 | 4.97E-01 | -5.79 |
| 1425001_PM_at          | Rnf146                  | RNF146     | 0.37  | 3.99 | 1.35  | 2.05E-01 | 4.97E-01 | -5.79 |
| 1451173_PM_at          | Lrrc49                  | LRRC49     | 0.63  | 3.26 | 1.35  | 2.05E-01 | 4.97E-01 | -5.79 |
| 1426897_PM_at          | Rcc2                    | RCC2       | -0.15 | 3.08 | -1.35 | 2.05E-01 | 4.97E-01 | -5.79 |
| 1431233_PM_at          | Cnmn4                   | NA         | 0.19  | 2.59 | 1.35  | 2.05E-01 | 4.97E-01 | -5.79 |
| 1445267_PM_at          | ---                     | NA         | 0.24  | 3.65 | 1.35  | 2.05E-01 | 4.97E-01 | -5.79 |
| 1420604_PM_at          | Hex1                    | HESX1      | 0.12  | 2.31 | 1.35  | 2.05E-01 | 4.97E-01 | -5.79 |
| 1435323_PM_a_at        | Mboat1                  | MBOAT1     | 0.15  | 2.22 | 1.35  | 2.05E-01 | 4.97E-01 | -5.79 |
| 1453450_PM_at          | C030006K11Rik ///Lrrc24 | LRRC24     | 0.18  | 2.90 | 1.35  | 2.05E-01 | 4.97E-01 | -5.79 |
| 1449707_PM_at          | Nr5a2                   | NA         | 0.22  | 2.69 | 1.35  | 2.05E-01 | 4.97E-01 | -5.79 |
| 1422964_PM_at          | Rad23a                  | RAD23A     | 0.32  | 3.56 | 1.35  | 2.05E-01 | 4.97E-01 | -5.79 |
| 1431369_PM_at          | Asap2                   | ASAP2      | 0.41  | 2.89 | 1.35  | 2.05E-01 | 4.97E-01 | -5.79 |
| 1436917_PM_s_at        | Gpsm1                   | GPSM1      | 0.83  | 5.90 | 1.35  | 2.05E-01 | 4.97E-01 | -5.79 |
| 1431470_PM_a_at        | 4933414I15Rik           | NA         | 0.25  | 2.92 | 1.35  | 2.06E-01 | 4.98E-01 | -5.80 |
| 1442013_PM_at          | Ccdc79                  | TERB1      | -0.10 | 2.36 | -1.35 | 2.06E-01 | 4.98E-01 | -5.80 |
| 1416039_PM_x_at        | Cyr61                   | CYR61      | 0.14  | 2.38 | 1.35  | 2.06E-01 | 4.98E-01 | -5.80 |
| 1435360_PM_at          | Zfp651                  | ZBTB47     | 0.36  | 5.00 | 1.35  | 2.06E-01 | 4.98E-01 | -5.80 |
| 1457475_PM_at          | C80993                  | NA         | -0.29 | 2.69 | -1.35 | 2.06E-01 | 4.98E-01 | -5.80 |
| 1418326_PM_at          | Slc7a5                  | SLC7A5     | -0.36 | 4.34 | -1.35 | 2.06E-01 | 4.98E-01 | -5.80 |
| 1443519_PM_at          | ---                     | NA         | 0.12  | 2.04 | 1.35  | 2.06E-01 | 4.98E-01 | -5.80 |
| 1441609_PM_at          | ---                     | NA         | 0.14  | 2.27 | 1.35  | 2.06E-01 | 4.98E-01 | -5.80 |
| 1434596_PM_at          | Sema4d                  | NA         | 0.15  | 2.74 | 1.35  | 2.06E-01 | 4.98E-01 | -5.80 |
| 1459948_PM_at          | ---                     | NA         | 0.15  | 2.02 | 1.35  | 2.06E-01 | 4.98E-01 | -5.80 |
| 1454267_PM_a_at        | Prss32                  | NA         | 0.19  | 2.34 | 1.35  | 2.06E-01 | 4.98E-01 | -5.80 |
| 1458494_PM_at          | Etv6                    | NA         | 0.20  | 2.44 | 1.35  | 2.06E-01 | 4.98E-01 | -5.80 |
| 1443356_PM_at          | ---                     | NA         | 0.22  | 2.64 | 1.35  | 2.06E-01 | 4.98E-01 | -5.80 |
| 1418007_PM_at          | Paxbp1                  | PAXBP1     | 0.31  | 6.00 | 1.35  | 2.06E-01 | 4.98E-01 | -5.80 |
| 1421255_PM_a_at        | Cabp1                   | CABP1      | 0.36  | 2.63 | 1.35  | 2.06E-01 | 4.98E-01 | -5.80 |
| 1431508_PM_at          | 4930423M02Rik           | NA         | 0.16  | 2.19 | 1.35  | 2.06E-01 | 4.98E-01 | -5.80 |
| 1431116_PM_at          | Tmem200a                | TMEM200A   | -0.19 | 2.51 | -1.35 | 2.06E-01 | 4.98E-01 | -5.80 |
| 1433924_PM_at          | Peg3                    | PEG3       | -0.30 | 9.80 | -1.35 | 2.06E-01 | 4.98E-01 | -5.80 |
| 1423156_PM_at          | Gnpnat1                 | GNPNAT1    | 0.20  | 2.64 | 1.35  | 2.06E-01 | 4.98E-01 | -5.80 |
| 1451346_PM_at          | Mtap                    | AL359922.1 | 0.35  | 2.81 | 1.35  | 2.06E-01 | 4.98E-01 | -5.80 |
| 1428498_PM_at          | Rnf219                  | RNF219     | -0.27 | 3.45 | -1.35 | 2.06E-01 | 4.98E-01 | -5.80 |
| 1454077_PM_at          | ---                     | NA         | 0.15  | 2.37 | 1.35  | 2.06E-01 | 4.98E-01 | -5.80 |
| 1447986_PM_at          | D17892                  | NA         | 0.15  | 2.54 | 1.35  | 2.06E-01 | 4.98E-01 | -5.80 |
| 1422111_PM_at          | Ackr2                   | ACKR2      | 0.15  | 2.20 | 1.35  | 2.06E-01 | 4.98E-01 | -5.80 |
| 1434828_PM_at          | Fam102b                 | FAM102B    | -0.17 | 3.49 | -1.35 | 2.06E-01 | 4.98E-01 | -5.80 |
| 1426475_PM_at          | Hmbs                    | HMBS       | 0.20  | 2.82 | 1.35  | 2.06E-01 | 4.98E-01 | -5.80 |
| 1457795_PM_at          | ---                     | NA         | 0.21  | 3.07 | 1.35  | 2.06E-01 | 4.98E-01 | -5.80 |
| 1428814_PM_at          | ---                     | NA         | 0.39  | 2.83 | 1.35  | 2.06E-01 | 4.98E-01 | -5.80 |
| 1460696_PM_at          | BC026585                | NA         | 0.14  | 2.45 | 1.35  | 2.06E-01 | 4.98E-01 | -5.80 |
| 1416589_PM_at          | Sparc                   | SPARC      | -0.80 | 4.53 | -1.35 | 2.06E-01 | 4.98E-01 | -5.80 |
| 1445328_PM_at          | Col4a4                  | COL4A4     | 0.13  | 2.30 | 1.35  | 2.06E-01 | 4.98E-01 | -5.80 |
| 1431103_PM_at          | 1700003P14Rik           | NA         | 0.19  | 2.89 | 1.35  | 2.06E-01 | 4.98E-01 | -5.80 |
| 1437053_PM_x_at        | Api5                    | API5       | 0.13  | 2.37 | 1.35  | 2.06E-01 | 4.99E-01 | -5.80 |
| 1425874_PM_at          | Hoxc13                  | HOXC13     | 0.12  | 2.21 | 1.35  | 2.06E-01 | 4.99E-01 | -5.80 |
| 1418733_PM_at          | Twist1                  | TWIST1     | 0.15  | 2.61 | 1.35  | 2.06E-01 | 4.99E-01 | -5.80 |
| 1424523_PM_at          | Elmo1                   | ELMO1      | 0.37  | 3.04 | 1.35  | 2.06E-01 | 4.99E-01 | -5.80 |
| 1443202_PM_at          | ---                     | NA         | 0.17  | 2.76 | 1.35  | 2.06E-01 | 4.99E-01 | -5.80 |
| 1423974_PM_at          | Numa1                   | NUMA1      | 0.16  | 2.56 | 1.35  | 2.06E-01 | 4.99E-01 | -5.80 |
| 1422619_PM_at          | Plpp1                   | PLPP1      | -0.39 | 3.21 | -1.35 | 2.06E-01 | 4.99E-01 | -5.80 |
| 1427485_PM_at          | Lmod1                   | LMOD1      | -0.22 | 3.51 | -1.35 | 2.06E-01 | 4.99E-01 | -5.80 |
| 1458352_PM_at          | Lcorl                   | NA         | 0.12  | 2.38 | 1.35  | 2.06E-01 | 4.99E-01 | -5.80 |



|                 |                              |          |       |      |       |          |          |       |
|-----------------|------------------------------|----------|-------|------|-------|----------|----------|-------|
| 1439351_PM_at   | ---                          | NA       | 0.18  | 2.65 | 1.35  | 2.06E-01 | 4.99E-01 | -5.80 |
| 1457303_PM_at   | Anks3                        | NA       | 0.14  | 2.08 | 1.35  | 2.07E-01 | 4.99E-01 | -5.80 |
| 1434415_PM_at   | Dact3                        | DACT3    | 0.39  | 3.35 | 1.35  | 2.07E-01 | 4.99E-01 | -5.80 |
| 1460081_PM_at   | Syt7                         | SYT7     | -0.56 | 6.30 | -1.35 | 2.07E-01 | 4.99E-01 | -5.80 |
| 1417713_PM_at   | Eif2s2                       | EIF2S2   | 0.27  | 7.34 | 1.35  | 2.07E-01 | 4.99E-01 | -5.80 |
| 1444303_PM_at   | LOC102639888                 | NA       | 0.20  | 3.25 | 1.35  | 2.07E-01 | 4.99E-01 | -5.80 |
| 1451870_PM_a_at | Brd4                         | BRD4     | 0.36  | 4.22 | 1.35  | 2.07E-01 | 4.99E-01 | -5.80 |
| 1446345_PM_at   | ---                          | NA       | -0.57 | 3.31 | -1.35 | 2.07E-01 | 4.99E-01 | -5.80 |
| 1448722_PM_s_at | Ppcs                         | PPCS     | -0.21 | 3.49 | -1.35 | 2.07E-01 | 4.99E-01 | -5.80 |
| 1457314_PM_at   | L1td1                        | L1TD1    | 0.12  | 2.47 | 1.35  | 2.07E-01 | 4.99E-01 | -5.80 |
| 1450485_PM_at   | Sox3                         | SOX3     | 0.14  | 2.50 | 1.35  | 2.07E-01 | 4.99E-01 | -5.80 |
| 1444115_PM_at   | Platr22                      | NA       | 0.16  | 2.35 | 1.35  | 2.07E-01 | 4.99E-01 | -5.80 |
| 1447429_PM_at   | ---                          | NA       | 0.18  | 2.20 | 1.35  | 2.07E-01 | 4.99E-01 | -5.80 |
| 1442602_PM_at   | ---                          | NA       | 0.19  | 2.15 | 1.35  | 2.07E-01 | 4.99E-01 | -5.80 |
| 1455523_PM_at   | Cstf2                        | CSTF2    | 0.24  | 2.68 | 1.35  | 2.07E-01 | 4.99E-01 | -5.80 |
| 1416096_PM_at   | Vipas39                      | VIPAS39  | 0.24  | 4.12 | 1.35  | 2.07E-01 | 4.99E-01 | -5.80 |
| 1451377_PM_a_at | Aaas                         | AAAS     | 0.37  | 2.66 | 1.35  | 2.07E-01 | 4.99E-01 | -5.80 |
| 1415752_PM_at   | BC031181 ///<br>LOC102641497 | C18orf32 | -0.38 | 5.11 | -1.35 | 2.07E-01 | 4.99E-01 | -5.80 |
| 1458029_PM_at   | ---                          | NA       | 0.32  | 2.73 | 1.35  | 2.07E-01 | 4.99E-01 | -5.80 |
| 1457378_PM_at   | ---                          | NA       | 0.32  | 2.65 | 1.35  | 2.07E-01 | 4.99E-01 | -5.80 |
| 1444051_PM_at   | 1700019D03Rik                | C2orf88  | 0.34  | 3.82 | 1.35  | 2.07E-01 | 4.99E-01 | -5.80 |
| 1421246_PM_at   | Pax9                         | PAX9     | 0.17  | 2.51 | 1.35  | 2.07E-01 | 4.99E-01 | -5.80 |
| 1431649_PM_at   | Lrrc72                       | LRRC72   | 0.11  | 2.18 | 1.35  | 2.07E-01 | 4.99E-01 | -5.80 |
| 1430783_PM_at   | LOC102637515                 | NA       | 0.15  | 2.38 | 1.35  | 2.07E-01 | 4.99E-01 | -5.80 |
| 1456413_PM_at   | ---                          | NA       | 0.19  | 2.22 | 1.35  | 2.07E-01 | 4.99E-01 | -5.80 |
| 1446771_PM_at   | Tuba8                        | TUBA8    | 0.20  | 2.49 | 1.35  | 2.07E-01 | 4.99E-01 | -5.80 |
| 1425643_PM_at   | Gypa                         | GYPA     | 0.20  | 2.87 | 1.35  | 2.07E-01 | 4.99E-01 | -5.80 |
| 1443824_PM_s_at | Car7                         | CA7      | 0.21  | 3.11 | 1.35  | 2.07E-01 | 4.99E-01 | -5.80 |
| 1416366_PM_at   | LOC102641347 ///Ndufc2       | NDUFC2   | -0.53 | 4.13 | -1.35 | 2.07E-01 | 4.99E-01 | -5.80 |
| 1420033_PM_s_at | Ppp2r2d                      | PPP2R2D  | -0.49 | 3.88 | -1.35 | 2.07E-01 | 4.99E-01 | -5.80 |
| 1426596_PM_a_at | Smn1                         | SMN2     | 0.47  | 3.09 | 1.35  | 2.07E-01 | 4.99E-01 | -5.80 |
| 1436205_PM_at   | Nfasc                        | NFASC    | -0.45 | 4.68 | -1.35 | 2.07E-01 | 4.99E-01 | -5.80 |
| 1448529_PM_at   | Thbd                         | THBD     | -0.59 | 3.87 | -1.35 | 2.07E-01 | 4.99E-01 | -5.80 |
| 1447262_PM_at   | ---                          | NA       | 0.15  | 2.15 | 1.35  | 2.07E-01 | 4.99E-01 | -5.80 |
| 1453357_PM_at   | Tdrd9                        | TDRD9    | 0.19  | 2.73 | 1.35  | 2.07E-01 | 4.99E-01 | -5.80 |
| 1441629_PM_at   | ---                          | NA       | 0.26  | 3.17 | 1.35  | 2.07E-01 | 4.99E-01 | -5.80 |
| 1431858_PM_at   | 4930480K15Rik                | NA       | 0.14  | 2.34 | 1.35  | 2.07E-01 | 4.99E-01 | -5.80 |
| 1428070_PM_at   | Syvn1                        | SYVN1    | 0.19  | 3.30 | 1.35  | 2.07E-01 | 4.99E-01 | -5.80 |
| 1439660_PM_at   | Hivep3                       | HIVEP3   | 0.16  | 2.53 | 1.35  | 2.07E-01 | 4.99E-01 | -5.80 |
| 1444004_PM_at   | Thoc2                        | THOC2    | -0.43 | 4.52 | -1.35 | 2.07E-01 | 4.99E-01 | -5.80 |
| 1441898_PM_at   | Ms4a15                       | MS4A15   | 0.22  | 2.73 | 1.35  | 2.07E-01 | 4.99E-01 | -5.80 |
| 1459470_PM_at   | ---                          | NA       | -0.25 | 2.45 | -1.35 | 2.07E-01 | 5.00E-01 | -5.80 |
| 1454033_PM_at   | Pdilt                        | PDILT    | 0.14  | 2.38 | 1.35  | 2.07E-01 | 5.00E-01 | -5.80 |
| 1418639_PM_at   | Sftpc                        | SFTPC    | 0.14  | 2.15 | 1.34  | 2.07E-01 | 5.00E-01 | -5.80 |
| 1459084_PM_at   | ---                          | NA       | 0.15  | 2.27 | 1.35  | 2.07E-01 | 5.00E-01 | -5.80 |
| 1419060_PM_at   | Gzmb                         | GZMB     | 0.16  | 2.31 | 1.35  | 2.07E-01 | 5.00E-01 | -5.80 |
| 1439819_PM_at   | AU015263                     | NA       | 0.18  | 2.23 | 1.34  | 2.07E-01 | 5.00E-01 | -5.80 |
| 1432563_PM_at   | 1700116B05Rik                | NA       | 0.27  | 2.48 | 1.35  | 2.07E-01 | 5.00E-01 | -5.80 |
| 1431145_PM_a_at | Cuedc2                       | CUEDC2   | 0.44  | 5.80 | 1.35  | 2.07E-01 | 5.00E-01 | -5.80 |
| 1439426_PM_x_at | Lyz1                         | LYZ      | -0.66 | 3.21 | -1.34 | 2.07E-01 | 5.00E-01 | -5.80 |
| 1429847_PM_a_at | Dcaf17                       | DCAF17   | 0.12  | 2.12 | 1.34  | 2.07E-01 | 5.00E-01 | -5.80 |
| 1434850_PM_at   | Iqgap3                       | IQGAP3   | 0.13  | 2.43 | 1.34  | 2.07E-01 | 5.00E-01 | -5.80 |
| 1445161_PM_at   | Usp6nl                       | USP6NL   | -0.38 | 3.00 | -1.34 | 2.07E-01 | 5.00E-01 | -5.80 |
| 1459329_PM_at   | Ttc7                         | TTC7A    | 0.11  | 2.33 | 1.34  | 2.07E-01 | 5.00E-01 | -5.80 |
| 1443400_PM_at   | ---                          | NA       | 0.13  | 2.36 | 1.34  | 2.07E-01 | 5.00E-01 | -5.80 |
| 1456363_PM_at   | St7l                         | ST7L     | 0.20  | 2.85 | 1.34  | 2.07E-01 | 5.00E-01 | -5.80 |
| 1458307_PM_at   | ---                          | NA       | 0.44  | 3.70 | 1.34  | 2.07E-01 | 5.00E-01 | -5.80 |
| 1433998_PM_at   | 4933427D14Rik                | KIAA0753 | -0.47 | 3.57 | -1.34 | 2.08E-01 | 5.00E-01 | -5.80 |
| 1424525_PM_at   | Grp /// Rax                  | GRP      | 0.15  | 2.82 | 1.34  | 2.08E-01 | 5.00E-01 | -5.80 |
| 1446180_PM_at   | Lamb1                        | LAMB1    | 0.19  | 2.49 | 1.34  | 2.08E-01 | 5.00E-01 | -5.80 |
| 1424262_PM_at   | Aif1l                        | AIF1L    | 0.25  | 2.26 | 1.34  | 2.08E-01 | 5.00E-01 | -5.80 |
| 1450259_PM_a_at | Stat5a                       | STAT5A   | 0.17  | 2.17 | 1.34  | 2.08E-01 | 5.00E-01 | -5.80 |
| 1417642_PM_at   | Aldh1a3                      | ALDH1A3  | 0.12  | 2.54 | 1.34  | 2.08E-01 | 5.00E-01 | -5.80 |
| 1449144_PM_at   | Gna11                        | GNA11    | 0.37  | 4.91 | 1.34  | 2.08E-01 | 5.00E-01 | -5.80 |
| 1443107_PM_at   | ---                          | NA       | 0.26  | 3.55 | 1.34  | 2.08E-01 | 5.00E-01 | -5.80 |
| 1432034_PM_at   | Neurog3                      | NEUROG3  | 0.11  | 1.99 | 1.34  | 2.08E-01 | 5.00E-01 | -5.80 |
| 1435878_PM_at   | Stk38l                       | STK38L   | -0.37 | 3.53 | -1.34 | 2.08E-01 | 5.00E-01 | -5.80 |
| 1438603_PM_x_at | Masp1                        | NA       | 0.14  | 2.13 | 1.34  | 2.08E-01 | 5.00E-01 | -5.80 |
| 1424520_PM_at   | Coa7                         | COA7     | 0.18  | 2.52 | 1.34  | 2.08E-01 | 5.00E-01 | -5.80 |
| 1456699_PM_s_at | Ythdc1                       | YTHDC1   | -0.82 | 5.99 | -1.34 | 2.08E-01 | 5.00E-01 | -5.80 |
| 1443416_PM_at   | C79741                       | NA       | 0.34  | 2.98 | 1.34  | 2.08E-01 | 5.00E-01 | -5.80 |
| 1453477_PM_at   | Zc3h6                        | ZC3H6    | -0.11 | 2.42 | -1.34 | 2.08E-01 | 5.00E-01 | -5.80 |
| 1433311_PM_at   | ---                          | NA       | 0.16  | 2.61 | 1.34  | 2.08E-01 | 5.00E-01 | -5.80 |

|                 |                  |            |       |      |       |          |          |       |
|-----------------|------------------|------------|-------|------|-------|----------|----------|-------|
| 1446414_PM_at   | ---              | NA         | 0.32  | 2.85 | 1.34  | 2.08E-01 | 5.00E-01 | -5.80 |
| 1436361_PM_at   | Vgl2             | VGLL2      | 0.18  | 3.10 | 1.34  | 2.08E-01 | 5.00E-01 | -5.80 |
| 1458519_PM_at   | ---              | NA         | 0.16  | 2.67 | 1.34  | 2.08E-01 | 5.00E-01 | -5.80 |
| 1434560_PM_at   | Wdtdc1           | WDTC1      | -0.16 | 3.01 | -1.34 | 2.08E-01 | 5.00E-01 | -5.80 |
| 1416596_PM_at   | Slc44a4          | SLC44A4    | 0.17  | 2.44 | 1.34  | 2.08E-01 | 5.00E-01 | -5.80 |
| 1433768_PM_at   | Pald             | NA         | -0.69 | 3.90 | -1.34 | 2.08E-01 | 5.00E-01 | -5.80 |
| 1434998_PM_at   | Iqgap1           | IQGAP1     | -0.28 | 3.19 | -1.34 | 2.08E-01 | 5.00E-01 | -5.80 |
| 1415945_PM_at   | Mcm5             | MCM5       | 0.23  | 2.45 | 1.34  | 2.08E-01 | 5.00E-01 | -5.80 |
| 1427449_PM_a_at | Adprhl2          | ADPRHL2    | 0.12  | 3.29 | 1.34  | 2.08E-01 | 5.00E-01 | -5.80 |
| 1435225_PM_s_at | Brpf3            | BRPF3      | 0.16  | 2.62 | 1.34  | 2.08E-01 | 5.00E-01 | -5.81 |
| 1431121_PM_at   | Amotl1           | AMOTL1     | 0.14  | 2.84 | 1.34  | 2.08E-01 | 5.00E-01 | -5.81 |
| 1422880_PM_at   | Sypl             | SYPL1      | -0.63 | 6.97 | -1.34 | 2.08E-01 | 5.00E-01 | -5.81 |
| 1422098_PM_at   | Acvr1b           | ACVR1B     | -0.13 | 2.86 | -1.34 | 2.08E-01 | 5.00E-01 | -5.81 |
| 1417242_PM_at   | Eif4a3           | EIF4A3     | 0.34  | 4.81 | 1.34  | 2.08E-01 | 5.00E-01 | -5.81 |
| 1438191_PM_a_at | Rnf40            | RNF40      | -0.31 | 3.46 | -1.34 | 2.08E-01 | 5.00E-01 | -5.81 |
| 1427363_PM_at   | ---              | NA         | 0.16  | 2.46 | 1.34  | 2.08E-01 | 5.00E-01 | -5.81 |
| 1442451_PM_at   | ---              | NA         | 0.19  | 2.34 | 1.34  | 2.08E-01 | 5.00E-01 | -5.81 |
| 1459502_PM_at   | D17Ert589e       | NA         | 0.25  | 2.82 | 1.34  | 2.08E-01 | 5.00E-01 | -5.81 |
| 1437198_PM_at   | Lig3             | LIG3       | -0.44 | 4.82 | -1.34 | 2.08E-01 | 5.00E-01 | -5.81 |
| 1438488_PM_at   | Esd              | ESD        | 0.15  | 2.80 | 1.34  | 2.08E-01 | 5.00E-01 | -5.81 |
| 1439081_PM_at   | ---              | NA         | 0.35  | 3.14 | 1.34  | 2.08E-01 | 5.00E-01 | -5.81 |
| 1440254_PM_at   | Snord104         | NA         | -0.72 | 4.47 | -1.34 | 2.08E-01 | 5.00E-01 | -5.81 |
| 1439117_PM_at   | Clmn             | CLMN       | 0.21  | 2.59 | 1.34  | 2.08E-01 | 5.01E-01 | -5.81 |
| 1445579_PM_at   | ---              | NA         | 0.24  | 3.37 | 1.34  | 2.08E-01 | 5.01E-01 | -5.81 |
| 1452356_PM_at   | Iqcc             | IQCC       | 0.17  | 2.27 | 1.34  | 2.08E-01 | 5.01E-01 | -5.81 |
| 1436923_PM_at   | Rab2b            | RAB2B      | 0.15  | 3.46 | 1.34  | 2.08E-01 | 5.01E-01 | -5.81 |
| 1426928_PM_at   | Ccdc93           | CCDC93     | 0.11  | 2.27 | 1.34  | 2.08E-01 | 5.01E-01 | -5.81 |
| 1449050_PM_at   | Rfc1             | RFC1       | 0.13  | 2.76 | 1.34  | 2.08E-01 | 5.01E-01 | -5.81 |
| 1447895_PM_x_at | Pan3             | PAN3       | -0.51 | 5.68 | -1.34 | 2.08E-01 | 5.01E-01 | -5.81 |
| 1427328_PM_a_at | Clasp2           | CLASP2     | -0.26 | 3.92 | -1.34 | 2.08E-01 | 5.01E-01 | -5.81 |
| 1425052_PM_at   | Isoc1            | ISOC1      | -0.19 | 2.31 | -1.34 | 2.08E-01 | 5.01E-01 | -5.81 |
| 1416441_PM_at   | Cpq              | CPQ        | -0.19 | 2.31 | -1.34 | 2.08E-01 | 5.01E-01 | -5.81 |
| 1436396_PM_at   | Wdr60            | WDR60      | -0.16 | 2.60 | -1.34 | 2.08E-01 | 5.01E-01 | -5.81 |
| 1446866_PM_at   | ---              | NA         | 0.14  | 2.29 | 1.34  | 2.08E-01 | 5.01E-01 | -5.81 |
| 1429609_PM_at   | Tmigd3           | TMIGD3     | 0.16  | 2.40 | 1.34  | 2.08E-01 | 5.01E-01 | -5.81 |
| 1459763_PM_at   | ---              | NA         | 0.19  | 2.84 | 1.34  | 2.08E-01 | 5.01E-01 | -5.81 |
| 1446202_PM_at   | ---              | NA         | 0.21  | 2.63 | 1.34  | 2.08E-01 | 5.01E-01 | -5.81 |
| 1425541_PM_at   | Ddx27            | DDX27      | 0.22  | 2.58 | 1.34  | 2.08E-01 | 5.01E-01 | -5.81 |
| 1424656_PM_s_at | Usp19            | USP19      | 0.14  | 2.84 | 1.34  | 2.09E-01 | 5.01E-01 | -5.81 |
| 1432466_PM_a_at | Apoe             | APOE       | 0.18  | 3.18 | 1.34  | 2.09E-01 | 5.01E-01 | -5.81 |
| 1459892_PM_at   | Pg19             | NA         | 0.24  | 2.34 | 1.34  | 2.09E-01 | 5.01E-01 | -5.81 |
| 1449792_PM_at   | ---              | NA         | 0.14  | 2.20 | 1.34  | 2.09E-01 | 5.01E-01 | -5.81 |
| 1451126_PM_at   | Maf1             | MAF1       | -0.19 | 3.53 | -1.34 | 2.09E-01 | 5.01E-01 | -5.81 |
| 1437990_PM_x_at | Hbb-bh1          | HBG1       | 0.30  | 2.98 | 1.34  | 2.09E-01 | 5.01E-01 | -5.81 |
| 1423151_PM_at   | Dnajb11          | AC068631.2 | -0.47 | 5.59 | -1.34 | 2.09E-01 | 5.01E-01 | -5.81 |
| 1434034_PM_at   | Cerk             | CERK       | -0.22 | 2.48 | -1.34 | 2.09E-01 | 5.01E-01 | -5.81 |
| 1444891_PM_at   | ---              | NA         | -0.14 | 2.73 | -1.34 | 2.09E-01 | 5.01E-01 | -5.81 |
| 1457040_PM_at   | Lgi2             | LGI2       | 0.15  | 2.94 | 1.34  | 2.09E-01 | 5.01E-01 | -5.81 |
| 1417580_PM_s_at | Selenbp1         | SELENBP1   | 0.16  | 3.07 | 1.34  | 2.09E-01 | 5.01E-01 | -5.81 |
| 1445302_PM_at   | ---              | NA         | 0.16  | 2.72 | 1.34  | 2.09E-01 | 5.01E-01 | -5.81 |
| 1438722_PM_at   | Inafm1           | NA         | 0.18  | 3.10 | 1.34  | 2.09E-01 | 5.01E-01 | -5.81 |
| 1437488_PM_at   | Slc9a9           | SLC9A9     | 0.21  | 2.82 | 1.34  | 2.09E-01 | 5.01E-01 | -5.81 |
| 1425407_PM_s_at | Clec4a2//Clec4b1 | CLECA4     | 0.22  | 2.66 | 1.34  | 2.09E-01 | 5.01E-01 | -5.81 |
| 1431013_PM_at   | Psm11            | PSMD11     | 0.41  | 3.06 | 1.34  | 2.09E-01 | 5.01E-01 | -5.81 |
| 1418271_PM_at   | Bhlhe22          | NA         | -0.34 | 6.12 | -1.34 | 2.09E-01 | 5.01E-01 | -5.81 |
| 1446081_PM_at   | ---              | NA         | 0.25  | 2.86 | 1.34  | 2.09E-01 | 5.01E-01 | -5.81 |
| 1427042_PM_at   | Mal2             | MAL2       | -0.50 | 2.90 | -1.34 | 2.09E-01 | 5.01E-01 | -5.81 |
| 1443205_PM_at   | Gabbr1           | GABRB1     | -0.62 | 7.53 | -1.34 | 2.09E-01 | 5.01E-01 | -5.81 |
| 1424612_PM_at   | Nipa2            | NIPAL2     | -0.28 | 2.83 | -1.34 | 2.09E-01 | 5.01E-01 | -5.81 |
| 1432173_PM_at   | Serpnb12         | SERPINB12  | 0.15  | 2.23 | 1.34  | 2.09E-01 | 5.01E-01 | -5.81 |
| 1443627_PM_at   | ---              | NA         | 0.10  | 2.16 | 1.34  | 2.09E-01 | 5.01E-01 | -5.81 |
| 1449240_PM_at   | Ppp1r17          | PPP1R17    | 0.57  | 2.58 | 1.34  | 2.09E-01 | 5.01E-01 | -5.81 |
| 1439373_PM_x_at | Wnt5b            | WNT5B      | -0.69 | 3.39 | -1.34 | 2.09E-01 | 5.01E-01 | -5.81 |
| 1426145_PM_at   | ---              | NA         | 0.11  | 1.95 | 1.34  | 2.09E-01 | 5.01E-01 | -5.81 |
| 1449384_PM_at   | 4931417E11Rik    | JKAMP      | 0.11  | 2.49 | 1.34  | 2.09E-01 | 5.01E-01 | -5.81 |
| 1435997_PM_at   | Spag8            | SPAG8      | 0.14  | 2.79 | 1.34  | 2.09E-01 | 5.01E-01 | -5.81 |
| 1418218_PM_at   | Ceacam9          | CEACAM21   | 0.15  | 2.54 | 1.34  | 2.09E-01 | 5.01E-01 | -5.81 |
| 1434407_PM_at   | Srgap2           | SRGAP2B    | 0.28  | 3.20 | 1.34  | 2.09E-01 | 5.01E-01 | -5.81 |
| 1420113_PM_s_at | Coprs            | COPRS      | 0.29  | 7.10 | 1.34  | 2.09E-01 | 5.01E-01 | -5.81 |
| 1445537_PM_at   | ---              | NA         | -0.24 | 3.73 | -1.34 | 2.09E-01 | 5.01E-01 | -5.81 |
| 1451890_PM_at   | Kif13a           | NA         | 0.16  | 2.29 | 1.34  | 2.09E-01 | 5.01E-01 | -5.81 |
| 1434196_PM_at   | Dnaja4           | DNAA4      | -0.29 | 3.20 | -1.34 | 2.09E-01 | 5.01E-01 | -5.81 |
| 1450179_PM_at   | Sost             | SOST       | 0.15  | 2.59 | 1.34  | 2.09E-01 | 5.01E-01 | -5.81 |
| 1453854_PM_at   | Ptar1            | PTAR1      | 0.28  | 2.44 | 1.34  | 2.09E-01 | 5.01E-01 | -5.81 |
| 1454932_PM_at   | Rcor1            | RCOR1      | 0.14  | 2.50 | 1.34  | 2.09E-01 | 5.01E-01 | -5.81 |

|                         |                       |           |       |      |       |          |          |       |
|-------------------------|-----------------------|-----------|-------|------|-------|----------|----------|-------|
| 1442635_PM_at           | Gm13483               | NA        | 0.17  | 2.23 | 1.34  | 2.09E-01 | 5.01E-01 | -5.81 |
| 1457340_PM_at           | ---                   | NA        | -0.11 | 2.12 | -1.34 | 2.09E-01 | 5.01E-01 | -5.81 |
| 1452022_PM_at           | Baalc                 | NA        | 0.13  | 2.13 | 1.34  | 2.09E-01 | 5.01E-01 | -5.81 |
| 1444885_PM_at           | ---                   | NA        | 0.14  | 2.52 | 1.34  | 2.09E-01 | 5.01E-01 | -5.81 |
| 1432950_PM_at           | ---                   | NA        | 0.15  | 2.21 | 1.34  | 2.09E-01 | 5.01E-01 | -5.81 |
| 1458776_PM_at           | ---                   | NA        | 0.17  | 2.80 | 1.34  | 2.09E-01 | 5.01E-01 | -5.81 |
| 1418241_PM_at           | Usf2                  | USF2      | 0.18  | 2.84 | 1.34  | 2.09E-01 | 5.01E-01 | -5.81 |
| 1451038_PM_at           | Apln                  | APLN      | 0.19  | 2.31 | 1.34  | 2.09E-01 | 5.01E-01 | -5.81 |
| 1430302_PM_at           | Cnrip1                | CNRI1     | 0.21  | 2.85 | 1.34  | 2.09E-01 | 5.01E-01 | -5.81 |
| 1445246_PM_at           | ---                   | NA        | 0.25  | 3.23 | 1.34  | 2.09E-01 | 5.01E-01 | -5.81 |
| 1428309_PM_s_at         | Pdrg1                 | PDRG1     | 0.35  | 3.49 | 1.34  | 2.09E-01 | 5.01E-01 | -5.81 |
| 1440405_PM_at           | ---                   | NA        | 0.11  | 2.19 | 1.34  | 2.09E-01 | 5.01E-01 | -5.81 |
| 1455736_PM_at           | Mybpc2                | MYBPC2    | 0.13  | 2.26 | 1.34  | 2.09E-01 | 5.01E-01 | -5.81 |
| 1448723_PM_at           | Rdh7                  | RDH16     | 0.14  | 2.47 | 1.34  | 2.09E-01 | 5.01E-01 | -5.81 |
| 1419806_PM_at           | Hdlbp                 | HDLBP     | 0.29  | 2.70 | 1.34  | 2.09E-01 | 5.01E-01 | -5.81 |
| 1428659_PM_at           | Phf7                  | PHF7      | 0.19  | 2.13 | 1.34  | 2.09E-01 | 5.01E-01 | -5.81 |
| 1436756_PM_x_at         | Hadh                  | HADH      | -0.55 | 4.79 | -1.34 | 2.09E-01 | 5.01E-01 | -5.81 |
| 1448371_PM_at           | Mylpf                 | MYLPF     | 0.11  | 3.01 | 1.34  | 2.09E-01 | 5.01E-01 | -5.81 |
| 1445682_PM_at           | ---                   | NA        | -0.22 | 4.15 | -1.34 | 2.09E-01 | 5.01E-01 | -5.81 |
| 1431239_PM_at           | Nono                  | NONO      | 0.20  | 2.71 | 1.34  | 2.09E-01 | 5.01E-01 | -5.81 |
| 1444669_PM_at           | Lrfn1                 | LRFN1     | 0.23  | 6.61 | 1.34  | 2.09E-01 | 5.01E-01 | -5.81 |
| 1421661_PM_at           | Fpr3                  | FPR3      | 0.27  | 2.45 | 1.34  | 2.09E-01 | 5.01E-01 | -5.81 |
| 1444622_PM_at           | ---                   | NA        | 0.51  | 3.05 | 1.34  | 2.09E-01 | 5.01E-01 | -5.81 |
| 1443310_PM_at           | Nup210                | NUP210    | 0.14  | 2.29 | 1.34  | 2.09E-01 | 5.01E-01 | -5.81 |
| 1436828_PM_a_at         | Tpd52l2               | TPD52L2   | 0.36  | 3.55 | 1.34  | 2.09E-01 | 5.01E-01 | -5.81 |
| 1450686_PM_at           | Pon2                  | PON2      | -0.26 | 5.02 | -1.34 | 2.09E-01 | 5.01E-01 | -5.81 |
| 1436417_PM_at           | Slc19a3               | SLC19A3   | 0.12  | 2.19 | 1.34  | 2.09E-01 | 5.01E-01 | -5.81 |
| 1432141_PM_x_at         | Gsdma2                | GSDMA     | 0.16  | 2.53 | 1.34  | 2.09E-01 | 5.01E-01 | -5.81 |
| 1444760_PM_at           | Ncor1                 | NCOR1     | 0.15  | 2.40 | 1.34  | 2.10E-01 | 5.01E-01 | -5.81 |
| 1421098_PM_at           | Stap1                 | STAP1     | 0.20  | 2.51 | 1.34  | 2.10E-01 | 5.01E-01 | -5.81 |
| AFFX-NonspecificGC20_at | ---                   | NA        | 0.10  | 2.12 | 1.34  | 2.10E-01 | 5.01E-01 | -5.81 |
| 1443763_PM_at           | ---                   | NA        | 0.13  | 2.36 | 1.34  | 2.10E-01 | 5.01E-01 | -5.81 |
| 1422454_PM_at           | Krt13                 | KRT13     | 0.14  | 2.58 | 1.34  | 2.10E-01 | 5.01E-01 | -5.81 |
| 1454783_PM_at           | Il13ra1               | IL13RA1   | 0.17  | 2.28 | 1.34  | 2.10E-01 | 5.01E-01 | -5.81 |
| 1431907_PM_at           | Erich2                | ERICH2    | 0.18  | 2.82 | 1.34  | 2.10E-01 | 5.01E-01 | -5.81 |
| 1442446_PM_at           | ---                   | NA        | 0.20  | 2.62 | 1.34  | 2.10E-01 | 5.01E-01 | -5.81 |
| 1421619_PM_at           | Kcnn3                 | NA        | 0.21  | 4.17 | 1.34  | 2.10E-01 | 5.01E-01 | -5.81 |
| 1419704_PM_at           | Cyp3a41a /// Cyp3a41b | CYP3A4    | 0.20  | 2.06 | 1.34  | 2.10E-01 | 5.01E-01 | -5.81 |
| 1415788_PM_at           | Ublcp1                | UBLCP1    | -0.35 | 3.39 | -1.34 | 2.10E-01 | 5.02E-01 | -5.81 |
| 1447379_PM_at           | ---                   | NA        | 0.18  | 3.02 | 1.34  | 2.10E-01 | 5.02E-01 | -5.81 |
| 1425289_PM_a_at         | Cr2                   | CR2       | -0.19 | 2.81 | -1.34 | 2.10E-01 | 5.02E-01 | -5.81 |
| 1445938_PM_at           | ---                   | NA        | 0.34  | 2.69 | 1.34  | 2.10E-01 | 5.02E-01 | -5.81 |
| 1438525_PM_at           | ---                   | NA        | -0.41 | 3.48 | -1.34 | 2.10E-01 | 5.02E-01 | -5.81 |
| 1449995_PM_at           | 4933421107Rik         | NA        | 0.13  | 2.84 | 1.34  | 2.10E-01 | 5.02E-01 | -5.81 |
| 1452863_PM_at           | 1700003F12Rik         | C20orf144 | 0.13  | 2.38 | 1.34  | 2.10E-01 | 5.02E-01 | -5.81 |
| 1438812_PM_x_at         | Usp19                 | USP19     | -0.12 | 3.04 | -1.34 | 2.10E-01 | 5.02E-01 | -5.81 |
| 1429178_PM_at           | Tenm3                 | NA        | -0.43 | 3.43 | -1.34 | 2.10E-01 | 5.02E-01 | -5.81 |
| 1430969_PM_at           | Mtch2                 | MTCH2     | -0.16 | 2.28 | -1.34 | 2.10E-01 | 5.02E-01 | -5.81 |
| 1437411_PM_at           | Ino80d                | INO80D    | 0.25  | 3.43 | 1.34  | 2.10E-01 | 5.02E-01 | -5.81 |
| 1419796_PM_at           | Gm15934               | NA        | 0.12  | 2.30 | 1.34  | 2.10E-01 | 5.02E-01 | -5.81 |
| 1449184_PM_at           | Pglyrp1               | PGLYRP1   | 0.15  | 3.18 | 1.34  | 2.10E-01 | 5.02E-01 | -5.81 |
| 1460718_PM_s_at         | Mtch1                 | MTCH1     | -0.38 | 3.67 | -1.34 | 2.10E-01 | 5.02E-01 | -5.81 |
| 1429671_PM_at           | Zbed5                 | ZBED8     | -0.15 | 2.22 | -1.34 | 2.10E-01 | 5.02E-01 | -5.81 |
| 1423709_PM_s_at         | Farsb                 | FARSB     | -0.46 | 3.67 | -1.34 | 2.10E-01 | 5.02E-01 | -5.81 |
| 1434947_PM_at           | Kif3c                 | KIF3C     | -0.25 | 5.50 | -1.34 | 2.10E-01 | 5.02E-01 | -5.81 |
| 1426133_PM_a_at         | Mitd1                 | MITD1     | -0.19 | 2.49 | -1.34 | 2.10E-01 | 5.02E-01 | -5.81 |
| 1440396_PM_at           | ---                   | NA        | -0.18 | 2.32 | -1.34 | 2.10E-01 | 5.02E-01 | -5.81 |
| 1435210_PM_s_at         | Snph                  | SNPH      | -0.15 | 4.80 | -1.34 | 2.10E-01 | 5.02E-01 | -5.81 |
| 1445450_PM_x_at         | A530021107Rik         | NA        | -0.10 | 2.00 | -1.34 | 2.10E-01 | 5.02E-01 | -5.81 |
| 1458291_PM_at           | Inhba                 | NA        | 0.13  | 2.14 | 1.34  | 2.10E-01 | 5.02E-01 | -5.81 |
| 1433235_PM_at           | C030011116Rik         | NA        | 0.13  | 2.29 | 1.34  | 2.10E-01 | 5.02E-01 | -5.81 |
| 1436370_PM_at           | Gucy2c                | NA        | 0.14  | 2.80 | 1.34  | 2.10E-01 | 5.02E-01 | -5.81 |
| 1429923_PM_x_at         | Spata3                | SPATA3    | 0.16  | 2.53 | 1.34  | 2.10E-01 | 5.02E-01 | -5.81 |
| 1450221_PM_at           | 4933417A18Rik         | C6orf201  | 0.21  | 2.58 | 1.34  | 2.10E-01 | 5.02E-01 | -5.81 |
| 1421789_PM_s_at         | Arf3                  | ARF3      | 0.26  | 4.34 | 1.34  | 2.10E-01 | 5.02E-01 | -5.81 |
| 1436095_PM_at           | Chd5                  | CHD5      | 0.29  | 3.92 | 1.34  | 2.10E-01 | 5.02E-01 | -5.81 |
| 1431241_PM_at           | Chchd3                | CHCHD3    | 0.33  | 2.76 | 1.34  | 2.10E-01 | 5.02E-01 | -5.81 |
| 1426296_PM_at           | Rad52                 | RAD52     | 0.36  | 3.58 | 1.34  | 2.10E-01 | 5.02E-01 | -5.81 |
| 1454472_PM_at           | ---                   | NA        | 0.29  | 3.58 | 1.34  | 2.10E-01 | 5.02E-01 | -5.81 |
| 1440336_PM_at           | ---                   | NA        | 0.30  | 2.35 | 1.34  | 2.10E-01 | 5.02E-01 | -5.81 |
| 1449696_PM_at           | Arnt                  | NA        | -0.37 | 4.10 | -1.34 | 2.10E-01 | 5.02E-01 | -5.81 |
| 1454603_PM_a_at         | Cnot2                 | CNOT2     | 0.27  | 4.34 | 1.34  | 2.10E-01 | 5.02E-01 | -5.81 |
| 1438894_PM_at           | ---                   | NA        | 0.12  | 2.21 | 1.34  | 2.10E-01 | 5.02E-01 | -5.81 |
| 1445408_PM_at           | ---                   | NA        | 0.14  | 2.53 | 1.34  | 2.10E-01 | 5.02E-01 | -5.81 |
| 1420428_PM_at           | Ager                  | AGER      | 0.14  | 3.58 | 1.34  | 2.10E-01 | 5.02E-01 | -5.81 |

|                 |                                       |          |       |      |       |          |          |       |
|-----------------|---------------------------------------|----------|-------|------|-------|----------|----------|-------|
| 1419131_PM_at   | F13b                                  | F13B     | -0.12 | 2.32 | -1.34 | 2.10E-01 | 5.02E-01 | -5.81 |
| 1435342_PM_at   | Kcnk6                                 | KCNK6    | -0.41 | 2.78 | -1.33 | 2.11E-01 | 5.02E-01 | -5.81 |
| 1449438_PM_at   | Dpm1 /// Dpm1-adnp                    | DPM1     | -0.27 | 4.57 | -1.33 | 2.10E-01 | 5.02E-01 | -5.81 |
| 1459094_PM_at   | ---                                   | NA       | 0.15  | 3.43 | 1.33  | 2.11E-01 | 5.02E-01 | -5.81 |
| 1455753_PM_at   | Fam163b                               | FAM163B  | 0.23  | 3.11 | 1.33  | 2.10E-01 | 5.02E-01 | -5.81 |
| 1436458_PM_at   | Sema6a                                | SEMA6A   | 0.36  | 2.75 | 1.33  | 2.10E-01 | 5.02E-01 | -5.81 |
| 1455587_PM_at   | Fam167b                               | FAM167B  | 0.25  | 2.96 | 1.33  | 2.11E-01 | 5.02E-01 | -5.81 |
| 1425737_PM_at   | 1500002F19Rik                         | NA       | 0.16  | 2.55 | 1.33  | 2.11E-01 | 5.02E-01 | -5.81 |
| 1460036_PM_at   | Ap1s2                                 | AP1S2    | 0.18  | 2.82 | 1.33  | 2.11E-01 | 5.02E-01 | -5.81 |
| 1428805_PM_at   | Slc35e3                               | SLC35E3  | -0.60 | 5.44 | -1.33 | 2.11E-01 | 5.03E-01 | -5.82 |
| 1428126_PM_a_at | Atxn7l3b                              | ATXN7L3B | -0.25 | 7.44 | -1.33 | 2.11E-01 | 5.03E-01 | -5.82 |
| 1426253_PM_at   | Pacrgl                                | PACRGL   | -0.24 | 2.72 | -1.33 | 2.11E-01 | 5.03E-01 | -5.82 |
| 1417638_PM_at   | Lefty1                                | LEFTY1   | 0.12  | 2.52 | 1.33  | 2.11E-01 | 5.03E-01 | -5.82 |
| 1435425_PM_at   | Pisd-ps1 /// Pisd-ps3                 | NA       | 0.17  | 3.35 | 1.33  | 2.11E-01 | 5.03E-01 | -5.82 |
| 1458919_PM_at   | Mkl1                                  | MKLN1    | 0.34  | 2.93 | 1.33  | 2.11E-01 | 5.03E-01 | -5.82 |
| 1424739_PM_at   | Ap5m1                                 | AP5M1    | 0.19  | 2.19 | 1.33  | 2.11E-01 | 5.03E-01 | -5.82 |
| 1426545_PM_at   | Tnrc6b                                | TNRC6B   | 0.33  | 3.01 | 1.33  | 2.11E-01 | 5.03E-01 | -5.82 |
| 1436450_PM_at   | Rbfox3                                | RBFOX3   | -0.69 | 8.65 | -1.33 | 2.11E-01 | 5.03E-01 | -5.82 |
| 1416929_PM_at   | Rbm12                                 | RBM12    | -0.25 | 2.73 | -1.33 | 2.11E-01 | 5.03E-01 | -5.82 |
| 1435391_PM_at   | Rbm33                                 | RBM33    | 0.24  | 2.68 | 1.33  | 2.11E-01 | 5.03E-01 | -5.82 |
| 1453985_PM_at   | Erc6l2                                | ERCC6L2  | 0.26  | 2.76 | 1.33  | 2.11E-01 | 5.03E-01 | -5.82 |
| 1451099_PM_at   | Esy1                                  | ESYT1    | -0.22 | 3.20 | -1.33 | 2.11E-01 | 5.03E-01 | -5.82 |
| 1459830_PM_at   | Timm50                                | TIMM50   | 0.20  | 3.55 | 1.33  | 2.11E-01 | 5.03E-01 | -5.82 |
| 1431592_PM_a_at | Sh3kbp1                               | SH3KBP1  | 0.22  | 3.06 | 1.33  | 2.11E-01 | 5.03E-01 | -5.82 |
| 1445621_PM_at   | ---                                   | NA       | 0.27  | 2.55 | 1.33  | 2.11E-01 | 5.03E-01 | -5.82 |
| 1456876_PM_at   | Mypop                                 | MYPOP    | 0.34  | 2.30 | 1.33  | 2.11E-01 | 5.03E-01 | -5.82 |
| 1441930_PM_x_at | Vat1                                  | NA       | 0.63  | 6.78 | 1.33  | 2.11E-01 | 5.03E-01 | -5.82 |
| 1438560_PM_x_at | Cct4                                  | CCT4     | -0.44 | 6.18 | -1.33 | 2.11E-01 | 5.03E-01 | -5.82 |
| 1457521_PM_at   | ---                                   | NA       | 0.17  | 2.30 | 1.33  | 2.11E-01 | 5.03E-01 | -5.82 |
| 1459102_PM_at   | ---                                   | NA       | 0.23  | 3.00 | 1.33  | 2.11E-01 | 5.03E-01 | -5.82 |
| 1432785_PM_at   | A930028O11Rik                         | NA       | 0.10  | 2.43 | 1.33  | 2.11E-01 | 5.03E-01 | -5.82 |
| 1460612_PM_at   | Ranbp3                                | RANBP3   | 0.17  | 2.72 | 1.33  | 2.11E-01 | 5.03E-01 | -5.82 |
| 1438679_PM_at   | Trim8                                 | NA       | 0.23  | 2.79 | 1.33  | 2.11E-01 | 5.03E-01 | -5.82 |
| 1450602_PM_at   | Vmn1r14                               | NA       | -0.11 | 2.19 | -1.33 | 2.11E-01 | 5.03E-01 | -5.82 |
| 1452556_PM_at   | ---                                   | NA       | 0.53  | 4.64 | 1.33  | 2.11E-01 | 5.03E-01 | -5.82 |
| 1460499_PM_at   | ---                                   | NA       | 0.17  | 2.32 | 1.33  | 2.11E-01 | 5.03E-01 | -5.82 |
| 1454205_PM_at   | ---                                   | NA       | 0.12  | 2.43 | 1.33  | 2.11E-01 | 5.03E-01 | -5.82 |
| 1440854_PM_at   | 2810403A07Rik                         | KIAA0907 | 0.18  | 3.17 | 1.33  | 2.11E-01 | 5.03E-01 | -5.82 |
| 1447927_PM_at   | Gbp6                                  | GBP6     | 0.24  | 2.74 | 1.33  | 2.11E-01 | 5.03E-01 | -5.82 |
| 1421374_PM_a_at | Fxyd1                                 | FXYD1    | 0.61  | 3.81 | 1.33  | 2.11E-01 | 5.03E-01 | -5.82 |
| 1437009_PM_a_at | Rnf115                                | RNF115   | -0.57 | 6.54 | -1.33 | 2.11E-01 | 5.03E-01 | -5.82 |
| 1442809_PM_at   | Scn9a                                 | SCN9A    | 0.19  | 2.46 | 1.33  | 2.11E-01 | 5.03E-01 | -5.82 |
| 1454051_PM_at   | Amer2                                 | AMER2    | 0.19  | 2.28 | 1.33  | 2.11E-01 | 5.03E-01 | -5.82 |
| 1419952_PM_at   | LOC102640359                          | NA       | 0.30  | 3.51 | 1.33  | 2.11E-01 | 5.03E-01 | -5.82 |
| 1435355_PM_at   | Neb                                   | NEB      | 0.37  | 2.38 | 1.33  | 2.11E-01 | 5.03E-01 | -5.82 |
| 1457412_PM_at   | Scn8a                                 | SCN8A    | -0.45 | 6.15 | -1.33 | 2.11E-01 | 5.03E-01 | -5.82 |
| 1433255_PM_at   | ---                                   | NA       | 0.11  | 2.80 | 1.33  | 2.11E-01 | 5.03E-01 | -5.82 |
| 1429793_PM_at   | Fthl17a                               | FTHL17   | 0.13  | 2.55 | 1.33  | 2.11E-01 | 5.03E-01 | -5.82 |
| 1439156_PM_at   | Ap5b1                                 | AP5B1    | 0.20  | 3.25 | 1.33  | 2.11E-01 | 5.03E-01 | -5.82 |
| 1446793_PM_at   | Ldah                                  | NA       | 0.12  | 2.46 | 1.33  | 2.11E-01 | 5.04E-01 | -5.82 |
| 1451212_PM_at   | Cep85                                 | CEP85    | 0.17  | 2.66 | 1.33  | 2.11E-01 | 5.04E-01 | -5.82 |
| 1434445_PM_at   | Arhgap39                              | ARHGAP39 | -0.45 | 7.42 | -1.33 | 2.11E-01 | 5.04E-01 | -5.82 |
| 1453820_PM_at   | BC065403                              | NA       | 0.12  | 2.28 | 1.33  | 2.12E-01 | 5.04E-01 | -5.82 |
| 1452192_PM_at   | Naf1                                  | NAF1     | -0.37 | 3.31 | -1.33 | 2.12E-01 | 5.04E-01 | -5.82 |
| 1434433_PM_x_at | Wdr61                                 | WDR61    | -0.24 | 2.61 | -1.33 | 2.12E-01 | 5.04E-01 | -5.82 |
| 1448377_PM_at   | Slpi                                  | SLPI     | 0.13  | 2.25 | 1.33  | 2.12E-01 | 5.04E-01 | -5.82 |
| 1437074_PM_at   | ---                                   | NA       | 0.20  | 2.67 | 1.33  | 2.12E-01 | 5.04E-01 | -5.82 |
| 1418302_PM_at   | Ppt2                                  | PPT2     | 0.23  | 4.00 | 1.33  | 2.12E-01 | 5.04E-01 | -5.82 |
| 1436490_PM_x_at | LOC102641332 /// LOC102641833 /// Ran | RAN      | -0.13 | 2.62 | -1.33 | 2.12E-01 | 5.04E-01 | -5.82 |
| 1445213_PM_at   | ---                                   | NA       | 0.12  | 2.29 | 1.33  | 2.12E-01 | 5.04E-01 | -5.82 |
| 1443655_PM_s_at | Pik3c2a                               | PIK3C2A  | 0.17  | 2.43 | 1.33  | 2.12E-01 | 5.04E-01 | -5.82 |
| 1458146_PM_at   | Dennd5b                               | DENND5B  | 0.26  | 2.29 | 1.33  | 2.12E-01 | 5.04E-01 | -5.82 |
| 1441271_PM_at   | Idh3b                                 | IDH3B    | -0.11 | 2.79 | -1.33 | 2.12E-01 | 5.04E-01 | -5.82 |
| 1416305_PM_at   | Sh3bp4                                | SH3BP4   | 0.19  | 2.86 | 1.33  | 2.12E-01 | 5.04E-01 | -5.82 |
| 1435094_PM_at   | Kcnj16                                | KCNJ16   | -0.55 | 4.00 | -1.33 | 2.12E-01 | 5.04E-01 | -5.82 |
| 1424134_PM_at   | Rspry1                                | RSPRY1   | -0.27 | 2.76 | -1.33 | 2.12E-01 | 5.04E-01 | -5.82 |
| 1450381_PM_a_at | Bcl6                                  | BCL6     | -0.17 | 2.41 | -1.33 | 2.12E-01 | 5.04E-01 | -5.82 |
| 1440803_PM_x_at | Tacr3                                 | TACR3    | 0.23  | 3.06 | 1.33  | 2.12E-01 | 5.04E-01 | -5.82 |
| 1422117_PM_s_at | Khdrbs2                               | KHDRBS2  | 0.31  | 2.66 | 1.33  | 2.12E-01 | 5.04E-01 | -5.82 |
| 1440350_PM_at   | Panx2                                 | PANX2    | 0.37  | 3.43 | 1.33  | 2.12E-01 | 5.04E-01 | -5.82 |
| 1452931_PM_at   | Trp53rka                              | TP53RK   | 0.16  | 2.64 | 1.33  | 2.12E-01 | 5.04E-01 | -5.82 |
| 1457557_PM_at   | ---                                   | NA       | -0.23 | 5.42 | -1.33 | 2.12E-01 | 5.04E-01 | -5.82 |
| 1432442_PM_at   | Syce1l                                | SYCE1L   | 0.12  | 2.77 | 1.33  | 2.12E-01 | 5.04E-01 | -5.82 |
| 1418552_PM_at   | Opn1sw                                | OPN1SW   | 0.13  | 2.41 | 1.33  | 2.12E-01 | 5.04E-01 | -5.82 |

|                 |                 |          |       |      |       |          |          |       |
|-----------------|-----------------|----------|-------|------|-------|----------|----------|-------|
| 1441143_PM_at   | E130309D14Rik   | NA       | 0.16  | 2.33 | 1.33  | 2.12E-01 | 5.04E-01 | -5.82 |
| 1458441_PM_at   | SLc6a17         | SLC6A17  | 0.34  | 4.45 | 1.33  | 2.12E-01 | 5.04E-01 | -5.82 |
| 1451900_PM_at   | Mfn2            | NA       | 0.26  | 2.60 | 1.33  | 2.12E-01 | 5.04E-01 | -5.82 |
| 1419968_PM_at   | C77370          | KIAA2022 | -0.34 | 3.07 | -1.33 | 2.12E-01 | 5.04E-01 | -5.82 |
| 1433400_PM_at   | 5033405D04Rik   | NA       | 0.16  | 2.51 | 1.33  | 2.12E-01 | 5.04E-01 | -5.82 |
| 1420769_PM_at   | Dhx58           | DHX58    | 0.15  | 2.23 | 1.33  | 2.12E-01 | 5.05E-01 | -5.82 |
| 1416429_PM_a_at | Cat             | CAT      | -0.38 | 4.73 | -1.33 | 2.12E-01 | 5.05E-01 | -5.82 |
| 1425778_PM_at   | Ido2            | IDO2     | -0.22 | 3.81 | -1.33 | 2.12E-01 | 5.05E-01 | -5.82 |
| 1454548_PM_at   | ---             | NA       | 0.14  | 2.38 | 1.33  | 2.12E-01 | 5.05E-01 | -5.82 |
| 1435343_PM_at   | Dock10          | DOCK10   | -0.38 | 2.55 | -1.33 | 2.12E-01 | 5.05E-01 | -5.82 |
| 1459700_PM_at   | Lemd3           | LEMD3    | 0.13  | 2.25 | 1.33  | 2.12E-01 | 5.05E-01 | -5.82 |
| 1424933_PM_at   | Myo5c           | MYO5C    | 0.16  | 2.40 | 1.33  | 2.12E-01 | 5.05E-01 | -5.82 |
| 1448996_PM_at   | Rom1            | ROM1     | 0.17  | 2.50 | 1.33  | 2.12E-01 | 5.05E-01 | -5.82 |
| 1450088_PM_a_at | Mobp            | MOBP     | 0.93  | 3.42 | 1.33  | 2.12E-01 | 5.05E-01 | -5.82 |
| 1432169_PM_at   | 4930523O13Rik   | NA       | -0.12 | 2.23 | -1.33 | 2.12E-01 | 5.05E-01 | -5.82 |
| 1443085_PM_at   | ---             | NA       | 0.27  | 3.61 | 1.33  | 2.12E-01 | 5.05E-01 | -5.82 |
| 1422026_PM_at   | Pl16            | PL16     | 0.13  | 2.45 | 1.33  | 2.12E-01 | 5.05E-01 | -5.82 |
| 1432793_PM_at   | ---             | NA       | 0.17  | 2.50 | 1.33  | 2.12E-01 | 5.05E-01 | -5.82 |
| 1456467_PM_s_at | Nlk             | NLK      | 0.42  | 7.44 | 1.33  | 2.12E-01 | 5.05E-01 | -5.82 |
| 1448096_PM_at   | ---             | NA       | -0.19 | 2.24 | -1.33 | 2.13E-01 | 5.05E-01 | -5.82 |
| 1442895_PM_at   | ---             | NA       | 0.10  | 2.11 | 1.33  | 2.13E-01 | 5.05E-01 | -5.82 |
| 1430069_PM_at   | ---             | NA       | 0.24  | 2.59 | 1.33  | 2.13E-01 | 5.05E-01 | -5.82 |
| 1456592_PM_at   | ---             | NA       | -0.59 | 3.47 | -1.33 | 2.13E-01 | 5.05E-01 | -5.82 |
| 1451975_PM_at   | Fam220a         | FAM220A  | -0.16 | 2.39 | -1.33 | 2.13E-01 | 5.05E-01 | -5.82 |
| 1452732_PM_at   | Asprv1          | ASPRV1   | 0.11  | 2.65 | 1.33  | 2.13E-01 | 5.05E-01 | -5.82 |
| 1446021_PM_at   | AU018466        | NA       | 0.13  | 2.32 | 1.33  | 2.13E-01 | 5.05E-01 | -5.82 |
| 1422611_PM_s_at | Igf2bp3         | IGF2BP3  | 0.18  | 2.43 | 1.33  | 2.13E-01 | 5.05E-01 | -5.82 |
| 1444255_PM_at   | D630045J12Rik   | KIAA1549 | 0.24  | 3.39 | 1.33  | 2.13E-01 | 5.05E-01 | -5.82 |
| 1449175_PM_at   | Gpr65           | GPR65    | 0.32  | 2.56 | 1.33  | 2.13E-01 | 5.05E-01 | -5.82 |
| 1430418_PM_at   | Tmem57          | TMEM57   | -0.36 | 2.69 | -1.33 | 2.13E-01 | 5.05E-01 | -5.82 |
| 1452442_PM_at   | Usp13           | USP13    | 0.16  | 2.68 | 1.33  | 2.13E-01 | 5.05E-01 | -5.82 |
| 1418495_PM_at   | Zc3h8           | ZC3H8    | 0.34  | 3.19 | 1.33  | 2.13E-01 | 5.05E-01 | -5.82 |
| 1458427_PM_at   | Brip1           | BRIP1    | 0.13  | 2.13 | 1.33  | 2.13E-01 | 5.05E-01 | -5.82 |
| 1450322_PM_s_at | Sifn3 /// Sifn4 | SLFN12   | 0.10  | 2.05 | 1.33  | 2.13E-01 | 5.05E-01 | -5.82 |
| 1421639_PM_at   | ---             | NA       | 0.20  | 3.69 | 1.33  | 2.13E-01 | 5.05E-01 | -5.82 |
| 1442489_PM_at   | Agfg1           | AGFG1    | 0.14  | 2.14 | 1.33  | 2.13E-01 | 5.05E-01 | -5.82 |
| 1419094_PM_at   | Cyp2c37         | NA       | 0.18  | 2.75 | 1.33  | 2.13E-01 | 5.05E-01 | -5.82 |
| 1438102_PM_at   | Senp8           | SENP8    | 0.14  | 2.25 | 1.33  | 2.13E-01 | 5.05E-01 | -5.82 |
| 1431222_PM_at   | ---             | NA       | 0.22  | 2.86 | 1.33  | 2.13E-01 | 5.05E-01 | -5.82 |
| 1458378_PM_at   | Grin3a          | GRI3A    | -0.15 | 2.30 | -1.33 | 2.13E-01 | 5.06E-01 | -5.82 |
| 1420200_PM_at   | ---             | NA       | 0.11  | 2.12 | 1.33  | 2.13E-01 | 5.06E-01 | -5.82 |
| 1433434_PM_at   | AW551984        | VWASA    | 0.31  | 2.56 | 1.33  | 2.13E-01 | 5.06E-01 | -5.82 |
| 1452793_PM_at   | Dzip1           | DZIP1    | -0.15 | 2.23 | -1.33 | 2.13E-01 | 5.06E-01 | -5.82 |
| 1438595_PM_at   | Prr22           | PRR22    | 0.13  | 2.44 | 1.33  | 2.13E-01 | 5.06E-01 | -5.82 |
| 1421436_PM_at   | Grid2           | GRI2     | 0.53  | 2.93 | 1.33  | 2.13E-01 | 5.06E-01 | -5.82 |
| 1451254_PM_at   | Ikbkap          | IKBKAP   | -0.52 | 5.35 | -1.33 | 2.13E-01 | 5.06E-01 | -5.82 |
| 1416303_PM_at   | Litaf           | LITAF    | -0.22 | 3.03 | -1.33 | 2.13E-01 | 5.06E-01 | -5.82 |
| 1422393_PM_at   | Foxe3           | FOXE3    | 0.12  | 2.40 | 1.33  | 2.13E-01 | 5.06E-01 | -5.82 |
| 1444376_PM_at   | Sesn1           | SESN1    | 0.14  | 2.48 | 1.33  | 2.13E-01 | 5.06E-01 | -5.83 |
| 1438763_PM_at   | Dnah2           | DNAH2    | 0.20  | 2.64 | 1.33  | 2.13E-01 | 5.06E-01 | -5.82 |
| 1419722_PM_at   | Klk8            | KLK8     | 0.22  | 3.17 | 1.33  | 2.13E-01 | 5.06E-01 | -5.83 |
| 1422943_PM_a_at | Hspb1           | HSPB1    | -0.25 | 2.58 | -1.33 | 2.13E-01 | 5.06E-01 | -5.83 |
| 1419436_PM_at   | Cfhr1           | CFHR1    | 0.14  | 2.08 | 1.33  | 2.13E-01 | 5.06E-01 | -5.83 |
| 1443818_PM_at   | ---             | NA       | 0.15  | 2.19 | 1.33  | 2.13E-01 | 5.06E-01 | -5.83 |
| 1439890_PM_at   | Fbx17           | FBXL7    | 0.14  | 2.34 | 1.33  | 2.13E-01 | 5.06E-01 | -5.83 |
| 1441788_PM_s_at | Dkc1            | DKC1     | 0.56  | 4.78 | 1.33  | 2.13E-01 | 5.06E-01 | -5.83 |
| 1429163_PM_at   | Dchs1           | DCHS1    | 0.09  | 2.41 | 1.33  | 2.13E-01 | 5.06E-01 | -5.83 |
| 1443071_PM_at   | AI839979        | NA       | 0.12  | 2.74 | 1.33  | 2.13E-01 | 5.06E-01 | -5.83 |
| 1452001_PM_at   | Nfe2            | NFE2     | 0.15  | 2.30 | 1.33  | 2.13E-01 | 5.06E-01 | -5.83 |
| 1425232_PM_x_at | Arr3            | ARR3     | 0.17  | 2.33 | 1.33  | 2.13E-01 | 5.06E-01 | -5.83 |
| 1423105_PM_a_at | Yeats4          | YEATS4   | -0.24 | 5.07 | -1.33 | 2.13E-01 | 5.06E-01 | -5.83 |
| 1450312_PM_at   | Cdh20           | CDH20    | 0.26  | 2.37 | 1.33  | 2.14E-01 | 5.06E-01 | -5.83 |
| 1449045_PM_at   | Afg311          | NA       | 0.29  | 3.03 | 1.33  | 2.14E-01 | 5.06E-01 | -5.83 |
| 1437338_PM_x_at | Elp3            | NA       | -0.30 | 5.90 | -1.33 | 2.14E-01 | 5.06E-01 | -5.83 |
| 1427631_PM_x_at | Mup3            | NA       | 0.15  | 2.46 | 1.33  | 2.14E-01 | 5.06E-01 | -5.83 |
| 1417814_PM_at   | Pla2g5          | PLA2G5   | 0.15  | 2.28 | 1.33  | 2.14E-01 | 5.06E-01 | -5.83 |
| 1445911_PM_at   | Chic2           | CHIC2    | 0.22  | 2.88 | 1.33  | 2.14E-01 | 5.06E-01 | -5.83 |
| 1441476_PM_at   | Soc2            | SOCS2    | 0.63  | 4.02 | 1.33  | 2.14E-01 | 5.06E-01 | -5.83 |
| 1427376_PM_a_at | Map4k5          | MAP4K5   | 0.14  | 2.71 | 1.33  | 2.14E-01 | 5.06E-01 | -5.83 |
| 1440879_PM_at   | Abca9           | ABCA9    | -0.41 | 2.95 | -1.32 | 2.14E-01 | 5.06E-01 | -5.83 |
| 1421415_PM_s_at | Gcnt2           | GCNT2    | 0.18  | 2.90 | 1.32  | 2.14E-01 | 5.06E-01 | -5.83 |
| 1443462_PM_at   | D8Erttd572e     | NA       | -0.51 | 3.47 | -1.32 | 2.14E-01 | 5.06E-01 | -5.83 |
| 1431701_PM_a_at | Pdzk1           | PDZK1    | 0.14  | 2.78 | 1.32  | 2.14E-01 | 5.06E-01 | -5.83 |
| 1458781_PM_at   | ---             | NA       | 0.20  | 2.69 | 1.32  | 2.14E-01 | 5.06E-01 | -5.83 |
| 1425241_PM_a_at | Wsb1            | WSB1     | -0.46 | 7.58 | -1.32 | 2.14E-01 | 5.07E-01 | -5.83 |

|                 |                                                              |              |       |      |       |          |          |       |
|-----------------|--------------------------------------------------------------|--------------|-------|------|-------|----------|----------|-------|
| 1431619_PM_a_at | Dtnbp1                                                       | DTNBP1       | -0.37 | 3.59 | -1.32 | 2.14E-01 | 5.07E-01 | -5.83 |
| 1446097_PM_at   | ---                                                          | NA           | -0.18 | 2.89 | -1.32 | 2.14E-01 | 5.07E-01 | -5.83 |
| 1454561_PM_at   | ---                                                          | NA           | 0.11  | 2.50 | 1.32  | 2.14E-01 | 5.07E-01 | -5.83 |
| 1434050_PM_at   | Vps8                                                         | VPS8         | 0.11  | 2.11 | 1.32  | 2.14E-01 | 5.07E-01 | -5.83 |
| 1426054_PM_at   | Npy1r                                                        | NA           | 0.13  | 2.34 | 1.32  | 2.14E-01 | 5.07E-01 | -5.83 |
| 1448187_PM_at   | Pold1                                                        | POLD1        | 0.15  | 2.49 | 1.32  | 2.14E-01 | 5.07E-01 | -5.83 |
| 1431231_PM_at   | Hist1h3e /// Hist1h3f /// Hist1h3g /// Hist1h3h /// Hist1h3i | HIST1H3B     | 0.19  | 3.04 | 1.32  | 2.14E-01 | 5.07E-01 | -5.83 |
| 1444702_PM_at   | ---                                                          | NA           | 0.25  | 2.81 | 1.32  | 2.14E-01 | 5.07E-01 | -5.83 |
| 1443149_PM_at   | ---                                                          | NA           | 0.26  | 2.48 | 1.32  | 2.14E-01 | 5.07E-01 | -5.83 |
| 1419761_PM_a_at | Gabpb1                                                       | GABPB1       | 0.29  | 2.58 | 1.32  | 2.14E-01 | 5.07E-01 | -5.83 |
| 1422448_PM_at   | Tff2                                                         | TFF2         | 0.12  | 3.16 | 1.32  | 2.14E-01 | 5.07E-01 | -5.83 |
| 1452257_PM_at   | Bdh1                                                         | BDH1         | -0.20 | 3.55 | -1.32 | 2.14E-01 | 5.07E-01 | -5.83 |
| 1415729_PM_at   | Pdpk1                                                        | PDPK1        | -0.29 | 5.87 | -1.32 | 2.14E-01 | 5.07E-01 | -5.83 |
| 1436698_PM_x_at | Tmem204                                                      | TMEM204      | -0.83 | 3.93 | -1.32 | 2.14E-01 | 5.07E-01 | -5.83 |
| 1447130_PM_at   | D8Wsu26e                                                     | NA           | 0.17  | 2.55 | 1.32  | 2.14E-01 | 5.07E-01 | -5.83 |
| 1433791_PM_at   | Rab9b                                                        | RAB9B        | -0.24 | 2.82 | -1.32 | 2.14E-01 | 5.07E-01 | -5.83 |
| 1456452_PM_at   | Prss45                                                       | PRSS45       | 0.13  | 2.53 | 1.32  | 2.14E-01 | 5.07E-01 | -5.83 |
| 1452477_PM_at   | 3110057O12Rik                                                | ABHD18       | 0.28  | 2.98 | 1.32  | 2.14E-01 | 5.07E-01 | -5.83 |
| 1455614_PM_at   | Tomm40l                                                      | TOMM40L      | 0.46  | 4.02 | 1.32  | 2.14E-01 | 5.07E-01 | -5.83 |
| 1459512_PM_at   | ---                                                          | NA           | 0.10  | 2.23 | 1.32  | 2.14E-01 | 5.07E-01 | -5.83 |
| 1456431_PM_at   | Zfp64                                                        | NA           | 0.16  | 2.55 | 1.32  | 2.14E-01 | 5.07E-01 | -5.83 |
| 1436285_PM_at   | Ccdc113                                                      | CCDC113      | 0.26  | 2.46 | 1.32  | 2.14E-01 | 5.07E-01 | -5.83 |
| 1417053_PM_at   | 1700071K01Rik /// Phb                                        | PHB          | 0.24  | 2.61 | 1.32  | 2.14E-01 | 5.07E-01 | -5.83 |
| 1418804_PM_at   | Sucnr1                                                       | SUCNR1       | 0.11  | 2.27 | 1.32  | 2.14E-01 | 5.07E-01 | -5.83 |
| 1440041_PM_at   | ---                                                          | NA           | -0.29 | 4.36 | -1.32 | 2.14E-01 | 5.07E-01 | -5.83 |
| 1448348_PM_at   | Caprin1                                                      | CAPRIN1      | -0.50 | 5.27 | -1.32 | 2.15E-01 | 5.07E-01 | -5.83 |
| 1425692_PM_a_at | Dnah8                                                        | NA           | 0.11  | 2.69 | 1.32  | 2.15E-01 | 5.07E-01 | -5.83 |
| 1436569_PM_at   | Prex2                                                        | PREX2        | -0.40 | 2.32 | -1.32 | 2.15E-01 | 5.07E-01 | -5.83 |
| 1456718_PM_at   | Tmem56                                                       | TMEM56-RWDD3 | -0.15 | 2.06 | -1.32 | 2.15E-01 | 5.07E-01 | -5.83 |
| 1432813_PM_at   | Adgrl3                                                       | NA           | -0.28 | 2.33 | -1.32 | 2.15E-01 | 5.08E-01 | -5.83 |
| 1454128_PM_at   | 4930413E15Rik                                                | NA           | 0.13  | 2.09 | 1.32  | 2.15E-01 | 5.08E-01 | -5.83 |
| 1429721_PM_s_at | Egtn                                                         | EQTN         | 0.18  | 2.59 | 1.32  | 2.15E-01 | 5.08E-01 | -5.83 |
| 1429713_PM_at   | Sumf2                                                        | SUMF2        | 0.11  | 2.32 | 1.32  | 2.15E-01 | 5.08E-01 | -5.83 |
| 1450898_PM_at   | Hiat1                                                        | AC118553.2   | -0.58 | 4.95 | -1.32 | 2.15E-01 | 5.08E-01 | -5.83 |
| 1455931_PM_at   | Chrna3                                                       | CHRNA3       | 0.13  | 2.20 | 1.32  | 2.15E-01 | 5.08E-01 | -5.83 |
| 1456215_PM_at   | Tfam                                                         | TFAM         | 0.28  | 3.01 | 1.32  | 2.15E-01 | 5.08E-01 | -5.83 |
| 1441505_PM_at   | ---                                                          | NA           | -0.60 | 3.62 | -1.32 | 2.15E-01 | 5.08E-01 | -5.83 |
| 1419548_PM_at   | Kpna1                                                        | KPNA1        | -0.69 | 8.44 | -1.32 | 2.15E-01 | 5.08E-01 | -5.83 |
| 1459784_PM_x_at | Lonp2                                                        | LONP2        | -0.17 | 2.63 | -1.32 | 2.15E-01 | 5.08E-01 | -5.83 |
| 1432000_PM_a_at | Dedd                                                         | DEDD         | -0.12 | 2.52 | -1.32 | 2.15E-01 | 5.08E-01 | -5.83 |
| 1422119_PM_at   | Rab5b                                                        | RAB5B        | 0.24  | 2.71 | 1.32  | 2.15E-01 | 5.08E-01 | -5.83 |
| 1432102_PM_at   | ---                                                          | NA           | 0.27  | 2.29 | 1.32  | 2.15E-01 | 5.08E-01 | -5.83 |
| 1443282_PM_at   | ---                                                          | NA           | 0.30  | 2.75 | 1.32  | 2.15E-01 | 5.08E-01 | -5.83 |
| 1427192_PM_a_at | Brd8                                                         | BRD8         | -0.53 | 6.03 | -1.32 | 2.15E-01 | 5.08E-01 | -5.83 |
| 1457569_PM_at   | D8Ert51e                                                     | NA           | 0.15  | 2.62 | 1.32  | 2.15E-01 | 5.08E-01 | -5.83 |
| 1433756_PM_at   | S100pbp                                                      | S100BPB      | -0.40 | 2.65 | -1.32 | 2.15E-01 | 5.08E-01 | -5.83 |
| 1443152_PM_at   | ---                                                          | NA           | 0.14  | 3.14 | 1.32  | 2.15E-01 | 5.08E-01 | -5.83 |
| 1451198_PM_at   | Gatad2a                                                      | GATAD2A      | 0.15  | 2.36 | 1.32  | 2.15E-01 | 5.08E-01 | -5.83 |
| 1415995_PM_at   | Casp6                                                        | CASP6        | 0.16  | 2.36 | 1.32  | 2.15E-01 | 5.08E-01 | -5.83 |
| 1429585_PM_s_at | Mynn                                                         | MYNN         | 0.60  | 3.47 | 1.32  | 2.15E-01 | 5.08E-01 | -5.83 |
| 1433973_PM_at   | Sephs1                                                       | SEPHS1       | -0.23 | 5.44 | -1.32 | 2.15E-01 | 5.08E-01 | -5.83 |
| 1449217_PM_at   | Casp8ap2                                                     | CASP8AP2     | -0.55 | 2.91 | -1.32 | 2.15E-01 | 5.08E-01 | -5.83 |
| 1438362_PM_x_at | 2310035C23Rik                                                | KIAA1468     | -0.34 | 3.10 | -1.32 | 2.15E-01 | 5.08E-01 | -5.83 |
| 1460529_PM_at   | ---                                                          | NA           | 0.15  | 2.76 | 1.32  | 2.15E-01 | 5.08E-01 | -5.83 |
| 1429972_PM_s_at | Txnrd2                                                       | TXNRD2       | 0.19  | 2.67 | 1.32  | 2.15E-01 | 5.08E-01 | -5.83 |
| 1426971_PM_at   | Uba7                                                         | UBA7         | 0.14  | 2.08 | 1.32  | 2.15E-01 | 5.08E-01 | -5.83 |
| 1430575_PM_a_at | Tpp2                                                         | TPP2         | 0.51  | 3.38 | 1.32  | 2.15E-01 | 5.08E-01 | -5.83 |
| 1457050_PM_at   | ---                                                          | NA           | -0.10 | 2.28 | -1.32 | 2.15E-01 | 5.08E-01 | -5.83 |
| 1438037_PM_at   | Herc6                                                        | HERC6        | -0.13 | 2.35 | -1.32 | 2.15E-01 | 5.08E-01 | -5.83 |
| 1454234_PM_at   | Wbscr28                                                      | WBSR28       | 0.12  | 2.20 | 1.32  | 2.15E-01 | 5.08E-01 | -5.83 |
| 1454474_PM_at   | ---                                                          | NA           | 0.12  | 2.29 | 1.32  | 2.15E-01 | 5.08E-01 | -5.83 |
| 1457439_PM_at   | ---                                                          | NA           | 0.19  | 2.34 | 1.32  | 2.15E-01 | 5.08E-01 | -5.83 |
| 1458913_PM_at   | 4831440E17Rik                                                | NA           | 0.55  | 2.82 | 1.32  | 2.15E-01 | 5.08E-01 | -5.83 |
| 1423392_PM_at   | Clic4                                                        | CLIC4        | -0.39 | 3.34 | -1.32 | 2.15E-01 | 5.08E-01 | -5.83 |
| 1420034_PM_at   | Ppp2r2d                                                      | NA           | -0.24 | 3.38 | -1.32 | 2.15E-01 | 5.08E-01 | -5.83 |
| 1459559_PM_at   | ---                                                          | NA           | -0.19 | 2.67 | -1.32 | 2.15E-01 | 5.08E-01 | -5.83 |
| 1438477_PM_a_at | Mcee                                                         | MCEE         | -0.14 | 2.88 | -1.32 | 2.15E-01 | 5.08E-01 | -5.83 |
| 1454148_PM_at   | ---                                                          | NA           | 0.10  | 1.81 | 1.32  | 2.15E-01 | 5.08E-01 | -5.83 |
| 1454039_PM_at   | ---                                                          | NA           | 0.13  | 2.37 | 1.32  | 2.15E-01 | 5.08E-01 | -5.83 |
| 1443011_PM_at   | ---                                                          | NA           | 0.13  | 2.17 | 1.32  | 2.15E-01 | 5.08E-01 | -5.83 |
| 1430249_PM_at   | 4930473A02Rik                                                | NA           | 0.15  | 2.38 | 1.32  | 2.15E-01 | 5.08E-01 | -5.83 |
| 1417726_PM_at   | Ssca1                                                        | SSSCA1       | 0.17  | 2.48 | 1.32  | 2.15E-01 | 5.08E-01 | -5.83 |
| 1445810_PM_at   | C85163                                                       | NA           | 0.23  | 2.46 | 1.32  | 2.15E-01 | 5.08E-01 | -5.83 |

|                         |                        |          |       |      |       |          |          |       |
|-------------------------|------------------------|----------|-------|------|-------|----------|----------|-------|
| 1439834_PM_at           | Fcor                   | NA       | 0.25  | 3.86 | 1.32  | 2.15E-01 | 5.08E-01 | -5.83 |
| 1431480_PM_at           | ---                    | NA       | 0.27  | 2.31 | 1.32  | 2.15E-01 | 5.08E-01 | -5.83 |
| 1458623_PM_at           | ---                    | NA       | 0.34  | 2.92 | 1.32  | 2.15E-01 | 5.08E-01 | -5.83 |
| 1432021_PM_at           | Cpne3                  | CPNE3    | -0.11 | 2.19 | -1.32 | 2.16E-01 | 5.09E-01 | -5.83 |
| 1455299_PM_at           | Vgll3                  | NA       | -0.19 | 2.35 | -1.32 | 2.16E-01 | 5.09E-01 | -5.83 |
| 1427237_PM_at           | 2410015M20Rik          | C19orf70 | 0.11  | 2.15 | 1.32  | 2.16E-01 | 5.09E-01 | -5.83 |
| 1449600_PM_at           | Gm3716                 | NA       | 0.14  | 2.40 | 1.32  | 2.16E-01 | 5.09E-01 | -5.83 |
| AFFX-NonspecificGC25_at | ---                    | NA       | 0.15  | 2.06 | 1.32  | 2.16E-01 | 5.09E-01 | -5.83 |
| 1458130_PM_at           | ---                    | NA       | 0.15  | 2.18 | 1.32  | 2.16E-01 | 5.09E-01 | -5.83 |
| 1424990_PM_at           | Orai1                  | ORAI1    | 0.18  | 2.60 | 1.32  | 2.16E-01 | 5.09E-01 | -5.83 |
| 1442743_PM_at           | Trip4                  | TRIP4    | -0.53 | 3.21 | -1.32 | 2.16E-01 | 5.09E-01 | -5.83 |
| 1417233_PM_at           | Chchd4                 | CHCHD4   | -0.39 | 4.25 | -1.32 | 2.16E-01 | 5.09E-01 | -5.83 |
| 1455246_PM_at           | Smarcc1                | SMARCC1  | -0.32 | 3.60 | -1.32 | 2.16E-01 | 5.09E-01 | -5.83 |
| 1423871_PM_at           | Tmem63a                | TMEM63A  | -0.25 | 4.87 | -1.32 | 2.16E-01 | 5.09E-01 | -5.83 |
| 1457509_PM_at           | Sbno1                  | SBNO1    | 0.16  | 2.38 | 1.32  | 2.16E-01 | 5.09E-01 | -5.83 |
| 1418353_PM_at           | Cd5                    | CD5      | 0.16  | 2.26 | 1.32  | 2.16E-01 | 5.09E-01 | -5.83 |
| 1454265_PM_a_at         | Abcb10                 | ABCB10   | 0.18  | 2.17 | 1.32  | 2.16E-01 | 5.09E-01 | -5.83 |
| 1449431_PM_at           | Trpc6                  | NA       | 0.28  | 2.45 | 1.32  | 2.16E-01 | 5.09E-01 | -5.83 |
| 1428761_PM_a_at         | Snape3                 | SNAPC3   | 0.29  | 3.59 | 1.32  | 2.16E-01 | 5.09E-01 | -5.83 |
| 1438299_PM_at           | Gm36348 /// Gm39564    | NA       | 0.44  | 5.28 | 1.32  | 2.16E-01 | 5.09E-01 | -5.83 |
| 1456164_PM_at           | AW011738               | NA       | -0.36 | 3.81 | -1.32 | 2.16E-01 | 5.09E-01 | -5.83 |
| 1449993_PM_at           | Vamp5                  | VAMP5    | 0.21  | 3.11 | 1.32  | 2.16E-01 | 5.09E-01 | -5.84 |
| 1456365_PM_at           | Gm11517                | NA       | -0.13 | 2.76 | -1.32 | 2.16E-01 | 5.09E-01 | -5.84 |
| 1444557_PM_at           | ---                    | NA       | 0.20  | 2.36 | 1.32  | 2.16E-01 | 5.09E-01 | -5.84 |
| 1425556_PM_at           | Cdk12                  | CDK12    | 0.34  | 3.15 | 1.32  | 2.16E-01 | 5.09E-01 | -5.84 |
| 1443005_PM_at           | Zeb1                   | ZEB1     | -0.14 | 3.00 | -1.32 | 2.16E-01 | 5.09E-01 | -5.84 |
| 1452424_PM_at           | Lpar4                  | LPAR4    | 0.12  | 2.50 | 1.32  | 2.16E-01 | 5.09E-01 | -5.84 |
| 1441377_PM_at           | Kif6                   | KIF6     | 0.13  | 2.29 | 1.32  | 2.16E-01 | 5.09E-01 | -5.84 |
| 1444496_PM_at           | ---                    | NA       | 0.33  | 3.24 | 1.32  | 2.16E-01 | 5.09E-01 | -5.84 |
| 1420805_PM_at           | My10                   | MYL10    | 0.14  | 2.48 | 1.32  | 2.16E-01 | 5.09E-01 | -5.84 |
| 1420018_PM_s_at         | Tspan8                 | TSPAN8   | 0.16  | 2.72 | 1.32  | 2.16E-01 | 5.09E-01 | -5.84 |
| 1439958_PM_at           | Gm1995 /// Gm7104      | NA       | 0.77  | 3.47 | 1.32  | 2.16E-01 | 5.09E-01 | -5.84 |
| 1420868_PM_s_at         | Gm21540 /// Tmed2      | TMED2    | -0.56 | 3.33 | -1.32 | 2.16E-01 | 5.09E-01 | -5.84 |
| 1435975_PM_at           | Dennd4a                | DENND4A  | -0.44 | 5.35 | -1.32 | 2.16E-01 | 5.09E-01 | -5.84 |
| 1433528_PM_at           | Gtf2a2                 | GTF2A2   | -0.19 | 3.30 | -1.32 | 2.16E-01 | 5.09E-01 | -5.84 |
| 1421773_PM_at           | Etv2                   | ETV2     | -0.11 | 2.15 | -1.32 | 2.16E-01 | 5.09E-01 | -5.84 |
| 1458805_PM_at           | ---                    | NA       | 0.10  | 2.25 | 1.32  | 2.16E-01 | 5.09E-01 | -5.84 |
| 1429550_PM_at           | Entpd8                 | ENTPD8   | 0.11  | 2.38 | 1.32  | 2.16E-01 | 5.09E-01 | -5.84 |
| 1458057_PM_at           | Gm19966                | NA       | 0.12  | 2.21 | 1.32  | 2.16E-01 | 5.09E-01 | -5.84 |
| 1431963_PM_at           | Gm16555                | NA       | 0.13  | 2.22 | 1.32  | 2.16E-01 | 5.09E-01 | -5.84 |
| 1419480_PM_at           | Sell                   | SELL     | 0.14  | 2.12 | 1.32  | 2.16E-01 | 5.09E-01 | -5.84 |
| 1447578_PM_at           | ---                    | NA       | 0.16  | 2.49 | 1.32  | 2.16E-01 | 5.09E-01 | -5.84 |
| 1460349_PM_at           | Prr14                  | PRR14    | 0.16  | 2.56 | 1.32  | 2.16E-01 | 5.09E-01 | -5.84 |
| 1434789_PM_at           | Depdc1b                | DEPDC1B  | 0.19  | 2.65 | 1.32  | 2.16E-01 | 5.09E-01 | -5.84 |
| 1455355_PM_at           | G2e3                   | G2E3     | 0.24  | 2.78 | 1.32  | 2.16E-01 | 5.09E-01 | -5.84 |
| 1452991_PM_at           | 1810026B05Rik /// Chd2 | CHD2     | 0.31  | 4.34 | 1.32  | 2.16E-01 | 5.09E-01 | -5.84 |
| 1429537_PM_at           | Pnlsr                  | PNISR    | 0.90  | 5.50 | 1.32  | 2.16E-01 | 5.09E-01 | -5.84 |
| 1435370_PM_a_at         | Ces1d                  | CES1     | 0.15  | 2.01 | 1.32  | 2.16E-01 | 5.09E-01 | -5.84 |
| 1427524_PM_a_at         | Mphosph8               | MPHOSPH8 | 0.28  | 4.91 | 1.32  | 2.16E-01 | 5.09E-01 | -5.84 |
| 1454223_PM_at           | ---                    | NA       | 0.22  | 3.12 | 1.32  | 2.16E-01 | 5.09E-01 | -5.84 |
| 1421695_PM_at           | Strc                   | STRC     | 0.16  | 2.63 | 1.32  | 2.16E-01 | 5.09E-01 | -5.84 |
| 1459796_PM_at           | ---                    | NA       | -0.11 | 1.99 | -1.32 | 2.16E-01 | 5.09E-01 | -5.84 |
| 1459259_PM_at           | Gm5084                 | NA       | 0.14  | 2.35 | 1.32  | 2.16E-01 | 5.09E-01 | -5.84 |
| 1449223_PM_at           | Dnajb8                 | DNAJB8   | 0.23  | 2.83 | 1.32  | 2.16E-01 | 5.09E-01 | -5.84 |
| 1458629_PM_at           | ---                    | NA       | 0.15  | 2.63 | 1.32  | 2.16E-01 | 5.09E-01 | -5.84 |
| 1460272_PM_at           | Ubl4b                  | UBL4B    | -0.16 | 2.40 | -1.32 | 2.17E-01 | 5.09E-01 | -5.84 |
| 1420993_PM_at           | B3gnt5                 | B3GNT5   | 0.11  | 2.27 | 1.32  | 2.17E-01 | 5.09E-01 | -5.84 |
| 1421544_PM_at           | Dnah11                 | DNAH11   | 0.26  | 3.79 | 1.32  | 2.17E-01 | 5.09E-01 | -5.84 |
| 1459067_PM_at           | 1190002N15Rik          | NA       | 0.14  | 2.11 | 1.32  | 2.17E-01 | 5.09E-01 | -5.84 |
| 1430096_PM_at           | ---                    | NA       | 0.19  | 2.82 | 1.32  | 2.17E-01 | 5.09E-01 | -5.84 |
| 1427903_PM_at           | Phtp1                  | MAMDC4   | -0.45 | 4.68 | -1.32 | 2.17E-01 | 5.10E-01 | -5.84 |
| 1449083_PM_at           | Ccdc91                 | CCDC91   | -0.23 | 3.11 | -1.32 | 2.17E-01 | 5.10E-01 | -5.84 |
| 1459477_PM_at           | ---                    | NA       | -0.19 | 2.64 | -1.32 | 2.17E-01 | 5.10E-01 | -5.84 |
| 1435174_PM_at           | Rbn1                   | RSBN1    | -0.16 | 2.51 | -1.32 | 2.17E-01 | 5.10E-01 | -5.84 |
| 1427751_PM_a_at         | Krt36                  | KRT36    | 0.12  | 2.56 | 1.32  | 2.17E-01 | 5.10E-01 | -5.84 |
| 1452573_PM_a_at         | Erc6l2                 | ERCC6L2  | 0.19  | 2.40 | 1.32  | 2.17E-01 | 5.10E-01 | -5.84 |
| 1447948_PM_at           | Cped1                  | NA       | 0.25  | 2.41 | 1.32  | 2.17E-01 | 5.10E-01 | -5.84 |
| 1437394_PM_at           | Agap1                  | AGAP1    | 0.26  | 3.06 | 1.32  | 2.17E-01 | 5.10E-01 | -5.84 |
| 1424713_PM_at           | Calml4                 | CALML4   | 0.27  | 2.36 | 1.32  | 2.17E-01 | 5.10E-01 | -5.84 |
| 1459922_PM_at           | Al646383               | NA       | 0.32  | 2.49 | 1.32  | 2.17E-01 | 5.10E-01 | -5.84 |
| 1455065_PM_x_at         | Gm8615 /// Gnpda1      | GNPDA1   | 0.39  | 4.03 | 1.32  | 2.17E-01 | 5.10E-01 | -5.84 |
| 1440470_PM_at           | Lrrc14                 | LRRC14   | 0.15  | 2.29 | 1.32  | 2.17E-01 | 5.10E-01 | -5.84 |
| 1460227_PM_at           | Timp1                  | TIMP1    | 0.12  | 2.20 | 1.32  | 2.17E-01 | 5.10E-01 | -5.84 |
| 1421925_PM_at           | Mapk11                 | MAPK11   | 0.35  | 2.65 | 1.32  | 2.17E-01 | 5.10E-01 | -5.84 |
| 1437351_PM_at           | Cxhc4                  | CXHC4    | -0.28 | 3.13 | -1.31 | 2.17E-01 | 5.10E-01 | -5.84 |

|                 |                 |          |       |      |       |          |          |       |
|-----------------|-----------------|----------|-------|------|-------|----------|----------|-------|
| 1434262_PM_at   | Cog1            | NA       | -0.23 | 2.55 | -1.31 | 2.17E-01 | 5.10E-01 | -5.84 |
| 1429336_PM_at   | Tmem87b         | TMEM87B  | -0.39 | 3.12 | -1.31 | 2.17E-01 | 5.10E-01 | -5.84 |
| 1438229_PM_at   | Pggt1b          | NA       | 0.16  | 3.54 | 1.31  | 2.17E-01 | 5.10E-01 | -5.84 |
| 1451223_PM_a_at | Btf3l4          | BTF3L4   | 0.32  | 3.74 | 1.31  | 2.17E-01 | 5.10E-01 | -5.84 |
| 1426151_PM_a_at | Stx3            | STX3     | 0.39  | 3.43 | 1.31  | 2.17E-01 | 5.10E-01 | -5.84 |
| 1441215_PM_at   | Trabd           | TRABD    | 0.14  | 2.48 | 1.31  | 2.17E-01 | 5.10E-01 | -5.84 |
| 1445361_PM_at   | ---             | NA       | 0.25  | 2.32 | 1.31  | 2.17E-01 | 5.10E-01 | -5.84 |
| 1432564_PM_at   | 1700066C05Rik   | NA       | 0.38  | 3.99 | 1.31  | 2.17E-01 | 5.10E-01 | -5.84 |
| 1451457_PM_at   | Sc5d            | SC5D     | -0.31 | 2.90 | -1.31 | 2.17E-01 | 5.10E-01 | -5.84 |
| 1447381_PM_at   | ---             | NA       | 0.24  | 2.20 | 1.31  | 2.17E-01 | 5.10E-01 | -5.84 |
| 1435904_PM_at   | Ago3            | AGO3     | -0.29 | 2.34 | -1.31 | 2.17E-01 | 5.10E-01 | -5.84 |
| 1441466_PM_at   | Tra2b           | TRA2B    | -0.12 | 3.09 | -1.31 | 2.17E-01 | 5.10E-01 | -5.84 |
| 1451612_PM_at   | Mt1             | NA       | 0.12  | 2.67 | 1.31  | 2.17E-01 | 5.10E-01 | -5.84 |
| 1421636_PM_at   | ---             | NA       | 0.15  | 2.33 | 1.31  | 2.17E-01 | 5.10E-01 | -5.84 |
| 1431346_PM_at   | ---             | NA       | 0.17  | 2.46 | 1.31  | 2.17E-01 | 5.10E-01 | -5.84 |
| 1418581_PM_a_at | Limk2           | LIMK2    | 0.18  | 2.82 | 1.31  | 2.17E-01 | 5.10E-01 | -5.84 |
| 1450295_PM_s_at | Pvr             | PVR      | 0.18  | 2.29 | 1.31  | 2.17E-01 | 5.10E-01 | -5.84 |
| 1451163_PM_at   | Tinf2           | TINF2    | 0.17  | 3.30 | 1.31  | 2.17E-01 | 5.10E-01 | -5.84 |
| 1417461_PM_at   | Cap1            | CAP1     | -0.55 | 5.55 | -1.31 | 2.17E-01 | 5.10E-01 | -5.84 |
| 1422952_PM_at   | Sapcd1          | SAPCD1   | 0.15  | 2.33 | 1.31  | 2.17E-01 | 5.10E-01 | -5.84 |
| 1450262_PM_at   | Clcf1           | CLCF1    | 0.18  | 2.54 | 1.31  | 2.17E-01 | 5.10E-01 | -5.84 |
| 1441162_PM_at   | ---             | NA       | 0.14  | 2.22 | 1.31  | 2.17E-01 | 5.10E-01 | -5.84 |
| 1438337_PM_x_at | Tmprss11g       | NA       | 0.15  | 2.25 | 1.31  | 2.17E-01 | 5.10E-01 | -5.84 |
| 1430626_PM_at   | Zfp398          | ZNF398   | 0.11  | 2.32 | 1.31  | 2.17E-01 | 5.10E-01 | -5.84 |
| 1454240_PM_at   | Nfe2l3          | NFE2L3   | 0.13  | 2.42 | 1.31  | 2.17E-01 | 5.10E-01 | -5.84 |
| 1429574_PM_at   | Clic3           | CLIC3    | 0.13  | 3.11 | 1.31  | 2.17E-01 | 5.10E-01 | -5.84 |
| 1454559_PM_at   | Sh3bgr          | NA       | 0.13  | 2.90 | 1.31  | 2.17E-01 | 5.10E-01 | -5.84 |
| 1446333_PM_at   | ---             | NA       | 0.15  | 2.33 | 1.31  | 2.17E-01 | 5.10E-01 | -5.84 |
| 1459537_PM_at   | ---             | NA       | -0.13 | 2.18 | -1.31 | 2.17E-01 | 5.10E-01 | -5.84 |
| 1447747_PM_x_at | Adal            | NA       | 0.11  | 2.32 | 1.31  | 2.17E-01 | 5.10E-01 | -5.84 |
| 1438848_PM_at   | ---             | NA       | -0.37 | 2.82 | -1.31 | 2.17E-01 | 5.10E-01 | -5.84 |
| 1451934_PM_at   | H2-D1           | NA       | 0.13  | 2.31 | 1.31  | 2.17E-01 | 5.10E-01 | -5.84 |
| 1438520_PM_at   | Slc25a36        | SLC25A36 | -0.34 | 3.88 | -1.31 | 2.18E-01 | 5.10E-01 | -5.84 |
| 1456821_PM_at   | ---             | NA       | -0.32 | 2.76 | -1.31 | 2.18E-01 | 5.10E-01 | -5.84 |
| 1435677_PM_at   | Pomgnt2         | POMGNT2  | -0.20 | 3.84 | -1.31 | 2.18E-01 | 5.10E-01 | -5.84 |
| 1438767_PM_at   | Osm             | OSM      | 0.19  | 2.55 | 1.31  | 2.18E-01 | 5.10E-01 | -5.84 |
| 1431793_PM_at   | ---             | NA       | 0.22  | 2.54 | 1.31  | 2.18E-01 | 5.10E-01 | -5.84 |
| 1444884_PM_at   | Ppt1            | NA       | -0.32 | 3.90 | -1.31 | 2.18E-01 | 5.10E-01 | -5.84 |
| 1439140_PM_at   | Tll8            | NA       | 0.17  | 2.60 | 1.31  | 2.18E-01 | 5.10E-01 | -5.84 |
| 1458525_PM_at   | ---             | NA       | 0.45  | 3.90 | 1.31  | 2.18E-01 | 5.10E-01 | -5.84 |
| 1455743_PM_at   | Olfml2a         | OLFML2A  | 0.20  | 2.46 | 1.31  | 2.18E-01 | 5.10E-01 | -5.84 |
| 1456987_PM_at   | Ccdc187         | CCDC187  | 0.14  | 2.83 | 1.31  | 2.18E-01 | 5.10E-01 | -5.84 |
| 1453672_PM_at   | Lonrf2          | LONRF2   | 0.22  | 3.08 | 1.31  | 2.18E-01 | 5.10E-01 | -5.84 |
| 1433471_PM_at   | Tcf7            | TCF7     | -0.15 | 3.17 | -1.31 | 2.18E-01 | 5.11E-01 | -5.84 |
| 1425963_PM_at   | Cabp7           | CABP7    | 0.20  | 2.36 | 1.31  | 2.18E-01 | 5.11E-01 | -5.84 |
| 1435640_PM_x_at | ---             | NA       | 0.43  | 6.89 | 1.31  | 2.18E-01 | 5.11E-01 | -5.84 |
| 1429584_PM_at   | Mynn            | MYNN     | 0.67  | 4.00 | 1.31  | 2.18E-01 | 5.11E-01 | -5.84 |
| 1458261_PM_at   | ---             | NA       | -0.20 | 3.59 | -1.31 | 2.18E-01 | 5.11E-01 | -5.84 |
| 1435458_PM_at   | Pim1            | PIM1     | 0.13  | 2.52 | 1.31  | 2.18E-01 | 5.11E-01 | -5.84 |
| 1452125_PM_at   | Thrap3          | THRAP3   | 0.53  | 3.26 | 1.31  | 2.18E-01 | 5.11E-01 | -5.84 |
| 1432559_PM_at   | 2210409D07Rik   | NA       | 0.15  | 2.50 | 1.31  | 2.18E-01 | 5.11E-01 | -5.84 |
| 1451563_PM_at   | Adgre4          | NA       | 0.14  | 2.18 | 1.31  | 2.18E-01 | 5.11E-01 | -5.84 |
| 1446064_PM_at   | ---             | NA       | -0.15 | 2.27 | -1.31 | 2.18E-01 | 5.11E-01 | -5.84 |
| 1421382_PM_at   | Prlr            | PRLR     | -0.12 | 2.32 | -1.31 | 2.18E-01 | 5.11E-01 | -5.84 |
| 1430608_PM_at   | ---             | NA       | 0.34  | 3.33 | 1.31  | 2.18E-01 | 5.11E-01 | -5.84 |
| 1423816_PM_at   | Cxx1a /// Cxx1b | RTL8A    | 0.17  | 2.86 | 1.31  | 2.18E-01 | 5.11E-01 | -5.84 |
| 1442276_PM_at   | ---             | NA       | 0.41  | 3.16 | 1.31  | 2.18E-01 | 5.11E-01 | -5.84 |
| 1428573_PM_at   | Chn2            | CHN2     | 0.53  | 2.76 | 1.31  | 2.18E-01 | 5.11E-01 | -5.84 |
| 1429620_PM_at   | Mgme1           | MGME1    | 0.14  | 2.39 | 1.31  | 2.18E-01 | 5.11E-01 | -5.84 |
| 1459408_PM_at   | ---             | NA       | 0.22  | 2.73 | 1.31  | 2.18E-01 | 5.11E-01 | -5.84 |
| 1432384_PM_a_at | Mettl6          | METTL6   | 0.22  | 2.91 | 1.31  | 2.18E-01 | 5.11E-01 | -5.84 |
| 1433885_PM_at   | Iqgap2          | IQGAP2   | -0.59 | 3.69 | -1.31 | 2.18E-01 | 5.11E-01 | -5.84 |
| 1434760_PM_at   | Lrrtm3          | LRRTM3   | 0.21  | 2.68 | 1.31  | 2.18E-01 | 5.11E-01 | -5.84 |
| 1418303_PM_at   | H2afb1          | NA       | 0.11  | 2.58 | 1.31  | 2.18E-01 | 5.11E-01 | -5.84 |
| 1418672_PM_at   | Akr1c13         | AKR1C2   | 0.11  | 2.28 | 1.31  | 2.18E-01 | 5.11E-01 | -5.84 |
| 1421053_PM_at   | Kif1a           | KIF1A    | 0.40  | 3.40 | 1.31  | 2.18E-01 | 5.11E-01 | -5.84 |
| 1427349_PM_x_at | Zfp931          | NA       | -0.29 | 5.56 | -1.31 | 2.18E-01 | 5.11E-01 | -5.84 |
| 1427167_PM_at   | Armxc4          | ARMCX4   | -0.25 | 2.98 | -1.31 | 2.18E-01 | 5.11E-01 | -5.84 |
| 1453087_PM_at   | ---             | NA       | -0.17 | 2.37 | -1.31 | 2.18E-01 | 5.11E-01 | -5.84 |
| 1445551_PM_at   | Nfrkb           | NFRKB    | 0.20  | 2.57 | 1.31  | 2.18E-01 | 5.11E-01 | -5.84 |
| 1435629_PM_at   | Hapln2          | NA       | 0.90  | 4.06 | 1.31  | 2.18E-01 | 5.11E-01 | -5.84 |
| 1424458_PM_at   | Kdm4c           | KDM4C    | -0.19 | 4.53 | -1.31 | 2.18E-01 | 5.11E-01 | -5.84 |
| 1417021_PM_a_at | Spo11           | SPO11    | 0.11  | 2.04 | 1.31  | 2.18E-01 | 5.11E-01 | -5.84 |
| 1429408_PM_at   | Tbc1d21         | TBC1D21  | 0.12  | 2.64 | 1.31  | 2.18E-01 | 5.11E-01 | -5.84 |
| 1430961_PM_at   | Zfp292          | ZNF292   | 0.17  | 2.20 | 1.31  | 2.18E-01 | 5.11E-01 | -5.84 |



|                 |               |            |       |      |       |          |          |       |
|-----------------|---------------|------------|-------|------|-------|----------|----------|-------|
| 1417523_PM_at   | Plek          | PLEK       | 0.19  | 2.75 | 1.31  | 2.18E-01 | 5.11E-01 | -5.84 |
| 1417521_PM_at   | EfnA2         | EFNA2      | 0.21  | 2.44 | 1.31  | 2.18E-01 | 5.11E-01 | -5.84 |
| 1448404_PM_at   | Scamp2        | SCAMP2     | 0.13  | 2.39 | 1.31  | 2.18E-01 | 5.11E-01 | -5.84 |
| 1449312_PM_at   | Npy5r         | NPY5R      | -0.17 | 2.82 | -1.31 | 2.18E-01 | 5.11E-01 | -5.84 |
| 1453912_PM_at   | Zfp558        | ZNF558     | -0.14 | 2.41 | -1.31 | 2.18E-01 | 5.11E-01 | -5.85 |
| 1426217_PM_at   | Tmem216       | TMEM216    | -0.12 | 2.48 | -1.31 | 2.18E-01 | 5.11E-01 | -5.85 |
| 1425891_PM_a_at | Grtp1         | GRTP1      | 0.11  | 2.50 | 1.31  | 2.18E-01 | 5.11E-01 | -5.85 |
| 1448597_PM_at   | Cstf1         | CSTF1      | 0.18  | 3.07 | 1.31  | 2.19E-01 | 5.11E-01 | -5.85 |
| 1457220_PM_at   | Rsu1          | RSU1       | 0.18  | 2.72 | 1.31  | 2.19E-01 | 5.11E-01 | -5.85 |
| 1432876_PM_at   | 4632418H02Rik | NA         | 0.27  | 3.50 | 1.31  | 2.19E-01 | 5.11E-01 | -5.85 |
| 1458503_PM_at   | Bcl7a         | BCL7A      | 0.14  | 2.40 | 1.31  | 2.19E-01 | 5.11E-01 | -5.85 |
| 1446926_PM_at   | Pycard        | NA         | 0.16  | 2.40 | 1.31  | 2.19E-01 | 5.11E-01 | -5.85 |
| 1460079_PM_at   | Ttc5          | NA         | 0.22  | 2.97 | 1.31  | 2.19E-01 | 5.11E-01 | -5.85 |
| 1438616_PM_x_at | Svs5          | NA         | 0.11  | 2.26 | 1.31  | 2.19E-01 | 5.11E-01 | -5.85 |
| 1430194_PM_at   | Ptx4          | PTX4       | 0.11  | 2.11 | 1.31  | 2.19E-01 | 5.11E-01 | -5.85 |
| 1459015_PM_at   | ---           | NA         | 0.14  | 2.40 | 1.31  | 2.19E-01 | 5.11E-01 | -5.85 |
| 1433455_PM_at   | Sh2b3         | SH2B3      | 0.19  | 2.53 | 1.31  | 2.19E-01 | 5.11E-01 | -5.85 |
| 1445497_PM_at   | ---           | NA         | 0.22  | 2.39 | 1.31  | 2.19E-01 | 5.11E-01 | -5.85 |
| 1454930_PM_at   | Tbcel         | TBCEL      | 0.35  | 3.72 | 1.31  | 2.19E-01 | 5.11E-01 | -5.85 |
| 1419421_PM_at   | Ank1          | ANK1       | 0.77  | 4.95 | 1.31  | 2.19E-01 | 5.11E-01 | -5.85 |
| 1458039_PM_at   | ---           | NA         | -0.67 | 3.50 | -1.31 | 2.19E-01 | 5.12E-01 | -5.85 |
| 1419083_PM_at   | Tnfsf11       | TNFSF11    | -0.20 | 2.00 | -1.31 | 2.19E-01 | 5.12E-01 | -5.85 |
| 1420247_PM_at   | Glb1l         | GLB1L      | 0.10  | 2.21 | 1.31  | 2.19E-01 | 5.12E-01 | -5.85 |
| 1457566_PM_at   | Zfp677        | NA         | 0.12  | 2.10 | 1.31  | 2.19E-01 | 5.12E-01 | -5.85 |
| 1451750_PM_at   | Irak4         | IRAK4      | 0.13  | 2.04 | 1.31  | 2.19E-01 | 5.12E-01 | -5.85 |
| 1423255_PM_at   | Atp6v1g1      | ATP6V1G1   | 0.29  | 5.34 | 1.31  | 2.19E-01 | 5.12E-01 | -5.85 |
| 1439284_PM_at   | Epb415        | EPB41L5    | 0.27  | 4.40 | 1.31  | 2.19E-01 | 5.12E-01 | -5.85 |
| 1426381_PM_at   | Pprc1         | PPRC1      | 0.26  | 3.10 | 1.31  | 2.19E-01 | 5.12E-01 | -5.85 |
| 1435328_PM_at   | Cyhr1         | CYHR1      | -0.31 | 3.24 | -1.31 | 2.19E-01 | 5.12E-01 | -5.85 |
| 1424036_PM_at   | Prpf6         | PRPF6      | -0.18 | 3.55 | -1.31 | 2.19E-01 | 5.12E-01 | -5.85 |
| 1446039_PM_at   | ---           | NA         | 0.13  | 2.66 | 1.31  | 2.19E-01 | 5.12E-01 | -5.85 |
| 1420215_PM_x_at | 1810012K16Rik | NA         | 0.16  | 2.71 | 1.31  | 2.19E-01 | 5.12E-01 | -5.85 |
| 1441541_PM_at   | ---           | NA         | 0.34  | 2.69 | 1.31  | 2.19E-01 | 5.12E-01 | -5.85 |
| 1421350_PM_a_at | Grip1         | GRI1       | 0.38  | 3.52 | 1.31  | 2.19E-01 | 5.12E-01 | -5.85 |
| 1442866_PM_at   | Rcsd1         | RCS1       | 0.14  | 2.86 | 1.31  | 2.19E-01 | 5.12E-01 | -5.85 |
| 1439031_PM_at   | Jph4          | JPH4       | -0.68 | 5.50 | -1.31 | 2.19E-01 | 5.12E-01 | -5.85 |
| 1459192_PM_at   | ---           | NA         | -0.11 | 2.92 | -1.31 | 2.19E-01 | 5.12E-01 | -5.85 |
| 1422145_PM_at   | Mgat3         | MGAT3      | 0.15  | 2.21 | 1.31  | 2.19E-01 | 5.12E-01 | -5.85 |
| 1443347_PM_at   | ---           | NA         | 0.11  | 2.01 | 1.31  | 2.19E-01 | 5.12E-01 | -5.85 |
| 1434290_PM_at   | Gtdc1         | GTDC1      | -0.35 | 3.25 | -1.31 | 2.19E-01 | 5.12E-01 | -5.85 |
| 1422294_PM_at   | Xcr1          | XCR1       | 0.14  | 2.29 | 1.31  | 2.19E-01 | 5.12E-01 | -5.85 |
| 1449727_PM_x_at | ---           | NA         | 0.14  | 3.06 | 1.31  | 2.19E-01 | 5.12E-01 | -5.85 |
| 1421799_PM_at   | Uts2          | UTS2       | -0.14 | 2.56 | -1.31 | 2.19E-01 | 5.12E-01 | -5.85 |
| 1447228_PM_at   | Arfgap2       | ARFGAP2    | 0.15  | 2.32 | 1.31  | 2.19E-01 | 5.12E-01 | -5.85 |
| 1424761_PM_at   | Tcaf2         | AC073264.3 | -0.11 | 2.61 | -1.31 | 2.19E-01 | 5.12E-01 | -5.85 |
| 1434867_PM_at   | Slc4a11       | SLC4A11    | 0.13  | 2.23 | 1.31  | 2.19E-01 | 5.12E-01 | -5.85 |
| 1432258_PM_at   | 9430014N10Rik | NA         | 0.19  | 2.26 | 1.31  | 2.19E-01 | 5.12E-01 | -5.85 |
| 1440387_PM_at   | Gm40469       | NA         | 0.33  | 3.95 | 1.31  | 2.19E-01 | 5.12E-01 | -5.85 |
| 1443851_PM_at   | Ppp4r4        | PPP4R4     | 0.27  | 3.32 | 1.31  | 2.19E-01 | 5.12E-01 | -5.85 |
| 1418704_PM_at   | S100a13       | S100A13    | 0.23  | 4.36 | 1.31  | 2.19E-01 | 5.12E-01 | -5.85 |
| 1437434_PM_a_at | Wls           | WLS        | -0.17 | 2.62 | -1.31 | 2.19E-01 | 5.12E-01 | -5.85 |
| 1428683_PM_at   | Fam173b       | FAM173B    | 0.12  | 2.43 | 1.31  | 2.19E-01 | 5.12E-01 | -5.85 |
| 1447613_PM_at   | Gdi1          | NA         | 0.13  | 2.38 | 1.31  | 2.19E-01 | 5.12E-01 | -5.85 |
| 1449456_PM_a_at | Cma1          | CMA1       | 0.14  | 2.21 | 1.31  | 2.19E-01 | 5.12E-01 | -5.85 |
| 1455780_PM_at   | Tll6          | TLL6       | 0.14  | 2.69 | 1.31  | 2.19E-01 | 5.12E-01 | -5.85 |
| 1431463_PM_at   | Ccdc30        | CCDC30     | 0.15  | 2.50 | 1.31  | 2.19E-01 | 5.12E-01 | -5.85 |
| 1423454_PM_a_at | Sema6c        | SEMA6C     | 0.18  | 3.16 | 1.31  | 2.19E-01 | 5.12E-01 | -5.85 |
| 1425208_PM_at   | Lbh           | LBH        | 0.20  | 3.48 | 1.31  | 2.19E-01 | 5.12E-01 | -5.85 |
| 1456580_PM_s_at | Atp5d         | ATP5D      | -0.49 | 6.82 | -1.31 | 2.19E-01 | 5.12E-01 | -5.85 |
| 1447679_PM_s_at | Bms1          | BMS1       | -0.32 | 7.38 | -1.31 | 2.20E-01 | 5.12E-01 | -5.85 |
| 1450057_PM_at   | Sys1          | NA         | 0.32  | 4.01 | 1.31  | 2.20E-01 | 5.12E-01 | -5.85 |
| 1445466_PM_at   | Map6d1        | NA         | 0.11  | 2.43 | 1.31  | 2.20E-01 | 5.12E-01 | -5.85 |
| 1420923_PM_at   | Usp9x         | USP9X      | -0.31 | 4.78 | -1.31 | 2.20E-01 | 5.13E-01 | -5.85 |
| 1443132_PM_at   | ---           | NA         | 0.14  | 2.24 | 1.31  | 2.20E-01 | 5.13E-01 | -5.85 |
| 1427469_PM_at   | Helz          | HELZ       | -0.50 | 3.02 | -1.31 | 2.20E-01 | 5.13E-01 | -5.85 |
| 1433900_PM_at   | Tmem248       | TMEM248    | -0.41 | 3.39 | -1.31 | 2.20E-01 | 5.13E-01 | -5.85 |
| 1446348_PM_at   | ---           | NA         | 0.14  | 2.43 | 1.31  | 2.20E-01 | 5.13E-01 | -5.85 |
| 1460745_PM_at   | Trdv2-2       | NA         | 0.19  | 2.21 | 1.31  | 2.20E-01 | 5.13E-01 | -5.85 |
| 1430622_PM_at   | ---           | NA         | 0.21  | 2.37 | 1.31  | 2.20E-01 | 5.13E-01 | -5.85 |
| 1455858_PM_x_at | Pomc          | POMC       | 0.40  | 3.10 | 1.31  | 2.20E-01 | 5.13E-01 | -5.85 |
| 1456805_PM_a_at | Ppp4r1-ps     | NA         | -0.18 | 2.04 | -1.31 | 2.20E-01 | 5.13E-01 | -5.85 |
| 1436811_PM_at   | Kctd3         | KCTD3      | -0.18 | 2.67 | -1.31 | 2.20E-01 | 5.13E-01 | -5.85 |
| 1418646_PM_at   | Gnl1          | GNL1       | 0.15  | 4.83 | 1.31  | 2.20E-01 | 5.13E-01 | -5.85 |
| 1442773_PM_at   | ---           | NA         | 0.13  | 2.33 | 1.31  | 2.20E-01 | 5.13E-01 | -5.85 |
| 1429268_PM_at   | 2610318N02Rik | NA         | 0.13  | 2.30 | 1.31  | 2.20E-01 | 5.13E-01 | -5.85 |

|                 |                    |          |       |       |       |          |          |       |
|-----------------|--------------------|----------|-------|-------|-------|----------|----------|-------|
| 1457647_PM_x_at | 1600023N17Rik      | NA       | 0.16  | 3.41  | 1.31  | 2.20E-01 | 5.13E-01 | -5.85 |
| 1453705_PM_at   | B230110C06Rik      | NA       | 0.18  | 2.70  | 1.31  | 2.20E-01 | 5.13E-01 | -5.85 |
| 1430360_PM_at   | ---                | NA       | 0.20  | 2.46  | 1.31  | 2.20E-01 | 5.13E-01 | -5.85 |
| 1425455_PM_a_at | Churc1             | CHURC1   | -0.30 | 4.30  | -1.30 | 2.20E-01 | 5.13E-01 | -5.85 |
| 1436234_PM_at   | Simc1              | SIMC1    | -0.20 | 2.39  | -1.30 | 2.20E-01 | 5.13E-01 | -5.85 |
| 1442383_PM_at   | ---                | NA       | 0.13  | 2.15  | 1.30  | 2.20E-01 | 5.13E-01 | -5.85 |
| 1426907_PM_s_at | Dhx57              | DHX57    | 0.15  | 2.69  | 1.30  | 2.20E-01 | 5.13E-01 | -5.85 |
| 1425850_PM_a_at | Nek6               | NEK6     | 0.22  | 2.74  | 1.30  | 2.20E-01 | 5.13E-01 | -5.85 |
| 1420110_PM_s_at | Zfp334             | ZNF334   | 0.24  | 4.02  | 1.30  | 2.20E-01 | 5.13E-01 | -5.85 |
| 1452101_PM_at   | Blmh               | BLMH     | 0.33  | 4.03  | 1.30  | 2.20E-01 | 5.13E-01 | -5.85 |
| 1423292_PM_a_at | Prx                | PRX      | 0.16  | 2.27  | 1.30  | 2.20E-01 | 5.13E-01 | -5.85 |
| 1443604_PM_at   | ---                | NA       | 0.84  | 3.62  | 1.30  | 2.20E-01 | 5.13E-01 | -5.85 |
| 1418375_PM_at   | Mbd6               | MBD6     | 0.72  | 5.59  | 1.30  | 2.20E-01 | 5.13E-01 | -5.85 |
| 1458381_PM_at   | Clic5              | CLIC5    | 0.14  | 2.41  | 1.30  | 2.20E-01 | 5.14E-01 | -5.85 |
| 1426874_PM_at   | Edc4               | EDC4     | 0.26  | 5.26  | 1.30  | 2.20E-01 | 5.14E-01 | -5.85 |
| 1445746_PM_at   | Eif4h              | EIF4H    | 0.39  | 2.30  | 1.30  | 2.20E-01 | 5.14E-01 | -5.85 |
| 1424609_PM_a_at | Cwc22 /// Xdh      | NA       | 0.19  | 10.60 | 1.30  | 2.20E-01 | 5.14E-01 | -5.85 |
| 1427259_PM_at   | Trim24             | NA       | -0.20 | 2.51  | -1.30 | 2.20E-01 | 5.14E-01 | -5.85 |
| 1420521_PM_at   | Papln              | PAPLN    | 0.18  | 2.59  | 1.30  | 2.20E-01 | 5.14E-01 | -5.85 |
| 1446051_PM_at   | Gm1140 /// Gm14692 | NA       | 0.12  | 2.18  | 1.30  | 2.20E-01 | 5.14E-01 | -5.85 |
| 1440869_PM_x_at | 6720489N17Rik      | NA       | 0.19  | 2.51  | 1.30  | 2.21E-01 | 5.14E-01 | -5.85 |
| 1417551_PM_at   | Cln3               | CLN3     | 0.23  | 2.41  | 1.30  | 2.21E-01 | 5.14E-01 | -5.85 |
| 1426989_PM_at   | Clstn3             | CLSTN3   | -0.28 | 4.51  | -1.30 | 2.21E-01 | 5.14E-01 | -5.85 |
| 1441249_PM_at   | 4930403D09Rik      | NA       | 0.10  | 2.23  | 1.30  | 2.21E-01 | 5.14E-01 | -5.85 |
| 1450608_PM_at   | Hist1h1t           | HIST1H1T | 0.14  | 2.98  | 1.30  | 2.21E-01 | 5.14E-01 | -5.85 |
| 1436157_PM_at   | Ccar1              | CCAR1    | 0.43  | 7.78  | 1.30  | 2.21E-01 | 5.14E-01 | -5.85 |
| 1443496_PM_at   | ---                | NA       | 0.15  | 3.33  | 1.30  | 2.21E-01 | 5.14E-01 | -5.85 |
| 1419343_PM_at   | Slc15a1            | SLC15A1  | -0.11 | 2.39  | -1.30 | 2.21E-01 | 5.14E-01 | -5.85 |
| 1451889_PM_at   | Notch2             | NOTCH2   | 0.23  | 2.79  | 1.30  | 2.21E-01 | 5.14E-01 | -5.85 |
| 1439773_PM_at   | Ly6e               | LY6E     | 0.28  | 3.17  | 1.30  | 2.21E-01 | 5.14E-01 | -5.85 |
| 1442356_PM_at   | Mga                | MGA      | -0.21 | 2.58  | -1.30 | 2.21E-01 | 5.14E-01 | -5.85 |
| 1420722_PM_at   | Elov3              | ELOVL3   | -0.12 | 2.25  | -1.30 | 2.21E-01 | 5.14E-01 | -5.85 |
| 1443235_PM_at   | Eif2ak4            | EIF2AK4  | 0.14  | 2.33  | 1.30  | 2.21E-01 | 5.14E-01 | -5.85 |
| 1433673_PM_at   | E130309D14Rik      | NA       | 0.25  | 2.35  | 1.30  | 2.21E-01 | 5.14E-01 | -5.85 |
| 1427689_PM_a_at | Tnip1              | TNIP1    | -0.27 | 3.86  | -1.30 | 2.21E-01 | 5.14E-01 | -5.85 |
| 1424599_PM_at   | Fgl1               | FGL1     | 0.11  | 2.55  | 1.30  | 2.21E-01 | 5.14E-01 | -5.85 |
| 1455530_PM_at   | Ighd               | NA       | 0.11  | 2.24  | 1.30  | 2.21E-01 | 5.14E-01 | -5.85 |
| 1453219_PM_a_at | Tdrd12             | TDRD12   | 0.12  | 2.53  | 1.30  | 2.21E-01 | 5.14E-01 | -5.85 |
| 1443420_PM_at   | ---                | NA       | 0.20  | 2.46  | 1.30  | 2.21E-01 | 5.14E-01 | -5.85 |
| 1457676_PM_at   | Tirap              | TIRAP    | 0.20  | 2.80  | 1.30  | 2.21E-01 | 5.14E-01 | -5.85 |
| 1452706_PM_a_at | Dennd6b            | DENND6B  | 0.26  | 3.03  | 1.30  | 2.21E-01 | 5.14E-01 | -5.85 |
| 1434203_PM_at   | Fam107a            | FAM107A  | -0.59 | 5.43  | -1.30 | 2.21E-01 | 5.14E-01 | -5.85 |
| 1433677_PM_at   | Sfswap             | SFSWAP   | 0.21  | 2.52  | 1.30  | 2.21E-01 | 5.14E-01 | -5.85 |
| 1423268_PM_at   | Irga5              | ITGA5    | 0.16  | 2.49  | 1.30  | 2.21E-01 | 5.14E-01 | -5.85 |
| 1446286_PM_at   | ---                | NA       | -0.34 | 2.27  | -1.30 | 2.21E-01 | 5.14E-01 | -5.85 |
| 1423861_PM_at   | Plekhf2            | PLEKHF2  | 0.18  | 2.19  | 1.30  | 2.21E-01 | 5.14E-01 | -5.85 |
| 1450529_PM_at   | H2-M9              | HLA-A    | 0.19  | 2.94  | 1.30  | 2.21E-01 | 5.14E-01 | -5.85 |
| 1459141_PM_at   | 1810008118Rik      | NA       | 0.22  | 2.93  | 1.30  | 2.21E-01 | 5.14E-01 | -5.85 |
| 1432114_PM_at   | 1110035E04Rik      | NA       | 0.17  | 2.48  | 1.30  | 2.21E-01 | 5.14E-01 | -5.85 |
| 1438036_PM_x_at | Rmdn2              | RMDN2    | -0.13 | 1.99  | -1.30 | 2.21E-01 | 5.14E-01 | -5.85 |
| 1436589_PM_x_at | Prkd2              | PRKD2    | -0.15 | 2.58  | -1.30 | 2.21E-01 | 5.14E-01 | -5.85 |
| 1442470_PM_at   | ---                | NA       | 0.12  | 1.99  | 1.30  | 2.21E-01 | 5.14E-01 | -5.85 |
| 1429511_PM_at   | 4933402E13Rik      | NA       | 0.17  | 2.36  | 1.30  | 2.21E-01 | 5.14E-01 | -5.85 |
| 1432003_PM_a_at | Rnf41              | RNF41    | 0.22  | 3.37  | 1.30  | 2.21E-01 | 5.14E-01 | -5.85 |
| 1421102_PM_a_at | Vamp3              | VAMP3    | 0.44  | 2.86  | 1.30  | 2.21E-01 | 5.14E-01 | -5.85 |
| 1455168_PM_a_at | Gnb2l1             | RACK1    | -0.53 | 5.76  | -1.30 | 2.21E-01 | 5.14E-01 | -5.85 |
| 1421832_PM_at   | Twsg1              | TWSG1    | -0.48 | 3.73  | -1.30 | 2.21E-01 | 5.14E-01 | -5.86 |
| 1428908_PM_at   | Rbm25              | RBM25    | -0.40 | 3.48  | -1.30 | 2.21E-01 | 5.14E-01 | -5.86 |
| 1425739_PM_at   | Pld1               | PLD1     | -0.28 | 2.16  | -1.30 | 2.21E-01 | 5.14E-01 | -5.86 |
| 1454668_PM_at   | Ubr4               | UBR4     | -0.24 | 5.11  | -1.30 | 2.21E-01 | 5.14E-01 | -5.86 |
| 1446573_PM_at   | ---                | NA       | -0.20 | 2.70  | -1.30 | 2.21E-01 | 5.14E-01 | -5.86 |
| 1437831_PM_at   | Zcchc4             | ZCCHC4   | 0.10  | 2.18  | 1.30  | 2.21E-01 | 5.14E-01 | -5.86 |
| 1450171_PM_x_at | Gzme               | GZMB     | 0.11  | 1.95  | 1.30  | 2.21E-01 | 5.14E-01 | -5.86 |
| 1419415_PM_a_at | Rarg               | RARG     | 0.12  | 2.03  | 1.30  | 2.21E-01 | 5.14E-01 | -5.86 |
| 1424155_PM_at   | Fabp4              | FABP4    | 0.13  | 2.20  | 1.30  | 2.21E-01 | 5.14E-01 | -5.86 |
| 1430867_PM_at   | ---                | NA       | 0.13  | 2.12  | 1.30  | 2.21E-01 | 5.14E-01 | -5.85 |
| 1441398_PM_at   | ---                | NA       | 0.14  | 2.50  | 1.30  | 2.21E-01 | 5.14E-01 | -5.86 |
| 1429576_PM_at   | Ms4a13             | MS4A13   | 0.15  | 2.25  | 1.30  | 2.21E-01 | 5.14E-01 | -5.86 |
| 1453758_PM_at   | Ccdc34             | CCDC34   | 0.16  | 2.02  | 1.30  | 2.21E-01 | 5.14E-01 | -5.86 |
| 1422733_PM_at   | Fjx1               | FJX1     | 0.17  | 2.29  | 1.30  | 2.21E-01 | 5.14E-01 | -5.86 |
| 1438502_PM_x_at | Rps17              | RPS17    | 0.26  | 4.48  | 1.30  | 2.21E-01 | 5.14E-01 | -5.86 |
| 1457355_PM_at   | Pnpla8             | NA       | -0.36 | 3.58  | -1.30 | 2.22E-01 | 5.15E-01 | -5.86 |
| 1428804_PM_at   | Mfap3l             | MFAP3L   | -0.17 | 4.28  | -1.30 | 2.22E-01 | 5.15E-01 | -5.86 |
| 1437960_PM_at   | Capn13             | CAPN13   | 0.17  | 2.44  | 1.30  | 2.22E-01 | 5.15E-01 | -5.86 |
| 1423384_PM_s_at | Tex261             | TEX261   | 0.18  | 2.42  | 1.30  | 2.21E-01 | 5.15E-01 | -5.86 |

|                 |                                                                                                                                                                                       |            |       |      |       |          |          |       |
|-----------------|---------------------------------------------------------------------------------------------------------------------------------------------------------------------------------------|------------|-------|------|-------|----------|----------|-------|
| 1422717_PM_at   | Acpi1///LOC102642088                                                                                                                                                                  | ACP1       | 0.20  | 2.61 | 1.30  | 2.22E-01 | 5.15E-01 | -5.86 |
| 1428044_PM_at   | Ap3s2                                                                                                                                                                                 | NA         | 0.12  | 2.22 | 1.30  | 2.22E-01 | 5.15E-01 | -5.86 |
| 1453256_PM_at   | Polr3c                                                                                                                                                                                | POLR3C     | -0.29 | 3.05 | -1.30 | 2.22E-01 | 5.15E-01 | -5.86 |
| 1419117_PM_at   | Slc22a2                                                                                                                                                                               | SLC22A2    | 0.18  | 3.32 | 1.30  | 2.22E-01 | 5.15E-01 | -5.86 |
| 1429708_PM_at   | Gm4943///Ndufa11                                                                                                                                                                      | ACO24592.3 | -0.27 | 3.83 | -1.30 | 2.22E-01 | 5.15E-01 | -5.86 |
| 1422729_PM_at   | Pcdhb10                                                                                                                                                                               | NA         | -0.42 | 3.51 | -1.30 | 2.22E-01 | 5.15E-01 | -5.86 |
| 1421978_PM_at   | Gad2                                                                                                                                                                                  | GAD2       | 0.63  | 5.19 | 1.30  | 2.22E-01 | 5.15E-01 | -5.86 |
| 1458945_PM_at   | AU015148                                                                                                                                                                              | NA         | 0.12  | 1.91 | 1.30  | 2.22E-01 | 5.15E-01 | -5.86 |
| 1441242_PM_at   | ---                                                                                                                                                                                   | NA         | 0.12  | 2.41 | 1.30  | 2.22E-01 | 5.15E-01 | -5.86 |
| 1433975_PM_at   | Cdk10                                                                                                                                                                                 | CDK10      | 0.37  | 4.87 | 1.30  | 2.22E-01 | 5.15E-01 | -5.86 |
| 1431986_PM_at   | ---                                                                                                                                                                                   | NA         | 0.14  | 2.15 | 1.30  | 2.22E-01 | 5.15E-01 | -5.86 |
| 1428553_PM_at   | GlrX5                                                                                                                                                                                 | GLRX5      | -0.35 | 3.29 | -1.30 | 2.22E-01 | 5.15E-01 | -5.86 |
| 1450606_PM_at   | Pnmt                                                                                                                                                                                  | PNMT       | 0.12  | 2.24 | 1.30  | 2.22E-01 | 5.15E-01 | -5.86 |
| 1418378_PM_at   | Bpifb2                                                                                                                                                                                | BPIFB2     | 0.13  | 2.35 | 1.30  | 2.22E-01 | 5.15E-01 | -5.86 |
| 1445264_PM_at   | Catsper2                                                                                                                                                                              | CATSPER2   | 0.14  | 2.42 | 1.30  | 2.22E-01 | 5.15E-01 | -5.86 |
| 1421488_PM_at   | Rabgap1l                                                                                                                                                                              | RABGAP1L   | 0.24  | 3.16 | 1.30  | 2.22E-01 | 5.15E-01 | -5.86 |
| 1425152_PM_s_at | Serpini2                                                                                                                                                                              | SERPINI2   | 0.14  | 2.54 | 1.30  | 2.22E-01 | 5.15E-01 | -5.86 |
| 1423382_PM_a_at | Hnrnpf                                                                                                                                                                                | HNRNPF     | 0.25  | 5.80 | 1.30  | 2.22E-01 | 5.15E-01 | -5.86 |
| 1447913_PM_x_at | Akap9                                                                                                                                                                                 | AKAP9      | 0.26  | 6.35 | 1.30  | 2.22E-01 | 5.15E-01 | -5.86 |
| 1415889_PM_a_at | Hsp90b1                                                                                                                                                                               | HSP90B1    | -0.33 | 8.86 | -1.30 | 2.22E-01 | 5.15E-01 | -5.86 |
| 1427720_PM_a_at | Rrp1                                                                                                                                                                                  | RRP1       | 0.35  | 7.66 | 1.30  | 2.22E-01 | 5.15E-01 | -5.86 |
| 1432244_PM_at   | 4930507D10Rik                                                                                                                                                                         | NA         | 0.10  | 2.01 | 1.30  | 2.22E-01 | 5.15E-01 | -5.86 |
| 1442454_PM_at   | Top2a                                                                                                                                                                                 | TOP2A      | 0.17  | 2.86 | 1.30  | 2.22E-01 | 5.15E-01 | -5.86 |
| 1454031_PM_at   | ---                                                                                                                                                                                   | NA         | 0.25  | 2.75 | 1.30  | 2.22E-01 | 5.15E-01 | -5.86 |
| 1421680_PM_at   | ---                                                                                                                                                                                   | NA         | 0.18  | 2.76 | 1.30  | 2.22E-01 | 5.15E-01 | -5.86 |
| 1420893_PM_a_at | Tgfb1                                                                                                                                                                                 | TGFBR1     | 0.14  | 2.81 | 1.30  | 2.22E-01 | 5.15E-01 | -5.86 |
| 1454864_PM_at   | Zfp592                                                                                                                                                                                | ZNF592     | 0.18  | 2.66 | 1.30  | 2.22E-01 | 5.15E-01 | -5.86 |
| 1447357_PM_at   | ---                                                                                                                                                                                   | NA         | 0.21  | 2.46 | 1.30  | 2.22E-01 | 5.15E-01 | -5.86 |
| 1439510_PM_at   | Sgol1                                                                                                                                                                                 | SGO1       | 0.16  | 2.39 | 1.30  | 2.22E-01 | 5.15E-01 | -5.86 |
| 1437382_PM_at   | Acvr2a                                                                                                                                                                                | ACVR2A     | -0.36 | 6.31 | -1.30 | 2.22E-01 | 5.15E-01 | -5.86 |
| 1430872_PM_at   | 4930412O13Rik                                                                                                                                                                         | NA         | 0.13  | 2.29 | 1.30  | 2.22E-01 | 5.15E-01 | -5.86 |
| 1421050_PM_at   | Vps25                                                                                                                                                                                 | VPS25      | -0.54 | 5.50 | -1.30 | 2.22E-01 | 5.15E-01 | -5.86 |
| 1439844_PM_at   | 8430426J06Rik                                                                                                                                                                         | NA         | 0.11  | 3.44 | 1.30  | 2.22E-01 | 5.15E-01 | -5.86 |
| 1458768_PM_at   | ---                                                                                                                                                                                   | NA         | 0.13  | 2.42 | 1.30  | 2.22E-01 | 5.15E-01 | -5.86 |
| 1450241_PM_a_at | Evi2a                                                                                                                                                                                 | AC134669.2 | 0.17  | 2.90 | 1.30  | 2.22E-01 | 5.15E-01 | -5.86 |
| 1440548_PM_at   | ---                                                                                                                                                                                   | NA         | 0.25  | 2.74 | 1.30  | 2.22E-01 | 5.15E-01 | -5.86 |
| 1448604_PM_at   | Uck2                                                                                                                                                                                  | UCK2       | 0.31  | 2.84 | 1.30  | 2.22E-01 | 5.15E-01 | -5.86 |
| 1429857_PM_at   | 2900092D14Rik///Pou3f3                                                                                                                                                                | POU3F3     | 0.33  | 4.18 | 1.30  | 2.22E-01 | 5.15E-01 | -5.86 |
| 1454152_PM_a_at | Grk4                                                                                                                                                                                  | GRK4       | 0.39  | 2.63 | 1.30  | 2.22E-01 | 5.15E-01 | -5.86 |
| 1448488_PM_at   | Mrp5                                                                                                                                                                                  | MRP5       | 0.14  | 2.78 | 1.30  | 2.22E-01 | 5.16E-01 | -5.86 |
| 1427096_PM_s_at | Ssr4                                                                                                                                                                                  | SSR4       | 0.31  | 2.68 | 1.30  | 2.22E-01 | 5.16E-01 | -5.86 |
| 1445824_PM_at   | Zfp458                                                                                                                                                                                | ZNF458     | -0.35 | 2.69 | -1.30 | 2.22E-01 | 5.16E-01 | -5.86 |
| 1450194_PM_a_at | Myb                                                                                                                                                                                   | MYB        | 0.12  | 2.39 | 1.30  | 2.22E-01 | 5.16E-01 | -5.86 |
| 1421786_PM_at   | Ppp3r1                                                                                                                                                                                | ACO17083.4 | -0.16 | 3.43 | -1.30 | 2.23E-01 | 5.16E-01 | -5.86 |
| 1431542_PM_at   | Psen2                                                                                                                                                                                 | PSEN2      | 0.14  | 2.96 | 1.30  | 2.23E-01 | 5.16E-01 | -5.86 |
| 1431190_PM_x_at | Fahd2a                                                                                                                                                                                | FAHD2B     | 0.21  | 3.03 | 1.30  | 2.23E-01 | 5.16E-01 | -5.86 |
| 1440906_PM_at   | ---                                                                                                                                                                                   | NA         | 0.12  | 2.30 | 1.30  | 2.23E-01 | 5.16E-01 | -5.86 |
| 1451380_PM_at   | Zfyve19                                                                                                                                                                               | ZFYVE19    | 0.20  | 3.73 | 1.30  | 2.23E-01 | 5.16E-01 | -5.86 |
| 1428782_PM_a_at | Uqcr1                                                                                                                                                                                 | UQCRC1     | -0.34 | 4.43 | -1.30 | 2.23E-01 | 5.16E-01 | -5.86 |
| 1433633_PM_at   | Irf2bp2                                                                                                                                                                               | IRF2BP2    | 0.27  | 8.36 | 1.30  | 2.23E-01 | 5.16E-01 | -5.86 |
| 1417494_PM_a_at | Cp                                                                                                                                                                                    | CP         | -0.49 | 2.85 | -1.30 | 2.23E-01 | 5.16E-01 | -5.86 |
| 1448345_PM_at   | Tomm34                                                                                                                                                                                | TOMM34     | -0.22 | 4.95 | -1.30 | 2.23E-01 | 5.16E-01 | -5.86 |
| 1445808_PM_at   | ---                                                                                                                                                                                   | NA         | -0.10 | 2.18 | -1.30 | 2.23E-01 | 5.16E-01 | -5.86 |
| 1423981_PM_x_at | Slc25a29                                                                                                                                                                              | SLC25A29   | 0.11  | 2.40 | 1.30  | 2.23E-01 | 5.16E-01 | -5.86 |
| 1430744_PM_at   | Napsa                                                                                                                                                                                 | NAPSA      | 0.12  | 2.31 | 1.30  | 2.23E-01 | 5.16E-01 | -5.86 |
| 1440687_PM_at   | Gm11476                                                                                                                                                                               | NA         | 0.13  | 2.58 | 1.30  | 2.23E-01 | 5.16E-01 | -5.86 |
| 1458276_PM_x_at | Cit                                                                                                                                                                                   | CIT        | 0.16  | 2.65 | 1.30  | 2.23E-01 | 5.16E-01 | -5.86 |
| 1418164_PM_at   | Stx2                                                                                                                                                                                  | STX2       | 0.19  | 3.57 | 1.30  | 2.23E-01 | 5.16E-01 | -5.86 |
| 1455596_PM_a_at | BC029214                                                                                                                                                                              | C9orf142   | 0.28  | 5.47 | 1.30  | 2.23E-01 | 5.16E-01 | -5.86 |
| 1438738_PM_at   | ---                                                                                                                                                                                   | NA         | 0.38  | 3.26 | 1.30  | 2.23E-01 | 5.16E-01 | -5.86 |
| 1418735_PM_at   | Krt4                                                                                                                                                                                  | KRT4       | 0.18  | 2.17 | 1.30  | 2.23E-01 | 5.16E-01 | -5.86 |
| 1421450_PM_a_at | Map3k4                                                                                                                                                                                | MAP3K4     | 0.20  | 2.82 | 1.30  | 2.23E-01 | 5.16E-01 | -5.86 |
| 1459631_PM_at   | Rps12///Rps12-ps10///Rps12-ps11///Rps12-ps12///Rps12-ps13///Rps12-ps14///Rps12-ps15///Rps12-ps16///Rps12-ps17///Rps12-ps18///Rps12-ps24///Rps12-ps5///Rps12-ps6///Rps12-ps9///Rps12l1 | RPS12      | 0.12  | 2.15 | 1.30  | 2.23E-01 | 5.16E-01 | -5.86 |
| 1452046_PM_a_at | Gm5601///Ppp1cc                                                                                                                                                                       | PPP1CC     | -0.34 | 4.40 | -1.30 | 2.23E-01 | 5.16E-01 | -5.86 |
| 1423970_PM_at   | Thoc3                                                                                                                                                                                 | THOC3      | 0.32  | 4.59 | 1.30  | 2.23E-01 | 5.17E-01 | -5.86 |
| 1425409_PM_at   | Chrna2                                                                                                                                                                                | CHRNA2     | 0.13  | 2.15 | 1.30  | 2.23E-01 | 5.17E-01 | -5.86 |

|                 |               |          |       |      |       |          |          |       |
|-----------------|---------------|----------|-------|------|-------|----------|----------|-------|
| 1454515_PM_at   | 5430425E15Rik | NA       | 0.21  | 2.21 | 1.30  | 2.23E-01 | 5.17E-01 | -5.86 |
| 1452373_PM_at   | Kansl1        | KANSL1   | -0.41 | 3.26 | -1.30 | 2.23E-01 | 5.17E-01 | -5.86 |
| 1452840_PM_at   | 1500009L16Rik | C12orf75 | -0.27 | 2.56 | -1.30 | 2.23E-01 | 5.17E-01 | -5.86 |
| 1459968_PM_at   | ---           | NA       | 0.12  | 2.32 | 1.30  | 2.23E-01 | 5.17E-01 | -5.86 |
| 1448547_PM_at   | Rassf3        | RASSF3   | 0.14  | 2.35 | 1.30  | 2.23E-01 | 5.17E-01 | -5.86 |
| 1426719_PM_at   | Apbb2         | APBB2    | 0.21  | 4.32 | 1.30  | 2.23E-01 | 5.17E-01 | -5.86 |
| 1419533_PM_at   | Nhlh1         | NHLH1    | 0.22  | 2.39 | 1.30  | 2.23E-01 | 5.17E-01 | -5.86 |
| 1420664_PM_s_at | Procr         | PROCR    | 0.36  | 2.97 | 1.30  | 2.23E-01 | 5.17E-01 | -5.86 |
| 1444948_PM_at   | ---           | NA       | 0.12  | 2.45 | 1.30  | 2.23E-01 | 5.17E-01 | -5.86 |
| 1417725_PM_a_at | Ssca1         | SSSCA1   | 0.34  | 2.72 | 1.30  | 2.23E-01 | 5.17E-01 | -5.86 |
| 1419568_PM_at   | Mapk1         | MAPK1    | 0.57  | 3.18 | 1.30  | 2.23E-01 | 5.17E-01 | -5.86 |
| 1432990_PM_at   | ---           | NA       | 0.15  | 2.86 | 1.30  | 2.23E-01 | 5.17E-01 | -5.86 |
| 1421548_PM_at   | Pcdhb2        | PCDHB6   | 0.15  | 2.30 | 1.30  | 2.23E-01 | 5.17E-01 | -5.86 |
| 1459223_PM_at   | B930095G15Rik | NA       | 0.20  | 2.60 | 1.30  | 2.23E-01 | 5.17E-01 | -5.86 |
| 1454784_PM_at   | Hs3st2        | HS3ST2   | 0.11  | 2.14 | 1.29  | 2.23E-01 | 5.17E-01 | -5.86 |
| 1456871_PM_a_at | Phf20l1       | PHF20L1  | 0.24  | 5.01 | 1.29  | 2.23E-01 | 5.17E-01 | -5.86 |
| 1420638_PM_at   | Prps2         | PRPS2    | 0.22  | 2.75 | 1.29  | 2.23E-01 | 5.17E-01 | -5.86 |
| 1451391_PM_at   | Edrf1         | EDRF1    | -0.26 | 2.73 | -1.29 | 2.24E-01 | 5.17E-01 | -5.86 |
| 1451364_PM_at   | Polr3gl       | POLR3GL  | 0.17  | 3.41 | 1.29  | 2.24E-01 | 5.17E-01 | -5.86 |
| 1447039_PM_at   | ---           | NA       | 0.21  | 2.57 | 1.29  | 2.24E-01 | 5.17E-01 | -5.86 |
| 1452688_PM_at   | Prpf39        | PRPF39   | 0.33  | 5.58 | 1.29  | 2.24E-01 | 5.17E-01 | -5.86 |
| 1457362_PM_at   | ---           | NA       | 0.15  | 2.90 | 1.29  | 2.24E-01 | 5.17E-01 | -5.86 |
| 1432959_PM_at   | Gm26664       | NA       | 0.17  | 2.51 | 1.29  | 2.24E-01 | 5.17E-01 | -5.86 |
| 1453091_PM_s_at | Letmd1        | LETMD1   | -1.17 | 4.69 | -1.29 | 2.24E-01 | 5.17E-01 | -5.86 |
| 1460279_PM_a_at | Gtf2i         | GTF2I    | -0.32 | 2.97 | -1.29 | 2.24E-01 | 5.17E-01 | -5.86 |
| 1431061_PM_s_at | Pel1          | PEL1     | 0.14  | 2.04 | 1.29  | 2.24E-01 | 5.17E-01 | -5.86 |
| 1444000_PM_at   | B930059L03Rik | NA       | 0.16  | 2.42 | 1.29  | 2.24E-01 | 5.17E-01 | -5.86 |
| 1436475_PM_at   | Nr2f2         | NR2F2    | 0.20  | 2.15 | 1.29  | 2.24E-01 | 5.17E-01 | -5.86 |
| 1451565_PM_s_at | Uroc1         | UROC1    | 0.20  | 2.47 | 1.29  | 2.24E-01 | 5.17E-01 | -5.86 |
| 1436372_PM_a_at | Pxdc1         | PDXDC1   | 0.28  | 3.09 | 1.29  | 2.24E-01 | 5.17E-01 | -5.86 |
| 1445445_PM_s_at | Ptger1        | PTGER1   | 0.32  | 2.55 | 1.29  | 2.24E-01 | 5.17E-01 | -5.86 |
| 1443816_PM_s_at | Pik3r6        | PIK3R6   | 0.45  | 3.09 | 1.29  | 2.24E-01 | 5.17E-01 | -5.86 |
| 1447257_PM_at   | ---           | NA       | 0.53  | 2.88 | 1.29  | 2.24E-01 | 5.17E-01 | -5.86 |
| 1451646_PM_at   | Pdik1l        | PDIK1L   | 0.11  | 2.29 | 1.29  | 2.24E-01 | 5.17E-01 | -5.86 |
| 1444787_PM_at   | ---           | NA       | 0.13  | 2.29 | 1.29  | 2.24E-01 | 5.17E-01 | -5.86 |
| 1430470_PM_at   | Arhgef37      | ARHGEF37 | 0.12  | 2.25 | 1.29  | 2.24E-01 | 5.17E-01 | -5.86 |
| 1445489_PM_at   | Ttpal         | TTPAL    | 0.20  | 2.55 | 1.29  | 2.24E-01 | 5.18E-01 | -5.86 |
| 1437759_PM_at   | Pfkp          | NA       | -0.45 | 4.66 | -1.29 | 2.24E-01 | 5.18E-01 | -5.87 |
| 1426224_PM_x_at | Cntm2a        | CMTM2    | 0.11  | 2.20 | 1.29  | 2.24E-01 | 5.18E-01 | -5.87 |
| 1437594_PM_x_at | Pigt          | PIGT     | 0.16  | 2.33 | 1.29  | 2.24E-01 | 5.18E-01 | -5.87 |
| 1423512_PM_at   | AW209491      | C7orf25  | -0.47 | 4.54 | -1.29 | 2.24E-01 | 5.18E-01 | -5.87 |
| 1460471_PM_at   | Ooep          | OOEP     | 0.14  | 2.96 | 1.29  | 2.24E-01 | 5.18E-01 | -5.87 |
| 1425137_PM_a_at | H2-Q10        | NA       | 0.16  | 2.43 | 1.29  | 2.24E-01 | 5.18E-01 | -5.87 |
| 1434842_PM_s_at | Upf3b         | UPF3B    | 0.21  | 5.50 | 1.29  | 2.24E-01 | 5.18E-01 | -5.87 |
| 1437695_PM_at   | Prokr2        | PROKR2   | 0.29  | 3.28 | 1.29  | 2.24E-01 | 5.18E-01 | -5.87 |
| 1448232_PM_x_at | Tuba1c        | TUBA1C   | 0.36  | 3.60 | 1.29  | 2.24E-01 | 5.18E-01 | -5.87 |
| 1457537_PM_at   | Rab1a         | NA       | 0.12  | 2.08 | 1.29  | 2.24E-01 | 5.18E-01 | -5.87 |
| 1442355_PM_at   | Gm5914        | NA       | 0.11  | 2.23 | 1.29  | 2.24E-01 | 5.18E-01 | -5.87 |
| 1427514_PM_at   | LOC624295     | NA       | -0.36 | 3.95 | -1.29 | 2.24E-01 | 5.18E-01 | -5.87 |
| 1458013_PM_at   | Rbm27         | RBM27    | 0.11  | 2.07 | 1.29  | 2.24E-01 | 5.18E-01 | -5.87 |
| 1425641_PM_at   | Aff1          | AFF1     | 0.11  | 2.85 | 1.29  | 2.24E-01 | 5.18E-01 | -5.87 |
| 1421667_PM_at   | Nmur1         | NMUR1    | 0.20  | 3.49 | 1.29  | 2.24E-01 | 5.18E-01 | -5.87 |
| 1426305_PM_at   | Upk1a         | UPK1A    | 0.25  | 2.62 | 1.29  | 2.24E-01 | 5.18E-01 | -5.87 |
| 1450083_PM_at   | Cnot4         | CNOT4    | 0.14  | 2.84 | 1.29  | 2.24E-01 | 5.18E-01 | -5.87 |
| 1437667_PM_a_at | Bach2         | BACH2    | 0.12  | 2.31 | 1.29  | 2.24E-01 | 5.18E-01 | -5.87 |
| 1457746_PM_at   | ---           | NA       | 0.34  | 2.88 | 1.29  | 2.24E-01 | 5.18E-01 | -5.87 |
| 1420550_PM_at   | Lce1f         | NA       | 0.17  | 2.16 | 1.29  | 2.24E-01 | 5.18E-01 | -5.87 |
| 1437116_PM_at   | ---           | NA       | 0.39  | 2.70 | 1.29  | 2.24E-01 | 5.18E-01 | -5.87 |
| 1454144_PM_a_at | Ccnc          | CCNC     | -0.47 | 2.85 | -1.29 | 2.24E-01 | 5.18E-01 | -5.87 |
| 1417266_PM_at   | Ccl6          | CCL15    | 0.15  | 2.50 | 1.29  | 2.24E-01 | 5.18E-01 | -5.87 |
| 1458513_PM_at   | Mapk10        | MAPK10   | 0.29  | 2.78 | 1.29  | 2.24E-01 | 5.18E-01 | -5.87 |
| 1431826_PM_a_at | Brsk2         | BRSK2    | 0.22  | 3.51 | 1.29  | 2.24E-01 | 5.18E-01 | -5.87 |
| 1448554_PM_s_at | Myh6 /// Myh7 | MYH6     | 0.34  | 3.32 | 1.29  | 2.24E-01 | 5.18E-01 | -5.87 |
| 1423548_PM_s_at | Ergic3        | ERGI3    | 0.66  | 4.06 | 1.29  | 2.24E-01 | 5.18E-01 | -5.87 |
| 1435085_PM_at   | Crebl2        | CREBL2   | -0.28 | 4.65 | -1.29 | 2.25E-01 | 5.18E-01 | -5.87 |
| 1430218_PM_at   | 4933424M12Rik | NA       | 0.12  | 2.23 | 1.29  | 2.25E-01 | 5.18E-01 | -5.87 |
| 1460062_PM_at   | Plekhh2       | PLEKHH2  | 0.12  | 2.52 | 1.29  | 2.25E-01 | 5.18E-01 | -5.87 |
| 1458320_PM_at   | Erich6        | ERICH6   | 0.59  | 3.01 | 1.29  | 2.25E-01 | 5.18E-01 | -5.87 |
| 1444843_PM_at   | ---           | NA       | 0.10  | 1.84 | 1.29  | 2.25E-01 | 5.18E-01 | -5.87 |
| 1440488_PM_at   | ---           | NA       | 0.13  | 2.07 | 1.29  | 2.25E-01 | 5.18E-01 | -5.87 |
| 1442486_PM_at   | ---           | NA       | 0.14  | 2.61 | 1.29  | 2.25E-01 | 5.18E-01 | -5.87 |
| 1456824_PM_at   | Zfp612        | NA       | 0.15  | 3.88 | 1.29  | 2.25E-01 | 5.18E-01 | -5.87 |
| 1452748_PM_at   | Xrcc3         | XRCC3    | 0.18  | 2.97 | 1.29  | 2.25E-01 | 5.18E-01 | -5.87 |
| 1444917_PM_at   | ---           | NA       | 0.23  | 2.52 | 1.29  | 2.25E-01 | 5.18E-01 | -5.87 |
| 1457893_PM_at   | ---           | NA       | 0.16  | 2.40 | 1.29  | 2.25E-01 | 5.18E-01 | -5.87 |

|                              |                |            |       |      |       |          |          |       |
|------------------------------|----------------|------------|-------|------|-------|----------|----------|-------|
| 1420370_PM_s_at              | Csn2           | CSN2       | 0.46  | 2.69 | 1.29  | 2.25E-01 | 5.18E-01 | -5.87 |
| 1456122_PM_at                | ---            | NA         | 0.11  | 2.50 | 1.29  | 2.25E-01 | 5.18E-01 | -5.87 |
| 1445195_PM_at                | C77631         | NA         | 0.13  | 2.06 | 1.29  | 2.25E-01 | 5.18E-01 | -5.87 |
| 1458449_PM_at                | Kdm2a          | KDM2A      | 0.30  | 2.96 | 1.29  | 2.25E-01 | 5.18E-01 | -5.87 |
| 1455211_PM_a_at              | Timm13         | TIMM13     | 0.24  | 2.66 | 1.29  | 2.25E-01 | 5.18E-01 | -5.87 |
| 1451039_PM_at                | Nop9           | NOP9       | -0.25 | 3.34 | -1.29 | 2.25E-01 | 5.18E-01 | -5.87 |
| 1446253_PM_at                | ---            | NA         | 0.16  | 3.51 | 1.29  | 2.25E-01 | 5.18E-01 | -5.87 |
| 1426246_PM_at                | Prosl          | PROS1      | 0.26  | 5.06 | 1.29  | 2.25E-01 | 5.19E-01 | -5.87 |
| AFFX-TransRecMur/X57349_5_at | Tfrc           | NA         | -0.38 | 3.35 | -1.29 | 2.25E-01 | 5.19E-01 | -5.87 |
| 1448524_PM_s_at              | Ssr4           | SSR4       | -0.37 | 3.25 | -1.29 | 2.25E-01 | 5.19E-01 | -5.87 |
| 1418288_PM_at                | Lpin1          | LPIN1      | -0.23 | 2.77 | -1.29 | 2.25E-01 | 5.19E-01 | -5.87 |
| 1427812_PM_at                | lds            | NA         | 0.45  | 3.05 | 1.29  | 2.25E-01 | 5.19E-01 | -5.87 |
| 1453145_PM_at                | Pisd-ps3       | NA         | 0.90  | 5.47 | 1.29  | 2.25E-01 | 5.19E-01 | -5.87 |
| 1458806_PM_at                | ---            | NA         | 0.16  | 2.63 | 1.29  | 2.25E-01 | 5.19E-01 | -5.87 |
| 1452179_PM_at                | Jade1          | JADE1      | -0.20 | 2.83 | -1.29 | 2.25E-01 | 5.19E-01 | -5.87 |
| 1435226_PM_at                | Rnf19b         | RNF19B     | -0.35 | 2.82 | -1.29 | 2.25E-01 | 5.19E-01 | -5.87 |
| 1429504_PM_at                | Amy1///Rnpc3   | RNPC3      | -0.11 | 2.17 | -1.29 | 2.25E-01 | 5.19E-01 | -5.87 |
| 1435010_PM_at                | Asb7           | ASB7       | -0.34 | 3.21 | -1.29 | 2.25E-01 | 5.19E-01 | -5.87 |
| 1445322_PM_x_at              | ---            | NA         | 0.82  | 3.08 | 1.29  | 2.25E-01 | 5.19E-01 | -5.87 |
| 1452109_PM_at                | Il17re         | IL17RE     | 0.12  | 2.17 | 1.29  | 2.25E-01 | 5.19E-01 | -5.87 |
| 1429200_PM_at                | Saal1          | SAAL1      | 0.15  | 2.78 | 1.29  | 2.25E-01 | 5.19E-01 | -5.87 |
| 1432917_PM_at                | Cnga1          | CNGA1      | 0.12  | 1.96 | 1.29  | 2.25E-01 | 5.19E-01 | -5.87 |
| 1419513_PM_a_at              | Ect2           | ECT2       | -0.13 | 2.12 | -1.29 | 2.25E-01 | 5.19E-01 | -5.87 |
| 1454676_PM_s_at              | Ticam1         | TICAM1     | 0.10  | 2.49 | 1.29  | 2.25E-01 | 5.19E-01 | -5.87 |
| 1420468_PM_at                | Asb17          | ASB17      | 0.11  | 1.98 | 1.29  | 2.25E-01 | 5.19E-01 | -5.87 |
| 1440734_PM_at                | Ttbk2          | TTBK2      | 0.12  | 2.65 | 1.29  | 2.25E-01 | 5.19E-01 | -5.87 |
| 1416380_PM_at                | Mov10          | MOV10      | 0.17  | 2.31 | 1.29  | 2.25E-01 | 5.19E-01 | -5.87 |
| 1445139_PM_at                | ---            | NA         | 0.25  | 2.96 | 1.29  | 2.25E-01 | 5.19E-01 | -5.87 |
| 1441205_PM_at                | Aldh3b3        | ALDH3B2    | 0.14  | 2.31 | 1.29  | 2.25E-01 | 5.19E-01 | -5.87 |
| 1429372_PM_at                | Sox11          | SOX11      | 0.43  | 2.85 | 1.29  | 2.25E-01 | 5.19E-01 | -5.87 |
| 1429528_PM_at                | Rae1           | RAE1       | -0.34 | 3.58 | -1.29 | 2.25E-01 | 5.19E-01 | -5.87 |
| 1437875_PM_at                | Bicd2          | BICD2      | -0.39 | 5.34 | -1.29 | 2.25E-01 | 5.19E-01 | -5.87 |
| 1440557_PM_at                | ---            | NA         | -0.46 | 4.42 | -1.29 | 2.25E-01 | 5.19E-01 | -5.87 |
| 1434317_PM_s_at              | Tex10          | TEX10      | -0.11 | 2.77 | -1.29 | 2.25E-01 | 5.19E-01 | -5.87 |
| 1447620_PM_at                | Bloc1s4        | BLOC1S4    | 0.13  | 2.22 | 1.29  | 2.25E-01 | 5.19E-01 | -5.87 |
| 1440916_PM_at                | Mkrrn2os       | MKRRN2OS   | 0.14  | 2.55 | 1.29  | 2.25E-01 | 5.19E-01 | -5.87 |
| 1427264_PM_at                | Crygb          | CRYGB      | 0.17  | 2.27 | 1.29  | 2.25E-01 | 5.19E-01 | -5.87 |
| 1427012_PM_at                | Lanc1          | LANC1      | -0.28 | 2.93 | -1.29 | 2.26E-01 | 5.19E-01 | -5.87 |
| 1456133_PM_x_at              | Itgb5          | ITGB5      | -0.11 | 3.03 | -1.29 | 2.25E-01 | 5.19E-01 | -5.87 |
| 1454441_PM_at                | Bnip2          | BNIP2      | 0.09  | 2.27 | 1.29  | 2.26E-01 | 5.19E-01 | -5.87 |
| 1434616_PM_at                | Slc38a10       | SLC38A10   | 0.15  | 2.37 | 1.29  | 2.25E-01 | 5.19E-01 | -5.87 |
| 1453696_PM_at                | Slc36a1os      | NA         | 0.15  | 2.29 | 1.29  | 2.25E-01 | 5.19E-01 | -5.87 |
| 1447949_PM_at                | ---            | NA         | 0.16  | 3.11 | 1.29  | 2.26E-01 | 5.19E-01 | -5.87 |
| 1455520_PM_at                | Ppp2r5c        | NA         | 0.17  | 2.31 | 1.29  | 2.26E-01 | 5.19E-01 | -5.87 |
| 1425748_PM_at                | Diras1         | DIRAS1     | 0.18  | 2.55 | 1.29  | 2.26E-01 | 5.19E-01 | -5.87 |
| 1439637_PM_at                | Kif7           | KIF7       | 0.18  | 2.74 | 1.29  | 2.26E-01 | 5.19E-01 | -5.87 |
| 1423552_PM_at                | Leprotl1       | LEPROTL1   | 0.18  | 3.53 | 1.29  | 2.25E-01 | 5.19E-01 | -5.87 |
| 1444862_PM_at                | ---            | NA         | 0.20  | 2.49 | 1.29  | 2.26E-01 | 5.19E-01 | -5.87 |
| 1429008_PM_at                | Ufl1           | UFL1       | 0.23  | 2.67 | 1.29  | 2.26E-01 | 5.19E-01 | -5.87 |
| 1453364_PM_x_at              | 9130019O22Rik  | ACO02310.5 | 0.29  | 3.14 | 1.29  | 2.25E-01 | 5.19E-01 | -5.87 |
| 1431066_PM_at                | Fut11          | FUT11      | 0.31  | 2.98 | 1.29  | 2.26E-01 | 5.19E-01 | -5.87 |
| 1448468_PM_a_at              | Kcnab1         | KCNAB1     | -0.32 | 3.23 | -1.29 | 2.26E-01 | 5.19E-01 | -5.87 |
| 1454242_PM_at                | 2310079G19Rik  | NA         | 0.14  | 2.19 | 1.29  | 2.26E-01 | 5.19E-01 | -5.87 |
| 1458213_PM_at                | ---            | NA         | 0.16  | 3.15 | 1.29  | 2.26E-01 | 5.19E-01 | -5.87 |
| 1459602_PM_at                | Sept11         | NA         | 0.54  | 3.78 | 1.29  | 2.26E-01 | 5.19E-01 | -5.87 |
| 1417511_PM_at                | Lyar           | LYAR       | 0.12  | 3.73 | 1.29  | 2.26E-01 | 5.19E-01 | -5.87 |
| 1446003_PM_at                | ---            | NA         | 0.12  | 2.40 | 1.29  | 2.26E-01 | 5.19E-01 | -5.87 |
| 1424668_PM_a_at              | Cux1           | CUX1       | 0.21  | 2.71 | 1.29  | 2.26E-01 | 5.19E-01 | -5.87 |
| 1452172_PM_at                | Fastkd2        | FASTKD2    | 0.17  | 2.77 | 1.29  | 2.26E-01 | 5.19E-01 | -5.87 |
| 1425141_PM_at                | Lactb2         | LACTB2     | -0.24 | 2.55 | -1.29 | 2.26E-01 | 5.19E-01 | -5.87 |
| 1427418_PM_a_at              | Hif1a          | HIF1A      | -0.24 | 3.88 | -1.29 | 2.26E-01 | 5.19E-01 | -5.87 |
| 1438161_PM_s_at              | Rfc4           | RFC4       | 0.52  | 2.85 | 1.29  | 2.26E-01 | 5.19E-01 | -5.87 |
| 1417853_PM_at                | Cla1///Clca3a1 | NA         | 0.14  | 2.21 | 1.29  | 2.26E-01 | 5.19E-01 | -5.87 |
| 1447348_PM_at                | ---            | NA         | 0.12  | 2.07 | 1.29  | 2.26E-01 | 5.19E-01 | -5.87 |
| 1450152_PM_at                | Zfp316         | ZNF316     | 0.12  | 2.43 | 1.29  | 2.26E-01 | 5.19E-01 | -5.87 |
| 1431140_PM_at                | Them4          | THEM4      | 0.15  | 2.37 | 1.29  | 2.26E-01 | 5.19E-01 | -5.87 |
| 1416349_PM_at                | Mrp34          | MRPL34     | 0.16  | 2.65 | 1.29  | 2.26E-01 | 5.19E-01 | -5.87 |
| 1433926_PM_at                | Dync1li2       | DYNC1L12   | -0.32 | 5.21 | -1.29 | 2.26E-01 | 5.20E-01 | -5.87 |
| 1427443_PM_at                | ---            | NA         | 0.12  | 2.38 | 1.29  | 2.26E-01 | 5.20E-01 | -5.87 |
| 1429406_PM_at                | Slco6c1        | SLCO6A1    | 0.17  | 2.36 | 1.29  | 2.26E-01 | 5.20E-01 | -5.87 |
| 1431722_PM_a_at              | Afmid          | AFMID      | 0.18  | 2.97 | 1.29  | 2.26E-01 | 5.20E-01 | -5.87 |
| 1451745_PM_a_at              | Znhit1         | ZNHIT1     | 0.87  | 6.62 | 1.29  | 2.26E-01 | 5.20E-01 | -5.87 |
| 1430651_PM_s_at              | Zfp24          | ZNF24      | -0.56 | 3.58 | -1.29 | 2.26E-01 | 5.20E-01 | -5.87 |
| 1458898_PM_at                | ---            | NA         | 0.15  | 2.52 | 1.29  | 2.26E-01 | 5.20E-01 | -5.87 |
| 1438414_PM_at                | Fkrp           | NA         | 0.19  | 2.68 | 1.29  | 2.26E-01 | 5.20E-01 | -5.87 |

|                 |                         |          |       |      |       |          |          |       |
|-----------------|-------------------------|----------|-------|------|-------|----------|----------|-------|
| 1451283_PM_at   | Fam114a2                | FAM114A2 | -0.16 | 2.84 | -1.29 | 2.26E-01 | 5.20E-01 | -5.87 |
| 1439916_PM_at   | ---                     | NA       | 0.10  | 2.08 | 1.29  | 2.26E-01 | 5.20E-01 | -5.87 |
| 1454178_PM_at   | 2610027F03Rik           | NA       | 0.11  | 2.32 | 1.29  | 2.26E-01 | 5.20E-01 | -5.87 |
| 1459096_PM_at   | ---                     | NA       | 0.16  | 2.81 | 1.29  | 2.26E-01 | 5.20E-01 | -5.87 |
| 1431678_PM_at   | Atxn7l1os2              | NA       | 0.19  | 2.56 | 1.29  | 2.26E-01 | 5.20E-01 | -5.87 |
| 1425190_PM_a_at | Phospho2                | PHOSPHO2 | 0.48  | 3.30 | 1.29  | 2.26E-01 | 5.20E-01 | -5.87 |
| 1430057_PM_s_at | Lrrc57                  | LRRC57   | 0.27  | 2.71 | 1.29  | 2.26E-01 | 5.20E-01 | -5.87 |
| 1428282_PM_at   | Tbce                    | TBCE     | 0.24  | 4.51 | 1.29  | 2.26E-01 | 5.20E-01 | -5.87 |
| 1442935_PM_at   | ---                     | NA       | 0.17  | 2.52 | 1.29  | 2.26E-01 | 5.20E-01 | -5.87 |
| 1442136_PM_at   | Ankib1                  | ANKIB1   | 0.12  | 2.15 | 1.29  | 2.26E-01 | 5.20E-01 | -5.87 |
| 1417058_PM_a_at | Krtcap2                 | KRTCAP2  | 0.72  | 6.11 | 1.29  | 2.26E-01 | 5.20E-01 | -5.87 |
| 1450245_PM_at   | Slc10a2                 | SLC10A2  | -0.36 | 2.34 | -1.29 | 2.26E-01 | 5.20E-01 | -5.87 |
| 1444805_PM_at   | ---                     | NA       | -0.33 | 3.63 | -1.29 | 2.26E-01 | 5.20E-01 | -5.87 |
| 1420644_PM_a_at | Sec61a2                 | SEC61A2  | -0.27 | 3.02 | -1.29 | 2.26E-01 | 5.20E-01 | -5.87 |
| 1429240_PM_at   | Stard4                  | STARD4   | 0.14  | 2.38 | 1.29  | 2.26E-01 | 5.20E-01 | -5.87 |
| 1437268_PM_at   | Lanc13                  | LANCL3   | 0.20  | 2.14 | 1.29  | 2.26E-01 | 5.20E-01 | -5.87 |
| 1460398_PM_at   | Phf8                    | PHF8     | 0.25  | 7.48 | 1.29  | 2.26E-01 | 5.20E-01 | -5.87 |
| 1427629_PM_at   | Gm38718 /// Gm39869 /// | PTPRJ    | 0.87  | 3.89 | 1.29  | 2.26E-01 | 5.20E-01 | -5.87 |
| 1433124_PM_at   | ---                     | NA       | 0.12  | 2.10 | 1.29  | 2.27E-01 | 5.20E-01 | -5.87 |
| 1424651_PM_at   | Acsf3                   | ACSF3    | 0.12  | 2.33 | 1.29  | 2.27E-01 | 5.20E-01 | -5.87 |
| 1427840_PM_at   | ---                     | NA       | 0.12  | 2.23 | 1.29  | 2.27E-01 | 5.20E-01 | -5.87 |
| 1429858_PM_at   | 1700011E24Rik           | STPG4    | 0.13  | 2.24 | 1.29  | 2.27E-01 | 5.20E-01 | -5.87 |
| 1443710_PM_s_at | Spats1                  | SPATS1   | 0.15  | 2.62 | 1.29  | 2.27E-01 | 5.20E-01 | -5.87 |
| 1417773_PM_at   | Nans                    | NANS     | 0.19  | 2.62 | 1.29  | 2.27E-01 | 5.20E-01 | -5.87 |
| 1421208_PM_at   | Ikbkg                   | IKBKG    | -0.18 | 2.47 | -1.29 | 2.27E-01 | 5.20E-01 | -5.87 |
| 1424302_PM_at   | Pirb                    | NA       | 0.11  | 2.82 | 1.29  | 2.27E-01 | 5.20E-01 | -5.87 |
| 1459790_PM_x_at | Ak3                     | ALX3     | 0.18  | 2.72 | 1.29  | 2.27E-01 | 5.20E-01 | -5.87 |
| 1417067_PM_s_at | Adck3                   | COQ8A    | -0.26 | 8.14 | -1.29 | 2.27E-01 | 5.20E-01 | -5.87 |
| 1437015_PM_x_at | Pla2g1b                 | PLA2G1B  | 0.15  | 2.83 | 1.29  | 2.27E-01 | 5.20E-01 | -5.87 |
| 1430178_PM_at   | 2810408A11Rik           | NA       | 0.09  | 2.33 | 1.28  | 2.27E-01 | 5.20E-01 | -5.88 |
| 1426276_PM_at   | Ifih1                   | IFIH1    | 0.13  | 2.38 | 1.28  | 2.27E-01 | 5.20E-01 | -5.88 |
| 1458646_PM_at   | ---                     | NA       | 0.14  | 2.31 | 1.28  | 2.27E-01 | 5.20E-01 | -5.88 |
| 1429815_PM_at   | Armc3                   | ARMC3    | 0.17  | 2.41 | 1.29  | 2.27E-01 | 5.20E-01 | -5.87 |
| 1421803_PM_at   | Scgb1b2                 | NA       | 0.17  | 2.86 | 1.29  | 2.27E-01 | 5.20E-01 | -5.88 |
| 1451334_PM_at   | Fams58b                 | FAMS58A  | -0.15 | 3.31 | -1.28 | 2.27E-01 | 5.20E-01 | -5.88 |
| 1454973_PM_at   | Atf7ip                  | ATF7IP   | -0.32 | 3.67 | -1.28 | 2.27E-01 | 5.20E-01 | -5.88 |
| 1433101_PM_at   | ---                     | NA       | 0.13  | 2.27 | 1.28  | 2.27E-01 | 5.20E-01 | -5.88 |
| 1433048_PM_at   | 4933428L01Rik           | NA       | 0.13  | 2.06 | 1.28  | 2.27E-01 | 5.20E-01 | -5.88 |
| 1451378_PM_at   | Utp6                    | UTP6     | 0.20  | 2.49 | 1.28  | 2.27E-01 | 5.20E-01 | -5.88 |
| 1432437_PM_at   | Tmem217                 | TMEM217  | 0.12  | 2.35 | 1.28  | 2.27E-01 | 5.20E-01 | -5.88 |
| 1459206_PM_at   | ---                     | NA       | 0.12  | 2.85 | 1.28  | 2.27E-01 | 5.20E-01 | -5.88 |
| 1426189_PM_at   | Dusp15                  | DUSP15   | 0.16  | 2.16 | 1.28  | 2.27E-01 | 5.20E-01 | -5.88 |
| 1420390_PM_s_at | Zfp354a                 | ZNF354A  | 0.22  | 2.27 | 1.28  | 2.27E-01 | 5.20E-01 | -5.88 |
| 1417533_PM_a_at | Itgb5                   | ITGB5    | 0.14  | 2.62 | 1.28  | 2.27E-01 | 5.20E-01 | -5.88 |
| 1459324_PM_at   | ---                     | NA       | 0.24  | 2.98 | 1.28  | 2.27E-01 | 5.20E-01 | -5.88 |
| 1452802_PM_at   | 4933411K16Rik           | C10orf62 | 0.19  | 2.92 | 1.28  | 2.27E-01 | 5.21E-01 | -5.88 |
| 1449118_PM_at   | Dbt                     | DBT      | -0.40 | 4.28 | -1.28 | 2.27E-01 | 5.21E-01 | -5.88 |
| 1437742_PM_at   | ---                     | NA       | -0.34 | 4.33 | -1.28 | 2.27E-01 | 5.21E-01 | -5.88 |
| 1442129_PM_at   | ---                     | NA       | 0.15  | 2.52 | 1.28  | 2.27E-01 | 5.21E-01 | -5.88 |
| 1440321_PM_at   | Mast2                   | NA       | 0.17  | 2.42 | 1.28  | 2.27E-01 | 5.21E-01 | -5.88 |
| 1427624_PM_s_at | Il22 /// Il1fb          | IL22     | 0.35  | 2.46 | 1.28  | 2.27E-01 | 5.21E-01 | -5.88 |
| 1442069_PM_at   | Ept1                    | SELENOI  | 0.16  | 2.36 | 1.28  | 2.27E-01 | 5.21E-01 | -5.88 |
| 1431218_PM_at   | Zdhc20                  | NA       | -0.51 | 3.92 | -1.28 | 2.27E-01 | 5.21E-01 | -5.88 |
| 1451657_PM_a_at | Enox2                   | ENOX2    | -0.19 | 2.82 | -1.28 | 2.27E-01 | 5.21E-01 | -5.88 |
| 1459975_PM_at   | Kat7                    | NA       | 0.13  | 2.18 | 1.28  | 2.27E-01 | 5.21E-01 | -5.88 |
| 1427816_PM_at   | Srsf2                   | NA       | 0.26  | 2.97 | 1.28  | 2.27E-01 | 5.21E-01 | -5.88 |
| 1432101_PM_a_at | Tssk4                   | TSSK4    | 0.11  | 2.25 | 1.28  | 2.27E-01 | 5.21E-01 | -5.88 |
| 1438199_PM_at   | Smim19                  | SMIM19   | -0.55 | 4.23 | -1.28 | 2.27E-01 | 5.21E-01 | -5.88 |
| 1437632_PM_at   | Med14                   | MED14    | -0.41 | 3.23 | -1.28 | 2.27E-01 | 5.21E-01 | -5.88 |
| 1440902_PM_at   | Ernm                    | ERMN     | -0.40 | 3.79 | -1.28 | 2.27E-01 | 5.21E-01 | -5.88 |
| 1442157_PM_at   | Parp8                   | NA       | -0.39 | 2.72 | -1.28 | 2.27E-01 | 5.21E-01 | -5.88 |
| 1443307_PM_at   | Psmc2                   | PSMC2    | -0.16 | 2.64 | -1.28 | 2.27E-01 | 5.21E-01 | -5.88 |
| 1427916_PM_at   | St7l                    | ST7L     | -0.15 | 2.80 | -1.28 | 2.27E-01 | 5.21E-01 | -5.88 |
| 1442896_PM_at   | ---                     | NA       | 0.11  | 2.47 | 1.28  | 2.27E-01 | 5.21E-01 | -5.88 |
| 1432171_PM_at   | 4933409F18Rik           | NA       | 0.11  | 1.93 | 1.28  | 2.27E-01 | 5.21E-01 | -5.88 |
| 1456703_PM_at   | DSErtd301e              | NA       | 0.13  | 2.86 | 1.28  | 2.27E-01 | 5.21E-01 | -5.88 |
| 1427706_PM_a_at | Siglec1                 | SIGLEC1  | 0.14  | 2.59 | 1.28  | 2.27E-01 | 5.21E-01 | -5.88 |
| 1422069_PM_at   | Mc1r                    | MC1R     | 0.14  | 2.79 | 1.28  | 2.27E-01 | 5.21E-01 | -5.88 |
| 1443422_PM_at   | 2410089E03Rik           | CSorf42  | 0.18  | 2.52 | 1.28  | 2.27E-01 | 5.21E-01 | -5.88 |
| 1437209_PM_at   | Cep76                   | CEP76    | 0.19  | 2.69 | 1.28  | 2.27E-01 | 5.21E-01 | -5.88 |
| 1444752_PM_at   | C230073G13Rik           | NA       | 0.22  | 2.77 | 1.28  | 2.27E-01 | 5.21E-01 | -5.88 |
| 1421140_PM_a_at | Foxp1                   | FOXP1    | 0.23  | 2.38 | 1.28  | 2.27E-01 | 5.21E-01 | -5.88 |
| 1444429_PM_at   | Lrtm1                   | LRTM1    | 0.43  | 3.11 | 1.28  | 2.27E-01 | 5.21E-01 | -5.88 |
| 1451438_PM_s_at | Clec2h                  | CLEC2D   | 0.16  | 3.03 | 1.28  | 2.28E-01 | 5.21E-01 | -5.88 |

|                 |                          |            |       |      |       |          |          |       |
|-----------------|--------------------------|------------|-------|------|-------|----------|----------|-------|
| 1421179_PM_at   | Ttyh2                    | TTYH2      | 0.18  | 2.84 | 1.28  | 2.28E-01 | 5.21E-01 | -5.88 |
| 1417936_PM_at   | Cc19                     | CCL15      | -0.14 | 2.38 | -1.28 | 2.28E-01 | 5.21E-01 | -5.88 |
| 1427792_PM_at   | ---                      | NA         | -0.11 | 2.20 | -1.28 | 2.28E-01 | 5.21E-01 | -5.88 |
| 1443054_PM_at   | Kcnj15                   | KCNJ15     | 0.14  | 2.44 | 1.28  | 2.28E-01 | 5.21E-01 | -5.88 |
| 1446488_PM_at   | ---                      | NA         | 0.16  | 2.31 | 1.28  | 2.28E-01 | 5.21E-01 | -5.88 |
| 1435842_PM_at   | Nat8l                    | NAT8L      | 0.28  | 6.98 | 1.28  | 2.28E-01 | 5.21E-01 | -5.88 |
| 1446198_PM_at   | ---                      | NA         | -0.11 | 2.15 | -1.28 | 2.28E-01 | 5.21E-01 | -5.88 |
| 1440602_PM_at   | ---                      | NA         | 0.17  | 2.56 | 1.28  | 2.28E-01 | 5.21E-01 | -5.88 |
| 1426651_PM_at   | Mrp44                    | MRPL44     | 0.22  | 2.63 | 1.28  | 2.28E-01 | 5.21E-01 | -5.88 |
| 1460225_PM_at   | Mrp57                    | MRPL57     | -0.38 | 3.47 | -1.28 | 2.28E-01 | 5.21E-01 | -5.88 |
| 1456213_PM_x_at | Qars                     | QARS       | -0.12 | 2.02 | -1.28 | 2.28E-01 | 5.21E-01 | -5.88 |
| 1459939_PM_at   | ---                      | NA         | -0.10 | 2.53 | -1.28 | 2.28E-01 | 5.21E-01 | -5.88 |
| 1454750_PM_a_at | Dcaf15                   | DCAF15     | 0.15  | 3.21 | 1.28  | 2.28E-01 | 5.21E-01 | -5.88 |
| 1449059_PM_a_at | Oxct1                    | OXCT1      | -0.60 | 8.42 | -1.28 | 2.28E-01 | 5.21E-01 | -5.88 |
| 1431979_PM_at   | 4930444M15Rik            | NA         | 0.11  | 2.18 | 1.28  | 2.28E-01 | 5.21E-01 | -5.88 |
| 1451130_PM_at   | Use1                     | USE1       | 0.47  | 3.04 | 1.28  | 2.28E-01 | 5.21E-01 | -5.88 |
| 1450771_PM_at   | Fut9                     | FUT9       | -0.32 | 2.95 | -1.28 | 2.28E-01 | 5.21E-01 | -5.88 |
| 1423889_PM_at   | Gm5617                   | C11orf71   | 0.10  | 2.33 | 1.28  | 2.28E-01 | 5.21E-01 | -5.88 |
| 1420538_PM_at   | Gprc5d                   | GPRC5D     | 0.12  | 2.72 | 1.28  | 2.28E-01 | 5.21E-01 | -5.88 |
| 1425589_PM_at   | Hsd17b13                 | HSD17B13   | 0.14  | 2.25 | 1.28  | 2.28E-01 | 5.21E-01 | -5.88 |
| 1430281_PM_at   | Glpr1l1                  | GLIPR1L1   | 0.12  | 2.38 | 1.28  | 2.28E-01 | 5.21E-01 | -5.88 |
| 1437151_PM_at   | Usp22                    | USP22      | -0.27 | 5.69 | -1.28 | 2.28E-01 | 5.21E-01 | -5.88 |
| 1453945_PM_at   | 2310005E17Rik            | NA         | 0.10  | 2.25 | 1.28  | 2.28E-01 | 5.21E-01 | -5.88 |
| 1430936_PM_at   | ---                      | NA         | 0.14  | 2.33 | 1.28  | 2.28E-01 | 5.21E-01 | -5.88 |
| 1444791_PM_at   | ---                      | NA         | 0.18  | 3.28 | 1.28  | 2.28E-01 | 5.21E-01 | -5.88 |
| 1445914_PM_at   | Nrf1                     | NA         | 0.24  | 3.16 | 1.28  | 2.28E-01 | 5.21E-01 | -5.88 |
| 1451734_PM_a_at | Dbn1                     | DBN1       | 0.29  | 3.61 | 1.28  | 2.28E-01 | 5.21E-01 | -5.88 |
| 1448885_PM_at   | Rap2b                    | RAP2B      | 0.35  | 3.56 | 1.28  | 2.28E-01 | 5.21E-01 | -5.88 |
| 1441989_PM_at   | Bnip2                    | NA         | -0.16 | 2.31 | -1.28 | 2.28E-01 | 5.21E-01 | -5.88 |
| 1445698_PM_at   | Capn11                   | CAPN11     | 0.16  | 2.30 | 1.28  | 2.28E-01 | 5.21E-01 | -5.88 |
| 1446446_PM_at   | ---                      | NA         | 0.25  | 3.23 | 1.28  | 2.28E-01 | 5.21E-01 | -5.88 |
| 1436213_PM_a_at | Kansl1                   | KANSL1L    | -0.24 | 2.70 | -1.28 | 2.28E-01 | 5.21E-01 | -5.88 |
| 1445966_PM_at   | ---                      | NA         | 0.20  | 2.29 | 1.28  | 2.28E-01 | 5.21E-01 | -5.88 |
| 1421826_PM_at   | Dll4                     | DLL4       | 0.12  | 2.13 | 1.28  | 2.28E-01 | 5.21E-01 | -5.88 |
| 1418838_PM_at   | Abcd1                    | ABCD1      | 0.20  | 3.22 | 1.28  | 2.28E-01 | 5.21E-01 | -5.88 |
| 1428470_PM_at   | Exoc2                    | EXOC2      | -0.28 | 2.92 | -1.28 | 2.28E-01 | 5.22E-01 | -5.88 |
| 1438170_PM_x_at | Adrm1                    | ADRM1      | -0.21 | 7.44 | -1.28 | 2.28E-01 | 5.22E-01 | -5.88 |
| 1441174_PM_a_at | Lmln                     | LMLN       | -0.18 | 2.51 | -1.28 | 2.28E-01 | 5.22E-01 | -5.88 |
| 1441200_PM_at   | Klf3                     | KLf3       | 0.11  | 2.53 | 1.28  | 2.28E-01 | 5.22E-01 | -5.88 |
| 1421677_PM_at   | Fgf20                    | FGF20      | 0.12  | 2.53 | 1.28  | 2.28E-01 | 5.22E-01 | -5.88 |
| 1424439_PM_at   | 1810065E05Rik            | NA         | 0.12  | 2.34 | 1.28  | 2.28E-01 | 5.22E-01 | -5.88 |
| 1430453_PM_a_at | Bcl2l2                   | BCL2L2     | 0.12  | 3.15 | 1.28  | 2.28E-01 | 5.22E-01 | -5.88 |
| 1453228_PM_at   | Stx11                    | STX11      | 0.12  | 2.41 | 1.28  | 2.28E-01 | 5.22E-01 | -5.88 |
| 1458461_PM_at   | E330021D16Rik            | UBE2Q2     | 0.13  | 2.41 | 1.28  | 2.28E-01 | 5.22E-01 | -5.88 |
| 1424629_PM_at   | Brca1                    | BRCA1      | 0.13  | 2.39 | 1.28  | 2.28E-01 | 5.22E-01 | -5.88 |
| 1457037_PM_at   | Zbtb2                    | ZBTB2      | 0.15  | 2.50 | 1.28  | 2.28E-01 | 5.22E-01 | -5.88 |
| 1449849_PM_a_at | Fbxl6                    | AC233992.2 | 0.17  | 2.14 | 1.28  | 2.28E-01 | 5.22E-01 | -5.88 |
| 1459859_PM_x_at | Chrac1                   | CHRAC1     | 0.21  | 2.54 | 1.28  | 2.28E-01 | 5.22E-01 | -5.88 |
| 1451652_PM_a_at | Cnep1r1                  | CNEP1R1    | -0.33 | 2.78 | -1.28 | 2.28E-01 | 5.22E-01 | -5.88 |
| 1428300_PM_at   | Specc1l                  | SPECC1L    | -0.31 | 2.97 | -1.28 | 2.28E-01 | 5.22E-01 | -5.88 |
| 1454817_PM_at   | Utp18                    | UTP18      | -0.30 | 3.56 | -1.28 | 2.28E-01 | 5.22E-01 | -5.88 |
| 1439391_PM_at   | Zc2hc1c                  | ZC2HC1C    | -0.14 | 2.20 | -1.28 | 2.29E-01 | 5.22E-01 | -5.88 |
| 1448002_PM_x_at | 2610001J05Rik            | NA         | -0.15 | 8.85 | -1.28 | 2.29E-01 | 5.22E-01 | -5.88 |
| 1447767_PM_at   | Cdk4                     | CDK4       | 0.10  | 2.03 | 1.28  | 2.29E-01 | 5.22E-01 | -5.88 |
| 1446770_PM_at   | Pik3cd                   | PIK3CD     | 0.11  | 2.28 | 1.28  | 2.29E-01 | 5.22E-01 | -5.88 |
| 1429686_PM_at   | Polr3f                   | POLR3F     | 0.13  | 2.48 | 1.28  | 2.29E-01 | 5.22E-01 | -5.88 |
| 1442844_PM_at   | A830052D11Rik            | NA         | 0.15  | 2.45 | 1.28  | 2.29E-01 | 5.22E-01 | -5.88 |
| 1439197_PM_at   | Pl4kb                    | PI4KB      | 0.16  | 2.46 | 1.28  | 2.29E-01 | 5.22E-01 | -5.88 |
| 1445205_PM_at   | ---                      | NA         | 0.17  | 2.72 | 1.28  | 2.29E-01 | 5.22E-01 | -5.88 |
| 1447552_PM_s_at | Gm31953                  | NA         | 0.18  | 2.09 | 1.28  | 2.29E-01 | 5.22E-01 | -5.88 |
| 1431127_PM_at   | Zbtb43                   | ZBTB43     | 0.31  | 3.13 | 1.28  | 2.29E-01 | 5.22E-01 | -5.88 |
| 1447540_PM_at   | Tigd3                    | TIGD3      | 0.60  | 3.12 | 1.28  | 2.29E-01 | 5.22E-01 | -5.88 |
| 1438380_PM_at   | Ddx47                    | NA         | 0.15  | 2.16 | 1.28  | 2.29E-01 | 5.22E-01 | -5.88 |
| 1444621_PM_at   | Iqsec2                   | NA         | -0.29 | 2.77 | -1.28 | 2.29E-01 | 5.22E-01 | -5.88 |
| 1454122_PM_at   | 1810011H11Rik            | C10orf128  | 0.13  | 2.25 | 1.28  | 2.29E-01 | 5.22E-01 | -5.88 |
| 1436800_PM_at   | Fstl5                    | FSTL5      | -0.41 | 2.80 | -1.28 | 2.29E-01 | 5.22E-01 | -5.88 |
| 1437065_PM_at   | Zbtb20                   | ZBTB20     | -0.38 | 3.46 | -1.28 | 2.29E-01 | 5.22E-01 | -5.88 |
| 1429800_PM_at   | 9130221H12Rik /// Zfp526 | NA         | -0.22 | 3.30 | -1.28 | 2.29E-01 | 5.22E-01 | -5.88 |
| 1437949_PM_x_at | Rnf114                   | RNF114     | -0.17 | 2.19 | -1.28 | 2.29E-01 | 5.22E-01 | -5.88 |
| 1436644_PM_x_at | Tmem25                   | TMEM25     | -0.42 | 6.31 | -1.28 | 2.29E-01 | 5.22E-01 | -5.88 |
| 1427949_PM_at   | Ltn1                     | LTN1       | -0.29 | 6.10 | -1.28 | 2.29E-01 | 5.22E-01 | -5.88 |
| 1441598_PM_at   | Tmeff2                   | TMEFF2     | -0.25 | 3.03 | -1.28 | 2.29E-01 | 5.22E-01 | -5.88 |
| 1446473_PM_at   | ---                      | NA         | 0.12  | 2.36 | 1.28  | 2.29E-01 | 5.22E-01 | -5.88 |
| 1440606_PM_at   | ---                      | NA         | 0.14  | 2.14 | 1.28  | 2.29E-01 | 5.22E-01 | -5.88 |

|                 |                 |            |       |      |       |          |          |       |
|-----------------|-----------------|------------|-------|------|-------|----------|----------|-------|
| 1437205_PM_at   | Tcf25           | TCF25      | 0.16  | 2.82 | 1.28  | 2.29E-01 | 5.22E-01 | -5.88 |
| 1423810_PM_at   | Ppme1           | PPME1      | 0.20  | 3.01 | 1.28  | 2.29E-01 | 5.22E-01 | -5.88 |
| 1459506_PM_at   | ---             | NA         | 0.24  | 2.54 | 1.28  | 2.29E-01 | 5.22E-01 | -5.88 |
| 1456457_PM_at   | Slc32a1         | NA         | 0.64  | 4.31 | 1.28  | 2.29E-01 | 5.22E-01 | -5.88 |
| 1459292_PM_at   | ---             | NA         | 0.16  | 2.30 | 1.28  | 2.29E-01 | 5.22E-01 | -5.88 |
| 1448872_PM_at   | Reg3g           | REG3G      | 0.11  | 2.35 | 1.28  | 2.29E-01 | 5.22E-01 | -5.88 |
| 1424565_PM_at   | Polr3d          | POLR3D     | 0.27  | 2.30 | 1.28  | 2.29E-01 | 5.22E-01 | -5.88 |
| 1457753_PM_at   | Tlr13           | NA         | 0.10  | 2.23 | 1.28  | 2.29E-01 | 5.22E-01 | -5.88 |
| 1440276_PM_at   | Rfpl4b          | AL365214.3 | 0.11  | 2.26 | 1.28  | 2.29E-01 | 5.22E-01 | -5.88 |
| 1437531_PM_at   | Trpm1           | NA         | 0.11  | 2.24 | 1.28  | 2.29E-01 | 5.22E-01 | -5.88 |
| 1456951_PM_at   | Mybl1           | MYBL1      | 0.14  | 2.63 | 1.28  | 2.29E-01 | 5.22E-01 | -5.88 |
| 1436252_PM_at   | Slc45a1         | SLC45A1    | 0.16  | 3.23 | 1.28  | 2.29E-01 | 5.22E-01 | -5.88 |
| 1446863_PM_at   | ---             | NA         | 0.18  | 3.18 | 1.28  | 2.29E-01 | 5.22E-01 | -5.88 |
| 1436573_PM_at   | Scrn3           | SCRN3      | 0.30  | 2.94 | 1.28  | 2.29E-01 | 5.22E-01 | -5.88 |
| 1456259_PM_at   | Ints10          | INTS10     | 0.35  | 3.26 | 1.28  | 2.29E-01 | 5.22E-01 | -5.88 |
| 1431726_PM_a_at | Tmem80          | TMEM80     | 0.16  | 2.47 | 1.28  | 2.29E-01 | 5.22E-01 | -5.88 |
| 1429023_PM_at   | Hepacam         | HEPACAM    | 0.16  | 2.48 | 1.28  | 2.29E-01 | 5.22E-01 | -5.88 |
| 1455891_PM_at   | Slc9b1          | SLC9B1     | 0.13  | 2.25 | 1.28  | 2.29E-01 | 5.22E-01 | -5.88 |
| 1417578_PM_a_at | Gmppa           | GMPPA      | 0.16  | 4.28 | 1.28  | 2.29E-01 | 5.22E-01 | -5.88 |
| 1457400_PM_at   | Srx19           | SNX19      | 0.25  | 3.37 | 1.28  | 2.29E-01 | 5.22E-01 | -5.88 |
| 1454918_PM_at   | Agps            | AGPS       | 0.28  | 3.40 | 1.28  | 2.29E-01 | 5.22E-01 | -5.88 |
| 1420685_PM_at   | Grap2           | GRAP2      | 0.15  | 2.87 | 1.28  | 2.29E-01 | 5.22E-01 | -5.88 |
| 1455662_PM_x_at | Rps17           | RPS17      | -0.48 | 5.49 | -1.28 | 2.29E-01 | 5.22E-01 | -5.88 |
| 1426932_PM_at   | Pum3            | PUM3       | -0.47 | 4.14 | -1.28 | 2.29E-01 | 5.22E-01 | -5.88 |
| 1436200_PM_at   | Lonf3           | NA         | -0.29 | 3.51 | -1.28 | 2.29E-01 | 5.22E-01 | -5.88 |
| 1460381_PM_at   | Zfp772          | NA         | -0.20 | 2.83 | -1.28 | 2.29E-01 | 5.22E-01 | -5.88 |
| 1427014_PM_at   | Dennd4b         | DENND4B    | -0.14 | 2.93 | -1.28 | 2.29E-01 | 5.22E-01 | -5.88 |
| 1447101_PM_at   | Rnf122          | RNF122     | 0.10  | 2.20 | 1.28  | 2.29E-01 | 5.22E-01 | -5.88 |
| 1420585_PM_a_at | Nxf2            | NXF5       | 0.13  | 2.10 | 1.28  | 2.29E-01 | 5.22E-01 | -5.88 |
| 1446920_PM_at   | ---             | NA         | 0.14  | 2.45 | 1.28  | 2.29E-01 | 5.22E-01 | -5.88 |
| 1433964_PM_s_at | Fermt3          | FERMT3     | 0.17  | 2.80 | 1.28  | 2.29E-01 | 5.22E-01 | -5.88 |
| 1419864_PM_x_at | Tnp1            | TNPO1      | 0.26  | 2.58 | 1.28  | 2.29E-01 | 5.22E-01 | -5.88 |
| 1440699_PM_at   | Map2            | MAP2       | 0.29  | 5.11 | 1.28  | 2.29E-01 | 5.22E-01 | -5.88 |
| 1445176_PM_at   | ---             | NA         | 0.10  | 2.05 | 1.28  | 2.29E-01 | 5.22E-01 | -5.88 |
| 1420007_PM_at   | Wwc1            | WWC1       | 0.10  | 2.07 | 1.28  | 2.30E-01 | 5.23E-01 | -5.88 |
| 1429049_PM_at   | Nuak2           | NUAK2      | 0.30  | 3.16 | 1.28  | 2.30E-01 | 5.23E-01 | -5.88 |
| 1420479_PM_a_at | Nap1l1          | NAP1L1     | -0.40 | 4.40 | -1.28 | 2.30E-01 | 5.23E-01 | -5.88 |
| 1437657_PM_at   | Scaper          | SCAPER     | 0.50  | 5.49 | 1.28  | 2.30E-01 | 5.23E-01 | -5.89 |
| 1455963_PM_at   | Tmem229a        | TMEM229A   | -0.61 | 4.10 | -1.28 | 2.30E-01 | 5.23E-01 | -5.89 |
| 1421732_PM_at   | Glrp1           | NA         | 0.18  | 2.90 | 1.28  | 2.30E-01 | 5.23E-01 | -5.89 |
| 1450261_PM_a_at | Slc10a1         | SLC10A1    | 0.10  | 2.06 | 1.28  | 2.30E-01 | 5.23E-01 | -5.89 |
| 1420861_PM_at   | Dctn4           | DCTN4      | -0.34 | 8.09 | -1.28 | 2.30E-01 | 5.23E-01 | -5.89 |
| 1447648_PM_at   | ---             | NA         | 0.12  | 2.30 | 1.28  | 2.30E-01 | 5.23E-01 | -5.89 |
| 1445426_PM_at   | ---             | NA         | 0.18  | 2.40 | 1.28  | 2.30E-01 | 5.23E-01 | -5.89 |
| 1459065_PM_at   | ---             | NA         | 0.45  | 3.02 | 1.28  | 2.30E-01 | 5.23E-01 | -5.89 |
| 1417650_PM_at   | Lao1            | NA         | 0.13  | 2.12 | 1.28  | 2.30E-01 | 5.23E-01 | -5.89 |
| 1439948_PM_at   | ---             | NA         | 0.19  | 2.67 | 1.28  | 2.30E-01 | 5.23E-01 | -5.89 |
| 1454286_PM_at   | ---             | NA         | 0.23  | 2.25 | 1.28  | 2.30E-01 | 5.23E-01 | -5.89 |
| 1444137_PM_at   | A430108G06Rik   | NA         | -0.11 | 2.50 | -1.28 | 2.30E-01 | 5.23E-01 | -5.89 |
| 1453486_PM_a_at | Scube2          | SCUBE2     | 0.14  | 2.03 | 1.28  | 2.30E-01 | 5.23E-01 | -5.89 |
| 1457789_PM_at   | Cln3            | CLN3       | 0.18  | 2.50 | 1.28  | 2.30E-01 | 5.23E-01 | -5.89 |
| 1438424_PM_at   | Ntn3 ///Tbc1d24 | NTN3       | 0.24  | 4.88 | 1.28  | 2.30E-01 | 5.23E-01 | -5.89 |
| 1443864_PM_at   | Dtl             | DTL        | 0.14  | 2.44 | 1.28  | 2.30E-01 | 5.23E-01 | -5.89 |
| 1451451_PM_at   | Gca             | GCA        | -0.23 | 2.38 | -1.28 | 2.30E-01 | 5.23E-01 | -5.89 |
| 1446489_PM_at   | ---             | NA         | 0.32  | 3.05 | 1.28  | 2.30E-01 | 5.23E-01 | -5.89 |
| 1434104_PM_at   | Slc35e1         | SLC35E1    | -0.29 | 3.26 | -1.28 | 2.30E-01 | 5.23E-01 | -5.89 |
| 1417951_PM_at   | Eno3            | ENO3       | 0.11  | 2.51 | 1.28  | 2.30E-01 | 5.23E-01 | -5.89 |
| 1422367_PM_at   | Olfir70         | NA         | 0.12  | 2.16 | 1.28  | 2.30E-01 | 5.23E-01 | -5.89 |
| 1444352_PM_at   | Zfp287          | ZNF883     | 0.14  | 2.32 | 1.28  | 2.30E-01 | 5.23E-01 | -5.89 |
| 1435457_PM_at   | Pdxd4           | PDXD4      | -0.49 | 6.27 | -1.27 | 2.30E-01 | 5.23E-01 | -5.89 |
| 1445331_PM_at   | Gm41147         | NA         | 0.18  | 2.93 | 1.27  | 2.30E-01 | 5.23E-01 | -5.89 |
| 1459636_PM_at   | Angpt2          | ANGPT2     | 0.19  | 2.39 | 1.27  | 2.30E-01 | 5.23E-01 | -5.89 |
| 1434572_PM_at   | Hdac9           | HDAC9      | 0.49  | 4.51 | 1.27  | 2.30E-01 | 5.23E-01 | -5.89 |
| 1419439_PM_at   | Tsk1            | TSK1       | 0.26  | 3.07 | 1.27  | 2.30E-01 | 5.23E-01 | -5.89 |
| 1448915_PM_at   | Zfp524          | ZNF524     | 0.16  | 2.72 | 1.27  | 2.30E-01 | 5.23E-01 | -5.89 |
| 1459247_PM_at   | Agbl3           | AGBL3      | 0.17  | 2.61 | 1.27  | 2.30E-01 | 5.23E-01 | -5.89 |
| 1416849_PM_at   | Cisd1           | CISD1      | -0.17 | 2.44 | -1.27 | 2.30E-01 | 5.24E-01 | -5.89 |
| 1421347_PM_at   | Ftmt            | FTMT       | -0.13 | 2.33 | -1.27 | 2.30E-01 | 5.24E-01 | -5.89 |
| 1448138_PM_at   | Ppp2r4          | PTPA       | -0.22 | 3.72 | -1.27 | 2.30E-01 | 5.24E-01 | -5.89 |
| 1433878_PM_at   | Mrp26           | MRP26      | -0.33 | 3.69 | -1.27 | 2.30E-01 | 5.24E-01 | -5.89 |
| 1455300_PM_at   | Tet2            | TET2       | -0.41 | 5.37 | -1.27 | 2.30E-01 | 5.24E-01 | -5.89 |
| 1418190_PM_at   | Pon1            | PON1       | -0.12 | 2.20 | -1.27 | 2.30E-01 | 5.24E-01 | -5.89 |
| 1447215_PM_at   | Wdr66           | NA         | 0.14  | 2.23 | 1.27  | 2.30E-01 | 5.24E-01 | -5.89 |
| 1448601_PM_s_at | Msx1            | MSX1       | 0.14  | 2.02 | 1.27  | 2.30E-01 | 5.24E-01 | -5.89 |
| 1419484_PM_a_at | Gbas            | NIPSNAP2   | -0.40 | 5.79 | -1.27 | 2.31E-01 | 5.24E-01 | -5.89 |



|                 |                                                                                                                                                                   |          |       |      |       |          |          |       |
|-----------------|-------------------------------------------------------------------------------------------------------------------------------------------------------------------|----------|-------|------|-------|----------|----------|-------|
| 1420596_PM_at   | Cacng2                                                                                                                                                            | CACNG2   | -0.21 | 3.53 | -1.27 | 2.31E-01 | 5.24E-01 | -5.89 |
| 1446666_PM_at   | Adamts12                                                                                                                                                          | ADAMTS12 | -0.13 | 2.22 | -1.27 | 2.31E-01 | 5.24E-01 | -5.89 |
| 1444814_PM_at   | D15Ert180e                                                                                                                                                        | NA       | 0.12  | 2.25 | 1.27  | 2.31E-01 | 5.24E-01 | -5.89 |
| 1430242_PM_at   | ---                                                                                                                                                               | NA       | 0.13  | 2.03 | 1.27  | 2.31E-01 | 5.24E-01 | -5.89 |
| 1423690_PM_s_at | Gpsm1                                                                                                                                                             | GPSM1    | 0.15  | 2.43 | 1.27  | 2.31E-01 | 5.24E-01 | -5.89 |
| 1433001_PM_at   | ---                                                                                                                                                               | NA       | 0.18  | 2.15 | 1.27  | 2.31E-01 | 5.24E-01 | -5.89 |
| 1423232_PM_at   | Etv4                                                                                                                                                              | ETV4     | 0.19  | 2.95 | 1.27  | 2.31E-01 | 5.24E-01 | -5.89 |
| 1425467_PM_a_at | Plp1                                                                                                                                                              | PLP1     | -0.77 | 6.09 | -1.27 | 2.31E-01 | 5.24E-01 | -5.89 |
| 1457438_PM_at   | Gm11827                                                                                                                                                           | NA       | 0.20  | 2.64 | 1.27  | 2.31E-01 | 5.24E-01 | -5.89 |
| 1455323_PM_at   | Rbak                                                                                                                                                              | RBAK     | -0.23 | 2.57 | -1.27 | 2.31E-01 | 5.24E-01 | -5.89 |
| 1448797_PM_at   | Elk3                                                                                                                                                              | ELK3     | 0.29  | 2.66 | 1.27  | 2.31E-01 | 5.24E-01 | -5.89 |
| 1444668_PM_at   | Astx /// Astx6 /// Gm28133<br>/// Gm28220 /// Gm28260<br>/// Gm28365 /// Gm28606<br>/// Gm28938 /// Gm29027<br>/// Gm29081 /// Gm29255<br>/// Gm29386 /// Gm29565 | NA       | -0.62 | 4.83 | -1.27 | 2.31E-01 | 5.24E-01 | -5.89 |
| 1456706_PM_at   | ---                                                                                                                                                               | NA       | 0.13  | 2.25 | 1.27  | 2.31E-01 | 5.24E-01 | -5.89 |
| 1418865_PM_at   | Zfp385a                                                                                                                                                           | ZNF385A  | 0.19  | 2.75 | 1.27  | 2.31E-01 | 5.24E-01 | -5.89 |
| 1435428_PM_at   | Fam193a                                                                                                                                                           | FAM193A  | 0.42  | 3.25 | 1.27  | 2.31E-01 | 5.24E-01 | -5.89 |
| 1438375_PM_at   | Fbln2                                                                                                                                                             | FBLN2    | 0.11  | 2.16 | 1.27  | 2.31E-01 | 5.24E-01 | -5.89 |
| 1455693_PM_x_at | LOC105244208 /// Rps6                                                                                                                                             | NA       | -0.22 | 9.85 | -1.27 | 2.31E-01 | 5.24E-01 | -5.89 |
| 1448113_PM_at   | Stmn1                                                                                                                                                             | STMN1    | 0.40  | 5.19 | 1.27  | 2.31E-01 | 5.24E-01 | -5.89 |
| 1448074_PM_at   | Rln1                                                                                                                                                              | RLN1     | 0.17  | 2.38 | 1.27  | 2.31E-01 | 5.24E-01 | -5.89 |
| 1421882_PM_a_at | Elavl2                                                                                                                                                            | ELAVL2   | -0.74 | 6.60 | -1.27 | 2.31E-01 | 5.24E-01 | -5.89 |
| 1447725_PM_at   | ---                                                                                                                                                               | NA       | -0.59 | 4.98 | -1.27 | 2.31E-01 | 5.24E-01 | -5.89 |
| 1429390_PM_at   | Pxylp1                                                                                                                                                            | PXYLP1   | -0.39 | 3.36 | -1.27 | 2.31E-01 | 5.24E-01 | -5.89 |
| 1429103_PM_at   | Tomm22                                                                                                                                                            | TOMM22   | -0.28 | 2.67 | -1.27 | 2.31E-01 | 5.24E-01 | -5.89 |
| 1423235_PM_at   | Ap3b1                                                                                                                                                             | AP3B1    | -0.25 | 5.39 | -1.27 | 2.31E-01 | 5.24E-01 | -5.89 |
| 1430066_PM_at   | Fam184a                                                                                                                                                           | FAM184A  | -0.24 | 3.12 | -1.27 | 2.31E-01 | 5.24E-01 | -5.89 |
| 1449987_PM_at   | Alk                                                                                                                                                               | NA       | -0.21 | 2.39 | -1.27 | 2.31E-01 | 5.24E-01 | -5.89 |
| 1445437_PM_at   | Ccdc74a                                                                                                                                                           | CCDC74B  | -0.11 | 2.25 | -1.27 | 2.31E-01 | 5.24E-01 | -5.89 |
| 1459768_PM_x_at | Rap1gds1                                                                                                                                                          | RAP1GDS1 | 0.11  | 1.95 | 1.27  | 2.31E-01 | 5.24E-01 | -5.89 |
| 1439306_PM_at   | ---                                                                                                                                                               | NA       | 0.13  | 2.21 | 1.27  | 2.31E-01 | 5.24E-01 | -5.89 |
| 1430397_PM_at   | Got2 /// Got2-ps1                                                                                                                                                 | GOT2     | 0.13  | 2.51 | 1.27  | 2.31E-01 | 5.24E-01 | -5.89 |
| 1455645_PM_at   | Mybpc1                                                                                                                                                            | MYBPC1   | 0.15  | 2.75 | 1.27  | 2.31E-01 | 5.24E-01 | -5.89 |
| 1445617_PM_at   | Ncbp3                                                                                                                                                             | NCBP3    | 0.20  | 2.32 | 1.27  | 2.31E-01 | 5.24E-01 | -5.89 |
| 1458636_PM_at   | Rnf219                                                                                                                                                            | RNF219   | 0.21  | 2.42 | 1.27  | 2.31E-01 | 5.24E-01 | -5.89 |
| 1440943_PM_at   | ---                                                                                                                                                               | NA       | 0.21  | 2.93 | 1.27  | 2.31E-01 | 5.24E-01 | -5.89 |
| 1457089_PM_at   | ---                                                                                                                                                               | NA       | 0.22  | 2.64 | 1.27  | 2.31E-01 | 5.24E-01 | -5.89 |
| 1417398_PM_at   | Rras2                                                                                                                                                             | RRAS2    | 0.22  | 2.49 | 1.27  | 2.31E-01 | 5.24E-01 | -5.89 |
| 1428132_PM_at   | Cdc42se1                                                                                                                                                          | CDC42SE1 | 0.29  | 2.71 | 1.27  | 2.31E-01 | 5.24E-01 | -5.89 |
| 1460364_PM_at   | Gtf2ird1                                                                                                                                                          | NA       | 0.34  | 2.38 | 1.27  | 2.31E-01 | 5.24E-01 | -5.89 |
| 1431759_PM_at   | 4930529C04Rik ///<br>Gm15583 /// Zbed4                                                                                                                            | ZBED4    | 0.44  | 3.43 | 1.27  | 2.31E-01 | 5.24E-01 | -5.89 |
| 1426346_PM_at   | Prepl                                                                                                                                                             | PREPL    | 0.50  | 4.00 | 1.27  | 2.31E-01 | 5.24E-01 | -5.89 |
| 1437593_PM_x_at | Api5                                                                                                                                                              | API5     | 0.52  | 5.74 | 1.27  | 2.31E-01 | 5.24E-01 | -5.89 |
| 1443425_PM_at   | ---                                                                                                                                                               | NA       | -0.12 | 2.33 | -1.27 | 2.31E-01 | 5.24E-01 | -5.89 |
| 1440322_PM_at   | ---                                                                                                                                                               | NA       | 0.14  | 2.30 | 1.27  | 2.31E-01 | 5.24E-01 | -5.89 |
| 1432638_PM_at   | Bag5                                                                                                                                                              | BAG5     | 0.18  | 2.14 | 1.27  | 2.31E-01 | 5.24E-01 | -5.89 |
| 1459487_PM_at   | ---                                                                                                                                                               | NA       | 0.09  | 2.22 | 1.27  | 2.31E-01 | 5.24E-01 | -5.89 |
| 1456188_PM_at   | Svs2                                                                                                                                                              | NA       | 0.13  | 2.19 | 1.27  | 2.31E-01 | 5.24E-01 | -5.89 |
| 1437764_PM_at   | Endov                                                                                                                                                             | ENDOV    | 0.23  | 2.79 | 1.27  | 2.31E-01 | 5.24E-01 | -5.89 |
| 1445854_PM_at   | ---                                                                                                                                                               | NA       | -0.26 | 2.78 | -1.27 | 2.31E-01 | 5.24E-01 | -5.89 |
| 1429770_PM_at   | Pggt1b                                                                                                                                                            | NA       | -0.11 | 2.15 | -1.27 | 2.31E-01 | 5.24E-01 | -5.89 |
| 1442877_PM_at   | ---                                                                                                                                                               | NA       | 0.12  | 2.22 | 1.27  | 2.31E-01 | 5.24E-01 | -5.89 |
| 1419638_PM_at   | Efnb2                                                                                                                                                             | EFNB2    | -0.37 | 3.55 | -1.27 | 2.32E-01 | 5.24E-01 | -5.89 |
| 1448437_PM_a_at | Gtpbp2                                                                                                                                                            | GTPBP2   | -0.31 | 7.61 | -1.27 | 2.31E-01 | 5.24E-01 | -5.89 |
| 1428326_PM_s_at | Hrsp12                                                                                                                                                            | RIDA     | -0.23 | 3.54 | -1.27 | 2.32E-01 | 5.24E-01 | -5.89 |
| 1431465_PM_s_at | Fyttl1                                                                                                                                                            | FYTTL1   | -0.19 | 3.33 | -1.27 | 2.32E-01 | 5.24E-01 | -5.89 |
| 1416692_PM_at   | Coil                                                                                                                                                              | COIL     | 0.12  | 2.54 | 1.27  | 2.31E-01 | 5.24E-01 | -5.89 |
| 1420742_PM_at   | Adam7                                                                                                                                                             | ADAM7    | 0.14  | 2.11 | 1.27  | 2.32E-01 | 5.24E-01 | -5.89 |
| 1439492_PM_at   | Sptlc3                                                                                                                                                            | SPTLC3   | 0.14  | 2.63 | 1.27  | 2.32E-01 | 5.24E-01 | -5.89 |
| 1429195_PM_at   | Apol6                                                                                                                                                             | APOL6    | 0.15  | 2.20 | 1.27  | 2.32E-01 | 5.24E-01 | -5.89 |
| 1452471_PM_at   | Il17rd                                                                                                                                                            | IL17RD   | 0.16  | 2.53 | 1.27  | 2.32E-01 | 5.24E-01 | -5.89 |
| 1458490_PM_at   | 9230116N13Rik                                                                                                                                                     | NA       | 0.16  | 2.66 | 1.27  | 2.32E-01 | 5.24E-01 | -5.89 |
| 1440296_PM_at   | Gm16432 /// Gm30473                                                                                                                                               | NA       | 0.16  | 2.13 | 1.27  | 2.31E-01 | 5.24E-01 | -5.89 |
| 1441811_PM_x_at | Tmem176a                                                                                                                                                          | TMEM176A | 0.20  | 2.77 | 1.27  | 2.32E-01 | 5.24E-01 | -5.89 |
| 1441829_PM_s_at | Akap10                                                                                                                                                            | AKAP10   | 0.24  | 2.26 | 1.27  | 2.32E-01 | 5.24E-01 | -5.89 |
| 1449005_PM_at   | Slc16a3                                                                                                                                                           | SLC16A3  | 0.27  | 2.55 | 1.27  | 2.32E-01 | 5.24E-01 | -5.89 |
| 1436001_PM_at   | Minos1                                                                                                                                                            | MINOS1   | 0.33  | 5.38 | 1.27  | 2.32E-01 | 5.24E-01 | -5.89 |
| 1419763_PM_at   | Nkap                                                                                                                                                              | NKAP     | 0.26  | 2.40 | 1.27  | 2.32E-01 | 5.24E-01 | -5.89 |
| 1446152_PM_at   | ---                                                                                                                                                               | NA       | 0.22  | 2.54 | 1.27  | 2.32E-01 | 5.25E-01 | -5.89 |

|                 |                                                                                                                              |             |       |      |       |          |          |       |
|-----------------|------------------------------------------------------------------------------------------------------------------------------|-------------|-------|------|-------|----------|----------|-------|
| 1460020_PM_at   | ---                                                                                                                          | NA          | 0.25  | 3.22 | 1.27  | 2.32E-01 | 5.25E-01 | -5.89 |
| 1431687_PM_at   | Gmfb                                                                                                                         | GMFB        | 0.11  | 2.39 | 1.27  | 2.32E-01 | 5.25E-01 | -5.89 |
| 1434464_PM_at   | Aqp12                                                                                                                        | AQP12B      | 0.15  | 2.43 | 1.27  | 2.32E-01 | 5.25E-01 | -5.89 |
| 1420823_PM_at   | Sema4d                                                                                                                       | SEMA4D      | 0.16  | 2.15 | 1.27  | 2.32E-01 | 5.25E-01 | -5.89 |
| 1430190_PM_at   | Ccdc30                                                                                                                       | CCDC30      | 0.24  | 2.98 | 1.27  | 2.32E-01 | 5.25E-01 | -5.89 |
| 1419403_PM_at   | Smco4                                                                                                                        | SMCO4       | 0.36  | 2.50 | 1.27  | 2.32E-01 | 5.25E-01 | -5.89 |
| 1438284_PM_at   | Ocrl                                                                                                                         | OURL        | 0.11  | 2.18 | 1.27  | 2.32E-01 | 5.25E-01 | -5.89 |
| 1432030_PM_at   | 4930434J06Rik                                                                                                                | NA          | 0.16  | 2.34 | 1.27  | 2.32E-01 | 5.25E-01 | -5.89 |
| 1460648_PM_at   | Nr2f6                                                                                                                        | NR2F6       | 0.19  | 3.65 | 1.27  | 2.32E-01 | 5.25E-01 | -5.89 |
| 1441393_PM_at   | ---                                                                                                                          | NA          | 0.13  | 2.11 | 1.27  | 2.32E-01 | 5.25E-01 | -5.89 |
| 1458457_PM_at   | ---                                                                                                                          | NA          | 0.15  | 2.71 | 1.27  | 2.32E-01 | 5.25E-01 | -5.89 |
| 1434946_PM_at   | Dnajc27                                                                                                                      | DNAJC27     | -0.18 | 2.60 | -1.27 | 2.32E-01 | 5.25E-01 | -5.89 |
| 1420505_PM_a_at | Stxbp1                                                                                                                       | STXBP1      | -0.46 | 8.69 | -1.27 | 2.32E-01 | 5.25E-01 | -5.89 |
| 1430849_PM_a_at | Cgrrf1                                                                                                                       | CGRRF1      | -0.25 | 2.37 | -1.27 | 2.32E-01 | 5.25E-01 | -5.89 |
| 1447625_PM_at   | Ezf5                                                                                                                         | EZF5        | 0.10  | 2.10 | 1.27  | 2.32E-01 | 5.25E-01 | -5.89 |
| 1433002_PM_at   | ---                                                                                                                          | NA          | 0.20  | 2.59 | 1.27  | 2.32E-01 | 5.25E-01 | -5.89 |
| 1443148_PM_at   | Ube2k                                                                                                                        | UBE2K       | 0.27  | 2.66 | 1.27  | 2.32E-01 | 5.25E-01 | -5.89 |
| 1442196_PM_at   | A930006K02Rik                                                                                                                | NA          | 0.10  | 1.93 | 1.27  | 2.32E-01 | 5.25E-01 | -5.89 |
| 1449370_PM_at   | Sox4                                                                                                                         | SOX4        | 0.75  | 2.68 | 1.27  | 2.32E-01 | 5.25E-01 | -5.89 |
| 1420465_PM_s_at | Gm2083 /// Gm21320 /// Mup1 /// Mup10 /// Mup12 /// Mup13 /// Mup14 /// Mup15 /// Mup17 /// Mup19 /// Mup2 /// Mup7 /// Mup8 | NA          | -0.52 | 7.66 | -1.27 | 2.32E-01 | 5.25E-01 | -5.89 |
| 1452710_PM_at   | Rpusd4                                                                                                                       | RPUUSD4     | 0.16  | 2.57 | 1.27  | 2.32E-01 | 5.25E-01 | -5.89 |
| 1449355_PM_a_at | Eps15l1                                                                                                                      | EPS15L1     | -0.24 | 2.83 | -1.27 | 2.32E-01 | 5.25E-01 | -5.89 |
| 1432499_PM_a_at | Ube4b                                                                                                                        | UBE4B       | -0.16 | 2.97 | -1.27 | 2.32E-01 | 5.25E-01 | -5.89 |
| 1438937_PM_x_at | Ang                                                                                                                          | ANG         | -0.15 | 2.30 | -1.27 | 2.32E-01 | 5.25E-01 | -5.89 |
| 1418465_PM_at   | Ncf4                                                                                                                         | NCF4        | 0.13  | 2.62 | 1.27  | 2.32E-01 | 5.25E-01 | -5.89 |
| 1419847_PM_at   | ---                                                                                                                          | NA          | 0.16  | 2.55 | 1.27  | 2.32E-01 | 5.25E-01 | -5.89 |
| 1444980_PM_at   | Onecut2                                                                                                                      | ONECUT2     | 0.17  | 4.15 | 1.27  | 2.32E-01 | 5.25E-01 | -5.89 |
| 1427981_PM_a_at | Csad                                                                                                                         | CSAD        | 0.19  | 2.74 | 1.27  | 2.32E-01 | 5.25E-01 | -5.89 |
| 1434773_PM_a_at | Slc2a1                                                                                                                       | SLC2A1      | -0.96 | 7.37 | -1.27 | 2.32E-01 | 5.25E-01 | -5.89 |
| 1459931_PM_a_at | ---                                                                                                                          | NA          | 0.15  | 2.82 | 1.27  | 2.32E-01 | 5.25E-01 | -5.89 |
| 1434605_PM_at   | Eif5b                                                                                                                        | EIF5B       | -0.52 | 4.54 | -1.27 | 2.32E-01 | 5.25E-01 | -5.89 |
| 1423441_PM_at   | Tfb2m                                                                                                                        | TFB2M       | 0.23  | 2.87 | 1.27  | 2.32E-01 | 5.25E-01 | -5.89 |
| 1450815_PM_s_at | Chchd2 /// Gm13202 /// LOC102641790 /// Zbed5                                                                                | ZBED8       | -0.19 | 4.16 | -1.27 | 2.32E-01 | 5.25E-01 | -5.89 |
| 1443357_PM_at   | ---                                                                                                                          | NA          | -0.33 | 3.43 | -1.27 | 2.32E-01 | 5.25E-01 | -5.89 |
| 1421788_PM_x_at | Egfbp2                                                                                                                       | NA          | 0.15  | 2.33 | 1.27  | 2.32E-01 | 5.25E-01 | -5.89 |
| 1424002_PM_at   | Pdc1b                                                                                                                        | PDCL3       | -0.18 | 3.44 | -1.27 | 2.32E-01 | 5.25E-01 | -5.89 |
| 1446857_PM_at   | C87115                                                                                                                       | NA          | 0.10  | 2.01 | 1.27  | 2.32E-01 | 5.25E-01 | -5.89 |
| 1444641_PM_at   | Cenpo                                                                                                                        | CENPO       | 0.17  | 3.43 | 1.27  | 2.32E-01 | 5.25E-01 | -5.89 |
| 1441590_PM_at   | Kcnj5                                                                                                                        | KCNJ5       | 0.23  | 2.47 | 1.27  | 2.32E-01 | 5.25E-01 | -5.89 |
| 1427678_PM_at   | Zim3                                                                                                                         | NA          | 0.42  | 4.09 | 1.27  | 2.32E-01 | 5.25E-01 | -5.89 |
| 1442092_PM_at   | Fancd2                                                                                                                       | FANCD2      | 0.10  | 2.33 | 1.27  | 2.32E-01 | 5.25E-01 | -5.90 |
| 1456425_PM_at   | Arhgap20os                                                                                                                   | NA          | 0.14  | 2.19 | 1.27  | 2.32E-01 | 5.25E-01 | -5.90 |
| 1441411_PM_at   | ---                                                                                                                          | NA          | 0.17  | 2.59 | 1.27  | 2.32E-01 | 5.25E-01 | -5.90 |
| 1459797_PM_at   | ---                                                                                                                          | NA          | 0.20  | 2.47 | 1.27  | 2.32E-01 | 5.25E-01 | -5.90 |
| 1432999_PM_at   | Pde11a                                                                                                                       | NA          | 0.23  | 2.66 | 1.27  | 2.32E-01 | 5.25E-01 | -5.89 |
| 1458561_PM_at   | Neur1a                                                                                                                       | NEURL1      | 0.14  | 2.67 | 1.27  | 2.33E-01 | 5.25E-01 | -5.90 |
| 1429159_PM_at   | Itih5                                                                                                                        | ITIH5       | -0.25 | 2.34 | -1.27 | 2.33E-01 | 5.25E-01 | -5.90 |
| 1444612_PM_at   | Ppp2r3a                                                                                                                      | PPP2R3A     | -0.13 | 2.13 | -1.27 | 2.33E-01 | 5.25E-01 | -5.90 |
| 1459503_PM_at   | Gm3764                                                                                                                       | NA          | 0.17  | 2.94 | 1.27  | 2.33E-01 | 5.25E-01 | -5.90 |
| 1435620_PM_at   | Pfdn2                                                                                                                        | PFDN2       | 0.20  | 3.68 | 1.27  | 2.33E-01 | 5.25E-01 | -5.90 |
| 1442422_PM_at   | ---                                                                                                                          | NA          | 0.22  | 3.44 | 1.27  | 2.33E-01 | 5.25E-01 | -5.90 |
| 1456947_PM_at   | ---                                                                                                                          | NA          | 0.41  | 2.59 | 1.27  | 2.33E-01 | 5.25E-01 | -5.90 |
| 1429618_PM_at   | Cyld                                                                                                                         | CYLD        | -0.43 | 5.21 | -1.27 | 2.33E-01 | 5.25E-01 | -5.90 |
| 1421475_PM_at   | Ms4a2                                                                                                                        | MS4A2       | 0.13  | 2.65 | 1.27  | 2.33E-01 | 5.25E-01 | -5.90 |
| 1451466_PM_at   | D16Ert472e                                                                                                                   | NA          | 0.11  | 3.05 | 1.27  | 2.33E-01 | 5.26E-01 | -5.90 |
| 1430445_PM_at   | Akap13                                                                                                                       | AKAP13      | 0.13  | 2.39 | 1.27  | 2.33E-01 | 5.26E-01 | -5.90 |
| 1444741_PM_at   | Dock2                                                                                                                        | DOCK2       | 0.13  | 2.54 | 1.27  | 2.33E-01 | 5.26E-01 | -5.90 |
| 1421069_PM_at   | Phf2                                                                                                                         | PHF2        | 0.20  | 2.30 | 1.27  | 2.33E-01 | 5.26E-01 | -5.90 |
| 1441913_PM_at   | Luzp2                                                                                                                        | NA          | -0.17 | 2.31 | -1.27 | 2.33E-01 | 5.26E-01 | -5.90 |
| 1430928_PM_at   | ---                                                                                                                          | NA          | 0.14  | 2.32 | 1.27  | 2.33E-01 | 5.26E-01 | -5.90 |
| 1435985_PM_at   | ---                                                                                                                          | NA          | 0.21  | 2.51 | 1.27  | 2.33E-01 | 5.26E-01 | -5.90 |
| 1417023_PM_a_at | Fabp4                                                                                                                        | FABP4       | 0.26  | 3.00 | 1.27  | 2.33E-01 | 5.26E-01 | -5.90 |
| 1437524_PM_x_at | Coro7                                                                                                                        | CORO7-PAM16 | 0.62  | 5.90 | 1.27  | 2.33E-01 | 5.26E-01 | -5.90 |
| 1443128_PM_at   | ---                                                                                                                          | NA          | 0.16  | 2.36 | 1.27  | 2.33E-01 | 5.26E-01 | -5.90 |
| 1440736_PM_at   | Al131651                                                                                                                     | NA          | 0.16  | 2.42 | 1.27  | 2.33E-01 | 5.26E-01 | -5.90 |
| 1423163_PM_at   | Gpank1                                                                                                                       | GPANK1      | 0.32  | 2.83 | 1.27  | 2.33E-01 | 5.26E-01 | -5.90 |
| 1457131_PM_at   | Fry                                                                                                                          | FRY         | 0.26  | 2.92 | 1.27  | 2.33E-01 | 5.26E-01 | -5.90 |
| 1430712_PM_at   | Arhgap24                                                                                                                     | ARHGAP24    | 0.12  | 2.23 | 1.27  | 2.33E-01 | 5.26E-01 | -5.90 |
| 1424291_PM_at   | Nup93                                                                                                                        | NUP93       | 0.45  | 4.55 | 1.27  | 2.33E-01 | 5.26E-01 | -5.90 |

|                 |                                     |            |       |       |       |          |          |       |
|-----------------|-------------------------------------|------------|-------|-------|-------|----------|----------|-------|
| 1451468_PM_s_at | Xpo5                                | XPO5       | 0.27  | 3.31  | 1.27  | 2.33E-01 | 5.26E-01 | -5.90 |
| 1437786_PM_at   | Naa11                               | NAA11      | 0.10  | 2.08  | 1.27  | 2.33E-01 | 5.26E-01 | -5.90 |
| 1447858_PM_x_at | Il4ra                               | IL4R       | 0.20  | 3.03  | 1.27  | 2.33E-01 | 5.26E-01 | -5.90 |
| 1416337_PM_at   | Uqcrb                               | UQCRB      | -0.46 | 5.26  | -1.27 | 2.33E-01 | 5.26E-01 | -5.90 |
| 1425936_PM_a_at | Ankmy2                              | ANKMY2     | -0.35 | 2.90  | -1.27 | 2.33E-01 | 5.26E-01 | -5.90 |
| 1422010_PM_at   | Tlr7                                | TLR7       | -0.11 | 2.01  | -1.27 | 2.33E-01 | 5.26E-01 | -5.90 |
| 1422201_PM_at   | Gm20506 /// H2-Ob                   | HLA-DOB    | 0.10  | 2.30  | 1.27  | 2.33E-01 | 5.26E-01 | -5.90 |
| 1453031_PM_at   | Tmem174                             | TMEM174    | 0.17  | 2.18  | 1.27  | 2.33E-01 | 5.26E-01 | -5.90 |
| 1447681_PM_x_at | ---                                 | NA         | 0.14  | 3.10  | 1.27  | 2.33E-01 | 5.26E-01 | -5.90 |
| 1421217_PM_a_at | Lgals9                              | LGALS9B    | 0.14  | 2.43  | 1.27  | 2.33E-01 | 5.26E-01 | -5.90 |
| 1447806_PM_s_at | Srpk3                               | SRPK3      | 0.41  | 2.28  | 1.27  | 2.33E-01 | 5.26E-01 | -5.90 |
| 1435414_PM_s_at | Dctn1                               | DCTN1      | -0.34 | 4.72  | -1.27 | 2.33E-01 | 5.26E-01 | -5.90 |
| 1453388_PM_at   | 4933416M07Rik                       | NA         | 0.14  | 2.24  | 1.27  | 2.33E-01 | 5.26E-01 | -5.90 |
| 1440812_PM_at   | ---                                 | NA         | 0.13  | 2.05  | 1.27  | 2.33E-01 | 5.26E-01 | -5.90 |
| 1425448_PM_x_at | Atp6v0b                             | NA         | -0.19 | 3.29  | -1.27 | 2.33E-01 | 5.26E-01 | -5.90 |
| 1417219_PM_s_at | Tmsb10                              | TMSB10     | 0.84  | 5.29  | 1.27  | 2.33E-01 | 5.26E-01 | -5.90 |
| 1452180_PM_at   | Jade1                               | JADE1      | 0.19  | 2.57  | 1.27  | 2.34E-01 | 5.26E-01 | -5.90 |
| 1426956_PM_a_at | Trp53bp1                            | TP53BP1    | 0.20  | 10.91 | 1.26  | 2.34E-01 | 5.27E-01 | -5.90 |
| 1429578_PM_at   | Prss52                              | NA         | 0.15  | 2.26  | 1.26  | 2.34E-01 | 5.27E-01 | -5.90 |
| 1434165_PM_at   | Clic6                               | CLIC6      | 0.15  | 2.30  | 1.26  | 2.34E-01 | 5.27E-01 | -5.90 |
| 1435130_PM_at   | Tvp23a                              | TVP23A     | -0.28 | 3.00  | -1.26 | 2.34E-01 | 5.27E-01 | -5.90 |
| 1425791_PM_at   | Pon2                                | PON2       | -0.16 | 2.65  | -1.26 | 2.34E-01 | 5.27E-01 | -5.90 |
| 1459163_PM_at   | ---                                 | NA         | 0.14  | 2.45  | 1.26  | 2.34E-01 | 5.27E-01 | -5.90 |
| 1431202_PM_at   | Herc3                               | HERC3      | 0.23  | 2.99  | 1.26  | 2.34E-01 | 5.27E-01 | -5.90 |
| 1439943_PM_at   | Vps54                               | VPS54      | -0.10 | 2.24  | -1.26 | 2.34E-01 | 5.27E-01 | -5.90 |
| 1432697_PM_at   | 5830431M20Rik                       | NA         | 0.22  | 2.88  | 1.26  | 2.34E-01 | 5.27E-01 | -5.90 |
| 1422095_PM_a_at | Cmpk2                               | CMPK2      | 0.18  | 2.78  | 1.26  | 2.34E-01 | 5.27E-01 | -5.90 |
| 1425155_PM_x_at | Csf1                                | CSF1       | 0.11  | 2.54  | 1.26  | 2.34E-01 | 5.27E-01 | -5.90 |
| 1445498_PM_at   | ---                                 | NA         | 0.27  | 3.15  | 1.26  | 2.34E-01 | 5.27E-01 | -5.90 |
| 1452727_PM_at   | R3hdm2                              | R3HDM2     | 0.31  | 6.23  | 1.26  | 2.34E-01 | 5.27E-01 | -5.90 |
| 1451656_PM_at   | Clmn                                | CLMN       | 0.37  | 2.82  | 1.26  | 2.34E-01 | 5.27E-01 | -5.90 |
| 1433854_PM_at   | Tmem164                             | NA         | -0.35 | 2.89  | -1.26 | 2.34E-01 | 5.27E-01 | -5.90 |
| 1416757_PM_at   | Zwilch                              | ZWILCH     | -0.33 | 2.35  | -1.26 | 2.34E-01 | 5.27E-01 | -5.90 |
| 1416948_PM_at   | Mrp23 /// Mrpl23-ps1                | ACO04556.1 | -0.30 | 3.68  | -1.26 | 2.34E-01 | 5.27E-01 | -5.90 |
| 1451315_PM_at   | Tmem101                             | TMEM101    | -0.21 | 2.78  | -1.26 | 2.34E-01 | 5.27E-01 | -5.90 |
| 1426570_PM_a_at | Frk                                 | FRK        | 0.13  | 2.34  | 1.26  | 2.34E-01 | 5.27E-01 | -5.90 |
| 1442199_PM_at   | Btl2                                | BTNL2      | 0.15  | 2.47  | 1.26  | 2.34E-01 | 5.27E-01 | -5.90 |
| 1448126_PM_at   | Fam60a /// Gm41465 /// LOC102636734 | FAM60A     | 0.36  | 3.74  | 1.26  | 2.34E-01 | 5.27E-01 | -5.90 |
| 1441607_PM_at   | AU015603                            | NA         | -0.29 | 2.73  | -1.26 | 2.34E-01 | 5.27E-01 | -5.90 |
| 1458058_PM_at   | ---                                 | NA         | 0.35  | 3.92  | 1.26  | 2.34E-01 | 5.27E-01 | -5.90 |
| 1457292_PM_at   | Taf1d                               | NA         | 0.47  | 4.59  | 1.26  | 2.34E-01 | 5.27E-01 | -5.90 |
| 1449835_PM_at   | Pcdc1                               | PDCD1      | 0.19  | 2.42  | 1.26  | 2.34E-01 | 5.27E-01 | -5.90 |
| 1447691_PM_x_at | ---                                 | NA         | 0.66  | 4.06  | 1.26  | 2.34E-01 | 5.27E-01 | -5.90 |
| 1421969_PM_a_at | Faah                                | FAAH       | -0.25 | 4.41  | -1.26 | 2.34E-01 | 5.27E-01 | -5.90 |
| 1459444_PM_at   | Zfp91 /// Zfp91Cntf                 | NA         | 0.46  | 2.43  | 1.26  | 2.34E-01 | 5.27E-01 | -5.90 |
| 1457515_PM_at   | ---                                 | NA         | 0.17  | 2.48  | 1.26  | 2.34E-01 | 5.27E-01 | -5.90 |
| 1437136_PM_at   | ---                                 | NA         | 0.12  | 2.43  | 1.26  | 2.34E-01 | 5.27E-01 | -5.90 |
| 1427063_PM_at   | 5330417C22Rik                       | KIAA1324   | -0.14 | 2.50  | -1.26 | 2.34E-01 | 5.28E-01 | -5.90 |
| 1430426_PM_at   | ---                                 | NA         | 0.15  | 2.73  | 1.26  | 2.34E-01 | 5.28E-01 | -5.90 |
| 1428831_PM_at   | Senp5                               | NA         | 0.18  | 2.76  | 1.26  | 2.34E-01 | 5.28E-01 | -5.90 |
| 1437440_PM_at   | ---                                 | NA         | 0.51  | 2.64  | 1.26  | 2.34E-01 | 5.28E-01 | -5.90 |
| 1455993_PM_at   | Tenm4                               | TENM4      | -0.24 | 3.13  | -1.26 | 2.34E-01 | 5.28E-01 | -5.90 |
| 1459689_PM_at   | ---                                 | NA         | 0.23  | 2.45  | 1.26  | 2.34E-01 | 5.28E-01 | -5.90 |
| 1420870_PM_at   | Mllt10                              | MLLT10     | -0.21 | 2.88  | -1.26 | 2.34E-01 | 5.28E-01 | -5.90 |
| 1432375_PM_a_at | Spata3                              | SPATA3     | 0.11  | 2.20  | 1.26  | 2.34E-01 | 5.28E-01 | -5.90 |
| 1432787_PM_at   | ---                                 | NA         | 0.14  | 2.59  | 1.26  | 2.34E-01 | 5.28E-01 | -5.90 |
| 1418322_PM_at   | Creml                               | CREM       | 0.28  | 3.11  | 1.26  | 2.34E-01 | 5.28E-01 | -5.90 |
| 1452426_PM_x_at | ---                                 | NA         | -0.29 | 2.75  | -1.26 | 2.35E-01 | 5.28E-01 | -5.90 |
| 1459881_PM_at   | Fbl1                                | FBLL1      | 0.16  | 3.10  | 1.26  | 2.35E-01 | 5.28E-01 | -5.90 |
| 1426091_PM_a_at | Wnt10b                              | WNT10B     | 0.10  | 2.65  | 1.26  | 2.35E-01 | 5.28E-01 | -5.90 |
| 1422248_PM_at   | Irs4                                | IRS4       | 0.17  | 2.45  | 1.26  | 2.35E-01 | 5.28E-01 | -5.90 |
| 1442376_PM_at   | Ablim1                              | ABLIM1     | 0.20  | 2.81  | 1.26  | 2.35E-01 | 5.28E-01 | -5.90 |
| 1452585_PM_at   | Mrp528                              | MRPS28     | 0.16  | 3.03  | 1.26  | 2.35E-01 | 5.28E-01 | -5.90 |
| 1429526_PM_at   | Brd8                                | BRD8       | 0.22  | 2.41  | 1.26  | 2.35E-01 | 5.28E-01 | -5.90 |
| 1457719_PM_at   | ---                                 | NA         | 0.13  | 3.02  | 1.26  | 2.35E-01 | 5.28E-01 | -5.90 |
| 1429213_PM_at   | Ndufaf6                             | NDUFAF6    | 0.13  | 2.55  | 1.26  | 2.35E-01 | 5.28E-01 | -5.90 |
| 1448974_PM_at   | Dcx                                 | DCX        | 0.14  | 2.28  | 1.26  | 2.35E-01 | 5.28E-01 | -5.90 |
| 1437050_PM_s_at | Angel2                              | ANGEL2     | -0.32 | 6.03  | -1.26 | 2.35E-01 | 5.28E-01 | -5.90 |
| 1457297_PM_at   | ---                                 | NA         | 0.14  | 2.15  | 1.26  | 2.35E-01 | 5.28E-01 | -5.90 |
| 1450690_PM_at   | Ranbp2                              | RANBP2     | -0.41 | 6.30  | -1.26 | 2.35E-01 | 5.28E-01 | -5.90 |
| 1434936_PM_at   | Hirip3                              | HIRIP3     | 0.17  | 2.71  | 1.26  | 2.35E-01 | 5.28E-01 | -5.90 |
| 1458742_PM_at   | Adgrl3                              | NA         | -0.29 | 3.01  | -1.26 | 2.35E-01 | 5.28E-01 | -5.90 |
| 1439877_PM_at   | ---                                 | NA         | 0.09  | 2.43  | 1.26  | 2.35E-01 | 5.28E-01 | -5.90 |
| 1432656_PM_at   | 3222402N08Rik                       | NA         | 0.11  | 2.41  | 1.26  | 2.35E-01 | 5.28E-01 | -5.90 |

|                         |                                       |          |       |       |       |          |          |       |
|-------------------------|---------------------------------------|----------|-------|-------|-------|----------|----------|-------|
| 1419770_PM_at           | ---                                   | NA       | 0.15  | 2.53  | 1.26  | 2.35E-01 | 5.28E-01 | -5.90 |
| 1427062_PM_at           | Rbbp8                                 | RBBP8    | 0.22  | 3.01  | 1.26  | 2.35E-01 | 5.28E-01 | -5.90 |
| 1433015_PM_at           | ---                                   | NA       | 0.33  | 2.59  | 1.26  | 2.35E-01 | 5.28E-01 | -5.90 |
| 1453540_PM_at           | ---                                   | NA       | -0.13 | 2.33  | -1.26 | 2.35E-01 | 5.28E-01 | -5.90 |
| 1442282_PM_at           | ---                                   | NA       | -0.40 | 3.02  | -1.26 | 2.35E-01 | 5.28E-01 | -5.90 |
| 1443249_PM_at           | ---                                   | NA       | 0.11  | 2.40  | 1.26  | 2.35E-01 | 5.28E-01 | -5.90 |
| 1459869_PM_x_at         | Pdpr                                  | PDPR     | 0.41  | 5.53  | 1.26  | 2.35E-01 | 5.28E-01 | -5.90 |
| 1438863_PM_at           | A530079E22Rik                         | NA       | 0.13  | 2.41  | 1.26  | 2.35E-01 | 5.28E-01 | -5.90 |
| 1419050_PM_at           | Tmem8c                                | TMEM8C   | 0.14  | 2.38  | 1.26  | 2.35E-01 | 5.28E-01 | -5.90 |
| 1453019_PM_at           | Nvl                                   | NVL      | -0.28 | 2.62  | -1.26 | 2.35E-01 | 5.28E-01 | -5.90 |
| 1427303_PM_at           | Enpp3                                 | NA       | 0.12  | 2.32  | 1.26  | 2.35E-01 | 5.28E-01 | -5.90 |
| 1427924_PM_at           | Stx17                                 | STX17    | 0.20  | 2.78  | 1.26  | 2.35E-01 | 5.28E-01 | -5.90 |
| AFFX-NonspecificGC21_at | ---                                   | NA       | 0.09  | 2.15  | 1.26  | 2.35E-01 | 5.28E-01 | -5.90 |
| 1451394_PM_at           | Dpp6                                  | DPP6     | -0.29 | 4.76  | -1.26 | 2.35E-01 | 5.29E-01 | -5.90 |
| 1429106_PM_at           | Hspa4l                                | HSPA4L   | -0.29 | 3.43  | -1.26 | 2.35E-01 | 5.29E-01 | -5.90 |
| 1436139_PM_at           | Mdga2                                 | NA       | -0.35 | 2.35  | -1.26 | 2.35E-01 | 5.29E-01 | -5.90 |
| 1460120_PM_at           | Ablim1                                | ABLIM1   | 0.18  | 3.48  | 1.26  | 2.35E-01 | 5.29E-01 | -5.90 |
| 1438435_PM_at           | Acer3                                 | ACER3    | 0.18  | 2.42  | 1.26  | 2.35E-01 | 5.29E-01 | -5.90 |
| 1438748_PM_at           | Cacl1                                 | NA       | -0.19 | 2.56  | -1.26 | 2.35E-01 | 5.29E-01 | -5.91 |
| 1419007_PM_at           | Zp3                                   | ZP3      | -0.11 | 2.37  | -1.26 | 2.35E-01 | 5.29E-01 | -5.91 |
| 1424934_PM_at           | Ugt2b1                                | UGT2B15  | 0.40  | 2.58  | 1.26  | 2.35E-01 | 5.29E-01 | -5.91 |
| 1433822_PM_x_at         | Anapc5                                | ANAPC5   | -0.32 | 8.56  | -1.26 | 2.35E-01 | 5.29E-01 | -5.91 |
| 1449637_PM_at           | Cdh4                                  | CDH4     | 0.16  | 3.30  | 1.26  | 2.35E-01 | 5.29E-01 | -5.91 |
| 1431795_PM_a_at         | Sema3b                                | SEMA3B   | -0.14 | 2.48  | -1.26 | 2.36E-01 | 5.29E-01 | -5.91 |
| 1449547_PM_at           | Asb14                                 | ASB14    | 0.17  | 2.46  | 1.26  | 2.36E-01 | 5.29E-01 | -5.91 |
| 1428685_PM_at           | Syce1                                 | SYCE1    | 0.12  | 2.26  | 1.26  | 2.36E-01 | 5.29E-01 | -5.91 |
| 1430067_PM_at           | 5430401F13Rik ///<br>LOC102638913     | NA       | 0.18  | 2.96  | 1.26  | 2.36E-01 | 5.29E-01 | -5.91 |
| 1424099_PM_at           | Gpx8                                  | GPX8     | 0.25  | 2.60  | 1.26  | 2.36E-01 | 5.29E-01 | -5.91 |
| 1445945_PM_at           | AU021880                              | NA       | 0.53  | 2.95  | 1.26  | 2.36E-01 | 5.29E-01 | -5.91 |
| 1437521_PM_s_at         | Ammecr1l                              | AMMECR1L | -0.65 | 3.81  | -1.26 | 2.36E-01 | 5.29E-01 | -5.91 |
| 1424135_PM_at           | Rspry1                                | RSPRY1   | -0.26 | 3.36  | -1.26 | 2.36E-01 | 5.29E-01 | -5.91 |
| 1421110_PM_at           | Mtdh                                  | MTDH     | 0.16  | 2.41  | 1.26  | 2.36E-01 | 5.29E-01 | -5.91 |
| 1444067_PM_at           | Pde1c                                 | PDE1C    | 0.15  | 2.24  | 1.26  | 2.36E-01 | 5.29E-01 | -5.91 |
| 1430324_PM_x_at         | 1700049E17Rik1                        | NA       | 0.38  | 4.40  | 1.26  | 2.36E-01 | 5.29E-01 | -5.91 |
| 1416186_PM_at           | Pnrc2                                 | PNRC2    | -0.38 | 5.66  | -1.26 | 2.36E-01 | 5.29E-01 | -5.91 |
| 1423879_PM_at           | D030056L22Rik                         | C9orf40  | -0.20 | 2.73  | -1.26 | 2.36E-01 | 5.29E-01 | -5.91 |
| 1432544_PM_at           | 4930449E01Rik                         | NA       | 0.10  | 2.37  | 1.26  | 2.36E-01 | 5.29E-01 | -5.91 |
| 1456734_PM_at           | Txn1                                  | TXN      | 0.13  | 2.27  | 1.26  | 2.36E-01 | 5.29E-01 | -5.91 |
| 1453811_PM_at           | Hspa9                                 | HSPA9    | 0.17  | 2.80  | 1.26  | 2.36E-01 | 5.29E-01 | -5.91 |
| 1458812_PM_at           | ---                                   | NA       | 0.24  | 2.55  | 1.26  | 2.36E-01 | 5.29E-01 | -5.91 |
| 1451384_PM_at           | Kdm8                                  | KDM8     | 0.25  | 2.30  | 1.26  | 2.36E-01 | 5.29E-01 | -5.91 |
| 1443799_PM_at           | ---                                   | NA       | 0.35  | 5.27  | 1.26  | 2.36E-01 | 5.29E-01 | -5.91 |
| 1449813_PM_at           | Zfp30                                 | ZFP30    | -0.67 | 3.00  | -1.26 | 2.36E-01 | 5.29E-01 | -5.91 |
| 1435645_PM_at           | Mmd                                   | MMD      | -0.29 | 3.59  | -1.26 | 2.36E-01 | 5.29E-01 | -5.91 |
| 1456309_PM_x_at         | Laspl                                 | LASP1    | -0.23 | 5.49  | -1.26 | 2.36E-01 | 5.29E-01 | -5.91 |
| 1428161_PM_a_at         | Chchd2 ///Gm13202 ///<br>LOC102641790 | CHCHD2   | -0.16 | 10.82 | -1.26 | 2.36E-01 | 5.29E-01 | -5.91 |
| 1445257_PM_at           | AU022531                              | NA       | 0.11  | 2.23  | 1.26  | 2.36E-01 | 5.29E-01 | -5.91 |
| 1448367_PM_at           | Sdf4                                  | SDF4     | 0.16  | 2.36  | 1.26  | 2.36E-01 | 5.29E-01 | -5.91 |
| 1419798_PM_at           | Rab26os                               | NA       | 0.28  | 2.53  | 1.26  | 2.36E-01 | 5.29E-01 | -5.91 |
| 1431415_PM_a_at         | Tbpl1                                 | TBPL1    | 0.38  | 5.45  | 1.26  | 2.36E-01 | 5.29E-01 | -5.91 |
| 1423695_PM_at           | Edem2                                 | EDEM2    | 0.30  | 2.78  | 1.26  | 2.36E-01 | 5.29E-01 | -5.91 |
| 1456013_PM_x_at         | Slc35a4                               | SLC35A4  | -0.25 | 2.15  | -1.26 | 2.36E-01 | 5.29E-01 | -5.91 |
| 1459481_PM_at           | ---                                   | NA       | 0.21  | 2.48  | 1.26  | 2.36E-01 | 5.29E-01 | -5.91 |
| 1436119_PM_at           | Aldh1l2                               | ALDH1L2  | 0.31  | 3.60  | 1.26  | 2.36E-01 | 5.29E-01 | -5.91 |
| 1426416_PM_a_at         | Yipf4                                 | YIPF4    | -0.52 | 4.06  | -1.26 | 2.36E-01 | 5.29E-01 | -5.91 |
| 1441720_PM_at           | Stamos                                | NA       | 0.10  | 2.67  | 1.26  | 2.36E-01 | 5.29E-01 | -5.91 |
| 1454017_PM_at           | 4921509O07Rik                         | NA       | 0.14  | 2.55  | 1.26  | 2.36E-01 | 5.29E-01 | -5.91 |
| 1424354_PM_at           | Tmem140                               | TMEM140  | -0.41 | 2.73  | -1.26 | 2.36E-01 | 5.29E-01 | -5.91 |
| 1456825_PM_at           | ---                                   | NA       | -0.38 | 3.72  | -1.26 | 2.36E-01 | 5.29E-01 | -5.91 |
| 1441127_PM_at           | Slitrk2                               | SLITRK2  | -0.27 | 2.79  | -1.26 | 2.36E-01 | 5.29E-01 | -5.91 |
| 1427892_PM_at           | Myo1g                                 | MYO1G    | 0.10  | 2.34  | 1.26  | 2.36E-01 | 5.29E-01 | -5.91 |
| 1452842_PM_at           | Hspb9                                 | HSPB9    | 0.12  | 2.37  | 1.26  | 2.36E-01 | 5.29E-01 | -5.91 |
| 1420759_PM_s_at         | Zfy1 ///Zfy2                          | ZFY      | 0.17  | 2.30  | 1.26  | 2.36E-01 | 5.29E-01 | -5.91 |
| 1423465_PM_at           | Frrs1                                 | FRRS1    | 0.19  | 2.31  | 1.26  | 2.36E-01 | 5.29E-01 | -5.91 |
| 1418777_PM_at           | Ccl25                                 | CCL25    | 0.32  | 2.45  | 1.26  | 2.36E-01 | 5.29E-01 | -5.91 |
| 1435271_PM_at           | Irf3                                  | IRF3     | 0.12  | 2.55  | 1.26  | 2.36E-01 | 5.29E-01 | -5.91 |
| 1430468_PM_at           | ---                                   | NA       | 0.12  | 2.11  | 1.26  | 2.36E-01 | 5.29E-01 | -5.91 |
| 1443767_PM_at           | Pcmt1                                 | NA       | 0.16  | 2.93  | 1.26  | 2.36E-01 | 5.29E-01 | -5.91 |
| 1439981_PM_at           | ---                                   | NA       | 0.18  | 2.36  | 1.26  | 2.36E-01 | 5.29E-01 | -5.91 |
| 1420661_PM_a_at         | Gid4                                  | GID4     | 0.20  | 2.49  | 1.26  | 2.36E-01 | 5.29E-01 | -5.91 |
| 1424752_PM_x_at         | Zfp65 ///Zfp738                       | ZNF720   | -0.29 | 3.73  | -1.26 | 2.36E-01 | 5.29E-01 | -5.91 |
| 1451707_PM_s_at         | Slc41a3                               | SLC41A3  | 0.10  | 2.14  | 1.26  | 2.36E-01 | 5.29E-01 | -5.91 |
| 1431666_PM_at           | Efcab11                               | NA       | 0.17  | 2.33  | 1.26  | 2.36E-01 | 5.29E-01 | -5.91 |

|                 |                                                                                |            |       |      |       |          |          |       |
|-----------------|--------------------------------------------------------------------------------|------------|-------|------|-------|----------|----------|-------|
| 1450430_PM_at   | Mrc1                                                                           | MRC1       | 0.25  | 2.36 | 1.26  | 2.36E-01 | 5.29E-01 | -5.91 |
| 1438794_PM_x_at | LOC102642137 /// Rps13 /// Rps13-ps1 /// Rps13-ps2 /// Rps13-ps4 /// Rps13-ps5 | NA         | -0.29 | 6.06 | -1.26 | 2.36E-01 | 5.29E-01 | -5.91 |
| 1425030_PM_at   | Zfp622                                                                         | ZNF622     | -0.25 | 2.71 | -1.26 | 2.36E-01 | 5.29E-01 | -5.91 |
| 1438988_PM_x_at | Hn1                                                                            | JPT1       | -0.23 | 7.49 | -1.26 | 2.36E-01 | 5.29E-01 | -5.91 |
| 1437578_PM_at   | Cla2 /// Clca3a2                                                               | NA         | -0.12 | 2.21 | -1.26 | 2.36E-01 | 5.29E-01 | -5.91 |
| 1417843_PM_s_at | Eps8l2                                                                         | EPS8L2     | 0.10  | 2.32 | 1.26  | 2.36E-01 | 5.29E-01 | -5.91 |
| 1439954_PM_at   | Gm29695 /// Lemd1                                                              | LEMD1      | 0.13  | 2.11 | 1.26  | 2.36E-01 | 5.29E-01 | -5.91 |
| 1448415_PM_a_at | Sema3b                                                                         | SEMA3B     | 0.16  | 2.87 | 1.26  | 2.36E-01 | 5.29E-01 | -5.91 |
| 1452669_PM_at   | Fam53c                                                                         | FAM53C     | 0.17  | 2.50 | 1.26  | 2.36E-01 | 5.29E-01 | -5.91 |
| 1440930_PM_a_at | Scrt2                                                                          | SCRT2      | 0.24  | 3.35 | 1.26  | 2.36E-01 | 5.29E-01 | -5.91 |
| 1441472_PM_at   | ---                                                                            | NA         | 0.24  | 2.44 | 1.26  | 2.36E-01 | 5.29E-01 | -5.91 |
| 1459078_PM_at   | ---                                                                            | NA         | 0.26  | 2.64 | 1.26  | 2.36E-01 | 5.29E-01 | -5.91 |
| 1445744_PM_at   | ---                                                                            | NA         | 0.29  | 3.17 | 1.26  | 2.36E-01 | 5.29E-01 | -5.91 |
| 1456680_PM_at   | B3gnt6                                                                         | B3GNT6     | 0.16  | 2.21 | 1.26  | 2.36E-01 | 5.29E-01 | -5.91 |
| 1418056_PM_at   | lqc f3                                                                         | NA         | 0.24  | 3.34 | 1.26  | 2.36E-01 | 5.29E-01 | -5.91 |
| 1421020_PM_at   | Ranbp17                                                                        | RANBP17    | 0.13  | 2.31 | 1.26  | 2.36E-01 | 5.29E-01 | -5.91 |
| 1456104_PM_at   | ---                                                                            | NA         | 0.22  | 2.60 | 1.26  | 2.37E-01 | 5.29E-01 | -5.91 |
| 1425642_PM_at   | Cep290                                                                         | CEP290     | -0.44 | 2.28 | -1.26 | 2.37E-01 | 5.29E-01 | -5.91 |
| 1415727_PM_at   | Apoa1bp                                                                        | NAXE       | -0.37 | 4.24 | -1.26 | 2.37E-01 | 5.29E-01 | -5.91 |
| 1417316_PM_at   | Acot13                                                                         | ACOT13     | -0.34 | 6.63 | -1.26 | 2.37E-01 | 5.29E-01 | -5.91 |
| 1437246_PM_x_at | LOC105244208 /// Rps6                                                          | NA         | -0.19 | 4.23 | -1.26 | 2.37E-01 | 5.29E-01 | -5.91 |
| 1441448_PM_at   | ---                                                                            | NA         | -0.10 | 1.90 | -1.26 | 2.37E-01 | 5.29E-01 | -5.91 |
| 1430563_PM_at   | Mc m9                                                                          | MCM9       | 0.10  | 2.19 | 1.26  | 2.37E-01 | 5.29E-01 | -5.91 |
| 1438617_PM_at   | Serpina7                                                                       | SERPINA7   | 0.11  | 2.33 | 1.26  | 2.37E-01 | 5.29E-01 | -5.91 |
| 1441561_PM_at   | ---                                                                            | NA         | 0.25  | 3.04 | 1.26  | 2.37E-01 | 5.29E-01 | -5.91 |
| 1429009_PM_at   | Snmp70                                                                         | NA         | 0.35  | 4.91 | 1.26  | 2.37E-01 | 5.29E-01 | -5.91 |
| 1436505_PM_at   | Ppig                                                                           | PPIG       | 0.50  | 5.60 | 1.26  | 2.37E-01 | 5.29E-01 | -5.91 |
| 1421265_PM_a_at | Rbm38                                                                          | RBM38      | 0.14  | 2.55 | 1.26  | 2.37E-01 | 5.30E-01 | -5.91 |
| 1458763_PM_at   | C78024                                                                         | NA         | 0.16  | 2.61 | 1.26  | 2.37E-01 | 5.30E-01 | -5.91 |
| 1457782_PM_at   | Tln1                                                                           | TLN1       | 0.20  | 2.48 | 1.26  | 2.37E-01 | 5.30E-01 | -5.91 |
| 1426736_PM_at   | Gspt1                                                                          | GSPT1      | -0.59 | 3.97 | -1.26 | 2.37E-01 | 5.30E-01 | -5.91 |
| 1450112_PM_a_at | Gas2                                                                           | GAS2       | -0.23 | 2.62 | -1.26 | 2.37E-01 | 5.30E-01 | -5.91 |
| 1438811_PM_at   | Dlgap5                                                                         | DLGAP5     | 0.12  | 2.47 | 1.26  | 2.37E-01 | 5.30E-01 | -5.91 |
| 1435579_PM_at   | ---                                                                            | NA         | 0.21  | 3.70 | 1.26  | 2.37E-01 | 5.30E-01 | -5.91 |
| 1457617_PM_at   | Fam228b                                                                        | NA         | 0.22  | 3.25 | 1.26  | 2.37E-01 | 5.30E-01 | -5.91 |
| 1438661_PM_a_at | Arf2                                                                           | NA         | 0.58  | 3.14 | 1.26  | 2.37E-01 | 5.30E-01 | -5.91 |
| 1428392_PM_at   | Rassf2                                                                         | RASSF2     | 0.19  | 2.37 | 1.26  | 2.37E-01 | 5.30E-01 | -5.91 |
| 1453604_PM_a_at | Hbs1l                                                                          | HBS1L      | 0.55  | 3.79 | 1.26  | 2.37E-01 | 5.30E-01 | -5.91 |
| 1446049_PM_at   | ---                                                                            | NA         | 0.15  | 2.60 | 1.25  | 2.37E-01 | 5.30E-01 | -5.91 |
| 1444914_PM_at   | ---                                                                            | NA         | 0.13  | 2.42 | 1.25  | 2.37E-01 | 5.30E-01 | -5.91 |
| 1429508_PM_at   | Z310057M21Rik                                                                  | C10orf88   | -0.61 | 3.21 | -1.25 | 2.37E-01 | 5.30E-01 | -5.91 |
| 1453309_PM_at   | 9330179D12Rik                                                                  | NA         | 0.12  | 2.09 | 1.25  | 2.37E-01 | 5.30E-01 | -5.91 |
| 1453271_PM_at   | Phf14                                                                          | PHF14      | -0.35 | 7.19 | -1.25 | 2.37E-01 | 5.30E-01 | -5.91 |
| 1444504_PM_at   | Dhrs7c                                                                         | DHRS7C     | 0.13  | 2.49 | 1.25  | 2.37E-01 | 5.30E-01 | -5.91 |
| 1420349_PM_at   | Ptgfr                                                                          | PTGFR      | 0.14  | 2.76 | 1.25  | 2.37E-01 | 5.30E-01 | -5.91 |
| 1448854_PM_s_at | Mug-ps1 /// Mug1 /// Mug2 /// Mug4-ps                                          | PZP        | 0.16  | 2.35 | 1.25  | 2.37E-01 | 5.30E-01 | -5.91 |
| 1440691_PM_at   | Cyp2j6                                                                         | CYP2J2     | 0.16  | 2.10 | 1.25  | 2.37E-01 | 5.30E-01 | -5.91 |
| 1445871_PM_at   | Al315376                                                                       | NA         | 0.19  | 2.64 | 1.25  | 2.37E-01 | 5.30E-01 | -5.91 |
| 1432963_PM_at   | 2410049M19Rik                                                                  | NA         | 0.23  | 3.33 | 1.25  | 2.37E-01 | 5.30E-01 | -5.91 |
| 1443850_PM_at   | Gm35558                                                                        | NA         | 0.51  | 5.86 | 1.25  | 2.37E-01 | 5.30E-01 | -5.91 |
| 1444242_PM_at   | Slco2a1                                                                        | SLCO2A1    | 0.53  | 2.90 | 1.25  | 2.37E-01 | 5.30E-01 | -5.91 |
| 1427593_PM_at   | Gm9798                                                                         | NA         | 0.13  | 2.12 | 1.25  | 2.37E-01 | 5.30E-01 | -5.91 |
| 1422169_PM_a_at | Bdnf                                                                           | BDNF       | 0.45  | 4.99 | 1.25  | 2.37E-01 | 5.30E-01 | -5.91 |
| 1415834_PM_at   | Dusp6                                                                          | DUSP6      | -0.26 | 5.29 | -1.25 | 2.37E-01 | 5.30E-01 | -5.91 |
| 1420719_PM_at   | Tex15                                                                          | TEX15      | 0.16  | 2.51 | 1.25  | 2.37E-01 | 5.30E-01 | -5.91 |
| 1437330_PM_at   | Lrrk1                                                                          | LRRK1      | 0.12  | 2.19 | 1.25  | 2.37E-01 | 5.30E-01 | -5.91 |
| 1441515_PM_at   | Fam228b                                                                        | NA         | 0.23  | 2.34 | 1.25  | 2.37E-01 | 5.30E-01 | -5.91 |
| 1432014_PM_at   | ---                                                                            | NA         | 0.12  | 2.20 | 1.25  | 2.37E-01 | 5.30E-01 | -5.91 |
| 1445792_PM_at   | ---                                                                            | NA         | 0.15  | 2.28 | 1.25  | 2.37E-01 | 5.30E-01 | -5.91 |
| 1423830_PM_a_at | Mier2                                                                          | MIER2      | 0.16  | 2.68 | 1.25  | 2.37E-01 | 5.30E-01 | -5.91 |
| 1439995_PM_at   | Slc9b2                                                                         | SLC9B2     | 0.16  | 2.63 | 1.25  | 2.37E-01 | 5.30E-01 | -5.91 |
| 1429975_PM_at   | Prss54                                                                         | PRSS54     | 0.15  | 2.46 | 1.25  | 2.38E-01 | 5.30E-01 | -5.91 |
| 1444613_PM_at   | ---                                                                            | NA         | -0.20 | 2.35 | -1.25 | 2.38E-01 | 5.31E-01 | -5.91 |
| 1436233_PM_at   | Btnl9                                                                          | BTNL9      | 0.11  | 2.37 | 1.25  | 2.38E-01 | 5.31E-01 | -5.91 |
| 1453188_PM_at   | ---                                                                            | NA         | 0.17  | 2.31 | 1.25  | 2.38E-01 | 5.31E-01 | -5.91 |
| 1431659_PM_at   | ---                                                                            | NA         | 0.39  | 2.69 | 1.25  | 2.38E-01 | 5.31E-01 | -5.91 |
| 1423252_PM_at   | Hdgfrp3                                                                        | ACO24270.1 | -0.37 | 3.70 | -1.25 | 2.38E-01 | 5.31E-01 | -5.91 |
| 1417787_PM_at   | Dkk1                                                                           | DKK1       | 0.16  | 2.62 | 1.25  | 2.38E-01 | 5.31E-01 | -5.91 |
| 1425819_PM_at   | Zbtb7c                                                                         | ZBTB7C     | 0.13  | 2.19 | 1.25  | 2.38E-01 | 5.31E-01 | -5.91 |
| 1455967_PM_at   | ---                                                                            | NA         | 0.17  | 2.79 | 1.25  | 2.38E-01 | 5.31E-01 | -5.91 |
| 1451645_PM_at   | Fbrs                                                                           | FBRS       | 0.18  | 2.73 | 1.25  | 2.38E-01 | 5.31E-01 | -5.91 |

|                 |                      |            |       |      |       |          |          |       |
|-----------------|----------------------|------------|-------|------|-------|----------|----------|-------|
| 1450126_PM_at   | Gata5                | GATA5      | 0.10  | 2.88 | 1.25  | 2.38E-01 | 5.31E-01 | -5.91 |
| 1416501_PM_at   | Pdpk1                | PDPK1      | 0.32  | 4.29 | 1.25  | 2.38E-01 | 5.31E-01 | -5.91 |
| 1425607_PM_at   | Hlcs                 | H LCS      | 0.15  | 3.14 | 1.25  | 2.38E-01 | 5.31E-01 | -5.91 |
| 1443986_PM_at   | Cdc73                | CD73       | -0.25 | 2.94 | -1.25 | 2.38E-01 | 5.31E-01 | -5.91 |
| 1443227_PM_at   | Bzw2                 | NA         | 0.26  | 3.17 | 1.25  | 2.38E-01 | 5.31E-01 | -5.91 |
| 1450535_PM_at   | Krtap12-1            | KRTAP12-2  | 0.27  | 2.87 | 1.25  | 2.38E-01 | 5.31E-01 | -5.91 |
| 1455317_PM_at   | Epc2                 | EPC2       | -0.26 | 7.98 | -1.25 | 2.38E-01 | 5.31E-01 | -5.91 |
| 1457995_PM_at   | ---                  | NA         | 0.13  | 2.17 | 1.25  | 2.38E-01 | 5.31E-01 | -5.91 |
| 1442135_PM_at   | Ado                  | ADO        | -0.37 | 2.68 | -1.25 | 2.38E-01 | 5.31E-01 | -5.91 |
| 1437487_PM_at   | Kat6a                | KAT6A      | 0.31  | 3.41 | 1.25  | 2.38E-01 | 5.31E-01 | -5.91 |
| 1460434_PM_at   | Fundc2               | FUNDC2     | -0.45 | 5.85 | -1.25 | 2.38E-01 | 5.31E-01 | -5.91 |
| 1457342_PM_at   | Ikzf4                | IKZF4      | -0.43 | 5.73 | -1.25 | 2.38E-01 | 5.31E-01 | -5.91 |
| 1460191_PM_at   | Ykt6                 | YKT6       | -0.27 | 2.66 | -1.25 | 2.38E-01 | 5.31E-01 | -5.91 |
| 1424378_PM_at   | Ldlrap1              | LDLRAP1    | 0.09  | 2.24 | 1.25  | 2.38E-01 | 5.31E-01 | -5.91 |
| 1430180_PM_at   | Map2k5               | NA         | 0.10  | 2.44 | 1.25  | 2.38E-01 | 5.31E-01 | -5.91 |
| 1429346_PM_a_at | Cep72                | CEP72      | 0.11  | 2.10 | 1.25  | 2.38E-01 | 5.31E-01 | -5.91 |
| 1452569_PM_at   | Skc1b2               | ACO11604.2 | 0.13  | 2.73 | 1.25  | 2.38E-01 | 5.31E-01 | -5.91 |
| 1457257_PM_x_at | Pvr13                | NECTIN3    | -0.95 | 4.34 | -1.25 | 2.38E-01 | 5.31E-01 | -5.91 |
| 1449678_PM_at   | Irf5                 | IRF5       | -0.21 | 4.16 | -1.25 | 2.38E-01 | 5.31E-01 | -5.91 |
| 1451742_PM_a_at | Ugp2                 | UGP2       | -0.18 | 2.69 | -1.25 | 2.38E-01 | 5.31E-01 | -5.91 |
| 1454040_PM_at   | ---                  | NA         | 0.10  | 2.31 | 1.25  | 2.38E-01 | 5.31E-01 | -5.91 |
| 1458138_PM_at   | ---                  | NA         | 0.15  | 2.34 | 1.25  | 2.38E-01 | 5.31E-01 | -5.91 |
| 1420869_PM_at   | Mllt10               | MLLT10     | 0.30  | 2.71 | 1.25  | 2.38E-01 | 5.31E-01 | -5.91 |
| 1441140_PM_at   | ---                  | NA         | 0.13  | 2.10 | 1.25  | 2.38E-01 | 5.31E-01 | -5.92 |
| 1443472_PM_at   | C77691               | NA         | 0.22  | 2.52 | 1.25  | 2.38E-01 | 5.32E-01 | -5.92 |
| 1441295_PM_at   | Lman2l               | LMAN2L     | -0.40 | 4.25 | -1.25 | 2.39E-01 | 5.32E-01 | -5.92 |
| 1436909_PM_at   | Slc25a44             | SLC25A44   | -0.35 | 3.28 | -1.25 | 2.39E-01 | 5.32E-01 | -5.92 |
| 1443396_PM_at   | Smndc1               | SMNDC1     | -0.26 | 2.26 | -1.25 | 2.39E-01 | 5.32E-01 | -5.92 |
| 1423681_PM_at   | Cmtr1 /// Rnf8-cmtr1 | CMTR1      | -0.18 | 2.53 | -1.25 | 2.39E-01 | 5.32E-01 | -5.92 |
| 1422396_PM_s_at | Ascl2                | ASCL2      | 0.10  | 2.09 | 1.25  | 2.39E-01 | 5.32E-01 | -5.92 |
| 1452698_PM_at   | Tsfm                 | TSFM       | 0.11  | 2.53 | 1.25  | 2.39E-01 | 5.32E-01 | -5.92 |
| 1460268_PM_at   | ---                  | NA         | 0.12  | 2.49 | 1.25  | 2.39E-01 | 5.32E-01 | -5.92 |
| 1460513_PM_a_at | Ednra                | EDNRA      | 0.13  | 2.33 | 1.25  | 2.38E-01 | 5.32E-01 | -5.92 |
| 1432986_PM_at   | ---                  | NA         | 0.14  | 2.62 | 1.25  | 2.39E-01 | 5.32E-01 | -5.92 |
| 1438719_PM_at   | Map3k2               | MAP3K2     | 0.15  | 2.43 | 1.25  | 2.39E-01 | 5.32E-01 | -5.92 |
| 1434473_PM_at   | Slc16a5              | SLC16A5    | 0.17  | 2.27 | 1.25  | 2.39E-01 | 5.32E-01 | -5.92 |
| 1418119_PM_at   | Rbm8a                | RBM8A      | 0.31  | 4.99 | 1.25  | 2.39E-01 | 5.32E-01 | -5.92 |
| 1451574_PM_at   | Bcl9                 | BCL9       | 0.51  | 3.78 | 1.25  | 2.39E-01 | 5.32E-01 | -5.92 |
| 1426568_PM_at   | Slc2a9               | SLC2A9     | -0.52 | 3.30 | -1.25 | 2.39E-01 | 5.32E-01 | -5.92 |
| 1459422_PM_at   | ---                  | NA         | 0.10  | 2.25 | 1.25  | 2.39E-01 | 5.32E-01 | -5.92 |
| 1437581_PM_at   | Zfp800               | ZNF800     | -0.18 | 2.49 | -1.25 | 2.39E-01 | 5.32E-01 | -5.92 |
| 1456168_PM_at   | Ccnj1                | CCNJ1      | 0.12  | 2.25 | 1.25  | 2.39E-01 | 5.32E-01 | -5.92 |
| 1434161_PM_at   | Gm7020 /// Lin52     | LIN52      | -0.13 | 2.84 | -1.25 | 2.39E-01 | 5.32E-01 | -5.92 |
| 1433952_PM_at   | Tufm                 | TUFM       | -0.13 | 2.18 | -1.25 | 2.39E-01 | 5.32E-01 | -5.92 |
| 1440460_PM_at   | 4930504013Rik        | NA         | 0.10  | 3.13 | 1.25  | 2.39E-01 | 5.32E-01 | -5.92 |
| 1435301_PM_at   | 1110004E09Rik        | APO00275.2 | 0.20  | 2.95 | 1.25  | 2.39E-01 | 5.32E-01 | -5.92 |
| 1451182_PM_s_at | Ankrd54              | ANKRD54    | 0.20  | 3.00 | 1.25  | 2.39E-01 | 5.32E-01 | -5.92 |
| 1418663_PM_at   | Mpdz                 | MPDZ       | 0.17  | 2.88 | 1.25  | 2.39E-01 | 5.32E-01 | -5.92 |
| 1455395_PM_at   | Oxsm                 | OXSM       | -0.31 | 2.69 | -1.25 | 2.39E-01 | 5.32E-01 | -5.92 |
| 1443491_PM_at   | ---                  | NA         | 0.14  | 2.35 | 1.25  | 2.39E-01 | 5.32E-01 | -5.92 |
| 1421240_PM_at   | Ern1                 | ERN1       | 0.24  | 3.43 | 1.25  | 2.39E-01 | 5.32E-01 | -5.92 |
| 1445005_PM_at   | C79491               | NA         | 0.28  | 2.63 | 1.25  | 2.39E-01 | 5.32E-01 | -5.92 |
| 1427953_PM_at   | Fanci                | FANCI      | -0.28 | 3.34 | -1.25 | 2.39E-01 | 5.32E-01 | -5.92 |
| 1441856_PM_x_at | Tysnd1               | TYSND1     | -0.25 | 3.06 | -1.25 | 2.39E-01 | 5.32E-01 | -5.92 |
| 1444544_PM_at   | ---                  | NA         | -0.25 | 2.74 | -1.25 | 2.39E-01 | 5.32E-01 | -5.92 |
| 1439319_PM_at   | Elf1                 | NA         | 0.14  | 2.26 | 1.25  | 2.39E-01 | 5.32E-01 | -5.92 |
| 1447179_PM_at   | ---                  | NA         | 0.15  | 2.92 | 1.25  | 2.39E-01 | 5.32E-01 | -5.92 |
| 1456677_PM_at   | ---                  | NA         | 0.29  | 2.41 | 1.25  | 2.39E-01 | 5.32E-01 | -5.92 |
| 1458766_PM_at   | ---                  | NA         | 0.28  | 2.26 | 1.25  | 2.39E-01 | 5.32E-01 | -5.92 |
| 1419250_PM_a_at | Cdk14                | CDK14      | -0.37 | 3.35 | -1.25 | 2.39E-01 | 5.32E-01 | -5.92 |
| 1417693_PM_a_at | Gab1                 | GAB1       | -0.33 | 3.94 | -1.25 | 2.39E-01 | 5.32E-01 | -5.92 |
| 1447318_PM_at   | ---                  | NA         | 0.12  | 2.18 | 1.25  | 2.39E-01 | 5.32E-01 | -5.92 |
| 1418549_PM_at   | Cga                  | CGA        | 0.13  | 2.27 | 1.25  | 2.39E-01 | 5.32E-01 | -5.92 |
| 1429156_PM_at   | Cenpw                | CENPW      | 0.17  | 2.35 | 1.25  | 2.39E-01 | 5.32E-01 | -5.92 |
| 1447157_PM_at   | 4930480K23Rik        | NA         | -0.15 | 2.39 | -1.25 | 2.39E-01 | 5.32E-01 | -5.92 |
| 1447775_PM_x_at | Zfp622               | ZNF622     | 0.19  | 3.89 | 1.25  | 2.39E-01 | 5.32E-01 | -5.92 |
| 1456416_PM_at   | Cbfa2t2              | CBFA2T2    | -0.27 | 2.42 | -1.25 | 2.39E-01 | 5.32E-01 | -5.92 |
| 1420366_PM_at   | Spesp1               | SPESP1     | -0.12 | 2.35 | -1.25 | 2.39E-01 | 5.32E-01 | -5.92 |
| 1426666_PM_a_at | Sun1                 | SUN1       | -0.46 | 3.92 | -1.25 | 2.39E-01 | 5.33E-01 | -5.92 |
| 1426450_PM_at   | Plcl2                | PLCL2      | -0.25 | 4.10 | -1.25 | 2.39E-01 | 5.33E-01 | -5.92 |
| 1436765_PM_at   | Pard3                | PARD3      | -0.11 | 2.08 | -1.25 | 2.39E-01 | 5.33E-01 | -5.92 |
| 1436625_PM_at   | Fcgr1                | FCGR1B     | 0.12  | 2.27 | 1.25  | 2.40E-01 | 5.33E-01 | -5.92 |
| 1430403_PM_at   | Usp32                | USP32      | -0.21 | 3.06 | -1.25 | 2.40E-01 | 5.33E-01 | -5.92 |
| 1438942_PM_x_at | Tgm2                 | TGM2       | -0.11 | 2.23 | -1.25 | 2.40E-01 | 5.33E-01 | -5.92 |
| 1429196_PM_at   | Rabgap1l             | RABGAP1L   | 0.49  | 5.19 | 1.25  | 2.40E-01 | 5.33E-01 | -5.92 |

|                 |                                                              |          |       |       |       |          |          |       |
|-----------------|--------------------------------------------------------------|----------|-------|-------|-------|----------|----------|-------|
| 1424909_PM_at   | Lrrc46                                                       | LRRC46   | 0.14  | 2.94  | 1.25  | 2.40E-01 | 5.33E-01 | -5.92 |
| 1441327_PM_a_at | Ssr1                                                         | SSR1     | -0.17 | 2.59  | -1.25 | 2.40E-01 | 5.33E-01 | -5.92 |
| 1453573_PM_at   | Hist1h3d///Hist1h3e///<br>Hist1h3g///Hist1h3h///<br>Hist1h3i | HIST1H3B | 0.12  | 2.35  | 1.25  | 2.40E-01 | 5.33E-01 | -5.92 |
| 1429714_PM_at   | Sumf2                                                        | SUMF2    | 0.14  | 2.72  | 1.25  | 2.40E-01 | 5.33E-01 | -5.92 |
| 1430750_PM_at   | Dhfr                                                         | DHFR     | 0.15  | 2.73  | 1.25  | 2.40E-01 | 5.33E-01 | -5.92 |
| 1427284_PM_a_at | Ttpa                                                         | TTPA     | 0.16  | 2.41  | 1.25  | 2.40E-01 | 5.33E-01 | -5.92 |
| 1447048_PM_at   | ---                                                          | NA       | 0.16  | 2.51  | 1.25  | 2.40E-01 | 5.33E-01 | -5.92 |
| 1437319_PM_at   | Unc13c                                                       | UNC13C   | 0.18  | 2.17  | 1.25  | 2.40E-01 | 5.33E-01 | -5.92 |
| 1431004_PM_at   | Gm21451///Lox12                                              | LOXL2    | 0.10  | 2.16  | 1.25  | 2.40E-01 | 5.33E-01 | -5.92 |
| 1423594_PM_a_at | Ednrb                                                        | EDNRB    | 0.26  | 2.88  | 1.25  | 2.40E-01 | 5.33E-01 | -5.92 |
| 1443380_PM_at   | Adh5                                                         | ADH5     | 0.12  | 2.25  | 1.25  | 2.40E-01 | 5.33E-01 | -5.92 |
| 1446649_PM_at   | ---                                                          | NA       | -0.10 | 1.92  | -1.25 | 2.40E-01 | 5.33E-01 | -5.92 |
| 1454100_PM_at   | 4930480E11Rik                                                | FAM47C   | -0.10 | 2.01  | -1.25 | 2.40E-01 | 5.33E-01 | -5.92 |
| 1454468_PM_at   | 5430434N17Rik                                                | NA       | 0.10  | 1.98  | 1.25  | 2.40E-01 | 5.33E-01 | -5.92 |
| 1439178_PM_at   | Adrbk2                                                       | GRK3     | 0.21  | 3.67  | 1.25  | 2.40E-01 | 5.33E-01 | -5.92 |
| 1423713_PM_at   | Abcb8                                                        | ABCB8    | 0.22  | 2.63  | 1.25  | 2.40E-01 | 5.33E-01 | -5.92 |
| 1456661_PM_at   | ---                                                          | NA       | 0.44  | 3.55  | 1.25  | 2.40E-01 | 5.33E-01 | -5.92 |
| 1434548_PM_at   | Serinc3                                                      | SERINC3  | -0.49 | 7.02  | -1.25 | 2.40E-01 | 5.33E-01 | -5.92 |
| 1448923_PM_at   | Prkra                                                        | PRKRA    | -0.14 | 2.51  | -1.25 | 2.40E-01 | 5.33E-01 | -5.92 |
| 1444475_PM_at   | ---                                                          | NA       | 0.12  | 2.27  | 1.25  | 2.40E-01 | 5.33E-01 | -5.92 |
| 1452500_PM_at   | ---                                                          | NA       | 0.15  | 2.22  | 1.25  | 2.40E-01 | 5.33E-01 | -5.92 |
| 1425010_PM_at   | Zfp119a                                                      | NA       | 0.18  | 2.36  | 1.25  | 2.40E-01 | 5.33E-01 | -5.92 |
| 1419923_PM_at   | ---                                                          | NA       | 0.22  | 2.88  | 1.25  | 2.40E-01 | 5.33E-01 | -5.92 |
| 1418455_PM_at   | Copz2                                                        | COPZ2    | 0.26  | 3.48  | 1.25  | 2.40E-01 | 5.33E-01 | -5.92 |
| 1444192_PM_at   | ---                                                          | NA       | 0.33  | 4.04  | 1.25  | 2.40E-01 | 5.33E-01 | -5.92 |
| 1452035_PM_at   | Col4a1                                                       | COL4A1   | 0.44  | 6.49  | 1.25  | 2.40E-01 | 5.33E-01 | -5.92 |
| 1425708_PM_at   | Rnf17                                                        | RNF17    | 0.10  | 2.13  | 1.25  | 2.40E-01 | 5.33E-01 | -5.92 |
| 1421674_PM_at   | ---                                                          | NA       | 0.15  | 2.81  | 1.25  | 2.40E-01 | 5.33E-01 | -5.92 |
| 1433279_PM_at   | ---                                                          | NA       | 0.13  | 2.43  | 1.25  | 2.40E-01 | 5.33E-01 | -5.92 |
| 1457460_PM_at   | Acs2///LOC102636309                                          | ACSS2    | 0.11  | 2.34  | 1.25  | 2.40E-01 | 5.33E-01 | -5.92 |
| 1419048_PM_at   | Pcnx                                                         | PCNX1    | 0.52  | 4.79  | 1.25  | 2.40E-01 | 5.33E-01 | -5.92 |
| 1437714_PM_x_at | Usp14                                                        | NA       | -0.61 | 5.12  | -1.25 | 2.40E-01 | 5.34E-01 | -5.92 |
| 1450164_PM_at   | Asc1                                                         | ASCL1    | 0.11  | 2.33  | 1.25  | 2.40E-01 | 5.34E-01 | -5.92 |
| 1458409_PM_at   | ---                                                          | NA       | -0.36 | 3.16  | -1.25 | 2.40E-01 | 5.34E-01 | -5.92 |
| 1459981_PM_s_at | Rsbn1                                                        | RSBN1    | -0.33 | 7.85  | -1.25 | 2.40E-01 | 5.34E-01 | -5.92 |
| 1448438_PM_at   | Derl2                                                        | DERL2    | -0.30 | 2.73  | -1.25 | 2.40E-01 | 5.34E-01 | -5.92 |
| 1418104_PM_at   | Nrip3                                                        | NRIP3    | -0.26 | 5.03  | -1.25 | 2.40E-01 | 5.34E-01 | -5.92 |
| 1436032_PM_at   | ---                                                          | NA       | -0.18 | 3.45  | -1.25 | 2.40E-01 | 5.34E-01 | -5.92 |
| 1440787_PM_s_at | Bbs10                                                        | BBS10    | -0.14 | 2.16  | -1.25 | 2.40E-01 | 5.34E-01 | -5.92 |
| 1420267_PM_at   | ---                                                          | NA       | 0.10  | 2.76  | 1.25  | 2.40E-01 | 5.34E-01 | -5.92 |
| 1455838_PM_at   | Sflnl1                                                       | SLFNL1   | 0.11  | 3.35  | 1.25  | 2.40E-01 | 5.34E-01 | -5.92 |
| 1440820_PM_x_at | Tmco2                                                        | TMCO2    | 0.13  | 2.22  | 1.25  | 2.40E-01 | 5.34E-01 | -5.92 |
| 1429937_PM_at   | Utp23                                                        | UTP23    | 0.20  | 2.06  | 1.25  | 2.40E-01 | 5.34E-01 | -5.92 |
| 1452415_PM_at   | Actn1                                                        | ACTN1    | 0.23  | 2.83  | 1.25  | 2.40E-01 | 5.34E-01 | -5.92 |
| 1455141_PM_at   | Tnrc6a                                                       | TNRC6A   | 0.25  | 3.03  | 1.25  | 2.40E-01 | 5.34E-01 | -5.92 |
| 1450115_PM_at   | Gnaq                                                         | GNAQ     | 0.50  | 4.31  | 1.25  | 2.40E-01 | 5.34E-01 | -5.92 |
| 1453130_PM_at   | Ep400                                                        | EP400    | 0.63  | 3.54  | 1.25  | 2.40E-01 | 5.34E-01 | -5.92 |
| 1440542_PM_at   | Vrtn                                                         | VRTN     | 0.11  | 2.17  | 1.25  | 2.41E-01 | 5.34E-01 | -5.92 |
| 1452725_PM_a_at | Rnaseh2a                                                     | RNASEH2A | 0.26  | 2.85  | 1.25  | 2.40E-01 | 5.34E-01 | -5.92 |
| 1453356_PM_at   | ---                                                          | NA       | -0.11 | 2.31  | -1.24 | 2.41E-01 | 5.34E-01 | -5.92 |
| 1424894_PM_at   | Rab13                                                        | RAB13    | 0.25  | 2.62  | 1.24  | 2.41E-01 | 5.34E-01 | -5.92 |
| 1440761_PM_at   | 4833422C13Rik                                                | NA       | -0.27 | 2.35  | -1.24 | 2.41E-01 | 5.34E-01 | -5.92 |
| 1422806_PM_x_at | Ing3                                                         | ING3     | 0.16  | 5.14  | 1.24  | 2.41E-01 | 5.34E-01 | -5.92 |
| 1422238_PM_at   | ---                                                          | NA       | -0.38 | 3.71  | -1.24 | 2.41E-01 | 5.34E-01 | -5.92 |
| 1428836_PM_at   | 2300009A05Rik                                                | C15orf61 | -0.12 | 2.64  | -1.24 | 2.41E-01 | 5.34E-01 | -5.92 |
| 1431348_PM_at   | Ppifos                                                       | NA       | 0.13  | 2.50  | 1.24  | 2.41E-01 | 5.34E-01 | -5.92 |
| 1424722_PM_at   | 1300017J02Rik                                                | NA       | 0.16  | 2.79  | 1.24  | 2.41E-01 | 5.34E-01 | -5.92 |
| 1449454_PM_at   | Bst1                                                         | BST1     | 0.20  | 2.59  | 1.24  | 2.41E-01 | 5.34E-01 | -5.92 |
| 1447329_PM_at   | ---                                                          | NA       | 0.25  | 11.35 | 1.24  | 2.41E-01 | 5.34E-01 | -5.92 |
| 1427733_PM_a_at | Nfia                                                         | NFIA     | 0.25  | 2.66  | 1.24  | 2.41E-01 | 5.34E-01 | -5.92 |
| 1430763_PM_at   | 4930563E22Rik                                                | NA       | 0.10  | 2.09  | 1.24  | 2.41E-01 | 5.34E-01 | -5.92 |
| 1429467_PM_s_at | Slc26a3                                                      | SLC26A3  | 0.12  | 1.90  | 1.24  | 2.41E-01 | 5.34E-01 | -5.92 |
| 1442145_PM_at   | Atp13a3                                                      | ATP13A3  | -0.39 | 4.40  | -1.24 | 2.41E-01 | 5.34E-01 | -5.92 |
| 1449967_PM_at   | Sim1                                                         | SIM1     | -0.11 | 2.12  | -1.24 | 2.41E-01 | 5.34E-01 | -5.92 |
| 1450497_PM_at   | Apc2                                                         | APC2     | 0.17  | 2.48  | 1.24  | 2.41E-01 | 5.34E-01 | -5.92 |
| 1421905_PM_at   | Tgs1                                                         | TGS1     | 0.26  | 5.20  | 1.24  | 2.41E-01 | 5.34E-01 | -5.92 |
| 1435241_PM_at   | Heatr5a                                                      | HEATR5A  | 0.20  | 2.41  | 1.24  | 2.41E-01 | 5.34E-01 | -5.92 |
| 1439434_PM_x_at | Sh2d5                                                        | SH2D5    | -0.56 | 4.92  | -1.24 | 2.41E-01 | 5.34E-01 | -5.92 |
| 1427778_PM_at   | Defb8                                                        | NA       | -0.15 | 2.10  | -1.24 | 2.41E-01 | 5.34E-01 | -5.92 |
| 1428941_PM_at   | Zmym2                                                        | ZMYM2    | -0.14 | 2.16  | -1.24 | 2.41E-01 | 5.34E-01 | -5.92 |
| 1432833_PM_at   | ---                                                          | NA       | 0.10  | 2.36  | 1.24  | 2.41E-01 | 5.34E-01 | -5.92 |
| 1431555_PM_at   | 4933409F18Rik                                                | NA       | -0.15 | 2.80  | -1.24 | 2.41E-01 | 5.34E-01 | -5.92 |
| 1437141_PM_x_at | Dym                                                          | DYM      | -0.34 | 3.42  | -1.24 | 2.41E-01 | 5.34E-01 | -5.92 |

|                 |                 |            |       |      |       |          |          |       |
|-----------------|-----------------|------------|-------|------|-------|----------|----------|-------|
| 1460045_PM_at   | Cdh7            | CDH7       | 0.23  | 2.61 | 1.24  | 2.41E-01 | 5.34E-01 | -5.92 |
| 1454832_PM_at   | Phactr1         | PHACTR1    | -0.44 | 4.36 | -1.24 | 2.41E-01 | 5.34E-01 | -5.92 |
| 1449200_PM_at   | Nup155          | NUP155     | -0.35 | 5.39 | -1.24 | 2.41E-01 | 5.34E-01 | -5.92 |
| 1426221_PM_at   | Vwa5a           | VWASA      | 0.27  | 3.06 | 1.24  | 2.41E-01 | 5.34E-01 | -5.92 |
| 1420154_PM_at   | ---             | NA         | 0.13  | 2.13 | 1.24  | 2.41E-01 | 5.34E-01 | -5.92 |
| 1449399_PM_a_at | Il1b            | IL1B       | 0.17  | 3.22 | 1.24  | 2.41E-01 | 5.34E-01 | -5.92 |
| 1417212_PM_at   | Fam195a         | MCRIP2     | 0.12  | 2.28 | 1.24  | 2.41E-01 | 5.34E-01 | -5.92 |
| 1417570_PM_at   | Anapc1          | ANAPC1     | 0.19  | 3.17 | 1.24  | 2.41E-01 | 5.34E-01 | -5.92 |
| 1437586_PM_at   | Cnot4           | CNOT4      | -0.48 | 3.95 | -1.24 | 2.41E-01 | 5.34E-01 | -5.92 |
| 1418923_PM_at   | Slc17a3         | SLC17A3    | -0.14 | 2.10 | -1.24 | 2.41E-01 | 5.34E-01 | -5.92 |
| 1420839_PM_at   | Plekha3         | PLEKHA3    | 0.21  | 2.44 | 1.24  | 2.41E-01 | 5.34E-01 | -5.92 |
| 1439544_PM_at   | Tbc1d5          | TBC1D5     | 0.46  | 2.52 | 1.24  | 2.41E-01 | 5.34E-01 | -5.92 |
| 1452938_PM_at   | Anks1b          | ANKS1B     | -0.51 | 4.46 | -1.24 | 2.41E-01 | 5.34E-01 | -5.92 |
| 1448920_PM_at   | Zkscan6         | ZNF18      | -0.36 | 6.11 | -1.24 | 2.41E-01 | 5.34E-01 | -5.92 |
| 1430935_PM_at   | 4933413G19Rik   | ACO05841.2 | 0.13  | 2.45 | 1.24  | 2.41E-01 | 5.34E-01 | -5.93 |
| 1452488_PM_at   | ---             | NA         | 0.21  | 2.50 | 1.24  | 2.41E-01 | 5.34E-01 | -5.92 |
| 1422203_PM_at   | Slc18a3         | SLC18A3    | 0.20  | 2.49 | 1.24  | 2.41E-01 | 5.34E-01 | -5.93 |
| 1435776_PM_at   | 2310009B15Rik   | C1orf53    | 0.10  | 2.17 | 1.24  | 2.41E-01 | 5.35E-01 | -5.93 |
| 1444610_PM_at   | ---             | NA         | 0.16  | 2.19 | 1.24  | 2.41E-01 | 5.35E-01 | -5.93 |
| 1460560_PM_at   | Bahcc1          | BAHCC1     | 0.17  | 2.68 | 1.24  | 2.41E-01 | 5.35E-01 | -5.93 |
| 1425065_PM_at   | Oas2            | OAS2       | 0.20  | 2.85 | 1.24  | 2.41E-01 | 5.35E-01 | -5.93 |
| 1435002_PM_at   | Zfp507          | ZNF507     | -0.46 | 4.69 | -1.24 | 2.41E-01 | 5.35E-01 | -5.93 |
| 1441405_PM_at   | ---             | NA         | 0.11  | 2.21 | 1.24  | 2.41E-01 | 5.35E-01 | -5.93 |
| 1417610_PM_at   | Apoa5           | APOA5      | 0.16  | 2.57 | 1.24  | 2.42E-01 | 5.35E-01 | -5.93 |
| 1444538_PM_at   | ---             | NA         | -0.33 | 4.01 | -1.24 | 2.42E-01 | 5.35E-01 | -5.93 |
| 1434565_PM_at   | Cgrrf1          | CGRRF1     | -0.18 | 3.26 | -1.24 | 2.42E-01 | 5.35E-01 | -5.93 |
| 1440484_PM_at   | Unc5d           | UNC5D      | -0.15 | 2.61 | -1.24 | 2.42E-01 | 5.35E-01 | -5.93 |
| 1454238_PM_a_at | 1700010H22Rik   | NA         | 0.16  | 2.98 | 1.24  | 2.42E-01 | 5.35E-01 | -5.93 |
| 1445743_PM_at   | Mthfd2l         | MTHFD2L    | 0.18  | 2.38 | 1.24  | 2.42E-01 | 5.35E-01 | -5.93 |
| 1449503_PM_at   | Kpna1           | KPNA1      | 0.21  | 2.25 | 1.24  | 2.42E-01 | 5.35E-01 | -5.93 |
| 1438090_PM_x_at | Ankrd54         | ANKRD54    | 0.34  | 5.85 | 1.24  | 2.42E-01 | 5.35E-01 | -5.93 |
| 1453907_PM_at   | ---             | NA         | 0.19  | 3.17 | 1.24  | 2.42E-01 | 5.35E-01 | -5.93 |
| 1437950_PM_at   | Fam149a         | FAM149A    | 0.11  | 1.93 | 1.24  | 2.42E-01 | 5.35E-01 | -5.93 |
| 1423017_PM_a_at | Il1rn           | IL1RN      | 0.14  | 2.90 | 1.24  | 2.42E-01 | 5.35E-01 | -5.93 |
| 1421219_PM_at   | Tll3            | TTLL3      | 0.28  | 2.29 | 1.24  | 2.42E-01 | 5.35E-01 | -5.93 |
| 1420559_PM_a_at | Shox2           | SHOX2      | -0.14 | 2.49 | -1.24 | 2.42E-01 | 5.35E-01 | -5.93 |
| 1457255_PM_x_at | Kif5c           | KIF5C      | -0.18 | 2.96 | -1.24 | 2.42E-01 | 5.35E-01 | -5.93 |
| 1451435_PM_at   | Cux1            | CUX1       | 0.28  | 4.03 | 1.24  | 2.42E-01 | 5.35E-01 | -5.93 |
| 1421835_PM_at   | Map7            | MAP7       | -0.46 | 3.26 | -1.24 | 2.42E-01 | 5.35E-01 | -5.93 |
| 1457045_PM_at   | Galnt13         | GALNT13    | -0.13 | 2.34 | -1.24 | 2.42E-01 | 5.35E-01 | -5.93 |
| 1420546_PM_at   | Th              | TH         | 0.35  | 2.75 | 1.24  | 2.42E-01 | 5.35E-01 | -5.93 |
| 1439251_PM_at   | Gm42151         | NA         | -0.33 | 3.68 | -1.24 | 2.42E-01 | 5.35E-01 | -5.93 |
| 1450326_PM_at   | Shc3            | SHC3       | 0.29  | 3.19 | 1.24  | 2.42E-01 | 5.35E-01 | -5.93 |
| 1434668_PM_at   | Nucks1          | NUCKS1     | -0.51 | 6.22 | -1.24 | 2.42E-01 | 5.35E-01 | -5.93 |
| 1437625_PM_at   | ---             | NA         | -0.11 | 1.90 | -1.24 | 2.42E-01 | 5.35E-01 | -5.93 |
| 1433613_PM_at   | Pank3           | PANK3      | -0.18 | 2.66 | -1.24 | 2.42E-01 | 5.35E-01 | -5.93 |
| 1459336_PM_at   | Gucy1a2         | GUCY1A2    | -0.11 | 2.07 | -1.24 | 2.42E-01 | 5.35E-01 | -5.93 |
| 1418752_PM_at   | Aldh3a1         | ALDH3A1    | 0.11  | 2.20 | 1.24  | 2.42E-01 | 5.35E-01 | -5.93 |
| 1418052_PM_at   | Mvk             | MVK        | 0.15  | 3.01 | 1.24  | 2.42E-01 | 5.35E-01 | -5.93 |
| 1434857_PM_at   | Zfp783          | NA         | 0.23  | 2.56 | 1.24  | 2.42E-01 | 5.35E-01 | -5.93 |
| 1433872_PM_at   | Katnbl1         | KATNBL1    | -0.18 | 2.24 | -1.24 | 2.42E-01 | 5.35E-01 | -5.93 |
| 1431938_PM_a_at | Pmm2            | PMM2       | 0.19  | 3.10 | 1.24  | 2.42E-01 | 5.35E-01 | -5.93 |
| 1458143_PM_at   | Adamts3         | ADAMTS3    | 0.13  | 2.11 | 1.24  | 2.42E-01 | 5.35E-01 | -5.93 |
| 1427415_PM_at   | Fbxo43          | FBXO43     | 0.14  | 2.79 | 1.24  | 2.42E-01 | 5.35E-01 | -5.93 |
| 1427606_PM_at   | Usp27x          | USP27X     | 0.32  | 2.95 | 1.24  | 2.42E-01 | 5.36E-01 | -5.93 |
| 1456268_PM_at   | Gm17762         | NA         | 0.11  | 2.21 | 1.24  | 2.42E-01 | 5.36E-01 | -5.93 |
| 1441177_PM_at   | ---             | NA         | 0.27  | 2.81 | 1.24  | 2.42E-01 | 5.36E-01 | -5.93 |
| 1424176_PM_a_at | Anxa4           | ANXA4      | 0.25  | 2.35 | 1.24  | 2.42E-01 | 5.36E-01 | -5.93 |
| 1431747_PM_at   | ---             | NA         | 0.13  | 2.31 | 1.24  | 2.42E-01 | 5.36E-01 | -5.93 |
| 1424801_PM_at   | Enah            | ENAH       | -0.18 | 3.64 | -1.24 | 2.43E-01 | 5.36E-01 | -5.93 |
| 1460746_PM_at   | Figl1           | FIGL1      | 0.14  | 2.52 | 1.24  | 2.43E-01 | 5.36E-01 | -5.93 |
| 1442889_PM_at   | Amph            | NA         | 0.18  | 2.88 | 1.24  | 2.43E-01 | 5.36E-01 | -5.93 |
| 1432136_PM_s_at | Zdhhc4          | ZDHHC4     | 0.28  | 2.80 | 1.24  | 2.42E-01 | 5.36E-01 | -5.93 |
| 1421163_PM_a_at | Nfia            | NFIA       | 0.51  | 3.77 | 1.24  | 2.43E-01 | 5.36E-01 | -5.93 |
| 1420229_PM_at   | ---             | NA         | 0.12  | 2.10 | 1.24  | 2.43E-01 | 5.36E-01 | -5.93 |
| 1420873_PM_at   | Gm4887 /// Twf1 | TWF1       | -0.18 | 2.40 | -1.24 | 2.43E-01 | 5.36E-01 | -5.93 |
| 1448847_PM_at   | Serinc3         | SERINC3    | -0.23 | 2.33 | -1.24 | 2.43E-01 | 5.36E-01 | -5.93 |
| 1420607_PM_at   | Rbm18           | RBM18      | -0.15 | 2.59 | -1.24 | 2.43E-01 | 5.36E-01 | -5.93 |
| 1454193_PM_at   | 5430401H09Rik   | NA         | -0.11 | 2.06 | -1.24 | 2.43E-01 | 5.36E-01 | -5.93 |
| 1430115_PM_at   | ---             | NA         | 0.11  | 2.37 | 1.24  | 2.43E-01 | 5.36E-01 | -5.93 |
| 1444896_PM_at   | ---             | NA         | 0.25  | 2.63 | 1.24  | 2.43E-01 | 5.36E-01 | -5.93 |
| 1441041_PM_at   | ---             | NA         | 0.32  | 2.67 | 1.24  | 2.43E-01 | 5.36E-01 | -5.93 |
| 1420073_PM_s_at | ---             | NA         | 0.33  | 3.78 | 1.24  | 2.43E-01 | 5.36E-01 | -5.93 |
| 1428332_PM_at   | Pik3ip1         | PIK3IP1    | -0.14 | 2.57 | -1.24 | 2.43E-01 | 5.36E-01 | -5.93 |
| 1422027_PM_a_at | Ets1            | ETS1       | 0.16  | 2.51 | 1.24  | 2.43E-01 | 5.36E-01 | -5.93 |



|                 |               |            |       |      |       |          |          |       |
|-----------------|---------------|------------|-------|------|-------|----------|----------|-------|
| 1415745_PM_a_at | Dscr3         | DSCR3      | 0.17  | 2.75 | 1.24  | 2.43E-01 | 5.36E-01 | -5.93 |
| 1424992_PM_at   | Tprkb         | TPRKB      | 0.27  | 3.11 | 1.24  | 2.43E-01 | 5.36E-01 | -5.93 |
| 1426890_PM_a_at | Rpap1         | RPAP1      | 0.34  | 4.30 | 1.24  | 2.43E-01 | 5.36E-01 | -5.93 |
| 1429678_PM_at   | 5730508B09Rik | C4orf32    | -0.18 | 3.00 | -1.24 | 2.43E-01 | 5.36E-01 | -5.93 |
| 1451774_PM_at   | Krtap4-16     | KRTAP4-1   | 0.11  | 2.01 | 1.24  | 2.43E-01 | 5.36E-01 | -5.93 |
| 1421536_PM_at   | Gabrq         | GABRQ      | 0.13  | 2.80 | 1.24  | 2.43E-01 | 5.36E-01 | -5.93 |
| 1455885_PM_at   | Amz1          | AMZ1       | 0.12  | 2.74 | 1.24  | 2.43E-01 | 5.36E-01 | -5.93 |
| 1440216_PM_at   | Ifitm5        | IFITM5     | 0.12  | 2.45 | 1.24  | 2.43E-01 | 5.36E-01 | -5.93 |
| 1451103_PM_at   | Haus4         | AL132780.3 | 0.12  | 2.44 | 1.24  | 2.43E-01 | 5.36E-01 | -5.93 |
| 1431808_PM_a_at | Itih4         | ITIH4      | 0.22  | 2.56 | 1.24  | 2.43E-01 | 5.36E-01 | -5.93 |
| 1420301_PM_at   | AA414903      | NA         | 0.29  | 2.28 | 1.24  | 2.43E-01 | 5.36E-01 | -5.93 |
| 1419884_PM_at   | ---           | NA         | 0.31  | 3.03 | 1.24  | 2.43E-01 | 5.36E-01 | -5.93 |
| 1433037_PM_at   | 583043F19Rik  | NA         | -0.18 | 2.37 | -1.24 | 2.43E-01 | 5.36E-01 | -5.93 |
| 1444278_PM_at   | ---           | NA         | 0.13  | 2.73 | 1.24  | 2.43E-01 | 5.36E-01 | -5.93 |
| 1426273_PM_at   | Lmbr1         | LMBR1      | 0.18  | 2.82 | 1.24  | 2.43E-01 | 5.36E-01 | -5.93 |
| 1425163_PM_at   | Al661453      | C6orf132   | 0.12  | 2.44 | 1.24  | 2.43E-01 | 5.36E-01 | -5.93 |
| 1458289_PM_at   | ---           | NA         | 0.15  | 2.43 | 1.24  | 2.43E-01 | 5.36E-01 | -5.93 |
| 1457907_PM_at   | ---           | NA         | 0.16  | 3.14 | 1.24  | 2.43E-01 | 5.36E-01 | -5.93 |
| 1437404_PM_at   | Mast4         | MAST4      | -0.22 | 2.26 | -1.24 | 2.43E-01 | 5.36E-01 | -5.93 |
| 1430459_PM_at   | 4632428C04Rik | NA         | 0.10  | 2.36 | 1.24  | 2.43E-01 | 5.36E-01 | -5.93 |
| 1426343_PM_at   | Stt3b         | STT3B      | -0.52 | 3.36 | -1.24 | 2.43E-01 | 5.36E-01 | -5.93 |
| 1423357_PM_at   | Lipt2         | LIPT2      | -0.28 | 2.64 | -1.24 | 2.43E-01 | 5.36E-01 | -5.93 |
| 1427089_PM_at   | Ccnt2         | CCNT2      | -0.27 | 6.51 | -1.24 | 2.43E-01 | 5.36E-01 | -5.93 |
| 1445274_PM_at   | Zfp781        | NA         | -0.14 | 2.41 | -1.24 | 2.43E-01 | 5.36E-01 | -5.93 |
| 1433918_PM_at   | Atg4d         | ATG4D      | -0.14 | 2.76 | -1.24 | 2.43E-01 | 5.36E-01 | -5.93 |
| 1445573_PM_at   | Ppp1r14b      | NA         | -0.13 | 2.28 | -1.24 | 2.43E-01 | 5.36E-01 | -5.93 |
| 1459761_PM_x_at | Cadm2         | CADM2      | -0.13 | 2.02 | -1.24 | 2.43E-01 | 5.36E-01 | -5.93 |
| 1427291_PM_at   | Sycp1         | SYCP1      | -0.11 | 2.15 | -1.24 | 2.43E-01 | 5.36E-01 | -5.93 |
| 1424279_PM_at   | Fga           | FGA        | 0.10  | 2.18 | 1.24  | 2.43E-01 | 5.36E-01 | -5.93 |
| 1453444_PM_at   | ---           | NA         | 0.11  | 1.88 | 1.24  | 2.43E-01 | 5.36E-01 | -5.93 |
| 1456301_PM_at   | Hoxc5         | HOXC5      | 0.14  | 2.74 | 1.24  | 2.43E-01 | 5.36E-01 | -5.93 |
| 1432282_PM_a_at | Tlcd2         | TLCD2      | 0.14  | 2.27 | 1.24  | 2.43E-01 | 5.36E-01 | -5.93 |
| 1418102_PM_at   | Hes1          | HES1       | 0.15  | 2.44 | 1.24  | 2.43E-01 | 5.36E-01 | -5.93 |
| 1437701_PM_at   | Smcr8         | SMCR8      | 0.15  | 2.33 | 1.24  | 2.43E-01 | 5.36E-01 | -5.93 |
| 1451856_PM_at   | Gigyf2        | GIGYF2     | 0.16  | 2.82 | 1.24  | 2.43E-01 | 5.36E-01 | -5.93 |
| 1417401_PM_at   | Rai14         | RAI14      | 0.17  | 2.16 | 1.24  | 2.43E-01 | 5.36E-01 | -5.93 |
| 1453175_PM_at   | Zbtb25        | ZBTB25     | 0.21  | 2.39 | 1.24  | 2.43E-01 | 5.36E-01 | -5.93 |
| 1433763_PM_at   | Entpd5        | ENTPD5     | 0.22  | 3.19 | 1.24  | 2.43E-01 | 5.36E-01 | -5.93 |
| 1456219_PM_at   | Zic5          | ZIC5       | 0.40  | 3.08 | 1.24  | 2.43E-01 | 5.36E-01 | -5.93 |
| 1444053_PM_at   | Ssbp1         | SSBP1      | -0.14 | 2.11 | -1.24 | 2.43E-01 | 5.36E-01 | -5.93 |
| 1423129_PM_at   | Shoc2         | SHOC2      | -0.48 | 6.95 | -1.24 | 2.44E-01 | 5.36E-01 | -5.93 |
| 1428081_PM_at   | Klh21         | KLHL21     | -0.24 | 3.10 | -1.24 | 2.44E-01 | 5.36E-01 | -5.93 |
| 1433443_PM_a_at | Hmgcs1        | HMGCS1     | -0.21 | 9.64 | -1.24 | 2.44E-01 | 5.36E-01 | -5.93 |
| 1457056_PM_at   | ---           | NA         | 0.11  | 2.37 | 1.24  | 2.44E-01 | 5.36E-01 | -5.93 |
| 1456594_PM_at   | Gm1971        | NA         | 0.12  | 2.48 | 1.24  | 2.44E-01 | 5.36E-01 | -5.93 |
| 1443118_PM_at   | ---           | NA         | 0.17  | 2.41 | 1.24  | 2.44E-01 | 5.36E-01 | -5.93 |
| 1450465_PM_at   | Cdk5r2        | CDK5R2     | 0.19  | 2.61 | 1.24  | 2.44E-01 | 5.36E-01 | -5.93 |
| 1445224_PM_at   | ---           | NA         | 0.26  | 2.93 | 1.24  | 2.44E-01 | 5.36E-01 | -5.93 |
| 1421921_PM_at   | Serpina3m     | SERPINA3   | 0.14  | 2.04 | 1.24  | 2.44E-01 | 5.36E-01 | -5.93 |
| 1454700_PM_at   | Lrfn4         | LRFN4      | -0.20 | 2.81 | -1.24 | 2.44E-01 | 5.36E-01 | -5.93 |
| 1449286_PM_at   | Ntng1         | NTNG1      | -0.27 | 3.04 | -1.24 | 2.44E-01 | 5.37E-01 | -5.93 |
| 1416527_PM_at   | Rab32         | RAB32      | 0.12  | 2.52 | 1.24  | 2.44E-01 | 5.37E-01 | -5.93 |
| 1450197_PM_at   | Rpe65         | RPE65      | 0.14  | 2.66 | 1.24  | 2.44E-01 | 5.37E-01 | -5.93 |
| 1423453_PM_at   | No12          | Z83844.1   | 0.15  | 2.43 | 1.24  | 2.44E-01 | 5.37E-01 | -5.93 |
| 1447047_PM_at   | ---           | NA         | 0.18  | 2.76 | 1.24  | 2.44E-01 | 5.37E-01 | -5.93 |
| 1421391_PM_at   | Vipr2         | VIPR2      | 0.30  | 2.45 | 1.24  | 2.44E-01 | 5.37E-01 | -5.93 |
| 1434003_PM_a_at | Dhps          | DHPS       | 0.71  | 7.89 | 1.24  | 2.44E-01 | 5.37E-01 | -5.93 |
| 1442733_PM_at   | Cep162        | CEP162     | 0.28  | 3.47 | 1.24  | 2.44E-01 | 5.37E-01 | -5.93 |
| 1430775_PM_at   | Wdr44         | WDR44      | 0.96  | 5.38 | 1.24  | 2.44E-01 | 5.37E-01 | -5.93 |
| 1424161_PM_at   | Ddx27         | DDX27      | 0.62  | 4.00 | 1.24  | 2.44E-01 | 5.37E-01 | -5.93 |
| 1427938_PM_at   | Mycbp         | AL139260.3 | -0.76 | 3.36 | -1.24 | 2.44E-01 | 5.37E-01 | -5.93 |
| 1418431_PM_at   | Kif5b         | KIF5B      | -0.47 | 7.04 | -1.24 | 2.44E-01 | 5.37E-01 | -5.93 |
| 1448816_PM_at   | Ptgis         | PTGIS      | -0.33 | 3.30 | -1.23 | 2.44E-01 | 5.37E-01 | -5.93 |
| 1424676_PM_s_at | Sec144        | SEC14L4    | 0.12  | 2.35 | 1.23  | 2.44E-01 | 5.37E-01 | -5.93 |
| 1450359_PM_at   | Fut1          | FUT1       | 0.13  | 2.49 | 1.24  | 2.44E-01 | 5.37E-01 | -5.93 |
| 1447735_PM_x_at | Rbfox1        | RBFOX1     | 0.16  | 3.12 | 1.23  | 2.44E-01 | 5.37E-01 | -5.93 |
| 1443546_PM_at   | LOC102641500  | NA         | 0.34  | 2.77 | 1.24  | 2.44E-01 | 5.37E-01 | -5.93 |
| 1445124_PM_at   | ---           | NA         | 0.43  | 3.13 | 1.23  | 2.44E-01 | 5.37E-01 | -5.93 |
| 1451307_PM_at   | Mrpl14        | MRPL14     | 0.15  | 2.35 | 1.23  | 2.44E-01 | 5.37E-01 | -5.93 |
| 1434059_PM_at   | Fam214b       | FAM214B    | 0.32  | 4.65 | 1.23  | 2.44E-01 | 5.37E-01 | -5.93 |
| 1425169_PM_at   | Prss42        | PRSS42     | 0.13  | 2.72 | 1.23  | 2.44E-01 | 5.37E-01 | -5.93 |
| 1422323_PM_a_at | Lbx1          | NA         | 0.14  | 2.30 | 1.23  | 2.44E-01 | 5.37E-01 | -5.93 |
| 1439126_PM_at   | Mcmbp         | MCMBP      | 0.11  | 2.57 | 1.23  | 2.44E-01 | 5.37E-01 | -5.93 |
| 1450573_PM_at   | Amh           | AMH        | 0.14  | 2.18 | 1.23  | 2.44E-01 | 5.37E-01 | -5.93 |
| 1442479_PM_at   | ---           | NA         | 0.15  | 2.44 | 1.23  | 2.44E-01 | 5.37E-01 | -5.93 |

|                 |                           |                |       |      |       |          |          |       |
|-----------------|---------------------------|----------------|-------|------|-------|----------|----------|-------|
| 1438878_PM_at   | ---                       | NA             | 0.15  | 2.41 | 1.23  | 2.44E-01 | 5.37E-01 | -5.93 |
| 1432325_PM_at   | 4930502M04Rik /// Col25a1 | COL25A1        | 0.17  | 2.44 | 1.23  | 2.44E-01 | 5.37E-01 | -5.93 |
| 1429523_PM_a_at | Slc39a5                   | SLC39A5        | 0.13  | 2.50 | 1.23  | 2.44E-01 | 5.38E-01 | -5.93 |
| 1424858_PM_at   | L2hgdh                    | L2HGDH         | -0.28 | 4.86 | -1.23 | 2.44E-01 | 5.38E-01 | -5.94 |
| 1436295_PM_at   | Hcrtr1                    | HCRTR1         | -0.14 | 2.19 | -1.23 | 2.44E-01 | 5.38E-01 | -5.94 |
| 1458434_PM_at   | A730009L09Rik             | NA             | 0.13  | 2.11 | 1.23  | 2.44E-01 | 5.38E-01 | -5.94 |
| 1457126_PM_at   | MyI4                      | MYL4           | 0.15  | 2.74 | 1.23  | 2.44E-01 | 5.38E-01 | -5.94 |
| 1425574_PM_at   | Epha3                     | EPHA3          | 0.31  | 3.15 | 1.23  | 2.45E-01 | 5.38E-01 | -5.94 |
| 1433097_PM_at   | Gm31904                   | NA             | 0.11  | 1.88 | 1.23  | 2.45E-01 | 5.38E-01 | -5.94 |
| 1444221_PM_at   | Tbc1d12                   | NA             | 0.21  | 2.38 | 1.23  | 2.45E-01 | 5.38E-01 | -5.94 |
| 1427929_PM_a_at | Pdxk                      | PDXX           | 0.37  | 6.23 | 1.23  | 2.45E-01 | 5.38E-01 | -5.94 |
| 1449890_PM_at   | Ugt2b37                   | UGT2B15        | 0.14  | 2.17 | 1.23  | 2.45E-01 | 5.38E-01 | -5.94 |
| 1417446_PM_at   | Slc12a4                   | SLC12A4        | 0.15  | 2.19 | 1.23  | 2.45E-01 | 5.38E-01 | -5.94 |
| 1457099_PM_at   | ---                       | NA             | 0.10  | 2.06 | 1.23  | 2.45E-01 | 5.38E-01 | -5.94 |
| 1458239_PM_at   | ---                       | NA             | 0.14  | 2.33 | 1.23  | 2.45E-01 | 5.38E-01 | -5.94 |
| 1421962_PM_at   | Dnajb5                    | DNAJB5         | -0.50 | 4.77 | -1.23 | 2.45E-01 | 5.38E-01 | -5.94 |
| 1446688_PM_at   | ---                       | NA             | 0.14  | 2.29 | 1.23  | 2.45E-01 | 5.38E-01 | -5.94 |
| 1437028_PM_at   | Sftpb                     | SFTPB          | -0.18 | 3.03 | -1.23 | 2.45E-01 | 5.38E-01 | -5.94 |
| 1421392_PM_a_at | Birc3                     | BIRC3          | 0.14  | 2.46 | 1.23  | 2.45E-01 | 5.38E-01 | -5.94 |
| 1456127_PM_at   | Cnpy1                     | CNPY1          | 0.20  | 2.32 | 1.23  | 2.45E-01 | 5.38E-01 | -5.94 |
| 1459168_PM_at   | ---                       | NA             | 0.14  | 2.47 | 1.23  | 2.45E-01 | 5.38E-01 | -5.94 |
| 1458846_PM_at   | ---                       | NA             | -0.10 | 2.28 | -1.23 | 2.45E-01 | 5.38E-01 | -5.94 |
| 1416699_PM_at   | 1110008F13Rik             | TGIF2-C20orf24 | -0.63 | 3.22 | -1.23 | 2.45E-01 | 5.38E-01 | -5.94 |
| 1420053_PM_at   | Psmb1                     | NA             | -0.14 | 2.58 | -1.23 | 2.45E-01 | 5.38E-01 | -5.94 |
| 1431452_PM_at   | Ndst4                     | NDST4          | 0.12  | 2.34 | 1.23  | 2.45E-01 | 5.38E-01 | -5.94 |
| 1418311_PM_at   | Fn3k                      | FN3K           | -0.46 | 3.39 | -1.23 | 2.45E-01 | 5.38E-01 | -5.94 |
| 1448858_PM_at   | Ulk2                      | ULK2           | -0.36 | 3.16 | -1.23 | 2.45E-01 | 5.38E-01 | -5.94 |
| 1450895_PM_a_at | Cox16                     | COX16          | -0.24 | 2.63 | -1.23 | 2.45E-01 | 5.38E-01 | -5.94 |
| 1416086_PM_at   | Tpst2                     | TPST2          | -0.16 | 3.91 | -1.23 | 2.45E-01 | 5.38E-01 | -5.94 |
| 1450020_PM_at   | Cx3cr1                    | CX3CR1         | 0.11  | 2.43 | 1.23  | 2.45E-01 | 5.38E-01 | -5.94 |
| 1457994_PM_at   | LOC105245193              | NA             | 0.12  | 2.34 | 1.23  | 2.45E-01 | 5.38E-01 | -5.94 |
| 1445865_PM_at   | ---                       | NA             | 0.13  | 2.13 | 1.23  | 2.45E-01 | 5.38E-01 | -5.94 |
| 1458695_PM_at   | Zbtb10                    | NA             | 0.14  | 2.71 | 1.23  | 2.45E-01 | 5.38E-01 | -5.94 |
| 1430509_PM_at   | Gm11567                   | KRTAP9-1       | 0.16  | 2.30 | 1.23  | 2.45E-01 | 5.38E-01 | -5.94 |
| 1435214_PM_at   | Gjc2                      | GJC2           | 0.18  | 2.62 | 1.23  | 2.45E-01 | 5.38E-01 | -5.94 |
| 1446316_PM_at   | ---                       | NA             | 0.18  | 2.81 | 1.23  | 2.45E-01 | 5.38E-01 | -5.94 |
| 1429069_PM_at   | ---                       | NA             | 0.19  | 3.10 | 1.23  | 2.45E-01 | 5.38E-01 | -5.94 |
| 1459355_PM_at   | ---                       | NA             | 0.20  | 2.73 | 1.23  | 2.45E-01 | 5.38E-01 | -5.94 |
| 1417534_PM_at   | Itgfb5                    | ITGB5          | 0.24  | 2.53 | 1.23  | 2.45E-01 | 5.38E-01 | -5.94 |
| 1448191_PM_at   | Plk1                      | PLK1           | 0.25  | 3.18 | 1.23  | 2.45E-01 | 5.38E-01 | -5.94 |
| 1434938_PM_at   | Rbfox2                    | RBFOX2         | 0.35  | 2.71 | 1.23  | 2.45E-01 | 5.38E-01 | -5.94 |
| 1443921_PM_at   | Ranbp3l                   | RANBP3L        | -0.46 | 3.02 | -1.23 | 2.45E-01 | 5.38E-01 | -5.94 |
| 1449113_PM_at   | Gppb1l1                   | GPBP1L1        | 0.16  | 6.27 | 1.23  | 2.45E-01 | 5.38E-01 | -5.94 |
| 1449392_PM_at   | Hsd17b1                   | HSD17B1        | 0.20  | 2.34 | 1.23  | 2.45E-01 | 5.38E-01 | -5.94 |
| 1431397_PM_at   | 3110099E03Rik             | NA             | -0.12 | 2.20 | -1.23 | 2.45E-01 | 5.38E-01 | -5.94 |
| 1428550_PM_at   | Ydjc                      | YDJC           | 0.18  | 2.60 | 1.23  | 2.45E-01 | 5.38E-01 | -5.94 |
| 1415716_PM_a_at | Rps27 /// Rps27rt         | RPS27          | 0.35  | 8.41 | 1.23  | 2.45E-01 | 5.38E-01 | -5.94 |
| 1452971_PM_at   | Upf3a                     | UPF3A          | 0.52  | 6.02 | 1.23  | 2.45E-01 | 5.38E-01 | -5.94 |
| 1443323_PM_at   | Trmt13                    | TRMT13         | 0.10  | 2.44 | 1.23  | 2.45E-01 | 5.38E-01 | -5.94 |
| 1444500_PM_at   | ---                       | NA             | 0.14  | 2.38 | 1.23  | 2.45E-01 | 5.38E-01 | -5.94 |
| 1458641_PM_at   | Braf                      | NA             | 0.28  | 2.32 | 1.23  | 2.45E-01 | 5.38E-01 | -5.94 |
| 1424263_PM_at   | Aif1l                     | AIF1L          | 0.17  | 2.16 | 1.23  | 2.45E-01 | 5.38E-01 | -5.94 |
| 1447096_PM_at   | ---                       | NA             | 0.32  | 3.94 | 1.23  | 2.45E-01 | 5.38E-01 | -5.94 |
| 1454781_PM_x_at | CommD9                    | COMMMD9        | 0.28  | 3.61 | 1.23  | 2.45E-01 | 5.38E-01 | -5.94 |
| 1422032_PM_a_at | Zfand6                    | ZFAND6         | 0.39  | 6.34 | 1.23  | 2.45E-01 | 5.38E-01 | -5.94 |
| 1443957_PM_at   | Dixdc1                    | DIXDC1         | -0.22 | 4.12 | -1.23 | 2.45E-01 | 5.38E-01 | -5.94 |
| 1443020_PM_at   | Hmbox1                    | HMBOX1         | -0.29 | 3.23 | -1.23 | 2.45E-01 | 5.38E-01 | -5.94 |
| 1443276_PM_at   | Htr5a                     | HTR5A          | -0.11 | 2.36 | -1.23 | 2.46E-01 | 5.38E-01 | -5.94 |
| 1450810_PM_at   | Fshr                      | FSHR           | 0.19  | 2.18 | 1.23  | 2.46E-01 | 5.38E-01 | -5.94 |
| 1439850_PM_at   | Zfp941                    | ZNF519         | 0.53  | 3.44 | 1.23  | 2.46E-01 | 5.38E-01 | -5.94 |
| 1424590_PM_at   | Ddx19b                    | DDX19B         | -0.18 | 2.95 | -1.23 | 2.46E-01 | 5.39E-01 | -5.94 |
| 1440963_PM_at   | Cbfa2t3                   | NA             | 0.14  | 2.29 | 1.23  | 2.46E-01 | 5.39E-01 | -5.94 |
| 1426549_PM_at   | Mri1                      | NA             | 0.14  | 2.34 | 1.23  | 2.46E-01 | 5.39E-01 | -5.94 |
| 1439920_PM_at   | ---                       | NA             | 0.23  | 6.69 | 1.23  | 2.46E-01 | 5.39E-01 | -5.94 |
| 1427406_PM_at   | Trip11                    | TRIP11         | 0.23  | 3.01 | 1.23  | 2.46E-01 | 5.39E-01 | -5.94 |
| 1422113_PM_at   | Slc5a5                    | NA             | 0.23  | 2.68 | 1.23  | 2.46E-01 | 5.39E-01 | -5.94 |
| 1420991_PM_at   | Ankrd1                    | ANKRD1         | 0.17  | 2.23 | 1.23  | 2.46E-01 | 5.39E-01 | -5.94 |
| 1431308_PM_at   | Ankrd33b                  | ANKRD33B       | 0.18  | 2.04 | 1.23  | 2.46E-01 | 5.39E-01 | -5.94 |
| 1450769_PM_s_at | Stard5                    | STARD5         | 0.25  | 2.68 | 1.23  | 2.46E-01 | 5.39E-01 | -5.94 |
| 1420124_PM_s_at | Tcta                      | TCTA           | -0.28 | 2.78 | -1.23 | 2.46E-01 | 5.39E-01 | -5.94 |
| 1444078_PM_at   | Cd8a                      | CD8A           | 0.13  | 2.30 | 1.23  | 2.46E-01 | 5.39E-01 | -5.94 |
| 1451244_PM_a_at | Zfp422                    | ZNF22          | -0.26 | 5.83 | -1.23 | 2.46E-01 | 5.39E-01 | -5.94 |
| 1457767_PM_at   | ---                       | NA             | 0.12  | 2.30 | 1.23  | 2.46E-01 | 5.39E-01 | -5.94 |
| 1440723_PM_at   | ---                       | NA             | 0.13  | 2.69 | 1.23  | 2.46E-01 | 5.39E-01 | -5.94 |

|                 |                    |          |       |      |       |          |          |       |
|-----------------|--------------------|----------|-------|------|-------|----------|----------|-------|
| 1454540_PM_at   | Fam63a             | MINDY1   | 0.14  | 2.42 | 1.23  | 2.46E-01 | 5.39E-01 | -5.94 |
| 1430254_PM_at   | 4921517D22Rik      | C9orf153 | 0.15  | 2.19 | 1.23  | 2.46E-01 | 5.39E-01 | -5.94 |
| 1454313_PM_at   | Egfr               | NA       | 0.17  | 2.87 | 1.23  | 2.46E-01 | 5.39E-01 | -5.94 |
| 1423264_PM_at   | Bop1               | BOP1     | 0.28  | 3.20 | 1.23  | 2.46E-01 | 5.39E-01 | -5.94 |
| 1454760_PM_at   | Htatsf1            | HTATSF1  | -0.47 | 7.75 | -1.23 | 2.46E-01 | 5.39E-01 | -5.94 |
| 1441681_PM_at   | Xpot               | XPOT     | 0.10  | 2.15 | 1.23  | 2.46E-01 | 5.39E-01 | -5.94 |
| 1420177_PM_at   | Igll1              | NA       | 0.26  | 3.57 | 1.23  | 2.46E-01 | 5.39E-01 | -5.94 |
| 1432160_PM_at   | Git2               | GIT2     | 0.10  | 2.28 | 1.23  | 2.46E-01 | 5.39E-01 | -5.94 |
| 1424189_PM_at   | Pigc               | PIGC     | -0.18 | 2.51 | -1.23 | 2.46E-01 | 5.39E-01 | -5.94 |
| 1439922_PM_at   | Prrc1              | NA       | 0.16  | 2.50 | 1.23  | 2.46E-01 | 5.39E-01 | -5.94 |
| 1424830_PM_at   | Ccnk               | CCNK     | 0.17  | 2.55 | 1.23  | 2.46E-01 | 5.39E-01 | -5.94 |
| 1421910_PM_at   | Tcf20              | TCF20    | 0.42  | 5.27 | 1.23  | 2.46E-01 | 5.39E-01 | -5.94 |
| 1448279_PM_at   | Arpc3              | ARPC3    | -0.33 | 6.21 | -1.23 | 2.46E-01 | 5.39E-01 | -5.94 |
| 1458061_PM_at   | ---                | NA       | 0.15  | 2.30 | 1.23  | 2.46E-01 | 5.39E-01 | -5.94 |
| 1418055_PM_at   | Neurod4            | NEUROD4  | 0.16  | 2.31 | 1.23  | 2.46E-01 | 5.39E-01 | -5.94 |
| 1437650_PM_at   | Zbtb38             | ZBTB38   | -0.27 | 3.83 | -1.23 | 2.46E-01 | 5.39E-01 | -5.94 |
| 1458471_PM_at   | ---                | NA       | 0.17  | 2.40 | 1.23  | 2.46E-01 | 5.39E-01 | -5.94 |
| 1440002_PM_at   | Rnmt               | RNMT     | 0.15  | 3.05 | 1.23  | 2.46E-01 | 5.39E-01 | -5.94 |
| 1433343_PM_at   | 4930448K20Rik      | NA       | 0.14  | 2.35 | 1.23  | 2.46E-01 | 5.39E-01 | -5.94 |
| 1428587_PM_at   | Tmem41b            | TMEM41B  | -0.35 | 2.46 | -1.23 | 2.46E-01 | 5.39E-01 | -5.94 |
| 1431329_PM_at   | Nphp4              | NPHP4    | 0.19  | 2.66 | 1.23  | 2.46E-01 | 5.39E-01 | -5.94 |
| 1446222_PM_at   | ---                | NA       | 0.33  | 3.37 | 1.23  | 2.46E-01 | 5.39E-01 | -5.94 |
| 1419213_PM_at   | Nat6               | NAT6     | 0.17  | 2.34 | 1.23  | 2.46E-01 | 5.39E-01 | -5.94 |
| 1443661_PM_at   | Gm35216            | NA       | 0.10  | 2.12 | 1.23  | 2.46E-01 | 5.39E-01 | -5.94 |
| 1426022_PM_a_at | Vill               | VILL     | 0.14  | 2.28 | 1.23  | 2.46E-01 | 5.39E-01 | -5.94 |
| 1443072_PM_at   | ---                | NA       | 0.16  | 2.45 | 1.23  | 2.46E-01 | 5.39E-01 | -5.94 |
| 1427873_PM_at   | Defa15             | NA       | 0.20  | 2.70 | 1.23  | 2.46E-01 | 5.39E-01 | -5.94 |
| 1455549_PM_at   | Sestd1             | SESTD1   | -0.26 | 3.37 | -1.23 | 2.46E-01 | 5.39E-01 | -5.94 |
| 1441676_PM_at   | Zfat               | ZFAT     | 0.13  | 2.41 | 1.23  | 2.46E-01 | 5.39E-01 | -5.94 |
| 1426850_PM_a_at | Map2k6             | MAP2K6   | 0.19  | 2.90 | 1.23  | 2.46E-01 | 5.39E-01 | -5.94 |
| 1422122_PM_at   | Fcer2a             | FCER2    | 0.28  | 2.73 | 1.23  | 2.46E-01 | 5.39E-01 | -5.94 |
| 1417019_PM_a_at | Cdc6               | CDC6     | 0.16  | 2.22 | 1.23  | 2.46E-01 | 5.39E-01 | -5.94 |
| 1435634_PM_at   | Pcmtd1             | PCMTD1   | -0.36 | 3.58 | -1.23 | 2.46E-01 | 5.39E-01 | -5.94 |
| 1434734_PM_at   | Rad54b             | RAD54B   | 0.14  | 2.33 | 1.23  | 2.47E-01 | 5.39E-01 | -5.94 |
| 1433678_PM_at   | Pld4               | PLD4     | 0.15  | 2.40 | 1.23  | 2.47E-01 | 5.39E-01 | -5.94 |
| 1418292_PM_at   | Asna1              | ASNA1    | 0.38  | 4.26 | 1.23  | 2.47E-01 | 5.39E-01 | -5.94 |
| 1460630_PM_at   | Camk2d             | NA       | 0.21  | 2.44 | 1.23  | 2.47E-01 | 5.39E-01 | -5.94 |
| 1448208_PM_at   | Smad1              | SMAD1    | -0.62 | 5.66 | -1.23 | 2.47E-01 | 5.39E-01 | -5.94 |
| 1450724_PM_at   | Fam126a            | FAM126A  | -0.29 | 3.41 | -1.23 | 2.47E-01 | 5.39E-01 | -5.94 |
| 1417790_PM_at   | Dok1               | DOK1     | 0.13  | 2.28 | 1.23  | 2.47E-01 | 5.39E-01 | -5.94 |
| 1425126_PM_at   | Ncam1              | NCAM1    | 0.30  | 2.30 | 1.23  | 2.47E-01 | 5.40E-01 | -5.94 |
| 1428835_PM_at   | Myh14              | MYH14    | -0.18 | 2.74 | -1.23 | 2.47E-01 | 5.40E-01 | -5.94 |
| 1442865_PM_at   | Dgkk               | NA       | 0.12  | 2.43 | 1.23  | 2.47E-01 | 5.40E-01 | -5.94 |
| 1428408_PM_a_at | Esy2               | ESY2     | -0.24 | 3.01 | -1.23 | 2.47E-01 | 5.40E-01 | -5.94 |
| 1440717_PM_at   | AA407881           | NA       | 0.11  | 2.16 | 1.23  | 2.47E-01 | 5.40E-01 | -5.94 |
| 1438431_PM_at   | Abcd2              | ABCD2    | 0.15  | 2.42 | 1.23  | 2.47E-01 | 5.40E-01 | -5.94 |
| 1430502_PM_at   | Zfr2               | ZFR2     | 0.36  | 5.02 | 1.23  | 2.47E-01 | 5.40E-01 | -5.94 |
| 1442093_PM_at   | Azin2              | AZIN2    | 0.13  | 2.26 | 1.23  | 2.47E-01 | 5.40E-01 | -5.94 |
| 1448474_PM_at   | Nek7               | NEK7     | -0.41 | 3.65 | -1.23 | 2.47E-01 | 5.40E-01 | -5.94 |
| 1428096_PM_at   | Ipo11              | IPO11    | -0.30 | 3.01 | -1.23 | 2.47E-01 | 5.40E-01 | -5.94 |
| 1439957_PM_at   | Gnal               | GNAL     | -0.29 | 3.00 | -1.23 | 2.47E-01 | 5.40E-01 | -5.94 |
| 1440289_PM_at   | Gabpb2             | GABPB2   | -0.21 | 3.02 | -1.23 | 2.47E-01 | 5.40E-01 | -5.94 |
| 1427860_PM_at   | Igkv6-15           | NA       | 0.10  | 2.15 | 1.23  | 2.47E-01 | 5.40E-01 | -5.94 |
| 1427318_PM_s_at | Myof               | MYOF     | 0.10  | 2.83 | 1.23  | 2.47E-01 | 5.40E-01 | -5.94 |
| 1420023_PM_at   | Etf1               | ETF1     | 0.11  | 2.20 | 1.23  | 2.47E-01 | 5.40E-01 | -5.94 |
| 1450175_PM_a_at | Ctsm               | NA       | 0.13  | 2.38 | 1.23  | 2.47E-01 | 5.40E-01 | -5.94 |
| 1431661_PM_at   | ---                | NA       | 0.16  | 2.44 | 1.23  | 2.47E-01 | 5.40E-01 | -5.94 |
| 1427425_PM_at   | Slc25a51           | SLC25A52 | 0.16  | 2.83 | 1.23  | 2.47E-01 | 5.40E-01 | -5.94 |
| 1448332_PM_at   | Pex19              | PEX19    | 0.20  | 2.69 | 1.23  | 2.47E-01 | 5.40E-01 | -5.94 |
| 1435826_PM_at   | Rad18              | RAD18    | 0.21  | 4.80 | 1.23  | 2.47E-01 | 5.40E-01 | -5.94 |
| 1431502_PM_a_at | Exosc3             | EXOSC3   | 0.21  | 3.31 | 1.23  | 2.47E-01 | 5.40E-01 | -5.94 |
| 1424334_PM_at   | Tspan17            | TSPAN17  | 0.22  | 3.06 | 1.23  | 2.47E-01 | 5.40E-01 | -5.94 |
| 1438219_PM_at   | Pura               | NA       | 0.48  | 5.68 | 1.23  | 2.47E-01 | 5.40E-01 | -5.94 |
| 1420830_PM_x_at | Cdk5rap2 /// Ywhaq | YWHAQ    | -0.29 | 5.88 | -1.23 | 2.47E-01 | 5.40E-01 | -5.94 |
| 1430238_PM_at   | Got1l1             | GOT1L1   | -0.12 | 2.25 | -1.23 | 2.47E-01 | 5.40E-01 | -5.94 |
| 1424105_PM_a_at | Pttg1              | PTTG1    | -1.01 | 5.30 | -1.23 | 2.47E-01 | 5.40E-01 | -5.94 |
| 1447142_PM_at   | Cts7               | CTSL     | -0.11 | 2.18 | -1.23 | 2.47E-01 | 5.40E-01 | -5.94 |
| 1453247_PM_at   | Zfp618             | ZNF618   | 0.15  | 2.36 | 1.23  | 2.47E-01 | 5.40E-01 | -5.94 |
| 1430748_PM_at   | Saysd1             | NA       | -0.32 | 3.17 | -1.23 | 2.47E-01 | 5.40E-01 | -5.94 |
| 1433353_PM_at   | D530015H24Rik      | NA       | 0.14  | 2.15 | 1.23  | 2.47E-01 | 5.40E-01 | -5.94 |
| 1437202_PM_at   | Mysm1              | MYSM1    | -0.15 | 2.56 | -1.23 | 2.47E-01 | 5.40E-01 | -5.94 |
| 1423354_PM_at   | Snap29             | SNAP29   | 0.20  | 2.89 | 1.23  | 2.47E-01 | 5.40E-01 | -5.94 |
| 1455563_PM_at   | Ddx49              | DDX49    | 0.28  | 3.31 | 1.23  | 2.47E-01 | 5.40E-01 | -5.94 |
| 1433137_PM_at   | ---                | NA       | 0.13  | 2.42 | 1.23  | 2.47E-01 | 5.40E-01 | -5.94 |
| 1449330_PM_at   | Pdzd3              | PDZD3    | 0.21  | 2.91 | 1.23  | 2.47E-01 | 5.40E-01 | -5.94 |

|                 |                        |            |       |      |       |          |          |       |
|-----------------|------------------------|------------|-------|------|-------|----------|----------|-------|
| 1454989_PM_at   | Cspp1                  | CSPP1      | -0.31 | 2.80 | -1.23 | 2.47E-01 | 5.40E-01 | -5.94 |
| 1427721_PM_at   | ---                    | NA         | 0.09  | 2.15 | 1.23  | 2.47E-01 | 5.40E-01 | -5.94 |
| 1432751_PM_at   | ---                    | NA         | 0.15  | 2.49 | 1.23  | 2.47E-01 | 5.40E-01 | -5.94 |
| 1459326_PM_at   | D9Erttd256e            | NA         | 0.16  | 2.17 | 1.23  | 2.47E-01 | 5.40E-01 | -5.94 |
| 1450117_PM_at   | Tcf7l1                 | TCF7L1     | 0.40  | 2.65 | 1.23  | 2.47E-01 | 5.40E-01 | -5.94 |
| 1430642_PM_at   | ---                    | NA         | 0.40  | 3.00 | 1.23  | 2.47E-01 | 5.40E-01 | -5.94 |
| 1436167_PM_at   | Shf                    | SHF        | -0.27 | 3.02 | -1.23 | 2.48E-01 | 5.40E-01 | -5.95 |
| 1449271_PM_a_at | Hebp2                  | HEBP2      | 0.17  | 2.10 | 1.23  | 2.48E-01 | 5.40E-01 | -5.94 |
| 1450425_PM_a_at | 2700062C07Rik          | C18orf21   | 0.49  | 3.10 | 1.23  | 2.48E-01 | 5.41E-01 | -5.95 |
| 1451692_PM_at   | Tmco6                  | TMCO6      | 0.33  | 3.24 | 1.22  | 2.48E-01 | 5.41E-01 | -5.95 |
| 1447144_PM_at   | ---                    | NA         | 0.10  | 2.11 | 1.22  | 2.48E-01 | 5.41E-01 | -5.95 |
| 1431568_PM_at   | 4933427E13Rik          | NA         | 0.11  | 2.07 | 1.22  | 2.48E-01 | 5.41E-01 | -5.95 |
| 1419350_PM_at   | Hook2                  | HOOK2      | 0.22  | 2.68 | 1.22  | 2.48E-01 | 5.41E-01 | -5.95 |
| 1430120_PM_at   | 4930519G04Rik          | NA         | -0.64 | 2.59 | -1.22 | 2.48E-01 | 5.41E-01 | -5.95 |
| 1439829_PM_at   | Adcy5                  | NA         | 0.20  | 2.98 | 1.22  | 2.48E-01 | 5.41E-01 | -5.95 |
| 1431580_PM_at   | ---                    | NA         | 0.31  | 3.41 | 1.22  | 2.48E-01 | 5.41E-01 | -5.95 |
| 1453708_PM_a_at | Gsto2                  | GSTO2      | 0.10  | 2.33 | 1.22  | 2.48E-01 | 5.41E-01 | -5.95 |
| 1448197_PM_at   | Ceacam11               | CEACAM3    | 0.10  | 2.20 | 1.22  | 2.48E-01 | 5.41E-01 | -5.95 |
| 1435595_PM_at   | 1810011010Rik          | C8orf4     | 0.10  | 2.18 | 1.22  | 2.48E-01 | 5.41E-01 | -5.95 |
| 1459647_PM_at   | ---                    | NA         | 0.14  | 2.27 | 1.22  | 2.48E-01 | 5.41E-01 | -5.95 |
| 1456400_PM_at   | ---                    | NA         | -0.23 | 3.01 | -1.22 | 2.48E-01 | 5.41E-01 | -5.95 |
| 1441375_PM_at   | ---                    | NA         | 0.15  | 2.11 | 1.22  | 2.48E-01 | 5.41E-01 | -5.95 |
| 1451857_PM_a_at | Notum                  | NOTUM      | -0.17 | 2.33 | -1.22 | 2.48E-01 | 5.41E-01 | -5.95 |
| 1442771_PM_at   | ---                    | NA         | 0.11  | 2.31 | 1.22  | 2.48E-01 | 5.41E-01 | -5.95 |
| 1460137_PM_at   | ---                    | NA         | 0.17  | 2.89 | 1.22  | 2.48E-01 | 5.41E-01 | -5.95 |
| 1419728_PM_at   | Cxc15                  | NA         | 0.18  | 2.14 | 1.22  | 2.48E-01 | 5.41E-01 | -5.95 |
| 1430847_PM_a_at | CreM                   | CREM       | 0.27  | 2.32 | 1.22  | 2.48E-01 | 5.41E-01 | -5.95 |
| 1426106_PM_a_at | Syt6                   | SYT6       | 0.31  | 2.56 | 1.22  | 2.48E-01 | 5.41E-01 | -5.95 |
| 1445091_PM_at   | Atr                    | ATR        | 0.26  | 2.91 | 1.22  | 2.48E-01 | 5.41E-01 | -5.95 |
| 1430040_PM_at   | Hspa12a                | HSPA12A    | 0.11  | 2.45 | 1.22  | 2.48E-01 | 5.41E-01 | -5.95 |
| 1457577_PM_at   | ---                    | NA         | 0.11  | 2.43 | 1.22  | 2.48E-01 | 5.41E-01 | -5.95 |
| 1424441_PM_at   | Slc27a4                | SLC27A4    | -0.36 | 3.23 | -1.22 | 2.48E-01 | 5.41E-01 | -5.95 |
| 1419501_PM_at   | Polk                   | POLK       | -0.20 | 2.46 | -1.22 | 2.48E-01 | 5.41E-01 | -5.95 |
| 1419466_PM_at   | Nkd2                   | NKD2       | -0.43 | 3.25 | -1.22 | 2.48E-01 | 5.41E-01 | -5.95 |
| 1440005_PM_at   | Onecut2                | ONECUT2    | 0.14  | 2.34 | 1.22  | 2.48E-01 | 5.41E-01 | -5.95 |
| 1444890_PM_at   | ---                    | NA         | 0.25  | 2.52 | 1.22  | 2.48E-01 | 5.41E-01 | -5.95 |
| 1431436_PM_a_at | Katnal2                | KATNAL2    | 0.15  | 4.50 | 1.22  | 2.48E-01 | 5.41E-01 | -5.95 |
| 1434276_PM_x_at | BC004004               | C6orf89    | 0.35  | 5.66 | 1.22  | 2.48E-01 | 5.41E-01 | -5.95 |
| 1439616_PM_at   | ---                    | NA         | -0.28 | 2.92 | -1.22 | 2.48E-01 | 5.41E-01 | -5.95 |
| 1431209_PM_s_at | Gm9856                 | NA         | -0.18 | 2.76 | -1.22 | 2.48E-01 | 5.41E-01 | -5.95 |
| 1459479_PM_at   | Gm12072                | NA         | -0.17 | 2.40 | -1.22 | 2.48E-01 | 5.41E-01 | -5.95 |
| 1433959_PM_at   | Zmat4                  | ZMAT4      | -0.14 | 2.21 | -1.22 | 2.48E-01 | 5.41E-01 | -5.95 |
| 1460310_PM_a_at | Gh                     | CSH2       | 0.11  | 2.23 | 1.22  | 2.48E-01 | 5.41E-01 | -5.95 |
| 1419012_PM_at   | Zfpm2                  | ZFPM2      | 0.12  | 2.61 | 1.22  | 2.48E-01 | 5.41E-01 | -5.95 |
| 1435825_PM_at   | Acvr1                  | ACVRL1     | 0.12  | 2.69 | 1.22  | 2.48E-01 | 5.41E-01 | -5.95 |
| 1458020_PM_at   | Reln                   | RELN       | 0.12  | 2.34 | 1.22  | 2.48E-01 | 5.41E-01 | -5.95 |
| 1449447_PM_at   | Cst10                  | CST4       | 0.15  | 2.17 | 1.22  | 2.48E-01 | 5.41E-01 | -5.95 |
| 1457287_PM_at   | ---                    | NA         | 0.17  | 2.75 | 1.22  | 2.48E-01 | 5.41E-01 | -5.95 |
| 1422036_PM_at   | Strn                   | STRN       | 0.21  | 2.34 | 1.22  | 2.48E-01 | 5.41E-01 | -5.95 |
| 1436179_PM_a_at | Dnajc5                 | DNAJC5     | -0.19 | 2.68 | -1.22 | 2.48E-01 | 5.41E-01 | -5.95 |
| 1438986_PM_x_at | Gm14586 /// Gm2614 /// | Rps17      | -0.41 | 9.17 | -1.22 | 2.48E-01 | 5.41E-01 | -5.95 |
| 1432137_PM_at   | ---                    | NA         | 0.11  | 2.30 | 1.22  | 2.48E-01 | 5.41E-01 | -5.95 |
| 1440199_PM_at   | Slc25a48               | SLC25A48   | 0.11  | 2.17 | 1.22  | 2.48E-01 | 5.41E-01 | -5.95 |
| 1447987_PM_at   | Letm2                  | NA         | 0.14  | 2.64 | 1.22  | 2.48E-01 | 5.41E-01 | -5.95 |
| 1439276_PM_at   | Adar                   | NA         | 0.17  | 2.18 | 1.22  | 2.48E-01 | 5.41E-01 | -5.95 |
| 1448908_PM_at   | Plpp3                  | PLPP3      | 0.33  | 2.85 | 1.22  | 2.48E-01 | 5.41E-01 | -5.95 |
| 1416480_PM_a_at | Higd1a                 | AC099329.3 | 0.28  | 4.59 | 1.22  | 2.49E-01 | 5.41E-01 | -5.95 |
| 1455980_PM_a_at | Gas2l3                 | GAS2L3     | -0.13 | 2.13 | -1.22 | 2.49E-01 | 5.41E-01 | -5.95 |
| 1439854_PM_at   | Hrk                    | HRK        | -0.46 | 2.96 | -1.22 | 2.49E-01 | 5.41E-01 | -5.95 |
| 1456396_PM_at   | Xpo4                   | NA         | -0.23 | 4.18 | -1.22 | 2.49E-01 | 5.41E-01 | -5.95 |
| 1436418_PM_at   | Mrgbp                  | NA         | 0.09  | 2.20 | 1.22  | 2.49E-01 | 5.41E-01 | -5.95 |
| 1418613_PM_at   | Kcnj1                  | KCNJ1      | 0.11  | 2.34 | 1.22  | 2.49E-01 | 5.41E-01 | -5.95 |
| 1440626_PM_at   | Hoxd13                 | HOXD13     | 0.13  | 2.24 | 1.22  | 2.49E-01 | 5.41E-01 | -5.95 |
| 1455948_PM_x_at | Matn3                  | MATN3      | 0.15  | 2.30 | 1.22  | 2.49E-01 | 5.41E-01 | -5.95 |
| 1443815_PM_x_at | Slk                    | SLK        | 0.17  | 3.13 | 1.22  | 2.49E-01 | 5.41E-01 | -5.95 |
| 1437072_PM_at   | Arhgap25               | ARHGAP25   | 0.33  | 4.18 | 1.22  | 2.49E-01 | 5.41E-01 | -5.95 |
| 1418612_PM_at   | Slf1                   | SLFN12     | -0.25 | 2.33 | -1.22 | 2.49E-01 | 5.41E-01 | -5.95 |
| 1421683_PM_at   | Gm3417 /// Gm3448 ///  | Tcte3      | 0.11  | 2.30 | 1.22  | 2.49E-01 | 5.41E-01 | -5.95 |
| 1456519_PM_at   | Slc4a8                 | NA         | 0.13  | 2.07 | 1.22  | 2.49E-01 | 5.41E-01 | -5.95 |
| 1451941_PM_a_at | Fcgr2b                 | FCGR2A     | 0.13  | 2.29 | 1.22  | 2.49E-01 | 5.41E-01 | -5.95 |
| 1420278_PM_at   | Prss58                 | PRSS58     | 0.16  | 2.31 | 1.22  | 2.49E-01 | 5.41E-01 | -5.95 |
| 1446353_PM_at   | Tubb6                  | NA         | 0.20  | 4.37 | 1.22  | 2.49E-01 | 5.41E-01 | -5.95 |
| 1453828_PM_at   | Setd1b                 | NA         | 0.25  | 2.48 | 1.22  | 2.49E-01 | 5.41E-01 | -5.95 |

|                 |                     |            |       |      |       |          |          |       |
|-----------------|---------------------|------------|-------|------|-------|----------|----------|-------|
| 1451150_PM_at   | Zfp410              | ZNF410     | 0.31  | 3.33 | 1.22  | 2.49E-01 | 5.41E-01 | -5.95 |
| 1416222_PM_at   | Nsdhl               | NSDHL      | 0.34  | 2.60 | 1.22  | 2.49E-01 | 5.41E-01 | -5.95 |
| 1459245_PM_s_at | Grid2               | GRID2      | 0.16  | 2.06 | 1.22  | 2.49E-01 | 5.42E-01 | -5.95 |
| 1459641_PM_at   | ---                 | NA         | 0.10  | 2.10 | 1.22  | 2.49E-01 | 5.42E-01 | -5.95 |
| 1419433_PM_at   | Nthl1               | NTHL1      | 0.17  | 2.78 | 1.22  | 2.49E-01 | 5.42E-01 | -5.95 |
| 1435131_PM_at   | Zfp13               | ZNF205     | 0.19  | 3.05 | 1.22  | 2.49E-01 | 5.42E-01 | -5.95 |
| 1435861_PM_at   | Ppfi1               | PPF1A1     | 0.38  | 3.24 | 1.22  | 2.49E-01 | 5.42E-01 | -5.95 |
| 1424808_PM_at   | Lama4               | LAMA4      | 0.14  | 2.35 | 1.22  | 2.49E-01 | 5.42E-01 | -5.95 |
| 1430854_PM_at   | Alg5                | ALG5       | 0.15  | 2.22 | 1.22  | 2.49E-01 | 5.42E-01 | -5.95 |
| 1432522_PM_s_at | Cep112              | CEP112     | 0.20  | 2.64 | 1.22  | 2.49E-01 | 5.42E-01 | -5.95 |
| 1446625_PM_at   | ---                 | NA         | 0.13  | 2.11 | 1.22  | 2.49E-01 | 5.42E-01 | -5.95 |
| 1422519_PM_at   | Cask                | CASK       | -0.22 | 2.45 | -1.22 | 2.49E-01 | 5.42E-01 | -5.95 |
| 1418683_PM_at   | Lin7b               | LIN7B      | -0.16 | 4.06 | -1.22 | 2.49E-01 | 5.42E-01 | -5.95 |
| 1454382_PM_at   | Samd4               | SAMD4A     | 0.12  | 2.52 | 1.22  | 2.49E-01 | 5.42E-01 | -5.95 |
| 1449434_PM_at   | Car3                | CA3        | 0.15  | 2.65 | 1.22  | 2.49E-01 | 5.42E-01 | -5.95 |
| 1430386_PM_at   | E030024N20Rik       | NA         | 0.21  | 2.71 | 1.22  | 2.49E-01 | 5.42E-01 | -5.95 |
| 1453783_PM_at   | Pura                | PURA       | -0.48 | 7.15 | -1.22 | 2.49E-01 | 5.42E-01 | -5.95 |
| 1427254_PM_at   | Zfp445              | NA         | -0.26 | 3.65 | -1.22 | 2.49E-01 | 5.42E-01 | -5.95 |
| 1424145_PM_at   | Pr3                 | PRR3       | 0.21  | 4.18 | 1.22  | 2.49E-01 | 5.42E-01 | -5.95 |
| 1438106_PM_at   | Pcdhb21             | NA         | 0.22  | 2.64 | 1.22  | 2.49E-01 | 5.42E-01 | -5.95 |
| 1442483_PM_at   | ---                 | NA         | 0.24  | 2.40 | 1.22  | 2.49E-01 | 5.42E-01 | -5.95 |
| 1415955_PM_x_at | Prr1                | NA         | 0.31  | 6.21 | 1.22  | 2.49E-01 | 5.42E-01 | -5.95 |
| 1424326_PM_at   | Lemd2               | LEMD2      | 0.13  | 2.51 | 1.22  | 2.50E-01 | 5.42E-01 | -5.95 |
| 1433053_PM_at   | Irgb2l              | ITGB2      | 0.14  | 2.25 | 1.22  | 2.50E-01 | 5.42E-01 | -5.95 |
| 1456528_PM_x_at | Ncl                 | NCL        | 0.20  | 5.48 | 1.22  | 2.50E-01 | 5.42E-01 | -5.95 |
| 1457735_PM_at   | ---                 | NA         | 0.09  | 2.26 | 1.22  | 2.50E-01 | 5.42E-01 | -5.95 |
| 1446542_PM_at   | Acss2               | ACSS2      | 0.19  | 2.80 | 1.22  | 2.50E-01 | 5.42E-01 | -5.95 |
| 1421022_PM_x_at | Acyp1               | ACYP1      | -0.63 | 4.16 | -1.22 | 2.50E-01 | 5.43E-01 | -5.95 |
| 1452482_PM_at   | Erb3                | ERBB3      | 0.12  | 2.30 | 1.22  | 2.50E-01 | 5.43E-01 | -5.95 |
| 1454505_PM_at   | ---                 | NA         | 0.12  | 2.32 | 1.22  | 2.50E-01 | 5.43E-01 | -5.95 |
| 1425439_PM_a_at | Slc41a3             | SLC41A3    | 0.20  | 3.12 | 1.22  | 2.50E-01 | 5.43E-01 | -5.95 |
| 1442359_PM_at   | Steap2              | STEAP2     | 0.27  | 2.65 | 1.22  | 2.50E-01 | 5.43E-01 | -5.95 |
| 1434742_PM_s_at | Aifm3               | AIFM3      | 0.30  | 3.51 | 1.22  | 2.50E-01 | 5.43E-01 | -5.95 |
| 1416701_PM_at   | Rnd3                | RND3       | 0.39  | 3.01 | 1.22  | 2.50E-01 | 5.43E-01 | -5.95 |
| 1432955_PM_at   | 4930444K16Rik       | NA         | 0.14  | 2.12 | 1.22  | 2.50E-01 | 5.43E-01 | -5.95 |
| 1444671_PM_at   | ---                 | NA         | 0.10  | 1.80 | 1.22  | 2.50E-01 | 5.43E-01 | -5.95 |
| 1448133_PM_at   | Nmd3                | NMD3       | -0.38 | 4.13 | -1.22 | 2.50E-01 | 5.43E-01 | -5.95 |
| 1443886_PM_at   | ---                 | NA         | 0.17  | 2.21 | 1.22  | 2.50E-01 | 5.43E-01 | -5.95 |
| 1446559_PM_at   | ---                 | NA         | 0.10  | 2.24 | 1.22  | 2.50E-01 | 5.43E-01 | -5.95 |
| 1422185_PM_a_at | Cyb5r3              | CY5R3      | 0.75  | 6.40 | 1.22  | 2.50E-01 | 5.43E-01 | -5.95 |
| 1431971_PM_at   | Gata5os             | NA         | 0.19  | 3.77 | 1.22  | 2.50E-01 | 5.43E-01 | -5.95 |
| 1439475_PM_at   | Zfp429              | ZNF720     | 0.12  | 2.57 | 1.22  | 2.50E-01 | 5.43E-01 | -5.95 |
| 1435955_PM_at   | Siglecg             | SIGLEC11   | 0.16  | 2.17 | 1.22  | 2.50E-01 | 5.43E-01 | -5.95 |
| 1437145_PM_s_at | Cysrt1              | CYSRT1     | 0.14  | 2.34 | 1.22  | 2.50E-01 | 5.43E-01 | -5.95 |
| 1423386_PM_at   | Psm9                | ACO69503.2 | 0.18  | 2.98 | 1.22  | 2.50E-01 | 5.43E-01 | -5.95 |
| 1459741_PM_x_at | Ucp2                | UCP2       | 0.21  | 4.21 | 1.22  | 2.50E-01 | 5.43E-01 | -5.95 |
| 1445934_PM_at   | Arih2               | ARIH2      | 0.16  | 2.96 | 1.22  | 2.50E-01 | 5.43E-01 | -5.95 |
| 1442874_PM_at   | ---                 | NA         | 0.16  | 2.44 | 1.22  | 2.50E-01 | 5.43E-01 | -5.95 |
| 1422760_PM_at   | Pad4                | NA         | 0.12  | 2.26 | 1.22  | 2.50E-01 | 5.43E-01 | -5.95 |
| 1429015_PM_at   | Glb1l               | GLB1L      | -0.15 | 2.53 | -1.22 | 2.50E-01 | 5.43E-01 | -5.95 |
| 1453406_PM_a_at | Rab28               | RAB28      | -0.25 | 4.14 | -1.22 | 2.50E-01 | 5.43E-01 | -5.95 |
| 1455114_PM_at   | Ccno                | CCNO       | 0.13  | 2.52 | 1.22  | 2.50E-01 | 5.43E-01 | -5.95 |
| 1432536_PM_at   | Tepp                | TEPP       | 0.14  | 2.26 | 1.22  | 2.50E-01 | 5.43E-01 | -5.95 |
| 1439727_PM_at   | Cla4a               | CLCA4      | 0.14  | 2.13 | 1.22  | 2.50E-01 | 5.43E-01 | -5.95 |
| 1420186_PM_at   | ---                 | NA         | 0.15  | 2.26 | 1.22  | 2.50E-01 | 5.43E-01 | -5.95 |
| 1460472_PM_at   | Cdk3-ps             | NA         | 0.23  | 2.65 | 1.22  | 2.50E-01 | 5.43E-01 | -5.95 |
| 1451506_PM_at   | Mef2c               | MEF2C      | -0.79 | 5.01 | -1.22 | 2.50E-01 | 5.43E-01 | -5.95 |
| 1432358_PM_at   | Muc16               | NA         | 0.10  | 2.12 | 1.22  | 2.50E-01 | 5.43E-01 | -5.95 |
| 1456184_PM_at   | Tmem63c             | TMEM63C    | -0.14 | 2.34 | -1.22 | 2.50E-01 | 5.43E-01 | -5.95 |
| 1417482_PM_at   | Tex19.1             | TEX19      | 0.24  | 2.85 | 1.22  | 2.50E-01 | 5.43E-01 | -5.95 |
| 1426896_PM_at   | Zfp24               | ZNF24      | 0.11  | 2.40 | 1.22  | 2.50E-01 | 5.43E-01 | -5.95 |
| 1447052_PM_at   | ---                 | NA         | 0.12  | 2.27 | 1.22  | 2.50E-01 | 5.43E-01 | -5.95 |
| 1453513_PM_at   | ---                 | NA         | 0.13  | 2.36 | 1.22  | 2.50E-01 | 5.43E-01 | -5.95 |
| 1443879_PM_at   | Mier1               | MIER1      | 0.14  | 2.44 | 1.22  | 2.50E-01 | 5.43E-01 | -5.95 |
| 1415931_PM_at   | Igf2                | IGF2       | -0.52 | 6.40 | -1.22 | 2.50E-01 | 5.43E-01 | -5.95 |
| 1452835_PM_a_at | Polrmt              | POLRMT     | -0.29 | 2.61 | -1.22 | 2.50E-01 | 5.43E-01 | -5.95 |
| 1443374_PM_at   | ---                 | NA         | -0.20 | 2.44 | -1.22 | 2.50E-01 | 5.43E-01 | -5.95 |
| 1417237_PM_at   | Pld2                | PLD2       | -0.15 | 2.85 | -1.22 | 2.50E-01 | 5.43E-01 | -5.95 |
| 1429472_PM_at   | 4921525O09Rik       | NA         | 0.13  | 2.80 | 1.22  | 2.50E-01 | 5.43E-01 | -5.95 |
| 1452859_PM_at   | Swt1                | SWT1       | 0.20  | 2.46 | 1.22  | 2.50E-01 | 5.43E-01 | -5.95 |
| 1417144_PM_at   | Tubg1               | TUBG1      | 0.28  | 2.55 | 1.22  | 2.50E-01 | 5.43E-01 | -5.95 |
| 1438977_PM_x_at | LOC102641332 ///Ran | RAN        | -0.22 | 8.60 | -1.22 | 2.51E-01 | 5.43E-01 | -5.95 |
| 1456503_PM_at   | Nup214              | NUP214     | 0.32  | 3.03 | 1.22  | 2.51E-01 | 5.43E-01 | -5.95 |
| 1453140_PM_at   | Zfp871              | NA         | -0.22 | 5.29 | -1.22 | 2.51E-01 | 5.43E-01 | -5.95 |
| 1424490_PM_at   | Zfp428              | ZNF428     | 0.16  | 2.70 | 1.22  | 2.51E-01 | 5.43E-01 | -5.95 |

|                 |                          |          |       |      |       |          |          |       |
|-----------------|--------------------------|----------|-------|------|-------|----------|----------|-------|
| 1442750_PM_at   | B3galnt2                 | NA       | -0.43 | 3.50 | -1.22 | 2.51E-01 | 5.44E-01 | -5.96 |
| 1424376_PM_at   | Cdc42ep1                 | CD42EP1  | 0.15  | 2.27 | 1.22  | 2.51E-01 | 5.44E-01 | -5.96 |
| 1427310_PM_at   | Bptf                     | BPTF     | 0.46  | 5.31 | 1.22  | 2.51E-01 | 5.44E-01 | -5.96 |
| 1438511_PM_a_at | Rgcc                     | RGCC     | 0.45  | 4.95 | 1.22  | 2.51E-01 | 5.44E-01 | -5.96 |
| 1426331_PM_a_at | FrmD4b                   | FRMD4B   | 0.14  | 2.48 | 1.22  | 2.51E-01 | 5.44E-01 | -5.96 |
| 1419320_PM_at   | Chst5                    | CHST5    | 0.15  | 2.46 | 1.22  | 2.51E-01 | 5.44E-01 | -5.96 |
| 1428879_PM_at   | Pitpnc1                  | PITPNC1  | 0.15  | 2.17 | 1.22  | 2.51E-01 | 5.44E-01 | -5.96 |
| 1420227_PM_at   | ---                      | NA       | 0.14  | 3.08 | 1.22  | 2.51E-01 | 5.44E-01 | -5.96 |
| 1431253_PM_s_at | Tbc1d9                   | TBC1D9   | 0.15  | 2.94 | 1.22  | 2.51E-01 | 5.44E-01 | -5.96 |
| 1460596_PM_at   | Agtrap                   | AGTRAP   | 0.17  | 3.92 | 1.22  | 2.51E-01 | 5.44E-01 | -5.96 |
| 1416122_PM_at   | Ccnd2                    | CCND2    | 0.30  | 3.17 | 1.22  | 2.51E-01 | 5.44E-01 | -5.96 |
| 1421449_PM_at   | Csmd1                    | CSMD1    | -0.20 | 3.77 | -1.22 | 2.51E-01 | 5.44E-01 | -5.96 |
| 1420865_PM_at   | Zbtb14                   | ZBTB14   | 0.26  | 3.38 | 1.22  | 2.51E-01 | 5.44E-01 | -5.96 |
| 1425291_PM_at   | Foxj1                    | FOXJ1    | 0.12  | 2.14 | 1.22  | 2.51E-01 | 5.44E-01 | -5.96 |
| 1442718_PM_at   | ---                      | NA       | 0.18  | 2.75 | 1.22  | 2.51E-01 | 5.44E-01 | -5.96 |
| 1433876_PM_at   | C030006K11Rik ///Lrrc24  | LRRC24   | 0.16  | 4.11 | 1.22  | 2.51E-01 | 5.44E-01 | -5.96 |
| 1432417_PM_a_at | Tspan2                   | TSPAN2   | 0.35  | 2.87 | 1.22  | 2.51E-01 | 5.44E-01 | -5.96 |
| 1423622_PM_a_at | Ccnl1                    | CCNL1    | 0.64  | 5.44 | 1.22  | 2.51E-01 | 5.44E-01 | -5.96 |
| 1458845_PM_at   | D4ErtD264e               | NA       | 0.12  | 2.10 | 1.22  | 2.51E-01 | 5.44E-01 | -5.96 |
| 1425944_PM_a_at | Rad51d                   | RAD51D   | -0.13 | 2.29 | -1.22 | 2.51E-01 | 5.44E-01 | -5.96 |
| 1457860_PM_at   | ---                      | NA       | 0.15  | 2.47 | 1.22  | 2.51E-01 | 5.44E-01 | -5.96 |
| 1422786_PM_at   | Slc30a1                  | SLC30A1  | -0.21 | 3.02 | -1.22 | 2.51E-01 | 5.44E-01 | -5.96 |
| 1458705_PM_at   | ---                      | NA       | 0.12  | 2.32 | 1.22  | 2.51E-01 | 5.44E-01 | -5.96 |
| 1459198_PM_at   | D4ErtD199e               | NA       | 0.18  | 2.39 | 1.21  | 2.51E-01 | 5.44E-01 | -5.96 |
| 1425608_PM_at   | Dusp3                    | DUSP3    | 0.22  | 3.20 | 1.21  | 2.51E-01 | 5.44E-01 | -5.96 |
| 1452307_PM_at   | Cables2                  | CABLES2  | -0.24 | 2.51 | -1.21 | 2.51E-01 | 5.44E-01 | -5.96 |
| 1436864_PM_at   | ---                      | NA       | 0.11  | 2.30 | 1.21  | 2.51E-01 | 5.44E-01 | -5.96 |
| 1430551_PM_s_at | Lipm                     | LIPM     | 0.12  | 2.20 | 1.21  | 2.51E-01 | 5.44E-01 | -5.96 |
| 1419446_PM_at   | Tbc1d1                   | TBC1D1   | 0.15  | 2.31 | 1.21  | 2.51E-01 | 5.44E-01 | -5.96 |
| 1458227_PM_at   | ---                      | NA       | 0.17  | 2.55 | 1.21  | 2.51E-01 | 5.44E-01 | -5.96 |
| 1458578_PM_at   | ---                      | NA       | 0.28  | 3.52 | 1.21  | 2.51E-01 | 5.44E-01 | -5.96 |
| 1459813_PM_at   | 1700012D01Rik ///Tmem194 | NEMP1    | 0.33  | 2.84 | 1.21  | 2.51E-01 | 5.44E-01 | -5.96 |
| 1446941_PM_at   | Gm16068                  | NA       | 0.39  | 2.57 | 1.21  | 2.51E-01 | 5.44E-01 | -5.96 |
| 1422663_PM_at   | Orc1                     | ORC1     | -0.13 | 2.37 | -1.21 | 2.52E-01 | 5.45E-01 | -5.96 |
| 1417387_PM_at   | Med31                    | MED31    | -0.25 | 3.10 | -1.21 | 2.52E-01 | 5.45E-01 | -5.96 |
| 1458033_PM_at   | Ubr1                     | NA       | 0.14  | 2.51 | 1.21  | 2.52E-01 | 5.45E-01 | -5.96 |
| 1433026_PM_at   | ---                      | NA       | 0.14  | 2.92 | 1.21  | 2.52E-01 | 5.45E-01 | -5.96 |
| 1438272_PM_at   | Csmd3                    | CSMD3    | -0.27 | 3.12 | -1.21 | 2.52E-01 | 5.45E-01 | -5.96 |
| 1456808_PM_at   | ---                      | NA       | 0.14  | 2.32 | 1.21  | 2.52E-01 | 5.45E-01 | -5.96 |
| 1423663_PM_at   | Flcn                     | FLCN     | 0.16  | 2.34 | 1.21  | 2.52E-01 | 5.45E-01 | -5.96 |
| 1446922_PM_at   | ---                      | NA       | 0.21  | 3.15 | 1.21  | 2.52E-01 | 5.45E-01 | -5.96 |
| 1452412_PM_at   | Hoxc8                    | HOXC8    | 0.22  | 3.00 | 1.21  | 2.52E-01 | 5.45E-01 | -5.96 |
| 1435720_PM_at   | Kcnd3                    | KCND3    | -0.37 | 5.46 | -1.21 | 2.52E-01 | 5.45E-01 | -5.96 |
| 1427193_PM_at   | Brd8                     | NA       | -0.16 | 2.24 | -1.21 | 2.52E-01 | 5.45E-01 | -5.96 |
| 1445732_PM_at   | ---                      | NA       | 0.11  | 2.21 | 1.21  | 2.52E-01 | 5.45E-01 | -5.96 |
| 1417863_PM_at   | Spata19                  | SPATA19  | 0.13  | 2.47 | 1.21  | 2.52E-01 | 5.45E-01 | -5.96 |
| 1420616_PM_at   | Ash2l                    | ASH2L    | 0.20  | 3.26 | 1.21  | 2.52E-01 | 5.45E-01 | -5.96 |
| 1452704_PM_at   | Rmdn3                    | RMDN3    | -0.17 | 3.44 | -1.21 | 2.52E-01 | 5.45E-01 | -5.96 |
| 1432834_PM_at   | ---                      | NA       | 0.19  | 2.28 | 1.21  | 2.52E-01 | 5.45E-01 | -5.96 |
| 1418623_PM_at   | Rab2a                    | NA       | 0.28  | 5.21 | 1.21  | 2.52E-01 | 5.45E-01 | -5.96 |
| 1436040_PM_at   | Snhg12                   | NA       | 0.18  | 2.41 | 1.21  | 2.52E-01 | 5.45E-01 | -5.96 |
| 1428415_PM_at   | Rnf113a2                 | RNF113B  | -0.50 | 4.64 | -1.21 | 2.52E-01 | 5.45E-01 | -5.96 |
| 1433127_PM_at   | 4930513L20Rik            | NA       | 0.15  | 2.41 | 1.21  | 2.52E-01 | 5.45E-01 | -5.96 |
| 1458237_PM_at   | Gm5219                   | NA       | 0.22  | 2.45 | 1.21  | 2.52E-01 | 5.45E-01 | -5.96 |
| 1416467_PM_at   | Ddx3x                    | DDX3X    | 0.33  | 6.77 | 1.21  | 2.52E-01 | 5.45E-01 | -5.96 |
| 1431608_PM_at   | Als2                     | ALS2     | 0.11  | 2.44 | 1.21  | 2.52E-01 | 5.45E-01 | -5.96 |
| 1422499_PM_at   | Lima1                    | LIMA1    | 0.20  | 4.23 | 1.21  | 2.52E-01 | 5.45E-01 | -5.96 |
| 1434935_PM_at   | Aak1 ///Gm38495          | AAK1     | -0.55 | 7.48 | -1.21 | 2.52E-01 | 5.45E-01 | -5.96 |
| 1453509_PM_at   | Lypd2                    | LYPD2    | 0.13  | 3.42 | 1.21  | 2.52E-01 | 5.45E-01 | -5.96 |
| 1440141_PM_at   | Kcng2                    | KCNQ2    | 0.18  | 3.98 | 1.21  | 2.52E-01 | 5.45E-01 | -5.96 |
| 1429092_PM_at   | Vkorc11                  | NA       | -0.48 | 6.39 | -1.21 | 2.52E-01 | 5.45E-01 | -5.96 |
| 1450790_PM_at   | Tg                       | TG       | 0.15  | 2.57 | 1.21  | 2.52E-01 | 5.45E-01 | -5.96 |
| 1445229_PM_at   | Dgat1                    | DGAT1    | 0.24  | 2.90 | 1.21  | 2.52E-01 | 5.45E-01 | -5.96 |
| 1456010_PM_x_at | Hes5                     | HES5     | -0.74 | 4.98 | -1.21 | 2.52E-01 | 5.45E-01 | -5.96 |
| 1454897_PM_at   | Slc9a7                   | NA       | -0.32 | 5.39 | -1.21 | 2.52E-01 | 5.45E-01 | -5.96 |
| 1433730_PM_at   | Elmod2                   | ELMOD2   | -0.23 | 2.84 | -1.21 | 2.52E-01 | 5.45E-01 | -5.96 |
| 1422858_PM_at   | Trip4                    | TRIP4    | -0.21 | 3.55 | -1.21 | 2.52E-01 | 5.45E-01 | -5.96 |
| 1435273_PM_at   | Wars2                    | WARS2    | 0.09  | 2.05 | 1.21  | 2.52E-01 | 5.45E-01 | -5.96 |
| 1460105_PM_at   | ---                      | NA       | 0.11  | 2.38 | 1.21  | 2.52E-01 | 5.45E-01 | -5.96 |
| 1420587_PM_at   | Tsga13                   | TSGA13   | 0.12  | 2.12 | 1.21  | 2.52E-01 | 5.45E-01 | -5.96 |
| 1450318_PM_a_at | P2ry2                    | P2RY2    | 0.12  | 2.34 | 1.21  | 2.52E-01 | 5.45E-01 | -5.96 |
| 1456578_PM_x_at | Lasp1                    | LASP1    | 0.14  | 2.55 | 1.21  | 2.52E-01 | 5.45E-01 | -5.96 |
| 1451539_PM_at   | Baiap21                  | BAIAP2L1 | 0.15  | 2.31 | 1.21  | 2.52E-01 | 5.45E-01 | -5.96 |

|                 |                           |          |       |      |       |          |          |       |
|-----------------|---------------------------|----------|-------|------|-------|----------|----------|-------|
| 1435961_PM_at   | Nat14                     | NAT14    | 0.17  | 5.59 | 1.21  | 2.52E-01 | 5.45E-01 | -5.96 |
| 1457758_PM_at   | Ery2                      | ENY2     | 0.22  | 2.98 | 1.21  | 2.52E-01 | 5.45E-01 | -5.96 |
| 1437796_PM_at   | Gm31445                   | NA       | 0.29  | 2.73 | 1.21  | 2.52E-01 | 5.45E-01 | -5.96 |
| 1439043_PM_at   | Tra2a                     | NA       | 0.31  | 3.73 | 1.21  | 2.52E-01 | 5.45E-01 | -5.96 |
| 1448382_PM_at   | Ehhadh                    | EHHADH   | 0.11  | 2.26 | 1.21  | 2.52E-01 | 5.45E-01 | -5.96 |
| 1441893_PM_at   | Tex24                     | NA       | -0.21 | 2.74 | -1.21 | 2.52E-01 | 5.45E-01 | -5.96 |
| 1433582_PM_at   | 1190002N15Rik             | C3orf58  | 0.12  | 2.07 | 1.21  | 2.52E-01 | 5.45E-01 | -5.96 |
| 1433401_PM_at   | ---                       | NA       | 0.13  | 2.18 | 1.21  | 2.52E-01 | 5.45E-01 | -5.96 |
| 1436517_PM_at   | H1fx                      | H1FX     | 0.14  | 2.93 | 1.21  | 2.52E-01 | 5.45E-01 | -5.96 |
| 1436506_PM_a_at | Snhg6                     | NA       | 0.25  | 5.38 | 1.21  | 2.52E-01 | 5.45E-01 | -5.96 |
| 1433354_PM_at   | ---                       | NA       | 0.28  | 2.18 | 1.21  | 2.52E-01 | 5.45E-01 | -5.96 |
| 1428942_PM_at   | Mt2                       | MT2A     | 0.39  | 4.85 | 1.21  | 2.52E-01 | 5.45E-01 | -5.96 |
| 1445313_PM_at   | Coq9                      | COQ9     | 0.12  | 2.29 | 1.21  | 2.52E-01 | 5.45E-01 | -5.96 |
| 1445662_PM_x_at | ---                       | NA       | 0.13  | 2.82 | 1.21  | 2.52E-01 | 5.45E-01 | -5.96 |
| 1443721_PM_x_at | Sbno2                     | SBNO2    | 0.15  | 2.57 | 1.21  | 2.53E-01 | 5.45E-01 | -5.96 |
| 1439918_PM_at   | Odf2                      | ODF2     | 0.16  | 2.93 | 1.21  | 2.53E-01 | 5.45E-01 | -5.96 |
| 1442909_PM_at   | ---                       | NA       | -0.14 | 2.30 | -1.21 | 2.53E-01 | 5.45E-01 | -5.96 |
| 1458640_PM_at   | ---                       | NA       | 0.22  | 2.84 | 1.21  | 2.53E-01 | 5.45E-01 | -5.96 |
| 1446341_PM_at   | ---                       | NA       | 0.28  | 2.55 | 1.21  | 2.53E-01 | 5.45E-01 | -5.96 |
| 1425350_PM_a_at | Myef2                     | MYEF2    | -0.41 | 5.24 | -1.21 | 2.53E-01 | 5.45E-01 | -5.96 |
| 1420531_PM_at   | Hsd3b5                    | HSD3B2   | 0.09  | 2.28 | 1.21  | 2.53E-01 | 5.45E-01 | -5.96 |
| 1433112_PM_at   | 4933424L07Rik             | NA       | 0.09  | 2.38 | 1.21  | 2.53E-01 | 5.45E-01 | -5.96 |
| 1429304_PM_at   | Ankrd10                   | ANKRD10  | 0.11  | 2.21 | 1.21  | 2.53E-01 | 5.45E-01 | -5.96 |
| 1419282_PM_at   | Cc1l2 ///LOC105242482     | CCL7     | 0.13  | 2.23 | 1.21  | 2.53E-01 | 5.45E-01 | -5.96 |
| 1460603_PM_at   | Samd9l                    | SAMD9L   | -0.15 | 2.41 | -1.21 | 2.53E-01 | 5.45E-01 | -5.96 |
| 1427364_PM_a_at | Odc1                      | ODC1     | -0.12 | 3.11 | -1.21 | 2.53E-01 | 5.45E-01 | -5.96 |
| 1437834_PM_s_at | Pacsin3                   | PACSN3   | 0.11  | 2.72 | 1.21  | 2.53E-01 | 5.45E-01 | -5.96 |
| 1423496_PM_a_at | Igdcc3                    | IGDCC3   | 0.12  | 2.48 | 1.21  | 2.53E-01 | 5.45E-01 | -5.96 |
| 1430726_PM_at   | Rassf8                    | RASSF8   | 0.16  | 2.37 | 1.21  | 2.53E-01 | 5.45E-01 | -5.96 |
| 1428881_PM_at   | Klc1                      | KLC1     | 0.16  | 2.38 | 1.21  | 2.53E-01 | 5.45E-01 | -5.96 |
| 1458870_PM_x_at | Mycbp2                    | MYCBP2   | -0.62 | 3.84 | -1.21 | 2.53E-01 | 5.45E-01 | -5.96 |
| 1441440_PM_at   | ---                       | NA       | 0.21  | 2.34 | 1.21  | 2.53E-01 | 5.45E-01 | -5.96 |
| 1443051_PM_at   | ---                       | NA       | 0.30  | 3.35 | 1.21  | 2.53E-01 | 5.45E-01 | -5.96 |
| 1424332_PM_at   | Rab40c                    | RAB40C   | 0.12  | 2.48 | 1.21  | 2.53E-01 | 5.45E-01 | -5.96 |
| 1459565_PM_at   | ---                       | NA       | 0.15  | 2.17 | 1.21  | 2.53E-01 | 5.45E-01 | -5.96 |
| 1448594_PM_at   | Wisp1                     | WISP1    | 0.16  | 3.14 | 1.21  | 2.53E-01 | 5.45E-01 | -5.96 |
| 1436426_PM_at   | Cc2d2a                    | CC2D2A   | 0.27  | 3.00 | 1.21  | 2.53E-01 | 5.46E-01 | -5.96 |
| 1454086_PM_a_at | Lmo2                      | LMO2     | -0.29 | 3.68 | -1.21 | 2.53E-01 | 5.46E-01 | -5.96 |
| 1437663_PM_at   | Pigv                      | PIGV     | 0.10  | 2.34 | 1.21  | 2.53E-01 | 5.46E-01 | -5.96 |
| 1453209_PM_at   | Brf1                      | BRF1     | 0.15  | 3.31 | 1.21  | 2.53E-01 | 5.46E-01 | -5.96 |
| 1419532_PM_at   | Il1r2                     | IL1R2    | 0.16  | 2.44 | 1.21  | 2.53E-01 | 5.46E-01 | -5.96 |
| 1445516_PM_at   | ---                       | NA       | 0.20  | 3.27 | 1.21  | 2.53E-01 | 5.46E-01 | -5.96 |
| 1438331_PM_at   | ---                       | NA       | 0.64  | 3.10 | 1.21  | 2.53E-01 | 5.46E-01 | -5.96 |
| 1437775_PM_at   | ---                       | NA       | -0.38 | 2.97 | -1.21 | 2.53E-01 | 5.46E-01 | -5.96 |
| 1429171_PM_a_at | Ncapg                     | NCAPG    | 0.12  | 2.60 | 1.21  | 2.53E-01 | 5.46E-01 | -5.96 |
| 1421390_PM_at   | Slc12a1                   | NA       | 0.14  | 2.25 | 1.21  | 2.53E-01 | 5.46E-01 | -5.96 |
| 1447285_PM_at   | ---                       | NA       | 0.19  | 2.99 | 1.21  | 2.53E-01 | 5.46E-01 | -5.96 |
| 1434145_PM_s_at | Serhl                     | SERHL2   | 0.22  | 3.49 | 1.21  | 2.53E-01 | 5.46E-01 | -5.96 |
| 1439731_PM_at   | Plppr1                    | PLPPR1   | 0.13  | 2.58 | 1.21  | 2.53E-01 | 5.46E-01 | -5.96 |
| 1443937_PM_at   | Il2rb                     | NA       | 0.13  | 2.25 | 1.21  | 2.53E-01 | 5.46E-01 | -5.96 |
| 1428478_PM_at   | Reep4                     | REEP4    | 0.18  | 3.01 | 1.21  | 2.53E-01 | 5.46E-01 | -5.96 |
| 1418363_PM_at   | Lalba                     | LALBA    | 0.14  | 2.52 | 1.21  | 2.53E-01 | 5.46E-01 | -5.96 |
| 1419883_PM_s_at | Atp6v1b2                  | ATP6V1B2 | -0.27 | 2.30 | -1.21 | 2.53E-01 | 5.46E-01 | -5.96 |
| 1449653_PM_at   | ---                       | NA       | 0.25  | 2.29 | 1.21  | 2.53E-01 | 5.46E-01 | -5.96 |
| 1417180_PM_at   | Pcsk7                     | PCSK7    | 0.13  | 2.26 | 1.21  | 2.53E-01 | 5.46E-01 | -5.96 |
| 1425703_PM_at   | Ppard                     | PPARD    | 0.17  | 2.29 | 1.21  | 2.53E-01 | 5.46E-01 | -5.96 |
| 1457954_PM_at   | ---                       | NA       | 0.66  | 4.75 | 1.21  | 2.53E-01 | 5.46E-01 | -5.96 |
| 1429532_PM_at   | Morc2a                    | MORC2    | 0.16  | 3.53 | 1.21  | 2.53E-01 | 5.46E-01 | -5.96 |
| 1416554_PM_at   | Pdlim1                    | PDLIM1   | -0.17 | 3.30 | -1.21 | 2.53E-01 | 5.46E-01 | -5.96 |
| 1442389_PM_at   | Oas1f                     | OAS1     | 0.10  | 1.96 | 1.21  | 2.53E-01 | 5.46E-01 | -5.96 |
| 1417603_PM_at   | Per2                      | PER2     | 0.13  | 2.60 | 1.21  | 2.54E-01 | 5.46E-01 | -5.96 |
| 1440754_PM_at   | ---                       | NA       | 0.14  | 2.51 | 1.21  | 2.54E-01 | 5.46E-01 | -5.96 |
| 1451073_PM_at   | Sppl3                     | SPPL3    | -0.28 | 4.80 | -1.21 | 2.54E-01 | 5.46E-01 | -5.96 |
| 1458506_PM_at   | Gm626                     | NA       | 0.15  | 2.16 | 1.21  | 2.54E-01 | 5.46E-01 | -5.96 |
| 1453274_PM_at   | Ccdc103                   | FAM187A  | 0.17  | 2.46 | 1.21  | 2.54E-01 | 5.46E-01 | -5.96 |
| 1440413_PM_at   | Vwc2l                     | VWC2L    | 0.22  | 2.36 | 1.21  | 2.54E-01 | 5.46E-01 | -5.96 |
| 1448490_PM_at   | Adck4                     | COQ8B    | 0.13  | 2.34 | 1.21  | 2.54E-01 | 5.46E-01 | -5.96 |
| 1435419_PM_at   | Rgag4                     | RTL5     | 0.14  | 2.51 | 1.21  | 2.54E-01 | 5.46E-01 | -5.96 |
| 1448142_PM_x_at | LOC102642137 ///Rps13 /// | RPS13    | -0.28 | 3.85 | -1.21 | 2.54E-01 | 5.46E-01 | -5.96 |
| 1432176_PM_a_at | Eng                       | ENG      | 0.10  | 3.61 | 1.21  | 2.54E-01 | 5.46E-01 | -5.96 |
| 1435760_PM_at   | Csta1                     | CSTA     | 0.13  | 2.32 | 1.21  | 2.54E-01 | 5.46E-01 | -5.96 |
| 1421337_PM_at   | Elf4                      | ELF4     | 0.19  | 2.34 | 1.21  | 2.54E-01 | 5.46E-01 | -5.96 |
| 1453882_PM_at   | Clhc1                     | CLHC1    | 0.15  | 3.26 | 1.21  | 2.54E-01 | 5.46E-01 | -5.96 |
| 1442352_PM_at   | ---                       | NA       | 0.14  | 2.17 | 1.21  | 2.54E-01 | 5.47E-01 | -5.96 |

|                 |                              |          |       |      |       |          |          |       |
|-----------------|------------------------------|----------|-------|------|-------|----------|----------|-------|
| 1433373_PM_at   | Supt7l                       | NA       | 0.10  | 2.01 | 1.21  | 2.54E-01 | 5.47E-01 | -5.96 |
| 1422067_PM_at   | Klrb1b                       | KLRB1    | 0.14  | 2.29 | 1.21  | 2.54E-01 | 5.47E-01 | -5.97 |
| 1418635_PM_at   | Etv3                         | ETV3     | 0.14  | 2.31 | 1.21  | 2.54E-01 | 5.47E-01 | -5.97 |
| 1436521_PM_at   | Slc36a2                      | SLC36A2  | 0.15  | 2.34 | 1.21  | 2.54E-01 | 5.47E-01 | -5.97 |
| 1422973_PM_a_at | Thrsp                        | THRSP    | 0.20  | 3.32 | 1.21  | 2.54E-01 | 5.47E-01 | -5.97 |
| 1447608_PM_x_at | Nacc2                        | NACC2    | 0.29  | 4.24 | 1.21  | 2.54E-01 | 5.47E-01 | -5.97 |
| 1416490_PM_at   | Tmed6                        | TMED6    | 0.13  | 2.36 | 1.21  | 2.54E-01 | 5.47E-01 | -5.97 |
| 1433243_PM_at   | 2810421E14Rik                | NA       | 0.11  | 2.93 | 1.21  | 2.54E-01 | 5.47E-01 | -5.97 |
| 1422814_PM_at   | Aspm                         | ASPM     | 0.21  | 2.43 | 1.21  | 2.54E-01 | 5.47E-01 | -5.97 |
| 1429045_PM_at   | Smurf2                       | SMURF2   | 0.44  | 2.96 | 1.21  | 2.54E-01 | 5.47E-01 | -5.97 |
| 1416248_PM_at   | Nadk                         | NADK     | -0.20 | 2.89 | -1.21 | 2.54E-01 | 5.47E-01 | -5.97 |
| 1430581_PM_at   | Bclaf1                       | BCLAF1   | -0.14 | 2.10 | -1.21 | 2.54E-01 | 5.47E-01 | -5.97 |
| 1443294_PM_at   | Cdk12                        | CDK12    | 0.18  | 2.19 | 1.21  | 2.54E-01 | 5.47E-01 | -5.97 |
| 1422362_PM_s_at | Ofrr68 /// Ofrr69            | OR52A5   | 0.42  | 2.52 | 1.21  | 2.54E-01 | 5.47E-01 | -5.97 |
| 1438373_PM_at   | App                          | APP      | 0.11  | 2.21 | 1.21  | 2.54E-01 | 5.47E-01 | -5.97 |
| 1460207_PM_s_at | E2f5                         | E2F5     | 0.12  | 2.34 | 1.21  | 2.54E-01 | 5.47E-01 | -5.97 |
| 1445106_PM_at   | Gm19816                      | NA       | 0.15  | 2.46 | 1.21  | 2.54E-01 | 5.47E-01 | -5.97 |
| 1446680_PM_at   | ---                          | NA       | 0.16  | 2.52 | 1.21  | 2.54E-01 | 5.47E-01 | -5.97 |
| 1446062_PM_at   | Fam196a                      | FAM196A  | 0.13  | 2.54 | 1.21  | 2.54E-01 | 5.47E-01 | -5.97 |
| 1430208_PM_at   | Krt42                        | NA       | 0.17  | 3.22 | 1.21  | 2.54E-01 | 5.47E-01 | -5.97 |
| 1438377_PM_x_at | Slc13a3                      | SLC13A3  | -0.88 | 6.60 | -1.21 | 2.54E-01 | 5.47E-01 | -5.97 |
| 1427808_PM_at   | Nfya                         | NA       | 0.12  | 2.34 | 1.21  | 2.54E-01 | 5.47E-01 | -5.97 |
| 1458106_PM_at   | Tmem60                       | TMEM60   | 0.12  | 2.26 | 1.21  | 2.54E-01 | 5.47E-01 | -5.97 |
| 1460200_PM_s_at | Lztf1                        | LZTF1    | -0.30 | 2.82 | -1.21 | 2.54E-01 | 5.47E-01 | -5.97 |
| 1430766_PM_at   | 5033403F01Rik                | NA       | 0.10  | 2.27 | 1.21  | 2.54E-01 | 5.47E-01 | -5.97 |
| 1455044_PM_at   | Tmem44                       | TMEM44   | 0.10  | 2.18 | 1.21  | 2.55E-01 | 5.47E-01 | -5.97 |
| 1433223_PM_at   | 5830442K09Rik                | NA       | 0.12  | 2.19 | 1.21  | 2.54E-01 | 5.47E-01 | -5.97 |
| 1446706_PM_at   | C79123                       | NA       | 0.14  | 2.61 | 1.21  | 2.54E-01 | 5.47E-01 | -5.97 |
| 1436368_PM_at   | Slc16a10                     | SLC16A10 | 0.14  | 2.72 | 1.21  | 2.55E-01 | 5.47E-01 | -5.97 |
| 1427235_PM_at   | Kdm6a                        | KDM6A    | 0.15  | 2.65 | 1.21  | 2.54E-01 | 5.47E-01 | -5.97 |
| 1429099_PM_at   | Duxbl1 /// Duxbl2 /// Duxbl3 | DUXB     | 0.18  | 2.29 | 1.21  | 2.54E-01 | 5.47E-01 | -5.97 |
| 1446725_PM_at   | ---                          | NA       | 0.18  | 2.21 | 1.21  | 2.55E-01 | 5.47E-01 | -5.97 |
| 1435371_PM_x_at | Ces1d                        | CES1     | 0.20  | 2.39 | 1.21  | 2.54E-01 | 5.47E-01 | -5.97 |
| 1425515_PM_at   | Pik3r1                       | PIK3R1   | 0.37  | 3.24 | 1.21  | 2.54E-01 | 5.47E-01 | -5.97 |
| 1451104_PM_a_at | Snmp70                       | SNRNP70  | 0.65  | 6.10 | 1.21  | 2.55E-01 | 5.47E-01 | -5.97 |
| 1424222_PM_s_at | Rad23b                       | RAD23B   | -0.57 | 5.71 | -1.21 | 2.55E-01 | 5.47E-01 | -5.97 |
| 1452715_PM_at   | Haus5                        | HAUS5    | 0.12  | 2.22 | 1.21  | 2.55E-01 | 5.47E-01 | -5.97 |
| 1417889_PM_at   | Apobec2                      | APOBEC2  | 0.14  | 2.27 | 1.21  | 2.55E-01 | 5.47E-01 | -5.97 |
| 1455236_PM_x_at | Serf2                        | SERF2    | 0.23  | 3.87 | 1.21  | 2.55E-01 | 5.47E-01 | -5.97 |
| 1460243_PM_at   | Sptlc2                       | SPTLC2   | 0.25  | 3.49 | 1.21  | 2.55E-01 | 5.47E-01 | -5.97 |
| 1418132_PM_a_at | Ubf1                         | UBFD1    | -0.43 | 4.88 | -1.21 | 2.55E-01 | 5.47E-01 | -5.97 |
| 1436282_PM_at   | 4732440D04Rik                | NA       | 0.08  | 2.07 | 1.21  | 2.55E-01 | 5.47E-01 | -5.97 |
| 1454577_PM_at   | Cdc20b                       | CD20B    | 0.12  | 2.39 | 1.21  | 2.55E-01 | 5.47E-01 | -5.97 |
| 1421356_PM_at   | Tex9                         | NA       | 0.17  | 2.64 | 1.21  | 2.55E-01 | 5.47E-01 | -5.97 |
| 1446842_PM_at   | D4Erttd571e                  | NA       | 0.22  | 3.07 | 1.21  | 2.55E-01 | 5.47E-01 | -5.97 |
| 1420888_PM_at   | Bcl2l1                       | BCL2L1   | 0.20  | 4.41 | 1.21  | 2.55E-01 | 5.47E-01 | -5.97 |
| 1443001_PM_at   | C78344                       | NA       | 0.12  | 2.17 | 1.21  | 2.55E-01 | 5.47E-01 | -5.97 |
| 1453709_PM_at   | Arhgap32                     | ARHGAP32 | 0.23  | 2.98 | 1.21  | 2.55E-01 | 5.47E-01 | -5.97 |
| 1424423_PM_at   | Flad1 /// Lenep              | FLAD1    | -0.18 | 2.70 | -1.21 | 2.55E-01 | 5.47E-01 | -5.97 |
| 1449364_PM_at   | Aurkc                        | NA       | 0.16  | 2.41 | 1.21  | 2.55E-01 | 5.47E-01 | -5.97 |
| 1456482_PM_at   | Pik3r3                       | PIK3R3   | 0.20  | 2.65 | 1.21  | 2.55E-01 | 5.47E-01 | -5.97 |
| 1442525_PM_at   | Ccdc47                       | CCDC47   | -0.15 | 3.51 | -1.21 | 2.55E-01 | 5.47E-01 | -5.97 |
| 1435894_PM_at   | ---                          | NA       | -0.31 | 3.60 | -1.21 | 2.55E-01 | 5.47E-01 | -5.97 |
| 1437962_PM_at   | Cct8l1                       | CCT8L2   | 0.11  | 2.23 | 1.21  | 2.55E-01 | 5.48E-01 | -5.97 |
| 1418702_PM_a_at | 2810428115Rik                | C19orf60 | 0.16  | 2.71 | 1.21  | 2.55E-01 | 5.48E-01 | -5.97 |
| 1448963_PM_at   | Nfyc                         | NFYC     | 0.24  | 3.98 | 1.20  | 2.55E-01 | 5.48E-01 | -5.97 |
| 1453410_PM_at   | Angptl4                      | ANGPTL4  | 0.10  | 2.18 | 1.20  | 2.55E-01 | 5.48E-01 | -5.97 |
| 1434009_PM_at   | Arhgap35                     | ARHGAP35 | -0.22 | 3.00 | -1.20 | 2.55E-01 | 5.48E-01 | -5.97 |
| 1423048_PM_a_at | Tollip                       | TOLLIP   | -0.18 | 2.37 | -1.20 | 2.55E-01 | 5.48E-01 | -5.97 |
| 1429747_PM_at   | 170009N14Rik                 | NA       | 0.14  | 2.45 | 1.20  | 2.55E-01 | 5.48E-01 | -5.97 |
| 1437443_PM_at   | ---                          | NA       | 0.20  | 2.16 | 1.20  | 2.55E-01 | 5.48E-01 | -5.97 |
| 1420610_PM_at   | Prkacb                       | PRKACB   | 0.31  | 3.78 | 1.20  | 2.55E-01 | 5.48E-01 | -5.97 |
| 1451399_PM_at   | Pnk1                         | PNKD     | 0.18  | 2.71 | 1.20  | 2.55E-01 | 5.48E-01 | -5.97 |
| 1454605_PM_a_at | Pik2a                        | PI4K2A   | 0.19  | 2.75 | 1.20  | 2.55E-01 | 5.48E-01 | -5.97 |
| 1436849_PM_x_at | Gaa                          | GAA      | -0.47 | 5.21 | -1.20 | 2.55E-01 | 5.48E-01 | -5.97 |
| 1424432_PM_at   | Ubt1                         | UBTD1    | 0.14  | 2.60 | 1.20  | 2.55E-01 | 5.48E-01 | -5.97 |
| 1417681_PM_at   | Nudt21                       | NUDT21   | -0.33 | 3.55 | -1.20 | 2.55E-01 | 5.48E-01 | -5.97 |
| 1457450_PM_at   | Sarm1                        | SARM1    | -0.11 | 2.15 | -1.20 | 2.55E-01 | 5.48E-01 | -5.97 |
| 1435277_PM_x_at | Nme1                         | NME1     | -0.10 | 6.58 | -1.20 | 2.55E-01 | 5.48E-01 | -5.97 |
| 1429027_PM_at   | Snhg18                       | NA       | 0.10  | 2.05 | 1.20  | 2.55E-01 | 5.48E-01 | -5.97 |
| 1442079_PM_at   | Sgms1                        | SGMS1    | 0.11  | 2.30 | 1.20  | 2.55E-01 | 5.48E-01 | -5.97 |
| 1418471_PM_at   | Pgf                          | PGF      | 0.12  | 2.08 | 1.20  | 2.55E-01 | 5.48E-01 | -5.97 |
| 1418199_PM_at   | Hemgn                        | HEMGN    | 0.12  | 2.22 | 1.20  | 2.55E-01 | 5.48E-01 | -5.97 |
| 1423675_PM_at   | Usp1                         | USP1     | 0.36  | 4.44 | 1.20  | 2.55E-01 | 5.48E-01 | -5.97 |



|                 |               |          |       |      |       |          |          |       |
|-----------------|---------------|----------|-------|------|-------|----------|----------|-------|
| 1418621_PM_at   | Rab2a         | RAB2A    | -0.21 | 5.48 | -1.20 | 2.55E-01 | 5.48E-01 | -5.97 |
| 1432937_PM_at   | 5430439C14Rik | NA       | 0.12  | 2.36 | 1.20  | 2.55E-01 | 5.48E-01 | -5.97 |
| 1433362_PM_at   | ---           | NA       | 0.13  | 2.73 | 1.20  | 2.55E-01 | 5.48E-01 | -5.97 |
| 1454681_PM_at   | Esrp1         | ESRP1    | 0.15  | 2.24 | 1.20  | 2.55E-01 | 5.48E-01 | -5.97 |
| 1451054_PM_at   | Orm1          | ORM1     | 0.18  | 2.33 | 1.20  | 2.55E-01 | 5.48E-01 | -5.97 |
| 1450501_PM_at   | Itga2         | ITGA2    | 0.11  | 2.54 | 1.20  | 2.55E-01 | 5.48E-01 | -5.97 |
| 1439909_PM_at   | Zfp521        | ZNF521   | 0.17  | 2.47 | 1.20  | 2.55E-01 | 5.48E-01 | -5.97 |
| 1434611_PM_at   | Rnf123        | RNF123   | 0.31  | 5.33 | 1.20  | 2.55E-01 | 5.48E-01 | -5.97 |
| 1454899_PM_at   | Lpp           | LPP      | -0.35 | 2.88 | -1.20 | 2.56E-01 | 5.48E-01 | -5.97 |
| 1455602_PM_x_at | Kansl1l       | KANSL1L  | -0.21 | 3.03 | -1.20 | 2.56E-01 | 5.48E-01 | -5.97 |
| 1445982_PM_at   | ---           | NA       | 0.13  | 2.32 | 1.20  | 2.56E-01 | 5.48E-01 | -5.97 |
| 1457447_PM_at   | ---           | NA       | 0.22  | 2.34 | 1.20  | 2.56E-01 | 5.48E-01 | -5.97 |
| 1425773_PM_s_at | Nmnat1        | NMNAT1   | 0.12  | 2.56 | 1.20  | 2.56E-01 | 5.48E-01 | -5.97 |
| 1445611_PM_at   | ---           | NA       | 0.10  | 2.10 | 1.20  | 2.56E-01 | 5.48E-01 | -5.97 |
| 1446050_PM_at   | ---           | NA       | 0.10  | 2.43 | 1.20  | 2.56E-01 | 5.48E-01 | -5.97 |
| 1447190_PM_at   | LOC102635682  | NA       | -0.22 | 2.42 | -1.20 | 2.56E-01 | 5.48E-01 | -5.97 |
| 1424836_PM_a_at | Clasp2        | CLASP2   | -0.21 | 8.60 | -1.20 | 2.56E-01 | 5.48E-01 | -5.97 |
| 1444439_PM_at   | Bri3bp        | BRI3BP   | -0.19 | 2.46 | -1.20 | 2.56E-01 | 5.48E-01 | -5.97 |
| 1431794_PM_at   | ---           | NA       | 0.13  | 2.09 | 1.20  | 2.56E-01 | 5.48E-01 | -5.97 |
| 1418252_PM_at   | Padl2         | PADL2    | -0.18 | 2.84 | -1.20 | 2.56E-01 | 5.48E-01 | -5.97 |
| 1442074_PM_at   | ---           | NA       | 0.11  | 2.43 | 1.20  | 2.56E-01 | 5.48E-01 | -5.97 |
| 1423327_PM_at   | Rpl39l        | RPL39L   | 0.13  | 2.27 | 1.20  | 2.56E-01 | 5.48E-01 | -5.97 |
| 1458568_PM_at   | ---           | NA       | 0.20  | 3.33 | 1.20  | 2.56E-01 | 5.48E-01 | -5.97 |
| 1446303_PM_at   | ---           | NA       | 0.12  | 2.25 | 1.20  | 2.56E-01 | 5.48E-01 | -5.97 |
| 1423412_PM_at   | Rbm47         | RBM47    | 0.14  | 2.84 | 1.20  | 2.56E-01 | 5.48E-01 | -5.97 |
| 1418680_PM_at   | Serpind1      | SERPIND1 | 0.29  | 3.38 | 1.20  | 2.56E-01 | 5.48E-01 | -5.97 |
| 1453336_PM_at   | Fam175a       | FAM175A  | 0.16  | 2.41 | 1.20  | 2.56E-01 | 5.49E-01 | -5.97 |
| 1436721_PM_x_at | Oog3          | PRAMEF9  | 0.12  | 2.13 | 1.20  | 2.56E-01 | 5.49E-01 | -5.97 |
| 1444047_PM_at   | ---           | NA       | 0.13  | 2.58 | 1.20  | 2.56E-01 | 5.49E-01 | -5.97 |
| 1432894_PM_at   | ---           | NA       | 0.17  | 2.30 | 1.20  | 2.56E-01 | 5.49E-01 | -5.97 |
| 1448761_PM_a_at | Copg2         | NA       | 0.36  | 3.34 | 1.20  | 2.56E-01 | 5.49E-01 | -5.97 |
| 1452925_PM_a_at | March5        | MARCH5   | -0.23 | 2.46 | -1.20 | 2.56E-01 | 5.49E-01 | -5.97 |
| 1440878_PM_at   | Runx1         | RUNX1    | 0.10  | 2.42 | 1.20  | 2.56E-01 | 5.49E-01 | -5.97 |
| 1454153_PM_at   | Pes1          | NA       | 0.11  | 2.05 | 1.20  | 2.56E-01 | 5.49E-01 | -5.97 |
| 1426428_PM_at   | Thap7         | THAP7    | 0.16  | 3.09 | 1.20  | 2.56E-01 | 5.49E-01 | -5.97 |
| 1452043_PM_at   | 2310011J03Rik | C19orf25 | 0.16  | 2.86 | 1.20  | 2.56E-01 | 5.49E-01 | -5.97 |
| 1427121_PM_at   | Fbxo4         | FBXO4    | 0.42  | 3.24 | 1.20  | 2.56E-01 | 5.49E-01 | -5.97 |
| 1419549_PM_at   | Arg1          | ARG1     | 0.16  | 3.11 | 1.20  | 2.56E-01 | 5.49E-01 | -5.97 |
| 1455440_PM_at   | Clcn6         | CLCN6    | -0.31 | 5.09 | -1.20 | 2.56E-01 | 5.49E-01 | -5.97 |
| 1426923_PM_at   | Agfg1         | AGFG1    | -0.26 | 2.63 | -1.20 | 2.56E-01 | 5.49E-01 | -5.97 |
| 1433868_PM_at   | Btbd3         | BTBD3    | -0.36 | 6.13 | -1.20 | 2.56E-01 | 5.49E-01 | -5.97 |
| 1459439_PM_at   | Mrp5          | MRP5     | 0.17  | 2.40 | 1.20  | 2.56E-01 | 5.49E-01 | -5.97 |
| 1441347_PM_at   | ---           | NA       | 0.17  | 2.34 | 1.20  | 2.56E-01 | 5.49E-01 | -5.97 |
| 1423066_PM_at   | Dnmt3a        | DNMT3A   | 0.29  | 4.23 | 1.20  | 2.56E-01 | 5.49E-01 | -5.97 |
| 1440399_PM_at   | ---           | NA       | -0.34 | 2.71 | -1.20 | 2.56E-01 | 5.49E-01 | -5.97 |
| 1416155_PM_at   | Hmgb3         | NA       | 0.36  | 4.63 | 1.20  | 2.56E-01 | 5.49E-01 | -5.97 |
| 1436177_PM_at   | Plekha2       | PLEKHA2  | -0.30 | 5.09 | -1.20 | 2.56E-01 | 5.49E-01 | -5.97 |
| 1418283_PM_at   | Cldn4         | CLDN4    | 0.13  | 2.61 | 1.20  | 2.56E-01 | 5.49E-01 | -5.97 |
| 1459023_PM_at   | Nt5e          | NT5E     | 0.15  | 2.67 | 1.20  | 2.56E-01 | 5.49E-01 | -5.97 |
| 1417775_PM_at   | Polr1a        | POLR1A   | 0.23  | 2.93 | 1.20  | 2.56E-01 | 5.49E-01 | -5.97 |
| 1452095_PM_a_at | Vimp          | SELENOS  | -0.26 | 3.14 | -1.20 | 2.56E-01 | 5.49E-01 | -5.97 |
| 1440393_PM_at   | ---           | NA       | 0.25  | 3.06 | 1.20  | 2.56E-01 | 5.49E-01 | -5.97 |
| 1444346_PM_at   | Sh3bp5        | SH3BP5   | 0.13  | 2.47 | 1.20  | 2.56E-01 | 5.49E-01 | -5.97 |
| 1452520_PM_a_at | Chrng         | CHRNA    | 0.10  | 2.46 | 1.20  | 2.57E-01 | 5.49E-01 | -5.97 |
| 1434177_PM_at   | Ece1          | ECE1     | 0.14  | 3.44 | 1.20  | 2.57E-01 | 5.49E-01 | -5.97 |
| 1433374_PM_at   | Supt7l        | SUPT7L   | 0.15  | 2.30 | 1.20  | 2.57E-01 | 5.49E-01 | -5.97 |
| 1446121_PM_at   | ---           | NA       | 0.27  | 3.44 | 1.20  | 2.57E-01 | 5.49E-01 | -5.97 |
| 1459264_PM_at   | Trim33        | TRIM33   | 0.36  | 2.72 | 1.20  | 2.57E-01 | 5.49E-01 | -5.97 |
| 1434078_PM_at   | Ubfd1         | UBFD1    | -0.25 | 2.84 | -1.20 | 2.57E-01 | 5.49E-01 | -5.97 |
| 1455329_PM_at   | Cdc37l1       | NA       | -0.14 | 3.51 | -1.20 | 2.57E-01 | 5.49E-01 | -5.97 |
| 1439252_PM_at   | Incenp        | NA       | 0.12  | 2.72 | 1.20  | 2.57E-01 | 5.49E-01 | -5.97 |
| 1432841_PM_at   | ---           | NA       | 0.14  | 2.32 | 1.20  | 2.57E-01 | 5.49E-01 | -5.97 |
| 1445950_PM_at   | C87926        | NA       | 0.16  | 3.86 | 1.20  | 2.57E-01 | 5.49E-01 | -5.97 |
| 1422883_PM_at   | Usp8          | USP8     | -0.17 | 3.01 | -1.20 | 2.57E-01 | 5.49E-01 | -5.97 |
| 1426418_PM_at   | Atoh8         | ATOH8    | 0.12  | 2.51 | 1.20  | 2.57E-01 | 5.49E-01 | -5.97 |
| 1449484_PM_at   | Stc2          | STC2     | 0.40  | 3.01 | 1.20  | 2.57E-01 | 5.49E-01 | -5.97 |
| 1423227_PM_at   | Krt17         | KRT17    | 0.11  | 2.31 | 1.20  | 2.57E-01 | 5.49E-01 | -5.97 |
| 1449695_PM_at   | ---           | NA       | 0.21  | 4.40 | 1.20  | 2.57E-01 | 5.49E-01 | -5.97 |
| 1432680_PM_at   | ---           | NA       | 0.24  | 2.74 | 1.20  | 2.57E-01 | 5.49E-01 | -5.97 |
| 1419496_PM_at   | Slco1a6       | SLCO1A2  | 0.12  | 1.94 | 1.20  | 2.57E-01 | 5.49E-01 | -5.97 |
| 1417041_PM_at   | Polr1c        | POLR1C   | -0.31 | 3.34 | -1.20 | 2.57E-01 | 5.49E-01 | -5.97 |
| 1421762_PM_at   | Kcnj5         | NA       | 0.11  | 2.13 | 1.20  | 2.57E-01 | 5.49E-01 | -5.97 |
| 1454660_PM_at   | Arhgap36      | ARHGAP36 | 0.12  | 2.19 | 1.20  | 2.57E-01 | 5.49E-01 | -5.97 |
| 1430312_PM_at   | Wrb           | WRB      | 0.13  | 2.63 | 1.20  | 2.57E-01 | 5.49E-01 | -5.97 |
| 1438598_PM_at   | Shc2          | SHC2     | 0.13  | 2.33 | 1.20  | 2.57E-01 | 5.49E-01 | -5.97 |

|                 |                                                                                                                                                                              |         |       |      |       |          |          |       |
|-----------------|------------------------------------------------------------------------------------------------------------------------------------------------------------------------------|---------|-------|------|-------|----------|----------|-------|
| 1455992_PM_at   | Vgll4                                                                                                                                                                        | VGLL4   | 0.17  | 2.62 | 1.20  | 2.57E-01 | 5.49E-01 | -5.97 |
| 1441958_PM_s_at | Ager                                                                                                                                                                         | AGER    | 0.25  | 2.60 | 1.20  | 2.57E-01 | 5.49E-01 | -5.97 |
| 1444547_PM_at   | Ankrd40                                                                                                                                                                      | ANKRD40 | 0.34  | 3.10 | 1.20  | 2.57E-01 | 5.49E-01 | -5.97 |
| 1419803_PM_s_at | Ccdc12                                                                                                                                                                       | CCDC12  | 0.48  | 4.47 | 1.20  | 2.57E-01 | 5.49E-01 | -5.97 |
| 1417411_PM_at   | Nap1l5                                                                                                                                                                       | NAP1L5  | 0.55  | 6.01 | 1.20  | 2.57E-01 | 5.49E-01 | -5.97 |
| 1443906_PM_at   | Cd55                                                                                                                                                                         | CD55    | 0.11  | 2.17 | 1.20  | 2.57E-01 | 5.49E-01 | -5.97 |
| 1423704_PM_at   | Pla2g15                                                                                                                                                                      | PLA2G15 | -0.16 | 2.38 | -1.20 | 2.57E-01 | 5.49E-01 | -5.97 |
| 1424494_PM_s_at | Flywch2                                                                                                                                                                      | FLYWCH2 | 0.18  | 2.67 | 1.20  | 2.57E-01 | 5.49E-01 | -5.97 |
| 1442678_PM_at   | ---                                                                                                                                                                          | NA      | 0.16  | 2.35 | 1.20  | 2.57E-01 | 5.49E-01 | -5.97 |
| 1437678_PM_at   | Meioc                                                                                                                                                                        | MEIOC   | 0.20  | 2.32 | 1.20  | 2.57E-01 | 5.49E-01 | -5.98 |
| 1459185_PM_at   | Npat                                                                                                                                                                         | NPAT    | 0.29  | 2.36 | 1.20  | 2.57E-01 | 5.49E-01 | -5.98 |
| 1460370_PM_at   | Top1mt                                                                                                                                                                       | TOP1MT  | 0.30  | 2.77 | 1.20  | 2.57E-01 | 5.49E-01 | -5.98 |
| 1451047_PM_at   | Iitm2a                                                                                                                                                                       | ITM2A   | 0.43  | 3.91 | 1.20  | 2.57E-01 | 5.49E-01 | -5.98 |
| 1434065_PM_at   | Cwf19l1                                                                                                                                                                      | CWF19L1 | 0.10  | 2.33 | 1.20  | 2.57E-01 | 5.50E-01 | -5.98 |
| 1444016_PM_at   | Anxa1                                                                                                                                                                        | ANXA1   | 0.12  | 2.02 | 1.20  | 2.57E-01 | 5.50E-01 | -5.98 |
| 1451769_PM_s_at | Pcdha1 /// Pcdha10 ///<br>Pcdha11 /// Pcdha12 ///<br>Pcdha2 /// Pcdha3 ///<br>Pcdha4 /// Pcdha5 ///<br>Pcdha6 /// Pcdha7 ///<br>Pcdha8 /// Pcdha9 ///<br>Pcdhac1 /// Pcdhac2 | PCDHA7  | -0.31 | 3.05 | -1.20 | 2.57E-01 | 5.50E-01 | -5.98 |
| 1459304_PM_at   | Kif26b                                                                                                                                                                       | KIF26B  | 0.18  | 2.94 | 1.20  | 2.57E-01 | 5.50E-01 | -5.98 |
| 1447805_PM_s_at | Slu7                                                                                                                                                                         | SLU7    | -0.50 | 3.85 | -1.20 | 2.57E-01 | 5.50E-01 | -5.98 |
| 1421858_PM_at   | Adam17                                                                                                                                                                       | ADAM17  | -0.23 | 3.08 | -1.20 | 2.57E-01 | 5.50E-01 | -5.98 |
| 1427459_PM_at   | Cpn2                                                                                                                                                                         | CPN2    | 0.14  | 2.40 | 1.20  | 2.57E-01 | 5.50E-01 | -5.98 |
| 1455824_PM_x_at | Stt3a                                                                                                                                                                        | STT3A   | -0.37 | 4.25 | -1.20 | 2.57E-01 | 5.50E-01 | -5.98 |
| 1448507_PM_at   | Efh1                                                                                                                                                                         | EFHD1   | -0.22 | 3.17 | -1.20 | 2.57E-01 | 5.50E-01 | -5.98 |
| 1448823_PM_at   | Cxcl12                                                                                                                                                                       | CXCL12  | -0.30 | 2.98 | -1.20 | 2.57E-01 | 5.50E-01 | -5.98 |
| 1429654_PM_at   | Dppa2                                                                                                                                                                        | DPPA2   | 0.09  | 2.18 | 1.20  | 2.57E-01 | 5.50E-01 | -5.98 |
| 1421279_PM_at   | Lamc2                                                                                                                                                                        | NA      | 0.14  | 2.65 | 1.20  | 2.58E-01 | 5.50E-01 | -5.98 |
| 1447877_PM_x_at | Dnmt1                                                                                                                                                                        | DNMT1   | 0.35  | 5.64 | 1.20  | 2.58E-01 | 5.50E-01 | -5.98 |
| 1443221_PM_at   | ---                                                                                                                                                                          | NA      | 0.11  | 2.25 | 1.20  | 2.58E-01 | 5.50E-01 | -5.98 |
| 1434636_PM_at   | Homez                                                                                                                                                                        | HOMEZ   | 0.26  | 3.81 | 1.20  | 2.58E-01 | 5.50E-01 | -5.98 |
| 1453472_PM_a_at | Slamf7                                                                                                                                                                       | SLAMF7  | 0.20  | 2.80 | 1.20  | 2.58E-01 | 5.50E-01 | -5.98 |
| 1422019_PM_at   | Tgfb2                                                                                                                                                                        | NA      | 0.14  | 2.02 | 1.20  | 2.58E-01 | 5.50E-01 | -5.98 |
| 1453967_PM_at   | ---                                                                                                                                                                          | NA      | 0.17  | 2.91 | 1.20  | 2.58E-01 | 5.50E-01 | -5.98 |
| 1448611_PM_at   | Wwc2                                                                                                                                                                         | WWC2    | 0.17  | 2.67 | 1.20  | 2.58E-01 | 5.50E-01 | -5.98 |
| 1458431_PM_at   | ---                                                                                                                                                                          | NA      | 0.24  | 2.45 | 1.20  | 2.58E-01 | 5.50E-01 | -5.98 |
| 1425806_PM_a_at | Med21                                                                                                                                                                        | MED21   | 0.26  | 3.21 | 1.20  | 2.58E-01 | 5.50E-01 | -5.98 |
| 1454569_PM_at   | ---                                                                                                                                                                          | NA      | 0.15  | 2.43 | 1.20  | 2.58E-01 | 5.50E-01 | -5.98 |
| 1433781_PM_a_at | Clcn12                                                                                                                                                                       | CLDN12  | 0.20  | 9.61 | 1.20  | 2.58E-01 | 5.50E-01 | -5.98 |
| 1447920_PM_at   | Atxn10                                                                                                                                                                       | NA      | 0.11  | 2.15 | 1.20  | 2.58E-01 | 5.50E-01 | -5.98 |
| 1448241_PM_at   | Gm2a                                                                                                                                                                         | GM2A    | -0.23 | 5.16 | -1.20 | 2.58E-01 | 5.50E-01 | -5.98 |
| 1443407_PM_at   | Rnf13                                                                                                                                                                        | RNF13   | 0.22  | 2.85 | 1.20  | 2.58E-01 | 5.50E-01 | -5.98 |
| 1423796_PM_at   | Sfpq                                                                                                                                                                         | SFPQ    | -0.17 | 2.97 | -1.20 | 2.58E-01 | 5.50E-01 | -5.98 |
| 1454759_PM_at   | Git1                                                                                                                                                                         | GIT1    | 0.23  | 3.74 | 1.20  | 2.58E-01 | 5.50E-01 | -5.98 |
| 1457024_PM_x_at | Slc35a2                                                                                                                                                                      | SLC35A2 | -0.41 | 3.21 | -1.20 | 2.58E-01 | 5.51E-01 | -5.98 |
| 1417293_PM_at   | Hs6st1                                                                                                                                                                       | HS6ST1  | 0.32  | 2.98 | 1.20  | 2.58E-01 | 5.51E-01 | -5.98 |
| 1459526_PM_at   | ---                                                                                                                                                                          | NA      | 0.47  | 3.35 | 1.20  | 2.58E-01 | 5.51E-01 | -5.98 |
| 1456291_PM_x_at | Scx                                                                                                                                                                          | SCX     | 0.14  | 2.48 | 1.20  | 2.58E-01 | 5.51E-01 | -5.98 |
| 1424589_PM_s_at | Rnpc3                                                                                                                                                                        | RNPC3   | 0.16  | 2.56 | 1.20  | 2.58E-01 | 5.51E-01 | -5.98 |
| 1452269_PM_at   | Sptbn2                                                                                                                                                                       | SPTBN2  | -0.35 | 5.15 | -1.20 | 2.58E-01 | 5.51E-01 | -5.98 |
| 1448566_PM_at   | Slc40a1                                                                                                                                                                      | SLC40A1 | 0.09  | 2.20 | 1.20  | 2.58E-01 | 5.51E-01 | -5.98 |
| 1417171_PM_at   | Itk                                                                                                                                                                          | ITK     | 0.10  | 2.22 | 1.20  | 2.58E-01 | 5.51E-01 | -5.98 |
| 1450161_PM_at   | Ikbkg                                                                                                                                                                        | IKBKG   | 0.10  | 2.70 | 1.20  | 2.58E-01 | 5.51E-01 | -5.98 |
| 1451233_PM_at   | Traf2                                                                                                                                                                        | TRAF2   | 0.11  | 2.39 | 1.20  | 2.58E-01 | 5.51E-01 | -5.98 |
| 1422318_PM_at   | Foxd4                                                                                                                                                                        | FOXD4L1 | 0.11  | 1.99 | 1.20  | 2.58E-01 | 5.51E-01 | -5.98 |
| 1436457_PM_at   | ---                                                                                                                                                                          | NA      | 0.19  | 3.28 | 1.20  | 2.58E-01 | 5.51E-01 | -5.98 |
| 1440713_PM_at   | ---                                                                                                                                                                          | NA      | 0.19  | 2.74 | 1.20  | 2.58E-01 | 5.51E-01 | -5.98 |
| 1444895_PM_at   | ---                                                                                                                                                                          | NA      | 0.32  | 4.39 | 1.20  | 2.58E-01 | 5.51E-01 | -5.98 |
| 1458967_PM_at   | Fam49a                                                                                                                                                                       | NA      | -0.33 | 4.09 | -1.20 | 2.58E-01 | 5.51E-01 | -5.98 |
| 1455428_PM_at   | Fam53b                                                                                                                                                                       | FAMS3B  | -0.09 | 2.03 | -1.20 | 2.58E-01 | 5.51E-01 | -5.98 |
| 1457283_PM_at   | Nrg2                                                                                                                                                                         | NRG2    | 0.13  | 2.56 | 1.20  | 2.58E-01 | 5.51E-01 | -5.98 |
| 1429409_PM_at   | Nlrp14                                                                                                                                                                       | NLRP14  | 0.11  | 2.28 | 1.20  | 2.58E-01 | 5.51E-01 | -5.98 |
| 1422301_PM_at   | Ftl1 /// Ftl2-ps ///<br>LOC100862446 /// Mir692-1<br>/// Mir692-2 /// Mir692-3                                                                                               | FTL     | 0.16  | 2.78 | 1.20  | 2.58E-01 | 5.51E-01 | -5.98 |
| 1439202_PM_at   | ---                                                                                                                                                                          | NA      | 0.10  | 1.94 | 1.20  | 2.58E-01 | 5.51E-01 | -5.98 |
| 1419829_PM_a_at | Gab2                                                                                                                                                                         | GAB4    | -0.43 | 4.90 | -1.20 | 2.58E-01 | 5.51E-01 | -5.98 |
| 1433352_PM_at   | C430049A07Rik                                                                                                                                                                | NA      | 0.14  | 2.28 | 1.20  | 2.58E-01 | 5.51E-01 | -5.98 |
| 1429754_PM_a_at | 4933406F09Rik                                                                                                                                                                | NA      | 0.15  | 2.40 | 1.20  | 2.59E-01 | 5.51E-01 | -5.98 |
| 1439801_PM_at   | Sun3                                                                                                                                                                         | SUN3    | 0.13  | 2.10 | 1.20  | 2.59E-01 | 5.51E-01 | -5.98 |
| 1439980_PM_at   | D14Erttd725e                                                                                                                                                                 | NA      | -0.20 | 2.84 | -1.20 | 2.59E-01 | 5.51E-01 | -5.98 |

|                 |                  |         |       |      |       |          |          |       |
|-----------------|------------------|---------|-------|------|-------|----------|----------|-------|
| 1450870_PM_at   | Rala             | RALA    | 0.28  | 3.97 | 1.20  | 2.59E-01 | 5.51E-01 | -5.98 |
| 1437957_PM_at   | ---              | NA      | 0.28  | 2.99 | 1.20  | 2.59E-01 | 5.51E-01 | -5.98 |
| 1422842_PM_at   | Xrn2             | XRN2    | -0.50 | 3.81 | -1.20 | 2.59E-01 | 5.51E-01 | -5.98 |
| 1440025_PM_at   | Kptn             | KPTN    | 0.14  | 2.51 | 1.20  | 2.59E-01 | 5.51E-01 | -5.98 |
| 1446296_PM_at   | ---              | NA      | 0.28  | 2.55 | 1.19  | 2.59E-01 | 5.51E-01 | -5.98 |
| 1439210_PM_at   | Mrps9            | MRPS9   | 0.57  | 3.98 | 1.19  | 2.59E-01 | 5.51E-01 | -5.98 |
| 1451693_PM_a_at | Fgf12            | FGF12   | -0.42 | 5.69 | -1.19 | 2.59E-01 | 5.51E-01 | -5.98 |
| 1438216_PM_at   | ---              | NA      | 0.28  | 3.20 | 1.19  | 2.59E-01 | 5.51E-01 | -5.98 |
| 1438727_PM_at   | Dcaf10           | DCAF10  | 0.16  | 2.61 | 1.19  | 2.59E-01 | 5.51E-01 | -5.98 |
| 1450250_PM_at   | Otud7a           | OTUD7A  | -0.39 | 4.63 | -1.19 | 2.59E-01 | 5.51E-01 | -5.98 |
| 1455919_PM_at   | ---              | NA      | 0.10  | 2.03 | 1.19  | 2.59E-01 | 5.51E-01 | -5.98 |
| 1453984_PM_at   | Ifi30 /// Pik3r2 | PIK3R2  | 0.11  | 2.04 | 1.19  | 2.59E-01 | 5.51E-01 | -5.98 |
| 1450336_PM_at   | Setd1a           | NA      | 0.16  | 2.59 | 1.19  | 2.59E-01 | 5.51E-01 | -5.98 |
| 1424162_PM_at   | Trim29           | TRIM29  | 0.17  | 2.41 | 1.19  | 2.59E-01 | 5.51E-01 | -5.98 |
| 1440933_PM_at   | ---              | NA      | 0.19  | 2.76 | 1.19  | 2.59E-01 | 5.51E-01 | -5.98 |
| 1456920_PM_at   | ---              | NA      | 0.12  | 2.39 | 1.19  | 2.59E-01 | 5.51E-01 | -5.98 |
| 1437582_PM_at   | Acss1            | ACSS1   | 0.14  | 2.46 | 1.19  | 2.59E-01 | 5.51E-01 | -5.98 |
| 1428055_PM_at   | Rian             | NA      | 0.63  | 4.12 | 1.19  | 2.59E-01 | 5.51E-01 | -5.98 |
| 1453315_PM_at   | Pym1             | PYM1    | 0.23  | 2.86 | 1.19  | 2.59E-01 | 5.51E-01 | -5.98 |
| 1443130_PM_at   | Gm6936           | NA      | -0.10 | 2.02 | -1.19 | 2.59E-01 | 5.51E-01 | -5.98 |
| 1459278_PM_at   | ---              | NA      | 0.14  | 2.89 | 1.19  | 2.59E-01 | 5.51E-01 | -5.98 |
| 1427494_PM_at   | Hoxb7            | NA      | 0.20  | 2.68 | 1.19  | 2.59E-01 | 5.51E-01 | -5.98 |
| 1448388_PM_a_at | Sptssa           | SPTSSA  | -0.33 | 5.69 | -1.19 | 2.59E-01 | 5.51E-01 | -5.98 |
| 1417546_PM_at   | Il2rb            | IL2RB   | 0.12  | 2.23 | 1.19  | 2.59E-01 | 5.51E-01 | -5.98 |
| 1421482_PM_at   | Bsnd             | BSND    | 0.13  | 2.35 | 1.19  | 2.59E-01 | 5.51E-01 | -5.98 |
| 1446517_PM_at   | ---              | NA      | 0.15  | 2.26 | 1.19  | 2.59E-01 | 5.51E-01 | -5.98 |
| 1452892_PM_at   | Stk33            | STK33   | 0.23  | 2.61 | 1.19  | 2.59E-01 | 5.51E-01 | -5.98 |
| 1431950_PM_at   | 4930528G23Rik    | NA      | 0.12  | 2.72 | 1.19  | 2.59E-01 | 5.52E-01 | -5.98 |
| 1442019_PM_at   | ---              | NA      | 0.40  | 3.56 | 1.19  | 2.59E-01 | 5.52E-01 | -5.98 |
| 1456762_PM_at   | Gimap6           | GIMAP6  | 0.12  | 2.46 | 1.19  | 2.59E-01 | 5.52E-01 | -5.98 |
| 1430939_PM_at   | 4930528D03Rik    | NA      | 0.16  | 2.62 | 1.19  | 2.59E-01 | 5.52E-01 | -5.98 |
| 1435692_PM_at   | Kctd21           | KCTD21  | 0.22  | 3.48 | 1.19  | 2.59E-01 | 5.52E-01 | -5.98 |
| 1431821_PM_a_at | Eps8l1           | EPS8L1  | 0.32  | 2.29 | 1.19  | 2.59E-01 | 5.52E-01 | -5.98 |
| 1444935_PM_at   | ---              | NA      | 0.09  | 2.27 | 1.19  | 2.59E-01 | 5.52E-01 | -5.98 |
| 1458638_PM_at   | Mtdh             | MTDH    | 0.26  | 2.81 | 1.19  | 2.59E-01 | 5.52E-01 | -5.98 |
| 1436339_PM_at   | 1810058124Rik    | NA      | 0.14  | 2.88 | 1.19  | 2.59E-01 | 5.52E-01 | -5.98 |
| 1449528_PM_at   | Figf             | VEGFD   | 0.19  | 2.49 | 1.19  | 2.59E-01 | 5.52E-01 | -5.98 |
| 1459350_PM_at   | ---              | NA      | 0.16  | 2.18 | 1.19  | 2.59E-01 | 5.52E-01 | -5.98 |
| 1457808_PM_at   | LOC432842        | NA      | 0.16  | 2.47 | 1.19  | 2.59E-01 | 5.52E-01 | -5.98 |
| 1418443_PM_at   | Xpo1             | XPO1    | -0.26 | 2.92 | -1.19 | 2.60E-01 | 5.52E-01 | -5.98 |
| 1422841_PM_at   | Gpat4            | NA      | 0.20  | 2.45 | 1.19  | 2.60E-01 | 5.52E-01 | -5.98 |
| 1422772_PM_at   | C1galt1          | C1GALT1 | 0.20  | 2.43 | 1.19  | 2.60E-01 | 5.52E-01 | -5.98 |
| 1416690_PM_at   | Gtpbp2           | GTPBP2  | -0.54 | 4.61 | -1.19 | 2.60E-01 | 5.52E-01 | -5.98 |
| 1421822_PM_at   | Ppp2cb           | PPP2CB  | -0.11 | 2.22 | -1.19 | 2.60E-01 | 5.52E-01 | -5.98 |
| 1448256_PM_at   | Gosr1            | GOSR1   | 0.12  | 2.30 | 1.19  | 2.60E-01 | 5.52E-01 | -5.98 |
| 1458002_PM_at   | ---              | NA      | 0.53  | 5.00 | 1.19  | 2.60E-01 | 5.52E-01 | -5.98 |
| 1444104_PM_at   | G630016G05Rik    | NA      | 0.66  | 3.75 | 1.19  | 2.60E-01 | 5.52E-01 | -5.98 |
| 1437710_PM_x_at | Fam71e1          | FAM71E1 | -0.25 | 2.24 | -1.19 | 2.60E-01 | 5.52E-01 | -5.98 |
| 1458360_PM_at   | ---              | NA      | 0.09  | 3.53 | 1.19  | 2.60E-01 | 5.52E-01 | -5.98 |
| 1452799_PM_at   | Fggy             | FGGY    | 0.11  | 2.54 | 1.19  | 2.60E-01 | 5.52E-01 | -5.98 |
| 1449796_PM_at   | Prph             | NA      | 0.12  | 2.50 | 1.19  | 2.60E-01 | 5.52E-01 | -5.98 |
| 1442324_PM_at   | ---              | NA      | 0.69  | 3.49 | 1.19  | 2.60E-01 | 5.52E-01 | -5.98 |
| 1445017_PM_at   | Cnot2            | NA      | 0.17  | 3.22 | 1.19  | 2.60E-01 | 5.52E-01 | -5.98 |
| 1458419_PM_at   | E130215H24Rik    | NA      | 0.11  | 2.18 | 1.19  | 2.60E-01 | 5.52E-01 | -5.98 |
| 1459626_PM_at   | ---              | NA      | 0.13  | 2.29 | 1.19  | 2.60E-01 | 5.52E-01 | -5.98 |
| 1419601_PM_at   | Kcnj10           | KCNJ10  | -0.34 | 3.57 | -1.19 | 2.60E-01 | 5.52E-01 | -5.98 |
| 1420598_PM_x_at | Defa-rs2         | NA      | 0.14  | 2.96 | 1.19  | 2.60E-01 | 5.52E-01 | -5.98 |
| 1421688_PM_a_at | Ccl1             | CCL1    | 0.10  | 2.36 | 1.19  | 2.60E-01 | 5.52E-01 | -5.98 |
| 1456689_PM_at   | Rnf10            | RNF10   | 0.18  | 2.80 | 1.19  | 2.60E-01 | 5.52E-01 | -5.98 |
| 1446598_PM_at   | ---              | NA      | 0.31  | 4.16 | 1.19  | 2.60E-01 | 5.52E-01 | -5.98 |
| 1441033_PM_at   | Tmtc2            | TMTC2   | 0.35  | 2.84 | 1.19  | 2.60E-01 | 5.52E-01 | -5.98 |
| 1416930_PM_at   | Ly6d             | LY6D    | 0.16  | 2.90 | 1.19  | 2.60E-01 | 5.53E-01 | -5.98 |
| 1460654_PM_at   | Slc30a3          | SLC30A3 | -0.13 | 2.77 | -1.19 | 2.60E-01 | 5.53E-01 | -5.98 |
| 1457090_PM_at   | ---              | NA      | -0.15 | 2.61 | -1.19 | 2.60E-01 | 5.53E-01 | -5.98 |
| 1458576_PM_at   | ---              | NA      | 0.20  | 2.84 | 1.19  | 2.60E-01 | 5.53E-01 | -5.98 |
| 1421293_PM_at   | Hdgfl1           | HDGFL1  | 0.09  | 2.59 | 1.19  | 2.60E-01 | 5.53E-01 | -5.98 |
| 1444068_PM_at   | ---              | NA      | 0.29  | 2.38 | 1.19  | 2.60E-01 | 5.53E-01 | -5.98 |
| 1438528_PM_at   | ---              | NA      | 0.22  | 3.08 | 1.19  | 2.60E-01 | 5.53E-01 | -5.98 |
| 1425880_PM_x_at | Zfp352           | KLF18   | 0.19  | 2.95 | 1.19  | 2.60E-01 | 5.53E-01 | -5.98 |
| 1457259_PM_at   | ---              | NA      | 0.11  | 2.14 | 1.19  | 2.60E-01 | 5.53E-01 | -5.98 |
| 1427298_PM_at   | Dnm3os           | NA      | 0.30  | 3.05 | 1.19  | 2.60E-01 | 5.53E-01 | -5.98 |
| 1456815_PM_at   | Foxn1            | FOXN1   | 0.14  | 2.22 | 1.19  | 2.60E-01 | 5.53E-01 | -5.98 |
| 1455343_PM_at   | Plekha7          | PLEKHA7 | -0.15 | 2.18 | -1.19 | 2.60E-01 | 5.53E-01 | -5.98 |
| 1449329_PM_at   | Zfp235           | NA      | -0.21 | 3.19 | -1.19 | 2.60E-01 | 5.53E-01 | -5.98 |
| 1420347_PM_at   | Bpifa1           | BPIFA1  | 0.11  | 2.27 | 1.19  | 2.60E-01 | 5.53E-01 | -5.98 |

|                 |                       |          |       |      |       |          |          |       |
|-----------------|-----------------------|----------|-------|------|-------|----------|----------|-------|
| 1452405_PM_x_at | Trac                  | NA       | 0.41  | 2.35 | 1.19  | 2.60E-01 | 5.53E-01 | -5.98 |
| 1441479_PM_at   | ---                   | NA       | 0.24  | 3.04 | 1.19  | 2.60E-01 | 5.53E-01 | -5.99 |
| 1433491_PM_at   | Epb4112               | EPB4112  | 0.54  | 4.64 | 1.19  | 2.60E-01 | 5.53E-01 | -5.99 |
| 1456401_PM_at   | Cacnb2                | CACNB2   | 0.21  | 3.07 | 1.19  | 2.61E-01 | 5.53E-01 | -5.99 |
| 1436407_PM_at   | Amer3                 | AMER3    | -0.18 | 3.17 | -1.19 | 2.61E-01 | 5.53E-01 | -5.99 |
| 1443521_PM_at   | ---                   | NA       | 0.26  | 2.88 | 1.19  | 2.61E-01 | 5.53E-01 | -5.99 |
| 1452203_PM_at   | Nabp1                 | NABP1    | -0.41 | 4.13 | -1.19 | 2.61E-01 | 5.53E-01 | -5.99 |
| 1453713_PM_s_at | Spaca6                | SPACA6   | 0.14  | 2.64 | 1.19  | 2.61E-01 | 5.53E-01 | -5.99 |
| 1428491_PM_at   | Comm10                | COMM10   | 0.31  | 2.89 | 1.19  | 2.61E-01 | 5.53E-01 | -5.99 |
| 1425438_PM_at   | ---                   | NA       | 0.10  | 2.09 | 1.19  | 2.61E-01 | 5.53E-01 | -5.99 |
| 1425233_PM_at   | 2210407C18Rik         | NA       | 0.13  | 2.32 | 1.19  | 2.61E-01 | 5.53E-01 | -5.99 |
| 1444132_PM_at   | Gm9981                | NA       | 0.14  | 2.39 | 1.19  | 2.61E-01 | 5.53E-01 | -5.99 |
| 1419756_PM_at   | Dgkg                  | DGKG     | 0.57  | 4.94 | 1.19  | 2.61E-01 | 5.53E-01 | -5.99 |
| 1452096_PM_s_at | D230025D16Rik         | C16orf70 | -0.31 | 4.47 | -1.19 | 2.61E-01 | 5.54E-01 | -5.99 |
| 1445181_PM_at   | Eml5                  | EML5     | -0.23 | 3.47 | -1.19 | 2.61E-01 | 5.54E-01 | -5.99 |
| 1445239_PM_at   | Gatad2a               | GATAD2A  | 0.14  | 2.68 | 1.19  | 2.61E-01 | 5.54E-01 | -5.99 |
| 1436636_PM_at   | ---                   | NA       | 0.14  | 2.55 | 1.19  | 2.61E-01 | 5.54E-01 | -5.99 |
| 1440710_PM_at   | Zfp706                | ZNF706   | 0.19  | 2.65 | 1.19  | 2.61E-01 | 5.54E-01 | -5.99 |
| 1422142_PM_at   | Nphs1                 | NPHS1    | 0.18  | 2.47 | 1.19  | 2.61E-01 | 5.54E-01 | -5.99 |
| 1457764_PM_at   | A530058O07Rik         | NA       | 0.16  | 2.72 | 1.19  | 2.61E-01 | 5.54E-01 | -5.99 |
| 1452529_PM_a_at | Creb1                 | CREB1    | 0.21  | 2.69 | 1.19  | 2.61E-01 | 5.54E-01 | -5.99 |
| 1456069_PM_at   | Dtna                  | DTNA     | 0.35  | 2.67 | 1.19  | 2.61E-01 | 5.54E-01 | -5.99 |
| 1434096_PM_at   | Slc4a4                | SLC4A4   | -0.61 | 5.31 | -1.19 | 2.61E-01 | 5.54E-01 | -5.99 |
| 1456290_PM_x_at | Ccm2                  | CCM2     | -0.33 | 4.02 | -1.19 | 2.61E-01 | 5.54E-01 | -5.99 |
| 1420624_PM_a_at | Vamp8                 | VAMP8    | -0.32 | 2.73 | -1.19 | 2.61E-01 | 5.54E-01 | -5.99 |
| 1449477_PM_s_at | Slc2a10               | SLC2A10  | 0.10  | 2.52 | 1.19  | 2.61E-01 | 5.54E-01 | -5.99 |
| 1457011_PM_at   | Gm28876               | NA       | 0.12  | 2.13 | 1.19  | 2.61E-01 | 5.54E-01 | -5.99 |
| 1459600_PM_at   | ---                   | NA       | 0.12  | 2.20 | 1.19  | 2.61E-01 | 5.54E-01 | -5.99 |
| 1438109_PM_at   | Clca2                 | CLCA2    | 0.13  | 2.30 | 1.19  | 2.61E-01 | 5.54E-01 | -5.99 |
| 1451859_PM_at   | Krtap6-1              | NA       | 0.14  | 2.65 | 1.19  | 2.61E-01 | 5.54E-01 | -5.99 |
| 1424123_PM_at   | Mfsd7c                | FLVCR2   | 0.15  | 2.68 | 1.19  | 2.61E-01 | 5.54E-01 | -5.99 |
| 1441756_PM_at   | ---                   | NA       | 0.19  | 2.71 | 1.19  | 2.61E-01 | 5.54E-01 | -5.99 |
| 1432389_PM_at   | 4933438A12Rik         | NA       | 0.20  | 2.72 | 1.19  | 2.61E-01 | 5.54E-01 | -5.99 |
| 1428243_PM_at   | Rubcn                 | RUBCN    | 0.25  | 3.03 | 1.19  | 2.61E-01 | 5.54E-01 | -5.99 |
| 1444742_PM_at   | ---                   | NA       | 0.25  | 3.05 | 1.19  | 2.61E-01 | 5.54E-01 | -5.99 |
| 1448728_PM_a_at | Nfkbiz                | NFKBIZ   | -0.15 | 2.37 | -1.19 | 2.61E-01 | 5.54E-01 | -5.99 |
| 1456550_PM_at   | ---                   | NA       | 0.13  | 2.84 | 1.19  | 2.61E-01 | 5.54E-01 | -5.99 |
| 1445963_PM_at   | ---                   | NA       | 0.16  | 2.43 | 1.19  | 2.61E-01 | 5.54E-01 | -5.99 |
| 1451064_PM_a_at | Psat1                 | PSAT1    | -0.85 | 5.83 | -1.19 | 2.61E-01 | 5.54E-01 | -5.99 |
| 1439625_PM_at   | ---                   | NA       | 0.10  | 2.02 | 1.19  | 2.61E-01 | 5.54E-01 | -5.99 |
| 1455400_PM_at   | Ddah1                 | DDAH1    | -0.66 | 5.41 | -1.19 | 2.61E-01 | 5.54E-01 | -5.99 |
| 1423866_PM_at   | Serpina3k             | SERPINA3 | 0.12  | 2.01 | 1.19  | 2.61E-01 | 5.54E-01 | -5.99 |
| 1449439_PM_at   | Klf7                  | KLf7     | -0.28 | 2.85 | -1.19 | 2.61E-01 | 5.54E-01 | -5.99 |
| 1435895_PM_at   | Lsamp                 | LSAMP    | -0.37 | 5.26 | -1.19 | 2.61E-01 | 5.54E-01 | -5.99 |
| 1454620_PM_x_at | LOC105244208 /// Rps6 | NA       | -0.19 | 9.78 | -1.19 | 2.61E-01 | 5.54E-01 | -5.99 |
| 1419885_PM_at   | ---                   | NA       | -0.12 | 2.19 | -1.19 | 2.61E-01 | 5.54E-01 | -5.99 |
| 1424467_PM_at   | Phldb1                | PHLDB1   | 0.11  | 2.28 | 1.19  | 2.61E-01 | 5.54E-01 | -5.99 |
| 1451781_PM_at   | Nfatc2ip              | NFATC2IP | 0.16  | 2.48 | 1.19  | 2.61E-01 | 5.54E-01 | -5.99 |
| 1420795_PM_at   | Fgf9                  | FGF9     | 0.19  | 3.00 | 1.19  | 2.61E-01 | 5.54E-01 | -5.99 |
| 1454699_PM_at   | Sesn1                 | SESN1    | -0.23 | 2.89 | -1.19 | 2.61E-01 | 5.54E-01 | -5.99 |
| 1434187_PM_at   | Alg11                 | ALG11    | -0.71 | 6.23 | -1.19 | 2.62E-01 | 5.54E-01 | -5.99 |
| 1440672_PM_at   | Zfp541                | ZNF541   | -0.15 | 2.36 | -1.19 | 2.62E-01 | 5.54E-01 | -5.99 |
| 1443950_PM_at   | ---                   | NA       | -0.12 | 2.20 | -1.19 | 2.62E-01 | 5.54E-01 | -5.99 |
| 1418358_PM_at   | Smcp                  | NA       | 0.14  | 2.46 | 1.19  | 2.62E-01 | 5.54E-01 | -5.99 |
| 1417484_PM_at   | Ibsp                  | IBSP     | 0.33  | 2.60 | 1.19  | 2.62E-01 | 5.54E-01 | -5.99 |
| 1444443_PM_at   | Gm36401               | NA       | 0.16  | 2.28 | 1.19  | 2.62E-01 | 5.54E-01 | -5.99 |
| 1455952_PM_at   | Adprhl1               | ADPRHL1  | 0.14  | 2.54 | 1.19  | 2.62E-01 | 5.54E-01 | -5.99 |
| 1452691_PM_at   | Rbm17                 | RBM17    | -0.18 | 8.41 | -1.19 | 2.62E-01 | 5.54E-01 | -5.99 |
| 1459785_PM_at   | Zfp383                | ZNF383   | 0.11  | 2.18 | 1.19  | 2.62E-01 | 5.54E-01 | -5.99 |
| 1437321_PM_at   | Atp1a4                | ATP1A4   | 0.15  | 2.95 | 1.19  | 2.62E-01 | 5.54E-01 | -5.99 |
| 1421402_PM_at   | Mta3                  | NA       | 0.68  | 3.35 | 1.19  | 2.62E-01 | 5.54E-01 | -5.99 |
| 1431411_PM_a_at | Elp5                  | ELP5     | -0.24 | 3.78 | -1.19 | 2.62E-01 | 5.54E-01 | -5.99 |
| 1436112_PM_at   | Tmem266               | TMEM266  | 0.14  | 2.68 | 1.19  | 2.62E-01 | 5.54E-01 | -5.99 |
| 1428281_PM_at   | Trub1                 | TRUB1    | 0.35  | 3.03 | 1.19  | 2.62E-01 | 5.54E-01 | -5.99 |
| 1430276_PM_at   | ---                   | NA       | -0.21 | 3.21 | -1.19 | 2.62E-01 | 5.54E-01 | -5.99 |
| 1436011_PM_at   | Elmo2                 | ELMO2    | -0.22 | 2.69 | -1.19 | 2.62E-01 | 5.54E-01 | -5.99 |
| 1433310_PM_at   | D530031A16Rik         | NA       | 0.15  | 2.14 | 1.19  | 2.62E-01 | 5.54E-01 | -5.99 |
| 1436816_PM_at   | Nup133                | NUP133   | -0.56 | 4.65 | -1.19 | 2.62E-01 | 5.54E-01 | -5.99 |
| 1450387_PM_s_at | Ak4                   | AK4      | -0.41 | 7.22 | -1.19 | 2.62E-01 | 5.54E-01 | -5.99 |
| 1438906_PM_at   | ---                   | NA       | -0.26 | 2.77 | -1.19 | 2.62E-01 | 5.54E-01 | -5.99 |
| 1458820_PM_at   | Zfp560                | ZNF560   | -0.22 | 2.29 | -1.19 | 2.62E-01 | 5.54E-01 | -5.99 |
| 1430667_PM_at   | Pcdh10                | NA       | -0.14 | 2.60 | -1.19 | 2.62E-01 | 5.54E-01 | -5.99 |
| 1424541_PM_at   | Tmem70                | TMEM70   | -0.14 | 2.72 | -1.19 | 2.62E-01 | 5.54E-01 | -5.99 |
| 1418182_PM_at   | Ptp4a3                | PTP4A3   | -0.12 | 2.14 | -1.19 | 2.62E-01 | 5.54E-01 | -5.99 |
| 1431865_PM_a_at | Zfp819                | ZNF175   | 0.11  | 2.48 | 1.19  | 2.62E-01 | 5.54E-01 | -5.99 |

|                 |                         |                |       |      |       |          |          |       |
|-----------------|-------------------------|----------------|-------|------|-------|----------|----------|-------|
| 1431658_PM_at   | Hist1h4j///LOC102641229 | NA             | 0.11  | 2.19 | 1.19  | 2.62E-01 | 5.54E-01 | -5.99 |
| 1445790_PM_at   | Gipr                    | GIPR           | 0.11  | 2.39 | 1.19  | 2.62E-01 | 5.54E-01 | -5.99 |
| 1441171_PM_at   | Prob1                   | PROB1          | 0.12  | 2.42 | 1.19  | 2.62E-01 | 5.54E-01 | -5.99 |
| 1431834_PM_a_at | Emilin1                 | EMILIN1        | 0.13  | 2.39 | 1.19  | 2.62E-01 | 5.54E-01 | -5.99 |
| 1425809_PM_at   | Fabp4                   | FABP4          | 0.14  | 2.26 | 1.19  | 2.62E-01 | 5.54E-01 | -5.99 |
| 1458302_PM_at   | ---                     | NA             | 0.14  | 2.40 | 1.19  | 2.62E-01 | 5.54E-01 | -5.99 |
| 1438981_PM_at   | ---                     | NA             | 0.14  | 2.30 | 1.19  | 2.62E-01 | 5.54E-01 | -5.99 |
| 1440182_PM_at   | Fzd10                   | FZD10          | 0.16  | 3.07 | 1.19  | 2.62E-01 | 5.54E-01 | -5.99 |
| 1430090_PM_at   | Ccdc28b                 | CCDC28B        | 0.19  | 2.61 | 1.19  | 2.62E-01 | 5.54E-01 | -5.99 |
| 1432757_PM_at   | ---                     | NA             | 0.20  | 2.61 | 1.19  | 2.62E-01 | 5.54E-01 | -5.99 |
| 1450036_PM_at   | Sgk3                    | C8orf44-SGK3   | 0.28  | 6.25 | 1.19  | 2.62E-01 | 5.54E-01 | -5.99 |
| 1449406_PM_at   | Cyhr1                   | CYHR1          | 0.34  | 3.25 | 1.19  | 2.62E-01 | 5.54E-01 | -5.99 |
| 1446781_PM_at   | D8Erttd54e              | NA             | -0.09 | 1.96 | -1.19 | 2.62E-01 | 5.55E-01 | -5.99 |
| 1443800_PM_at   | ---                     | NA             | 0.09  | 2.01 | 1.19  | 2.62E-01 | 5.55E-01 | -5.99 |
| 1439344_PM_at   | ---                     | NA             | -0.22 | 4.26 | -1.19 | 2.62E-01 | 5.55E-01 | -5.99 |
| 1427473_PM_at   | Gstm3                   | NA             | 0.11  | 1.95 | 1.19  | 2.62E-01 | 5.55E-01 | -5.99 |
| 1427233_PM_at   | Tshz1                   | TSHZ1          | -0.44 | 2.47 | -1.19 | 2.62E-01 | 5.55E-01 | -5.99 |
| 1449044_PM_at   | Eef1e1                  | EEF1E1-BLOC155 | -0.24 | 2.96 | -1.19 | 2.62E-01 | 5.55E-01 | -5.99 |
| 1421906_PM_at   | Med1                    | MED1           | 0.20  | 4.15 | 1.19  | 2.62E-01 | 5.55E-01 | -5.99 |
| 1428640_PM_at   | Hsf2bp                  | HSF2BP         | 0.11  | 2.53 | 1.19  | 2.62E-01 | 5.55E-01 | -5.99 |
| 1436276_PM_at   | Gpat4                   | NA             | -0.14 | 2.36 | -1.19 | 2.62E-01 | 5.55E-01 | -5.99 |
| 1427020_PM_at   | Scara3                  | SCARA3         | -0.40 | 2.69 | -1.19 | 2.62E-01 | 5.55E-01 | -5.99 |
| 1425497_PM_a_at | Prpf4b                  | PRPF4B         | -0.36 | 3.47 | -1.19 | 2.62E-01 | 5.55E-01 | -5.99 |
| 1455004_PM_at   | D2Wsu81e                | SPOUT1         | -0.11 | 2.16 | -1.19 | 2.62E-01 | 5.55E-01 | -5.99 |
| 1436087_PM_at   | Dpp10                   | DPP10          | -0.45 | 3.19 | -1.18 | 2.62E-01 | 5.55E-01 | -5.99 |
| 1440905_PM_at   | Hs2st1                  | AC093155.3     | 0.11  | 2.14 | 1.18  | 2.63E-01 | 5.55E-01 | -5.99 |
| 1443847_PM_x_at | Aff2                    | NA             | -0.48 | 2.64 | -1.18 | 2.63E-01 | 5.55E-01 | -5.99 |
| 1448958_PM_at   | Tor1aip2                | TOR1AIIP2      | -0.20 | 2.42 | -1.18 | 2.63E-01 | 5.55E-01 | -5.99 |
| 1419080_PM_at   | Gdnf                    | GDNF           | 0.14  | 2.11 | 1.18  | 2.63E-01 | 5.55E-01 | -5.99 |
| 1433697_PM_at   | Pat1                    | PATL1          | 0.15  | 2.49 | 1.18  | 2.63E-01 | 5.55E-01 | -5.99 |
| 1431028_PM_a_at | Pank1                   | PANK1          | 0.18  | 2.91 | 1.18  | 2.63E-01 | 5.55E-01 | -5.99 |
| 1430421_PM_a_at | Tmem205                 | TMEM205        | 0.32  | 2.89 | 1.18  | 2.63E-01 | 5.55E-01 | -5.99 |
| 1432403_PM_at   | 4933402C06Rik           | NA             | 0.21  | 2.74 | 1.18  | 2.63E-01 | 5.55E-01 | -5.99 |
| 1444093_PM_at   | 1700034H15Rik           | NA             | 0.12  | 2.32 | 1.18  | 2.63E-01 | 5.55E-01 | -5.99 |
| 1434758_PM_at   | Crispld2                | CRISPLD2       | -0.32 | 2.83 | -1.18 | 2.63E-01 | 5.55E-01 | -5.99 |
| 1435107_PM_at   | Ptpdc1                  | PTPDC1         | -0.22 | 3.36 | -1.18 | 2.63E-01 | 5.55E-01 | -5.99 |
| 1446360_PM_at   | ---                     | NA             | 0.20  | 2.73 | 1.18  | 2.63E-01 | 5.55E-01 | -5.99 |
| 1425189_PM_a_at | Mrpl15                  | MRPL15         | 0.30  | 3.33 | 1.18  | 2.63E-01 | 5.55E-01 | -5.99 |
| 1439019_PM_at   | Fras1                   | FRAS1          | 0.32  | 3.04 | 1.18  | 2.63E-01 | 5.55E-01 | -5.99 |
| 1441090_PM_at   | ---                     | NA             | 0.17  | 2.47 | 1.18  | 2.63E-01 | 5.55E-01 | -5.99 |
| 1434696_PM_at   | Ift52                   | IFT52          | 0.18  | 2.99 | 1.18  | 2.63E-01 | 5.55E-01 | -5.99 |
| 1447712_PM_x_at | Ep400                   | NA             | 0.13  | 2.61 | 1.18  | 2.63E-01 | 5.55E-01 | -5.99 |
| 1427901_PM_at   | Mprps18c                | MRPS18C        | -0.33 | 5.42 | -1.18 | 2.63E-01 | 5.55E-01 | -5.99 |
| 1450212_PM_at   | Fmn1                    | FMN1           | -0.22 | 3.61 | -1.18 | 2.63E-01 | 5.55E-01 | -5.99 |
| 1418403_PM_at   | Adam19                  | ADAM19         | 0.19  | 2.66 | 1.18  | 2.63E-01 | 5.55E-01 | -5.99 |
| 1422516_PM_a_at | Fibp                    | FIBP           | 0.17  | 2.67 | 1.18  | 2.63E-01 | 5.55E-01 | -5.99 |
| 1427245_PM_at   | Arfgap1                 | ARFGAP1        | 0.30  | 4.29 | 1.18  | 2.63E-01 | 5.55E-01 | -5.99 |
| 1423567_PM_a_at | Psm7                    | PSMA7          | -0.34 | 5.18 | -1.18 | 2.63E-01 | 5.55E-01 | -5.99 |
| 1448782_PM_at   | Txndc11                 | TXNDC11        | 0.13  | 2.33 | 1.18  | 2.63E-01 | 5.55E-01 | -5.99 |
| 1431984_PM_at   | 1700007F19Rik           | NA             | -0.11 | 2.23 | -1.18 | 2.63E-01 | 5.55E-01 | -5.99 |
| 1441064_PM_at   | Pcnx2                   | PCNX2          | 0.16  | 2.50 | 1.18  | 2.63E-01 | 5.55E-01 | -5.99 |
| 1420832_PM_at   | Qsox1                   | QSOX1          | 0.19  | 3.74 | 1.18  | 2.63E-01 | 5.55E-01 | -5.99 |
| 1458096_PM_at   | ---                     | NA             | 0.24  | 2.49 | 1.18  | 2.63E-01 | 5.55E-01 | -5.99 |
| 1436911_PM_at   | Ss18l1                  | SS18L1         | 0.30  | 6.78 | 1.18  | 2.63E-01 | 5.55E-01 | -5.99 |
| 1425826_PM_a_at | Sorbs1                  | SORBS1         | 0.40  | 3.23 | 1.18  | 2.63E-01 | 5.55E-01 | -5.99 |
| 1418531_PM_at   | Oosp1                   | NA             | -0.11 | 2.53 | -1.18 | 2.63E-01 | 5.55E-01 | -5.99 |
| 1422550_PM_a_at | Map6                    | MAP6           | 0.41  | 3.60 | 1.18  | 2.63E-01 | 5.55E-01 | -5.99 |
| 1460697_PM_s_at | Snrnp27                 | SNRNP27        | -0.40 | 3.31 | -1.18 | 2.63E-01 | 5.56E-01 | -5.99 |
| 1445332_PM_at   | ---                     | NA             | 0.11  | 2.42 | 1.18  | 2.63E-01 | 5.56E-01 | -5.99 |
| 1422828_PM_at   | Cd3d                    | CD3D           | 0.18  | 2.63 | 1.18  | 2.63E-01 | 5.56E-01 | -5.99 |
| 1456949_PM_at   | ---                     | NA             | 0.21  | 2.77 | 1.18  | 2.63E-01 | 5.56E-01 | -5.99 |
| 1418258_PM_s_at | Dynll2                  | DYNLL2         | 0.26  | 6.81 | 1.18  | 2.63E-01 | 5.56E-01 | -5.99 |
| 1446274_PM_at   | Slc16a1                 | SLC16A1        | -0.19 | 2.55 | -1.18 | 2.63E-01 | 5.56E-01 | -5.99 |
| 1436706_PM_at   | Mmgt1                   | MMGT1          | 0.12  | 2.20 | 1.18  | 2.63E-01 | 5.56E-01 | -5.99 |
| 1458699_PM_at   | ---                     | NA             | 0.12  | 2.33 | 1.18  | 2.63E-01 | 5.56E-01 | -5.99 |
| 1447397_PM_at   | Saxo2                   | SAXO2          | 0.12  | 2.09 | 1.18  | 2.63E-01 | 5.56E-01 | -5.99 |
| 1446009_PM_at   | ---                     | NA             | 0.14  | 2.96 | 1.18  | 2.63E-01 | 5.56E-01 | -5.99 |
| 1436054_PM_at   | Khynn                   | NA             | 0.17  | 3.10 | 1.18  | 2.63E-01 | 5.56E-01 | -5.99 |
| 1447750_PM_x_at | Ph1d1                   | PIH1D1         | 0.45  | 3.48 | 1.18  | 2.63E-01 | 5.56E-01 | -5.99 |
| 1439511_PM_at   | Cdk7                    | CDK7           | -0.50 | 4.40 | -1.18 | 2.63E-01 | 5.56E-01 | -5.99 |
| 1419279_PM_at   | Pip4k2a                 | PIP4K2A        | -0.22 | 2.98 | -1.18 | 2.63E-01 | 5.56E-01 | -5.99 |
| 1443536_PM_at   | Slc7a11                 | SLC7A11        | -0.18 | 2.49 | -1.18 | 2.63E-01 | 5.56E-01 | -5.99 |
| 1418522_PM_at   | Mtx1                    | MTX1           | -0.11 | 2.23 | -1.18 | 2.63E-01 | 5.56E-01 | -5.99 |
| 1436061_PM_at   | ---                     | NA             | 0.14  | 2.29 | 1.18  | 2.63E-01 | 5.56E-01 | -5.99 |

|                         |               |           |       |      |       |          |          |       |
|-------------------------|---------------|-----------|-------|------|-------|----------|----------|-------|
| 1424350_PM_s_at         | Lpgat1        | LPGAT1    | 0.20  | 3.88 | 1.18  | 2.63E-01 | 5.56E-01 | -5.99 |
| 1431031_PM_at           | Arid4b        | ARID4B    | 0.29  | 2.65 | 1.18  | 2.63E-01 | 5.56E-01 | -5.99 |
| 1459848_PM_x_at         | Dbh           | DBH       | 0.20  | 2.42 | 1.18  | 2.64E-01 | 5.56E-01 | -5.99 |
| 1451800_PM_at           | Gcc2          | GCC2      | -0.34 | 5.82 | -1.18 | 2.64E-01 | 5.56E-01 | -5.99 |
| 1432490_PM_a_at         | Pde10a        | PDE10A    | 0.14  | 2.22 | 1.18  | 2.64E-01 | 5.56E-01 | -5.99 |
| 1423921_PM_at           | Ints3         | INTS3     | 0.15  | 2.23 | 1.18  | 2.64E-01 | 5.56E-01 | -5.99 |
| 1431790_PM_at           | 4932412D23Rik | NA        | 0.16  | 2.41 | 1.18  | 2.64E-01 | 5.56E-01 | -5.99 |
| 1448945_PM_at           | Plp           | PLL       | 0.19  | 3.33 | 1.18  | 2.64E-01 | 5.56E-01 | -5.99 |
| 1456390_PM_at           | Ppp2ca        | PPP2CA    | -0.49 | 8.19 | -1.18 | 2.64E-01 | 5.56E-01 | -5.99 |
| 1458622_PM_at           | Ntrk2         | NTRK2     | -0.42 | 6.85 | -1.18 | 2.64E-01 | 5.56E-01 | -5.99 |
| 1422023_PM_at           | Bsn           | BSN       | 0.25  | 2.70 | 1.18  | 2.64E-01 | 5.56E-01 | -5.99 |
| 1430545_PM_at           | Dbf4          | DBF4      | 0.37  | 3.14 | 1.18  | 2.64E-01 | 5.56E-01 | -5.99 |
| 1444329_PM_at           | Gfpt1         | GFPT1     | 0.11  | 2.49 | 1.18  | 2.64E-01 | 5.56E-01 | -5.99 |
| 1435117_PM_a_at         | Dnajc27       | DNAJC27   | -0.28 | 2.68 | -1.18 | 2.64E-01 | 5.56E-01 | -5.99 |
| 1457385_PM_at           | ---           | NA        | 0.14  | 2.95 | 1.18  | 2.64E-01 | 5.56E-01 | -6.00 |
| 1434288_PM_at           | Bvm           | BIVM      | -0.20 | 2.90 | -1.18 | 2.64E-01 | 5.56E-01 | -6.00 |
| 1445836_PM_at           | ---           | NA        | 0.09  | 2.00 | 1.18  | 2.64E-01 | 5.56E-01 | -6.00 |
| 1442044_PM_at           | ---           | NA        | 0.23  | 3.02 | 1.18  | 2.64E-01 | 5.56E-01 | -6.00 |
| 1458615_PM_at           | Depdc5        | DEPDC5    | 0.25  | 2.66 | 1.18  | 2.64E-01 | 5.56E-01 | -6.00 |
| 1452898_PM_at           | Vps36         | VPS36     | 0.28  | 3.35 | 1.18  | 2.64E-01 | 5.56E-01 | -6.00 |
| 1430591_PM_at           | Ddc           | DDC       | 0.11  | 2.52 | 1.18  | 2.64E-01 | 5.56E-01 | -6.00 |
| 1438140_PM_a_at         | Zfp64         | ZFP64     | 0.50  | 2.19 | 1.18  | 2.64E-01 | 5.56E-01 | -6.00 |
| 1446565_PM_at           | ---           | NA        | 0.27  | 3.95 | 1.18  | 2.64E-01 | 5.56E-01 | -6.00 |
| 1447197_PM_at           | C86544        | NA        | 0.31  | 2.87 | 1.18  | 2.64E-01 | 5.56E-01 | -6.00 |
| 1447319_PM_at           | Ext2          | EXT2      | 0.17  | 2.55 | 1.18  | 2.64E-01 | 5.56E-01 | -6.00 |
| 1422491_PM_a_at         | Bnip2         | BNIP2     | -0.37 | 4.20 | -1.18 | 2.64E-01 | 5.56E-01 | -6.00 |
| AFFX-NonspecificGC24_at | ---           | NA        | 0.09  | 2.09 | 1.18  | 2.64E-01 | 5.56E-01 | -6.00 |
| 1439683_PM_at           | Gm29811       | NA        | 0.18  | 2.57 | 1.18  | 2.64E-01 | 5.56E-01 | -6.00 |
| 1457237_PM_at           | Mbnl2         | NA        | 0.33  | 2.83 | 1.18  | 2.64E-01 | 5.56E-01 | -6.00 |
| 1443441_PM_x_at         | Gm5141        | NA        | 0.12  | 2.45 | 1.18  | 2.64E-01 | 5.56E-01 | -6.00 |
| 1434173_PM_s_at         | Pum3          | PUM3      | -0.50 | 4.68 | -1.18 | 2.64E-01 | 5.57E-01 | -6.00 |
| 1435644_PM_at           | Sh3pxd2b      | SH3PXD2B  | 0.12  | 2.41 | 1.18  | 2.64E-01 | 5.57E-01 | -6.00 |
| 1445781_PM_at           | ---           | NA        | 0.17  | 2.51 | 1.18  | 2.64E-01 | 5.57E-01 | -6.00 |
| 1430564_PM_at           | Mob1b         | MOB1B     | -0.34 | 3.80 | -1.18 | 2.64E-01 | 5.57E-01 | -6.00 |
| 1429791_PM_at           | A930004D18Rik | NA        | 0.23  | 3.07 | 1.18  | 2.64E-01 | 5.57E-01 | -6.00 |
| 1446423_PM_at           | ---           | NA        | 0.13  | 1.94 | 1.18  | 2.64E-01 | 5.57E-01 | -6.00 |
| 1416887_PM_at           | C1d           | C1D       | 0.16  | 2.16 | 1.18  | 2.64E-01 | 5.57E-01 | -6.00 |
| 1429530_PM_a_at         | Smpd4         | SMPD4     | 0.34  | 2.61 | 1.18  | 2.64E-01 | 5.57E-01 | -6.00 |
| 1447433_PM_at           | Wdfy3         | WDFY3     | 0.10  | 2.25 | 1.18  | 2.65E-01 | 5.57E-01 | -6.00 |
| 1459824_PM_at           | Smarcc1       | SMARCC1   | 0.12  | 2.19 | 1.18  | 2.64E-01 | 5.57E-01 | -6.00 |
| 1458435_PM_at           | Jpx           | NA        | 0.29  | 3.37 | 1.18  | 2.65E-01 | 5.57E-01 | -6.00 |
| 1427582_PM_at           | Fgf6          | FGF6      | 0.11  | 2.39 | 1.18  | 2.65E-01 | 5.57E-01 | -6.00 |
| 1444326_PM_at           | ---           | NA        | -0.40 | 3.30 | -1.18 | 2.65E-01 | 5.57E-01 | -6.00 |
| 1436882_PM_at           | Ubl5          | UBL5      | 0.47  | 3.02 | 1.18  | 2.65E-01 | 5.57E-01 | -6.00 |
| 1453307_PM_a_at         | Anapc5        | ANAPC5    | 0.41  | 3.42 | 1.18  | 2.65E-01 | 5.57E-01 | -6.00 |
| 1417453_PM_at           | Cul4b         | CUL4B     | -0.22 | 6.26 | -1.18 | 2.65E-01 | 5.57E-01 | -6.00 |
| 1457594_PM_at           | ---           | NA        | 0.12  | 2.75 | 1.18  | 2.65E-01 | 5.57E-01 | -6.00 |
| 1420669_PM_at           | Arnt2         | ARNT2     | 0.20  | 3.30 | 1.18  | 2.65E-01 | 5.57E-01 | -6.00 |
| 1416445_PM_at           | Fam98a        | FAM98A    | -0.29 | 3.33 | -1.18 | 2.65E-01 | 5.57E-01 | -6.00 |
| 1431283_PM_at           | ---           | NA        | 0.09  | 2.08 | 1.18  | 2.65E-01 | 5.57E-01 | -6.00 |
| 1430489_PM_at           | Gm4221        | NA        | 0.11  | 2.21 | 1.18  | 2.65E-01 | 5.57E-01 | -6.00 |
| 1455914_PM_at           | Al987944      | NA        | 0.17  | 2.35 | 1.18  | 2.65E-01 | 5.57E-01 | -6.00 |
| 1425507_PM_at           | Arfrp1        | ARFRP1    | 0.21  | 3.16 | 1.18  | 2.65E-01 | 5.57E-01 | -6.00 |
| 1423160_PM_at           | Spred1        | SPRED1    | 0.39  | 6.46 | 1.18  | 2.65E-01 | 5.57E-01 | -6.00 |
| 1444259_PM_at           | AW495222      | NA        | 0.20  | 2.76 | 1.18  | 2.65E-01 | 5.57E-01 | -6.00 |
| 1457268_PM_at           | Dot1l         | DOT1L     | 0.26  | 3.93 | 1.18  | 2.65E-01 | 5.57E-01 | -6.00 |
| 1447560_PM_at           | ---           | NA        | 0.15  | 2.43 | 1.18  | 2.65E-01 | 5.57E-01 | -6.00 |
| 1430996_PM_at           | Etnk1         | ETNK1     | -0.29 | 5.14 | -1.18 | 2.65E-01 | 5.57E-01 | -6.00 |
| 1428384_PM_at           | Lurap1l       | LURAP1L   | -0.26 | 3.08 | -1.18 | 2.65E-01 | 5.57E-01 | -6.00 |
| 1418572_PM_x_at         | Tnfrsf12a     | TNFRSF12A | 0.12  | 2.49 | 1.18  | 2.65E-01 | 5.57E-01 | -6.00 |
| 1420133_PM_at           | Gm11487       | NA        | 0.12  | 2.11 | 1.18  | 2.65E-01 | 5.57E-01 | -6.00 |
| 1443925_PM_at           | Gatsl2        | CASTOR2   | 0.17  | 3.05 | 1.18  | 2.65E-01 | 5.57E-01 | -6.00 |
| 1447099_PM_at           | ---           | NA        | 0.26  | 3.55 | 1.18  | 2.65E-01 | 5.57E-01 | -6.00 |
| 1457536_PM_at           | Gpc5          | GPC5      | -0.49 | 3.76 | -1.18 | 2.65E-01 | 5.57E-01 | -6.00 |
| 1440914_PM_s_at         | Aftph         | AFTPH     | -0.23 | 2.39 | -1.18 | 2.65E-01 | 5.57E-01 | -6.00 |
| 1451984_PM_at           | Hnrnpul1      | HNRNPUL1  | -0.18 | 6.66 | -1.18 | 2.65E-01 | 5.57E-01 | -6.00 |
| 1424524_PM_at           | Dram1         | DRAM1     | -0.13 | 2.80 | -1.18 | 2.65E-01 | 5.57E-01 | -6.00 |
| 1446563_PM_at           | ---           | NA        | 0.09  | 2.17 | 1.18  | 2.65E-01 | 5.57E-01 | -6.00 |
| 1422987_PM_at           | Ntn1          | NTN1      | 0.12  | 2.24 | 1.18  | 2.65E-01 | 5.57E-01 | -6.00 |
| 1459970_PM_at           | ---           | NA        | 0.12  | 2.14 | 1.18  | 2.65E-01 | 5.57E-01 | -6.00 |
| 1458270_PM_at           | Kcnb1         | KCNB1     | 0.13  | 2.28 | 1.18  | 2.65E-01 | 5.57E-01 | -6.00 |
| 1447706_PM_at           | ---           | NA        | 0.16  | 2.07 | 1.18  | 2.65E-01 | 5.57E-01 | -6.00 |
| 1449105_PM_at           | Sh2d2a        | SH2D2A    | 0.17  | 3.16 | 1.18  | 2.65E-01 | 5.57E-01 | -6.00 |
| 1455265_PM_a_at         | Rgs16         | RGS16     | 0.27  | 2.76 | 1.18  | 2.65E-01 | 5.57E-01 | -6.00 |
| 1448658_PM_at           | Sart1         | SART1     | 0.38  | 5.37 | 1.18  | 2.65E-01 | 5.57E-01 | -6.00 |

|                 |                                                            |            |       |      |       |          |          |       |
|-----------------|------------------------------------------------------------|------------|-------|------|-------|----------|----------|-------|
| 1452430_PM_s_at | Srsf1                                                      | SRSF1      | 0.49  | 4.89 | 1.18  | 2.65E-01 | 5.57E-01 | -6.00 |
| 1438160_PM_x_at | Slco4a1                                                    | SLCO4A1    | 0.66  | 4.35 | 1.18  | 2.65E-01 | 5.57E-01 | -6.00 |
| 1460252_PM_s_at | Zfp105                                                     | ZNF35      | 0.14  | 2.17 | 1.18  | 2.65E-01 | 5.58E-01 | -6.00 |
| 1457958_PM_at   | ---                                                        | NA         | 0.13  | 2.64 | 1.18  | 2.65E-01 | 5.58E-01 | -6.00 |
| 1428520_PM_at   | Rbfa                                                       | RBFA       | 0.23  | 3.49 | 1.18  | 2.65E-01 | 5.58E-01 | -6.00 |
| 1458355_PM_x_at | Wdr92                                                      | WDR92      | -0.36 | 3.01 | -1.18 | 2.65E-01 | 5.58E-01 | -6.00 |
| 1432970_PM_at   | LOC105242701                                               | NA         | 0.11  | 2.67 | 1.18  | 2.66E-01 | 5.58E-01 | -6.00 |
| 1450653_PM_at   | Spz1                                                       | SPZ1       | 0.12  | 2.31 | 1.18  | 2.66E-01 | 5.58E-01 | -6.00 |
| 1424125_PM_at   | Kcnk13                                                     | KCNK13     | 0.18  | 2.97 | 1.18  | 2.65E-01 | 5.58E-01 | -6.00 |
| 1460235_PM_at   | Scarb2                                                     | SCARB2     | -0.55 | 4.69 | -1.18 | 2.66E-01 | 5.58E-01 | -6.00 |
| 1425031_PM_at   | Fktn                                                       | FKTN       | -0.29 | 3.00 | -1.18 | 2.66E-01 | 5.58E-01 | -6.00 |
| 1429395_PM_at   | Gstcd                                                      | GSTCD      | -0.21 | 3.27 | -1.18 | 2.66E-01 | 5.58E-01 | -6.00 |
| 1443593_PM_at   | ---                                                        | NA         | -0.09 | 2.41 | -1.18 | 2.66E-01 | 5.58E-01 | -6.00 |
| 1451790_PM_a_at | Tfpi                                                       | TFPI       | 0.19  | 2.30 | 1.18  | 2.66E-01 | 5.58E-01 | -6.00 |
| 1446220_PM_at   | Ntn5                                                       | NTN5       | 0.28  | 2.76 | 1.18  | 2.66E-01 | 5.58E-01 | -6.00 |
| 1418935_PM_at   | Trpm1                                                      | TRPM1      | 0.11  | 2.31 | 1.18  | 2.66E-01 | 5.58E-01 | -6.00 |
| 1446018_PM_at   | C79240                                                     | NA         | 0.20  | 3.89 | 1.18  | 2.66E-01 | 5.58E-01 | -6.00 |
| 1421137_PM_a_at | Pkib                                                       | PKIB       | -0.76 | 5.56 | -1.18 | 2.66E-01 | 5.58E-01 | -6.00 |
| 1451665_PM_a_at | Ap4s1                                                      | AP4S1      | -0.17 | 2.42 | -1.18 | 2.66E-01 | 5.58E-01 | -6.00 |
| 1428006_PM_at   | Scfd1                                                      | NA         | -0.14 | 2.12 | -1.18 | 2.66E-01 | 5.58E-01 | -6.00 |
| 1454946_PM_at   | Mybl2                                                      | MYBL2      | 0.12  | 2.56 | 1.18  | 2.66E-01 | 5.58E-01 | -6.00 |
| 1447743_PM_x_at | Ext2                                                       | EXT2       | 0.15  | 3.72 | 1.18  | 2.66E-01 | 5.58E-01 | -6.00 |
| 1450367_PM_at   | ---                                                        | NA         | 0.17  | 2.43 | 1.18  | 2.66E-01 | 5.58E-01 | -6.00 |
| 1425349_PM_a_at | Myef2                                                      | MYEF2      | 0.20  | 4.57 | 1.18  | 2.66E-01 | 5.58E-01 | -6.00 |
| 1429916_PM_at   | 9530077C05Rik                                              | KIAA0895   | 0.17  | 2.22 | 1.18  | 2.66E-01 | 5.58E-01 | -6.00 |
| 1460687_PM_at   | Setd8                                                      | KMT5A      | -0.22 | 3.61 | -1.18 | 2.66E-01 | 5.58E-01 | -6.00 |
| 1459527_PM_at   | ---                                                        | NA         | 0.11  | 2.21 | 1.18  | 2.66E-01 | 5.58E-01 | -6.00 |
| 1424744_PM_at   | Sds                                                        | SDS        | 0.17  | 2.39 | 1.18  | 2.66E-01 | 5.58E-01 | -6.00 |
| 1417619_PM_at   | Gadd45gip1                                                 | GADD45GIP1 | 0.22  | 2.89 | 1.18  | 2.66E-01 | 5.58E-01 | -6.00 |
| 1435405_PM_at   | Setd4                                                      | NA         | 0.11  | 2.23 | 1.18  | 2.66E-01 | 5.58E-01 | -6.00 |
| 1438663_PM_at   | Prrc2c                                                     | PRRC2C     | -0.31 | 6.28 | -1.18 | 2.66E-01 | 5.58E-01 | -6.00 |
| 1443687_PM_x_at | H2-DMb2                                                    | ALG45941.2 | 0.14  | 2.22 | 1.18  | 2.66E-01 | 5.58E-01 | -6.00 |
| 1437099_PM_x_at | Hnrnpf                                                     | HNRNPF     | 0.33  | 8.81 | 1.18  | 2.66E-01 | 5.58E-01 | -6.00 |
| 1440079_PM_at   | 3632454L22Rik                                              | NA         | 0.12  | 2.25 | 1.18  | 2.66E-01 | 5.58E-01 | -6.00 |
| 1422166_PM_at   | Clec2i                                                     | CLEC2D     | 0.11  | 2.57 | 1.18  | 2.66E-01 | 5.58E-01 | -6.00 |
| 1443179_PM_at   | ---                                                        | NA         | 0.18  | 2.71 | 1.18  | 2.66E-01 | 5.58E-01 | -6.00 |
| 1460522_PM_at   | ---                                                        | NA         | 0.16  | 2.58 | 1.18  | 2.66E-01 | 5.58E-01 | -6.00 |
| 1454423_PM_at   | Tmem180                                                    | MFSD13A    | 0.11  | 2.23 | 1.18  | 2.66E-01 | 5.58E-01 | -6.00 |
| 1441986_PM_at   | Zcchc6                                                     | ZCCHC6     | 0.22  | 2.97 | 1.18  | 2.66E-01 | 5.58E-01 | -6.00 |
| 1439882_PM_at   | Sec23ip                                                    | SEC23IP    | -0.27 | 3.88 | -1.18 | 2.66E-01 | 5.58E-01 | -6.00 |
| 1437254_PM_at   | Cep76                                                      | CEP76      | 0.12  | 2.56 | 1.18  | 2.66E-01 | 5.58E-01 | -6.00 |
| 1443998_PM_at   | Rassf2                                                     | RASSF2     | 0.14  | 2.52 | 1.18  | 2.66E-01 | 5.58E-01 | -6.00 |
| 1436596_PM_at   | H2afv                                                      | H2AFV      | -0.29 | 3.69 | -1.18 | 2.66E-01 | 5.58E-01 | -6.00 |
| 1447006_PM_at   | ---                                                        | NA         | 0.11  | 2.42 | 1.17  | 2.66E-01 | 5.58E-01 | -6.00 |
| 1460276_PM_a_at | Tpra1                                                      | TPRA1      | 0.19  | 3.81 | 1.17  | 2.66E-01 | 5.58E-01 | -6.00 |
| 1450487_PM_at   | Vsx1                                                       | VSX1       | 0.09  | 2.49 | 1.17  | 2.66E-01 | 5.58E-01 | -6.00 |
| 1421432_PM_at   | Arl10                                                      | ARL10      | 0.12  | 2.26 | 1.17  | 2.66E-01 | 5.59E-01 | -6.00 |
| 1417133_PM_at   | Pmp22                                                      | PMP22      | -0.30 | 3.18 | -1.17 | 2.66E-01 | 5.59E-01 | -6.00 |
| 1460253_PM_at   | Cntm7                                                      | CMTM7      | 0.18  | 2.33 | 1.17  | 2.66E-01 | 5.59E-01 | -6.00 |
| 1453177_PM_at   | Srx31                                                      | SNX31      | 0.12  | 2.23 | 1.17  | 2.66E-01 | 5.59E-01 | -6.00 |
| 1459201_PM_at   | ---                                                        | NA         | 0.13  | 2.54 | 1.17  | 2.66E-01 | 5.59E-01 | -6.00 |
| 1440844_PM_at   | Tob1                                                       | TOB1       | 0.10  | 2.01 | 1.17  | 2.67E-01 | 5.59E-01 | -6.00 |
| 1434980_PM_at   | Pik3r5                                                     | PIK3R5     | 0.16  | 2.69 | 1.17  | 2.67E-01 | 5.59E-01 | -6.00 |
| 1456099_PM_at   | ---                                                        | NA         | 0.23  | 2.52 | 1.17  | 2.67E-01 | 5.59E-01 | -6.00 |
| 1443567_PM_at   | Gtscr1l                                                    | NA         | 0.25  | 2.59 | 1.17  | 2.67E-01 | 5.59E-01 | -6.00 |
| 1456015_PM_x_at | Ndufv1                                                     | NDUFV1     | -0.37 | 8.17 | -1.17 | 2.67E-01 | 5.59E-01 | -6.00 |
| 1451237_PM_s_at | Rbm7                                                       | APO02373.1 | -0.24 | 5.80 | -1.17 | 2.67E-01 | 5.59E-01 | -6.00 |
| 1452397_PM_at   | 2810474O19Rik                                              | KIAA1551   | 0.17  | 4.98 | 1.17  | 2.67E-01 | 5.59E-01 | -6.00 |
| 1431765_PM_a_at | Rps2 /// Rps2-ps10 /// Rps2-ps13 /// Rps2-ps5 /// Rps2-ps9 | NA         | 0.18  | 8.70 | 1.17  | 2.67E-01 | 5.59E-01 | -6.00 |
| 1446083_PM_at   | Gm42127                                                    | NA         | 0.18  | 2.41 | 1.17  | 2.67E-01 | 5.59E-01 | -6.00 |
| 1453013_PM_at   | Zfp740                                                     | ZNF740     | -0.23 | 3.44 | -1.17 | 2.67E-01 | 5.59E-01 | -6.00 |
| 1440874_PM_at   | Slco5a1                                                    | SLCO5A1    | -0.13 | 3.88 | -1.17 | 2.67E-01 | 5.59E-01 | -6.00 |
| 1432531_PM_at   | 9230104L09Rik                                              | CST9       | 0.11  | 2.75 | 1.17  | 2.67E-01 | 5.59E-01 | -6.00 |
| 1418077_PM_at   | Trim21                                                     | TRIM21     | -0.13 | 2.23 | -1.17 | 2.67E-01 | 5.59E-01 | -6.00 |
| 1456146_PM_at   | Osbpl10                                                    | NA         | 0.13  | 2.81 | 1.17  | 2.67E-01 | 5.59E-01 | -6.00 |
| 1439377_PM_x_at | Cdc20                                                      | CD20       | 0.24  | 2.38 | 1.17  | 2.67E-01 | 5.59E-01 | -6.00 |
| 1420781_PM_at   | Etos1                                                      | NA         | 0.12  | 2.14 | 1.17  | 2.67E-01 | 5.59E-01 | -6.00 |
| 1419204_PM_at   | Dll1                                                       | DLL1       | 0.18  | 2.52 | 1.17  | 2.67E-01 | 5.59E-01 | -6.00 |
| 1441740_PM_at   | ---                                                        | NA         | 0.29  | 2.79 | 1.17  | 2.67E-01 | 5.59E-01 | -6.00 |
| 1451661_PM_at   | Akap4                                                      | AKAP4      | -0.11 | 2.42 | -1.17 | 2.67E-01 | 5.59E-01 | -6.00 |
| 1458727_PM_at   | ---                                                        | NA         | 0.13  | 2.13 | 1.17  | 2.67E-01 | 5.59E-01 | -6.00 |
| 1417950_PM_a_at | Apoa2                                                      | APOA2      | 0.15  | 2.65 | 1.17  | 2.67E-01 | 5.59E-01 | -6.00 |
| 1449900_PM_at   | Galc                                                       | GALC       | 0.11  | 2.19 | 1.17  | 2.67E-01 | 5.59E-01 | -6.00 |

|                 |                       |            |       |      |       |          |          |       |
|-----------------|-----------------------|------------|-------|------|-------|----------|----------|-------|
| 1446369_PM_at   | Armc1                 | ARMC1      | -0.19 | 2.60 | -1.17 | 2.67E-01 | 5.59E-01 | -6.00 |
| 1448231_PM_at   | Fkbp5                 | FKBP5      | 0.10  | 2.78 | 1.17  | 2.67E-01 | 5.59E-01 | -6.00 |
| 1431301_PM_at   | Prr15                 | PRR15      | 0.11  | 2.43 | 1.17  | 2.67E-01 | 5.59E-01 | -6.00 |
| 1446150_PM_at   | ---                   | NA         | 0.11  | 2.38 | 1.17  | 2.67E-01 | 5.59E-01 | -6.00 |
| 1425536_PM_at   | Stx3                  | STX3       | -0.29 | 5.04 | -1.17 | 2.67E-01 | 5.59E-01 | -6.00 |
| 1420841_PM_at   | Ptpf                  | PTPRF      | 0.11  | 2.60 | 1.17  | 2.67E-01 | 5.59E-01 | -6.00 |
| 1424258_PM_at   | Polr2d                | POLR2D     | 0.14  | 2.86 | 1.17  | 2.67E-01 | 5.59E-01 | -6.00 |
| 1426734_PM_at   | Fam43a                | FAM43A     | -0.24 | 2.94 | -1.17 | 2.67E-01 | 5.59E-01 | -6.00 |
| 1460492_PM_at   | ---                   | NA         | -0.11 | 2.24 | -1.17 | 2.67E-01 | 5.59E-01 | -6.00 |
| 1460609_PM_at   | Ints8                 | NA         | 0.10  | 2.06 | 1.17  | 2.67E-01 | 5.59E-01 | -6.00 |
| 1429899_PM_at   | ---                   | NA         | 0.13  | 2.32 | 1.17  | 2.67E-01 | 5.59E-01 | -6.00 |
| 1430196_PM_at   | ---                   | NA         | 0.14  | 2.58 | 1.17  | 2.67E-01 | 5.59E-01 | -6.00 |
| 1434941_PM_s_at | Esf1                  | ESF1       | 0.20  | 2.84 | 1.17  | 2.67E-01 | 5.59E-01 | -6.00 |
| 1425614_PM_x_at | H2-D1///LOC102641613  | NA         | 0.21  | 2.92 | 1.17  | 2.67E-01 | 5.59E-01 | -6.00 |
| 1456442_PM_at   | ---                   | NA         | 0.23  | 2.21 | 1.17  | 2.67E-01 | 5.59E-01 | -6.00 |
| 1460221_PM_at   | LOC102641464///Ptges3 | PTGES3     | 0.29  | 8.19 | 1.17  | 2.67E-01 | 5.59E-01 | -6.00 |
| 1445074_PM_at   | Gm15506               | NA         | 0.15  | 2.32 | 1.17  | 2.67E-01 | 5.59E-01 | -6.00 |
| 1429510_PM_at   | 2810410L24Rik         | NA         | 0.13  | 2.63 | 1.17  | 2.67E-01 | 5.59E-01 | -6.01 |
| 1442002_PM_at   | Tmf1                  | TMF1       | 0.17  | 3.11 | 1.17  | 2.67E-01 | 5.59E-01 | -6.01 |
| 1446515_PM_at   | ---                   | NA         | 0.18  | 2.79 | 1.17  | 2.67E-01 | 5.59E-01 | -6.01 |
| 1450437_PM_a_at | Ncam1                 | NCAM1      | 0.72  | 5.81 | 1.17  | 2.67E-01 | 5.59E-01 | -6.01 |
| 1451062_PM_a_at | Pex5l                 | PEX5L      | 0.14  | 3.58 | 1.17  | 2.67E-01 | 5.59E-01 | -6.01 |
| 1460583_PM_at   | Golt1b                | GOLT1B     | -0.45 | 3.29 | -1.17 | 2.67E-01 | 5.59E-01 | -6.01 |
| 1431625_PM_at   | Pde1a                 | PDE1A      | 0.11  | 2.01 | 1.17  | 2.67E-01 | 5.59E-01 | -6.01 |
| 1426700_PM_a_at | Pan2                  | PAN2       | 0.24  | 2.91 | 1.17  | 2.67E-01 | 5.59E-01 | -6.01 |
| 1443968_PM_at   | Adarb1                | ADARB1     | 0.28  | 3.76 | 1.17  | 2.67E-01 | 5.59E-01 | -6.01 |
| 1443624_PM_at   | ---                   | NA         | 0.16  | 2.17 | 1.17  | 2.67E-01 | 5.60E-01 | -6.01 |
| 1450652_PM_at   | Ctsk                  | CTSK       | 0.14  | 2.22 | 1.17  | 2.68E-01 | 5.60E-01 | -6.01 |
| 1430737_PM_at   | Zfp773                | NA         | 0.18  | 2.68 | 1.17  | 2.68E-01 | 5.60E-01 | -6.01 |
| 1426220_PM_at   | Slc35f6               | SLC35F6    | 0.12  | 2.46 | 1.17  | 2.68E-01 | 5.60E-01 | -6.01 |
| 1435712_PM_a_at | Rps18                 | RPS18      | 0.29  | 7.51 | 1.17  | 2.68E-01 | 5.60E-01 | -6.01 |
| 1439558_PM_at   | Zfp317                | NA         | -0.31 | 4.02 | -1.17 | 2.68E-01 | 5.60E-01 | -6.01 |
| 1441698_PM_at   | ---                   | NA         | 0.18  | 2.32 | 1.17  | 2.68E-01 | 5.60E-01 | -6.01 |
| 1419281_PM_a_at | Zpr1                  | ZPR1       | 0.21  | 2.86 | 1.17  | 2.68E-01 | 5.60E-01 | -6.01 |
| 1449268_PM_at   | Gfpt1                 | GFPT1      | 0.39  | 3.37 | 1.17  | 2.68E-01 | 5.60E-01 | -6.01 |
| 1454693_PM_at   | Hdac4                 | HDAC4      | -0.24 | 3.11 | -1.17 | 2.68E-01 | 5.60E-01 | -6.01 |
| 1421572_PM_at   | Hif3a                 | HIF3A      | 0.12  | 2.53 | 1.17  | 2.68E-01 | 5.60E-01 | -6.01 |
| 1416868_PM_at   | Cdkn2c                | CDKN2C     | 0.19  | 2.42 | 1.17  | 2.68E-01 | 5.60E-01 | -6.01 |
| 1457605_PM_at   | ---                   | NA         | -0.18 | 2.45 | -1.17 | 2.68E-01 | 5.60E-01 | -6.01 |
| 1420423_PM_at   | Tcl1b4                | TCL1B      | 0.12  | 2.21 | 1.17  | 2.68E-01 | 5.60E-01 | -6.01 |
| 1458389_PM_at   | ---                   | NA         | 0.13  | 2.60 | 1.17  | 2.68E-01 | 5.60E-01 | -6.01 |
| 1429844_PM_at   | Upk3bl                | UPK3BL1    | 0.15  | 2.28 | 1.17  | 2.68E-01 | 5.60E-01 | -6.01 |
| 1428123_PM_at   | Mvb12b                | MVB12B     | 0.16  | 2.65 | 1.17  | 2.68E-01 | 5.60E-01 | -6.01 |
| 1450110_PM_at   | Adh7                  | ADH7       | 0.18  | 2.79 | 1.17  | 2.68E-01 | 5.60E-01 | -6.01 |
| 1453944_PM_at   | 5430435K18Rik         | NA         | 0.20  | 2.49 | 1.17  | 2.68E-01 | 5.60E-01 | -6.01 |
| 1450761_PM_s_at | Rims2                 | NA         | 0.34  | 2.76 | 1.17  | 2.68E-01 | 5.60E-01 | -6.01 |
| 1438172_PM_x_at | Eri2                  | ERI2       | 0.67  | 6.46 | 1.17  | 2.68E-01 | 5.60E-01 | -6.01 |
| 1441078_PM_at   | 1700023F02Rik         | NA         | 0.14  | 2.43 | 1.17  | 2.68E-01 | 5.60E-01 | -6.01 |
| 1449430_PM_a_at | Treh                  | TREH       | 0.13  | 2.58 | 1.17  | 2.68E-01 | 5.60E-01 | -6.01 |
| 1458217_PM_s_at | Emsy                  | NA         | 0.20  | 2.40 | 1.17  | 2.68E-01 | 5.60E-01 | -6.01 |
| 1416529_PM_at   | Emp1                  | EMP1       | -0.22 | 2.64 | -1.17 | 2.68E-01 | 5.60E-01 | -6.01 |
| 1422595_PM_s_at | Sike1                 | SIKE1      | 0.34  | 3.40 | 1.17  | 2.68E-01 | 5.60E-01 | -6.01 |
| 1422337_PM_at   | Ofir156               | NA         | 0.10  | 2.22 | 1.17  | 2.68E-01 | 5.60E-01 | -6.01 |
| 1440213_PM_a_at | Abhd11os              | NA         | 0.18  | 2.86 | 1.17  | 2.68E-01 | 5.60E-01 | -6.01 |
| 1446077_PM_at   | ---                   | NA         | 0.25  | 2.59 | 1.17  | 2.68E-01 | 5.60E-01 | -6.01 |
| 1450306_PM_at   | Zp1                   | ZP1        | 0.11  | 2.13 | 1.17  | 2.68E-01 | 5.60E-01 | -6.01 |
| 1429391_PM_at   | Pxylp1                | NA         | 0.12  | 2.25 | 1.17  | 2.68E-01 | 5.60E-01 | -6.01 |
| 1457766_PM_at   | Wfdc6a                | WFDC6      | 0.14  | 2.15 | 1.17  | 2.68E-01 | 5.60E-01 | -6.01 |
| 1455541_PM_a_at | 4430402118Rik         | SPATA6L    | 0.17  | 2.52 | 1.17  | 2.68E-01 | 5.60E-01 | -6.01 |
| 1429805_PM_at   | Myo1a                 | MYO1A      | 0.11  | 2.28 | 1.17  | 2.68E-01 | 5.60E-01 | -6.01 |
| 1429500_PM_at   | Ppm1a                 | NA         | -0.22 | 2.81 | -1.17 | 2.68E-01 | 5.60E-01 | -6.01 |
| 1457155_PM_at   | Alh2                  | ACO02996.1 | 0.13  | 2.93 | 1.17  | 2.68E-01 | 5.60E-01 | -6.01 |
| 1450609_PM_at   | Lcn8                  | LCN8       | 0.13  | 3.54 | 1.17  | 2.68E-01 | 5.60E-01 | -6.01 |
| 1422082_PM_a_at | Nfya                  | NFYA       | 0.27  | 3.60 | 1.17  | 2.68E-01 | 5.60E-01 | -6.01 |
| 1436470_PM_at   | Rims2                 | NA         | -0.19 | 3.02 | -1.17 | 2.68E-01 | 5.60E-01 | -6.01 |
| 1436600_PM_at   | Tox3                  | TOX3       | -0.27 | 2.57 | -1.17 | 2.68E-01 | 5.60E-01 | -6.01 |
| 1433864_PM_at   | Lrp12                 | LRP12      | -0.23 | 4.21 | -1.17 | 2.68E-01 | 5.60E-01 | -6.01 |
| 1427236_PM_a_at | Kmt2e                 | KMT2E      | -0.18 | 6.97 | -1.17 | 2.68E-01 | 5.60E-01 | -6.01 |
| 1440367_PM_at   | ---                   | NA         | 0.11  | 2.39 | 1.17  | 2.68E-01 | 5.60E-01 | -6.01 |
| 1458844_PM_at   | ---                   | NA         | 0.13  | 2.20 | 1.17  | 2.68E-01 | 5.60E-01 | -6.01 |
| 1434007_PM_at   | Gylt1b                | LARGE2     | 0.14  | 2.20 | 1.17  | 2.68E-01 | 5.60E-01 | -6.01 |
| 1416301_PM_a_at | Ebf1                  | EBF1       | 0.18  | 2.66 | 1.17  | 2.68E-01 | 5.60E-01 | -6.01 |
| 1419611_PM_at   | 4632415L05Rik         | NA         | 0.20  | 2.90 | 1.17  | 2.68E-01 | 5.60E-01 | -6.01 |
| 1458268_PM_s_at | Igfbp3                | IGFBP3     | -0.15 | 2.31 | -1.17 | 2.68E-01 | 5.60E-01 | -6.01 |
| 1442644_PM_at   | Gm10523               | NA         | 0.18  | 2.38 | 1.17  | 2.68E-01 | 5.60E-01 | -6.01 |



|                 |                                  |          |       |      |       |          |          |       |
|-----------------|----------------------------------|----------|-------|------|-------|----------|----------|-------|
| 1456076_PM_at   | Defb19                           | NA       | -0.10 | 2.45 | -1.17 | 2.69E-01 | 5.60E-01 | -6.01 |
| 1439646_PM_at   | ---                              | NA       | 0.12  | 2.28 | 1.17  | 2.69E-01 | 5.60E-01 | -6.01 |
| 1435835_PM_at   | Mks1                             | MKS1     | -0.16 | 3.15 | -1.17 | 2.69E-01 | 5.60E-01 | -6.01 |
| 1437910_PM_at   | Tmem39b                          | TMEM39B  | -0.14 | 2.52 | -1.17 | 2.69E-01 | 5.60E-01 | -6.01 |
| 1424724_PM_a_at | D16Ert472e                       | C21orf91 | 0.11  | 2.65 | 1.17  | 2.69E-01 | 5.61E-01 | -6.01 |
| 1419077_PM_at   | Mpp3                             | MPP3     | -0.44 | 4.99 | -1.17 | 2.69E-01 | 5.61E-01 | -6.01 |
| 1436281_PM_at   | B230307C23Rik                    | NA       | -0.09 | 2.22 | -1.17 | 2.69E-01 | 5.61E-01 | -6.01 |
| 1459452_PM_at   | ---                              | NA       | 0.11  | 1.94 | 1.17  | 2.69E-01 | 5.61E-01 | -6.01 |
| 1419326_PM_at   | 1700028P14Rik                    | C9orf135 | 0.13  | 2.38 | 1.17  | 2.69E-01 | 5.61E-01 | -6.01 |
| 1445446_PM_at   | ---                              | NA       | 0.27  | 2.76 | 1.17  | 2.69E-01 | 5.61E-01 | -6.01 |
| 1424394_PM_at   | Selm                             | SELENOM  | 0.27  | 3.10 | 1.17  | 2.69E-01 | 5.61E-01 | -6.01 |
| 1447543_PM_at   | Wdfy1                            | WDFY1    | 0.10  | 2.11 | 1.17  | 2.69E-01 | 5.61E-01 | -6.01 |
| 1430336_PM_at   | Gucy2g                           | NA       | 0.11  | 2.12 | 1.17  | 2.69E-01 | 5.61E-01 | -6.01 |
| 1459819_PM_at   | ---                              | NA       | 0.18  | 2.57 | 1.17  | 2.69E-01 | 5.61E-01 | -6.01 |
| 1432059_PM_x_at | LOC102635844 ///<br>LOC105247647 | NA       | 0.20  | 2.73 | 1.17  | 2.69E-01 | 5.61E-01 | -6.01 |
| 1425697_PM_at   | Nemf                             | NA       | 0.26  | 2.37 | 1.17  | 2.69E-01 | 5.61E-01 | -6.01 |
| 1460033_PM_at   | A330023F24Rik                    | NA       | -0.22 | 6.60 | -1.17 | 2.69E-01 | 5.61E-01 | -6.01 |
| 1459062_PM_x_at | ---                              | NA       | -0.15 | 2.11 | -1.17 | 2.69E-01 | 5.61E-01 | -6.01 |
| 1431029_PM_at   | Ttl9                             | TTL9     | 0.18  | 2.25 | 1.17  | 2.69E-01 | 5.61E-01 | -6.01 |
| 1441395_PM_at   | AU021933                         | NA       | 0.24  | 2.89 | 1.17  | 2.69E-01 | 5.61E-01 | -6.01 |
| 1430501_PM_at   | C030047K22Rik                    | NA       | 0.10  | 2.36 | 1.17  | 2.69E-01 | 5.61E-01 | -6.01 |
| 1453492_PM_at   | Tmem67                           | TMEM67   | 0.15  | 2.44 | 1.17  | 2.69E-01 | 5.61E-01 | -6.01 |
| 1453858_PM_at   | Slc35a2                          | NA       | -0.41 | 2.80 | -1.17 | 2.69E-01 | 5.61E-01 | -6.01 |
| 1420860_PM_at   | Itga9                            | ITGA9    | 0.25  | 3.65 | 1.17  | 2.69E-01 | 5.61E-01 | -6.01 |
| 1440623_PM_at   | Gpr26                            | GPR26    | -0.34 | 2.72 | -1.17 | 2.69E-01 | 5.61E-01 | -6.01 |
| 1417569_PM_at   | Ncald                            | NCALD    | -0.34 | 5.41 | -1.17 | 2.69E-01 | 5.61E-01 | -6.01 |
| 1436151_PM_x_at | Sde2                             | SDE2     | 0.09  | 2.09 | 1.17  | 2.69E-01 | 5.61E-01 | -6.01 |
| 1451735_PM_at   | Arfrp1                           | ARFRP1   | 0.14  | 2.29 | 1.17  | 2.69E-01 | 5.61E-01 | -6.01 |
| 1423578_PM_at   | Col11a2                          | COL11A2  | 0.14  | 2.23 | 1.17  | 2.69E-01 | 5.61E-01 | -6.01 |
| 1436778_PM_at   | Cybb                             | CYBB     | 0.15  | 2.32 | 1.17  | 2.69E-01 | 5.61E-01 | -6.01 |
| 1436437_PM_at   | Oosp3                            | NA       | 0.17  | 2.59 | 1.17  | 2.69E-01 | 5.61E-01 | -6.01 |
| 1432797_PM_at   | 2900060N12Rik                    | NA       | 0.42  | 2.63 | 1.17  | 2.69E-01 | 5.61E-01 | -6.01 |
| 1425835_PM_a_at | Bbx                              | BBX      | -0.25 | 2.72 | -1.17 | 2.69E-01 | 5.61E-01 | -6.01 |
| 1435593_PM_x_at | Rps7                             | RPS7     | -0.26 | 3.44 | -1.17 | 2.69E-01 | 5.61E-01 | -6.01 |
| 1444399_PM_at   | Nabp1                            | NABP1    | -0.13 | 2.58 | -1.17 | 2.69E-01 | 5.61E-01 | -6.01 |
| 1420291_PM_at   | ---                              | NA       | -0.11 | 2.37 | -1.17 | 2.69E-01 | 5.61E-01 | -6.01 |
| 1421408_PM_at   | Igsf6                            | IGSF6    | 0.19  | 2.73 | 1.17  | 2.69E-01 | 5.61E-01 | -6.01 |
| 1456646_PM_at   | Pex10                            | PEX10    | -0.27 | 3.43 | -1.17 | 2.69E-01 | 5.61E-01 | -6.01 |
| 1421146_PM_at   | Rapgef1                          | RAPGEF1  | 0.13  | 2.50 | 1.17  | 2.69E-01 | 5.61E-01 | -6.01 |
| 1425177_PM_at   | Shmt1                            | SHMT1    | -0.29 | 4.71 | -1.17 | 2.69E-01 | 5.61E-01 | -6.01 |
| 1418150_PM_at   | Mtmr4                            | MTMR4    | -0.22 | 2.99 | -1.17 | 2.69E-01 | 5.61E-01 | -6.01 |
| 1419139_PM_at   | Gdf5                             | GDF5     | 0.10  | 2.23 | 1.17  | 2.69E-01 | 5.61E-01 | -6.01 |
| 1418964_PM_at   | Pigm                             | PIGM     | 0.15  | 2.17 | 1.17  | 2.69E-01 | 5.61E-01 | -6.01 |
| 1445080_PM_at   | ---                              | NA       | 0.22  | 2.51 | 1.17  | 2.69E-01 | 5.61E-01 | -6.01 |
| 1444364_PM_at   | Rcor3                            | RCOR3    | 0.38  | 2.46 | 1.17  | 2.69E-01 | 5.61E-01 | -6.01 |
| 1425946_PM_at   | Gstm7                            | NA       | -0.11 | 1.98 | -1.17 | 2.70E-01 | 5.61E-01 | -6.01 |
| 1425500_PM_x_at | ---                              | NA       | 0.11  | 2.04 | 1.17  | 2.70E-01 | 5.61E-01 | -6.01 |
| 1432337_PM_at   | Fancl                            | FANCL    | 0.14  | 2.21 | 1.17  | 2.70E-01 | 5.61E-01 | -6.01 |
| 1452983_PM_at   | Cep57                            | CEP57    | 0.23  | 2.42 | 1.17  | 2.70E-01 | 5.61E-01 | -6.01 |
| 1440219_PM_at   | ---                              | NA       | 0.29  | 4.53 | 1.17  | 2.70E-01 | 5.61E-01 | -6.01 |
| 1440522_PM_at   | Chic1                            | CHIC1    | -0.59 | 3.77 | -1.17 | 2.70E-01 | 5.61E-01 | -6.01 |
| 1438662_PM_at   | Ajap1                            | AJAP1    | -0.48 | 5.81 | -1.17 | 2.70E-01 | 5.61E-01 | -6.01 |
| 1444232_PM_at   | Prkg1                            | NA       | -0.36 | 3.76 | -1.17 | 2.70E-01 | 5.61E-01 | -6.01 |
| 1433997_PM_at   | Klhdc10                          | KLHDC10  | -0.22 | 3.25 | -1.17 | 2.70E-01 | 5.61E-01 | -6.01 |
| 1426406_PM_at   | Setd8                            | KMT5A    | -0.14 | 2.97 | -1.17 | 2.70E-01 | 5.61E-01 | -6.01 |
| 1447265_PM_at   | Al848615                         | NA       | 0.08  | 2.03 | 1.17  | 2.70E-01 | 5.61E-01 | -6.01 |
| 1455679_PM_at   | Nabp1                            | NABP1    | 0.11  | 2.12 | 1.17  | 2.70E-01 | 5.61E-01 | -6.01 |
| 1444185_PM_at   | ---                              | NA       | 0.11  | 2.23 | 1.17  | 2.70E-01 | 5.61E-01 | -6.01 |
| 1430009_PM_at   | Hsfy2                            | HSFY1    | 0.11  | 1.94 | 1.17  | 2.70E-01 | 5.61E-01 | -6.01 |
| 1448819_PM_at   | Eif2s2                           | EIF2S2   | 0.12  | 2.90 | 1.17  | 2.70E-01 | 5.61E-01 | -6.01 |
| 1420430_PM_a_at | Ccdc159                          | CCDC159  | 0.12  | 2.47 | 1.17  | 2.70E-01 | 5.61E-01 | -6.01 |
| 1419418_PM_a_at | Morc1                            | MORC1    | 0.13  | 2.46 | 1.17  | 2.70E-01 | 5.61E-01 | -6.01 |
| 1420360_PM_at   | Dkk1                             | DKK1     | 0.13  | 2.46 | 1.17  | 2.70E-01 | 5.61E-01 | -6.01 |
| 1459721_PM_at   | ---                              | NA       | 0.13  | 2.01 | 1.17  | 2.70E-01 | 5.61E-01 | -6.01 |
| 1432702_PM_at   | 2810403G07Rik                    | NA       | 0.13  | 3.27 | 1.17  | 2.70E-01 | 5.61E-01 | -6.01 |
| 1418593_PM_at   | Taf6                             | TAF6     | 0.14  | 3.21 | 1.17  | 2.70E-01 | 5.61E-01 | -6.01 |
| 1448320_PM_at   | Stim1                            | STIM1    | 0.14  | 2.65 | 1.17  | 2.70E-01 | 5.61E-01 | -6.01 |
| 1453603_PM_at   | ---                              | NA       | 0.14  | 2.26 | 1.17  | 2.70E-01 | 5.61E-01 | -6.01 |
| 1428885_PM_at   | Afmid                            | AFMID    | 0.15  | 2.61 | 1.17  | 2.70E-01 | 5.61E-01 | -6.01 |
| 1457842_PM_at   | ---                              | NA       | 0.15  | 2.72 | 1.17  | 2.70E-01 | 5.61E-01 | -6.01 |
| 1445025_PM_at   | AU015536                         | NA       | 0.15  | 2.51 | 1.17  | 2.70E-01 | 5.61E-01 | -6.01 |
| 1439875_PM_at   | Zfp128                           | ZNF8     | 0.15  | 3.25 | 1.17  | 2.70E-01 | 5.61E-01 | -6.01 |
| 1421603_PM_a_at | Ceacam2                          | PSG7     | 0.15  | 2.66 | 1.17  | 2.70E-01 | 5.61E-01 | -6.01 |
| 1435707_PM_at   | Nars2                            | NARS2    | 0.16  | 2.62 | 1.17  | 2.70E-01 | 5.61E-01 | -6.01 |

|                 |                                                               |          |       |      |       |          |          |       |
|-----------------|---------------------------------------------------------------|----------|-------|------|-------|----------|----------|-------|
| 1418869_PM_a_at | Pus1                                                          | PUS1     | 0.16  | 2.90 | 1.17  | 2.70E-01 | 5.61E-01 | -6.01 |
| 1432451_PM_at   | 4930445E18Rik                                                 | NA       | 0.17  | 2.36 | 1.17  | 2.70E-01 | 5.61E-01 | -6.01 |
| 1423877_PM_at   | Chaf1b                                                        | CHAF1B   | 0.17  | 2.56 | 1.17  | 2.70E-01 | 5.61E-01 | -6.01 |
| 1418235_PM_at   | Atg5                                                          | ATG5     | 0.17  | 2.77 | 1.17  | 2.70E-01 | 5.61E-01 | -6.01 |
| 1453014_PM_a_at | Sec31a                                                        | SEC31A   | 0.18  | 2.96 | 1.17  | 2.70E-01 | 5.61E-01 | -6.01 |
| 1455895_PM_x_at | Mvb12a                                                        | MVB12A   | 0.21  | 3.33 | 1.17  | 2.70E-01 | 5.61E-01 | -6.01 |
| 1457013_PM_at   | Ralgapa1                                                      | RALGAP1  | 0.21  | 2.61 | 1.17  | 2.70E-01 | 5.61E-01 | -6.01 |
| 1444164_PM_at   | ---                                                           | NA       | 0.23  | 3.24 | 1.17  | 2.70E-01 | 5.61E-01 | -6.01 |
| 1460594_PM_a_at | Gmppa                                                         | GMPPA    | 0.32  | 3.88 | 1.17  | 2.70E-01 | 5.61E-01 | -6.01 |
| 1439296_PM_at   | ---                                                           | NA       | 0.34  | 3.10 | 1.17  | 2.70E-01 | 5.61E-01 | -6.01 |
| 1428580_PM_at   | Blvra                                                         | BLVRA    | 0.34  | 2.93 | 1.17  | 2.70E-01 | 5.61E-01 | -6.01 |
| 1451642_PM_at   | Kif1b                                                         | KIF1B    | 0.36  | 3.08 | 1.17  | 2.70E-01 | 5.61E-01 | -6.01 |
| 1432598_PM_at   | Gmc1l                                                         | NA       | 0.40  | 2.27 | 1.17  | 2.70E-01 | 5.61E-01 | -6.01 |
| 1420286_PM_at   | ---                                                           | NA       | 0.53  | 6.55 | 1.17  | 2.70E-01 | 5.61E-01 | -6.01 |
| 1456849_PM_at   | ---                                                           | NA       | 0.56  | 3.02 | 1.17  | 2.70E-01 | 5.61E-01 | -6.01 |
| 1423194_PM_at   | Arhgap5                                                       | ARHGAP5  | -0.24 | 5.94 | -1.16 | 2.70E-01 | 5.61E-01 | -6.01 |
| 1424450_PM_at   | Gprc5c                                                        | GPRC5C   | 0.10  | 2.15 | 1.16  | 2.70E-01 | 5.61E-01 | -6.01 |
| 1422571_PM_at   | Thbs2                                                         | THBS2    | 0.12  | 3.12 | 1.16  | 2.70E-01 | 5.61E-01 | -6.01 |
| 1436433_PM_at   | BC049762                                                      | NA       | 0.13  | 2.70 | 1.16  | 2.70E-01 | 5.61E-01 | -6.01 |
| 1421180_PM_at   | Gm11578 /// Lix1                                              | LIX1     | 0.19  | 2.65 | 1.17  | 2.70E-01 | 5.61E-01 | -6.01 |
| 1440785_PM_at   | Rxfp1                                                         | RXFP1    | 0.38  | 2.47 | 1.16  | 2.70E-01 | 5.61E-01 | -6.01 |
| 1427190_PM_at   | Appl1                                                         | APPL1    | 0.45  | 6.55 | 1.16  | 2.70E-01 | 5.61E-01 | -6.01 |
| 1426485_PM_at   | Ubxn4                                                         | UBXN4    | 0.53  | 7.61 | 1.16  | 2.70E-01 | 5.61E-01 | -6.01 |
| 1423729_PM_a_at | Rnf181                                                        | RNF181   | -0.38 | 3.71 | -1.16 | 2.70E-01 | 5.62E-01 | -6.01 |
| 1434183_PM_at   | Samd1                                                         | SAMD1    | -0.21 | 3.00 | -1.16 | 2.70E-01 | 5.62E-01 | -6.01 |
| 1451892_PM_at   | Kl                                                            | KL       | 0.19  | 2.80 | 1.16  | 2.70E-01 | 5.62E-01 | -6.01 |
| 1428308_PM_at   | Pdrg1                                                         | PDRG1    | 0.17  | 2.84 | 1.16  | 2.70E-01 | 5.62E-01 | -6.01 |
| 1419705_PM_at   | Car5b                                                         | CASB     | 0.17  | 2.49 | 1.16  | 2.70E-01 | 5.62E-01 | -6.01 |
| 1428429_PM_at   | Rgmb                                                          | RGBM     | 0.12  | 2.57 | 1.16  | 2.70E-01 | 5.62E-01 | -6.01 |
| 1450349_PM_at   | Stx1b                                                         | NA       | 0.12  | 2.89 | 1.16  | 2.71E-01 | 5.62E-01 | -6.01 |
| 1441978_PM_at   | Aqp6                                                          | AQP6     | 0.15  | 2.47 | 1.16  | 2.71E-01 | 5.62E-01 | -6.01 |
| 1431394_PM_a_at | Lrrk2                                                         | LRRK2    | 0.19  | 2.70 | 1.16  | 2.71E-01 | 5.62E-01 | -6.01 |
| 1460254_PM_at   | Oxl1                                                          | OXL1     | 0.12  | 2.63 | 1.16  | 2.71E-01 | 5.62E-01 | -6.01 |
| 1434809_PM_at   | Arhgap28                                                      | ARHGAP28 | 0.10  | 2.04 | 1.16  | 2.71E-01 | 5.62E-01 | -6.02 |
| 1419437_PM_at   | Sim2                                                          | SIM2     | 0.10  | 2.30 | 1.16  | 2.71E-01 | 5.62E-01 | -6.01 |
| 1427506_PM_at   | Lrr1                                                          | LRR1     | 0.12  | 2.50 | 1.16  | 2.71E-01 | 5.62E-01 | -6.01 |
| 1458279_PM_at   | ---                                                           | NA       | 0.15  | 2.61 | 1.16  | 2.71E-01 | 5.62E-01 | -6.02 |
| 1420285_PM_at   | ---                                                           | NA       | 0.17  | 2.66 | 1.16  | 2.71E-01 | 5.62E-01 | -6.02 |
| 1434550_PM_at   | 3830406C13Rik                                                 | C3orf14  | 0.30  | 3.00 | 1.16  | 2.71E-01 | 5.62E-01 | -6.02 |
| 1422161_PM_at   | Siglec1                                                       | SIGLEC1  | 0.13  | 2.64 | 1.16  | 2.71E-01 | 5.62E-01 | -6.02 |
| 1422656_PM_at   | Ras2-9                                                        | RAN      | -0.15 | 2.13 | -1.16 | 2.71E-01 | 5.62E-01 | -6.02 |
| 1459643_PM_at   | ---                                                           | NA       | 0.11  | 2.33 | 1.16  | 2.71E-01 | 5.62E-01 | -6.02 |
| 1427993_PM_at   | Rufy2                                                         | RUFY2    | -0.28 | 3.01 | -1.16 | 2.71E-01 | 5.62E-01 | -6.02 |
| 1453770_PM_at   | Cpa4                                                          | CPA4     | 0.12  | 2.36 | 1.16  | 2.71E-01 | 5.62E-01 | -6.02 |
| 1426277_PM_at   | Tmem203                                                       | TMEM203  | 0.14  | 2.67 | 1.16  | 2.71E-01 | 5.62E-01 | -6.02 |
| 1438268_PM_at   | Rc3h2                                                         | RC3H2    | 0.49  | 3.68 | 1.16  | 2.71E-01 | 5.62E-01 | -6.02 |
| 1444546_PM_at   | Tifab                                                         | TIFAB    | 0.11  | 2.79 | 1.16  | 2.71E-01 | 5.62E-01 | -6.02 |
| 1431125_PM_a_at | Tars2                                                         | TARS2    | 0.20  | 3.35 | 1.16  | 2.71E-01 | 5.62E-01 | -6.02 |
| 1439700_PM_at   | Adam1b                                                        | NA       | 0.16  | 2.47 | 1.16  | 2.71E-01 | 5.62E-01 | -6.02 |
| 1438820_PM_at   | Rnf17                                                         | NA       | 0.16  | 2.45 | 1.16  | 2.71E-01 | 5.62E-01 | -6.02 |
| 1416245_PM_at   | Aurkaip1                                                      | AURKAIP1 | 0.21  | 3.19 | 1.16  | 2.71E-01 | 5.62E-01 | -6.02 |
| 1417132_PM_at   | Cdc25a                                                        | CD25A    | 0.17  | 2.53 | 1.16  | 2.71E-01 | 5.63E-01 | -6.02 |
| 1442820_PM_at   | ---                                                           | NA       | 0.13  | 3.97 | 1.16  | 2.71E-01 | 5.63E-01 | -6.02 |
| 1459109_PM_at   | ---                                                           | NA       | 0.11  | 2.13 | 1.16  | 2.71E-01 | 5.63E-01 | -6.02 |
| 1420244_PM_at   | ---                                                           | NA       | 0.10  | 2.22 | 1.16  | 2.71E-01 | 5.63E-01 | -6.02 |
| 1418144_PM_a_at | Pip5k1a                                                       | PIP5K1A  | -0.17 | 4.15 | -1.16 | 2.71E-01 | 5.63E-01 | -6.02 |
| 1422290_PM_at   | Htr1d                                                         | HTR1D    | 0.19  | 2.59 | 1.16  | 2.71E-01 | 5.63E-01 | -6.02 |
| 1422207_PM_at   | Htr5a                                                         | HTR5A    | 0.12  | 2.54 | 1.16  | 2.71E-01 | 5.63E-01 | -6.02 |
| 1460309_PM_at   | Tal2                                                          | TAL2     | 0.10  | 2.19 | 1.16  | 2.71E-01 | 5.63E-01 | -6.02 |
| 1421032_PM_a_at | Dnajb12                                                       | DNAJB12  | 0.32  | 2.99 | 1.16  | 2.71E-01 | 5.63E-01 | -6.02 |
| 1452918_PM_at   | Fam204a                                                       | FAM204A  | 0.20  | 6.03 | 1.16  | 2.71E-01 | 5.63E-01 | -6.02 |
| 1456407_PM_a_at | Tlk1                                                          | TLK1     | -0.48 | 3.50 | -1.16 | 2.71E-01 | 5.63E-01 | -6.02 |
| 1416412_PM_at   | Nsmaf                                                         | NSMAF    | -0.26 | 2.53 | -1.16 | 2.72E-01 | 5.63E-01 | -6.02 |
| 1419781_PM_at   | D630004N19Rik                                                 | NA       | 0.12  | 2.09 | 1.16  | 2.72E-01 | 5.63E-01 | -6.02 |
| 1436965_PM_at   | Emilin3                                                       | EMILIN3  | 0.14  | 2.26 | 1.16  | 2.72E-01 | 5.63E-01 | -6.02 |
| 1448836_PM_s_at | Gpn2                                                          | GPN2     | 0.17  | 2.37 | 1.16  | 2.72E-01 | 5.63E-01 | -6.02 |
| 1450542_PM_s_at | Magea1 /// Magea2 /// Magea3 /// Magea5 /// Magea6 /// Magea8 | MAGEA2   | -0.16 | 2.19 | -1.16 | 2.72E-01 | 5.63E-01 | -6.02 |
| 1444129_PM_at   | ---                                                           | NA       | 0.10  | 2.72 | 1.16  | 2.72E-01 | 5.63E-01 | -6.02 |
| 1440486_PM_at   | Kansl2                                                        | NA       | 0.21  | 4.00 | 1.16  | 2.72E-01 | 5.63E-01 | -6.02 |
| 1419993_PM_at   | Rab31l1                                                       | NA       | 0.10  | 2.44 | 1.16  | 2.72E-01 | 5.63E-01 | -6.02 |
| 1427130_PM_x_at | Tbata                                                         | TBATA    | 0.18  | 3.00 | 1.16  | 2.72E-01 | 5.63E-01 | -6.02 |
| 1415774_PM_at   | Elp2                                                          | ELP2     | 0.29  | 5.17 | 1.16  | 2.72E-01 | 5.63E-01 | -6.02 |
| 1454575_PM_at   | ---                                                           | NA       | 0.19  | 2.46 | 1.16  | 2.72E-01 | 5.63E-01 | -6.02 |

|                 |               |          |       |       |       |          |          |       |
|-----------------|---------------|----------|-------|-------|-------|----------|----------|-------|
| 1447324_PM_at   | ---           | NA       | 0.11  | 2.27  | 1.16  | 2.72E-01 | 5.63E-01 | -6.02 |
| 1436024_PM_at   | Pced1a        | PCED1A   | -0.49 | 3.17  | -1.16 | 2.72E-01 | 5.63E-01 | -6.02 |
| 1435398_PM_at   | Stxbp5        | STXBP5   | -0.35 | 3.09  | -1.16 | 2.72E-01 | 5.63E-01 | -6.02 |
| 1440136_PM_at   | ---           | NA       | -0.19 | 2.46  | -1.16 | 2.72E-01 | 5.63E-01 | -6.02 |
| 1418466_PM_at   | Rnf141        | RNF141   | 0.10  | 2.19  | 1.16  | 2.72E-01 | 5.63E-01 | -6.02 |
| 1426294_PM_at   | Haplh1        | HAPLN1   | 0.15  | 2.28  | 1.16  | 2.72E-01 | 5.63E-01 | -6.02 |
| 1422125_PM_at   | Htr2b         | HTR2B    | 0.17  | 2.67  | 1.16  | 2.72E-01 | 5.63E-01 | -6.02 |
| 1443720_PM_s_at | Bmpr1b        | BMPR1B   | 0.17  | 2.23  | 1.16  | 2.72E-01 | 5.63E-01 | -6.02 |
| 1439997_PM_at   | Synj1         | SYNJ1    | 0.27  | 3.32  | 1.16  | 2.72E-01 | 5.63E-01 | -6.02 |
| 1440704_PM_at   | Rxfp2         | RXFP2    | 0.18  | 2.71  | 1.16  | 2.72E-01 | 5.63E-01 | -6.02 |
| 1455294_PM_at   | Ago2          | AGO2     | 0.19  | 3.53  | 1.16  | 2.72E-01 | 5.63E-01 | -6.02 |
| 1432740_PM_at   | 4833420L08Rik | NA       | 0.11  | 2.65  | 1.16  | 2.72E-01 | 5.63E-01 | -6.02 |
| 1454829_PM_at   | Rundc1        | RUND1    | 0.22  | 2.67  | 1.16  | 2.72E-01 | 5.63E-01 | -6.02 |
| 1420455_PM_at   | Gcm2          | GCM2     | 0.19  | 2.28  | 1.16  | 2.72E-01 | 5.64E-01 | -6.02 |
| 1431385_PM_a_at | Mbtps1        | MBTPS1   | 0.27  | 2.55  | 1.16  | 2.72E-01 | 5.64E-01 | -6.02 |
| 1437917_PM_at   | ---           | NA       | -0.25 | 2.64  | -1.16 | 2.72E-01 | 5.64E-01 | -6.02 |
| 1458462_PM_at   | Arhgap30      | ARHGAP30 | 0.10  | 2.28  | 1.16  | 2.72E-01 | 5.64E-01 | -6.02 |
| 1455610_PM_at   | Synm          | SYNM     | -0.25 | 2.90  | -1.16 | 2.72E-01 | 5.64E-01 | -6.02 |
| 1449595_PM_at   | C79490        | NA       | 0.11  | 2.06  | 1.16  | 2.72E-01 | 5.64E-01 | -6.02 |
| 1419976_PM_s_at | Nfatc3        | NFATC3   | 0.26  | 3.88  | 1.16  | 2.72E-01 | 5.64E-01 | -6.02 |
| 1446906_PM_at   | C81615        | NA       | 0.16  | 2.35  | 1.16  | 2.72E-01 | 5.64E-01 | -6.02 |
| 1419979_PM_s_at | Creb3         | CREB3    | 0.47  | 8.64  | 1.16  | 2.72E-01 | 5.64E-01 | -6.02 |
| 1432745_PM_at   | LOC102633149  | NA       | 0.50  | 2.85  | 1.16  | 2.72E-01 | 5.64E-01 | -6.02 |
| 1431612_PM_at   | 170000710Rik  | NA       | 0.15  | 2.42  | 1.16  | 2.72E-01 | 5.64E-01 | -6.02 |
| 1436940_PM_at   | ---           | NA       | 0.17  | 3.41  | 1.16  | 2.72E-01 | 5.64E-01 | -6.02 |
| 1422823_PM_at   | Eps8          | EPS8     | -0.36 | 2.86  | -1.16 | 2.72E-01 | 5.64E-01 | -6.02 |
| 1459270_PM_at   | ---           | NA       | -0.15 | 2.67  | -1.16 | 2.72E-01 | 5.64E-01 | -6.02 |
| 1450556_PM_at   | Sptb          | SPTB     | 0.10  | 2.81  | 1.16  | 2.72E-01 | 5.64E-01 | -6.02 |
| 1455689_PM_at   | Fzd10         | FZD10    | 0.10  | 2.17  | 1.16  | 2.72E-01 | 5.64E-01 | -6.02 |
| 1441070_PM_at   | ---           | NA       | 0.14  | 2.40  | 1.16  | 2.72E-01 | 5.64E-01 | -6.02 |
| 1449737_PM_at   | ---           | NA       | 0.11  | 2.00  | 1.16  | 2.72E-01 | 5.64E-01 | -6.02 |
| 1455316_PM_x_at | BC094435      | NA       | -0.14 | 10.02 | -1.16 | 2.72E-01 | 5.64E-01 | -6.02 |
| 1437768_PM_at   | Ank1b1        | ANK1B1   | 0.14  | 2.95  | 1.16  | 2.72E-01 | 5.64E-01 | -6.02 |
| 1450965_PM_at   | Tex261        | TEX261   | 0.18  | 2.78  | 1.16  | 2.72E-01 | 5.64E-01 | -6.02 |
| 1446524_PM_at   | ---           | NA       | 0.40  | 3.84  | 1.16  | 2.72E-01 | 5.64E-01 | -6.02 |
| 1438395_PM_at   | Ak4           | NA       | -0.29 | 2.62  | -1.16 | 2.73E-01 | 5.64E-01 | -6.02 |
| 1459758_PM_at   | Usf1          | USF1     | 0.17  | 2.20  | 1.16  | 2.73E-01 | 5.64E-01 | -6.02 |
| 1443413_PM_s_at | Trpm5         | TRPM5    | -0.11 | 2.13  | -1.16 | 2.73E-01 | 5.64E-01 | -6.02 |
| 1432685_PM_at   | Mon1b         | MON1B    | 0.12  | 2.31  | 1.16  | 2.73E-01 | 5.64E-01 | -6.02 |
| 1447064_PM_at   | ---           | NA       | -0.16 | 2.52  | -1.16 | 2.73E-01 | 5.64E-01 | -6.02 |
| 1435610_PM_at   | Fam19a4       | FAM19A4  | -0.14 | 2.41  | -1.16 | 2.73E-01 | 5.64E-01 | -6.02 |
| 1420385_PM_at   | Gna14         | GNA14    | 0.12  | 2.33  | 1.16  | 2.73E-01 | 5.64E-01 | -6.02 |
| 1457815_PM_at   | ---           | NA       | 0.16  | 2.22  | 1.16  | 2.73E-01 | 5.64E-01 | -6.02 |
| 1455043_PM_at   | Tnpo1         | TNPO1    | 0.34  | 3.37  | 1.16  | 2.73E-01 | 5.64E-01 | -6.02 |
| 1420378_PM_at   | Sftpd         | SFTPD    | 0.18  | 2.50  | 1.16  | 2.73E-01 | 5.64E-01 | -6.02 |
| 1445777_PM_at   | ---           | NA       | 0.11  | 2.02  | 1.16  | 2.73E-01 | 5.65E-01 | -6.02 |
| 1442528_PM_at   | Xpo4          | XPO4     | 0.11  | 2.34  | 1.16  | 2.73E-01 | 5.65E-01 | -6.02 |
| 1452333_PM_at   | Smarca2       | SMARCA2  | 0.57  | 5.71  | 1.16  | 2.73E-01 | 5.65E-01 | -6.02 |
| 1428370_PM_at   | 1500011B03Rik | NA       | -0.17 | 4.19  | -1.16 | 2.73E-01 | 5.65E-01 | -6.02 |
| 1445209_PM_at   | AU021745      | NA       | 0.12  | 2.47  | 1.16  | 2.73E-01 | 5.65E-01 | -6.02 |
| 1439080_PM_at   | Erb2ip        | NA       | -0.21 | 2.83  | -1.16 | 2.73E-01 | 5.65E-01 | -6.02 |
| 1442361_PM_at   | ---           | NA       | 0.12  | 2.28  | 1.16  | 2.73E-01 | 5.65E-01 | -6.02 |
| 1439179_PM_a_at | Tespa1        | TESPA1   | 0.14  | 2.40  | 1.16  | 2.73E-01 | 5.65E-01 | -6.02 |
| 1459322_PM_at   | ---           | NA       | 0.12  | 2.29  | 1.16  | 2.73E-01 | 5.65E-01 | -6.02 |
| 1458832_PM_at   | ---           | NA       | 0.20  | 2.32  | 1.16  | 2.73E-01 | 5.65E-01 | -6.02 |
| 1416960_PM_at   | B3gat3        | B3GAT3   | 0.21  | 3.55  | 1.16  | 2.73E-01 | 5.65E-01 | -6.02 |
| 1459934_PM_at   | Usp42         | USP42    | 0.24  | 2.61  | 1.16  | 2.73E-01 | 5.65E-01 | -6.02 |
| 1459230_PM_at   | B430319G15Rik | NA       | 0.30  | 2.42  | 1.16  | 2.73E-01 | 5.65E-01 | -6.02 |
| 1420042_PM_at   | Thoc1         | THOC1    | -0.48 | 4.93  | -1.16 | 2.73E-01 | 5.65E-01 | -6.02 |
| 1441728_PM_at   | Scn1a         | SCN1A    | 0.23  | 3.43  | 1.16  | 2.73E-01 | 5.65E-01 | -6.02 |
| 1445821_PM_at   | ---           | NA       | 0.10  | 2.49  | 1.16  | 2.73E-01 | 5.65E-01 | -6.02 |
| 1438644_PM_x_at | Commnd9       | COMMND9  | 0.45  | 4.72  | 1.16  | 2.73E-01 | 5.65E-01 | -6.02 |
| 1459601_PM_at   | ---           | NA       | 0.11  | 2.12  | 1.16  | 2.73E-01 | 5.65E-01 | -6.02 |
| 1442704_PM_at   | ---           | NA       | 0.16  | 2.76  | 1.16  | 2.73E-01 | 5.65E-01 | -6.02 |
| 1434471_PM_at   | BC003331      | C1orf27  | -0.71 | 7.26  | -1.16 | 2.73E-01 | 5.65E-01 | -6.02 |
| 1445779_PM_at   | ---           | NA       | -0.17 | 2.44  | -1.16 | 2.73E-01 | 5.65E-01 | -6.02 |
| 1422127_PM_at   | Dhh           | DHH      | 0.12  | 2.59  | 1.16  | 2.73E-01 | 5.65E-01 | -6.02 |
| 1438631_PM_x_at | Ttc13         | TTC13    | 0.27  | 9.69  | 1.16  | 2.73E-01 | 5.65E-01 | -6.02 |
| 1448933_PM_at   | Pcdhb17       | NA       | -0.29 | 3.14  | -1.16 | 2.73E-01 | 5.65E-01 | -6.02 |
| 1441269_PM_at   | Gm21283       | NA       | 0.12  | 2.10  | 1.16  | 2.73E-01 | 5.65E-01 | -6.02 |
| 1445784_PM_at   | ---           | NA       | 0.18  | 2.91  | 1.16  | 2.73E-01 | 5.65E-01 | -6.02 |
| 1421829_PM_at   | Ak4           | AK4      | -0.52 | 5.42  | -1.16 | 2.73E-01 | 5.65E-01 | -6.02 |
| 1435111_PM_at   | ---           | NA       | 0.11  | 2.25  | 1.16  | 2.73E-01 | 5.65E-01 | -6.02 |
| 1432268_PM_at   | 2310068J16Rik | NA       | 0.09  | 2.15  | 1.16  | 2.73E-01 | 5.65E-01 | -6.02 |
| 1444790_PM_at   | Hsbp111       | HSBP111  | 0.13  | 2.56  | 1.16  | 2.74E-01 | 5.65E-01 | -6.02 |

|                 |                                                                                                      |            |       |      |       |          |          |       |
|-----------------|------------------------------------------------------------------------------------------------------|------------|-------|------|-------|----------|----------|-------|
| 1422460_PM_at   | Mad2l1                                                                                               | MAD2L1     | 0.21  | 2.57 | 1.16  | 2.74E-01 | 5.65E-01 | -6.02 |
| 1429744_PM_at   | Cabs1                                                                                                | CABS1      | 0.11  | 2.44 | 1.16  | 2.74E-01 | 5.65E-01 | -6.02 |
| 1451716_PM_at   | Mafb                                                                                                 | MAFB       | 0.17  | 4.14 | 1.16  | 2.74E-01 | 5.65E-01 | -6.02 |
| 1427188_PM_at   | Arih1                                                                                                | ARIH1      | 0.23  | 2.80 | 1.16  | 2.74E-01 | 5.65E-01 | -6.02 |
| 1417095_PM_a_at | Hspa14                                                                                               | ACO69544.2 | -0.36 | 6.10 | -1.16 | 2.74E-01 | 5.65E-01 | -6.02 |
| 1418071_PM_s_at | Cdyl                                                                                                 | CDY1       | -0.13 | 2.37 | -1.16 | 2.74E-01 | 5.65E-01 | -6.02 |
| 1435627_PM_x_at | Marcks1                                                                                              | MARCKSL1   | 0.43  | 3.64 | 1.16  | 2.74E-01 | 5.65E-01 | -6.02 |
| 1448586_PM_at   | Hspa14                                                                                               | ACO69544.2 | -0.19 | 2.73 | -1.16 | 2.74E-01 | 5.65E-01 | -6.02 |
| 1433392_PM_at   | 3300002110Rik                                                                                        | NA         | 0.13  | 2.04 | 1.16  | 2.74E-01 | 5.65E-01 | -6.02 |
| 1426154_PM_s_at | Mup1 /// Mup10 /// Mup11<br>/// Mup12 /// Mup14 ///<br>Mup16 /// Mup18 /// Mup2<br>/// Mup3 /// Mup9 | NA         | -0.49 | 2.55 | -1.16 | 2.74E-01 | 5.65E-01 | -6.02 |
| 1459668_PM_at   | ---                                                                                                  | NA         | 0.09  | 2.09 | 1.16  | 2.74E-01 | 5.65E-01 | -6.02 |
| 1453272_PM_at   | 4930579F01Rik                                                                                        | C4orf17    | 0.10  | 2.39 | 1.16  | 2.74E-01 | 5.65E-01 | -6.02 |
| 1418984_PM_at   | Inadl                                                                                                | PATJ       | 0.15  | 2.25 | 1.16  | 2.74E-01 | 5.65E-01 | -6.02 |
| 1443102_PM_at   | Zfp597                                                                                               | ZNF597     | 0.17  | 2.32 | 1.16  | 2.74E-01 | 5.65E-01 | -6.02 |
| 1435494_PM_s_at | Dsp                                                                                                  | DSP        | -0.51 | 2.30 | -1.16 | 2.74E-01 | 5.65E-01 | -6.02 |
| 1417591_PM_at   | Ptges2                                                                                               | PTGES2     | -0.13 | 2.73 | -1.16 | 2.74E-01 | 5.65E-01 | -6.02 |
| 1453499_PM_at   | Ddo                                                                                                  | NA         | 0.12  | 2.30 | 1.16  | 2.74E-01 | 5.65E-01 | -6.02 |
| 1417421_PM_at   | S100a1                                                                                               | S100A1     | 0.15  | 2.35 | 1.16  | 2.74E-01 | 5.65E-01 | -6.02 |
| 1437045_PM_at   | Mapk8                                                                                                | MAPK8      | 0.18  | 2.64 | 1.16  | 2.74E-01 | 5.65E-01 | -6.02 |
| 1446056_PM_at   | ---                                                                                                  | NA         | 0.34  | 2.60 | 1.16  | 2.74E-01 | 5.65E-01 | -6.02 |
| 1446797_PM_at   | ---                                                                                                  | NA         | 0.13  | 2.04 | 1.16  | 2.74E-01 | 5.65E-01 | -6.02 |
| 1418987_PM_at   | Pla2g2d                                                                                              | PLA2G2D    | 0.20  | 2.53 | 1.16  | 2.74E-01 | 5.65E-01 | -6.02 |
| 1418451_PM_at   | Gng2                                                                                                 | GNG2       | 0.23  | 3.25 | 1.16  | 2.74E-01 | 5.65E-01 | -6.02 |
| 1432957_PM_at   | 5730407O05Rik                                                                                        | NA         | 0.14  | 2.39 | 1.15  | 2.74E-01 | 5.65E-01 | -6.02 |
| 1427958_PM_at   | Abhd10                                                                                               | ABHD10     | 0.29  | 3.22 | 1.15  | 2.74E-01 | 5.65E-01 | -6.02 |
| 1451248_PM_at   | Prmt7                                                                                                | PRMT7      | -0.27 | 3.35 | -1.15 | 2.74E-01 | 5.66E-01 | -6.02 |
| 1459663_PM_at   | ---                                                                                                  | NA         | 0.16  | 2.49 | 1.15  | 2.74E-01 | 5.66E-01 | -6.02 |
| 1420673_PM_a_at | Acox2                                                                                                | ACOX2      | 0.17  | 2.65 | 1.15  | 2.74E-01 | 5.66E-01 | -6.02 |
| 1449532_PM_at   | Chrng                                                                                                | CHRNA      | 0.21  | 3.05 | 1.15  | 2.74E-01 | 5.66E-01 | -6.02 |
| 1436037_PM_at   | Itga4                                                                                                | ITGA4      | -0.25 | 2.61 | -1.15 | 2.74E-01 | 5.66E-01 | -6.02 |
| 1420130_PM_s_at | Rtcb                                                                                                 | NA         | -0.55 | 4.25 | -1.15 | 2.74E-01 | 5.66E-01 | -6.03 |
| 1424028_PM_at   | Chtf8                                                                                                | CHTF8      | -0.30 | 3.42 | -1.15 | 2.74E-01 | 5.66E-01 | -6.03 |
| 1431770_PM_at   | Cherp                                                                                                | NA         | 0.08  | 2.14 | 1.15  | 2.74E-01 | 5.66E-01 | -6.03 |
| 1445390_PM_at   | Pawr                                                                                                 | PAWR       | 0.17  | 2.11 | 1.15  | 2.74E-01 | 5.66E-01 | -6.03 |
| 1426160_PM_a_at | Stk16                                                                                                | STK16      | -0.32 | 3.12 | -1.15 | 2.74E-01 | 5.66E-01 | -6.03 |
| 1424912_PM_at   | Slc25a17                                                                                             | SLC25A17   | 0.15  | 2.23 | 1.15  | 2.74E-01 | 5.66E-01 | -6.03 |
| 1426320_PM_at   | Snx29                                                                                                | SNX29      | 0.18  | 2.65 | 1.15  | 2.74E-01 | 5.66E-01 | -6.03 |
| 1444013_PM_at   | 5930412G12Rik                                                                                        | NA         | 0.13  | 2.24 | 1.15  | 2.74E-01 | 5.66E-01 | -6.03 |
| 1425140_PM_at   | Lactb2                                                                                               | LACTB2     | 0.24  | 2.36 | 1.15  | 2.74E-01 | 5.66E-01 | -6.03 |
| 1419287_PM_at   | Tmem208                                                                                              | TMEM208    | -0.13 | 2.82 | -1.15 | 2.74E-01 | 5.66E-01 | -6.03 |
| 1457960_PM_at   | ---                                                                                                  | NA         | 0.38  | 4.57 | 1.15  | 2.74E-01 | 5.66E-01 | -6.03 |
| 1442327_PM_at   | 2410141K09Rik                                                                                        | NA         | 0.28  | 3.09 | 1.15  | 2.75E-01 | 5.66E-01 | -6.03 |
| 1451446_PM_at   | Antxr1                                                                                               | ANTXR1     | -0.25 | 2.84 | -1.15 | 2.75E-01 | 5.66E-01 | -6.03 |
| 1459657_PM_s_at | Polr1d                                                                                               | POLR1D     | -0.17 | 5.13 | -1.15 | 2.75E-01 | 5.66E-01 | -6.03 |
| 1432089_PM_at   | 4930550C17Rik                                                                                        | NA         | 0.11  | 1.86 | 1.15  | 2.75E-01 | 5.66E-01 | -6.03 |
| 1450802_PM_at   | Prss28                                                                                               | NA         | 0.12  | 2.65 | 1.15  | 2.75E-01 | 5.66E-01 | -6.03 |
| 1450182_PM_at   | Clnka                                                                                                | CLCNKB     | 0.12  | 2.51 | 1.15  | 2.75E-01 | 5.66E-01 | -6.03 |
| 1460226_PM_at   | Trap1a                                                                                               | NA         | 0.12  | 2.37 | 1.15  | 2.75E-01 | 5.66E-01 | -6.03 |
| 1427766_PM_at   | ---                                                                                                  | NA         | 0.14  | 2.46 | 1.15  | 2.75E-01 | 5.66E-01 | -6.03 |
| 1420279_PM_at   | Prss58                                                                                               | NA         | 0.20  | 2.33 | 1.15  | 2.75E-01 | 5.66E-01 | -6.03 |
| 1459619_PM_at   | Epb412                                                                                               | NA         | 0.34  | 4.76 | 1.15  | 2.75E-01 | 5.66E-01 | -6.03 |
| 1430644_PM_at   | Wbscr25                                                                                              | NA         | 0.09  | 2.17 | 1.15  | 2.75E-01 | 5.66E-01 | -6.03 |
| 1432855_PM_at   | Kctd3                                                                                                | KCTD3      | 0.12  | 2.02 | 1.15  | 2.75E-01 | 5.66E-01 | -6.03 |
| 1438563_PM_s_at | MRPS24                                                                                               | MRPS24     | 0.36  | 6.40 | 1.15  | 2.75E-01 | 5.66E-01 | -6.03 |
| 1450099_PM_a_at | Gba                                                                                                  | GBA        | -0.23 | 3.15 | -1.15 | 2.75E-01 | 5.66E-01 | -6.03 |
| 1422670_PM_at   | Rnd2                                                                                                 | RND2       | 0.45  | 4.38 | 1.15  | 2.75E-01 | 5.66E-01 | -6.03 |
| 1443516_PM_at   | Atxn2                                                                                                | ATXN2      | -0.22 | 2.68 | -1.15 | 2.75E-01 | 5.66E-01 | -6.03 |
| 1457780_PM_at   | Stx11                                                                                                | NA         | 0.10  | 2.32 | 1.15  | 2.75E-01 | 5.66E-01 | -6.03 |
| 1453974_PM_at   | ---                                                                                                  | NA         | 0.11  | 2.06 | 1.15  | 2.75E-01 | 5.66E-01 | -6.03 |
| 1430377_PM_at   | Ctcflos                                                                                              | NA         | 0.12  | 2.26 | 1.15  | 2.75E-01 | 5.66E-01 | -6.03 |
| 1449829_PM_at   | Itgb2l                                                                                               | ITGB2      | 0.13  | 2.42 | 1.15  | 2.75E-01 | 5.66E-01 | -6.03 |
| 1448808_PM_a_at | Nme2                                                                                                 | NME2       | -0.26 | 8.21 | -1.15 | 2.75E-01 | 5.66E-01 | -6.03 |
| 1444982_PM_at   | ---                                                                                                  | NA         | -0.26 | 2.98 | -1.15 | 2.75E-01 | 5.66E-01 | -6.03 |
| 1451794_PM_at   | Tmcc3                                                                                                | TMCC3      | 0.11  | 2.50 | 1.15  | 2.75E-01 | 5.66E-01 | -6.03 |
| 1454902_PM_at   | Prkc2                                                                                                | PRKC2      | 0.26  | 3.22 | 1.15  | 2.75E-01 | 5.66E-01 | -6.03 |
| 1449213_PM_at   | Lage3                                                                                                | LAGE3      | 0.33  | 3.05 | 1.15  | 2.75E-01 | 5.66E-01 | -6.03 |
| 1442802_PM_x_at | Prrc2a                                                                                               | PRRC2A     | 0.43  | 3.96 | 1.15  | 2.75E-01 | 5.66E-01 | -6.03 |
| 1429722_PM_at   | Zbtb4                                                                                                | ZBTB4      | -0.28 | 5.99 | -1.15 | 2.75E-01 | 5.66E-01 | -6.03 |
| 1429499_PM_at   | Fbxo5                                                                                                | FBXO5      | 0.11  | 2.74 | 1.15  | 2.75E-01 | 5.66E-01 | -6.03 |
| 1432912_PM_at   | ---                                                                                                  | NA         | 0.12  | 2.45 | 1.15  | 2.75E-01 | 5.66E-01 | -6.03 |
| 1453881_PM_x_at | Cetn1                                                                                                | CETN1      | 0.14  | 2.45 | 1.15  | 2.75E-01 | 5.66E-01 | -6.03 |

|                 |                        |          |       |      |       |          |          |       |
|-----------------|------------------------|----------|-------|------|-------|----------|----------|-------|
| 1453897_PM_at   | ---                    | NA       | 0.20  | 2.48 | 1.15  | 2.75E-01 | 5.66E-01 | -6.03 |
| 1431583_PM_at   | Tbc1d22bos             | NA       | 0.10  | 2.21 | 1.15  | 2.75E-01 | 5.67E-01 | -6.03 |
| 1426166_PM_at   | Mup5                   | NA       | 0.28  | 3.78 | 1.15  | 2.75E-01 | 5.67E-01 | -6.03 |
| 1459288_PM_at   | ---                    | NA       | 0.26  | 2.84 | 1.15  | 2.75E-01 | 5.67E-01 | -6.03 |
| 1453440_PM_at   | 4921539E11Rik          | C1orf141 | 0.13  | 2.18 | 1.15  | 2.75E-01 | 5.67E-01 | -6.03 |
| 1419953_PM_at   | C80678                 | NA       | 0.13  | 2.26 | 1.15  | 2.75E-01 | 5.67E-01 | -6.03 |
| 1429100_PM_at   | Ccdc71l                | CCDC71L  | 0.13  | 2.58 | 1.15  | 2.75E-01 | 5.67E-01 | -6.03 |
| 1426875_PM_s_at | Srxn1                  | SRXN1    | -0.18 | 3.48 | -1.15 | 2.75E-01 | 5.67E-01 | -6.03 |
| 1427747_PM_a_at | Lcn2                   | LCN2     | 0.10  | 2.40 | 1.15  | 2.75E-01 | 5.67E-01 | -6.03 |
| 1422009_PM_at   | Atp1b2                 | ATP1B2   | -0.42 | 5.32 | -1.15 | 2.75E-01 | 5.67E-01 | -6.03 |
| 1443451_PM_at   | ---                    | NA       | 0.20  | 3.49 | 1.15  | 2.75E-01 | 5.67E-01 | -6.03 |
| 1431005_PM_at   | D10Wsu102e             | C12orf45 | 0.41  | 2.66 | 1.15  | 2.75E-01 | 5.67E-01 | -6.03 |
| 1450948_PM_a_at | Mrp1                   | MRP1     | -0.32 | 3.29 | -1.15 | 2.75E-01 | 5.67E-01 | -6.03 |
| 1425219_PM_x_at | Gngt1                  | GNGT1    | 0.11  | 2.18 | 1.15  | 2.75E-01 | 5.67E-01 | -6.03 |
| 1453368_PM_at   | Faap100                | FAAP100  | 0.13  | 2.16 | 1.15  | 2.75E-01 | 5.67E-01 | -6.03 |
| 1437736_PM_at   | Akt1s1                 | NA       | 0.15  | 2.68 | 1.15  | 2.75E-01 | 5.67E-01 | -6.03 |
| 1431850_PM_at   | 3200001D21Rik          | NA       | 0.18  | 2.15 | 1.15  | 2.75E-01 | 5.67E-01 | -6.03 |
| 1448246_PM_at   | Hdac1                  | HDAC1    | 0.20  | 3.83 | 1.15  | 2.75E-01 | 5.67E-01 | -6.03 |
| 1442351_PM_a_at | BC029214               | C9orf142 | 0.13  | 2.52 | 1.15  | 2.76E-01 | 5.67E-01 | -6.03 |
| 1428122_PM_s_at | Mvb12b                 | MVB12B   | -0.24 | 3.84 | -1.15 | 2.76E-01 | 5.67E-01 | -6.03 |
| 1424957_PM_at   | Ahd1                   | AHD1     | 0.10  | 2.43 | 1.15  | 2.76E-01 | 5.67E-01 | -6.03 |
| 1449566_PM_at   | Nkx2-5                 | NKX2-5   | 0.16  | 2.44 | 1.15  | 2.76E-01 | 5.67E-01 | -6.03 |
| 1459791_PM_at   | Dnajc1                 | DNAJC1   | -0.27 | 2.36 | -1.15 | 2.76E-01 | 5.67E-01 | -6.03 |
| 1443555_PM_at   | ---                    | NA       | 0.12  | 2.36 | 1.15  | 2.76E-01 | 5.67E-01 | -6.03 |
| 1435983_PM_at   | Tu1l8                  | NA       | 0.14  | 2.43 | 1.15  | 2.76E-01 | 5.67E-01 | -6.03 |
| 1457499_PM_at   | ---                    | NA       | -0.12 | 2.45 | -1.15 | 2.76E-01 | 5.67E-01 | -6.03 |
| 1426048_PM_s_at | Tfap2a                 | TFAP2A   | 0.16  | 2.21 | 1.15  | 2.76E-01 | 5.67E-01 | -6.03 |
| 1427345_PM_a_at | Sult1a1                | SULT1A4  | 0.40  | 3.67 | 1.15  | 2.76E-01 | 5.67E-01 | -6.03 |
| 1441308_PM_at   | Mobp                   | MOBP     | 0.42  | 3.56 | 1.15  | 2.76E-01 | 5.67E-01 | -6.03 |
| 1442958_PM_at   | ---                    | NA       | 0.11  | 2.26 | 1.15  | 2.76E-01 | 5.67E-01 | -6.03 |
| 1442366_PM_at   | ---                    | NA       | 0.11  | 2.60 | 1.15  | 2.76E-01 | 5.67E-01 | -6.03 |
| 1446621_PM_at   | ---                    | NA       | 0.14  | 2.53 | 1.15  | 2.76E-01 | 5.67E-01 | -6.03 |
| 1439357_PM_at   | Il17re                 | IL17RE   | 0.16  | 2.43 | 1.15  | 2.76E-01 | 5.67E-01 | -6.03 |
| 1435734_PM_x_at | Dus1l                  | DUS1L    | 0.44  | 5.54 | 1.15  | 2.76E-01 | 5.67E-01 | -6.03 |
| 1432579_PM_at   | ---                    | NA       | -0.35 | 4.27 | -1.15 | 2.76E-01 | 5.67E-01 | -6.03 |
| 1425906_PM_a_at | Sema3e                 | SEMA3E   | -0.24 | 2.49 | -1.15 | 2.76E-01 | 5.67E-01 | -6.03 |
| 1456273_PM_x_at | Tpmt                   | NA       | -0.12 | 2.55 | -1.15 | 2.76E-01 | 5.67E-01 | -6.03 |
| 1447756_PM_x_at | Mcm6                   | MCM6     | 0.12  | 2.61 | 1.15  | 2.76E-01 | 5.67E-01 | -6.03 |
| 1459187_PM_at   | St3gal4                | NA       | 0.25  | 4.05 | 1.15  | 2.76E-01 | 5.67E-01 | -6.03 |
| 1452229_PM_at   | Camta2                 | NA       | 0.26  | 2.69 | 1.15  | 2.76E-01 | 5.67E-01 | -6.03 |
| 1423969_PM_at   | Nup37                  | NUP37    | -0.11 | 2.58 | -1.15 | 2.76E-01 | 5.67E-01 | -6.03 |
| 1456831_PM_at   | ---                    | NA       | 0.11  | 2.10 | 1.15  | 2.76E-01 | 5.67E-01 | -6.03 |
| 1456162_PM_x_at | Add3                   | ADD3     | 0.15  | 2.45 | 1.15  | 2.76E-01 | 5.67E-01 | -6.03 |
| 1456066_PM_a_at | Polr1a                 | POLR1A   | 0.16  | 2.38 | 1.15  | 2.76E-01 | 5.67E-01 | -6.03 |
| 1424551_PM_at   | Zfyve27                | ZFYVE27  | 0.21  | 3.35 | 1.15  | 2.76E-01 | 5.67E-01 | -6.03 |
| 1431223_PM_at   | 2700054A10Rik ///Tcte2 | NA       | 0.25  | 3.15 | 1.15  | 2.76E-01 | 5.67E-01 | -6.03 |
| 1433674_PM_a_at | Snhg1                  | NA       | -0.42 | 3.49 | -1.15 | 2.76E-01 | 5.67E-01 | -6.03 |
| 1418824_PM_at   | Arf6                   | ARF6     | -0.41 | 4.59 | -1.15 | 2.76E-01 | 5.67E-01 | -6.03 |
| 1441812_PM_at   | LOC100503594           | NA       | -0.10 | 2.29 | -1.15 | 2.76E-01 | 5.67E-01 | -6.03 |
| 1429598_PM_at   | Perm1                  | PERM1    | 0.09  | 2.43 | 1.15  | 2.76E-01 | 5.67E-01 | -6.03 |
| 1455221_PM_at   | Abcg1                  | NA       | 0.10  | 2.63 | 1.15  | 2.76E-01 | 5.67E-01 | -6.03 |
| 1439982_PM_at   | ---                    | NA       | 0.11  | 2.51 | 1.15  | 2.76E-01 | 5.67E-01 | -6.03 |
| 1444847_PM_at   | ---                    | NA       | 0.13  | 2.12 | 1.15  | 2.76E-01 | 5.67E-01 | -6.03 |
| 1457794_PM_at   | Whsc1l1                | NSD3     | 0.24  | 2.42 | 1.15  | 2.76E-01 | 5.67E-01 | -6.03 |
| 1447313_PM_at   | Gm12762                | NA       | 0.25  | 2.62 | 1.15  | 2.76E-01 | 5.67E-01 | -6.03 |
| 1456591_PM_x_at | Akap3                  | AKAP3    | 0.33  | 6.32 | 1.15  | 2.76E-01 | 5.67E-01 | -6.03 |
| 1424996_PM_at   | Cflar                  | CFLAR    | 0.38  | 3.48 | 1.15  | 2.76E-01 | 5.67E-01 | -6.03 |
| 1448114_PM_a_at | Trmt2a                 | TRMT2A   | -0.25 | 4.44 | -1.15 | 2.76E-01 | 5.67E-01 | -6.03 |
| 1434588_PM_x_at | Tbca                   | TBCA     | -0.10 | 2.20 | -1.15 | 2.76E-01 | 5.67E-01 | -6.03 |
| 1443292_PM_at   | ---                    | NA       | -0.35 | 2.66 | -1.15 | 2.76E-01 | 5.67E-01 | -6.03 |
| 1458973_PM_at   | ---                    | NA       | 0.13  | 2.14 | 1.15  | 2.76E-01 | 5.67E-01 | -6.03 |
| 1422050_PM_at   | Nkx1-2                 | NKX1-2   | 0.10  | 2.21 | 1.15  | 2.76E-01 | 5.68E-01 | -6.03 |
| 1433224_PM_at   | 5830442K09Rik          | NA       | 0.10  | 2.27 | 1.15  | 2.76E-01 | 5.68E-01 | -6.03 |
| 1418847_PM_at   | Arg2                   | ARG2     | 0.12  | 2.46 | 1.15  | 2.76E-01 | 5.68E-01 | -6.03 |
| 1417662_PM_at   | Elk3                   | ELK3     | -0.18 | 2.71 | -1.15 | 2.76E-01 | 5.68E-01 | -6.03 |
| 1438445_PM_at   | Lrrc8e                 | LRRC8E   | -0.12 | 2.19 | -1.15 | 2.76E-01 | 5.68E-01 | -6.03 |
| 1433372_PM_at   | 5330425B07Rik          | NA       | 0.09  | 2.09 | 1.15  | 2.76E-01 | 5.68E-01 | -6.03 |
| 1421620_PM_at   | Il5ra                  | IL5RA    | 0.11  | 2.79 | 1.15  | 2.76E-01 | 5.68E-01 | -6.03 |
| 1457279_PM_at   | LOC105243654           | NA       | 0.12  | 2.28 | 1.15  | 2.76E-01 | 5.68E-01 | -6.03 |
| 1447299_PM_at   | ---                    | NA       | 0.17  | 2.57 | 1.15  | 2.76E-01 | 5.68E-01 | -6.03 |
| 1429664_PM_at   | Cdk1                   | CDKL1    | 0.19  | 2.84 | 1.15  | 2.77E-01 | 5.68E-01 | -6.03 |
| 1452004_PM_at   | Calca                  | CALCA    | 0.27  | 2.62 | 1.15  | 2.76E-01 | 5.68E-01 | -6.03 |
| 1439397_PM_at   | Fmn1                   | FMN1     | 0.54  | 3.19 | 1.15  | 2.76E-01 | 5.68E-01 | -6.03 |
| 1439951_PM_at   | ---                    | NA       | 0.11  | 2.06 | 1.15  | 2.77E-01 | 5.68E-01 | -6.03 |
| 1459024_PM_at   | ---                    | NA       | -0.11 | 2.27 | -1.15 | 2.77E-01 | 5.68E-01 | -6.03 |

|                 |                       |          |       |      |       |          |          |       |
|-----------------|-----------------------|----------|-------|------|-------|----------|----------|-------|
| 1446483_PM_at   | Akr1e1                | AKR1E2   | 0.12  | 2.63 | 1.15  | 2.77E-01 | 5.68E-01 | -6.03 |
| 1424782_PM_at   | Dram2                 | DRAM2    | -0.28 | 3.68 | -1.15 | 2.77E-01 | 5.68E-01 | -6.03 |
| 1418780_PM_at   | Cyp39a1               | CYP39A1  | -0.18 | 2.45 | -1.15 | 2.77E-01 | 5.68E-01 | -6.03 |
| 1443573_PM_at   | Parp1                 | PARP1    | 0.12  | 2.19 | 1.15  | 2.77E-01 | 5.68E-01 | -6.03 |
| 1451633_PM_a_at | Gngt1                 | GNGT1    | 0.20  | 2.84 | 1.15  | 2.77E-01 | 5.68E-01 | -6.03 |
| 1455738_PM_at   | Nsrp1                 | NSRP1    | 0.34  | 3.98 | 1.15  | 2.77E-01 | 5.68E-01 | -6.03 |
| 1430613_PM_at   | Lurap1                | LURAP1   | 0.16  | 3.03 | 1.15  | 2.77E-01 | 5.68E-01 | -6.03 |
| 1450217_PM_at   | Ccl28                 | CCL28    | 0.18  | 3.07 | 1.15  | 2.77E-01 | 5.68E-01 | -6.03 |
| 1449090_PM_a_at | Yes1                  | YES1     | -0.27 | 2.77 | -1.15 | 2.77E-01 | 5.68E-01 | -6.03 |
| 1459093_PM_at   | ---                   | NA       | 0.14  | 2.56 | 1.15  | 2.77E-01 | 5.68E-01 | -6.03 |
| 1446020_PM_at   | ---                   | NA       | 0.19  | 2.68 | 1.15  | 2.77E-01 | 5.68E-01 | -6.03 |
| 1439389_PM_s_at | Myadm                 | MYADM    | -0.49 | 7.90 | -1.15 | 2.77E-01 | 5.68E-01 | -6.03 |
| 1425586_PM_a_at | Mlph                  | MLPH     | 0.11  | 2.76 | 1.15  | 2.77E-01 | 5.68E-01 | -6.03 |
| 1427846_PM_x_at | Fgfr4                 | NA       | 0.09  | 2.16 | 1.15  | 2.77E-01 | 5.68E-01 | -6.03 |
| 1419940_PM_at   | ---                   | NA       | 0.10  | 2.48 | 1.15  | 2.77E-01 | 5.68E-01 | -6.03 |
| 1436286_PM_at   | B830017H08Rik         | NA       | 0.10  | 2.39 | 1.15  | 2.77E-01 | 5.68E-01 | -6.03 |
| 1448748_PM_at   | Plek                  | PLEK     | 0.15  | 2.79 | 1.15  | 2.77E-01 | 5.68E-01 | -6.03 |
| 1443176_PM_at   | Sfmbt2                | SFMBT2   | 0.16  | 2.45 | 1.15  | 2.77E-01 | 5.68E-01 | -6.03 |
| 1424391_PM_at   | Nrd1                  | NRDC     | -0.23 | 5.12 | -1.15 | 2.77E-01 | 5.68E-01 | -6.03 |
| 1427336_PM_at   | Alch8a1               | ALDH8A1  | 0.15  | 2.58 | 1.15  | 2.77E-01 | 5.68E-01 | -6.03 |
| 1419585_PM_at   | Rp2                   | RP2      | -0.16 | 2.39 | -1.15 | 2.77E-01 | 5.68E-01 | -6.03 |
| 1427995_PM_at   | Cpa5                  | CPA5     | 0.12  | 2.32 | 1.15  | 2.77E-01 | 5.68E-01 | -6.03 |
| 1443473_PM_at   | C79562                | NA       | 0.15  | 3.42 | 1.15  | 2.77E-01 | 5.68E-01 | -6.03 |
| 1440774_PM_x_at | Wee2                  | WEE2     | 0.15  | 2.60 | 1.15  | 2.77E-01 | 5.68E-01 | -6.03 |
| 1440160_PM_x_at | Vwa9                  | INTS14   | 0.24  | 2.53 | 1.15  | 2.77E-01 | 5.68E-01 | -6.03 |
| 1418021_PM_at   | C4b///LOC102643089    | C4A      | -0.47 | 3.44 | -1.15 | 2.77E-01 | 5.68E-01 | -6.03 |
| 1455726_PM_at   | LOC102641916///Vcpkmt | VCPKMT   | -0.42 | 3.74 | -1.15 | 2.77E-01 | 5.68E-01 | -6.03 |
| 1425164_PM_a_at | Phkg1                 | PHKG1    | -0.24 | 3.93 | -1.15 | 2.77E-01 | 5.68E-01 | -6.03 |
| 1425040_PM_at   | Cybrd1                | CYBRD1   | -0.15 | 2.34 | -1.15 | 2.77E-01 | 5.68E-01 | -6.03 |
| 1442888_PM_at   | ---                   | NA       | 0.09  | 2.18 | 1.15  | 2.77E-01 | 5.68E-01 | -6.03 |
| 1436440_PM_at   | Slc25a12              | SLC25A12 | 0.19  | 2.88 | 1.15  | 2.77E-01 | 5.68E-01 | -6.03 |
| 1445750_PM_at   | ---                   | NA       | 0.23  | 2.15 | 1.15  | 2.77E-01 | 5.68E-01 | -6.03 |
| 1459984_PM_at   | Mia3                  | NA       | -0.57 | 5.60 | -1.15 | 2.77E-01 | 5.68E-01 | -6.03 |
| 1428554_PM_a_at | Slirp                 | SLIRP    | -0.45 | 4.69 | -1.15 | 2.77E-01 | 5.68E-01 | -6.03 |
| 1433044_PM_at   | Vcan                  | VCAN     | -0.23 | 2.62 | -1.15 | 2.77E-01 | 5.68E-01 | -6.03 |
| 1442192_PM_at   | Tyms                  | TYMS     | 0.11  | 2.95 | 1.15  | 2.77E-01 | 5.68E-01 | -6.03 |
| 1424791_PM_a_at | Bcam                  | BCAM     | 0.12  | 2.64 | 1.15  | 2.77E-01 | 5.68E-01 | -6.03 |
| 1424798_PM_a_at | Adam5                 | NA       | 0.13  | 2.38 | 1.15  | 2.77E-01 | 5.68E-01 | -6.03 |
| 1420420_PM_at   | Hao1                  | HAO1     | 0.13  | 2.32 | 1.15  | 2.77E-01 | 5.68E-01 | -6.03 |
| 1452119_PM_at   | Rrp1b                 | RRP1B    | 0.20  | 2.40 | 1.15  | 2.77E-01 | 5.68E-01 | -6.03 |
| 1450722_PM_at   | Nup50                 | NUP50    | 0.21  | 3.21 | 1.15  | 2.77E-01 | 5.68E-01 | -6.03 |
| 1434538_PM_x_at | Eif2b2                | EIF2B2   | 0.21  | 4.58 | 1.15  | 2.77E-01 | 5.68E-01 | -6.03 |
| 1452451_PM_at   | Bean1                 | BEAN1    | 0.27  | 2.32 | 1.15  | 2.77E-01 | 5.68E-01 | -6.03 |
| 1450674_PM_at   | Cdk5                  | CDK5     | -0.20 | 2.83 | -1.15 | 2.77E-01 | 5.68E-01 | -6.03 |
| 1451588_PM_at   | Eci3                  | ECI2     | 0.14  | 2.48 | 1.15  | 2.77E-01 | 5.68E-01 | -6.03 |
| 1430229_PM_at   | Gpr137c               | GPR137C  | 0.20  | 2.86 | 1.15  | 2.78E-01 | 5.68E-01 | -6.03 |
| 1432280_PM_at   | Prr29                 | PRR29    | 0.15  | 2.66 | 1.15  | 2.78E-01 | 5.68E-01 | -6.03 |
| 1421527_PM_at   | Epha6                 | EPHA6    | -0.72 | 6.07 | -1.15 | 2.78E-01 | 5.68E-01 | -6.03 |
| 1437417_PM_s_at | Gpc6                  | GPC6     | -0.44 | 2.93 | -1.15 | 2.78E-01 | 5.68E-01 | -6.03 |
| 1442314_PM_at   | Nup188                | NUP188   | -0.30 | 2.56 | -1.15 | 2.78E-01 | 5.68E-01 | -6.03 |
| 1448613_PM_at   | Ecm1                  | ECM1     | 0.15  | 2.33 | 1.15  | 2.78E-01 | 5.68E-01 | -6.03 |
| 1451746_PM_a_at | Atg12                 | ATG12    | 0.27  | 2.78 | 1.15  | 2.78E-01 | 5.68E-01 | -6.03 |
| 1433764_PM_at   | Clec2l                | CLEC2L   | 0.10  | 2.22 | 1.15  | 2.78E-01 | 5.69E-01 | -6.03 |
| 1425441_PM_at   | Guca1b                | GUCA1B   | 0.11  | 2.58 | 1.15  | 2.78E-01 | 5.69E-01 | -6.03 |
| 1421471_PM_at   | Npy1r                 | NPY1R    | 0.22  | 2.40 | 1.15  | 2.78E-01 | 5.69E-01 | -6.03 |
| 1419765_PM_at   | Cul2                  | CUL2     | -0.20 | 2.22 | -1.15 | 2.78E-01 | 5.69E-01 | -6.04 |
| 1457506_PM_at   | ---                   | NA       | -0.12 | 2.39 | -1.15 | 2.78E-01 | 5.69E-01 | -6.04 |
| 1450138_PM_a_at | Serpinb6a             | SERPINB6 | -0.26 | 2.92 | -1.15 | 2.78E-01 | 5.69E-01 | -6.04 |
| 1448881_PM_at   | Hp                    | HP       | 0.11  | 3.07 | 1.15  | 2.78E-01 | 5.69E-01 | -6.04 |
| 1431780_PM_at   | Cdhr4                 | CDHR4    | -0.20 | 3.07 | -1.15 | 2.78E-01 | 5.69E-01 | -6.04 |
| 1427669_PM_a_at | Cit                   | CIT      | 0.32  | 2.86 | 1.15  | 2.78E-01 | 5.69E-01 | -6.04 |
| 1429441_PM_at   | Fbxo30                | FBXO30   | -0.14 | 2.27 | -1.14 | 2.78E-01 | 5.69E-01 | -6.04 |
| 1457824_PM_at   | ---                   | NA       | 0.11  | 1.90 | 1.14  | 2.78E-01 | 5.69E-01 | -6.04 |
| 1450527_PM_at   | Sstr1                 | SSTR1    | 0.12  | 2.19 | 1.14  | 2.78E-01 | 5.69E-01 | -6.04 |
| 1460458_PM_at   | Crispld2              | CRISPLD2 | 0.15  | 2.30 | 1.14  | 2.78E-01 | 5.69E-01 | -6.04 |
| 1442081_PM_at   | Zfp957                | NA       | 0.16  | 2.71 | 1.14  | 2.78E-01 | 5.69E-01 | -6.04 |
| 1418206_PM_at   | Sdf2l1                | SDF2L1   | -0.19 | 2.77 | -1.14 | 2.78E-01 | 5.69E-01 | -6.04 |
| 1422535_PM_at   | Ccne2                 | CCNE2    | -0.12 | 2.07 | -1.14 | 2.78E-01 | 5.69E-01 | -6.04 |
| 1460018_PM_at   | ---                   | NA       | 0.14  | 2.24 | 1.14  | 2.78E-01 | 5.69E-01 | -6.04 |
| 1453194_PM_at   | 4930432K21Rik         | C19orf57 | 0.14  | 2.31 | 1.14  | 2.78E-01 | 5.69E-01 | -6.04 |
| 1428060_PM_at   | ---                   | NA       | 0.15  | 2.74 | 1.14  | 2.78E-01 | 5.69E-01 | -6.04 |
| 1422533_PM_at   | Cyp51                 | CYP51A1  | -0.16 | 2.80 | -1.14 | 2.78E-01 | 5.69E-01 | -6.04 |
| 1455691_PM_at   | Cyp21a1               | CYP21A2  | 0.18  | 3.20 | 1.14  | 2.78E-01 | 5.69E-01 | -6.04 |
| 1427776_PM_a_at | Fgfr4                 | FGFR4    | 0.11  | 2.10 | 1.14  | 2.78E-01 | 5.69E-01 | -6.04 |

|                         |                     |         |       |      |       |          |          |       |
|-------------------------|---------------------|---------|-------|------|-------|----------|----------|-------|
| 1439714_PM_at           | Gm33397             | NA      | 0.11  | 2.41 | 1.14  | 2.78E-01 | 5.69E-01 | -6.04 |
| 1448498_PM_at           | Rps6ka4             | RPS6KA4 | 0.17  | 2.67 | 1.14  | 2.78E-01 | 5.69E-01 | -6.04 |
| 1439384_PM_at           | Slc13a3             | SLC13A3 | 0.11  | 2.28 | 1.14  | 2.78E-01 | 5.69E-01 | -6.04 |
| 1456810_PM_at           | ---                 | NA      | 0.15  | 3.15 | 1.14  | 2.78E-01 | 5.69E-01 | -6.04 |
| 1418965_PM_at           | Nosip               | NOSIP   | 0.25  | 3.61 | 1.14  | 2.78E-01 | 5.69E-01 | -6.04 |
| 1417887_PM_at           | Ints5               | INTS5   | 0.30  | 3.36 | 1.14  | 2.78E-01 | 5.69E-01 | -6.04 |
| 1446254_PM_at           | ---                 | NA      | 0.11  | 2.74 | 1.14  | 2.78E-01 | 5.69E-01 | -6.04 |
| 1442082_PM_at           | C3ar1               | C3AR1   | 0.13  | 2.35 | 1.14  | 2.78E-01 | 5.69E-01 | -6.04 |
| 1450486_PM_a_at         | Opr1                | OPRL1   | 0.15  | 2.38 | 1.14  | 2.78E-01 | 5.69E-01 | -6.04 |
| 1441221_PM_at           | 1700008J07Rik       | NA      | 0.14  | 2.66 | 1.14  | 2.78E-01 | 5.69E-01 | -6.04 |
| 1419215_PM_at           | Aox4                | NA      | 0.11  | 2.37 | 1.14  | 2.79E-01 | 5.69E-01 | -6.04 |
| 1446474_PM_at           | ---                 | NA      | 0.14  | 2.30 | 1.14  | 2.79E-01 | 5.69E-01 | -6.04 |
| 1443822_PM_s_at         | Cisd1               | CISD1   | -0.57 | 6.29 | -1.14 | 2.79E-01 | 5.69E-01 | -6.04 |
| 1422123_PM_s_at         | Ceacam1 /// Ceacam2 | PSG7    | -0.45 | 3.33 | -1.14 | 2.79E-01 | 5.69E-01 | -6.04 |
| 1442027_PM_at           | Nbeal1              | NBEAL1  | -0.42 | 2.67 | -1.14 | 2.79E-01 | 5.69E-01 | -6.04 |
| 1427005_PM_at           | Plk2                | PLK2    | -0.32 | 7.30 | -1.14 | 2.79E-01 | 5.69E-01 | -6.04 |
| 1440833_PM_at           | Cdk13               | NA      | -0.32 | 3.84 | -1.14 | 2.79E-01 | 5.69E-01 | -6.04 |
| 1443635_PM_at           | Gm128               | C1orf56 | -0.09 | 2.35 | -1.14 | 2.79E-01 | 5.69E-01 | -6.04 |
| 1430990_PM_s_at         | Mrp44               | MRPL44  | 0.11  | 2.43 | 1.14  | 2.79E-01 | 5.69E-01 | -6.04 |
| 1428283_PM_at           | Cyp2s1              | CYP2S1  | 0.12  | 2.26 | 1.14  | 2.79E-01 | 5.69E-01 | -6.04 |
| 1427900_PM_at           | Pip5kl1             | PIP5KL1 | 0.12  | 2.12 | 1.14  | 2.79E-01 | 5.69E-01 | -6.04 |
| 1439258_PM_at           | Atf4                | ATF4    | 0.13  | 2.69 | 1.14  | 2.79E-01 | 5.69E-01 | -6.04 |
| 1422443_PM_at           | Xpnpep1             | XPNPEP1 | 0.15  | 4.79 | 1.14  | 2.79E-01 | 5.69E-01 | -6.04 |
| 1423337_PM_at           | Orc4                | ORC4    | -0.46 | 4.28 | -1.14 | 2.79E-01 | 5.69E-01 | -6.04 |
| 1437262_PM_x_at         | Bcas2               | BCAS2   | -0.36 | 7.00 | -1.14 | 2.79E-01 | 5.69E-01 | -6.04 |
| 1443963_PM_at           | Aff2                | NA      | -0.32 | 2.81 | -1.14 | 2.79E-01 | 5.69E-01 | -6.04 |
| 1447192_PM_at           | ---                 | NA      | -0.14 | 3.09 | -1.14 | 2.79E-01 | 5.69E-01 | -6.04 |
| 1445594_PM_at           | Hnrnp1              | NA      | 0.10  | 1.89 | 1.14  | 2.79E-01 | 5.69E-01 | -6.04 |
| 1432874_PM_at           | 4632404M16Rik       | NA      | 0.11  | 2.15 | 1.14  | 2.79E-01 | 5.69E-01 | -6.04 |
| 1433361_PM_at           | 4930527F18Rik       | NA      | 0.12  | 2.27 | 1.14  | 2.79E-01 | 5.69E-01 | -6.04 |
| 1445961_PM_at           | ---                 | NA      | 0.12  | 3.05 | 1.14  | 2.79E-01 | 5.69E-01 | -6.04 |
| 1456417_PM_at           | Zic4                | ZIC4    | 0.12  | 2.21 | 1.14  | 2.79E-01 | 5.69E-01 | -6.04 |
| 1419005_PM_at           | Crybb3              | CRYBB3  | 0.12  | 2.71 | 1.14  | 2.79E-01 | 5.69E-01 | -6.04 |
| 1417732_PM_at           | Anxa8               | ANXA8L1 | 0.14  | 2.49 | 1.14  | 2.79E-01 | 5.69E-01 | -6.04 |
| 1446812_PM_at           | ---                 | NA      | 0.14  | 2.61 | 1.14  | 2.79E-01 | 5.69E-01 | -6.04 |
| 1450238_PM_at           | Gcnt2               | NA      | 0.16  | 2.62 | 1.14  | 2.79E-01 | 5.69E-01 | -6.04 |
| 1422719_PM_s_at         | Nup50               | NUP50   | 0.16  | 2.55 | 1.14  | 2.79E-01 | 5.69E-01 | -6.04 |
| 1431934_PM_at           | ---                 | NA      | 0.18  | 2.80 | 1.14  | 2.79E-01 | 5.69E-01 | -6.04 |
| 1431624_PM_a_at         | Rnf219              | NA      | 0.22  | 2.98 | 1.14  | 2.79E-01 | 5.69E-01 | -6.04 |
| 1459138_PM_at           | ---                 | NA      | 0.28  | 2.48 | 1.14  | 2.79E-01 | 5.69E-01 | -6.04 |
| 1453634_PM_a_at         | Erp29               | ERP29   | 0.65  | 5.62 | 1.14  | 2.79E-01 | 5.69E-01 | -6.04 |
| 1423276_PM_at           | Ildr1               | ILDR1   | 0.10  | 2.29 | 1.14  | 2.79E-01 | 5.69E-01 | -6.04 |
| 1455241_PM_at           | Mab21b              | MAB21L3 | 0.16  | 2.21 | 1.14  | 2.79E-01 | 5.69E-01 | -6.04 |
| 1441100_PM_at           | Mbtd1               | MBTD1   | 0.27  | 2.44 | 1.14  | 2.79E-01 | 5.69E-01 | -6.04 |
| 1446329_PM_at           | ---                 | NA      | 0.11  | 2.32 | 1.14  | 2.79E-01 | 5.69E-01 | -6.04 |
| 1457112_PM_at           | Fam163a             | FAM163A | 0.18  | 2.33 | 1.14  | 2.79E-01 | 5.69E-01 | -6.04 |
| 1424756_PM_at           | Hip1                | HIP1    | 0.14  | 2.24 | 1.14  | 2.79E-01 | 5.70E-01 | -6.04 |
| 1424201_PM_a_at         | Seh1l               | SEH1L   | -0.19 | 2.51 | -1.14 | 2.79E-01 | 5.70E-01 | -6.04 |
| 1432620_PM_at           | ---                 | NA      | 0.14  | 2.53 | 1.14  | 2.79E-01 | 5.70E-01 | -6.04 |
| 1447807_PM_s_at         | Plekhh1             | PLEKHH1 | 0.68  | 5.74 | 1.14  | 2.79E-01 | 5.70E-01 | -6.04 |
| 1454428_PM_at           | ---                 | NA      | 0.12  | 2.33 | 1.14  | 2.79E-01 | 5.70E-01 | -6.04 |
| 1446411_PM_at           | ---                 | NA      | -0.19 | 2.68 | -1.14 | 2.79E-01 | 5.70E-01 | -6.04 |
| 1432172_PM_at           | Gm34183             | NA      | -0.12 | 2.34 | -1.14 | 2.79E-01 | 5.70E-01 | -6.04 |
| 1421525_PM_a_at         | Naip5               | NAIP    | 0.09  | 1.96 | 1.14  | 2.79E-01 | 5.70E-01 | -6.04 |
| 1442869_PM_at           | Dok7                | DOK7    | 0.10  | 2.28 | 1.14  | 2.79E-01 | 5.70E-01 | -6.04 |
| 1458480_PM_at           | Topbp1              | TOPBP1  | 0.12  | 2.72 | 1.14  | 2.79E-01 | 5.70E-01 | -6.04 |
| 1424898_PM_at           | Slc10a1             | SLC10A1 | 0.14  | 2.33 | 1.14  | 2.79E-01 | 5.70E-01 | -6.04 |
| 1432933_PM_at           | 4930429N05Rik       | NA      | 0.21  | 2.25 | 1.14  | 2.79E-01 | 5.70E-01 | -6.04 |
| 1449391_PM_at           | Zfp37               | ZFP37   | -0.39 | 3.17 | -1.14 | 2.79E-01 | 5.70E-01 | -6.04 |
| 1416054_PM_at           | Rps5                | RPS5    | -0.48 | 5.00 | -1.14 | 2.79E-01 | 5.70E-01 | -6.04 |
| 1455439_PM_a_at         | Lgals1              | LGALS1  | -0.39 | 4.87 | -1.14 | 2.80E-01 | 5.70E-01 | -6.04 |
| 1434021_PM_at           | Emc1                | EMC1    | -0.29 | 6.61 | -1.14 | 2.80E-01 | 5.70E-01 | -6.04 |
| 1423644_PM_at           | Aco1                | ACO1    | -0.24 | 2.60 | -1.14 | 2.79E-01 | 5.70E-01 | -6.04 |
| 1446833_PM_at           | ---                 | NA      | -0.21 | 2.54 | -1.14 | 2.79E-01 | 5.70E-01 | -6.04 |
| 1422227_PM_at           | Klf12               | KL F12  | -0.19 | 2.85 | -1.14 | 2.79E-01 | 5.70E-01 | -6.04 |
| 1448589_PM_at           | Ndufb5              | NDUFB5  | -0.18 | 2.24 | -1.14 | 2.79E-01 | 5.70E-01 | -6.04 |
| 1428944_PM_at           | Uba6                | UBA6    | -0.14 | 2.14 | -1.14 | 2.79E-01 | 5.70E-01 | -6.04 |
| 1446364_PM_at           | ---                 | NA      | -0.14 | 2.34 | -1.14 | 2.79E-01 | 5.70E-01 | -6.04 |
| AFFX-NonspecificGC16_at | ---                 | NA      | 0.08  | 2.10 | 1.14  | 2.79E-01 | 5.70E-01 | -6.04 |
| 1459669_PM_at           | ---                 | NA      | 0.11  | 2.35 | 1.14  | 2.79E-01 | 5.70E-01 | -6.04 |
| 1446775_PM_at           | ---                 | NA      | 0.12  | 2.44 | 1.14  | 2.79E-01 | 5.70E-01 | -6.04 |
| 1452959_PM_a_at         | Capn10              | CAPN10  | 0.12  | 3.15 | 1.14  | 2.79E-01 | 5.70E-01 | -6.04 |
| 1453347_PM_at           | ---                 | NA      | 0.14  | 2.61 | 1.14  | 2.79E-01 | 5.70E-01 | -6.04 |
| 1418628_PM_at           | Khdrbs1             | KHDRBS1 | 0.17  | 2.57 | 1.14  | 2.79E-01 | 5.70E-01 | -6.04 |
| 1424638_PM_at           | Cdkn1a              | CDKN1A  | 0.21  | 2.68 | 1.14  | 2.79E-01 | 5.70E-01 | -6.04 |

|                 |                                                                                                                                                                                                                                                                                                                    |                      |       |       |       |          |          |          |       |
|-----------------|--------------------------------------------------------------------------------------------------------------------------------------------------------------------------------------------------------------------------------------------------------------------------------------------------------------------|----------------------|-------|-------|-------|----------|----------|----------|-------|
| 1422773_PM_at   | Myt1                                                                                                                                                                                                                                                                                                               | MYT1                 | 0.34  | 3.76  | 1.14  | 2.79E-01 | 5.70E-01 | -6.04    |       |
| 1455097_PM_at   | Wdr70                                                                                                                                                                                                                                                                                                              | WDR70                | 0.21  | 3.12  | 1.14  | 2.80E-01 | 5.70E-01 | -6.04    |       |
| 1424691_PM_at   | Cacfd1                                                                                                                                                                                                                                                                                                             | CACFD1               | -0.26 | 3.01  | -1.14 | 2.80E-01 | 5.70E-01 | -6.04    |       |
| 1420050_PM_at   | LOC105243127                                                                                                                                                                                                                                                                                                       | NA                   | 0.09  | 2.39  | 1.14  | 2.80E-01 | 5.70E-01 | -6.04    |       |
| 1454411_PM_at   | 4933406F09Rik ///<br>Gm26650                                                                                                                                                                                                                                                                                       | NA                   | 0.24  | 3.43  | 1.14  | 2.80E-01 | 5.70E-01 | -6.04    |       |
| 1417426_PM_at   | Srgn                                                                                                                                                                                                                                                                                                               | SRGN                 | -0.17 | 3.57  | -1.14 | 2.80E-01 | 5.70E-01 | -6.04    |       |
| 1437420_PM_at   | Baz1b                                                                                                                                                                                                                                                                                                              | NA                   | 0.21  | 2.63  | 1.14  | 2.80E-01 | 5.70E-01 | -6.04    |       |
| 1423826_PM_at   | Noc4l                                                                                                                                                                                                                                                                                                              | NOC4L                | 0.10  | 2.20  | 1.14  | 2.80E-01 | 5.70E-01 | -6.04    |       |
| 1452453_PM_a_at | Camk2a                                                                                                                                                                                                                                                                                                             | CAMK2A               | -0.73 | 8.21  | -1.14 | 2.80E-01 | 5.70E-01 | -6.04    |       |
| 1460128_PM_at   | Tmed2                                                                                                                                                                                                                                                                                                              | NA                   | 0.24  | 2.56  | 1.14  | 2.80E-01 | 5.70E-01 | -6.04    |       |
| 1447856_PM_x_at | Slc25a25                                                                                                                                                                                                                                                                                                           | SLC25A25             | 0.36  | 3.67  | 1.14  | 2.80E-01 | 5.70E-01 | -6.04    |       |
| 1435717_PM_at   | Slc30a7                                                                                                                                                                                                                                                                                                            | SLC30A7              | -0.35 | 3.22  | -1.14 | 2.80E-01 | 5.70E-01 | -6.04    |       |
| 1432860_PM_at   | Panx3                                                                                                                                                                                                                                                                                                              | NA                   | 0.14  | 3.03  | 1.14  | 2.80E-01 | 5.70E-01 | -6.04    |       |
| 1420436_PM_x_at | Tex21                                                                                                                                                                                                                                                                                                              | NA                   | 0.15  | 2.83  | 1.14  | 2.80E-01 | 5.70E-01 | -6.04    |       |
| 1443887_PM_at   | Ankrd13c                                                                                                                                                                                                                                                                                                           | NA                   | 0.17  | 2.73  | 1.14  | 2.80E-01 | 5.70E-01 | -6.04    |       |
| 1452347_PM_at   | Mef2a                                                                                                                                                                                                                                                                                                              | MEF2A                | -0.30 | 3.76  | -1.14 | 2.80E-01 | 5.70E-01 | -6.04    |       |
| 1430711_PM_at   | 4933416E03Rik                                                                                                                                                                                                                                                                                                      | NA                   | 0.11  | 2.58  | 1.14  | 2.80E-01 | 5.70E-01 | -6.04    |       |
| 1420352_PM_at   | Prss22                                                                                                                                                                                                                                                                                                             | PRSS22               | 0.26  | 3.13  | 1.14  | 2.80E-01 | 5.70E-01 | -6.04    |       |
| 1451176_PM_at   | Mavs                                                                                                                                                                                                                                                                                                               | MAVS                 | 0.12  | 2.26  | 1.14  | 2.80E-01 | 5.70E-01 | -6.04    |       |
| 1447029_PM_at   | ---                                                                                                                                                                                                                                                                                                                | NA                   | 0.14  | 2.61  | 1.14  | 2.80E-01 | 5.70E-01 | -6.04    |       |
| 1434991_PM_at   | Fbxw17                                                                                                                                                                                                                                                                                                             | NA                   | 0.20  | 2.53  | 1.14  | 2.80E-01 | 5.70E-01 | -6.04    |       |
| 1430662_PM_at   | 9430091E24Rik                                                                                                                                                                                                                                                                                                      | NA                   | 0.22  | 3.72  | 1.14  | 2.80E-01 | 5.70E-01 | -6.04    |       |
| 1431300_PM_at   | Sgip1                                                                                                                                                                                                                                                                                                              | SGIP1                | -0.40 | 3.62  | -1.14 | 2.80E-01 | 5.70E-01 | -6.04    |       |
| 1458875_PM_at   | ---                                                                                                                                                                                                                                                                                                                | NA                   | 0.17  | 2.78  | 1.14  | 2.80E-01 | 5.70E-01 | -6.04    |       |
| 1427743_PM_at   | ---                                                                                                                                                                                                                                                                                                                | NA                   | 0.17  | 2.52  | 1.14  | 2.80E-01 | 5.71E-01 | -6.04    |       |
| 1440866_PM_at   | Eif2ak2                                                                                                                                                                                                                                                                                                            | EIF2AK2              | 0.25  | 4.03  | 1.14  | 2.80E-01 | 5.71E-01 | -6.04    |       |
| 1456897_PM_at   | ---                                                                                                                                                                                                                                                                                                                | NA                   | 0.34  | 3.13  | 1.14  | 2.80E-01 | 5.71E-01 | -6.04    |       |
| 1456552_PM_at   | Foxl2os                                                                                                                                                                                                                                                                                                            | NA                   | 0.17  | 2.52  | 1.14  | 2.80E-01 | 5.71E-01 | -6.04    |       |
| 1417278_PM_a_at | Nkd1                                                                                                                                                                                                                                                                                                               | NKD1                 | 0.12  | 2.66  | 1.14  | 2.80E-01 | 5.71E-01 | -6.04    |       |
| 1423770_PM_at   | Tmc6                                                                                                                                                                                                                                                                                                               | TMC6                 | 0.15  | 2.39  | 1.14  | 2.80E-01 | 5.71E-01 | -6.04    |       |
| 1416098_PM_at   | Syng3                                                                                                                                                                                                                                                                                                              | SYNG3                | -0.39 | 3.48  | -1.14 | 2.80E-01 | 5.71E-01 | -6.04    |       |
| 1448243_PM_at   | Napa                                                                                                                                                                                                                                                                                                               | NAPA                 | -0.20 | 3.52  | -1.14 | 2.80E-01 | 5.71E-01 | -6.04    |       |
| 1420439_PM_at   | Tsx                                                                                                                                                                                                                                                                                                                | NA                   | -0.14 | 2.66  | -1.14 | 2.80E-01 | 5.71E-01 | -6.04    |       |
| 1445303_PM_at   | ---                                                                                                                                                                                                                                                                                                                | NA                   | 0.12  | 2.77  | 1.14  | 2.80E-01 | 5.71E-01 | -6.04    |       |
| 1423139_PM_at   | Wdr4                                                                                                                                                                                                                                                                                                               | WDR4                 | 0.12  | 3.09  | 1.14  | 2.80E-01 | 5.71E-01 | -6.04    |       |
| 1441862_PM_at   | Ppox                                                                                                                                                                                                                                                                                                               | PPOX                 | 0.12  | 2.16  | 1.14  | 2.80E-01 | 5.71E-01 | -6.04    |       |
| 1445927_PM_at   | D13Erttd212e                                                                                                                                                                                                                                                                                                       | NA                   | 0.15  | 2.98  | 1.14  | 2.80E-01 | 5.71E-01 | -6.04    |       |
| 1440743_PM_at   | 4931428F04Rik                                                                                                                                                                                                                                                                                                      | KIAA0895L            | 0.20  | 2.63  | 1.14  | 2.80E-01 | 5.71E-01 | -6.04    |       |
| 1442357_PM_at   | Arhgef17                                                                                                                                                                                                                                                                                                           | NA                   | 0.29  | 2.89  | 1.14  | 2.80E-01 | 5.71E-01 | -6.04    |       |
| 1420745_PM_a_at | Ccndbp1                                                                                                                                                                                                                                                                                                            | CCNDBP1              | -0.69 | 4.55  | -1.14 | 2.80E-01 | 5.71E-01 | -6.04    |       |
| 1439368_PM_a_at | Slc9a3r2                                                                                                                                                                                                                                                                                                           | SLC9A3R2             | -0.69 | 6.93  | -1.14 | 2.81E-01 | 5.71E-01 | -6.04    |       |
| 1446583_PM_at   | ---                                                                                                                                                                                                                                                                                                                | NA                   | 0.16  | 2.11  | 1.14  | 2.81E-01 | 5.71E-01 | -6.04    |       |
| 1448409_PM_at   | Lrmp                                                                                                                                                                                                                                                                                                               | LRMP                 | 0.20  | 2.28  | 1.14  | 2.81E-01 | 5.71E-01 | -6.04    |       |
| 1456962_PM_at   | Cntn2                                                                                                                                                                                                                                                                                                              | CNTN2                | 0.14  | 2.46  | 1.14  | 2.81E-01 | 5.71E-01 | -6.04    |       |
| 1438184_PM_a_at | Ankef1                                                                                                                                                                                                                                                                                                             | ANKEF1               | 0.15  | 2.38  | 1.14  | 2.81E-01 | 5.71E-01 | -6.04    |       |
| 1457572_PM_at   | ---                                                                                                                                                                                                                                                                                                                | NA                   | 0.14  | 2.24  | 1.14  | 2.81E-01 | 5.71E-01 | -6.04    |       |
| 1448031_PM_at   | Gnao1                                                                                                                                                                                                                                                                                                              | NA                   | -0.41 | 4.48  | -1.14 | 2.81E-01 | 5.71E-01 | -6.04    |       |
| 1423508_PM_at   | Kat6b                                                                                                                                                                                                                                                                                                              | KAT6B                | -0.14 | 2.21  | -1.14 | 2.81E-01 | 5.71E-01 | -6.04    |       |
| 1455692_PM_x_at | 1700097N02Rik                                                                                                                                                                                                                                                                                                      | NA                   | 0.18  | 2.57  | 1.14  | 2.81E-01 | 5.71E-01 | -6.04    |       |
| 1441883_PM_at   | Cystm1                                                                                                                                                                                                                                                                                                             | CYSTM1               | 0.18  | 2.56  | 1.14  | 2.81E-01 | 5.71E-01 | -6.04    |       |
| 1455270_PM_at   | Adam11                                                                                                                                                                                                                                                                                                             | ADAM11               | -0.18 | 3.77  | -1.14 | 2.81E-01 | 5.71E-01 | -6.04    |       |
| 1443003_PM_at   | ---                                                                                                                                                                                                                                                                                                                | NA                   | 0.15  | 2.10  | 1.14  | 2.81E-01 | 5.71E-01 | -6.04    |       |
| 1419354_PM_at   | Klf7                                                                                                                                                                                                                                                                                                               | KLF7                 | -0.43 | 7.11  | -1.14 | 2.81E-01 | 5.71E-01 | -6.04    |       |
| 1449467_PM_at   | Gm20737 /// Gm20772 ///<br>Gm20773 /// Gm20777 ///<br>Gm20793 /// Gm20795 ///<br>Gm20807 /// Gm20827 ///<br>Gm20831 /// Gm20833 ///<br>Gm20836 /// Gm20851 ///<br>Gm20910 /// Gm20928 ///<br>Gm21310 /// Gm21425 ///<br>Gm21440 /// Gm21454 ///<br>Gm21660 /// Gm21678 ///<br>LOC102641037 ///<br>LOC105243608 /// | LOC0665918 /// Ssty1 | NA    | -0.24 | 6.23  | -1.14    | 2.81E-01 | 5.71E-01 | -6.04 |
| 1441510_PM_at   | ---                                                                                                                                                                                                                                                                                                                | NA                   | 0.11  | 2.42  | 1.14  | 2.81E-01 | 5.71E-01 | -6.04    |       |
| 1442469_PM_at   | ---                                                                                                                                                                                                                                                                                                                | NA                   | 0.12  | 2.69  | 1.14  | 2.81E-01 | 5.71E-01 | -6.04    |       |
| 1450184_PM_s_at | Tef                                                                                                                                                                                                                                                                                                                | TEF                  | 0.16  | 2.35  | 1.14  | 2.81E-01 | 5.71E-01 | -6.04    |       |
| 1421172_PM_at   | Adam12                                                                                                                                                                                                                                                                                                             | ADAM12               | 0.19  | 2.58  | 1.14  | 2.81E-01 | 5.71E-01 | -6.04    |       |
| 1440670_PM_at   | Gm31765                                                                                                                                                                                                                                                                                                            | NA                   | 0.27  | 3.08  | 1.14  | 2.81E-01 | 5.71E-01 | -6.04    |       |



|                 |                                                                  |          |       |      |       |          |          |       |
|-----------------|------------------------------------------------------------------|----------|-------|------|-------|----------|----------|-------|
| 1460341_PM_at   | Plekhb2                                                          | PLEKHB2  | -0.19 | 2.79 | -1.14 | 2.81E-01 | 5.71E-01 | -6.04 |
| 1437799_PM_at   | Uvssa                                                            | UVSSA    | 0.11  | 2.37 | 1.14  | 2.81E-01 | 5.71E-01 | -6.04 |
| 1416726_PM_s_at | Ube2s                                                            | UBE2S    | 0.66  | 3.65 | 1.14  | 2.81E-01 | 5.71E-01 | -6.04 |
| 1460625_PM_at   | Ccdc177                                                          | CCDC177  | 0.16  | 2.36 | 1.14  | 2.81E-01 | 5.71E-01 | -6.04 |
| 1419996_PM_s_at | Arnt                                                             | ARNT     | -0.41 | 4.00 | -1.14 | 2.81E-01 | 5.71E-01 | -6.04 |
| 1441571_PM_at   | 2410089E03Rik                                                    | CSorf42  | -0.12 | 2.41 | -1.14 | 2.81E-01 | 5.71E-01 | -6.04 |
| 1418555_PM_x_at | Spic                                                             | SPIC     | -0.12 | 2.18 | -1.14 | 2.81E-01 | 5.71E-01 | -6.04 |
| 1440515_PM_at   | Dcdc2b                                                           | NA       | 0.14  | 2.29 | 1.14  | 2.81E-01 | 5.71E-01 | -6.04 |
| 1424725_PM_at   | D16Ert472e                                                       | NA       | 0.16  | 2.33 | 1.14  | 2.81E-01 | 5.71E-01 | -6.04 |
| 1453205_PM_at   | Dydc1                                                            | DYDC1    | 0.20  | 2.17 | 1.14  | 2.81E-01 | 5.71E-01 | -6.04 |
| 1423971_PM_at   | Thoc3                                                            | THOC3    | 0.22  | 5.18 | 1.14  | 2.81E-01 | 5.71E-01 | -6.04 |
| 1445370_PM_at   | ---                                                              | NA       | 0.12  | 1.99 | 1.14  | 2.81E-01 | 5.71E-01 | -6.04 |
| 1442290_PM_at   | Defb45                                                           | NA       | -0.22 | 2.82 | -1.14 | 2.81E-01 | 5.71E-01 | -6.04 |
| 1435631_PM_x_at | Sh3glb1                                                          | SH3GLB1  | 0.34  | 3.36 | 1.14  | 2.81E-01 | 5.71E-01 | -6.04 |
| 1424023_PM_at   | Ctu1                                                             | CTU1     | -0.19 | 2.97 | -1.14 | 2.81E-01 | 5.71E-01 | -6.04 |
| 1439414_PM_x_at | ---                                                              | NA       | 0.13  | 2.14 | 1.14  | 2.81E-01 | 5.71E-01 | -6.04 |
| 1423732_PM_at   | Tram1                                                            | TRAM1    | -0.26 | 3.42 | -1.14 | 2.81E-01 | 5.71E-01 | -6.04 |
| 1420824_PM_at   | Sema4d                                                           | SEMA4D   | -0.16 | 2.44 | -1.14 | 2.81E-01 | 5.71E-01 | -6.04 |
| 1442255_PM_at   | ---                                                              | NA       | -0.10 | 2.30 | -1.14 | 2.81E-01 | 5.71E-01 | -6.04 |
| 1425453_PM_x_at | Kfra12                                                           | NA       | 0.12  | 2.26 | 1.14  | 2.81E-01 | 5.71E-01 | -6.04 |
| 1438830_PM_at   | Gm10512                                                          | NA       | 0.12  | 2.57 | 1.14  | 2.81E-01 | 5.71E-01 | -6.04 |
| 1453423_PM_at   | ---                                                              | NA       | 0.13  | 2.20 | 1.14  | 2.81E-01 | 5.71E-01 | -6.04 |
| 1419540_PM_at   | Fthl17-ps1 /// Fthl17b ///<br>Fthl17c /// Fthl17d ///<br>Fthl17e | FTHL17   | 0.15  | 3.08 | 1.14  | 2.81E-01 | 5.71E-01 | -6.04 |
| 1445327_PM_at   | ---                                                              | NA       | 0.15  | 3.02 | 1.14  | 2.81E-01 | 5.71E-01 | -6.04 |
| 1431378_PM_at   | Nr3c1                                                            | NR3C1    | 0.24  | 4.28 | 1.14  | 2.81E-01 | 5.71E-01 | -6.04 |
| 1457591_PM_at   | ---                                                              | NA       | 0.17  | 2.49 | 1.14  | 2.81E-01 | 5.72E-01 | -6.05 |
| 1458091_PM_at   | ---                                                              | NA       | 0.33  | 3.39 | 1.14  | 2.81E-01 | 5.72E-01 | -6.05 |
| 1460408_PM_at   | Gabrg1                                                           | GABRG1   | -0.31 | 4.84 | -1.14 | 2.81E-01 | 5.72E-01 | -6.05 |
| 1421631_PM_at   | Pcdhb1                                                           | NA       | 0.11  | 2.44 | 1.14  | 2.81E-01 | 5.72E-01 | -6.05 |
| 1450046_PM_at   | Tmem59                                                           | NA       | 0.14  | 2.43 | 1.14  | 2.81E-01 | 5.72E-01 | -6.05 |
| 1440365_PM_at   | ---                                                              | NA       | 0.11  | 2.39 | 1.14  | 2.82E-01 | 5.72E-01 | -6.05 |
| 1420433_PM_at   | Taf7l                                                            | TAF7L    | 0.12  | 2.18 | 1.14  | 2.82E-01 | 5.72E-01 | -6.05 |
| 1419479_PM_at   | Sectm1b                                                          | SECTM1   | 0.12  | 2.27 | 1.14  | 2.82E-01 | 5.72E-01 | -6.05 |
| 1444063_PM_at   | Rab7b                                                            | RAB7B    | 0.18  | 3.24 | 1.14  | 2.82E-01 | 5.72E-01 | -6.05 |
| 1457309_PM_at   | AU015228                                                         | NA       | -0.09 | 2.20 | -1.14 | 2.82E-01 | 5.72E-01 | -6.05 |
| 1451982_PM_at   | Map2k4                                                           | MAP2K4   | -0.34 | 6.36 | -1.14 | 2.82E-01 | 5.72E-01 | -6.05 |
| 1448195_PM_at   | Taf5l                                                            | TAF5L    | -0.19 | 3.35 | -1.14 | 2.82E-01 | 5.72E-01 | -6.05 |
| 1433367_PM_at   | 8430401P03Rik                                                    | NA       | -0.09 | 2.59 | -1.14 | 2.82E-01 | 5.72E-01 | -6.05 |
| 1445353_PM_at   | ---                                                              | NA       | 0.08  | 1.80 | 1.14  | 2.82E-01 | 5.72E-01 | -6.05 |
| 1444256_PM_at   | Rae1                                                             | NA       | 0.21  | 3.04 | 1.14  | 2.82E-01 | 5.72E-01 | -6.05 |
| 1446962_PM_at   | ---                                                              | NA       | 0.12  | 2.15 | 1.14  | 2.82E-01 | 5.72E-01 | -6.05 |
| 1452339_PM_at   | Adamts7                                                          | ADAMTS7  | 0.16  | 2.92 | 1.14  | 2.82E-01 | 5.72E-01 | -6.05 |
| 1439937_PM_at   | ---                                                              | NA       | 0.11  | 2.35 | 1.14  | 2.82E-01 | 5.72E-01 | -6.05 |
| 1435979_PM_a_at | Myo15b                                                           | NA       | 0.11  | 2.21 | 1.13  | 2.82E-01 | 5.72E-01 | -6.05 |
| 1449854_PM_at   | Nr0b2                                                            | NROB2    | 0.18  | 2.43 | 1.13  | 2.82E-01 | 5.72E-01 | -6.05 |
| 1430230_PM_at   | RcSD1                                                            | RCSD1    | 0.18  | 2.71 | 1.13  | 2.82E-01 | 5.72E-01 | -6.05 |
| 1419074_PM_at   | Chac2                                                            | CHAC2    | -0.17 | 2.17 | -1.13 | 2.82E-01 | 5.72E-01 | -6.05 |
| 1428973_PM_s_at | Tctex1d2                                                         | TCTEX1D2 | 0.15  | 3.52 | 1.13  | 2.82E-01 | 5.72E-01 | -6.05 |
| 1442554_PM_s_at | Kalrn                                                            | NA       | 0.20  | 2.34 | 1.13  | 2.82E-01 | 5.72E-01 | -6.05 |
| 1444640_PM_at   | Pigg                                                             | PIGG     | -0.38 | 2.47 | -1.13 | 2.82E-01 | 5.72E-01 | -6.05 |
| 1438497_PM_at   | Mfsd8                                                            | MFSDB8   | -0.23 | 3.01 | -1.13 | 2.82E-01 | 5.72E-01 | -6.05 |
| 1446986_PM_at   | Scrt2                                                            | SCRT2    | 0.11  | 2.05 | 1.13  | 2.82E-01 | 5.72E-01 | -6.05 |
| 1419413_PM_at   | Ccl17                                                            | CCL17    | 0.16  | 2.30 | 1.13  | 2.82E-01 | 5.72E-01 | -6.05 |
| 1450594_PM_at   | Magea4                                                           | MAGEA2   | -0.17 | 2.34 | -1.13 | 2.82E-01 | 5.72E-01 | -6.05 |
| 1456510_PM_x_at | Mettl7a2                                                         | METTL7A  | -0.13 | 5.41 | -1.13 | 2.82E-01 | 5.72E-01 | -6.05 |
| 1446442_PM_at   | Rnmt                                                             | NA       | 0.10  | 2.14 | 1.13  | 2.82E-01 | 5.72E-01 | -6.05 |
| 1434079_PM_s_at | Mcm2                                                             | MCM2     | 0.12  | 2.36 | 1.13  | 2.82E-01 | 5.72E-01 | -6.05 |
| 1441357_PM_at   | Kirrel3                                                          | KIRREL3  | 0.13  | 2.17 | 1.13  | 2.82E-01 | 5.72E-01 | -6.05 |
| 1428725_PM_at   | Pias2                                                            | PIAS2    | -0.28 | 3.89 | -1.13 | 2.82E-01 | 5.72E-01 | -6.05 |
| 1430221_PM_at   | 9130008F23Rik                                                    | C6orf141 | 0.11  | 2.70 | 1.13  | 2.82E-01 | 5.72E-01 | -6.05 |
| 1417499_PM_at   | Timm10                                                           | TIMM10   | -0.38 | 5.38 | -1.13 | 2.82E-01 | 5.73E-01 | -6.05 |
| 1458621_PM_at   | ---                                                              | NA       | 0.17  | 2.43 | 1.13  | 2.82E-01 | 5.73E-01 | -6.05 |
| 1449539_PM_at   | Ms4a6d                                                           | NA       | 0.10  | 2.18 | 1.13  | 2.82E-01 | 5.73E-01 | -6.05 |
| 1432527_PM_at   | Lrrc72                                                           | LRRRC72  | 0.17  | 2.31 | 1.13  | 2.82E-01 | 5.73E-01 | -6.05 |
| 1447387_PM_at   | ---                                                              | NA       | 0.20  | 2.21 | 1.13  | 2.82E-01 | 5.73E-01 | -6.05 |
| 1418782_PM_at   | Rxrg                                                             | RXRG     | 0.17  | 2.87 | 1.13  | 2.82E-01 | 5.73E-01 | -6.05 |
| 1436110_PM_at   | Homer2                                                           | HOMER2   | 0.26  | 2.60 | 1.13  | 2.83E-01 | 5.73E-01 | -6.05 |
| 1433700_PM_at   | Gskip                                                            | GSKIP    | -0.15 | 3.00 | -1.13 | 2.83E-01 | 5.73E-01 | -6.05 |
| 1451741_PM_a_at | Cdk7                                                             | CDK7     | -0.17 | 2.89 | -1.13 | 2.83E-01 | 5.73E-01 | -6.05 |
| 1460208_PM_at   | Fbn1                                                             | FBN1     | -0.12 | 2.35 | -1.13 | 2.83E-01 | 5.73E-01 | -6.05 |
| 1420051_PM_at   | ---                                                              | NA       | 0.10  | 2.14 | 1.13  | 2.83E-01 | 5.73E-01 | -6.05 |
| 1438046_PM_at   | AU019823                                                         | C11orf57 | 0.21  | 3.00 | 1.13  | 2.83E-01 | 5.73E-01 | -6.05 |
| 1424548_PM_at   | Zgpat                                                            | ZGPAT    | 0.16  | 2.57 | 1.13  | 2.83E-01 | 5.73E-01 | -6.05 |

|                 |               |           |       |      |       |          |          |       |
|-----------------|---------------|-----------|-------|------|-------|----------|----------|-------|
| 1418058_PM_at   | Adgrl4        | ADGRL4    | -0.14 | 2.20 | -1.13 | 2.83E-01 | 5.73E-01 | -6.05 |
| 1431389_PM_at   | Tbkbp1        | TBKBP1    | 0.11  | 2.33 | 1.13  | 2.83E-01 | 5.73E-01 | -6.05 |
| 1460176_PM_at   | Crk           | CRK       | -0.37 | 3.19 | -1.13 | 2.83E-01 | 5.73E-01 | -6.05 |
| 1442024_PM_at   | LOC105246790  | NA        | -0.33 | 2.93 | -1.13 | 2.83E-01 | 5.73E-01 | -6.05 |
| 1450554_PM_at   | Defb2         | NA        | 0.13  | 2.71 | 1.13  | 2.83E-01 | 5.73E-01 | -6.05 |
| 1416891_PM_at   | Numb          | NUMB      | -0.32 | 3.51 | -1.13 | 2.83E-01 | 5.73E-01 | -6.05 |
| 1436412_PM_at   | ---           | NA        | -0.12 | 2.15 | -1.13 | 2.83E-01 | 5.73E-01 | -6.05 |
| 1439313_PM_at   | Adgrl3        | NA        | -0.53 | 4.14 | -1.13 | 2.83E-01 | 5.73E-01 | -6.05 |
| 1419183_PM_at   | Papd4         | PAPD4     | -0.25 | 3.43 | -1.13 | 2.83E-01 | 5.73E-01 | -6.05 |
| 1442467_PM_at   | Nav2          | NAV2      | -0.12 | 2.56 | -1.13 | 2.83E-01 | 5.73E-01 | -6.05 |
| 1445737_PM_at   | 1700057H21Rik | NA        | -0.11 | 2.26 | -1.13 | 2.83E-01 | 5.73E-01 | -6.05 |
| 1448044_PM_a_at | Gm10658       | NA        | 0.10  | 1.96 | 1.13  | 2.83E-01 | 5.73E-01 | -6.05 |
| 1427726_PM_at   | H2-T3         | NA        | 0.11  | 2.26 | 1.13  | 2.83E-01 | 5.73E-01 | -6.05 |
| 1440731_PM_at   | Al413759      | NA        | 0.13  | 2.62 | 1.13  | 2.83E-01 | 5.73E-01 | -6.05 |
| 1458733_PM_at   | ---           | NA        | 0.14  | 2.78 | 1.13  | 2.83E-01 | 5.73E-01 | -6.05 |
| 1454026_PM_a_at | Rgs3          | RGS3      | 0.16  | 2.93 | 1.13  | 2.83E-01 | 5.73E-01 | -6.05 |
| 1458168_PM_at   | Ufm1          | UFM1      | -0.20 | 2.37 | -1.13 | 2.83E-01 | 5.73E-01 | -6.05 |
| 1430187_PM_at   | Zfp60         | NA        | 0.12  | 1.93 | 1.13  | 2.83E-01 | 5.73E-01 | -6.05 |
| 1430435_PM_at   | Aff3          | AFF3      | 0.15  | 2.77 | 1.13  | 2.83E-01 | 5.73E-01 | -6.05 |
| 1427018_PM_at   | Tsnaxip1      | TSNAXIP1  | 0.21  | 2.87 | 1.13  | 2.83E-01 | 5.73E-01 | -6.05 |
| 1418662_PM_at   | Tceanc2       | TCEANC2   | 0.10  | 2.13 | 1.13  | 2.83E-01 | 5.73E-01 | -6.05 |
| 1436429_PM_at   | Zfp606        | ZNF606    | -0.14 | 2.31 | -1.13 | 2.83E-01 | 5.73E-01 | -6.05 |
| 1457160_PM_at   | Fjx1          | FJX1      | 0.15  | 2.49 | 1.13  | 2.83E-01 | 5.73E-01 | -6.05 |
| 1458947_PM_at   | LOC102643251  | NA        | 0.17  | 2.82 | 1.13  | 2.83E-01 | 5.73E-01 | -6.05 |
| 1438168_PM_x_at | Ddx39         | DDX39A    | 0.73  | 3.97 | 1.13  | 2.83E-01 | 5.73E-01 | -6.05 |
| 1434418_PM_at   | Cers6         | CERS6     | -0.55 | 6.69 | -1.13 | 2.83E-01 | 5.73E-01 | -6.05 |
| 1455327_PM_at   | Senp2         | SENP2     | -0.26 | 3.57 | -1.13 | 2.83E-01 | 5.73E-01 | -6.05 |
| 1416594_PM_at   | Sfrp1         | SFRP1     | 0.13  | 2.20 | 1.13  | 2.83E-01 | 5.73E-01 | -6.05 |
| 1417913_PM_at   | Gins4         | GIN54     | 0.19  | 2.73 | 1.13  | 2.83E-01 | 5.73E-01 | -6.05 |
| 1444015_PM_at   | Papola        | NA        | 0.31  | 3.28 | 1.13  | 2.83E-01 | 5.73E-01 | -6.05 |
| 1431277_PM_at   | Pla2g6        | PLA2G6    | 0.37  | 3.72 | 1.13  | 2.83E-01 | 5.73E-01 | -6.05 |
| 1460505_PM_at   | 8030442B05Rik | NA        | 0.15  | 2.32 | 1.13  | 2.83E-01 | 5.73E-01 | -6.05 |
| 1435083_PM_at   | Ctxn1         | CTXN1     | -0.60 | 7.14 | -1.13 | 2.83E-01 | 5.73E-01 | -6.05 |
| 1437557_PM_at   | D3Ert254e     | ZNF267    | -0.54 | 4.70 | -1.13 | 2.84E-01 | 5.73E-01 | -6.05 |
| 1436079_PM_s_at | Vapb          | VAPB      | -0.18 | 5.14 | -1.13 | 2.83E-01 | 5.73E-01 | -6.05 |
| 1432482_PM_at   | Lyzl6         | LYZL6     | -0.09 | 1.96 | -1.13 | 2.83E-01 | 5.73E-01 | -6.05 |
| 1435838_PM_at   | Agxt2         | AGXT2     | 0.10  | 1.98 | 1.13  | 2.83E-01 | 5.73E-01 | -6.05 |
| 1460327_PM_at   | Gpr88         | GPR88     | 0.12  | 2.41 | 1.13  | 2.83E-01 | 5.73E-01 | -6.05 |
| 1418299_PM_at   | Dpysl4        | DPYSL4    | 0.12  | 2.57 | 1.13  | 2.83E-01 | 5.73E-01 | -6.05 |
| 1446426_PM_at   | ---           | NA        | 0.12  | 2.15 | 1.13  | 2.84E-01 | 5.73E-01 | -6.05 |
| 1418438_PM_at   | Fabp2         | FABP2     | 0.13  | 2.24 | 1.13  | 2.83E-01 | 5.73E-01 | -6.05 |
| 1439576_PM_at   | ---           | NA        | 0.13  | 2.48 | 1.13  | 2.84E-01 | 5.73E-01 | -6.05 |
| 1419448_PM_at   | Tbc1d1        | TBC1D1    | 0.14  | 2.38 | 1.13  | 2.83E-01 | 5.73E-01 | -6.05 |
| 1458746_PM_at   | ---           | NA        | 0.14  | 2.44 | 1.13  | 2.83E-01 | 5.73E-01 | -6.05 |
| 1456969_PM_at   | ---           | NA        | 0.15  | 2.40 | 1.13  | 2.83E-01 | 5.73E-01 | -6.05 |
| 1443043_PM_at   | Otop2         | OTOP2     | 0.15  | 2.26 | 1.13  | 2.83E-01 | 5.73E-01 | -6.05 |
| 1453819_PM_x_at | Stx18         | STX18     | 0.15  | 2.74 | 1.13  | 2.84E-01 | 5.73E-01 | -6.05 |
| 1430922_PM_at   | 5530401A14Rik | NA        | 0.15  | 2.46 | 1.13  | 2.84E-01 | 5.73E-01 | -6.05 |
| 1417084_PM_at   | Eif4ebp2      | EIF4EBP2  | 0.16  | 2.46 | 1.13  | 2.84E-01 | 5.73E-01 | -6.05 |
| 1416065_PM_a_at | Ankrd10       | ANKRD10   | 0.21  | 7.86 | 1.13  | 2.83E-01 | 5.73E-01 | -6.05 |
| 1454491_PM_at   | 2900040J22Rik | NA        | 0.23  | 3.53 | 1.13  | 2.83E-01 | 5.73E-01 | -6.05 |
| 1444842_PM_at   | Kdm5a         | KDM5A     | 0.32  | 2.92 | 1.13  | 2.83E-01 | 5.73E-01 | -6.05 |
| 1439845_PM_at   | Hp1bp3        | HP1BP3    | 0.46  | 3.31 | 1.13  | 2.83E-01 | 5.73E-01 | -6.05 |
| 1437318_PM_at   | Pak3          | PAK3      | -0.75 | 3.82 | -1.13 | 2.84E-01 | 5.73E-01 | -6.05 |
| 1451376_PM_at   | Atl3          | ATL3      | 0.14  | 2.46 | 1.13  | 2.84E-01 | 5.73E-01 | -6.05 |
| 1420679_PM_a_at | Aig1          | AIG1      | -0.25 | 3.91 | -1.13 | 2.84E-01 | 5.73E-01 | -6.05 |
| 1423521_PM_at   | Lmnb1         | LMNB1     | 0.17  | 2.81 | 1.13  | 2.84E-01 | 5.73E-01 | -6.05 |
| 1440789_PM_at   | ---           | NA        | 0.67  | 3.53 | 1.13  | 2.84E-01 | 5.73E-01 | -6.05 |
| 1438021_PM_at   | Rbm47         | RBM47     | 0.20  | 2.64 | 1.13  | 2.84E-01 | 5.73E-01 | -6.05 |
| 1439207_PM_at   | Pnma5         | PNMA5     | 0.11  | 2.06 | 1.13  | 2.84E-01 | 5.73E-01 | -6.05 |
| 1452813_PM_a_at | Cnep1r1       | CNEP1R1   | -0.36 | 3.89 | -1.13 | 2.84E-01 | 5.73E-01 | -6.05 |
| 1435379_PM_at   | Urb2          | URB2      | 0.11  | 2.61 | 1.13  | 2.84E-01 | 5.73E-01 | -6.05 |
| 1418571_PM_at   | Tnfrsf12a     | TNFRSF12A | 0.14  | 2.95 | 1.13  | 2.84E-01 | 5.73E-01 | -6.05 |
| 1439672_PM_at   | ---           | NA        | -0.18 | 2.43 | -1.13 | 2.84E-01 | 5.73E-01 | -6.05 |
| 1430771_PM_a_at | Msh5          | MSH5      | 0.12  | 2.20 | 1.13  | 2.84E-01 | 5.73E-01 | -6.05 |
| 1451473_PM_a_at | Cryz1         | CRYZ1     | -0.30 | 4.18 | -1.13 | 2.84E-01 | 5.73E-01 | -6.05 |
| 1416376_PM_at   | Tmem97        | TMEM97    | 0.14  | 3.38 | 1.13  | 2.84E-01 | 5.73E-01 | -6.05 |
| 1416400_PM_at   | Pycr1         | PYCR3     | 0.14  | 2.98 | 1.13  | 2.84E-01 | 5.73E-01 | -6.05 |
| 1434210_PM_s_at | Lrig1         | LRIG1     | -0.44 | 3.79 | -1.13 | 2.84E-01 | 5.73E-01 | -6.05 |
| 1456623_PM_at   | Tpm1          | TPM1      | 0.18  | 2.51 | 1.13  | 2.84E-01 | 5.73E-01 | -6.05 |
| 1459623_PM_at   | ---           | NA        | 0.13  | 2.15 | 1.13  | 2.84E-01 | 5.73E-01 | -6.05 |
| 1435473_PM_at   | Ppp1r26       | PPP1R26   | -0.43 | 5.42 | -1.13 | 2.84E-01 | 5.74E-01 | -6.05 |
| 1442757_PM_at   | Lrch1         | LRCH1     | -0.38 | 2.92 | -1.13 | 2.84E-01 | 5.74E-01 | -6.05 |
| 1438364_PM_x_at | Ang4          | ANG       | 0.11  | 2.08 | 1.13  | 2.84E-01 | 5.74E-01 | -6.05 |
| 1427966_PM_at   | Otulin        | OTULIN    | 0.26  | 2.92 | 1.13  | 2.84E-01 | 5.74E-01 | -6.05 |

|                 |                                         |           |       |      |       |          |          |       |
|-----------------|-----------------------------------------|-----------|-------|------|-------|----------|----------|-------|
| 1435101_PM_at   | Derl2                                   | DERL2     | -0.34 | 3.18 | -1.13 | 2.84E-01 | 5.74E-01 | -6.05 |
| 1457101_PM_at   | ---                                     | NA        | 0.10  | 2.89 | 1.13  | 2.84E-01 | 5.74E-01 | -6.05 |
| 1423500_PM_a_at | Sox5                                    | SOX5      | 0.19  | 2.78 | 1.13  | 2.84E-01 | 5.74E-01 | -6.05 |
| 1450121_PM_at   | Scn1a                                   | SCN1A     | -0.44 | 6.92 | -1.13 | 2.84E-01 | 5.74E-01 | -6.05 |
| 1447402_PM_at   | ---                                     | NA        | 0.12  | 2.13 | 1.13  | 2.84E-01 | 5.74E-01 | -6.05 |
| 1439677_PM_at   | ---                                     | NA        | 0.24  | 2.97 | 1.13  | 2.84E-01 | 5.74E-01 | -6.05 |
| 1417355_PM_at   | Peg3                                    | PEG3      | 0.34  | 5.69 | 1.13  | 2.84E-01 | 5.74E-01 | -6.05 |
| 1418304_PM_at   | Cdhr1                                   | CDHR1     | -0.31 | 2.90 | -1.13 | 2.84E-01 | 5.74E-01 | -6.05 |
| 1457845_PM_at   | ---                                     | NA        | 0.12  | 2.13 | 1.13  | 2.84E-01 | 5.74E-01 | -6.05 |
| 1428867_PM_at   | Exoc3l2                                 | NA        | 0.17  | 2.53 | 1.13  | 2.84E-01 | 5.74E-01 | -6.05 |
| 1422746_PM_s_at | Bicd2                                   | BICD2     | 0.17  | 2.25 | 1.13  | 2.84E-01 | 5.74E-01 | -6.05 |
| 1444851_PM_at   | ---                                     | NA        | 0.17  | 2.41 | 1.13  | 2.84E-01 | 5.74E-01 | -6.05 |
| 1434649_PM_at   | Ccm2                                    | CCM2      | 0.21  | 2.84 | 1.13  | 2.84E-01 | 5.74E-01 | -6.05 |
| 1419019_PM_a_at | Akap4                                   | AKAP4     | -0.09 | 2.22 | -1.13 | 2.84E-01 | 5.74E-01 | -6.05 |
| 1445993_PM_at   | ---                                     | NA        | 0.09  | 2.10 | 1.13  | 2.84E-01 | 5.74E-01 | -6.05 |
| 1450613_PM_x_at | Ifnab                                   | IFNA6     | 0.11  | 2.14 | 1.13  | 2.84E-01 | 5.74E-01 | -6.05 |
| 1422726_PM_x_at | Speer4a                                 | NA        | 0.14  | 2.23 | 1.13  | 2.84E-01 | 5.74E-01 | -6.05 |
| 1421421_PM_at   | Angptl1                                 | ANGPTL1   | 0.14  | 2.39 | 1.13  | 2.84E-01 | 5.74E-01 | -6.05 |
| 1423814_PM_at   | Ddx41                                   | DDX41     | 0.15  | 2.93 | 1.13  | 2.84E-01 | 5.74E-01 | -6.05 |
| 1453216_PM_at   | Gpt                                     | NA        | 0.16  | 2.98 | 1.13  | 2.84E-01 | 5.74E-01 | -6.05 |
| 1427684_PM_at   | Zfp264                                  | NA        | 0.16  | 2.61 | 1.13  | 2.84E-01 | 5.74E-01 | -6.05 |
| 1459627_PM_at   | Msmo1                                   | MSMO1     | 0.24  | 2.52 | 1.13  | 2.84E-01 | 5.74E-01 | -6.05 |
| 1418598_PM_at   | Ubox5                                   | UBOX5     | 0.19  | 2.75 | 1.13  | 2.84E-01 | 5.74E-01 | -6.05 |
| 1442859_PM_at   | ---                                     | NA        | 0.30  | 3.44 | 1.13  | 2.85E-01 | 5.74E-01 | -6.05 |
| 1433749_PM_at   | Gna13                                   | GNA13     | -0.57 | 5.31 | -1.13 | 2.85E-01 | 5.74E-01 | -6.05 |
| 1416801_PM_at   | Trpm7                                   | TRPM7     | -0.18 | 3.22 | -1.13 | 2.85E-01 | 5.74E-01 | -6.05 |
| 1417874_PM_at   | Tmem9b                                  | TMEM9B    | -0.17 | 3.60 | -1.13 | 2.85E-01 | 5.74E-01 | -6.05 |
| 1458318_PM_at   | ---                                     | NA        | 0.12  | 2.01 | 1.13  | 2.85E-01 | 5.74E-01 | -6.05 |
| 1453469_PM_at   | ---                                     | NA        | 0.26  | 2.43 | 1.13  | 2.85E-01 | 5.74E-01 | -6.05 |
| 1443722_PM_at   | ---                                     | NA        | 0.35  | 3.21 | 1.13  | 2.85E-01 | 5.74E-01 | -6.05 |
| 1416046_PM_a_at | Fuca2                                   | FUCA2     | -0.18 | 2.31 | -1.13 | 2.85E-01 | 5.74E-01 | -6.05 |
| 1431842_PM_at   | ---                                     | NA        | 0.14  | 2.13 | 1.13  | 2.85E-01 | 5.74E-01 | -6.05 |
| 1430323_PM_at   | 1700049E17Rik1                          | NA        | 0.29  | 4.12 | 1.13  | 2.85E-01 | 5.74E-01 | -6.05 |
| 1425385_PM_a_at | Ighg2c                                  | NA        | 0.70  | 3.05 | 1.13  | 2.85E-01 | 5.74E-01 | -6.05 |
| 1422644_PM_at   | Sh3bgr                                  | SH3BGR    | 0.16  | 2.75 | 1.13  | 2.85E-01 | 5.74E-01 | -6.05 |
| 1455903_PM_at   | Tbc1d4                                  | TBC1D4    | 0.17  | 3.24 | 1.13  | 2.85E-01 | 5.74E-01 | -6.05 |
| 1457244_PM_at   | D6Ert474e                               | NA        | 0.11  | 2.10 | 1.13  | 2.85E-01 | 5.74E-01 | -6.05 |
| 1436034_PM_at   | Cep68                                   | NA        | -0.23 | 2.93 | -1.13 | 2.85E-01 | 5.74E-01 | -6.05 |
| 1426062_PM_a_at | Casp7                                   | CASP7     | 0.11  | 2.29 | 1.13  | 2.85E-01 | 5.74E-01 | -6.05 |
| 1450536_PM_s_at | Krtap12-1                               | KRTAP12-2 | 0.11  | 2.43 | 1.13  | 2.85E-01 | 5.74E-01 | -6.05 |
| 1418554_PM_at   | Gpr182                                  | GPR182    | 0.15  | 2.68 | 1.13  | 2.85E-01 | 5.74E-01 | -6.05 |
| 1425055_PM_at   | Ppp6r2                                  | PPP6R2    | 0.17  | 2.49 | 1.13  | 2.85E-01 | 5.74E-01 | -6.05 |
| 1446472_PM_at   | Ahctf1                                  | AHCTF1    | 0.17  | 2.42 | 1.13  | 2.85E-01 | 5.74E-01 | -6.05 |
| 1446901_PM_at   | AU022077                                | NA        | 0.29  | 2.51 | 1.13  | 2.85E-01 | 5.74E-01 | -6.05 |
| 1424027_PM_at   | Pxn                                     | PXN       | 0.18  | 3.17 | 1.13  | 2.85E-01 | 5.74E-01 | -6.05 |
| 1427909_PM_at   | 2410015M20Rik                           | C19orf70  | 0.24  | 3.01 | 1.13  | 2.85E-01 | 5.74E-01 | -6.05 |
| 1457192_PM_at   | ---                                     | NA        | 0.29  | 3.83 | 1.13  | 2.85E-01 | 5.74E-01 | -6.05 |
| 1443141_PM_at   | ---                                     | NA        | 0.10  | 2.12 | 1.13  | 2.85E-01 | 5.74E-01 | -6.05 |
| 1417986_PM_at   | Nrarp                                   | NRARP     | 0.14  | 2.27 | 1.13  | 2.85E-01 | 5.74E-01 | -6.05 |
| 1425283_PM_a_at | Mt5                                     | TESMIN    | 0.21  | 2.96 | 1.13  | 2.85E-01 | 5.74E-01 | -6.05 |
| 1435041_PM_at   | Gm10080 /// Myl6                        | NA        | 0.24  | 3.59 | 1.13  | 2.85E-01 | 5.74E-01 | -6.05 |
| 1428117_PM_x_at | Dynt1f                                  | NA        | 0.25  | 3.97 | 1.13  | 2.85E-01 | 5.74E-01 | -6.05 |
| 1440032_PM_at   | R3hdm1                                  | R3HDM1    | 0.50  | 3.76 | 1.13  | 2.85E-01 | 5.74E-01 | -6.05 |
| 1439128_PM_at   | Zbtb20                                  | ZBTB20    | -0.45 | 6.14 | -1.13 | 2.85E-01 | 5.74E-01 | -6.06 |
| 1446823_PM_at   | D4Ert103e                               | NA        | 0.52  | 3.02 | 1.13  | 2.85E-01 | 5.74E-01 | -6.06 |
| 1433584_PM_at   | Tuba1a                                  | TUBA1A    | -0.10 | 2.15 | -1.13 | 2.85E-01 | 5.74E-01 | -6.06 |
| 1418936_PM_at   | Maff                                    | MAFF      | -0.09 | 2.42 | -1.13 | 2.85E-01 | 5.74E-01 | -6.06 |
| 1445729_PM_at   | ---                                     | NA        | 0.12  | 2.11 | 1.13  | 2.85E-01 | 5.74E-01 | -6.06 |
| 1457681_PM_at   | Ccdc141                                 | CCDC141   | 0.12  | 2.36 | 1.13  | 2.85E-01 | 5.74E-01 | -6.06 |
| 1445536_PM_at   | AW061096                                | NA        | 0.24  | 2.72 | 1.13  | 2.85E-01 | 5.74E-01 | -6.06 |
| 1427694_PM_at   | Gnrhr                                   | GNRHR     | 0.19  | 2.30 | 1.13  | 2.85E-01 | 5.75E-01 | -6.06 |
| 1456308_PM_x_at | Trim28                                  | TRIM28    | -0.33 | 5.18 | -1.13 | 2.85E-01 | 5.75E-01 | -6.06 |
| 1429572_PM_at   | Nsun7                                   | NSUN7     | 0.10  | 2.28 | 1.13  | 2.85E-01 | 5.75E-01 | -6.06 |
| 1433559_PM_at   | Slc45a4                                 | SLC45A4   | -0.25 | 2.77 | -1.13 | 2.85E-01 | 5.75E-01 | -6.06 |
| 1430891_PM_at   | ---                                     | NA        | -0.11 | 2.19 | -1.13 | 2.85E-01 | 5.75E-01 | -6.06 |
| 1439535_PM_at   | ---                                     | NA        | 0.13  | 2.63 | 1.13  | 2.85E-01 | 5.75E-01 | -6.06 |
| 1460649_PM_at   | Irak1                                   | IRAK1     | 0.13  | 2.89 | 1.13  | 2.85E-01 | 5.75E-01 | -6.06 |
| 1446023_PM_at   | Ostf1                                   | OSTF1     | 0.14  | 2.23 | 1.13  | 2.85E-01 | 5.75E-01 | -6.06 |
| 1444707_PM_at   | ---                                     | NA        | 0.15  | 2.71 | 1.13  | 2.85E-01 | 5.75E-01 | -6.06 |
| 1422537_PM_a_at | Id2                                     | ID2       | 0.27  | 2.58 | 1.13  | 2.85E-01 | 5.75E-01 | -6.06 |
| 1438237_PM_at   | Gm13242 /// Gm30910 /// Rex2 /// Zfp600 | ZNF578    | 0.36  | 4.86 | 1.13  | 2.85E-01 | 5.75E-01 | -6.06 |
| 1430420_PM_at   | ---                                     | NA        | 0.10  | 2.13 | 1.13  | 2.85E-01 | 5.75E-01 | -6.06 |
| 1437287_PM_at   | Nadk2                                   | NADK2     | -0.23 | 3.27 | -1.13 | 2.85E-01 | 5.75E-01 | -6.06 |
| 1460088_PM_at   | 6430531B16Rik                           | NA        | 0.27  | 2.72 | 1.13  | 2.85E-01 | 5.75E-01 | -6.06 |

|                         |                |           |       |       |       |          |          |       |
|-------------------------|----------------|-----------|-------|-------|-------|----------|----------|-------|
| 1451087_PM_at           | Wdr36          | WDR36     | -0.13 | 2.41  | -1.13 | 2.85E-01 | 5.75E-01 | -6.06 |
| 1428105_PM_at           | Tpx2           | TPX2      | -0.08 | 2.18  | -1.13 | 2.85E-01 | 5.75E-01 | -6.06 |
| 1459583_PM_at           | ---            | NA        | -0.18 | 2.50  | -1.13 | 2.86E-01 | 5.75E-01 | -6.06 |
| AFFX-r2-TagIN-3_at      | ---            | NA        | 0.09  | 2.12  | 1.13  | 2.86E-01 | 5.75E-01 | -6.06 |
| 1458750_PM_at           | Gm17250        | NA        | 0.11  | 2.82  | 1.13  | 2.86E-01 | 5.75E-01 | -6.06 |
| 1430950_PM_at           | Osr2           | OSR2      | 0.13  | 2.54  | 1.13  | 2.86E-01 | 5.75E-01 | -6.06 |
| 1453785_PM_at           | Taz            | TAZ       | 0.15  | 2.34  | 1.13  | 2.86E-01 | 5.75E-01 | -6.06 |
| 1421666_PM_a_at         | Aanat          | AANAT     | 0.15  | 2.48  | 1.13  | 2.86E-01 | 5.75E-01 | -6.06 |
| 1447802_PM_x_at         | LOC102633666   | NA        | 0.17  | 3.34  | 1.13  | 2.86E-01 | 5.75E-01 | -6.06 |
| 1423000_PM_a_at         | Dgke           | DGKE      | 0.18  | 2.56  | 1.13  | 2.86E-01 | 5.75E-01 | -6.06 |
| 1443706_PM_at           | C1galt1c1      | C1GALT1C1 | 0.21  | 3.41  | 1.13  | 2.86E-01 | 5.75E-01 | -6.06 |
| 1433775_PM_at           | C77080         | KIAA1522  | 0.23  | 4.57  | 1.13  | 2.86E-01 | 5.75E-01 | -6.06 |
| 1431685_PM_at           | ---            | NA        | 0.33  | 3.13  | 1.13  | 2.86E-01 | 5.75E-01 | -6.06 |
| 1423108_PM_at           | Slc25a20       | SLC25A20  | 0.65  | 4.94  | 1.13  | 2.86E-01 | 5.75E-01 | -6.06 |
| 1442596_PM_at           | Klhdc2         | KLHDC2    | 0.24  | 2.32  | 1.13  | 2.86E-01 | 5.75E-01 | -6.06 |
| 1417660_PM_s_at         | Vps29          | VPS29     | -0.36 | 5.27  | -1.13 | 2.86E-01 | 5.75E-01 | -6.06 |
| 1425320_PM_at           | Zfp605         | NA        | 0.13  | 2.17  | 1.13  | 2.86E-01 | 5.75E-01 | -6.06 |
| 1448314_PM_at           | Cdk1           | CDK1      | 0.11  | 2.41  | 1.13  | 2.86E-01 | 5.75E-01 | -6.06 |
| 1426943_PM_at           | Ints1          | INTS1     | 0.18  | 3.03  | 1.13  | 2.86E-01 | 5.75E-01 | -6.06 |
| 1451869_PM_at           | Abca3          | ABCA3     | -0.19 | 2.99  | -1.13 | 2.86E-01 | 5.75E-01 | -6.06 |
| 1432744_PM_at           | 4930443G03Rik  | NA        | 0.13  | 2.22  | 1.13  | 2.86E-01 | 5.75E-01 | -6.06 |
| 1419814_PM_s_at         | S100a1         | S100A1    | 0.35  | 2.76  | 1.13  | 2.86E-01 | 5.75E-01 | -6.06 |
| 1459495_PM_at           | ---            | NA        | 0.12  | 2.68  | 1.13  | 2.86E-01 | 5.75E-01 | -6.06 |
| 1430407_PM_at           | Rnf217         | RNF217    | 0.15  | 2.60  | 1.13  | 2.86E-01 | 5.75E-01 | -6.06 |
| 1432708_PM_at           | Gm8096         | NA        | 0.15  | 2.66  | 1.12  | 2.86E-01 | 5.75E-01 | -6.06 |
| 1444296_PM_a_at         | Serpina4-ps1   | NA        | 0.09  | 2.08  | 1.12  | 2.86E-01 | 5.75E-01 | -6.06 |
| 1425300_PM_at           | Tkfc           | TKFC      | 0.11  | 2.28  | 1.12  | 2.86E-01 | 5.75E-01 | -6.06 |
| 1435031_PM_at           | Tmem120a       | TMEM120A  | 0.14  | 2.54  | 1.12  | 2.86E-01 | 5.75E-01 | -6.06 |
| 1454916_PM_s_at         | Arfp1          | ARFP1     | 0.33  | 4.24  | 1.12  | 2.86E-01 | 5.75E-01 | -6.06 |
| 1456531_PM_x_at         | Prpf19         | PRPF19    | -0.14 | 12.06 | -1.12 | 2.86E-01 | 5.75E-01 | -6.06 |
| 1452985_PM_at           | Uaca           | UACA      | 0.18  | 2.32  | 1.12  | 2.86E-01 | 5.75E-01 | -6.06 |
| 1421062_PM_s_at         | Ctla           | CTLA      | 0.27  | 10.03 | 1.12  | 2.86E-01 | 5.75E-01 | -6.06 |
| 1435642_PM_at           | Prr18          | PRR18     | -0.52 | 4.61  | -1.12 | 2.86E-01 | 5.75E-01 | -6.06 |
| 1437017_PM_at           | Xxyt1          | XXYL1     | 0.12  | 2.16  | 1.12  | 2.86E-01 | 5.75E-01 | -6.06 |
| 1422459_PM_a_at         | Psm13          | PSMD13    | 0.21  | 3.36  | 1.12  | 2.86E-01 | 5.75E-01 | -6.06 |
| 1440042_PM_at           | Ank2           | ANK2      | 0.59  | 3.92  | 1.12  | 2.86E-01 | 5.75E-01 | -6.06 |
| 1439505_PM_at           | Clic5          | CLIC5     | 0.35  | 2.76  | 1.12  | 2.86E-01 | 5.75E-01 | -6.06 |
| 1430345_PM_at           | ---            | NA        | -0.14 | 2.34  | -1.12 | 2.86E-01 | 5.75E-01 | -6.06 |
| 1430539_PM_at           | Mxra7          | MXRA7     | 0.11  | 2.30  | 1.12  | 2.86E-01 | 5.75E-01 | -6.06 |
| 1434954_PM_at           | Mpp5           | MPP5      | -0.30 | 3.60  | -1.12 | 2.86E-01 | 5.75E-01 | -6.06 |
| 1431985_PM_at           | Zfp846         | NA        | 0.11  | 2.35  | 1.12  | 2.86E-01 | 5.75E-01 | -6.06 |
| 1448914_PM_a_at         | Csf1           | CSF1      | 0.20  | 2.96  | 1.12  | 2.86E-01 | 5.75E-01 | -6.06 |
| 1416639_PM_at           | Slc2a5         | SLC2A5    | 0.09  | 2.70  | 1.12  | 2.86E-01 | 5.76E-01 | -6.06 |
| 1430704_PM_at           | Irak3          | IRAK3     | 0.14  | 3.17  | 1.12  | 2.87E-01 | 5.76E-01 | -6.06 |
| 1431852_PM_at           | ---            | NA        | 0.12  | 2.87  | 1.12  | 2.87E-01 | 5.76E-01 | -6.06 |
| 1418481_PM_at           | Pkmyt1         | PKMYT1    | 0.17  | 2.76  | 1.12  | 2.87E-01 | 5.76E-01 | -6.06 |
| 1456094_PM_at           | Usp36          | USP36     | 0.36  | 3.18  | 1.12  | 2.87E-01 | 5.76E-01 | -6.06 |
| 1435843_PM_x_at         | Mrp5           | MRP5      | 0.24  | 4.18  | 1.12  | 2.87E-01 | 5.76E-01 | -6.06 |
| 1449386_PM_at           | Gm41105        | NA        | 0.15  | 3.18  | 1.12  | 2.87E-01 | 5.76E-01 | -6.06 |
| 1427862_PM_at           | Sec61b         | NA        | 0.17  | 2.26  | 1.12  | 2.87E-01 | 5.76E-01 | -6.06 |
| 1438725_PM_at           | Med13          | MED13     | -0.29 | 2.68  | -1.12 | 2.87E-01 | 5.76E-01 | -6.06 |
| 1448325_PM_at           | Ppp1r15a       | PPP1R15A  | 0.21  | 3.42  | 1.12  | 2.87E-01 | 5.76E-01 | -6.06 |
| 1428003_PM_s_at         | Thtpa          | THTPA     | 0.14  | 2.77  | 1.12  | 2.87E-01 | 5.76E-01 | -6.06 |
| 1426338_PM_a_at         | Ntng1          | NTNG1     | 0.26  | 2.70  | 1.12  | 2.87E-01 | 5.76E-01 | -6.06 |
| 1426933_PM_at           | Oxsr1          | OXS1      | -0.33 | 4.63  | -1.12 | 2.87E-01 | 5.76E-01 | -6.06 |
| 1424435_PM_a_at         | Gart           | GART      | 0.46  | 3.79  | 1.12  | 2.87E-01 | 5.76E-01 | -6.06 |
| 1450851_PM_at           | Wdr1           | WDR1      | -0.35 | 3.45  | -1.12 | 2.87E-01 | 5.76E-01 | -6.06 |
| 1419199_PM_at           | Cbx8           | CBX8      | 0.08  | 2.26  | 1.12  | 2.87E-01 | 5.76E-01 | -6.06 |
| 1420300_PM_at           | ---            | NA        | 0.24  | 3.16  | 1.12  | 2.87E-01 | 5.76E-01 | -6.06 |
| 1447516_PM_at           | ---            | NA        | 0.28  | 3.27  | 1.12  | 2.87E-01 | 5.76E-01 | -6.06 |
| 1419670_PM_at           | Ftcd           | FTCD      | 0.13  | 2.57  | 1.12  | 2.87E-01 | 5.76E-01 | -6.06 |
| 1420812_PM_at           | Hdac7          | HDAC7     | 0.16  | 2.60  | 1.12  | 2.87E-01 | 5.76E-01 | -6.06 |
| 1456835_PM_at           | ---            | NA        | 0.14  | 2.52  | 1.12  | 2.87E-01 | 5.76E-01 | -6.06 |
| 1423184_PM_at           | Itn2           | ITSN2     | 0.24  | 6.71  | 1.12  | 2.87E-01 | 5.76E-01 | -6.06 |
| 1428970_PM_at           | Naa50          | NAA50     | -0.39 | 4.15  | -1.12 | 2.87E-01 | 5.76E-01 | -6.06 |
| AFFX-NonspecificGC17_at | ---            | NA        | 0.08  | 2.14  | 1.12  | 2.87E-01 | 5.77E-01 | -6.06 |
| 1446985_PM_at           | Gm40830        | NA        | 0.10  | 2.34  | 1.12  | 2.87E-01 | 5.77E-01 | -6.06 |
| 1453239_PM_a_at         | Ankrd22        | ANKRD22   | 0.12  | 2.36  | 1.12  | 2.87E-01 | 5.77E-01 | -6.06 |
| 1439199_PM_at           | ---            | NA        | 0.13  | 2.16  | 1.12  | 2.87E-01 | 5.77E-01 | -6.06 |
| 1416900_PM_s_at         | Cers1 /// Gdf1 | GDF1      | 0.17  | 2.94  | 1.12  | 2.87E-01 | 5.77E-01 | -6.06 |
| 1423624_PM_at           | Fancl          | FANCL     | 0.19  | 2.93  | 1.12  | 2.87E-01 | 5.77E-01 | -6.06 |
| 1439304_PM_at           | ---            | NA        | 0.20  | 2.44  | 1.12  | 2.87E-01 | 5.77E-01 | -6.06 |
| 1441866_PM_s_at         | Ptdss1         | PTDSS1    | -0.30 | 7.12  | -1.12 | 2.87E-01 | 5.77E-01 | -6.06 |
| 1459957_PM_at           | ---            | NA        | 0.31  | 2.66  | 1.12  | 2.87E-01 | 5.77E-01 | -6.06 |
| 1450027_PM_at           | Sdc3           | SDC3      | -0.18 | 3.75  | -1.12 | 2.87E-01 | 5.77E-01 | -6.06 |

|                 |                       |            |       |      |       |          |          |       |
|-----------------|-----------------------|------------|-------|------|-------|----------|----------|-------|
| 1416869_PM_x_at | Lime1 /// Zgpat       | ZGPAT      | 0.11  | 2.58 | 1.12  | 2.87E-01 | 5.77E-01 | -6.06 |
| 1416196_PM_at   | LOC102642689 /// Rpsa | RPSA       | -0.18 | 2.83 | -1.12 | 2.88E-01 | 5.77E-01 | -6.06 |
| 1422793_PM_at   | Pafah1b2              | PAFAH1B2   | 0.21  | 5.40 | 1.12  | 2.88E-01 | 5.77E-01 | -6.06 |
| 1437810_PM_a_at | Hbb-bh1               | HBG1       | 0.25  | 4.20 | 1.12  | 2.88E-01 | 5.77E-01 | -6.06 |
| 1441922_PM_x_at | Vps11                 | VPS11      | -0.41 | 3.30 | -1.12 | 2.88E-01 | 5.77E-01 | -6.06 |
| 1417804_PM_at   | Rasgrp2               | RASGRP2    | 0.19  | 2.80 | 1.12  | 2.88E-01 | 5.77E-01 | -6.06 |
| 1453378_PM_at   | Ikzf3                 | IKZF3      | 0.12  | 2.12 | 1.12  | 2.88E-01 | 5.77E-01 | -6.06 |
| 1430951_PM_at   | Tunar                 | NA         | 0.14  | 2.62 | 1.12  | 2.88E-01 | 5.77E-01 | -6.06 |
| 1436465_PM_at   | Klh1                  | KLHL1      | 0.15  | 2.43 | 1.12  | 2.88E-01 | 5.77E-01 | -6.06 |
| 1416914_PM_s_at | Fam89b /// Ssca1      | FAM89B     | -0.12 | 2.32 | -1.12 | 2.88E-01 | 5.77E-01 | -6.06 |
| 1445523_PM_at   | Gjc3                  | GJC3       | -0.11 | 2.25 | -1.12 | 2.88E-01 | 5.77E-01 | -6.06 |
| 1439639_PM_at   | ---                   | NA         | 0.13  | 2.52 | 1.12  | 2.88E-01 | 5.77E-01 | -6.06 |
| 1451305_PM_at   | Cby1                  | CBY1       | 0.18  | 3.55 | 1.12  | 2.88E-01 | 5.77E-01 | -6.06 |
| 1439174_PM_at   | ---                   | NA         | 0.26  | 2.91 | 1.12  | 2.88E-01 | 5.77E-01 | -6.06 |
| 1426603_PM_at   | Rnasel                | RNASEL     | 0.26  | 2.52 | 1.12  | 2.88E-01 | 5.77E-01 | -6.06 |
| 1443999_PM_at   | ---                   | NA         | -0.14 | 2.20 | -1.12 | 2.88E-01 | 5.77E-01 | -6.06 |
| 1457713_PM_at   | Ercc5                 | ERCC5      | -0.10 | 2.18 | -1.12 | 2.88E-01 | 5.77E-01 | -6.06 |
| 1444407_PM_at   | ---                   | NA         | 0.11  | 2.25 | 1.12  | 2.88E-01 | 5.77E-01 | -6.06 |
| 1431161_PM_at   | Arhgef28              | ARHGEF28   | 0.15  | 2.56 | 1.12  | 2.88E-01 | 5.77E-01 | -6.06 |
| 1438409_PM_at   | Cep63                 | CEP63      | 0.29  | 4.40 | 1.12  | 2.88E-01 | 5.77E-01 | -6.06 |
| 1429337_PM_at   | Tmem87b               | TMEM87B    | -0.47 | 5.73 | -1.12 | 2.88E-01 | 5.77E-01 | -6.06 |
| 1441480_PM_at   | ---                   | NA         | -0.09 | 2.45 | -1.12 | 2.88E-01 | 5.77E-01 | -6.06 |
| 1422088_PM_at   | Mycl                  | MYCL       | 0.09  | 2.14 | 1.12  | 2.88E-01 | 5.77E-01 | -6.06 |
| 1439472_PM_at   | Gcn1l1                | GCN1       | 0.15  | 3.04 | 1.12  | 2.88E-01 | 5.77E-01 | -6.06 |
| 1451490_PM_at   | Lyplal1               | LYPLAL1    | -0.23 | 3.20 | -1.12 | 2.88E-01 | 5.77E-01 | -6.06 |
| 1426575_PM_at   | Sgms1                 | SGMS1      | -0.26 | 3.25 | -1.12 | 2.88E-01 | 5.77E-01 | -6.06 |
| 1459935_PM_at   | AA517562              | NA         | 0.11  | 2.54 | 1.12  | 2.88E-01 | 5.77E-01 | -6.06 |
| 1459279_PM_at   | ---                   | NA         | 0.35  | 3.34 | 1.12  | 2.88E-01 | 5.77E-01 | -6.06 |
| 1444505_PM_at   | Zmiz1                 | ZMIZ1      | 0.63  | 3.18 | 1.12  | 2.88E-01 | 5.77E-01 | -6.06 |
| 1460389_PM_at   | Cdk8                  | CDK8       | -0.13 | 3.17 | -1.12 | 2.88E-01 | 5.77E-01 | -6.06 |
| 1426786_PM_s_at | Dhx38                 | DHX38      | 0.15  | 3.07 | 1.12  | 2.88E-01 | 5.77E-01 | -6.06 |
| 1418482_PM_at   | Cyb561d2              | CYB561D2   | -0.22 | 2.63 | -1.12 | 2.88E-01 | 5.77E-01 | -6.06 |
| 1431667_PM_s_at | Efcab11               | EFCA11     | 0.12  | 2.14 | 1.12  | 2.88E-01 | 5.77E-01 | -6.06 |
| 1455019_PM_x_at | Ckap4                 | CKAP4      | -0.67 | 7.96 | -1.12 | 2.88E-01 | 5.78E-01 | -6.06 |
| 1433892_PM_at   | Spag5                 | ACO05726.2 | 0.13  | 2.36 | 1.12  | 2.88E-01 | 5.78E-01 | -6.06 |
| 1440248_PM_at   | Casc4                 | CASC4      | 0.49  | 6.87 | 1.12  | 2.88E-01 | 5.78E-01 | -6.06 |
| 1457211_PM_at   | Gls                   | GLS        | 0.16  | 3.55 | 1.12  | 2.88E-01 | 5.78E-01 | -6.06 |
| 1440690_PM_at   | ---                   | NA         | -0.08 | 2.18 | -1.12 | 2.88E-01 | 5.78E-01 | -6.06 |
| 1419503_PM_at   | Stc2                  | STC2       | 0.14  | 2.80 | 1.12  | 2.88E-01 | 5.78E-01 | -6.06 |
| 1418781_PM_at   | Nat9                  | NAT9       | 0.19  | 3.46 | 1.12  | 2.88E-01 | 5.78E-01 | -6.06 |
| 1416342_PM_at   | Tnc                   | TNC        | 0.11  | 2.10 | 1.12  | 2.88E-01 | 5.78E-01 | -6.06 |
| 1433468_PM_at   | Irf2bpl               | IRF2BPL    | 0.12  | 2.39 | 1.12  | 2.89E-01 | 5.78E-01 | -6.06 |
| 1430535_PM_at   | Tsc22d2               | TSC22D2    | -0.45 | 4.57 | -1.12 | 2.89E-01 | 5.78E-01 | -6.06 |
| 1430905_PM_at   | 4921504E06Rik         | C10orf67   | 0.09  | 2.05 | 1.12  | 2.89E-01 | 5.78E-01 | -6.06 |
| 1428713_PM_s_at | Gins2                 | GIN52      | 0.12  | 2.53 | 1.12  | 2.89E-01 | 5.78E-01 | -6.06 |
| 1450396_PM_at   | Stag2                 | STAG2      | 0.36  | 3.67 | 1.12  | 2.89E-01 | 5.78E-01 | -6.06 |
| 1453252_PM_at   | Dus4l                 | DUS4L      | 0.37  | 3.15 | 1.12  | 2.89E-01 | 5.78E-01 | -6.06 |
| 1444713_PM_at   | ---                   | NA         | 0.18  | 2.27 | 1.12  | 2.89E-01 | 5.78E-01 | -6.06 |
| 1427424_PM_at   | Galnt6                | GALNT6     | 0.11  | 2.28 | 1.12  | 2.89E-01 | 5.78E-01 | -6.06 |
| 1457983_PM_s_at | Rwdd4a                | RWD4A      | -0.83 | 6.14 | -1.12 | 2.89E-01 | 5.78E-01 | -6.06 |
| 1418698_PM_a_at | Fech                  | FECH       | -0.36 | 4.38 | -1.12 | 2.89E-01 | 5.78E-01 | -6.07 |
| 1440402_PM_at   | Syne3                 | SYNE3      | 0.15  | 2.53 | 1.12  | 2.89E-01 | 5.78E-01 | -6.07 |
| 1433809_PM_at   | Ddx5                  | DDX5       | 0.16  | 2.32 | 1.12  | 2.89E-01 | 5.78E-01 | -6.07 |
| 1430253_PM_at   | ---                   | NA         | 0.16  | 2.36 | 1.12  | 2.89E-01 | 5.78E-01 | -6.07 |
| 1416051_PM_at   | C2                    | C2         | 0.18  | 2.62 | 1.12  | 2.89E-01 | 5.78E-01 | -6.07 |
| 1419363_PM_a_at | MrpB5                 | MRPL35     | 0.19  | 3.28 | 1.12  | 2.89E-01 | 5.78E-01 | -6.07 |
| 1457549_PM_at   | ---                   | NA         | 0.15  | 2.93 | 1.12  | 2.89E-01 | 5.78E-01 | -6.07 |
| 1428258_PM_at   | 2010107E04Rik         | C14orf2    | -0.30 | 5.56 | -1.12 | 2.89E-01 | 5.78E-01 | -6.07 |
| 1431807_PM_at   | ---                   | NA         | 0.10  | 2.32 | 1.12  | 2.89E-01 | 5.78E-01 | -6.07 |
| 1440319_PM_at   | Rbm44                 | RBM44      | 0.11  | 2.13 | 1.12  | 2.89E-01 | 5.78E-01 | -6.07 |
| 1460251_PM_at   | Fas                   | FAS        | 0.12  | 2.08 | 1.12  | 2.89E-01 | 5.78E-01 | -6.07 |
| 1432831_PM_at   | ---                   | NA         | 0.16  | 2.39 | 1.12  | 2.89E-01 | 5.78E-01 | -6.07 |
| 1416585_PM_at   | Ruvbl1                | RUVBL1     | 0.21  | 2.87 | 1.12  | 2.89E-01 | 5.78E-01 | -6.07 |
| 1458166_PM_at   | ---                   | NA         | 0.23  | 2.19 | 1.12  | 2.89E-01 | 5.78E-01 | -6.07 |
| 1434466_PM_at   | Atcay                 | ATCAY      | 0.62  | 3.48 | 1.12  | 2.89E-01 | 5.78E-01 | -6.07 |
| 1423379_PM_at   | Nfatc4                | NFATC4     | 0.12  | 2.40 | 1.12  | 2.89E-01 | 5.78E-01 | -6.07 |
| 1446071_PM_at   | Steap2                | STEAP2     | 0.15  | 2.29 | 1.12  | 2.89E-01 | 5.78E-01 | -6.07 |
| 1455465_PM_at   | ---                   | NA         | 0.23  | 3.71 | 1.12  | 2.89E-01 | 5.78E-01 | -6.07 |
| 1435718_PM_at   | Ap3s2                 | AP3S2      | 0.26  | 3.59 | 1.12  | 2.89E-01 | 5.78E-01 | -6.07 |
| 1419153_PM_at   | 2810417H13Rik         | PCLAF      | 0.11  | 2.31 | 1.12  | 2.89E-01 | 5.79E-01 | -6.07 |
| 1454020_PM_at   | 4930554H23Rik         | NA         | 0.15  | 2.45 | 1.12  | 2.89E-01 | 5.79E-01 | -6.07 |
| 1425331_PM_at   | Zfp106                | ZNF106     | -0.31 | 4.65 | -1.12 | 2.89E-01 | 5.79E-01 | -6.07 |
| 1420560_PM_at   | Chrne                 | CHRNE      | 0.11  | 2.71 | 1.12  | 2.89E-01 | 5.79E-01 | -6.07 |
| 1425904_PM_at   | Satb2                 | SATB2      | 0.27  | 2.32 | 1.12  | 2.89E-01 | 5.79E-01 | -6.07 |
| 1428217_PM_at   | 1600012H06Rik         | C6orf120   | -0.44 | 4.23 | -1.12 | 2.89E-01 | 5.79E-01 | -6.07 |

|                 |                   |            |       |      |       |          |          |       |
|-----------------|-------------------|------------|-------|------|-------|----------|----------|-------|
| 1459510_PM_at   | Tmprss2           | NA         | -0.09 | 2.16 | -1.12 | 2.89E-01 | 5.79E-01 | -6.07 |
| 1442080_PM_at   | ---               | NA         | 0.12  | 2.24 | 1.12  | 2.89E-01 | 5.79E-01 | -6.07 |
| 1444737_PM_at   | D2Wsu107e         | NA         | 0.14  | 2.35 | 1.12  | 2.89E-01 | 5.79E-01 | -6.07 |
| 1453935_PM_a_at | Ccdc7a            | CCDC7      | 0.14  | 2.29 | 1.12  | 2.89E-01 | 5.79E-01 | -6.07 |
| 1436484_PM_at   | Fndc9             | FND9       | 0.29  | 2.53 | 1.12  | 2.89E-01 | 5.79E-01 | -6.07 |
| 1436512_PM_at   | Arl4c             | ARL4C      | -0.47 | 3.72 | -1.12 | 2.90E-01 | 5.79E-01 | -6.07 |
| 1454994_PM_at   | Klhl20            | KLHL20     | 0.27  | 3.85 | 1.12  | 2.90E-01 | 5.79E-01 | -6.07 |
| 1457507_PM_at   | ---               | NA         | 0.70  | 4.56 | 1.12  | 2.90E-01 | 5.79E-01 | -6.07 |
| 1450638_PM_at   | Gm3837 /// Pdc d5 | PD5        | -0.29 | 6.97 | -1.12 | 2.90E-01 | 5.79E-01 | -6.07 |
| 1453352_PM_at   | Atp10b            | ATP10B     | 0.15  | 3.39 | 1.12  | 2.90E-01 | 5.79E-01 | -6.07 |
| 1424480_PM_s_at | Akt2              | AKT2       | 0.21  | 4.51 | 1.12  | 2.90E-01 | 5.79E-01 | -6.07 |
| 1457338_PM_at   | ---               | NA         | 0.61  | 3.06 | 1.12  | 2.90E-01 | 5.79E-01 | -6.07 |
| 1442867_PM_at   | ---               | NA         | -0.46 | 4.16 | -1.12 | 2.90E-01 | 5.79E-01 | -6.07 |
| 1422738_PM_at   | Ddr2              | DDR2       | -0.16 | 2.78 | -1.12 | 2.90E-01 | 5.79E-01 | -6.07 |
| 1439568_PM_at   | Greb1             | GREB1      | 0.09  | 2.18 | 1.12  | 2.90E-01 | 5.79E-01 | -6.07 |
| 1421203_PM_at   | Chrna4            | CHRNA4     | 0.14  | 2.57 | 1.12  | 2.90E-01 | 5.79E-01 | -6.07 |
| 1431912_PM_at   | 2700089I24Rik     | NA         | 0.12  | 2.38 | 1.12  | 2.90E-01 | 5.79E-01 | -6.07 |
| 1431001_PM_at   | 9030624J02Rik     | C16orf62   | 0.34  | 2.74 | 1.12  | 2.90E-01 | 5.79E-01 | -6.07 |
| 1457296_PM_at   | Cilp              | CILP       | 0.11  | 2.16 | 1.12  | 2.90E-01 | 5.79E-01 | -6.07 |
| 1440142_PM_s_at | Gfap              | GFAP       | -0.88 | 5.98 | -1.12 | 2.90E-01 | 5.79E-01 | -6.07 |
| 1433601_PM_at   | Adra2a            | ADRA2A     | -0.24 | 2.62 | -1.12 | 2.90E-01 | 5.79E-01 | -6.07 |
| 1442734_PM_at   | Phactr2           | NA         | -0.18 | 2.20 | -1.12 | 2.90E-01 | 5.79E-01 | -6.07 |
| 1438002_PM_at   | ---               | NA         | 0.09  | 2.30 | 1.12  | 2.90E-01 | 5.79E-01 | -6.07 |
| 1454361_PM_at   | 9230106L01Rik     | NA         | 0.11  | 2.26 | 1.12  | 2.90E-01 | 5.79E-01 | -6.07 |
| 1443414_PM_at   | C78513            | NA         | 0.15  | 2.11 | 1.12  | 2.90E-01 | 5.79E-01 | -6.07 |
| 1458904_PM_at   | Gm26704           | NA         | 0.18  | 2.32 | 1.12  | 2.90E-01 | 5.79E-01 | -6.07 |
| 1445385_PM_at   | ---               | NA         | -0.32 | 4.38 | -1.12 | 2.90E-01 | 5.79E-01 | -6.07 |
| 1417834_PM_at   | Synj2bp           | SYNJ2BP    | -0.31 | 3.40 | -1.12 | 2.90E-01 | 5.79E-01 | -6.07 |
| 1428834_PM_at   | ---               | NA         | -0.22 | 2.96 | -1.12 | 2.90E-01 | 5.79E-01 | -6.07 |
| 1419402_PM_at   | Mns1              | MNS1       | 0.20  | 2.81 | 1.12  | 2.90E-01 | 5.79E-01 | -6.07 |
| 1426915_PM_at   | Dapk1             | DAPK1      | -0.33 | 3.22 | -1.12 | 2.90E-01 | 5.79E-01 | -6.07 |
| 1426202_PM_at   | H2-Ea-ps          | NA         | 0.09  | 2.18 | 1.12  | 2.90E-01 | 5.79E-01 | -6.07 |
| 1433522_PM_at   | Pskh1             | PSKH1      | 0.15  | 2.60 | 1.12  | 2.90E-01 | 5.79E-01 | -6.07 |
| 1433803_PM_at   | Jak1              | JAK1       | -0.32 | 4.31 | -1.11 | 2.90E-01 | 5.79E-01 | -6.07 |
| 1446243_PM_at   | ---               | NA         | -0.10 | 1.97 | -1.11 | 2.90E-01 | 5.79E-01 | -6.07 |
| 1429743_PM_at   | 6720468P15Rik     | NA         | 0.16  | 2.34 | 1.11  | 2.90E-01 | 5.79E-01 | -6.07 |
| 1427080_PM_at   | Tti1              | TTI1       | 0.25  | 3.25 | 1.11  | 2.90E-01 | 5.79E-01 | -6.07 |
| 1431136_PM_at   | Rab36             | RAB36      | 0.32  | 2.50 | 1.11  | 2.90E-01 | 5.79E-01 | -6.07 |
| 1428993_PM_at   | Ucma              | UCMA       | -0.21 | 2.38 | -1.11 | 2.90E-01 | 5.79E-01 | -6.07 |
| 1448099_PM_at   | Smim22            | NA         | 0.09  | 1.94 | 1.11  | 2.90E-01 | 5.79E-01 | -6.07 |
| 1445863_PM_at   | ---               | NA         | 0.14  | 2.10 | 1.11  | 2.90E-01 | 5.79E-01 | -6.07 |
| 1435088_PM_at   | Nsd1              | NSD1       | -0.31 | 3.06 | -1.11 | 2.90E-01 | 5.79E-01 | -6.07 |
| 1430232_PM_at   | ---               | NA         | 0.13  | 2.49 | 1.11  | 2.90E-01 | 5.79E-01 | -6.07 |
| 1439303_PM_at   | ---               | NA         | 0.20  | 2.63 | 1.11  | 2.90E-01 | 5.79E-01 | -6.07 |
| 1459528_PM_at   | ---               | NA         | 0.10  | 2.12 | 1.11  | 2.90E-01 | 5.79E-01 | -6.07 |
| 1453102_PM_at   | Flrt3             | FLRT3      | -0.16 | 4.04 | -1.11 | 2.90E-01 | 5.79E-01 | -6.07 |
| 1429525_PM_s_at | Myo1f             | MYO1F      | 0.15  | 2.47 | 1.11  | 2.90E-01 | 5.79E-01 | -6.07 |
| 1423148_PM_at   | Skp1a             | SKP1       | -0.32 | 7.59 | -1.11 | 2.90E-01 | 5.79E-01 | -6.07 |
| 1441962_PM_at   | Alox5             | ALOX5      | -0.17 | 2.47 | -1.11 | 2.90E-01 | 5.80E-01 | -6.07 |
| 1451006_PM_at   | Xdh               | XDH        | 0.14  | 2.94 | 1.11  | 2.91E-01 | 5.80E-01 | -6.07 |
| 1458677_PM_at   | Entpd5            | ENTPD5     | 0.23  | 2.62 | 1.11  | 2.90E-01 | 5.80E-01 | -6.07 |
| 1443793_PM_x_at | Ints1             | INTS1      | -0.10 | 2.27 | -1.11 | 2.91E-01 | 5.80E-01 | -6.07 |
| 1417861_PM_at   | Ccnc              | CCNC       | -0.11 | 1.84 | -1.11 | 2.91E-01 | 5.80E-01 | -6.07 |
| 1457630_PM_at   | ---               | NA         | -0.11 | 1.96 | -1.11 | 2.91E-01 | 5.80E-01 | -6.07 |
| 1447427_PM_at   | ---               | NA         | 0.10  | 2.23 | 1.11  | 2.91E-01 | 5.80E-01 | -6.07 |
| 1457580_PM_at   | Chd8              | CHD8       | 0.19  | 2.77 | 1.11  | 2.91E-01 | 5.80E-01 | -6.07 |
| 1434134_PM_at   | Dcaf8             | AL139011.2 | -0.21 | 7.50 | -1.11 | 2.91E-01 | 5.80E-01 | -6.07 |
| 1439242_PM_at   | Mocs3             | NA         | 0.13  | 2.27 | 1.11  | 2.91E-01 | 5.80E-01 | -6.07 |
| 1447600_PM_at   | ---               | NA         | 0.15  | 2.21 | 1.11  | 2.91E-01 | 5.80E-01 | -6.07 |
| 1419620_PM_at   | Pttg1             | PTTG1      | -0.43 | 4.04 | -1.11 | 2.91E-01 | 5.80E-01 | -6.07 |
| 1443125_PM_at   | Trip12            | TRIP12     | 0.22  | 3.70 | 1.11  | 2.91E-01 | 5.80E-01 | -6.07 |
| 1443352_PM_at   | C77614            | NA         | -0.27 | 4.19 | -1.11 | 2.91E-01 | 5.80E-01 | -6.07 |
| 1437175_PM_at   | Pdik1l            | PDIK1L     | 0.15  | 2.26 | 1.11  | 2.91E-01 | 5.80E-01 | -6.07 |
| 1441668_PM_at   | ---               | NA         | 0.13  | 2.30 | 1.11  | 2.91E-01 | 5.80E-01 | -6.07 |
| 1416741_PM_at   | Col5a1            | COL5A1     | 0.14  | 2.59 | 1.11  | 2.91E-01 | 5.80E-01 | -6.07 |
| 1419840_PM_at   | Krt72             | KRT72      | 0.15  | 2.54 | 1.11  | 2.91E-01 | 5.80E-01 | -6.07 |
| 1452407_PM_at   | Spag4             | SPAG4      | 0.10  | 2.19 | 1.11  | 2.91E-01 | 5.80E-01 | -6.07 |
| 1442954_PM_at   | ---               | NA         | -0.15 | 2.41 | -1.11 | 2.91E-01 | 5.80E-01 | -6.07 |
| 1424453_PM_at   | Pcyt1a            | PCYT1A     | 0.10  | 2.16 | 1.11  | 2.91E-01 | 5.80E-01 | -6.07 |
| 1432866_PM_at   | 6030442K20Rik     | NA         | 0.17  | 2.50 | 1.11  | 2.91E-01 | 5.80E-01 | -6.07 |
| 1442161_PM_at   | Igbp1             | IGBP1      | 0.30  | 2.88 | 1.11  | 2.91E-01 | 5.80E-01 | -6.07 |
| 1440356_PM_at   | Ciapin1           | CIAPIN1    | -0.26 | 4.33 | -1.11 | 2.91E-01 | 5.80E-01 | -6.07 |
| 1423635_PM_at   | Bmp2              | BMP2       | -0.15 | 2.11 | -1.11 | 2.91E-01 | 5.80E-01 | -6.07 |
| 1426920_PM_x_at | Ilgbl1            | NA         | -0.13 | 2.27 | -1.11 | 2.91E-01 | 5.80E-01 | -6.07 |
| 1429497_PM_s_at | Snx6              | SNX6       | -0.13 | 2.41 | -1.11 | 2.91E-01 | 5.80E-01 | -6.07 |

|                 |               |            |       |      |       |          |          |       |
|-----------------|---------------|------------|-------|------|-------|----------|----------|-------|
| 1459143_PM_at   | ---           | NA         | -0.09 | 2.32 | -1.11 | 2.91E-01 | 5.80E-01 | -6.07 |
| 1458717_PM_at   | ---           | NA         | 0.09  | 2.15 | 1.11  | 2.91E-01 | 5.80E-01 | -6.07 |
| 1447173_PM_at   | Lrrc31        | NA         | 0.10  | 2.19 | 1.11  | 2.91E-01 | 5.80E-01 | -6.07 |
| 1416677_PM_at   | Apoh          | APOH       | 0.10  | 2.34 | 1.11  | 2.91E-01 | 5.80E-01 | -6.07 |
| 1432781_PM_at   | Intu          | NA         | 0.11  | 2.66 | 1.11  | 2.91E-01 | 5.80E-01 | -6.07 |
| 1447671_PM_x_at | Fbxo6         | FBXO6      | 0.12  | 2.48 | 1.11  | 2.91E-01 | 5.80E-01 | -6.07 |
| 1456331_PM_at   | 9130023H24Rik | ZNF696     | 0.12  | 2.28 | 1.11  | 2.91E-01 | 5.80E-01 | -6.07 |
| 1433790_PM_at   | Troap         | TROAP      | 0.12  | 2.43 | 1.11  | 2.91E-01 | 5.80E-01 | -6.07 |
| 1448355_PM_at   | Prss16        | PRSS16     | 0.14  | 3.20 | 1.11  | 2.91E-01 | 5.80E-01 | -6.07 |
| 1436556_PM_at   | Tmem139       | TMEM139    | 0.14  | 2.36 | 1.11  | 2.91E-01 | 5.80E-01 | -6.07 |
| 1458035_PM_at   | ---           | NA         | 0.18  | 2.64 | 1.11  | 2.91E-01 | 5.80E-01 | -6.07 |
| 1454800_PM_at   | Morn2         | MORN2      | 0.24  | 2.82 | 1.11  | 2.91E-01 | 5.80E-01 | -6.07 |
| 1457716_PM_at   | Otud7b        | OTUD7B     | -0.50 | 5.23 | -1.11 | 2.91E-01 | 5.80E-01 | -6.07 |
| 1432266_PM_at   | ---           | NA         | 0.17  | 2.46 | 1.11  | 2.91E-01 | 5.80E-01 | -6.07 |
| 1428635_PM_at   | Comtd1        | COMTD1     | 0.10  | 2.24 | 1.11  | 2.91E-01 | 5.80E-01 | -6.07 |
| 1460263_PM_at   | Pdc61p        | NA         | -0.24 | 2.39 | -1.11 | 2.91E-01 | 5.80E-01 | -6.07 |
| 1418649_PM_at   | Egln3         | EGLN3      | 0.10  | 2.16 | 1.11  | 2.91E-01 | 5.80E-01 | -6.07 |
| 1431381_PM_at   | LOC102635122  | NA         | 0.13  | 2.75 | 1.11  | 2.91E-01 | 5.80E-01 | -6.07 |
| 1452902_PM_at   | Dhrs13        | DHRS13     | 0.18  | 2.23 | 1.11  | 2.91E-01 | 5.80E-01 | -6.07 |
| 1431688_PM_at   | LOC73899      | NA         | 0.10  | 2.36 | 1.11  | 2.91E-01 | 5.80E-01 | -6.07 |
| 1446940_PM_at   | Traf6         | TRAF6      | 0.17  | 2.21 | 1.11  | 2.91E-01 | 5.80E-01 | -6.07 |
| 1456193_PM_x_at | Gm7338///Gpx4 | GPX4       | 0.21  | 5.30 | 1.11  | 2.91E-01 | 5.80E-01 | -6.07 |
| 1447870_PM_x_at | LOC102634333  | AC083902.2 | 0.41  | 3.89 | 1.11  | 2.91E-01 | 5.80E-01 | -6.07 |
| 1439433_PM_a_at | Slc35a2       | SLC35A2    | -0.45 | 8.18 | -1.11 | 2.92E-01 | 5.80E-01 | -6.07 |
| 1445028_PM_at   | ---           | NA         | 0.11  | 2.36 | 1.11  | 2.91E-01 | 5.80E-01 | -6.07 |
| 1427740_PM_a_at | Gm12606       | NA         | 0.17  | 2.51 | 1.11  | 2.92E-01 | 5.80E-01 | -6.07 |
| 1423554_PM_at   | Ggcx          | GGCX       | 0.21  | 2.35 | 1.11  | 2.92E-01 | 5.80E-01 | -6.07 |
| 1449253_PM_at   | Smc1b         | SMC1B      | 0.19  | 2.54 | 1.11  | 2.92E-01 | 5.80E-01 | -6.07 |
| 1450002_PM_at   | Gsx1          | GSX1       | 0.16  | 2.72 | 1.11  | 2.92E-01 | 5.80E-01 | -6.07 |
| 1438131_PM_at   | Fbxw2         | FBXW2      | -0.28 | 3.26 | -1.11 | 2.92E-01 | 5.81E-01 | -6.07 |
| 1447187_PM_at   | ---           | NA         | -0.54 | 3.09 | -1.11 | 2.92E-01 | 5.81E-01 | -6.07 |
| 1427511_PM_at   | ---           | NA         | -0.25 | 2.70 | -1.11 | 2.92E-01 | 5.81E-01 | -6.07 |
| 1447623_PM_s_at | Prkd1         | PRKD1      | -0.23 | 2.68 | -1.11 | 2.92E-01 | 5.81E-01 | -6.07 |
| 1422625_PM_at   | Ly6h          | LY6H       | -0.17 | 2.99 | -1.11 | 2.92E-01 | 5.81E-01 | -6.07 |
| 1446582_PM_at   | Poln          | POLN       | 0.10  | 2.52 | 1.11  | 2.92E-01 | 5.81E-01 | -6.07 |
| 1460340_PM_at   | Piw1l         | PIW1L1     | 0.11  | 2.63 | 1.11  | 2.92E-01 | 5.81E-01 | -6.07 |
| 1460300_PM_a_at | Ltk           | LTK        | 0.12  | 3.30 | 1.11  | 2.92E-01 | 5.81E-01 | -6.07 |
| 1418040_PM_at   | Tmem186       | TMEM186    | 0.29  | 3.95 | 1.11  | 2.92E-01 | 5.81E-01 | -6.07 |
| 1442155_PM_at   | ---           | NA         | 0.29  | 3.60 | 1.11  | 2.92E-01 | 5.81E-01 | -6.07 |
| 1437226_PM_x_at | Marcksl1      | MARCKSL1   | 0.31  | 2.95 | 1.11  | 2.92E-01 | 5.81E-01 | -6.07 |
| 1447738_PM_s_at | Ankrd13d      | ANKRD13D   | 0.32  | 3.99 | 1.11  | 2.92E-01 | 5.81E-01 | -6.07 |
| 1425082_PM_s_at | Pds5a         | PDS5A      | 0.38  | 3.98 | 1.11  | 2.92E-01 | 5.81E-01 | -6.07 |
| 1436511_PM_at   | Sde2          | SDE2       | -0.31 | 3.90 | -1.11 | 2.92E-01 | 5.81E-01 | -6.07 |
| 1419750_PM_at   | Trdmt1        | TRDMT1     | -0.18 | 2.42 | -1.11 | 2.92E-01 | 5.81E-01 | -6.07 |
| 1417723_PM_at   | Ube2j1        | UBE2J1     | -0.13 | 2.42 | -1.11 | 2.92E-01 | 5.81E-01 | -6.07 |
| 1438447_PM_at   | Ddx11         | DDX11      | 0.10  | 2.52 | 1.11  | 2.92E-01 | 5.81E-01 | -6.07 |
| 1446217_PM_at   | Gm9925        | NA         | 0.14  | 3.25 | 1.11  | 2.92E-01 | 5.81E-01 | -6.07 |
| 1422953_PM_at   | Fpr2          | FPR3       | 0.23  | 2.54 | 1.11  | 2.92E-01 | 5.81E-01 | -6.07 |
| 1436543_PM_at   | Gtpbp10       | GTPBP10    | 0.40  | 2.80 | 1.11  | 2.92E-01 | 5.81E-01 | -6.07 |
| 1422480_PM_at   | Srx3          | SNX3       | -0.24 | 4.25 | -1.11 | 2.92E-01 | 5.81E-01 | -6.07 |
| 1439626_PM_at   | ---           | NA         | 0.42  | 2.48 | 1.11  | 2.92E-01 | 5.81E-01 | -6.07 |
| 1421231_PM_at   | Msi2          | NA         | -0.08 | 2.34 | -1.11 | 2.92E-01 | 5.81E-01 | -6.07 |
| 1436935_PM_x_at | Clns1a        | CLNS1A     | -0.46 | 8.20 | -1.11 | 2.92E-01 | 5.81E-01 | -6.07 |
| 1427590_PM_at   | Zfp39         | ZNF717     | -0.28 | 2.82 | -1.11 | 2.92E-01 | 5.81E-01 | -6.07 |
| 1454395_PM_at   | ---           | NA         | 0.11  | 2.74 | 1.11  | 2.92E-01 | 5.81E-01 | -6.07 |
| 1460556_PM_at   | Mical1        | MICAL1     | 0.20  | 4.66 | 1.11  | 2.92E-01 | 5.81E-01 | -6.07 |
| 1429515_PM_at   | Ubr2          | UBR2       | -0.42 | 4.06 | -1.11 | 2.92E-01 | 5.81E-01 | -6.07 |
| 1431863_PM_at   | 4931430N09Rik | NA         | 0.08  | 2.23 | 1.11  | 2.92E-01 | 5.81E-01 | -6.07 |
| 1456994_PM_at   | Rassf1        | RASSF1     | 0.09  | 1.98 | 1.11  | 2.92E-01 | 5.81E-01 | -6.07 |
| 1418666_PM_at   | Ptx3          | PTX3       | 0.16  | 2.80 | 1.11  | 2.92E-01 | 5.81E-01 | -6.07 |
| 1421117_PM_at   | Dst           | DST        | 0.17  | 2.90 | 1.11  | 2.92E-01 | 5.81E-01 | -6.07 |
| 1437996_PM_s_at | Cnpy1         | CNPY1      | 1.34  | 3.87 | 1.11  | 2.92E-01 | 5.81E-01 | -6.07 |
| 1440444_PM_at   | ---           | NA         | -0.47 | 3.82 | -1.11 | 2.92E-01 | 5.81E-01 | -6.07 |
| 1422401_PM_at   | Sprr3         | SPRR3      | 0.10  | 2.43 | 1.11  | 2.92E-01 | 5.81E-01 | -6.07 |
| 1427671_PM_a_at | Fmn1          | FMN1       | 0.29  | 3.01 | 1.11  | 2.92E-01 | 5.81E-01 | -6.07 |
| 1423996_PM_a_at | Il4ra         | IL4R       | 0.12  | 2.29 | 1.11  | 2.93E-01 | 5.81E-01 | -6.07 |
| 1451441_PM_at   | Lypd8         | LYPD8      | -0.27 | 2.81 | -1.11 | 2.93E-01 | 5.81E-01 | -6.07 |
| 1453932_PM_at   | Agbl4         | AGBL4      | 0.15  | 2.19 | 1.11  | 2.93E-01 | 5.81E-01 | -6.07 |
| 1415901_PM_at   | Plod3         | PLOD3      | 0.14  | 2.54 | 1.11  | 2.93E-01 | 5.81E-01 | -6.07 |
| 1450680_PM_at   | Rag1          | RAG1       | -0.14 | 2.53 | -1.11 | 2.93E-01 | 5.82E-01 | -6.07 |
| 1449582_PM_at   | Cdx1          | CDX1       | 0.11  | 2.06 | 1.11  | 2.93E-01 | 5.82E-01 | -6.08 |
| 1424215_PM_at   | Fundc1        | FUNDC1     | -0.22 | 3.17 | -1.11 | 2.93E-01 | 5.82E-01 | -6.08 |
| 1415932_PM_x_at | Atp9a         | ATP9A      | -0.20 | 4.16 | -1.11 | 2.93E-01 | 5.82E-01 | -6.08 |
| 1449029_PM_at   | Mknk2         | MKNK2      | 0.18  | 2.43 | 1.11  | 2.93E-01 | 5.82E-01 | -6.08 |
| 1419359_PM_at   | Hexim1        | HEXIM1     | 0.25  | 3.24 | 1.11  | 2.93E-01 | 5.82E-01 | -6.08 |

|                 |                                           |              |       |      |       |          |          |       |
|-----------------|-------------------------------------------|--------------|-------|------|-------|----------|----------|-------|
| 1455503_PM_at   | Zfp273 /// Zfp85                          | ZNF141       | -0.25 | 2.67 | -1.11 | 2.93E-01 | 5.82E-01 | -6.08 |
| 1448535_PM_at   | Elp4                                      | ELP4         | 0.18  | 2.85 | 1.11  | 2.93E-01 | 5.82E-01 | -6.08 |
| 1432861_PM_at   | 2900046F13Rik                             | NA           | 0.14  | 3.39 | 1.11  | 2.93E-01 | 5.82E-01 | -6.08 |
| 1430333_PM_at   | Eftud1                                    | EFL1         | 0.15  | 2.17 | 1.11  | 2.93E-01 | 5.82E-01 | -6.08 |
| 1458586_PM_at   | ---                                       | NA           | -0.13 | 2.41 | -1.11 | 2.93E-01 | 5.82E-01 | -6.08 |
| 1459099_PM_at   | Tmc7                                      | TMC7         | 0.10  | 2.30 | 1.11  | 2.93E-01 | 5.82E-01 | -6.08 |
| 1423525_PM_at   | Mastl                                     | MASTL        | 0.11  | 2.18 | 1.11  | 2.93E-01 | 5.82E-01 | -6.08 |
| 1421419_PM_at   | Kcnk4                                     | KCNK4        | 0.11  | 2.32 | 1.11  | 2.93E-01 | 5.82E-01 | -6.08 |
| 1424010_PM_at   | Mfap4                                     | MFAP4        | 0.26  | 2.48 | 1.11  | 2.93E-01 | 5.82E-01 | -6.08 |
| 1419186_PM_a_at | St8sia4                                   | ST8SIA4      | -0.41 | 4.13 | -1.11 | 2.93E-01 | 5.82E-01 | -6.08 |
| 1419430_PM_at   | Cyp26a1                                   | CYP26A1      | 0.11  | 2.25 | 1.11  | 2.93E-01 | 5.82E-01 | -6.08 |
| 1427874_PM_at   | Rnf114                                    | RNF114       | -0.21 | 3.40 | -1.11 | 2.93E-01 | 5.82E-01 | -6.08 |
| 1430267_PM_at   | 4833422M21Rik                             | NA           | 0.09  | 2.12 | 1.11  | 2.93E-01 | 5.82E-01 | -6.08 |
| 1447918_PM_x_at | Igfc2                                     | NA           | 0.16  | 2.43 | 1.11  | 2.93E-01 | 5.82E-01 | -6.08 |
| 1431045_PM_at   | Fam49a                                    | FAM49A       | -0.51 | 4.13 | -1.11 | 2.93E-01 | 5.82E-01 | -6.08 |
| 1428864_PM_at   | Dusp8                                     | DUSP8        | -0.20 | 3.22 | -1.11 | 2.93E-01 | 5.82E-01 | -6.08 |
| 1416188_PM_at   | Gm2a                                      | GM2A         | 0.08  | 1.93 | 1.11  | 2.93E-01 | 5.82E-01 | -6.08 |
| 1439144_PM_at   | Cwf191                                    | CWF19L1      | 0.33  | 5.32 | 1.11  | 2.93E-01 | 5.82E-01 | -6.08 |
| 1432500_PM_at   | ---                                       | NA           | -0.12 | 2.53 | -1.11 | 2.93E-01 | 5.82E-01 | -6.08 |
| 1439269_PM_x_at | McM7                                      | MCM7         | 0.22  | 3.99 | 1.11  | 2.93E-01 | 5.82E-01 | -6.08 |
| 1456323_PM_at   | Pofut1                                    | POFUT1       | 0.11  | 2.70 | 1.11  | 2.94E-01 | 5.82E-01 | -6.08 |
| 1418153_PM_at   | Lama1                                     | LAMA1        | 0.15  | 2.46 | 1.11  | 2.94E-01 | 5.82E-01 | -6.08 |
| 1448170_PM_at   | Siah2                                     | SIAH2        | -0.17 | 2.89 | -1.11 | 2.94E-01 | 5.82E-01 | -6.08 |
| 1454600_PM_at   | 9530086P17Rik                             | NA           | 0.17  | 2.47 | 1.11  | 2.94E-01 | 5.83E-01 | -6.08 |
| 1431549_PM_at   | ---                                       | NA           | 0.19  | 2.47 | 1.11  | 2.94E-01 | 5.83E-01 | -6.08 |
| 1431896_PM_at   | 4930447C04Rik                             | C14orf39     | -0.48 | 6.21 | -1.11 | 2.94E-01 | 5.83E-01 | -6.08 |
| 1449133_PM_at   | Sprrr1a                                   | SPRR1A       | 0.23  | 2.82 | 1.11  | 2.94E-01 | 5.83E-01 | -6.08 |
| 1443378_PM_s_at | Adam1a                                    | NA           | 0.28  | 3.30 | 1.11  | 2.94E-01 | 5.83E-01 | -6.08 |
| 1441755_PM_at   | Mapk15                                    | MAPK15       | -0.14 | 2.55 | -1.11 | 2.94E-01 | 5.83E-01 | -6.08 |
| 1453574_PM_at   | Hba-a1                                    | NA           | 0.09  | 2.43 | 1.11  | 2.94E-01 | 5.83E-01 | -6.08 |
| 1416865_PM_at   | Fgd1                                      | FGD1         | 0.13  | 2.42 | 1.11  | 2.94E-01 | 5.83E-01 | -6.08 |
| 1459354_PM_at   | ---                                       | NA           | 0.15  | 2.44 | 1.11  | 2.94E-01 | 5.83E-01 | -6.08 |
| 1439005_PM_x_at | ---                                       | NA           | -0.23 | 9.55 | -1.11 | 2.94E-01 | 5.83E-01 | -6.08 |
| 1430710_PM_at   | ---                                       | NA           | 0.16  | 2.50 | 1.11  | 2.94E-01 | 5.83E-01 | -6.08 |
| 1460209_PM_at   | Usp39                                     | USP39        | 0.22  | 3.12 | 1.11  | 2.94E-01 | 5.83E-01 | -6.08 |
| 1453861_PM_at   | Fam78b                                    | NA           | -0.32 | 3.08 | -1.11 | 2.94E-01 | 5.83E-01 | -6.08 |
| 1448637_PM_at   | Med25                                     | MED25        | -0.19 | 2.72 | -1.11 | 2.94E-01 | 5.83E-01 | -6.08 |
| 1418851_PM_at   | Trim39                                    | TRIM39-RPP21 | -0.16 | 2.80 | -1.11 | 2.94E-01 | 5.83E-01 | -6.08 |
| 1454438_PM_at   | Rab27a                                    | NA           | 0.15  | 2.56 | 1.11  | 2.94E-01 | 5.83E-01 | -6.08 |
| 1436866_PM_at   | EfnA5                                     | EFNA5        | 0.18  | 2.26 | 1.11  | 2.94E-01 | 5.83E-01 | -6.08 |
| 1439687_PM_at   | Rab14                                     | RAB14        | 0.14  | 2.27 | 1.11  | 2.94E-01 | 5.83E-01 | -6.08 |
| 1422815_PM_at   | C9                                        | C9           | 0.21  | 2.51 | 1.11  | 2.94E-01 | 5.83E-01 | -6.08 |
| 1454602_PM_s_at | Cnot2                                     | CNOT2        | -0.34 | 3.67 | -1.11 | 2.94E-01 | 5.83E-01 | -6.08 |
| 1454508_PM_at   | 4930485E13Rik                             | NA           | 0.17  | 2.56 | 1.11  | 2.94E-01 | 5.83E-01 | -6.08 |
| 1447730_PM_at   | ---                                       | NA           | 0.10  | 2.22 | 1.11  | 2.94E-01 | 5.83E-01 | -6.08 |
| 1428694_PM_at   | Mir17hg                                   | NA           | 0.22  | 2.53 | 1.11  | 2.94E-01 | 5.83E-01 | -6.08 |
| 1454937_PM_at   | B630005N14Rik                             | BMT2         | -0.39 | 3.98 | -1.10 | 2.94E-01 | 5.83E-01 | -6.08 |
| 1440669_PM_at   | ---                                       | NA           | -0.12 | 2.32 | -1.10 | 2.94E-01 | 5.83E-01 | -6.08 |
| 1420348_PM_at   | Lhx5                                      | LHX5         | 0.10  | 2.39 | 1.10  | 2.94E-01 | 5.83E-01 | -6.08 |
| 1446082_PM_at   | ---                                       | NA           | 0.10  | 2.37 | 1.11  | 2.94E-01 | 5.83E-01 | -6.08 |
| 1427541_PM_x_at | Hmmr                                      | NA           | 0.17  | 5.08 | 1.11  | 2.94E-01 | 5.83E-01 | -6.08 |
| 1417825_PM_at   | Esd                                       | ESD          | 0.23  | 4.25 | 1.11  | 2.94E-01 | 5.83E-01 | -6.08 |
| 1436086_PM_at   | Lca5l                                     | LCA5L        | 0.25  | 2.75 | 1.10  | 2.94E-01 | 5.83E-01 | -6.08 |
| 1430019_PM_a_at | Gm10052 /// Gm5643 /// Gm5803 /// Hnrnpa1 | HNRNPA1      | 0.36  | 6.71 | 1.11  | 2.94E-01 | 5.83E-01 | -6.08 |
| 1450659_PM_at   | Rgs7                                      | RGS7         | -0.33 | 4.22 | -1.10 | 2.94E-01 | 5.83E-01 | -6.08 |
| 1433011_PM_at   | AU041133                                  | NA           | -0.17 | 2.36 | -1.10 | 2.94E-01 | 5.83E-01 | -6.08 |
| 1440550_PM_at   | ---                                       | NA           | 0.10  | 2.32 | 1.10  | 2.94E-01 | 5.83E-01 | -6.08 |
| 1450695_PM_at   | Ahr                                       | AHR          | 0.13  | 2.40 | 1.10  | 2.94E-01 | 5.83E-01 | -6.08 |
| 1428036_PM_at   | Gm15498                                   | NA           | 0.14  | 1.97 | 1.10  | 2.94E-01 | 5.83E-01 | -6.08 |
| 1423439_PM_at   | Pck1                                      | PCK1         | 0.11  | 2.25 | 1.10  | 2.94E-01 | 5.83E-01 | -6.08 |
| 1451273_PM_x_at | Cmtr2                                     | CMTR2        | 0.20  | 2.99 | 1.10  | 2.94E-01 | 5.83E-01 | -6.08 |
| 1421507_PM_at   | Olf78                                     | ORS1E2       | 0.08  | 1.97 | 1.10  | 2.94E-01 | 5.83E-01 | -6.08 |
| 1434239_PM_at   | Rrp12                                     | RRP12        | -0.24 | 2.74 | -1.10 | 2.94E-01 | 5.83E-01 | -6.08 |
| 1444163_PM_at   | Nek5                                      | NEK5         | -0.14 | 2.55 | -1.10 | 2.95E-01 | 5.83E-01 | -6.08 |
| 1436111_PM_at   | Tmem212                                   | TMEM212      | 0.09  | 2.08 | 1.10  | 2.95E-01 | 5.84E-01 | -6.08 |
| 1415966_PM_a_at | Ndufv1                                    | NDUFV1       | -0.43 | 7.40 | -1.10 | 2.95E-01 | 5.84E-01 | -6.08 |
| 1424401_PM_at   | Alah11                                    | ALDH1L1      | 0.13  | 2.18 | 1.10  | 2.95E-01 | 5.84E-01 | -6.08 |
| 1460613_PM_x_at | Gh                                        | CSH2         | 0.25  | 2.58 | 1.10  | 2.95E-01 | 5.84E-01 | -6.08 |
| 1436192_PM_at   | Arfgef2                                   | ARFGEF2      | 0.27  | 2.70 | 1.10  | 2.95E-01 | 5.84E-01 | -6.08 |
| 1455363_PM_at   | Adgrb1                                    | ADGRB1       | 0.17  | 3.77 | 1.10  | 2.95E-01 | 5.84E-01 | -6.08 |
| 1446175_PM_at   | ---                                       | NA           | -0.38 | 2.88 | -1.10 | 2.95E-01 | 5.84E-01 | -6.08 |
| 1439277_PM_at   | Frs3os                                    | NA           | 0.10  | 2.44 | 1.10  | 2.95E-01 | 5.84E-01 | -6.08 |
| 1448929_PM_at   | F13a1                                     | F13A1        | 0.13  | 2.41 | 1.10  | 2.95E-01 | 5.84E-01 | -6.08 |
| 1422112_PM_at   | Ackr2                                     | ACKR2        | 0.13  | 2.28 | 1.10  | 2.95E-01 | 5.84E-01 | -6.08 |



|                 |                                         |            |       |       |       |          |          |       |
|-----------------|-----------------------------------------|------------|-------|-------|-------|----------|----------|-------|
| 1453184_PM_at   | Fam83g                                  | FAM83G     | 0.14  | 2.61  | 1.10  | 2.95E-01 | 5.84E-01 | -6.08 |
| 1453972_PM_x_at | Med1                                    | MED1       | 0.15  | 2.21  | 1.10  | 2.95E-01 | 5.84E-01 | -6.08 |
| 1457508_PM_at   | ---                                     | NA         | 0.35  | 2.84  | 1.10  | 2.95E-01 | 5.84E-01 | -6.08 |
| 1451729_PM_at   | Bmpr1a                                  | BMPR1A     | -0.21 | 3.30  | -1.10 | 2.95E-01 | 5.84E-01 | -6.08 |
| 1448800_PM_at   | Rtn4ip1                                 | RTN4IP1    | 0.20  | 2.22  | 1.10  | 2.95E-01 | 5.84E-01 | -6.08 |
| 1443857_PM_at   | Hook3                                   | HOOK3      | 0.25  | 2.51  | 1.10  | 2.95E-01 | 5.84E-01 | -6.08 |
| 1424500_PM_at   | Utp6                                    | UTP6       | 0.30  | 3.45  | 1.10  | 2.95E-01 | 5.84E-01 | -6.08 |
| 1446838_PM_at   | ---                                     | NA         | -0.30 | 2.47  | -1.10 | 2.95E-01 | 5.84E-01 | -6.08 |
| 1448528_PM_at   | Pdcd10                                  | PDCD10     | -0.37 | 4.73  | -1.10 | 2.95E-01 | 5.84E-01 | -6.08 |
| 1426693_PM_x_at | Cox15                                   | COX15      | -0.18 | 3.23  | -1.10 | 2.95E-01 | 5.84E-01 | -6.08 |
| 1438136_PM_at   | Astl                                    | ASTL       | 0.09  | 2.16  | 1.10  | 2.95E-01 | 5.84E-01 | -6.08 |
| AFFX-DapX-M_at  | ---                                     | NA         | 0.10  | 2.28  | 1.10  | 2.95E-01 | 5.84E-01 | -6.08 |
| 1459148_PM_at   | ---                                     | NA         | 0.09  | 2.08  | 1.10  | 2.95E-01 | 5.84E-01 | -6.08 |
| 1454087_PM_at   | Zfp618                                  | ZNF618     | 0.09  | 2.66  | 1.10  | 2.95E-01 | 5.84E-01 | -6.08 |
| 1456816_PM_at   | Zmiz1                                   | ZMIZ1      | 0.11  | 2.57  | 1.10  | 2.95E-01 | 5.84E-01 | -6.08 |
| 1431458_PM_at   | 4921507L20Rik                           | NA         | 0.14  | 2.99  | 1.10  | 2.95E-01 | 5.84E-01 | -6.08 |
| 1453646_PM_at   | ---                                     | NA         | 0.16  | 2.40  | 1.10  | 2.95E-01 | 5.84E-01 | -6.08 |
| 1427342_PM_at   | Fastkd1                                 | FASTKD1    | 0.11  | 2.25  | 1.10  | 2.95E-01 | 5.84E-01 | -6.08 |
| 1436091_PM_at   | Spats2l                                 | SPATS2L    | 0.11  | 2.11  | 1.10  | 2.95E-01 | 5.84E-01 | -6.08 |
| 1444605_PM_at   | 1700061F12Rik                           | NA         | 0.11  | 2.15  | 1.10  | 2.95E-01 | 5.84E-01 | -6.08 |
| 1455263_PM_at   | Lacc1                                   | AL512506.3 | 0.21  | 2.93  | 1.10  | 2.95E-01 | 5.84E-01 | -6.08 |
| 1427013_PM_at   | Car9                                    | CA9        | 0.24  | 2.82  | 1.10  | 2.95E-01 | 5.84E-01 | -6.08 |
| 1436170_PM_a_at | Csn1s2a                                 | NA         | 0.27  | 2.68  | 1.10  | 2.95E-01 | 5.84E-01 | -6.08 |
| 1417231_PM_at   | Cldn2                                   | CLDN2      | 0.56  | 3.02  | 1.10  | 2.95E-01 | 5.84E-01 | -6.08 |
| 1443021_PM_at   | Mthfs                                   | ST20-MTHFS | 0.09  | 2.07  | 1.10  | 2.95E-01 | 5.84E-01 | -6.08 |
| 1416198_PM_at   | Nelfcd                                  | NELFCD     | 0.13  | 2.98  | 1.10  | 2.95E-01 | 5.84E-01 | -6.08 |
| 1447255_PM_at   | 2310015A10Rik                           | NA         | 0.15  | 2.81  | 1.10  | 2.95E-01 | 5.84E-01 | -6.08 |
| 1425632_PM_a_at | Pqlc2                                   | PQLC2      | 0.37  | 3.17  | 1.10  | 2.95E-01 | 5.84E-01 | -6.08 |
| 1435872_PM_at   | ---                                     | NA         | -0.23 | 3.28  | -1.10 | 2.95E-01 | 5.84E-01 | -6.08 |
| 1442394_PM_at   | ---                                     | NA         | 0.10  | 2.17  | 1.10  | 2.95E-01 | 5.84E-01 | -6.08 |
| 1459080_PM_at   | ---                                     | NA         | 0.14  | 3.30  | 1.10  | 2.95E-01 | 5.84E-01 | -6.08 |
| 1421774_PM_at   | Vax1                                    | VAX1       | 0.15  | 2.29  | 1.10  | 2.95E-01 | 5.84E-01 | -6.08 |
| 1423014_PM_at   | Pcdhb6                                  | PCDHB5     | 0.09  | 2.27  | 1.10  | 2.95E-01 | 5.84E-01 | -6.08 |
| 1417994_PM_a_at | Asic2                                   | ASIC2      | 0.16  | 3.20  | 1.10  | 2.96E-01 | 5.84E-01 | -6.08 |
| 1429651_PM_at   | Phactr3                                 | PHACTR3    | -0.36 | 4.66  | -1.10 | 2.96E-01 | 5.84E-01 | -6.08 |
| 1436153_PM_a_at | Zmynd11                                 | ZMYND11    | -0.26 | 10.13 | -1.10 | 2.96E-01 | 5.84E-01 | -6.08 |
| 1447944_PM_at   | Zkscan1                                 | ZKSCAN1    | -0.30 | 3.02  | -1.10 | 2.96E-01 | 5.84E-01 | -6.08 |
| 1450899_PM_at   | Nedd1                                   | NEDD1      | 0.12  | 2.32  | 1.10  | 2.96E-01 | 5.84E-01 | -6.08 |
| 1447180_PM_at   | B230110G15Rik                           | NA         | 0.10  | 2.28  | 1.10  | 2.96E-01 | 5.84E-01 | -6.08 |
| 1460467_PM_at   | Iqcg                                    | IQCG       | 0.13  | 2.10  | 1.10  | 2.96E-01 | 5.84E-01 | -6.08 |
| 1444729_PM_at   | E130317F20Rik                           | NA         | 0.15  | 2.52  | 1.10  | 2.96E-01 | 5.84E-01 | -6.08 |
| 1455214_PM_at   | Mitf                                    | MITF       | 0.25  | 3.32  | 1.10  | 2.96E-01 | 5.84E-01 | -6.08 |
| 1435528_PM_at   | Dnlz                                    | DNLZ       | 0.13  | 2.35  | 1.10  | 2.96E-01 | 5.84E-01 | -6.08 |
| 1421940_PM_at   | Stag1                                   | STAG1      | 0.26  | 2.76  | 1.10  | 2.96E-01 | 5.84E-01 | -6.08 |
| 1416264_PM_at   | Abcb9                                   | ABCB9      | 0.12  | 3.01  | 1.10  | 2.96E-01 | 5.85E-01 | -6.08 |
| 1426623_PM_a_at | Arhgap17                                | ARHGAP17   | 0.12  | 2.11  | 1.10  | 2.96E-01 | 5.85E-01 | -6.08 |
| 1424282_PM_at   | Gatb                                    | GATB       | 0.32  | 3.80  | 1.10  | 2.96E-01 | 5.85E-01 | -6.08 |
| 1416448_PM_at   | Itpa                                    | ITPA       | -0.11 | 2.24  | -1.10 | 2.96E-01 | 5.85E-01 | -6.08 |
| 1421295_PM_at   | Chrd1                                   | CHRD1      | 0.12  | 2.24  | 1.10  | 2.96E-01 | 5.85E-01 | -6.08 |
| 1457966_PM_at   | ---                                     | NA         | -0.17 | 2.34  | -1.10 | 2.96E-01 | 5.85E-01 | -6.08 |
| 1442049_PM_at   | ---                                     | NA         | -0.25 | 2.97  | -1.10 | 2.96E-01 | 5.85E-01 | -6.08 |
| 1455647_PM_at   | Ar                                      | AR         | -0.17 | 2.53  | -1.10 | 2.96E-01 | 5.85E-01 | -6.08 |
| 1433359_PM_at   | ---                                     | NA         | -0.12 | 2.07  | -1.10 | 2.96E-01 | 5.85E-01 | -6.08 |
| 1440692_PM_at   | Gm364                                   | NA         | 0.11  | 1.81  | 1.10  | 2.96E-01 | 5.85E-01 | -6.08 |
| 1417855_PM_at   | Fbx15                                   | FBXL15     | 0.11  | 2.37  | 1.10  | 2.96E-01 | 5.85E-01 | -6.08 |
| 1424417_PM_at   | Vps36                                   | VPS36      | 0.12  | 2.01  | 1.10  | 2.96E-01 | 5.85E-01 | -6.08 |
| 1440839_PM_x_at | 1700065I16Rik                           | NA         | 0.13  | 2.10  | 1.10  | 2.96E-01 | 5.85E-01 | -6.08 |
| 1432783_PM_at   | ---                                     | NA         | 0.13  | 2.53  | 1.10  | 2.96E-01 | 5.85E-01 | -6.08 |
| 1450163_PM_a_at | LOC105242468 /// Wrn                    | WRN        | 0.13  | 2.41  | 1.10  | 2.96E-01 | 5.85E-01 | -6.08 |
| 1444485_PM_at   | ---                                     | NA         | 0.15  | 2.61  | 1.10  | 2.96E-01 | 5.85E-01 | -6.08 |
| 1421290_PM_at   | Hspb7                                   | HSPB7      | 0.10  | 2.33  | 1.10  | 2.96E-01 | 5.85E-01 | -6.08 |
| 1418557_PM_s_at | Tssk3                                   | TSSK3      | 0.14  | 2.66  | 1.10  | 2.96E-01 | 5.85E-01 | -6.08 |
| 1430044_PM_at   | 4930415F15Rik                           | C7orf72    | 0.12  | 3.02  | 1.10  | 2.96E-01 | 5.85E-01 | -6.08 |
| 1418638_PM_at   | H2-DMb1 /// H2-DMb2 ///<br>LOC102642102 | AL645941.2 | 0.13  | 2.43  | 1.10  | 2.96E-01 | 5.85E-01 | -6.08 |
| 1437756_PM_at   | Gimap9                                  | NA         | 0.13  | 2.36  | 1.10  | 2.96E-01 | 5.85E-01 | -6.08 |
| 1419203_PM_at   | Map2k3os                                | NA         | 0.14  | 2.25  | 1.10  | 2.96E-01 | 5.85E-01 | -6.08 |
| 1450183_PM_a_at | Sh2b3                                   | SH2B3      | 0.16  | 2.70  | 1.10  | 2.96E-01 | 5.85E-01 | -6.08 |
| 1428738_PM_a_at | Tmem254a /// Tmem254b<br>/// Tmem254c   | TMEM254    | -0.14 | 2.58  | -1.10 | 2.96E-01 | 5.85E-01 | -6.08 |
| 1440988_PM_at   | ---                                     | NA         | 0.11  | 1.98  | 1.10  | 2.96E-01 | 5.85E-01 | -6.08 |
| 1420265_PM_x_at | Cog8                                    | COG8       | 0.18  | 2.88  | 1.10  | 2.96E-01 | 5.85E-01 | -6.08 |
| 1417563_PM_at   | Eif4ebp1                                | EIF4EBP1   | 0.18  | 2.88  | 1.10  | 2.96E-01 | 5.85E-01 | -6.08 |
| 1444386_PM_at   | Pde1c                                   | PDE1C      | 0.13  | 2.18  | 1.10  | 2.96E-01 | 5.85E-01 | -6.08 |

|                 |                            |           |       |      |       |          |          |          |       |
|-----------------|----------------------------|-----------|-------|------|-------|----------|----------|----------|-------|
| 1424399_PM_at   | Uck1                       | UCK1      | 0.11  | 2.18 | 1.10  | 2.97E-01 | 5.85E-01 | -6.08    |       |
| 1440509_PM_at   | Sox30                      | SOX30     | 0.11  | 2.04 | 1.10  | 2.97E-01 | 5.85E-01 | -6.08    |       |
| 1441612_PM_at   | ---                        | NA        | 0.30  | 3.10 | 1.10  | 2.97E-01 | 5.85E-01 | -6.08    |       |
| 1442639_PM_at   | ---                        | NA        | 0.10  | 2.22 | 1.10  | 2.97E-01 | 5.85E-01 | -6.08    |       |
| 1443109_PM_at   | ---                        | NA        | 0.15  | 2.55 | 1.10  | 2.97E-01 | 5.85E-01 | -6.09    |       |
| 1436945_PM_x_at | Stim1                      | STIM1     | -0.23 | 2.82 | -1.10 | 2.97E-01 | 5.85E-01 | -6.09    |       |
| 1436363_PM_a_at | Nfix                       | NFIX      | -0.40 | 6.79 | -1.10 | 2.97E-01 | 5.85E-01 | -6.09    |       |
| 1430296_PM_at   | Krtap31-1                  | NA        | 0.11  | 2.17 | 1.10  | 2.97E-01 | 5.85E-01 | -6.09    |       |
| 1445751_PM_at   | Col12a1                    | NA        | 0.13  | 2.30 | 1.10  | 2.97E-01 | 5.85E-01 | -6.09    |       |
| 1441591_PM_at   | ---                        | NA        | -0.09 | 2.29 | -1.10 | 2.97E-01 | 5.85E-01 | -6.09    |       |
| 1425919_PM_at   | Ndufa12                    | NA        | 0.11  | 2.11 | 1.10  | 2.97E-01 | 5.85E-01 | -6.09    |       |
| 1441099_PM_at   | Al463170                   | NA        | 0.14  | 3.03 | 1.10  | 2.97E-01 | 5.85E-01 | -6.09    |       |
| 1438870_PM_at   | ---                        | NA        | 0.12  | 2.33 | 1.10  | 2.97E-01 | 5.85E-01 | -6.09    |       |
| 1446827_PM_at   | Ncoa2                      | NCOA2     | 0.22  | 2.57 | 1.10  | 2.97E-01 | 5.86E-01 | -6.09    |       |
| 1441810_PM_at   | ---                        | NA        | 0.12  | 2.63 | 1.10  | 2.97E-01 | 5.86E-01 | -6.09    |       |
| 1442096_PM_at   | Lrrc66                     | LRRC66    | 0.11  | 2.80 | 1.10  | 2.97E-01 | 5.86E-01 | -6.09    |       |
| 1433617_PM_s_at | B4galt5                    | B4GALT5   | -0.23 | 3.61 | -1.10 | 2.97E-01 | 5.86E-01 | -6.09    |       |
| 1432213_PM_at   | ---                        | NA        | 0.12  | 2.59 | 1.10  | 2.97E-01 | 5.86E-01 | -6.09    |       |
| 1425069_PM_at   | Cyp2d34                    | CYP2D6    | 0.09  | 2.20 | 1.10  | 2.97E-01 | 5.86E-01 | -6.09    |       |
| 1449887_PM_at   | Chmp4c                     | CHMP4C    | 0.09  | 2.22 | 1.10  | 2.97E-01 | 5.86E-01 | -6.09    |       |
| 1450557_PM_at   | Scn4a                      | SCN4A     | 0.10  | 2.03 | 1.10  | 2.97E-01 | 5.86E-01 | -6.09    |       |
| 1442521_PM_at   | Gm30853                    | NA        | 0.15  | 2.12 | 1.10  | 2.97E-01 | 5.86E-01 | -6.09    |       |
| 1434153_PM_at   | Shb                        | SHB       | 0.20  | 2.74 | 1.10  | 2.97E-01 | 5.86E-01 | -6.09    |       |
| 1427276_PM_at   | Smc4                       | SMC4      | -0.47 | 4.62 | -1.10 | 2.97E-01 | 5.86E-01 | -6.09    |       |
| 1434733_PM_at   | Stk36                      | STK36     | 0.13  | 2.18 | 1.10  | 2.97E-01 | 5.86E-01 | -6.09    |       |
| 1460113_PM_at   | ---                        | NA        | 0.08  | 2.23 | 1.10  | 2.97E-01 | 5.86E-01 | -6.09    |       |
| 1420082_PM_at   | Gm39913                    | NA        | 0.09  | 2.14 | 1.10  | 2.97E-01 | 5.86E-01 | -6.09    |       |
| 1426538_PM_a_at | Trp53                      | TP53      | 0.17  | 2.48 | 1.10  | 2.97E-01 | 5.86E-01 | -6.09    |       |
| 1431182_PM_at   | Hspa8                      | HSPA8     | 0.52  | 2.91 | 1.10  | 2.97E-01 | 5.86E-01 | -6.09    |       |
| 1416803_PM_at   | Fkbp7                      | FKBP7     | -0.23 | 2.92 | -1.10 | 2.97E-01 | 5.86E-01 | -6.09    |       |
| 1435725_PM_x_at | LOC102635048 /// Rpl12 /// | Rpl12-ps1 | NA    | 0.15 | 8.70  | 1.10     | 2.97E-01 | 5.86E-01 | -6.09 |
| 1426056_PM_at   | Pigq                       | NA        | 0.12  | 2.08 | 1.10  | 2.97E-01 | 5.86E-01 | -6.09    |       |
| 1438327_PM_at   | Zfp385b                    | NA        | -0.51 | 3.81 | -1.10 | 2.97E-01 | 5.86E-01 | -6.09    |       |
| 1426659_PM_a_at | Gm8290 /// Rpl23a          | RPL23A    | -0.39 | 7.55 | -1.10 | 2.97E-01 | 5.86E-01 | -6.09    |       |
| 1431023_PM_at   | Ric1                       | RIC1      | -0.37 | 3.57 | -1.10 | 2.97E-01 | 5.86E-01 | -6.09    |       |
| 1433797_PM_at   | E130309D02Rik              | C7orf26   | 0.10  | 3.26 | 1.10  | 2.97E-01 | 5.86E-01 | -6.09    |       |
| 1444632_PM_at   | ---                        | NA        | 0.11  | 2.23 | 1.10  | 2.97E-01 | 5.86E-01 | -6.09    |       |
| 1455308_PM_at   | Ano6                       | ANO6      | -0.27 | 4.15 | -1.10 | 2.97E-01 | 5.86E-01 | -6.09    |       |
| 1455453_PM_at   | Gemin5                     | GEMIN5    | -0.27 | 2.46 | -1.10 | 2.97E-01 | 5.86E-01 | -6.09    |       |
| 1431012_PM_a_at | Eci2                       | ECI2      | -0.23 | 2.93 | -1.10 | 2.97E-01 | 5.86E-01 | -6.09    |       |
| 1425122_PM_at   | Fam3b                      | FAM3B     | 0.14  | 2.38 | 1.10  | 2.97E-01 | 5.86E-01 | -6.09    |       |
| 1442499_PM_at   | Cdv3                       | CDV3      | 0.28  | 3.22 | 1.10  | 2.97E-01 | 5.86E-01 | -6.09    |       |
| 1441216_PM_at   | ---                        | NA        | 0.13  | 2.13 | 1.10  | 2.97E-01 | 5.86E-01 | -6.09    |       |
| 1416536_PM_at   | Mum1                       | MUM1      | 0.18  | 2.73 | 1.10  | 2.97E-01 | 5.86E-01 | -6.09    |       |
| 1447440_PM_at   | Nutf2 /// Nutf2-ps1 ///    | Nutf2-ps2 | 0.09  | 2.22 | 1.10  | 2.98E-01 | 5.86E-01 | -6.09    |       |
| 1444754_PM_at   | Asxl2                      | ASXL2     | 0.13  | 2.47 | 1.10  | 2.98E-01 | 5.86E-01 | -6.09    |       |
| 1439526_PM_at   | Me2                        | NA        | 0.12  | 2.46 | 1.10  | 2.98E-01 | 5.86E-01 | -6.09    |       |
| 1441906_PM_x_at | Syap1                      | SYAP1     | -0.13 | 2.19 | -1.10 | 2.98E-01 | 5.86E-01 | -6.09    |       |
| 1427166_PM_a_at | Spg7                       | SPG7      | 0.19  | 2.69 | 1.10  | 2.98E-01 | 5.86E-01 | -6.09    |       |
| 1428679_PM_s_at | 0610010K14Rik              | C17orf49  | 0.40  | 2.60 | 1.10  | 2.98E-01 | 5.86E-01 | -6.09    |       |
| 1416388_PM_at   | Pip4k2c                    | PIP4K2C   | 0.12  | 3.01 | 1.10  | 2.98E-01 | 5.86E-01 | -6.09    |       |
| 1444248_PM_at   | Rcn2                       | RCN2      | -0.23 | 2.73 | -1.10 | 2.98E-01 | 5.86E-01 | -6.09    |       |
| 1431796_PM_at   | ---                        | NA        | 0.10  | 2.06 | 1.10  | 2.98E-01 | 5.86E-01 | -6.09    |       |
| 1435049_PM_s_at | Al854703                   | NA        | 0.11  | 2.23 | 1.10  | 2.98E-01 | 5.86E-01 | -6.09    |       |
| 1458377_PM_at   | Med26                      | MED26     | 0.23  | 2.66 | 1.10  | 2.98E-01 | 5.86E-01 | -6.09    |       |
| 1450432_PM_s_at | Mus81                      | MUS81     | -0.21 | 3.16 | -1.10 | 2.98E-01 | 5.86E-01 | -6.09    |       |
| 1453639_PM_s_at | Ccdc163                    | NA        | 0.10  | 2.25 | 1.10  | 2.98E-01 | 5.86E-01 | -6.09    |       |
| 1453597_PM_at   | Tmem239                    | TMEM239   | 0.11  | 2.35 | 1.10  | 2.98E-01 | 5.86E-01 | -6.09    |       |
| 1425646_PM_at   | Nmrk1                      | NMRK1     | 0.09  | 2.17 | 1.10  | 2.98E-01 | 5.86E-01 | -6.09    |       |
| 1456583_PM_x_at | Tmem144                    | TMEM144   | 0.10  | 2.16 | 1.10  | 2.98E-01 | 5.87E-01 | -6.09    |       |
| 1437012_PM_x_at | Rapgef3                    | RAPGEF3   | -0.38 | 5.41 | -1.10 | 2.98E-01 | 5.87E-01 | -6.09    |       |
| 1437297_PM_at   | Chd8                       | CHD8      | -0.37 | 6.30 | -1.10 | 2.98E-01 | 5.87E-01 | -6.09    |       |
| 1420523_PM_at   | Ccdc50                     | CCDC50    | 0.08  | 2.02 | 1.10  | 2.98E-01 | 5.87E-01 | -6.09    |       |
| 1422409_PM_at   | Hes3                       | HES3      | 0.11  | 2.07 | 1.10  | 2.98E-01 | 5.87E-01 | -6.09    |       |
| 1441674_PM_at   | ---                        | NA        | 0.11  | 2.27 | 1.10  | 2.98E-01 | 5.87E-01 | -6.09    |       |
| 1451528_PM_at   | Tmem82                     | TMEM82    | 0.15  | 2.41 | 1.10  | 2.98E-01 | 5.87E-01 | -6.09    |       |
| 1417993_PM_at   | Svs3a                      | NA        | 0.20  | 3.14 | 1.10  | 2.98E-01 | 5.87E-01 | -6.09    |       |
| 1430615_PM_at   | Ttl7                       | TTLL7     | 0.29  | 4.11 | 1.10  | 2.98E-01 | 5.87E-01 | -6.09    |       |
| 1432057_PM_a_at | Prdm5                      | PRDM5     | 0.23  | 3.06 | 1.10  | 2.98E-01 | 5.87E-01 | -6.09    |       |
| 1438580_PM_at   | Zcchc7                     | ZCCHC7    | -0.25 | 2.62 | -1.10 | 2.98E-01 | 5.87E-01 | -6.09    |       |
| 1454248_PM_at   | Cib4                       | CIB4      | 0.11  | 2.59 | 1.10  | 2.98E-01 | 5.87E-01 | -6.09    |       |
| 1421204_PM_a_at | Nudt16                     | NUDT16    | 0.14  | 2.59 | 1.10  | 2.98E-01 | 5.87E-01 | -6.09    |       |
| 1421056_PM_at   | Dnase1b                    | DNASE1B   | 0.10  | 2.01 | 1.10  | 2.98E-01 | 5.87E-01 | -6.09    |       |

|                              |                        |          |       |      |       |          |          |       |
|------------------------------|------------------------|----------|-------|------|-------|----------|----------|-------|
| 1444923_PM_at                | ---                    | NA       | -0.23 | 3.58 | -1.10 | 2.98E-01 | 5.87E-01 | -6.09 |
| 1427132_PM_at                | Sbf2                   | SBF2     | 0.16  | 3.90 | 1.10  | 2.98E-01 | 5.87E-01 | -6.09 |
| 1433325_PM_at                | ---                    | NA       | 0.45  | 4.91 | 1.10  | 2.98E-01 | 5.87E-01 | -6.09 |
| 1443458_PM_at                | D630033O11Rik          | NA       | 0.12  | 2.29 | 1.09  | 2.98E-01 | 5.87E-01 | -6.09 |
| 1446871_PM_at                | D7Erttd481e            | NA       | 0.20  | 3.18 | 1.09  | 2.98E-01 | 5.87E-01 | -6.09 |
| 1431269_PM_at                | Prdx4                  | PRDX4    | 0.23  | 2.34 | 1.09  | 2.98E-01 | 5.87E-01 | -6.09 |
| 1459277_PM_at                | ---                    | NA       | -0.17 | 2.45 | -1.09 | 2.98E-01 | 5.87E-01 | -6.09 |
| AFFX-TransRecMur/X57349_3_at | Tfrc                   | NA       | -0.15 | 2.46 | -1.09 | 2.98E-01 | 5.87E-01 | -6.09 |
| 1441116_PM_at                | ---                    | NA       | 0.15  | 2.45 | 1.09  | 2.98E-01 | 5.87E-01 | -6.09 |
| 1421504_PM_at                | Sp4                    | SP4      | 0.33  | 2.60 | 1.09  | 2.98E-01 | 5.87E-01 | -6.09 |
| 1442835_PM_at                | Gm19990                | NA       | 0.46  | 2.59 | 1.09  | 2.98E-01 | 5.87E-01 | -6.09 |
| 1422486_PM_a_at              | Smad4                  | SMAD4    | -0.47 | 5.35 | -1.09 | 2.99E-01 | 5.87E-01 | -6.09 |
| 1457888_PM_at                | ---                    | NA       | -0.30 | 3.32 | -1.09 | 2.99E-01 | 5.87E-01 | -6.09 |
| 1452133_PM_at                | Uqcrh                  | NA       | -0.28 | 4.68 | -1.09 | 2.99E-01 | 5.87E-01 | -6.09 |
| 1450759_PM_at                | Bmp6                   | NA       | -0.24 | 2.78 | -1.09 | 2.98E-01 | 5.87E-01 | -6.09 |
| 1427127_PM_x_at              | Hspa1b                 | NA       | -0.13 | 2.28 | -1.09 | 2.98E-01 | 5.87E-01 | -6.09 |
| 1430162_PM_at                | 3830417A13Rik          | MAGEA2   | 0.09  | 2.33 | 1.09  | 2.98E-01 | 5.87E-01 | -6.09 |
| 1449684_PM_at                | Oxsm                   | OXSM     | 0.10  | 2.11 | 1.09  | 2.98E-01 | 5.87E-01 | -6.09 |
| 1435939_PM_s_at              | Hepacam2               | HEPACAM2 | 0.10  | 1.96 | 1.09  | 2.99E-01 | 5.87E-01 | -6.09 |
| 1444149_PM_at                | Zscan12                | NA       | 0.10  | 2.46 | 1.09  | 2.99E-01 | 5.87E-01 | -6.09 |
| 1420584_PM_at                | Pla2g2c                | PLA2G2C  | 0.11  | 2.14 | 1.09  | 2.99E-01 | 5.87E-01 | -6.09 |
| 1437662_PM_at                | Acsn5                  | ACSM5    | 0.11  | 2.26 | 1.09  | 2.99E-01 | 5.87E-01 | -6.09 |
| 1430516_PM_at                | ---                    | NA       | 0.11  | 2.31 | 1.09  | 2.98E-01 | 5.87E-01 | -6.09 |
| 1454322_PM_at                | ---                    | NA       | 0.11  | 2.18 | 1.09  | 2.99E-01 | 5.87E-01 | -6.09 |
| 1423935_PM_x_at              | Krt14                  | KRT14    | 0.11  | 2.23 | 1.09  | 2.99E-01 | 5.87E-01 | -6.09 |
| 1418723_PM_at                | Lpar3                  | LPAR3    | 0.13  | 2.36 | 1.09  | 2.99E-01 | 5.87E-01 | -6.09 |
| 1445474_PM_at                | Prim2                  | PRIM2    | 0.14  | 2.40 | 1.09  | 2.99E-01 | 5.87E-01 | -6.09 |
| 1459077_PM_at                | ---                    | NA       | 0.15  | 2.43 | 1.09  | 2.99E-01 | 5.87E-01 | -6.09 |
| 1453909_PM_at                | 4930505N22Rik          | NA       | 0.17  | 2.48 | 1.09  | 2.99E-01 | 5.87E-01 | -6.09 |
| 1460286_PM_at                | Sept6                  | SEPT6    | 0.28  | 3.55 | 1.09  | 2.99E-01 | 5.87E-01 | -6.09 |
| 1450264_PM_a_at              | Chka                   | CHKA     | -0.18 | 3.76 | -1.09 | 2.99E-01 | 5.87E-01 | -6.09 |
| 1430826_PM_s_at              | Gcnt2                  | GCNT2    | 0.08  | 2.07 | 1.09  | 2.99E-01 | 5.87E-01 | -6.09 |
| 1430447_PM_a_at              | Lair1                  | LAIR1    | 0.11  | 2.38 | 1.09  | 2.99E-01 | 5.87E-01 | -6.09 |
| 1440000_PM_at                | E330013P04Rik          | NA       | 0.16  | 2.09 | 1.09  | 2.99E-01 | 5.87E-01 | -6.09 |
| 1439902_PM_at                | CSar1                  | CSAR1    | 0.23  | 2.87 | 1.09  | 2.99E-01 | 5.87E-01 | -6.09 |
| 1444056_PM_at                | ---                    | NA       | 0.39  | 3.53 | 1.09  | 2.99E-01 | 5.87E-01 | -6.09 |
| 1434861_PM_at                | ---                    | NA       | -0.29 | 3.32 | -1.09 | 2.99E-01 | 5.87E-01 | -6.09 |
| 1418969_PM_at                | Skp2                   | SKP2     | 0.13  | 2.88 | 1.09  | 2.99E-01 | 5.87E-01 | -6.09 |
| 1454435_PM_at                | 5530400N10Rik          | NA       | 0.14  | 2.42 | 1.09  | 2.99E-01 | 5.87E-01 | -6.09 |
| 1437510_PM_x_at              | Gm14586 /// Gm2614 /// | RPS17    | -0.41 | 9.08 | -1.09 | 2.99E-01 | 5.87E-01 | -6.09 |
| 1418767_PM_at                | Cyp4f13                | NA       | 0.14  | 2.36 | 1.09  | 2.99E-01 | 5.87E-01 | -6.09 |
| 1426637_PM_a_at              | Six3                   | SIX3     | 0.15  | 2.46 | 1.09  | 2.99E-01 | 5.87E-01 | -6.09 |
| 1456311_PM_x_at              | Esco2                  | ESCO2    | 0.09  | 1.94 | 1.09  | 2.99E-01 | 5.87E-01 | -6.09 |
| 1438448_PM_at                | Otop1                  | OTOP1    | 0.10  | 2.04 | 1.09  | 2.99E-01 | 5.87E-01 | -6.09 |
| 1452018_PM_at                | Nkx2-6                 | NKX2-6   | 0.10  | 2.32 | 1.09  | 2.99E-01 | 5.87E-01 | -6.09 |
| 1429287_PM_a_at              | Prl                    | PRL      | 0.12  | 2.71 | 1.09  | 2.99E-01 | 5.87E-01 | -6.09 |
| 1437757_PM_at                | Hinfp                  | NA       | 0.26  | 3.89 | 1.09  | 2.99E-01 | 5.87E-01 | -6.09 |
| 1423499_PM_at                | Sncap                  | SNCAP    | -0.20 | 2.74 | -1.09 | 2.99E-01 | 5.87E-01 | -6.09 |
| 1442379_PM_at                | Fam196b                | FAM196B  | 0.16  | 2.15 | 1.09  | 2.99E-01 | 5.87E-01 | -6.09 |
| 1424787_PM_a_at              | Nrf1                   | NRF1     | 0.13  | 3.31 | 1.09  | 2.99E-01 | 5.87E-01 | -6.09 |
| 1452746_PM_at                | Atp13a2                | ATP13A2  | -0.15 | 4.73 | -1.09 | 2.99E-01 | 5.87E-01 | -6.09 |
| 1422044_PM_at                | Ndst1                  | NDST1    | 0.09  | 2.58 | 1.09  | 2.99E-01 | 5.87E-01 | -6.09 |
| 1417816_PM_s_at              | Serinc3                | SERINC3  | -0.30 | 3.61 | -1.09 | 2.99E-01 | 5.87E-01 | -6.09 |
| 1445903_PM_at                | ---                    | NA       | -0.10 | 2.31 | -1.09 | 2.99E-01 | 5.87E-01 | -6.09 |
| 1443889_PM_at                | 9030619P08Rik          | NA       | 0.12  | 2.23 | 1.09  | 2.99E-01 | 5.88E-01 | -6.09 |
| 1423388_PM_at                | Ap1g1                  | AP1G1    | -0.21 | 2.74 | -1.09 | 2.99E-01 | 5.88E-01 | -6.09 |
| 1433833_PM_at                | Fndc3b                 | FNDC3B   | -0.12 | 4.66 | -1.09 | 2.99E-01 | 5.88E-01 | -6.09 |
| 1417520_PM_at                | Nfe2l3                 | NFE2L3   | -0.27 | 2.79 | -1.09 | 2.99E-01 | 5.88E-01 | -6.09 |
| 1460690_PM_at                | Fam195b                | MCRI1P1  | 0.10  | 2.37 | 1.09  | 2.99E-01 | 5.88E-01 | -6.09 |
| 1451624_PM_a_at              | Phospho2               | PHOSPHO2 | -0.44 | 2.63 | -1.09 | 3.00E-01 | 5.88E-01 | -6.09 |
| 1424364_PM_a_at              | Uqcr10                 | UQCR10   | -0.38 | 2.90 | -1.09 | 3.00E-01 | 5.88E-01 | -6.09 |
| 1434437_PM_x_at              | Rrm2                   | RRM2     | -0.34 | 2.67 | -1.09 | 3.00E-01 | 5.88E-01 | -6.09 |
| 1447707_PM_s_at              | Pde2a                  | PDE2A    | -0.33 | 8.61 | -1.09 | 3.00E-01 | 5.88E-01 | -6.09 |
| 1449145_PM_a_at              | Cav1                   | CAV1     | -0.32 | 2.66 | -1.09 | 3.00E-01 | 5.88E-01 | -6.09 |
| 1442748_PM_at                | Btbd3                  | NA       | -0.25 | 2.57 | -1.09 | 3.00E-01 | 5.88E-01 | -6.09 |
| 1437184_PM_at                | Guf1                   | GUF1     | -0.20 | 3.23 | -1.09 | 3.00E-01 | 5.88E-01 | -6.09 |
| 1451812_PM_at                | Adam22                 | ADAM22   | -0.19 | 4.38 | -1.09 | 3.00E-01 | 5.88E-01 | -6.09 |
| 1436325_PM_at                | Rora                   | RORA     | -0.16 | 3.02 | -1.09 | 3.00E-01 | 5.88E-01 | -6.09 |
| 1426698_PM_a_at              | Hnrnp                  | HNRNPM   | -0.13 | 4.22 | -1.09 | 3.00E-01 | 5.88E-01 | -6.09 |
| 1426231_PM_at                | Vit                    | VIT      | -0.12 | 2.21 | -1.09 | 3.00E-01 | 5.88E-01 | -6.09 |
| 1419961_PM_s_at              | Cphx3                  | NA       | -0.11 | 2.04 | -1.09 | 3.00E-01 | 5.88E-01 | -6.09 |
| 1437935_PM_at                | Mei4                   | MEI4     | -0.08 | 2.06 | -1.09 | 3.00E-01 | 5.88E-01 | -6.09 |
| 1450215_PM_at                | Rcvrn                  | RCVRN    | 0.08  | 2.24 | 1.09  | 3.00E-01 | 5.88E-01 | -6.09 |
| 1458753_PM_at                | Arhgef33               | ARHGEF33 | 0.09  | 2.65 | 1.09  | 3.00E-01 | 5.88E-01 | -6.09 |

|                 |                                      |          |       |      |       |          |          |       |
|-----------------|--------------------------------------|----------|-------|------|-------|----------|----------|-------|
| 1417561_PM_at   | Apoc1                                | APOC1    | 0.10  | 2.10 | 1.09  | 3.00E-01 | 5.88E-01 | -6.09 |
| 1429241_PM_at   | Nipal3                               | NIPAL3   | 0.10  | 2.69 | 1.09  | 3.00E-01 | 5.88E-01 | -6.09 |
| 1442761_PM_at   | ---                                  | NA       | 0.11  | 2.41 | 1.09  | 3.00E-01 | 5.88E-01 | -6.09 |
| 1426740_PM_s_at | Armc5                                | ARMC5    | 0.11  | 2.46 | 1.09  | 3.00E-01 | 5.88E-01 | -6.09 |
| 1440504_PM_at   | Ccdc39                               | CCDC39   | 0.11  | 2.32 | 1.09  | 3.00E-01 | 5.88E-01 | -6.09 |
| 1426648_PM_at   | Mapkapk2                             | MAPKAPK2 | 0.11  | 2.46 | 1.09  | 3.00E-01 | 5.88E-01 | -6.09 |
| 1456048_PM_at   | Cpeb3                                | CPEB3    | 0.11  | 2.70 | 1.09  | 3.00E-01 | 5.88E-01 | -6.09 |
| 1420266_PM_at   | Cog8                                 | NA       | 0.12  | 3.69 | 1.09  | 3.00E-01 | 5.88E-01 | -6.09 |
| 1439934_PM_at   | Slc30a10                             | SLC30A10 | 0.13  | 2.52 | 1.09  | 3.00E-01 | 5.88E-01 | -6.09 |
| 1449554_PM_at   | Tle3                                 | TLE3     | 0.15  | 2.31 | 1.09  | 3.00E-01 | 5.88E-01 | -6.09 |
| 1450005_PM_x_at | Dlk2                                 | DLK2     | 0.15  | 3.03 | 1.09  | 3.00E-01 | 5.88E-01 | -6.09 |
| 1416203_PM_at   | Aqp1                                 | AQP1     | 0.15  | 2.45 | 1.09  | 3.00E-01 | 5.88E-01 | -6.09 |
| 1418633_PM_at   | Notch1                               | NOTCH1   | 0.17  | 2.66 | 1.09  | 3.00E-01 | 5.88E-01 | -6.09 |
| 1441166_PM_at   | A330050F15Rik                        | AKAIN1   | 0.17  | 2.83 | 1.09  | 3.00E-01 | 5.88E-01 | -6.09 |
| 1447603_PM_x_at | Dennd6b                              | DENND6B  | 0.18  | 2.64 | 1.09  | 3.00E-01 | 5.88E-01 | -6.09 |
| 1457762_PM_at   | ---                                  | NA       | 0.19  | 2.64 | 1.09  | 3.00E-01 | 5.88E-01 | -6.09 |
| 1426807_PM_at   | Lta4h                                | NA       | 0.19  | 2.39 | 1.09  | 3.00E-01 | 5.88E-01 | -6.09 |
| 1426633_PM_s_at | Kctd14                               | KCTD14   | 0.24  | 2.74 | 1.09  | 3.00E-01 | 5.88E-01 | -6.09 |
| 1442595_PM_at   | ---                                  | NA       | 0.24  | 3.10 | 1.09  | 3.00E-01 | 5.88E-01 | -6.09 |
| 1432198_PM_at   | ---                                  | NA       | 0.31  | 4.81 | 1.09  | 3.00E-01 | 5.88E-01 | -6.09 |
| 1434157_PM_at   | Txlna                                | TXLNA    | 0.33  | 3.93 | 1.09  | 3.00E-01 | 5.88E-01 | -6.09 |
| 1441542_PM_at   | Drp2                                 | DRP2     | 0.34  | 3.27 | 1.09  | 3.00E-01 | 5.88E-01 | -6.09 |
| 1455926_PM_at   | Lsm6                                 | LSM6     | 0.61  | 3.22 | 1.09  | 3.00E-01 | 5.88E-01 | -6.09 |
| 1421966_PM_at   | Ncam1                                | NA       | -0.30 | 4.59 | -1.09 | 3.00E-01 | 5.88E-01 | -6.09 |
| 1431774_PM_a_at | Lymr1                                | LYRM1    | -0.13 | 2.87 | -1.09 | 3.00E-01 | 5.88E-01 | -6.09 |
| 1460016_PM_at   | ---                                  | NA       | 0.15  | 2.54 | 1.09  | 3.00E-01 | 5.88E-01 | -6.09 |
| 1451644_PM_a_at | H2-Q4///H2-Q6///H2-Q8<br>///LOC68395 | NA       | 0.22  | 2.55 | 1.09  | 3.00E-01 | 5.88E-01 | -6.09 |
| 1438098_PM_at   | Dlgap1                               | DLGAP1   | -0.20 | 2.46 | -1.09 | 3.00E-01 | 5.88E-01 | -6.09 |
| 1453913_PM_a_at | Tap2                                 | TAP2     | 0.15  | 2.55 | 1.09  | 3.00E-01 | 5.88E-01 | -6.09 |
| 1432272_PM_a_at | Ercc4                                | ERCC4    | 0.16  | 2.17 | 1.09  | 3.00E-01 | 5.88E-01 | -6.09 |
| 1436052_PM_at   | Gpatch2l                             | NA       | 0.14  | 2.44 | 1.09  | 3.00E-01 | 5.88E-01 | -6.09 |
| 1438236_PM_at   | Nfia                                 | NFIA     | -0.19 | 2.81 | -1.09 | 3.00E-01 | 5.88E-01 | -6.09 |
| 1450842_PM_a_at | Cenpa                                | CENPA    | -0.11 | 2.14 | -1.09 | 3.00E-01 | 5.88E-01 | -6.09 |
| 1439813_PM_at   | ---                                  | NA       | 0.07  | 2.14 | 1.09  | 3.00E-01 | 5.88E-01 | -6.09 |
| 1455466_PM_at   | Adgrd1                               | ADGRD1   | 0.11  | 2.29 | 1.09  | 3.00E-01 | 5.88E-01 | -6.09 |
| 1420337_PM_at   | Gbx2                                 | GBX2     | 0.11  | 2.25 | 1.09  | 3.00E-01 | 5.88E-01 | -6.09 |
| 1423753_PM_at   | Bambi                                | BAMBI    | 0.12  | 2.44 | 1.09  | 3.00E-01 | 5.88E-01 | -6.09 |
| 1432201_PM_a_at | Zswim2                               | ZSWIM2   | 0.13  | 2.60 | 1.09  | 3.00E-01 | 5.88E-01 | -6.09 |
| 1429912_PM_at   | Sun5                                 | SUN5     | 0.13  | 2.42 | 1.09  | 3.00E-01 | 5.88E-01 | -6.09 |
| 1441132_PM_at   | ---                                  | NA       | 0.15  | 2.14 | 1.09  | 3.00E-01 | 5.88E-01 | -6.09 |
| 1443226_PM_at   | Sike1                                | SIKE1    | 0.26  | 2.53 | 1.09  | 3.00E-01 | 5.88E-01 | -6.09 |
| 1436656_PM_at   | Tmem150c                             | TMEM150C | -0.28 | 2.78 | -1.09 | 3.00E-01 | 5.88E-01 | -6.09 |
| 1457380_PM_at   | ---                                  | NA       | 0.11  | 2.72 | 1.09  | 3.00E-01 | 5.88E-01 | -6.09 |
| 1421617_PM_at   | Trpm8                                | TRPM8    | 0.11  | 2.42 | 1.09  | 3.00E-01 | 5.88E-01 | -6.09 |
| 1423947_PM_at   | 1110008P14Rik                        | C9orf16  | 0.11  | 2.05 | 1.09  | 3.00E-01 | 5.88E-01 | -6.09 |
| 1439316_PM_at   | Rbm39                                | RBM39    | 0.13  | 2.55 | 1.09  | 3.00E-01 | 5.88E-01 | -6.09 |
| 1440569_PM_at   | Slc16a10                             | NA       | 0.09  | 2.56 | 1.09  | 3.00E-01 | 5.88E-01 | -6.09 |
| 1451329_PM_at   | Nudt22                               | NUDT22   | 0.11  | 2.40 | 1.09  | 3.01E-01 | 5.88E-01 | -6.09 |
| 1456367_PM_at   | ---                                  | NA       | 0.15  | 2.36 | 1.09  | 3.00E-01 | 5.88E-01 | -6.09 |
| 1439915_PM_at   | ---                                  | NA       | 0.15  | 2.46 | 1.09  | 3.01E-01 | 5.88E-01 | -6.10 |
| 1430056_PM_at   | ---                                  | NA       | 0.19  | 2.87 | 1.09  | 3.01E-01 | 5.88E-01 | -6.09 |
| 1457996_PM_at   | ---                                  | NA       | 0.21  | 2.41 | 1.09  | 3.01E-01 | 5.88E-01 | -6.10 |
| 1460545_PM_at   | Thrap3                               | THRAP3   | -0.20 | 4.13 | -1.09 | 3.01E-01 | 5.88E-01 | -6.10 |
| 1458145_PM_at   | Rora                                 | RORA     | 0.17  | 2.39 | 1.09  | 3.01E-01 | 5.88E-01 | -6.10 |
| 1440280_PM_at   | Cep95                                | CEP95    | 0.30  | 2.49 | 1.09  | 3.01E-01 | 5.88E-01 | -6.10 |
| 1425108_PM_a_at | Smagp                                | SMAGP    | 0.14  | 2.92 | 1.09  | 3.01E-01 | 5.88E-01 | -6.10 |
| 1460035_PM_at   | Phb2                                 | PHB2     | 0.13  | 2.04 | 1.09  | 3.01E-01 | 5.88E-01 | -6.10 |
| 1437697_PM_at   | ---                                  | NA       | 0.15  | 2.79 | 1.09  | 3.01E-01 | 5.88E-01 | -6.10 |
| 1439722_PM_at   | ---                                  | NA       | 0.18  | 2.66 | 1.09  | 3.01E-01 | 5.88E-01 | -6.10 |
| 1455654_PM_at   | Hjurp                                | NA       | 0.19  | 3.35 | 1.09  | 3.01E-01 | 5.88E-01 | -6.10 |
| 1421015_PM_s_at | Pole3                                | POLE3    | 0.24  | 2.51 | 1.09  | 3.01E-01 | 5.88E-01 | -6.10 |
| 1431815_PM_a_at | Mms19                                | MMS19    | 0.26  | 2.42 | 1.09  | 3.01E-01 | 5.88E-01 | -6.10 |
| 1435447_PM_at   | Mip                                  | MIP      | 0.27  | 2.37 | 1.09  | 3.01E-01 | 5.88E-01 | -6.10 |
| 1431889_PM_x_at | Psg21                                | CEACAM3  | 0.12  | 2.41 | 1.09  | 3.01E-01 | 5.88E-01 | -6.10 |
| 1417925_PM_at   | Ccl22                                | CCL22    | 0.14  | 2.43 | 1.09  | 3.01E-01 | 5.88E-01 | -6.10 |
| 1454592_PM_at   | ---                                  | NA       | 0.22  | 2.73 | 1.09  | 3.01E-01 | 5.88E-01 | -6.10 |
| 1424982_PM_a_at | Calc1                                | CACUL1   | -0.19 | 2.72 | -1.09 | 3.01E-01 | 5.88E-01 | -6.10 |
| 1431768_PM_a_at | Prmt3                                | PRMT3    | -0.13 | 2.35 | -1.09 | 3.01E-01 | 5.88E-01 | -6.10 |
| 1446944_PM_at   | D1Ert84e                             | NA       | 0.10  | 2.18 | 1.09  | 3.01E-01 | 5.88E-01 | -6.10 |
| 1432630_PM_at   | Tnks                                 | TNKS     | 0.14  | 2.29 | 1.09  | 3.01E-01 | 5.88E-01 | -6.10 |
| 1428079_PM_at   | Fgb                                  | FGB      | 0.14  | 2.88 | 1.09  | 3.01E-01 | 5.88E-01 | -6.10 |
| 1442531_PM_at   | D12Ert123e                           | NA       | 0.17  | 2.39 | 1.09  | 3.01E-01 | 5.88E-01 | -6.10 |
| 1452809_PM_at   | Izum04                               | NA       | 0.17  | 3.41 | 1.09  | 3.01E-01 | 5.88E-01 | -6.10 |
| 1434301_PM_at   | Fam84b                               | FAM84B   | -0.47 | 3.25 | -1.09 | 3.01E-01 | 5.88E-01 | -6.10 |

|                 |                              |            |       |      |       |          |          |       |
|-----------------|------------------------------|------------|-------|------|-------|----------|----------|-------|
| 1436657_PM_at   | Gm11744                      | PRCD       | 0.10  | 2.50 | 1.09  | 3.01E-01 | 5.89E-01 | -6.10 |
| 1421362_PM_a_at | Frk                          | FRK        | 0.18  | 2.30 | 1.09  | 3.01E-01 | 5.89E-01 | -6.10 |
| 1451717_PM_s_at | Senp2                        | SENP2      | -0.14 | 2.58 | -1.09 | 3.01E-01 | 5.89E-01 | -6.10 |
| 1448082_PM_at   | ---                          | NA         | 0.09  | 2.09 | 1.09  | 3.01E-01 | 5.89E-01 | -6.10 |
| 1458032_PM_at   | ---                          | NA         | 0.10  | 2.37 | 1.09  | 3.01E-01 | 5.89E-01 | -6.10 |
| 1420198_PM_at   | ---                          | NA         | 0.16  | 2.48 | 1.09  | 3.01E-01 | 5.89E-01 | -6.10 |
| 1416399_PM_a_at | Hmox2                        | HMOX2      | -0.60 | 5.70 | -1.09 | 3.01E-01 | 5.89E-01 | -6.10 |
| 1430416_PM_at   | 4931431B13Rik                | NA         | -0.11 | 2.31 | -1.09 | 3.01E-01 | 5.89E-01 | -6.10 |
| 1441196_PM_at   | Mtpp                         | MTTP       | 0.11  | 2.22 | 1.09  | 3.01E-01 | 5.89E-01 | -6.10 |
| 1439761_PM_x_at | D830026112Rik                | NA         | 0.27  | 2.33 | 1.09  | 3.01E-01 | 5.89E-01 | -6.10 |
| 1434918_PM_at   | Sox6                         | NA         | -0.22 | 2.27 | -1.09 | 3.01E-01 | 5.89E-01 | -6.10 |
| 1445600_PM_at   | ---                          | NA         | -0.12 | 2.64 | -1.09 | 3.01E-01 | 5.89E-01 | -6.10 |
| 1450139_PM_at   | Ern2                         | ERN2       | 0.16  | 2.62 | 1.09  | 3.01E-01 | 5.89E-01 | -6.10 |
| 1446728_PM_at   | D3Erttd797e                  | NA         | 0.14  | 2.27 | 1.09  | 3.01E-01 | 5.89E-01 | -6.10 |
| 1454409_PM_at   | ---                          | NA         | 0.10  | 2.20 | 1.09  | 3.01E-01 | 5.89E-01 | -6.10 |
| 1429465_PM_at   | Scp2d1                       | SCP2D1     | 0.10  | 2.20 | 1.09  | 3.01E-01 | 5.89E-01 | -6.10 |
| 1437536_PM_at   | Fkrp                         | FKRP       | 0.13  | 2.26 | 1.09  | 3.01E-01 | 5.89E-01 | -6.10 |
| 1423233_PM_at   | Cebpd                        | NA         | 0.22  | 3.48 | 1.09  | 3.01E-01 | 5.89E-01 | -6.10 |
| 1440746_PM_at   | ---                          | NA         | 0.11  | 2.31 | 1.09  | 3.01E-01 | 5.89E-01 | -6.10 |
| 1421758_PM_at   | Nat1                         | NAT1       | 0.14  | 2.20 | 1.09  | 3.01E-01 | 5.89E-01 | -6.10 |
| 1430733_PM_at   | ---                          | NA         | 0.08  | 2.17 | 1.09  | 3.02E-01 | 5.89E-01 | -6.10 |
| 1451965_PM_at   | LOC672450                    | NA         | 0.14  | 2.89 | 1.09  | 3.02E-01 | 5.89E-01 | -6.10 |
| 1430567_PM_at   | Spink5                       | SPINK5     | 0.10  | 2.27 | 1.09  | 3.02E-01 | 5.89E-01 | -6.10 |
| 1422708_PM_at   | Pik3cg                       | NA         | 0.09  | 2.30 | 1.09  | 3.02E-01 | 5.89E-01 | -6.10 |
| 1432323_PM_at   | 8430436N08Rik                | NA         | 0.10  | 1.91 | 1.09  | 3.02E-01 | 5.89E-01 | -6.10 |
| 1459747_PM_at   | ---                          | NA         | 0.10  | 2.18 | 1.09  | 3.02E-01 | 5.89E-01 | -6.10 |
| 1449901_PM_a_at | Map3k6                       | MAP3K6     | 0.12  | 3.26 | 1.09  | 3.02E-01 | 5.89E-01 | -6.10 |
| 1440283_PM_at   | 1810059H22Rik ///<br>Gm15411 | NA         | 0.18  | 2.52 | 1.09  | 3.02E-01 | 5.89E-01 | -6.10 |
| 1446732_PM_at   | ---                          | NA         | 0.30  | 2.58 | 1.09  | 3.02E-01 | 5.89E-01 | -6.10 |
| 1460582_PM_x_at | a                            | NA         | -0.33 | 6.17 | -1.09 | 3.02E-01 | 5.89E-01 | -6.10 |
| 1446273_PM_at   | Csmd1                        | CSMD1      | -0.26 | 3.48 | -1.09 | 3.02E-01 | 5.89E-01 | -6.10 |
| 1454793_PM_x_at | Ddx5                         | DDX5       | -0.26 | 8.65 | -1.09 | 3.02E-01 | 5.89E-01 | -6.10 |
| 1435000_PM_at   | Gspt1                        | NA         | -0.26 | 3.89 | -1.09 | 3.02E-01 | 5.89E-01 | -6.10 |
| 1422105_PM_at   | Cd3e                         | CD3E       | -0.15 | 2.55 | -1.09 | 3.02E-01 | 5.89E-01 | -6.10 |
| 1430840_PM_at   | 4930449C09Rik                | NA         | 0.11  | 2.26 | 1.09  | 3.02E-01 | 5.89E-01 | -6.10 |
| 1455540_PM_at   | Cps1                         | CPS1       | 0.13  | 2.45 | 1.09  | 3.02E-01 | 5.89E-01 | -6.10 |
| 1425872_PM_at   | Gm10229                      | NA         | 0.15  | 2.34 | 1.09  | 3.02E-01 | 5.89E-01 | -6.10 |
| 1435577_PM_at   | Dab1                         | DAB1       | 0.47  | 6.80 | 1.09  | 3.02E-01 | 5.89E-01 | -6.10 |
| 1415791_PM_at   | Rnf34                        | RNF34      | -0.21 | 2.88 | -1.09 | 3.02E-01 | 5.89E-01 | -6.10 |
| 1443580_PM_at   | LOC102641318                 | NA         | -0.17 | 2.30 | -1.09 | 3.02E-01 | 5.89E-01 | -6.10 |
| 1436526_PM_at   | Gnptg                        | NA         | -0.42 | 3.88 | -1.09 | 3.02E-01 | 5.89E-01 | -6.10 |
| 1430593_PM_at   | Ccdc30                       | CCDC30     | -0.25 | 2.64 | -1.09 | 3.02E-01 | 5.89E-01 | -6.10 |
| 1427788_PM_at   | Nespas                       | NA         | 0.09  | 2.38 | 1.09  | 3.02E-01 | 5.89E-01 | -6.10 |
| 1459296_PM_at   | Ube2z                        | UBE2Z      | 0.11  | 2.18 | 1.09  | 3.02E-01 | 5.89E-01 | -6.10 |
| 1452574_PM_x_at | Igh-VJ558                    | NA         | 0.13  | 2.12 | 1.09  | 3.02E-01 | 5.89E-01 | -6.10 |
| 1457115_PM_at   | ---                          | NA         | -0.19 | 2.70 | -1.09 | 3.02E-01 | 5.89E-01 | -6.10 |
| 1435812_PM_at   | Unc50                        | UNC50      | 0.13  | 2.58 | 1.09  | 3.02E-01 | 5.89E-01 | -6.10 |
| 1455718_PM_at   | Spata21                      | SPATA21    | 0.10  | 2.45 | 1.09  | 3.02E-01 | 5.89E-01 | -6.10 |
| 1450963_PM_at   | Hnrnpf                       | HNRNPF     | 0.32  | 4.64 | 1.09  | 3.02E-01 | 5.89E-01 | -6.10 |
| 1429581_PM_at   | Acad9                        | ACAD9      | -0.37 | 3.05 | -1.09 | 3.02E-01 | 5.89E-01 | -6.10 |
| 1430387_PM_at   | 1810073O08Rik                | NA         | 0.12  | 2.51 | 1.09  | 3.02E-01 | 5.90E-01 | -6.10 |
| 1444549_PM_at   | Gabrg3                       | GABRG3     | 0.22  | 2.51 | 1.09  | 3.02E-01 | 5.90E-01 | -6.10 |
| 1423811_PM_at   | Sf3a3                        | SF3A3      | 0.24  | 3.16 | 1.09  | 3.02E-01 | 5.90E-01 | -6.10 |
| 1420822_PM_s_at | Sgpp1                        | SGPP1      | -0.28 | 5.77 | -1.09 | 3.02E-01 | 5.90E-01 | -6.10 |
| 1451514_PM_at   | Usp43                        | USP43      | 0.09  | 2.67 | 1.09  | 3.02E-01 | 5.90E-01 | -6.10 |
| 1421438_PM_at   | Pcdhb14                      | NA         | 0.10  | 2.30 | 1.09  | 3.02E-01 | 5.90E-01 | -6.10 |
| 1417832_PM_at   | Smc1a                        | SMC1A      | -0.39 | 5.00 | -1.08 | 3.03E-01 | 5.90E-01 | -6.10 |
| 1418586_PM_at   | Adcy9                        | ADCY9      | -0.20 | 3.20 | -1.08 | 3.03E-01 | 5.90E-01 | -6.10 |
| 1444483_PM_at   | ---                          | NA         | 0.18  | 2.90 | 1.08  | 3.03E-01 | 5.90E-01 | -6.10 |
| 1417298_PM_at   | Ebpl                         | EBPL       | 0.29  | 3.19 | 1.09  | 3.02E-01 | 5.90E-01 | -6.10 |
| 1431003_PM_a_at | Faap20                       | NA         | 0.20  | 2.65 | 1.08  | 3.03E-01 | 5.90E-01 | -6.10 |
| 1436856_PM_x_at | Tars2                        | TARS2      | 0.40  | 4.55 | 1.08  | 3.03E-01 | 5.90E-01 | -6.10 |
| 1428918_PM_at   | Scyl3                        | SCYL3      | -0.29 | 3.10 | -1.08 | 3.03E-01 | 5.90E-01 | -6.10 |
| 1433402_PM_at   | 4930451E06Rik                | NA         | 0.15  | 2.59 | 1.08  | 3.03E-01 | 5.90E-01 | -6.10 |
| 1429539_PM_at   | Bcl2l13                      | BCL2L13    | -0.27 | 3.07 | -1.08 | 3.03E-01 | 5.90E-01 | -6.10 |
| 1446267_PM_at   | D17Erttd657e                 | NA         | -0.24 | 3.08 | -1.08 | 3.03E-01 | 5.90E-01 | -6.10 |
| 1429607_PM_at   | Trak2                        | TRAK2      | -0.40 | 2.98 | -1.08 | 3.03E-01 | 5.90E-01 | -6.10 |
| 1459718_PM_x_at | Klf6                         | KLf6       | -0.34 | 2.53 | -1.08 | 3.03E-01 | 5.90E-01 | -6.10 |
| 1432887_PM_at   | Zfp942                       | NA         | -0.13 | 3.06 | -1.08 | 3.03E-01 | 5.90E-01 | -6.10 |
| 1454522_PM_at   | ---                          | NA         | -0.13 | 2.50 | -1.08 | 3.03E-01 | 5.90E-01 | -6.10 |
| 1449580_PM_s_at | H2-DMb1 /// H2-DMb2          | AL645941.2 | 0.14  | 2.83 | 1.08  | 3.03E-01 | 5.90E-01 | -6.10 |
| 1438241_PM_at   | Rgma                         | RGMA       | 0.24  | 2.69 | 1.08  | 3.03E-01 | 5.90E-01 | -6.10 |
| 1446294_PM_at   | Tcf12                        | TCF12      | 0.32  | 3.66 | 1.08  | 3.03E-01 | 5.90E-01 | -6.10 |
| 1429067_PM_at   | Capns2                       | CAPNS2     | 0.08  | 2.10 | 1.08  | 3.03E-01 | 5.90E-01 | -6.10 |

|                 |                      |            |       |       |       |          |          |       |
|-----------------|----------------------|------------|-------|-------|-------|----------|----------|-------|
| 1437866_PM_at   | Dusp18               | DUSP18     | 0.16  | 3.00  | 1.08  | 3.03E-01 | 5.90E-01 | -6.10 |
| 1428113_PM_at   | Tmtc4                | TMTC4      | 0.27  | 3.85  | 1.08  | 3.03E-01 | 5.90E-01 | -6.10 |
| 1455947_PM_at   | March11              | MARCH11    | -0.25 | 4.52  | -1.08 | 3.03E-01 | 5.90E-01 | -6.10 |
| 1438093_PM_x_at | Dbi                  | DBI        | -0.24 | 7.29  | -1.08 | 3.03E-01 | 5.90E-01 | -6.10 |
| 1423963_PM_at   | Wdr26                | WDR26      | -0.10 | 2.45  | -1.08 | 3.03E-01 | 5.90E-01 | -6.10 |
| 1451823_PM_at   | Ckca3b               | NA         | 0.11  | 2.27  | 1.08  | 3.03E-01 | 5.90E-01 | -6.10 |
| 1432376_PM_at   | 3830403N18Rik ///Xlr | NA         | 0.15  | 2.55  | 1.08  | 3.03E-01 | 5.90E-01 | -6.10 |
| 1416341_PM_at   | Polr2c               | POLR2C     | -0.21 | 3.93  | -1.08 | 3.03E-01 | 5.90E-01 | -6.10 |
| 1422784_PM_at   | Krt6a                | KRT6B      | 0.18  | 2.58  | 1.08  | 3.03E-01 | 5.90E-01 | -6.10 |
| 1432523_PM_at   | Hipk2                | HIPK2      | -0.21 | 2.22  | -1.08 | 3.03E-01 | 5.90E-01 | -6.10 |
| 1417544_PM_a_at | Flot2                | FLOT2      | -0.43 | 3.69  | -1.08 | 3.03E-01 | 5.90E-01 | -6.10 |
| 1433520_PM_at   | Scap                 | SCAP       | -0.27 | 3.38  | -1.08 | 3.03E-01 | 5.90E-01 | -6.10 |
| 1419791_PM_at   | Zhx3                 | NA         | -0.31 | 3.25  | -1.08 | 3.03E-01 | 5.90E-01 | -6.10 |
| 1434092_PM_at   | Atg9b                | ATG9B      | 0.15  | 2.64  | 1.08  | 3.03E-01 | 5.90E-01 | -6.10 |
| 1433826_PM_at   | Tspy13               | NA         | -0.39 | 2.79  | -1.08 | 3.03E-01 | 5.91E-01 | -6.10 |
| 1446091_PM_at   | ---                  | NA         | -0.11 | 2.19  | -1.08 | 3.03E-01 | 5.91E-01 | -6.10 |
| 1452200_PM_at   | Cdkn2aipnl           | CDKN2AIPNL | 0.09  | 2.39  | 1.08  | 3.03E-01 | 5.91E-01 | -6.10 |
| 1446530_PM_at   | ---                  | NA         | 0.24  | 5.16  | 1.08  | 3.03E-01 | 5.91E-01 | -6.10 |
| 1417428_PM_at   | Gng3                 | GNG3       | 0.34  | 8.03  | 1.08  | 3.03E-01 | 5.91E-01 | -6.10 |
| 1441145_PM_at   | ---                  | NA         | 0.12  | 2.34  | 1.08  | 3.03E-01 | 5.91E-01 | -6.10 |
| 1417008_PM_at   | Crat                 | CRAT       | 0.13  | 2.97  | 1.08  | 3.03E-01 | 5.91E-01 | -6.10 |
| 1436509_PM_at   | Mlec                 | MLEC       | -0.42 | 5.89  | -1.08 | 3.03E-01 | 5.91E-01 | -6.10 |
| 1442821_PM_at   | ---                  | NA         | 0.09  | 2.21  | 1.08  | 3.03E-01 | 5.91E-01 | -6.10 |
| 1420085_PM_at   | Fgf4                 | FGF4       | 0.11  | 2.34  | 1.08  | 3.03E-01 | 5.91E-01 | -6.10 |
| 1420600_PM_at   | Tpo                  | TPO        | 0.15  | 2.35  | 1.08  | 3.03E-01 | 5.91E-01 | -6.10 |
| 1438422_PM_at   | Lrrc20               | LRRC20     | -0.30 | 3.70  | -1.08 | 3.04E-01 | 5.91E-01 | -6.10 |
| 1440853_PM_at   | Rhot1                | RHOT1      | -0.28 | 5.39  | -1.08 | 3.04E-01 | 5.91E-01 | -6.10 |
| 1446205_PM_at   | ---                  | NA         | -0.16 | 3.15  | -1.08 | 3.04E-01 | 5.91E-01 | -6.10 |
| 1450671_PM_at   | Cryba1               | CRYBA1     | 0.16  | 2.59  | 1.08  | 3.04E-01 | 5.91E-01 | -6.10 |
| 1446925_PM_at   | Gm41855              | NA         | 0.19  | 2.37  | 1.08  | 3.04E-01 | 5.91E-01 | -6.10 |
| 1418528_PM_a_at | Dad1                 | DAD1       | -0.13 | 3.33  | -1.08 | 3.04E-01 | 5.91E-01 | -6.10 |
| 1444882_PM_at   | ---                  | NA         | 0.14  | 2.48  | 1.08  | 3.04E-01 | 5.91E-01 | -6.10 |
| 1425669_PM_at   | Mob3b                | MOB3B      | 0.11  | 2.26  | 1.08  | 3.04E-01 | 5.91E-01 | -6.10 |
| 1445518_PM_at   | ---                  | NA         | 0.15  | 3.62  | 1.08  | 3.04E-01 | 5.91E-01 | -6.10 |
| 1436914_PM_at   | Ctdspl2              | NA         | -0.21 | 2.81  | -1.08 | 3.04E-01 | 5.91E-01 | -6.10 |
| 1444095_PM_a_at | Al847159             | NA         | 0.08  | 2.20  | 1.08  | 3.04E-01 | 5.91E-01 | -6.10 |
| 1455711_PM_at   | Dtx4                 | DTX4       | -0.48 | 3.88  | -1.08 | 3.04E-01 | 5.91E-01 | -6.10 |
| 1419450_PM_at   | Ormdl3               | ORMDL3     | 0.14  | 2.43  | 1.08  | 3.04E-01 | 5.91E-01 | -6.10 |
| 1427620_PM_at   | Cul9                 | CUL9       | 0.21  | 3.22  | 1.08  | 3.04E-01 | 5.91E-01 | -6.10 |
| 1455341_PM_at   | Eif1ad               | EIF1AD     | 0.15  | 2.48  | 1.08  | 3.04E-01 | 5.91E-01 | -6.10 |
| 1449861_PM_at   | Nek4                 | NA         | 0.20  | 3.49  | 1.08  | 3.04E-01 | 5.91E-01 | -6.10 |
| 1450024_PM_at   | Sufu                 | SUFU       | -0.32 | 2.71  | -1.08 | 3.04E-01 | 5.91E-01 | -6.10 |
| 1431739_PM_at   | Mto1                 | MTO1       | -0.09 | 2.09  | -1.08 | 3.04E-01 | 5.91E-01 | -6.10 |
| 1425125_PM_at   | Oit3                 | OIT3       | 0.11  | 2.57  | 1.08  | 3.04E-01 | 5.91E-01 | -6.10 |
| 1427119_PM_at   | Spink4               | SPINK4     | 0.16  | 2.69  | 1.08  | 3.04E-01 | 5.91E-01 | -6.10 |
| 1453196_PM_a_at | Oas2                 | NA         | 0.26  | 2.83  | 1.08  | 3.04E-01 | 5.91E-01 | -6.10 |
| 1433897_PM_at   | Tmem263              | TMEM263    | -0.60 | 5.29  | -1.08 | 3.04E-01 | 5.91E-01 | -6.10 |
| 1459246_PM_at   | ---                  | NA         | 0.11  | 2.35  | 1.08  | 3.04E-01 | 5.91E-01 | -6.10 |
| 1458838_PM_at   | ---                  | NA         | 0.13  | 2.10  | 1.08  | 3.04E-01 | 5.91E-01 | -6.10 |
| 1449285_PM_at   | Cst9                 | CST9       | 0.15  | 2.26  | 1.08  | 3.04E-01 | 5.91E-01 | -6.10 |
| 1424999_PM_at   | Znrd1as              | NA         | 0.35  | 3.55  | 1.08  | 3.04E-01 | 5.91E-01 | -6.10 |
| 1457731_PM_at   | Snape3               | SNAPC3     | -0.29 | 3.19  | -1.08 | 3.04E-01 | 5.91E-01 | -6.10 |
| 1447741_PM_x_at | Acad10               | ACAD10     | 0.10  | 2.31  | 1.08  | 3.04E-01 | 5.91E-01 | -6.10 |
| 1442077_PM_at   | Htr1b                | HTR1B      | 0.14  | 2.31  | 1.08  | 3.04E-01 | 5.91E-01 | -6.10 |
| 1448019_PM_at   | Taok3                | TAOK3      | 0.35  | 3.50  | 1.08  | 3.04E-01 | 5.91E-01 | -6.10 |
| 1436740_PM_at   | 2610005L07Rik        | NA         | -0.38 | 3.82  | -1.08 | 3.04E-01 | 5.91E-01 | -6.10 |
| 1422632_PM_at   | Ctsw                 | CTSW       | 0.09  | 2.47  | 1.08  | 3.04E-01 | 5.91E-01 | -6.10 |
| 1423643_PM_at   | Ddx39                | DDX39A     | 0.13  | 2.22  | 1.08  | 3.04E-01 | 5.91E-01 | -6.10 |
| 1441627_PM_at   | ---                  | NA         | 0.47  | 3.49  | 1.08  | 3.04E-01 | 5.91E-01 | -6.10 |
| 1440572_PM_at   | ---                  | NA         | -0.21 | 3.74  | -1.08 | 3.04E-01 | 5.91E-01 | -6.10 |
| 1432658_PM_at   | 2810403D21Rik        | NA         | -0.14 | 2.08  | -1.08 | 3.04E-01 | 5.91E-01 | -6.10 |
| 1442810_PM_x_at | Scn9a                | SCN9A      | 0.13  | 2.55  | 1.08  | 3.04E-01 | 5.91E-01 | -6.10 |
| 1426152_PM_a_at | Kitl                 | KITLG      | 0.13  | 2.43  | 1.08  | 3.04E-01 | 5.91E-01 | -6.10 |
| 1452751_PM_at   | Ebf3                 | EBF3       | 0.13  | 2.78  | 1.08  | 3.04E-01 | 5.91E-01 | -6.10 |
| 1457704_PM_at   | Zfp385b              | ZNF385B    | 0.20  | 2.83  | 1.08  | 3.04E-01 | 5.91E-01 | -6.10 |
| 1432898_PM_at   | ---                  | NA         | 0.10  | 2.01  | 1.08  | 3.04E-01 | 5.91E-01 | -6.10 |
| 1418416_PM_x_at | Psg23                | CEACAM3    | 0.15  | 3.15  | 1.08  | 3.04E-01 | 5.91E-01 | -6.10 |
| 1426626_PM_at   | Gtf2f2               | GTF2F2     | 0.25  | 2.91  | 1.08  | 3.04E-01 | 5.92E-01 | -6.10 |
| 1445687_PM_at   | Milr1                | MILR1      | 0.12  | 2.33  | 1.08  | 3.05E-01 | 5.92E-01 | -6.10 |
| 1456943_PM_a_at | Dsndd2               | DBNDD2     | 0.58  | 6.16  | 1.08  | 3.05E-01 | 5.92E-01 | -6.10 |
| 1436966_PM_at   | Peli2                | PELI2      | 0.21  | 2.64  | 1.08  | 3.05E-01 | 5.92E-01 | -6.10 |
| 1448280_PM_at   | Syp                  | SYP        | -0.24 | 10.20 | -1.08 | 3.05E-01 | 5.92E-01 | -6.11 |
| 1444055_PM_at   | ---                  | NA         | 0.19  | 3.02  | 1.08  | 3.05E-01 | 5.92E-01 | -6.11 |
| 1419671_PM_a_at | Il17rc               | IL17RC     | 0.08  | 2.20  | 1.08  | 3.05E-01 | 5.92E-01 | -6.11 |
| 1430389_PM_at   | 4930509H03Rik        | NA         | 0.18  | 2.55  | 1.08  | 3.05E-01 | 5.92E-01 | -6.11 |

|                 |                                                                   |          |       |       |       |          |          |       |
|-----------------|-------------------------------------------------------------------|----------|-------|-------|-------|----------|----------|-------|
| 1429712_PM_at   | Etohi1 /// Gm14288 /// Gm14305 /// Gm14436 /// Gm14440 /// Gm8923 | ZNF69    | -0.32 | 3.18  | -1.08 | 3.05E-01 | 5.92E-01 | -6.11 |
| 1453704_PM_at   | ---                                                               | NA       | 0.17  | 2.46  | 1.08  | 3.05E-01 | 5.92E-01 | -6.11 |
| 1449929_PM_at   | Dynlt3                                                            | DYNLT3   | -0.41 | 6.95  | -1.08 | 3.05E-01 | 5.92E-01 | -6.11 |
| 1419892_PM_at   | Ccdc167                                                           | CCDC167  | -0.22 | 2.82  | -1.08 | 3.05E-01 | 5.92E-01 | -6.11 |
| 1432734_PM_at   | 4933402E15Rik                                                     | NA       | 0.10  | 2.57  | 1.08  | 3.05E-01 | 5.92E-01 | -6.11 |
| 1423984_PM_a_at | Meis3                                                             | MEIS3    | 0.20  | 4.61  | 1.08  | 3.05E-01 | 5.92E-01 | -6.11 |
| 1455295_PM_at   | Slc38a7                                                           | SLC38A7  | -0.32 | 3.58  | -1.08 | 3.05E-01 | 5.92E-01 | -6.11 |
| 1431080_PM_at   | Galnt6                                                            | GALNT6   | 0.67  | 3.10  | 1.08  | 3.05E-01 | 5.92E-01 | -6.11 |
| 1437548_PM_at   | Bicd1                                                             | BICD1    | 0.12  | 2.43  | 1.08  | 3.05E-01 | 5.92E-01 | -6.11 |
| 1457250_PM_x_at | ---                                                               | NA       | 0.29  | 3.34  | 1.08  | 3.05E-01 | 5.92E-01 | -6.11 |
| 1418896_PM_a_at | Rpn2                                                              | RPN2     | -0.17 | 2.79  | -1.08 | 3.05E-01 | 5.92E-01 | -6.11 |
| 1460087_PM_at   | BC017643                                                          | C17orf62 | 0.09  | 2.16  | 1.08  | 3.05E-01 | 5.92E-01 | -6.11 |
| 1442185_PM_at   | ---                                                               | NA       | 0.11  | 2.56  | 1.08  | 3.05E-01 | 5.92E-01 | -6.11 |
| 1455180_PM_at   | Myzap                                                             | GCOM1    | 0.18  | 2.58  | 1.08  | 3.05E-01 | 5.92E-01 | -6.11 |
| 1426854_PM_a_at | Set                                                               | SET      | -0.27 | 4.85  | -1.08 | 3.05E-01 | 5.92E-01 | -6.11 |
| 1447616_PM_at   | ---                                                               | NA       | 0.13  | 2.11  | 1.08  | 3.05E-01 | 5.92E-01 | -6.11 |
| 1452032_PM_at   | Prkar1a                                                           | PRKAR1A  | 0.17  | 10.45 | 1.08  | 3.05E-01 | 5.92E-01 | -6.11 |
| 1442298_PM_at   | ---                                                               | NA       | 0.24  | 2.69  | 1.08  | 3.05E-01 | 5.92E-01 | -6.11 |
| 1431540_PM_at   | 4930511E03Rik                                                     | NA       | 0.10  | 2.44  | 1.08  | 3.05E-01 | 5.92E-01 | -6.11 |
| 1436667_PM_at   | Slc6a20b                                                          | SLC6A20  | -0.12 | 2.18  | -1.08 | 3.05E-01 | 5.93E-01 | -6.11 |
| 1419919_PM_at   | ---                                                               | NA       | 0.09  | 2.46  | 1.08  | 3.05E-01 | 5.93E-01 | -6.11 |
| 1445568_PM_at   | Inca1                                                             | NA       | 0.30  | 2.86  | 1.08  | 3.05E-01 | 5.93E-01 | -6.11 |
| 1446435_PM_at   | ---                                                               | NA       | 0.14  | 2.45  | 1.08  | 3.05E-01 | 5.93E-01 | -6.11 |
| 1456683_PM_at   | ---                                                               | NA       | 0.13  | 2.50  | 1.08  | 3.05E-01 | 5.93E-01 | -6.11 |
| 1422386_PM_at   | Olfr64                                                            | NA       | 0.10  | 2.15  | 1.08  | 3.05E-01 | 5.93E-01 | -6.11 |
| 1457052_PM_at   | Kcng1                                                             | KCNG1    | -0.10 | 2.56  | -1.08 | 3.06E-01 | 5.93E-01 | -6.11 |
| 1445071_PM_at   | ---                                                               | NA       | 0.14  | 2.50  | 1.08  | 3.06E-01 | 5.93E-01 | -6.11 |
| 1460010_PM_a_at | Ptdss2                                                            | PTDSS2   | -0.62 | 5.22  | -1.08 | 3.06E-01 | 5.93E-01 | -6.11 |
| 1446564_PM_at   | D18Erd169e                                                        | NA       | 0.32  | 3.78  | 1.08  | 3.06E-01 | 5.93E-01 | -6.11 |
| 1420816_PM_at   | Ywhag                                                             | YWHAG    | 0.42  | 4.43  | 1.08  | 3.06E-01 | 5.93E-01 | -6.11 |
| 1425149_PM_a_at | Pdcl                                                              | PDCL     | -0.32 | 5.09  | -1.08 | 3.06E-01 | 5.93E-01 | -6.11 |
| 1418487_PM_at   | Ripk4                                                             | RIPK4    | -0.13 | 2.23  | -1.08 | 3.06E-01 | 5.93E-01 | -6.11 |
| 1447092_PM_at   | ---                                                               | NA       | 0.19  | 2.69  | 1.08  | 3.06E-01 | 5.93E-01 | -6.11 |
| 1420955_PM_at   | Vsnl1                                                             | VSNL1    | -0.41 | 8.77  | -1.08 | 3.06E-01 | 5.93E-01 | -6.11 |
| 1426300_PM_at   | Alcam                                                             | ALCAM    | -0.59 | 5.39  | -1.08 | 3.06E-01 | 5.93E-01 | -6.11 |
| 1447793_PM_x_at | Gm9840 /// Rbx1                                                   | RBX1     | -0.11 | 2.24  | -1.08 | 3.06E-01 | 5.93E-01 | -6.11 |
| 1457870_PM_at   | ---                                                               | NA       | 0.10  | 1.97  | 1.08  | 3.06E-01 | 5.93E-01 | -6.11 |
| 1438285_PM_at   | Ube2d-ps                                                          | NA       | 0.28  | 3.16  | 1.08  | 3.06E-01 | 5.93E-01 | -6.11 |
| 1448730_PM_at   | Cpa3                                                              | CPA3     | 0.11  | 2.45  | 1.08  | 3.06E-01 | 5.93E-01 | -6.11 |
| 1424687_PM_at   | Heatr6                                                            | HEATR6   | 0.11  | 2.42  | 1.08  | 3.06E-01 | 5.93E-01 | -6.11 |
| 1428238_PM_at   | ---                                                               | NA       | 0.33  | 3.66  | 1.08  | 3.06E-01 | 5.93E-01 | -6.11 |
| 1444380_PM_at   | AI844869                                                          | NA       | 0.14  | 2.53  | 1.08  | 3.06E-01 | 5.93E-01 | -6.11 |
| 1439079_PM_a_at | Erbp2ip                                                           | NA       | -0.76 | 4.25  | -1.08 | 3.06E-01 | 5.93E-01 | -6.11 |
| 1424130_PM_a_at | Ptrf                                                              | CAVIN1   | -0.25 | 2.53  | -1.08 | 3.06E-01 | 5.93E-01 | -6.11 |
| 1433347_PM_at   | ---                                                               | NA       | 0.09  | 2.30  | 1.08  | 3.06E-01 | 5.93E-01 | -6.11 |
| 1454469_PM_at   | ---                                                               | NA       | 0.14  | 2.38  | 1.08  | 3.06E-01 | 5.93E-01 | -6.11 |
| 1456717_PM_at   | ---                                                               | NA       | 0.17  | 2.29  | 1.08  | 3.06E-01 | 5.93E-01 | -6.11 |
| 1416534_PM_at   | Dpf2                                                              | DPF2     | 0.26  | 3.23  | 1.08  | 3.06E-01 | 5.93E-01 | -6.11 |
| 1426230_PM_at   | Sphk2                                                             | SPHK2    | 0.27  | 3.64  | 1.08  | 3.06E-01 | 5.93E-01 | -6.11 |
| 1441896_PM_x_at | ---                                                               | NA       | 0.57  | 2.17  | 1.08  | 3.06E-01 | 5.93E-01 | -6.11 |
| 1434983_PM_at   | Ccdc108                                                           | CFAP65   | 0.85  | 3.81  | 1.08  | 3.06E-01 | 5.93E-01 | -6.11 |
| 1438111_PM_at   | Pvr1                                                              | NA       | 0.15  | 2.66  | 1.08  | 3.06E-01 | 5.93E-01 | -6.11 |
| 1429483_PM_at   | Calcoco2                                                          | CALCOCO2 | 0.17  | 2.57  | 1.08  | 3.06E-01 | 5.93E-01 | -6.11 |
| 1442034_PM_at   | Fastkd1                                                           | FASTKD1  | 0.17  | 2.76  | 1.08  | 3.06E-01 | 5.93E-01 | -6.11 |
| 1446853_PM_at   | ---                                                               | NA       | 0.17  | 2.44  | 1.08  | 3.06E-01 | 5.93E-01 | -6.11 |
| 1434520_PM_at   | Sc5d                                                              | NA       | 0.10  | 2.13  | 1.08  | 3.06E-01 | 5.93E-01 | -6.11 |
| 1443994_PM_at   | 6030407O03Rik                                                     | NA       | 0.10  | 2.21  | 1.08  | 3.06E-01 | 5.93E-01 | -6.11 |
| 1440888_PM_at   | Oxtr                                                              | OXTR     | 0.10  | 2.34  | 1.08  | 3.06E-01 | 5.93E-01 | -6.11 |
| 1434363_PM_x_at | Paxip1                                                            | NA       | 0.11  | 2.84  | 1.08  | 3.06E-01 | 5.93E-01 | -6.11 |
| 1436950_PM_at   | Crkl                                                              | NA       | 0.18  | 2.63  | 1.08  | 3.06E-01 | 5.93E-01 | -6.11 |
| 1442943_PM_at   | Usp20                                                             | USP20    | 0.09  | 2.31  | 1.08  | 3.06E-01 | 5.93E-01 | -6.11 |
| 1424001_PM_at   | Nifk                                                              | NIFK     | -0.30 | 3.45  | -1.08 | 3.06E-01 | 5.94E-01 | -6.11 |
| 1423777_PM_at   | Usp20                                                             | USP20    | -0.32 | 3.49  | -1.08 | 3.06E-01 | 5.94E-01 | -6.11 |
| 1443967_PM_at   | Banf2                                                             | BANF2    | 0.12  | 2.23  | 1.08  | 3.06E-01 | 5.94E-01 | -6.11 |
| 1418435_PM_at   | Mkrn1                                                             | MKRN1    | 0.36  | 3.75  | 1.08  | 3.06E-01 | 5.94E-01 | -6.11 |
| 1432211_PM_a_at | Fbxo9                                                             | FBXO9    | 0.20  | 2.96  | 1.08  | 3.07E-01 | 5.94E-01 | -6.11 |
| 1454030_PM_at   | Ppp6r3                                                            | NA       | -0.24 | 2.58  | -1.08 | 3.07E-01 | 5.94E-01 | -6.11 |
| 1430558_PM_at   | Zfp318                                                            | ZNF318   | -0.21 | 3.00  | -1.08 | 3.07E-01 | 5.94E-01 | -6.11 |
| 1416491_PM_at   | Numbl                                                             | NUMBL    | 0.11  | 2.42  | 1.08  | 3.07E-01 | 5.94E-01 | -6.11 |
| 1418242_PM_at   | Faf1                                                              | FAF1     | -0.46 | 4.39  | -1.08 | 3.07E-01 | 5.94E-01 | -6.11 |
| 1450489_PM_at   | Sall1                                                             | SALL1    | 0.10  | 2.10  | 1.08  | 3.07E-01 | 5.94E-01 | -6.11 |
| 1430743_PM_at   | AW046200                                                          | NA       | 0.13  | 2.23  | 1.08  | 3.07E-01 | 5.94E-01 | -6.11 |
| 1450776_PM_at   | Gpat4                                                             | GPAT4    | 0.28  | 3.31  | 1.08  | 3.07E-01 | 5.94E-01 | -6.11 |

|                 |               |            |       |      |       |          |          |       |
|-----------------|---------------|------------|-------|------|-------|----------|----------|-------|
| 1421413_PM_a_at | Pdlim5        | PDLIM5     | -0.23 | 3.33 | -1.07 | 3.07E-01 | 5.94E-01 | -6.11 |
| 1426443_PM_at   | Rhbdd2        | RHBDD2     | 0.22  | 4.40 | 1.07  | 3.07E-01 | 5.94E-01 | -6.11 |
| 1417215_PM_at   | Rab27b        | RAB27B     | -0.31 | 3.03 | -1.07 | 3.07E-01 | 5.94E-01 | -6.11 |
| 1444695_PM_at   | ---           | NA         | 0.14  | 2.75 | 1.07  | 3.07E-01 | 5.94E-01 | -6.11 |
| 1442337_PM_at   | ---           | NA         | 0.15  | 2.01 | 1.07  | 3.07E-01 | 5.94E-01 | -6.11 |
| 1433530_PM_at   | Rpl41         | RPL41      | 0.19  | 2.84 | 1.07  | 3.07E-01 | 5.94E-01 | -6.11 |
| 1435688_PM_at   | Gm19935       | NA         | 0.20  | 2.88 | 1.07  | 3.07E-01 | 5.94E-01 | -6.11 |
| 1449679_PM_s_at | Stx5a         | STX5       | 0.29  | 2.89 | 1.07  | 3.07E-01 | 5.94E-01 | -6.11 |
| 1438989_PM_s_at | Cdh6          | NA         | 0.60  | 7.82 | 1.07  | 3.07E-01 | 5.94E-01 | -6.11 |
| 1416739_PM_a_at | Brap          | BRAP       | 0.16  | 2.98 | 1.07  | 3.07E-01 | 5.94E-01 | -6.11 |
| 1449368_PM_at   | Dcn           | DCN        | -0.33 | 3.62 | -1.07 | 3.07E-01 | 5.94E-01 | -6.11 |
| 1441331_PM_at   | ---           | NA         | -0.27 | 2.76 | -1.07 | 3.07E-01 | 5.94E-01 | -6.11 |
| 1428955_PM_x_at | Slc9a3r2      | SLC9A3R2   | -0.16 | 3.58 | -1.07 | 3.07E-01 | 5.94E-01 | -6.11 |
| 1456649_PM_at   | ---           | NA         | 0.13  | 2.71 | 1.07  | 3.07E-01 | 5.94E-01 | -6.11 |
| 1453227_PM_at   | Rhobtb3       | RHOBTB3    | 0.11  | 2.29 | 1.07  | 3.07E-01 | 5.94E-01 | -6.11 |
| 1424046_PM_at   | Bub1          | BUB1       | 0.12  | 2.07 | 1.07  | 3.07E-01 | 5.94E-01 | -6.11 |
| 1459749_PM_s_at | Fat4          | FAT4       | -0.48 | 3.04 | -1.07 | 3.07E-01 | 5.94E-01 | -6.11 |
| 1421124_PM_at   | Cdk5r1        | CDK5R1     | 0.10  | 2.59 | 1.07  | 3.07E-01 | 5.94E-01 | -6.11 |
| 1426510_PM_at   | Sccpdh        | SCCPDH     | -0.32 | 3.84 | -1.07 | 3.07E-01 | 5.94E-01 | -6.11 |
| 1436768_PM_x_at | Arhgef40      | ARHGEF40   | 0.14  | 2.67 | 1.07  | 3.07E-01 | 5.94E-01 | -6.11 |
| 1422737_PM_at   | Ncoa3         | NCOA3      | 0.28  | 2.38 | 1.07  | 3.07E-01 | 5.94E-01 | -6.11 |
| 1449176_PM_a_at | Dck           | DCK        | -0.25 | 3.37 | -1.07 | 3.07E-01 | 5.94E-01 | -6.11 |
| 1448976_PM_at   | Tfip11        | TFIP11     | 0.28  | 3.71 | 1.07  | 3.07E-01 | 5.94E-01 | -6.11 |
| 1446628_PM_at   | ---           | NA         | 0.27  | 2.66 | 1.07  | 3.07E-01 | 5.95E-01 | -6.11 |
| 1418200_PM_at   | Zbtb48        | ZBTB48     | 0.13  | 2.27 | 1.07  | 3.07E-01 | 5.95E-01 | -6.11 |
| 1454799_PM_at   | Agpat9        | GPAT3      | 0.16  | 2.90 | 1.07  | 3.07E-01 | 5.95E-01 | -6.11 |
| 1440685_PM_at   | ---           | NA         | 0.41  | 2.93 | 1.07  | 3.07E-01 | 5.95E-01 | -6.11 |
| 1446990_PM_at   | Nfia          | NFIA       | -0.48 | 5.01 | -1.07 | 3.07E-01 | 5.95E-01 | -6.11 |
| 1452091_PM_a_at | Rbm28         | RBM28      | 0.19  | 3.63 | 1.07  | 3.07E-01 | 5.95E-01 | -6.11 |
| 1430184_PM_at   | Zfp597        | ZNF597     | -0.18 | 2.91 | -1.07 | 3.07E-01 | 5.95E-01 | -6.11 |
| 1440882_PM_at   | Lrp8          | LRP8       | -0.32 | 3.58 | -1.07 | 3.08E-01 | 5.95E-01 | -6.11 |
| 1455158_PM_at   | Iitga3        | ITGA3      | -0.20 | 2.98 | -1.07 | 3.08E-01 | 5.95E-01 | -6.11 |
| 1445077_PM_at   | ---           | NA         | 0.10  | 2.17 | 1.07  | 3.08E-01 | 5.95E-01 | -6.11 |
| 1421627_PM_at   | Evx1          | EVX1       | 0.11  | 2.46 | 1.07  | 3.08E-01 | 5.95E-01 | -6.11 |
| 1422305_PM_at   | Ifnb1         | IFNB1      | 0.13  | 2.34 | 1.07  | 3.08E-01 | 5.95E-01 | -6.11 |
| 1455326_PM_at   | Clec16a       | CLEC16A    | 0.18  | 3.95 | 1.07  | 3.08E-01 | 5.95E-01 | -6.11 |
| 1429666_PM_at   | Kctd16        | KCTD16     | 0.30  | 2.80 | 1.07  | 3.07E-01 | 5.95E-01 | -6.11 |
| 1417114_PM_at   | Gmcl1         | GMCL1      | 0.34  | 2.52 | 1.07  | 3.08E-01 | 5.95E-01 | -6.11 |
| 1440246_PM_at   | ---           | NA         | 0.33  | 3.71 | 1.07  | 3.08E-01 | 5.95E-01 | -6.11 |
| 1420495_PM_a_at | Vps26a        | VPS26A     | -0.38 | 3.49 | -1.07 | 3.08E-01 | 5.95E-01 | -6.11 |
| 1460479_PM_at   | LOC105246501  | NA         | 0.09  | 2.48 | 1.07  | 3.08E-01 | 5.95E-01 | -6.11 |
| 1422417_PM_at   | ---           | NA         | 0.09  | 2.30 | 1.07  | 3.08E-01 | 5.95E-01 | -6.11 |
| 1447506_PM_at   | ---           | NA         | 0.11  | 2.28 | 1.07  | 3.08E-01 | 5.95E-01 | -6.11 |
| 1446948_PM_at   | ---           | NA         | 0.12  | 2.11 | 1.07  | 3.08E-01 | 5.95E-01 | -6.11 |
| 1450043_PM_at   | Fzd7          | FZD7       | 0.12  | 2.60 | 1.07  | 3.08E-01 | 5.95E-01 | -6.11 |
| 1453109_PM_at   | Arsk          | ARSK       | 0.15  | 2.71 | 1.07  | 3.08E-01 | 5.95E-01 | -6.11 |
| 1421164_PM_a_at | Arhgef1       | ARHGEF1    | 0.15  | 2.39 | 1.07  | 3.08E-01 | 5.95E-01 | -6.11 |
| 1459590_PM_at   | ---           | NA         | 0.19  | 3.05 | 1.07  | 3.08E-01 | 5.95E-01 | -6.11 |
| 1435980_PM_x_at | Wnt6          | WNT6       | 0.21  | 2.81 | 1.07  | 3.08E-01 | 5.95E-01 | -6.11 |
| 1432336_PM_at   | 5033404E19Rik | NA         | 0.21  | 2.96 | 1.07  | 3.08E-01 | 5.95E-01 | -6.11 |
| 1450578_PM_at   | Sry           | SRY        | 0.21  | 3.11 | 1.07  | 3.08E-01 | 5.95E-01 | -6.11 |
| 1432329_PM_a_at | Matk          | MATK       | 0.31  | 2.75 | 1.07  | 3.08E-01 | 5.95E-01 | -6.11 |
| 1436833_PM_x_at | Tll1          | TLL1       | 0.47  | 2.83 | 1.07  | 3.08E-01 | 5.95E-01 | -6.11 |
| 1444806_PM_at   | ---           | NA         | 0.54  | 6.10 | 1.07  | 3.08E-01 | 5.95E-01 | -6.11 |
| 1454968_PM_at   | Dnaaf2        | DNAAF2     | 0.16  | 2.18 | 1.07  | 3.08E-01 | 5.95E-01 | -6.11 |
| 1423916_PM_s_at | Mlf2          | MLF2       | -0.76 | 5.29 | -1.07 | 3.08E-01 | 5.95E-01 | -6.11 |
| 1417977_PM_at   | Eif4e3        | EIF4E3     | -0.30 | 3.44 | -1.07 | 3.08E-01 | 5.95E-01 | -6.11 |
| 1430450_PM_at   | Atp5sl        | ATP5SL     | 0.17  | 2.23 | 1.07  | 3.08E-01 | 5.95E-01 | -6.11 |
| 1454213_PM_at   | Armc9         | ARMC9      | 0.43  | 2.53 | 1.07  | 3.08E-01 | 5.95E-01 | -6.11 |
| 1441195_PM_at   | ---           | NA         | 0.15  | 2.76 | 1.07  | 3.08E-01 | 5.95E-01 | -6.11 |
| 1423948_PM_at   | Bag2          | BAG2       | 0.11  | 2.30 | 1.07  | 3.08E-01 | 5.95E-01 | -6.11 |
| 1424267_PM_at   | 1810043G02Rik | C21orf2    | 0.19  | 3.31 | 1.07  | 3.08E-01 | 5.95E-01 | -6.11 |
| 1459215_PM_at   | ---           | NA         | 0.39  | 3.63 | 1.07  | 3.08E-01 | 5.95E-01 | -6.11 |
| 1440771_PM_at   | ---           | NA         | -0.20 | 2.58 | -1.07 | 3.08E-01 | 5.95E-01 | -6.11 |
| 1449763_PM_at   | Dmrt3         | NA         | 0.07  | 2.10 | 1.07  | 3.08E-01 | 5.95E-01 | -6.11 |
| 1448689_PM_at   | Rras2         | RRAS2      | 0.14  | 2.26 | 1.07  | 3.08E-01 | 5.95E-01 | -6.11 |
| 1447020_PM_at   | ---           | NA         | 0.14  | 2.69 | 1.07  | 3.08E-01 | 5.95E-01 | -6.11 |
| 1425473_PM_at   | Med17         | AP001273.2 | -0.30 | 2.80 | -1.07 | 3.08E-01 | 5.95E-01 | -6.11 |
| 1426347_PM_at   | Vwa9          | INTS14     | -0.16 | 2.24 | -1.07 | 3.08E-01 | 5.95E-01 | -6.11 |
| 1430217_PM_at   | Lrguk         | LRGUK      | 0.11  | 2.63 | 1.07  | 3.08E-01 | 5.95E-01 | -6.11 |
| 1429018_PM_at   | Hrct1         | NA         | 0.11  | 2.14 | 1.07  | 3.08E-01 | 5.95E-01 | -6.11 |
| 1421440_PM_at   | Wnt8b         | WNT8B      | 0.11  | 2.29 | 1.07  | 3.08E-01 | 5.95E-01 | -6.11 |
| 1435200_PM_at   | Smin10l2a     | NA         | 0.12  | 2.40 | 1.07  | 3.08E-01 | 5.95E-01 | -6.11 |
| 1423498_PM_at   | Aldoart2      | ALDOA      | 0.16  | 2.88 | 1.07  | 3.08E-01 | 5.95E-01 | -6.11 |
| 1430203_PM_at   | Usp16         | USP16      | 0.23  | 2.63 | 1.07  | 3.08E-01 | 5.95E-01 | -6.11 |



|                 |               |          |       |      |       |          |          |       |
|-----------------|---------------|----------|-------|------|-------|----------|----------|-------|
| 1425275_PM_at   | Asph          | ASPH     | 0.33  | 4.58 | 1.07  | 3.08E-01 | 5.95E-01 | -6.11 |
| 1443293_PM_at   | ---           | NA       | 0.84  | 3.65 | 1.07  | 3.08E-01 | 5.95E-01 | -6.11 |
| 1447752_PM_x_at | Drg1          | DRG1     | -0.14 | 2.85 | -1.07 | 3.08E-01 | 5.95E-01 | -6.11 |
| 1441708_PM_at   | Spag16        | SPAG16   | 0.11  | 1.98 | 1.07  | 3.08E-01 | 5.95E-01 | -6.11 |
| 1421944_PM_a_at | Asgr1         | ASGR1    | 0.14  | 2.52 | 1.07  | 3.08E-01 | 5.95E-01 | -6.11 |
| 1431890_PM_a_at | Mllt3         | MLLT3    | -0.47 | 2.68 | -1.07 | 3.08E-01 | 5.95E-01 | -6.11 |
| 1456795_PM_at   | Bend4         | BEND4    | -0.16 | 3.70 | -1.07 | 3.08E-01 | 5.95E-01 | -6.11 |
| 1459517_PM_at   | ---           | NA       | -0.09 | 2.58 | -1.07 | 3.08E-01 | 5.95E-01 | -6.11 |
| 1444897_PM_at   | AU017263      | NA       | 0.31  | 2.69 | 1.07  | 3.08E-01 | 5.95E-01 | -6.11 |
| 1416285_PM_at   | Ndufc1        | NDUFC1   | -0.19 | 2.71 | -1.07 | 3.08E-01 | 5.95E-01 | -6.11 |
| 1442807_PM_at   | ---           | NA       | 0.09  | 2.04 | 1.07  | 3.08E-01 | 5.95E-01 | -6.11 |
| 1418166_PM_at   | Il12rb1       | IL12RB1  | 0.23  | 3.21 | 1.07  | 3.09E-01 | 5.95E-01 | -6.11 |
| 1444574_PM_at   | ---           | NA       | 0.23  | 3.18 | 1.07  | 3.09E-01 | 5.95E-01 | -6.11 |
| 1442312_PM_at   | Tbl1xr1       | TBL1XR1  | 0.21  | 2.57 | 1.07  | 3.09E-01 | 5.95E-01 | -6.11 |
| 1431824_PM_at   | Cdh13         | CDH13    | 0.09  | 2.16 | 1.07  | 3.09E-01 | 5.95E-01 | -6.11 |
| 1445202_PM_at   | Caln1         | CALN1    | -0.11 | 2.62 | -1.07 | 3.09E-01 | 5.95E-01 | -6.12 |
| 1427690_PM_a_at | Tpte          | TPTE2    | -0.09 | 2.09 | -1.07 | 3.09E-01 | 5.95E-01 | -6.12 |
| 1454880_PM_s_at | Bmf           | BMF      | 0.17  | 2.45 | 1.07  | 3.09E-01 | 5.95E-01 | -6.12 |
| 1424789_PM_at   | Zscan22       | ZSCAN22  | -0.19 | 2.12 | -1.07 | 3.09E-01 | 5.95E-01 | -6.12 |
| 1448901_PM_at   | Cpxm1         | CPXM1    | 0.22  | 2.68 | 1.07  | 3.09E-01 | 5.95E-01 | -6.12 |
| 1427675_PM_at   | Vmn1r45       | NA       | 0.11  | 2.21 | 1.07  | 3.09E-01 | 5.95E-01 | -6.12 |
| 1443228_PM_at   | ---           | NA       | 0.12  | 2.46 | 1.07  | 3.09E-01 | 5.95E-01 | -6.12 |
| 1449922_PM_at   | 4933425L06Rik | NA       | 0.15  | 2.66 | 1.07  | 3.09E-01 | 5.95E-01 | -6.12 |
| 1458933_PM_at   | Slc22a15      | SLC22A15 | 0.23  | 2.27 | 1.07  | 3.09E-01 | 5.95E-01 | -6.12 |
| 1452996_PM_a_at | Aven          | AVEN     | 0.10  | 2.59 | 1.07  | 3.09E-01 | 5.95E-01 | -6.12 |
| 1451699_PM_at   | ---           | NA       | 0.10  | 2.37 | 1.07  | 3.09E-01 | 5.95E-01 | -6.12 |
| 1459381_PM_at   | ---           | NA       | 0.17  | 2.77 | 1.07  | 3.09E-01 | 5.95E-01 | -6.12 |
| 1424974_PM_at   | Zfp418        | NA       | 0.25  | 2.73 | 1.07  | 3.09E-01 | 5.95E-01 | -6.12 |
| 1459863_PM_x_at | Gga1          | GGA1     | -0.08 | 2.54 | -1.07 | 3.09E-01 | 5.95E-01 | -6.12 |
| 1421744_PM_at   | Tnfsf4        | NA       | 0.10  | 2.51 | 1.07  | 3.09E-01 | 5.95E-01 | -6.12 |
| 1450764_PM_at   | Aoah          | AOAH     | 0.11  | 2.49 | 1.07  | 3.09E-01 | 5.95E-01 | -6.12 |
| 1432050_PM_at   | ---           | NA       | 0.18  | 3.61 | 1.07  | 3.09E-01 | 5.95E-01 | -6.12 |
| 1456279_PM_a_at | Bcap31        | BCAP31   | 0.41  | 8.35 | 1.07  | 3.09E-01 | 5.96E-01 | -6.12 |
| 1418203_PM_at   | Pmaip1        | PMAI1    | 0.12  | 2.01 | 1.07  | 3.09E-01 | 5.96E-01 | -6.12 |
| 1457763_PM_at   | Gabrd         | NA       | 0.10  | 2.19 | 1.07  | 3.09E-01 | 5.96E-01 | -6.12 |
| 1436741_PM_at   | Obox5         | NA       | 0.08  | 2.07 | 1.07  | 3.09E-01 | 5.96E-01 | -6.12 |
| 1431273_PM_at   | Trip4         | NA       | 0.08  | 2.33 | 1.07  | 3.09E-01 | 5.96E-01 | -6.12 |
| 1450177_PM_at   | Ngfr          | NGFR     | 0.15  | 2.62 | 1.07  | 3.09E-01 | 5.96E-01 | -6.12 |
| 1457020_PM_at   | ---           | NA       | -0.13 | 2.04 | -1.07 | 3.09E-01 | 5.96E-01 | -6.12 |
| 1417225_PM_at   | Arl6ip5       | ARL6IP5  | -0.23 | 3.92 | -1.07 | 3.09E-01 | 5.96E-01 | -6.12 |
| 1429535_PM_at   | Arm8          | ARMC8    | -0.18 | 2.94 | -1.07 | 3.09E-01 | 5.96E-01 | -6.12 |
| 1435456_PM_at   | Ttc28         | TTC28    | 0.10  | 2.43 | 1.07  | 3.09E-01 | 5.96E-01 | -6.12 |
| 1456224_PM_x_at | Cage1         | CAGE1    | 0.12  | 2.02 | 1.07  | 3.09E-01 | 5.96E-01 | -6.12 |
| 1430279_PM_at   | ---           | NA       | 0.13  | 3.00 | 1.07  | 3.09E-01 | 5.96E-01 | -6.12 |
| 1440112_PM_at   | Lrrtm3        | LRRTM3   | 0.14  | 2.54 | 1.07  | 3.09E-01 | 5.96E-01 | -6.12 |
| 1423147_PM_at   | Mat1a         | MAT1A    | 0.09  | 1.91 | 1.07  | 3.09E-01 | 5.96E-01 | -6.12 |
| 1432767_PM_at   | E130112B07Rik | NA       | 0.11  | 2.36 | 1.07  | 3.09E-01 | 5.96E-01 | -6.12 |
| 1459630_PM_at   | ---           | NA       | 0.22  | 2.16 | 1.07  | 3.09E-01 | 5.96E-01 | -6.12 |
| 1455875_PM_x_at | Tm9sf2        | TM9SF2   | -0.36 | 8.78 | -1.07 | 3.09E-01 | 5.96E-01 | -6.12 |
| 1445395_PM_at   | ---           | NA       | 0.12  | 3.05 | 1.07  | 3.09E-01 | 5.96E-01 | -6.12 |
| 1440946_PM_at   | Zkscan16      | NA       | 0.32  | 3.68 | 1.07  | 3.09E-01 | 5.96E-01 | -6.12 |
| 1422896_PM_at   | Vamp4         | NA       | -0.30 | 3.15 | -1.07 | 3.09E-01 | 5.96E-01 | -6.12 |
| 1451538_PM_at   | Sox9          | SOX9     | -0.25 | 3.57 | -1.07 | 3.09E-01 | 5.96E-01 | -6.12 |
| 1426280_PM_at   | Wdpcp         | WDPCP    | -0.14 | 2.69 | -1.07 | 3.09E-01 | 5.96E-01 | -6.12 |
| 1428601_PM_at   | 1700003E16Rik | C2orf81  | 0.10  | 2.65 | 1.07  | 3.09E-01 | 5.96E-01 | -6.12 |
| 1440230_PM_at   | Tsku          | TSKU     | 0.13  | 2.16 | 1.07  | 3.09E-01 | 5.96E-01 | -6.12 |
| 1424980_PM_s_at | Aph1a         | APH1A    | 0.15  | 2.99 | 1.07  | 3.09E-01 | 5.96E-01 | -6.12 |
| 1430368_PM_s_at | 1700019D03Rik | C2orf88  | 0.19  | 2.76 | 1.07  | 3.09E-01 | 5.96E-01 | -6.12 |
| 1420729_PM_at   | Tcstv1        | NA       | 0.20  | 2.32 | 1.07  | 3.09E-01 | 5.96E-01 | -6.12 |
| 1459131_PM_at   | ---           | NA       | 0.31  | 2.99 | 1.07  | 3.09E-01 | 5.96E-01 | -6.12 |
| 1417552_PM_at   | Fap           | FAP      | 0.44  | 2.85 | 1.07  | 3.10E-01 | 5.96E-01 | -6.12 |
| 1432665_PM_at   | ---           | NA       | 0.17  | 2.46 | 1.07  | 3.10E-01 | 5.96E-01 | -6.12 |
| 1456269_PM_at   | Pramef6       | PRAMEF9  | 0.12  | 2.41 | 1.07  | 3.10E-01 | 5.96E-01 | -6.12 |
| 1447074_PM_at   | ---           | NA       | 0.13  | 2.21 | 1.07  | 3.10E-01 | 5.96E-01 | -6.12 |
| 1438941_PM_x_at | Ampd2         | AMPD2    | 0.33  | 8.37 | 1.07  | 3.10E-01 | 5.96E-01 | -6.12 |
| 1454866_PM_s_at | Clic6         | CLIC6    | -0.47 | 2.71 | -1.07 | 3.10E-01 | 5.96E-01 | -6.12 |
| 1453160_PM_at   | Med13         | MED13    | -0.43 | 5.57 | -1.07 | 3.10E-01 | 5.96E-01 | -6.12 |
| 1423927_PM_at   | Slc35b2       | SLC35B2  | 0.13  | 2.77 | 1.07  | 3.10E-01 | 5.96E-01 | -6.12 |
| 1449832_PM_at   | 1700091H14Rik | NA       | 0.29  | 4.69 | 1.07  | 3.10E-01 | 5.96E-01 | -6.12 |
| 1425330_PM_a_at | Ppm1b         | PPM1B    | -0.33 | 5.06 | -1.07 | 3.10E-01 | 5.96E-01 | -6.12 |
| 1445475_PM_at   | Pak6          | PAK6     | 0.24  | 2.35 | 1.07  | 3.10E-01 | 5.96E-01 | -6.12 |
| 1434851_PM_s_at | Cr3           | CRB3     | 0.19  | 3.10 | 1.07  | 3.10E-01 | 5.96E-01 | -6.12 |
| 1455644_PM_at   | Vps53         | VPS53    | 0.24  | 3.87 | 1.07  | 3.10E-01 | 5.96E-01 | -6.12 |
| 1437535_PM_at   | Ppp3r2        | PPP3R2   | 0.10  | 2.43 | 1.07  | 3.10E-01 | 5.96E-01 | -6.12 |

|                 |                         |           |       |      |       |          |          |       |  |
|-----------------|-------------------------|-----------|-------|------|-------|----------|----------|-------|--|
|                 | Gm9295 /// LOC102642925 |           |       |      |       |          |          |       |  |
| 1432637_PM_at   | /// LOC105245406        | NA        | 0.11  | 2.56 | 1.07  | 3.10E-01 | 5.96E-01 | -6.12 |  |
| 1432804_PM_at   | A230101C19Rik           | NA        | 0.13  | 2.26 | 1.07  | 3.10E-01 | 5.96E-01 | -6.12 |  |
| 1421345_PM_at   | Lrat                    | LRAT      | 0.17  | 2.63 | 1.07  | 3.10E-01 | 5.96E-01 | -6.12 |  |
| 1435685_PM_x_at | Abcc5                   | ABCC5     | 0.30  | 5.63 | 1.07  | 3.10E-01 | 5.96E-01 | -6.12 |  |
| 1446397_PM_at   | ---                     | NA        | -0.17 | 2.23 | -1.07 | 3.10E-01 | 5.96E-01 | -6.12 |  |
| 1447884_PM_x_at | Fam134c                 | RETREG3   | 0.11  | 3.11 | 1.07  | 3.10E-01 | 5.96E-01 | -6.12 |  |
| 1425723_PM_at   | Nr12                    | NR12      | 0.12  | 2.54 | 1.07  | 3.10E-01 | 5.96E-01 | -6.12 |  |
| 1451067_PM_at   | Sgta                    | SGTA      | 0.29  | 3.88 | 1.07  | 3.10E-01 | 5.96E-01 | -6.12 |  |
| 1446692_PM_at   | ---                     | NA        | 0.09  | 2.01 | 1.07  | 3.10E-01 | 5.97E-01 | -6.12 |  |
| 1458551_PM_at   | ---                     | NA        | 0.24  | 2.63 | 1.07  | 3.10E-01 | 5.97E-01 | -6.12 |  |
| 1417646_PM_a_at | Snx5                    | SNX5      | -0.44 | 3.49 | -1.07 | 3.10E-01 | 5.97E-01 | -6.12 |  |
| 1426405_PM_at   | Rnf11                   | RNF11     | -0.21 | 2.56 | -1.07 | 3.10E-01 | 5.97E-01 | -6.12 |  |
| 1432324_PM_at   | 4930432J09Rik           | NA        | -0.20 | 3.06 | -1.07 | 3.10E-01 | 5.97E-01 | -6.12 |  |
| 1428568_PM_at   | B230217C12Rik           | NA        | -0.18 | 3.78 | -1.07 | 3.10E-01 | 5.97E-01 | -6.12 |  |
| 1440441_PM_at   | Fbx17                   | NA        | 0.10  | 2.24 | 1.07  | 3.10E-01 | 5.97E-01 | -6.12 |  |
| 1421008_PM_at   | Rsad2                   | RSAD2     | 0.12  | 2.56 | 1.07  | 3.10E-01 | 5.97E-01 | -6.12 |  |
| 1457128_PM_at   | Ror2                    | ROR2      | 0.14  | 2.15 | 1.07  | 3.10E-01 | 5.97E-01 | -6.12 |  |
| 1429209_PM_at   | Col23a1                 | COL23A1   | 0.18  | 2.36 | 1.07  | 3.10E-01 | 5.97E-01 | -6.12 |  |
| 1444870_PM_at   | AU015438                | NA        | -0.20 | 2.72 | -1.07 | 3.10E-01 | 5.97E-01 | -6.12 |  |
| 1438153_PM_x_at | Coq10a                  | COQ10A    | 0.09  | 2.03 | 1.07  | 3.10E-01 | 5.97E-01 | -6.12 |  |
| 1447981_PM_at   | C78441                  | NA        | 0.28  | 2.78 | 1.07  | 3.10E-01 | 5.97E-01 | -6.12 |  |
| 1439501_PM_at   | Mic1                    | MICU1     | 0.17  | 2.34 | 1.07  | 3.11E-01 | 5.97E-01 | -6.12 |  |
| 1421394_PM_a_at | Xiap                    | BIRC8     | 0.21  | 2.33 | 1.07  | 3.10E-01 | 5.97E-01 | -6.12 |  |
| 1447605_PM_at   | Zfp457                  | ZNF678    | 0.23  | 2.34 | 1.07  | 3.11E-01 | 5.97E-01 | -6.12 |  |
| 1420978_PM_at   | Nrf1                    | NRF1      | 0.25  | 3.44 | 1.07  | 3.11E-01 | 5.97E-01 | -6.12 |  |
| 1437370_PM_at   | Sgol2a                  | SGO2      | 0.25  | 2.85 | 1.07  | 3.11E-01 | 5.97E-01 | -6.12 |  |
| 1441570_PM_at   | ---                     | NA        | 0.52  | 5.68 | 1.07  | 3.11E-01 | 5.97E-01 | -6.12 |  |
| 1418294_PM_at   | Epb414b                 | EPB41L4B  | -0.15 | 2.42 | -1.07 | 3.11E-01 | 5.97E-01 | -6.12 |  |
| 1449224_PM_at   | Trpm5                   | TRPM5     | 0.15  | 3.07 | 1.07  | 3.11E-01 | 5.97E-01 | -6.12 |  |
| 1431148_PM_at   | 1700018L02Rik           | NA        | 0.14  | 2.81 | 1.07  | 3.11E-01 | 5.97E-01 | -6.12 |  |
| 1430815_PM_at   | Cep128                  | CEP128    | 0.22  | 2.88 | 1.07  | 3.11E-01 | 5.97E-01 | -6.12 |  |
| 1446804_PM_at   | ---                     | NA        | 0.11  | 2.28 | 1.07  | 3.11E-01 | 5.97E-01 | -6.12 |  |
| 1438257_PM_at   | ---                     | NA        | 0.11  | 2.76 | 1.07  | 3.11E-01 | 5.97E-01 | -6.12 |  |
| 1419827_PM_s_at | Kif17                   | KIF17     | 0.19  | 3.18 | 1.07  | 3.11E-01 | 5.97E-01 | -6.12 |  |
| 1429238_PM_a_at | Ogfod2                  | OGFOD2    | 0.17  | 3.33 | 1.07  | 3.11E-01 | 5.97E-01 | -6.12 |  |
| 1446456_PM_at   | ---                     | NA        | 0.15  | 2.44 | 1.07  | 3.11E-01 | 5.97E-01 | -6.12 |  |
| 1415773_PM_at   | Ncl                     | NCL       | -0.33 | 7.60 | -1.07 | 3.11E-01 | 5.97E-01 | -6.12 |  |
| 1447002_PM_at   | ---                     | NA        | 0.15  | 2.08 | 1.07  | 3.11E-01 | 5.97E-01 | -6.12 |  |
| 1444938_PM_at   | ---                     | NA        | -0.12 | 2.36 | -1.07 | 3.11E-01 | 5.97E-01 | -6.12 |  |
| 1447854_PM_s_at | Hist2h2be               | HIST1H2BJ | -0.46 | 5.16 | -1.07 | 3.11E-01 | 5.97E-01 | -6.12 |  |
| 1417475_PM_at   | Atp13a1                 | ATP13A1   | 0.18  | 3.01 | 1.07  | 3.11E-01 | 5.97E-01 | -6.12 |  |
| 1441946_PM_at   | Itih5                   | ITIH5     | -0.32 | 2.86 | -1.06 | 3.11E-01 | 5.98E-01 | -6.12 |  |
| 1427421_PM_at   | Tcp10a /// Tcp10b ///   | NA        | 0.09  | 2.34 | 1.06  | 3.11E-01 | 5.98E-01 | -6.12 |  |
| 1428306_PM_at   | Ddit4                   | DDIT4     | -0.39 | 6.42 | -1.06 | 3.11E-01 | 5.98E-01 | -6.12 |  |
| 1450113_PM_at   | Mpp5                    | MPP5      | -0.18 | 3.07 | -1.06 | 3.11E-01 | 5.98E-01 | -6.12 |  |
| 1457224_PM_at   | 4921517D16Rik           | NA        | 0.09  | 2.16 | 1.06  | 3.11E-01 | 5.98E-01 | -6.12 |  |
| 1431455_PM_at   | Tmem30c                 | NA        | 0.09  | 2.19 | 1.06  | 3.11E-01 | 5.98E-01 | -6.12 |  |
| 1442666_PM_at   | D9Erttd12e              | NA        | 0.09  | 2.11 | 1.06  | 3.11E-01 | 5.98E-01 | -6.12 |  |
| 1458242_PM_at   | ---                     | NA        | 0.12  | 2.73 | 1.06  | 3.11E-01 | 5.98E-01 | -6.12 |  |
| 1418605_PM_at   | Nr2c1                   | NR2C1     | 0.13  | 2.63 | 1.06  | 3.11E-01 | 5.98E-01 | -6.12 |  |
| 1450022_PM_at   | Gtpbp1                  | GTPBP1    | 0.34  | 3.42 | 1.06  | 3.11E-01 | 5.98E-01 | -6.12 |  |
| 1447912_PM_x_at | Akap9                   | AKAP9     | 0.47  | 4.35 | 1.06  | 3.11E-01 | 5.98E-01 | -6.12 |  |
| 1450874_PM_at   | Matr3                   | MATR3     | -0.50 | 6.54 | -1.06 | 3.11E-01 | 5.98E-01 | -6.12 |  |
| 1423395_PM_at   | Tsnax                   | TSNAX     | -0.34 | 6.03 | -1.06 | 3.11E-01 | 5.98E-01 | -6.12 |  |
| 1430028_PM_at   | Emsy                    | NA        | -0.21 | 2.81 | -1.06 | 3.11E-01 | 5.98E-01 | -6.12 |  |
| 1434508_PM_at   | Ube2q1                  | UBE2Q1    | -0.16 | 2.77 | -1.06 | 3.11E-01 | 5.98E-01 | -6.12 |  |
| 1433459_PM_x_at | Prss2                   | PRSS2     | 0.09  | 2.15 | 1.06  | 3.11E-01 | 5.98E-01 | -6.12 |  |
| 1419314_PM_at   | Tinag                   | TINAG     | 0.11  | 2.09 | 1.06  | 3.11E-01 | 5.98E-01 | -6.12 |  |
| 1445602_PM_at   | Rmi2                    | RMI2      | 0.11  | 2.82 | 1.06  | 3.11E-01 | 5.98E-01 | -6.12 |  |
| 1437946_PM_x_at | Rapgef3                 | RAPGEF3   | 0.12  | 5.36 | 1.06  | 3.11E-01 | 5.98E-01 | -6.12 |  |
| 1460129_PM_at   | Slc6a2                  | SLC6A2    | 0.13  | 2.30 | 1.06  | 3.11E-01 | 5.98E-01 | -6.12 |  |
| 1428026_PM_at   | Tsh2                    | TSHZ2     | 0.19  | 3.09 | 1.06  | 3.11E-01 | 5.98E-01 | -6.12 |  |
| 1459047_PM_x_at | ---                     | NA        | 0.25  | 2.72 | 1.06  | 3.11E-01 | 5.98E-01 | -6.12 |  |
| 1416754_PM_at   | Prkar1b                 | PRKAR1B   | 0.39  | 3.54 | 1.06  | 3.11E-01 | 5.98E-01 | -6.12 |  |
| 1420615_PM_at   | Ash2l                   | ASH2L     | -0.24 | 3.07 | -1.06 | 3.11E-01 | 5.98E-01 | -6.12 |  |
| 1448840_PM_at   | Tmub1                   | TMUB1     | 0.11  | 2.15 | 1.06  | 3.11E-01 | 5.98E-01 | -6.12 |  |
| 1454670_PM_at   | Rere                    | RERE      | -0.20 | 5.74 | -1.06 | 3.12E-01 | 5.98E-01 | -6.12 |  |
| 1415924_PM_at   | Tnp1                    | TNP1      | 0.14  | 2.26 | 1.06  | 3.12E-01 | 5.98E-01 | -6.12 |  |
| 1426660_PM_x_at | Gm8290 /// Rpl23a       | RPL23A    | -0.37 | 7.55 | -1.06 | 3.12E-01 | 5.98E-01 | -6.12 |  |
| 1451418_PM_a_at | Spsb4                   | SPSB4     | -0.17 | 2.65 | -1.06 | 3.12E-01 | 5.98E-01 | -6.12 |  |
| 1426112_PM_a_at | Cd72                    | CD72      | -0.13 | 2.39 | -1.06 | 3.12E-01 | 5.98E-01 | -6.12 |  |
| 1450358_PM_at   | Arl4d                   | NA        | 0.09  | 2.14 | 1.06  | 3.12E-01 | 5.98E-01 | -6.12 |  |

|                 |                |            |       |      |       |          |          |       |
|-----------------|----------------|------------|-------|------|-------|----------|----------|-------|
| 1433929_PM_at   | Nhlrc2         | NA         | 0.10  | 2.65 | 1.06  | 3.12E-01 | 5.98E-01 | -6.12 |
| 1452410_PM_a_at | Fes            | FES        | 0.10  | 2.55 | 1.06  | 3.12E-01 | 5.98E-01 | -6.12 |
| 1454260_PM_at   | ---            | NA         | 0.10  | 2.45 | 1.06  | 3.12E-01 | 5.98E-01 | -6.12 |
| 1417123_PM_at   | Vav3           | VAV3       | 0.11  | 2.36 | 1.06  | 3.12E-01 | 5.98E-01 | -6.12 |
| 1422005_PM_at   | Eif2ak2        | EIF2AK2    | 0.13  | 2.65 | 1.06  | 3.12E-01 | 5.98E-01 | -6.12 |
| 1453661_PM_at   | ---            | NA         | 0.16  | 3.33 | 1.06  | 3.12E-01 | 5.98E-01 | -6.12 |
| 1446174_PM_at   | Gm4988         | NA         | 0.19  | 2.88 | 1.06  | 3.12E-01 | 5.98E-01 | -6.12 |
| 1444819_PM_at   | C86090         | NA         | 0.20  | 2.67 | 1.06  | 3.12E-01 | 5.98E-01 | -6.12 |
| 1441029_PM_at   | ---            | NA         | 0.26  | 2.85 | 1.06  | 3.12E-01 | 5.98E-01 | -6.12 |
| 1430584_PM_s_at | Car3           | CA3        | 0.30  | 2.87 | 1.06  | 3.12E-01 | 5.98E-01 | -6.12 |
| 1452323_PM_at   | Spryd3         | SPRYD3     | 0.32  | 5.14 | 1.06  | 3.12E-01 | 5.98E-01 | -6.12 |
| 1457527_PM_at   | Gm34268        | NA         | -0.08 | 2.18 | -1.06 | 3.12E-01 | 5.98E-01 | -6.12 |
| 1418175_PM_at   | Vdr            | VDR        | 0.10  | 2.23 | 1.06  | 3.12E-01 | 5.98E-01 | -6.12 |
| 1439451_PM_x_at | Slc52a2        | SLC52A1    | 0.22  | 4.72 | 1.06  | 3.12E-01 | 5.98E-01 | -6.12 |
| 1455860_PM_at   | Pigh           | PIGH       | -0.51 | 4.88 | -1.06 | 3.12E-01 | 5.98E-01 | -6.12 |
| 1424893_PM_at   | Ndel1          | NDEL1      | 0.15  | 2.35 | 1.06  | 3.12E-01 | 5.98E-01 | -6.12 |
| 1422344_PM_s_at | Tnfrsf10b      | TNFRSF10D  | 0.08  | 2.39 | 1.06  | 3.12E-01 | 5.98E-01 | -6.12 |
| 1456056_PM_a_at | Fam21          | WASHC2C    | -0.88 | 5.72 | -1.06 | 3.12E-01 | 5.98E-01 | -6.12 |
| 1451142_PM_at   | Exoc1          | EXOC1      | -0.20 | 4.18 | -1.06 | 3.12E-01 | 5.98E-01 | -6.12 |
| 1450162_PM_at   | Dpf3           | DPF3       | -0.15 | 2.41 | -1.06 | 3.12E-01 | 5.98E-01 | -6.12 |
| 1449496_PM_at   | 2010109I03Rik  | NA         | -0.09 | 2.24 | -1.06 | 3.12E-01 | 5.98E-01 | -6.12 |
| 1426035_PM_at   | Serinc4        | SERINC4    | 0.14  | 3.09 | 1.06  | 3.12E-01 | 5.98E-01 | -6.12 |
| 1441594_PM_at   | ---            | NA         | 0.15  | 2.54 | 1.06  | 3.12E-01 | 5.98E-01 | -6.12 |
| 1441345_PM_at   | ---            | NA         | 0.33  | 3.11 | 1.06  | 3.12E-01 | 5.98E-01 | -6.12 |
| 1417780_PM_at   | Cers4          | CERS4      | -0.14 | 2.32 | -1.06 | 3.12E-01 | 5.98E-01 | -6.12 |
| 1453488_PM_at   | ---            | NA         | -0.07 | 2.62 | -1.06 | 3.12E-01 | 5.98E-01 | -6.12 |
| 1439509_PM_at   | 2900008C10Rik  | NA         | 0.10  | 2.30 | 1.06  | 3.12E-01 | 5.98E-01 | -6.12 |
| 1450169_PM_at   | Slc4a4         | NA         | 0.10  | 2.60 | 1.06  | 3.12E-01 | 5.98E-01 | -6.12 |
| 1425549_PM_at   | Psen1          | NA         | 0.14  | 2.76 | 1.06  | 3.12E-01 | 5.98E-01 | -6.12 |
| 1419206_PM_at   | Cd37           | CD37       | 0.14  | 2.67 | 1.06  | 3.12E-01 | 5.98E-01 | -6.12 |
| 1427945_PM_at   | Dpyd           | DPYD       | 0.15  | 2.45 | 1.06  | 3.12E-01 | 5.98E-01 | -6.12 |
| 1424460_PM_s_at | Lpcat1         | LPCAT1     | 0.21  | 4.39 | 1.06  | 3.12E-01 | 5.98E-01 | -6.12 |
| 1432626_PM_at   | ---            | NA         | 0.23  | 3.45 | 1.06  | 3.12E-01 | 5.98E-01 | -6.12 |
| 1423479_PM_at   | Nol11          | NOL11      | -0.11 | 2.04 | -1.06 | 3.12E-01 | 5.98E-01 | -6.12 |
| 1419711_PM_at   | Cd7            | CD7        | 0.11  | 2.20 | 1.06  | 3.12E-01 | 5.98E-01 | -6.12 |
| 1417361_PM_at   | Asb3           | ASB3       | -0.16 | 2.52 | -1.06 | 3.12E-01 | 5.98E-01 | -6.12 |
| 1433825_PM_at   | Ntrk3          | NA         | -0.12 | 2.82 | -1.06 | 3.12E-01 | 5.98E-01 | -6.12 |
| 1457000_PM_at   | Efcab12        | EFCAB12    | 0.12  | 2.24 | 1.06  | 3.12E-01 | 5.98E-01 | -6.12 |
| 1456306_PM_a_at | Umod           | NA         | 0.13  | 2.18 | 1.06  | 3.12E-01 | 5.98E-01 | -6.12 |
| 1441575_PM_at   | ---            | NA         | 0.18  | 2.54 | 1.06  | 3.12E-01 | 5.98E-01 | -6.12 |
| 1454614_PM_at   | Smin20         | SMIM20     | -0.16 | 3.09 | -1.06 | 3.12E-01 | 5.98E-01 | -6.12 |
| 1449388_PM_at   | Thbs4          | THBS4      | 0.12  | 2.32 | 1.06  | 3.12E-01 | 5.98E-01 | -6.12 |
| 1460316_PM_at   | Acsl1          | ACSL1      | 0.08  | 1.99 | 1.06  | 3.13E-01 | 5.98E-01 | -6.12 |
| 1446654_PM_at   | ---            | NA         | 0.13  | 2.93 | 1.06  | 3.13E-01 | 5.98E-01 | -6.12 |
| 1457240_PM_at   | Cdk9           | CDK9       | 0.15  | 2.22 | 1.06  | 3.13E-01 | 5.98E-01 | -6.12 |
| 1426324_PM_at   | H2-D1 /// H2-L | NA         | -0.61 | 4.35 | -1.06 | 3.13E-01 | 5.98E-01 | -6.12 |
| 1454366_PM_at   | ---            | NA         | -0.43 | 2.22 | -1.06 | 3.13E-01 | 5.98E-01 | -6.13 |
| 1447513_PM_at   | Kcnd3          | KCND3      | -0.43 | 3.26 | -1.06 | 3.13E-01 | 5.98E-01 | -6.12 |
| 1435140_PM_at   | Ide            | IDE        | -0.24 | 3.33 | -1.06 | 3.13E-01 | 5.98E-01 | -6.13 |
| 1455572_PM_x_at | Rps18          | RPS18      | -0.23 | 6.87 | -1.06 | 3.13E-01 | 5.98E-01 | -6.13 |
| 1420340_PM_at   | Cspp1          | CSPP1      | -0.22 | 2.85 | -1.06 | 3.13E-01 | 5.98E-01 | -6.13 |
| 1419353_PM_at   | Dpm1           | DPM1       | -0.21 | 2.71 | -1.06 | 3.13E-01 | 5.98E-01 | -6.13 |
| 1425961_PM_at   | BC016548       | NA         | -0.21 | 2.61 | -1.06 | 3.13E-01 | 5.98E-01 | -6.12 |
| 1425736_PM_at   | Cd37           | CD37       | -0.20 | 2.68 | -1.06 | 3.13E-01 | 5.98E-01 | -6.12 |
| 1452449_PM_at   | Hmbox1         | HMBBOX1    | -0.16 | 3.36 | -1.06 | 3.13E-01 | 5.98E-01 | -6.12 |
| 1429929_PM_at   | Mei1           | MEI1       | -0.08 | 2.50 | -1.06 | 3.13E-01 | 5.98E-01 | -6.12 |
| 1442606_PM_at   | ---            | NA         | 0.10  | 2.24 | 1.06  | 3.13E-01 | 5.98E-01 | -6.13 |
| 1442342_PM_at   | Sp6            | SP6        | 0.13  | 2.48 | 1.06  | 3.13E-01 | 5.98E-01 | -6.12 |
| 1436503_PM_at   | BC048546       | ACO24940.1 | 0.14  | 2.42 | 1.06  | 3.13E-01 | 5.98E-01 | -6.13 |
| 1455105_PM_at   | Ptpn12         | PTPN12     | 0.14  | 2.45 | 1.06  | 3.13E-01 | 5.98E-01 | -6.12 |
| 1455146_PM_at   | Strbp          | STRBP      | 0.15  | 2.86 | 1.06  | 3.13E-01 | 5.98E-01 | -6.12 |
| 1450584_PM_at   | Hoxd11         | HOXD11     | 0.15  | 2.23 | 1.06  | 3.13E-01 | 5.98E-01 | -6.13 |
| 1430030_PM_at   | Dubr           | NA         | 0.16  | 2.27 | 1.06  | 3.13E-01 | 5.98E-01 | -6.12 |
| 1450654_PM_a_at | Dhdds          | DHDDS      | 0.18  | 4.68 | 1.06  | 3.13E-01 | 5.98E-01 | -6.13 |
| 1447952_PM_at   | Auh            | AUH        | 0.20  | 2.40 | 1.06  | 3.13E-01 | 5.98E-01 | -6.12 |
| 1435927_PM_at   | Dennd3         | DENND3     | 0.22  | 2.73 | 1.06  | 3.13E-01 | 5.98E-01 | -6.12 |
| 1450920_PM_at   | Ccnb2          | CCNB2      | 0.22  | 2.63 | 1.06  | 3.13E-01 | 5.98E-01 | -6.12 |
| 1459309_PM_at   | Rufy3          | RUFY3      | 0.23  | 2.15 | 1.06  | 3.13E-01 | 5.98E-01 | -6.12 |
| 1459525_PM_at   | ---            | NA         | 0.09  | 2.02 | 1.06  | 3.13E-01 | 5.98E-01 | -6.13 |
| 1445378_PM_at   | ---            | NA         | 0.09  | 2.12 | 1.06  | 3.13E-01 | 5.98E-01 | -6.13 |
| 1437103_PM_at   | Igf2bp2        | IGF2BP2    | 0.12  | 2.57 | 1.06  | 3.13E-01 | 5.98E-01 | -6.13 |
| 1434395_PM_at   | Man1a2         | MAN1A2     | -0.50 | 4.51 | -1.06 | 3.13E-01 | 5.98E-01 | -6.13 |
| 1440507_PM_at   | Gm10575        | NA         | 0.11  | 2.22 | 1.06  | 3.13E-01 | 5.99E-01 | -6.13 |
| 1442563_PM_at   | Tmem8          | NA         | 0.12  | 2.10 | 1.06  | 3.13E-01 | 5.99E-01 | -6.13 |
| 1433342_PM_at   | 5730416F02Rik  | NA         | 0.14  | 3.16 | 1.06  | 3.13E-01 | 5.99E-01 | -6.13 |

|                 |                                        |          |       |       |       |          |          |       |
|-----------------|----------------------------------------|----------|-------|-------|-------|----------|----------|-------|
| 1439369_PM_x_at | Slc9a3r2                               | SLC9A3R2 | -0.49 | 6.01  | -1.06 | 3.13E-01 | 5.99E-01 | -6.13 |
| 1444651_PM_at   | ---                                    | NA       | -0.22 | 2.86  | -1.06 | 3.13E-01 | 5.99E-01 | -6.13 |
| 1453386_PM_at   | Tusc1                                  | TUSC1    | -0.22 | 5.74  | -1.06 | 3.13E-01 | 5.99E-01 | -6.13 |
| 1453071_PM_s_at | Kdelc2                                 | KDEL2    | -0.18 | 2.76  | -1.06 | 3.13E-01 | 5.99E-01 | -6.13 |
| 1433259_PM_at   | LOC102638761                           | NA       | -0.08 | 2.00  | -1.06 | 3.13E-01 | 5.99E-01 | -6.13 |
| 1418556_PM_at   | Capza3                                 | CAPZA3   | 0.10  | 2.32  | 1.06  | 3.13E-01 | 5.99E-01 | -6.13 |
| 1458587_PM_at   | 2310047D07Rik                          | NA       | 0.10  | 2.45  | 1.06  | 3.13E-01 | 5.99E-01 | -6.13 |
| 1443658_PM_at   | ---                                    | NA       | 0.12  | 2.01  | 1.06  | 3.13E-01 | 5.99E-01 | -6.13 |
| 1439906_PM_at   | ---                                    | NA       | 0.50  | 3.62  | 1.06  | 3.13E-01 | 5.99E-01 | -6.13 |
| 1435780_PM_at   | Psd                                    | PSD      | 0.13  | 4.06  | 1.06  | 3.13E-01 | 5.99E-01 | -6.13 |
| 1449016_PM_at   | Zp2                                    | ZP2      | 0.11  | 2.18  | 1.06  | 3.13E-01 | 5.99E-01 | -6.13 |
| 1438315_PM_x_at | Akr7a5                                 | AKR7L    | 0.24  | 4.48  | 1.06  | 3.13E-01 | 5.99E-01 | -6.13 |
| 1443024_PM_at   | ---                                    | NA       | 0.12  | 2.15  | 1.06  | 3.13E-01 | 5.99E-01 | -6.13 |
| 1446337_PM_at   | Htt                                    | HTT      | 0.14  | 2.38  | 1.06  | 3.13E-01 | 5.99E-01 | -6.13 |
| 1441222_PM_x_at | ---                                    | NA       | 0.12  | 3.35  | 1.06  | 3.13E-01 | 5.99E-01 | -6.13 |
| 1428028_PM_at   | Mkl2                                   | MKL2     | 0.25  | 2.77  | 1.06  | 3.13E-01 | 5.99E-01 | -6.13 |
| 1420892_PM_at   | Wnt7b                                  | WNT7B    | 0.14  | 2.61  | 1.06  | 3.14E-01 | 5.99E-01 | -6.13 |
| 1442921_PM_at   | ---                                    | NA       | 0.12  | 2.19  | 1.06  | 3.14E-01 | 5.99E-01 | -6.13 |
| 1432930_PM_at   | Gsdmcl2                                | NA       | 0.11  | 2.30  | 1.06  | 3.14E-01 | 5.99E-01 | -6.13 |
| 1456714_PM_at   | Wwp2                                   | NA       | 0.10  | 2.48  | 1.06  | 3.14E-01 | 5.99E-01 | -6.13 |
| 1437172_PM_x_at | Exosc4                                 | EXOSC4   | 0.24  | 3.12  | 1.06  | 3.14E-01 | 5.99E-01 | -6.13 |
| 1418086_PM_at   | Ppp1r14a                               | PPP1R14A | 0.30  | 3.13  | 1.06  | 3.14E-01 | 5.99E-01 | -6.13 |
| 1437163_PM_x_at | Gtf2h4                                 | GTF2H4   | 0.49  | 4.31  | 1.06  | 3.14E-01 | 5.99E-01 | -6.13 |
| 1427088_PM_at   | Ccnt2                                  | CCNT2    | -0.20 | 2.78  | -1.06 | 3.14E-01 | 5.99E-01 | -6.13 |
| 1434624_PM_x_at | Rps9                                   | RPS9     | -0.15 | 10.45 | -1.06 | 3.14E-01 | 5.99E-01 | -6.13 |
| 1455814_PM_x_at | Ddx39                                  | DDX39A   | 0.65  | 4.15  | 1.06  | 3.14E-01 | 5.99E-01 | -6.13 |
| 1450165_PM_at   | Sfn2                                   | SLFN12   | 0.10  | 2.53  | 1.06  | 3.14E-01 | 5.99E-01 | -6.13 |
| 1437997_PM_x_at | LOC102643207 ///Mrpl48<br>///Mrpl48-ps | MRPL48   | -0.29 | 4.17  | -1.06 | 3.14E-01 | 5.99E-01 | -6.13 |
| 1425402_PM_at   | Thop1                                  | THOP1    | -0.14 | 2.27  | -1.06 | 3.14E-01 | 5.99E-01 | -6.13 |
| 1447893_PM_x_at | Slc39a6                                | SLC39A6  | 0.09  | 2.04  | 1.06  | 3.14E-01 | 5.99E-01 | -6.13 |
| 1421736_PM_at   | Vmn1r56                                | NA       | 0.09  | 1.93  | 1.06  | 3.14E-01 | 5.99E-01 | -6.13 |
| 1423922_PM_s_at | Ints3                                  | INTS3    | 0.15  | 4.64  | 1.06  | 3.14E-01 | 5.99E-01 | -6.13 |
| 1456252_PM_x_at | Ap1s2                                  | AP1S2    | 0.08  | 2.06  | 1.06  | 3.14E-01 | 5.99E-01 | -6.13 |
| 1424498_PM_at   | Atl3                                   | ATL3     | 0.45  | 3.15  | 1.06  | 3.14E-01 | 5.99E-01 | -6.13 |
| 1426444_PM_at   | Rhbdd2                                 | RHBDD2   | 0.17  | 2.21  | 1.06  | 3.14E-01 | 5.99E-01 | -6.13 |
| 1459622_PM_at   | Gm22                                   | NA       | -0.09 | 2.75  | -1.06 | 3.14E-01 | 6.00E-01 | -6.13 |
| 1438599_PM_at   | ---                                    | NA       | 0.10  | 2.26  | 1.06  | 3.14E-01 | 6.00E-01 | -6.13 |
| 1444877_PM_at   | ---                                    | NA       | 0.09  | 2.20  | 1.06  | 3.14E-01 | 6.00E-01 | -6.13 |
| 1429283_PM_at   | Cisd2                                  | CISD2    | 0.18  | 2.79  | 1.06  | 3.14E-01 | 6.00E-01 | -6.13 |
| 1416572_PM_at   | Mmp14                                  | MMP14    | 0.11  | 2.59  | 1.06  | 3.14E-01 | 6.00E-01 | -6.13 |
| 1460361_PM_at   | Plgrkt                                 | PLGRKT   | 0.21  | 2.62  | 1.06  | 3.14E-01 | 6.00E-01 | -6.13 |
| 1444477_PM_at   | ---                                    | NA       | 0.26  | 2.28  | 1.06  | 3.14E-01 | 6.00E-01 | -6.13 |
| 1445730_PM_at   | ---                                    | NA       | -0.10 | 2.08  | -1.06 | 3.14E-01 | 6.00E-01 | -6.13 |
| 1442222_PM_at   | Ifnar1                                 | IFNAR1   | 0.25  | 3.03  | 1.06  | 3.14E-01 | 6.00E-01 | -6.13 |
| 1436578_PM_at   | Ernm                                   | ERMN     | -0.23 | 3.46  | -1.06 | 3.14E-01 | 6.00E-01 | -6.13 |
| 1439447_PM_x_at | Mir682 ///Rpl37a                       | RPL37A   | 0.11  | 2.41  | 1.06  | 3.14E-01 | 6.00E-01 | -6.13 |
| 1420675_PM_at   | Zfp113                                 | ZNF3     | -0.12 | 2.63  | -1.06 | 3.14E-01 | 6.00E-01 | -6.13 |
| 1454354_PM_at   | ---                                    | NA       | 0.15  | 3.19  | 1.06  | 3.14E-01 | 6.00E-01 | -6.13 |
| 1422583_PM_at   | Rab3b                                  | RAB3B    | 0.25  | 2.82  | 1.06  | 3.14E-01 | 6.00E-01 | -6.13 |
| 1426640_PM_s_at | Trib2                                  | TRIB2    | -0.30 | 2.45  | -1.06 | 3.15E-01 | 6.00E-01 | -6.13 |
| 1446453_PM_at   | ---                                    | NA       | 0.16  | 2.33  | 1.06  | 3.15E-01 | 6.00E-01 | -6.13 |
| 1425934_PM_a_at | B4galt4                                | B4GALT4  | 0.21  | 2.81  | 1.06  | 3.15E-01 | 6.00E-01 | -6.13 |
| 1447217_PM_at   | Uhrf2                                  | UHRF2    | -0.34 | 2.47  | -1.06 | 3.15E-01 | 6.00E-01 | -6.13 |
| 1430821_PM_at   | Lyrm7                                  | LYRM7    | 0.09  | 2.21  | 1.06  | 3.15E-01 | 6.00E-01 | -6.13 |
| 1445210_PM_at   | ---                                    | NA       | 0.18  | 2.52  | 1.06  | 3.15E-01 | 6.00E-01 | -6.13 |
| 1444121_PM_at   | Ntrk2                                  | NA       | 0.52  | 4.72  | 1.06  | 3.15E-01 | 6.00E-01 | -6.13 |
| 1434701_PM_at   | Alkbh5                                 | ALKBH5   | -0.29 | 4.07  | -1.06 | 3.15E-01 | 6.00E-01 | -6.13 |
| 1457107_PM_at   | ---                                    | NA       | 0.10  | 2.11  | 1.06  | 3.15E-01 | 6.00E-01 | -6.13 |
| 1456496_PM_at   | Dapk3                                  | NA       | 0.12  | 2.81  | 1.06  | 3.15E-01 | 6.00E-01 | -6.13 |
| 1458045_PM_at   | ---                                    | NA       | 0.15  | 2.33  | 1.06  | 3.15E-01 | 6.00E-01 | -6.13 |
| 1439336_PM_at   | ---                                    | NA       | 0.19  | 2.43  | 1.06  | 3.15E-01 | 6.00E-01 | -6.13 |
| 1456139_PM_at   | ---                                    | NA       | 0.19  | 3.19  | 1.06  | 3.15E-01 | 6.00E-01 | -6.13 |
| 1447211_PM_at   | Nrip1                                  | NRIP1    | -0.26 | 3.55  | -1.06 | 3.15E-01 | 6.00E-01 | -6.13 |
| 1449569_PM_at   | Thpo                                   | THPO     | 0.11  | 2.62  | 1.06  | 3.15E-01 | 6.00E-01 | -6.13 |
| 1417854_PM_at   | Map2k5                                 | MAP2K5   | 0.24  | 2.39  | 1.06  | 3.15E-01 | 6.00E-01 | -6.13 |
| 1429456_PM_a_at | Polr3e                                 | POLR3E   | -0.14 | 3.70  | -1.06 | 3.15E-01 | 6.00E-01 | -6.13 |
| 1450811_PM_at   | Spr2j-ps                               | NA       | 0.11  | 2.56  | 1.06  | 3.15E-01 | 6.00E-01 | -6.13 |
| 1446532_PM_at   | ---                                    | NA       | -0.10 | 2.34  | -1.06 | 3.15E-01 | 6.00E-01 | -6.13 |
| 1450991_PM_at   | Dnajb7                                 | DNAJB7   | 0.12  | 2.42  | 1.06  | 3.15E-01 | 6.00E-01 | -6.13 |
| 1432867_PM_at   | 9230112117Rik                          | NA       | 0.13  | 2.62  | 1.06  | 3.15E-01 | 6.01E-01 | -6.13 |
| 1440697_PM_at   | Al746446                               | NA       | 0.13  | 2.56  | 1.06  | 3.15E-01 | 6.01E-01 | -6.13 |
| 1431016_PM_at   | Cwf19l1                                | CWF19L1  | 0.10  | 2.41  | 1.06  | 3.15E-01 | 6.01E-01 | -6.13 |
| 1453766_PM_a_at | Efcab6                                 | EFCAB6   | 0.23  | 2.26  | 1.06  | 3.15E-01 | 6.01E-01 | -6.13 |
| 1434275_PM_at   | Nkd2                                   | NKD2     | 0.19  | 2.78  | 1.06  | 3.15E-01 | 6.01E-01 | -6.13 |

|                 |                                                             |            |       |      |       |          |          |       |
|-----------------|-------------------------------------------------------------|------------|-------|------|-------|----------|----------|-------|
| 1458142_PM_at   | ---                                                         | NA         | -0.18 | 2.30 | -1.06 | 3.15E-01 | 6.01E-01 | -6.13 |
| 1445069_PM_at   | ---                                                         | NA         | 0.38  | 2.51 | 1.06  | 3.15E-01 | 6.01E-01 | -6.13 |
| 1419008_PM_at   | Npy5r                                                       | NPY5R      | 0.11  | 2.14 | 1.06  | 3.15E-01 | 6.01E-01 | -6.13 |
| 1423857_PM_at   | Mrp30                                                       | ACO79447.1 | -0.43 | 4.90 | -1.06 | 3.15E-01 | 6.01E-01 | -6.13 |
| 1419773_PM_at   | Aplf                                                        | APLF       | -0.33 | 2.72 | -1.05 | 3.15E-01 | 6.01E-01 | -6.13 |
| 1432551_PM_at   | 1700031F10Rik                                               | NA         | 0.09  | 2.24 | 1.05  | 3.15E-01 | 6.01E-01 | -6.13 |
| 1458934_PM_at   | ---                                                         | NA         | 0.13  | 2.21 | 1.06  | 3.15E-01 | 6.01E-01 | -6.13 |
| 1457466_PM_at   | AA09368                                                     | NA         | 0.14  | 2.32 | 1.05  | 3.15E-01 | 6.01E-01 | -6.13 |
| 1458068_PM_at   | ---                                                         | NA         | 0.14  | 2.40 | 1.05  | 3.15E-01 | 6.01E-01 | -6.13 |
| 1438079_PM_at   | Zfp867                                                      | ZNF136     | 0.15  | 2.29 | 1.06  | 3.15E-01 | 6.01E-01 | -6.13 |
| 1435024_PM_at   | 4931428F04Rik                                               | KIAA0895L  | 0.17  | 2.85 | 1.05  | 3.15E-01 | 6.01E-01 | -6.13 |
| 1432381_PM_a_at | Fsip1                                                       | FSIP1      | 0.18  | 2.39 | 1.05  | 3.15E-01 | 6.01E-01 | -6.13 |
| 1452354_PM_at   | 2810459M11Rik                                               | C2orf72    | 0.10  | 2.38 | 1.05  | 3.16E-01 | 6.01E-01 | -6.13 |
| 1460377_PM_a_at | Tmem8                                                       | TMEM8A     | 0.11  | 2.47 | 1.05  | 3.15E-01 | 6.01E-01 | -6.13 |
| 1445994_PM_at   | ---                                                         | NA         | 0.11  | 2.02 | 1.05  | 3.15E-01 | 6.01E-01 | -6.13 |
| 1456148_PM_a_at | Ubald2                                                      | NA         | 0.14  | 2.53 | 1.05  | 3.15E-01 | 6.01E-01 | -6.13 |
| 1424218_PM_a_at | Creb3l4                                                     | CREB3L4    | 0.15  | 2.43 | 1.05  | 3.16E-01 | 6.01E-01 | -6.13 |
| 1420355_PM_at   | Grk4                                                        | GRK4       | 0.19  | 2.62 | 1.05  | 3.16E-01 | 6.01E-01 | -6.13 |
| 1434966_PM_at   | Sfswap                                                      | SFSWAP     | 0.21  | 2.92 | 1.05  | 3.16E-01 | 6.01E-01 | -6.13 |
| 1452667_PM_at   | Rab2b                                                       | RAB2B      | 0.36  | 4.22 | 1.05  | 3.15E-01 | 6.01E-01 | -6.13 |
| 1426317_PM_at   | Stard6                                                      | STARD6     | 0.27  | 2.21 | 1.05  | 3.16E-01 | 6.01E-01 | -6.13 |
| 1456333_PM_a_at | Arhgap6                                                     | ARHGAP6    | 0.29  | 2.34 | 1.05  | 3.16E-01 | 6.01E-01 | -6.13 |
| 1440608_PM_at   | ---                                                         | NA         | -0.21 | 2.46 | -1.05 | 3.16E-01 | 6.01E-01 | -6.13 |
| 1427265_PM_at   | Bcr                                                         | BCR        | 0.19  | 2.43 | 1.05  | 3.16E-01 | 6.01E-01 | -6.13 |
| 1424556_PM_at   | Pycr1                                                       | PYCR1      | 0.12  | 2.51 | 1.05  | 3.16E-01 | 6.01E-01 | -6.13 |
| 1430280_PM_at   | 1810062G17Rik                                               | NA         | -0.09 | 2.33 | -1.05 | 3.16E-01 | 6.01E-01 | -6.13 |
| 1426846_PM_at   | Cenpt                                                       | CENPT      | 0.20  | 3.07 | 1.05  | 3.16E-01 | 6.01E-01 | -6.13 |
| 1457964_PM_at   | 1810044D09Rik                                               | NA         | 0.22  | 2.68 | 1.05  | 3.16E-01 | 6.01E-01 | -6.13 |
| 1423867_PM_at   | Serpina3k                                                   | SERPINA3   | -0.11 | 2.40 | -1.05 | 3.16E-01 | 6.01E-01 | -6.13 |
| 1456337_PM_at   | Arap2                                                       | ARAP2      | 0.14  | 3.23 | 1.05  | 3.16E-01 | 6.01E-01 | -6.13 |
| 1426642_PM_at   | Fn1                                                         | FN1        | -0.36 | 3.27 | -1.05 | 3.16E-01 | 6.01E-01 | -6.13 |
| 1458031_PM_at   | ---                                                         | NA         | 0.22  | 2.81 | 1.05  | 3.16E-01 | 6.01E-01 | -6.13 |
| 1416208_PM_at   | Usp14                                                       | USP14      | -0.57 | 4.79 | -1.05 | 3.16E-01 | 6.01E-01 | -6.13 |
| 1438289_PM_a_at | Sumo1                                                       | SUMO1      | -0.47 | 6.93 | -1.05 | 3.16E-01 | 6.01E-01 | -6.13 |
| 1444506_PM_at   | ---                                                         | NA         | -0.38 | 2.90 | -1.05 | 3.16E-01 | 6.01E-01 | -6.13 |
| 1435156_PM_at   | Cep104                                                      | CEP104     | -0.16 | 2.64 | -1.05 | 3.16E-01 | 6.01E-01 | -6.13 |
| 1433238_PM_at   | 4930448E06Rik                                               | NA         | 0.09  | 3.37 | 1.05  | 3.16E-01 | 6.01E-01 | -6.13 |
| 1425159_PM_at   | Golt1a /// Kiss1                                            | GOLT1A     | 0.12  | 2.23 | 1.05  | 3.16E-01 | 6.01E-01 | -6.13 |
| 1435782_PM_at   | Gm4802                                                      | NA         | 0.12  | 2.97 | 1.05  | 3.16E-01 | 6.01E-01 | -6.13 |
| 1432228_PM_at   | ---                                                         | NA         | 0.17  | 2.95 | 1.05  | 3.16E-01 | 6.01E-01 | -6.13 |
| 1458180_PM_at   | ---                                                         | NA         | 0.17  | 2.89 | 1.05  | 3.16E-01 | 6.01E-01 | -6.13 |
| 1428904_PM_at   | Ammecr1l                                                    | AMMECR1L   | 0.21  | 2.50 | 1.05  | 3.16E-01 | 6.01E-01 | -6.13 |
| 1429636_PM_at   | 1700010D01Rik /// Gm5941                                    | NA         | 0.12  | 2.16 | 1.05  | 3.16E-01 | 6.01E-01 | -6.13 |
| 1456128_PM_at   | Atp5g2 /// LOC102641133                                     | ATP5G2     | 0.08  | 2.09 | 1.05  | 3.16E-01 | 6.01E-01 | -6.13 |
| 1424911_PM_a_at | Lyz4                                                        | LYZL4      | 0.09  | 2.21 | 1.05  | 3.16E-01 | 6.01E-01 | -6.13 |
| 1443298_PM_at   | Fbxw13                                                      | FBXW12     | 0.09  | 2.27 | 1.05  | 3.16E-01 | 6.01E-01 | -6.13 |
| 1435678_PM_at   | Pantr1                                                      | NA         | -0.57 | 4.58 | -1.05 | 3.16E-01 | 6.02E-01 | -6.13 |
| 1419165_PM_at   | Zfp260                                                      | ZNF260     | -0.27 | 2.42 | -1.05 | 3.16E-01 | 6.02E-01 | -6.13 |
| 1428654_PM_at   | Swf1                                                        | SWT1       | -0.26 | 2.64 | -1.05 | 3.16E-01 | 6.02E-01 | -6.13 |
| 1419825_PM_at   | ---                                                         | NA         | 0.11  | 2.60 | 1.05  | 3.16E-01 | 6.02E-01 | -6.13 |
| 1442894_PM_at   | Dnah6                                                       | NA         | 0.14  | 3.12 | 1.05  | 3.16E-01 | 6.02E-01 | -6.13 |
| 1449476_PM_at   | Mok                                                         | MOK        | 0.16  | 3.04 | 1.05  | 3.16E-01 | 6.02E-01 | -6.13 |
| 1450549_PM_s_at | Elk4                                                        | ELK4       | 0.36  | 3.43 | 1.05  | 3.16E-01 | 6.02E-01 | -6.13 |
| 1448144_PM_at   | Hnrnpab                                                     | HNRNPAB    | -0.60 | 2.72 | -1.05 | 3.16E-01 | 6.02E-01 | -6.13 |
| 1425212_PM_a_at | Tnfrsf19                                                    | TNFRSF19   | -0.13 | 2.86 | -1.05 | 3.16E-01 | 6.02E-01 | -6.13 |
| 1420774_PM_a_at | Mgarp                                                       | MGARP      | 0.13  | 2.64 | 1.05  | 3.16E-01 | 6.02E-01 | -6.13 |
| 1448775_PM_at   | Gm16340 /// Ifi203 /// LOC102641031                         | NA         | -0.26 | 3.34 | -1.05 | 3.16E-01 | 6.02E-01 | -6.13 |
| 1431044_PM_at   | ---                                                         | NA         | 0.44  | 6.88 | 1.05  | 3.16E-01 | 6.02E-01 | -6.13 |
| 1443137_PM_at   | ---                                                         | NA         | -0.10 | 2.03 | -1.05 | 3.17E-01 | 6.02E-01 | -6.13 |
| 1448306_PM_at   | Nfkbia                                                      | NFKBIA     | 0.14  | 3.08 | 1.05  | 3.16E-01 | 6.02E-01 | -6.13 |
| 1453714_PM_a_at | Shroom3                                                     | SHROOM3    | 0.15  | 2.24 | 1.05  | 3.17E-01 | 6.02E-01 | -6.13 |
| 1428318_PM_at   | Smgc                                                        | NA         | -0.13 | 2.22 | -1.05 | 3.17E-01 | 6.02E-01 | -6.13 |
| 1445935_PM_at   | ---                                                         | NA         | 0.09  | 2.04 | 1.05  | 3.17E-01 | 6.02E-01 | -6.13 |
| 1436094_PM_at   | Vgf                                                         | VEGF       | 0.61  | 6.10 | 1.05  | 3.17E-01 | 6.02E-01 | -6.13 |
| 1431835_PM_at   | Tcerg1l                                                     | TCERG1L    | 0.11  | 2.13 | 1.05  | 3.17E-01 | 6.02E-01 | -6.13 |
| 1455719_PM_at   | Tubb5                                                       | TUBB       | -0.31 | 5.23 | -1.05 | 3.17E-01 | 6.02E-01 | -6.13 |
| 1459868_PM_x_at | Gm13305 /// Gm2002 /// Il11ra1 /// Il11ra2 /// LOC100861969 | IL11RA     | 0.13  | 3.47 | 1.05  | 3.17E-01 | 6.02E-01 | -6.13 |
| 1427388_PM_at   | Lrrc2                                                       | LRRC2      | 0.10  | 2.29 | 1.05  | 3.17E-01 | 6.02E-01 | -6.13 |
| 1447835_PM_at   | ---                                                         | NA         | -0.09 | 2.12 | -1.05 | 3.17E-01 | 6.02E-01 | -6.13 |
| 1426192_PM_at   | Smarcd2                                                     | NA         | -0.18 | 4.10 | -1.05 | 3.17E-01 | 6.02E-01 | -6.13 |

|                 |                                              |           |       |      |       |          |          |       |
|-----------------|----------------------------------------------|-----------|-------|------|-------|----------|----------|-------|
| 1420383_PM_a_at | Col4a3bp                                     | COL4A3BP  | -0.13 | 3.95 | -1.05 | 3.17E-01 | 6.02E-01 | -6.13 |
| 1446965_PM_at   | Arhgef12                                     | ARHGEF12  | 0.11  | 2.64 | 1.05  | 3.17E-01 | 6.02E-01 | -6.13 |
| 1430328_PM_at   | Polr3f                                       | POLR3F    | 0.12  | 2.57 | 1.05  | 3.17E-01 | 6.02E-01 | -6.13 |
| 1451337_PM_at   | Psmf1                                        | PSMF1     | 0.13  | 2.63 | 1.05  | 3.17E-01 | 6.02E-01 | -6.13 |
| 1442313_PM_at   | ---                                          | NA        | 0.16  | 2.62 | 1.05  | 3.17E-01 | 6.02E-01 | -6.13 |
| 1441146_PM_at   | C76132                                       | NA        | 0.17  | 2.26 | 1.05  | 3.17E-01 | 6.02E-01 | -6.13 |
| 1459732_PM_at   | ---                                          | NA        | -0.34 | 3.45 | -1.05 | 3.17E-01 | 6.02E-01 | -6.13 |
| 1448495_PM_at   | Tsta3                                        | TSTA3     | 0.11  | 3.19 | 1.05  | 3.17E-01 | 6.02E-01 | -6.13 |
| 1424285_PM_s_at | Arl6ip4                                      | ARL6IP4   | 0.32  | 5.43 | 1.05  | 3.17E-01 | 6.02E-01 | -6.13 |
| 1416548_PM_at   | Slc35b4                                      | SLC35B4   | 0.10  | 2.61 | 1.05  | 3.17E-01 | 6.02E-01 | -6.14 |
| 1451712_PM_at   | 8030411F24Rik                                | NA        | 0.15  | 2.65 | 1.05  | 3.17E-01 | 6.02E-01 | -6.14 |
| 1434006_PM_at   | Mpv17l2                                      | MPV17L2   | 0.14  | 2.42 | 1.05  | 3.17E-01 | 6.02E-01 | -6.14 |
| 1447183_PM_at   | ---                                          | NA        | 0.10  | 1.86 | 1.05  | 3.17E-01 | 6.02E-01 | -6.14 |
| 1451706_PM_a_at | Gabra6                                       | GABRA6    | 0.42  | 2.53 | 1.05  | 3.17E-01 | 6.02E-01 | -6.14 |
| 1459265_PM_at   | Myo19                                        | MYO19     | 0.14  | 3.25 | 1.05  | 3.17E-01 | 6.02E-01 | -6.14 |
| 1445889_PM_at   | ---                                          | NA        | 0.15  | 2.13 | 1.05  | 3.17E-01 | 6.02E-01 | -6.14 |
| 1421162_PM_a_at | Nfia                                         | NFIA      | 0.26  | 3.75 | 1.05  | 3.17E-01 | 6.02E-01 | -6.14 |
| 1441231_PM_at   | ---                                          | NA        | 0.10  | 2.14 | 1.05  | 3.17E-01 | 6.02E-01 | -6.14 |
| 1444663_PM_at   | Gm38532                                      | NA        | -0.15 | 2.35 | -1.05 | 3.17E-01 | 6.02E-01 | -6.14 |
| 1415992_PM_at   | Pigo                                         | PIGO      | 0.14  | 3.17 | 1.05  | 3.17E-01 | 6.02E-01 | -6.14 |
| 1441385_PM_at   | Rhoh                                         | RHOH      | 0.12  | 2.39 | 1.05  | 3.17E-01 | 6.03E-01 | -6.14 |
| 1433319_PM_at   | ---                                          | NA        | 0.11  | 2.37 | 1.05  | 3.17E-01 | 6.03E-01 | -6.14 |
| 1432464_PM_a_at | Camsap3                                      | CAMSAP3   | 0.19  | 2.42 | 1.05  | 3.17E-01 | 6.03E-01 | -6.14 |
| 1458253_PM_at   | ---                                          | NA        | 0.09  | 2.39 | 1.05  | 3.18E-01 | 6.03E-01 | -6.14 |
| 1445900_PM_at   | ---                                          | NA        | 0.10  | 2.32 | 1.05  | 3.18E-01 | 6.03E-01 | -6.14 |
| 1454246_PM_at   | St3gal6                                      | ST3GAL6   | 0.10  | 2.31 | 1.05  | 3.18E-01 | 6.03E-01 | -6.14 |
| 1447413_PM_at   | ---                                          | NA        | 0.12  | 2.53 | 1.05  | 3.17E-01 | 6.03E-01 | -6.14 |
| 1417738_PM_at   | Rab25                                        | RAB25     | 0.12  | 2.75 | 1.05  | 3.17E-01 | 6.03E-01 | -6.14 |
| 1438105_PM_at   | March10                                      | MARCH10   | 0.17  | 3.27 | 1.05  | 3.17E-01 | 6.03E-01 | -6.14 |
| 1454166_PM_at   | Bcas1os2                                     | NA        | 0.09  | 2.67 | 1.05  | 3.18E-01 | 6.03E-01 | -6.14 |
| 1431410_PM_at   | D16Ert472e                                   | C21orf91  | 0.11  | 2.47 | 1.05  | 3.18E-01 | 6.03E-01 | -6.14 |
| 1430182_PM_a_at | 1700006J14Rik                                | NA        | 0.11  | 2.29 | 1.05  | 3.18E-01 | 6.03E-01 | -6.14 |
| 1453085_PM_at   | Serpina1f                                    | SERPINA2  | 0.11  | 2.25 | 1.05  | 3.18E-01 | 6.03E-01 | -6.14 |
| 1443443_PM_at   | Gm15511                                      | NA        | 0.12  | 2.32 | 1.05  | 3.18E-01 | 6.03E-01 | -6.14 |
| 1438717_PM_a_at | Osbpl6                                       | OSBPL6    | 0.13  | 2.40 | 1.05  | 3.18E-01 | 6.03E-01 | -6.14 |
| 1418136_PM_at   | Tgfb1i1                                      | TGFB1I1   | 0.10  | 2.26 | 1.05  | 3.18E-01 | 6.03E-01 | -6.14 |
| 1434111_PM_at   | Adgrl2                                       | ADGRL2    | -0.25 | 2.89 | -1.05 | 3.18E-01 | 6.03E-01 | -6.14 |
| 1436648_PM_at   | Nanos1                                       | NANOS1    | -0.13 | 2.80 | -1.05 | 3.18E-01 | 6.03E-01 | -6.14 |
| 1448157_PM_s_at | Gm5621 /// Rpl10 /// Rpl10-ps1 /// Rpl10-ps6 | NA        | -0.34 | 6.01 | -1.05 | 3.18E-01 | 6.03E-01 | -6.14 |
| 1419507_PM_at   | Krtap15                                      | KRTAP15-1 | 0.10  | 2.09 | 1.05  | 3.18E-01 | 6.03E-01 | -6.14 |
| 1441551_PM_at   | Mypn                                         | MYPN      | 0.13  | 2.62 | 1.05  | 3.18E-01 | 6.03E-01 | -6.14 |
| 1459083_PM_at   | A330084C13Rik                                | NA        | 0.15  | 2.40 | 1.05  | 3.18E-01 | 6.03E-01 | -6.14 |
| 1433141_PM_at   | 4921504P05Rik                                | NA        | 0.21  | 3.25 | 1.05  | 3.18E-01 | 6.03E-01 | -6.14 |
| 1437513_PM_a_at | Serinc1                                      | SERINC1   | -0.30 | 6.65 | -1.05 | 3.18E-01 | 6.03E-01 | -6.14 |
| 1455688_PM_at   | Ddr2                                         | DDR2      | -0.27 | 2.71 | -1.05 | 3.18E-01 | 6.03E-01 | -6.14 |
| 1438535_PM_at   | Phip                                         | PHIP      | -0.25 | 2.75 | -1.05 | 3.18E-01 | 6.03E-01 | -6.14 |
| 1435690_PM_at   | Knop1                                        | KNOP1     | -0.18 | 2.94 | -1.05 | 3.18E-01 | 6.03E-01 | -6.14 |
| 1423197_PM_a_at | Smek2                                        | PPP4R3B   | -0.17 | 2.99 | -1.05 | 3.18E-01 | 6.03E-01 | -6.14 |
| 1440328_PM_at   | Nasp                                         | NASP      | 0.09  | 2.74 | 1.05  | 3.18E-01 | 6.03E-01 | -6.14 |
| 1458157_PM_at   | Nek8                                         | NEK8      | 0.10  | 2.12 | 1.05  | 3.18E-01 | 6.03E-01 | -6.14 |
| 1459754_PM_x_at | Eef1d                                        | EEF1D     | 0.11  | 2.40 | 1.05  | 3.18E-01 | 6.03E-01 | -6.14 |
| 1441687_PM_at   | Wnt4                                         | WNT4      | 0.12  | 2.81 | 1.05  | 3.18E-01 | 6.03E-01 | -6.14 |
| 1426784_PM_at   | Trim47                                       | TRIM47    | 0.14  | 2.37 | 1.05  | 3.18E-01 | 6.03E-01 | -6.14 |
| 1433046_PM_at   | ---                                          | NA        | 0.21  | 2.21 | 1.05  | 3.18E-01 | 6.03E-01 | -6.14 |
| 1428555_PM_at   | Setd2                                        | SETD2     | 0.23  | 4.19 | 1.05  | 3.18E-01 | 6.03E-01 | -6.14 |
| 1434923_PM_at   | Cox19                                        | COX19     | 0.25  | 4.08 | 1.05  | 3.18E-01 | 6.03E-01 | -6.14 |
| 1426201_PM_at   | Igkv4-72                                     | NA        | 0.10  | 2.38 | 1.05  | 3.18E-01 | 6.03E-01 | -6.14 |
| 1428002_PM_at   | Saal1                                        | SAAL1     | 0.15  | 2.17 | 1.05  | 3.18E-01 | 6.03E-01 | -6.14 |
| 1424941_PM_at   | BC016579                                     | C3orf52   | 0.09  | 2.11 | 1.05  | 3.18E-01 | 6.03E-01 | -6.14 |
| 1452558_PM_at   | Gm31887                                      | NA        | 0.08  | 2.10 | 1.05  | 3.18E-01 | 6.03E-01 | -6.14 |
| 1452040_PM_a_at | Cdca3                                        | CDCA3     | 0.08  | 2.36 | 1.05  | 3.18E-01 | 6.03E-01 | -6.14 |
| 1420108_PM_at   | ---                                          | NA        | 0.11  | 2.29 | 1.05  | 3.18E-01 | 6.03E-01 | -6.14 |
| 1424925_PM_at   | Sec63                                        | SEC63     | -0.20 | 5.02 | -1.05 | 3.18E-01 | 6.03E-01 | -6.14 |
| 1443324_PM_at   | ---                                          | NA        | -0.11 | 2.18 | -1.05 | 3.18E-01 | 6.03E-01 | -6.14 |
| 1418845_PM_at   | Proc                                         | PROC      | 0.09  | 2.74 | 1.05  | 3.18E-01 | 6.03E-01 | -6.14 |
| 1438626_PM_x_at | Rpl14 /// Rpl14-ps1                          | RPL14     | 0.46  | 7.86 | 1.05  | 3.18E-01 | 6.03E-01 | -6.14 |
| 1437872_PM_at   | Napepld                                      | NAPEPLD   | -0.16 | 2.77 | -1.05 | 3.18E-01 | 6.03E-01 | -6.14 |
| 1456410_PM_at   | Foxl2                                        | NA        | 0.10  | 2.27 | 1.05  | 3.18E-01 | 6.03E-01 | -6.14 |
| 1440741_PM_at   | Htr1d                                        | HTR1D     | -0.34 | 2.59 | -1.05 | 3.18E-01 | 6.03E-01 | -6.14 |
| 1448664_PM_a_at | Speg                                         | SPEG      | -0.24 | 9.87 | -1.05 | 3.18E-01 | 6.03E-01 | -6.14 |
| 1442686_PM_at   | ---                                          | NA        | -0.16 | 2.43 | -1.05 | 3.18E-01 | 6.03E-01 | -6.14 |
| 1440306_PM_at   | ---                                          | NA        | 0.14  | 2.66 | 1.05  | 3.18E-01 | 6.03E-01 | -6.14 |
| 1440831_PM_at   | Bach1                                        | BACH1     | -0.31 | 2.64 | -1.05 | 3.19E-01 | 6.04E-01 | -6.14 |
| 1450347_PM_at   | Syt10                                        | SYT10     | -0.15 | 2.65 | -1.05 | 3.19E-01 | 6.04E-01 | -6.14 |

|                         |               |            |       |      |       |          |          |       |
|-------------------------|---------------|------------|-------|------|-------|----------|----------|-------|
| 1421454_PM_at           | Zfp108        | ZNF235     | 0.11  | 2.82 | 1.05  | 3.19E-01 | 6.04E-01 | -6.14 |
| 1444738_PM_at           | C2cd5         | C2CD5      | 0.19  | 2.77 | 1.05  | 3.19E-01 | 6.04E-01 | -6.14 |
| 1450893_PM_a_at         | Ubpap1        | UBAP1      | -0.24 | 3.09 | -1.05 | 3.19E-01 | 6.04E-01 | -6.14 |
| 1437546_PM_at           | Dnajc14       | ACO23055.1 | -0.41 | 3.22 | -1.05 | 3.19E-01 | 6.04E-01 | -6.14 |
| 1444418_PM_at           | Itpr2         | NA         | 0.10  | 2.50 | 1.05  | 3.19E-01 | 6.04E-01 | -6.14 |
| 1442321_PM_at           | Commmd2       | COMMD2     | 0.10  | 2.28 | 1.05  | 3.19E-01 | 6.04E-01 | -6.14 |
| 1446949_PM_at           | 4930431P19Rik | NA         | 0.13  | 2.40 | 1.05  | 3.19E-01 | 6.04E-01 | -6.14 |
| 1446116_PM_at           | Pkna4os1      | NA         | 0.15  | 2.32 | 1.05  | 3.19E-01 | 6.04E-01 | -6.14 |
| 1447005_PM_at           | ---           | NA         | -0.64 | 4.28 | -1.05 | 3.19E-01 | 6.04E-01 | -6.14 |
| 1437460_PM_x_at         | Rin1          | RIN1       | -0.13 | 2.11 | -1.05 | 3.19E-01 | 6.04E-01 | -6.14 |
| 1440493_PM_at           | Galnt10       | GALNT10    | 0.10  | 2.24 | 1.05  | 3.19E-01 | 6.04E-01 | -6.14 |
| 1446743_PM_at           | Las1l         | LAS1L      | 0.13  | 2.44 | 1.05  | 3.19E-01 | 6.04E-01 | -6.14 |
| 1419851_PM_at           | Slc4a8        | SLC4A8     | 0.14  | 2.63 | 1.05  | 3.19E-01 | 6.04E-01 | -6.14 |
| 1423019_PM_at           | Gjd2          | GJD2       | 0.19  | 3.01 | 1.05  | 3.19E-01 | 6.04E-01 | -6.14 |
| 1442915_PM_at           | Slc9a4        | SLC9A4     | -0.10 | 1.92 | -1.05 | 3.19E-01 | 6.04E-01 | -6.14 |
| 1441643_PM_at           | ---           | NA         | 0.10  | 2.31 | 1.05  | 3.19E-01 | 6.04E-01 | -6.14 |
| 1452220_PM_at           | Dock1         | DOCK1      | -0.21 | 2.50 | -1.05 | 3.19E-01 | 6.04E-01 | -6.14 |
| 1439921_PM_at           | Gm3458        | NA         | 0.11  | 2.04 | 1.05  | 3.19E-01 | 6.04E-01 | -6.14 |
| 1454483_PM_at           | ---           | NA         | -0.12 | 2.44 | -1.05 | 3.19E-01 | 6.04E-01 | -6.14 |
| 1457662_PM_x_at         | Tpk1          | TPK1       | 0.10  | 2.34 | 1.05  | 3.19E-01 | 6.04E-01 | -6.14 |
| 1439349_PM_at           | ---           | NA         | 0.19  | 2.45 | 1.05  | 3.19E-01 | 6.04E-01 | -6.14 |
| 1440372_PM_at           | ---           | NA         | 0.21  | 2.78 | 1.05  | 3.19E-01 | 6.04E-01 | -6.14 |
| 1429078_PM_a_at         | Cops7a        | COP57A     | -0.25 | 3.78 | -1.05 | 3.19E-01 | 6.04E-01 | -6.14 |
| 1430443_PM_at           | Anxa10        | NA         | -0.18 | 2.30 | -1.05 | 3.19E-01 | 6.04E-01 | -6.14 |
| 1446392_PM_at           | ---           | NA         | 0.09  | 2.41 | 1.05  | 3.19E-01 | 6.04E-01 | -6.14 |
| 1453292_PM_at           | 4921501E09Rik | PHF8       | 0.14  | 2.65 | 1.05  | 3.19E-01 | 6.04E-01 | -6.14 |
| 1438436_PM_at           | Soga3         | SOGA3      | 0.12  | 3.31 | 1.05  | 3.19E-01 | 6.04E-01 | -6.14 |
| 1429595_PM_at           | 2700049A03Rik | KIAA0586   | 0.14  | 2.44 | 1.05  | 3.19E-01 | 6.04E-01 | -6.14 |
| 1444757_PM_at           | ---           | NA         | 0.09  | 2.25 | 1.05  | 3.19E-01 | 6.04E-01 | -6.14 |
| 1438334_PM_at           | ---           | NA         | 0.13  | 2.26 | 1.05  | 3.19E-01 | 6.04E-01 | -6.14 |
| 1425144_PM_at           | Klk1b11       | KLK3       | 0.15  | 2.89 | 1.05  | 3.20E-01 | 6.04E-01 | -6.14 |
| 1427246_PM_at           | Magi1         | MAG1       | 0.16  | 2.33 | 1.05  | 3.20E-01 | 6.04E-01 | -6.14 |
| 1435153_PM_at           | Btdb6         | BTBD6      | 0.16  | 2.48 | 1.05  | 3.20E-01 | 6.04E-01 | -6.14 |
| 1421800_PM_at           | Phxr1         | NA         | 0.23  | 2.77 | 1.05  | 3.19E-01 | 6.04E-01 | -6.14 |
| 1457698_PM_at           | Wt1os         | NA         | 0.11  | 2.18 | 1.05  | 3.20E-01 | 6.05E-01 | -6.14 |
| 1443010_PM_at           | ---           | NA         | 0.23  | 3.06 | 1.05  | 3.20E-01 | 6.05E-01 | -6.14 |
| 1450357_PM_a_at         | Ccr6          | CCR6       | 0.19  | 2.39 | 1.05  | 3.20E-01 | 6.05E-01 | -6.14 |
| AFFX-NonspecificGC15_at | ---           | NA         | 0.07  | 2.07 | 1.05  | 3.20E-01 | 6.05E-01 | -6.14 |
| 1441567_PM_at           | ---           | NA         | 0.45  | 2.42 | 1.05  | 3.20E-01 | 6.05E-01 | -6.14 |
| 1422690_PM_at           | Sptlc1        | SPTLC1     | -0.38 | 4.17 | -1.05 | 3.20E-01 | 6.05E-01 | -6.14 |
| 1420422_PM_at           | Pcdhb21       | NA         | 0.23  | 2.34 | 1.05  | 3.20E-01 | 6.05E-01 | -6.14 |
| 1441615_PM_at           | ---           | NA         | -0.15 | 2.40 | -1.05 | 3.20E-01 | 6.05E-01 | -6.14 |
| 1443332_PM_at           | ---           | NA         | 0.09  | 2.04 | 1.04  | 3.20E-01 | 6.05E-01 | -6.14 |
| 1437771_PM_at           | Lrrn4cl       | LRRN4CL    | 0.18  | 2.40 | 1.04  | 3.20E-01 | 6.05E-01 | -6.14 |
| 1417972_PM_s_at         | Pop5          | POP5       | -0.11 | 2.62 | -1.04 | 3.20E-01 | 6.05E-01 | -6.14 |
| 1443509_PM_at           | ---           | NA         | 0.09  | 2.16 | 1.04  | 3.20E-01 | 6.05E-01 | -6.14 |
| 1435649_PM_at           | Nexn          | NEXN       | 0.17  | 2.61 | 1.04  | 3.20E-01 | 6.05E-01 | -6.14 |
| 1443962_PM_at           | Tfdp2         | TFDP2      | 0.21  | 2.93 | 1.04  | 3.20E-01 | 6.05E-01 | -6.14 |
| 1435193_PM_at           | A230050P20Rik | C19orf66   | 0.21  | 5.94 | 1.04  | 3.20E-01 | 6.05E-01 | -6.14 |
| 1439293_PM_at           | ---           | NA         | 0.29  | 3.02 | 1.04  | 3.20E-01 | 6.05E-01 | -6.14 |
| 1442938_PM_at           | D12Ert427e    | NA         | 0.34  | 2.99 | 1.04  | 3.20E-01 | 6.05E-01 | -6.14 |
| 1431380_PM_at           | ---           | NA         | 0.22  | 2.96 | 1.04  | 3.20E-01 | 6.05E-01 | -6.14 |
| 1439217_PM_at           | Nlrp9c        | NLRP9      | -0.12 | 2.38 | -1.04 | 3.20E-01 | 6.05E-01 | -6.14 |
| 1445277_PM_at           | ---           | NA         | 0.15  | 2.65 | 1.04  | 3.20E-01 | 6.05E-01 | -6.14 |
| 1428689_PM_at           | Tysnd1        | TYSND1     | -0.15 | 2.32 | -1.04 | 3.20E-01 | 6.05E-01 | -6.14 |
| 1422562_PM_at           | Rrad          | RRAD       | 0.11  | 2.49 | 1.04  | 3.20E-01 | 6.05E-01 | -6.14 |
| 1417269_PM_at           | Cdk9          | CDK9       | -0.36 | 4.85 | -1.04 | 3.20E-01 | 6.05E-01 | -6.14 |
| 1456977_PM_at           | Samd11        | NA         | 0.14  | 2.55 | 1.04  | 3.20E-01 | 6.05E-01 | -6.14 |
| 1459207_PM_at           | ---           | NA         | 0.16  | 2.33 | 1.04  | 3.20E-01 | 6.05E-01 | -6.14 |
| 1454025_PM_at           | Ddo           | NA         | 0.10  | 2.39 | 1.04  | 3.20E-01 | 6.05E-01 | -6.14 |
| 1424366_PM_at           | Dolk          | DOLK       | -0.37 | 3.20 | -1.04 | 3.20E-01 | 6.05E-01 | -6.14 |
| 1420790_PM_x_at         | Kfra16        | NA         | -0.08 | 2.32 | -1.04 | 3.20E-01 | 6.05E-01 | -6.14 |
| 1418133_PM_at           | Bcl3          | BCL3       | 0.11  | 2.81 | 1.04  | 3.20E-01 | 6.05E-01 | -6.14 |
| 1433664_PM_at           | Ube2q2        | NA         | 0.21  | 5.34 | 1.04  | 3.20E-01 | 6.05E-01 | -6.14 |
| 1437027_PM_x_at         | Rnps1         | RNPS1      | 0.28  | 7.70 | 1.04  | 3.20E-01 | 6.05E-01 | -6.14 |
| 1444291_PM_at           | Lysmd4        | NA         | -0.31 | 3.20 | -1.04 | 3.20E-01 | 6.05E-01 | -6.14 |
| 1454523_PM_at           | C530007A02Rik | NA         | -0.12 | 2.18 | -1.04 | 3.20E-01 | 6.05E-01 | -6.14 |
| 1441412_PM_s_at         | Trim45        | TRIM45     | -0.17 | 3.03 | -1.04 | 3.20E-01 | 6.05E-01 | -6.14 |
| 1420240_PM_at           | Smarcd1       | SMARCD1    | 0.12  | 2.67 | 1.04  | 3.20E-01 | 6.05E-01 | -6.14 |
| 1438892_PM_at           | ---           | NA         | -0.16 | 2.28 | -1.04 | 3.20E-01 | 6.05E-01 | -6.14 |
| 1457701_PM_at           | Tmem136       | TMEM136    | -0.41 | 4.79 | -1.04 | 3.20E-01 | 6.05E-01 | -6.14 |
| 1436358_PM_at           | Atpaf1        | ATPAF1     | -0.32 | 2.86 | -1.04 | 3.20E-01 | 6.05E-01 | -6.14 |
| 1452190_PM_at           | Prcp          | PRCP       | 0.14  | 2.61 | 1.04  | 3.20E-01 | 6.05E-01 | -6.14 |
| 1429981_PM_a_at         | Rimklb        | RIMKLB     | 0.17  | 3.20 | 1.04  | 3.20E-01 | 6.05E-01 | -6.14 |
| 1425099_PM_a_at         | Arntl         | ARNTL      | -0.10 | 2.40 | -1.04 | 3.20E-01 | 6.05E-01 | -6.14 |

|                 |                        |         |       |      |       |          |          |       |
|-----------------|------------------------|---------|-------|------|-------|----------|----------|-------|
| 1428567_PM_at   | Hspbp1                 | HSPBAP1 | 0.16  | 2.26 | 1.04  | 3.21E-01 | 6.05E-01 | -6.14 |
| 1423372_PM_at   | Pole4                  | POLE4   | 0.19  | 2.93 | 1.04  | 3.20E-01 | 6.05E-01 | -6.14 |
| 1423261_PM_at   | 1500015010Rik          | C2orf40 | 0.28  | 2.68 | 1.04  | 3.21E-01 | 6.05E-01 | -6.14 |
| 1429785_PM_at   | Mapk1ip1l              | NA      | 0.17  | 2.12 | 1.04  | 3.21E-01 | 6.05E-01 | -6.14 |
| 1419721_PM_at   | Hcar2                  | HCAR3   | 0.16  | 2.67 | 1.04  | 3.21E-01 | 6.05E-01 | -6.14 |
| AFFX-Lyx-3_at   | ---                    | NA      | 0.08  | 2.19 | 1.04  | 3.21E-01 | 6.05E-01 | -6.14 |
| 1459012_PM_at   | ---                    | NA      | 0.15  | 2.16 | 1.04  | 3.21E-01 | 6.05E-01 | -6.14 |
| 1451091_PM_at   | Txndc5                 | TXNDC5  | 0.17  | 3.01 | 1.04  | 3.21E-01 | 6.05E-01 | -6.14 |
| 1458451_PM_at   | ---                    | NA      | 0.13  | 2.60 | 1.04  | 3.21E-01 | 6.05E-01 | -6.14 |
| 1454906_PM_at   | Rarb                   | RARB    | 0.11  | 2.04 | 1.04  | 3.21E-01 | 6.05E-01 | -6.14 |
| 1448981_PM_x_at | Tcl1b1                 | TCL1B   | 0.11  | 2.91 | 1.04  | 3.21E-01 | 6.05E-01 | -6.14 |
| 1455003_PM_at   | Thap1                  | NA      | -0.19 | 2.56 | -1.04 | 3.21E-01 | 6.05E-01 | -6.14 |
| 1448017_PM_at   | Ubap2l                 | UBAP2L  | 0.10  | 2.06 | 1.04  | 3.21E-01 | 6.05E-01 | -6.14 |
| 1417209_PM_at   | Sertad2                | SERTAD2 | 0.17  | 2.69 | 1.04  | 3.21E-01 | 6.05E-01 | -6.14 |
| 1429434_PM_at   | Pik3ca                 | PIK3CA  | 0.18  | 2.95 | 1.04  | 3.21E-01 | 6.05E-01 | -6.14 |
| 1448200_PM_at   | Tcn2                   | TCN2    | 0.33  | 2.98 | 1.04  | 3.21E-01 | 6.05E-01 | -6.14 |
| 1436798_PM_at   | Rp19                   | NA      | -0.28 | 4.34 | -1.04 | 3.21E-01 | 6.06E-01 | -6.14 |
| 1442493_PM_at   | ---                    | NA      | -0.20 | 3.00 | -1.04 | 3.21E-01 | 6.06E-01 | -6.14 |
| 1416860_PM_s_at | Ing1                   | ING1    | -0.18 | 4.33 | -1.04 | 3.21E-01 | 6.06E-01 | -6.14 |
| 1432048_PM_at   | ---                    | NA      | 0.11  | 2.15 | 1.04  | 3.21E-01 | 6.06E-01 | -6.14 |
| 1442444_PM_at   | ---                    | NA      | 0.15  | 3.05 | 1.04  | 3.21E-01 | 6.06E-01 | -6.14 |
| 1442918_PM_at   | Nav3                   | NAV3    | 0.24  | 2.78 | 1.04  | 3.21E-01 | 6.06E-01 | -6.14 |
| 1450365_PM_at   | Myoz3                  | NA      | 0.11  | 2.56 | 1.04  | 3.21E-01 | 6.06E-01 | -6.14 |
| 1432769_PM_at   | Slc44a1                | SLC44A1 | 0.12  | 2.24 | 1.04  | 3.21E-01 | 6.06E-01 | -6.14 |
| 1443460_PM_at   | ---                    | NA      | 0.21  | 2.65 | 1.04  | 3.21E-01 | 6.06E-01 | -6.14 |
| 1415840_PM_at   | Elov5                  | ELOVL5  | -0.33 | 5.14 | -1.04 | 3.21E-01 | 6.06E-01 | -6.14 |
| 1418412_PM_at   | Tpd52l1                | TPD52L1 | -0.20 | 3.06 | -1.04 | 3.21E-01 | 6.06E-01 | -6.14 |
| 1450475_PM_at   | Dlx3                   | DLX3    | 0.14  | 2.86 | 1.04  | 3.21E-01 | 6.06E-01 | -6.14 |
| 1445217_PM_at   | ---                    | NA      | 0.13  | 2.65 | 1.04  | 3.21E-01 | 6.06E-01 | -6.14 |
| 1455703_PM_at   | Akt2                   | AKT2    | 0.09  | 2.31 | 1.04  | 3.21E-01 | 6.06E-01 | -6.15 |
| 1451601_PM_a_at | Spns2                  | SPNS2   | -0.17 | 3.15 | -1.04 | 3.21E-01 | 6.06E-01 | -6.15 |
| 1447979_PM_at   | Sgsm1                  | SGSM1   | 0.23  | 2.99 | 1.04  | 3.21E-01 | 6.06E-01 | -6.15 |
| 1430429_PM_at   | Pgs1                   | PGS1    | 0.13  | 2.39 | 1.04  | 3.21E-01 | 6.06E-01 | -6.15 |
| 1437481_PM_at   | Trmt61b                | NA      | 0.22  | 4.09 | 1.04  | 3.21E-01 | 6.06E-01 | -6.15 |
| 1427082_PM_at   | Sdr42e1                | SDR42E1 | 0.11  | 2.32 | 1.04  | 3.22E-01 | 6.06E-01 | -6.15 |
| 1430211_PM_at   | 4930415020Rik          | TEX49   | 0.13  | 2.30 | 1.04  | 3.22E-01 | 6.06E-01 | -6.15 |
| 1436957_PM_at   | Gabra3                 | GABRA3  | -0.34 | 3.16 | -1.04 | 3.22E-01 | 6.07E-01 | -6.15 |
| 1425726_PM_x_at | Ppp2r5c                | PPP2R5C | -0.10 | 2.15 | -1.04 | 3.22E-01 | 6.07E-01 | -6.15 |
| 1459837_PM_at   | ---                    | NA      | 0.22  | 2.57 | 1.04  | 3.22E-01 | 6.07E-01 | -6.15 |
| 1426639_PM_a_at | Tcf7l2                 | TCF7L2  | 0.56  | 2.96 | 1.04  | 3.22E-01 | 6.07E-01 | -6.15 |
| 1440835_PM_at   | Zfp27                  | ZNF585B | 0.12  | 2.68 | 1.04  | 3.22E-01 | 6.07E-01 | -6.15 |
| 1447523_PM_at   | ---                    | NA      | -0.31 | 3.47 | -1.04 | 3.22E-01 | 6.07E-01 | -6.15 |
| 1458433_PM_at   | ---                    | NA      | 0.13  | 2.22 | 1.04  | 3.22E-01 | 6.07E-01 | -6.15 |
| 1421506_PM_at   | Olfir78                | OR51E2  | 0.13  | 2.78 | 1.04  | 3.22E-01 | 6.07E-01 | -6.15 |
| 1451145_PM_s_at | Emc3                   | EMC3    | -0.22 | 7.28 | -1.04 | 3.22E-01 | 6.07E-01 | -6.15 |
| 1441293_PM_at   | ---                    | NA      | 0.12  | 2.24 | 1.04  | 3.22E-01 | 6.07E-01 | -6.15 |
| 1458822_PM_at   | ---                    | NA      | 0.16  | 2.91 | 1.04  | 3.22E-01 | 6.07E-01 | -6.15 |
| 1454371_PM_at   | Sypl2                  | NA      | 0.23  | 2.24 | 1.04  | 3.22E-01 | 6.07E-01 | -6.15 |
| 1435097_PM_at   | Mmab                   | MMAB    | 0.15  | 3.11 | 1.04  | 3.22E-01 | 6.07E-01 | -6.15 |
| 1435332_PM_at   | Htr7                   | HTR7    | 0.32  | 3.65 | 1.04  | 3.22E-01 | 6.07E-01 | -6.15 |
| 1447251_PM_x_at | Ccdc141                | CCDC141 | 0.28  | 3.49 | 1.04  | 3.22E-01 | 6.07E-01 | -6.15 |
| 1457574_PM_at   | Fbxw23                 | NA      | -0.18 | 2.90 | -1.04 | 3.22E-01 | 6.07E-01 | -6.15 |
| 1425618_PM_at   | Dhx9                   | DHX9    | -0.09 | 2.12 | -1.04 | 3.22E-01 | 6.07E-01 | -6.15 |
| 1420518_PM_a_at | Igsf9                  | IGSF9   | -0.09 | 2.61 | -1.04 | 3.22E-01 | 6.07E-01 | -6.15 |
| 1455739_PM_at   | Gm4980                 | TPBGL   | 0.15  | 3.20 | 1.04  | 3.22E-01 | 6.07E-01 | -6.15 |
| 1452800_PM_a_at | Apoo                   | APOO    | 0.22  | 4.38 | 1.04  | 3.22E-01 | 6.07E-01 | -6.15 |
| 1440452_PM_at   | Drp2                   | DRP2    | 0.44  | 3.31 | 1.04  | 3.22E-01 | 6.07E-01 | -6.15 |
| 1421937_PM_at   | Dapp1                  | DAPP1   | -0.14 | 2.06 | -1.04 | 3.22E-01 | 6.07E-01 | -6.15 |
| 1449965_PM_at   | Mcpt8                  | NA      | 0.10  | 2.71 | 1.04  | 3.22E-01 | 6.07E-01 | -6.15 |
| 1447069_PM_at   | ---                    | NA      | 0.11  | 2.29 | 1.04  | 3.22E-01 | 6.07E-01 | -6.15 |
| 1436080_PM_at   | ---                    | NA      | -0.14 | 2.36 | -1.04 | 3.22E-01 | 6.07E-01 | -6.15 |
| 1440941_PM_at   | Rnf130                 | NA      | 0.15  | 2.70 | 1.04  | 3.22E-01 | 6.07E-01 | -6.15 |
| 1455376_PM_at   | Vwa8                   | VWA8    | -0.27 | 3.96 | -1.04 | 3.22E-01 | 6.07E-01 | -6.15 |
| 1425489_PM_at   | Slu7                   | SLU7    | 0.12  | 2.81 | 1.04  | 3.22E-01 | 6.07E-01 | -6.15 |
| 1442781_PM_at   | Frs1                   | NA      | 0.15  | 2.31 | 1.04  | 3.22E-01 | 6.07E-01 | -6.15 |
| 1426983_PM_at   | Frbp1                  | FNBP1   | 0.34  | 4.53 | 1.04  | 3.22E-01 | 6.07E-01 | -6.15 |
| 1431806_PM_at   | 4931408D14Rik          | NA      | 0.23  | 2.63 | 1.04  | 3.22E-01 | 6.07E-01 | -6.15 |
| 1457666_PM_s_at | Ifi202b///LOC100044068 | NA      | -0.11 | 1.94 | -1.04 | 3.22E-01 | 6.07E-01 | -6.15 |
| 1460323_PM_at   | Tars                   | TARS    | -0.19 | 3.07 | -1.04 | 3.22E-01 | 6.07E-01 | -6.15 |
| 1418595_PM_at   | Plin4                  | PLIN4   | -0.16 | 2.78 | -1.04 | 3.22E-01 | 6.07E-01 | -6.15 |
| 1427845_PM_at   | Fgfr4                  | NA      | 0.10  | 1.97 | 1.04  | 3.22E-01 | 6.07E-01 | -6.15 |
| 1440051_PM_at   | ---                    | NA      | -0.12 | 2.16 | -1.04 | 3.23E-01 | 6.07E-01 | -6.15 |
| 1459893_PM_at   | C76472                 | NA      | 0.10  | 2.49 | 1.04  | 3.23E-01 | 6.07E-01 | -6.15 |
| 1442650_PM_at   | ---                    | NA      | 0.18  | 3.96 | 1.04  | 3.23E-01 | 6.07E-01 | -6.15 |



|                 |                            |           |       |       |       |          |          |       |
|-----------------|----------------------------|-----------|-------|-------|-------|----------|----------|-------|
| 1446325_PM_at   | Pcyox1                     | PCYOX1    | -0.11 | 2.45  | -1.04 | 3.23E-01 | 6.07E-01 | -6.15 |
| 1429463_PM_at   | Prkaa2                     | PRKAA2    | 0.10  | 2.26  | 1.04  | 3.23E-01 | 6.07E-01 | -6.15 |
| 1435255_PM_at   | Pknb1                      | PLXNB1    | -0.21 | 2.68  | -1.04 | 3.23E-01 | 6.07E-01 | -6.15 |
| 1440060_PM_at   | Gm5126                     | NA        | -0.20 | 2.88  | -1.04 | 3.23E-01 | 6.07E-01 | -6.15 |
| 1439270_PM_x_at | LOC102641332 /// Ran       | RAN       | -0.20 | 9.27  | -1.04 | 3.23E-01 | 6.07E-01 | -6.15 |
| 1453235_PM_at   | Lelp1                      | LELP1     | 0.09  | 2.55  | 1.04  | 3.23E-01 | 6.07E-01 | -6.15 |
| 1433149_PM_at   | ---                        | NA        | 0.11  | 2.55  | 1.04  | 3.23E-01 | 6.07E-01 | -6.15 |
| 1434189_PM_at   | Stag1                      | STAG1     | 0.18  | 4.52  | 1.04  | 3.23E-01 | 6.08E-01 | -6.15 |
| 1432568_PM_at   | Cby3                       | CBY3      | 0.11  | 2.13  | 1.04  | 3.23E-01 | 6.08E-01 | -6.15 |
| 1428061_PM_at   | Hat1                       | HAT1      | -0.33 | 4.20  | -1.04 | 3.23E-01 | 6.08E-01 | -6.15 |
| 1447129_PM_at   | ---                        | NA        | -0.11 | 2.13  | -1.04 | 3.23E-01 | 6.08E-01 | -6.15 |
| 1430643_PM_at   | Msh3                       | MSH3      | 0.12  | 2.39  | 1.04  | 3.23E-01 | 6.08E-01 | -6.15 |
| 1431347_PM_at   | ---                        | NA        | 0.12  | 2.55  | 1.04  | 3.23E-01 | 6.08E-01 | -6.15 |
| 1429305_PM_at   | Ankrd10                    | ANKRD10   | 0.31  | 2.93  | 1.04  | 3.23E-01 | 6.08E-01 | -6.15 |
| 1422839_PM_at   | Neurog2                    | NEUROG2   | 0.10  | 2.13  | 1.04  | 3.23E-01 | 6.08E-01 | -6.15 |
| 1459694_PM_at   | Al428898                   | NA        | 0.07  | 2.23  | 1.04  | 3.23E-01 | 6.08E-01 | -6.15 |
| 1427584_PM_at   | Amot                       | AMOT      | 0.15  | 2.67  | 1.04  | 3.23E-01 | 6.08E-01 | -6.15 |
| 1454933_PM_at   | Eva1b                      | EVA1B     | 0.14  | 2.62  | 1.04  | 3.23E-01 | 6.08E-01 | -6.15 |
| 1452937_PM_s_at | Ccdc28b                    | CCDC28B   | 0.46  | 4.42  | 1.04  | 3.23E-01 | 6.08E-01 | -6.15 |
| 1435305_PM_at   | Ntrk2                      | NTRK2     | -0.28 | 5.91  | -1.04 | 3.23E-01 | 6.08E-01 | -6.15 |
| 1428024_PM_at   | Map1k3b                    | MAP1LC3B2 | 0.11  | 2.13  | 1.04  | 3.23E-01 | 6.08E-01 | -6.15 |
| 1455639_PM_at   | ---                        | NA        | 0.20  | 3.73  | 1.04  | 3.23E-01 | 6.08E-01 | -6.15 |
| 1431334_PM_a_at | Gskip                      | GSKIP     | 0.26  | 2.39  | 1.04  | 3.23E-01 | 6.08E-01 | -6.15 |
| 1433741_PM_at   | Cd38                       | CD38      | -0.17 | 2.76  | -1.04 | 3.23E-01 | 6.08E-01 | -6.15 |
| 1441097_PM_at   | Vangl1                     | VANGL1    | 0.21  | 3.50  | 1.04  | 3.23E-01 | 6.08E-01 | -6.15 |
| 1451055_PM_at   | Slc45a2                    | SLC45A2   | 0.11  | 2.15  | 1.04  | 3.23E-01 | 6.08E-01 | -6.15 |
| 1424018_PM_at   | Hint1                      | HINT1     | -0.16 | 3.29  | -1.04 | 3.23E-01 | 6.08E-01 | -6.15 |
| 1432110_PM_at   | 4930402F06Rik              | NA        | 0.16  | 2.34  | 1.04  | 3.23E-01 | 6.08E-01 | -6.15 |
| 1416071_PM_at   | Ddx18                      | DDX18     | 0.28  | 2.67  | 1.04  | 3.23E-01 | 6.08E-01 | -6.15 |
| 1447609_PM_at   | ---                        | NA        | 0.36  | 3.29  | 1.04  | 3.23E-01 | 6.08E-01 | -6.15 |
| 1445136_PM_at   | Nup155                     | NUP155    | 0.18  | 2.92  | 1.04  | 3.23E-01 | 6.08E-01 | -6.15 |
| 1428807_PM_at   | Pabpc6                     | PABPC3    | 0.09  | 2.02  | 1.04  | 3.23E-01 | 6.08E-01 | -6.15 |
| 1443640_PM_at   | Zfp882                     | NA        | -0.36 | 2.80  | -1.04 | 3.23E-01 | 6.08E-01 | -6.15 |
| 1418323_PM_at   | Fem1b                      | FEM1B     | -0.32 | 3.14  | -1.04 | 3.23E-01 | 6.08E-01 | -6.15 |
| 1449649_PM_at   | ---                        | NA        | -0.26 | 2.49  | -1.04 | 3.23E-01 | 6.08E-01 | -6.15 |
| 1445067_PM_at   | Arfgap1                    | ARFGAP1   | 0.13  | 2.44  | 1.04  | 3.23E-01 | 6.08E-01 | -6.15 |
| 1433157_PM_at   | 6330562C20Rik              | NA        | 0.14  | 2.89  | 1.04  | 3.23E-01 | 6.08E-01 | -6.15 |
| 1421725_PM_at   | Slc26a5                    | SLC26A5   | -0.09 | 2.43  | -1.04 | 3.23E-01 | 6.08E-01 | -6.15 |
| 1441800_PM_at   | Rabgap1                    | RABGAP1   | 0.14  | 2.46  | 1.04  | 3.23E-01 | 6.08E-01 | -6.15 |
| 1436927_PM_at   | Cypt10 /// Cypt4 /// Cypt9 | NA        | 0.09  | 2.22  | 1.04  | 3.23E-01 | 6.08E-01 | -6.15 |
| 1443389_PM_at   | ---                        | NA        | 0.20  | 3.33  | 1.04  | 3.23E-01 | 6.08E-01 | -6.15 |
| 1443242_PM_at   | D5Erttd121e                | NA        | 0.12  | 2.07  | 1.04  | 3.24E-01 | 6.08E-01 | -6.15 |
| 1440409_PM_at   | Gcnt3                      | GCNT3     | 0.13  | 2.30  | 1.04  | 3.24E-01 | 6.08E-01 | -6.15 |
| 1435735_PM_x_at | Vmp                        | SELENOS   | -0.59 | 6.65  | -1.04 | 3.24E-01 | 6.08E-01 | -6.15 |
| 1417586_PM_at   | Timeless                   | TIMELESS  | -0.21 | 2.77  | -1.04 | 3.24E-01 | 6.08E-01 | -6.15 |
| 1431857_PM_at   | Phf19                      | PHF19     | -0.13 | 2.33  | -1.04 | 3.24E-01 | 6.08E-01 | -6.15 |
| 1443503_PM_at   | Ip6k3                      | IP6K3     | 0.09  | 2.80  | 1.04  | 3.24E-01 | 6.08E-01 | -6.15 |
| 1421195_PM_at   | Cckar                      | CCKAR     | 0.10  | 2.21  | 1.04  | 3.24E-01 | 6.08E-01 | -6.15 |
| 1441855_PM_x_at | Cxcl1                      | CXCL3     | 0.23  | 2.94  | 1.04  | 3.24E-01 | 6.08E-01 | -6.15 |
| 1432503_PM_a_at | Pdc12                      | PDCL2     | 0.11  | 2.41  | 1.04  | 3.24E-01 | 6.08E-01 | -6.15 |
| 1428828_PM_at   | Rpain                      | RPAIN     | 0.11  | 3.51  | 1.04  | 3.24E-01 | 6.08E-01 | -6.15 |
| 1433321_PM_at   | 9430087B13Rik              | NA        | 0.10  | 2.33  | 1.04  | 3.24E-01 | 6.08E-01 | -6.15 |
| 1427091_PM_at   | Znfx1                      | ZNFX1     | 0.10  | 2.52  | 1.04  | 3.24E-01 | 6.08E-01 | -6.15 |
| 1451314_PM_a_at | Vcam1                      | VCAM1     | 0.13  | 2.61  | 1.04  | 3.24E-01 | 6.08E-01 | -6.15 |
| 1454250_PM_at   | Exoc6b                     | EXOC6B    | 0.26  | 3.18  | 1.04  | 3.24E-01 | 6.08E-01 | -6.15 |
| 1445127_PM_at   | Ccbe1                      | CCBE1     | 0.26  | 2.89  | 1.04  | 3.24E-01 | 6.08E-01 | -6.15 |
| 1459237_PM_at   | ---                        | NA        | -0.27 | 2.90  | -1.04 | 3.24E-01 | 6.08E-01 | -6.15 |
| 1435676_PM_at   | Cep164                     | CEP164    | 0.16  | 3.45  | 1.04  | 3.24E-01 | 6.08E-01 | -6.15 |
| 1421491_PM_a_at | Vmp1                       | VMP1      | -0.17 | 3.40  | -1.04 | 3.24E-01 | 6.09E-01 | -6.15 |
| 1434475_PM_at   | Ppig                       | PPIG      | -0.11 | 2.11  | -1.04 | 3.24E-01 | 6.09E-01 | -6.15 |
| 1422549_PM_at   | Arl2                       | ARL2      | 0.15  | 2.78  | 1.04  | 3.24E-01 | 6.09E-01 | -6.15 |
| 1446420_PM_at   | ---                        | NA        | 0.15  | 3.05  | 1.04  | 3.24E-01 | 6.09E-01 | -6.15 |
| 1423246_PM_at   | Erp44                      | ERP44     | 0.15  | 2.49  | 1.04  | 3.24E-01 | 6.09E-01 | -6.15 |
| 1423865_PM_at   | Slc44a1                    | SLC44A1   | -0.36 | 3.64  | -1.03 | 3.24E-01 | 6.09E-01 | -6.15 |
| 1445833_PM_at   | ---                        | NA        | 0.10  | 2.08  | 1.03  | 3.24E-01 | 6.09E-01 | -6.15 |
| 1437541_PM_at   | ---                        | NA        | 0.15  | 2.61  | 1.03  | 3.24E-01 | 6.09E-01 | -6.15 |
| 1454236_PM_a_at | Fam118b                    | FAM118B   | -0.28 | 3.04  | -1.03 | 3.24E-01 | 6.09E-01 | -6.15 |
| 1420880_PM_a_at | Ywhab                      | YWHA8     | -0.22 | 10.29 | -1.03 | 3.24E-01 | 6.09E-01 | -6.15 |
| 1437777_PM_at   | Atf2 /// LOC102641666      | ATF2      | -0.09 | 2.14  | -1.03 | 3.24E-01 | 6.09E-01 | -6.15 |
| 1417402_PM_at   | Smim11                     | SMIM11B   | 0.14  | 2.51  | 1.03  | 3.24E-01 | 6.09E-01 | -6.15 |
| 1422418_PM_s_at | Supt4a /// Supt4b          | SUPT4H1   | -0.42 | 6.01  | -1.03 | 3.24E-01 | 6.09E-01 | -6.15 |
| 1441840_PM_x_at | ---                        | NA        | 0.32  | 3.74  | 1.03  | 3.24E-01 | 6.09E-01 | -6.15 |
| 1438361_PM_at   | 2310035C23Rik              | KIAA1468  | -0.24 | 3.20  | -1.03 | 3.24E-01 | 6.09E-01 | -6.15 |
| 1426158_PM_at   | Tcrb-J                     | NA        | 0.17  | 3.07  | 1.03  | 3.24E-01 | 6.09E-01 | -6.15 |

|                 |                              |         |       |      |       |          |          |       |
|-----------------|------------------------------|---------|-------|------|-------|----------|----------|-------|
| 1438724_PM_at   | Osblp3                       | OSBPL3  | 0.25  | 2.88 | 1.03  | 3.24E-01 | 6.09E-01 | -6.15 |
| 1433943_PM_at   | Cfap43 /// Itrip             | CFAP43  | 0.09  | 2.31 | 1.03  | 3.25E-01 | 6.09E-01 | -6.15 |
| 1424075_PM_at   | 9430016H08Rik                | MAIP1   | -0.37 | 3.89 | -1.03 | 3.25E-01 | 6.09E-01 | -6.15 |
| 1441150_PM_x_at | ---                          | NA      | -0.21 | 8.03 | -1.03 | 3.25E-01 | 6.09E-01 | -6.15 |
| 1439676_PM_at   | ---                          | NA      | 0.10  | 2.18 | 1.03  | 3.25E-01 | 6.09E-01 | -6.15 |
| 1431124_PM_at   | Auh                          | AUH     | 0.13  | 2.51 | 1.03  | 3.25E-01 | 6.09E-01 | -6.15 |
| 1453692_PM_at   | 4930581F22Rik                | NA      | 0.15  | 2.38 | 1.03  | 3.25E-01 | 6.09E-01 | -6.15 |
| 1419366_PM_at   | Zmat5                        | ZMAT5   | 0.16  | 2.44 | 1.03  | 3.25E-01 | 6.09E-01 | -6.15 |
| 1438013_PM_x_at | Dhx32                        | DHX32   | 0.14  | 2.94 | 1.03  | 3.25E-01 | 6.09E-01 | -6.15 |
| 1430461_PM_at   | 1700120E14Rik                | NA      | 0.15  | 2.38 | 1.03  | 3.25E-01 | 6.09E-01 | -6.15 |
| 1435166_PM_at   | Cntn2                        | CNTN2   | 0.20  | 3.22 | 1.03  | 3.25E-01 | 6.09E-01 | -6.15 |
| 1445298_PM_at   | Cdca2                        | NA      | 0.26  | 2.60 | 1.03  | 3.25E-01 | 6.09E-01 | -6.15 |
| 1459239_PM_at   | ---                          | NA      | -0.09 | 2.24 | -1.03 | 3.25E-01 | 6.09E-01 | -6.15 |
| 1440366_PM_at   | ---                          | NA      | -0.67 | 3.88 | -1.03 | 3.25E-01 | 6.09E-01 | -6.15 |
| 1448384_PM_at   | Pofut2                       | POFUT2  | 0.15  | 3.18 | 1.03  | 3.25E-01 | 6.09E-01 | -6.15 |
| 1453100_PM_at   | Csnk2a2                      | NA      | 0.27  | 3.20 | 1.03  | 3.25E-01 | 6.09E-01 | -6.15 |
| 1435602_PM_at   | Sephs2                       | NA      | 0.31  | 4.59 | 1.03  | 3.25E-01 | 6.09E-01 | -6.15 |
| 1444397_PM_at   | Spef1                        | SPEF1   | 0.08  | 2.12 | 1.03  | 3.25E-01 | 6.10E-01 | -6.15 |
| 1427081_PM_at   | A630072M18Rik                | NA      | -0.10 | 2.09 | -1.03 | 3.25E-01 | 6.10E-01 | -6.15 |
| 1418979_PM_at   | Akr1c14                      | AKR1C2  | -0.21 | 2.61 | -1.03 | 3.25E-01 | 6.10E-01 | -6.15 |
| 1441704_PM_at   | ---                          | NA      | 0.18  | 2.50 | 1.03  | 3.25E-01 | 6.10E-01 | -6.15 |
| 1435311_PM_s_at | Syn3                         | NA      | 0.20  | 2.58 | 1.03  | 3.25E-01 | 6.10E-01 | -6.15 |
| 1428090_PM_at   | Ptcd3                        | PTCD3   | -0.74 | 5.06 | -1.03 | 3.25E-01 | 6.10E-01 | -6.15 |
| 1443497_PM_at   | ---                          | NA      | 0.18  | 2.78 | 1.03  | 3.25E-01 | 6.10E-01 | -6.15 |
| 1418450_PM_at   | Islr                         | ISLR    | -0.38 | 2.81 | -1.03 | 3.25E-01 | 6.10E-01 | -6.15 |
| 1437150_PM_at   | Fam110b                      | FAM110B | -0.24 | 2.76 | -1.03 | 3.25E-01 | 6.10E-01 | -6.15 |
| 1432818_PM_at   | ---                          | NA      | -0.13 | 2.43 | -1.03 | 3.25E-01 | 6.10E-01 | -6.15 |
| 1446640_PM_at   | ---                          | NA      | -0.13 | 2.56 | -1.03 | 3.25E-01 | 6.10E-01 | -6.15 |
| 1421428_PM_at   | Slc5a7                       | SLC5A7  | -0.10 | 2.27 | -1.03 | 3.25E-01 | 6.10E-01 | -6.15 |
| 1457788_PM_at   | Rassf1                       | RASSF1  | 0.11  | 2.36 | 1.03  | 3.25E-01 | 6.10E-01 | -6.15 |
| 1426608_PM_at   | Ccl28                        | NA      | 0.11  | 2.00 | 1.03  | 3.25E-01 | 6.10E-01 | -6.15 |
| 1446816_PM_at   | ---                          | NA      | 0.11  | 2.26 | 1.03  | 3.25E-01 | 6.10E-01 | -6.15 |
| 1433288_PM_at   | ---                          | NA      | 0.12  | 2.43 | 1.03  | 3.25E-01 | 6.10E-01 | -6.15 |
| 1443528_PM_at   | Ttbk1                        | TTBK1   | 0.17  | 2.95 | 1.03  | 3.25E-01 | 6.10E-01 | -6.15 |
| 1424449_PM_at   | Frs3                         | FRS3    | 0.18  | 3.58 | 1.03  | 3.25E-01 | 6.10E-01 | -6.15 |
| 1446760_PM_at   | Trip13                       | TRIP13  | 0.18  | 2.52 | 1.03  | 3.25E-01 | 6.10E-01 | -6.15 |
| 1444262_PM_at   | Snim6                        | SMIM6   | 0.20  | 2.72 | 1.03  | 3.25E-01 | 6.10E-01 | -6.15 |
| 1418881_PM_at   | Necab2                       | NECAB2  | 0.24  | 3.58 | 1.03  | 3.25E-01 | 6.10E-01 | -6.15 |
| 1429071_PM_at   | Me3                          | ME3     | -0.15 | 3.03 | -1.03 | 3.25E-01 | 6.10E-01 | -6.15 |
| 1433234_PM_at   | 4930424E08Rik                | NA      | 0.09  | 2.26 | 1.03  | 3.26E-01 | 6.10E-01 | -6.15 |
| 1430634_PM_a_at | Pfkp                         | PFKP    | -0.27 | 2.72 | -1.03 | 3.26E-01 | 6.10E-01 | -6.15 |
| 1456161_PM_at   | 0610040B10Rik                | NA      | 0.13  | 2.51 | 1.03  | 3.26E-01 | 6.10E-01 | -6.15 |
| 1437881_PM_at   | ---                          | NA      | 0.15  | 2.49 | 1.03  | 3.26E-01 | 6.10E-01 | -6.15 |
| 1416451_PM_s_at | Taf8                         | TAF8    | 0.11  | 2.80 | 1.03  | 3.26E-01 | 6.10E-01 | -6.15 |
| 1422506_PM_a_at | Cstb                         | CSTB    | -0.44 | 7.01 | -1.03 | 3.26E-01 | 6.10E-01 | -6.15 |
| 1457626_PM_at   | D3Wsu106e                    | NA      | 0.12  | 2.69 | 1.03  | 3.26E-01 | 6.10E-01 | -6.15 |
| 1456181_PM_at   | Wdr91                        | WDR91   | 0.21  | 2.57 | 1.03  | 3.26E-01 | 6.10E-01 | -6.15 |
| 1455017_PM_a_at | Zmym3                        | ZMYM3   | 0.43  | 4.79 | 1.03  | 3.26E-01 | 6.10E-01 | -6.15 |
| 1440095_PM_at   | ---                          | NA      | 0.11  | 2.33 | 1.03  | 3.26E-01 | 6.10E-01 | -6.15 |
| 1448749_PM_at   | Plek                         | PLEK    | 0.10  | 2.08 | 1.03  | 3.26E-01 | 6.10E-01 | -6.15 |
| 1450886_PM_at   | Gsg2                         | GSG2    | -0.11 | 2.33 | -1.03 | 3.26E-01 | 6.10E-01 | -6.15 |
| 1419126_PM_at   | Hoxd9                        | HOXD9   | 0.11  | 2.81 | 1.03  | 3.26E-01 | 6.10E-01 | -6.15 |
| 1449424_PM_at   | Plek2                        | PLEK2   | -0.08 | 2.72 | -1.03 | 3.26E-01 | 6.10E-01 | -6.16 |
| 1444645_PM_at   | ---                          | NA      | 0.12  | 2.63 | 1.03  | 3.26E-01 | 6.10E-01 | -6.16 |
| 1439000_PM_at   | Acsbg2                       | ACSBG2  | 0.13  | 2.40 | 1.03  | 3.26E-01 | 6.10E-01 | -6.16 |
| 1417205_PM_at   | Kdelr2                       | KDEL2   | 0.14  | 2.49 | 1.03  | 3.26E-01 | 6.10E-01 | -6.16 |
| 1458354_PM_x_at | ---                          | NA      | 0.16  | 3.26 | 1.03  | 3.26E-01 | 6.10E-01 | -6.16 |
| 1450961_PM_a_at | Tceal3 /// Tceal5 /// Tceal6 | TCEAL6  | 0.48  | 6.91 | 1.03  | 3.26E-01 | 6.10E-01 | -6.16 |
| 1447461_PM_at   | ---                          | NA      | -0.41 | 7.24 | -1.03 | 3.26E-01 | 6.10E-01 | -6.16 |
| 1429953_PM_at   | 2210011C24Rik                | MISP3   | 0.11  | 2.41 | 1.03  | 3.26E-01 | 6.10E-01 | -6.16 |
| 1452455_PM_at   | Myof                         | NA      | 0.14  | 2.47 | 1.03  | 3.26E-01 | 6.10E-01 | -6.16 |
| 1443931_PM_at   | Zfp882                       | NA      | 0.10  | 2.29 | 1.03  | 3.26E-01 | 6.10E-01 | -6.16 |
| 1456001_PM_at   | Lce3a                        | NA      | 0.09  | 2.17 | 1.03  | 3.26E-01 | 6.10E-01 | -6.16 |
| 1439775_PM_at   | Brwd3                        | BRWD3   | 0.14  | 2.88 | 1.03  | 3.26E-01 | 6.11E-01 | -6.16 |
| 1443540_PM_at   | Map3k1                       | MAP3K1  | 0.15  | 2.33 | 1.03  | 3.26E-01 | 6.11E-01 | -6.16 |
| 1450918_PM_s_at | Src                          | SRC     | 0.16  | 2.86 | 1.03  | 3.26E-01 | 6.11E-01 | -6.16 |
| 1448905_PM_at   | Mpr34 /// Nme3               | MRPS34  | 0.18  | 2.66 | 1.03  | 3.26E-01 | 6.11E-01 | -6.16 |
| 1424276_PM_at   | Snx16                        | SNX16   | -0.26 | 3.52 | -1.03 | 3.26E-01 | 6.11E-01 | -6.16 |
| 1442630_PM_at   | ---                          | NA      | 0.13  | 2.59 | 1.03  | 3.26E-01 | 6.11E-01 | -6.16 |
| 1445137_PM_at   | ---                          | NA      | 0.14  | 2.35 | 1.03  | 3.26E-01 | 6.11E-01 | -6.16 |
| 1452792_PM_at   | Dzip1                        | DZIP1   | -0.58 | 6.16 | -1.03 | 3.26E-01 | 6.11E-01 | -6.16 |
| 1459425_PM_at   | Gm38838                      | NA      | 0.09  | 2.19 | 1.03  | 3.26E-01 | 6.11E-01 | -6.16 |
| 1446930_PM_at   | ---                          | NA      | 0.11  | 2.14 | 1.03  | 3.26E-01 | 6.11E-01 | -6.16 |
| 1420766_PM_at   | Socs7                        | SOCS7   | 0.24  | 3.09 | 1.03  | 3.26E-01 | 6.11E-01 | -6.16 |

|                 |                                                                                                                                                             |          |       |      |       |          |          |       |
|-----------------|-------------------------------------------------------------------------------------------------------------------------------------------------------------|----------|-------|------|-------|----------|----------|-------|
| 1442294_PM_at   | A530053G22Rik                                                                                                                                               | NA       | 0.12  | 2.23 | 1.03  | 3.27E-01 | 6.11E-01 | -6.16 |
| 1436831_PM_at   | Iqub                                                                                                                                                        | IQUB     | 0.10  | 2.44 | 1.03  | 3.27E-01 | 6.11E-01 | -6.16 |
| 1459546_PM_s_at | Enpp1                                                                                                                                                       | ENPP1    | 0.18  | 2.28 | 1.03  | 3.27E-01 | 6.11E-01 | -6.16 |
| 1453537_PM_a_at | Wdr17                                                                                                                                                       | WDR17    | 0.11  | 2.68 | 1.03  | 3.27E-01 | 6.11E-01 | -6.16 |
| 1459562_PM_at   | ---                                                                                                                                                         | NA       | 0.11  | 2.43 | 1.03  | 3.27E-01 | 6.11E-01 | -6.16 |
| 1439705_PM_at   | ---                                                                                                                                                         | NA       | 0.12  | 2.62 | 1.03  | 3.27E-01 | 6.11E-01 | -6.16 |
| 1429601_PM_x_at | Mthfd2l                                                                                                                                                     | MTHFD2L  | 0.20  | 2.39 | 1.03  | 3.27E-01 | 6.11E-01 | -6.16 |
| 1439531_PM_at   | E130311K13Rik                                                                                                                                               | C3orf33  | 0.18  | 2.88 | 1.03  | 3.27E-01 | 6.11E-01 | -6.16 |
| 1453217_PM_at   | Gm14590 /// Gm14594 ///<br>Gm14595 /// Gm14596 ///<br>Gm14598 /// Gm14625 ///<br>Gm16404 /// Gm16405 ///<br>Gm16430 /// Gm6664 ///<br>Gm7950 /// Gm7958 /// | NA       | 0.19  | 2.90 | 1.03  | 3.27E-01 | 6.11E-01 | -6.16 |
| 1419118_PM_at   | Vstm2b                                                                                                                                                      | VSTM2B   | 0.24  | 3.06 | 1.03  | 3.27E-01 | 6.11E-01 | -6.16 |
| 1448985_PM_at   | Dusp22                                                                                                                                                      | DUSP22   | -0.19 | 2.54 | -1.03 | 3.27E-01 | 6.11E-01 | -6.16 |
| 1458160_PM_at   | ---                                                                                                                                                         | NA       | 0.09  | 2.39 | 1.03  | 3.27E-01 | 6.11E-01 | -6.16 |
| 1419859_PM_at   | ---                                                                                                                                                         | NA       | 0.21  | 2.38 | 1.03  | 3.27E-01 | 6.11E-01 | -6.16 |
| 1430427_PM_a_at | Pcdh18                                                                                                                                                      | PCDH18   | 0.08  | 2.17 | 1.03  | 3.27E-01 | 6.11E-01 | -6.16 |
| 1431732_PM_at   | Spag16                                                                                                                                                      | SPAG16   | 0.13  | 2.55 | 1.03  | 3.27E-01 | 6.11E-01 | -6.16 |
| 1435624_PM_at   | Kazn                                                                                                                                                        | KAZN     | 0.14  | 2.52 | 1.03  | 3.27E-01 | 6.11E-01 | -6.16 |
| 1415760_PM_s_at | Atox1                                                                                                                                                       | ATOX1    | 0.20  | 2.87 | 1.03  | 3.27E-01 | 6.11E-01 | -6.16 |
| 1437353_PM_at   | Setd1b                                                                                                                                                      | SETD1B   | 0.29  | 2.89 | 1.03  | 3.27E-01 | 6.11E-01 | -6.16 |
| 1421371_PM_at   | ---                                                                                                                                                         | NA       | 0.11  | 2.20 | 1.03  | 3.27E-01 | 6.11E-01 | -6.16 |
| 1444012_PM_at   | Yipf3                                                                                                                                                       | YIPF3    | 0.15  | 2.80 | 1.03  | 3.27E-01 | 6.11E-01 | -6.16 |
| 1417371_PM_at   | Pel1                                                                                                                                                        | PEL1     | -0.18 | 4.36 | -1.03 | 3.27E-01 | 6.12E-01 | -6.16 |
| 1440553_PM_at   | ---                                                                                                                                                         | NA       | 0.15  | 2.94 | 1.03  | 3.27E-01 | 6.12E-01 | -6.16 |
| 1451866_PM_a_at | Hgf                                                                                                                                                         | HGF      | 0.52  | 2.72 | 1.03  | 3.27E-01 | 6.12E-01 | -6.16 |
| 1451970_PM_at   | Daglb                                                                                                                                                       | DAGLB    | -0.33 | 2.91 | -1.03 | 3.27E-01 | 6.12E-01 | -6.16 |
| 1427389_PM_at   | BC021785                                                                                                                                                    | MFSD4B   | 0.12  | 2.21 | 1.03  | 3.27E-01 | 6.12E-01 | -6.16 |
| 1420500_PM_at   | Dnajc1                                                                                                                                                      | DNAJC1   | 0.33  | 3.49 | 1.03  | 3.27E-01 | 6.12E-01 | -6.16 |
| 1456851_PM_at   | ---                                                                                                                                                         | NA       | 0.11  | 2.16 | 1.03  | 3.27E-01 | 6.12E-01 | -6.16 |
| 1441495_PM_at   | Kctd8                                                                                                                                                       | KCTD8    | 0.17  | 2.14 | 1.03  | 3.27E-01 | 6.12E-01 | -6.16 |
| 1450816_PM_at   | Polg2                                                                                                                                                       | POLG2    | -0.21 | 2.69 | -1.03 | 3.28E-01 | 6.12E-01 | -6.16 |
| 1429358_PM_at   | Fam135a                                                                                                                                                     | NA       | -0.15 | 2.42 | -1.03 | 3.28E-01 | 6.12E-01 | -6.16 |
| 1453418_PM_at   | Col24a1                                                                                                                                                     | COL24A1  | -0.10 | 2.22 | -1.03 | 3.27E-01 | 6.12E-01 | -6.16 |
| 1418425_PM_at   | Sp7                                                                                                                                                         | SP7      | 0.08  | 2.23 | 1.03  | 3.27E-01 | 6.12E-01 | -6.16 |
| 1439221_PM_s_at | Cd40                                                                                                                                                        | CD40     | 0.18  | 3.02 | 1.03  | 3.28E-01 | 6.12E-01 | -6.16 |
| 1456671_PM_at   | Tbrg3                                                                                                                                                       | NA       | 0.21  | 2.80 | 1.03  | 3.27E-01 | 6.12E-01 | -6.16 |
| 1431552_PM_at   | 1810006J02Rik                                                                                                                                               | NA       | 0.09  | 2.05 | 1.03  | 3.28E-01 | 6.12E-01 | -6.16 |
| 1422928_PM_at   | Elane                                                                                                                                                       | ELANE    | 0.08  | 2.12 | 1.03  | 3.28E-01 | 6.12E-01 | -6.16 |
| 1432647_PM_at   | ---                                                                                                                                                         | NA       | 0.11  | 2.17 | 1.03  | 3.28E-01 | 6.12E-01 | -6.16 |
| 1455315_PM_at   | Trp53i13                                                                                                                                                    | TP53I13  | 0.17  | 2.43 | 1.03  | 3.28E-01 | 6.12E-01 | -6.16 |
| 1440817_PM_x_at | Zfp771                                                                                                                                                      | ZNF771   | -0.54 | 4.69 | -1.03 | 3.28E-01 | 6.12E-01 | -6.16 |
| 1431597_PM_a_at | Nrip3                                                                                                                                                       | NRI3     | -0.44 | 3.39 | -1.03 | 3.28E-01 | 6.12E-01 | -6.16 |
| 1438426_PM_at   | Shisa4                                                                                                                                                      | SHISA4   | -0.36 | 6.32 | -1.03 | 3.28E-01 | 6.12E-01 | -6.16 |
| 1434040_PM_at   | Appbp2                                                                                                                                                      | APPBP2   | -0.36 | 5.24 | -1.03 | 3.28E-01 | 6.12E-01 | -6.16 |
| 1423735_PM_a_at | Wdr36                                                                                                                                                       | WDR36    | -0.32 | 2.98 | -1.03 | 3.28E-01 | 6.12E-01 | -6.16 |
| 1448626_PM_at   | Cdk5rap1                                                                                                                                                    | CDK5RAP1 | -0.26 | 2.59 | -1.03 | 3.28E-01 | 6.12E-01 | -6.16 |
| 1422434_PM_a_at | 2210010C04Rik                                                                                                                                               | NA       | -0.11 | 2.55 | -1.03 | 3.28E-01 | 6.12E-01 | -6.16 |
| 1432770_PM_at   | ---                                                                                                                                                         | NA       | 0.10  | 2.08 | 1.03  | 3.28E-01 | 6.12E-01 | -6.16 |
| 1422330_PM_at   | Glp1r                                                                                                                                                       | GLP1R    | 0.10  | 2.42 | 1.03  | 3.28E-01 | 6.12E-01 | -6.16 |
| 1452462_PM_a_at | Banp                                                                                                                                                        | BANP     | 0.10  | 3.03 | 1.03  | 3.28E-01 | 6.12E-01 | -6.16 |
| 1453602_PM_at   | Zc2hc1c                                                                                                                                                     | ZC2HC1C  | 0.11  | 2.50 | 1.03  | 3.28E-01 | 6.12E-01 | -6.16 |
| 1431537_PM_at   | 2010001E11Rik                                                                                                                                               | MFSD4B   | 0.11  | 2.39 | 1.03  | 3.28E-01 | 6.12E-01 | -6.16 |
| 1459787_PM_at   | ---                                                                                                                                                         | NA       | 0.13  | 2.25 | 1.03  | 3.28E-01 | 6.12E-01 | -6.16 |
| 1454574_PM_at   | ---                                                                                                                                                         | NA       | 0.13  | 2.18 | 1.03  | 3.28E-01 | 6.12E-01 | -6.16 |
| 1444458_PM_at   | ---                                                                                                                                                         | NA       | 0.13  | 2.52 | 1.03  | 3.28E-01 | 6.12E-01 | -6.16 |
| 1418276_PM_at   | Elf2                                                                                                                                                        | ELF2     | 0.15  | 2.44 | 1.03  | 3.28E-01 | 6.12E-01 | -6.16 |
| 1435844_PM_at   | A330009N23Rik                                                                                                                                               | NA       | 0.15  | 3.09 | 1.03  | 3.28E-01 | 6.12E-01 | -6.16 |
| 1418331_PM_at   | Ogfod3                                                                                                                                                      | OGFOD3   | 0.15  | 2.50 | 1.03  | 3.28E-01 | 6.12E-01 | -6.16 |
| 1458223_PM_at   | Mdm4                                                                                                                                                        | MDM4     | 0.15  | 2.33 | 1.03  | 3.28E-01 | 6.12E-01 | -6.16 |
| 1421183_PM_at   | Tex12                                                                                                                                                       | TEX12    | 0.17  | 2.52 | 1.03  | 3.28E-01 | 6.12E-01 | -6.16 |
| 1440695_PM_at   | ---                                                                                                                                                         | NA       | 0.22  | 2.61 | 1.03  | 3.28E-01 | 6.12E-01 | -6.16 |
| 1427813_PM_at   | Ids                                                                                                                                                         | NA       | 0.24  | 2.39 | 1.03  | 3.28E-01 | 6.12E-01 | -6.16 |
| 1436494_PM_x_at | Trmt1                                                                                                                                                       | TRMT1    | 0.34  | 5.91 | 1.03  | 3.28E-01 | 6.12E-01 | -6.16 |
| 1416330_PM_at   | Cd81                                                                                                                                                        | CD81     | -0.25 | 9.05 | -1.03 | 3.28E-01 | 6.12E-01 | -6.16 |
| 1438664_PM_at   | Prkar2b                                                                                                                                                     | PRKAR2B  | -0.12 | 2.24 | -1.03 | 3.28E-01 | 6.12E-01 | -6.16 |
| 1438125_PM_at   | ---                                                                                                                                                         | NA       | 0.18  | 3.26 | 1.03  | 3.28E-01 | 6.12E-01 | -6.16 |
| 1419020_PM_at   | Gif                                                                                                                                                         | GIF      | -0.12 | 2.53 | -1.03 | 3.28E-01 | 6.12E-01 | -6.16 |
| 1459959_PM_at   | ---                                                                                                                                                         | NA       | 0.14  | 2.73 | 1.03  | 3.28E-01 | 6.12E-01 | -6.16 |
| 1420162_PM_at   | AA409749                                                                                                                                                    | NA       | 0.16  | 2.58 | 1.03  | 3.28E-01 | 6.12E-01 | -6.16 |
| 1451650_PM_at   | Ddo                                                                                                                                                         | DDO      | 0.16  | 2.41 | 1.03  | 3.28E-01 | 6.12E-01 | -6.16 |

|                 |                                                     |         |       |      |       |          |          |       |
|-----------------|-----------------------------------------------------|---------|-------|------|-------|----------|----------|-------|
| 144588_PM_at    | Ankrd44                                             | ANKRD44 | 0.12  | 2.61 | 1.03  | 3.28E-01 | 6.12E-01 | -6.16 |
| 1457732_PM_at   | ---                                                 | NA      | 0.12  | 2.57 | 1.03  | 3.28E-01 | 6.12E-01 | -6.16 |
| 1456049_PM_at   | Rala                                                | RALA    | 0.14  | 2.48 | 1.03  | 3.28E-01 | 6.12E-01 | -6.16 |
| 1423365_PM_at   | Cacna1g                                             | CACNA1G | 0.29  | 2.78 | 1.03  | 3.28E-01 | 6.12E-01 | -6.16 |
| 1456811_PM_at   | Cxhc4                                               | CXHC4   | 0.30  | 2.76 | 1.03  | 3.28E-01 | 6.12E-01 | -6.16 |
| 1430127_PM_a_at | Ccnd2                                               | CCND2   | 0.49  | 5.74 | 1.03  | 3.28E-01 | 6.12E-01 | -6.16 |
| 1453022_PM_at   | Gp1hbp1                                             | GPIHBP1 | 0.10  | 2.11 | 1.03  | 3.28E-01 | 6.12E-01 | -6.16 |
| 1433032_PM_at   | ---                                                 | NA      | 0.13  | 2.32 | 1.03  | 3.28E-01 | 6.13E-01 | -6.16 |
| 1456788_PM_at   | Mrp54                                               | MRPL54  | 0.11  | 2.54 | 1.03  | 3.28E-01 | 6.13E-01 | -6.16 |
| 1455617_PM_at   | Lmbrd1                                              | LMBRD1  | -0.29 | 4.46 | -1.03 | 3.28E-01 | 6.13E-01 | -6.16 |
| 1433745_PM_at   | Trio                                                | TRIO    | -0.29 | 3.51 | -1.03 | 3.28E-01 | 6.13E-01 | -6.16 |
| 1423167_PM_at   | Mob4                                                | MOB4    | -0.23 | 3.34 | -1.03 | 3.28E-01 | 6.13E-01 | -6.16 |
| 1425957_PM_x_at | Tbata                                               | TBATA   | 0.14  | 2.96 | 1.03  | 3.29E-01 | 6.13E-01 | -6.16 |
| 1445174_PM_at   | ---                                                 | NA      | 0.25  | 3.06 | 1.03  | 3.29E-01 | 6.13E-01 | -6.16 |
| 1425973_PM_at   | Lyst                                                | NA      | 0.26  | 3.02 | 1.03  | 3.29E-01 | 6.13E-01 | -6.16 |
| 1416710_PM_at   | Tmem35                                              | TMEM35A | 0.57  | 3.22 | 1.03  | 3.29E-01 | 6.13E-01 | -6.16 |
| 1453342_PM_at   | Cdc40                                               | CDC40   | -0.27 | 3.77 | -1.02 | 3.29E-01 | 6.13E-01 | -6.16 |
| 1450788_PM_at   | Saa1                                                | NA      | 0.09  | 2.12 | 1.02  | 3.29E-01 | 6.13E-01 | -6.16 |
| 1418544_PM_at   | Kcni3                                               | KCNI3   | 0.09  | 2.44 | 1.02  | 3.29E-01 | 6.13E-01 | -6.16 |
| 1440369_PM_at   | Ptger3                                              | PTGER3  | 0.15  | 2.23 | 1.02  | 3.29E-01 | 6.13E-01 | -6.16 |
| 1448194_PM_a_at | H19                                                 | NA      | 0.12  | 1.99 | 1.02  | 3.29E-01 | 6.13E-01 | -6.16 |
| 1456198_PM_at   | 1810007D17Rik                                       | NA      | 0.13  | 2.69 | 1.02  | 3.29E-01 | 6.13E-01 | -6.16 |
| 1418184_PM_at   | Cenpm                                               | CENPM   | 0.11  | 2.36 | 1.02  | 3.29E-01 | 6.13E-01 | -6.16 |
| 1460126_PM_at   | ---                                                 | NA      | 0.33  | 3.57 | 1.02  | 3.29E-01 | 6.13E-01 | -6.16 |
| 1452713_PM_a_at | Snrnp40                                             | SNRNP40 | 0.42  | 3.80 | 1.02  | 3.29E-01 | 6.13E-01 | -6.16 |
| 1449961_PM_at   | Rph3a                                               | RPH3A   | -0.40 | 3.96 | -1.02 | 3.29E-01 | 6.13E-01 | -6.16 |
| 1451625_PM_a_at | C8g                                                 | C8G     | 0.10  | 2.23 | 1.02  | 3.29E-01 | 6.13E-01 | -6.16 |
| 1431078_PM_at   | Fbxo3                                               | FBXO3   | 0.18  | 2.59 | 1.02  | 3.29E-01 | 6.13E-01 | -6.16 |
| 1453402_PM_at   | ---                                                 | NA      | 0.22  | 2.76 | 1.02  | 3.29E-01 | 6.13E-01 | -6.16 |
| 1443014_PM_at   | Lvrn                                                | LVRN    | 0.14  | 2.75 | 1.02  | 3.29E-01 | 6.13E-01 | -6.16 |
| 1417826_PM_at   | Akr1e1                                              | AKR1E2  | 0.37  | 3.37 | 1.02  | 3.29E-01 | 6.13E-01 | -6.16 |
| 1415818_PM_at   | Anxa6                                               | ANXA6   | 0.14  | 3.19 | 1.02  | 3.29E-01 | 6.13E-01 | -6.16 |
| 1438178_PM_x_at | Atad3a                                              | ATAD3C  | -0.16 | 3.02 | -1.02 | 3.29E-01 | 6.13E-01 | -6.16 |
| 1459737_PM_s_at | Ttr                                                 | TTR     | -2.10 | 6.00 | -1.02 | 3.29E-01 | 6.13E-01 | -6.16 |
| 1438427_PM_at   | Fam120b                                             | NA      | -0.47 | 3.51 | -1.02 | 3.29E-01 | 6.13E-01 | -6.16 |
| 1455139_PM_at   | Smarcal1                                            | NA      | -0.35 | 4.78 | -1.02 | 3.29E-01 | 6.13E-01 | -6.16 |
| 1423592_PM_at   | Rock2                                               | ROCK2   | -0.31 | 5.60 | -1.02 | 3.29E-01 | 6.13E-01 | -6.16 |
| 1452936_PM_at   | Crtac1                                              | CRTAC1  | -0.28 | 2.70 | -1.02 | 3.29E-01 | 6.13E-01 | -6.16 |
| 1435650_PM_at   | Hapln4                                              | HAPLN4  | -0.24 | 4.01 | -1.02 | 3.29E-01 | 6.13E-01 | -6.16 |
| 1458082_PM_at   | ---                                                 | NA      | -0.14 | 3.02 | -1.02 | 3.29E-01 | 6.13E-01 | -6.16 |
| 1449455_PM_at   | Hck                                                 | HCK     | -0.10 | 2.45 | -1.02 | 3.29E-01 | 6.13E-01 | -6.16 |
| 1437452_PM_x_at | ---                                                 | NA      | -0.10 | 2.82 | -1.02 | 3.29E-01 | 6.13E-01 | -6.16 |
| 1439623_PM_at   | ---                                                 | NA      | -0.07 | 2.37 | -1.02 | 3.29E-01 | 6.13E-01 | -6.16 |
| 1425875_PM_a_at | Lepr                                                | LEPR    | 0.11  | 2.09 | 1.02  | 3.29E-01 | 6.13E-01 | -6.16 |
| 1433411_PM_at   | ---                                                 | NA      | 0.12  | 3.02 | 1.02  | 3.29E-01 | 6.13E-01 | -6.16 |
| 1457194_PM_at   | ---                                                 | NA      | 0.13  | 2.35 | 1.02  | 3.29E-01 | 6.13E-01 | -6.16 |
| 1424157_PM_at   | Ehd2                                                | EHD2    | 0.14  | 2.71 | 1.02  | 3.29E-01 | 6.13E-01 | -6.16 |
| 1444900_PM_at   | D18Ert289e                                          | NA      | 0.17  | 2.34 | 1.02  | 3.29E-01 | 6.13E-01 | -6.16 |
| 1459612_PM_at   | ---                                                 | NA      | 0.18  | 3.49 | 1.02  | 3.29E-01 | 6.13E-01 | -6.16 |
| 1443918_PM_at   | Edrf1                                               | EDRF1   | 0.18  | 3.35 | 1.02  | 3.29E-01 | 6.13E-01 | -6.16 |
| 1445980_PM_at   | ---                                                 | NA      | 0.19  | 2.42 | 1.02  | 3.29E-01 | 6.13E-01 | -6.16 |
| 1444008_PM_at   | Gm2137                                              | NA      | 0.37  | 4.99 | 1.02  | 3.29E-01 | 6.13E-01 | -6.16 |
| 1419368_PM_a_at | Rnf138                                              | RNF138  | -0.12 | 2.63 | -1.02 | 3.29E-01 | 6.13E-01 | -6.16 |
| 1417108_PM_at   | Klc4                                                | KL4     | 0.19  | 3.47 | 1.02  | 3.29E-01 | 6.13E-01 | -6.16 |
| 1416547_PM_at   | Ndufb3                                              | NDUFB3  | -0.43 | 6.58 | -1.02 | 3.30E-01 | 6.13E-01 | -6.16 |
| 1420099_PM_at   | D13Ert2787e                                         | NA      | 0.10  | 2.06 | 1.02  | 3.30E-01 | 6.13E-01 | -6.16 |
| 1420866_PM_at   | Zbtb14                                              | ZBTB14  | 0.15  | 2.66 | 1.02  | 3.30E-01 | 6.13E-01 | -6.16 |
| 1421756_PM_a_at | Gpr19                                               | GPR19   | 0.18  | 2.53 | 1.02  | 3.30E-01 | 6.13E-01 | -6.16 |
| 1431294_PM_at   | Gm21847 /// Gm38698 ///<br>Speer4cos /// Speer8-ps1 | NA      | 0.41  | 5.11 | 1.02  | 3.30E-01 | 6.13E-01 | -6.16 |
| 1436004_PM_at   | Usp27x                                              | USP27X  | -0.45 | 4.93 | -1.02 | 3.30E-01 | 6.14E-01 | -6.16 |
| 1451880_PM_at   | Gm9779                                              | NA      | -0.08 | 2.27 | -1.02 | 3.30E-01 | 6.14E-01 | -6.16 |
| 1459953_PM_at   | ---                                                 | NA      | 0.08  | 2.25 | 1.02  | 3.30E-01 | 6.14E-01 | -6.16 |
| 1438120_PM_x_at | Irak1                                               | IRAK1   | -0.53 | 4.59 | -1.02 | 3.30E-01 | 6.14E-01 | -6.16 |
| 1459834_PM_x_at | Spock3                                              | SPOCK3  | 0.08  | 2.19 | 1.02  | 3.30E-01 | 6.14E-01 | -6.16 |
| AFFX-PheX-3_at  | ---                                                 | NA      | 0.14  | 2.96 | 1.02  | 3.30E-01 | 6.14E-01 | -6.16 |
| 1423965_PM_at   | Cd99l2                                              | CD99L2  | 0.20  | 2.57 | 1.02  | 3.30E-01 | 6.14E-01 | -6.16 |
| 1434695_PM_at   | Dtl                                                 | DTL     | 0.21  | 2.68 | 1.02  | 3.30E-01 | 6.14E-01 | -6.16 |
| 1438008_PM_at   | Gga3                                                | GGA3    | -0.32 | 3.48 | -1.02 | 3.30E-01 | 6.14E-01 | -6.16 |
| 1433685_PM_a_at | 6430706D22Rik ///<br>A730008H23Rik /// Hjurp        | HJURP   | -0.21 | 3.04 | -1.02 | 3.30E-01 | 6.14E-01 | -6.16 |
| 1433162_PM_at   | 6230414M07Rik                                       | NA      | 0.17  | 2.85 | 1.02  | 3.30E-01 | 6.14E-01 | -6.16 |
| 1448965_PM_at   | Ino80                                               | INO80   | 0.25  | 2.38 | 1.02  | 3.30E-01 | 6.14E-01 | -6.16 |
| 1422785_PM_at   | Rasa2                                               | RASA2   | -0.22 | 3.03 | -1.02 | 3.30E-01 | 6.14E-01 | -6.16 |

|                 |                           |         |       |      |       |          |          |       |
|-----------------|---------------------------|---------|-------|------|-------|----------|----------|-------|
| 1433313_PM_at   | 6720454L07Rik             | NA      | 0.11  | 2.24 | 1.02  | 3.30E-01 | 6.14E-01 | -6.16 |
| 1438033_PM_at   | Tef                       | TEF     | -0.26 | 3.59 | -1.02 | 3.30E-01 | 6.14E-01 | -6.16 |
| 1434088_PM_at   | Zkscan17                  | ZNF496  | 0.11  | 3.46 | 1.02  | 3.30E-01 | 6.14E-01 | -6.16 |
| 1434195_PM_at   | Prss35                    | PRSS35  | -0.37 | 2.90 | -1.02 | 3.30E-01 | 6.14E-01 | -6.16 |
| 1421052_PM_a_at | Gm14680 /// Sms           | SMS     | -0.27 | 4.40 | -1.02 | 3.30E-01 | 6.14E-01 | -6.16 |
| 1457411_PM_at   | Fgfr3-ps                  | NA      | 0.10  | 2.15 | 1.02  | 3.30E-01 | 6.14E-01 | -6.16 |
| 1446258_PM_at   | ---                       | NA      | 0.12  | 3.01 | 1.02  | 3.30E-01 | 6.14E-01 | -6.16 |
| 1426566_PM_s_at | Il17re                    | IL17RE  | 0.14  | 2.38 | 1.02  | 3.30E-01 | 6.14E-01 | -6.16 |
| 1429941_PM_at   | Slc10a7                   | SLC10A7 | 0.18  | 3.02 | 1.02  | 3.30E-01 | 6.14E-01 | -6.16 |
| 1460338_PM_a_at | Crlf3                     | CRLF3   | 0.18  | 2.79 | 1.02  | 3.30E-01 | 6.14E-01 | -6.16 |
| 1429404_PM_at   | Sapcd2                    | SAPCD2  | 0.11  | 2.79 | 1.02  | 3.30E-01 | 6.14E-01 | -6.16 |
| 1441664_PM_at   | Tnni1                     | TNNI1   | 0.12  | 2.59 | 1.02  | 3.30E-01 | 6.14E-01 | -6.17 |
| 1427332_PM_at   | Med19                     | MED19   | 0.40  | 4.15 | 1.02  | 3.30E-01 | 6.14E-01 | -6.17 |
| 1424129_PM_at   | Mfsd1                     | MFSD1   | 0.25  | 3.24 | 1.02  | 3.30E-01 | 6.14E-01 | -6.17 |
| 1436631_PM_at   | Ctnna1                    | NA      | -0.15 | 2.63 | -1.02 | 3.30E-01 | 6.14E-01 | -6.17 |
| 1454203_PM_at   | Tex33                     | TEX33   | 0.11  | 2.23 | 1.02  | 3.30E-01 | 6.14E-01 | -6.17 |
| 1430270_PM_at   | Anapc13                   | ANAPC13 | 0.11  | 2.59 | 1.02  | 3.30E-01 | 6.14E-01 | -6.17 |
| 1458437_PM_at   | ---                       | NA      | 0.26  | 3.63 | 1.02  | 3.30E-01 | 6.14E-01 | -6.17 |
| 1448204_PM_at   | Sav1                      | SAV1    | -0.17 | 2.99 | -1.02 | 3.30E-01 | 6.14E-01 | -6.17 |
| 1448634_PM_at   | Ralbp1                    | RALBP1  | -0.10 | 2.76 | -1.02 | 3.30E-01 | 6.14E-01 | -6.17 |
| 1448940_PM_at   | Trim21                    | TRIM21  | -0.29 | 2.53 | -1.02 | 3.31E-01 | 6.14E-01 | -6.17 |
| 1440268_PM_at   | ---                       | NA      | -0.20 | 3.29 | -1.02 | 3.31E-01 | 6.14E-01 | -6.17 |
| 1434332_PM_at   | Zz3                       | ZZZ3    | -0.30 | 3.92 | -1.02 | 3.31E-01 | 6.14E-01 | -6.17 |
| 1450441_PM_at   | Dnaaf1                    | DNAAF1  | 0.12  | 2.39 | 1.02  | 3.31E-01 | 6.14E-01 | -6.17 |
| 1459461_PM_at   | ---                       | NA      | 0.12  | 2.29 | 1.02  | 3.31E-01 | 6.14E-01 | -6.17 |
| 1425090_PM_s_at | Kcnc4                     | KCNC4   | 0.26  | 3.83 | 1.02  | 3.31E-01 | 6.14E-01 | -6.17 |
| 1424849_PM_at   | Wdr62                     | WDR62   | 0.08  | 2.29 | 1.02  | 3.31E-01 | 6.14E-01 | -6.17 |
| 1421112_PM_at   | Nkx2-2                    | NKX2-2  | 0.19  | 2.94 | 1.02  | 3.31E-01 | 6.14E-01 | -6.17 |
| 1425659_PM_at   | Tom1l2                    | TOM1L2  | 0.23  | 3.20 | 1.02  | 3.31E-01 | 6.15E-01 | -6.17 |
| 1416568_PM_a_at | Acin1                     | ACIN1   | 0.31  | 2.77 | 1.02  | 3.31E-01 | 6.15E-01 | -6.17 |
| 1432422_PM_at   | 1700063K16Rik             | NA      | 0.17  | 2.17 | 1.02  | 3.31E-01 | 6.15E-01 | -6.17 |
| 1417870_PM_x_at | CtSZ                      | CTSZ    | -0.20 | 2.37 | -1.02 | 3.31E-01 | 6.15E-01 | -6.17 |
| 1444351_PM_at   | ---                       | NA      | 0.52  | 2.97 | 1.02  | 3.31E-01 | 6.15E-01 | -6.17 |
| 1446960_PM_at   | ---                       | NA      | -0.43 | 3.00 | -1.02 | 3.31E-01 | 6.15E-01 | -6.17 |
| 1452173_PM_at   | Hadha                     | HADHA   | 0.42  | 3.83 | 1.02  | 3.31E-01 | 6.15E-01 | -6.17 |
| 1448462_PM_at   | Gm9855 /// Tdg /// Tdg-ps | TDG     | -0.18 | 3.62 | -1.02 | 3.31E-01 | 6.15E-01 | -6.17 |
| 1433000_PM_at   | Csrnp1                    | NA      | 0.12  | 2.64 | 1.02  | 3.31E-01 | 6.15E-01 | -6.17 |
| 1425354_PM_a_at | Aggf1                     | AGGF1   | 0.13  | 5.16 | 1.02  | 3.31E-01 | 6.15E-01 | -6.17 |
| 1430332_PM_a_at | Gusb                      | GUSB    | 0.13  | 2.32 | 1.02  | 3.31E-01 | 6.15E-01 | -6.17 |
| 1425958_PM_at   | Il1f9                     | IL136G  | 0.14  | 2.28 | 1.02  | 3.31E-01 | 6.15E-01 | -6.17 |
| 1444647_PM_at   | Plaa                      | PLAA    | 0.38  | 3.49 | 1.02  | 3.31E-01 | 6.15E-01 | -6.17 |
| 1433143_PM_at   | ---                       | NA      | 0.08  | 2.37 | 1.02  | 3.31E-01 | 6.15E-01 | -6.17 |
| 1433449_PM_at   | Srx32                     | SNX32   | 0.13  | 2.52 | 1.02  | 3.31E-01 | 6.15E-01 | -6.17 |
| 1444172_PM_at   | LOC105244488              | NA      | 0.09  | 2.20 | 1.02  | 3.31E-01 | 6.15E-01 | -6.17 |
| 1416987_PM_at   | Elp4                      | ELP4    | 0.12  | 2.45 | 1.02  | 3.31E-01 | 6.15E-01 | -6.17 |
| 1447416_PM_at   | Myrf1                     | MYRFL   | 0.12  | 2.47 | 1.02  | 3.31E-01 | 6.15E-01 | -6.17 |
| 1456321_PM_at   | Nipal1                    | NIPAL1  | 0.09  | 1.89 | 1.02  | 3.31E-01 | 6.15E-01 | -6.17 |
| 1447649_PM_x_at | Dnajc1                    | DNAJC1  | -0.17 | 2.31 | -1.02 | 3.31E-01 | 6.15E-01 | -6.17 |
| 1417282_PM_at   | Mmp23                     | MMP23B  | 0.18  | 2.85 | 1.02  | 3.31E-01 | 6.15E-01 | -6.17 |
| 1440211_PM_at   | Cyp2j11                   | CYP2J2  | 0.12  | 2.26 | 1.02  | 3.31E-01 | 6.15E-01 | -6.17 |
| 1447065_PM_at   | Gm5107                    | NA      | 0.11  | 2.78 | 1.02  | 3.31E-01 | 6.15E-01 | -6.17 |
| 1433457_PM_s_at | Grsf1                     | GRSF1   | -0.27 | 2.82 | -1.02 | 3.31E-01 | 6.15E-01 | -6.17 |
| 1449579_PM_at   | Sh3yl1                    | SH3YL1  | -0.18 | 2.73 | -1.02 | 3.31E-01 | 6.15E-01 | -6.17 |
| 1454486_PM_at   | 9530002O20Rik             | NA      | -0.12 | 3.06 | -1.02 | 3.31E-01 | 6.15E-01 | -6.17 |
| 1452598_PM_at   | Gins1                     | GINS1   | 0.10  | 2.02 | 1.02  | 3.31E-01 | 6.15E-01 | -6.17 |
| 1420905_PM_at   | Il17ra                    | IL17RA  | -0.16 | 3.01 | -1.02 | 3.32E-01 | 6.15E-01 | -6.17 |
| 1440747_PM_at   | ---                       | NA      | 0.11  | 1.96 | 1.02  | 3.32E-01 | 6.15E-01 | -6.17 |
| 1443571_PM_at   | ---                       | NA      | 0.14  | 2.45 | 1.02  | 3.32E-01 | 6.15E-01 | -6.17 |
| 1454461_PM_at   | 5830433M15Rik             | NA      | 0.09  | 2.42 | 1.02  | 3.32E-01 | 6.15E-01 | -6.17 |
| 1439341_PM_at   | Greb1l                    | GREB1L  | 0.24  | 3.64 | 1.02  | 3.32E-01 | 6.15E-01 | -6.17 |
| 1434603_PM_at   | Med13l                    | MED13L  | -0.31 | 4.26 | -1.02 | 3.32E-01 | 6.15E-01 | -6.17 |
| 1417765_PM_a_at | Amy1                      | AMY2B   | -0.26 | 4.60 | -1.02 | 3.32E-01 | 6.15E-01 | -6.17 |
| 1450355_PM_a_at | Capg                      | CAPG    | 0.09  | 2.14 | 1.02  | 3.32E-01 | 6.15E-01 | -6.17 |
| 1446197_PM_at   | ---                       | NA      | 0.18  | 2.43 | 1.02  | 3.32E-01 | 6.15E-01 | -6.17 |
| 1434876_PM_at   | Gxylt1                    | GXYLT1  | 0.22  | 3.47 | 1.02  | 3.32E-01 | 6.15E-01 | -6.17 |
| 1437998_PM_at   | Ap1s2                     | NA      | 0.10  | 2.14 | 1.02  | 3.32E-01 | 6.15E-01 | -6.17 |
| AFFX-TrpnX-5_at | ---                       | NA      | 0.10  | 2.39 | 1.02  | 3.32E-01 | 6.15E-01 | -6.17 |
| 1432779_PM_at   | ---                       | NA      | 0.26  | 2.86 | 1.02  | 3.32E-01 | 6.15E-01 | -6.17 |
| 1423580_PM_at   | Ankrd36                   | NA      | 0.08  | 2.35 | 1.02  | 3.32E-01 | 6.16E-01 | -6.17 |
| 1457957_PM_at   | ---                       | NA      | 0.09  | 2.34 | 1.02  | 3.32E-01 | 6.16E-01 | -6.17 |
| 1451999_PM_at   | Ldb3                      | LDB3    | 0.16  | 2.88 | 1.02  | 3.32E-01 | 6.16E-01 | -6.17 |
| 1444994_PM_at   | ---                       | NA      | 0.12  | 2.59 | 1.02  | 3.32E-01 | 6.16E-01 | -6.17 |
| 1416426_PM_at   | Rab5a                     | RAB5A   | -0.26 | 4.30 | -1.02 | 3.32E-01 | 6.16E-01 | -6.17 |
| 1440376_PM_at   | Fbxo41                    | FBXO41  | 0.10  | 4.37 | 1.02  | 3.32E-01 | 6.16E-01 | -6.17 |

|                 |                       |          |       |      |       |          |          |       |
|-----------------|-----------------------|----------|-------|------|-------|----------|----------|-------|
| 1453993_PM_a_at | Bnip2                 | BNIP2    | -0.54 | 4.51 | -1.02 | 3.32E-01 | 6.16E-01 | -6.17 |
| 1427559_PM_a_at | Atf2 /// LOC102641666 | ATF2     | -0.36 | 2.97 | -1.02 | 3.32E-01 | 6.16E-01 | -6.17 |
| 1446490_PM_at   | ---                   | NA       | -0.14 | 2.40 | -1.02 | 3.32E-01 | 6.16E-01 | -6.17 |
| 1431547_PM_at   | 4930435F18Rik         | NA       | -0.09 | 2.37 | -1.02 | 3.32E-01 | 6.16E-01 | -6.17 |
| 1435647_PM_at   | Ikbbg                 | IKBKG    | 0.08  | 2.12 | 1.02  | 3.32E-01 | 6.16E-01 | -6.17 |
| 1431936_PM_a_at | Neu2                  | NEU2     | 0.08  | 2.17 | 1.02  | 3.32E-01 | 6.16E-01 | -6.17 |
| 1456899_PM_at   | Mir7666               | NA       | 0.10  | 3.46 | 1.02  | 3.32E-01 | 6.16E-01 | -6.17 |
| 1432032_PM_a_at | Artn                  | ARTN     | 0.12  | 2.39 | 1.02  | 3.32E-01 | 6.16E-01 | -6.17 |
| 1419647_PM_a_at | Ier3                  | IER3     | 0.13  | 3.00 | 1.02  | 3.32E-01 | 6.16E-01 | -6.17 |
| 1433370_PM_at   | 4930474A20Rik         | NA       | 0.18  | 2.20 | 1.02  | 3.32E-01 | 6.16E-01 | -6.17 |
| 1421578_PM_at   | Ccl4                  | CCL4L2   | 0.18  | 2.57 | 1.02  | 3.32E-01 | 6.16E-01 | -6.17 |
| 1431538_PM_at   | LOC105243122          | NA       | -0.13 | 3.39 | -1.02 | 3.32E-01 | 6.16E-01 | -6.17 |
| 1417631_PM_at   | Mknk1                 | MKNK1    | -0.09 | 2.46 | -1.02 | 3.32E-01 | 6.16E-01 | -6.17 |
| 1427050_PM_at   | Txndc16               | TXNDC16  | -0.61 | 2.88 | -1.02 | 3.32E-01 | 6.16E-01 | -6.17 |
| 1451306_PM_at   | Cdca7l                | CDCA7L   | 0.26  | 2.93 | 1.02  | 3.32E-01 | 6.16E-01 | -6.17 |
| 1443317_PM_at   | Gm38876               | NA       | 0.11  | 2.51 | 1.02  | 3.32E-01 | 6.16E-01 | -6.17 |
| 1445861_PM_at   | ---                   | NA       | 0.08  | 2.00 | 1.02  | 3.33E-01 | 6.16E-01 | -6.17 |
| 1440256_PM_at   | Rgs9bp                | RG9BP    | 0.13  | 2.29 | 1.02  | 3.33E-01 | 6.16E-01 | -6.17 |
| 1432162_PM_s_at | Ptar1                 | PTAR1    | 0.18  | 2.63 | 1.02  | 3.32E-01 | 6.16E-01 | -6.17 |
| 1449023_PM_a_at | Ezh1                  | EZH1     | -0.18 | 3.84 | -1.02 | 3.33E-01 | 6.16E-01 | -6.17 |
| 1451424_PM_at   | Gabrp                 | GABRP    | 0.08  | 2.58 | 1.02  | 3.33E-01 | 6.16E-01 | -6.17 |
| 1436197_PM_at   | Cdc42bpg              | CDC42BPG | -0.33 | 3.18 | -1.02 | 3.33E-01 | 6.16E-01 | -6.17 |
| 1442091_PM_at   | ---                   | NA       | 0.14  | 2.09 | 1.02  | 3.33E-01 | 6.16E-01 | -6.17 |
| 1424692_PM_at   | L3hpydh               | L3HYPDH  | 0.14  | 2.70 | 1.02  | 3.33E-01 | 6.16E-01 | -6.17 |
| 1421760_PM_at   | Ptcra                 | PTCRA    | 0.09  | 2.26 | 1.02  | 3.33E-01 | 6.16E-01 | -6.17 |
| 1457558_PM_at   | A330050F15Rik         | AKAIN1   | 0.12  | 2.60 | 1.02  | 3.33E-01 | 6.16E-01 | -6.17 |
| 1428477_PM_at   | Elac2                 | ELAC2    | 0.14  | 4.26 | 1.02  | 3.33E-01 | 6.16E-01 | -6.17 |
| 1420392_PM_at   | Ubl4b                 | UBL4B    | 0.09  | 2.21 | 1.02  | 3.33E-01 | 6.16E-01 | -6.17 |
| 1449137_PM_at   | Pdha1                 | PDHA1    | -0.30 | 4.28 | -1.02 | 3.33E-01 | 6.16E-01 | -6.17 |
| 1428822_PM_a_at | Srx24                 | SNX24    | -0.22 | 2.90 | -1.02 | 3.33E-01 | 6.16E-01 | -6.17 |
| 1433715_PM_at   | Cpne7                 | CPNE7    | -0.19 | 3.43 | -1.02 | 3.33E-01 | 6.16E-01 | -6.17 |
| 1430695_PM_at   | Tlr4                  | TLR4     | 0.09  | 2.23 | 1.02  | 3.33E-01 | 6.16E-01 | -6.17 |
| 1440096_PM_at   | Ecm2                  | ECM2     | 0.10  | 2.17 | 1.02  | 3.33E-01 | 6.16E-01 | -6.17 |
| 1452682_PM_at   | Fam122b               | FAM122B  | -0.15 | 2.42 | -1.02 | 3.33E-01 | 6.16E-01 | -6.17 |
| 1440742_PM_at   | ---                   | NA       | -0.29 | 2.38 | -1.02 | 3.33E-01 | 6.16E-01 | -6.17 |
| 1456434_PM_x_at | Hspb8                 | HSPB8    | 0.12  | 3.39 | 1.02  | 3.33E-01 | 6.17E-01 | -6.17 |
| 1417230_PM_at   | Ralgs2                | RALGPS2  | 0.14  | 2.55 | 1.02  | 3.33E-01 | 6.17E-01 | -6.17 |
| 1451777_PM_at   | Ddx60                 | DDX60    | 0.15  | 2.24 | 1.02  | 3.33E-01 | 6.17E-01 | -6.17 |
| 1428589_PM_at   | Mrp41                 | MRPL41   | -0.19 | 4.38 | -1.02 | 3.33E-01 | 6.17E-01 | -6.17 |
| 1429138_PM_at   | Npas3                 | NPAS3    | 0.11  | 2.64 | 1.02  | 3.33E-01 | 6.17E-01 | -6.17 |
| 1433721_PM_x_at | Rps21                 | RPS21    | -0.40 | 8.22 | -1.02 | 3.33E-01 | 6.17E-01 | -6.17 |
| 1457043_PM_at   | B3glt                 | B3GLT    | -0.37 | 5.04 | -1.02 | 3.33E-01 | 6.17E-01 | -6.17 |
| 1423543_PM_at   | Swap70                | SWAP70   | -0.15 | 2.87 | -1.02 | 3.33E-01 | 6.17E-01 | -6.17 |
| 1431621_PM_at   | ---                   | NA       | 0.08  | 2.35 | 1.02  | 3.33E-01 | 6.17E-01 | -6.17 |
| 1419751_PM_x_at | Slc22a27              | SLC22A9  | 0.10  | 2.22 | 1.02  | 3.33E-01 | 6.17E-01 | -6.17 |
| 1445622_PM_at   | Gm33727               | NA       | 0.12  | 2.56 | 1.02  | 3.33E-01 | 6.17E-01 | -6.17 |
| 1444817_PM_at   | Plekhh2               | PLEKHH2  | 0.15  | 2.51 | 1.02  | 3.33E-01 | 6.17E-01 | -6.17 |
| 1419726_PM_at   | Adam18                | ADAM18   | 0.18  | 2.56 | 1.02  | 3.33E-01 | 6.17E-01 | -6.17 |
| 1439222_PM_at   | Morc2b                | MORC2    | 0.35  | 2.98 | 1.02  | 3.33E-01 | 6.17E-01 | -6.17 |
| 1439481_PM_at   | Ipo9                  | IPO9     | -0.38 | 6.63 | -1.02 | 3.33E-01 | 6.17E-01 | -6.17 |
| 1429382_PM_at   | Tomm40l               | TOMM40L  | -0.32 | 3.87 | -1.01 | 3.33E-01 | 6.17E-01 | -6.17 |
| 1428159_PM_s_at | Ndufab1               | NDUFAB1  | -0.28 | 2.72 | -1.01 | 3.33E-01 | 6.17E-01 | -6.17 |
| 1444792_PM_at   | ---                   | NA       | 0.12  | 2.21 | 1.01  | 3.33E-01 | 6.17E-01 | -6.17 |
| 1452464_PM_a_at | Metap1d               | METAP1D  | 0.16  | 3.55 | 1.01  | 3.33E-01 | 6.17E-01 | -6.17 |
| 1450572_PM_at   | Akp3                  | ALPPL2   | 0.16  | 2.58 | 1.01  | 3.33E-01 | 6.17E-01 | -6.17 |
| 1420394_PM_s_at | Lilr4b /// Lilrb4a    | LILRB3   | -0.27 | 3.17 | -1.01 | 3.34E-01 | 6.17E-01 | -6.17 |
| 1434644_PM_at   | Tbl1x                 | TBL1Y    | -0.23 | 2.36 | -1.01 | 3.34E-01 | 6.17E-01 | -6.17 |
| 1449011_PM_at   | Slc12a7               | SLC12A7  | -0.22 | 2.29 | -1.01 | 3.34E-01 | 6.17E-01 | -6.17 |
| 1432308_PM_at   | Bpifa3                | BPIFA3   | 0.08  | 2.06 | 1.01  | 3.34E-01 | 6.17E-01 | -6.17 |
| 1449417_PM_at   | Ambn                  | AMBN     | 0.10  | 2.27 | 1.01  | 3.34E-01 | 6.17E-01 | -6.17 |
| 1442601_PM_at   | Gmeb1                 | GMEB1    | 0.12  | 2.27 | 1.01  | 3.34E-01 | 6.17E-01 | -6.17 |
| 1425788_PM_a_at | Echdc2                | ECHDC2   | 0.16  | 2.83 | 1.01  | 3.34E-01 | 6.17E-01 | -6.17 |
| 1459856_PM_at   | Mrp13                 | MRPL13   | 0.22  | 2.38 | 1.01  | 3.34E-01 | 6.17E-01 | -6.17 |
| 1455268_PM_at   | Dph3                  | DPH3     | 0.26  | 4.44 | 1.01  | 3.34E-01 | 6.17E-01 | -6.17 |
| 1447301_PM_at   | Akap5                 | AKAP5    | -0.30 | 3.28 | -1.01 | 3.34E-01 | 6.17E-01 | -6.17 |
| 1438230_PM_at   | Pggt1b                | NA       | 0.41  | 3.43 | 1.01  | 3.34E-01 | 6.17E-01 | -6.17 |
| 1448494_PM_at   | Gas1                  | GAS1     | -0.37 | 2.82 | -1.01 | 3.34E-01 | 6.17E-01 | -6.17 |
| 1452052_PM_s_at | Eif3j1 /// Eif3j2     | EIF3J    | 0.51  | 5.45 | 1.01  | 3.34E-01 | 6.17E-01 | -6.17 |
| 1428232_PM_at   | Cpsf6                 | CPSF6    | -0.17 | 2.78 | -1.01 | 3.34E-01 | 6.17E-01 | -6.17 |
| 1458927_PM_at   | ---                   | NA       | -0.09 | 2.25 | -1.01 | 3.34E-01 | 6.17E-01 | -6.17 |
| 1451682_PM_at   | Zfp142                | ZNF142   | 0.08  | 2.26 | 1.01  | 3.34E-01 | 6.17E-01 | -6.17 |
| 1431898_PM_at   | Adad2                 | ADAD2    | 0.11  | 2.15 | 1.01  | 3.34E-01 | 6.17E-01 | -6.17 |
| 1449881_PM_a_at | Casr                  | CASR     | 0.14  | 2.29 | 1.01  | 3.34E-01 | 6.17E-01 | -6.17 |
| 1418999_PM_at   | 2310033P09Rik         | C1orf35  | 0.15  | 4.10 | 1.01  | 3.34E-01 | 6.17E-01 | -6.17 |
| 1457809_PM_at   | Kat2b                 | KAT2B    | 0.09  | 2.08 | 1.01  | 3.34E-01 | 6.17E-01 | -6.17 |

|                 |                         |            |       |      |       |          |          |       |
|-----------------|-------------------------|------------|-------|------|-------|----------|----------|-------|
| 1452677_PM_at   | LOC102641325 /// Pnpt1  | PNPT1      | 0.11  | 3.16 | 1.01  | 3.34E-01 | 6.17E-01 | -6.17 |
| 1426816_PM_at   | Ccdc64                  | BICDL1     | 0.13  | 2.77 | 1.01  | 3.34E-01 | 6.17E-01 | -6.17 |
| 1445548_PM_at   | ---                     | NA         | -0.12 | 2.23 | -1.01 | 3.34E-01 | 6.17E-01 | -6.17 |
| 1459803_PM_x_at | 2810408A11Rik           | NA         | 0.10  | 2.20 | 1.01  | 3.34E-01 | 6.17E-01 | -6.17 |
| 1431671_PM_at   | 4930447A16Rik           | NA         | 0.17  | 2.33 | 1.01  | 3.34E-01 | 6.17E-01 | -6.17 |
| 1443330_PM_at   | D1Ert646e               | NA         | 0.08  | 2.15 | 1.01  | 3.34E-01 | 6.18E-01 | -6.17 |
| 1441027_PM_at   | ---                     | NA         | 0.13  | 2.33 | 1.01  | 3.34E-01 | 6.18E-01 | -6.17 |
| 1423880_PM_at   | Rtcb                    | RTCB       | 0.21  | 3.00 | 1.01  | 3.34E-01 | 6.18E-01 | -6.17 |
| 1420219_PM_at   | Dnajc21                 | DNAJC21    | 0.18  | 2.46 | 1.01  | 3.34E-01 | 6.18E-01 | -6.17 |
| 1451111_PM_at   | Nup133                  | NUP133     | 0.10  | 2.28 | 1.01  | 3.34E-01 | 6.18E-01 | -6.17 |
| 1450689_PM_at   | Prss3                   | NA         | 0.10  | 2.42 | 1.01  | 3.34E-01 | 6.18E-01 | -6.17 |
| 1454064_PM_a_at | Rnf138                  | RNF138     | 0.13  | 2.97 | 1.01  | 3.34E-01 | 6.18E-01 | -6.17 |
| 1443133_PM_at   | A230070E04Rik           | NA         | 0.21  | 3.13 | 1.01  | 3.34E-01 | 6.18E-01 | -6.17 |
| 1459865_PM_x_at | Ces5a                   | CESSA      | 0.18  | 2.18 | 1.01  | 3.34E-01 | 6.18E-01 | -6.17 |
| 1435966_PM_x_at | Mrpl13                  | MRPL13     | -0.28 | 4.06 | -1.01 | 3.34E-01 | 6.18E-01 | -6.17 |
| 1425913_PM_a_at | Spats2l                 | SPATS2L    | 0.19  | 2.56 | 1.01  | 3.34E-01 | 6.18E-01 | -6.17 |
| 1432629_PM_at   | Gm9939                  | NA         | 0.10  | 2.54 | 1.01  | 3.34E-01 | 6.18E-01 | -6.17 |
| 1447490_PM_at   | ---                     | NA         | 0.11  | 2.08 | 1.01  | 3.35E-01 | 6.18E-01 | -6.17 |
| 1442132_PM_at   | Gm39210                 | NA         | 0.09  | 2.45 | 1.01  | 3.35E-01 | 6.18E-01 | -6.17 |
| 1454893_PM_at   | Fam189b                 | FAM189B    | -0.21 | 3.55 | -1.01 | 3.35E-01 | 6.18E-01 | -6.17 |
| 1440102_PM_at   | Slc36a3                 | SLC36A3    | 0.10  | 2.58 | 1.01  | 3.35E-01 | 6.18E-01 | -6.17 |
| 1458580_PM_at   | ---                     | NA         | 0.21  | 3.01 | 1.01  | 3.35E-01 | 6.18E-01 | -6.17 |
| 1451660_PM_a_at | Hoxb6                   | HOXB6      | 0.09  | 1.94 | 1.01  | 3.35E-01 | 6.18E-01 | -6.17 |
| 1426177_PM_a_at | Nkx1-2                  | NKX1-2     | 0.08  | 2.37 | 1.01  | 3.35E-01 | 6.18E-01 | -6.18 |
| 1437430_PM_at   | Slc45a2                 | SLC45A2    | 0.12  | 2.59 | 1.01  | 3.35E-01 | 6.18E-01 | -6.18 |
| 1443588_PM_at   | ---                     | NA         | 0.10  | 2.30 | 1.01  | 3.35E-01 | 6.19E-01 | -6.18 |
| 1440989_PM_at   | MrpB5                   | MRPL35     | 0.15  | 2.86 | 1.01  | 3.35E-01 | 6.19E-01 | -6.18 |
| 1439094_PM_at   | Cltc                    | CLTC       | 0.12  | 2.16 | 1.01  | 3.35E-01 | 6.19E-01 | -6.18 |
| 1459269_PM_at   | ---                     | NA         | 0.12  | 2.45 | 1.01  | 3.35E-01 | 6.19E-01 | -6.18 |
| 1447317_PM_at   | ---                     | NA         | 0.16  | 3.68 | 1.01  | 3.35E-01 | 6.19E-01 | -6.18 |
| 1452080_PM_a_at | Dcun1d1                 | DCUN1D1    | -0.47 | 4.90 | -1.01 | 3.35E-01 | 6.19E-01 | -6.18 |
| 1415676_PM_a_at | Psmb5                   | PSMB5      | -0.18 | 3.52 | -1.01 | 3.35E-01 | 6.19E-01 | -6.18 |
| 1440910_PM_at   | C77370                  | KIAA2022   | -0.17 | 6.22 | -1.01 | 3.35E-01 | 6.19E-01 | -6.18 |
| 1422850_PM_at   | Pabpn1                  | PABPN1     | -0.43 | 2.85 | -1.01 | 3.35E-01 | 6.19E-01 | -6.18 |
| 1457298_PM_at   | Pou6f2                  | POU6F2     | 0.10  | 2.21 | 1.01  | 3.35E-01 | 6.19E-01 | -6.18 |
| 1448295_PM_at   | Med10                   | MED10      | -0.19 | 3.30 | -1.01 | 3.35E-01 | 6.19E-01 | -6.18 |
| 1455002_PM_at   | LOC102643131 /// Ptp4a1 | PTP4A1     | -0.13 | 3.45 | -1.01 | 3.35E-01 | 6.19E-01 | -6.18 |
| 1456508_PM_at   | Skint10                 | NA         | 0.15  | 2.21 | 1.01  | 3.35E-01 | 6.19E-01 | -6.18 |
| 1438126_PM_at   | Exoc5                   | EXOC5      | 0.20  | 3.10 | 1.01  | 3.35E-01 | 6.19E-01 | -6.18 |
| 1446693_PM_at   | ---                     | NA         | 0.20  | 2.94 | 1.01  | 3.35E-01 | 6.19E-01 | -6.18 |
| 1459202_PM_at   | Cecr2                   | CECR2      | -0.52 | 2.73 | -1.01 | 3.36E-01 | 6.19E-01 | -6.18 |
| 1451928_PM_a_at | Rad18                   | RAD18      | -0.32 | 3.28 | -1.01 | 3.36E-01 | 6.19E-01 | -6.18 |
| 1431951_PM_a_at | Usp16                   | USP16      | -0.18 | 3.43 | -1.01 | 3.36E-01 | 6.19E-01 | -6.18 |
| 1436835_PM_at   | Crk                     | CRK        | 0.08  | 2.36 | 1.01  | 3.36E-01 | 6.19E-01 | -6.18 |
| 1416629_PM_at   | Slc1a5                  | SLC1A5     | 0.12  | 2.42 | 1.01  | 3.36E-01 | 6.19E-01 | -6.18 |
| 1434246_PM_at   | L3mbtl3                 | L3MBTL3    | -0.37 | 4.24 | -1.01 | 3.36E-01 | 6.19E-01 | -6.18 |
| 1449371_PM_at   | Hars2                   | HARS2      | 0.23  | 3.13 | 1.01  | 3.36E-01 | 6.19E-01 | -6.18 |
| 1452499_PM_a_at | Kif2a                   | KIF2A      | 0.18  | 3.01 | 1.01  | 3.36E-01 | 6.19E-01 | -6.18 |
| 1445055_PM_at   | Gm39182                 | NA         | -0.11 | 2.15 | -1.01 | 3.36E-01 | 6.19E-01 | -6.18 |
| 1419001_PM_at   | Baat                    | BAAT       | 0.09  | 2.10 | 1.01  | 3.36E-01 | 6.19E-01 | -6.18 |
| 1447220_PM_at   | ---                     | NA         | 0.15  | 3.44 | 1.01  | 3.36E-01 | 6.19E-01 | -6.18 |
| 1434043_PM_a_at | Repin1                  | REPIN1     | -0.16 | 6.52 | -1.01 | 3.36E-01 | 6.20E-01 | -6.18 |
| 1451448_PM_a_at | Mett23                  | ACO05837.2 | 0.15  | 2.65 | 1.01  | 3.36E-01 | 6.20E-01 | -6.18 |
| 1454176_PM_at   | Erc8                    | ERCC8      | 0.17  | 2.58 | 1.01  | 3.36E-01 | 6.20E-01 | -6.18 |
| 1459798_PM_x_at | Trmt2b                  | TRMT2B     | -0.09 | 1.87 | -1.01 | 3.36E-01 | 6.20E-01 | -6.18 |
| 1431476_PM_at   | ---                     | NA         | 0.09  | 2.33 | 1.01  | 3.36E-01 | 6.20E-01 | -6.18 |
| 1416848_PM_at   | Ubl5                    | UBL5       | 0.13  | 2.53 | 1.01  | 3.36E-01 | 6.20E-01 | -6.18 |
| 1452021_PM_a_at | Hes6                    | HES6       | 0.13  | 2.39 | 1.01  | 3.36E-01 | 6.20E-01 | -6.18 |
| 1441190_PM_at   | Arpc5l                  | ARPC5L     | 0.24  | 2.40 | 1.01  | 3.36E-01 | 6.20E-01 | -6.18 |
| 1420459_PM_at   | Riply3                  | RIPPLY3    | 0.11  | 2.18 | 1.01  | 3.36E-01 | 6.20E-01 | -6.18 |
| 1428762_PM_at   | Tab3                    | TAB3       | -0.38 | 3.80 | -1.01 | 3.36E-01 | 6.20E-01 | -6.18 |
| 1453106_PM_a_at | Rnmt                    | RNMT       | -0.24 | 5.58 | -1.01 | 3.36E-01 | 6.20E-01 | -6.18 |
| 1458259_PM_x_at | Cops3                   | COPS3      | 0.11  | 2.34 | 1.01  | 3.36E-01 | 6.20E-01 | -6.18 |
| 1430653_PM_at   | ---                     | NA         | 0.18  | 3.92 | 1.01  | 3.36E-01 | 6.20E-01 | -6.18 |
| 1418408_PM_at   | Zfand1                  | ZFAND1     | 0.23  | 3.00 | 1.01  | 3.36E-01 | 6.20E-01 | -6.18 |
| 1445379_PM_at   | ---                     | NA         | 0.26  | 2.56 | 1.01  | 3.36E-01 | 6.20E-01 | -6.18 |
| 1443779_PM_s_at | Lcor                    | NA         | 0.32  | 6.00 | 1.01  | 3.36E-01 | 6.20E-01 | -6.18 |
| 1450641_PM_at   | Vim                     | VIM        | -0.43 | 5.33 | -1.01 | 3.36E-01 | 6.20E-01 | -6.18 |
| 1449264_PM_at   | Syt11                   | SYT11      | -0.42 | 7.19 | -1.01 | 3.36E-01 | 6.20E-01 | -6.18 |
| 1438610_PM_a_at | Cryz                    | CRYZ       | -0.26 | 2.61 | -1.01 | 3.36E-01 | 6.20E-01 | -6.18 |
| 1437402_PM_x_at | Tmem41b                 | TMEM41B    | -0.24 | 4.49 | -1.01 | 3.36E-01 | 6.20E-01 | -6.18 |
| 1450885_PM_at   | Dffa                    | FMR1       | -0.14 | 3.53 | -1.01 | 3.36E-01 | 6.20E-01 | -6.18 |
| 1436425_PM_at   | Kank4                   | KANK4      | -0.14 | 2.88 | -1.01 | 3.36E-01 | 6.20E-01 | -6.18 |
| 1431274_PM_a_at | Hspa9                   | HSPA9      | 0.08  | 2.32 | 1.01  | 3.36E-01 | 6.20E-01 | -6.18 |

|                 |                                                                    |            |       |      |       |          |          |       |
|-----------------|--------------------------------------------------------------------|------------|-------|------|-------|----------|----------|-------|
| 1417267_PM_s_at | Fkbp11                                                             | FKBP11     | 0.10  | 2.18 | 1.01  | 3.36E-01 | 6.20E-01 | -6.18 |
| 1433322_PM_at   | 4930529F21Rik                                                      | NA         | 0.10  | 2.37 | 1.01  | 3.36E-01 | 6.20E-01 | -6.18 |
| 1446424_PM_at   | Dnah12                                                             | NA         | 0.10  | 2.29 | 1.01  | 3.36E-01 | 6.20E-01 | -6.18 |
| 1430789_PM_at   | 4930452B06Rik                                                      | C3orf67    | 0.12  | 2.31 | 1.01  | 3.36E-01 | 6.20E-01 | -6.18 |
| 1420785_PM_at   | Gab2                                                               | GAB4       | 0.14  | 2.62 | 1.01  | 3.36E-01 | 6.20E-01 | -6.18 |
| 1435550_PM_at   | Kmt2d                                                              | KMT2D      | 0.18  | 7.98 | 1.01  | 3.36E-01 | 6.20E-01 | -6.18 |
| 1429604_PM_at   | 1810011H11Rik                                                      | C10orf128  | 0.18  | 3.15 | 1.01  | 3.36E-01 | 6.20E-01 | -6.18 |
| 1453449_PM_at   | Kcnmb4os1                                                          | NA         | 0.19  | 2.63 | 1.01  | 3.36E-01 | 6.20E-01 | -6.18 |
| 1452494_PM_s_at | Skco1b2                                                            | ACO11604.2 | 0.19  | 2.57 | 1.01  | 3.36E-01 | 6.20E-01 | -6.18 |
| 1429426_PM_at   | ---                                                                | NA         | 0.25  | 3.00 | 1.01  | 3.36E-01 | 6.20E-01 | -6.18 |
| 1452567_PM_at   | Gcap8                                                              | NA         | 0.37  | 2.89 | 1.01  | 3.36E-01 | 6.20E-01 | -6.18 |
| 1427881_PM_at   | Dnttip2                                                            | DNTTIP2    | -0.33 | 3.40 | -1.01 | 3.36E-01 | 6.20E-01 | -6.18 |
| 1418018_PM_at   | Cpd                                                                | CPD        | -0.23 | 3.05 | -1.01 | 3.36E-01 | 6.20E-01 | -6.18 |
| 1437819_PM_s_at | Wdr91                                                              | WDR91      | 0.16  | 4.10 | 1.01  | 3.36E-01 | 6.20E-01 | -6.18 |
| 1420134_PM_at   | Gm11487                                                            | NA         | 0.10  | 2.45 | 1.01  | 3.37E-01 | 6.20E-01 | -6.18 |
| 1447363_PM_s_at | Bub1b                                                              | BUB1B      | 0.11  | 2.62 | 1.01  | 3.37E-01 | 6.20E-01 | -6.18 |
| 1422274_PM_at   | Gja8                                                               | GJA8       | 0.12  | 2.70 | 1.01  | 3.37E-01 | 6.20E-01 | -6.18 |
| 1449087_PM_at   | Rnf141                                                             | RNF141     | -0.16 | 4.02 | -1.01 | 3.37E-01 | 6.20E-01 | -6.18 |
| 1426792_PM_s_at | Rusc2                                                              | RUSC2      | -0.22 | 3.28 | -1.01 | 3.37E-01 | 6.20E-01 | -6.18 |
| 1460461_PM_at   | Lpcat2b                                                            | NA         | 0.08  | 2.12 | 1.01  | 3.37E-01 | 6.20E-01 | -6.18 |
| 1435553_PM_at   | Pdzd2                                                              | PDZD2      | -0.44 | 4.06 | -1.01 | 3.37E-01 | 6.20E-01 | -6.18 |
| 1426411_PM_a_at | Strbp                                                              | STRBP      | -0.41 | 4.15 | -1.01 | 3.37E-01 | 6.20E-01 | -6.18 |
| 1417926_PM_at   | Ncapg2                                                             | NCAPG2     | -0.24 | 2.15 | -1.01 | 3.37E-01 | 6.20E-01 | -6.18 |
| 1423262_PM_a_at | Gm10257 /// Gm12657 /// H3f3a /// H3f3b /// H3f3c /// LOC102642045 | H3F3A      | -0.17 | 6.48 | -1.01 | 3.37E-01 | 6.20E-01 | -6.18 |
| 1439603_PM_at   | Gm13446                                                            | NA         | -0.15 | 2.77 | -1.01 | 3.37E-01 | 6.20E-01 | -6.18 |
| 1447139_PM_at   | Bc17c                                                              | NA         | -0.08 | 2.12 | -1.01 | 3.37E-01 | 6.20E-01 | -6.18 |
| 1443845_PM_x_at | 1700012P22Rik                                                      | C1orf158   | 0.11  | 2.03 | 1.01  | 3.37E-01 | 6.20E-01 | -6.18 |
| 1416897_PM_at   | Parp9                                                              | PARP9      | 0.11  | 3.02 | 1.01  | 3.37E-01 | 6.20E-01 | -6.18 |
| 1436491_PM_at   | Gm11346                                                            | NA         | 0.12  | 2.19 | 1.01  | 3.37E-01 | 6.20E-01 | -6.18 |
| 1430940_PM_at   | ---                                                                | NA         | 0.16  | 2.74 | 1.01  | 3.37E-01 | 6.20E-01 | -6.18 |
| 1453294_PM_at   | Rab10os                                                            | NA         | 0.37  | 4.06 | 1.01  | 3.37E-01 | 6.20E-01 | -6.18 |
| 1459995_PM_at   | 1700015G11Rik                                                      | CCDC179    | 0.09  | 2.34 | 1.01  | 3.37E-01 | 6.20E-01 | -6.18 |
| 1445291_PM_at   | C230037L18Rik                                                      | NA         | -0.22 | 2.63 | -1.01 | 3.37E-01 | 6.20E-01 | -6.18 |
| 1427239_PM_at   | Ift122                                                             | IFT122     | 0.14  | 2.37 | 1.01  | 3.37E-01 | 6.20E-01 | -6.18 |
| 1436510_PM_a_at | Lrrfip2                                                            | LRRFIP2    | 0.21  | 6.20 | 1.01  | 3.37E-01 | 6.20E-01 | -6.18 |
| 1433669_PM_at   | Akap8                                                              | AKAP8      | 0.15  | 3.69 | 1.01  | 3.37E-01 | 6.20E-01 | -6.18 |
| 1433263_PM_at   | Dld                                                                | DLD        | 0.09  | 2.52 | 1.01  | 3.37E-01 | 6.20E-01 | -6.18 |
| 1427466_PM_at   | Pigu                                                               | PIGU       | 0.13  | 2.57 | 1.01  | 3.37E-01 | 6.20E-01 | -6.18 |
| 1446945_PM_at   | ---                                                                | NA         | 0.29  | 2.85 | 1.01  | 3.37E-01 | 6.20E-01 | -6.18 |
| 1454966_PM_at   | Irga8                                                              | ITGAB      | -0.48 | 3.36 | -1.01 | 3.37E-01 | 6.20E-01 | -6.18 |
| 1458921_PM_at   | ---                                                                | NA         | 0.09  | 2.26 | 1.01  | 3.37E-01 | 6.20E-01 | -6.18 |
| 1416923_PM_a_at | Bnip3l                                                             | BNIP3L     | -0.35 | 4.42 | -1.01 | 3.37E-01 | 6.20E-01 | -6.18 |
| 1420838_PM_at   | Ntrk2                                                              | NTRK2      | -0.30 | 6.31 | -1.01 | 3.37E-01 | 6.20E-01 | -6.18 |
| 1424398_PM_at   | Dhx36                                                              | DHX36      | -0.22 | 2.56 | -1.01 | 3.37E-01 | 6.20E-01 | -6.18 |
| 1445926_PM_at   | ---                                                                | NA         | -0.14 | 2.73 | -1.01 | 3.37E-01 | 6.20E-01 | -6.18 |
| 1432177_PM_a_at | Mnat1                                                              | MNAT1      | -0.12 | 2.82 | -1.01 | 3.37E-01 | 6.20E-01 | -6.18 |
| 1425985_PM_s_at | Masp1                                                              | NA         | 0.13  | 2.20 | 1.01  | 3.37E-01 | 6.20E-01 | -6.18 |
| 1433396_PM_at   | 4921504P13Rik                                                      | NA         | 0.17  | 2.59 | 1.01  | 3.37E-01 | 6.20E-01 | -6.18 |
| 1460683_PM_at   | Tead4                                                              | TEAD4      | 0.17  | 2.59 | 1.01  | 3.37E-01 | 6.20E-01 | -6.18 |
| 1435276_PM_a_at | Dgcr2                                                              | DGCR2      | 0.20  | 2.44 | 1.01  | 3.37E-01 | 6.20E-01 | -6.18 |
| 1418721_PM_at   | Cops7b                                                             | COP57B     | 0.24  | 6.11 | 1.01  | 3.37E-01 | 6.20E-01 | -6.18 |
| 1456686_PM_at   | ---                                                                | NA         | 0.42  | 3.34 | 1.01  | 3.37E-01 | 6.20E-01 | -6.18 |
| 1435868_PM_at   | Ankrd13c                                                           | ANKRD13C   | 0.22  | 3.67 | 1.01  | 3.37E-01 | 6.20E-01 | -6.18 |
| 1424504_PM_at   | Rab22a                                                             | RAB22A     | 0.15  | 2.62 | 1.01  | 3.37E-01 | 6.20E-01 | -6.18 |
| 1417260_PM_at   | U2af2                                                              | U2AF2      | 0.16  | 5.46 | 1.01  | 3.37E-01 | 6.20E-01 | -6.18 |
| 1432640_PM_at   | ---                                                                | NA         | 0.11  | 2.32 | 1.01  | 3.37E-01 | 6.20E-01 | -6.18 |
| 1441524_PM_at   | ---                                                                | NA         | 0.15  | 2.41 | 1.01  | 3.37E-01 | 6.20E-01 | -6.18 |
| 1420440_PM_at   | Ppy                                                                | PPY        | 0.13  | 2.63 | 1.01  | 3.37E-01 | 6.21E-01 | -6.18 |
| 1424371_PM_at   | Psmf1                                                              | PSMF1      | 0.19  | 2.38 | 1.01  | 3.37E-01 | 6.21E-01 | -6.18 |
| 1437364_PM_at   | Coq3                                                               | COQ3       | 0.20  | 2.87 | 1.01  | 3.38E-01 | 6.21E-01 | -6.18 |
| 1438814_PM_at   | ---                                                                | NA         | 0.23  | 2.26 | 1.01  | 3.37E-01 | 6.21E-01 | -6.18 |
| 1426939_PM_at   | Tsr2                                                               | TSR2       | 0.24  | 3.35 | 1.01  | 3.38E-01 | 6.21E-01 | -6.18 |
| 1448577_PM_x_at | Syng2                                                              | SYNGR2     | 0.13  | 2.65 | 1.01  | 3.38E-01 | 6.21E-01 | -6.18 |
| 1428698_PM_at   | Dpp8                                                               | NA         | -0.31 | 3.55 | -1.01 | 3.38E-01 | 6.21E-01 | -6.18 |
| 1444497_PM_at   | BC059050                                                           | NA         | 0.12  | 2.51 | 1.01  | 3.38E-01 | 6.21E-01 | -6.18 |
| 1424924_PM_at   | Sec63                                                              | SEC63      | 0.38  | 3.82 | 1.01  | 3.38E-01 | 6.21E-01 | -6.18 |
| 1455133_PM_s_at | Suco                                                               | SUCO       | -0.20 | 7.49 | -1.01 | 3.38E-01 | 6.21E-01 | -6.18 |
| 1441054_PM_at   | Apol8                                                              | NA         | -0.13 | 2.23 | -1.01 | 3.38E-01 | 6.21E-01 | -6.18 |
| 1440506_PM_at   | ---                                                                | NA         | -0.10 | 2.62 | -1.01 | 3.38E-01 | 6.21E-01 | -6.18 |
| 1442363_PM_at   | Mtc1l                                                              | MTCL1      | 0.25  | 2.92 | 1.01  | 3.38E-01 | 6.21E-01 | -6.18 |
| 1424223_PM_at   | Mtfp1                                                              | MTFP1      | -0.24 | 3.14 | -1.01 | 3.38E-01 | 6.21E-01 | -6.18 |
| 1430258_PM_at   | Kxd1                                                               | KXD1       | 0.10  | 2.14 | 1.01  | 3.38E-01 | 6.21E-01 | -6.18 |
| 1439537_PM_at   | ---                                                                | NA         | 0.14  | 3.14 | 1.01  | 3.38E-01 | 6.21E-01 | -6.18 |



|                 |               |          |       |       |       |          |          |       |
|-----------------|---------------|----------|-------|-------|-------|----------|----------|-------|
| 1457756_PM_at   | Zkscan8       | ZKSCAN8  | 0.10  | 2.34  | 1.00  | 3.38E-01 | 6.21E-01 | -6.18 |
| 1455577_PM_at   | Ccl28         | CCL28    | 0.16  | 2.46  | 1.00  | 3.38E-01 | 6.21E-01 | -6.18 |
| AFFX-CreX-3_at  | ---           | NA       | -0.08 | 12.28 | -1.00 | 3.38E-01 | 6.21E-01 | -6.18 |
| 1443671_PM_x_at | Odf3b         | ODF3B    | 0.23  | 3.56  | 1.00  | 3.38E-01 | 6.21E-01 | -6.18 |
| 1453375_PM_at   | ---           | NA       | 0.12  | 3.09  | 1.00  | 3.38E-01 | 6.21E-01 | -6.18 |
| 1452003_PM_at   | Rbm14         | RBM14    | 0.13  | 2.35  | 1.00  | 3.38E-01 | 6.21E-01 | -6.18 |
| 1449336_PM_a_at | Slk           | SLK      | 0.48  | 3.78  | 1.00  | 3.38E-01 | 6.21E-01 | -6.18 |
| 1453363_PM_at   | Cacng2        | CACNG2   | 0.11  | 3.63  | 1.00  | 3.38E-01 | 6.21E-01 | -6.18 |
| 1417037_PM_at   | Orc6          | ORC6     | 0.22  | 4.33  | 1.00  | 3.38E-01 | 6.21E-01 | -6.18 |
| 1438746_PM_at   | A530058N18Rik | NA       | 0.14  | 2.02  | 1.00  | 3.38E-01 | 6.21E-01 | -6.18 |
| 1421168_PM_at   | Abcg3         | ABCG2    | 0.15  | 2.54  | 1.00  | 3.38E-01 | 6.21E-01 | -6.18 |
| 1455112_PM_at   | Aifm2         | AIFM2    | 0.11  | 2.19  | 1.00  | 3.38E-01 | 6.21E-01 | -6.18 |
| 1441831_PM_x_at | Cln5          | CLN5     | -0.19 | 2.39  | -1.00 | 3.38E-01 | 6.21E-01 | -6.18 |
| 1447388_PM_at   | LOC546061     | NA       | -0.18 | 3.59  | -1.00 | 3.38E-01 | 6.21E-01 | -6.18 |
| 1449601_PM_x_at | ---           | NA       | -0.18 | 2.85  | -1.00 | 3.38E-01 | 6.21E-01 | -6.18 |
| 1443912_PM_at   | ---           | NA       | -0.14 | 2.70  | -1.00 | 3.38E-01 | 6.21E-01 | -6.18 |
| 1432405_PM_a_at | Plcz1         | PLCZ1    | -0.12 | 2.13  | -1.00 | 3.38E-01 | 6.21E-01 | -6.18 |
| 1432099_PM_a_at | Prodh2        | PRODH2   | 0.10  | 2.97  | 1.00  | 3.38E-01 | 6.21E-01 | -6.18 |
| 1443650_PM_at   | ---           | NA       | 0.12  | 2.28  | 1.00  | 3.38E-01 | 6.21E-01 | -6.18 |
| 1431288_PM_at   | Car10         | CA10     | 0.14  | 2.31  | 1.00  | 3.38E-01 | 6.21E-01 | -6.18 |
| 1437880_PM_at   | Skor1         | SKOR1    | 0.69  | 3.42  | 1.00  | 3.38E-01 | 6.21E-01 | -6.18 |
| 1416883_PM_at   | Clptm1        | CLPTM1   | -0.14 | 4.49  | -1.00 | 3.38E-01 | 6.21E-01 | -6.18 |
| 1445893_PM_at   | Plod1         | PLOD1    | 0.14  | 2.67  | 1.00  | 3.38E-01 | 6.21E-01 | -6.18 |
| 1419289_PM_a_at | Syng1         | SYNGR1   | 0.18  | 2.29  | 1.00  | 3.38E-01 | 6.21E-01 | -6.18 |
| 1442338_PM_at   | Gm42362       | NA       | 0.11  | 2.70  | 1.00  | 3.38E-01 | 6.21E-01 | -6.18 |
| 1442526_PM_at   | C77681        | NA       | 0.14  | 2.59  | 1.00  | 3.38E-01 | 6.21E-01 | -6.18 |
| 1452265_PM_at   | Clasp1        | CLASP1   | 0.14  | 3.74  | 1.00  | 3.38E-01 | 6.21E-01 | -6.18 |
| 1439074_PM_a_at | Son           | SON      | 0.11  | 2.67  | 1.00  | 3.38E-01 | 6.21E-01 | -6.18 |
| 1436700_PM_a_at | ---           | NA       | 0.14  | 2.98  | 1.00  | 3.38E-01 | 6.21E-01 | -6.18 |
| 1453807_PM_at   | Hcn1          | NA       | -0.55 | 3.53  | -1.00 | 3.39E-01 | 6.21E-01 | -6.18 |
| 1435858_PM_at   | Tmem215       | TMEM215  | -0.36 | 3.93  | -1.00 | 3.39E-01 | 6.21E-01 | -6.18 |
| 1432750_PM_at   | Zfp711        | ZNF711   | -0.23 | 3.06  | -1.00 | 3.39E-01 | 6.21E-01 | -6.18 |
| 1427542_PM_at   | Sobp          | SOBP     | -0.20 | 2.83  | -1.00 | 3.39E-01 | 6.21E-01 | -6.18 |
| 1423185_PM_a_at | Ubap1         | UBAP1    | -0.16 | 2.75  | -1.00 | 3.39E-01 | 6.21E-01 | -6.18 |
| 1454368_PM_at   | Psmd7         | NA       | -0.11 | 2.44  | -1.00 | 3.39E-01 | 6.21E-01 | -6.18 |
| 1443806_PM_x_at | ---           | NA       | 0.08  | 2.09  | 1.00  | 3.39E-01 | 6.21E-01 | -6.18 |
| 1447637_PM_at   | ---           | NA       | 0.11  | 2.33  | 1.00  | 3.39E-01 | 6.21E-01 | -6.18 |
| 1448024_PM_at   | Npr3          | NPR3     | 0.19  | 2.75  | 1.00  | 3.39E-01 | 6.21E-01 | -6.18 |
| 1451259_PM_at   | Rexo2         | REXO2    | 0.36  | 6.75  | 1.00  | 3.39E-01 | 6.21E-01 | -6.18 |
| 1432443_PM_at   | Fam71e1       | FAM71E1  | 0.12  | 2.22  | 1.00  | 3.39E-01 | 6.21E-01 | -6.18 |
| 1423817_PM_s_at | Use1          | USE1     | 0.19  | 4.34  | 1.00  | 3.39E-01 | 6.21E-01 | -6.18 |
| 1445064_PM_at   | ---           | NA       | -0.13 | 3.14  | -1.00 | 3.39E-01 | 6.21E-01 | -6.18 |
| 1421271_PM_at   | Sh3rf1        | SH3RF1   | 0.11  | 2.20  | 1.00  | 3.39E-01 | 6.21E-01 | -6.18 |
| 1446122_PM_at   | ---           | NA       | 0.15  | 2.43  | 1.00  | 3.39E-01 | 6.21E-01 | -6.18 |
| 1419900_PM_at   | ---           | NA       | 0.20  | 3.48  | 1.00  | 3.39E-01 | 6.21E-01 | -6.18 |
| 1424167_PM_a_at | Pmm1          | PMM1     | 0.21  | 3.10  | 1.00  | 3.39E-01 | 6.21E-01 | -6.18 |
| 1448501_PM_at   | Tspan6        | TSPAN6   | 0.23  | 2.92  | 1.00  | 3.39E-01 | 6.21E-01 | -6.18 |
| 1437705_PM_at   | Zfp551        | ZNF551   | 0.35  | 3.12  | 1.00  | 3.39E-01 | 6.21E-01 | -6.18 |
| 1433759_PM_at   | Dpy19l1       | DPY19L1  | -0.35 | 3.90  | -1.00 | 3.39E-01 | 6.22E-01 | -6.18 |
| 1421028_PM_a_at | Mef2c         | MEF2C    | 0.24  | 2.86  | 1.00  | 3.39E-01 | 6.22E-01 | -6.18 |
| 1458577_PM_at   | ---           | NA       | -0.11 | 2.65  | -1.00 | 3.39E-01 | 6.22E-01 | -6.18 |
| 1429386_PM_at   | Dcaf7         | DCAF7    | 0.14  | 2.47  | 1.00  | 3.39E-01 | 6.22E-01 | -6.18 |
| 1458614_PM_at   | Dcp1b         | DCP1B    | 0.16  | 2.37  | 1.00  | 3.39E-01 | 6.22E-01 | -6.18 |
| 1433244_PM_at   | 4930573G07Rik | NA       | 0.23  | 2.53  | 1.00  | 3.39E-01 | 6.22E-01 | -6.18 |
| 1458209_PM_at   | Kndc1         | NA       | -0.09 | 2.24  | -1.00 | 3.39E-01 | 6.22E-01 | -6.18 |
| 1453051_PM_at   | Zkscan1       | ZKSCAN1  | 0.08  | 2.40  | 1.00  | 3.39E-01 | 6.22E-01 | -6.18 |
| 1422039_PM_at   | Tnfrsf22      | NA       | 0.10  | 2.22  | 1.00  | 3.39E-01 | 6.22E-01 | -6.18 |
| 1447799_PM_x_at | 1700001P01Rik | C17orf98 | 0.10  | 2.39  | 1.00  | 3.39E-01 | 6.22E-01 | -6.18 |
| 1449504_PM_at   | Kpna1         | KPNA1    | 0.42  | 2.99  | 1.00  | 3.39E-01 | 6.22E-01 | -6.18 |
| 1429380_PM_at   | Rgs12         | RGS12    | 0.15  | 2.54  | 1.00  | 3.39E-01 | 6.22E-01 | -6.18 |
| 1453570_PM_x_at | Bet1l         | BET1L    | -0.13 | 3.91  | -1.00 | 3.39E-01 | 6.22E-01 | -6.18 |
| 1426791_PM_at   | Rusc2         | RUSC2    | -0.19 | 2.69  | -1.00 | 3.39E-01 | 6.22E-01 | -6.18 |
| 1441544_PM_at   | ---           | NA       | 0.10  | 2.27  | 1.00  | 3.39E-01 | 6.22E-01 | -6.18 |
| 1456613_PM_at   | ---           | NA       | 0.12  | 3.32  | 1.00  | 3.39E-01 | 6.22E-01 | -6.18 |
| 1444964_PM_at   | Csnk1g1       | CSNK1G1  | 0.10  | 2.31  | 1.00  | 3.39E-01 | 6.22E-01 | -6.18 |
| 1419569_PM_a_at | Isg20         | ISG20    | 0.11  | 2.44  | 1.00  | 3.39E-01 | 6.22E-01 | -6.18 |
| 1438910_PM_a_at | Stom          | STOM     | 0.14  | 2.25  | 1.00  | 3.39E-01 | 6.22E-01 | -6.18 |
| 1436074_PM_at   | Nfkbid        | NFKBID   | 0.13  | 2.18  | 1.00  | 3.39E-01 | 6.22E-01 | -6.18 |
| 1416839_PM_at   | Mut           | MUT      | 0.08  | 2.40  | 1.00  | 3.39E-01 | 6.22E-01 | -6.19 |
| 1429128_PM_x_at | Nfkcb2        | NA       | -0.25 | 4.34  | -1.00 | 3.39E-01 | 6.22E-01 | -6.19 |
| 1421132_PM_at   | Pvr13         | NECTIN3  | 0.63  | 2.72  | 1.00  | 3.39E-01 | 6.22E-01 | -6.19 |
| 1439806_PM_at   | ---           | NA       | -0.22 | 2.85  | -1.00 | 3.39E-01 | 6.22E-01 | -6.19 |
| 1423937_PM_at   | Kctd5         | KCTD5    | 0.10  | 2.47  | 1.00  | 3.40E-01 | 6.22E-01 | -6.19 |
| 1435296_PM_at   | Adra2c        | ADRA2C   | -0.14 | 2.77  | -1.00 | 3.40E-01 | 6.22E-01 | -6.19 |
| 1440273_PM_at   | Gm38457       | NA       | -0.20 | 2.66  | -1.00 | 3.40E-01 | 6.22E-01 | -6.19 |

|                 |                        |              |       |      |       |          |          |       |
|-----------------|------------------------|--------------|-------|------|-------|----------|----------|-------|
| 1421613_PM_at   | H2afy3                 | NA           | 0.13  | 2.12 | 1.00  | 3.40E-01 | 6.22E-01 | -6.19 |
| 1449116_PM_a_at | Dtymk                  | DTYMK        | 0.09  | 2.32 | 1.00  | 3.40E-01 | 6.22E-01 | -6.19 |
| 1419438_PM_at   | Sim2                   | SIM2         | 0.09  | 2.99 | 1.00  | 3.40E-01 | 6.22E-01 | -6.19 |
| 1437886_PM_at   | Klh6                   | KLHL6        | 0.11  | 2.39 | 1.00  | 3.40E-01 | 6.22E-01 | -6.19 |
| 1428424_PM_at   | Pcgf3                  | PCGF3        | 0.11  | 2.68 | 1.00  | 3.40E-01 | 6.22E-01 | -6.19 |
| 1431904_PM_at   | 4933427G17Rik          | NA           | -0.62 | 2.92 | -1.00 | 3.40E-01 | 6.23E-01 | -6.19 |
| 1420771_PM_at   | Sprr2d                 | NA           | 0.09  | 2.31 | 1.00  | 3.40E-01 | 6.23E-01 | -6.19 |
| 1423987_PM_at   | Cdc2                   | CDC26        | -0.26 | 3.64 | -1.00 | 3.40E-01 | 6.23E-01 | -6.19 |
| 1450999_PM_a_at | 1700029H14Rik          | FP565324.1   | 0.10  | 2.26 | 1.00  | 3.40E-01 | 6.23E-01 | -6.19 |
| 1430390_PM_x_at | 4930444G20Rik          | NA           | 0.20  | 2.76 | 1.00  | 3.40E-01 | 6.23E-01 | -6.19 |
| 1424708_PM_at   | Tmed10                 | TMED10       | -0.40 | 4.24 | -1.00 | 3.40E-01 | 6.23E-01 | -6.19 |
| 1430291_PM_at   | Dock5                  | DOCK5        | -0.19 | 4.34 | -1.00 | 3.40E-01 | 6.23E-01 | -6.19 |
| 1426459_PM_s_at | AW549877               | CSorf51      | -0.18 | 3.96 | -1.00 | 3.40E-01 | 6.23E-01 | -6.19 |
| 1436394_PM_at   | Trim37                 | NA           | 0.23  | 4.25 | 1.00  | 3.40E-01 | 6.23E-01 | -6.19 |
| 1440259_PM_at   | ---                    | NA           | 0.41  | 2.94 | 1.00  | 3.40E-01 | 6.23E-01 | -6.19 |
| 1437725_PM_x_at | Tm2d2                  | TM2D2        | -0.22 | 4.76 | -1.00 | 3.40E-01 | 6.23E-01 | -6.19 |
| 1449233_PM_at   | Bhlha15                | BHLHA15      | 0.09  | 2.35 | 1.00  | 3.40E-01 | 6.23E-01 | -6.19 |
| 1454059_PM_at   | ---                    | NA           | 0.11  | 2.40 | 1.00  | 3.40E-01 | 6.23E-01 | -6.19 |
| 1417924_PM_at   | Pak3                   | PAK3         | 0.12  | 2.40 | 1.00  | 3.40E-01 | 6.23E-01 | -6.19 |
| 1434116_PM_at   | Cbx2                   | CBX2         | 0.15  | 2.57 | 1.00  | 3.40E-01 | 6.23E-01 | -6.19 |
| 1432189_PM_a_at | Sox5                   | SOX5         | 0.19  | 3.15 | 1.00  | 3.40E-01 | 6.23E-01 | -6.19 |
| 1456026_PM_at   | Nhlrc3                 | NHLRC3       | 0.20  | 2.85 | 1.00  | 3.40E-01 | 6.23E-01 | -6.19 |
| 1416864_PM_at   | Surf6                  | SURF6        | 0.30  | 4.07 | 1.00  | 3.40E-01 | 6.23E-01 | -6.19 |
| 1455070_PM_at   | Dcp2                   | DCP2         | -0.50 | 5.79 | -1.00 | 3.40E-01 | 6.23E-01 | -6.19 |
| 1437362_PM_at   | Trmt13                 | TRMT13       | -0.23 | 3.62 | -1.00 | 3.40E-01 | 6.23E-01 | -6.19 |
| 1442775_PM_at   | ---                    | NA           | -0.23 | 2.68 | -1.00 | 3.40E-01 | 6.23E-01 | -6.19 |
| 1448657_PM_a_at | Dnajb2                 | DNAJB2       | -0.19 | 5.82 | -1.00 | 3.40E-01 | 6.23E-01 | -6.19 |
| 1435814_PM_at   | Xpo7                   | XPO7         | -0.14 | 3.16 | -1.00 | 3.40E-01 | 6.23E-01 | -6.19 |
| 1428400_PM_at   | Vstm5                  | VSTM5        | -0.12 | 2.72 | -1.00 | 3.40E-01 | 6.23E-01 | -6.19 |
| 1420799_PM_at   | Ntsr1                  | NTSR1        | -0.10 | 2.26 | -1.00 | 3.40E-01 | 6.23E-01 | -6.19 |
| 1450240_PM_a_at | Sytl1                  | SYTL1        | 0.08  | 2.33 | 1.00  | 3.40E-01 | 6.23E-01 | -6.19 |
| 1459263_PM_at   | ---                    | NA           | 0.08  | 2.47 | 1.00  | 3.40E-01 | 6.23E-01 | -6.19 |
| 1440588_PM_at   | Faf2                   | NA           | 0.12  | 2.50 | 1.00  | 3.40E-01 | 6.23E-01 | -6.19 |
| 1441104_PM_at   | Myo5b                  | MYO5B        | 0.12  | 2.49 | 1.00  | 3.40E-01 | 6.23E-01 | -6.19 |
| 1450946_PM_at   | Nrl                    | NRL          | 0.14  | 2.17 | 1.00  | 3.40E-01 | 6.23E-01 | -6.19 |
| 1447376_PM_at   | Mov10                  | MOV10        | 0.15  | 2.81 | 1.00  | 3.40E-01 | 6.23E-01 | -6.19 |
| 1434409_PM_at   | Armxc6                 | ARMXC6       | 0.16  | 2.50 | 1.00  | 3.40E-01 | 6.23E-01 | -6.19 |
| 1458286_PM_at   | ---                    | NA           | 0.21  | 3.09 | 1.00  | 3.40E-01 | 6.23E-01 | -6.19 |
| 1438516_PM_at   | ---                    | NA           | 0.31  | 2.65 | 1.00  | 3.40E-01 | 6.23E-01 | -6.19 |
| 1445259_PM_at   | Scn2a1                 | SCN2A        | 0.17  | 2.73 | 1.00  | 3.40E-01 | 6.23E-01 | -6.19 |
| 1444258_PM_at   | ---                    | NA           | 0.18  | 2.69 | 1.00  | 3.41E-01 | 6.23E-01 | -6.19 |
| 1417779_PM_at   | Ntpcr                  | NTPCR        | 0.11  | 2.75 | 1.00  | 3.41E-01 | 6.23E-01 | -6.19 |
| 1449009_PM_at   | Tgtp1 /// Tgtp2        | NA           | -0.11 | 2.19 | -1.00 | 3.41E-01 | 6.23E-01 | -6.19 |
| 1440065_PM_at   | ---                    | NA           | 0.10  | 2.78 | 1.00  | 3.41E-01 | 6.23E-01 | -6.19 |
| 1456033_PM_at   | Tbx4                   | TBX4         | 0.11  | 2.42 | 1.00  | 3.41E-01 | 6.23E-01 | -6.19 |
| 1454228_PM_a_at | Ccdc77                 | CCDC77       | 0.12  | 2.44 | 1.00  | 3.41E-01 | 6.23E-01 | -6.19 |
| 1455117_PM_at   | Mcm9                   | MCM9         | 0.15  | 2.44 | 1.00  | 3.41E-01 | 6.23E-01 | -6.19 |
| 1447375_PM_at   | ---                    | NA           | 0.11  | 2.57 | 1.00  | 3.41E-01 | 6.23E-01 | -6.19 |
| 1448349_PM_at   | Vapa                   | VAPA         | -0.10 | 2.24 | -1.00 | 3.41E-01 | 6.23E-01 | -6.19 |
| 1429606_PM_at   | ---                    | NA           | -0.08 | 1.98 | -1.00 | 3.41E-01 | 6.23E-01 | -6.19 |
| 1432791_PM_at   | 9030218A15Rik          | NA           | 0.10  | 2.33 | 1.00  | 3.41E-01 | 6.23E-01 | -6.19 |
| 1419173_PM_at   | Acy1                   | ABHD14A-ACY1 | 0.19  | 2.82 | 1.00  | 3.41E-01 | 6.23E-01 | -6.19 |
| 1437985_PM_a_at | 2310061I04Rik          | C6orf136     | 0.43  | 6.12 | 1.00  | 3.41E-01 | 6.23E-01 | -6.19 |
| 1455475_PM_at   | 3110057O12Rik          | ABHD18       | 0.17  | 2.78 | 1.00  | 3.41E-01 | 6.23E-01 | -6.19 |
| 1424842_PM_a_at | Arhgap24               | ARHGAP24     | 0.32  | 2.50 | 1.00  | 3.41E-01 | 6.23E-01 | -6.19 |
| 1435033_PM_at   | Arhgef4                | ARHGEF4      | -0.36 | 3.23 | -1.00 | 3.41E-01 | 6.23E-01 | -6.19 |
| 1457643_PM_x_at | 2610316D01Rik          | NA           | 0.13  | 2.46 | 1.00  | 3.41E-01 | 6.23E-01 | -6.19 |
| 1419757_PM_at   | Pitpnm2                | PITPNM2      | 0.42  | 4.72 | 1.00  | 3.41E-01 | 6.23E-01 | -6.19 |
| 1437167_PM_at   | Tmod2                  | TMOD2        | -0.20 | 3.23 | -1.00 | 3.41E-01 | 6.23E-01 | -6.19 |
| AFFX-r2-TagD_at | ---                    | NA           | 0.08  | 2.03 | 1.00  | 3.41E-01 | 6.23E-01 | -6.19 |
| 1427391_PM_a_at | Col12a1                | COL12A1      | 0.10  | 2.32 | 1.00  | 3.41E-01 | 6.23E-01 | -6.19 |
| 1439595_PM_at   | Traj18 /// Traj19      | NA           | 0.13  | 2.57 | 1.00  | 3.41E-01 | 6.23E-01 | -6.19 |
| 1453978_PM_at   | ---                    | NA           | 0.14  | 2.22 | 1.00  | 3.41E-01 | 6.23E-01 | -6.19 |
| 1448169_PM_at   | Krt18                  | KRT18        | 0.15  | 2.29 | 1.00  | 3.41E-01 | 6.23E-01 | -6.19 |
| 1444345_PM_at   | ---                    | NA           | 0.21  | 2.34 | 1.00  | 3.41E-01 | 6.23E-01 | -6.19 |
| 1436922_PM_at   | Lrr1                   | LRR1         | 0.08  | 1.93 | 1.00  | 3.41E-01 | 6.24E-01 | -6.19 |
| 1420996_PM_at   | Plkna3                 | PLXNA3       | 0.09  | 2.31 | 1.00  | 3.41E-01 | 6.24E-01 | -6.19 |
| 1416232_PM_at   | Olig2                  | OLIG2        | -0.12 | 2.50 | -1.00 | 3.41E-01 | 6.24E-01 | -6.19 |
| 1425216_PM_at   | Ffar2                  | FFAR2        | 0.08  | 2.15 | 1.00  | 3.41E-01 | 6.24E-01 | -6.19 |
| 1459929_PM_at   | Zfp568                 | NA           | 0.16  | 2.44 | 1.00  | 3.41E-01 | 6.24E-01 | -6.19 |
| 1422363_PM_at   | Olf65                  | NA           | 0.09  | 1.94 | 1.00  | 3.41E-01 | 6.24E-01 | -6.19 |
| 1422916_PM_at   | Fgf21 /// LOC105242481 | FGF21        | 0.11  | 2.43 | 1.00  | 3.41E-01 | 6.24E-01 | -6.19 |
| 1443869_PM_at   | Pde12                  | PDE12        | 0.09  | 2.16 | 1.00  | 3.41E-01 | 6.24E-01 | -6.19 |
| 1454095_PM_at   | 4930579H20Rik          | NA           | 0.10  | 1.94 | 1.00  | 3.41E-01 | 6.24E-01 | -6.19 |
| 1442926_PM_at   | 1700011B04Rik          | NA           | 0.13  | 2.43 | 1.00  | 3.41E-01 | 6.24E-01 | -6.19 |

|                 |                                                              |            |       |      |       |          |          |       |
|-----------------|--------------------------------------------------------------|------------|-------|------|-------|----------|----------|-------|
| 1448401_PM_at   | Smarcd2                                                      | SMARCD2    | 0.19  | 4.06 | 1.00  | 3.41E-01 | 6.24E-01 | -6.19 |
| 1437798_PM_at   | ---                                                          | NA         | 0.07  | 1.90 | 1.00  | 3.42E-01 | 6.24E-01 | -6.19 |
| 1443926_PM_at   | ---                                                          | NA         | 0.10  | 2.06 | 1.00  | 3.42E-01 | 6.24E-01 | -6.19 |
| 1416804_PM_at   | Ehbp11                                                       | EHBP11     | 0.28  | 2.43 | 1.00  | 3.42E-01 | 6.24E-01 | -6.19 |
| 1441616_PM_at   | Cbx3                                                         | CBX3       | 0.10  | 2.01 | 1.00  | 3.42E-01 | 6.24E-01 | -6.19 |
| 1447405_PM_at   | ---                                                          | NA         | 0.10  | 2.03 | 1.00  | 3.42E-01 | 6.24E-01 | -6.19 |
| 1422572_PM_at   | Rhog                                                         | RHOG       | 0.09  | 1.92 | 1.00  | 3.42E-01 | 6.24E-01 | -6.19 |
| 1436592_PM_at   | Zfp811                                                       | NA         | -0.23 | 3.56 | -1.00 | 3.42E-01 | 6.24E-01 | -6.19 |
| 1420170_PM_at   | Myh9                                                         | MYH9       | -0.19 | 3.16 | -1.00 | 3.42E-01 | 6.24E-01 | -6.19 |
| 1451747_PM_a_at | Atg12                                                        | ATG12      | -0.15 | 2.69 | -1.00 | 3.42E-01 | 6.24E-01 | -6.19 |
| 1421260_PM_a_at | Srm                                                          | SRM        | 0.08  | 2.75 | 1.00  | 3.42E-01 | 6.24E-01 | -6.19 |
| 1445741_PM_at   | ---                                                          | NA         | -0.67 | 5.58 | -1.00 | 3.42E-01 | 6.24E-01 | -6.19 |
| 1447119_PM_at   | ---                                                          | NA         | 0.12  | 2.15 | 1.00  | 3.42E-01 | 6.24E-01 | -6.19 |
| 1431729_PM_at   | Spata17                                                      | SPATA17    | 0.12  | 2.46 | 1.00  | 3.42E-01 | 6.24E-01 | -6.19 |
| 1433168_PM_x_at | 5830456j23Rik                                                | NA         | -0.21 | 2.74 | -1.00 | 3.42E-01 | 6.24E-01 | -6.19 |
| 1418500_PM_at   | Nap1l3                                                       | NAP1L3     | -0.22 | 4.77 | -1.00 | 3.42E-01 | 6.24E-01 | -6.19 |
| 1449249_PM_at   | Pcdh7                                                        | PCDH7      | -0.12 | 2.11 | -1.00 | 3.42E-01 | 6.24E-01 | -6.19 |
| 1446837_PM_at   | ---                                                          | NA         | 0.08  | 1.95 | 1.00  | 3.42E-01 | 6.24E-01 | -6.19 |
| 1434237_PM_at   | Upk3b                                                        | UPK3B      | 0.11  | 3.18 | 1.00  | 3.42E-01 | 6.24E-01 | -6.19 |
| 1449992_PM_at   | Prss29                                                       | NA         | 0.13  | 3.11 | 1.00  | 3.42E-01 | 6.24E-01 | -6.19 |
| 1448423_PM_at   | Tmed4                                                        | TMED4      | 0.20  | 3.53 | 1.00  | 3.42E-01 | 6.24E-01 | -6.19 |
| 1428406_PM_s_at | Hcfc1r1                                                      | HCF1R1     | -0.13 | 2.75 | -1.00 | 3.42E-01 | 6.24E-01 | -6.19 |
| 1425021_PM_a_at | Pex16                                                        | PEX16      | 0.09  | 2.22 | 1.00  | 3.42E-01 | 6.24E-01 | -6.19 |
| 1435250_PM_at   | Ints8                                                        | INTS8      | 0.14  | 2.51 | 1.00  | 3.42E-01 | 6.24E-01 | -6.19 |
| 1425504_PM_at   | Myk                                                          | MYLK       | -0.20 | 2.76 | -1.00 | 3.42E-01 | 6.24E-01 | -6.19 |
| 1450185_PM_a_at | Kcnj15                                                       | KCNJ15     | -0.09 | 2.11 | -1.00 | 3.42E-01 | 6.24E-01 | -6.19 |
| 1445803_PM_at   | ---                                                          | NA         | 0.09  | 1.92 | 1.00  | 3.42E-01 | 6.24E-01 | -6.19 |
| 1449394_PM_at   | Sko1b2                                                       | ACO11604.2 | 0.10  | 2.53 | 1.00  | 3.42E-01 | 6.24E-01 | -6.19 |
| 1424968_PM_at   | Ces2g                                                        | CES2       | 0.13  | 2.63 | 1.00  | 3.42E-01 | 6.24E-01 | -6.19 |
| 1422577_PM_at   | Cs                                                           | CS         | 0.24  | 3.28 | 1.00  | 3.42E-01 | 6.24E-01 | -6.19 |
| 1419453_PM_at   | Uchl5                                                        | UCL5       | -0.19 | 2.60 | -1.00 | 3.42E-01 | 6.24E-01 | -6.19 |
| 1433579_PM_at   | Tmem30b                                                      | TMEM30B    | -0.11 | 2.39 | -1.00 | 3.42E-01 | 6.24E-01 | -6.19 |
| 1433651_PM_at   | Wrip                                                         | WTIP       | -0.27 | 4.03 | -1.00 | 3.42E-01 | 6.24E-01 | -6.19 |
| 1459132_PM_at   | Bnc2                                                         | BNC2       | -0.09 | 2.11 | -1.00 | 3.42E-01 | 6.24E-01 | -6.19 |
| 1423541_PM_at   | Armc12                                                       | ARMC12     | 0.11  | 2.18 | 1.00  | 3.42E-01 | 6.24E-01 | -6.19 |
| 1423083_PM_at   | Rab33b                                                       | RAB33B     | -0.21 | 4.36 | -0.99 | 3.42E-01 | 6.25E-01 | -6.19 |
| 1436212_PM_at   | Tmem71                                                       | TMEM71     | 0.09  | 2.15 | 0.99  | 3.42E-01 | 6.25E-01 | -6.19 |
| 1418441_PM_at   | Col8a1                                                       | COL8A1     | -0.27 | 2.85 | -0.99 | 3.43E-01 | 6.25E-01 | -6.19 |
| 1456917_PM_at   | ---                                                          | NA         | -0.24 | 2.49 | -0.99 | 3.43E-01 | 6.25E-01 | -6.19 |
| 1416474_PM_at   | Igdcc4                                                       | IGDCC4     | -0.16 | 3.57 | -0.99 | 3.43E-01 | 6.25E-01 | -6.19 |
| 1428524_PM_at   | Cars2                                                        | CARS2      | -0.13 | 3.17 | -0.99 | 3.43E-01 | 6.25E-01 | -6.19 |
| 1439666_PM_at   | Odf3b                                                        | ODF3B      | 0.11  | 2.69 | 0.99  | 3.43E-01 | 6.25E-01 | -6.19 |
| 1438538_PM_at   | Mecp2                                                        | MECP2      | 0.11  | 2.47 | 0.99  | 3.43E-01 | 6.25E-01 | -6.19 |
| 1459397_PM_at   | ---                                                          | NA         | 0.11  | 2.27 | 0.99  | 3.43E-01 | 6.25E-01 | -6.19 |
| 1425345_PM_at   | Ccdc28a                                                      | CCDC28A    | 0.13  | 3.33 | 0.99  | 3.43E-01 | 6.25E-01 | -6.19 |
| 1426292_PM_at   | Zfp790                                                       | ZNF790     | 0.13  | 2.82 | 0.99  | 3.42E-01 | 6.25E-01 | -6.19 |
| 1446128_PM_at   | ---                                                          | NA         | 0.14  | 2.42 | 0.99  | 3.43E-01 | 6.25E-01 | -6.19 |
| 1453754_PM_at   | S100bbp                                                      | S100BPB    | 0.29  | 3.51 | 0.99  | 3.43E-01 | 6.25E-01 | -6.19 |
| 1416055_PM_at   | Amy2a2 /// Amy2a3 /// Amy2a4 /// Amy2a5                      | AMY2B      | 0.34  | 3.65 | 0.99  | 3.43E-01 | 6.25E-01 | -6.19 |
| 1440190_PM_at   | Leng9                                                        | LENG9      | 0.24  | 3.04 | 0.99  | 3.43E-01 | 6.25E-01 | -6.19 |
| 1447009_PM_at   | C79657                                                       | NA         | 0.11  | 2.42 | 0.99  | 3.43E-01 | 6.25E-01 | -6.19 |
| 1427512_PM_a_at | Lama3                                                        | LAMA3      | 0.12  | 2.14 | 0.99  | 3.43E-01 | 6.25E-01 | -6.19 |
| 1447866_PM_x_at | 2300009A05Rik                                                | C15orf61   | -0.09 | 2.30 | -0.99 | 3.43E-01 | 6.25E-01 | -6.19 |
| 1444551_PM_at   | ---                                                          | NA         | -0.34 | 2.53 | -0.99 | 3.43E-01 | 6.25E-01 | -6.19 |
| 1415845_PM_at   | Syt4                                                         | SYT4       | -0.29 | 6.55 | -0.99 | 3.43E-01 | 6.25E-01 | -6.19 |
| 1456266_PM_at   | Gm5481 /// Gm6109 /// Gm6570 /// Gm7429 /// Gm9703 /// Rpl30 | RPL30      | -0.12 | 2.18 | -0.99 | 3.43E-01 | 6.25E-01 | -6.19 |
| 1436190_PM_at   | Zfp618                                                       | ZNF618     | 0.09  | 2.65 | 0.99  | 3.43E-01 | 6.25E-01 | -6.19 |
| 1453755_PM_at   | Lsm11                                                        | LSM11      | 0.12  | 2.67 | 0.99  | 3.43E-01 | 6.25E-01 | -6.19 |
| 1449275_PM_at   | Mettl21a                                                     | METTL21A   | 0.12  | 2.82 | 0.99  | 3.43E-01 | 6.25E-01 | -6.19 |
| 1443295_PM_at   | ---                                                          | NA         | 0.12  | 2.34 | 0.99  | 3.43E-01 | 6.25E-01 | -6.19 |
| 1427072_PM_at   | Stard8                                                       | STARD8     | 0.16  | 2.92 | 0.99  | 3.43E-01 | 6.25E-01 | -6.19 |
| 1439192_PM_at   | Nova2                                                        | NOVA2      | 0.53  | 4.36 | 0.99  | 3.43E-01 | 6.25E-01 | -6.19 |
| 1449255_PM_a_at | Gm4581 /// Rpl15 /// Rpl15-p3                                | RPL15      | -0.35 | 6.69 | -0.99 | 3.43E-01 | 6.25E-01 | -6.19 |
| 1460553_PM_at   | Fam229b                                                      | FAM229B    | 0.09  | 2.41 | 0.99  | 3.43E-01 | 6.25E-01 | -6.19 |
| 1454140_PM_at   | Gm11149                                                      | NA         | 0.13  | 2.40 | 0.99  | 3.43E-01 | 6.25E-01 | -6.19 |
| 1419263_PM_a_at | Adrm1                                                        | ADRM1      | 0.13  | 3.26 | 0.99  | 3.43E-01 | 6.25E-01 | -6.19 |
| 1449351_PM_s_at | Pdgfc                                                        | PDGFC      | 0.14  | 2.86 | 0.99  | 3.43E-01 | 6.25E-01 | -6.19 |
| 1415710_PM_at   | Cox18                                                        | COX18      | 0.14  | 3.20 | 0.99  | 3.43E-01 | 6.25E-01 | -6.19 |
| 1436792_PM_at   | Whamm                                                        | WHAMM      | 0.17  | 3.11 | 0.99  | 3.43E-01 | 6.25E-01 | -6.19 |
| 1426838_PM_at   | Pold3                                                        | POLD3      | 0.14  | 4.07 | 0.99  | 3.43E-01 | 6.25E-01 | -6.19 |
| 1435407_PM_at   | Zkscan16                                                     | NA         | -0.27 | 4.56 | -0.99 | 3.43E-01 | 6.25E-01 | -6.19 |

|                 |                                                                                                              |          |       |      |       |          |          |       |
|-----------------|--------------------------------------------------------------------------------------------------------------|----------|-------|------|-------|----------|----------|-------|
| 1459772_PM_at   | Hps3                                                                                                         | NA       | -0.19 | 2.97 | -0.99 | 3.43E-01 | 6.25E-01 | -6.19 |
| 1429546_PM_at   | ---                                                                                                          | NA       | -0.17 | 2.24 | -0.99 | 3.43E-01 | 6.25E-01 | -6.19 |
| 1430016_PM_at   | 4930584F24Rik                                                                                                | NA       | 0.09  | 2.72 | 0.99  | 3.43E-01 | 6.25E-01 | -6.19 |
| 1431670_PM_at   | LOC102641347 /// Ndufc2                                                                                      | NDUFC2   | 0.16  | 2.41 | 0.99  | 3.43E-01 | 6.25E-01 | -6.19 |
| 1439168_PM_at   | Camk2d                                                                                                       | NA       | 0.09  | 2.16 | 0.99  | 3.43E-01 | 6.25E-01 | -6.19 |
| 1456985_PM_at   | Dnttip1                                                                                                      | DNTTIP1  | 0.17  | 2.36 | 0.99  | 3.43E-01 | 6.25E-01 | -6.19 |
| 1422452_PM_at   | Bag3                                                                                                         | BAG3     | -0.18 | 2.76 | -0.99 | 3.43E-01 | 6.25E-01 | -6.19 |
| 1449171_PM_at   | Ttk                                                                                                          | TTK      | 0.20  | 2.96 | 0.99  | 3.43E-01 | 6.25E-01 | -6.19 |
| 1426743_PM_at   | Appl2                                                                                                        | APPL2    | 0.56  | 3.93 | 0.99  | 3.43E-01 | 6.25E-01 | -6.19 |
| 1424918_PM_at   | Tbc1d19                                                                                                      | TBC1D19  | -0.19 | 3.55 | -0.99 | 3.43E-01 | 6.25E-01 | -6.19 |
| 1459509_PM_at   | ---                                                                                                          | NA       | 0.14  | 2.66 | 0.99  | 3.43E-01 | 6.25E-01 | -6.19 |
| 1435730_PM_at   | Cacna1c                                                                                                      | CACNA1C  | -0.35 | 6.13 | -0.99 | 3.43E-01 | 6.25E-01 | -6.19 |
| 1447185_PM_at   | ---                                                                                                          | NA       | 0.11  | 2.38 | 0.99  | 3.43E-01 | 6.25E-01 | -6.19 |
| 1458546_PM_at   | ---                                                                                                          | NA       | 0.13  | 2.69 | 0.99  | 3.43E-01 | 6.25E-01 | -6.19 |
| 1426782_PM_at   | Adgra3                                                                                                       | ADGRA3   | 0.16  | 2.29 | 0.99  | 3.43E-01 | 6.25E-01 | -6.19 |
| 1456129_PM_at   | Vwa3a                                                                                                        | VWA3A    | 0.16  | 2.40 | 0.99  | 3.43E-01 | 6.25E-01 | -6.19 |
| 1452408_PM_at   | ---                                                                                                          | NA       | 0.10  | 2.18 | 0.99  | 3.44E-01 | 6.25E-01 | -6.19 |
| 1432175_PM_at   | 5430434I15Rik                                                                                                | NA       | 0.13  | 2.40 | 0.99  | 3.44E-01 | 6.25E-01 | -6.19 |
| 1436886_PM_x_at | Xab2                                                                                                         | XAB2     | -0.40 | 4.84 | -0.99 | 3.44E-01 | 6.25E-01 | -6.19 |
| 1453172_PM_at   | Hspa13                                                                                                       | HSPA13   | -0.33 | 2.83 | -0.99 | 3.44E-01 | 6.25E-01 | -6.19 |
| 1438970_PM_x_at | Clhc1                                                                                                        | CLHC1    | -0.10 | 2.19 | -0.99 | 3.44E-01 | 6.25E-01 | -6.19 |
| 1425935_PM_at   | Hspb11                                                                                                       | HSPB11   | 0.12  | 2.55 | 0.99  | 3.44E-01 | 6.25E-01 | -6.19 |
| 1431916_PM_at   | Hsd3b3                                                                                                       | HSD3B2   | 0.15  | 2.18 | 0.99  | 3.44E-01 | 6.25E-01 | -6.19 |
| 1417375_PM_at   | Tuba4a                                                                                                       | TUBA4A   | 0.21  | 2.64 | 0.99  | 3.44E-01 | 6.25E-01 | -6.19 |
| 1422573_PM_at   | Ampd3                                                                                                        | AMPD3    | -0.16 | 2.55 | -0.99 | 3.44E-01 | 6.25E-01 | -6.19 |
| 1421618_PM_at   | Myo1f                                                                                                        | MYO1F    | 0.11  | 2.71 | 0.99  | 3.44E-01 | 6.25E-01 | -6.19 |
| 1430395_PM_at   | Ankrd45                                                                                                      | ANKRD45  | 0.22  | 2.75 | 0.99  | 3.44E-01 | 6.25E-01 | -6.19 |
| 1438907_PM_at   | ---                                                                                                          | NA       | 0.26  | 3.61 | 0.99  | 3.44E-01 | 6.25E-01 | -6.19 |
| 1458840_PM_at   | ---                                                                                                          | NA       | 0.29  | 2.89 | 0.99  | 3.44E-01 | 6.25E-01 | -6.19 |
| 1451813_PM_at   | Oprk1                                                                                                        | OPRK1    | 0.08  | 2.19 | 0.99  | 3.44E-01 | 6.26E-01 | -6.19 |
| 1443059_PM_at   | Hsd17b11                                                                                                     | HSD17B11 | 0.13  | 2.31 | 0.99  | 3.44E-01 | 6.26E-01 | -6.19 |
| 1458584_PM_at   | 9330159F19Rik                                                                                                | NA       | 0.28  | 5.44 | 0.99  | 3.44E-01 | 6.26E-01 | -6.19 |
| 1426781_PM_at   | Tyw1                                                                                                         | TYW1B    | 0.13  | 2.29 | 0.99  | 3.44E-01 | 6.26E-01 | -6.19 |
| 1433880_PM_at   | Dnajc11                                                                                                      | DNAJC11  | -0.12 | 2.34 | -0.99 | 3.44E-01 | 6.26E-01 | -6.19 |
| 1440264_PM_at   | ---                                                                                                          | NA       | -0.11 | 2.58 | -0.99 | 3.44E-01 | 6.26E-01 | -6.19 |
| 1428067_PM_at   | Rasl12                                                                                                       | RASL12   | -0.11 | 2.12 | -0.99 | 3.44E-01 | 6.26E-01 | -6.19 |
| 1446417_PM_at   | ---                                                                                                          | NA       | 0.08  | 2.25 | 0.99  | 3.44E-01 | 6.26E-01 | -6.19 |
| 1459795_PM_at   | Gpr85                                                                                                        | GPR85    | 0.08  | 1.94 | 0.99  | 3.44E-01 | 6.26E-01 | -6.19 |
| 1453483_PM_at   | Thegl                                                                                                        | THEGL    | 0.09  | 2.12 | 0.99  | 3.44E-01 | 6.26E-01 | -6.19 |
| 1438621_PM_x_at | Axl                                                                                                          | AXL      | 0.10  | 2.08 | 0.99  | 3.44E-01 | 6.26E-01 | -6.19 |
| 1425640_PM_at   | Aff1                                                                                                         | AFF1     | 0.10  | 2.61 | 0.99  | 3.44E-01 | 6.26E-01 | -6.19 |
| 1446094_PM_at   | ---                                                                                                          | NA       | 0.10  | 2.13 | 0.99  | 3.44E-01 | 6.26E-01 | -6.19 |
| 1460058_PM_at   | Gm39874                                                                                                      | NA       | 0.10  | 2.71 | 0.99  | 3.44E-01 | 6.26E-01 | -6.19 |
| 1419905_PM_s_at | Hpgd                                                                                                         | HPGD     | 0.11  | 2.46 | 0.99  | 3.44E-01 | 6.26E-01 | -6.19 |
| 1435034_PM_at   | Rpap2                                                                                                        | RPAP2    | 0.11  | 2.22 | 0.99  | 3.44E-01 | 6.26E-01 | -6.19 |
| 1454531_PM_at   | C030043A13Rik                                                                                                | NA       | 0.13  | 2.68 | 0.99  | 3.44E-01 | 6.26E-01 | -6.19 |
| 1438733_PM_at   | Zfp689                                                                                                       | NA       | 0.16  | 2.26 | 0.99  | 3.44E-01 | 6.26E-01 | -6.19 |
| 1422403_PM_at   | Ifna1 /// Ifna12 /// Ifna13<br>/// Ifna15 /// Ifna16 ///<br>Ifna5 /// Ifna6 /// Ifna7 ///<br>Ifna9 /// Ifnab | IFNA6    | -0.14 | 2.22 | -0.99 | 3.44E-01 | 6.26E-01 | -6.20 |
| 1454227_PM_at   | ---                                                                                                          | NA       | -0.10 | 2.83 | -0.99 | 3.44E-01 | 6.26E-01 | -6.20 |
| 1458382_PM_a_at | ---                                                                                                          | NA       | 0.36  | 6.72 | 0.99  | 3.44E-01 | 6.26E-01 | -6.20 |
| 1449767_PM_x_at | Syt6                                                                                                         | SYT6     | 0.08  | 2.02 | 0.99  | 3.44E-01 | 6.26E-01 | -6.20 |
| 1432940_PM_at   | ---                                                                                                          | NA       | 0.10  | 2.09 | 0.99  | 3.44E-01 | 6.26E-01 | -6.20 |
| 1452810_PM_at   | Ints10                                                                                                       | INTS10   | -0.32 | 4.94 | -0.99 | 3.44E-01 | 6.26E-01 | -6.20 |
| 1422968_PM_at   | Ipgk1                                                                                                        | IPGK1    | 0.12  | 2.73 | 0.99  | 3.44E-01 | 6.26E-01 | -6.20 |
| 1426341_PM_at   | Slc1a3                                                                                                       | SLC1A3   | -0.40 | 5.03 | -0.99 | 3.45E-01 | 6.26E-01 | -6.20 |
| 1441823_PM_at   | Zmiz1                                                                                                        | ZMIZ1    | -0.21 | 2.41 | -0.99 | 3.45E-01 | 6.26E-01 | -6.20 |
| 1449760_PM_at   | ---                                                                                                          | NA       | -0.09 | 2.48 | -0.99 | 3.45E-01 | 6.26E-01 | -6.20 |
| 1417956_PM_at   | Cidea                                                                                                        | CIDEA    | 0.09  | 2.36 | 0.99  | 3.45E-01 | 6.26E-01 | -6.20 |
| 1440825_PM_s_at | Ccdc28a                                                                                                      | CCDC28A  | 0.29  | 2.94 | 0.99  | 3.45E-01 | 6.26E-01 | -6.20 |
| 1426521_PM_at   | D230025D16Rik                                                                                                | C16orf70 | -0.15 | 2.65 | -0.99 | 3.45E-01 | 6.26E-01 | -6.20 |
| 1426319_PM_at   | Pdgfd                                                                                                        | PDGFD    | -0.15 | 3.07 | -0.99 | 3.45E-01 | 6.26E-01 | -6.20 |
| 1419727_PM_at   | Cd55b                                                                                                        | CD55     | 0.09  | 2.06 | 0.99  | 3.45E-01 | 6.26E-01 | -6.20 |
| 1426136_PM_x_at | Klra21                                                                                                       | NA       | 0.09  | 1.98 | 0.99  | 3.45E-01 | 6.26E-01 | -6.20 |
| 1448042_PM_s_at | Rnf2                                                                                                         | RNF2     | 0.10  | 2.22 | 0.99  | 3.45E-01 | 6.26E-01 | -6.20 |
| 1422152_PM_at   | Hmx1                                                                                                         | HMX1     | 0.10  | 2.39 | 0.99  | 3.45E-01 | 6.26E-01 | -6.20 |
| 1417079_PM_s_at | Lgals2                                                                                                       | LGALS2   | 0.10  | 2.36 | 0.99  | 3.45E-01 | 6.26E-01 | -6.20 |
| 1445965_PM_at   | ---                                                                                                          | NA       | 0.11  | 2.15 | 0.99  | 3.45E-01 | 6.26E-01 | -6.20 |
| 1459648_PM_at   | ---                                                                                                          | NA       | 0.13  | 2.27 | 0.99  | 3.45E-01 | 6.26E-01 | -6.20 |
| 1437081_PM_at   | Timp2                                                                                                        | NA       | 0.13  | 2.56 | 0.99  | 3.45E-01 | 6.26E-01 | -6.20 |
| 1426147_PM_s_at | Cldn10                                                                                                       | CLDN10   | 0.14  | 2.56 | 0.99  | 3.45E-01 | 6.26E-01 | -6.20 |
| 1456605_PM_at   | Cebpd                                                                                                        | NA       | 0.17  | 2.64 | 0.99  | 3.45E-01 | 6.26E-01 | -6.20 |

|                 |                                                                |            |       |      |       |          |          |       |
|-----------------|----------------------------------------------------------------|------------|-------|------|-------|----------|----------|-------|
| 1448451_PM_at   | Ak2                                                            | AK2        | 0.20  | 2.62 | 0.99  | 3.45E-01 | 6.26E-01 | -6.20 |
| 1436554_PM_at   | Ikzf5                                                          | IKZF5      | 0.28  | 3.80 | 0.99  | 3.45E-01 | 6.26E-01 | -6.20 |
| 1447268_PM_at   | Nol12                                                          | Z83844.1   | 0.12  | 2.39 | 0.99  | 3.45E-01 | 6.26E-01 | -6.20 |
| 1453387_PM_at   | 4833432E10Rik                                                  | NA         | 0.13  | 2.56 | 0.99  | 3.45E-01 | 6.26E-01 | -6.20 |
| 1451680_PM_at   | Srxn1                                                          | SRXN1      | 0.20  | 3.06 | 0.99  | 3.45E-01 | 6.26E-01 | -6.20 |
| 1428209_PM_at   | Bex4                                                           | BEX4       | 0.26  | 3.22 | 0.99  | 3.45E-01 | 6.26E-01 | -6.20 |
| 1440947_PM_at   | Prrc2c                                                         | PRRC2C     | -0.17 | 3.03 | -0.99 | 3.45E-01 | 6.27E-01 | -6.20 |
| 1433120_PM_at   | ---                                                            | NA         | 0.13  | 2.45 | 0.99  | 3.45E-01 | 6.27E-01 | -6.20 |
| 1446543_PM_at   | Gcn1l1                                                         | GCN1       | -0.13 | 2.51 | -0.99 | 3.45E-01 | 6.27E-01 | -6.20 |
| 1428696_PM_at   | Rftn1                                                          | RFTN1      | 0.15  | 3.30 | 0.99  | 3.45E-01 | 6.27E-01 | -6.20 |
| 1452470_PM_at   | Cep350                                                         | CEP350     | 0.44  | 5.06 | 0.99  | 3.45E-01 | 6.27E-01 | -6.20 |
| 1425815_PM_a_at | Hmmr                                                           | HMMR       | 0.08  | 2.08 | 0.99  | 3.45E-01 | 6.27E-01 | -6.20 |
| 1416557_PM_a_at | Eftud2                                                         | EFTUD2     | -0.14 | 2.48 | -0.99 | 3.45E-01 | 6.27E-01 | -6.20 |
| 1430112_PM_at   | Wdr66                                                          | NA         | 0.12  | 2.44 | 0.99  | 3.45E-01 | 6.27E-01 | -6.20 |
| 1427661_PM_a_at | Tssc4                                                          | TSSC4      | 0.25  | 4.11 | 0.99  | 3.45E-01 | 6.27E-01 | -6.20 |
| 1452967_PM_at   | Gtsf1                                                          | GTSF1      | 0.09  | 2.55 | 0.99  | 3.45E-01 | 6.27E-01 | -6.20 |
| 1457216_PM_at   | ---                                                            | NA         | 0.16  | 2.78 | 0.99  | 3.45E-01 | 6.27E-01 | -6.20 |
| 1457277_PM_at   | Mblac1                                                         | MBLAC1     | 0.15  | 2.82 | 0.99  | 3.45E-01 | 6.27E-01 | -6.20 |
| 1421698_PM_a_at | Col19a1                                                        | COL19A1    | 0.23  | 2.30 | 0.99  | 3.45E-01 | 6.27E-01 | -6.20 |
| 1438421_PM_at   | Pvr1                                                           | NECTIN1    | -0.14 | 2.75 | -0.99 | 3.46E-01 | 6.27E-01 | -6.20 |
| 1431291_PM_at   | ---                                                            | NA         | 0.14  | 2.44 | 0.99  | 3.46E-01 | 6.27E-01 | -6.20 |
| 1448987_PM_at   | Acadl                                                          | ACADL      | -0.22 | 2.74 | -0.99 | 3.46E-01 | 6.27E-01 | -6.20 |
| 1430109_PM_at   | ---                                                            | NA         | 0.13  | 2.48 | 0.99  | 3.46E-01 | 6.27E-01 | -6.20 |
| 1415808_PM_at   | Tpbpa                                                          | NA         | 0.14  | 2.33 | 0.99  | 3.46E-01 | 6.27E-01 | -6.20 |
| 1430745_PM_at   | ---                                                            | NA         | 0.18  | 2.44 | 0.99  | 3.46E-01 | 6.27E-01 | -6.20 |
| 1456606_PM_a_at | Chst11 /// Phactr1                                             | PHACTR1    | -0.51 | 5.45 | -0.99 | 3.46E-01 | 6.27E-01 | -6.20 |
| 1456216_PM_at   | ---                                                            | NA         | -0.40 | 3.89 | -0.99 | 3.46E-01 | 6.27E-01 | -6.20 |
| 1458184_PM_at   | ---                                                            | NA         | 0.25  | 2.56 | 0.99  | 3.46E-01 | 6.27E-01 | -6.20 |
| 1419785_PM_at   | AA516738                                                       | NA         | 0.10  | 2.19 | 0.99  | 3.46E-01 | 6.27E-01 | -6.20 |
| 1429182_PM_at   | ---                                                            | NA         | 0.10  | 2.44 | 0.99  | 3.46E-01 | 6.27E-01 | -6.20 |
| 1418280_PM_at   | Klf6                                                           | KL F6      | -0.61 | 5.48 | -0.99 | 3.46E-01 | 6.27E-01 | -6.20 |
| 1424133_PM_at   | Tmem98                                                         | TMEM98     | -0.21 | 2.78 | -0.99 | 3.46E-01 | 6.27E-01 | -6.20 |
| 1420391_PM_at   | Pard3                                                          | PARD3      | 0.08  | 2.57 | 0.99  | 3.46E-01 | 6.27E-01 | -6.20 |
| 1432903_PM_at   | Gm2977 /// Gm3029 /// Gm3050 /// Gm3629 /// Gm36704 /// Gm8159 | NA         | 0.22  | 2.62 | 0.99  | 3.46E-01 | 6.27E-01 | -6.20 |
| 1430870_PM_at   | ---                                                            | NA         | 0.08  | 2.16 | 0.99  | 3.46E-01 | 6.27E-01 | -6.20 |
| 1427179_PM_at   | Krt33b                                                         | KRT33B     | 0.18  | 3.13 | 0.99  | 3.46E-01 | 6.27E-01 | -6.20 |
| 1430801_PM_at   | Vps13b                                                         | VPS13B     | 0.17  | 3.83 | 0.99  | 3.46E-01 | 6.28E-01 | -6.20 |
| 1452873_PM_at   | Trmo                                                           | TRMO       | 0.12  | 2.43 | 0.99  | 3.46E-01 | 6.28E-01 | -6.20 |
| 1429695_PM_at   | Izumo1                                                         | IZUMO1     | 0.12  | 2.52 | 0.99  | 3.46E-01 | 6.28E-01 | -6.20 |
| 1419075_PM_s_at | Saa1                                                           | NA         | -0.12 | 2.46 | -0.99 | 3.46E-01 | 6.28E-01 | -6.20 |
| 1420118_PM_s_at | ---                                                            | NA         | 0.14  | 2.10 | 0.99  | 3.46E-01 | 6.28E-01 | -6.20 |
| 1424064_PM_at   | Rab1b                                                          | RAB1B      | 0.21  | 2.72 | 0.99  | 3.46E-01 | 6.28E-01 | -6.20 |
| 1432042_PM_a_at | Smu1                                                           | SMU1       | -0.38 | 4.80 | -0.99 | 3.46E-01 | 6.28E-01 | -6.20 |
| 1454091_PM_at   | Psg21                                                          | CEACAM3    | -0.08 | 2.19 | -0.99 | 3.46E-01 | 6.28E-01 | -6.20 |
| 1459827_PM_x_at | Hps1                                                           | HPS1       | 0.15  | 2.56 | 0.99  | 3.46E-01 | 6.28E-01 | -6.20 |
| 1436679_PM_at   | Tecpr1                                                         | TECPR1     | 0.23  | 2.48 | 0.99  | 3.46E-01 | 6.28E-01 | -6.20 |
| 1422826_PM_at   | Igfals                                                         | IGFALS     | 0.10  | 2.17 | 0.99  | 3.46E-01 | 6.28E-01 | -6.20 |
| 1440456_PM_at   | Dnah7a                                                         | NA         | 0.11  | 2.42 | 0.99  | 3.46E-01 | 6.28E-01 | -6.20 |
| 1438874_PM_at   | Nme7                                                           | NME7       | -0.23 | 3.18 | -0.99 | 3.46E-01 | 6.28E-01 | -6.20 |
| 1449756_PM_at   | Dnajc17                                                        | NA         | 0.19  | 2.44 | 0.99  | 3.46E-01 | 6.28E-01 | -6.20 |
| 1417379_PM_at   | Iqgap1                                                         | IQGAP1     | -0.34 | 2.79 | -0.99 | 3.47E-01 | 6.28E-01 | -6.20 |
| 1435633_PM_at   | Pwmp2a                                                         | PWWP2A     | -0.21 | 3.00 | -0.99 | 3.47E-01 | 6.28E-01 | -6.20 |
| 1446522_PM_at   | Ttc7                                                           | TTC7A      | -0.13 | 2.49 | -0.99 | 3.47E-01 | 6.28E-01 | -6.20 |
| 1454319_PM_at   | 4930402H05Rik                                                  | NA         | 0.11  | 2.17 | 0.99  | 3.47E-01 | 6.28E-01 | -6.20 |
| 1422106_PM_a_at | Spsb2                                                          | SPSB2      | 0.15  | 3.06 | 0.99  | 3.47E-01 | 6.28E-01 | -6.20 |
| 1438806_PM_at   | Bcl9l                                                          | BCL9L      | 0.15  | 2.22 | 0.99  | 3.47E-01 | 6.28E-01 | -6.20 |
| 1440204_PM_at   | 3110039M20Rik                                                  | NA         | -0.24 | 2.62 | -0.99 | 3.47E-01 | 6.28E-01 | -6.20 |
| 1449369_PM_at   | Tmprss2                                                        | TMPRSS2    | 0.10  | 2.72 | 0.99  | 3.47E-01 | 6.28E-01 | -6.20 |
| 1443682_PM_at   | ---                                                            | NA         | 0.13  | 2.37 | 0.99  | 3.47E-01 | 6.28E-01 | -6.20 |
| 1437528_PM_x_at | A730017C20Rik                                                  | KIAA1024L  | -0.76 | 6.16 | -0.99 | 3.47E-01 | 6.28E-01 | -6.20 |
| 1423035_PM_s_at | Txndc17                                                        | TXNDC17    | -0.35 | 4.56 | -0.99 | 3.47E-01 | 6.28E-01 | -6.20 |
| 1442465_PM_s_at | Strbp                                                          | STRBP      | -0.25 | 5.33 | -0.99 | 3.47E-01 | 6.28E-01 | -6.20 |
| 1422220_PM_at   | Pou1f1                                                         | NA         | 0.09  | 2.72 | 0.99  | 3.47E-01 | 6.28E-01 | -6.20 |
| 1447689_PM_at   | Gprasp1                                                        | GPRASP1    | 0.09  | 6.62 | 0.99  | 3.47E-01 | 6.28E-01 | -6.20 |
| 1435681_PM_s_at | Ddx49                                                          | DDX49      | 0.11  | 2.52 | 0.99  | 3.47E-01 | 6.28E-01 | -6.20 |
| 1437410_PM_at   | Aldh2                                                          | ACO02996.1 | 0.14  | 2.52 | 0.99  | 3.47E-01 | 6.28E-01 | -6.20 |
| 1442911_PM_at   | ---                                                            | NA         | 0.15  | 2.39 | 0.99  | 3.47E-01 | 6.28E-01 | -6.20 |
| 1449305_PM_at   | F10                                                            | F10        | -0.14 | 3.04 | -0.99 | 3.47E-01 | 6.28E-01 | -6.20 |
| 1429766_PM_at   | 2810013P06Rik                                                  | NA         | -0.13 | 2.75 | -0.99 | 3.47E-01 | 6.28E-01 | -6.20 |
| 1427725_PM_a_at | Pou2f2                                                         | POU2F2     | 0.08  | 2.48 | 0.99  | 3.47E-01 | 6.28E-01 | -6.20 |
| 1457245_PM_at   | Dirc2                                                          | DIRC2      | -0.08 | 2.27 | -0.99 | 3.47E-01 | 6.28E-01 | -6.20 |
| 1415959_PM_at   | Slc2a4                                                         | SLC2A4     | 0.08  | 2.22 | 0.99  | 3.47E-01 | 6.28E-01 | -6.20 |
| 1446441_PM_at   | Slc20a1                                                        | SLC20A1    | 0.19  | 3.21 | 0.99  | 3.47E-01 | 6.28E-01 | -6.20 |

|                 |                                                                                                                           |         |       |      |       |          |          |       |
|-----------------|---------------------------------------------------------------------------------------------------------------------------|---------|-------|------|-------|----------|----------|-------|
| 1434772_PM_at   | Adora2b                                                                                                                   | ADORA2B | 0.12  | 2.53 | 0.98  | 3.47E-01 | 6.29E-01 | -6.20 |
| 1459740_PM_s_at | Ucp2                                                                                                                      | UCP2    | -0.33 | 2.60 | -0.98 | 3.47E-01 | 6.29E-01 | -6.20 |
| 1431513_PM_at   | Poteg                                                                                                                     | NA      | 0.10  | 1.99 | 0.98  | 3.47E-01 | 6.29E-01 | -6.20 |
| 1440991_PM_at   | Plekhg1                                                                                                                   | PLEKHG1 | 0.13  | 2.47 | 0.98  | 3.47E-01 | 6.29E-01 | -6.20 |
| 1454678_PM_s_at | Eogt                                                                                                                      | EOGT    | -0.16 | 5.30 | -0.98 | 3.47E-01 | 6.29E-01 | -6.20 |
| 1455886_PM_at   | Cbl                                                                                                                       | CBL     | -0.29 | 3.29 | -0.98 | 3.47E-01 | 6.29E-01 | -6.20 |
| 1432427_PM_at   | Gm3244 /// Gm3873 ///<br>Ndufb4                                                                                           | NDUFB4  | 0.08  | 2.29 | 0.98  | 3.47E-01 | 6.29E-01 | -6.20 |
| 1422893_PM_at   | Sfmbt1                                                                                                                    | SFMBT1  | 0.08  | 2.36 | 0.98  | 3.47E-01 | 6.29E-01 | -6.20 |
| 1433397_PM_at   | 9430012M22Rik                                                                                                             | NA      | 0.34  | 2.57 | 0.98  | 3.47E-01 | 6.29E-01 | -6.20 |
| 1430425_PM_at   | Sdk2                                                                                                                      | SDK2    | 0.27  | 3.51 | 0.98  | 3.47E-01 | 6.29E-01 | -6.20 |
| 1438726_PM_at   | Mical2                                                                                                                    | MICAL2  | 0.09  | 2.78 | 0.98  | 3.47E-01 | 6.29E-01 | -6.20 |
| 1427982_PM_s_at | Syne2                                                                                                                     | SYNE2   | -0.09 | 2.27 | -0.98 | 3.47E-01 | 6.29E-01 | -6.20 |
| 1456967_PM_at   | Trim66                                                                                                                    | TRIM66  | 0.14  | 2.68 | 0.98  | 3.47E-01 | 6.29E-01 | -6.20 |
| 1432778_PM_at   | ---                                                                                                                       | NA      | 0.17  | 2.79 | 0.98  | 3.47E-01 | 6.29E-01 | -6.20 |
| 1458038_PM_at   | ---                                                                                                                       | NA      | 0.17  | 2.95 | 0.98  | 3.47E-01 | 6.29E-01 | -6.20 |
| 1438669_PM_at   | Dcaf12                                                                                                                    | DCAF12  | 0.24  | 2.78 | 0.98  | 3.47E-01 | 6.29E-01 | -6.20 |
| 1447626_PM_x_at | Arid3b                                                                                                                    | ARID3B  | -0.09 | 2.00 | -0.98 | 3.47E-01 | 6.29E-01 | -6.20 |
| 1460164_PM_at   | Spin1                                                                                                                     | SPIN1   | -0.25 | 5.45 | -0.98 | 3.47E-01 | 6.29E-01 | -6.20 |
| 1444518_PM_at   | Gm39475                                                                                                                   | NA      | 0.10  | 2.24 | 0.98  | 3.47E-01 | 6.29E-01 | -6.20 |
| 1441710_PM_at   | ---                                                                                                                       | NA      | 0.10  | 2.13 | 0.98  | 3.47E-01 | 6.29E-01 | -6.20 |
| 1427517_PM_at   | Boc                                                                                                                       | NA      | 0.07  | 2.07 | 0.98  | 3.47E-01 | 6.29E-01 | -6.20 |
| 1420356_PM_at   | Ninj2                                                                                                                     | NINJ2   | 0.12  | 2.63 | 0.98  | 3.48E-01 | 6.29E-01 | -6.20 |
| 1430736_PM_at   | Piezo2                                                                                                                    | PIEZO2  | 0.15  | 3.83 | 0.98  | 3.48E-01 | 6.29E-01 | -6.20 |
| 1452137_PM_at   | Acbd3                                                                                                                     | ACBD3   | 0.10  | 3.13 | 0.98  | 3.48E-01 | 6.29E-01 | -6.20 |
| 1439543_PM_at   | 1110064A23Rik                                                                                                             | NA      | -0.15 | 2.52 | -0.98 | 3.48E-01 | 6.29E-01 | -6.20 |
| 1419155_PM_a_at | Sox4                                                                                                                      | SOX4    | 0.10  | 2.18 | 0.98  | 3.48E-01 | 6.29E-01 | -6.20 |
| 1438332_PM_at   | Slc22a6                                                                                                                   | SLC22A6 | 0.20  | 2.78 | 0.98  | 3.48E-01 | 6.29E-01 | -6.20 |
| 1441450_PM_s_at | Kdm5c                                                                                                                     | KDM5C   | 0.22  | 2.94 | 0.98  | 3.48E-01 | 6.29E-01 | -6.20 |
| 1416391_PM_at   | Ptcd1                                                                                                                     | PTCD1   | -0.47 | 4.45 | -0.98 | 3.48E-01 | 6.29E-01 | -6.20 |
| 1441144_PM_at   | Arr3                                                                                                                      | NA      | 0.10  | 2.80 | 0.98  | 3.48E-01 | 6.29E-01 | -6.20 |
| 1454871_PM_at   | Rbm15b                                                                                                                    | RBM15B  | 0.19  | 3.20 | 0.98  | 3.48E-01 | 6.29E-01 | -6.20 |
| 1424560_PM_at   | Pstpip1                                                                                                                   | PSTPIP1 | 0.11  | 2.51 | 0.98  | 3.48E-01 | 6.29E-01 | -6.20 |
| 1455904_PM_at   | Gas5 /// Snord47                                                                                                          | NA      | -0.35 | 5.05 | -0.98 | 3.48E-01 | 6.29E-01 | -6.20 |
| 1432541_PM_at   | ---                                                                                                                       | NA      | 0.08  | 2.30 | 0.98  | 3.48E-01 | 6.29E-01 | -6.20 |
| 1451309_PM_at   | Arhgap1                                                                                                                   | ARHGAP1 | 0.11  | 2.88 | 0.98  | 3.48E-01 | 6.29E-01 | -6.20 |
| 1432344_PM_a_at | Aplp2                                                                                                                     | APLP2   | 0.37  | 3.54 | 0.98  | 3.48E-01 | 6.29E-01 | -6.20 |
| 1452297_PM_at   | Ccnt2                                                                                                                     | CCNT2   | 0.17  | 2.52 | 0.98  | 3.48E-01 | 6.29E-01 | -6.20 |
| 1451513_PM_x_at | Serpina1b                                                                                                                 | NA      | 0.11  | 2.10 | 0.98  | 3.48E-01 | 6.29E-01 | -6.20 |
| 1437120_PM_at   | Srx30                                                                                                                     | SNX30   | 0.10  | 2.09 | 0.98  | 3.48E-01 | 6.29E-01 | -6.20 |
| 1435906_PM_x_at | Gbp2                                                                                                                      | GBP2    | -0.11 | 2.02 | -0.98 | 3.48E-01 | 6.29E-01 | -6.20 |
| 1437286_PM_x_at | Nadk2                                                                                                                     | NADK2   | 0.13  | 2.76 | 0.98  | 3.48E-01 | 6.29E-01 | -6.20 |
| 1418024_PM_at   | Naa15                                                                                                                     | NAA15   | 0.35  | 4.38 | 0.98  | 3.48E-01 | 6.29E-01 | -6.20 |
| 1419426_PM_s_at | Ccl21a /// Ccl21b /// Ccl21c<br>/// Gm10591 /// Gm13304<br>/// Gm1987 /// Gm21541 ///<br>LOC100041504 ///<br>LOC100041593 | CCL21   | 0.23  | 2.73 | 0.98  | 3.48E-01 | 6.29E-01 | -6.20 |
| 1417941_PM_at   | Nanp                                                                                                                      | NANP    | -0.24 | 3.35 | -0.98 | 3.48E-01 | 6.29E-01 | -6.20 |
| 1453986_PM_at   | Lig3                                                                                                                      | LIG3    | -0.09 | 2.33 | -0.98 | 3.48E-01 | 6.29E-01 | -6.20 |
| 1430630_PM_at   | Itgb1                                                                                                                     | NA      | 0.10  | 2.15 | 0.98  | 3.48E-01 | 6.29E-01 | -6.20 |
| 1422154_PM_at   | Gpr27                                                                                                                     | GPR27   | 0.14  | 2.59 | 0.98  | 3.48E-01 | 6.29E-01 | -6.20 |
| 1427942_PM_at   | Rassf9                                                                                                                    | RASSF9  | -0.28 | 2.35 | -0.98 | 3.48E-01 | 6.29E-01 | -6.20 |
| 1438335_PM_at   | B3gnt1                                                                                                                    | NA      | 0.08  | 2.46 | 0.98  | 3.48E-01 | 6.29E-01 | -6.20 |
| 1444516_PM_at   | ---                                                                                                                       | NA      | 0.12  | 2.17 | 0.98  | 3.48E-01 | 6.29E-01 | -6.20 |
| 1443466_PM_s_at | Polr3b                                                                                                                    | POLR3B  | 0.20  | 2.28 | 0.98  | 3.48E-01 | 6.29E-01 | -6.20 |
| 1457454_PM_at   | Usp47                                                                                                                     | USP47   | 0.27  | 3.54 | 0.98  | 3.48E-01 | 6.29E-01 | -6.20 |
| 1454197_PM_a_at | Ccdc86                                                                                                                    | CCDC86  | 0.19  | 2.57 | 0.98  | 3.48E-01 | 6.29E-01 | -6.20 |
| 1422781_PM_at   | Tlr3                                                                                                                      | TLR3    | 0.10  | 2.39 | 0.98  | 3.48E-01 | 6.29E-01 | -6.20 |
| 1427745_PM_x_at | Gm4736 /// Gm8882 ///<br>LOC100502592 ///<br>LOC105242791 /// Prb1 ///<br>Prmp5                                           | NA      | 0.13  | 2.21 | 0.98  | 3.48E-01 | 6.29E-01 | -6.20 |
| 1454231_PM_a_at | Rpgrp1                                                                                                                    | RPGRP1  | 0.19  | 2.50 | 0.98  | 3.48E-01 | 6.29E-01 | -6.20 |
| 1440326_PM_at   | ---                                                                                                                       | NA      | 0.09  | 2.44 | 0.98  | 3.48E-01 | 6.29E-01 | -6.20 |
| 1459038_PM_at   | ---                                                                                                                       | NA      | -0.31 | 3.05 | -0.98 | 3.48E-01 | 6.29E-01 | -6.20 |
| 1421194_PM_at   | Itga4                                                                                                                     | ITGA4   | -0.14 | 2.82 | -0.98 | 3.48E-01 | 6.29E-01 | -6.20 |
| 1448924_PM_at   | Tmem186                                                                                                                   | NA      | 0.21  | 2.67 | 0.98  | 3.48E-01 | 6.30E-01 | -6.20 |
| 1440791_PM_x_at | Tcea2                                                                                                                     | TCEA2   | -0.17 | 3.12 | -0.98 | 3.48E-01 | 6.30E-01 | -6.20 |
| 1435950_PM_at   | Hr                                                                                                                        | HR      | 0.14  | 2.60 | 0.98  | 3.49E-01 | 6.30E-01 | -6.20 |
| 1449367_PM_at   | Trex2                                                                                                                     | TREX2   | 0.10  | 2.18 | 0.98  | 3.49E-01 | 6.30E-01 | -6.20 |
| 1424481_PM_s_at | Armxc5                                                                                                                    | ARMCX5  | -0.14 | 2.62 | -0.98 | 3.49E-01 | 6.30E-01 | -6.20 |
| 1429541_PM_at   | Zfp777                                                                                                                    | ZNF777  | 0.12  | 2.69 | 0.98  | 3.49E-01 | 6.30E-01 | -6.20 |
| 1448812_PM_at   | Hpcal1                                                                                                                    | HPCAL1  | 0.33  | 6.67 | 0.98  | 3.49E-01 | 6.30E-01 | -6.20 |

|                 |                                                                                                                   |          |       |       |       |          |          |       |
|-----------------|-------------------------------------------------------------------------------------------------------------------|----------|-------|-------|-------|----------|----------|-------|
| 1442967_PM_at   | Arhgap10                                                                                                          | NA       | -0.12 | 2.39  | -0.98 | 3.49E-01 | 6.30E-01 | -6.20 |
| 1418273_PM_a_at | Gm12191 /// Gm5481 ///<br>Gm6109 /// Gm6570 ///<br>Gm7429 /// Gm9703 ///<br>Rpl30 /// Rpl30-ps10 ///<br>Rpl30-ps9 | RPL30    | -0.55 | 6.62  | -0.98 | 3.49E-01 | 6.30E-01 | -6.20 |
| 1460703_PM_at   | Ascc1                                                                                                             | ASCC1    | 0.21  | 3.55  | 0.98  | 3.49E-01 | 6.30E-01 | -6.20 |
| 1432623_PM_at   | Supw3l1                                                                                                           | NA       | 0.09  | 2.44  | 0.98  | 3.49E-01 | 6.30E-01 | -6.20 |
| 1438514_PM_at   | Npc1l1                                                                                                            | NPC1L1   | 0.10  | 2.16  | 0.98  | 3.49E-01 | 6.30E-01 | -6.20 |
| 1446841_PM_at   | ---                                                                                                               | NA       | 0.15  | 2.30  | 0.98  | 3.49E-01 | 6.30E-01 | -6.20 |
| 1457402_PM_at   | ---                                                                                                               | NA       | 0.23  | 2.81  | 0.98  | 3.49E-01 | 6.30E-01 | -6.20 |
| 1419928_PM_at   | Lrig1                                                                                                             | LRIG1    | -0.19 | 4.55  | -0.98 | 3.49E-01 | 6.30E-01 | -6.20 |
| 1445387_PM_at   | Senp6                                                                                                             | NA       | 0.20  | 2.87  | 0.98  | 3.49E-01 | 6.30E-01 | -6.20 |
| 1438439_PM_at   | Gpr171                                                                                                            | GPR171   | 0.24  | 2.43  | 0.98  | 3.49E-01 | 6.30E-01 | -6.20 |
| 1435352_PM_at   | Pigk                                                                                                              | PIGK     | 0.29  | 3.99  | 0.98  | 3.49E-01 | 6.30E-01 | -6.20 |
| 1424653_PM_at   | Tspan15                                                                                                           | TSPAN15  | -0.11 | 3.05  | -0.98 | 3.49E-01 | 6.30E-01 | -6.21 |
| 1447256_PM_at   | Gm16835                                                                                                           | NA       | 0.28  | 2.49  | 0.98  | 3.49E-01 | 6.30E-01 | -6.21 |
| 1432436_PM_a_at | Ak3                                                                                                               | AK3      | -0.27 | 3.41  | -0.98 | 3.49E-01 | 6.30E-01 | -6.21 |
| 1434127_PM_a_at | Gm10257 /// Gm12657 ///<br>H3f3a /// H3f3b /// H3f3c<br>/// LOC102642045                                          | H3F3A    | -0.11 | 10.46 | -0.98 | 3.49E-01 | 6.30E-01 | -6.21 |
| 1454803_PM_a_at | Hdac11                                                                                                            | HDAC11   | 0.13  | 3.16  | 0.98  | 3.49E-01 | 6.30E-01 | -6.21 |
| 1419528_PM_at   | Sult2a2                                                                                                           | NA       | 0.14  | 2.16  | 0.98  | 3.49E-01 | 6.30E-01 | -6.21 |
| 1434380_PM_at   | Gbp7                                                                                                              | GBP4     | 0.37  | 3.30  | 0.98  | 3.49E-01 | 6.30E-01 | -6.21 |
| 1451921_PM_a_at | Nfat5                                                                                                             | NFAT5    | -0.22 | 3.66  | -0.98 | 3.49E-01 | 6.30E-01 | -6.21 |
| 1454718_PM_at   | Nagpa                                                                                                             | NAGPA    | -0.21 | 2.74  | -0.98 | 3.49E-01 | 6.30E-01 | -6.21 |
| 1454287_PM_at   | Gm41918                                                                                                           | NA       | 0.08  | 2.38  | 0.98  | 3.49E-01 | 6.30E-01 | -6.21 |
| 1421286_PM_a_at | Atp4a                                                                                                             | ATP4A    | 0.08  | 2.22  | 0.98  | 3.49E-01 | 6.30E-01 | -6.21 |
| 1447697_PM_at   | ---                                                                                                               | NA       | 0.08  | 2.18  | 0.98  | 3.49E-01 | 6.30E-01 | -6.21 |
| 1443390_PM_at   | ---                                                                                                               | NA       | 0.10  | 2.45  | 0.98  | 3.49E-01 | 6.30E-01 | -6.21 |
| 1430503_PM_at   | ---                                                                                                               | NA       | 0.10  | 2.30  | 0.98  | 3.49E-01 | 6.30E-01 | -6.21 |
| 1453167_PM_at   | 1700013G24Rik                                                                                                     | NA       | 0.10  | 2.60  | 0.98  | 3.49E-01 | 6.30E-01 | -6.21 |
| 1435036_PM_at   | Aspg                                                                                                              | ASPG     | 0.13  | 2.40  | 0.98  | 3.49E-01 | 6.30E-01 | -6.21 |
| 1448574_PM_at   | Nme6                                                                                                              | NME6     | 0.14  | 2.65  | 0.98  | 3.49E-01 | 6.30E-01 | -6.21 |
| 1457855_PM_at   | Rbp3                                                                                                              | RBP3     | 0.14  | 2.06  | 0.98  | 3.49E-01 | 6.30E-01 | -6.21 |
| 1446995_PM_at   | Cyp7b1                                                                                                            | NA       | 0.13  | 2.02  | 0.98  | 3.49E-01 | 6.30E-01 | -6.21 |
| 1421836_PM_at   | Map7                                                                                                              | MAP7     | -0.22 | 4.58  | -0.98 | 3.49E-01 | 6.30E-01 | -6.21 |
| 1438287_PM_x_at | Ddx39                                                                                                             | DDX39A   | 0.11  | 1.98  | 0.98  | 3.49E-01 | 6.30E-01 | -6.21 |
| 1452819_PM_at   | Adgr3                                                                                                             | NA       | 0.16  | 2.08  | 0.98  | 3.49E-01 | 6.30E-01 | -6.21 |
| 1415743_PM_at   | Hdac5                                                                                                             | HDAC5    | 0.21  | 3.83  | 0.98  | 3.49E-01 | 6.30E-01 | -6.21 |
| 1458649_PM_at   | Gm39173                                                                                                           | NA       | 0.42  | 3.18  | 0.98  | 3.49E-01 | 6.30E-01 | -6.21 |
| 1438443_PM_at   | Zbtb20                                                                                                            | ZBTB20   | -0.45 | 7.55  | -0.98 | 3.50E-01 | 6.30E-01 | -6.21 |
| 1421070_PM_at   | Supt20                                                                                                            | SUPT20H  | -0.31 | 5.99  | -0.98 | 3.50E-01 | 6.30E-01 | -6.21 |
| 1421865_PM_at   | Dbil5                                                                                                             | NA       | 0.09  | 2.16  | 0.98  | 3.50E-01 | 6.30E-01 | -6.21 |
| 1458097_PM_at   | Cobl1                                                                                                             | COBLL1   | 0.09  | 2.27  | 0.98  | 3.50E-01 | 6.30E-01 | -6.21 |
| 1445672_PM_at   | Gm35658                                                                                                           | NA       | 0.12  | 2.21  | 0.98  | 3.50E-01 | 6.30E-01 | -6.21 |
| 1451867_PM_x_at | Arhgap6                                                                                                           | NA       | 0.13  | 2.02  | 0.98  | 3.50E-01 | 6.30E-01 | -6.21 |
| 1425278_PM_at   | Ube4a                                                                                                             | UBE4A    | 0.13  | 2.22  | 0.98  | 3.50E-01 | 6.30E-01 | -6.21 |
| 1441046_PM_at   | ---                                                                                                               | NA       | 0.17  | 2.57  | 0.98  | 3.50E-01 | 6.30E-01 | -6.21 |
| 1415828_PM_a_at | Serp1                                                                                                             | SERP1    | 0.20  | 2.50  | 0.98  | 3.50E-01 | 6.30E-01 | -6.21 |
| 1452724_PM_at   | Ppp1r16a                                                                                                          | PPP1R16A | 0.10  | 2.89  | 0.98  | 3.50E-01 | 6.30E-01 | -6.21 |
| 1422608_PM_at   | Arpp19                                                                                                            | ARPP19   | 0.41  | 5.86  | 0.98  | 3.50E-01 | 6.30E-01 | -6.21 |
| 1456907_PM_at   | Cxc19                                                                                                             | CXCL9    | 0.11  | 2.15  | 0.98  | 3.50E-01 | 6.30E-01 | -6.21 |
| 1449801_PM_at   | ---                                                                                                               | NA       | 0.11  | 2.41  | 0.98  | 3.50E-01 | 6.30E-01 | -6.21 |
| 1436613_PM_at   | Coro6                                                                                                             | CORO6    | 0.12  | 2.33  | 0.98  | 3.50E-01 | 6.30E-01 | -6.21 |
| 1452068_PM_at   | Naaa                                                                                                              | NAAA     | 0.17  | 3.35  | 0.98  | 3.50E-01 | 6.30E-01 | -6.21 |
| 1441749_PM_at   | 4930447F24Rik                                                                                                     | NA       | -0.11 | 2.35  | -0.98 | 3.50E-01 | 6.31E-01 | -6.21 |
| 1444162_PM_at   | Frs2                                                                                                              | NA       | 0.09  | 2.10  | 0.98  | 3.50E-01 | 6.31E-01 | -6.21 |
| 1460161_PM_at   | D5Erttd422e                                                                                                       | NA       | 0.13  | 2.37  | 0.98  | 3.50E-01 | 6.31E-01 | -6.21 |
| 1429917_PM_at   | ---                                                                                                               | NA       | 0.14  | 2.90  | 0.98  | 3.50E-01 | 6.31E-01 | -6.21 |
| 1443100_PM_at   | ---                                                                                                               | NA       | 0.08  | 2.14  | 0.98  | 3.50E-01 | 6.31E-01 | -6.21 |
| 1418947_PM_at   | Nek3                                                                                                              | NEK3     | 0.31  | 2.98  | 0.98  | 3.50E-01 | 6.31E-01 | -6.21 |
| 1424895_PM_at   | Gpsm2                                                                                                             | GPSM2    | -0.32 | 3.54  | -0.98 | 3.50E-01 | 6.31E-01 | -6.21 |
| 1439814_PM_at   | Atp8b4                                                                                                            | ATP8B4   | -0.09 | 2.36  | -0.98 | 3.50E-01 | 6.31E-01 | -6.21 |
| 1443855_PM_at   | Kcnc1                                                                                                             | NA       | -0.53 | 8.05  | -0.98 | 3.50E-01 | 6.31E-01 | -6.21 |

|                 |                                                                                                                                                                                                                                 |          |       |      |       |          |          |       |
|-----------------|---------------------------------------------------------------------------------------------------------------------------------------------------------------------------------------------------------------------------------|----------|-------|------|-------|----------|----------|-------|
|                 | 0610010B08Rik ///<br>Gm11007 /// Gm14305 ///<br>Gm14308 /// Gm14325 ///<br>Gm14326 /// Gm14410 ///<br>Gm14419 /// Gm14430 ///<br>Gm14432 /// Gm14434 ///<br>Gm2004 /// Gm38519 ///<br>Gm4724 /// Gm6710 ///<br>LOC102633156 /// |          |       |      |       |          |          |       |
| 1427174_PM_at   | LOC102639653                                                                                                                                                                                                                    | NA       | -0.36 | 4.64 | -0.98 | 3.50E-01 | 6.31E-01 | -6.21 |
| 1419221_PM_a_at | Rgs14                                                                                                                                                                                                                           | RGS14    | 0.16  | 2.36 | 0.98  | 3.50E-01 | 6.31E-01 | -6.21 |
| 1416313_PM_at   | Mllt11                                                                                                                                                                                                                          | MLLT11   | -0.39 | 8.37 | -0.98 | 3.50E-01 | 6.31E-01 | -6.21 |
| 1437207_PM_at   | Rnf170                                                                                                                                                                                                                          | RNF170   | -0.30 | 2.97 | -0.98 | 3.50E-01 | 6.31E-01 | -6.21 |
| 1436999_PM_at   | Pid1                                                                                                                                                                                                                            | PID1     | -0.14 | 2.57 | -0.98 | 3.50E-01 | 6.31E-01 | -6.21 |
| 1432875_PM_at   | ---                                                                                                                                                                                                                             | NA       | 0.08  | 2.38 | 0.98  | 3.50E-01 | 6.31E-01 | -6.21 |
| 1438500_PM_at   | Pprt3                                                                                                                                                                                                                           | PRRT3    | 0.08  | 2.64 | 0.98  | 3.50E-01 | 6.31E-01 | -6.21 |
| 1459635_PM_at   | ---                                                                                                                                                                                                                             | NA       | 0.08  | 2.14 | 0.98  | 3.50E-01 | 6.31E-01 | -6.21 |
| 1445509_PM_at   | ---                                                                                                                                                                                                                             | NA       | 0.09  | 2.20 | 0.98  | 3.50E-01 | 6.31E-01 | -6.21 |
| 1441791_PM_at   | Oprm1                                                                                                                                                                                                                           | NA       | 0.09  | 2.11 | 0.98  | 3.50E-01 | 6.31E-01 | -6.21 |
| 1429973_PM_at   | Lrrc63                                                                                                                                                                                                                          | LRRCC3   | 0.10  | 2.17 | 0.98  | 3.50E-01 | 6.31E-01 | -6.21 |
| 1432441_PM_at   | 4933413J09Rik                                                                                                                                                                                                                   | NA       | 0.10  | 2.69 | 0.98  | 3.50E-01 | 6.31E-01 | -6.21 |
| 1421954_PM_at   | Crkl                                                                                                                                                                                                                            | CRKL     | 0.15  | 2.63 | 0.98  | 3.50E-01 | 6.31E-01 | -6.21 |
| 1441965_PM_at   | Ccdc38                                                                                                                                                                                                                          | CCDC38   | 0.16  | 2.78 | 0.98  | 3.50E-01 | 6.31E-01 | -6.21 |
| 1442700_PM_at   | ---                                                                                                                                                                                                                             | NA       | 0.18  | 2.84 | 0.98  | 3.50E-01 | 6.31E-01 | -6.21 |
| 1420039_PM_s_at | Cbx7                                                                                                                                                                                                                            | CBX7     | 0.23  | 3.12 | 0.98  | 3.50E-01 | 6.31E-01 | -6.21 |
| 1427143_PM_at   | Kdm5b                                                                                                                                                                                                                           | KDM5B    | 0.27  | 5.05 | 0.98  | 3.50E-01 | 6.31E-01 | -6.21 |
| 1434222_PM_at   | Sipa11l                                                                                                                                                                                                                         | SIPA11L  | 0.55  | 4.89 | 0.98  | 3.50E-01 | 6.31E-01 | -6.21 |
| 1446470_PM_at   | Gm9799                                                                                                                                                                                                                          | NA       | 0.08  | 2.52 | 0.98  | 3.50E-01 | 6.31E-01 | -6.21 |
| 1451533_PM_at   | BC022687                                                                                                                                                                                                                        | C14orf79 | 0.11  | 2.13 | 0.98  | 3.50E-01 | 6.31E-01 | -6.21 |
| 1419929_PM_at   | D15Ertid55e                                                                                                                                                                                                                     | NA       | 0.11  | 2.60 | 0.98  | 3.50E-01 | 6.31E-01 | -6.21 |
| 1431022_PM_at   | SncA                                                                                                                                                                                                                            | SNCA     | 0.25  | 2.47 | 0.98  | 3.50E-01 | 6.31E-01 | -6.21 |
| 1456823_PM_at   | Ppp1r36                                                                                                                                                                                                                         | PPP1R36  | 0.10  | 2.78 | 0.98  | 3.51E-01 | 6.31E-01 | -6.21 |
| 1455387_PM_at   | Nufip2                                                                                                                                                                                                                          | NUFI P2  | -0.23 | 3.13 | -0.98 | 3.51E-01 | 6.31E-01 | -6.21 |
| 1436639_PM_at   | Bola2                                                                                                                                                                                                                           | BOLA2    | 0.17  | 2.76 | 0.98  | 3.51E-01 | 6.31E-01 | -6.21 |
| 1444276_PM_at   | Ict1                                                                                                                                                                                                                            | MRPL58   | -0.17 | 3.81 | -0.98 | 3.51E-01 | 6.31E-01 | -6.21 |
| 1428898_PM_at   | Mon1a                                                                                                                                                                                                                           | MON1A    | 0.08  | 2.30 | 0.98  | 3.51E-01 | 6.31E-01 | -6.21 |
| 1454518_PM_at   | 4930429L21Rik                                                                                                                                                                                                                   | NA       | 0.10  | 2.51 | 0.98  | 3.51E-01 | 6.31E-01 | -6.21 |
| 1441813_PM_at   | ---                                                                                                                                                                                                                             | NA       | 0.10  | 2.00 | 0.98  | 3.51E-01 | 6.31E-01 | -6.21 |
| 1455157_PM_a_at | Piezo1                                                                                                                                                                                                                          | PIEZO1   | 0.11  | 2.46 | 0.98  | 3.51E-01 | 6.31E-01 | -6.21 |
| 1440250_PM_at   | Col4a4                                                                                                                                                                                                                          | COL4A4   | 0.15  | 2.44 | 0.98  | 3.51E-01 | 6.31E-01 | -6.21 |
| 1429129_PM_at   | Lrrcc1                                                                                                                                                                                                                          | LRRCC1   | -0.25 | 3.84 | -0.98 | 3.51E-01 | 6.31E-01 | -6.21 |
| 1449069_PM_at   | Zfp148                                                                                                                                                                                                                          | ZNF148   | -0.20 | 3.81 | -0.98 | 3.51E-01 | 6.31E-01 | -6.21 |
| 1427337_PM_at   | Albh8a1                                                                                                                                                                                                                         | ALDH8A1  | 0.13  | 3.01 | 0.98  | 3.51E-01 | 6.31E-01 | -6.21 |
| 1436364_PM_x_at | Nfix                                                                                                                                                                                                                            | NFIX     | 0.14  | 5.10 | 0.98  | 3.51E-01 | 6.31E-01 | -6.21 |
| 1451874_PM_at   | ---                                                                                                                                                                                                                             | NA       | 0.08  | 2.19 | 0.98  | 3.51E-01 | 6.31E-01 | -6.21 |
| 1451258_PM_at   | PscA                                                                                                                                                                                                                            | PSCA     | 0.12  | 2.57 | 0.98  | 3.51E-01 | 6.31E-01 | -6.21 |
| 1440600_PM_at   | 4930407110Rik                                                                                                                                                                                                                   | NA       | 0.12  | 2.83 | 0.98  | 3.51E-01 | 6.31E-01 | -6.21 |
| 1442330_PM_at   | Srrm1                                                                                                                                                                                                                           | SRRM1    | 0.14  | 2.55 | 0.98  | 3.51E-01 | 6.31E-01 | -6.21 |
| 1451445_PM_at   | Umps                                                                                                                                                                                                                            | UMPS     | 0.17  | 2.49 | 0.98  | 3.51E-01 | 6.31E-01 | -6.21 |
| 1460261_PM_at   | Dlg4                                                                                                                                                                                                                            | DLG4     | 0.13  | 2.70 | 0.98  | 3.51E-01 | 6.31E-01 | -6.21 |
| 1444142_PM_at   | Gm11544                                                                                                                                                                                                                         | NA       | 0.09  | 2.63 | 0.98  | 3.51E-01 | 6.31E-01 | -6.21 |
| 1436502_PM_at   | Mtus1                                                                                                                                                                                                                           | MTUS1    | 0.14  | 2.20 | 0.98  | 3.51E-01 | 6.31E-01 | -6.21 |
| 1425414_PM_at   | Ppp1r16b                                                                                                                                                                                                                        | PPP1R16B | 0.27  | 4.76 | 0.98  | 3.51E-01 | 6.31E-01 | -6.21 |
| 1426413_PM_at   | Neurod1                                                                                                                                                                                                                         | NEUROD1  | 0.69  | 3.39 | 0.98  | 3.51E-01 | 6.32E-01 | -6.21 |
| 1434330_PM_at   | Tbcel                                                                                                                                                                                                                           | TBCEL    | -0.19 | 3.53 | -0.98 | 3.51E-01 | 6.32E-01 | -6.21 |
| 1453753_PM_at   | Dtl                                                                                                                                                                                                                             | DTL      | 0.17  | 2.08 | 0.98  | 3.51E-01 | 6.32E-01 | -6.21 |
| 1443952_PM_at   | ---                                                                                                                                                                                                                             | NA       | 0.28  | 5.07 | 0.98  | 3.51E-01 | 6.32E-01 | -6.21 |
| 1431673_PM_at   | 4930557A04Rik                                                                                                                                                                                                                   | NA       | 0.10  | 2.12 | 0.98  | 3.51E-01 | 6.32E-01 | -6.21 |
| 1459385_PM_at   | Camsap2                                                                                                                                                                                                                         | CAMSAP2  | 0.23  | 4.11 | 0.98  | 3.51E-01 | 6.32E-01 | -6.21 |
| 1423556_PM_at   | Akr1b7                                                                                                                                                                                                                          | AKR1B15  | 0.09  | 2.53 | 0.98  | 3.51E-01 | 6.32E-01 | -6.21 |
| 1457058_PM_at   | Adamts2                                                                                                                                                                                                                         | ADAMTS2  | 0.12  | 2.59 | 0.98  | 3.51E-01 | 6.32E-01 | -6.21 |
| 1437926_PM_at   | Xpnpep3                                                                                                                                                                                                                         | XPNPEP3  | 0.19  | 2.79 | 0.98  | 3.51E-01 | 6.32E-01 | -6.21 |
| 1451242_PM_a_at | Ppp5c                                                                                                                                                                                                                           | PPP5C    | 0.25  | 2.88 | 0.98  | 3.51E-01 | 6.32E-01 | -6.21 |
| 1418122_PM_at   | Myh11                                                                                                                                                                                                                           | MYH11    | -0.24 | 3.28 | -0.98 | 3.51E-01 | 6.32E-01 | -6.21 |
| 1459295_PM_at   | ---                                                                                                                                                                                                                             | NA       | -0.08 | 2.15 | -0.98 | 3.51E-01 | 6.32E-01 | -6.21 |
| 1423429_PM_at   | Rhox5                                                                                                                                                                                                                           | NA       | 0.13  | 2.33 | 0.98  | 3.51E-01 | 6.32E-01 | -6.21 |
| 1429673_PM_at   | ---                                                                                                                                                                                                                             | NA       | 0.14  | 2.49 | 0.98  | 3.51E-01 | 6.32E-01 | -6.21 |
| 1454970_PM_at   | Bud31 /// LOC102642043                                                                                                                                                                                                          | BUD31    | 0.25  | 3.46 | 0.98  | 3.51E-01 | 6.32E-01 | -6.21 |
| 1416334_PM_at   | Wwox                                                                                                                                                                                                                            | WWOX     | 0.13  | 2.37 | 0.98  | 3.51E-01 | 6.32E-01 | -6.21 |
| 1447216_PM_at   | Nrxn1                                                                                                                                                                                                                           | NRXN1    | 0.17  | 2.60 | 0.98  | 3.51E-01 | 6.32E-01 | -6.21 |
| 1451709_PM_at   | Oprm1                                                                                                                                                                                                                           | NA       | 0.15  | 2.52 | 0.98  | 3.51E-01 | 6.32E-01 | -6.21 |
| 1450495_PM_a_at | Klrk1                                                                                                                                                                                                                           | KLRK1    | 0.10  | 2.04 | 0.98  | 3.52E-01 | 6.32E-01 | -6.21 |
| 1431315_PM_at   | Hyls1                                                                                                                                                                                                                           | HYLS1    | 0.11  | 2.25 | 0.98  | 3.52E-01 | 6.32E-01 | -6.21 |



|                 |               |          |       |      |       |          |          |       |
|-----------------|---------------|----------|-------|------|-------|----------|----------|-------|
| 1460274_PM_at   | Tex19.2       | TEX19    | 0.13  | 2.71 | 0.98  | 3.52E-01 | 6.32E-01 | -6.21 |
| 1436848_PM_x_at | Impa1         | IMPA1    | 0.51  | 8.01 | 0.98  | 3.52E-01 | 6.32E-01 | -6.21 |
| 1416871_PM_at   | Adam8         | ADAM8    | 0.08  | 2.16 | 0.98  | 3.52E-01 | 6.32E-01 | -6.21 |
| 1453651_PM_a_at | Mpc1          | MPC1     | -0.20 | 3.04 | -0.97 | 3.52E-01 | 6.32E-01 | -6.21 |
| 1416889_PM_at   | Tnni2         | TNNI2    | -0.15 | 3.08 | -0.98 | 3.52E-01 | 6.32E-01 | -6.21 |
| 1420927_PM_at   | St6gal1       | ST6GAL1  | -0.14 | 2.47 | -0.98 | 3.52E-01 | 6.32E-01 | -6.21 |
| 1418027_PM_at   | Exo1          | EXO1     | -0.11 | 2.45 | -0.97 | 3.52E-01 | 6.32E-01 | -6.21 |
| 1453377_PM_at   | Sh2d4a        | SH2D4A   | 0.10  | 2.41 | 0.98  | 3.52E-01 | 6.32E-01 | -6.21 |
| 1417828_PM_at   | Aqp8          | AQP8     | 0.12  | 2.48 | 0.97  | 3.52E-01 | 6.32E-01 | -6.21 |
| 1436026_PM_at   | Zfp703        | ZNF703   | 0.12  | 2.68 | 0.98  | 3.52E-01 | 6.32E-01 | -6.21 |
| 1431174_PM_at   | ---           | NA       | 0.13  | 2.43 | 0.97  | 3.52E-01 | 6.32E-01 | -6.21 |
| 1448956_PM_at   | Stard10       | STARD10  | 0.16  | 2.48 | 0.97  | 3.52E-01 | 6.32E-01 | -6.21 |
| 1446924_PM_at   | ---           | NA       | 0.18  | 3.13 | 0.98  | 3.52E-01 | 6.32E-01 | -6.21 |
| 1436341_PM_at   | Hmbox1        | HMBBOX1  | 0.19  | 2.79 | 0.98  | 3.52E-01 | 6.32E-01 | -6.21 |
| 1447922_PM_at   | Stxbp5l       | NA       | 0.20  | 7.26 | 0.98  | 3.52E-01 | 6.32E-01 | -6.21 |
| 1418854_PM_at   | Birc2         | BIRC2    | -0.22 | 4.36 | -0.97 | 3.52E-01 | 6.32E-01 | -6.21 |
| 1439994_PM_at   | ---           | NA       | -0.16 | 4.40 | -0.97 | 3.52E-01 | 6.32E-01 | -6.21 |
| 1449983_PM_a_at | Nqo2          | NQO2     | 0.12  | 3.03 | 0.97  | 3.52E-01 | 6.32E-01 | -6.21 |
| 1425560_PM_a_at | S100a16       | S100A16  | 0.15  | 3.75 | 0.97  | 3.52E-01 | 6.32E-01 | -6.21 |
| 1456516_PM_x_at | Uap1          | UAP1     | -0.27 | 4.99 | -0.97 | 3.52E-01 | 6.32E-01 | -6.21 |
| 1445035_PM_at   | Igkv2-137     | NA       | 0.08  | 2.43 | 0.97  | 3.52E-01 | 6.32E-01 | -6.21 |
| 1458715_PM_at   | Casp6         | CASP6    | 0.12  | 2.60 | 0.97  | 3.52E-01 | 6.32E-01 | -6.21 |
| 1447383_PM_at   | ---           | NA       | 0.13  | 3.38 | 0.97  | 3.52E-01 | 6.32E-01 | -6.21 |
| 1460009_PM_at   | Ier5          | IER5     | 0.15  | 3.04 | 0.97  | 3.52E-01 | 6.32E-01 | -6.21 |
| 1419412_PM_at   | Xcl1          | XCL2     | 0.18  | 2.57 | 0.97  | 3.52E-01 | 6.32E-01 | -6.21 |
| 1454554_PM_at   | 9330159N22Rik | NA       | 0.21  | 2.76 | 0.97  | 3.52E-01 | 6.32E-01 | -6.21 |
| 1455642_PM_a_at | Tspan17       | TSPAN17  | -0.14 | 3.17 | -0.97 | 3.52E-01 | 6.32E-01 | -6.21 |
| 1442792_PM_x_at | Slc35f6       | SLC35F6  | 0.07  | 1.92 | 0.97  | 3.52E-01 | 6.32E-01 | -6.21 |
| 1430444_PM_at   | 0610006L08Rik | NA       | 0.10  | 2.54 | 0.97  | 3.52E-01 | 6.32E-01 | -6.21 |
| 1454833_PM_at   | Rpl35         | NA       | 0.11  | 2.19 | 0.97  | 3.52E-01 | 6.32E-01 | -6.21 |
| 1454298_PM_at   | ---           | NA       | 0.12  | 3.42 | 0.97  | 3.52E-01 | 6.32E-01 | -6.21 |
| 1424908_PM_at   | Mtfmt         | MTFMT    | 0.14  | 3.01 | 0.97  | 3.52E-01 | 6.32E-01 | -6.21 |
| 1429952_PM_at   | Mospd4        | NA       | 0.16  | 3.72 | 0.97  | 3.52E-01 | 6.32E-01 | -6.21 |
| 1455452_PM_x_at | Kctd14        | KCTD14   | 0.19  | 2.34 | 0.97  | 3.52E-01 | 6.32E-01 | -6.21 |
| 1458734_PM_at   | C78128        | NA       | 0.25  | 2.69 | 0.97  | 3.52E-01 | 6.32E-01 | -6.21 |
| 1437867_PM_at   | ---           | NA       | 0.27  | 4.91 | 0.97  | 3.52E-01 | 6.32E-01 | -6.21 |
| 1456903_PM_at   | ---           | NA       | 0.09  | 2.62 | 0.97  | 3.52E-01 | 6.32E-01 | -6.21 |
| 1439752_PM_at   | Mboat4        | MBOAT4   | 0.12  | 2.54 | 0.97  | 3.52E-01 | 6.32E-01 | -6.21 |
| 1430713_PM_s_at | Ndufa13       | NDUFA13  | 0.26  | 8.52 | 0.97  | 3.52E-01 | 6.32E-01 | -6.21 |
| 1432604_PM_at   | Rbl1          | RBL1     | -0.16 | 2.48 | -0.97 | 3.52E-01 | 6.32E-01 | -6.21 |
| 1452383_PM_at   | Rps6ka3       | RPS6KA3  | -0.15 | 2.50 | -0.97 | 3.52E-01 | 6.32E-01 | -6.21 |
| 1443030_PM_at   | ---           | NA       | 0.13  | 2.37 | 0.97  | 3.52E-01 | 6.32E-01 | -6.21 |
| 1429854_PM_at   | 2900092C05Rik | C19orf18 | 0.08  | 2.02 | 0.97  | 3.52E-01 | 6.32E-01 | -6.21 |
| 1437227_PM_at   | Urm1          | URM1     | 0.15  | 2.05 | 0.97  | 3.52E-01 | 6.32E-01 | -6.21 |
| 1452909_PM_at   | Klhdc10       | KLHDC10  | -0.13 | 4.92 | -0.97 | 3.52E-01 | 6.32E-01 | -6.21 |
| 1429262_PM_at   | Rassf6        | RASSF6   | 0.10  | 2.13 | 0.97  | 3.52E-01 | 6.32E-01 | -6.21 |
| 1457228_PM_x_at | Gle1          | GLE1     | 0.18  | 5.00 | 0.97  | 3.52E-01 | 6.32E-01 | -6.21 |
| 1444334_PM_at   | Gm31690       | NA       | 0.17  | 2.46 | 0.97  | 3.52E-01 | 6.32E-01 | -6.21 |
| 1459352_PM_at   | ---           | NA       | 0.13  | 2.59 | 0.97  | 3.53E-01 | 6.32E-01 | -6.21 |
| 1423229_PM_at   | Inpp5e        | INPP5E   | 0.18  | 3.17 | 0.97  | 3.53E-01 | 6.32E-01 | -6.21 |
| 1458452_PM_at   | ---           | NA       | -0.17 | 2.65 | -0.97 | 3.53E-01 | 6.32E-01 | -6.21 |
| 1443209_PM_at   | ---           | NA       | 0.10  | 2.25 | 0.97  | 3.53E-01 | 6.32E-01 | -6.21 |
| 1428390_PM_at   | Wdr43         | WDR43    | 0.16  | 3.64 | 0.97  | 3.53E-01 | 6.32E-01 | -6.21 |
| 1421399_PM_at   | Insm1         | INSM1    | -0.22 | 2.72 | -0.97 | 3.53E-01 | 6.32E-01 | -6.21 |
| 1451844_PM_at   | Prlr          | PRLR     | 0.09  | 2.53 | 0.97  | 3.53E-01 | 6.32E-01 | -6.21 |
| 1427646_PM_a_at | Arhgef2       | ARHGEF2  | 0.18  | 2.59 | 0.97  | 3.53E-01 | 6.32E-01 | -6.21 |
| 1429481_PM_at   | Nck2          | NCK2     | 0.27  | 2.44 | 0.97  | 3.53E-01 | 6.32E-01 | -6.21 |
| 1434089_PM_at   | Synpo         | SYNPO    | -0.61 | 3.98 | -0.97 | 3.53E-01 | 6.32E-01 | -6.21 |
| 1457918_PM_at   | ---           | NA       | -0.15 | 3.27 | -0.97 | 3.53E-01 | 6.32E-01 | -6.21 |
| 1431336_PM_at   | Scara5        | SCARA5   | 0.07  | 2.24 | 0.97  | 3.53E-01 | 6.32E-01 | -6.21 |
| 1460110_PM_at   | Rtnn          | RTTN     | 0.09  | 2.43 | 0.97  | 3.53E-01 | 6.32E-01 | -6.21 |
| 1439314_PM_at   | Clock         | CLOCK    | 0.14  | 2.65 | 0.97  | 3.53E-01 | 6.32E-01 | -6.21 |
| 1437367_PM_at   | Ddx39b        | NA       | 0.15  | 2.88 | 0.97  | 3.53E-01 | 6.32E-01 | -6.21 |
| 1452549_PM_at   | Gm1549        | NA       | 0.34  | 2.49 | 0.97  | 3.53E-01 | 6.32E-01 | -6.21 |
| 1442280_PM_at   | Knstrn        | KNSTRN   | 0.11  | 2.35 | 0.97  | 3.53E-01 | 6.32E-01 | -6.21 |
| 1428315_PM_at   | Ebna1bp2      | EBNA1BP2 | 0.40  | 4.18 | 0.97  | 3.53E-01 | 6.32E-01 | -6.21 |
| 1449794_PM_x_at | Ctsf          | NA       | 0.09  | 2.54 | 0.97  | 3.53E-01 | 6.32E-01 | -6.21 |
| 1456339_PM_at   | ---           | NA       | -0.37 | 2.50 | -0.97 | 3.53E-01 | 6.32E-01 | -6.21 |
| 1445212_PM_at   | ---           | NA       | 0.17  | 2.52 | 0.97  | 3.53E-01 | 6.33E-01 | -6.21 |
| 1443764_PM_x_at | Rab27b        | RAB27B   | 0.16  | 2.18 | 0.97  | 3.53E-01 | 6.33E-01 | -6.21 |
| 1448774_PM_at   | Stoml2        | STOML2   | 0.22  | 2.67 | 0.97  | 3.53E-01 | 6.33E-01 | -6.21 |
| 1426383_PM_at   | Cry2          | CRY2     | 0.35  | 4.89 | 0.97  | 3.53E-01 | 6.33E-01 | -6.21 |
| 1447550_PM_at   | Gm8350        | NA       | -0.34 | 3.51 | -0.97 | 3.53E-01 | 6.33E-01 | -6.21 |
| 1417571_PM_at   | Mpg           | MPG      | -0.14 | 2.25 | -0.97 | 3.53E-01 | 6.33E-01 | -6.21 |
| 1444947_PM_at   | ---           | NA       | 0.09  | 2.23 | 0.97  | 3.53E-01 | 6.33E-01 | -6.21 |

|                 |                         |               |       |      |       |          |          |       |
|-----------------|-------------------------|---------------|-------|------|-------|----------|----------|-------|
| 1457301_PM_at   | Prmt10                  | PRMT9         | 0.10  | 2.03 | 0.97  | 3.53E-01 | 6.33E-01 | -6.21 |
| 1443490_PM_at   | D3Ert34e                | NA            | 0.16  | 2.91 | 0.97  | 3.53E-01 | 6.33E-01 | -6.21 |
| 1431932_PM_s_at | Trim44                  | TRIM44        | 0.21  | 3.71 | 0.97  | 3.53E-01 | 6.33E-01 | -6.21 |
| 1441814_PM_s_at | Rpain                   | RPAIN         | 0.22  | 5.32 | 0.97  | 3.53E-01 | 6.33E-01 | -6.21 |
| 1457683_PM_at   | Grik2                   | GRIK2         | 0.22  | 6.29 | 0.97  | 3.53E-01 | 6.33E-01 | -6.21 |
| 1420847_PM_a_at | Fgfr2                   | FGFR2         | 0.47  | 3.53 | 0.97  | 3.53E-01 | 6.33E-01 | -6.21 |
| 1437540_PM_at   | Mcoln3                  | MCOLN3        | -0.07 | 1.96 | -0.97 | 3.53E-01 | 6.33E-01 | -6.21 |
| 1441142_PM_at   | Smc2os                  | NA            | 0.11  | 2.41 | 0.97  | 3.53E-01 | 6.33E-01 | -6.21 |
| 1430494_PM_at   | ---                     | NA            | 0.10  | 2.47 | 0.97  | 3.53E-01 | 6.33E-01 | -6.21 |
| 1459086_PM_at   | ---                     | NA            | 0.09  | 2.44 | 0.97  | 3.53E-01 | 6.33E-01 | -6.21 |
| 1455717_PM_s_at | Daam2                   | DAAM2         | -0.18 | 2.60 | -0.97 | 3.53E-01 | 6.33E-01 | -6.21 |
| 1420813_PM_at   | Hdac7                   | HDAC7         | 0.55  | 2.77 | 0.97  | 3.53E-01 | 6.33E-01 | -6.21 |
| 1452780_PM_at   | Gtf3c2                  | GTF3C2        | -0.23 | 2.64 | -0.97 | 3.53E-01 | 6.33E-01 | -6.21 |
| 1442749_PM_at   | ---                     | NA            | 0.35  | 3.18 | 0.97  | 3.54E-01 | 6.33E-01 | -6.21 |
| 1441339_PM_at   | ---                     | NA            | -0.18 | 3.46 | -0.97 | 3.54E-01 | 6.33E-01 | -6.21 |
| 1460369_PM_at   | Zfp958                  | NA            | -0.11 | 2.20 | -0.97 | 3.54E-01 | 6.33E-01 | -6.21 |
| 1442008_PM_at   | Gm17399                 | NA            | 0.10  | 2.39 | 0.97  | 3.54E-01 | 6.33E-01 | -6.21 |
| 1440601_PM_at   | ---                     | NA            | 0.14  | 2.84 | 0.97  | 3.54E-01 | 6.33E-01 | -6.21 |
| 1443421_PM_s_at | Pcdhb15                 | NA            | -0.63 | 2.59 | -0.97 | 3.54E-01 | 6.33E-01 | -6.21 |
| 1433637_PM_at   | Adck2                   | ADCK2         | 0.11  | 2.78 | 0.97  | 3.54E-01 | 6.33E-01 | -6.21 |
| 1417860_PM_a_at | Spon2                   | SPON2         | 0.15  | 3.37 | 0.97  | 3.54E-01 | 6.33E-01 | -6.21 |
| 1418095_PM_at   | Smpx                    | SMPX          | 0.08  | 2.20 | 0.97  | 3.54E-01 | 6.33E-01 | -6.21 |
| 1441243_PM_at   | ---                     | NA            | 0.10  | 2.19 | 0.97  | 3.54E-01 | 6.33E-01 | -6.21 |
| 1444434_PM_at   | ---                     | NA            | -0.08 | 2.27 | -0.97 | 3.54E-01 | 6.33E-01 | -6.21 |
| 1439898_PM_at   | D4Ert617e               | NA            | 0.11  | 2.16 | 0.97  | 3.54E-01 | 6.33E-01 | -6.21 |
| 1443163_PM_at   | Slc39a2                 | SLC39A2       | 0.14  | 2.72 | 0.97  | 3.54E-01 | 6.33E-01 | -6.21 |
| 1436173_PM_at   | Dlc1                    | DLC1          | -0.41 | 3.49 | -0.97 | 3.54E-01 | 6.34E-01 | -6.22 |
| 1418368_PM_at   | Retnlb                  | RETNLB        | 0.11  | 2.14 | 0.97  | 3.54E-01 | 6.34E-01 | -6.22 |
| 1437453_PM_s_at | Pcsk9                   | PCSK9         | 0.13  | 2.69 | 0.97  | 3.54E-01 | 6.34E-01 | -6.22 |
| 1442653_PM_at   | ---                     | NA            | 0.15  | 2.21 | 0.97  | 3.54E-01 | 6.34E-01 | -6.22 |
| 1456068_PM_at   | Nfasc                   | NFASC         | -0.34 | 5.70 | -0.97 | 3.54E-01 | 6.34E-01 | -6.22 |
| 1448362_PM_at   | Dnajc7                  | DNAJC7        | -0.27 | 6.29 | -0.97 | 3.54E-01 | 6.34E-01 | -6.22 |
| 1436322_PM_a_at | ---                     | NA            | -0.27 | 2.99 | -0.97 | 3.54E-01 | 6.34E-01 | -6.22 |
| 1428869_PM_at   | Nolc1                   | NOLC1         | -0.23 | 2.90 | -0.97 | 3.54E-01 | 6.34E-01 | -6.22 |
| 1425231_PM_a_at | Zfp46                   | ZNF436        | -0.16 | 4.57 | -0.97 | 3.54E-01 | 6.34E-01 | -6.22 |
| 1430370_PM_at   | Eprs                    | EPRS          | -0.09 | 2.11 | -0.97 | 3.54E-01 | 6.34E-01 | -6.22 |
| 1458526_PM_at   | ---                     | NA            | 0.07  | 2.26 | 0.97  | 3.54E-01 | 6.34E-01 | -6.22 |
| 1434927_PM_at   | Hspb7                   | HSPB7         | 0.09  | 1.82 | 0.97  | 3.54E-01 | 6.34E-01 | -6.22 |
| 1451962_PM_at   | Igkv6-20                | NA            | 0.10  | 2.10 | 0.97  | 3.54E-01 | 6.34E-01 | -6.22 |
| 1419148_PM_at   | Avil                    | AVIL          | 0.12  | 3.51 | 0.97  | 3.54E-01 | 6.34E-01 | -6.22 |
| 1434240_PM_at   | Ddias                   | DDIAS         | 0.14  | 2.40 | 0.97  | 3.54E-01 | 6.34E-01 | -6.22 |
| 1448137_PM_at   | Alh7a1                  | ALDH7A1       | 0.16  | 4.18 | 0.97  | 3.54E-01 | 6.34E-01 | -6.22 |
| 1450243_PM_a_at | Rcan2                   | RCAN2         | 0.47  | 3.18 | 0.97  | 3.54E-01 | 6.34E-01 | -6.22 |
| 1437499_PM_at   | Ankrd39                 | ANKRD39       | 0.11  | 2.63 | 0.97  | 3.54E-01 | 6.34E-01 | -6.22 |
| 1433578_PM_at   | Gm5868///Slc10a4        | SLC10A4       | 0.09  | 2.03 | 0.97  | 3.54E-01 | 6.34E-01 | -6.22 |
| 1449151_PM_at   | Cdk18                   | CDK18         | -0.09 | 2.43 | -0.97 | 3.54E-01 | 6.34E-01 | -6.22 |
| 1438317_PM_a_at | Endog                   | ENDOG         | 0.55  | 5.30 | 0.97  | 3.54E-01 | 6.34E-01 | -6.22 |
| 1431113_PM_at   | ---                     | NA            | -0.14 | 3.22 | -0.97 | 3.55E-01 | 6.34E-01 | -6.22 |
| 1459714_PM_at   | ---                     | NA            | 0.08  | 2.00 | 0.97  | 3.55E-01 | 6.34E-01 | -6.22 |
| 1436861_PM_at   | Ii7                     | IL7           | 0.09  | 2.26 | 0.97  | 3.55E-01 | 6.34E-01 | -6.22 |
| 1423088_PM_at   | Tmod3                   | TMOD3         | -0.37 | 3.02 | -0.97 | 3.55E-01 | 6.34E-01 | -6.22 |
| 1442961_PM_at   | ---                     | NA            | 0.08  | 2.61 | 0.97  | 3.55E-01 | 6.34E-01 | -6.22 |
| 1448375_PM_at   | Tm9sf3                  | TM9SF3        | 0.20  | 2.50 | 0.97  | 3.55E-01 | 6.34E-01 | -6.22 |
| 1434232_PM_a_at | Vma21                   | VMA21         | 0.68  | 3.79 | 0.97  | 3.55E-01 | 6.34E-01 | -6.22 |
| 1440284_PM_at   | Stap1                   | STAP1         | 0.12  | 2.35 | 0.97  | 3.55E-01 | 6.34E-01 | -6.22 |
| 1428129_PM_at   | Lman1                   | LMAN1         | -0.29 | 3.85 | -0.97 | 3.55E-01 | 6.34E-01 | -6.22 |
| 1442484_PM_at   | D9Ert306e               | NA            | 0.10  | 2.24 | 0.97  | 3.55E-01 | 6.34E-01 | -6.22 |
| 1443837_PM_x_at | Bcl2                    | BCL2          | 0.50  | 2.49 | 0.97  | 3.55E-01 | 6.34E-01 | -6.22 |
| 1428639_PM_at   | Lin9                    | LIN9          | 0.13  | 3.05 | 0.97  | 3.55E-01 | 6.35E-01 | -6.22 |
| 1435775_PM_at   | Clock                   | CLOCK         | -0.18 | 2.81 | -0.97 | 3.55E-01 | 6.35E-01 | -6.22 |
| 1432477_PM_at   | Cldn34c4                | CLDN34        | 0.08  | 2.23 | 0.97  | 3.55E-01 | 6.35E-01 | -6.22 |
| 1416571_PM_at   | Traf4                   | TRAF4         | 0.18  | 2.30 | 0.97  | 3.55E-01 | 6.35E-01 | -6.22 |
| 1443115_PM_at   | ---                     | NA            | 0.20  | 2.80 | 0.97  | 3.55E-01 | 6.35E-01 | -6.22 |
| 1423791_PM_at   | Ik                      | IK            | 0.22  | 7.38 | 0.97  | 3.55E-01 | 6.35E-01 | -6.22 |
| 1431507_PM_a_at | Synj2bp///Synj2bp-cox16 | SYNJ2BP-COX16 | 0.23  | 3.48 | 0.97  | 3.55E-01 | 6.35E-01 | -6.22 |
| 1434103_PM_at   | Slc35e1                 | SLC35E1       | 0.30  | 3.51 | 0.97  | 3.55E-01 | 6.35E-01 | -6.22 |
| 1423364_PM_a_at | Aktip                   | AKTIP         | -0.30 | 5.37 | -0.97 | 3.55E-01 | 6.35E-01 | -6.22 |
| 1433703_PM_s_at | Bahd1                   | BAHD1         | -0.20 | 2.96 | -0.97 | 3.55E-01 | 6.35E-01 | -6.22 |
| 1445037_PM_at   | Git2                    | GIT2          | 0.10  | 2.40 | 0.97  | 3.55E-01 | 6.35E-01 | -6.22 |
| 1415719_PM_s_at | Armc1                   | ARMC1         | -0.13 | 3.51 | -0.97 | 3.55E-01 | 6.35E-01 | -6.22 |
| 1449787_PM_at   | ---                     | NA            | 0.09  | 2.16 | 0.97  | 3.55E-01 | 6.35E-01 | -6.22 |
| 1416304_PM_at   | Litaf                   | LITAF         | 0.13  | 2.65 | 0.97  | 3.55E-01 | 6.35E-01 | -6.22 |
| 1430832_PM_at   | 4930426i24Rik           | NA            | 0.18  | 2.43 | 0.97  | 3.55E-01 | 6.35E-01 | -6.22 |
| 1442365_PM_at   | ---                     | NA            | 0.38  | 4.65 | 0.97  | 3.55E-01 | 6.35E-01 | -6.22 |

|                 |               |            |       |       |       |          |          |       |
|-----------------|---------------|------------|-------|-------|-------|----------|----------|-------|
| 1429029_PM_at   | Sgms2         | SGMS2      | 0.10  | 2.11  | 0.97  | 3.55E-01 | 6.35E-01 | -6.22 |
| 1443601_PM_at   | Gm12888       | NA         | 0.12  | 2.34  | 0.97  | 3.55E-01 | 6.35E-01 | -6.22 |
| 1453305_PM_at   | Iqcd          | IQCD       | 0.13  | 2.70  | 0.97  | 3.55E-01 | 6.35E-01 | -6.22 |
| 1424172_PM_at   | Hagh          | HAGH       | 0.29  | 3.08  | 0.97  | 3.55E-01 | 6.35E-01 | -6.22 |
| 1416854_PM_at   | Slc34a2       | SLC34A2    | 0.08  | 2.67  | 0.97  | 3.55E-01 | 6.35E-01 | -6.22 |
| 1430614_PM_at   | Tlhc1         | NA         | 0.11  | 2.56  | 0.97  | 3.55E-01 | 6.35E-01 | -6.22 |
| 1442806_PM_at   | ---           | NA         | 0.12  | 2.46  | 0.97  | 3.55E-01 | 6.35E-01 | -6.22 |
| 1424607_PM_a_at | Cwc22///Xdh   | NA         | 0.17  | 10.59 | 0.97  | 3.55E-01 | 6.35E-01 | -6.22 |
| 1441305_PM_at   | Nedd4l        | NEDD4L     | -0.39 | 5.00  | -0.97 | 3.55E-01 | 6.35E-01 | -6.22 |
| 1421159_PM_at   | Cgnl1         | CGNL1      | 0.11  | 2.35  | 0.97  | 3.55E-01 | 6.35E-01 | -6.22 |
| 1428175_PM_at   | Tmem161b      | TMEM161B   | -0.21 | 2.69  | -0.97 | 3.55E-01 | 6.35E-01 | -6.22 |
| 1443653_PM_at   | ---           | NA         | 0.11  | 2.45  | 0.97  | 3.55E-01 | 6.35E-01 | -6.22 |
| 1452548_PM_x_at | H2-T3         | NA         | 0.12  | 2.40  | 0.97  | 3.55E-01 | 6.35E-01 | -6.22 |
| 1445214_PM_at   | ---           | NA         | 0.13  | 2.47  | 0.97  | 3.55E-01 | 6.35E-01 | -6.22 |
| 1434798_PM_at   | Atp6v0d2      | ATP6VOD2   | 0.28  | 3.45  | 0.97  | 3.55E-01 | 6.35E-01 | -6.22 |
| 1430076_PM_at   | Ccdc116       | CCDC116    | -0.20 | 2.85  | -0.97 | 3.56E-01 | 6.35E-01 | -6.22 |
| 1427227_PM_at   | Gabrg1        | GABRG1     | -0.09 | 1.89  | -0.97 | 3.56E-01 | 6.35E-01 | -6.22 |
| 1437273_PM_at   | Htra4         | NA         | -0.08 | 2.65  | -0.97 | 3.56E-01 | 6.35E-01 | -6.22 |
| 1448560_PM_at   | Bid           | BID        | 0.08  | 2.39  | 0.97  | 3.56E-01 | 6.35E-01 | -6.22 |
| 1441105_PM_at   | Gm11110       | NA         | 0.11  | 2.66  | 0.97  | 3.56E-01 | 6.35E-01 | -6.22 |
| 1453662_PM_at   | Dcaf8         | AL139011.2 | 0.13  | 2.32  | 0.97  | 3.56E-01 | 6.35E-01 | -6.22 |
| 1444460_PM_at   | Ube2r2        | UBE2R2     | 0.18  | 2.67  | 0.97  | 3.56E-01 | 6.35E-01 | -6.22 |
| 1454879_PM_s_at | Armt1         | ARMT1      | 0.20  | 2.54  | 0.97  | 3.56E-01 | 6.35E-01 | -6.22 |
| 1433451_PM_at   | Cdk5r1        | CDK5R1     | -0.17 | 4.73  | -0.97 | 3.56E-01 | 6.35E-01 | -6.22 |
| 1419974_PM_at   | Scp2          | SCP2       | 0.11  | 2.16  | 0.97  | 3.56E-01 | 6.35E-01 | -6.22 |
| 1421802_PM_at   | Ear1          | RNASE2     | 0.28  | 2.56  | 0.97  | 3.56E-01 | 6.35E-01 | -6.22 |
| 1432311_PM_at   | Tmem168       | TMEM168    | -0.18 | 2.97  | -0.97 | 3.56E-01 | 6.35E-01 | -6.22 |
| 1437358_PM_at   | Wdfy1         | WDFY1      | 0.13  | 2.38  | 0.97  | 3.56E-01 | 6.35E-01 | -6.22 |
| 1440222_PM_at   | ---           | NA         | 0.16  | 2.34  | 0.97  | 3.56E-01 | 6.35E-01 | -6.22 |
| 1429036_PM_at   | Otop3         | OTOP3      | 0.13  | 2.63  | 0.97  | 3.56E-01 | 6.35E-01 | -6.22 |
| 1436427_PM_at   | Prpf4b        | NA         | -0.23 | 4.84  | -0.97 | 3.56E-01 | 6.35E-01 | -6.22 |
| 1430804_PM_at   | Slc13a1       | SLC13A1    | 0.10  | 2.15  | 0.97  | 3.56E-01 | 6.35E-01 | -6.22 |
| 1432976_PM_at   | Ces2f         | NA         | 0.12  | 2.18  | 0.97  | 3.56E-01 | 6.35E-01 | -6.22 |
| 1430434_PM_at   | Tktl2         | TKTL2      | 0.13  | 2.59  | 0.97  | 3.56E-01 | 6.35E-01 | -6.22 |
| 1450409_PM_a_at | Slc48a1       | SLC48A1    | 0.21  | 3.61  | 0.97  | 3.56E-01 | 6.35E-01 | -6.22 |
| 1433060_PM_at   | ---           | NA         | -0.09 | 3.02  | -0.97 | 3.56E-01 | 6.35E-01 | -6.22 |
| 1440004_PM_at   | ---           | NA         | 0.09  | 2.69  | 0.97  | 3.56E-01 | 6.35E-01 | -6.22 |
| 1419749_PM_at   | Trdmt1        | TRDMT1     | 0.08  | 2.19  | 0.97  | 3.56E-01 | 6.35E-01 | -6.22 |
| 1454427_PM_at   | 4930467D19Rik | NA         | 0.08  | 1.98  | 0.97  | 3.56E-01 | 6.35E-01 | -6.22 |
| 1449168_PM_a_at | Akap2///Pakap | AKAP2      | -0.13 | 3.46  | -0.97 | 3.56E-01 | 6.35E-01 | -6.22 |
| 1434981_PM_at   | Enkd1         | ENKD1      | 0.10  | 2.62  | 0.97  | 3.56E-01 | 6.35E-01 | -6.22 |
| 1439437_PM_x_at | Cpe           | CPE        | 0.16  | 2.69  | 0.97  | 3.56E-01 | 6.35E-01 | -6.22 |
| 1455910_PM_at   | Klhdc3        | KLHDC3     | 0.11  | 2.21  | 0.97  | 3.56E-01 | 6.35E-01 | -6.22 |
| 1433357_PM_at   | ---           | NA         | 0.14  | 2.55  | 0.97  | 3.56E-01 | 6.35E-01 | -6.22 |
| 1434507_PM_at   | Npepl1        | NPEPL1     | 0.15  | 3.36  | 0.97  | 3.56E-01 | 6.35E-01 | -6.22 |
| 1425196_PM_a_at | Hint2         | HINT2      | 0.16  | 4.29  | 0.97  | 3.56E-01 | 6.35E-01 | -6.22 |
| 1446366_PM_at   | Trpc4         | TRPC4      | 0.20  | 2.53  | 0.97  | 3.56E-01 | 6.35E-01 | -6.22 |
| 1445946_PM_at   | ---           | NA         | 0.07  | 2.13  | 0.97  | 3.56E-01 | 6.35E-01 | -6.22 |
| 1455658_PM_at   | Cggbp1        | CGGBP1     | -0.25 | 2.82  | -0.97 | 3.56E-01 | 6.35E-01 | -6.22 |
| 1427752_PM_a_at | Trbv29        | NA         | 0.18  | 2.40  | 0.97  | 3.56E-01 | 6.35E-01 | -6.22 |
| 1417089_PM_a_at | Ckmt1         | CKMT1A     | -0.28 | 5.35  | -0.97 | 3.56E-01 | 6.35E-01 | -6.22 |
| 1435661_PM_at   | Tmem237       | TMEM237    | -0.16 | 2.65  | -0.97 | 3.56E-01 | 6.35E-01 | -6.22 |
| 1457624_PM_at   | Rab8a         | NA         | -0.09 | 2.18  | -0.97 | 3.56E-01 | 6.35E-01 | -6.22 |
| 1443621_PM_at   | Xaf1          | XAF1       | 0.08  | 2.16  | 0.97  | 3.56E-01 | 6.35E-01 | -6.22 |
| 1420939_PM_at   | Hs6st2        | NA         | 0.10  | 2.26  | 0.97  | 3.56E-01 | 6.35E-01 | -6.22 |
| 1433214_PM_x_at | ---           | NA         | 0.12  | 2.42  | 0.97  | 3.56E-01 | 6.35E-01 | -6.22 |
| 1417050_PM_at   | C1qtnf4       | C1QTNF4    | 0.14  | 2.86  | 0.97  | 3.56E-01 | 6.35E-01 | -6.22 |
| 1443780_PM_at   | Plk2          | NA         | 0.15  | 2.33  | 0.97  | 3.56E-01 | 6.35E-01 | -6.22 |
| 1460672_PM_at   | 2410002F23Rik | NA         | 0.19  | 3.13  | 0.97  | 3.56E-01 | 6.35E-01 | -6.22 |
| 1452290_PM_at   | Tmem106b      | TMEM106B   | -0.39 | 3.45  | -0.97 | 3.56E-01 | 6.35E-01 | -6.22 |
| 1439852_PM_at   | Bnc2          | NA         | 0.09  | 1.99  | 0.97  | 3.56E-01 | 6.35E-01 | -6.22 |
| 1429893_PM_at   | Il17rd        | IL17RD     | -0.20 | 2.55  | -0.96 | 3.57E-01 | 6.35E-01 | -6.22 |
| 1423275_PM_at   | Ints6         | NA         | -0.15 | 3.18  | -0.96 | 3.57E-01 | 6.35E-01 | -6.22 |
| 1450084_PM_s_at | Ivns1abp      | IVNS1ABP   | 0.17  | 8.20  | 0.96  | 3.57E-01 | 6.36E-01 | -6.22 |
| 1419981_PM_at   | Riok3         | NA         | -0.15 | 3.02  | -0.96 | 3.57E-01 | 6.36E-01 | -6.22 |
| 1420386_PM_at   | Seh1l         | NA         | 0.09  | 2.15  | 0.96  | 3.57E-01 | 6.36E-01 | -6.22 |
| 1418195_PM_at   | Galnt10       | GALNT10    | 0.10  | 2.42  | 0.96  | 3.57E-01 | 6.36E-01 | -6.22 |
| 1440992_PM_at   | 3110052M02Rik | NA         | -0.23 | 2.59  | -0.96 | 3.57E-01 | 6.36E-01 | -6.22 |
| 1454123_PM_at   | 4933406K04Rik | NA         | -0.30 | 2.36  | -0.96 | 3.57E-01 | 6.36E-01 | -6.22 |
| 1445937_PM_at   | ---           | NA         | 0.09  | 2.22  | 0.96  | 3.57E-01 | 6.36E-01 | -6.22 |
| 1445920_PM_at   | Fastkd3       | NA         | 0.11  | 2.12  | 0.96  | 3.57E-01 | 6.36E-01 | -6.22 |
| 1448559_PM_at   | Flot1         | FLOT1      | 0.16  | 6.41  | 0.96  | 3.57E-01 | 6.36E-01 | -6.22 |
| 1450981_PM_at   | Cnn2          | CNN2       | -0.12 | 3.19  | -0.96 | 3.57E-01 | 6.36E-01 | -6.22 |
| 1441547_PM_at   | ---           | NA         | -0.39 | 2.73  | -0.96 | 3.57E-01 | 6.36E-01 | -6.22 |
| 1439629_PM_at   | Nrxn3         | NRXN3      | -0.32 | 3.42  | -0.96 | 3.57E-01 | 6.36E-01 | -6.22 |

|                 |                               |          |       |      |       |          |          |       |
|-----------------|-------------------------------|----------|-------|------|-------|----------|----------|-------|
| 1452117_PM_a_at | Fyb                           | FYB      | -0.12 | 2.62 | -0.96 | 3.57E-01 | 6.36E-01 | -6.22 |
| 1431461_PM_at   | 4933417E11Rik                 | NA       | -0.10 | 2.24 | -0.96 | 3.57E-01 | 6.36E-01 | -6.22 |
| 1445663_PM_at   | ---                           | NA       | -0.10 | 2.02 | -0.96 | 3.57E-01 | 6.36E-01 | -6.22 |
| 1453033_PM_at   | ---                           | NA       | -0.08 | 1.99 | -0.96 | 3.57E-01 | 6.36E-01 | -6.22 |
| 1452204_PM_at   | Anks1                         | ANKS1A   | 0.07  | 2.14 | 0.96  | 3.57E-01 | 6.36E-01 | -6.22 |
| 1450855_PM_at   | Arvcf                         | ARVCF    | 0.08  | 3.94 | 0.96  | 3.57E-01 | 6.36E-01 | -6.22 |
| 1428422_PM_at   | Faf2                          | FAF2     | 0.14  | 3.10 | 0.96  | 3.57E-01 | 6.36E-01 | -6.22 |
| 1437094_PM_x_at | Dnaic1                        | DNAI1    | 0.15  | 2.82 | 0.96  | 3.57E-01 | 6.36E-01 | -6.22 |
| 1422147_PM_a_at | Pla2g6                        | PLA2G6   | 0.15  | 2.88 | 0.96  | 3.57E-01 | 6.36E-01 | -6.22 |
| 1436634_PM_at   | Robo3                         | ROBO3    | 0.24  | 3.01 | 0.96  | 3.57E-01 | 6.36E-01 | -6.22 |
| 1429569_PM_a_at | Cep112                        | CEP112   | 0.39  | 2.92 | 0.96  | 3.57E-01 | 6.36E-01 | -6.22 |
| 1432148_PM_at   | ---                           | NA       | -0.08 | 2.30 | -0.96 | 3.57E-01 | 6.36E-01 | -6.22 |
| 1439695_PM_a_at | Kif20b                        | KIF20B   | 0.17  | 2.22 | 0.96  | 3.57E-01 | 6.36E-01 | -6.22 |
| 1427870_PM_x_at | Ighg1                         | NA       | -0.20 | 2.42 | -0.96 | 3.57E-01 | 6.36E-01 | -6.22 |
| 1432335_PM_at   | ---                           | NA       | 0.13  | 2.64 | 0.96  | 3.57E-01 | 6.36E-01 | -6.22 |
| 1417472_PM_at   | Myh9                          | MYH9     | 0.14  | 2.67 | 0.96  | 3.57E-01 | 6.36E-01 | -6.22 |
| 1447339_PM_at   | ---                           | NA       | 0.08  | 1.97 | 0.96  | 3.57E-01 | 6.36E-01 | -6.22 |
| 1426756_PM_at   | Galnt2                        | GALNT2   | 0.11  | 2.10 | 0.96  | 3.57E-01 | 6.36E-01 | -6.22 |
| 1449000_PM_at   | D10Jhu81e ///<br>LOC102641949 | C21orf33 | -0.15 | 2.83 | -0.96 | 3.57E-01 | 6.36E-01 | -6.22 |
| 1429974_PM_at   | Tbx18                         | TBX18    | -0.17 | 2.56 | -0.96 | 3.57E-01 | 6.36E-01 | -6.22 |
| 1449373_PM_at   | Dnajc3                        | DNAJC3   | 0.16  | 2.75 | 0.96  | 3.57E-01 | 6.36E-01 | -6.22 |
| 1454573_PM_at   | 4933412L11Rik                 | NA       | 0.11  | 2.56 | 0.96  | 3.57E-01 | 6.36E-01 | -6.22 |
| 1421148_PM_a_at | Tial1                         | TIAL1    | -0.19 | 3.33 | -0.96 | 3.57E-01 | 6.36E-01 | -6.22 |
| 1429247_PM_at   | Anxa6                         | ANXA6    | 0.28  | 2.88 | 0.96  | 3.57E-01 | 6.36E-01 | -6.22 |
| 1426458_PM_at   | Slmap                         | SLMAP    | -0.25 | 4.95 | -0.96 | 3.58E-01 | 6.36E-01 | -6.22 |
| 1422565_PM_s_at | Nfic                          | NFIC     | -0.15 | 2.49 | -0.96 | 3.58E-01 | 6.36E-01 | -6.22 |
| 1449317_PM_at   | Cflar                         | CFLAR    | -0.09 | 2.27 | -0.96 | 3.58E-01 | 6.36E-01 | -6.22 |
| 1457699_PM_at   | E330009J07Rik                 | KIAA1147 | 0.10  | 2.12 | 0.96  | 3.58E-01 | 6.36E-01 | -6.22 |
| 1428249_PM_at   | Pygo2                         | PYGO2    | 0.13  | 3.36 | 0.96  | 3.58E-01 | 6.36E-01 | -6.22 |
| 1422505_PM_at   | Chrac1                        | CHRA1    | 0.12  | 2.56 | 0.96  | 3.58E-01 | 6.36E-01 | -6.22 |
| 1454117_PM_at   | 5330439B14Rik                 | NA       | 0.09  | 2.13 | 0.96  | 3.58E-01 | 6.36E-01 | -6.22 |
| 1451947_PM_at   | Igh-v7183                     | NA       | 0.12  | 2.28 | 0.96  | 3.58E-01 | 6.37E-01 | -6.22 |
| 1436302_PM_at   | Slc10a7                       | SLC10A7  | -0.14 | 2.69 | -0.96 | 3.58E-01 | 6.37E-01 | -6.22 |
| 1440897_PM_at   | Gm17619                       | NA       | 0.09  | 2.34 | 0.96  | 3.58E-01 | 6.37E-01 | -6.22 |
| 1455576_PM_at   | Rinl                          | RINL     | 0.10  | 2.56 | 0.96  | 3.58E-01 | 6.37E-01 | -6.22 |
| 1430827_PM_a_at | Ptk2                          | PTK2     | -0.24 | 3.22 | -0.96 | 3.58E-01 | 6.37E-01 | -6.22 |
| 1445572_PM_at   | ---                           | NA       | -0.10 | 1.96 | -0.96 | 3.58E-01 | 6.37E-01 | -6.22 |
| 1434457_PM_at   | Sp100                         | SP140L   | 0.12  | 2.60 | 0.96  | 3.58E-01 | 6.37E-01 | -6.22 |
| 1416420_PM_a_at | Rpl9 /// Rpl9-ps7             | NA       | -0.50 | 5.71 | -0.96 | 3.58E-01 | 6.37E-01 | -6.22 |
| 1452606_PM_at   | Mnd1                          | MND1     | -0.09 | 2.48 | -0.96 | 3.58E-01 | 6.37E-01 | -6.22 |
| 1424762_PM_at   | C1qtnf5 /// Mfrp              | MFRP     | 0.11  | 2.83 | 0.96  | 3.58E-01 | 6.37E-01 | -6.22 |
| 1438847_PM_at   | Mxd3                          | MXD3     | 0.25  | 6.93 | 0.96  | 3.58E-01 | 6.37E-01 | -6.22 |
| 1423653_PM_at   | Atp1a1                        | ATP1A1   | -0.35 | 5.95 | -0.96 | 3.58E-01 | 6.37E-01 | -6.22 |
| 1430980_PM_a_at | Eif4a1                        | EIF4A1   | -0.28 | 4.24 | -0.96 | 3.58E-01 | 6.37E-01 | -6.22 |
| 1431070_PM_a_at | Mau2                          | MAU2     | 0.10  | 2.38 | 0.96  | 3.58E-01 | 6.37E-01 | -6.22 |
| 1436807_PM_x_at | Trim62                        | TRIM62   | 0.10  | 2.40 | 0.96  | 3.58E-01 | 6.37E-01 | -6.22 |
| 1422131_PM_at   | Dcp1a                         | DCP1A    | 0.11  | 2.84 | 0.96  | 3.58E-01 | 6.37E-01 | -6.22 |
| 1424356_PM_a_at | Metrn1                        | METRN1   | 0.11  | 2.58 | 0.96  | 3.58E-01 | 6.37E-01 | -6.22 |
| 1431413_PM_at   | Ramp1                         | RAMP1    | 0.07  | 2.29 | 0.96  | 3.58E-01 | 6.37E-01 | -6.22 |
| 1421825_PM_at   | Bace1                         | BACE1    | -0.38 | 4.86 | -0.96 | 3.58E-01 | 6.37E-01 | -6.22 |
| 1417987_PM_at   | Btd                           | BTD      | 0.15  | 2.75 | 0.96  | 3.58E-01 | 6.37E-01 | -6.22 |
| 1418810_PM_at   | Crhr1                         | CRHR1    | 0.14  | 2.59 | 0.96  | 3.58E-01 | 6.37E-01 | -6.22 |
| 1420886_PM_a_at | Xbp1                          | XBP1     | 0.30  | 2.66 | 0.96  | 3.58E-01 | 6.37E-01 | -6.22 |
| 1457640_PM_x_at | Pigs                          | NA       | 0.13  | 2.35 | 0.96  | 3.58E-01 | 6.37E-01 | -6.22 |
| 1426594_PM_at   | Frm4b                         | FRMD4B   | 0.16  | 2.84 | 0.96  | 3.58E-01 | 6.37E-01 | -6.22 |
| 1436520_PM_at   | Ahnak2                        | NA       | 0.10  | 2.21 | 0.96  | 3.58E-01 | 6.37E-01 | -6.22 |
| 1443701_PM_at   | Fam171a2                      | FAM171A2 | -0.10 | 2.06 | -0.96 | 3.59E-01 | 6.37E-01 | -6.22 |
| 1439642_PM_at   | ---                           | NA       | 0.10  | 2.31 | 0.96  | 3.59E-01 | 6.37E-01 | -6.22 |
| 1445155_PM_at   | ---                           | NA       | 0.09  | 2.62 | 0.96  | 3.59E-01 | 6.38E-01 | -6.22 |
| 1427605_PM_at   | Hoxb3                         | HOXB3    | 0.11  | 2.39 | 0.96  | 3.59E-01 | 6.38E-01 | -6.22 |
| 1444861_PM_at   | D13Ert297e                    | NA       | 0.11  | 2.27 | 0.96  | 3.59E-01 | 6.38E-01 | -6.22 |
| 1455894_PM_at   | Pthr2                         | PTRH2    | 0.30  | 2.57 | 0.96  | 3.59E-01 | 6.38E-01 | -6.22 |
| 1441837_PM_at   | Chrb2                         | CHRN2    | 0.11  | 2.33 | 0.96  | 3.59E-01 | 6.38E-01 | -6.22 |
| 1431981_PM_at   | Hif1a                         | HIF1A    | -0.11 | 2.32 | -0.96 | 3.59E-01 | 6.38E-01 | -6.23 |
| 1429851_PM_at   | Cfap206                       | CFAP206  | 0.12  | 2.72 | 0.96  | 3.59E-01 | 6.38E-01 | -6.23 |
| 1456463_PM_at   | Igln5                         | IGLN5    | 0.21  | 2.17 | 0.96  | 3.59E-01 | 6.38E-01 | -6.23 |
| 1442725_PM_at   | Map2k6                        | NA       | -0.09 | 2.11 | -0.96 | 3.59E-01 | 6.38E-01 | -6.23 |
| 1425767_PM_a_at | Six4                          | SIX4     | 0.10  | 2.49 | 0.96  | 3.59E-01 | 6.38E-01 | -6.23 |
| 1432801_PM_at   | Pip5k1bos                     | NA       | 0.07  | 2.09 | 0.96  | 3.59E-01 | 6.38E-01 | -6.23 |
| 1455187_PM_at   | Zbtb40                        | ZBTB40   | -0.23 | 4.18 | -0.96 | 3.59E-01 | 6.38E-01 | -6.23 |
| 1442994_PM_at   | ---                           | NA       | -0.20 | 2.54 | -0.96 | 3.59E-01 | 6.38E-01 | -6.23 |
| 1440140_PM_at   | ---                           | NA       | 0.12  | 2.54 | 0.96  | 3.59E-01 | 6.38E-01 | -6.23 |
| 1425442_PM_at   | Oscar                         | OSCAR    | 0.13  | 2.41 | 0.96  | 3.59E-01 | 6.38E-01 | -6.23 |
| 1443296_PM_at   | Cdk16                         | CDK16    | 0.14  | 2.27 | 0.96  | 3.59E-01 | 6.38E-01 | -6.23 |

|                      |               |         |       |       |       |          |          |       |
|----------------------|---------------|---------|-------|-------|-------|----------|----------|-------|
| 1441647_PM_at        | Gm16364       | NA      | 0.32  | 2.49  | 0.96  | 3.59E-01 | 6.38E-01 | -6.23 |
| 1427260_PM_a_at      | Tpm3          | TPM3    | 0.27  | 5.38  | 0.96  | 3.59E-01 | 6.38E-01 | -6.23 |
| 1422901_PM_at        | Mgea5         | MGEA5   | -0.27 | 2.99  | -0.96 | 3.59E-01 | 6.38E-01 | -6.23 |
| 1449138_PM_at        | Sf3b1         | SF3B1   | 0.14  | 9.35  | 0.96  | 3.59E-01 | 6.38E-01 | -6.23 |
| 1454252_PM_at        | 8030453022Rik | NA      | 0.15  | 2.25  | 0.96  | 3.59E-01 | 6.38E-01 | -6.23 |
| 1425454_PM_a_at      | Il12a         | IL12A   | 0.10  | 2.46  | 0.96  | 3.59E-01 | 6.38E-01 | -6.23 |
| 1454822_PM_x_at      | Apcdd1        | NA      | -0.54 | 5.43  | -0.96 | 3.59E-01 | 6.38E-01 | -6.23 |
| 1438080_PM_at        | Mrpl11        | MRPL11  | -0.22 | 3.26  | -0.96 | 3.59E-01 | 6.38E-01 | -6.23 |
| 1420354_PM_at        | Cnrm1         | CNNM1   | -0.12 | 2.61  | -0.96 | 3.59E-01 | 6.38E-01 | -6.23 |
| 1423888_PM_at        | Telo2         | TELO2   | 0.09  | 3.51  | 0.96  | 3.59E-01 | 6.38E-01 | -6.23 |
| 1433426_PM_at        | Tll13         | NA      | 0.12  | 2.68  | 0.96  | 3.59E-01 | 6.38E-01 | -6.23 |
| 1450472_PM_s_at      | Smad3         | SMAD3   | 0.16  | 2.76  | 0.96  | 3.59E-01 | 6.38E-01 | -6.23 |
| 1428730_PM_at        | Krit1         | KRIT1   | -0.28 | 3.17  | -0.96 | 3.60E-01 | 6.38E-01 | -6.23 |
| 1448720_PM_at        | Lrrc40        | LRRC40  | -0.20 | 6.02  | -0.96 | 3.60E-01 | 6.38E-01 | -6.23 |
| 1437933_PM_at        | Hhip          | HHIP    | 0.09  | 2.28  | 0.96  | 3.60E-01 | 6.38E-01 | -6.23 |
| 1423878_PM_at        | Gypc          | GYPC    | 0.15  | 2.74  | 0.96  | 3.60E-01 | 6.38E-01 | -6.23 |
| 1438632_PM_x_at      | Tnp1          | TNP1    | 0.22  | 3.25  | 0.96  | 3.60E-01 | 6.38E-01 | -6.23 |
| 1455353_PM_at        | Tmcc1         | TMCC1   | 0.25  | 2.88  | 0.96  | 3.60E-01 | 6.38E-01 | -6.23 |
| 1444972_PM_at        | C77626        | NA      | 0.12  | 2.15  | 0.96  | 3.60E-01 | 6.38E-01 | -6.23 |
| 1436183_PM_at        | Zc3hav1       | ZC3HAV1 | -0.24 | 2.87  | -0.96 | 3.60E-01 | 6.39E-01 | -6.23 |
| 1434017_PM_at        | Znrf2         | ZNRF2   | -0.24 | 2.77  | -0.96 | 3.60E-01 | 6.39E-01 | -6.23 |
| 1428556_PM_at        | Pyurf         | PYURF   | -0.14 | 2.89  | -0.96 | 3.60E-01 | 6.39E-01 | -6.23 |
| 1434710_PM_at        | Dhx29         | DHX29   | 0.09  | 2.57  | 0.96  | 3.60E-01 | 6.39E-01 | -6.23 |
| 1422270_PM_a_at      | Il6ra         | IL6R    | 0.09  | 2.49  | 0.96  | 3.60E-01 | 6.39E-01 | -6.23 |
| 1429830_PM_a_at      | Cd59a         | CD59    | 0.14  | 2.51  | 0.96  | 3.60E-01 | 6.39E-01 | -6.23 |
| 1450443_PM_at        | Ptbp1         | NA      | 0.15  | 3.05  | 0.96  | 3.60E-01 | 6.39E-01 | -6.23 |
| 1443049_PM_at        | ---           | NA      | -0.10 | 2.20  | -0.96 | 3.60E-01 | 6.39E-01 | -6.23 |
| 1440883_PM_at        | Usp6nl        | USP6NL  | 0.15  | 4.35  | 0.96  | 3.60E-01 | 6.39E-01 | -6.23 |
| 1446694_PM_at        | Dnm3          | DNM3    | 0.14  | 2.61  | 0.96  | 3.60E-01 | 6.39E-01 | -6.23 |
| 1439223_PM_at        | Tmod2         | TMOD2   | -0.18 | 3.22  | -0.96 | 3.60E-01 | 6.39E-01 | -6.23 |
| AFX-r2-Bs-thr-3_s_at | ---           | NA      | -0.11 | 2.37  | -0.96 | 3.60E-01 | 6.39E-01 | -6.23 |
| 1428458_PM_at        | Pop1          | POP1    | 0.11  | 2.69  | 0.96  | 3.60E-01 | 6.39E-01 | -6.23 |
| 1421848_PM_at        | Slc22a5       | SLC22A5 | 0.13  | 2.35  | 0.96  | 3.60E-01 | 6.39E-01 | -6.23 |
| 1428095_PM_a_at      | C2cd2l        | C2CD2L  | -0.40 | 4.13  | -0.96 | 3.60E-01 | 6.39E-01 | -6.23 |
| 1436563_PM_at        | ---           | NA      | 0.22  | 3.12  | 0.96  | 3.60E-01 | 6.39E-01 | -6.23 |
| 1427478_PM_at        | Usp12         | USP12   | 0.13  | 2.58  | 0.96  | 3.60E-01 | 6.39E-01 | -6.23 |
| 1456210_PM_at        | Proser2       | PROSER2 | 0.11  | 2.17  | 0.96  | 3.60E-01 | 6.39E-01 | -6.23 |
| 1452563_PM_a_at      | Kdm5d         | KDM5D   | 0.24  | 3.07  | 0.96  | 3.60E-01 | 6.39E-01 | -6.23 |
| 1438786_PM_a_at      | ---           | NA      | -0.33 | 3.94  | -0.96 | 3.60E-01 | 6.39E-01 | -6.23 |
| 1425470_PM_at        | LOC105247125  | NA      | 0.12  | 2.13  | 0.96  | 3.60E-01 | 6.39E-01 | -6.23 |
| 1459563_PM_x_at      | ---           | NA      | -0.61 | 3.95  | -0.96 | 3.60E-01 | 6.39E-01 | -6.23 |
| 1424405_PM_at        | Mbip          | MBIP    | -0.21 | 3.87  | -0.96 | 3.60E-01 | 6.39E-01 | -6.23 |
| 1432121_PM_a_at      | Lrriq3        | LRRIQ3  | 0.10  | 2.33  | 0.96  | 3.60E-01 | 6.39E-01 | -6.23 |
| 1446184_PM_at        | ---           | NA      | 0.14  | 2.36  | 0.96  | 3.60E-01 | 6.39E-01 | -6.23 |
| 1453007_PM_at        | 3110082117Rik | C7orf50 | 0.66  | 3.93  | 0.96  | 3.60E-01 | 6.39E-01 | -6.23 |
| 1452744_PM_at        | 2210016F16Rik | C9orf64 | 0.09  | 2.14  | 0.96  | 3.60E-01 | 6.39E-01 | -6.23 |
| 1443256_PM_at        | ---           | NA      | 0.09  | 1.98  | 0.96  | 3.61E-01 | 6.39E-01 | -6.23 |
| 1439226_PM_at        | ---           | NA      | 0.15  | 2.62  | 0.96  | 3.61E-01 | 6.39E-01 | -6.23 |
| 1445582_PM_at        | ---           | NA      | 0.16  | 2.17  | 0.96  | 3.61E-01 | 6.39E-01 | -6.23 |
| 1435112_PM_a_at      | Atp5h         | ATP5H   | -0.12 | 10.53 | -0.96 | 3.61E-01 | 6.39E-01 | -6.23 |
| 1457987_PM_at        | 6030458C11Rik | NA      | 0.13  | 2.38  | 0.96  | 3.61E-01 | 6.39E-01 | -6.23 |
| 1435246_PM_at        | Paqr8         | PAQR8   | -0.16 | 3.15  | -0.96 | 3.61E-01 | 6.39E-01 | -6.23 |
| 1422851_PM_at        | Hmga2         | HMGGA2  | 0.12  | 2.27  | 0.96  | 3.61E-01 | 6.39E-01 | -6.23 |
| 1424930_PM_s_at      | Fam83f        | FAM83F  | 0.08  | 2.08  | 0.96  | 3.61E-01 | 6.39E-01 | -6.23 |
| 1425756_PM_at        | Rab40b        | RAB40A  | 0.14  | 2.54  | 0.96  | 3.61E-01 | 6.40E-01 | -6.23 |
| 1439524_PM_at        | Dnajb4        | DNAJB4  | -0.25 | 2.62  | -0.96 | 3.61E-01 | 6.40E-01 | -6.23 |
| 1432580_PM_at        | Rsph3a        | NA      | 0.21  | 3.36  | 0.96  | 3.61E-01 | 6.40E-01 | -6.23 |
| 1445153_PM_at        | ---           | NA      | 0.08  | 2.32  | 0.96  | 3.61E-01 | 6.40E-01 | -6.23 |
| 1439577_PM_at        | ---           | NA      | 0.10  | 2.27  | 0.96  | 3.61E-01 | 6.40E-01 | -6.23 |
| 1460291_PM_at        | Cdk6          | CDK6    | 0.13  | 2.00  | 0.96  | 3.61E-01 | 6.40E-01 | -6.23 |
| 1429122_PM_a_at      | Pradc1        | PRADC1  | 0.16  | 2.18  | 0.96  | 3.61E-01 | 6.40E-01 | -6.23 |
| 1439874_PM_at        | 9330102E08Rik | NA      | 0.27  | 3.81  | 0.96  | 3.61E-01 | 6.40E-01 | -6.23 |
| 1439404_PM_x_at      | Zfa-ps///Zfx  | ZFY     | 0.18  | 3.04  | 0.96  | 3.61E-01 | 6.40E-01 | -6.23 |
| 1437294_PM_at        | Exosc10       | EXOSC10 | 0.21  | 2.55  | 0.96  | 3.61E-01 | 6.40E-01 | -6.23 |
| 1458358_PM_at        | Pank2         | PANK2   | 0.08  | 2.49  | 0.96  | 3.61E-01 | 6.40E-01 | -6.23 |
| 1459335_PM_at        | ---           | NA      | -0.11 | 2.32  | -0.96 | 3.61E-01 | 6.40E-01 | -6.23 |
| 1424373_PM_at        | Armxc3        | ARMCX3  | -0.48 | 4.77  | -0.96 | 3.61E-01 | 6.40E-01 | -6.23 |
| 1424089_PM_a_at      | Tcf4          | TCF4    | -0.40 | 6.54  | -0.96 | 3.61E-01 | 6.40E-01 | -6.23 |
| 1437688_PM_x_at      | Atp6ap2       | ATP6AP2 | -0.10 | 12.56 | -0.96 | 3.61E-01 | 6.40E-01 | -6.23 |
| 1430448_PM_at        | 6720418B01Rik | NA      | 0.09  | 2.27  | 0.96  | 3.61E-01 | 6.40E-01 | -6.23 |
| 1453652_PM_at        | 4933400F21Rik | NA      | 0.10  | 2.25  | 0.96  | 3.61E-01 | 6.40E-01 | -6.23 |
| 1454484_PM_at        | ---           | NA      | 0.12  | 2.71  | 0.96  | 3.61E-01 | 6.40E-01 | -6.23 |
| 1431563_PM_at        | ---           | NA      | 0.14  | 2.30  | 0.96  | 3.61E-01 | 6.40E-01 | -6.23 |
| 1455288_PM_at        | P3h4          | P3H4    | 0.17  | 4.52  | 0.95  | 3.61E-01 | 6.40E-01 | -6.23 |
| 1426904_PM_s_at      | Dnajc10       | DNAJC10 | -0.22 | 3.48  | -0.95 | 3.61E-01 | 6.40E-01 | -6.23 |

|                 |                        |          |       |      |       |          |          |       |
|-----------------|------------------------|----------|-------|------|-------|----------|----------|-------|
| 1458850_PM_at   | ---                    | NA       | 0.16  | 2.50 | 0.95  | 3.61E-01 | 6.40E-01 | -6.23 |
| 1424868_PM_at   | Glyat                  | GLYAT    | 0.09  | 2.57 | 0.95  | 3.61E-01 | 6.40E-01 | -6.23 |
| 1442702_PM_at   | ---                    | NA       | 0.21  | 3.07 | 0.95  | 3.61E-01 | 6.40E-01 | -6.23 |
| 1432921_PM_at   | ---                    | NA       | 0.12  | 2.28 | 0.95  | 3.61E-01 | 6.40E-01 | -6.23 |
| 1439228_PM_at   | Zfp407                 | ZNF407   | 0.14  | 2.63 | 0.95  | 3.61E-01 | 6.40E-01 | -6.23 |
| 1432347_PM_at   | 4931428L18Rik          | NA       | -0.12 | 2.44 | -0.95 | 3.62E-01 | 6.40E-01 | -6.23 |
| 1459233_PM_at   | Clasp1                 | CLASP1   | 0.08  | 2.35 | 0.95  | 3.62E-01 | 6.40E-01 | -6.23 |
| 1437317_PM_at   | Uba7                   | UBA7     | 0.12  | 3.17 | 0.95  | 3.62E-01 | 6.40E-01 | -6.23 |
| 1435351_PM_at   | Bend5                  | BEND5    | 0.14  | 2.23 | 0.95  | 3.62E-01 | 6.40E-01 | -6.23 |
| 1424715_PM_at   | Retsat                 | RETSAT   | 0.25  | 2.91 | 0.95  | 3.61E-01 | 6.40E-01 | -6.23 |
| 1429622_PM_at   | Cand2                  | CAND2    | -0.07 | 2.22 | -0.95 | 3.62E-01 | 6.40E-01 | -6.23 |
| 1443997_PM_at   | Gprin2                 | NA       | 0.28  | 2.77 | 0.95  | 3.62E-01 | 6.40E-01 | -6.23 |
| 1455508_PM_at   | Slc35e2                | SLC35E2B | -0.28 | 6.53 | -0.95 | 3.62E-01 | 6.40E-01 | -6.23 |
| 1435160_PM_at   | Ahsa2                  | AHSA2    | -0.24 | 5.00 | -0.95 | 3.62E-01 | 6.40E-01 | -6.23 |
| 1427417_PM_at   | Scml4                  | SCML4    | -0.18 | 2.98 | -0.95 | 3.62E-01 | 6.40E-01 | -6.23 |
| 1440257_PM_at   | Obox6                  | NA       | 0.07  | 2.03 | 0.95  | 3.62E-01 | 6.40E-01 | -6.23 |
| 1456813_PM_at   | Gm9899                 | NA       | 0.10  | 2.50 | 0.95  | 3.62E-01 | 6.40E-01 | -6.23 |
| 1452191_PM_at   | Prcp                   | PRCP     | -0.17 | 2.99 | -0.95 | 3.62E-01 | 6.40E-01 | -6.23 |
| 1439485_PM_at   | Zfp608                 | ZNF608   | -0.21 | 3.62 | -0.95 | 3.62E-01 | 6.40E-01 | -6.23 |
| 1444169_PM_at   | 3110052M02Rik          | NA       | -0.11 | 3.44 | -0.95 | 3.62E-01 | 6.40E-01 | -6.23 |
| 1437078_PM_at   | LOC102641458 /// Vps52 | VPS52    | -0.40 | 4.01 | -0.95 | 3.62E-01 | 6.40E-01 | -6.23 |
| 1458983_PM_at   | AU015559               | NA       | 0.21  | 2.85 | 0.95  | 3.62E-01 | 6.40E-01 | -6.23 |
| 1442539_PM_at   | ---                    | NA       | -0.08 | 2.25 | -0.95 | 3.62E-01 | 6.40E-01 | -6.23 |
| 1452158_PM_at   | Eprs                   | EPRS     | -0.34 | 3.73 | -0.95 | 3.62E-01 | 6.40E-01 | -6.23 |
| 1458567_PM_at   | ---                    | NA       | 0.11  | 3.11 | 0.95  | 3.62E-01 | 6.40E-01 | -6.23 |
| 1442573_PM_at   | Trmt13                 | TRMT13   | 0.12  | 2.35 | 0.95  | 3.62E-01 | 6.40E-01 | -6.23 |
| 1430909_PM_at   | Nup210l                | NUP210L  | 0.09  | 2.57 | 0.95  | 3.62E-01 | 6.41E-01 | -6.23 |
| 1431306_PM_at   | Nt5c3                  | NT5C3A   | 0.11  | 2.21 | 0.95  | 3.62E-01 | 6.41E-01 | -6.23 |
| 1458122_PM_at   | ---                    | NA       | -0.13 | 2.30 | -0.95 | 3.62E-01 | 6.41E-01 | -6.23 |
| 1431224_PM_at   | Ube3a                  | UBE3A    | 0.27  | 2.97 | 0.95  | 3.62E-01 | 6.41E-01 | -6.23 |
| 1416436_PM_a_at | Uqcc1                  | UQCC1    | 0.12  | 2.51 | 0.95  | 3.62E-01 | 6.41E-01 | -6.23 |
| 1448317_PM_at   | Tmem128                | TMEM128  | -0.23 | 3.16 | -0.95 | 3.62E-01 | 6.41E-01 | -6.23 |
| 1444198_PM_at   | ---                    | NA       | 0.08  | 2.20 | 0.95  | 3.62E-01 | 6.41E-01 | -6.23 |
| 1430683_PM_at   | Dock6                  | DOCK6    | 0.10  | 2.39 | 0.95  | 3.62E-01 | 6.41E-01 | -6.23 |
| 1435853_PM_at   | Cyp2d12                | CYP2D6   | 0.11  | 2.30 | 0.95  | 3.62E-01 | 6.41E-01 | -6.23 |
| 1425142_PM_a_at | Hrnnpd                 | HNRNPD   | 0.28  | 6.45 | 0.95  | 3.62E-01 | 6.41E-01 | -6.23 |
| 1427048_PM_at   | Smo                    | SMO      | 0.48  | 3.47 | 0.95  | 3.62E-01 | 6.41E-01 | -6.23 |
| 1445768_PM_at   | Ankrd31                | NA       | -0.07 | 2.12 | -0.95 | 3.62E-01 | 6.41E-01 | -6.23 |
| 1430800_PM_at   | 4930518F22Rik          | NA       | 0.29  | 2.19 | 0.95  | 3.62E-01 | 6.41E-01 | -6.23 |
| 1449194_PM_at   | Mmps25                 | MRPS25   | 0.18  | 3.06 | 0.95  | 3.62E-01 | 6.41E-01 | -6.23 |
| 1442785_PM_at   | ---                    | NA       | 0.14  | 2.66 | 0.95  | 3.62E-01 | 6.41E-01 | -6.23 |
| 1419266_PM_at   | Nfyb                   | NFYB     | -0.24 | 2.69 | -0.95 | 3.62E-01 | 6.41E-01 | -6.23 |
| 1441265_PM_at   | ---                    | NA       | 0.12  | 2.27 | 0.95  | 3.62E-01 | 6.41E-01 | -6.23 |
| 1444317_PM_at   | Pcdh15                 | PCDH15   | 0.13  | 2.50 | 0.95  | 3.62E-01 | 6.41E-01 | -6.23 |
| 1422748_PM_at   | Zeb2                   | ZEB2     | 0.21  | 7.09 | 0.95  | 3.62E-01 | 6.41E-01 | -6.23 |
| 1428632_PM_at   | Tmem258                | TMEM258  | 0.23  | 3.34 | 0.95  | 3.62E-01 | 6.41E-01 | -6.23 |
| 1445555_PM_at   | ---                    | NA       | 0.11  | 2.29 | 0.95  | 3.62E-01 | 6.41E-01 | -6.23 |
| 1452773_PM_at   | Tmem230                | TMEM230  | -0.18 | 3.13 | -0.95 | 3.62E-01 | 6.41E-01 | -6.23 |
| 1454200_PM_at   | Zeb2                   | ZEB2     | 0.26  | 2.52 | 0.95  | 3.62E-01 | 6.41E-01 | -6.23 |
| 1439497_PM_at   | Atxn7l1                | ATXN7L1  | -0.16 | 2.52 | -0.95 | 3.63E-01 | 6.41E-01 | -6.23 |
| 1447617_PM_at   | Cdk2                   | CDK2     | 0.09  | 2.13 | 0.95  | 3.63E-01 | 6.41E-01 | -6.23 |
| 1425496_PM_at   | Abca3                  | ABCA3    | 0.12  | 2.46 | 0.95  | 3.63E-01 | 6.41E-01 | -6.23 |
| 1449143_PM_at   | Rtp4                   | RTP4     | 0.13  | 2.67 | 0.95  | 3.63E-01 | 6.41E-01 | -6.23 |
| 1459964_PM_at   | ---                    | NA       | 0.13  | 2.51 | 0.95  | 3.63E-01 | 6.41E-01 | -6.23 |
| 1446241_PM_at   | ---                    | NA       | 0.10  | 2.34 | 0.95  | 3.63E-01 | 6.41E-01 | -6.23 |
| 1422011_PM_s_at | 3830403N18Rik /// Xlr  | NA       | 0.13  | 2.32 | 0.95  | 3.63E-01 | 6.41E-01 | -6.23 |
| 1429062_PM_at   | Kif16b                 | KIF16B   | -0.13 | 2.34 | -0.95 | 3.63E-01 | 6.41E-01 | -6.23 |
| 1429789_PM_at   | Actrt3                 | ACTRT3   | 0.10  | 2.66 | 0.95  | 3.63E-01 | 6.41E-01 | -6.23 |
| 1441628_PM_at   | ---                    | NA       | 0.18  | 2.53 | 0.95  | 3.63E-01 | 6.41E-01 | -6.23 |
| 1435541_PM_at   | Btc                    | BTC      | 0.09  | 2.32 | 0.95  | 3.63E-01 | 6.41E-01 | -6.23 |
| 1418117_PM_at   | Ndufs4                 | NDUFS4   | 0.19  | 2.51 | 0.95  | 3.63E-01 | 6.41E-01 | -6.23 |
| 1449325_PM_at   | Fads2                  | FADS2    | 0.12  | 2.59 | 0.95  | 3.63E-01 | 6.41E-01 | -6.23 |
| 1433949_PM_x_at | Pla2g1b                | PLA2G1B  | 0.10  | 2.11 | 0.95  | 3.63E-01 | 6.41E-01 | -6.23 |
| 1431093_PM_at   | Nphp3                  | NPHP3    | 0.08  | 2.12 | 0.95  | 3.63E-01 | 6.41E-01 | -6.23 |
| 1453952_PM_at   | 4930572G02Rik          | NA       | 0.11  | 2.69 | 0.95  | 3.63E-01 | 6.41E-01 | -6.23 |
| 1445051_PM_at   | ---                    | NA       | 0.23  | 2.51 | 0.95  | 3.63E-01 | 6.41E-01 | -6.23 |
| 1440131_PM_at   | ---                    | NA       | 0.10  | 2.15 | 0.95  | 3.63E-01 | 6.41E-01 | -6.23 |
| 1423872_PM_a_at | Dag1                   | DAG1     | 0.12  | 2.67 | 0.95  | 3.63E-01 | 6.41E-01 | -6.23 |
| 1453277_PM_at   | ---                    | NA       | 0.19  | 2.60 | 0.95  | 3.63E-01 | 6.41E-01 | -6.23 |
| 1446388_PM_at   | ---                    | NA       | 0.12  | 2.42 | 0.95  | 3.63E-01 | 6.41E-01 | -6.23 |
| 1428261_PM_at   | Ccdc134                | CCDC134  | 0.13  | 2.69 | 0.95  | 3.63E-01 | 6.41E-01 | -6.23 |
| 1423779_PM_at   | Chchd6                 | CHCHD6   | 0.23  | 3.17 | 0.95  | 3.63E-01 | 6.41E-01 | -6.23 |
| 1460537_PM_at   | ---                    | NA       | 0.11  | 3.11 | 0.95  | 3.63E-01 | 6.41E-01 | -6.23 |
| 1441649_PM_at   | ---                    | NA       | -0.14 | 2.21 | -0.95 | 3.63E-01 | 6.41E-01 | -6.23 |
| 1453080_PM_at   | Apol7a                 | NA       | 0.10  | 2.17 | 0.95  | 3.63E-01 | 6.41E-01 | -6.23 |

|                 |                                                                                            |              |       |      |       |          |          |       |
|-----------------|--------------------------------------------------------------------------------------------|--------------|-------|------|-------|----------|----------|-------|
| 1429593_PM_at   | ---                                                                                        | NA           | 0.20  | 3.33 | 0.95  | 3.63E-01 | 6.41E-01 | -6.23 |
| 1426676_PM_s_at | Tomm70a                                                                                    | TOMM70       | -0.27 | 7.34 | -0.95 | 3.63E-01 | 6.41E-01 | -6.23 |
| 1437282_PM_at   | ---                                                                                        | NA           | 0.10  | 2.16 | 0.95  | 3.63E-01 | 6.41E-01 | -6.23 |
| 1421416_PM_at   | ---                                                                                        | NA           | 0.08  | 2.16 | 0.95  | 3.63E-01 | 6.41E-01 | -6.23 |
| 1424790_PM_at   | Slc25a42                                                                                   | SLC25A42     | 0.11  | 2.71 | 0.95  | 3.63E-01 | 6.41E-01 | -6.23 |
| 1444962_PM_at   | Gm15433 /// Gm38510 ///<br>Gm7609 /// LOC101055663<br>/// LOC101055758 ///<br>LOC105247076 | NA           | 0.13  | 2.78 | 0.95  | 3.63E-01 | 6.41E-01 | -6.23 |
| 1456593_PM_at   | ---                                                                                        | NA           | 0.19  | 2.76 | 0.95  | 3.63E-01 | 6.41E-01 | -6.23 |
| 1431095_PM_a_at | Herc6                                                                                      | HERC6        | 0.30  | 2.52 | 0.95  | 3.63E-01 | 6.41E-01 | -6.23 |
| 1444152_PM_at   | Celf2                                                                                      | CELF2        | 0.60  | 4.75 | 0.95  | 3.63E-01 | 6.41E-01 | -6.23 |
| 1430136_PM_at   | Grm3                                                                                       | NA           | -0.34 | 4.66 | -0.95 | 3.63E-01 | 6.41E-01 | -6.23 |
| 1455041_PM_at   | Omt2b                                                                                      | NA           | 0.09  | 2.27 | 0.95  | 3.63E-01 | 6.41E-01 | -6.23 |
| 1430343_PM_at   | Nup205                                                                                     | NUP205       | 0.14  | 2.21 | 0.95  | 3.63E-01 | 6.41E-01 | -6.23 |
| 1430228_PM_at   | Dtl                                                                                        | DTL          | 0.17  | 2.83 | 0.95  | 3.63E-01 | 6.41E-01 | -6.23 |
| 1423311_PM_s_at | Tpbg                                                                                       | TPBG         | 0.55  | 6.15 | 0.95  | 3.63E-01 | 6.41E-01 | -6.23 |
| 1420731_PM_a_at | Csrp2                                                                                      | CSRP2        | -0.27 | 2.69 | -0.95 | 3.63E-01 | 6.41E-01 | -6.23 |
| 1445831_PM_at   | ---                                                                                        | NA           | -0.22 | 2.78 | -0.95 | 3.63E-01 | 6.41E-01 | -6.23 |
| 1426252_PM_a_at | Umod                                                                                       | NA           | 0.07  | 2.12 | 0.95  | 3.63E-01 | 6.41E-01 | -6.23 |
| 1450305_PM_at   | 4930591A17Rik                                                                              | NA           | 0.10  | 2.49 | 0.95  | 3.63E-01 | 6.41E-01 | -6.23 |
| 1442637_PM_at   | Itns1                                                                                      | ITSN1        | 0.10  | 2.54 | 0.95  | 3.63E-01 | 6.41E-01 | -6.23 |
| 1439064_PM_at   | Nynrin                                                                                     | NYNRIN       | 0.19  | 3.08 | 0.95  | 3.63E-01 | 6.41E-01 | -6.23 |
| 1445434_PM_at   | Snupn                                                                                      | NA           | 0.10  | 2.35 | 0.95  | 3.64E-01 | 6.41E-01 | -6.23 |
| 1459536_PM_at   | ---                                                                                        | NA           | 0.10  | 2.20 | 0.95  | 3.64E-01 | 6.41E-01 | -6.23 |
| 1447818_PM_x_at | Rhebl1                                                                                     | RHEBL1       | 0.14  | 2.47 | 0.95  | 3.64E-01 | 6.41E-01 | -6.23 |
| 1419084_PM_a_at | Pcp2                                                                                       | PCP2         | 0.39  | 2.49 | 0.95  | 3.64E-01 | 6.41E-01 | -6.23 |
| 1431362_PM_a_at | Smoc2                                                                                      | SMOC2        | 0.31  | 3.29 | 0.95  | 3.64E-01 | 6.41E-01 | -6.23 |
| 1454143_PM_at   | ---                                                                                        | NA           | 0.10  | 2.07 | 0.95  | 3.64E-01 | 6.41E-01 | -6.23 |
| 1436419_PM_a_at | 1700097N02Rik                                                                              | NA           | 0.09  | 2.12 | 0.95  | 3.64E-01 | 6.41E-01 | -6.23 |
| 1427615_PM_at   | Itga4                                                                                      | NA           | 0.10  | 2.34 | 0.95  | 3.64E-01 | 6.41E-01 | -6.23 |
| 1455853_PM_x_at | Tspan31                                                                                    | TSPAN31      | 0.15  | 4.65 | 0.95  | 3.64E-01 | 6.41E-01 | -6.23 |
| 1447684_PM_at   | Lzic                                                                                       | LZIC         | 0.19  | 2.24 | 0.95  | 3.64E-01 | 6.41E-01 | -6.23 |
| 1449633_PM_s_at | Nt5c3b                                                                                     | NT5C3B       | 0.22  | 2.21 | 0.95  | 3.64E-01 | 6.41E-01 | -6.23 |
| 1423271_PM_at   | Gjb2                                                                                       | GJB2         | -0.33 | 2.62 | -0.95 | 3.64E-01 | 6.41E-01 | -6.23 |
| 1442722_PM_at   | ---                                                                                        | NA           | 0.15  | 2.65 | 0.95  | 3.64E-01 | 6.41E-01 | -6.23 |
| 1415807_PM_s_at | Srsf2                                                                                      | SRSF2        | 0.13  | 2.63 | 0.95  | 3.64E-01 | 6.41E-01 | -6.23 |
| 1417356_PM_at   | Peg3                                                                                       | PEG3         | -0.25 | 8.36 | -0.95 | 3.64E-01 | 6.41E-01 | -6.23 |
| 1436432_PM_at   | Fgf12                                                                                      | NA           | -0.16 | 2.43 | -0.95 | 3.64E-01 | 6.41E-01 | -6.23 |
| 1449515_PM_at   | Zfp292                                                                                     | ZNF292       | -0.14 | 3.63 | -0.95 | 3.64E-01 | 6.41E-01 | -6.23 |
| 1458357_PM_x_at | Ptov1                                                                                      | PTOV1        | 0.09  | 2.18 | 0.95  | 3.64E-01 | 6.41E-01 | -6.23 |
| 1431525_PM_at   | 9130002K18Rik                                                                              | NA           | 0.23  | 3.35 | 0.95  | 3.64E-01 | 6.41E-01 | -6.23 |
| 1447054_PM_at   | C85395                                                                                     | NA           | 0.20  | 2.35 | 0.95  | 3.64E-01 | 6.41E-01 | -6.23 |
| 1453056_PM_at   | Slc16a13                                                                                   | SLC16A13     | 0.35  | 3.32 | 0.95  | 3.64E-01 | 6.41E-01 | -6.23 |
| 1423900_PM_at   | Trip12                                                                                     | TRIP12       | -0.34 | 4.40 | -0.95 | 3.64E-01 | 6.41E-01 | -6.23 |
| 1418517_PM_at   | Irx3                                                                                       | IRX3         | 0.09  | 2.65 | 0.95  | 3.64E-01 | 6.41E-01 | -6.23 |
| 1428952_PM_at   | Pdia2                                                                                      | PDIA2        | 0.10  | 2.74 | 0.95  | 3.64E-01 | 6.42E-01 | -6.23 |
| 1453370_PM_at   | Troap                                                                                      | NA           | 0.09  | 2.21 | 0.95  | 3.64E-01 | 6.42E-01 | -6.24 |
| 1455856_PM_at   | Gm1965                                                                                     | NA           | 0.15  | 2.33 | 0.95  | 3.64E-01 | 6.42E-01 | -6.24 |
| 1417945_PM_at   | Pou5f1                                                                                     | POU5F1       | 0.11  | 2.72 | 0.95  | 3.64E-01 | 6.42E-01 | -6.24 |
| 1451557_PM_at   | Tat                                                                                        | TAT          | 0.08  | 2.28 | 0.95  | 3.64E-01 | 6.42E-01 | -6.24 |
| 1446371_PM_at   | ---                                                                                        | NA           | 0.14  | 2.44 | 0.95  | 3.64E-01 | 6.42E-01 | -6.24 |
| 1431137_PM_at   | Rusc1                                                                                      | RUSC1        | 0.27  | 2.93 | 0.95  | 3.64E-01 | 6.42E-01 | -6.24 |
| 1426837_PM_at   | Metap1                                                                                     | METAP1       | 0.33  | 3.61 | 0.95  | 3.64E-01 | 6.42E-01 | -6.24 |
| 1432170_PM_at   | Tsfm                                                                                       | TSFM         | 0.08  | 1.97 | 0.95  | 3.64E-01 | 6.42E-01 | -6.24 |
| 1456409_PM_at   | Klhdc7a                                                                                    | KLHDC7A      | -0.33 | 3.04 | -0.95 | 3.64E-01 | 6.42E-01 | -6.24 |
| 1424981_PM_at   | Nln                                                                                        | NLN          | 0.27  | 3.19 | 0.95  | 3.64E-01 | 6.42E-01 | -6.24 |
| 1443788_PM_at   | ---                                                                                        | NA           | -0.11 | 2.00 | -0.95 | 3.64E-01 | 6.42E-01 | -6.24 |
| 1452523_PM_a_at | Ccdc130                                                                                    | CCDC130      | -0.10 | 2.52 | -0.95 | 3.64E-01 | 6.42E-01 | -6.24 |
| 1459667_PM_at   | ---                                                                                        | NA           | 0.16  | 2.30 | 0.95  | 3.64E-01 | 6.42E-01 | -6.24 |
| 1456909_PM_at   | Gpi1                                                                                       | NA           | 0.16  | 2.75 | 0.95  | 3.64E-01 | 6.42E-01 | -6.24 |
| 1427474_PM_s_at | Gstm3                                                                                      | NA           | 0.12  | 2.23 | 0.95  | 3.64E-01 | 6.42E-01 | -6.24 |
| 1431404_PM_at   | Tmem56                                                                                     | TMEM56-RWDD3 | 0.09  | 2.24 | 0.95  | 3.65E-01 | 6.42E-01 | -6.24 |
| 1450383_PM_at   | Ldlr                                                                                       | LDLR         | 0.10  | 2.56 | 0.95  | 3.65E-01 | 6.42E-01 | -6.24 |
| 1415793_PM_at   | Pnpo                                                                                       | PNPO         | 0.16  | 3.16 | 0.95  | 3.65E-01 | 6.42E-01 | -6.24 |
| 1452197_PM_at   | Smc4                                                                                       | SMC4         | -0.09 | 2.41 | -0.95 | 3.65E-01 | 6.42E-01 | -6.24 |
| 1448059_PM_at   | Mipol1                                                                                     | MIPOL1       | 0.17  | 2.26 | 0.95  | 3.65E-01 | 6.42E-01 | -6.24 |
| 1459114_PM_at   | ---                                                                                        | NA           | 0.12  | 2.66 | 0.95  | 3.65E-01 | 6.42E-01 | -6.24 |
| 1443041_PM_at   | Zbtb17                                                                                     | ZBTB17       | 0.13  | 2.22 | 0.95  | 3.65E-01 | 6.42E-01 | -6.24 |
| 1433622_PM_at   | Gemin4 /// Glod4                                                                           | GLOD4        | 0.08  | 2.38 | 0.95  | 3.65E-01 | 6.42E-01 | -6.24 |
| 1451923_PM_at   | Rftn2                                                                                      | RFTN2        | 0.11  | 2.68 | 0.95  | 3.65E-01 | 6.42E-01 | -6.24 |
| 1441894_PM_s_at | Grasp                                                                                      | GRASP        | -1.08 | 5.01 | -0.95 | 3.65E-01 | 6.42E-01 | -6.24 |
| 1441666_PM_at   | Gm29514                                                                                    | NA           | -0.08 | 2.16 | -0.95 | 3.65E-01 | 6.42E-01 | -6.24 |
| 1436685_PM_at   | Fam181a                                                                                    | FAM181A      | 0.09  | 1.99 | 0.95  | 3.65E-01 | 6.42E-01 | -6.24 |

|                 |                    |           |       |       |       |          |          |       |
|-----------------|--------------------|-----------|-------|-------|-------|----------|----------|-------|
| 1426438_PM_at   | Ddx3y              | DDX3Y     | -0.21 | 3.57  | -0.95 | 3.65E-01 | 6.42E-01 | -6.24 |
| 1424526_PM_a_at | Tgds               | TGDS      | -0.16 | 2.55  | -0.95 | 3.65E-01 | 6.42E-01 | -6.24 |
| 1431653_PM_at   | Tcrb-J /// Trbv5   | NA        | 0.09  | 2.13  | 0.95  | 3.65E-01 | 6.43E-01 | -6.24 |
| 1424082_PM_at   | Tbc1d13            | TBC1D13   | 0.13  | 2.62  | 0.95  | 3.65E-01 | 6.43E-01 | -6.24 |
| 1459809_PM_x_at | 1700063D05Rik      | NA        | 0.17  | 2.79  | 0.95  | 3.65E-01 | 6.43E-01 | -6.24 |
| 1447892_PM_at   | Gm7788             | NA        | 0.18  | 2.64  | 0.95  | 3.65E-01 | 6.43E-01 | -6.24 |
| 1416223_PM_at   | Sh3bp5l            | SH3BP5L   | 0.19  | 3.83  | 0.95  | 3.65E-01 | 6.43E-01 | -6.24 |
| 1445754_PM_at   | Acacb              | NA        | 0.09  | 2.38  | 0.95  | 3.65E-01 | 6.43E-01 | -6.24 |
| 1457819_PM_at   | Scn9a              | SCN9A     | 0.16  | 2.67  | 0.95  | 3.65E-01 | 6.43E-01 | -6.24 |
| 1430600_PM_at   | Cmtm5              | CMTM5     | -0.17 | 2.53  | -0.95 | 3.65E-01 | 6.43E-01 | -6.24 |
| 1457989_PM_at   | Slc4a11            | SLC4A11   | 0.08  | 2.09  | 0.95  | 3.65E-01 | 6.43E-01 | -6.24 |
| 1420803_PM_at   | Tex18              | NA        | 0.12  | 2.38  | 0.95  | 3.65E-01 | 6.43E-01 | -6.24 |
| 1420024_PM_s_at | Etf1               | ETF1      | 0.22  | 4.19  | 0.95  | 3.65E-01 | 6.43E-01 | -6.24 |
| 1458507_PM_at   | ---                | NA        | 0.51  | 3.14  | 0.95  | 3.65E-01 | 6.43E-01 | -6.24 |
| 1456465_PM_at   | Slc25a44           | SLC25A44  | 0.08  | 2.30  | 0.95  | 3.65E-01 | 6.43E-01 | -6.24 |
| 1449617_PM_at   | Pagr1a             | PAGR1     | -0.17 | 2.99  | -0.95 | 3.65E-01 | 6.43E-01 | -6.24 |
| 1452717_PM_at   | Slc25a24           | SLC25A24  | -0.16 | 2.56  | -0.95 | 3.65E-01 | 6.43E-01 | -6.24 |
| 1423254_PM_x_at | Rps27l             | RPS27L    | -0.20 | 2.63  | -0.95 | 3.65E-01 | 6.43E-01 | -6.24 |
| 1421458_PM_at   | Zfp112             | NA        | 0.21  | 2.82  | 0.95  | 3.65E-01 | 6.43E-01 | -6.24 |
| 1441619_PM_at   | Zfp14              | NA        | 0.13  | 3.11  | 0.95  | 3.65E-01 | 6.43E-01 | -6.24 |
| 1454335_PM_at   | LOC102632957       | NA        | 0.10  | 2.15  | 0.95  | 3.65E-01 | 6.43E-01 | -6.24 |
| 1456383_PM_at   | Rsl1d1             | RSL1D1    | 0.38  | 5.35  | 0.95  | 3.65E-01 | 6.43E-01 | -6.24 |
| 1455416_PM_at   | ---                | NA        | 0.09  | 2.24  | 0.95  | 3.65E-01 | 6.43E-01 | -6.24 |
| 1448067_PM_at   | Slc25a48           | SLC25A48  | 0.11  | 2.22  | 0.95  | 3.65E-01 | 6.43E-01 | -6.24 |
| 1420710_PM_at   | Rel                | REL       | -0.09 | 2.11  | -0.95 | 3.65E-01 | 6.43E-01 | -6.24 |
| 1452515_PM_a_at | Xylt2              | XYLT2     | 0.09  | 2.36  | 0.95  | 3.65E-01 | 6.43E-01 | -6.24 |
| 1446177_PM_at   | ---                | NA        | 0.10  | 2.19  | 0.95  | 3.65E-01 | 6.43E-01 | -6.24 |
| 1423294_PM_at   | Mest               | MEST      | 0.23  | 4.56  | 0.95  | 3.65E-01 | 6.43E-01 | -6.24 |
| 1451425_PM_a_at | Mkrn1              | MKRN1     | -0.25 | 3.43  | -0.95 | 3.65E-01 | 6.43E-01 | -6.24 |
| 1448366_PM_at   | Stx1a              | STX1A     | 0.12  | 2.55  | 0.95  | 3.66E-01 | 6.43E-01 | -6.24 |
| 1433265_PM_at   | 2810416A17Rik      | NA        | 0.16  | 2.64  | 0.95  | 3.66E-01 | 6.43E-01 | -6.24 |
| 1441351_PM_at   | ---                | NA        | 0.23  | 2.50  | 0.95  | 3.66E-01 | 6.43E-01 | -6.24 |
| 1432154_PM_at   | 4933407I08Rik      | NA        | 0.24  | 2.72  | 0.95  | 3.66E-01 | 6.43E-01 | -6.24 |
| 1432249_PM_a_at | Erc8               | ERCC8     | 0.42  | 2.45  | 0.95  | 3.66E-01 | 6.43E-01 | -6.24 |
| 1446378_PM_at   | ---                | NA        | 0.09  | 2.07  | 0.95  | 3.66E-01 | 6.43E-01 | -6.24 |
| 1451184_PM_at   | Gm6793 /// Hnrnpa3 | NA        | 0.19  | 9.61  | 0.95  | 3.66E-01 | 6.43E-01 | -6.24 |
| 1448020_PM_at   | Rap1a              | RAP1A     | -0.36 | 3.57  | -0.95 | 3.66E-01 | 6.43E-01 | -6.24 |
| 1438087_PM_at   | Tpmt               | NA        | -0.14 | 2.71  | -0.95 | 3.66E-01 | 6.43E-01 | -6.24 |
| 1427505_PM_a_at | Cradd              | CRADD     | -0.14 | 3.61  | -0.95 | 3.66E-01 | 6.43E-01 | -6.24 |
| 1460531_PM_at   | Syne1              | NA        | -0.13 | 2.43  | -0.95 | 3.66E-01 | 6.43E-01 | -6.24 |
| 1453180_PM_at   | Rnl5               | RNL5      | -0.11 | 2.20  | -0.95 | 3.66E-01 | 6.43E-01 | -6.24 |
| 1456101_PM_at   | Ccdc175            | CCDC175   | 0.10  | 2.61  | 0.95  | 3.66E-01 | 6.43E-01 | -6.24 |
| 1457514_PM_at   | ---                | NA        | 0.10  | 2.14  | 0.95  | 3.66E-01 | 6.43E-01 | -6.24 |
| 1432852_PM_at   | Phactr1            | NA        | 0.10  | 2.40  | 0.95  | 3.66E-01 | 6.43E-01 | -6.24 |
| 1446196_PM_at   | ---                | NA        | 0.10  | 2.15  | 0.95  | 3.66E-01 | 6.43E-01 | -6.24 |
| 1422935_PM_x_at | Cbx1               | CBX1      | 0.12  | 2.52  | 0.95  | 3.66E-01 | 6.43E-01 | -6.24 |
| 1446159_PM_at   | Pak7               | PAK5      | 0.14  | 2.45  | 0.95  | 3.66E-01 | 6.43E-01 | -6.24 |
| 1454146_PM_at   | 9530036M11Rik      | NA        | 0.16  | 2.47  | 0.95  | 3.66E-01 | 6.43E-01 | -6.24 |
| 1457294_PM_at   | Tmtc3              | TMTC3     | 0.18  | 2.96  | 0.95  | 3.66E-01 | 6.43E-01 | -6.24 |
| 1452648_PM_at   | Tbrg1              | TBRG1     | 0.25  | 4.60  | 0.95  | 3.66E-01 | 6.43E-01 | -6.24 |
| 1422463_PM_a_at | MrpB               | MRPL3     | 0.31  | 4.91  | 0.95  | 3.66E-01 | 6.43E-01 | -6.24 |
| 1437473_PM_at   | Maf                | MAF       | -0.11 | 2.94  | -0.95 | 3.66E-01 | 6.43E-01 | -6.24 |
| 1450708_PM_at   | Scg2               | SCG2      | -0.36 | 5.13  | -0.95 | 3.66E-01 | 6.43E-01 | -6.24 |
| 1419697_PM_at   | Cxcl11             | CXCL11    | 0.10  | 2.30  | 0.95  | 3.66E-01 | 6.43E-01 | -6.24 |
| 1458886_PM_at   | ---                | NA        | 0.13  | 2.51  | 0.95  | 3.66E-01 | 6.43E-01 | -6.24 |
| 1433821_PM_at   | Tmem198b           | NA        | 0.16  | 3.51  | 0.95  | 3.66E-01 | 6.43E-01 | -6.24 |
| 1423182_PM_at   | Tnfrsf13b          | TNFRSF13B | 0.10  | 2.11  | 0.94  | 3.66E-01 | 6.43E-01 | -6.24 |
| 1460738_PM_at   | Limd2              | LIMD2     | 0.14  | 3.11  | 0.94  | 3.66E-01 | 6.43E-01 | -6.24 |
| 1423979_PM_a_at | Slc25a29           | SLC25A29  | 0.09  | 2.16  | 0.94  | 3.66E-01 | 6.43E-01 | -6.24 |
| 1454494_PM_at   | Wapl               | NA        | 0.09  | 2.24  | 0.94  | 3.66E-01 | 6.43E-01 | -6.24 |
| 1458233_PM_at   | Fryl               | FRYL      | 0.22  | 2.38  | 0.94  | 3.66E-01 | 6.43E-01 | -6.24 |
| 1421472_PM_at   | Srrm3              | SRRM3     | 0.15  | 2.37  | 0.94  | 3.66E-01 | 6.43E-01 | -6.24 |
| 1433800_PM_a_at | Pomc               | POMC      | 0.08  | 2.27  | 0.94  | 3.66E-01 | 6.43E-01 | -6.24 |
| 1422018_PM_at   | Hivep2             | HIVEP2    | -0.28 | 3.53  | -0.94 | 3.66E-01 | 6.43E-01 | -6.24 |
| 1438839_PM_a_at | Ywhae              | YWHAE     | 0.19  | 10.94 | 0.94  | 3.66E-01 | 6.43E-01 | -6.24 |
| 1451525_PM_at   | Arhgap12           | ARHGAP12  | -0.24 | 3.14  | -0.94 | 3.66E-01 | 6.43E-01 | -6.24 |
| 1426020_PM_at   | Tmpo               | NA        | 0.08  | 2.17  | 0.94  | 3.66E-01 | 6.43E-01 | -6.24 |
| 1452943_PM_at   | Tmem65             | TMEM65    | -0.31 | 4.00  | -0.94 | 3.66E-01 | 6.44E-01 | -6.24 |
| 1423930_PM_at   | Anapc4             | ANAPC4    | -0.11 | 3.12  | -0.94 | 3.66E-01 | 6.44E-01 | -6.24 |
| 1438877_PM_at   | Trpm6              | TRPM6     | 0.13  | 2.31  | 0.94  | 3.66E-01 | 6.44E-01 | -6.24 |
| 1432566_PM_at   | Tmsb15a            | NA        | 0.15  | 4.67  | 0.94  | 3.66E-01 | 6.44E-01 | -6.24 |
| 1456271_PM_at   | Garem              | GAREM1    | -0.28 | 3.70  | -0.94 | 3.67E-01 | 6.44E-01 | -6.24 |
| 1447378_PM_at   | Mars2              | MARS2     | 0.18  | 2.57  | 0.94  | 3.67E-01 | 6.44E-01 | -6.24 |
| 1460671_PM_at   | Gpx1               | GPX1      | -0.25 | 4.37  | -0.94 | 3.67E-01 | 6.44E-01 | -6.24 |
| 1423752_PM_at   | Ddx47              | DDX47     | -0.16 | 4.95  | -0.94 | 3.67E-01 | 6.44E-01 | -6.24 |



|                 |               |          |       |      |       |          |          |       |
|-----------------|---------------|----------|-------|------|-------|----------|----------|-------|
| 1434689_PM_at   | Zfp637        | ZNF32    | -0.09 | 2.23 | -0.94 | 3.67E-01 | 6.44E-01 | -6.24 |
| 1447338_PM_at   | Gm12318       | NA       | 0.09  | 2.50 | 0.94  | 3.67E-01 | 6.44E-01 | -6.24 |
| 1431837_PM_at   | ---           | NA       | 0.10  | 2.40 | 0.94  | 3.67E-01 | 6.44E-01 | -6.24 |
| 1444387_PM_at   | Nmt2          | NMT2     | 0.14  | 2.60 | 0.94  | 3.67E-01 | 6.44E-01 | -6.24 |
| 1421120_PM_at   | Myo6          | NA       | 0.15  | 2.30 | 0.94  | 3.67E-01 | 6.44E-01 | -6.24 |
| 1430747_PM_at   | Pqlc1         | PQLC1    | 0.15  | 3.28 | 0.94  | 3.67E-01 | 6.44E-01 | -6.24 |
| 1437206_PM_at   | Setd5         | SETD5    | 0.23  | 7.76 | 0.94  | 3.67E-01 | 6.44E-01 | -6.24 |
| 1433859_PM_at   | Ino80c        | INO80C   | 0.41  | 3.62 | 0.94  | 3.67E-01 | 6.44E-01 | -6.24 |
| 1442004_PM_at   | Trim65        | TRIM65   | 0.13  | 2.35 | 0.94  | 3.67E-01 | 6.44E-01 | -6.24 |
| 1457390_PM_at   | ---           | NA       | -0.16 | 2.19 | -0.94 | 3.67E-01 | 6.44E-01 | -6.24 |
| 1416689_PM_at   | Tuft1         | TUFT1    | 0.10  | 2.01 | 0.94  | 3.67E-01 | 6.44E-01 | -6.24 |
| 1440909_PM_at   | Irgc1         | IRGC     | 0.10  | 2.45 | 0.94  | 3.67E-01 | 6.44E-01 | -6.24 |
| 1418532_PM_at   | Fzd2          | FZD2     | 0.10  | 2.29 | 0.94  | 3.67E-01 | 6.44E-01 | -6.24 |
| 1428206_PM_at   | Ccdc69        | CCDC69   | 0.12  | 2.98 | 0.94  | 3.67E-01 | 6.44E-01 | -6.24 |
| 1460558_PM_at   | Ccdc32        | C15orf57 | -0.17 | 6.12 | -0.94 | 3.67E-01 | 6.44E-01 | -6.24 |
| 1418265_PM_s_at | Irf2          | IRF2     | -0.11 | 2.10 | -0.94 | 3.67E-01 | 6.44E-01 | -6.24 |
| 1425273_PM_s_at | Emp2          | EMP2     | 0.08  | 2.24 | 0.94  | 3.67E-01 | 6.44E-01 | -6.24 |
| 1451710_PM_at   | Oscar         | OSCAR    | 0.10  | 2.34 | 0.94  | 3.67E-01 | 6.44E-01 | -6.24 |
| 1417380_PM_at   | Iqgap1        | IQGAP1   | 0.11  | 2.20 | 0.94  | 3.67E-01 | 6.44E-01 | -6.24 |
| 1445601_PM_at   | Gm12596       | NA       | 0.12  | 2.74 | 0.94  | 3.67E-01 | 6.44E-01 | -6.24 |
| 1458169_PM_at   | LOC675947     | NA       | 0.12  | 2.38 | 0.94  | 3.67E-01 | 6.44E-01 | -6.24 |
| 1427325_PM_s_at | Akna          | AKNA     | 0.13  | 2.31 | 0.94  | 3.67E-01 | 6.44E-01 | -6.24 |
| 1438067_PM_at   | Nf1           | NF1      | 0.15  | 4.53 | 0.94  | 3.67E-01 | 6.44E-01 | -6.24 |
| 1450086_PM_at   | Gmeb1         | GMEB1    | 0.20  | 2.87 | 0.94  | 3.67E-01 | 6.44E-01 | -6.24 |
| 1432989_PM_at   | ---           | NA       | 0.09  | 2.14 | 0.94  | 3.67E-01 | 6.44E-01 | -6.24 |
| 1446165_PM_at   | Gm6211        | NA       | 0.10  | 2.47 | 0.94  | 3.67E-01 | 6.44E-01 | -6.24 |
| 1460667_PM_at   | U90926        | NA       | 0.10  | 2.05 | 0.94  | 3.67E-01 | 6.44E-01 | -6.24 |
| 1454593_PM_at   | Fgd3          | NA       | 0.13  | 2.45 | 0.94  | 3.67E-01 | 6.44E-01 | -6.24 |
| 1433612_PM_at   | Ap2s1         | AP2S1    | 0.12  | 2.99 | 0.94  | 3.67E-01 | 6.44E-01 | -6.24 |
| 1451063_PM_at   | Stxbp4        | STXBP4   | 0.19  | 3.04 | 0.94  | 3.67E-01 | 6.44E-01 | -6.24 |
| 1426107_PM_at   | Prdm9         | PRDM9    | 0.23  | 2.79 | 0.94  | 3.67E-01 | 6.44E-01 | -6.24 |
| 1424502_PM_at   | Oit1          | FAM3D    | 0.08  | 2.11 | 0.94  | 3.67E-01 | 6.44E-01 | -6.24 |
| 1419318_PM_at   | Saa4          | SAA4     | -0.08 | 2.20 | -0.94 | 3.67E-01 | 6.44E-01 | -6.24 |
| 1428380_PM_at   | Atraid        | ATRAID   | -0.21 | 2.45 | -0.94 | 3.67E-01 | 6.44E-01 | -6.24 |
| 1418181_PM_at   | Ptp4a3        | PTP4A3   | 0.09  | 2.33 | 0.94  | 3.67E-01 | 6.44E-01 | -6.24 |
| 1441416_PM_at   | Inpp4b        | INPP4B   | -0.20 | 3.11 | -0.94 | 3.68E-01 | 6.44E-01 | -6.24 |
| 1434307_PM_at   | Tmem64        | TMEM64   | -0.13 | 2.51 | -0.94 | 3.68E-01 | 6.44E-01 | -6.24 |
| 1427623_PM_at   | Herc2         | NA       | 0.08  | 2.06 | 0.94  | 3.68E-01 | 6.44E-01 | -6.24 |
| 1445185_PM_at   | Ttll10        | TLL10    | 0.10  | 2.17 | 0.94  | 3.68E-01 | 6.44E-01 | -6.24 |
| 1460212_PM_at   | Gnat1         | GNAT1    | 0.10  | 2.66 | 0.94  | 3.68E-01 | 6.44E-01 | -6.24 |
| 1428445_PM_at   | Yif1b         | YIF1B    | 0.12  | 2.88 | 0.94  | 3.68E-01 | 6.44E-01 | -6.24 |
| 1440605_PM_at   | Fscn2         | FSCN2    | 0.13  | 2.68 | 0.94  | 3.68E-01 | 6.44E-01 | -6.24 |
| 1431284_PM_a_at | Spns1         | SPNS1    | 0.17  | 2.73 | 0.94  | 3.68E-01 | 6.44E-01 | -6.24 |
| 1416550_PM_at   | Slc35b4       | SLC35B4  | 0.26  | 3.79 | 0.94  | 3.68E-01 | 6.44E-01 | -6.24 |
| 1447156_PM_at   | ---           | NA       | 0.27  | 2.84 | 0.94  | 3.68E-01 | 6.44E-01 | -6.24 |
| 1457403_PM_at   | 9130409123Rik | DEGS1    | -0.08 | 2.19 | -0.94 | 3.68E-01 | 6.44E-01 | -6.24 |
| 1417038_PM_at   | Sept9         | SEPT9    | 0.16  | 2.40 | 0.94  | 3.68E-01 | 6.44E-01 | -6.24 |
| 1419907_PM_s_at | Fcrla         | FCRLA    | -0.11 | 2.20 | -0.94 | 3.68E-01 | 6.44E-01 | -6.24 |
| 1431987_PM_at   | ---           | NA       | -0.08 | 1.93 | -0.94 | 3.68E-01 | 6.44E-01 | -6.24 |
| 1427978_PM_at   | Efcab14       | EFCAB14  | -0.34 | 3.67 | -0.94 | 3.68E-01 | 6.45E-01 | -6.24 |
| 1422860_PM_at   | Nts           | NTS      | 0.10  | 2.26 | 0.94  | 3.68E-01 | 6.45E-01 | -6.24 |
| 1436980_PM_x_at | Cnot2         | CNOT2    | -0.40 | 6.01 | -0.94 | 3.68E-01 | 6.45E-01 | -6.24 |
| 1428710_PM_at   | Rit1          | RIT1     | 0.10  | 2.73 | 0.94  | 3.68E-01 | 6.45E-01 | -6.24 |
| 1426119_PM_at   | Tyms-ps       | NA       | 0.08  | 2.52 | 0.94  | 3.68E-01 | 6.45E-01 | -6.24 |
| 1442430_PM_at   | BC048562      | C3orf84  | 0.10  | 2.14 | 0.94  | 3.68E-01 | 6.45E-01 | -6.24 |
| 1453838_PM_at   | 4930471G03Rik | NA       | 0.13  | 2.92 | 0.94  | 3.68E-01 | 6.45E-01 | -6.24 |
| 1453023_PM_at   | Ankhd1        | ANKHD1   | 0.17  | 2.69 | 0.94  | 3.68E-01 | 6.45E-01 | -6.24 |
| 1436601_PM_at   | Fbxo46        | FBXO46   | 0.21  | 2.73 | 0.94  | 3.68E-01 | 6.45E-01 | -6.24 |
| 1445883_PM_at   | ---           | NA       | 0.37  | 4.01 | 0.94  | 3.68E-01 | 6.45E-01 | -6.24 |
| 1427847_PM_at   | ---           | NA       | 0.08  | 2.05 | 0.94  | 3.68E-01 | 6.45E-01 | -6.24 |
| 1427970_PM_at   | Zfp689        | NA       | 0.16  | 2.92 | 0.94  | 3.68E-01 | 6.45E-01 | -6.24 |
| 1433668_PM_at   | Pnrc1         | PNRC1    | -0.27 | 4.48 | -0.94 | 3.68E-01 | 6.45E-01 | -6.24 |
| 1454787_PM_at   | Zdhhc9        | ZDHH9    | -0.18 | 3.14 | -0.94 | 3.68E-01 | 6.45E-01 | -6.24 |
| 1435845_PM_at   | Asphd2        | ASPHD2   | -0.13 | 3.55 | -0.94 | 3.68E-01 | 6.45E-01 | -6.24 |
| 1418724_PM_at   | Cfi           | CFI      | 0.07  | 2.03 | 0.94  | 3.68E-01 | 6.45E-01 | -6.24 |
| 1443284_PM_at   | ---           | NA       | 0.09  | 2.32 | 0.94  | 3.68E-01 | 6.45E-01 | -6.24 |
| 1447686_PM_at   | ---           | NA       | 0.10  | 2.57 | 0.94  | 3.68E-01 | 6.45E-01 | -6.24 |
| 1440483_PM_at   | ---           | NA       | 0.12  | 2.13 | 0.94  | 3.68E-01 | 6.45E-01 | -6.24 |
| 1460353_PM_at   | Ndc1          | NDC1     | 0.12  | 2.06 | 0.94  | 3.68E-01 | 6.45E-01 | -6.24 |
| 1432392_PM_at   | Kif2c         | KIF2C    | 0.12  | 2.24 | 0.94  | 3.68E-01 | 6.45E-01 | -6.24 |
| 1431255_PM_at   | Calr3         | CALR3    | 0.14  | 2.67 | 0.94  | 3.68E-01 | 6.45E-01 | -6.24 |
| 1455380_PM_at   | Pcyox1l       | PCYOX1L  | 0.15  | 2.74 | 0.94  | 3.68E-01 | 6.45E-01 | -6.24 |
| 1453126_PM_at   | Lrfn2         | LRFN2    | -0.14 | 3.26 | -0.94 | 3.68E-01 | 6.45E-01 | -6.24 |
| 1427698_PM_at   | Brca1         | BRCA1    | 0.09  | 2.32 | 0.94  | 3.68E-01 | 6.45E-01 | -6.24 |
| 1454370_PM_at   | ---           | NA       | 0.09  | 2.41 | 0.94  | 3.68E-01 | 6.45E-01 | -6.24 |

|                 |                                                                                                              |          |       |      |       |          |          |       |
|-----------------|--------------------------------------------------------------------------------------------------------------|----------|-------|------|-------|----------|----------|-------|
| 1423196_PM_at   | Nedd1                                                                                                        | NEDD1    | 0.11  | 2.67 | 0.94  | 3.68E-01 | 6.45E-01 | -6.24 |
| 1448316_PM_at   | Cmtrm3                                                                                                       | CMTM3    | 0.13  | 2.32 | 0.94  | 3.68E-01 | 6.45E-01 | -6.24 |
| 1425901_PM_at   | Nfatc2                                                                                                       | NA       | 0.14  | 2.64 | 0.94  | 3.68E-01 | 6.45E-01 | -6.24 |
| 1421198_PM_at   | Itgav                                                                                                        | ITGAV    | -0.19 | 2.47 | -0.94 | 3.68E-01 | 6.45E-01 | -6.24 |
| 1428767_PM_at   | Gsdmd                                                                                                        | GSDMD    | 0.11  | 2.48 | 0.94  | 3.68E-01 | 6.45E-01 | -6.24 |
| 1429536_PM_at   | Fam83g                                                                                                       | FAM83G   | 0.10  | 2.06 | 0.94  | 3.69E-01 | 6.45E-01 | -6.24 |
| 1417362_PM_at   | Rhcg                                                                                                         | RHCG     | 0.11  | 2.34 | 0.94  | 3.69E-01 | 6.45E-01 | -6.24 |
| 1419786_PM_at   | Ltbp1                                                                                                        | NA       | 0.21  | 4.00 | 0.94  | 3.69E-01 | 6.45E-01 | -6.24 |
| 1434995_PM_s_at | Dedd                                                                                                         | DEDD     | -0.30 | 3.83 | -0.94 | 3.69E-01 | 6.45E-01 | -6.24 |
| 1420695_PM_at   | Dach1                                                                                                        | DACH1    | 0.13  | 3.25 | 0.94  | 3.69E-01 | 6.45E-01 | -6.24 |
| 1459802_PM_at   | ---                                                                                                          | NA       | 0.12  | 2.69 | 0.94  | 3.69E-01 | 6.45E-01 | -6.24 |
| 1437553_PM_at   | Brcc3                                                                                                        | BRCC3    | -0.19 | 3.13 | -0.94 | 3.69E-01 | 6.45E-01 | -6.24 |
| 1456537_PM_at   | A930033H14Rik                                                                                                | NA       | 0.16  | 2.44 | 0.94  | 3.69E-01 | 6.45E-01 | -6.24 |
| 1455781_PM_at   | Gtpbp8                                                                                                       | GTPBP8   | -0.18 | 2.94 | -0.94 | 3.69E-01 | 6.45E-01 | -6.24 |
| 1421533_PM_at   | Slc7a1                                                                                                       | SLC7A1   | 0.18  | 2.54 | 0.94  | 3.69E-01 | 6.45E-01 | -6.24 |
| 1432290_PM_at   | Gm41894 /// Gm42097 ///<br>Gm42168 /// Gm42169 ///<br>Gm42170 /// Gm42171 ///<br>Gm42172 ///<br>LOC105243587 | NA       | -0.17 | 2.48 | -0.94 | 3.69E-01 | 6.45E-01 | -6.24 |
| 1423901_PM_at   | Tripl2                                                                                                       | TRIP12   | -0.27 | 3.68 | -0.94 | 3.69E-01 | 6.45E-01 | -6.24 |
| 1452930_PM_at   | Dock3                                                                                                        | DOCK3    | -0.09 | 2.42 | -0.94 | 3.69E-01 | 6.45E-01 | -6.24 |
| 1427399_PM_a_at | Nxf7                                                                                                         | NXF5     | 0.10  | 2.08 | 0.94  | 3.69E-01 | 6.45E-01 | -6.24 |
| 1425926_PM_a_at | Otx2                                                                                                         | OTX2     | 0.22  | 2.38 | 0.94  | 3.69E-01 | 6.45E-01 | -6.24 |
| 1433646_PM_at   | Mrp527                                                                                                       | MRP527   | -0.22 | 3.25 | -0.94 | 3.69E-01 | 6.45E-01 | -6.24 |
| 1455354_PM_at   | Dcaf5                                                                                                        | DCAF5    | 0.23  | 7.48 | 0.94  | 3.69E-01 | 6.45E-01 | -6.24 |
| 1416493_PM_at   | Ddost                                                                                                        | DDOST    | -0.23 | 4.20 | -0.94 | 3.69E-01 | 6.46E-01 | -6.24 |
| 1428290_PM_at   | Mipep                                                                                                        | MIPEP    | -0.18 | 2.41 | -0.94 | 3.69E-01 | 6.46E-01 | -6.24 |
| 1449665_PM_at   | ---                                                                                                          | NA       | 0.09  | 2.13 | 0.94  | 3.69E-01 | 6.46E-01 | -6.24 |
| 1426834_PM_s_at | D930015E06Rik                                                                                                | KIAA0922 | -0.14 | 2.26 | -0.94 | 3.69E-01 | 6.46E-01 | -6.25 |
| 1447231_PM_at   | ---                                                                                                          | NA       | 0.49  | 4.56 | 0.94  | 3.69E-01 | 6.46E-01 | -6.25 |
| 1428786_PM_at   | Nckap1l                                                                                                      | NCKAP1L  | -0.27 | 3.09 | -0.94 | 3.69E-01 | 6.46E-01 | -6.25 |
| 1440120_PM_at   | Gnb2l1                                                                                                       | RACK1    | 0.15  | 2.77 | 0.94  | 3.69E-01 | 6.46E-01 | -6.25 |
| 1428549_PM_at   | Ccdc3                                                                                                        | CCDC3    | -0.39 | 3.16 | -0.94 | 3.69E-01 | 6.46E-01 | -6.25 |
| 1459956_PM_at   | ---                                                                                                          | NA       | -0.09 | 2.39 | -0.94 | 3.69E-01 | 6.46E-01 | -6.25 |
| 1428704_PM_at   | Zfp661                                                                                                       | ZNF2     | 0.55  | 3.37 | 0.94  | 3.69E-01 | 6.46E-01 | -6.25 |
| 1436480_PM_at   | Dpp7                                                                                                         | DPP7     | 0.09  | 2.58 | 0.94  | 3.69E-01 | 6.46E-01 | -6.25 |
| 1455371_PM_at   | Rfxank                                                                                                       | RFXANK   | 0.12  | 2.23 | 0.94  | 3.69E-01 | 6.46E-01 | -6.25 |
| 1459839_PM_x_at | Btbd11                                                                                                       | BTBD11   | 0.26  | 2.83 | 0.94  | 3.70E-01 | 6.46E-01 | -6.25 |
| 1429887_PM_at   | Nos1                                                                                                         | NOS1     | -0.13 | 3.13 | -0.94 | 3.70E-01 | 6.46E-01 | -6.25 |
| 1434417_PM_at   | Capn15                                                                                                       | NA       | 0.09  | 2.63 | 0.94  | 3.70E-01 | 6.46E-01 | -6.25 |
| 1444474_PM_at   | ---                                                                                                          | NA       | 0.09  | 2.18 | 0.94  | 3.70E-01 | 6.46E-01 | -6.25 |
| 1446194_PM_at   | ---                                                                                                          | NA       | 0.11  | 2.21 | 0.94  | 3.70E-01 | 6.46E-01 | -6.25 |
| 1451815_PM_at   | B3gnt4                                                                                                       | B3GNT4   | 0.08  | 3.15 | 0.94  | 3.70E-01 | 6.46E-01 | -6.25 |
| 1424605_PM_at   | Pcsk5                                                                                                        | PCSK5    | 0.14  | 2.73 | 0.94  | 3.70E-01 | 6.46E-01 | -6.25 |
| 1430819_PM_at   | Naaa                                                                                                         | NAAA     | 0.10  | 2.24 | 0.94  | 3.70E-01 | 6.46E-01 | -6.25 |
| 1439650_PM_at   | ---                                                                                                          | NA       | 0.12  | 2.53 | 0.94  | 3.70E-01 | 6.46E-01 | -6.25 |
| 1429909_PM_at   | Prr5l                                                                                                        | PRR5L    | 0.15  | 2.64 | 0.94  | 3.70E-01 | 6.46E-01 | -6.25 |
| 1448633_PM_at   | Prpf31                                                                                                       | PRPF31   | 0.18  | 2.57 | 0.94  | 3.70E-01 | 6.46E-01 | -6.25 |
| 1420441_PM_at   | Cenpc1                                                                                                       | CENPC    | 0.19  | 3.50 | 0.94  | 3.70E-01 | 6.46E-01 | -6.25 |
| 1429641_PM_x_at | Lce3b                                                                                                        | NA       | 0.29  | 4.25 | 0.94  | 3.70E-01 | 6.46E-01 | -6.25 |
| 1423003_PM_at   | Setd7                                                                                                        | SETD7    | 0.35  | 3.42 | 0.94  | 3.70E-01 | 6.46E-01 | -6.25 |
| 1441159_PM_at   | Med12l                                                                                                       | MED12L   | 0.12  | 2.61 | 0.94  | 3.70E-01 | 6.46E-01 | -6.25 |
| 1446300_PM_at   | ---                                                                                                          | NA       | 0.12  | 4.04 | 0.94  | 3.70E-01 | 6.46E-01 | -6.25 |
| 1421065_PM_at   | Jak2                                                                                                         | JAK2     | 0.19  | 2.93 | 0.94  | 3.70E-01 | 6.46E-01 | -6.25 |
| 1433329_PM_at   | A930573C08Rik                                                                                                | NA       | 0.09  | 2.27 | 0.94  | 3.70E-01 | 6.46E-01 | -6.25 |
| 1440304_PM_at   | ---                                                                                                          | NA       | 0.31  | 2.61 | 0.94  | 3.70E-01 | 6.46E-01 | -6.25 |
| 1439728_PM_at   | Prrt4                                                                                                        | PRRT4    | -0.11 | 2.32 | -0.94 | 3.70E-01 | 6.46E-01 | -6.25 |
| 1460040_PM_at   | ---                                                                                                          | NA       | 0.12  | 2.46 | 0.94  | 3.70E-01 | 6.46E-01 | -6.25 |
| 1437073_PM_x_at | ---                                                                                                          | NA       | 0.32  | 4.66 | 0.94  | 3.70E-01 | 6.46E-01 | -6.25 |
| 1419805_PM_s_at | Ggps1                                                                                                        | GGPS1    | -0.38 | 3.48 | -0.94 | 3.70E-01 | 6.46E-01 | -6.25 |
| 1427257_PM_at   | Vcan                                                                                                         | VCAN     | 0.29  | 3.72 | 0.94  | 3.70E-01 | 6.46E-01 | -6.25 |
| 1455280_PM_at   | Frem1                                                                                                        | FREM1    | -0.13 | 3.09 | -0.94 | 3.70E-01 | 6.46E-01 | -6.25 |
| 1435451_PM_at   | Helq                                                                                                         | HELQ     | 0.16  | 3.07 | 0.94  | 3.70E-01 | 6.46E-01 | -6.25 |
| 1449919_PM_at   | Krtap6-2                                                                                                     | NA       | 0.17  | 2.40 | 0.94  | 3.70E-01 | 6.46E-01 | -6.25 |
| 1447963_PM_at   | ---                                                                                                          | NA       | 0.12  | 2.25 | 0.94  | 3.70E-01 | 6.46E-01 | -6.25 |
| 1427107_PM_at   | Slc16a11                                                                                                     | SLC16A11 | 0.17  | 2.59 | 0.94  | 3.70E-01 | 6.46E-01 | -6.25 |
| 1424735_PM_at   | Slc25a25                                                                                                     | SLC25A25 | 0.10  | 2.98 | 0.94  | 3.70E-01 | 6.47E-01 | -6.25 |
| 1426033_PM_at   | Rgs9                                                                                                         | NA       | 0.10  | 2.15 | 0.94  | 3.70E-01 | 6.47E-01 | -6.25 |
| 1450137_PM_at   | Pofut1                                                                                                       | POFUT1   | 0.10  | 2.29 | 0.94  | 3.70E-01 | 6.47E-01 | -6.25 |
| 1418215_PM_at   | Mep1b                                                                                                        | MEP1B    | 0.11  | 2.16 | 0.94  | 3.70E-01 | 6.47E-01 | -6.25 |
| 1419574_PM_at   | Zfp292                                                                                                       | ZNF292   | 0.14  | 3.95 | 0.94  | 3.70E-01 | 6.47E-01 | -6.25 |
| 1425098_PM_at   | Zfp106                                                                                                       | ZNF106   | 0.15  | 2.56 | 0.94  | 3.70E-01 | 6.47E-01 | -6.25 |
| 1425472_PM_a_at | Lmna                                                                                                         | LMNA     | 0.19  | 3.78 | 0.94  | 3.70E-01 | 6.47E-01 | -6.25 |

|                 |               |          |       |       |       |          |          |       |
|-----------------|---------------|----------|-------|-------|-------|----------|----------|-------|
| 1434166_PM_at   | 9330151L19Rik | NA       | -0.14 | 3.62  | -0.94 | 3.70E-01 | 6.47E-01 | -6.25 |
| 1456659_PM_at   | ---           | NA       | 0.08  | 3.83  | 0.94  | 3.70E-01 | 6.47E-01 | -6.25 |
| 1431527_PM_at   | Cd164         | CD164    | 0.41  | 3.41  | 0.94  | 3.70E-01 | 6.47E-01 | -6.25 |
| 1433610_PM_at   | AA986860      | C1orf116 | -0.25 | 2.53  | -0.94 | 3.70E-01 | 6.47E-01 | -6.25 |
| 1446516_PM_at   | Bcl7c         | NA       | 0.11  | 2.73  | 0.94  | 3.70E-01 | 6.47E-01 | -6.25 |
| 1454076_PM_at   | Lrrc17        | LRRC17   | 0.11  | 2.97  | 0.94  | 3.71E-01 | 6.47E-01 | -6.25 |
| 1429368_PM_at   | ---           | NA       | 0.12  | 2.26  | 0.94  | 3.70E-01 | 6.47E-01 | -6.25 |
| 1429531_PM_at   | Smpd4         | SMPD4    | 0.22  | 2.47  | 0.94  | 3.71E-01 | 6.47E-01 | -6.25 |
| 1454513_PM_at   | 9430031J08Rik | NA       | 0.36  | 2.26  | 0.94  | 3.70E-01 | 6.47E-01 | -6.25 |
| 1448986_PM_x_at | Dnase2a       | NA       | -0.33 | 7.31  | -0.94 | 3.71E-01 | 6.47E-01 | -6.25 |
| 1421034_PM_a_at | Il4ra         | IL4R     | -0.13 | 2.61  | -0.94 | 3.71E-01 | 6.47E-01 | -6.25 |
| 1418422_PM_at   | Serpnb9g      | NA       | -0.11 | 2.09  | -0.94 | 3.71E-01 | 6.47E-01 | -6.25 |
| 1458153_PM_at   | ---           | NA       | 0.07  | 2.51  | 0.94  | 3.71E-01 | 6.47E-01 | -6.25 |
| 1430919_PM_at   | Fam227b       | FAM227B  | 0.08  | 2.36  | 0.94  | 3.71E-01 | 6.47E-01 | -6.25 |
| 1444875_PM_at   | ---           | NA       | 0.11  | 2.38  | 0.94  | 3.71E-01 | 6.47E-01 | -6.25 |
| 1415855_PM_at   | Kitl          | KITLG    | 0.12  | 2.87  | 0.94  | 3.71E-01 | 6.47E-01 | -6.25 |
| 1442378_PM_x_at | Gm20362       | NA       | 0.30  | 3.91  | 0.94  | 3.71E-01 | 6.47E-01 | -6.25 |
| 1432386_PM_a_at | Phf7          | PHF7     | 0.18  | 2.46  | 0.94  | 3.71E-01 | 6.47E-01 | -6.25 |
| 1419665_PM_a_at | Nupr1         | NUPR1    | -0.48 | 3.33  | -0.94 | 3.71E-01 | 6.47E-01 | -6.25 |
| 1429819_PM_at   | Nmnat1        | NMNAT1   | -0.10 | 2.75  | -0.94 | 3.71E-01 | 6.47E-01 | -6.25 |
| 1453800_PM_at   | Rnf181        | RNF181   | 0.07  | 2.59  | 0.94  | 3.71E-01 | 6.47E-01 | -6.25 |
| 1431870_PM_at   | 4930463O16Rik | NA       | 0.08  | 2.50  | 0.94  | 3.71E-01 | 6.47E-01 | -6.25 |
| 1435183_PM_at   | Tbkbp1        | TBKBP1   | 0.09  | 2.97  | 0.94  | 3.71E-01 | 6.47E-01 | -6.25 |
| 1450159_PM_at   | Rem1          | NA       | 0.10  | 2.25  | 0.94  | 3.71E-01 | 6.47E-01 | -6.25 |
| 1439674_PM_at   | ---           | NA       | 0.12  | 2.30  | 0.94  | 3.71E-01 | 6.47E-01 | -6.25 |
| 1440807_PM_at   | ---           | NA       | 0.18  | 3.03  | 0.94  | 3.71E-01 | 6.47E-01 | -6.25 |
| 1425577_PM_at   | Zmym5         | ZMYM5    | 0.23  | 2.80  | 0.94  | 3.71E-01 | 6.47E-01 | -6.25 |
| 1454597_PM_at   | 4930423O20Rik | NA       | 0.08  | 2.05  | 0.94  | 3.71E-01 | 6.47E-01 | -6.25 |
| 1416461_PM_at   | Caprin1       | CAPRIN1  | -0.54 | 5.77  | -0.94 | 3.71E-01 | 6.47E-01 | -6.25 |
| 1450706_PM_a_at | Arl3          | ARL3     | -0.30 | 6.77  | -0.94 | 3.71E-01 | 6.47E-01 | -6.25 |
| 1428253_PM_at   | Chmp2b        | CHMP2B   | -0.20 | 3.51  | -0.94 | 3.71E-01 | 6.47E-01 | -6.25 |
| 1443192_PM_at   | ---           | NA       | -0.14 | 2.57  | -0.94 | 3.71E-01 | 6.47E-01 | -6.25 |
| 1455072_PM_at   | Cep350        | CEP350   | -0.11 | 3.03  | -0.94 | 3.71E-01 | 6.47E-01 | -6.25 |
| 1433371_PM_at   | ---           | NA       | 0.09  | 2.33  | 0.94  | 3.71E-01 | 6.47E-01 | -6.25 |
| 1426516_PM_a_at | Lpin1         | LPIN1    | 0.13  | 2.42  | 0.94  | 3.71E-01 | 6.47E-01 | -6.25 |
| 1430277_PM_at   | 9430034F23Rik | NA       | 0.13  | 2.56  | 0.94  | 3.71E-01 | 6.47E-01 | -6.25 |
| 1436682_PM_at   | Tmsb10        | TMSB10   | 0.16  | 2.84  | 0.94  | 3.71E-01 | 6.47E-01 | -6.25 |
| 1441979_PM_at   | Efcab12       | EFCAB12  | 0.17  | 2.35  | 0.94  | 3.71E-01 | 6.47E-01 | -6.25 |
| 1444096_PM_at   | ---           | NA       | 0.19  | 3.24  | 0.94  | 3.71E-01 | 6.47E-01 | -6.25 |
| 1426384_PM_a_at | Ywhae         | YWHAE    | 0.19  | 10.35 | 0.94  | 3.71E-01 | 6.47E-01 | -6.25 |
| 1452881_PM_at   | Gins2         | GIN52    | 0.20  | 2.80  | 0.94  | 3.71E-01 | 6.47E-01 | -6.25 |
| 1428987_PM_at   | Dynlrb2       | DYNLRB2  | 0.20  | 2.68  | 0.94  | 3.71E-01 | 6.47E-01 | -6.25 |
| 1456360_PM_at   | Tes3-ps       | NA       | 0.35  | 4.44  | 0.94  | 3.71E-01 | 6.47E-01 | -6.25 |
| 1420519_PM_a_at | Eral1         | ERAL1    | -0.11 | 3.29  | -0.93 | 3.71E-01 | 6.47E-01 | -6.25 |
| 1433526_PM_at   | Klh8          | KLHL8    | 0.11  | 2.63  | 0.93  | 3.71E-01 | 6.47E-01 | -6.25 |
| 1450712_PM_at   | Kcnj9         | KCNJ9    | -0.58 | 4.73  | -0.93 | 3.71E-01 | 6.47E-01 | -6.25 |
| 1416669_PM_s_at | Naca          | NACA2    | -0.24 | 6.19  | -0.93 | 3.71E-01 | 6.47E-01 | -6.25 |
| 1454790_PM_at   | Wdr35         | WDR35    | -0.24 | 4.75  | -0.93 | 3.71E-01 | 6.47E-01 | -6.25 |
| 1419983_PM_at   | Zfp644        | ZNF644   | 0.08  | 2.22  | 0.93  | 3.71E-01 | 6.47E-01 | -6.25 |
| 1444461_PM_at   | ---           | NA       | 0.27  | 5.29  | 0.93  | 3.71E-01 | 6.47E-01 | -6.25 |
| 1435256_PM_at   | Clip3         | CLIP3    | -0.39 | 4.55  | -0.93 | 3.71E-01 | 6.47E-01 | -6.25 |
| 1443607_PM_at   | AU020745      | NA       | 0.08  | 2.36  | 0.93  | 3.71E-01 | 6.47E-01 | -6.25 |
| 1433982_PM_at   | Usp28         | USP28    | 0.14  | 2.32  | 0.93  | 3.71E-01 | 6.47E-01 | -6.25 |
| 1422545_PM_at   | Tbx2          | TBX2     | 0.09  | 2.28  | 0.93  | 3.71E-01 | 6.47E-01 | -6.25 |
| 1438637_PM_x_at | Sf3b2         | SF3B2    | -0.14 | 8.73  | -0.93 | 3.71E-01 | 6.47E-01 | -6.25 |
| 1425650_PM_at   | Tle4          | TLE4     | -0.17 | 2.42  | -0.93 | 3.71E-01 | 6.47E-01 | -6.25 |
| 1440668_PM_at   | Adamts3       | ADAMTSL3 | 0.13  | 2.54  | 0.93  | 3.71E-01 | 6.47E-01 | -6.25 |
| 1431344_PM_at   | Gm28111       | NA       | 0.16  | 2.48  | 0.93  | 3.71E-01 | 6.47E-01 | -6.25 |
| 1444144_PM_at   | ---           | NA       | 0.10  | 2.11  | 0.93  | 3.71E-01 | 6.47E-01 | -6.25 |
| 1429755_PM_a_at | 4933406F09Rik | NA       | -0.10 | 2.36  | -0.93 | 3.71E-01 | 6.47E-01 | -6.25 |
| 1437904_PM_at   | Rbm45         | RBM45    | -0.37 | 4.57  | -0.93 | 3.72E-01 | 6.47E-01 | -6.25 |
| 1437860_PM_at   | Prkce         | PRKCE    | -0.07 | 2.18  | -0.93 | 3.72E-01 | 6.47E-01 | -6.25 |
| 1428278_PM_at   | Zdhc24        | ZDHHC24  | -0.19 | 2.07  | -0.93 | 3.72E-01 | 6.47E-01 | -6.25 |
| 1456211_PM_at   | Nlrp10        | NLRP10   | -0.14 | 2.63  | -0.93 | 3.72E-01 | 6.47E-01 | -6.25 |
| 1454208_PM_at   | 4930483O08Rik | NA       | 0.11  | 2.34  | 0.93  | 3.72E-01 | 6.47E-01 | -6.25 |
| 1421730_PM_at   | Nr5a1         | NR5A1    | 0.13  | 2.70  | 0.93  | 3.72E-01 | 6.47E-01 | -6.25 |
| 1426446_PM_at   | 6430548M08Rik | KIAA0513 | 0.22  | 2.87  | 0.93  | 3.72E-01 | 6.47E-01 | -6.25 |
| 1421911_PM_at   | Stat2         | STAT2    | 0.23  | 2.82  | 0.93  | 3.72E-01 | 6.47E-01 | -6.25 |
| 1426945_PM_at   | Ipo5          | IPO5     | 0.28  | 4.53  | 0.93  | 3.72E-01 | 6.47E-01 | -6.25 |
| 1425509_PM_at   | Mark1         | MARK1    | 0.14  | 2.57  | 0.93  | 3.72E-01 | 6.47E-01 | -6.25 |
| 1450273_PM_at   | Il1rl2        | IL1RL2   | 0.09  | 2.41  | 0.93  | 3.72E-01 | 6.47E-01 | -6.25 |
| 1436925_PM_at   | Foxn3         | NA       | 0.20  | 3.88  | 0.93  | 3.72E-01 | 6.47E-01 | -6.25 |
| 1420797_PM_at   | Otog          | OTOG     | 0.13  | 2.34  | 0.93  | 3.72E-01 | 6.47E-01 | -6.25 |
| 1437307_PM_at   | Senp8         | SENP8    | -0.08 | 2.19  | -0.93 | 3.72E-01 | 6.48E-01 | -6.25 |
| 1453119_PM_at   | Otud1         | OTUD1    | -0.47 | 5.93  | -0.93 | 3.72E-01 | 6.48E-01 | -6.25 |

|                 |                                                      |            |       |      |       |          |          |       |
|-----------------|------------------------------------------------------|------------|-------|------|-------|----------|----------|-------|
| 1452404_PM_at   | Phactr2                                              | PHACTR2    | -0.26 | 3.24 | -0.93 | 3.72E-01 | 6.48E-01 | -6.25 |
| 1460101_PM_at   | ---                                                  | NA         | -0.21 | 3.17 | -0.93 | 3.72E-01 | 6.48E-01 | -6.25 |
| 1427553_PM_at   | Gm16489                                              | NA         | -0.20 | 2.90 | -0.93 | 3.72E-01 | 6.48E-01 | -6.25 |
| 1431025_PM_at   | Fuz                                                  | FUZ        | 0.08  | 2.24 | 0.93  | 3.72E-01 | 6.48E-01 | -6.25 |
| 1421489_PM_a_at | 2010106E10Rik                                        | NA         | 0.08  | 2.03 | 0.93  | 3.72E-01 | 6.48E-01 | -6.25 |
| 1455318_PM_at   | Timd4                                                | TIMD4      | 0.09  | 2.07 | 0.93  | 3.72E-01 | 6.48E-01 | -6.25 |
| 1438343_PM_at   | 0610037L13Rik                                        | C1orf123   | 0.11  | 1.98 | 0.93  | 3.72E-01 | 6.48E-01 | -6.25 |
| 1432577_PM_at   | ---                                                  | NA         | 0.11  | 2.65 | 0.93  | 3.72E-01 | 6.48E-01 | -6.25 |
| 1441951_PM_x_at | 2010109A12Rik                                        | NA         | 0.13  | 3.00 | 0.93  | 3.72E-01 | 6.48E-01 | -6.25 |
| 1437213_PM_at   | Nudt21                                               | NUDT21     | 0.17  | 2.64 | 0.93  | 3.72E-01 | 6.48E-01 | -6.25 |
| 1438807_PM_at   | Hnrnpr                                               | HNRNPR     | 0.17  | 2.58 | 0.93  | 3.72E-01 | 6.48E-01 | -6.25 |
| 1429246_PM_a_at | Anxa6                                                | ANXA6      | 0.18  | 3.41 | 0.93  | 3.72E-01 | 6.48E-01 | -6.25 |
| 1453571_PM_at   | Deptor                                               | DEPTOR     | 0.29  | 3.82 | 0.93  | 3.72E-01 | 6.48E-01 | -6.25 |
| 1456707_PM_at   | Gm15510 /// Gm38940                                  | NA         | 0.16  | 2.45 | 0.93  | 3.72E-01 | 6.48E-01 | -6.25 |
| 1434899_PM_s_at | Tnrc6a                                               | TNRC6A     | -0.20 | 3.21 | -0.93 | 3.72E-01 | 6.48E-01 | -6.25 |
| 1455958_PM_s_at | Pptc7                                                | PPTC7      | -0.20 | 4.71 | -0.93 | 3.72E-01 | 6.48E-01 | -6.25 |
| 1434819_PM_at   | St6gal2                                              | ST6GAL2    | -0.20 | 2.64 | -0.93 | 3.72E-01 | 6.48E-01 | -6.25 |
| 1422172_PM_x_at | 2810408B13Rik /// Zfp934                             | NA         | -0.17 | 2.77 | -0.93 | 3.72E-01 | 6.48E-01 | -6.25 |
| 1435148_PM_at   | Atp1b2                                               | ATP1B2     | -0.16 | 6.52 | -0.93 | 3.72E-01 | 6.48E-01 | -6.25 |
| 1431648_PM_at   | Meiob                                                | MEIOB      | 0.07  | 2.19 | 0.93  | 3.72E-01 | 6.48E-01 | -6.25 |
| 1453057_PM_at   | Fam187b                                              | FAM187B    | 0.08  | 2.70 | 0.93  | 3.72E-01 | 6.48E-01 | -6.25 |
| 1456912_PM_at   | Zfp691                                               | NA         | 0.10  | 2.34 | 0.93  | 3.72E-01 | 6.48E-01 | -6.25 |
| 1418696_PM_at   | Ttc36                                                | TTC36      | 0.13  | 2.93 | 0.93  | 3.72E-01 | 6.48E-01 | -6.25 |
| 1436374_PM_x_at | F11r                                                 | F11R       | 0.13  | 2.40 | 0.93  | 3.72E-01 | 6.48E-01 | -6.25 |
| 1457615_PM_at   | ---                                                  | NA         | -0.31 | 2.98 | -0.93 | 3.72E-01 | 6.48E-01 | -6.25 |
| 1435846_PM_x_at | Mrps17                                               | AC092647.5 | -0.21 | 2.76 | -0.93 | 3.72E-01 | 6.48E-01 | -6.25 |
| 1437836_PM_x_at | Aar2                                                 | AAR2       | -0.09 | 2.15 | -0.93 | 3.72E-01 | 6.48E-01 | -6.25 |
| 1452067_PM_at   | Naaa                                                 | NAAA       | 0.11  | 2.47 | 0.93  | 3.72E-01 | 6.48E-01 | -6.25 |
| 1449196_PM_a_at | Gm8430 /// LOC100042019<br>/// Rps27a /// Rps27a-ps2 | RPS27A     | 0.15  | 9.28 | 0.93  | 3.72E-01 | 6.48E-01 | -6.25 |
| 1424732_PM_s_at | Tmem192                                              | TMEM192    | 0.16  | 2.86 | 0.93  | 3.72E-01 | 6.48E-01 | -6.25 |
| 1438735_PM_at   | Rsf1                                                 | RSF1       | 0.32  | 4.29 | 0.93  | 3.72E-01 | 6.48E-01 | -6.25 |
| 1423284_PM_at   | Mansc1                                               | MANSC1     | 0.19  | 3.25 | 0.93  | 3.72E-01 | 6.48E-01 | -6.25 |
| 1446022_PM_at   | ---                                                  | NA         | 0.31  | 4.25 | 0.93  | 3.73E-01 | 6.48E-01 | -6.25 |
| 1420874_PM_at   | Gm4887 /// Twf1                                      | TWF1       | 0.24  | 3.08 | 0.93  | 3.73E-01 | 6.48E-01 | -6.25 |
| 1440887_PM_at   | Papl                                                 | ACP7       | 0.07  | 2.18 | 0.93  | 3.73E-01 | 6.48E-01 | -6.25 |
| 1433177_PM_at   | Avl9                                                 | AVL9       | 0.07  | 2.33 | 0.93  | 3.73E-01 | 6.48E-01 | -6.25 |
| 1440451_PM_at   | Ankrd66                                              | ANKRD66    | 0.11  | 2.30 | 0.93  | 3.73E-01 | 6.48E-01 | -6.25 |
| 1452772_PM_at   | Tnks2                                                | TNKS2      | 0.12  | 2.55 | 0.93  | 3.73E-01 | 6.48E-01 | -6.25 |
| 1432188_PM_s_at | Nup43                                                | NUP43      | 0.09  | 2.28 | 0.93  | 3.73E-01 | 6.48E-01 | -6.25 |
| 1426018_PM_a_at | Sox6                                                 | SOX6       | 0.10  | 2.24 | 0.93  | 3.73E-01 | 6.48E-01 | -6.25 |
| 1454598_PM_at   | 4930425F17Rik                                        | NA         | 0.14  | 2.50 | 0.93  | 3.73E-01 | 6.48E-01 | -6.25 |
| 1418759_PM_at   | Ptpn20                                               | PTPN20     | 0.08  | 1.96 | 0.93  | 3.73E-01 | 6.48E-01 | -6.25 |
| 1454001_PM_at   | LOC105246056                                         | NA         | 0.09  | 2.19 | 0.93  | 3.73E-01 | 6.48E-01 | -6.25 |
| 1426271_PM_at   | Smc5                                                 | SMC5       | 0.22  | 3.47 | 0.93  | 3.73E-01 | 6.48E-01 | -6.25 |
| 1444602_PM_at   | Ophn1                                                | OPHN1      | 0.13  | 2.30 | 0.93  | 3.73E-01 | 6.48E-01 | -6.25 |
| 1443948_PM_at   | Ttc9c                                                | TTC9C      | 0.13  | 2.58 | 0.93  | 3.73E-01 | 6.48E-01 | -6.25 |
| 1458863_PM_at   | Zfp213                                               | ZNF213     | -0.10 | 2.75 | -0.93 | 3.73E-01 | 6.48E-01 | -6.25 |
| 1419594_PM_at   | Ctsg                                                 | CTSG       | -0.07 | 2.10 | -0.93 | 3.73E-01 | 6.48E-01 | -6.25 |
| 1423430_PM_at   | Mybbp1a                                              | MYBBP1A    | 0.32  | 3.28 | 0.93  | 3.73E-01 | 6.49E-01 | -6.25 |
| 1435941_PM_at   | Rhbdl3                                               | RHBDL3     | -0.26 | 2.69 | -0.93 | 3.73E-01 | 6.49E-01 | -6.25 |
| 1418661_PM_at   | Abhd2                                                | ABHD2      | 0.14  | 3.09 | 0.93  | 3.73E-01 | 6.49E-01 | -6.25 |
| 1460739_PM_at   | Zmiz2                                                | ZMIZ2      | 0.17  | 4.24 | 0.93  | 3.73E-01 | 6.49E-01 | -6.25 |
| 1425849_PM_at   | Chrn4                                                | CHRN4      | 0.13  | 2.61 | 0.93  | 3.73E-01 | 6.49E-01 | -6.25 |
| 1428833_PM_at   | ---                                                  | NA         | 0.27  | 2.80 | 0.93  | 3.73E-01 | 6.49E-01 | -6.25 |
| 1430792_PM_at   | ---                                                  | NA         | -0.11 | 2.22 | -0.93 | 3.73E-01 | 6.49E-01 | -6.25 |
| 1443384_PM_at   | ---                                                  | NA         | -0.09 | 2.31 | -0.93 | 3.73E-01 | 6.49E-01 | -6.25 |
| 1448783_PM_at   | Slc7a9                                               | SLC7A9     | 0.08  | 2.33 | 0.93  | 3.73E-01 | 6.49E-01 | -6.25 |
| 1417098_PM_s_at | Mecr                                                 | MECR       | 0.09  | 2.58 | 0.93  | 3.73E-01 | 6.49E-01 | -6.25 |
| 1441306_PM_at   | 6820408C15Rik                                        | C20orf96   | 0.16  | 2.79 | 0.93  | 3.73E-01 | 6.49E-01 | -6.25 |
| 1429020_PM_at   | Pon2                                                 | NA         | 0.17  | 2.57 | 0.93  | 3.74E-01 | 6.49E-01 | -6.25 |
| 1451354_PM_at   | Foxred1                                              | FOXRED1    | 0.09  | 2.38 | 0.93  | 3.74E-01 | 6.49E-01 | -6.25 |
| 1424833_PM_at   | Itrp2                                                | ITPR2      | 0.12  | 2.64 | 0.93  | 3.74E-01 | 6.49E-01 | -6.25 |
| 1447103_PM_at   | Cdk5rap2                                             | CDK5RAP2   | 0.10  | 2.21 | 0.93  | 3.74E-01 | 6.49E-01 | -6.25 |
| 1448537_PM_at   | Ttc1                                                 | TTC1       | 0.20  | 3.33 | 0.93  | 3.74E-01 | 6.49E-01 | -6.25 |
| 1454779_PM_s_at | Faap24                                               | FAAP24     | 0.47  | 2.40 | 0.93  | 3.74E-01 | 6.49E-01 | -6.25 |
| 1443625_PM_at   | ---                                                  | NA         | 0.48  | 2.52 | 0.93  | 3.74E-01 | 6.49E-01 | -6.25 |
| 1442546_PM_at   | C730027H18Rik                                        | NA         | 0.09  | 1.87 | 0.93  | 3.74E-01 | 6.49E-01 | -6.25 |
| 1434225_PM_at   | Swap70                                               | SWAP70     | 0.23  | 2.96 | 0.93  | 3.74E-01 | 6.49E-01 | -6.25 |
| 1436075_PM_at   | Sfrp5                                                | SFRP5      | 0.13  | 2.58 | 0.93  | 3.74E-01 | 6.49E-01 | -6.25 |
| 1456597_PM_at   | Heatr3                                               | HEATR3     | 0.34  | 3.46 | 0.93  | 3.74E-01 | 6.49E-01 | -6.25 |
| 1451843_PM_a_at | Ggta1                                                | NA         | -0.15 | 2.28 | -0.93 | 3.74E-01 | 6.49E-01 | -6.25 |

|                 |                         |          |       |      |       |          |          |       |
|-----------------|-------------------------|----------|-------|------|-------|----------|----------|-------|
| 1419024_PM_at   | LOC102643131 /// Ptp4a1 | PTP4A1   | 0.11  | 2.34 | 0.93  | 3.74E-01 | 6.49E-01 | -6.25 |
| 1422995_PM_at   | Bmf                     | BMF      | 0.11  | 2.31 | 0.93  | 3.74E-01 | 6.49E-01 | -6.25 |
| 1453040_PM_at   | Slc25a53                | SLC25A53 | -0.33 | 3.06 | -0.93 | 3.74E-01 | 6.49E-01 | -6.25 |
| 1446213_PM_at   | ---                     | NA       | -0.22 | 2.41 | -0.93 | 3.74E-01 | 6.49E-01 | -6.25 |
| 1438994_PM_at   | Hyal5                   | SPAM1    | 0.10  | 2.12 | 0.93  | 3.74E-01 | 6.49E-01 | -6.25 |
| 1452201_PM_at   | Swsap1                  | SWSAP1   | 0.13  | 2.64 | 0.93  | 3.74E-01 | 6.49E-01 | -6.25 |
| 1438235_PM_at   | Crif3                   | NA       | 0.14  | 2.93 | 0.93  | 3.74E-01 | 6.49E-01 | -6.25 |
| 1440426_PM_at   | Nfatc2                  | NFATC2   | 0.18  | 3.19 | 0.93  | 3.74E-01 | 6.49E-01 | -6.25 |
| 1439542_PM_at   | Zfp651                  | ZBTB47   | 0.12  | 2.53 | 0.93  | 3.74E-01 | 6.49E-01 | -6.25 |
| 1429333_PM_at   | Kif2b                   | KIF2B    | 0.14  | 2.20 | 0.93  | 3.74E-01 | 6.49E-01 | -6.25 |
| 1457304_PM_at   | D13Erttd787e            | NA       | 0.44  | 3.16 | 0.93  | 3.74E-01 | 6.49E-01 | -6.25 |
| 1442762_PM_at   | Ttll10                  | TTL10    | 0.11  | 2.46 | 0.93  | 3.74E-01 | 6.49E-01 | -6.25 |
| 1430774_PM_at   | ---                     | NA       | 0.15  | 2.49 | 0.93  | 3.74E-01 | 6.50E-01 | -6.25 |
| 1446895_PM_at   | ---                     | NA       | -0.09 | 2.17 | -0.93 | 3.74E-01 | 6.50E-01 | -6.25 |
| 1438233_PM_at   | Fam178a                 | SLF2     | 0.17  | 3.63 | 0.93  | 3.74E-01 | 6.50E-01 | -6.25 |
| 1427467_PM_a_at | Rpgr                    | RPGR     | -0.37 | 3.30 | -0.93 | 3.74E-01 | 6.50E-01 | -6.25 |
| 1435714_PM_x_at | Il17d                   | IL17D    | -0.18 | 2.78 | -0.93 | 3.74E-01 | 6.50E-01 | -6.25 |
| 1448839_PM_at   | Kank3                   | KANK3    | 0.09  | 2.32 | 0.93  | 3.74E-01 | 6.50E-01 | -6.25 |
| 1443300_PM_at   | ---                     | NA       | 0.10  | 2.52 | 0.93  | 3.74E-01 | 6.50E-01 | -6.25 |
| 1422921_PM_at   | Vpreb3                  | VPREB3   | 0.13  | 2.29 | 0.93  | 3.74E-01 | 6.50E-01 | -6.25 |
| 1454206_PM_a_at | Adam15                  | ADAM15   | 0.14  | 3.18 | 0.93  | 3.74E-01 | 6.50E-01 | -6.25 |
| 1460077_PM_at   | Ttc3                    | TTC3     | 0.16  | 3.59 | 0.93  | 3.74E-01 | 6.50E-01 | -6.26 |
| 1416326_PM_at   | Crip1                   | CRIP1    | -0.25 | 2.69 | -0.93 | 3.74E-01 | 6.50E-01 | -6.26 |
| 1459678_PM_at   | ---                     | NA       | 0.12  | 3.09 | 0.93  | 3.75E-01 | 6.50E-01 | -6.26 |
| 1438350_PM_at   | Adgrg2                  | ADGRG2   | 0.09  | 2.13 | 0.93  | 3.75E-01 | 6.50E-01 | -6.26 |
| 1424698_PM_s_at | Gca                     | GCA      | -0.48 | 4.15 | -0.93 | 3.75E-01 | 6.50E-01 | -6.26 |
| 1449193_PM_at   | Cd5l                    | CD5L     | 0.09  | 2.73 | 0.93  | 3.75E-01 | 6.50E-01 | -6.26 |
| 1441726_PM_at   | ---                     | NA       | 0.49  | 3.19 | 0.93  | 3.75E-01 | 6.50E-01 | -6.26 |
| 1420092_PM_at   | Morc3                   | NA       | -0.31 | 3.90 | -0.93 | 3.75E-01 | 6.50E-01 | -6.26 |
| 1456570_PM_at   | Epb41lb                 | EPB41L4B | -0.36 | 4.65 | -0.93 | 3.75E-01 | 6.50E-01 | -6.26 |
| 1449584_PM_at   | Dgkg                    | DGKG     | -0.24 | 3.42 | -0.93 | 3.75E-01 | 6.50E-01 | -6.26 |
| 1449859_PM_at   | Golt1b                  | GOLT1B   | -0.23 | 3.67 | -0.93 | 3.75E-01 | 6.50E-01 | -6.26 |
| 1421201_PM_a_at | Tro                     | TRO      | -0.21 | 4.02 | -0.93 | 3.75E-01 | 6.50E-01 | -6.26 |
| 1424482_PM_at   | Arhgef7                 | ARHGEF7  | -0.18 | 2.44 | -0.93 | 3.75E-01 | 6.50E-01 | -6.26 |
| 1459599_PM_at   | ---                     | NA       | -0.12 | 2.33 | -0.93 | 3.75E-01 | 6.50E-01 | -6.26 |
| 1455525_PM_at   | Exog                    | EXOGE    | -0.08 | 2.43 | -0.93 | 3.75E-01 | 6.50E-01 | -6.26 |
| 1422253_PM_at   | Col10a1                 | COL10A1  | -0.07 | 2.45 | -0.93 | 3.75E-01 | 6.50E-01 | -6.26 |
| 1458872_PM_at   | ---                     | NA       | 0.07  | 2.08 | 0.93  | 3.75E-01 | 6.50E-01 | -6.26 |
| 1430932_PM_at   | Slc9a8                  | SLC9A8   | 0.09  | 2.33 | 0.93  | 3.75E-01 | 6.50E-01 | -6.26 |
| 1426073_PM_at   | Twsg1                   | NA       | 0.09  | 2.36 | 0.93  | 3.75E-01 | 6.50E-01 | -6.26 |
| 1458752_PM_at   | ---                     | NA       | 0.09  | 2.48 | 0.93  | 3.75E-01 | 6.50E-01 | -6.26 |
| 1418076_PM_at   | St14                    | ST14     | 0.11  | 2.62 | 0.93  | 3.75E-01 | 6.50E-01 | -6.26 |
| 1453587_PM_at   | Ggt6                    | GGT6     | 0.12  | 2.52 | 0.93  | 3.75E-01 | 6.50E-01 | -6.26 |
| 1441805_PM_at   | ---                     | NA       | 0.13  | 2.65 | 0.93  | 3.75E-01 | 6.50E-01 | -6.26 |
| 1454003_PM_at   | Afg3l2                  | NA       | 0.14  | 2.83 | 0.93  | 3.75E-01 | 6.50E-01 | -6.26 |
| 1456807_PM_at   | Ppp1r3e                 | PPP1R3E  | 0.14  | 2.49 | 0.93  | 3.75E-01 | 6.50E-01 | -6.26 |
| 1428469_PM_a_at | Dzip1                   | DZIP1    | 0.14  | 2.50 | 0.93  | 3.75E-01 | 6.50E-01 | -6.26 |
| 1444543_PM_at   | Z810405F15Rik           | NA       | 0.18  | 2.69 | 0.93  | 3.75E-01 | 6.50E-01 | -6.26 |
| 1439911_PM_at   | Gm32618                 | NA       | 0.19  | 2.87 | 0.93  | 3.75E-01 | 6.50E-01 | -6.26 |
| 1443036_PM_at   | Zfp804a                 | ZNF804A  | 0.32  | 3.28 | 0.93  | 3.75E-01 | 6.50E-01 | -6.26 |
| 1429041_PM_at   | Z610005L07Rik           | NA       | 0.33  | 3.88 | 0.93  | 3.75E-01 | 6.50E-01 | -6.26 |
| 1445739_PM_at   | ---                     | NA       | 0.13  | 3.46 | 0.93  | 3.75E-01 | 6.50E-01 | -6.26 |
| 1443525_PM_at   | Dbx2                    | DBX2     | 0.13  | 2.31 | 0.93  | 3.75E-01 | 6.50E-01 | -6.26 |
| 1448995_PM_at   | Pf4                     | PF4V1    | 0.08  | 2.40 | 0.93  | 3.75E-01 | 6.50E-01 | -6.26 |
| 1446704_PM_at   | ---                     | NA       | 0.10  | 2.37 | 0.93  | 3.75E-01 | 6.50E-01 | -6.26 |
| 1427701_PM_a_at | Six4                    | SIX4     | 0.11  | 2.37 | 0.93  | 3.75E-01 | 6.50E-01 | -6.26 |
| 1433232_PM_at   | LOC102635990            | NA       | 0.17  | 3.91 | 0.93  | 3.75E-01 | 6.50E-01 | -6.26 |
| 1448047_PM_at   | Nvl                     | NVL      | -0.08 | 2.10 | -0.93 | 3.75E-01 | 6.50E-01 | -6.26 |
| 1442193_PM_at   | ---                     | NA       | 0.08  | 2.03 | 0.93  | 3.75E-01 | 6.50E-01 | -6.26 |
| 1423206_PM_s_at | Hypk /// Serf2          | HYPK     | -0.39 | 7.00 | -0.93 | 3.75E-01 | 6.50E-01 | -6.26 |
| 1456833_PM_at   | Gpr17                   | GPR17    | -0.13 | 2.63 | -0.93 | 3.75E-01 | 6.50E-01 | -6.26 |
| 1433197_PM_at   | Z930445B03Rik           | NA       | 0.08  | 2.28 | 0.93  | 3.75E-01 | 6.50E-01 | -6.26 |
| 1455650_PM_at   | ---                     | NA       | 0.10  | 2.19 | 0.93  | 3.75E-01 | 6.50E-01 | -6.26 |
| 1424763_PM_at   | Rsp9                    | RSPH9    | 0.11  | 2.35 | 0.93  | 3.75E-01 | 6.50E-01 | -6.26 |
| 1446880_PM_at   | ---                     | NA       | 0.15  | 4.12 | 0.93  | 3.75E-01 | 6.50E-01 | -6.26 |
| 1440917_PM_at   | ---                     | NA       | 0.22  | 2.56 | 0.93  | 3.75E-01 | 6.50E-01 | -6.26 |
| 1435347_PM_at   | Stau1                   | STAU1    | -0.37 | 3.73 | -0.93 | 3.75E-01 | 6.50E-01 | -6.26 |
| 1431179_PM_at   | Entpd7                  | ENTPD7   | -0.31 | 3.64 | -0.93 | 3.75E-01 | 6.50E-01 | -6.26 |
| 1417102_PM_a_at | Ndufb5                  | NDUFB5   | -0.26 | 7.72 | -0.93 | 3.75E-01 | 6.50E-01 | -6.26 |
| 1455607_PM_at   | Rspo3                   | RSP03    | -0.17 | 3.15 | -0.93 | 3.75E-01 | 6.50E-01 | -6.26 |
| 1442742_PM_at   | Atp2c1                  | ATP2C1   | -0.16 | 2.54 | -0.93 | 3.76E-01 | 6.50E-01 | -6.26 |
| 1449297_PM_at   | Casp12                  | CASP12   | -0.11 | 2.57 | -0.93 | 3.75E-01 | 6.50E-01 | -6.26 |
| 1447848_PM_at   | Eps15l1                 | EPS15L1  | 0.09  | 2.00 | 0.93  | 3.76E-01 | 6.50E-01 | -6.26 |
| 1440650_PM_at   | ---                     | NA       | 0.09  | 2.25 | 0.93  | 3.75E-01 | 6.50E-01 | -6.26 |

|                 |                                                                                                                                         |          |       |      |       |          |          |       |
|-----------------|-----------------------------------------------------------------------------------------------------------------------------------------|----------|-------|------|-------|----------|----------|-------|
| 1418001_PM_at   | l1m2b                                                                                                                                   | ITM2B    | -0.10 | 2.88 | -0.93 | 3.76E-01 | 6.50E-01 | -6.26 |
| 1417342_PM_at   | Ppp1r2                                                                                                                                  | PPP1R2   | 0.16  | 3.35 | 0.93  | 3.76E-01 | 6.50E-01 | -6.26 |
| 1453283_PM_at   | Pgm1                                                                                                                                    | PGM2     | 0.16  | 2.91 | 0.93  | 3.76E-01 | 6.50E-01 | -6.26 |
| 1446608_PM_at   | ---                                                                                                                                     | NA       | 0.32  | 3.40 | 0.93  | 3.76E-01 | 6.50E-01 | -6.26 |
| 1445661_PM_at   | 4930406D18Rik                                                                                                                           | NA       | 0.09  | 2.28 | 0.93  | 3.76E-01 | 6.50E-01 | -6.26 |
| 1418716_PM_at   | Mrps25                                                                                                                                  | MRPS25   | 0.33  | 3.13 | 0.93  | 3.76E-01 | 6.50E-01 | -6.26 |
| 1446579_PM_at   | ---                                                                                                                                     | NA       | 0.10  | 2.12 | 0.93  | 3.76E-01 | 6.51E-01 | -6.26 |
| 1429548_PM_at   | Tex22                                                                                                                                   | TEX22    | 0.13  | 2.50 | 0.93  | 3.76E-01 | 6.51E-01 | -6.26 |
| 1457682_PM_at   | Arhgap42                                                                                                                                | ARHGAP42 | -0.54 | 4.26 | -0.93 | 3.76E-01 | 6.51E-01 | -6.26 |
| 1449786_PM_at   | Zdhhc7                                                                                                                                  | ZDHHC7   | 0.10  | 2.24 | 0.93  | 3.76E-01 | 6.51E-01 | -6.26 |
| 1456548_PM_at   | ---                                                                                                                                     | NA       | 0.11  | 2.43 | 0.93  | 3.76E-01 | 6.51E-01 | -6.26 |
| 1446578_PM_at   | ---                                                                                                                                     | NA       | 0.13  | 2.20 | 0.93  | 3.76E-01 | 6.51E-01 | -6.26 |
| 1436127_PM_at   | Crhbp                                                                                                                                   | CRHBP    | -0.50 | 3.14 | -0.92 | 3.76E-01 | 6.51E-01 | -6.26 |
| 1439343_PM_at   | ---                                                                                                                                     | NA       | -0.11 | 2.87 | -0.92 | 3.76E-01 | 6.51E-01 | -6.26 |
| 1426100_PM_a_at | Tk2                                                                                                                                     | TK2      | 0.08  | 2.13 | 0.92  | 3.76E-01 | 6.51E-01 | -6.26 |
| 1438130_PM_at   | Taf15                                                                                                                                   | NA       | 0.12  | 2.21 | 0.92  | 3.76E-01 | 6.51E-01 | -6.26 |
| 1458050_PM_at   | ---                                                                                                                                     | NA       | 0.16  | 2.96 | 0.92  | 3.76E-01 | 6.51E-01 | -6.26 |
| 1441581_PM_at   | Asb10                                                                                                                                   | ASB10    | 0.17  | 2.39 | 0.92  | 3.76E-01 | 6.51E-01 | -6.26 |
| 1460470_PM_at   | Acox1                                                                                                                                   | ACOXL    | 0.10  | 2.30 | 0.92  | 3.76E-01 | 6.51E-01 | -6.26 |
| 1432257_PM_at   | Gsdmcl1                                                                                                                                 | NA       | 0.11  | 2.59 | 0.92  | 3.76E-01 | 6.51E-01 | -6.26 |
| 1455922_PM_at   | Rab3gap1                                                                                                                                | RAB3GAP1 | -0.23 | 3.83 | -0.92 | 3.76E-01 | 6.51E-01 | -6.26 |
| 1455681_PM_at   | Zfp369                                                                                                                                  | NA       | 0.13  | 2.55 | 0.92  | 3.76E-01 | 6.51E-01 | -6.26 |
| 1459906_PM_at   | Dgkh                                                                                                                                    | NA       | 0.23  | 3.77 | 0.92  | 3.76E-01 | 6.51E-01 | -6.26 |
| 1449805_PM_at   | Prss29                                                                                                                                  | NA       | 0.09  | 2.36 | 0.92  | 3.76E-01 | 6.51E-01 | -6.26 |
| 1421447_PM_at   | Onecut1                                                                                                                                 | ONECUT1  | 0.13  | 2.82 | 0.92  | 3.76E-01 | 6.51E-01 | -6.26 |
| 1426764_PM_at   | Oaz2                                                                                                                                    | OAZ2     | 0.16  | 2.99 | 0.92  | 3.76E-01 | 6.51E-01 | -6.26 |
| 1435114_PM_at   | Wdhd1                                                                                                                                   | WDHD1    | -0.09 | 2.68 | -0.92 | 3.76E-01 | 6.51E-01 | -6.26 |
| 1427271_PM_at   | Zbtb44                                                                                                                                  | ZBTB44   | -0.34 | 3.46 | -0.92 | 3.77E-01 | 6.51E-01 | -6.26 |
| 1437948_PM_x_at | Eif3l                                                                                                                                   | EIF3L    | -0.25 | 3.87 | -0.92 | 3.77E-01 | 6.51E-01 | -6.26 |
| 1422190_PM_at   | C5ar1                                                                                                                                   | CSAR1    | 0.11  | 2.23 | 0.92  | 3.77E-01 | 6.51E-01 | -6.26 |
| 1420727_PM_a_at | Tmlhe                                                                                                                                   | TMLHE    | 0.13  | 2.69 | 0.92  | 3.77E-01 | 6.51E-01 | -6.26 |
| 1456263_PM_at   | Notch4                                                                                                                                  | NA       | 0.19  | 2.58 | 0.92  | 3.77E-01 | 6.51E-01 | -6.26 |
| 1434974_PM_at   | ---                                                                                                                                     | NA       | 0.42  | 2.99 | 0.92  | 3.76E-01 | 6.51E-01 | -6.26 |
| 1440018_PM_at   | Kcnc4                                                                                                                                   | NA       | 0.10  | 2.42 | 0.92  | 3.77E-01 | 6.51E-01 | -6.26 |
| 1424178_PM_at   | Tmem38a                                                                                                                                 | TMEM38A  | 0.13  | 2.90 | 0.92  | 3.77E-01 | 6.51E-01 | -6.26 |
| 1417287_PM_at   | H13                                                                                                                                     | HM13     | 0.13  | 3.50 | 0.92  | 3.77E-01 | 6.51E-01 | -6.26 |
| 1432419_PM_a_at | Mob2                                                                                                                                    | MOB2     | 0.17  | 2.54 | 0.92  | 3.77E-01 | 6.51E-01 | -6.26 |
| 1460084_PM_at   | ---                                                                                                                                     | NA       | 0.20  | 3.41 | 0.92  | 3.77E-01 | 6.51E-01 | -6.26 |
| 1419743_PM_s_at | Carm1                                                                                                                                   | CARM1    | 0.20  | 4.21 | 0.92  | 3.77E-01 | 6.51E-01 | -6.26 |
| 1425825_PM_at   | Eml6                                                                                                                                    | EML6     | 0.16  | 2.41 | 0.92  | 3.77E-01 | 6.51E-01 | -6.26 |
| 1429831_PM_at   | Pik3ap1                                                                                                                                 | PIK3AP1  | 0.10  | 2.29 | 0.92  | 3.77E-01 | 6.51E-01 | -6.26 |
| 1449339_PM_at   | Anapc16                                                                                                                                 | ANAPC16  | -0.34 | 3.51 | -0.92 | 3.77E-01 | 6.52E-01 | -6.26 |
| 1448648_PM_at   | Fam114a1                                                                                                                                | FAM114A1 | -0.12 | 2.30 | -0.92 | 3.77E-01 | 6.52E-01 | -6.26 |
| 1420603_PM_s_at | Raet1a /// Raet1b /// Raet1c<br>/// Raet1d /// Raet1e                                                                                   | NA       | 0.07  | 2.40 | 0.92  | 3.77E-01 | 6.52E-01 | -6.26 |
| 1422942_PM_at   | Galr2                                                                                                                                   | GALR2    | 0.08  | 2.24 | 0.92  | 3.77E-01 | 6.52E-01 | -6.26 |
| 1440893_PM_at   | Rlok1                                                                                                                                   | RLOK1    | 0.10  | 2.18 | 0.92  | 3.77E-01 | 6.52E-01 | -6.26 |
| 1443928_PM_at   | Cytip                                                                                                                                   | CYTIP    | 0.17  | 3.22 | 0.92  | 3.77E-01 | 6.52E-01 | -6.26 |
| 1435504_PM_at   | Clip4                                                                                                                                   | CLIP4    | -0.20 | 3.09 | -0.92 | 3.77E-01 | 6.52E-01 | -6.26 |
| 1431995_PM_at   | Antxr1                                                                                                                                  | ANTXR1   | 0.10  | 2.80 | 0.92  | 3.77E-01 | 6.52E-01 | -6.26 |
| 1451227_PM_a_at | Sk10a3                                                                                                                                  | SLC10A3  | -0.29 | 2.54 | -0.92 | 3.77E-01 | 6.52E-01 | -6.26 |
| 1422654_PM_at   | Sgca                                                                                                                                    | SGCA     | 0.11  | 2.75 | 0.92  | 3.77E-01 | 6.52E-01 | -6.26 |
| 1438162_PM_x_at | Gm4871                                                                                                                                  | NA       | 0.09  | 1.86 | 0.92  | 3.77E-01 | 6.52E-01 | -6.26 |
| 1424583_PM_at   | Farp2                                                                                                                                   | FARP2    | 0.17  | 2.88 | 0.92  | 3.77E-01 | 6.52E-01 | -6.26 |
| 1437896_PM_at   | ---                                                                                                                                     | NA       | 0.19  | 2.73 | 0.92  | 3.77E-01 | 6.52E-01 | -6.26 |
| 1446604_PM_at   | ---                                                                                                                                     | NA       | 0.25  | 2.57 | 0.92  | 3.77E-01 | 6.52E-01 | -6.26 |
| 1430024_PM_at   | Yipf6                                                                                                                                   | YIPF6    | 0.15  | 3.61 | 0.92  | 3.77E-01 | 6.52E-01 | -6.26 |
| 1438075_PM_at   | Fem1c                                                                                                                                   | FEM1C    | -0.22 | 2.92 | -0.92 | 3.77E-01 | 6.52E-01 | -6.26 |
| 1456426_PM_at   | Clec2i                                                                                                                                  | CLEC2D   | -0.08 | 1.79 | -0.92 | 3.77E-01 | 6.52E-01 | -6.26 |
| 1429014_PM_at   | Glb1l                                                                                                                                   | NA       | 0.10  | 2.54 | 0.92  | 3.77E-01 | 6.52E-01 | -6.26 |
| 1434631_PM_at   | D3Erd751e                                                                                                                               | C4orf33  | 0.21  | 2.94 | 0.92  | 3.77E-01 | 6.52E-01 | -6.26 |
| 1427799_PM_x_at | Igk-v21 /// Igk-v28 /// Igk-v8<br>/// Igkc /// Igkj2 /// Igkv3-10<br>/// Igkv3-4 /// Igkv3-5 /// Igkv6-14<br>/// Igkv6-23 /// LOC672450 | NA       | 0.09  | 2.10 | 0.92  | 3.77E-01 | 6.52E-01 | -6.26 |
| 1430557_PM_at   | ---                                                                                                                                     | NA       | -0.11 | 2.49 | -0.92 | 3.77E-01 | 6.52E-01 | -6.26 |
| 1438479_PM_at   | Zfp213                                                                                                                                  | ZNF213   | 0.12  | 2.50 | 0.92  | 3.77E-01 | 6.52E-01 | -6.26 |
| 1432666_PM_at   | Gm32641                                                                                                                                 | NA       | 0.09  | 2.45 | 0.92  | 3.77E-01 | 6.52E-01 | -6.26 |
| 1422425_PM_at   | Sprr2k                                                                                                                                  | NA       | 0.11  | 2.68 | 0.92  | 3.77E-01 | 6.52E-01 | -6.26 |
| 1430915_PM_at   | Fndc8                                                                                                                                   | FNDC8    | 0.11  | 2.60 | 0.92  | 3.78E-01 | 6.52E-01 | -6.26 |
| 1418898_PM_at   | Lin7c                                                                                                                                   | LIN7C    | -0.26 | 5.18 | -0.92 | 3.78E-01 | 6.52E-01 | -6.26 |
| 1430349_PM_at   | Zdhhc11                                                                                                                                 | ZDHHC11B | -0.09 | 2.16 | -0.92 | 3.78E-01 | 6.52E-01 | -6.26 |

|                 |                     |             |       |      |       |          |          |       |
|-----------------|---------------------|-------------|-------|------|-------|----------|----------|-------|
| 1444955_PM_at   | ---                 | NA          | 0.07  | 2.27 | 0.92  | 3.78E-01 | 6.52E-01 | -6.26 |
| 1445030_PM_at   | ---                 | NA          | 0.14  | 2.84 | 0.92  | 3.78E-01 | 6.52E-01 | -6.26 |
| 1446615_PM_at   | ---                 | NA          | 0.15  | 2.24 | 0.92  | 3.78E-01 | 6.52E-01 | -6.26 |
| 1429058_PM_at   | Tmem107             | TMEM107     | 0.17  | 2.19 | 0.92  | 3.78E-01 | 6.52E-01 | -6.26 |
| 1425940_PM_a_at | Ssbp3               | SSBP3       | 0.19  | 2.62 | 0.92  | 3.78E-01 | 6.52E-01 | -6.26 |
| 1431996_PM_at   | ---                 | NA          | 0.26  | 2.46 | 0.92  | 3.78E-01 | 6.52E-01 | -6.26 |
| 1423491_PM_at   | Fbxo3               | FBXO3       | -0.24 | 2.49 | -0.92 | 3.78E-01 | 6.52E-01 | -6.26 |
| 1433547_PM_s_at | Nudcd1              | NUDCD1      | -0.24 | 2.81 | -0.92 | 3.78E-01 | 6.52E-01 | -6.26 |
| 1416002_PM_x_at | Cotl1               | COTL1       | 0.11  | 2.52 | 0.92  | 3.78E-01 | 6.52E-01 | -6.26 |
| 1444716_PM_at   | Mettl2              | METTL2A     | 0.11  | 2.43 | 0.92  | 3.78E-01 | 6.52E-01 | -6.26 |
| 1451023_PM_at   | Hcn3                | HCN3        | 0.13  | 2.57 | 0.92  | 3.78E-01 | 6.52E-01 | -6.26 |
| 1449280_PM_at   | Esm1                | ESM1        | 0.15  | 2.52 | 0.92  | 3.78E-01 | 6.52E-01 | -6.26 |
| 1454848_PM_at   | Ppp1r12c            | PPP1R12C    | 0.23  | 3.60 | 0.92  | 3.78E-01 | 6.52E-01 | -6.26 |
| 1427572_PM_at   | ---                 | NA          | -0.15 | 3.13 | -0.92 | 3.78E-01 | 6.52E-01 | -6.26 |
| 1452584_PM_at   | Smdt1               | SMDT1       | 0.28  | 5.78 | 0.92  | 3.78E-01 | 6.52E-01 | -6.26 |
| 1436565_PM_at   | Ceacam10            | PSG7        | -0.10 | 2.50 | -0.92 | 3.78E-01 | 6.52E-01 | -6.26 |
| 1458210_PM_at   | Themis3             | NA          | 0.11  | 2.32 | 0.92  | 3.78E-01 | 6.52E-01 | -6.26 |
| 1440247_PM_at   | Phf14               | PHF14       | -0.08 | 2.06 | -0.92 | 3.78E-01 | 6.52E-01 | -6.26 |
| 1446377_PM_at   | Fbln5               | FBLN5       | 0.07  | 1.99 | 0.92  | 3.78E-01 | 6.52E-01 | -6.26 |
| 1458741_PM_at   | ---                 | NA          | 0.20  | 2.28 | 0.92  | 3.78E-01 | 6.52E-01 | -6.26 |
| 1431884_PM_at   | ---                 | NA          | 0.35  | 2.55 | 0.92  | 3.78E-01 | 6.52E-01 | -6.26 |
| 1456558_PM_s_at | C87977              | PRAMEF9     | 0.08  | 1.98 | 0.92  | 3.78E-01 | 6.52E-01 | -6.26 |
| 1446946_PM_at   | ---                 | NA          | 0.20  | 2.71 | 0.92  | 3.78E-01 | 6.52E-01 | -6.26 |
| 1444082_PM_at   | A730017C20Rik       | KIAA1024L   | -0.10 | 2.36 | -0.92 | 3.78E-01 | 6.52E-01 | -6.26 |
| 1458552_PM_at   | ---                 | NA          | 0.08  | 2.05 | 0.92  | 3.78E-01 | 6.52E-01 | -6.26 |
| 1439385_PM_x_at | Slc13a3             | SLC13A3     | 0.08  | 2.37 | 0.92  | 3.78E-01 | 6.52E-01 | -6.26 |
| 1422774_PM_at   | 1700088E04Rik       | C22orf23    | 0.18  | 3.01 | 0.92  | 3.78E-01 | 6.52E-01 | -6.26 |
| 1415724_PM_a_at | Cdc42               | CDC42       | -0.21 | 2.59 | -0.92 | 3.78E-01 | 6.53E-01 | -6.26 |
| 1457223_PM_at   | ---                 | NA          | 0.11  | 2.13 | 0.92  | 3.78E-01 | 6.53E-01 | -6.26 |
| 1430511_PM_at   | Unc13c              | UNC13C      | 0.15  | 2.62 | 0.92  | 3.78E-01 | 6.53E-01 | -6.26 |
| 1457494_PM_at   | ---                 | NA          | -0.26 | 3.19 | -0.92 | 3.78E-01 | 6.53E-01 | -6.26 |
| 1429123_PM_at   | Rab27a              | RAB27A      | 0.10  | 2.64 | 0.92  | 3.78E-01 | 6.53E-01 | -6.26 |
| 1432318_PM_at   | Ugg1                | UGG1        | 0.10  | 2.30 | 0.92  | 3.78E-01 | 6.53E-01 | -6.26 |
| 1448953_PM_at   | Blm                 | BLM         | 0.11  | 2.40 | 0.92  | 3.78E-01 | 6.53E-01 | -6.26 |
| 1440533_PM_at   | ---                 | NA          | 0.11  | 2.06 | 0.92  | 3.78E-01 | 6.53E-01 | -6.26 |
| 1425042_PM_s_at | Pelp1               | PELP1       | 0.31  | 2.99 | 0.92  | 3.78E-01 | 6.53E-01 | -6.26 |
| 1434247_PM_at   | Ldhal6b             | LDHAL6B     | 0.13  | 2.58 | 0.92  | 3.79E-01 | 6.53E-01 | -6.26 |
| 1456495_PM_s_at | Osbpl6              | OSBPL6      | -0.22 | 2.85 | -0.92 | 3.79E-01 | 6.53E-01 | -6.26 |
| 1443992_PM_at   | Nipbl               | NA          | -0.13 | 2.55 | -0.92 | 3.79E-01 | 6.53E-01 | -6.26 |
| 1428147_PM_at   | Coro7               | CORO7-PAM16 | 0.18  | 2.80 | 0.92  | 3.79E-01 | 6.53E-01 | -6.26 |
| 1448139_PM_at   | Mlc1                | MLC1        | -0.63 | 4.21 | -0.92 | 3.79E-01 | 6.53E-01 | -6.26 |
| 1448792_PM_a_at | Cyp2f2              | CYP2F1      | 0.14  | 2.15 | 0.92  | 3.79E-01 | 6.53E-01 | -6.26 |
| 1436142_PM_at   | Akap5               | AKAP5       | -0.31 | 5.08 | -0.92 | 3.79E-01 | 6.53E-01 | -6.26 |
| 1446106_PM_at   | ---                 | NA          | 0.09  | 2.43 | 0.92  | 3.79E-01 | 6.53E-01 | -6.26 |
| 1459055_PM_at   | Foxj3               | FOXJ3       | 0.08  | 2.14 | 0.92  | 3.79E-01 | 6.53E-01 | -6.26 |
| 1448217_PM_a_at | Rpl27 /// Rpl27-ps1 | NA          | 0.26  | 7.81 | 0.92  | 3.79E-01 | 6.53E-01 | -6.26 |
| 1455794_PM_at   | Smtnl2              | SMTNL2      | 0.07  | 2.21 | 0.92  | 3.79E-01 | 6.53E-01 | -6.26 |
| 1441508_PM_at   | ---                 | NA          | 0.11  | 3.01 | 0.92  | 3.79E-01 | 6.53E-01 | -6.26 |
| 1451465_PM_at   | Ubl7                | UBL7        | 0.25  | 4.05 | 0.92  | 3.79E-01 | 6.53E-01 | -6.26 |
| 1456044_PM_at   | Nedd4l              | NEDD4L      | -0.47 | 3.97 | -0.92 | 3.79E-01 | 6.53E-01 | -6.26 |
| 1435474_PM_at   | Taf5                | TAF5        | -0.32 | 3.39 | -0.92 | 3.79E-01 | 6.53E-01 | -6.26 |
| 1448346_PM_at   | Cfl1                | NA          | 0.21  | 4.02 | 0.92  | 3.79E-01 | 6.53E-01 | -6.26 |
| 1418226_PM_at   | Orc2                | ORC2        | 0.10  | 2.43 | 0.92  | 3.79E-01 | 6.53E-01 | -6.26 |
| 1449845_PM_a_at | Ephb4               | EPHB4       | 0.08  | 2.74 | 0.92  | 3.79E-01 | 6.53E-01 | -6.26 |
| 1441844_PM_at   | ---                 | NA          | 0.31  | 3.07 | 0.92  | 3.79E-01 | 6.54E-01 | -6.26 |
| 1452834_PM_at   | Prr5l               | PRR5L       | 0.17  | 2.74 | 0.92  | 3.79E-01 | 6.54E-01 | -6.26 |
| 1439390_PM_at   | Vps9d1              | VPS9D1      | 0.08  | 2.18 | 0.92  | 3.79E-01 | 6.54E-01 | -6.26 |
| 1436336_PM_at   | Pthr1               | PTRH1       | 0.09  | 2.16 | 0.92  | 3.79E-01 | 6.54E-01 | -6.26 |
| 1447969_PM_at   | ---                 | NA          | 0.17  | 2.48 | 0.92  | 3.79E-01 | 6.54E-01 | -6.26 |
| 1443834_PM_at   | Gabbr1              | GABRB1      | -0.27 | 2.74 | -0.92 | 3.79E-01 | 6.54E-01 | -6.26 |
| 1444540_PM_at   | ---                 | NA          | 0.27  | 2.62 | 0.92  | 3.79E-01 | 6.54E-01 | -6.26 |
| 1457074_PM_at   | Kif24               | KIF24       | 0.15  | 2.95 | 0.92  | 3.80E-01 | 6.54E-01 | -6.26 |
| 1453348_PM_at   | ---                 | NA          | -0.12 | 2.83 | -0.92 | 3.80E-01 | 6.54E-01 | -6.26 |
| 1431926_PM_a_at | Fam134c             | RETREG3     | 0.09  | 2.66 | 0.92  | 3.80E-01 | 6.54E-01 | -6.26 |
| 1443196_PM_at   | Rnf217              | RNF217      | -0.23 | 2.36 | -0.92 | 3.80E-01 | 6.54E-01 | -6.26 |
| 1445371_PM_at   | Tmem207             | TMEM207     | -0.13 | 2.58 | -0.92 | 3.80E-01 | 6.54E-01 | -6.26 |
| 1419477_PM_at   | Clec2d              | CLEC2D      | 0.09  | 2.22 | 0.92  | 3.80E-01 | 6.54E-01 | -6.26 |
| 1445423_PM_at   | ---                 | NA          | 0.09  | 2.39 | 0.92  | 3.80E-01 | 6.54E-01 | -6.26 |
| 1437655_PM_at   | D430020J02Rik       | NA          | 0.11  | 2.15 | 0.92  | 3.80E-01 | 6.54E-01 | -6.26 |
| 1443917_PM_at   | ---                 | NA          | 0.16  | 2.40 | 0.92  | 3.80E-01 | 6.54E-01 | -6.26 |
| 1418589_PM_a_at | Mlf1                | MLF1        | 0.08  | 2.24 | 0.92  | 3.80E-01 | 6.54E-01 | -6.26 |
| 1442745_PM_x_at | Gm39971             | NA          | 0.19  | 2.33 | 0.92  | 3.80E-01 | 6.54E-01 | -6.26 |
| 1417888_PM_at   | Trim13              | TRIM13      | -0.15 | 2.38 | -0.92 | 3.80E-01 | 6.54E-01 | -6.26 |
| 1439671_PM_at   | ---                 | NA          | 0.12  | 3.63 | 0.92  | 3.80E-01 | 6.54E-01 | -6.27 |
| 1447491_PM_at   | ---                 | NA          | 0.27  | 3.45 | 0.92  | 3.80E-01 | 6.54E-01 | -6.27 |

|                 |               |          |       |       |       |          |          |       |
|-----------------|---------------|----------|-------|-------|-------|----------|----------|-------|
| 1425799_PM_at   | Fmo4          | FMO4     | 0.11  | 2.13  | 0.92  | 3.80E-01 | 6.54E-01 | -6.27 |
| 1431084_PM_x_at | 1810014B01Rik | NA       | -0.12 | 2.37  | -0.92 | 3.80E-01 | 6.54E-01 | -6.27 |
| 1427007_PM_at   | Sash3         | SASH3    | 0.14  | 2.40  | 0.92  | 3.80E-01 | 6.54E-01 | -6.27 |
| 1453203_PM_at   | Prps1l1       | PRPS1L1  | 0.12  | 2.34  | 0.92  | 3.80E-01 | 6.54E-01 | -6.27 |
| 1456491_PM_at   | Rbm24         | NA       | -0.17 | 2.20  | -0.92 | 3.80E-01 | 6.54E-01 | -6.27 |
| 1458405_PM_at   | Gm5113        | NA       | 0.16  | 2.15  | 0.92  | 3.80E-01 | 6.54E-01 | -6.27 |
| 1440938_PM_at   | Trem12        | TREML2   | 0.07  | 2.54  | 0.92  | 3.80E-01 | 6.54E-01 | -6.27 |
| 1423356_PM_at   | Snap29        | SNAP29   | 0.17  | 4.23  | 0.92  | 3.80E-01 | 6.54E-01 | -6.27 |
| 1419432_PM_at   | Spam1         | SPAM1    | -0.09 | 2.18  | -0.92 | 3.80E-01 | 6.54E-01 | -6.27 |
| 1440576_PM_at   | Cpn1          | CPN1     | 0.08  | 1.99  | 0.92  | 3.80E-01 | 6.54E-01 | -6.27 |
| 1425256_PM_a_at | Dixdc1        | DIXDC1   | 0.09  | 2.26  | 0.92  | 3.80E-01 | 6.54E-01 | -6.27 |
| 1445444_PM_at   | ---           | NA       | 0.11  | 2.80  | 0.92  | 3.80E-01 | 6.54E-01 | -6.27 |
| 1449164_PM_at   | Cd68          | CD68     | 0.11  | 2.38  | 0.92  | 3.80E-01 | 6.54E-01 | -6.27 |
| 1438156_PM_x_at | Cpt1a         | CPT1A    | 0.39  | 3.71  | 0.92  | 3.80E-01 | 6.54E-01 | -6.27 |
| 1448793_PM_a_at | Sdc4          | SDC4     | 0.24  | 2.80  | 0.92  | 3.80E-01 | 6.55E-01 | -6.27 |
| 1445558_PM_at   | 5930430L01Rik | NA       | 0.21  | 4.61  | 0.92  | 3.80E-01 | 6.55E-01 | -6.27 |
| 1458979_PM_at   | Otud7a        | NA       | -0.15 | 2.78  | -0.92 | 3.80E-01 | 6.55E-01 | -6.27 |
| 1427773_PM_a_at | Rabac1        | RABAC1   | 0.11  | 2.23  | 0.92  | 3.80E-01 | 6.55E-01 | -6.27 |
| 1450445_PM_at   | Phex          | PHEX     | 0.08  | 2.24  | 0.92  | 3.80E-01 | 6.55E-01 | -6.27 |
| 1453413_PM_at   | Gnas          | NA       | 0.14  | 3.03  | 0.92  | 3.80E-01 | 6.55E-01 | -6.27 |
| 1437446_PM_at   | ---           | NA       | 0.16  | 2.95  | 0.92  | 3.80E-01 | 6.55E-01 | -6.27 |
| 1450272_PM_at   | Tnfsf8        | TNFSF8   | 0.09  | 2.21  | 0.92  | 3.81E-01 | 6.55E-01 | -6.27 |
| 1429656_PM_at   | Rhobtb1       | RHOBTB1  | 0.11  | 2.61  | 0.92  | 3.81E-01 | 6.55E-01 | -6.27 |
| 1457039_PM_at   | Cecr2         | CECR2    | 0.11  | 2.66  | 0.92  | 3.81E-01 | 6.55E-01 | -6.27 |
| 1451101_PM_a_at | Rps28         | RPS28    | -0.23 | 9.25  | -0.92 | 3.81E-01 | 6.55E-01 | -6.27 |
| 1452111_PM_at   | Mrops35       | MRPS35   | -0.10 | 3.36  | -0.92 | 3.81E-01 | 6.55E-01 | -6.27 |
| 1415946_PM_at   | Pigq          | PIGQ     | -0.16 | 2.81  | -0.92 | 3.81E-01 | 6.55E-01 | -6.27 |
| 1453842_PM_at   | Pard3bos1     | NA       | 0.10  | 2.01  | 0.92  | 3.81E-01 | 6.55E-01 | -6.27 |
| 1445243_PM_at   | D10ErtD533e   | NA       | 0.11  | 2.67  | 0.92  | 3.81E-01 | 6.55E-01 | -6.27 |
| 1454594_PM_at   | ---           | NA       | 0.17  | 2.47  | 0.92  | 3.81E-01 | 6.55E-01 | -6.27 |
| 1446981_PM_at   | A830010M20Rik | KIAA1107 | -0.18 | 2.96  | -0.92 | 3.81E-01 | 6.55E-01 | -6.27 |
| 1455284_PM_x_at | Pigx          | PIGX     | 0.12  | 2.80  | 0.92  | 3.81E-01 | 6.55E-01 | -6.27 |
| 1455138_PM_x_at | Cfl1          | NA       | 0.16  | 11.02 | 0.92  | 3.81E-01 | 6.55E-01 | -6.27 |
| 1442645_PM_at   | Atp2b3        | NA       | -0.22 | 3.10  | -0.92 | 3.81E-01 | 6.55E-01 | -6.27 |
| 1415900_PM_a_at | Kit           | KIT      | -0.12 | 2.20  | -0.92 | 3.81E-01 | 6.55E-01 | -6.27 |
| 1445167_PM_at   | 9630001P10Rik | NA       | 0.09  | 2.47  | 0.92  | 3.81E-01 | 6.55E-01 | -6.27 |
| 1454300_PM_at   | 4933424C09Rik | NA       | 0.11  | 2.62  | 0.92  | 3.81E-01 | 6.55E-01 | -6.27 |
| 1428514_PM_at   | Cpne3         | CPNE3    | 0.12  | 2.61  | 0.92  | 3.81E-01 | 6.55E-01 | -6.27 |
| 1425841_PM_at   | Slc26a7       | SLC26A7  | 0.15  | 2.25  | 0.92  | 3.81E-01 | 6.55E-01 | -6.27 |
| 1455071_PM_at   | Zbtb7b        | ZBTB7B   | 0.09  | 2.43  | 0.91  | 3.81E-01 | 6.55E-01 | -6.27 |
| 1454192_PM_at   | Eqtn          | EQTN     | 0.15  | 2.56  | 0.92  | 3.81E-01 | 6.55E-01 | -6.27 |
| 1436178_PM_at   | P3h2          | P3H2     | 0.11  | 2.48  | 0.91  | 3.81E-01 | 6.55E-01 | -6.27 |
| 1417310_PM_at   | Tob2          | TOB2     | 0.17  | 3.90  | 0.91  | 3.81E-01 | 6.55E-01 | -6.27 |
| 1429538_PM_a_at | Pnlsr         | PNISR    | 0.30  | 6.29  | 0.91  | 3.81E-01 | 6.55E-01 | -6.27 |
| 1456514_PM_at   | ---           | NA       | 0.31  | 3.62  | 0.91  | 3.81E-01 | 6.55E-01 | -6.27 |
| 1423754_PM_at   | Ifitm3        | IFITM1   | -0.38 | 4.05  | -0.91 | 3.81E-01 | 6.55E-01 | -6.27 |
| 1448931_PM_at   | F2rl1         | F2RL1    | -0.13 | 2.06  | -0.91 | 3.81E-01 | 6.55E-01 | -6.27 |
| 1421492_PM_at   | Hpgds         | HPGDS    | 0.14  | 2.58  | 0.91  | 3.81E-01 | 6.55E-01 | -6.27 |
| 1428638_PM_at   | Efhc2         | EFHC2    | 0.12  | 2.67  | 0.91  | 3.81E-01 | 6.55E-01 | -6.27 |
| 1460135_PM_at   | A930005H10Rik | NA       | -0.13 | 2.16  | -0.91 | 3.81E-01 | 6.55E-01 | -6.27 |
| 1449022_PM_at   | Nes           | NES      | 0.11  | 2.34  | 0.91  | 3.81E-01 | 6.55E-01 | -6.27 |
| 1440169_PM_x_at | Ifnar2        | IFNAR2   | 0.24  | 2.25  | 0.91  | 3.81E-01 | 6.55E-01 | -6.27 |
| 1426178_PM_at   | Igk           | NA       | 0.07  | 2.13  | 0.91  | 3.81E-01 | 6.55E-01 | -6.27 |
| 1457786_PM_at   | ---           | NA       | -0.12 | 2.71  | -0.91 | 3.81E-01 | 6.55E-01 | -6.27 |
| 1451541_PM_at   | Bcs1l         | BCS1L    | -0.32 | 3.12  | -0.91 | 3.81E-01 | 6.55E-01 | -6.27 |
| 1430621_PM_at   | Mmrn1         | MMRN1    | 0.15  | 2.28  | 0.91  | 3.81E-01 | 6.55E-01 | -6.27 |
| 1419824_PM_a_at | Aasdh         | AASDH    | -0.33 | 4.18  | -0.91 | 3.82E-01 | 6.55E-01 | -6.27 |
| 1429642_PM_at   | Zfand4        | ZFAND4   | 0.12  | 2.40  | 0.91  | 3.82E-01 | 6.55E-01 | -6.27 |
| 1455732_PM_at   | 1700025G04Rik | C1orf21  | 0.17  | 2.69  | 0.91  | 3.82E-01 | 6.55E-01 | -6.27 |
| 1429689_PM_at   | Prdm10        | NA       | 0.23  | 3.42  | 0.91  | 3.82E-01 | 6.56E-01 | -6.27 |
| 1418899_PM_at   | Ufm1          | UFM1     | 0.18  | 4.33  | 0.91  | 3.82E-01 | 6.56E-01 | -6.27 |
| 1441374_PM_at   | ---           | NA       | -0.08 | 1.91  | -0.91 | 3.82E-01 | 6.56E-01 | -6.27 |
| 1431853_PM_at   | ---           | NA       | 0.12  | 2.22  | 0.91  | 3.82E-01 | 6.56E-01 | -6.27 |
| 1456651_PM_a_at | Tpr           | TPR      | 0.45  | 5.14  | 0.91  | 3.82E-01 | 6.56E-01 | -6.27 |
| 1435330_PM_at   | Pyhin1        | NA       | 0.11  | 2.20  | 0.91  | 3.82E-01 | 6.56E-01 | -6.27 |
| 1450599_PM_at   | Vmn1r53       | NA       | 0.09  | 1.96  | 0.91  | 3.82E-01 | 6.56E-01 | -6.27 |
| 1427139_PM_at   | Adams10       | ADAMTS10 | 0.12  | 2.43  | 0.91  | 3.82E-01 | 6.56E-01 | -6.27 |
| 1431366_PM_at   | 4930519G04Rik | NA       | 0.09  | 2.24  | 0.91  | 3.82E-01 | 6.56E-01 | -6.27 |
| 1430048_PM_at   | Zfp626        | NA       | 0.10  | 2.67  | 0.91  | 3.82E-01 | 6.56E-01 | -6.27 |
| 1425638_PM_at   | Adap2         | ADAP2    | 0.13  | 3.83  | 0.91  | 3.82E-01 | 6.56E-01 | -6.27 |
| 1418566_PM_s_at | Nudcd2        | NUDCD2   | -0.25 | 4.52  | -0.91 | 3.82E-01 | 6.56E-01 | -6.27 |
| 1431617_PM_at   | 4933405E24Rik | NA       | 0.08  | 2.10  | 0.91  | 3.82E-01 | 6.56E-01 | -6.27 |
| 1423040_PM_at   | Bzw1          | BZW1     | 0.24  | 4.66  | 0.91  | 3.82E-01 | 6.56E-01 | -6.27 |
| 1418715_PM_at   | Pank1         | PANK1    | -0.24 | 3.49  | -0.91 | 3.82E-01 | 6.56E-01 | -6.27 |
| 1432922_PM_at   | ---           | NA       | 0.07  | 1.96  | 0.91  | 3.82E-01 | 6.56E-01 | -6.27 |



|                 |                         |          |       |      |       |          |          |       |
|-----------------|-------------------------|----------|-------|------|-------|----------|----------|-------|
| 1433948_PM_at   | Pla2g1b                 | NA       | 0.08  | 2.15 | 0.91  | 3.82E-01 | 6.56E-01 | -6.27 |
| 1431695_PM_at   | Rph3al                  | RPH3AL   | 0.09  | 2.11 | 0.91  | 3.82E-01 | 6.56E-01 | -6.27 |
| 1454463_PM_at   | ---                     | NA       | 0.11  | 2.32 | 0.91  | 3.82E-01 | 6.56E-01 | -6.27 |
| 1450085_PM_at   | Angptl2                 | ANGPTL2  | 0.12  | 2.08 | 0.91  | 3.82E-01 | 6.56E-01 | -6.27 |
| 1433389_PM_at   | Cyp4f18                 | CYP4F12  | 0.12  | 2.79 | 0.91  | 3.82E-01 | 6.56E-01 | -6.27 |
| 1447298_PM_at   | C130071C03Rik           | NA       | -0.48 | 4.48 | -0.91 | 3.82E-01 | 6.56E-01 | -6.27 |
| 1442831_PM_at   | ---                     | NA       | -0.26 | 2.75 | -0.91 | 3.82E-01 | 6.56E-01 | -6.27 |
| 1429728_PM_at   | Gin1                    | GIN1     | -0.21 | 2.97 | -0.91 | 3.82E-01 | 6.56E-01 | -6.27 |
| 1456732_PM_at   | Gpd1                    | NA       | -0.09 | 2.08 | -0.91 | 3.82E-01 | 6.56E-01 | -6.27 |
| 1447208_PM_at   | ---                     | NA       | -0.08 | 2.38 | -0.91 | 3.82E-01 | 6.56E-01 | -6.27 |
| 1418519_PM_at   | Aadat                   | AADAT    | -0.06 | 2.17 | -0.91 | 3.82E-01 | 6.56E-01 | -6.27 |
| 1419014_PM_at   | Rhag                    | RHAG     | 0.06  | 1.89 | 0.91  | 3.82E-01 | 6.56E-01 | -6.27 |
| 1430759_PM_at   | 4930523C07Rik           | KIAA0040 | 0.07  | 2.18 | 0.91  | 3.82E-01 | 6.56E-01 | -6.27 |
| 1425086_PM_a_at | Slamf6                  | SLAMF6   | 0.08  | 2.65 | 0.91  | 3.82E-01 | 6.56E-01 | -6.27 |
| 1422892_PM_s_at | H2-Ea-ps                | NA       | 0.08  | 2.11 | 0.91  | 3.82E-01 | 6.56E-01 | -6.27 |
| 1439738_PM_at   | Mettl13                 | METTL13  | 0.11  | 2.51 | 0.91  | 3.82E-01 | 6.56E-01 | -6.27 |
| 1418957_PM_at   | Stac                    | STAC     | 0.13  | 2.45 | 0.91  | 3.82E-01 | 6.56E-01 | -6.27 |
| 1457286_PM_at   | ---                     | NA       | 0.13  | 2.54 | 0.91  | 3.82E-01 | 6.56E-01 | -6.27 |
| 1421645_PM_at   | Cemp                    | CEMIP    | 0.15  | 3.49 | 0.91  | 3.82E-01 | 6.56E-01 | -6.27 |
| 1428057_PM_a_at | Ahnak                   | AHNAK    | 0.15  | 3.38 | 0.91  | 3.82E-01 | 6.56E-01 | -6.27 |
| 1450504_PM_a_at | Agpat3                  | AGPAT3   | 0.17  | 4.61 | 0.91  | 3.82E-01 | 6.56E-01 | -6.27 |
| 1446372_PM_at   | ---                     | NA       | 0.24  | 2.80 | 0.91  | 3.82E-01 | 6.56E-01 | -6.27 |
| 1421358_PM_at   | H2-M3                   | NA       | 0.26  | 3.24 | 0.91  | 3.82E-01 | 6.56E-01 | -6.27 |
| 1422938_PM_at   | Bcl2                    | BCL2     | 0.49  | 4.81 | 0.91  | 3.82E-01 | 6.56E-01 | -6.27 |
| 1459169_PM_at   | ---                     | NA       | 0.08  | 1.93 | 0.91  | 3.83E-01 | 6.56E-01 | -6.27 |
| 1458367_PM_at   | Gm94                    | CSorf46  | 0.11  | 2.37 | 0.91  | 3.83E-01 | 6.56E-01 | -6.27 |
| 1453715_PM_at   | Sv2c                    | SV2C     | 0.08  | 2.26 | 0.91  | 3.83E-01 | 6.56E-01 | -6.27 |
| 1450986_PM_at   | Nop58                   | NOP58    | -0.31 | 3.74 | -0.91 | 3.83E-01 | 6.56E-01 | -6.27 |
| 1450356_PM_at   | Trhr2                   | NA       | 0.10  | 3.19 | 0.91  | 3.83E-01 | 6.56E-01 | -6.27 |
| 1422216_PM_at   | Mid2                    | MID2     | -0.19 | 2.98 | -0.91 | 3.83E-01 | 6.56E-01 | -6.27 |
| 1445589_PM_at   | ---                     | NA       | 0.19  | 3.16 | 0.91  | 3.83E-01 | 6.56E-01 | -6.27 |
| 1416494_PM_at   | LOC102641315 /// Ndufs5 | NDUFS5   | -0.39 | 3.56 | -0.91 | 3.83E-01 | 6.56E-01 | -6.27 |
| 1420336_PM_at   | Adamts5                 | ADAMTSL5 | -0.11 | 2.29 | -0.91 | 3.83E-01 | 6.56E-01 | -6.27 |
| 1441555_PM_at   | Rabgap1                 | RABGAP1  | -0.09 | 2.25 | -0.91 | 3.83E-01 | 6.56E-01 | -6.27 |
| 1418678_PM_at   | Has2                    | HAS2     | 0.07  | 2.08 | 0.91  | 3.83E-01 | 6.56E-01 | -6.27 |
| 1450737_PM_at   | Polr3k                  | POLR3K   | 0.34  | 3.78 | 0.91  | 3.83E-01 | 6.56E-01 | -6.27 |
| 1445917_PM_at   | ---                     | NA       | 0.08  | 2.51 | 0.91  | 3.83E-01 | 6.56E-01 | -6.27 |
| 1423892_PM_at   | Apbb1                   | APBB1    | 0.09  | 2.05 | 0.91  | 3.83E-01 | 6.56E-01 | -6.27 |
| 1438732_PM_at   | Nhsl2                   | NHSL2    | -0.25 | 3.79 | -0.91 | 3.83E-01 | 6.57E-01 | -6.27 |
| 1441579_PM_at   | Dmrt1                   | DMRTA1   | -0.11 | 2.57 | -0.91 | 3.83E-01 | 6.57E-01 | -6.27 |
| 1448239_PM_at   | Hmox1                   | HMOX1    | 0.09  | 2.40 | 0.91  | 3.83E-01 | 6.57E-01 | -6.27 |
| 1432726_PM_at   | ---                     | NA       | 0.09  | 2.18 | 0.91  | 3.83E-01 | 6.57E-01 | -6.27 |
| 1416206_PM_at   | Sipa1                   | SIPA1    | 0.09  | 2.98 | 0.91  | 3.83E-01 | 6.57E-01 | -6.27 |
| 1441651_PM_at   | 4930414N06Rik           | NA       | 0.11  | 2.23 | 0.91  | 3.83E-01 | 6.57E-01 | -6.27 |
| 1417414_PM_at   | Sept3                   | SEPT3    | 0.36  | 5.87 | 0.91  | 3.83E-01 | 6.57E-01 | -6.27 |
| 1439152_PM_at   | Mthfsd                  | MTHFSD   | -0.20 | 3.44 | -0.91 | 3.83E-01 | 6.57E-01 | -6.27 |
| 1447606_PM_x_at | Aqp11                   | AQP11    | -0.08 | 2.28 | -0.91 | 3.83E-01 | 6.57E-01 | -6.27 |
| 1443267_PM_at   | ---                     | NA       | 0.15  | 2.25 | 0.91  | 3.83E-01 | 6.57E-01 | -6.27 |
| 1446409_PM_at   | Gtdc1                   | GTDC1    | 0.11  | 2.59 | 0.91  | 3.83E-01 | 6.57E-01 | -6.27 |
| 1440412_PM_at   | ---                     | NA       | 0.11  | 2.85 | 0.91  | 3.83E-01 | 6.57E-01 | -6.27 |
| 1444214_PM_at   | ---                     | NA       | 0.09  | 2.19 | 0.91  | 3.83E-01 | 6.57E-01 | -6.27 |
| 1451651_PM_at   | Vsig4                   | VSIG4    | -0.11 | 2.32 | -0.91 | 3.83E-01 | 6.57E-01 | -6.27 |
| 1457398_PM_at   | ---                     | NA       | -0.16 | 2.64 | -0.91 | 3.83E-01 | 6.57E-01 | -6.27 |
| 1453373_PM_at   | Il1rapl1                | IL1RAPL1 | -0.27 | 3.06 | -0.91 | 3.84E-01 | 6.57E-01 | -6.27 |
| 1441300_PM_at   | Kcnf1                   | KCNF1    | 0.10  | 2.39 | 0.91  | 3.84E-01 | 6.57E-01 | -6.27 |
| 1453655_PM_at   | LOC105247651            | NA       | 0.09  | 2.34 | 0.91  | 3.84E-01 | 6.57E-01 | -6.27 |
| 1453701_PM_at   | 4921515E04Rik           | NA       | -0.14 | 2.71 | -0.91 | 3.84E-01 | 6.57E-01 | -6.27 |
| 1424197_PM_s_at | Fance                   | NA       | 0.08  | 1.94 | 0.91  | 3.84E-01 | 6.57E-01 | -6.27 |
| 1418449_PM_at   | Lad1                    | LAD1     | 0.08  | 2.25 | 0.91  | 3.84E-01 | 6.57E-01 | -6.27 |
| 1460348_PM_at   | Mad2l2                  | MAD2L2   | 0.26  | 2.36 | 0.91  | 3.84E-01 | 6.57E-01 | -6.27 |
| 1455604_PM_at   | Fzd5                    | FZD5     | -0.36 | 3.62 | -0.91 | 3.84E-01 | 6.57E-01 | -6.27 |
| 1457404_PM_at   | Nfkbiz                  | NFKBIZ   | -0.24 | 2.52 | -0.91 | 3.84E-01 | 6.57E-01 | -6.27 |
| 1460289_PM_at   | Nrg3                    | NRG3     | -0.16 | 3.00 | -0.91 | 3.84E-01 | 6.57E-01 | -6.27 |
| 1440340_PM_at   | B3galt6                 | B3GALT6  | -0.15 | 2.88 | -0.91 | 3.84E-01 | 6.57E-01 | -6.27 |
| 1458225_PM_at   | Fkbp14                  | FKBP14   | 0.08  | 2.32 | 0.91  | 3.84E-01 | 6.57E-01 | -6.27 |
| 1427794_PM_at   | ---                     | NA       | 0.10  | 2.25 | 0.91  | 3.84E-01 | 6.57E-01 | -6.27 |
| 1450222_PM_x_at | Klk1b4                  | KLK3     | 0.10  | 2.41 | 0.91  | 3.84E-01 | 6.57E-01 | -6.27 |
| 1460394_PM_a_at | Inpp1                   | INPPL1   | 0.11  | 2.71 | 0.91  | 3.84E-01 | 6.57E-01 | -6.27 |
| 1443120_PM_at   | Pdzd4                   | NA       | 0.08  | 2.04 | 0.91  | 3.84E-01 | 6.57E-01 | -6.27 |
| 1449630_PM_s_at | Mark1                   | MARK1    | -0.51 | 4.53 | -0.91 | 3.84E-01 | 6.57E-01 | -6.27 |
| 1439484_PM_at   | Pde7a                   | PDE7A    | -0.25 | 2.70 | -0.91 | 3.84E-01 | 6.57E-01 | -6.27 |
| 1430972_PM_x_at | Aqr                     | AQR      | 0.11  | 2.20 | 0.91  | 3.84E-01 | 6.57E-01 | -6.27 |
| 1425303_PM_at   | Gck                     | GCK      | 0.15  | 2.51 | 0.91  | 3.84E-01 | 6.57E-01 | -6.27 |
| 1454892_PM_at   | Pitpnb                  | PITPNB   | -0.52 | 5.90 | -0.91 | 3.84E-01 | 6.57E-01 | -6.27 |

|                 |               |          |       |      |       |          |          |       |
|-----------------|---------------|----------|-------|------|-------|----------|----------|-------|
| 1451137_PM_a_at | Brd8          | BRD8     | -0.14 | 2.65 | -0.91 | 3.84E-01 | 6.57E-01 | -6.27 |
| 1432914_PM_at   | ---           | NA       | 0.07  | 2.16 | 0.91  | 3.84E-01 | 6.57E-01 | -6.27 |
| 1424889_PM_at   | Nupl2         | NUPL2    | 0.11  | 2.12 | 0.91  | 3.84E-01 | 6.57E-01 | -6.27 |
| 1454258_PM_at   | ---           | NA       | 0.15  | 2.43 | 0.91  | 3.84E-01 | 6.57E-01 | -6.27 |
| 1436810_PM_x_at | Uqcc2         | UQCC2    | 0.17  | 4.30 | 0.91  | 3.84E-01 | 6.57E-01 | -6.27 |
| 1433883_PM_at   | Tpm4          | TPM4     | 0.23  | 3.88 | 0.91  | 3.84E-01 | 6.57E-01 | -6.27 |
| 1430780_PM_a_at | Pmm1          | PMM1     | 0.38  | 4.17 | 0.91  | 3.84E-01 | 6.57E-01 | -6.27 |
| 1452301_PM_at   | Alch3b1       | ALDH3B1  | 0.10  | 3.13 | 0.91  | 3.84E-01 | 6.57E-01 | -6.27 |
| 1453995_PM_a_at | Trmt2a        | TRMT2A   | 0.12  | 2.78 | 0.91  | 3.84E-01 | 6.57E-01 | -6.27 |
| 1450025_PM_at   | Pard6g        | PAR6G    | 0.13  | 2.75 | 0.91  | 3.84E-01 | 6.58E-01 | -6.27 |
| 1451164_PM_a_at | Mrps18b       | MRPS18B  | 0.10  | 4.66 | 0.91  | 3.84E-01 | 6.58E-01 | -6.27 |
| 1451778_PM_at   | Crtc3         | CRTC3    | 0.13  | 2.64 | 0.91  | 3.84E-01 | 6.58E-01 | -6.27 |
| 1436736_PM_x_at | Nrep          | NREP     | 0.46  | 5.84 | 0.91  | 3.84E-01 | 6.58E-01 | -6.27 |
| 1448937_PM_at   | Slc35b3       | SLC35B3  | -0.13 | 2.63 | -0.91 | 3.84E-01 | 6.58E-01 | -6.27 |
| 1457599_PM_at   | ---           | NA       | 0.07  | 2.10 | 0.91  | 3.84E-01 | 6.58E-01 | -6.27 |
| 1453255_PM_at   | Slc43a1       | SLC43A1  | 0.10  | 2.35 | 0.91  | 3.84E-01 | 6.58E-01 | -6.27 |
| 1444726_PM_at   | Krr1          | KRR1     | 0.21  | 2.98 | 0.91  | 3.84E-01 | 6.58E-01 | -6.27 |
| 1440492_PM_at   | ---           | NA       | 0.17  | 3.27 | 0.91  | 3.84E-01 | 6.58E-01 | -6.27 |
| 1439770_PM_at   | Nyap1         | NYAP1    | 0.34  | 3.75 | 0.91  | 3.84E-01 | 6.58E-01 | -6.27 |
| 1415862_PM_at   | Tyrl1         | TYRL1    | -0.08 | 2.32 | -0.91 | 3.84E-01 | 6.58E-01 | -6.27 |
| 1437623_PM_x_at | Xrcc3         | XRCC3    | -0.20 | 3.75 | -0.91 | 3.85E-01 | 6.58E-01 | -6.27 |
| 1444939_PM_at   | Prpf19        | PRPF19   | 0.09  | 2.49 | 0.91  | 3.85E-01 | 6.58E-01 | -6.27 |
| 1431489_PM_at   | 4933432K03Rik | NA       | 0.17  | 2.76 | 0.91  | 3.85E-01 | 6.58E-01 | -6.27 |
| 1446721_PM_at   | ---           | NA       | 0.11  | 2.57 | 0.91  | 3.85E-01 | 6.58E-01 | -6.27 |
| 1431719_PM_a_at | Srgap1        | SRGAP1   | 0.17  | 2.72 | 0.91  | 3.85E-01 | 6.58E-01 | -6.27 |
| 1423426_PM_at   | Plbd2         | PLBD2    | 0.18  | 2.86 | 0.91  | 3.85E-01 | 6.58E-01 | -6.27 |
| 1453264_PM_at   | Marveld3      | MARVELD3 | 0.08  | 2.06 | 0.91  | 3.85E-01 | 6.58E-01 | -6.27 |
| 1456829_PM_at   | Pnma3         | PNMA3    | 0.09  | 2.30 | 0.91  | 3.85E-01 | 6.58E-01 | -6.27 |
| 1419759_PM_at   | Abcb1a        | ABCB1    | -0.22 | 3.40 | -0.91 | 3.85E-01 | 6.58E-01 | -6.27 |
| 1435077_PM_at   | Asxl1         | ASXL1    | 0.09  | 2.45 | 0.91  | 3.85E-01 | 6.58E-01 | -6.27 |
| 1456773_PM_at   | Nupl2         | NUPL2    | 0.13  | 2.94 | 0.91  | 3.85E-01 | 6.58E-01 | -6.27 |
| 1446735_PM_at   | Itn2          | ITSN2    | 0.20  | 2.61 | 0.91  | 3.85E-01 | 6.58E-01 | -6.27 |
| 1457200_PM_at   | Serpinb9d     | NA       | 0.13  | 2.29 | 0.91  | 3.85E-01 | 6.58E-01 | -6.27 |
| 1444097_PM_at   | ---           | NA       | -0.10 | 2.39 | -0.91 | 3.85E-01 | 6.58E-01 | -6.27 |
| 1437193_PM_s_at | Snrpb         | SNRPB    | 0.54  | 3.37 | 0.91  | 3.85E-01 | 6.58E-01 | -6.27 |
| 1448766_PM_at   | Gjb1          | GJB1     | 0.08  | 2.25 | 0.91  | 3.85E-01 | 6.58E-01 | -6.27 |
| 1454772_PM_at   | Snrnp200      | SNRNP200 | -0.30 | 3.78 | -0.91 | 3.85E-01 | 6.58E-01 | -6.27 |
| 1416978_PM_at   | Fcgrt         | FCGR2    | 0.13  | 3.23 | 0.91  | 3.85E-01 | 6.58E-01 | -6.27 |
| 1457883_PM_at   | Pm20d2        | NA       | -0.12 | 2.08 | -0.91 | 3.85E-01 | 6.58E-01 | -6.27 |
| 1426604_PM_at   | Rnasel        | RNASEL   | -0.18 | 2.60 | -0.91 | 3.85E-01 | 6.58E-01 | -6.27 |
| 1442488_PM_at   | ---           | NA       | 0.09  | 2.16 | 0.91  | 3.85E-01 | 6.58E-01 | -6.27 |
| 1438600_PM_at   | Cks1brt       | NA       | 0.10  | 2.28 | 0.91  | 3.85E-01 | 6.58E-01 | -6.27 |
| 1449316_PM_at   | Cyp4f15       | CYP4F12  | 0.12  | 2.20 | 0.91  | 3.85E-01 | 6.58E-01 | -6.27 |
| 1453004_PM_at   | Slc22a23      | SLC22A23 | 0.18  | 5.44 | 0.91  | 3.85E-01 | 6.58E-01 | -6.27 |
| 1428496_PM_at   | Secisbp2      | SECISBP2 | 0.24  | 3.82 | 0.91  | 3.85E-01 | 6.58E-01 | -6.27 |
| 1424069_PM_at   | Napg          | NAPG     | -0.38 | 6.82 | -0.91 | 3.85E-01 | 6.58E-01 | -6.27 |
| 1443586_PM_at   | Fip1l1        | FIP1L1   | -0.13 | 2.28 | -0.91 | 3.85E-01 | 6.58E-01 | -6.27 |
| 1424952_PM_at   | Ociad1        | OCLAD1   | 0.12  | 2.40 | 0.91  | 3.85E-01 | 6.59E-01 | -6.27 |
| 1427255_PM_s_at | Zfp445        | NA       | -0.60 | 4.28 | -0.91 | 3.85E-01 | 6.59E-01 | -6.28 |
| 1460395_PM_at   | Nudcd3        | NUDCD3   | -0.25 | 4.86 | -0.91 | 3.86E-01 | 6.59E-01 | -6.28 |
| 1445062_PM_at   | ---           | NA       | -0.19 | 2.23 | -0.91 | 3.86E-01 | 6.59E-01 | -6.28 |
| 1434806_PM_at   | Mtx3          | MTX3     | -0.09 | 2.03 | -0.91 | 3.86E-01 | 6.59E-01 | -6.28 |
| 1419822_PM_at   | Eif3e         | NA       | 0.08  | 2.21 | 0.91  | 3.86E-01 | 6.59E-01 | -6.28 |
| 1426198_PM_at   | ---           | NA       | 0.09  | 2.18 | 0.91  | 3.86E-01 | 6.59E-01 | -6.28 |
| 1459933_PM_at   | ---           | NA       | 0.11  | 2.31 | 0.91  | 3.86E-01 | 6.59E-01 | -6.28 |
| 1435956_PM_at   | Frmd5         | FRMD5    | 0.11  | 2.44 | 0.91  | 3.85E-01 | 6.59E-01 | -6.28 |
| 1425943_PM_at   | Nmur2         | NMUR2    | 0.12  | 2.69 | 0.91  | 3.86E-01 | 6.59E-01 | -6.28 |
| 1433233_PM_at   | LOC105245696  | NA       | 0.13  | 2.34 | 0.91  | 3.86E-01 | 6.59E-01 | -6.28 |
| 1448207_PM_at   | Lasp1         | LASP1    | 0.13  | 3.88 | 0.91  | 3.85E-01 | 6.59E-01 | -6.28 |
| 1417345_PM_at   | Emc7          | EMC7     | 0.14  | 2.23 | 0.91  | 3.86E-01 | 6.59E-01 | -6.28 |
| 1417167_PM_at   | Exosc5        | EXOSC5   | 0.16  | 2.57 | 0.91  | 3.85E-01 | 6.59E-01 | -6.28 |
| 1436172_PM_at   | ---           | NA       | 0.17  | 2.50 | 0.91  | 3.86E-01 | 6.59E-01 | -6.28 |
| 1447391_PM_at   | ---           | NA       | 0.18  | 2.69 | 0.91  | 3.86E-01 | 6.59E-01 | -6.28 |
| 1420329_PM_at   | Timmcd1       | TIMMDC1  | 0.22  | 2.95 | 0.91  | 3.86E-01 | 6.59E-01 | -6.28 |
| 1424254_PM_at   | Ifitm1        | IFITM1   | 0.28  | 3.30 | 0.91  | 3.85E-01 | 6.59E-01 | -6.28 |
| 1450839_PM_at   | Nrep          | NREP     | 0.54  | 6.24 | 0.91  | 3.86E-01 | 6.59E-01 | -6.28 |
| 1455536_PM_at   | A630023A22Rik | NA       | 0.09  | 2.48 | 0.91  | 3.86E-01 | 6.59E-01 | -6.28 |
| 1427128_PM_at   | Ptpn23        | PTPN23   | 0.25  | 3.52 | 0.91  | 3.86E-01 | 6.59E-01 | -6.28 |
| 1421694_PM_a_at | Vcan          | VCAN     | 0.26  | 2.83 | 0.91  | 3.86E-01 | 6.59E-01 | -6.28 |
| 1446001_PM_at   | ---           | NA       | 0.09  | 2.21 | 0.91  | 3.86E-01 | 6.59E-01 | -6.28 |
| 1453028_PM_at   | Pwwp2a        | PWWP2A   | 0.14  | 3.55 | 0.91  | 3.86E-01 | 6.59E-01 | -6.28 |
| 1440127_PM_a_at | Gm37336       | NA       | 0.07  | 2.41 | 0.91  | 3.86E-01 | 6.59E-01 | -6.28 |
| 1454608_PM_x_at | Ttr           | TTR      | -1.56 | 7.90 | -0.91 | 3.86E-01 | 6.59E-01 | -6.28 |
| 1444404_PM_at   | Rnf207        | RNF207   | 0.18  | 2.65 | 0.91  | 3.86E-01 | 6.59E-01 | -6.28 |
| 1434120_PM_a_at | Metap2        | METAP2   | -0.46 | 5.69 | -0.91 | 3.86E-01 | 6.59E-01 | -6.28 |

|                 |                                         |            |       |      |       |          |          |       |
|-----------------|-----------------------------------------|------------|-------|------|-------|----------|----------|-------|
| 1452593_PM_a_at | LOC102642819 /// Tceb1                  | ELOC       | -0.35 | 3.38 | -0.91 | 3.86E-01 | 6.59E-01 | -6.28 |
| 1446824_PM_at   | ---                                     | NA         | -0.33 | 3.08 | -0.90 | 3.86E-01 | 6.59E-01 | -6.28 |
| 1454951_PM_at   | Zfp606                                  | ZNF606     | -0.19 | 4.58 | -0.90 | 3.86E-01 | 6.59E-01 | -6.28 |
| 1436050_PM_x_at | Hes6                                    | HES6       | -0.12 | 2.85 | -0.91 | 3.86E-01 | 6.59E-01 | -6.28 |
| 1449699_PM_s_at | C330027C09Rik                           | KIAA1524   | -0.10 | 2.24 | -0.90 | 3.86E-01 | 6.59E-01 | -6.28 |
| 1432128_PM_at   | Mroh2b                                  | MROH2B     | 0.07  | 2.28 | 0.90  | 3.86E-01 | 6.59E-01 | -6.28 |
| 1418334_PM_at   | Dbf4                                    | DBF4       | 0.11  | 2.39 | 0.91  | 3.86E-01 | 6.59E-01 | -6.28 |
| 1430330_PM_at   | Wiz                                     | WIZ        | 0.12  | 2.60 | 0.90  | 3.86E-01 | 6.59E-01 | -6.28 |
| 1453525_PM_at   | ---                                     | NA         | 0.13  | 2.16 | 0.91  | 3.86E-01 | 6.59E-01 | -6.28 |
| 1441966_PM_at   | ---                                     | NA         | 0.14  | 2.94 | 0.90  | 3.86E-01 | 6.59E-01 | -6.28 |
| 1416511_PM_a_at | Cdc42ep4                                | CDC42EP4   | 0.18  | 2.91 | 0.91  | 3.86E-01 | 6.59E-01 | -6.28 |
| 1450679_PM_at   | Sike1                                   | SIKE1      | 0.20  | 2.19 | 0.90  | 3.86E-01 | 6.59E-01 | -6.28 |
| 1434977_PM_at   | FAM210a                                 | FAM210A    | 0.20  | 2.62 | 0.90  | 3.86E-01 | 6.59E-01 | -6.28 |
| 1426749_PM_at   | Prmt3                                   | PRMT3      | 0.20  | 5.14 | 0.91  | 3.86E-01 | 6.59E-01 | -6.28 |
| 1457497_PM_at   | ---                                     | NA         | 0.29  | 2.88 | 0.90  | 3.86E-01 | 6.59E-01 | -6.28 |
| 1425130_PM_a_at | Ptpn5                                   | PTPN5      | 0.30  | 3.37 | 0.91  | 3.86E-01 | 6.59E-01 | -6.28 |
| 1451905_PM_a_at | Mx1                                     | NA         | 0.09  | 2.21 | 0.90  | 3.86E-01 | 6.59E-01 | -6.28 |
| 1448037_PM_at   | ---                                     | NA         | -0.19 | 3.02 | -0.90 | 3.86E-01 | 6.59E-01 | -6.28 |
| 1460520_PM_at   | Mocs1                                   | MOCS1      | 0.07  | 1.95 | 0.90  | 3.86E-01 | 6.59E-01 | -6.28 |
| 1444986_PM_at   | ---                                     | NA         | 0.13  | 2.14 | 0.90  | 3.86E-01 | 6.59E-01 | -6.28 |
| 1431994_PM_at   | LOC105245161 ///<br>LOC105247081        | NA         | 0.16  | 2.11 | 0.90  | 3.86E-01 | 6.59E-01 | -6.28 |
| 1427914_PM_a_at | LOC102642819 /// Tceb1                  | ELOC       | -0.62 | 7.29 | -0.90 | 3.86E-01 | 6.59E-01 | -6.28 |
| 1428228_PM_at   | Pgm3                                    | PGM3       | -0.18 | 3.31 | -0.90 | 3.86E-01 | 6.59E-01 | -6.28 |
| 1426869_PM_at   | Boc                                     | BOC        | 0.16  | 3.33 | 0.90  | 3.86E-01 | 6.59E-01 | -6.28 |
| 1442509_PM_at   | ---                                     | NA         | 0.28  | 3.09 | 0.90  | 3.86E-01 | 6.59E-01 | -6.28 |
| 1446957_PM_s_at | N4bp1                                   | N4BP1      | -0.40 | 2.93 | -0.90 | 3.86E-01 | 6.59E-01 | -6.28 |
| 1458961_PM_at   | ---                                     | NA         | 0.10  | 2.47 | 0.90  | 3.86E-01 | 6.59E-01 | -6.28 |
| 1423257_PM_at   | Cyp4a14                                 | CYP4A11    | 0.07  | 2.28 | 0.90  | 3.86E-01 | 6.59E-01 | -6.28 |
| 1431600_PM_at   | 4930564C03Rik                           | NA         | 0.08  | 2.51 | 0.90  | 3.87E-01 | 6.59E-01 | -6.28 |
| 1424038_PM_a_at | Emc10                                   | EMC10      | -0.28 | 5.62 | -0.90 | 3.87E-01 | 6.59E-01 | -6.28 |
| 1426886_PM_at   | Cln5                                    | ACO01226.2 | -0.18 | 2.58 | -0.90 | 3.87E-01 | 6.59E-01 | -6.28 |
| 1429416_PM_at   | Ttc9b                                   | TT9B       | -0.14 | 2.95 | -0.90 | 3.87E-01 | 6.59E-01 | -6.28 |
| 1428977_PM_at   | Chst8                                   | CHST8      | 0.09  | 2.66 | 0.90  | 3.87E-01 | 6.59E-01 | -6.28 |
| 1445345_PM_at   | ---                                     | NA         | 0.12  | 2.09 | 0.90  | 3.87E-01 | 6.59E-01 | -6.28 |
| 1453328_PM_at   | 2700008G24Rik ///<br>Gm38524 /// Xkr6   | XKR6       | 0.14  | 2.47 | 0.90  | 3.87E-01 | 6.59E-01 | -6.28 |
| 1443977_PM_at   | ---                                     | NA         | 0.14  | 3.01 | 0.90  | 3.87E-01 | 6.59E-01 | -6.28 |
| 1447657_PM_s_at | Synpo2l                                 | SYNPO2L    | -0.21 | 6.90 | -0.90 | 3.87E-01 | 6.59E-01 | -6.28 |
| 1451128_PM_s_at | Kif22                                   | KIF22      | 0.09  | 2.82 | 0.90  | 3.87E-01 | 6.59E-01 | -6.28 |
| 1454519_PM_at   | ---                                     | NA         | 0.12  | 2.61 | 0.90  | 3.87E-01 | 6.59E-01 | -6.28 |
| 1438817_PM_at   | Dna2                                    | DNA2       | 0.09  | 2.25 | 0.90  | 3.87E-01 | 6.59E-01 | -6.28 |
| 1438821_PM_at   | Rfwd2                                   | RFWD2      | -0.10 | 2.24 | -0.90 | 3.87E-01 | 6.59E-01 | -6.28 |
| 1451232_PM_at   | Cd151                                   | CD151      | 0.10  | 2.19 | 0.90  | 3.87E-01 | 6.59E-01 | -6.28 |
| 1454903_PM_at   | Ngfr                                    | NGFR       | 0.12  | 2.87 | 0.90  | 3.87E-01 | 6.59E-01 | -6.28 |
| 1440177_PM_at   | Grik3                                   | GRIK3      | -0.53 | 4.34 | -0.90 | 3.87E-01 | 6.59E-01 | -6.28 |
| 1457212_PM_at   | ---                                     | NA         | 0.12  | 2.28 | 0.90  | 3.87E-01 | 6.59E-01 | -6.28 |
| 1460167_PM_at   | Aldh7a1                                 | ALDH7A1    | -0.23 | 3.48 | -0.90 | 3.87E-01 | 6.59E-01 | -6.28 |
| 1449541_PM_x_at | 1700010I14Rik                           | C6orf118   | -0.13 | 2.92 | -0.90 | 3.87E-01 | 6.59E-01 | -6.28 |
| 1416169_PM_at   | Tpbpb                                   | NA         | -0.08 | 2.23 | -0.90 | 3.87E-01 | 6.59E-01 | -6.28 |
| 1448150_PM_at   | Nup62                                   | NA         | 0.11  | 2.26 | 0.90  | 3.87E-01 | 6.59E-01 | -6.28 |
| 1439833_PM_at   | Sept3                                   | NA         | -0.29 | 8.27 | -0.90 | 3.87E-01 | 6.60E-01 | -6.28 |
| 1420753_PM_at   | Tll1                                    | TLL1       | -0.19 | 2.89 | -0.90 | 3.87E-01 | 6.60E-01 | -6.28 |
| 1434519_PM_at   | Ddah1                                   | DDAH1      | -0.16 | 3.32 | -0.90 | 3.87E-01 | 6.60E-01 | -6.28 |
| 1416495_PM_s_at | BC002163 ///<br>LOC102641315 /// Ndufs5 | NDUFS5     | -0.29 | 6.19 | -0.90 | 3.87E-01 | 6.60E-01 | -6.28 |
| 1456997_PM_at   | ---                                     | NA         | -0.12 | 2.56 | -0.90 | 3.87E-01 | 6.60E-01 | -6.28 |
| 1442946_PM_at   | ---                                     | NA         | 0.11  | 2.25 | 0.90  | 3.87E-01 | 6.60E-01 | -6.28 |
| 1421757_PM_at   | Htr6                                    | HTR6       | -0.09 | 2.18 | -0.90 | 3.87E-01 | 6.60E-01 | -6.28 |
| 1454737_PM_at   | Dusp9                                   | DUSP9      | 0.07  | 2.27 | 0.90  | 3.87E-01 | 6.60E-01 | -6.28 |
| 1421899_PM_a_at | Mr1                                     | MR1        | 0.16  | 2.80 | 0.90  | 3.87E-01 | 6.60E-01 | -6.28 |
| 1426429_PM_at   | Thap7                                   | NA         | 0.27  | 2.56 | 0.90  | 3.87E-01 | 6.60E-01 | -6.28 |
| 1422204_PM_at   | Avpr1b                                  | AVPR1B     | -0.11 | 2.42 | -0.90 | 3.87E-01 | 6.60E-01 | -6.28 |
| 1442273_PM_at   | Ccdc158                                 | CCDC158    | -0.11 | 2.19 | -0.90 | 3.87E-01 | 6.60E-01 | -6.28 |
| 1438705_PM_at   | Cbfa2t3                                 | CBFA2T3    | 0.15  | 3.63 | 0.90  | 3.87E-01 | 6.60E-01 | -6.28 |
| 1436846_PM_x_at | Cdk5rap2 /// Gm2423 ///<br>Ywhaq        | YWHAQ      | -0.16 | 6.75 | -0.90 | 3.88E-01 | 6.60E-01 | -6.28 |
| 1446821_PM_at   | ---                                     | NA         | -0.09 | 2.02 | -0.90 | 3.88E-01 | 6.60E-01 | -6.28 |
| 1418009_PM_at   | Paxbp1                                  | PAXBP1     | -0.07 | 2.13 | -0.90 | 3.88E-01 | 6.60E-01 | -6.28 |
| 1449032_PM_at   | Prl2a1                                  | PRL        | 0.08  | 2.36 | 0.90  | 3.88E-01 | 6.60E-01 | -6.28 |
| 1445346_PM_at   | ---                                     | NA         | 0.09  | 2.43 | 0.90  | 3.88E-01 | 6.60E-01 | -6.28 |
| 1451579_PM_at   | BC024139                                | NA         | 0.11  | 2.69 | 0.90  | 3.87E-01 | 6.60E-01 | -6.28 |
| 1432538_PM_a_at | Rfc3                                    | RFC3       | 0.16  | 2.41 | 0.90  | 3.88E-01 | 6.60E-01 | -6.28 |
| 1434820_PM_s_at | Pkig                                    | PKIG       | 0.28  | 8.23 | 0.90  | 3.88E-01 | 6.60E-01 | -6.28 |

|                 |                   |          |       |      |       |          |          |       |
|-----------------|-------------------|----------|-------|------|-------|----------|----------|-------|
| 1429004_PM_at   | Phip              | PHIP     | -0.40 | 4.97 | -0.90 | 3.88E-01 | 6.60E-01 | -6.28 |
| 1417618_PM_at   | Itih2             | ITIH2    | -0.11 | 2.84 | -0.90 | 3.88E-01 | 6.60E-01 | -6.28 |
| 1458263_PM_at   | ---               | NA       | 0.36  | 3.32 | 0.90  | 3.88E-01 | 6.60E-01 | -6.28 |
| 1418407_PM_at   | Pde8a             | PDE8A    | 0.23  | 2.70 | 0.90  | 3.88E-01 | 6.60E-01 | -6.28 |
| 1455441_PM_at   | Map3k7            | MAP3K7   | -0.25 | 4.12 | -0.90 | 3.88E-01 | 6.60E-01 | -6.28 |
| 1454860_PM_x_at | Dad1              | DAD1     | -0.23 | 8.06 | -0.90 | 3.88E-01 | 6.60E-01 | -6.28 |
| 1450807_PM_at   | Ltb4r2            | LTB4R2   | -0.07 | 2.35 | -0.90 | 3.88E-01 | 6.60E-01 | -6.28 |
| 1456114_PM_at   | Cds1              | CDS1     | 0.09  | 3.32 | 0.90  | 3.88E-01 | 6.60E-01 | -6.28 |
| 1437383_PM_at   | ---               | NA       | 0.10  | 1.95 | 0.90  | 3.88E-01 | 6.60E-01 | -6.28 |
| 1434192_PM_at   | Zzef1             | ZZEF1    | 0.10  | 2.58 | 0.90  | 3.88E-01 | 6.60E-01 | -6.28 |
| 1432865_PM_at   | ---               | NA       | 0.15  | 2.29 | 0.90  | 3.88E-01 | 6.60E-01 | -6.28 |
| 1443552_PM_at   | Ccdc180           | CCDC180  | 0.19  | 3.02 | 0.90  | 3.88E-01 | 6.60E-01 | -6.28 |
| 1449345_PM_at   | Ccdc34            | CCDC34   | 0.22  | 2.68 | 0.90  | 3.88E-01 | 6.60E-01 | -6.28 |
| 1439815_PM_at   | Heatr5b           | HEATR5B  | -0.12 | 2.77 | -0.90 | 3.88E-01 | 6.60E-01 | -6.28 |
| 1423928_PM_at   | Ubac2             | UBAC2    | 0.13  | 2.50 | 0.90  | 3.88E-01 | 6.60E-01 | -6.28 |
| 1429516_PM_at   | Ubr2              | UBR2     | 0.13  | 2.77 | 0.90  | 3.88E-01 | 6.60E-01 | -6.28 |
| 1456789_PM_at   | Zfp462            | ZNF462   | -0.14 | 4.87 | -0.90 | 3.88E-01 | 6.60E-01 | -6.28 |
| 1427680_PM_a_at | Nfib              | NFIB     | -0.48 | 3.75 | -0.90 | 3.88E-01 | 6.61E-01 | -6.28 |
| 1439721_PM_at   | Fbxw18            | FBXW12   | 0.07  | 2.05 | 0.90  | 3.88E-01 | 6.61E-01 | -6.28 |
| 1453068_PM_at   | Prdm2             | NA       | 0.34  | 2.67 | 0.90  | 3.88E-01 | 6.61E-01 | -6.28 |
| 1420590_PM_at   | Has1              | HAS1     | 0.10  | 2.59 | 0.90  | 3.88E-01 | 6.61E-01 | -6.28 |
| 1447468_PM_at   | ---               | NA       | -0.10 | 2.17 | -0.90 | 3.88E-01 | 6.61E-01 | -6.28 |
| 1432350_PM_at   | Sync              | SYNC     | 0.17  | 2.19 | 0.90  | 3.88E-01 | 6.61E-01 | -6.28 |
| 1434894_PM_at   | Zc3h13            | ZC3H13   | -0.19 | 3.31 | -0.90 | 3.88E-01 | 6.61E-01 | -6.28 |
| 1447252_PM_s_at | Mep1a             | MEP1A    | -0.10 | 2.31 | -0.90 | 3.88E-01 | 6.61E-01 | -6.28 |
| 1429843_PM_at   | Grrp1             | FAM110D  | 0.12  | 2.65 | 0.90  | 3.88E-01 | 6.61E-01 | -6.28 |
| 1439151_PM_at   | Msrb3             | MSRB3    | -0.13 | 2.64 | -0.90 | 3.88E-01 | 6.61E-01 | -6.28 |
| 1432366_PM_at   | 4930447K03Rik     | NA       | 0.07  | 2.11 | 0.90  | 3.89E-01 | 6.61E-01 | -6.28 |
| 1426394_PM_at   | Eif3j1 /// Eif3j2 | EIF3J    | 0.16  | 2.48 | 0.90  | 3.89E-01 | 6.61E-01 | -6.28 |
| 1442497_PM_at   | Smchd1            | SMCHD1   | 0.10  | 3.13 | 0.90  | 3.89E-01 | 6.61E-01 | -6.28 |
| 1431725_PM_at   | Fmn2              | FMN2     | 0.14  | 2.19 | 0.90  | 3.89E-01 | 6.61E-01 | -6.28 |
| 1445639_PM_at   | Adgb              | ADGB     | 0.27  | 2.52 | 0.90  | 3.89E-01 | 6.61E-01 | -6.28 |
| 1430093_PM_at   | ---               | NA       | 0.07  | 2.13 | 0.90  | 3.89E-01 | 6.61E-01 | -6.28 |
| 1455862_PM_at   | Ubtcd2            | NA       | 0.14  | 2.53 | 0.90  | 3.89E-01 | 6.61E-01 | -6.28 |
| 1417240_PM_at   | Zyx               | ZYX      | 0.24  | 3.65 | 0.90  | 3.89E-01 | 6.61E-01 | -6.28 |
| 1455752_PM_a_at | Tmem134           | NA       | 0.09  | 2.39 | 0.90  | 3.89E-01 | 6.61E-01 | -6.28 |
| 1429932_PM_at   | ---               | NA       | 0.10  | 2.52 | 0.90  | 3.89E-01 | 6.61E-01 | -6.28 |
| 1442627_PM_at   | ---               | NA       | 0.10  | 2.21 | 0.90  | 3.89E-01 | 6.61E-01 | -6.28 |
| 1459571_PM_at   | ---               | NA       | 0.12  | 2.20 | 0.90  | 3.89E-01 | 6.61E-01 | -6.28 |
| 1427334_PM_s_at | 2810474O19Rik     | KIAA1551 | -0.38 | 3.72 | -0.90 | 3.89E-01 | 6.61E-01 | -6.28 |
| 1441211_PM_at   | ---               | NA       | -0.20 | 2.74 | -0.90 | 3.89E-01 | 6.61E-01 | -6.28 |
| 1452434_PM_s_at | Dgcr6             | DGCR6    | -0.13 | 3.39 | -0.90 | 3.89E-01 | 6.61E-01 | -6.28 |
| 1452384_PM_at   | Enpp3             | NA       | -0.10 | 2.22 | -0.90 | 3.89E-01 | 6.61E-01 | -6.28 |
| 1454416_PM_at   | ---               | NA       | 0.10  | 2.42 | 0.90  | 3.89E-01 | 6.61E-01 | -6.28 |
| 1460190_PM_at   | Ap1m2             | AP1M2    | 0.11  | 2.27 | 0.90  | 3.89E-01 | 6.61E-01 | -6.28 |
| 1416195_PM_at   | Inpp5k            | INPP5K   | 0.11  | 2.52 | 0.90  | 3.89E-01 | 6.61E-01 | -6.28 |
| 1418139_PM_at   | Dcx               | DCX      | 0.13  | 2.49 | 0.90  | 3.89E-01 | 6.61E-01 | -6.28 |
| 1438718_PM_at   | Fgf9              | FGF9     | 0.46  | 5.68 | 0.90  | 3.89E-01 | 6.61E-01 | -6.28 |
| 1420046_PM_s_at | Maf1              | MAF1     | -0.25 | 5.22 | -0.90 | 3.89E-01 | 6.61E-01 | -6.28 |
| 1455487_PM_at   | Mfsd11            | MFSD11   | -0.13 | 2.74 | -0.90 | 3.89E-01 | 6.61E-01 | -6.28 |
| 1430887_PM_s_at | 1700112E06Rik     | LRMDA    | -0.08 | 2.40 | -0.90 | 3.89E-01 | 6.61E-01 | -6.28 |
| 1441984_PM_at   | Clsn              | CLSPN    | 0.09  | 2.42 | 0.90  | 3.89E-01 | 6.61E-01 | -6.28 |
| 1429769_PM_at   | Pggt1b            | PGGT1B   | 0.17  | 3.48 | 0.90  | 3.89E-01 | 6.61E-01 | -6.28 |
| 1460290_PM_at   | Lpin2             | LPIN2    | 0.10  | 2.48 | 0.90  | 3.89E-01 | 6.61E-01 | -6.28 |
| 1442763_PM_s_at | Ttll10            | TTL10    | 0.07  | 2.42 | 0.90  | 3.89E-01 | 6.61E-01 | -6.28 |
| 1437005_PM_a_at | Rpl18             | RPL18    | -0.40 | 4.31 | -0.90 | 3.89E-01 | 6.61E-01 | -6.28 |
| 1454459_PM_at   | ---               | NA       | 0.13  | 2.31 | 0.90  | 3.89E-01 | 6.61E-01 | -6.28 |
| 1443659_PM_at   | ---               | NA       | 0.10  | 2.08 | 0.90  | 3.89E-01 | 6.61E-01 | -6.28 |
| 1458446_PM_at   | LOC105246409      | NA       | -0.12 | 2.03 | -0.90 | 3.89E-01 | 6.61E-01 | -6.28 |
| 1456145_PM_at   | ---               | NA       | 0.12  | 2.08 | 0.90  | 3.89E-01 | 6.61E-01 | -6.28 |
| 1447915_PM_x_at | Tmem204           | TMEM204  | -0.12 | 2.47 | -0.90 | 3.89E-01 | 6.61E-01 | -6.28 |
| 1438145_PM_at   | Spty2d1           | SPTY2D1  | 0.10  | 2.08 | 0.90  | 3.89E-01 | 6.61E-01 | -6.28 |
| 1451460_PM_a_at | Slc22a7           | SLC22A7  | 0.09  | 2.70 | 0.90  | 3.89E-01 | 6.62E-01 | -6.28 |
| 1444701_PM_at   | Mex3c             | NA       | 0.11  | 2.06 | 0.90  | 3.89E-01 | 6.62E-01 | -6.28 |
| 1443184_PM_at   | ---               | NA       | -0.19 | 2.47 | -0.90 | 3.89E-01 | 6.62E-01 | -6.28 |
| 1449320_PM_at   | Pbsn              | NA       | 0.08  | 2.16 | 0.90  | 3.90E-01 | 6.62E-01 | -6.28 |
| 1452304_PM_a_at | Arhgef5           | ARHGEF5  | 0.12  | 2.60 | 0.90  | 3.90E-01 | 6.62E-01 | -6.28 |
| 1441325_PM_at   | Nkrf              | NKRF     | 0.21  | 3.07 | 0.90  | 3.90E-01 | 6.62E-01 | -6.28 |
| 1449883_PM_at   | Fxyd2             | NA       | 0.10  | 2.31 | 0.90  | 3.90E-01 | 6.62E-01 | -6.28 |
| 1444238_PM_at   | Gm38910           | NA       | 0.13  | 2.26 | 0.90  | 3.90E-01 | 6.62E-01 | -6.28 |
| 1425147_PM_at   | Ccdc166           | CCDC166  | 0.09  | 2.82 | 0.90  | 3.90E-01 | 6.62E-01 | -6.28 |
| 1442930_PM_at   | AW061147          | NA       | 0.09  | 2.52 | 0.90  | 3.90E-01 | 6.62E-01 | -6.28 |
| 1430072_PM_at   | Tex35             | TEX35    | 0.10  | 2.45 | 0.90  | 3.90E-01 | 6.62E-01 | -6.28 |
| 1459285_PM_at   | ---               | NA       | 0.15  | 3.18 | 0.90  | 3.90E-01 | 6.62E-01 | -6.28 |
| 1447796_PM_at   | Ph1d1             | PIH1D1   | -0.14 | 1.91 | -0.90 | 3.90E-01 | 6.62E-01 | -6.28 |

|                 |               |            |       |      |       |          |          |       |
|-----------------|---------------|------------|-------|------|-------|----------|----------|-------|
| 1454588_PM_at   | 9430006E15Rik | NA         | 0.09  | 2.25 | 0.90  | 3.90E-01 | 6.62E-01 | -6.28 |
| 1458042_PM_at   | ---           | NA         | 0.29  | 4.40 | 0.90  | 3.90E-01 | 6.62E-01 | -6.28 |
| 1435373_PM_at   | Csnk1e        | CSNK1E     | 0.10  | 2.57 | 0.90  | 3.90E-01 | 6.62E-01 | -6.28 |
| 1436232_PM_a_at | Gabpb1        | GABPB1     | 0.26  | 3.06 | 0.90  | 3.90E-01 | 6.62E-01 | -6.28 |
| 1458497_PM_at   | ---           | NA         | -0.34 | 3.52 | -0.90 | 3.90E-01 | 6.62E-01 | -6.28 |
| 1446497_PM_at   | ---           | NA         | 0.19  | 3.13 | 0.90  | 3.90E-01 | 6.62E-01 | -6.28 |
| 1417949_PM_at   | Ilf2          | ILF2       | 0.12  | 2.57 | 0.90  | 3.90E-01 | 6.62E-01 | -6.28 |
| 1417012_PM_at   | Sdc2          | SDC2       | -0.40 | 3.97 | -0.90 | 3.90E-01 | 6.62E-01 | -6.28 |
| 1427544_PM_a_at | Papola        | NA         | -0.32 | 3.27 | -0.90 | 3.90E-01 | 6.62E-01 | -6.28 |
| 1436049_PM_at   | Tox4          | TOX4       | -0.24 | 3.36 | -0.90 | 3.90E-01 | 6.62E-01 | -6.28 |
| 1455843_PM_at   | Fut4          | FUT4       | 0.09  | 2.44 | 0.90  | 3.90E-01 | 6.62E-01 | -6.28 |
| 1436912_PM_at   | Cacnb4        | ACO68547.1 | 0.20  | 2.90 | 0.90  | 3.90E-01 | 6.62E-01 | -6.28 |
| 1430195_PM_at   | ---           | NA         | -0.40 | 4.62 | -0.90 | 3.90E-01 | 6.62E-01 | -6.28 |
| 1440188_PM_at   | ---           | NA         | 0.09  | 2.62 | 0.90  | 3.90E-01 | 6.62E-01 | -6.28 |
| 1425595_PM_at   | Gabbr1        | NA         | 0.09  | 2.20 | 0.90  | 3.90E-01 | 6.62E-01 | -6.28 |
| 1432908_PM_at   | 2810410P21Rik | NA         | -0.07 | 2.42 | -0.90 | 3.90E-01 | 6.62E-01 | -6.28 |
| 1447792_PM_x_at | Gpr174        | GPR174     | -0.07 | 1.94 | -0.90 | 3.90E-01 | 6.62E-01 | -6.28 |
| 1418362_PM_at   | Zfp42         | ZFP42      | 0.07  | 2.24 | 0.90  | 3.90E-01 | 6.62E-01 | -6.28 |
| 1446277_PM_at   | ---           | NA         | 0.08  | 2.09 | 0.90  | 3.90E-01 | 6.62E-01 | -6.28 |
| 1439588_PM_at   | Slco5a1       | SLCO5A1    | 0.11  | 2.26 | 0.90  | 3.90E-01 | 6.62E-01 | -6.28 |
| 1436385_PM_at   | Ganc          | GANC       | 0.15  | 2.25 | 0.90  | 3.90E-01 | 6.62E-01 | -6.28 |
| 1449162_PM_at   | Pop7          | POP7       | -0.16 | 3.06 | -0.90 | 3.90E-01 | 6.62E-01 | -6.28 |
| 1418126_PM_at   | Ccl5          | CCL5       | 0.15  | 2.17 | 0.90  | 3.90E-01 | 6.62E-01 | -6.28 |
| 1447788_PM_s_at | Tspy13        | NA         | -0.75 | 5.63 | -0.90 | 3.90E-01 | 6.62E-01 | -6.28 |
| 1451348_PM_at   | Deptor        | DEPTOR     | -0.24 | 2.91 | -0.90 | 3.90E-01 | 6.62E-01 | -6.28 |
| 1448049_PM_at   | Jmjd1c        | JMJD1C     | 0.31  | 5.00 | 0.90  | 3.90E-01 | 6.62E-01 | -6.28 |
| 1444440_PM_at   | Gm12359       | NA         | -0.10 | 2.39 | -0.90 | 3.90E-01 | 6.62E-01 | -6.28 |
| 1440764_PM_at   | Araf          | ARAF       | 0.28  | 2.90 | 0.90  | 3.91E-01 | 6.62E-01 | -6.28 |
| 1422937_PM_at   | Fzd5          | FZD5       | 0.07  | 2.28 | 0.90  | 3.91E-01 | 6.62E-01 | -6.28 |
| 1440648_PM_at   | Coq10a        | NA         | 0.12  | 2.45 | 0.90  | 3.91E-01 | 6.62E-01 | -6.28 |
| 1436645_PM_a_at | Cnot4         | CNOT4      | -0.65 | 5.14 | -0.90 | 3.91E-01 | 6.63E-01 | -6.28 |
| 1445058_PM_at   | ---           | NA         | 0.08  | 2.24 | 0.90  | 3.91E-01 | 6.63E-01 | -6.28 |
| 1421011_PM_at   | Hsd17b11      | HSD17B11   | 0.10  | 2.22 | 0.90  | 3.91E-01 | 6.63E-01 | -6.28 |
| 1444302_PM_at   | Gxylt2        | GXYLT2     | 0.12  | 2.40 | 0.90  | 3.91E-01 | 6.63E-01 | -6.28 |
| 1434381_PM_at   | Atmin         | ATMIN      | 0.12  | 2.82 | 0.90  | 3.91E-01 | 6.63E-01 | -6.28 |
| 1447845_PM_s_at | Vnn1          | VNN1       | 0.16  | 2.47 | 0.90  | 3.91E-01 | 6.63E-01 | -6.28 |
| 1439793_PM_at   | Gja3          | NA         | 0.55  | 2.95 | 0.90  | 3.91E-01 | 6.63E-01 | -6.28 |
| 1430866_PM_at   | ---           | NA         | -0.20 | 2.63 | -0.90 | 3.91E-01 | 6.63E-01 | -6.28 |
| 1422099_PM_a_at | Opr1          | OPRL1      | -0.17 | 2.84 | -0.90 | 3.91E-01 | 6.63E-01 | -6.28 |
| 1423858_PM_a_at | Hmgcs2        | HMGCS2     | 0.09  | 2.26 | 0.90  | 3.91E-01 | 6.63E-01 | -6.28 |
| 1432634_PM_at   | ---           | NA         | 0.12  | 2.04 | 0.90  | 3.91E-01 | 6.63E-01 | -6.28 |
| 1420027_PM_at   | C80171        | NA         | 0.17  | 2.55 | 0.90  | 3.91E-01 | 6.63E-01 | -6.28 |
| 1439930_PM_at   | ---           | NA         | 0.59  | 4.03 | 0.90  | 3.91E-01 | 6.63E-01 | -6.28 |
| 1447968_PM_at   | ---           | NA         | 0.11  | 2.40 | 0.90  | 3.91E-01 | 6.63E-01 | -6.28 |
| 1458528_PM_at   | ---           | NA         | -0.14 | 2.60 | -0.90 | 3.91E-01 | 6.63E-01 | -6.29 |
| 1460014_PM_at   | Trem4         | TREML4     | 0.09  | 2.24 | 0.90  | 3.91E-01 | 6.63E-01 | -6.29 |
| 1456207_PM_at   | Mtcp1         | MTCP1      | 0.24  | 2.37 | 0.89  | 3.91E-01 | 6.63E-01 | -6.29 |
| 1451972_PM_at   | Glcc1         | GLCC1      | 0.30  | 3.16 | 0.89  | 3.91E-01 | 6.63E-01 | -6.29 |
| 1417264_PM_at   | Coq5          | COQ5       | 0.14  | 5.05 | 0.89  | 3.91E-01 | 6.63E-01 | -6.29 |
| 1456430_PM_at   | ---           | NA         | 0.23  | 3.27 | 0.89  | 3.91E-01 | 6.63E-01 | -6.29 |
| 1428816_PM_a_at | Gata2         | GATA2      | -0.09 | 2.32 | -0.89 | 3.91E-01 | 6.63E-01 | -6.29 |
| 1420062_PM_at   | ---           | NA         | 0.11  | 2.37 | 0.89  | 3.91E-01 | 6.63E-01 | -6.29 |
| 1426627_PM_at   | Map3k7        | MAP3K7     | -0.16 | 2.25 | -0.89 | 3.91E-01 | 6.63E-01 | -6.29 |
| 1450446_PM_a_at | Socs1         | SOCS1      | 0.07  | 2.08 | 0.89  | 3.91E-01 | 6.63E-01 | -6.29 |
| 1438577_PM_at   | Inpp4b        | NA         | 0.09  | 2.32 | 0.89  | 3.91E-01 | 6.63E-01 | -6.29 |
| 1451510_PM_s_at | Olah          | OLAH       | 0.13  | 2.89 | 0.89  | 3.91E-01 | 6.63E-01 | -6.29 |
| 1426297_PM_at   | Tcf3          | TCF3       | 0.11  | 2.67 | 0.89  | 3.91E-01 | 6.63E-01 | -6.29 |
| 1438308_PM_at   | Agbl4         | AGBL4      | 0.09  | 2.35 | 0.89  | 3.91E-01 | 6.63E-01 | -6.29 |
| 1425440_PM_x_at | Slc41a3       | NA         | 0.10  | 2.80 | 0.89  | 3.91E-01 | 6.63E-01 | -6.29 |
| 1445848_PM_at   | ---           | NA         | 0.14  | 2.48 | 0.89  | 3.91E-01 | 6.63E-01 | -6.29 |
| 1457196_PM_at   | ---           | NA         | 0.07  | 2.04 | 0.89  | 3.92E-01 | 6.63E-01 | -6.29 |
| 1427515_PM_at   | Gsap          | GSAP       | 0.07  | 2.20 | 0.89  | 3.92E-01 | 6.63E-01 | -6.29 |
| 1456663_PM_x_at | Tm2d2         | TM2D2      | -0.16 | 2.17 | -0.89 | 3.92E-01 | 6.63E-01 | -6.29 |
| 1441248_PM_at   | Cln3          | CLCN3      | -0.10 | 2.59 | -0.89 | 3.92E-01 | 6.63E-01 | -6.29 |
| 1433128_PM_at   | ---           | NA         | 0.08  | 2.93 | 0.89  | 3.92E-01 | 6.63E-01 | -6.29 |
| 1450338_PM_x_at | Vmn2r-ps159   | NA         | 0.10  | 2.32 | 0.89  | 3.92E-01 | 6.63E-01 | -6.29 |
| 1419692_PM_a_at | Ltc4s         | LTC4S      | 0.11  | 2.39 | 0.89  | 3.92E-01 | 6.63E-01 | -6.29 |
| 1445693_PM_at   | Araf          | ARAF       | 0.09  | 2.40 | 0.89  | 3.92E-01 | 6.63E-01 | -6.29 |
| 1443151_PM_at   | ---           | NA         | 0.13  | 2.36 | 0.89  | 3.92E-01 | 6.63E-01 | -6.29 |
| 1428218_PM_a_at | 1600012H06Rik | Cgorf120   | -0.10 | 2.43 | -0.89 | 3.92E-01 | 6.63E-01 | -6.29 |
| 1444710_PM_at   | Gm19589       | NA         | 0.09  | 2.60 | 0.89  | 3.92E-01 | 6.63E-01 | -6.29 |
| 1436695_PM_x_at | Elmod3        | ELMOD3     | 0.33  | 5.81 | 0.89  | 3.92E-01 | 6.63E-01 | -6.29 |
| 1432297_PM_at   | Zim2          | NA         | 0.10  | 2.53 | 0.89  | 3.92E-01 | 6.64E-01 | -6.29 |
| 1433977_PM_at   | Hs3st3b1      | HS3ST3B1   | 0.13  | 2.47 | 0.89  | 3.92E-01 | 6.64E-01 | -6.29 |
| 1420776_PM_a_at | Auh           | AUH        | 0.19  | 5.91 | 0.89  | 3.92E-01 | 6.64E-01 | -6.29 |

|                 |                  |            |       |       |       |          |          |       |
|-----------------|------------------|------------|-------|-------|-------|----------|----------|-------|
| 1445973_PM_at   | C79461           | NA         | 0.09  | 2.08  | 0.89  | 3.92E-01 | 6.64E-01 | -6.29 |
| 1455038_PM_at   | Gm14230          | NA         | 0.17  | 3.00  | 0.89  | 3.92E-01 | 6.64E-01 | -6.29 |
| 1442325_PM_at   | Ntn3///Tbc1d24   | NTN3       | -0.17 | 2.55  | -0.89 | 3.92E-01 | 6.64E-01 | -6.29 |
| 1455396_PM_at   | Atp8b1           | ATP8B1     | -0.17 | 2.35  | -0.89 | 3.92E-01 | 6.64E-01 | -6.29 |
| 1440959_PM_s_at | Mynn             | MYNN       | -0.14 | 2.28  | -0.89 | 3.92E-01 | 6.64E-01 | -6.29 |
| 1443086_PM_at   | ---              | NA         | 0.08  | 2.31  | 0.89  | 3.92E-01 | 6.64E-01 | -6.29 |
| 1459966_PM_at   | Ospl7            | OSBPL7     | 0.12  | 2.40  | 0.89  | 3.92E-01 | 6.64E-01 | -6.29 |
| 1429212_PM_a_at | Lrrc51           | NA         | 0.16  | 2.65  | 0.89  | 3.92E-01 | 6.64E-01 | -6.29 |
| 1424411_PM_at   | Tmem189          | TMEM189    | 0.10  | 2.74  | 0.89  | 3.92E-01 | 6.64E-01 | -6.29 |
| 1415765_PM_at   | Hnrnpul2         | HNRNPUL2   | 0.17  | 6.07  | 0.89  | 3.92E-01 | 6.64E-01 | -6.29 |
| 1453831_PM_at   | Tmem138          | NA         | -0.12 | 2.54  | -0.89 | 3.92E-01 | 6.64E-01 | -6.29 |
| 1441209_PM_at   | ---              | NA         | 0.10  | 2.13  | 0.89  | 3.92E-01 | 6.64E-01 | -6.29 |
| 1439297_PM_at   | Pif1             | PIF1       | 0.11  | 2.79  | 0.89  | 3.92E-01 | 6.64E-01 | -6.29 |
| 1444501_PM_at   | Al462521         | NA         | 0.09  | 2.12  | 0.89  | 3.92E-01 | 6.64E-01 | -6.29 |
| 1455756_PM_at   | Pcif1            | PCIF1      | -0.13 | 2.31  | -0.89 | 3.92E-01 | 6.64E-01 | -6.29 |
| 1436892_PM_at   | Spred2           | SPRED2     | 0.25  | 3.63  | 0.89  | 3.92E-01 | 6.64E-01 | -6.29 |
| 1421913_PM_at   | Mrp19            | MRPL19     | 0.12  | 2.73  | 0.89  | 3.92E-01 | 6.64E-01 | -6.29 |
| 1418167_PM_at   | Tfap4            | TFAP4      | 0.21  | 3.10  | 0.89  | 3.92E-01 | 6.64E-01 | -6.29 |
| 1451618_PM_at   | Rho              | RHO        | 0.09  | 2.53  | 0.89  | 3.92E-01 | 6.64E-01 | -6.29 |
| 1429186_PM_a_at | Cdad1            | CDADC1     | 0.10  | 2.42  | 0.89  | 3.92E-01 | 6.64E-01 | -6.29 |
| 1437046_PM_x_at | Fam63a           | MINDY1     | 0.11  | 3.10  | 0.89  | 3.92E-01 | 6.64E-01 | -6.29 |
| 1432513_PM_a_at | 1700001C02Rik    | C2orf70    | 0.11  | 2.21  | 0.89  | 3.92E-01 | 6.64E-01 | -6.29 |
| 1438777_PM_a_at | Brat1            | BRAT1      | 0.12  | 2.94  | 0.89  | 3.93E-01 | 6.64E-01 | -6.29 |
| 1441484_PM_at   | ---              | NA         | 0.14  | 2.95  | 0.89  | 3.93E-01 | 6.64E-01 | -6.29 |
| 1449851_PM_at   | Per1             | PER1       | 0.20  | 2.62  | 0.89  | 3.93E-01 | 6.64E-01 | -6.29 |
| 1424257_PM_at   | Cdk7             | CDK7       | 0.21  | 2.73  | 0.89  | 3.93E-01 | 6.64E-01 | -6.29 |
| 1427067_PM_at   | Gid4             | GID4       | -0.51 | 5.48  | -0.89 | 3.93E-01 | 6.64E-01 | -6.29 |
| 1437261_PM_at   | Mblac2           | MBLAC2     | -0.19 | 3.60  | -0.89 | 3.93E-01 | 6.64E-01 | -6.29 |
| 1459917_PM_at   | Ggnbp2           | GGNBP2     | -0.19 | 2.51  | -0.89 | 3.93E-01 | 6.64E-01 | -6.29 |
| 1428705_PM_at   | 1700007K13Rik    | C9orf116   | 0.09  | 2.52  | 0.89  | 3.93E-01 | 6.64E-01 | -6.29 |
| 1438403_PM_s_at | Malat1           | NA         | 0.10  | 11.46 | 0.89  | 3.93E-01 | 6.64E-01 | -6.29 |
| 1430830_PM_at   | A430105J06Rik    | NA         | 0.10  | 2.54  | 0.89  | 3.93E-01 | 6.64E-01 | -6.29 |
| 1426021_PM_a_at | Cdc7             | CDC7       | 0.10  | 2.81  | 0.89  | 3.93E-01 | 6.64E-01 | -6.29 |
| 1435420_PM_at   | Slc4a5           | SLC4A5     | 0.12  | 2.24  | 0.89  | 3.93E-01 | 6.64E-01 | -6.29 |
| 1455899_PM_x_at | Socs3            | SOCS3      | 0.12  | 2.41  | 0.89  | 3.93E-01 | 6.64E-01 | -6.29 |
| 1426726_PM_at   | Gm8801///Ppp1r10 | PPP1R10    | 0.15  | 2.43  | 0.89  | 3.93E-01 | 6.64E-01 | -6.29 |
| 1427189_PM_at   | Arih1            | ARIH1      | 0.15  | 3.40  | 0.89  | 3.93E-01 | 6.64E-01 | -6.29 |
| 1435978_PM_at   | Gmppa            | GMPPA      | 0.15  | 2.65  | 0.89  | 3.93E-01 | 6.64E-01 | -6.29 |
| 1455089_PM_at   | Gng12            | GNG12      | 0.10  | 3.67  | 0.89  | 3.93E-01 | 6.64E-01 | -6.29 |
| 1422374_PM_s_at | Ofrr66           | OR51B4     | -0.10 | 2.43  | -0.89 | 3.93E-01 | 6.64E-01 | -6.29 |
| 1442598_PM_at   | Prkrip1          | PRKRIP1    | 0.08  | 2.18  | 0.89  | 3.93E-01 | 6.64E-01 | -6.29 |
| 1440242_PM_at   | Fam78b           | FAM78B     | 0.14  | 2.52  | 0.89  | 3.93E-01 | 6.64E-01 | -6.29 |
| 1440016_PM_at   | ---              | NA         | 0.19  | 2.11  | 0.89  | 3.93E-01 | 6.64E-01 | -6.29 |
| 1429753_PM_at   | Nxph4            | NXPH4      | 0.09  | 2.27  | 0.89  | 3.93E-01 | 6.64E-01 | -6.29 |
| 1454110_PM_at   | ---              | NA         | 0.10  | 2.31  | 0.89  | 3.93E-01 | 6.64E-01 | -6.29 |
| 1455198_PM_a_at | Ppp2r3d          | NA         | 0.10  | 2.94  | 0.89  | 3.93E-01 | 6.64E-01 | -6.29 |
| 1460241_PM_a_at | St3gal5          | ST3GAL5    | 0.17  | 2.83  | 0.89  | 3.93E-01 | 6.64E-01 | -6.29 |
| 1427036_PM_a_at | Eif4g1           | EIF4G1     | 0.19  | 4.81  | 0.89  | 3.93E-01 | 6.64E-01 | -6.29 |
| 1418762_PM_at   | Cd55             | CD55       | 0.33  | 2.59  | 0.89  | 3.93E-01 | 6.64E-01 | -6.29 |
| 1455624_PM_at   | Gm3764           | NA         | 0.12  | 2.69  | 0.89  | 3.93E-01 | 6.64E-01 | -6.29 |
| 1433478_PM_at   | Parl             | PARL       | -0.10 | 2.87  | -0.89 | 3.93E-01 | 6.64E-01 | -6.29 |
| 1420350_PM_at   | Lce1a2           | NA         | 0.11  | 2.26  | 0.89  | 3.93E-01 | 6.64E-01 | -6.29 |
| 1457902_PM_at   | ---              | NA         | 0.08  | 2.36  | 0.89  | 3.93E-01 | 6.64E-01 | -6.29 |
| 1442825_PM_at   | ---              | NA         | 0.10  | 2.19  | 0.89  | 3.93E-01 | 6.64E-01 | -6.29 |
| 1423022_PM_at   | Adra2a           | ADRA2A     | 0.11  | 3.16  | 0.89  | 3.93E-01 | 6.64E-01 | -6.29 |
| 1437058_PM_at   | Megf6            | MEGF6      | 0.12  | 2.32  | 0.89  | 3.93E-01 | 6.64E-01 | -6.29 |
| 1440757_PM_at   | Gm39559          | NA         | 0.12  | 2.39  | 0.89  | 3.93E-01 | 6.64E-01 | -6.29 |
| 1457927_PM_at   | Trpm3            | TRPM3      | 0.14  | 2.55  | 0.89  | 3.93E-01 | 6.64E-01 | -6.29 |
| 1433690_PM_at   | 2210016L21Rik    | C12orf43   | -0.44 | 5.91  | -0.89 | 3.93E-01 | 6.64E-01 | -6.29 |
| 1447607_PM_at   | ---              | NA         | 0.11  | 2.45  | 0.89  | 3.93E-01 | 6.64E-01 | -6.29 |
| 1429381_PM_x_at | Igh-VJ558///Igha | NA         | 0.28  | 3.20  | 0.89  | 3.93E-01 | 6.64E-01 | -6.29 |
| 1426233_PM_at   | Map2k4           | MAP2K4     | -0.23 | 4.40  | -0.89 | 3.93E-01 | 6.64E-01 | -6.29 |
| 1438985_PM_x_at | Otud5            | OTUD5      | -0.50 | 5.76  | -0.89 | 3.93E-01 | 6.64E-01 | -6.29 |
| 1436928_PM_s_at | Adcy3            | ADCY3      | -0.17 | 2.39  | -0.89 | 3.93E-01 | 6.64E-01 | -6.29 |
| 1459887_PM_at   | ---              | NA         | 0.24  | 2.70  | 0.89  | 3.93E-01 | 6.64E-01 | -6.29 |
| 1448603_PM_at   | Srpk2            | SRPK2      | -0.27 | 3.27  | -0.89 | 3.94E-01 | 6.64E-01 | -6.29 |
| 1438903_PM_at   | Maea             | NA         | -0.10 | 2.43  | -0.89 | 3.94E-01 | 6.64E-01 | -6.29 |
| 1449402_PM_at   | Chst7            | CHST7      | -0.09 | 2.91  | -0.89 | 3.94E-01 | 6.64E-01 | -6.29 |
| 1423056_PM_at   | Nsg1             | AC110814.1 | -0.08 | 2.18  | -0.89 | 3.94E-01 | 6.64E-01 | -6.29 |
| 1423611_PM_at   | Alpl             | ALPL       | 0.10  | 2.81  | 0.89  | 3.93E-01 | 6.64E-01 | -6.29 |
| 1450308_PM_a_at | Xrn1             | XRN1       | 0.12  | 2.63  | 0.89  | 3.93E-01 | 6.64E-01 | -6.29 |
| 1419331_PM_at   | Cdh17            | NA         | 0.16  | 2.38  | 0.89  | 3.94E-01 | 6.64E-01 | -6.29 |
| 1433499_PM_at   | Urgcp            | URGCP      | 0.18  | 3.31  | 0.89  | 3.93E-01 | 6.64E-01 | -6.29 |
| 1433453_PM_a_at | Abtb2            | ABTB2      | 0.34  | 3.53  | 0.89  | 3.93E-01 | 6.64E-01 | -6.29 |
| 1439418_PM_x_at | Tmem43           | TMEM43     | -0.18 | 2.79  | -0.89 | 3.94E-01 | 6.65E-01 | -6.29 |

|                 |               |          |       |       |       |          |          |       |
|-----------------|---------------|----------|-------|-------|-------|----------|----------|-------|
| 1446931_PM_at   | ---           | NA       | -0.13 | 2.70  | -0.89 | 3.94E-01 | 6.65E-01 | -6.29 |
| 1426348_PM_at   | Col4a1        | COL4A1   | 0.16  | 2.65  | 0.89  | 3.94E-01 | 6.65E-01 | -6.29 |
| 1436830_PM_at   | Marveld1      | MARVELD1 | -0.35 | 4.33  | -0.89 | 3.94E-01 | 6.65E-01 | -6.29 |
| 1449035_PM_at   | 4930544G11Rik | NA       | 0.09  | 2.37  | 0.89  | 3.94E-01 | 6.65E-01 | -6.29 |
| 1450743_PM_s_at | Syncrip       | SYNCRIP  | 0.28  | 4.14  | 0.89  | 3.94E-01 | 6.65E-01 | -6.29 |
| 1446156_PM_at   | ---           | NA       | 0.13  | 2.35  | 0.89  | 3.94E-01 | 6.65E-01 | -6.29 |
| 1439441_PM_x_at | Lats2         | LATS2    | -0.79 | 8.55  | -0.89 | 3.94E-01 | 6.65E-01 | -6.29 |
| 1435175_PM_at   | BC034090      | KIAA1614 | 0.08  | 2.38  | 0.89  | 3.94E-01 | 6.65E-01 | -6.29 |
| 1429752_PM_x_at | Clip4         | NA       | 0.12  | 3.08  | 0.89  | 3.94E-01 | 6.65E-01 | -6.29 |
| 1435601_PM_at   | Phlpp2        | PHLPP2   | 0.27  | 3.96  | 0.89  | 3.94E-01 | 6.65E-01 | -6.29 |
| 1421067_PM_a_at | Phf2          | PHF2     | 0.16  | 2.47  | 0.89  | 3.94E-01 | 6.65E-01 | -6.29 |
| 1455394_PM_at   | Pias4         | PIAS4    | 0.12  | 1.98  | 0.89  | 3.94E-01 | 6.65E-01 | -6.29 |
| 1456255_PM_at   | Al314180      | KIAA0368 | 0.12  | 3.11  | 0.89  | 3.94E-01 | 6.65E-01 | -6.29 |
| 1441786_PM_at   | ---           | NA       | 0.13  | 2.69  | 0.89  | 3.94E-01 | 6.65E-01 | -6.29 |
| 1445691_PM_at   | Chn1          | CHN1     | -0.29 | 4.40  | -0.89 | 3.94E-01 | 6.65E-01 | -6.29 |
| 1459068_PM_at   | ---           | NA       | 0.17  | 2.59  | 0.89  | 3.94E-01 | 6.65E-01 | -6.29 |
| 1423340_PM_at   | Tfap2b        | TFAP2B   | 0.10  | 2.19  | 0.89  | 3.94E-01 | 6.65E-01 | -6.29 |
| 1446370_PM_at   | Rab11fip4os1  | NA       | 0.14  | 2.60  | 0.89  | 3.94E-01 | 6.65E-01 | -6.29 |
| 1433492_PM_at   | Epb41l2       | EPB41L2  | 0.17  | 2.63  | 0.89  | 3.94E-01 | 6.65E-01 | -6.29 |
| 1433824_PM_x_at | Grsf1         | GRSF1    | -0.48 | 8.14  | -0.89 | 3.94E-01 | 6.65E-01 | -6.29 |
| 1455744_PM_at   | ---           | NA       | -0.23 | 5.05  | -0.89 | 3.94E-01 | 6.65E-01 | -6.29 |
| 1443729_PM_at   | ---           | NA       | -0.09 | 2.47  | -0.89 | 3.94E-01 | 6.65E-01 | -6.29 |
| 1424851_PM_at   | Chchd5        | CHCHD5   | 0.08  | 2.85  | 0.89  | 3.94E-01 | 6.65E-01 | -6.29 |
| 1418091_PM_at   | Tfcp2l1       | TFCP2L1  | 0.08  | 2.17  | 0.89  | 3.94E-01 | 6.65E-01 | -6.29 |
| 1450488_PM_at   | Ccl24         | CCL24    | 0.09  | 2.18  | 0.89  | 3.94E-01 | 6.65E-01 | -6.29 |
| 1454977_PM_at   | C2cd3         | C2CD3    | 0.11  | 3.10  | 0.89  | 3.94E-01 | 6.65E-01 | -6.29 |
| 1432428_PM_at   | Ankrd55       | ANKRD55  | 0.12  | 2.47  | 0.89  | 3.94E-01 | 6.65E-01 | -6.29 |
| 1432456_PM_at   | ---           | NA       | 0.12  | 2.42  | 0.89  | 3.94E-01 | 6.65E-01 | -6.29 |
| 1420707_PM_a_at | Traip         | TRAIIP   | 0.13  | 2.47  | 0.89  | 3.94E-01 | 6.65E-01 | -6.29 |
| 1439348_PM_at   | ---           | NA       | 0.12  | 2.44  | 0.89  | 3.94E-01 | 6.65E-01 | -6.29 |
| 1458072_PM_at   | ---           | NA       | -0.21 | 3.48  | -0.89 | 3.94E-01 | 6.65E-01 | -6.29 |
| 1454867_PM_at   | Mn1           | MN1      | -0.21 | 3.94  | -0.89 | 3.95E-01 | 6.65E-01 | -6.29 |
| 1441233_PM_at   | ---           | NA       | 0.10  | 2.24  | 0.89  | 3.95E-01 | 6.65E-01 | -6.29 |
| 1419998_PM_at   | ---           | NA       | 0.11  | 2.52  | 0.89  | 3.95E-01 | 6.65E-01 | -6.29 |
| 1442747_PM_at   | ---           | NA       | 0.12  | 2.81  | 0.89  | 3.95E-01 | 6.65E-01 | -6.29 |
| AFFX-BioB-3_at  | ---           | NA       | 0.09  | 8.17  | 0.89  | 3.95E-01 | 6.65E-01 | -6.29 |
| 1449203_PM_at   | Sko1a5        | SLCO1A2  | 0.10  | 2.62  | 0.89  | 3.95E-01 | 6.65E-01 | -6.29 |
| 1446216_PM_at   | ---           | NA       | 0.14  | 2.13  | 0.89  | 3.95E-01 | 6.65E-01 | -6.29 |
| 1440708_PM_at   | Myh9          | MYH9     | -0.15 | 2.88  | -0.89 | 3.95E-01 | 6.65E-01 | -6.29 |
| 1433427_PM_at   | Ttl13         | TTL13P   | 0.06  | 2.08  | 0.89  | 3.95E-01 | 6.65E-01 | -6.29 |
| 1451834_PM_at   | Cacnb1        | CACNB1   | 0.11  | 2.84  | 0.89  | 3.95E-01 | 6.65E-01 | -6.29 |
| 1419138_PM_at   | B3galt4       | B3GALT4  | 0.17  | 3.21  | 0.89  | 3.95E-01 | 6.65E-01 | -6.29 |
| 1458608_PM_at   | ---           | NA       | 0.29  | 2.58  | 0.89  | 3.95E-01 | 6.65E-01 | -6.29 |
| 1440928_PM_at   | Tbc1d32       | TBC1D32  | -0.19 | 3.74  | -0.89 | 3.95E-01 | 6.65E-01 | -6.29 |
| 1419669_PM_at   | Prt3          | PRTN3    | -0.09 | 2.78  | -0.89 | 3.95E-01 | 6.65E-01 | -6.29 |
| 1432453_PM_a_at | Ms4a10        | MS4A10   | -0.09 | 2.43  | -0.89 | 3.95E-01 | 6.65E-01 | -6.29 |
| 1431650_PM_at   | Krtap4-6      | NA       | 0.07  | 2.25  | 0.89  | 3.95E-01 | 6.65E-01 | -6.29 |
| 1452998_PM_at   | Tmem167b      | NA       | 0.10  | 2.37  | 0.89  | 3.95E-01 | 6.65E-01 | -6.29 |
| 1420077_PM_at   | E230029C05Rik | NA       | 0.12  | 2.49  | 0.89  | 3.95E-01 | 6.65E-01 | -6.29 |
| 1445749_PM_at   | ---           | NA       | 0.18  | 2.29  | 0.89  | 3.95E-01 | 6.65E-01 | -6.29 |
| 1459722_PM_at   | ---           | NA       | 0.55  | 3.82  | 0.89  | 3.95E-01 | 6.65E-01 | -6.29 |
| 1419792_PM_at   | Kif20b        | KIF20B   | 0.08  | 2.11  | 0.89  | 3.95E-01 | 6.66E-01 | -6.29 |
| 1442318_PM_at   | ---           | NA       | 0.09  | 2.22  | 0.89  | 3.95E-01 | 6.66E-01 | -6.29 |
| 1444113_PM_at   | ---           | NA       | -0.14 | 2.41  | -0.89 | 3.95E-01 | 6.66E-01 | -6.29 |
| 1455054_PM_a_at | Dcun1d1       | DCUN1D1  | -0.21 | 3.09  | -0.89 | 3.95E-01 | 6.66E-01 | -6.29 |
| 1416792_PM_at   | Ppm1g         | PPM1G    | 0.13  | 4.59  | 0.89  | 3.95E-01 | 6.66E-01 | -6.29 |
| 1442800_PM_x_at | Fam181b       | NA       | -0.27 | 2.57  | -0.89 | 3.95E-01 | 6.66E-01 | -6.29 |
| 1454311_PM_at   | ---           | NA       | 0.17  | 2.31  | 0.89  | 3.95E-01 | 6.66E-01 | -6.29 |
| 1418188_PM_a_at | Malat1        | NA       | 0.07  | 12.59 | 0.89  | 3.95E-01 | 6.66E-01 | -6.29 |
| 1444664_PM_at   | ---           | NA       | 0.10  | 2.35  | 0.89  | 3.95E-01 | 6.66E-01 | -6.29 |
| 1422745_PM_at   | Bicd2         | BICD2    | 0.22  | 2.58  | 0.89  | 3.95E-01 | 6.66E-01 | -6.29 |
| 1457453_PM_at   | 1700057G04Rik | PLSCR2   | 0.09  | 2.29  | 0.89  | 3.95E-01 | 6.66E-01 | -6.29 |
| 1439366_PM_at   | Grsf1         | GRSF1    | 0.13  | 2.55  | 0.89  | 3.95E-01 | 6.66E-01 | -6.29 |
| 1454824_PM_s_at | Mtus1         | MTUS1    | -0.41 | 4.82  | -0.89 | 3.95E-01 | 6.66E-01 | -6.29 |
| 1448617_PM_at   | Cd53          | CD53     | -0.30 | 3.55  | -0.89 | 3.95E-01 | 6.66E-01 | -6.29 |
| 1436378_PM_at   | Lrrfp2        | LRRFP2   | -0.19 | 3.18  | -0.89 | 3.95E-01 | 6.66E-01 | -6.29 |
| 1458911_PM_at   | Spef2         | SPEF2    | -0.16 | 2.46  | -0.89 | 3.95E-01 | 6.66E-01 | -6.29 |
| 1459110_PM_at   | Myo9b         | NA       | 0.18  | 2.75  | 0.89  | 3.95E-01 | 6.66E-01 | -6.29 |
| 1457496_PM_at   | Gm14169       | NA       | 0.19  | 3.44  | 0.89  | 3.95E-01 | 6.66E-01 | -6.29 |
| 1424256_PM_at   | Rdh12         | RDH12    | 0.20  | 2.85  | 0.89  | 3.95E-01 | 6.66E-01 | -6.29 |
| 1435490_PM_at   | Hk3           | HK3      | 0.18  | 2.81  | 0.89  | 3.95E-01 | 6.66E-01 | -6.29 |
| 1426312_PM_at   | Bre           | BABAM2   | 0.33  | 3.99  | 0.89  | 3.95E-01 | 6.66E-01 | -6.29 |
| 1422693_PM_a_at | Sub1          | SUB1     | -0.36 | 7.50  | -0.89 | 3.96E-01 | 6.66E-01 | -6.29 |
| 1452053_PM_a_at | Tmem33        | TMEM33   | -0.36 | 7.72  | -0.89 | 3.96E-01 | 6.66E-01 | -6.29 |
| 1451833_PM_a_at | Setdb1        | SETDB1   | -0.13 | 2.27  | -0.89 | 3.96E-01 | 6.66E-01 | -6.29 |

|                 |               |            |       |      |       |          |          |       |
|-----------------|---------------|------------|-------|------|-------|----------|----------|-------|
| 1444666_PM_at   | Rpf2          | RPF2       | 0.14  | 2.55 | 0.89  | 3.96E-01 | 6.66E-01 | -6.29 |
| 1434622_PM_at   | lqce          | lQCE       | 0.14  | 3.42 | 0.89  | 3.96E-01 | 6.66E-01 | -6.29 |
| 1449664_PM_s_at | Rnf20         | RNF20      | 0.24  | 5.71 | 0.89  | 3.96E-01 | 6.66E-01 | -6.29 |
| 1425106_PM_a_at | Wars          | WARS       | -0.24 | 2.79 | -0.89 | 3.96E-01 | 6.66E-01 | -6.29 |
| 1442035_PM_at   | Chrna5        | CHRNA5     | 0.08  | 2.23 | 0.89  | 3.96E-01 | 6.66E-01 | -6.29 |
| 1449307_PM_at   | Dbndd1        | DBNDD1     | 0.10  | 2.91 | 0.89  | 3.96E-01 | 6.66E-01 | -6.29 |
| 1437463_PM_x_at | Tgfbi         | TGFBI      | 0.17  | 3.29 | 0.89  | 3.96E-01 | 6.66E-01 | -6.29 |
| 1456710_PM_at   | Pcdhb11       | NA         | -0.10 | 2.21 | -0.89 | 3.96E-01 | 6.66E-01 | -6.29 |
| 1427546_PM_at   | Abca8b        | ABCA8      | -0.08 | 2.02 | -0.89 | 3.96E-01 | 6.66E-01 | -6.29 |
| 1434729_PM_at   | Zc4h2         | ZC4H2      | 0.20  | 2.73 | 0.89  | 3.96E-01 | 6.66E-01 | -6.29 |
| 1422739_PM_at   | Hs2st1        | AC093155.3 | 0.25  | 4.61 | 0.89  | 3.96E-01 | 6.66E-01 | -6.29 |
| 1443385_PM_at   | A930012N16Rik | NA         | 0.09  | 2.17 | 0.89  | 3.96E-01 | 6.66E-01 | -6.29 |
| 1435390_PM_at   | Eri2          | ERI2       | -0.14 | 2.40 | -0.89 | 3.96E-01 | 6.66E-01 | -6.29 |
| 1447407_PM_at   | ---           | NA         | -0.08 | 2.53 | -0.89 | 3.96E-01 | 6.66E-01 | -6.29 |
| 1439502_PM_at   | Tecpr2        | TECPR2     | 0.20  | 3.99 | 0.89  | 3.96E-01 | 6.66E-01 | -6.29 |
| 1444431_PM_at   | Rcsd1         | RCSD1      | 0.15  | 2.43 | 0.89  | 3.96E-01 | 6.67E-01 | -6.29 |
| 1448994_PM_at   | Sp1           | SP1        | -0.33 | 3.82 | -0.89 | 3.96E-01 | 6.67E-01 | -6.29 |
| 1429716_PM_at   | Zcchc4        | ZCCHC4     | -0.12 | 2.23 | -0.88 | 3.96E-01 | 6.67E-01 | -6.29 |
| 1442560_PM_at   | ---           | NA         | 0.11  | 2.57 | 0.88  | 3.96E-01 | 6.67E-01 | -6.29 |
| 1432339_PM_at   | 4933432I03Rik | NA         | 0.10  | 2.88 | 0.88  | 3.96E-01 | 6.67E-01 | -6.29 |
| 1459831_PM_s_at | ---           | NA         | -0.07 | 1.99 | -0.88 | 3.96E-01 | 6.67E-01 | -6.29 |
| 1427365_PM_at   | Krt86         | KRT86      | 0.07  | 2.18 | 0.88  | 3.96E-01 | 6.67E-01 | -6.29 |
| 1430571_PM_s_at | Arm6          | ARM6       | 0.13  | 2.77 | 0.88  | 3.96E-01 | 6.67E-01 | -6.29 |
| 1442970_PM_at   | ---           | NA         | 0.09  | 2.07 | 0.88  | 3.96E-01 | 6.67E-01 | -6.29 |
| 1430822_PM_at   | Smarce1       | NA         | 0.07  | 2.28 | 0.88  | 3.97E-01 | 6.67E-01 | -6.29 |
| 1429130_PM_at   | Ttc25         | TTC25      | 0.30  | 3.00 | 0.88  | 3.97E-01 | 6.67E-01 | -6.29 |
| 1452534_PM_a_at | Hmgb2         | HMGB2      | -0.38 | 3.26 | -0.88 | 3.97E-01 | 6.67E-01 | -6.30 |
| 1453730_PM_at   | Samd8         | SAMD8      | -0.28 | 3.49 | -0.88 | 3.97E-01 | 6.67E-01 | -6.30 |
| 1419552_PM_at   | Echdc1        | ECHDC1     | -0.21 | 2.91 | -0.88 | 3.97E-01 | 6.67E-01 | -6.30 |
| 1427811_PM_at   | Tyms          | NA         | 0.08  | 2.51 | 0.88  | 3.97E-01 | 6.67E-01 | -6.29 |
| 1418676_PM_at   | Isl2          | ISL2       | 0.09  | 2.35 | 0.88  | 3.97E-01 | 6.67E-01 | -6.29 |
| 1435555_PM_at   | Pou2f1        | POU2F1     | 0.11  | 2.51 | 0.88  | 3.97E-01 | 6.67E-01 | -6.30 |
| 1450090_PM_at   | Zfp101        | NA         | 0.12  | 2.57 | 0.88  | 3.97E-01 | 6.67E-01 | -6.29 |
| 1416279_PM_at   | Ap1b1         | AP1B1      | 0.12  | 2.62 | 0.88  | 3.97E-01 | 6.67E-01 | -6.29 |
| 1429692_PM_s_at | Gch1          | GCH1       | 0.13  | 2.50 | 0.88  | 3.97E-01 | 6.67E-01 | -6.29 |
| 1419324_PM_at   | Lhx9          | LHX9       | 0.14  | 2.63 | 0.88  | 3.97E-01 | 6.67E-01 | -6.29 |
| 1424174_PM_at   | Shkbp1        | SHKBP1     | 0.15  | 3.06 | 0.88  | 3.97E-01 | 6.67E-01 | -6.29 |
| 1421670_PM_a_at | Irak4         | IRAK4      | 0.16  | 2.24 | 0.88  | 3.97E-01 | 6.67E-01 | -6.30 |
| 1422243_PM_at   | Fgf7          | FGF7       | 0.16  | 2.98 | 0.88  | 3.97E-01 | 6.67E-01 | -6.30 |
| 1457546_PM_at   | Cnot1         | CNOT1      | 0.17  | 2.72 | 0.88  | 3.97E-01 | 6.67E-01 | -6.29 |
| 1424529_PM_s_at | Cgref1        | CGREF1     | 0.17  | 4.95 | 0.88  | 3.97E-01 | 6.67E-01 | -6.29 |
| 1457722_PM_at   | Klrb1f        | KLFB1      | 0.27  | 3.04 | 0.88  | 3.97E-01 | 6.67E-01 | -6.29 |
| 1444656_PM_at   | BC030499      | NA         | 0.30  | 2.57 | 0.88  | 3.97E-01 | 6.67E-01 | -6.29 |
| 1420705_PM_at   | Foxb1         | FOXB1      | 0.09  | 2.47 | 0.88  | 3.97E-01 | 6.67E-01 | -6.30 |
| 1437577_PM_at   | ---           | NA         | 0.16  | 2.91 | 0.88  | 3.97E-01 | 6.67E-01 | -6.30 |
| 1432977_PM_at   | 9030607L02Rik | NA         | 0.12  | 2.30 | 0.88  | 3.97E-01 | 6.67E-01 | -6.30 |
| 1450760_PM_a_at | Ing3          | ING3       | -0.11 | 2.43 | -0.88 | 3.97E-01 | 6.67E-01 | -6.30 |
| 1420060_PM_s_at | AA675344      | NA         | 0.08  | 2.34 | 0.88  | 3.97E-01 | 6.67E-01 | -6.30 |
| 1441403_PM_at   | ---           | NA         | 0.13  | 2.40 | 0.88  | 3.97E-01 | 6.67E-01 | -6.30 |
| 1427825_PM_at   | ---           | NA         | 0.07  | 2.07 | 0.88  | 3.97E-01 | 6.67E-01 | -6.30 |
| 1438882_PM_at   | ---           | NA         | 0.07  | 2.05 | 0.88  | 3.97E-01 | 6.67E-01 | -6.30 |
| 1427767_PM_a_at | Cftr          | CFTR       | 0.07  | 2.08 | 0.88  | 3.97E-01 | 6.67E-01 | -6.30 |
| 1449475_PM_at   | Atp12a        | ATP12A     | 0.09  | 2.14 | 0.88  | 3.97E-01 | 6.67E-01 | -6.30 |
| 1431883_PM_at   | Tac1          | TAC1       | 0.10  | 2.44 | 0.88  | 3.97E-01 | 6.67E-01 | -6.30 |
| 1439635_PM_at   | Rgs9          | RG9        | 0.34  | 2.67 | 0.88  | 3.97E-01 | 6.67E-01 | -6.30 |
| 1427300_PM_at   | Lhx8          | LHX8       | 0.09  | 1.97 | 0.88  | 3.97E-01 | 6.67E-01 | -6.30 |
| 1435833_PM_at   | Timp4         | TIMP4      | 0.14  | 2.44 | 0.88  | 3.97E-01 | 6.67E-01 | -6.30 |
| 1417966_PM_at   | Mrp39         | MRP39      | 0.23  | 5.21 | 0.88  | 3.97E-01 | 6.67E-01 | -6.30 |
| 1459858_PM_x_at | Crtac1        | CRTAC1     | -0.17 | 4.00 | -0.88 | 3.97E-01 | 6.67E-01 | -6.30 |
| 1435916_PM_at   | Zfp84         | NA         | -0.14 | 2.34 | -0.88 | 3.97E-01 | 6.67E-01 | -6.30 |
| 1427212_PM_at   | Mapkap1       | MAPKAP1    | -0.29 | 3.08 | -0.88 | 3.97E-01 | 6.68E-01 | -6.30 |
| 1454414_PM_at   | Btdb7         | NA         | -0.09 | 2.31 | -0.88 | 3.97E-01 | 6.68E-01 | -6.30 |
| 1440961_PM_at   | ---           | NA         | 0.09  | 2.26 | 0.88  | 3.97E-01 | 6.68E-01 | -6.30 |
| 1416647_PM_at   | Bckdha        | BCKDHA     | 0.12  | 2.66 | 0.88  | 3.98E-01 | 6.68E-01 | -6.30 |
| 1419099_PM_x_at | Stom          | STOM       | -0.18 | 2.38 | -0.88 | 3.98E-01 | 6.68E-01 | -6.30 |
| 1442727_PM_at   | ---           | NA         | 0.11  | 2.55 | 0.88  | 3.98E-01 | 6.68E-01 | -6.30 |
| 1428837_PM_at   | Khl14         | KLHL14     | 0.07  | 1.95 | 0.88  | 3.98E-01 | 6.68E-01 | -6.30 |
| 1419491_PM_at   | Defb1         | DEFB1      | 0.08  | 4.37 | 0.88  | 3.98E-01 | 6.68E-01 | -6.30 |
| 1432966_PM_at   | ---           | NA         | 0.08  | 2.00 | 0.88  | 3.98E-01 | 6.68E-01 | -6.30 |
| 1448930_PM_at   | 3010026O09Rik | MRNIP      | 0.13  | 2.69 | 0.88  | 3.98E-01 | 6.68E-01 | -6.30 |
| 1457213_PM_a_at | Dgkh          | DGKH       | 0.37  | 3.22 | 0.88  | 3.98E-01 | 6.68E-01 | -6.30 |
| 1459766_PM_x_at | Sf1           | SF1        | 0.08  | 2.92 | 0.88  | 3.98E-01 | 6.68E-01 | -6.30 |
| 1435697_PM_a_at | Cytip         | CYTIP      | 0.09  | 2.36 | 0.88  | 3.98E-01 | 6.68E-01 | -6.30 |
| 1433169_PM_at   | ---           | NA         | 0.10  | 2.14 | 0.88  | 3.98E-01 | 6.68E-01 | -6.30 |
| 1445380_PM_at   | A230072C01Rik | NA         | 0.10  | 2.15 | 0.88  | 3.98E-01 | 6.68E-01 | -6.30 |



|                       |                              |          |       |      |       |          |          |       |
|-----------------------|------------------------------|----------|-------|------|-------|----------|----------|-------|
| 1418468_PM_at         | Anxa11 /// Gm2260 /// Gm2274 | ANXA11   | 0.13  | 2.50 | 0.88  | 3.98E-01 | 6.68E-01 | -6.30 |
| 1421302_PM_a_at       | Gna15                        | GNA15    | 0.14  | 2.51 | 0.88  | 3.98E-01 | 6.68E-01 | -6.30 |
| 1443469_PM_at         | ---                          | NA       | -0.12 | 2.10 | -0.88 | 3.98E-01 | 6.68E-01 | -6.30 |
| 1443695_PM_at         | Habp2                        | HABP2    | -0.08 | 2.33 | -0.88 | 3.98E-01 | 6.68E-01 | -6.30 |
| 1459349_PM_at         | ---                          | NA       | 0.10  | 2.58 | 0.88  | 3.98E-01 | 6.68E-01 | -6.30 |
| 1421660_PM_at         | Scn9a                        | SCN9A    | 0.07  | 2.07 | 0.88  | 3.98E-01 | 6.68E-01 | -6.30 |
| 1447392_PM_s_at       | Cpd                          | CPD      | -0.20 | 3.19 | -0.88 | 3.98E-01 | 6.68E-01 | -6.30 |
| 1422727_PM_at         | Nme5                         | NME5     | 0.20  | 3.11 | 0.88  | 3.98E-01 | 6.68E-01 | -6.30 |
| 1440196_PM_at         | ---                          | NA       | 0.08  | 2.16 | 0.88  | 3.98E-01 | 6.68E-01 | -6.30 |
| 1459006_PM_a_at       | Gm2824                       | NA       | -0.28 | 2.45 | -0.88 | 3.98E-01 | 6.68E-01 | -6.30 |
| 1442503_PM_at         | Gm41421                      | NA       | 0.09  | 2.12 | 0.88  | 3.98E-01 | 6.68E-01 | -6.30 |
| 1450468_PM_at         | Myoc                         | MYOC     | 0.12  | 2.46 | 0.88  | 3.98E-01 | 6.68E-01 | -6.30 |
| 1435764_PM_a_at       | Gemin7                       | GEMIN7   | 0.12  | 2.83 | 0.88  | 3.98E-01 | 6.68E-01 | -6.30 |
| 1421448_PM_at         | Ralgapa1                     | RALGAP1  | -0.20 | 3.20 | -0.88 | 3.98E-01 | 6.68E-01 | -6.30 |
| 1429970_PM_at         | Spaca3                       | SPACA3   | 0.10  | 2.29 | 0.88  | 3.98E-01 | 6.68E-01 | -6.30 |
| 1425336_PM_x_at       | H2-K1                        | NA       | -0.68 | 4.03 | -0.88 | 3.98E-01 | 6.68E-01 | -6.30 |
| 1417109_PM_at         | Tinagl1                      | TINAGL1  | -0.15 | 2.62 | -0.88 | 3.98E-01 | 6.68E-01 | -6.30 |
| 1460271_PM_at         | Trem3                        | NA       | 0.08  | 2.42 | 0.88  | 3.98E-01 | 6.68E-01 | -6.30 |
| 1418194_PM_at         | Galnt10                      | GALNT10  | 0.09  | 2.52 | 0.88  | 3.98E-01 | 6.68E-01 | -6.30 |
| 1442697_PM_at         | ---                          | NA       | 0.12  | 2.27 | 0.88  | 3.98E-01 | 6.68E-01 | -6.30 |
| 1450041_PM_a_at       | Tub                          | TUB      | 0.09  | 2.98 | 0.88  | 3.98E-01 | 6.68E-01 | -6.30 |
| 1415974_PM_at         | Map2k2                       | MAP2K2   | -0.17 | 3.45 | -0.88 | 3.98E-01 | 6.68E-01 | -6.30 |
| 1451061_PM_at         | 170018B24Rik                 | NA       | -0.07 | 2.33 | -0.88 | 3.98E-01 | 6.68E-01 | -6.30 |
| 1421935_PM_at         | Rps20                        | RPS20    | -0.18 | 2.35 | -0.88 | 3.99E-01 | 6.69E-01 | -6.30 |
| 1452796_PM_at         | Def6                         | DEF6     | 0.15  | 2.58 | 0.88  | 3.99E-01 | 6.69E-01 | -6.30 |
| 1456874_PM_at         | Flrt2                        | FLRT2    | -0.32 | 4.23 | -0.88 | 3.99E-01 | 6.69E-01 | -6.30 |
| 1439888_PM_at         | Gm15867                      | NA       | -0.11 | 2.90 | -0.88 | 3.99E-01 | 6.69E-01 | -6.30 |
| 1445401_PM_at         | ---                          | NA       | 0.16  | 2.63 | 0.88  | 3.99E-01 | 6.69E-01 | -6.30 |
| 1459744_PM_at         | Cd53                         | NA       | -0.09 | 2.16 | -0.88 | 3.99E-01 | 6.69E-01 | -6.30 |
| 1430679_PM_at         | 4933404O12Rik                | NA       | 0.12  | 3.80 | 0.88  | 3.99E-01 | 6.69E-01 | -6.30 |
| 1434708_PM_at         | Vhl                          | VHL      | 0.16  | 4.40 | 0.88  | 3.99E-01 | 6.69E-01 | -6.30 |
| 1457908_PM_at         | ---                          | NA       | -0.07 | 2.23 | -0.88 | 3.99E-01 | 6.69E-01 | -6.30 |
| 1418373_PM_at         | Pgam2                        | PGAM2    | 0.09  | 2.52 | 0.88  | 3.99E-01 | 6.69E-01 | -6.30 |
| 1430528_PM_at         | Sdcbp                        | SDCBP    | 0.26  | 2.92 | 0.88  | 3.99E-01 | 6.69E-01 | -6.30 |
| 1423214_PM_at         | Plkc1                        | PLXNC1   | 0.23  | 2.70 | 0.88  | 3.99E-01 | 6.69E-01 | -6.30 |
| 1449167_PM_at         | Epb414a                      | EPB41L4A | 0.11  | 2.53 | 0.88  | 3.99E-01 | 6.69E-01 | -6.30 |
| 1430329_PM_at         | Cgn                          | CGN      | 0.23  | 3.32 | 0.88  | 3.99E-01 | 6.69E-01 | -6.30 |
| 1423219_PM_a_at       | Mrpl49                       | MRPL49   | -0.15 | 3.33 | -0.88 | 3.99E-01 | 6.69E-01 | -6.30 |
| 1429780_PM_at         | Ccdc39                       | CCDC39   | -0.13 | 2.51 | -0.88 | 3.99E-01 | 6.69E-01 | -6.30 |
| 1460127_PM_at         | Hnf4g                        | NA       | -0.08 | 2.17 | -0.88 | 3.99E-01 | 6.69E-01 | -6.30 |
| AFFX-r2-Bs-thr-5_s_at | ---                          | NA       | 0.08  | 2.17 | 0.88  | 3.99E-01 | 6.69E-01 | -6.30 |
| 1433466_PM_at         | Al467606                     | C16orf54 | 0.08  | 2.07 | 0.88  | 3.99E-01 | 6.69E-01 | -6.30 |
| 1425747_PM_at         | Dock5                        | DOCK5    | 0.09  | 2.14 | 0.88  | 3.99E-01 | 6.69E-01 | -6.30 |
| 1445984_PM_at         | ---                          | NA       | 0.09  | 2.30 | 0.88  | 3.99E-01 | 6.69E-01 | -6.30 |
| 1419015_PM_at         | Wisp2                        | WISP2    | 0.10  | 2.24 | 0.88  | 3.99E-01 | 6.69E-01 | -6.30 |
| 1435673_PM_at         | Al448005                     | NA       | 0.12  | 2.32 | 0.88  | 3.99E-01 | 6.69E-01 | -6.30 |
| 1456858_PM_at         | Gpr149                       | GPR149   | 0.12  | 2.18 | 0.88  | 3.99E-01 | 6.69E-01 | -6.30 |
| 1457658_PM_x_at       | Anxa4                        | ANXA4    | 0.12  | 2.57 | 0.88  | 3.99E-01 | 6.69E-01 | -6.30 |
| 1425047_PM_a_at       | Cnbd2                        | CNBD2    | 0.12  | 2.15 | 0.88  | 3.99E-01 | 6.69E-01 | -6.30 |
| 1455774_PM_at         | ---                          | NA       | 0.15  | 3.06 | 0.88  | 3.99E-01 | 6.69E-01 | -6.30 |
| 1432054_PM_at         | Golga1                       | GOLGA1   | 0.09  | 2.31 | 0.88  | 3.99E-01 | 6.69E-01 | -6.30 |
| 1447072_PM_at         | ---                          | NA       | 0.12  | 2.29 | 0.88  | 3.99E-01 | 6.69E-01 | -6.30 |
| 1442927_PM_at         | Ptk2b                        | PTK2B    | -0.40 | 3.89 | -0.88 | 3.99E-01 | 6.69E-01 | -6.30 |
| 1420293_PM_at         | Lpcat1                       | LPCAT1   | -0.09 | 1.89 | -0.88 | 3.99E-01 | 6.69E-01 | -6.30 |
| 1419348_PM_at         | Bpifa2                       | BPIFA2   | 0.08  | 2.19 | 0.88  | 3.99E-01 | 6.69E-01 | -6.30 |
| 1451243_PM_at         | Rnpep                        | RNPEP    | 0.08  | 2.53 | 0.88  | 3.99E-01 | 6.69E-01 | -6.30 |
| 1422366_PM_at         | Vmn1r54                      | NA       | 0.09  | 2.23 | 0.88  | 3.99E-01 | 6.69E-01 | -6.30 |
| 1425089_PM_at         | Kcnc4                        | KCNC4    | 0.09  | 3.50 | 0.88  | 3.99E-01 | 6.69E-01 | -6.30 |
| 1440703_PM_at         | ---                          | NA       | 0.17  | 2.99 | 0.88  | 3.99E-01 | 6.69E-01 | -6.30 |
| 1421214_PM_at         | Cmah                         | NA       | 0.10  | 2.27 | 0.88  | 3.99E-01 | 6.69E-01 | -6.30 |
| 1454595_PM_at         | 4930451E06Rik                | NA       | 0.11  | 2.20 | 0.88  | 3.99E-01 | 6.69E-01 | -6.30 |
| 1438196_PM_at         | Gpd1l                        | GPD1L    | -0.15 | 2.72 | -0.88 | 4.00E-01 | 6.69E-01 | -6.30 |
| 1442993_PM_at         | ---                          | NA       | 0.09  | 2.43 | 0.88  | 4.00E-01 | 6.69E-01 | -6.30 |
| 1444721_PM_at         | ---                          | NA       | 0.20  | 2.75 | 0.88  | 4.00E-01 | 6.69E-01 | -6.30 |
| 1428262_PM_s_at       | Hrrnpa3                      | NA       | 0.25  | 7.04 | 0.88  | 4.00E-01 | 6.69E-01 | -6.30 |
| 1446742_PM_at         | ---                          | NA       | 0.19  | 2.24 | 0.88  | 4.00E-01 | 6.69E-01 | -6.30 |
| 1432631_PM_at         | Prc1                         | NA       | 0.10  | 2.65 | 0.88  | 4.00E-01 | 6.69E-01 | -6.30 |
| 1435093_PM_at         | Rbsn                         | RBSN     | -0.40 | 3.48 | -0.88 | 4.00E-01 | 6.69E-01 | -6.30 |
| 1460094_PM_at         | ---                          | NA       | 0.09  | 2.29 | 0.88  | 4.00E-01 | 6.69E-01 | -6.30 |
| 1453775_PM_at         | Rictor                       | RICTOR   | -0.17 | 2.31 | -0.88 | 4.00E-01 | 6.69E-01 | -6.30 |
| 1458730_PM_at         | ---                          | NA       | 0.19  | 2.47 | 0.88  | 4.00E-01 | 6.69E-01 | -6.30 |
| 1455729_PM_at         | ---                          | NA       | -0.52 | 6.47 | -0.88 | 4.00E-01 | 6.70E-01 | -6.30 |
| 1427712_PM_at         | Ceacam1                      | NA       | 0.08  | 2.28 | 0.88  | 4.00E-01 | 6.70E-01 | -6.30 |
| 1448999_PM_at         | Trappc5                      | TRAPPC5  | 0.13  | 4.14 | 0.88  | 4.00E-01 | 6.70E-01 | -6.30 |

|                 |               |          |       |      |       |          |          |       |
|-----------------|---------------|----------|-------|------|-------|----------|----------|-------|
| 1441384_PM_at   | Gad1          | GAD1     | 0.12  | 2.40 | 0.88  | 4.00E-01 | 6.70E-01 | -6.30 |
| 1444420_PM_at   | ---           | NA       | -0.15 | 2.43 | -0.88 | 4.00E-01 | 6.70E-01 | -6.30 |
| 1417395_PM_at   | Klf4          | KLf4     | 0.08  | 2.66 | 0.88  | 4.00E-01 | 6.70E-01 | -6.30 |
| 1429512_PM_at   | Zbp2          | ZBP2     | 0.09  | 2.59 | 0.88  | 4.00E-01 | 6.70E-01 | -6.30 |
| 1436395_PM_at   | Card6         | CARD6    | 0.29  | 3.13 | 0.88  | 4.00E-01 | 6.70E-01 | -6.30 |
| 1434101_PM_at   | Nfib          | NFIB     | 0.22  | 4.06 | 0.88  | 4.00E-01 | 6.70E-01 | -6.30 |
| 1436813_PM_x_at | Khsrp         | KHSRP    | -0.18 | 4.36 | -0.88 | 4.00E-01 | 6.70E-01 | -6.30 |
| 1419464_PM_at   | Wdr86         | WDR86    | 0.13  | 2.56 | 0.88  | 4.00E-01 | 6.70E-01 | -6.30 |
| 1433694_PM_at   | Pde3b         | PDE3B    | 0.24  | 5.66 | 0.88  | 4.00E-01 | 6.70E-01 | -6.30 |
| 1457174_PM_at   | ---           | NA       | -0.14 | 2.69 | -0.88 | 4.00E-01 | 6.70E-01 | -6.30 |
| 1447059_PM_at   | ---           | NA       | 0.20  | 9.92 | 0.88  | 4.00E-01 | 6.70E-01 | -6.30 |
| 1423074_PM_at   | Lman2         | LMAN2    | 0.28  | 3.41 | 0.88  | 4.00E-01 | 6.70E-01 | -6.30 |
| 1441569_PM_at   | Fbxw21        | FBXW12   | 0.08  | 2.10 | 0.88  | 4.00E-01 | 6.70E-01 | -6.30 |
| 1428856_PM_at   | H13           | NA       | 0.15  | 2.67 | 0.88  | 4.00E-01 | 6.70E-01 | -6.30 |
| 1448647_PM_at   | Man2a1        | MAN2A1   | 0.12  | 3.10 | 0.88  | 4.00E-01 | 6.70E-01 | -6.30 |
| 1431339_PM_a_at | Efh2          | EFHD2    | 0.16  | 2.91 | 0.88  | 4.00E-01 | 6.70E-01 | -6.30 |
| 1418763_PM_at   | Nit2          | NIT2     | 0.10  | 2.54 | 0.88  | 4.00E-01 | 6.70E-01 | -6.30 |
| 1425718_PM_a_at | Ivns1abp      | IVNS1ABP | -0.63 | 6.51 | -0.88 | 4.01E-01 | 6.70E-01 | -6.30 |
| 1421964_PM_at   | Notch3        | NOTCH3   | 0.07  | 2.14 | 0.88  | 4.01E-01 | 6.70E-01 | -6.30 |
| 1443470_PM_at   | ---           | NA       | 0.08  | 2.42 | 0.88  | 4.01E-01 | 6.70E-01 | -6.30 |
| 1448964_PM_at   | S100g         | S100G    | -0.09 | 2.36 | -0.88 | 4.01E-01 | 6.70E-01 | -6.30 |
| 1456634_PM_at   | Soga1         | SOGA1    | 0.09  | 2.32 | 0.88  | 4.01E-01 | 6.70E-01 | -6.30 |
| 1449853_PM_at   | Sfxn2         | SFXN2    | 0.09  | 2.49 | 0.88  | 4.01E-01 | 6.70E-01 | -6.30 |
| 1443369_PM_at   | Vwa5b2        | VWA5B2   | 0.12  | 2.24 | 0.88  | 4.01E-01 | 6.70E-01 | -6.30 |
| 1429880_PM_at   | 4921531C22Rik | NA       | 0.06  | 2.16 | 0.88  | 4.01E-01 | 6.70E-01 | -6.30 |
| 1434406_PM_at   | Srgap2        | SRGAP2B  | 0.12  | 3.18 | 0.88  | 4.01E-01 | 6.70E-01 | -6.30 |
| 1428642_PM_at   | Slc35d3       | SLC35D3  | -0.11 | 2.16 | -0.88 | 4.01E-01 | 6.70E-01 | -6.30 |
| 1419134_PM_at   | Rhbg          | RHBG     | 0.07  | 2.29 | 0.88  | 4.01E-01 | 6.70E-01 | -6.30 |
| 1429690_PM_at   | Zfp946        | NA       | -0.25 | 3.22 | -0.88 | 4.01E-01 | 6.71E-01 | -6.30 |
| 1454545_PM_at   | 4933403L11Rik | NA       | -0.15 | 2.44 | -0.88 | 4.01E-01 | 6.71E-01 | -6.30 |
| 1444665_PM_at   | Pdpr          | PDPR     | 0.12  | 2.39 | 0.88  | 4.01E-01 | 6.71E-01 | -6.30 |
| 1417436_PM_at   | Large         | LARGE1   | -0.15 | 2.27 | -0.88 | 4.01E-01 | 6.71E-01 | -6.30 |
| 1446131_PM_at   | ---           | NA       | -0.15 | 2.90 | -0.88 | 4.01E-01 | 6.71E-01 | -6.30 |
| 1445492_PM_at   | ---           | NA       | -0.13 | 2.08 | -0.88 | 4.01E-01 | 6.71E-01 | -6.30 |
| 1428995_PM_at   | Smpd5         | NA       | 0.11  | 2.41 | 0.88  | 4.01E-01 | 6.71E-01 | -6.30 |
| 1421556_PM_at   | Serpina3a     | SERPINA3 | 0.09  | 2.93 | 0.88  | 4.01E-01 | 6.71E-01 | -6.30 |
| 1429168_PM_at   | Zbtb46        | ZBTB46   | 0.10  | 2.32 | 0.88  | 4.01E-01 | 6.71E-01 | -6.30 |
| 1445443_PM_at   | ---           | NA       | -0.10 | 2.36 | -0.88 | 4.01E-01 | 6.71E-01 | -6.30 |
| 1454856_PM_x_at | Rpl35         | RPL35    | -0.26 | 6.46 | -0.88 | 4.01E-01 | 6.71E-01 | -6.30 |
| 1434188_PM_at   | Slc16a12      | SLC16A12 | -0.14 | 2.04 | -0.88 | 4.01E-01 | 6.71E-01 | -6.30 |
| 1446737_PM_a_at | Hook3         | HOO3     | -0.12 | 2.26 | -0.88 | 4.01E-01 | 6.71E-01 | -6.30 |
| 1444360_PM_at   | ---           | NA       | 0.09  | 2.23 | 0.88  | 4.01E-01 | 6.71E-01 | -6.30 |
| 1448086_PM_at   | D1Ert164e     | NA       | 0.11  | 2.25 | 0.88  | 4.01E-01 | 6.71E-01 | -6.30 |
| 1444061_PM_at   | Prr9          | PRR9     | 0.09  | 2.67 | 0.88  | 4.01E-01 | 6.71E-01 | -6.30 |
| 1434045_PM_at   | Cdkn1b        | CDKN1B   | -0.28 | 5.62 | -0.88 | 4.01E-01 | 6.71E-01 | -6.30 |
| 1428047_PM_s_at | Zfa-ps///Zfx  | ZFY      | 0.16  | 2.64 | 0.88  | 4.01E-01 | 6.71E-01 | -6.30 |
| 1442687_PM_at   | ---           | NA       | 0.21  | 2.45 | 0.87  | 4.01E-01 | 6.71E-01 | -6.30 |
| 1451431_PM_a_at | Dbn2          | DBNDD2   | -0.27 | 5.00 | -0.87 | 4.01E-01 | 6.71E-01 | -6.30 |
| 1442615_PM_at   | ---           | NA       | 0.13  | 2.81 | 0.87  | 4.02E-01 | 6.71E-01 | -6.30 |
| 1459851_PM_x_at | Riok1         | RIOK1    | 0.15  | 2.58 | 0.87  | 4.02E-01 | 6.71E-01 | -6.30 |
| 1425996_PM_a_at | Hltf          | HLTF     | 0.28  | 2.82 | 0.87  | 4.02E-01 | 6.71E-01 | -6.30 |
| 1454473_PM_at   | 4933433M23Rik | NA       | -0.17 | 3.25 | -0.87 | 4.02E-01 | 6.71E-01 | -6.30 |
| 1419092_PM_a_at | Slk           | SLK      | -0.32 | 5.81 | -0.87 | 4.02E-01 | 6.71E-01 | -6.30 |
| 1453732_PM_at   | Mcur1         | MCUR1    | -0.17 | 2.21 | -0.87 | 4.02E-01 | 6.71E-01 | -6.30 |
| 1438914_PM_at   | Tmem206       | NA       | 0.11  | 2.34 | 0.87  | 4.02E-01 | 6.71E-01 | -6.30 |
| 1449915_PM_at   | Zfp202        | ZNF202   | -0.12 | 2.27 | -0.87 | 4.02E-01 | 6.71E-01 | -6.30 |
| 1450534_PM_x_at | H2-K1         | NA       | 0.16  | 3.58 | 0.87  | 4.02E-01 | 6.71E-01 | -6.30 |
| 1431809_PM_at   | Fam90a1b      | NA       | -0.07 | 2.13 | -0.87 | 4.02E-01 | 6.71E-01 | -6.30 |
| 1422263_PM_at   | Bdkrb2        | BDKRB2   | 0.09  | 2.25 | 0.87  | 4.02E-01 | 6.71E-01 | -6.30 |
| 1418176_PM_at   | Vdr           | VDR      | 0.10  | 2.45 | 0.87  | 4.02E-01 | 6.71E-01 | -6.30 |
| 1458532_PM_at   | Mtr           | MTR      | 0.13  | 2.51 | 0.87  | 4.02E-01 | 6.71E-01 | -6.30 |
| 1454253_PM_at   | Cmp           | NA       | 0.19  | 3.17 | 0.87  | 4.02E-01 | 6.71E-01 | -6.30 |
| 1449850_PM_at   | Scube1        | SCUBE1   | 0.23  | 3.64 | 0.87  | 4.02E-01 | 6.71E-01 | -6.30 |
| 1442153_PM_at   | ---           | NA       | 0.15  | 2.56 | 0.87  | 4.02E-01 | 6.71E-01 | -6.30 |
| 1452961_PM_at   | Tril          | TRIL     | 0.13  | 2.40 | 0.87  | 4.02E-01 | 6.71E-01 | -6.30 |
| 1426441_PM_at   | Slc11a2       | SLC11A2  | -0.26 | 4.50 | -0.87 | 4.02E-01 | 6.71E-01 | -6.30 |
| 1437511_PM_x_at | Clc1          | CLCC1    | -0.21 | 3.26 | -0.87 | 4.02E-01 | 6.71E-01 | -6.30 |
| 1455763_PM_at   | Rnf41         | RNF41    | -0.16 | 2.32 | -0.87 | 4.02E-01 | 6.71E-01 | -6.30 |
| 1420012_PM_at   | Xbp1          | NA       | -0.13 | 2.48 | -0.87 | 4.02E-01 | 6.71E-01 | -6.30 |
| 1443201_PM_at   | ---           | NA       | 0.08  | 2.28 | 0.87  | 4.02E-01 | 6.71E-01 | -6.30 |
| 1427774_PM_at   | Defb7         | NA       | 0.09  | 2.37 | 0.87  | 4.02E-01 | 6.71E-01 | -6.30 |
| 1420020_PM_at   | Suz12         | SUZ12    | 0.09  | 2.06 | 0.87  | 4.02E-01 | 6.71E-01 | -6.30 |
| 1442862_PM_at   | ---           | NA       | 0.11  | 2.54 | 0.87  | 4.02E-01 | 6.71E-01 | -6.30 |
| 1431416_PM_a_at | Jam2          | JAM2     | 0.23  | 2.67 | 0.87  | 4.02E-01 | 6.71E-01 | -6.30 |
| 1457924_PM_at   | Mbn1          | MBNL1    | 0.26  | 3.04 | 0.87  | 4.02E-01 | 6.71E-01 | -6.30 |

|                 |                                                                                                                                                                          |            |       |      |       |          |          |       |
|-----------------|--------------------------------------------------------------------------------------------------------------------------------------------------------------------------|------------|-------|------|-------|----------|----------|-------|
| 1447470_PM_at   | Hdh2                                                                                                                                                                     | HDHD2      | 0.07  | 2.15 | 0.87  | 4.02E-01 | 6.71E-01 | -6.30 |
| 1435019_PM_at   | Atxn7l3                                                                                                                                                                  | ATXN7L3    | 0.12  | 3.53 | 0.87  | 4.02E-01 | 6.71E-01 | -6.30 |
| 1443691_PM_at   | 2410089E03Rik                                                                                                                                                            | C5orf42    | -0.18 | 2.79 | -0.87 | 4.02E-01 | 6.71E-01 | -6.30 |
| 1430316_PM_at   | Ispd                                                                                                                                                                     | ISPD       | -0.22 | 2.50 | -0.87 | 4.02E-01 | 6.71E-01 | -6.30 |
| 1441141_PM_at   | Amn1                                                                                                                                                                     | AMN1       | -0.13 | 2.53 | -0.87 | 4.02E-01 | 6.71E-01 | -6.30 |
| 1423765_PM_at   | Athl1                                                                                                                                                                    | PGGHG      | 0.09  | 2.18 | 0.87  | 4.02E-01 | 6.71E-01 | -6.30 |
| 1457703_PM_at   | Cacna2d4                                                                                                                                                                 | CACNA2D4   | 0.11  | 2.67 | 0.87  | 4.02E-01 | 6.71E-01 | -6.30 |
| 1452608_PM_at   | Mycbp                                                                                                                                                                    | AL139260.3 | 0.18  | 2.91 | 0.87  | 4.02E-01 | 6.72E-01 | -6.30 |
| 1450813_PM_a_at | Tnni1                                                                                                                                                                    | TNNI1      | 0.08  | 2.73 | 0.87  | 4.02E-01 | 6.72E-01 | -6.30 |
| 1441673_PM_at   | C80120                                                                                                                                                                   | NA         | 0.12  | 2.11 | 0.87  | 4.02E-01 | 6.72E-01 | -6.30 |
| 1421483_PM_at   | Lhx4                                                                                                                                                                     | LHX4       | 0.10  | 2.20 | 0.87  | 4.02E-01 | 6.72E-01 | -6.30 |
| 1457604_PM_x_at | Cyp11a1                                                                                                                                                                  | CYP11A1    | 0.08  | 2.13 | 0.87  | 4.02E-01 | 6.72E-01 | -6.30 |
| 1423259_PM_at   | Id4                                                                                                                                                                      | ID4        | -0.48 | 3.82 | -0.87 | 4.03E-01 | 6.72E-01 | -6.30 |
| 1457172_PM_at   | Arhgef15                                                                                                                                                                 | ARHGEF15   | -0.18 | 2.44 | -0.87 | 4.02E-01 | 6.72E-01 | -6.30 |
| 1426841_PM_at   | Ythdf3                                                                                                                                                                   | YTHDF3     | -0.14 | 2.92 | -0.87 | 4.03E-01 | 6.72E-01 | -6.31 |
| 1455759_PM_a_at | Ankhd1                                                                                                                                                                   | ANKHD1     | -0.12 | 2.29 | -0.87 | 4.03E-01 | 6.72E-01 | -6.30 |
| 1435116_PM_at   | Map10                                                                                                                                                                    | MAP10      | -0.09 | 1.94 | -0.87 | 4.02E-01 | 6.72E-01 | -6.30 |
| 1450256_PM_at   | Cer1                                                                                                                                                                     | NA         | 0.07  | 2.31 | 0.87  | 4.03E-01 | 6.72E-01 | -6.31 |
| 1419676_PM_at   | Mx2                                                                                                                                                                      | MX1        | 0.08  | 2.50 | 0.87  | 4.03E-01 | 6.72E-01 | -6.30 |
| 1449209_PM_a_at | Rdh11                                                                                                                                                                    | RDH11      | 0.08  | 2.22 | 0.87  | 4.03E-01 | 6.72E-01 | -6.30 |
| 1430993_PM_at   | Ubpap2l                                                                                                                                                                  | NA         | 0.08  | 2.19 | 0.87  | 4.02E-01 | 6.72E-01 | -6.30 |
| 1416797_PM_at   | Nck2                                                                                                                                                                     | NCK2       | 0.09  | 2.56 | 0.87  | 4.03E-01 | 6.72E-01 | -6.30 |
| 1429407_PM_at   | Pex11g                                                                                                                                                                   | PEX11G     | 0.09  | 2.25 | 0.87  | 4.02E-01 | 6.72E-01 | -6.30 |
| 1415786_PM_at   | Pgc                                                                                                                                                                      | PGC        | 0.09  | 2.36 | 0.87  | 4.03E-01 | 6.72E-01 | -6.30 |
| 1427378_PM_at   | Krt75                                                                                                                                                                    | KRT75      | 0.11  | 2.62 | 0.87  | 4.03E-01 | 6.72E-01 | -6.30 |
| 1449350_PM_at   | Osr1                                                                                                                                                                     | OSR1       | 0.12  | 3.32 | 0.87  | 4.03E-01 | 6.72E-01 | -6.31 |
| 1432610_PM_at   | ---                                                                                                                                                                      | NA         | 0.12  | 2.42 | 0.87  | 4.03E-01 | 6.72E-01 | -6.30 |
| 1440468_PM_at   | D630023F18Rik                                                                                                                                                            | C2orf80    | 0.14  | 2.11 | 0.87  | 4.03E-01 | 6.72E-01 | -6.31 |
| 1457909_PM_at   | Dna2                                                                                                                                                                     | DNA2       | 0.17  | 2.42 | 0.87  | 4.03E-01 | 6.72E-01 | -6.30 |
| 1448888_PM_at   | Ppp1r7                                                                                                                                                                   | PPP1R7     | 0.21  | 5.78 | 0.87  | 4.03E-01 | 6.72E-01 | -6.30 |
| 1422405_PM_at   | H2-D4                                                                                                                                                                    | NA         | -0.09 | 2.23 | -0.87 | 4.03E-01 | 6.72E-01 | -6.31 |
| 1453232_PM_at   | Calr3                                                                                                                                                                    | CALR3      | 0.10  | 2.51 | 0.87  | 4.03E-01 | 6.72E-01 | -6.31 |
| 1422064_PM_a_at | Zbtb20                                                                                                                                                                   | ZBTB20     | 0.28  | 3.40 | 0.87  | 4.03E-01 | 6.72E-01 | -6.31 |
| 1416620_PM_at   | Smarcal1                                                                                                                                                                 | SMARCAL1   | 0.13  | 2.77 | 0.87  | 4.03E-01 | 6.72E-01 | -6.31 |
| 1418085_PM_at   | Prkc                                                                                                                                                                     | PRKCZ      | -0.15 | 4.47 | -0.87 | 4.03E-01 | 6.72E-01 | -6.31 |
| 1433003_PM_at   | 4933423N03Rik                                                                                                                                                            | NA         | 0.10  | 3.21 | 0.87  | 4.03E-01 | 6.72E-01 | -6.31 |
| 1437706_PM_x_at | LOC102634709 /// Rps14                                                                                                                                                   | RPS14      | 0.18  | 4.37 | 0.87  | 4.03E-01 | 6.72E-01 | -6.31 |
| 1421644_PM_at   | Slf3                                                                                                                                                                     | SLFN12     | 0.07  | 1.90 | 0.87  | 4.03E-01 | 6.72E-01 | -6.31 |
| 1429934_PM_at   | 4930502E18Rik                                                                                                                                                            | NA         | 0.10  | 2.50 | 0.87  | 4.03E-01 | 6.72E-01 | -6.31 |
| 1435702_PM_s_at | Ywhae                                                                                                                                                                    | YWHAE      | -0.32 | 6.27 | -0.87 | 4.03E-01 | 6.72E-01 | -6.31 |
| 1438929_PM_at   | ---                                                                                                                                                                      | NA         | 0.49  | 3.23 | 0.87  | 4.03E-01 | 6.72E-01 | -6.31 |
| 1441304_PM_at   | Rpl31 /// Rpl31-ps10 ///<br>Rpl31-ps11 /// Rpl31-ps12 ///<br>Rpl31-ps13 /// Rpl31-ps14 ///<br>Rpl31-ps15 /// Rpl31-ps16 ///<br>Rpl31-ps17 /// Rpl31-ps8 ///<br>Rpl31-ps9 | NA         | 0.17  | 2.87 | 0.87  | 4.03E-01 | 6.72E-01 | -6.31 |
| 1437089_PM_at   | Pyrox2                                                                                                                                                                   | PYROXD2    | 0.09  | 2.31 | 0.87  | 4.03E-01 | 6.72E-01 | -6.31 |
| 1432616_PM_at   | 4833422B07Rik                                                                                                                                                            | NA         | -0.18 | 3.29 | -0.87 | 4.03E-01 | 6.72E-01 | -6.31 |
| 1424438_PM_a_at | Leprot                                                                                                                                                                   | LEPROT     | -0.16 | 3.06 | -0.87 | 4.03E-01 | 6.72E-01 | -6.31 |
| 1430234_PM_at   | Arl14                                                                                                                                                                    | ARL14      | 0.06  | 1.76 | 0.87  | 4.03E-01 | 6.72E-01 | -6.31 |
| 1455593_PM_at   | Apob                                                                                                                                                                     | APOB       | 0.08  | 2.11 | 0.87  | 4.03E-01 | 6.72E-01 | -6.31 |
| 1440454_PM_at   | Gsap                                                                                                                                                                     | GSAP       | 0.08  | 1.98 | 0.87  | 4.03E-01 | 6.72E-01 | -6.31 |
| 1453530_PM_at   | ---                                                                                                                                                                      | NA         | 0.10  | 2.52 | 0.87  | 4.03E-01 | 6.72E-01 | -6.31 |
| 1432143_PM_a_at | Hbp1                                                                                                                                                                     | HBP1       | 0.10  | 3.01 | 0.87  | 4.03E-01 | 6.72E-01 | -6.31 |
| 1430739_PM_at   | 4930471M09Rik                                                                                                                                                            | NA         | 0.11  | 2.30 | 0.87  | 4.03E-01 | 6.72E-01 | -6.31 |
| 1447601_PM_x_at | Nat10                                                                                                                                                                    | NAT10      | 0.11  | 3.33 | 0.87  | 4.03E-01 | 6.72E-01 | -6.31 |
| 1436567_PM_a_at | Ndufa7                                                                                                                                                                   | NDUFA7     | 0.21  | 2.18 | 0.87  | 4.03E-01 | 6.72E-01 | -6.31 |
| 1440418_PM_at   | ---                                                                                                                                                                      | NA         | 0.29  | 3.16 | 0.87  | 4.03E-01 | 6.72E-01 | -6.31 |
| 1456820_PM_at   | ---                                                                                                                                                                      | NA         | 0.09  | 2.23 | 0.87  | 4.03E-01 | 6.72E-01 | -6.31 |
| 1430477_PM_s_at | ---                                                                                                                                                                      | NA         | -0.14 | 2.78 | -0.87 | 4.03E-01 | 6.72E-01 | -6.31 |
| 1459447_PM_at   | Gm40121                                                                                                                                                                  | NA         | 0.07  | 2.07 | 0.87  | 4.03E-01 | 6.72E-01 | -6.31 |
| 1421109_PM_at   | Cml2                                                                                                                                                                     | NAT8       | 0.10  | 2.18 | 0.87  | 4.03E-01 | 6.72E-01 | -6.31 |
| 1416202_PM_at   | Phb2                                                                                                                                                                     | PHB2       | -0.29 | 5.31 | -0.87 | 4.03E-01 | 6.72E-01 | -6.31 |
| 1454170_PM_at   | LOC102631612                                                                                                                                                             | NA         | 0.11  | 2.72 | 0.87  | 4.03E-01 | 6.72E-01 | -6.31 |
| 1451973_PM_at   | Uba5                                                                                                                                                                     | UBA5       | -0.37 | 3.93 | -0.87 | 4.04E-01 | 6.72E-01 | -6.31 |
| 1460123_PM_at   | Gpr1                                                                                                                                                                     | GPR1       | 0.11  | 2.69 | 0.87  | 4.04E-01 | 6.72E-01 | -6.31 |
| 1431532_PM_at   | 4931400O07Rik                                                                                                                                                            | NA         | 0.09  | 2.60 | 0.87  | 4.04E-01 | 6.72E-01 | -6.31 |
| 1444951_PM_at   | Dennd1b                                                                                                                                                                  | DENND1B    | 0.25  | 2.43 | 0.87  | 4.04E-01 | 6.72E-01 | -6.31 |
| 1424953_PM_at   | BC021614                                                                                                                                                                 | NA         | 0.08  | 2.30 | 0.87  | 4.04E-01 | 6.72E-01 | -6.31 |
| 1441793_PM_at   | ---                                                                                                                                                                      | NA         | -0.16 | 2.66 | -0.87 | 4.04E-01 | 6.72E-01 | -6.31 |
| 1424247_PM_at   | Erc1                                                                                                                                                                     | ERC1       | -0.15 | 2.48 | -0.87 | 4.04E-01 | 6.72E-01 | -6.31 |
| 1444411_PM_at   | ---                                                                                                                                                                      | NA         | 0.10  | 2.14 | 0.87  | 4.04E-01 | 6.72E-01 | -6.31 |
| 1438063_PM_at   | Mphosph9                                                                                                                                                                 | MPHOSPH9   | -0.19 | 2.38 | -0.87 | 4.04E-01 | 6.72E-01 | -6.31 |

|                 |                                                                          |           |       |      |       |          |          |       |
|-----------------|--------------------------------------------------------------------------|-----------|-------|------|-------|----------|----------|-------|
| 1445307_PM_at   | ---                                                                      | NA        | 0.10  | 2.47 | 0.87  | 4.04E-01 | 6.72E-01 | -6.31 |
| 1422156_PM_a_at | LOC105242669 ///<br>LOC105243270 /// Rps2 ///<br>Rps2-ps10 /// Rps2-ps13 | NA        | -0.28 | 4.02 | -0.87 | 4.04E-01 | 6.72E-01 | -6.31 |
| 1430553_PM_at   | Vsig1                                                                    | VSIG1     | 0.07  | 2.09 | 0.87  | 4.04E-01 | 6.73E-01 | -6.31 |
| 1429343_PM_at   | Rbmxl2                                                                   | RBMXL2    | 0.07  | 1.86 | 0.87  | 4.04E-01 | 6.73E-01 | -6.31 |
| 1420168_PM_at   | AA517841                                                                 | NA        | 0.09  | 2.19 | 0.87  | 4.04E-01 | 6.73E-01 | -6.31 |
| 1417273_PM_at   | Pdk4                                                                     | PKD4      | 0.19  | 2.93 | 0.87  | 4.04E-01 | 6.73E-01 | -6.31 |
| 1451477_PM_at   | Gm13139                                                                  | NA        | 0.21  | 3.53 | 0.87  | 4.04E-01 | 6.73E-01 | -6.31 |
| 1449492_PM_a_at | Lect2                                                                    | LECT2     | 0.15  | 2.54 | 0.87  | 4.04E-01 | 6.73E-01 | -6.31 |
| 1452087_PM_at   | Epst11                                                                   | EPST11    | 0.09  | 2.47 | 0.87  | 4.04E-01 | 6.73E-01 | -6.31 |
| 1422899_PM_at   | Slc6a20b                                                                 | SLC6A20   | 0.10  | 2.57 | 0.87  | 4.04E-01 | 6.73E-01 | -6.31 |
| 1422420_PM_at   | Mb                                                                       | NA        | 0.12  | 3.59 | 0.87  | 4.04E-01 | 6.73E-01 | -6.31 |
| 1453529_PM_at   | ---                                                                      | NA        | -0.15 | 2.45 | -0.87 | 4.04E-01 | 6.73E-01 | -6.31 |
| 1421310_PM_at   | Actl11                                                                   | NA        | 0.10  | 2.52 | 0.87  | 4.04E-01 | 6.73E-01 | -6.31 |
| 1460406_PM_at   | Pls1                                                                     | PLS1      | 0.14  | 2.37 | 0.87  | 4.04E-01 | 6.73E-01 | -6.31 |
| 1448650_PM_a_at | Pole                                                                     | POLE      | 0.09  | 2.21 | 0.87  | 4.04E-01 | 6.73E-01 | -6.31 |
| 1451704_PM_at   | Scgb2b20 /// Scgb2b7                                                     | NA        | 0.09  | 2.48 | 0.87  | 4.04E-01 | 6.73E-01 | -6.31 |
| 1456419_PM_at   | 5730455P16Rik                                                            | C17orf75  | 0.23  | 3.53 | 0.87  | 4.04E-01 | 6.73E-01 | -6.31 |
| 1438655_PM_a_at | Gm4705 /// Rpl34 /// Rpl34-ps1                                           | RPL34     | 0.44  | 6.47 | 0.87  | 4.04E-01 | 6.73E-01 | -6.31 |
| 1444181_PM_at   | Gimap5                                                                   | GIMAP5    | 0.11  | 2.66 | 0.87  | 4.04E-01 | 6.73E-01 | -6.31 |
| 1435751_PM_at   | Abcc9                                                                    | ABCC9     | -0.42 | 2.57 | -0.87 | 4.04E-01 | 6.73E-01 | -6.31 |
| 1429369_PM_at   | Tnpo3                                                                    | TNPO3     | -0.20 | 2.89 | -0.87 | 4.04E-01 | 6.73E-01 | -6.31 |
| 1432749_PM_at   | ---                                                                      | NA        | 0.09  | 2.42 | 0.87  | 4.04E-01 | 6.73E-01 | -6.31 |
| 1456948_PM_at   | Ap4e1                                                                    | NA        | 0.16  | 3.63 | 0.87  | 4.04E-01 | 6.73E-01 | -6.31 |
| 1417270_PM_at   | Wdr12                                                                    | WDR12     | 0.22  | 3.60 | 0.87  | 4.04E-01 | 6.73E-01 | -6.31 |
| 1447872_PM_at   | ---                                                                      | NA        | -0.21 | 2.64 | -0.87 | 4.04E-01 | 6.73E-01 | -6.31 |
| 1433237_PM_at   | ---                                                                      | NA        | 0.09  | 2.74 | 0.87  | 4.05E-01 | 6.73E-01 | -6.31 |
| 1458901_PM_at   | ---                                                                      | NA        | 0.13  | 2.43 | 0.87  | 4.05E-01 | 6.73E-01 | -6.31 |
| 1422134_PM_at   | Fosb                                                                     | FOSB      | 0.10  | 2.09 | 0.87  | 4.05E-01 | 6.73E-01 | -6.31 |
| 1447014_PM_at   | ---                                                                      | NA        | 0.13  | 2.75 | 0.87  | 4.05E-01 | 6.73E-01 | -6.31 |
| 1424243_PM_at   | Rwdd4a                                                                   | RWDD4     | -0.33 | 4.48 | -0.87 | 4.05E-01 | 6.73E-01 | -6.31 |
| 1425326_PM_at   | Acly                                                                     | ACLY      | 0.35  | 3.88 | 0.87  | 4.05E-01 | 6.73E-01 | -6.31 |
| 1437791_PM_s_at | Emf5                                                                     | EML5      | -0.17 | 7.25 | -0.87 | 4.05E-01 | 6.73E-01 | -6.31 |
| 1435588_PM_at   | Wdfy1                                                                    | WDFY1     | -0.10 | 2.37 | -0.87 | 4.05E-01 | 6.73E-01 | -6.31 |
| 1441723_PM_at   | ---                                                                      | NA        | 0.07  | 2.19 | 0.87  | 4.05E-01 | 6.73E-01 | -6.31 |
| 1429955_PM_at   | 5031434011Rik                                                            | NA        | 0.13  | 3.16 | 0.87  | 4.05E-01 | 6.73E-01 | -6.31 |
| 1442790_PM_at   | Zfp131                                                                   | NA        | 0.15  | 2.28 | 0.87  | 4.05E-01 | 6.73E-01 | -6.31 |
| 1420997_PM_a_at | Gpi1                                                                     | GPI       | -0.27 | 6.63 | -0.87 | 4.05E-01 | 6.73E-01 | -6.31 |
| 1419531_PM_at   | 1700102P08Rik                                                            | C3orf62   | 0.07  | 2.24 | 0.87  | 4.05E-01 | 6.73E-01 | -6.31 |
| 1421128_PM_at   | Zrsr2                                                                    | ZRSR2     | 0.12  | 2.36 | 0.87  | 4.05E-01 | 6.73E-01 | -6.31 |
| 1452114_PM_s_at | Igfbp5                                                                   | IGFBP5    | 0.50  | 4.76 | 0.87  | 4.05E-01 | 6.73E-01 | -6.31 |
| 1446645_PM_at   | Ccdc169                                                                  | CCDC169   | 0.12  | 2.97 | 0.87  | 4.05E-01 | 6.74E-01 | -6.31 |
| 1416344_PM_at   | Lamp2                                                                    | LAMP2     | -0.28 | 2.83 | -0.87 | 4.05E-01 | 6.74E-01 | -6.31 |
| 1451141_PM_at   | Mettl8                                                                   | METTL8    | -0.17 | 3.97 | -0.87 | 4.05E-01 | 6.74E-01 | -6.31 |
| 1443898_PM_at   | Bcl7c                                                                    | BCL7C     | 0.09  | 2.19 | 0.87  | 4.05E-01 | 6.74E-01 | -6.31 |
| 1429228_PM_at   | Cep128                                                                   | CEP128    | 0.10  | 2.66 | 0.87  | 4.05E-01 | 6.74E-01 | -6.31 |
| 1457331_PM_at   | ---                                                                      | NA        | 0.16  | 2.58 | 0.87  | 4.05E-01 | 6.74E-01 | -6.31 |
| 1426283_PM_at   | Ntm                                                                      | NTM       | 0.20  | 4.70 | 0.87  | 4.05E-01 | 6.74E-01 | -6.31 |
| 1435896_PM_at   | Sfxn2                                                                    | SFXN2     | 0.21  | 3.51 | 0.87  | 4.05E-01 | 6.74E-01 | -6.31 |
| 1456046_PM_at   | Cd93                                                                     | CD93      | 0.24  | 2.83 | 0.87  | 4.05E-01 | 6.74E-01 | -6.31 |
| 1424518_PM_at   | Apol9a /// Apol9b                                                        | APOL1     | 0.15  | 2.97 | 0.87  | 4.05E-01 | 6.74E-01 | -6.31 |
| 1457697_PM_at   | Cfap69                                                                   | CFAP69    | -0.15 | 2.23 | -0.87 | 4.05E-01 | 6.74E-01 | -6.31 |
| 1451715_PM_at   | Mafb                                                                     | MAFB      | 0.07  | 2.27 | 0.87  | 4.05E-01 | 6.74E-01 | -6.31 |
| 1416512_PM_at   | Nubp2                                                                    | NUBP2     | 0.09  | 2.36 | 0.87  | 4.05E-01 | 6.74E-01 | -6.31 |
| 1440683_PM_at   | ---                                                                      | NA        | 0.19  | 2.55 | 0.87  | 4.05E-01 | 6.74E-01 | -6.31 |
| 1429001_PM_at   | Pir                                                                      | PIR       | 0.10  | 2.98 | 0.87  | 4.05E-01 | 6.74E-01 | -6.31 |
| 1447865_PM_x_at | Pdzd11                                                                   | PDZD11    | -0.16 | 4.71 | -0.87 | 4.05E-01 | 6.74E-01 | -6.31 |
| 1438022_PM_at   | Rab11fip3                                                                | RAB11FIP3 | -0.19 | 5.19 | -0.87 | 4.05E-01 | 6.74E-01 | -6.31 |
| 1431921_PM_a_at | Stag1                                                                    | STAG1     | -0.33 | 4.21 | -0.87 | 4.05E-01 | 6.74E-01 | -6.31 |
| 1432985_PM_at   | 5430402M21Rik                                                            | NA        | 0.09  | 2.16 | 0.87  | 4.05E-01 | 6.74E-01 | -6.31 |
| 1451779_PM_at   | Pyroxd1                                                                  | PYROXD1   | 0.12  | 2.87 | 0.87  | 4.05E-01 | 6.74E-01 | -6.31 |
| 1435533_PM_s_at | Rimklb                                                                   | RIMKLB    | -0.26 | 3.53 | -0.87 | 4.06E-01 | 6.74E-01 | -6.31 |
| 1450820_PM_a_at | Ntng2                                                                    | NTNG2     | -0.09 | 2.49 | -0.87 | 4.06E-01 | 6.74E-01 | -6.31 |
| 1424211_PM_at   | Slc25a33                                                                 | SLC25A33  | -0.15 | 4.12 | -0.87 | 4.06E-01 | 6.74E-01 | -6.31 |
| 1441340_PM_at   | Cep68                                                                    | CEP68     | 0.15  | 2.66 | 0.87  | 4.06E-01 | 6.74E-01 | -6.31 |
| 1433780_PM_at   | Ubn1                                                                     | UBN1      | -0.13 | 2.77 | -0.87 | 4.06E-01 | 6.74E-01 | -6.31 |
| 1438802_PM_at   | Foxp1                                                                    | NA        | 0.11  | 2.57 | 0.87  | 4.06E-01 | 6.74E-01 | -6.31 |
| 1433615_PM_at   | Tmem117                                                                  | TMEM117   | -0.26 | 2.64 | -0.87 | 4.06E-01 | 6.74E-01 | -6.31 |
| 1441784_PM_at   | Gm15958                                                                  | NA        | 0.13  | 2.20 | 0.87  | 4.06E-01 | 6.74E-01 | -6.31 |
| 1422493_PM_at   | CpoX                                                                     | CPOX      | 0.15  | 3.06 | 0.87  | 4.06E-01 | 6.74E-01 | -6.31 |
| 1419128_PM_at   | Itgax                                                                    | ITGAX     | -0.09 | 2.21 | -0.87 | 4.06E-01 | 6.74E-01 | -6.31 |
| 1421101_PM_a_at | Ldb2                                                                     | LDB2      | 0.08  | 2.47 | 0.87  | 4.06E-01 | 6.74E-01 | -6.31 |

|                 |                                              |           |       |      |       |          |          |       |
|-----------------|----------------------------------------------|-----------|-------|------|-------|----------|----------|-------|
| 1457542_PM_at   | ---                                          | NA        | 0.14  | 3.46 | 0.87  | 4.06E-01 | 6.74E-01 | -6.31 |
| 1428274_PM_s_at | Abhd13                                       | ABHD13    | -0.15 | 3.85 | -0.87 | 4.06E-01 | 6.74E-01 | -6.31 |
| 1445862_PM_at   | Marf1                                        | NA        | -0.09 | 2.13 | -0.87 | 4.06E-01 | 6.74E-01 | -6.31 |
| 1416724_PM_x_at | Tcf4                                         | TCF4      | -0.43 | 7.68 | -0.87 | 4.06E-01 | 6.74E-01 | -6.31 |
| 1454606_PM_at   | Susd6                                        | SUSD6     | -0.38 | 3.84 | -0.87 | 4.06E-01 | 6.74E-01 | -6.31 |
| 1422168_PM_a_at | Bdnf                                         | BDNF      | -0.34 | 3.45 | -0.87 | 4.06E-01 | 6.74E-01 | -6.31 |
| 1423202_PM_a_at | Ncor1                                        | NCOR1     | -0.30 | 4.80 | -0.87 | 4.06E-01 | 6.74E-01 | -6.31 |
| 1417962_PM_s_at | Ghr                                          | GHR       | -0.24 | 2.49 | -0.87 | 4.06E-01 | 6.74E-01 | -6.31 |
| 1418253_PM_a_at | Hspa4l                                       | HSPA4L    | -0.17 | 4.66 | -0.87 | 4.06E-01 | 6.74E-01 | -6.31 |
| 1437253_PM_at   | Dennd6a                                      | DENND6A   | -0.14 | 3.14 | -0.87 | 4.06E-01 | 6.74E-01 | -6.31 |
| 1457027_PM_at   | Dhtkd1                                       | DHTKD1    | -0.13 | 2.55 | -0.87 | 4.06E-01 | 6.74E-01 | -6.31 |
| 1416103_PM_at   | Ywhaz                                        | NA        | -0.13 | 3.20 | -0.87 | 4.06E-01 | 6.74E-01 | -6.31 |
| 1426179_PM_a_at | Twsg1                                        | TWSG1     | 0.10  | 2.61 | 0.87  | 4.06E-01 | 6.74E-01 | -6.31 |
| 1417651_PM_at   | Cyp2c29                                      | NA        | 0.14  | 2.55 | 0.87  | 4.06E-01 | 6.74E-01 | -6.31 |
| 1459478_PM_at   | AA408396                                     | NA        | 0.18  | 2.59 | 0.87  | 4.06E-01 | 6.74E-01 | -6.31 |
| 1435679_PM_at   | Optn                                         | OPTN      | 0.21  | 3.36 | 0.87  | 4.06E-01 | 6.74E-01 | -6.31 |
| 1435948_PM_at   | Tmem181a /// Tmem181b-<br>ps /// Tmem181c-ps | TMEM181   | 0.28  | 2.90 | 0.87  | 4.06E-01 | 6.74E-01 | -6.31 |
| 1423696_PM_a_at | Psm6                                         | PSMD6     | -0.40 | 5.38 | -0.87 | 4.06E-01 | 6.74E-01 | -6.31 |
| 1437610_PM_x_at | Rps8                                         | RP58      | 0.20  | 9.14 | 0.87  | 4.06E-01 | 6.74E-01 | -6.31 |
| 1448716_PM_at   | Hba-x                                        | HBZ       | 0.07  | 2.45 | 0.87  | 4.06E-01 | 6.74E-01 | -6.31 |
| 1443772_PM_at   | ---                                          | NA        | 0.18  | 2.34 | 0.87  | 4.06E-01 | 6.75E-01 | -6.31 |
| 1445727_PM_at   | Ube3a                                        | UBE3A     | 0.29  | 2.72 | 0.87  | 4.06E-01 | 6.75E-01 | -6.31 |
| 1418221_PM_at   | Csn1s2b                                      | NA        | 0.08  | 2.23 | 0.87  | 4.06E-01 | 6.75E-01 | -6.31 |
| 1420443_PM_at   | Pcdhb19                                      | PCDHB11   | -0.46 | 3.40 | -0.87 | 4.07E-01 | 6.75E-01 | -6.31 |
| 1419255_PM_at   | Sptbn1                                       | SPTBN1    | -0.27 | 3.25 | -0.87 | 4.07E-01 | 6.75E-01 | -6.31 |
| 1454350_PM_at   | Intu                                         | INTU      | 0.10  | 2.23 | 0.87  | 4.07E-01 | 6.75E-01 | -6.31 |
| 1434293_PM_at   | Hectd3                                       | HECTD3    | 0.12  | 2.64 | 0.87  | 4.07E-01 | 6.75E-01 | -6.31 |
| 1416479_PM_a_at | Gm4246 /// Tmem14c                           | TMEM14B   | -0.10 | 3.02 | -0.86 | 4.07E-01 | 6.75E-01 | -6.31 |
| 1445293_PM_at   | ---                                          | NA        | 0.10  | 2.56 | 0.86  | 4.07E-01 | 6.75E-01 | -6.31 |
| 1443394_PM_at   | ---                                          | NA        | 0.12  | 2.63 | 0.86  | 4.07E-01 | 6.75E-01 | -6.31 |
| 1419312_PM_at   | Atp2a1                                       | ATP2A1    | 0.14  | 2.71 | 0.87  | 4.07E-01 | 6.75E-01 | -6.31 |
| 1430041_PM_at   | Snrnp35                                      | SNRNP35   | 0.30  | 4.63 | 0.86  | 4.07E-01 | 6.75E-01 | -6.31 |
| 1452929_PM_at   | Clip1                                        | CLIP1     | -0.21 | 6.08 | -0.86 | 4.07E-01 | 6.75E-01 | -6.31 |
| 1433092_PM_at   | ---                                          | NA        | 0.09  | 2.23 | 0.86  | 4.07E-01 | 6.75E-01 | -6.31 |
| 1456284_PM_at   | Tmem171                                      | TMEM171   | 0.09  | 3.08 | 0.86  | 4.07E-01 | 6.75E-01 | -6.31 |
| 1459756_PM_at   | Cnot10                                       | CNOT10    | 0.10  | 4.48 | 0.86  | 4.07E-01 | 6.75E-01 | -6.31 |
| 1445951_PM_at   | C86345                                       | NA        | 0.12  | 2.42 | 0.86  | 4.07E-01 | 6.75E-01 | -6.31 |
| 1428824_PM_at   | Gid8                                         | GID8      | -0.30 | 3.98 | -0.86 | 4.07E-01 | 6.75E-01 | -6.31 |
| 1451529_PM_at   | Sgtb                                         | SGTB      | -0.30 | 7.66 | -0.86 | 4.07E-01 | 6.75E-01 | -6.31 |
| 1440721_PM_at   | ---                                          | NA        | -0.29 | 3.42 | -0.86 | 4.07E-01 | 6.75E-01 | -6.31 |
| 1457384_PM_at   | ---                                          | NA        | -0.12 | 2.50 | -0.86 | 4.07E-01 | 6.75E-01 | -6.31 |
| 1432253_PM_at   | ---                                          | NA        | 0.06  | 2.13 | 0.86  | 4.07E-01 | 6.75E-01 | -6.31 |
| 1423015_PM_at   | Kirrel                                       | KIRREL    | 0.07  | 2.55 | 0.86  | 4.07E-01 | 6.75E-01 | -6.31 |
| 1434906_PM_at   | 0610005C13Rik                                | NA        | 0.07  | 2.24 | 0.86  | 4.07E-01 | 6.75E-01 | -6.31 |
| 1419059_PM_at   | Apcs                                         | APCS      | 0.08  | 2.33 | 0.86  | 4.07E-01 | 6.75E-01 | -6.31 |
| 1439924_PM_x_at | Tubgcp5                                      | NA        | 0.14  | 2.62 | 0.86  | 4.07E-01 | 6.75E-01 | -6.31 |
| 1438591_PM_at   | Strada                                       | STRADA    | -0.12 | 2.27 | -0.86 | 4.07E-01 | 6.75E-01 | -6.31 |
| 1419782_PM_at   | AA517864                                     | NA        | 0.11  | 2.47 | 0.86  | 4.07E-01 | 6.75E-01 | -6.31 |
| 1421874_PM_a_at | Mrps23                                       | MRPS23    | 0.15  | 2.27 | 0.86  | 4.07E-01 | 6.75E-01 | -6.31 |
| 1445902_PM_at   | ---                                          | NA        | 0.12  | 2.60 | 0.86  | 4.07E-01 | 6.75E-01 | -6.31 |
| 1415812_PM_at   | Gsn                                          | GSN       | -0.13 | 2.33 | -0.86 | 4.07E-01 | 6.75E-01 | -6.31 |
| 1431635_PM_at   | ---                                          | NA        | -0.13 | 2.67 | -0.86 | 4.07E-01 | 6.75E-01 | -6.31 |
| 1423100_PM_at   | Fos                                          | FOS       | 0.16  | 3.17 | 0.86  | 4.07E-01 | 6.75E-01 | -6.31 |
| 1422115_PM_a_at | Ft3l /// Rpl13a                              | RPL13A    | 0.20  | 2.25 | 0.86  | 4.07E-01 | 6.75E-01 | -6.31 |
| 1431060_PM_at   | Pel1                                         | PEL1      | 0.21  | 3.32 | 0.86  | 4.07E-01 | 6.75E-01 | -6.31 |
| 1423738_PM_at   | Oxa1l                                        | OXA1L     | 0.31  | 3.91 | 0.86  | 4.07E-01 | 6.75E-01 | -6.31 |
| 1430309_PM_at   | Nipbl                                        | NIPBL     | 0.23  | 5.51 | 0.86  | 4.07E-01 | 6.75E-01 | -6.31 |
| 1452178_PM_at   | Parp10 /// Plec                              | PARP10    | -0.08 | 2.07 | -0.86 | 4.07E-01 | 6.75E-01 | -6.31 |
| 1459521_PM_at   | ---                                          | NA        | -0.09 | 2.35 | -0.86 | 4.07E-01 | 6.75E-01 | -6.31 |
| 1421494_PM_at   | Krtap4-2                                     | KRTAP4-16 | 0.07  | 2.01 | 0.86  | 4.07E-01 | 6.75E-01 | -6.31 |
| 1437696_PM_at   | Zfp948                                       | NA        | 0.27  | 2.66 | 0.86  | 4.07E-01 | 6.75E-01 | -6.31 |
| 1420828_PM_s_at | Cdk5rap2 /// Gm2423 ///                      | YWHAQ     | -0.32 | 5.94 | -0.86 | 4.08E-01 | 6.75E-01 | -6.31 |
| 1431929_PM_a_at | Stx17                                        | STX17     | -0.15 | 2.37 | -0.86 | 4.07E-01 | 6.75E-01 | -6.31 |
| 1450852_PM_s_at | F2r                                          | F2R       | -0.14 | 2.08 | -0.86 | 4.07E-01 | 6.75E-01 | -6.31 |
| 1454638_PM_a_at | Pah                                          | PAH       | -0.10 | 1.95 | -0.86 | 4.07E-01 | 6.75E-01 | -6.31 |
| 1421315_PM_s_at | Ctnn                                         | CTTN      | -0.10 | 2.88 | -0.86 | 4.08E-01 | 6.75E-01 | -6.31 |
| 1427398_PM_at   | Muc4                                         | NA        | 0.08  | 2.25 | 0.86  | 4.08E-01 | 6.75E-01 | -6.31 |
| 1457348_PM_at   | ---                                          | NA        | 0.10  | 2.13 | 0.86  | 4.08E-01 | 6.75E-01 | -6.31 |
| 1457363_PM_at   | Gm17753                                      | NA        | 0.10  | 2.82 | 0.86  | 4.08E-01 | 6.75E-01 | -6.31 |
| 1421986_PM_at   | Eif4e2                                       | EIF4E2    | 0.14  | 2.40 | 0.86  | 4.07E-01 | 6.75E-01 | -6.31 |
| 1427397_PM_at   | Proser1                                      | PROSER1   | 0.14  | 2.54 | 0.86  | 4.07E-01 | 6.75E-01 | -6.31 |
| 1446574_PM_at   | ---                                          | NA        | 0.15  | 2.59 | 0.86  | 4.08E-01 | 6.75E-01 | -6.31 |

|                 |                                                                                     |            |       |      |       |          |          |       |
|-----------------|-------------------------------------------------------------------------------------|------------|-------|------|-------|----------|----------|-------|
| 1441929_PM_at   | B4galnt2                                                                            | NA         | 0.15  | 2.63 | 0.86  | 4.08E-01 | 6.75E-01 | -6.31 |
| 1431099_PM_at   | Hoxd8                                                                               | HOXD8      | 0.16  | 2.33 | 0.86  | 4.08E-01 | 6.75E-01 | -6.31 |
| 1444746_PM_at   | ---                                                                                 | NA         | -0.25 | 3.44 | -0.86 | 4.08E-01 | 6.75E-01 | -6.31 |
| 1452459_PM_at   | Aspm                                                                                | ASPM       | -0.09 | 2.16 | -0.86 | 4.08E-01 | 6.75E-01 | -6.31 |
| 1436641_PM_at   | ---                                                                                 | NA         | -0.14 | 3.32 | -0.86 | 4.08E-01 | 6.75E-01 | -6.31 |
| 1443844_PM_at   | Rhox13                                                                              | RHOXF1     | -0.13 | 2.33 | -0.86 | 4.08E-01 | 6.75E-01 | -6.31 |
| 1426000_PM_at   | Oxtr                                                                                | OXTR       | 0.12  | 2.44 | 0.86  | 4.08E-01 | 6.75E-01 | -6.31 |
| 1434822_PM_at   | Pphln1                                                                              | PPHLN1     | -0.36 | 5.18 | -0.86 | 4.08E-01 | 6.75E-01 | -6.31 |
| 1438429_PM_at   | ---                                                                                 | NA         | 0.33  | 4.35 | 0.86  | 4.08E-01 | 6.75E-01 | -6.31 |
| 1454145_PM_at   | Pla2r1                                                                              | PLA2R1     | 0.08  | 2.21 | 0.86  | 4.08E-01 | 6.75E-01 | -6.31 |
| 1419710_PM_at   | Nxph3                                                                               | NXP3       | 0.16  | 2.41 | 0.86  | 4.08E-01 | 6.75E-01 | -6.31 |
| 1454299_PM_at   | ---                                                                                 | NA         | -0.10 | 2.60 | -0.86 | 4.08E-01 | 6.75E-01 | -6.31 |
| 1442991_PM_at   | B3gat2                                                                              | B3GAT2     | 0.09  | 2.32 | 0.86  | 4.08E-01 | 6.75E-01 | -6.31 |
| 1437889_PM_x_at | Bgn                                                                                 | BGN        | -0.12 | 2.71 | -0.86 | 4.08E-01 | 6.75E-01 | -6.31 |
| 1443341_PM_at   | ---                                                                                 | NA         | 0.08  | 2.20 | 0.86  | 4.08E-01 | 6.75E-01 | -6.31 |
| 1447248_PM_at   | Slc39a12                                                                            | SLC39A12   | -0.14 | 2.91 | -0.86 | 4.08E-01 | 6.75E-01 | -6.31 |
| 1423945_PM_a_at | Pkig                                                                                | PKIG       | 0.17  | 4.32 | 0.86  | 4.08E-01 | 6.75E-01 | -6.31 |
| 1440317_PM_at   | ---                                                                                 | NA         | 0.26  | 3.82 | 0.86  | 4.08E-01 | 6.75E-01 | -6.31 |
| 1427545_PM_at   | Scml4                                                                               | SCML4      | -0.08 | 2.27 | -0.86 | 4.08E-01 | 6.75E-01 | -6.31 |
| 1449644_PM_at   | Trav12-1 /// Trav12-2 ///<br>Trav12d-1 /// Trav12d-2 ///<br>Trav12n-1 /// Trav12n-2 | NA         | 0.10  | 2.97 | 0.86  | 4.08E-01 | 6.75E-01 | -6.31 |
| 1446535_PM_at   | ---                                                                                 | NA         | 0.14  | 2.41 | 0.86  | 4.08E-01 | 6.75E-01 | -6.31 |
| 1436239_PM_at   | Slc5a5                                                                              | SLC5A5     | 0.36  | 4.24 | 0.86  | 4.08E-01 | 6.75E-01 | -6.31 |
| 1443814_PM_x_at | Ctsh                                                                                | CTSH       | -0.22 | 2.55 | -0.86 | 4.08E-01 | 6.75E-01 | -6.31 |
| 1424585_PM_at   | Ranbp10                                                                             | RANBP10    | -0.13 | 2.68 | -0.86 | 4.08E-01 | 6.75E-01 | -6.31 |
| 1453921_PM_at   | 4930429F11Rik                                                                       | NA         | 0.07  | 2.44 | 0.86  | 4.08E-01 | 6.75E-01 | -6.31 |
| 1430555_PM_s_at | Lrig3                                                                               | LRIG3      | 0.08  | 2.17 | 0.86  | 4.08E-01 | 6.75E-01 | -6.31 |
| 1441761_PM_at   | ---                                                                                 | NA         | 0.11  | 2.38 | 0.86  | 4.08E-01 | 6.75E-01 | -6.31 |
| 1436351_PM_at   | Coq3                                                                                | COQ3       | 0.21  | 2.93 | 0.86  | 4.08E-01 | 6.75E-01 | -6.31 |
| 1434969_PM_at   | Celf5                                                                               | CELF5      | -0.22 | 6.29 | -0.86 | 4.08E-01 | 6.75E-01 | -6.31 |
| 1447772_PM_at   | Plekha3                                                                             | PLEKHA3    | -0.09 | 3.13 | -0.86 | 4.08E-01 | 6.75E-01 | -6.31 |
| 1439052_PM_at   | lsm1                                                                                | NA         | -0.12 | 2.74 | -0.86 | 4.08E-01 | 6.75E-01 | -6.31 |
| 1459149_PM_at   | ---                                                                                 | NA         | -0.34 | 2.93 | -0.86 | 4.08E-01 | 6.75E-01 | -6.31 |
| 1422979_PM_at   | Suv39h2                                                                             | SUV39H2    | 0.18  | 2.48 | 0.86  | 4.08E-01 | 6.75E-01 | -6.31 |
| 1446176_PM_at   | ---                                                                                 | NA         | 0.26  | 3.00 | 0.86  | 4.09E-01 | 6.76E-01 | -6.31 |
| 1437498_PM_at   | ---                                                                                 | NA         | -0.17 | 2.33 | -0.86 | 4.09E-01 | 6.76E-01 | -6.31 |
| 1447091_PM_at   | ---                                                                                 | NA         | 0.09  | 2.10 | 0.86  | 4.09E-01 | 6.76E-01 | -6.31 |
| 1430779_PM_at   | Ntng1                                                                               | NTNG1      | 0.13  | 3.03 | 0.86  | 4.09E-01 | 6.76E-01 | -6.31 |
| 1432296_PM_a_at | Itgav                                                                               | ITGAV      | 0.15  | 2.42 | 0.86  | 4.09E-01 | 6.76E-01 | -6.31 |
| 1449775_PM_x_at | Slc35a4                                                                             | SLC35A4    | 0.07  | 2.09 | 0.86  | 4.09E-01 | 6.76E-01 | -6.32 |
| 1426096_PM_at   | Prmt7                                                                               | NA         | 0.14  | 2.45 | 0.86  | 4.09E-01 | 6.76E-01 | -6.32 |
| 1440582_PM_at   | ltch                                                                                | NA         | 0.08  | 2.44 | 0.86  | 4.09E-01 | 6.76E-01 | -6.32 |
| 1458607_PM_at   | ---                                                                                 | NA         | -0.12 | 2.13 | -0.86 | 4.09E-01 | 6.76E-01 | -6.32 |
| 1418722_PM_at   | Ngp                                                                                 | NA         | 0.10  | 2.17 | 0.86  | 4.09E-01 | 6.76E-01 | -6.32 |
| 1439675_PM_at   | Ppara                                                                               | NA         | 0.13  | 2.77 | 0.86  | 4.09E-01 | 6.76E-01 | -6.32 |
| 1417915_PM_at   | Rap2b                                                                               | RAP2B      | -0.13 | 2.42 | -0.86 | 4.09E-01 | 6.76E-01 | -6.32 |
| 1453693_PM_at   | Wdr20rt                                                                             | WDR20      | -0.08 | 2.87 | -0.86 | 4.09E-01 | 6.76E-01 | -6.32 |
| 1427613_PM_at   | AY074887                                                                            | NA         | 0.07  | 2.17 | 0.86  | 4.09E-01 | 6.76E-01 | -6.32 |
| 1459580_PM_at   | G630055G22Rik                                                                       | NA         | 0.08  | 2.23 | 0.86  | 4.09E-01 | 6.76E-01 | -6.32 |
| 1417764_PM_at   | Ssr1                                                                                | SSR1       | 0.13  | 3.84 | 0.86  | 4.09E-01 | 6.76E-01 | -6.32 |
| 1442969_PM_at   | ---                                                                                 | NA         | 0.14  | 3.40 | 0.86  | 4.09E-01 | 6.76E-01 | -6.32 |
| 1417943_PM_at   | Gng4                                                                                | GNG4       | 0.16  | 2.45 | 0.86  | 4.09E-01 | 6.76E-01 | -6.32 |
| 1437264_PM_at   | BC051142                                                                            | C6orf10    | 0.21  | 3.32 | 0.86  | 4.09E-01 | 6.76E-01 | -6.32 |
| 1459260_PM_at   | ---                                                                                 | NA         | 0.44  | 5.01 | 0.86  | 4.09E-01 | 6.76E-01 | -6.32 |
| 1449564_PM_at   | Tpsg1                                                                               | TPSG1      | 0.10  | 2.67 | 0.86  | 4.09E-01 | 6.76E-01 | -6.32 |
| 1418034_PM_at   | Mrps9                                                                               | MRPS9      | 0.11  | 2.67 | 0.86  | 4.09E-01 | 6.76E-01 | -6.32 |
| 1452760_PM_at   | Cactin                                                                              | CACTIN     | -0.07 | 2.07 | -0.86 | 4.09E-01 | 6.76E-01 | -6.32 |
| 1428008_PM_at   | Dnm1l                                                                               | NA         | 0.07  | 1.98 | 0.86  | 4.09E-01 | 6.76E-01 | -6.32 |
| 1440294_PM_at   | ---                                                                                 | NA         | 0.09  | 2.49 | 0.86  | 4.09E-01 | 6.76E-01 | -6.32 |
| 1444463_PM_at   | ---                                                                                 | NA         | 0.09  | 2.27 | 0.86  | 4.09E-01 | 6.76E-01 | -6.32 |
| 1430051_PM_at   | 4930486L24Rik                                                                       | CTSL       | 0.14  | 3.26 | 0.86  | 4.09E-01 | 6.76E-01 | -6.32 |
| 1460572_PM_a_at | Zfp511                                                                              | AL360181.5 | -0.23 | 3.25 | -0.86 | 4.09E-01 | 6.76E-01 | -6.32 |
| 1443331_PM_at   | ---                                                                                 | NA         | 0.12  | 2.17 | 0.86  | 4.09E-01 | 6.77E-01 | -6.32 |
| 1439632_PM_at   | Gnb4                                                                                | GNB4       | 0.22  | 2.91 | 0.86  | 4.09E-01 | 6.77E-01 | -6.32 |
| 1447782_PM_x_at | Tbl3                                                                                | TBL3       | 0.07  | 1.95 | 0.86  | 4.09E-01 | 6.77E-01 | -6.32 |
| 1427619_PM_a_at | Sh3tc1                                                                              | SH3TC1     | 0.09  | 2.89 | 0.86  | 4.09E-01 | 6.77E-01 | -6.32 |
| 1457710_PM_at   | Zhx3                                                                                | ZHX3       | 0.17  | 2.72 | 0.86  | 4.09E-01 | 6.77E-01 | -6.32 |
| 1444271_PM_at   | Anapc1                                                                              | ANAPC1     | 0.15  | 2.68 | 0.86  | 4.09E-01 | 6.77E-01 | -6.32 |
| 1453949_PM_s_at | Lypla1                                                                              | LYPLA1     | -0.39 | 2.99 | -0.86 | 4.10E-01 | 6.77E-01 | -6.32 |
| 1448192_PM_s_at | Prps1 /// Prps1b                                                                    | PRPS1      | -0.26 | 3.69 | -0.86 | 4.10E-01 | 6.77E-01 | -6.32 |
| 1418790_PM_at   | Fezf2                                                                               | FEZF2      | -0.25 | 2.95 | -0.86 | 4.10E-01 | 6.77E-01 | -6.32 |
| 1452223_PM_s_at | Ccser2                                                                              | CCSER2     | -0.21 | 3.18 | -0.86 | 4.10E-01 | 6.77E-01 | -6.32 |
| 1455631_PM_at   | H13                                                                                 | HM13       | -0.17 | 2.58 | -0.86 | 4.10E-01 | 6.77E-01 | -6.32 |

|                 |               |          |       |      |       |          |          |       |
|-----------------|---------------|----------|-------|------|-------|----------|----------|-------|
| 1448926_PM_at   | Hoxa5         | HOXA5    | -0.08 | 2.06 | -0.86 | 4.10E-01 | 6.77E-01 | -6.32 |
| 1460397_PM_at   | Armc6         | ARMC6    | -0.08 | 2.15 | -0.86 | 4.10E-01 | 6.77E-01 | -6.32 |
| 1458121_PM_at   | ---           | NA       | 0.07  | 2.43 | 0.86  | 4.10E-01 | 6.77E-01 | -6.32 |
| 1419790_PM_at   | ---           | NA       | 0.08  | 2.22 | 0.86  | 4.10E-01 | 6.77E-01 | -6.32 |
| 1417120_PM_at   | Miip          | MIIIP    | 0.09  | 2.31 | 0.86  | 4.10E-01 | 6.77E-01 | -6.32 |
| 1448173_PM_a_at | Top3b         | TOP3B    | 0.10  | 2.52 | 0.86  | 4.10E-01 | 6.77E-01 | -6.32 |
| 1423678_PM_at   | BC017643      | C17orf62 | 0.14  | 2.65 | 0.86  | 4.10E-01 | 6.77E-01 | -6.32 |
| 1453641_PM_at   | Bcas1         | BCAS1    | 0.15  | 3.60 | 0.86  | 4.10E-01 | 6.77E-01 | -6.32 |
| 1458964_PM_at   | ---           | NA       | 0.17  | 2.92 | 0.86  | 4.10E-01 | 6.77E-01 | -6.32 |
| 1435254_PM_at   | Pknb1         | PLXNB1   | -0.18 | 3.54 | -0.86 | 4.10E-01 | 6.77E-01 | -6.32 |
| 1435272_PM_at   | Itpkb         | ITPKB    | -0.10 | 2.46 | -0.86 | 4.10E-01 | 6.77E-01 | -6.32 |
| 1433307_PM_at   | ---           | NA       | 0.07  | 1.94 | 0.86  | 4.10E-01 | 6.77E-01 | -6.32 |
| 1457006_PM_at   | ---           | NA       | 0.08  | 2.59 | 0.86  | 4.10E-01 | 6.77E-01 | -6.32 |
| 1440666_PM_at   | 493343017Rik  | C9orf43  | 0.09  | 2.22 | 0.86  | 4.10E-01 | 6.77E-01 | -6.32 |
| 1449409_PM_at   | Sult1c2       | SULT1C2  | 0.09  | 2.72 | 0.86  | 4.10E-01 | 6.77E-01 | -6.32 |
| 1421654_PM_a_at | Lmna          | LMNA     | 0.09  | 2.39 | 0.86  | 4.10E-01 | 6.77E-01 | -6.32 |
| 1453148_PM_at   | Sema3d        | SEMA3D   | 0.10  | 2.49 | 0.86  | 4.10E-01 | 6.77E-01 | -6.32 |
| 1433798_PM_a_at | E330034G19Rik | NA       | 0.13  | 2.95 | 0.86  | 4.10E-01 | 6.77E-01 | -6.32 |
| 1447903_PM_x_at | Ap1s2         | AP1S2    | 0.61  | 5.59 | 0.86  | 4.10E-01 | 6.77E-01 | -6.32 |
| 1441872_PM_x_at | ---           | NA       | 0.11  | 2.28 | 0.86  | 4.10E-01 | 6.77E-01 | -6.32 |
| 1423870_PM_at   | Aida          | AIDA     | 0.22  | 2.66 | 0.86  | 4.10E-01 | 6.77E-01 | -6.32 |
| 1415706_PM_at   | Copa          | COPA     | -0.30 | 6.34 | -0.86 | 4.10E-01 | 6.77E-01 | -6.32 |
| 1418510_PM_s_at | Fbxo8         | FBXO8    | -0.14 | 2.59 | -0.86 | 4.10E-01 | 6.77E-01 | -6.32 |
| 1449562_PM_at   | 1700001G17Rik | NA       | 0.07  | 2.09 | 0.86  | 4.10E-01 | 6.77E-01 | -6.32 |
| 1436973_PM_at   | Cct8          | CCT8     | 0.08  | 2.11 | 0.86  | 4.10E-01 | 6.77E-01 | -6.32 |
| 1446311_PM_at   | ---           | NA       | 0.13  | 2.63 | 0.86  | 4.10E-01 | 6.77E-01 | -6.32 |
| 1444490_PM_at   | ---           | NA       | 0.13  | 2.27 | 0.86  | 4.10E-01 | 6.77E-01 | -6.32 |
| 1432599_PM_at   | 2610301H18Rik | NA       | 0.15  | 3.05 | 0.86  | 4.10E-01 | 6.77E-01 | -6.32 |
| 1447398_PM_at   | Gm30679       | NA       | 0.19  | 2.31 | 0.86  | 4.10E-01 | 6.77E-01 | -6.32 |
| 1459140_PM_at   | C130063H03Rik | NA       | 0.22  | 3.09 | 0.86  | 4.10E-01 | 6.77E-01 | -6.32 |
| 1448124_PM_at   | Gusb          | GUSB     | -0.18 | 2.35 | -0.86 | 4.10E-01 | 6.77E-01 | -6.32 |
| 1444442_PM_at   | ---           | NA       | 0.12  | 2.75 | 0.86  | 4.10E-01 | 6.77E-01 | -6.32 |
| 1449265_PM_at   | Casp1         | CASP1    | 0.13  | 2.38 | 0.86  | 4.10E-01 | 6.77E-01 | -6.32 |
| 1435525_PM_at   | Kctd17        | NA       | 0.16  | 3.55 | 0.86  | 4.10E-01 | 6.77E-01 | -6.32 |
| 1436522_PM_at   | Map3k3        | NA       | -0.32 | 5.33 | -0.86 | 4.11E-01 | 6.77E-01 | -6.32 |
| 1438365_PM_x_at | Laptm4b       | LAPT4B   | -0.23 | 9.70 | -0.86 | 4.10E-01 | 6.77E-01 | -6.32 |
| 1433860_PM_at   | 6030458C11Rik | C5orf22  | -0.15 | 2.42 | -0.86 | 4.11E-01 | 6.77E-01 | -6.32 |
| 1442020_PM_at   | Gm12863       | NA       | 0.07  | 2.38 | 0.86  | 4.10E-01 | 6.77E-01 | -6.32 |
| 1437096_PM_at   | Ttc29         | TTC29    | 0.10  | 2.45 | 0.86  | 4.11E-01 | 6.77E-01 | -6.32 |
| 1436423_PM_at   | Themis        | THEMIS   | 0.10  | 2.25 | 0.86  | 4.10E-01 | 6.77E-01 | -6.32 |
| 1430598_PM_at   | Crem          | CREM     | 0.11  | 2.38 | 0.86  | 4.10E-01 | 6.77E-01 | -6.32 |
| 1445907_PM_at   | ---           | NA       | 0.12  | 2.82 | 0.86  | 4.10E-01 | 6.77E-01 | -6.32 |
| 1422724_PM_at   | Mak           | MAK      | 0.17  | 2.64 | 0.86  | 4.11E-01 | 6.77E-01 | -6.32 |
| 1445840_PM_at   | Gm33002       | NA       | 0.20  | 2.72 | 0.86  | 4.10E-01 | 6.77E-01 | -6.32 |
| 1435508_PM_x_at | Sf3b6         | SF3B6    | -0.09 | 2.17 | -0.86 | 4.11E-01 | 6.77E-01 | -6.32 |
| 1415877_PM_at   | Dpysl3        | DPYSL3   | 0.06  | 2.25 | 0.86  | 4.11E-01 | 6.77E-01 | -6.32 |
| 1419096_PM_at   | Apom          | APOM     | 0.08  | 2.50 | 0.86  | 4.11E-01 | 6.77E-01 | -6.32 |
| 1440267_PM_at   | Pex1          | PEX1     | 0.12  | 2.66 | 0.86  | 4.11E-01 | 6.77E-01 | -6.32 |
| 1431359_PM_a_at | 1110007C09Rik | CARD19   | 0.13  | 2.61 | 0.86  | 4.11E-01 | 6.77E-01 | -6.32 |
| 1432168_PM_at   | D730045A05Rik | NA       | 0.15  | 2.31 | 0.86  | 4.11E-01 | 6.77E-01 | -6.32 |
| 1433606_PM_at   | Dcp1a         | DCP1A    | 0.15  | 3.64 | 0.86  | 4.11E-01 | 6.77E-01 | -6.32 |
| 1432692_PM_at   | ---           | NA       | 0.13  | 2.78 | 0.86  | 4.11E-01 | 6.77E-01 | -6.32 |
| 1419916_PM_at   | Rnf20         | NA       | 0.19  | 6.20 | 0.86  | 4.11E-01 | 6.77E-01 | -6.32 |
| 1425707_PM_a_at | Kcnj6         | KCNJ6    | -0.21 | 4.46 | -0.86 | 4.11E-01 | 6.78E-01 | -6.32 |
| 1449432_PM_a_at | Mmel1         | MMEL1    | 0.09  | 2.17 | 0.86  | 4.11E-01 | 6.78E-01 | -6.32 |
| 1425324_PM_x_at | Ighg1         | NA       | 0.15  | 3.00 | 0.86  | 4.11E-01 | 6.78E-01 | -6.32 |
| 1445957_PM_at   | ---           | NA       | 0.21  | 2.16 | 0.86  | 4.11E-01 | 6.78E-01 | -6.32 |
| 1431042_PM_at   | Paqr8         | PAQR8    | -0.22 | 3.13 | -0.86 | 4.11E-01 | 6.78E-01 | -6.32 |
| 1442007_PM_at   | Zmym5         | ZMYM5    | 0.24  | 4.00 | 0.86  | 4.11E-01 | 6.78E-01 | -6.32 |
| 1426569_PM_a_at | Frk           | FRK      | 0.12  | 2.15 | 0.86  | 4.11E-01 | 6.78E-01 | -6.32 |
| 1419674_PM_a_at | Dpep1         | DPEP1    | 0.10  | 2.17 | 0.86  | 4.11E-01 | 6.78E-01 | -6.32 |
| 1419332_PM_at   | Egfl6         | EGFL6    | 0.11  | 2.33 | 0.86  | 4.11E-01 | 6.78E-01 | -6.32 |
| 1457742_PM_at   | ---           | NA       | 0.09  | 2.27 | 0.86  | 4.11E-01 | 6.78E-01 | -6.32 |
| 1457586_PM_at   | ---           | NA       | 0.11  | 2.34 | 0.86  | 4.11E-01 | 6.78E-01 | -6.32 |
| 1435304_PM_at   | ---           | NA       | -0.17 | 3.10 | -0.86 | 4.11E-01 | 6.78E-01 | -6.32 |
| 1450553_PM_at   | Hoxd12        | HOXD12   | 0.11  | 2.97 | 0.86  | 4.11E-01 | 6.78E-01 | -6.32 |
| 1421560_PM_at   | Snai3         | SNAI3    | 0.09  | 2.30 | 0.86  | 4.11E-01 | 6.78E-01 | -6.32 |
| 1418818_PM_at   | Aqp5          | AQP5     | 0.11  | 3.13 | 0.86  | 4.11E-01 | 6.78E-01 | -6.32 |
| 1424869_PM_at   | Dhrs7b        | DHRS7B   | -0.14 | 2.34 | -0.86 | 4.11E-01 | 6.78E-01 | -6.32 |
| 1446881_PM_at   | AJ022749      | NA       | 0.06  | 2.19 | 0.86  | 4.11E-01 | 6.78E-01 | -6.32 |
| 1449903_PM_at   | Crtam         | CRTAM    | 0.17  | 2.50 | 0.86  | 4.11E-01 | 6.78E-01 | -6.32 |
| 1451385_PM_at   | Fam162a       | FAM162A  | -0.18 | 3.87 | -0.86 | 4.11E-01 | 6.78E-01 | -6.32 |
| 1444968_PM_at   | ---           | NA       | -0.06 | 1.94 | -0.86 | 4.11E-01 | 6.78E-01 | -6.32 |
| 1417985_PM_at   | Nrarp         | NRARP    | -0.29 | 3.64 | -0.86 | 4.11E-01 | 6.78E-01 | -6.32 |
| 1441878_PM_s_at | Oxld1         | OXL1     | -0.28 | 3.32 | -0.86 | 4.12E-01 | 6.78E-01 | -6.32 |

|                 |                                                     |                |       |      |       |          |          |       |
|-----------------|-----------------------------------------------------|----------------|-------|------|-------|----------|----------|-------|
| 1432025_PM_at   | ---                                                 | NA             | 0.08  | 2.66 | 0.86  | 4.12E-01 | 6.78E-01 | -6.32 |
| 1454563_PM_at   | ---                                                 | NA             | 0.11  | 2.91 | 0.86  | 4.12E-01 | 6.78E-01 | -6.32 |
| 1454565_PM_at   | ---                                                 | NA             | 0.07  | 1.95 | 0.86  | 4.12E-01 | 6.78E-01 | -6.32 |
| 1447498_PM_at   | Edar                                                | EDAR           | 0.06  | 2.07 | 0.86  | 4.12E-01 | 6.78E-01 | -6.32 |
| 1442815_PM_at   | ---                                                 | NA             | 0.12  | 2.33 | 0.86  | 4.12E-01 | 6.78E-01 | -6.32 |
| 1451592_PM_at   | Myppop                                              | MYPOP          | 0.23  | 2.37 | 0.86  | 4.12E-01 | 6.78E-01 | -6.32 |
| 1441890_PM_x_at | Tmeff1                                              | MSANTD3-TMEFF1 | -0.25 | 7.40 | -0.86 | 4.12E-01 | 6.78E-01 | -6.32 |
| 1446959_PM_at   | AU021871                                            | NA             | 0.23  | 2.92 | 0.86  | 4.12E-01 | 6.78E-01 | -6.32 |
| 1429188_PM_at   | Cox11                                               | COX11          | -0.17 | 3.98 | -0.86 | 4.12E-01 | 6.78E-01 | -6.32 |
| 1429341_PM_at   | Oaz3                                                | OAZ3           | -0.16 | 2.82 | -0.86 | 4.12E-01 | 6.78E-01 | -6.32 |
| 1445720_PM_at   | ---                                                 | NA             | 0.08  | 2.20 | 0.85  | 4.12E-01 | 6.78E-01 | -6.32 |
| 1447914_PM_x_at | Prr5l                                               | PRR5L          | 0.11  | 2.34 | 0.86  | 4.12E-01 | 6.78E-01 | -6.32 |
| 1422371_PM_at   | Olfr1507                                            | NA             | 0.11  | 2.44 | 0.86  | 4.12E-01 | 6.78E-01 | -6.32 |
| 1430062_PM_at   | ---                                                 | NA             | 0.13  | 2.87 | 0.86  | 4.12E-01 | 6.78E-01 | -6.32 |
| 1443648_PM_at   | ---                                                 | NA             | 0.23  | 2.98 | 0.86  | 4.12E-01 | 6.78E-01 | -6.32 |
| 1456660_PM_a_at | 0610010F05Rik                                       | KIAA1841       | 0.35  | 4.74 | 0.85  | 4.12E-01 | 6.78E-01 | -6.32 |
| 1427736_PM_a_at | Ccrl2                                               | CCRL2          | 0.09  | 2.18 | 0.85  | 4.12E-01 | 6.78E-01 | -6.32 |
| 1444511_PM_at   | Slc41a1                                             | SLC41A1        | 0.12  | 2.49 | 0.85  | 4.12E-01 | 6.78E-01 | -6.32 |
| 1457929_PM_at   | ---                                                 | NA             | 0.15  | 2.65 | 0.85  | 4.12E-01 | 6.78E-01 | -6.32 |
| 1441636_PM_at   | Sec14l5                                             | NA             | -0.06 | 2.67 | -0.85 | 4.12E-01 | 6.78E-01 | -6.32 |
| 1427319_PM_at   | A230046K03Rik                                       | WASHC4         | 0.12  | 3.63 | 0.85  | 4.12E-01 | 6.78E-01 | -6.32 |
| 1439009_PM_at   | Gnl3l                                               | GNL3L          | 0.25  | 7.58 | 0.85  | 4.12E-01 | 6.78E-01 | -6.32 |
| 1425202_PM_a_at | Ank3                                                | ANK3           | -0.20 | 6.38 | -0.85 | 4.12E-01 | 6.78E-01 | -6.32 |
| 1430913_PM_at   | Erp27                                               | ERP27          | 0.07  | 2.10 | 0.85  | 4.12E-01 | 6.78E-01 | -6.32 |
| 1419107_PM_at   | Ophn1                                               | OPHN1          | 0.18  | 3.23 | 0.85  | 4.12E-01 | 6.78E-01 | -6.32 |
| 1423687_PM_a_at | Man2c1                                              | MAN2C1         | 0.31  | 6.38 | 0.85  | 4.12E-01 | 6.78E-01 | -6.32 |
| 1454104_PM_a_at | Slc16a9                                             | SLC16A9        | -0.10 | 2.17 | -0.85 | 4.12E-01 | 6.78E-01 | -6.32 |
| 1426239_PM_s_at | Arrb2                                               | ARRB2          | 0.13  | 4.90 | 0.85  | 4.12E-01 | 6.78E-01 | -6.32 |
| 1426690_PM_a_at | Sreb1f1                                             | SREBF1         | -0.26 | 2.46 | -0.85 | 4.12E-01 | 6.78E-01 | -6.32 |
| 1445715_PM_at   | A230001M10Rik                                       | NA             | 0.11  | 2.65 | 0.85  | 4.12E-01 | 6.79E-01 | -6.32 |
| 1421325_PM_at   | Pla2g2f                                             | PLA2G2F        | 0.14  | 3.18 | 0.85  | 4.12E-01 | 6.79E-01 | -6.32 |
| 1435558_PM_at   | Adgrb2                                              | ADGRB2         | -0.35 | 4.23 | -0.85 | 4.12E-01 | 6.79E-01 | -6.32 |
| 1417154_PM_at   | Slc25a14                                            | SLC25A14       | -0.18 | 7.84 | -0.85 | 4.13E-01 | 6.79E-01 | -6.32 |
| 1452663_PM_at   | Svop                                                | SVOP           | -0.14 | 2.68 | -0.85 | 4.13E-01 | 6.79E-01 | -6.32 |
| 1426717_PM_at   | Nipa2                                               | NIPA2          | -0.11 | 3.30 | -0.85 | 4.13E-01 | 6.79E-01 | -6.32 |
| 1439113_PM_at   | Gm30625 /// Gm4120 /// Gm4983 /// Gm9222 /// Gm9292 | NA             | 0.12  | 2.28 | 0.85  | 4.13E-01 | 6.79E-01 | -6.32 |
| 1428515_PM_at   | Zswim7                                              | ZSWIM7         | 0.16  | 2.58 | 0.85  | 4.13E-01 | 6.79E-01 | -6.32 |
| 1442285_PM_at   | Syne2                                               | SYNE2          | 0.21  | 2.40 | 0.85  | 4.13E-01 | 6.79E-01 | -6.32 |
| 1430474_PM_a_at | Mtch2                                               | MTCH2          | -0.32 | 3.99 | -0.85 | 4.13E-01 | 6.79E-01 | -6.32 |
| 1428531_PM_at   | Ints7                                               | INTS7          | -0.33 | 3.89 | -0.85 | 4.13E-01 | 6.79E-01 | -6.32 |
| 1420482_PM_at   | Cnnm3                                               | CNNM3          | -0.22 | 3.94 | -0.85 | 4.13E-01 | 6.79E-01 | -6.32 |
| 1437329_PM_at   | Hacd2                                               | HACD2          | -0.15 | 3.57 | -0.85 | 4.13E-01 | 6.79E-01 | -6.32 |
| 1437320_PM_s_at | Xpa                                                 | XPA            | -0.08 | 2.31 | -0.85 | 4.13E-01 | 6.79E-01 | -6.32 |
| 1457234_PM_at   | ---                                                 | NA             | 0.07  | 1.90 | 0.85  | 4.13E-01 | 6.79E-01 | -6.32 |
| 1431281_PM_at   | Ppp1r27                                             | PPP1R27        | 0.08  | 2.53 | 0.85  | 4.13E-01 | 6.79E-01 | -6.32 |
| 1441798_PM_at   | LOC102637763                                        | NA             | 0.08  | 2.76 | 0.85  | 4.13E-01 | 6.79E-01 | -6.32 |
| 1440596_PM_at   | Cabin1                                              | CABIN1         | 0.09  | 2.41 | 0.85  | 4.13E-01 | 6.79E-01 | -6.32 |
| 1443315_PM_at   | Dmd                                                 | DMD            | 0.11  | 2.55 | 0.85  | 4.13E-01 | 6.79E-01 | -6.32 |
| 1429529_PM_at   | Tsen54                                              | TSEN54         | 0.11  | 2.64 | 0.85  | 4.13E-01 | 6.79E-01 | -6.32 |
| 1424067_PM_at   | Icam1                                               | ICAM1          | 0.16  | 2.58 | 0.85  | 4.13E-01 | 6.79E-01 | -6.32 |
| 1452823_PM_at   | Gstk1                                               | GSTK1          | -0.12 | 2.24 | -0.85 | 4.13E-01 | 6.79E-01 | -6.32 |
| 1425276_PM_at   | Fbbs                                                | FBBS           | 0.10  | 2.21 | 0.85  | 4.13E-01 | 6.79E-01 | -6.32 |
| 1429478_PM_at   | Bora                                                | NA             | -0.16 | 2.66 | -0.85 | 4.13E-01 | 6.79E-01 | -6.32 |
| 1421322_PM_a_at | Irf9                                                | IRF9           | 0.20  | 2.65 | 0.85  | 4.13E-01 | 6.79E-01 | -6.32 |
| 1425833_PM_a_at | Hpca                                                | HPCA           | -0.29 | 3.71 | -0.85 | 4.13E-01 | 6.79E-01 | -6.32 |
| 1450505_PM_a_at | Fam134b                                             | RETREG1        | -0.17 | 4.33 | -0.85 | 4.13E-01 | 6.79E-01 | -6.32 |
| 1420751_PM_at   | Gm10228                                             | NA             | -0.07 | 2.13 | -0.85 | 4.13E-01 | 6.79E-01 | -6.32 |
| 1420580_PM_at   | 4930429B21Rik                                       | NA             | 0.18  | 2.23 | 0.85  | 4.13E-01 | 6.79E-01 | -6.32 |
| 1420626_PM_at   | Gtf3c6                                              | GTF3C6         | 0.21  | 6.56 | 0.85  | 4.13E-01 | 6.79E-01 | -6.32 |
| 1448703_PM_at   | Lsm8                                                | LSM8           | -0.29 | 4.46 | -0.85 | 4.13E-01 | 6.79E-01 | -6.32 |
| 1455555_PM_at   | Vipr1                                               | VIPR1          | -0.09 | 2.80 | -0.85 | 4.13E-01 | 6.79E-01 | -6.32 |
| 1428502_PM_at   | Actr6                                               | ACTR6          | -0.22 | 3.37 | -0.85 | 4.13E-01 | 6.79E-01 | -6.32 |
| 1427076_PM_at   | Mpeg1                                               | MPEG1          | -0.15 | 2.57 | -0.85 | 4.13E-01 | 6.79E-01 | -6.32 |
| 1456150_PM_at   | Kdm7a                                               | KDM7A          | -0.11 | 2.75 | -0.85 | 4.13E-01 | 6.79E-01 | -6.32 |
| 1447843_PM_at   | Psm13                                               | PSMD13         | 0.07  | 2.11 | 0.85  | 4.13E-01 | 6.79E-01 | -6.32 |
| 1443973_PM_at   | Dact2                                               | DACT2          | 0.11  | 3.10 | 0.85  | 4.13E-01 | 6.79E-01 | -6.32 |
| 1448477_PM_at   | Chst12                                              | CHST12         | 0.11  | 3.15 | 0.85  | 4.13E-01 | 6.79E-01 | -6.32 |
| 1457095_PM_at   | ---                                                 | NA             | 0.15  | 3.12 | 0.85  | 4.13E-01 | 6.79E-01 | -6.32 |
| 1446755_PM_at   | ---                                                 | NA             | -0.25 | 5.60 | -0.85 | 4.13E-01 | 6.79E-01 | -6.32 |
| 1429864_PM_at   | Spatc1                                              | SPATC1         | 0.09  | 2.58 | 0.85  | 4.13E-01 | 6.79E-01 | -6.32 |
| 1421690_PM_s_at | Agrp                                                | AGRP           | 0.12  | 3.17 | 0.85  | 4.13E-01 | 6.79E-01 | -6.32 |
| 1419771_PM_at   | ---                                                 | NA             | 0.14  | 2.21 | 0.85  | 4.13E-01 | 6.79E-01 | -6.32 |
| 1417839_PM_at   | Cldn5                                               | CLDN5          | 0.15  | 2.94 | 0.85  | 4.13E-01 | 6.79E-01 | -6.32 |



|                 |                                           |            |       |       |       |          |          |       |
|-----------------|-------------------------------------------|------------|-------|-------|-------|----------|----------|-------|
| 1431132_PM_x_at | Tsr3                                      | TSR3       | 0.16  | 3.22  | 0.85  | 4.13E-01 | 6.79E-01 | -6.32 |
| 1457501_PM_at   | Ccdc17                                    | NA         | 0.09  | 2.45  | 0.85  | 4.13E-01 | 6.80E-01 | -6.32 |
| 1443311_PM_at   | ---                                       | NA         | 0.08  | 2.21  | 0.85  | 4.14E-01 | 6.80E-01 | -6.32 |
| 1457387_PM_at   | ---                                       | NA         | 0.09  | 2.88  | 0.85  | 4.14E-01 | 6.80E-01 | -6.32 |
| 1451914_PM_a_at | Add2                                      | ADD2       | 0.27  | 4.03  | 0.85  | 4.14E-01 | 6.80E-01 | -6.32 |
| 1460278_PM_a_at | Desi1                                     | DESI1      | -0.16 | 3.18  | -0.85 | 4.14E-01 | 6.80E-01 | -6.32 |
| 1450949_PM_at   | Katna1                                    | KATNA1     | -0.15 | 2.59  | -0.85 | 4.14E-01 | 6.80E-01 | -6.32 |
| 1419465_PM_at   | Nkd2                                      | NKD2       | 0.09  | 2.89  | 0.85  | 4.14E-01 | 6.80E-01 | -6.32 |
| 1444633_PM_at   | Gm35161                                   | NA         | 0.13  | 2.59  | 0.85  | 4.14E-01 | 6.80E-01 | -6.32 |
| 1419639_PM_at   | Efnb2                                     | EFNB2      | -0.26 | 3.07  | -0.85 | 4.14E-01 | 6.80E-01 | -6.32 |
| 1420287_PM_at   | Cacna1a                                   | NA         | 0.37  | 6.36  | 0.85  | 4.14E-01 | 6.80E-01 | -6.32 |
| 1437780_PM_at   | Fancb                                     | FANCB      | 0.17  | 2.34  | 0.85  | 4.14E-01 | 6.80E-01 | -6.32 |
| 1433641_PM_at   | Smad5                                     | SMAD5      | 0.17  | 3.40  | 0.85  | 4.14E-01 | 6.80E-01 | -6.32 |
| 1460068_PM_at   | BB044704                                  | NA         | 0.07  | 2.79  | 0.85  | 4.14E-01 | 6.80E-01 | -6.32 |
| 1416993_PM_at   | Cog4                                      | COG4       | 0.17  | 2.44  | 0.85  | 4.14E-01 | 6.80E-01 | -6.32 |
| 1445671_PM_at   | Pot1b                                     | NA         | -0.25 | 3.20  | -0.85 | 4.14E-01 | 6.80E-01 | -6.32 |
| 1431119_PM_at   | Dnajb13                                   | DNAJB13    | 0.09  | 2.36  | 0.85  | 4.14E-01 | 6.80E-01 | -6.32 |
| 1416142_PM_at   | Rps6                                      | NA         | 0.20  | 3.48  | 0.85  | 4.14E-01 | 6.80E-01 | -6.32 |
| 1428724_PM_at   | Pcf11                                     | NA         | -0.22 | 4.61  | -0.85 | 4.14E-01 | 6.80E-01 | -6.32 |
| 1418681_PM_at   | Alg13                                     | NA         | -0.17 | 3.31  | -0.85 | 4.14E-01 | 6.80E-01 | -6.32 |
| 1416728_PM_at   | Csnk2b                                    | CSNK2B     | -0.23 | 4.13  | -0.85 | 4.14E-01 | 6.80E-01 | -6.32 |
| 1442482_PM_at   | ---                                       | NA         | 0.07  | 2.26  | 0.85  | 4.14E-01 | 6.80E-01 | -6.32 |
| 1443981_PM_at   | LOC102638940                              | NA         | 0.09  | 2.37  | 0.85  | 4.14E-01 | 6.80E-01 | -6.32 |
| 1421018_PM_at   | Aaed1                                     | AAED1      | -0.17 | 3.41  | -0.85 | 4.14E-01 | 6.80E-01 | -6.32 |
| 1456424_PM_s_at | Pltp                                      | PLTP       | -0.17 | 9.12  | -0.85 | 4.14E-01 | 6.80E-01 | -6.32 |
| 1422696_PM_at   | Ttyh1                                     | TTYH1      | 0.09  | 2.20  | 0.85  | 4.14E-01 | 6.80E-01 | -6.32 |
| 1437753_PM_at   | Faxc                                      | NA         | -0.26 | 5.70  | -0.85 | 4.14E-01 | 6.80E-01 | -6.32 |
| 1435808_PM_at   | Iba57                                     | IBA57      | -0.21 | 2.86  | -0.85 | 4.14E-01 | 6.80E-01 | -6.32 |
| 1425294_PM_at   | Slamf8                                    | SLAMF8     | 0.07  | 2.28  | 0.85  | 4.14E-01 | 6.80E-01 | -6.32 |
| 1431762_PM_at   | Htra3                                     | HTRA3      | 0.10  | 2.28  | 0.85  | 4.14E-01 | 6.80E-01 | -6.32 |
| 1426286_PM_at   | Noc3l                                     | NOC3L      | 0.56  | 3.31  | 0.85  | 4.14E-01 | 6.80E-01 | -6.32 |
| 1421515_PM_at   | Nr6a1                                     | NR6A1      | 0.19  | 2.37  | 0.85  | 4.14E-01 | 6.80E-01 | -6.32 |
| 1432543_PM_a_at | Klf13                                     | KLf13      | 0.12  | 2.42  | 0.85  | 4.15E-01 | 6.80E-01 | -6.32 |
| 1423221_PM_at   | Tubb4a                                    | TUBB4A     | 0.17  | 9.77  | 0.85  | 4.15E-01 | 6.80E-01 | -6.32 |
| 1435205_PM_at   | Tfap2e                                    | TFAP2E     | -0.16 | 2.67  | -0.85 | 4.15E-01 | 6.80E-01 | -6.32 |
| 1441286_PM_at   | ---                                       | NA         | 0.08  | 2.12  | 0.85  | 4.15E-01 | 6.80E-01 | -6.32 |
| 1433565_PM_at   | Prpf38a                                   | PRPF38A    | 0.26  | 3.23  | 0.85  | 4.15E-01 | 6.80E-01 | -6.32 |
| 1421490_PM_at   | LOC100502592 ///<br>LOC105242791 ///Prmp5 | NA         | 0.10  | 2.25  | 0.85  | 4.15E-01 | 6.80E-01 | -6.32 |
| 1416622_PM_at   | Wbscr16                                   | RCC1L      | 0.12  | 2.33  | 0.85  | 4.15E-01 | 6.80E-01 | -6.32 |
| 1455297_PM_at   | Spin2c                                    | NA         | -0.21 | 3.67  | -0.85 | 4.15E-01 | 6.81E-01 | -6.32 |
| 1424859_PM_at   | Homer3                                    | HOMER3     | -0.19 | 3.35  | -0.85 | 4.15E-01 | 6.81E-01 | -6.33 |
| 1434814_PM_x_at | Gpi1                                      | GPI        | -0.15 | 10.06 | -0.85 | 4.15E-01 | 6.81E-01 | -6.33 |
| 1449946_PM_a_at | Zfp593                                    | ZNF593     | 0.11  | 2.66  | 0.85  | 4.15E-01 | 6.81E-01 | -6.32 |
| 1416021_PM_a_at | Fabp5                                     | FABP5      | -0.21 | 8.20  | -0.85 | 4.15E-01 | 6.81E-01 | -6.33 |
| 1440125_PM_at   | Zfp729a                                   | ZNF208     | 0.07  | 2.16  | 0.85  | 4.15E-01 | 6.81E-01 | -6.33 |
| 1439460_PM_a_at | Arfgap2                                   | ARFGAP2    | 0.47  | 3.72  | 0.85  | 4.15E-01 | 6.81E-01 | -6.33 |
| 1443696_PM_s_at | Habp2                                     | HABP2      | 0.11  | 2.71  | 0.85  | 4.15E-01 | 6.81E-01 | -6.33 |
| 1460230_PM_at   | Syn2                                      | SYN2       | -0.42 | 5.48  | -0.85 | 4.15E-01 | 6.81E-01 | -6.33 |
| 1435693_PM_at   | Mall                                      | MALL       | -0.14 | 2.94  | -0.85 | 4.15E-01 | 6.81E-01 | -6.33 |
| 1447050_PM_at   | ---                                       | NA         | 0.24  | 6.97  | 0.85  | 4.15E-01 | 6.81E-01 | -6.33 |
| 1432033_PM_at   | ---                                       | NA         | 0.07  | 2.55  | 0.85  | 4.15E-01 | 6.81E-01 | -6.33 |
| 1441905_PM_x_at | Snrpn /// Snurf                           | SNRPN      | 0.17  | 2.57  | 0.85  | 4.15E-01 | 6.81E-01 | -6.33 |
| 1437033_PM_a_at | Skp2                                      | SKP2       | 0.07  | 2.32  | 0.85  | 4.15E-01 | 6.81E-01 | -6.33 |
| 1440129_PM_at   | Aurka                                     | AURKA      | 0.08  | 2.38  | 0.85  | 4.15E-01 | 6.81E-01 | -6.33 |
| 1445855_PM_at   | Ggct                                      | AC005154.6 | 0.25  | 3.19  | 0.85  | 4.15E-01 | 6.81E-01 | -6.33 |
| 1454674_PM_at   | Fez1                                      | FEZ1       | 0.25  | 5.14  | 0.85  | 4.15E-01 | 6.81E-01 | -6.33 |
| 1420452_PM_at   | Krtap5-2                                  | NA         | 0.08  | 1.96  | 0.85  | 4.15E-01 | 6.81E-01 | -6.33 |
| 1425502_PM_x_at | ---                                       | NA         | 0.09  | 2.25  | 0.85  | 4.15E-01 | 6.81E-01 | -6.33 |
| 1455086_PM_at   | ---                                       | NA         | 0.11  | 2.51  | 0.85  | 4.15E-01 | 6.81E-01 | -6.33 |
| 1444092_PM_at   | Zfp939                                    | NA         | 0.29  | 2.71  | 0.85  | 4.15E-01 | 6.81E-01 | -6.33 |
| 1425862_PM_a_at | Pik3c2a                                   | PIK3C2A    | -0.16 | 2.90  | -0.85 | 4.15E-01 | 6.81E-01 | -6.33 |
| 1447155_PM_at   | ---                                       | NA         | 0.06  | 2.03  | 0.85  | 4.15E-01 | 6.81E-01 | -6.33 |
| 1450623_PM_at   | Gnb2                                      | GNB2       | 0.07  | 2.61  | 0.85  | 4.15E-01 | 6.81E-01 | -6.33 |
| 1454591_PM_at   | Mast4                                     | NA         | 0.09  | 2.47  | 0.85  | 4.15E-01 | 6.81E-01 | -6.33 |
| 1429173_PM_at   | Dnase1l1                                  | DNASE1L1   | 0.10  | 2.15  | 0.85  | 4.15E-01 | 6.81E-01 | -6.33 |
| 1436044_PM_at   | Scn7a                                     | SCN7A      | -0.26 | 3.11  | -0.85 | 4.15E-01 | 6.81E-01 | -6.33 |
| 1435530_PM_at   | Camsap1                                   | CAMSAP1    | -0.23 | 5.81  | -0.85 | 4.15E-01 | 6.81E-01 | -6.33 |
| 1449142_PM_a_at | Yipf5                                     | YIPF5      | -0.47 | 5.50  | -0.85 | 4.16E-01 | 6.81E-01 | -6.33 |
| 1442987_PM_at   | ---                                       | NA         | -0.33 | 2.58  | -0.85 | 4.16E-01 | 6.81E-01 | -6.33 |
| 1458119_PM_at   | Skc25a27                                  | NA         | -0.10 | 2.82  | -0.85 | 4.15E-01 | 6.81E-01 | -6.33 |
| 1445873_PM_at   | Tfdp2                                     | TFDP2      | -0.07 | 2.35  | -0.85 | 4.16E-01 | 6.81E-01 | -6.33 |
| 1422587_PM_at   | Tmem45a                                   | NA         | 0.08  | 2.13  | 0.85  | 4.15E-01 | 6.81E-01 | -6.33 |
| 1439795_PM_at   | Adgrg2                                    | ADGRG2     | 0.08  | 2.06  | 0.85  | 4.16E-01 | 6.81E-01 | -6.33 |

|                            |                 |            |       |      |       |          |          |       |
|----------------------------|-----------------|------------|-------|------|-------|----------|----------|-------|
| 1460488_PM_at              | Zbtb4           | ZBTB4      | 0.09  | 2.21 | 0.85  | 4.16E-01 | 6.81E-01 | -6.33 |
| 1425902_PM_a_at            | Nfkb2           | NFKB2      | 0.09  | 2.63 | 0.85  | 4.15E-01 | 6.81E-01 | -6.33 |
| 1418250_PM_at              | Arl4d           | ARL4D      | 0.11  | 2.84 | 0.85  | 4.16E-01 | 6.81E-01 | -6.33 |
| 1447786_PM_at              | Cyth1///Gm38514 | CYTH1      | 0.17  | 2.45 | 0.85  | 4.16E-01 | 6.81E-01 | -6.33 |
| 1437177_PM_at              | Larp4           | LARP4      | 0.22  | 3.52 | 0.85  | 4.16E-01 | 6.81E-01 | -6.33 |
| 1424598_PM_at              | Ddx6            | DDX6       | 0.22  | 3.75 | 0.85  | 4.15E-01 | 6.81E-01 | -6.33 |
| 1426455_PM_at              | Cwc27           | CWC27      | 0.27  | 3.60 | 0.85  | 4.15E-01 | 6.81E-01 | -6.33 |
| AFFX-18SRNAMur/X00686_5_at | ---             | NA         | 0.50  | 8.20 | 0.85  | 4.15E-01 | 6.81E-01 | -6.33 |
| 1452314_PM_at              | Kif11           | KIF11      | 0.08  | 2.49 | 0.85  | 4.16E-01 | 6.81E-01 | -6.33 |
| 1434321_PM_at              | Atrip           | ATRIP      | 0.10  | 2.29 | 0.85  | 4.16E-01 | 6.81E-01 | -6.33 |
| 1435654_PM_at              | Ccdc14          | CCDC14     | 0.12  | 2.35 | 0.85  | 4.16E-01 | 6.81E-01 | -6.33 |
| 1451408_PM_at              | Trub2           | TRUB2      | 0.19  | 2.74 | 0.85  | 4.16E-01 | 6.81E-01 | -6.33 |
| 1444459_PM_at              | ---             | NA         | 0.23  | 2.44 | 0.85  | 4.16E-01 | 6.81E-01 | -6.33 |
| 1453787_PM_at              | Tmx4            | TMX4       | 0.35  | 5.64 | 0.85  | 4.16E-01 | 6.81E-01 | -6.33 |
| 1415847_PM_at              | Ldhc            | LDHC       | -0.12 | 2.68 | -0.85 | 4.16E-01 | 6.81E-01 | -6.33 |
| 1456641_PM_at              | Smim1           | SMIM1      | -0.33 | 4.53 | -0.85 | 4.16E-01 | 6.81E-01 | -6.33 |
| 1444926_PM_at              | ---             | NA         | -0.06 | 1.87 | -0.85 | 4.16E-01 | 6.81E-01 | -6.33 |
| 1451609_PM_at              | Tspan33         | TSPAN33    | 0.08  | 2.66 | 0.85  | 4.16E-01 | 6.81E-01 | -6.33 |
| 1452010_PM_at              | Chrna3          | CHRNA3     | 0.09  | 3.91 | 0.85  | 4.16E-01 | 6.81E-01 | -6.33 |
| 1455583_PM_at              | Gne             | GNE        | -0.08 | 2.60 | -0.85 | 4.16E-01 | 6.81E-01 | -6.33 |
| 1425343_PM_at              | Hdhd3           | HDHD3      | -0.19 | 2.50 | -0.85 | 4.16E-01 | 6.81E-01 | -6.33 |
| 1459690_PM_at              | Zfp426          | ZNF426     | 0.19  | 2.71 | 0.85  | 4.16E-01 | 6.81E-01 | -6.33 |
| 1460527_PM_at              | 4933407C09Rik   | NA         | 0.10  | 2.29 | 0.85  | 4.16E-01 | 6.81E-01 | -6.33 |
| 1425129_PM_a_at            | Taldo1          | TALDO1     | 0.11  | 2.55 | 0.85  | 4.16E-01 | 6.81E-01 | -6.33 |
| 1455125_PM_at              | Acap1           | NA         | -0.13 | 2.55 | -0.85 | 4.16E-01 | 6.81E-01 | -6.33 |
| 1436739_PM_at              | Agtr1a          | AGTR1      | -0.09 | 2.32 | -0.85 | 4.16E-01 | 6.81E-01 | -6.33 |
| 1443037_PM_at              | ---             | NA         | 0.31  | 2.98 | 0.85  | 4.16E-01 | 6.81E-01 | -6.33 |
| 1446111_PM_at              | D14Erd611e      | NA         | 0.18  | 2.02 | 0.85  | 4.16E-01 | 6.81E-01 | -6.33 |
| 1422610_PM_s_at            | Igf2bp3         | IGF2BP3    | -0.21 | 3.35 | -0.85 | 4.16E-01 | 6.81E-01 | -6.33 |
| 1457869_PM_at              | ---             | NA         | 0.09  | 2.65 | 0.85  | 4.16E-01 | 6.81E-01 | -6.33 |
| 1450079_PM_at              | Nrk             | NRK        | 0.11  | 2.37 | 0.85  | 4.16E-01 | 6.81E-01 | -6.33 |
| 1419290_PM_at              | Mettl6          | METTL6     | 0.21  | 4.33 | 0.85  | 4.16E-01 | 6.81E-01 | -6.33 |
| 1416272_PM_at              | Lamtor3         | LAMTOR3    | 0.25  | 6.82 | 0.85  | 4.16E-01 | 6.81E-01 | -6.33 |
| 1449674_PM_s_at            | Pdc61p          | PDCD61P    | -0.16 | 2.98 | -0.85 | 4.16E-01 | 6.82E-01 | -6.33 |
| 1434528_PM_at              | Aard            | AARD       | 0.09  | 2.25 | 0.85  | 4.16E-01 | 6.82E-01 | -6.33 |
| 1429551_PM_at              | Nupr1           | NUPR2      | 0.08  | 2.38 | 0.85  | 4.16E-01 | 6.82E-01 | -6.33 |
| 1439100_PM_s_at            | Krtap11-1       | KRTAP11-1  | -0.09 | 2.35 | -0.85 | 4.17E-01 | 6.82E-01 | -6.33 |
| 1458613_PM_at              | Arrdc1          | ARRDC1     | 0.07  | 2.24 | 0.85  | 4.17E-01 | 6.82E-01 | -6.33 |
| 1427522_PM_at              | Arhgap20        | ARHGAP20   | -0.20 | 3.37 | -0.85 | 4.17E-01 | 6.82E-01 | -6.33 |
| 1445998_PM_at              | ---             | NA         | -0.10 | 2.38 | -0.85 | 4.17E-01 | 6.82E-01 | -6.33 |
| 1445802_PM_at              | ---             | NA         | 0.08  | 2.21 | 0.85  | 4.17E-01 | 6.82E-01 | -6.33 |
| 1447150_PM_at              | Mycbp2          | MYCBP2     | -0.31 | 3.98 | -0.85 | 4.17E-01 | 6.82E-01 | -6.33 |
| 1442604_PM_at              | ---             | NA         | 0.11  | 2.35 | 0.85  | 4.17E-01 | 6.82E-01 | -6.33 |
| 1419793_PM_at              | ---             | NA         | 0.13  | 2.70 | 0.85  | 4.17E-01 | 6.82E-01 | -6.33 |
| 1436709_PM_at              | Emc1            | EMC1       | -0.11 | 5.58 | -0.85 | 4.17E-01 | 6.82E-01 | -6.33 |
| 1424031_PM_at              | Srx11           | SNX11      | 0.10  | 2.52 | 0.85  | 4.17E-01 | 6.82E-01 | -6.33 |
| 1424515_PM_at              | B230354K17Rik   | NA         | 0.32  | 2.76 | 0.85  | 4.17E-01 | 6.82E-01 | -6.33 |
| 1431897_PM_at              | Chst9           | CHST9      | 0.39  | 3.13 | 0.85  | 4.17E-01 | 6.82E-01 | -6.33 |
| 1427019_PM_at              | Ptprz1          | PTPRZ1     | 0.34  | 3.16 | 0.85  | 4.17E-01 | 6.82E-01 | -6.33 |
| 1441538_PM_at              | ---             | NA         | 0.20  | 2.93 | 0.85  | 4.17E-01 | 6.82E-01 | -6.33 |
| 1425378_PM_at              | Herc1           | HERC1      | 0.11  | 3.98 | 0.85  | 4.17E-01 | 6.82E-01 | -6.33 |
| 1448391_PM_at              | Rab9            | RAB9A      | -0.30 | 3.52 | -0.85 | 4.17E-01 | 6.82E-01 | -6.33 |
| 1454120_PM_a_at            | Pcgf6           | PCGF6      | 0.08  | 2.27 | 0.85  | 4.17E-01 | 6.82E-01 | -6.33 |
| 1453206_PM_at              | Acad9           | ACAD9      | -0.26 | 3.92 | -0.85 | 4.17E-01 | 6.82E-01 | -6.33 |
| 1440057_PM_at              | Hsd17b7         | HSD17B7    | 0.11  | 2.90 | 0.85  | 4.17E-01 | 6.82E-01 | -6.33 |
| 1443002_PM_at              | ---             | NA         | 0.15  | 2.54 | 0.85  | 4.17E-01 | 6.82E-01 | -6.33 |
| 1447356_PM_at              | Methg1          | NA         | 0.07  | 2.36 | 0.85  | 4.17E-01 | 6.82E-01 | -6.33 |
| 1424622_PM_at              | Hsf1            | HSF1       | -0.21 | 2.83 | -0.85 | 4.17E-01 | 6.82E-01 | -6.33 |
| 1418823_PM_at              | Arf6            | ARF6       | -0.12 | 2.76 | -0.84 | 4.17E-01 | 6.82E-01 | -6.33 |
| 1435920_PM_x_at            | Atp1a1          | ATP1A1     | -0.09 | 2.93 | -0.84 | 4.17E-01 | 6.82E-01 | -6.33 |
| 1449057_PM_at              | Kel             | KEL        | -0.07 | 2.24 | -0.84 | 4.17E-01 | 6.82E-01 | -6.33 |
| 1458200_PM_at              | ---             | NA         | 0.08  | 2.74 | 0.85  | 4.17E-01 | 6.82E-01 | -6.33 |
| 1443930_PM_at              | Zfp811          | NA         | 0.08  | 2.20 | 0.85  | 4.17E-01 | 6.82E-01 | -6.33 |
| 1435575_PM_at              | Kntc1           | KNTC1      | 0.12  | 2.57 | 0.84  | 4.17E-01 | 6.82E-01 | -6.33 |
| 1453493_PM_at              | Mroh9           | MROH9      | 0.07  | 2.30 | 0.84  | 4.17E-01 | 6.82E-01 | -6.33 |
| 1456242_PM_at              | Gm7325          | AL139392.1 | 0.15  | 2.33 | 0.84  | 4.17E-01 | 6.82E-01 | -6.33 |
| 1419563_PM_at              | Birc6           | BIRC6      | -0.11 | 3.64 | -0.84 | 4.17E-01 | 6.82E-01 | -6.33 |
| 1446581_PM_at              | ---             | NA         | 0.08  | 2.20 | 0.84  | 4.17E-01 | 6.83E-01 | -6.33 |
| 1419260_PM_a_at            | Snrpb           | SNRPB      | 0.11  | 2.78 | 0.84  | 4.18E-01 | 6.83E-01 | -6.33 |
| 1444978_PM_at              | ---             | NA         | -0.08 | 2.28 | -0.84 | 4.18E-01 | 6.83E-01 | -6.33 |
| 1452657_PM_at              | Ap1s2           | AP1S2      | 0.28  | 3.06 | 0.84  | 4.18E-01 | 6.83E-01 | -6.33 |
| 1424007_PM_at              | Gdf10           | GDF10      | -0.21 | 2.94 | -0.84 | 4.18E-01 | 6.83E-01 | -6.33 |
| 1439148_PM_a_at            | Pfkl            | PFKL       | -0.23 | 3.42 | -0.84 | 4.18E-01 | 6.83E-01 | -6.33 |
| 1443600_PM_at              | AA414992        | NA         | 0.11  | 2.17 | 0.84  | 4.18E-01 | 6.83E-01 | -6.33 |
| 1428809_PM_at              | 1810010H24Rik   | NA         | 0.10  | 2.10 | 0.84  | 4.18E-01 | 6.83E-01 | -6.33 |

|                 |                        |          |       |      |       |          |          |       |
|-----------------|------------------------|----------|-------|------|-------|----------|----------|-------|
| 1453788_PM_at   | ---                    | NA       | 0.07  | 2.07 | 0.84  | 4.18E-01 | 6.83E-01 | -6.33 |
| 1425960_PM_s_at | Pax6                   | PAX6     | 0.10  | 2.09 | 0.84  | 4.18E-01 | 6.83E-01 | -6.33 |
| 1438795_PM_x_at | ---                    | NA       | 0.09  | 2.79 | 0.84  | 4.18E-01 | 6.83E-01 | -6.33 |
| 1417177_PM_at   | Galk1                  | GALK1    | 0.16  | 2.93 | 0.84  | 4.18E-01 | 6.83E-01 | -6.33 |
| 1426208_PM_x_at | Plagl1                 | PLAGL1   | -0.23 | 8.08 | -0.84 | 4.18E-01 | 6.83E-01 | -6.33 |
| 1458499_PM_at   | Pde10a                 | PDE10A   | -0.18 | 4.78 | -0.84 | 4.18E-01 | 6.83E-01 | -6.33 |
| 1435794_PM_at   | 5031425E22Rik          | NA       | 0.11  | 3.38 | 0.84  | 4.18E-01 | 6.83E-01 | -6.33 |
| 1444040_PM_at   | Lair1                  | LAI1     | 0.13  | 2.10 | 0.84  | 4.18E-01 | 6.83E-01 | -6.33 |
| 1447564_PM_x_at | Piwil4                 | PIWIL4   | 0.13  | 2.41 | 0.84  | 4.18E-01 | 6.83E-01 | -6.33 |
| 1442105_PM_at   | Sh3rf3                 | SH3RF3   | 0.09  | 2.22 | 0.84  | 4.18E-01 | 6.83E-01 | -6.33 |
| 1434229_PM_a_at | Polb                   | POLB     | -0.29 | 3.22 | -0.84 | 4.18E-01 | 6.83E-01 | -6.33 |
| 1460384_PM_a_at | Arid4b                 | ARID4B   | -0.27 | 3.01 | -0.84 | 4.18E-01 | 6.83E-01 | -6.33 |
| 1433629_PM_s_at | Tmem199                | TMEM199  | -0.17 | 4.19 | -0.84 | 4.18E-01 | 6.83E-01 | -6.33 |
| 1456098_PM_a_at | Elmo2                  | ELMO2    | -0.14 | 2.64 | -0.84 | 4.18E-01 | 6.83E-01 | -6.33 |
| 1458189_PM_at   | Col26a1                | COL26A1  | 0.08  | 2.61 | 0.84  | 4.18E-01 | 6.83E-01 | -6.33 |
| 1444572_PM_at   | Mmd2                   | MMD2     | 0.11  | 2.31 | 0.84  | 4.18E-01 | 6.83E-01 | -6.33 |
| 1424575_PM_at   | Ift22                  | IFT22    | 0.18  | 3.51 | 0.84  | 4.18E-01 | 6.83E-01 | -6.33 |
| 1452012_PM_a_at | Exosc1                 | EXOSC1   | 0.59  | 4.50 | 0.84  | 4.18E-01 | 6.83E-01 | -6.33 |
| 1421849_PM_at   | Stag2                  | STAG2    | -0.16 | 3.52 | -0.84 | 4.18E-01 | 6.83E-01 | -6.33 |
| 1456087_PM_at   | Nfia                   | NFIA     | -0.21 | 4.62 | -0.84 | 4.18E-01 | 6.83E-01 | -6.33 |
| 1449882_PM_a_at | Casr                   | CASR     | 0.15  | 3.14 | 0.84  | 4.18E-01 | 6.83E-01 | -6.33 |
| 1432699_PM_at   | 2900024i21Rik          | NA       | 0.10  | 2.34 | 0.84  | 4.18E-01 | 6.83E-01 | -6.33 |
| 1444593_PM_at   | Phlpp2                 | PHLPP2   | 0.11  | 2.41 | 0.84  | 4.18E-01 | 6.83E-01 | -6.33 |
| 1444279_PM_at   | Huwe1                  | HUWE1    | -0.22 | 3.29 | -0.84 | 4.18E-01 | 6.83E-01 | -6.33 |
| 1420924_PM_at   | Timp2                  | TIMP2    | 0.10  | 2.21 | 0.84  | 4.18E-01 | 6.83E-01 | -6.33 |
| 1426724_PM_at   | Cnn3                   | CNN3     | -0.33 | 3.48 | -0.84 | 4.18E-01 | 6.83E-01 | -6.33 |
| 1446629_PM_at   | ---                    | NA       | -0.08 | 1.97 | -0.84 | 4.18E-01 | 6.83E-01 | -6.33 |
| 1424505_PM_at   | Rmnd1                  | RMND1    | 0.10  | 2.23 | 0.84  | 4.18E-01 | 6.83E-01 | -6.33 |
| 1452767_PM_at   | Rrbp1                  | RRBP1    | 0.29  | 4.34 | 0.84  | 4.18E-01 | 6.83E-01 | -6.33 |
| 1456233_PM_at   | Tmem196                | NA       | -0.24 | 7.71 | -0.84 | 4.18E-01 | 6.83E-01 | -6.33 |
| 1445491_PM_at   | C79685                 | NA       | 0.10  | 2.70 | 0.84  | 4.18E-01 | 6.83E-01 | -6.33 |
| 1454915_PM_at   | Rab3gap2               | RAB3GAP2 | -0.23 | 2.92 | -0.84 | 4.19E-01 | 6.83E-01 | -6.33 |
| 1424329_PM_a_at | Prrg2                  | PRRG2    | 0.07  | 2.61 | 0.84  | 4.19E-01 | 6.83E-01 | -6.33 |
| 1420283_PM_at   | Phf14                  | PHF14    | 0.09  | 1.92 | 0.84  | 4.19E-01 | 6.83E-01 | -6.33 |
| 1459159_PM_a_at | Ccdc6                  | CCDC6    | 0.10  | 2.38 | 0.84  | 4.19E-01 | 6.83E-01 | -6.33 |
| 1444057_PM_at   | ---                    | NA       | 0.12  | 2.19 | 0.84  | 4.19E-01 | 6.83E-01 | -6.33 |
| 1421333_PM_a_at | Mynn                   | MYNN     | 0.19  | 2.72 | 0.84  | 4.19E-01 | 6.83E-01 | -6.33 |
| 1426007_PM_a_at | Ubxn10                 | UBXN10   | 0.32  | 3.84 | 0.84  | 4.19E-01 | 6.83E-01 | -6.33 |
| 1432269_PM_a_at | Sh3kbp1                | SH3KBP1  | 0.43  | 3.67 | 0.84  | 4.19E-01 | 6.83E-01 | -6.33 |
| 1428976_PM_at   | Tmpo                   | TMPO     | -0.20 | 2.52 | -0.84 | 4.19E-01 | 6.83E-01 | -6.33 |
| 1449576_PM_at   | Eif1ax                 | EIF1AX   | 0.13  | 2.83 | 0.84  | 4.19E-01 | 6.83E-01 | -6.33 |
| 1426744_PM_at   | Sreb2                  | SREBF2   | 0.14  | 3.59 | 0.84  | 4.19E-01 | 6.83E-01 | -6.33 |
| 1445874_PM_at   | ---                    | NA       | 0.19  | 4.74 | 0.84  | 4.19E-01 | 6.83E-01 | -6.33 |
| 1438300_PM_at   | Cdkn2aip               | CDKN2AIP | -0.08 | 2.34 | -0.84 | 4.19E-01 | 6.83E-01 | -6.33 |
| 1433083_PM_at   | 4930448K20Rik          | NA       | 0.07  | 2.05 | 0.84  | 4.19E-01 | 6.83E-01 | -6.33 |
| 1429117_PM_at   | LOC105242493 /// Tradd | TRADD    | 0.08  | 2.40 | 0.84  | 4.19E-01 | 6.83E-01 | -6.33 |
| 1454243_PM_at   | Ick                    | ICK      | 0.10  | 2.59 | 0.84  | 4.19E-01 | 6.83E-01 | -6.33 |
| 1446889_PM_at   | D2Ertd105e             | NA       | 0.11  | 2.25 | 0.84  | 4.19E-01 | 6.83E-01 | -6.33 |
| 1460119_PM_at   | ---                    | NA       | 0.12  | 2.62 | 0.84  | 4.19E-01 | 6.83E-01 | -6.33 |
| 1450861_PM_at   | Fancc                  | FANCC    | 0.12  | 2.82 | 0.84  | 4.19E-01 | 6.83E-01 | -6.33 |
| 1438378_PM_at   | Med9os                 | NA       | 0.13  | 2.41 | 0.84  | 4.19E-01 | 6.83E-01 | -6.33 |
| 1449332_PM_at   | Fhl5                   | FHL5     | 0.13  | 2.31 | 0.84  | 4.19E-01 | 6.83E-01 | -6.33 |
| 1433159_PM_at   | ---                    | NA       | 0.14  | 2.63 | 0.84  | 4.19E-01 | 6.83E-01 | -6.33 |
| 1447143_PM_at   | ---                    | NA       | 0.18  | 2.68 | 0.84  | 4.19E-01 | 6.83E-01 | -6.33 |
| 1433621_PM_at   | Wdr41                  | WDR41    | 0.21  | 2.61 | 0.84  | 4.19E-01 | 6.83E-01 | -6.33 |
| 1450703_PM_at   | Slc7a2                 | SLC7A2   | 0.33  | 6.85 | 0.84  | 4.19E-01 | 6.83E-01 | -6.33 |
| 1452227_PM_at   | Sel13                  | SEL1L3   | -0.19 | 4.87 | -0.84 | 4.19E-01 | 6.83E-01 | -6.33 |
| 1419311_PM_at   | Trim10                 | TRIM10   | 0.13  | 2.80 | 0.84  | 4.19E-01 | 6.83E-01 | -6.33 |
| 1453459_PM_at   | 1700028i16Rik          | NA       | 0.08  | 2.33 | 0.84  | 4.19E-01 | 6.84E-01 | -6.33 |
| 1430025_PM_at   | Ppp3cc                 | NA       | -0.13 | 2.39 | -0.84 | 4.19E-01 | 6.84E-01 | -6.33 |
| 1416147_PM_at   | Hspa4                  | HSPA4    | 0.24  | 4.42 | 0.84  | 4.19E-01 | 6.84E-01 | -6.33 |
| 1420081_PM_s_at | Knstrn                 | KNSTRN   | 0.09  | 2.51 | 0.84  | 4.19E-01 | 6.84E-01 | -6.33 |
| 1431913_PM_a_at | Pde3a                  | PDE3A    | -0.10 | 2.54 | -0.84 | 4.19E-01 | 6.84E-01 | -6.33 |
| 1459733_PM_at   | ---                    | NA       | 0.20  | 2.15 | 0.84  | 4.19E-01 | 6.84E-01 | -6.33 |
| 1449106_PM_at   | Gpx3                   | GPX3     | 0.23  | 3.39 | 0.84  | 4.19E-01 | 6.84E-01 | -6.33 |
| 1422260_PM_x_at | Ccr5                   | NA       | 0.07  | 2.19 | 0.84  | 4.19E-01 | 6.84E-01 | -6.33 |
| 1435242_PM_at   | Pds5b                  | PDS5B    | 0.12  | 2.87 | 0.84  | 4.19E-01 | 6.84E-01 | -6.33 |
| 1458508_PM_at   | Matr3                  | MATR3    | 0.26  | 2.96 | 0.84  | 4.19E-01 | 6.84E-01 | -6.33 |
| 1418082_PM_at   | Nmt1                   | NMT1     | -0.10 | 2.35 | -0.84 | 4.19E-01 | 6.84E-01 | -6.33 |
| 1441774_PM_at   | ---                    | NA       | 0.10  | 2.02 | 0.84  | 4.19E-01 | 6.84E-01 | -6.33 |
| 1426364_PM_at   | Mrrf                   | MRRF     | 0.13  | 3.01 | 0.84  | 4.19E-01 | 6.84E-01 | -6.33 |
| 1437755_PM_at   | Slc5a12                | SLC5A12  | 0.26  | 2.62 | 0.84  | 4.19E-01 | 6.84E-01 | -6.33 |
| 1447586_PM_at   | Vcan                   | VCAN     | 0.06  | 2.03 | 0.84  | 4.20E-01 | 6.84E-01 | -6.33 |
| 1425804_PM_at   | Hmx2                   | HMX2     | 0.09  | 2.12 | 0.84  | 4.20E-01 | 6.84E-01 | -6.33 |
| 1439021_PM_at   | Acap3                  | ACAP3    | 0.11  | 2.29 | 0.84  | 4.20E-01 | 6.84E-01 | -6.33 |

|                 |                              |          |       |      |       |          |          |       |
|-----------------|------------------------------|----------|-------|------|-------|----------|----------|-------|
| 1453846_PM_at   | Chpf2                        | CHPF2    | 0.15  | 2.77 | 0.84  | 4.20E-01 | 6.84E-01 | -6.33 |
| 1422321_PM_a_at | Sf1                          | SF1      | 0.18  | 2.85 | 0.84  | 4.20E-01 | 6.84E-01 | -6.33 |
| 1439569_PM_at   | Gpr83                        | GPR83    | -0.40 | 3.64 | -0.84 | 4.20E-01 | 6.84E-01 | -6.33 |
| 1451726_PM_at   | Mtmr6                        | MTMR6    | -0.16 | 3.49 | -0.84 | 4.20E-01 | 6.84E-01 | -6.33 |
| 1458544_PM_at   | BC059841                     | NA       | -0.15 | 4.00 | -0.84 | 4.20E-01 | 6.84E-01 | -6.33 |
| 1421957_PM_a_at | Pcyt1a                       | PCYT1A   | 0.08  | 2.30 | 0.84  | 4.20E-01 | 6.84E-01 | -6.33 |
| 1442447_PM_at   | ---                          | NA       | 0.10  | 2.22 | 0.84  | 4.20E-01 | 6.84E-01 | -6.33 |
| 1428245_PM_at   | G6pc3                        | G6PC3    | 0.13  | 3.21 | 0.84  | 4.20E-01 | 6.84E-01 | -6.33 |
| 1459659_PM_at   | ---                          | NA       | 0.14  | 2.08 | 0.84  | 4.20E-01 | 6.84E-01 | -6.33 |
| 1440432_PM_at   | ---                          | NA       | 0.24  | 3.43 | 0.84  | 4.20E-01 | 6.84E-01 | -6.33 |
| 1431188_PM_a_at | Tom1                         | TOM1     | -0.09 | 2.34 | -0.84 | 4.20E-01 | 6.84E-01 | -6.33 |
| 1448585_PM_at   | Gtf2h4                       | GTF2H4   | -0.08 | 2.05 | -0.84 | 4.20E-01 | 6.84E-01 | -6.33 |
| 1460181_PM_at   | Stmn3                        | STMN3    | 0.27  | 4.85 | 0.84  | 4.20E-01 | 6.84E-01 | -6.33 |
| 1426835_PM_at   | Metap1                       | METAP1   | 0.21  | 5.27 | 0.84  | 4.20E-01 | 6.84E-01 | -6.33 |
| 1440489_PM_at   | Zbtb46                       | ZBTB46   | -0.09 | 2.82 | -0.84 | 4.20E-01 | 6.84E-01 | -6.33 |
| 1434578_PM_x_at | LOC102641332 /// Ran         | RAN      | -0.15 | 9.26 | -0.84 | 4.20E-01 | 6.84E-01 | -6.33 |
| 1459581_PM_at   | Trp63                        | TP63     | -0.07 | 2.17 | -0.84 | 4.20E-01 | 6.84E-01 | -6.33 |
| 1426209_PM_at   | Strn4                        | STRN4    | -0.19 | 3.21 | -0.84 | 4.20E-01 | 6.84E-01 | -6.33 |
| 1439458_PM_x_at | Ceacam11                     | CEACAM3  | 0.08  | 2.22 | 0.84  | 4.20E-01 | 6.84E-01 | -6.33 |
| 1444354_PM_at   | ---                          | NA       | -0.10 | 3.18 | -0.84 | 4.20E-01 | 6.84E-01 | -6.33 |
| 1457916_PM_at   | ---                          | NA       | -0.08 | 2.42 | -0.84 | 4.20E-01 | 6.84E-01 | -6.33 |
| 1453856_PM_at   | Zbtb46                       | ZBTB46   | 0.13  | 2.12 | 0.84  | 4.20E-01 | 6.84E-01 | -6.33 |
| 1436953_PM_at   | Wipf1                        | WIPF1    | -0.23 | 2.97 | -0.84 | 4.20E-01 | 6.84E-01 | -6.33 |
| 1424896_PM_at   | Gpr85                        | GPR85    | -0.22 | 3.24 | -0.84 | 4.20E-01 | 6.84E-01 | -6.33 |
| 1423273_PM_at   | Polg                         | POLG     | -0.20 | 2.59 | -0.84 | 4.20E-01 | 6.84E-01 | -6.33 |
| 1420254_PM_at   | ---                          | NA       | 0.07  | 1.85 | 0.84  | 4.20E-01 | 6.84E-01 | -6.33 |
| 1435938_PM_at   | Ckap2l                       | CKAP2L   | 0.08  | 2.24 | 0.84  | 4.20E-01 | 6.84E-01 | -6.33 |
| 1460616_PM_at   | Slco4c1                      | SLCO4C1  | 0.20  | 2.19 | 0.84  | 4.20E-01 | 6.84E-01 | -6.33 |
| 1450068_PM_at   | Baz1b                        | BAZ1B    | 0.28  | 3.95 | 0.84  | 4.20E-01 | 6.84E-01 | -6.33 |
| 1441517_PM_at   | ---                          | NA       | -0.18 | 2.89 | -0.84 | 4.20E-01 | 6.84E-01 | -6.33 |
| 1448674_PM_at   | Rnf25                        | RNF25    | 0.24  | 3.32 | 0.84  | 4.20E-01 | 6.84E-01 | -6.33 |
| 1460256_PM_at   | Car3                         | CA3      | 0.08  | 2.55 | 0.84  | 4.20E-01 | 6.84E-01 | -6.33 |
| 1427760_PM_s_at | Prl2c2 /// Prl2c3 /// Prl2c4 | PRL      | -0.14 | 3.00 | -0.84 | 4.20E-01 | 6.84E-01 | -6.33 |
| 1451691_PM_at   | Ednra                        | EDNRA    | 0.08  | 2.00 | 0.84  | 4.20E-01 | 6.84E-01 | -6.33 |
| 1438534_PM_x_at | BC004004                     | Cgorf89  | 0.11  | 2.55 | 0.84  | 4.20E-01 | 6.84E-01 | -6.33 |
| 1439615_PM_at   | Gan                          | GAN      | 0.19  | 2.36 | 0.84  | 4.20E-01 | 6.84E-01 | -6.33 |
| 1416753_PM_at   | Prkar1b                      | PRKAR1B  | 0.20  | 5.99 | 0.84  | 4.20E-01 | 6.84E-01 | -6.33 |
| 1422439_PM_a_at | Cdk4 /// LOC102641469        | CDK4     | -0.17 | 2.50 | -0.84 | 4.20E-01 | 6.84E-01 | -6.33 |
| 1419226_PM_at   | Cd96                         | CD96     | -0.08 | 2.50 | -0.84 | 4.20E-01 | 6.84E-01 | -6.33 |
| 1420086_PM_x_at | Fgf4                         | FGF4     | -0.07 | 2.33 | -0.84 | 4.20E-01 | 6.84E-01 | -6.33 |
| 1417559_PM_at   | Sfxn1                        | SFXN1    | 0.13  | 2.90 | 0.84  | 4.21E-01 | 6.85E-01 | -6.33 |
| 1454038_PM_at   | Lvrn                         | NA       | 0.08  | 2.14 | 0.84  | 4.21E-01 | 6.85E-01 | -6.33 |
| 1434955_PM_at   | March1                       | MARCH1   | -0.16 | 2.75 | -0.84 | 4.21E-01 | 6.85E-01 | -6.33 |
| 1426797_PM_at   | Tmem209                      | TMEM209  | -0.07 | 2.64 | -0.84 | 4.21E-01 | 6.85E-01 | -6.33 |
| 1458205_PM_at   | ---                          | NA       | 0.09  | 2.22 | 0.84  | 4.21E-01 | 6.85E-01 | -6.33 |
| 1447667_PM_x_at | Map3k4                       | MAP3K4   | 0.29  | 3.19 | 0.84  | 4.21E-01 | 6.85E-01 | -6.33 |
| 1429448_PM_s_at | Tet1                         | TET1     | 0.09  | 2.16 | 0.84  | 4.21E-01 | 6.85E-01 | -6.33 |
| 1453174_PM_at   | Nbeal1                       | NBEAL1   | -0.12 | 3.01 | -0.84 | 4.21E-01 | 6.85E-01 | -6.33 |
| 1444366_PM_at   | ---                          | NA       | 0.10  | 2.12 | 0.84  | 4.21E-01 | 6.85E-01 | -6.33 |
| 1432607_PM_at   | Z610012C04Rik                | NA       | 0.18  | 2.31 | 0.84  | 4.21E-01 | 6.85E-01 | -6.33 |
| 1441736_PM_at   | ---                          | NA       | -0.16 | 2.94 | -0.84 | 4.21E-01 | 6.85E-01 | -6.33 |
| 1440327_PM_at   | Al195470                     | NA       | 0.15  | 2.56 | 0.84  | 4.21E-01 | 6.85E-01 | -6.33 |
| 1451629_PM_at   | Lbh                          | LBH      | 0.21  | 3.39 | 0.84  | 4.21E-01 | 6.85E-01 | -6.33 |
| 1458620_PM_at   | Gm5129                       | NA       | -0.07 | 2.32 | -0.84 | 4.21E-01 | 6.85E-01 | -6.33 |
| 1446938_PM_at   | AA08213                      | NA       | 0.09  | 2.34 | 0.84  | 4.21E-01 | 6.85E-01 | -6.33 |
| 1460661_PM_at   | S1pr3                        | S1PR3    | 0.11  | 2.67 | 0.84  | 4.21E-01 | 6.85E-01 | -6.33 |
| 1432704_PM_at   | S730405A17Rik                | NA       | 0.12  | 2.67 | 0.84  | 4.21E-01 | 6.85E-01 | -6.33 |
| 1417622_PM_at   | Slc12a2                      | SLC12A2  | -0.17 | 6.57 | -0.84 | 4.21E-01 | 6.85E-01 | -6.33 |
| 1418486_PM_at   | Vnn1                         | VNN1     | 0.10  | 2.77 | 0.84  | 4.21E-01 | 6.85E-01 | -6.33 |
| 1445599_PM_at   | Fndc7                        | FND7     | 0.13  | 2.30 | 0.84  | 4.21E-01 | 6.85E-01 | -6.34 |
| 1426701_PM_at   | Fam160a2                     | FAM160A2 | -0.14 | 3.06 | -0.84 | 4.21E-01 | 6.85E-01 | -6.34 |
| 1421753_PM_a_at | Lhx3                         | LHX3     | 0.09  | 2.13 | 0.84  | 4.21E-01 | 6.85E-01 | -6.34 |
| 1435639_PM_at   | Z610528A11Rik                | C10orf99 | 0.09  | 2.69 | 0.84  | 4.21E-01 | 6.85E-01 | -6.34 |
| 1433529_PM_at   | Pamr1                        | PAMR1    | 0.09  | 2.49 | 0.84  | 4.21E-01 | 6.85E-01 | -6.34 |
| 1425251_PM_at   | Ptger3                       | PTGER3   | 0.12  | 2.16 | 0.84  | 4.21E-01 | 6.85E-01 | -6.34 |
| 1418410_PM_at   | Jrk                          | JRK      | 0.12  | 2.43 | 0.84  | 4.21E-01 | 6.85E-01 | -6.34 |
| 1440192_PM_at   | Ttc39b                       | TTC39B   | 0.32  | 4.41 | 0.84  | 4.21E-01 | 6.85E-01 | -6.34 |
| 1421336_PM_at   | Prox1                        | PROX1    | -0.07 | 2.07 | -0.84 | 4.21E-01 | 6.85E-01 | -6.34 |
| 1417439_PM_at   | Cd248                        | CD248    | 0.10  | 2.64 | 0.84  | 4.22E-01 | 6.85E-01 | -6.34 |
| 1434463_PM_at   | Bfsp2                        | BFSP2    | 0.20  | 3.34 | 0.84  | 4.21E-01 | 6.85E-01 | -6.34 |
| 1434115_PM_at   | Cdh13                        | CDH13    | -0.21 | 2.84 | -0.84 | 4.22E-01 | 6.85E-01 | -6.34 |
| 1456287_PM_at   | BB236558                     | NA       | -0.21 | 2.38 | -0.84 | 4.22E-01 | 6.85E-01 | -6.34 |
| 1423787_PM_at   | Nup133                       | NUP133   | -0.13 | 4.01 | -0.84 | 4.22E-01 | 6.85E-01 | -6.34 |
| 1459378_PM_at   | ---                          | NA       | 0.15  | 2.51 | 0.84  | 4.22E-01 | 6.85E-01 | -6.34 |

|                 |                     |          |       |      |       |          |          |       |
|-----------------|---------------------|----------|-------|------|-------|----------|----------|-------|
| 1442316_PM_x_at | Trp53bp1            | TP53BP1  | 0.16  | 2.83 | 0.84  | 4.22E-01 | 6.85E-01 | -6.34 |
| 1421211_PM_a_at | Cita                | CIITA    | 0.07  | 2.27 | 0.84  | 4.22E-01 | 6.86E-01 | -6.34 |
| 1441742_PM_at   | Kcnh5               | KCNH5    | -0.19 | 2.43 | -0.84 | 4.22E-01 | 6.86E-01 | -6.34 |
| 1442086_PM_at   | ---                 | NA       | -0.09 | 2.10 | -0.84 | 4.22E-01 | 6.86E-01 | -6.34 |
| 1450580_PM_at   | Gpr45               | GPR45    | 0.12  | 2.25 | 0.84  | 4.22E-01 | 6.86E-01 | -6.34 |
| 1450713_PM_at   | Cspg5               | CSPG5    | -0.25 | 4.27 | -0.84 | 4.22E-01 | 6.86E-01 | -6.34 |
| 1419530_PM_at   | Il12b               | IL12B    | 0.08  | 2.03 | 0.84  | 4.22E-01 | 6.86E-01 | -6.34 |
| 1419401_PM_at   | Asb13               | ASB13    | -0.31 | 2.63 | -0.84 | 4.22E-01 | 6.86E-01 | -6.34 |
| 1449335_PM_at   | Timp3               | TIMP3    | -0.22 | 2.84 | -0.84 | 4.22E-01 | 6.86E-01 | -6.34 |
| 1425038_PM_at   | Slc22a19            | SLC22A9  | -0.11 | 2.39 | -0.84 | 4.22E-01 | 6.86E-01 | -6.34 |
| 1452432_PM_at   | Tfpi                | TFPI     | 0.08  | 2.18 | 0.84  | 4.22E-01 | 6.86E-01 | -6.34 |
| 1451835_PM_at   | Sox21               | SOX21    | 0.12  | 2.59 | 0.84  | 4.22E-01 | 6.86E-01 | -6.34 |
| 1433111_PM_at   | Nhsl1               | NHSL1    | 0.18  | 2.27 | 0.84  | 4.22E-01 | 6.86E-01 | -6.34 |
| 1438507_PM_x_at | Rpl14 /// Rpl14-ps1 | RPL14    | 0.44  | 7.91 | 0.84  | 4.22E-01 | 6.86E-01 | -6.34 |
| 1446284_PM_at   | ---                 | NA       | 0.10  | 2.01 | 0.84  | 4.22E-01 | 6.86E-01 | -6.34 |
| 1432227_PM_at   | ---                 | NA       | -0.08 | 2.04 | -0.84 | 4.22E-01 | 6.86E-01 | -6.34 |
| 1455171_PM_at   | Suv420h1            | KMT5B    | 0.10  | 2.30 | 0.84  | 4.22E-01 | 6.86E-01 | -6.34 |
| 1454733_PM_at   | Nod1                | NOD1     | 0.10  | 2.94 | 0.84  | 4.22E-01 | 6.86E-01 | -6.34 |
| 1430538_PM_at   | 2210013O21Rik       | NA       | 0.27  | 4.38 | 0.84  | 4.22E-01 | 6.86E-01 | -6.34 |
| 1439734_PM_at   | ---                 | NA       | 0.09  | 2.04 | 0.84  | 4.22E-01 | 6.86E-01 | -6.34 |
| 1429248_PM_at   | Apopt1              | APOPT1   | 0.20  | 4.01 | 0.84  | 4.22E-01 | 6.86E-01 | -6.34 |
| 1446362_PM_at   | ---                 | NA       | -0.13 | 2.60 | -0.84 | 4.22E-01 | 6.86E-01 | -6.34 |
| 1422873_PM_at   | Prg2                | PRG2     | 0.08  | 2.25 | 0.84  | 4.22E-01 | 6.86E-01 | -6.34 |
| 1419630_PM_a_at | Trim11              | TRIM11   | 0.16  | 3.11 | 0.84  | 4.22E-01 | 6.86E-01 | -6.34 |
| 1423943_PM_at   | Dus1l               | DUS1L    | 0.25  | 4.41 | 0.84  | 4.22E-01 | 6.86E-01 | -6.34 |
| 1435917_PM_at   | Ociad2              | OCLAD2   | -0.15 | 3.62 | -0.84 | 4.22E-01 | 6.86E-01 | -6.34 |
| 1457138_PM_x_at | ---                 | NA       | -0.08 | 2.22 | -0.84 | 4.22E-01 | 6.86E-01 | -6.34 |
| 1452783_PM_at   | Fndc3b              | FNDC3B   | 0.17  | 2.60 | 0.84  | 4.22E-01 | 6.86E-01 | -6.34 |
| 1421958_PM_at   | L1cam               | L1CAM    | 0.17  | 2.49 | 0.84  | 4.22E-01 | 6.86E-01 | -6.34 |
| 1428142_PM_at   | Etv5                | ETV5     | -0.31 | 3.38 | -0.84 | 4.22E-01 | 6.86E-01 | -6.34 |
| 1446741_PM_at   | Gm4151              | NA       | 0.09  | 2.22 | 0.84  | 4.22E-01 | 6.86E-01 | -6.34 |
| 1421546_PM_a_at | Racgap1             | RACGAP1  | 0.10  | 2.28 | 0.84  | 4.22E-01 | 6.86E-01 | -6.34 |
| 1451626_PM_x_at | ---                 | NA       | 0.17  | 4.60 | 0.84  | 4.22E-01 | 6.86E-01 | -6.34 |
| 1446568_PM_at   | ---                 | NA       | -0.14 | 2.65 | -0.84 | 4.22E-01 | 6.86E-01 | -6.34 |
| 1422336_PM_at   | Hoxa13              | HOXA13   | 0.14  | 2.66 | 0.84  | 4.22E-01 | 6.86E-01 | -6.34 |
| 1448772_PM_at   | Ube2a /// Ube2b     | UBE2A    | -0.32 | 2.83 | -0.83 | 4.23E-01 | 6.86E-01 | -6.34 |
| 1456399_PM_at   | ---                 | NA       | -0.30 | 3.51 | -0.84 | 4.23E-01 | 6.86E-01 | -6.34 |
| 1427219_PM_at   | ---                 | NA       | -0.23 | 4.31 | -0.83 | 4.23E-01 | 6.86E-01 | -6.34 |
| 1424410_PM_at   | Ttc8                | TTC8     | -0.19 | 2.70 | -0.83 | 4.23E-01 | 6.86E-01 | -6.34 |
| 1458448_PM_at   | Diexf               | DIEXF    | -0.09 | 2.73 | -0.83 | 4.23E-01 | 6.86E-01 | -6.34 |
| 1447717_PM_x_at | Nrsn2               | NRSN2    | -0.08 | 2.05 | -0.83 | 4.23E-01 | 6.86E-01 | -6.34 |
| 1441459_PM_at   | ---                 | NA       | -0.07 | 2.01 | -0.83 | 4.23E-01 | 6.86E-01 | -6.34 |
| 1448886_PM_at   | Gata3               | GATA3    | 0.08  | 2.46 | 0.83  | 4.23E-01 | 6.86E-01 | -6.34 |
| 1444852_PM_at   | ---                 | NA       | 0.11  | 2.54 | 0.83  | 4.23E-01 | 6.86E-01 | -6.34 |
| 1456317_PM_at   | Aldh3b2             | ALDH3B2  | 0.11  | 2.37 | 0.83  | 4.23E-01 | 6.86E-01 | -6.34 |
| 1441354_PM_at   | AU018740            | NA       | 0.12  | 2.42 | 0.83  | 4.23E-01 | 6.86E-01 | -6.34 |
| 1448051_PM_at   | ---                 | NA       | 0.14  | 3.85 | 0.83  | 4.23E-01 | 6.86E-01 | -6.34 |
| 1456730_PM_x_at | Actl6a              | ACTL6A   | 0.18  | 2.22 | 0.83  | 4.23E-01 | 6.86E-01 | -6.34 |
| 1445375_PM_at   | Itns2               | NA       | 0.22  | 3.98 | 0.83  | 4.23E-01 | 6.86E-01 | -6.34 |
| 1447176_PM_at   | ---                 | NA       | 0.23  | 2.34 | 0.84  | 4.23E-01 | 6.86E-01 | -6.34 |
| 1455385_PM_at   | Sh3glb1             | SH3GLB1  | 0.20  | 4.13 | 0.83  | 4.23E-01 | 6.86E-01 | -6.34 |
| 1447646_PM_at   | Dnaaf5              | DNAAF5   | 0.07  | 2.11 | 0.83  | 4.23E-01 | 6.86E-01 | -6.34 |
| 1449125_PM_at   | Tnfaipl1            | TNFAIPL1 | 0.14  | 2.83 | 0.83  | 4.23E-01 | 6.86E-01 | -6.34 |
| 1445288_PM_at   | ---                 | NA       | 0.09  | 2.44 | 0.83  | 4.23E-01 | 6.86E-01 | -6.34 |
| 1424876_PM_s_at | Spg20               | SPG20    | -0.24 | 4.00 | -0.83 | 4.23E-01 | 6.86E-01 | -6.34 |
| 1454604_PM_s_at | Tspan12             | TSPAN12  | -0.14 | 2.45 | -0.83 | 4.23E-01 | 6.86E-01 | -6.34 |
| 1451811_PM_at   | Cacng6              | CACNG6   | 0.08  | 2.67 | 0.83  | 4.23E-01 | 6.86E-01 | -6.34 |
| 1442716_PM_at   | Trmt10c             | TRMT10C  | 0.11  | 2.95 | 0.83  | 4.23E-01 | 6.86E-01 | -6.34 |
| 1429457_PM_at   | Psap1               | PSAP1    | 0.12  | 2.98 | 0.83  | 4.23E-01 | 6.86E-01 | -6.34 |
| 1417891_PM_at   | Spsb3               | SPSB3    | 0.11  | 2.94 | 0.83  | 4.23E-01 | 6.86E-01 | -6.34 |
| 1422910_PM_s_at | Smc6                | SMC6     | -0.29 | 5.60 | -0.83 | 4.23E-01 | 6.86E-01 | -6.34 |
| 1443531_PM_at   | Msahtd1             | NA       | 0.10  | 2.36 | 0.83  | 4.23E-01 | 6.86E-01 | -6.34 |
| 1435856_PM_x_at | Smcarb1             | SMARCB1  | 0.12  | 3.86 | 0.83  | 4.23E-01 | 6.86E-01 | -6.34 |
| 1422555_PM_s_at | Gna13               | GNA13    | 0.22  | 2.49 | 0.83  | 4.23E-01 | 6.86E-01 | -6.34 |
| 1418010_PM_a_at | Sh3glb1             | SH3GLB1  | -0.32 | 4.71 | -0.83 | 4.23E-01 | 6.86E-01 | -6.34 |
| 1433766_PM_at   | Naa25               | NAA25    | -0.20 | 3.08 | -0.83 | 4.24E-01 | 6.86E-01 | -6.34 |
| 1442801_PM_x_at | Tm7sf3              | TM7SF3   | -0.15 | 3.02 | -0.83 | 4.24E-01 | 6.86E-01 | -6.34 |
| 1438401_PM_at   | Ubn1                | UBN1     | -0.14 | 2.76 | -0.83 | 4.24E-01 | 6.86E-01 | -6.34 |
| 1448824_PM_at   | Ube2j1              | UBE2J1   | -0.10 | 4.46 | -0.83 | 4.24E-01 | 6.86E-01 | -6.34 |
| 1445656_PM_at   | ---                 | NA       | -0.10 | 2.29 | -0.83 | 4.23E-01 | 6.86E-01 | -6.34 |
| 1430479_PM_at   | Gm32819             | NA       | -0.09 | 2.18 | -0.83 | 4.24E-01 | 6.86E-01 | -6.34 |
| 1422164_PM_at   | Pou3f4              | POU3F4   | -0.08 | 2.84 | -0.83 | 4.24E-01 | 6.86E-01 | -6.34 |
| 1427777_PM_x_at | Fgfr4               | NA       | 0.08  | 2.21 | 0.83  | 4.23E-01 | 6.86E-01 | -6.34 |
| 1443434_PM_s_at | Plxnc1              | PLXNC1   | 0.08  | 2.52 | 0.83  | 4.24E-01 | 6.86E-01 | -6.34 |
| 1458417_PM_at   | ---                 | NA       | 0.08  | 2.33 | 0.83  | 4.23E-01 | 6.86E-01 | -6.34 |

|                 |                 |            |       |      |       |          |          |       |
|-----------------|-----------------|------------|-------|------|-------|----------|----------|-------|
| 1455921_PM_at   | Ttc30a2         | TTC30A     | 0.09  | 2.07 | 0.83  | 4.24E-01 | 6.86E-01 | -6.34 |
| 1450988_PM_at   | Lgr5            | LGR5       | 0.09  | 2.09 | 0.83  | 4.24E-01 | 6.86E-01 | -6.34 |
| 1451896_PM_a_at | Cherp           | CHERP      | 0.10  | 3.38 | 0.83  | 4.23E-01 | 6.86E-01 | -6.34 |
| 1425508_PM_s_at | Arfrp1          | ARFRP1     | 0.11  | 2.85 | 0.83  | 4.24E-01 | 6.86E-01 | -6.34 |
| 1454421_PM_at   | ---             | NA         | 0.11  | 2.54 | 0.83  | 4.23E-01 | 6.86E-01 | -6.34 |
| 1442817_PM_at   | ---             | NA         | 0.11  | 2.34 | 0.83  | 4.23E-01 | 6.86E-01 | -6.34 |
| 1442287_PM_at   | ---             | NA         | 0.11  | 2.42 | 0.83  | 4.23E-01 | 6.86E-01 | -6.34 |
| 1449015_PM_at   | Retnla          | RETNLB     | 0.11  | 2.15 | 0.83  | 4.24E-01 | 6.86E-01 | -6.34 |
| 1448635_PM_at   | Smc2            | SMC2       | 0.11  | 2.27 | 0.83  | 4.23E-01 | 6.86E-01 | -6.34 |
| 1436055_PM_at   | Lrrc15          | LRRC15     | 0.11  | 2.51 | 0.83  | 4.24E-01 | 6.86E-01 | -6.34 |
| 1458413_PM_at   | Fbxw8           | FBXW8      | 0.11  | 2.57 | 0.83  | 4.23E-01 | 6.86E-01 | -6.34 |
| 1458703_PM_at   | ---             | NA         | 0.12  | 2.14 | 0.83  | 4.24E-01 | 6.86E-01 | -6.34 |
| 1450672_PM_a_at | Atrip///Trex1   | TREX1      | 0.12  | 2.55 | 0.83  | 4.23E-01 | 6.86E-01 | -6.34 |
| 1426979_PM_at   | Mlxip           | MLXIP      | 0.13  | 2.35 | 0.83  | 4.23E-01 | 6.86E-01 | -6.34 |
| 1430916_PM_at   | Fancd2          | FANCD2     | 0.13  | 2.63 | 0.83  | 4.24E-01 | 6.86E-01 | -6.34 |
| 1439999_PM_at   | ---             | NA         | 0.14  | 3.24 | 0.83  | 4.24E-01 | 6.86E-01 | -6.34 |
| 1456791_PM_at   | Zfp800          | ZNF800     | 0.15  | 2.77 | 0.83  | 4.24E-01 | 6.86E-01 | -6.34 |
| 1431844_PM_at   | Kcnmb2          | KCNMB2     | 0.16  | 2.58 | 0.83  | 4.23E-01 | 6.86E-01 | -6.34 |
| 1430859_PM_at   | ---             | NA         | 0.16  | 2.74 | 0.83  | 4.23E-01 | 6.86E-01 | -6.34 |
| 1453572_PM_a_at | Gm13669///Plp2  | PLP2       | 0.17  | 3.52 | 0.83  | 4.23E-01 | 6.86E-01 | -6.34 |
| 1455319_PM_x_at | Rps8            | RPS8       | 0.18  | 8.86 | 0.83  | 4.24E-01 | 6.86E-01 | -6.34 |
| 1458942_PM_at   | ---             | NA         | 0.24  | 3.38 | 0.83  | 4.24E-01 | 6.86E-01 | -6.34 |
| 1426813_PM_at   | Ltv1            | AL049844.3 | 0.28  | 3.16 | 0.83  | 4.24E-01 | 6.86E-01 | -6.34 |
| 1427994_PM_at   | Cd300f          | CD300LD    | 0.29  | 2.83 | 0.83  | 4.24E-01 | 6.86E-01 | -6.34 |
| 1430629_PM_at   | Slc16a14        | SLC16A14   | 0.33  | 3.51 | 0.83  | 4.23E-01 | 6.86E-01 | -6.34 |
| 1432674_PM_at   | 2300010F08Rik   | NA         | 0.11  | 2.18 | 0.83  | 4.24E-01 | 6.87E-01 | -6.34 |
| 1458453_PM_at   | Lmo7            | LMO7       | -0.09 | 2.32 | -0.83 | 4.24E-01 | 6.87E-01 | -6.34 |
| 1419197_PM_x_at | Hamp            | HAMP       | 0.09  | 2.71 | 0.83  | 4.24E-01 | 6.87E-01 | -6.34 |
| 1456326_PM_at   | Fndc3c1         | NA         | 0.11  | 2.22 | 0.83  | 4.24E-01 | 6.87E-01 | -6.34 |
| 1422339_PM_at   | Gja3            | GJA3       | 0.16  | 2.72 | 0.83  | 4.24E-01 | 6.87E-01 | -6.34 |
| 1416261_PM_at   | Tmem19          | TMEM19     | -0.14 | 3.37 | -0.83 | 4.24E-01 | 6.87E-01 | -6.34 |
| 1451957_PM_at   | Il1f10          | IL1F10     | 0.10  | 2.52 | 0.83  | 4.24E-01 | 6.87E-01 | -6.34 |
| 1458533_PM_at   | ---             | NA         | 0.09  | 2.10 | 0.83  | 4.24E-01 | 6.87E-01 | -6.34 |
| 1440539_PM_at   | Slc10a7         | NA         | 0.10  | 2.14 | 0.83  | 4.24E-01 | 6.87E-01 | -6.34 |
| 1429459_PM_at   | Sema3d          | SEMA3D     | -0.12 | 2.15 | -0.83 | 4.24E-01 | 6.87E-01 | -6.34 |
| 1437567_PM_at   | Zfp772          | NA         | -0.18 | 2.46 | -0.83 | 4.24E-01 | 6.87E-01 | -6.34 |
| 1454447_PM_at   | ---             | NA         | -0.08 | 2.17 | -0.83 | 4.24E-01 | 6.87E-01 | -6.34 |
| 1416273_PM_at   | Tnfaip2         | TNFAIP2    | 0.11  | 2.31 | 0.83  | 4.24E-01 | 6.87E-01 | -6.34 |
| 1449025_PM_at   | Ifit3           | IFIT3      | 0.25  | 4.43 | 0.83  | 4.24E-01 | 6.87E-01 | -6.34 |
| 1432209_PM_at   | 1810010K12Rik   | NA         | 0.06  | 1.89 | 0.83  | 4.24E-01 | 6.87E-01 | -6.34 |
| 1454943_PM_a_at | Paxip1          | PAXIP1     | -0.10 | 3.09 | -0.83 | 4.24E-01 | 6.87E-01 | -6.34 |
| 1421484_PM_at   | Ugt2a1///Ugt2a2 | UGT2A2     | 0.08  | 2.48 | 0.83  | 4.24E-01 | 6.87E-01 | -6.34 |
| 1442056_PM_at   | ---             | NA         | 0.12  | 2.34 | 0.83  | 4.24E-01 | 6.87E-01 | -6.34 |
| 1444076_PM_at   | Zfp81           | NA         | 0.18  | 3.12 | 0.83  | 4.24E-01 | 6.87E-01 | -6.34 |
| 1447221_PM_x_at | ---             | NA         | 0.25  | 2.62 | 0.83  | 4.24E-01 | 6.87E-01 | -6.34 |
| 1420002_PM_at   | D7Erdt1e        | NA         | 0.10  | 2.58 | 0.83  | 4.24E-01 | 6.87E-01 | -6.34 |
| 1421665_PM_a_at | Gnrhr           | GNRHR      | 0.12  | 2.47 | 0.83  | 4.24E-01 | 6.87E-01 | -6.34 |
| 1431295_PM_a_at | Stx18           | STX18      | 0.23  | 2.94 | 0.83  | 4.24E-01 | 6.87E-01 | -6.34 |
| 1433018_PM_at   | ---             | NA         | 0.10  | 2.23 | 0.83  | 4.24E-01 | 6.87E-01 | -6.34 |
| 1429083_PM_at   | Agl             | AGL        | -0.32 | 3.07 | -0.83 | 4.24E-01 | 6.87E-01 | -6.34 |
| 1424374_PM_at   | Gimap4          | GIMAP4     | 0.06  | 2.21 | 0.83  | 4.24E-01 | 6.87E-01 | -6.34 |
| 1460006_PM_at   | Zfhx3           | ZFHX3      | 0.29  | 5.10 | 0.83  | 4.24E-01 | 6.87E-01 | -6.34 |
| 1432997_PM_at   | ---             | NA         | 0.13  | 2.58 | 0.83  | 4.25E-01 | 6.87E-01 | -6.34 |
| 1443165_PM_at   | ---             | NA         | 0.09  | 2.82 | 0.83  | 4.25E-01 | 6.87E-01 | -6.34 |
| 1442610_PM_at   | ---             | NA         | -0.06 | 1.99 | -0.83 | 4.25E-01 | 6.87E-01 | -6.34 |
| 1425546_PM_a_at | Trf             | TF         | -0.40 | 4.22 | -0.83 | 4.25E-01 | 6.87E-01 | -6.34 |
| 1460681_PM_at   | Ceacam1         | PSG7       | 0.12  | 3.07 | 0.83  | 4.25E-01 | 6.87E-01 | -6.34 |
| 1418604_PM_at   | Avpr1a          | AVPR1A     | 0.08  | 2.50 | 0.83  | 4.25E-01 | 6.87E-01 | -6.34 |
| 1448952_PM_at   | Chd3os          | NA         | -0.17 | 5.48 | -0.83 | 4.25E-01 | 6.87E-01 | -6.34 |
| 1427659_PM_at   | ---             | NA         | -0.09 | 2.56 | -0.83 | 4.25E-01 | 6.87E-01 | -6.34 |
| 1446188_PM_at   | Cep97           | CEP97      | 0.10  | 2.38 | 0.83  | 4.25E-01 | 6.87E-01 | -6.34 |
| 1446749_PM_at   | Ktn1            | KTN1       | 0.10  | 1.99 | 0.83  | 4.25E-01 | 6.87E-01 | -6.34 |
| 1442575_PM_at   | ---             | NA         | 0.12  | 2.28 | 0.83  | 4.25E-01 | 6.87E-01 | -6.34 |
| 1448668_PM_a_at | Irak1           | IRAK1      | 0.19  | 2.91 | 0.83  | 4.25E-01 | 6.87E-01 | -6.34 |
| 1432320_PM_at   | 9430065F17Rik   | NA         | 0.46  | 2.87 | 0.83  | 4.25E-01 | 6.87E-01 | -6.34 |
| 1418330_PM_at   | Ctcf            | CTCF       | -0.14 | 4.43 | -0.83 | 4.25E-01 | 6.87E-01 | -6.34 |
| 1455957_PM_x_at | Ceacam11        | CEACAM3    | 0.07  | 2.17 | 0.83  | 4.25E-01 | 6.87E-01 | -6.34 |
| 1453039_PM_at   | Zfp335          | ZNF335     | 0.09  | 2.68 | 0.83  | 4.25E-01 | 6.87E-01 | -6.34 |
| 1424338_PM_at   | Slc6a13         | SLC6A13    | 0.20  | 3.48 | 0.83  | 4.25E-01 | 6.87E-01 | -6.34 |
| 1420863_PM_at   | Dctn4           | DCTN4      | -0.31 | 3.04 | -0.83 | 4.25E-01 | 6.87E-01 | -6.34 |
| 1425526_PM_a_at | Prrx1           | PRRX1      | 0.08  | 2.67 | 0.83  | 4.25E-01 | 6.87E-01 | -6.34 |
| 1433216_PM_at   | ---             | NA         | 0.10  | 2.52 | 0.83  | 4.25E-01 | 6.87E-01 | -6.34 |
| 1450204_PM_a_at | Mynn            | MYNN       | 0.13  | 3.01 | 0.83  | 4.25E-01 | 6.87E-01 | -6.34 |
| 1441493_PM_at   | Erc1            | ERC1       | 0.15  | 3.85 | 0.83  | 4.25E-01 | 6.87E-01 | -6.34 |
| 1425543_PM_s_at | Plekha5         | PLEKHA5    | 0.43  | 3.17 | 0.83  | 4.25E-01 | 6.87E-01 | -6.34 |

|                 |                        |            |       |      |       |          |          |       |
|-----------------|------------------------|------------|-------|------|-------|----------|----------|-------|
| 1435942_PM_at   | Kcnq2                  | KCNQ2      | -0.31 | 6.12 | -0.83 | 4.25E-01 | 6.87E-01 | -6.34 |
| 1421891_PM_at   | St3gal2                | ST3GAL2    | -0.21 | 3.57 | -0.83 | 4.25E-01 | 6.87E-01 | -6.34 |
| 1439681_PM_at   | ---                    | NA         | -0.09 | 2.31 | -0.83 | 4.25E-01 | 6.87E-01 | -6.34 |
| 1440727_PM_at   | ---                    | NA         | -0.10 | 2.35 | -0.83 | 4.25E-01 | 6.87E-01 | -6.34 |
| 1439944_PM_at   | Rbm46                  | NA         | 0.07  | 2.15 | 0.83  | 4.25E-01 | 6.87E-01 | -6.34 |
| 1444133_PM_at   | ---                    | NA         | 0.08  | 2.39 | 0.83  | 4.25E-01 | 6.87E-01 | -6.34 |
| 1437778_PM_at   | Rbm15b                 | NA         | 0.09  | 2.67 | 0.83  | 4.25E-01 | 6.87E-01 | -6.34 |
| 1431917_PM_at   | Pigq                   | PIGQ       | 0.11  | 2.79 | 0.83  | 4.25E-01 | 6.87E-01 | -6.34 |
| 1437079_PM_at   | Slc18a2                | SLC18A2    | 0.19  | 3.83 | 0.83  | 4.25E-01 | 6.87E-01 | -6.34 |
| 1455197_PM_at   | Rnd1                   | RND1       | 0.08  | 2.60 | 0.83  | 4.25E-01 | 6.88E-01 | -6.34 |
| 1427801_PM_at   | Krtap19-1              | NA         | 0.11  | 2.40 | 0.83  | 4.25E-01 | 6.88E-01 | -6.34 |
| 1436612_PM_at   | 2410004I01Rik          | NA         | 0.10  | 2.63 | 0.83  | 4.25E-01 | 6.88E-01 | -6.34 |
| 1449974_PM_at   | Gapdhs                 | GAPDHS     | 0.09  | 2.26 | 0.83  | 4.25E-01 | 6.88E-01 | -6.34 |
| 1456489_PM_at   | Pcf11                  | PCF11      | -0.37 | 3.92 | -0.83 | 4.25E-01 | 6.88E-01 | -6.34 |
| 1418807_PM_at   | 3110070M22Rik          | NA         | 0.14  | 2.67 | 0.83  | 4.26E-01 | 6.88E-01 | -6.34 |
| 1430659_PM_at   | 4930548H24Rik          | CCDC121    | 0.10  | 2.64 | 0.83  | 4.26E-01 | 6.88E-01 | -6.34 |
| 1440150_PM_at   | Tgm3                   | TGM3       | 0.13  | 2.43 | 0.83  | 4.26E-01 | 6.88E-01 | -6.34 |
| 1457524_PM_at   | ---                    | NA         | 0.19  | 3.11 | 0.83  | 4.26E-01 | 6.88E-01 | -6.34 |
| 1449780_PM_at   | ---                    | NA         | 0.06  | 2.05 | 0.83  | 4.26E-01 | 6.88E-01 | -6.34 |
| 1442519_PM_at   | ---                    | NA         | 0.08  | 2.11 | 0.83  | 4.26E-01 | 6.88E-01 | -6.34 |
| 1451488_PM_at   | Fitm1                  | FITM1      | 0.08  | 2.62 | 0.83  | 4.26E-01 | 6.88E-01 | -6.34 |
| 1432063_PM_at   | 4833427F10Rik          | NA         | 0.11  | 3.68 | 0.83  | 4.26E-01 | 6.88E-01 | -6.34 |
| 1428998_PM_at   | Phf3                   | PHF3       | 0.16  | 4.33 | 0.83  | 4.26E-01 | 6.88E-01 | -6.34 |
| 1447335_PM_x_at | Bc11a                  | NA         | 0.14  | 2.61 | 0.83  | 4.26E-01 | 6.88E-01 | -6.34 |
| 1433980_PM_at   | Kat5                   | KAT5       | -0.16 | 2.32 | -0.83 | 4.26E-01 | 6.88E-01 | -6.34 |
| 1449715_PM_at   | ---                    | NA         | 0.08  | 2.31 | 0.83  | 4.26E-01 | 6.88E-01 | -6.34 |
| 1432611_PM_at   | ---                    | NA         | 0.10  | 2.08 | 0.83  | 4.26E-01 | 6.88E-01 | -6.34 |
| 1425933_PM_a_at | Nt5c2                  | NT5C2      | 0.16  | 3.36 | 0.83  | 4.26E-01 | 6.88E-01 | -6.34 |
| 1421586_PM_a_at | Cd46                   | CD46       | 0.11  | 2.34 | 0.83  | 4.26E-01 | 6.88E-01 | -6.34 |
| 1446745_PM_at   | Gm5547                 | NA         | 0.12  | 2.20 | 0.83  | 4.26E-01 | 6.88E-01 | -6.34 |
| 1459046_PM_at   | Ccdc171                | CCDC171    | -0.34 | 3.19 | -0.83 | 4.26E-01 | 6.88E-01 | -6.34 |
| 1453491_PM_at   | Pyrox2                 | NA         | 0.09  | 2.99 | 0.83  | 4.26E-01 | 6.88E-01 | -6.34 |
| 1443699_PM_at   | Ptprk                  | NA         | 0.10  | 2.54 | 0.83  | 4.26E-01 | 6.88E-01 | -6.34 |
| 1450091_PM_at   | Ighmbp2                | NA         | 0.14  | 3.05 | 0.83  | 4.26E-01 | 6.88E-01 | -6.34 |
| 1429281_PM_at   | 2610008E11Rik          | ZNF717     | -0.19 | 4.01 | -0.83 | 4.26E-01 | 6.88E-01 | -6.34 |
| 1449153_PM_at   | Mmp12                  | MMMP12     | -0.06 | 1.90 | -0.83 | 4.26E-01 | 6.88E-01 | -6.34 |
| 1420231_PM_at   | ---                    | NA         | 0.06  | 2.07 | 0.83  | 4.26E-01 | 6.88E-01 | -6.34 |
| 1440469_PM_at   | Gm9999                 | NA         | 0.07  | 2.11 | 0.83  | 4.26E-01 | 6.88E-01 | -6.34 |
| 1449006_PM_at   | Gla                    | GLA        | 0.07  | 2.23 | 0.83  | 4.26E-01 | 6.88E-01 | -6.34 |
| 1429522_PM_at   | Ankrd42                | ANKRD42    | -0.19 | 2.57 | -0.83 | 4.26E-01 | 6.88E-01 | -6.34 |
| 1431069_PM_at   | Sphkap                 | SPHKAP     | 0.07  | 2.19 | 0.83  | 4.26E-01 | 6.88E-01 | -6.34 |
| 1423381_PM_at   | Akr1c1                 | AKR1C2     | 0.09  | 2.42 | 0.83  | 4.26E-01 | 6.88E-01 | -6.34 |
| 1435240_PM_at   | Baz2b                  | BAZ2B      | -0.27 | 2.93 | -0.83 | 4.26E-01 | 6.88E-01 | -6.34 |
| 1430071_PM_at   | Mpc2                   | MPC2       | -0.08 | 2.62 | -0.83 | 4.26E-01 | 6.88E-01 | -6.34 |
| 1444367_PM_at   | Fndc7                  | FND7       | 0.09  | 2.06 | 0.83  | 4.26E-01 | 6.88E-01 | -6.34 |
| 1417742_PM_a_at | Dmap1                  | DMAP1      | 0.10  | 2.65 | 0.83  | 4.26E-01 | 6.88E-01 | -6.34 |
| 1437694_PM_at   | ---                    | NA         | 0.14  | 2.53 | 0.83  | 4.26E-01 | 6.88E-01 | -6.34 |
| 1455255_PM_at   | Gid8                   | NA         | -0.20 | 2.70 | -0.83 | 4.26E-01 | 6.88E-01 | -6.34 |
| 1449986_PM_at   | 2310034C09Rik          | KRTAP13-3  | -0.08 | 2.08 | -0.83 | 4.27E-01 | 6.88E-01 | -6.34 |
| 1420066_PM_s_at | Cd160                  | CD160      | 0.09  | 2.29 | 0.83  | 4.26E-01 | 6.88E-01 | -6.34 |
| 1435729_PM_at   | Lamtor2                | LAMTOR2    | 0.13  | 2.73 | 0.83  | 4.26E-01 | 6.88E-01 | -6.34 |
| 1427367_PM_at   | Cracr2b                | CRACR2B    | 0.13  | 2.96 | 0.83  | 4.27E-01 | 6.88E-01 | -6.34 |
| 1420454_PM_at   | Rai1                   | RAI1       | 0.13  | 2.26 | 0.83  | 4.27E-01 | 6.88E-01 | -6.34 |
| 1429992_PM_at   | Speer4b                | NA         | 0.15  | 2.84 | 0.83  | 4.27E-01 | 6.88E-01 | -6.34 |
| 1427819_PM_at   | ---                    | NA         | 0.15  | 2.11 | 0.83  | 4.26E-01 | 6.88E-01 | -6.34 |
| 1418059_PM_at   | Adgrl4                 | ADGRL4     | 0.21  | 2.50 | 0.83  | 4.26E-01 | 6.88E-01 | -6.34 |
| 1424340_PM_at   | Lrrc48                 | LRR3       | 0.21  | 3.49 | 0.83  | 4.27E-01 | 6.88E-01 | -6.34 |
| 1432924_PM_at   | ---                    | NA         | 0.23  | 2.40 | 0.83  | 4.27E-01 | 6.88E-01 | -6.34 |
| 1419212_PM_at   | Icosl                  | FP565260.3 | 0.25  | 2.73 | 0.83  | 4.27E-01 | 6.88E-01 | -6.34 |
| 1449575_PM_a_at | Gstp1                  | GSTP1      | -0.30 | 5.83 | -0.83 | 4.27E-01 | 6.88E-01 | -6.34 |
| 1457461_PM_at   | LOC102631735           | NA         | -0.11 | 2.79 | -0.83 | 4.27E-01 | 6.89E-01 | -6.34 |
| 1419441_PM_at   | Rplp0                  | RPLP0      | -0.32 | 6.17 | -0.83 | 4.27E-01 | 6.89E-01 | -6.34 |
| 1451423_PM_at   | Tbcc                   | TBCC       | -0.20 | 4.76 | -0.83 | 4.27E-01 | 6.89E-01 | -6.34 |
| 1451545_PM_at   | Tdtd3                  | TDRD3      | -0.16 | 3.83 | -0.83 | 4.27E-01 | 6.89E-01 | -6.34 |
| 1438751_PM_at   | Slc30a10               | SLC30A10   | 0.17  | 2.32 | 0.83  | 4.27E-01 | 6.89E-01 | -6.34 |
| 1434787_PM_at   | Arf3                   | NA         | 0.21  | 3.39 | 0.83  | 4.27E-01 | 6.89E-01 | -6.34 |
| 1425368_PM_a_at | Numb                   | NUMB       | 0.29  | 2.79 | 0.83  | 4.27E-01 | 6.89E-01 | -6.34 |
| 1453108_PM_at   | Arsk                   | ARSK       | -0.06 | 2.34 | -0.83 | 4.27E-01 | 6.89E-01 | -6.34 |
| 1445032_PM_at   | ---                    | NA         | 0.12  | 2.24 | 0.83  | 4.27E-01 | 6.89E-01 | -6.34 |
| 1446336_PM_at   | ---                    | NA         | 0.19  | 2.60 | 0.83  | 4.27E-01 | 6.89E-01 | -6.34 |
| 1444478_PM_at   | Appl1                  | APPL1      | -0.24 | 6.07 | -0.83 | 4.27E-01 | 6.89E-01 | -6.34 |
| 1446485_PM_at   | Gm12130                | NA         | 0.11  | 2.17 | 0.83  | 4.27E-01 | 6.89E-01 | -6.34 |
| 1448768_PM_at   | Mog                    | MOG        | 0.16  | 2.62 | 0.83  | 4.27E-01 | 6.89E-01 | -6.34 |
| 1433611_PM_s_at | Bud31 /// LOC102642043 | BUD31      | -0.25 | 3.61 | -0.83 | 4.27E-01 | 6.89E-01 | -6.34 |
| 1440848_PM_at   | ---                    | NA         | -0.10 | 2.50 | -0.83 | 4.27E-01 | 6.89E-01 | -6.34 |

|                         |                                                   |            |       |      |       |          |          |       |
|-------------------------|---------------------------------------------------|------------|-------|------|-------|----------|----------|-------|
| 1453552_PM_at           | Plet1os                                           | NA         | 0.08  | 2.16 | 0.83  | 4.27E-01 | 6.89E-01 | -6.34 |
| 1443694_PM_at           | Rgs20                                             | RGS20      | -0.44 | 8.23 | -0.83 | 4.27E-01 | 6.89E-01 | -6.34 |
| 1455161_PM_at           | AI504432                                          | NA         | 0.17  | 3.26 | 0.83  | 4.27E-01 | 6.89E-01 | -6.34 |
| 1432739_PM_at           | 2900060K15Rik                                     | NA         | -0.16 | 2.36 | -0.83 | 4.27E-01 | 6.89E-01 | -6.34 |
| 1458178_PM_at           | ---                                               | NA         | 0.12  | 2.54 | 0.83  | 4.27E-01 | 6.89E-01 | -6.34 |
| 1454456_PM_at           | ---                                               | NA         | 0.13  | 2.21 | 0.83  | 4.27E-01 | 6.89E-01 | -6.34 |
| 1418393_PM_a_at         | Itga7                                             | ITGA7      | 0.16  | 3.18 | 0.83  | 4.27E-01 | 6.89E-01 | -6.34 |
| 1447342_PM_at           | ---                                               | NA         | -0.18 | 3.51 | -0.83 | 4.27E-01 | 6.89E-01 | -6.34 |
| 1427340_PM_at           | Rgs6                                              | RGS6       | 0.13  | 2.27 | 0.83  | 4.27E-01 | 6.89E-01 | -6.34 |
| 1439578_PM_at           | Lsm11                                             | LSM11      | 0.13  | 2.89 | 0.83  | 4.27E-01 | 6.89E-01 | -6.35 |
| 1441075_PM_at           | Nostrin                                           | NOSTRIN    | 0.09  | 2.74 | 0.83  | 4.27E-01 | 6.89E-01 | -6.35 |
| 1448070_PM_at           | Xpo1                                              | XPO1       | -0.27 | 2.95 | -0.83 | 4.28E-01 | 6.89E-01 | -6.35 |
| 1457552_PM_at           | ---                                               | NA         | -0.08 | 2.26 | -0.83 | 4.28E-01 | 6.89E-01 | -6.35 |
| 1425602_PM_a_at         | Rabep2                                            | RABEP2     | 0.07  | 2.19 | 0.83  | 4.28E-01 | 6.89E-01 | -6.35 |
| 1452443_PM_s_at         | Helz                                              | HELZ       | 0.08  | 2.06 | 0.83  | 4.28E-01 | 6.89E-01 | -6.35 |
| 1456973_PM_at           | ---                                               | NA         | 0.16  | 2.55 | 0.83  | 4.28E-01 | 6.89E-01 | -6.35 |
| 1457125_PM_at           | St6galnac3                                        | ST6GALNAC3 | -0.13 | 2.36 | -0.83 | 4.28E-01 | 6.89E-01 | -6.35 |
| 1450417_PM_a_at         | Rps20                                             | RPS20      | -0.15 | 2.83 | -0.83 | 4.28E-01 | 6.89E-01 | -6.35 |
| 1418485_PM_at           | Slc4a3                                            | SLC4A3     | 0.17  | 3.66 | 0.83  | 4.28E-01 | 6.89E-01 | -6.35 |
| 1428832_PM_at           | 1600002H07Rik                                     | C16orf59   | -0.15 | 3.55 | -0.83 | 4.28E-01 | 6.89E-01 | -6.35 |
| AFFX-NonspecificGC14_at | ---                                               | NA         | 0.06  | 2.05 | 0.83  | 4.28E-01 | 6.89E-01 | -6.35 |
| 1440180_PM_x_at         | Zbtb3                                             | ZBTB3      | 0.11  | 3.14 | 0.83  | 4.28E-01 | 6.89E-01 | -6.35 |
| 1424733_PM_at           | P2ry14                                            | P2RY14     | 0.08  | 2.04 | 0.83  | 4.28E-01 | 6.89E-01 | -6.35 |
| 1441554_PM_at           | ---                                               | NA         | 0.20  | 2.42 | 0.83  | 4.28E-01 | 6.89E-01 | -6.35 |
| 1423572_PM_at           | Bcl2l2                                            | BCL2L2     | -0.26 | 3.63 | -0.83 | 4.28E-01 | 6.90E-01 | -6.35 |
| 1434903_PM_s_at         | Il1rl2                                            | IL1RL2     | 0.07  | 2.86 | 0.82  | 4.28E-01 | 6.90E-01 | -6.35 |
| 1421012_PM_at           | Srprb                                             | SRPRB      | 0.12  | 3.21 | 0.82  | 4.28E-01 | 6.90E-01 | -6.35 |
| 1416961_PM_at           | Bub1b                                             | BUB1B      | 0.07  | 2.54 | 0.82  | 4.28E-01 | 6.90E-01 | -6.35 |
| 1431225_PM_at           | ---                                               | NA         | 0.39  | 2.66 | 0.82  | 4.28E-01 | 6.90E-01 | -6.35 |
| 1454125_PM_a_at         | Daw1                                              | DAW1       | 0.09  | 2.22 | 0.82  | 4.28E-01 | 6.90E-01 | -6.35 |
| 1438026_PM_at           | Zfp560                                            | ZNF560     | -0.30 | 3.15 | -0.82 | 4.28E-01 | 6.90E-01 | -6.35 |
| 1427823_PM_at           | ---                                               | NA         | 0.11  | 2.74 | 0.82  | 4.28E-01 | 6.90E-01 | -6.35 |
| 1417261_PM_at           | Mbtd1                                             | MBTD1      | 0.15  | 3.06 | 0.82  | 4.28E-01 | 6.90E-01 | -6.35 |
| 1433173_PM_at           | Gm30496                                           | NA         | 0.16  | 2.86 | 0.82  | 4.28E-01 | 6.90E-01 | -6.35 |
| 1442302_PM_at           | Mpg                                               | MPG        | 0.18  | 2.52 | 0.82  | 4.28E-01 | 6.90E-01 | -6.35 |
| 1439338_PM_at           | Gm6150                                            | NA         | 0.08  | 2.13 | 0.82  | 4.28E-01 | 6.90E-01 | -6.35 |
| 1456872_PM_a_at         | Harb1                                             | HARBI1     | -0.13 | 3.40 | -0.82 | 4.28E-01 | 6.90E-01 | -6.35 |
| 1452923_PM_at           | Ndufaf2                                           | NDUFAF2    | -0.45 | 5.82 | -0.82 | 4.28E-01 | 6.90E-01 | -6.35 |
| 1452260_PM_at           | Cidec                                             | CIDEC      | -0.09 | 2.62 | -0.82 | 4.28E-01 | 6.90E-01 | -6.35 |
| 1440702_PM_at           | ---                                               | NA         | 0.07  | 2.23 | 0.82  | 4.28E-01 | 6.90E-01 | -6.35 |
| 1417817_PM_a_at         | Wwtr1                                             | WWTR1      | 0.13  | 2.63 | 0.82  | 4.28E-01 | 6.90E-01 | -6.35 |
| 1448859_PM_at           | Cxcl13                                            | CXCL13     | 0.16  | 2.45 | 0.82  | 4.28E-01 | 6.90E-01 | -6.35 |
| 1422162_PM_at           | Dcc                                               | DCC        | 0.28  | 4.87 | 0.82  | 4.28E-01 | 6.90E-01 | -6.35 |
| 1459455_PM_at           | ---                                               | NA         | 0.12  | 3.32 | 0.82  | 4.29E-01 | 6.90E-01 | -6.35 |
| 1444194_PM_at           | ---                                               | NA         | 0.15  | 3.31 | 0.82  | 4.29E-01 | 6.90E-01 | -6.35 |
| 1422601_PM_at           | Serpib9                                           | SERPINB9   | 0.21  | 3.38 | 0.82  | 4.29E-01 | 6.90E-01 | -6.35 |
| 1418423_PM_s_at         | Gm11397 /// Serpinb9e /// Serpinb9f /// Serpinb9g | SERPINB9   | 0.22  | 2.57 | 0.82  | 4.29E-01 | 6.90E-01 | -6.35 |
| 1423822_PM_a_at         | Tmem168                                           | TMEM168    | -0.20 | 2.40 | -0.82 | 4.29E-01 | 6.90E-01 | -6.35 |
| 1460112_PM_at           | ---                                               | NA         | 0.13  | 2.50 | 0.82  | 4.29E-01 | 6.90E-01 | -6.35 |
| 1459781_PM_x_at         | Trp53                                             | TP53       | 0.07  | 2.21 | 0.82  | 4.29E-01 | 6.90E-01 | -6.35 |
| 1456636_PM_at           | Partic1                                           | NA         | 0.08  | 2.75 | 0.82  | 4.29E-01 | 6.90E-01 | -6.35 |
| 1437431_PM_at           | Cux1                                              | CUX1       | 0.08  | 2.24 | 0.82  | 4.29E-01 | 6.90E-01 | -6.35 |
| 1439667_PM_at           | Gm17455                                           | C10orf105  | 0.20  | 2.42 | 0.82  | 4.29E-01 | 6.90E-01 | -6.35 |
| 1432322_PM_at           | LOC102632739 /// Ost4                             | OST4       | 0.30  | 3.50 | 0.82  | 4.29E-01 | 6.90E-01 | -6.35 |
| AFFX-r2-Bs-lys-M_at     | ---                                               | NA         | 0.13  | 2.63 | 0.82  | 4.29E-01 | 6.90E-01 | -6.35 |
| 1417158_PM_at           | Zxdc                                              | ZXDC       | -0.21 | 2.43 | -0.82 | 4.29E-01 | 6.91E-01 | -6.35 |
| 1448786_PM_at           | Plbd1                                             | PLBD1      | 0.10  | 2.31 | 0.82  | 4.29E-01 | 6.91E-01 | -6.35 |
| 1455195_PM_at           | Rps24                                             | NA         | 0.15  | 2.90 | 0.82  | 4.29E-01 | 6.91E-01 | -6.35 |
| 1447273_PM_x_at         | Atp10a                                            | ATP10A     | 0.07  | 1.84 | 0.82  | 4.29E-01 | 6.91E-01 | -6.35 |
| 1441035_PM_at           | Kcne1                                             | KCNE1B     | 0.08  | 2.60 | 0.82  | 4.29E-01 | 6.91E-01 | -6.35 |
| 1426084_PM_a_at         | Tor1aip1                                          | TOR1AIP1   | 0.12  | 2.39 | 0.82  | 4.29E-01 | 6.91E-01 | -6.35 |
| 1425991_PM_a_at         | Kank2                                             | KANK2      | -0.30 | 3.10 | -0.82 | 4.29E-01 | 6.91E-01 | -6.35 |
| 1427806_PM_at           | ---                                               | NA         | 0.08  | 2.05 | 0.82  | 4.29E-01 | 6.91E-01 | -6.35 |
| 1451931_PM_x_at         | H2-K1                                             | NA         | 0.11  | 3.32 | 0.82  | 4.29E-01 | 6.91E-01 | -6.35 |
| 1444266_PM_at           | ---                                               | NA         | 0.09  | 2.55 | 0.82  | 4.29E-01 | 6.91E-01 | -6.35 |
| 1438399_PM_at           | Pex5l                                             | PEX5L      | 0.19  | 2.60 | 0.82  | 4.29E-01 | 6.91E-01 | -6.35 |
| 1448457_PM_at           | Krt71                                             | KRT71      | 0.07  | 2.53 | 0.82  | 4.29E-01 | 6.91E-01 | -6.35 |
| 1435911_PM_s_at         | Slc2a12                                           | SLC2A12    | -0.42 | 3.74 | -0.82 | 4.30E-01 | 6.91E-01 | -6.35 |
| 1455970_PM_at           | Pde5a                                             | PDE5A      | -0.30 | 2.48 | -0.82 | 4.30E-01 | 6.91E-01 | -6.35 |
| 1443920_PM_at           | Ccdc66                                            | NA         | -0.29 | 3.88 | -0.82 | 4.30E-01 | 6.91E-01 | -6.35 |
| 1451555_PM_at           | Nln                                               | NA         | -0.26 | 3.81 | -0.82 | 4.30E-01 | 6.91E-01 | -6.35 |
| 1418057_PM_at           | Tiam1                                             | TIAM1      | -0.22 | 3.99 | -0.82 | 4.30E-01 | 6.91E-01 | -6.35 |
| 1449066_PM_a_at         | Arhgef7                                           | ARHGEF7    | -0.21 | 3.88 | -0.82 | 4.30E-01 | 6.91E-01 | -6.35 |



|                 |                                      |            |       |      |       |          |          |       |
|-----------------|--------------------------------------|------------|-------|------|-------|----------|----------|-------|
| 1419873_PM_s_at | Csf1r                                | CSF1R      | -0.16 | 2.69 | -0.82 | 4.30E-01 | 6.91E-01 | -6.35 |
| 1448012_PM_at   | C76336                               | NA         | -0.11 | 2.69 | -0.82 | 4.30E-01 | 6.91E-01 | -6.35 |
| 1444087_PM_at   | Prpf38a                              | PRPF38A    | -0.09 | 2.12 | -0.82 | 4.30E-01 | 6.91E-01 | -6.35 |
| 1429640_PM_at   | 1700025F22Rik                        | NA         | 0.07  | 2.07 | 0.82  | 4.30E-01 | 6.91E-01 | -6.35 |
| 1429308_PM_at   | Prdm16                               | PRDM16     | 0.08  | 2.50 | 0.82  | 4.30E-01 | 6.91E-01 | -6.35 |
| 1417017_PM_at   | Cyp17a1                              | CYP17A1    | 0.09  | 2.25 | 0.82  | 4.30E-01 | 6.91E-01 | -6.35 |
| 1432179_PM_x_at | Ska1                                 | SKA1       | 0.09  | 2.16 | 0.82  | 4.30E-01 | 6.91E-01 | -6.35 |
| 1440288_PM_at   | Ptchd2                               | DISP3      | 0.10  | 2.26 | 0.82  | 4.30E-01 | 6.91E-01 | -6.35 |
| 1432262_PM_at   | Fam63a                               | MINDY1     | 0.11  | 2.26 | 0.82  | 4.30E-01 | 6.91E-01 | -6.35 |
| 1416798_PM_a_at | Nme4                                 | NME4       | 0.13  | 2.28 | 0.82  | 4.30E-01 | 6.91E-01 | -6.35 |
| 1446376_PM_at   | Rps6kb1                              | NA         | 0.14  | 2.68 | 0.82  | 4.30E-01 | 6.91E-01 | -6.35 |
| 1453316_PM_at   | Prss55                               | PRSS55     | 0.14  | 3.18 | 0.82  | 4.30E-01 | 6.91E-01 | -6.35 |
| 1450699_PM_at   | Selenbp1                             | SELENBP1   | 0.15  | 5.13 | 0.82  | 4.30E-01 | 6.91E-01 | -6.35 |
| 1431801_PM_at   | Gm32509                              | NA         | 0.16  | 3.06 | 0.82  | 4.30E-01 | 6.91E-01 | -6.35 |
| 1440614_PM_at   | ---                                  | NA         | 0.19  | 2.76 | 0.82  | 4.30E-01 | 6.91E-01 | -6.35 |
| 1459673_PM_at   | ---                                  | NA         | 0.28  | 3.29 | 0.82  | 4.30E-01 | 6.91E-01 | -6.35 |
| 1449018_PM_at   | Pfn1                                 | PFN1       | 0.34  | 6.47 | 0.82  | 4.30E-01 | 6.91E-01 | -6.35 |
| 1451792_PM_a_at | Pja1                                 | PJA1       | 0.37  | 4.36 | 0.82  | 4.30E-01 | 6.91E-01 | -6.35 |
| 1419694_PM_at   | St8sia1                              | ST8SIA1    | 0.07  | 2.10 | 0.82  | 4.30E-01 | 6.91E-01 | -6.35 |
| 1435119_PM_at   | LOC105244487                         | NA         | 0.12  | 2.68 | 0.82  | 4.30E-01 | 6.91E-01 | -6.35 |
| 1455998_PM_at   | Zbed6                                | ZBED6      | 0.19  | 3.55 | 0.82  | 4.30E-01 | 6.91E-01 | -6.35 |
| 1420741_PM_x_at | Lce1i                                | NA         | 0.09  | 2.47 | 0.82  | 4.30E-01 | 6.91E-01 | -6.35 |
| 1419351_PM_a_at | I7Rn6                                | HIKESHI    | -0.25 | 3.21 | -0.82 | 4.30E-01 | 6.91E-01 | -6.35 |
| 1426138_PM_a_at | Ube2j2                               | UBE2J2     | -0.11 | 2.74 | -0.82 | 4.30E-01 | 6.91E-01 | -6.35 |
| 1446667_PM_at   | ---                                  | NA         | 0.09  | 2.40 | 0.82  | 4.30E-01 | 6.91E-01 | -6.35 |
| 1457993_PM_at   | A330049N07Rik                        | NA         | 0.15  | 2.83 | 0.82  | 4.30E-01 | 6.91E-01 | -6.35 |
| 1444959_PM_at   | D1ErtD83e                            | NA         | 0.24  | 2.80 | 0.82  | 4.30E-01 | 6.91E-01 | -6.35 |
| 1438107_PM_x_at | BB236558                             | NA         | -0.13 | 2.41 | -0.82 | 4.30E-01 | 6.91E-01 | -6.35 |
| 1444075_PM_at   | Filip1                               | FILIP1     | 0.17  | 2.54 | 0.82  | 4.30E-01 | 6.91E-01 | -6.35 |
| 1443453_PM_at   | Zfp651                               | ZBTB47     | 0.10  | 2.24 | 0.82  | 4.30E-01 | 6.91E-01 | -6.35 |
| 1456052_PM_at   | Cdkl3                                | CDKL3      | 0.10  | 2.21 | 0.82  | 4.30E-01 | 6.91E-01 | -6.35 |
| 1423398_PM_at   | Taf12                                | TAF12      | -0.36 | 3.24 | -0.82 | 4.30E-01 | 6.91E-01 | -6.35 |
| 1436346_PM_at   | Cd109                                | CD109      | -0.34 | 3.03 | -0.82 | 4.30E-01 | 6.91E-01 | -6.35 |
| 1435540_PM_at   | Irgq                                 | IRGQ       | -0.22 | 3.51 | -0.82 | 4.30E-01 | 6.91E-01 | -6.35 |
| 1421914_PM_s_at | Mrpl19                               | MRPL19     | -0.21 | 3.99 | -0.82 | 4.30E-01 | 6.91E-01 | -6.35 |
| 1458176_PM_at   | ---                                  | NA         | -0.12 | 2.83 | -0.82 | 4.30E-01 | 6.91E-01 | -6.35 |
| 1425381_PM_a_at | Tfr2                                 | TFR2       | -0.07 | 2.24 | -0.82 | 4.30E-01 | 6.91E-01 | -6.35 |
| 1440739_PM_at   | Vegfc                                | VEGFC      | 0.09  | 2.09 | 0.82  | 4.30E-01 | 6.91E-01 | -6.35 |
| 1432581_PM_at   | 1110001J03Rik                        | FMC1       | 0.09  | 2.41 | 0.82  | 4.30E-01 | 6.91E-01 | -6.35 |
| 1457991_PM_at   | ---                                  | NA         | 0.11  | 2.70 | 0.82  | 4.30E-01 | 6.91E-01 | -6.35 |
| 1424543_PM_at   | Nck1                                 | NCK1       | 0.12  | 3.05 | 0.82  | 4.30E-01 | 6.91E-01 | -6.35 |
| 1429288_PM_x_at | Stx18                                | STX18      | 0.13  | 2.89 | 0.82  | 4.30E-01 | 6.91E-01 | -6.35 |
| 1441034_PM_at   | ---                                  | NA         | 0.14  | 2.85 | 0.82  | 4.30E-01 | 6.91E-01 | -6.35 |
| 1438518_PM_at   | 9930021J03Rik                        | NA         | 0.21  | 2.76 | 0.82  | 4.30E-01 | 6.91E-01 | -6.35 |
| 1460333_PM_at   | Ddx59                                | DDX59      | 0.21  | 3.19 | 0.82  | 4.30E-01 | 6.91E-01 | -6.35 |
| 1426445_PM_at   | Ctage5                               | CTAGE1     | -0.20 | 3.06 | -0.82 | 4.31E-01 | 6.91E-01 | -6.35 |
| 1425198_PM_at   | Ptpn2                                | PTPN2      | -0.11 | 2.61 | -0.82 | 4.31E-01 | 6.91E-01 | -6.35 |
| 1453637_PM_at   | ---                                  | NA         | 0.07  | 2.32 | 0.82  | 4.31E-01 | 6.91E-01 | -6.35 |
| 1437187_PM_at   | Ezf7                                 | EZF7       | 0.08  | 2.44 | 0.82  | 4.31E-01 | 6.91E-01 | -6.35 |
| 1426422_PM_at   | Cc2d1a                               | CC2D1A     | 0.10  | 2.72 | 0.82  | 4.31E-01 | 6.91E-01 | -6.35 |
| 1453362_PM_x_at | LOC102642752 /// Rps24 /// Rps24-ps3 | RPS24      | 0.30  | 6.06 | 0.82  | 4.31E-01 | 6.91E-01 | -6.35 |
| 1448784_PM_at   | Taf10                                | TAF10      | -0.10 | 4.65 | -0.82 | 4.31E-01 | 6.91E-01 | -6.35 |
| 1453542_PM_at   | ---                                  | NA         | 0.13  | 2.37 | 0.82  | 4.31E-01 | 6.92E-01 | -6.35 |
| 1454560_PM_at   | 4930519N06Rik                        | NA         | 0.12  | 2.50 | 0.82  | 4.31E-01 | 6.92E-01 | -6.35 |
| 1455795_PM_at   | Dse                                  | DSE        | -0.14 | 2.59 | -0.82 | 4.31E-01 | 6.92E-01 | -6.35 |
| 1422991_PM_at   | Pik3cd                               | PIK3CD     | 0.07  | 1.97 | 0.82  | 4.31E-01 | 6.92E-01 | -6.35 |
| 1448776_PM_at   | Gadd45gip1                           | GADD45GIP1 | 0.06  | 2.49 | 0.82  | 4.31E-01 | 6.92E-01 | -6.35 |
| 1420665_PM_at   | Irgb3bp                              | ITGB3BP    | 0.11  | 2.31 | 0.82  | 4.31E-01 | 6.92E-01 | -6.35 |
| 1427381_PM_at   | Irg1                                 | ACOD1      | 0.13  | 2.31 | 0.82  | 4.31E-01 | 6.92E-01 | -6.35 |
| 1433113_PM_at   | 4921504P20Rik                        | NA         | 0.14  | 2.46 | 0.82  | 4.31E-01 | 6.92E-01 | -6.35 |
| 1460723_PM_at   | Mc5r                                 | MC5R       | 0.09  | 2.35 | 0.82  | 4.31E-01 | 6.92E-01 | -6.35 |
| 1434785_PM_at   | Cacng5                               | CACNG5     | 0.31  | 3.83 | 0.82  | 4.31E-01 | 6.92E-01 | -6.35 |
| 1442085_PM_at   | Whsc11                               | NSD3       | 0.09  | 2.58 | 0.82  | 4.31E-01 | 6.92E-01 | -6.35 |
| 1422869_PM_at   | Mertk                                | MERTK      | 0.16  | 3.07 | 0.82  | 4.31E-01 | 6.92E-01 | -6.35 |
| 1454630_PM_at   | Samd14                               | SAMD14     | 0.11  | 3.32 | 0.82  | 4.31E-01 | 6.92E-01 | -6.35 |
| 1419452_PM_at   | Uchl5                                | UCHL5      | -0.28 | 6.16 | -0.82 | 4.31E-01 | 6.92E-01 | -6.35 |
| 1449591_PM_at   | Casp4                                | CASP5      | -0.15 | 2.19 | -0.82 | 4.31E-01 | 6.92E-01 | -6.35 |
| 1454453_PM_at   | 261001118Rik                         | NA         | -0.06 | 2.19 | -0.82 | 4.31E-01 | 6.92E-01 | -6.35 |
| 1443121_PM_at   | ---                                  | NA         | 0.09  | 2.40 | 0.82  | 4.31E-01 | 6.92E-01 | -6.35 |
| 1422102_PM_a_at | Stat5b                               | STAT5B     | 0.14  | 2.68 | 0.82  | 4.31E-01 | 6.92E-01 | -6.35 |
| 1442776_PM_at   | ---                                  | NA         | 0.15  | 2.62 | 0.82  | 4.31E-01 | 6.92E-01 | -6.35 |
| 1436203_PM_a_at | ---                                  | NA         | -0.24 | 2.67 | -0.82 | 4.31E-01 | 6.92E-01 | -6.35 |
| 1443477_PM_at   | Psm2                                 | PSMD2      | 0.06  | 2.14 | 0.82  | 4.31E-01 | 6.92E-01 | -6.35 |
| 1418128_PM_at   | Adcy6                                | ADCY6      | 0.08  | 2.65 | 0.82  | 4.31E-01 | 6.92E-01 | -6.35 |

|                 |                     |          |       |      |       |          |          |       |
|-----------------|---------------------|----------|-------|------|-------|----------|----------|-------|
| 1438164_PM_x_at | Flot2               | FLOT2    | -0.27 | 5.77 | -0.82 | 4.31E-01 | 6.92E-01 | -6.35 |
| 1457961_PM_at   | Lpgat1              | LPGAT1   | 0.21  | 2.21 | 0.82  | 4.31E-01 | 6.92E-01 | -6.35 |
| 1441997_PM_at   | Zfp184              | ZNF184   | 0.09  | 2.42 | 0.82  | 4.31E-01 | 6.92E-01 | -6.35 |
| 1445665_PM_at   | ---                 | NA       | 0.10  | 2.51 | 0.82  | 4.31E-01 | 6.92E-01 | -6.35 |
| 1448271_PM_a_at | Ddx21               | DDX21    | 0.12  | 2.94 | 0.82  | 4.32E-01 | 6.92E-01 | -6.35 |
| 1428798_PM_s_at | Setd6               | SETD6    | -0.54 | 5.88 | -0.82 | 4.32E-01 | 6.92E-01 | -6.35 |
| 1421767_PM_at   | Adk                 | NA       | 0.13  | 3.44 | 0.82  | 4.32E-01 | 6.92E-01 | -6.35 |
| 1442691_PM_at   | ---                 | NA       | -0.11 | 3.39 | -0.82 | 4.32E-01 | 6.92E-01 | -6.35 |
| 1418231_PM_at   | Lims1               | LIMS1    | 0.12  | 2.90 | 0.82  | 4.32E-01 | 6.92E-01 | -6.35 |
| 1458450_PM_at   | Zfr                 | NA       | 0.15  | 2.64 | 0.82  | 4.32E-01 | 6.92E-01 | -6.35 |
| 1425907_PM_s_at | Amot                | AMOT     | 0.08  | 3.00 | 0.82  | 4.32E-01 | 6.92E-01 | -6.35 |
| 1457207_PM_at   | ---                 | NA       | 0.07  | 2.14 | 0.82  | 4.32E-01 | 6.92E-01 | -6.35 |
| 1447151_PM_at   | ---                 | NA       | 0.08  | 2.13 | 0.82  | 4.32E-01 | 6.92E-01 | -6.35 |
| 1433240_PM_at   | 9430013L17Rik       | NA       | 0.08  | 2.11 | 0.82  | 4.32E-01 | 6.92E-01 | -6.35 |
| 1433349_PM_at   | 4930553P13Rik       | NA       | 0.11  | 2.72 | 0.82  | 4.32E-01 | 6.92E-01 | -6.35 |
| 1439175_PM_at   | ---                 | NA       | -0.14 | 3.46 | -0.82 | 4.32E-01 | 6.92E-01 | -6.35 |
| 1451042_PM_a_at | Mina                | RIOX2    | -0.09 | 2.40 | -0.82 | 4.32E-01 | 6.92E-01 | -6.35 |
| 1425236_PM_at   | Col20a1             | NA       | 0.09  | 2.38 | 0.82  | 4.32E-01 | 6.92E-01 | -6.35 |
| 1452781_PM_a_at | Gtf3c2              | GTF3C2   | -0.29 | 4.28 | -0.82 | 4.32E-01 | 6.92E-01 | -6.35 |
| 1435664_PM_at   | Zfp397              | ZNF397   | 0.08  | 2.27 | 0.82  | 4.32E-01 | 6.92E-01 | -6.35 |
| 1419516_PM_at   | Fam50a              | FAM50A   | 0.18  | 3.79 | 0.82  | 4.32E-01 | 6.92E-01 | -6.35 |
| 1431033_PM_x_at | Agl                 | AGL      | 0.12  | 2.35 | 0.82  | 4.32E-01 | 6.92E-01 | -6.35 |
| 1423547_PM_at   | Lyz2                | LYZ      | -0.28 | 2.71 | -0.82 | 4.32E-01 | 6.93E-01 | -6.35 |
| 1430654_PM_at   | ---                 | NA       | -0.26 | 3.29 | -0.82 | 4.32E-01 | 6.93E-01 | -6.35 |
| 1437029_PM_at   | Tacr3               | TACR3    | -0.07 | 2.26 | -0.82 | 4.32E-01 | 6.93E-01 | -6.35 |
| 1439060_PM_s_at | Wipi1               | WIP1     | 0.13  | 3.07 | 0.82  | 4.32E-01 | 6.93E-01 | -6.35 |
| 1457873_PM_at   | ---                 | NA       | 0.15  | 2.12 | 0.82  | 4.32E-01 | 6.93E-01 | -6.35 |
| 1456494_PM_a_at | Trim30a /// Trim30d | TRIM5    | 0.22  | 2.69 | 0.82  | 4.32E-01 | 6.93E-01 | -6.35 |
| 1455889_PM_at   | Far2                | FAR2     | 0.40  | 3.26 | 0.82  | 4.32E-01 | 6.93E-01 | -6.35 |
| 1454036_PM_a_at | Usp15               | USP15    | -0.20 | 3.23 | -0.82 | 4.32E-01 | 6.93E-01 | -6.35 |
| 1428062_PM_at   | Cpa1                | CPA1     | -0.11 | 2.57 | -0.82 | 4.32E-01 | 6.93E-01 | -6.35 |
| 1427322_PM_at   | Brwd1               | BRWD1    | -0.25 | 3.03 | -0.82 | 4.32E-01 | 6.93E-01 | -6.35 |
| 1442071_PM_at   | ---                 | NA       | -0.12 | 2.22 | -0.82 | 4.32E-01 | 6.93E-01 | -6.35 |
| 1443809_PM_at   | ---                 | NA       | 0.08  | 2.15 | 0.82  | 4.32E-01 | 6.93E-01 | -6.35 |
| 1420975_PM_at   | Baz1b               | BAZ1B    | 0.30  | 2.94 | 0.82  | 4.32E-01 | 6.93E-01 | -6.35 |
| 1429911_PM_at   | Mcp1                | MCPH1    | 0.24  | 3.91 | 0.82  | 4.32E-01 | 6.93E-01 | -6.35 |
| 1433495_PM_at   | Colgalt1            | COLGALT1 | 0.26  | 4.83 | 0.82  | 4.32E-01 | 6.93E-01 | -6.35 |
| 1455611_PM_at   | Pias1               | PIAS1    | -0.13 | 2.65 | -0.82 | 4.32E-01 | 6.93E-01 | -6.35 |
| 1431236_PM_at   | Stk32b              | STK32B   | 0.12  | 2.55 | 0.82  | 4.32E-01 | 6.93E-01 | -6.35 |
| 1440055_PM_at   | ---                 | NA       | -0.11 | 2.51 | -0.82 | 4.33E-01 | 6.93E-01 | -6.35 |
| 1445888_PM_x_at | Parp3               | PARP3    | 0.11  | 2.42 | 0.82  | 4.33E-01 | 6.93E-01 | -6.35 |
| 1419447_PM_s_at | Tbc1d1              | TBC1D1   | 0.12  | 3.04 | 0.82  | 4.33E-01 | 6.93E-01 | -6.35 |
| 1443087_PM_at   | Cdc23               | CDC23    | -0.12 | 2.35 | -0.82 | 4.33E-01 | 6.93E-01 | -6.35 |
| 1454488_PM_at   | 4930534I15Rik       | NA       | 0.14  | 2.28 | 0.82  | 4.33E-01 | 6.93E-01 | -6.35 |
| 1435937_PM_at   | Spltc2              | SPTLC2   | -0.14 | 2.53 | -0.82 | 4.33E-01 | 6.93E-01 | -6.35 |
| 1430906_PM_at   | ---                 | NA       | 0.09  | 2.18 | 0.82  | 4.33E-01 | 6.93E-01 | -6.35 |
| 1452476_PM_at   | Cacnb2              | CACNB2   | 0.21  | 2.67 | 0.82  | 4.33E-01 | 6.93E-01 | -6.35 |
| 1425408_PM_a_at | Pdzh1               | NA       | 0.11  | 2.54 | 0.82  | 4.33E-01 | 6.93E-01 | -6.35 |
| 1419505_PM_a_at | Ggps1               | GGPS1    | 0.14  | 3.20 | 0.82  | 4.33E-01 | 6.93E-01 | -6.35 |
| 1429057_PM_at   | Naa16               | NAA16    | 0.28  | 3.44 | 0.82  | 4.33E-01 | 6.93E-01 | -6.35 |
| 1428848_PM_a_at | Macf1               | MACF1    | 0.25  | 4.76 | 0.82  | 4.33E-01 | 6.93E-01 | -6.35 |
| 1456357_PM_at   | Scal                | SCAI     | -0.22 | 5.19 | -0.82 | 4.33E-01 | 6.93E-01 | -6.35 |
| 1437537_PM_at   | Casp9               | CASP9    | -0.11 | 3.82 | -0.82 | 4.33E-01 | 6.93E-01 | -6.35 |
| 1431449_PM_at   | Slco6d1             | SLCO6A1  | -0.09 | 2.39 | -0.82 | 4.33E-01 | 6.93E-01 | -6.35 |
| 1427851_PM_x_at | Igh-VJ558           | NA       | 0.07  | 1.95 | 0.82  | 4.33E-01 | 6.93E-01 | -6.35 |
| 1417553_PM_at   | Plac1               | PLAC1    | 0.08  | 2.27 | 0.82  | 4.33E-01 | 6.93E-01 | -6.35 |
| 1441392_PM_at   | ---                 | NA       | 0.09  | 2.28 | 0.82  | 4.33E-01 | 6.93E-01 | -6.35 |
| 1452639_PM_at   | Enpp4               | ENPP4    | -0.12 | 2.97 | -0.82 | 4.33E-01 | 6.93E-01 | -6.35 |
| 1435396_PM_at   | Stxbp6              | STXBP6   | -0.27 | 4.79 | -0.82 | 4.33E-01 | 6.93E-01 | -6.35 |
| 1447702_PM_x_at | Igsf1               | IGSF1    | 0.09  | 3.02 | 0.82  | 4.33E-01 | 6.93E-01 | -6.35 |
| 1437538_PM_at   | Snhg7               | NA       | -0.17 | 2.87 | -0.82 | 4.33E-01 | 6.93E-01 | -6.35 |
| 1455694_PM_at   | Nbeal2              | NBEAL2   | 0.08  | 2.22 | 0.82  | 4.33E-01 | 6.93E-01 | -6.35 |
| 1457878_PM_at   | C430042M11Rik       | NA       | 0.09  | 2.38 | 0.82  | 4.33E-01 | 6.93E-01 | -6.35 |
| 1429396_PM_at   | Atg16l2             | ATG16L2  | 0.11  | 2.39 | 0.82  | 4.33E-01 | 6.93E-01 | -6.35 |
| 1433250_PM_at   | ---                 | NA       | 0.11  | 2.48 | 0.82  | 4.33E-01 | 6.93E-01 | -6.35 |
| 1430989_PM_a_at | 1700020I14Rik       | NA       | 0.26  | 3.66 | 0.82  | 4.33E-01 | 6.93E-01 | -6.35 |
| 1455254_PM_at   | Gid8                | NA       | -0.17 | 3.35 | -0.82 | 4.33E-01 | 6.93E-01 | -6.35 |
| 1437805_PM_at   | Mtch2               | MTCH2    | -0.09 | 2.16 | -0.82 | 4.33E-01 | 6.93E-01 | -6.35 |
| 1448273_PM_at   | Gss                 | GSS      | 0.08  | 2.64 | 0.82  | 4.33E-01 | 6.94E-01 | -6.35 |
| 1422057_PM_at   | Nodal               | NODAL    | 0.12  | 2.41 | 0.81  | 4.33E-01 | 6.94E-01 | -6.35 |
| 1426134_PM_at   | Trdn                | NA       | 0.16  | 2.71 | 0.81  | 4.33E-01 | 6.94E-01 | -6.35 |
| 1454433_PM_at   | 6330526H18Rik       | NA       | 0.09  | 2.28 | 0.81  | 4.34E-01 | 6.94E-01 | -6.35 |
| 1435463_PM_s_at | Myo1d               | MYO1D    | -0.17 | 2.99 | -0.81 | 4.34E-01 | 6.94E-01 | -6.35 |
| 1460149_PM_at   | ---                 | NA       | 0.16  | 2.59 | 0.81  | 4.34E-01 | 6.94E-01 | -6.35 |
| 1438861_PM_at   | Bnc2                | BNC2     | 0.22  | 3.46 | 0.81  | 4.34E-01 | 6.94E-01 | -6.35 |

|                 |               |           |       |      |       |          |          |       |
|-----------------|---------------|-----------|-------|------|-------|----------|----------|-------|
| 1432351_PM_at   | 9030625G05Rik | NA        | -0.08 | 2.52 | -0.81 | 4.34E-01 | 6.94E-01 | -6.35 |
| 1454317_PM_at   | Adam1b        | NA        | 0.09  | 2.58 | 0.81  | 4.34E-01 | 6.94E-01 | -6.35 |
| 1431021_PM_at   | Cyb561d1      | CYB561D1  | 0.15  | 2.50 | 0.81  | 4.34E-01 | 6.94E-01 | -6.35 |
| 1430148_PM_at   | Rab19         | RAB19     | 0.14  | 2.64 | 0.81  | 4.34E-01 | 6.94E-01 | -6.35 |
| 1437526_PM_x_at | Hrnpr         | HNRNPR    | 0.28  | 8.54 | 0.81  | 4.34E-01 | 6.94E-01 | -6.35 |
| 1456245_PM_x_at | Vamp3         | VAMP3     | -0.26 | 4.02 | -0.81 | 4.34E-01 | 6.94E-01 | -6.35 |
| 1433395_PM_at   | 4921504P13Rik | NA        | 0.09  | 2.19 | 0.81  | 4.34E-01 | 6.94E-01 | -6.35 |
| 1426707_PM_at   | Tubgcp3       | TUBGCP3   | 0.26  | 4.35 | 0.81  | 4.34E-01 | 6.94E-01 | -6.35 |
| 1456304_PM_at   | Gm996         | C9orf172  | -0.07 | 2.45 | -0.81 | 4.34E-01 | 6.94E-01 | -6.35 |
| 1438971_PM_x_at | Ube2h         | UBE2H     | -0.59 | 5.93 | -0.81 | 4.34E-01 | 6.94E-01 | -6.35 |
| 1427196_PM_at   | Wnk4          | WNK4      | 0.10  | 2.86 | 0.81  | 4.34E-01 | 6.94E-01 | -6.35 |
| 1447862_PM_x_at | Thbs2         | THBS2     | -0.14 | 2.42 | -0.81 | 4.34E-01 | 6.94E-01 | -6.35 |
| 1441018_PM_at   | Usp24         | USP24     | 0.19  | 3.00 | 0.81  | 4.34E-01 | 6.94E-01 | -6.35 |
| 1456652_PM_at   | Dtl           | DTL       | 0.06  | 2.07 | 0.81  | 4.34E-01 | 6.94E-01 | -6.36 |
| 1457001_PM_at   | Cenpk         | CENPK     | -0.06 | 2.09 | -0.81 | 4.34E-01 | 6.94E-01 | -6.36 |
| 1445958_PM_at   | ---           | NA        | 0.10  | 2.07 | 0.81  | 4.34E-01 | 6.94E-01 | -6.36 |
| 1420835_PM_at   | Slc25a30      | SLC25A30  | 0.06  | 2.03 | 0.81  | 4.34E-01 | 6.94E-01 | -6.36 |
| 1435046_PM_at   | ---           | NA        | 0.10  | 2.26 | 0.81  | 4.34E-01 | 6.94E-01 | -6.36 |
| 1425858_PM_at   | Ube2m         | UBE2M     | -0.30 | 2.76 | -0.81 | 4.34E-01 | 6.94E-01 | -6.36 |
| 1447826_PM_x_at | Iffo1         | IFFO1     | -0.09 | 2.99 | -0.81 | 4.34E-01 | 6.94E-01 | -6.36 |
| 1455260_PM_at   | Lcorl         | LCORL     | 0.15  | 3.18 | 0.81  | 4.34E-01 | 6.94E-01 | -6.36 |
| 1434683_PM_at   | Cux1          | CUX1      | 0.25  | 4.41 | 0.81  | 4.34E-01 | 6.94E-01 | -6.36 |
| 1418658_PM_at   | Rmdn1         | RMDN1     | -0.17 | 2.87 | -0.81 | 4.34E-01 | 6.94E-01 | -6.36 |
| 1418894_PM_s_at | Pbx2          | PBX2      | -0.33 | 4.83 | -0.81 | 4.34E-01 | 6.95E-01 | -6.36 |
| 1443947_PM_at   | ---           | NA        | 0.07  | 2.09 | 0.81  | 4.34E-01 | 6.95E-01 | -6.36 |
| 1443373_PM_at   | ---           | NA        | 0.20  | 2.46 | 0.81  | 4.34E-01 | 6.95E-01 | -6.36 |
| 1453417_PM_at   | 4933407K13Rik | NA        | 0.17  | 2.78 | 0.81  | 4.35E-01 | 6.95E-01 | -6.36 |
| 1446005_PM_at   | D2Erttd337e   | NA        | 0.08  | 2.32 | 0.81  | 4.35E-01 | 6.95E-01 | -6.36 |
| 1439166_PM_at   | Nol11         | NOL11     | 0.29  | 2.94 | 0.81  | 4.35E-01 | 6.95E-01 | -6.36 |
| 1419338_PM_at   | Bc051019      | C11orf16  | 0.09  | 2.22 | 0.81  | 4.35E-01 | 6.95E-01 | -6.36 |
| 1448592_PM_at   | Crtap         | CRTAP     | 0.16  | 2.62 | 0.81  | 4.35E-01 | 6.95E-01 | -6.36 |
| 1449076_PM_x_at | Adi1          | ADI1      | 0.20  | 6.06 | 0.81  | 4.35E-01 | 6.95E-01 | -6.36 |
| 1426561_PM_a_at | Npnt          | NPNT      | 0.09  | 2.47 | 0.81  | 4.35E-01 | 6.95E-01 | -6.36 |
| 1436714_PM_at   | Lpp           | LPP       | 0.08  | 2.22 | 0.81  | 4.35E-01 | 6.95E-01 | -6.36 |
| 1456883_PM_at   | Stox1         | STOX1     | -0.08 | 1.96 | -0.81 | 4.35E-01 | 6.95E-01 | -6.36 |
| 1418985_PM_at   | Ctnb2nl       | CTTNBP2NL | -0.08 | 2.20 | -0.81 | 4.35E-01 | 6.95E-01 | -6.36 |
| 1429086_PM_at   | LOC105245924  | NA        | 0.11  | 2.20 | 0.81  | 4.35E-01 | 6.95E-01 | -6.36 |
| 1427540_PM_at   | Zwint         | ZWINT     | 0.31  | 3.56 | 0.81  | 4.35E-01 | 6.95E-01 | -6.36 |
| 1431775_PM_at   | ---           | NA        | 0.08  | 2.37 | 0.81  | 4.35E-01 | 6.95E-01 | -6.36 |
| 1443891_PM_at   | Rad51d        | RAD51D    | 0.10  | 2.48 | 0.81  | 4.35E-01 | 6.95E-01 | -6.36 |
| 1419230_PM_at   | Krt12         | KRT12     | -0.16 | 2.39 | -0.81 | 4.35E-01 | 6.95E-01 | -6.36 |
| 1428432_PM_at   | Zcchc24       | ZCCHC24   | 0.07  | 2.13 | 0.81  | 4.35E-01 | 6.95E-01 | -6.36 |
| 1424240_PM_at   | Arfip2        | ARFIP2    | 0.24  | 3.71 | 0.81  | 4.35E-01 | 6.95E-01 | -6.36 |
| 1453479_PM_at   | 1700086P04Rik | NA        | 0.09  | 2.70 | 0.81  | 4.35E-01 | 6.95E-01 | -6.36 |
| 1425671_PM_at   | Homer1        | HOMER1    | 0.44  | 3.97 | 0.81  | 4.35E-01 | 6.95E-01 | -6.36 |
| 1450094_PM_at   | Ranbp17       | RANBP17   | -0.08 | 2.51 | -0.81 | 4.35E-01 | 6.95E-01 | -6.36 |
| 1433253_PM_at   | 5033423K11Rik | NA        | 0.09  | 2.36 | 0.81  | 4.35E-01 | 6.95E-01 | -6.36 |
| 1444769_PM_at   | Mns1          | MNS1      | 0.10  | 2.20 | 0.81  | 4.35E-01 | 6.95E-01 | -6.36 |
| 1425545_PM_x_at | H2-D1///H2-L  | NA        | -0.14 | 3.44 | -0.81 | 4.35E-01 | 6.95E-01 | -6.36 |
| 1458172_PM_at   | ---           | NA        | 0.09  | 2.23 | 0.81  | 4.35E-01 | 6.95E-01 | -6.36 |
| 1426453_PM_at   | Pitrm1        | PITRM1    | -0.23 | 3.11 | -0.81 | 4.35E-01 | 6.95E-01 | -6.36 |
| 1443689_PM_at   | ---           | NA        | -0.19 | 2.05 | -0.81 | 4.35E-01 | 6.95E-01 | -6.36 |
| 1444598_PM_at   | ---           | NA        | 0.19  | 2.74 | 0.81  | 4.35E-01 | 6.95E-01 | -6.36 |
| 1446342_PM_at   | 2310001H17Rik | NA        | 0.13  | 2.24 | 0.81  | 4.35E-01 | 6.95E-01 | -6.36 |
| 1448291_PM_at   | Mmp9          | MMP9      | 0.10  | 2.13 | 0.81  | 4.35E-01 | 6.95E-01 | -6.36 |
| 1453074_PM_at   | Dusp23        | DUSP23    | 0.11  | 2.45 | 0.81  | 4.35E-01 | 6.95E-01 | -6.36 |
| 1424711_PM_at   | Tmem2         | TMEM2     | 0.14  | 3.25 | 0.81  | 4.35E-01 | 6.95E-01 | -6.36 |
| 1417059_PM_at   | Krtcap2       | KRTCAP2   | -0.14 | 2.74 | -0.81 | 4.35E-01 | 6.95E-01 | -6.36 |
| 1441387_PM_at   | ---           | NA        | -0.12 | 3.20 | -0.81 | 4.35E-01 | 6.95E-01 | -6.36 |
| 1421573_PM_at   | 4930533N22Rik | NA        | 0.09  | 2.07 | 0.81  | 4.35E-01 | 6.95E-01 | -6.36 |
| 1434221_PM_at   | MicaB         | MICAL3    | 0.19  | 3.37 | 0.81  | 4.35E-01 | 6.95E-01 | -6.36 |
| 1441746_PM_at   | ---           | NA        | 0.11  | 2.31 | 0.81  | 4.36E-01 | 6.95E-01 | -6.36 |
| 1433151_PM_at   | ---           | NA        | 0.11  | 3.79 | 0.81  | 4.36E-01 | 6.95E-01 | -6.36 |
| 1447810_PM_x_at | Plekhb2       | PLEKHB2   | -0.10 | 2.25 | -0.81 | 4.36E-01 | 6.95E-01 | -6.36 |
| 1453412_PM_a_at | Sec14l1       | SEC14L1   | -0.19 | 3.85 | -0.81 | 4.36E-01 | 6.95E-01 | -6.36 |
| 1422757_PM_at   | Slc5a4b       | SLC5A4    | 0.10  | 2.07 | 0.81  | 4.36E-01 | 6.95E-01 | -6.36 |
| 1447174_PM_at   | ---           | NA        | 0.08  | 2.03 | 0.81  | 4.36E-01 | 6.95E-01 | -6.36 |
| 1437763_PM_at   | Dcun1d3       | DCUN1D3   | -0.17 | 2.41 | -0.81 | 4.36E-01 | 6.95E-01 | -6.36 |
| 1452402_PM_at   | ---           | NA        | -0.08 | 2.16 | -0.81 | 4.36E-01 | 6.95E-01 | -6.36 |
| 1418256_PM_at   | Srf           | SRF       | 0.09  | 2.43 | 0.81  | 4.36E-01 | 6.95E-01 | -6.36 |
| 1458482_PM_at   | Tnni3k        | TNNI3K    | 0.10  | 2.51 | 0.81  | 4.36E-01 | 6.95E-01 | -6.36 |
| 1422341_PM_s_at | Pla2g15       | PLA2G15   | 0.13  | 2.60 | 0.81  | 4.36E-01 | 6.95E-01 | -6.36 |
| 1446759_PM_at   | ---           | NA        | 0.14  | 2.81 | 0.81  | 4.36E-01 | 6.95E-01 | -6.36 |
| 1450701_PM_a_at | Gtf2h2        | GTF2H2C   | 0.14  | 2.96 | 0.81  | 4.36E-01 | 6.95E-01 | -6.36 |
| 1424731_PM_at   | Nle1          | NLE1      | 0.08  | 2.41 | 0.81  | 4.36E-01 | 6.95E-01 | -6.36 |

|                 |                         |                 |       |      |       |          |          |       |
|-----------------|-------------------------|-----------------|-------|------|-------|----------|----------|-------|
| 1418870_PM_at   | Ppp1r32                 | PPP1R32         | 0.09  | 2.12 | 0.81  | 4.36E-01 | 6.95E-01 | -6.36 |
| 1444918_PM_at   | C80198                  | NA              | 0.09  | 2.60 | 0.81  | 4.36E-01 | 6.95E-01 | -6.36 |
| 1458022_PM_at   | ---                     | NA              | 0.10  | 2.69 | 0.81  | 4.36E-01 | 6.96E-01 | -6.36 |
| 1421656_PM_at   | Spry2                   | SPRY2           | 0.38  | 3.18 | 0.81  | 4.36E-01 | 6.96E-01 | -6.36 |
| 1424510_PM_at   | Nudt6                   | NUDT6           | -0.14 | 2.69 | -0.81 | 4.36E-01 | 6.96E-01 | -6.36 |
| 1432073_PM_at   | Ptges3l                 | PTGES3L         | -0.11 | 2.51 | -0.81 | 4.36E-01 | 6.96E-01 | -6.36 |
| 1431450_PM_at   | 4930444P10Rik           | C8orf89         | -0.08 | 2.29 | -0.81 | 4.36E-01 | 6.96E-01 | -6.36 |
| 1423447_PM_at   | Clpx                    | CLPX            | -0.20 | 2.79 | -0.81 | 4.36E-01 | 6.96E-01 | -6.36 |
| 1420181_PM_at   | Gm9112                  | NA              | -0.09 | 2.36 | -0.81 | 4.36E-01 | 6.96E-01 | -6.36 |
| 1458887_PM_at   | ---                     | NA              | 0.06  | 2.05 | 0.81  | 4.36E-01 | 6.96E-01 | -6.36 |
| 1454157_PM_a_at | Pla2g2d                 | PLA2G2D         | 0.07  | 2.17 | 0.81  | 4.36E-01 | 6.96E-01 | -6.36 |
| 1430734_PM_at   | Cyb5r3                  | CYB5R3          | 0.14  | 3.20 | 0.81  | 4.36E-01 | 6.96E-01 | -6.36 |
| 1436547_PM_at   | Dgke                    | DGKE            | -0.18 | 4.31 | -0.81 | 4.36E-01 | 6.96E-01 | -6.36 |
| 1451950_PM_a_at | Cd80                    | CD80            | 0.07  | 2.31 | 0.81  | 4.36E-01 | 6.96E-01 | -6.36 |
| 1440993_PM_at   | ---                     | NA              | 0.09  | 2.23 | 0.81  | 4.36E-01 | 6.96E-01 | -6.36 |
| 1422309_PM_a_at | Flad1 ///Lenep          | FLAD1           | 0.10  | 2.55 | 0.81  | 4.36E-01 | 6.96E-01 | -6.36 |
| 1418986_PM_a_at | Uxt                     | UXT             | -0.16 | 2.48 | -0.81 | 4.36E-01 | 6.96E-01 | -6.36 |
| 1440022_PM_at   | Poldip3                 | POLDIP3         | 0.09  | 2.51 | 0.81  | 4.36E-01 | 6.96E-01 | -6.36 |
| 1458222_PM_at   | ---                     | NA              | 0.31  | 2.76 | 0.81  | 4.36E-01 | 6.96E-01 | -6.36 |
| 1432489_PM_a_at | Wdyhv1                  | WDYHV1          | -0.16 | 3.22 | -0.81 | 4.36E-01 | 6.96E-01 | -6.36 |
| 1430607_PM_at   | Tbc1d30                 | TBC1D30         | -0.15 | 2.97 | -0.81 | 4.36E-01 | 6.96E-01 | -6.36 |
| 1452440_PM_at   | Tnfsf12 ///Tnfsf13      | TNFSF12-TNFSF13 | -0.10 | 2.27 | -0.81 | 4.36E-01 | 6.96E-01 | -6.36 |
| 1431693_PM_a_at | Il17b                   | IL17B           | 0.08  | 2.42 | 0.81  | 4.36E-01 | 6.96E-01 | -6.36 |
| 1457487_PM_at   | Gm19619                 | NA              | 0.08  | 2.01 | 0.81  | 4.36E-01 | 6.96E-01 | -6.36 |
| 1420990_PM_at   | Chd1                    | CHD1            | 0.21  | 4.23 | 0.81  | 4.36E-01 | 6.96E-01 | -6.36 |
| 1432701_PM_at   | ---                     | NA              | 0.10  | 2.26 | 0.81  | 4.36E-01 | 6.96E-01 | -6.36 |
| 1450818_PM_a_at | Ndufa7                  | NDUFA7          | 0.20  | 3.87 | 0.81  | 4.36E-01 | 6.96E-01 | -6.36 |
| 1420909_PM_at   | Vegfa                   | VEGFA           | -0.15 | 3.84 | -0.81 | 4.36E-01 | 6.96E-01 | -6.36 |
| 1419819_PM_s_at | Sec63                   | SEC63           | 0.38  | 5.39 | 0.81  | 4.36E-01 | 6.96E-01 | -6.36 |
| 1446038_PM_at   | ---                     | NA              | 0.08  | 2.30 | 0.81  | 4.36E-01 | 6.96E-01 | -6.36 |
| 1443220_PM_at   | ---                     | NA              | 0.09  | 2.38 | 0.81  | 4.36E-01 | 6.96E-01 | -6.36 |
| 1459720_PM_x_at | ---                     | NA              | 0.09  | 2.26 | 0.81  | 4.37E-01 | 6.96E-01 | -6.36 |
| 1429353_PM_a_at | Tmbim7                  | NA              | 0.07  | 2.04 | 0.81  | 4.37E-01 | 6.96E-01 | -6.36 |
| 1443557_PM_at   | ---                     | NA              | 0.10  | 2.31 | 0.81  | 4.37E-01 | 6.96E-01 | -6.36 |
| 1427110_PM_at   | Raver1                  | RAVER1          | 0.21  | 2.57 | 0.81  | 4.37E-01 | 6.96E-01 | -6.36 |
| 1450271_PM_at   | Ptk6                    | PTK6            | 0.07  | 2.27 | 0.81  | 4.37E-01 | 6.96E-01 | -6.36 |
| 1417498_PM_at   | Serpinf2                | SERPINF2        | 0.09  | 2.45 | 0.81  | 4.37E-01 | 6.96E-01 | -6.36 |
| 1452123_PM_s_at | Frm4b                   | FRMD4B          | -0.13 | 2.50 | -0.81 | 4.37E-01 | 6.96E-01 | -6.36 |
| 1428700_PM_at   | P2ry13                  | P2RY13          | -0.26 | 3.01 | -0.81 | 4.37E-01 | 6.96E-01 | -6.36 |
| 1431372_PM_at   | Srpk2                   | SRPK2           | -0.21 | 2.74 | -0.81 | 4.37E-01 | 6.96E-01 | -6.36 |
| 1456043_PM_at   | Usp22                   | USP22           | -0.20 | 4.29 | -0.81 | 4.37E-01 | 6.96E-01 | -6.36 |
| 1425264_PM_s_at | Mbp                     | MBP             | -0.13 | 2.69 | -0.81 | 4.37E-01 | 6.96E-01 | -6.36 |
| 1430627_PM_at   | Pak2                    | PAK2            | 0.07  | 2.20 | 0.81  | 4.37E-01 | 6.96E-01 | -6.36 |
| 1425881_PM_at   | Psg28                   | CEACAM3         | 0.13  | 6.23 | 0.81  | 4.37E-01 | 6.96E-01 | -6.36 |
| 1454304_PM_at   | ---                     | NA              | 0.16  | 2.89 | 0.81  | 4.37E-01 | 6.96E-01 | -6.36 |
| 1448590_PM_at   | Col6a1                  | COL6A1          | 0.18  | 2.34 | 0.81  | 4.37E-01 | 6.96E-01 | -6.36 |
| 1429428_PM_at   | Tcf7l2                  | TCF7L2          | 0.51  | 3.51 | 0.81  | 4.37E-01 | 6.96E-01 | -6.36 |
| 1444803_PM_at   | ---                     | NA              | 0.51  | 4.21 | 0.81  | 4.37E-01 | 6.96E-01 | -6.36 |
| 1457538_PM_at   | ---                     | NA              | -0.12 | 2.35 | -0.81 | 4.37E-01 | 6.96E-01 | -6.36 |
| 1437243_PM_at   | D2hgdh                  | D2HGDH          | 0.10  | 2.58 | 0.81  | 4.37E-01 | 6.96E-01 | -6.36 |
| 1425830_PM_a_at | Cinp                    | CINP            | -0.19 | 3.53 | -0.81 | 4.37E-01 | 6.96E-01 | -6.36 |
| 1420983_PM_at   | Pctp                    | PCTP            | 0.08  | 2.22 | 0.81  | 4.37E-01 | 6.96E-01 | -6.36 |
| 1446002_PM_at   | ---                     | NA              | 0.17  | 2.31 | 0.81  | 4.37E-01 | 6.96E-01 | -6.36 |
| 1455539_PM_at   | Mrs2                    | NA              | -0.29 | 7.33 | -0.81 | 4.37E-01 | 6.96E-01 | -6.36 |
| 1446637_PM_at   | ---                     | NA              | -0.06 | 2.15 | -0.81 | 4.37E-01 | 6.96E-01 | -6.36 |
| 1417831_PM_at   | Smc1a                   | SMC1A           | -0.39 | 6.40 | -0.81 | 4.37E-01 | 6.96E-01 | -6.36 |
| 1444251_PM_x_at | ---                     | NA              | 0.16  | 2.23 | 0.81  | 4.37E-01 | 6.96E-01 | -6.36 |
| 1447742_PM_at   | Laptm5                  | LAPTM5          | 0.06  | 2.73 | 0.81  | 4.37E-01 | 6.96E-01 | -6.36 |
| 1452650_PM_at   | Trim62                  | TRIM62          | -0.15 | 2.38 | -0.81 | 4.37E-01 | 6.96E-01 | -6.36 |
| 1422342_PM_at   | Nmbr                    | NMBR            | 0.09  | 2.65 | 0.81  | 4.37E-01 | 6.96E-01 | -6.36 |
| 1459533_PM_at   | D19Ert79e               | NA              | 0.14  | 2.65 | 0.81  | 4.37E-01 | 6.96E-01 | -6.36 |
| 1442594_PM_at   | Ttk                     | TTK             | 0.15  | 2.57 | 0.81  | 4.37E-01 | 6.96E-01 | -6.36 |
| 1436277_PM_at   | Rnf207                  | RNF207          | -0.26 | 3.03 | -0.81 | 4.37E-01 | 6.96E-01 | -6.36 |
| 1419472_PM_s_at | Nudc                    | NUDC            | -0.25 | 5.15 | -0.81 | 4.37E-01 | 6.96E-01 | -6.36 |
| 1416709_PM_a_at | Ngrn                    | NGRN            | -0.16 | 2.73 | -0.81 | 4.37E-01 | 6.96E-01 | -6.36 |
| 1447243_PM_at   | BC040756                | NA              | -0.14 | 3.58 | -0.81 | 4.37E-01 | 6.96E-01 | -6.36 |
| 1424902_PM_at   | Plxdc1                  | PLXDC1          | -0.11 | 2.15 | -0.81 | 4.37E-01 | 6.96E-01 | -6.36 |
| 1443214_PM_at   | ---                     | NA              | -0.09 | 2.36 | -0.81 | 4.37E-01 | 6.96E-01 | -6.36 |
| 1429719_PM_at   | Foxp4                   | FOXP4           | 0.06  | 2.24 | 0.81  | 4.37E-01 | 6.96E-01 | -6.36 |
| 1432214_PM_at   | 1700017D01Rik           | NA              | 0.09  | 2.33 | 0.81  | 4.37E-01 | 6.96E-01 | -6.36 |
| 1454237_PM_at   | Spata9                  | NA              | 0.10  | 2.34 | 0.81  | 4.37E-01 | 6.96E-01 | -6.36 |
| 1437274_PM_at   | Copa                    | COPA            | 0.09  | 2.28 | 0.81  | 4.38E-01 | 6.96E-01 | -6.36 |
| 1435756_PM_at   | Samd10                  | SAMD10          | 0.07  | 2.43 | 0.81  | 4.38E-01 | 6.97E-01 | -6.36 |
| 1453107_PM_s_at | 4933413G19Rik /// Foxm1 | FOXM1           | -0.09 | 2.35 | -0.81 | 4.38E-01 | 6.97E-01 | -6.36 |

|                 |                                 |          |       |      |       |          |          |       |
|-----------------|---------------------------------|----------|-------|------|-------|----------|----------|-------|
| 1459161_PM_at   | AU015777                        | NA       | 0.08  | 2.29 | 0.81  | 4.38E-01 | 6.97E-01 | -6.36 |
| 1448075_PM_at   | AA408251                        | NA       | 0.09  | 2.62 | 0.81  | 4.38E-01 | 6.97E-01 | -6.36 |
| 1429869_PM_at   | Gm35329                         | NA       | -0.08 | 2.46 | -0.81 | 4.38E-01 | 6.97E-01 | -6.36 |
| 1456547_PM_at   | Gm19313                         | NA       | 0.10  | 2.46 | 0.81  | 4.38E-01 | 6.97E-01 | -6.36 |
| 1423982_PM_at   | Gm5446 /// LOC632268 /// Srsf10 | SRSF10   | -0.18 | 6.86 | -0.81 | 4.38E-01 | 6.97E-01 | -6.36 |
| 1422328_PM_at   | Gja10                           | GJA10    | 0.08  | 2.17 | 0.81  | 4.38E-01 | 6.97E-01 | -6.36 |
| 1444601_PM_at   | 5730422E09Rik                   | NA       | 0.11  | 2.39 | 0.81  | 4.38E-01 | 6.97E-01 | -6.36 |
| 1439499_PM_at   | AA415398                        | FRG2     | -0.26 | 3.14 | -0.81 | 4.38E-01 | 6.97E-01 | -6.36 |
| 1455033_PM_at   | Fam102b                         | FAM102B  | -0.11 | 2.91 | -0.81 | 4.38E-01 | 6.97E-01 | -6.36 |
| 1459000_PM_at   | ---                             | NA       | 0.09  | 2.26 | 0.81  | 4.38E-01 | 6.97E-01 | -6.36 |
| 1446609_PM_at   | ---                             | NA       | 0.08  | 2.35 | 0.81  | 4.38E-01 | 6.97E-01 | -6.36 |
| 1428606_PM_at   | Ccdc124                         | NA       | 0.06  | 2.26 | 0.81  | 4.38E-01 | 6.97E-01 | -6.36 |
| 1451392_PM_at   | Elmod3                          | ELMOD3   | 0.20  | 3.68 | 0.81  | 4.38E-01 | 6.97E-01 | -6.36 |
| 1436344_PM_at   | C2cd2                           | C2CD2    | -0.15 | 4.08 | -0.81 | 4.38E-01 | 6.97E-01 | -6.36 |
| 1417620_PM_at   | Rac2                            | RAC2     | 0.10  | 2.80 | 0.81  | 4.38E-01 | 6.97E-01 | -6.36 |
| 1436473_PM_at   | Zfp248                          | ZNF248   | -0.27 | 3.39 | -0.81 | 4.38E-01 | 6.97E-01 | -6.36 |
| 1415697_PM_at   | G3bp2                           | G3BP2    | -0.22 | 4.11 | -0.81 | 4.38E-01 | 6.97E-01 | -6.36 |
| 1441578_PM_at   | Ccdc86                          | CCDC86   | 0.10  | 2.35 | 0.81  | 4.38E-01 | 6.97E-01 | -6.36 |
| 1447154_PM_at   | ---                             | NA       | 0.13  | 2.29 | 0.81  | 4.38E-01 | 6.97E-01 | -6.36 |
| 1456350_PM_at   | Zfp451                          | ZNF451   | 0.16  | 3.87 | 0.81  | 4.38E-01 | 6.97E-01 | -6.36 |
| 1449942_PM_a_at | Ilk                             | ILK      | 0.16  | 3.73 | 0.81  | 4.38E-01 | 6.97E-01 | -6.36 |
| 1427465_PM_at   | Atp1a2                          | ATP1A2   | -0.50 | 5.49 | -0.81 | 4.38E-01 | 6.97E-01 | -6.36 |
| 1440266_PM_at   | 5830428M24Rik                   | NA       | 0.10  | 2.41 | 0.81  | 4.38E-01 | 6.97E-01 | -6.36 |
| 1432542_PM_at   | Mir8102                         | NA       | 0.13  | 2.34 | 0.81  | 4.38E-01 | 6.97E-01 | -6.36 |
| 1447104_PM_at   | ---                             | NA       | -0.08 | 2.34 | -0.81 | 4.39E-01 | 6.97E-01 | -6.36 |
| 1432920_PM_at   | 5330421C15Rik                   | NA       | 0.13  | 2.36 | 0.81  | 4.39E-01 | 6.97E-01 | -6.36 |
| 1424436_PM_at   | Gart                            | GART     | 0.27  | 3.07 | 0.81  | 4.39E-01 | 6.97E-01 | -6.36 |
| 1428676_PM_at   | Tmprss6                         | TMPRSS6  | 0.08  | 2.43 | 0.81  | 4.39E-01 | 6.97E-01 | -6.36 |
| 1437590_PM_at   | Pyroxd2                         | PYROXD2  | 0.08  | 2.29 | 0.81  | 4.39E-01 | 6.97E-01 | -6.36 |
| 1435828_PM_at   | Maf                             | MAF      | 0.10  | 2.04 | 0.81  | 4.39E-01 | 6.97E-01 | -6.36 |
| 1442427_PM_at   | ---                             | NA       | 0.13  | 2.58 | 0.81  | 4.39E-01 | 6.97E-01 | -6.36 |
| 1459701_PM_x_at | ---                             | NA       | 0.13  | 2.18 | 0.81  | 4.39E-01 | 6.97E-01 | -6.36 |
| 1448588_PM_at   | Cd320                           | CD320    | 0.12  | 2.30 | 0.81  | 4.39E-01 | 6.98E-01 | -6.36 |
| 1452805_PM_at   | D11Wsu47e                       | C17orf80 | 0.08  | 2.15 | 0.81  | 4.39E-01 | 6.98E-01 | -6.36 |
| 1431333_PM_at   | Gm11335                         | NA       | 0.09  | 2.27 | 0.81  | 4.39E-01 | 6.98E-01 | -6.36 |
| 1420849_PM_at   | Crnk1                           | CRNK1    | 0.09  | 2.30 | 0.81  | 4.39E-01 | 6.98E-01 | -6.36 |
| 1450498_PM_at   | Mthfr                           | MTHFR    | 0.17  | 3.15 | 0.81  | 4.39E-01 | 6.98E-01 | -6.36 |
| 1441260_PM_a_at | Zfp771                          | ZNF771   | 0.08  | 2.45 | 0.81  | 4.39E-01 | 6.98E-01 | -6.36 |
| 1458618_PM_at   | ---                             | NA       | 0.11  | 2.61 | 0.81  | 4.39E-01 | 6.98E-01 | -6.36 |
| 1424303_PM_at   | Depdc7                          | DEPDC7   | 0.08  | 2.11 | 0.80  | 4.39E-01 | 6.98E-01 | -6.36 |
| 1439557_PM_s_at | Ldb2                            | LDB2     | -0.19 | 2.96 | -0.80 | 4.39E-01 | 6.98E-01 | -6.36 |
| 1446657_PM_at   | Galnt6                          | NA       | 0.08  | 2.52 | 0.80  | 4.39E-01 | 6.98E-01 | -6.36 |
| 1422669_PM_at   | Ebag9                           | EBAG9    | 0.14  | 6.75 | 0.80  | 4.39E-01 | 6.98E-01 | -6.36 |
| 1434748_PM_at   | Ckap2                           | CKAP2    | 0.09  | 2.61 | 0.80  | 4.39E-01 | 6.98E-01 | -6.36 |
| 1447227_PM_at   | ---                             | NA       | 0.15  | 2.02 | 0.80  | 4.39E-01 | 6.98E-01 | -6.36 |
| 1444470_PM_x_at | ---                             | NA       | 0.12  | 2.22 | 0.80  | 4.39E-01 | 6.98E-01 | -6.36 |
| 1446580_PM_at   | Apool                           | APOOL    | -0.18 | 2.49 | -0.80 | 4.39E-01 | 6.98E-01 | -6.36 |
| 1430875_PM_a_at | Pak1ip1                         | PAK1IP1  | 0.21  | 3.56 | 0.80  | 4.39E-01 | 6.98E-01 | -6.36 |
| 1454775_PM_at   | Hdac10                          | HDAC10   | 0.09  | 2.26 | 0.80  | 4.39E-01 | 6.98E-01 | -6.36 |
| 1459445_PM_at   | ---                             | NA       | 0.09  | 2.50 | 0.80  | 4.39E-01 | 6.98E-01 | -6.36 |
| 1433818_PM_at   | Agpat3                          | AGPAT3   | -0.08 | 2.52 | -0.80 | 4.39E-01 | 6.98E-01 | -6.36 |
| 1427386_PM_at   | Arhgef16                        | ARHGEF16 | 0.08  | 2.75 | 0.80  | 4.39E-01 | 6.98E-01 | -6.36 |
| 1447434_PM_at   | ---                             | NA       | 0.08  | 2.30 | 0.80  | 4.39E-01 | 6.98E-01 | -6.36 |
| 1451733_PM_at   | Gcnt2                           | GCNT2    | -0.49 | 4.48 | -0.80 | 4.39E-01 | 6.98E-01 | -6.36 |
| 1450104_PM_at   | Adam10                          | ADAM10   | -0.19 | 3.32 | -0.80 | 4.39E-01 | 6.98E-01 | -6.36 |
| 1440858_PM_at   | Cdk12                           | CDK12    | -0.19 | 4.50 | -0.80 | 4.39E-01 | 6.98E-01 | -6.36 |
| 1438691_PM_at   | Zzef1                           | ZZEF1    | -0.18 | 3.80 | -0.80 | 4.39E-01 | 6.98E-01 | -6.36 |
| 1428053_PM_at   | Gprc6a                          | GPRC6A   | 0.08  | 2.63 | 0.80  | 4.39E-01 | 6.98E-01 | -6.36 |
| 1448712_PM_at   | Chm                             | CHM      | 0.08  | 2.54 | 0.80  | 4.39E-01 | 6.98E-01 | -6.36 |
| 1425257_PM_at   | Acot5                           | ACOT1    | 0.12  | 2.47 | 0.80  | 4.39E-01 | 6.98E-01 | -6.36 |
| 1449806_PM_at   | ---                             | NA       | 0.15  | 2.61 | 0.80  | 4.39E-01 | 6.98E-01 | -6.36 |
| 1447503_PM_at   | Nmrk1                           | NMRK1    | 0.38  | 2.84 | 0.80  | 4.39E-01 | 6.98E-01 | -6.36 |
| 1443762_PM_s_at | Sbf2                            | SBF2     | 0.43  | 4.98 | 0.80  | 4.39E-01 | 6.98E-01 | -6.36 |
| 1437605_PM_at   | Nphs2                           | NPHS2    | 0.09  | 2.16 | 0.80  | 4.39E-01 | 6.98E-01 | -6.36 |
| 1455622_PM_at   | Podxl2                          | PODXL2   | 0.11  | 2.79 | 0.80  | 4.40E-01 | 6.98E-01 | -6.36 |
| 1425362_PM_at   | Afg2                            | AGFG2    | 0.11  | 2.88 | 0.80  | 4.40E-01 | 6.98E-01 | -6.36 |
| 1437346_PM_x_at | Igh-VJ558                       | NA       | 0.15  | 3.99 | 0.80  | 4.40E-01 | 6.98E-01 | -6.36 |
| 1421407_PM_at   | F2rl2                           | NA       | 0.20  | 2.75 | 0.80  | 4.40E-01 | 6.98E-01 | -6.36 |
| 1433314_PM_at   | 4930486A15Rik                   | NA       | 0.11  | 2.49 | 0.80  | 4.40E-01 | 6.98E-01 | -6.36 |
| 1459606_PM_at   | Lmbr1                           | NA       | 0.07  | 2.17 | 0.80  | 4.40E-01 | 6.98E-01 | -6.36 |
| 1447541_PM_s_at | Ilgae                           | ITGAE    | 0.09  | 2.71 | 0.80  | 4.40E-01 | 6.98E-01 | -6.36 |
| 1439841_PM_at   | Zfyve27                         | ZFYVE27  | 0.19  | 3.76 | 0.80  | 4.40E-01 | 6.98E-01 | -6.36 |
| 1433446_PM_at   | Hmgcs1                          | HMGCS1   | -0.27 | 5.57 | -0.80 | 4.40E-01 | 6.98E-01 | -6.36 |
| 1436805_PM_at   | Ubash3b                         | UBASH3B  | -0.26 | 3.66 | -0.80 | 4.40E-01 | 6.98E-01 | -6.36 |

|                 |                                                              |           |       |      |       |          |          |       |
|-----------------|--------------------------------------------------------------|-----------|-------|------|-------|----------|----------|-------|
| 1434123_PM_at   | ---                                                          | NA        | -0.21 | 4.02 | -0.80 | 4.40E-01 | 6.98E-01 | -6.36 |
| 1447757_PM_x_at | Inpp5f                                                       | INPP5F    | -0.16 | 3.35 | -0.80 | 4.40E-01 | 6.98E-01 | -6.36 |
| 1448960_PM_at   | Cxc5                                                         | CXCS      | -0.15 | 2.67 | -0.80 | 4.40E-01 | 6.98E-01 | -6.36 |
| 1442217_PM_at   | ---                                                          | NA        | -0.12 | 2.56 | -0.80 | 4.40E-01 | 6.98E-01 | -6.36 |
| 1434871_PM_at   | Cox17                                                        | COX17     | -0.10 | 2.32 | -0.80 | 4.40E-01 | 6.98E-01 | -6.36 |
| 1432046_PM_at   | ---                                                          | NA        | -0.10 | 2.67 | -0.80 | 4.40E-01 | 6.98E-01 | -6.36 |
| 1456100_PM_at   | BC089491                                                     | SELENOV   | -0.06 | 2.32 | -0.80 | 4.40E-01 | 6.98E-01 | -6.36 |
| 1447548_PM_at   | Abhd5                                                        | ABHD5     | 0.06  | 1.88 | 0.80  | 4.40E-01 | 6.98E-01 | -6.36 |
| 1455677_PM_s_at | Clcnka                                                       | CLCNKB    | 0.07  | 2.67 | 0.80  | 4.40E-01 | 6.98E-01 | -6.36 |
| 1423775_PM_s_at | Prc1                                                         | PRC1      | 0.07  | 2.52 | 0.80  | 4.40E-01 | 6.98E-01 | -6.36 |
| 1422233_PM_at   | Elk4                                                         | ELK4      | 0.10  | 2.34 | 0.80  | 4.40E-01 | 6.98E-01 | -6.36 |
| 1430570_PM_at   | Kynu                                                         | KYNU      | 0.15  | 2.31 | 0.80  | 4.40E-01 | 6.98E-01 | -6.36 |
| 1453799_PM_at   | 9430038I01Rik                                                | LINC00959 | 0.15  | 4.02 | 0.80  | 4.40E-01 | 6.98E-01 | -6.36 |
| 1434725_PM_at   | Gramd1c                                                      | GRAMD1C   | 0.16  | 2.79 | 0.80  | 4.40E-01 | 6.98E-01 | -6.36 |
| 1451873_PM_a_at | Smad5                                                        | SMAD5     | 0.20  | 2.62 | 0.80  | 4.40E-01 | 6.98E-01 | -6.36 |
| 1456205_PM_x_at | Tbca                                                         | TBCA      | 0.24  | 6.86 | 0.80  | 4.40E-01 | 6.98E-01 | -6.36 |
| 1424942_PM_a_at | Myc                                                          | NA        | 0.11  | 2.70 | 0.80  | 4.40E-01 | 6.98E-01 | -6.36 |
| 1439740_PM_s_at | Uck2                                                         | UCK2      | 0.13  | 2.37 | 0.80  | 4.40E-01 | 6.98E-01 | -6.36 |
| 1444773_PM_at   | ---                                                          | NA        | 0.12  | 2.48 | 0.80  | 4.40E-01 | 6.98E-01 | -6.36 |
| 1423855_PM_x_at | Gm10362 /// Rpl17 /// Rpl17-ps10 /// Rpl17-ps4 /// Rpl17-ps8 | NA        | 0.27  | 6.50 | 0.80  | 4.40E-01 | 6.98E-01 | -6.36 |
| 1446179_PM_at   | ---                                                          | NA        | -0.23 | 2.80 | -0.80 | 4.40E-01 | 6.98E-01 | -6.36 |
| 1453268_PM_at   | Thg1l                                                        | THG1L     | -0.18 | 3.63 | -0.80 | 4.40E-01 | 6.98E-01 | -6.36 |
| 1447642_PM_x_at | Dmwd                                                         | DMWD      | -0.06 | 2.03 | -0.80 | 4.40E-01 | 6.98E-01 | -6.36 |
| 1437740_PM_at   | Plekhm2                                                      | PLEKHM2   | 0.08  | 3.16 | 0.80  | 4.40E-01 | 6.98E-01 | -6.36 |
| 1442412_PM_at   | Dnah9                                                        | DNAH9     | 0.12  | 2.32 | 0.80  | 4.40E-01 | 6.98E-01 | -6.36 |
| 1452917_PM_at   | Rfc5                                                         | RFC5      | 0.18  | 2.86 | 0.80  | 4.40E-01 | 6.98E-01 | -6.36 |
| 1447275_PM_at   | Bbs12                                                        | BBS12     | -0.25 | 2.66 | -0.80 | 4.40E-01 | 6.98E-01 | -6.36 |
| 1453776_PM_at   | Snx21                                                        | SNX21     | -0.23 | 2.92 | -0.80 | 4.40E-01 | 6.98E-01 | -6.36 |
| 1424832_PM_at   | Cd300ld                                                      | CD300LD   | -0.22 | 2.54 | -0.80 | 4.40E-01 | 6.98E-01 | -6.36 |
| 1436274_PM_at   | Mrap2                                                        | MRAP2     | 0.07  | 2.71 | 0.80  | 4.40E-01 | 6.98E-01 | -6.36 |
| 1439358_PM_a_at | Nrxn1                                                        | NRXN1     | 0.08  | 2.12 | 0.80  | 4.40E-01 | 6.98E-01 | -6.36 |
| 1451765_PM_a_at | Entpd5                                                       | ENTPD5    | 0.09  | 2.20 | 0.80  | 4.40E-01 | 6.98E-01 | -6.36 |
| 1432448_PM_at   | ---                                                          | NA        | 0.10  | 2.46 | 0.80  | 4.40E-01 | 6.98E-01 | -6.36 |
| 1438990_PM_x_at | Iqcf3                                                        | NA        | 0.16  | 2.11 | 0.80  | 4.40E-01 | 6.98E-01 | -6.36 |
| 1441781_PM_at   | Al317158                                                     | NA        | 0.18  | 3.97 | 0.80  | 4.40E-01 | 6.98E-01 | -6.36 |
| 1419457_PM_at   | Arhgef28                                                     | ARHGEF28  | 0.23  | 2.94 | 0.80  | 4.40E-01 | 6.98E-01 | -6.36 |
| 1416444_PM_at   | Elov2                                                        | ELOVL2    | -0.10 | 2.82 | -0.80 | 4.40E-01 | 6.98E-01 | -6.36 |
| 1429907_PM_at   | 1700094D03Rik /// 4933434E20Rik                              | C1orf43   | 0.13  | 3.02 | 0.80  | 4.40E-01 | 6.98E-01 | -6.36 |
| 1441291_PM_at   | Abl1                                                         | ABL1      | 0.09  | 2.03 | 0.80  | 4.41E-01 | 6.98E-01 | -6.36 |
| 1437376_PM_at   | Adam32                                                       | ADAM32    | 0.09  | 2.36 | 0.80  | 4.41E-01 | 6.98E-01 | -6.36 |
| 1447978_PM_at   | C80719                                                       | NA        | 0.09  | 2.17 | 0.80  | 4.41E-01 | 6.98E-01 | -6.36 |
| 1438244_PM_at   | Nfib                                                         | NFIB      | -0.33 | 3.12 | -0.80 | 4.41E-01 | 6.98E-01 | -6.36 |
| 1426139_PM_a_at | Ackr4                                                        | ACKR4     | 0.09  | 2.59 | 0.80  | 4.41E-01 | 6.99E-01 | -6.36 |
| 1427587_PM_at   | Zfp28                                                        | NA        | 0.06  | 1.85 | 0.80  | 4.41E-01 | 6.99E-01 | -6.37 |
| 1418526_PM_at   | Gm5446 /// LOC632268 /// Srsf10                              | SRSF10    | 0.07  | 2.37 | 0.80  | 4.41E-01 | 6.99E-01 | -6.37 |
| 1421002_PM_at   | Angptl2                                                      | ANGPTL2   | 0.10  | 2.62 | 0.80  | 4.41E-01 | 6.99E-01 | -6.37 |
| 1430888_PM_at   | Ccdc33                                                       | CCDC33    | 0.11  | 2.58 | 0.80  | 4.41E-01 | 6.99E-01 | -6.37 |
| 1428779_PM_at   | Zbtb41                                                       | ZBTB41    | -0.20 | 3.96 | -0.80 | 4.41E-01 | 6.99E-01 | -6.37 |
| 1440187_PM_at   | Taf3                                                         | TAF3      | -0.16 | 3.87 | -0.80 | 4.41E-01 | 6.99E-01 | -6.37 |
| 1429022_PM_at   | Adcyap1r1                                                    | ADCYAP1R1 | -0.29 | 4.05 | -0.80 | 4.41E-01 | 6.99E-01 | -6.37 |
| 1422283_PM_at   | Cd40lg                                                       | CD40LG    | 0.09  | 2.37 | 0.80  | 4.41E-01 | 6.99E-01 | -6.37 |
| 1437164_PM_x_at | Atp5o /// LOC102641678                                       | ATP5O     | 0.17  | 5.89 | 0.80  | 4.41E-01 | 6.99E-01 | -6.37 |
| 1417096_PM_at   | Rrp15                                                        | RRP15     | 0.19  | 2.94 | 0.80  | 4.41E-01 | 6.99E-01 | -6.37 |
| 1459475_PM_at   | D10ErtD761e                                                  | NA        | 0.13  | 2.11 | 0.80  | 4.41E-01 | 6.99E-01 | -6.37 |
| 1438227_PM_at   | She                                                          | SHE       | -0.14 | 2.69 | -0.80 | 4.41E-01 | 6.99E-01 | -6.37 |
| 1443147_PM_at   | Acot3                                                        | NA        | -0.07 | 2.79 | -0.80 | 4.41E-01 | 6.99E-01 | -6.37 |
| 1430186_PM_at   | Odpm                                                         | ODAM      | 0.07  | 2.18 | 0.80  | 4.41E-01 | 6.99E-01 | -6.37 |
| 1441254_PM_at   | Pard3b                                                       | PARD3B    | -0.10 | 2.57 | -0.80 | 4.41E-01 | 6.99E-01 | -6.37 |
| 1456506_PM_at   | Prpf38b                                                      | PRPF38B   | 0.09  | 2.34 | 0.80  | 4.41E-01 | 6.99E-01 | -6.37 |
| 1457332_PM_at   | ---                                                          | NA        | 0.09  | 2.34 | 0.80  | 4.41E-01 | 6.99E-01 | -6.37 |
| 1419789_PM_at   | Agap2                                                        | NA        | 0.09  | 3.57 | 0.80  | 4.41E-01 | 6.99E-01 | -6.37 |
| 1422485_PM_at   | Smad4                                                        | SMAD4     | 0.10  | 2.38 | 0.80  | 4.41E-01 | 6.99E-01 | -6.37 |
| 1422521_PM_at   | Dctn1                                                        | DCTN1     | 0.10  | 2.94 | 0.80  | 4.41E-01 | 6.99E-01 | -6.37 |
| 1432261_PM_at   | Ces1h                                                        | NA        | 0.12  | 3.65 | 0.80  | 4.41E-01 | 6.99E-01 | -6.37 |
| 1450906_PM_at   | Pknc1                                                        | PLXNC1    | -0.23 | 3.04 | -0.80 | 4.41E-01 | 6.99E-01 | -6.37 |
| 1428544_PM_at   | Tmem248                                                      | TMEM248   | -0.18 | 3.24 | -0.80 | 4.41E-01 | 6.99E-01 | -6.37 |
| 1455646_PM_at   | ---                                                          | NA        | -0.14 | 2.88 | -0.80 | 4.41E-01 | 6.99E-01 | -6.37 |
| 1448731_PM_at   | Il10ra                                                       | IL10RA    | -0.08 | 2.17 | -0.80 | 4.41E-01 | 6.99E-01 | -6.37 |
| 1435294_PM_at   | ---                                                          | NA        | 0.08  | 2.38 | 0.80  | 4.41E-01 | 6.99E-01 | -6.37 |
| 1424448_PM_at   | Trim6                                                        | TRIM6     | 0.09  | 2.13 | 0.80  | 4.41E-01 | 6.99E-01 | -6.37 |
| 1432084_PM_at   | ---                                                          | NA        | 0.11  | 2.47 | 0.80  | 4.41E-01 | 6.99E-01 | -6.37 |

|                 |                   |          |       |      |       |          |          |       |
|-----------------|-------------------|----------|-------|------|-------|----------|----------|-------|
| 1428013_PM_at   | 6030458C11Rik     | NA       | 0.14  | 2.66 | 0.80  | 4.41E-01 | 6.99E-01 | -6.37 |
| 1432146_PM_at   | Catsper3          | CATSPER3 | 0.09  | 2.32 | 0.80  | 4.41E-01 | 6.99E-01 | -6.37 |
| 1456584_PM_x_at | Phgdh             | PHGDH    | 0.21  | 4.90 | 0.80  | 4.41E-01 | 6.99E-01 | -6.37 |
| 1455790_PM_at   | E2f2              | E2F2     | 0.09  | 2.00 | 0.80  | 4.41E-01 | 6.99E-01 | -6.37 |
| 1442151_PM_at   | ---               | NA       | -0.15 | 2.67 | -0.80 | 4.42E-01 | 6.99E-01 | -6.37 |
| 1457874_PM_at   | Gm31336           | NA       | 0.09  | 2.70 | 0.80  | 4.42E-01 | 6.99E-01 | -6.37 |
| 1434872_PM_x_at | Rpl37 /// Rpl37rt | RPL37    | -0.26 | 7.43 | -0.80 | 4.42E-01 | 6.99E-01 | -6.37 |
| 1451474_PM_a_at | Parp8             | PARP8    | -0.11 | 3.38 | -0.80 | 4.42E-01 | 6.99E-01 | -6.37 |
| 1424796_PM_at   | Ccsap             | CCSAP    | -0.14 | 2.61 | -0.80 | 4.42E-01 | 6.99E-01 | -6.37 |
| 1419079_PM_at   | Scnn1g            | SCNN1G   | 0.07  | 2.53 | 0.80  | 4.42E-01 | 6.99E-01 | -6.37 |
| 1442189_PM_at   | ---               | NA       | 0.08  | 2.96 | 0.80  | 4.42E-01 | 6.99E-01 | -6.37 |
| 1452112_PM_a_at | Rbm4b             | RBM4B    | 0.19  | 3.16 | 0.80  | 4.42E-01 | 6.99E-01 | -6.37 |
| 1450605_PM_at   | Tas2r108          | TAS2R4   | 0.10  | 2.38 | 0.80  | 4.42E-01 | 6.99E-01 | -6.37 |
| 1443265_PM_at   | Cd44              | NA       | -0.13 | 2.34 | -0.80 | 4.42E-01 | 6.99E-01 | -6.37 |
| 1417214_PM_at   | Rab27b            | RAB27B   | -0.28 | 3.76 | -0.80 | 4.42E-01 | 6.99E-01 | -6.37 |
| 1440342_PM_at   | G530011O06Rik     | NA       | 0.09  | 2.54 | 0.80  | 4.42E-01 | 6.99E-01 | -6.37 |
| 1448520_PM_at   | Dclre1b           | DCLRE1B  | -0.09 | 2.22 | -0.80 | 4.42E-01 | 6.99E-01 | -6.37 |
| 1431063_PM_at   | Ganc              | GANC     | 0.21  | 3.75 | 0.80  | 4.42E-01 | 6.99E-01 | -6.37 |
| 1446858_PM_at   | AU022245          | NA       | -0.09 | 2.05 | -0.80 | 4.42E-01 | 6.99E-01 | -6.37 |
| 1415909_PM_at   | Stip1             | STIP1    | -0.29 | 3.59 | -0.80 | 4.42E-01 | 6.99E-01 | -6.37 |
| 1435137_PM_s_at | 1200015M12Rik     | NA       | -0.19 | 6.79 | -0.80 | 4.42E-01 | 6.99E-01 | -6.37 |
| 1436301_PM_at   | Dstyk             | DSTYK    | -0.14 | 3.22 | -0.80 | 4.42E-01 | 6.99E-01 | -6.37 |
| 1455524_PM_at   | Proser1           | PROSER1  | -0.10 | 2.30 | -0.80 | 4.42E-01 | 6.99E-01 | -6.37 |
| 1415848_PM_at   | Prl3d1            | PRL      | 0.06  | 2.22 | 0.80  | 4.42E-01 | 6.99E-01 | -6.37 |
| 1439670_PM_at   | Ubtfl1            | UBTF1    | 0.07  | 2.05 | 0.80  | 4.42E-01 | 6.99E-01 | -6.37 |
| 1421585_PM_at   | Fam187a           | NA       | 0.07  | 2.14 | 0.80  | 4.42E-01 | 6.99E-01 | -6.37 |
| 1458814_PM_at   | ---               | NA       | 0.07  | 2.22 | 0.80  | 4.42E-01 | 6.99E-01 | -6.37 |
| 1452865_PM_at   | Lrrc27            | LRRC27   | 0.09  | 2.07 | 0.80  | 4.42E-01 | 6.99E-01 | -6.37 |
| 1455382_PM_at   | Gm35959           | NA       | 0.09  | 2.25 | 0.80  | 4.42E-01 | 6.99E-01 | -6.37 |
| 1449234_PM_at   | Car15             | NA       | 0.11  | 2.79 | 0.80  | 4.42E-01 | 6.99E-01 | -6.37 |
| 1419675_PM_at   | Ngf               | NGF      | 0.12  | 2.47 | 0.80  | 4.42E-01 | 6.99E-01 | -6.37 |
| 1443498_PM_at   | Mmab              | MMAB     | 0.14  | 2.98 | 0.80  | 4.42E-01 | 6.99E-01 | -6.37 |
| 1429951_PM_at   | Ssbp2             | SSBP2    | 0.17  | 2.90 | 0.80  | 4.42E-01 | 6.99E-01 | -6.37 |
| 1420372_PM_at   | Sntb2             | SNTB2    | 0.19  | 2.74 | 0.80  | 4.42E-01 | 6.99E-01 | -6.37 |
| 1455633_PM_at   | Zfp647            | NA       | 0.19  | 2.89 | 0.80  | 4.42E-01 | 6.99E-01 | -6.37 |
| 1444312_PM_at   | Slc22a15          | SLC22A15 | 0.21  | 3.03 | 0.80  | 4.42E-01 | 7.00E-01 | -6.37 |
| 1452546_PM_x_at | Defb11            | NA       | 0.12  | 2.34 | 0.80  | 4.42E-01 | 7.00E-01 | -6.37 |
| 1449924_PM_at   | Prg3              | PRG3     | 0.06  | 2.04 | 0.80  | 4.42E-01 | 7.00E-01 | -6.37 |
| 1452267_PM_at   | Flywch1           | FLYWCH1  | 0.07  | 2.34 | 0.80  | 4.42E-01 | 7.00E-01 | -6.37 |
| 1457500_PM_at   | Depdc5            | DEPDC5   | 0.08  | 2.04 | 0.80  | 4.42E-01 | 7.00E-01 | -6.37 |
| 1437391_PM_x_at | Mrp144            | MRPL44   | 0.34  | 6.59 | 0.80  | 4.42E-01 | 7.00E-01 | -6.37 |
| 1459125_PM_at   | ---               | NA       | 0.35  | 2.48 | 0.80  | 4.43E-01 | 7.00E-01 | -6.37 |
| 1439931_PM_at   | Gsk3b             | GSK3B    | 0.34  | 2.57 | 0.80  | 4.43E-01 | 7.00E-01 | -6.37 |
| 1459334_PM_at   | ---               | NA       | 0.08  | 2.35 | 0.80  | 4.43E-01 | 7.00E-01 | -6.37 |
| 1423670_PM_a_at | Srpr              | SRPRA    | -0.18 | 5.44 | -0.80 | 4.43E-01 | 7.00E-01 | -6.37 |
| 1422646_PM_at   | Mga               | MGA      | 0.17  | 2.79 | 0.80  | 4.43E-01 | 7.00E-01 | -6.37 |
| 1430878_PM_at   | ---               | NA       | 0.13  | 2.45 | 0.80  | 4.43E-01 | 7.00E-01 | -6.37 |
| 1434245_PM_a_at | Cyb561a3          | NA       | -0.32 | 4.76 | -0.80 | 4.43E-01 | 7.00E-01 | -6.37 |
| 1445228_PM_at   | ---               | NA       | -0.18 | 3.34 | -0.80 | 4.43E-01 | 7.00E-01 | -6.37 |
| 1432139_PM_at   | Srpk3             | SRPK3    | 0.06  | 2.09 | 0.80  | 4.43E-01 | 7.00E-01 | -6.37 |
| 1427126_PM_at   | Hspa1b            | NA       | 0.08  | 2.15 | 0.80  | 4.43E-01 | 7.00E-01 | -6.37 |
| 1431077_PM_at   | Alpi              | ALPPL2   | 0.09  | 2.28 | 0.80  | 4.43E-01 | 7.00E-01 | -6.37 |
| 1455277_PM_at   | Hhip              | HHIP     | 0.09  | 2.60 | 0.80  | 4.43E-01 | 7.00E-01 | -6.37 |
| 1445511_PM_at   | Cetn4             | NA       | 0.11  | 2.69 | 0.80  | 4.43E-01 | 7.00E-01 | -6.37 |
| 1420810_PM_at   | Chp1              | CHP1     | 0.14  | 2.90 | 0.80  | 4.43E-01 | 7.00E-01 | -6.37 |
| 1449799_PM_s_at | Pkp2              | PKP2     | -0.45 | 4.95 | -0.80 | 4.43E-01 | 7.00E-01 | -6.37 |
| 1432226_PM_at   | 4930548G14Rik     | NA       | -0.10 | 2.43 | -0.80 | 4.43E-01 | 7.00E-01 | -6.37 |
| 1417257_PM_at   | Cel               | CEL      | 0.08  | 2.17 | 0.80  | 4.43E-01 | 7.00E-01 | -6.37 |
| 1425651_PM_at   | Nhej1             | NA       | 0.09  | 2.24 | 0.80  | 4.43E-01 | 7.00E-01 | -6.37 |
| 1415776_PM_at   | Aldh3a2           | ALDH3A2  | 0.13  | 3.56 | 0.80  | 4.43E-01 | 7.00E-01 | -6.37 |
| 1457187_PM_at   | Nron              | NA       | 0.11  | 2.46 | 0.80  | 4.43E-01 | 7.00E-01 | -6.37 |
| 1441488_PM_at   | ---               | NA       | 0.07  | 2.40 | 0.80  | 4.43E-01 | 7.00E-01 | -6.37 |
| 1422416_PM_s_at | Vpreb1 /// Vpreb2 | VPREB1   | 0.08  | 2.56 | 0.80  | 4.43E-01 | 7.00E-01 | -6.37 |
| 1421264_PM_at   | Btnl10            | NA       | 0.14  | 2.50 | 0.80  | 4.43E-01 | 7.00E-01 | -6.37 |
| 1422369_PM_at   | Vmn1r42           | NA       | 0.20  | 2.35 | 0.80  | 4.43E-01 | 7.00E-01 | -6.37 |
| 1457142_PM_at   | Necab1            | NECAB1   | 0.32  | 3.09 | 0.80  | 4.43E-01 | 7.00E-01 | -6.37 |
| 1458016_PM_at   | LOC102638940      | NA       | 0.09  | 2.36 | 0.80  | 4.43E-01 | 7.00E-01 | -6.37 |
| 1439889_PM_at   | Scn8a             | SCN8A    | -0.29 | 7.70 | -0.80 | 4.43E-01 | 7.00E-01 | -6.37 |
| 1439823_PM_at   | ---               | NA       | 0.06  | 2.23 | 0.80  | 4.43E-01 | 7.00E-01 | -6.37 |
| 1433399_PM_at   | 2900078I11Rik     | NA       | 0.11  | 2.17 | 0.80  | 4.43E-01 | 7.00E-01 | -6.37 |
| 1454334_PM_at   | Zfp711            | NA       | 0.13  | 2.18 | 0.80  | 4.43E-01 | 7.00E-01 | -6.37 |
| 1455877_PM_a_at | Nanos1            | NANOS1   | -0.22 | 3.86 | -0.80 | 4.43E-01 | 7.00E-01 | -6.37 |
| 1450957_PM_a_at | Sqstm1            | SQSTM1   | -0.20 | 4.04 | -0.80 | 4.43E-01 | 7.00E-01 | -6.37 |
| 1448013_PM_at   | Usp24             | USP24    | -0.28 | 3.81 | -0.80 | 4.43E-01 | 7.00E-01 | -6.37 |
| 1441468_PM_at   | Gm10710           | NA       | -0.06 | 2.04 | -0.80 | 4.43E-01 | 7.00E-01 | -6.37 |

|                 |                       |          |       |      |       |          |          |       |
|-----------------|-----------------------|----------|-------|------|-------|----------|----------|-------|
| 1421967_PM_at   | B4galt5               | B4GALT5  | 0.22  | 3.33 | 0.80  | 4.43E-01 | 7.00E-01 | -6.37 |
| 1420733_PM_at   | Cab39l                | CAB39L   | 0.27  | 3.00 | 0.80  | 4.43E-01 | 7.00E-01 | -6.37 |
| 1426173_PM_at   | ---                   | NA       | 0.09  | 2.42 | 0.80  | 4.43E-01 | 7.00E-01 | -6.37 |
| 1460568_PM_at   | Trim46                | TRIM46   | 0.14  | 3.17 | 0.80  | 4.44E-01 | 7.00E-01 | -6.37 |
| 1439070_PM_x_at | Pisd-ps1 /// Pisd-ps3 | NA       | 0.40  | 5.39 | 0.80  | 4.44E-01 | 7.00E-01 | -6.37 |
| 1423466_PM_at   | Ccr7                  | CCR7     | 0.10  | 2.56 | 0.80  | 4.44E-01 | 7.00E-01 | -6.37 |
| 1428740_PM_a_at | Pigt                  | PIGT     | 0.11  | 3.15 | 0.80  | 4.44E-01 | 7.00E-01 | -6.37 |
| 1433198_PM_at   | ---                   | NA       | 0.12  | 2.91 | 0.80  | 4.44E-01 | 7.00E-01 | -6.37 |
| 1448773_PM_at   | Rpl11                 | RPL11    | 0.10  | 3.23 | 0.80  | 4.44E-01 | 7.00E-01 | -6.37 |
| 1451654_PM_x_at | Zfp825                | NA       | -0.11 | 2.62 | -0.80 | 4.44E-01 | 7.01E-01 | -6.37 |
| 1422749_PM_at   | Ly6g6c                | LY6G6C   | 0.11  | 2.09 | 0.80  | 4.44E-01 | 7.01E-01 | -6.37 |
| 1446492_PM_at   | Tmem132d              | TMEM132D | 0.29  | 3.11 | 0.80  | 4.44E-01 | 7.01E-01 | -6.37 |
| 1458298_PM_at   | ---                   | NA       | 0.49  | 3.82 | 0.80  | 4.44E-01 | 7.01E-01 | -6.37 |
| 1453052_PM_at   | Tmem192               | TMEM192  | -0.12 | 2.64 | -0.80 | 4.44E-01 | 7.01E-01 | -6.37 |
| 1437600_PM_at   | ---                   | NA       | 0.07  | 2.47 | 0.80  | 4.44E-01 | 7.01E-01 | -6.37 |
| 1433996_PM_at   | Suv39h2               | SUV39H2  | -0.08 | 2.22 | -0.80 | 4.44E-01 | 7.01E-01 | -6.37 |
| 1420682_PM_at   | Chrb1                 | CHRB1    | 0.09  | 2.06 | 0.80  | 4.44E-01 | 7.01E-01 | -6.37 |
| 1418054_PM_at   | Neurod4               | NEUROD4  | 0.18  | 2.18 | 0.80  | 4.44E-01 | 7.01E-01 | -6.37 |
| 1417757_PM_at   | Unc13b                | NA       | -0.30 | 3.42 | -0.80 | 4.44E-01 | 7.01E-01 | -6.37 |
| 1425498_PM_at   | Prpf4b                | PRPF4B   | -0.22 | 2.93 | -0.80 | 4.44E-01 | 7.01E-01 | -6.37 |
| 1425365_PM_a_at | Cyp2d13               | NA       | 0.10  | 2.77 | 0.80  | 4.44E-01 | 7.01E-01 | -6.37 |
| 1459880_PM_at   | ---                   | NA       | 0.15  | 4.62 | 0.80  | 4.44E-01 | 7.01E-01 | -6.37 |
| 1459465_PM_at   | ---                   | NA       | 0.26  | 4.08 | 0.80  | 4.44E-01 | 7.01E-01 | -6.37 |
| 1447554_PM_at   | Sde2                  | SDE2     | 0.10  | 2.14 | 0.80  | 4.44E-01 | 7.01E-01 | -6.37 |
| 1442696_PM_at   | ---                   | NA       | 0.10  | 2.52 | 0.80  | 4.44E-01 | 7.01E-01 | -6.37 |
| 1458104_PM_a_at | Ccdc153               | CCDC153  | 0.24  | 3.22 | 0.80  | 4.44E-01 | 7.01E-01 | -6.37 |
| 1423524_PM_at   | Mastl                 | MASTL    | -0.12 | 2.63 | -0.80 | 4.44E-01 | 7.01E-01 | -6.37 |
| 1419154_PM_at   | Tmprss2               | TMRSS2   | 0.09  | 2.28 | 0.80  | 4.44E-01 | 7.01E-01 | -6.37 |
| 1428609_PM_at   | My112b                | MYL12B   | 0.09  | 3.85 | 0.80  | 4.44E-01 | 7.01E-01 | -6.37 |
| 1422523_PM_at   | Pmel                  | PMEL     | 0.18  | 2.79 | 0.80  | 4.44E-01 | 7.01E-01 | -6.37 |
| 1445003_PM_at   | Farsa                 | FARSA    | 0.13  | 2.59 | 0.80  | 4.44E-01 | 7.01E-01 | -6.37 |
| 1420779_PM_at   | Fhl3                  | FHL3     | -0.11 | 2.33 | -0.80 | 4.44E-01 | 7.01E-01 | -6.37 |
| 1438286_PM_at   | Otud7a                | NA       | -0.26 | 4.93 | -0.79 | 4.44E-01 | 7.01E-01 | -6.37 |
| 1446715_PM_at   | Abca13                | NA       | -0.08 | 2.15 | -0.79 | 4.44E-01 | 7.01E-01 | -6.37 |
| 1428529_PM_at   | Snhg5                 | NA       | 0.14  | 7.05 | 0.79  | 4.44E-01 | 7.01E-01 | -6.37 |
| 1435576_PM_at   | AW413774              | NA       | 0.18  | 2.99 | 0.79  | 4.44E-01 | 7.01E-01 | -6.37 |
| 1424299_PM_at   | Oma1                  | OMA1     | 0.23  | 3.26 | 0.79  | 4.44E-01 | 7.01E-01 | -6.37 |
| 1433436_PM_s_at | Thtpa                 | THTPA    | -0.25 | 4.15 | -0.79 | 4.45E-01 | 7.01E-01 | -6.37 |
| 1430352_PM_at   | Adams9                | NA       | -0.07 | 2.63 | -0.79 | 4.45E-01 | 7.01E-01 | -6.37 |
| 1432122_PM_at   | Lrriq3                | LRRIQ3   | -0.09 | 2.66 | -0.79 | 4.45E-01 | 7.01E-01 | -6.37 |
| 1455269_PM_a_at | Coro1a                | CORO1A   | -0.33 | 5.92 | -0.79 | 4.45E-01 | 7.01E-01 | -6.37 |
| 1445845_PM_at   | ---                   | NA       | 0.19  | 2.39 | 0.79  | 4.45E-01 | 7.01E-01 | -6.37 |
| 1443913_PM_at   | ---                   | NA       | 0.16  | 5.66 | 0.79  | 4.45E-01 | 7.01E-01 | -6.37 |
| 1441952_PM_x_at | Lynx1                 | LYNX1    | 0.25  | 3.97 | 0.79  | 4.45E-01 | 7.01E-01 | -6.37 |
| 1442673_PM_at   | ---                   | NA       | 0.07  | 2.12 | 0.79  | 4.45E-01 | 7.01E-01 | -6.37 |
| 1442440_PM_at   | ---                   | NA       | 0.07  | 2.12 | 0.79  | 4.45E-01 | 7.01E-01 | -6.37 |
| 1424347_PM_at   | Ppp6c                 | PPP6C    | 0.35  | 4.08 | 0.79  | 4.45E-01 | 7.01E-01 | -6.37 |
| 1441842_PM_s_at | Zfp707                | ZNF707   | -0.18 | 4.18 | -0.79 | 4.45E-01 | 7.01E-01 | -6.37 |
| 1458000_PM_at   | Dsg1a                 | DSG1     | 0.08  | 1.96 | 0.79  | 4.45E-01 | 7.01E-01 | -6.37 |
| 1453804_PM_a_at | Orc4                  | ORC4     | -0.30 | 3.04 | -0.79 | 4.45E-01 | 7.01E-01 | -6.37 |
| 1438972_PM_x_at | ---                   | NA       | -0.25 | 2.55 | -0.79 | 4.45E-01 | 7.01E-01 | -6.37 |
| 1421038_PM_a_at | Kcnn4                 | KCNN4    | -0.08 | 2.40 | -0.79 | 4.45E-01 | 7.01E-01 | -6.37 |
| 1428985_PM_at   | Ints12                | INTS12   | 0.07  | 1.98 | 0.79  | 4.45E-01 | 7.01E-01 | -6.37 |
| 1446800_PM_at   | ---                   | NA       | 0.13  | 2.41 | 0.79  | 4.45E-01 | 7.01E-01 | -6.37 |
| 1450288_PM_at   | Cdh6                  | CDH6     | 0.14  | 2.38 | 0.79  | 4.45E-01 | 7.01E-01 | -6.37 |
| 1438347_PM_at   | Clrn1                 | CLRN1    | 0.07  | 2.33 | 0.79  | 4.45E-01 | 7.01E-01 | -6.37 |
| 1416229_PM_at   | Rfk                   | RFK      | -0.26 | 3.20 | -0.79 | 4.45E-01 | 7.01E-01 | -6.37 |
| 1427248_PM_at   | Nelfa                 | NELFA    | 0.08  | 3.42 | 0.79  | 4.45E-01 | 7.01E-01 | -6.37 |
| 1419044_PM_at   | Cntnap4               | CNTNAP4  | 0.15  | 2.29 | 0.79  | 4.45E-01 | 7.01E-01 | -6.37 |
| 1454431_PM_at   | ---                   | NA       | 0.08  | 2.23 | 0.79  | 4.45E-01 | 7.01E-01 | -6.37 |
| 1442410_PM_at   | Depdc5                | DEPDC5   | -0.18 | 2.38 | -0.79 | 4.45E-01 | 7.01E-01 | -6.37 |
| 1456461_PM_at   | Ewsr1                 | EWSR1    | 0.11  | 2.33 | 0.79  | 4.45E-01 | 7.02E-01 | -6.37 |
| 1434019_PM_at   | Pdap1                 | PDAP1    | 0.19  | 3.70 | 0.79  | 4.45E-01 | 7.02E-01 | -6.37 |
| 1428665_PM_at   | Pfn4                  | NA       | 0.09  | 2.31 | 0.79  | 4.45E-01 | 7.02E-01 | -6.37 |
| 1423964_PM_at   | Cpsf3l                | INTS11   | 0.11  | 2.28 | 0.79  | 4.45E-01 | 7.02E-01 | -6.37 |
| 1454232_PM_at   | ---                   | NA       | 0.08  | 2.54 | 0.79  | 4.45E-01 | 7.02E-01 | -6.37 |
| 1435135_PM_at   | Nceh1                 | NCEH1    | -0.16 | 3.58 | -0.79 | 4.45E-01 | 7.02E-01 | -6.37 |
| 1458164_PM_at   | Gm14634               | NA       | 0.11  | 2.55 | 0.79  | 4.45E-01 | 7.02E-01 | -6.37 |
| 1424355_PM_a_at | Sin3b                 | SIN3B    | 0.27  | 3.23 | 0.79  | 4.45E-01 | 7.02E-01 | -6.37 |
| 1427536_PM_at   | Zfp125                | NA       | -0.11 | 4.15 | -0.79 | 4.45E-01 | 7.02E-01 | -6.37 |
| 1449573_PM_at   | Alpk3                 | ALPK3    | -0.08 | 2.59 | -0.79 | 4.45E-01 | 7.02E-01 | -6.37 |
| 1446525_PM_at   | ---                   | NA       | 0.10  | 2.18 | 0.79  | 4.45E-01 | 7.02E-01 | -6.37 |
| 1451382_PM_at   | Chac1                 | CHAC1    | 0.13  | 2.79 | 0.79  | 4.45E-01 | 7.02E-01 | -6.37 |
| 1456827_PM_at   | Zfp729b               | ZNF208   | -0.22 | 2.91 | -0.79 | 4.45E-01 | 7.02E-01 | -6.37 |
| 1449046_PM_a_at | Josd2                 | JOSD2    | 0.13  | 2.33 | 0.79  | 4.45E-01 | 7.02E-01 | -6.37 |



|                     |                                    |             |       |      |       |          |          |       |
|---------------------|------------------------------------|-------------|-------|------|-------|----------|----------|-------|
| 1448066_PM_at       | ---                                | NA          | 0.07  | 2.24 | 0.79  | 4.46E-01 | 7.02E-01 | -6.37 |
| 1423763_PM_x_at     | Rps28                              | RPS28       | -0.27 | 9.06 | -0.79 | 4.46E-01 | 7.02E-01 | -6.37 |
| 1438895_PM_at       | ---                                | NA          | -0.24 | 3.19 | -0.79 | 4.46E-01 | 7.02E-01 | -6.37 |
| 1429255_PM_at       | Ppp1r35                            | PPP1R35     | 0.07  | 2.32 | 0.79  | 4.46E-01 | 7.02E-01 | -6.37 |
| 1417325_PM_at       | Btrc                               | BTRC        | 0.11  | 2.23 | 0.79  | 4.46E-01 | 7.02E-01 | -6.37 |
| 1436688_PM_x_at     | Rpl14                              | RPL14       | 0.36  | 7.23 | 0.79  | 4.46E-01 | 7.02E-01 | -6.37 |
| 1424572_PM_a_at     | H2afy                              | H2AFY       | -0.22 | 3.25 | -0.79 | 4.46E-01 | 7.02E-01 | -6.37 |
| 1446401_PM_at       | ---                                | NA          | -0.08 | 2.46 | -0.79 | 4.46E-01 | 7.02E-01 | -6.37 |
| 1420588_PM_at       | Eppin                              | EPPIN-WFDC6 | 0.08  | 2.28 | 0.79  | 4.46E-01 | 7.02E-01 | -6.37 |
| 1424706_PM_at       | Zfp51                              | NA          | 0.08  | 2.44 | 0.79  | 4.46E-01 | 7.02E-01 | -6.37 |
| 1438496_PM_a_at     | Ddx26b                             | INTS6L      | 0.09  | 2.29 | 0.79  | 4.46E-01 | 7.02E-01 | -6.37 |
| 1448849_PM_at       | Mrp40                              | MRPL40      | 0.15  | 3.00 | 0.79  | 4.46E-01 | 7.02E-01 | -6.37 |
| 1459031_PM_at       | Ttl4                               | TTL4        | 0.19  | 2.33 | 0.79  | 4.46E-01 | 7.02E-01 | -6.37 |
| 1448175_PM_at       | Ehd1                               | EHD1        | 0.32  | 3.71 | 0.79  | 4.46E-01 | 7.02E-01 | -6.37 |
| 1432480_PM_a_at     | Cntd1                              | CNTD1       | 0.05  | 1.98 | 0.79  | 4.46E-01 | 7.02E-01 | -6.37 |
| 1419605_PM_at       | Clec10a                            | NA          | 0.08  | 2.40 | 0.79  | 4.46E-01 | 7.02E-01 | -6.37 |
| 1451953_PM_at       | Smr2                               | NA          | 0.19  | 2.55 | 0.79  | 4.46E-01 | 7.02E-01 | -6.37 |
| 1453829_PM_at       | 2310007J06Rik                      | NA          | -0.11 | 2.46 | -0.79 | 4.46E-01 | 7.02E-01 | -6.37 |
| 1443160_PM_at       | Sbf2                               | SBF2        | -0.09 | 2.27 | -0.79 | 4.46E-01 | 7.02E-01 | -6.37 |
| 1425124_PM_at       | Rnf183                             | RNF183      | 0.07  | 2.64 | 0.79  | 4.46E-01 | 7.02E-01 | -6.37 |
| 1442403_PM_at       | B130034C11Rik                      | NA          | 0.08  | 2.46 | 0.79  | 4.46E-01 | 7.02E-01 | -6.37 |
| 1456294_PM_at       | Rnft1                              | RNFT1       | 0.15  | 2.44 | 0.79  | 4.46E-01 | 7.02E-01 | -6.37 |
| 1425706_PM_a_at     | Ddb2                               | DDB2        | -0.29 | 3.80 | -0.79 | 4.46E-01 | 7.02E-01 | -6.37 |
| 1428921_PM_at       | Gm7102 /// Mplkip                  | MPLKIP      | -0.09 | 2.17 | -0.79 | 4.46E-01 | 7.02E-01 | -6.37 |
| 1458366_PM_at       | ---                                | NA          | 0.08  | 2.60 | 0.79  | 4.46E-01 | 7.02E-01 | -6.37 |
| 1450246_PM_at       | Fut2                               | FUT2        | 0.08  | 2.66 | 0.79  | 4.46E-01 | 7.02E-01 | -6.37 |
| 1457861_PM_at       | A230009B12Rik                      | NA          | 0.09  | 2.56 | 0.79  | 4.46E-01 | 7.02E-01 | -6.37 |
| 1446007_PM_at       | ---                                | NA          | 0.10  | 2.39 | 0.79  | 4.46E-01 | 7.02E-01 | -6.37 |
| 1419336_PM_at       | Lcn5                               | NA          | 0.10  | 2.50 | 0.79  | 4.46E-01 | 7.02E-01 | -6.37 |
| 1458795_PM_at       | ---                                | NA          | 0.11  | 2.49 | 0.79  | 4.46E-01 | 7.02E-01 | -6.37 |
| 1427744_PM_at       | Ccnb3                              | CCNB3       | 0.07  | 2.16 | 0.79  | 4.46E-01 | 7.02E-01 | -6.37 |
| 1435076_PM_at       | Fam57a                             | FAM57A      | 0.08  | 2.71 | 0.79  | 4.46E-01 | 7.02E-01 | -6.37 |
| 1443387_PM_at       | BB045044                           | NA          | 0.15  | 2.49 | 0.79  | 4.46E-01 | 7.02E-01 | -6.37 |
| 1449160_PM_at       | Npr1                               | NPR1        | -0.06 | 2.27 | -0.79 | 4.46E-01 | 7.02E-01 | -6.37 |
| 1431111_PM_at       | Eno1 /// Eno1b ///<br>LOC102642340 | ENO1        | 0.07  | 2.13 | 0.79  | 4.46E-01 | 7.02E-01 | -6.37 |
| 1442887_PM_at       | Lypd1                              | LYPD1       | 0.12  | 2.47 | 0.79  | 4.46E-01 | 7.02E-01 | -6.37 |
| 1418022_PM_at       | Naa15                              | NAA15       | -0.22 | 3.17 | -0.79 | 4.46E-01 | 7.02E-01 | -6.37 |
| 1440615_PM_at       | Dusp16                             | DUSP16      | -0.28 | 2.57 | -0.79 | 4.47E-01 | 7.02E-01 | -6.37 |
| 1416045_PM_a_at     | Smarcb1                            | SMARCB1     | -0.27 | 3.52 | -0.79 | 4.47E-01 | 7.02E-01 | -6.37 |
| 1429232_PM_at       | Hrnpr                              | HNRNPR      | -0.20 | 2.57 | -0.79 | 4.47E-01 | 7.02E-01 | -6.37 |
| 1450700_PM_at       | Cdc42ep3                           | CDC42EP3    | -0.19 | 2.07 | -0.79 | 4.47E-01 | 7.02E-01 | -6.37 |
| 1437785_PM_at       | Adamts9                            | ADAMTS9     | -0.17 | 2.52 | -0.79 | 4.47E-01 | 7.02E-01 | -6.37 |
| 1454084_PM_a_at     | Senp8                              | SENP8       | -0.09 | 2.45 | -0.79 | 4.47E-01 | 7.02E-01 | -6.37 |
| 1427964_PM_at       | Cmtm8                              | CMTM8       | 0.07  | 2.25 | 0.79  | 4.47E-01 | 7.02E-01 | -6.37 |
| 1440085_PM_at       | Eda2r                              | EDA2R       | 0.08  | 2.34 | 0.79  | 4.47E-01 | 7.02E-01 | -6.37 |
| 1454080_PM_at       | Ktbd12                             | KBTBD12     | 0.09  | 2.47 | 0.79  | 4.47E-01 | 7.02E-01 | -6.37 |
| 1439690_PM_at       | ---                                | NA          | 0.13  | 2.68 | 0.79  | 4.47E-01 | 7.02E-01 | -6.37 |
| 1427046_PM_at       | Grhl2                              | GRHL2       | 0.14  | 3.24 | 0.79  | 4.47E-01 | 7.02E-01 | -6.37 |
| 1428699_PM_at       | Gm14680 /// Sms                    | SMS         | 0.25  | 2.75 | 0.79  | 4.47E-01 | 7.02E-01 | -6.37 |
| 1452250_PM_a_at     | Col6a2                             | COL6A2      | 0.43  | 3.03 | 0.79  | 4.47E-01 | 7.02E-01 | -6.37 |
| 1449730_PM_s_at     | Fzd3                               | FZD3        | -0.23 | 4.13 | -0.79 | 4.47E-01 | 7.02E-01 | -6.37 |
| 1449461_PM_at       | Rbp7                               | RBP7        | 0.06  | 2.39 | 0.79  | 4.47E-01 | 7.02E-01 | -6.37 |
| 1441106_PM_at       | ---                                | NA          | 0.07  | 3.04 | 0.79  | 4.47E-01 | 7.02E-01 | -6.37 |
| 1430104_PM_at       | LOC105247089                       | NA          | 0.08  | 2.69 | 0.79  | 4.47E-01 | 7.02E-01 | -6.37 |
| 1460378_PM_a_at     | Tes                                | TES         | 0.09  | 2.35 | 0.79  | 4.47E-01 | 7.02E-01 | -6.37 |
| 1457761_PM_at       | C79607                             | NA          | 0.11  | 2.75 | 0.79  | 4.47E-01 | 7.02E-01 | -6.37 |
| 1457406_PM_at       | ---                                | NA          | 0.11  | 2.27 | 0.79  | 4.47E-01 | 7.02E-01 | -6.37 |
| 1442434_PM_at       | D8Ert82e                           | PRAG1       | 0.18  | 2.64 | 0.79  | 4.47E-01 | 7.02E-01 | -6.37 |
| 1447147_PM_at       | ---                                | NA          | 0.11  | 3.13 | 0.79  | 4.47E-01 | 7.02E-01 | -6.37 |
| 1449724_PM_s_at     | D8Ert738e                          | C19orf53    | 0.21  | 5.25 | 0.79  | 4.47E-01 | 7.02E-01 | -6.37 |
| 1454171_PM_x_at     | 9530053H05Rik                      | NA          | 0.14  | 3.18 | 0.79  | 4.47E-01 | 7.03E-01 | -6.37 |
| AFFX-r2-Bs-phe-M_at | ---                                | NA          | 0.09  | 2.13 | 0.79  | 4.47E-01 | 7.03E-01 | -6.37 |
| 1425388_PM_a_at     | Tpk1                               | TPK1        | 0.11  | 2.17 | 0.79  | 4.47E-01 | 7.03E-01 | -6.37 |
| 1425629_PM_a_at     | Nol6                               | NOL6        | 0.16  | 2.89 | 0.79  | 4.47E-01 | 7.03E-01 | -6.37 |
| 1458008_PM_at       | Gm29805                            | NA          | 0.14  | 2.87 | 0.79  | 4.47E-01 | 7.03E-01 | -6.37 |
| 1423207_PM_at       | Tmem167                            | TMEM167A    | -0.18 | 2.62 | -0.79 | 4.47E-01 | 7.03E-01 | -6.37 |
| 1420311_PM_s_at     | ---                                | NA          | 0.10  | 2.24 | 0.79  | 4.47E-01 | 7.03E-01 | -6.37 |
| 1417432_PM_a_at     | Gnb1                               | GNB1        | 0.26  | 4.86 | 0.79  | 4.47E-01 | 7.03E-01 | -6.37 |
| 1417724_PM_at       | Alyref                             | ALYREF      | 0.16  | 4.21 | 0.79  | 4.47E-01 | 7.03E-01 | -6.37 |
| 1458912_PM_at       | ---                                | NA          | 0.12  | 2.83 | 0.79  | 4.47E-01 | 7.03E-01 | -6.37 |

|                 |                                                                                                                                                                                                                                                                                                                                                                                                                                                                                                                                                                                                                                         |            |       |      |       |          |          |       |
|-----------------|-----------------------------------------------------------------------------------------------------------------------------------------------------------------------------------------------------------------------------------------------------------------------------------------------------------------------------------------------------------------------------------------------------------------------------------------------------------------------------------------------------------------------------------------------------------------------------------------------------------------------------------------|------------|-------|------|-------|----------|----------|-------|
|                 | 2610042L04Rik ///<br>4930555G01Rik ///<br>D830030K20Rik ///<br>Gm10338 /// Gm10406 ///<br>Gm10409 /// Gm16434 ///<br>Gm2897 /// Gm2956 ///<br>Gm3002 /// Gm3020 ///<br>Gm3095 /// Gm3159 ///<br>Gm3164 /// Gm3173 ///<br>Gm3194 /// Gm3239 ///<br>Gm3264 /// Gm3317 ///<br>Gm3373 /// Gm3383 ///<br>Gm33933 /// Gm3488 ///<br>Gm3594 /// Gm3636 ///<br>Gm3642 /// Gm3667 ///<br>Gm3696 /// Gm3739 ///<br>Gm5796 /// Gm6337 ///<br>Gm9602 /// Gm9603 ///<br>LOC100040870 ///<br>LOC100861615 ///<br>LOC101055754 ///<br>LOC102632113 ///<br>LOC102638110 ///<br>LOC102642063 ///<br>LOC105242441 ///<br>LOC105245673 ///<br>LOC105245675 | NA         | -0.21 | 6.07 | -0.79 | 4.47E-01 | 7.03E-01 | -6.37 |
| 1454137_PM_s_at | Hfe2                                                                                                                                                                                                                                                                                                                                                                                                                                                                                                                                                                                                                                    | HFE2       | -0.20 | 2.80 | -0.79 | 4.47E-01 | 7.03E-01 | -6.37 |
| 1419980_PM_at   | Gba2                                                                                                                                                                                                                                                                                                                                                                                                                                                                                                                                                                                                                                    | GBA2       | -0.17 | 3.73 | -0.79 | 4.47E-01 | 7.03E-01 | -6.37 |
| 1454637_PM_at   | Klh8                                                                                                                                                                                                                                                                                                                                                                                                                                                                                                                                                                                                                                    | KLHL8      | -0.17 | 3.97 | -0.79 | 4.48E-01 | 7.03E-01 | -6.37 |
| 1432066_PM_at   | Dnaja3                                                                                                                                                                                                                                                                                                                                                                                                                                                                                                                                                                                                                                  | DNAJA3     | -0.12 | 2.43 | -0.79 | 4.47E-01 | 7.03E-01 | -6.37 |
| 1432420_PM_a_at | Z310002L09Rik                                                                                                                                                                                                                                                                                                                                                                                                                                                                                                                                                                                                                           | NA         | 0.06  | 2.28 | 0.79  | 4.47E-01 | 7.03E-01 | -6.37 |
| 1460629_PM_at   | Trim16                                                                                                                                                                                                                                                                                                                                                                                                                                                                                                                                                                                                                                  | TRIM16     | 0.07  | 2.17 | 0.79  | 4.47E-01 | 7.03E-01 | -6.37 |
| 1423774_PM_a_at | Prc1                                                                                                                                                                                                                                                                                                                                                                                                                                                                                                                                                                                                                                    | PRC1       | 0.08  | 2.40 | 0.79  | 4.48E-01 | 7.03E-01 | -6.37 |
| 1418673_PM_at   | Snai2                                                                                                                                                                                                                                                                                                                                                                                                                                                                                                                                                                                                                                   | SNAI2      | 0.08  | 2.33 | 0.79  | 4.47E-01 | 7.03E-01 | -6.37 |
| 1452469_PM_a_at | Smtn                                                                                                                                                                                                                                                                                                                                                                                                                                                                                                                                                                                                                                    | SMTN       | 0.08  | 2.40 | 0.79  | 4.47E-01 | 7.03E-01 | -6.37 |
| 1419570_PM_at   | Slc28a3                                                                                                                                                                                                                                                                                                                                                                                                                                                                                                                                                                                                                                 | SLC28A3    | 0.08  | 2.49 | 0.79  | 4.47E-01 | 7.03E-01 | -6.37 |
| 1440173_PM_x_at | Selp                                                                                                                                                                                                                                                                                                                                                                                                                                                                                                                                                                                                                                    | SELP       | 0.10  | 2.06 | 0.79  | 4.47E-01 | 7.03E-01 | -6.37 |
| 1426030_PM_a_at | Apeh                                                                                                                                                                                                                                                                                                                                                                                                                                                                                                                                                                                                                                    | APEH       | 0.11  | 3.41 | 0.79  | 4.47E-01 | 7.03E-01 | -6.37 |
| 1432777_PM_at   | ---                                                                                                                                                                                                                                                                                                                                                                                                                                                                                                                                                                                                                                     | NA         | 0.12  | 2.41 | 0.79  | 4.48E-01 | 7.03E-01 | -6.37 |
| 1438296_PM_at   | Slc2a4rg-ps                                                                                                                                                                                                                                                                                                                                                                                                                                                                                                                                                                                                                             | NA         | 0.15  | 3.56 | 0.79  | 4.47E-01 | 7.03E-01 | -6.37 |
| 1435129_PM_at   | Ptp4a2                                                                                                                                                                                                                                                                                                                                                                                                                                                                                                                                                                                                                                  | NA         | 0.16  | 8.54 | 0.79  | 4.48E-01 | 7.03E-01 | -6.37 |
| 1440347_PM_at   | LOC102641521                                                                                                                                                                                                                                                                                                                                                                                                                                                                                                                                                                                                                            | NA         | 0.17  | 2.52 | 0.79  | 4.47E-01 | 7.03E-01 | -6.37 |
|                 | Mageb1 /// Mageb2 ///<br>Mageb3                                                                                                                                                                                                                                                                                                                                                                                                                                                                                                                                                                                                         | MAGEB6P1   | 0.22  | 2.66 | 0.79  | 4.48E-01 | 7.03E-01 | -6.37 |
| 1422345_PM_s_at | Plau                                                                                                                                                                                                                                                                                                                                                                                                                                                                                                                                                                                                                                    | PLAU       | 0.25  | 2.83 | 0.79  | 4.47E-01 | 7.03E-01 | -6.37 |
| 1422139_PM_at   | Stxbp5l                                                                                                                                                                                                                                                                                                                                                                                                                                                                                                                                                                                                                                 | NA         | -0.46 | 6.93 | -0.79 | 4.48E-01 | 7.03E-01 | -6.38 |
| 1460438_PM_at   | Lysmd1                                                                                                                                                                                                                                                                                                                                                                                                                                                                                                                                                                                                                                  | LYSMD1     | -0.09 | 2.46 | -0.79 | 4.48E-01 | 7.03E-01 | -6.38 |
| 1450263_PM_at   | Pcdhb5                                                                                                                                                                                                                                                                                                                                                                                                                                                                                                                                                                                                                                  | PCDHB4     | 0.10  | 2.32 | 0.79  | 4.48E-01 | 7.03E-01 | -6.38 |
| 1429647_PM_at   | Prss56                                                                                                                                                                                                                                                                                                                                                                                                                                                                                                                                                                                                                                  | PRSS56     | 0.13  | 2.49 | 0.79  | 4.48E-01 | 7.03E-01 | -6.38 |
| 1452309_PM_at   | Cgln1                                                                                                                                                                                                                                                                                                                                                                                                                                                                                                                                                                                                                                   | CGNL1      | 0.13  | 2.90 | 0.79  | 4.48E-01 | 7.03E-01 | -6.38 |
| 1419405_PM_at   | Nmb                                                                                                                                                                                                                                                                                                                                                                                                                                                                                                                                                                                                                                     | NMB        | 0.26  | 2.38 | 0.79  | 4.48E-01 | 7.03E-01 | -6.38 |
| 1444693_PM_at   | ---                                                                                                                                                                                                                                                                                                                                                                                                                                                                                                                                                                                                                                     | NA         | -0.10 | 3.19 | -0.79 | 4.48E-01 | 7.03E-01 | -6.38 |
| 1457629_PM_at   | Atmin                                                                                                                                                                                                                                                                                                                                                                                                                                                                                                                                                                                                                                   | ATMIN      | -0.08 | 2.15 | -0.79 | 4.48E-01 | 7.03E-01 | -6.38 |
| 1439090_PM_at   | ---                                                                                                                                                                                                                                                                                                                                                                                                                                                                                                                                                                                                                                     | NA         | -0.06 | 2.20 | -0.79 | 4.48E-01 | 7.03E-01 | -6.38 |
| 1458149_PM_at   | ---                                                                                                                                                                                                                                                                                                                                                                                                                                                                                                                                                                                                                                     | NA         | 0.33  | 3.22 | 0.79  | 4.48E-01 | 7.03E-01 | -6.38 |
| 1441943_PM_x_at | Ciapi1                                                                                                                                                                                                                                                                                                                                                                                                                                                                                                                                                                                                                                  | NA         | 0.15  | 2.96 | 0.79  | 4.48E-01 | 7.03E-01 | -6.38 |
| 1416362_PM_a_at | Fkbp4                                                                                                                                                                                                                                                                                                                                                                                                                                                                                                                                                                                                                                   | FKBP4      | 0.20  | 3.09 | 0.79  | 4.48E-01 | 7.03E-01 | -6.38 |
| 1448432_PM_at   | Plcd1                                                                                                                                                                                                                                                                                                                                                                                                                                                                                                                                                                                                                                   | PLCD1      | 0.21  | 3.25 | 0.79  | 4.48E-01 | 7.03E-01 | -6.38 |
| 1447198_PM_at   | Recql                                                                                                                                                                                                                                                                                                                                                                                                                                                                                                                                                                                                                                   | RECQL      | -0.22 | 2.45 | -0.79 | 4.48E-01 | 7.03E-01 | -6.38 |
| 1444911_PM_at   | Atp10b                                                                                                                                                                                                                                                                                                                                                                                                                                                                                                                                                                                                                                  | ATP10B     | -0.10 | 2.31 | -0.79 | 4.48E-01 | 7.03E-01 | -6.38 |
| 1431474_PM_at   | ---                                                                                                                                                                                                                                                                                                                                                                                                                                                                                                                                                                                                                                     | NA         | 0.07  | 2.17 | 0.79  | 4.48E-01 | 7.03E-01 | -6.38 |
| 1443927_PM_at   | Stap1                                                                                                                                                                                                                                                                                                                                                                                                                                                                                                                                                                                                                                   | STAP1      | 0.07  | 2.84 | 0.79  | 4.48E-01 | 7.03E-01 | -6.38 |
| 1443326_PM_at   | ---                                                                                                                                                                                                                                                                                                                                                                                                                                                                                                                                                                                                                                     | NA         | -0.08 | 2.32 | -0.79 | 4.48E-01 | 7.03E-01 | -6.38 |
| 1428671_PM_at   | Z200002D01Rik                                                                                                                                                                                                                                                                                                                                                                                                                                                                                                                                                                                                                           | NA         | 0.08  | 2.62 | 0.79  | 4.48E-01 | 7.03E-01 | -6.38 |
| 1427632_PM_x_at | Cd55b                                                                                                                                                                                                                                                                                                                                                                                                                                                                                                                                                                                                                                   | NA         | 0.09  | 2.06 | 0.79  | 4.48E-01 | 7.03E-01 | -6.38 |
| 1435646_PM_at   | Ikbkg                                                                                                                                                                                                                                                                                                                                                                                                                                                                                                                                                                                                                                   | IKBKG      | 0.15  | 2.69 | 0.79  | 4.48E-01 | 7.03E-01 | -6.38 |
| 1454769_PM_at   | Tatdn2                                                                                                                                                                                                                                                                                                                                                                                                                                                                                                                                                                                                                                  | AC022384.1 | 0.17  | 3.39 | 0.79  | 4.48E-01 | 7.03E-01 | -6.38 |
| 1441597_PM_at   | ---                                                                                                                                                                                                                                                                                                                                                                                                                                                                                                                                                                                                                                     | NA         | 0.33  | 2.96 | 0.79  | 4.48E-01 | 7.03E-01 | -6.38 |
| 1419560_PM_at   | Lipc                                                                                                                                                                                                                                                                                                                                                                                                                                                                                                                                                                                                                                    | LIPC       | -0.08 | 2.15 | -0.79 | 4.48E-01 | 7.03E-01 | -6.38 |
| 1442680_PM_at   | ---                                                                                                                                                                                                                                                                                                                                                                                                                                                                                                                                                                                                                                     | NA         | -0.15 | 2.88 | -0.79 | 4.48E-01 | 7.03E-01 | -6.38 |
| 1430460_PM_at   | Fam188a                                                                                                                                                                                                                                                                                                                                                                                                                                                                                                                                                                                                                                 | MINDY3     | 0.08  | 2.25 | 0.79  | 4.48E-01 | 7.03E-01 | -6.38 |
| 1460578_PM_at   | Fgd5                                                                                                                                                                                                                                                                                                                                                                                                                                                                                                                                                                                                                                    | FGD5       | 0.20  | 2.74 | 0.79  | 4.48E-01 | 7.03E-01 | -6.38 |

|                 |                        |          |       |       |       |          |          |       |
|-----------------|------------------------|----------|-------|-------|-------|----------|----------|-------|
| 1459914_PM_at   | Slc25a53               | SLC25A53 | 0.10  | 3.04  | 0.79  | 4.48E-01 | 7.03E-01 | -6.38 |
| 1427206_PM_at   | Afg3l2                 | AFG3L2   | 0.09  | 2.47  | 0.79  | 4.48E-01 | 7.03E-01 | -6.38 |
| 1451077_PM_at   | Rpl5                   | RPL5     | 0.20  | 4.30  | 0.79  | 4.48E-01 | 7.03E-01 | -6.38 |
| 1454776_PM_at   | Ehmt1 /// LOC102641262 | EHMT1    | 0.13  | 3.24  | 0.79  | 4.48E-01 | 7.03E-01 | -6.38 |
| 1452398_PM_at   | Plce1                  | PLCE1    | -0.08 | 2.63  | -0.79 | 4.48E-01 | 7.03E-01 | -6.38 |
| 1458308_PM_at   | Sbno2                  | SBNO2    | 0.11  | 3.02  | 0.79  | 4.48E-01 | 7.03E-01 | -6.38 |
| 1443726_PM_at   | Smyd1                  | SMYD1    | 0.14  | 2.64  | 0.79  | 4.48E-01 | 7.03E-01 | -6.38 |
| 1452640_PM_at   | Cldn34c1               | CLDN34   | 0.07  | 2.46  | 0.79  | 4.49E-01 | 7.04E-01 | -6.38 |
| 1416967_PM_at   | Sox2                   | SOX2     | -0.22 | 2.66  | -0.79 | 4.49E-01 | 7.04E-01 | -6.38 |
| 1428866_PM_at   | Amer2 /// LOC102643118 | NA       | -0.22 | 3.95  | -0.79 | 4.49E-01 | 7.04E-01 | -6.38 |
| 1419809_PM_s_at | Cog4                   | COG4     | -0.18 | 3.95  | -0.79 | 4.49E-01 | 7.04E-01 | -6.38 |
| 1456560_PM_at   | Fam170a                | FAM170A  | 0.09  | 2.46  | 0.79  | 4.49E-01 | 7.04E-01 | -6.38 |
| 1415736_PM_at   | Pfdn5                  | PFDN5    | 0.28  | 3.62  | 0.79  | 4.49E-01 | 7.04E-01 | -6.38 |
| 1455094_PM_s_at | Ube2g1                 | UBE2G1   | -0.29 | 3.45  | -0.79 | 4.49E-01 | 7.04E-01 | -6.38 |
| 1444048_PM_at   | ---                    | NA       | -0.27 | 3.09  | -0.79 | 4.49E-01 | 7.04E-01 | -6.38 |
| 1442113_PM_at   | 5330417C22Rik          | KIAA1324 | -0.13 | 2.67  | -0.79 | 4.49E-01 | 7.04E-01 | -6.38 |
| 1440698_PM_at   | ---                    | NA       | 0.06  | 2.42  | 0.79  | 4.49E-01 | 7.04E-01 | -6.38 |
| 1444270_PM_at   | Rsph4a                 | RSPH4A   | 0.08  | 2.32  | 0.79  | 4.49E-01 | 7.04E-01 | -6.38 |
| 1443749_PM_x_at | Slc1a3                 | SLC1A3   | 0.12  | 5.56  | 0.79  | 4.49E-01 | 7.04E-01 | -6.38 |
| 1432426_PM_a_at | Ube2f                  | UBE2F    | 0.19  | 3.16  | 0.79  | 4.49E-01 | 7.04E-01 | -6.38 |
| 1428402_PM_at   | Zcchc3                 | ZCCHC3   | 0.38  | 6.48  | 0.79  | 4.49E-01 | 7.04E-01 | -6.38 |
| 1449527_PM_at   | Pcdhb7                 | PCDH4    | -0.09 | 2.18  | -0.79 | 4.49E-01 | 7.04E-01 | -6.38 |
| 1419551_PM_s_at | Stk39                  | STK39    | -0.15 | 2.79  | -0.79 | 4.49E-01 | 7.04E-01 | -6.38 |
| 1422221_PM_at   | Hand2                  | HAND2    | 0.07  | 2.32  | 0.79  | 4.49E-01 | 7.04E-01 | -6.38 |
| 1420302_PM_at   | AA414903               | NA       | 0.19  | 2.45  | 0.79  | 4.49E-01 | 7.04E-01 | -6.38 |
| 1425298_PM_a_at | Naip1                  | NAIP     | 0.17  | 2.61  | 0.79  | 4.49E-01 | 7.04E-01 | -6.38 |
| 1432824_PM_at   | 2900018N21Rik          | NA       | -0.13 | 2.95  | -0.79 | 4.49E-01 | 7.04E-01 | -6.38 |
| 1435236_PM_at   | Tceanc                 | TCEANC   | 0.09  | 2.09  | 0.79  | 4.49E-01 | 7.04E-01 | -6.38 |
| 1459818_PM_x_at | Zmym3                  | ZMYM3    | -0.24 | 6.47  | -0.79 | 4.49E-01 | 7.04E-01 | -6.38 |
| 1421187_PM_at   | Ccr2                   | CCR2     | -0.10 | 2.30  | -0.79 | 4.49E-01 | 7.04E-01 | -6.38 |
| 1454819_PM_at   | Plekha8                | PLEKHA8  | -0.21 | 2.92  | -0.79 | 4.49E-01 | 7.04E-01 | -6.38 |
| 1417678_PM_at   | Mmp24                  | MMP24    | 0.08  | 2.75  | 0.79  | 4.49E-01 | 7.04E-01 | -6.38 |
| 1444282_PM_at   | ---                    | NA       | 0.10  | 2.27  | 0.79  | 4.49E-01 | 7.04E-01 | -6.38 |
| 1426959_PM_at   | Bdh1                   | BDH1     | 0.09  | 2.41  | 0.79  | 4.49E-01 | 7.04E-01 | -6.38 |
| 1417879_PM_at   | Nenf                   | NENF     | 0.25  | 3.26  | 0.79  | 4.49E-01 | 7.04E-01 | -6.38 |
| 1436219_PM_at   | Fam210a                | FAM210A  | -0.16 | 5.32  | -0.79 | 4.49E-01 | 7.04E-01 | -6.38 |
| 1441206_PM_at   | Synpo2                 | SYNPO2   | 0.16  | 3.32  | 0.79  | 4.49E-01 | 7.04E-01 | -6.38 |
| 1436313_PM_at   | Scyl2                  | SCYL2    | 0.25  | 2.45  | 0.79  | 4.49E-01 | 7.04E-01 | -6.38 |
| 1450822_PM_at   | Lyz1                   | LYZ      | 0.08  | 3.18  | 0.79  | 4.49E-01 | 7.04E-01 | -6.38 |
| 1428825_PM_at   | Nr6a1                  | NR6A1    | 0.09  | 2.33  | 0.79  | 4.49E-01 | 7.04E-01 | -6.38 |
| 1425302_PM_at   | Mfsd6l                 | MFSD6L   | 0.10  | 2.44  | 0.79  | 4.49E-01 | 7.04E-01 | -6.38 |
| 1460008_PM_x_at | Rpl31                  | NA       | 0.21  | 8.26  | 0.79  | 4.49E-01 | 7.04E-01 | -6.38 |
| 1427361_PM_at   | Hoxc6                  | HOXC6    | 0.11  | 2.53  | 0.79  | 4.50E-01 | 7.04E-01 | -6.38 |
| 1447403_PM_a_at | Zmynd19                | ZMYND19  | -0.16 | 3.52  | -0.79 | 4.50E-01 | 7.04E-01 | -6.38 |
| 1438176_PM_x_at | Snap47                 | SNAP47   | -0.25 | 10.13 | -0.79 | 4.50E-01 | 7.04E-01 | -6.38 |
| 1445612_PM_at   | ---                    | NA       | 0.21  | 2.55  | 0.79  | 4.50E-01 | 7.04E-01 | -6.38 |
| 1416042_PM_s_at | Nasp                   | NASP     | 0.35  | 3.51  | 0.79  | 4.50E-01 | 7.04E-01 | -6.38 |
| 1459204_PM_at   | AU015449               | NA       | 0.08  | 2.57  | 0.79  | 4.50E-01 | 7.04E-01 | -6.38 |
| 1442973_PM_at   | C80865                 | NA       | 0.11  | 2.35  | 0.79  | 4.50E-01 | 7.04E-01 | -6.38 |
| 1428959_PM_at   | Tespa1                 | TESPA1   | -0.07 | 2.12  | -0.79 | 4.50E-01 | 7.04E-01 | -6.38 |
| 1441285_PM_at   | Pdp2                   | NA       | 0.12  | 3.24  | 0.79  | 4.50E-01 | 7.04E-01 | -6.38 |
| 1423539_PM_at   | Pms2                   | PMS2     | -0.19 | 3.29  | -0.79 | 4.50E-01 | 7.04E-01 | -6.38 |
| 1421192_PM_a_at | Itns1                  | ITSN1    | 0.16  | 3.57  | 0.79  | 4.50E-01 | 7.04E-01 | -6.38 |
| 1429357_PM_at   | Fam135a                | FAM135A  | 0.17  | 3.14  | 0.79  | 4.50E-01 | 7.04E-01 | -6.38 |
| 1447464_PM_at   | Anks1b                 | NA       | 0.23  | 2.64  | 0.79  | 4.50E-01 | 7.04E-01 | -6.38 |
| 1418261_PM_at   | Syk                    | SYK      | 0.09  | 2.65  | 0.79  | 4.50E-01 | 7.04E-01 | -6.38 |
| 1454188_PM_at   | 4921508D12Rik          | NA       | 0.12  | 2.60  | 0.79  | 4.50E-01 | 7.04E-01 | -6.38 |
| 1430042_PM_at   | ---                    | NA       | 0.07  | 2.09  | 0.79  | 4.50E-01 | 7.04E-01 | -6.38 |
| 1427934_PM_at   | Lymr2                  | NA       | -0.18 | 2.52  | -0.79 | 4.50E-01 | 7.04E-01 | -6.38 |
| 1434244_PM_x_at | Trmt2a                 | TRMT2A   | -0.11 | 2.35  | -0.79 | 4.50E-01 | 7.04E-01 | -6.38 |
| 1445668_PM_at   | ---                    | NA       | 0.15  | 3.12  | 0.79  | 4.50E-01 | 7.04E-01 | -6.38 |
| 1418454_PM_at   | Mfap5                  | MFAP5    | 0.07  | 2.43  | 0.79  | 4.50E-01 | 7.05E-01 | -6.38 |
| 1442906_PM_at   | ---                    | NA       | 0.19  | 3.06  | 0.78  | 4.50E-01 | 7.05E-01 | -6.38 |
| 1429102_PM_at   | Arrdc5                 | ARRDC5   | 0.08  | 2.53  | 0.78  | 4.50E-01 | 7.05E-01 | -6.38 |
| 1435739_PM_at   | Lats1                  | LATS1    | 0.10  | 3.49  | 0.78  | 4.50E-01 | 7.05E-01 | -6.38 |
| 1435454_PM_a_at | Helz2                  | HELZ2    | 0.08  | 2.16  | 0.78  | 4.50E-01 | 7.05E-01 | -6.38 |
| 1450692_PM_at   | Kif4                   | KIF4     | 0.09  | 2.40  | 0.78  | 4.50E-01 | 7.05E-01 | -6.38 |
| 1417213_PM_a_at | Rbm6                   | RBM6     | 0.24  | 3.42  | 0.78  | 4.50E-01 | 7.05E-01 | -6.38 |
| 1424640_PM_at   | Arl8a                  | ARL8A    | -0.21 | 4.81  | -0.78 | 4.50E-01 | 7.05E-01 | -6.38 |
| 1418686_PM_at   | Oas1c                  | OAS1     | 0.07  | 2.14  | 0.78  | 4.50E-01 | 7.05E-01 | -6.38 |
| 1418460_PM_at   | Sh3d19                 | SH3D19   | 0.09  | 2.30  | 0.78  | 4.50E-01 | 7.05E-01 | -6.38 |
| 1454907_PM_at   | Serf1                  | SERF1B   | 0.11  | 2.77  | 0.78  | 4.50E-01 | 7.05E-01 | -6.38 |
| 1417700_PM_at   | Rab38                  | RAB38    | 0.15  | 2.56  | 0.78  | 4.50E-01 | 7.05E-01 | -6.38 |

|                 |                                       |            |       |       |       |          |          |       |
|-----------------|---------------------------------------|------------|-------|-------|-------|----------|----------|-------|
| 1460646_PM_at   | Csnk2a2                               | CSNK2A2    | -0.13 | 5.79  | -0.78 | 4.50E-01 | 7.05E-01 | -6.38 |
| 1436008_PM_at   | Tpd52                                 | TPD52      | -0.09 | 2.64  | -0.78 | 4.50E-01 | 7.05E-01 | -6.38 |
| 1442780_PM_at   | ---                                   | NA         | -0.08 | 2.75  | -0.78 | 4.50E-01 | 7.05E-01 | -6.38 |
| 1430842_PM_at   | 1500002F19Rik                         | NA         | 0.07  | 2.31  | 0.78  | 4.50E-01 | 7.05E-01 | -6.38 |
| 1439785_PM_at   | 9630013A20Rik                         | NA         | 0.10  | 2.31  | 0.78  | 4.50E-01 | 7.05E-01 | -6.38 |
| 1448718_PM_at   | Lamtor1                               | LAMTOR1    | 0.19  | 2.78  | 0.78  | 4.51E-01 | 7.05E-01 | -6.38 |
| 1445726_PM_at   | Rsl1 /// Zfp429 /// Zfp456 /// Zfp953 | NA         | 0.10  | 2.63  | 0.78  | 4.51E-01 | 7.05E-01 | -6.38 |
| 1455391_PM_at   | Rad23a                                | RAD23A     | -0.16 | 4.12  | -0.78 | 4.51E-01 | 7.05E-01 | -6.38 |
| 1447572_PM_at   | 1700052122Rik                         | NA         | 0.05  | 2.09  | 0.78  | 4.51E-01 | 7.05E-01 | -6.38 |
| 1459611_PM_at   | Mpp3                                  | MPP3       | 0.09  | 2.37  | 0.78  | 4.51E-01 | 7.05E-01 | -6.38 |
| 1447232_PM_at   | ---                                   | NA         | -0.09 | 2.55  | -0.78 | 4.51E-01 | 7.05E-01 | -6.38 |
| 1453848_PM_s_at | Zbed3                                 | ZBED3      | -0.09 | 2.92  | -0.78 | 4.51E-01 | 7.05E-01 | -6.38 |
| 1450516_PM_a_at | Rab17                                 | RAB17      | 0.09  | 2.40  | 0.78  | 4.51E-01 | 7.05E-01 | -6.38 |
| 1449624_PM_at   | Sel1l2                                | SEL1L2     | 0.11  | 2.79  | 0.78  | 4.51E-01 | 7.05E-01 | -6.38 |
| 1447025_PM_at   | ---                                   | NA         | 0.08  | 2.54  | 0.78  | 4.51E-01 | 7.05E-01 | -6.38 |
| 1424136_PM_a_at | Ppih                                  | NA         | 0.19  | 5.14  | 0.78  | 4.51E-01 | 7.05E-01 | -6.38 |
| 1437823_PM_at   | Gm12405                               | NA         | 0.08  | 2.15  | 0.78  | 4.51E-01 | 7.05E-01 | -6.38 |
| 1427771_PM_x_at | Iltgb1                                | NA         | 0.16  | 2.35  | 0.78  | 4.51E-01 | 7.05E-01 | -6.38 |
| 1451647_PM_at   | Slc24a1                               | SLC24A1    | 0.09  | 2.47  | 0.78  | 4.51E-01 | 7.05E-01 | -6.38 |
| 1417332_PM_at   | Rfx2                                  | RFX2       | 0.11  | 2.63  | 0.78  | 4.51E-01 | 7.05E-01 | -6.38 |
| 1454422_PM_at   | ---                                   | NA         | 0.16  | 2.71  | 0.78  | 4.51E-01 | 7.05E-01 | -6.38 |
| 1451748_PM_a_at | Setd3                                 | SETD3      | -0.14 | 3.43  | -0.78 | 4.51E-01 | 7.05E-01 | -6.38 |
| 1444626_PM_at   | ---                                   | NA         | 0.07  | 2.01  | 0.78  | 4.51E-01 | 7.05E-01 | -6.38 |
| 1437611_PM_x_at | Kif2c                                 | KIF2C      | 0.08  | 2.05  | 0.78  | 4.51E-01 | 7.05E-01 | -6.38 |
| 1441337_PM_at   | ---                                   | NA         | 0.15  | 2.65  | 0.78  | 4.51E-01 | 7.06E-01 | -6.38 |
| 1458442_PM_at   | Al132709                              | NA         | 0.09  | 2.38  | 0.78  | 4.51E-01 | 7.06E-01 | -6.38 |
| 1435442_PM_at   | Dcaf13                                | DCAF13     | -0.24 | 4.93  | -0.78 | 4.51E-01 | 7.06E-01 | -6.38 |
| 1446193_PM_at   | DSErtd579e                            | KIAA0232   | -0.09 | 2.58  | -0.78 | 4.51E-01 | 7.06E-01 | -6.38 |
| 1460481_PM_at   | ---                                   | NA         | 0.09  | 2.46  | 0.78  | 4.51E-01 | 7.06E-01 | -6.38 |
| 1439227_PM_at   | ---                                   | NA         | 0.11  | 2.69  | 0.78  | 4.51E-01 | 7.06E-01 | -6.38 |
| 1444529_PM_at   | Gm2016 /// Gm8300 /// LOC102642254    | NA         | -0.14 | 2.47  | -0.78 | 4.51E-01 | 7.06E-01 | -6.38 |
| 1423458_PM_at   | Slc35a5                               | SLC35A5    | -0.08 | 2.54  | -0.78 | 4.51E-01 | 7.06E-01 | -6.38 |
| 1457083_PM_at   | Lbhd1                                 | LBHD1      | 0.25  | 3.03  | 0.78  | 4.51E-01 | 7.06E-01 | -6.38 |
| 1425962_PM_at   | Klrb1f                                | KLRB1      | 0.08  | 2.30  | 0.78  | 4.51E-01 | 7.06E-01 | -6.38 |
| 1429158_PM_at   | Fbxo28                                | FBXO28     | 0.15  | 2.69  | 0.78  | 4.51E-01 | 7.06E-01 | -6.38 |
| 1419523_PM_at   | Cyp3a13                               | CYP3A4     | -0.08 | 2.17  | -0.78 | 4.51E-01 | 7.06E-01 | -6.38 |
| 1440998_PM_at   | Zswim8                                | NA         | 0.11  | 2.38  | 0.78  | 4.51E-01 | 7.06E-01 | -6.38 |
| 1419455_PM_at   | Ili10rb                               | AP000295.1 | -0.06 | 2.20  | -0.78 | 4.51E-01 | 7.06E-01 | -6.38 |
| 1439224_PM_at   | ---                                   | NA         | 0.07  | 2.08  | 0.78  | 4.51E-01 | 7.06E-01 | -6.38 |
| 1441348_PM_at   | Zfp955a                               | NA         | 0.09  | 2.25  | 0.78  | 4.51E-01 | 7.06E-01 | -6.38 |
| 1419468_PM_at   | Clec14a                               | CLEC14A    | 0.17  | 2.64  | 0.78  | 4.52E-01 | 7.06E-01 | -6.38 |
| 1445084_PM_at   | ---                                   | NA         | -0.08 | 2.18  | -0.78 | 4.52E-01 | 7.06E-01 | -6.38 |
| 1441096_PM_at   | Tusc5                                 | TUSC5      | 0.07  | 2.64  | 0.78  | 4.52E-01 | 7.06E-01 | -6.38 |
| 1418227_PM_at   | Orc2                                  | ORC2       | -0.22 | 3.23  | -0.78 | 4.52E-01 | 7.06E-01 | -6.38 |
| 1430934_PM_at   | Naaladl2                              | NAALADL2   | -0.07 | 2.51  | -0.78 | 4.52E-01 | 7.06E-01 | -6.38 |
| 1431376_PM_at   | Wdr62                                 | WDR62      | 0.07  | 2.19  | 0.78  | 4.52E-01 | 7.06E-01 | -6.38 |
| 1444990_PM_at   | ---                                   | NA         | 0.10  | 2.54  | 0.78  | 4.52E-01 | 7.06E-01 | -6.38 |
| 1429024_PM_at   | Rbm20                                 | RBM20      | -0.08 | 2.36  | -0.78 | 4.52E-01 | 7.06E-01 | -6.38 |
| 1446643_PM_at   | ---                                   | NA         | -0.13 | 2.79  | -0.78 | 4.52E-01 | 7.06E-01 | -6.38 |
| 1451752_PM_at   | Foxk1                                 | FOXK1      | 0.08  | 2.53  | 0.78  | 4.52E-01 | 7.06E-01 | -6.38 |
| 1433405_PM_at   | Dnmbp                                 | NA         | 0.12  | 2.66  | 0.78  | 4.52E-01 | 7.06E-01 | -6.38 |
| 1425851_PM_a_at | Amigo1                                | AMIGO1     | 0.12  | 3.02  | 0.78  | 4.52E-01 | 7.06E-01 | -6.38 |
| 1447875_PM_x_at | Zfp800                                | ZNF800     | -0.11 | 2.56  | -0.78 | 4.52E-01 | 7.06E-01 | -6.38 |
| 1459193_PM_at   | ---                                   | NA         | 0.07  | 2.09  | 0.78  | 4.52E-01 | 7.06E-01 | -6.38 |
| 1456860_PM_at   | Cdc26                                 | CDC26      | 0.08  | 2.30  | 0.78  | 4.52E-01 | 7.06E-01 | -6.38 |
| 1443915_PM_at   | Mrpl47                                | MRPL47     | 0.08  | 2.72  | 0.78  | 4.52E-01 | 7.06E-01 | -6.38 |
| 1444233_PM_at   | Gpr132                                | GPR132     | 0.12  | 2.50  | 0.78  | 4.52E-01 | 7.06E-01 | -6.38 |
| 1438962_PM_s_at | Ddx31                                 | DDX31      | 0.48  | 5.33  | 0.78  | 4.52E-01 | 7.06E-01 | -6.38 |
| 1447709_PM_at   | 2410021H03Rik                         | NA         | 0.07  | 2.26  | 0.78  | 4.52E-01 | 7.06E-01 | -6.38 |
| 1418671_PM_at   | Capn5                                 | CAPN5      | 0.08  | 2.66  | 0.78  | 4.52E-01 | 7.06E-01 | -6.38 |
| 1422817_PM_at   | Gp5                                   | GP5        | 0.09  | 2.32  | 0.78  | 4.52E-01 | 7.06E-01 | -6.38 |
| 1424844_PM_at   | Angel1                                | ANGEL1     | -0.13 | 3.28  | -0.78 | 4.52E-01 | 7.06E-01 | -6.38 |
| 1417896_PM_at   | Tjp3                                  | TJP3       | 0.07  | 3.40  | 0.78  | 4.52E-01 | 7.06E-01 | -6.38 |
| 1439585_PM_at   | Mdn1                                  | MDN1       | 0.09  | 2.15  | 0.78  | 4.52E-01 | 7.06E-01 | -6.38 |
| 1440163_PM_at   | ---                                   | NA         | -0.35 | 3.84  | -0.78 | 4.52E-01 | 7.06E-01 | -6.38 |
| 1415969_PM_s_at | Kap                                   | NA         | 0.06  | 2.10  | 0.78  | 4.52E-01 | 7.06E-01 | -6.38 |
| 1458075_PM_at   | ---                                   | NA         | 0.10  | 1.90  | 0.78  | 4.52E-01 | 7.06E-01 | -6.38 |
| 1454922_PM_at   | Wdr92                                 | WDR92      | 0.16  | 3.16  | 0.78  | 4.52E-01 | 7.06E-01 | -6.38 |
| 1453559_PM_a_at | Sel1l                                 | SEL1L      | 0.20  | 2.99  | 0.78  | 4.52E-01 | 7.06E-01 | -6.38 |
| 1430754_PM_at   | Ccdc150                               | CCDC150    | -0.07 | 2.39  | -0.78 | 4.52E-01 | 7.06E-01 | -6.38 |
| 1441660_PM_at   | Actr2                                 | ACTR2      | -0.08 | 2.37  | -0.78 | 4.52E-01 | 7.06E-01 | -6.38 |
| 1439456_PM_x_at | Atp6ap2                               | ATP6AP2    | -0.08 | 11.47 | -0.78 | 4.53E-01 | 7.06E-01 | -6.38 |
| 1442391_PM_at   | 4930519H02Rik                         | NA         | -0.08 | 2.74  | -0.78 | 4.52E-01 | 7.06E-01 | -6.38 |

|                 |                      |          |       |      |       |          |          |       |
|-----------------|----------------------|----------|-------|------|-------|----------|----------|-------|
| 1441303_PM_at   | Gm34292              | NA       | 0.06  | 2.22 | 0.78  | 4.52E-01 | 7.06E-01 | -6.38 |
| 1430833_PM_at   | ltk                  | ITK      | 0.07  | 2.12 | 0.78  | 4.53E-01 | 7.06E-01 | -6.38 |
| 1440164_PM_x_at | Cd8a                 | CD8A     | 0.07  | 2.12 | 0.78  | 4.52E-01 | 7.06E-01 | -6.38 |
| 1449728_PM_at   | ---                  | NA       | 0.08  | 2.46 | 0.78  | 4.52E-01 | 7.06E-01 | -6.38 |
| 1453619_PM_at   | Efcab1               | NA       | 0.09  | 2.56 | 0.78  | 4.53E-01 | 7.06E-01 | -6.38 |
| 1435724_PM_at   | Rfx8                 | RFX8     | 0.11  | 2.45 | 0.78  | 4.52E-01 | 7.06E-01 | -6.38 |
| 1448510_PM_at   | Efna1                | EFNA1    | 0.11  | 2.70 | 0.78  | 4.52E-01 | 7.06E-01 | -6.38 |
| 1447765_PM_at   | ---                  | NA       | 0.13  | 2.63 | 0.78  | 4.52E-01 | 7.06E-01 | -6.38 |
| 1425734_PM_a_at | Ccdc77               | CCDC77   | 0.15  | 3.23 | 0.78  | 4.53E-01 | 7.06E-01 | -6.38 |
| 1444494_PM_at   | Klh41                | KLHL41   | 0.08  | 1.91 | 0.78  | 4.53E-01 | 7.06E-01 | -6.38 |
| 1420527_PM_s_at | Tcp10a /// Tcp10b    | NA       | 0.12  | 2.32 | 0.78  | 4.53E-01 | 7.06E-01 | -6.38 |
| 1459634_PM_at   | Heatr5b              | HEATR5B  | 0.14  | 2.68 | 0.78  | 4.53E-01 | 7.06E-01 | -6.38 |
| 1419462_PM_s_at | Cfap20               | CFAP20   | 0.14  | 3.14 | 0.78  | 4.53E-01 | 7.06E-01 | -6.38 |
| 1420700_PM_s_at | Izumoir              | IZUMO1R  | 0.07  | 2.37 | 0.78  | 4.53E-01 | 7.06E-01 | -6.38 |
| 1444143_PM_at   | ---                  | NA       | 0.09  | 2.46 | 0.78  | 4.53E-01 | 7.06E-01 | -6.38 |
| 1452132_PM_at   | Tlcd1                | TLCD1    | 0.17  | 2.61 | 0.78  | 4.53E-01 | 7.06E-01 | -6.38 |
| 1440750_PM_at   | ---                  | NA       | 0.17  | 2.82 | 0.78  | 4.53E-01 | 7.06E-01 | -6.38 |
| 1422042_PM_at   | Gjc3                 | GJC3     | -0.10 | 2.34 | -0.78 | 4.53E-01 | 7.06E-01 | -6.38 |
| 1445442_PM_at   | Map9                 | MAP9     | 0.07  | 2.33 | 0.78  | 4.53E-01 | 7.06E-01 | -6.38 |
| 1444153_PM_at   | ---                  | NA       | 0.07  | 2.35 | 0.78  | 4.53E-01 | 7.06E-01 | -6.38 |
| 1441803_PM_at   | Ipcef1               | IPCEF1   | 0.10  | 2.86 | 0.78  | 4.53E-01 | 7.06E-01 | -6.38 |
| 1432373_PM_at   | 4930533B01Rik        | NA       | 0.07  | 2.27 | 0.78  | 4.53E-01 | 7.06E-01 | -6.38 |
| 1435237_PM_at   | 2310009A05Rik        | NA       | 0.18  | 3.06 | 0.78  | 4.53E-01 | 7.06E-01 | -6.38 |
| 1456845_PM_at   | Oxa1l                | NA       | -0.13 | 2.69 | -0.78 | 4.53E-01 | 7.07E-01 | -6.38 |
| 1444654_PM_at   | ---                  | NA       | 0.09  | 2.45 | 0.78  | 4.53E-01 | 7.07E-01 | -6.38 |
| 1458014_PM_at   | ---                  | NA       | -0.17 | 2.79 | -0.78 | 4.53E-01 | 7.07E-01 | -6.38 |
| 1422206_PM_at   | B3galt1              | B3GALT1  | -0.13 | 6.24 | -0.78 | 4.53E-01 | 7.07E-01 | -6.38 |
| 1444472_PM_at   | ---                  | NA       | 0.09  | 2.02 | 0.78  | 4.53E-01 | 7.07E-01 | -6.38 |
| 1431618_PM_a_at | Pibf1                | PIBF1    | 0.11  | 2.59 | 0.78  | 4.53E-01 | 7.07E-01 | -6.38 |
| 1418989_PM_at   | Ctse                 | CTSE     | 0.13  | 2.22 | 0.78  | 4.53E-01 | 7.07E-01 | -6.38 |
| 1442826_PM_at   | ---                  | NA       | 0.14  | 2.86 | 0.78  | 4.53E-01 | 7.07E-01 | -6.38 |
| 1448452_PM_at   | Irf8                 | IRF8     | 0.14  | 2.97 | 0.78  | 4.53E-01 | 7.07E-01 | -6.38 |
| 1444392_PM_at   | ---                  | NA       | 0.19  | 2.49 | 0.78  | 4.53E-01 | 7.07E-01 | -6.38 |
| 1420962_PM_at   | Hapln2               | HAPLN2   | 0.21  | 3.80 | 0.78  | 4.53E-01 | 7.07E-01 | -6.38 |
| 1460034_PM_at   | Pak4 /// Samd4b      | PAK4     | 0.11  | 3.48 | 0.78  | 4.53E-01 | 7.07E-01 | -6.38 |
| 1452308_PM_a_at | Atp1a2               | ATP1A2   | -0.45 | 5.34 | -0.78 | 4.53E-01 | 7.07E-01 | -6.38 |
| 1437439_PM_at   | 2410089E03Rik        | C5orf42  | -0.26 | 2.82 | -0.78 | 4.53E-01 | 7.07E-01 | -6.38 |
| 1431302_PM_a_at | Nudt7                | NUDT7    | -0.12 | 2.49 | -0.78 | 4.53E-01 | 7.07E-01 | -6.38 |
| 1439827_PM_at   | ---                  | NA       | 0.11  | 2.57 | 0.78  | 4.53E-01 | 7.07E-01 | -6.38 |
| 1421779_PM_at   | Rit2                 | NA       | 0.06  | 2.05 | 0.78  | 4.53E-01 | 7.07E-01 | -6.38 |
| 1424472_PM_at   | Nol6                 | NOL6     | 0.22  | 4.01 | 0.78  | 4.53E-01 | 7.07E-01 | -6.38 |
| 1450787_PM_at   | Cln5                 | CLCN5    | -0.12 | 2.61 | -0.78 | 4.53E-01 | 7.07E-01 | -6.38 |
| 1444465_PM_at   | ---                  | NA       | 0.14  | 2.58 | 0.78  | 4.53E-01 | 7.07E-01 | -6.38 |
| 1419997_PM_at   | ---                  | NA       | -0.33 | 5.86 | -0.78 | 4.54E-01 | 7.07E-01 | -6.38 |
| 1443175_PM_at   | ---                  | NA       | 0.12  | 2.52 | 0.78  | 4.54E-01 | 7.07E-01 | -6.38 |
| 1445008_PM_at   | ---                  | NA       | -0.14 | 2.89 | -0.78 | 4.54E-01 | 7.07E-01 | -6.38 |
| 1422006_PM_at   | Eif2ak2              | EIF2AK2  | 0.18  | 4.99 | 0.78  | 4.54E-01 | 7.07E-01 | -6.38 |
| 1422121_PM_at   | Oprd1                | OPRD1    | -0.28 | 3.05 | -0.78 | 4.54E-01 | 7.07E-01 | -6.38 |
| 1454413_PM_at   | 4933424H11Rik        | NA       | 0.06  | 2.02 | 0.78  | 4.54E-01 | 7.07E-01 | -6.38 |
| 1445522_PM_at   | Atp8b4               | ATP8B4   | 0.07  | 2.43 | 0.78  | 4.54E-01 | 7.07E-01 | -6.38 |
| 1418972_PM_at   | Bcl10                | BCL10    | 0.11  | 2.76 | 0.78  | 4.54E-01 | 7.07E-01 | -6.38 |
| 1428622_PM_at   | Deptor               | DEPTOR   | -0.14 | 2.82 | -0.78 | 4.54E-01 | 7.07E-01 | -6.38 |
| 1425582_PM_a_at | Emcn                 | EMCN     | -0.10 | 2.34 | -0.78 | 4.54E-01 | 7.07E-01 | -6.38 |
| 1447476_PM_at   | Abcc10               | ABCC10   | -0.39 | 4.74 | -0.78 | 4.54E-01 | 7.07E-01 | -6.38 |
| 1438450_PM_at   | Lin7a                | LIN7A    | 0.57  | 4.26 | 0.78  | 4.54E-01 | 7.07E-01 | -6.38 |
| 1452982_PM_at   | Igf1r                | NA       | -0.25 | 2.71 | -0.78 | 4.54E-01 | 7.07E-01 | -6.38 |
| 1417600_PM_at   | Slc15a2              | SLC15A2  | -0.23 | 3.57 | -0.78 | 4.54E-01 | 7.07E-01 | -6.38 |
| 1432135_PM_s_at | Mettl4-ps1 /// Spdya | SPDYA    | -0.10 | 2.57 | -0.78 | 4.54E-01 | 7.07E-01 | -6.38 |
| 1450111_PM_a_at | Nudt8                | NUDT8    | 0.14  | 2.33 | 0.78  | 4.54E-01 | 7.07E-01 | -6.38 |
| 1431219_PM_at   | B3gat3               | B3GAT3   | 0.16  | 2.68 | 0.78  | 4.54E-01 | 7.07E-01 | -6.38 |
| 1448896_PM_at   | Pigf                 | PIGF     | 0.25  | 3.17 | 0.78  | 4.54E-01 | 7.07E-01 | -6.38 |
| 1419144_PM_at   | Cd163                | CD163    | -0.23 | 3.67 | -0.78 | 4.54E-01 | 7.07E-01 | -6.38 |
| 1460085_PM_at   | ---                  | NA       | -0.19 | 4.90 | -0.78 | 4.54E-01 | 7.07E-01 | -6.38 |
| 1427304_PM_at   | Vps18                | VPS18    | -0.16 | 3.03 | -0.78 | 4.54E-01 | 7.07E-01 | -6.38 |
| 1422352_PM_at   | Mcpt1                | NA       | -0.07 | 2.17 | -0.78 | 4.54E-01 | 7.07E-01 | -6.38 |
| 1434200_PM_at   | BC010981             | NA       | -0.18 | 5.23 | -0.78 | 4.54E-01 | 7.07E-01 | -6.38 |
| 1436305_PM_at   | Rnf217               | RNF217   | 0.07  | 2.09 | 0.78  | 4.54E-01 | 7.07E-01 | -6.38 |
| 1432725_PM_at   | 4930445G23Rik        | NA       | 0.08  | 2.23 | 0.78  | 4.54E-01 | 7.07E-01 | -6.38 |
| 1432956_PM_at   | ---                  | NA       | 0.08  | 2.31 | 0.78  | 4.54E-01 | 7.07E-01 | -6.38 |
| 1456525_PM_at   | Brat1                | BRAT1    | 0.10  | 2.57 | 0.78  | 4.54E-01 | 7.07E-01 | -6.38 |
| 1436187_PM_at   | Lppos                | NA       | 0.07  | 2.19 | 0.78  | 4.54E-01 | 7.07E-01 | -6.38 |
| 1419373_PM_at   | Atp6v1b1             | ATP6V1B1 | 0.07  | 1.95 | 0.78  | 4.54E-01 | 7.07E-01 | -6.38 |
| 1425704_PM_at   | Dhrs11               | DHRS11   | 0.08  | 2.44 | 0.78  | 4.54E-01 | 7.07E-01 | -6.38 |
| 1450735_PM_at   | Pno1                 | PNO1     | -0.08 | 2.72 | -0.78 | 4.54E-01 | 7.07E-01 | -6.38 |
| 1459538_PM_at   | ---                  | NA       | 0.11  | 2.43 | 0.78  | 4.54E-01 | 7.07E-01 | -6.38 |

|                 |               |              |       |      |       |          |          |       |
|-----------------|---------------|--------------|-------|------|-------|----------|----------|-------|
| 1429925_PM_at   | Clec12b       | CLEC12B      | 0.11  | 2.23 | 0.78  | 4.54E-01 | 7.07E-01 | -6.38 |
| 1416020_PM_a_at | Atp5g1        | ATP5G1       | 0.21  | 3.75 | 0.78  | 4.54E-01 | 7.07E-01 | -6.38 |
| 1446355_PM_at   | ---           | NA           | 0.11  | 2.17 | 0.78  | 4.54E-01 | 7.07E-01 | -6.38 |
| 1435934_PM_at   | Ndufab1       | NDUFAB1      | 0.26  | 2.68 | 0.78  | 4.54E-01 | 7.07E-01 | -6.38 |
| 1422599_PM_s_at | Zfp143        | ZNF143       | -0.15 | 3.15 | -0.78 | 4.54E-01 | 7.07E-01 | -6.38 |
| 1458288_PM_at   | ---           | NA           | 0.07  | 2.14 | 0.78  | 4.54E-01 | 7.07E-01 | -6.38 |
| 1446531_PM_at   | ---           | NA           | 0.09  | 2.14 | 0.78  | 4.54E-01 | 7.07E-01 | -6.38 |
| 1427815_PM_at   | Mfsd11        | MFSD11       | 0.10  | 2.35 | 0.78  | 4.54E-01 | 7.07E-01 | -6.38 |
| 1437333_PM_x_at | Alah18a1      | ALDH18A1     | 0.15  | 2.46 | 0.78  | 4.54E-01 | 7.07E-01 | -6.38 |
| 1417709_PM_at   | Cyp46a1       | CYP46A1      | -0.18 | 5.61 | -0.78 | 4.54E-01 | 7.07E-01 | -6.38 |
| 1430590_PM_at   | D3Ert751e     | C4orf33      | -0.11 | 2.49 | -0.78 | 4.55E-01 | 7.07E-01 | -6.38 |
| 1446040_PM_at   | ---           | NA           | -0.07 | 2.44 | -0.78 | 4.55E-01 | 7.07E-01 | -6.38 |
| 1439525_PM_at   | ---           | NA           | 0.07  | 2.87 | 0.78  | 4.55E-01 | 7.07E-01 | -6.38 |
| 1446590_PM_at   | ---           | NA           | 0.09  | 2.85 | 0.78  | 4.55E-01 | 7.07E-01 | -6.38 |
| 1428019_PM_at   | Maats1        | MAATS1       | 0.10  | 2.29 | 0.78  | 4.55E-01 | 7.07E-01 | -6.38 |
| 1458555_PM_at   | ---           | NA           | 0.29  | 2.87 | 0.78  | 4.55E-01 | 7.07E-01 | -6.38 |
| 1438958_PM_x_at | Fkbp1a        | FKBP1C       | 0.18  | 9.91 | 0.78  | 4.55E-01 | 7.07E-01 | -6.38 |
| 1427869_PM_at   | Ighm          | NA           | -0.24 | 2.81 | -0.78 | 4.55E-01 | 7.07E-01 | -6.39 |
| 1419200_PM_at   | Fxyd7         | FXVD7        | -0.10 | 2.65 | -0.78 | 4.55E-01 | 7.07E-01 | -6.39 |
| 1457530_PM_at   | ---           | NA           | -0.08 | 2.26 | -0.78 | 4.55E-01 | 7.07E-01 | -6.39 |
| 1425333_PM_at   | Rab43         | RAB43        | -0.07 | 2.40 | -0.78 | 4.55E-01 | 7.07E-01 | -6.39 |
| 1433054_PM_at   | ---           | NA           | 0.06  | 2.39 | 0.78  | 4.55E-01 | 7.07E-01 | -6.39 |
| 1432223_PM_at   | 4930552N02Rik | NA           | 0.07  | 2.15 | 0.78  | 4.55E-01 | 7.07E-01 | -6.39 |
| 1452921_PM_at   | Evi5l         | EVI5L        | 0.09  | 2.64 | 0.78  | 4.55E-01 | 7.07E-01 | -6.39 |
| 1453616_PM_at   | 3830408C21Rik | NA           | 0.10  | 2.47 | 0.78  | 4.55E-01 | 7.07E-01 | -6.39 |
| 1449344_PM_s_at | 2210409E12Rik | NA           | 0.10  | 2.36 | 0.78  | 4.55E-01 | 7.07E-01 | -6.39 |
| 1418594_PM_a_at | Ncoa1         | NCOA1        | 0.20  | 3.20 | 0.78  | 4.55E-01 | 7.08E-01 | -6.39 |
| 1423448_PM_at   | Rab11b        | RAB11B       | -0.18 | 5.20 | -0.78 | 4.55E-01 | 7.08E-01 | -6.39 |
| 1453683_PM_a_at | Cep55         | CEP55        | 0.07  | 2.20 | 0.78  | 4.55E-01 | 7.08E-01 | -6.39 |
| 1442552_PM_at   | Thsd4         | THSD4        | 0.09  | 2.40 | 0.78  | 4.55E-01 | 7.08E-01 | -6.39 |
| 1459186_PM_at   | C80165        | NA           | 0.07  | 2.27 | 0.78  | 4.55E-01 | 7.08E-01 | -6.39 |
| 1459429_PM_at   | Ktn1          | KTN1         | 0.27  | 2.86 | 0.78  | 4.55E-01 | 7.08E-01 | -6.39 |
| 1421378_PM_s_at | Abcc1         | ABCC1        | -0.13 | 2.95 | -0.78 | 4.55E-01 | 7.08E-01 | -6.39 |
| 1426800_PM_at   | Rab8b         | RAB8B        | 0.10  | 2.13 | 0.78  | 4.55E-01 | 7.08E-01 | -6.39 |
| 1459951_PM_at   | Rps6kb1       | NA           | 0.08  | 2.06 | 0.78  | 4.55E-01 | 7.08E-01 | -6.39 |
| 1455561_PM_at   | Cndp1         | CNDP1        | 0.09  | 2.69 | 0.78  | 4.55E-01 | 7.08E-01 | -6.39 |
| 1449450_PM_at   | Ptges         | PTGES        | 0.09  | 2.33 | 0.78  | 4.55E-01 | 7.08E-01 | -6.39 |
| 1437249_PM_at   | Skap1         | SKAP1        | 0.10  | 2.29 | 0.78  | 4.55E-01 | 7.08E-01 | -6.39 |
| 1419132_PM_at   | Tlr2          | TLR2         | 0.10  | 2.37 | 0.78  | 4.55E-01 | 7.08E-01 | -6.39 |
| 1454791_PM_a_at | Rbbp4         | RBBP4        | 0.10  | 2.59 | 0.78  | 4.55E-01 | 7.08E-01 | -6.39 |
| 1438529_PM_at   | Tmem201       | TMEM201      | 0.12  | 2.91 | 0.78  | 4.55E-01 | 7.08E-01 | -6.39 |
| 1439630_PM_x_at | Sbsn          | SBSN         | 0.26  | 3.48 | 0.78  | 4.55E-01 | 7.08E-01 | -6.39 |
| 1425741_PM_at   | Srgap3        | SRGAP3       | -0.17 | 4.26 | -0.78 | 4.55E-01 | 7.08E-01 | -6.39 |
| 1446610_PM_at   | Elm1          | NA           | 0.12  | 2.75 | 0.78  | 4.55E-01 | 7.08E-01 | -6.39 |
| 1427101_PM_at   | Metrn         | METRN        | 0.12  | 2.57 | 0.78  | 4.55E-01 | 7.08E-01 | -6.39 |
| 1425898_PM_x_at | Olfm3         | OLFM3        | 0.52  | 5.93 | 0.78  | 4.55E-01 | 7.08E-01 | -6.39 |
| 1437517_PM_x_at | Serpib3a      | SERPINB4     | 0.06  | 2.15 | 0.78  | 4.55E-01 | 7.08E-01 | -6.39 |
| 1427313_PM_at   | Ptgir         | PTGIR        | 0.10  | 2.34 | 0.78  | 4.55E-01 | 7.08E-01 | -6.39 |
| 1432484_PM_at   | Cmc2          | CMC2         | 0.07  | 2.13 | 0.78  | 4.55E-01 | 7.08E-01 | -6.39 |
| 1421621_PM_at   | Rasgrf2       | NA           | 0.22  | 2.96 | 0.78  | 4.55E-01 | 7.08E-01 | -6.39 |
| 1425068_PM_a_at | Tex264        | TEX264       | -0.10 | 2.64 | -0.78 | 4.55E-01 | 7.08E-01 | -6.39 |
| 1436989_PM_s_at | Slc12a6       | SLC12A6      | -0.16 | 5.12 | -0.78 | 4.55E-01 | 7.08E-01 | -6.39 |
| 1424989_PM_at   | Orai1         | ORAI1        | 0.09  | 2.22 | 0.78  | 4.56E-01 | 7.08E-01 | -6.39 |
| 1442640_PM_at   | Sifn5         | NA           | 0.07  | 2.17 | 0.78  | 4.56E-01 | 7.08E-01 | -6.39 |
| 1419072_PM_at   | Gstm7         | GSTM2        | -0.30 | 3.24 | -0.78 | 4.56E-01 | 7.08E-01 | -6.39 |
| 1431736_PM_at   | 4933405D12Rik | NA           | -0.08 | 2.44 | -0.77 | 4.56E-01 | 7.08E-01 | -6.39 |
| 1419843_PM_at   | ---           | NA           | 0.07  | 2.27 | 0.78  | 4.56E-01 | 7.08E-01 | -6.39 |
| 1446381_PM_at   | ---           | NA           | 0.07  | 2.24 | 0.78  | 4.56E-01 | 7.08E-01 | -6.39 |
| 1443124_PM_at   | Hpse2         | NA           | 0.08  | 2.66 | 0.77  | 4.56E-01 | 7.08E-01 | -6.39 |
| 1442377_PM_at   | Gm20083       | NA           | 0.11  | 3.08 | 0.78  | 4.56E-01 | 7.08E-01 | -6.39 |
| 1420918_PM_at   | Sgk3          | C8orf44-SGK3 | 0.16  | 2.87 | 0.77  | 4.56E-01 | 7.08E-01 | -6.39 |
| 1445898_PM_at   | ---           | NA           | 0.20  | 2.77 | 0.77  | 4.56E-01 | 7.08E-01 | -6.39 |
| 1424313_PM_a_at | Ndufs7        | NDUFS7       | -0.31 | 8.18 | -0.77 | 4.56E-01 | 7.08E-01 | -6.39 |
| 1450096_PM_at   | Gna12         | GNA12        | 0.07  | 2.86 | 0.77  | 4.56E-01 | 7.08E-01 | -6.39 |
| 1453405_PM_at   | Pla2g4d       | PLA2G4D      | 0.10  | 2.12 | 0.77  | 4.56E-01 | 7.08E-01 | -6.39 |
| 1441904_PM_x_at | Fam114a1      | FAM114A1     | 0.07  | 2.06 | 0.77  | 4.56E-01 | 7.08E-01 | -6.39 |
| 1421470_PM_at   | Grpr          | GRPR         | 0.08  | 2.29 | 0.77  | 4.56E-01 | 7.08E-01 | -6.39 |
| 1443329_PM_at   | March7        | MARCH7       | 0.10  | 2.62 | 0.77  | 4.56E-01 | 7.08E-01 | -6.39 |
| 1418111_PM_at   | Tmed11        | NA           | -0.06 | 2.16 | -0.77 | 4.56E-01 | 7.08E-01 | -6.39 |
| 1424619_PM_at   | Sf3b4         | SF3B4        | 0.15  | 2.56 | 0.77  | 4.56E-01 | 7.08E-01 | -6.39 |
| 1449410_PM_a_at | Gas5          | NA           | -0.40 | 7.44 | -0.77 | 4.56E-01 | 7.08E-01 | -6.39 |
| 1430054_PM_at   | 1700030F18Rik | FAM186A      | 0.06  | 1.86 | 0.77  | 4.56E-01 | 7.08E-01 | -6.39 |
| 1454444_PM_at   | ---           | NA           | 0.07  | 2.31 | 0.77  | 4.56E-01 | 7.08E-01 | -6.39 |
| 1452295_PM_at   | Pmepa1        | PMEP1        | -0.10 | 2.55 | -0.77 | 4.56E-01 | 7.08E-01 | -6.39 |
| 1436906_PM_at   | Rnf166        | RNF166       | -0.44 | 3.80 | -0.77 | 4.56E-01 | 7.08E-01 | -6.39 |

|                 |                             |              |       |      |       |          |          |       |
|-----------------|-----------------------------|--------------|-------|------|-------|----------|----------|-------|
| 1432872_PM_at   | ---                         | NA           | 0.07  | 2.44 | 0.77  | 4.56E-01 | 7.08E-01 | -6.39 |
| 1449435_PM_at   | B4galt3                     | B4GALT3      | 0.08  | 2.44 | 0.77  | 4.56E-01 | 7.08E-01 | -6.39 |
| 1446027_PM_at   | ---                         | NA           | 0.09  | 2.45 | 0.77  | 4.56E-01 | 7.08E-01 | -6.39 |
| 1450538_PM_s_at | Cma2 /// Mcpt9              | NA           | 0.10  | 2.55 | 0.77  | 4.56E-01 | 7.08E-01 | -6.39 |
| 1442114_PM_at   | Gpn1                        | GPN1         | 0.12  | 2.52 | 0.77  | 4.56E-01 | 7.08E-01 | -6.39 |
| 1424850_PM_at   | Map3k1                      | NA           | 0.13  | 2.74 | 0.77  | 4.56E-01 | 7.08E-01 | -6.39 |
| 1424143_PM_a_at | Cdt1                        | CDT1         | 0.14  | 2.52 | 0.77  | 4.56E-01 | 7.08E-01 | -6.39 |
| 1438025_PM_at   | Mtrf1l                      | MTRF1L       | 0.28  | 2.90 | 0.77  | 4.56E-01 | 7.08E-01 | -6.39 |
| 1457822_PM_at   | ---                         | NA           | 0.13  | 2.73 | 0.77  | 4.56E-01 | 7.08E-01 | -6.39 |
| 1456915_PM_at   | Papolb                      | PAPOLB       | -0.07 | 2.20 | -0.77 | 4.56E-01 | 7.08E-01 | -6.39 |
| 1428267_PM_at   | Dhx40                       | DHX40        | -0.22 | 4.27 | -0.77 | 4.56E-01 | 7.08E-01 | -6.39 |
| 1422512_PM_a_at | Ogfr                        | OGFR         | 0.09  | 2.48 | 0.77  | 4.56E-01 | 7.08E-01 | -6.39 |
| 1448370_PM_at   | Ulk1                        | ULK1         | -0.11 | 3.28 | -0.77 | 4.56E-01 | 7.08E-01 | -6.39 |
| 1446047_PM_at   | ---                         | NA           | 0.11  | 2.63 | 0.77  | 4.56E-01 | 7.09E-01 | -6.39 |
| 1428674_PM_at   | Prpf38b                     | PRPF38B      | 0.58  | 4.76 | 0.77  | 4.56E-01 | 7.09E-01 | -6.39 |
| 1436877_PM_at   | Lrch2                       | LRCH2        | -0.20 | 4.02 | -0.77 | 4.57E-01 | 7.09E-01 | -6.39 |
| 1436546_PM_at   | Lix1l                       | LIX1L        | -0.20 | 3.29 | -0.77 | 4.57E-01 | 7.09E-01 | -6.39 |
| 1455099_PM_at   | Mogat2                      | MOGAT2       | -0.07 | 1.98 | -0.77 | 4.57E-01 | 7.09E-01 | -6.39 |
| 1450289_PM_at   | Foxd2                       | FOXD2        | 0.10  | 2.26 | 0.77  | 4.57E-01 | 7.09E-01 | -6.39 |
| 1435380_PM_at   | Cox10                       | COX10        | 0.12  | 2.63 | 0.77  | 4.57E-01 | 7.09E-01 | -6.39 |
| 1449865_PM_at   | Sema3a                      | SEMA3A       | 0.19  | 2.38 | 0.77  | 4.57E-01 | 7.09E-01 | -6.39 |
| 1439988_PM_at   | Mrp15                       | MRP15        | 0.20  | 3.37 | 0.77  | 4.57E-01 | 7.09E-01 | -6.39 |
| 1436669_PM_at   | 1700019G17Rik               | NAT8         | -0.17 | 2.17 | -0.77 | 4.57E-01 | 7.09E-01 | -6.39 |
| 1431466_PM_at   | Tomm20l                     | TOMM20L      | 0.15  | 2.71 | 0.77  | 4.57E-01 | 7.09E-01 | -6.39 |
| 1440332_PM_at   | Cdv3                        | CDV3         | 0.12  | 3.19 | 0.77  | 4.57E-01 | 7.09E-01 | -6.39 |
| 1416327_PM_at   | Ufc1                        | UFC1         | -0.20 | 4.07 | -0.77 | 4.57E-01 | 7.09E-01 | -6.39 |
| 1439283_PM_at   | ---                         | NA           | -0.16 | 3.56 | -0.77 | 4.57E-01 | 7.09E-01 | -6.39 |
| 1440061_PM_at   | ---                         | NA           | -0.10 | 2.82 | -0.77 | 4.57E-01 | 7.09E-01 | -6.39 |
| 1458248_PM_at   | ---                         | NA           | -0.08 | 2.39 | -0.77 | 4.57E-01 | 7.09E-01 | -6.39 |
| 1449291_PM_a_at | Dcbl1                       | DCBLD1       | -0.08 | 2.33 | -0.77 | 4.57E-01 | 7.09E-01 | -6.39 |
| 1427147_PM_at   | Mms22l                      | MMS22L       | 0.08  | 2.42 | 0.77  | 4.57E-01 | 7.09E-01 | -6.39 |
| 1433206_PM_at   | 5033430J17Rik               | NA           | 0.14  | 2.21 | 0.77  | 4.57E-01 | 7.09E-01 | -6.39 |
| 1443982_PM_at   | Arhgef28                    | NA           | -0.21 | 3.37 | -0.77 | 4.57E-01 | 7.09E-01 | -6.39 |
| 1421811_PM_at   | Thbs1                       | THBS1        | -0.15 | 2.44 | -0.77 | 4.57E-01 | 7.09E-01 | -6.39 |
| 1440408_PM_at   | ---                         | NA           | -0.07 | 2.55 | -0.77 | 4.57E-01 | 7.09E-01 | -6.39 |
| 1454556_PM_at   | 2700057C20Rik               | NA           | -0.07 | 2.34 | -0.77 | 4.57E-01 | 7.09E-01 | -6.39 |
| 1425429_PM_s_at | Hif3a                       | HIF3A        | 0.11  | 2.33 | 0.77  | 4.57E-01 | 7.09E-01 | -6.39 |
| 1441903_PM_x_at | ---                         | NA           | 0.37  | 3.59 | 0.77  | 4.57E-01 | 7.09E-01 | -6.39 |
| 1456103_PM_at   | Pml                         | NA           | 0.13  | 2.54 | 0.77  | 4.57E-01 | 7.09E-01 | -6.39 |
| 1451482_PM_at   | Zfp940                      | NA           | -0.17 | 3.59 | -0.77 | 4.57E-01 | 7.09E-01 | -6.39 |
| 1458748_PM_at   | Rbm27                       | RBM27        | 0.29  | 3.33 | 0.77  | 4.57E-01 | 7.09E-01 | -6.39 |
| 1459359_PM_at   | Gm36529                     | NA           | 0.12  | 2.55 | 0.77  | 4.57E-01 | 7.09E-01 | -6.39 |
| 1459584_PM_at   | Chmp3                       | RNF103-CHMP3 | 0.06  | 2.49 | 0.77  | 4.57E-01 | 7.09E-01 | -6.39 |
| 1424745_PM_at   | Phykpl                      | PHYKPL       | 0.15  | 3.53 | 0.77  | 4.57E-01 | 7.09E-01 | -6.39 |
| 1442766_PM_at   | ---                         | NA           | 0.20  | 3.07 | 0.77  | 4.57E-01 | 7.09E-01 | -6.39 |
| 1423260_PM_at   | Id4                         | ID4          | 0.25  | 8.34 | 0.77  | 4.57E-01 | 7.09E-01 | -6.39 |
| 1423290_PM_at   | Hyou1                       | HYOU1        | -0.27 | 5.10 | -0.77 | 4.57E-01 | 7.09E-01 | -6.39 |
| 1441111_PM_at   | Myk4                        | MYLK4        | 0.10  | 2.40 | 0.77  | 4.57E-01 | 7.09E-01 | -6.39 |
| 1449875_PM_s_at | H2-T10 /// H2-T22 /// H2-T9 | NA           | 0.23  | 3.55 | 0.77  | 4.57E-01 | 7.09E-01 | -6.39 |
| 1436797_PM_a_at | Surf4                       | SURF4        | -0.36 | 3.10 | -0.77 | 4.57E-01 | 7.09E-01 | -6.39 |
| 1450583_PM_s_at | Fpr3                        | FPR3         | 0.09  | 2.36 | 0.77  | 4.57E-01 | 7.09E-01 | -6.39 |
| 1448699_PM_at   | Mrp54                       | MRPL54       | 0.09  | 2.65 | 0.77  | 4.57E-01 | 7.09E-01 | -6.39 |
| 1440744_PM_at   | ---                         | NA           | 0.10  | 2.26 | 0.77  | 4.57E-01 | 7.09E-01 | -6.39 |
| 1443463_PM_at   | ---                         | NA           | 0.11  | 2.85 | 0.77  | 4.58E-01 | 7.09E-01 | -6.39 |
| 1459311_PM_at   | ---                         | NA           | 0.12  | 2.93 | 0.77  | 4.58E-01 | 7.09E-01 | -6.39 |
| 1454008_PM_at   | Prmt3                       | PRMT3        | -0.07 | 2.29 | -0.77 | 4.58E-01 | 7.09E-01 | -6.39 |
| 1442272_PM_at   | Galntl6                     | GALNTL6      | 0.12  | 2.27 | 0.77  | 4.58E-01 | 7.09E-01 | -6.39 |
| 1442258_PM_at   | Lonp2                       | LONP2        | -0.19 | 2.87 | -0.77 | 4.58E-01 | 7.09E-01 | -6.39 |
| 1421177_PM_at   | Thap2                       | AC073612.1   | -0.08 | 2.20 | -0.77 | 4.58E-01 | 7.09E-01 | -6.39 |
| 1441212_PM_at   | Fam92a                      | FAM92A       | 0.06  | 2.10 | 0.77  | 4.58E-01 | 7.09E-01 | -6.39 |
| 1439340_PM_at   | ---                         | NA           | 0.08  | 2.44 | 0.77  | 4.58E-01 | 7.09E-01 | -6.39 |
| 1435944_PM_s_at | Cenpb                       | CENPB        | 0.09  | 2.22 | 0.77  | 4.58E-01 | 7.09E-01 | -6.39 |
| 1425329_PM_a_at | Cyb5r3                      | CY5R3        | 0.11  | 2.39 | 0.77  | 4.58E-01 | 7.09E-01 | -6.39 |
| 1434456_PM_at   | Rundc3b                     | RUNC3B       | 0.13  | 3.70 | 0.77  | 4.58E-01 | 7.09E-01 | -6.39 |
| 1446154_PM_at   | Gm15743                     | NA           | 0.14  | 2.66 | 0.77  | 4.58E-01 | 7.09E-01 | -6.39 |
| 1437837_PM_x_at | Poldip3                     | POLDIP3      | 0.16  | 9.65 | 0.77  | 4.58E-01 | 7.09E-01 | -6.39 |
| 1435615_PM_at   | Zfp365                      | ZNF365       | 0.16  | 3.12 | 0.77  | 4.58E-01 | 7.09E-01 | -6.39 |
| 1453308_PM_at   | 8430429K09Rik               | NA           | 0.56  | 5.29 | 0.77  | 4.58E-01 | 7.09E-01 | -6.39 |
| 1424611_PM_x_at | Trub2                       | TRUB2        | -0.41 | 6.20 | -0.77 | 4.58E-01 | 7.09E-01 | -6.39 |
| 1421375_PM_a_at | S100a6                      | S100A6       | -0.14 | 2.45 | -0.77 | 4.58E-01 | 7.09E-01 | -6.39 |
| 1443409_PM_at   | C76434                      | NA           | -0.08 | 2.77 | -0.77 | 4.58E-01 | 7.09E-01 | -6.39 |
| 1451757_PM_at   | ---                         | NA           | -0.07 | 2.13 | -0.77 | 4.58E-01 | 7.09E-01 | -6.39 |
| 1447745_PM_at   | Aqp4                        | AQP4         | -0.38 | 3.15 | -0.77 | 4.58E-01 | 7.09E-01 | -6.39 |
| 1436870_PM_s_at | Afap1l2                     | AFAP1L2      | 0.12  | 2.10 | 0.77  | 4.58E-01 | 7.09E-01 | -6.39 |

|                 |                                                                                                        |         |       |      |       |          |          |       |
|-----------------|--------------------------------------------------------------------------------------------------------|---------|-------|------|-------|----------|----------|-------|
| 1454885_PM_at   | Zfp141                                                                                                 | NA      | -0.08 | 2.21 | -0.77 | 4.58E-01 | 7.10E-01 | -6.39 |
| 1448146_PM_at   | Wwp2                                                                                                   | WWP2    | 0.12  | 4.35 | 0.77  | 4.58E-01 | 7.10E-01 | -6.39 |
| 1458010_PM_at   | ---                                                                                                    | NA      | 0.25  | 3.59 | 0.77  | 4.58E-01 | 7.10E-01 | -6.39 |
| 1431919_PM_at   | ---                                                                                                    | NA      | -0.07 | 2.39 | -0.77 | 4.58E-01 | 7.10E-01 | -6.39 |
| 1434387_PM_at   | Fam234a                                                                                                | FAM234A | 0.09  | 2.31 | 0.77  | 4.58E-01 | 7.10E-01 | -6.39 |
| 1436968_PM_x_at | Klh24                                                                                                  | KLHL24  | -0.28 | 5.06 | -0.77 | 4.58E-01 | 7.10E-01 | -6.39 |
| 1442706_PM_at   | Nsmf                                                                                                   | NSMF    | 0.21  | 2.69 | 0.77  | 4.58E-01 | 7.10E-01 | -6.39 |
| 1419947_PM_at   | D4Erttd117e                                                                                            | NA      | -0.11 | 2.70 | -0.77 | 4.59E-01 | 7.10E-01 | -6.39 |
| 1445641_PM_at   | ---                                                                                                    | NA      | -0.09 | 2.68 | -0.77 | 4.58E-01 | 7.10E-01 | -6.39 |
| 1435691_PM_at   | Hykk                                                                                                   | HYKK    | -0.08 | 2.14 | -0.77 | 4.59E-01 | 7.10E-01 | -6.39 |
| 1426025_PM_s_at | Laptm5                                                                                                 | LAPT5   | -0.07 | 2.52 | -0.77 | 4.59E-01 | 7.10E-01 | -6.39 |
| 1456678_PM_at   | ---                                                                                                    | NA      | 0.06  | 2.36 | 0.77  | 4.59E-01 | 7.10E-01 | -6.39 |
| 1455383_PM_at   | Fam47e                                                                                                 | FAM47E  | 0.08  | 2.19 | 0.77  | 4.59E-01 | 7.10E-01 | -6.39 |
| 1445490_PM_at   | C77805                                                                                                 | NA      | 0.09  | 2.21 | 0.77  | 4.59E-01 | 7.10E-01 | -6.39 |
| 1447188_PM_at   | ---                                                                                                    | NA      | 0.10  | 2.86 | 0.77  | 4.59E-01 | 7.10E-01 | -6.39 |
| 1419292_PM_at   | Htra3                                                                                                  | HTRA3   | 0.11  | 2.39 | 0.77  | 4.59E-01 | 7.10E-01 | -6.39 |
| 1460288_PM_a_at | Ppp4c                                                                                                  | PPP4C   | 0.12  | 2.67 | 0.77  | 4.59E-01 | 7.10E-01 | -6.39 |
| 1451452_PM_a_at | Rgs16                                                                                                  | RGS16   | 0.15  | 3.24 | 0.77  | 4.59E-01 | 7.10E-01 | -6.39 |
| 1460416_PM_s_at | Csprs /// Gm15433 ///<br>Gm2666 /// Gm7609 ///<br>LOC100041903 ///<br>LOC100503923 ///<br>LOC101055758 | NA      | 0.15  | 2.72 | 0.77  | 4.59E-01 | 7.10E-01 | -6.39 |
| 1431698_PM_at   | ---                                                                                                    | NA      | 0.18  | 2.40 | 0.77  | 4.59E-01 | 7.10E-01 | -6.39 |
| 1447887_PM_x_at | Vcan                                                                                                   | VCAN    | 0.32  | 2.77 | 0.77  | 4.59E-01 | 7.10E-01 | -6.39 |
| 1426397_PM_at   | Tgfbr2                                                                                                 | TGFBR2  | -0.20 | 2.54 | -0.77 | 4.59E-01 | 7.10E-01 | -6.39 |
| 1425102_PM_a_at | Ace2                                                                                                   | ACE2    | 0.08  | 2.44 | 0.77  | 4.59E-01 | 7.10E-01 | -6.39 |
| 1460231_PM_at   | Irf5                                                                                                   | IRF5    | 0.09  | 2.73 | 0.77  | 4.59E-01 | 7.10E-01 | -6.39 |
| 1459133_PM_at   | ---                                                                                                    | NA      | 0.09  | 2.61 | 0.77  | 4.59E-01 | 7.10E-01 | -6.39 |
| 1435786_PM_at   | Klhl12                                                                                                 | KLHL12  | -0.22 | 5.11 | -0.77 | 4.59E-01 | 7.10E-01 | -6.39 |
| 1448698_PM_at   | Ccnd1                                                                                                  | CCND1   | 0.18  | 3.31 | 0.77  | 4.59E-01 | 7.10E-01 | -6.39 |
| 1445168_PM_at   | ---                                                                                                    | NA      | 0.25  | 2.48 | 0.77  | 4.59E-01 | 7.10E-01 | -6.39 |
| 1439953_PM_at   | Pmm2                                                                                                   | PMM2    | -0.09 | 2.95 | -0.77 | 4.59E-01 | 7.10E-01 | -6.39 |
| 1428450_PM_at   | Arpin                                                                                                  | ARPIN   | 0.07  | 2.59 | 0.77  | 4.59E-01 | 7.10E-01 | -6.39 |
| 1455740_PM_at   | Hnrnpa1                                                                                                | NA      | -0.09 | 2.26 | -0.77 | 4.59E-01 | 7.10E-01 | -6.39 |
| 1454439_PM_at   | ---                                                                                                    | NA      | 0.15  | 2.24 | 0.77  | 4.59E-01 | 7.10E-01 | -6.39 |
| 1419271_PM_at   | Pax6                                                                                                   | PAX6    | 0.15  | 2.46 | 0.77  | 4.59E-01 | 7.10E-01 | -6.39 |
| 1423427_PM_at   | Adcyap1                                                                                                | ADCYAP1 | -0.30 | 2.92 | -0.77 | 4.59E-01 | 7.10E-01 | -6.39 |
| 1417894_PM_at   | Adgrg3                                                                                                 | ADGRG3  | 0.06  | 2.10 | 0.77  | 4.59E-01 | 7.10E-01 | -6.39 |
| 1427094_PM_at   | Pole2                                                                                                  | POLE2   | 0.06  | 2.35 | 0.77  | 4.59E-01 | 7.10E-01 | -6.39 |
| 1439051_PM_a_at | Mark4                                                                                                  | MARK4   | 0.09  | 2.33 | 0.77  | 4.59E-01 | 7.10E-01 | -6.39 |
| 1417111_PM_at   | Man1a                                                                                                  | MAN1A1  | -0.36 | 5.62 | -0.77 | 4.59E-01 | 7.10E-01 | -6.39 |
| 1439278_PM_at   | Zbtb20                                                                                                 | ZBTB20  | -0.29 | 7.34 | -0.77 | 4.59E-01 | 7.10E-01 | -6.39 |
| 1425814_PM_a_at | Calcr1                                                                                                 | CALCRL  | -0.13 | 2.54 | -0.77 | 4.59E-01 | 7.10E-01 | -6.39 |
| 1448482_PM_at   | Slc39a8                                                                                                | SLC39A8 | -0.09 | 2.38 | -0.77 | 4.59E-01 | 7.10E-01 | -6.39 |
| 1442343_PM_at   | ---                                                                                                    | NA      | -0.08 | 2.34 | -0.77 | 4.59E-01 | 7.10E-01 | -6.39 |
| 1421755_PM_at   | Gpr132                                                                                                 | GPR132  | 0.07  | 2.40 | 0.77  | 4.59E-01 | 7.10E-01 | -6.39 |
| 1437388_PM_at   | Fut10                                                                                                  | FUT10   | 0.07  | 2.48 | 0.77  | 4.59E-01 | 7.10E-01 | -6.39 |
| 1437772_PM_s_at | Fuca1                                                                                                  | FUCA1   | 0.08  | 2.47 | 0.77  | 4.59E-01 | 7.10E-01 | -6.39 |
| 1449744_PM_at   | Slc19a1                                                                                                | NA      | 0.08  | 2.92 | 0.77  | 4.59E-01 | 7.10E-01 | -6.39 |
| 1440913_PM_at   | BC037704                                                                                               | NA      | 0.09  | 2.28 | 0.77  | 4.59E-01 | 7.10E-01 | -6.39 |
| 1430680_PM_a_at | 5830417110Rik /// Gon4l                                                                                | YY1AP1  | 0.11  | 2.48 | 0.77  | 4.59E-01 | 7.10E-01 | -6.39 |
| 1444869_PM_at   | ---                                                                                                    | NA      | 0.11  | 2.03 | 0.77  | 4.59E-01 | 7.10E-01 | -6.39 |
| 1460658_PM_at   | Ap1g1                                                                                                  | AP1G1   | 0.07  | 1.97 | 0.77  | 4.59E-01 | 7.10E-01 | -6.39 |
| 1439213_PM_at   | Ston1                                                                                                  | STON1   | 0.07  | 2.24 | 0.77  | 4.59E-01 | 7.10E-01 | -6.39 |
| 1422059_PM_at   | Cbx2                                                                                                   | CBX2    | 0.09  | 2.12 | 0.77  | 4.59E-01 | 7.10E-01 | -6.39 |
| 1427357_PM_at   | Cda                                                                                                    | CDA     | 0.09  | 2.41 | 0.77  | 4.59E-01 | 7.10E-01 | -6.39 |
| 1436962_PM_at   | Prdm6                                                                                                  | PRDM6   | 0.10  | 2.84 | 0.77  | 4.59E-01 | 7.10E-01 | -6.39 |
| 1451160_PM_s_at | Pvr                                                                                                    | PVR     | -0.21 | 3.40 | -0.77 | 4.60E-01 | 7.10E-01 | -6.39 |
| 1437129_PM_at   | Mgea5                                                                                                  | NA      | -0.09 | 2.58 | -0.77 | 4.60E-01 | 7.10E-01 | -6.39 |
| 1430058_PM_at   | Slbp                                                                                                   | SLBP    | 0.07  | 2.23 | 0.77  | 4.60E-01 | 7.10E-01 | -6.39 |
| 1431299_PM_a_at | Ppp1r18                                                                                                | PPP1R18 | 0.07  | 2.34 | 0.77  | 4.60E-01 | 7.10E-01 | -6.39 |
| 1431170_PM_at   | Efna3                                                                                                  | EFNA3   | 0.14  | 4.16 | 0.77  | 4.60E-01 | 7.10E-01 | -6.39 |
| 1432601_PM_at   | Kmt2e                                                                                                  | KMT2E   | 0.16  | 2.44 | 0.77  | 4.60E-01 | 7.10E-01 | -6.39 |
| 1428737_PM_s_at | Gramd3                                                                                                 | GRAMD3  | -0.11 | 2.81 | -0.77 | 4.60E-01 | 7.11E-01 | -6.39 |
| 1443639_PM_at   | ---                                                                                                    | NA      | 0.16  | 2.52 | 0.77  | 4.60E-01 | 7.11E-01 | -6.39 |
| 1452350_PM_at   | Brd8                                                                                                   | BRD8    | -0.12 | 2.38 | -0.77 | 4.60E-01 | 7.11E-01 | -6.39 |
| 1458294_PM_at   | ---                                                                                                    | NA      | 0.15  | 2.61 | 0.77  | 4.60E-01 | 7.11E-01 | -6.39 |
| 1444924_PM_at   | N4bp2l2                                                                                                | N4BP2L2 | -0.13 | 3.30 | -0.77 | 4.60E-01 | 7.11E-01 | -6.39 |
| 1426110_PM_a_at | Lpar1                                                                                                  | LPAR1   | 0.09  | 2.54 | 0.77  | 4.60E-01 | 7.11E-01 | -6.39 |
| 1423487_PM_at   | Cript                                                                                                  | CRIPT   | 0.11  | 2.54 | 0.77  | 4.60E-01 | 7.11E-01 | -6.39 |
| 1439612_PM_at   | Cacna1b                                                                                                | CACNA1B | 0.23  | 3.25 | 0.77  | 4.60E-01 | 7.11E-01 | -6.39 |
| 1460399_PM_at   | Ccdc117                                                                                                | CCDC117 | -0.15 | 2.84 | -0.77 | 4.60E-01 | 7.11E-01 | -6.39 |
| 1438967_PM_x_at | Amhr2                                                                                                  | AMHR2   | 0.08  | 2.14 | 0.77  | 4.60E-01 | 7.11E-01 | -6.39 |
| 1421253_PM_at   | Nrap                                                                                                   | NRAP    | 0.10  | 2.66 | 0.77  | 4.60E-01 | 7.11E-01 | -6.39 |



|                 |                       |          |       |      |       |          |          |       |
|-----------------|-----------------------|----------|-------|------|-------|----------|----------|-------|
| 1443786_PM_at   | Utf1                  | UTF1     | -0.19 | 2.62 | -0.77 | 4.60E-01 | 7.11E-01 | -6.39 |
| 1439279_PM_at   | ClDn34c1              | CLDN34   | -0.12 | 2.97 | -0.77 | 4.60E-01 | 7.11E-01 | -6.39 |
| 1458696_PM_at   | ---                   | NA       | -0.10 | 2.31 | -0.77 | 4.60E-01 | 7.11E-01 | -6.39 |
| 1442464_PM_at   | ---                   | NA       | 0.09  | 2.72 | 0.77  | 4.60E-01 | 7.11E-01 | -6.39 |
| 1453793_PM_at   | 1700026j12Rik         | NA       | 0.11  | 2.46 | 0.77  | 4.60E-01 | 7.11E-01 | -6.39 |
| 1434279_PM_at   | ---                   | NA       | 0.23  | 5.45 | 0.77  | 4.60E-01 | 7.11E-01 | -6.39 |
| 1426034_PM_a_at | Runx2                 | RUNX2    | 0.08  | 2.21 | 0.77  | 4.60E-01 | 7.11E-01 | -6.39 |
| 1423597_PM_at   | Atp8a1                | ATP8A1   | 0.19  | 3.79 | 0.77  | 4.60E-01 | 7.11E-01 | -6.39 |
| 1459958_PM_at   | ---                   | NA       | 0.08  | 2.66 | 0.77  | 4.60E-01 | 7.11E-01 | -6.39 |
| 1452807_PM_s_at | Fam57b                | FAM57B   | 0.12  | 2.96 | 0.77  | 4.60E-01 | 7.11E-01 | -6.39 |
| 1460223_PM_a_at | Dmtn                  | DMTN     | -0.19 | 4.14 | -0.77 | 4.60E-01 | 7.11E-01 | -6.39 |
| 1423446_PM_at   | Dapk3                 | DAPK3    | 0.10  | 2.65 | 0.77  | 4.60E-01 | 7.11E-01 | -6.39 |
| 1442739_PM_at   | Zfp119b               | NA       | 0.09  | 2.01 | 0.77  | 4.60E-01 | 7.11E-01 | -6.39 |
| 1435970_PM_at   | Nlk                   | NLK      | -0.40 | 5.30 | -0.77 | 4.60E-01 | 7.11E-01 | -6.39 |
| 1450616_PM_at   | Rnase2b               | RNASE2   | 0.07  | 1.92 | 0.77  | 4.61E-01 | 7.11E-01 | -6.39 |
| 1457563_PM_at   | ---                   | NA       | 0.08  | 1.92 | 0.77  | 4.61E-01 | 7.11E-01 | -6.39 |
| 1425088_PM_at   | Scnn1a                | SCNN1A   | 0.09  | 2.92 | 0.77  | 4.61E-01 | 7.11E-01 | -6.39 |
| 1438108_PM_at   | Plekhm3               | PLEKHM3  | 0.17  | 3.27 | 0.77  | 4.61E-01 | 7.11E-01 | -6.39 |
| 1434559_PM_at   | Stx3                  | STX3     | 0.11  | 2.41 | 0.77  | 4.61E-01 | 7.11E-01 | -6.39 |
| 1417169_PM_at   | Usp2                  | USP2     | -0.18 | 5.16 | -0.77 | 4.61E-01 | 7.11E-01 | -6.39 |
| 1435464_PM_at   | Snim14                | SMIM14   | -0.19 | 5.55 | -0.77 | 4.61E-01 | 7.11E-01 | -6.39 |
| 1450834_PM_at   | Fut4                  | FUT4     | 0.06  | 2.07 | 0.77  | 4.61E-01 | 7.11E-01 | -6.39 |
| 1443376_PM_at   | ---                   | NA       | 0.10  | 2.42 | 0.77  | 4.61E-01 | 7.11E-01 | -6.39 |
| 1458653_PM_at   | ---                   | NA       | 0.16  | 2.52 | 0.77  | 4.61E-01 | 7.11E-01 | -6.39 |
| 1448695_PM_at   | Prkci                 | PRKCI    | 0.21  | 2.87 | 0.77  | 4.61E-01 | 7.11E-01 | -6.39 |
| 1449042_PM_at   | Ctcf                  | CTCF     | 0.34  | 4.27 | 0.77  | 4.61E-01 | 7.11E-01 | -6.39 |
| 1425854_PM_x_at | LOC665506 /// Trbc2   | NA       | 0.06  | 2.11 | 0.77  | 4.61E-01 | 7.11E-01 | -6.39 |
| 1422267_PM_at   | Foxb2                 | FOXB2    | 0.08  | 2.34 | 0.77  | 4.61E-01 | 7.11E-01 | -6.39 |
| 1441462_PM_at   | ---                   | NA       | -0.23 | 2.63 | -0.77 | 4.61E-01 | 7.11E-01 | -6.39 |
| 1440344_PM_at   | Snord89               | NA       | -0.22 | 2.64 | -0.77 | 4.61E-01 | 7.11E-01 | -6.39 |
| 1427711_PM_a_at | Ceacam1               | PSG7     | -0.08 | 2.35 | -0.77 | 4.61E-01 | 7.12E-01 | -6.39 |
| 1418906_PM_at   | Nubp1                 | NUBP1    | 0.12  | 2.69 | 0.77  | 4.61E-01 | 7.12E-01 | -6.39 |
| 1421273_PM_at   | Socs4                 | SOCS4    | -0.09 | 2.95 | -0.77 | 4.61E-01 | 7.12E-01 | -6.39 |
| 1419469_PM_at   | Gnb4                  | GNB4     | 0.25  | 2.48 | 0.77  | 4.61E-01 | 7.12E-01 | -6.39 |
| 1448760_PM_at   | Zfp68                 | ZNF717   | -0.08 | 2.46 | -0.77 | 4.61E-01 | 7.12E-01 | -6.39 |
| 1426984_PM_at   | Tmem94                | TMEM94   | 0.13  | 2.76 | 0.77  | 4.61E-01 | 7.12E-01 | -6.39 |
| 1453397_PM_at   | Alcf                  | NA       | -0.06 | 1.92 | -0.77 | 4.61E-01 | 7.12E-01 | -6.39 |
| 1443159_PM_at   | ---                   | NA       | -0.11 | 2.65 | -0.77 | 4.61E-01 | 7.12E-01 | -6.39 |
| 1446256_PM_at   | Gm35961               | NA       | 0.07  | 2.21 | 0.77  | 4.61E-01 | 7.12E-01 | -6.39 |
| 1430353_PM_at   | Glis3                 | GLIS3    | 0.08  | 2.40 | 0.77  | 4.61E-01 | 7.12E-01 | -6.39 |
| 1438775_PM_at   | ---                   | NA       | 0.11  | 2.24 | 0.77  | 4.61E-01 | 7.12E-01 | -6.39 |
| 1438348_PM_x_at | Ccbl1                 | KYAT1    | 0.12  | 3.72 | 0.77  | 4.61E-01 | 7.12E-01 | -6.39 |
| 1444108_PM_at   | Dnajc25               | NA       | 0.18  | 3.02 | 0.77  | 4.61E-01 | 7.12E-01 | -6.39 |
| 1446954_PM_at   | ---                   | NA       | -0.08 | 2.16 | -0.77 | 4.61E-01 | 7.12E-01 | -6.39 |
| 1459832_PM_s_at | Ap1m1                 | AP1M1    | 0.23  | 2.90 | 0.77  | 4.61E-01 | 7.12E-01 | -6.39 |
| 1429564_PM_at   | Pcgf5                 | PCGF5    | -0.12 | 2.94 | -0.76 | 4.61E-01 | 7.12E-01 | -6.39 |
| 1427668_PM_at   | Siglec1               | SIGLEC1  | 0.08  | 2.37 | 0.76  | 4.61E-01 | 7.12E-01 | -6.39 |
| 1428906_PM_at   | Gtf2h5                | GTF2H5   | -0.22 | 3.24 | -0.76 | 4.61E-01 | 7.12E-01 | -6.39 |
| 1431700_PM_at   | Grin2b                | GRIN2B   | 0.06  | 2.11 | 0.76  | 4.61E-01 | 7.12E-01 | -6.39 |
| 1444145_PM_at   | ---                   | NA       | -0.17 | 3.29 | -0.76 | 4.62E-01 | 7.12E-01 | -6.39 |
| 1458400_PM_at   | ---                   | NA       | 0.14  | 5.23 | 0.76  | 4.62E-01 | 7.12E-01 | -6.39 |
| 1452979_PM_at   | Atat1                 | ATAT1    | 0.17  | 2.90 | 0.76  | 4.62E-01 | 7.12E-01 | -6.39 |
| 1452627_PM_at   | Senp6                 | SENP6    | -0.27 | 4.64 | -0.76 | 4.62E-01 | 7.12E-01 | -6.39 |
| 1427586_PM_at   | Sema4b                | SEMA4B   | 0.13  | 2.92 | 0.76  | 4.62E-01 | 7.12E-01 | -6.39 |
| 1436045_PM_at   | Tsga10                | TSGA10   | -0.15 | 3.17 | -0.76 | 4.62E-01 | 7.12E-01 | -6.39 |
| 1460089_PM_at   | ---                   | NA       | 0.08  | 2.46 | 0.76  | 4.62E-01 | 7.12E-01 | -6.39 |
| 1433043_PM_at   | Vcan                  | NA       | 0.19  | 2.94 | 0.76  | 4.62E-01 | 7.12E-01 | -6.39 |
| 1418069_PM_at   | Apoc2 /// Apoc4-apoc2 | APOC2    | 0.11  | 2.54 | 0.76  | 4.62E-01 | 7.12E-01 | -6.39 |
| 1428900_PM_s_at | Mettl15               | METTL15  | -0.25 | 2.93 | -0.76 | 4.62E-01 | 7.12E-01 | -6.39 |
| 1423409_PM_a_at | Chtop                 | CHTOP    | -0.18 | 5.82 | -0.76 | 4.62E-01 | 7.12E-01 | -6.40 |
| 1439961_PM_x_at | ---                   | NA       | -0.14 | 3.36 | -0.76 | 4.62E-01 | 7.12E-01 | -6.40 |
| 1438213_PM_at   | A830018L16Rik         | C8orf34  | -0.13 | 2.64 | -0.76 | 4.62E-01 | 7.12E-01 | -6.39 |
| 1431457_PM_at   | 7420700N18Rik         | NA       | 0.07  | 2.30 | 0.76  | 4.62E-01 | 7.12E-01 | -6.39 |
| 1430907_PM_at   | 4930455J16Rik         | NA       | 0.08  | 2.40 | 0.76  | 4.62E-01 | 7.12E-01 | -6.39 |
| 1427041_PM_at   | Themis2               | THEMIS2  | 0.10  | 3.36 | 0.76  | 4.62E-01 | 7.12E-01 | -6.39 |
| 1425477_PM_x_at | H2-Ab1                | HLA-DQB2 | 0.11  | 2.28 | 0.76  | 4.62E-01 | 7.12E-01 | -6.40 |
| 1441415_PM_at   | ---                   | NA       | 0.16  | 2.43 | 0.76  | 4.62E-01 | 7.12E-01 | -6.39 |
| 1420095_PM_s_at | Zscan21               | ZSCAN21  | 0.17  | 5.25 | 0.76  | 4.62E-01 | 7.12E-01 | -6.39 |
| 1441138_PM_at   | Foxn2                 | FOXN2    | 0.17  | 2.74 | 0.76  | 4.62E-01 | 7.12E-01 | -6.39 |
| 1448580_PM_at   | Glg1                  | GLG1     | 0.35  | 4.76 | 0.76  | 4.62E-01 | 7.12E-01 | -6.39 |
| 1459519_PM_at   | ---                   | NA       | 0.08  | 2.09 | 0.76  | 4.62E-01 | 7.12E-01 | -6.40 |
| 1444146_PM_at   | Rnf20                 | RNF20    | 0.33  | 4.26 | 0.76  | 4.62E-01 | 7.12E-01 | -6.40 |
| 1436220_PM_at   | Zfp287                | ZNF883   | -0.29 | 3.43 | -0.76 | 4.62E-01 | 7.12E-01 | -6.40 |
| 1440875_PM_a_at | Rsad1                 | RSAD1    | -0.09 | 2.19 | -0.76 | 4.62E-01 | 7.12E-01 | -6.40 |
| 1448277_PM_at   | Pold2                 | POLD2    | 0.07  | 2.07 | 0.76  | 4.62E-01 | 7.12E-01 | -6.40 |

|                 |                         |            |       |      |       |          |          |       |
|-----------------|-------------------------|------------|-------|------|-------|----------|----------|-------|
| 1442579_PM_at   | Gm32639                 | NA         | 0.09  | 2.46 | 0.76  | 4.62E-01 | 7.12E-01 | -6.40 |
| 1441483_PM_at   | Slitrk2                 | SLITRK2    | 0.11  | 2.70 | 0.76  | 4.62E-01 | 7.12E-01 | -6.40 |
| 1424497_PM_at   | Tmem219                 | TMEM219    | 0.17  | 2.93 | 0.76  | 4.62E-01 | 7.12E-01 | -6.40 |
| 1427277_PM_at   | Six1                    | SIX1       | -0.11 | 2.54 | -0.76 | 4.62E-01 | 7.12E-01 | -6.40 |
| 1452230_PM_at   | Dnajc10                 | DNAJC10    | 0.11  | 2.44 | 0.76  | 4.62E-01 | 7.12E-01 | -6.40 |
| 1440422_PM_at   | Htr1f                   | HTR1F      | -0.11 | 2.42 | -0.76 | 4.62E-01 | 7.12E-01 | -6.40 |
| 1458284_PM_at   | Ptbp1                   | PTBP1      | 0.07  | 2.50 | 0.76  | 4.62E-01 | 7.12E-01 | -6.40 |
| 1427882_PM_at   | Dnrtip2                 | DNRTIP2    | 0.27  | 3.42 | 0.76  | 4.62E-01 | 7.12E-01 | -6.40 |
| 1437414_PM_at   | Zfp217                  | ZNF217     | 0.18  | 3.20 | 0.76  | 4.62E-01 | 7.12E-01 | -6.40 |
| 1448850_PM_a_at | Dnajc5                  | DNAJC5     | -0.18 | 5.36 | -0.76 | 4.62E-01 | 7.12E-01 | -6.40 |
| 1444011_PM_at   | Arpc5l                  | NA         | -0.11 | 2.23 | -0.76 | 4.62E-01 | 7.12E-01 | -6.40 |
| 1433148_PM_at   | 4930513N20Rik           | NA         | -0.08 | 2.46 | -0.76 | 4.62E-01 | 7.12E-01 | -6.40 |
| 1456968_PM_at   | ---                     | NA         | 0.07  | 2.04 | 0.76  | 4.62E-01 | 7.12E-01 | -6.40 |
| 1427321_PM_s_at | Cxadr                   | NA         | 0.24  | 2.42 | 0.76  | 4.62E-01 | 7.12E-01 | -6.40 |
| 1433776_PM_at   | Lhfp                    | LHFP       | 0.31  | 4.31 | 0.76  | 4.62E-01 | 7.12E-01 | -6.40 |
| 1420310_PM_at   | ---                     | NA         | 0.32  | 7.10 | 0.76  | 4.62E-01 | 7.12E-01 | -6.40 |
| 1440598_PM_at   | Sntg1                   | SNTG1      | 0.17  | 2.39 | 0.76  | 4.62E-01 | 7.12E-01 | -6.40 |
| 1445006_PM_at   | ---                     | NA         | 0.07  | 2.38 | 0.76  | 4.62E-01 | 7.12E-01 | -6.40 |
| 1455974_PM_at   | Pithd1                  | PITHD1     | 0.11  | 2.67 | 0.76  | 4.63E-01 | 7.12E-01 | -6.40 |
| 1459608_PM_at   | ---                     | NA         | -0.14 | 2.19 | -0.76 | 4.63E-01 | 7.12E-01 | -6.40 |
| 1446641_PM_at   | ---                     | NA         | 0.13  | 2.55 | 0.76  | 4.63E-01 | 7.12E-01 | -6.40 |
| 1440821_PM_x_at | Odf1                    | ODF1       | 0.06  | 2.25 | 0.76  | 4.63E-01 | 7.13E-01 | -6.40 |
| 1436124_PM_at   | Pcyt1b                  | PCYT1B     | -0.08 | 2.55 | -0.76 | 4.63E-01 | 7.13E-01 | -6.40 |
| 1446698_PM_at   | ---                     | NA         | 0.07  | 2.30 | 0.76  | 4.63E-01 | 7.13E-01 | -6.40 |
| 1438306_PM_at   | Rnf180                  | NA         | -0.20 | 3.51 | -0.76 | 4.63E-01 | 7.13E-01 | -6.40 |
| 1448421_PM_s_at | Aspn                    | ASPEN      | -0.07 | 2.13 | -0.76 | 4.63E-01 | 7.13E-01 | -6.40 |
| 1423790_PM_at   | Dap                     | NA         | 0.06  | 2.23 | 0.76  | 4.63E-01 | 7.13E-01 | -6.40 |
| 1436794_PM_at   | Nlrp4f                  | NLRP4      | 0.08  | 2.43 | 0.76  | 4.63E-01 | 7.13E-01 | -6.40 |
| 1417046_PM_at   | Nprl2                   | NPRL2      | -0.08 | 2.75 | -0.76 | 4.63E-01 | 7.13E-01 | -6.40 |
| 1429320_PM_at   | Cdkn2aip                | CDKN2AIP   | -0.14 | 2.50 | -0.76 | 4.63E-01 | 7.13E-01 | -6.40 |
| 1448646_PM_at   | Wdr12                   | WDR12      | -0.20 | 3.21 | -0.76 | 4.63E-01 | 7.13E-01 | -6.40 |
| 1417524_PM_at   | Cnih2                   | CNIH2      | -0.20 | 4.33 | -0.76 | 4.63E-01 | 7.13E-01 | -6.40 |
| 1455984_PM_at   | Zmiz1                   | ZMIZ1      | -0.13 | 3.14 | -0.76 | 4.63E-01 | 7.13E-01 | -6.40 |
| 1434994_PM_at   | Dedd                    | DEDD       | -0.08 | 2.60 | -0.76 | 4.63E-01 | 7.13E-01 | -6.40 |
| 1425771_PM_at   | Akr1d1                  | AKR1D1     | 0.08  | 2.36 | 0.76  | 4.63E-01 | 7.13E-01 | -6.40 |
| 1423778_PM_at   | Usp20                   | USP20      | 0.09  | 2.56 | 0.76  | 4.63E-01 | 7.13E-01 | -6.40 |
| 1426882_PM_at   | Ube3c                   | UBE3C      | 0.11  | 3.61 | 0.76  | 4.63E-01 | 7.13E-01 | -6.40 |
| 1446763_PM_at   | ---                     | NA         | 0.15  | 2.69 | 0.76  | 4.63E-01 | 7.13E-01 | -6.40 |
| 1444503_PM_at   | ---                     | NA         | 0.10  | 2.51 | 0.76  | 4.63E-01 | 7.13E-01 | -6.40 |
| 1438523_PM_x_at | Srrm4                   | SRRM4      | 0.10  | 3.30 | 0.76  | 4.63E-01 | 7.13E-01 | -6.40 |
| 1435215_PM_at   | ---                     | NA         | -0.18 | 3.62 | -0.76 | 4.63E-01 | 7.13E-01 | -6.40 |
| 1460080_PM_at   | Fer                     | NA         | -0.09 | 2.69 | -0.76 | 4.63E-01 | 7.13E-01 | -6.40 |
| 1426417_PM_at   | ---                     | NA         | 0.30  | 5.33 | 0.76  | 4.63E-01 | 7.13E-01 | -6.40 |
| 1437349_PM_at   | Ckap5                   | CKAP5      | -0.31 | 4.01 | -0.76 | 4.64E-01 | 7.13E-01 | -6.40 |
| 1425079_PM_at   | Tm6sf2                  | TM6SF2     | 0.11  | 2.47 | 0.76  | 4.64E-01 | 7.13E-01 | -6.40 |
| 1426751_PM_s_at | Nup107                  | NUP107     | 0.13  | 3.29 | 0.76  | 4.64E-01 | 7.13E-01 | -6.40 |
| 1420011_PM_s_at | Xbp1                    | XBP1       | -0.14 | 3.26 | -0.76 | 4.64E-01 | 7.13E-01 | -6.40 |
| 1427944_PM_at   | Caprin2                 | CAPRIN2    | 0.15  | 2.90 | 0.76  | 4.64E-01 | 7.13E-01 | -6.40 |
| 1447844_PM_at   | ---                     | NA         | -0.38 | 2.97 | -0.76 | 4.64E-01 | 7.14E-01 | -6.40 |
| 1416875_PM_at   | Parvg                   | PARVG      | 0.13  | 2.32 | 0.76  | 4.64E-01 | 7.14E-01 | -6.40 |
| 1427354_PM_at   | Hoxa4                   | HOXA4      | 0.08  | 2.55 | 0.76  | 4.64E-01 | 7.14E-01 | -6.40 |
| 1442569_PM_at   | ---                     | NA         | 0.11  | 2.41 | 0.76  | 4.64E-01 | 7.14E-01 | -6.40 |
| 1438200_PM_at   | Sulf1                   | SULF1      | -0.48 | 5.30 | -0.76 | 4.64E-01 | 7.14E-01 | -6.40 |
| 1456327_PM_at   | A530020G20Rik           | NA         | -0.09 | 2.43 | -0.76 | 4.64E-01 | 7.14E-01 | -6.40 |
| 1444630_PM_at   | ---                     | NA         | 0.19  | 3.43 | 0.76  | 4.64E-01 | 7.14E-01 | -6.40 |
| 1423576_PM_a_at | Fh4                     | NA         | 0.08  | 2.29 | 0.76  | 4.64E-01 | 7.14E-01 | -6.40 |
| 1439253_PM_x_at | LOC102641161 ///Prelid1 | PRELID1    | 0.36  | 5.66 | 0.76  | 4.64E-01 | 7.14E-01 | -6.40 |
| 1447724_PM_x_at | Opa3                    | OPA3       | -0.24 | 3.46 | -0.76 | 4.64E-01 | 7.14E-01 | -6.40 |
| 1439108_PM_at   | Kmt2e                   | KMT2E      | -0.20 | 4.44 | -0.76 | 4.64E-01 | 7.14E-01 | -6.40 |
| 1442999_PM_at   | Ccdc85c                 | NA         | -0.10 | 2.58 | -0.76 | 4.64E-01 | 7.14E-01 | -6.40 |
| 1445725_PM_at   | ---                     | NA         | 0.13  | 2.49 | 0.76  | 4.64E-01 | 7.14E-01 | -6.40 |
| 1417616_PM_at   | St6galnac2              | ST6GALNAC2 | 0.12  | 2.89 | 0.76  | 4.64E-01 | 7.14E-01 | -6.40 |
| 1460490_PM_at   | Mrp15                   | MRP15      | 0.10  | 2.28 | 0.76  | 4.64E-01 | 7.14E-01 | -6.40 |
| 1437856_PM_at   | Ipmk                    | IPMK       | -0.13 | 2.93 | -0.76 | 4.64E-01 | 7.14E-01 | -6.40 |
| 1422888_PM_at   | Rnf5                    | RNF5       | -0.11 | 3.47 | -0.76 | 4.64E-01 | 7.14E-01 | -6.40 |
| 1449510_PM_at   | Zfp467                  | ZNF467     | -0.08 | 1.99 | -0.76 | 4.64E-01 | 7.14E-01 | -6.40 |
| 1430160_PM_at   | Ankib1                  | ANKIB1     | 0.06  | 2.22 | 0.76  | 4.64E-01 | 7.14E-01 | -6.40 |
| 1450378_PM_at   | Tapbp                   | TAPBP      | 0.09  | 2.25 | 0.76  | 4.64E-01 | 7.14E-01 | -6.40 |
| 1438297_PM_at   | AA545190                | NA         | 0.11  | 2.18 | 0.76  | 4.64E-01 | 7.14E-01 | -6.40 |
| 1448785_PM_at   | Runx1t1                 | RUNX1T1    | 0.11  | 2.40 | 0.76  | 4.64E-01 | 7.14E-01 | -6.40 |
| 1430540_PM_at   | Coa4                    | COA4       | 0.11  | 2.82 | 0.76  | 4.64E-01 | 7.14E-01 | -6.40 |
| 1459103_PM_at   | Hira                    | NA         | 0.16  | 2.59 | 0.76  | 4.64E-01 | 7.14E-01 | -6.40 |
| 1439860_PM_at   | Eef2k                   | EEF2K      | 0.19  | 2.50 | 0.76  | 4.64E-01 | 7.14E-01 | -6.40 |
| 1418229_PM_s_at | Nfu1                    | NFU1       | -0.29 | 5.66 | -0.76 | 4.65E-01 | 7.14E-01 | -6.40 |

|                 |                     |            |       |      |       |          |          |       |
|-----------------|---------------------|------------|-------|------|-------|----------|----------|-------|
| 1428441_PM_at   | Cisd2               | CISD2      | -0.26 | 4.92 | -0.76 | 4.65E-01 | 7.14E-01 | -6.40 |
| 1416910_PM_at   | Dnajc15             | DNAI15     | -0.23 | 2.66 | -0.76 | 4.65E-01 | 7.14E-01 | -6.40 |
| 1441137_PM_at   | Bicc1               | BICC1      | -0.12 | 2.28 | -0.76 | 4.65E-01 | 7.14E-01 | -6.40 |
| 1453660_PM_at   | ---                 | NA         | 0.06  | 2.25 | 0.76  | 4.65E-01 | 7.14E-01 | -6.40 |
| 1439723_PM_at   | Ticrr               | TICRR      | 0.07  | 2.16 | 0.76  | 4.65E-01 | 7.14E-01 | -6.40 |
| 1424923_PM_at   | Serpina3g           | NA         | 0.08  | 2.21 | 0.76  | 4.65E-01 | 7.14E-01 | -6.40 |
| 1453173_PM_at   | Akr1b10             | AKR1B15    | 0.14  | 3.23 | 0.76  | 4.65E-01 | 7.14E-01 | -6.40 |
| 1441184_PM_at   | Trpc4ap             | NA         | 0.14  | 2.70 | 0.76  | 4.65E-01 | 7.14E-01 | -6.40 |
| 1425863_PM_a_at | Ptpro               | PTPRO      | 0.24  | 2.46 | 0.76  | 4.65E-01 | 7.14E-01 | -6.40 |
| 1459567_PM_at   | C77905              | NA         | 0.10  | 2.55 | 0.76  | 4.65E-01 | 7.14E-01 | -6.40 |
| 1442009_PM_at   | Ago3                | AGO3       | -0.23 | 3.50 | -0.76 | 4.65E-01 | 7.14E-01 | -6.40 |
| 1458344_PM_at   | Nagpa               | NAGPA      | 0.08  | 2.32 | 0.76  | 4.65E-01 | 7.14E-01 | -6.40 |
| 1424593_PM_at   | Ecd                 | ECD        | 0.09  | 2.55 | 0.76  | 4.65E-01 | 7.14E-01 | -6.40 |
| 1457310_PM_x_at | Scrt2               | SCRT2      | 0.12  | 2.33 | 0.76  | 4.65E-01 | 7.14E-01 | -6.40 |
| 1433704_PM_s_at | Sec62               | SEC62      | 0.28  | 7.66 | 0.76  | 4.65E-01 | 7.14E-01 | -6.40 |
| 1428780_PM_at   | Tha1                | NA         | 0.12  | 2.42 | 0.76  | 4.65E-01 | 7.14E-01 | -6.40 |
| 1424788_PM_at   | Kri1                | KRI1       | -0.15 | 4.41 | -0.76 | 4.65E-01 | 7.14E-01 | -6.40 |
| 1454434_PM_at   | 9030607J07Rik       | NA         | 0.08  | 2.20 | 0.76  | 4.65E-01 | 7.14E-01 | -6.40 |
| 1451419_PM_at   | Spsb4               | SPSB4      | 0.09  | 3.28 | 0.76  | 4.65E-01 | 7.14E-01 | -6.40 |
| 1440059_PM_at   | ---                 | NA         | 0.20  | 3.55 | 0.76  | 4.65E-01 | 7.14E-01 | -6.40 |
| 1437645_PM_at   | Atf7                | AC023509.3 | -0.11 | 2.19 | -0.76 | 4.65E-01 | 7.14E-01 | -6.40 |
| 1447901_PM_x_at | LOC100861749 ///Sf1 | SF1        | -0.09 | 2.31 | -0.76 | 4.65E-01 | 7.14E-01 | -6.40 |
| 1418535_PM_at   | Rgl1                | RGL1       | -0.09 | 2.43 | -0.76 | 4.65E-01 | 7.14E-01 | -6.40 |
| 1446063_PM_at   | C730034F03Rik       | NA         | 0.16  | 2.45 | 0.76  | 4.65E-01 | 7.14E-01 | -6.40 |
| 1419356_PM_at   | Klf7                | KLf7       | -0.09 | 2.11 | -0.76 | 4.65E-01 | 7.14E-01 | -6.40 |
| 1417995_PM_at   | Ptpn22              | PTPN22     | 0.09  | 2.10 | 0.76  | 4.65E-01 | 7.14E-01 | -6.40 |
| 1427865_PM_at   | Hbb-b2              | NA         | -0.33 | 3.74 | -0.76 | 4.65E-01 | 7.14E-01 | -6.40 |
| 1426753_PM_at   | Jade1               | JADE1      | -0.12 | 4.43 | -0.76 | 4.65E-01 | 7.14E-01 | -6.40 |
| 1431626_PM_at   | 4933429K18Rik       | NA         | -0.07 | 2.64 | -0.76 | 4.65E-01 | 7.14E-01 | -6.40 |
| 1456988_PM_at   | Celrr               | NA         | 0.08  | 2.05 | 0.76  | 4.65E-01 | 7.14E-01 | -6.40 |
| 1431493_PM_at   | ---                 | NA         | 0.12  | 2.97 | 0.76  | 4.65E-01 | 7.14E-01 | -6.40 |
| 1454015_PM_a_at | Cdh13               | CDH13      | 0.22  | 3.00 | 0.76  | 4.65E-01 | 7.14E-01 | -6.40 |
| 1423253_PM_at   | Mpz                 | MPZ        | 0.08  | 3.01 | 0.76  | 4.65E-01 | 7.15E-01 | -6.40 |
| 1448555_PM_at   | Rpap3               | RPAP3      | -0.13 | 2.44 | -0.76 | 4.65E-01 | 7.15E-01 | -6.40 |
| 1447957_PM_at   | D7Ertdd128e         | NA         | 0.08  | 2.46 | 0.76  | 4.65E-01 | 7.15E-01 | -6.40 |
| 1420223_PM_at   | ---                 | NA         | 0.14  | 2.63 | 0.76  | 4.65E-01 | 7.15E-01 | -6.40 |
| 1435803_PM_a_at | Eif4e2              | EIF4E2     | 0.27  | 3.84 | 0.76  | 4.65E-01 | 7.15E-01 | -6.40 |
| 1431952_PM_at   | 4930532I03Rik       | NA         | 0.07  | 2.04 | 0.76  | 4.65E-01 | 7.15E-01 | -6.40 |
| 1429856_PM_at   | Tspan18             | TSPAN18    | 0.08  | 2.18 | 0.76  | 4.65E-01 | 7.15E-01 | -6.40 |
| 1456428_PM_at   | Cxcl15              | NA         | 0.08  | 2.31 | 0.76  | 4.65E-01 | 7.15E-01 | -6.40 |
| 1444594_PM_at   | Tbx3                | TBX3       | 0.07  | 2.05 | 0.76  | 4.66E-01 | 7.15E-01 | -6.40 |
| 1455219_PM_at   | Slx1b               | SLX1B      | 0.08  | 2.92 | 0.76  | 4.66E-01 | 7.15E-01 | -6.40 |
| 1425046_PM_at   | Bpifb5              | NA         | 0.11  | 2.74 | 0.76  | 4.66E-01 | 7.15E-01 | -6.40 |
| 1457247_PM_at   | Lmln                | LMLN       | 0.16  | 4.96 | 0.76  | 4.66E-01 | 7.15E-01 | -6.40 |
| 1433202_PM_at   | 6030400A10Rik       | NA         | -0.14 | 2.48 | -0.76 | 4.66E-01 | 7.15E-01 | -6.40 |
| 1442858_PM_at   | Mycbp2              | MYCBP2     | 0.07  | 1.91 | 0.76  | 4.66E-01 | 7.15E-01 | -6.40 |
| 1418805_PM_at   | Sct                 | SCT        | 0.11  | 2.99 | 0.76  | 4.66E-01 | 7.15E-01 | -6.40 |
| 1426532_PM_at   | Zmynd11             | ZMYND11    | 0.19  | 5.33 | 0.76  | 4.66E-01 | 7.15E-01 | -6.40 |
| 1431026_PM_at   | Naa30               | NAA30      | 0.28  | 2.94 | 0.76  | 4.66E-01 | 7.15E-01 | -6.40 |
| 1431443_PM_at   | ---                 | NA         | 0.07  | 2.27 | 0.76  | 4.66E-01 | 7.15E-01 | -6.40 |
| 1417594_PM_at   | Gkap1               | GKAP1      | 0.16  | 2.92 | 0.76  | 4.66E-01 | 7.15E-01 | -6.40 |
| 1447487_PM_at   | Opalin              | NA         | 0.09  | 2.13 | 0.76  | 4.66E-01 | 7.15E-01 | -6.40 |
| 1436762_PM_x_at | Elp3                | NA         | -0.20 | 7.91 | -0.76 | 4.66E-01 | 7.15E-01 | -6.40 |
| 1430086_PM_at   | Chrna9              | CHRNA9     | 0.07  | 2.47 | 0.76  | 4.66E-01 | 7.15E-01 | -6.40 |
| 1432302_PM_s_at | ---                 | NA         | 0.07  | 2.07 | 0.76  | 4.66E-01 | 7.15E-01 | -6.40 |
| 1441223_PM_at   | March4              | MARCH4     | 0.09  | 3.07 | 0.76  | 4.66E-01 | 7.15E-01 | -6.40 |
| 1437914_PM_at   | E2f6                | NA         | 0.10  | 3.12 | 0.76  | 4.66E-01 | 7.15E-01 | -6.40 |
| 1431928_PM_at   | LOC102641264 ///Ttn | TTN        | 0.10  | 2.39 | 0.76  | 4.66E-01 | 7.15E-01 | -6.40 |
| 1457829_PM_at   | Clgn                | CLGN       | -0.11 | 3.26 | -0.76 | 4.66E-01 | 7.15E-01 | -6.40 |
| 1441501_PM_at   | Serbp1              | SERBP1     | -0.29 | 3.42 | -0.76 | 4.66E-01 | 7.15E-01 | -6.40 |
| 1444202_PM_at   | Zfp703              | ZNF703     | -0.10 | 2.72 | -0.76 | 4.66E-01 | 7.15E-01 | -6.40 |
| 1425810_PM_a_at | Csrp1               | CSR1       | 0.12  | 2.48 | 0.76  | 4.66E-01 | 7.15E-01 | -6.40 |
| 1419877_PM_x_at | ---                 | NA         | 0.12  | 2.74 | 0.76  | 4.66E-01 | 7.15E-01 | -6.40 |
| 1436990_PM_s_at | Chchd10             | CHCHD10    | -0.21 | 8.53 | -0.76 | 4.66E-01 | 7.15E-01 | -6.40 |
| 1459799_PM_at   | Farp1               | NA         | -0.08 | 2.28 | -0.76 | 4.66E-01 | 7.15E-01 | -6.40 |
| 1437390_PM_x_at | Stx1a               | STX1A      | 0.52  | 6.59 | 0.76  | 4.66E-01 | 7.15E-01 | -6.40 |
| 1450989_PM_at   | TdGF1               | TDGF1      | 0.10  | 2.27 | 0.76  | 4.66E-01 | 7.15E-01 | -6.40 |
| 1434942_PM_at   | Esf1                | ESF1       | -0.24 | 5.45 | -0.76 | 4.66E-01 | 7.15E-01 | -6.40 |
| 1458557_PM_at   | Bcas3               | BCAS3      | -0.09 | 2.32 | -0.76 | 4.66E-01 | 7.15E-01 | -6.40 |
| 1438866_PM_at   | Grin3a              | GRIN3A     | -0.09 | 2.19 | -0.76 | 4.66E-01 | 7.15E-01 | -6.40 |
| 1430541_PM_at   | Fbxo44              | FBXO44     | 0.09  | 2.35 | 0.76  | 4.66E-01 | 7.15E-01 | -6.40 |
| 1449808_PM_at   | ---                 | NA         | 0.11  | 2.41 | 0.76  | 4.66E-01 | 7.15E-01 | -6.40 |
| 1434118_PM_at   | Mul1                | MUL1       | 0.15  | 2.68 | 0.76  | 4.66E-01 | 7.15E-01 | -6.40 |
| 1421368_PM_at   | Scrt1               | SCRT1      | 0.07  | 2.02 | 0.76  | 4.66E-01 | 7.15E-01 | -6.40 |
| 1417908_PM_s_at | Gm10705 ///Ube2l3   | UBE2L5P    | -0.17 | 2.71 | -0.76 | 4.67E-01 | 7.15E-01 | -6.40 |

|                 |                                                                                                                |         |       |      |       |          |          |       |
|-----------------|----------------------------------------------------------------------------------------------------------------|---------|-------|------|-------|----------|----------|-------|
| 1421173_PM_at   | Irf4                                                                                                           | IRF4    | -0.08 | 2.42 | -0.76 | 4.67E-01 | 7.15E-01 | -6.40 |
| 1449912_PM_at   | Ssxb1                                                                                                          | SSX2    | 0.07  | 2.37 | 0.76  | 4.67E-01 | 7.15E-01 | -6.40 |
| 1457401_PM_at   | Dnah9                                                                                                          | DNAH9   | 0.23  | 2.85 | 0.76  | 4.67E-01 | 7.15E-01 | -6.40 |
| 1419655_PM_at   | Tle3                                                                                                           | TLE3    | -0.19 | 3.93 | -0.76 | 4.67E-01 | 7.16E-01 | -6.40 |
| 1441245_PM_a_at | Zfp512b                                                                                                        | ZNF512B | 0.10  | 2.68 | 0.76  | 4.67E-01 | 7.16E-01 | -6.40 |
| 1453906_PM_at   | Med13l                                                                                                         | MED13L  | -0.14 | 2.51 | -0.76 | 4.67E-01 | 7.16E-01 | -6.40 |
| 1454374_PM_at   | Cd302                                                                                                          | CD302   | 0.07  | 1.86 | 0.76  | 4.67E-01 | 7.16E-01 | -6.40 |
| 1456471_PM_x_at | Gm6756 /// Phgdh                                                                                               | PHGDH   | -0.32 | 4.45 | -0.76 | 4.67E-01 | 7.16E-01 | -6.40 |
| 1446623_PM_at   | ---                                                                                                            | NA      | -0.06 | 1.87 | -0.76 | 4.67E-01 | 7.16E-01 | -6.40 |
| 1443157_PM_at   | ---                                                                                                            | NA      | 0.09  | 2.06 | 0.76  | 4.67E-01 | 7.16E-01 | -6.40 |
| 1453784_PM_at   | Ilkap                                                                                                          | ILKAP   | 0.12  | 2.59 | 0.76  | 4.67E-01 | 7.16E-01 | -6.40 |
| 1435785_PM_at   | Ehd2                                                                                                           | EHD2    | 0.35  | 5.56 | 0.76  | 4.67E-01 | 7.16E-01 | -6.40 |
| 1436468_PM_at   | Zdhhc8                                                                                                         | ZDHH8   | 0.08  | 2.49 | 0.76  | 4.67E-01 | 7.16E-01 | -6.40 |
| 1417338_PM_at   | Epb42                                                                                                          | EPB42   | 0.13  | 2.80 | 0.76  | 4.67E-01 | 7.16E-01 | -6.40 |
| 1460590_PM_s_at | Cdk5rap2 /// Gm2423 /// Ywhaq                                                                                  | YWHAQ   | -0.21 | 7.94 | -0.76 | 4.67E-01 | 7.16E-01 | -6.40 |
| 1433462_PM_a_at | Pik2a                                                                                                          | PI4K2A  | 0.27  | 3.07 | 0.76  | 4.67E-01 | 7.16E-01 | -6.40 |
| 1419660_PM_at   | Yae1d1                                                                                                         | YAE1D1  | -0.26 | 4.59 | -0.76 | 4.67E-01 | 7.16E-01 | -6.40 |
| 1455697_PM_at   | Fam124a                                                                                                        | FAM124A | -0.12 | 3.32 | -0.76 | 4.67E-01 | 7.16E-01 | -6.40 |
| 1438326_PM_at   | Trmt6                                                                                                          | TRMT6   | 0.08  | 2.59 | 0.76  | 4.67E-01 | 7.16E-01 | -6.40 |
| 1422299_PM_a_at | Styx11                                                                                                         | STYX11  | 0.08  | 2.38 | 0.76  | 4.67E-01 | 7.16E-01 | -6.40 |
| 1433415_PM_at   | ---                                                                                                            | NA      | 0.13  | 2.75 | 0.76  | 4.67E-01 | 7.16E-01 | -6.40 |
| 1450628_PM_at   | Slc2a8                                                                                                         | SLC2A8  | 0.17  | 3.33 | 0.76  | 4.67E-01 | 7.16E-01 | -6.40 |
| 1426814_PM_at   | Sec16a                                                                                                         | SEC16A  | -0.21 | 3.98 | -0.75 | 4.67E-01 | 7.16E-01 | -6.40 |
| 1449088_PM_at   | Fbp2                                                                                                           | FBP2    | 0.07  | 2.25 | 0.75  | 4.67E-01 | 7.16E-01 | -6.40 |
| 1419529_PM_at   | Il23a                                                                                                          | IL23A   | 0.08  | 2.21 | 0.75  | 4.67E-01 | 7.16E-01 | -6.40 |
| 1448936_PM_at   | Stx12                                                                                                          | STX12   | 0.22  | 4.29 | 0.75  | 4.67E-01 | 7.16E-01 | -6.40 |
| 1429206_PM_at   | Rhobtb1                                                                                                        | RHOBTB1 | 0.26  | 3.63 | 0.75  | 4.67E-01 | 7.16E-01 | -6.40 |
| 1450191_PM_a_at | Sox13                                                                                                          | SOX13   | 0.07  | 2.39 | 0.75  | 4.67E-01 | 7.16E-01 | -6.40 |
| 1431490_PM_at   | A930033C23Rik                                                                                                  | NA      | 0.06  | 2.34 | 0.75  | 4.67E-01 | 7.16E-01 | -6.40 |
| 1432383_PM_a_at | Arm9                                                                                                           | ARM9    | -0.12 | 2.57 | -0.75 | 4.67E-01 | 7.16E-01 | -6.40 |
| 1432926_PM_at   | ---                                                                                                            | NA      | 0.10  | 2.56 | 0.75  | 4.67E-01 | 7.16E-01 | -6.40 |
| 1430471_PM_at   | LOC102631977                                                                                                   | NA      | 0.10  | 2.37 | 0.75  | 4.67E-01 | 7.16E-01 | -6.40 |
| 1439949_PM_at   | ---                                                                                                            | NA      | 0.07  | 2.54 | 0.75  | 4.68E-01 | 7.16E-01 | -6.40 |
| 1430484_PM_at   | ---                                                                                                            | NA      | 0.08  | 2.20 | 0.75  | 4.68E-01 | 7.16E-01 | -6.40 |
| 1459469_PM_at   | C78516                                                                                                         | NA      | 0.11  | 2.04 | 0.75  | 4.68E-01 | 7.16E-01 | -6.40 |
| 1446067_PM_at   | ---                                                                                                            | NA      | 0.11  | 3.03 | 0.75  | 4.68E-01 | 7.16E-01 | -6.40 |
| 1450307_PM_x_at | H2afy3                                                                                                         | NA      | 0.11  | 2.11 | 0.75  | 4.67E-01 | 7.16E-01 | -6.40 |
| 1452583_PM_s_at | Galm                                                                                                           | GALM    | 0.12  | 2.71 | 0.75  | 4.68E-01 | 7.16E-01 | -6.40 |
| 1457876_PM_at   | D9Ert496e                                                                                                      | NA      | 0.17  | 2.94 | 0.75  | 4.68E-01 | 7.16E-01 | -6.40 |
| 1419188_PM_s_at | Cc127a /// Cc127b /// Gm13306 /// Gm2506 /// LOC100861978                                                      | CCL27   | 0.31  | 4.85 | 0.75  | 4.68E-01 | 7.16E-01 | -6.40 |
| 1455331_PM_at   | Plekhh3                                                                                                        | PLEKHM3 | -0.18 | 3.07 | -0.75 | 4.68E-01 | 7.16E-01 | -6.40 |
| 1435836_PM_at   | Pdk1                                                                                                           | PDK1    | -0.27 | 4.89 | -0.75 | 4.68E-01 | 7.16E-01 | -6.40 |
| 1416126_PM_at   | Polr1b                                                                                                         | POLR1B  | -0.08 | 2.74 | -0.75 | 4.68E-01 | 7.16E-01 | -6.40 |
| 1425615_PM_a_at | Pck2                                                                                                           | PCK2    | -0.33 | 3.52 | -0.75 | 4.68E-01 | 7.16E-01 | -6.40 |
| 1417900_PM_a_at | Vldlr                                                                                                          | VLDLR   | -0.19 | 2.98 | -0.75 | 4.68E-01 | 7.16E-01 | -6.40 |
| 1424345_PM_s_at | Ube2m                                                                                                          | UBE2M   | -0.16 | 2.38 | -0.75 | 4.68E-01 | 7.16E-01 | -6.40 |
| 1449146_PM_at   | Notch4                                                                                                         | NOTCH4  | 0.15  | 2.46 | 0.75  | 4.68E-01 | 7.16E-01 | -6.40 |
| 1431440_PM_at   | Pole2                                                                                                          | POLE2   | 0.08  | 2.08 | 0.75  | 4.68E-01 | 7.16E-01 | -6.40 |
| 1428207_PM_at   | Bcl7a                                                                                                          | BCL7A   | 0.10  | 3.03 | 0.75  | 4.68E-01 | 7.16E-01 | -6.40 |
| 1455427_PM_at   | Angpt4                                                                                                         | ANGPT4  | 0.05  | 2.23 | 0.75  | 4.68E-01 | 7.16E-01 | -6.40 |
| 1453012_PM_at   | Tsc22d2                                                                                                        | TSC22D2 | 0.18  | 2.93 | 0.75  | 4.68E-01 | 7.16E-01 | -6.40 |
| 1436815_PM_x_at | 1810010D01Rik                                                                                                  | NA      | 0.10  | 2.43 | 0.75  | 4.68E-01 | 7.16E-01 | -6.40 |
| 1420156_PM_at   | AA408954                                                                                                       | NA      | 0.08  | 2.41 | 0.75  | 4.68E-01 | 7.16E-01 | -6.40 |
| 1439370_PM_x_at | Sf3b5                                                                                                          | SF3B5   | 0.11  | 3.03 | 0.75  | 4.68E-01 | 7.16E-01 | -6.40 |
| 1444949_PM_at   | ---                                                                                                            | NA      | -0.08 | 2.23 | -0.75 | 4.68E-01 | 7.16E-01 | -6.40 |
| 1421641_PM_at   | Slc6a2                                                                                                         | SLC6A2  | 0.11  | 2.71 | 0.75  | 4.68E-01 | 7.16E-01 | -6.40 |
| 1452745_PM_at   | Trapp9                                                                                                         | TRAPP9  | 0.16  | 2.76 | 0.75  | 4.68E-01 | 7.16E-01 | -6.40 |
| 1427660_PM_x_at | Igk-V28 /// Igkc /// Iggk1 /// Iggkv1-117 /// Iggkv3-4 /// Iggkv4-53 /// Iggkv6-23 /// Iggkv8-16 /// Iggkv8-30 | NA      | -0.48 | 4.88 | -0.75 | 4.68E-01 | 7.16E-01 | -6.40 |
| 1446227_PM_at   | ---                                                                                                            | NA      | 0.07  | 2.21 | 0.75  | 4.68E-01 | 7.16E-01 | -6.40 |
| 1455001_PM_x_at | Rpl13a                                                                                                         | RPL13A  | 0.12  | 7.18 | 0.75  | 4.68E-01 | 7.16E-01 | -6.40 |
| 1422832_PM_at   | Rgr                                                                                                            | RGR     | 0.06  | 2.16 | 0.75  | 4.68E-01 | 7.17E-01 | -6.40 |
| 1436229_PM_at   | Fam126b                                                                                                        | FAM126B | 0.22  | 3.29 | 0.75  | 4.68E-01 | 7.17E-01 | -6.40 |
| 1439318_PM_at   | Mast4                                                                                                          | MAST4   | 0.08  | 2.26 | 0.75  | 4.68E-01 | 7.17E-01 | -6.40 |
| 1451736_PM_a_at | Map2k7                                                                                                         | MAP2K7  | 0.35  | 5.85 | 0.75  | 4.68E-01 | 7.17E-01 | -6.40 |
| 1459387_PM_at   | Mast4                                                                                                          | MAST4   | 0.08  | 2.27 | 0.75  | 4.68E-01 | 7.17E-01 | -6.40 |
| 1456880_PM_at   | ---                                                                                                            | NA      | 0.10  | 2.77 | 0.75  | 4.68E-01 | 7.17E-01 | -6.40 |
| 1433437_PM_at   | Dock8                                                                                                          | DOCK8   | 0.14  | 2.27 | 0.75  | 4.68E-01 | 7.17E-01 | -6.40 |
| 1459287_PM_at   | ---                                                                                                            | NA      | 0.08  | 2.35 | 0.75  | 4.68E-01 | 7.17E-01 | -6.40 |
| 1418005_PM_at   | Sdhb                                                                                                           | SDHB    | -0.11 | 5.40 | -0.75 | 4.69E-01 | 7.17E-01 | -6.40 |

|                 |                         |          |       |      |       |          |          |       |
|-----------------|-------------------------|----------|-------|------|-------|----------|----------|-------|
| 1451876_PM_a_at | Trp63                   | TP63     | 0.13  | 2.78 | 0.75  | 4.69E-01 | 7.17E-01 | -6.40 |
| 1440818_PM_s_at | Sf3b1                   | SF3B1    | 0.13  | 8.84 | 0.75  | 4.69E-01 | 7.17E-01 | -6.40 |
| 1422239_PM_at   | Hoxd13                  | HOXD13   | 0.09  | 2.48 | 0.75  | 4.69E-01 | 7.17E-01 | -6.40 |
| 1437408_PM_at   | Adgrg6                  | ADGRG6   | -0.06 | 2.88 | -0.75 | 4.69E-01 | 7.17E-01 | -6.40 |
| 1443876_PM_at   | ---                     | NA       | 0.09  | 2.55 | 0.75  | 4.69E-01 | 7.17E-01 | -6.40 |
| 1457573_PM_at   | Top1                    | TOP1     | 0.27  | 3.68 | 0.75  | 4.69E-01 | 7.17E-01 | -6.40 |
| 1424116_PM_x_at | Ppp5c                   | PPP5C    | -0.07 | 2.93 | -0.75 | 4.69E-01 | 7.17E-01 | -6.40 |
| 1416231_PM_at   | Vac14                   | VAC14    | 0.11  | 2.74 | 0.75  | 4.69E-01 | 7.17E-01 | -6.40 |
| 1447967_PM_at   | Tmem69                  | TMEM69   | -0.12 | 2.33 | -0.75 | 4.69E-01 | 7.17E-01 | -6.40 |
| 1442997_PM_at   | ---                     | NA       | 0.06  | 2.11 | 0.75  | 4.69E-01 | 7.17E-01 | -6.40 |
| 1443938_PM_at   | ---                     | NA       | -0.21 | 2.80 | -0.75 | 4.69E-01 | 7.17E-01 | -6.40 |
| 1453162_PM_at   | Utp11l                  | UTP11    | -0.07 | 2.36 | -0.75 | 4.69E-01 | 7.17E-01 | -6.40 |
| 1428108_PM_x_at | Tmcc2                   | TMCC2    | -0.17 | 6.75 | -0.75 | 4.69E-01 | 7.17E-01 | -6.40 |
| 1459645_PM_at   | ---                     | NA       | -0.17 | 2.23 | -0.75 | 4.69E-01 | 7.17E-01 | -6.40 |
| 1436690_PM_at   | ---                     | NA       | -0.12 | 2.77 | -0.75 | 4.69E-01 | 7.17E-01 | -6.40 |
| 1417018_PM_at   | Efemp2                  | EFEMP2   | 0.14  | 3.07 | 0.75  | 4.69E-01 | 7.17E-01 | -6.40 |
| 1424396_PM_a_at | Asrg1                   | ASRGL1   | -0.54 | 4.26 | -0.75 | 4.69E-01 | 7.17E-01 | -6.40 |
| 1421864_PM_at   | Dbil5                   | NA       | -0.08 | 2.75 | -0.75 | 4.69E-01 | 7.17E-01 | -6.41 |
| 1416489_PM_at   | Plk4b2                  | PI4K2B   | 0.10  | 2.36 | 0.75  | 4.69E-01 | 7.17E-01 | -6.41 |
| 1460027_PM_at   | Spag6l                  | SPAG6    | -0.15 | 2.61 | -0.75 | 4.69E-01 | 7.17E-01 | -6.41 |
| 1425652_PM_s_at | Rbpms                   | RBPMS    | -0.09 | 3.39 | -0.75 | 4.69E-01 | 7.17E-01 | -6.41 |
| 1453746_PM_at   | Frbp1                   | FNBP1    | 0.13  | 3.30 | 0.75  | 4.69E-01 | 7.18E-01 | -6.41 |
| 1429047_PM_at   | Rtf1                    | RTF1     | -0.20 | 3.56 | -0.75 | 4.69E-01 | 7.18E-01 | -6.41 |
| 1456669_PM_at   | 1110018N20Rik           | NA       | 0.14  | 2.32 | 0.75  | 4.69E-01 | 7.18E-01 | -6.41 |
| 1450168_PM_at   | Ankrd12                 | ANKRD12  | 0.16  | 3.04 | 0.75  | 4.69E-01 | 7.18E-01 | -6.41 |
| 1449356_PM_at   | Asb5                    | ASB5     | 0.14  | 2.43 | 0.75  | 4.69E-01 | 7.18E-01 | -6.41 |
| 1451808_PM_at   | Kcnj4                   | KCNJ4    | 0.08  | 2.73 | 0.75  | 4.69E-01 | 7.18E-01 | -6.41 |
| 1441949_PM_x_at | Slc39a6                 | SLC39A6  | 0.24  | 3.49 | 0.75  | 4.70E-01 | 7.18E-01 | -6.41 |
| 1458855_PM_at   | D11Ert49e               | NA       | 0.18  | 4.66 | 0.75  | 4.70E-01 | 7.18E-01 | -6.41 |
| 1441241_PM_at   | 9630013D21Rik           | NA       | -0.07 | 2.31 | -0.75 | 4.70E-01 | 7.18E-01 | -6.41 |
| 1425279_PM_at   | Pdik1l                  | PDIK1L   | 0.08  | 2.58 | 0.75  | 4.70E-01 | 7.18E-01 | -6.41 |
| 1422081_PM_at   | Ky                      | NA       | 0.06  | 1.92 | 0.75  | 4.70E-01 | 7.18E-01 | -6.41 |
| 1452084_PM_at   | Zcchc17                 | ZCCHC17  | 0.14  | 3.04 | 0.75  | 4.70E-01 | 7.18E-01 | -6.41 |
| 1430955_PM_at   | ---                     | NA       | -0.17 | 2.51 | -0.75 | 4.70E-01 | 7.18E-01 | -6.41 |
| 1417557_PM_at   | Ubxn6                   | UBXN6    | -0.14 | 3.21 | -0.75 | 4.70E-01 | 7.18E-01 | -6.41 |
| 1437505_PM_at   | ---                     | NA       | -0.09 | 2.65 | -0.75 | 4.70E-01 | 7.18E-01 | -6.41 |
| 1422388_PM_at   | Vmn1r25                 | NA       | 0.07  | 2.06 | 0.75  | 4.70E-01 | 7.18E-01 | -6.41 |
| 1431709_PM_at   | Mt5                     | TESMIN   | 0.07  | 3.59 | 0.75  | 4.70E-01 | 7.18E-01 | -6.41 |
| 1443467_PM_at   | Dock11                  | DOCK11   | 0.08  | 2.27 | 0.75  | 4.70E-01 | 7.18E-01 | -6.41 |
| 1447214_PM_at   | Chrna9 /// LOC102635442 | CHRNA9   | 0.08  | 2.47 | 0.75  | 4.70E-01 | 7.18E-01 | -6.41 |
| 1456394_PM_at   | Rint1                   | RINT1    | 0.10  | 2.73 | 0.75  | 4.70E-01 | 7.18E-01 | -6.41 |
| 1457564_PM_at   | Dffa                    | DFFA     | 0.11  | 2.57 | 0.75  | 4.70E-01 | 7.18E-01 | -6.41 |
| 1450067_PM_a_at | Mdp1                    | MDP1     | 0.11  | 2.74 | 0.75  | 4.70E-01 | 7.18E-01 | -6.41 |
| 1446703_PM_at   | ---                     | NA       | 0.11  | 2.30 | 0.75  | 4.70E-01 | 7.18E-01 | -6.41 |
| 1434517_PM_at   | Wdfy2                   | NA       | 0.17  | 3.66 | 0.75  | 4.70E-01 | 7.18E-01 | -6.41 |
| 1450684_PM_at   | Etv1                    | ETV1     | 0.28  | 3.62 | 0.75  | 4.70E-01 | 7.18E-01 | -6.41 |
| 1416138_PM_at   | Anxa7                   | ANXA7    | -0.25 | 3.46 | -0.75 | 4.70E-01 | 7.18E-01 | -6.41 |
| 1430287_PM_s_at | Hemk1                   | HEMK1    | -0.13 | 3.33 | -0.75 | 4.70E-01 | 7.18E-01 | -6.41 |
| 1432859_PM_at   | ---                     | NA       | 0.06  | 1.96 | 0.75  | 4.70E-01 | 7.18E-01 | -6.41 |
| 1436264_PM_at   | BC025920                | NA       | 0.06  | 2.74 | 0.75  | 4.70E-01 | 7.18E-01 | -6.41 |
| 1431758_PM_at   | BC051628                | FNDC11   | 0.07  | 2.12 | 0.75  | 4.70E-01 | 7.18E-01 | -6.41 |
| 1451562_PM_at   | Ggact                   | GGACT    | 0.11  | 2.94 | 0.75  | 4.70E-01 | 7.18E-01 | -6.41 |
| 1438694_PM_at   | Csn1s2a                 | NA       | 0.39  | 2.81 | 0.75  | 4.70E-01 | 7.18E-01 | -6.41 |
| 1459060_PM_at   | ---                     | NA       | 0.12  | 3.12 | 0.75  | 4.70E-01 | 7.18E-01 | -6.41 |
| 1419178_PM_at   | Cd3g                    | CD3G     | 0.11  | 2.36 | 0.75  | 4.70E-01 | 7.18E-01 | -6.41 |
| 1453220_PM_at   | Nxpe2                   | NXPE2    | 0.22  | 3.26 | 0.75  | 4.70E-01 | 7.18E-01 | -6.41 |
| 1433525_PM_at   | Ednra                   | EDNRA    | -0.13 | 2.73 | -0.75 | 4.70E-01 | 7.18E-01 | -6.41 |
| 1433930_PM_at   | Hpse                    | HPSE     | 0.06  | 2.31 | 0.75  | 4.70E-01 | 7.18E-01 | -6.41 |
| 1425383_PM_a_at | Pbx1                    | PBX1     | 0.17  | 2.53 | 0.75  | 4.70E-01 | 7.18E-01 | -6.41 |
| 1418254_PM_at   | Apip                    | APIP     | -0.22 | 4.34 | -0.75 | 4.71E-01 | 7.18E-01 | -6.41 |
| 1459817_PM_at   | ---                     | NA       | -0.19 | 4.55 | -0.75 | 4.70E-01 | 7.18E-01 | -6.41 |
| 1444103_PM_at   | ---                     | NA       | -0.11 | 2.26 | -0.75 | 4.70E-01 | 7.18E-01 | -6.41 |
| 1429665_PM_at   | Haus6                   | HAUS6    | -0.10 | 2.56 | -0.75 | 4.70E-01 | 7.18E-01 | -6.41 |
| 1418750_PM_at   | Plxn3                   | PLXNB3   | -0.06 | 2.37 | -0.75 | 4.70E-01 | 7.18E-01 | -6.41 |
| 1448815_PM_at   | Ogg1                    | OGG1     | -0.06 | 2.24 | -0.75 | 4.70E-01 | 7.18E-01 | -6.41 |
| 1436696_PM_x_at | Ceacam11                | CEACAM3  | 0.06  | 1.97 | 0.75  | 4.70E-01 | 7.18E-01 | -6.41 |
| 1430399_PM_at   | Pot1b                   | POT1     | 0.07  | 3.23 | 0.75  | 4.71E-01 | 7.18E-01 | -6.41 |
| 1438147_PM_at   | Ssc4d                   | SSC4D    | 0.08  | 2.37 | 0.75  | 4.70E-01 | 7.18E-01 | -6.41 |
| 1446419_PM_at   | ---                     | NA       | 0.08  | 2.43 | 0.75  | 4.71E-01 | 7.18E-01 | -6.41 |
| 1431803_PM_at   | Cyp2d13                 | NA       | 0.10  | 2.24 | 0.75  | 4.70E-01 | 7.18E-01 | -6.41 |
| 1454596_PM_at   | C530008M17Rik           | NA       | 0.10  | 2.17 | 0.75  | 4.70E-01 | 7.18E-01 | -6.41 |
| 1424447_PM_at   | 1700030K09Rik           | C19orf44 | 0.11  | 2.48 | 0.75  | 4.70E-01 | 7.18E-01 | -6.41 |
| 1433312_PM_at   | ---                     | NA       | 0.17  | 2.88 | 0.75  | 4.71E-01 | 7.18E-01 | -6.41 |
| 1438513_PM_at   | Tatdn1                  | NA       | 0.17  | 4.29 | 0.75  | 4.71E-01 | 7.18E-01 | -6.41 |

|                 |                                                                                                     |          |       |      |       |          |          |       |
|-----------------|-----------------------------------------------------------------------------------------------------|----------|-------|------|-------|----------|----------|-------|
| 1445193_PM_x_at | D8Ert575e                                                                                           | NA       | -0.07 | 2.04 | -0.75 | 4.71E-01 | 7.18E-01 | -6.41 |
| 1447022_PM_at   | ---                                                                                                 | NA       | 0.19  | 2.65 | 0.75  | 4.71E-01 | 7.18E-01 | -6.41 |
| 1455463_PM_at   | Phyhip                                                                                              | PHYHIP   | -0.20 | 7.62 | -0.75 | 4.71E-01 | 7.18E-01 | -6.41 |
| 1454814_PM_s_at | Prps1B                                                                                              | NA       | -0.14 | 2.62 | -0.75 | 4.71E-01 | 7.18E-01 | -6.41 |
| 1417441_PM_at   | Dnajc12                                                                                             | DNAJC12  | -0.08 | 2.41 | -0.75 | 4.71E-01 | 7.18E-01 | -6.41 |
| 1455088_PM_at   | Gm10668 /// Gm4567 ///<br>Gm5157 /// Gm6176 ///<br>Gm6902 /// Gm8600 ///<br>Gm8708 /// LOC101055864 | NA       | 0.07  | 2.61 | 0.75  | 4.71E-01 | 7.18E-01 | -6.41 |
| 1453905_PM_at   | ---                                                                                                 | NA       | 0.08  | 2.37 | 0.75  | 4.71E-01 | 7.18E-01 | -6.41 |
| 1421001_PM_a_at | Car6                                                                                                | CA6      | 0.09  | 2.68 | 0.75  | 4.71E-01 | 7.18E-01 | -6.41 |
| 1450844_PM_at   | Stx6                                                                                                | STX6     | 0.14  | 2.52 | 0.75  | 4.71E-01 | 7.18E-01 | -6.41 |
| 1425272_PM_at   | Emp2                                                                                                | EMP2     | 0.09  | 2.36 | 0.75  | 4.71E-01 | 7.18E-01 | -6.41 |
| 1460615_PM_at   | Nt5dc1                                                                                              | NT5DC1   | 0.16  | 2.81 | 0.75  | 4.71E-01 | 7.18E-01 | -6.41 |
| 1427053_PM_at   | Abi3bp                                                                                              | ABI3BP   | 0.07  | 1.99 | 0.75  | 4.71E-01 | 7.18E-01 | -6.41 |
| 1431831_PM_at   | Slx4p                                                                                               | SLX4P    | 0.07  | 2.31 | 0.75  | 4.71E-01 | 7.19E-01 | -6.41 |
| 1419235_PM_s_at | Helb                                                                                                | HELB     | -0.16 | 2.98 | -0.75 | 4.71E-01 | 7.19E-01 | -6.41 |
| 1456705_PM_at   | ---                                                                                                 | NA       | 0.13  | 3.01 | 0.75  | 4.71E-01 | 7.19E-01 | -6.41 |
| 1447488_PM_at   | ---                                                                                                 | NA       | 0.22  | 2.73 | 0.75  | 4.71E-01 | 7.19E-01 | -6.41 |
| 1457914_PM_at   | ---                                                                                                 | NA       | -0.17 | 3.11 | -0.75 | 4.71E-01 | 7.19E-01 | -6.41 |
| 1454857_PM_at   | Rnf122                                                                                              | RNF122   | 0.06  | 2.05 | 0.75  | 4.71E-01 | 7.19E-01 | -6.41 |
| 1419055_PM_a_at | Ptpn21                                                                                              | PTPN21   | 0.08  | 2.28 | 0.75  | 4.71E-01 | 7.19E-01 | -6.41 |
| 1458498_PM_at   | ---                                                                                                 | NA       | 0.10  | 2.20 | 0.75  | 4.71E-01 | 7.19E-01 | -6.41 |
| 1444689_PM_at   | Tbc1d31                                                                                             | TBC1D31  | 0.12  | 2.65 | 0.75  | 4.71E-01 | 7.19E-01 | -6.41 |
| 1428180_PM_at   | Kxd1                                                                                                | KXD1     | -0.12 | 3.37 | -0.75 | 4.71E-01 | 7.19E-01 | -6.41 |
| 1425654_PM_a_at | Lima1                                                                                               | LIMA1    | -0.13 | 3.08 | -0.75 | 4.71E-01 | 7.19E-01 | -6.41 |
| 1451839_PM_a_at | Pde7a                                                                                               | PDE7A    | 0.09  | 2.66 | 0.75  | 4.71E-01 | 7.19E-01 | -6.41 |
| 1432187_PM_at   | Nup43                                                                                               | NUP43    | 0.11  | 2.29 | 0.75  | 4.71E-01 | 7.19E-01 | -6.41 |
| 1455579_PM_at   | Csn1s2a                                                                                             | NA       | 0.06  | 1.94 | 0.75  | 4.71E-01 | 7.19E-01 | -6.41 |
| 1417229_PM_at   | Capn1                                                                                               | CAPN1    | 0.15  | 2.82 | 0.75  | 4.71E-01 | 7.19E-01 | -6.41 |
| 1424370_PM_s_at | Psmf1                                                                                               | PSMF1    | -0.40 | 2.93 | -0.75 | 4.72E-01 | 7.19E-01 | -6.41 |
| 1423312_PM_at   | Tpbg                                                                                                | TPBG     | -0.08 | 2.12 | -0.75 | 4.72E-01 | 7.19E-01 | -6.41 |
| 1445140_PM_at   | AU022804                                                                                            | NA       | 0.08  | 2.21 | 0.75  | 4.72E-01 | 7.19E-01 | -6.41 |
| 1434635_PM_at   | Rph3a                                                                                               | RPH3A    | -0.18 | 7.97 | -0.75 | 4.72E-01 | 7.19E-01 | -6.41 |
| 1450453_PM_a_at | Pde6g                                                                                               | PDE6G    | 0.13  | 2.76 | 0.75  | 4.72E-01 | 7.19E-01 | -6.41 |
| 1416561_PM_at   | Gad1                                                                                                | GAD1     | -0.31 | 6.24 | -0.75 | 4.72E-01 | 7.19E-01 | -6.41 |
| 1453317_PM_a_at | Khdrbs3                                                                                             | KHDRBS3  | -0.26 | 4.15 | -0.75 | 4.72E-01 | 7.19E-01 | -6.41 |
| 1420388_PM_at   | Prss12                                                                                              | PRSS12   | -0.12 | 2.49 | -0.75 | 4.72E-01 | 7.19E-01 | -6.41 |
| 1415943_PM_at   | Sdc1                                                                                                | SDC1     | -0.07 | 2.92 | -0.75 | 4.72E-01 | 7.19E-01 | -6.41 |
| 1418160_PM_at   | Mkrn3                                                                                               | MKRN3    | 0.07  | 2.02 | 0.75  | 4.72E-01 | 7.19E-01 | -6.41 |
| 1421562_PM_at   | Cd209c                                                                                              | NA       | 0.08  | 2.21 | 0.75  | 4.72E-01 | 7.19E-01 | -6.41 |
| 1444553_PM_at   | Gm28777                                                                                             | NA       | 0.10  | 2.60 | 0.75  | 4.72E-01 | 7.19E-01 | -6.41 |
| 1425297_PM_at   | Zfp825                                                                                              | NA       | 0.11  | 3.39 | 0.75  | 4.72E-01 | 7.19E-01 | -6.41 |
| 1454133_PM_s_at | 4930523O13Rik                                                                                       | NA       | 0.12  | 2.45 | 0.75  | 4.72E-01 | 7.19E-01 | -6.41 |
| 1437518_PM_at   | Gm2694                                                                                              | NA       | 0.14  | 2.31 | 0.75  | 4.72E-01 | 7.19E-01 | -6.41 |
| 1444305_PM_at   | Myh7b                                                                                               | MYH7B    | 0.17  | 2.52 | 0.75  | 4.72E-01 | 7.19E-01 | -6.41 |
| 1430286_PM_s_at | Gm14057 /// Ppp1r14c                                                                                | PPP1R14C | 0.30  | 2.91 | 0.75  | 4.72E-01 | 7.19E-01 | -6.41 |
| 1426765_PM_at   | Comm7                                                                                               | COMM7    | 0.10  | 2.99 | 0.75  | 4.72E-01 | 7.19E-01 | -6.41 |
| 1450845_PM_a_at | Bzw1                                                                                                | BZW1     | 0.46  | 3.44 | 0.75  | 4.72E-01 | 7.19E-01 | -6.41 |
| 1427213_PM_at   | Pfkfb1                                                                                              | PFKFB1   | 0.12  | 2.58 | 0.75  | 4.72E-01 | 7.19E-01 | -6.41 |
| 1422174_PM_at   | Pdx1                                                                                                | PDX1     | 0.06  | 2.13 | 0.75  | 4.72E-01 | 7.19E-01 | -6.41 |
| 1439575_PM_at   | Tmem232                                                                                             | TMEM232  | 0.09  | 2.26 | 0.75  | 4.72E-01 | 7.19E-01 | -6.41 |
| 1427383_PM_at   | Irx6                                                                                                | IRX6     | 0.08  | 2.53 | 0.75  | 4.72E-01 | 7.19E-01 | -6.41 |
| 1457235_PM_at   | Lrp1b                                                                                               | LRP1B    | -0.28 | 3.83 | -0.75 | 4.72E-01 | 7.19E-01 | -6.41 |
| 1456035_PM_at   | Nxf3                                                                                                | NXF3     | 0.06  | 2.18 | 0.75  | 4.72E-01 | 7.19E-01 | -6.41 |
| 1416575_PM_at   | Cdc45                                                                                               | CDC45    | 0.07  | 2.51 | 0.75  | 4.72E-01 | 7.19E-01 | -6.41 |
| 1423310_PM_at   | Tpbg                                                                                                | TPBG     | -0.33 | 3.05 | -0.75 | 4.72E-01 | 7.19E-01 | -6.41 |
| 1442265_PM_at   | Fancc                                                                                               | FANCC    | 0.23  | 2.75 | 0.75  | 4.72E-01 | 7.19E-01 | -6.41 |
| 1455384_PM_x_at | D030056L22Rik                                                                                       | C9orf40  | -0.28 | 7.30 | -0.75 | 4.72E-01 | 7.19E-01 | -6.41 |
| 1429740_PM_at   | Ttc7                                                                                                | TTC7A    | -0.06 | 2.46 | -0.75 | 4.72E-01 | 7.19E-01 | -6.41 |
| 1433688_PM_x_at | Rpl14                                                                                               | RPL14    | 0.37  | 6.52 | 0.75  | 4.72E-01 | 7.19E-01 | -6.41 |
| 1430690_PM_at   | ---                                                                                                 | NA       | -0.07 | 2.17 | -0.75 | 4.72E-01 | 7.19E-01 | -6.41 |
| 1439480_PM_at   | Gm10857                                                                                             | NA       | 0.07  | 2.39 | 0.75  | 4.72E-01 | 7.19E-01 | -6.41 |
| 1430784_PM_a_at | Rptor                                                                                               | RPTOR    | -0.19 | 2.92 | -0.75 | 4.72E-01 | 7.19E-01 | -6.41 |
| 1429594_PM_at   | Slc38a2                                                                                             | SLC38A2  | -0.15 | 4.74 | -0.75 | 4.72E-01 | 7.19E-01 | -6.41 |
| 1439500_PM_at   | Scrn1                                                                                               | SCRN1    | -0.15 | 5.87 | -0.75 | 4.72E-01 | 7.19E-01 | -6.41 |
| 1454055_PM_at   | 1600029O15Rik                                                                                       | NA       | 0.13  | 2.56 | 0.75  | 4.72E-01 | 7.19E-01 | -6.41 |
| 1429922_PM_at   | Gm13629                                                                                             | NA       | 0.21  | 3.85 | 0.75  | 4.72E-01 | 7.19E-01 | -6.41 |
| 1440656_PM_at   | ---                                                                                                 | NA       | 0.34  | 4.94 | 0.75  | 4.72E-01 | 7.19E-01 | -6.41 |
| 1452749_PM_at   | Mtpap                                                                                               | MTPAP    | -0.19 | 2.57 | -0.75 | 4.72E-01 | 7.19E-01 | -6.41 |
| 1447350_PM_at   | ---                                                                                                 | NA       | 0.07  | 2.56 | 0.75  | 4.72E-01 | 7.19E-01 | -6.41 |
| 1415712_PM_at   | Zranb1                                                                                              | ZRANB1   | -0.36 | 6.37 | -0.75 | 4.72E-01 | 7.19E-01 | -6.41 |
| 1450125_PM_at   | Gata5                                                                                               | GATA5    | 0.10  | 2.04 | 0.75  | 4.72E-01 | 7.19E-01 | -6.41 |
| 1453083_PM_at   | Vmn2r29                                                                                             | NA       | 0.24  | 5.03 | 0.75  | 4.72E-01 | 7.19E-01 | -6.41 |

|                 |                                   |          |       |      |       |          |          |       |
|-----------------|-----------------------------------|----------|-------|------|-------|----------|----------|-------|
| 1445059_PM_at   | ---                               | NA       | 0.06  | 2.16 | 0.75  | 4.73E-01 | 7.19E-01 | -6.41 |
| 1454377_PM_at   | ---                               | NA       | 0.07  | 2.16 | 0.75  | 4.73E-01 | 7.19E-01 | -6.41 |
| 1420419_PM_a_at | Otof                              | OTOF     | 0.08  | 2.22 | 0.75  | 4.73E-01 | 7.19E-01 | -6.41 |
| 1421046_PM_a_at | Pabpc4                            | PABPC4   | 0.18  | 3.11 | 0.75  | 4.73E-01 | 7.19E-01 | -6.41 |
| 1453339_PM_at   | Tcp11x2                           | TCP11X2  | 0.09  | 2.75 | 0.75  | 4.73E-01 | 7.19E-01 | -6.41 |
| 1418950_PM_at   | Drd2                              | NA       | 0.08  | 2.30 | 0.75  | 4.73E-01 | 7.20E-01 | -6.41 |
| 1416241_PM_at   | Sec13                             | SEC13    | -0.15 | 4.33 | -0.75 | 4.73E-01 | 7.20E-01 | -6.41 |
| 1426914_PM_at   | Marveld2                          | MARVELD2 | 0.08  | 2.50 | 0.74  | 4.73E-01 | 7.20E-01 | -6.41 |
| 1451270_PM_at   | Dusp18                            | DUSP18   | 0.09  | 2.44 | 0.74  | 4.73E-01 | 7.20E-01 | -6.41 |
| 1450522_PM_a_at | H1f0                              | H1F0     | 0.09  | 2.55 | 0.74  | 4.73E-01 | 7.20E-01 | -6.41 |
| 1437954_PM_at   | Heatr4                            | NA       | 0.10  | 2.03 | 0.74  | 4.73E-01 | 7.20E-01 | -6.41 |
| 1424712_PM_at   | Ahctf1                            | AHCTF1   | -0.11 | 2.46 | -0.74 | 4.73E-01 | 7.20E-01 | -6.41 |
| 1422983_PM_at   | Irgb6                             | ITGB6    | 0.11  | 2.55 | 0.74  | 4.73E-01 | 7.20E-01 | -6.41 |
| 1424754_PM_at   | Ms4a7                             | MS4A7    | 0.10  | 2.05 | 0.74  | 4.73E-01 | 7.20E-01 | -6.41 |
| 1419038_PM_a_at | Csnk2a1                           | CSNK2A3  | 0.17  | 2.63 | 0.74  | 4.73E-01 | 7.20E-01 | -6.41 |
| 1445653_PM_at   | BC031361                          | NA       | -0.07 | 2.24 | -0.74 | 4.73E-01 | 7.20E-01 | -6.41 |
| 1438023_PM_at   | Spata6                            | NA       | 0.11  | 2.17 | 0.74  | 4.73E-01 | 7.20E-01 | -6.41 |
| 1439339_PM_at   | Gm34055                           | NA       | 0.08  | 2.52 | 0.74  | 4.73E-01 | 7.20E-01 | -6.41 |
| 1446766_PM_at   | AU022746                          | NA       | 0.07  | 2.17 | 0.74  | 4.73E-01 | 7.20E-01 | -6.41 |
| 1448158_PM_at   | Sdc1                              | SDC1     | 0.10  | 2.64 | 0.74  | 4.73E-01 | 7.20E-01 | -6.41 |
| 1434803_PM_a_at | Sycn                              | SYCN     | 0.14  | 2.50 | 0.74  | 4.73E-01 | 7.20E-01 | -6.41 |
| 1417560_PM_at   | Sfxn1                             | SFXN1    | 0.15  | 3.24 | 0.74  | 4.73E-01 | 7.20E-01 | -6.41 |
| 1434390_PM_at   | AI503316 ///Hnrnpu                | NA       | 0.33  | 5.91 | 0.74  | 4.73E-01 | 7.20E-01 | -6.41 |
| 1436661_PM_at   | Dpp10                             | DPP10    | 0.08  | 4.13 | 0.74  | 4.74E-01 | 7.20E-01 | -6.41 |
| 1421425_PM_a_at | Rcan2                             | RCAN2    | 0.41  | 5.61 | 0.74  | 4.74E-01 | 7.20E-01 | -6.41 |
| 1432397_PM_at   | Tssk3                             | TSSK3    | 0.07  | 2.27 | 0.74  | 4.74E-01 | 7.20E-01 | -6.41 |
| 1451872_PM_a_at | Neurl1a                           | NEURL1   | 0.12  | 2.82 | 0.74  | 4.74E-01 | 7.20E-01 | -6.41 |
| 1430260_PM_at   | ---                               | NA       | -0.08 | 2.10 | -0.74 | 4.74E-01 | 7.20E-01 | -6.41 |
| 1450366_PM_at   | Hrk                               | HRK      | 0.09  | 2.88 | 0.74  | 4.74E-01 | 7.20E-01 | -6.41 |
| 1435902_PM_at   | Nudt18                            | NUDT18   | -0.08 | 4.12 | -0.74 | 4.74E-01 | 7.21E-01 | -6.41 |
| 1418930_PM_at   | Cxcl10                            | CXCL10   | 0.08  | 2.55 | 0.74  | 4.74E-01 | 7.21E-01 | -6.41 |
| 1420985_PM_at   | Ash1l                             | ASH1L    | -0.16 | 3.24 | -0.74 | 4.74E-01 | 7.21E-01 | -6.41 |
| 1425150_PM_at   | Acnat2                            | NA       | 0.13  | 2.56 | 0.74  | 4.74E-01 | 7.21E-01 | -6.41 |
| 1449945_PM_at   | Ppargc1b                          | PPARGC1B | -0.15 | 2.72 | -0.74 | 4.74E-01 | 7.21E-01 | -6.41 |
| 1456169_PM_at   | Tstd1                             | TSTD1    | 0.17  | 2.36 | 0.74  | 4.74E-01 | 7.21E-01 | -6.41 |
| 1440935_PM_at   | LOC102631979                      | NA       | -0.13 | 2.77 | -0.74 | 4.74E-01 | 7.21E-01 | -6.41 |
| 1460652_PM_at   | Esrra                             | ESRRA    | 0.12  | 2.60 | 0.74  | 4.74E-01 | 7.21E-01 | -6.41 |
| 1436964_PM_at   | ---                               | NA       | -0.23 | 2.64 | -0.74 | 4.74E-01 | 7.21E-01 | -6.41 |
| 1453122_PM_at   | Fam135a                           | FAM135A  | -0.18 | 4.33 | -0.74 | 4.74E-01 | 7.21E-01 | -6.41 |
| 1431869_PM_at   | 5730419F03Rik                     | NA       | -0.06 | 2.14 | -0.74 | 4.74E-01 | 7.21E-01 | -6.41 |
| 1459692_PM_at   | Al661323                          | NA       | 0.06  | 2.06 | 0.74  | 4.74E-01 | 7.21E-01 | -6.41 |
| 1439494_PM_at   | Slc5a9                            | SLC5A9   | 0.07  | 2.21 | 0.74  | 4.74E-01 | 7.21E-01 | -6.41 |
| 1436060_PM_at   | Gm15706                           | NA       | 0.08  | 2.68 | 0.74  | 4.74E-01 | 7.21E-01 | -6.41 |
| 1431679_PM_at   | 2510042H12Rik                     | NA       | 0.12  | 2.39 | 0.74  | 4.74E-01 | 7.21E-01 | -6.41 |
| 1456346_PM_at   | ---                               | NA       | 0.21  | 3.44 | 0.74  | 4.74E-01 | 7.21E-01 | -6.41 |
| 1459674_PM_at   | ---                               | NA       | 0.09  | 2.77 | 0.74  | 4.74E-01 | 7.21E-01 | -6.41 |
| 1440261_PM_at   | Ap4e1                             | AP4E1    | 0.08  | 2.16 | 0.74  | 4.74E-01 | 7.21E-01 | -6.41 |
| 1415784_PM_at   | Vps35                             | VPS35    | 0.17  | 3.61 | 0.74  | 4.74E-01 | 7.21E-01 | -6.41 |
| 1458981_PM_at   | ---                               | NA       | 0.13  | 2.44 | 0.74  | 4.74E-01 | 7.21E-01 | -6.41 |
| 1439540_PM_at   | March2                            | MARCH2   | 0.24  | 3.03 | 0.74  | 4.74E-01 | 7.21E-01 | -6.41 |
| 1418527_PM_a_at | Gm5446 ///LOC632268 ///<br>Srsf10 | SRSF10   | 0.30  | 6.66 | 0.74  | 4.74E-01 | 7.21E-01 | -6.41 |
| 1459946_PM_at   | Dalir                             | NA       | 0.07  | 2.33 | 0.74  | 4.74E-01 | 7.21E-01 | -6.41 |
| 1425951_PM_a_at | Clec4n                            | CLEC4G   | 0.07  | 2.35 | 0.74  | 4.74E-01 | 7.21E-01 | -6.41 |
| 1431724_PM_a_at | P2ry12                            | P2RY12   | 0.14  | 3.02 | 0.74  | 4.75E-01 | 7.21E-01 | -6.41 |
| 1449950_PM_at   | Fam133b                           | FAM133B  | 0.09  | 2.75 | 0.74  | 4.75E-01 | 7.21E-01 | -6.41 |
| 1447137_PM_at   | ---                               | NA       | 0.10  | 2.30 | 0.74  | 4.75E-01 | 7.21E-01 | -6.41 |
| 1441968_PM_at   | Tspan9                            | TSPAN9   | -0.07 | 2.39 | -0.74 | 4.75E-01 | 7.21E-01 | -6.41 |
| 1422062_PM_at   | Msr1                              | MSR1     | -0.13 | 2.65 | -0.74 | 4.75E-01 | 7.22E-01 | -6.41 |
| 1424414_PM_at   | Ogfr1                             | OGFR1    | 0.14  | 2.56 | 0.74  | 4.75E-01 | 7.22E-01 | -6.41 |
| 1445461_PM_at   | Lztr1                             | NA       | 0.10  | 2.30 | 0.74  | 4.75E-01 | 7.22E-01 | -6.41 |
| 1457176_PM_at   | ---                               | NA       | 0.13  | 2.40 | 0.74  | 4.75E-01 | 7.22E-01 | -6.41 |
| 1425201_PM_a_at | Hyi                               | HYI      | -0.09 | 2.54 | -0.74 | 4.75E-01 | 7.22E-01 | -6.41 |
| 1430400_PM_at   | Ph1d3                             | PIH1D3   | -0.07 | 2.06 | -0.74 | 4.75E-01 | 7.22E-01 | -6.41 |
| 1422284_PM_at   | Nkx2-9                            | NA       | 0.07  | 2.33 | 0.74  | 4.75E-01 | 7.22E-01 | -6.41 |
| 1447138_PM_at   | Al853502                          | NA       | 0.09  | 2.43 | 0.74  | 4.75E-01 | 7.22E-01 | -6.41 |
| 1452777_PM_a_at | Nub1                              | NUB1     | 0.10  | 2.71 | 0.74  | 4.75E-01 | 7.22E-01 | -6.41 |
| 1444309_PM_at   | ---                               | NA       | 0.14  | 2.93 | 0.74  | 4.75E-01 | 7.22E-01 | -6.41 |
| 1431349_PM_at   | Hnrnpab                           | HNRNPAB  | -0.14 | 2.81 | -0.74 | 4.75E-01 | 7.22E-01 | -6.41 |
| 1446956_PM_at   | N4bp1                             | N4BP1    | 0.07  | 2.19 | 0.74  | 4.75E-01 | 7.22E-01 | -6.41 |
| 1438489_PM_at   | ---                               | NA       | 0.12  | 2.77 | 0.74  | 4.75E-01 | 7.22E-01 | -6.41 |
| 1439078_PM_at   | Klh4                              | KLHL4    | -0.13 | 2.11 | -0.74 | 4.75E-01 | 7.22E-01 | -6.41 |
| 1446459_PM_at   | ---                               | NA       | 0.06  | 1.89 | 0.74  | 4.75E-01 | 7.22E-01 | -6.41 |
| 1427641_PM_at   | LOC102640586 ///<br>LOC105242522  | NA       | 0.07  | 2.25 | 0.74  | 4.75E-01 | 7.22E-01 | -6.41 |

|                      |                                                                                          |                |       |       |       |          |          |       |
|----------------------|------------------------------------------------------------------------------------------|----------------|-------|-------|-------|----------|----------|-------|
| 1417068_PM_a_at      | Ptpn1                                                                                    | PTPN1          | 0.09  | 3.11  | 0.74  | 4.75E-01 | 7.22E-01 | -6.41 |
| 1449672_PM_s_at      | Tufm                                                                                     | TUFM           | 0.09  | 2.06  | 0.74  | 4.75E-01 | 7.22E-01 | -6.41 |
| 1452381_PM_at        | Creb3l2                                                                                  | CREB3L2        | 0.12  | 2.60  | 0.74  | 4.75E-01 | 7.22E-01 | -6.41 |
| 1424168_PM_a_at      | Capzb                                                                                    | CAPZB          | 0.17  | 6.30  | 0.74  | 4.75E-01 | 7.22E-01 | -6.41 |
| 1417682_PM_a_at      | Prss2                                                                                    | PRSS2          | 0.19  | 2.79  | 0.74  | 4.75E-01 | 7.22E-01 | -6.41 |
| 1416966_PM_at        | Slc22a8                                                                                  | SLC22A8        | 0.21  | 3.19  | 0.74  | 4.75E-01 | 7.22E-01 | -6.41 |
| 1422155_PM_at        | Hist2h3c2                                                                                | HIST2H3C       | -0.21 | 2.63  | -0.74 | 4.75E-01 | 7.22E-01 | -6.41 |
| 1428680_PM_at        | Cds1                                                                                     | CDS1           | -0.17 | 3.68  | -0.74 | 4.76E-01 | 7.22E-01 | -6.41 |
| 1444642_PM_at        | Uxs1                                                                                     | UXS1           | 0.12  | 2.39  | 0.74  | 4.75E-01 | 7.22E-01 | -6.41 |
| 1440568_PM_at        | Pot1a                                                                                    | POT1           | 0.16  | 2.34  | 0.74  | 4.76E-01 | 7.22E-01 | -6.41 |
| 1440302_PM_at        | LOC102641364 /// Slc25a3                                                                 | SLC25A3        | 0.16  | 2.48  | 0.74  | 4.76E-01 | 7.22E-01 | -6.41 |
| 1420894_PM_at        | Tgfb1                                                                                    | TGFB1          | 0.22  | 2.77  | 0.74  | 4.76E-01 | 7.22E-01 | -6.41 |
| 1432004_PM_a_at      | Dnm2                                                                                     | DNM2           | 0.45  | 5.20  | 0.74  | 4.76E-01 | 7.22E-01 | -6.41 |
| 1418029_PM_at        | Faim                                                                                     | FAIM           | -0.19 | 4.54  | -0.74 | 4.76E-01 | 7.22E-01 | -6.41 |
| 1432814_PM_at        | 2900064F13Rik                                                                            | NA             | -0.16 | 2.68  | -0.74 | 4.76E-01 | 7.22E-01 | -6.41 |
| 1420884_PM_at        | Slh                                                                                      | SLN            | -0.10 | 2.19  | -0.74 | 4.76E-01 | 7.22E-01 | -6.41 |
| 1447272_PM_s_at      | Atp10a                                                                                   | ATP10A         | -0.07 | 2.67  | -0.74 | 4.76E-01 | 7.22E-01 | -6.41 |
| 1444797_PM_at        | 8030474K03Rik                                                                            | BX276092.10    | 0.06  | 2.08  | 0.74  | 4.76E-01 | 7.22E-01 | -6.41 |
| 1438009_PM_at        | Hist1h2ao /// Hist1h2ap                                                                  | NA             | 0.07  | 1.99  | 0.74  | 4.76E-01 | 7.22E-01 | -6.41 |
| 1442998_PM_at        | ---                                                                                      | NA             | 0.08  | 2.29  | 0.74  | 4.76E-01 | 7.22E-01 | -6.41 |
| 1432869_PM_at        | ---                                                                                      | NA             | 0.08  | 2.24  | 0.74  | 4.76E-01 | 7.22E-01 | -6.41 |
| 1444887_PM_at        | ---                                                                                      | NA             | 0.08  | 2.16  | 0.74  | 4.76E-01 | 7.22E-01 | -6.41 |
| 1428490_PM_at        | C1galt1                                                                                  | C1GALT1        | 0.09  | 3.14  | 0.74  | 4.76E-01 | 7.22E-01 | -6.41 |
| 1426168_PM_a_at      | Trac                                                                                     | NA             | 0.10  | 2.04  | 0.74  | 4.76E-01 | 7.22E-01 | -6.41 |
| 1459426_PM_at        | Scel                                                                                     | NA             | 0.10  | 2.07  | 0.74  | 4.76E-01 | 7.22E-01 | -6.41 |
| 1418035_PM_a_at      | Prim2                                                                                    | PRIM2          | 0.17  | 2.54  | 0.74  | 4.76E-01 | 7.22E-01 | -6.41 |
| 1447972_PM_at        | Kcnk15                                                                                   | KCNK15         | 0.11  | 2.95  | 0.74  | 4.76E-01 | 7.22E-01 | -6.41 |
| 1441052_PM_at        | ---                                                                                      | NA             | -0.07 | 2.13  | -0.74 | 4.76E-01 | 7.22E-01 | -6.41 |
| 1416525_PM_at        | Spop                                                                                     | SPOP           | -0.15 | 3.22  | -0.74 | 4.76E-01 | 7.22E-01 | -6.41 |
| 1436021_PM_at        | Mfsd4                                                                                    | MFSD4A         | -0.32 | 2.92  | -0.74 | 4.76E-01 | 7.22E-01 | -6.41 |
| 1459210_PM_at        | Tmem108                                                                                  | TMEM108        | -0.15 | 3.28  | -0.74 | 4.76E-01 | 7.22E-01 | -6.41 |
| 1448979_PM_at        | Bloc1s5                                                                                  | BLOC1S5-TXNDC5 | 0.10  | 2.94  | 0.74  | 4.76E-01 | 7.22E-01 | -6.41 |
| 1460159_PM_at        | Mysm1                                                                                    | MYSM1          | 0.12  | 2.47  | 0.74  | 4.76E-01 | 7.22E-01 | -6.41 |
| 1454338_PM_at        | Prrc2c                                                                                   | PRRC2C         | -0.13 | 2.70  | -0.74 | 4.76E-01 | 7.23E-01 | -6.41 |
| 1452886_PM_at        | Khlh28                                                                                   | NA             | 0.19  | 3.63  | 0.74  | 4.76E-01 | 7.23E-01 | -6.41 |
| 1428949_PM_at        | Xpot                                                                                     | XPOT           | -0.18 | 6.30  | -0.74 | 4.76E-01 | 7.23E-01 | -6.41 |
| 1454703_PM_x_at      | Snhg1 /// Snord22                                                                        | NA             | -0.15 | 4.20  | -0.74 | 4.76E-01 | 7.23E-01 | -6.41 |
| 1459873_PM_x_at      | Maged2                                                                                   | MAGED2         | 0.07  | 11.62 | 0.74  | 4.76E-01 | 7.23E-01 | -6.41 |
| 1456074_PM_at        | Sdr9c7                                                                                   | SDR9C7         | 0.07  | 2.73  | 0.74  | 4.76E-01 | 7.23E-01 | -6.41 |
| 1424642_PM_at        | Thoc1                                                                                    | THOC1          | 0.18  | 6.71  | 0.74  | 4.76E-01 | 7.23E-01 | -6.41 |
| 1419056_PM_at        | Rtn2                                                                                     | RTN2           | 0.13  | 2.73  | 0.74  | 4.77E-01 | 7.23E-01 | -6.41 |
| 1431792_PM_a_at      | Stk11ip                                                                                  | STK11IP        | -0.11 | 2.37  | -0.74 | 4.77E-01 | 7.23E-01 | -6.41 |
| 1431096_PM_at        | Ints8                                                                                    | INTS8          | -0.19 | 3.11  | -0.74 | 4.77E-01 | 7.23E-01 | -6.41 |
| 1459254_PM_at        | Cdca2                                                                                    | CDCA2          | -0.10 | 2.73  | -0.74 | 4.77E-01 | 7.23E-01 | -6.41 |
| 1459671_PM_at        | ---                                                                                      | NA             | 0.08  | 2.24  | 0.74  | 4.77E-01 | 7.23E-01 | -6.41 |
| AFFX-r2-Ec-bioB-3_at | ---                                                                                      | NA             | 0.11  | 7.83  | 0.74  | 4.77E-01 | 7.23E-01 | -6.41 |
| 1437838_PM_x_at      | Grsf1                                                                                    | GRSF1          | -0.44 | 8.11  | -0.74 | 4.77E-01 | 7.23E-01 | -6.41 |
| 1418783_PM_at        | Trpm5                                                                                    | TRPM5          | 0.08  | 2.43  | 0.74  | 4.77E-01 | 7.23E-01 | -6.41 |
| 1425351_PM_at        | Srxn1                                                                                    | SRXN1          | 0.17  | 2.36  | 0.74  | 4.77E-01 | 7.23E-01 | -6.41 |
| 1430852_PM_at        | 1600029I14Rik                                                                            | NA             | 0.09  | 2.70  | 0.74  | 4.77E-01 | 7.23E-01 | -6.42 |
| 1423119_PM_at        | Rsph3a /// Rsph3b                                                                        | RSPH3          | -0.30 | 5.48  | -0.74 | 4.77E-01 | 7.23E-01 | -6.42 |
| 1415802_PM_at        | Slc16a1                                                                                  | SLC16A1        | -0.28 | 4.16  | -0.74 | 4.77E-01 | 7.23E-01 | -6.42 |
| 1441600_PM_at        | LOC328066                                                                                | NA             | -0.13 | 2.35  | -0.74 | 4.77E-01 | 7.23E-01 | -6.42 |
| 1445910_PM_at        | C79999                                                                                   | NA             | 0.07  | 2.48  | 0.74  | 4.77E-01 | 7.23E-01 | -6.42 |
| 1452550_PM_a_at      | Fmr1                                                                                     | FMR1           | -0.18 | 2.68  | -0.74 | 4.77E-01 | 7.23E-01 | -6.42 |
| 1429486_PM_at        | Pfkfb2                                                                                   | PFKFB2         | -0.08 | 2.27  | -0.74 | 4.77E-01 | 7.23E-01 | -6.42 |
| 1447942_PM_x_at      | Neu1                                                                                     | NEU1           | 0.06  | 2.37  | 0.74  | 4.77E-01 | 7.23E-01 | -6.42 |
| 1457837_PM_at        | Plb1                                                                                     | PLB1           | 0.06  | 2.29  | 0.74  | 4.77E-01 | 7.23E-01 | -6.42 |
| 1457545_PM_at        | ---                                                                                      | NA             | 0.07  | 2.24  | 0.74  | 4.77E-01 | 7.23E-01 | -6.42 |
| 1426082_PM_a_at      | Slc16a4                                                                                  | SLC16A4        | 0.08  | 2.42  | 0.74  | 4.77E-01 | 7.23E-01 | -6.42 |
| 1429447_PM_at        | Evc2                                                                                     | EVC2           | -0.11 | 2.55  | -0.74 | 4.77E-01 | 7.23E-01 | -6.42 |
| 1435791_PM_x_at      | Gm10362 /// Rpl17 /// Rpl17-ps10 /// Rpl17-ps4 /// Rpl17-ps5 /// Rpl17-ps8 /// Rpl17-ps9 | NA             | -0.25 | 7.48  | -0.74 | 4.77E-01 | 7.23E-01 | -6.42 |
| 1445255_PM_at        | ---                                                                                      | NA             | -0.17 | 2.95  | -0.74 | 4.77E-01 | 7.23E-01 | -6.42 |
| 1447060_PM_at        | ---                                                                                      | NA             | 0.07  | 2.16  | 0.74  | 4.77E-01 | 7.23E-01 | -6.42 |
| 1450410_PM_a_at      | Slc48a1                                                                                  | SLC48A1        | 0.09  | 2.30  | 0.74  | 4.77E-01 | 7.23E-01 | -6.42 |
| 1460372_PM_at        | Duoxa1                                                                                   | NA             | 0.10  | 2.86  | 0.74  | 4.77E-01 | 7.23E-01 | -6.42 |
| 1454169_PM_a_at      | Epst11                                                                                   | EPST11         | 0.12  | 3.27  | 0.74  | 4.77E-01 | 7.23E-01 | -6.42 |
| 1417326_PM_a_at      | Anapc11                                                                                  | ANAPC11        | 0.26  | 3.36  | 0.74  | 4.77E-01 | 7.23E-01 | -6.42 |
| 1416115_PM_at        | Orc3                                                                                     | ORC3           | -0.21 | 5.09  | -0.74 | 4.77E-01 | 7.23E-01 | -6.42 |
| 1454909_PM_at        | Tacc1                                                                                    | TACC1          | -0.09 | 2.48  | -0.74 | 4.77E-01 | 7.23E-01 | -6.42 |
| 1432250_PM_at        | Utp14a                                                                                   | UTP14C         | -0.08 | 2.89  | -0.74 | 4.78E-01 | 7.23E-01 | -6.42 |



|                 |                                                                                                         |          |       |      |       |          |          |       |
|-----------------|---------------------------------------------------------------------------------------------------------|----------|-------|------|-------|----------|----------|-------|
| 1447579_PM_at   | Rtn4ip1                                                                                                 | NA       | 0.07  | 2.19 | 0.74  | 4.77E-01 | 7.23E-01 | -6.42 |
| 1426094_PM_at   | Rhbd1                                                                                                   | RHBD1    | 0.08  | 2.32 | 0.74  | 4.77E-01 | 7.23E-01 | -6.42 |
| 1445748_PM_at   | ---                                                                                                     | NA       | 0.10  | 2.31 | 0.74  | 4.77E-01 | 7.23E-01 | -6.42 |
| 1451956_PM_a_at | Sigmar1                                                                                                 | SIGMAR1  | 0.10  | 2.47 | 0.74  | 4.77E-01 | 7.23E-01 | -6.42 |
| 1454048_PM_a_at | Eva1c                                                                                                   | EVA1C    | 0.11  | 2.32 | 0.74  | 4.77E-01 | 7.23E-01 | -6.42 |
| 1455289_PM_at   | Ankrd13b                                                                                                | ANKRD13B | 0.14  | 3.61 | 0.74  | 4.77E-01 | 7.23E-01 | -6.42 |
| 1428454_PM_at   | Bcas3                                                                                                   | BCAS3    | 0.15  | 4.22 | 0.74  | 4.77E-01 | 7.23E-01 | -6.42 |
| 1422581_PM_at   | Pias1                                                                                                   | PIAS1    | 0.19  | 2.86 | 0.74  | 4.78E-01 | 7.23E-01 | -6.42 |
| 1458148_PM_at   | Nlrc3                                                                                                   | NLRC3    | 0.21  | 3.02 | 0.74  | 4.77E-01 | 7.23E-01 | -6.42 |
| 1432471_PM_at   | C2cd5                                                                                                   | C2CD5    | 0.08  | 2.48 | 0.74  | 4.78E-01 | 7.23E-01 | -6.42 |
| 1453430_PM_at   | Use1                                                                                                    | USE1     | 0.08  | 2.28 | 0.74  | 4.78E-01 | 7.23E-01 | -6.42 |
| 1427875_PM_a_at | Gm4705 /// Rpl34 /// Rpl34-ps1                                                                          | RPL34    | -0.49 | 4.97 | -0.74 | 4.78E-01 | 7.23E-01 | -6.42 |
| 1429177_PM_x_at | Sox17                                                                                                   | SOX17    | -0.18 | 3.86 | -0.74 | 4.78E-01 | 7.23E-01 | -6.42 |
| 1444922_PM_at   | ---                                                                                                     | NA       | -0.10 | 2.64 | -0.74 | 4.78E-01 | 7.23E-01 | -6.42 |
| 1431572_PM_at   | 2310015K22Rik                                                                                           | NA       | 0.06  | 2.27 | 0.74  | 4.78E-01 | 7.23E-01 | -6.42 |
| 1443707_PM_at   | ---                                                                                                     | NA       | 0.07  | 2.28 | 0.74  | 4.78E-01 | 7.23E-01 | -6.42 |
| 1458559_PM_at   | ---                                                                                                     | NA       | 0.08  | 2.18 | 0.74  | 4.78E-01 | 7.23E-01 | -6.42 |
| 1449398_PM_at   | Rpl3l                                                                                                   | RPL3L    | 0.09  | 2.37 | 0.74  | 4.78E-01 | 7.23E-01 | -6.42 |
| 1435915_PM_at   | Jmjd4                                                                                                   | JMJD4    | 0.15  | 3.71 | 0.74  | 4.78E-01 | 7.23E-01 | -6.42 |
| 1436553_PM_at   | Lhfpl4                                                                                                  | LHFPL4   | -0.14 | 4.24 | -0.74 | 4.78E-01 | 7.23E-01 | -6.42 |
| 1430081_PM_at   | Jade2                                                                                                   | JADE2    | 0.08  | 2.22 | 0.74  | 4.78E-01 | 7.23E-01 | -6.42 |
| 1426363_PM_x_at | H2afy2                                                                                                  | H2AFY2   | 0.23  | 4.24 | 0.74  | 4.78E-01 | 7.23E-01 | -6.42 |
| 1446913_PM_at   | ---                                                                                                     | NA       | 0.09  | 2.60 | 0.74  | 4.78E-01 | 7.23E-01 | -6.42 |
| 1458530_PM_at   | ---                                                                                                     | NA       | -0.10 | 2.25 | -0.74 | 4.78E-01 | 7.23E-01 | -6.42 |
| 1434512_PM_x_at | Srsf3                                                                                                   | SRSF3    | -0.13 | 5.96 | -0.74 | 4.78E-01 | 7.24E-01 | -6.42 |
| 1447960_PM_at   | Aste1                                                                                                   | ASTE1    | 0.09  | 2.64 | 0.74  | 4.78E-01 | 7.24E-01 | -6.42 |
| 1421024_PM_at   | Agpat1                                                                                                  | AGPAT1   | 0.13  | 2.89 | 0.74  | 4.78E-01 | 7.24E-01 | -6.42 |
| 1433650_PM_at   | Haghl                                                                                                   | HAGHL    | 0.15  | 2.47 | 0.74  | 4.78E-01 | 7.24E-01 | -6.42 |
| 1442837_PM_at   | ---                                                                                                     | NA       | 0.15  | 2.29 | 0.74  | 4.78E-01 | 7.24E-01 | -6.42 |
| 1437634_PM_at   | Thoc2                                                                                                   | THOC2    | -0.23 | 4.91 | -0.74 | 4.78E-01 | 7.24E-01 | -6.42 |
| 1460409_PM_at   | Cpt1a                                                                                                   | CPT1A    | -0.11 | 2.55 | -0.74 | 4.78E-01 | 7.24E-01 | -6.42 |
| 1445557_PM_at   | ---                                                                                                     | NA       | 0.06  | 2.11 | 0.74  | 4.78E-01 | 7.24E-01 | -6.42 |
| 1416523_PM_at   | Rnase1                                                                                                  | RNASE1   | 0.07  | 2.55 | 0.74  | 4.78E-01 | 7.24E-01 | -6.42 |
| 1445794_PM_at   | ---                                                                                                     | NA       | 0.13  | 3.07 | 0.74  | 4.78E-01 | 7.24E-01 | -6.42 |
| 1420834_PM_at   | Vamp2                                                                                                   | VAMP2    | 0.20  | 3.63 | 0.74  | 4.78E-01 | 7.24E-01 | -6.42 |
| 1417608_PM_a_at | Rpl13a                                                                                                  | RPL13A   | 0.29  | 3.29 | 0.74  | 4.78E-01 | 7.24E-01 | -6.42 |
| 1442655_PM_at   | ---                                                                                                     | NA       | 0.07  | 2.33 | 0.74  | 4.78E-01 | 7.24E-01 | -6.42 |
| 1437806_PM_x_at | Mtch2                                                                                                   | MTCH2    | -0.10 | 2.15 | -0.74 | 4.78E-01 | 7.24E-01 | -6.42 |
| 1451371_PM_at   | Mrap                                                                                                    | MRAP     | 0.08  | 2.79 | 0.74  | 4.78E-01 | 7.24E-01 | -6.42 |
| 1431164_PM_at   | Rragd                                                                                                   | RRAGD    | 0.27  | 3.25 | 0.74  | 4.78E-01 | 7.24E-01 | -6.42 |
| 1416356_PM_at   | Gmpr2                                                                                                   | GMPR2    | 0.19  | 2.67 | 0.74  | 4.78E-01 | 7.24E-01 | -6.42 |
| 1441457_PM_at   | Nptn                                                                                                    | NPTN     | -0.08 | 2.33 | -0.74 | 4.78E-01 | 7.24E-01 | -6.42 |
| 1456067_PM_at   | Gl3                                                                                                     | GLI3     | 0.07  | 2.13 | 0.74  | 4.78E-01 | 7.24E-01 | -6.42 |
| 1439664_PM_at   | Dcaf7                                                                                                   | DCAF7    | 0.19  | 2.73 | 0.74  | 4.78E-01 | 7.24E-01 | -6.42 |
| 1426127_PM_x_at | Kfra18                                                                                                  | NA       | 0.06  | 2.01 | 0.74  | 4.78E-01 | 7.24E-01 | -6.42 |
| 1415675_PM_at   | Dpm2                                                                                                    | DPM2     | 0.11  | 3.98 | 0.74  | 4.78E-01 | 7.24E-01 | -6.42 |
| 1460234_PM_at   | Wdr81                                                                                                   | WDR81    | 0.15  | 3.19 | 0.74  | 4.78E-01 | 7.24E-01 | -6.42 |
| 1438995_PM_at   | ---                                                                                                     | NA       | 0.10  | 2.48 | 0.74  | 4.79E-01 | 7.24E-01 | -6.42 |
| 1427455_PM_x_at | Igk-V28 /// Igkc /// Igk1 /// Igkv1-117 /// Igkv3-4 /// Igkv4-53 /// Igkv6-23 /// Igkv8-16 /// Igkv8-30 | NA       | -0.64 | 4.64 | -0.73 | 4.79E-01 | 7.24E-01 | -6.42 |
| 1416514_PM_a_at | Fscn1                                                                                                   | FSCN1    | -0.29 | 7.42 | -0.74 | 4.79E-01 | 7.24E-01 | -6.42 |
| 1460709_PM_a_at | Abhd16a                                                                                                 | ABHD16A  | -0.28 | 6.13 | -0.73 | 4.79E-01 | 7.24E-01 | -6.42 |
| 1450925_PM_a_at | Rps27l                                                                                                  | RPS27L   | -0.25 | 3.28 | -0.74 | 4.79E-01 | 7.24E-01 | -6.42 |
| 1458155_PM_at   | ---                                                                                                     | NA       | -0.10 | 2.16 | -0.73 | 4.79E-01 | 7.24E-01 | -6.42 |
| 1443335_PM_at   | ---                                                                                                     | NA       | 0.11  | 2.65 | 0.73  | 4.79E-01 | 7.24E-01 | -6.42 |
| 1442443_PM_at   | ---                                                                                                     | NA       | 0.13  | 2.52 | 0.73  | 4.79E-01 | 7.24E-01 | -6.42 |
| 1445618_PM_at   | ---                                                                                                     | NA       | 0.16  | 2.54 | 0.73  | 4.79E-01 | 7.24E-01 | -6.42 |
| 1440133_PM_x_at | Prkar1b                                                                                                 | PRKAR1B  | 0.16  | 4.92 | 0.73  | 4.79E-01 | 7.24E-01 | -6.42 |
| 1441498_PM_at   | ---                                                                                                     | NA       | 0.17  | 2.81 | 0.73  | 4.79E-01 | 7.24E-01 | -6.42 |
| 1439063_PM_at   | Asxl2                                                                                                   | ASXL2    | 0.18  | 2.84 | 0.73  | 4.79E-01 | 7.24E-01 | -6.42 |
| 1437456_PM_x_at | Ythdf1                                                                                                  | YTHDF1   | 0.37  | 6.28 | 0.74  | 4.79E-01 | 7.24E-01 | -6.42 |
| 1439572_PM_at   | R3hdm1                                                                                                  | R3HDM1   | -0.10 | 2.29 | -0.73 | 4.79E-01 | 7.24E-01 | -6.42 |
| 1452336_PM_at   | Zfp395                                                                                                  | ZNF395   | 0.06  | 2.36 | 0.73  | 4.79E-01 | 7.24E-01 | -6.42 |
| 1454590_PM_at   | LOC105245580                                                                                            | NA       | 0.13  | 2.75 | 0.73  | 4.79E-01 | 7.24E-01 | -6.42 |
| 1421030_PM_at   | Zfp64                                                                                                   | NA       | 0.11  | 2.42 | 0.73  | 4.79E-01 | 7.24E-01 | -6.42 |
| 1428739_PM_at   | Enho                                                                                                    | ENHO     | 0.21  | 4.22 | 0.73  | 4.79E-01 | 7.24E-01 | -6.42 |
| 1449732_PM_at   | Zscan21                                                                                                 | ZSCAN21  | 0.67  | 3.43 | 0.73  | 4.79E-01 | 7.24E-01 | -6.42 |
| 1445959_PM_at   | ---                                                                                                     | NA       | 0.15  | 2.19 | 0.73  | 4.79E-01 | 7.24E-01 | -6.42 |
| 1418440_PM_at   | Col8a1                                                                                                  | COL8A1   | 0.14  | 4.24 | 0.73  | 4.79E-01 | 7.24E-01 | -6.42 |
| 1422744_PM_at   | Phka1                                                                                                   | PHKA1    | 0.12  | 2.61 | 0.73  | 4.79E-01 | 7.24E-01 | -6.42 |
| 1431152_PM_at   | Haplh3                                                                                                  | HAPLN3   | 0.07  | 2.28 | 0.73  | 4.79E-01 | 7.24E-01 | -6.42 |
| 1437097_PM_at   | Zbed3                                                                                                   | ZBED3    | 0.07  | 2.29 | 0.73  | 4.79E-01 | 7.24E-01 | -6.42 |

|                 |                          |            |       |       |       |          |          |       |
|-----------------|--------------------------|------------|-------|-------|-------|----------|----------|-------|
| 1450282_PM_at   | Fgf4                     | FGF4       | 0.10  | 2.48  | 0.73  | 4.79E-01 | 7.24E-01 | -6.42 |
| 1437153_PM_at   | Gm13084 /// Oog2         | PRAMEF9    | 0.07  | 2.17  | 0.73  | 4.79E-01 | 7.24E-01 | -6.42 |
| 1416418_PM_at   | Gabarapl1                | GABARAPL1  | -0.35 | 5.87  | -0.73 | 4.79E-01 | 7.24E-01 | -6.42 |
| 1437638_PM_at   | ---                      | NA         | 0.32  | 3.79  | 0.73  | 4.79E-01 | 7.24E-01 | -6.42 |
| 1443383_PM_at   | ---                      | NA         | 0.08  | 2.04  | 0.73  | 4.79E-01 | 7.24E-01 | -6.42 |
| 1419220_PM_at   | Xirp1                    | XIRP1      | 0.09  | 2.68  | 0.73  | 4.79E-01 | 7.24E-01 | -6.42 |
| 1433551_PM_at   | Vat1l                    | VAT1L      | 0.24  | 2.42  | 0.73  | 4.79E-01 | 7.24E-01 | -6.42 |
| 1457261_PM_at   | Gm40841                  | NA         | -0.10 | 2.27  | -0.73 | 4.79E-01 | 7.24E-01 | -6.42 |
| 1433687_PM_at   | Vmac                     | AC104532.1 | 0.07  | 2.48  | 0.73  | 4.79E-01 | 7.24E-01 | -6.42 |
| 1458204_PM_at   | ---                      | NA         | 0.09  | 3.57  | 0.73  | 4.79E-01 | 7.24E-01 | -6.42 |
| 1440033_PM_at   | ---                      | NA         | 0.08  | 2.38  | 0.73  | 4.79E-01 | 7.24E-01 | -6.42 |
| 1436949_PM_a_at | Gm9238 /// Tceb2         | ELOB       | -0.21 | 6.71  | -0.73 | 4.79E-01 | 7.24E-01 | -6.42 |
| 1419707_PM_at   | Krtap14                  | NA         | 0.06  | 2.03  | 0.73  | 4.79E-01 | 7.24E-01 | -6.42 |
| 1460443_PM_at   | Brms1l                   | BRMS1L     | -0.16 | 2.74  | -0.73 | 4.79E-01 | 7.24E-01 | -6.42 |
| 1434125_PM_at   | Utp15                    | UTP15      | 0.25  | 4.35  | 0.73  | 4.79E-01 | 7.24E-01 | -6.42 |
| 1448390_PM_a_at | Dhrs3                    | DHRS3      | 0.12  | 3.44  | 0.73  | 4.80E-01 | 7.24E-01 | -6.42 |
| 1460255_PM_at   | Tnfsf13b                 | NA         | 0.09  | 3.10  | 0.73  | 4.80E-01 | 7.24E-01 | -6.42 |
| 1456854_PM_at   | ---                      | NA         | -0.09 | 2.73  | -0.73 | 4.80E-01 | 7.24E-01 | -6.42 |
| 1453827_PM_at   | ---                      | NA         | 0.11  | 2.87  | 0.73  | 4.80E-01 | 7.25E-01 | -6.42 |
| 1449667_PM_at   | ---                      | NA         | 0.09  | 2.35  | 0.73  | 4.80E-01 | 7.25E-01 | -6.42 |
| 1432735_PM_at   | 1700017H01Rik            | NA         | -0.09 | 2.05  | -0.73 | 4.80E-01 | 7.25E-01 | -6.42 |
| 1459453_PM_at   | ---                      | NA         | 0.14  | 2.75  | 0.73  | 4.80E-01 | 7.25E-01 | -6.42 |
| 1433566_PM_at   | Rasl10b                  | RASL10B    | 0.11  | 3.16  | 0.73  | 4.80E-01 | 7.25E-01 | -6.42 |
| 1430422_PM_at   | 1700020A23Rik            | C20orf141  | -0.09 | 2.43  | -0.73 | 4.80E-01 | 7.25E-01 | -6.42 |
| 1420686_PM_at   | Cryba4                   | CRYBA4     | 0.09  | 2.85  | 0.73  | 4.80E-01 | 7.25E-01 | -6.42 |
| 1420620_PM_a_at | Rnf13                    | RNF13      | 0.17  | 3.37  | 0.73  | 4.80E-01 | 7.25E-01 | -6.42 |
| 1440676_PM_at   | Fam124b                  | FAM124B    | 0.07  | 2.17  | 0.73  | 4.80E-01 | 7.25E-01 | -6.42 |
| 1450131_PM_a_at | Bspry                    | BSPRY      | 0.09  | 2.55  | 0.73  | 4.80E-01 | 7.25E-01 | -6.42 |
| 1423579_PM_a_at | Trpc4                    | TRPC4      | -0.24 | 2.71  | -0.73 | 4.80E-01 | 7.25E-01 | -6.42 |
| 1433812_PM_at   | Lix1l                    | LIX1L      | -0.16 | 2.77  | -0.73 | 4.80E-01 | 7.25E-01 | -6.42 |
| 1456021_PM_at   | Atf6                     | ATF6       | -0.10 | 2.31  | -0.73 | 4.80E-01 | 7.25E-01 | -6.42 |
| 1448932_PM_at   | Krt16                    | KRT16      | 0.07  | 2.33  | 0.73  | 4.80E-01 | 7.25E-01 | -6.42 |
| 1422465_PM_a_at | Nxn                      | NXN        | 0.09  | 2.57  | 0.73  | 4.80E-01 | 7.25E-01 | -6.42 |
| 1432283_PM_at   | Fam228a /// Fam228b      | FAM228A    | 0.09  | 2.09  | 0.73  | 4.80E-01 | 7.25E-01 | -6.42 |
| 1455710_PM_x_at | Cmc4 /// Mtcp1           | CMC4       | 0.10  | 2.58  | 0.73  | 4.80E-01 | 7.25E-01 | -6.42 |
| 1442458_PM_at   | ---                      | NA         | 0.11  | 2.62  | 0.73  | 4.80E-01 | 7.25E-01 | -6.42 |
| 1422918_PM_at   | 1810009J06Rik /// Gm2663 | NA         | 0.12  | 2.71  | 0.73  | 4.80E-01 | 7.25E-01 | -6.42 |
| 1439521_PM_at   | ---                      | NA         | 0.13  | 2.55  | 0.73  | 4.80E-01 | 7.25E-01 | -6.42 |
| 1458337_PM_at   | ---                      | NA         | 0.17  | 3.22  | 0.73  | 4.80E-01 | 7.25E-01 | -6.42 |
| 1425347_PM_a_at | Zfp318                   | ZNF318     | 0.18  | 2.77  | 0.73  | 4.80E-01 | 7.25E-01 | -6.42 |
| 1417615_PM_a_at | Rpl11                    | RPL11      | 0.23  | 7.80  | 0.73  | 4.80E-01 | 7.25E-01 | -6.42 |
| 1449342_PM_at   | Hacd2                    | HACD2      | -0.23 | 4.28  | -0.73 | 4.80E-01 | 7.25E-01 | -6.42 |
| 1444493_PM_at   | ---                      | NA         | -0.08 | 2.37  | -0.73 | 4.80E-01 | 7.25E-01 | -6.42 |
| 1434618_PM_at   | Crebzf                   | CREBZF     | -0.20 | 3.93  | -0.73 | 4.80E-01 | 7.25E-01 | -6.42 |
| 1425344_PM_at   | Narf                     | NARF       | 0.19  | 2.76  | 0.73  | 4.80E-01 | 7.25E-01 | -6.42 |
| 1422324_PM_a_at | Pthlh                    | PTHLH      | 0.08  | 2.33  | 0.73  | 4.80E-01 | 7.25E-01 | -6.42 |
| 1443843_PM_x_at | Rpl9                     | NA         | 0.09  | 10.59 | 0.73  | 4.80E-01 | 7.25E-01 | -6.42 |
| 1450213_PM_at   | Pde7b                    | PDE7B      | -0.10 | 2.36  | -0.73 | 4.81E-01 | 7.25E-01 | -6.42 |
| 1418812_PM_a_at | Barhl1                   | BARHL1     | 0.08  | 2.15  | 0.73  | 4.81E-01 | 7.25E-01 | -6.42 |
| 1437115_PM_at   | Phrf1                    | PHRF1      | 0.12  | 3.11  | 0.73  | 4.81E-01 | 7.25E-01 | -6.42 |
| 1420851_PM_at   | Pard6g                   | PARD6G     | 0.13  | 2.53  | 0.73  | 4.81E-01 | 7.25E-01 | -6.42 |
| 1458415_PM_at   | Clec2e                   | NA         | -0.13 | 2.75  | -0.73 | 4.81E-01 | 7.25E-01 | -6.42 |
| 1426821_PM_at   | Cog8                     | COG8       | 0.12  | 2.40  | 0.73  | 4.81E-01 | 7.25E-01 | -6.42 |
| 1439272_PM_at   | Lcorl                    | LCORL      | -0.10 | 2.96  | -0.73 | 4.81E-01 | 7.25E-01 | -6.42 |
| 1456441_PM_at   | Ccdc87                   | CCDC87     | 0.06  | 2.00  | 0.73  | 4.81E-01 | 7.25E-01 | -6.42 |
| 1428660_PM_s_at | Tor3a                    | TOR3A      | 0.07  | 2.42  | 0.73  | 4.81E-01 | 7.25E-01 | -6.42 |
| 1451292_PM_at   | Zfp212                   | ZNF212     | 0.19  | 3.24  | 0.73  | 4.81E-01 | 7.25E-01 | -6.42 |
| 1420984_PM_at   | Pctp                     | PCTP       | 0.06  | 2.45  | 0.73  | 4.81E-01 | 7.25E-01 | -6.42 |
| 1429042_PM_at   | Tmem167b                 | TMEM167B   | -0.27 | 4.05  | -0.73 | 4.81E-01 | 7.25E-01 | -6.42 |
| 1444313_PM_at   | ---                      | NA         | 0.06  | 2.39  | 0.73  | 4.81E-01 | 7.25E-01 | -6.42 |
| 1422755_PM_at   | Btk                      | BTK        | 0.09  | 2.18  | 0.73  | 4.81E-01 | 7.25E-01 | -6.42 |
| 1435066_PM_at   | Pitpnc1                  | PITPNC1    | 0.22  | 2.63  | 0.73  | 4.81E-01 | 7.25E-01 | -6.42 |
| 1454308_PM_at   | 1700030C10Rik            | NA         | 0.09  | 2.44  | 0.73  | 4.81E-01 | 7.25E-01 | -6.42 |
| 1456249_PM_x_at | Syp                      | NA         | 0.11  | 2.25  | 0.73  | 4.81E-01 | 7.25E-01 | -6.42 |
| 1454285_PM_at   | 2900042E19Rik            | NA         | 0.07  | 2.19  | 0.73  | 4.81E-01 | 7.26E-01 | -6.42 |
| 1455410_PM_at   | Faim2                    | FAIM2      | 0.17  | 2.56  | 0.73  | 4.81E-01 | 7.26E-01 | -6.42 |
| 1460487_PM_at   | Zim1                     | ZNF485     | 0.10  | 2.67  | 0.73  | 4.81E-01 | 7.26E-01 | -6.42 |
| 1422643_PM_at   | Moxd1                    | MOXD1      | 0.12  | 2.42  | 0.73  | 4.81E-01 | 7.26E-01 | -6.42 |
| 1437001_PM_at   | Gsk3b                    | GSK3B      | 0.19  | 4.05  | 0.73  | 4.81E-01 | 7.26E-01 | -6.42 |
| 1445458_PM_at   | Mrgprg                   | MRGPRG     | 0.09  | 2.38  | 0.73  | 4.81E-01 | 7.26E-01 | -6.42 |
| 1460053_PM_at   | Smyd4                    | SMYD4      | 0.09  | 2.23  | 0.73  | 4.81E-01 | 7.26E-01 | -6.42 |
| 1439946_PM_at   | ---                      | NA         | 0.29  | 3.30  | 0.73  | 4.81E-01 | 7.26E-01 | -6.42 |
| 1430949_PM_at   | ---                      | NA         | 0.09  | 2.54  | 0.73  | 4.81E-01 | 7.26E-01 | -6.42 |
| 1443129_PM_at   | ---                      | NA         | 0.13  | 2.63  | 0.73  | 4.81E-01 | 7.26E-01 | -6.42 |

|                 |               |          |       |      |       |          |          |       |
|-----------------|---------------|----------|-------|------|-------|----------|----------|-------|
| 1417004_PM_at   | Tsg101        | TSG101   | -0.18 | 2.51 | -0.73 | 4.81E-01 | 7.26E-01 | -6.42 |
| 1416520_PM_x_at | Rpl36         | RPL36    | 0.25  | 6.45 | 0.73  | 4.81E-01 | 7.26E-01 | -6.42 |
| 1452427_PM_s_at | Hacd3         | HACD3    | -0.14 | 2.44 | -0.73 | 4.81E-01 | 7.26E-01 | -6.42 |
| 1453844_PM_at   | Chit1         | CHIT1    | 0.08  | 2.67 | 0.73  | 4.81E-01 | 7.26E-01 | -6.42 |
| 1427051_PM_at   | TNKS1bp1      | TNKS1BP1 | 0.13  | 3.22 | 0.73  | 4.81E-01 | 7.26E-01 | -6.42 |
| 1452970_PM_at   | Zmym2         | ZMYM2    | -0.23 | 6.09 | -0.73 | 4.82E-01 | 7.26E-01 | -6.42 |
| 1447823_PM_x_at | Mapk12        | MAPK12   | 0.07  | 2.16 | 0.73  | 4.82E-01 | 7.26E-01 | -6.42 |
| 1439408_PM_a_at | Med1          | MED1     | 0.07  | 2.13 | 0.73  | 4.82E-01 | 7.26E-01 | -6.42 |
| 1419301_PM_at   | Fzd4          | FZD4     | 0.14  | 2.50 | 0.73  | 4.82E-01 | 7.26E-01 | -6.42 |
| 1436069_PM_at   | Ing5          | ING5     | -0.16 | 3.82 | -0.73 | 4.82E-01 | 7.26E-01 | -6.42 |
| 1435824_PM_at   | ---           | NA       | -0.19 | 3.98 | -0.73 | 4.82E-01 | 7.26E-01 | -6.42 |
| 1446230_PM_at   | ---           | NA       | -0.12 | 2.29 | -0.73 | 4.82E-01 | 7.26E-01 | -6.42 |
| 1432458_PM_at   | Ccdc172       | CCDC172  | 0.06  | 2.02 | 0.73  | 4.82E-01 | 7.26E-01 | -6.42 |
| 1459170_PM_at   | ---           | NA       | 0.08  | 2.45 | 0.73  | 4.82E-01 | 7.26E-01 | -6.42 |
| 1456295_PM_at   | ---           | NA       | 0.08  | 2.32 | 0.73  | 4.82E-01 | 7.26E-01 | -6.42 |
| 1460734_PM_at   | Col9a3        | COL9A3   | 0.33  | 3.11 | 0.73  | 4.82E-01 | 7.26E-01 | -6.42 |
| 1425755_PM_at   | Mtc p1        | MTCP1    | 0.09  | 2.31 | 0.73  | 4.82E-01 | 7.26E-01 | -6.42 |
| 1440297_PM_at   | ---           | NA       | 0.07  | 2.37 | 0.73  | 4.82E-01 | 7.26E-01 | -6.42 |
| 1439720_PM_at   | Ralgps1       | RALGPS1  | 0.08  | 2.40 | 0.73  | 4.82E-01 | 7.26E-01 | -6.42 |
| 1423975_PM_s_at | Numa1         | NUMA1    | 0.17  | 2.97 | 0.73  | 4.82E-01 | 7.26E-01 | -6.42 |
| 1416439_PM_at   | Dctpp1        | DCTPP1   | 0.10  | 2.74 | 0.73  | 4.82E-01 | 7.26E-01 | -6.42 |
| 1417024_PM_at   | Hars          | HARS     | -0.14 | 5.14 | -0.73 | 4.82E-01 | 7.26E-01 | -6.42 |
| 1450883_PM_a_at | Cd36          | CD36     | -0.07 | 2.12 | -0.73 | 4.82E-01 | 7.26E-01 | -6.42 |
| 1445899_PM_at   | AA09289       | NA       | 0.08  | 2.46 | 0.73  | 4.82E-01 | 7.26E-01 | -6.42 |
| 1442406_PM_at   | ---           | NA       | 0.07  | 2.78 | 0.73  | 4.82E-01 | 7.26E-01 | -6.42 |
| 1447274_PM_at   | ---           | NA       | 0.07  | 2.50 | 0.73  | 4.82E-01 | 7.26E-01 | -6.42 |
| 1453961_PM_a_at | Mospd3        | MOSPD3   | 0.13  | 2.65 | 0.73  | 4.82E-01 | 7.26E-01 | -6.42 |
| 1434388_PM_at   | Mob3a         | MOB3A    | 0.08  | 2.05 | 0.73  | 4.82E-01 | 7.27E-01 | -6.42 |
| 1432333_PM_a_at | Spatc1l       | SPATC1L  | 0.10  | 2.38 | 0.73  | 4.82E-01 | 7.27E-01 | -6.42 |
| 1444530_PM_at   | ---           | NA       | 0.13  | 2.25 | 0.73  | 4.82E-01 | 7.27E-01 | -6.42 |
| 1417110_PM_at   | Man1a         | MAN1A1   | -0.13 | 2.63 | -0.73 | 4.82E-01 | 7.27E-01 | -6.42 |
| 1449537_PM_at   | Msh5          | MSH5     | 0.07  | 2.41 | 0.73  | 4.82E-01 | 7.27E-01 | -6.42 |
| 1420674_PM_at   | Pla2g2e       | PLA2G2E  | -0.08 | 2.43 | -0.73 | 4.83E-01 | 7.27E-01 | -6.42 |
| 1417549_PM_at   | Zfp68         | ZNF717   | 0.26  | 2.71 | 0.73  | 4.83E-01 | 7.27E-01 | -6.42 |
| 1439071_PM_at   | 5430416N02Rik | NA       | -0.13 | 3.75 | -0.73 | 4.83E-01 | 7.27E-01 | -6.42 |
| 1446851_PM_at   | Col22a1       | COL22A1  | 0.09  | 2.90 | 0.73  | 4.83E-01 | 7.27E-01 | -6.42 |
| 1459716_PM_at   | Al835735      | NA       | 0.21  | 2.65 | 0.73  | 4.83E-01 | 7.27E-01 | -6.42 |
| 1416297_PM_s_at | Reg3b         | REG3G    | 0.08  | 2.35 | 0.73  | 4.83E-01 | 7.27E-01 | -6.42 |
| 1447531_PM_x_at | ---           | NA       | 0.09  | 1.96 | 0.73  | 4.83E-01 | 7.27E-01 | -6.42 |
| 1443033_PM_at   | Gm21992       | RBM4     | 0.15  | 2.94 | 0.73  | 4.83E-01 | 7.27E-01 | -6.42 |
| 1417781_PM_at   | Cers4         | CERS4    | 0.08  | 2.22 | 0.73  | 4.83E-01 | 7.27E-01 | -6.42 |
| 1454150_PM_at   | 4930453O03Rik | NA       | 0.06  | 2.31 | 0.73  | 4.83E-01 | 7.27E-01 | -6.42 |
| 1439746_PM_at   | Dusp27        | DUSP27   | 0.07  | 2.41 | 0.73  | 4.83E-01 | 7.27E-01 | -6.42 |
| 1440642_PM_at   | Ssu2          | SSUH2    | 0.08  | 2.64 | 0.73  | 4.83E-01 | 7.27E-01 | -6.42 |
| 1454957_PM_at   | Nob1          | NOB1     | -0.21 | 2.91 | -0.73 | 4.83E-01 | 7.27E-01 | -6.42 |
| 1428391_PM_at   | Rab31l        | RAB31L1  | -0.07 | 2.34 | -0.73 | 4.83E-01 | 7.27E-01 | -6.42 |
| 1450629_PM_at   | Lima1         | LIMA1    | 0.06  | 2.52 | 0.73  | 4.83E-01 | 7.27E-01 | -6.42 |
| 1419086_PM_at   | Fgfbp1        | FGFBP1   | 0.10  | 2.32 | 0.73  | 4.83E-01 | 7.27E-01 | -6.42 |
| 1419102_PM_at   | Sin3a         | SIN3A    | 0.17  | 2.72 | 0.73  | 4.83E-01 | 7.27E-01 | -6.42 |
| 1458023_PM_at   | ---           | NA       | 0.10  | 2.52 | 0.73  | 4.83E-01 | 7.27E-01 | -6.42 |
| 1459456_PM_at   | Aar2          | AAR2     | 0.13  | 3.26 | 0.73  | 4.83E-01 | 7.27E-01 | -6.42 |
| 1457852_PM_at   | ---           | NA       | 0.06  | 2.15 | 0.73  | 4.83E-01 | 7.27E-01 | -6.42 |
| 1439491_PM_at   | Lrrc38        | LRRC38   | 0.09  | 2.86 | 0.73  | 4.83E-01 | 7.27E-01 | -6.42 |
| 1450590_PM_at   | Ofri159       | NA       | -0.08 | 2.56 | -0.73 | 4.83E-01 | 7.27E-01 | -6.42 |
| 1424983_PM_a_at | Cacl1         | CACUL1   | -0.16 | 2.99 | -0.73 | 4.83E-01 | 7.27E-01 | -6.42 |
| 1449060_PM_at   | Kif2c         | KIF2C    | 0.07  | 2.40 | 0.73  | 4.83E-01 | 7.27E-01 | -6.42 |
| 1457495_PM_at   | 2900052N01Rik | NA       | -0.08 | 2.74 | -0.73 | 4.83E-01 | 7.28E-01 | -6.42 |
| 1449170_PM_at   | Piwil2        | PIWIL2   | 0.16  | 2.59 | 0.73  | 4.83E-01 | 7.28E-01 | -6.42 |
| 1416530_PM_a_at | Pnp           | PNP      | -0.19 | 2.58 | -0.73 | 4.84E-01 | 7.28E-01 | -6.42 |
| 1431445_PM_at   | Fam47c        | FAM47C   | -0.08 | 2.16 | -0.73 | 4.84E-01 | 7.28E-01 | -6.42 |
| 1450867_PM_at   | Mrpl17        | MRPL17   | 0.07  | 2.20 | 0.73  | 4.84E-01 | 7.28E-01 | -6.42 |
| 1432424_PM_at   | Nudt12os      | NA       | 0.09  | 2.17 | 0.73  | 4.84E-01 | 7.28E-01 | -6.42 |
| 1443410_PM_at   | ---           | NA       | 0.09  | 2.53 | 0.73  | 4.84E-01 | 7.28E-01 | -6.42 |
| 1421985_PM_a_at | Eif4e2        | EIF4E2   | 0.10  | 2.59 | 0.73  | 4.84E-01 | 7.28E-01 | -6.42 |
| 1459687_PM_x_at | ---           | NA       | 0.11  | 2.40 | 0.73  | 4.84E-01 | 7.28E-01 | -6.42 |
| 1419254_PM_at   | Mthfd2        | MTHFD2   | 0.12  | 1.96 | 0.73  | 4.84E-01 | 7.28E-01 | -6.42 |
| 1446834_PM_at   | Ctsc          | NA       | 0.30  | 2.88 | 0.73  | 4.84E-01 | 7.28E-01 | -6.42 |
| 1455222_PM_a_at | Ubp1          | UBP1     | -0.56 | 6.33 | -0.73 | 4.84E-01 | 7.28E-01 | -6.42 |
| 1443871_PM_at   | ---           | NA       | -0.12 | 2.48 | -0.73 | 4.84E-01 | 7.28E-01 | -6.42 |
| 1426589_PM_at   | Gab3          | GAB3     | 0.10  | 2.78 | 0.73  | 4.84E-01 | 7.28E-01 | -6.42 |
| 1454502_PM_at   | 2900022B07Rik | NA       | 0.08  | 2.24 | 0.73  | 4.84E-01 | 7.28E-01 | -6.42 |
| 1435030_PM_at   | Upf2          | UPF2     | -0.23 | 6.12 | -0.73 | 4.84E-01 | 7.28E-01 | -6.42 |
| 1454763_PM_at   | Ankrd17       | ANKRD17  | -0.11 | 2.86 | -0.73 | 4.84E-01 | 7.28E-01 | -6.42 |
| 1431053_PM_at   | Mphosph9      | MPHOSPH9 | -0.07 | 2.24 | -0.73 | 4.84E-01 | 7.28E-01 | -6.42 |
| 1421429_PM_a_at | Npnt          | NPNT     | 0.08  | 2.41 | 0.73  | 4.84E-01 | 7.28E-01 | -6.42 |

|                 |                    |          |       |       |       |          |          |       |
|-----------------|--------------------|----------|-------|-------|-------|----------|----------|-------|
| 1432752_PM_at   | 4930403O18Rik      | NA       | 0.08  | 2.16  | 0.73  | 4.84E-01 | 7.28E-01 | -6.42 |
| 1444275_PM_at   | ---                | NA       | 0.22  | 2.77  | 0.73  | 4.84E-01 | 7.28E-01 | -6.42 |
| 1433485_PM_x_at | Adgrg1             | ADGRG1   | 0.07  | 2.80  | 0.73  | 4.84E-01 | 7.28E-01 | -6.42 |
| 1457141_PM_at   | ---                | NA       | 0.45  | 4.14  | 0.73  | 4.84E-01 | 7.28E-01 | -6.42 |
| 1456182_PM_x_at | Mela               | NA       | 0.07  | 2.18  | 0.73  | 4.84E-01 | 7.28E-01 | -6.42 |
| AFFX-CreX-5_at  | ---                | NA       | -0.06 | 11.95 | -0.73 | 4.84E-01 | 7.28E-01 | -6.42 |
| 1460368_PM_at   | Mpp4               | MPP4     | 0.08  | 2.54  | 0.73  | 4.84E-01 | 7.28E-01 | -6.42 |
| 1437109_PM_s_at | Lsm6               | LSM6     | 0.21  | 3.88  | 0.73  | 4.84E-01 | 7.28E-01 | -6.42 |
| 1442269_PM_at   | Gm26910            | NA       | -0.31 | 3.14  | -0.73 | 4.84E-01 | 7.28E-01 | -6.42 |
| 1458694_PM_at   | Kif16b             | KIF16B   | 0.06  | 1.89  | 0.73  | 4.84E-01 | 7.28E-01 | -6.42 |
| 1432988_PM_at   | Tenm2              | NA       | 0.11  | 2.38  | 0.73  | 4.84E-01 | 7.28E-01 | -6.42 |
| 1443630_PM_at   | ---                | NA       | -0.15 | 3.11  | -0.73 | 4.84E-01 | 7.28E-01 | -6.42 |
| 1431901_PM_a_at | C4bp-ps1           | NA       | 0.10  | 2.21  | 0.73  | 4.84E-01 | 7.28E-01 | -6.42 |
| 1457903_PM_at   | Gm19434            | NA       | 0.12  | 2.28  | 0.73  | 4.84E-01 | 7.28E-01 | -6.42 |
| 1418990_PM_at   | Ms4a4d             | NA       | -0.09 | 2.44  | -0.72 | 4.85E-01 | 7.28E-01 | -6.42 |
| 1447030_PM_at   | ---                | NA       | 0.10  | 2.02  | 0.72  | 4.85E-01 | 7.28E-01 | -6.42 |
| 1427658_PM_at   | Ctbs               | CTBS     | 0.12  | 2.12  | 0.72  | 4.85E-01 | 7.28E-01 | -6.42 |
| 1435592_PM_at   | Eif5b              | EIF5B    | -0.17 | 2.60  | -0.72 | 4.85E-01 | 7.28E-01 | -6.42 |
| 1460296_PM_a_at | Fgf22              | FGF22    | 0.07  | 2.56  | 0.72  | 4.85E-01 | 7.28E-01 | -6.42 |
| 1430100_PM_at   | Mrp515             | MRP515   | 0.10  | 3.00  | 0.72  | 4.85E-01 | 7.28E-01 | -6.42 |
| 1438698_PM_at   | Tmem132c           | TMEM132C | 0.22  | 2.53  | 0.72  | 4.85E-01 | 7.28E-01 | -6.42 |
| 1440707_PM_at   | Dmrt3              | DMRT3    | 0.20  | 2.86  | 0.72  | 4.85E-01 | 7.28E-01 | -6.43 |
| 1432782_PM_at   | ---                | NA       | 0.07  | 2.24  | 0.72  | 4.85E-01 | 7.28E-01 | -6.43 |
| 1417811_PM_at   | Slc8b1             | SLC8B1   | 0.10  | 2.95  | 0.72  | 4.85E-01 | 7.28E-01 | -6.43 |
| 1419742_PM_at   | 1700037H04Rik      | C20orf27 | 0.13  | 3.75  | 0.72  | 4.85E-01 | 7.29E-01 | -6.43 |
| 1449222_PM_at   | Ebi3               | EBI3     | -0.09 | 2.87  | -0.72 | 4.85E-01 | 7.29E-01 | -6.43 |
| 1440720_PM_s_at | Gle1               | GLE1     | 0.25  | 3.07  | 0.72  | 4.85E-01 | 7.29E-01 | -6.43 |
| 1456455_PM_at   | Morf411 ///Morf41b | MORF411  | 0.11  | 2.31  | 0.72  | 4.85E-01 | 7.29E-01 | -6.43 |
| 1439863_PM_at   | Ugcg               | UGCG     | 0.09  | 2.54  | 0.72  | 4.85E-01 | 7.29E-01 | -6.43 |
| 1428214_PM_at   | Tom7               | TOMM7    | -0.14 | 3.90  | -0.72 | 4.85E-01 | 7.29E-01 | -6.43 |
| 1439355_PM_at   | Plekha5            | NA       | 0.08  | 3.07  | 0.72  | 4.85E-01 | 7.29E-01 | -6.43 |
| 1438444_PM_at   | Spink10            | SPINK6   | 0.10  | 2.35  | 0.72  | 4.85E-01 | 7.29E-01 | -6.43 |
| 1439725_PM_at   | Ptpst              | PTPRT    | -0.07 | 2.15  | -0.72 | 4.85E-01 | 7.29E-01 | -6.43 |
| 1452429_PM_s_at | Abcf1              | ABCF1    | 0.07  | 2.45  | 0.72  | 4.85E-01 | 7.29E-01 | -6.43 |
| 1445018_PM_at   | ---                | NA       | 0.09  | 2.58  | 0.72  | 4.85E-01 | 7.29E-01 | -6.43 |
| 1458951_PM_at   | Vrk1               | VRK1     | 0.16  | 3.45  | 0.72  | 4.85E-01 | 7.29E-01 | -6.43 |
| 1425873_PM_a_at | Lepr               | LEPR     | 0.13  | 3.26  | 0.72  | 4.85E-01 | 7.29E-01 | -6.43 |
| 1449228_PM_at   | Sh3gl2             | SH3GL2   | -0.23 | 3.89  | -0.72 | 4.85E-01 | 7.29E-01 | -6.43 |
| 1419442_PM_at   | Matn2              | MATN2    | -0.20 | 2.86  | -0.72 | 4.85E-01 | 7.29E-01 | -6.43 |
| 1416682_PM_at   | Ube3a              | UBE3A    | -0.12 | 5.05  | -0.72 | 4.85E-01 | 7.29E-01 | -6.43 |
| 1453198_PM_at   | Zfp955b            | NA       | -0.09 | 6.98  | -0.72 | 4.85E-01 | 7.29E-01 | -6.43 |
| 1439919_PM_at   | ---                | NA       | 0.05  | 2.11  | 0.72  | 4.85E-01 | 7.29E-01 | -6.43 |
| 1450974_PM_at   | Timp4              | TIMP4    | 0.06  | 2.85  | 0.72  | 4.85E-01 | 7.29E-01 | -6.43 |
| 1455660_PM_at   | Csf2rb             | CSF2RB   | 0.07  | 2.43  | 0.72  | 4.85E-01 | 7.29E-01 | -6.43 |
| 1453048_PM_at   | Nhlrc2             | NHLRC2   | 0.09  | 2.51  | 0.72  | 4.85E-01 | 7.29E-01 | -6.43 |
| 1426672_PM_at   | Ano10              | ANO10    | 0.09  | 3.58  | 0.72  | 4.85E-01 | 7.29E-01 | -6.43 |
| 1428211_PM_at   | P4htm              | P4HTM    | -0.15 | 3.64  | -0.72 | 4.86E-01 | 7.29E-01 | -6.43 |
| 1437925_PM_at   | ---                | NA       | -0.07 | 2.27  | -0.72 | 4.86E-01 | 7.29E-01 | -6.43 |
| 1420921_PM_at   | Cd151              | NA       | 0.06  | 2.34  | 0.72  | 4.86E-01 | 7.29E-01 | -6.43 |
| 1457596_PM_at   | Donson             | NA       | 0.08  | 2.02  | 0.72  | 4.86E-01 | 7.29E-01 | -6.43 |
| 1449270_PM_at   | Pkxdc2             | PLXDC2   | 0.15  | 2.81  | 0.72  | 4.86E-01 | 7.29E-01 | -6.43 |
| 1439764_PM_s_at | Igf2bp2            | IGF2BP2  | 0.17  | 2.50  | 0.72  | 4.86E-01 | 7.29E-01 | -6.43 |
| 1445180_PM_at   | Srd5a3             | NA       | 0.06  | 2.07  | 0.72  | 4.86E-01 | 7.29E-01 | -6.43 |
| 1428154_PM_s_at | Plpp5              | PLPP5    | -0.16 | 2.26  | -0.72 | 4.86E-01 | 7.29E-01 | -6.43 |
| 1426970_PM_a_at | Uba7               | UBA7     | 0.10  | 2.53  | 0.72  | 4.86E-01 | 7.29E-01 | -6.43 |
| 1442032_PM_at   | BC030500           | NA       | 0.17  | 3.94  | 0.72  | 4.86E-01 | 7.30E-01 | -6.43 |
| 1456155_PM_x_at | Fuca1              | FUCA1    | -0.26 | 4.87  | -0.72 | 4.86E-01 | 7.30E-01 | -6.43 |
| 1455147_PM_at   | Tmem200c           | TMEM200C | -0.10 | 2.15  | -0.72 | 4.86E-01 | 7.30E-01 | -6.43 |
| 1447042_PM_at   | Zbtb34             | ZBTB34   | -0.07 | 2.41  | -0.72 | 4.86E-01 | 7.30E-01 | -6.43 |
| 1425259_PM_x_at | Klra12             | NA       | 0.07  | 2.21  | 0.72  | 4.86E-01 | 7.30E-01 | -6.43 |
| 1431973_PM_at   | Sept6              | SEPT6    | 0.07  | 2.13  | 0.72  | 4.86E-01 | 7.30E-01 | -6.43 |
| 1450348_PM_at   | Slc19a3            | SLC19A3  | 0.10  | 2.08  | 0.72  | 4.86E-01 | 7.30E-01 | -6.43 |
| 1419027_PM_s_at | Gltp               | GLTP     | 0.14  | 3.17  | 0.72  | 4.86E-01 | 7.30E-01 | -6.43 |
| 1422799_PM_at   | Prrc2a             | PRRC2A   | 0.16  | 3.05  | 0.72  | 4.86E-01 | 7.30E-01 | -6.43 |
| 1455040_PM_s_at | Nhsl2              | NHSL2    | 0.16  | 3.09  | 0.72  | 4.86E-01 | 7.30E-01 | -6.43 |
| 1423467_PM_at   | Ms4a4b             | NA       | 0.17  | 2.66  | 0.72  | 4.86E-01 | 7.30E-01 | -6.43 |
| 1451036_PM_at   | Spg21              | SPG21    | 0.12  | 2.25  | 0.72  | 4.86E-01 | 7.30E-01 | -6.43 |
| 1451387_PM_s_at | Cuta               | CUTA     | 0.10  | 2.99  | 0.72  | 4.86E-01 | 7.30E-01 | -6.43 |
| 1437911_PM_at   | Zfp944             | NA       | -0.12 | 2.73  | -0.72 | 4.86E-01 | 7.30E-01 | -6.43 |
| 1420411_PM_a_at | Plk4b              | PLK4B    | 0.05  | 1.97  | 0.72  | 4.86E-01 | 7.30E-01 | -6.43 |
| 1445453_PM_at   | Helz               | HELZ     | 0.07  | 2.05  | 0.72  | 4.86E-01 | 7.30E-01 | -6.43 |
| 1434862_PM_at   | Fut2               | FUT2     | 0.30  | 2.26  | 0.72  | 4.86E-01 | 7.30E-01 | -6.43 |
| 1453045_PM_at   | Cep83              | CEP83    | -0.17 | 3.52  | -0.72 | 4.86E-01 | 7.30E-01 | -6.43 |
| 1451084_PM_at   | Etfdh              | ETFDH    | 0.17  | 3.21  | 0.72  | 4.86E-01 | 7.30E-01 | -6.43 |
| 1448069_PM_at   | Tm4sf1             | TM4SF1   | 0.19  | 2.62  | 0.72  | 4.86E-01 | 7.30E-01 | -6.43 |

|                 |                  |          |       |      |       |          |          |       |
|-----------------|------------------|----------|-------|------|-------|----------|----------|-------|
| 1456696_PM_x_at | ---              | NA       | 0.29  | 3.18 | 0.72  | 4.86E-01 | 7.30E-01 | -6.43 |
| 1442920_PM_at   | Klf3             | KLF3     | 0.05  | 2.31 | 0.72  | 4.86E-01 | 7.30E-01 | -6.43 |
| 1453009_PM_at   | Cpm              | CPM      | -0.10 | 2.49 | -0.72 | 4.87E-01 | 7.30E-01 | -6.43 |
| 1456355_PM_s_at | Srrd             | SRRD     | 0.15  | 4.47 | 0.72  | 4.87E-01 | 7.30E-01 | -6.43 |
| 1452785_PM_at   | Timm21           | TIMM21   | 0.20  | 3.09 | 0.72  | 4.87E-01 | 7.30E-01 | -6.43 |
| 1428172_PM_at   | Prpf39           | PRPF39   | -0.21 | 4.31 | -0.72 | 4.87E-01 | 7.30E-01 | -6.43 |
| 1440348_PM_at   | Zfyve9           | ZFYVE9   | -0.15 | 4.50 | -0.72 | 4.87E-01 | 7.30E-01 | -6.43 |
| 1451561_PM_at   | Prr12            | PRR12    | -0.29 | 5.41 | -0.72 | 4.87E-01 | 7.30E-01 | -6.43 |
| 1459039_PM_at   | ---              | NA       | 0.34  | 3.37 | 0.72  | 4.87E-01 | 7.30E-01 | -6.43 |
| 1446495_PM_at   | Gm30062          | NA       | -0.11 | 3.06 | -0.72 | 4.87E-01 | 7.30E-01 | -6.43 |
| 1431453_PM_at   | 4933406K04Rik    | NA       | 0.06  | 2.17 | 0.72  | 4.87E-01 | 7.30E-01 | -6.43 |
| 1442948_PM_at   | C79452           | NA       | 0.09  | 2.12 | 0.72  | 4.87E-01 | 7.30E-01 | -6.43 |
| 1426533_PM_at   | Nop56            | NOP56    | 0.20  | 3.41 | 0.72  | 4.87E-01 | 7.30E-01 | -6.43 |
| 1451847_PM_s_at | Arid4b           | ARID4B   | 0.36  | 4.42 | 0.72  | 4.87E-01 | 7.30E-01 | -6.43 |
| 1441203_PM_at   | Gm14204          | NA       | 0.08  | 2.51 | 0.72  | 4.87E-01 | 7.30E-01 | -6.43 |
| 1435170_PM_at   | Tsr2             | TSR2     | -0.22 | 2.95 | -0.72 | 4.87E-01 | 7.30E-01 | -6.43 |
| 1418674_PM_at   | Osmr             | OSMR     | -0.14 | 2.85 | -0.72 | 4.87E-01 | 7.30E-01 | -6.43 |
| 1450793_PM_at   | 4930550L24Rik    | MAGEC1   | 0.07  | 2.29 | 0.72  | 4.87E-01 | 7.30E-01 | -6.43 |
| 1436147_PM_at   | Snx19            | NA       | 0.08  | 2.10 | 0.72  | 4.87E-01 | 7.30E-01 | -6.43 |
| 1457471_PM_at   | ---              | NA       | 0.08  | 2.14 | 0.72  | 4.87E-01 | 7.30E-01 | -6.43 |
| 1440864_PM_at   | Al836737         | NA       | 0.13  | 2.44 | 0.72  | 4.87E-01 | 7.30E-01 | -6.43 |
| 1433921_PM_s_at | Dph3             | DPH3     | 0.29  | 3.59 | 0.72  | 4.87E-01 | 7.30E-01 | -6.43 |
| 1433490_PM_s_at | Epb4112          | EPB4112  | -0.16 | 3.42 | -0.72 | 4.87E-01 | 7.30E-01 | -6.43 |
| 1432463_PM_at   | ---              | NA       | -0.08 | 2.17 | -0.72 | 4.87E-01 | 7.30E-01 | -6.43 |
| 1451694_PM_at   | Tll3             | TLL3     | 0.06  | 2.57 | 0.72  | 4.87E-01 | 7.30E-01 | -6.43 |
| 1429724_PM_at   | Prpf4            | PRPF4    | 0.07  | 2.56 | 0.72  | 4.87E-01 | 7.30E-01 | -6.43 |
| 1425782_PM_at   | Plcb1            | NA       | 0.08  | 2.85 | 0.72  | 4.87E-01 | 7.30E-01 | -6.43 |
| 1416818_PM_at   | Parva            | PARVA    | 0.12  | 2.63 | 0.72  | 4.87E-01 | 7.30E-01 | -6.43 |
| 1422332_PM_at   | Ifna11           | IFNA6    | 0.21  | 2.70 | 0.72  | 4.87E-01 | 7.30E-01 | -6.43 |
| 1431482_PM_at   | ---              | NA       | -0.15 | 3.08 | -0.72 | 4.87E-01 | 7.30E-01 | -6.43 |
| 1419299_PM_at   | Borc57           | BORCS7   | 0.08  | 2.60 | 0.72  | 4.87E-01 | 7.30E-01 | -6.43 |
| 1459116_PM_at   | ---              | NA       | -0.08 | 2.44 | -0.72 | 4.87E-01 | 7.30E-01 | -6.43 |
| 1437713_PM_x_at | Ctc1             | CTC1     | -0.06 | 2.42 | -0.72 | 4.87E-01 | 7.30E-01 | -6.43 |
| 1452045_PM_at   | Zfp281           | ZNF281   | -0.08 | 3.89 | -0.72 | 4.87E-01 | 7.30E-01 | -6.43 |
| 1451789_PM_a_at | Ryk              | RYK      | 0.11  | 3.24 | 0.72  | 4.87E-01 | 7.30E-01 | -6.43 |
| 1427078_PM_at   | Snx19            | SNX19    | -0.16 | 5.43 | -0.72 | 4.88E-01 | 7.31E-01 | -6.43 |
| 1437564_PM_at   | Polg             | POLG     | 0.11  | 2.32 | 0.72  | 4.88E-01 | 7.31E-01 | -6.43 |
| 1449423_PM_at   | Mast1            | MAST1    | 0.18  | 3.71 | 0.72  | 4.88E-01 | 7.31E-01 | -6.43 |
| 1429184_PM_at   | Gm4070 /// Gvin1 | NA       | -0.17 | 3.66 | -0.72 | 4.88E-01 | 7.31E-01 | -6.43 |
| 1434333_PM_a_at | Prkd2            | PRKD2    | -0.07 | 2.03 | -0.72 | 4.88E-01 | 7.31E-01 | -6.43 |
| 1455238_PM_at   | Mum11            | MUM11    | -0.07 | 2.44 | -0.72 | 4.88E-01 | 7.31E-01 | -6.43 |
| 1416398_PM_at   | Mesdc1           | MESDC1   | -0.07 | 2.27 | -0.72 | 4.88E-01 | 7.31E-01 | -6.43 |
| 1424815_PM_at   | Gys2             | GYS2     | 0.08  | 2.16 | 0.72  | 4.88E-01 | 7.31E-01 | -6.43 |
| 1433337_PM_at   | 6720460K10Rik    | NA       | 0.09  | 2.15 | 0.72  | 4.88E-01 | 7.31E-01 | -6.43 |
| 1416068_PM_at   | Kars             | KARS     | -0.08 | 2.74 | -0.72 | 4.88E-01 | 7.31E-01 | -6.43 |
| 1443591_PM_at   | Dlx4             | DLX4     | 0.11  | 2.30 | 0.72  | 4.88E-01 | 7.31E-01 | -6.43 |
| 1452509_PM_at   | Usp9y            | USP9Y    | -0.09 | 2.44 | -0.72 | 4.88E-01 | 7.31E-01 | -6.43 |
| 1427140_PM_at   | Pvt1             | NA       | -0.25 | 3.21 | -0.72 | 4.88E-01 | 7.31E-01 | -6.43 |
| 1424344_PM_s_at | Eif1a            | NA       | -0.23 | 3.57 | -0.72 | 4.88E-01 | 7.31E-01 | -6.43 |
| 1424641_PM_a_at | Thoc1            | THOC1    | -0.15 | 7.75 | -0.72 | 4.88E-01 | 7.31E-01 | -6.43 |
| 1453032_PM_at   | Mob4             | MOB4     | -0.14 | 5.57 | -0.72 | 4.88E-01 | 7.31E-01 | -6.43 |
| 1443346_PM_at   | ---              | NA       | -0.13 | 2.57 | -0.72 | 4.88E-01 | 7.31E-01 | -6.43 |
| 1427749_PM_at   | Galnt3           | NA       | -0.12 | 2.54 | -0.72 | 4.88E-01 | 7.31E-01 | -6.43 |
| 1419112_PM_at   | Nlk              | NLK      | -0.11 | 3.72 | -0.72 | 4.88E-01 | 7.31E-01 | -6.43 |
| 1456904_PM_at   | ---              | NA       | -0.11 | 2.63 | -0.72 | 4.88E-01 | 7.31E-01 | -6.43 |
| 1443688_PM_at   | Zfp599           | ZNF717   | -0.07 | 2.18 | -0.72 | 4.88E-01 | 7.31E-01 | -6.43 |
| 1427168_PM_a_at | Col14a1          | COL14A1  | -0.07 | 1.92 | -0.72 | 4.88E-01 | 7.31E-01 | -6.43 |
| 1456006_PM_at   | Bcl2l11          | BCL2L11  | -0.07 | 2.37 | -0.72 | 4.88E-01 | 7.31E-01 | -6.43 |
| 1444840_PM_at   | C87487           | NA       | 0.06  | 2.57 | 0.72  | 4.88E-01 | 7.31E-01 | -6.43 |
| 1420226_PM_x_at | Hoxa4            | HOXA4    | 0.06  | 2.04 | 0.72  | 4.88E-01 | 7.31E-01 | -6.43 |
| 1432967_PM_at   | 4930456A14Rik    | NA       | 0.06  | 2.68 | 0.72  | 4.88E-01 | 7.31E-01 | -6.43 |
| 1432055_PM_at   | ---              | NA       | 0.07  | 2.06 | 0.72  | 4.88E-01 | 7.31E-01 | -6.43 |
| 1450832_PM_at   | Hoxc5            | HOXC5    | 0.07  | 2.78 | 0.72  | 4.88E-01 | 7.31E-01 | -6.43 |
| 1438798_PM_at   | 4931406P16Rik    | KIAA0355 | 0.08  | 4.46 | 0.72  | 4.88E-01 | 7.31E-01 | -6.43 |
| 1442529_PM_at   | ---              | NA       | 0.08  | 2.06 | 0.72  | 4.88E-01 | 7.31E-01 | -6.43 |
| 1453244_PM_at   | Mirt1            | NA       | 0.09  | 2.01 | 0.72  | 4.88E-01 | 7.31E-01 | -6.43 |
| 1441199_PM_at   | ---              | NA       | 0.10  | 2.69 | 0.72  | 4.88E-01 | 7.31E-01 | -6.43 |
| 1415846_PM_a_at | Ldhc             | LDHC     | 0.10  | 2.63 | 0.72  | 4.88E-01 | 7.31E-01 | -6.43 |
| 1432748_PM_at   | ---              | NA       | 0.10  | 2.84 | 0.72  | 4.88E-01 | 7.31E-01 | -6.43 |
| 1453939_PM_x_at | Gm9706           | NA       | 0.10  | 2.51 | 0.72  | 4.88E-01 | 7.31E-01 | -6.43 |
| 1439966_PM_x_at | Sfxn2            | SFXN2    | 0.20  | 3.94 | 0.72  | 4.88E-01 | 7.31E-01 | -6.43 |
| 1422157_PM_a_at | Irgb1bp1         | ITGB1BP1 | 0.22  | 2.48 | 0.72  | 4.88E-01 | 7.31E-01 | -6.43 |
| 1451321_PM_a_at | Rbm43            | RBM43    | 0.26  | 3.52 | 0.72  | 4.88E-01 | 7.31E-01 | -6.43 |
| 1445349_PM_at   | ---              | NA       | 0.29  | 3.34 | 0.72  | 4.88E-01 | 7.31E-01 | -6.43 |
| 1439621_PM_at   | Gm16835          | NA       | 0.09  | 2.29 | 0.72  | 4.88E-01 | 7.31E-01 | -6.43 |

|                 |               |            |       |      |       |          |          |       |
|-----------------|---------------|------------|-------|------|-------|----------|----------|-------|
| 1442902_PM_at   | Qrich2        | QRI CH2    | 0.09  | 2.79 | 0.72  | 4.88E-01 | 7.31E-01 | -6.43 |
| 1460569_PM_x_at | Cldn3         | CLDN3      | 0.13  | 3.34 | 0.72  | 4.88E-01 | 7.31E-01 | -6.43 |
| 1421021_PM_at   | Aebp2         | AEBP2      | 0.07  | 2.44 | 0.72  | 4.89E-01 | 7.31E-01 | -6.43 |
| 1451827_PM_a_at | Nox4          | NOX4       | -0.09 | 2.75 | -0.72 | 4.89E-01 | 7.31E-01 | -6.43 |
| 1428050_PM_a_at | Tmbim4        | ACO78927.1 | 0.15  | 2.95 | 0.72  | 4.89E-01 | 7.31E-01 | -6.43 |
| 1445527_PM_at   | ---           | NA         | 0.06  | 2.01 | 0.72  | 4.89E-01 | 7.31E-01 | -6.43 |
| 1427563_PM_at   | Dlx6os2       | NA         | 0.06  | 2.28 | 0.72  | 4.89E-01 | 7.31E-01 | -6.43 |
| 1451964_PM_at   | Mia2          | NA         | 0.06  | 2.30 | 0.72  | 4.89E-01 | 7.31E-01 | -6.43 |
| 1442871_PM_at   | Gm26806       | NA         | 0.07  | 2.79 | 0.72  | 4.89E-01 | 7.31E-01 | -6.43 |
| 1425606_PM_at   | Slc5a8        | SLC5A8     | 0.09  | 2.26 | 0.72  | 4.89E-01 | 7.31E-01 | -6.43 |
| 1449969_PM_at   | Tmod4         | TMOD4      | 0.11  | 2.41 | 0.72  | 4.89E-01 | 7.31E-01 | -6.43 |
| 1447365_PM_at   | Lgi1          | LG1        | 0.12  | 2.32 | 0.72  | 4.89E-01 | 7.31E-01 | -6.43 |
| 1441917_PM_s_at | Tmem40        | TMEM40     | 0.14  | 2.49 | 0.72  | 4.89E-01 | 7.31E-01 | -6.43 |
| 1437342_PM_x_at | Pttg1ip       | PTTG1IP    | 0.17  | 8.66 | 0.72  | 4.89E-01 | 7.31E-01 | -6.43 |
| 1417390_PM_at   | Gpn1          | GPN1       | 0.18  | 4.30 | 0.72  | 4.89E-01 | 7.31E-01 | -6.43 |
| 1430169_PM_at   | 1700007K09Rik | NA         | -0.12 | 2.24 | -0.72 | 4.89E-01 | 7.31E-01 | -6.43 |
| 1434699_PM_at   | Gze3          | GZE3       | -0.09 | 2.53 | -0.72 | 4.89E-01 | 7.31E-01 | -6.43 |
| 1441734_PM_at   | Camk2a        | CAMK2A     | 0.06  | 2.15 | 0.72  | 4.89E-01 | 7.31E-01 | -6.43 |
| 1419680_PM_a_at | Elac2         | ELAC2      | 0.07  | 2.37 | 0.72  | 4.89E-01 | 7.31E-01 | -6.43 |
| 1449013_PM_at   | Eef2k         | EEF2K      | 0.09  | 2.81 | 0.72  | 4.89E-01 | 7.31E-01 | -6.43 |
| 1457463_PM_at   | Dscam1        | DSCAM1     | 0.13  | 2.93 | 0.72  | 4.89E-01 | 7.31E-01 | -6.43 |
| 1420151_PM_at   | ---           | NA         | 0.07  | 2.20 | 0.72  | 4.89E-01 | 7.31E-01 | -6.43 |
| 1441686_PM_at   | ---           | NA         | 0.08  | 2.35 | 0.72  | 4.89E-01 | 7.31E-01 | -6.43 |
| 1443505_PM_at   | Prok1         | NA         | 0.14  | 2.51 | 0.72  | 4.89E-01 | 7.31E-01 | -6.43 |
| 1428220_PM_at   | C2cd5         | C2CD5      | 0.15  | 6.29 | 0.72  | 4.89E-01 | 7.31E-01 | -6.43 |
| 1436793_PM_at   | St18          | ST18       | 0.09  | 2.25 | 0.72  | 4.89E-01 | 7.31E-01 | -6.43 |
| 1439290_PM_at   | ---           | NA         | -0.26 | 3.97 | -0.72 | 4.89E-01 | 7.31E-01 | -6.43 |
| 1425930_PM_a_at | Mlx           | MLX        | 0.09  | 2.66 | 0.72  | 4.89E-01 | 7.31E-01 | -6.43 |
| 1427372_PM_at   | Cyp27b1       | CYP27B1    | 0.07  | 2.11 | 0.72  | 4.89E-01 | 7.31E-01 | -6.43 |
| 1433684_PM_at   | Chmp6         | CHMP6      | 0.06  | 2.39 | 0.72  | 4.89E-01 | 7.31E-01 | -6.43 |
| 1420248_PM_at   | Tubg2         | TUBG2      | 0.08  | 2.15 | 0.72  | 4.89E-01 | 7.31E-01 | -6.43 |
| 1427616_PM_at   | Gm13583       | NA         | 0.09  | 2.25 | 0.72  | 4.89E-01 | 7.31E-01 | -6.43 |
| 1459814_PM_at   | Tmem109       | TMEM109    | -0.06 | 2.19 | -0.72 | 4.89E-01 | 7.31E-01 | -6.43 |
| 1440082_PM_at   | ---           | NA         | -0.19 | 2.77 | -0.72 | 4.89E-01 | 7.31E-01 | -6.43 |
| 1454571_PM_at   | A930036A04Rik | NA         | -0.05 | 2.16 | -0.72 | 4.89E-01 | 7.31E-01 | -6.43 |
| 1432005_PM_at   | Dnm2          | DNM2       | 0.23  | 5.36 | 0.72  | 4.89E-01 | 7.31E-01 | -6.43 |
| 1424903_PM_at   | Kdm5d         | KDM5D      | 0.25  | 4.35 | 0.72  | 4.89E-01 | 7.31E-01 | -6.43 |
| 1418249_PM_at   | Crcp          | CRCP       | -0.13 | 2.47 | -0.72 | 4.89E-01 | 7.31E-01 | -6.43 |
| 1460694_PM_s_at | Svil          | SVIL       | 0.14  | 2.42 | 0.72  | 4.89E-01 | 7.32E-01 | -6.43 |
| 1426274_PM_at   | Slc9a8        | SLC9A8     | 0.12  | 3.89 | 0.72  | 4.90E-01 | 7.32E-01 | -6.43 |
| 1444535_PM_at   | AA692955      | NA         | 0.11  | 2.16 | 0.72  | 4.90E-01 | 7.32E-01 | -6.43 |
| 1455701_PM_at   | Arhgap33      | ARHGAP33   | 0.36  | 2.63 | 0.72  | 4.90E-01 | 7.32E-01 | -6.43 |
| 1438938_PM_x_at | Phb2          | PHB2       | -0.30 | 7.25 | -0.72 | 4.90E-01 | 7.32E-01 | -6.43 |
| 1429317_PM_at   | Qrs1          | QRS1       | -0.08 | 2.44 | -0.72 | 4.90E-01 | 7.32E-01 | -6.43 |
| 1438471_PM_at   | ---           | NA         | -0.08 | 2.28 | -0.72 | 4.90E-01 | 7.32E-01 | -6.43 |
| 1429645_PM_at   | 1700017G19Rik | NA         | 0.09  | 2.54 | 0.72  | 4.90E-01 | 7.32E-01 | -6.43 |
| 1447929_PM_at   | Ssh3          | SSH3       | 0.09  | 2.89 | 0.72  | 4.90E-01 | 7.32E-01 | -6.43 |
| 1445480_PM_at   | Gpr19         | GPR19      | 0.11  | 2.50 | 0.72  | 4.90E-01 | 7.32E-01 | -6.43 |
| 1436355_PM_at   | Fads6         | FADS6      | 0.23  | 2.97 | 0.72  | 4.90E-01 | 7.32E-01 | -6.43 |
| 1425092_PM_at   | Cdh10         | CDH10      | -0.17 | 3.44 | -0.72 | 4.90E-01 | 7.32E-01 | -6.43 |
| 1458723_PM_at   | ---           | NA         | 0.05  | 2.25 | 0.72  | 4.90E-01 | 7.32E-01 | -6.43 |
| 1454224_PM_at   | 2010300F17Rik | NA         | 0.08  | 2.66 | 0.72  | 4.90E-01 | 7.32E-01 | -6.43 |
| 1421150_PM_at   | Hivep3        | HIVEP3     | 0.09  | 2.32 | 0.72  | 4.90E-01 | 7.32E-01 | -6.43 |
| 1420235_PM_at   | Bphl          | BPHL       | -0.06 | 2.03 | -0.72 | 4.90E-01 | 7.32E-01 | -6.43 |
| 1429879_PM_at   | 0610037L13Rik | C1orf123   | -0.32 | 2.52 | -0.72 | 4.90E-01 | 7.32E-01 | -6.43 |
| 1457493_PM_at   | Pten          | PTEN       | -0.11 | 2.95 | -0.72 | 4.90E-01 | 7.32E-01 | -6.43 |
| 1446304_PM_at   | ---           | NA         | 0.06  | 2.16 | 0.72  | 4.90E-01 | 7.32E-01 | -6.43 |
| 1427457_PM_a_at | Bmp1          | BMP1       | -0.10 | 2.96 | -0.72 | 4.90E-01 | 7.32E-01 | -6.43 |
| 1427943_PM_at   | Acyp2         | ACYP2      | -0.26 | 4.56 | -0.72 | 4.90E-01 | 7.32E-01 | -6.43 |
| 1419422_PM_at   | Pkd2l2        | PKD2L2     | -0.24 | 3.77 | -0.72 | 4.90E-01 | 7.32E-01 | -6.43 |
| 1426891_PM_at   | Rpap1         | RPAP1      | -0.09 | 2.85 | -0.72 | 4.90E-01 | 7.32E-01 | -6.43 |
| 1450167_PM_at   | Rab37         | RAB37      | 0.06  | 2.58 | 0.72  | 4.90E-01 | 7.32E-01 | -6.43 |
| 1439335_PM_at   | ---           | NA         | 0.06  | 2.31 | 0.72  | 4.90E-01 | 7.32E-01 | -6.43 |
| 1447457_PM_at   | LOC102639518  | NA         | 0.09  | 2.44 | 0.72  | 4.90E-01 | 7.32E-01 | -6.43 |
| 1437299_PM_at   | ---           | NA         | 0.06  | 1.94 | 0.71  | 4.90E-01 | 7.32E-01 | -6.43 |
| 1430603_PM_at   | 4930579K19Rik | NA         | -0.08 | 2.04 | -0.71 | 4.91E-01 | 7.32E-01 | -6.43 |
| 1430171_PM_at   | Fibp          | NA         | 0.07  | 2.11 | 0.71  | 4.91E-01 | 7.32E-01 | -6.43 |
| 1458575_PM_at   | ---           | NA         | 0.09  | 2.78 | 0.71  | 4.91E-01 | 7.32E-01 | -6.43 |
| 1443959_PM_at   | Tmem72        | TMEM72     | 0.19  | 2.89 | 0.71  | 4.91E-01 | 7.32E-01 | -6.43 |
| 1453923_PM_at   | Ccdc83        | CCDC83     | 0.08  | 2.21 | 0.71  | 4.91E-01 | 7.33E-01 | -6.43 |
| 1427064_PM_a_at | Scrib         | SCRIB      | -0.10 | 2.56 | -0.71 | 4.91E-01 | 7.33E-01 | -6.43 |
| 1424487_PM_x_at | Txnrd1        | NA         | 0.14  | 2.70 | 0.71  | 4.91E-01 | 7.33E-01 | -6.43 |
| 1423267_PM_s_at | Itga5         | ITGA5      | 0.07  | 2.41 | 0.71  | 4.91E-01 | 7.33E-01 | -6.43 |
| 1425668_PM_a_at | St3gal4       | ST3GAL4    | 0.09  | 2.31 | 0.71  | 4.91E-01 | 7.33E-01 | -6.43 |
| 1445409_PM_at   | ---           | NA         | 0.10  | 2.22 | 0.71  | 4.91E-01 | 7.33E-01 | -6.43 |

|                 |                                   |          |       |      |       |          |          |       |
|-----------------|-----------------------------------|----------|-------|------|-------|----------|----------|-------|
| 1418946_PM_at   | St3gal1                           | ST3GAL1  | 0.08  | 2.76 | 0.71  | 4.91E-01 | 7.33E-01 | -6.43 |
| 1423782_PM_at   | Mob1a                             | MOB1A    | -0.11 | 2.27 | -0.71 | 4.91E-01 | 7.33E-01 | -6.43 |
| 1426211_PM_at   | Tmem161a                          | TMEM161A | 0.21  | 2.97 | 0.71  | 4.91E-01 | 7.33E-01 | -6.43 |
| 1441219_PM_at   | ---                               | NA       | -0.10 | 2.13 | -0.71 | 4.91E-01 | 7.33E-01 | -6.43 |
| 1423593_PM_a_at | Csf1r                             | CSF1R    | 0.10  | 2.44 | 0.71  | 4.91E-01 | 7.33E-01 | -6.43 |
| 1429072_PM_at   | Col6a4                            | NA       | 0.15  | 2.81 | 0.71  | 4.91E-01 | 7.33E-01 | -6.43 |
| 1460411_PM_s_at | Pkdcc                             | PKDCC    | 0.08  | 2.72 | 0.71  | 4.91E-01 | 7.33E-01 | -6.43 |
| 1452910_PM_at   | Bcor                              | BCOR     | 0.08  | 2.78 | 0.71  | 4.91E-01 | 7.33E-01 | -6.43 |
| 1416908_PM_s_at | Tsn                               | TSN      | -0.19 | 5.57 | -0.71 | 4.91E-01 | 7.33E-01 | -6.43 |
| 1436677_PM_at   | 1810032O08Rik                     | NA       | 0.06  | 2.04 | 0.71  | 4.91E-01 | 7.33E-01 | -6.43 |
| 1456610_PM_at   | Kdm6b                             | KDM6B    | 0.07  | 2.26 | 0.71  | 4.91E-01 | 7.33E-01 | -6.43 |
| 1433936_PM_at   | Sdhaf1                            | SDHAF1   | -0.22 | 3.30 | -0.71 | 4.91E-01 | 7.33E-01 | -6.43 |
| 1418301_PM_at   | Irf6                              | IRF6     | 0.09  | 2.40 | 0.71  | 4.91E-01 | 7.33E-01 | -6.43 |
| 1439365_PM_at   | ---                               | NA       | 0.23  | 2.90 | 0.71  | 4.91E-01 | 7.33E-01 | -6.43 |
| 1431350_PM_at   | C130036L24Rik                     | NA       | 0.07  | 2.63 | 0.71  | 4.91E-01 | 7.33E-01 | -6.43 |
| 1432929_PM_at   | Gsdmcl2                           | NA       | 0.07  | 2.44 | 0.71  | 4.91E-01 | 7.33E-01 | -6.43 |
| 1435449_PM_at   | Bcl2l11                           | BCL2L11  | 0.12  | 2.65 | 0.71  | 4.91E-01 | 7.33E-01 | -6.43 |
| 1415738_PM_at   | Txndc12                           | TXNDC12  | 0.17  | 3.18 | 0.71  | 4.91E-01 | 7.33E-01 | -6.43 |
| 1419606_PM_a_at | Tnnt1                             | TNNT1    | 0.13  | 2.39 | 0.71  | 4.91E-01 | 7.33E-01 | -6.43 |
| 1450678_PM_at   | Irgb2                             | ITGB2    | 0.14  | 2.48 | 0.71  | 4.91E-01 | 7.33E-01 | -6.43 |
| 1457609_PM_at   | ---                               | NA       | 0.14  | 2.94 | 0.71  | 4.91E-01 | 7.33E-01 | -6.43 |
| 1439783_PM_at   | C330018D20Rik                     | CSorf63  | -0.12 | 3.10 | -0.71 | 4.91E-01 | 7.33E-01 | -6.43 |
| 1441408_PM_at   | AU044856                          | NA       | -0.15 | 2.46 | -0.71 | 4.91E-01 | 7.33E-01 | -6.43 |
| 1432820_PM_at   | Psm7                              | NA       | 0.06  | 2.40 | 0.71  | 4.91E-01 | 7.33E-01 | -6.43 |
| 1440148_PM_at   | Gpr6                              | GPR6     | -0.10 | 2.35 | -0.71 | 4.91E-01 | 7.33E-01 | -6.43 |
| 1423245_PM_at   | Cops7a                            | COPS7A   | 0.10  | 5.66 | 0.71  | 4.92E-01 | 7.33E-01 | -6.43 |
| 1457290_PM_at   | Nbea                              | NBEA     | 0.07  | 1.96 | 0.71  | 4.92E-01 | 7.33E-01 | -6.43 |
| 1438837_PM_at   | ---                               | NA       | 0.11  | 2.47 | 0.71  | 4.92E-01 | 7.33E-01 | -6.43 |
| 1429079_PM_a_at | 2310045n01rik-mef2b ///<br>Borcs8 | MEF2B    | 0.12  | 2.50 | 0.71  | 4.92E-01 | 7.33E-01 | -6.43 |
| 1424871_PM_s_at | Ubal1                             | UBALD1   | -0.08 | 2.90 | -0.71 | 4.92E-01 | 7.33E-01 | -6.43 |
| 1447278_PM_at   | Cep164                            | CEP164   | 0.14  | 2.76 | 0.71  | 4.92E-01 | 7.33E-01 | -6.43 |
| 1441783_PM_at   | 2410022M11Rik                     | NA       | 0.07  | 2.33 | 0.71  | 4.92E-01 | 7.33E-01 | -6.43 |
| 1446031_PM_at   | ---                               | NA       | 0.07  | 2.09 | 0.71  | 4.92E-01 | 7.33E-01 | -6.43 |
| 1446875_PM_at   | ---                               | NA       | 0.18  | 2.74 | 0.71  | 4.92E-01 | 7.33E-01 | -6.43 |
| 1441383_PM_at   | Gad1os                            | NA       | -0.07 | 2.06 | -0.71 | 4.92E-01 | 7.33E-01 | -6.43 |
| 1417656_PM_at   | Mybl2                             | MYBL2    | -0.06 | 2.37 | -0.71 | 4.92E-01 | 7.33E-01 | -6.43 |
| 1449266_PM_at   | Mecp2                             | MECP2    | 0.11  | 3.03 | 0.71  | 4.92E-01 | 7.33E-01 | -6.43 |
| 1450575_PM_at   | Chrm4                             | CHRM4    | 0.10  | 2.37 | 0.71  | 4.92E-01 | 7.33E-01 | -6.43 |
| 1455641_PM_at   | 1600014C10Rik                     | C19orf12 | 0.07  | 2.23 | 0.71  | 4.92E-01 | 7.33E-01 | -6.43 |
| 1438027_PM_at   | Gbp9                              | NA       | 0.09  | 2.67 | 0.71  | 4.92E-01 | 7.33E-01 | -6.43 |
| 1424730_PM_a_at | Slc15a2                           | SLC15A2  | 0.15  | 3.29 | 0.71  | 4.92E-01 | 7.33E-01 | -6.43 |
| 1436717_PM_x_at | Hbb-y ///LOC102643133             | HBE1     | 0.05  | 2.02 | 0.71  | 4.92E-01 | 7.33E-01 | -6.43 |
| 1446181_PM_at   | ---                               | NA       | -0.11 | 2.36 | -0.71 | 4.92E-01 | 7.34E-01 | -6.43 |
| 1449816_PM_at   | Sult5a1                           | NA       | 0.07  | 3.04 | 0.71  | 4.92E-01 | 7.34E-01 | -6.43 |
| 1419245_PM_at   | Rab14                             | RAB14    | 0.26  | 3.66 | 0.71  | 4.92E-01 | 7.34E-01 | -6.43 |
| 1438800_PM_at   | ---                               | NA       | 0.10  | 2.46 | 0.71  | 4.92E-01 | 7.34E-01 | -6.43 |
| 1438582_PM_at   | Actr5                             | ACTR5    | 0.14  | 2.13 | 0.71  | 4.92E-01 | 7.34E-01 | -6.43 |
| 1435158_PM_at   | Rbm12b1 ///Rbm12b2                | RBM12B   | -0.13 | 2.97 | -0.71 | 4.92E-01 | 7.34E-01 | -6.43 |
| 1445281_PM_a_at | B230311B06Rik                     | NA       | 0.08  | 2.50 | 0.71  | 4.92E-01 | 7.34E-01 | -6.43 |
| 1425978_PM_at   | Myocd                             | MYOCD    | 0.09  | 2.80 | 0.71  | 4.92E-01 | 7.34E-01 | -6.43 |
| 1447814_PM_x_at | Il16                              | IL16     | 0.12  | 2.73 | 0.71  | 4.92E-01 | 7.34E-01 | -6.43 |
| 1458799_PM_at   | A330033J07Rik                     | NA       | 0.06  | 2.05 | 0.71  | 4.93E-01 | 7.34E-01 | -6.43 |
| 1430094_PM_at   | Mgat4e                            | NA       | 0.06  | 2.05 | 0.71  | 4.93E-01 | 7.34E-01 | -6.43 |
| 1451613_PM_at   | Hrnr                              | HRNR     | 0.07  | 2.07 | 0.71  | 4.93E-01 | 7.34E-01 | -6.43 |
| 1457734_PM_at   | ---                               | NA       | -0.16 | 3.07 | -0.71 | 4.93E-01 | 7.34E-01 | -6.44 |
| 1449652_PM_at   | ---                               | NA       | 0.08  | 3.60 | 0.71  | 4.93E-01 | 7.34E-01 | -6.44 |
| 1424767_PM_at   | Cdh22                             | CDH22    | 0.16  | 3.65 | 0.71  | 4.93E-01 | 7.34E-01 | -6.44 |
| 1449619_PM_s_at | Arhgap9                           | ARHGAP9  | 0.17  | 3.08 | 0.71  | 4.93E-01 | 7.34E-01 | -6.44 |
| 1436617_PM_at   | Cetn4                             | NA       | 0.31  | 3.72 | 0.71  | 4.93E-01 | 7.34E-01 | -6.44 |
| 1427854_PM_x_at | ---                               | NA       | 0.08  | 2.45 | 0.71  | 4.93E-01 | 7.34E-01 | -6.44 |
| 1434376_PM_at   | Cd44                              | CD44     | 0.09  | 2.55 | 0.71  | 4.93E-01 | 7.34E-01 | -6.44 |
| 1457727_PM_at   | ---                               | NA       | 0.09  | 2.48 | 0.71  | 4.93E-01 | 7.34E-01 | -6.44 |
| 1438876_PM_at   | ---                               | NA       | -0.10 | 2.13 | -0.71 | 4.93E-01 | 7.34E-01 | -6.44 |
| 1422885_PM_at   | Snrpd3                            | SNRPD3   | 0.22  | 5.65 | 0.71  | 4.93E-01 | 7.34E-01 | -6.44 |
| 1427817_PM_at   | ---                               | NA       | -0.05 | 2.06 | -0.71 | 4.93E-01 | 7.34E-01 | -6.44 |
| 1444304_PM_at   | ---                               | NA       | 0.07  | 2.76 | 0.71  | 4.93E-01 | 7.34E-01 | -6.44 |
| 1429208_PM_at   | 5730408K05Rik ///Mir5136          | NA       | 0.08  | 2.44 | 0.71  | 4.93E-01 | 7.35E-01 | -6.44 |
| 1437400_PM_at   | Nedd4l                            | NEDD4L   | -0.23 | 3.89 | -0.71 | 4.93E-01 | 7.35E-01 | -6.44 |
| 1458252_PM_at   | ---                               | NA       | -0.12 | 2.75 | -0.71 | 4.93E-01 | 7.35E-01 | -6.44 |
| 1450274_PM_at   | Vmn2r-ps54                        | NA       | 0.08  | 2.58 | 0.71  | 4.93E-01 | 7.35E-01 | -6.44 |
| 1423431_PM_a_at | Mybbp1a                           | MYBBP1A  | -0.09 | 5.55 | -0.71 | 4.93E-01 | 7.35E-01 | -6.44 |
| 1436184_PM_at   | Zfp512b                           | ZNF512B  | 0.09  | 2.62 | 0.71  | 4.93E-01 | 7.35E-01 | -6.44 |
| 1454458_PM_at   | 6230426l18Rik                     | NA       | 0.08  | 2.40 | 0.71  | 4.93E-01 | 7.35E-01 | -6.44 |

|                 |                          |           |       |      |       |          |          |       |
|-----------------|--------------------------|-----------|-------|------|-------|----------|----------|-------|
| 1434840_PM_at   | Afg1                     | AGFG1     | -0.14 | 2.80 | -0.71 | 4.94E-01 | 7.35E-01 | -6.44 |
| 1450611_PM_at   | Orm3                     | ORM1      | 0.06  | 2.17 | 0.71  | 4.94E-01 | 7.35E-01 | -6.44 |
| 1440389_PM_at   | ---                      | NA        | 0.06  | 2.13 | 0.71  | 4.94E-01 | 7.35E-01 | -6.44 |
| 1432609_PM_at   | ---                      | NA        | 0.07  | 2.10 | 0.71  | 4.94E-01 | 7.35E-01 | -6.44 |
| 1435042_PM_at   | ---                      | NA        | 0.08  | 2.48 | 0.71  | 4.94E-01 | 7.35E-01 | -6.44 |
| 1446554_PM_at   | Gp6                      | GP6       | 0.08  | 2.91 | 0.71  | 4.94E-01 | 7.35E-01 | -6.44 |
| 1437893_PM_at   | Plb1                     | PLB1      | 0.09  | 2.33 | 0.71  | 4.94E-01 | 7.35E-01 | -6.44 |
| 1458852_PM_at   | Gm41726                  | NA        | 0.11  | 2.52 | 0.71  | 4.94E-01 | 7.35E-01 | -6.44 |
| 1457236_PM_at   | Gpr62                    | NA        | 0.11  | 2.58 | 0.71  | 4.94E-01 | 7.35E-01 | -6.44 |
| 1447785_PM_x_at | Fam104a                  | FAM104A   | 0.11  | 2.60 | 0.71  | 4.94E-01 | 7.35E-01 | -6.44 |
| 1416811_PM_s_at | Ctla2a /// Ctla2b        | NA        | 0.12  | 2.27 | 0.71  | 4.94E-01 | 7.35E-01 | -6.44 |
| 1439648_PM_at   | Anln                     | ANLN      | 0.13  | 5.20 | 0.71  | 4.94E-01 | 7.35E-01 | -6.44 |
| 1446008_PM_at   | D3Erttd246e              | NA        | 0.20  | 3.63 | 0.71  | 4.94E-01 | 7.35E-01 | -6.44 |
| 1448935_PM_at   | Cdyl                     | CDY1      | 0.08  | 2.57 | 0.71  | 4.94E-01 | 7.35E-01 | -6.44 |
| 1431276_PM_at   | 9130019P16Rik            | NA        | -0.07 | 2.17 | -0.71 | 4.94E-01 | 7.35E-01 | -6.44 |
| 1431484_PM_at   | Prg1                     | PRRG1     | 0.07  | 2.18 | 0.71  | 4.94E-01 | 7.35E-01 | -6.44 |
| 1447158_PM_at   | ---                      | NA        | 0.06  | 2.17 | 0.71  | 4.94E-01 | 7.35E-01 | -6.44 |
| 1416747_PM_at   | Mfsd5                    | MFS5      | 0.10  | 2.57 | 0.71  | 4.94E-01 | 7.35E-01 | -6.44 |
| 1438209_PM_at   | 4632404H12Rik            | NA        | 0.12  | 2.60 | 0.71  | 4.94E-01 | 7.35E-01 | -6.44 |
| 1424138_PM_at   | Rhbd1                    | RHBDF1    | -0.08 | 2.30 | -0.71 | 4.94E-01 | 7.35E-01 | -6.44 |
| 1437574_PM_at   | Adamts18                 | ADAMTS18  | 0.07  | 2.38 | 0.71  | 4.94E-01 | 7.35E-01 | -6.44 |
| 1426755_PM_at   | Ckap4                    | CKAP4     | -0.09 | 2.62 | -0.71 | 4.94E-01 | 7.35E-01 | -6.44 |
| 1434873_PM_a_at | Acap1                    | ACAP1     | 0.11  | 2.07 | 0.71  | 4.94E-01 | 7.35E-01 | -6.44 |
| 1458854_PM_at   | C78891                   | NA        | -0.10 | 2.54 | -0.71 | 4.94E-01 | 7.35E-01 | -6.44 |
| 1455769_PM_at   | ---                      | NA        | -0.11 | 2.38 | -0.71 | 4.94E-01 | 7.35E-01 | -6.44 |
| 1447175_PM_at   | ---                      | NA        | -0.10 | 2.10 | -0.71 | 4.94E-01 | 7.35E-01 | -6.44 |
| 1460330_PM_at   | Anxa3                    | ANXA3     | 0.15  | 2.72 | 0.71  | 4.94E-01 | 7.35E-01 | -6.44 |
| 1426564_PM_at   | Zfp553                   | ZNF48     | -0.21 | 5.17 | -0.71 | 4.94E-01 | 7.35E-01 | -6.44 |
| 1418840_PM_at   | Pcdc4                    | PDCD4     | -0.23 | 7.94 | -0.71 | 4.94E-01 | 7.35E-01 | -6.44 |
| 1436390_PM_a_at | Ckcc1                    | CLCC1     | -0.24 | 4.45 | -0.71 | 4.94E-01 | 7.36E-01 | -6.44 |
| 1447881_PM_x_at | Usp15                    | NA        | -0.20 | 6.05 | -0.71 | 4.95E-01 | 7.36E-01 | -6.44 |
| 1416066_PM_at   | Cd9                      | CD9       | -0.10 | 2.62 | -0.71 | 4.94E-01 | 7.36E-01 | -6.44 |
| 1454509_PM_at   | ---                      | NA        | 0.06  | 1.95 | 0.71  | 4.95E-01 | 7.36E-01 | -6.44 |
| 1422150_PM_at   | Hmx3                     | HMX3      | 0.06  | 1.99 | 0.71  | 4.95E-01 | 7.36E-01 | -6.44 |
| 1435182_PM_at   | Ccdc61                   | CCDC61    | 0.07  | 2.93 | 0.71  | 4.95E-01 | 7.36E-01 | -6.44 |
| 1416459_PM_at   | Arf2                     | NA        | 0.08  | 2.26 | 0.71  | 4.95E-01 | 7.36E-01 | -6.44 |
| 1458639_PM_at   | ---                      | NA        | 0.09  | 2.69 | 0.71  | 4.95E-01 | 7.36E-01 | -6.44 |
| 1434450_PM_s_at | Adrbk2                   | GRK3      | 0.12  | 3.01 | 0.71  | 4.94E-01 | 7.36E-01 | -6.44 |
| 1454732_PM_at   | Map1s                    | MAP1S     | 0.14  | 2.93 | 0.71  | 4.95E-01 | 7.36E-01 | -6.44 |
| 1441630_PM_at   | ---                      | NA        | 0.15  | 2.46 | 0.71  | 4.94E-01 | 7.36E-01 | -6.44 |
| 1447213_PM_at   | ---                      | NA        | 0.08  | 2.58 | 0.71  | 4.95E-01 | 7.36E-01 | -6.44 |
| 1436246_PM_at   | ---                      | NA        | -0.15 | 8.70 | -0.71 | 4.95E-01 | 7.36E-01 | -6.44 |
| 1431354_PM_a_at | Fars2                    | FARS2     | 0.12  | 2.41 | 0.71  | 4.95E-01 | 7.36E-01 | -6.44 |
| 1440224_PM_at   | 9330133O14Rik            | NA        | -0.11 | 2.84 | -0.71 | 4.95E-01 | 7.36E-01 | -6.44 |
| 1421220_PM_at   | Ankrd17                  | ANKRD17   | -0.07 | 2.13 | -0.71 | 4.95E-01 | 7.36E-01 | -6.44 |
| 1446373_PM_at   | ---                      | NA        | 0.08  | 2.55 | 0.71  | 4.95E-01 | 7.36E-01 | -6.44 |
| 1422829_PM_at   | Drd4                     | DRD4      | 0.08  | 2.32 | 0.71  | 4.95E-01 | 7.36E-01 | -6.44 |
| 1447515_PM_at   | ---                      | NA        | 0.10  | 2.51 | 0.71  | 4.95E-01 | 7.36E-01 | -6.44 |
| 1439853_PM_at   | B4galnt2                 | NA        | 0.10  | 2.54 | 0.71  | 4.95E-01 | 7.36E-01 | -6.44 |
| 1432210_PM_at   | 4933401H06Rik            | NA        | 0.13  | 2.23 | 0.71  | 4.95E-01 | 7.36E-01 | -6.44 |
| 1423460_PM_at   | Gigyf1                   | GIGYF1    | 0.19  | 3.07 | 0.71  | 4.95E-01 | 7.36E-01 | -6.44 |
| 1445241_PM_at   | Rab11fip4                | RAB11FIP4 | 0.14  | 2.39 | 0.71  | 4.95E-01 | 7.36E-01 | -6.44 |
| 1446352_PM_at   | Heatr4                   | NA        | 0.11  | 2.30 | 0.71  | 4.95E-01 | 7.36E-01 | -6.44 |
| 1417066_PM_at   | Adck3                    | COQ8A     | 0.15  | 5.17 | 0.71  | 4.95E-01 | 7.36E-01 | -6.44 |
| 1435253_PM_at   | Rab11b                   | RAB11B    | 0.25  | 3.93 | 0.71  | 4.95E-01 | 7.36E-01 | -6.44 |
| 1444017_PM_at   | ---                      | NA        | 0.09  | 2.31 | 0.71  | 4.95E-01 | 7.36E-01 | -6.44 |
| 1436255_PM_at   | D830044I16Rik            | NA        | 0.08  | 3.16 | 0.71  | 4.95E-01 | 7.36E-01 | -6.44 |
| 1432218_PM_a_at | Nol9                     | NOL9      | 0.18  | 3.86 | 0.71  | 4.95E-01 | 7.36E-01 | -6.44 |
| 1455490_PM_at   | Pigr                     | PIGR      | -0.07 | 2.16 | -0.71 | 4.95E-01 | 7.36E-01 | -6.44 |
| 1438596_PM_at   | 1500017E21Rik            | NA        | -0.07 | 2.30 | -0.71 | 4.95E-01 | 7.36E-01 | -6.44 |
| 1427375_PM_at   | LOC102641477 /// Trmt10a | TRMT10A   | 0.06  | 2.06 | 0.71  | 4.95E-01 | 7.36E-01 | -6.44 |
| 1458797_PM_at   | ---                      | NA        | 0.07  | 2.27 | 0.71  | 4.95E-01 | 7.36E-01 | -6.44 |
| 1444820_PM_at   | ---                      | NA        | 0.11  | 2.74 | 0.71  | 4.95E-01 | 7.36E-01 | -6.44 |
| 1453816_PM_at   | LOC102642514 /// Nsa2    | NA        | -0.12 | 2.08 | -0.71 | 4.95E-01 | 7.36E-01 | -6.44 |
| 1440419_PM_at   | Lrcol1                   | LRCOL1    | 0.07  | 2.50 | 0.71  | 4.95E-01 | 7.36E-01 | -6.44 |
| 1442402_PM_at   | Sh3rf1                   | SH3RF1    | 0.08  | 2.27 | 0.71  | 4.95E-01 | 7.36E-01 | -6.44 |
| 1416777_PM_at   | Ceacam12                 | CEACAM3   | 0.09  | 2.07 | 0.71  | 4.95E-01 | 7.36E-01 | -6.44 |
| 1445320_PM_at   | Ubxn7                    | UBXN7     | 0.10  | 2.54 | 0.71  | 4.95E-01 | 7.36E-01 | -6.44 |
| 1444307_PM_at   | Nt5c1a                   | NA        | 0.11  | 3.11 | 0.71  | 4.95E-01 | 7.36E-01 | -6.44 |
| 1446496_PM_at   | ---                      | NA        | 0.12  | 2.65 | 0.71  | 4.95E-01 | 7.36E-01 | -6.44 |
| 1454746_PM_at   | Plekham1                 | PLEKHM1   | 0.14  | 3.15 | 0.71  | 4.96E-01 | 7.36E-01 | -6.44 |
| 1452030_PM_a_at | Hrnpr                    | HNRNPR    | 0.16  | 5.93 | 0.71  | 4.96E-01 | 7.36E-01 | -6.44 |
| 1441092_PM_at   | 9330159M07Rik            | NA        | -0.17 | 2.50 | -0.71 | 4.96E-01 | 7.36E-01 | -6.44 |
| 1432621_PM_at   | 5730410E19Rik            | NA        | -0.08 | 2.36 | -0.71 | 4.96E-01 | 7.36E-01 | -6.44 |



|                 |                                      |            |       |      |       |          |          |       |
|-----------------|--------------------------------------|------------|-------|------|-------|----------|----------|-------|
| 1432433_PM_at   | 4930524N10Rik                        | NA         | 0.07  | 2.38 | 0.71  | 4.96E-01 | 7.36E-01 | -6.44 |
| 1450841_PM_at   | Stt3a                                | STT3A      | -0.30 | 4.31 | -0.71 | 4.96E-01 | 7.36E-01 | -6.44 |
| 1440571_PM_at   | LOC105247629                         | NA         | 0.10  | 2.30 | 0.71  | 4.96E-01 | 7.36E-01 | -6.44 |
| 1444419_PM_at   | ---                                  | NA         | 0.12  | 2.17 | 0.71  | 4.96E-01 | 7.36E-01 | -6.44 |
| 1420728_PM_at   | Krt32                                | KRT32      | 0.06  | 2.59 | 0.71  | 4.96E-01 | 7.37E-01 | -6.44 |
| 1456840_PM_at   | ---                                  | NA         | -0.08 | 2.49 | -0.71 | 4.96E-01 | 7.37E-01 | -6.44 |
| 1421031_PM_a_at | Hilpda                               | HILPDA     | -0.06 | 2.38 | -0.71 | 4.96E-01 | 7.37E-01 | -6.44 |
| 1430669_PM_at   | Krtap4-7                             | NA         | -0.06 | 2.01 | -0.71 | 4.96E-01 | 7.37E-01 | -6.44 |
| 1456786_PM_at   | Ldb2                                 | LDB2       | -0.24 | 2.21 | -0.71 | 4.96E-01 | 7.37E-01 | -6.44 |
| 1432044_PM_a_at | 4921504E06Rik                        | C10orf67   | -0.08 | 2.45 | -0.71 | 4.96E-01 | 7.37E-01 | -6.44 |
| 1454011_PM_a_at | Rpa2                                 | RPA2       | -0.11 | 2.68 | -0.71 | 4.96E-01 | 7.37E-01 | -6.44 |
| 1452932_PM_at   | Zbtb7a                               | ZBTB7A     | 0.18  | 7.05 | 0.71  | 4.96E-01 | 7.37E-01 | -6.44 |
| 1421215_PM_a_at | Smap                                 | SLMAP      | -0.19 | 4.62 | -0.71 | 4.96E-01 | 7.37E-01 | -6.44 |
| 1443813_PM_x_at | Bckdk                                | BCKDK      | 0.09  | 2.56 | 0.71  | 4.96E-01 | 7.37E-01 | -6.44 |
| 1429587_PM_at   | Rbm34                                | RBM34      | -0.30 | 3.80 | -0.71 | 4.96E-01 | 7.37E-01 | -6.44 |
| 1459092_PM_at   | Sco6c1                               | NA         | 0.06  | 2.02 | 0.71  | 4.96E-01 | 7.37E-01 | -6.44 |
| 1438571_PM_at   | Bub1                                 | NA         | 0.14  | 3.49 | 0.71  | 4.96E-01 | 7.37E-01 | -6.44 |
| 1448380_PM_at   | Lgals3bp                             | LGALS3BP   | -0.08 | 2.13 | -0.71 | 4.96E-01 | 7.37E-01 | -6.44 |
| 1445364_PM_at   | Syngap1                              | SYNGAP1    | 0.26  | 6.92 | 0.71  | 4.96E-01 | 7.37E-01 | -6.44 |
| 1420529_PM_at   | Dpf1                                 | DPF1       | -0.07 | 2.50 | -0.71 | 4.96E-01 | 7.37E-01 | -6.44 |
| 1425511_PM_at   | Mark1                                | MARK1      | 0.07  | 3.05 | 0.70  | 4.96E-01 | 7.37E-01 | -6.44 |
| 1453503_PM_at   | Spink12                              | SPINK9     | -0.07 | 2.53 | -0.70 | 4.96E-01 | 7.37E-01 | -6.44 |
| 1445652_PM_at   | ---                                  | NA         | 0.19  | 2.94 | 0.70  | 4.96E-01 | 7.37E-01 | -6.44 |
| 1422768_PM_at   | Syncrip                              | SYNCRIP    | 0.17  | 3.34 | 0.70  | 4.96E-01 | 7.37E-01 | -6.44 |
| 1444134_PM_at   | Abl1                                 | ABL1       | 0.09  | 2.81 | 0.70  | 4.97E-01 | 7.37E-01 | -6.44 |
| 1440215_PM_at   | Triqk                                | TRIQK      | 0.11  | 2.86 | 0.70  | 4.97E-01 | 7.37E-01 | -6.44 |
| 1447193_PM_at   | ---                                  | NA         | 0.07  | 2.40 | 0.70  | 4.97E-01 | 7.37E-01 | -6.44 |
| 1442212_PM_at   | Cpd                                  | NA         | 0.14  | 2.78 | 0.70  | 4.97E-01 | 7.37E-01 | -6.44 |
| 1456628_PM_x_at | Rps24                                | RPS24      | 0.20  | 6.34 | 0.70  | 4.97E-01 | 7.37E-01 | -6.44 |
| 1436897_PM_at   | Mfhas1                               | MFHAS1     | 0.13  | 3.37 | 0.70  | 4.97E-01 | 7.37E-01 | -6.44 |
| 1456896_PM_at   | ---                                  | NA         | 0.25  | 2.97 | 0.70  | 4.97E-01 | 7.37E-01 | -6.44 |
| 1431689_PM_at   | ---                                  | NA         | 0.09  | 2.65 | 0.70  | 4.97E-01 | 7.37E-01 | -6.44 |
| 1457065_PM_at   | Upk1b                                | UPK1B      | 0.07  | 2.60 | 0.70  | 4.97E-01 | 7.37E-01 | -6.44 |
| 1421989_PM_s_at | Paps2                                | PAPSS2     | -0.40 | 5.70 | -0.70 | 4.97E-01 | 7.37E-01 | -6.44 |
| 1417984_PM_at   | Ube2v2                               | UBE2V2     | -0.19 | 2.96 | -0.70 | 4.97E-01 | 7.37E-01 | -6.44 |
| 1416081_PM_at   | Smad1                                | SMAD1      | -0.10 | 2.39 | -0.70 | 4.97E-01 | 7.37E-01 | -6.44 |
| 1444620_PM_at   | ---                                  | NA         | -0.07 | 1.87 | -0.70 | 4.97E-01 | 7.37E-01 | -6.44 |
| 1429437_PM_at   | Prpf40a                              | PRPF40A    | -0.07 | 2.75 | -0.70 | 4.97E-01 | 7.37E-01 | -6.44 |
| 1438730_PM_at   | Nav1                                 | NAV1       | 0.06  | 2.45 | 0.70  | 4.97E-01 | 7.37E-01 | -6.44 |
| 1433146_PM_at   | ---                                  | NA         | 0.09  | 2.54 | 0.70  | 4.97E-01 | 7.37E-01 | -6.44 |
| 1422043_PM_at   | Tsc1                                 | TSC1       | 0.09  | 2.80 | 0.70  | 4.97E-01 | 7.37E-01 | -6.44 |
| 1444872_PM_at   | D3Erttd740e                          | NA         | 0.10  | 3.02 | 0.70  | 4.97E-01 | 7.37E-01 | -6.44 |
| 1445493_PM_at   | AU022255                             | NA         | 0.08  | 2.65 | 0.70  | 4.97E-01 | 7.37E-01 | -6.44 |
| 1446791_PM_at   | Pl15                                 | PL15       | 0.07  | 2.40 | 0.70  | 4.97E-01 | 7.37E-01 | -6.44 |
| 1453942_PM_at   | 1700123I01Rik                        | MAJIN      | 0.10  | 2.74 | 0.70  | 4.97E-01 | 7.37E-01 | -6.44 |
| 1420599_PM_at   | Gm11554 /// Gm11569 ///<br>Krtap4-13 | NA         | 0.10  | 2.32 | 0.70  | 4.97E-01 | 7.37E-01 | -6.44 |
| 1449745_PM_at   | ---                                  | NA         | 0.36  | 4.00 | 0.70  | 4.97E-01 | 7.37E-01 | -6.44 |
| 1426435_PM_at   | Tmem135                              | TMEM135    | -0.15 | 2.97 | -0.70 | 4.97E-01 | 7.37E-01 | -6.44 |
| 1432365_PM_a_at | 4930556L07Rik                        | NA         | -0.07 | 2.21 | -0.70 | 4.97E-01 | 7.37E-01 | -6.44 |
| 1442118_PM_at   | Fcgr2b                               | FCGR2A     | 0.07  | 2.28 | 0.70  | 4.97E-01 | 7.37E-01 | -6.44 |
| 1431521_PM_at   | Ms4a18                               | AP004243.1 | 0.07  | 2.23 | 0.70  | 4.97E-01 | 7.37E-01 | -6.44 |
| 1433055_PM_at   | ---                                  | NA         | 0.20  | 2.72 | 0.70  | 4.97E-01 | 7.37E-01 | -6.44 |
| 1449246_PM_at   | Rundc3a                              | RUNDC3A    | -0.10 | 3.04 | -0.70 | 4.97E-01 | 7.37E-01 | -6.44 |
| 1440701_PM_at   | ---                                  | NA         | 0.09  | 2.64 | 0.70  | 4.97E-01 | 7.37E-01 | -6.44 |
| 1428686_PM_at   | 2810029C07Rik                        | NA         | 0.12  | 2.79 | 0.70  | 4.97E-01 | 7.37E-01 | -6.44 |
| 1430157_PM_at   | 1700095J03Rik                        | NA         | 0.13  | 2.46 | 0.70  | 4.97E-01 | 7.37E-01 | -6.44 |
| 1443101_PM_at   | ---                                  | NA         | -0.17 | 2.13 | -0.70 | 4.97E-01 | 7.37E-01 | -6.44 |
| 1444853_PM_at   | ---                                  | NA         | 0.08  | 2.26 | 0.70  | 4.97E-01 | 7.37E-01 | -6.44 |
| 1427450_PM_x_at | Myo1b                                | MYO1B      | 0.11  | 2.73 | 0.70  | 4.97E-01 | 7.37E-01 | -6.44 |
| 1450293_PM_at   | Mageb3                               | MAGEB6P1   | 0.12  | 2.53 | 0.70  | 4.97E-01 | 7.37E-01 | -6.44 |
| 1417548_PM_at   | Sart3                                | SART3      | 0.25  | 3.97 | 0.70  | 4.97E-01 | 7.37E-01 | -6.44 |
| 1427394_PM_at   | Igf2os                               | NA         | -0.17 | 2.65 | -0.70 | 4.97E-01 | 7.38E-01 | -6.44 |
| 1424074_PM_at   | Btf3l4                               | BTF3L4     | -0.15 | 2.68 | -0.70 | 4.98E-01 | 7.38E-01 | -6.44 |
| 1431585_PM_at   | Gm39590                              | NA         | 0.08  | 2.22 | 0.70  | 4.98E-01 | 7.38E-01 | -6.44 |
| 1442783_PM_x_at | Rpusd2                               | NA         | 0.10  | 2.91 | 0.70  | 4.98E-01 | 7.38E-01 | -6.44 |
| 1450987_PM_a_at | Adprm                                | ADPRM      | 0.12  | 2.77 | 0.70  | 4.98E-01 | 7.38E-01 | -6.44 |
| 1434852_PM_at   | Pla2g2f                              | PLA2G2F    | 0.07  | 2.52 | 0.70  | 4.98E-01 | 7.38E-01 | -6.44 |
| 1421908_PM_a_at | Tcf12                                | TCF12      | 0.08  | 2.33 | 0.70  | 4.98E-01 | 7.38E-01 | -6.44 |
| 1426219_PM_at   | Scp2                                 | SCP2       | 0.13  | 3.46 | 0.70  | 4.98E-01 | 7.38E-01 | -6.44 |
| 1420031_PM_at   | Chek1                                | CHEK1      | 0.06  | 2.04 | 0.70  | 4.98E-01 | 7.38E-01 | -6.44 |
| 1459825_PM_x_at | Igf2bp1                              | IGF2BP1    | 0.15  | 2.37 | 0.70  | 4.98E-01 | 7.38E-01 | -6.44 |
| 1460344_PM_at   | Pbxip1                               | PBXIP1     | -0.11 | 3.72 | -0.70 | 4.98E-01 | 7.38E-01 | -6.44 |
| 1438356_PM_x_at | 4933432K03Rik                        | NA         | -0.07 | 2.60 | -0.70 | 4.98E-01 | 7.38E-01 | -6.44 |
| 1443549_PM_at   | Ispd                                 | ISPD       | 0.16  | 2.49 | 0.70  | 4.98E-01 | 7.38E-01 | -6.44 |

|                 |                       |          |       |      |       |          |          |       |
|-----------------|-----------------------|----------|-------|------|-------|----------|----------|-------|
| 1416872_PM_at   | Tspan6                | TSPAN6   | -0.18 | 2.72 | -0.70 | 4.98E-01 | 7.38E-01 | -6.44 |
| 1425982_PM_a_at | LOC105242468 ///Wrm   | WRN      | -0.06 | 2.42 | -0.70 | 4.98E-01 | 7.38E-01 | -6.44 |
| 1450474_PM_at   | Serpinb9c             | SERPINB9 | 0.07  | 1.93 | 0.70  | 4.98E-01 | 7.38E-01 | -6.44 |
| 1452064_PM_at   | Med23                 | MED23    | -0.14 | 2.79 | -0.70 | 4.98E-01 | 7.38E-01 | -6.44 |
| 1427947_PM_at   | B9D2                  | B9D2     | 0.11  | 2.64 | 0.70  | 4.98E-01 | 7.38E-01 | -6.44 |
| 1426663_PM_s_at | Slc45a3               | SLC45A3  | 0.11  | 2.42 | 0.70  | 4.98E-01 | 7.38E-01 | -6.44 |
| 1458777_PM_at   | Slc18a1               | SLC18A1  | 0.07  | 2.11 | 0.70  | 4.98E-01 | 7.38E-01 | -6.44 |
| 1437455_PM_a_at | Btg1                  | BTG1     | 0.28  | 4.90 | 0.70  | 4.98E-01 | 7.38E-01 | -6.44 |
| 1416912_PM_at   | Akirin1               | AKIRIN1  | -0.14 | 3.75 | -0.70 | 4.98E-01 | 7.38E-01 | -6.44 |
| 1420854_PM_at   | Eln                   | ELN      | 0.07  | 2.34 | 0.70  | 4.98E-01 | 7.38E-01 | -6.44 |
| 1442597_PM_at   | C79122                | NA       | 0.08  | 2.20 | 0.70  | 4.98E-01 | 7.38E-01 | -6.44 |
| 1441235_PM_at   | Nup133                | NUP133   | -0.07 | 2.54 | -0.70 | 4.98E-01 | 7.38E-01 | -6.44 |
| 1447355_PM_at   | Acs1                  | ACSL1    | 0.06  | 1.97 | 0.70  | 4.98E-01 | 7.38E-01 | -6.44 |
| 1443187_PM_at   | Rspo3                 | NA       | 0.11  | 2.69 | 0.70  | 4.98E-01 | 7.38E-01 | -6.44 |
| 1418873_PM_at   | Sfxn4                 | SFXN4    | -0.11 | 2.63 | -0.70 | 4.98E-01 | 7.38E-01 | -6.44 |
| 1421480_PM_a_at | Adarb1                | ADARB1   | 0.07  | 2.65 | 0.70  | 4.98E-01 | 7.38E-01 | -6.44 |
| 1447761_PM_x_at | Sod1                  | NA       | 0.07  | 2.52 | 0.70  | 4.98E-01 | 7.38E-01 | -6.44 |
| 1429053_PM_at   | Mtc1                  | MTCL1    | 0.20  | 4.66 | 0.70  | 4.98E-01 | 7.38E-01 | -6.44 |
| 1428328_PM_at   | Nup50                 | NUP50    | -0.17 | 4.47 | -0.70 | 4.98E-01 | 7.38E-01 | -6.44 |
| 1424877_PM_a_at | Alad                  | ALAD     | 0.09  | 2.80 | 0.70  | 4.98E-01 | 7.38E-01 | -6.44 |
| 1432591_PM_at   | Pappa                 | PAPPA    | 0.08  | 2.29 | 0.70  | 4.98E-01 | 7.38E-01 | -6.44 |
| 1458867_PM_at   | Edil3                 | EDIL3    | -0.10 | 2.08 | -0.70 | 4.98E-01 | 7.38E-01 | -6.44 |
| 1460705_PM_at   | Rps6kb1               | RPS6KB1  | -0.16 | 2.88 | -0.70 | 4.98E-01 | 7.38E-01 | -6.44 |
| 1437963_PM_at   | Gm4258                | NA       | 0.06  | 2.12 | 0.70  | 4.98E-01 | 7.38E-01 | -6.44 |
| 1435064_PM_a_at | Tmem27                | TMEM27   | 0.13  | 2.34 | 0.70  | 4.98E-01 | 7.38E-01 | -6.44 |
| 1423686_PM_a_at | Prr13                 | NA       | 0.12  | 7.90 | 0.70  | 4.99E-01 | 7.38E-01 | -6.44 |
| 1443081_PM_at   | ---                   | NA       | 0.07  | 2.33 | 0.70  | 4.99E-01 | 7.38E-01 | -6.44 |
| 1422655_PM_at   | Ptch2                 | PTCH2    | 0.09  | 2.51 | 0.70  | 4.99E-01 | 7.38E-01 | -6.44 |
| 1415693_PM_at   | Der1                  | DERL1    | -0.13 | 4.19 | -0.70 | 4.99E-01 | 7.38E-01 | -6.44 |
| 1458631_PM_at   | ---                   | NA       | 0.08  | 2.13 | 0.70  | 4.99E-01 | 7.38E-01 | -6.44 |
| 1437281_PM_x_at | Xab2                  | XAB2     | -0.39 | 5.61 | -0.70 | 4.99E-01 | 7.38E-01 | -6.44 |
| 1430454_PM_x_at | Bcl2l2                | BCL2L2   | 0.09  | 2.62 | 0.70  | 4.99E-01 | 7.38E-01 | -6.44 |
| 1418726_PM_a_at | Tnnt2                 | TNNT2    | 0.27  | 2.58 | 0.70  | 4.99E-01 | 7.38E-01 | -6.44 |
| 1420836_PM_at   | Slc25a30              | SLC25A30 | 0.07  | 1.95 | 0.70  | 4.99E-01 | 7.39E-01 | -6.44 |
| 1418073_PM_at   | Acot9                 | ACOT9    | -0.21 | 3.74 | -0.70 | 4.99E-01 | 7.39E-01 | -6.44 |
| 1455887_PM_at   | Alg8                  | ALG8     | -0.18 | 2.98 | -0.70 | 4.99E-01 | 7.39E-01 | -6.44 |
| 1430682_PM_at   | Stpg1                 | STPG1    | -0.08 | 2.57 | -0.70 | 4.99E-01 | 7.39E-01 | -6.44 |
| 1428757_PM_at   | Aasdhppt              | AASDHPPT | 0.09  | 2.98 | 0.70  | 4.99E-01 | 7.39E-01 | -6.44 |
| 1416238_PM_at   | Tie1                  | TIE1     | 0.09  | 2.30 | 0.70  | 4.99E-01 | 7.39E-01 | -6.44 |
| 1455991_PM_at   | Ccb12                 | KYAT3    | 0.15  | 2.50 | 0.70  | 4.99E-01 | 7.39E-01 | -6.44 |
| 1441945_PM_s_at | Abhd14a               | ABHD14A  | 0.66  | 5.53 | 0.70  | 4.99E-01 | 7.39E-01 | -6.44 |
| 1457143_PM_at   | LOC105245355          | NA       | 0.06  | 2.12 | 0.70  | 4.99E-01 | 7.39E-01 | -6.44 |
| 1460638_PM_at   | Yars                  | YARS     | -0.11 | 2.40 | -0.70 | 4.99E-01 | 7.39E-01 | -6.44 |
| 1438536_PM_at   | 5830411N06Rik         | NA       | 0.08  | 2.45 | 0.70  | 4.99E-01 | 7.39E-01 | -6.44 |
| 1438932_PM_at   | Rasgrp2               | RASGRP2  | 0.09  | 2.22 | 0.70  | 4.99E-01 | 7.39E-01 | -6.44 |
| 1427732_PM_s_at | Abcg4                 | ABCG4    | 0.12  | 3.58 | 0.70  | 4.99E-01 | 7.39E-01 | -6.44 |
| 1427877_PM_at   | Zc3h15                | ZC3H15   | 0.17  | 7.18 | 0.70  | 4.99E-01 | 7.39E-01 | -6.44 |
| 1447447_PM_s_at | Srrm1                 | SRRM1    | 0.29  | 4.98 | 0.70  | 4.99E-01 | 7.39E-01 | -6.44 |
| 1440599_PM_at   | Olfir658              | ORS2N4   | 0.08  | 2.36 | 0.70  | 4.99E-01 | 7.39E-01 | -6.44 |
| 1430602_PM_at   | ---                   | NA       | -0.06 | 2.24 | -0.70 | 4.99E-01 | 7.39E-01 | -6.44 |
| 1427702_PM_at   | Zfp1                  | NA       | -0.18 | 2.79 | -0.70 | 4.99E-01 | 7.39E-01 | -6.44 |
| 1418928_PM_a_at | Mettl21a              | METTL21A | -0.08 | 2.49 | -0.70 | 4.99E-01 | 7.39E-01 | -6.44 |
| 1460158_PM_at   | ---                   | NA       | 0.07  | 2.50 | 0.70  | 4.99E-01 | 7.39E-01 | -6.44 |
| 1445759_PM_at   | ---                   | NA       | 0.07  | 2.26 | 0.70  | 4.99E-01 | 7.39E-01 | -6.44 |
| 1423999_PM_at   | Abl1                  | ABL1     | 0.10  | 2.62 | 0.70  | 4.99E-01 | 7.39E-01 | -6.44 |
| 1442878_PM_at   | LOC102642619 ///Prdx6 | PRDX6    | -0.27 | 3.01 | -0.70 | 5.00E-01 | 7.39E-01 | -6.44 |
| 1458026_PM_at   | Zfp462                | ZNF462   | -0.09 | 2.51 | -0.70 | 5.00E-01 | 7.39E-01 | -6.44 |
| 1427102_PM_at   | Sifn4                 | SLFN12   | 0.07  | 2.53 | 0.70  | 5.00E-01 | 7.39E-01 | -6.44 |
| 1422602_PM_a_at | Wnt5b                 | WNT5B    | 0.09  | 2.52 | 0.70  | 5.00E-01 | 7.39E-01 | -6.44 |
| 1417884_PM_at   | Slc16a6               | SLC16A6  | 0.13  | 2.67 | 0.70  | 4.99E-01 | 7.39E-01 | -6.44 |
| 1436508_PM_at   | Mlec                  | MLEC     | 0.33  | 5.74 | 0.70  | 5.00E-01 | 7.39E-01 | -6.44 |
| 1458175_PM_at   | Spon2                 | NA       | -0.07 | 2.19 | -0.70 | 5.00E-01 | 7.39E-01 | -6.44 |
| 1434167_PM_at   | Slc35e4               | SLC35E4  | 0.06  | 3.25 | 0.70  | 5.00E-01 | 7.39E-01 | -6.44 |
| 1452916_PM_at   | Kmt2b                 | KMT2B    | 0.10  | 2.26 | 0.70  | 5.00E-01 | 7.39E-01 | -6.44 |
| 1456201_PM_at   | 4632427E13Rik         | NA       | 0.16  | 3.03 | 0.70  | 5.00E-01 | 7.39E-01 | -6.44 |
| 1421931_PM_at   | Icos                  | ICOS     | 0.13  | 2.85 | 0.70  | 5.00E-01 | 7.39E-01 | -6.44 |
| 1435988_PM_x_at | Ik                    | IK       | -0.13 | 6.05 | -0.70 | 5.00E-01 | 7.39E-01 | -6.44 |
| 1418078_PM_at   | Psme3                 | PSME3    | -0.33 | 7.04 | -0.70 | 5.00E-01 | 7.39E-01 | -6.44 |
| 1424615_PM_at   | Pgap2                 | PGAP2    | 0.15  | 2.51 | 0.70  | 5.00E-01 | 7.39E-01 | -6.44 |
| 1435506_PM_at   | Cdk13                 | CDKL3    | -0.10 | 2.23 | -0.70 | 5.00E-01 | 7.39E-01 | -6.44 |
| 1427510_PM_at   | Gnai1                 | GNAI1    | -0.24 | 7.89 | -0.70 | 5.00E-01 | 7.39E-01 | -6.44 |
| 1444718_PM_at   | Trem12                | TREML2   | 0.06  | 2.25 | 0.70  | 5.00E-01 | 7.39E-01 | -6.44 |
| 1433557_PM_at   | Cbx7                  | CBX7     | 0.08  | 3.27 | 0.70  | 5.00E-01 | 7.39E-01 | -6.44 |
| 1440570_PM_at   | ---                   | NA       | -0.06 | 2.15 | -0.70 | 5.00E-01 | 7.39E-01 | -6.44 |
| 1422358_PM_at   | Fpr-rs4               | FPR3     | 0.08  | 2.11 | 0.70  | 5.00E-01 | 7.39E-01 | -6.44 |

|                 |                           |            |       |      |       |          |          |       |
|-----------------|---------------------------|------------|-------|------|-------|----------|----------|-------|
| 1459128_PM_at   | ---                       | NA         | 0.07  | 2.57 | 0.70  | 5.00E-01 | 7.39E-01 | -6.44 |
| 1437239_PM_x_at | Phc2                      | PHC2       | 0.43  | 4.94 | 0.70  | 5.00E-01 | 7.39E-01 | -6.44 |
| 1441155_PM_at   | ---                       | NA         | 0.26  | 3.36 | 0.70  | 5.00E-01 | 7.39E-01 | -6.44 |
| 1439038_PM_at   | Khynyn                    | KHNYN      | 0.13  | 2.57 | 0.70  | 5.00E-01 | 7.39E-01 | -6.44 |
| 1441307_PM_at   | Krtap4-1                  | KRTAP4-16  | -0.08 | 2.15 | -0.70 | 5.00E-01 | 7.39E-01 | -6.44 |
| 1450872_PM_s_at | Lipa                      | LIPA       | 0.14  | 4.42 | 0.70  | 5.00E-01 | 7.39E-01 | -6.44 |
| 1450762_PM_s_at | Zfp24                     | ZNF24      | -0.18 | 3.21 | -0.70 | 5.00E-01 | 7.39E-01 | -6.44 |
| 1416372_PM_at   | Ptdss1                    | PTDSS1     | -0.22 | 3.96 | -0.70 | 5.00E-01 | 7.40E-01 | -6.44 |
| 1432952_PM_at   | LOC102633321              | NA         | 0.07  | 2.44 | 0.70  | 5.00E-01 | 7.40E-01 | -6.44 |
| 1418992_PM_at   | F10                       | F10        | 0.09  | 2.56 | 0.70  | 5.00E-01 | 7.40E-01 | -6.44 |
| 1441732_PM_at   | ---                       | NA         | 0.11  | 2.93 | 0.70  | 5.00E-01 | 7.40E-01 | -6.44 |
| 1445869_PM_at   | ---                       | NA         | 0.09  | 3.12 | 0.70  | 5.00E-01 | 7.40E-01 | -6.44 |
| 1420773_PM_at   | Usp17la                   | NA         | 0.10  | 2.31 | 0.70  | 5.00E-01 | 7.40E-01 | -6.44 |
| 1420929_PM_at   | Ctnna1                    | CTNNAL1    | 0.12  | 2.73 | 0.70  | 5.00E-01 | 7.40E-01 | -6.44 |
| 1445597_PM_s_at | Pla2g16                   | PLA2G16    | 0.27  | 5.02 | 0.70  | 5.01E-01 | 7.40E-01 | -6.44 |
| 1457291_PM_at   | Gm19835                   | NA         | -0.15 | 2.24 | -0.70 | 5.01E-01 | 7.40E-01 | -6.44 |
| 1429174_PM_at   | Wdr34                     | WDR34      | 0.10  | 2.58 | 0.70  | 5.01E-01 | 7.40E-01 | -6.44 |
| 1437976_PM_x_at | Gm8290 /// Rpl23a         | RPL23A     | 0.13  | 8.82 | 0.70  | 5.01E-01 | 7.40E-01 | -6.44 |
| 1455999_PM_at   | Cphx1 /// Cphx2 /// Cphx3 | ACO09122.1 | 0.08  | 2.49 | 0.70  | 5.01E-01 | 7.40E-01 | -6.44 |
| 1418469_PM_at   | Nrip1                     | NRP1       | 0.13  | 3.29 | 0.70  | 5.01E-01 | 7.40E-01 | -6.44 |
| 1445312_PM_at   | ---                       | NA         | 0.05  | 2.35 | 0.70  | 5.01E-01 | 7.40E-01 | -6.44 |
| 1422457_PM_s_at | Sumo3                     | SUMO3      | -0.27 | 4.48 | -0.70 | 5.01E-01 | 7.40E-01 | -6.44 |
| 1440193_PM_at   | Ankrd12                   | ANKRD12    | 0.11  | 8.95 | 0.70  | 5.01E-01 | 7.40E-01 | -6.45 |
| 1432292_PM_at   | 4930504C09Rik             | NA         | -0.13 | 3.12 | -0.70 | 5.01E-01 | 7.40E-01 | -6.45 |
| 1448970_PM_at   | Slc25a46                  | SLC25A46   | -0.19 | 3.51 | -0.70 | 5.01E-01 | 7.40E-01 | -6.45 |
| 1445094_PM_at   | D19Erttd744e              | NA         | -0.09 | 2.29 | -0.70 | 5.01E-01 | 7.40E-01 | -6.45 |
| 1442740_PM_at   | Prdm5                     | PRDM5      | -0.08 | 1.99 | -0.70 | 5.01E-01 | 7.40E-01 | -6.45 |
| 1454442_PM_at   | ---                       | NA         | -0.05 | 2.12 | -0.70 | 5.01E-01 | 7.40E-01 | -6.45 |
| 1450917_PM_at   | Myom2                     | MYOM2      | 0.06  | 2.17 | 0.70  | 5.01E-01 | 7.40E-01 | -6.45 |
| 1459402_PM_at   | Oprm1                     | OPRM1      | 0.09  | 2.36 | 0.70  | 5.01E-01 | 7.40E-01 | -6.45 |
| 1447507_PM_at   | C80406                    | NA         | 0.11  | 2.51 | 0.70  | 5.01E-01 | 7.40E-01 | -6.45 |
| 1443098_PM_at   | ---                       | NA         | 0.12  | 2.59 | 0.70  | 5.01E-01 | 7.40E-01 | -6.45 |
| 1423788_PM_at   | Nup133                    | NUP133     | 0.13  | 2.38 | 0.70  | 5.01E-01 | 7.40E-01 | -6.45 |
| 1434524_PM_at   | Eif2b3                    | EIF2B3     | 0.15  | 3.29 | 0.70  | 5.01E-01 | 7.40E-01 | -6.45 |
| 1433006_PM_at   | 5430430B14Rik             | NA         | -0.08 | 2.80 | -0.70 | 5.01E-01 | 7.40E-01 | -6.45 |
| 1447645_PM_x_at | Kcnk13                    | KCNK13     | 0.05  | 2.19 | 0.70  | 5.01E-01 | 7.40E-01 | -6.45 |
| 1420377_PM_at   | St8sia2                   | ST8SIA2    | 0.11  | 2.43 | 0.70  | 5.01E-01 | 7.40E-01 | -6.45 |
| 1431011_PM_at   | Dlst                      | DLST       | 0.07  | 2.53 | 0.70  | 5.01E-01 | 7.40E-01 | -6.45 |
| 1433239_PM_at   | ---                       | NA         | 0.06  | 2.46 | 0.70  | 5.01E-01 | 7.40E-01 | -6.45 |
| 1458492_PM_x_at | Ntm                       | NTM        | 0.21  | 5.96 | 0.70  | 5.01E-01 | 7.40E-01 | -6.45 |
| 1419159_PM_at   | Golga3                    | GOLGA3     | -0.16 | 3.56 | -0.70 | 5.01E-01 | 7.40E-01 | -6.45 |
| 1455656_PM_at   | Btla                      | BTLA       | -0.09 | 2.33 | -0.70 | 5.01E-01 | 7.40E-01 | -6.45 |
| 1425418_PM_at   | Wfdc5                     | WFDC5      | 0.06  | 2.32 | 0.70  | 5.01E-01 | 7.40E-01 | -6.45 |
| 1420681_PM_at   | 1700120K04Rik             | NA         | 0.06  | 2.06 | 0.70  | 5.02E-01 | 7.40E-01 | -6.45 |
| 1451902_PM_at   | Zfp758                    | NA         | 0.09  | 2.26 | 0.70  | 5.02E-01 | 7.40E-01 | -6.45 |
| 1455909_PM_at   | Spinkl                    | NA         | 0.06  | 2.31 | 0.70  | 5.02E-01 | 7.40E-01 | -6.45 |
| 1456474_PM_at   | ---                       | NA         | 0.06  | 2.08 | 0.70  | 5.02E-01 | 7.40E-01 | -6.45 |
| 1431286_PM_at   | 5830416I19Rik             | NA         | 0.07  | 2.05 | 0.70  | 5.02E-01 | 7.40E-01 | -6.45 |
| 1439719_PM_at   | Themis                    | THEMIS     | 0.10  | 2.51 | 0.70  | 5.02E-01 | 7.40E-01 | -6.45 |
| 1457694_PM_at   | Eno4                      | ENO4       | -0.10 | 2.14 | -0.70 | 5.02E-01 | 7.40E-01 | -6.45 |
| 1458309_PM_at   | ---                       | NA         | -0.09 | 2.44 | -0.70 | 5.02E-01 | 7.40E-01 | -6.45 |
| 1424387_PM_at   | Prl8a8                    | NA         | -0.08 | 2.23 | -0.70 | 5.02E-01 | 7.40E-01 | -6.45 |
| 1435806_PM_at   | Utp23                     | UTP23      | 0.06  | 2.21 | 0.70  | 5.02E-01 | 7.40E-01 | -6.45 |
| 1439325_PM_at   | ---                       | NA         | 0.07  | 2.59 | 0.70  | 5.02E-01 | 7.40E-01 | -6.45 |
| 1437930_PM_at   | Colgalt2                  | COLGALT2   | 0.07  | 2.82 | 0.70  | 5.02E-01 | 7.40E-01 | -6.45 |
| 1437392_PM_at   | Syndig1                   | SYNDIG1    | 0.09  | 2.36 | 0.70  | 5.02E-01 | 7.40E-01 | -6.45 |
| 1425451_PM_s_at | Chi3 /// Chi4             | CHIA       | 0.09  | 2.70 | 0.70  | 5.02E-01 | 7.40E-01 | -6.45 |
| 1459680_PM_at   | ---                       | NA         | 0.10  | 2.29 | 0.70  | 5.02E-01 | 7.40E-01 | -6.45 |
| 1442463_PM_at   | ---                       | NA         | 0.10  | 2.24 | 0.70  | 5.02E-01 | 7.40E-01 | -6.45 |
| 1429176_PM_at   | Lrsam1                    | LRSAM1     | 0.13  | 2.57 | 0.70  | 5.02E-01 | 7.40E-01 | -6.45 |
| 1457358_PM_at   | LOC105247524              | NA         | 0.23  | 2.51 | 0.70  | 5.02E-01 | 7.40E-01 | -6.45 |
| 1437480_PM_at   | Ska2                      | SKA2       | 0.06  | 2.28 | 0.70  | 5.02E-01 | 7.40E-01 | -6.45 |
| 1433182_PM_at   | ---                       | NA         | 0.08  | 2.36 | 0.70  | 5.02E-01 | 7.40E-01 | -6.45 |
| 1435096_PM_at   | Ric8b                     | RIC8B      | 0.16  | 3.06 | 0.70  | 5.02E-01 | 7.40E-01 | -6.45 |
| 1446065_PM_at   | ---                       | NA         | 0.07  | 2.16 | 0.70  | 5.02E-01 | 7.40E-01 | -6.45 |
| 1430729_PM_at   | Myg1                      | C12orf10   | 0.14  | 3.73 | 0.70  | 5.02E-01 | 7.40E-01 | -6.45 |
| 1442588_PM_at   | Panc2                     | NA         | 0.14  | 2.81 | 0.70  | 5.02E-01 | 7.40E-01 | -6.45 |
| 1449437_PM_at   | D6Wsu163e                 | C12orf4    | -0.27 | 3.41 | -0.70 | 5.02E-01 | 7.40E-01 | -6.45 |
| 1422219_PM_a_at | Tbx20                     | TBX20      | -0.07 | 2.35 | -0.70 | 5.02E-01 | 7.40E-01 | -6.45 |
| 1432041_PM_at   | ---                       | NA         | 0.06  | 1.99 | 0.70  | 5.02E-01 | 7.40E-01 | -6.45 |
| 1419341_PM_at   | Epha8                     | EPHA8      | 0.07  | 2.30 | 0.70  | 5.02E-01 | 7.40E-01 | -6.45 |
| 1439243_PM_x_at | Cops5                     | COP5       | 0.10  | 3.04 | 0.70  | 5.02E-01 | 7.41E-01 | -6.45 |
| 1426981_PM_at   | Pcsk6                     | PCSK6      | 0.13  | 3.24 | 0.70  | 5.02E-01 | 7.41E-01 | -6.45 |
| 1452139_PM_at   | Slc35c1                   | SLC35C1    | 0.15  | 2.47 | 0.70  | 5.02E-01 | 7.41E-01 | -6.45 |

|                 |                                                                              |              |       |      |       |          |          |       |
|-----------------|------------------------------------------------------------------------------|--------------|-------|------|-------|----------|----------|-------|
| 1416409_PM_at   | Acox1                                                                        | ACOX1        | -0.15 | 5.21 | -0.70 | 5.02E-01 | 7.41E-01 | -6.45 |
| 1424602_PM_s_at | Xrcc4                                                                        | XRCC4        | 0.07  | 2.14 | 0.70  | 5.02E-01 | 7.41E-01 | -6.45 |
| 1439263_PM_at   | ---                                                                          | NA           | 0.18  | 2.55 | 0.70  | 5.02E-01 | 7.41E-01 | -6.45 |
| 1442764_PM_at   | Suv420h1                                                                     | KMT5B        | -0.11 | 2.32 | -0.69 | 5.02E-01 | 7.41E-01 | -6.45 |
| 1445414_PM_at   | ---                                                                          | NA           | 0.08  | 2.31 | 0.69  | 5.02E-01 | 7.41E-01 | -6.45 |
| 1445089_PM_at   | ---                                                                          | NA           | 0.09  | 2.42 | 0.69  | 5.02E-01 | 7.41E-01 | -6.45 |
| 1424904_PM_at   | Vwa8                                                                         | NA           | 0.08  | 2.41 | 0.69  | 5.02E-01 | 7.41E-01 | -6.45 |
| 1417905_PM_at   | Prf7a2                                                                       | PRL          | 0.06  | 1.98 | 0.69  | 5.03E-01 | 7.41E-01 | -6.45 |
| 1431557_PM_at   | ---                                                                          | NA           | 0.07  | 2.23 | 0.69  | 5.03E-01 | 7.41E-01 | -6.45 |
| 1454325_PM_at   | Kctd7                                                                        | NA           | 0.10  | 2.51 | 0.69  | 5.03E-01 | 7.41E-01 | -6.45 |
| 1453127_PM_at   | Ppm1j                                                                        | PPM1J        | 0.11  | 2.74 | 0.69  | 5.03E-01 | 7.41E-01 | -6.45 |
| 1433409_PM_at   | 4930402H24Rik                                                                | NA           | 0.16  | 3.09 | 0.69  | 5.03E-01 | 7.41E-01 | -6.45 |
| 1459572_PM_at   | C86371                                                                       | NA           | 0.06  | 1.99 | 0.69  | 5.03E-01 | 7.41E-01 | -6.45 |
| 1457109_PM_x_at | Gm26919                                                                      | NA           | -0.06 | 2.01 | -0.69 | 5.03E-01 | 7.41E-01 | -6.45 |
| 1418187_PM_at   | Ramp2                                                                        | RAMP2        | -0.06 | 3.60 | -0.69 | 5.03E-01 | 7.41E-01 | -6.45 |
| 1449893_PM_a_at | Lrig1                                                                        | LRI1G1       | -0.27 | 3.31 | -0.69 | 5.03E-01 | 7.41E-01 | -6.45 |
| 1457693_PM_a_at | Eno4                                                                         | ENO4         | 0.21  | 2.39 | 0.69  | 5.03E-01 | 7.41E-01 | -6.45 |
| 1424872_PM_at   | Zfp932                                                                       | NA           | -0.26 | 3.72 | -0.69 | 5.03E-01 | 7.41E-01 | -6.45 |
| 1437156_PM_at   | Necab1                                                                       | NECAB1       | -0.16 | 2.58 | -0.69 | 5.03E-01 | 7.41E-01 | -6.45 |
| 1457373_PM_at   | Cdh19                                                                        | CDH19        | 0.07  | 2.17 | 0.69  | 5.03E-01 | 7.41E-01 | -6.45 |
| 1426963_PM_at   | Pacs2                                                                        | PACS2        | 0.09  | 2.61 | 0.69  | 5.03E-01 | 7.41E-01 | -6.45 |
| 1445590_PM_at   | ---                                                                          | NA           | 0.11  | 2.83 | 0.69  | 5.03E-01 | 7.41E-01 | -6.45 |
| 1437008_PM_x_at | Tmem109                                                                      | TMEM109      | 0.14  | 9.57 | 0.69  | 5.03E-01 | 7.41E-01 | -6.45 |
| 1456890_PM_at   | Ddx58                                                                        | DDX58        | -0.14 | 2.48 | -0.69 | 5.03E-01 | 7.41E-01 | -6.45 |
| 1418734_PM_at   | H2-Q2                                                                        | NA           | -0.06 | 1.92 | -0.69 | 5.03E-01 | 7.41E-01 | -6.45 |
| 1429745_PM_at   | DXBay18 /// Gm14685 /// Gm5639 /// Gm5640 /// Gm5936 /// Gm8617              | NA           | -0.07 | 2.46 | -0.69 | 5.03E-01 | 7.41E-01 | -6.45 |
| 1424499_PM_s_at | Atl3                                                                         | ATL3         | -0.12 | 2.56 | -0.69 | 5.03E-01 | 7.41E-01 | -6.45 |
| 1437276_PM_at   | Hinfp                                                                        | NA           | 0.24  | 3.49 | 0.69  | 5.03E-01 | 7.41E-01 | -6.45 |
| 1436860_PM_at   | Senp7                                                                        | SENP7        | 0.12  | 2.79 | 0.69  | 5.03E-01 | 7.41E-01 | -6.45 |
| 1431566_PM_at   | 9030622O22Rik                                                                | NA           | 0.06  | 2.44 | 0.69  | 5.03E-01 | 7.42E-01 | -6.45 |
| 1426042_PM_at   | Fgd4                                                                         | FGD4         | -0.11 | 2.99 | -0.69 | 5.03E-01 | 7.42E-01 | -6.45 |
| 1440234_PM_at   | Lymr9                                                                        | AC005697.1   | -0.19 | 2.36 | -0.69 | 5.04E-01 | 7.42E-01 | -6.45 |
| 1426399_PM_at   | Vwa1                                                                         | VWA1         | -0.12 | 2.85 | -0.69 | 5.04E-01 | 7.42E-01 | -6.45 |
| 1453506_PM_at   | Saxo1                                                                        | SAXO1        | -0.08 | 2.62 | -0.69 | 5.03E-01 | 7.42E-01 | -6.45 |
| 1443207_PM_at   | ---                                                                          | NA           | 0.05  | 2.05 | 0.69  | 5.04E-01 | 7.42E-01 | -6.45 |
| 1457721_PM_at   | Ppara                                                                        | NA           | 0.05  | 2.31 | 0.69  | 5.04E-01 | 7.42E-01 | -6.45 |
| 1424555_PM_at   | 9430015G10Rik                                                                | C1orf159     | 0.06  | 2.20 | 0.69  | 5.04E-01 | 7.42E-01 | -6.45 |
| 1420672_PM_at   | Kcne1                                                                        | KCNE1B       | 0.07  | 2.16 | 0.69  | 5.04E-01 | 7.42E-01 | -6.45 |
| 1430930_PM_at   | 0610038B21Rik                                                                | NA           | 0.09  | 2.40 | 0.69  | 5.04E-01 | 7.42E-01 | -6.45 |
| 1430410_PM_at   | 1810019N24Rik                                                                | NA           | 0.09  | 2.36 | 0.69  | 5.03E-01 | 7.42E-01 | -6.45 |
| 1426093_PM_at   | Trim34a                                                                      | TRIM6-TRIM34 | 0.09  | 2.51 | 0.69  | 5.04E-01 | 7.42E-01 | -6.45 |
| 1459558_PM_at   | ---                                                                          | NA           | 0.10  | 2.36 | 0.69  | 5.04E-01 | 7.42E-01 | -6.45 |
| 1458131_PM_at   | ---                                                                          | NA           | 0.11  | 2.62 | 0.69  | 5.04E-01 | 7.42E-01 | -6.45 |
| 1433709_PM_at   | Cant1                                                                        | CANT1        | 0.12  | 4.84 | 0.69  | 5.04E-01 | 7.42E-01 | -6.45 |
| 1433125_PM_at   | 5330422M15Rik                                                                | NA           | 0.12  | 3.02 | 0.69  | 5.04E-01 | 7.42E-01 | -6.45 |
| 1444333_PM_at   | ---                                                                          | NA           | 0.13  | 2.77 | 0.69  | 5.04E-01 | 7.42E-01 | -6.45 |
| 1424743_PM_at   | Jmjd8                                                                        | JMJD8        | 0.15  | 3.34 | 0.69  | 5.04E-01 | 7.42E-01 | -6.45 |
| 1418228_PM_at   | Nfu1                                                                         | NFU1         | 0.27  | 5.25 | 0.69  | 5.04E-01 | 7.42E-01 | -6.45 |
| 1420079_PM_at   | Vmn2r-ps115 /// Vmn2r-ps117 /// Vmn2r103 /// Vmn2r96 /// Vmn2r97 /// Vmn2r98 | NA           | -0.08 | 2.41 | -0.69 | 5.04E-01 | 7.42E-01 | -6.45 |
| 1459089_PM_at   | Gm11756 /// Gm11757 /// Gm11758 /// Gm13871                                  | NA           | 0.14  | 4.11 | 0.69  | 5.04E-01 | 7.42E-01 | -6.45 |
| 1452287_PM_at   | Msi1                                                                         | MSI1         | -0.15 | 3.47 | -0.69 | 5.04E-01 | 7.42E-01 | -6.45 |
| 1432072_PM_at   | Kif2a                                                                        | KIF2A        | -0.08 | 2.20 | -0.69 | 5.04E-01 | 7.42E-01 | -6.45 |
| 1441540_PM_at   | ---                                                                          | NA           | 0.14  | 2.78 | 0.69  | 5.04E-01 | 7.42E-01 | -6.45 |
| 1427891_PM_at   | Gimap6                                                                       | GIMAP6       | 0.09  | 2.44 | 0.69  | 5.04E-01 | 7.42E-01 | -6.45 |
| 1424219_PM_at   | Mrm1                                                                         | MRM1         | 0.13  | 2.75 | 0.69  | 5.04E-01 | 7.42E-01 | -6.45 |
| 1458665_PM_at   | ---                                                                          | NA           | -0.09 | 2.87 | -0.69 | 5.04E-01 | 7.42E-01 | -6.45 |
| 1441709_PM_at   | Slc11a2                                                                      | SLC11A2      | -0.08 | 2.22 | -0.69 | 5.04E-01 | 7.42E-01 | -6.45 |
| 1417329_PM_at   | Slc23a2                                                                      | SLC23A2      | 0.18  | 3.58 | 0.69  | 5.04E-01 | 7.42E-01 | -6.45 |
| 1449099_PM_at   | Lrba                                                                         | LRBA         | 0.11  | 2.45 | 0.69  | 5.04E-01 | 7.42E-01 | -6.45 |
| 1428188_PM_at   | Strada                                                                       | STRADA       | 0.12  | 2.67 | 0.69  | 5.04E-01 | 7.42E-01 | -6.45 |
| 1426235_PM_a_at | Glul                                                                         | GLUL         | -0.26 | 5.32 | -0.69 | 5.04E-01 | 7.42E-01 | -6.45 |
| 1440146_PM_at   | Vps13a                                                                       | VPS13A       | -0.19 | 2.83 | -0.69 | 5.04E-01 | 7.42E-01 | -6.45 |
| 1433506_PM_at   | Lrrc8d                                                                       | LRRCD8       | -0.17 | 2.98 | -0.69 | 5.04E-01 | 7.42E-01 | -6.45 |
| 1442913_PM_at   | Gm32444                                                                      | NA           | -0.16 | 3.24 | -0.69 | 5.04E-01 | 7.42E-01 | -6.45 |
| 1446270_PM_at   | E030042O20Rik                                                                | NA           | -0.11 | 2.43 | -0.69 | 5.04E-01 | 7.42E-01 | -6.45 |
| 1442033_PM_at   | C1qtnf9                                                                      | C1QTNF9B     | 0.06  | 2.29 | 0.69  | 5.04E-01 | 7.42E-01 | -6.45 |
| 1419167_PM_at   | Prap1                                                                        | PRAP1        | 0.06  | 2.33 | 0.69  | 5.04E-01 | 7.42E-01 | -6.45 |
| 1434737_PM_at   | Obfc1                                                                        | STN1         | 0.06  | 2.56 | 0.69  | 5.04E-01 | 7.42E-01 | -6.45 |

|                 |                                  |          |       |      |       |          |          |       |
|-----------------|----------------------------------|----------|-------|------|-------|----------|----------|-------|
| 1438645_PM_x_at | Bace2                            | BACE2    | 0.06  | 2.43 | 0.69  | 5.04E-01 | 7.42E-01 | -6.45 |
| 1439581_PM_at   | ---                              | NA       | 0.06  | 2.55 | 0.69  | 5.04E-01 | 7.42E-01 | -6.45 |
| 1437444_PM_at   | BC037039                         | NA       | 0.07  | 2.47 | 0.69  | 5.04E-01 | 7.42E-01 | -6.45 |
| 1435067_PM_at   | Rabl6                            | RABL6    | 0.08  | 2.92 | 0.69  | 5.04E-01 | 7.42E-01 | -6.45 |
| 1451584_PM_at   | Havcr2                           | HAVCR2   | 0.08  | 2.51 | 0.69  | 5.04E-01 | 7.42E-01 | -6.45 |
| 1422097_PM_at   | Mgat4d                           | MGAT4D   | 0.11  | 2.77 | 0.69  | 5.04E-01 | 7.42E-01 | -6.45 |
| 1457714_PM_at   | Cox20                            | NA       | 0.11  | 2.71 | 0.69  | 5.04E-01 | 7.42E-01 | -6.45 |
| 1442585_PM_at   | LOC102638475 ///<br>LOC102638670 | NA       | 0.14  | 4.97 | 0.69  | 5.04E-01 | 7.42E-01 | -6.45 |
| 1428966_PM_at   | Fam103a1                         | FAM103A1 | 0.21  | 6.57 | 0.69  | 5.04E-01 | 7.42E-01 | -6.45 |
| 1456753_PM_at   | Foxo4                            | FOXO4    | 0.22  | 2.60 | 0.69  | 5.04E-01 | 7.42E-01 | -6.45 |
| 1429375_PM_at   | Anapc10                          | ANAPC10  | 0.25  | 2.88 | 0.69  | 5.04E-01 | 7.42E-01 | -6.45 |
| 1455872_PM_at   | Fam167a                          | FAM167A  | -0.16 | 2.42 | -0.69 | 5.04E-01 | 7.42E-01 | -6.45 |
| 1452709_PM_at   | Poldip3                          | POLDIP3  | 0.10  | 3.04 | 0.69  | 5.04E-01 | 7.42E-01 | -6.45 |
| 1424486_PM_a_at | Txnrd1                           | TXNRD1   | -0.18 | 3.03 | -0.69 | 5.04E-01 | 7.42E-01 | -6.45 |
| 1426373_PM_at   | Ski                              | SKI      | 0.24  | 3.85 | 0.69  | 5.05E-01 | 7.42E-01 | -6.45 |
| 1421809_PM_at   | Dgcr2                            | DGCR2    | 0.13  | 3.18 | 0.69  | 5.05E-01 | 7.42E-01 | -6.45 |
| 1447568_PM_at   | ---                              | NA       | 0.46  | 4.15 | 0.69  | 5.05E-01 | 7.42E-01 | -6.45 |
| 1430958_PM_at   | 4933430N04Rik                    | NA       | 0.07  | 2.20 | 0.69  | 5.05E-01 | 7.42E-01 | -6.45 |
| 1416877_PM_a_at | Mrp51                            | MRPL51   | 0.19  | 5.31 | 0.69  | 5.05E-01 | 7.42E-01 | -6.45 |
| 1440307_PM_at   | Gtf3c2                           | GTF3C2   | 0.13  | 2.63 | 0.69  | 5.05E-01 | 7.42E-01 | -6.45 |
| 1447081_PM_at   | ---                              | NA       | 0.15  | 5.98 | 0.69  | 5.05E-01 | 7.43E-01 | -6.45 |
| 1432387_PM_at   | ---                              | NA       | -0.12 | 2.24 | -0.69 | 5.05E-01 | 7.43E-01 | -6.45 |
| 1458426_PM_at   | ---                              | NA       | 0.08  | 2.25 | 0.69  | 5.05E-01 | 7.43E-01 | -6.45 |
| 1432996_PM_at   | ---                              | NA       | 0.12  | 2.26 | 0.69  | 5.05E-01 | 7.43E-01 | -6.45 |
| 1443362_PM_at   | ---                              | NA       | 0.25  | 2.44 | 0.69  | 5.05E-01 | 7.43E-01 | -6.45 |
| 1435005_PM_at   | Cenpe                            | CENPE    | 0.08  | 2.76 | 0.69  | 5.05E-01 | 7.43E-01 | -6.45 |
| 1424506_PM_at   | Zfp768                           | ZNF768   | 0.12  | 3.17 | 0.69  | 5.05E-01 | 7.43E-01 | -6.45 |
| 1455388_PM_at   | Pcmtd1                           | PCMTD1   | -0.19 | 4.83 | -0.69 | 5.05E-01 | 7.43E-01 | -6.45 |
| 1446109_PM_at   | Wdfy3                            | WDFY3    | 0.20  | 3.60 | 0.69  | 5.05E-01 | 7.43E-01 | -6.45 |
| 1426285_PM_at   | Lama2                            | LAMA2    | -0.12 | 2.48 | -0.69 | 5.05E-01 | 7.43E-01 | -6.45 |
| 1420214_PM_at   | 1810012K16Rik                    | NA       | 0.06  | 2.45 | 0.69  | 5.05E-01 | 7.43E-01 | -6.45 |
| 1431782_PM_s_at | Ypel1                            | YPEL1    | 0.19  | 2.47 | 0.69  | 5.05E-01 | 7.43E-01 | -6.45 |
| 1435393_PM_at   | Mc1r                             | MC1R     | 0.06  | 2.35 | 0.69  | 5.05E-01 | 7.43E-01 | -6.45 |
| 1443448_PM_x_at | ---                              | NA       | 0.09  | 2.56 | 0.69  | 5.05E-01 | 7.43E-01 | -6.45 |
| 1425591_PM_a_at | Chmp2a                           | CHMP2A   | 0.12  | 4.59 | 0.69  | 5.05E-01 | 7.43E-01 | -6.45 |
| 1419357_PM_at   | Ishy1                            | ISY1     | 0.20  | 2.88 | 0.69  | 5.05E-01 | 7.43E-01 | -6.45 |
| 1457061_PM_at   | Umad1                            | UMAD1    | -0.07 | 2.38 | -0.69 | 5.06E-01 | 7.43E-01 | -6.45 |
| 1427682_PM_a_at | Egr2                             | EGR2     | -0.27 | 2.99 | -0.69 | 5.06E-01 | 7.43E-01 | -6.45 |
| 1422193_PM_at   | Gucy2e                           | GUCY2D   | 0.08  | 2.10 | 0.69  | 5.06E-01 | 7.43E-01 | -6.45 |
| 1452392_PM_a_at | Wipi1                            | WIPI1    | 0.06  | 2.15 | 0.69  | 5.06E-01 | 7.43E-01 | -6.45 |
| 1438095_PM_x_at | ---                              | NA       | -0.39 | 5.81 | -0.69 | 5.06E-01 | 7.43E-01 | -6.45 |
| 1445360_PM_at   | ---                              | NA       | 0.08  | 2.20 | 0.69  | 5.06E-01 | 7.43E-01 | -6.45 |
| 1448041_PM_at   | Gm36527 /// Rnf2                 | RNF2     | 0.08  | 2.42 | 0.69  | 5.06E-01 | 7.43E-01 | -6.45 |
| 1449343_PM_s_at | Sin3a                            | SIN3A    | 0.25  | 3.68 | 0.69  | 5.06E-01 | 7.43E-01 | -6.45 |
| 1451343_PM_at   | Vps36                            | VPS36    | 0.13  | 3.10 | 0.69  | 5.06E-01 | 7.43E-01 | -6.45 |
| 1449688_PM_at   | Arhgef25                         | NA       | -0.13 | 7.48 | -0.69 | 5.06E-01 | 7.43E-01 | -6.45 |
| 1422894_PM_at   | Sfmbt1                           | SFMBT1   | 0.07  | 2.32 | 0.69  | 5.06E-01 | 7.43E-01 | -6.45 |
| 1460618_PM_x_at | Gm7444                           | NA       | 0.09  | 2.12 | 0.69  | 5.06E-01 | 7.43E-01 | -6.45 |
| 1438936_PM_s_at | Ang                              | ANG      | -0.09 | 2.32 | -0.69 | 5.06E-01 | 7.43E-01 | -6.45 |
| 1416377_PM_at   | Pdc7                             | PDCD7    | -0.15 | 3.24 | -0.69 | 5.06E-01 | 7.43E-01 | -6.45 |
| 1444944_PM_at   | ---                              | NA       | 0.10  | 2.43 | 0.69  | 5.06E-01 | 7.43E-01 | -6.45 |
| 1444054_PM_at   | ---                              | NA       | 0.05  | 2.36 | 0.69  | 5.06E-01 | 7.43E-01 | -6.45 |
| 1447720_PM_x_at | Prkaca                           | PRKACA   | -0.42 | 6.06 | -0.69 | 5.06E-01 | 7.44E-01 | -6.45 |
| 1426244_PM_at   | Mapre2                           | MAPRE2   | -0.29 | 2.96 | -0.69 | 5.06E-01 | 7.44E-01 | -6.45 |
| 1456079_PM_x_at | Apex1                            | APEX1    | -0.24 | 4.36 | -0.69 | 5.06E-01 | 7.44E-01 | -6.45 |
| 1417597_PM_at   | Cd28                             | CD28     | 0.06  | 2.19 | 0.69  | 5.06E-01 | 7.44E-01 | -6.45 |
| 1447692_PM_x_at | Tab1                             | TAB1     | 0.07  | 2.62 | 0.69  | 5.06E-01 | 7.44E-01 | -6.45 |
| 1425252_PM_a_at | Mad11                            | MAD11.1  | 0.09  | 2.50 | 0.69  | 5.06E-01 | 7.44E-01 | -6.45 |
| 1453841_PM_at   | ---                              | NA       | 0.06  | 2.11 | 0.69  | 5.06E-01 | 7.44E-01 | -6.45 |
| 1428427_PM_at   | Fbxl2                            | FBXL2    | 0.11  | 2.53 | 0.69  | 5.06E-01 | 7.44E-01 | -6.45 |
| 1451181_PM_at   | Tmem121                          | TMEM121  | 0.08  | 2.45 | 0.69  | 5.06E-01 | 7.44E-01 | -6.45 |
| 1429433_PM_at   | Prrc2c                           | PRRC2C   | -0.31 | 5.13 | -0.69 | 5.07E-01 | 7.44E-01 | -6.45 |
| 1444237_PM_at   | ---                              | NA       | 0.10  | 2.34 | 0.69  | 5.07E-01 | 7.44E-01 | -6.45 |
| 1438851_PM_x_at | Cldn1                            | CLDN1    | -0.06 | 1.93 | -0.69 | 5.07E-01 | 7.44E-01 | -6.45 |
| 1424994_PM_at   | Glyctk                           | GLYCTK   | 0.08  | 2.27 | 0.69  | 5.07E-01 | 7.44E-01 | -6.45 |
| 1451685_PM_at   | Mllt6                            | MLLT6    | 0.09  | 2.46 | 0.69  | 5.07E-01 | 7.44E-01 | -6.45 |
| 1455413_PM_at   | Zfp11                            | ZNF135   | 0.11  | 2.70 | 0.69  | 5.07E-01 | 7.44E-01 | -6.45 |
| 1452436_PM_at   | Gm21451 /// Loxl2                | LOXL2    | 0.07  | 2.23 | 0.69  | 5.07E-01 | 7.44E-01 | -6.45 |
| 1446278_PM_at   | ---                              | NA       | -0.16 | 2.43 | -0.69 | 5.07E-01 | 7.44E-01 | -6.45 |
| 1435378_PM_at   | Smim5                            | SMIM5    | 0.06  | 2.55 | 0.69  | 5.07E-01 | 7.44E-01 | -6.45 |
| 1416104_PM_at   | Mpdu1                            | MPDU1    | 0.11  | 2.65 | 0.69  | 5.07E-01 | 7.44E-01 | -6.45 |
| 1434405_PM_at   | Fnip1                            | FNIP1    | -0.23 | 2.78 | -0.69 | 5.07E-01 | 7.44E-01 | -6.45 |
| 1459035_PM_at   | ---                              | NA       | 0.06  | 2.35 | 0.69  | 5.07E-01 | 7.44E-01 | -6.45 |
| 1436272_PM_at   | Rab3gap2                         | RAB3GAP2 | 0.11  | 4.36 | 0.69  | 5.07E-01 | 7.44E-01 | -6.45 |

|                 |                        |          |       |       |       |          |          |       |
|-----------------|------------------------|----------|-------|-------|-------|----------|----------|-------|
| 1447458_PM_at   | ---                    | NA       | 0.20  | 4.71  | 0.69  | 5.07E-01 | 7.44E-01 | -6.45 |
| 1422297_PM_at   | Pfdn5                  | PFDN5    | -0.09 | 2.51  | -0.69 | 5.07E-01 | 7.44E-01 | -6.45 |
| 1459305_PM_at   | Zmi1                   | NA       | 0.07  | 2.82  | 0.69  | 5.07E-01 | 7.44E-01 | -6.45 |
| 1441454_PM_at   | Zhx3                   | ZHX3     | 0.09  | 3.59  | 0.69  | 5.07E-01 | 7.44E-01 | -6.45 |
| 1433430_PM_s_at | Cdc23                  | CDC23    | -0.13 | 3.28  | -0.69 | 5.07E-01 | 7.44E-01 | -6.45 |
| 1453443_PM_at   | 1110015O18Rik          | NA       | -0.06 | 1.92  | -0.69 | 5.07E-01 | 7.44E-01 | -6.45 |
| 1416957_PM_at   | Pou2af1                | POU2AF1  | -0.06 | 2.27  | -0.69 | 5.07E-01 | 7.44E-01 | -6.45 |
| 1430166_PM_at   | ---                    | NA       | 0.07  | 2.72  | 0.69  | 5.07E-01 | 7.44E-01 | -6.45 |
| 1430077_PM_at   | Srsf11                 | SRSF11   | 0.07  | 2.24  | 0.69  | 5.07E-01 | 7.44E-01 | -6.45 |
| 1425009_PM_at   | Tcte2                  | NA       | -0.12 | 2.31  | -0.69 | 5.07E-01 | 7.44E-01 | -6.45 |
| 1449071_PM_at   | My17                   | MYL7     | 0.06  | 2.40  | 0.69  | 5.07E-01 | 7.44E-01 | -6.45 |
| 1426423_PM_at   | Shmt2                  | SHMT2    | 0.10  | 2.48  | 0.69  | 5.07E-01 | 7.44E-01 | -6.45 |
| 1426006_PM_at   | Kcnc2                  | KCNQ2    | -0.09 | 2.82  | -0.69 | 5.07E-01 | 7.44E-01 | -6.45 |
| 1453975_PM_a_at | 1700029M20Rik          | NA       | 0.08  | 2.22  | 0.69  | 5.07E-01 | 7.44E-01 | -6.45 |
| 1429599_PM_a_at | Mthfd2l                | MTHFD2L  | 0.21  | 3.04  | 0.69  | 5.07E-01 | 7.44E-01 | -6.45 |
| 1436166_PM_at   | Stox2                  | STOX2    | -0.24 | 3.08  | -0.69 | 5.07E-01 | 7.44E-01 | -6.45 |
| 1443281_PM_at   | ---                    | NA       | -0.17 | 2.53  | -0.69 | 5.07E-01 | 7.44E-01 | -6.45 |
| 1425856_PM_at   | Cib1                   | CIB1     | 0.07  | 2.37  | 0.69  | 5.07E-01 | 7.44E-01 | -6.45 |
| 1420643_PM_at   | Lfng                   | LFNG     | 0.11  | 2.59  | 0.69  | 5.07E-01 | 7.44E-01 | -6.45 |
| 1452088_PM_at   | Zbed3                  | ZBED3    | 0.06  | 2.25  | 0.69  | 5.08E-01 | 7.45E-01 | -6.45 |
| 1448365_PM_at   | Exosc7                 | EXOSC7   | -0.11 | 3.07  | -0.69 | 5.08E-01 | 7.45E-01 | -6.45 |
| 1420176_PM_x_at | Igl1                   | IGLC1    | 0.09  | 2.48  | 0.69  | 5.08E-01 | 7.45E-01 | -6.45 |
| 1442897_PM_at   | ---                    | NA       | 0.14  | 2.93  | 0.69  | 5.08E-01 | 7.45E-01 | -6.45 |
| 1452506_PM_a_at | Ilkap                  | ILKAP    | 0.21  | 3.43  | 0.69  | 5.08E-01 | 7.45E-01 | -6.45 |
| 1453300_PM_at   | Slc35d2                | SLC35D2  | 0.14  | 5.09  | 0.69  | 5.08E-01 | 7.45E-01 | -6.45 |
| 1421342_PM_at   | Kcns2                  | KCNS2    | -0.16 | 2.81  | -0.69 | 5.08E-01 | 7.45E-01 | -6.45 |
| 1451944_PM_a_at | Tnfsf11                | TNFSF11  | -0.10 | 2.99  | -0.69 | 5.08E-01 | 7.45E-01 | -6.45 |
| 1450780_PM_s_at | Hmga2                  | HMG2     | -0.08 | 2.61  | -0.69 | 5.08E-01 | 7.45E-01 | -6.45 |
| 1419772_PM_at   | Gm39761                | NA       | 0.08  | 2.39  | 0.69  | 5.08E-01 | 7.45E-01 | -6.45 |
| 1454057_PM_at   | LOC102637336           | NA       | 0.08  | 2.51  | 0.69  | 5.08E-01 | 7.45E-01 | -6.45 |
| 1439264_PM_x_at | Lasp1                  | LASP1    | 0.19  | 5.74  | 0.69  | 5.08E-01 | 7.45E-01 | -6.45 |
| 1435186_PM_s_at | Lrrcc1                 | LRCC1    | 0.06  | 2.41  | 0.69  | 5.08E-01 | 7.45E-01 | -6.45 |
| 1433762_PM_at   | G630043F03Rik          | NA       | -0.11 | 2.66  | -0.69 | 5.08E-01 | 7.45E-01 | -6.45 |
| 1436409_PM_at   | Cox8a /// LOC102641334 | COX8A    | 0.06  | 2.23  | 0.69  | 5.08E-01 | 7.45E-01 | -6.45 |
| 1421010_PM_at   | Mobp                   | MOBP     | -0.57 | 6.94  | -0.69 | 5.08E-01 | 7.45E-01 | -6.45 |
| 1437907_PM_a_at | Tbca                   | TBCA     | -0.30 | 6.33  | -0.69 | 5.08E-01 | 7.45E-01 | -6.45 |
| 1438723_PM_a_at | Rps10 /// Rps10-ps2    | NA       | -0.33 | 2.76  | -0.69 | 5.08E-01 | 7.45E-01 | -6.45 |
| 1430983_PM_at   | Pdia6                  | PDIA6    | -0.08 | 2.52  | -0.69 | 5.08E-01 | 7.45E-01 | -6.45 |
| 1430142_PM_at   | Tgm5                   | TGM5     | 0.07  | 2.70  | 0.69  | 5.08E-01 | 7.45E-01 | -6.45 |
| 1430140_PM_at   | 1700017N19Rik          | C12orf50 | 0.12  | 2.60  | 0.69  | 5.08E-01 | 7.45E-01 | -6.45 |
| 1421741_PM_at   | Cyp3a16                | CYP3A4   | -0.06 | 2.11  | -0.69 | 5.08E-01 | 7.45E-01 | -6.45 |
| 1440738_PM_at   | B020011L13Rik          | NA       | -0.06 | 2.11  | -0.69 | 5.08E-01 | 7.45E-01 | -6.45 |
| 1460392_PM_a_at | Eny2                   | ENY2     | 0.23  | 7.56  | 0.69  | 5.08E-01 | 7.45E-01 | -6.45 |
| 1430977_PM_at   | Fam159b                | FAM159B  | 0.07  | 2.39  | 0.69  | 5.08E-01 | 7.45E-01 | -6.45 |
| 1423699_PM_at   | Ncaph2                 | NCAPH2   | 0.05  | 2.14  | 0.69  | 5.08E-01 | 7.45E-01 | -6.45 |
| 1438728_PM_at   | Nif3l1                 | NIF3L1   | 0.08  | 2.33  | 0.69  | 5.08E-01 | 7.45E-01 | -6.45 |
| 1425688_PM_a_at | Dpys                   | DPYS     | 0.13  | 3.08  | 0.69  | 5.08E-01 | 7.45E-01 | -6.45 |
| 1418910_PM_at   | Bmp7                   | BMP7     | -0.06 | 2.39  | -0.68 | 5.08E-01 | 7.45E-01 | -6.45 |
| 1445508_PM_at   | ---                    | NA       | 0.05  | 2.04  | 0.68  | 5.08E-01 | 7.45E-01 | -6.45 |
| 1449623_PM_at   | Txnrd3                 | TXNRD3   | 0.19  | 2.41  | 0.68  | 5.08E-01 | 7.45E-01 | -6.45 |
| 1457827_PM_at   | Arsj                   | ARSJ     | -0.24 | 2.81  | -0.68 | 5.08E-01 | 7.45E-01 | -6.45 |
| 1447797_PM_x_at | Ph1d1                  | PIH1D1   | -0.07 | 2.17  | -0.68 | 5.08E-01 | 7.45E-01 | -6.45 |
| 1425663_PM_at   | Il1rn                  | IL1RN    | 0.14  | 2.86  | 0.68  | 5.08E-01 | 7.45E-01 | -6.45 |
| 1431528_PM_at   | ---                    | NA       | -0.30 | 4.23  | -0.68 | 5.09E-01 | 7.45E-01 | -6.45 |
| 1432840_PM_at   | Galnt11                | GALNT11  | -0.25 | 2.93  | -0.68 | 5.09E-01 | 7.45E-01 | -6.45 |
| 1433680_PM_x_at | Siva1                  | SIVA1    | -0.18 | 5.17  | -0.68 | 5.09E-01 | 7.45E-01 | -6.45 |
| 1438993_PM_a_at | Atp6v1d                | ATP6V1D  | -0.17 | 10.74 | -0.68 | 5.09E-01 | 7.45E-01 | -6.45 |
| 1449007_PM_at   | Btg3 /// Gm7334        | BTG3     | -0.13 | 3.45  | -0.68 | 5.09E-01 | 7.45E-01 | -6.45 |
| 1452581_PM_at   | Rprd1b                 | RPRD1B   | -0.11 | 2.77  | -0.68 | 5.09E-01 | 7.45E-01 | -6.45 |
| 1444320_PM_at   | ---                    | NA       | -0.10 | 2.66  | -0.68 | 5.09E-01 | 7.45E-01 | -6.45 |
| 1460447_PM_at   | Pus7l                  | PUS7L    | -0.10 | 2.60  | -0.68 | 5.09E-01 | 7.45E-01 | -6.45 |
| 1429313_PM_at   | Ror1                   | ROR1     | -0.08 | 2.42  | -0.68 | 5.09E-01 | 7.45E-01 | -6.45 |
| 1423297_PM_at   | Add3                   | ADD3     | -0.07 | 2.64  | -0.68 | 5.09E-01 | 7.45E-01 | -6.45 |
| 1442392_PM_at   | Gm15866                | NA       | -0.07 | 2.19  | -0.68 | 5.09E-01 | 7.45E-01 | -6.45 |
| 1422343_PM_at   | Olf155                 | NA       | 0.05  | 1.89  | 0.68  | 5.09E-01 | 7.45E-01 | -6.45 |
| 1431322_PM_at   | Igsf3                  | NA       | 0.07  | 2.65  | 0.68  | 5.09E-01 | 7.45E-01 | -6.45 |
| 1432614_PM_at   | ---                    | NA       | 0.07  | 2.87  | 0.68  | 5.09E-01 | 7.45E-01 | -6.45 |
| 1436422_PM_at   | Fam206a                | FAM206A  | 0.07  | 2.28  | 0.68  | 5.09E-01 | 7.45E-01 | -6.45 |
| 1430359_PM_a_at | Nadsyn1                | NADSYN1  | 0.08  | 2.31  | 0.68  | 5.09E-01 | 7.45E-01 | -6.45 |
| 1432573_PM_at   | Npm2 /// Xpo7          | XPO7     | 0.09  | 2.29  | 0.68  | 5.09E-01 | 7.45E-01 | -6.45 |
| 1417460_PM_at   | Ifitm2                 | IFITM1   | 0.13  | 2.88  | 0.68  | 5.09E-01 | 7.45E-01 | -6.45 |
| 1454945_PM_at   | Cep97                  | CEP97    | 0.13  | 3.28  | 0.68  | 5.09E-01 | 7.45E-01 | -6.45 |
| 1428519_PM_at   | Cmss1                  | NA       | 0.15  | 3.05  | 0.68  | 5.09E-01 | 7.45E-01 | -6.45 |
| 1437471_PM_at   | Lrrc45                 | LRRC45   | 0.29  | 4.40  | 0.68  | 5.09E-01 | 7.45E-01 | -6.45 |
| 1453396_PM_at   | Wdr38                  | WDR38    | 0.05  | 2.46  | 0.68  | 5.09E-01 | 7.45E-01 | -6.45 |

|                 |                                                                                                                                                           |            |       |      |       |          |          |       |
|-----------------|-----------------------------------------------------------------------------------------------------------------------------------------------------------|------------|-------|------|-------|----------|----------|-------|
| 1446004_PM_at   | ---                                                                                                                                                       | NA         | 0.07  | 2.25 | 0.68  | 5.09E-01 | 7.45E-01 | -6.45 |
| 1422651_PM_at   | Adipoq                                                                                                                                                    | ADIPOQ     | 0.06  | 2.18 | 0.68  | 5.09E-01 | 7.45E-01 | -6.45 |
| 1422585_PM_at   | Odf1                                                                                                                                                      | ODF1       | 0.07  | 2.22 | 0.68  | 5.09E-01 | 7.45E-01 | -6.45 |
| 1426867_PM_at   | Dmrt2                                                                                                                                                     | DMRT2      | 0.07  | 2.31 | 0.68  | 5.09E-01 | 7.45E-01 | -6.45 |
| 1421630_PM_at   | Zfy1 /// Zfy2                                                                                                                                             | ZFY        | 0.07  | 2.05 | 0.68  | 5.09E-01 | 7.45E-01 | -6.45 |
| 1457051_PM_at   | Trim27                                                                                                                                                    | TRIM27     | 0.09  | 2.24 | 0.68  | 5.09E-01 | 7.45E-01 | -6.45 |
| 1429902_PM_at   | ---                                                                                                                                                       | NA         | 0.14  | 3.08 | 0.68  | 5.09E-01 | 7.45E-01 | -6.45 |
| 1456694_PM_x_at | Ptpn6                                                                                                                                                     | PTPN6      | 0.06  | 3.01 | 0.68  | 5.09E-01 | 7.45E-01 | -6.45 |
| 1424212_PM_at   | Atg101                                                                                                                                                    | ATG101     | 0.10  | 3.14 | 0.68  | 5.09E-01 | 7.45E-01 | -6.45 |
| 1444833_PM_at   | ---                                                                                                                                                       | NA         | -0.05 | 2.53 | -0.68 | 5.09E-01 | 7.45E-01 | -6.45 |
| 1417852_PM_x_at | Cla1 /// Clca3a1                                                                                                                                          | NA         | 0.07  | 2.20 | 0.68  | 5.09E-01 | 7.45E-01 | -6.45 |
| 1442291_PM_at   | Lpar2                                                                                                                                                     | LPAR2      | 0.05  | 2.18 | 0.68  | 5.09E-01 | 7.45E-01 | -6.45 |
| 1459719_PM_at   | Deptor                                                                                                                                                    | DEPTOR     | -0.07 | 2.18 | -0.68 | 5.09E-01 | 7.45E-01 | -6.45 |
| 1421609_PM_a_at | Cml3 /// Gm11128 /// Gm4477                                                                                                                               | NAT8       | 0.13  | 2.75 | 0.68  | 5.09E-01 | 7.45E-01 | -6.45 |
| 1418706_PM_at   | Slc38a3                                                                                                                                                   | SLC38A3    | 0.11  | 2.77 | 0.68  | 5.09E-01 | 7.46E-01 | -6.46 |
| 1454005_PM_at   | Fmo2                                                                                                                                                      | FMO2       | 0.06  | 1.98 | 0.68  | 5.09E-01 | 7.46E-01 | -6.46 |
| 1437335_PM_x_at | Poldip3                                                                                                                                                   | POLDIP3    | -0.19 | 7.18 | -0.68 | 5.09E-01 | 7.46E-01 | -6.46 |
| 1445341_PM_at   | Gm31913                                                                                                                                                   | NA         | 0.06  | 2.29 | 0.68  | 5.09E-01 | 7.46E-01 | -6.46 |
| 1445912_PM_at   | ---                                                                                                                                                       | NA         | -0.10 | 2.44 | -0.68 | 5.10E-01 | 7.46E-01 | -6.46 |
| 1423997_PM_at   | Csde1                                                                                                                                                     | CSDE1      | -0.13 | 5.16 | -0.68 | 5.10E-01 | 7.46E-01 | -6.46 |
| 1424699_PM_at   | Ccdc136                                                                                                                                                   | CCDC136    | 0.16  | 4.54 | 0.68  | 5.10E-01 | 7.46E-01 | -6.46 |
| 1448811_PM_at   | Mrp2                                                                                                                                                      | MRPL2      | -0.26 | 3.70 | -0.68 | 5.10E-01 | 7.46E-01 | -6.46 |
| 1447431_PM_at   | Dera                                                                                                                                                      | DERA       | 0.07  | 2.17 | 0.68  | 5.10E-01 | 7.46E-01 | -6.46 |
| 1417350_PM_at   | Bloc1s6                                                                                                                                                   | BLOC1S6    | 0.08  | 2.58 | 0.68  | 5.10E-01 | 7.46E-01 | -6.46 |
| 1428356_PM_at   | Osbp2                                                                                                                                                     | OSBP2      | 0.12  | 3.27 | 0.68  | 5.10E-01 | 7.46E-01 | -6.46 |
| 1427299_PM_at   | Rps6ka3                                                                                                                                                   | RPS6KA3    | 0.22  | 3.70 | 0.68  | 5.10E-01 | 7.46E-01 | -6.46 |
| 1446882_PM_at   | ---                                                                                                                                                       | NA         | -0.08 | 2.64 | -0.68 | 5.10E-01 | 7.46E-01 | -6.46 |
| 1416969_PM_at   | Gtse1                                                                                                                                                     | GTSE1      | 0.06  | 2.33 | 0.68  | 5.10E-01 | 7.46E-01 | -6.46 |
| 1426251_PM_at   | Cpz                                                                                                                                                       | CPZ        | 0.09  | 2.45 | 0.68  | 5.10E-01 | 7.46E-01 | -6.46 |
| 1447932_PM_at   | Zfp830                                                                                                                                                    | NA         | -0.13 | 2.33 | -0.68 | 5.10E-01 | 7.46E-01 | -6.46 |
| 1417295_PM_at   | Mta1                                                                                                                                                      | MTA1       | -0.11 | 4.25 | -0.68 | 5.10E-01 | 7.46E-01 | -6.46 |
| 1453047_PM_at   | Tspo2                                                                                                                                                     | TSP02      | 0.07  | 2.55 | 0.68  | 5.10E-01 | 7.46E-01 | -6.46 |
| 1441935_PM_at   | Ankra2                                                                                                                                                    | ANKRA2     | -0.12 | 3.94 | -0.68 | 5.10E-01 | 7.46E-01 | -6.46 |
| 1457973_PM_at   | ---                                                                                                                                                       | NA         | 0.18  | 2.93 | 0.68  | 5.10E-01 | 7.46E-01 | -6.46 |
| 1444816_PM_at   | Olfir75-ps1                                                                                                                                               | NA         | 0.10  | 2.70 | 0.68  | 5.10E-01 | 7.46E-01 | -6.46 |
| 1424315_PM_at   | 1110004E09Rik                                                                                                                                             | AP000275.2 | 0.14  | 3.52 | 0.68  | 5.10E-01 | 7.46E-01 | -6.46 |
| 1435270_PM_x_at | Ngamt2                                                                                                                                                    | EEF1AKMT1  | -0.12 | 2.59 | -0.68 | 5.10E-01 | 7.46E-01 | -6.46 |
| 1443584_PM_at   | ---                                                                                                                                                       | NA         | -0.17 | 2.46 | -0.68 | 5.10E-01 | 7.46E-01 | -6.46 |
| 1455216_PM_at   | Paqr6                                                                                                                                                     | PAQR6      | -0.10 | 3.00 | -0.68 | 5.10E-01 | 7.46E-01 | -6.46 |
| 1418344_PM_at   | Tmem8                                                                                                                                                     | TMEM8A     | 0.08  | 2.22 | 0.68  | 5.10E-01 | 7.46E-01 | -6.46 |
| 1459670_PM_at   | ---                                                                                                                                                       | NA         | 0.09  | 2.42 | 0.68  | 5.10E-01 | 7.46E-01 | -6.46 |
| 1429862_PM_at   | Pla2g4e                                                                                                                                                   | PLA2G4E    | 0.07  | 2.57 | 0.68  | 5.10E-01 | 7.46E-01 | -6.46 |
| 1417140_PM_a_at | Ptpn2                                                                                                                                                     | PTPN2      | -0.27 | 4.49 | -0.68 | 5.10E-01 | 7.46E-01 | -6.46 |
| 1433152_PM_at   | ---                                                                                                                                                       | NA         | -0.09 | 2.67 | -0.68 | 5.11E-01 | 7.47E-01 | -6.46 |
| AFFX-r2-TagA_at | ---                                                                                                                                                       | NA         | 0.05  | 2.37 | 0.68  | 5.11E-01 | 7.47E-01 | -6.46 |
| 1460314_PM_s_at | Hist1h3a /// Hist1h3b /// Hist1h3c /// Hist1h3d /// Hist1h3e /// Hist1h3f /// Hist1h3g /// Hist1h3h /// Hist1h3i /// Hist2h3b /// Hist2h3c1 /// Hist2h3c2 | HIST2H3C   | 0.06  | 2.08 | 0.68  | 5.11E-01 | 7.47E-01 | -6.46 |
| 1422387_PM_at   | Vmn1r29                                                                                                                                                   | NA         | 0.07  | 2.36 | 0.68  | 5.11E-01 | 7.47E-01 | -6.46 |
| 1431254_PM_at   | Kbtbd11                                                                                                                                                   | KBTBD11    | -0.25 | 4.73 | -0.68 | 5.11E-01 | 7.47E-01 | -6.46 |
| 1436099_PM_at   | Ccdc184                                                                                                                                                   | CCDC184    | 0.11  | 2.65 | 0.68  | 5.11E-01 | 7.47E-01 | -6.46 |
| 1425346_PM_at   | Zfp318                                                                                                                                                    | ZNF318     | -0.14 | 2.63 | -0.68 | 5.11E-01 | 7.47E-01 | -6.46 |
| 1446323_PM_at   | Atf7ip                                                                                                                                                    | ATF7IP     | -0.07 | 2.27 | -0.68 | 5.11E-01 | 7.47E-01 | -6.46 |
| 1424298_PM_at   | Zfp282                                                                                                                                                    | ZNF282     | 0.08  | 2.89 | 0.68  | 5.11E-01 | 7.47E-01 | -6.46 |
| 1460285_PM_at   | Itga9                                                                                                                                                     | ITGA9      | 0.09  | 2.55 | 0.68  | 5.11E-01 | 7.47E-01 | -6.46 |
| 1425932_PM_a_at | Celf1                                                                                                                                                     | CELF1      | 0.19  | 3.14 | 0.68  | 5.11E-01 | 7.47E-01 | -6.46 |
| 1459708_PM_at   | ---                                                                                                                                                       | NA         | -0.15 | 2.40 | -0.68 | 5.11E-01 | 7.47E-01 | -6.46 |
| 1443759_PM_at   | ---                                                                                                                                                       | NA         | 0.06  | 2.32 | 0.68  | 5.11E-01 | 7.47E-01 | -6.46 |
| 1430753_PM_at   | Dnhd1                                                                                                                                                     | DNHD1      | -0.08 | 2.48 | -0.68 | 5.11E-01 | 7.47E-01 | -6.46 |
| 1432190_PM_at   | Sox5                                                                                                                                                      | SOX5       | -0.06 | 2.37 | -0.68 | 5.11E-01 | 7.47E-01 | -6.46 |
| 1429462_PM_at   | Slc25a32                                                                                                                                                  | SLC25A32   | -0.10 | 2.22 | -0.68 | 5.11E-01 | 7.47E-01 | -6.46 |
| 1450884_PM_at   | Cd36                                                                                                                                                      | CD36       | 0.06  | 2.35 | 0.68  | 5.11E-01 | 7.47E-01 | -6.46 |
| 1429966_PM_at   | ---                                                                                                                                                       | NA         | 0.07  | 2.33 | 0.68  | 5.11E-01 | 7.47E-01 | -6.46 |
| 1420462_PM_at   | Il1rapl2                                                                                                                                                  | IL1RAPL2   | 0.08  | 2.66 | 0.68  | 5.11E-01 | 7.47E-01 | -6.46 |
| 1449420_PM_at   | Pde1b                                                                                                                                                     | PDE1B      | -0.17 | 4.39 | -0.68 | 5.11E-01 | 7.47E-01 | -6.46 |
| 1419376_PM_at   | Fibin                                                                                                                                                     | FIBIN      | -0.10 | 2.89 | -0.68 | 5.11E-01 | 7.47E-01 | -6.46 |
| 1436033_PM_at   | Fam214a                                                                                                                                                   | FAM214A    | -0.21 | 4.23 | -0.68 | 5.11E-01 | 7.47E-01 | -6.46 |
| 1444036_PM_at   | ---                                                                                                                                                       | NA         | 0.10  | 2.27 | 0.68  | 5.11E-01 | 7.47E-01 | -6.46 |
| 1447619_PM_at   | ---                                                                                                                                                       | NA         | 0.13  | 3.58 | 0.68  | 5.11E-01 | 7.47E-01 | -6.46 |
| 1419522_PM_at   | Zmynd19                                                                                                                                                   | ZMYND19    | -0.08 | 2.20 | -0.68 | 5.11E-01 | 7.47E-01 | -6.46 |
| 1426812_PM_a_at | Fam129b                                                                                                                                                   | FAM129B    | -0.26 | 3.77 | -0.68 | 5.11E-01 | 7.47E-01 | -6.46 |

|                 |                               |            |       |      |       |          |          |       |
|-----------------|-------------------------------|------------|-------|------|-------|----------|----------|-------|
| 1456640_PM_at   | Sh3rf2                        | SH3RF2     | -0.08 | 2.61 | -0.68 | 5.11E-01 | 7.47E-01 | -6.46 |
| 1428198_PM_at   | Adal                          | ADAL       | 0.06  | 2.55 | 0.68  | 5.11E-01 | 7.47E-01 | -6.46 |
| 1422561_PM_at   | Adamts5                       | ADAMTS5    | 0.06  | 2.40 | 0.68  | 5.11E-01 | 7.47E-01 | -6.46 |
| 1442642_PM_at   | ---                           | NA         | 0.08  | 2.49 | 0.68  | 5.11E-01 | 7.47E-01 | -6.46 |
| 1446487_PM_at   | ---                           | NA         | 0.09  | 2.30 | 0.68  | 5.11E-01 | 7.47E-01 | -6.46 |
| 1430811_PM_a_at | Nuf2                          | NUF2       | 0.08  | 2.45 | 0.68  | 5.11E-01 | 7.47E-01 | -6.46 |
| 1434080_PM_at   | Aebp2                         | AEBP2      | -0.23 | 5.65 | -0.68 | 5.11E-01 | 7.47E-01 | -6.46 |
| 1429054_PM_at   | Mrp47                         | MRPL47     | 0.15  | 2.64 | 0.68  | 5.12E-01 | 7.47E-01 | -6.46 |
| 1434428_PM_at   | Fam221a                       | FAM221A    | 0.10  | 2.76 | 0.68  | 5.12E-01 | 7.47E-01 | -6.46 |
| 1441044_PM_at   | ---                           | NA         | 0.07  | 2.12 | 0.68  | 5.12E-01 | 7.47E-01 | -6.46 |
| 1420129_PM_s_at | Rtcb                          | RTCB       | -0.28 | 6.64 | -0.68 | 5.12E-01 | 7.47E-01 | -6.46 |
| 1419797_PM_at   | AA672641                      | NA         | 0.05  | 2.15 | 0.68  | 5.12E-01 | 7.47E-01 | -6.46 |
| 1453700_PM_s_at | Gm4981 /// Gm9919             | NA         | 0.15  | 3.97 | 0.68  | 5.12E-01 | 7.47E-01 | -6.46 |
| 1428925_PM_at   | Senp1                         | SENP1      | 0.17  | 2.51 | 0.68  | 5.12E-01 | 7.47E-01 | -6.46 |
| 1453129_PM_a_at | Rgs12                         | RGS12      | 0.18  | 2.71 | 0.68  | 5.12E-01 | 7.47E-01 | -6.46 |
| 1441847_PM_at   | ---                           | NA         | 0.18  | 2.64 | 0.68  | 5.12E-01 | 7.47E-01 | -6.46 |
| 1455349_PM_at   | Rap1b                         | NA         | 0.22  | 6.81 | 0.68  | 5.12E-01 | 7.47E-01 | -6.46 |
| 1458340_PM_at   | LOC105246114                  | NA         | -0.22 | 2.81 | -0.68 | 5.12E-01 | 7.47E-01 | -6.46 |
| 1451589_PM_at   | Gats2                         | CASTOR2    | -0.14 | 3.12 | -0.68 | 5.12E-01 | 7.47E-01 | -6.46 |
| 1421497_PM_at   | Gpha2                         | GPHA2      | 0.06  | 2.20 | 0.68  | 5.12E-01 | 7.47E-01 | -6.46 |
| 1457919_PM_at   | E430024P14Rik                 | NA         | -0.07 | 2.37 | -0.68 | 5.12E-01 | 7.48E-01 | -6.46 |
| 1446275_PM_at   | ---                           | NA         | -0.15 | 2.81 | -0.68 | 5.12E-01 | 7.48E-01 | -6.46 |
| 1451531_PM_at   | Cbwd1                         | CBWD3      | -0.10 | 2.70 | -0.68 | 5.12E-01 | 7.48E-01 | -6.46 |
| 1458982_PM_at   | AU014965                      | NA         | 0.11  | 2.23 | 0.68  | 5.12E-01 | 7.48E-01 | -6.46 |
| 1452237_PM_at   | Aefg1                         | AGFG1      | -0.18 | 3.89 | -0.68 | 5.12E-01 | 7.48E-01 | -6.46 |
| 1443611_PM_at   | ---                           | NA         | 0.06  | 2.24 | 0.68  | 5.12E-01 | 7.48E-01 | -6.46 |
| 1451795_PM_at   | Tom1l2                        | TOM1L2     | -0.11 | 2.70 | -0.68 | 5.12E-01 | 7.48E-01 | -6.46 |
| 1442195_PM_at   | ---                           | NA         | 0.08  | 2.31 | 0.68  | 5.12E-01 | 7.48E-01 | -6.46 |
| 1451030_PM_at   | Akr1c21                       | AKR1C2     | -0.10 | 2.31 | -0.68 | 5.12E-01 | 7.48E-01 | -6.46 |
| 1440549_PM_at   | ---                           | NA         | 0.06  | 2.10 | 0.68  | 5.12E-01 | 7.48E-01 | -6.46 |
| 1426055_PM_a_at | Pigq                          | PIGQ       | 0.12  | 2.39 | 0.68  | 5.12E-01 | 7.48E-01 | -6.46 |
| 1438472_PM_at   | Tmem8                         | NA         | 0.09  | 2.05 | 0.68  | 5.12E-01 | 7.48E-01 | -6.46 |
| 1417694_PM_at   | Gab1                          | GAB1       | -0.15 | 2.57 | -0.68 | 5.12E-01 | 7.48E-01 | -6.46 |
| 1429244_PM_at   | 2610524H06Rik                 | NA         | -0.14 | 2.98 | -0.68 | 5.12E-01 | 7.48E-01 | -6.46 |
| 1448983_PM_at   | Cdrt4                         | CDRT4      | 0.10  | 2.95 | 0.68  | 5.13E-01 | 7.48E-01 | -6.46 |
| 1435035_PM_at   | LOC102641477 /// Trmt10a      | TRMT10A    | 0.13  | 2.80 | 0.68  | 5.13E-01 | 7.48E-01 | -6.46 |
| 1458571_PM_at   | ---                           | NA         | -0.08 | 2.19 | -0.68 | 5.13E-01 | 7.48E-01 | -6.46 |
| 1437897_PM_at   | Klhl21                        | KLHL21     | 0.06  | 2.20 | 0.68  | 5.13E-01 | 7.48E-01 | -6.46 |
| 1443261_PM_at   | ---                           | NA         | 0.07  | 2.23 | 0.68  | 5.13E-01 | 7.48E-01 | -6.46 |
| 1417784_PM_at   | Als2                          | ALS2       | 0.08  | 2.09 | 0.68  | 5.13E-01 | 7.48E-01 | -6.46 |
| 1445797_PM_at   | ---                           | NA         | -0.10 | 2.38 | -0.68 | 5.13E-01 | 7.48E-01 | -6.46 |
| 1444865_PM_at   | ---                           | NA         | -0.10 | 3.02 | -0.68 | 5.13E-01 | 7.48E-01 | -6.46 |
| 1460228_PM_at   | Usf2                          | USF2       | -0.08 | 2.20 | -0.68 | 5.13E-01 | 7.48E-01 | -6.46 |
| 1431260_PM_at   | 4833417C18Rik                 | NA         | 0.06  | 2.26 | 0.68  | 5.13E-01 | 7.48E-01 | -6.46 |
| 1441471_PM_at   | ---                           | NA         | 0.15  | 2.94 | 0.68  | 5.13E-01 | 7.48E-01 | -6.46 |
| 1424080_PM_at   | Dcps                          | DCPS       | 0.20  | 2.90 | 0.68  | 5.13E-01 | 7.48E-01 | -6.46 |
| 1444288_PM_at   | Pnpt1                         | NA         | -0.19 | 3.21 | -0.68 | 5.13E-01 | 7.48E-01 | -6.46 |
| 1454621_PM_s_at | Fam73b                        | MIGA2      | -0.13 | 3.91 | -0.68 | 5.13E-01 | 7.48E-01 | -6.46 |
| 1419201_PM_at   | Klk11                         | KLK11      | -0.07 | 2.43 | -0.68 | 5.13E-01 | 7.48E-01 | -6.46 |
| 1419298_PM_at   | Pon3                          | PON3       | 0.05  | 2.02 | 0.68  | 5.13E-01 | 7.48E-01 | -6.46 |
| 1435142_PM_at   | Sft2d2                        | SFT2D2     | 0.10  | 2.80 | 0.68  | 5.13E-01 | 7.48E-01 | -6.46 |
| 1423910_PM_at   | Agap3                         | AGAP3      | 0.20  | 2.77 | 0.68  | 5.13E-01 | 7.48E-01 | -6.46 |
| 1457108_PM_at   | ---                           | NA         | 0.09  | 2.56 | 0.68  | 5.13E-01 | 7.48E-01 | -6.46 |
| 1420379_PM_at   | Slco1a1                       | SLCO1A2    | -0.10 | 2.70 | -0.68 | 5.13E-01 | 7.48E-01 | -6.46 |
| 1456436_PM_x_at | Rps20                         | RPS20      | -0.11 | 8.16 | -0.68 | 5.13E-01 | 7.48E-01 | -6.46 |
| 1424890_PM_at   | Bnc1                          | BNC1       | -0.07 | 2.05 | -0.68 | 5.13E-01 | 7.48E-01 | -6.46 |
| 1440094_PM_at   | BC030870                      | NA         | 0.06  | 2.03 | 0.68  | 5.13E-01 | 7.48E-01 | -6.46 |
| 1438058_PM_s_at | Ptov1                         | PTOV1      | 0.14  | 3.22 | 0.68  | 5.13E-01 | 7.48E-01 | -6.46 |
| 1444165_PM_at   | Layn                          | LAYN       | 0.19  | 3.39 | 0.68  | 5.13E-01 | 7.48E-01 | -6.46 |
| 1450730_PM_at   | Hs2t1                         | AC093155.3 | -0.13 | 3.18 | -0.68 | 5.13E-01 | 7.48E-01 | -6.46 |
| 1433539_PM_at   | Comm3                         | COMM3      | -0.38 | 5.38 | -0.68 | 5.13E-01 | 7.48E-01 | -6.46 |
| 1421026_PM_at   | Gna12                         | GNA12      | -0.14 | 3.04 | -0.68 | 5.13E-01 | 7.48E-01 | -6.46 |
| 1440080_PM_at   | ---                           | NA         | -0.08 | 2.25 | -0.68 | 5.13E-01 | 7.48E-01 | -6.46 |
| 1453025_PM_at   | Macro2                        | NA         | -0.08 | 2.94 | -0.68 | 5.13E-01 | 7.48E-01 | -6.46 |
| 1449567_PM_at   | Tktl1                         | TKTL1      | 0.06  | 1.86 | 0.68  | 5.13E-01 | 7.48E-01 | -6.46 |
| 1433416_PM_at   | Rfx2                          | RFX2       | 0.07  | 1.93 | 0.68  | 5.13E-01 | 7.48E-01 | -6.46 |
| 1423563_PM_at   | Prrt1                         | PRRT1      | 0.07  | 3.47 | 0.68  | 5.13E-01 | 7.48E-01 | -6.46 |
| 1440275_PM_at   | Runx3                         | RUNX3      | 0.07  | 2.08 | 0.68  | 5.13E-01 | 7.48E-01 | -6.46 |
| 1418307_PM_a_at | LOC105242502 /// Sbp /// Sbp1 | ZG16B      | 0.08  | 2.35 | 0.68  | 5.13E-01 | 7.48E-01 | -6.46 |
| 1444901_PM_at   | ---                           | NA         | 0.08  | 2.49 | 0.68  | 5.13E-01 | 7.48E-01 | -6.46 |
| 1436404_PM_at   | Tlcd1                         | TLCD1      | 0.09  | 3.00 | 0.68  | 5.13E-01 | 7.48E-01 | -6.46 |
| 1427739_PM_a_at | Trp53                         | TP53       | 0.09  | 3.03 | 0.68  | 5.13E-01 | 7.48E-01 | -6.46 |
| 1436154_PM_at   | ---                           | NA         | 0.09  | 2.24 | 0.68  | 5.13E-01 | 7.48E-01 | -6.46 |



|                 |                      |            |       |       |       |          |          |       |
|-----------------|----------------------|------------|-------|-------|-------|----------|----------|-------|
| 1452628_PM_at   | Bag5                 | BAG5       | 0.20  | 3.27  | 0.68  | 5.13E-01 | 7.48E-01 | -6.46 |
| 1432705_PM_at   | ---                  | NA         | 0.20  | 3.01  | 0.68  | 5.13E-01 | 7.48E-01 | -6.46 |
| 1450181_PM_at   | Cux2                 | CUX2       | 0.21  | 2.65  | 0.68  | 5.13E-01 | 7.48E-01 | -6.46 |
| 1428124_PM_at   | Gtf2e1               | GTF2E1     | -0.12 | 2.65  | -0.68 | 5.14E-01 | 7.48E-01 | -6.46 |
| 1457880_PM_at   | ---                  | NA         | 0.07  | 2.54  | 0.68  | 5.14E-01 | 7.49E-01 | -6.46 |
| 1440830_PM_at   | Adgrf5               | ADGRF5     | 0.17  | 4.47  | 0.68  | 5.14E-01 | 7.49E-01 | -6.46 |
| 1432746_PM_at   | ---                  | NA         | 0.07  | 2.61  | 0.68  | 5.14E-01 | 7.49E-01 | -6.46 |
| 1420973_PM_at   | Arid5b               | ARID5B     | -0.14 | 3.19  | -0.68 | 5.14E-01 | 7.49E-01 | -6.46 |
| 1458133_PM_at   | ---                  | NA         | -0.07 | 2.13  | -0.68 | 5.14E-01 | 7.49E-01 | -6.46 |
| 1431429_PM_a_at | Arl4a                | ARL4A      | -0.35 | 5.07  | -0.68 | 5.14E-01 | 7.49E-01 | -6.46 |
| 1416414_PM_at   | Emilin1              | EMILIN1    | 0.07  | 2.27  | 0.68  | 5.14E-01 | 7.49E-01 | -6.46 |
| 1430663_PM_at   | ---                  | NA         | 0.08  | 2.26  | 0.68  | 5.14E-01 | 7.49E-01 | -6.46 |
| 1452655_PM_at   | Zdhhc2               | ZDHHC2     | 0.11  | 2.37  | 0.68  | 5.14E-01 | 7.49E-01 | -6.46 |
| 1444591_PM_at   | ---                  | NA         | -0.07 | 2.42  | -0.68 | 5.14E-01 | 7.49E-01 | -6.46 |
| 1453879_PM_at   | 1700016H13Rik        | C4orf36    | -0.07 | 2.58  | -0.68 | 5.14E-01 | 7.49E-01 | -6.46 |
| 1429362_PM_a_at | Sf3b2                | SF3B2      | 0.31  | 6.51  | 0.68  | 5.14E-01 | 7.49E-01 | -6.46 |
| 1425801_PM_x_at | Cotl1                | COTL1      | 0.10  | 2.73  | 0.68  | 5.14E-01 | 7.49E-01 | -6.46 |
| 1419970_PM_at   | Slc35a5              | SLC35A5    | 0.06  | 2.28  | 0.68  | 5.14E-01 | 7.49E-01 | -6.46 |
| 1436065_PM_at   | ---                  | NA         | -0.07 | 2.51  | -0.68 | 5.14E-01 | 7.49E-01 | -6.46 |
| 1435587_PM_at   | Pcid2                | PCID2      | 0.11  | 2.49  | 0.68  | 5.14E-01 | 7.49E-01 | -6.46 |
| 1445230_PM_at   | ---                  | NA         | 0.34  | 3.97  | 0.68  | 5.14E-01 | 7.49E-01 | -6.46 |
| 1429364_PM_at   | 4930579G24Rik        | C4orf46    | 0.06  | 2.29  | 0.68  | 5.14E-01 | 7.49E-01 | -6.46 |
| 1425798_PM_a_at | Recql                | RECQL      | 0.08  | 2.51  | 0.68  | 5.14E-01 | 7.49E-01 | -6.46 |
| 1434041_PM_at   | Appbp2               | APBP2      | 0.17  | 2.12  | 0.68  | 5.14E-01 | 7.49E-01 | -6.46 |
| 1435509_PM_x_at | Cdk2ap1              | CDK2AP1    | -0.16 | 6.46  | -0.68 | 5.14E-01 | 7.49E-01 | -6.46 |
| 1451197_PM_s_at | Gatad2a              | GATAD2A    | -0.13 | 3.82  | -0.68 | 5.14E-01 | 7.49E-01 | -6.46 |
| 1442914_PM_at   | Tmf1                 | NA         | -0.08 | 2.33  | -0.68 | 5.14E-01 | 7.49E-01 | -6.46 |
| 1455347_PM_at   | Rtel1                | RTEL1      | 0.06  | 2.03  | 0.68  | 5.14E-01 | 7.49E-01 | -6.46 |
| 1430595_PM_at   | Gas2l1               | GAS2L1     | 0.07  | 2.52  | 0.68  | 5.14E-01 | 7.49E-01 | -6.46 |
| 1441073_PM_at   | Gm33248              | NA         | 0.07  | 2.23  | 0.68  | 5.14E-01 | 7.49E-01 | -6.46 |
| 1427040_PM_at   | Mdfc                 | MDFC       | 0.07  | 2.56  | 0.68  | 5.14E-01 | 7.49E-01 | -6.46 |
| 1458467_PM_at   | Krtap22-2            | NA         | 0.09  | 2.37  | 0.68  | 5.14E-01 | 7.49E-01 | -6.46 |
| 1456445_PM_at   | 4930563D23Rik        | CU633980.1 | 0.09  | 2.68  | 0.68  | 5.14E-01 | 7.49E-01 | -6.46 |
| 1449692_PM_at   | Prkcz                | PRKCZ      | 0.10  | 2.37  | 0.68  | 5.14E-01 | 7.49E-01 | -6.46 |
| 1456490_PM_at   | Cdk2ap2              | NA         | 0.12  | 2.40  | 0.68  | 5.14E-01 | 7.49E-01 | -6.46 |
| 1453803_PM_at   | Tia1                 | TIA1       | 0.17  | 2.89  | 0.68  | 5.14E-01 | 7.49E-01 | -6.46 |
| 1459910_PM_at   | Tnks                 | TNKS       | 0.19  | 3.36  | 0.68  | 5.14E-01 | 7.49E-01 | -6.46 |
| 1455042_PM_at   | Tbl1x                | TBL1Y      | -0.28 | 4.33  | -0.67 | 5.14E-01 | 7.49E-01 | -6.46 |
| 1417311_PM_at   | Crip2                | CRIP2      | -0.09 | 2.85  | -0.67 | 5.14E-01 | 7.49E-01 | -6.46 |
| 1429466_PM_s_at | Aph1b///Aph1c        | APH1B      | -0.28 | 3.05  | -0.67 | 5.15E-01 | 7.49E-01 | -6.46 |
| 1456090_PM_at   | Pdhx                 | PDHX       | 0.09  | 2.60  | 0.67  | 5.15E-01 | 7.49E-01 | -6.46 |
| 1428972_PM_at   | Tctex1d2             | TCTEX1D2   | 0.20  | 3.09  | 0.67  | 5.15E-01 | 7.49E-01 | -6.46 |
| 1434223_PM_at   | LOC102643079///Oscp1 | OSCP1      | -0.10 | 3.71  | -0.67 | 5.15E-01 | 7.49E-01 | -6.46 |
| 1434518_PM_at   | Phka2                | PHKA2      | -0.22 | 3.59  | -0.67 | 5.15E-01 | 7.49E-01 | -6.46 |
| 1432273_PM_a_at | Ackr1                | ACKR1      | -0.11 | 4.05  | -0.67 | 5.15E-01 | 7.49E-01 | -6.46 |
| 1428064_PM_at   | Arap1                | ARAP1      | -0.06 | 2.47  | -0.67 | 5.15E-01 | 7.49E-01 | -6.46 |
| 1448003_PM_at   | 1810043H04Rik        | NDUFAF8    | -0.07 | 3.20  | -0.67 | 5.15E-01 | 7.49E-01 | -6.46 |
| 1460267_PM_at   | Dmrt3                | DMRT3      | -0.05 | 2.11  | -0.67 | 5.15E-01 | 7.49E-01 | -6.46 |
| 1452282_PM_at   | Med26                | MED26      | 0.12  | 2.63  | 0.67  | 5.15E-01 | 7.49E-01 | -6.46 |
| 1445829_PM_at   | Dnhd1                | DNHD1      | 0.14  | 2.33  | 0.67  | 5.15E-01 | 7.49E-01 | -6.46 |
| 1455196_PM_s_at | Zfp729b              | ZNF208     | -0.22 | 3.42  | -0.67 | 5.15E-01 | 7.49E-01 | -6.46 |
| 1439142_PM_at   | Smarcal1             | SMARCAL1   | 0.09  | 2.82  | 0.67  | 5.15E-01 | 7.49E-01 | -6.46 |
| 1440558_PM_at   | Atp9b                | ATP9B      | -0.11 | 3.03  | -0.67 | 5.15E-01 | 7.49E-01 | -6.46 |
| 1455296_PM_at   | Adcy5                | ADCY5      | 0.23  | 4.91  | 0.67  | 5.15E-01 | 7.49E-01 | -6.46 |
| 1432716_PM_at   | Lrrn1                | NA         | -0.06 | 2.21  | -0.67 | 5.15E-01 | 7.49E-01 | -6.46 |
| 1438110_PM_at   | Zbtb1                | ZBTB1      | -0.19 | 3.59  | -0.67 | 5.15E-01 | 7.49E-01 | -6.46 |
| 1422331_PM_at   | Pou3f3               | POU3F3     | 0.09  | 2.51  | 0.67  | 5.15E-01 | 7.49E-01 | -6.46 |
| 1420999_PM_at   | Cnot4                | CNOT4      | 0.14  | 4.38  | 0.67  | 5.15E-01 | 7.49E-01 | -6.46 |
| 1430255_PM_at   | ---                  | NA         | 0.07  | 2.33  | 0.67  | 5.15E-01 | 7.50E-01 | -6.46 |
| 1416402_PM_at   | Abcb10               | ABCB10     | -0.26 | 4.34  | -0.67 | 5.15E-01 | 7.50E-01 | -6.46 |
| 1427120_PM_at   | Zfp26                | NA         | -0.19 | 3.97  | -0.67 | 5.15E-01 | 7.50E-01 | -6.46 |
| 1434292_PM_at   | Snhg11               | NA         | -0.14 | 10.14 | -0.67 | 5.15E-01 | 7.50E-01 | -6.46 |
| 1443686_PM_at   | H2-DMb2              | AL645941.2 | 0.08  | 2.27  | 0.67  | 5.15E-01 | 7.50E-01 | -6.46 |
| 1417232_PM_at   | Cldn2                | CLDN2      | 0.06  | 2.40  | 0.67  | 5.15E-01 | 7.50E-01 | -6.46 |
| 1453455_PM_at   | ---                  | NA         | 0.09  | 2.33  | 0.67  | 5.15E-01 | 7.50E-01 | -6.46 |
| 1433469_PM_at   | Lrrn2                | LRRN2      | -0.12 | 3.73  | -0.67 | 5.15E-01 | 7.50E-01 | -6.46 |
| 1446271_PM_at   | ---                  | NA         | -0.08 | 2.85  | -0.67 | 5.15E-01 | 7.50E-01 | -6.46 |
| 1432487_PM_at   | LOC102638465         | NA         | 0.06  | 2.23  | 0.67  | 5.15E-01 | 7.50E-01 | -6.46 |
| 1431779_PM_at   | ---                  | NA         | 0.10  | 2.80  | 0.67  | 5.15E-01 | 7.50E-01 | -6.46 |
| 1443244_PM_at   | Ptgr2                | ACO05520.1 | 0.10  | 2.75  | 0.67  | 5.15E-01 | 7.50E-01 | -6.46 |
| 1416608_PM_a_at | BC004004             | C6orf89    | 0.23  | 5.95  | 0.67  | 5.15E-01 | 7.50E-01 | -6.46 |
| 1455368_PM_at   | Zdhhc3               | ZDHHC3     | -0.15 | 2.90  | -0.67 | 5.16E-01 | 7.50E-01 | -6.46 |
| 1422925_PM_s_at | Acot3                | ACOT1      | 0.08  | 2.19  | 0.67  | 5.16E-01 | 7.50E-01 | -6.46 |
| 1420912_PM_at   | Aff4                 | AFF4       | 0.11  | 2.59  | 0.67  | 5.16E-01 | 7.50E-01 | -6.46 |
| 1424077_PM_at   | Gdpp1                | GDPP1      | -0.23 | 4.13  | -0.67 | 5.16E-01 | 7.50E-01 | -6.46 |

|                 |                                              |          |       |      |       |          |          |       |
|-----------------|----------------------------------------------|----------|-------|------|-------|----------|----------|-------|
| 1423511_PM_at   | Asf1a                                        | ASF1A    | -0.19 | 3.87 | -0.67 | 5.16E-01 | 7.50E-01 | -6.46 |
| 1416508_PM_at   | Med28                                        | MED28    | -0.14 | 3.07 | -0.67 | 5.16E-01 | 7.50E-01 | -6.46 |
| 1437542_PM_at   | Ikzf2                                        | IKZF2    | -0.08 | 2.29 | -0.67 | 5.16E-01 | 7.50E-01 | -6.46 |
| 1456065_PM_at   | Ubash3a                                      | UBASH3A  | 0.05  | 2.06 | 0.67  | 5.16E-01 | 7.50E-01 | -6.46 |
| 1441247_PM_at   | ---                                          | NA       | -0.19 | 3.19 | -0.67 | 5.16E-01 | 7.50E-01 | -6.46 |
| 1425520_PM_a_at | Dhdds                                        | DHDDS    | 0.12  | 2.89 | 0.67  | 5.16E-01 | 7.50E-01 | -6.46 |
| 1423689_PM_a_at | Gpsm1                                        | GPSM1    | 0.14  | 2.42 | 0.67  | 5.16E-01 | 7.50E-01 | -6.46 |
| 1436365_PM_at   | Zbtb7c                                       | ZBTB7C   | 0.11  | 2.52 | 0.67  | 5.16E-01 | 7.50E-01 | -6.46 |
| 1416014_PM_at   | Abce1                                        | ABCE1    | -0.16 | 2.98 | -0.67 | 5.16E-01 | 7.50E-01 | -6.46 |
| 1452498_PM_at   | ---                                          | NA       | 0.06  | 2.12 | 0.67  | 5.16E-01 | 7.50E-01 | -6.46 |
| 1458690_PM_at   | March7                                       | MARCH7   | 0.20  | 3.24 | 0.67  | 5.16E-01 | 7.50E-01 | -6.46 |
| 1427428_PM_at   | Clec4g                                       | CLEC4G   | 0.09  | 2.61 | 0.67  | 5.16E-01 | 7.50E-01 | -6.46 |
| 1419046_PM_at   | Hgh1                                         | HGH1     | 0.14  | 2.39 | 0.67  | 5.16E-01 | 7.50E-01 | -6.46 |
| 1438384_PM_at   | Spanxn4                                      | NA       | 0.21  | 2.43 | 0.67  | 5.16E-01 | 7.50E-01 | -6.46 |
| 1424852_PM_at   | Mef2c                                        | MEF2C    | -0.40 | 5.62 | -0.67 | 5.16E-01 | 7.50E-01 | -6.46 |
| 1426889_PM_at   | Zfp821                                       | ZNF821   | -0.20 | 3.13 | -0.67 | 5.16E-01 | 7.50E-01 | -6.46 |
| 1426644_PM_at   | Tbc1d20                                      | TBC1D20  | -0.15 | 3.72 | -0.67 | 5.16E-01 | 7.50E-01 | -6.46 |
| 1433683_PM_at   | Esrp2                                        | ESRP2    | -0.05 | 2.80 | -0.67 | 5.16E-01 | 7.50E-01 | -6.46 |
| 1426466_PM_s_at | Rps6kl1                                      | RPS6KL1  | 0.07  | 2.65 | 0.67  | 5.16E-01 | 7.50E-01 | -6.46 |
| 1437847_PM_x_at | RbmX                                         | RBMX     | -0.13 | 2.25 | -0.67 | 5.16E-01 | 7.50E-01 | -6.46 |
| 1452591_PM_a_at | Mtz2                                         | MZT2A    | -0.09 | 3.60 | -0.67 | 5.16E-01 | 7.50E-01 | -6.46 |
| 1456603_PM_at   | Fam101b                                      | RFLNB    | 0.11  | 2.72 | 0.67  | 5.16E-01 | 7.50E-01 | -6.46 |
| 1419682_PM_a_at | Trp53rka /// Trp53rkb                        | TP53RK   | 0.08  | 2.21 | 0.67  | 5.16E-01 | 7.50E-01 | -6.46 |
| 1431270_PM_a_at | Aste1                                        | ASTE1    | -0.15 | 3.61 | -0.67 | 5.16E-01 | 7.50E-01 | -6.46 |
| 1436453_PM_at   | BB144871                                     | NA       | 0.06  | 2.04 | 0.67  | 5.16E-01 | 7.50E-01 | -6.46 |
| 1419618_PM_at   | Bbox1                                        | BBOX1    | -0.11 | 2.43 | -0.67 | 5.16E-01 | 7.50E-01 | -6.46 |
| 1417149_PM_at   | P4ha2                                        | P4HA2    | 0.09  | 2.90 | 0.67  | 5.16E-01 | 7.50E-01 | -6.46 |
| 1455772_PM_at   | ---                                          | NA       | -0.14 | 2.28 | -0.67 | 5.16E-01 | 7.50E-01 | -6.46 |
| 1444774_PM_at   | Det1                                         | DET1     | 0.08  | 2.19 | 0.67  | 5.17E-01 | 7.50E-01 | -6.46 |
| 1431634_PM_at   | 4930455C13Rik                                | NA       | 0.10  | 2.61 | 0.67  | 5.17E-01 | 7.51E-01 | -6.46 |
| 1430205_PM_a_at | Cdc37l1                                      | CDC37L1  | 0.17  | 4.02 | 0.67  | 5.17E-01 | 7.51E-01 | -6.46 |
| 1455431_PM_at   | Slc5a1                                       | SLC5A1   | 0.21  | 2.80 | 0.67  | 5.17E-01 | 7.51E-01 | -6.46 |
| 1419941_PM_at   | C030018P15Rik                                | NA       | 0.10  | 2.46 | 0.67  | 5.17E-01 | 7.51E-01 | -6.46 |
| 1460299_PM_at   | Mnx1                                         | MNX1     | -0.05 | 1.83 | -0.67 | 5.17E-01 | 7.51E-01 | -6.46 |
| 1448213_PM_at   | Anxa1                                        | ANXA1    | 0.15  | 2.28 | 0.67  | 5.17E-01 | 7.51E-01 | -6.46 |
| 1434061_PM_at   | Rp2                                          | RP2      | 0.09  | 2.66 | 0.67  | 5.17E-01 | 7.51E-01 | -6.46 |
| 1436808_PM_x_at | Mcm5                                         | MCM5     | 0.41  | 3.60 | 0.67  | 5.17E-01 | 7.51E-01 | -6.46 |
| 1416946_PM_a_at | Acaa1a /// Acaa1b                            | ACAA1    | -0.09 | 2.44 | -0.67 | 5.17E-01 | 7.51E-01 | -6.46 |
| 1422411_PM_s_at | Ear-ps2 /// Ear1 /// Ear12 /// Ear2 /// Ear3 | RNASE2   | 0.06  | 2.18 | 0.67  | 5.17E-01 | 7.51E-01 | -6.46 |
| 1459257_PM_at   | ---                                          | NA       | 0.11  | 2.25 | 0.67  | 5.17E-01 | 7.51E-01 | -6.46 |
| 1428307_PM_at   | Zdhhc13                                      | ZDHHHC13 | 0.14  | 3.60 | 0.67  | 5.17E-01 | 7.51E-01 | -6.46 |
| 1457894_PM_at   | Mettl11b                                     | METTL11B | 0.10  | 2.64 | 0.67  | 5.17E-01 | 7.51E-01 | -6.46 |
| 1419109_PM_at   | Hrc                                          | HRC      | 0.07  | 2.59 | 0.67  | 5.17E-01 | 7.51E-01 | -6.46 |
| 1425822_PM_a_at | Dtx1                                         | DTX1     | -0.09 | 3.40 | -0.67 | 5.17E-01 | 7.51E-01 | -6.46 |
| 1424995_PM_at   | Glyctk                                       | GLYCTK   | -0.06 | 2.18 | -0.67 | 5.17E-01 | 7.51E-01 | -6.46 |
| 1456866_PM_x_at | Spatc1l                                      | SPATC1L  | 0.08  | 2.80 | 0.67  | 5.17E-01 | 7.51E-01 | -6.46 |
| 1452726_PM_a_at | Ph1d1                                        | PIH1D1   | 0.12  | 2.95 | 0.67  | 5.17E-01 | 7.51E-01 | -6.46 |
| 1437965_PM_at   | Heatr1                                       | HEATR1   | 0.12  | 2.70 | 0.67  | 5.17E-01 | 7.51E-01 | -6.46 |
| 1442107_PM_at   | ---                                          | NA       | 0.18  | 3.03 | 0.67  | 5.17E-01 | 7.51E-01 | -6.46 |
| 1423286_PM_at   | Cbln1                                        | CBLN1    | 0.62  | 4.00 | 0.67  | 5.17E-01 | 7.51E-01 | -6.46 |
| 1458878_PM_at   | ---                                          | NA       | 0.07  | 2.00 | 0.67  | 5.17E-01 | 7.51E-01 | -6.46 |
| 1449768_PM_at   | ---                                          | NA       | 0.07  | 2.39 | 0.67  | 5.17E-01 | 7.51E-01 | -6.46 |
| 1447112_PM_s_at | Cryl1                                        | CRYL1    | 0.07  | 2.50 | 0.67  | 5.17E-01 | 7.51E-01 | -6.46 |
| 1439802_PM_at   | Stk35                                        | STK35    | -0.06 | 2.46 | -0.67 | 5.17E-01 | 7.51E-01 | -6.46 |
| 1445088_PM_at   | ---                                          | NA       | 0.13  | 2.79 | 0.67  | 5.17E-01 | 7.51E-01 | -6.46 |
| 1455822_PM_x_at | Surf4                                        | SURF4    | 0.16  | 4.08 | 0.67  | 5.17E-01 | 7.51E-01 | -6.46 |
| 1451294_PM_s_at | Snrpe                                        | SNRPE    | -0.21 | 6.49 | -0.67 | 5.17E-01 | 7.51E-01 | -6.46 |
| 1448741_PM_at   | Slc3a1                                       | SLC3A1   | 0.26  | 3.80 | 0.67  | 5.17E-01 | 7.51E-01 | -6.46 |
| 1415860_PM_at   | Kpna2                                        | KPNA2    | -0.23 | 2.81 | -0.67 | 5.17E-01 | 7.51E-01 | -6.46 |
| 1456894_PM_at   | Elmsan1                                      | ELMSAN1  | 0.09  | 2.92 | 0.67  | 5.17E-01 | 7.51E-01 | -6.46 |
| 1441683_PM_at   | ---                                          | NA       | -0.09 | 2.42 | -0.67 | 5.18E-01 | 7.51E-01 | -6.46 |
| 1427487_PM_at   | Abcf2                                        | NA       | -0.10 | 2.85 | -0.67 | 5.18E-01 | 7.51E-01 | -6.46 |
| 1455852_PM_at   | Nsl1                                         | NSL1     | 0.06  | 2.26 | 0.67  | 5.18E-01 | 7.51E-01 | -6.46 |
| 1447873_PM_x_at | Bid                                          | BID      | 0.07  | 2.22 | 0.67  | 5.18E-01 | 7.51E-01 | -6.46 |
| 1455640_PM_a_at | Txn2                                         | TXN2     | 0.07  | 2.45 | 0.67  | 5.18E-01 | 7.51E-01 | -6.46 |
| 1431814_PM_at   | 4932443L11Rik                                | NA       | 0.09  | 2.90 | 0.67  | 5.18E-01 | 7.51E-01 | -6.46 |
| 1438765_PM_at   | Dhx33                                        | DHX33    | 0.12  | 2.39 | 0.67  | 5.18E-01 | 7.51E-01 | -6.46 |
| 1451974_PM_at   | Osbp12                                       | OSBPL2   | 0.21  | 3.93 | 0.67  | 5.18E-01 | 7.51E-01 | -6.46 |
| 1454249_PM_at   | ---                                          | NA       | -0.09 | 2.44 | -0.67 | 5.18E-01 | 7.51E-01 | -6.46 |
| 1455050_PM_at   | Vstm4                                        | VSTM4    | -0.07 | 2.35 | -0.67 | 5.18E-01 | 7.51E-01 | -6.46 |
| 1445376_PM_at   | ---                                          | NA       | -0.17 | 3.70 | -0.67 | 5.18E-01 | 7.51E-01 | -6.46 |
| 1456027_PM_at   | Rbm41                                        | NA       | 0.08  | 2.89 | 0.67  | 5.18E-01 | 7.51E-01 | -6.46 |
| 1452912_PM_at   | Dscc1                                        | DSCC1    | 0.07  | 2.05 | 0.67  | 5.18E-01 | 7.51E-01 | -6.46 |
| 1457476_PM_at   | ---                                          | NA       | 0.10  | 2.31 | 0.67  | 5.18E-01 | 7.52E-01 | -6.46 |

|                   |                                |            |       |       |       |          |          |       |
|-------------------|--------------------------------|------------|-------|-------|-------|----------|----------|-------|
| 1455997_PM_a_at   | Uqcrb                          | UQCRB      | -0.14 | 9.80  | -0.67 | 5.18E-01 | 7.52E-01 | -6.47 |
| 1456460_PM_at     | BC068281                       | WDCP       | -0.07 | 2.17  | -0.67 | 5.18E-01 | 7.52E-01 | -6.47 |
| 1427826_PM_a_at   | Skolb2                         | ACO11604.2 | 0.06  | 1.98  | 0.67  | 5.18E-01 | 7.52E-01 | -6.47 |
| 1428815_PM_at     | Gstt4                          | GSTTP1     | 0.07  | 2.28  | 0.67  | 5.18E-01 | 7.52E-01 | -6.47 |
| 1440045_PM_at     | ---                            | NA         | 0.10  | 2.79  | 0.67  | 5.18E-01 | 7.52E-01 | -6.47 |
| 1430778_PM_a_at   | Nubp1                          | NUBP1      | 0.12  | 2.70  | 0.67  | 5.18E-01 | 7.52E-01 | -6.47 |
| 1441366_PM_at     | ---                            | NA         | -0.30 | 6.06  | -0.67 | 5.18E-01 | 7.52E-01 | -6.47 |
| 1458147_PM_at     | ---                            | NA         | -0.10 | 2.69  | -0.67 | 5.18E-01 | 7.52E-01 | -6.47 |
| 1448229_PM_s_at   | Ccnd2                          | CCND2      | -0.23 | 3.54  | -0.67 | 5.18E-01 | 7.52E-01 | -6.47 |
| 1440783_PM_at     | Cfap61                         | CFAP61     | 0.08  | 2.36  | 0.67  | 5.18E-01 | 7.52E-01 | -6.47 |
| 1434313_PM_at     | Ccdc126                        | CCDC126    | 0.08  | 2.55  | 0.67  | 5.18E-01 | 7.52E-01 | -6.47 |
| 1439554_PM_at     | Scmh1                          | SCMH1      | -0.12 | 3.07  | -0.67 | 5.18E-01 | 7.52E-01 | -6.47 |
| 1418912_PM_at     | Pkxdc2                         | PLXDC2     | -0.30 | 4.70  | -0.67 | 5.18E-01 | 7.52E-01 | -6.47 |
| 1454939_PM_at     | Phf20l1                        | NA         | -0.21 | 3.19  | -0.67 | 5.18E-01 | 7.52E-01 | -6.47 |
| 1450860_PM_at     | Lap3                           | LAP3       | -0.16 | 3.12  | -0.67 | 5.18E-01 | 7.52E-01 | -6.47 |
| 1447286_PM_at     | ---                            | NA         | -0.12 | 2.28  | -0.67 | 5.18E-01 | 7.52E-01 | -6.47 |
| 1451906_PM_at     | Ubxn10                         | NA         | 0.06  | 2.39  | 0.67  | 5.18E-01 | 7.52E-01 | -6.47 |
| AFFX-r2-TagQ-5_at | ---                            | NA         | 0.07  | 2.05  | 0.67  | 5.18E-01 | 7.52E-01 | -6.47 |
| 1457646_PM_at     | Hoxa11os                       | NA         | 0.08  | 2.10  | 0.67  | 5.18E-01 | 7.52E-01 | -6.47 |
| 1459135_PM_at     | ---                            | NA         | 0.09  | 2.48  | 0.67  | 5.18E-01 | 7.52E-01 | -6.47 |
| 1419410_PM_at     | Batf                           | BATF       | 0.06  | 2.20  | 0.67  | 5.18E-01 | 7.52E-01 | -6.47 |
| 1419034_PM_at     | Csnk2a1                        | CSNK2A3    | 0.25  | 3.65  | 0.67  | 5.19E-01 | 7.52E-01 | -6.47 |
| 1460075_PM_x_at   | Snrpn /// Snurf                | SNRPN      | -0.13 | 4.13  | -0.67 | 5.19E-01 | 7.52E-01 | -6.47 |
| 1415836_PM_at     | Alh18a1                        | ALDH18A1   | -0.06 | 2.25  | -0.67 | 5.19E-01 | 7.52E-01 | -6.47 |
| 1435510_PM_at     | Ppm1h                          | PPM1H      | 0.27  | 3.21  | 0.67  | 5.19E-01 | 7.52E-01 | -6.47 |
| 1452762_PM_at     | Rbms3                          | RBMS3      | 0.13  | 4.17  | 0.67  | 5.19E-01 | 7.52E-01 | -6.47 |
| 1418675_PM_at     | Osmr                           | OSMR       | 0.08  | 2.02  | 0.67  | 5.19E-01 | 7.52E-01 | -6.47 |
| 1452147_PM_at     | Sec24c                         | SEC24C     | -0.24 | 4.02  | -0.67 | 5.19E-01 | 7.52E-01 | -6.47 |
| 1424386_PM_at     | Reep2                          | REEP2      | -0.23 | 5.04  | -0.67 | 5.19E-01 | 7.52E-01 | -6.47 |
| 1434064_PM_at     | Orai3                          | ORAI3      | 0.09  | 2.71  | 0.67  | 5.19E-01 | 7.52E-01 | -6.47 |
| 1457811_PM_at     | ---                            | NA         | -0.26 | 3.45  | -0.67 | 5.19E-01 | 7.52E-01 | -6.47 |
| 1432118_PM_at     | 2410012E07Rik                  | NA         | 0.08  | 2.16  | 0.67  | 5.19E-01 | 7.52E-01 | -6.47 |
| 1430668_PM_a_at   | Ankra2                         | ANKRA2     | 0.09  | 2.63  | 0.67  | 5.19E-01 | 7.52E-01 | -6.47 |
| 1434318_PM_a_at   | Tfe3                           | TFE3       | 0.19  | 3.19  | 0.67  | 5.19E-01 | 7.52E-01 | -6.47 |
| 1452348_PM_s_at   | Ifi204 /// Ifi205 /// Mnda /// | Mnda       | 0.26  | 3.31  | 0.67  | 5.19E-01 | 7.52E-01 | -6.47 |
| 1435353_PM_a_at   | Pisd-ps1 /// Pisd-ps3          | NA         | 0.33  | 4.53  | 0.67  | 5.19E-01 | 7.52E-01 | -6.47 |
| 1441782_PM_at     | Aak1                           | AAK1       | -0.25 | 5.33  | -0.67 | 5.19E-01 | 7.52E-01 | -6.47 |
| 1453461_PM_at     | Timm10b                        | ACO84337.2 | -0.19 | 3.12  | -0.67 | 5.19E-01 | 7.52E-01 | -6.47 |
| 1416411_PM_at     | Gstm2                          | NA         | -0.16 | 2.85  | -0.67 | 5.19E-01 | 7.52E-01 | -6.47 |
| 1435743_PM_at     | Klh23                          | KLHL23     | -0.13 | 3.72  | -0.67 | 5.19E-01 | 7.52E-01 | -6.47 |
| 1454934_PM_at     | Ppm1f                          | PPM1F      | -0.12 | 3.05  | -0.67 | 5.19E-01 | 7.52E-01 | -6.47 |
| 1458619_PM_at     | ---                            | NA         | -0.08 | 2.21  | -0.67 | 5.19E-01 | 7.52E-01 | -6.47 |
| 1449948_PM_at     | ---                            | NA         | -0.07 | 2.49  | -0.67 | 5.19E-01 | 7.52E-01 | -6.47 |
| 1446013_PM_at     | Slc38a3                        | SLC38A3    | 0.06  | 2.65  | 0.67  | 5.19E-01 | 7.52E-01 | -6.47 |
| 1444390_PM_at     | Prdm14                         | PRDM14     | 0.06  | 2.22  | 0.67  | 5.19E-01 | 7.52E-01 | -6.47 |
| 1460024_PM_at     | Tnrc6b                         | TNRC6B     | 0.08  | 2.72  | 0.67  | 5.19E-01 | 7.52E-01 | -6.47 |
| 1440786_PM_x_at   | Sfxn2                          | NA         | 0.10  | 2.32  | 0.67  | 5.19E-01 | 7.52E-01 | -6.47 |
| 1419223_PM_a_at   | Dtna                           | DTNA       | 0.42  | 3.90  | 0.67  | 5.19E-01 | 7.52E-01 | -6.47 |
| 1453535_PM_at     | Olfir560 /// Olfir78           | NA         | 0.07  | 2.17  | 0.67  | 5.19E-01 | 7.52E-01 | -6.47 |
| 1454529_PM_at     | ---                            | NA         | -0.09 | 2.25  | -0.67 | 5.19E-01 | 7.52E-01 | -6.47 |
| 1434168_PM_at     | Peo1                           | TWINK      | -0.09 | 3.19  | -0.67 | 5.19E-01 | 7.52E-01 | -6.47 |
| 1432600_PM_at     | ---                            | NA         | -0.08 | 2.34  | -0.67 | 5.19E-01 | 7.52E-01 | -6.47 |
| 1433086_PM_at     | ---                            | NA         | 0.08  | 2.47  | 0.67  | 5.19E-01 | 7.52E-01 | -6.47 |
| 1421314_PM_at     | Ctnn                           | CTTN       | 0.06  | 2.43  | 0.67  | 5.19E-01 | 7.52E-01 | -6.47 |
| 1437478_PM_s_at   | Efh2                           | EFHD2      | -0.32 | 8.03  | -0.67 | 5.20E-01 | 7.52E-01 | -6.47 |
| 1450821_PM_at     | Kat2b                          | KAT2B      | -0.28 | 3.01  | -0.67 | 5.20E-01 | 7.52E-01 | -6.47 |
| 1429784_PM_at     | Mapk1ip1l                      | NA         | -0.09 | 2.55  | -0.67 | 5.19E-01 | 7.52E-01 | -6.47 |
| 1452761_PM_a_at   | Rbms3                          | RBMS3      | -0.08 | 2.17  | -0.67 | 5.20E-01 | 7.52E-01 | -6.47 |
| 1449081_PM_at     | Ces1d                          | CES1       | -0.06 | 2.28  | -0.67 | 5.20E-01 | 7.52E-01 | -6.47 |
| 1449414_PM_at     | Zfp53                          | NA         | -0.06 | 2.08  | -0.67 | 5.20E-01 | 7.52E-01 | -6.47 |
| 1445642_PM_at     | Lemd1                          | LEMD1      | 0.06  | 2.14  | 0.67  | 5.20E-01 | 7.52E-01 | -6.47 |
| 1447803_PM_x_at   | Capg                           | CAPG       | 0.07  | 2.24  | 0.67  | 5.20E-01 | 7.52E-01 | -6.47 |
| 1457620_PM_at     | Trmt2a                         | TRMT2A     | 0.07  | 2.50  | 0.67  | 5.20E-01 | 7.52E-01 | -6.47 |
| 1443082_PM_at     | ---                            | NA         | 0.07  | 2.05  | 0.67  | 5.20E-01 | 7.52E-01 | -6.47 |
| 1444424_PM_at     | ---                            | NA         | 0.09  | 2.32  | 0.67  | 5.20E-01 | 7.52E-01 | -6.47 |
| 1459256_PM_at     | ---                            | NA         | 0.11  | 2.25  | 0.67  | 5.20E-01 | 7.52E-01 | -6.47 |
| 1459853_PM_x_at   | Sde2                           | SDE2       | 0.11  | 5.03  | 0.67  | 5.20E-01 | 7.52E-01 | -6.47 |
| 1455226_PM_at     | Sptb                           | SPTB       | 0.11  | 3.96  | 0.67  | 5.20E-01 | 7.52E-01 | -6.47 |
| 1417496_PM_at     | Cp                             | CP         | -0.23 | 2.47  | -0.67 | 5.20E-01 | 7.52E-01 | -6.47 |
| 1456384_PM_at     | Nlgn3                          | NLGN3      | 0.11  | 3.17  | 0.67  | 5.20E-01 | 7.52E-01 | -6.47 |
| 1416867_PM_at     | Bet1                           | BET1       | 0.13  | 2.60  | 0.67  | 5.20E-01 | 7.52E-01 | -6.47 |
| 1419657_PM_a_at   | Slc25a36                       | SLC25A36   | 0.19  | 5.53  | 0.67  | 5.20E-01 | 7.52E-01 | -6.47 |
| 1437468_PM_x_at   | Fbxw11                         | FBXW11     | -0.22 | 10.05 | -0.67 | 5.20E-01 | 7.52E-01 | -6.47 |
| 1458747_PM_at     | ---                            | NA         | -0.12 | 2.46  | -0.67 | 5.20E-01 | 7.52E-01 | -6.47 |

|                 |                     |             |       |      |       |          |          |       |
|-----------------|---------------------|-------------|-------|------|-------|----------|----------|-------|
| 1438135_PM_at   | ---                 | NA          | -0.07 | 2.16 | -0.67 | 5.20E-01 | 7.52E-01 | -6.47 |
| 1441186_PM_at   | Sall3               | SALL3       | -0.06 | 2.43 | -0.67 | 5.20E-01 | 7.52E-01 | -6.47 |
| 1444111_PM_at   | ---                 | NA          | 0.09  | 2.22 | 0.67  | 5.20E-01 | 7.52E-01 | -6.47 |
| 1457528_PM_at   | Slc4a7              | NA          | 0.12  | 2.59 | 0.67  | 5.20E-01 | 7.52E-01 | -6.47 |
| 1451755_PM_a_at | Apohec1             | APOBEC1     | 0.14  | 2.89 | 0.67  | 5.20E-01 | 7.52E-01 | -6.47 |
| 1443337_PM_at   | ---                 | NA          | 0.32  | 4.57 | 0.67  | 5.20E-01 | 7.52E-01 | -6.47 |
| 1440621_PM_at   | ---                 | NA          | 0.07  | 2.25 | 0.67  | 5.20E-01 | 7.53E-01 | -6.47 |
| 1428148_PM_s_at | Coro7               | CORO7-PAM16 | 0.33  | 2.57 | 0.67  | 5.20E-01 | 7.53E-01 | -6.47 |
| 1431731_PM_at   | Bnip2               | BNIP2       | -0.08 | 2.15 | -0.67 | 5.20E-01 | 7.53E-01 | -6.47 |
| 1425999_PM_at   | Gm4788              | NA          | 0.06  | 2.07 | 0.67  | 5.20E-01 | 7.53E-01 | -6.47 |
| 1430174_PM_at   | ---                 | NA          | 0.05  | 1.99 | 0.67  | 5.20E-01 | 7.53E-01 | -6.47 |
| 1436780_PM_at   | Ogt                 | OGT         | -0.19 | 4.94 | -0.67 | 5.20E-01 | 7.53E-01 | -6.47 |
| 1459281_PM_at   | ---                 | NA          | -0.07 | 2.09 | -0.67 | 5.20E-01 | 7.53E-01 | -6.47 |
| 1445399_PM_at   | Klrb1b              | KLRB1       | 0.06  | 2.21 | 0.67  | 5.20E-01 | 7.53E-01 | -6.47 |
| 1452447_PM_at   | Erc6l2              | ERCC6L2     | 0.06  | 2.11 | 0.67  | 5.20E-01 | 7.53E-01 | -6.47 |
| 1453517_PM_at   | Metap1d             | METAP1D     | 0.07  | 2.21 | 0.67  | 5.20E-01 | 7.53E-01 | -6.47 |
| 1445340_PM_at   | Mycbp2              | MYCBP2      | 0.08  | 2.27 | 0.67  | 5.20E-01 | 7.53E-01 | -6.47 |
| 1453965_PM_at   | 4930432O09Rik       | NA          | 0.08  | 2.23 | 0.67  | 5.20E-01 | 7.53E-01 | -6.47 |
| 1456468_PM_x_at | Myadml2             | MYADML2     | 0.09  | 2.29 | 0.67  | 5.20E-01 | 7.53E-01 | -6.47 |
| 1430110_PM_at   | Gje1                | GJE1        | 0.09  | 2.42 | 0.67  | 5.20E-01 | 7.53E-01 | -6.47 |
| 1432001_PM_at   | Mss51               | MSS51       | 0.10  | 2.32 | 0.67  | 5.20E-01 | 7.53E-01 | -6.47 |
| 1416048_PM_at   | Phc2                | PHC2        | 0.14  | 3.89 | 0.67  | 5.21E-01 | 7.53E-01 | -6.47 |
| 1448991_PM_a_at | Ina                 | INA         | 0.19  | 2.83 | 0.67  | 5.20E-01 | 7.53E-01 | -6.47 |
| 1451304_PM_at   | Tmem143             | TMEM143     | 0.09  | 3.25 | 0.67  | 5.21E-01 | 7.53E-01 | -6.47 |
| 1429076_PM_a_at | Gdpd2               | GDPD2       | 0.09  | 3.03 | 0.66  | 5.21E-01 | 7.53E-01 | -6.47 |
| 1425127_PM_at   | Hsd3b2              | HSD3B2      | 0.10  | 2.59 | 0.66  | 5.21E-01 | 7.53E-01 | -6.47 |
| 1447209_PM_at   | ---                 | NA          | 0.13  | 2.80 | 0.66  | 5.21E-01 | 7.53E-01 | -6.47 |
| 1417633_PM_at   | Sod3                | SOD3        | -0.13 | 2.70 | -0.66 | 5.21E-01 | 7.53E-01 | -6.47 |
| 1455768_PM_at   | Npc2                | NPC2        | -0.12 | 2.63 | -0.66 | 5.21E-01 | 7.53E-01 | -6.47 |
| 1454487_PM_at   | ---                 | NA          | -0.06 | 2.21 | -0.66 | 5.21E-01 | 7.53E-01 | -6.47 |
| 1445201_PM_at   | ---                 | NA          | 0.05  | 1.96 | 0.66  | 5.21E-01 | 7.53E-01 | -6.47 |
| 1445569_PM_at   | Klh33               | KLHL33      | 0.06  | 2.29 | 0.66  | 5.21E-01 | 7.53E-01 | -6.47 |
| 1441518_PM_at   | Gm11754             | NA          | 0.06  | 2.95 | 0.66  | 5.21E-01 | 7.53E-01 | -6.47 |
| 1446332_PM_at   | ---                 | NA          | 0.08  | 2.69 | 0.66  | 5.21E-01 | 7.53E-01 | -6.47 |
| 1430758_PM_x_at | Bcas1               | BCAS1       | 0.09  | 2.95 | 0.66  | 5.21E-01 | 7.53E-01 | -6.47 |
| 1423434_PM_at   | Tead1               | TEAD1       | -0.27 | 3.12 | -0.66 | 5.21E-01 | 7.53E-01 | -6.47 |
| 1418127_PM_a_at | Aifm1               | AIFM1       | -0.14 | 3.68 | -0.66 | 5.21E-01 | 7.53E-01 | -6.47 |
| 1457274_PM_at   | Gm13088 /// Gm13103 | PRAMEF9     | -0.06 | 2.18 | -0.66 | 5.21E-01 | 7.53E-01 | -6.47 |
| 1419901_PM_at   | ---                 | NA          | 0.12  | 2.87 | 0.66  | 5.21E-01 | 7.53E-01 | -6.47 |
| 1421866_PM_at   | Nr3c1               | NR3C1       | 0.08  | 2.69 | 0.66  | 5.21E-01 | 7.53E-01 | -6.47 |
| 1420646_PM_at   | Nus1                | NUS1        | 0.25  | 3.45 | 0.66  | 5.21E-01 | 7.53E-01 | -6.47 |
| 1433875_PM_at   | Efcab14             | EFCAB14     | -0.13 | 3.47 | -0.66 | 5.21E-01 | 7.53E-01 | -6.47 |
| 1416560_PM_at   | Slc13a3             | SLC13A3     | -0.10 | 2.41 | -0.66 | 5.21E-01 | 7.53E-01 | -6.47 |
| 1444131_PM_at   | ---                 | NA          | 0.06  | 2.52 | 0.66  | 5.21E-01 | 7.53E-01 | -6.47 |
| 1440995_PM_at   | LOC102635948        | NA          | 0.08  | 2.61 | 0.66  | 5.21E-01 | 7.53E-01 | -6.47 |
| 1424019_PM_at   | Nop2                | NOP2        | 0.08  | 3.11 | 0.66  | 5.21E-01 | 7.53E-01 | -6.47 |
| 1452474_PM_a_at | Art3                | ART3        | -0.06 | 2.26 | -0.66 | 5.21E-01 | 7.53E-01 | -6.47 |
| 1442576_PM_at   | Creb5               | CREB5       | 0.07  | 2.11 | 0.66  | 5.21E-01 | 7.53E-01 | -6.47 |
| 1442339_PM_at   | Stfa2l1             | CSTA        | 0.10  | 2.23 | 0.66  | 5.21E-01 | 7.53E-01 | -6.47 |
| 1416463_PM_at   | Caprin1             | CAPRIN1     | 0.10  | 3.28 | 0.66  | 5.21E-01 | 7.53E-01 | -6.47 |
| 1439102_PM_at   | Bptf                | BPTF        | 0.19  | 2.98 | 0.66  | 5.21E-01 | 7.53E-01 | -6.47 |
| 1418730_PM_at   | Rlim                | RLIM        | -0.29 | 3.24 | -0.66 | 5.21E-01 | 7.53E-01 | -6.47 |
| 1418149_PM_at   | Chga                | CHGA        | -0.14 | 5.41 | -0.66 | 5.22E-01 | 7.53E-01 | -6.47 |
| 1426530_PM_a_at | Klh5                | KLHL5       | -0.08 | 2.37 | -0.66 | 5.22E-01 | 7.53E-01 | -6.47 |
| 1458240_PM_at   | ---                 | NA          | 0.07  | 2.15 | 0.66  | 5.22E-01 | 7.53E-01 | -6.47 |
| 1443798_PM_at   | Pik3cd              | PIK3CD      | 0.35  | 2.57 | 0.66  | 5.22E-01 | 7.53E-01 | -6.47 |
| 1456246_PM_x_at | Tpppb               | NA          | -0.14 | 3.19 | -0.66 | 5.22E-01 | 7.54E-01 | -6.47 |
| 1447794_PM_x_at | Plac8l1             | PLAC8L1     | 0.05  | 1.96 | 0.66  | 5.22E-01 | 7.54E-01 | -6.47 |
| 1421481_PM_at   | ---                 | NA          | -0.06 | 2.26 | -0.66 | 5.22E-01 | 7.54E-01 | -6.47 |
| 1459742_PM_at   | ---                 | NA          | -0.07 | 2.35 | -0.66 | 5.22E-01 | 7.54E-01 | -6.47 |
| 1422808_PM_s_at | Dock2               | DOCK2       | 0.06  | 2.23 | 0.66  | 5.22E-01 | 7.54E-01 | -6.47 |
| 1431512_PM_at   | ---                 | NA          | 0.06  | 2.58 | 0.66  | 5.22E-01 | 7.54E-01 | -6.47 |
| 1438339_PM_at   | Fancd2              | FANCD2      | 0.09  | 2.82 | 0.66  | 5.22E-01 | 7.54E-01 | -6.47 |
| 1449951_PM_at   | Nfkb1l1             | NFKB1L1     | 0.13  | 2.96 | 0.66  | 5.22E-01 | 7.54E-01 | -6.47 |
| 1444347_PM_at   | Mgat4a              | MGAT4A      | -0.16 | 2.67 | -0.66 | 5.22E-01 | 7.54E-01 | -6.47 |
| 1442724_PM_at   | Dlk1                | DLK1        | 0.09  | 2.85 | 0.66  | 5.22E-01 | 7.54E-01 | -6.47 |
| 1442184_PM_at   | ---                 | NA          | 0.06  | 2.44 | 0.66  | 5.22E-01 | 7.54E-01 | -6.47 |
| 1419517_PM_at   | Cnih3               | CNIH3       | -0.10 | 2.45 | -0.66 | 5.22E-01 | 7.54E-01 | -6.47 |
| 1428546_PM_at   | Syncrip             | SYNCRIP     | -0.18 | 4.86 | -0.66 | 5.22E-01 | 7.54E-01 | -6.47 |
| 1442992_PM_at   | ---                 | NA          | 0.11  | 2.76 | 0.66  | 5.22E-01 | 7.54E-01 | -6.47 |
| 1416643_PM_at   | Tpt1                | NA          | 0.06  | 2.21 | 0.66  | 5.22E-01 | 7.54E-01 | -6.47 |
| 1456974_PM_at   | Gm16551             | NA          | -0.07 | 2.29 | -0.66 | 5.22E-01 | 7.54E-01 | -6.47 |
| 1456061_PM_at   | Gimap8              | GIMAP8      | -0.09 | 2.64 | -0.66 | 5.22E-01 | 7.54E-01 | -6.47 |
| 1425063_PM_at   | Fcrl1               | FCRL1       | 0.06  | 2.04 | 0.66  | 5.22E-01 | 7.54E-01 | -6.47 |
| 1421734_PM_at   | Cxcr2               | NA          | 0.06  | 2.23 | 0.66  | 5.22E-01 | 7.54E-01 | -6.47 |

|                 |                       |            |       |       |       |          |          |       |
|-----------------|-----------------------|------------|-------|-------|-------|----------|----------|-------|
| 1458114_PM_at   | Samd12                | NA         | 0.06  | 2.43  | 0.66  | 5.22E-01 | 7.54E-01 | -6.47 |
| 1418924_PM_at   | Rassf7                | RASSF7     | 0.07  | 2.43  | 0.66  | 5.22E-01 | 7.54E-01 | -6.47 |
| 1431598_PM_a_at | Lhx9                  | LHX9       | 0.12  | 3.63  | 0.66  | 5.23E-01 | 7.54E-01 | -6.47 |
| 1427384_PM_at   | Chd6                  | CHD6       | -0.15 | 4.67  | -0.66 | 5.23E-01 | 7.54E-01 | -6.47 |
| 1452161_PM_at   | Tiparp                | TIPARP     | -0.16 | 2.91  | -0.66 | 5.23E-01 | 7.55E-01 | -6.47 |
| 1444203_PM_at   | ---                   | NA         | -0.07 | 2.17  | -0.66 | 5.23E-01 | 7.55E-01 | -6.47 |
| 1436854_PM_at   | Xndc1                 | AP002495.2 | -0.07 | 2.52  | -0.66 | 5.23E-01 | 7.55E-01 | -6.47 |
| 1425245_PM_a_at | Rgs11                 | RGS11      | 0.06  | 2.60  | 0.66  | 5.23E-01 | 7.55E-01 | -6.47 |
| 1439679_PM_at   | Cct3                  | CCT3       | 0.07  | 3.01  | 0.66  | 5.23E-01 | 7.55E-01 | -6.47 |
| 1444292_PM_at   | D7Erdt143e            | NA         | 0.09  | 2.94  | 0.66  | 5.23E-01 | 7.55E-01 | -6.47 |
| 1425459_PM_at   | Mttr2                 | MTMR2      | -0.09 | 2.32  | -0.66 | 5.23E-01 | 7.55E-01 | -6.47 |
| 1432962_PM_at   | ---                   | NA         | -0.06 | 2.33  | -0.66 | 5.23E-01 | 7.55E-01 | -6.47 |
| 1425888_PM_at   | Klra17                | NA         | 0.08  | 2.28  | 0.66  | 5.23E-01 | 7.55E-01 | -6.47 |
| 1426667_PM_a_at | Sun1                  | SUN1       | 0.13  | 2.94  | 0.66  | 5.23E-01 | 7.55E-01 | -6.47 |
| 1454788_PM_at   | Arl4c                 | ARL4C      | 0.14  | 2.83  | 0.66  | 5.23E-01 | 7.55E-01 | -6.47 |
| 1443617_PM_at   | ---                   | NA         | -0.07 | 2.57  | -0.66 | 5.23E-01 | 7.55E-01 | -6.47 |
| 1428953_PM_at   | Otud7b                | OTUD7B     | 0.14  | 2.56  | 0.66  | 5.23E-01 | 7.55E-01 | -6.47 |
| 1417572_PM_at   | Mpg                   | MPG        | -0.12 | 2.50  | -0.66 | 5.23E-01 | 7.55E-01 | -6.47 |
| 1424825_PM_a_at | Glycam1               | NA         | 0.07  | 2.99  | 0.66  | 5.23E-01 | 7.55E-01 | -6.47 |
| 1426279_PM_at   | Fam133b               | FAM133B    | -0.29 | 5.63  | -0.66 | 5.23E-01 | 7.55E-01 | -6.47 |
| 1439527_PM_at   | Pgr                   | PGR        | -0.21 | 3.70  | -0.66 | 5.23E-01 | 7.55E-01 | -6.47 |
| 1441094_PM_at   | Adh6b                 | NA         | -0.08 | 2.19  | -0.66 | 5.23E-01 | 7.55E-01 | -6.47 |
| 1449609_PM_at   | ---                   | NA         | -0.05 | 2.24  | -0.66 | 5.23E-01 | 7.55E-01 | -6.47 |
| 1439835_PM_x_at | Abcd2                 | ABCD2      | -0.05 | 1.85  | -0.66 | 5.23E-01 | 7.55E-01 | -6.47 |
| 1450345_PM_at   | Ubqln1                | NA         | 0.06  | 2.19  | 0.66  | 5.23E-01 | 7.55E-01 | -6.47 |
| 1441806_PM_at   | ---                   | NA         | 0.06  | 2.27  | 0.66  | 5.23E-01 | 7.55E-01 | -6.47 |
| 1432721_PM_at   | ---                   | NA         | 0.07  | 2.57  | 0.66  | 5.23E-01 | 7.55E-01 | -6.47 |
| 1442084_PM_at   | Prkrip1               | PRKRIP1    | 0.07  | 2.32  | 0.66  | 5.23E-01 | 7.55E-01 | -6.47 |
| 1457970_PM_at   | ---                   | NA         | 0.08  | 2.06  | 0.66  | 5.23E-01 | 7.55E-01 | -6.47 |
| 1445673_PM_at   | 2900052N01Rik         | NA         | 0.08  | 3.23  | 0.66  | 5.23E-01 | 7.55E-01 | -6.47 |
| 1436496_PM_at   | ---                   | NA         | 0.09  | 2.38  | 0.66  | 5.23E-01 | 7.55E-01 | -6.47 |
| 1438865_PM_at   | H13                   | HM13       | 0.09  | 2.26  | 0.66  | 5.23E-01 | 7.55E-01 | -6.47 |
| 1455598_PM_at   | Usp30                 | USP30      | 0.10  | 3.67  | 0.66  | 5.23E-01 | 7.55E-01 | -6.47 |
| 1419904_PM_at   | Dbndd2                | NA         | 0.11  | 3.86  | 0.66  | 5.23E-01 | 7.55E-01 | -6.47 |
| 1432086_PM_a_at | Ribc2                 | RIBC2      | 0.12  | 2.45  | 0.66  | 5.23E-01 | 7.55E-01 | -6.47 |
| 1416881_PM_at   | Mcl1                  | MCL1       | 0.12  | 2.79  | 0.66  | 5.23E-01 | 7.55E-01 | -6.47 |
| 1434343_PM_at   | Zfp954                | NA         | 0.14  | 2.71  | 0.66  | 5.23E-01 | 7.55E-01 | -6.47 |
| 1447106_PM_at   | ---                   | NA         | 0.15  | 3.10  | 0.66  | 5.23E-01 | 7.55E-01 | -6.47 |
| 1417564_PM_at   | Med7                  | MED7       | 0.18  | 4.31  | 0.66  | 5.23E-01 | 7.55E-01 | -6.47 |
| 1448282_PM_at   | Plrg1                 | PLRG1      | 0.18  | 3.92  | 0.66  | 5.23E-01 | 7.55E-01 | -6.47 |
| 1416612_PM_at   | Cyp1b1                | CYP1B1     | -0.19 | 2.60  | -0.66 | 5.24E-01 | 7.55E-01 | -6.47 |
| 1443956_PM_at   | Zfp397                | NA         | 0.11  | 2.90  | 0.66  | 5.24E-01 | 7.55E-01 | -6.47 |
| 1435765_PM_at   | E130114P18Rik         | NA         | -0.13 | 2.86  | -0.66 | 5.24E-01 | 7.55E-01 | -6.47 |
| 1420917_PM_at   | Prpf40a               | PRPF40A    | -0.12 | 2.96  | -0.66 | 5.24E-01 | 7.55E-01 | -6.47 |
| 1424660_PM_s_at | Crtc2                 | CRTC2      | 0.05  | 2.55  | 0.66  | 5.24E-01 | 7.55E-01 | -6.47 |
| 1449321_PM_x_at | Serpina1b///Serpina1e | SERPINA1   | 0.08  | 2.01  | 0.66  | 5.24E-01 | 7.55E-01 | -6.47 |
| 1420683_PM_at   | Bnipl                 | BNIPL      | 0.09  | 2.51  | 0.66  | 5.24E-01 | 7.55E-01 | -6.47 |
| 1441923_PM_s_at | Edn3                  | EDN3       | 0.09  | 2.82  | 0.66  | 5.24E-01 | 7.55E-01 | -6.47 |
| 1437240_PM_at   | Pgm2                  | NA         | 0.09  | 2.46  | 0.66  | 5.24E-01 | 7.55E-01 | -6.47 |
| 1423449_PM_a_at | Actn4                 | ACTN4      | 0.17  | 3.10  | 0.66  | 5.24E-01 | 7.55E-01 | -6.47 |
| 1436971_PM_x_at | Ywhaz                 | YWHAZ      | 0.17  | 10.93 | 0.66  | 5.24E-01 | 7.55E-01 | -6.47 |
| 1437387_PM_at   | Susd5                 | SUSD5      | -0.17 | 2.66  | -0.66 | 5.24E-01 | 7.55E-01 | -6.47 |
| 1441559_PM_at   | Ptchd4                | PTCHD4     | 0.23  | 3.17  | 0.66  | 5.24E-01 | 7.55E-01 | -6.47 |
| 1434886_PM_at   | Opa3                  | OPA3       | -0.11 | 2.91  | -0.66 | 5.24E-01 | 7.55E-01 | -6.47 |
| 1454648_PM_s_at | D10Wsu102e            | C12orf45   | -0.21 | 4.41  | -0.66 | 5.24E-01 | 7.55E-01 | -6.47 |
| 1433291_PM_at   | ---                   | NA         | -0.19 | 3.80  | -0.66 | 5.24E-01 | 7.55E-01 | -6.47 |
| 1430706_PM_at   | Pebp4                 | NA         | 0.08  | 2.60  | 0.66  | 5.24E-01 | 7.55E-01 | -6.47 |
| 1418529_PM_at   | Osgep                 | OSGEP      | -0.08 | 2.64  | -0.66 | 5.24E-01 | 7.55E-01 | -6.47 |
| 1428826_PM_at   | Nr6a1                 | NR6A1      | 0.21  | 2.19  | 0.66  | 5.24E-01 | 7.55E-01 | -6.47 |
| 1459409_PM_at   | ---                   | NA         | 0.22  | 2.79  | 0.66  | 5.24E-01 | 7.55E-01 | -6.47 |
| 1457690_PM_at   | Kalrn                 | NA         | -0.07 | 2.10  | -0.66 | 5.24E-01 | 7.55E-01 | -6.47 |
| 1426072_PM_at   | Cmkl1                 | NA         | 0.05  | 2.27  | 0.66  | 5.24E-01 | 7.55E-01 | -6.47 |
| 1454156_PM_at   | Spats2l               | SPATS2L    | 0.09  | 2.56  | 0.66  | 5.24E-01 | 7.55E-01 | -6.47 |
| 1437509_PM_x_at | Prkd2                 | PRKD2      | -0.10 | 2.89  | -0.66 | 5.24E-01 | 7.55E-01 | -6.47 |
| 1429090_PM_at   | Ggct                  | ACO05154.6 | 0.07  | 3.02  | 0.66  | 5.24E-01 | 7.55E-01 | -6.47 |
| 1418094_PM_s_at | Car4                  | CA4        | -0.27 | 4.47  | -0.66 | 5.24E-01 | 7.55E-01 | -6.47 |
| 1434922_PM_at   | Phf12                 | PHF12      | 0.09  | 2.83  | 0.66  | 5.24E-01 | 7.55E-01 | -6.47 |
| 1417203_PM_at   | Ethe1                 | ETHE1      | 0.10  | 2.79  | 0.66  | 5.24E-01 | 7.55E-01 | -6.47 |
| 1430806_PM_at   | Mlip                  | MLIP       | 0.11  | 2.63  | 0.66  | 5.24E-01 | 7.55E-01 | -6.47 |
| 1423868_PM_at   | Txnrd3                | TXNRD3     | 0.09  | 2.23  | 0.66  | 5.24E-01 | 7.55E-01 | -6.47 |
| 1437469_PM_at   | Zfp750                | ZNF750     | 0.08  | 2.48  | 0.66  | 5.24E-01 | 7.55E-01 | -6.47 |
| 1458196_PM_at   | ---                   | NA         | 0.06  | 2.01  | 0.66  | 5.25E-01 | 7.56E-01 | -6.47 |
| 1434114_PM_at   | Rexo4                 | REXO4      | -0.12 | 2.82  | -0.66 | 5.25E-01 | 7.56E-01 | -6.47 |
| 1433185_PM_at   | Strada                | NA         | -0.09 | 3.00  | -0.66 | 5.25E-01 | 7.56E-01 | -6.47 |
| 1420152_PM_at   | ---                   | NA         | 0.09  | 2.65  | 0.66  | 5.25E-01 | 7.56E-01 | -6.47 |

|                 |               |          |       |      |       |          |          |       |
|-----------------|---------------|----------|-------|------|-------|----------|----------|-------|
| 1455321_PM_at   | Dhd1          | DDHD1    | 0.12  | 2.57 | 0.66  | 5.25E-01 | 7.56E-01 | -6.47 |
| 1436269_PM_s_at | Htra2         | HTRA2    | -0.18 | 4.92 | -0.66 | 5.25E-01 | 7.56E-01 | -6.47 |
| 1443156_PM_at   | ---           | NA       | 0.07  | 2.79 | 0.66  | 5.25E-01 | 7.56E-01 | -6.47 |
| 1418105_PM_at   | Stmn4         | STMN4    | 0.29  | 6.83 | 0.66  | 5.25E-01 | 7.56E-01 | -6.47 |
| 1445605_PM_s_at | Fam135a       | FAM135A  | -0.27 | 3.10 | -0.66 | 5.25E-01 | 7.56E-01 | -6.47 |
| 1440383_PM_at   | Dclre1b       | DCLRE1B  | -0.20 | 4.39 | -0.66 | 5.25E-01 | 7.56E-01 | -6.47 |
| 1444416_PM_at   | Cenpa         | CENPA    | 0.08  | 3.22 | 0.66  | 5.25E-01 | 7.56E-01 | -6.47 |
| 1446428_PM_at   | ---           | NA       | 0.11  | 2.49 | 0.66  | 5.25E-01 | 7.56E-01 | -6.47 |
| 1450412_PM_at   | Tbl2          | TBL2     | 0.07  | 2.34 | 0.66  | 5.25E-01 | 7.56E-01 | -6.47 |
| 1416284_PM_at   | Mrp128        | MRPL28   | 0.10  | 3.55 | 0.66  | 5.25E-01 | 7.56E-01 | -6.47 |
| 1460360_PM_at   | Asrg1         | ASRGL1   | 0.26  | 4.58 | 0.66  | 5.25E-01 | 7.56E-01 | -6.47 |
| 1422273_PM_at   | Mmp1b         | MMP1     | 0.05  | 1.88 | 0.66  | 5.25E-01 | 7.56E-01 | -6.47 |
| 1451580_PM_a_at | Ttr           | TTR      | -1.02 | 5.47 | -0.66 | 5.25E-01 | 7.56E-01 | -6.47 |
| 1449908_PM_at   | Gip           | GIP      | -0.08 | 3.01 | -0.66 | 5.25E-01 | 7.56E-01 | -6.47 |
| 1427315_PM_at   | Tmed7         | TMED7    | 0.06  | 2.20 | 0.66  | 5.25E-01 | 7.56E-01 | -6.47 |
| 1437176_PM_at   | Nlrc5         | NLRC5    | 0.10  | 3.04 | 0.66  | 5.25E-01 | 7.56E-01 | -6.47 |
| 1425396_PM_a_at | Lck           | LCK      | 0.07  | 2.24 | 0.66  | 5.25E-01 | 7.56E-01 | -6.47 |
| 1427600_PM_at   | ---           | NA       | 0.07  | 2.42 | 0.66  | 5.25E-01 | 7.56E-01 | -6.47 |
| 1420212_PM_at   | Gm36243       | NA       | 0.13  | 2.64 | 0.66  | 5.25E-01 | 7.56E-01 | -6.47 |
| 1453230_PM_at   | Zfp74         | NA       | 0.17  | 3.03 | 0.66  | 5.25E-01 | 7.56E-01 | -6.47 |
| 1452079_PM_s_at | Dcun1d1       | DCUN1D1  | 0.24  | 4.88 | 0.66  | 5.25E-01 | 7.56E-01 | -6.47 |
| 1417680_PM_at   | Kcna5         | KCNA5    | 0.09  | 2.52 | 0.66  | 5.25E-01 | 7.56E-01 | -6.47 |
| 1436058_PM_at   | Rsad2         | RSAD2    | 0.21  | 2.90 | 0.66  | 5.25E-01 | 7.56E-01 | -6.47 |
| 1422685_PM_at   | Exoc4         | EXOC4    | -0.36 | 7.14 | -0.66 | 5.25E-01 | 7.56E-01 | -6.47 |
| 1431939_PM_a_at | Mina          | RIOX2    | -0.07 | 2.46 | -0.66 | 5.25E-01 | 7.56E-01 | -6.47 |
| 1424513_PM_at   | Atp6v0a2      | ATP6V0A2 | 0.08  | 3.58 | 0.66  | 5.25E-01 | 7.56E-01 | -6.47 |
| 1432774_PM_at   | 2610105M22Rik | NA       | 0.09  | 2.53 | 0.66  | 5.26E-01 | 7.56E-01 | -6.47 |
| 1450376_PM_at   | Mxi1          | MXI1     | 0.14  | 3.02 | 0.66  | 5.25E-01 | 7.56E-01 | -6.47 |
| 1439280_PM_at   | LOC102634887  | NA       | 0.06  | 2.58 | 0.66  | 5.26E-01 | 7.56E-01 | -6.47 |
| 1428449_PM_at   | Gtf3c2        | GTF3C2   | 0.13  | 2.61 | 0.66  | 5.26E-01 | 7.56E-01 | -6.47 |
| 1431059_PM_x_at | Htatsf1       | HTATSF1  | 0.21  | 2.76 | 0.66  | 5.26E-01 | 7.56E-01 | -6.47 |
| 1428146_PM_s_at | Acaa2         | ACAA2    | -0.17 | 3.38 | -0.66 | 5.26E-01 | 7.56E-01 | -6.47 |
| 1458171_PM_at   | ---           | NA       | 0.07  | 3.01 | 0.66  | 5.26E-01 | 7.56E-01 | -6.47 |
| 1430666_PM_at   | Plb1          | PLB1     | 0.09  | 2.35 | 0.66  | 5.26E-01 | 7.56E-01 | -6.47 |
| 1421987_PM_at   | Paps2         | PAPSS2   | 0.06  | 2.27 | 0.66  | 5.26E-01 | 7.56E-01 | -6.47 |
| 1416717_PM_at   | Crisp         | CRISP2   | -0.07 | 2.25 | -0.66 | 5.26E-01 | 7.56E-01 | -6.47 |
| 1417774_PM_at   | Nans          | NANS     | 0.22  | 2.80 | 0.66  | 5.26E-01 | 7.56E-01 | -6.47 |
| 1430000_PM_at   | ---           | NA       | -0.18 | 2.62 | -0.66 | 5.26E-01 | 7.57E-01 | -6.47 |
| 1421474_PM_a_at | Spsb1         | SPSB1    | 0.07  | 2.83 | 0.66  | 5.26E-01 | 7.57E-01 | -6.47 |
| 1438714_PM_at   | ---           | NA       | 0.23  | 6.82 | 0.66  | 5.26E-01 | 7.57E-01 | -6.47 |
| 1449400_PM_at   | Csl           | CS       | 0.07  | 2.39 | 0.66  | 5.26E-01 | 7.57E-01 | -6.47 |
| 1446144_PM_at   | Pex5l         | PEX5L    | -0.30 | 3.43 | -0.66 | 5.26E-01 | 7.57E-01 | -6.47 |
| 1417335_PM_at   | Sult2b1       | SULT2B1  | -0.05 | 2.28 | -0.66 | 5.26E-01 | 7.57E-01 | -6.47 |
| 1456924_PM_at   | AW492981      | NA       | 0.10  | 2.54 | 0.66  | 5.26E-01 | 7.57E-01 | -6.47 |
| 1425062_PM_at   | Fcrl1         | FCRL1    | 0.06  | 2.13 | 0.66  | 5.26E-01 | 7.57E-01 | -6.47 |
| 1447344_PM_at   | ---           | NA       | 0.17  | 3.05 | 0.66  | 5.26E-01 | 7.57E-01 | -6.47 |
| 1437340_PM_x_at | Gkn1          | GKN1     | 0.06  | 2.26 | 0.66  | 5.26E-01 | 7.57E-01 | -6.47 |
| 1432372_PM_a_at | Spr           | SPR      | 0.13  | 3.14 | 0.66  | 5.26E-01 | 7.57E-01 | -6.47 |
| 1457611_PM_x_at | Fam136a       | FAM136A  | 0.11  | 2.50 | 0.66  | 5.26E-01 | 7.57E-01 | -6.47 |
| 1436163_PM_at   | Kcnj16        | KCNJ16   | 0.16  | 3.15 | 0.66  | 5.26E-01 | 7.57E-01 | -6.47 |
| 1427561_PM_a_at | Afm           | AFM      | -0.23 | 2.34 | -0.66 | 5.26E-01 | 7.57E-01 | -6.47 |
| 1431104_PM_at   | 4930522H14Rik | C1orf185 | -0.06 | 2.34 | -0.66 | 5.26E-01 | 7.57E-01 | -6.47 |
| 1457641_PM_at   | ---           | NA       | 0.13  | 2.28 | 0.66  | 5.26E-01 | 7.57E-01 | -6.47 |
| 1443517_PM_at   | ---           | NA       | -0.12 | 3.10 | -0.66 | 5.27E-01 | 7.57E-01 | -6.47 |
| 1419261_PM_at   | Acad8         | ACAD8    | -0.14 | 2.97 | -0.66 | 5.27E-01 | 7.57E-01 | -6.47 |
| 1428265_PM_at   | Ppp2r1b       | PPP2R1B  | 0.18  | 3.62 | 0.66  | 5.27E-01 | 7.57E-01 | -6.47 |
| 1432612_PM_at   | ---           | NA       | -0.06 | 2.56 | -0.65 | 5.27E-01 | 7.57E-01 | -6.47 |
| 1443529_PM_at   | ---           | NA       | -0.06 | 2.31 | -0.65 | 5.27E-01 | 7.57E-01 | -6.47 |
| 1454264_PM_at   | ---           | NA       | 0.05  | 2.85 | 0.65  | 5.27E-01 | 7.57E-01 | -6.47 |
| 1424232_PM_a_at | Cmtr2         | CMTR2    | 0.10  | 2.66 | 0.65  | 5.27E-01 | 7.57E-01 | -6.47 |
| 1429998_PM_at   | Trim23        | TRIM23   | 0.06  | 2.29 | 0.65  | 5.27E-01 | 7.57E-01 | -6.47 |
| 1421057_PM_at   | Dnase1b       | DNASE1L3 | 0.06  | 2.30 | 0.65  | 5.27E-01 | 7.57E-01 | -6.47 |
| 1454786_PM_at   | 5031439G07Rik | KIAA0930 | -0.14 | 3.40 | -0.65 | 5.27E-01 | 7.57E-01 | -6.47 |
| 1424084_PM_at   | Ptpb3         | PTBP3    | -0.05 | 2.14 | -0.65 | 5.27E-01 | 7.57E-01 | -6.47 |
| 1451925_PM_at   | Eda           | NA       | -0.11 | 2.26 | -0.65 | 5.27E-01 | 7.57E-01 | -6.47 |
| 1420368_PM_at   | Denr          | DENR     | 0.11  | 5.25 | 0.65  | 5.27E-01 | 7.57E-01 | -6.48 |
| 1426323_PM_x_at | Siva1         | SIVA1    | 0.17  | 5.62 | 0.65  | 5.27E-01 | 7.57E-01 | -6.48 |
| 1443193_PM_at   | Ttl1          | TLL1     | 0.09  | 2.39 | 0.65  | 5.27E-01 | 7.58E-01 | -6.48 |
| 1453021_PM_at   | Stxbp5        | STXBP5   | -0.24 | 5.96 | -0.65 | 5.27E-01 | 7.58E-01 | -6.48 |
| 1448860_PM_at   | Rem2          | REM2     | -0.14 | 2.53 | -0.65 | 5.27E-01 | 7.58E-01 | -6.48 |
| 1427217_PM_at   | Zfp455        | ZNF720   | -0.13 | 2.16 | -0.65 | 5.27E-01 | 7.58E-01 | -6.48 |
| 1421182_PM_at   | Clec1b        | CLEC1B   | 0.08  | 2.46 | 0.65  | 5.27E-01 | 7.58E-01 | -6.48 |
| 1435044_PM_at   | Ebf4          | EBF4     | 0.12  | 2.64 | 0.65  | 5.27E-01 | 7.58E-01 | -6.48 |
| 1440427_PM_at   | ---           | NA       | 0.12  | 2.35 | 0.65  | 5.27E-01 | 7.58E-01 | -6.48 |
| 1440253_PM_at   | Psm11         | PSMD11   | 0.30  | 4.26 | 0.65  | 5.27E-01 | 7.58E-01 | -6.48 |

|                 |                                                                  |          |       |      |       |          |          |       |
|-----------------|------------------------------------------------------------------|----------|-------|------|-------|----------|----------|-------|
| 1425422_PM_a_at | Parn                                                             | PARN     | 0.06  | 2.58 | 0.65  | 5.27E-01 | 7.58E-01 | -6.48 |
| 1431038_PM_at   | Rassf4                                                           | RASSF4   | -0.05 | 2.03 | -0.65 | 5.27E-01 | 7.58E-01 | -6.48 |
| 1453678_PM_at   | Mbd1                                                             | NA       | 0.13  | 2.36 | 0.65  | 5.27E-01 | 7.58E-01 | -6.48 |
| 1454375_PM_at   | ---                                                              | NA       | -0.11 | 2.83 | -0.65 | 5.27E-01 | 7.58E-01 | -6.48 |
| 1430904_PM_at   | Arfgap3                                                          | ARFGAP3  | -0.10 | 2.63 | -0.65 | 5.27E-01 | 7.58E-01 | -6.48 |
| 1428902_PM_at   | Chst11                                                           | CHST11   | -0.10 | 3.33 | -0.65 | 5.27E-01 | 7.58E-01 | -6.48 |
| 1442097_PM_at   | Gm32461                                                          | NA       | 0.05  | 2.14 | 0.65  | 5.27E-01 | 7.58E-01 | -6.48 |
| 1423127_PM_at   | Impa1                                                            | IMPA1    | -0.32 | 3.69 | -0.65 | 5.27E-01 | 7.58E-01 | -6.48 |
| 1444343_PM_at   | ---                                                              | NA       | 0.11  | 2.47 | 0.65  | 5.28E-01 | 7.58E-01 | -6.48 |
| 1438678_PM_at   | 1500011K16Rik                                                    | NA       | -0.34 | 4.23 | -0.65 | 5.28E-01 | 7.58E-01 | -6.48 |
| 1451428_PM_x_at | Egfl7                                                            | EGFL7    | 0.11  | 3.25 | 0.65  | 5.28E-01 | 7.58E-01 | -6.48 |
| 1456748_PM_a_at | Nipsnap1                                                         | NIPSNAP1 | 0.30  | 7.08 | 0.65  | 5.28E-01 | 7.58E-01 | -6.48 |
| 1417998_PM_at   | LOC102641464 /// Ptges3                                          | PTGES3   | -0.19 | 7.52 | -0.65 | 5.28E-01 | 7.58E-01 | -6.48 |
| 1441696_PM_at   | ---                                                              | NA       | 0.13  | 3.12 | 0.65  | 5.28E-01 | 7.58E-01 | -6.48 |
| 1459219_PM_at   | ---                                                              | NA       | -0.19 | 3.45 | -0.65 | 5.28E-01 | 7.58E-01 | -6.48 |
| 1416645_PM_a_at | Afp                                                              | AFP      | -0.05 | 1.79 | -0.65 | 5.28E-01 | 7.58E-01 | -6.48 |
| 1426108_PM_s_at | Cacnb1                                                           | CACNB1   | 0.33  | 3.01 | 0.65  | 5.28E-01 | 7.58E-01 | -6.48 |
| 1424948_PM_x_at | H2-D1 /// H2-K1 ///<br>LOC101056305 ///<br>LOC102641613          | NA       | 0.09  | 2.43 | 0.65  | 5.28E-01 | 7.58E-01 | -6.48 |
| 1426863_PM_at   | Rbmx                                                             | RBMX     | -0.17 | 3.95 | -0.65 | 5.28E-01 | 7.58E-01 | -6.48 |
| 1435701_PM_at   | Cyrr1                                                            | CYR1     | -0.13 | 2.82 | -0.65 | 5.28E-01 | 7.58E-01 | -6.48 |
| 1417711_PM_at   | ---                                                              | NA       | 0.08  | 2.70 | 0.65  | 5.28E-01 | 7.58E-01 | -6.48 |
| 1439116_PM_at   | Med14                                                            | NA       | 0.07  | 2.03 | 0.65  | 5.28E-01 | 7.58E-01 | -6.48 |
| 1425234_PM_at   | Col20a1                                                          | COL20A1  | 0.07  | 2.64 | 0.65  | 5.28E-01 | 7.58E-01 | -6.48 |
| 1419244_PM_a_at | Rab14                                                            | RAB14    | 0.25  | 6.50 | 0.65  | 5.28E-01 | 7.58E-01 | -6.48 |
| 1436790_PM_a_at | Sox11                                                            | SOX11    | 0.07  | 2.60 | 0.65  | 5.28E-01 | 7.58E-01 | -6.48 |
| 1420647_PM_a_at | Krt8                                                             | KRT8     | 0.08  | 2.85 | 0.65  | 5.28E-01 | 7.58E-01 | -6.48 |
| 1452545_PM_a_at | Itgb1                                                            | ITGB1    | -0.14 | 4.53 | -0.65 | 5.28E-01 | 7.58E-01 | -6.48 |
| 1417481_PM_at   | Ramp1                                                            | RAMP1    | 0.08  | 3.32 | 0.65  | 5.28E-01 | 7.58E-01 | -6.48 |
| 1458764_PM_at   | ---                                                              | NA       | 0.05  | 2.13 | 0.65  | 5.28E-01 | 7.58E-01 | -6.48 |
| 1436444_PM_at   | Sertm1                                                           | SERTM1   | 0.15  | 3.05 | 0.65  | 5.28E-01 | 7.58E-01 | -6.48 |
| 1437300_PM_at   | Mef2d                                                            | MEF2D    | 0.10  | 2.96 | 0.65  | 5.28E-01 | 7.58E-01 | -6.48 |
| 1456776_PM_at   | Spata2                                                           | SPATA2   | 0.07  | 2.60 | 0.65  | 5.28E-01 | 7.58E-01 | -6.48 |
| 1421783_PM_a_at | Kcnp2                                                            | NA       | 0.07  | 2.32 | 0.65  | 5.28E-01 | 7.59E-01 | -6.48 |
| 1450422_PM_a_at | Kdelc1                                                           | KDEL1    | 0.09  | 2.45 | 0.65  | 5.29E-01 | 7.59E-01 | -6.48 |
| 1460022_PM_at   | Cdk5                                                             | NA       | 0.10  | 3.05 | 0.65  | 5.29E-01 | 7.59E-01 | -6.48 |
| 1443194_PM_at   | ---                                                              | NA       | 0.10  | 2.39 | 0.65  | 5.29E-01 | 7.59E-01 | -6.48 |
| 1456747_PM_x_at | Cd99l2                                                           | CD99L2   | -0.07 | 2.66 | -0.65 | 5.29E-01 | 7.59E-01 | -6.48 |
| 1430820_PM_a_at | Bbx                                                              | BBX      | 0.20  | 4.02 | 0.65  | 5.29E-01 | 7.59E-01 | -6.48 |
| 1446512_PM_at   | ---                                                              | NA       | 0.08  | 2.27 | 0.65  | 5.29E-01 | 7.59E-01 | -6.48 |
| 1435265_PM_at   | Fbxo32                                                           | FBXO32   | -0.10 | 2.37 | -0.65 | 5.29E-01 | 7.59E-01 | -6.48 |
| 1449258_PM_at   | Fam104a                                                          | FAM104A  | 0.18  | 2.96 | 0.65  | 5.29E-01 | 7.59E-01 | -6.48 |
| 1431317_PM_at   | 2410018L13Rik ///<br>Gm30124 /// Gm4983 ///<br>Gm5784 /// Gm9292 | NA       | 0.12  | 2.65 | 0.65  | 5.29E-01 | 7.59E-01 | -6.48 |
| 1433722_PM_at   | Akap13                                                           | AKAP13   | -0.25 | 4.52 | -0.65 | 5.29E-01 | 7.59E-01 | -6.48 |
| 1416433_PM_at   | Rpa2                                                             | RPA2     | 0.13  | 2.89 | 0.65  | 5.29E-01 | 7.59E-01 | -6.48 |
| 1428797_PM_at   | Setd6                                                            | SETD6    | 0.14  | 7.49 | 0.65  | 5.29E-01 | 7.59E-01 | -6.48 |
| 1423691_PM_x_at | Krt8                                                             | KRT8     | 0.09  | 2.31 | 0.65  | 5.29E-01 | 7.59E-01 | -6.48 |
| 1449094_PM_at   | Gjc1                                                             | GJC1     | 0.11  | 2.55 | 0.65  | 5.29E-01 | 7.59E-01 | -6.48 |
| 1424190_PM_at   | Pigc                                                             | PIGC     | 0.12  | 3.19 | 0.65  | 5.29E-01 | 7.59E-01 | -6.48 |
| 1452680_PM_at   | Snrpd2                                                           | SNRPD2   | -0.30 | 5.37 | -0.65 | 5.29E-01 | 7.59E-01 | -6.48 |
| 1420158_PM_s_at | Abcf1                                                            | NA       | -0.23 | 4.99 | -0.65 | 5.29E-01 | 7.59E-01 | -6.48 |
| 1419564_PM_at   | Zfp467                                                           | ZNF467   | -0.08 | 2.30 | -0.65 | 5.29E-01 | 7.59E-01 | -6.48 |
| 1453425_PM_at   | Ccdc83                                                           | CCDC83   | -0.06 | 2.62 | -0.65 | 5.29E-01 | 7.59E-01 | -6.48 |
| 1443066_PM_at   | ---                                                              | NA       | 0.07  | 2.15 | 0.65  | 5.29E-01 | 7.59E-01 | -6.48 |
| 1435192_PM_at   | Sox3                                                             | SOX3     | 0.08  | 2.78 | 0.65  | 5.29E-01 | 7.59E-01 | -6.48 |
| 1454392_PM_at   | 9230112J17Rik                                                    | NA       | 0.10  | 2.98 | 0.65  | 5.29E-01 | 7.59E-01 | -6.48 |
| 1459019_PM_at   | Sprn                                                             | SPRN     | 0.15  | 2.95 | 0.65  | 5.29E-01 | 7.59E-01 | -6.48 |
| 1422791_PM_at   | Pafah1b2                                                         | PAFAH1B2 | 0.15  | 2.87 | 0.65  | 5.29E-01 | 7.59E-01 | -6.48 |
| 1430956_PM_at   | ---                                                              | NA       | 0.21  | 2.95 | 0.65  | 5.29E-01 | 7.59E-01 | -6.48 |
| 1453982_PM_at   | Gm38687 /// Mdm4                                                 | MDM4     | 0.09  | 2.46 | 0.65  | 5.29E-01 | 7.59E-01 | -6.48 |
| 1445565_PM_at   | Hist1h2be                                                        | NA       | -0.11 | 3.18 | -0.65 | 5.29E-01 | 7.59E-01 | -6.48 |
| 1433106_PM_at   | ---                                                              | NA       | -0.04 | 2.44 | -0.65 | 5.29E-01 | 7.59E-01 | -6.48 |
| 1429312_PM_s_at | Ror1                                                             | ROR1     | 0.05  | 2.48 | 0.65  | 5.29E-01 | 7.59E-01 | -6.48 |
| 1449100_PM_at   | Pard6a                                                           | PARD6A   | 0.09  | 3.52 | 0.65  | 5.29E-01 | 7.59E-01 | -6.48 |
| 1433672_PM_at   | Trmt2b                                                           | TRMT2B   | -0.11 | 3.46 | -0.65 | 5.30E-01 | 7.59E-01 | -6.48 |
| 1457071_PM_x_at | ---                                                              | NA       | 0.15  | 2.36 | 0.65  | 5.30E-01 | 7.59E-01 | -6.48 |
| 1429965_PM_at   | Lonrf2                                                           | LONRF2   | -0.32 | 5.36 | -0.65 | 5.30E-01 | 7.59E-01 | -6.48 |
| 1436732_PM_s_at | Fbxw8                                                            | FBXW8    | -0.07 | 2.27 | -0.65 | 5.30E-01 | 7.59E-01 | -6.48 |
| 1426199_PM_x_at | ---                                                              | NA       | 0.06  | 2.18 | 0.65  | 5.30E-01 | 7.59E-01 | -6.48 |
| 1429631_PM_at   | Sirt6                                                            | SIRT6    | 0.13  | 2.76 | 0.65  | 5.30E-01 | 7.59E-01 | -6.48 |
| 1457656_PM_s_at | ---                                                              | NA       | 0.20  | 2.60 | 0.65  | 5.30E-01 | 7.59E-01 | -6.48 |
| 1435771_PM_at   | Plcb4                                                            | PLCB4    | 0.20  | 3.45 | 0.65  | 5.30E-01 | 7.59E-01 | -6.48 |

|                 |                              |            |       |      |       |          |          |       |
|-----------------|------------------------------|------------|-------|------|-------|----------|----------|-------|
| 1421308_PM_at   | Car13                        | CA13       | 0.05  | 2.04 | 0.65  | 5.30E-01 | 7.59E-01 | -6.48 |
| 1448608_PM_at   | Pr18a2                       | NA         | 0.06  | 2.04 | 0.65  | 5.30E-01 | 7.59E-01 | -6.48 |
| 1442263_PM_at   | Rgs13                        | RGS13      | -0.06 | 2.15 | -0.65 | 5.30E-01 | 7.60E-01 | -6.48 |
| 1453496_PM_at   | Fam162b                      | FAM162B    | 0.08  | 2.47 | 0.65  | 5.30E-01 | 7.60E-01 | -6.48 |
| 1450907_PM_at   | Spes2                        | SPCS2      | 0.21  | 4.50 | 0.65  | 5.30E-01 | 7.60E-01 | -6.48 |
| 1442050_PM_at   | Zfp608                       | ZNF608     | 0.07  | 2.48 | 0.65  | 5.30E-01 | 7.60E-01 | -6.48 |
| 1446921_PM_at   | ---                          | NA         | -0.06 | 2.35 | -0.65 | 5.30E-01 | 7.60E-01 | -6.48 |
| 1430601_PM_at   | Tbccd1                       | TBCCD1     | -0.09 | 2.53 | -0.65 | 5.30E-01 | 7.60E-01 | -6.48 |
| 1421197_PM_a_at | Acin1                        | ACIN1      | 0.11  | 3.38 | 0.65  | 5.30E-01 | 7.60E-01 | -6.48 |
| 1424469_PM_a_at | Cpsf4                        | CPSF4      | 0.14  | 3.82 | 0.65  | 5.30E-01 | 7.60E-01 | -6.48 |
| 1439866_PM_at   | Cul9                         | CUL9       | 0.09  | 2.99 | 0.65  | 5.30E-01 | 7.60E-01 | -6.48 |
| 1443222_PM_at   | ---                          | NA         | -0.22 | 3.01 | -0.65 | 5.30E-01 | 7.60E-01 | -6.48 |
| 1452077_PM_at   | Ddx3y                        | DDX3Y      | -0.20 | 3.45 | -0.65 | 5.30E-01 | 7.60E-01 | -6.48 |
| 1433914_PM_at   | Lipo1                        | LIPJ       | -0.17 | 2.52 | -0.65 | 5.31E-01 | 7.60E-01 | -6.48 |
| 1437747_PM_at   | Ube4a                        | UBE4A      | -0.16 | 4.13 | -0.65 | 5.31E-01 | 7.60E-01 | -6.48 |
| 1435230_PM_at   | Ankrd12                      | ANKRD12    | -0.16 | 4.68 | -0.65 | 5.31E-01 | 7.60E-01 | -6.48 |
| 1449129_PM_a_at | Kcni3                        | KCNI3      | -0.13 | 2.62 | -0.65 | 5.30E-01 | 7.60E-01 | -6.48 |
| 1431516_PM_at   | 4930565N06Rik                | NA         | -0.10 | 3.30 | -0.65 | 5.31E-01 | 7.60E-01 | -6.48 |
| 1439109_PM_at   | Ccdc68                       | CCDC68     | -0.07 | 2.21 | -0.65 | 5.31E-01 | 7.60E-01 | -6.48 |
| 1442131_PM_at   | 1700048M11Rik                | NA         | -0.05 | 2.18 | -0.65 | 5.31E-01 | 7.60E-01 | -6.48 |
| 1440680_PM_at   | LOC102636733                 | NA         | 0.06  | 1.95 | 0.65  | 5.30E-01 | 7.60E-01 | -6.48 |
| 1442474_PM_at   | ---                          | NA         | 0.06  | 2.14 | 0.65  | 5.30E-01 | 7.60E-01 | -6.48 |
| 1429995_PM_at   | Prss44                       | NA         | 0.08  | 2.38 | 0.65  | 5.30E-01 | 7.60E-01 | -6.48 |
| 1443690_PM_at   | ---                          | NA         | 0.09  | 2.48 | 0.65  | 5.31E-01 | 7.60E-01 | -6.48 |
| 1424320_PM_a_at | Traf7                        | TRAF7      | 0.10  | 2.84 | 0.65  | 5.31E-01 | 7.60E-01 | -6.48 |
| 1444925_PM_at   | ---                          | NA         | 0.11  | 2.53 | 0.65  | 5.31E-01 | 7.60E-01 | -6.48 |
| 1442490_PM_at   | ---                          | NA         | 0.14  | 2.86 | 0.65  | 5.31E-01 | 7.60E-01 | -6.48 |
| 1428092_PM_at   | Cdc5l                        | CD5L       | 0.18  | 4.66 | 0.65  | 5.31E-01 | 7.60E-01 | -6.48 |
| 1425248_PM_a_at | Tyro3                        | TYRO3      | 0.21  | 3.89 | 0.65  | 5.30E-01 | 7.60E-01 | -6.48 |
| 1421934_PM_at   | Cbx5                         | CBX5       | 0.32  | 4.64 | 0.65  | 5.31E-01 | 7.60E-01 | -6.48 |
| 1454869_PM_at   | Dcaf12l1                     | DCAF12L1   | 0.34  | 6.12 | 0.65  | 5.31E-01 | 7.60E-01 | -6.48 |
| 1423918_PM_at   | Rhbdd1                       | RHBDD1     | 0.08  | 2.39 | 0.65  | 5.31E-01 | 7.60E-01 | -6.48 |
| 1457437_PM_at   | Fam163b                      | FAM163B    | 0.08  | 2.68 | 0.65  | 5.31E-01 | 7.60E-01 | -6.48 |
| 1460708_PM_s_at | Cdc42                        | CD42       | 0.24  | 6.59 | 0.65  | 5.31E-01 | 7.60E-01 | -6.48 |
| 1423712_PM_a_at | Qars                         | QARS       | 0.07  | 5.53 | 0.65  | 5.31E-01 | 7.60E-01 | -6.48 |
| 1445306_PM_at   | ---                          | NA         | -0.26 | 2.82 | -0.65 | 5.31E-01 | 7.60E-01 | -6.48 |
| 1419411_PM_at   | Tac2                         | TAC3       | 0.09  | 2.56 | 0.65  | 5.31E-01 | 7.60E-01 | -6.48 |
| 1455364_PM_a_at | Gm7285 /// Rps7              | RPS7       | -0.28 | 2.92 | -0.65 | 5.31E-01 | 7.60E-01 | -6.48 |
| 1428383_PM_a_at | Zswim8                       | ZSWIM8     | -0.18 | 6.34 | -0.65 | 5.31E-01 | 7.60E-01 | -6.48 |
| 1420469_PM_at   | 4933411G06Rik                | NA         | 0.06  | 2.37 | 0.65  | 5.31E-01 | 7.60E-01 | -6.48 |
| 1427198_PM_at   | BC022960 ///<br>LOC101055907 | NA         | 0.14  | 2.72 | 0.65  | 5.31E-01 | 7.60E-01 | -6.48 |
| 1452987_PM_at   | ---                          | NA         | 0.10  | 2.48 | 0.65  | 5.31E-01 | 7.60E-01 | -6.48 |
| 1452480_PM_at   | Cfap61                       | CFAP61     | 0.06  | 2.30 | 0.65  | 5.31E-01 | 7.60E-01 | -6.48 |
| 1452258_PM_at   | Phf20                        | PHF20      | 0.19  | 3.61 | 0.65  | 5.31E-01 | 7.60E-01 | -6.48 |
| 1425270_PM_at   | Kif1b                        | KIF1B      | 0.22  | 3.27 | 0.65  | 5.31E-01 | 7.60E-01 | -6.48 |
| 1429723_PM_at   | Spryd7                       | SPRYD7     | -0.15 | 5.65 | -0.65 | 5.31E-01 | 7.60E-01 | -6.48 |
| 1450051_PM_at   | Atrx                         | ATRX       | -0.28 | 5.74 | -0.65 | 5.31E-01 | 7.61E-01 | -6.48 |
| 1434084_PM_at   | Zfp266                       | ZNF561     | -0.25 | 4.72 | -0.65 | 5.31E-01 | 7.61E-01 | -6.48 |
| 1453060_PM_at   | Rgs8                         | RG58       | -0.19 | 3.81 | -0.65 | 5.31E-01 | 7.61E-01 | -6.48 |
| 1445236_PM_at   | ---                          | NA         | -0.08 | 2.19 | -0.65 | 5.31E-01 | 7.61E-01 | -6.48 |
| 1450176_PM_at   | Ern1                         | ERN1       | 0.06  | 2.20 | 0.65  | 5.31E-01 | 7.61E-01 | -6.48 |
| 1436662_PM_at   | Sorcs1                       | SORCS1     | 0.12  | 2.31 | 0.65  | 5.31E-01 | 7.61E-01 | -6.48 |
| 1435401_PM_at   | Ttc26                        | TTC26      | 0.16  | 2.47 | 0.65  | 5.31E-01 | 7.61E-01 | -6.48 |
| 1449156_PM_at   | Ly9                          | LY9        | 0.07  | 2.35 | 0.65  | 5.31E-01 | 7.61E-01 | -6.48 |
| 1457275_PM_at   | Synm                         | SYNM       | 0.11  | 3.18 | 0.65  | 5.31E-01 | 7.61E-01 | -6.48 |
| 1428536_PM_at   | Kcng4                        | KCNJ4      | -0.13 | 2.58 | -0.65 | 5.32E-01 | 7.61E-01 | -6.48 |
| 1430088_PM_at   | Zfp619                       | NA         | 0.07  | 2.36 | 0.65  | 5.32E-01 | 7.61E-01 | -6.48 |
| 1457792_PM_at   | ---                          | NA         | 0.08  | 2.41 | 0.65  | 5.32E-01 | 7.61E-01 | -6.48 |
| 1435141_PM_at   | Sft2d2                       | SFT2D2     | 0.10  | 4.36 | 0.65  | 5.32E-01 | 7.61E-01 | -6.48 |
| 1454521_PM_at   | ---                          | NA         | 0.10  | 2.66 | 0.65  | 5.32E-01 | 7.61E-01 | -6.48 |
| 1446107_PM_at   | ---                          | NA         | 0.10  | 2.42 | 0.65  | 5.32E-01 | 7.61E-01 | -6.48 |
| 1419304_PM_at   | T                            | T          | -0.06 | 2.07 | -0.65 | 5.32E-01 | 7.61E-01 | -6.48 |
| 1431079_PM_at   | C1qtnf2                      | C1QTNF2    | 0.07  | 2.56 | 0.65  | 5.32E-01 | 7.61E-01 | -6.48 |
| 1428155_PM_at   | Comm9                        | COMM9      | 0.07  | 2.53 | 0.65  | 5.32E-01 | 7.61E-01 | -6.48 |
| 1444456_PM_at   | ---                          | NA         | 0.09  | 2.39 | 0.65  | 5.32E-01 | 7.61E-01 | -6.48 |
| 1441039_PM_at   | ---                          | NA         | 0.14  | 2.34 | 0.65  | 5.32E-01 | 7.61E-01 | -6.48 |
| 1429403_PM_x_at | Gl8d2                        | GLT8D2     | -0.09 | 3.08 | -0.65 | 5.32E-01 | 7.61E-01 | -6.48 |
| 1454070_PM_a_at | Ddhd1                        | DDHD1      | -0.19 | 3.13 | -0.65 | 5.32E-01 | 7.61E-01 | -6.48 |
| 1418074_PM_at   | St6galnac4                   | ST6GALNAC4 | 0.12  | 2.91 | 0.65  | 5.32E-01 | 7.61E-01 | -6.48 |
| 1434521_PM_at   | Rfx7                         | RFX7       | -0.22 | 4.69 | -0.65 | 5.32E-01 | 7.61E-01 | -6.48 |
| 1448579_PM_at   | Glg1                         | GLG1       | -0.21 | 4.74 | -0.65 | 5.32E-01 | 7.61E-01 | -6.48 |
| 1418707_PM_at   | Bag4                         | BAG4       | 0.11  | 2.44 | 0.65  | 5.32E-01 | 7.61E-01 | -6.48 |
| 1440478_PM_at   | Nus1                         | NUS1       | 0.11  | 3.05 | 0.65  | 5.32E-01 | 7.61E-01 | -6.48 |
| 1448255_PM_a_at | Surf4                        | SURF4      | 0.17  | 3.58 | 0.65  | 5.32E-01 | 7.61E-01 | -6.48 |



|                 |                              |           |       |      |       |          |          |       |
|-----------------|------------------------------|-----------|-------|------|-------|----------|----------|-------|
| 1437484_PM_at   | Zbtb5                        | ZBTB5     | 0.10  | 2.51 | 0.65  | 5.32E-01 | 7.61E-01 | -6.48 |
| 1439962_PM_at   | 231001017Rik                 | NA        | 0.08  | 2.35 | 0.65  | 5.32E-01 | 7.61E-01 | -6.48 |
| 1455613_PM_at   | E130308A19Rik                | KIAA1958  | -0.08 | 2.42 | -0.65 | 5.32E-01 | 7.61E-01 | -6.48 |
| 1439822_PM_at   | ---                          | NA        | 0.06  | 2.40 | 0.65  | 5.32E-01 | 7.61E-01 | -6.48 |
| 1444189_PM_at   | ---                          | NA        | 0.08  | 2.14 | 0.65  | 5.32E-01 | 7.61E-01 | -6.48 |
| 1416693_PM_at   | Foxc2                        | FOXC2     | -0.19 | 2.49 | -0.65 | 5.32E-01 | 7.61E-01 | -6.48 |
| 1459371_PM_at   | ---                          | NA        | 0.08  | 2.49 | 0.65  | 5.32E-01 | 7.61E-01 | -6.48 |
| 1452228_PM_at   | Tbc1d23                      | TBC1D23   | 0.09  | 2.42 | 0.65  | 5.32E-01 | 7.61E-01 | -6.48 |
| 1447263_PM_at   | ---                          | NA        | 0.14  | 2.70 | 0.65  | 5.32E-01 | 7.61E-01 | -6.48 |
| 1437715_PM_x_at | Apex1                        | APEX1     | 0.22  | 6.02 | 0.65  | 5.32E-01 | 7.61E-01 | -6.48 |
| 1443042_PM_at   | ---                          | NA        | -0.12 | 2.57 | -0.65 | 5.32E-01 | 7.61E-01 | -6.48 |
| 1434224_PM_at   | Tbl2                         | TBL2      | -0.27 | 3.75 | -0.65 | 5.32E-01 | 7.61E-01 | -6.48 |
| 1460168_PM_at   | Slbp                         | SLBP      | -0.20 | 4.42 | -0.65 | 5.32E-01 | 7.61E-01 | -6.48 |
| 1440772_PM_x_at | 9530077C05Rik                | KIAA0895  | 0.06  | 2.29 | 0.65  | 5.32E-01 | 7.61E-01 | -6.48 |
| 1455755_PM_at   | Lrrc73                       | LRRC73    | 0.18  | 4.86 | 0.65  | 5.32E-01 | 7.61E-01 | -6.48 |
| 1416346_PM_at   | Timm8a1                      | TIMM8A    | -0.06 | 2.19 | -0.65 | 5.32E-01 | 7.61E-01 | -6.48 |
| 1455987_PM_at   | Sec61a1                      | SEC61A1   | -0.12 | 3.76 | -0.65 | 5.33E-01 | 7.61E-01 | -6.48 |
| 1416845_PM_at   | Tmem132a                     | TMEM132A  | -0.08 | 3.77 | -0.65 | 5.33E-01 | 7.61E-01 | -6.48 |
| 1443019_PM_at   | Gm31674                      | NA        | -0.06 | 2.16 | -0.65 | 5.33E-01 | 7.61E-01 | -6.48 |
| 1453892_PM_at   | A930007119Rik ///<br>Gm41830 | NA        | 0.11  | 2.60 | 0.65  | 5.33E-01 | 7.61E-01 | -6.48 |
| 1445485_PM_at   | D7Erttd187e                  | NA        | 0.11  | 2.64 | 0.65  | 5.33E-01 | 7.61E-01 | -6.48 |
| 1459058_PM_at   | Siae                         | SIAE      | 0.05  | 2.16 | 0.65  | 5.33E-01 | 7.61E-01 | -6.48 |
| 1424817_PM_at   | Spef1                        | SPEF1     | 0.07  | 2.26 | 0.65  | 5.33E-01 | 7.61E-01 | -6.48 |
| 1434993_PM_at   | Brinp3                       | BRINP3    | -0.07 | 2.24 | -0.65 | 5.33E-01 | 7.61E-01 | -6.48 |
| 1450687_PM_at   | Igf2bp3                      | IGF2BP3   | -0.08 | 2.41 | -0.65 | 5.33E-01 | 7.62E-01 | -6.48 |
| 1447474_PM_at   | Ramp1                        | RAMP1     | 0.06  | 2.36 | 0.65  | 5.33E-01 | 7.62E-01 | -6.48 |
| 1444009_PM_at   | Rassf4                       | RASSF4    | 0.07  | 2.35 | 0.65  | 5.33E-01 | 7.62E-01 | -6.48 |
| 1453996_PM_a_at | Cts3                         | CTSL      | 0.07  | 2.57 | 0.64  | 5.33E-01 | 7.62E-01 | -6.48 |
| 1446699_PM_at   | Kdm4a                        | KDM4A     | 0.08  | 2.39 | 0.64  | 5.33E-01 | 7.62E-01 | -6.48 |
| 1441513_PM_at   | Tank                         | TANK      | -0.07 | 2.57 | -0.64 | 5.33E-01 | 7.62E-01 | -6.48 |
| 1456891_PM_at   | Dennd2c                      | DENND2C   | 0.06  | 2.31 | 0.64  | 5.33E-01 | 7.62E-01 | -6.48 |
| 1442917_PM_at   | Gm11627                      | NA        | 0.09  | 2.27 | 0.64  | 5.33E-01 | 7.62E-01 | -6.48 |
| 1432289_PM_a_at | Jsrp1                        | JSRP1     | 0.13  | 3.33 | 0.64  | 5.33E-01 | 7.62E-01 | -6.48 |
| 1434233_PM_at   | Vma21                        | VMA21     | 0.07  | 2.71 | 0.64  | 5.33E-01 | 7.62E-01 | -6.48 |
| 1453278_PM_a_at | Clip4                        | CLIP4     | 0.09  | 3.16 | 0.64  | 5.33E-01 | 7.62E-01 | -6.48 |
| 1454920_PM_at   | Uhrf2                        | UHRF2     | -0.10 | 3.38 | -0.64 | 5.33E-01 | 7.62E-01 | -6.48 |
| 1430121_PM_at   | 1700006E09Rik                | C17orf105 | 0.05  | 2.28 | 0.64  | 5.33E-01 | 7.62E-01 | -6.48 |
| 1455116_PM_at   | Relt                         | RELT      | -0.08 | 2.66 | -0.64 | 5.33E-01 | 7.62E-01 | -6.48 |
| 1428960_PM_at   | Enkur                        | ENKUR     | 0.13  | 2.72 | 0.64  | 5.33E-01 | 7.62E-01 | -6.48 |
| 1418467_PM_at   | Smarcd3                      | SMARCD3   | -0.20 | 4.21 | -0.64 | 5.33E-01 | 7.62E-01 | -6.48 |
| 1451727_PM_at   | Slu7                         | SLU7      | 0.26  | 3.77 | 0.64  | 5.33E-01 | 7.62E-01 | -6.48 |
| 1454789_PM_x_at | Prpf6                        | PRPF6     | 0.16  | 9.22 | 0.64  | 5.33E-01 | 7.62E-01 | -6.48 |
| 1417892_PM_a_at | Sirt3                        | SIRT3     | -0.17 | 3.53 | -0.64 | 5.33E-01 | 7.62E-01 | -6.48 |
| 1435162_PM_at   | Prkg2                        | PRKG2     | -0.08 | 2.05 | -0.64 | 5.33E-01 | 7.62E-01 | -6.48 |
| 1438959_PM_x_at | ---                          | NA        | -0.06 | 2.53 | -0.64 | 5.33E-01 | 7.62E-01 | -6.48 |
| 1428720_PM_s_at | Igk2 /// Igk3 /// Iglv1      | NA        | 0.17  | 2.46 | 0.64  | 5.33E-01 | 7.62E-01 | -6.48 |
| 1451037_PM_at   | Ptpn9                        | PTPN9     | -0.18 | 3.37 | -0.64 | 5.33E-01 | 7.62E-01 | -6.48 |
| 1437060_PM_at   | Olfm4                        | NA        | 0.09  | 2.61 | 0.64  | 5.33E-01 | 7.62E-01 | -6.48 |
| 1445129_PM_at   | ---                          | NA        | 0.10  | 2.42 | 0.64  | 5.34E-01 | 7.62E-01 | -6.48 |
| 1427470_PM_s_at | Napb                         | NAPB      | 0.20  | 3.56 | 0.64  | 5.34E-01 | 7.62E-01 | -6.48 |
| 1419078_PM_at   | Nin                          | NIN       | 0.12  | 3.08 | 0.64  | 5.34E-01 | 7.62E-01 | -6.48 |
| 1424883_PM_s_at | Srsf7                        | SRSF7     | 0.30  | 5.93 | 0.64  | 5.34E-01 | 7.62E-01 | -6.48 |
| 1438205_PM_at   | Vps51                        | VPS51     | 0.11  | 2.72 | 0.64  | 5.34E-01 | 7.62E-01 | -6.48 |
| 1450756_PM_s_at | Cul3                         | CUL3      | -0.19 | 5.54 | -0.64 | 5.34E-01 | 7.62E-01 | -6.48 |
| 1458423_PM_at   | Luc7l2                       | LUC7L2    | 0.16  | 2.64 | 0.64  | 5.34E-01 | 7.62E-01 | -6.48 |
| 1443708_PM_at   | BC068281                     | WDCP      | 0.07  | 2.27 | 0.64  | 5.34E-01 | 7.62E-01 | -6.48 |
| 1430719_PM_at   | 4833447P13Rik                | NA        | 0.06  | 2.03 | 0.64  | 5.34E-01 | 7.62E-01 | -6.48 |
| 1431478_PM_at   | ---                          | NA        | 0.07  | 2.47 | 0.64  | 5.34E-01 | 7.62E-01 | -6.48 |
| 1446937_PM_at   | ---                          | NA        | 0.06  | 2.43 | 0.64  | 5.34E-01 | 7.62E-01 | -6.48 |
| 1427696_PM_at   | Fech                         | AP2B1     | 0.08  | 2.06 | 0.64  | 5.34E-01 | 7.62E-01 | -6.48 |
| 1431211_PM_s_at | Them5                        | THEM5     | 0.06  | 2.22 | 0.64  | 5.34E-01 | 7.62E-01 | -6.48 |
| 1449173_PM_at   | Mpp2                         | MPP2      | 0.23  | 2.94 | 0.64  | 5.34E-01 | 7.63E-01 | -6.48 |
| 1416302_PM_at   | Ebf1                         | EBF1      | 0.07  | 2.21 | 0.64  | 5.34E-01 | 7.63E-01 | -6.48 |
| 1445199_PM_at   | ---                          | NA        | -0.15 | 2.81 | -0.64 | 5.34E-01 | 7.63E-01 | -6.48 |
| 1431879_PM_at   | ---                          | NA        | 0.08  | 2.78 | 0.64  | 5.34E-01 | 7.63E-01 | -6.48 |
| 1422070_PM_at   | Adh4                         | NA        | 0.09  | 2.22 | 0.64  | 5.34E-01 | 7.63E-01 | -6.48 |
| 1440481_PM_at   | ---                          | NA        | 0.07  | 2.46 | 0.64  | 5.34E-01 | 7.63E-01 | -6.48 |
| 1453554_PM_a_at | Wdr33                        | WDR33     | 0.26  | 4.35 | 0.64  | 5.34E-01 | 7.63E-01 | -6.48 |
| 1428669_PM_at   | Bmyc                         | MYC       | -0.09 | 2.60 | -0.64 | 5.34E-01 | 7.63E-01 | -6.48 |
| 1437283_PM_at   | Tnpo2                        | TNPO2     | 0.20  | 2.38 | 0.64  | 5.34E-01 | 7.63E-01 | -6.48 |
| 1440093_PM_at   | Ednra                        | EDNRA     | 0.07  | 2.41 | 0.64  | 5.35E-01 | 7.63E-01 | -6.48 |
| 1423652_PM_at   | IscA1                        | ISCA1     | -0.21 | 3.10 | -0.64 | 5.35E-01 | 7.63E-01 | -6.48 |
| 1417497_PM_at   | Cp                           | NA        | -0.10 | 2.56 | -0.64 | 5.35E-01 | 7.63E-01 | -6.48 |
| 1459698_PM_at   | ---                          | NA        | -0.06 | 2.10 | -0.64 | 5.35E-01 | 7.63E-01 | -6.48 |

|                 |               |            |       |      |       |          |          |       |
|-----------------|---------------|------------|-------|------|-------|----------|----------|-------|
| 1432359_PM_at   | LOC102638442  | NA         | 0.06  | 2.60 | 0.64  | 5.35E-01 | 7.63E-01 | -6.48 |
| 1423269_PM_a_at | Nedd4l        | NEDD4L     | 0.13  | 2.99 | 0.64  | 5.35E-01 | 7.63E-01 | -6.48 |
| 1442692_PM_at   | ---           | NA         | 0.14  | 3.38 | 0.64  | 5.35E-01 | 7.63E-01 | -6.48 |
| 1459051_PM_at   | Fam212b       | FAM212B    | 0.22  | 4.25 | 0.64  | 5.35E-01 | 7.63E-01 | -6.48 |
| 1452089_PM_at   | Cacnb4        | ACO68547.1 | 0.26  | 4.95 | 0.64  | 5.35E-01 | 7.63E-01 | -6.48 |
| 1419475_PM_a_at | Ehf           | EHF        | 0.07  | 2.28 | 0.64  | 5.35E-01 | 7.63E-01 | -6.48 |
| 1438498_PM_at   | Zmynd15       | ZMYND15    | 0.08  | 2.27 | 0.64  | 5.35E-01 | 7.63E-01 | -6.48 |
| 1445501_PM_at   | ---           | NA         | 0.09  | 2.40 | 0.64  | 5.35E-01 | 7.63E-01 | -6.48 |
| 1457184_PM_at   | ---           | NA         | 0.10  | 3.02 | 0.64  | 5.35E-01 | 7.63E-01 | -6.48 |
| 1453136_PM_at   | Fbxo30        | FBXO30     | 0.13  | 2.40 | 0.64  | 5.35E-01 | 7.63E-01 | -6.48 |
| 1460454_PM_at   | Glod5         | GLOD5      | 0.06  | 2.48 | 0.64  | 5.35E-01 | 7.63E-01 | -6.48 |
| 1447437_PM_at   | ---           | NA         | -0.16 | 2.84 | -0.64 | 5.35E-01 | 7.63E-01 | -6.48 |
| 1424475_PM_at   | Camkk2        | CAMKK2     | 0.18  | 3.18 | 0.64  | 5.35E-01 | 7.63E-01 | -6.48 |
| 1445242_PM_at   | Gk            | GK         | -0.08 | 2.88 | -0.64 | 5.35E-01 | 7.63E-01 | -6.48 |
| 1435607_PM_at   | Grm2          | GRM2       | 0.09  | 2.65 | 0.64  | 5.35E-01 | 7.63E-01 | -6.48 |
| 1426868_PM_x_at | Lmna          | LMNA       | 0.08  | 2.05 | 0.64  | 5.35E-01 | 7.63E-01 | -6.48 |
| 1432303_PM_at   | ---           | NA         | 0.06  | 2.43 | 0.64  | 5.35E-01 | 7.63E-01 | -6.48 |
| 1432998_PM_at   | ---           | NA         | 0.06  | 2.31 | 0.64  | 5.35E-01 | 7.63E-01 | -6.48 |
| 1429239_PM_a_at | Stard4        | STARD4     | 0.19  | 2.29 | 0.64  | 5.35E-01 | 7.63E-01 | -6.48 |
| 1459032_PM_at   | ---           | NA         | 0.12  | 2.64 | 0.64  | 5.35E-01 | 7.63E-01 | -6.48 |
| 1446281_PM_at   | ---           | NA         | -0.09 | 2.44 | -0.64 | 5.35E-01 | 7.63E-01 | -6.48 |
| 1458412_PM_at   | Zfp78         | NA         | 0.08  | 2.21 | 0.64  | 5.35E-01 | 7.63E-01 | -6.48 |
| 1444728_PM_at   | ---           | NA         | 0.09  | 2.77 | 0.64  | 5.35E-01 | 7.63E-01 | -6.48 |
| 1458548_PM_at   | ---           | NA         | -0.06 | 2.04 | -0.64 | 5.35E-01 | 7.63E-01 | -6.48 |
| 1436651_PM_at   | Prdm11        | PRDM11     | 0.09  | 2.62 | 0.64  | 5.35E-01 | 7.63E-01 | -6.48 |
| 1420857_PM_at   | Lanc12        | LANCL2     | 0.21  | 3.73 | 0.64  | 5.35E-01 | 7.63E-01 | -6.48 |
| 1418044_PM_at   | Hmgxb3        | HMGXB3     | 0.12  | 3.31 | 0.64  | 5.35E-01 | 7.63E-01 | -6.48 |
| 1458342_PM_at   | Syndig1l      | SYNDIG1L   | -0.46 | 4.03 | -0.64 | 5.35E-01 | 7.63E-01 | -6.48 |
| 1449824_PM_at   | Prg4          | PRG4       | -0.31 | 2.92 | -0.64 | 5.35E-01 | 7.63E-01 | -6.48 |
| 1432661_PM_at   | ---           | NA         | 0.06  | 2.19 | 0.64  | 5.36E-01 | 7.63E-01 | -6.48 |
| 1434626_PM_at   | Rpusd3        | RPUSD3     | 0.08  | 3.39 | 0.64  | 5.36E-01 | 7.63E-01 | -6.48 |
| 1427905_PM_at   | Saysd1        | SAYSD1     | 0.09  | 2.99 | 0.64  | 5.36E-01 | 7.63E-01 | -6.48 |
| 1446291_PM_at   | ---           | NA         | 0.14  | 2.87 | 0.64  | 5.36E-01 | 7.63E-01 | -6.48 |
| 1439599_PM_at   | Gal3st2       | GAL3ST2    | 0.06  | 2.32 | 0.64  | 5.36E-01 | 7.63E-01 | -6.48 |
| 1430334_PM_at   | Zkscan8       | ZKSCAN8    | 0.07  | 2.43 | 0.64  | 5.36E-01 | 7.64E-01 | -6.48 |
| 1453518_PM_at   | ---           | NA         | -0.10 | 2.84 | -0.64 | 5.36E-01 | 7.64E-01 | -6.48 |
| 1417150_PM_at   | Slc6a4        | SLC6A4     | 0.11  | 2.65 | 0.64  | 5.36E-01 | 7.64E-01 | -6.48 |
| 1431208_PM_a_at | Slc9a3r2      | SLC9A3R2   | 0.07  | 2.33 | 0.64  | 5.36E-01 | 7.64E-01 | -6.48 |
| 1459152_PM_at   | C78515        | NA         | -0.19 | 2.93 | -0.64 | 5.36E-01 | 7.64E-01 | -6.48 |
| 1434351_PM_at   | Nup214        | NUP214     | -0.14 | 3.56 | -0.64 | 5.36E-01 | 7.64E-01 | -6.48 |
| 1444168_PM_at   | Xpr1          | XPR1       | -0.12 | 2.95 | -0.64 | 5.36E-01 | 7.64E-01 | -6.48 |
| 1451365_PM_at   | Rbm19         | RBM19      | -0.10 | 2.54 | -0.64 | 5.36E-01 | 7.64E-01 | -6.48 |
| 1458478_PM_at   | ---           | NA         | -0.08 | 2.68 | -0.64 | 5.36E-01 | 7.64E-01 | -6.48 |
| 1440295_PM_at   | ---           | NA         | -0.06 | 1.89 | -0.64 | 5.36E-01 | 7.64E-01 | -6.48 |
| 1431899_PM_at   | Nkx6-3        | NKX6-3     | -0.05 | 2.14 | -0.64 | 5.36E-01 | 7.64E-01 | -6.48 |
| 1431878_PM_at   | Grhl2         | GRHL2      | 0.06  | 2.14 | 0.64  | 5.36E-01 | 7.64E-01 | -6.48 |
| 1454274_PM_at   | Tmem210       | TMEM210    | 0.08  | 2.65 | 0.64  | 5.36E-01 | 7.64E-01 | -6.48 |
| 1449333_PM_at   | Sf3a1         | SF3A1      | 0.09  | 2.55 | 0.64  | 5.36E-01 | 7.64E-01 | -6.48 |
| 1443515_PM_at   | 1110032F04Rik | NA         | 0.09  | 2.37 | 0.64  | 5.36E-01 | 7.64E-01 | -6.48 |
| 1425531_PM_at   | Znhit1        | ZNHIT1     | 0.28  | 3.63 | 0.64  | 5.36E-01 | 7.64E-01 | -6.48 |
| 1440430_PM_at   | ---           | NA         | -0.05 | 2.16 | -0.64 | 5.36E-01 | 7.64E-01 | -6.49 |
| 1440135_PM_at   | ---           | NA         | 0.07  | 2.33 | 0.64  | 5.36E-01 | 7.64E-01 | -6.49 |
| 1457199_PM_at   | ---           | NA         | 0.13  | 2.45 | 0.64  | 5.36E-01 | 7.64E-01 | -6.49 |
| 1448826_PM_at   | Myh6          | NA         | 0.10  | 2.32 | 0.64  | 5.36E-01 | 7.64E-01 | -6.49 |
| 1444979_PM_at   | ---           | NA         | 0.06  | 2.20 | 0.64  | 5.36E-01 | 7.64E-01 | -6.49 |
| 1448132_PM_at   | Slc19a1       | SLC19A1    | -0.08 | 2.45 | -0.64 | 5.37E-01 | 7.64E-01 | -6.49 |
| 1460674_PM_at   | Paqr7         | PAQR7      | -0.11 | 3.69 | -0.64 | 5.37E-01 | 7.64E-01 | -6.49 |
| 1418771_PM_a_at | Cpb2          | CPB2       | 0.07  | 2.31 | 0.64  | 5.37E-01 | 7.64E-01 | -6.49 |
| 1418398_PM_a_at | Tspan32       | TSPAN32    | 0.09  | 2.69 | 0.64  | 5.37E-01 | 7.64E-01 | -6.49 |
| 1418697_PM_at   | Inmt          | INMT       | -0.06 | 2.33 | -0.64 | 5.37E-01 | 7.64E-01 | -6.49 |
| 1432584_PM_at   | 1110004M10Rik | NA         | 0.09  | 2.24 | 0.64  | 5.37E-01 | 7.64E-01 | -6.49 |
| 1459176_PM_at   | ---           | NA         | 0.06  | 2.23 | 0.64  | 5.37E-01 | 7.64E-01 | -6.49 |
| 1443264_PM_at   | Ms4a2         | MS4A2      | 0.10  | 2.48 | 0.64  | 5.37E-01 | 7.64E-01 | -6.49 |
| 1454062_PM_at   | 4933402D24Rik | NA         | -0.06 | 2.34 | -0.64 | 5.37E-01 | 7.64E-01 | -6.49 |
| 1434495_PM_at   | Patz1         | PATZ1      | -0.05 | 2.10 | -0.64 | 5.37E-01 | 7.64E-01 | -6.49 |
| 1447994_PM_at   | Snhg10        | NA         | 0.08  | 2.44 | 0.64  | 5.37E-01 | 7.64E-01 | -6.49 |
| 1448663_PM_s_at | Mvd           | MVD        | 0.12  | 2.76 | 0.64  | 5.37E-01 | 7.64E-01 | -6.49 |
| 1418138_PM_at   | Sult1d1       | NA         | 0.07  | 2.46 | 0.64  | 5.37E-01 | 7.64E-01 | -6.49 |
| 1450865_PM_s_at | Mrps24        | MRPS24     | 0.10  | 3.15 | 0.64  | 5.37E-01 | 7.64E-01 | -6.49 |
| 1447878_PM_s_at | Fgfri1        | FGFRL1     | -0.35 | 4.81 | -0.64 | 5.37E-01 | 7.64E-01 | -6.49 |
| 1439345_PM_at   | Gpnmb         | GNPMB      | -0.15 | 2.38 | -0.64 | 5.37E-01 | 7.65E-01 | -6.49 |
| 1425793_PM_a_at | Rorc          | RORC       | -0.14 | 2.68 | -0.64 | 5.37E-01 | 7.65E-01 | -6.49 |
| 1444417_PM_at   | Cfap46        | CFAP46     | 0.09  | 2.34 | 0.64  | 5.37E-01 | 7.65E-01 | -6.49 |
| 1440753_PM_at   | ---           | NA         | -0.07 | 2.48 | -0.64 | 5.37E-01 | 7.65E-01 | -6.49 |
| 1423155_PM_at   | Sri           | SRI        | 0.11  | 2.59 | 0.64  | 5.37E-01 | 7.65E-01 | -6.49 |

|                 |                                      |          |       |      |       |          |          |       |
|-----------------|--------------------------------------|----------|-------|------|-------|----------|----------|-------|
| 1460498_PM_a_at | Dnajc5                               | DNAJC5   | -0.10 | 2.26 | -0.64 | 5.37E-01 | 7.65E-01 | -6.49 |
| 1428731_PM_at   | Usp54                                | USP54    | -0.17 | 4.92 | -0.64 | 5.37E-01 | 7.65E-01 | -6.49 |
| 1448244_PM_at   | Lypla1                               | LYPLA1   | -0.08 | 2.49 | -0.64 | 5.37E-01 | 7.65E-01 | -6.49 |
| 1460107_PM_at   | Saxo2                                | SAXO2    | 0.06  | 2.22 | 0.64  | 5.37E-01 | 7.65E-01 | -6.49 |
| 1425323_PM_a_at | Fam173a                              | FAM173A  | -0.14 | 3.42 | -0.64 | 5.37E-01 | 7.65E-01 | -6.49 |
| 1455372_PM_at   | Cpeb3                                | CPEB3    | 0.18  | 4.25 | 0.64  | 5.37E-01 | 7.65E-01 | -6.49 |
| 1454344_PM_at   | Skc4a1                               | NA       | 0.13  | 2.51 | 0.64  | 5.37E-01 | 7.65E-01 | -6.49 |
| 1447653_PM_x_at | Gm9385 /// LOC102641064<br>/// Rpl24 | RPL24    | 0.08  | 2.33 | 0.64  | 5.38E-01 | 7.65E-01 | -6.49 |
| 1443044_PM_at   | ---                                  | NA       | 0.06  | 2.46 | 0.64  | 5.38E-01 | 7.65E-01 | -6.49 |
| 1434557_PM_at   | Hip1                                 | HIP1     | -0.16 | 3.64 | -0.64 | 5.38E-01 | 7.65E-01 | -6.49 |
| 1422701_PM_at   | Zap70                                | ZAP70    | 0.08  | 2.07 | 0.64  | 5.38E-01 | 7.65E-01 | -6.49 |
| 1416299_PM_at   | Shcbp1                               | SHCBP1   | 0.08  | 3.18 | 0.64  | 5.38E-01 | 7.65E-01 | -6.49 |
| 1422734_PM_a_at | Myb                                  | MYB      | -0.05 | 2.33 | -0.64 | 5.38E-01 | 7.65E-01 | -6.49 |
| 1446952_PM_at   | D11Ert506e                           | NA       | 0.13  | 3.14 | 0.64  | 5.38E-01 | 7.65E-01 | -6.49 |
| 1438420_PM_at   | Rbm39                                | RBM39    | 0.30  | 3.68 | 0.64  | 5.38E-01 | 7.65E-01 | -6.49 |
| 1439536_PM_at   | Mettl16                              | METTL16  | 0.06  | 2.07 | 0.64  | 5.38E-01 | 7.65E-01 | -6.49 |
| 1421276_PM_a_at | Dst                                  | DST      | 0.18  | 2.83 | 0.64  | 5.38E-01 | 7.65E-01 | -6.49 |
| 1437635_PM_at   | Dcbld2                               | DCBLD2   | -0.14 | 4.42 | -0.64 | 5.38E-01 | 7.65E-01 | -6.49 |
| 1452465_PM_at   | Myh1 /// Myh4                        | MYH1     | -0.06 | 2.43 | -0.64 | 5.38E-01 | 7.65E-01 | -6.49 |
| 1454568_PM_at   | 6030460B20Rik                        | NA       | 0.07  | 2.17 | 0.64  | 5.38E-01 | 7.65E-01 | -6.49 |
| 1421079_PM_at   | Nr4a3                                | NR4A3    | 0.09  | 2.16 | 0.64  | 5.38E-01 | 7.65E-01 | -6.49 |
| 1458792_PM_at   | D12Ert208e                           | NA       | 0.07  | 2.22 | 0.64  | 5.38E-01 | 7.65E-01 | -6.49 |
| 1446443_PM_at   | ---                                  | NA       | 0.08  | 2.16 | 0.64  | 5.38E-01 | 7.65E-01 | -6.49 |
| 1427302_PM_at   | Enpp3                                | ENPP3    | 0.09  | 2.50 | 0.64  | 5.38E-01 | 7.65E-01 | -6.49 |
| 1438406_PM_at   | Scarf2                               | SCARF2   | 0.10  | 3.02 | 0.64  | 5.38E-01 | 7.65E-01 | -6.49 |
| 1432367_PM_a_at | Ufd1l                                | UFD1     | 0.15  | 3.65 | 0.64  | 5.38E-01 | 7.65E-01 | -6.49 |
| 1421804_PM_at   | Fabp9                                | NA       | -0.06 | 2.30 | -0.64 | 5.38E-01 | 7.65E-01 | -6.49 |
| 1417922_PM_at   | Kbtbd4                               | KBTBD4   | -0.09 | 3.41 | -0.64 | 5.38E-01 | 7.65E-01 | -6.49 |
| 1458772_PM_at   | ---                                  | NA       | 0.08  | 2.25 | 0.64  | 5.38E-01 | 7.65E-01 | -6.49 |
| 1452993_PM_at   | 5430416O09Rik                        | NA       | 0.10  | 2.42 | 0.64  | 5.38E-01 | 7.65E-01 | -6.49 |
| 1433667_PM_at   | Lgi3                                 | LGI3     | -0.09 | 2.24 | -0.64 | 5.38E-01 | 7.65E-01 | -6.49 |
| 1425445_PM_a_at | Cldn18                               | CLDN18   | 0.06  | 2.40 | 0.64  | 5.38E-01 | 7.65E-01 | -6.49 |
| 1425123_PM_at   | Klh36                                | KLHL36   | 0.07  | 2.80 | 0.64  | 5.38E-01 | 7.65E-01 | -6.49 |
| 1424777_PM_at   | Dcaf4                                | DCAF4L2  | 0.10  | 2.55 | 0.64  | 5.38E-01 | 7.65E-01 | -6.49 |
| 1457238_PM_at   | ---                                  | NA       | 0.10  | 2.48 | 0.64  | 5.38E-01 | 7.65E-01 | -6.49 |
| 1452252_PM_at   | Utp20                                | UTP20    | 0.20  | 3.19 | 0.64  | 5.38E-01 | 7.65E-01 | -6.49 |
| 1436751_PM_at   | Wee2                                 | WEE2     | 0.08  | 2.24 | 0.64  | 5.38E-01 | 7.66E-01 | -6.49 |
| 1420167_PM_at   | ---                                  | NA       | -0.06 | 2.16 | -0.64 | 5.38E-01 | 7.66E-01 | -6.49 |
| 1452103_PM_at   | Arl16                                | ARL16    | 0.12  | 2.45 | 0.64  | 5.38E-01 | 7.66E-01 | -6.49 |
| 1446298_PM_at   | ---                                  | NA       | -0.07 | 2.72 | -0.64 | 5.39E-01 | 7.66E-01 | -6.49 |
| 1440912_PM_at   | Rnf39                                | RNF39    | 0.07  | 2.12 | 0.64  | 5.39E-01 | 7.66E-01 | -6.49 |
| 1436485_PM_s_at | Whrn                                 | WHRN     | 0.12  | 2.31 | 0.64  | 5.39E-01 | 7.66E-01 | -6.49 |
| 1458207_PM_at   | ---                                  | NA       | 0.05  | 2.17 | 0.64  | 5.39E-01 | 7.66E-01 | -6.49 |
| 1447055_PM_at   | Dnajc11                              | DNAJC11  | 0.16  | 2.64 | 0.64  | 5.39E-01 | 7.66E-01 | -6.49 |
| 1449136_PM_at   | Epx                                  | EPX      | 0.05  | 2.32 | 0.64  | 5.39E-01 | 7.66E-01 | -6.49 |
| 1435493_PM_at   | Dsp                                  | DSP      | -0.61 | 3.18 | -0.64 | 5.39E-01 | 7.66E-01 | -6.49 |
| AFFX-PheX-5_at  | ---                                  | NA       | 0.06  | 2.47 | 0.64  | 5.39E-01 | 7.66E-01 | -6.49 |
| 1428099_PM_a_at | Srsf1                                | SRSF1    | 0.22  | 7.05 | 0.64  | 5.39E-01 | 7.66E-01 | -6.49 |
| 1431401_PM_at   | ---                                  | NA       | -0.08 | 2.84 | -0.64 | 5.39E-01 | 7.66E-01 | -6.49 |
| 1448343_PM_a_at | Nbr1                                 | NBR1     | -0.28 | 6.40 | -0.64 | 5.39E-01 | 7.66E-01 | -6.49 |
| 1436084_PM_at   | Scrt1                                | SCRT1    | 0.16  | 3.53 | 0.64  | 5.39E-01 | 7.66E-01 | -6.49 |
| 1427244_PM_at   | Trappc12                             | TRAPPC12 | 0.05  | 2.48 | 0.64  | 5.39E-01 | 7.66E-01 | -6.49 |
| 1423493_PM_a_at | Nfix                                 | NFIX     | 0.22  | 4.15 | 0.63  | 5.39E-01 | 7.66E-01 | -6.49 |
| 1427608_PM_a_at | Tcrg-C4                              | NA       | -0.08 | 2.16 | -0.63 | 5.39E-01 | 7.66E-01 | -6.49 |
| 1416920_PM_at   | Gm21992 /// Rbm4                     | RBM4     | 0.19  | 3.08 | 0.63  | 5.39E-01 | 7.66E-01 | -6.49 |
| 1453523_PM_at   | Krtap17-1                            | NA       | 0.09  | 2.41 | 0.63  | 5.39E-01 | 7.66E-01 | -6.49 |
| 1425268_PM_a_at | Pear1                                | PEAR1    | 0.11  | 2.43 | 0.63  | 5.39E-01 | 7.66E-01 | -6.49 |
| 1429591_PM_at   | Tacc1                                | TACC1    | -0.20 | 3.56 | -0.63 | 5.39E-01 | 7.67E-01 | -6.49 |
| 1429946_PM_at   | Ccdc141                              | CCDC141  | -0.08 | 2.63 | -0.63 | 5.39E-01 | 7.67E-01 | -6.49 |
| 1445402_PM_at   | ---                                  | NA       | 0.07  | 2.26 | 0.63  | 5.39E-01 | 7.67E-01 | -6.49 |
| 1455953_PM_x_at | Pstk                                 | PSTK     | 0.10  | 2.27 | 0.63  | 5.39E-01 | 7.67E-01 | -6.49 |
| 1456853_PM_at   | Gm4924                               | NA       | -0.05 | 2.14 | -0.63 | 5.40E-01 | 7.67E-01 | -6.49 |
| 1457633_PM_x_at | Cox6a2                               | COX6A2   | 0.05  | 2.12 | 0.63  | 5.40E-01 | 7.67E-01 | -6.49 |
| 1439780_PM_at   | Rpl7l                                | RPL7L1   | 0.07  | 2.44 | 0.63  | 5.40E-01 | 7.67E-01 | -6.49 |
| 1430317_PM_at   | ---                                  | NA       | 0.26  | 3.16 | 0.63  | 5.40E-01 | 7.67E-01 | -6.49 |
| 1456356_PM_at   | B230217O12Rik                        | NA       | -0.08 | 2.33 | -0.63 | 5.40E-01 | 7.67E-01 | -6.49 |
| 1452000_PM_s_at | Sars                                 | SARS     | -0.21 | 5.76 | -0.63 | 5.40E-01 | 7.67E-01 | -6.49 |
| 1430469_PM_at   | Ttl5                                 | TTL5     | 0.06  | 2.50 | 0.63  | 5.40E-01 | 7.67E-01 | -6.49 |
| 1454669_PM_at   | Tmem11                               | TMEM11   | -0.12 | 4.29 | -0.63 | 5.40E-01 | 7.67E-01 | -6.49 |
| 1424665_PM_at   | Gpatch8                              | GPATCH8  | -0.31 | 3.31 | -0.63 | 5.40E-01 | 7.67E-01 | -6.49 |
| 1423165_PM_a_at | Mta2                                 | MTA2     | 0.05  | 2.25 | 0.63  | 5.40E-01 | 7.67E-01 | -6.49 |
| 1446211_PM_at   | ---                                  | NA       | 0.06  | 2.20 | 0.63  | 5.40E-01 | 7.67E-01 | -6.49 |
| 1446911_PM_at   | ---                                  | NA       | 0.06  | 2.11 | 0.63  | 5.40E-01 | 7.67E-01 | -6.49 |
| 1455438_PM_at   | Pxmp4                                | PXMP4    | 0.08  | 2.69 | 0.63  | 5.40E-01 | 7.67E-01 | -6.49 |

|                 |                         |             |       |      |       |          |          |       |
|-----------------|-------------------------|-------------|-------|------|-------|----------|----------|-------|
| 1422994_PM_at   | Pikfyve                 | PIKFYVE     | 0.09  | 2.17 | 0.63  | 5.40E-01 | 7.67E-01 | -6.49 |
| 1448276_PM_at   | Tspan4                  | TSPAN4      | 0.11  | 3.54 | 0.63  | 5.40E-01 | 7.67E-01 | -6.49 |
| 1417654_PM_at   | Sdc4                    | SDC4        | -0.19 | 2.84 | -0.63 | 5.40E-01 | 7.67E-01 | -6.49 |
| 1417529_PM_at   | Rab33a                  | RAB33A      | -0.09 | 2.39 | -0.63 | 5.40E-01 | 7.67E-01 | -6.49 |
| 1441702_PM_at   | ---                     | NA          | -0.09 | 2.25 | -0.63 | 5.40E-01 | 7.67E-01 | -6.49 |
| 1455626_PM_at   | Hoxa9                   | AC004080.3  | 0.06  | 2.45 | 0.63  | 5.40E-01 | 7.67E-01 | -6.49 |
| 1422226_PM_at   | ---                     | NA          | 0.20  | 3.23 | 0.63  | 5.40E-01 | 7.67E-01 | -6.49 |
| 1450792_PM_at   | Tyrobp                  | TYROBP      | 0.22  | 3.68 | 0.63  | 5.40E-01 | 7.67E-01 | -6.49 |
| 1427154_PM_at   | Krt2                    | KRT2        | -0.05 | 2.23 | -0.63 | 5.40E-01 | 7.67E-01 | -6.49 |
| 1443158_PM_at   | ---                     | NA          | -0.08 | 2.05 | -0.63 | 5.40E-01 | 7.67E-01 | -6.49 |
| 1421138_PM_a_at | Pkib                    | PKIB        | 0.08  | 2.44 | 0.63  | 5.40E-01 | 7.67E-01 | -6.49 |
| 1441227_PM_at   | Mthfsd                  | MTHFSD      | -0.08 | 2.57 | -0.63 | 5.40E-01 | 7.67E-01 | -6.49 |
| 1449208_PM_at   | Papob                   | PAPOLB      | 0.19  | 2.77 | 0.63  | 5.40E-01 | 7.67E-01 | -6.49 |
| 1458505_PM_at   | ---                     | NA          | -0.11 | 2.38 | -0.63 | 5.40E-01 | 7.67E-01 | -6.49 |
| 1431010_PM_a_at | Rdh12                   | RDH12       | 0.05  | 2.11 | 0.63  | 5.40E-01 | 7.67E-01 | -6.49 |
| 1454063_PM_at   | 4933412E24Rik           | BX276092.10 | 0.05  | 2.38 | 0.63  | 5.40E-01 | 7.67E-01 | -6.49 |
| 1423764_PM_s_at | Mrp37                   | MRPL37      | 0.08  | 2.92 | 0.63  | 5.40E-01 | 7.67E-01 | -6.49 |
| 1453291_PM_at   | Hmgxb4 /// LOC102641187 | HMGXB4      | 0.06  | 2.40 | 0.63  | 5.40E-01 | 7.67E-01 | -6.49 |
| 1439356_PM_at   | Flii                    | FLII        | 0.06  | 2.55 | 0.63  | 5.41E-01 | 7.67E-01 | -6.49 |
| 1418669_PM_at   | Hspg2                   | HSPG2       | 0.13  | 3.01 | 0.63  | 5.41E-01 | 7.67E-01 | -6.49 |
| 1447492_PM_at   | Gm2087                  | NA          | -0.11 | 3.13 | -0.63 | 5.41E-01 | 7.67E-01 | -6.49 |
| 1435047_PM_at   | Rab3c                   | RAB3C       | 0.18  | 5.27 | 0.63  | 5.41E-01 | 7.67E-01 | -6.49 |
| 1443858_PM_at   | Trim12c                 | TRIM5       | 0.10  | 2.15 | 0.63  | 5.41E-01 | 7.67E-01 | -6.49 |
| 1439362_PM_at   | Gm26760                 | NA          | -0.07 | 2.36 | -0.63 | 5.41E-01 | 7.67E-01 | -6.49 |
| 1437138_PM_at   | Foxm1                   | FOXM1       | 0.05  | 2.04 | 0.63  | 5.41E-01 | 7.67E-01 | -6.49 |
| 1444985_PM_at   | ---                     | NA          | -0.11 | 2.29 | -0.63 | 5.41E-01 | 7.67E-01 | -6.49 |
| 1445287_PM_at   | ---                     | NA          | 0.06  | 2.22 | 0.63  | 5.41E-01 | 7.67E-01 | -6.49 |
| 1432651_PM_at   | 2510019K15Rik           | NA          | 0.10  | 2.25 | 0.63  | 5.41E-01 | 7.67E-01 | -6.49 |
| 1424261_PM_at   | Zfp672                  | ZNF672      | -0.17 | 2.72 | -0.63 | 5.41E-01 | 7.67E-01 | -6.49 |
| 1438611_PM_at   | Tuba3b                  | NA          | 0.09  | 2.51 | 0.63  | 5.41E-01 | 7.67E-01 | -6.49 |
| 1445953_PM_at   | D17Ert191e              | NA          | -0.12 | 2.28 | -0.63 | 5.41E-01 | 7.67E-01 | -6.49 |
| 1416027_PM_at   | Pdc6                    | PDCD6       | -0.19 | 4.56 | -0.63 | 5.41E-01 | 7.67E-01 | -6.49 |
| 1431637_PM_at   | ---                     | NA          | 0.05  | 2.24 | 0.63  | 5.41E-01 | 7.67E-01 | -6.49 |
| 1448456_PM_at   | Clh8                    | KBTBD11-OT1 | 0.05  | 2.19 | 0.63  | 5.41E-01 | 7.67E-01 | -6.49 |
| 1425972_PM_a_at | Zfx                     | ZFY         | -0.13 | 3.12 | -0.63 | 5.41E-01 | 7.68E-01 | -6.49 |
| 1425660_PM_at   | Btd3                    | BTBD3       | 0.20  | 6.54 | 0.63  | 5.41E-01 | 7.68E-01 | -6.49 |
| 1426721_PM_s_at | Tiparp                  | TIPARP      | -0.16 | 3.62 | -0.63 | 5.41E-01 | 7.68E-01 | -6.49 |
| 1455036_PM_s_at | LOC102641347 /// Ndufc2 | NDUFC2      | -0.16 | 8.89 | -0.63 | 5.41E-01 | 7.68E-01 | -6.49 |
| 1432529_PM_at   | Boll                    | BOLL        | 0.05  | 2.00 | 0.63  | 5.41E-01 | 7.68E-01 | -6.49 |
| 1449103_PM_at   | Tex101                  | TEX101      | 0.06  | 2.79 | 0.63  | 5.41E-01 | 7.68E-01 | -6.49 |
| 1418202_PM_a_at | Wiz                     | WIZ         | 0.07  | 2.80 | 0.63  | 5.41E-01 | 7.68E-01 | -6.49 |
| 1429524_PM_at   | Myo1f                   | MYO1F       | 0.06  | 2.03 | 0.63  | 5.41E-01 | 7.68E-01 | -6.49 |
| 1442242_PM_at   | Ppm1n                   | PPM1N       | 0.07  | 2.52 | 0.63  | 5.41E-01 | 7.68E-01 | -6.49 |
| 1452241_PM_at   | Topbp1                  | TOPBP1      | 0.07  | 3.04 | 0.63  | 5.41E-01 | 7.68E-01 | -6.49 |
| 1448166_PM_a_at | Psmb1                   | PSMB1       | -0.14 | 3.76 | -0.63 | 5.41E-01 | 7.68E-01 | -6.49 |
| 1460673_PM_at   | Fpgs                    | FPGS        | 0.06  | 2.35 | 0.63  | 5.41E-01 | 7.68E-01 | -6.49 |
| 1420670_PM_at   | Arnt2                   | ARNT2       | 0.17  | 3.00 | 0.63  | 5.41E-01 | 7.68E-01 | -6.49 |
| 1418230_PM_a_at | Lims1                   | LIMS1       | -0.19 | 2.97 | -0.63 | 5.41E-01 | 7.68E-01 | -6.49 |
| 1420065_PM_at   | Tkt1                    | NA          | 0.06  | 2.26 | 0.63  | 5.41E-01 | 7.68E-01 | -6.49 |
| 1430504_PM_at   | Vmn2r-ps54              | NA          | 0.05  | 2.06 | 0.63  | 5.41E-01 | 7.68E-01 | -6.49 |
| 1450552_PM_at   | Atp6v1e2                | ATP6V1E2    | 0.07  | 2.24 | 0.63  | 5.41E-01 | 7.68E-01 | -6.49 |
| 1438778_PM_at   | Gm40841                 | NA          | 0.08  | 2.30 | 0.63  | 5.42E-01 | 7.68E-01 | -6.49 |
| 1460182_PM_at   | Snx4                    | SNX4        | -0.08 | 3.54 | -0.63 | 5.42E-01 | 7.68E-01 | -6.49 |
| 1448685_PM_at   | Uqcc2                   | UQCC2       | 0.29  | 3.79 | 0.63  | 5.42E-01 | 7.68E-01 | -6.49 |
| 1416090_PM_at   | Pdhh                    | PDHB        | -0.29 | 6.06 | -0.63 | 5.42E-01 | 7.68E-01 | -6.49 |
| 1457145_PM_at   | Plekkg4                 | PLEKHG4     | 0.07  | 2.15 | 0.63  | 5.42E-01 | 7.68E-01 | -6.49 |
| 1421710_PM_at   | Zfp92                   | ZFP92       | 0.13  | 2.40 | 0.63  | 5.42E-01 | 7.68E-01 | -6.49 |
| 1438996_PM_at   | Sel1l2                  | SEL1L2      | -0.05 | 2.09 | -0.63 | 5.42E-01 | 7.68E-01 | -6.49 |
| 1452070_PM_at   | Dedd2                   | DEDD2       | 0.09  | 2.67 | 0.63  | 5.42E-01 | 7.68E-01 | -6.49 |
| 1436538_PM_at   | Ankrd37                 | ANKRD37     | 0.11  | 2.57 | 0.63  | 5.42E-01 | 7.68E-01 | -6.49 |
| 1430865_PM_s_at | Ttl9                    | TTL9        | 0.05  | 2.19 | 0.63  | 5.42E-01 | 7.68E-01 | -6.49 |
| 1459553_PM_at   | ---                     | NA          | 0.07  | 2.19 | 0.63  | 5.42E-01 | 7.68E-01 | -6.49 |
| 1427645_PM_a_at | Il1rapl2                | IL1RAPL2    | 0.06  | 2.33 | 0.63  | 5.42E-01 | 7.68E-01 | -6.49 |
| 1427393_PM_at   | F9                      | F9          | 0.09  | 2.21 | 0.63  | 5.42E-01 | 7.68E-01 | -6.49 |
| 1424991_PM_s_at | Tyms /// Tyms-ps        | TYMS        | 0.19  | 2.58 | 0.63  | 5.42E-01 | 7.68E-01 | -6.49 |
| 1441406_PM_at   | Armt1                   | ARMT1       | 0.06  | 2.52 | 0.63  | 5.42E-01 | 7.68E-01 | -6.49 |
| 1440123_PM_at   | ---                     | NA          | 0.09  | 1.92 | 0.63  | 5.42E-01 | 7.68E-01 | -6.49 |
| 1449328_PM_at   | Ly75                    | NA          | -0.08 | 2.16 | -0.63 | 5.42E-01 | 7.68E-01 | -6.49 |
| 1452049_PM_at   | Rpl7l1                  | RPL7L1      | -0.35 | 2.76 | -0.63 | 5.42E-01 | 7.68E-01 | -6.49 |
| 1459594_PM_at   | Ltn1                    | LTN1        | -0.07 | 2.29 | -0.63 | 5.42E-01 | 7.68E-01 | -6.49 |
| 1443664_PM_s_at | Cd164l2                 | CD164L2     | 0.05  | 3.32 | 0.63  | 5.42E-01 | 7.68E-01 | -6.49 |
| 1422262_PM_a_at | Lhx6                    | LHX6        | 0.05  | 2.32 | 0.63  | 5.42E-01 | 7.68E-01 | -6.49 |
| 1422528_PM_a_at | Zfp36l1                 | ZFP36L1     | 0.06  | 2.20 | 0.63  | 5.42E-01 | 7.68E-01 | -6.49 |

|                 |                        |          |       |      |       |          |          |       |
|-----------------|------------------------|----------|-------|------|-------|----------|----------|-------|
| 1444480_PM_at   | Prkag3                 | PRKAG3   | 0.08  | 2.61 | 0.63  | 5.42E-01 | 7.68E-01 | -6.49 |
| 1436352_PM_at   | Cep78                  | CEP78    | 0.12  | 2.76 | 0.63  | 5.42E-01 | 7.68E-01 | -6.49 |
| 1449377_PM_at   | Nicn1                  | NICN1    | 0.14  | 2.84 | 0.63  | 5.42E-01 | 7.68E-01 | -6.49 |
| 1443810_PM_at   | Tsk4                   | TSSK4    | 0.05  | 2.02 | 0.63  | 5.42E-01 | 7.69E-01 | -6.49 |
| 1424816_PM_at   | Cecr5                  | HDHD5    | 0.06  | 2.30 | 0.63  | 5.43E-01 | 7.69E-01 | -6.49 |
| 1449803_PM_x_at | Tap1                   | TAP1     | 0.07  | 2.35 | 0.63  | 5.43E-01 | 7.69E-01 | -6.49 |
| 1453772_PM_at   | Syng1                  | SYNGR1   | 0.07  | 2.53 | 0.63  | 5.43E-01 | 7.69E-01 | -6.49 |
| 1453557_PM_at   | 4930562F07Rik          | NA       | 0.09  | 2.20 | 0.63  | 5.43E-01 | 7.69E-01 | -6.49 |
| 1427809_PM_at   | ---                    | NA       | 0.12  | 2.87 | 0.63  | 5.43E-01 | 7.69E-01 | -6.49 |
| 1453977_PM_at   | Exoc4                  | EXOC4    | 0.12  | 2.29 | 0.63  | 5.43E-01 | 7.69E-01 | -6.49 |
| 1445764_PM_at   | Gm19277                | NA       | 0.13  | 2.43 | 0.63  | 5.43E-01 | 7.69E-01 | -6.49 |
| 1447847_PM_x_at | Stom3                  | STOML3   | 0.15  | 2.64 | 0.63  | 5.43E-01 | 7.69E-01 | -6.49 |
| 1436165_PM_at   | Luc7l2                 | LUC7L2   | -0.23 | 4.80 | -0.63 | 5.43E-01 | 7.69E-01 | -6.49 |
| 1419115_PM_at   | Alg14                  | ALG14    | -0.17 | 3.05 | -0.63 | 5.43E-01 | 7.69E-01 | -6.49 |
| 1442794_PM_at   | ---                    | NA       | -0.06 | 2.20 | -0.63 | 5.43E-01 | 7.69E-01 | -6.49 |
| 1432243_PM_a_at | 4933433G15Rik          | NA       | 0.11  | 2.40 | 0.63  | 5.43E-01 | 7.69E-01 | -6.49 |
| 1442778_PM_at   | AA511254               | NA       | 0.07  | 2.97 | 0.63  | 5.43E-01 | 7.69E-01 | -6.49 |
| 1458905_PM_x_at | ---                    | NA       | -0.17 | 2.52 | -0.63 | 5.43E-01 | 7.69E-01 | -6.49 |
| 1436954_PM_at   | Wipf1                  | WIPF1    | -0.16 | 2.57 | -0.63 | 5.43E-01 | 7.69E-01 | -6.49 |
| 1433890_PM_a_at | Bag6                   | BAG6     | -0.14 | 3.93 | -0.63 | 5.43E-01 | 7.69E-01 | -6.49 |
| 1434664_PM_at   | Mzt1                   | MZT1     | -0.13 | 3.64 | -0.63 | 5.43E-01 | 7.69E-01 | -6.49 |
| 1429264_PM_at   | Fam120aos              | NA       | -0.13 | 3.92 | -0.63 | 5.43E-01 | 7.69E-01 | -6.49 |
| 1430391_PM_a_at | St8sia4                | ST8SIA4  | -0.11 | 2.53 | -0.63 | 5.43E-01 | 7.69E-01 | -6.49 |
| 1417323_PM_at   | Psrc1                  | PSRC1    | -0.10 | 2.36 | -0.63 | 5.43E-01 | 7.69E-01 | -6.49 |
| 1456931_PM_at   | ---                    | NA       | -0.10 | 2.42 | -0.63 | 5.43E-01 | 7.69E-01 | -6.49 |
| 1418092_PM_s_at | Trip10                 | TRIP10   | -0.09 | 2.75 | -0.63 | 5.43E-01 | 7.69E-01 | -6.49 |
| 1441364_PM_at   | ---                    | NA       | 0.05  | 2.16 | 0.63  | 5.43E-01 | 7.69E-01 | -6.49 |
| 1417729_PM_at   | Myh6                   | MYH6     | 0.05  | 2.14 | 0.63  | 5.43E-01 | 7.69E-01 | -6.49 |
| 1445638_PM_at   | ---                    | NA       | 0.06  | 2.37 | 0.63  | 5.43E-01 | 7.69E-01 | -6.49 |
| 1455802_PM_x_at | Agr2                   | AGR2     | 0.06  | 3.08 | 0.63  | 5.43E-01 | 7.69E-01 | -6.49 |
| 1453855_PM_at   | Mxra7                  | MXRA7    | 0.06  | 2.27 | 0.63  | 5.43E-01 | 7.69E-01 | -6.49 |
| 1440986_PM_at   | Rpap1                  | RPAP1    | 0.07  | 2.24 | 0.63  | 5.43E-01 | 7.69E-01 | -6.49 |
| 1421539_PM_at   | Zic4                   | ZIC4     | 0.07  | 2.31 | 0.63  | 5.43E-01 | 7.69E-01 | -6.49 |
| 1450517_PM_at   | Tal2                   | TAL2     | 0.07  | 2.10 | 0.63  | 5.43E-01 | 7.69E-01 | -6.49 |
| 1431959_PM_x_at | Psg21 /// Psg23        | CEACAM3  | 0.08  | 2.39 | 0.63  | 5.43E-01 | 7.69E-01 | -6.49 |
| 1432454_PM_at   | 2410137M14Rik          | NA       | 0.08  | 2.93 | 0.63  | 5.43E-01 | 7.69E-01 | -6.49 |
| 1418670_PM_s_at | Hspg2                  | HSPG2    | 0.10  | 3.60 | 0.63  | 5.43E-01 | 7.69E-01 | -6.49 |
| 1452532_PM_x_at | Ceacam1                | PSG7     | 0.10  | 2.68 | 0.63  | 5.43E-01 | 7.69E-01 | -6.49 |
| 1418822_PM_a_at | Arf6                   | ARF6     | 0.10  | 8.35 | 0.63  | 5.43E-01 | 7.69E-01 | -6.49 |
| 1429580_PM_x_at | Spat24                 | NA       | 0.12  | 2.77 | 0.63  | 5.43E-01 | 7.69E-01 | -6.49 |
| 1444522_PM_at   | ---                    | NA       | 0.12  | 2.71 | 0.63  | 5.43E-01 | 7.69E-01 | -6.49 |
| 1420402_PM_at   | Atp2b2                 | ATP2B2   | 0.12  | 6.86 | 0.63  | 5.43E-01 | 7.69E-01 | -6.49 |
| 1427152_PM_at   | Qser1                  | QSER1    | 0.15  | 3.68 | 0.63  | 5.43E-01 | 7.69E-01 | -6.49 |
| 1426973_PM_at   | Gpr153                 | GPR153   | 0.16  | 3.20 | 0.63  | 5.43E-01 | 7.69E-01 | -6.49 |
| 1441737_PM_s_at | Rassf1                 | RASSF1   | 0.30  | 3.18 | 0.63  | 5.43E-01 | 7.69E-01 | -6.49 |
| 1417291_PM_at   | Tnfrsf1a               | TNFRSF1A | 0.08  | 2.17 | 0.63  | 5.43E-01 | 7.69E-01 | -6.49 |
| 1449614_PM_s_at | Oard1                  | OARD1    | -0.15 | 3.42 | -0.63 | 5.43E-01 | 7.69E-01 | -6.49 |
| 1450196_PM_s_at | Gys1                   | GYS1     | 0.05  | 2.29 | 0.63  | 5.43E-01 | 7.69E-01 | -6.49 |
| 1445245_PM_at   | ---                    | NA       | 0.26  | 3.12 | 0.63  | 5.43E-01 | 7.69E-01 | -6.49 |
| 1433632_PM_at   | Irf2bp2                | IRF2BP2  | 0.16  | 3.35 | 0.63  | 5.43E-01 | 7.69E-01 | -6.49 |
| 1420208_PM_at   | ---                    | NA       | 0.05  | 1.94 | 0.63  | 5.43E-01 | 7.69E-01 | -6.49 |
| 1444286_PM_at   | Otp                    | OTP      | 0.09  | 2.34 | 0.63  | 5.44E-01 | 7.69E-01 | -6.49 |
| 1428442_PM_at   | BC029722               | NA       | 0.19  | 5.18 | 0.63  | 5.44E-01 | 7.69E-01 | -6.49 |
| 1435144_PM_at   | Fyb                    | NA       | -0.07 | 2.49 | -0.63 | 5.44E-01 | 7.69E-01 | -6.49 |
| 1420471_PM_at   | Hcrt                   | HCRT     | -0.06 | 2.54 | -0.63 | 5.44E-01 | 7.69E-01 | -6.49 |
| 1449362_PM_a_at | Mink1                  | MINK1    | 0.10  | 4.08 | 0.63  | 5.44E-01 | 7.69E-01 | -6.49 |
| 1455478_PM_at   | Ppfia1                 | PPFIA1   | -0.19 | 3.21 | -0.63 | 5.44E-01 | 7.69E-01 | -6.49 |
| 1444899_PM_at   | ---                    | NA       | -0.07 | 2.28 | -0.63 | 5.44E-01 | 7.69E-01 | -6.49 |
| 1421752_PM_a_at | Serpinb5               | SERPINB5 | 0.07  | 2.22 | 0.63  | 5.44E-01 | 7.69E-01 | -6.49 |
| 1425538_PM_x_at | Ceacam1                | PSG7     | 0.21  | 2.76 | 0.63  | 5.44E-01 | 7.69E-01 | -6.49 |
| 1435596_PM_at   | Gsap                   | GSAP     | 0.11  | 3.47 | 0.63  | 5.44E-01 | 7.69E-01 | -6.49 |
| 1425405_PM_a_at | Adar                   | ADAR     | 0.19  | 2.99 | 0.63  | 5.44E-01 | 7.69E-01 | -6.49 |
| 1456758_PM_at   | ---                    | NA       | -0.06 | 2.40 | -0.63 | 5.44E-01 | 7.69E-01 | -6.49 |
| 1424547_PM_at   | Car10                  | CA10     | 0.16  | 3.07 | 0.63  | 5.44E-01 | 7.69E-01 | -6.49 |
| 1452377_PM_at   | Kmt2a                  | KMT2A    | 0.16  | 3.38 | 0.63  | 5.44E-01 | 7.69E-01 | -6.49 |
| 1449243_PM_a_at | Rps19                  | RPS19    | 0.18  | 4.14 | 0.63  | 5.44E-01 | 7.69E-01 | -6.49 |
| 1423223_PM_a_at | LOC102642619 /// Prdx6 | PRDX6    | 0.24  | 3.92 | 0.63  | 5.44E-01 | 7.69E-01 | -6.49 |
| 1422430_PM_at   | Figl1                  | FIGNL1   | 0.08  | 2.46 | 0.63  | 5.44E-01 | 7.69E-01 | -6.49 |
| 1447358_PM_at   | ---                    | NA       | 0.08  | 2.71 | 0.63  | 5.44E-01 | 7.69E-01 | -6.49 |
| 1459196_PM_at   | ---                    | NA       | 0.13  | 2.59 | 0.63  | 5.44E-01 | 7.69E-01 | -6.49 |
| 1427849_PM_a_at | LOC665506 /// Trbv26   | NA       | 0.06  | 2.12 | 0.63  | 5.44E-01 | 7.70E-01 | -6.49 |
| 1423516_PM_a_at | Nid2                   | NID2     | 0.12  | 2.48 | 0.63  | 5.44E-01 | 7.70E-01 | -6.49 |
| 1420056_PM_s_at | Jmjd6                  | JMJD6    | 0.13  | 2.74 | 0.63  | 5.44E-01 | 7.70E-01 | -6.49 |
| 1451998_PM_at   | Tasp1                  | TASP1    | -0.16 | 2.43 | -0.63 | 5.44E-01 | 7.70E-01 | -6.49 |
| 1446024_PM_at   | ---                    | NA       | -0.13 | 2.30 | -0.63 | 5.44E-01 | 7.70E-01 | -6.49 |

|                         |                                                                                                          |             |       |      |       |          |          |       |
|-------------------------|----------------------------------------------------------------------------------------------------------|-------------|-------|------|-------|----------|----------|-------|
| 1431887_PM_at           | Gm21379 /// Rbm31y                                                                                       | NA          | 0.07  | 2.22 | 0.63  | 5.44E-01 | 7.70E-01 | -6.49 |
| 1458686_PM_at           | ---                                                                                                      | NA          | -0.17 | 3.13 | -0.63 | 5.44E-01 | 7.70E-01 | -6.49 |
| 1433649_PM_at           | Kdm1b                                                                                                    | KDM1B       | -0.09 | 2.37 | -0.63 | 5.44E-01 | 7.70E-01 | -6.49 |
| 1460233_PM_at           | Guca2b                                                                                                   | GUCA2B      | 0.07  | 2.38 | 0.63  | 5.44E-01 | 7.70E-01 | -6.49 |
| 1456750_PM_at           | ---                                                                                                      | NA          | 0.09  | 2.58 | 0.63  | 5.44E-01 | 7.70E-01 | -6.49 |
| 1428920_PM_at           | ---                                                                                                      | NA          | 0.12  | 2.21 | 0.63  | 5.44E-01 | 7.70E-01 | -6.49 |
| 1434374_PM_at           | Fam168a                                                                                                  | FAM168A     | 0.13  | 3.83 | 0.63  | 5.44E-01 | 7.70E-01 | -6.49 |
| 1445788_PM_at           | ---                                                                                                      | NA          | 0.11  | 2.97 | 0.63  | 5.45E-01 | 7.70E-01 | -6.49 |
| 1457435_PM_x_at         | Myom2                                                                                                    | MYOM2       | -0.30 | 3.10 | -0.63 | 5.45E-01 | 7.70E-01 | -6.49 |
| 1418312_PM_at           | Zfp276                                                                                                   | ZNF276      | 0.14  | 3.72 | 0.63  | 5.45E-01 | 7.70E-01 | -6.49 |
| 1448833_PM_at           | Foxm1                                                                                                    | FOXM1       | 0.08  | 2.25 | 0.63  | 5.45E-01 | 7.70E-01 | -6.49 |
| 1449299_PM_at           | Lrp5                                                                                                     | LRP5        | 0.09  | 2.72 | 0.63  | 5.45E-01 | 7.70E-01 | -6.49 |
| 1456908_PM_at           | Mboat2                                                                                                   | NA          | -0.06 | 4.35 | -0.63 | 5.45E-01 | 7.70E-01 | -6.49 |
| 1425848_PM_a_at         | Dusp26                                                                                                   | DUSP26      | 0.17  | 7.41 | 0.63  | 5.45E-01 | 7.70E-01 | -6.49 |
| 1437162_PM_at           | ---                                                                                                      | NA          | -0.11 | 3.23 | -0.63 | 5.45E-01 | 7.70E-01 | -6.49 |
| 1457263_PM_at           | ---                                                                                                      | NA          | 0.06  | 2.04 | 0.63  | 5.45E-01 | 7.70E-01 | -6.49 |
| 1425584_PM_x_at         | ---                                                                                                      | NA          | 0.06  | 2.25 | 0.63  | 5.45E-01 | 7.70E-01 | -6.49 |
| 1440966_PM_at           | March7                                                                                                   | MARCH7      | -0.08 | 2.92 | -0.63 | 5.45E-01 | 7.70E-01 | -6.49 |
| 1426038_PM_at           | ---                                                                                                      | NA          | 0.06  | 2.34 | 0.63  | 5.45E-01 | 7.70E-01 | -6.49 |
| 1424805_PM_a_at         | Tmem214                                                                                                  | TMEM214     | 0.07  | 2.65 | 0.63  | 5.45E-01 | 7.70E-01 | -6.49 |
| 1418679_PM_at           | Gzmf                                                                                                     | GZMB        | 0.10  | 2.06 | 0.63  | 5.45E-01 | 7.70E-01 | -6.49 |
| 1455566_PM_s_at         | Spats2l                                                                                                  | SPATS2L     | 0.11  | 3.11 | 0.63  | 5.45E-01 | 7.70E-01 | -6.49 |
| 1416234_PM_at           | Lrrc59                                                                                                   | LRRC59      | 0.39  | 3.65 | 0.63  | 5.45E-01 | 7.70E-01 | -6.49 |
| 1423703_PM_at           | Ppan                                                                                                     | PPAN-P2RY11 | 0.15  | 3.72 | 0.63  | 5.45E-01 | 7.70E-01 | -6.49 |
| 1441251_PM_a_at         | 2010001A14Rik                                                                                            | NA          | 0.16  | 2.85 | 0.63  | 5.45E-01 | 7.70E-01 | -6.49 |
| 1454747_PM_a_at         | Klhdc3                                                                                                   | KLHDC3      | 0.31  | 6.71 | 0.63  | 5.45E-01 | 7.70E-01 | -6.49 |
| 1451019_PM_at           | Ctsf                                                                                                     | CTSF        | -0.10 | 2.78 | -0.63 | 5.45E-01 | 7.70E-01 | -6.49 |
| 1456782_PM_at           | Pogk                                                                                                     | POGK        | 0.09  | 3.61 | 0.62  | 5.45E-01 | 7.70E-01 | -6.49 |
| 1457778_PM_at           | Stox2                                                                                                    | STOX2       | 0.33  | 2.75 | 0.62  | 5.45E-01 | 7.70E-01 | -6.49 |
| 1427674_PM_a_at         | Sez6                                                                                                     | SEZ6        | -0.07 | 2.35 | -0.62 | 5.46E-01 | 7.70E-01 | -6.49 |
| 1418392_PM_a_at         | Gbp3                                                                                                     | GBP4        | -0.11 | 2.57 | -0.62 | 5.46E-01 | 7.71E-01 | -6.49 |
| 1432849_PM_at           | ---                                                                                                      | NA          | 0.08  | 2.51 | 0.62  | 5.46E-01 | 7.71E-01 | -6.49 |
| 1442028_PM_at           | B4galnt2                                                                                                 | NA          | 0.10  | 2.36 | 0.62  | 5.46E-01 | 7.71E-01 | -6.49 |
| 1453072_PM_at           | Gpr160                                                                                                   | GPR160      | -0.06 | 2.63 | -0.62 | 5.46E-01 | 7.71E-01 | -6.49 |
| 1456910_PM_at           | ---                                                                                                      | NA          | -0.14 | 3.01 | -0.62 | 5.46E-01 | 7.71E-01 | -6.49 |
| 1437476_PM_at           | Rrm2b                                                                                                    | RRM2B       | -0.09 | 2.42 | -0.62 | 5.46E-01 | 7.71E-01 | -6.49 |
| 1448605_PM_at           | Rhoc                                                                                                     | RHOC        | -0.09 | 2.53 | -0.62 | 5.46E-01 | 7.71E-01 | -6.50 |
| 1447499_PM_s_at         | Omt2a /// Omt2b                                                                                          | NA          | 0.06  | 2.05 | 0.62  | 5.46E-01 | 7.71E-01 | -6.50 |
| 1460462_PM_at           | Med18                                                                                                    | MED18       | 0.07  | 2.15 | 0.62  | 5.46E-01 | 7.71E-01 | -6.50 |
| 1457281_PM_at           | Dnajc21                                                                                                  | DNAJC21     | -0.18 | 2.61 | -0.62 | 5.46E-01 | 7.71E-01 | -6.50 |
| 1442710_PM_at           | ---                                                                                                      | NA          | 0.08  | 2.20 | 0.62  | 5.46E-01 | 7.71E-01 | -6.50 |
| 1420510_PM_at           | LOC102641936 /// Srfbp1                                                                                  | SRFBP1      | 0.07  | 2.75 | 0.62  | 5.46E-01 | 7.71E-01 | -6.50 |
| 1457239_PM_at           | Syk                                                                                                      | SYK         | 0.13  | 2.82 | 0.62  | 5.46E-01 | 7.71E-01 | -6.50 |
| AFFX-NonspecificGC13_at | ---                                                                                                      | NA          | 0.04  | 2.02 | 0.62  | 5.46E-01 | 7.71E-01 | -6.50 |
| 1460598_PM_at           | Ifnlr1                                                                                                   | IFNL1       | 0.05  | 2.24 | 0.62  | 5.46E-01 | 7.71E-01 | -6.50 |
| 1429278_PM_at           | Nubpl                                                                                                    | NUBPL       | 0.15  | 2.88 | 0.62  | 5.46E-01 | 7.71E-01 | -6.50 |
| 1433922_PM_at           | Rab35                                                                                                    | RAB35       | -0.13 | 3.70 | -0.62 | 5.46E-01 | 7.71E-01 | -6.50 |
| 1432328_PM_at           | Olfrc639 /// Olfrc643                                                                                    | NA          | -0.05 | 2.33 | -0.62 | 5.46E-01 | 7.71E-01 | -6.50 |
| 1446660_PM_at           | ---                                                                                                      | NA          | 0.04  | 2.05 | 0.62  | 5.46E-01 | 7.71E-01 | -6.50 |
| 1427205_PM_x_at         | Cep112                                                                                                   | CEP112      | 0.06  | 2.37 | 0.62  | 5.46E-01 | 7.71E-01 | -6.50 |
| 1440979_PM_at           | ---                                                                                                      | NA          | 0.08  | 2.44 | 0.62  | 5.46E-01 | 7.71E-01 | -6.50 |
| 1442989_PM_at           | ---                                                                                                      | NA          | -0.10 | 3.13 | -0.62 | 5.46E-01 | 7.71E-01 | -6.50 |
| 1420473_PM_at           | Mtpn                                                                                                     | MTPN        | -0.15 | 8.51 | -0.62 | 5.46E-01 | 7.71E-01 | -6.50 |
| 1432516_PM_at           | ---                                                                                                      | NA          | -0.06 | 2.00 | -0.62 | 5.46E-01 | 7.71E-01 | -6.50 |
| 1449735_PM_at           | ---                                                                                                      | NA          | -0.05 | 2.15 | -0.62 | 5.46E-01 | 7.71E-01 | -6.50 |
| 1459272_PM_at           | Gm40824                                                                                                  | NA          | 0.05  | 2.17 | 0.62  | 5.46E-01 | 7.71E-01 | -6.50 |
| 1419534_PM_at           | Olrl                                                                                                     | OLR1        | 0.06  | 1.98 | 0.62  | 5.46E-01 | 7.71E-01 | -6.50 |
| 1457105_PM_at           | Pkd2l1                                                                                                   | PKD2L1      | 0.09  | 2.50 | 0.62  | 5.46E-01 | 7.71E-01 | -6.50 |
| 1417501_PM_at           | Fbxo6                                                                                                    | FBXO6       | 0.11  | 2.78 | 0.62  | 5.47E-01 | 7.71E-01 | -6.50 |
| 1429910_PM_at           | March5                                                                                                   | NA          | 0.14  | 2.85 | 0.62  | 5.47E-01 | 7.71E-01 | -6.50 |
| 1424422_PM_s_at         | Flad1 /// Lenep                                                                                          | FLAD1       | 0.18  | 3.12 | 0.62  | 5.46E-01 | 7.71E-01 | -6.50 |
| 1434086_PM_at           | Gpr107                                                                                                   | GPR107      | 0.07  | 2.29 | 0.62  | 5.47E-01 | 7.71E-01 | -6.50 |
| 1452417_PM_x_at         | Igk-V28 /// Igkc /// Igkj1 /// Igkv1-117 /// Igkv3-4 /// Igkv4-53 /// Igkv6-23 /// Igkv8-16 /// Igkv8-30 | NA          | -0.43 | 4.79 | -0.62 | 5.47E-01 | 7.71E-01 | -6.50 |
| 1422293_PM_a_at         | Kctd1                                                                                                    | KCTD1       | -0.19 | 5.16 | -0.62 | 5.47E-01 | 7.71E-01 | -6.50 |
| 1418775_PM_at           | Al837181                                                                                                 | C11orf68    | 0.13  | 3.69 | 0.62  | 5.47E-01 | 7.71E-01 | -6.50 |
| 1437824_PM_at           | Gm38520                                                                                                  | NA          | -0.08 | 2.22 | -0.62 | 5.47E-01 | 7.71E-01 | -6.50 |
| 1452502_PM_at           | BC001981                                                                                                 | NA          | 0.15  | 4.31 | 0.62  | 5.47E-01 | 7.71E-01 | -6.50 |
| 1432083_PM_a_at         | Lrrc23                                                                                                   | LRRC23      | -0.14 | 3.05 | -0.62 | 5.47E-01 | 7.71E-01 | -6.50 |
| 1436047_PM_at           | Ctif                                                                                                     | CTIF        | -0.10 | 3.69 | -0.62 | 5.47E-01 | 7.71E-01 | -6.50 |
| 1427194_PM_a_at         | Erc8                                                                                                     | ERCC8       | 0.20  | 2.73 | 0.62  | 5.47E-01 | 7.71E-01 | -6.50 |
| 1426334_PM_a_at         | Bcl2l11                                                                                                  | BCL2L11     | -0.07 | 2.28 | -0.62 | 5.47E-01 | 7.71E-01 | -6.50 |
| 1448275_PM_at           | Tmem19                                                                                                   | TMEM19      | 0.11  | 2.65 | 0.62  | 5.47E-01 | 7.72E-01 | -6.50 |

|                 |                                                                                                        |          |       |      |       |          |          |       |
|-----------------|--------------------------------------------------------------------------------------------------------|----------|-------|------|-------|----------|----------|-------|
| 1441534_PM_at   | C86753                                                                                                 | NA       | -0.06 | 2.19 | -0.62 | 5.47E-01 | 7.72E-01 | -6.50 |
| 1416898_PM_a_at | Irf3                                                                                                   | IRF3     | 0.05  | 2.51 | 0.62  | 5.47E-01 | 7.72E-01 | -6.50 |
| 1427029_PM_at   | Htra3                                                                                                  | HTRA3    | 0.07  | 2.23 | 0.62  | 5.47E-01 | 7.72E-01 | -6.50 |
| 1429506_PM_at   | Nkd1                                                                                                   | NKD1     | 0.07  | 2.75 | 0.62  | 5.47E-01 | 7.72E-01 | -6.50 |
| 1433769_PM_at   | Als2cl                                                                                                 | ALS2CL   | 0.08  | 2.48 | 0.62  | 5.47E-01 | 7.72E-01 | -6.50 |
| 1419194_PM_s_at | Gmfg                                                                                                   | GMFG     | 0.08  | 2.66 | 0.62  | 5.47E-01 | 7.72E-01 | -6.50 |
| 1458323_PM_at   | ---                                                                                                    | NA       | 0.15  | 2.56 | 0.62  | 5.47E-01 | 7.72E-01 | -6.50 |
| 1450389_PM_s_at | Pip5k1b                                                                                                | PIP5K1B  | 0.17  | 2.67 | 0.62  | 5.47E-01 | 7.72E-01 | -6.50 |
| 1438808_PM_at   | Trp53                                                                                                  | TP53     | -0.07 | 2.53 | -0.62 | 5.47E-01 | 7.72E-01 | -6.50 |
| 1433403_PM_at   | C530008M17Rik ///<br>LOC105247661                                                                      | KIAA1211 | 0.07  | 2.19 | 0.62  | 5.47E-01 | 7.72E-01 | -6.50 |
| 1450154_PM_at   | Folh1                                                                                                  | FOLH1    | 0.10  | 2.22 | 0.62  | 5.47E-01 | 7.72E-01 | -6.50 |
| 1456913_PM_at   | ---                                                                                                    | NA       | 0.16  | 3.03 | 0.62  | 5.47E-01 | 7.72E-01 | -6.50 |
| 1430588_PM_at   | Mro                                                                                                    | MRO      | 0.18  | 3.57 | 0.62  | 5.47E-01 | 7.72E-01 | -6.50 |
| 1447152_PM_at   | ---                                                                                                    | NA       | 0.05  | 2.31 | 0.62  | 5.47E-01 | 7.72E-01 | -6.50 |
| 1456045_PM_at   | Camkmt                                                                                                 | NA       | 0.12  | 2.31 | 0.62  | 5.47E-01 | 7.72E-01 | -6.50 |
| 1460621_PM_x_at | Cdk5rap2 ///Ywhaq                                                                                      | YWHAQ    | 0.14  | 9.89 | 0.62  | 5.47E-01 | 7.72E-01 | -6.50 |
| 1434940_PM_x_at | Rgs19                                                                                                  | RGS19    | -0.19 | 3.45 | -0.62 | 5.47E-01 | 7.72E-01 | -6.50 |
| 1453415_PM_at   | ---                                                                                                    | NA       | -0.13 | 2.29 | -0.62 | 5.48E-01 | 7.72E-01 | -6.50 |
| 1454221_PM_a_at | Kif2c                                                                                                  | KIF2C    | 0.06  | 2.10 | 0.62  | 5.48E-01 | 7.72E-01 | -6.50 |
| 1429629_PM_at   | Ezh1                                                                                                   | EZH1     | 0.07  | 2.26 | 0.62  | 5.47E-01 | 7.72E-01 | -6.50 |
| 1432760_PM_at   | Prrc2c                                                                                                 | NA       | 0.07  | 2.26 | 0.62  | 5.47E-01 | 7.72E-01 | -6.50 |
| 1446672_PM_at   | ---                                                                                                    | NA       | 0.08  | 2.71 | 0.62  | 5.47E-01 | 7.72E-01 | -6.50 |
| 1454233_PM_at   | Mroh3                                                                                                  | NA       | 0.08  | 2.13 | 0.62  | 5.48E-01 | 7.72E-01 | -6.50 |
| 1425355_PM_at   | Acsf2                                                                                                  | ACSF2    | 0.08  | 3.00 | 0.62  | 5.48E-01 | 7.72E-01 | -6.50 |
| 1441037_PM_at   | ---                                                                                                    | NA       | 0.18  | 2.59 | 0.62  | 5.47E-01 | 7.72E-01 | -6.50 |
| 1431420_PM_s_at | LOC102641161 ///Prelid1                                                                                | PRELID1  | 0.40  | 3.80 | 0.62  | 5.48E-01 | 7.72E-01 | -6.50 |
| 1427355_PM_at   | Calca                                                                                                  | CALCA    | 0.05  | 2.09 | 0.62  | 5.48E-01 | 7.72E-01 | -6.50 |
| 1439552_PM_at   | Trio                                                                                                   | NA       | -0.25 | 3.70 | -0.62 | 5.48E-01 | 7.72E-01 | -6.50 |
| 1420786_PM_a_at | Gm10256 /// Gm10352 ///<br>Gm21677 /// Gm21693 ///<br>Gm21704 /// Gm21708 ///<br>Gm3376 /// Gm4064 /// | Rbmy     | -0.16 | 2.52 | -0.62 | 5.48E-01 | 7.72E-01 | -6.50 |
| 1424216_PM_a_at | Papola                                                                                                 | NA       | -0.11 | 3.07 | -0.62 | 5.48E-01 | 7.72E-01 | -6.50 |
| 1438240_PM_at   | Ccin                                                                                                   | CCIN     | 0.07  | 2.42 | 0.62  | 5.48E-01 | 7.72E-01 | -6.50 |
| 1439098_PM_at   | E230013L22Rik                                                                                          | NA       | 0.08  | 2.46 | 0.62  | 5.48E-01 | 7.72E-01 | -6.50 |
| 1433302_PM_at   | Cdh10                                                                                                  | NA       | 0.13  | 4.01 | 0.62  | 5.48E-01 | 7.72E-01 | -6.50 |
| 1430378_PM_at   | ---                                                                                                    | NA       | 0.18  | 3.60 | 0.62  | 5.48E-01 | 7.72E-01 | -6.50 |
| 1451489_PM_at   | Slc25a35                                                                                               | SLC25A35 | 0.18  | 2.44 | 0.62  | 5.48E-01 | 7.72E-01 | -6.50 |
| 1418141_PM_at   | Dcx                                                                                                    | DCX      | 0.25  | 3.68 | 0.62  | 5.48E-01 | 7.72E-01 | -6.50 |
| 1426086_PM_a_at | Fmr1                                                                                                   | FMR1     | 0.30  | 4.37 | 0.62  | 5.48E-01 | 7.72E-01 | -6.50 |
| 1452623_PM_at   | Zfp759                                                                                                 | ZNF678   | 0.06  | 2.20 | 0.62  | 5.48E-01 | 7.72E-01 | -6.50 |
| 1452765_PM_at   | Slc39a9                                                                                                | SLC39A9  | 0.10  | 3.44 | 0.62  | 5.48E-01 | 7.72E-01 | -6.50 |
| 1440793_PM_at   | 1700029M03Rik                                                                                          | NA       | 0.08  | 2.12 | 0.62  | 5.48E-01 | 7.72E-01 | -6.50 |
| 1437121_PM_at   | Dennd1c                                                                                                | DENND1C  | 0.05  | 2.02 | 0.62  | 5.48E-01 | 7.72E-01 | -6.50 |
| 1428945_PM_at   | Uba6                                                                                                   | UBA6     | -0.20 | 3.56 | -0.62 | 5.48E-01 | 7.72E-01 | -6.50 |
| 1424951_PM_at   | Baiap2l1                                                                                               | BAIAP2L1 | 0.06  | 2.36 | 0.62  | 5.48E-01 | 7.72E-01 | -6.50 |
| 1436614_PM_at   | March3                                                                                                 | NA       | 0.06  | 2.20 | 0.62  | 5.48E-01 | 7.72E-01 | -6.50 |
| 1460155_PM_at   | Rmdn1                                                                                                  | RMDN1    | 0.08  | 2.52 | 0.62  | 5.48E-01 | 7.72E-01 | -6.50 |
| 1439477_PM_at   | ---                                                                                                    | NA       | 0.25  | 3.76 | 0.62  | 5.48E-01 | 7.72E-01 | -6.50 |
| 1448364_PM_at   | Ccng2                                                                                                  | CCNG2    | -0.08 | 2.49 | -0.62 | 5.48E-01 | 7.72E-01 | -6.50 |
| 1440781_PM_at   | ---                                                                                                    | NA       | 0.13  | 2.73 | 0.62  | 5.48E-01 | 7.72E-01 | -6.50 |
| 1451743_PM_at   | Wbp1l                                                                                                  | WBP1L    | 0.05  | 2.49 | 0.62  | 5.48E-01 | 7.72E-01 | -6.50 |
| 1458985_PM_at   | Fry                                                                                                    | FRY      | -0.15 | 2.76 | -0.62 | 5.48E-01 | 7.72E-01 | -6.50 |
| 1448971_PM_at   | Coprs                                                                                                  | COPRS    | -0.12 | 2.64 | -0.62 | 5.48E-01 | 7.72E-01 | -6.50 |
| 1458080_PM_at   | Setx                                                                                                   | SETX     | -0.26 | 2.62 | -0.62 | 5.48E-01 | 7.72E-01 | -6.50 |
| 1421961_PM_a_at | Dnajb5                                                                                                 | DNAJB5   | 0.24  | 3.67 | 0.62  | 5.48E-01 | 7.72E-01 | -6.50 |
| 1424050_PM_s_at | Fgfr1                                                                                                  | FGFR1    | -0.13 | 4.26 | -0.62 | 5.49E-01 | 7.72E-01 | -6.50 |
| 1446292_PM_at   | ---                                                                                                    | NA       | 0.08  | 2.11 | 0.62  | 5.49E-01 | 7.72E-01 | -6.50 |
| 1451278_PM_a_at | Ntmt1                                                                                                  | NTMT1    | 0.09  | 3.33 | 0.62  | 5.49E-01 | 7.72E-01 | -6.50 |
| 1437054_PM_x_at | Prrm1                                                                                                  | NA       | 0.12  | 2.75 | 0.62  | 5.48E-01 | 7.72E-01 | -6.50 |
| 1429012_PM_at   | Arhgef6                                                                                                | ARHGEF6  | 0.13  | 2.96 | 0.62  | 5.49E-01 | 7.72E-01 | -6.50 |
| 1436951_PM_x_at | Txndc9                                                                                                 | TXNDC9   | -0.22 | 4.83 | -0.62 | 5.49E-01 | 7.72E-01 | -6.50 |
| 1419716_PM_a_at | Pou2f1                                                                                                 | POU2F1   | 0.07  | 2.30 | 0.62  | 5.49E-01 | 7.72E-01 | -6.50 |
| 1431162_PM_a_at | Enah                                                                                                   | ENAH     | 0.26  | 3.49 | 0.62  | 5.49E-01 | 7.73E-01 | -6.50 |
| 1442152_PM_at   | ---                                                                                                    | NA       | 0.07  | 2.04 | 0.62  | 5.49E-01 | 7.73E-01 | -6.50 |
| 1458173_PM_at   | ---                                                                                                    | NA       | 0.06  | 2.30 | 0.62  | 5.49E-01 | 7.73E-01 | -6.50 |
| 1438017_PM_at   | Rusc1                                                                                                  | RUSC1    | 0.08  | 2.44 | 0.62  | 5.49E-01 | 7.73E-01 | -6.50 |
| 1436431_PM_at   | 1700025G04Rik                                                                                          | C1orf21  | -0.16 | 2.72 | -0.62 | 5.49E-01 | 7.73E-01 | -6.50 |
| 1443870_PM_at   | Abcc4                                                                                                  | ABCC4    | -0.08 | 3.24 | -0.62 | 5.49E-01 | 7.73E-01 | -6.50 |
| 1439239_PM_at   | Lin7b                                                                                                  | LIN7B    | -0.20 | 3.70 | -0.62 | 5.49E-01 | 7.73E-01 | -6.50 |
| 1456638_PM_at   | Wdr59                                                                                                  | WDR59    | -0.05 | 2.27 | -0.62 | 5.49E-01 | 7.73E-01 | -6.50 |
| 1459684_PM_at   | ---                                                                                                    | NA       | 0.16  | 2.82 | 0.62  | 5.49E-01 | 7.73E-01 | -6.50 |

|                 |                                   |           |       |      |       |          |          |       |
|-----------------|-----------------------------------|-----------|-------|------|-------|----------|----------|-------|
| 1448454_PM_at   | Srsf6                             | SRSF6     | -0.13 | 3.02 | -0.62 | 5.49E-01 | 7.73E-01 | -6.50 |
| 1458356_PM_at   | ---                               | NA        | 0.10  | 2.88 | 0.62  | 5.49E-01 | 7.73E-01 | -6.50 |
| 1451358_PM_a_at | Racgap1                           | RACGAP1   | 0.10  | 2.46 | 0.62  | 5.49E-01 | 7.73E-01 | -6.50 |
| 1451527_PM_at   | Pcolce2                           | PCOLCE2   | -0.27 | 4.18 | -0.62 | 5.49E-01 | 7.73E-01 | -6.50 |
| 1420735_PM_at   | Gabbr2                            | NA        | 0.06  | 2.16 | 0.62  | 5.49E-01 | 7.73E-01 | -6.50 |
| 1431714_PM_at   | 2310015D24Rik                     | NA        | 0.07  | 2.55 | 0.62  | 5.49E-01 | 7.73E-01 | -6.50 |
| 1441175_PM_at   | Arx                               | ARX       | 0.09  | 2.37 | 0.62  | 5.49E-01 | 7.73E-01 | -6.50 |
| 1437179_PM_at   | Rif1                              | RIF1      | 0.09  | 2.11 | 0.62  | 5.49E-01 | 7.73E-01 | -6.50 |
| 1441049_PM_at   | ---                               | NA        | 0.07  | 2.44 | 0.62  | 5.49E-01 | 7.73E-01 | -6.50 |
| 1428940_PM_at   | ---                               | NA        | -0.23 | 4.86 | -0.62 | 5.49E-01 | 7.73E-01 | -6.50 |
| 1460116_PM_s_at | Spred1                            | SPRED1    | -0.21 | 5.84 | -0.62 | 5.50E-01 | 7.73E-01 | -6.50 |
| 1449841_PM_at   | Kif3a                             | KIF3A     | -0.20 | 4.78 | -0.62 | 5.50E-01 | 7.73E-01 | -6.50 |
| 1451393_PM_at   | Pex26                             | PEX26     | -0.13 | 2.89 | -0.62 | 5.50E-01 | 7.73E-01 | -6.50 |
| 1417614_PM_at   | Ckm                               | CKM       | 0.06  | 2.43 | 0.62  | 5.50E-01 | 7.73E-01 | -6.50 |
| 1455247_PM_at   | Amotl1                            | AMOTL1    | 0.07  | 3.26 | 0.62  | 5.50E-01 | 7.73E-01 | -6.50 |
| 1451708_PM_at   | Gpr33                             | GPR33     | 0.08  | 2.33 | 0.62  | 5.50E-01 | 7.73E-01 | -6.50 |
| 1443091_PM_at   | ---                               | NA        | 0.09  | 2.25 | 0.62  | 5.50E-01 | 7.73E-01 | -6.50 |
| 1432918_PM_at   | 4921511E18Rik                     | NA        | 0.11  | 2.34 | 0.62  | 5.50E-01 | 7.73E-01 | -6.50 |
| 1435026_PM_at   | Spock2                            | SPOCK2    | -0.19 | 6.78 | -0.62 | 5.50E-01 | 7.73E-01 | -6.50 |
| 1443432_PM_at   | AU022680                          | NA        | 0.17  | 2.50 | 0.62  | 5.50E-01 | 7.73E-01 | -6.50 |
| 1433898_PM_at   | ---                               | NA        | -0.12 | 2.23 | -0.62 | 5.50E-01 | 7.73E-01 | -6.50 |
| 1459664_PM_at   | Wdr31                             | WDR31     | 0.06  | 2.22 | 0.62  | 5.50E-01 | 7.73E-01 | -6.50 |
| 1432191_PM_at   | ---                               | NA        | 0.06  | 2.05 | 0.62  | 5.50E-01 | 7.73E-01 | -6.50 |
| 1417184_PM_s_at | Hbb-b1///Hbb-b2///Hbb-bs///Hbb-bt | HBD       | -0.36 | 5.34 | -0.62 | 5.50E-01 | 7.73E-01 | -6.50 |
| 1447604_PM_at   | BC053393                          | HAVCR1    | -0.10 | 2.46 | -0.62 | 5.50E-01 | 7.73E-01 | -6.50 |
| 1427828_PM_at   | ---                               | NA        | -0.06 | 2.35 | -0.62 | 5.50E-01 | 7.73E-01 | -6.50 |
| 1440388_PM_at   | ---                               | NA        | -0.06 | 2.44 | -0.62 | 5.50E-01 | 7.73E-01 | -6.50 |
| 1448680_PM_at   | Serpina1c                         | SERPINA1  | -0.05 | 2.08 | -0.62 | 5.50E-01 | 7.73E-01 | -6.50 |
| 1421856_PM_at   | S100a3                            | S100A3    | 0.06  | 2.27 | 0.62  | 5.50E-01 | 7.73E-01 | -6.50 |
| 1448832_PM_a_at | Cplx1                             | CPLX1     | 0.22  | 8.18 | 0.62  | 5.50E-01 | 7.73E-01 | -6.50 |
| 1428344_PM_at   | Plpp6                             | PLPP6     | -0.24 | 5.62 | -0.62 | 5.50E-01 | 7.73E-01 | -6.50 |
| 1451486_PM_at   | Slc46a3                           | SLC46A3   | 0.08  | 2.55 | 0.62  | 5.50E-01 | 7.73E-01 | -6.50 |
| 1448735_PM_at   | Cp                                | CP        | 0.17  | 2.29 | 0.62  | 5.50E-01 | 7.74E-01 | -6.50 |
| 1427437_PM_at   | ---                               | NA        | -0.20 | 3.19 | -0.62 | 5.50E-01 | 7.74E-01 | -6.50 |
| 1427868_PM_x_at | Myh1                              | MYH1      | -0.42 | 3.33 | -0.62 | 5.50E-01 | 7.74E-01 | -6.50 |
| 1427161_PM_at   | Cenpf                             | CENPF     | 0.05  | 2.24 | 0.62  | 5.50E-01 | 7.74E-01 | -6.50 |
| 1428983_PM_at   | Scx                               | NA        | 0.06  | 2.58 | 0.62  | 5.50E-01 | 7.74E-01 | -6.50 |
| 1457915_PM_at   | Mettl20                           | ETFBKMT   | 0.06  | 2.00 | 0.62  | 5.50E-01 | 7.74E-01 | -6.50 |
| 1445960_PM_at   | ---                               | NA        | 0.07  | 2.44 | 0.62  | 5.50E-01 | 7.74E-01 | -6.50 |
| 1441994_PM_at   | Pcdhb16                           | NA        | 0.09  | 2.98 | 0.62  | 5.50E-01 | 7.74E-01 | -6.50 |
| 1452272_PM_a_at | Gfer                              | GFER      | 0.19  | 2.59 | 0.62  | 5.50E-01 | 7.74E-01 | -6.50 |
| 1423724_PM_at   | Zwint                             | ZWINT     | -0.19 | 7.89 | -0.62 | 5.51E-01 | 7.74E-01 | -6.50 |
| 1445384_PM_at   | ---                               | NA        | -0.12 | 2.27 | -0.62 | 5.51E-01 | 7.74E-01 | -6.50 |
| 1449670_PM_x_at | Gpr137b                           | GPR137B   | -0.08 | 2.22 | -0.62 | 5.51E-01 | 7.74E-01 | -6.50 |
| 1440865_PM_at   | Ifitm6                            | NA        | 0.06  | 2.34 | 0.62  | 5.51E-01 | 7.74E-01 | -6.50 |
| 1447833_PM_x_at | Mfap2                             | MFAP2     | 0.07  | 2.64 | 0.62  | 5.51E-01 | 7.74E-01 | -6.50 |
| 1418385_PM_at   | Cuedc2                            | CUEDC2    | 0.08  | 2.74 | 0.62  | 5.51E-01 | 7.74E-01 | -6.50 |
| 1434590_PM_at   | Bend6                             | BEND6     | 0.22  | 3.91 | 0.62  | 5.51E-01 | 7.74E-01 | -6.50 |
| 1438062_PM_at   | Rsf1                              | RSF1      | -0.13 | 3.52 | -0.62 | 5.51E-01 | 7.74E-01 | -6.50 |
| 1445280_PM_at   | ---                               | NA        | 0.06  | 2.21 | 0.62  | 5.51E-01 | 7.74E-01 | -6.50 |
| 1416149_PM_at   | Olig1                             | OLIG1     | -0.29 | 3.98 | -0.62 | 5.51E-01 | 7.74E-01 | -6.50 |
| 1418350_PM_at   | Hbegf                             | HBEGF     | 0.05  | 2.56 | 0.62  | 5.51E-01 | 7.74E-01 | -6.50 |
| 1430898_PM_s_at | 4931428L18Rik                     | NA        | 0.08  | 2.33 | 0.62  | 5.51E-01 | 7.74E-01 | -6.50 |
| 1416657_PM_at   | Akt1                              | AKT1      | 0.13  | 3.08 | 0.62  | 5.51E-01 | 7.74E-01 | -6.50 |
| 1426783_PM_at   | Kat2a                             | KAT2A     | 0.23  | 3.40 | 0.62  | 5.51E-01 | 7.74E-01 | -6.50 |
| 1422495_PM_a_at | Hmgn1///LOC102641809              | NA        | -0.15 | 6.36 | -0.62 | 5.51E-01 | 7.74E-01 | -6.50 |
| 1448094_PM_at   | Gm5914                            | NA        | -0.10 | 3.14 | -0.62 | 5.51E-01 | 7.74E-01 | -6.50 |
| 1446805_PM_at   | ---                               | NA        | -0.05 | 2.19 | -0.62 | 5.51E-01 | 7.74E-01 | -6.50 |
| 1431605_PM_at   | Rb1cc1                            | RB1CC1    | -0.05 | 2.14 | -0.62 | 5.51E-01 | 7.74E-01 | -6.50 |
| 1429297_PM_at   | Serpib12                          | SERPINB12 | 0.05  | 1.96 | 0.62  | 5.51E-01 | 7.74E-01 | -6.50 |
| 1419339_PM_at   | Neu3                              | NEU3      | 0.10  | 2.49 | 0.62  | 5.51E-01 | 7.74E-01 | -6.50 |
| 1447640_PM_s_at | Pbx3                              | PBX3      | 0.21  | 2.28 | 0.62  | 5.51E-01 | 7.74E-01 | -6.50 |
| 1436000_PM_a_at | Skp2                              | SKP2      | 0.06  | 2.18 | 0.62  | 5.51E-01 | 7.75E-01 | -6.50 |
| 1454226_PM_at   | ---                               | NA        | 0.07  | 2.50 | 0.62  | 5.51E-01 | 7.75E-01 | -6.50 |
| 1427052_PM_at   | Acacb                             | ACACB     | 0.07  | 2.23 | 0.62  | 5.52E-01 | 7.75E-01 | -6.50 |
| 1447719_PM_at   | ApoH                              | APOH      | 0.07  | 2.06 | 0.62  | 5.52E-01 | 7.75E-01 | -6.50 |
| 1424204_PM_at   | Mrpl13                            | MRPL13    | -0.11 | 2.77 | -0.62 | 5.52E-01 | 7.75E-01 | -6.50 |
| 1457655_PM_x_at | Arhgap27                          | NA        | 0.04  | 1.91 | 0.62  | 5.52E-01 | 7.75E-01 | -6.50 |
| 1433937_PM_at   | Trp53bp2                          | TP53BP2   | 0.13  | 3.56 | 0.62  | 5.52E-01 | 7.75E-01 | -6.50 |
| 1437603_PM_at   | Abhd16b                           | ABHD16B   | -0.06 | 2.13 | -0.62 | 5.52E-01 | 7.75E-01 | -6.50 |
| 1434309_PM_at   | Fntb                              | FNTB      | 0.11  | 4.53 | 0.62  | 5.52E-01 | 7.75E-01 | -6.50 |
| 1458662_PM_at   | 1700008O03Rik                     | NA        | 0.16  | 9.39 | 0.62  | 5.52E-01 | 7.75E-01 | -6.50 |
| 1453273_PM_at   | Kcnv1                             | KCNV1     | -0.11 | 4.75 | -0.62 | 5.52E-01 | 7.75E-01 | -6.50 |



|                 |                         |         |       |      |       |          |          |       |
|-----------------|-------------------------|---------|-------|------|-------|----------|----------|-------|
| 1438709_PM_at   | Wipi1                   | WPI1    | 0.13  | 3.37 | 0.62  | 5.52E-01 | 7.75E-01 | -6.50 |
| 1442142_PM_at   | Edrf1                   | EDRF1   | -0.23 | 2.99 | -0.61 | 5.52E-01 | 7.75E-01 | -6.50 |
| 1453997_PM_a_at | Nes                     | NES     | 0.06  | 2.47 | 0.62  | 5.52E-01 | 7.75E-01 | -6.50 |
| 1456118_PM_at   | Mettl2                  | METTL2A | 0.21  | 2.59 | 0.61  | 5.52E-01 | 7.75E-01 | -6.50 |
| 1439559_PM_at   | 1700040D17Rik           | NA      | -0.08 | 2.46 | -0.61 | 5.52E-01 | 7.75E-01 | -6.50 |
| 1446685_PM_at   | Col6a5                  | COL6A5  | 0.06  | 2.09 | 0.61  | 5.52E-01 | 7.75E-01 | -6.50 |
| 1423887_PM_a_at | Telo2                   | TELO2   | 0.26  | 6.70 | 0.61  | 5.52E-01 | 7.75E-01 | -6.50 |
| 1455202_PM_at   | Maneal                  | MANEAL  | -0.07 | 2.73 | -0.61 | 5.52E-01 | 7.75E-01 | -6.50 |
| 1420784_PM_at   | Scn11a                  | SCN11A  | 0.06  | 2.40 | 0.61  | 5.52E-01 | 7.75E-01 | -6.50 |
| 1448818_PM_at   | Wnt5a                   | WNT5A   | -0.20 | 3.21 | -0.61 | 5.52E-01 | 7.75E-01 | -6.50 |
| 1447714_PM_x_at | Atp5g2 /// LOC102641133 | ATP5G2  | 0.06  | 2.01 | 0.61  | 5.52E-01 | 7.75E-01 | -6.50 |
| 1419367_PM_at   | Decr1                   | DEC1    | -0.12 | 3.22 | -0.61 | 5.52E-01 | 7.75E-01 | -6.50 |
| 1442944_PM_at   | C76555                  | NA      | 0.05  | 2.09 | 0.61  | 5.52E-01 | 7.75E-01 | -6.50 |
| 1460297_PM_at   | Nphs2                   | NPHS2   | 0.06  | 2.78 | 0.61  | 5.52E-01 | 7.75E-01 | -6.50 |
| 1431418_PM_at   | ---                     | NA      | 0.21  | 2.90 | 0.61  | 5.52E-01 | 7.75E-01 | -6.50 |
| 1448026_PM_at   | Chd7                    | CHD7    | 0.31  | 3.78 | 0.61  | 5.52E-01 | 7.75E-01 | -6.50 |
| 1450546_PM_at   | Ammecl1                 | AMMECL1 | 0.16  | 2.75 | 0.61  | 5.52E-01 | 7.75E-01 | -6.50 |
| 1433383_PM_at   | ---                     | NA      | 0.08  | 7.31 | 0.61  | 5.52E-01 | 7.75E-01 | -6.50 |
| 1448639_PM_a_at | Spat5                   | SPATA5  | -0.24 | 3.13 | -0.61 | 5.52E-01 | 7.75E-01 | -6.50 |
| 1445449_PM_at   | ---                     | NA      | 0.07  | 2.60 | 0.61  | 5.52E-01 | 7.75E-01 | -6.50 |
| 1430419_PM_at   | ---                     | NA      | -0.12 | 2.74 | -0.61 | 5.52E-01 | 7.75E-01 | -6.50 |
| 1438210_PM_at   | Gpr149                  | GPR149  | 0.06  | 2.07 | 0.61  | 5.52E-01 | 7.75E-01 | -6.50 |
| 1460356_PM_at   | Esam                    | ESAM    | 0.13  | 2.92 | 0.61  | 5.52E-01 | 7.75E-01 | -6.50 |
| 1422013_PM_at   | Clec4a2                 | CLEC4A  | -0.06 | 2.08 | -0.61 | 5.52E-01 | 7.75E-01 | -6.50 |
| 1430693_PM_at   | Pnpla5                  | PNPLA5  | 0.06  | 2.48 | 0.61  | 5.53E-01 | 7.75E-01 | -6.50 |
| 1430724_PM_at   | Ephx3                   | EPHX3   | 0.06  | 2.19 | 0.61  | 5.53E-01 | 7.75E-01 | -6.50 |
| 1429458_PM_at   | Carmt1                  | CARNMT1 | -0.12 | 3.27 | -0.61 | 5.53E-01 | 7.75E-01 | -6.50 |
| 1446478_PM_at   | A530072M11Rik           | NA      | 0.07  | 2.25 | 0.61  | 5.53E-01 | 7.75E-01 | -6.50 |
| 1418701_PM_at   | Comt                    | COMT    | 0.11  | 2.56 | 0.61  | 5.53E-01 | 7.75E-01 | -6.50 |
| 1417599_PM_at   | Cd276                   | CD276   | 0.07  | 3.36 | 0.61  | 5.53E-01 | 7.75E-01 | -6.50 |
| 1442026_PM_at   | Zbtb16                  | NA      | 0.27  | 6.30 | 0.61  | 5.53E-01 | 7.75E-01 | -6.50 |
| 1428325_PM_at   | Cnpy4                   | CNPY4   | -0.13 | 4.41 | -0.61 | 5.53E-01 | 7.75E-01 | -6.50 |
| 1447420_PM_at   | Brd1                    | BRD1    | -0.16 | 2.55 | -0.61 | 5.53E-01 | 7.75E-01 | -6.50 |
| 1440800_PM_at   | ---                     | NA      | 0.17  | 3.76 | 0.61  | 5.53E-01 | 7.75E-01 | -6.50 |
| 1429112_PM_at   | Tln2                    | TLN2    | -0.13 | 3.06 | -0.61 | 5.53E-01 | 7.76E-01 | -6.50 |
| 1441860_PM_x_at | Ide                     | IDE     | -0.07 | 2.03 | -0.61 | 5.53E-01 | 7.76E-01 | -6.50 |
| 1438696_PM_at   | Edn3                    | EDN3    | 0.08  | 2.34 | 0.61  | 5.53E-01 | 7.76E-01 | -6.50 |
| 1438683_PM_at   | Waf2                    | WASF2   | 0.13  | 2.39 | 0.61  | 5.53E-01 | 7.76E-01 | -6.50 |
| 1428100_PM_at   | Srsf1                   | SRSF1   | -0.12 | 3.21 | -0.61 | 5.53E-01 | 7.76E-01 | -6.50 |
| 1425859_PM_a_at | Psm4                    | PSMD4   | -0.10 | 2.85 | -0.61 | 5.53E-01 | 7.76E-01 | -6.50 |
| 1426185_PM_at   | Cacna2d2                | NA      | 0.07  | 2.45 | 0.61  | 5.53E-01 | 7.76E-01 | -6.50 |
| 1418155_PM_at   | Myot                    | MYOT    | 0.07  | 2.19 | 0.61  | 5.53E-01 | 7.76E-01 | -6.50 |
| 1445467_PM_at   | ---                     | NA      | 0.07  | 2.65 | 0.61  | 5.53E-01 | 7.76E-01 | -6.50 |
| 1434443_PM_at   | Anapc1                  | ANAPC1  | 0.16  | 4.66 | 0.61  | 5.53E-01 | 7.76E-01 | -6.50 |
| 1456893_PM_at   | ---                     | NA      | 0.09  | 3.71 | 0.61  | 5.53E-01 | 7.76E-01 | -6.50 |
| 1454720_PM_at   | Hs3st5                  | HS3ST5  | 0.05  | 1.93 | 0.61  | 5.53E-01 | 7.76E-01 | -6.50 |
| 1444886_PM_at   | ---                     | NA      | -0.09 | 2.39 | -0.61 | 5.53E-01 | 7.76E-01 | -6.50 |
| 1449917_PM_at   | Pitx3                   | PITX3   | 0.07  | 2.52 | 0.61  | 5.53E-01 | 7.76E-01 | -6.50 |
| 1433725_PM_at   | Acvr1b                  | ACVR1B  | -0.24 | 3.51 | -0.61 | 5.54E-01 | 7.76E-01 | -6.50 |
| 1417756_PM_a_at | Lsp1                    | LSP1    | -0.07 | 2.55 | -0.61 | 5.54E-01 | 7.76E-01 | -6.50 |
| 1454073_PM_at   | 4930455D15Rik           | NA      | -0.07 | 2.59 | -0.61 | 5.54E-01 | 7.76E-01 | -6.50 |
| 1436160_PM_at   | Krt26                   | KRT26   | 0.05  | 2.39 | 0.61  | 5.54E-01 | 7.76E-01 | -6.50 |
| 1431435_PM_at   | ---                     | NA      | -0.07 | 2.17 | -0.61 | 5.54E-01 | 7.76E-01 | -6.50 |
| 1457295_PM_at   | Tnrc6a                  | TNRC6A  | 0.11  | 2.62 | 0.61  | 5.54E-01 | 7.76E-01 | -6.50 |
| 1434341_PM_x_at | Uqcr10                  | UQCR10  | 0.11  | 3.22 | 0.61  | 5.54E-01 | 7.76E-01 | -6.50 |
| 1451818_PM_at   | Mib1                    | MIB1    | 0.16  | 5.63 | 0.61  | 5.54E-01 | 7.76E-01 | -6.50 |
| 1438634_PM_x_at | Lasp1                   | LASP1   | -0.22 | 7.29 | -0.61 | 5.54E-01 | 7.76E-01 | -6.50 |
| 1450211_PM_at   | Lrp1b                   | LRP1B   | -0.12 | 3.48 | -0.61 | 5.54E-01 | 7.76E-01 | -6.50 |
| 1430730_PM_at   | ---                     | NA      | 0.09  | 2.48 | 0.61  | 5.54E-01 | 7.76E-01 | -6.50 |
| 1424655_PM_at   | Acp2                    | ACP2    | 0.09  | 2.98 | 0.61  | 5.54E-01 | 7.76E-01 | -6.50 |
| 1428718_PM_at   | Scrn1                   | SCRN1   | -0.19 | 3.67 | -0.61 | 5.54E-01 | 7.76E-01 | -6.50 |
| 1456930_PM_at   | Camsap1                 | CAMSAP1 | -0.19 | 4.02 | -0.61 | 5.54E-01 | 7.76E-01 | -6.50 |
| 1452166_PM_a_at | Krt10                   | KRT10   | -0.17 | 3.89 | -0.61 | 5.54E-01 | 7.76E-01 | -6.50 |
| 1439516_PM_at   | ---                     | NA      | -0.14 | 3.79 | -0.61 | 5.54E-01 | 7.76E-01 | -6.50 |
| 1458661_PM_at   | ---                     | NA      | -0.12 | 2.87 | -0.61 | 5.54E-01 | 7.76E-01 | -6.50 |
| 1440435_PM_at   | Ky                      | KY      | -0.08 | 3.18 | -0.61 | 5.54E-01 | 7.76E-01 | -6.50 |
| 1423950_PM_at   | Kcnab3                  | KCNAB3  | -0.08 | 3.16 | -0.61 | 5.54E-01 | 7.76E-01 | -6.50 |
| 1446403_PM_at   | AU022899                | NA      | -0.07 | 2.70 | -0.61 | 5.54E-01 | 7.76E-01 | -6.50 |
| 1439310_PM_at   | A630012P03Rik           | NA      | -0.06 | 2.44 | -0.61 | 5.54E-01 | 7.76E-01 | -6.50 |
| 1442219_PM_at   | Gm8369                  | NA      | -0.04 | 2.09 | -0.61 | 5.54E-01 | 7.76E-01 | -6.50 |
| 1435191_PM_at   | Cdsn                    | CDSN    | 0.05  | 2.10 | 0.61  | 5.54E-01 | 7.76E-01 | -6.50 |
| 1440386_PM_at   | Glce                    | GLCE    | 0.06  | 2.30 | 0.61  | 5.54E-01 | 7.76E-01 | -6.50 |
| 1429549_PM_at   | Col27a1                 | COL27A1 | 0.07  | 3.24 | 0.61  | 5.54E-01 | 7.76E-01 | -6.50 |
| 1456097_PM_a_at | Itgb3bp                 | ITGB3BP | 0.07  | 2.42 | 0.61  | 5.54E-01 | 7.76E-01 | -6.50 |

|                 |                  |            |       |      |       |          |          |       |
|-----------------|------------------|------------|-------|------|-------|----------|----------|-------|
| 1459436_PM_at   | ---              | NA         | 0.07  | 2.48 | 0.61  | 5.54E-01 | 7.76E-01 | -6.50 |
| 1429377_PM_at   | Khdc3            | KHDC3L     | 0.08  | 2.64 | 0.61  | 5.54E-01 | 7.76E-01 | -6.50 |
| 1419613_PM_at   | Col7a1           | COL7A1     | 0.09  | 2.78 | 0.61  | 5.54E-01 | 7.76E-01 | -6.50 |
| 1418580_PM_at   | Rtp4             | RTP4       | 0.09  | 2.99 | 0.61  | 5.54E-01 | 7.76E-01 | -6.50 |
| 1453853_PM_a_at | Arhgef12         | ARHGEF12   | 0.09  | 3.47 | 0.61  | 5.54E-01 | 7.76E-01 | -6.50 |
| 1445054_PM_at   | ---              | NA         | 0.10  | 2.56 | 0.61  | 5.54E-01 | 7.76E-01 | -6.50 |
| 1418942_PM_at   | Ift74            | IFT74      | 0.11  | 3.79 | 0.61  | 5.54E-01 | 7.76E-01 | -6.50 |
| 1451350_PM_a_at | Leprot           | LEPROT     | 0.11  | 3.34 | 0.61  | 5.54E-01 | 7.76E-01 | -6.50 |
| 1448249_PM_at   | Gpd1             | GPD1       | 0.18  | 3.58 | 0.61  | 5.54E-01 | 7.76E-01 | -6.50 |
| 1419810_PM_x_at | Arhgap9          | ARHGAP9    | 0.05  | 2.12 | 0.61  | 5.55E-01 | 7.77E-01 | -6.50 |
| 1459203_PM_at   | Ipo8             | IPO8       | 0.06  | 3.17 | 0.61  | 5.55E-01 | 7.77E-01 | -6.50 |
| 1442141_PM_at   | Xrn1             | XRN1       | 0.14  | 2.43 | 0.61  | 5.55E-01 | 7.77E-01 | -6.50 |
| 1452565_PM_x_at | ---              | NA         | -0.05 | 2.36 | -0.61 | 5.55E-01 | 7.77E-01 | -6.50 |
| 1427160_PM_at   | Pcf11            | NA         | -0.15 | 3.13 | -0.61 | 5.55E-01 | 7.77E-01 | -6.50 |
| 1422847_PM_a_at | Prkcd            | PRKCD      | -0.19 | 3.47 | -0.61 | 5.55E-01 | 7.77E-01 | -6.50 |
| 1444859_PM_at   | ---              | NA         | 0.06  | 2.03 | 0.61  | 5.55E-01 | 7.77E-01 | -6.50 |
| 1460744_PM_at   | ---              | NA         | 0.07  | 2.43 | 0.61  | 5.55E-01 | 7.77E-01 | -6.50 |
| 1417220_PM_at   | Fah              | FAH        | 0.18  | 3.01 | 0.61  | 5.55E-01 | 7.77E-01 | -6.50 |
| 1451751_PM_at   | Ddit4l           | DDIT4L     | -0.08 | 2.36 | -0.61 | 5.55E-01 | 7.77E-01 | -6.50 |
| 1423021_PM_s_at | Ins3///Jak3      | JAK3       | 0.09  | 2.53 | 0.61  | 5.55E-01 | 7.77E-01 | -6.50 |
| 1420690_PM_at   | Fgf10            | FGF10      | 0.11  | 3.31 | 0.61  | 5.55E-01 | 7.77E-01 | -6.50 |
| 1455542_PM_at   | C630043F03Rik    | NA         | 0.06  | 2.29 | 0.61  | 5.55E-01 | 7.77E-01 | -6.50 |
| 1418185_PM_at   | Ndufaf3          | NDUFAF3    | 0.08  | 2.51 | 0.61  | 5.55E-01 | 7.77E-01 | -6.50 |
| 1449605_PM_at   | Nr2c2            | NA         | 0.05  | 2.30 | 0.61  | 5.55E-01 | 7.77E-01 | -6.50 |
| 1449002_PM_at   | Phlda3           | PHLDA3     | 0.05  | 2.24 | 0.61  | 5.55E-01 | 7.77E-01 | -6.50 |
| 1442723_PM_at   | ---              | NA         | 0.06  | 2.38 | 0.61  | 5.55E-01 | 7.77E-01 | -6.50 |
| 1441678_PM_at   | ---              | NA         | -0.06 | 2.09 | -0.61 | 5.55E-01 | 7.77E-01 | -6.50 |
| 1456719_PM_at   | Gm13752          | NA         | 0.07  | 2.02 | 0.61  | 5.55E-01 | 7.78E-01 | -6.50 |
| 1431733_PM_at   | Alpk1            | ALPK1      | 0.05  | 2.71 | 0.61  | 5.56E-01 | 7.78E-01 | -6.50 |
| 1460257_PM_a_at | Mthfs///Mthfsl   | ST20-MTHFS | -0.07 | 2.59 | -0.61 | 5.56E-01 | 7.78E-01 | -6.50 |
| 1425772_PM_at   | Col4a4           | COL4A4     | 0.05  | 2.31 | 0.61  | 5.56E-01 | 7.78E-01 | -6.50 |
| 1457059_PM_at   | Zfp438           | ZNF438     | 0.07  | 2.33 | 0.61  | 5.56E-01 | 7.78E-01 | -6.50 |
| 1433911_PM_at   | Smg6             | SMG6       | 0.09  | 3.27 | 0.61  | 5.56E-01 | 7.78E-01 | -6.50 |
| 1428673_PM_at   | Sympk            | SYMPK      | 0.10  | 3.30 | 0.61  | 5.56E-01 | 7.78E-01 | -6.50 |
| 1457066_PM_at   | Abcc8            | ABCC8      | 0.05  | 2.25 | 0.61  | 5.56E-01 | 7.78E-01 | -6.50 |
| 1431431_PM_a_at | Nfs1             | NFS1       | -0.07 | 2.18 | -0.61 | 5.56E-01 | 7.78E-01 | -6.51 |
| 1420846_PM_at   | Mrps2            | MRPS2      | 0.13  | 3.25 | 0.61  | 5.56E-01 | 7.78E-01 | -6.51 |
| 1416601_PM_a_at | Rcan1            | RCAN1      | 0.25  | 3.57 | 0.61  | 5.56E-01 | 7.78E-01 | -6.51 |
| 1458425_PM_at   | A430046D13Rik    | NA         | -0.17 | 3.22 | -0.61 | 5.56E-01 | 7.78E-01 | -6.51 |
| 1447321_PM_at   | ---              | NA         | -0.09 | 2.46 | -0.61 | 5.56E-01 | 7.78E-01 | -6.51 |
| 1447247_PM_at   | ---              | NA         | 0.09  | 2.75 | 0.61  | 5.56E-01 | 7.78E-01 | -6.51 |
| 1436347_PM_a_at | 5530601H04Rik    | NA         | -0.23 | 2.51 | -0.61 | 5.56E-01 | 7.78E-01 | -6.51 |
| 1417778_PM_at   | Zfp35            | ZNF585A    | -0.13 | 3.34 | -0.61 | 5.56E-01 | 7.78E-01 | -6.51 |
| 1437435_PM_at   | 1700061G19Rik    | NA         | 0.06  | 2.09 | 0.61  | 5.56E-01 | 7.78E-01 | -6.51 |
| 1429758_PM_at   | 1700017B05Rik    | C15orf39   | 0.09  | 3.23 | 0.61  | 5.56E-01 | 7.78E-01 | -6.51 |
| 1438253_PM_at   | Ssh1             | SSH1       | 0.17  | 2.46 | 0.61  | 5.56E-01 | 7.78E-01 | -6.51 |
| 1458317_PM_at   | ---              | NA         | 0.05  | 2.30 | 0.61  | 5.56E-01 | 7.78E-01 | -6.51 |
| 1457175_PM_at   | ---              | NA         | 0.09  | 2.62 | 0.61  | 5.56E-01 | 7.78E-01 | -6.51 |
| 1456370_PM_s_at | 0610037L13Rik    | C1orf123   | -0.18 | 3.20 | -0.61 | 5.56E-01 | 7.78E-01 | -6.51 |
| 1441007_PM_at   | A330102110Rik    | NA         | 0.05  | 2.63 | 0.61  | 5.56E-01 | 7.78E-01 | -6.51 |
| 1419755_PM_at   | Mfi2             | MELTF      | -0.07 | 2.92 | -0.61 | 5.56E-01 | 7.78E-01 | -6.51 |
| 1415892_PM_at   | Sgpl1            | SGPL1      | -0.07 | 2.50 | -0.61 | 5.56E-01 | 7.78E-01 | -6.51 |
| 1419603_PM_at   | Ifi104           | IFI16      | 0.05  | 2.01 | 0.61  | 5.56E-01 | 7.78E-01 | -6.51 |
| 1421999_PM_at   | Tshr             | TSHR       | 0.06  | 2.13 | 0.61  | 5.56E-01 | 7.78E-01 | -6.51 |
| 1430652_PM_at   | 9030612E09Rik    | NA         | 0.07  | 2.28 | 0.61  | 5.56E-01 | 7.78E-01 | -6.51 |
| 1434277_PM_a_at | Ype12            | YPEL2      | 0.12  | 6.90 | 0.61  | 5.56E-01 | 7.78E-01 | -6.51 |
| 1416649_PM_at   | Ambp             | AMBP       | 0.06  | 2.54 | 0.61  | 5.56E-01 | 7.78E-01 | -6.51 |
| 1421387_PM_at   | Kremen1          | KREMEN1    | 0.09  | 2.64 | 0.61  | 5.56E-01 | 7.78E-01 | -6.51 |
| 1441546_PM_at   | Mpp6             | MPP6       | -0.07 | 2.54 | -0.61 | 5.56E-01 | 7.78E-01 | -6.51 |
| 1457008_PM_at   | Chrb4            | CHRN4      | 0.05  | 2.02 | 0.61  | 5.56E-01 | 7.78E-01 | -6.51 |
| 1440777_PM_x_at | Ptgfr            | PTGFR      | 0.06  | 2.16 | 0.61  | 5.56E-01 | 7.78E-01 | -6.51 |
| 1423799_PM_at   | Eif1             | EIF1       | 0.16  | 7.08 | 0.61  | 5.56E-01 | 7.78E-01 | -6.51 |
| 1441931_PM_x_at | Gss              | GSS        | 0.19  | 2.77 | 0.61  | 5.56E-01 | 7.78E-01 | -6.51 |
| 1439361_PM_at   | ---              | NA         | 0.28  | 3.32 | 0.61  | 5.56E-01 | 7.78E-01 | -6.51 |
| 1426223_PM_at   | Ttc39c           | TTC39C     | 0.10  | 2.99 | 0.61  | 5.57E-01 | 7.78E-01 | -6.51 |
| 1458156_PM_at   | ---              | NA         | 0.13  | 2.79 | 0.61  | 5.57E-01 | 7.78E-01 | -6.51 |
| 1417116_PM_at   | Slc6a8           | SLC6A8     | -0.18 | 4.92 | -0.61 | 5.57E-01 | 7.78E-01 | -6.51 |
| 1432091_PM_a_at | Sgsm3            | NA         | -0.09 | 2.67 | -0.61 | 5.57E-01 | 7.78E-01 | -6.51 |
| 1450645_PM_at   | Mt4              | MT4        | 0.07  | 2.16 | 0.61  | 5.57E-01 | 7.78E-01 | -6.51 |
| 1452641_PM_at   | Ndufa13///Yjefn3 | YJEFN3     | 0.07  | 2.56 | 0.61  | 5.57E-01 | 7.78E-01 | -6.51 |
| 1446390_PM_at   | Elk1             | ELK1       | -0.12 | 2.26 | -0.61 | 5.57E-01 | 7.78E-01 | -6.51 |
| 1443995_PM_at   | Gm9              | NA         | 0.05  | 2.17 | 0.61  | 5.57E-01 | 7.78E-01 | -6.51 |
| 1421280_PM_at   | Gabra1           | GABRA1     | 0.14  | 4.43 | 0.61  | 5.57E-01 | 7.78E-01 | -6.51 |
| 1438492_PM_at   | Soc7             | NA         | 0.05  | 2.28 | 0.61  | 5.57E-01 | 7.78E-01 | -6.51 |
| 1417002_PM_at   | 0610012G03Rik    | NA         | -0.06 | 2.46 | -0.61 | 5.57E-01 | 7.78E-01 | -6.51 |

|                 |                        |            |       |      |       |          |          |       |
|-----------------|------------------------|------------|-------|------|-------|----------|----------|-------|
| 1450009_PM_at   | Ltf                    | LTF        | 0.07  | 2.58 | 0.61  | 5.57E-01 | 7.78E-01 | -6.51 |
| 1450831_PM_at   | Pou3f2                 | POU3F2     | 0.12  | 2.36 | 0.61  | 5.57E-01 | 7.78E-01 | -6.51 |
| 1444245_PM_at   | B230118H07Rik          | C11orf74   | 0.06  | 2.22 | 0.61  | 5.57E-01 | 7.78E-01 | -6.51 |
| 1455989_PM_at   | Gjc2                   | NA         | 0.06  | 2.31 | 0.61  | 5.57E-01 | 7.79E-01 | -6.51 |
| 1452340_PM_at   | Zfp518b                | ZNF518B    | -0.11 | 2.78 | -0.61 | 5.57E-01 | 7.79E-01 | -6.51 |
| 1415987_PM_at   | Hdlbp                  | HDLBP      | 0.13  | 3.24 | 0.61  | 5.57E-01 | 7.79E-01 | -6.51 |
| 1456572_PM_x_at | Cct4                   | CCT4       | -0.11 | 3.05 | -0.61 | 5.57E-01 | 7.79E-01 | -6.51 |
| 1424119_PM_at   | Prkab1                 | PRKAB1     | -0.05 | 3.38 | -0.61 | 5.57E-01 | 7.79E-01 | -6.51 |
| 1446151_PM_at   | ---                    | NA         | 0.06  | 2.37 | 0.61  | 5.57E-01 | 7.79E-01 | -6.51 |
| 1431998_PM_at   | 4930432L08Rik          | NA         | 0.09  | 2.25 | 0.61  | 5.57E-01 | 7.79E-01 | -6.51 |
| 1430139_PM_at   | Hells                  | HELLS      | 0.09  | 2.77 | 0.61  | 5.57E-01 | 7.79E-01 | -6.51 |
| 1428889_PM_at   | Alkbh3                 | ALKBH3     | -0.18 | 3.12 | -0.61 | 5.57E-01 | 7.79E-01 | -6.51 |
| 1456887_PM_at   | Cmklr1                 | CMKLR1     | -0.08 | 2.41 | -0.61 | 5.57E-01 | 7.79E-01 | -6.51 |
| 1429038_PM_at   | Dda1                   | DDA1       | 0.19  | 2.85 | 0.61  | 5.57E-01 | 7.79E-01 | -6.51 |
| 1422079_PM_at   | Prkch                  | PRKCH      | 0.11  | 2.37 | 0.61  | 5.57E-01 | 7.79E-01 | -6.51 |
| 1443418_PM_at   | Gm15239                | NA         | 0.06  | 2.26 | 0.61  | 5.57E-01 | 7.79E-01 | -6.51 |
| 1421567_PM_at   | Npas3                  | NPAS3      | 0.06  | 2.41 | 0.61  | 5.57E-01 | 7.79E-01 | -6.51 |
| 1457686_PM_at   | Akap17b                | NA         | 0.23  | 2.83 | 0.61  | 5.57E-01 | 7.79E-01 | -6.51 |
| 1434878_PM_at   | ---                    | NA         | 0.07  | 3.30 | 0.61  | 5.58E-01 | 7.79E-01 | -6.51 |
| 1432317_PM_at   | 9430078K24Rik          | NA         | 0.09  | 2.26 | 0.61  | 5.58E-01 | 7.79E-01 | -6.51 |
| 1451271_PM_a_at | Acat1                  | ACAT1      | -0.18 | 8.08 | -0.61 | 5.58E-01 | 7.79E-01 | -6.51 |
| 1420097_PM_at   | D13Erd787e             | NA         | 0.05  | 1.86 | 0.61  | 5.58E-01 | 7.79E-01 | -6.51 |
| 1435772_PM_at   | Kif21b                 | KIF21B     | 0.16  | 2.86 | 0.61  | 5.58E-01 | 7.79E-01 | -6.51 |
| 1448887_PM_x_at | Timm10b                | ACO84337.2 | 0.07  | 2.97 | 0.61  | 5.58E-01 | 7.79E-01 | -6.51 |
| 1449963_PM_at   | Krtap9-3               | KRTAP1-4   | 0.06  | 1.99 | 0.61  | 5.58E-01 | 7.79E-01 | -6.51 |
| 1445503_PM_at   | Gm715                  | NA         | 0.08  | 2.03 | 0.61  | 5.58E-01 | 7.79E-01 | -6.51 |
| 1430755_PM_at   | 4930452G13Rik          | NA         | 0.09  | 2.42 | 0.61  | 5.58E-01 | 7.79E-01 | -6.51 |
| 1459357_PM_at   | ---                    | NA         | -0.12 | 2.46 | -0.61 | 5.58E-01 | 7.79E-01 | -6.51 |
| 1450966_PM_at   | Crot                   | CROT       | -0.13 | 2.33 | -0.60 | 5.58E-01 | 7.80E-01 | -6.51 |
| 1430432_PM_at   | Trim42                 | TRIM42     | 0.06  | 2.09 | 0.60  | 5.58E-01 | 7.80E-01 | -6.51 |
| 1431442_PM_at   | LOC100049077           | NA         | 0.09  | 2.29 | 0.60  | 5.58E-01 | 7.80E-01 | -6.51 |
| 1426925_PM_at   | Rc3h2                  | NA         | 0.10  | 2.36 | 0.60  | 5.58E-01 | 7.80E-01 | -6.51 |
| 1430239_PM_at   | 5430421F17Rik          | NA         | 0.05  | 2.25 | 0.60  | 5.58E-01 | 7.80E-01 | -6.51 |
| 1443489_PM_at   | ---                    | NA         | 0.06  | 2.13 | 0.60  | 5.58E-01 | 7.80E-01 | -6.51 |
| 1426345_PM_at   | Prepl                  | NA         | -0.13 | 9.08 | -0.60 | 5.58E-01 | 7.80E-01 | -6.51 |
| 1427226_PM_at   | Epn2                   | EPN2       | -0.16 | 4.61 | -0.60 | 5.58E-01 | 7.80E-01 | -6.51 |
| 1430064_PM_at   | Tll11                  | NA         | 0.05  | 2.17 | 0.60  | 5.58E-01 | 7.80E-01 | -6.51 |
| 1418569_PM_at   | Fblim1                 | FBLIM1     | 0.06  | 2.20 | 0.60  | 5.59E-01 | 7.80E-01 | -6.51 |
| 1428880_PM_at   | Sdhaf2                 | SDHAF2     | 0.09  | 2.72 | 0.60  | 5.59E-01 | 7.80E-01 | -6.51 |
| 1449254_PM_at   | Spp1                   | SPP1       | -0.38 | 3.18 | -0.60 | 5.59E-01 | 7.80E-01 | -6.51 |
| 1440733_PM_at   | ---                    | NA         | -0.05 | 2.67 | -0.60 | 5.59E-01 | 7.80E-01 | -6.51 |
| 1428793_PM_at   | Slc36a1                | SLC36A1    | -0.17 | 3.03 | -0.60 | 5.59E-01 | 7.80E-01 | -6.51 |
| 1456715_PM_at   | ---                    | NA         | -0.11 | 2.65 | -0.60 | 5.59E-01 | 7.80E-01 | -6.51 |
| 1459705_PM_at   | ---                    | NA         | 0.12  | 2.84 | 0.60  | 5.59E-01 | 7.80E-01 | -6.51 |
| 1449404_PM_at   | Pip4k2a                | PIP4K2A    | -0.12 | 6.04 | -0.60 | 5.59E-01 | 7.80E-01 | -6.51 |
| 1425029_PM_a_at | Mboat2                 | MBOAT2     | -0.08 | 3.34 | -0.60 | 5.59E-01 | 7.80E-01 | -6.51 |
| 1421972_PM_s_at | Hcfc1                  | HCFC1      | 0.05  | 2.21 | 0.60  | 5.59E-01 | 7.80E-01 | -6.51 |
| 1446898_PM_at   | ---                    | NA         | 0.05  | 1.95 | 0.60  | 5.59E-01 | 7.80E-01 | -6.51 |
| 1443234_PM_at   | ---                    | NA         | 0.07  | 2.55 | 0.60  | 5.59E-01 | 7.80E-01 | -6.51 |
| 1420503_PM_at   | Slc6a14                | SLC6A14    | 0.10  | 3.12 | 0.60  | 5.59E-01 | 7.80E-01 | -6.51 |
| 1457198_PM_at   | Nrp1                   | NA         | 0.19  | 3.70 | 0.60  | 5.59E-01 | 7.80E-01 | -6.51 |
| 1459994_PM_x_at | Tfr2                   | TFR2       | 0.25  | 2.88 | 0.60  | 5.59E-01 | 7.80E-01 | -6.51 |
| 1442570_PM_at   | ---                    | NA         | -0.10 | 2.44 | -0.60 | 5.59E-01 | 7.80E-01 | -6.51 |
| 1426878_PM_at   | Pbrm1                  | PBRM1      | 0.06  | 2.16 | 0.60  | 5.59E-01 | 7.80E-01 | -6.51 |
| 1445001_PM_at   | ---                    | NA         | -0.08 | 2.37 | -0.60 | 5.59E-01 | 7.80E-01 | -6.51 |
| 1451532_PM_s_at | Steap1                 | STEAP1B    | 0.16  | 2.23 | 0.60  | 5.59E-01 | 7.80E-01 | -6.51 |
| 1460345_PM_at   | Aida                   | AIDA       | 0.07  | 2.48 | 0.60  | 5.59E-01 | 7.80E-01 | -6.51 |
| 1449642_PM_at   | ---                    | NA         | 0.11  | 2.32 | 0.60  | 5.59E-01 | 7.80E-01 | -6.51 |
| 1418107_PM_at   | Tcea2                  | TCEA2      | -0.08 | 2.98 | -0.60 | 5.59E-01 | 7.80E-01 | -6.51 |
| 1437803_PM_at   | Slbp                   | SLBP       | 0.05  | 2.14 | 0.60  | 5.59E-01 | 7.80E-01 | -6.51 |
| 1439101_PM_at   | Mylk3                  | MYLK3      | 0.07  | 2.14 | 0.60  | 5.59E-01 | 7.80E-01 | -6.51 |
| 1457023_PM_at   | Avl9                   | AVL9       | 0.07  | 2.07 | 0.60  | 5.59E-01 | 7.80E-01 | -6.51 |
| 1428663_PM_at   | Sgms2                  | SGMS2      | 0.09  | 2.09 | 0.60  | 5.59E-01 | 7.80E-01 | -6.51 |
| 1417175_PM_at   | Csnk1e                 | CSNK1E     | 0.14  | 3.17 | 0.60  | 5.59E-01 | 7.80E-01 | -6.51 |
| 1417057_PM_a_at | Lamp3 /// Ppid         | PPID       | -0.35 | 5.65 | -0.60 | 5.59E-01 | 7.80E-01 | -6.51 |
| 1437042_PM_at   | Arnt                   | ARNT       | -0.10 | 4.37 | -0.60 | 5.59E-01 | 7.80E-01 | -6.51 |
| 1458348_PM_at   | ---                    | NA         | 0.07  | 2.66 | 0.60  | 5.59E-01 | 7.80E-01 | -6.51 |
| 1415898_PM_at   | Mgst1                  | MGST1      | -0.05 | 2.36 | -0.60 | 5.59E-01 | 7.80E-01 | -6.51 |
| 1418310_PM_a_at | Rlbp1                  | RLBP1      | 0.06  | 2.12 | 0.60  | 5.59E-01 | 7.80E-01 | -6.51 |
| 1423034_PM_at   | Txndc17                | TXND17     | -0.44 | 4.81 | -0.60 | 5.59E-01 | 7.80E-01 | -6.51 |
| 1448001_PM_x_at | Cdca3                  | CDCA3      | 0.05  | 1.99 | 0.60  | 5.60E-01 | 7.80E-01 | -6.51 |
| 1430937_PM_at   | A930016O22Rik          | NA         | 0.05  | 2.14 | 0.60  | 5.60E-01 | 7.80E-01 | -6.51 |
| 1441778_PM_at   | Adcyap1                | NA         | 0.14  | 2.43 | 0.60  | 5.60E-01 | 7.80E-01 | -6.51 |
| 1416088_PM_a_at | LOC102642592 /// Rps15 | NA         | 0.21  | 7.01 | 0.60  | 5.60E-01 | 7.80E-01 | -6.51 |
| 1421156_PM_a_at | Dsc2                   | DSC2       | 0.05  | 2.22 | 0.60  | 5.60E-01 | 7.80E-01 | -6.51 |

|                 |                      |           |       |      |       |          |          |       |
|-----------------|----------------------|-----------|-------|------|-------|----------|----------|-------|
| 1443273_PM_at   | ---                  | NA        | 0.07  | 2.25 | 0.60  | 5.60E-01 | 7.80E-01 | -6.51 |
| 1450670_PM_at   | Dbh                  | DBH       | -0.06 | 2.31 | -0.60 | 5.60E-01 | 7.80E-01 | -6.51 |
| 1437409_PM_s_at | Adgrg6               | ADGRG6    | 0.06  | 2.28 | 0.60  | 5.60E-01 | 7.80E-01 | -6.51 |
| 1438280_PM_at   | Smkr-ps              | NA        | 0.06  | 2.20 | 0.60  | 5.60E-01 | 7.80E-01 | -6.51 |
| 1417347_PM_at   | Pycard               | NA        | 0.07  | 2.23 | 0.60  | 5.60E-01 | 7.80E-01 | -6.51 |
| 1420216_PM_at   | 1810012K16Rik        | NA        | 0.07  | 2.34 | 0.60  | 5.60E-01 | 7.80E-01 | -6.51 |
| 1421933_PM_at   | Cbx5                 | CBX5      | 0.10  | 2.62 | 0.60  | 5.60E-01 | 7.80E-01 | -6.51 |
| 1445420_PM_at   | ---                  | NA        | 0.07  | 2.45 | 0.60  | 5.60E-01 | 7.80E-01 | -6.51 |
| 1425922_PM_a_at | Mycn                 | MYCN      | -0.08 | 3.65 | -0.60 | 5.60E-01 | 7.80E-01 | -6.51 |
| 1421493_PM_a_at | Rgs20                | RGS20     | 0.18  | 2.56 | 0.60  | 5.60E-01 | 7.80E-01 | -6.51 |
| 1422716_PM_a_at | Acp1///LOC102642088  | ACP1      | -0.15 | 8.88 | -0.60 | 5.60E-01 | 7.80E-01 | -6.51 |
| 1430933_PM_at   | Shq1                 | SHQ1      | 0.10  | 2.76 | 0.60  | 5.60E-01 | 7.80E-01 | -6.51 |
| 1426682_PM_at   | Cnot6                | CNOT6     | -0.15 | 3.41 | -0.60 | 5.60E-01 | 7.81E-01 | -6.51 |
| 1448354_PM_at   | G6pdx                | G6PD      | 0.14  | 3.40 | 0.60  | 5.60E-01 | 7.81E-01 | -6.51 |
| 1456959_PM_at   | 1700034H15Rik        | NA        | -0.05 | 2.12 | -0.60 | 5.60E-01 | 7.81E-01 | -6.51 |
| 1426149_PM_at   | ---                  | NA        | 0.07  | 2.22 | 0.60  | 5.60E-01 | 7.81E-01 | -6.51 |
| 1437841_PM_x_at | Csd2                 | CSDC2     | 0.18  | 6.86 | 0.60  | 5.60E-01 | 7.81E-01 | -6.51 |
| 1441226_PM_at   | Spon1                | SPON1     | 0.05  | 2.55 | 0.60  | 5.60E-01 | 7.81E-01 | -6.51 |
| 1458882_PM_at   | Serpinb8             | SERPIN8   | 0.06  | 2.26 | 0.60  | 5.60E-01 | 7.81E-01 | -6.51 |
| 1457581_PM_at   | Ubxn10               | UBXN10    | 0.08  | 2.61 | 0.60  | 5.60E-01 | 7.81E-01 | -6.51 |
| 1420299_PM_at   | Gabra2               | GABRA2    | -0.04 | 2.14 | -0.60 | 5.60E-01 | 7.81E-01 | -6.51 |
| 1448593_PM_at   | Wisp1                | WISP1     | 0.05  | 2.57 | 0.60  | 5.60E-01 | 7.81E-01 | -6.51 |
| 1453157_PM_at   | 1700022A21Rik        | NA        | 0.08  | 3.53 | 0.60  | 5.60E-01 | 7.81E-01 | -6.51 |
| 1454613_PM_at   | Dpysl3               | DPYSL3    | -0.32 | 3.04 | -0.60 | 5.60E-01 | 7.81E-01 | -6.51 |
| 1436703_PM_x_at | Snapc2               | SNAPC2    | 0.12  | 2.87 | 0.60  | 5.60E-01 | 7.81E-01 | -6.51 |
| 1440895_PM_at   | ---                  | NA        | 0.06  | 2.36 | 0.60  | 5.60E-01 | 7.81E-01 | -6.51 |
| 1432161_PM_a_at | Ptar1                | PTAR1     | 0.17  | 3.37 | 0.60  | 5.60E-01 | 7.81E-01 | -6.51 |
| 1455237_PM_at   | Usp36                | USP36     | -0.22 | 4.22 | -0.60 | 5.60E-01 | 7.81E-01 | -6.51 |
| 1423633_PM_at   | Snrnp48              | SNRNP48   | -0.09 | 2.64 | -0.60 | 5.60E-01 | 7.81E-01 | -6.51 |
| 1435671_PM_at   | Mipol1               | MIPOL1    | -0.06 | 1.97 | -0.60 | 5.60E-01 | 7.81E-01 | -6.51 |
| 1439372_PM_at   | Sumo3                | SUMO3     | -0.06 | 2.09 | -0.60 | 5.60E-01 | 7.81E-01 | -6.51 |
| 1458278_PM_at   | ---                  | NA        | 0.06  | 2.18 | 0.60  | 5.60E-01 | 7.81E-01 | -6.51 |
| 1456073_PM_s_at | Panx3                | PANX3     | 0.07  | 2.13 | 0.60  | 5.60E-01 | 7.81E-01 | -6.51 |
| 1432891_PM_at   | Dhrs7                | NA        | 0.08  | 2.75 | 0.60  | 5.60E-01 | 7.81E-01 | -6.51 |
| 1428649_PM_at   | Cand1                | CAND1     | -0.16 | 3.05 | -0.60 | 5.61E-01 | 7.81E-01 | -6.51 |
| 1436748_PM_at   | Gm7367               | NA        | -0.09 | 2.59 | -0.60 | 5.61E-01 | 7.81E-01 | -6.51 |
| 1419701_PM_s_at | Ank3                 | ANKS3     | -0.09 | 3.66 | -0.60 | 5.61E-01 | 7.81E-01 | -6.51 |
| 1439547_PM_at   | A930007A09Rik        | NA        | 0.06  | 2.01 | 0.60  | 5.61E-01 | 7.81E-01 | -6.51 |
| 1459890_PM_s_at | 1110008P14Rik        | C9orf16   | -0.11 | 2.62 | -0.60 | 5.61E-01 | 7.81E-01 | -6.51 |
| 1458088_PM_at   | ---                  | NA        | 0.06  | 2.63 | 0.60  | 5.61E-01 | 7.81E-01 | -6.51 |
| 1434175_PM_s_at | Tecpr1               | TECPR1    | 0.16  | 4.21 | 0.60  | 5.61E-01 | 7.81E-01 | -6.51 |
| 1438940_PM_x_at | Hmg1n///LOC102641809 | NA        | -0.07 | 9.90 | -0.60 | 5.61E-01 | 7.81E-01 | -6.51 |
| 1428840_PM_s_at | Wdr53                | WDR53     | 0.15  | 3.98 | 0.60  | 5.61E-01 | 7.81E-01 | -6.51 |
| 1458128_PM_at   | Kans1l               | KANSL1L   | 0.07  | 2.68 | 0.60  | 5.61E-01 | 7.81E-01 | -6.51 |
| 1426967_PM_at   | Axin1                | AXIN1     | 0.09  | 2.94 | 0.60  | 5.61E-01 | 7.81E-01 | -6.51 |
| 1419662_PM_at   | Ogn                  | OGN       | -0.12 | 2.36 | -0.60 | 5.61E-01 | 7.81E-01 | -6.51 |
| 1453481_PM_at   | Zdhc2                | ZDHHC2    | 0.08  | 2.75 | 0.60  | 5.61E-01 | 7.81E-01 | -6.51 |
| 1427700_PM_x_at | Krt6a                | NA        | 0.06  | 2.27 | 0.60  | 5.61E-01 | 7.81E-01 | -6.51 |
| 1451079_PM_at   | Adpgk                | ADPGK     | 0.06  | 2.26 | 0.60  | 5.61E-01 | 7.81E-01 | -6.51 |
| 1418546_PM_a_at | Stambpl1             | STAMBPL1  | 0.11  | 2.60 | 0.60  | 5.61E-01 | 7.81E-01 | -6.51 |
| 1427444_PM_at   | Abcf1                | ABCF1     | 0.05  | 1.86 | 0.60  | 5.61E-01 | 7.81E-01 | -6.51 |
| 1443436_PM_at   | ---                  | NA        | 0.06  | 2.93 | 0.60  | 5.61E-01 | 7.81E-01 | -6.51 |
| 1445795_PM_at   | AU022848             | NA        | 0.07  | 2.40 | 0.60  | 5.61E-01 | 7.81E-01 | -6.51 |
| 1459633_PM_at   | ---                  | NA        | 0.09  | 2.58 | 0.60  | 5.61E-01 | 7.81E-01 | -6.51 |
| 1417587_PM_at   | Timeless             | TIMELESS  | 0.11  | 2.58 | 0.60  | 5.61E-01 | 7.81E-01 | -6.51 |
| 1415994_PM_at   | Cyp2e1               | CYP2E1    | 0.06  | 2.05 | 0.60  | 5.61E-01 | 7.81E-01 | -6.51 |
| 1441553_PM_at   | Pds5b                | PDS5B     | 0.07  | 2.61 | 0.60  | 5.61E-01 | 7.81E-01 | -6.51 |
| 1439189_PM_at   | Fnip2                | FNIP2     | -0.14 | 3.57 | -0.60 | 5.61E-01 | 7.81E-01 | -6.51 |
| 1454352_PM_at   | A930028O11Rik        | NA        | -0.07 | 2.28 | -0.60 | 5.61E-01 | 7.81E-01 | -6.51 |
| 1435354_PM_at   | Kcnj15               | KCNJ15    | -0.05 | 2.38 | -0.60 | 5.61E-01 | 7.81E-01 | -6.51 |
| 1440377_PM_at   | Tigd5                | TIGD5     | 0.05  | 2.33 | 0.60  | 5.61E-01 | 7.81E-01 | -6.51 |
| 1460546_PM_at   | Lgi3                 | LGI3      | 0.27  | 5.07 | 0.60  | 5.61E-01 | 7.81E-01 | -6.51 |
| 1450133_PM_at   | Ugt2a3               | UGT2A3    | -0.05 | 1.91 | -0.60 | 5.61E-01 | 7.81E-01 | -6.51 |
| 1430259_PM_at   | Tnfrsf11a            | TNFRSF11A | 0.09  | 2.44 | 0.60  | 5.61E-01 | 7.81E-01 | -6.51 |
| 1428153_PM_at   | Mrp510               | MRP510    | 0.17  | 3.28 | 0.60  | 5.61E-01 | 7.81E-01 | -6.51 |
| 1438530_PM_at   | Tfpi                 | TFPI      | -0.18 | 2.83 | -0.60 | 5.62E-01 | 7.81E-01 | -6.51 |
| 1458751_PM_at   | ---                  | NA        | -0.15 | 2.99 | -0.60 | 5.61E-01 | 7.81E-01 | -6.51 |
| 1456349_PM_x_at | Sumo1                | SUMO1     | -0.12 | 6.89 | -0.60 | 5.62E-01 | 7.81E-01 | -6.51 |
| 1433433_PM_at   | Kat7                 | KAT7      | -0.14 | 3.72 | -0.60 | 5.62E-01 | 7.81E-01 | -6.51 |
| 1447639_PM_x_at | ---                  | NA        | -0.05 | 1.94 | -0.60 | 5.62E-01 | 7.81E-01 | -6.51 |
| 1423476_PM_at   | Slc46a2              | SLC46A2   | 0.07  | 2.26 | 0.60  | 5.62E-01 | 7.81E-01 | -6.51 |
| 1449860_PM_at   | Higd1b               | HIGD1B    | 0.09  | 2.98 | 0.60  | 5.62E-01 | 7.81E-01 | -6.51 |
| 1435655_PM_at   | Rpl12                | RPL12     | 0.10  | 3.10 | 0.60  | 5.62E-01 | 7.81E-01 | -6.51 |
| 1456340_PM_at   | ---                  | NA        | 0.13  | 7.01 | 0.60  | 5.62E-01 | 7.81E-01 | -6.51 |

|                 |                           |          |       |      |       |          |          |       |
|-----------------|---------------------------|----------|-------|------|-------|----------|----------|-------|
| 1454006_PM_a_at | Ubxn8                     | UBXN8    | 0.13  | 3.65 | 0.60  | 5.62E-01 | 7.81E-01 | -6.51 |
| 1423322_PM_at   | Lin7c                     | LIN7C    | 0.29  | 3.91 | 0.60  | 5.62E-01 | 7.81E-01 | -6.51 |
| 1449877_PM_s_at | Kifc1                     | KIFC1    | 0.05  | 2.47 | 0.60  | 5.62E-01 | 7.82E-01 | -6.51 |
| 1429331_PM_at   | ---                       | NA       | -0.11 | 2.42 | -0.60 | 5.62E-01 | 7.82E-01 | -6.51 |
| 1445036_PM_at   | D11Erttd518e              | NA       | -0.05 | 2.01 | -0.60 | 5.62E-01 | 7.82E-01 | -6.51 |
| 1441703_PM_at   | Zfp787                    | NA       | 0.06  | 2.39 | 0.60  | 5.62E-01 | 7.82E-01 | -6.51 |
| 1423618_PM_at   | Bin1                      | BIN1     | 0.07  | 2.28 | 0.60  | 5.62E-01 | 7.82E-01 | -6.51 |
| 1423656_PM_x_at | Ctc1                      | CTC1     | 0.09  | 2.70 | 0.60  | 5.62E-01 | 7.82E-01 | -6.51 |
| 1424542_PM_at   | S100a4                    | S100A4   | 0.10  | 2.57 | 0.60  | 5.62E-01 | 7.82E-01 | -6.51 |
| 1458093_PM_at   | ---                       | NA       | 0.11  | 2.30 | 0.60  | 5.62E-01 | 7.82E-01 | -6.51 |
| 1427980_PM_at   | Cmip                      | CMIP     | -0.24 | 4.83 | -0.60 | 5.62E-01 | 7.82E-01 | -6.51 |
| 1437496_PM_at   | Acad10 /// Acad12         | ACAD10   | 0.08  | 2.86 | 0.60  | 5.62E-01 | 7.82E-01 | -6.51 |
| 1422291_PM_at   | Ccr8                      | CCR8     | 0.05  | 2.14 | 0.60  | 5.62E-01 | 7.82E-01 | -6.51 |
| 1449159_PM_at   | Gnb3                      | GNB3     | 0.07  | 2.22 | 0.60  | 5.62E-01 | 7.82E-01 | -6.51 |
| 1437432_PM_a_at | Trim12a                   | TRIM5    | -0.09 | 2.54 | -0.60 | 5.62E-01 | 7.82E-01 | -6.51 |
| 1422160_PM_at   | H2-T24                    | HLA-A    | 0.13  | 4.44 | 0.60  | 5.62E-01 | 7.82E-01 | -6.51 |
| 1420413_PM_at   | Slc7a11                   | SLC7A11  | -0.24 | 2.60 | -0.60 | 5.62E-01 | 7.82E-01 | -6.51 |
| 1418089_PM_at   | Stx8                      | STX8     | -0.18 | 4.51 | -0.60 | 5.62E-01 | 7.82E-01 | -6.51 |
| 1430534_PM_at   | Rnase6                    | NA       | -0.11 | 3.27 | -0.60 | 5.62E-01 | 7.82E-01 | -6.51 |
| 1425193_PM_at   | Sppl2a                    | SPPL2A   | -0.11 | 2.64 | -0.60 | 5.62E-01 | 7.82E-01 | -6.51 |
| 1421885_PM_at   | Sos1                      | SOS1     | -0.09 | 2.87 | -0.60 | 5.62E-01 | 7.82E-01 | -6.51 |
| 1427884_PM_at   | Col3a1                    | COL3A1   | 0.04  | 2.07 | 0.60  | 5.62E-01 | 7.82E-01 | -6.51 |
| 1437971_PM_at   | Skiv2l2                   | SKIV2L2  | 0.07  | 2.43 | 0.60  | 5.62E-01 | 7.82E-01 | -6.51 |
| 1447831_PM_s_at | Mtmr7                     | MTMR7    | -0.20 | 4.17 | -0.60 | 5.62E-01 | 7.82E-01 | -6.51 |
| 1419608_PM_a_at | Mia                       | MIA      | 0.08  | 2.47 | 0.60  | 5.62E-01 | 7.82E-01 | -6.51 |
| 1440625_PM_at   | D930015E06Rik             | KIAA0922 | 0.07  | 2.38 | 0.60  | 5.62E-01 | 7.82E-01 | -6.51 |
| 1449448_PM_at   | Med9                      | MED9     | 0.10  | 2.96 | 0.60  | 5.62E-01 | 7.82E-01 | -6.51 |
| 1443197_PM_at   | Wnt9b                     | WNT9B    | 0.10  | 2.68 | 0.60  | 5.62E-01 | 7.82E-01 | -6.51 |
| 1452913_PM_at   | Pcp4l1                    | PCP4L1   | 0.13  | 2.66 | 0.60  | 5.62E-01 | 7.82E-01 | -6.51 |
| 1457657_PM_at   | ---                       | NA       | -0.16 | 4.29 | -0.60 | 5.62E-01 | 7.82E-01 | -6.51 |
| 1425553_PM_s_at | Hip1r                     | HIP1R    | -0.08 | 2.56 | -0.60 | 5.63E-01 | 7.82E-01 | -6.51 |
| 1442345_PM_at   | ---                       | NA       | -0.06 | 1.78 | -0.60 | 5.63E-01 | 7.82E-01 | -6.51 |
| 1423336_PM_at   | Orc4                      | ORC4     | -0.14 | 3.16 | -0.60 | 5.63E-01 | 7.82E-01 | -6.51 |
| 1460659_PM_at   | ---                       | NA       | 0.21  | 2.85 | 0.60  | 5.63E-01 | 7.82E-01 | -6.51 |
| 1444687_PM_at   | C1ql2                     | C1QL2    | -0.08 | 2.71 | -0.60 | 5.63E-01 | 7.82E-01 | -6.51 |
| 1448394_PM_at   | My12                      | MYL2     | 0.06  | 3.24 | 0.60  | 5.63E-01 | 7.82E-01 | -6.51 |
| 1438142_PM_s_at | Cdhr4                     | CDHR4    | 0.11  | 2.50 | 0.60  | 5.63E-01 | 7.82E-01 | -6.51 |
| 1441312_PM_at   | Cnnm1                     | CNNM1    | 0.13  | 3.59 | 0.60  | 5.63E-01 | 7.82E-01 | -6.51 |
| 1453719_PM_at   | 4930506C21Rik             | NA       | 0.14  | 2.72 | 0.60  | 5.63E-01 | 7.82E-01 | -6.51 |
| 1434505_PM_a_at | 6430548M08Rik             | KIAA0513 | 0.07  | 4.01 | 0.60  | 5.63E-01 | 7.82E-01 | -6.51 |
| 1459087_PM_at   | ---                       | NA       | -0.05 | 2.21 | -0.60 | 5.63E-01 | 7.82E-01 | -6.51 |
| 1455913_PM_x_at | Ttr                       | TTR      | -1.03 | 7.74 | -0.60 | 5.63E-01 | 7.82E-01 | -6.51 |
| 1429633_PM_at   | Lcor                      | NA       | -0.32 | 6.30 | -0.60 | 5.63E-01 | 7.82E-01 | -6.51 |
| 1427333_PM_s_at | Scaf4                     | SCAF4    | -0.19 | 4.56 | -0.60 | 5.63E-01 | 7.82E-01 | -6.51 |
| 1419358_PM_at   | Sorc2                     | SORCS2   | -0.18 | 2.69 | -0.60 | 5.63E-01 | 7.82E-01 | -6.51 |
| 1459178_PM_at   | D8Erttd503e               | NA       | 0.04  | 2.09 | 0.60  | 5.63E-01 | 7.82E-01 | -6.51 |
| 1422947_PM_at   | Hist1h4a /// LOC102641229 | HIST1H4J | 0.06  | 2.20 | 0.60  | 5.63E-01 | 7.82E-01 | -6.51 |
| 1449788_PM_at   | ---                       | NA       | 0.08  | 2.36 | 0.60  | 5.63E-01 | 7.82E-01 | -6.51 |
| 1452533_PM_at   | Ryr3                      | RYR3     | 0.14  | 3.09 | 0.60  | 5.63E-01 | 7.82E-01 | -6.51 |
| 1436599_PM_at   | ---                       | NA       | -0.09 | 3.43 | -0.60 | 5.63E-01 | 7.82E-01 | -6.51 |
| 1459496_PM_at   | C77267                    | NA       | -0.06 | 2.54 | -0.60 | 5.63E-01 | 7.82E-01 | -6.51 |
| 1436415_PM_at   | Med29                     | NA       | -0.05 | 2.15 | -0.60 | 5.63E-01 | 7.82E-01 | -6.51 |
| 1459927_PM_at   | Dalr3                     | NA       | 0.08  | 2.35 | 0.60  | 5.63E-01 | 7.82E-01 | -6.51 |
| 1446398_PM_at   | Gm29677                   | NA       | 0.10  | 2.57 | 0.60  | 5.63E-01 | 7.82E-01 | -6.51 |
| 1426009_PM_a_at | Pip5k1a                   | PIP5K1A  | 0.10  | 2.43 | 0.60  | 5.63E-01 | 7.82E-01 | -6.51 |
| 1457968_PM_at   | ---                       | NA       | 0.16  | 2.55 | 0.60  | 5.63E-01 | 7.82E-01 | -6.51 |
| 1458514_PM_at   | AA536887                  | NA       | 0.07  | 2.48 | 0.60  | 5.63E-01 | 7.82E-01 | -6.51 |
| 1432635_PM_a_at | Sec62                     | SEC62    | -0.06 | 2.50 | -0.60 | 5.63E-01 | 7.82E-01 | -6.51 |
| 1460633_PM_at   | Prpf19                    | PRPF19   | 0.08  | 2.83 | 0.60  | 5.63E-01 | 7.82E-01 | -6.51 |
| 1452013_PM_at   | Atp10a                    | ATP10A   | 0.11  | 2.99 | 0.60  | 5.63E-01 | 7.82E-01 | -6.51 |
| 1458993_PM_at   | AU022882                  | NA       | 0.05  | 2.38 | 0.60  | 5.63E-01 | 7.82E-01 | -6.51 |
| 1459276_PM_at   | A530088E08Rik             | NA       | 0.07  | 2.33 | 0.60  | 5.63E-01 | 7.82E-01 | -6.51 |
| 1443191_PM_at   | ---                       | NA       | 0.18  | 2.70 | 0.60  | 5.63E-01 | 7.82E-01 | -6.51 |
| 1446751_PM_s_at | Impact                    | NA       | -0.10 | 2.89 | -0.60 | 5.63E-01 | 7.82E-01 | -6.51 |
| 1455565_PM_at   | Bcl9                      | BCL9     | -0.07 | 2.27 | -0.60 | 5.64E-01 | 7.82E-01 | -6.51 |
| 1444105_PM_at   | Acta2                     | NA       | -0.15 | 2.59 | -0.60 | 5.64E-01 | 7.83E-01 | -6.51 |
| 1427084_PM_a_at | Map4k5                    | MAP4K5   | -0.10 | 2.71 | -0.60 | 5.64E-01 | 7.83E-01 | -6.51 |
| 1449597_PM_at   | Gm14743                   | NA       | -0.07 | 2.39 | -0.60 | 5.64E-01 | 7.83E-01 | -6.51 |
| 1438006_PM_at   | Gid4                      | GID4     | -0.06 | 2.28 | -0.60 | 5.64E-01 | 7.83E-01 | -6.51 |
| 1428399_PM_a_at | Armc9                     | ARMC9    | 0.06  | 2.29 | 0.60  | 5.64E-01 | 7.83E-01 | -6.51 |
| 1427796_PM_at   | Gm38402 /// Zfp133-ps     | NA       | 0.08  | 3.97 | 0.60  | 5.64E-01 | 7.83E-01 | -6.51 |
| 1431126_PM_a_at | 0610011F06Rik             | METTL26  | 0.11  | 4.12 | 0.60  | 5.64E-01 | 7.83E-01 | -6.51 |
| 1440903_PM_at   | ---                       | NA       | 0.15  | 3.42 | 0.60  | 5.64E-01 | 7.83E-01 | -6.51 |
| 1450592_PM_at   | Olfir68 /// Olfir69       | ORS2A5   | 0.21  | 2.31 | 0.60  | 5.64E-01 | 7.83E-01 | -6.51 |

|                 |                 |          |       |      |       |          |          |       |
|-----------------|-----------------|----------|-------|------|-------|----------|----------|-------|
| 1428295_PM_at   | Synp2l          | SYNPO2L  | -0.07 | 2.30 | -0.60 | 5.64E-01 | 7.83E-01 | -6.51 |
| 1453474_PM_at   | Abhd15          | NA       | -0.06 | 2.77 | -0.60 | 5.64E-01 | 7.83E-01 | -6.51 |
| 1456016_PM_x_at | BC005624        | C9orf78  | 0.09  | 2.71 | 0.60  | 5.64E-01 | 7.83E-01 | -6.51 |
| 1416116_PM_at   | Orc3            | NA       | -0.13 | 2.83 | -0.60 | 5.64E-01 | 7.83E-01 | -6.51 |
| 1445767_PM_at   | Ptprd           | PTPRD    | -0.08 | 2.22 | -0.60 | 5.64E-01 | 7.83E-01 | -6.51 |
| 1433810_PM_x_at | Ddx5            | DDX5     | 0.07  | 2.90 | 0.60  | 5.64E-01 | 7.83E-01 | -6.51 |
| 1449540_PM_at   | Rhox9           | NA       | 0.09  | 2.93 | 0.60  | 5.64E-01 | 7.83E-01 | -6.51 |
| 1444590_PM_at   | Dhdh2           | NA       | 0.16  | 2.92 | 0.60  | 5.64E-01 | 7.83E-01 | -6.51 |
| 1444879_PM_at   | ---             | NA       | -0.09 | 2.48 | -0.60 | 5.64E-01 | 7.83E-01 | -6.51 |
| 1454160_PM_at   | Grip1os1        | NA       | 0.05  | 2.46 | 0.60  | 5.64E-01 | 7.83E-01 | -6.51 |
| 1449061_PM_a_at | Prim1           | PRIM1    | 0.11  | 3.07 | 0.60  | 5.64E-01 | 7.83E-01 | -6.51 |
| 1416740_PM_at   | Col5a1          | COL5A1   | 0.14  | 3.69 | 0.60  | 5.64E-01 | 7.83E-01 | -6.51 |
| 1452136_PM_at   | Slc5a9          | SLC5A9   | 0.11  | 3.15 | 0.60  | 5.64E-01 | 7.83E-01 | -6.51 |
| 1420930_PM_s_at | Cttna1          | CTNNAL1  | -0.08 | 2.90 | -0.60 | 5.64E-01 | 7.83E-01 | -6.51 |
| 1438712_PM_at   | Dennd2d         | DENND2D  | 0.07  | 2.24 | 0.60  | 5.64E-01 | 7.83E-01 | -6.51 |
| 1437707_PM_at   | Slmo1           | PRELID3A | -0.18 | 4.55 | -0.60 | 5.64E-01 | 7.83E-01 | -6.51 |
| 1416748_PM_a_at | Mre11a          | MRE11    | -0.07 | 2.80 | -0.60 | 5.64E-01 | 7.83E-01 | -6.51 |
| 1428695_PM_at   | Sdr39u1         | SDR39U1  | 0.09  | 3.40 | 0.60  | 5.64E-01 | 7.83E-01 | -6.51 |
| 1433117_PM_at   | 2300004M11Rik   | NA       | 0.06  | 3.05 | 0.60  | 5.64E-01 | 7.83E-01 | -6.51 |
| 1424658_PM_at   | Taok1           | TAOK1    | -0.23 | 2.87 | -0.60 | 5.64E-01 | 7.83E-01 | -6.51 |
| 1454579_PM_at   | ---             | NA       | -0.07 | 2.47 | -0.60 | 5.64E-01 | 7.83E-01 | -6.51 |
| 1436319_PM_at   | Sulf1           | SULF1    | -0.06 | 2.09 | -0.60 | 5.64E-01 | 7.83E-01 | -6.51 |
| 1428986_PM_at   | Slc17a7         | SLC17A7  | -0.31 | 4.50 | -0.60 | 5.64E-01 | 7.83E-01 | -6.51 |
| 1457768_PM_at   | ---             | NA       | 0.05  | 2.43 | 0.60  | 5.65E-01 | 7.83E-01 | -6.51 |
| 1419444_PM_at   | Gm10094///Sap18 | SAP18    | 0.17  | 2.96 | 0.59  | 5.65E-01 | 7.83E-01 | -6.51 |
| 1416044_PM_at   | Flii            | FLII     | -0.30 | 3.57 | -0.59 | 5.65E-01 | 7.83E-01 | -6.51 |
| 1430767_PM_a_at | 4930543E12Rik   | NA       | 0.04  | 2.04 | 0.59  | 5.65E-01 | 7.83E-01 | -6.51 |
| 1430942_PM_at   | ---             | NA       | 0.18  | 2.68 | 0.59  | 5.65E-01 | 7.83E-01 | -6.51 |
| 1459255_PM_at   | 1700034P13Rik   | NA       | 0.05  | 1.91 | 0.59  | 5.65E-01 | 7.83E-01 | -6.51 |
| 1415756_PM_a_at | Snapin          | SNAPIN   | 0.09  | 3.88 | 0.59  | 5.65E-01 | 7.83E-01 | -6.51 |
| 1427719_PM_s_at | Krt82           | KRT82    | -0.08 | 2.40 | -0.59 | 5.65E-01 | 7.83E-01 | -6.51 |
| 1436734_PM_at   | Plppr1          | PLPPR1   | -0.19 | 3.10 | -0.59 | 5.65E-01 | 7.83E-01 | -6.51 |
| 1433345_PM_s_at | 4930448K20Rik   | NA       | -0.11 | 2.32 | -0.59 | 5.65E-01 | 7.83E-01 | -6.51 |
| 1442860_PM_at   | ---             | NA       | -0.07 | 2.10 | -0.59 | 5.65E-01 | 7.83E-01 | -6.51 |
| 1447093_PM_at   | ---             | NA       | 0.05  | 2.09 | 0.59  | 5.65E-01 | 7.83E-01 | -6.51 |
| 1438944_PM_at   | ---             | NA       | 0.06  | 2.09 | 0.59  | 5.65E-01 | 7.83E-01 | -6.51 |
| 1431783_PM_at   | 1700010L04Rik   | NA       | 0.06  | 2.49 | 0.59  | 5.65E-01 | 7.83E-01 | -6.51 |
| 1434790_PM_a_at | Lta4h           | LTA4H    | 0.07  | 2.34 | 0.59  | 5.65E-01 | 7.83E-01 | -6.51 |
| 1451168_PM_a_at | Arhgdia         | ARHGDI A | 0.08  | 3.69 | 0.59  | 5.65E-01 | 7.83E-01 | -6.51 |
| 1458779_PM_at   | ---             | NA       | 0.13  | 2.42 | 0.59  | 5.65E-01 | 7.83E-01 | -6.51 |
| 1431064_PM_at   | Dpp8            | DPP8     | 0.17  | 3.49 | 0.59  | 5.65E-01 | 7.83E-01 | -6.51 |
| 1415965_PM_at   | Scd1            | SCD      | -0.23 | 3.51 | -0.59 | 5.65E-01 | 7.83E-01 | -6.51 |
| 1418236_PM_s_at | Atg5            | ATG5     | 0.12  | 2.55 | 0.59  | 5.65E-01 | 7.83E-01 | -6.51 |
| 1435809_PM_at   | Ankrd34a        | ANKRD34A | 0.16  | 5.02 | 0.59  | 5.65E-01 | 7.83E-01 | -6.51 |
| 1444965_PM_at   | ---             | NA       | 0.05  | 2.32 | 0.59  | 5.65E-01 | 7.84E-01 | -6.51 |
| 1443542_PM_at   | AU022252        | C1orf50  | 0.06  | 2.42 | 0.59  | 5.65E-01 | 7.84E-01 | -6.51 |
| 1419689_PM_at   | Gpc6            | NA       | 0.07  | 3.00 | 0.59  | 5.65E-01 | 7.84E-01 | -6.51 |
| 1429571_PM_a_at | Spaca1          | SPACA1   | 0.07  | 2.25 | 0.59  | 5.65E-01 | 7.84E-01 | -6.51 |
| 1429307_PM_s_at | Lzic            | LZIC     | 0.08  | 3.06 | 0.59  | 5.65E-01 | 7.84E-01 | -6.51 |
| 1415684_PM_at   | Atg5            | ATG5     | -0.06 | 2.18 | -0.59 | 5.65E-01 | 7.84E-01 | -6.51 |
| 1438061_PM_at   | 4930523C07Rik   | KIAA0040 | 0.07  | 2.40 | 0.59  | 5.65E-01 | 7.84E-01 | -6.51 |
| 1452420_PM_at   | Stk32b          | STK32B   | -0.08 | 2.85 | -0.59 | 5.65E-01 | 7.84E-01 | -6.51 |
| 1439007_PM_at   | Alg6            | ALG6     | -0.06 | 2.37 | -0.59 | 5.66E-01 | 7.84E-01 | -6.51 |
| 1457971_PM_at   | ---             | NA       | -0.06 | 2.69 | -0.59 | 5.65E-01 | 7.84E-01 | -6.51 |
| 1426229_PM_s_at | Kras            | NA       | 0.06  | 2.08 | 0.59  | 5.65E-01 | 7.84E-01 | -6.51 |
| 1447713_PM_at   | Tpm1            | TPM1     | 0.06  | 2.06 | 0.59  | 5.65E-01 | 7.84E-01 | -6.51 |
| 1432823_PM_at   | Syp12           | NA       | 0.08  | 2.06 | 0.59  | 5.65E-01 | 7.84E-01 | -6.51 |
| 1456502_PM_at   | Dyrk2           | DYRK2    | 0.08  | 2.58 | 0.59  | 5.66E-01 | 7.84E-01 | -6.51 |
| 1416464_PM_at   | Slc4a1          | SLC4A1   | 0.06  | 2.41 | 0.59  | 5.66E-01 | 7.84E-01 | -6.51 |
| 1416983_PM_s_at | Foxo1           | FOXO1    | -0.20 | 5.07 | -0.59 | 5.66E-01 | 7.84E-01 | -6.51 |
| 1445887_PM_at   | ---             | NA       | 0.06  | 2.19 | 0.59  | 5.66E-01 | 7.84E-01 | -6.51 |
| 1458562_PM_at   | ---             | NA       | 0.10  | 2.60 | 0.59  | 5.66E-01 | 7.84E-01 | -6.51 |
| 1426728_PM_x_at | Ptdss2          | PTDSS2   | 0.10  | 2.96 | 0.59  | 5.66E-01 | 7.84E-01 | -6.51 |
| 1445564_PM_at   | ---             | NA       | 0.17  | 2.22 | 0.59  | 5.66E-01 | 7.84E-01 | -6.51 |
| 1441695_PM_at   | ---             | NA       | -0.05 | 2.26 | -0.59 | 5.66E-01 | 7.84E-01 | -6.51 |
| 1443718_PM_at   | ---             | NA       | 0.06  | 2.45 | 0.59  | 5.66E-01 | 7.84E-01 | -6.51 |
| 1451935_PM_a_at | Spint2          | SPINT2   | 0.07  | 2.31 | 0.59  | 5.66E-01 | 7.84E-01 | -6.51 |
| 1426552_PM_a_at | Bcl11a          | BCL11A   | 0.14  | 4.17 | 0.59  | 5.66E-01 | 7.84E-01 | -6.51 |
| 1450206_PM_at   | Dlc1            | DLC1     | 0.25  | 3.44 | 0.59  | 5.66E-01 | 7.84E-01 | -6.51 |
| 1454717_PM_at   | Ankrd27         | ANKRD27  | -0.39 | 6.15 | -0.59 | 5.66E-01 | 7.84E-01 | -6.51 |
| 1433166_PM_at   | ---             | NA       | -0.08 | 2.30 | -0.59 | 5.66E-01 | 7.84E-01 | -6.51 |
| 1453081_PM_at   | 2410022M11Rik   | NA       | -0.06 | 2.15 | -0.59 | 5.66E-01 | 7.84E-01 | -6.51 |
| 1435369_PM_at   | Fastkd5         | FASTKD5  | 0.07  | 4.18 | 0.59  | 5.66E-01 | 7.84E-01 | -6.51 |
| 1418727_PM_at   | Nup155          | NUP155   | 0.10  | 2.50 | 0.59  | 5.66E-01 | 7.84E-01 | -6.51 |
| 1419198_PM_at   | Cbx8            | CBX8     | 0.09  | 2.59 | 0.59  | 5.66E-01 | 7.84E-01 | -6.51 |

|                 |                 |          |       |      |       |          |          |       |
|-----------------|-----------------|----------|-------|------|-------|----------|----------|-------|
| 1440260_PM_at   | Ccdc58          | CCDC58   | -0.24 | 3.18 | -0.59 | 5.66E-01 | 7.84E-01 | -6.52 |
| 1458869_PM_at   | ---             | NA       | -0.13 | 2.53 | -0.59 | 5.66E-01 | 7.84E-01 | -6.52 |
| 1447943_PM_x_at | Yeats2          | YEATS2   | -0.17 | 3.79 | -0.59 | 5.66E-01 | 7.84E-01 | -6.52 |
| 1448957_PM_at   | Rbpj            | RBPJ     | -0.08 | 2.81 | -0.59 | 5.66E-01 | 7.84E-01 | -6.52 |
| 1452097_PM_a_at | Dusp7           | DUSP7    | 0.05  | 2.44 | 0.59  | 5.66E-01 | 7.84E-01 | -6.52 |
| 1426447_PM_at   | Nup35           | NUP35    | 0.10  | 2.55 | 0.59  | 5.66E-01 | 7.84E-01 | -6.52 |
| 1455907_PM_x_at | Phox2b          | PHOX2B   | 0.11  | 2.14 | 0.59  | 5.66E-01 | 7.84E-01 | -6.52 |
| 1428361_PM_x_at | Hba-a1///Hba-a2 | HBA1     | -0.39 | 4.66 | -0.59 | 5.66E-01 | 7.84E-01 | -6.52 |
| 1424412_PM_at   | Ogfrl1          | OGFRL1   | 0.17  | 7.54 | 0.59  | 5.66E-01 | 7.84E-01 | -6.52 |
| 1423175_PM_s_at | Pard6b          | PARD6B   | -0.14 | 2.36 | -0.59 | 5.66E-01 | 7.84E-01 | -6.52 |
| 1441036_PM_at   | Stoml3          | STOML3   | -0.14 | 3.24 | -0.59 | 5.66E-01 | 7.84E-01 | -6.52 |
| 1422560_PM_at   | Ddi2///Rsc1a1   | RSC1A1   | -0.08 | 2.59 | -0.59 | 5.66E-01 | 7.84E-01 | -6.52 |
| 1419189_PM_at   | Vti1a           | VTI1A    | 0.06  | 2.67 | 0.59  | 5.66E-01 | 7.84E-01 | -6.52 |
| 1418901_PM_at   | Cebpbb          | CEBPB    | 0.07  | 3.95 | 0.59  | 5.66E-01 | 7.84E-01 | -6.52 |
| 1416032_PM_at   | Tmem109         | TMEM109  | 0.17  | 2.54 | 0.59  | 5.66E-01 | 7.84E-01 | -6.52 |
| 1415843_PM_at   | Mlst8           | MLST8    | 0.08  | 2.29 | 0.59  | 5.67E-01 | 7.84E-01 | -6.52 |
| 1436211_PM_at   | Alyref          | ALYREF   | 0.06  | 2.38 | 0.59  | 5.67E-01 | 7.84E-01 | -6.52 |
| 1446041_PM_at   | ---             | NA       | 0.07  | 2.03 | 0.59  | 5.67E-01 | 7.84E-01 | -6.52 |
| 1428448_PM_a_at | Gtf3c2          | GTF3C2   | -0.12 | 2.88 | -0.59 | 5.67E-01 | 7.84E-01 | -6.52 |
| 1453433_PM_at   | Wdr89           | WDR89    | -0.06 | 2.17 | -0.59 | 5.67E-01 | 7.84E-01 | -6.52 |
| 1433793_PM_s_at | Nrip2           | NRP2     | 0.08  | 2.25 | 0.59  | 5.67E-01 | 7.84E-01 | -6.52 |
| 1438772_PM_at   | Zfp367          | ZNF367   | 0.05  | 2.29 | 0.59  | 5.67E-01 | 7.84E-01 | -6.52 |
| 1418462_PM_at   | Exosc9          | EXOSC9   | -0.14 | 6.13 | -0.59 | 5.67E-01 | 7.84E-01 | -6.52 |
| 1457256_PM_x_at | Ptch2           | PTCH2    | -0.07 | 2.60 | -0.59 | 5.67E-01 | 7.84E-01 | -6.52 |
| 1419333_PM_at   | Rita1           | RITA1    | -0.07 | 2.74 | -0.59 | 5.67E-01 | 7.84E-01 | -6.52 |
| 1447058_PM_at   | ---             | NA       | 0.06  | 2.23 | 0.59  | 5.67E-01 | 7.84E-01 | -6.52 |
| 1424270_PM_at   | Dclk1           | DCLK1    | -0.16 | 3.05 | -0.59 | 5.67E-01 | 7.84E-01 | -6.52 |
| 1434358_PM_x_at | Rps21           | RPS21    | -0.14 | 9.07 | -0.59 | 5.67E-01 | 7.84E-01 | -6.52 |
| 1415871_PM_at   | Tgfb1           | TGFB1    | -0.11 | 2.61 | -0.59 | 5.67E-01 | 7.84E-01 | -6.52 |
| 1433056_PM_at   | ---             | NA       | -0.07 | 2.33 | -0.59 | 5.67E-01 | 7.84E-01 | -6.52 |
| 1438112_PM_at   | 9430021M05Rik   | NA       | -0.05 | 2.01 | -0.59 | 5.67E-01 | 7.84E-01 | -6.52 |
| 1442624_PM_at   | ---             | NA       | 0.14  | 2.24 | 0.59  | 5.67E-01 | 7.84E-01 | -6.52 |
| 1455177_PM_at   | Ahi1            | AHI1     | 0.20  | 5.61 | 0.59  | 5.67E-01 | 7.84E-01 | -6.52 |
| 1436605_PM_at   | Tkt             | TKT      | 0.15  | 3.20 | 0.59  | 5.67E-01 | 7.85E-01 | -6.52 |
| 1420188_PM_at   | Syt6            | NA       | 0.06  | 2.20 | 0.59  | 5.67E-01 | 7.85E-01 | -6.52 |
| 1439601_PM_at   | Heatr6          | HEATR6   | -0.15 | 2.56 | -0.59 | 5.67E-01 | 7.85E-01 | -6.52 |
| 1459576_PM_at   | ---             | NA       | 0.07  | 2.64 | 0.59  | 5.67E-01 | 7.85E-01 | -6.52 |
| 1452341_PM_at   | Echs1           | ECHS1    | -0.14 | 2.68 | -0.59 | 5.67E-01 | 7.85E-01 | -6.52 |
| 1447435_PM_at   | ---             | NA       | -0.06 | 2.16 | -0.59 | 5.67E-01 | 7.85E-01 | -6.52 |
| 1451954_PM_at   | ---             | NA       | 0.05  | 2.30 | 0.59  | 5.67E-01 | 7.85E-01 | -6.52 |
| 1455655_PM_a_at | Tardbp          | TARDBP   | 0.12  | 2.73 | 0.59  | 5.67E-01 | 7.85E-01 | -6.52 |
| 1454850_PM_at   | Tbc1d10c        | TBC1D10C | 0.07  | 2.66 | 0.59  | 5.67E-01 | 7.85E-01 | -6.52 |
| 1418842_PM_at   | Hcls1           | HCL1     | 0.04  | 1.91 | 0.59  | 5.67E-01 | 7.85E-01 | -6.52 |
| 1448516_PM_at   | Tsn             | TSN      | -0.23 | 3.15 | -0.59 | 5.67E-01 | 7.85E-01 | -6.52 |
| 1418043_PM_at   | Abcc5           | ABCC5    | -0.15 | 2.53 | -0.59 | 5.67E-01 | 7.85E-01 | -6.52 |
| 1425624_PM_at   | Epm2aip1        | EPM2AI1  | -0.16 | 3.26 | -0.59 | 5.67E-01 | 7.85E-01 | -6.52 |
| 1445624_PM_at   | Atxn1l          | NA       | 0.06  | 2.00 | 0.59  | 5.67E-01 | 7.85E-01 | -6.52 |
| 1434580_PM_at   | Enpp4           | ENPP4    | -0.10 | 3.71 | -0.59 | 5.68E-01 | 7.85E-01 | -6.52 |
| 1454499_PM_at   | ---             | NA       | 0.05  | 2.62 | 0.59  | 5.68E-01 | 7.85E-01 | -6.52 |
| 1456299_PM_at   | E330012B07Rik   | NA       | -0.05 | 1.97 | -0.59 | 5.68E-01 | 7.85E-01 | -6.52 |
| 1424906_PM_at   | Pqlc3           | PQLC3    | 0.07  | 2.17 | 0.59  | 5.68E-01 | 7.85E-01 | -6.52 |
| 1456744_PM_x_at | Fln             | FLCN     | 0.09  | 2.59 | 0.59  | 5.68E-01 | 7.85E-01 | -6.52 |
| 1448269_PM_a_at | Klhl13          | KLHL13   | 0.29  | 5.18 | 0.59  | 5.68E-01 | 7.85E-01 | -6.52 |
| 1442535_PM_at   | ---             | NA       | 0.11  | 2.68 | 0.59  | 5.68E-01 | 7.85E-01 | -6.52 |
| 1418508_PM_a_at | Grb2            | GRB2     | -0.08 | 2.79 | -0.59 | 5.68E-01 | 7.85E-01 | -6.52 |
| 1437727_PM_at   | ---             | NA       | 0.05  | 2.42 | 0.59  | 5.68E-01 | 7.85E-01 | -6.52 |
| 1432370_PM_at   | ---             | NA       | 0.07  | 2.54 | 0.59  | 5.68E-01 | 7.85E-01 | -6.52 |
| 1417455_PM_at   | Tgfb3           | TGFB3    | -0.08 | 2.55 | -0.59 | 5.68E-01 | 7.85E-01 | -6.52 |
| 1450887_PM_at   | Rqc1            | CNOT9    | 0.09  | 2.44 | 0.59  | 5.68E-01 | 7.85E-01 | -6.52 |
| 1440312_PM_at   | Elov17          | ELOVL7   | 0.23  | 4.54 | 0.59  | 5.68E-01 | 7.85E-01 | -6.52 |
| 1458341_PM_x_at | Pde5a           | PDE5A    | -0.25 | 2.81 | -0.59 | 5.68E-01 | 7.85E-01 | -6.52 |
| 1453615_PM_at   | ---             | NA       | 0.05  | 2.11 | 0.59  | 5.68E-01 | 7.85E-01 | -6.52 |
| 1417381_PM_at   | C1qa            | C1QA     | 0.11  | 2.61 | 0.59  | 5.68E-01 | 7.85E-01 | -6.52 |
| 1425885_PM_a_at | Kcnab2          | KCNAB2   | -0.25 | 4.58 | -0.59 | 5.68E-01 | 7.85E-01 | -6.52 |
| 1418918_PM_at   | Igfbp1          | IGFBP1   | 0.05  | 2.49 | 0.59  | 5.68E-01 | 7.86E-01 | -6.52 |
| 1416431_PM_at   | Tubb6           | TUBB6    | 0.13  | 2.84 | 0.59  | 5.68E-01 | 7.86E-01 | -6.52 |
| 1429221_PM_at   | Dph7            | NA       | 0.10  | 2.61 | 0.59  | 5.68E-01 | 7.86E-01 | -6.52 |
| 1457367_PM_at   | ---             | NA       | -0.10 | 3.36 | -0.59 | 5.68E-01 | 7.86E-01 | -6.52 |
| 1446939_PM_at   | ---             | NA       | -0.09 | 2.25 | -0.59 | 5.68E-01 | 7.86E-01 | -6.52 |
| 1438010_PM_at   | Tmem201         | TMEM201  | 0.24  | 6.25 | 0.59  | 5.68E-01 | 7.86E-01 | -6.52 |
| 1427607_PM_at   | Cacna1h         | CACNA1H  | -0.08 | 2.43 | -0.59 | 5.68E-01 | 7.86E-01 | -6.52 |
| 1450029_PM_s_at | Irga9           | ITGA9    | -0.11 | 2.66 | -0.59 | 5.69E-01 | 7.86E-01 | -6.52 |
| 1436474_PM_at   | Clec18a         | CLEC18C  | -0.11 | 2.11 | -0.59 | 5.69E-01 | 7.86E-01 | -6.52 |
| 1447222_PM_at   | Hspa12a         | HSPA12A  | -0.10 | 3.14 | -0.59 | 5.69E-01 | 7.86E-01 | -6.52 |
| 1444871_PM_at   | AU022697        | NA       | -0.05 | 1.88 | -0.59 | 5.69E-01 | 7.86E-01 | -6.52 |

|                 |                                                                         |         |       |      |       |          |          |       |
|-----------------|-------------------------------------------------------------------------|---------|-------|------|-------|----------|----------|-------|
| 1438387_PM_x_at | Top3b                                                                   | TOP3B   | 0.09  | 2.36 | 0.59  | 5.68E-01 | 7.86E-01 | -6.52 |
| 1433910_PM_at   | Zcchc6                                                                  | ZCCHC6  | -0.13 | 5.71 | -0.59 | 5.69E-01 | 7.86E-01 | -6.52 |
| 1448910_PM_at   | Pecr                                                                    | PECR    | 0.06  | 2.52 | 0.59  | 5.69E-01 | 7.86E-01 | -6.52 |
| 1426203_PM_at   | Krtap19-4                                                               | NA      | 0.06  | 2.30 | 0.59  | 5.69E-01 | 7.86E-01 | -6.52 |
| 1457779_PM_at   | 1110046J04Rik                                                           | NA      | 0.13  | 2.34 | 0.59  | 5.69E-01 | 7.86E-01 | -6.52 |
| 1435909_PM_at   | C030034I22Rik                                                           | NA      | 0.15  | 3.06 | 0.59  | 5.69E-01 | 7.86E-01 | -6.52 |
| 1416492_PM_at   | Ccne1                                                                   | CCNE1   | 0.08  | 3.29 | 0.59  | 5.69E-01 | 7.86E-01 | -6.52 |
| 1435800_PM_a_at | Ybx3                                                                    | YBX3    | 0.12  | 5.89 | 0.59  | 5.69E-01 | 7.86E-01 | -6.52 |
| 1437495_PM_at   | Mbtps2 ///Yy2                                                           | MBTPS2  | -0.15 | 3.15 | -0.59 | 5.69E-01 | 7.86E-01 | -6.52 |
| 1442553_PM_at   | ---                                                                     | NA      | 0.06  | 2.40 | 0.59  | 5.69E-01 | 7.86E-01 | -6.52 |
| 1424919_PM_at   | Erbp2                                                                   | ERBP2   | 0.08  | 2.56 | 0.59  | 5.69E-01 | 7.86E-01 | -6.52 |
| 1416835_PM_s_at | Amd1                                                                    | AMD1    | 0.20  | 4.49 | 0.59  | 5.69E-01 | 7.86E-01 | -6.52 |
| 1434675_PM_at   | Zfp763                                                                  | NA      | 0.26  | 5.52 | 0.59  | 5.69E-01 | 7.86E-01 | -6.52 |
| 1420437_PM_at   | Ido1                                                                    | IDO1    | 0.07  | 2.39 | 0.59  | 5.69E-01 | 7.86E-01 | -6.52 |
| 1451363_PM_a_at | Dennd2d                                                                 | DENND2D | -0.06 | 2.14 | -0.59 | 5.69E-01 | 7.86E-01 | -6.52 |
| 1447614_PM_at   | Slf1                                                                    | SLFN12  | 0.05  | 1.97 | 0.59  | 5.69E-01 | 7.86E-01 | -6.52 |
| 1416694_PM_at   | Gk2                                                                     | GK2     | 0.06  | 2.44 | 0.59  | 5.69E-01 | 7.86E-01 | -6.52 |
| 1455399_PM_at   | Cnksr1                                                                  | CNKSRI  | 0.08  | 2.18 | 0.59  | 5.69E-01 | 7.86E-01 | -6.52 |
| 1422967_PM_a_at | Tfrc                                                                    | TFRC    | 0.26  | 4.46 | 0.59  | 5.69E-01 | 7.86E-01 | -6.52 |
| 1421178_PM_at   | Mgat4c                                                                  | MGAT4C  | -0.08 | 2.78 | -0.59 | 5.69E-01 | 7.86E-01 | -6.52 |
| 1436707_PM_x_at | Ncaph                                                                   | NCAPH   | -0.07 | 2.13 | -0.59 | 5.69E-01 | 7.86E-01 | -6.52 |
| 1447621_PM_s_at | Tmem173                                                                 | TMEM173 | -0.07 | 2.73 | -0.59 | 5.69E-01 | 7.86E-01 | -6.52 |
| 1438987_PM_at   | Fam71d                                                                  | NA      | 0.06  | 2.58 | 0.59  | 5.69E-01 | 7.86E-01 | -6.52 |
| 1459879_PM_at   | Marf1                                                                   | NA      | 0.06  | 2.42 | 0.59  | 5.69E-01 | 7.86E-01 | -6.52 |
| 1431071_PM_at   | Mtx3                                                                    | MTX3    | 0.20  | 5.48 | 0.59  | 5.69E-01 | 7.86E-01 | -6.52 |
| 1453957_PM_a_at | Igf2bp3                                                                 | IGF2BP3 | 0.08  | 2.25 | 0.59  | 5.69E-01 | 7.86E-01 | -6.52 |
| 1418827_PM_at   | Eri1                                                                    | ERI1    | -0.07 | 2.35 | -0.59 | 5.69E-01 | 7.86E-01 | -6.52 |
| 1455130_PM_at   | Spty2d1                                                                 | SPTY2D1 | -0.06 | 2.81 | -0.59 | 5.69E-01 | 7.86E-01 | -6.52 |
| 1444515_PM_at   | ---                                                                     | NA      | 0.06  | 2.05 | 0.59  | 5.69E-01 | 7.86E-01 | -6.52 |
| 1459075_PM_at   | AU022479                                                                | NA      | 0.09  | 2.17 | 0.59  | 5.69E-01 | 7.86E-01 | -6.52 |
| 1441093_PM_at   | LOC102640771                                                            | NA      | 0.11  | 2.32 | 0.59  | 5.69E-01 | 7.86E-01 | -6.52 |
| 1450405_PM_at   | Mrpl19                                                                  | MRPL19  | 0.15  | 2.28 | 0.59  | 5.69E-01 | 7.86E-01 | -6.52 |
| 1430917_PM_at   | ---                                                                     | NA      | 0.15  | 2.44 | 0.59  | 5.69E-01 | 7.86E-01 | -6.52 |
| 1430841_PM_at   | 3300002P13Rik ///Tmtc1                                                  | NA      | -0.36 | 6.44 | -0.59 | 5.70E-01 | 7.86E-01 | -6.52 |
| 1423911_PM_at   | Ppp2r5a                                                                 | PPP2R5A | -0.15 | 3.68 | -0.59 | 5.70E-01 | 7.86E-01 | -6.52 |
| 1417317_PM_s_at | Ino80 ///Rpl35a ///Rpl35a-ps2 ///Rpl35a-ps3 ///Rpl35a-ps4 ///Rpl35a-ps6 | RPL35A  | -0.12 | 6.80 | -0.59 | 5.70E-01 | 7.86E-01 | -6.52 |
| 1432871_PM_at   | ---                                                                     | NA      | -0.10 | 2.57 | -0.59 | 5.70E-01 | 7.86E-01 | -6.52 |
| 1431738_PM_at   | 4921531P14Rik                                                           | NA      | -0.10 | 2.66 | -0.59 | 5.70E-01 | 7.86E-01 | -6.52 |
| 1442872_PM_at   | ---                                                                     | NA      | -0.07 | 2.49 | -0.59 | 5.70E-01 | 7.86E-01 | -6.52 |
| 1456624_PM_at   | Wipi1                                                                   | WIPI1   | 0.06  | 2.64 | 0.59  | 5.70E-01 | 7.86E-01 | -6.52 |
| 1441147_PM_at   | D3Ert229e                                                               | NA      | 0.06  | 2.11 | 0.59  | 5.70E-01 | 7.86E-01 | -6.52 |
| 1441032_PM_at   | LOC102642578                                                            | NA      | 0.07  | 2.64 | 0.59  | 5.70E-01 | 7.86E-01 | -6.52 |
| 1453875_PM_at   | Slc7a15                                                                 | NA      | 0.08  | 2.10 | 0.59  | 5.70E-01 | 7.86E-01 | -6.52 |
| 1460670_PM_at   | Rlok3                                                                   | RLOK3   | 0.08  | 2.56 | 0.59  | 5.70E-01 | 7.86E-01 | -6.52 |
| 1439707_PM_at   | ---                                                                     | NA      | 0.12  | 2.40 | 0.59  | 5.70E-01 | 7.86E-01 | -6.52 |
| 1452086_PM_at   | Trmt5                                                                   | TRMT5   | 0.15  | 2.66 | 0.59  | 5.70E-01 | 7.86E-01 | -6.52 |
| 1436924_PM_x_at | Rpl31                                                                   | NA      | 0.16  | 8.37 | 0.59  | 5.70E-01 | 7.86E-01 | -6.52 |
| 1441887_PM_x_at | Gm6377                                                                  | NA      | 0.06  | 2.12 | 0.59  | 5.70E-01 | 7.86E-01 | -6.52 |
| 1452020_PM_a_at | Siva1                                                                   | SIVA1   | -0.17 | 3.09 | -0.59 | 5.70E-01 | 7.86E-01 | -6.52 |
| 1428234_PM_at   | Cpsf6                                                                   | CPSF6   | -0.16 | 3.92 | -0.59 | 5.70E-01 | 7.86E-01 | -6.52 |
| 1437066_PM_at   | Zbtb20                                                                  | ZBTB20  | -0.14 | 3.63 | -0.59 | 5.70E-01 | 7.86E-01 | -6.52 |
| 1454752_PM_at   | Rbm24                                                                   | RBM24   | -0.12 | 2.71 | -0.59 | 5.70E-01 | 7.86E-01 | -6.52 |
| 1428751_PM_at   | Pacrg                                                                   | PACRG   | -0.09 | 2.99 | -0.59 | 5.70E-01 | 7.86E-01 | -6.52 |
| 1427837_PM_at   | Igkv15-103                                                              | NA      | -0.09 | 2.88 | -0.59 | 5.70E-01 | 7.86E-01 | -6.52 |
| 1421131_PM_a_at | Zfp111                                                                  | ZNF578  | -0.08 | 2.89 | -0.59 | 5.70E-01 | 7.86E-01 | -6.52 |
| 1454908_PM_x_at | Serf1                                                                   | SERF1B  | -0.06 | 3.42 | -0.59 | 5.70E-01 | 7.86E-01 | -6.52 |
| 1421370_PM_a_at | Il1f5                                                                   | IL36RN  | 0.05  | 1.96 | 0.59  | 5.70E-01 | 7.86E-01 | -6.52 |
| 1452947_PM_at   | Gprc5c                                                                  | GPRC5C  | 0.06  | 2.14 | 0.59  | 5.70E-01 | 7.86E-01 | -6.52 |
| 1443285_PM_at   | ---                                                                     | NA      | 0.07  | 2.60 | 0.59  | 5.70E-01 | 7.86E-01 | -6.52 |
| 1425768_PM_at   | Diablo                                                                  | DIABLO  | 0.09  | 2.32 | 0.59  | 5.70E-01 | 7.86E-01 | -6.52 |
| 1447784_PM_x_at | Slc38a9                                                                 | SLC38A9 | 0.12  | 2.39 | 0.59  | 5.70E-01 | 7.86E-01 | -6.52 |
| 1447685_PM_x_at | Ets2                                                                    | ETS2    | 0.10  | 2.34 | 0.59  | 5.70E-01 | 7.86E-01 | -6.52 |
| 1428870_PM_at   | Nolc1                                                                   | NOLC1   | -0.21 | 3.13 | -0.59 | 5.70E-01 | 7.86E-01 | -6.52 |
| 1419667_PM_at   | Sgcb                                                                    | SGCB    | -0.08 | 3.45 | -0.59 | 5.70E-01 | 7.86E-01 | -6.52 |
| 1449124_PM_at   | Rgl1                                                                    | RGL1    | 0.16  | 2.52 | 0.59  | 5.70E-01 | 7.86E-01 | -6.52 |
| 1447953_PM_at   | Egfl8                                                                   | EGFL8   | 0.11  | 3.98 | 0.59  | 5.70E-01 | 7.86E-01 | -6.52 |
| 1443351_PM_at   | ---                                                                     | NA      | -0.05 | 2.43 | -0.59 | 5.70E-01 | 7.86E-01 | -6.52 |
| 1441700_PM_at   | Slc4a8                                                                  | SLC4A8  | -0.08 | 3.11 | -0.59 | 5.70E-01 | 7.87E-01 | -6.52 |
| 1449625_PM_at   | B4galnt3                                                                | NA      | 0.08  | 2.57 | 0.59  | 5.70E-01 | 7.87E-01 | -6.52 |
| 1427758_PM_x_at | Ighm                                                                    | NA      | 0.08  | 2.64 | 0.59  | 5.70E-01 | 7.87E-01 | -6.52 |
| 1445308_PM_at   | ---                                                                     | NA      | 0.13  | 2.64 | 0.59  | 5.70E-01 | 7.87E-01 | -6.52 |



|                     |               |          |       |      |       |          |          |       |
|---------------------|---------------|----------|-------|------|-------|----------|----------|-------|
| 1444222_PM_x_at     | Gm15510       | NA       | 0.28  | 3.60 | 0.59  | 5.70E-01 | 7.87E-01 | -6.52 |
| 1446562_PM_at       | ---           | NA       | 0.06  | 2.26 | 0.59  | 5.71E-01 | 7.87E-01 | -6.52 |
| 1452870_PM_at       | Apaf1         | APAF1    | 0.10  | 2.62 | 0.59  | 5.71E-01 | 7.87E-01 | -6.52 |
| 1425309_PM_at       | Catsper2      | CATSPER2 | 0.14  | 2.91 | 0.59  | 5.71E-01 | 7.87E-01 | -6.52 |
| 1418030_PM_at       | Slc3a1        | SLCO3A1  | -0.19 | 4.41 | -0.59 | 5.71E-01 | 7.87E-01 | -6.52 |
| 1446146_PM_at       | ---           | NA       | 0.11  | 2.93 | 0.59  | 5.71E-01 | 7.87E-01 | -6.52 |
| 1458124_PM_at       | LOC102641119  | NA       | 0.07  | 2.32 | 0.59  | 5.71E-01 | 7.87E-01 | -6.52 |
| 1437285_PM_at       | Nadk2         | NADK2    | 0.06  | 2.09 | 0.59  | 5.71E-01 | 7.87E-01 | -6.52 |
| 1439413_PM_x_at     | Morf4l2       | MORF4L2  | -0.16 | 9.34 | -0.59 | 5.71E-01 | 7.87E-01 | -6.52 |
| 1446968_PM_at       | ---           | NA       | 0.04  | 2.45 | 0.59  | 5.71E-01 | 7.87E-01 | -6.52 |
| 1428503_PM_a_at     | Nkiras1       | NKIRAS1  | 0.22  | 6.11 | 0.59  | 5.71E-01 | 7.87E-01 | -6.52 |
| 1442307_PM_at       | Usp15         | NA       | -0.08 | 2.84 | -0.59 | 5.71E-01 | 7.87E-01 | -6.52 |
| 1421346_PM_a_at     | Slc6a6        | SLC6A6   | -0.11 | 2.92 | -0.59 | 5.71E-01 | 7.87E-01 | -6.52 |
| 1417675_PM_a_at     | Mdn1          | MDN1     | -0.07 | 2.44 | -0.59 | 5.71E-01 | 7.87E-01 | -6.52 |
| 1432971_PM_at       | 4921518B13Rik | NA       | -0.06 | 2.16 | -0.59 | 5.71E-01 | 7.87E-01 | -6.52 |
| 1458524_PM_at       | ---           | NA       | -0.06 | 2.60 | -0.59 | 5.71E-01 | 7.87E-01 | -6.52 |
| 1439790_PM_at       | Serpinb9      | SERPINB9 | -0.06 | 2.13 | -0.59 | 5.71E-01 | 7.87E-01 | -6.52 |
| 1423873_PM_at       | Lsm1          | LSM1     | 0.07  | 3.83 | 0.59  | 5.71E-01 | 7.87E-01 | -6.52 |
| 1440298_PM_at       | Trem12        | TREML2   | 0.07  | 2.37 | 0.59  | 5.71E-01 | 7.87E-01 | -6.52 |
| 1459406_PM_at       | ---           | NA       | 0.07  | 2.14 | 0.59  | 5.71E-01 | 7.87E-01 | -6.52 |
| 1448357_PM_at       | Snrpg         | SNRPG    | -0.41 | 5.10 | -0.58 | 5.71E-01 | 7.87E-01 | -6.52 |
| 1433256_PM_at       | A930011E06Rik | NA       | -0.05 | 2.27 | -0.58 | 5.71E-01 | 7.87E-01 | -6.52 |
| 1418973_PM_at       | Blf1          | BLZF1    | 0.09  | 2.55 | 0.58  | 5.71E-01 | 7.87E-01 | -6.52 |
| 1416292_PM_at       | Prdx3         | PRDX3    | -0.12 | 3.02 | -0.58 | 5.71E-01 | 7.87E-01 | -6.52 |
| 1418761_PM_at       | Igf2bp1       | IGF2BP1  | 0.06  | 2.61 | 0.58  | 5.71E-01 | 7.87E-01 | -6.52 |
| 1434308_PM_at       | Slc43a2       | SLC43A2  | 0.17  | 3.23 | 0.58  | 5.71E-01 | 7.87E-01 | -6.52 |
| 1454068_PM_at       | 4930470H14Rik | NA       | -0.11 | 2.84 | -0.58 | 5.71E-01 | 7.87E-01 | -6.52 |
| 1460031_PM_at       | Gpr45         | GPR45    | 0.06  | 2.13 | 0.58  | 5.71E-01 | 7.87E-01 | -6.52 |
| 1453883_PM_at       | 4933425B07Rik | NA       | 0.07  | 3.41 | 0.58  | 5.71E-01 | 7.87E-01 | -6.52 |
| 1429423_PM_at       | ---           | NA       | 0.17  | 3.48 | 0.58  | 5.71E-01 | 7.87E-01 | -6.52 |
| 1421889_PM_a_at     | Ap1p2         | APLP2    | -0.29 | 6.74 | -0.58 | 5.71E-01 | 7.87E-01 | -6.52 |
| 1446631_PM_at       | Il1b1os       | NA       | 0.08  | 2.81 | 0.58  | 5.71E-01 | 7.87E-01 | -6.52 |
| 1426614_PM_at       | Zmynd8        | ZMYND8   | 0.23  | 6.09 | 0.58  | 5.71E-01 | 7.87E-01 | -6.52 |
| 1439205_PM_at       | Nfatc2        | NFATC2   | -0.06 | 2.53 | -0.58 | 5.71E-01 | 7.87E-01 | -6.52 |
| 1460156_PM_at       | Aoah          | NA       | -0.06 | 1.98 | -0.58 | 5.71E-01 | 7.87E-01 | -6.52 |
| 1449043_PM_at       | Naga          | NAGA     | -0.08 | 2.78 | -0.58 | 5.72E-01 | 7.87E-01 | -6.52 |
| 1442170_PM_at       | ---           | NA       | 0.07  | 2.37 | 0.58  | 5.72E-01 | 7.87E-01 | -6.52 |
| 1424797_PM_a_at     | Pitx2         | PITX2    | 0.08  | 2.32 | 0.58  | 5.72E-01 | 7.87E-01 | -6.52 |
| 1427830_PM_at       | Zfp260        | NA       | -0.17 | 3.74 | -0.58 | 5.72E-01 | 7.87E-01 | -6.52 |
| 1443943_PM_at       | Plag1         | PLAG1    | -0.06 | 2.15 | -0.58 | 5.72E-01 | 7.87E-01 | -6.52 |
| 1417531_PM_at       | Cyp2j5        | CYP2J2   | 0.05  | 2.12 | 0.58  | 5.72E-01 | 7.87E-01 | -6.52 |
| 1425017_PM_at       | Pcdhac1       | PCDHAC1  | -0.19 | 2.49 | -0.58 | 5.72E-01 | 7.87E-01 | -6.52 |
| 1420499_PM_at       | Gch1          | GCH1     | 0.05  | 2.05 | 0.58  | 5.72E-01 | 7.87E-01 | -6.52 |
| 1432511_PM_s_at     | Haus2         | HAUS2    | 0.06  | 2.49 | 0.58  | 5.72E-01 | 7.87E-01 | -6.52 |
| 1445013_PM_at       | ---           | NA       | 0.09  | 2.16 | 0.58  | 5.72E-01 | 7.87E-01 | -6.52 |
| 1455873_PM_a_at     | Vps18         | VPS18    | 0.10  | 2.75 | 0.58  | 5.72E-01 | 7.87E-01 | -6.52 |
| 1444747_PM_at       | ---           | NA       | 0.08  | 2.34 | 0.58  | 5.72E-01 | 7.87E-01 | -6.52 |
| 1442477_PM_at       | Ambra1        | AMBRA1   | 0.09  | 2.36 | 0.58  | 5.72E-01 | 7.87E-01 | -6.52 |
| 1432256_PM_at       | 1700111N16Rik | NA       | 0.05  | 2.04 | 0.58  | 5.72E-01 | 7.88E-01 | -6.52 |
| 1443465_PM_at       | ---           | NA       | 0.08  | 2.44 | 0.58  | 5.72E-01 | 7.88E-01 | -6.52 |
| 1425879_PM_at       | Zfp352        | KLF18    | 0.08  | 2.33 | 0.58  | 5.72E-01 | 7.88E-01 | -6.52 |
| 1448145_PM_at       | Wwp2          | WWP2     | 0.09  | 2.78 | 0.58  | 5.72E-01 | 7.88E-01 | -6.52 |
| 1446918_PM_at       | ---           | NA       | 0.06  | 2.38 | 0.58  | 5.72E-01 | 7.88E-01 | -6.52 |
| 1443254_PM_at       | ---           | NA       | 0.08  | 2.62 | 0.58  | 5.72E-01 | 7.88E-01 | -6.52 |
| 1426685_PM_a_at     | Cnot6         | CNOT6    | 0.09  | 2.63 | 0.58  | 5.72E-01 | 7.88E-01 | -6.52 |
| 1460293_PM_at       | Ncs1          | NCS1     | -0.07 | 2.44 | -0.58 | 5.72E-01 | 7.88E-01 | -6.52 |
| 1445717_PM_at       | Luc7l2        | NA       | 0.07  | 2.55 | 0.58  | 5.72E-01 | 7.88E-01 | -6.52 |
| 1450869_PM_at       | Fgf1          | FGF1     | -0.10 | 2.92 | -0.58 | 5.72E-01 | 7.88E-01 | -6.52 |
| AFFX-r2-Bs-dap-3_at | ---           | NA       | 0.05  | 2.15 | 0.58  | 5.72E-01 | 7.88E-01 | -6.52 |
| 1438933_PM_x_at     | Rasgrp2       | RASGRP2  | 0.07  | 2.25 | 0.58  | 5.72E-01 | 7.88E-01 | -6.52 |
| 1432736_PM_at       | ---           | NA       | 0.08  | 2.71 | 0.58  | 5.72E-01 | 7.88E-01 | -6.52 |
| 1441991_PM_at       | Prss53        | PRSS53   | 0.10  | 2.57 | 0.58  | 5.72E-01 | 7.88E-01 | -6.52 |
| 1420906_PM_at       | Cd2ap         | CD2AP    | 0.21  | 7.03 | 0.58  | 5.72E-01 | 7.88E-01 | -6.52 |
| 1425371_PM_at       | Polb          | NA       | 0.30  | 4.25 | 0.58  | 5.72E-01 | 7.88E-01 | -6.52 |
| 1438053_PM_at       | ---           | NA       | -0.18 | 3.88 | -0.58 | 5.72E-01 | 7.88E-01 | -6.52 |
| 1456756_PM_at       | Zc3hav1l      | ZC3HAV1L | 0.09  | 2.85 | 0.58  | 5.72E-01 | 7.88E-01 | -6.52 |
| 1426144_PM_x_at     | Trdn          | TRDN     | -0.22 | 2.82 | -0.58 | 5.73E-01 | 7.88E-01 | -6.52 |
| 1425823_PM_at       | Cfhr2         | NA       | 0.06  | 2.09 | 0.58  | 5.73E-01 | 7.88E-01 | -6.52 |
| 1437966_PM_at       | Prrt3         | PRRT3    | 0.07  | 2.88 | 0.58  | 5.73E-01 | 7.88E-01 | -6.52 |
| 1458324_PM_x_at     | ---           | NA       | 0.16  | 3.50 | 0.58  | 5.73E-01 | 7.88E-01 | -6.52 |
| 1425797_PM_a_at     | Syk           | SYK      | 0.06  | 2.31 | 0.58  | 5.73E-01 | 7.88E-01 | -6.52 |
| 1437982_PM_x_at     | Cox15         | COX15    | -0.23 | 3.32 | -0.58 | 5.73E-01 | 7.88E-01 | -6.52 |
| 1418855_PM_at       | Lce1l         | NA       | 0.05  | 2.20 | 0.58  | 5.73E-01 | 7.88E-01 | -6.52 |
| 1418853_PM_at       | Apon          | NA       | 0.07  | 2.52 | 0.58  | 5.73E-01 | 7.88E-01 | -6.52 |
| 1422854_PM_at       | Shc1          | SHC1     | 0.18  | 3.22 | 0.58  | 5.73E-01 | 7.88E-01 | -6.52 |

|                 |               |            |       |      |       |          |          |       |
|-----------------|---------------|------------|-------|------|-------|----------|----------|-------|
| 1452880_PM_at   | Znhit3        | ZNHIT3     | -0.12 | 3.04 | -0.58 | 5.73E-01 | 7.88E-01 | -6.52 |
| 1441899_PM_x_at | Bcan          | NA         | -0.23 | 5.42 | -0.58 | 5.73E-01 | 7.88E-01 | -6.52 |
| 1428480_PM_at   | Cdca8         | CDCA8      | 0.05  | 2.23 | 0.58  | 5.73E-01 | 7.88E-01 | -6.52 |
| 1416826_PM_a_at | Med20         | MED20      | 0.31  | 2.86 | 0.58  | 5.73E-01 | 7.88E-01 | -6.52 |
| 1456955_PM_at   | ---           | NA         | 0.08  | 2.22 | 0.58  | 5.73E-01 | 7.88E-01 | -6.52 |
| 1444070_PM_at   | ---           | NA         | -0.06 | 2.15 | -0.58 | 5.73E-01 | 7.88E-01 | -6.52 |
| 1444730_PM_at   | Tlk1          | TLK1       | 0.05  | 2.25 | 0.58  | 5.73E-01 | 7.88E-01 | -6.52 |
| 1439784_PM_at   | Fam219b       | FAM219B    | 0.15  | 3.09 | 0.58  | 5.73E-01 | 7.88E-01 | -6.52 |
| 1448330_PM_at   | Gstm1         | NA         | -0.30 | 5.05 | -0.58 | 5.73E-01 | 7.88E-01 | -6.52 |
| 1421105_PM_at   | Jag1          | JAG1       | 0.06  | 2.16 | 0.58  | 5.73E-01 | 7.88E-01 | -6.52 |
| 1449976_PM_a_at | Gpr35         | GPR35      | 0.07  | 2.45 | 0.58  | 5.73E-01 | 7.88E-01 | -6.52 |
| 1433338_PM_at   | ---           | NA         | 0.08  | 2.88 | 0.58  | 5.73E-01 | 7.88E-01 | -6.52 |
| 1424331_PM_at   | Rab40c        | RAB40C     | -0.08 | 4.93 | -0.58 | 5.73E-01 | 7.88E-01 | -6.52 |
| 1418264_PM_at   | Cenpk         | CENPK      | 0.11  | 2.49 | 0.58  | 5.73E-01 | 7.88E-01 | -6.52 |
| 1425792_PM_a_at | Rorc          | RORC       | 0.06  | 2.45 | 0.58  | 5.73E-01 | 7.88E-01 | -6.52 |
| 1435018_PM_at   | Cacfd1        | CACFD1     | -0.11 | 3.26 | -0.58 | 5.73E-01 | 7.88E-01 | -6.52 |
| 1432133_PM_at   | Ryr3          | RYR3       | -0.06 | 2.54 | -0.58 | 5.73E-01 | 7.88E-01 | -6.52 |
| 1452557_PM_a_at | Igk           | NA         | -0.26 | 2.70 | -0.58 | 5.73E-01 | 7.88E-01 | -6.52 |
| 1425316_PM_at   | B3gat1        | B3GAT1     | -0.10 | 2.56 | -0.58 | 5.73E-01 | 7.88E-01 | -6.52 |
| 1441531_PM_at   | ---           | NA         | 0.06  | 2.37 | 0.58  | 5.73E-01 | 7.88E-01 | -6.52 |
| 1427707_PM_a_at | Stil          | STIL       | 0.05  | 2.24 | 0.58  | 5.73E-01 | 7.88E-01 | -6.52 |
| 1433760_PM_a_at | Rhbdd3        | RHBDD3     | -0.07 | 2.93 | -0.58 | 5.73E-01 | 7.88E-01 | -6.52 |
| 1459845_PM_at   | ---           | NA         | 0.17  | 2.91 | 0.58  | 5.73E-01 | 7.88E-01 | -6.52 |
| 1456555_PM_at   | Ccdc67        | DEUP1      | -0.06 | 2.32 | -0.58 | 5.73E-01 | 7.88E-01 | -6.52 |
| 1443392_PM_at   | Trpv1         | TRPV1      | 0.07  | 2.38 | 0.58  | 5.74E-01 | 7.88E-01 | -6.52 |
| 1453849_PM_s_at | Hnrnpab       | HNRNPAB    | -0.19 | 5.47 | -0.58 | 5.74E-01 | 7.88E-01 | -6.52 |
| 1454882_PM_at   | L3mbtl3       | L3MBTL3    | -0.13 | 3.10 | -0.58 | 5.74E-01 | 7.88E-01 | -6.52 |
| 1431510_PM_s_at | Cmc1          | CMC1       | 0.08  | 2.73 | 0.58  | 5.74E-01 | 7.88E-01 | -6.52 |
| 1429141_PM_at   | Neurl2        | NEURL2     | 0.07  | 2.80 | 0.58  | 5.74E-01 | 7.88E-01 | -6.52 |
| 1424493_PM_s_at | Ugt3a1        | UGT3A2     | 0.25  | 4.22 | 0.58  | 5.74E-01 | 7.88E-01 | -6.52 |
| 1420555_PM_at   | Alx3          | ALX3       | 0.10  | 2.63 | 0.58  | 5.74E-01 | 7.88E-01 | -6.52 |
| 1418445_PM_at   | Slc16a2       | SLC16A2    | 0.16  | 2.92 | 0.58  | 5.74E-01 | 7.88E-01 | -6.52 |
| 1420339_PM_at   | Memo1         | NA         | -0.29 | 4.25 | -0.58 | 5.74E-01 | 7.89E-01 | -6.52 |
| 1448048_PM_at   | Nmrk1         | NMRK1      | 0.06  | 2.65 | 0.58  | 5.74E-01 | 7.89E-01 | -6.52 |
| 1457544_PM_at   | Ube2w         | ACO22826.2 | 0.06  | 2.20 | 0.58  | 5.74E-01 | 7.89E-01 | -6.52 |
| 1436643_PM_x_at | Hamp2         | HAMP       | 0.06  | 2.33 | 0.58  | 5.74E-01 | 7.89E-01 | -6.52 |
| 1456515_PM_s_at | Tcf15         | TCFL5      | 0.17  | 2.63 | 0.58  | 5.74E-01 | 7.89E-01 | -6.52 |
| 1416062_PM_at   | Tbc1d15       | TBC1D15    | 0.18  | 4.26 | 0.58  | 5.74E-01 | 7.89E-01 | -6.52 |
| 1436958_PM_x_at | Tpm3          | NA         | -0.14 | 5.04 | -0.58 | 5.74E-01 | 7.89E-01 | -6.52 |
| 1436062_PM_at   | Arcn1         | ARCN1      | -0.12 | 4.09 | -0.58 | 5.74E-01 | 7.89E-01 | -6.52 |
| 1418359_PM_at   | Wbscr27       | METTL27    | -0.10 | 2.22 | -0.58 | 5.74E-01 | 7.89E-01 | -6.52 |
| 1460386_PM_a_at | Slc1a1        | SLC1A1     | -0.10 | 2.78 | -0.58 | 5.74E-01 | 7.89E-01 | -6.52 |
| 1420794_PM_at   | Art2b         | NA         | 0.06  | 2.28 | 0.58  | 5.74E-01 | 7.89E-01 | -6.52 |
| 1452907_PM_at   | Galc          | GALC       | -0.17 | 3.60 | -0.58 | 5.74E-01 | 7.89E-01 | -6.52 |
| 1456629_PM_at   | Kank3         | KANK3      | 0.06  | 2.63 | 0.58  | 5.74E-01 | 7.89E-01 | -6.52 |
| 1460249_PM_at   | Lnx2          | LNX2       | 0.05  | 2.20 | 0.58  | 5.75E-01 | 7.89E-01 | -6.52 |
| 1416309_PM_at   | Nusap1        | NUSAP1     | 0.17  | 3.17 | 0.58  | 5.75E-01 | 7.89E-01 | -6.52 |
| 1459675_PM_at   | ---           | NA         | 0.30  | 3.93 | 0.58  | 5.75E-01 | 7.89E-01 | -6.52 |
| 1452413_PM_at   | Peak1         | PEAK1      | -0.05 | 2.48 | -0.58 | 5.75E-01 | 7.89E-01 | -6.52 |
| 1451260_PM_at   | Alh1b1        | ALDH1B1    | 0.08  | 3.03 | 0.58  | 5.75E-01 | 7.89E-01 | -6.52 |
| 1447721_PM_at   | Zbtb26        | ZBTB26     | 0.05  | 2.17 | 0.58  | 5.75E-01 | 7.89E-01 | -6.52 |
| 1453925_PM_at   | 4930429F24Rik | NA         | -0.16 | 2.52 | -0.58 | 5.75E-01 | 7.89E-01 | -6.52 |
| 1439086_PM_at   | ---           | NA         | -0.09 | 2.11 | -0.58 | 5.75E-01 | 7.89E-01 | -6.52 |
| 1441914_PM_x_at | Fgf3          | NA         | -0.05 | 2.19 | -0.58 | 5.75E-01 | 7.89E-01 | -6.52 |
| 1434915_PM_s_at | Lrrc19        | LRRC19     | -0.04 | 1.87 | -0.58 | 5.75E-01 | 7.89E-01 | -6.52 |
| 1444794_PM_at   | ---           | NA         | 0.07  | 2.77 | 0.58  | 5.75E-01 | 7.89E-01 | -6.52 |
| 1426543_PM_x_at | Endod1        | ENDOD1     | 0.07  | 2.36 | 0.58  | 5.75E-01 | 7.89E-01 | -6.52 |
| 1432530_PM_s_at | Boll          | BOLL       | 0.09  | 2.43 | 0.58  | 5.75E-01 | 7.89E-01 | -6.52 |
| 1422400_PM_a_at | Gml///Gml2    | GML        | 0.13  | 2.60 | 0.58  | 5.75E-01 | 7.89E-01 | -6.52 |
| 1435984_PM_at   | ---           | NA         | 0.19  | 2.79 | 0.58  | 5.75E-01 | 7.89E-01 | -6.52 |
| 1451969_PM_s_at | Parp3         | PARP3      | 0.26  | 2.46 | 0.58  | 5.75E-01 | 7.89E-01 | -6.52 |
| 1450548_PM_at   | Htr1f         | HTR1F      | 0.08  | 2.39 | 0.58  | 5.75E-01 | 7.90E-01 | -6.52 |
| 1438305_PM_at   | Rims1         | NA         | -0.13 | 4.60 | -0.58 | 5.75E-01 | 7.90E-01 | -6.52 |
| 1443518_PM_at   | Sgce          | SGCE       | -0.06 | 2.57 | -0.58 | 5.75E-01 | 7.90E-01 | -6.52 |
| 1453516_PM_at   | 4931431F19Rik | NA         | -0.06 | 2.52 | -0.58 | 5.75E-01 | 7.90E-01 | -6.52 |
| 1432897_PM_at   | ---           | NA         | 0.05  | 2.45 | 0.58  | 5.75E-01 | 7.90E-01 | -6.52 |
| 1429845_PM_at   | Cfap157       | CFAP157    | 0.06  | 2.34 | 0.58  | 5.75E-01 | 7.90E-01 | -6.52 |
| 1442850_PM_at   | AU045717      | NA         | 0.06  | 2.46 | 0.58  | 5.75E-01 | 7.90E-01 | -6.52 |
| 1436931_PM_at   | Rfx4          | RFX4       | 0.07  | 2.48 | 0.58  | 5.75E-01 | 7.90E-01 | -6.52 |
| 1442505_PM_at   | ---           | NA         | 0.07  | 2.22 | 0.58  | 5.75E-01 | 7.90E-01 | -6.52 |
| 1436254_PM_at   | Ube2f         | UBE2F      | 0.10  | 3.44 | 0.58  | 5.75E-01 | 7.90E-01 | -6.52 |
| 1434163_PM_at   | Khdc1b        | AL365232.1 | 0.09  | 2.30 | 0.58  | 5.75E-01 | 7.90E-01 | -6.52 |
| 1454599_PM_at   | 4930425F17Rik | NA         | 0.10  | 2.87 | 0.58  | 5.75E-01 | 7.90E-01 | -6.52 |
| 1446079_PM_at   | Zmat2         | ZMAT2      | -0.08 | 2.27 | -0.58 | 5.75E-01 | 7.90E-01 | -6.52 |
| 1441809_PM_at   | A930009A15Rik | NA         | 0.07  | 2.30 | 0.58  | 5.75E-01 | 7.90E-01 | -6.52 |

|                 |                     |         |       |      |       |          |          |       |
|-----------------|---------------------|---------|-------|------|-------|----------|----------|-------|
| 1457035_PM_at   | Al607873            | NA      | -0.04 | 2.01 | -0.58 | 5.75E-01 | 7.90E-01 | -6.52 |
| 1430341_PM_at   | Nudt5               | NUDT5   | 0.10  | 2.93 | 0.58  | 5.75E-01 | 7.90E-01 | -6.52 |
| 1453520_PM_at   | Ttc21b              | TTc21B  | 0.11  | 2.65 | 0.58  | 5.75E-01 | 7.90E-01 | -6.52 |
| 1433625_PM_at   | Prrc2b              | PRRC2B  | 0.18  | 4.92 | 0.58  | 5.75E-01 | 7.90E-01 | -6.52 |
| 1443618_PM_at   | Pdzd2               | PDZD2   | -0.05 | 2.41 | -0.58 | 5.76E-01 | 7.90E-01 | -6.52 |
| 1422657_PM_at   | Prl5a1              | PRL     | 0.09  | 2.21 | 0.58  | 5.76E-01 | 7.90E-01 | -6.52 |
| 1437413_PM_x_at | Rps29               | RPS29   | -0.34 | 7.35 | -0.58 | 5.76E-01 | 7.90E-01 | -6.52 |
| 1416809_PM_at   | Cyp3a11             | CYP3A4  | 0.07  | 2.45 | 0.58  | 5.76E-01 | 7.90E-01 | -6.52 |
| 1457409_PM_at   | Fut9                | FUT9    | -0.08 | 2.20 | -0.58 | 5.76E-01 | 7.90E-01 | -6.52 |
| 1433196_PM_at   | ---                 | NA      | 0.06  | 2.35 | 0.58  | 5.76E-01 | 7.90E-01 | -6.52 |
| 1442511_PM_at   | ---                 | NA      | 0.11  | 3.03 | 0.58  | 5.76E-01 | 7.90E-01 | -6.52 |
| 1443669_PM_at   | ---                 | NA      | 0.14  | 3.53 | 0.58  | 5.76E-01 | 7.90E-01 | -6.52 |
| 1421377_PM_at   | Traf6               | TRAF6   | 0.15  | 2.95 | 0.58  | 5.76E-01 | 7.90E-01 | -6.52 |
| 1452194_PM_at   | Tbcd                | TBCD    | -0.12 | 3.92 | -0.58 | 5.76E-01 | 7.90E-01 | -6.52 |
| 1416580_PM_a_at | Stub1               | STUB1   | -0.11 | 3.75 | -0.58 | 5.76E-01 | 7.90E-01 | -6.52 |
| 1446206_PM_at   | Bend6               | BEND6   | 0.04  | 2.18 | 0.58  | 5.76E-01 | 7.90E-01 | -6.52 |
| 1459615_PM_at   | ---                 | NA      | 0.10  | 2.46 | 0.58  | 5.76E-01 | 7.90E-01 | -6.52 |
| 1445506_PM_at   | Abhd15              | ABHD15  | -0.23 | 4.45 | -0.58 | 5.76E-01 | 7.90E-01 | -6.52 |
| 1427997_PM_at   | Ndufaf4             | NDUF4F4 | -0.22 | 7.15 | -0.58 | 5.76E-01 | 7.90E-01 | -6.52 |
| 1444523_PM_s_at | Ube2v1              | UBE2V1  | -0.08 | 3.88 | -0.58 | 5.76E-01 | 7.90E-01 | -6.52 |
| 1440124_PM_at   | ---                 | NA      | -0.06 | 2.58 | -0.58 | 5.76E-01 | 7.90E-01 | -6.52 |
| 1449844_PM_at   | Slco1a1             | SLCO1A2 | -0.05 | 2.26 | -0.58 | 5.76E-01 | 7.90E-01 | -6.52 |
| 1437814_PM_at   | Dnajc5g             | DNAJC5G | -0.05 | 1.90 | -0.58 | 5.76E-01 | 7.90E-01 | -6.52 |
| 1448878_PM_at   | Mxd3                | MXD3    | 0.05  | 2.32 | 0.58  | 5.76E-01 | 7.90E-01 | -6.52 |
| 1451915_PM_at   | Cct3                | NA      | 0.05  | 2.31 | 0.58  | 5.76E-01 | 7.90E-01 | -6.52 |
| 1452750_PM_at   | 5530601H04Rik       | NA      | 0.05  | 2.38 | 0.58  | 5.76E-01 | 7.90E-01 | -6.52 |
| 1415938_PM_at   | Spink1              | SPINK1  | 0.05  | 2.01 | 0.58  | 5.76E-01 | 7.90E-01 | -6.52 |
| 1450390_PM_x_at | Rps18               | RPS18   | 0.05  | 2.18 | 0.58  | 5.76E-01 | 7.90E-01 | -6.52 |
| 1456267_PM_at   | Borc58              | NA      | 0.05  | 2.76 | 0.58  | 5.76E-01 | 7.90E-01 | -6.52 |
| 1446238_PM_at   | 4930431P03Rik       | NA      | 0.06  | 2.23 | 0.58  | 5.76E-01 | 7.90E-01 | -6.52 |
| 1459040_PM_at   | ---                 | NA      | 0.07  | 2.20 | 0.58  | 5.76E-01 | 7.90E-01 | -6.52 |
| 1424159_PM_at   | Fam134c             | RETREG3 | 0.08  | 2.71 | 0.58  | 5.76E-01 | 7.90E-01 | -6.52 |
| 1422606_PM_at   | C1qtnf3             | C1QTNF3 | 0.08  | 2.03 | 0.58  | 5.76E-01 | 7.90E-01 | -6.52 |
| 1421245_PM_at   | Sost                | SOST    | 0.09  | 2.61 | 0.58  | 5.76E-01 | 7.90E-01 | -6.52 |
| 1425048_PM_a_at | Gm21596 /// Hmgb1   | HMGB1   | 0.10  | 9.44 | 0.58  | 5.76E-01 | 7.90E-01 | -6.52 |
| 1447070_PM_at   | Eif4h               | EIF4H   | 0.12  | 4.57 | 0.58  | 5.76E-01 | 7.90E-01 | -6.52 |
| 1459921_PM_at   | Nxph1               | NXP1    | 0.12  | 3.48 | 0.58  | 5.76E-01 | 7.90E-01 | -6.52 |
| 1455683_PM_a_at | Tbc1d8              | TBC1D8  | 0.12  | 2.57 | 0.58  | 5.76E-01 | 7.90E-01 | -6.52 |
| 1452456_PM_at   | Nrip2               | NRP2    | 0.13  | 2.59 | 0.58  | 5.76E-01 | 7.90E-01 | -6.52 |
| 1416519_PM_at   | Rpl36 /// Rpl36-ps2 | RPL36   | 0.17  | 4.86 | 0.58  | 5.76E-01 | 7.90E-01 | -6.52 |
| 1425299_PM_s_at | Trmt112             | TRMT112 | 0.18  | 6.49 | 0.58  | 5.76E-01 | 7.90E-01 | -6.52 |
| 1426617_PM_a_at | Ttyh1               | TTYH1   | 0.23  | 4.01 | 0.58  | 5.76E-01 | 7.90E-01 | -6.52 |
| 1455494_PM_at   | Col1a1              | COL1A1  | 0.24  | 4.00 | 0.58  | 5.76E-01 | 7.90E-01 | -6.52 |
| 1448254_PM_at   | Ptn                 | PTN     | -0.17 | 8.68 | -0.58 | 5.76E-01 | 7.90E-01 | -6.52 |
| 1429134_PM_at   | Hivep3              | HIVEP3  | -0.13 | 3.12 | -0.58 | 5.76E-01 | 7.90E-01 | -6.52 |
| 1448968_PM_at   | Ubf1                | UBFD1   | -0.12 | 2.58 | -0.58 | 5.76E-01 | 7.90E-01 | -6.52 |
| 1459577_PM_at   | Gm40128             | NA      | -0.06 | 2.37 | -0.58 | 5.76E-01 | 7.90E-01 | -6.52 |
| 1437939_PM_s_at | Ctsc                | CTSC    | -0.05 | 2.30 | -0.58 | 5.76E-01 | 7.90E-01 | -6.52 |
| 1453698_PM_at   | ---                 | NA      | 0.19  | 3.04 | 0.58  | 5.76E-01 | 7.90E-01 | -6.52 |
| 1450219_PM_at   | Htr1a               | HTR1A   | -0.08 | 2.47 | -0.58 | 5.77E-01 | 7.90E-01 | -6.52 |
| 1425908_PM_at   | Gnb1                | GNB1    | 0.08  | 2.17 | 0.58  | 5.77E-01 | 7.90E-01 | -6.53 |
| 1426335_PM_at   | Kcna2               | KCNQ2   | -0.10 | 3.47 | -0.58 | 5.77E-01 | 7.90E-01 | -6.53 |
| 1440126_PM_at   | BC037704            | NA      | -0.08 | 2.42 | -0.58 | 5.77E-01 | 7.90E-01 | -6.53 |
| 1420382_PM_at   | ApoB                | APOBR   | 0.07  | 2.48 | 0.58  | 5.77E-01 | 7.90E-01 | -6.53 |
| 1429165_PM_at   | 3110001122Rik       | NA      | 0.09  | 2.55 | 0.58  | 5.77E-01 | 7.90E-01 | -6.53 |
| 1441771_PM_at   | AtrX                | ATRX    | 0.16  | 2.55 | 0.58  | 5.77E-01 | 7.90E-01 | -6.53 |
| 1441790_PM_at   | ---                 | NA      | -0.25 | 3.34 | -0.58 | 5.77E-01 | 7.90E-01 | -6.53 |
| 1425058_PM_at   | Zfp472              | NA      | -0.09 | 2.17 | -0.58 | 5.77E-01 | 7.90E-01 | -6.53 |
| 1451219_PM_at   | Ormdl1              | NA      | -0.06 | 2.01 | -0.58 | 5.77E-01 | 7.90E-01 | -6.53 |
| 1442616_PM_at   | A330009N23Rik       | NA      | -0.06 | 2.29 | -0.58 | 5.77E-01 | 7.90E-01 | -6.53 |
| 1427681_PM_s_at | Vmn2r88             | NA      | -0.04 | 2.23 | -0.58 | 5.77E-01 | 7.90E-01 | -6.53 |
| 1435125_PM_at   | Prima1              | NA      | 0.05  | 1.98 | 0.58  | 5.77E-01 | 7.90E-01 | -6.53 |
| 1455192_PM_at   | Tmem198             | TMEM198 | 0.10  | 4.32 | 0.58  | 5.77E-01 | 7.90E-01 | -6.53 |
| 1447921_PM_at   | Zfp853              | NA      | 0.05  | 2.27 | 0.58  | 5.77E-01 | 7.90E-01 | -6.53 |
| 1440592_PM_at   | ---                 | NA      | 0.08  | 2.60 | 0.58  | 5.77E-01 | 7.90E-01 | -6.53 |
| 1456262_PM_at   | Rbm5                | RBMS    | 0.15  | 4.73 | 0.58  | 5.77E-01 | 7.90E-01 | -6.53 |
| 1455459_PM_at   | Prdm15              | PRDM15  | -0.15 | 2.81 | -0.58 | 5.77E-01 | 7.90E-01 | -6.53 |
| 1416218_PM_x_at | Rpl37a              | RPL37A  | 0.07  | 3.00 | 0.58  | 5.77E-01 | 7.90E-01 | -6.53 |
| 1442813_PM_at   | ---                 | NA      | 0.07  | 2.28 | 0.58  | 5.77E-01 | 7.90E-01 | -6.53 |
| 1417821_PM_at   | D17H6S56E-5         | NA      | 0.06  | 2.30 | 0.58  | 5.77E-01 | 7.90E-01 | -6.53 |
| 1426844_PM_a_at | Pdc2l               | PDCD2L  | -0.26 | 3.37 | -0.58 | 5.77E-01 | 7.90E-01 | -6.53 |
| 1428868_PM_a_at | Oaz1 /// Oaz1-ps    | OAZ1    | -0.19 | 3.66 | -0.58 | 5.77E-01 | 7.90E-01 | -6.53 |
| 1429322_PM_at   | Exosc6              | NA      | -0.06 | 2.86 | -0.58 | 5.77E-01 | 7.90E-01 | -6.53 |
| 1456524_PM_at   | Nrg1                | NA      | -0.06 | 2.45 | -0.58 | 5.77E-01 | 7.90E-01 | -6.53 |
| 1427866_PM_x_at | Hbb-b2              | NA      | -0.05 | 1.94 | -0.58 | 5.77E-01 | 7.90E-01 | -6.53 |

|                 |                         |          |       |      |       |          |          |       |
|-----------------|-------------------------|----------|-------|------|-------|----------|----------|-------|
| AFFX-ThrX-5_at  | ---                     | NA       | 0.05  | 2.14 | 0.58  | 5.77E-01 | 7.90E-01 | -6.53 |
| 1446030_PM_at   | ---                     | NA       | 0.05  | 2.11 | 0.58  | 5.77E-01 | 7.90E-01 | -6.53 |
| 1453121_PM_at   | Tekt4                   | TEKT4    | 0.06  | 2.33 | 0.58  | 5.77E-01 | 7.90E-01 | -6.53 |
| 1450514_PM_at   | Zscan2                  | ZSCAN2   | 0.06  | 2.15 | 0.58  | 5.77E-01 | 7.90E-01 | -6.53 |
| 1422567_PM_at   | Fam129a                 | FAM129A  | 0.07  | 2.17 | 0.58  | 5.77E-01 | 7.90E-01 | -6.53 |
| 1420190_PM_at   | ---                     | NA       | 0.07  | 2.20 | 0.58  | 5.77E-01 | 7.90E-01 | -6.53 |
| 1451602_PM_at   | Snx6                    | NA       | 0.07  | 2.41 | 0.58  | 5.77E-01 | 7.90E-01 | -6.53 |
| 1418061_PM_at   | Ltbp2                   | LTBP2    | 0.07  | 2.68 | 0.58  | 5.77E-01 | 7.90E-01 | -6.53 |
| 1421130_PM_at   | Zfp111                  | ZNF578   | 0.09  | 2.65 | 0.58  | 5.77E-01 | 7.90E-01 | -6.53 |
| 1455285_PM_at   | Slc31a1                 | SLC31A1  | 0.10  | 2.93 | 0.58  | 5.77E-01 | 7.90E-01 | -6.53 |
| 1440009_PM_at   | Olf78                   | ORS1E2   | 0.12  | 2.57 | 0.58  | 5.77E-01 | 7.90E-01 | -6.53 |
| 1454840_PM_at   | Mccl2                   | MCC2     | 0.14  | 3.34 | 0.58  | 5.77E-01 | 7.90E-01 | -6.53 |
| 1441119_PM_at   | ---                     | NA       | 0.15  | 2.80 | 0.58  | 5.77E-01 | 7.90E-01 | -6.53 |
| 1441748_PM_at   | ---                     | NA       | 0.10  | 2.36 | 0.58  | 5.77E-01 | 7.90E-01 | -6.53 |
| 1432314_PM_at   | 4930554C24Rik           | NA       | 0.06  | 2.30 | 0.58  | 5.78E-01 | 7.91E-01 | -6.53 |
| 1455670_PM_at   | LOC102635502            | NA       | 0.07  | 2.82 | 0.57  | 5.78E-01 | 7.91E-01 | -6.53 |
| 1426099_PM_at   | Hrh4                    | HRH4     | 0.06  | 2.43 | 0.57  | 5.78E-01 | 7.91E-01 | -6.53 |
| 1435962_PM_at   | LOC105244208 /// Rps6   | NA       | 0.08  | 2.91 | 0.57  | 5.78E-01 | 7.91E-01 | -6.53 |
| 1449353_PM_at   | Zmat3                   | ZMAT3    | 0.11  | 4.18 | 0.57  | 5.78E-01 | 7.91E-01 | -6.53 |
| 1420901_PM_a_at | Hk1                     | HK1      | -0.16 | 3.51 | -0.57 | 5.78E-01 | 7.91E-01 | -6.53 |
| 1443368_PM_at   | BB557941                | NA       | -0.07 | 2.19 | -0.57 | 5.78E-01 | 7.91E-01 | -6.53 |
| 1434067_PM_at   | Al662270                | NA       | 0.13  | 2.24 | 0.57  | 5.78E-01 | 7.91E-01 | -6.53 |
| 1450199_PM_a_at | Stab1                   | STAB1    | 0.09  | 2.55 | 0.57  | 5.78E-01 | 7.91E-01 | -6.53 |
| 1422676_PM_at   | Smarce1                 | SMARCE1  | -0.17 | 4.22 | -0.57 | 5.78E-01 | 7.91E-01 | -6.53 |
| 1446235_PM_at   | Ap1ar                   | AP1AR    | 0.07  | 2.74 | 0.57  | 5.78E-01 | 7.91E-01 | -6.53 |
| 1440819_PM_s_at | Sz2                     | SZ2      | 0.31  | 4.00 | 0.57  | 5.78E-01 | 7.91E-01 | -6.53 |
| 1423958_PM_a_at | Ttc33                   | TTC33    | -0.19 | 6.27 | -0.57 | 5.78E-01 | 7.91E-01 | -6.53 |
| 1430321_PM_at   | Krba1                   | KRBA1    | -0.10 | 2.42 | -0.57 | 5.78E-01 | 7.91E-01 | -6.53 |
| 1431256_PM_at   | ---                     | NA       | -0.07 | 2.37 | -0.57 | 5.78E-01 | 7.91E-01 | -6.53 |
| 1442431_PM_at   | ---                     | NA       | 0.05  | 2.45 | 0.57  | 5.78E-01 | 7.91E-01 | -6.53 |
| 1450555_PM_at   | Tex13                   | TEX13B   | 0.06  | 2.23 | 0.57  | 5.78E-01 | 7.91E-01 | -6.53 |
| 1437233_PM_x_at | Pithd1                  | PITHD1   | 0.09  | 2.70 | 0.57  | 5.78E-01 | 7.91E-01 | -6.53 |
| 1425868_PM_at   | Hist2h2bb               | NA       | -0.10 | 2.23 | -0.57 | 5.78E-01 | 7.91E-01 | -6.53 |
| 1432981_PM_at   | LOC102642974 /// Map3k9 | NA       | -0.05 | 2.12 | -0.57 | 5.78E-01 | 7.91E-01 | -6.53 |
| 1453153_PM_at   | Lins1                   | LINS1    | 0.06  | 2.28 | 0.57  | 5.78E-01 | 7.91E-01 | -6.53 |
| 1432144_PM_a_at | Rchy1                   | RCHY1    | -0.16 | 3.01 | -0.57 | 5.79E-01 | 7.91E-01 | -6.53 |
| 1420131_PM_s_at | Pttg1ip                 | PTTG1IP  | -0.12 | 2.81 | -0.57 | 5.79E-01 | 7.91E-01 | -6.53 |
| 1417539_PM_at   | Slc35a1                 | SLC35A1  | -0.06 | 2.53 | -0.57 | 5.79E-01 | 7.91E-01 | -6.53 |
| 1423389_PM_at   | Smad7                   | SMAD7    | -0.05 | 2.29 | -0.57 | 5.79E-01 | 7.91E-01 | -6.53 |
| 1447974_PM_s_at | Aqp6                    | AQP6     | 0.04  | 2.08 | 0.57  | 5.79E-01 | 7.91E-01 | -6.53 |
| 1424795_PM_a_at | 1700001O22Rik           | C9orf50  | 0.05  | 2.55 | 0.57  | 5.79E-01 | 7.91E-01 | -6.53 |
| 1450673_PM_at   | Col9a2                  | COL9A2   | 0.05  | 3.01 | 0.57  | 5.79E-01 | 7.91E-01 | -6.53 |
| 1416310_PM_at   | Nusap1                  | NA       | 0.06  | 2.10 | 0.57  | 5.78E-01 | 7.91E-01 | -6.53 |
| 1432104_PM_a_at | Allc                    | ALLC     | 0.06  | 2.27 | 0.57  | 5.79E-01 | 7.91E-01 | -6.53 |
| 1431529_PM_at   | ---                     | NA       | 0.06  | 2.29 | 0.57  | 5.79E-01 | 7.91E-01 | -6.53 |
| 1418251_PM_at   | Tulp3                   | TULP3    | 0.06  | 2.13 | 0.57  | 5.79E-01 | 7.91E-01 | -6.53 |
| 1429236_PM_at   | Galnt15                 | GALNT15  | 0.06  | 2.45 | 0.57  | 5.78E-01 | 7.91E-01 | -6.53 |
| 1439085_PM_at   | ---                     | NA       | 0.06  | 2.40 | 0.57  | 5.79E-01 | 7.91E-01 | -6.53 |
| 1449235_PM_at   | Fasl                    | FASLG    | 0.06  | 2.39 | 0.57  | 5.78E-01 | 7.91E-01 | -6.53 |
| 1445598_PM_at   | ---                     | NA       | 0.06  | 2.13 | 0.57  | 5.79E-01 | 7.91E-01 | -6.53 |
| 1453621_PM_at   | Thoc7                   | THOC7    | 0.06  | 1.97 | 0.57  | 5.79E-01 | 7.91E-01 | -6.53 |
| 1429398_PM_at   | Hoxa3                   | NA       | 0.07  | 2.55 | 0.57  | 5.78E-01 | 7.91E-01 | -6.53 |
| 1438715_PM_at   | Ccdc102a                | CCDC102A | 0.07  | 2.37 | 0.57  | 5.79E-01 | 7.91E-01 | -6.53 |
| 1438898_PM_at   | ---                     | NA       | 0.08  | 2.23 | 0.57  | 5.79E-01 | 7.91E-01 | -6.53 |
| 1416533_PM_at   | Egln2                   | EGLN2    | 0.08  | 6.28 | 0.57  | 5.79E-01 | 7.91E-01 | -6.53 |
| 1430437_PM_a_at | Vps9d1                  | VPS9D1   | 0.08  | 2.22 | 0.57  | 5.79E-01 | 7.91E-01 | -6.53 |
| 1423419_PM_at   | Lig3                    | LIG3     | 0.08  | 2.28 | 0.57  | 5.79E-01 | 7.91E-01 | -6.53 |
| 1441940_PM_x_at | Klhdc8a                 | KLHDC8A  | 0.09  | 2.73 | 0.57  | 5.79E-01 | 7.91E-01 | -6.53 |
| 1446190_PM_at   | Dcl1                    | DCL1     | 0.09  | 2.41 | 0.57  | 5.79E-01 | 7.91E-01 | -6.53 |
| 1429670_PM_a_at | Cep97                   | CEP97    | 0.10  | 3.23 | 0.57  | 5.79E-01 | 7.91E-01 | -6.53 |
| 1438298_PM_a_at | Sept12                  | SEPT12   | 0.10  | 2.92 | 0.57  | 5.78E-01 | 7.91E-01 | -6.53 |
| 1434750_PM_at   | Exoc3                   | EXOC3    | 0.13  | 2.88 | 0.57  | 5.79E-01 | 7.91E-01 | -6.53 |
| 1458916_PM_at   | ---                     | NA       | 0.13  | 3.79 | 0.57  | 5.78E-01 | 7.91E-01 | -6.53 |
| 1428584_PM_a_at | Haghl                   | HAGHL    | 0.19  | 2.45 | 0.57  | 5.79E-01 | 7.91E-01 | -6.53 |
| 1458634_PM_at   | ---                     | NA       | 0.21  | 3.05 | 0.57  | 5.79E-01 | 7.91E-01 | -6.53 |
| 1429385_PM_at   | Dcaf7                   | DCAF7    | 0.24  | 2.89 | 0.57  | 5.79E-01 | 7.91E-01 | -6.53 |
| 1452473_PM_at   | Prr15                   | PRR15    | 0.32  | 3.20 | 0.57  | 5.79E-01 | 7.91E-01 | -6.53 |
| 1445260_PM_at   | Dcun1d1                 | DCUN1D1  | 0.07  | 2.67 | 0.57  | 5.79E-01 | 7.91E-01 | -6.53 |
| 1446655_PM_at   | Scyl3                   | SCYL3    | 0.09  | 2.51 | 0.57  | 5.79E-01 | 7.91E-01 | -6.53 |
| 1451413_PM_at   | Cast                    | NA       | -0.07 | 2.34 | -0.57 | 5.79E-01 | 7.91E-01 | -6.53 |
| 1442638_PM_at   | ---                     | NA       | -0.05 | 2.10 | -0.57 | 5.79E-01 | 7.91E-01 | -6.53 |
| 1445215_PM_at   | ---                     | NA       | 0.08  | 2.58 | 0.57  | 5.79E-01 | 7.91E-01 | -6.53 |
| 1453451_PM_at   | ---                     | NA       | 0.16  | 3.71 | 0.57  | 5.79E-01 | 7.91E-01 | -6.53 |
| 1444932_PM_at   | 4732419C18Rik           | NA       | -0.06 | 2.29 | -0.57 | 5.79E-01 | 7.91E-01 | -6.53 |

|                 |                           |          |       |       |       |          |          |       |
|-----------------|---------------------------|----------|-------|-------|-------|----------|----------|-------|
| 1416567_PM_s_at | Atp5e                     | ATP5E    | 0.35  | 5.22  | 0.57  | 5.79E-01 | 7.91E-01 | -6.53 |
| 1422954_PM_at   | Zfp60                     | NA       | -0.10 | 2.82  | -0.57 | 5.79E-01 | 7.92E-01 | -6.53 |
| 1437211_PM_x_at | Elov5                     | ELOVL5   | 0.25  | 7.29  | 0.57  | 5.79E-01 | 7.92E-01 | -6.53 |
| 1446224_PM_at   | Hectd2                    | HECTD2   | 0.10  | 2.90  | 0.57  | 5.79E-01 | 7.92E-01 | -6.53 |
| 1426857_PM_a_at | Hsd12                     | HSDL2    | -0.28 | 4.43  | -0.57 | 5.79E-01 | 7.92E-01 | -6.53 |
| 1430769_PM_s_at | Fam122a                   | FAM122A  | 0.13  | 4.32  | 0.57  | 5.79E-01 | 7.92E-01 | -6.53 |
| 1452169_PM_a_at | Dgkz                      | DGKZ     | -0.12 | 10.01 | -0.57 | 5.79E-01 | 7.92E-01 | -6.53 |
| 1447795_PM_at   | Bspry                     | BSPRY    | 0.05  | 2.07  | 0.57  | 5.80E-01 | 7.92E-01 | -6.53 |
| 1422698_PM_s_at | Jarid2                    | JARID2   | 0.15  | 4.40  | 0.57  | 5.80E-01 | 7.92E-01 | -6.53 |
| 1430960_PM_at   | 4933440J02Rik             | NA       | -0.07 | 2.39  | -0.57 | 5.80E-01 | 7.92E-01 | -6.53 |
| 1422662_PM_at   | Lgals8                    | LGALS8   | 0.10  | 2.54  | 0.57  | 5.80E-01 | 7.92E-01 | -6.53 |
| 1428508_PM_at   | Tbc1d2b                   | TBC1D2B  | 0.16  | 3.21  | 0.57  | 5.80E-01 | 7.92E-01 | -6.53 |
| 1449021_PM_at   | Rpp21                     | RPP21    | 0.11  | 3.40  | 0.57  | 5.80E-01 | 7.92E-01 | -6.53 |
| 1448373_PM_at   | Mrpl18                    | MRPL18   | -0.11 | 3.27  | -0.57 | 5.80E-01 | 7.92E-01 | -6.53 |
| 1451884_PM_a_at | Lsm2                      | LSM2     | -0.15 | 2.20  | -0.57 | 5.80E-01 | 7.92E-01 | -6.53 |
| 1419428_PM_a_at | Gaa                       | GAA      | -0.25 | 4.73  | -0.57 | 5.80E-01 | 7.92E-01 | -6.53 |
| 1418419_PM_at   | Fbxl20                    | FBXL20   | 0.06  | 3.45  | 0.57  | 5.80E-01 | 7.92E-01 | -6.53 |
| 1439011_PM_at   | ---                       | NA       | 0.09  | 2.51  | 0.57  | 5.80E-01 | 7.92E-01 | -6.53 |
| 1420447_PM_at   | Sult1e1                   | SULT1E1  | 0.07  | 2.00  | 0.57  | 5.80E-01 | 7.92E-01 | -6.53 |
| 1417636_PM_at   | Slc6a9                    | SLC6A9   | -0.16 | 3.64  | -0.57 | 5.80E-01 | 7.92E-01 | -6.53 |
| 1418689_PM_at   | Cts6                      | CTSL     | -0.05 | 2.46  | -0.57 | 5.80E-01 | 7.92E-01 | -6.53 |
| 1424875_PM_at   | Spg20                     | SPG20    | 0.18  | 2.63  | 0.57  | 5.80E-01 | 7.92E-01 | -6.53 |
| 1439508_PM_at   | Rab11b                    | RAB11B   | 0.11  | 2.91  | 0.57  | 5.80E-01 | 7.92E-01 | -6.53 |
| 1453237_PM_at   | Qars                      | QARS     | -0.07 | 2.45  | -0.57 | 5.80E-01 | 7.92E-01 | -6.53 |
| 1458167_PM_at   | ---                       | NA       | -0.17 | 2.71  | -0.57 | 5.80E-01 | 7.92E-01 | -6.53 |
| 1454520_PM_at   | 5830415B17Rik             | NA       | -0.10 | 2.37  | -0.57 | 5.80E-01 | 7.92E-01 | -6.53 |
| 1459513_PM_at   | ---                       | NA       | -0.08 | 5.16  | -0.57 | 5.81E-01 | 7.92E-01 | -6.53 |
| 1456248_PM_at   | Lce3f /// LOC102642777    | NA       | -0.05 | 1.91  | -0.57 | 5.80E-01 | 7.92E-01 | -6.53 |
| 1442264_PM_at   | Rasgrp2                   | RASGRP2  | 0.04  | 2.28  | 0.57  | 5.81E-01 | 7.92E-01 | -6.53 |
| 1456633_PM_at   | ---                       | NA       | 0.28  | 5.14  | 0.57  | 5.81E-01 | 7.93E-01 | -6.53 |
| 1453349_PM_at   | Casz1                     | CASZ1    | 0.07  | 2.34  | 0.57  | 5.81E-01 | 7.93E-01 | -6.53 |
| 1428475_PM_at   | Lph                       | LLPH     | 0.25  | 6.28  | 0.57  | 5.81E-01 | 7.93E-01 | -6.53 |
| 1440171_PM_x_at | 1700049G17Rik             | NA       | -0.25 | 2.90  | -0.57 | 5.81E-01 | 7.93E-01 | -6.53 |
| 1456063_PM_at   | Fam120c                   | NA       | -0.20 | 2.95  | -0.57 | 5.81E-01 | 7.93E-01 | -6.53 |
| 1433543_PM_at   | Anln                      | ANLN     | -0.12 | 2.37  | -0.57 | 5.81E-01 | 7.93E-01 | -6.53 |
| 1459244_PM_at   | AU014756                  | NA       | 0.07  | 2.44  | 0.57  | 5.81E-01 | 7.93E-01 | -6.53 |
| 1452620_PM_at   | Pck2                      | PCK2     | 0.10  | 3.13  | 0.57  | 5.81E-01 | 7.93E-01 | -6.53 |
| 1443493_PM_at   | Dhx37                     | DHX37    | 0.07  | 2.29  | 0.57  | 5.81E-01 | 7.93E-01 | -6.53 |
| 1417016_PM_at   | Mapkapk5                  | MAPKAPK5 | -0.21 | 3.86  | -0.57 | 5.81E-01 | 7.93E-01 | -6.53 |
| 1437967_PM_at   | Ccdc141                   | CCDC141  | -0.11 | 2.69  | -0.57 | 5.81E-01 | 7.93E-01 | -6.53 |
| 1452481_PM_at   | Plcb2                     | PLCB2    | 0.05  | 3.93  | 0.57  | 5.81E-01 | 7.93E-01 | -6.53 |
| 1434662_PM_at   | Atg4a /// Atg4a-ps        | ATG4A    | 0.08  | 2.34  | 0.57  | 5.81E-01 | 7.93E-01 | -6.53 |
| 1437441_PM_at   | AA388235                  | NA       | -0.08 | 2.77  | -0.57 | 5.81E-01 | 7.93E-01 | -6.53 |
| 1451476_PM_at   | Zdhc8                     | ZDHHC8   | 0.05  | 3.25  | 0.57  | 5.81E-01 | 7.93E-01 | -6.53 |
| 1427454_PM_at   | Hoxc6                     | NA       | 0.06  | 2.74  | 0.57  | 5.81E-01 | 7.93E-01 | -6.53 |
| 1425780_PM_a_at | Tmem167                   | TMEM167A | -0.20 | 2.78  | -0.57 | 5.81E-01 | 7.93E-01 | -6.53 |
| 1435165_PM_at   | Cntn2                     | CNTN2    | 0.09  | 2.63  | 0.57  | 5.81E-01 | 7.93E-01 | -6.53 |
| 1443483_PM_at   | Xlr5a /// Xlr5b /// Xlr5c | NA       | 0.05  | 2.09  | 0.57  | 5.81E-01 | 7.93E-01 | -6.53 |
| 1437306_PM_at   | Ccser1                    | CCSER1   | 0.07  | 2.48  | 0.57  | 5.81E-01 | 7.93E-01 | -6.53 |
| 1450395_PM_at   | Slc22a5                   | SLC22A5  | -0.07 | 2.42  | -0.57 | 5.81E-01 | 7.93E-01 | -6.53 |
| 1455808_PM_at   | 4922502D21Rik             | NA       | 0.07  | 2.29  | 0.57  | 5.81E-01 | 7.93E-01 | -6.53 |
| 1441932_PM_at   | ---                       | NA       | 0.08  | 2.90  | 0.57  | 5.81E-01 | 7.93E-01 | -6.53 |
| 1456472_PM_at   | Armc4                     | ARMC4    | 0.10  | 2.30  | 0.57  | 5.81E-01 | 7.93E-01 | -6.53 |
| 1445138_PM_at   | A530083120Rik             | NA       | -0.16 | 3.43  | -0.57 | 5.82E-01 | 7.93E-01 | -6.53 |
| 1442721_PM_at   | Gm29943                   | NA       | -0.05 | 2.08  | -0.57 | 5.82E-01 | 7.93E-01 | -6.53 |
| 1441947_PM_x_at | Sik3                      | SIK3     | -0.48 | 6.17  | -0.57 | 5.82E-01 | 7.93E-01 | -6.53 |
| 1421088_PM_at   | Gpc4                      | GPC4     | 0.15  | 4.64  | 0.57  | 5.82E-01 | 7.93E-01 | -6.53 |
| 1424780_PM_a_at | Reep3                     | REEP3    | 0.10  | 2.45  | 0.57  | 5.82E-01 | 7.93E-01 | -6.53 |
| 1451472_PM_at   | Ears2                     | EARS2    | 0.08  | 2.53  | 0.57  | 5.82E-01 | 7.93E-01 | -6.53 |
| 1450747_PM_at   | Keap1                     | KEAP1    | 0.06  | 2.59  | 0.57  | 5.82E-01 | 7.93E-01 | -6.53 |
| 1428874_PM_at   | Fam96b                    | FAM96B   | 0.09  | 3.43  | 0.57  | 5.82E-01 | 7.94E-01 | -6.53 |
| 1417274_PM_at   | Snrpa                     | SNRPA    | -0.06 | 3.88  | -0.57 | 5.82E-01 | 7.94E-01 | -6.53 |
| 1450669_PM_at   | Map3k11                   | MAP3K11  | 0.07  | 2.82  | 0.57  | 5.82E-01 | 7.94E-01 | -6.53 |
| 1421522_PM_at   | B4galnt2                  | B4GALNT2 | 0.07  | 2.54  | 0.57  | 5.82E-01 | 7.94E-01 | -6.53 |
| 1447841_PM_x_at | St3gal6                   | ST3GAL6  | -0.10 | 3.04  | -0.57 | 5.82E-01 | 7.94E-01 | -6.53 |
| 1427178_PM_at   | Tmc4                      | TMC4     | -0.05 | 1.97  | -0.57 | 5.82E-01 | 7.94E-01 | -6.53 |
| 1420343_PM_at   | Gzmd                      | GZMB     | 0.04  | 1.76  | 0.57  | 5.82E-01 | 7.94E-01 | -6.53 |
| 1431643_PM_at   | Speer6-ps1                | NA       | 0.04  | 2.19  | 0.57  | 5.82E-01 | 7.94E-01 | -6.53 |
| 1445667_PM_at   | Tbc1d10a                  | NA       | 0.05  | 2.75  | 0.57  | 5.82E-01 | 7.94E-01 | -6.53 |
| 1422691_PM_at   | Sptlc1                    | SPTLC1   | 0.07  | 2.53  | 0.57  | 5.82E-01 | 7.94E-01 | -6.53 |
| 1425087_PM_at   | Hypk                      | HYPK     | 0.15  | 2.29  | 0.57  | 5.82E-01 | 7.94E-01 | -6.53 |
| 1436893_PM_a_at | March7                    | MARCH7   | -0.17 | 2.87  | -0.57 | 5.82E-01 | 7.94E-01 | -6.53 |
| 1422357_PM_at   | Magea6                    | MAGEA2   | -0.04 | 1.95  | -0.57 | 5.82E-01 | 7.94E-01 | -6.53 |
| 1460204_PM_at   | Tec                       | TEC      | -0.06 | 2.80  | -0.57 | 5.82E-01 | 7.94E-01 | -6.53 |
| 1456180_PM_at   | Rbm24                     | RBM24    | 0.06  | 2.86  | 0.57  | 5.83E-01 | 7.94E-01 | -6.53 |

|                 |                       |            |       |      |       |          |          |       |
|-----------------|-----------------------|------------|-------|------|-------|----------|----------|-------|
| 1452839_PM_at   | Dph5                  | DPH5       | 0.09  | 3.03 | 0.57  | 5.82E-01 | 7.94E-01 | -6.53 |
| 1441507_PM_at   | Sptbn1                | SPTBN1     | 0.10  | 2.57 | 0.57  | 5.83E-01 | 7.94E-01 | -6.53 |
| 1445134_PM_at   | Mkl2                  | MKL2       | -0.17 | 6.19 | -0.57 | 5.83E-01 | 7.94E-01 | -6.53 |
| 1442979_PM_at   | ---                   | NA         | 0.20  | 3.14 | 0.57  | 5.83E-01 | 7.94E-01 | -6.53 |
| 1443032_PM_at   | ---                   | NA         | -0.06 | 2.28 | -0.57 | 5.83E-01 | 7.94E-01 | -6.53 |
| 1436744_PM_x_at | Fbxw14 /// Fbxw28     | FBXW12     | 0.05  | 2.11 | 0.57  | 5.83E-01 | 7.94E-01 | -6.53 |
| 1449783_PM_at   | ---                   | NA         | 0.06  | 2.24 | 0.57  | 5.83E-01 | 7.94E-01 | -6.53 |
| 1453588_PM_at   | Car3                  | CA3        | 0.06  | 2.55 | 0.57  | 5.83E-01 | 7.94E-01 | -6.53 |
| 1445567_PM_at   | ---                   | NA         | 0.08  | 2.65 | 0.57  | 5.83E-01 | 7.94E-01 | -6.53 |
| 1433739_PM_at   | Nol10                 | NOL10      | 0.13  | 6.24 | 0.57  | 5.83E-01 | 7.94E-01 | -6.53 |
| 1451040_PM_at   | Dtd1                  | DTD1       | 0.19  | 5.36 | 0.57  | 5.83E-01 | 7.94E-01 | -6.53 |
| 1418023_PM_at   | Naa15                 | NAA15      | 0.15  | 3.07 | 0.57  | 5.83E-01 | 7.94E-01 | -6.53 |
| 1453677_PM_a_at | Der13                 | DERL3      | 0.05  | 2.37 | 0.57  | 5.83E-01 | 7.94E-01 | -6.53 |
| 1427352_PM_at   | Krt79                 | KRT79      | 0.06  | 2.31 | 0.57  | 5.83E-01 | 7.94E-01 | -6.53 |
| 1443835_PM_x_at | Gm7367 /// Ubald2     | UBALD2     | 0.08  | 2.02 | 0.57  | 5.83E-01 | 7.94E-01 | -6.53 |
| 1448228_PM_at   | Lox                   | LOX        | -0.11 | 2.70 | -0.57 | 5.83E-01 | 7.94E-01 | -6.53 |
| 1430861_PM_at   | 201011101Rik          | NA         | -0.05 | 2.47 | -0.57 | 5.83E-01 | 7.94E-01 | -6.53 |
| 1421151_PM_a_at | Epha2                 | EPHA2      | 0.06  | 2.46 | 0.57  | 5.83E-01 | 7.94E-01 | -6.53 |
| 1438734_PM_at   | A530016L24Rik         | C14orf180  | -0.08 | 2.41 | -0.57 | 5.83E-01 | 7.94E-01 | -6.53 |
| 1429436_PM_at   | Prpf40a               | PRPF40A    | -0.10 | 3.22 | -0.57 | 5.83E-01 | 7.94E-01 | -6.53 |
| 1420197_PM_at   | Gadd45b               | NA         | -0.07 | 3.37 | -0.57 | 5.83E-01 | 7.94E-01 | -6.53 |
| 1455039_PM_a_at | Sin3b                 | SIN3B      | 0.16  | 5.39 | 0.57  | 5.83E-01 | 7.94E-01 | -6.53 |
| 1417107_PM_at   | Tpd52l2               | TPD52L2    | -0.11 | 3.31 | -0.57 | 5.83E-01 | 7.94E-01 | -6.53 |
| 1425171_PM_at   | Rho                   | RHO        | 0.04  | 2.11 | 0.57  | 5.83E-01 | 7.94E-01 | -6.53 |
| 1423143_PM_at   | Gtpbp4                | GTPBP4     | 0.18  | 4.91 | 0.57  | 5.83E-01 | 7.94E-01 | -6.53 |
| 1432185_PM_a_at | Spdye4a               | SPDYE1     | 0.07  | 2.60 | 0.57  | 5.83E-01 | 7.94E-01 | -6.53 |
| 1422705_PM_at   | Pmepa1                | PMEPA1     | 0.07  | 2.37 | 0.57  | 5.83E-01 | 7.95E-01 | -6.53 |
| 1460237_PM_at   | Trim8                 | TRIM8      | 0.04  | 2.17 | 0.57  | 5.83E-01 | 7.95E-01 | -6.53 |
| 1448182_PM_a_at | Cd24a                 | CD24       | 0.25  | 2.95 | 0.57  | 5.83E-01 | 7.95E-01 | -6.53 |
| 1435910_PM_at   | Fads3                 | FADS3      | -0.22 | 3.17 | -0.57 | 5.84E-01 | 7.95E-01 | -6.53 |
| 1447997_PM_s_at | Timm8a2               | NA         | -0.17 | 2.38 | -0.57 | 5.84E-01 | 7.95E-01 | -6.53 |
| 1423094_PM_at   | Crbn                  | CRBN       | -0.11 | 2.79 | -0.57 | 5.84E-01 | 7.95E-01 | -6.53 |
| 1445105_PM_at   | ---                   | NA         | 0.06  | 2.08 | 0.57  | 5.84E-01 | 7.95E-01 | -6.53 |
| 1441657_PM_at   | ---                   | NA         | 0.07  | 2.36 | 0.57  | 5.84E-01 | 7.95E-01 | -6.53 |
| 1449261_PM_at   | Pbx2                  | PBX2       | 0.18  | 3.16 | 0.57  | 5.84E-01 | 7.95E-01 | -6.53 |
| 1458791_PM_at   | AU015849              | NA         | -0.06 | 2.29 | -0.57 | 5.84E-01 | 7.95E-01 | -6.53 |
| 1425528_PM_at   | Prrx1                 | PRRX1      | -0.16 | 3.07 | -0.57 | 5.84E-01 | 7.95E-01 | -6.53 |
| 1435704_PM_at   | C920006O11Rik         | NA         | 0.11  | 2.57 | 0.57  | 5.84E-01 | 7.95E-01 | -6.53 |
| 1423497_PM_at   | Klhl10                | KLHL10     | -0.06 | 2.19 | -0.57 | 5.84E-01 | 7.95E-01 | -6.53 |
| 1428166_PM_at   | Cdan1                 | CDAN1      | 0.10  | 3.13 | 0.57  | 5.84E-01 | 7.95E-01 | -6.53 |
| 1429592_PM_at   | Lhfp13                | LHFPL3     | 0.16  | 2.89 | 0.57  | 5.84E-01 | 7.95E-01 | -6.53 |
| 1446844_PM_at   | Chchd7                | CHCHD7     | 0.07  | 2.34 | 0.57  | 5.84E-01 | 7.95E-01 | -6.53 |
| 1428861_PM_at   | Filip1l               | FILIP1L    | -0.12 | 2.39 | -0.57 | 5.84E-01 | 7.95E-01 | -6.53 |
| 1426266_PM_s_at | Zbtb8os               | ZBTB8OS    | -0.19 | 3.17 | -0.56 | 5.84E-01 | 7.95E-01 | -6.53 |
| 1429859_PM_a_at | Arl2bp                | ARL2BP     | -0.14 | 3.77 | -0.56 | 5.84E-01 | 7.95E-01 | -6.53 |
| 1429610_PM_a_at | Zfp511                | AL360181.5 | -0.09 | 3.29 | -0.56 | 5.84E-01 | 7.95E-01 | -6.53 |
| 1443666_PM_at   | Mid1                  | MID1       | 0.05  | 2.17 | 0.56  | 5.84E-01 | 7.95E-01 | -6.53 |
| 1458463_PM_at   | LOC105244755          | NA         | 0.05  | 2.27 | 0.56  | 5.84E-01 | 7.95E-01 | -6.53 |
| 1433203_PM_at   | ---                   | NA         | 0.16  | 2.83 | 0.56  | 5.84E-01 | 7.95E-01 | -6.53 |
| 1417575_PM_at   | Otub2                 | OTUB2      | -0.13 | 2.77 | -0.56 | 5.84E-01 | 7.95E-01 | -6.53 |
| 1435658_PM_at   | Skc27a1               | NA         | -0.08 | 2.75 | -0.56 | 5.84E-01 | 7.95E-01 | -6.53 |
| 1438104_PM_at   | ---                   | NA         | 0.11  | 3.18 | 0.56  | 5.84E-01 | 7.95E-01 | -6.53 |
| 1418370_PM_at   | Tnnc1                 | TNNC1      | -0.10 | 3.91 | -0.56 | 5.84E-01 | 7.95E-01 | -6.53 |
| 1455876_PM_at   | Slc4a7                | SLC4A7     | 0.19  | 3.98 | 0.56  | 5.84E-01 | 7.95E-01 | -6.53 |
| 1426164_PM_a_at | Usf1                  | USF1       | 0.06  | 2.58 | 0.56  | 5.84E-01 | 7.95E-01 | -6.53 |
| 1459419_PM_at   | Gm5481                | NA         | 0.08  | 2.53 | 0.56  | 5.84E-01 | 7.95E-01 | -6.53 |
| 1431632_PM_at   | 4930526L06Rik         | NA         | -0.07 | 2.52 | -0.56 | 5.84E-01 | 7.95E-01 | -6.53 |
| 1422591_PM_at   | Tceb3                 | ELOA       | -0.08 | 2.21 | -0.56 | 5.85E-01 | 7.95E-01 | -6.53 |
| 1436416_PM_x_at | Timm10b               | AC084337.2 | -0.07 | 2.01 | -0.56 | 5.85E-01 | 7.95E-01 | -6.53 |
| 1449479_PM_at   | Cyp2b13               | CYP2B6     | -0.06 | 2.30 | -0.56 | 5.85E-01 | 7.95E-01 | -6.53 |
| 1421386_PM_at   | Ankrd6                | ANKRD6     | 0.06  | 2.55 | 0.56  | 5.85E-01 | 7.95E-01 | -6.53 |
| 1440237_PM_at   | Ercc4                 | NA         | 0.12  | 2.80 | 0.56  | 5.85E-01 | 7.95E-01 | -6.53 |
| 1434051_PM_s_at | Hspa12a               | HSPA12A    | -0.16 | 7.43 | -0.56 | 5.85E-01 | 7.96E-01 | -6.53 |
| 1456809_PM_at   | ---                   | NA         | -0.08 | 3.18 | -0.56 | 5.85E-01 | 7.96E-01 | -6.53 |
| 1422810_PM_at   | Zfp24                 | ZNF24      | -0.07 | 2.65 | -0.56 | 5.85E-01 | 7.96E-01 | -6.53 |
| 1438212_PM_at   | Usp37                 | USP37      | -0.06 | 2.32 | -0.56 | 5.85E-01 | 7.96E-01 | -6.53 |
| 1432810_PM_at   | Ttc32                 | TTC32      | 0.05  | 2.03 | 0.56  | 5.85E-01 | 7.96E-01 | -6.53 |
| 1447001_PM_at   | C87114                | NA         | 0.05  | 2.08 | 0.56  | 5.85E-01 | 7.96E-01 | -6.53 |
| 1430637_PM_at   | ---                   | NA         | 0.05  | 2.06 | 0.56  | 5.85E-01 | 7.96E-01 | -6.53 |
| 1447899_PM_x_at | Epcam                 | EPCAM      | 0.05  | 2.23 | 0.56  | 5.85E-01 | 7.96E-01 | -6.53 |
| 1456716_PM_s_at | 3110002H16Rik         | C18orf8    | 0.06  | 2.20 | 0.56  | 5.85E-01 | 7.96E-01 | -6.53 |
| 1430764_PM_at   | 1700023F06Rik         | NA         | 0.08  | 2.48 | 0.56  | 5.85E-01 | 7.96E-01 | -6.53 |
| 1416087_PM_at   | Ap1s1                 | AP1S1      | 0.09  | 3.26 | 0.56  | 5.85E-01 | 7.96E-01 | -6.53 |
| 1426995_PM_a_at | Gfer                  | GFER       | 0.09  | 2.93 | 0.56  | 5.85E-01 | 7.96E-01 | -6.53 |
| 1448245_PM_at   | LOC102642689 /// Rpsa | RPSA       | 0.26  | 8.20 | 0.56  | 5.85E-01 | 7.96E-01 | -6.53 |

|                 |                                     |           |       |      |       |          |          |       |
|-----------------|-------------------------------------|-----------|-------|------|-------|----------|----------|-------|
| 1419837_PM_at   | TremI2                              | TREML2    | -0.06 | 2.55 | -0.56 | 5.85E-01 | 7.96E-01 | -6.53 |
| 1418737_PM_at   | Nudt2                               | NUDT2     | -0.08 | 2.57 | -0.56 | 5.85E-01 | 7.96E-01 | -6.53 |
| 1443537_PM_at   | ---                                 | NA        | -0.06 | 2.03 | -0.56 | 5.85E-01 | 7.96E-01 | -6.53 |
| 1421186_PM_at   | Ccr2                                | CCR2      | -0.06 | 2.01 | -0.56 | 5.85E-01 | 7.96E-01 | -6.53 |
| 1422046_PM_at   | Itgam                               | ITGAM     | 0.05  | 2.26 | 0.56  | 5.85E-01 | 7.96E-01 | -6.53 |
| 1443189_PM_at   | ---                                 | NA        | 0.06  | 2.35 | 0.56  | 5.85E-01 | 7.96E-01 | -6.53 |
| 1444287_PM_at   | Al853106                            | NA        | 0.06  | 2.64 | 0.56  | 5.85E-01 | 7.96E-01 | -6.53 |
| 1415936_PM_at   | Bcar3                               | BCAR3     | 0.10  | 2.59 | 0.56  | 5.85E-01 | 7.96E-01 | -6.53 |
| 1443792_PM_at   | Cep41                               | CEP41     | 0.11  | 2.54 | 0.56  | 5.85E-01 | 7.96E-01 | -6.53 |
| 1456654_PM_at   | Paqr5                               | PAQR5     | 0.14  | 2.85 | 0.56  | 5.85E-01 | 7.96E-01 | -6.53 |
| 1426523_PM_a_at | Gnpda2                              | GNPDA2    | 0.18  | 3.19 | 0.56  | 5.85E-01 | 7.96E-01 | -6.53 |
| 1457518_PM_at   | ---                                 | NA        | 0.09  | 2.72 | 0.56  | 5.85E-01 | 7.96E-01 | -6.53 |
| 1443523_PM_at   | Fam135b                             | FAM135B   | 0.10  | 3.21 | 0.56  | 5.85E-01 | 7.96E-01 | -6.53 |
| 1424259_PM_at   | Lmf1                                | LMF1      | -0.09 | 2.45 | -0.56 | 5.85E-01 | 7.96E-01 | -6.53 |
| 1443131_PM_at   | Lrp1b                               | LRP1B     | 0.06  | 2.22 | 0.56  | 5.85E-01 | 7.96E-01 | -6.53 |
| 1436627_PM_at   | Airn                                | NA        | -0.07 | 2.63 | -0.56 | 5.85E-01 | 7.96E-01 | -6.53 |
| 1460468_PM_s_at | Dnajc22                             | DNAJC22   | 0.05  | 2.19 | 0.56  | 5.85E-01 | 7.96E-01 | -6.53 |
| 1447132_PM_at   | ---                                 | NA        | 0.12  | 2.76 | 0.56  | 5.85E-01 | 7.96E-01 | -6.53 |
| 1423920_PM_at   | Ncaph                               | NCAPH     | 0.07  | 2.85 | 0.56  | 5.85E-01 | 7.96E-01 | -6.53 |
| 1445268_PM_at   | ---                                 | NA        | 0.08  | 3.57 | 0.56  | 5.85E-01 | 7.96E-01 | -6.53 |
| 1442213_PM_at   | ---                                 | NA        | -0.17 | 4.20 | -0.56 | 5.86E-01 | 7.96E-01 | -6.53 |
| 1428488_PM_at   | Pigk                                | PIGK      | -0.09 | 4.06 | -0.56 | 5.86E-01 | 7.96E-01 | -6.53 |
| 1460704_PM_at   | Rfng                                | RFNG      | -0.16 | 5.17 | -0.56 | 5.86E-01 | 7.96E-01 | -6.53 |
| 1418952_PM_at   | Txlnb                               | TXLNB     | -0.06 | 2.87 | -0.56 | 5.86E-01 | 7.96E-01 | -6.53 |
| 1426170_PM_a_at | Cd8b1                               | CD8B      | -0.05 | 2.45 | -0.56 | 5.86E-01 | 7.96E-01 | -6.53 |
| 1431386_PM_s_at | Mbtps1                              | MBTPS1    | 0.07  | 2.45 | 0.56  | 5.86E-01 | 7.96E-01 | -6.53 |
| 1444003_PM_at   | Neur3                               | NEURL3    | 0.08  | 2.37 | 0.56  | 5.86E-01 | 7.96E-01 | -6.53 |
| 1456081_PM_a_at | Aacs                                | AACS      | 0.08  | 3.07 | 0.56  | 5.86E-01 | 7.96E-01 | -6.53 |
| 1434900_PM_at   | Mkl1                                | MKL1      | 0.11  | 3.50 | 0.56  | 5.86E-01 | 7.96E-01 | -6.53 |
| 1444913_PM_at   | ---                                 | NA        | 0.13  | 2.87 | 0.56  | 5.86E-01 | 7.96E-01 | -6.53 |
| 1439104_PM_at   | Peak1                               | PEAK1     | -0.12 | 3.61 | -0.56 | 5.86E-01 | 7.96E-01 | -6.53 |
| 1442414_PM_at   | ---                                 | NA        | 0.10  | 2.69 | 0.56  | 5.86E-01 | 7.96E-01 | -6.53 |
| 1458063_PM_at   | 4930518F22Rik                       | NA        | 0.05  | 2.14 | 0.56  | 5.86E-01 | 7.96E-01 | -6.53 |
| 1431107_PM_at   | Stk35                               | STK35     | -0.24 | 3.19 | -0.56 | 5.86E-01 | 7.96E-01 | -6.53 |
| 1450496_PM_a_at | Ska1                                | SKA1      | 0.04  | 2.06 | 0.56  | 5.86E-01 | 7.96E-01 | -6.53 |
| 1443074_PM_at   | ---                                 | NA        | 0.05  | 2.49 | 0.56  | 5.86E-01 | 7.96E-01 | -6.53 |
| 1441795_PM_at   | Snapc4                              | SNAPC4    | 0.16  | 2.99 | 0.56  | 5.86E-01 | 7.96E-01 | -6.53 |
| 1419037_PM_at   | Csnk2a1                             | CSNK2A3   | -0.20 | 4.62 | -0.56 | 5.86E-01 | 7.96E-01 | -6.53 |
| 1452838_PM_at   | Ddx10                               | DDX10     | -0.05 | 2.45 | -0.56 | 5.86E-01 | 7.96E-01 | -6.53 |
| 1451149_PM_at   | Pgm2                                | PGM1      | 0.07  | 3.22 | 0.56  | 5.86E-01 | 7.96E-01 | -6.53 |
| 1455578_PM_x_at | Rpl41                               | NA        | 0.12  | 8.32 | 0.56  | 5.86E-01 | 7.96E-01 | -6.53 |
| 1445460_PM_at   | Bach2                               | NA        | 0.13  | 4.57 | 0.56  | 5.86E-01 | 7.96E-01 | -6.53 |
| 1426550_PM_at   | Sidt1                               | SIDT1     | 0.16  | 4.27 | 0.56  | 5.86E-01 | 7.96E-01 | -6.53 |
| 1424840_PM_at   | Rbks                                | RBKS      | -0.05 | 2.38 | -0.56 | 5.86E-01 | 7.96E-01 | -6.53 |
| 1440980_PM_at   | Kcnh8                               | KCNH8     | 0.06  | 2.58 | 0.56  | 5.86E-01 | 7.97E-01 | -6.53 |
| 1458241_PM_at   | ---                                 | NA        | 0.06  | 2.29 | 0.56  | 5.86E-01 | 7.97E-01 | -6.53 |
| 1453973_PM_s_at | Tmem143                             | TMEM143   | 0.07  | 2.65 | 0.56  | 5.86E-01 | 7.97E-01 | -6.53 |
| 1449989_PM_at   | Mcpt2                               | NA        | 0.08  | 2.16 | 0.56  | 5.86E-01 | 7.97E-01 | -6.53 |
| 1441163_PM_at   | Med12l                              | MED12L    | 0.12  | 2.22 | 0.56  | 5.86E-01 | 7.97E-01 | -6.53 |
| 1427520_PM_a_at | Myh1                                | MYH1      | -0.46 | 3.09 | -0.56 | 5.87E-01 | 7.97E-01 | -6.53 |
| 1452247_PM_at   | Fxr1                                | FXR1      | -0.15 | 3.07 | -0.56 | 5.87E-01 | 7.97E-01 | -6.53 |
| 1433487_PM_at   | Ckcn3                               | CLCN3     | -0.15 | 4.72 | -0.56 | 5.87E-01 | 7.97E-01 | -6.53 |
| 1435795_PM_at   | Tmppe                               | TMPPE     | -0.11 | 3.05 | -0.56 | 5.87E-01 | 7.97E-01 | -6.53 |
| 1443778_PM_at   | Sox4                                | SOX4      | 0.05  | 1.91 | 0.56  | 5.87E-01 | 7.97E-01 | -6.53 |
| 1456841_PM_at   | Gm4961                              | NA        | 0.06  | 2.52 | 0.56  | 5.87E-01 | 7.97E-01 | -6.53 |
| 1435331_PM_at   | Pyhin1                              | NA        | 0.12  | 2.53 | 0.56  | 5.87E-01 | 7.97E-01 | -6.53 |
| 1453979_PM_at   | Rbm12b1                             | NA        | 0.13  | 4.84 | 0.56  | 5.87E-01 | 7.97E-01 | -6.53 |
| 1438437_PM_a_at | 4933439C10Rik                       | NA        | 0.25  | 3.50 | 0.56  | 5.87E-01 | 7.97E-01 | -6.53 |
| 1438879_PM_at   | ---                                 | NA        | -0.05 | 2.23 | -0.56 | 5.87E-01 | 7.97E-01 | -6.53 |
| 1438926_PM_at   | Rpl36a-ps2                          | NA        | -0.05 | 2.15 | -0.56 | 5.87E-01 | 7.97E-01 | -6.53 |
| 1454295_PM_at   | Nrip1                               | NRIP1     | 0.05  | 2.08 | 0.56  | 5.87E-01 | 7.97E-01 | -6.53 |
| 1448540_PM_a_at | 0610012G03Rik                       | NA        | 0.15  | 5.24 | 0.56  | 5.87E-01 | 7.97E-01 | -6.53 |
| 1456123_PM_at   | Sk5a12                              | NA        | -0.15 | 2.07 | -0.56 | 5.87E-01 | 7.97E-01 | -6.53 |
| 1427493_PM_at   | Sclt1                               | SCLT1     | -0.05 | 2.01 | -0.56 | 5.87E-01 | 7.97E-01 | -6.53 |
| 1454194_PM_at   | ---                                 | NA        | 0.07  | 2.46 | 0.56  | 5.87E-01 | 7.97E-01 | -6.53 |
| 1416108_PM_a_at | Tmed3                               | TMED3     | -0.13 | 2.74 | -0.56 | 5.87E-01 | 7.97E-01 | -6.53 |
| 1433574_PM_at   | Cdc37l1                             | NA        | -0.23 | 4.66 | -0.56 | 5.87E-01 | 7.97E-01 | -6.53 |
| 1444046_PM_at   | Shisa7                              | SHISA7    | 0.09  | 3.13 | 0.56  | 5.87E-01 | 7.97E-01 | -6.53 |
| 1422626_PM_at   | Mmp16                               | MMP16     | -0.10 | 2.69 | -0.56 | 5.87E-01 | 7.97E-01 | -6.53 |
| 1445740_PM_at   | ---                                 | NA        | -0.07 | 2.15 | -0.56 | 5.87E-01 | 7.97E-01 | -6.53 |
| 1452609_PM_at   | 1190005I06Rik ///Emc8-1190005I06rik | C16orf74  | 0.11  | 2.78 | 0.56  | 5.87E-01 | 7.97E-01 | -6.53 |
| 1439758_PM_at   | Als2cr12                            | ALS2CR12  | -0.05 | 1.97 | -0.56 | 5.87E-01 | 7.97E-01 | -6.53 |
| 1422347_PM_at   | Npy6r                               | NA        | 0.05  | 2.04 | 0.56  | 5.87E-01 | 7.97E-01 | -6.53 |
| 1418386_PM_at   | Ngamt2                              | EEF1AKMT1 | 0.14  | 2.47 | 0.56  | 5.87E-01 | 7.97E-01 | -6.53 |

|                 |                             |          |       |       |       |          |          |       |
|-----------------|-----------------------------|----------|-------|-------|-------|----------|----------|-------|
| 1450798_PM_at   | Tnxb                        | TNXB     | -0.06 | 2.63  | -0.56 | 5.87E-01 | 7.97E-01 | -6.53 |
| 1429978_PM_at   | Amn1                        | AMN1     | -0.05 | 2.10  | -0.56 | 5.87E-01 | 7.97E-01 | -6.53 |
| 1422296_PM_at   | Sike1                       | NA       | 0.06  | 2.33  | 0.56  | 5.87E-01 | 7.97E-01 | -6.53 |
| 1428200_PM_a_at | Pdxc1                       | PDXC1    | -0.06 | 3.00  | -0.56 | 5.87E-01 | 7.97E-01 | -6.53 |
| 1437520_PM_a_at | Nup85                       | NUP85    | 0.13  | 6.96  | 0.56  | 5.87E-01 | 7.97E-01 | -6.53 |
| 1432220_PM_at   | Zfp526                      | NA       | -0.05 | 2.06  | -0.56 | 5.87E-01 | 7.97E-01 | -6.53 |
| 1448614_PM_at   | Nt5c2                       | NT5C2    | 0.09  | 2.76  | 0.56  | 5.87E-01 | 7.97E-01 | -6.53 |
| 1430153_PM_at   | Tmod2                       | NA       | 0.27  | 4.26  | 0.56  | 5.87E-01 | 7.97E-01 | -6.53 |
| 1458250_PM_at   | ---                         | NA       | -0.19 | 3.31  | -0.56 | 5.87E-01 | 7.97E-01 | -6.53 |
| 1458716_PM_at   | Dusp27                      | DUSP27   | 0.04  | 2.03  | 0.56  | 5.87E-01 | 7.97E-01 | -6.53 |
| 1444556_PM_at   | ---                         | NA       | 0.05  | 2.29  | 0.56  | 5.87E-01 | 7.97E-01 | -6.53 |
| 1436472_PM_at   | Sifn9                       | NA       | 0.05  | 3.34  | 0.56  | 5.87E-01 | 7.97E-01 | -6.53 |
| 1446868_PM_at   | ---                         | NA       | 0.06  | 2.28  | 0.56  | 5.87E-01 | 7.97E-01 | -6.53 |
| 1415972_PM_at   | Marcks                      | MARCKS   | -0.22 | 5.54  | -0.56 | 5.88E-01 | 7.97E-01 | -6.53 |
| 1436463_PM_at   | ---                         | NA       | -0.09 | 2.62  | -0.56 | 5.88E-01 | 7.97E-01 | -6.53 |
| 1444940_PM_at   | C76411                      | NA       | -0.06 | 2.15  | -0.56 | 5.88E-01 | 7.97E-01 | -6.54 |
| 1454085_PM_at   | ---                         | NA       | 0.04  | 2.15  | 0.56  | 5.88E-01 | 7.97E-01 | -6.54 |
| 1440382_PM_at   | BC051628                    | FNDC11   | 0.06  | 2.31  | 0.56  | 5.88E-01 | 7.97E-01 | -6.54 |
| 1421790_PM_a_at | Kcnab3                      | KCNAB3   | 0.10  | 2.67  | 0.56  | 5.88E-01 | 7.97E-01 | -6.54 |
| 1449128_PM_at   | Ccdc43                      | CCDC43   | -0.18 | 3.13  | -0.56 | 5.88E-01 | 7.97E-01 | -6.54 |
| 1441920_PM_x_at | Trmt2a                      | TRMT2A   | 0.09  | 2.60  | 0.56  | 5.88E-01 | 7.97E-01 | -6.54 |
| 1431034_PM_at   | Adgra3                      | ADGRA3   | -0.26 | 2.89  | -0.56 | 5.88E-01 | 7.97E-01 | -6.54 |
| 1426836_PM_s_at | Metap1                      | METAP1   | -0.12 | 3.75  | -0.56 | 5.88E-01 | 7.97E-01 | -6.54 |
| 1441335_PM_at   | 4930474N05Rik               | NA       | 0.10  | 2.59  | 0.56  | 5.88E-01 | 7.97E-01 | -6.54 |
| 1451264_PM_at   | FrmD6                       | FRMD6    | 0.10  | 2.64  | 0.56  | 5.88E-01 | 7.97E-01 | -6.54 |
| 1424864_PM_at   | Hipk2                       | HIPK2    | 0.09  | 2.70  | 0.56  | 5.88E-01 | 7.97E-01 | -6.54 |
| 1419459_PM_a_at | Magt1                       | MAGT1    | 0.12  | 2.86  | 0.56  | 5.88E-01 | 7.97E-01 | -6.54 |
| 1426461_PM_at   | Ugp2                        | UGP2     | -0.27 | 4.52  | -0.56 | 5.88E-01 | 7.97E-01 | -6.54 |
| 1455350_PM_at   | Tmem62                      | TMEM62   | -0.13 | 2.64  | -0.56 | 5.88E-01 | 7.97E-01 | -6.54 |
| 1430505_PM_at   | Tmem219                     | TMEM219  | -0.09 | 3.60  | -0.56 | 5.88E-01 | 7.97E-01 | -6.54 |
| 1439096_PM_at   | Ddo                         | DDO      | -0.09 | 5.09  | -0.56 | 5.88E-01 | 7.97E-01 | -6.54 |
| 1457522_PM_at   | ---                         | NA       | -0.09 | 2.55  | -0.56 | 5.88E-01 | 7.97E-01 | -6.54 |
| 1429339_PM_a_at | Acad10                      | ACAD10   | -0.06 | 2.58  | -0.56 | 5.88E-01 | 7.97E-01 | -6.54 |
| 1431491_PM_at   | ---                         | NA       | -0.04 | 1.92  | -0.56 | 5.88E-01 | 7.97E-01 | -6.54 |
| 1421722_PM_at   | ---                         | NA       | 0.04  | 2.00  | 0.56  | 5.88E-01 | 7.97E-01 | -6.54 |
| 1421136_PM_at   | Edn3                        | EDN3     | 0.05  | 2.21  | 0.56  | 5.88E-01 | 7.97E-01 | -6.54 |
| 1444724_PM_at   | ---                         | NA       | 0.06  | 2.21  | 0.56  | 5.88E-01 | 7.97E-01 | -6.54 |
| 1453489_PM_at   | Gpatch2l                    | GPATCH2L | 0.06  | 2.77  | 0.56  | 5.88E-01 | 7.97E-01 | -6.54 |
| 1456704_PM_at   | ---                         | NA       | 0.11  | 2.43  | 0.56  | 5.88E-01 | 7.97E-01 | -6.54 |
| 1418286_PM_a_at | Efnb1                       | EFNB1    | 0.12  | 5.87  | 0.56  | 5.88E-01 | 7.97E-01 | -6.54 |
| 1446642_PM_at   | Phf14                       | NA       | 0.15  | 3.23  | 0.56  | 5.88E-01 | 7.97E-01 | -6.54 |
| 1457054_PM_a_at | D130020L05Rik               | NA       | -0.10 | 3.11  | -0.56 | 5.88E-01 | 7.97E-01 | -6.54 |
| 1437833_PM_at   | Ltbp3                       | LTBP3    | 0.13  | 2.20  | 0.56  | 5.88E-01 | 7.97E-01 | -6.54 |
| 1455972_PM_x_at | Hadh                        | HADH     | -0.33 | 4.90  | -0.56 | 5.88E-01 | 7.97E-01 | -6.54 |
| 1444510_PM_at   | ---                         | NA       | -0.16 | 3.69  | -0.56 | 5.88E-01 | 7.97E-01 | -6.54 |
| 1419239_PM_at   | Zfp54                       | NA       | 0.06  | 2.11  | 0.56  | 5.88E-01 | 7.97E-01 | -6.54 |
| 1431015_PM_at   | Tmem129                     | TMEM129  | -0.09 | 2.86  | -0.56 | 5.88E-01 | 7.97E-01 | -6.54 |
| 1440035_PM_at   | ---                         | NA       | 0.08  | 2.79  | 0.56  | 5.88E-01 | 7.97E-01 | -6.54 |
| 1455851_PM_at   | Bmp5                        | BMP5     | -0.35 | 3.68  | -0.56 | 5.88E-01 | 7.97E-01 | -6.54 |
| 1442456_PM_at   | Spata5                      | SPATA5   | 0.05  | 2.24  | 0.56  | 5.89E-01 | 7.97E-01 | -6.54 |
| 1446738_PM_at   | ---                         | NA       | 0.05  | 2.25  | 0.56  | 5.89E-01 | 7.97E-01 | -6.54 |
| 1453351_PM_at   | Tbx20                       | TBX20    | -0.17 | 2.55  | -0.56 | 5.89E-01 | 7.98E-01 | -6.54 |
| 1441916_PM_s_at | Odf3                        | ODF3     | 0.07  | 2.65  | 0.56  | 5.89E-01 | 7.98E-01 | -6.54 |
| 1449221_PM_a_at | Rrbp1                       | RRBP1    | 0.11  | 2.29  | 0.56  | 5.89E-01 | 7.98E-01 | -6.54 |
| 1425186_PM_at   | Lmbrd1                      | LMBRD1   | -0.12 | 3.82  | -0.56 | 5.89E-01 | 7.98E-01 | -6.54 |
| 1433219_PM_at   | 6720482G16Rik               | NA       | 0.05  | 2.22  | 0.56  | 5.89E-01 | 7.98E-01 | -6.54 |
| 1446709_PM_at   | Gm31562                     | NA       | 0.13  | 2.63  | 0.56  | 5.89E-01 | 7.98E-01 | -6.54 |
| 1458565_PM_at   | Arl2                        | ARL2     | 0.05  | 2.10  | 0.56  | 5.89E-01 | 7.98E-01 | -6.54 |
| 1436760_PM_a_at | Rps8                        | RPS8     | -0.24 | 3.85  | -0.56 | 5.89E-01 | 7.98E-01 | -6.54 |
| 1438082_PM_at   | Tmem206                     | NA       | -0.23 | 5.48  | -0.56 | 5.89E-01 | 7.98E-01 | -6.54 |
| 1455742_PM_x_at | Morf4l1 /// Morf4l1-ps1 /// | MORF4L1  | -0.10 | 10.18 | -0.56 | 5.89E-01 | 7.98E-01 | -6.54 |
| 1422146_PM_at   | Sema5b                      | SEMA5B   | -0.08 | 2.96  | -0.56 | 5.89E-01 | 7.98E-01 | -6.54 |
| 1439638_PM_at   | ---                         | NA       | -0.06 | 1.91  | -0.56 | 5.89E-01 | 7.98E-01 | -6.54 |
| 1443916_PM_at   | 2900026A02Rik               | KIAA1671 | 0.09  | 2.39  | 0.56  | 5.89E-01 | 7.98E-01 | -6.54 |
| 1429387_PM_at   | Grap                        | GRAP     | 0.09  | 2.62  | 0.56  | 5.89E-01 | 7.98E-01 | -6.54 |
| 1435495_PM_at   | Adora1                      | ADORA1   | 0.16  | 8.02  | 0.56  | 5.89E-01 | 7.98E-01 | -6.54 |
| 1450997_PM_at   | Stk17b                      | STK17B   | 0.22  | 2.54  | 0.56  | 5.89E-01 | 7.98E-01 | -6.54 |
| 1443353_PM_at   | ---                         | NA       | 0.14  | 3.39  | 0.56  | 5.89E-01 | 7.98E-01 | -6.54 |
| 1438412_PM_at   | Jade1                       | JADE1    | -0.12 | 2.14  | -0.56 | 5.89E-01 | 7.98E-01 | -6.54 |
| 1442836_PM_at   | Xpo7                        | NA       | -0.19 | 3.00  | -0.56 | 5.89E-01 | 7.98E-01 | -6.54 |
| 1425676_PM_a_at | Elov1                       | ELOVL1   | 0.05  | 2.47  | 0.56  | 5.89E-01 | 7.98E-01 | -6.54 |
| 1421628_PM_at   | Il18r1                      | IL18R1   | 0.15  | 3.13  | 0.56  | 5.89E-01 | 7.98E-01 | -6.54 |
| 1443237_PM_at   | ---                         | NA       | 0.09  | 2.52  | 0.56  | 5.89E-01 | 7.98E-01 | -6.54 |
| 1439969_PM_at   | Tmem8b                      | TMEM8B   | -0.20 | 6.50  | -0.56 | 5.90E-01 | 7.98E-01 | -6.54 |



|                 |                     |          |       |      |       |          |          |       |
|-----------------|---------------------|----------|-------|------|-------|----------|----------|-------|
| 1432628_PM_at   | Cbx3                | NA       | 0.10  | 2.87 | 0.56  | 5.90E-01 | 7.98E-01 | -6.54 |
| 1417195_PM_at   | Wwc2                | WWC2     | -0.06 | 2.82 | -0.56 | 5.90E-01 | 7.98E-01 | -6.54 |
| 1444829_PM_at   | C78532              | NA       | 0.07  | 2.26 | 0.56  | 5.90E-01 | 7.98E-01 | -6.54 |
| 1454129_PM_at   | 4933416M06Rik       | NA       | 0.10  | 2.22 | 0.56  | 5.90E-01 | 7.98E-01 | -6.54 |
| 1426679_PM_at   | Zfp706              | ZNF706   | -0.19 | 4.38 | -0.56 | 5.90E-01 | 7.98E-01 | -6.54 |
| 1441677_PM_at   | ---                 | NA       | 0.07  | 2.25 | 0.56  | 5.90E-01 | 7.98E-01 | -6.54 |
| 1460387_PM_a_at | Siae                | SIAE     | 0.16  | 2.85 | 0.56  | 5.90E-01 | 7.98E-01 | -6.54 |
| 1427907_PM_at   | 1110037F02Rik       | KIAA1429 | 0.18  | 3.55 | 0.56  | 5.90E-01 | 7.98E-01 | -6.54 |
| 1415750_PM_at   | Tbl3                | TBL3     | 0.05  | 2.46 | 0.56  | 5.90E-01 | 7.98E-01 | -6.54 |
| 1435110_PM_at   | Unc5b               | UNC5B    | 0.08  | 3.41 | 0.56  | 5.90E-01 | 7.98E-01 | -6.54 |
| 1431697_PM_at   | Synj2               | SYNJ2    | 0.08  | 2.30 | 0.56  | 5.90E-01 | 7.99E-01 | -6.54 |
| 1423457_PM_at   | Slc35a5             | SLC35A5  | -0.08 | 2.43 | -0.56 | 5.90E-01 | 7.99E-01 | -6.54 |
| 1445758_PM_at   | Gxylt2              | GXYLT2   | 0.07  | 2.49 | 0.56  | 5.90E-01 | 7.99E-01 | -6.54 |
| 1418940_PM_at   | Sult1b1             | SULT1B1  | 0.07  | 2.46 | 0.56  | 5.90E-01 | 7.99E-01 | -6.54 |
| 1458137_PM_at   | ---                 | NA       | 0.07  | 2.34 | 0.56  | 5.90E-01 | 7.99E-01 | -6.54 |
| 1431854_PM_a_at | 4930452B06Rik       | C3orf67  | 0.08  | 2.79 | 0.56  | 5.90E-01 | 7.99E-01 | -6.54 |
| 1437924_PM_at   | Son                 | SON      | 0.09  | 2.27 | 0.56  | 5.90E-01 | 7.99E-01 | -6.54 |
| 1449485_PM_at   | Ripk1               | RIPK1    | 0.10  | 2.20 | 0.56  | 5.90E-01 | 7.99E-01 | -6.54 |
| 1416606_PM_s_at | Nhp2                | NHP2     | 0.18  | 2.70 | 0.56  | 5.90E-01 | 7.99E-01 | -6.54 |
| 1416295_PM_a_at | Il2rg               | IL2RG    | 0.05  | 1.95 | 0.56  | 5.90E-01 | 7.99E-01 | -6.54 |
| 1441864_PM_x_at | ---                 | NA       | 0.14  | 2.17 | 0.56  | 5.90E-01 | 7.99E-01 | -6.54 |
| 1455825_PM_s_at | Lnx1                | LNK1     | -0.21 | 5.18 | -0.56 | 5.90E-01 | 7.99E-01 | -6.54 |
| 1427125_PM_s_at | Lrrc41              | LRRC41   | 0.10  | 3.33 | 0.56  | 5.90E-01 | 7.99E-01 | -6.54 |
| 1446736_PM_at   | ---                 | NA       | -0.10 | 2.41 | -0.56 | 5.90E-01 | 7.99E-01 | -6.54 |
| 1435505_PM_at   | Dmwd                | DMWD     | 0.15  | 2.80 | 0.56  | 5.90E-01 | 7.99E-01 | -6.54 |
| 1418542_PM_s_at | Cenpo               | CENPO    | -0.06 | 2.47 | -0.56 | 5.90E-01 | 7.99E-01 | -6.54 |
| 1419219_PM_at   | Cyp4f18             | CYP4F12  | 0.06  | 2.30 | 0.56  | 5.91E-01 | 7.99E-01 | -6.54 |
| 1424538_PM_at   | SlcUbl4a /// Ubl4a  | UBL4A    | 0.19  | 2.99 | 0.56  | 5.91E-01 | 7.99E-01 | -6.54 |
| 1419965_PM_at   | Tubb2a-ps2          | NA       | 0.11  | 2.46 | 0.55  | 5.91E-01 | 7.99E-01 | -6.54 |
| AFFX-r2-TagH_at | ---                 | NA       | -0.04 | 2.21 | -0.55 | 5.91E-01 | 7.99E-01 | -6.54 |
| 1443698_PM_at   | Xaf1                | XAF1     | -0.15 | 2.35 | -0.55 | 5.91E-01 | 7.99E-01 | -6.54 |
| 1425146_PM_at   | Ccdc166             | CCDC166  | 0.07  | 2.81 | 0.55  | 5.91E-01 | 7.99E-01 | -6.54 |
| 1455066_PM_s_at | Mia3                | NA       | -0.15 | 3.80 | -0.55 | 5.91E-01 | 7.99E-01 | -6.54 |
| 1424170_PM_at   | Phf5a               | PHF5A    | -0.12 | 3.87 | -0.55 | 5.91E-01 | 7.99E-01 | -6.54 |
| 1431266_PM_at   | Gpatch2             | NA       | -0.06 | 2.23 | -0.55 | 5.91E-01 | 7.99E-01 | -6.54 |
| 1456521_PM_at   | Nr5a2               | NR5A2    | -0.04 | 2.00 | -0.55 | 5.91E-01 | 7.99E-01 | -6.54 |
| 1440262_PM_at   | Al414108 /// Igsf9b | NA       | 0.09  | 2.71 | 0.55  | 5.91E-01 | 7.99E-01 | -6.54 |
| 1419268_PM_at   | Agr2                | NA       | 0.05  | 2.29 | 0.55  | 5.91E-01 | 7.99E-01 | -6.54 |
| 1451186_PM_at   | Aen                 | AEN      | 0.06  | 2.16 | 0.55  | 5.91E-01 | 7.99E-01 | -6.54 |
| 1452332_PM_at   | Ccdc85a             | CCDC85A  | -0.10 | 2.35 | -0.55 | 5.91E-01 | 7.99E-01 | -6.54 |
| 1456469_PM_x_at | Lasp1               | LASP1    | 0.05  | 2.08 | 0.55  | 5.91E-01 | 7.99E-01 | -6.54 |
| 1423117_PM_at   | Pum1                | PUM1     | 0.17  | 4.26 | 0.55  | 5.91E-01 | 7.99E-01 | -6.54 |
| 1427353_PM_at   | Clasp1              | CLASP1   | 0.11  | 2.42 | 0.55  | 5.91E-01 | 8.00E-01 | -6.54 |
| 1459262_PM_at   | Mterf3              | MTERF3   | 0.05  | 2.06 | 0.55  | 5.91E-01 | 8.00E-01 | -6.54 |
| 1457571_PM_at   | Zfp68               | ZNF717   | 0.05  | 2.37 | 0.55  | 5.91E-01 | 8.00E-01 | -6.54 |
| 1441210_PM_at   | ---                 | NA       | -0.14 | 2.65 | -0.55 | 5.91E-01 | 8.00E-01 | -6.54 |
| 1418591_PM_at   | Dnaj4               | DNAAJ4   | -0.09 | 3.36 | -0.55 | 5.91E-01 | 8.00E-01 | -6.54 |
| 1431422_PM_a_at | Dusp14              | DUSP14   | -0.07 | 2.52 | -0.55 | 5.91E-01 | 8.00E-01 | -6.54 |
| 1434832_PM_at   | Foxo3               | FOXO3    | -0.06 | 4.64 | -0.55 | 5.91E-01 | 8.00E-01 | -6.54 |
| 1446690_PM_at   | Gm31210             | NA       | 0.06  | 2.31 | 0.55  | 5.91E-01 | 8.00E-01 | -6.54 |
| 1436345_PM_at   | 5730559C18Rik       | C1orf106 | 0.06  | 2.10 | 0.55  | 5.91E-01 | 8.00E-01 | -6.54 |
| 1443238_PM_at   | ---                 | NA       | 0.09  | 2.27 | 0.55  | 5.91E-01 | 8.00E-01 | -6.54 |
| 1424723_PM_s_at | Cstf3               | CSTF3    | 0.12  | 2.78 | 0.55  | 5.92E-01 | 8.00E-01 | -6.54 |
| 1425717_PM_at   | Lrba                | LRBA     | 0.06  | 2.26 | 0.55  | 5.92E-01 | 8.00E-01 | -6.54 |
| 1440745_PM_at   | Prdm16              | PRDM16   | 0.07  | 2.50 | 0.55  | 5.92E-01 | 8.00E-01 | -6.54 |
| 1432718_PM_at   | ---                 | NA       | 0.15  | 3.15 | 0.55  | 5.92E-01 | 8.00E-01 | -6.54 |
| 1435341_PM_at   | Ppig                | PPIG     | -0.18 | 6.16 | -0.55 | 5.92E-01 | 8.00E-01 | -6.54 |
| 1424253_PM_at   | Fam114a2            | FAM114A2 | -0.16 | 3.75 | -0.55 | 5.92E-01 | 8.00E-01 | -6.54 |
| 1460313_PM_at   | Olf2                | OR6A2    | -0.07 | 2.36 | -0.55 | 5.92E-01 | 8.00E-01 | -6.54 |
| 1443568_PM_x_at | ---                 | NA       | 0.04  | 2.00 | 0.55  | 5.92E-01 | 8.00E-01 | -6.54 |
| 1417895_PM_a_at | Tmem54              | TMEM54   | 0.05  | 2.22 | 0.55  | 5.92E-01 | 8.00E-01 | -6.54 |
| 1451877_PM_at   | Eda                 | EDA      | 0.07  | 2.33 | 0.55  | 5.92E-01 | 8.00E-01 | -6.54 |
| 1422218_PM_at   | P2rx7               | P2RX7    | 0.09  | 2.66 | 0.55  | 5.92E-01 | 8.00E-01 | -6.54 |
| 1421887_PM_a_at | Aplp2               | APLP2    | 0.32  | 7.16 | 0.55  | 5.92E-01 | 8.00E-01 | -6.54 |
| 1444023_PM_at   | Ank2                | ANK2     | 0.10  | 2.53 | 0.55  | 5.92E-01 | 8.00E-01 | -6.54 |
| 1458527_PM_at   | ---                 | NA       | 0.10  | 2.55 | 0.55  | 5.92E-01 | 8.00E-01 | -6.54 |
| 1439563_PM_at   | Zfp3                | ZFP3     | -0.13 | 2.76 | -0.55 | 5.92E-01 | 8.00E-01 | -6.54 |
| 1423848_PM_at   | Mphosph6            | MPHOSPH6 | -0.08 | 2.53 | -0.55 | 5.92E-01 | 8.00E-01 | -6.54 |
| 1456647_PM_a_at | Eya4                | EYA4     | 0.06  | 1.99 | 0.55  | 5.92E-01 | 8.00E-01 | -6.54 |
| 1444727_PM_at   | ---                 | NA       | 0.06  | 2.29 | 0.55  | 5.92E-01 | 8.00E-01 | -6.54 |
| 1445429_PM_at   | ---                 | NA       | 0.09  | 2.60 | 0.55  | 5.92E-01 | 8.00E-01 | -6.54 |
| 1450877_PM_at   | BC005537            | C6orf62  | 0.14  | 6.65 | 0.55  | 5.92E-01 | 8.00E-01 | -6.54 |
| 1426433_PM_at   | Myc11               | MYCT1    | -0.04 | 2.00 | -0.55 | 5.92E-01 | 8.00E-01 | -6.54 |
| 1455291_PM_s_at | Znrf2               | ZNRF2    | -0.23 | 3.52 | -0.55 | 5.92E-01 | 8.00E-01 | -6.54 |
| 1426395_PM_s_at | Eif3j1 /// Eif3j2   | EIF3J1   | -0.18 | 2.70 | -0.55 | 5.92E-01 | 8.00E-01 | -6.54 |

|                 |                         |            |       |      |       |          |          |       |
|-----------------|-------------------------|------------|-------|------|-------|----------|----------|-------|
| 1425007_PM_at   | Zfp566                  | ZNF566     | -0.15 | 2.78 | -0.55 | 5.92E-01 | 8.00E-01 | -6.54 |
| 1432481_PM_a_at | Lyzl6                   | LYZL6      | 0.06  | 2.33 | 0.55  | 5.92E-01 | 8.00E-01 | -6.54 |
| 1444359_PM_at   | ---                     | NA         | -0.09 | 2.39 | -0.55 | 5.92E-01 | 8.00E-01 | -6.54 |
| 1452303_PM_at   | Arhgef10                | ARHGEF10   | 0.14  | 4.37 | 0.55  | 5.92E-01 | 8.00E-01 | -6.54 |
| 1457180_PM_at   | ---                     | NA         | 0.04  | 2.09 | 0.55  | 5.92E-01 | 8.00E-01 | -6.54 |
| 1415790_PM_at   | Ublcp1                  | UBLCP1     | -0.12 | 3.11 | -0.55 | 5.93E-01 | 8.00E-01 | -6.54 |
| 1445398_PM_at   | ---                     | NA         | -0.05 | 2.16 | -0.55 | 5.93E-01 | 8.00E-01 | -6.54 |
| 1425305_PM_at   | Zbtb21                  | ZBTB21     | 0.08  | 2.71 | 0.55  | 5.92E-01 | 8.00E-01 | -6.54 |
| 1427373_PM_at   | Amigo1                  | AMIGO1     | -0.13 | 3.08 | -0.55 | 5.93E-01 | 8.00E-01 | -6.54 |
| 1435502_PM_a_at | Brdt                    | BRDT       | 0.04  | 2.00 | 0.55  | 5.93E-01 | 8.00E-01 | -6.54 |
| 1426097_PM_a_at | Ccdc106                 | CCDC106    | 0.08  | 2.95 | 0.55  | 5.93E-01 | 8.00E-01 | -6.54 |
| 1436977_PM_at   | ---                     | NA         | 0.08  | 2.95 | 0.55  | 5.93E-01 | 8.00E-01 | -6.54 |
| 1438391_PM_x_at | Hsd17b10                | HSD17B10   | -0.21 | 3.15 | -0.55 | 5.93E-01 | 8.00E-01 | -6.54 |
| 1442876_PM_at   | ---                     | NA         | 0.23  | 3.77 | 0.55  | 5.93E-01 | 8.01E-01 | -6.54 |
| 1450128_PM_at   | Pla2g2a                 | NA         | 0.05  | 2.17 | 0.55  | 5.93E-01 | 8.01E-01 | -6.54 |
| 1458134_PM_at   | ---                     | NA         | -0.06 | 2.65 | -0.55 | 5.93E-01 | 8.01E-01 | -6.54 |
| 1442676_PM_at   | Maoa                    | MAOA       | -0.13 | 3.28 | -0.55 | 5.93E-01 | 8.01E-01 | -6.54 |
| 1426752_PM_at   | Jade1                   | JADE1      | 0.11  | 3.66 | 0.55  | 5.93E-01 | 8.01E-01 | -6.54 |
| 1438584_PM_at   | Spata31d1d              | SPATA31D1  | 0.07  | 2.71 | 0.55  | 5.93E-01 | 8.01E-01 | -6.54 |
| 1426212_PM_s_at | Tmem161a                | TMEM161A   | -0.12 | 3.89 | -0.55 | 5.93E-01 | 8.01E-01 | -6.54 |
| 1444744_PM_at   | Dido1                   | NA         | 0.05  | 2.07 | 0.55  | 5.93E-01 | 8.01E-01 | -6.54 |
| 1420582_PM_at   | Cd209e                  | CD209      | 0.06  | 2.39 | 0.55  | 5.93E-01 | 8.01E-01 | -6.54 |
| 1416258_PM_at   | Tk1                     | TK1        | -0.05 | 2.24 | -0.55 | 5.93E-01 | 8.01E-01 | -6.54 |
| 1445184_PM_at   | 9130019O22Rik // Zfp764 | AC002310.5 | 0.07  | 2.19 | 0.55  | 5.93E-01 | 8.01E-01 | -6.54 |
| 1430883_PM_at   | 4933402C05Rik           | NA         | 0.10  | 3.34 | 0.55  | 5.93E-01 | 8.01E-01 | -6.54 |
| 1452107_PM_s_at | Npnt                    | NPNT       | -0.17 | 3.00 | -0.55 | 5.93E-01 | 8.01E-01 | -6.54 |
| 1428735_PM_at   | Cd69                    | CD69       | 0.04  | 1.92 | 0.55  | 5.93E-01 | 8.01E-01 | -6.54 |
| 1446886_PM_at   | ---                     | NA         | 0.07  | 2.15 | 0.55  | 5.93E-01 | 8.01E-01 | -6.54 |
| 1435737_PM_a_at | Nde1                    | NDE1       | 0.10  | 3.67 | 0.55  | 5.93E-01 | 8.01E-01 | -6.54 |
| 1427269_PM_at   | Srsf11                  | SRSF11     | 0.12  | 2.93 | 0.55  | 5.93E-01 | 8.01E-01 | -6.54 |
| 1427439_PM_s_at | Prmt5                   | PRMT5      | 0.12  | 3.26 | 0.55  | 5.93E-01 | 8.01E-01 | -6.54 |
| 1439788_PM_at   | Primpol                 | PRIMPOL    | 0.15  | 2.38 | 0.55  | 5.93E-01 | 8.01E-01 | -6.54 |
| 1442381_PM_at   | ---                     | NA         | 0.22  | 3.11 | 0.55  | 5.93E-01 | 8.01E-01 | -6.54 |
| 1434880_PM_at   | Etv6                    | ETV6       | -0.07 | 2.22 | -0.55 | 5.93E-01 | 8.01E-01 | -6.54 |
| 1434815_PM_a_at | Mapkapk3                | MAPKAPK3   | 0.30  | 2.86 | 0.55  | 5.93E-01 | 8.01E-01 | -6.54 |
| 1460607_PM_at   | Igsf11                  | IGSF11     | -0.08 | 2.66 | -0.55 | 5.94E-01 | 8.01E-01 | -6.54 |
| 1447598_PM_x_at | ---                     | NA         | 0.05  | 1.89 | 0.55  | 5.94E-01 | 8.01E-01 | -6.54 |
| 1447195_PM_at   | ---                     | NA         | 0.07  | 2.75 | 0.55  | 5.94E-01 | 8.01E-01 | -6.54 |
| 1447125_PM_at   | ---                     | NA         | 0.05  | 2.27 | 0.55  | 5.94E-01 | 8.01E-01 | -6.54 |
| 1417289_PM_at   | Plekha2                 | PLEKHA2    | -0.05 | 2.15 | -0.55 | 5.94E-01 | 8.01E-01 | -6.54 |
| 1450252_PM_at   | Onecut1                 | ONECUT1    | -0.05 | 2.27 | -0.55 | 5.94E-01 | 8.01E-01 | -6.54 |
| 1417704_PM_a_at | Arhgap6                 | ARHGAP6    | 0.05  | 1.98 | 0.55  | 5.94E-01 | 8.01E-01 | -6.54 |
| 1431097_PM_at   | Ralgapa1                | RALGAPA1   | 0.10  | 8.16 | 0.55  | 5.94E-01 | 8.01E-01 | -6.54 |
| 1456276_PM_at   | ---                     | NA         | 0.14  | 2.51 | 0.55  | 5.94E-01 | 8.01E-01 | -6.54 |
| 1459021_PM_at   | Rabepk                  | RABEPK     | -0.17 | 3.08 | -0.55 | 5.94E-01 | 8.01E-01 | -6.54 |
| 1453937_PM_at   | 4933407G14Rik           | NA         | 0.06  | 2.18 | 0.55  | 5.94E-01 | 8.01E-01 | -6.54 |
| 1424913_PM_at   | Cipc                    | CIPC       | 0.15  | 4.70 | 0.55  | 5.94E-01 | 8.01E-01 | -6.54 |
| 1451484_PM_a_at | Syn1                    | SYN1       | -0.21 | 7.97 | -0.55 | 5.94E-01 | 8.01E-01 | -6.54 |
| 1431475_PM_a_at | Hoxa10                  | HOXA10     | -0.06 | 2.25 | -0.55 | 5.94E-01 | 8.01E-01 | -6.54 |
| 1440137_PM_at   | ---                     | NA         | -0.05 | 2.06 | -0.55 | 5.94E-01 | 8.01E-01 | -6.54 |
| 1421605_PM_a_at | Aqp9                    | AQP9       | 0.05  | 2.15 | 0.55  | 5.94E-01 | 8.01E-01 | -6.54 |
| 1453663_PM_at   | 4932442E05Rik           | NA         | 0.06  | 2.40 | 0.55  | 5.94E-01 | 8.01E-01 | -6.54 |
| 1439013_PM_x_at | Acyp1                   | ACYP1      | -0.17 | 3.92 | -0.55 | 5.94E-01 | 8.01E-01 | -6.54 |
| 1435322_PM_at   | Ankrd40                 | ANKRD40    | -0.16 | 3.31 | -0.55 | 5.94E-01 | 8.01E-01 | -6.54 |
| 1428783_PM_at   | Prkar2a                 | PRKAR2A    | -0.14 | 3.69 | -0.55 | 5.94E-01 | 8.01E-01 | -6.54 |
| 1436231_PM_at   | 2900052N01Rik           | NA         | -0.09 | 2.89 | -0.55 | 5.94E-01 | 8.01E-01 | -6.54 |
| 1432973_PM_at   | 4933421H12Rik           | NA         | 0.04  | 1.86 | 0.55  | 5.94E-01 | 8.01E-01 | -6.54 |
| 1419240_PM_at   | Tex14                   | TEX14      | 0.05  | 2.44 | 0.55  | 5.94E-01 | 8.01E-01 | -6.54 |
| 1432763_PM_at   | Prg2                    | NA         | 0.06  | 2.28 | 0.55  | 5.94E-01 | 8.01E-01 | -6.54 |
| 1451671_PM_at   | Gorasp1                 | GORASP1    | 0.06  | 2.67 | 0.55  | 5.94E-01 | 8.01E-01 | -6.54 |
| 1453694_PM_at   | ---                     | NA         | 0.06  | 2.31 | 0.55  | 5.94E-01 | 8.01E-01 | -6.54 |
| 1440944_PM_at   | Anks1b                  | ANKS1B     | 0.07  | 1.97 | 0.55  | 5.94E-01 | 8.01E-01 | -6.54 |
| 1446723_PM_at   | ---                     | NA         | 0.10  | 1.98 | 0.55  | 5.94E-01 | 8.01E-01 | -6.54 |
| 1448990_PM_a_at | Myo1b                   | MYO1B      | 0.14  | 2.44 | 0.55  | 5.94E-01 | 8.01E-01 | -6.54 |
| 1423596_PM_at   | Nek6                    | NEK6       | -0.21 | 3.71 | -0.55 | 5.94E-01 | 8.01E-01 | -6.54 |
| 1417030_PM_at   | Tmem206                 | TMEM206    | 0.07  | 2.34 | 0.55  | 5.94E-01 | 8.01E-01 | -6.54 |
| 1443526_PM_at   | ---                     | NA         | -0.08 | 2.66 | -0.55 | 5.94E-01 | 8.02E-01 | -6.54 |
| 1445101_PM_at   | ---                     | NA         | -0.08 | 2.10 | -0.55 | 5.95E-01 | 8.02E-01 | -6.54 |
| 1441237_PM_at   | D5Erttd163e             | NA         | 0.07  | 2.51 | 0.55  | 5.95E-01 | 8.02E-01 | -6.54 |
| 1431351_PM_at   | Pvt1                    | NA         | -0.06 | 2.70 | -0.55 | 5.95E-01 | 8.02E-01 | -6.54 |
| 1441130_PM_at   | ---                     | NA         | 0.05  | 2.10 | 0.55  | 5.95E-01 | 8.02E-01 | -6.54 |
| 1457769_PM_at   | H60a                    | NA         | 0.06  | 2.08 | 0.55  | 5.95E-01 | 8.02E-01 | -6.54 |
| 1433252_PM_at   | ---                     | NA         | 0.08  | 2.29 | 0.55  | 5.95E-01 | 8.02E-01 | -6.54 |
| 1448307_PM_at   | Psmg1                   | PSMG1      | 0.09  | 2.52 | 0.55  | 5.95E-01 | 8.02E-01 | -6.54 |

|                 |                 |            |       |      |       |          |          |       |
|-----------------|-----------------|------------|-------|------|-------|----------|----------|-------|
| 1426674_PM_at   | Eif3b           | EIF3B      | 0.10  | 3.30 | 0.55  | 5.95E-01 | 8.02E-01 | -6.54 |
| 1456978_PM_s_at | Cfap43 ///ltrip | CFAP43     | 0.10  | 2.21 | 0.55  | 5.95E-01 | 8.02E-01 | -6.54 |
| 1431992_PM_at   | Pitpnm2os1      | NA         | 0.07  | 2.50 | 0.55  | 5.95E-01 | 8.02E-01 | -6.54 |
| 1455274_PM_at   | a               | NA         | -0.24 | 5.95 | -0.55 | 5.95E-01 | 8.02E-01 | -6.54 |
| 1435657_PM_at   | Ston2           | NA         | -0.06 | 2.62 | -0.55 | 5.95E-01 | 8.02E-01 | -6.54 |
| 1420406_PM_at   | Peg12           | FRAT1      | 0.08  | 2.39 | 0.55  | 5.95E-01 | 8.02E-01 | -6.54 |
| 1453526_PM_at   | 4930503E14Rik   | NA         | -0.07 | 2.88 | -0.55 | 5.95E-01 | 8.02E-01 | -6.54 |
| 1459661_PM_at   | Dcdc2a          | DCDC2      | -0.06 | 2.51 | -0.55 | 5.95E-01 | 8.02E-01 | -6.54 |
| 1451167_PM_at   | Sgf29           | SGF29      | 0.09  | 2.38 | 0.55  | 5.95E-01 | 8.02E-01 | -6.54 |
| 1425533_PM_a_at | Stau2           | STAU2      | -0.14 | 5.35 | -0.55 | 5.95E-01 | 8.02E-01 | -6.54 |
| 1440414_PM_at   | Mtf1            | MTF1       | -0.09 | 2.63 | -0.55 | 5.95E-01 | 8.02E-01 | -6.54 |
| 1437666_PM_x_at | Ubc             | UBC        | -0.07 | 8.69 | -0.55 | 5.95E-01 | 8.02E-01 | -6.54 |
| 1451505_PM_at   | Chchd5          | CHCHD5     | -0.07 | 2.14 | -0.55 | 5.95E-01 | 8.02E-01 | -6.54 |
| 1443167_PM_at   | ---             | NA         | 0.05  | 2.15 | 0.55  | 5.95E-01 | 8.02E-01 | -6.54 |
| 1427677_PM_a_at | Sox6            | SOX6       | 0.07  | 2.28 | 0.55  | 5.95E-01 | 8.02E-01 | -6.54 |
| 1419508_PM_at   | Ripk1           | RIPK1      | 0.09  | 2.72 | 0.55  | 5.95E-01 | 8.02E-01 | -6.54 |
| 1423595_PM_at   | Mina            | RIOX2      | 0.09  | 3.73 | 0.55  | 5.95E-01 | 8.02E-01 | -6.54 |
| 1433620_PM_at   | Wdr41           | WDR41      | 0.10  | 3.91 | 0.55  | 5.95E-01 | 8.02E-01 | -6.54 |
| 1460047_PM_at   | ---             | NA         | 0.10  | 2.43 | 0.55  | 5.95E-01 | 8.02E-01 | -6.54 |
| 1428893_PM_at   | Osbp17          | OSBPL7     | 0.13  | 4.60 | 0.55  | 5.95E-01 | 8.02E-01 | -6.54 |
| 1433242_PM_at   | Atf7ip          | ATF7IP     | 0.16  | 2.18 | 0.55  | 5.95E-01 | 8.02E-01 | -6.54 |
| 1460619_PM_at   | Mfsd9           | MFSD9      | -0.15 | 2.92 | -0.55 | 5.95E-01 | 8.02E-01 | -6.54 |
| 1450459_PM_at   | Sppl2a          | SPPL2A     | -0.10 | 3.11 | -0.55 | 5.95E-01 | 8.02E-01 | -6.54 |
| 1447089_PM_at   | Arl1            | ARL1       | -0.08 | 2.32 | -0.55 | 5.95E-01 | 8.02E-01 | -6.54 |
| 1458566_PM_at   | ---             | NA         | -0.07 | 2.42 | -0.55 | 5.95E-01 | 8.02E-01 | -6.54 |
| 1436901_PM_at   | ---             | NA         | -0.05 | 2.02 | -0.55 | 5.95E-01 | 8.02E-01 | -6.54 |
| 1425596_PM_at   | Al317395        | MFSD4B     | 0.05  | 2.24 | 0.55  | 5.95E-01 | 8.02E-01 | -6.54 |
| 1424702_PM_a_at | Atg2b           | ATG2B      | 0.05  | 2.37 | 0.55  | 5.95E-01 | 8.02E-01 | -6.54 |
| 1442030_PM_at   | ---             | NA         | 0.07  | 2.67 | 0.55  | 5.96E-01 | 8.02E-01 | -6.54 |
| 1434462_PM_at   | Cep44           | CEP44      | 0.07  | 2.50 | 0.55  | 5.96E-01 | 8.02E-01 | -6.54 |
| 1434833_PM_at   | Map4k2          | MAP4K2     | 0.07  | 3.03 | 0.55  | 5.96E-01 | 8.02E-01 | -6.54 |
| 1450775_PM_at   | Mos             | MOS        | 0.05  | 2.22 | 0.55  | 5.96E-01 | 8.02E-01 | -6.54 |
| 1425280_PM_at   | Leng1           | LENG1      | -0.13 | 2.99 | -0.55 | 5.96E-01 | 8.02E-01 | -6.54 |
| 1419685_PM_at   | Upf1            | UPF1       | -0.11 | 4.63 | -0.55 | 5.96E-01 | 8.02E-01 | -6.54 |
| 1417920_PM_at   | Amn             | AMN        | -0.05 | 2.08 | -0.55 | 5.96E-01 | 8.02E-01 | -6.54 |
| 1447497_PM_at   | ---             | NA         | 0.06  | 2.23 | 0.55  | 5.96E-01 | 8.02E-01 | -6.54 |
| 1456232_PM_at   | Gmeb1           | GMEB1      | 0.18  | 2.41 | 0.55  | 5.96E-01 | 8.02E-01 | -6.54 |
| 1460464_PM_at   | Smim10l1        | SMIM10L1   | -0.19 | 7.67 | -0.55 | 5.96E-01 | 8.02E-01 | -6.54 |
| 1431573_PM_at   | Satl1           | SATL1      | 0.04  | 2.48 | 0.55  | 5.96E-01 | 8.02E-01 | -6.54 |
| 1442372_PM_at   | ---             | NA         | 0.05  | 2.25 | 0.55  | 5.96E-01 | 8.02E-01 | -6.54 |
| 1416618_PM_at   | Ppox            | PPOX       | 0.05  | 2.46 | 0.55  | 5.96E-01 | 8.02E-01 | -6.54 |
| 1446686_PM_at   | ---             | NA         | 0.06  | 2.38 | 0.55  | 5.96E-01 | 8.02E-01 | -6.54 |
| 1431193_PM_at   | Taf4b           | TAF4B      | 0.08  | 1.98 | 0.55  | 5.96E-01 | 8.02E-01 | -6.54 |
| 1425465_PM_a_at | Senp2           | SENP2      | 0.11  | 3.00 | 0.55  | 5.96E-01 | 8.02E-01 | -6.54 |
| 1458787_PM_at   | ---             | NA         | 0.12  | 2.29 | 0.55  | 5.96E-01 | 8.02E-01 | -6.54 |
| 1418050_PM_at   | Gpld1           | GPLD1      | 0.22  | 4.22 | 0.55  | 5.96E-01 | 8.02E-01 | -6.54 |
| 1447597_PM_at   | ---             | NA         | -0.05 | 1.96 | -0.55 | 5.96E-01 | 8.02E-01 | -6.54 |
| 1448183_PM_a_at | Hif1a           | HIF1A      | 0.18  | 3.58 | 0.55  | 5.96E-01 | 8.02E-01 | -6.54 |
| 1419149_PM_at   | Serpine1        | SERPINE1   | 0.06  | 2.25 | 0.55  | 5.96E-01 | 8.02E-01 | -6.54 |
| 1435321_PM_at   | Limch1          | LIMCH1     | 0.24  | 4.19 | 0.55  | 5.96E-01 | 8.02E-01 | -6.54 |
| 1428462_PM_at   | Ppp2r5e         | NA         | -0.08 | 2.65 | -0.55 | 5.96E-01 | 8.02E-01 | -6.54 |
| 1447740_PM_at   | 170034J05Rik    | C12orf71   | 0.04  | 2.18 | 0.55  | 5.96E-01 | 8.02E-01 | -6.54 |
| 1420540_PM_a_at | Rit1            | RIT1       | 0.11  | 3.62 | 0.55  | 5.96E-01 | 8.02E-01 | -6.54 |
| 1455063_PM_at   | Rmdn2           | NA         | 0.13  | 2.51 | 0.55  | 5.96E-01 | 8.02E-01 | -6.54 |
| 1435995_PM_at   | Mrp22           | MRPL22     | 0.13  | 3.52 | 0.55  | 5.96E-01 | 8.02E-01 | -6.54 |
| 1444174_PM_at   | Gm10700         | NA         | -0.07 | 2.34 | -0.55 | 5.96E-01 | 8.02E-01 | -6.54 |
| 1443447_PM_at   | ---             | NA         | -0.05 | 2.29 | -0.55 | 5.96E-01 | 8.02E-01 | -6.54 |
| 1454083_PM_at   | 4930440C22Rik   | NA         | 0.08  | 2.61 | 0.55  | 5.96E-01 | 8.03E-01 | -6.54 |
| 1456235_PM_at   | ---             | NA         | 0.05  | 2.46 | 0.55  | 5.96E-01 | 8.03E-01 | -6.54 |
| 1440881_PM_at   | Brwd3           | BRWD3      | 0.05  | 4.02 | 0.55  | 5.96E-01 | 8.03E-01 | -6.54 |
| 1451897_PM_a_at | Nbr1            | NBR1       | -0.14 | 3.85 | -0.55 | 5.97E-01 | 8.03E-01 | -6.54 |
| 1457972_PM_at   | C87436          | NA         | 0.06  | 2.19 | 0.55  | 5.97E-01 | 8.03E-01 | -6.54 |
| 1453741_PM_x_at | Angel2          | ANGEL2     | 0.06  | 2.36 | 0.55  | 5.97E-01 | 8.03E-01 | -6.54 |
| 1421343_PM_at   | ---             | NA         | 0.06  | 2.36 | 0.55  | 5.97E-01 | 8.03E-01 | -6.54 |
| 1442066_PM_at   | Pianp           | PIANP      | 0.10  | 3.01 | 0.55  | 5.97E-01 | 8.03E-01 | -6.54 |
| 1421200_PM_at   | Dlg2            | DLG2       | 0.17  | 6.18 | 0.55  | 5.97E-01 | 8.03E-01 | -6.54 |
| 1442061_PM_at   | Btdb7           | NA         | 0.08  | 2.46 | 0.55  | 5.97E-01 | 8.03E-01 | -6.54 |
| 1448550_PM_at   | Lbp             | LBP        | 0.06  | 2.43 | 0.55  | 5.97E-01 | 8.03E-01 | -6.54 |
| 1449819_PM_at   | Dmc1            | DMC1       | 0.06  | 2.46 | 0.55  | 5.97E-01 | 8.03E-01 | -6.54 |
| 1416964_PM_at   | Eefsec          | EEFSEC     | 0.07  | 2.31 | 0.55  | 5.97E-01 | 8.03E-01 | -6.54 |
| 1437547_PM_s_at | Dnajc14         | ACO23055.1 | 0.10  | 2.54 | 0.55  | 5.97E-01 | 8.03E-01 | -6.54 |
| 1444606_PM_at   | Efna2           | EFNA2      | 0.15  | 2.60 | 0.55  | 5.97E-01 | 8.03E-01 | -6.54 |
| 1449822_PM_at   | Atoh1           | ATOH1      | 0.06  | 2.50 | 0.55  | 5.97E-01 | 8.03E-01 | -6.54 |
| 1421720_PM_a_at | Dtx2            | DTX2       | 0.07  | 2.78 | 0.55  | 5.97E-01 | 8.03E-01 | -6.54 |
| 1459570_PM_at   | ---             | NA         | 0.08  | 2.08 | 0.55  | 5.97E-01 | 8.03E-01 | -6.54 |

|                 |               |            |       |      |       |          |          |       |
|-----------------|---------------|------------|-------|------|-------|----------|----------|-------|
| 1447596_PM_at   | ---           | NA         | 0.09  | 2.18 | 0.55  | 5.97E-01 | 8.03E-01 | -6.54 |
| 1422211_PM_a_at | B3gnt3        | B3GNT3     | -0.05 | 2.03 | -0.55 | 5.97E-01 | 8.03E-01 | -6.54 |
| 1459139_PM_at   | ---           | NA         | -0.04 | 2.25 | -0.55 | 5.97E-01 | 8.03E-01 | -6.54 |
| 1457063_PM_at   | ---           | NA         | 0.06  | 2.52 | 0.55  | 5.97E-01 | 8.03E-01 | -6.54 |
| 1421643_PM_at   | Ikzf2         | IKZF2      | 0.15  | 2.40 | 0.55  | 5.97E-01 | 8.03E-01 | -6.54 |
| 1436579_PM_s_at | Its1          | ITSN1      | 0.13  | 4.70 | 0.55  | 5.97E-01 | 8.03E-01 | -6.54 |
| 1434218_PM_at   | Prr14l        | NA         | -0.21 | 3.37 | -0.54 | 5.97E-01 | 8.03E-01 | -6.54 |
| 1460730_PM_at   | Eif2b1        | EIF2B1     | -0.10 | 3.06 | -0.54 | 5.97E-01 | 8.03E-01 | -6.54 |
| 1458117_PM_at   | Ralgapa1      | NA         | -0.08 | 3.03 | -0.54 | 5.97E-01 | 8.03E-01 | -6.54 |
| 1430721_PM_at   | 4931431C16Rik | NA         | -0.07 | 2.44 | -0.54 | 5.97E-01 | 8.03E-01 | -6.54 |
| 1446076_PM_at   | ---           | NA         | 0.05  | 2.01 | 0.54  | 5.97E-01 | 8.03E-01 | -6.54 |
| 1427403_PM_at   | Slco1a5       | SLCO1A2    | 0.05  | 2.31 | 0.54  | 5.97E-01 | 8.03E-01 | -6.54 |
| 1424966_PM_at   | Tmem40        | TMEM40     | 0.06  | 2.45 | 0.54  | 5.97E-01 | 8.03E-01 | -6.54 |
| 1432208_PM_at   | 4930459C07Rik | NA         | 0.07  | 2.48 | 0.54  | 5.97E-01 | 8.03E-01 | -6.54 |
| 1439235_PM_x_at | Tm2d2         | TM2D2      | 0.13  | 3.52 | 0.54  | 5.97E-01 | 8.03E-01 | -6.54 |
| 1445846_PM_at   | Gabrg3        | GABRG3     | 0.14  | 2.49 | 0.54  | 5.97E-01 | 8.03E-01 | -6.54 |
| 1440851_PM_at   | Elec1         | NA         | 0.15  | 4.98 | 0.54  | 5.97E-01 | 8.03E-01 | -6.54 |
| 1415769_PM_at   | Itch          | ITCH       | 0.10  | 4.70 | 0.54  | 5.97E-01 | 8.03E-01 | -6.54 |
| 1420052_PM_x_at | Psmb1         | PSMB1      | 0.06  | 3.18 | 0.54  | 5.98E-01 | 8.03E-01 | -6.54 |
| 1438618_PM_at   | Al507597      | NA         | -0.07 | 2.34 | -0.54 | 5.98E-01 | 8.03E-01 | -6.54 |
| 1421423_PM_at   | Prifc1        | PRL        | 0.10  | 2.69 | 0.54  | 5.98E-01 | 8.03E-01 | -6.54 |
| 1454558_PM_at   | ---           | NA         | 0.06  | 2.55 | 0.54  | 5.98E-01 | 8.03E-01 | -6.54 |
| 1443354_PM_at   | ---           | NA         | -0.06 | 2.55 | -0.54 | 5.98E-01 | 8.04E-01 | -6.54 |
| 1458890_PM_at   | ---           | NA         | -0.05 | 2.07 | -0.54 | 5.98E-01 | 8.04E-01 | -6.54 |
| 1433456_PM_at   | AU022751      | NA         | 0.05  | 2.64 | 0.54  | 5.98E-01 | 8.04E-01 | -6.54 |
| 1451530_PM_at   | Egfr          | EGFR       | 0.06  | 2.19 | 0.54  | 5.98E-01 | 8.04E-01 | -6.54 |
| 1417640_PM_at   | Cd79b         | CD79B      | 0.06  | 2.59 | 0.54  | 5.98E-01 | 8.04E-01 | -6.54 |
| 1459212_PM_at   | Anapc11       | ANAPC11    | 0.06  | 2.46 | 0.54  | 5.98E-01 | 8.04E-01 | -6.54 |
| 1454741_PM_s_at | Tmem164       | TMEM164    | 0.08  | 2.67 | 0.54  | 5.98E-01 | 8.04E-01 | -6.54 |
| 1439030_PM_at   | Gmppb         | GMPPB      | 0.10  | 2.89 | 0.54  | 5.98E-01 | 8.04E-01 | -6.54 |
| 1419076_PM_a_at | Brca2         | BRCA2      | 0.10  | 2.69 | 0.54  | 5.98E-01 | 8.04E-01 | -6.54 |
| 1443053_PM_at   | ---           | NA         | 0.10  | 2.32 | 0.54  | 5.98E-01 | 8.04E-01 | -6.54 |
| 1456617_PM_a_at | Eif2s2        | EIF2S2     | 0.12  | 4.63 | 0.54  | 5.98E-01 | 8.04E-01 | -6.54 |
| 1429790_PM_at   | Celf6         | AC009690.3 | 0.13  | 2.86 | 0.54  | 5.98E-01 | 8.04E-01 | -6.54 |
| 1439055_PM_at   | Gm15698       | NA         | 0.17  | 2.43 | 0.54  | 5.98E-01 | 8.04E-01 | -6.54 |
| 1420943_PM_at   | Zfp185        | ZNF185     | 0.05  | 2.27 | 0.54  | 5.98E-01 | 8.04E-01 | -6.54 |
| 1460210_PM_at   | Pkd1          | PKD1       | 0.09  | 2.10 | 0.54  | 5.98E-01 | 8.04E-01 | -6.54 |
| 1444778_PM_at   | Sept3         | NA         | -0.12 | 2.93 | -0.54 | 5.98E-01 | 8.04E-01 | -6.54 |
| 1426962_PM_at   | Phf20         | PHF20      | -0.16 | 3.71 | -0.54 | 5.98E-01 | 8.04E-01 | -6.54 |
| 1452342_PM_at   | Apbb2         | APBB2      | -0.16 | 4.72 | -0.54 | 5.98E-01 | 8.04E-01 | -6.54 |
| 1416725_PM_at   | Tcf4          | TCF4       | -0.06 | 2.80 | -0.54 | 5.98E-01 | 8.04E-01 | -6.54 |
| 1423428_PM_at   | Ror2          | ROR2       | 0.06  | 2.44 | 0.54  | 5.98E-01 | 8.04E-01 | -6.54 |
| 1426200_PM_at   | Igk           | NA         | 0.06  | 2.33 | 0.54  | 5.98E-01 | 8.04E-01 | -6.54 |
| 1431752_PM_a_at | Urm1          | URM1       | 0.07  | 3.38 | 0.54  | 5.98E-01 | 8.04E-01 | -6.54 |
| 1417883_PM_at   | Gstt2         | GSTT2      | 0.05  | 2.21 | 0.54  | 5.98E-01 | 8.04E-01 | -6.54 |
| 1446784_PM_at   | ---           | NA         | 0.08  | 2.59 | 0.54  | 5.98E-01 | 8.04E-01 | -6.54 |
| 1432540_PM_at   | Krtap7-1      | KRTAP7-1   | 0.05  | 2.27 | 0.54  | 5.99E-01 | 8.04E-01 | -6.54 |
| 1420416_PM_at   | Sema3a        | SEMA3A     | 0.14  | 3.04 | 0.54  | 5.99E-01 | 8.04E-01 | -6.54 |
| 1426289_PM_at   | Qrich1        | QRICH1     | -0.21 | 5.35 | -0.54 | 5.99E-01 | 8.04E-01 | -6.54 |
| 1440526_PM_at   | Ritpr         | CARMIL2    | 0.10  | 3.33 | 0.54  | 5.99E-01 | 8.04E-01 | -6.54 |
| 1447569_PM_at   | Kans1         | KANSL1     | 0.23  | 4.13 | 0.54  | 5.99E-01 | 8.04E-01 | -6.54 |
| 1434074_PM_x_at | Arf4          | ARF4       | -0.05 | 2.20 | -0.54 | 5.99E-01 | 8.04E-01 | -6.54 |
| 1455467_PM_at   | Fam188b       | MINDY4     | 0.06  | 2.50 | 0.54  | 5.99E-01 | 8.04E-01 | -6.54 |
| 1433215_PM_at   | ---           | NA         | 0.06  | 2.41 | 0.54  | 5.99E-01 | 8.04E-01 | -6.54 |
| 1442772_PM_at   | ---           | NA         | 0.06  | 2.18 | 0.54  | 5.99E-01 | 8.04E-01 | -6.54 |
| 1422642_PM_at   | Cdc42ep3      | CDC42EP3   | -0.15 | 3.73 | -0.54 | 5.99E-01 | 8.04E-01 | -6.54 |
| 1416671_PM_a_at | Mcoln1        | MCOLN1     | -0.10 | 2.77 | -0.54 | 5.99E-01 | 8.04E-01 | -6.54 |
| 1458545_PM_at   | ---           | NA         | 0.07  | 2.89 | 0.54  | 5.99E-01 | 8.04E-01 | -6.54 |
| 1437107_PM_at   | Rab6b         | RAB6B      | -0.20 | 8.20 | -0.54 | 5.99E-01 | 8.04E-01 | -6.55 |
| 1431567_PM_at   | 1700018A04Rik | NA         | 0.08  | 2.77 | 0.54  | 5.99E-01 | 8.04E-01 | -6.55 |
| 1437733_PM_at   | ---           | NA         | 0.13  | 2.82 | 0.54  | 5.99E-01 | 8.04E-01 | -6.55 |
| 1433249_PM_at   | 4931409D07Rik | NA         | 0.09  | 2.18 | 0.54  | 5.99E-01 | 8.04E-01 | -6.55 |
| 1427023_PM_at   | Phyhipl       | PHYHIPL    | -0.29 | 4.55 | -0.54 | 5.99E-01 | 8.04E-01 | -6.55 |
| 1439256_PM_x_at | Gpr137b-ps    | NA         | -0.25 | 3.07 | -0.54 | 5.99E-01 | 8.04E-01 | -6.55 |
| 1453822_PM_at   | Dnal1         | DNAL1      | -0.08 | 2.56 | -0.54 | 5.99E-01 | 8.04E-01 | -6.55 |
| 1426155_PM_a_at | Osr2          | OSR2       | 0.05  | 2.23 | 0.54  | 5.99E-01 | 8.04E-01 | -6.55 |
| 1452582_PM_at   | Galm          | GALM       | 0.13  | 2.28 | 0.54  | 5.99E-01 | 8.04E-01 | -6.55 |
| 1456509_PM_at   | 1110032F04Rik | C3orf80    | -0.10 | 2.40 | -0.54 | 5.99E-01 | 8.04E-01 | -6.55 |
| 1438869_PM_at   | 4930515G01Rik | NA         | -0.08 | 2.52 | -0.54 | 5.99E-01 | 8.04E-01 | -6.55 |
| 1441343_PM_at   | Gm41377       | NA         | 0.06  | 2.75 | 0.54  | 5.99E-01 | 8.04E-01 | -6.55 |
| 1427142_PM_s_at | Kdm5b         | KDM5B      | -0.11 | 4.72 | -0.54 | 5.99E-01 | 8.04E-01 | -6.55 |
| 1448977_PM_at   | Tfap2c        | TFAP2C     | -0.06 | 2.34 | -0.54 | 5.99E-01 | 8.04E-01 | -6.55 |
| 1439050_PM_at   | Gclm          | GCLM       | 0.08  | 2.58 | 0.54  | 5.99E-01 | 8.05E-01 | -6.55 |
| 1451961_PM_a_at | Mbp           | MBP        | 0.46  | 7.14 | 0.54  | 6.00E-01 | 8.05E-01 | -6.55 |
| 1443929_PM_at   | ---           | NA         | -0.13 | 3.28 | -0.54 | 6.00E-01 | 8.05E-01 | -6.55 |

|                 |                         |         |       |      |       |          |          |       |
|-----------------|-------------------------|---------|-------|------|-------|----------|----------|-------|
| 1452571_PM_at   | Tuba-rs1                | NA      | -0.12 | 4.15 | -0.54 | 6.00E-01 | 8.05E-01 | -6.55 |
| 1453323_PM_at   | 2900079G21Rik           | NA      | -0.06 | 2.24 | -0.54 | 6.00E-01 | 8.05E-01 | -6.55 |
| 1417343_PM_at   | Fxyd6                   | FXVD6   | -0.06 | 2.60 | -0.54 | 6.00E-01 | 8.05E-01 | -6.55 |
| 1450375_PM_at   | Pspn                    | PSPN    | 0.05  | 2.43 | 0.54  | 6.00E-01 | 8.05E-01 | -6.55 |
| 1432180_PM_at   | Lipe                    | LIPE    | 0.07  | 2.92 | 0.54  | 6.00E-01 | 8.05E-01 | -6.55 |
| 1441568_PM_at   | Osgin2                  | OSGIN2  | 0.07  | 2.42 | 0.54  | 6.00E-01 | 8.05E-01 | -6.55 |
| 1450493_PM_at   | Kiss1r                  | KISS1R  | 0.13  | 3.72 | 0.54  | 6.00E-01 | 8.05E-01 | -6.55 |
| 1458664_PM_at   | ---                     | NA      | 0.14  | 3.44 | 0.54  | 6.00E-01 | 8.05E-01 | -6.55 |
| 1449470_PM_at   | Dlx1                    | DLX1    | 0.18  | 2.94 | 0.54  | 6.00E-01 | 8.05E-01 | -6.55 |
| 1426140_PM_x_at | Kfra19                  | NA      | 0.05  | 2.06 | 0.54  | 6.00E-01 | 8.05E-01 | -6.55 |
| 1447471_PM_at   | Mau2                    | NA      | -0.13 | 2.82 | -0.54 | 6.00E-01 | 8.05E-01 | -6.55 |
| 1419835_PM_s_at | Plec                    | PLEC    | -0.12 | 3.31 | -0.54 | 6.00E-01 | 8.05E-01 | -6.55 |
| 1441799_PM_at   | ---                     | NA      | 0.04  | 2.28 | 0.54  | 6.00E-01 | 8.05E-01 | -6.55 |
| 1425172_PM_at   | Rho                     | RHO     | 0.05  | 2.35 | 0.54  | 6.00E-01 | 8.05E-01 | -6.55 |
| 1452185_PM_at   | Ipo8                    | IPO8    | 0.12  | 2.53 | 0.54  | 6.00E-01 | 8.05E-01 | -6.55 |
| 1460562_PM_at   | Eftud1                  | EFL1    | 0.12  | 3.07 | 0.54  | 6.00E-01 | 8.05E-01 | -6.55 |
| 1420140_PM_at   | Mepce                   | MEPCE   | -0.18 | 4.37 | -0.54 | 6.00E-01 | 8.05E-01 | -6.55 |
| 1432700_PM_at   | 2810047J09Rik           | NA      | -0.06 | 2.39 | -0.54 | 6.00E-01 | 8.05E-01 | -6.55 |
| 1445683_PM_at   | ---                     | NA      | 0.07  | 2.47 | 0.54  | 6.00E-01 | 8.05E-01 | -6.55 |
| 1444319_PM_at   | E2f8                    | E2F8    | 0.05  | 2.35 | 0.54  | 6.00E-01 | 8.05E-01 | -6.55 |
| 1445992_PM_at   | ---                     | NA      | -0.05 | 2.02 | -0.54 | 6.00E-01 | 8.05E-01 | -6.55 |
| 1428382_PM_at   | Smarcc2                 | SMARCC2 | 0.18  | 5.61 | 0.54  | 6.00E-01 | 8.05E-01 | -6.55 |
| 1442848_PM_at   | ---                     | NA      | 0.08  | 2.80 | 0.54  | 6.00E-01 | 8.05E-01 | -6.55 |
| 1458626_PM_at   | Nos1                    | NA      | 0.08  | 3.22 | 0.54  | 6.00E-01 | 8.05E-01 | -6.55 |
| 1451534_PM_at   | Scgn                    | SCGN    | -0.08 | 2.42 | -0.54 | 6.00E-01 | 8.05E-01 | -6.55 |
| 1418106_PM_at   | Hey2                    | HEY2    | -0.10 | 2.60 | -0.54 | 6.01E-01 | 8.05E-01 | -6.55 |
| 1452642_PM_at   | LOC102634389            | NA      | 0.05  | 2.26 | 0.54  | 6.00E-01 | 8.05E-01 | -6.55 |
| 1444974_PM_at   | AU023617                | NA      | 0.09  | 2.42 | 0.54  | 6.01E-01 | 8.05E-01 | -6.55 |
| 1448499_PM_a_at | Eph2                    | EPHX2   | -0.11 | 2.75 | -0.54 | 6.01E-01 | 8.05E-01 | -6.55 |
| 1445476_PM_at   | Gm36741                 | NA      | -0.04 | 2.01 | -0.54 | 6.01E-01 | 8.05E-01 | -6.55 |
| 1416123_PM_at   | Ccnd2                   | CCND2   | -0.23 | 4.22 | -0.54 | 6.01E-01 | 8.05E-01 | -6.55 |
| 1419679_PM_at   | Lats2                   | LATS2   | -0.05 | 2.11 | -0.54 | 6.01E-01 | 8.05E-01 | -6.55 |
| 1440240_PM_at   | Npb                     | NPB     | 0.08  | 2.51 | 0.54  | 6.01E-01 | 8.05E-01 | -6.55 |
| 1432602_PM_at   | ---                     | NA      | -0.12 | 3.28 | -0.54 | 6.01E-01 | 8.05E-01 | -6.55 |
| 1436878_PM_at   | Baalc                   | NA      | -0.08 | 2.45 | -0.54 | 6.01E-01 | 8.05E-01 | -6.55 |
| 1415823_PM_at   | Scd2                    | SCD     | -0.17 | 3.28 | -0.54 | 6.01E-01 | 8.06E-01 | -6.55 |
| 1458650_PM_at   | ---                     | NA      | 0.05  | 2.64 | 0.54  | 6.01E-01 | 8.06E-01 | -6.55 |
| 1433139_PM_at   | ---                     | NA      | 0.05  | 2.57 | 0.54  | 6.01E-01 | 8.06E-01 | -6.55 |
| 1422346_PM_at   | Nkx2-1                  | NA      | 0.06  | 2.56 | 0.54  | 6.01E-01 | 8.06E-01 | -6.55 |
| 1443350_PM_at   | Mta3                    | NA      | 0.07  | 2.82 | 0.54  | 6.01E-01 | 8.06E-01 | -6.55 |
| 1447459_PM_at   | ---                     | NA      | -0.17 | 2.54 | -0.54 | 6.01E-01 | 8.06E-01 | -6.55 |
| 1459585_PM_at   | Gas6                    | GAS6    | 0.05  | 2.30 | 0.54  | 6.01E-01 | 8.06E-01 | -6.55 |
| 1432166_PM_at   | E130018N17Rik           | NA      | 0.06  | 2.36 | 0.54  | 6.01E-01 | 8.06E-01 | -6.55 |
| 1453147_PM_at   | Polr3e                  | POLR3E  | 0.12  | 2.58 | 0.54  | 6.01E-01 | 8.06E-01 | -6.55 |
| 1422542_PM_at   | Gpr34                   | GPR34   | -0.08 | 2.18 | -0.54 | 6.01E-01 | 8.06E-01 | -6.55 |
| 1419152_PM_at   | 2810417H13Rik           | PCLAF   | 0.12  | 2.70 | 0.54  | 6.01E-01 | 8.06E-01 | -6.55 |
| 1448226_PM_at   | Rrm2                    | RRM2    | -0.08 | 2.80 | -0.54 | 6.01E-01 | 8.06E-01 | -6.55 |
| 1448829_PM_at   | Smc6                    | SMC6    | -0.21 | 3.44 | -0.54 | 6.01E-01 | 8.06E-01 | -6.55 |
| 1453666_PM_at   | Rnf32                   | RNF32   | 0.05  | 2.34 | 0.54  | 6.01E-01 | 8.06E-01 | -6.55 |
| 1431866_PM_at   | ---                     | NA      | 0.06  | 2.45 | 0.54  | 6.01E-01 | 8.06E-01 | -6.55 |
| 1447225_PM_at   | Slc16a5                 | NA      | 0.04  | 2.59 | 0.54  | 6.01E-01 | 8.06E-01 | -6.55 |
| 1422865_PM_at   | Runx1                   | RUNX1   | 0.17  | 2.55 | 0.54  | 6.01E-01 | 8.06E-01 | -6.55 |
| 1440303_PM_at   | ---                     | NA      | 0.08  | 2.34 | 0.54  | 6.02E-01 | 8.06E-01 | -6.55 |
| 1431672_PM_at   | 9430069I07Rik           | NA      | 0.10  | 3.32 | 0.54  | 6.02E-01 | 8.06E-01 | -6.55 |
| 1451908_PM_a_at | Sec14l1                 | SEC14L1 | -0.15 | 2.93 | -0.54 | 6.02E-01 | 8.06E-01 | -6.55 |
| 1458859_PM_at   | ---                     | NA      | 0.05  | 2.37 | 0.54  | 6.02E-01 | 8.06E-01 | -6.55 |
| 1428459_PM_at   | Pramef12                | PRAMEF9 | 0.07  | 2.10 | 0.54  | 6.02E-01 | 8.06E-01 | -6.55 |
| 1442960_PM_at   | Muc20                   | MUC20   | 0.05  | 2.53 | 0.54  | 6.02E-01 | 8.06E-01 | -6.55 |
| 1419684_PM_at   | Ccl8 /// LOC105242483   | CCL7    | 0.06  | 2.72 | 0.54  | 6.02E-01 | 8.06E-01 | -6.55 |
| 1437870_PM_at   | Slco4c1                 | SLCO4C1 | 0.06  | 2.12 | 0.54  | 6.02E-01 | 8.06E-01 | -6.55 |
| 1449673_PM_s_at | Tufm                    | NA      | -0.06 | 2.49 | -0.54 | 6.02E-01 | 8.06E-01 | -6.55 |
| 1419004_PM_s_at | Bcl2a1a /// Bcl2a1b /// | BCL2A1  | 0.05  | 2.40 | 0.54  | 6.02E-01 | 8.06E-01 | -6.55 |
| 1439153_PM_at   | Rnf144b                 | RNF144B | -0.14 | 3.67 | -0.54 | 6.02E-01 | 8.06E-01 | -6.55 |
| 1416386_PM_a_at | M6pr                    | M6PR    | -0.13 | 4.53 | -0.54 | 6.02E-01 | 8.06E-01 | -6.55 |
| 1423616_PM_at   | Tarbp2                  | TARBP2  | 0.06  | 2.22 | 0.54  | 6.02E-01 | 8.06E-01 | -6.55 |
| 1421118_PM_a_at | Adgrg1                  | ADGRG1  | 0.07  | 2.67 | 0.54  | 6.02E-01 | 8.06E-01 | -6.55 |
| 1429326_PM_at   | Cenpl                   | CENPL   | 0.06  | 2.47 | 0.54  | 6.02E-01 | 8.06E-01 | -6.55 |
| 1448810_PM_at   | Gne                     | GNE     | 0.08  | 3.19 | 0.54  | 6.02E-01 | 8.06E-01 | -6.55 |
| 1428706_PM_at   | Cenpv                   | CENPV   | -0.12 | 2.99 | -0.54 | 6.02E-01 | 8.07E-01 | -6.55 |
| 1417744_PM_a_at | Ralb                    | RALB    | -0.08 | 3.08 | -0.54 | 6.02E-01 | 8.07E-01 | -6.55 |
| 1445078_PM_at   | D7Ertd526e              | NA      | 0.06  | 2.32 | 0.54  | 6.02E-01 | 8.07E-01 | -6.55 |
| 1424446_PM_at   | Armc7                   | ARMC7   | -0.07 | 2.19 | -0.54 | 6.02E-01 | 8.07E-01 | -6.55 |
| 1439212_PM_at   | Zfp646                  | ZNF646  | -0.08 | 2.34 | -0.54 | 6.02E-01 | 8.07E-01 | -6.55 |
| 1459918_PM_at   | ---                     | NA      | -0.06 | 2.40 | -0.54 | 6.02E-01 | 8.07E-01 | -6.55 |

|                         |                       |              |       |      |       |          |          |       |
|-------------------------|-----------------------|--------------|-------|------|-------|----------|----------|-------|
| 1432236_PM_a_at         | Suv39h1               | SUV39H1      | 0.06  | 2.16 | 0.54  | 6.02E-01 | 8.07E-01 | -6.55 |
| 1423638_PM_at           | Galnt4                | POC1B-GALNT4 | 0.08  | 2.63 | 0.54  | 6.02E-01 | 8.07E-01 | -6.55 |
| 1435562_PM_at           | Pdzd8                 | PDZD8        | 0.08  | 2.16 | 0.54  | 6.02E-01 | 8.07E-01 | -6.55 |
| 1447936_PM_at           | 2410006H16Rik         | NA           | -0.16 | 3.59 | -0.54 | 6.02E-01 | 8.07E-01 | -6.55 |
| 1447113_PM_at           | ---                   | NA           | 0.06  | 2.17 | 0.54  | 6.02E-01 | 8.07E-01 | -6.55 |
| 1418268_PM_at           | Htr3a                 | HTR3A        | 0.13  | 2.72 | 0.54  | 6.02E-01 | 8.07E-01 | -6.55 |
| 1441057_PM_at           | ---                   | NA           | 0.09  | 2.60 | 0.54  | 6.02E-01 | 8.07E-01 | -6.55 |
| 1456265_PM_at           | Lekr1                 | LEKR1        | 0.07  | 2.49 | 0.54  | 6.03E-01 | 8.07E-01 | -6.55 |
| 1454257_PM_at           | Sptlc2                | NA           | 0.07  | 2.76 | 0.54  | 6.03E-01 | 8.07E-01 | -6.55 |
| 1445358_PM_at           | Tnks                  | TNKS         | 0.07  | 2.76 | 0.54  | 6.03E-01 | 8.07E-01 | -6.55 |
| 1455390_PM_at           | Alkbh6                | ALKBH6       | 0.06  | 2.32 | 0.54  | 6.03E-01 | 8.07E-01 | -6.55 |
| 1445197_PM_x_at         | C79595                | NA           | 0.05  | 2.22 | 0.54  | 6.03E-01 | 8.07E-01 | -6.55 |
| 1418293_PM_at           | Ifit2                 | IFIT2        | -0.10 | 2.44 | -0.54 | 6.03E-01 | 8.07E-01 | -6.55 |
| 1425109_PM_at           | Slc44a3               | SLC44A3      | 0.07  | 2.28 | 0.54  | 6.03E-01 | 8.07E-01 | -6.55 |
| 1449557_PM_at           | Yae1d1                | YAE1D1       | -0.06 | 2.34 | -0.54 | 6.03E-01 | 8.07E-01 | -6.55 |
| 1417567_PM_at           | Ctnnbp1               | CTNNB1P1     | -0.05 | 1.96 | -0.54 | 6.03E-01 | 8.07E-01 | -6.55 |
| 1438857_PM_x_at         | Irak1                 | IRAK1        | 0.07  | 3.15 | 0.54  | 6.03E-01 | 8.07E-01 | -6.55 |
| 1432927_PM_at           | Plcd4                 | NA           | -0.05 | 2.09 | -0.54 | 6.03E-01 | 8.07E-01 | -6.55 |
| 1422279_PM_at           | Fv1                   | NA           | 0.08  | 2.95 | 0.54  | 6.03E-01 | 8.07E-01 | -6.55 |
| 1435750_PM_at           | Gchfr                 | GCHFR        | 0.07  | 2.32 | 0.54  | 6.03E-01 | 8.07E-01 | -6.55 |
| 1429277_PM_at           | Slc16a9               | SLC16A9      | 0.17  | 2.68 | 0.54  | 6.03E-01 | 8.07E-01 | -6.55 |
| 1459912_PM_at           | Map4k4                | MAP4K4       | -0.05 | 1.92 | -0.54 | 6.03E-01 | 8.07E-01 | -6.55 |
| 1449227_PM_at           | Ch25h                 | CH25H        | 0.07  | 2.58 | 0.54  | 6.03E-01 | 8.07E-01 | -6.55 |
| 1423486_PM_at           | Cript                 | CRIPT        | -0.15 | 3.96 | -0.54 | 6.03E-01 | 8.07E-01 | -6.55 |
| 1432053_PM_at           | Rfx4                  | RFX4         | 0.07  | 2.49 | 0.54  | 6.03E-01 | 8.07E-01 | -6.55 |
| 1431962_PM_a_at         | Stambp                | STAMBIP      | 0.07  | 2.51 | 0.54  | 6.03E-01 | 8.07E-01 | -6.55 |
| 1450850_PM_at           | Ezr                   | EZR          | -0.19 | 3.28 | -0.54 | 6.04E-01 | 8.08E-01 | -6.55 |
| 1439992_PM_at           | ---                   | NA           | 0.06  | 2.53 | 0.54  | 6.04E-01 | 8.08E-01 | -6.55 |
| 1417685_PM_at           | Ankfy1                | ANKFY1       | -0.09 | 3.47 | -0.54 | 6.04E-01 | 8.08E-01 | -6.55 |
| 1454154_PM_at           | 4933416108Rik         | NA           | -0.07 | 2.11 | -0.54 | 6.04E-01 | 8.08E-01 | -6.55 |
| 1459225_PM_at           | ---                   | NA           | 0.06  | 2.32 | 0.54  | 6.04E-01 | 8.08E-01 | -6.55 |
| 1459486_PM_at           | AU022240              | NA           | 0.06  | 3.13 | 0.54  | 6.04E-01 | 8.08E-01 | -6.55 |
| 1452801_PM_at           | Pigk                  | PIGK         | 0.07  | 2.45 | 0.54  | 6.04E-01 | 8.08E-01 | -6.55 |
| 1449632_PM_s_at         | Fkbp10                | FKBP10       | 0.07  | 2.90 | 0.54  | 6.04E-01 | 8.08E-01 | -6.55 |
| 1423682_PM_a_at         | Cdca4                 | CDCA4        | 0.07  | 2.55 | 0.54  | 6.04E-01 | 8.08E-01 | -6.55 |
| 1431030_PM_a_at         | Rnf14                 | RNF14        | 0.14  | 2.65 | 0.54  | 6.04E-01 | 8.08E-01 | -6.55 |
| 1459454_PM_at           | ---                   | NA           | 0.11  | 3.06 | 0.54  | 6.04E-01 | 8.08E-01 | -6.55 |
| 1431058_PM_at           | Htatsf1               | HTATSF1      | -0.14 | 2.78 | -0.53 | 6.04E-01 | 8.08E-01 | -6.55 |
| AFFX-NonspecificGC11_at | ---                   | NA           | 0.04  | 1.96 | 0.53  | 6.04E-01 | 8.08E-01 | -6.55 |
| 1427519_PM_at           | Adora2a               | ADORA2A      | 0.05  | 2.52 | 0.54  | 6.04E-01 | 8.08E-01 | -6.55 |
| 1446200_PM_at           | ---                   | NA           | 0.05  | 2.44 | 0.54  | 6.04E-01 | 8.08E-01 | -6.55 |
| 1423140_PM_at           | Lipa                  | LIPA         | 0.05  | 2.26 | 0.53  | 6.04E-01 | 8.08E-01 | -6.55 |
| 1450291_PM_s_at         | Ms4a4c                | NA           | 0.06  | 2.35 | 0.53  | 6.04E-01 | 8.08E-01 | -6.55 |
| 1460477_PM_at           | Fam135b               | FAM135B      | 0.07  | 2.90 | 0.53  | 6.04E-01 | 8.08E-01 | -6.55 |
| 1435802_PM_at           | Zbtb45                | ZBTB45       | 0.07  | 2.88 | 0.54  | 6.04E-01 | 8.08E-01 | -6.55 |
| 1435723_PM_at           | Gm9776                | NA           | 0.13  | 3.03 | 0.53  | 6.04E-01 | 8.08E-01 | -6.55 |
| 1425821_PM_at           | Cln7                  | NA           | 0.05  | 2.47 | 0.53  | 6.04E-01 | 8.08E-01 | -6.55 |
| 1424152_PM_at           | Sall4                 | SALL4        | 0.05  | 2.39 | 0.53  | 6.04E-01 | 8.08E-01 | -6.55 |
| 1440229_PM_at           | 2310034G01Rik         | NA           | 0.06  | 2.41 | 0.53  | 6.04E-01 | 8.08E-01 | -6.55 |
| 1449606_PM_at           | ---                   | NA           | 0.04  | 2.43 | 0.53  | 6.04E-01 | 8.08E-01 | -6.55 |
| 1458040_PM_at           | D7Wsu130e             | NA           | 0.07  | 2.70 | 0.53  | 6.04E-01 | 8.08E-01 | -6.55 |
| 1432361_PM_a_at         | Cenpp                 | CENPP        | 0.09  | 3.30 | 0.53  | 6.04E-01 | 8.08E-01 | -6.55 |
| 1416384_PM_a_at         | Cope                  | COPE         | 0.15  | 2.94 | 0.53  | 6.04E-01 | 8.08E-01 | -6.55 |
| 1429661_PM_at           | Rhobtb3               | RHOBTB3      | 0.04  | 1.95 | 0.53  | 6.04E-01 | 8.08E-01 | -6.55 |
| 1439811_PM_at           | Mtr                   | MTR          | 0.06  | 2.78 | 0.53  | 6.04E-01 | 8.08E-01 | -6.55 |
| 1451379_PM_at           | Rab22a                | RAB22A       | 0.10  | 3.67 | 0.53  | 6.04E-01 | 8.08E-01 | -6.55 |
| 1453322_PM_at           | ---                   | NA           | -0.17 | 2.73 | -0.53 | 6.04E-01 | 8.08E-01 | -6.55 |
| 1451204_PM_at           | Scara5                | SCARA5       | -0.15 | 2.28 | -0.53 | 6.04E-01 | 8.08E-01 | -6.55 |
| 1437036_PM_at           | Snd1                  | NA           | -0.06 | 2.14 | -0.53 | 6.04E-01 | 8.08E-01 | -6.55 |
| 1456996_PM_at           | Trmt1l                | TRMT1L       | 0.05  | 2.15 | 0.53  | 6.04E-01 | 8.08E-01 | -6.55 |
| 1450189_PM_at           | Xk                    | NA           | 0.05  | 2.11 | 0.53  | 6.04E-01 | 8.08E-01 | -6.55 |
| 1458713_PM_at           | ---                   | NA           | 0.08  | 2.28 | 0.53  | 6.04E-01 | 8.08E-01 | -6.55 |
| 1416160_PM_at           | Nr2f2                 | NR2F2        | 0.13  | 2.92 | 0.53  | 6.04E-01 | 8.08E-01 | -6.55 |
| 1454623_PM_at           | Cpa2                  | CPA2         | 0.06  | 2.30 | 0.53  | 6.04E-01 | 8.08E-01 | -6.55 |
| 1425077_PM_at           | Dnajc18               | DNAJC18      | 0.07  | 2.34 | 0.53  | 6.04E-01 | 8.08E-01 | -6.55 |
| 1435999_PM_at           | Spink8                | SPINK8       | 0.17  | 2.35 | 0.53  | 6.05E-01 | 8.08E-01 | -6.55 |
| 1433801_PM_at           | 9930012K11Rik         | AC037459.1   | 0.07  | 2.24 | 0.53  | 6.05E-01 | 8.08E-01 | -6.55 |
| 1441158_PM_at           | ---                   | NA           | -0.09 | 2.44 | -0.53 | 6.05E-01 | 8.08E-01 | -6.55 |
| 1449251_PM_at           | Ndp                   | NDP          | 0.04  | 2.47 | 0.53  | 6.05E-01 | 8.08E-01 | -6.55 |
| 1443314_PM_at           | Katnbl1               | KATNBL1      | 0.05  | 1.96 | 0.53  | 6.05E-01 | 8.08E-01 | -6.55 |
| 1437234_PM_x_at         | Prmt2                 | PRMT2        | 0.24  | 8.48 | 0.53  | 6.05E-01 | 8.08E-01 | -6.55 |
| 1420132_PM_s_at         | Ptg1ip                | NA           | -0.14 | 4.09 | -0.53 | 6.05E-01 | 8.08E-01 | -6.55 |
| 1445171_PM_at           | Catsperg1///Catsperg2 | CATSPERG     | -0.05 | 2.04 | -0.53 | 6.05E-01 | 8.08E-01 | -6.55 |
| 1451597_PM_at           | Tmprss11d             | NA           | -0.05 | 2.23 | -0.53 | 6.05E-01 | 8.08E-01 | -6.55 |
| 1434256_PM_s_at         | Cds2                  | CDS2         | 0.12  | 3.37 | 0.53  | 6.05E-01 | 8.08E-01 | -6.55 |

|                 |                                                                                                                                                                                                                          |          |       |      |       |          |          |       |
|-----------------|--------------------------------------------------------------------------------------------------------------------------------------------------------------------------------------------------------------------------|----------|-------|------|-------|----------|----------|-------|
| 1424884_PM_at   | Fbxw2                                                                                                                                                                                                                    | NA       | -0.13 | 2.91 | -0.53 | 6.05E-01 | 8.08E-01 | -6.55 |
| 1429667_PM_at   | Pou4f1                                                                                                                                                                                                                   | POU4F1   | -0.10 | 5.78 | -0.53 | 6.05E-01 | 8.08E-01 | -6.55 |
| 1418179_PM_at   | Atg3                                                                                                                                                                                                                     | ATG3     | -0.09 | 2.66 | -0.53 | 6.05E-01 | 8.08E-01 | -6.55 |
| 1427621_PM_at   | ---                                                                                                                                                                                                                      | NA       | -0.09 | 2.48 | -0.53 | 6.05E-01 | 8.08E-01 | -6.55 |
| 1436256_PM_at   | Grpel2                                                                                                                                                                                                                   | GRPEL2   | -0.07 | 3.06 | -0.53 | 6.05E-01 | 8.08E-01 | -6.55 |
| 1440162_PM_x_at | Edaradd                                                                                                                                                                                                                  | EDARADD  | 0.06  | 3.55 | 0.53  | 6.05E-01 | 8.08E-01 | -6.55 |
| 1437579_PM_at   | Nek2                                                                                                                                                                                                                     | NEK2     | 0.06  | 2.55 | 0.53  | 6.05E-01 | 8.08E-01 | -6.55 |
| 1426172_PM_a_at | Cd209a                                                                                                                                                                                                                   | NA       | 0.06  | 2.37 | 0.53  | 6.05E-01 | 8.08E-01 | -6.55 |
| 1431171_PM_at   | D730001G18Rik                                                                                                                                                                                                            | NA       | 0.07  | 2.89 | 0.53  | 6.05E-01 | 8.08E-01 | -6.55 |
| 1428039_PM_at   | Gm39656                                                                                                                                                                                                                  | NA       | 0.07  | 2.38 | 0.53  | 6.05E-01 | 8.08E-01 | -6.55 |
| 1446605_PM_at   | ---                                                                                                                                                                                                                      | NA       | 0.10  | 2.28 | 0.53  | 6.05E-01 | 8.08E-01 | -6.55 |
| 1459930_PM_at   | ---                                                                                                                                                                                                                      | NA       | 0.12  | 2.21 | 0.53  | 6.05E-01 | 8.08E-01 | -6.55 |
| 1449629_PM_s_at | Snrpd3                                                                                                                                                                                                                   | SNRPD3   | 0.27  | 3.66 | 0.53  | 6.05E-01 | 8.08E-01 | -6.55 |
| 1450698_PM_at   | Dusp2                                                                                                                                                                                                                    | DUSP2    | 0.06  | 3.30 | 0.53  | 6.05E-01 | 8.08E-01 | -6.55 |
| 1442765_PM_at   | ---                                                                                                                                                                                                                      | NA       | 0.20  | 6.11 | 0.53  | 6.05E-01 | 8.08E-01 | -6.55 |
| 1435532_PM_at   | Rimklb                                                                                                                                                                                                                   | RIMKLB   | -0.07 | 2.13 | -0.53 | 6.05E-01 | 8.08E-01 | -6.55 |
| 1441889_PM_x_at | Racgap1                                                                                                                                                                                                                  | NA       | 0.06  | 2.11 | 0.53  | 6.05E-01 | 8.08E-01 | -6.55 |
| 1447288_PM_at   | ---                                                                                                                                                                                                                      | NA       | 0.15  | 2.34 | 0.53  | 6.05E-01 | 8.08E-01 | -6.55 |
| 1440490_PM_at   | ---                                                                                                                                                                                                                      | NA       | -0.05 | 2.20 | -0.53 | 6.05E-01 | 8.08E-01 | -6.55 |
| 1454269_PM_s_at | LOC102636203                                                                                                                                                                                                             | NA       | 0.06  | 2.19 | 0.53  | 6.05E-01 | 8.08E-01 | -6.55 |
| 1433266_PM_at   | ---                                                                                                                                                                                                                      | NA       | 0.09  | 2.28 | 0.53  | 6.05E-01 | 8.08E-01 | -6.55 |
| 1416124_PM_at   | Ccnd2                                                                                                                                                                                                                    | CCND2    | 0.09  | 6.02 | 0.53  | 6.05E-01 | 8.08E-01 | -6.55 |
| 1454121_PM_x_at | Ccdc18                                                                                                                                                                                                                   | CCDC18   | 0.06  | 2.25 | 0.53  | 6.05E-01 | 8.08E-01 | -6.55 |
| 1429979_PM_a_at | Slc38a10                                                                                                                                                                                                                 | SLC38A10 | -0.10 | 3.58 | -0.53 | 6.06E-01 | 8.08E-01 | -6.55 |
| 1451515_PM_s_at | Glyat                                                                                                                                                                                                                    | GLYAT    | 0.07  | 2.43 | 0.53  | 6.06E-01 | 8.09E-01 | -6.55 |
| 1421623_PM_at   | Il12rb2                                                                                                                                                                                                                  | IL12RB2  | -0.10 | 2.45 | -0.53 | 6.06E-01 | 8.09E-01 | -6.55 |
| 1438329_PM_at   | Tlr12                                                                                                                                                                                                                    | NA       | 0.13  | 2.83 | 0.53  | 6.06E-01 | 8.09E-01 | -6.55 |
| 1448000_PM_at   | Cdca3                                                                                                                                                                                                                    | CDCA3    | -0.04 | 2.04 | -0.53 | 6.06E-01 | 8.09E-01 | -6.55 |
| 1428167_PM_a_at | Mpz1                                                                                                                                                                                                                     | MPZ1     | 0.17  | 3.49 | 0.53  | 6.06E-01 | 8.09E-01 | -6.55 |
| 1424236_PM_at   | Tbc1d10b                                                                                                                                                                                                                 | TBC1D10B | -0.21 | 4.55 | -0.53 | 6.06E-01 | 8.09E-01 | -6.55 |
| 1429634_PM_at   | Zfp580                                                                                                                                                                                                                   | ZNF580   | 0.04  | 2.00 | 0.53  | 6.06E-01 | 8.09E-01 | -6.55 |
| 1432900_PM_at   | Etl4                                                                                                                                                                                                                     | NA       | 0.08  | 2.60 | 0.53  | 6.06E-01 | 8.09E-01 | -6.55 |
| 1428071_PM_at   | Gucd1                                                                                                                                                                                                                    | GUCD1    | 0.10  | 2.64 | 0.53  | 6.06E-01 | 8.09E-01 | -6.55 |
| 1458654_PM_at   | Ubr3                                                                                                                                                                                                                     | NA       | 0.11  | 2.38 | 0.53  | 6.06E-01 | 8.09E-01 | -6.55 |
| 1442277_PM_at   | Chka                                                                                                                                                                                                                     | CHKA     | 0.15  | 2.99 | 0.53  | 6.06E-01 | 8.09E-01 | -6.55 |
| 1440815_PM_x_at | Gm8267                                                                                                                                                                                                                   | NA       | 0.29  | 7.53 | 0.53  | 6.06E-01 | 8.09E-01 | -6.55 |
| 1417331_PM_a_at | Arl6                                                                                                                                                                                                                     | ARL6     | -0.22 | 3.36 | -0.53 | 6.06E-01 | 8.09E-01 | -6.55 |
| 1427312_PM_at   | Cmya5                                                                                                                                                                                                                    | CMYA5    | -0.11 | 2.43 | -0.53 | 6.06E-01 | 8.09E-01 | -6.55 |
| 1425428_PM_at   | Hif3a                                                                                                                                                                                                                    | HIF3A    | 0.07  | 2.64 | 0.53  | 6.06E-01 | 8.09E-01 | -6.55 |
| 1446135_PM_at   | ---                                                                                                                                                                                                                      | NA       | -0.05 | 2.61 | -0.53 | 6.06E-01 | 8.09E-01 | -6.55 |
| 1426240_PM_at   | Chmp4b                                                                                                                                                                                                                   | CHMP4B   | 0.13  | 3.63 | 0.53  | 6.06E-01 | 8.09E-01 | -6.55 |
| 1417762_PM_a_at | Rpl8                                                                                                                                                                                                                     | RPL8     | -0.23 | 3.79 | -0.53 | 6.06E-01 | 8.09E-01 | -6.55 |
| 1433049_PM_at   | 5730478J17Rik                                                                                                                                                                                                            | NA       | -0.14 | 3.30 | -0.53 | 6.06E-01 | 8.09E-01 | -6.55 |
| 1457595_PM_at   | ---                                                                                                                                                                                                                      | NA       | 0.10  | 3.10 | 0.53  | 6.06E-01 | 8.09E-01 | -6.55 |
| 1437217_PM_at   | Ankrd6                                                                                                                                                                                                                   | ANKRD6   | -0.12 | 2.14 | -0.53 | 6.06E-01 | 8.09E-01 | -6.55 |
| 1458935_PM_at   | C79744                                                                                                                                                                                                                   | NA       | 0.05  | 2.26 | 0.53  | 6.06E-01 | 8.09E-01 | -6.55 |
| 1425471_PM_x_at | LOC105247125                                                                                                                                                                                                             | NA       | -0.06 | 2.75 | -0.53 | 6.06E-01 | 8.09E-01 | -6.55 |
| 1449558_PM_at   | F8                                                                                                                                                                                                                       | F8       | 0.05  | 2.12 | 0.53  | 6.06E-01 | 8.09E-01 | -6.55 |
| 1446393_PM_at   | D5Erttd159e                                                                                                                                                                                                              | NA       | 0.05  | 2.33 | 0.53  | 6.06E-01 | 8.09E-01 | -6.55 |
| 1458384_PM_at   | Bola3                                                                                                                                                                                                                    | BOLA3    | 0.08  | 3.52 | 0.53  | 6.06E-01 | 8.09E-01 | -6.55 |
| 1421171_PM_at   | Adam12                                                                                                                                                                                                                   | ADAM12   | -0.23 | 4.80 | -0.53 | 6.07E-01 | 8.09E-01 | -6.55 |
| 1434535_PM_at   | Krt222                                                                                                                                                                                                                   | KRT222   | -0.16 | 3.95 | -0.53 | 6.07E-01 | 8.09E-01 | -6.55 |
| 1437717_PM_x_at | 2610005L07Rik                                                                                                                                                                                                            | NA       | -0.09 | 9.89 | -0.53 | 6.07E-01 | 8.09E-01 | -6.55 |
| 1456595_PM_x_at | Gh                                                                                                                                                                                                                       | CSH2     | -0.07 | 2.51 | -0.53 | 6.07E-01 | 8.09E-01 | -6.55 |
| 1433331_PM_at   | C030046M01Rik                                                                                                                                                                                                            | NA       | -0.04 | 1.95 | -0.53 | 6.07E-01 | 8.09E-01 | -6.55 |
| 1454340_PM_at   | 9530025H10Rik                                                                                                                                                                                                            | NA       | 0.04  | 2.21 | 0.53  | 6.07E-01 | 8.09E-01 | -6.55 |
| 1422951_PM_at   | Pcdhb4                                                                                                                                                                                                                   | PCDH85   | 0.05  | 2.31 | 0.53  | 6.07E-01 | 8.09E-01 | -6.55 |
| 1442804_PM_at   | Fgr                                                                                                                                                                                                                      | FGR      | 0.05  | 2.29 | 0.53  | 6.07E-01 | 8.09E-01 | -6.55 |
| 1429697_PM_at   | Izumo2                                                                                                                                                                                                                   | IZUMO2   | 0.06  | 2.60 | 0.53  | 6.07E-01 | 8.09E-01 | -6.55 |
| 1440574_PM_at   | ---                                                                                                                                                                                                                      | NA       | 0.06  | 2.30 | 0.53  | 6.07E-01 | 8.09E-01 | -6.55 |
| 1430233_PM_a_at | Slc9b1                                                                                                                                                                                                                   | SLC9B1   | 0.07  | 2.31 | 0.53  | 6.07E-01 | 8.09E-01 | -6.55 |
| 1444697_PM_at   | 4732490B19Rik                                                                                                                                                                                                            | NA       | 0.09  | 2.36 | 0.53  | 6.07E-01 | 8.09E-01 | -6.55 |
| 1421624_PM_a_at | Enah                                                                                                                                                                                                                     | ENAH     | 0.21  | 4.92 | 0.53  | 6.07E-01 | 8.09E-01 | -6.55 |
| 1421764_PM_at   | Vmn1r172                                                                                                                                                                                                                 | NA       | 0.05  | 2.62 | 0.53  | 6.07E-01 | 8.09E-01 | -6.55 |
| 1416453_PM_x_at | Rps12 /// Rps12-ps10 ///<br>Rps12-ps11 /// Rps12-ps12<br>/// Rps12-ps13 /// Rps12-<br>ps14 /// Rps12-ps15 ///<br>Rps12-ps17 /// Rps12-ps18<br>/// Rps12-ps24 /// Rps12-ps5<br>/// Rps12-ps6 /// Rps12-ps9<br>/// Rps12l1 | RPS12    | 0.12  | 3.66 | 0.53  | 6.07E-01 | 8.09E-01 | -6.55 |
| 1441239_PM_at   | Kctd18                                                                                                                                                                                                                   | KCTD18   | 0.09  | 2.84 | 0.53  | 6.07E-01 | 8.09E-01 | -6.55 |
| 1456567_PM_x_at | Grn                                                                                                                                                                                                                      | GRN      | 0.11  | 4.41 | 0.53  | 6.07E-01 | 8.09E-01 | -6.55 |

|                 |               |          |       |      |       |          |          |       |
|-----------------|---------------|----------|-------|------|-------|----------|----------|-------|
| 1428435_PM_at   | Muc2          | NA       | 0.06  | 2.53 | 0.53  | 6.07E-01 | 8.09E-01 | -6.55 |
| 1418321_PM_at   | Eci1          | ECI1     | 0.08  | 2.54 | 0.53  | 6.07E-01 | 8.09E-01 | -6.55 |
| 1442415_PM_at   | 5830454E08Rik | NA       | 0.15  | 2.45 | 0.53  | 6.07E-01 | 8.09E-01 | -6.55 |
| 1438781_PM_at   | Tet2          | TET2     | 0.10  | 2.56 | 0.53  | 6.07E-01 | 8.09E-01 | -6.55 |
| 1456336_PM_at   | Csrnp3        | CSRNP3   | 0.10  | 2.72 | 0.53  | 6.07E-01 | 8.09E-01 | -6.55 |
| 1420029_PM_at   | ---           | NA       | -0.07 | 2.37 | -0.53 | 6.07E-01 | 8.09E-01 | -6.55 |
| 1447396_PM_at   | ---           | NA       | 0.06  | 2.27 | 0.53  | 6.07E-01 | 8.09E-01 | -6.55 |
| 1430799_PM_at   | 5830432E09Rik | NA       | 0.08  | 2.72 | 0.53  | 6.07E-01 | 8.09E-01 | -6.55 |
| 1451587_PM_a_at | Tiplr         | TIPRL    | 0.17  | 4.02 | 0.53  | 6.07E-01 | 8.09E-01 | -6.55 |
| 1453337_PM_at   | Gm20389       | NA       | 0.04  | 2.23 | 0.53  | 6.07E-01 | 8.09E-01 | -6.55 |
| 1421039_PM_at   | Mip           | MIP      | 0.05  | 2.25 | 0.53  | 6.07E-01 | 8.09E-01 | -6.55 |
| 1436974_PM_at   | Tmem88b       | TMEM88B  | -0.20 | 5.35 | -0.53 | 6.07E-01 | 8.10E-01 | -6.55 |
| 1433951_PM_at   | Arl5a         | ARL5A    | -0.12 | 7.10 | -0.53 | 6.07E-01 | 8.10E-01 | -6.55 |
| 1436576_PM_at   | Fam26f        | FAM26F   | -0.07 | 2.46 | -0.53 | 6.07E-01 | 8.10E-01 | -6.55 |
| 1426076_PM_at   | Cdc27         | CDC27    | -0.07 | 2.87 | -0.53 | 6.07E-01 | 8.10E-01 | -6.55 |
| 1448107_PM_x_at | Klk1          | KLK3     | -0.05 | 2.17 | -0.53 | 6.07E-01 | 8.10E-01 | -6.55 |
| 1434327_PM_at   | 2610020H08Rik | REXO5    | 0.05  | 2.23 | 0.53  | 6.07E-01 | 8.10E-01 | -6.55 |
| 1434448_PM_at   | Txlna         | TXLNA    | 0.06  | 2.23 | 0.53  | 6.07E-01 | 8.10E-01 | -6.55 |
| 1432035_PM_at   | ---           | NA       | 0.05  | 2.31 | 0.53  | 6.07E-01 | 8.10E-01 | -6.55 |
| 1455793_PM_at   | Fam149a       | FAM149A  | 0.09  | 2.48 | 0.53  | 6.07E-01 | 8.10E-01 | -6.55 |
| 1426625_PM_at   | Zfp623        | ZNF623   | 0.12  | 3.13 | 0.53  | 6.07E-01 | 8.10E-01 | -6.55 |
| 1456599_PM_at   | Nxt2          | NXT2     | -0.07 | 2.36 | -0.53 | 6.08E-01 | 8.10E-01 | -6.55 |
| 1440837_PM_at   | H2-Ob         | HLA-DOB  | 0.06  | 2.17 | 0.53  | 6.08E-01 | 8.10E-01 | -6.55 |
| 1445337_PM_at   | Dnajc13       | DNAI13   | 0.20  | 2.63 | 0.53  | 6.08E-01 | 8.10E-01 | -6.55 |
| 1432284_PM_at   | Mipol1        | MIPOL1   | -0.21 | 3.03 | -0.53 | 6.08E-01 | 8.10E-01 | -6.55 |
| 1444936_PM_at   | D5Ert566e     | NA       | -0.17 | 3.11 | -0.53 | 6.08E-01 | 8.10E-01 | -6.55 |
| 1456733_PM_x_at | Serpinh1      | SERPINH1 | -0.09 | 2.28 | -0.53 | 6.08E-01 | 8.10E-01 | -6.55 |
| 1445543_PM_at   | ---           | NA       | -0.06 | 2.21 | -0.53 | 6.08E-01 | 8.10E-01 | -6.55 |
| 1449764_PM_x_at | Ssx2ip        | SSX2IP   | 0.04  | 1.90 | 0.53  | 6.08E-01 | 8.10E-01 | -6.55 |
| 1454363_PM_at   | 9430099H24Rik | NA       | 0.05  | 2.38 | 0.53  | 6.08E-01 | 8.10E-01 | -6.55 |
| 1426825_PM_at   | Fmn3          | FMNL3    | 0.05  | 2.35 | 0.53  | 6.08E-01 | 8.10E-01 | -6.55 |
| 1444874_PM_at   | Atp5g1        | ATP5G1   | 0.09  | 2.86 | 0.53  | 6.08E-01 | 8.10E-01 | -6.55 |
| 1448835_PM_at   | E2f6          | E2F6     | 0.23  | 3.85 | 0.53  | 6.08E-01 | 8.10E-01 | -6.55 |
| 1431114_PM_at   | ---           | NA       | 0.26  | 6.38 | 0.53  | 6.08E-01 | 8.10E-01 | -6.55 |
| 1436456_PM_at   | Slc38a9       | SLC38A9  | -0.10 | 3.08 | -0.53 | 6.08E-01 | 8.10E-01 | -6.55 |
| 1453626_PM_at   | 3930402G23Rik | NA       | -0.05 | 2.25 | -0.53 | 6.08E-01 | 8.10E-01 | -6.55 |
| 1449761_PM_at   | AA589418      | NA       | 0.05  | 2.05 | 0.53  | 6.08E-01 | 8.10E-01 | -6.55 |
| 1425762_PM_a_at | Rxra          | RXRA     | 0.08  | 2.78 | 0.53  | 6.08E-01 | 8.10E-01 | -6.55 |
| 1425484_PM_at   | Tox           | TOX      | 0.16  | 2.94 | 0.53  | 6.08E-01 | 8.10E-01 | -6.55 |
| 1433549_PM_x_at | Rps21         | RPS21    | -0.17 | 8.46 | -0.53 | 6.08E-01 | 8.10E-01 | -6.55 |
| 1424776_PM_a_at | Slc25a28      | SLC25A28 | -0.14 | 3.53 | -0.53 | 6.08E-01 | 8.10E-01 | -6.55 |
| 1428788_PM_at   | ---           | NA       | -0.09 | 2.44 | -0.53 | 6.08E-01 | 8.10E-01 | -6.55 |
| 1439334_PM_at   | ---           | NA       | -0.05 | 1.86 | -0.53 | 6.08E-01 | 8.10E-01 | -6.55 |
| 1444445_PM_at   | C77648        | NA       | 0.06  | 2.59 | 0.53  | 6.08E-01 | 8.10E-01 | -6.55 |
| 1451250_PM_at   | Gprin1        | GPRIN1   | 0.08  | 2.94 | 0.53  | 6.08E-01 | 8.10E-01 | -6.55 |
| 1418774_PM_a_at | Atp7a         | ATP7A    | 0.16  | 3.41 | 0.53  | 6.08E-01 | 8.10E-01 | -6.55 |
| 1442175_PM_at   | Srgap1        | SRGAP1   | -0.17 | 3.28 | -0.53 | 6.08E-01 | 8.10E-01 | -6.55 |
| 1421078_PM_at   | Tcf23         | TCF23    | -0.05 | 2.25 | -0.53 | 6.08E-01 | 8.10E-01 | -6.55 |
| 1431839_PM_a_at | Ccdc81        | CCDC81   | 0.07  | 2.75 | 0.53  | 6.08E-01 | 8.10E-01 | -6.55 |
| 1428421_PM_a_at | Glod4         | GLOD4    | 0.11  | 3.04 | 0.53  | 6.08E-01 | 8.10E-01 | -6.55 |
| 1449120_PM_a_at | Pcm1          | PCM1     | 0.17  | 4.88 | 0.53  | 6.08E-01 | 8.10E-01 | -6.55 |
| 1447166_PM_at   | ---           | NA       | 0.10  | 2.36 | 0.53  | 6.08E-01 | 8.10E-01 | -6.55 |
| 1456238_PM_at   | Zfp133-ps     | NA       | -0.21 | 2.78 | -0.53 | 6.08E-01 | 8.10E-01 | -6.55 |
| 1428564_PM_at   | Zfp579        | ZNF579   | 0.13  | 2.81 | 0.53  | 6.08E-01 | 8.10E-01 | -6.55 |
| 1455446_PM_x_at | Acadsb        | ACADSB   | 0.14  | 4.04 | 0.53  | 6.08E-01 | 8.10E-01 | -6.55 |
| 1436930_PM_x_at | Hmbs          | HMBS     | -0.10 | 2.38 | -0.53 | 6.09E-01 | 8.10E-01 | -6.55 |
| 1436189_PM_at   | Nqo2          | NQO2     | -0.07 | 2.74 | -0.53 | 6.09E-01 | 8.10E-01 | -6.55 |
| 1445545_PM_at   | ---           | NA       | 0.06  | 2.13 | 0.53  | 6.09E-01 | 8.10E-01 | -6.55 |
| 1453727_PM_at   | Esf1          | ESF1     | 0.06  | 2.49 | 0.53  | 6.09E-01 | 8.10E-01 | -6.55 |
| 1454229_PM_a_at | Eri2          | ERI2     | -0.08 | 2.46 | -0.53 | 6.09E-01 | 8.10E-01 | -6.55 |
| 1427839_PM_at   | Igh-VJ558     | NA       | 0.06  | 2.18 | 0.53  | 6.09E-01 | 8.10E-01 | -6.55 |
| 1431517_PM_at   | ---           | NA       | 0.08  | 2.62 | 0.53  | 6.09E-01 | 8.10E-01 | -6.55 |
| 1455702_PM_at   | Dcaf5         | DCAF5    | 0.16  | 4.28 | 0.53  | 6.09E-01 | 8.10E-01 | -6.55 |
| 1435134_PM_at   | Nceh1         | NCEH1    | -0.05 | 2.61 | -0.53 | 6.09E-01 | 8.10E-01 | -6.55 |
| 1458873_PM_at   | Aspm          | ASPM     | 0.06  | 2.15 | 0.53  | 6.09E-01 | 8.10E-01 | -6.55 |
| 1457389_PM_at   | 9830166K06Rik | NA       | 0.05  | 2.31 | 0.53  | 6.09E-01 | 8.10E-01 | -6.55 |
| 1448947_PM_at   | 2810004N23Rik | C1orf131 | 0.06  | 2.65 | 0.53  | 6.09E-01 | 8.10E-01 | -6.55 |
| 1421463_PM_at   | Siglece       | SIGLEC7  | 0.07  | 2.55 | 0.53  | 6.09E-01 | 8.10E-01 | -6.55 |
| 1443828_PM_x_at | ---           | NA       | 0.08  | 2.69 | 0.53  | 6.09E-01 | 8.10E-01 | -6.55 |
| 1432909_PM_at   | ---           | NA       | -0.06 | 2.10 | -0.53 | 6.09E-01 | 8.10E-01 | -6.55 |
| 1426083_PM_a_at | Btg1          | BTG1     | 0.20  | 3.70 | 0.53  | 6.09E-01 | 8.10E-01 | -6.55 |
| 1420180_PM_at   | ---           | NA       | 0.05  | 2.22 | 0.53  | 6.09E-01 | 8.10E-01 | -6.55 |
| 1431118_PM_at   | ---           | NA       | -0.14 | 3.00 | -0.53 | 6.09E-01 | 8.10E-01 | -6.55 |
| 1433853_PM_at   | Mib1          | MI1B1    | -0.06 | 2.21 | -0.53 | 6.09E-01 | 8.10E-01 | -6.55 |
| 1420203_PM_at   | ---           | NA       | 0.05  | 1.99 | 0.53  | 6.09E-01 | 8.10E-01 | -6.55 |



|                 |                                                                                                  |          |       |      |       |          |          |       |
|-----------------|--------------------------------------------------------------------------------------------------|----------|-------|------|-------|----------|----------|-------|
| 1460484_PM_at   | Ttl                                                                                              | TTL      | 0.14  | 3.36 | 0.53  | 6.09E-01 | 8.11E-01 | -6.55 |
| 1434753_PM_at   | Nfrkb                                                                                            | NFRKB    | -0.14 | 3.25 | -0.53 | 6.09E-01 | 8.11E-01 | -6.55 |
| 1434702_PM_at   | Ddrk1                                                                                            | DDRK1    | 0.14  | 4.05 | 0.53  | 6.09E-01 | 8.11E-01 | -6.55 |
| 1426261_PM_s_at | Ugt1a1 /// Ugt1a10 ///<br>Ugt1a2 /// Ugt1a5 ///<br>Ugt1a6a /// Ugt1a6b ///<br>Ugt1a7c /// Ugt1a9 | UGT1A6   | -0.06 | 2.38 | -0.53 | 6.09E-01 | 8.11E-01 | -6.55 |
| 1437854_PM_at   | ---                                                                                              | NA       | 0.10  | 3.24 | 0.53  | 6.09E-01 | 8.11E-01 | -6.55 |
| 1420940_PM_x_at | Rgs5                                                                                             | RG55     | -0.15 | 2.93 | -0.53 | 6.09E-01 | 8.11E-01 | -6.55 |
| 1458392_PM_at   | C87414                                                                                           | NA       | -0.18 | 4.71 | -0.53 | 6.09E-01 | 8.11E-01 | -6.55 |
| 1434795_PM_at   | Disp1                                                                                            | DISP1    | -0.06 | 2.28 | -0.53 | 6.09E-01 | 8.11E-01 | -6.55 |
| 1437851_PM_x_at | Rnps1                                                                                            | RNPS1    | 0.15  | 8.16 | 0.53  | 6.09E-01 | 8.11E-01 | -6.55 |
| 1455844_PM_at   | Gm6277                                                                                           | NA       | 0.08  | 2.37 | 0.53  | 6.09E-01 | 8.11E-01 | -6.55 |
| 1444548_PM_at   | 1600025M17Rik                                                                                    | NA       | 0.06  | 2.34 | 0.53  | 6.10E-01 | 8.11E-01 | -6.55 |
| 1431108_PM_at   | 2410131K14Rik                                                                                    | C12orf49 | 0.07  | 2.79 | 0.53  | 6.10E-01 | 8.11E-01 | -6.55 |
| 1449452_PM_a_at | Gp2                                                                                              | GP2      | 0.04  | 2.20 | 0.53  | 6.10E-01 | 8.11E-01 | -6.55 |
| 1427596_PM_at   | Tsix                                                                                             | NA       | 0.05  | 2.40 | 0.53  | 6.10E-01 | 8.11E-01 | -6.55 |
| 1443328_PM_at   | ---                                                                                              | NA       | 0.05  | 2.22 | 0.53  | 6.10E-01 | 8.11E-01 | -6.55 |
| 1431156_PM_at   | ---                                                                                              | NA       | 0.04  | 2.19 | 0.53  | 6.10E-01 | 8.11E-01 | -6.55 |
| 1445891_PM_at   | AF529169                                                                                         | KIAA1024 | 0.07  | 2.76 | 0.53  | 6.10E-01 | 8.11E-01 | -6.55 |
| 1420913_PM_at   | Slco2a1                                                                                          | SLCO2A1  | 0.08  | 3.22 | 0.53  | 6.10E-01 | 8.11E-01 | -6.55 |
| 1448950_PM_at   | Il1r1                                                                                            | IL1R1    | 0.11  | 2.39 | 0.53  | 6.10E-01 | 8.11E-01 | -6.55 |
| 1424881_PM_at   | Trib1                                                                                            | NA       | 0.13  | 3.41 | 0.53  | 6.10E-01 | 8.11E-01 | -6.55 |
| 1447780_PM_x_at | Tufm                                                                                             | TUFM     | -0.08 | 2.42 | -0.53 | 6.10E-01 | 8.11E-01 | -6.55 |
| 1442517_PM_a_at | 9630013A20Rik                                                                                    | NA       | -0.07 | 2.39 | -0.53 | 6.10E-01 | 8.11E-01 | -6.55 |
| 1441941_PM_x_at | Serpinb5                                                                                         | SERPINB5 | 0.05  | 1.99 | 0.53  | 6.10E-01 | 8.11E-01 | -6.55 |
| 1424576_PM_s_at | Cyp2c44                                                                                          | NA       | 0.05  | 2.00 | 0.53  | 6.10E-01 | 8.11E-01 | -6.55 |
| 1454049_PM_at   | Gsdmcl-ps                                                                                        | NA       | 0.06  | 2.32 | 0.53  | 6.10E-01 | 8.11E-01 | -6.55 |
| 1428623_PM_at   | Plkna1                                                                                           | PLXNA1   | -0.26 | 5.67 | -0.53 | 6.10E-01 | 8.11E-01 | -6.55 |
| 1425530_PM_a_at | Stx3                                                                                             | STX3     | -0.24 | 3.66 | -0.53 | 6.10E-01 | 8.11E-01 | -6.55 |
| 1455749_PM_x_at | Ndufa7                                                                                           | NDUFA7   | -0.08 | 2.61 | -0.53 | 6.10E-01 | 8.11E-01 | -6.55 |
| 1456665_PM_at   | Eya4                                                                                             | NA       | 0.05  | 2.64 | 0.53  | 6.10E-01 | 8.11E-01 | -6.55 |
| 1436487_PM_x_at | ---                                                                                              | NA       | 0.20  | 3.73 | 0.53  | 6.10E-01 | 8.11E-01 | -6.55 |
| 1439387_PM_x_at | Ctu2                                                                                             | CTU2     | 0.14  | 8.25 | 0.53  | 6.10E-01 | 8.11E-01 | -6.55 |
| 1429119_PM_at   | Iah1                                                                                             | IAH1     | 0.06  | 2.26 | 0.53  | 6.10E-01 | 8.11E-01 | -6.55 |
| 1432589_PM_at   | ---                                                                                              | NA       | -0.06 | 4.71 | -0.53 | 6.10E-01 | 8.11E-01 | -6.55 |
| 1441757_PM_at   | ---                                                                                              | NA       | 0.04  | 1.95 | 0.53  | 6.10E-01 | 8.11E-01 | -6.55 |
| 1445397_PM_at   | ---                                                                                              | NA       | 0.07  | 2.78 | 0.53  | 6.10E-01 | 8.11E-01 | -6.55 |
| 1422660_PM_at   | Gm15453 /// Rbm3                                                                                 | RBM3     | 0.11  | 7.82 | 0.53  | 6.10E-01 | 8.11E-01 | -6.55 |
| 1439139_PM_at   | D2Ert640e                                                                                        | NA       | 0.26  | 3.42 | 0.53  | 6.10E-01 | 8.11E-01 | -6.55 |
| 1436014_PM_a_at | Rusc1                                                                                            | RUSC1    | 0.25  | 3.50 | 0.53  | 6.11E-01 | 8.11E-01 | -6.55 |
| 1425139_PM_at   | Sesn2                                                                                            | SESN2    | -0.17 | 2.59 | -0.52 | 6.11E-01 | 8.12E-01 | -6.55 |
| 1438834_PM_at   | Mospd2                                                                                           | MOSPD2   | -0.08 | 2.51 | -0.52 | 6.11E-01 | 8.12E-01 | -6.55 |
| 1429700_PM_at   | 3110040M04Rik                                                                                    | NA       | -0.06 | 2.12 | -0.52 | 6.11E-01 | 8.12E-01 | -6.55 |
| 1439528_PM_at   | 4833423E24Rik                                                                                    | NA       | -0.05 | 2.39 | -0.52 | 6.11E-01 | 8.12E-01 | -6.55 |
| 1438601_PM_at   | Pkmyt1                                                                                           | PKMYT1   | -0.05 | 2.15 | -0.52 | 6.11E-01 | 8.12E-01 | -6.55 |
| 1433406_PM_at   | ---                                                                                              | NA       | 0.05  | 2.83 | 0.52  | 6.11E-01 | 8.12E-01 | -6.55 |
| 1442667_PM_at   | Cdc40                                                                                            | NA       | 0.06  | 2.75 | 0.52  | 6.11E-01 | 8.12E-01 | -6.55 |
| 1459595_PM_at   | ---                                                                                              | NA       | 0.07  | 2.16 | 0.52  | 6.11E-01 | 8.12E-01 | -6.55 |
| 1442512_PM_at   | ---                                                                                              | NA       | 0.07  | 2.46 | 0.52  | 6.11E-01 | 8.12E-01 | -6.55 |
| 1429518_PM_at   | Faim2                                                                                            | FAIM2    | 0.09  | 2.49 | 0.52  | 6.11E-01 | 8.12E-01 | -6.55 |
| 1426600_PM_at   | Slc2a1                                                                                           | SLC2A1   | 0.23  | 7.19 | 0.52  | 6.11E-01 | 8.12E-01 | -6.55 |
| 1430829_PM_s_at | Fto                                                                                              | FTO      | 0.29  | 5.15 | 0.52  | 6.11E-01 | 8.12E-01 | -6.55 |
| 1430727_PM_at   | Zfp943                                                                                           | NA       | 0.08  | 2.45 | 0.52  | 6.11E-01 | 8.12E-01 | -6.56 |
| 1445085_PM_at   | ---                                                                                              | NA       | 0.07  | 2.13 | 0.52  | 6.11E-01 | 8.12E-01 | -6.56 |
| 1433229_PM_at   | ---                                                                                              | NA       | 0.07  | 2.29 | 0.52  | 6.11E-01 | 8.12E-01 | -6.56 |
| 1436133_PM_at   | Ccdc127                                                                                          | CCDC127  | -0.12 | 2.47 | -0.52 | 6.11E-01 | 8.12E-01 | -6.56 |
| 1439573_PM_at   | Rtn4rl2                                                                                          | NA       | -0.17 | 2.86 | -0.52 | 6.11E-01 | 8.12E-01 | -6.56 |
| 1442041_PM_at   | ---                                                                                              | NA       | 0.04  | 2.01 | 0.52  | 6.11E-01 | 8.12E-01 | -6.56 |
| 1420959_PM_at   | Asph                                                                                             | ASPH     | 0.11  | 2.29 | 0.52  | 6.11E-01 | 8.12E-01 | -6.56 |
| 1440205_PM_at   | Zmynd19                                                                                          | ZMYND19  | -0.07 | 2.36 | -0.52 | 6.11E-01 | 8.12E-01 | -6.56 |
| 1447886_PM_at   | Hoxb5os                                                                                          | NA       | 0.06  | 2.20 | 0.52  | 6.11E-01 | 8.12E-01 | -6.56 |
| 1459844_PM_at   | ---                                                                                              | NA       | 0.07  | 2.23 | 0.52  | 6.11E-01 | 8.12E-01 | -6.56 |
| 1423317_PM_at   | Tmem261                                                                                          | TMEM261  | 0.09  | 2.51 | 0.52  | 6.11E-01 | 8.12E-01 | -6.56 |
| 1416374_PM_at   | Ap3m1                                                                                            | AP3M1    | 0.20  | 2.67 | 0.52  | 6.11E-01 | 8.12E-01 | -6.56 |
| 1427038_PM_at   | Penk                                                                                             | PENK     | -0.28 | 4.04 | -0.52 | 6.12E-01 | 8.12E-01 | -6.56 |
| 1422683_PM_at   | Irak1bp1                                                                                         | IRAK1BP1 | -0.10 | 2.52 | -0.52 | 6.12E-01 | 8.12E-01 | -6.56 |
| 1443178_PM_at   | Rnf13                                                                                            | RNF13    | -0.07 | 2.59 | -0.52 | 6.12E-01 | 8.12E-01 | -6.56 |
| 1418879_PM_at   | Fam110c                                                                                          | FAM110C  | -0.06 | 2.55 | -0.52 | 6.12E-01 | 8.12E-01 | -6.56 |
| 1424965_PM_at   | Lpxn                                                                                             | LPXN     | -0.05 | 2.30 | -0.52 | 6.12E-01 | 8.12E-01 | -6.56 |
| 1444678_PM_at   | ---                                                                                              | NA       | -0.04 | 2.13 | -0.52 | 6.12E-01 | 8.12E-01 | -6.56 |
| 1459137_PM_at   | ---                                                                                              | NA       | 0.04  | 1.99 | 0.52  | 6.12E-01 | 8.12E-01 | -6.56 |
| 1445696_PM_x_at | Bola3                                                                                            | BOLA3    | 0.05  | 2.19 | 0.52  | 6.12E-01 | 8.12E-01 | -6.56 |
| 1459085_PM_at   | D1Ert6259e                                                                                       | NA       | 0.05  | 1.95 | 0.52  | 6.12E-01 | 8.12E-01 | -6.56 |
| 1453011_PM_at   | Bdh2                                                                                             | BDH2     | 0.05  | 3.24 | 0.52  | 6.12E-01 | 8.12E-01 | -6.56 |

|                 |               |            |       |      |       |          |          |       |
|-----------------|---------------|------------|-------|------|-------|----------|----------|-------|
| 1431915_PM_at   | 4930442E04Rik | NA         | 0.06  | 2.03 | 0.52  | 6.12E-01 | 8.12E-01 | -6.56 |
| 1418837_PM_at   | Qprt          | ACO09086.2 | 0.06  | 2.85 | 0.52  | 6.12E-01 | 8.12E-01 | -6.56 |
| 1452957_PM_at   | Krtap3-3      | KRTAP3-2   | 0.06  | 2.20 | 0.52  | 6.12E-01 | 8.12E-01 | -6.56 |
| 1425905_PM_at   | ---           | NA         | 0.06  | 2.35 | 0.52  | 6.12E-01 | 8.12E-01 | -6.56 |
| 1426222_PM_s_at | Vwa5a         | VWASA      | 0.07  | 2.16 | 0.52  | 6.12E-01 | 8.12E-01 | -6.56 |
| 1452400_PM_a_at | Hoxa11os      | NA         | 0.07  | 2.86 | 0.52  | 6.12E-01 | 8.12E-01 | -6.56 |
| 1458593_PM_at   | ---           | NA         | 0.09  | 2.79 | 0.52  | 6.12E-01 | 8.12E-01 | -6.56 |
| 1442382_PM_at   | Mast4         | MAST4      | 0.09  | 2.93 | 0.52  | 6.12E-01 | 8.12E-01 | -6.56 |
| 1457820_PM_at   | ---           | NA         | 0.10  | 2.34 | 0.52  | 6.12E-01 | 8.12E-01 | -6.56 |
| 1447045_PM_at   | ---           | NA         | 0.10  | 2.39 | 0.52  | 6.12E-01 | 8.12E-01 | -6.56 |
| 1423757_PM_x_at | Igfbp4        | IGFBP4     | 0.15  | 4.63 | 0.52  | 6.12E-01 | 8.12E-01 | -6.56 |
| 1450151_PM_at   | Zfp316        | ZNF316     | 0.16  | 2.45 | 0.52  | 6.12E-01 | 8.12E-01 | -6.56 |
| 1421813_PM_a_at | Psap          | PSAP       | -0.34 | 7.38 | -0.52 | 6.12E-01 | 8.12E-01 | -6.56 |
| 1416662_PM_at   | Sardh         | SARDH      | 0.06  | 2.94 | 0.52  | 6.12E-01 | 8.12E-01 | -6.56 |
| 1436406_PM_at   | ---           | NA         | -0.08 | 2.08 | -0.52 | 6.12E-01 | 8.12E-01 | -6.56 |
| 1429461_PM_at   | Ints2         | INTS2      | -0.18 | 2.87 | -0.52 | 6.12E-01 | 8.12E-01 | -6.56 |
| 1418917_PM_at   | Hebp2         | HEBP2      | 0.04  | 2.29 | 0.52  | 6.12E-01 | 8.12E-01 | -6.56 |
| 1442934_PM_at   | C81608        | NA         | 0.18  | 4.00 | 0.52  | 6.12E-01 | 8.12E-01 | -6.56 |
| 1434112_PM_at   | Adgrl2        | ADGRL2     | -0.12 | 2.97 | -0.52 | 6.12E-01 | 8.12E-01 | -6.56 |
| 1431235_PM_at   | Mir1949       | NA         | -0.06 | 2.19 | -0.52 | 6.12E-01 | 8.12E-01 | -6.56 |
| 1440996_PM_at   | ---           | NA         | -0.05 | 2.12 | -0.52 | 6.12E-01 | 8.12E-01 | -6.56 |
| 1423850_PM_at   | Nsun2         | NSUN2      | 0.07  | 2.46 | 0.52  | 6.12E-01 | 8.12E-01 | -6.56 |
| 1445483_PM_at   | Abl2          | ABL2       | 0.10  | 3.07 | 0.52  | 6.12E-01 | 8.12E-01 | -6.56 |
| 1443000_PM_at   | Supt20        | SUPT20H    | 0.10  | 3.11 | 0.52  | 6.12E-01 | 8.12E-01 | -6.56 |
| 1427549_PM_s_at | Krtap16-3     | NA         | 0.06  | 2.13 | 0.52  | 6.12E-01 | 8.12E-01 | -6.56 |
| 1440314_PM_at   | ---           | NA         | -0.14 | 3.16 | -0.52 | 6.12E-01 | 8.12E-01 | -6.56 |
| 1454846_PM_at   | Utp15         | UTP15      | -0.09 | 2.56 | -0.52 | 6.12E-01 | 8.12E-01 | -6.56 |
| 1427268_PM_at   | Flg           | NA         | 0.05  | 2.12 | 0.52  | 6.12E-01 | 8.12E-01 | -6.56 |
| 1423435_PM_at   | ---           | NA         | 0.05  | 2.34 | 0.52  | 6.12E-01 | 8.12E-01 | -6.56 |
| 1456075_PM_at   | Prkd2         | PRKD2      | -0.06 | 2.51 | -0.52 | 6.12E-01 | 8.12E-01 | -6.56 |
| 1451933_PM_a_at | Cts7          | CTSL       | 0.04  | 2.01 | 0.52  | 6.12E-01 | 8.12E-01 | -6.56 |
| 1450353_PM_at   | Slc25a17      | NA         | 0.05  | 2.18 | 0.52  | 6.12E-01 | 8.12E-01 | -6.56 |
| 1433236_PM_at   | 3830422I06Rik | NA         | 0.07  | 2.68 | 0.52  | 6.12E-01 | 8.12E-01 | -6.56 |
| 1458274_PM_at   | Zfp69         | ZFP69      | 0.11  | 2.94 | 0.52  | 6.12E-01 | 8.12E-01 | -6.56 |
| 1445400_PM_at   | ---           | NA         | 0.05  | 2.21 | 0.52  | 6.12E-01 | 8.12E-01 | -6.56 |
| 1448997_PM_at   | Cyth1         | CYTH1      | 0.15  | 3.34 | 0.52  | 6.12E-01 | 8.12E-01 | -6.56 |
| 1428176_PM_at   | S1pr2         | S1PR2      | -0.06 | 2.17 | -0.52 | 6.13E-01 | 8.12E-01 | -6.56 |
| 1439346_PM_at   | Gpr135        | NA         | 0.04  | 2.50 | 0.52  | 6.13E-01 | 8.12E-01 | -6.56 |
| 1446125_PM_at   | ---           | NA         | -0.05 | 2.31 | -0.52 | 6.13E-01 | 8.12E-01 | -6.56 |
| 1428578_PM_s_at | Ppfia4        | PPFIA4     | 0.15  | 5.29 | 0.52  | 6.13E-01 | 8.12E-01 | -6.56 |
| 1444809_PM_at   | Marveld3      | NA         | 0.04  | 2.37 | 0.52  | 6.13E-01 | 8.12E-01 | -6.56 |
| 1448754_PM_at   | Rbp1          | RBP1       | 0.04  | 2.65 | 0.52  | 6.13E-01 | 8.12E-01 | -6.56 |
| 1456562_PM_x_at | Ap5z1         | AP5Z1      | 0.04  | 2.34 | 0.52  | 6.13E-01 | 8.12E-01 | -6.56 |
| 1442611_PM_at   | LOC102636317  | NA         | 0.05  | 2.17 | 0.52  | 6.13E-01 | 8.13E-01 | -6.56 |
| 1443988_PM_at   | ---           | NA         | 0.06  | 2.26 | 0.52  | 6.13E-01 | 8.13E-01 | -6.56 |
| 1458720_PM_at   | ---           | NA         | -0.08 | 2.53 | -0.52 | 6.13E-01 | 8.13E-01 | -6.56 |
| 1457421_PM_at   | 1700063D05Rik | NA         | 0.07  | 2.55 | 0.52  | 6.13E-01 | 8.13E-01 | -6.56 |
| 1421352_PM_at   | Tlr6          | TLR6       | 0.05  | 2.32 | 0.52  | 6.13E-01 | 8.13E-01 | -6.56 |
| 1424305_PM_at   | Jchain        | JCHAIN     | -0.13 | 2.60 | -0.52 | 6.13E-01 | 8.13E-01 | -6.56 |
| 1447889_PM_x_at | Maneal        | MANEAL     | -0.11 | 3.74 | -0.52 | 6.13E-01 | 8.13E-01 | -6.56 |
| 1444405_PM_at   | Pydc4         | NA         | -0.08 | 2.56 | -0.52 | 6.13E-01 | 8.13E-01 | -6.56 |
| 1434323_PM_at   | Eif3h         | EIF3H      | 0.04  | 2.09 | 0.52  | 6.13E-01 | 8.13E-01 | -6.56 |
| 1445433_PM_at   | Glt8d2        | GLT8D2     | 0.04  | 2.11 | 0.52  | 6.13E-01 | 8.13E-01 | -6.56 |
| 1442898_PM_at   | ---           | NA         | 0.05  | 2.38 | 0.52  | 6.13E-01 | 8.13E-01 | -6.56 |
| 1440482_PM_at   | Vps13a        | NA         | 0.08  | 2.87 | 0.52  | 6.13E-01 | 8.13E-01 | -6.56 |
| 1457474_PM_at   | Gm41848       | NA         | 0.06  | 2.12 | 0.52  | 6.13E-01 | 8.13E-01 | -6.56 |
| 1438215_PM_at   | Srsf3         | SRSF3      | 0.06  | 2.26 | 0.52  | 6.13E-01 | 8.13E-01 | -6.56 |
| 1420375_PM_at   | Kif3a         | KIF3A      | -0.22 | 3.92 | -0.52 | 6.13E-01 | 8.13E-01 | -6.56 |
| 1425626_PM_at   | Gstm1         | NA         | 0.05  | 2.14 | 0.52  | 6.13E-01 | 8.13E-01 | -6.56 |
| 1425180_PM_at   | Sgip1         | SGIP1      | -0.18 | 6.99 | -0.52 | 6.13E-01 | 8.13E-01 | -6.56 |
| 1453259_PM_at   | Insc          | INSC       | -0.05 | 2.16 | -0.52 | 6.13E-01 | 8.13E-01 | -6.56 |
| 1449363_PM_at   | Atf3          | ATF3       | 0.05  | 2.27 | 0.52  | 6.13E-01 | 8.13E-01 | -6.56 |
| 1437119_PM_at   | Ern1          | ERN1       | -0.14 | 2.72 | -0.52 | 6.13E-01 | 8.13E-01 | -6.56 |
| 1453618_PM_at   | ---           | NA         | 0.08  | 3.06 | 0.52  | 6.13E-01 | 8.13E-01 | -6.56 |
| 1434340_PM_at   | Uqcr10        | UQCR10     | 0.15  | 3.07 | 0.52  | 6.13E-01 | 8.13E-01 | -6.56 |
| 1418308_PM_at   | Hus1          | HUS1       | -0.12 | 4.00 | -0.52 | 6.13E-01 | 8.13E-01 | -6.56 |
| 1426132_PM_at   | ---           | NA         | 0.05  | 1.97 | 0.52  | 6.13E-01 | 8.13E-01 | -6.56 |
| 1427800_PM_at   | Krtap19-1     | NA         | 0.05  | 2.50 | 0.52  | 6.13E-01 | 8.13E-01 | -6.56 |
| 1433008_PM_at   | 6330526H18Rik | NA         | 0.07  | 2.32 | 0.52  | 6.13E-01 | 8.13E-01 | -6.56 |
| 1441359_PM_at   | ---           | NA         | -0.06 | 2.17 | -0.52 | 6.13E-01 | 8.13E-01 | -6.56 |
| 1449189_PM_at   | Smim12        | SMIM12     | 0.06  | 2.51 | 0.52  | 6.13E-01 | 8.13E-01 | -6.56 |
| 1445347_PM_at   | Gm2164        | NA         | 0.07  | 2.39 | 0.52  | 6.14E-01 | 8.13E-01 | -6.56 |
| 1418421_PM_at   | Bcl6b         | BCL6B      | -0.10 | 2.90 | -0.52 | 6.14E-01 | 8.13E-01 | -6.56 |
| 1451700_PM_a_at | Get4          | GET4       | 0.07  | 2.84 | 0.52  | 6.14E-01 | 8.13E-01 | -6.56 |
| 1431633_PM_x_at | 4930526L06Rik | NA         | 0.08  | 2.57 | 0.52  | 6.14E-01 | 8.13E-01 | -6.56 |

|                 |                                                                                                                                                                                                                                                            |          |       |      |       |          |          |       |
|-----------------|------------------------------------------------------------------------------------------------------------------------------------------------------------------------------------------------------------------------------------------------------------|----------|-------|------|-------|----------|----------|-------|
| 1431041_PM_at   | Gtppb8                                                                                                                                                                                                                                                     | GTPBP8   | 0.09  | 2.78 | 0.52  | 6.14E-01 | 8.13E-01 | -6.56 |
| 1425091_PM_at   | Rarres2                                                                                                                                                                                                                                                    | RARRES2  | -0.08 | 2.45 | -0.52 | 6.14E-01 | 8.13E-01 | -6.56 |
| 1424841_PM_s_at | Rbks                                                                                                                                                                                                                                                       | RBKS     | 0.05  | 2.34 | 0.52  | 6.14E-01 | 8.13E-01 | -6.56 |
| 1422598_PM_at   | Casq1                                                                                                                                                                                                                                                      | CASQ1    | -0.09 | 2.66 | -0.52 | 6.14E-01 | 8.13E-01 | -6.56 |
| 1449896_PM_at   | Mlph                                                                                                                                                                                                                                                       | MLPH     | 0.05  | 2.30 | 0.52  | 6.14E-01 | 8.13E-01 | -6.56 |
| 1429554_PM_at   | Sdccag3                                                                                                                                                                                                                                                    | SDCCAG3  | 0.14  | 2.79 | 0.52  | 6.14E-01 | 8.13E-01 | -6.56 |
| 1458645_PM_at   | ---                                                                                                                                                                                                                                                        | NA       | 0.05  | 2.33 | 0.52  | 6.14E-01 | 8.13E-01 | -6.56 |
| 1454963_PM_at   | Pde12                                                                                                                                                                                                                                                      | PDE12    | 0.05  | 2.47 | 0.52  | 6.14E-01 | 8.13E-01 | -6.56 |
| 1421283_PM_at   | Bmp5                                                                                                                                                                                                                                                       | BMP5     | -0.07 | 2.39 | -0.52 | 6.14E-01 | 8.13E-01 | -6.56 |
| 1435441_PM_at   | Ablim2                                                                                                                                                                                                                                                     | ABLIM2   | 0.07  | 4.23 | 0.52  | 6.14E-01 | 8.13E-01 | -6.56 |
|                 | 2610036A22Rik ///<br>Gm13051 /// Gm13139 ///<br>Gm13152 /// Gm13212 ///<br>Gm13248 /// Gm13251 ///<br>Gm21411 /// Gm30910 ///<br>Gm8935 ///<br>Gt(pU21)140Imeg ///<br>LOC102643189 ///<br>LOC105242453 ///<br>LOC105247632 ///<br>LOC383940 /// Zfp534 /// |          |       |      |       |          |          |       |
| 1440518_PM_at   | Znf41-ps                                                                                                                                                                                                                                                   | NA       | -0.15 | 3.08 | -0.52 | 6.14E-01 | 8.13E-01 | -6.56 |
| 1444451_PM_at   | Pappa2                                                                                                                                                                                                                                                     | PAPPA2   | 0.06  | 2.07 | 0.52  | 6.14E-01 | 8.13E-01 | -6.56 |
| 1428291_PM_at   | Exosc8                                                                                                                                                                                                                                                     | EXOSC8   | -0.09 | 3.77 | -0.52 | 6.14E-01 | 8.13E-01 | -6.56 |
| 1425151_PM_a_at | Noxo1                                                                                                                                                                                                                                                      | NOXO1    | 0.10  | 2.42 | 0.52  | 6.14E-01 | 8.13E-01 | -6.56 |
| 1446137_PM_at   | Gbas                                                                                                                                                                                                                                                       | NIPSNAP2 | 0.05  | 2.32 | 0.52  | 6.14E-01 | 8.13E-01 | -6.56 |
| 1422001_PM_at   | Inhbc                                                                                                                                                                                                                                                      | INHBC    | 0.06  | 2.69 | 0.52  | 6.14E-01 | 8.13E-01 | -6.56 |
| 1455906_PM_at   | Tmem241                                                                                                                                                                                                                                                    | TMEM241  | 0.08  | 2.54 | 0.52  | 6.14E-01 | 8.13E-01 | -6.56 |
| 1443382_PM_s_at | ---                                                                                                                                                                                                                                                        | NA       | -0.04 | 2.15 | -0.52 | 6.14E-01 | 8.13E-01 | -6.56 |
| 1458977_PM_at   | A530021J07Rik                                                                                                                                                                                                                                              | NA       | 0.04  | 1.90 | 0.52  | 6.14E-01 | 8.13E-01 | -6.56 |
| 1457897_PM_at   | Iqce                                                                                                                                                                                                                                                       | IQCE     | 0.05  | 2.10 | 0.52  | 6.14E-01 | 8.13E-01 | -6.56 |
| 1442628_PM_at   | Zfp800                                                                                                                                                                                                                                                     | NA       | 0.11  | 2.68 | 0.52  | 6.14E-01 | 8.13E-01 | -6.56 |
| 1435829_PM_at   | Zmat1                                                                                                                                                                                                                                                      | ZMAT1    | 0.11  | 3.86 | 0.52  | 6.14E-01 | 8.13E-01 | -6.56 |
| 1416540_PM_at   | Hgs                                                                                                                                                                                                                                                        | HGS      | 0.12  | 2.89 | 0.52  | 6.14E-01 | 8.13E-01 | -6.56 |
| 1427974_PM_s_at | Cacna1d                                                                                                                                                                                                                                                    | CACNA1D  | -0.17 | 4.05 | -0.52 | 6.14E-01 | 8.13E-01 | -6.56 |
| 1455250_PM_at   | Sh3bp4                                                                                                                                                                                                                                                     | SH3BP4   | -0.11 | 3.15 | -0.52 | 6.14E-01 | 8.13E-01 | -6.56 |
| 1435517_PM_x_at | Ralb                                                                                                                                                                                                                                                       | RALB     | -0.06 | 2.50 | -0.52 | 6.14E-01 | 8.13E-01 | -6.56 |
| 1457590_PM_at   | ---                                                                                                                                                                                                                                                        | NA       | -0.06 | 2.38 | -0.52 | 6.14E-01 | 8.13E-01 | -6.56 |
| 1442605_PM_at   | ---                                                                                                                                                                                                                                                        | NA       | 0.06  | 2.53 | 0.52  | 6.14E-01 | 8.13E-01 | -6.56 |
| 1421791_PM_at   | Ang3                                                                                                                                                                                                                                                       | NA       | 0.07  | 2.45 | 0.52  | 6.14E-01 | 8.13E-01 | -6.56 |
| 1422461_PM_at   | Atad3a                                                                                                                                                                                                                                                     | ATAD3C   | -0.07 | 2.65 | -0.52 | 6.15E-01 | 8.14E-01 | -6.56 |
| 1446283_PM_at   | ---                                                                                                                                                                                                                                                        | NA       | 0.05  | 2.43 | 0.52  | 6.15E-01 | 8.14E-01 | -6.56 |
| 1458477_PM_at   | Rere                                                                                                                                                                                                                                                       | NA       | 0.06  | 2.23 | 0.52  | 6.15E-01 | 8.14E-01 | -6.56 |
| 1457828_PM_at   | Stam                                                                                                                                                                                                                                                       | STAM     | 0.06  | 2.31 | 0.52  | 6.15E-01 | 8.14E-01 | -6.56 |
| 1423036_PM_at   | Txndc17                                                                                                                                                                                                                                                    | NA       | 0.07  | 2.28 | 0.52  | 6.15E-01 | 8.14E-01 | -6.56 |
| 1419305_PM_a_at | Fbxo36                                                                                                                                                                                                                                                     | FBXO36   | 0.16  | 2.74 | 0.52  | 6.15E-01 | 8.14E-01 | -6.56 |
| 1445412_PM_at   | Ccdc73                                                                                                                                                                                                                                                     | CCDC73   | -0.13 | 3.26 | -0.52 | 6.15E-01 | 8.14E-01 | -6.56 |
| 1425373_PM_a_at | Psmg2                                                                                                                                                                                                                                                      | PSMG2    | 0.05  | 2.03 | 0.52  | 6.15E-01 | 8.14E-01 | -6.56 |
| 1453867_PM_at   | Fbxw2                                                                                                                                                                                                                                                      | FBXW2    | 0.06  | 2.47 | 0.52  | 6.15E-01 | 8.14E-01 | -6.56 |
| 1435918_PM_at   | Fam107a                                                                                                                                                                                                                                                    | FAM107A  | 0.14  | 2.91 | 0.52  | 6.15E-01 | 8.14E-01 | -6.56 |
| 1432835_PM_at   | Cpb2                                                                                                                                                                                                                                                       | CPB2     | 0.06  | 2.88 | 0.52  | 6.15E-01 | 8.14E-01 | -6.56 |
| 1436933_PM_at   | ---                                                                                                                                                                                                                                                        | NA       | 0.09  | 2.86 | 0.52  | 6.15E-01 | 8.14E-01 | -6.56 |
| 1422478_PM_a_at | Acss2                                                                                                                                                                                                                                                      | ACSS2    | -0.18 | 6.07 | -0.52 | 6.15E-01 | 8.14E-01 | -6.56 |
| 1444565_PM_at   | ---                                                                                                                                                                                                                                                        | NA       | 0.09  | 3.21 | 0.52  | 6.15E-01 | 8.14E-01 | -6.56 |
| 1438045_PM_at   | Eea1                                                                                                                                                                                                                                                       | EEA1     | -0.09 | 3.03 | -0.52 | 6.15E-01 | 8.14E-01 | -6.56 |
| 1424440_PM_at   | Mrps6                                                                                                                                                                                                                                                      | MRPS6    | -0.11 | 3.50 | -0.52 | 6.15E-01 | 8.14E-01 | -6.56 |
| 1444423_PM_at   | ---                                                                                                                                                                                                                                                        | NA       | 0.07  | 2.48 | 0.52  | 6.15E-01 | 8.14E-01 | -6.56 |
| 1438545_PM_at   | Slc25a5                                                                                                                                                                                                                                                    | SLC25A5  | 0.07  | 2.75 | 0.52  | 6.15E-01 | 8.14E-01 | -6.56 |
| 1425375_PM_at   | Tdpoz1                                                                                                                                                                                                                                                     | NA       | -0.05 | 2.31 | -0.52 | 6.15E-01 | 8.14E-01 | -6.56 |
| 1426207_PM_at   | Ikbkb                                                                                                                                                                                                                                                      | IKBKB    | 0.08  | 3.58 | 0.52  | 6.15E-01 | 8.14E-01 | -6.56 |
| 1460465_PM_at   | Ndnf                                                                                                                                                                                                                                                       | NDNF     | -0.43 | 4.14 | -0.52 | 6.15E-01 | 8.14E-01 | -6.56 |
| 1450939_PM_at   | Entpd1                                                                                                                                                                                                                                                     | ENTPD1   | -0.22 | 2.95 | -0.52 | 6.15E-01 | 8.14E-01 | -6.56 |
| 1440813_PM_s_at | Plxnb3                                                                                                                                                                                                                                                     | PLXNB3   | -0.16 | 2.92 | -0.52 | 6.15E-01 | 8.14E-01 | -6.56 |
| 1436919_PM_at   | Trp53i11                                                                                                                                                                                                                                                   | TP53I11  | -0.13 | 2.77 | -0.52 | 6.15E-01 | 8.14E-01 | -6.56 |
| 1450801_PM_at   | Adam21                                                                                                                                                                                                                                                     | ADAM21   | 0.07  | 2.28 | 0.52  | 6.15E-01 | 8.14E-01 | -6.56 |
| 1450429_PM_at   | Capn6                                                                                                                                                                                                                                                      | CAPN6    | 0.09  | 2.64 | 0.52  | 6.15E-01 | 8.14E-01 | -6.56 |
| 1444467_PM_at   | C77534                                                                                                                                                                                                                                                     | NA       | 0.19  | 2.93 | 0.52  | 6.15E-01 | 8.14E-01 | -6.56 |
| 1420438_PM_at   | Orm2                                                                                                                                                                                                                                                       | ORM1     | 0.07  | 2.28 | 0.52  | 6.15E-01 | 8.14E-01 | -6.56 |
| 1443040_PM_x_at | Rfc2                                                                                                                                                                                                                                                       | RFC2     | 0.06  | 2.24 | 0.52  | 6.16E-01 | 8.14E-01 | -6.56 |
| 1437088_PM_at   | Sdad1                                                                                                                                                                                                                                                      | SDAD1    | 0.12  | 4.61 | 0.52  | 6.15E-01 | 8.14E-01 | -6.56 |
| 1416588_PM_at   | Ptprn                                                                                                                                                                                                                                                      | PTPRN    | 0.17  | 6.01 | 0.52  | 6.16E-01 | 8.14E-01 | -6.56 |
| 1418596_PM_at   | Fgfr4                                                                                                                                                                                                                                                      | FGFR4    | 0.05  | 2.12 | 0.52  | 6.16E-01 | 8.14E-01 | -6.56 |
| 1443919_PM_at   | Prrt3                                                                                                                                                                                                                                                      | PRRT3    | 0.08  | 2.99 | 0.52  | 6.16E-01 | 8.14E-01 | -6.56 |
| 1456486_PM_at   | Zfp574                                                                                                                                                                                                                                                     | ZNF574   | 0.06  | 2.59 | 0.52  | 6.16E-01 | 8.14E-01 | -6.56 |

|                 |                          |         |       |      |       |          |          |       |
|-----------------|--------------------------|---------|-------|------|-------|----------|----------|-------|
| 1427105_PM_at   | Cenpn                    | CENPN   | 0.04  | 1.99 | 0.52  | 6.16E-01 | 8.14E-01 | -6.56 |
| 1418956_PM_at   | Tsk6                     | TSSK6   | 0.05  | 2.25 | 0.52  | 6.16E-01 | 8.14E-01 | -6.56 |
| 1416259_PM_at   | Pex12                    | PEX12   | -0.13 | 2.70 | -0.52 | 6.16E-01 | 8.14E-01 | -6.56 |
| 1451635_PM_at   | Slc22a29 /// Slc22a30    | SLC22A9 | 0.05  | 2.07 | 0.52  | 6.16E-01 | 8.14E-01 | -6.56 |
| 1435177_PM_a_at | Anapc5                   | ANAPC5  | 0.24  | 4.84 | 0.52  | 6.16E-01 | 8.14E-01 | -6.56 |
| 1424377_PM_at   | Rsl24d1                  | RSL24D1 | 0.27  | 6.88 | 0.52  | 6.16E-01 | 8.14E-01 | -6.56 |
| 1458112_PM_at   | Adarb2                   | ADARB2  | 0.12  | 2.30 | 0.52  | 6.16E-01 | 8.14E-01 | -6.56 |
| 1429628_PM_at   | Soga3                    | SOGA3   | 0.08  | 3.21 | 0.52  | 6.16E-01 | 8.14E-01 | -6.56 |
| 1443831_PM_s_at | Mt5                      | TESMIN  | 0.09  | 3.58 | 0.52  | 6.16E-01 | 8.14E-01 | -6.56 |
| 1448298_PM_at   | Tnk2                     | TNK2    | -0.08 | 2.78 | -0.52 | 6.16E-01 | 8.14E-01 | -6.56 |
| 1456690_PM_at   | Usp44                    | NA      | 0.07  | 2.05 | 0.52  | 6.16E-01 | 8.14E-01 | -6.56 |
| 1454744_PM_at   | Ska3                     | SKA3    | -0.05 | 2.12 | -0.52 | 6.16E-01 | 8.15E-01 | -6.56 |
| 1438247_PM_at   | Klhl15                   | KLHL15  | -0.11 | 2.36 | -0.52 | 6.16E-01 | 8.15E-01 | -6.56 |
| 1416651_PM_at   | Znhit2                   | ZNHIT2  | -0.10 | 4.54 | -0.52 | 6.16E-01 | 8.15E-01 | -6.56 |
| 1432429_PM_at   | ---                      | NA      | -0.05 | 2.32 | -0.52 | 6.16E-01 | 8.15E-01 | -6.56 |
| 1448620_PM_at   | Fcgr3                    | FCGR2A  | 0.07  | 2.45 | 0.52  | 6.16E-01 | 8.15E-01 | -6.56 |
| 1431158_PM_at   | ---                      | NA      | -0.09 | 2.72 | -0.52 | 6.16E-01 | 8.15E-01 | -6.56 |
| 1446597_PM_at   | ---                      | NA      | -0.05 | 2.00 | -0.52 | 6.16E-01 | 8.15E-01 | -6.56 |
| 1423032_PM_at   | Rpl39 /// Rpl39-ps       | NA      | 0.08  | 3.67 | 0.52  | 6.16E-01 | 8.15E-01 | -6.56 |
| 1450208_PM_a_at | Elmo1                    | ELMO1   | 0.18  | 3.50 | 0.52  | 6.16E-01 | 8.15E-01 | -6.56 |
| 1444383_PM_at   | Rrp7a                    | RRP7A   | -0.05 | 2.52 | -0.52 | 6.16E-01 | 8.15E-01 | -6.56 |
| 1432883_PM_at   | 4932431P20Rik            | NA      | 0.07  | 3.40 | 0.52  | 6.16E-01 | 8.15E-01 | -6.56 |
| 1441848_PM_at   | ---                      | NA      | -0.08 | 2.31 | -0.52 | 6.17E-01 | 8.15E-01 | -6.56 |
| 1446676_PM_at   | ---                      | NA      | -0.08 | 4.30 | -0.52 | 6.17E-01 | 8.15E-01 | -6.56 |
| 1459175_PM_at   | ---                      | NA      | -0.06 | 2.36 | -0.52 | 6.17E-01 | 8.15E-01 | -6.56 |
| 1458669_PM_at   | Agpat5                   | AGPAT5  | 0.09  | 2.42 | 0.52  | 6.17E-01 | 8.15E-01 | -6.56 |
| 1442547_PM_at   | ---                      | NA      | -0.21 | 3.57 | -0.52 | 6.17E-01 | 8.15E-01 | -6.56 |
| 1443727_PM_x_at | Smyd1                    | SMYD1   | 0.05  | 2.87 | 0.52  | 6.17E-01 | 8.15E-01 | -6.56 |
| 1434385_PM_at   | Tom1l2                   | TOM1L2  | -0.06 | 3.29 | -0.52 | 6.17E-01 | 8.15E-01 | -6.56 |
| 1426958_PM_at   | Rps9                     | RPS9    | 0.06  | 2.47 | 0.52  | 6.17E-01 | 8.15E-01 | -6.56 |
| 1448916_PM_at   | Mafg                     | MAFG    | 0.06  | 3.26 | 0.52  | 6.17E-01 | 8.15E-01 | -6.56 |
| 1451993_PM_at   | Mau2                     | MAU2    | 0.08  | 2.99 | 0.52  | 6.17E-01 | 8.15E-01 | -6.56 |
| 1431122_PM_at   | Arm9                     | ARM9    | 0.05  | 2.05 | 0.52  | 6.17E-01 | 8.15E-01 | -6.56 |
| 1453781_PM_at   | Zbtb8os                  | ZBTB8OS | 0.05  | 2.95 | 0.52  | 6.17E-01 | 8.15E-01 | -6.56 |
| 1460166_PM_at   | Rit2                     | RIT2    | -0.13 | 3.83 | -0.52 | 6.17E-01 | 8.15E-01 | -6.56 |
| 1442150_PM_at   | ---                      | NA      | -0.11 | 2.32 | -0.52 | 6.17E-01 | 8.15E-01 | -6.56 |
| 1425210_PM_s_at | Zfp84                    | ZNF461  | 0.17  | 3.01 | 0.52  | 6.17E-01 | 8.15E-01 | -6.56 |
| 1441193_PM_at   | Ctnna3                   | CTNNA3  | 0.06  | 3.11 | 0.52  | 6.17E-01 | 8.15E-01 | -6.56 |
| 1438790_PM_x_at | Tmem41b                  | TMEM41B | -0.15 | 4.08 | -0.52 | 6.17E-01 | 8.15E-01 | -6.56 |
| 1426590_PM_at   | Gfm2                     | GFM2    | -0.12 | 2.73 | -0.52 | 6.17E-01 | 8.15E-01 | -6.56 |
| 1437898_PM_at   | C920009B18Rik            | NA      | 0.07  | 2.58 | 0.52  | 6.17E-01 | 8.15E-01 | -6.56 |
| 1418743_PM_a_at | Tesc                     | TESC    | -0.06 | 3.28 | -0.51 | 6.17E-01 | 8.15E-01 | -6.56 |
| 1451758_PM_at   | Lamc3                    | LAMC3   | -0.06 | 2.23 | -0.51 | 6.17E-01 | 8.15E-01 | -6.56 |
| 1444310_PM_at   | Polr3a                   | POLR3A  | 0.04  | 2.00 | 0.51  | 6.17E-01 | 8.15E-01 | -6.56 |
| 1439848_PM_at   | Bves                     | NA      | 0.05  | 2.21 | 0.51  | 6.17E-01 | 8.15E-01 | -6.56 |
| 1438055_PM_at   | Rarres1                  | RARRES1 | 0.06  | 2.16 | 0.51  | 6.17E-01 | 8.15E-01 | -6.56 |
| 1460281_PM_at   | Asb15                    | ASB15   | 0.05  | 1.91 | 0.51  | 6.18E-01 | 8.15E-01 | -6.56 |
| 1436857_PM_at   | Defa21 /// Defa22        | NA      | 0.11  | 3.25 | 0.51  | 6.18E-01 | 8.15E-01 | -6.56 |
| 1442346_PM_at   | ---                      | NA      | 0.12  | 2.40 | 0.51  | 6.18E-01 | 8.15E-01 | -6.56 |
| 1432130_PM_a_at | LOC102641273 /// Ttc14   | TTC14   | 0.14  | 3.35 | 0.51  | 6.18E-01 | 8.15E-01 | -6.56 |
| 1438291_PM_x_at | Gm12967                  | NA      | -0.04 | 1.87 | -0.51 | 6.18E-01 | 8.15E-01 | -6.56 |
| 1450407_PM_a_at | Anp32a                   | ANP32A  | 0.29  | 6.31 | 0.51  | 6.18E-01 | 8.15E-01 | -6.56 |
| 1437301_PM_a_at | Dvl1                     | DVL1    | 0.14  | 9.30 | 0.51  | 6.18E-01 | 8.16E-01 | -6.56 |
| 1455123_PM_at   | St18                     | ST18    | 0.34  | 4.91 | 0.51  | 6.18E-01 | 8.16E-01 | -6.56 |
| 1429082_PM_at   | Ankle2                   | ANKLE2  | -0.20 | 2.67 | -0.51 | 6.18E-01 | 8.16E-01 | -6.56 |
| 1431656_PM_at   | C630050I24Rik            | NA      | 0.05  | 1.95 | 0.51  | 6.18E-01 | 8.16E-01 | -6.56 |
| 1417088_PM_at   | Zfp346                   | ZNF346  | 0.06  | 3.02 | 0.51  | 6.18E-01 | 8.16E-01 | -6.56 |
| 1432712_PM_at   | 4933425M03Rik            | NA      | 0.07  | 2.52 | 0.51  | 6.18E-01 | 8.16E-01 | -6.56 |
| 1450178_PM_at   | Brdt                     | BRDT    | 0.08  | 3.37 | 0.51  | 6.18E-01 | 8.16E-01 | -6.56 |
| 1446476_PM_at   | Traj12 /// Trav14d-3-dv8 | NA      | -0.11 | 3.38 | -0.51 | 6.18E-01 | 8.16E-01 | -6.56 |
| 1445805_PM_x_at | Kcnn3                    | KCNN3   | 0.11  | 3.78 | 0.51  | 6.18E-01 | 8.16E-01 | -6.56 |
| 1454437_PM_at   | ---                      | NA      | -0.20 | 7.38 | -0.51 | 6.18E-01 | 8.16E-01 | -6.56 |
| 1437397_PM_at   | Prlr                     | PRLR    | -0.19 | 2.98 | -0.51 | 6.18E-01 | 8.16E-01 | -6.56 |
| 1434884_PM_at   | Mtdh                     | NA      | -0.19 | 6.82 | -0.51 | 6.18E-01 | 8.16E-01 | -6.56 |
| 1417639_PM_at   | Slc22a4                  | SLC22A4 | -0.19 | 3.17 | -0.51 | 6.18E-01 | 8.16E-01 | -6.56 |
| 1429688_PM_at   | Arntl2                   | ARNTL2  | -0.17 | 3.25 | -0.51 | 6.18E-01 | 8.16E-01 | -6.56 |
| 1438658_PM_a_at | S1pr3                    | S1PR3   | -0.12 | 2.63 | -0.51 | 6.18E-01 | 8.16E-01 | -6.56 |
| 1449278_PM_at   | Eif2ak3                  | EIF2AK3 | -0.11 | 2.94 | -0.51 | 6.18E-01 | 8.16E-01 | -6.56 |
| 1419677_PM_at   | Masp1                    | NA      | -0.07 | 2.19 | -0.51 | 6.18E-01 | 8.16E-01 | -6.56 |
| 1425049_PM_at   | Oas1h                    | NA      | -0.06 | 2.64 | -0.51 | 6.18E-01 | 8.16E-01 | -6.56 |
| 1418123_PM_at   | Unc119                   | UNC119  | -0.06 | 2.22 | -0.51 | 6.18E-01 | 8.16E-01 | -6.56 |
| 1454056_PM_at   | Pdzd9                    | NA      | -0.05 | 2.56 | -0.51 | 6.18E-01 | 8.16E-01 | -6.56 |
| 1456459_PM_x_at | Ccdc53                   | WASHC3  | -0.05 | 2.11 | -0.51 | 6.18E-01 | 8.16E-01 | -6.56 |
| 1444799_PM_at   | AU022054                 | NA      | 0.04  | 2.09 | 0.51  | 6.18E-01 | 8.16E-01 | -6.56 |
| 1419121_PM_at   | Tpmt                     | NA      | 0.05  | 2.23 | 0.51  | 6.18E-01 | 8.16E-01 | -6.56 |

|                     |                                          |          |       |       |       |          |          |       |
|---------------------|------------------------------------------|----------|-------|-------|-------|----------|----------|-------|
| 1418953_PM_at       | Fbxo16                                   | FBXO16   | 0.05  | 2.30  | 0.51  | 6.18E-01 | 8.16E-01 | -6.56 |
| 1458361_PM_at       | Dclre1c                                  | DCLRE1C  | 0.06  | 2.46  | 0.51  | 6.18E-01 | 8.16E-01 | -6.56 |
| 1429944_PM_at       | Tchhl1                                   | TCHHL1   | 0.06  | 2.41  | 0.51  | 6.18E-01 | 8.16E-01 | -6.56 |
| 1433204_PM_at       | Ndfip2                                   | NA       | 0.06  | 3.12  | 0.51  | 6.18E-01 | 8.16E-01 | -6.56 |
| 1427024_PM_at       | Slain2                                   | SLAIN2   | 0.06  | 2.27  | 0.51  | 6.18E-01 | 8.16E-01 | -6.56 |
| 1451776_PM_s_at     | Hopx                                     | HOPX     | 0.06  | 2.70  | 0.51  | 6.18E-01 | 8.16E-01 | -6.56 |
| 1441661_PM_at       | ---                                      | NA       | 0.07  | 2.31  | 0.51  | 6.18E-01 | 8.16E-01 | -6.56 |
| 1425749_PM_at       | Stxbp6                                   | STXBP6   | 0.08  | 2.69  | 0.51  | 6.18E-01 | 8.16E-01 | -6.56 |
| 1430617_PM_at       | LOC100862416 ///<br>LOC100862454 ///Oip5 | OIP5     | 0.09  | 3.67  | 0.51  | 6.18E-01 | 8.16E-01 | -6.56 |
| 1431983_PM_at       | Myo3a                                    | MYO3A    | 0.10  | 2.35  | 0.51  | 6.18E-01 | 8.16E-01 | -6.56 |
| 1460198_PM_a_at     | Psmb3                                    | PSMB3    | 0.17  | 6.74  | 0.51  | 6.18E-01 | 8.16E-01 | -6.56 |
| 1439843_PM_at       | Camk4                                    | CAMK4    | 0.19  | 7.80  | 0.51  | 6.18E-01 | 8.16E-01 | -6.56 |
| 1429298_PM_at       | Ddah1                                    | DDAH1    | -0.13 | 4.48  | -0.51 | 6.18E-01 | 8.16E-01 | -6.56 |
| 1460004_PM_x_at     | Stx6                                     | STX6     | -0.10 | 2.50  | -0.51 | 6.18E-01 | 8.16E-01 | -6.56 |
| 1420775_PM_at       | Hdhd1a                                   | PUDP     | 0.04  | 1.97  | 0.51  | 6.18E-01 | 8.16E-01 | -6.56 |
| 1443297_PM_at       | ---                                      | NA       | 0.07  | 2.36  | 0.51  | 6.18E-01 | 8.16E-01 | -6.56 |
| 1446758_PM_at       | Bre                                      | BABAM2   | -0.06 | 2.50  | -0.51 | 6.19E-01 | 8.16E-01 | -6.56 |
| 1446893_PM_at       | ---                                      | NA       | 0.05  | 1.97  | 0.51  | 6.19E-01 | 8.16E-01 | -6.56 |
| 1455537_PM_at       | ---                                      | NA       | -0.17 | 2.90  | -0.51 | 6.19E-01 | 8.16E-01 | -6.56 |
| 1453628_PM_s_at     | Lrrc2                                    | LRRC2    | -0.06 | 2.33  | -0.51 | 6.19E-01 | 8.16E-01 | -6.56 |
| 1449318_PM_at       | Tubg2                                    | TUBG2    | -0.04 | 1.94  | -0.51 | 6.19E-01 | 8.16E-01 | -6.56 |
| 1453669_PM_at       | 4930578C19Rik                            | CXorf36  | 0.05  | 2.27  | 0.51  | 6.19E-01 | 8.16E-01 | -6.56 |
| 1437608_PM_x_at     | Cdk5rap2 ///Ywhaq                        | YWHAQ    | 0.10  | 8.58  | 0.51  | 6.19E-01 | 8.16E-01 | -6.56 |
| 1424208_PM_at       | Ptger4                                   | PTGER4   | -0.10 | 2.94  | -0.51 | 6.19E-01 | 8.16E-01 | -6.56 |
| 1427634_PM_at       | Kcnn7                                    | KCNH7    | 0.11  | 3.01  | 0.51  | 6.19E-01 | 8.16E-01 | -6.56 |
| 1455546_PM_s_at     | Sf3a2                                    | SF3A2    | -0.26 | 4.81  | -0.51 | 6.19E-01 | 8.16E-01 | -6.56 |
| 1421582_PM_a_at     | Creb1                                    | CREB1    | -0.14 | 3.04  | -0.51 | 6.19E-01 | 8.16E-01 | -6.56 |
| 1449089_PM_at       | Nrip1                                    | NRP1     | -0.12 | 3.98  | -0.51 | 6.19E-01 | 8.16E-01 | -6.56 |
| 1433719_PM_at       | Slc9a9                                   | SLC9A9   | -0.09 | 3.04  | -0.51 | 6.19E-01 | 8.16E-01 | -6.56 |
| 1420105_PM_at       | D13Erttd205e                             | NA       | -0.05 | 2.29  | -0.51 | 6.19E-01 | 8.16E-01 | -6.56 |
| 1423092_PM_at       | Incenp                                   | INCENP   | -0.04 | 2.44  | -0.51 | 6.19E-01 | 8.16E-01 | -6.56 |
| 1432690_PM_at       | ---                                      | NA       | 0.04  | 2.00  | 0.51  | 6.19E-01 | 8.16E-01 | -6.56 |
| 1454367_PM_at       | Rbbp6                                    | RBBP6    | 0.04  | 2.77  | 0.51  | 6.19E-01 | 8.16E-01 | -6.56 |
| 1453330_PM_at       | Ccdc88c                                  | NA       | 0.05  | 2.84  | 0.51  | 6.19E-01 | 8.16E-01 | -6.56 |
| 1432411_PM_a_at     | Fbxw2                                    | FBXW2    | 0.05  | 2.19  | 0.51  | 6.19E-01 | 8.16E-01 | -6.56 |
| 1438875_PM_at       | Zfp616                                   | NA       | 0.05  | 1.91  | 0.51  | 6.19E-01 | 8.16E-01 | -6.56 |
| 1458511_PM_at       | Fbrs1                                    | FBRSL1   | 0.08  | 2.43  | 0.51  | 6.19E-01 | 8.16E-01 | -6.56 |
| 1433126_PM_at       | Gm30120                                  | NA       | 0.08  | 2.46  | 0.51  | 6.19E-01 | 8.16E-01 | -6.56 |
| 1439523_PM_at       | Bend4                                    | BEND4    | 0.11  | 2.47  | 0.51  | 6.19E-01 | 8.16E-01 | -6.56 |
| 1444098_PM_at       | Dnal1                                    | NA       | 0.12  | 3.19  | 0.51  | 6.19E-01 | 8.16E-01 | -6.56 |
| 1446740_PM_at       | ---                                      | NA       | -0.11 | 2.77  | -0.51 | 6.19E-01 | 8.16E-01 | -6.56 |
| AFFX-r2-P1-cre-3_at | ---                                      | NA       | -0.05 | 12.37 | -0.51 | 6.19E-01 | 8.16E-01 | -6.56 |
| 1429450_PM_at       | Fam217a                                  | FAM217A  | -0.04 | 2.27  | -0.51 | 6.19E-01 | 8.16E-01 | -6.56 |
| 1423705_PM_at       | Enoph1                                   | ENOPH1   | 0.08  | 2.97  | 0.51  | 6.19E-01 | 8.16E-01 | -6.56 |
| 1432293_PM_at       | 4930579G18Rik                            | NA       | 0.09  | 2.88  | 0.51  | 6.19E-01 | 8.16E-01 | -6.56 |
| 1438254_PM_at       | Mcmbp                                    | MCMBP    | 0.19  | 3.21  | 0.51  | 6.19E-01 | 8.16E-01 | -6.56 |
| 1432582_PM_at       | ---                                      | NA       | 0.21  | 2.94  | 0.51  | 6.19E-01 | 8.16E-01 | -6.56 |
| 1434199_PM_at       | Tmem151b                                 | TMEM151B | -0.06 | 2.95  | -0.51 | 6.19E-01 | 8.16E-01 | -6.56 |
| 1427208_PM_at       | Zfp451                                   | ZNF451   | 0.13  | 3.37  | 0.51  | 6.19E-01 | 8.16E-01 | -6.56 |
| 1442425_PM_at       | ---                                      | NA       | -0.06 | 2.45  | -0.51 | 6.20E-01 | 8.16E-01 | -6.56 |
| 1428041_PM_at       | BC028777                                 | NA       | 0.04  | 1.98  | 0.51  | 6.20E-01 | 8.16E-01 | -6.56 |
| 1425701_PM_a_at     | Rgs3                                     | RGS3     | -0.06 | 2.47  | -0.51 | 6.20E-01 | 8.16E-01 | -6.56 |
| 1426498_PM_at       | Kdmsc                                    | KDM5C    | 0.13  | 2.77  | 0.51  | 6.20E-01 | 8.16E-01 | -6.56 |
| 1417185_PM_at       | Ly6a                                     | NA       | -0.16 | 3.98  | -0.51 | 6.20E-01 | 8.16E-01 | -6.56 |
| 1424209_PM_at       | Rars2                                    | RARS2    | -0.14 | 3.87  | -0.51 | 6.20E-01 | 8.16E-01 | -6.56 |
| 1439474_PM_x_at     | ---                                      | NA       | -0.12 | 2.86  | -0.51 | 6.20E-01 | 8.16E-01 | -6.56 |
| 1443345_PM_at       | Gm36243                                  | NA       | -0.09 | 2.88  | -0.51 | 6.20E-01 | 8.16E-01 | -6.56 |
| 1446123_PM_at       | Ttc34                                    | TTC34    | 0.05  | 2.94  | 0.51  | 6.20E-01 | 8.16E-01 | -6.56 |
| 1449487_PM_at       | Ccdc70                                   | CCDC70   | 0.06  | 2.38  | 0.51  | 6.20E-01 | 8.16E-01 | -6.56 |
| 1442039_PM_at       | Tox                                      | TOX      | 0.07  | 2.18  | 0.51  | 6.20E-01 | 8.16E-01 | -6.56 |
| 1429160_PM_at       | Mtif3                                    | MTIF3    | -0.08 | 3.25  | -0.51 | 6.20E-01 | 8.16E-01 | -6.56 |
| 1460463_PM_at       | H60c                                     | NA       | -0.08 | 2.67  | -0.51 | 6.20E-01 | 8.16E-01 | -6.56 |
| 1448989_PM_a_at     | Myo1b                                    | MYO1B    | -0.07 | 2.93  | -0.51 | 6.20E-01 | 8.16E-01 | -6.56 |
| 1433293_PM_at       | Sdha                                     | SDHA     | 0.06  | 2.33  | 0.51  | 6.20E-01 | 8.16E-01 | -6.56 |
| 1416265_PM_at       | Capn10                                   | CAPN10   | 0.06  | 2.28  | 0.51  | 6.20E-01 | 8.16E-01 | -6.56 |
| 1426731_PM_at       | Des                                      | DES      | 0.07  | 2.37  | 0.51  | 6.20E-01 | 8.16E-01 | -6.56 |
| 1439818_PM_at       | Prmt10                                   | PRMT9    | 0.07  | 3.00  | 0.51  | 6.20E-01 | 8.16E-01 | -6.56 |
| 1423768_PM_at       | Unc93b1                                  | UNC93B1  | 0.07  | 2.13  | 0.51  | 6.20E-01 | 8.16E-01 | -6.56 |
| 1447954_PM_at       | Lrrc49                                   | LRRC49   | 0.14  | 2.98  | 0.51  | 6.20E-01 | 8.16E-01 | -6.56 |
| 1451865_PM_at       | Cxadr                                    | NA       | 0.24  | 4.39  | 0.51  | 6.20E-01 | 8.16E-01 | -6.56 |
| 1438951_PM_x_at     | Nup54                                    | NUP54    | -0.13 | 2.22  | -0.51 | 6.20E-01 | 8.16E-01 | -6.56 |
| 1455281_PM_at       | Wdr33                                    | NA       | -0.13 | 3.31  | -0.51 | 6.20E-01 | 8.16E-01 | -6.56 |
| 1448533_PM_at       | Tbcb                                     | TBCB     | -0.09 | 5.25  | -0.51 | 6.20E-01 | 8.16E-01 | -6.56 |
| 1421875_PM_a_at     | Mrps23                                   | MRPS23   | 0.08  | 3.41  | 0.51  | 6.20E-01 | 8.16E-01 | -6.56 |

|                 |                      |          |       |      |       |          |          |       |
|-----------------|----------------------|----------|-------|------|-------|----------|----------|-------|
| 1451170_PM_s_at | Nomo1                | NOMO3    | -0.15 | 6.02 | -0.51 | 6.20E-01 | 8.17E-01 | -6.56 |
| 1416919_PM_a_at | Nphp1                | NPHP1    | -0.05 | 2.29 | -0.51 | 6.20E-01 | 8.17E-01 | -6.56 |
| 1416219_PM_at   | Rpl19                | RPL19    | -0.22 | 6.02 | -0.51 | 6.20E-01 | 8.17E-01 | -6.56 |
| 1437894_PM_at   | Prox1                | PROX1    | -0.18 | 3.05 | -0.51 | 6.20E-01 | 8.17E-01 | -6.56 |
| 1437149_PM_at   | Slc6a6               | SLC6A6   | -0.13 | 7.55 | -0.51 | 6.20E-01 | 8.17E-01 | -6.56 |
| 1423797_PM_at   | Aacs                 | AACS     | -0.07 | 2.70 | -0.51 | 6.20E-01 | 8.17E-01 | -6.56 |
| 1438564_PM_at   | Fancf                | NA       | 0.05  | 2.71 | 0.51  | 6.20E-01 | 8.17E-01 | -6.56 |
| 1418379_PM_s_at | Adgra2               | ADGRA2   | 0.05  | 2.67 | 0.51  | 6.20E-01 | 8.17E-01 | -6.56 |
| 1441438_PM_at   | Gpc6                 | GPC6     | 0.08  | 2.44 | 0.51  | 6.20E-01 | 8.17E-01 | -6.56 |
| 1450847_PM_at   | Ncbp2                | NCBP2    | 0.09  | 2.86 | 0.51  | 6.20E-01 | 8.17E-01 | -6.56 |
| 1417409_PM_at   | Jun                  | JUN      | 0.24  | 4.10 | 0.51  | 6.20E-01 | 8.17E-01 | -6.56 |
| 1444618_PM_at   | ---                  | NA       | -0.10 | 2.70 | -0.51 | 6.21E-01 | 8.17E-01 | -6.56 |
| 1447622_PM_at   | Fcgr2b               | FCGR2A   | -0.04 | 1.80 | -0.51 | 6.21E-01 | 8.17E-01 | -6.56 |
| 1432654_PM_at   | 5830426C09Rik        | NA       | 0.06  | 2.72 | 0.51  | 6.21E-01 | 8.17E-01 | -6.56 |
| 1421778_PM_at   | Vmn1r49              | NA       | 0.05  | 2.07 | 0.51  | 6.21E-01 | 8.17E-01 | -6.56 |
| 1424321_PM_at   | Rfc4                 | RFC4     | 0.05  | 2.14 | 0.51  | 6.21E-01 | 8.17E-01 | -6.56 |
| 1428996_PM_at   | Pdp2                 | PDP2     | 0.05  | 2.29 | 0.51  | 6.21E-01 | 8.17E-01 | -6.56 |
| 1440078_PM_at   | ---                  | NA       | 0.05  | 2.21 | 0.51  | 6.21E-01 | 8.17E-01 | -6.56 |
| 1447876_PM_x_at | Nr2c2ap              | NR2C2AP  | 0.06  | 2.41 | 0.51  | 6.21E-01 | 8.17E-01 | -6.56 |
| 1438369_PM_x_at | Emc4                 | EMC4     | -0.07 | 7.33 | -0.51 | 6.21E-01 | 8.17E-01 | -6.56 |
| 1434209_PM_at   | Prmt6                | PRMT6    | -0.05 | 2.30 | -0.51 | 6.21E-01 | 8.17E-01 | -6.56 |
| 1417590_PM_at   | Cyp27a1              | CYP27A1  | 0.06  | 2.51 | 0.51  | 6.21E-01 | 8.17E-01 | -6.56 |
| 1448711_PM_at   | Mcm3ap               | MCM3AP   | -0.15 | 3.90 | -0.51 | 6.21E-01 | 8.17E-01 | -6.56 |
| 1420915_PM_at   | Stat1                | STAT1    | -0.15 | 4.16 | -0.51 | 6.21E-01 | 8.17E-01 | -6.56 |
| 1423081_PM_a_at | Tomm20               | TOMM20   | -0.10 | 3.33 | -0.51 | 6.21E-01 | 8.17E-01 | -6.56 |
| 1441834_PM_x_at | ---                  | NA       | -0.08 | 2.33 | -0.51 | 6.21E-01 | 8.17E-01 | -6.56 |
| 1441632_PM_at   | ---                  | NA       | -0.05 | 2.08 | -0.51 | 6.21E-01 | 8.17E-01 | -6.56 |
| 1441564_PM_at   | ---                  | NA       | 0.04  | 1.82 | 0.51  | 6.21E-01 | 8.17E-01 | -6.56 |
| 1423242_PM_at   | Mrops36              | MRPS36   | 0.06  | 4.36 | 0.51  | 6.21E-01 | 8.17E-01 | -6.56 |
| 1436735_PM_at   | Nsun3                | NSUN3    | 0.08  | 2.59 | 0.51  | 6.21E-01 | 8.17E-01 | -6.56 |
| 1430269_PM_at   | Mybphl               | MYBPHL   | 0.04  | 2.27 | 0.51  | 6.21E-01 | 8.17E-01 | -6.56 |
| 1437229_PM_at   | Efhb                 | EFHB     | 0.06  | 2.36 | 0.51  | 6.21E-01 | 8.17E-01 | -6.56 |
| 1454023_PM_a_at | Chpf                 | CHPF     | -0.06 | 2.39 | -0.51 | 6.21E-01 | 8.17E-01 | -6.56 |
| 1434957_PM_at   | Cdon                 | CDON     | -0.28 | 2.91 | -0.51 | 6.21E-01 | 8.17E-01 | -6.56 |
| 1447760_PM_x_at | Ehf                  | EHF      | 0.05  | 2.22 | 0.51  | 6.21E-01 | 8.17E-01 | -6.56 |
| 1436997_PM_x_at | Sh3bgrl              | SH3BGR1  | -0.28 | 7.23 | -0.51 | 6.22E-01 | 8.17E-01 | -6.56 |
| 1421330_PM_at   | Ptpn4                | PTPN4    | -0.21 | 3.49 | -0.51 | 6.22E-01 | 8.17E-01 | -6.56 |
| 1460623_PM_at   | Skap2                | SKAP2    | -0.19 | 4.97 | -0.51 | 6.22E-01 | 8.17E-01 | -6.56 |
| 1449886_PM_a_at | Timm9                | TIMM9    | -0.08 | 2.74 | -0.51 | 6.22E-01 | 8.17E-01 | -6.56 |
| 1418610_PM_at   | Slc17a6              | SLC17A6  | -0.22 | 2.64 | -0.51 | 6.22E-01 | 8.17E-01 | -6.56 |
| 1440632_PM_at   | Pcdhb4               | PCDHB5   | -0.13 | 2.50 | -0.51 | 6.22E-01 | 8.17E-01 | -6.56 |
| 1425655_PM_at   | Krtap19-2            | NA       | -0.10 | 2.18 | -0.51 | 6.22E-01 | 8.17E-01 | -6.56 |
| 1445704_PM_x_at | Vstm2b               | VSTM2B   | 0.05  | 2.09 | 0.51  | 6.22E-01 | 8.17E-01 | -6.56 |
| 1437082_PM_at   | Akap9                | AKAP9    | 0.10  | 3.62 | 0.51  | 6.22E-01 | 8.17E-01 | -6.56 |
| 1437313_PM_x_at | Hmgb2                | HMGB2    | -0.17 | 5.30 | -0.51 | 6.22E-01 | 8.18E-01 | -6.56 |
| 1446114_PM_at   | ---                  | NA       | 0.06  | 2.20 | 0.51  | 6.22E-01 | 8.18E-01 | -6.56 |
| 1422399_PM_a_at | Rab23                | RAB23    | 0.09  | 3.25 | 0.51  | 6.22E-01 | 8.18E-01 | -6.56 |
| 1435178_PM_x_at | Anapc5               | ANAPC5   | -0.18 | 5.12 | -0.51 | 6.22E-01 | 8.18E-01 | -6.56 |
| 1455682_PM_at   | Abl2                 | ABL2     | -0.12 | 3.12 | -0.51 | 6.22E-01 | 8.18E-01 | -6.56 |
| 1430049_PM_at   | Hyal6                | NA       | 0.10  | 2.22 | 0.51  | 6.22E-01 | 8.18E-01 | -6.56 |
| 1434779_PM_at   | Cbln2                | CBLN2    | 0.15  | 2.69 | 0.51  | 6.22E-01 | 8.18E-01 | -6.56 |
| 1418109_PM_at   | Gspt2                | GSPT2    | -0.16 | 2.91 | -0.51 | 6.22E-01 | 8.18E-01 | -6.56 |
| 1420446_PM_at   | Odf3                 | ODF3     | -0.06 | 2.32 | -0.51 | 6.22E-01 | 8.18E-01 | -6.56 |
| 1450639_PM_at   | Gm14085 /// Slc28a2  | SLC28A2  | -0.05 | 1.87 | -0.51 | 6.22E-01 | 8.18E-01 | -6.56 |
| 1452448_PM_at   | Aqr                  | AQR      | 0.21  | 3.87 | 0.51  | 6.22E-01 | 8.18E-01 | -6.56 |
| 1454485_PM_at   | ---                  | NA       | 0.09  | 3.06 | 0.51  | 6.22E-01 | 8.18E-01 | -6.56 |
| 1427617_PM_at   | Fut10                | NA       | 0.06  | 3.10 | 0.51  | 6.22E-01 | 8.18E-01 | -6.56 |
| 1460374_PM_at   | Adam2                | ADAM2    | 0.05  | 2.15 | 0.51  | 6.22E-01 | 8.18E-01 | -6.56 |
| 1447627_PM_at   | Tmem132e             | TMEM132E | 0.04  | 2.15 | 0.51  | 6.22E-01 | 8.18E-01 | -6.56 |
| 1420064_PM_s_at | Tktl1                | TKTL1    | 0.05  | 2.17 | 0.51  | 6.22E-01 | 8.18E-01 | -6.56 |
| 1424516_PM_at   | B230354K17Rik        | NA       | 0.24  | 7.33 | 0.51  | 6.22E-01 | 8.18E-01 | -6.56 |
| 1446098_PM_at   | ---                  | NA       | 0.07  | 2.44 | 0.51  | 6.22E-01 | 8.18E-01 | -6.56 |
| 1434771_PM_at   | 0610011F06Rik        | METTL26  | -0.14 | 4.32 | -0.51 | 6.22E-01 | 8.18E-01 | -6.56 |
| 1443574_PM_at   | Gm15850              | NA       | -0.05 | 2.39 | -0.51 | 6.23E-01 | 8.18E-01 | -6.56 |
| 1441188_PM_at   | ---                  | NA       | 0.04  | 2.13 | 0.51  | 6.23E-01 | 8.18E-01 | -6.56 |
| 1441543_PM_at   | ---                  | NA       | -0.04 | 2.06 | -0.51 | 6.23E-01 | 8.18E-01 | -6.56 |
| 1419172_PM_at   | Dhfr                 | DHFR     | 0.11  | 2.92 | 0.51  | 6.23E-01 | 8.18E-01 | -6.56 |
| 1446753_PM_at   | ---                  | NA       | -0.17 | 4.14 | -0.51 | 6.23E-01 | 8.18E-01 | -6.56 |
| 1442574_PM_at   | Gm10785              | NA       | 0.06  | 2.72 | 0.51  | 6.23E-01 | 8.18E-01 | -6.56 |
| 1425744_PM_a_at | Mgat5                | MGAT5    | 0.07  | 2.50 | 0.51  | 6.23E-01 | 8.18E-01 | -6.56 |
| 1431424_PM_at   | Gm31322 /// Mir99ahg | NA       | -0.19 | 4.02 | -0.51 | 6.23E-01 | 8.18E-01 | -6.56 |
| 1447127_PM_at   | ---                  | NA       | 0.05  | 2.02 | 0.51  | 6.23E-01 | 8.18E-01 | -6.56 |
| 1452984_PM_at   | Ccny                 | NA       | -0.07 | 2.91 | -0.51 | 6.23E-01 | 8.18E-01 | -6.56 |
| 1436471_PM_at   | Rab36                | RAB36    | -0.08 | 2.51 | -0.51 | 6.23E-01 | 8.18E-01 | -6.56 |
| 1457556_PM_at   | Gm17501              | NA       | 0.06  | 1.99 | 0.51  | 6.23E-01 | 8.18E-01 | -6.56 |

|                 |                                                                                                                                                                                                         |              |       |      |       |          |          |       |
|-----------------|---------------------------------------------------------------------------------------------------------------------------------------------------------------------------------------------------------|--------------|-------|------|-------|----------|----------|-------|
| 1426635_PM_at   | Acbd3                                                                                                                                                                                                   | ACBD3        | 0.12  | 2.70 | 0.51  | 6.23E-01 | 8.18E-01 | -6.56 |
| 1433869_PM_at   | Zxdc                                                                                                                                                                                                    | ZXDC         | -0.19 | 5.21 | -0.51 | 6.23E-01 | 8.18E-01 | -6.56 |
| 1441394_PM_at   | C76554                                                                                                                                                                                                  | NA           | 0.04  | 2.38 | 0.51  | 6.23E-01 | 8.18E-01 | -6.56 |
| 1455595_PM_at   | Ugt2b36                                                                                                                                                                                                 | UGT2B15      | 0.05  | 2.63 | 0.51  | 6.23E-01 | 8.18E-01 | -6.56 |
| 1435753_PM_a_at | Nucks1                                                                                                                                                                                                  | NUCKS1       | 0.23  | 6.24 | 0.51  | 6.23E-01 | 8.18E-01 | -6.56 |
| 1456498_PM_at   | Itga4                                                                                                                                                                                                   | ITGA4        | -0.08 | 2.93 | -0.51 | 6.23E-01 | 8.18E-01 | -6.56 |
| 1424264_PM_at   | Med6                                                                                                                                                                                                    | MED6         | -0.11 | 2.92 | -0.51 | 6.23E-01 | 8.18E-01 | -6.56 |
| 1447417_PM_at   | Taf1                                                                                                                                                                                                    | TAF1L        | 0.21  | 4.83 | 0.51  | 6.23E-01 | 8.18E-01 | -6.56 |
| 1438035_PM_at   | Rmdn2                                                                                                                                                                                                   | RMDN2        | -0.05 | 2.01 | -0.51 | 6.23E-01 | 8.19E-01 | -6.56 |
| 1422580_PM_at   | Myk4                                                                                                                                                                                                    | MYL4         | 0.08  | 2.74 | 0.51  | 6.23E-01 | 8.19E-01 | -6.56 |
| 1417916_PM_a_at | Dnhd1 /// Timm10b                                                                                                                                                                                       | DNHD1        | -0.07 | 2.31 | -0.51 | 6.23E-01 | 8.19E-01 | -6.56 |
| 1439282_PM_at   | ---                                                                                                                                                                                                     | NA           | 0.06  | 2.62 | 0.51  | 6.23E-01 | 8.19E-01 | -6.56 |
| 1445339_PM_at   | Cnga4                                                                                                                                                                                                   | CNGA4        | 0.07  | 2.58 | 0.51  | 6.23E-01 | 8.19E-01 | -6.56 |
| 1435813_PM_at   | Mypn                                                                                                                                                                                                    | MYPN         | 0.06  | 2.24 | 0.51  | 6.23E-01 | 8.19E-01 | -6.57 |
| 1428523_PM_at   | Adgr3                                                                                                                                                                                                   | ADGRL3       | -0.17 | 3.54 | -0.51 | 6.24E-01 | 8.19E-01 | -6.57 |
| 1428823_PM_at   | Hddc2                                                                                                                                                                                                   | HDCC2        | -0.10 | 3.06 | -0.51 | 6.24E-01 | 8.19E-01 | -6.57 |
| 1455589_PM_at   | ---                                                                                                                                                                                                     | NA           | -0.10 | 2.36 | -0.51 | 6.24E-01 | 8.19E-01 | -6.57 |
| 1449443_PM_at   | Decr1                                                                                                                                                                                                   | DECR1        | -0.07 | 2.68 | -0.51 | 6.24E-01 | 8.19E-01 | -6.57 |
|                 | E330016L19Rik /// Gm3669<br>/// Gm42098 /// Gm42101<br>/// Gm42173 /// Gm42175<br>/// Gm42177 /// Gm42179<br>/// Gm42181 /// Gm42182<br>/// Gm42218 /// Gm42403<br>/// LOC105246900 ///<br>LOC105247277 | NA           | -0.05 | 2.23 | -0.51 | 6.24E-01 | 8.19E-01 | -6.57 |
| 1445540_PM_at   | ---                                                                                                                                                                                                     | NA           | -0.05 | 2.27 | -0.51 | 6.24E-01 | 8.19E-01 | -6.57 |
| 1439736_PM_at   | ---                                                                                                                                                                                                     | NA           | -0.04 | 2.28 | -0.51 | 6.24E-01 | 8.19E-01 | -6.57 |
| 1430657_PM_at   | 1810034E14Rik                                                                                                                                                                                           | NA           | 0.05  | 2.35 | 0.51  | 6.24E-01 | 8.19E-01 | -6.57 |
| 1436955_PM_at   | Tssc1                                                                                                                                                                                                   | TSSC1        | 0.05  | 2.75 | 0.51  | 6.24E-01 | 8.19E-01 | -6.57 |
| 1430413_PM_at   | Tmem29                                                                                                                                                                                                  | FAM156A      | 0.08  | 2.87 | 0.51  | 6.24E-01 | 8.19E-01 | -6.57 |
| 1435738_PM_x_at | Serf2                                                                                                                                                                                                   | SERF2        | 0.08  | 3.74 | 0.51  | 6.24E-01 | 8.19E-01 | -6.57 |
| 1416541_PM_at   | Clpb                                                                                                                                                                                                    | CLPB         | 0.09  | 2.52 | 0.51  | 6.24E-01 | 8.19E-01 | -6.57 |
| 1421233_PM_at   | Pknox1                                                                                                                                                                                                  | PKNOX1       | 0.09  | 2.96 | 0.51  | 6.24E-01 | 8.19E-01 | -6.57 |
| 1458842_PM_at   | Tenm1                                                                                                                                                                                                   | TENM1        | 0.21  | 3.88 | 0.51  | 6.24E-01 | 8.19E-01 | -6.57 |
| 1432524_PM_at   | ---                                                                                                                                                                                                     | NA           | 0.06  | 2.08 | 0.51  | 6.24E-01 | 8.19E-01 | -6.57 |
| 1457321_PM_at   | D130037M23Rik                                                                                                                                                                                           | NA           | -0.04 | 2.09 | -0.51 | 6.24E-01 | 8.19E-01 | -6.57 |
| 1460222_PM_at   | Pdxp /// Sh3bp1                                                                                                                                                                                         | SH3BP1       | 0.08  | 3.62 | 0.51  | 6.24E-01 | 8.19E-01 | -6.57 |
| 1460383_PM_at   | Gnao1                                                                                                                                                                                                   | GNAO1        | 0.06  | 2.45 | 0.51  | 6.24E-01 | 8.19E-01 | -6.57 |
| 1443972_PM_at   | Al465300                                                                                                                                                                                                | NA           | -0.10 | 2.61 | -0.51 | 6.24E-01 | 8.19E-01 | -6.57 |
| 1459130_PM_at   | Hace1                                                                                                                                                                                                   | HACE1        | 0.07  | 3.01 | 0.51  | 6.24E-01 | 8.19E-01 | -6.57 |
| 1452127_PM_a_at | Ptpn13                                                                                                                                                                                                  | PTPN13       | -0.09 | 2.26 | -0.50 | 6.24E-01 | 8.19E-01 | -6.57 |
| 1450589_PM_at   | Olf1749                                                                                                                                                                                                 | OR11H4       | 0.06  | 2.28 | 0.50  | 6.24E-01 | 8.19E-01 | -6.57 |
| 1426092_PM_a_at | Trim34a /// Trim34b                                                                                                                                                                                     | TRIM6-TRIM34 | 0.12  | 2.63 | 0.50  | 6.24E-01 | 8.19E-01 | -6.57 |
| 1450742_PM_at   | Bysl                                                                                                                                                                                                    | BYSL         | -0.16 | 3.75 | -0.50 | 6.24E-01 | 8.19E-01 | -6.57 |
| 1429190_PM_at   | Arsb                                                                                                                                                                                                    | ARSB         | -0.14 | 3.14 | -0.50 | 6.24E-01 | 8.19E-01 | -6.57 |
| 1443424_PM_at   | Emsy                                                                                                                                                                                                    | NA           | 0.05  | 1.92 | 0.50  | 6.24E-01 | 8.19E-01 | -6.57 |
| 1428729_PM_at   | Krit1                                                                                                                                                                                                   | KRIT1        | 0.09  | 2.38 | 0.50  | 6.24E-01 | 8.19E-01 | -6.57 |
| 1453790_PM_at   | ---                                                                                                                                                                                                     | NA           | 0.09  | 2.98 | 0.50  | 6.24E-01 | 8.19E-01 | -6.57 |
| 1451883_PM_at   | BC002189                                                                                                                                                                                                | NA           | 0.12  | 3.22 | 0.50  | 6.24E-01 | 8.19E-01 | -6.57 |
| 1434315_PM_at   | Nipal3                                                                                                                                                                                                  | NIPAL3       | -0.13 | 4.25 | -0.50 | 6.24E-01 | 8.19E-01 | -6.57 |
| 1441972_PM_at   | ---                                                                                                                                                                                                     | NA           | -0.13 | 2.38 | -0.50 | 6.24E-01 | 8.19E-01 | -6.57 |
| 1451606_PM_at   | A530016L24Rik                                                                                                                                                                                           | C14orf180    | -0.05 | 2.72 | -0.50 | 6.24E-01 | 8.19E-01 | -6.57 |
| 1430107_PM_at   | Acbd7                                                                                                                                                                                                   | ACBD7        | 0.11  | 2.27 | 0.50  | 6.24E-01 | 8.19E-01 | -6.57 |
| 1437265_PM_at   | 5330438D12Rik                                                                                                                                                                                           | NA           | 0.11  | 2.72 | 0.50  | 6.24E-01 | 8.19E-01 | -6.57 |
| 1460485_PM_at   | ---                                                                                                                                                                                                     | NA           | 0.04  | 2.19 | 0.50  | 6.24E-01 | 8.19E-01 | -6.57 |
| 1444908_PM_at   | Habp4                                                                                                                                                                                                   | HABP4        | -0.15 | 3.34 | -0.50 | 6.25E-01 | 8.19E-01 | -6.57 |
| 1442559_PM_at   | ---                                                                                                                                                                                                     | NA           | 0.06  | 2.27 | 0.50  | 6.25E-01 | 8.19E-01 | -6.57 |
| 1415857_PM_at   | Emb                                                                                                                                                                                                     | EMB          | -0.15 | 2.89 | -0.50 | 6.25E-01 | 8.19E-01 | -6.57 |
| 1433012_PM_at   | Mga                                                                                                                                                                                                     | NA           | -0.05 | 2.32 | -0.50 | 6.25E-01 | 8.20E-01 | -6.57 |
| 1460494_PM_at   | Ttl10                                                                                                                                                                                                   | TTL10        | 0.05  | 2.54 | 0.50  | 6.25E-01 | 8.20E-01 | -6.57 |
| 1447975_PM_a_at | Bvht                                                                                                                                                                                                    | NA           | 0.06  | 2.46 | 0.50  | 6.25E-01 | 8.20E-01 | -6.57 |
| 1441533_PM_at   | Gm4491                                                                                                                                                                                                  | NA           | 0.04  | 2.11 | 0.50  | 6.25E-01 | 8.20E-01 | -6.57 |
| 1450317_PM_at   | Clec2g                                                                                                                                                                                                  | CLEC2D       | 0.05  | 2.25 | 0.50  | 6.25E-01 | 8.20E-01 | -6.57 |
| 1447829_PM_x_at | Taf9b                                                                                                                                                                                                   | TAF9B        | 0.05  | 1.90 | 0.50  | 6.25E-01 | 8.20E-01 | -6.57 |
| 1420332_PM_x_at | Lce1d                                                                                                                                                                                                   | NA           | 0.05  | 2.34 | 0.50  | 6.25E-01 | 8.20E-01 | -6.57 |
| 1440235_PM_at   | Itga10                                                                                                                                                                                                  | ITGA10       | 0.07  | 2.28 | 0.50  | 6.25E-01 | 8.20E-01 | -6.57 |
| 1450174_PM_at   | Ptp1r                                                                                                                                                                                                   | PTPRT        | -0.08 | 2.67 | -0.50 | 6.25E-01 | 8.20E-01 | -6.57 |
| 1448868_PM_at   | Scand1                                                                                                                                                                                                  | SCAND1       | 0.06  | 2.13 | 0.50  | 6.25E-01 | 8.20E-01 | -6.57 |
| 1431785_PM_at   | Rnaset2a /// Rnaset2b                                                                                                                                                                                   | AL159163.1   | 0.07  | 2.24 | 0.50  | 6.25E-01 | 8.20E-01 | -6.57 |
| 1452580_PM_a_at | Mrp21                                                                                                                                                                                                   | MRPL21       | 0.14  | 4.20 | 0.50  | 6.25E-01 | 8.20E-01 | -6.57 |
| 1418793_PM_at   | Idua                                                                                                                                                                                                    | IDUA         | -0.17 | 3.31 | -0.50 | 6.25E-01 | 8.20E-01 | -6.57 |
| 1452741_PM_s_at | Gpd2                                                                                                                                                                                                    | GPD2         | -0.10 | 3.21 | -0.50 | 6.25E-01 | 8.20E-01 | -6.57 |

|                 |                         |          |       |       |       |          |          |       |
|-----------------|-------------------------|----------|-------|-------|-------|----------|----------|-------|
| 1443820_PM_x_at | Elov1                   | ELOVL1   | 0.05  | 2.44  | 0.50  | 6.25E-01 | 8.20E-01 | -6.57 |
| 1453114_PM_at   | NoI9                    | NOL9     | -0.06 | 2.18  | -0.50 | 6.25E-01 | 8.20E-01 | -6.57 |
| 1459998_PM_at   | Zfp407                  | ZNF407   | -0.05 | 3.41  | -0.50 | 6.25E-01 | 8.20E-01 | -6.57 |
| 1421287_PM_a_at | Pecam1                  | PECAM1   | -0.06 | 2.26  | -0.50 | 6.26E-01 | 8.20E-01 | -6.57 |
| 1440152_PM_x_at | Edf1                    | EDF1     | -0.13 | 4.52  | -0.50 | 6.26E-01 | 8.20E-01 | -6.57 |
| 1438150_PM_at   | Fdps                    | FDPS     | 0.04  | 2.19  | 0.50  | 6.26E-01 | 8.20E-01 | -6.57 |
| 1419746_PM_at   | Arhgap23                | ARHGAP23 | 0.05  | 2.33  | 0.50  | 6.26E-01 | 8.20E-01 | -6.57 |
| 1434182_PM_at   | Ddx31                   | DDX31    | 0.11  | 2.69  | 0.50  | 6.26E-01 | 8.20E-01 | -6.57 |
| 1447547_PM_at   | Ltbp1                   | LTBP1    | -0.06 | 2.07  | -0.50 | 6.26E-01 | 8.20E-01 | -6.57 |
| 1433976_PM_at   | Reep3                   | REEP3    | -0.07 | 2.39  | -0.50 | 6.26E-01 | 8.20E-01 | -6.57 |
| 1433246_PM_at   | ---                     | NA       | -0.05 | 2.48  | -0.50 | 6.26E-01 | 8.20E-01 | -6.57 |
| 1418197_PM_at   | Ucp1                    | UCP1     | 0.06  | 2.92  | 0.50  | 6.26E-01 | 8.20E-01 | -6.57 |
| 1458807_PM_at   | ---                     | NA       | 0.09  | 2.67  | 0.50  | 6.26E-01 | 8.20E-01 | -6.57 |
| 1417688_PM_at   | Fam20c                  | FAM20C   | 0.10  | 3.74  | 0.50  | 6.26E-01 | 8.20E-01 | -6.57 |
| 1455870_PM_at   | Akap2 /// Pakap         | AKAP2    | 0.13  | 6.52  | 0.50  | 6.26E-01 | 8.20E-01 | -6.57 |
| 1416475_PM_at   | Ube2d2a                 | UBE2D2   | -0.17 | 6.20  | -0.50 | 6.26E-01 | 8.20E-01 | -6.57 |
| 1419779_PM_at   | ---                     | NA       | 0.05  | 2.25  | 0.50  | 6.26E-01 | 8.20E-01 | -6.57 |
| 1458301_PM_x_at | ---                     | NA       | 0.13  | 2.61  | 0.50  | 6.26E-01 | 8.20E-01 | -6.57 |
| 1446340_PM_at   | ---                     | NA       | 0.06  | 2.13  | 0.50  | 6.26E-01 | 8.20E-01 | -6.57 |
| 1424451_PM_at   | Acaa1b                  | ACAA1    | -0.09 | 2.36  | -0.50 | 6.26E-01 | 8.20E-01 | -6.57 |
| 1424627_PM_at   | Cst12                   | NA       | 0.04  | 2.30  | 0.50  | 6.26E-01 | 8.20E-01 | -6.57 |
| 1421956_PM_at   | Rbpj                    | RBPJL    | 0.05  | 3.13  | 0.50  | 6.26E-01 | 8.20E-01 | -6.57 |
| 1424648_PM_at   | Ift27                   | IFT27    | -0.08 | 2.84  | -0.50 | 6.26E-01 | 8.21E-01 | -6.57 |
| 1427867_PM_at   | Gm12300                 | NA       | -0.40 | 3.67  | -0.50 | 6.26E-01 | 8.21E-01 | -6.57 |
| 1444867_PM_at   | C76751                  | NA       | -0.05 | 2.01  | -0.50 | 6.26E-01 | 8.21E-01 | -6.57 |
| 1450682_PM_at   | Fabp6                   | FABP6    | 0.04  | 2.27  | 0.50  | 6.26E-01 | 8.21E-01 | -6.57 |
| 1432199_PM_at   | 4930568D16Rik           | NA       | 0.05  | 2.29  | 0.50  | 6.26E-01 | 8.21E-01 | -6.57 |
| 1430848_PM_a_at | Cep571                  | CEP57L1  | 0.11  | 2.73  | 0.50  | 6.26E-01 | 8.21E-01 | -6.57 |
| 1433431_PM_at   | Pnlip                   | PNLIP    | 0.04  | 2.11  | 0.50  | 6.26E-01 | 8.21E-01 | -6.57 |
| 1442261_PM_at   | Gpr150                  | GPR150   | -0.06 | 2.17  | -0.50 | 6.26E-01 | 8.21E-01 | -6.57 |
| 1431083_PM_a_at | 1810014B01Rik           | NA       | 0.06  | 1.92  | 0.50  | 6.26E-01 | 8.21E-01 | -6.57 |
| 1444517_PM_at   | Cfap54 /// LOC102643084 | NA       | 0.24  | 3.38  | 0.50  | 6.26E-01 | 8.21E-01 | -6.57 |
| 1417767_PM_at   | Cyb5b                   | CYB5B    | -0.12 | 3.12  | -0.50 | 6.27E-01 | 8.21E-01 | -6.57 |
| 1437758_PM_a_at | Slc4a1ap                | SLC4A1AP | -0.09 | 3.86  | -0.50 | 6.27E-01 | 8.21E-01 | -6.57 |
| 1443756_PM_at   | Serpini1                | SERPINI1 | -0.04 | 2.10  | -0.50 | 6.27E-01 | 8.21E-01 | -6.57 |
| 1420717_PM_at   | A930018P22Rik           | C11orf91 | 0.05  | 2.30  | 0.50  | 6.27E-01 | 8.21E-01 | -6.57 |
| 1449940_PM_a_at | Eif2b4                  | EIF2B4   | 0.07  | 2.97  | 0.50  | 6.27E-01 | 8.21E-01 | -6.57 |
| 1423315_PM_at   | Bbc3                    | NA       | 0.07  | 3.67  | 0.50  | 6.27E-01 | 8.21E-01 | -6.57 |
| 1434198_PM_at   | Atpif1                  | ATPIF1   | 0.10  | 2.57  | 0.50  | 6.27E-01 | 8.21E-01 | -6.57 |
| 1427326_PM_at   | Simc1                   | SIMC1    | 0.11  | 2.45  | 0.50  | 6.27E-01 | 8.21E-01 | -6.57 |
| 1418081_PM_at   | Dnajc30                 | DNAJC30  | 0.16  | 4.92  | 0.50  | 6.27E-01 | 8.21E-01 | -6.57 |
| 1457489_PM_at   | ---                     | NA       | -0.05 | 2.08  | -0.50 | 6.27E-01 | 8.21E-01 | -6.57 |
| 1450984_PM_at   | Tjp2                    | TJP2     | 0.06  | 2.44  | 0.50  | 6.27E-01 | 8.21E-01 | -6.57 |
| 1445344_PM_at   | ---                     | NA       | 0.06  | 2.40  | 0.50  | 6.27E-01 | 8.21E-01 | -6.57 |
| 1416991_PM_at   | Mto1                    | MTO1     | -0.09 | 2.91  | -0.50 | 6.27E-01 | 8.21E-01 | -6.57 |
| 1427667_PM_s_at | Tcrb-J /// Trbv5        | NA       | 0.05  | 2.27  | 0.50  | 6.27E-01 | 8.21E-01 | -6.57 |
| 1447442_PM_at   | ---                     | NA       | -0.06 | 2.16  | -0.50 | 6.27E-01 | 8.21E-01 | -6.57 |
| 1451738_PM_at   | Ogt                     | OGT      | -0.12 | 2.95  | -0.50 | 6.27E-01 | 8.21E-01 | -6.57 |
| 1441341_PM_at   | Cyp2w1                  | NA       | -0.04 | 2.45  | -0.50 | 6.27E-01 | 8.21E-01 | -6.57 |
| 1436296_PM_x_at | Dnaic2                  | DNAI2    | 0.04  | 1.98  | 0.50  | 6.27E-01 | 8.21E-01 | -6.57 |
| 1443971_PM_x_at | Mpp7                    | MPP7     | 0.05  | 1.98  | 0.50  | 6.27E-01 | 8.21E-01 | -6.57 |
| 1421249_PM_at   | ---                     | NA       | 0.06  | 2.40  | 0.50  | 6.27E-01 | 8.21E-01 | -6.57 |
| 1427379_PM_at   | ---                     | NA       | 0.08  | 2.38  | 0.50  | 6.27E-01 | 8.21E-01 | -6.57 |
| 1426477_PM_at   | Rasa1                   | RASA1    | 0.13  | 4.75  | 0.50  | 6.27E-01 | 8.21E-01 | -6.57 |
| 1443794_PM_x_at | Noc4l                   | NOC4L    | 0.17  | 7.70  | 0.50  | 6.27E-01 | 8.21E-01 | -6.57 |
| 1458385_PM_at   | Hspa4l                  | HSPA4L   | -0.08 | 3.37  | -0.50 | 6.27E-01 | 8.21E-01 | -6.57 |
| 1446539_PM_at   | Cab39l                  | NA       | 0.05  | 2.54  | 0.50  | 6.27E-01 | 8.21E-01 | -6.57 |
| 1422086_PM_at   | Tbx19                   | TBX19    | 0.05  | 2.26  | 0.50  | 6.27E-01 | 8.21E-01 | -6.57 |
| 1415771_PM_at   | Ncl                     | NCL      | -0.17 | 6.41  | -0.50 | 6.27E-01 | 8.21E-01 | -6.57 |
| 1424000_PM_a_at | Rps11                   | RPS11    | -0.12 | 6.41  | -0.50 | 6.27E-01 | 8.21E-01 | -6.57 |
| 1425317_PM_x_at | Stk31                   | STK31    | 0.05  | 2.36  | 0.50  | 6.27E-01 | 8.21E-01 | -6.57 |
| 1416856_PM_at   | Oser1                   | OSER1    | -0.11 | 3.82  | -0.50 | 6.27E-01 | 8.21E-01 | -6.57 |
| 1418828_PM_at   | Eri1                    | ERI1     | 0.07  | 2.63  | 0.50  | 6.27E-01 | 8.21E-01 | -6.57 |
| 1422375_PM_a_at | Art1                    | ART1     | 0.04  | 2.34  | 0.50  | 6.27E-01 | 8.21E-01 | -6.57 |
| 1423082_PM_at   | Der1                    | DERL1    | -0.13 | 2.56  | -0.50 | 6.28E-01 | 8.21E-01 | -6.57 |
| 1421839_PM_at   | Abca1                   | ABCA1    | 0.05  | 2.22  | 0.50  | 6.28E-01 | 8.21E-01 | -6.57 |
| 1455108_PM_at   | Eif4e2                  | EIF4E2   | 0.14  | 5.73  | 0.50  | 6.28E-01 | 8.21E-01 | -6.57 |
| 1437195_PM_x_at | Mapk10                  | MAPK10   | 0.16  | 10.73 | 0.50  | 6.28E-01 | 8.21E-01 | -6.57 |
| 1447593_PM_x_at | Gnaq                    | GNAQ     | -0.09 | 2.77  | -0.50 | 6.28E-01 | 8.21E-01 | -6.57 |
| 1425191_PM_at   | Ocel1                   | OCEL1    | -0.06 | 2.33  | -0.50 | 6.28E-01 | 8.21E-01 | -6.57 |
| 1450715_PM_at   | Cyp1a2                  | CYP1A2   | -0.05 | 2.43  | -0.50 | 6.28E-01 | 8.21E-01 | -6.57 |
| 1445276_PM_at   | C80154                  | NA       | 0.05  | 2.42  | 0.50  | 6.28E-01 | 8.21E-01 | -6.57 |
| 1454018_PM_at   | Tlk2                    | TLK2     | 0.05  | 2.97  | 0.50  | 6.28E-01 | 8.21E-01 | -6.57 |
| 1441711_PM_at   | ---                     | NA       | 0.07  | 2.56  | 0.50  | 6.28E-01 | 8.21E-01 | -6.57 |



|                 |                                                                                                        |         |       |      |       |          |          |       |
|-----------------|--------------------------------------------------------------------------------------------------------|---------|-------|------|-------|----------|----------|-------|
| 1444035_PM_at   | Mesdc2                                                                                                 | MESDC2  | 0.04  | 2.42 | 0.50  | 6.28E-01 | 8.21E-01 | -6.57 |
| 1417406_PM_at   | Sertad1                                                                                                | SERTAD1 | 0.06  | 5.99 | 0.50  | 6.28E-01 | 8.21E-01 | -6.57 |
| 1452697_PM_at   | Ctdp1                                                                                                  | CTDP1   | 0.14  | 3.03 | 0.50  | 6.28E-01 | 8.21E-01 | -6.57 |
| 1431035_PM_at   | Daam1                                                                                                  | DAAM1   | -0.14 | 5.43 | -0.50 | 6.28E-01 | 8.21E-01 | -6.57 |
| 1420107_PM_at   | Bbs4                                                                                                   | NA      | -0.11 | 6.66 | -0.50 | 6.28E-01 | 8.22E-01 | -6.57 |
| 1458579_PM_at   | ---                                                                                                    | NA      | 0.04  | 2.15 | 0.50  | 6.28E-01 | 8.22E-01 | -6.57 |
| 1451929_PM_a_at | Vrk2                                                                                                   | VRK2    | 0.07  | 2.42 | 0.50  | 6.28E-01 | 8.22E-01 | -6.57 |
| 1455320_PM_at   | Nampt                                                                                                  | NAMPT   | -0.18 | 4.26 | -0.50 | 6.28E-01 | 8.22E-01 | -6.57 |
| 1436328_PM_at   | Rnmt                                                                                                   | RNMT    | -0.16 | 3.60 | -0.50 | 6.28E-01 | 8.22E-01 | -6.57 |
| 1417367_PM_at   | Ppp2ca                                                                                                 | PPP2CA  | -0.16 | 7.48 | -0.50 | 6.28E-01 | 8.22E-01 | -6.57 |
| 1429227_PM_x_at | Nap1l1                                                                                                 | NAP1L1  | -0.16 | 7.40 | -0.50 | 6.28E-01 | 8.22E-01 | -6.57 |
| 1457171_PM_at   | ---                                                                                                    | NA      | -0.10 | 2.99 | -0.50 | 6.28E-01 | 8.22E-01 | -6.57 |
| 1439622_PM_at   | Rassf4                                                                                                 | RASSF4  | -0.09 | 2.55 | -0.50 | 6.28E-01 | 8.22E-01 | -6.57 |
| 1424079_PM_x_at | Urm1                                                                                                   | URM1    | -0.07 | 2.33 | -0.50 | 6.28E-01 | 8.22E-01 | -6.57 |
| AFX-r2-TagE_at  | ---                                                                                                    | NA      | 0.04  | 1.87 | 0.50  | 6.28E-01 | 8.22E-01 | -6.57 |
| 1454010_PM_a_at | Ssmem1                                                                                                 | SSMEM1  | 0.05  | 3.23 | 0.50  | 6.28E-01 | 8.22E-01 | -6.57 |
| 1447109_PM_at   | ---                                                                                                    | NA      | 0.11  | 2.99 | 0.50  | 6.28E-01 | 8.22E-01 | -6.57 |
| 1445562_PM_at   | ---                                                                                                    | NA      | 0.22  | 2.44 | 0.50  | 6.28E-01 | 8.22E-01 | -6.57 |
| 1426412_PM_at   | Neurod1                                                                                                | NEUROD1 | 0.33  | 5.33 | 0.50  | 6.28E-01 | 8.22E-01 | -6.57 |
| 1455306_PM_at   | Fam193a                                                                                                | FAM193A | -0.10 | 6.46 | -0.50 | 6.28E-01 | 8.22E-01 | -6.57 |
| 1445806_PM_at   | Cog5                                                                                                   | NA      | 0.06  | 2.02 | 0.50  | 6.28E-01 | 8.22E-01 | -6.57 |
| 1421658_PM_x_at | Psg18                                                                                                  | CEACAM3 | 0.06  | 2.77 | 0.50  | 6.29E-01 | 8.22E-01 | -6.57 |
| 1418509_PM_at   | Cbr2                                                                                                   | NA      | -0.07 | 2.33 | -0.50 | 6.29E-01 | 8.22E-01 | -6.57 |
| 1437019_PM_at   | Fam25c                                                                                                 | FAM25C  | -0.04 | 2.63 | -0.50 | 6.29E-01 | 8.22E-01 | -6.57 |
| 1416230_PM_at   | Rfk                                                                                                    | RFK     | 0.16  | 4.08 | 0.50  | 6.29E-01 | 8.22E-01 | -6.57 |
| 1427886_PM_at   | Pom121                                                                                                 | NA      | 0.20  | 8.45 | 0.50  | 6.29E-01 | 8.22E-01 | -6.57 |
| 1448181_PM_at   | Klf15                                                                                                  | KLF15   | -0.08 | 2.93 | -0.50 | 6.29E-01 | 8.22E-01 | -6.57 |
| 1444770_PM_at   | ---                                                                                                    | NA      | 0.04  | 2.04 | 0.50  | 6.29E-01 | 8.22E-01 | -6.57 |
| 1445595_PM_at   | ---                                                                                                    | NA      | 0.05  | 2.23 | 0.50  | 6.29E-01 | 8.22E-01 | -6.57 |
| 1445082_PM_at   | ---                                                                                                    | NA      | 0.11  | 3.20 | 0.50  | 6.29E-01 | 8.22E-01 | -6.57 |
| 1423792_PM_a_at | Cntm6                                                                                                  | CMTM6   | 0.28  | 3.61 | 0.50  | 6.29E-01 | 8.22E-01 | -6.57 |
| 1428022_PM_at   | Obp2a                                                                                                  | OBP2A   | 0.05  | 2.27 | 0.50  | 6.29E-01 | 8.22E-01 | -6.57 |
| 1416157_PM_at   | Vcl                                                                                                    | VCL     | 0.20  | 2.85 | 0.50  | 6.29E-01 | 8.22E-01 | -6.57 |
| 1428859_PM_at   | Paox                                                                                                   | PAOX    | -0.07 | 2.56 | -0.50 | 6.29E-01 | 8.22E-01 | -6.57 |
| 1415832_PM_at   | Agtr2                                                                                                  | AGTR2   | 0.06  | 2.19 | 0.50  | 6.29E-01 | 8.22E-01 | -6.57 |
| 1447789_PM_x_at | Ddx6                                                                                                   | DDX6    | -0.04 | 2.06 | -0.50 | 6.29E-01 | 8.22E-01 | -6.57 |
| 1419388_PM_at   | Tm4sf20                                                                                                | TM4SF20 | 0.04  | 2.41 | 0.50  | 6.29E-01 | 8.22E-01 | -6.57 |
| 1456244_PM_x_at | Glrx3                                                                                                  | GLRX3   | 0.12  | 8.35 | 0.50  | 6.29E-01 | 8.22E-01 | -6.57 |
| 1443095_PM_at   | ---                                                                                                    | NA      | -0.05 | 2.09 | -0.50 | 6.29E-01 | 8.22E-01 | -6.57 |
| 1422368_PM_at   | Vmn1r43                                                                                                | NA      | 0.06  | 2.13 | 0.50  | 6.29E-01 | 8.22E-01 | -6.57 |
| 1416275_PM_at   | Skc26a6                                                                                                | NA      | 0.05  | 2.30 | 0.50  | 6.29E-01 | 8.22E-01 | -6.57 |
| 1440951_PM_x_at | Wapl                                                                                                   | NA      | -0.05 | 2.13 | -0.50 | 6.29E-01 | 8.22E-01 | -6.57 |
| 1423803_PM_s_at | Gtscr2                                                                                                 | NOP53   | -0.15 | 5.02 | -0.50 | 6.29E-01 | 8.22E-01 | -6.57 |
| 1457041_PM_at   | Mir3069 /// Scarna13                                                                                   | NA      | 0.07  | 3.49 | 0.50  | 6.29E-01 | 8.22E-01 | -6.57 |
| 1439842_PM_at   | Zfp287                                                                                                 | NA      | 0.09  | 2.43 | 0.50  | 6.29E-01 | 8.22E-01 | -6.57 |
| 1432694_PM_at   | ---                                                                                                    | NA      | 0.11  | 2.40 | 0.50  | 6.29E-01 | 8.22E-01 | -6.57 |
| 1448288_PM_at   | Nfib                                                                                                   | NFIB    | 0.25  | 3.63 | 0.50  | 6.29E-01 | 8.22E-01 | -6.57 |
| 1422141_PM_s_at | Csprs /// Gm15433 ///<br>Gm2666 /// Gm7609 ///<br>LOC100041903 ///<br>LOC100503923 ///<br>LOC101055758 | NA      | 0.16  | 3.45 | 0.50  | 6.29E-01 | 8.22E-01 | -6.57 |
| 1433063_PM_at   | Wdr66                                                                                                  | NA      | 0.05  | 2.78 | 0.50  | 6.29E-01 | 8.22E-01 | -6.57 |
| 1424959_PM_at   | Anxa13                                                                                                 | NA      | 0.05  | 2.16 | 0.50  | 6.29E-01 | 8.22E-01 | -6.57 |
| 1431265_PM_at   | Zfp28                                                                                                  | ZFP28   | 0.23  | 2.96 | 0.50  | 6.29E-01 | 8.22E-01 | -6.57 |
| 1449497_PM_at   | Il12b                                                                                                  | IL12B   | 0.07  | 2.72 | 0.50  | 6.30E-01 | 8.22E-01 | -6.57 |
| 1422281_PM_at   | Sstr4                                                                                                  | SSTR4   | 0.09  | 2.76 | 0.50  | 6.30E-01 | 8.22E-01 | -6.57 |
| 1433789_PM_at   | Snhg3 /// Snora73a ///<br>Snora73b                                                                     | NA      | -0.07 | 2.50 | -0.50 | 6.30E-01 | 8.23E-01 | -6.57 |
| 1460642_PM_at   | Traf4                                                                                                  | TRAF4   | 0.04  | 2.24 | 0.50  | 6.30E-01 | 8.23E-01 | -6.57 |
| 1450480_PM_a_at | Grk6                                                                                                   | GRK6    | 0.04  | 2.28 | 0.50  | 6.30E-01 | 8.23E-01 | -6.57 |
| 1437324_PM_x_at | Fmod                                                                                                   | FMOD    | 0.20  | 4.14 | 0.50  | 6.30E-01 | 8.23E-01 | -6.57 |
| 1434610_PM_at   | Plec                                                                                                   | PLEC    | 0.14  | 2.56 | 0.50  | 6.30E-01 | 8.23E-01 | -6.57 |
| 1445472_PM_at   | Vsig10l                                                                                                | VSIG10L | 0.06  | 2.25 | 0.50  | 6.30E-01 | 8.23E-01 | -6.57 |
| 1420688_PM_a_at | Sgce                                                                                                   | SGCE    | -0.11 | 2.77 | -0.50 | 6.30E-01 | 8.23E-01 | -6.57 |
| 1436013_PM_at   | Gsg1l                                                                                                  | GSG1L   | -0.17 | 3.18 | -0.50 | 6.30E-01 | 8.23E-01 | -6.57 |
| 1436983_PM_at   | Crebbp                                                                                                 | CREBBP  | -0.11 | 5.51 | -0.50 | 6.30E-01 | 8.23E-01 | -6.57 |
| 1425480_PM_at   | Cnot6l                                                                                                 | CNOT6L  | -0.11 | 2.75 | -0.50 | 6.30E-01 | 8.23E-01 | -6.57 |
| 1418219_PM_at   | Il15                                                                                                   | IL15    | -0.06 | 2.28 | -0.50 | 6.30E-01 | 8.23E-01 | -6.57 |
| 1440814_PM_x_at | Hs3st2                                                                                                 | HS3ST2  | -0.04 | 2.22 | -0.50 | 6.30E-01 | 8.23E-01 | -6.57 |
| 1427841_PM_at   | Krt14 /// Krt17                                                                                        | KRT14   | 0.06  | 2.36 | 0.50  | 6.30E-01 | 8.23E-01 | -6.57 |
| 1449984_PM_at   | Cxcl2                                                                                                  | CXCL3   | 0.06  | 2.23 | 0.50  | 6.30E-01 | 8.23E-01 | -6.57 |
| 1455148_PM_at   | Tmem130                                                                                                | TMEM130 | 0.20  | 5.77 | 0.50  | 6.30E-01 | 8.23E-01 | -6.57 |
| 1417413_PM_at   | Cuzd1                                                                                                  | CUZD1   | -0.06 | 2.17 | -0.50 | 6.30E-01 | 8.23E-01 | -6.57 |
| 1424804_PM_at   | Mios                                                                                                   | MIOS    | -0.05 | 2.66 | -0.50 | 6.30E-01 | 8.23E-01 | -6.57 |

|                         |                        |          |       |      |       |          |          |       |
|-------------------------|------------------------|----------|-------|------|-------|----------|----------|-------|
| 1424928_PM_at           | Emsy                   | EMSY     | -0.12 | 3.15 | -0.50 | 6.30E-01 | 8.23E-01 | -6.57 |
| 1456596_PM_at           | Tmem255a               | TMEM255A | -0.05 | 2.01 | -0.50 | 6.31E-01 | 8.23E-01 | -6.57 |
| 1449481_PM_at           | Slc25a13               | SLC25A13 | 0.05  | 2.27 | 0.50  | 6.31E-01 | 8.23E-01 | -6.57 |
| 1443638_PM_at           | ---                    | NA       | 0.05  | 2.51 | 0.50  | 6.31E-01 | 8.23E-01 | -6.57 |
| 1439136_PM_at           | ---                    | NA       | 0.06  | 2.28 | 0.50  | 6.31E-01 | 8.23E-01 | -6.57 |
| 1447726_PM_at           | Ripply2                | RIPPLY2  | -0.14 | 3.00 | -0.50 | 6.31E-01 | 8.23E-01 | -6.57 |
| 1419804_PM_at           | 1700051A21Rik          | NA       | -0.04 | 2.38 | -0.50 | 6.31E-01 | 8.23E-01 | -6.57 |
| 1458943_PM_at           | Hgf                    | NA       | -0.07 | 2.18 | -0.50 | 6.31E-01 | 8.23E-01 | -6.57 |
| 1421650_PM_at           | Mepe                   | MEPE     | 0.07  | 2.69 | 0.50  | 6.31E-01 | 8.23E-01 | -6.57 |
| 1437332_PM_at           | A230006K03Rik          | NA       | 0.13  | 6.93 | 0.50  | 6.31E-01 | 8.23E-01 | -6.57 |
| 1438460_PM_at           | Zmym4                  | ZMYM4    | 0.16  | 3.46 | 0.50  | 6.31E-01 | 8.23E-01 | -6.57 |
| 1416670_PM_at           | Setdb1                 | SETDB1   | 0.26  | 4.77 | 0.50  | 6.31E-01 | 8.23E-01 | -6.57 |
| 1434866_PM_x_at         | Cpt1a                  | CPT1A    | -0.19 | 3.82 | -0.50 | 6.31E-01 | 8.24E-01 | -6.57 |
| 1434257_PM_s_at         | Pitpnb                 | PITPNB   | 0.10  | 3.62 | 0.49  | 6.31E-01 | 8.24E-01 | -6.57 |
| 1454883_PM_at           | Gsdmc2                 | GSDMC    | -0.11 | 2.36 | -0.49 | 6.31E-01 | 8.24E-01 | -6.57 |
| 1451939_PM_a_at         | Srpx                   | SRPX     | 0.05  | 1.91 | 0.49  | 6.31E-01 | 8.24E-01 | -6.57 |
| 1436530_PM_at           | LOC102642186 ///Wfdc17 | NA       | 0.07  | 2.43 | 0.49  | 6.31E-01 | 8.24E-01 | -6.57 |
| 1457711_PM_at           | Ranbp3                 | NA       | 0.07  | 2.49 | 0.49  | 6.31E-01 | 8.24E-01 | -6.57 |
| 1422390_PM_at           | Vmn1r13                | NA       | 0.07  | 2.14 | 0.49  | 6.31E-01 | 8.24E-01 | -6.57 |
| 1432051_PM_at           | Ccdc7a                 | CCDC7    | -0.07 | 2.32 | -0.49 | 6.31E-01 | 8.24E-01 | -6.57 |
| 1417667_PM_a_at         | Pter                   | PTER     | -0.04 | 2.26 | -0.49 | 6.31E-01 | 8.24E-01 | -6.57 |
| AFFX-NonspecificGC12_at | ---                    | NA       | 0.03  | 1.99 | 0.49  | 6.31E-01 | 8.24E-01 | -6.57 |
| 1441577_PM_at           | ---                    | NA       | 0.10  | 2.72 | 0.49  | 6.31E-01 | 8.24E-01 | -6.57 |
| 1425548_PM_a_at         | Lst1                   | LST1     | 0.14  | 3.47 | 0.49  | 6.31E-01 | 8.24E-01 | -6.57 |
| 1451240_PM_a_at         | Glo1                   | GLO1     | 0.20  | 7.91 | 0.49  | 6.31E-01 | 8.24E-01 | -6.57 |
| 1416355_PM_at           | Rbmx                   | RBMX     | 0.04  | 2.30 | 0.49  | 6.32E-01 | 8.24E-01 | -6.57 |
| 1430376_PM_at           | Lrrc9                  | LRRC9    | 0.05  | 2.64 | 0.49  | 6.32E-01 | 8.24E-01 | -6.57 |
| 1430612_PM_at           | Mcomp1                 | MCEMP1   | 0.06  | 2.58 | 0.49  | 6.32E-01 | 8.24E-01 | -6.57 |
| 1431553_PM_at           | LOC102638890           | NA       | 0.09  | 2.46 | 0.49  | 6.32E-01 | 8.24E-01 | -6.57 |
| 1427197_PM_at           | Atr                    | ATR      | 0.09  | 2.53 | 0.49  | 6.32E-01 | 8.24E-01 | -6.57 |
| 1430007_PM_a_at         | Cabyr                  | CABYR    | -0.07 | 2.22 | -0.49 | 6.32E-01 | 8.24E-01 | -6.57 |
| 1433815_PM_at           | Jakmip1                | JAKMIP1  | 0.30  | 4.23 | 0.49  | 6.32E-01 | 8.24E-01 | -6.57 |
| 1443455_PM_at           | ---                    | NA       | 0.10  | 2.49 | 0.49  | 6.32E-01 | 8.24E-01 | -6.57 |
| 1448565_PM_at           | Ppp1r11                | PPP1R11  | -0.24 | 3.54 | -0.49 | 6.32E-01 | 8.24E-01 | -6.57 |
| 1460543_PM_x_at         | Rpl37a                 | RPL37A   | -0.12 | 7.37 | -0.49 | 6.32E-01 | 8.24E-01 | -6.57 |
| 1445367_PM_at           | ---                    | NA       | 0.04  | 2.07 | 0.49  | 6.32E-01 | 8.24E-01 | -6.57 |
| 1431786_PM_s_at         | Urah                   | NA       | 0.05  | 2.40 | 0.49  | 6.32E-01 | 8.24E-01 | -6.57 |
| 1432570_PM_at           | 6030458E02Rik          | NA       | 0.17  | 3.30 | 0.49  | 6.32E-01 | 8.24E-01 | -6.57 |
| 1437465_PM_a_at         | P4hb                   | P4HB     | -0.10 | 2.65 | -0.49 | 6.32E-01 | 8.24E-01 | -6.57 |
| 1419932_PM_s_at         | ---                    | NA       | -0.10 | 2.74 | -0.49 | 6.32E-01 | 8.24E-01 | -6.57 |
| 1454858_PM_x_at         | Mettl7a1               | METTL7A  | -0.06 | 4.95 | -0.49 | 6.32E-01 | 8.24E-01 | -6.57 |
| 1431112_PM_at           | Ulk3                   | ULK3     | -0.06 | 3.62 | -0.49 | 6.32E-01 | 8.24E-01 | -6.57 |
| 1422481_PM_at           | Krt1                   | KRT1     | -0.04 | 2.64 | -0.49 | 6.32E-01 | 8.24E-01 | -6.57 |
| 1447647_PM_at           | Wnt7a                  | WNT7A    | 0.04  | 1.97 | 0.49  | 6.32E-01 | 8.24E-01 | -6.57 |
| 1445875_PM_at           | ---                    | NA       | 0.07  | 2.48 | 0.49  | 6.32E-01 | 8.24E-01 | -6.57 |
| 1426954_PM_at           | Trim33                 | TRIM33   | 0.10  | 2.45 | 0.49  | 6.32E-01 | 8.24E-01 | -6.57 |
| 1430648_PM_at           | Scn2b                  | NA       | -0.21 | 5.22 | -0.49 | 6.32E-01 | 8.24E-01 | -6.57 |
| 1434847_PM_at           | Cnnm4                  | CNNM4    | 0.09  | 2.67 | 0.49  | 6.32E-01 | 8.24E-01 | -6.57 |
| 1440449_PM_at           | ---                    | NA       | 0.15  | 4.23 | 0.49  | 6.32E-01 | 8.24E-01 | -6.57 |
| 1428612_PM_at           | Atg7                   | ATG7     | 0.06  | 2.60 | 0.49  | 6.32E-01 | 8.25E-01 | -6.57 |
| 1423474_PM_at           | Top1                   | TOP1     | -0.19 | 3.22 | -0.49 | 6.32E-01 | 8.25E-01 | -6.57 |
| 1432838_PM_at           | 6430598H11Rik          | NA       | -0.05 | 2.27 | -0.49 | 6.32E-01 | 8.25E-01 | -6.57 |
| 1437692_PM_x_at         | Anxa2                  | ANXA2    | 0.05  | 2.15 | 0.49  | 6.32E-01 | 8.25E-01 | -6.57 |
| 1426316_PM_at           | 6330416G13Rik          | TMEM268  | 0.08  | 2.64 | 0.49  | 6.32E-01 | 8.25E-01 | -6.57 |
| 1450677_PM_at           | Chek1                  | CHEK1    | 0.08  | 2.27 | 0.49  | 6.32E-01 | 8.25E-01 | -6.57 |
| 1431232_PM_a_at         | Mga                    | MGA      | 0.04  | 2.33 | 0.49  | 6.32E-01 | 8.25E-01 | -6.57 |
| 1434566_PM_a_at         | Pramef8                | PRAMEF9  | -0.08 | 2.25 | -0.49 | 6.33E-01 | 8.25E-01 | -6.57 |
| 1417162_PM_at           | Tmbim1                 | TMBIM1   | -0.28 | 3.34 | -0.49 | 6.33E-01 | 8.25E-01 | -6.57 |
| 1416168_PM_at           | Serpinf1               | SERPINF1 | -0.13 | 2.83 | -0.49 | 6.33E-01 | 8.25E-01 | -6.57 |
| 1428611_PM_at           | Atg7                   | ATG7     | 0.04  | 2.69 | 0.49  | 6.33E-01 | 8.25E-01 | -6.57 |
| 1419161_PM_a_at         | Nox4                   | NOX4     | 0.04  | 2.14 | 0.49  | 6.33E-01 | 8.25E-01 | -6.57 |
| 1449807_PM_x_at         | Gabra2                 | GABRA2   | 0.04  | 2.22 | 0.49  | 6.33E-01 | 8.25E-01 | -6.57 |
| 1444585_PM_at           | Azin2                  | AZIN2    | 0.07  | 2.75 | 0.49  | 6.33E-01 | 8.25E-01 | -6.57 |
| 1417125_PM_at           | Ahcy ///Gm4737         | AHCY     | 0.08  | 3.92 | 0.49  | 6.33E-01 | 8.25E-01 | -6.57 |
| 1443662_PM_at           | ---                    | NA       | 0.08  | 2.52 | 0.49  | 6.33E-01 | 8.25E-01 | -6.57 |
| 1426318_PM_at           | Serpib1b               | SERPINB1 | 0.08  | 2.68 | 0.49  | 6.33E-01 | 8.25E-01 | -6.57 |
| 1425628_PM_a_at         | Gtf2i                  | GTF2I    | 0.08  | 7.33 | 0.49  | 6.33E-01 | 8.25E-01 | -6.57 |
| 1443742_PM_x_at         | ---                    | NA       | 0.13  | 2.85 | 0.49  | 6.33E-01 | 8.25E-01 | -6.57 |
| 1439661_PM_at           | Slc16a14               | SLC16A14 | 0.16  | 3.06 | 0.49  | 6.33E-01 | 8.25E-01 | -6.57 |
| 1446754_PM_a_at         | Vax2os                 | NA       | 0.04  | 2.14 | 0.49  | 6.33E-01 | 8.25E-01 | -6.57 |
| 1446436_PM_at           | ---                    | NA       | 0.05  | 2.41 | 0.49  | 6.33E-01 | 8.25E-01 | -6.57 |
| 1438072_PM_at           | 2310067E19Rik          | NA       | -0.17 | 2.57 | -0.49 | 6.33E-01 | 8.25E-01 | -6.57 |
| 1419668_PM_at           | Sgcb                   | SGCB     | -0.13 | 3.20 | -0.49 | 6.33E-01 | 8.25E-01 | -6.57 |
| 1457562_PM_at           | Rps6kb1                | RPS6KB1  | 0.05  | 2.54 | 0.49  | 6.33E-01 | 8.25E-01 | -6.57 |

|                 |               |          |       |      |       |          |          |       |
|-----------------|---------------|----------|-------|------|-------|----------|----------|-------|
| 1415763_PM_a_at | Tmem234       | TMEM234  | -0.12 | 6.17 | -0.49 | 6.33E-01 | 8.25E-01 | -6.57 |
| 1417641_PM_at   | Galnt5        | GALNTL5  | 0.04  | 2.13 | 0.49  | 6.33E-01 | 8.25E-01 | -6.57 |
| 1418802_PM_at   | R74862        | NA       | 0.09  | 2.87 | 0.49  | 6.33E-01 | 8.25E-01 | -6.57 |
| 1456728_PM_x_at | Aco1          | ACO1     | -0.31 | 4.83 | -0.49 | 6.33E-01 | 8.25E-01 | -6.57 |
| 1436540_PM_at   | Mirlet7d      | NA       | -0.09 | 4.35 | -0.49 | 6.33E-01 | 8.25E-01 | -6.57 |
| 1459693_PM_x_at | Ywhag         | YWHAG    | 0.05  | 3.26 | 0.49  | 6.33E-01 | 8.25E-01 | -6.57 |
| 1450559_PM_at   | 5730559C18Rik | C1orf106 | 0.06  | 2.35 | 0.49  | 6.33E-01 | 8.25E-01 | -6.57 |
| 1417717_PM_a_at | Tyr           | TYR      | 0.06  | 2.14 | 0.49  | 6.33E-01 | 8.25E-01 | -6.57 |
| 1425705_PM_a_at | Ero1lb        | ERO1B    | 0.09  | 2.61 | 0.49  | 6.33E-01 | 8.25E-01 | -6.57 |
| 1417606_PM_a_at | Calr          | CALR     | -0.19 | 6.05 | -0.49 | 6.33E-01 | 8.25E-01 | -6.57 |
| 1419400_PM_at   | Mtttp         | MTTP     | -0.07 | 2.32 | -0.49 | 6.33E-01 | 8.25E-01 | -6.57 |
| 1419920_PM_s_at | Usp7          | USP7     | 0.10  | 8.02 | 0.49  | 6.33E-01 | 8.25E-01 | -6.57 |
| 1428279_PM_a_at | Atxn7l1       | ATXN7L1  | -0.07 | 2.37 | -0.49 | 6.33E-01 | 8.25E-01 | -6.57 |
| 1417739_PM_at   | Med11         | MED11    | -0.12 | 2.95 | -0.49 | 6.33E-01 | 8.25E-01 | -6.57 |
| 1449139_PM_at   | Ostc          | OSTC     | 0.13  | 3.20 | 0.49  | 6.33E-01 | 8.25E-01 | -6.57 |
| 1432567_PM_at   | A430105D02Rik | NA       | 0.10  | 2.74 | 0.49  | 6.34E-01 | 8.25E-01 | -6.57 |
| 1426586_PM_at   | Slc25a11      | SLC25A11 | 0.12  | 2.83 | 0.49  | 6.34E-01 | 8.25E-01 | -6.57 |
| 1435087_PM_at   | Zfp362        | ZNF362   | 0.06  | 3.12 | 0.49  | 6.34E-01 | 8.25E-01 | -6.57 |
| 1439668_PM_at   | Gm11681       | NA       | -0.07 | 2.20 | -0.49 | 6.34E-01 | 8.25E-01 | -6.57 |
| 1450235_PM_at   | Fgd3          | FGD3     | 0.05  | 2.90 | 0.49  | 6.34E-01 | 8.25E-01 | -6.57 |
| 1424228_PM_at   | Polr3h        | POLR3H   | 0.07  | 2.37 | 0.49  | 6.34E-01 | 8.25E-01 | -6.57 |
| 1416518_PM_at   | H1foo         | H1FOO    | 0.08  | 3.90 | 0.49  | 6.34E-01 | 8.25E-01 | -6.57 |
| 1460295_PM_s_at | Il6st         | IL6ST    | 0.15  | 3.16 | 0.49  | 6.34E-01 | 8.25E-01 | -6.57 |
| 1422118_PM_at   | Sync          | SYNC     | 0.07  | 2.54 | 0.49  | 6.34E-01 | 8.25E-01 | -6.57 |
| 1438964_PM_x_at | Tfpt          | TFPT     | -0.20 | 4.07 | -0.49 | 6.34E-01 | 8.25E-01 | -6.57 |
| 1441988_PM_at   | Ppm1k         | PPM1K    | -0.14 | 6.18 | -0.49 | 6.34E-01 | 8.25E-01 | -6.57 |
| 1415797_PM_at   | Ddr1          | NA       | -0.09 | 3.62 | -0.49 | 6.34E-01 | 8.25E-01 | -6.57 |
| 1422335_PM_at   | Adra2c        | ADRA2C   | 0.06  | 3.11 | 0.49  | 6.34E-01 | 8.25E-01 | -6.57 |
| 1451335_PM_at   | Plac8         | PLAC8    | 0.07  | 2.61 | 0.49  | 6.34E-01 | 8.25E-01 | -6.57 |
| 1435882_PM_at   | Ubap2l        | UBAP2L   | 0.11  | 4.49 | 0.49  | 6.34E-01 | 8.25E-01 | -6.57 |
| 1430256_PM_at   | Fam65c        | RIPOR3   | 0.05  | 2.18 | 0.49  | 6.34E-01 | 8.25E-01 | -6.57 |
| 1441045_PM_at   | Ddx43         | DDX43    | 0.06  | 2.16 | 0.49  | 6.34E-01 | 8.26E-01 | -6.57 |
| 1432960_PM_at   | ---           | NA       | -0.21 | 2.75 | -0.49 | 6.34E-01 | 8.26E-01 | -6.57 |
| 1423313_PM_at   | Pde7a         | PDE7A    | -0.14 | 4.76 | -0.49 | 6.34E-01 | 8.26E-01 | -6.57 |
| 1435798_PM_a_at | Sugp2         | SUGP2    | -0.20 | 7.10 | -0.49 | 6.34E-01 | 8.26E-01 | -6.57 |
| 1430770_PM_at   | ---           | NA       | 0.04  | 2.10 | 0.49  | 6.34E-01 | 8.26E-01 | -6.57 |
| 1441402_PM_at   | ---           | NA       | -0.07 | 2.91 | -0.49 | 6.34E-01 | 8.26E-01 | -6.57 |
| 1448925_PM_at   | Twist2        | TWIST2   | -0.07 | 2.43 | -0.49 | 6.34E-01 | 8.26E-01 | -6.57 |
| 1421731_PM_a_at | Fen1          | FEN1     | 0.05  | 2.06 | 0.49  | 6.34E-01 | 8.26E-01 | -6.57 |
| 1426467_PM_s_at | 0610037L13Rik | C1orf123 | 0.08  | 3.03 | 0.49  | 6.34E-01 | 8.26E-01 | -6.57 |
| 1428734_PM_at   | Anapc15       | ANAPC15  | 0.09  | 2.92 | 0.49  | 6.34E-01 | 8.26E-01 | -6.57 |
| 1434016_PM_at   | Znrf2         | ZNRF2    | -0.09 | 3.25 | -0.49 | 6.34E-01 | 8.26E-01 | -6.57 |
| 1441407_PM_at   | ---           | NA       | -0.15 | 2.81 | -0.49 | 6.35E-01 | 8.26E-01 | -6.57 |
| 1422764_PM_at   | Mapre1        | MAPRE1   | -0.15 | 3.40 | -0.49 | 6.35E-01 | 8.26E-01 | -6.57 |
| 1442139_PM_at   | ---           | NA       | -0.11 | 2.30 | -0.49 | 6.35E-01 | 8.26E-01 | -6.57 |
| 1452845_PM_at   | Hif1an        | HIF1AN   | -0.05 | 2.22 | -0.49 | 6.35E-01 | 8.26E-01 | -6.57 |
| 1432649_PM_at   | 3300002A11Rik | NA       | -0.04 | 2.18 | -0.49 | 6.35E-01 | 8.26E-01 | -6.57 |
| 1443183_PM_at   | Huwe1         | HUWE1    | -0.11 | 4.01 | -0.49 | 6.35E-01 | 8.26E-01 | -6.57 |
| 1442300_PM_at   | Tshr          | TSHR     | 0.04  | 2.40 | 0.49  | 6.35E-01 | 8.26E-01 | -6.57 |
| 1460188_PM_at   | Ptpn6         | PTPN6    | 0.05  | 2.30 | 0.49  | 6.35E-01 | 8.26E-01 | -6.57 |
| 1451325_PM_at   | Fyttl1        | FYTTD1   | -0.15 | 2.72 | -0.49 | 6.35E-01 | 8.26E-01 | -6.57 |
| 1457481_PM_at   | Camkmt        | NA       | 0.04  | 2.21 | 0.49  | 6.35E-01 | 8.26E-01 | -6.57 |
| 1436140_PM_at   | Dennd6b       | DENND6B  | 0.06  | 2.41 | 0.49  | 6.35E-01 | 8.26E-01 | -6.57 |
| 1417792_PM_at   | Zfp638        | ZNF638   | 0.11  | 4.95 | 0.49  | 6.35E-01 | 8.26E-01 | -6.57 |
| 1438301_PM_at   | ---           | NA       | -0.05 | 2.60 | -0.49 | 6.35E-01 | 8.26E-01 | -6.57 |
| 1433393_PM_at   | ---           | NA       | 0.08  | 2.35 | 0.49  | 6.35E-01 | 8.26E-01 | -6.57 |
| 1445580_PM_at   | ---           | NA       | -0.04 | 2.29 | -0.49 | 6.35E-01 | 8.26E-01 | -6.57 |
| 1418789_PM_at   | Sntg2         | SNTG2    | -0.05 | 2.35 | -0.49 | 6.35E-01 | 8.26E-01 | -6.57 |
| 1430903_PM_at   | ---           | NA       | 0.05  | 2.60 | 0.49  | 6.35E-01 | 8.26E-01 | -6.57 |
| 1423859_PM_a_at | Ptgds         | PTGDS    | -0.31 | 9.75 | -0.49 | 6.35E-01 | 8.26E-01 | -6.57 |
| 1444116_PM_at   | ---           | NA       | 0.05  | 2.28 | 0.49  | 6.35E-01 | 8.26E-01 | -6.57 |
| 1437186_PM_at   | BC055324      | C1orf112 | 0.08  | 3.03 | 0.49  | 6.35E-01 | 8.26E-01 | -6.57 |
| 1434069_PM_at   | Prex1         | PREX1    | -0.11 | 3.13 | -0.49 | 6.35E-01 | 8.26E-01 | -6.57 |
| 1455949_PM_at   | Atp1b1        | ATP1B1   | -0.05 | 2.74 | -0.49 | 6.35E-01 | 8.26E-01 | -6.57 |
| 1430050_PM_at   | Ddx23         | DDX23    | 0.07  | 2.49 | 0.49  | 6.35E-01 | 8.26E-01 | -6.57 |
| 1453749_PM_at   | 2610507I01Rik | NA       | 0.10  | 2.49 | 0.49  | 6.35E-01 | 8.26E-01 | -6.57 |
| 1457140_PM_s_at | Rassf10       | RASSF10  | 0.22  | 2.54 | 0.49  | 6.35E-01 | 8.26E-01 | -6.57 |
| 1440967_PM_at   | Gm15708       | NA       | 0.07  | 2.77 | 0.49  | 6.35E-01 | 8.26E-01 | -6.57 |
| 1442448_PM_at   | ---           | NA       | -0.04 | 2.48 | -0.49 | 6.35E-01 | 8.26E-01 | -6.57 |
| 1433081_PM_at   | ---           | NA       | 0.08  | 2.32 | 0.49  | 6.35E-01 | 8.26E-01 | -6.57 |
| 1456131_PM_x_at | Dag1          | DAG1     | -0.07 | 3.02 | -0.49 | 6.35E-01 | 8.26E-01 | -6.57 |
| 1460722_PM_at   | Soat2         | SOAT2    | 0.04  | 2.10 | 0.49  | 6.35E-01 | 8.26E-01 | -6.57 |
| 1459216_PM_at   | ---           | NA       | 0.05  | 2.26 | 0.49  | 6.35E-01 | 8.26E-01 | -6.57 |
| 1454771_PM_at   | LOC102631912  | NA       | 0.06  | 2.18 | 0.49  | 6.35E-01 | 8.26E-01 | -6.57 |
| 1418389_PM_at   | Fam220a       | FAM220A  | -0.10 | 2.62 | -0.49 | 6.35E-01 | 8.26E-01 | -6.57 |

|                 |                       |          |       |      |       |          |          |       |
|-----------------|-----------------------|----------|-------|------|-------|----------|----------|-------|
| 1429533_PM_at   | Immt                  | IMMT     | -0.14 | 3.20 | -0.49 | 6.36E-01 | 8.26E-01 | -6.57 |
| 1448492_PM_a_at | Psmid12               | PSMD12   | -0.10 | 4.77 | -0.49 | 6.36E-01 | 8.26E-01 | -6.57 |
| 1458542_PM_at   | ---                   | NA       | 0.04  | 2.99 | 0.49  | 6.36E-01 | 8.26E-01 | -6.57 |
| 1459530_PM_at   | ---                   | NA       | 0.04  | 2.12 | 0.49  | 6.36E-01 | 8.26E-01 | -6.57 |
| 1426908_PM_at   | Galnt7                | GALNT7   | -0.07 | 2.58 | -0.49 | 6.36E-01 | 8.26E-01 | -6.57 |
| 1424327_PM_at   | Anapc15               | ANAPC15  | -0.15 | 3.91 | -0.49 | 6.36E-01 | 8.27E-01 | -6.57 |
| 1423134_PM_at   | Rilpl2                | RILPL2   | 0.08  | 2.63 | 0.49  | 6.36E-01 | 8.27E-01 | -6.57 |
| 1435056_PM_x_at | Pofut2                | POFUT2   | -0.19 | 3.10 | -0.49 | 6.36E-01 | 8.27E-01 | -6.57 |
| 1416379_PM_at   | Panx1                 | PANX1    | -0.14 | 3.58 | -0.49 | 6.36E-01 | 8.27E-01 | -6.57 |
| 1456082_PM_x_at | Cct4                  | CCT4     | -0.09 | 4.69 | -0.49 | 6.36E-01 | 8.27E-01 | -6.57 |
| 1431110_PM_at   | Plxdc2                | PLXDC2   | -0.09 | 2.44 | -0.49 | 6.36E-01 | 8.27E-01 | -6.57 |
| 1421973_PM_at   | Gfra1                 | GFRA1    | -0.06 | 2.51 | -0.49 | 6.36E-01 | 8.27E-01 | -6.57 |
| 1426658_PM_x_at | Phgdh                 | PHGDH    | 0.06  | 2.80 | 0.49  | 6.36E-01 | 8.27E-01 | -6.57 |
| 1449930_PM_a_at | Ssr2                  | SSR2     | 0.14  | 3.58 | 0.49  | 6.36E-01 | 8.27E-01 | -6.57 |
| 1442663_PM_at   | Rbm12b2               | NA       | -0.05 | 2.02 | -0.49 | 6.36E-01 | 8.27E-01 | -6.57 |
| 1416237_PM_at   | Mpz2                  | MPZL2    | 0.07  | 2.26 | 0.49  | 6.36E-01 | 8.27E-01 | -6.57 |
| 1433318_PM_at   | 5430416B10Rik         | NA       | 0.19  | 2.48 | 0.49  | 6.36E-01 | 8.27E-01 | -6.57 |
| 1458520_PM_at   | ---                   | NA       | 0.08  | 2.25 | 0.49  | 6.36E-01 | 8.27E-01 | -6.57 |
| 1453908_PM_at   | Ptprb                 | PTPRB    | 0.10  | 2.24 | 0.49  | 6.36E-01 | 8.27E-01 | -6.57 |
| 1428195_PM_at   | Ahcy12                | AHCYL2   | 0.20  | 3.43 | 0.49  | 6.36E-01 | 8.27E-01 | -6.57 |
| 1417106_PM_at   | Tpd52l2               | TPD52L2  | -0.16 | 3.35 | -0.49 | 6.36E-01 | 8.27E-01 | -6.57 |
| 1455713_PM_x_at | Phb2                  | PHB2     | -0.10 | 5.59 | -0.49 | 6.36E-01 | 8.27E-01 | -6.58 |
| 1442847_PM_at   | LOC102643257          | NA       | -0.09 | 2.57 | -0.49 | 6.36E-01 | 8.27E-01 | -6.58 |
| 1421087_PM_at   | Per3                  | PER3     | -0.07 | 2.33 | -0.49 | 6.36E-01 | 8.27E-01 | -6.58 |
| 1442746_PM_at   | Vstm2b                | NA       | 0.04  | 2.55 | 0.49  | 6.36E-01 | 8.27E-01 | -6.58 |
| 1442819_PM_at   | Rhbdl2                | RHBDL2   | 0.04  | 2.04 | 0.49  | 6.36E-01 | 8.27E-01 | -6.58 |
| 1454476_PM_at   | ---                   | NA       | 0.04  | 2.49 | 0.49  | 6.36E-01 | 8.27E-01 | -6.57 |
| 1439903_PM_at   | Ndufa13               | YJEFN3   | 0.06  | 2.79 | 0.49  | 6.36E-01 | 8.27E-01 | -6.58 |
| 1425925_PM_at   | Fcamr                 | FCAMR    | 0.06  | 2.58 | 0.49  | 6.36E-01 | 8.27E-01 | -6.58 |
| 1452370_PM_s_at | Rabl6                 | RABL6    | 0.07  | 2.88 | 0.49  | 6.36E-01 | 8.27E-01 | -6.57 |
| 1460445_PM_at   | Scaf11                | SCAF11   | 0.07  | 2.55 | 0.49  | 6.36E-01 | 8.27E-01 | -6.57 |
| 1459842_PM_x_at | Nubp2                 | NUBP2    | 0.07  | 2.31 | 0.49  | 6.36E-01 | 8.27E-01 | -6.57 |
| 1429026_PM_at   | Hexim2                | HEXIM2   | 0.08  | 2.72 | 0.49  | 6.36E-01 | 8.27E-01 | -6.58 |
| 1430080_PM_at   | Fcnb                  | FCN1     | 0.09  | 2.68 | 0.49  | 6.36E-01 | 8.27E-01 | -6.57 |
| 1428182_PM_at   | Prpsap1               | PRPSAP1  | 0.12  | 3.88 | 0.49  | 6.36E-01 | 8.27E-01 | -6.57 |
| 1443371_PM_at   | ---                   | NA       | 0.13  | 3.14 | 0.49  | 6.36E-01 | 8.27E-01 | -6.57 |
| 1458761_PM_at   | ---                   | NA       | 0.04  | 1.93 | 0.49  | 6.37E-01 | 8.27E-01 | -6.58 |
| 1445334_PM_at   | ---                   | NA       | 0.05  | 2.51 | 0.49  | 6.37E-01 | 8.27E-01 | -6.58 |
| 1453860_PM_s_at | Nr3c1                 | NR3C1    | -0.06 | 2.16 | -0.49 | 6.37E-01 | 8.27E-01 | -6.58 |
| 1439029_PM_at   | Gpt2                  | GPT2     | 0.07  | 2.69 | 0.49  | 6.37E-01 | 8.27E-01 | -6.58 |
| 1423023_PM_at   | Sfrp5                 | SFRP5    | 0.08  | 2.61 | 0.49  | 6.37E-01 | 8.27E-01 | -6.58 |
| 1441091_PM_at   | Elov17                | ELOVL7   | 0.09  | 2.65 | 0.49  | 6.37E-01 | 8.27E-01 | -6.58 |
| 1420405_PM_at   | Skola4                | SLCO1A2  | -0.12 | 3.64 | -0.49 | 6.37E-01 | 8.27E-01 | -6.58 |
| 1424457_PM_at   | Apbb3//Sra1           | APBB3    | -0.07 | 2.27 | -0.49 | 6.37E-01 | 8.27E-01 | -6.58 |
| 1457708_PM_at   | Mbd4                  | MBD4     | 0.05  | 1.91 | 0.49  | 6.37E-01 | 8.27E-01 | -6.58 |
| 1440918_PM_at   | Rasgrf2               | NA       | 0.06  | 2.47 | 0.49  | 6.37E-01 | 8.27E-01 | -6.58 |
| 1423425_PM_at   | Pldb2                 | PLBD2    | 0.06  | 2.42 | 0.49  | 6.37E-01 | 8.27E-01 | -6.58 |
| 1426694_PM_at   | 9030624J02Rik         | C16orf62 | 0.07  | 2.95 | 0.49  | 6.37E-01 | 8.27E-01 | -6.58 |
| 1425398_PM_at   | Hist1h2bq///Hist1h2br | NA       | 0.09  | 2.49 | 0.49  | 6.37E-01 | 8.27E-01 | -6.58 |
| 1450017_PM_at   | Ccng1                 | CCNG1    | -0.04 | 2.23 | -0.49 | 6.37E-01 | 8.27E-01 | -6.58 |
| 1422816_PM_a_at | Mutyh                 | MUTYH    | 0.07  | 2.65 | 0.49  | 6.37E-01 | 8.27E-01 | -6.58 |
| 1448714_PM_at   | Rngtt                 | RNGTT    | -0.11 | 2.87 | -0.49 | 6.37E-01 | 8.27E-01 | -6.58 |
| 1420238_PM_at   | ---                   | NA       | -0.07 | 2.40 | -0.49 | 6.37E-01 | 8.27E-01 | -6.58 |
| 1460197_PM_a_at | Steap4                | STEAP4   | -0.05 | 2.32 | -0.49 | 6.37E-01 | 8.27E-01 | -6.58 |
| 1434097_PM_at   | Zfp930                | NA       | 0.08  | 2.78 | 0.49  | 6.37E-01 | 8.27E-01 | -6.58 |
| 1435604_PM_at   | Trim37                | TRIM37   | -0.20 | 7.07 | -0.49 | 6.37E-01 | 8.27E-01 | -6.58 |
| 1445113_PM_at   | ---                   | NA       | 0.07  | 2.92 | 0.49  | 6.37E-01 | 8.27E-01 | -6.58 |
| 1432165_PM_at   | 8430422H06Rik         | NA       | 0.04  | 1.93 | 0.49  | 6.37E-01 | 8.27E-01 | -6.58 |
| 1428102_PM_at   | Cpb1                  | CPB1     | -0.10 | 2.51 | -0.49 | 6.37E-01 | 8.27E-01 | -6.58 |
| 1435996_PM_at   | Card11                | CARD11   | 0.08  | 2.49 | 0.49  | 6.37E-01 | 8.27E-01 | -6.58 |
| 1453432_PM_at   | 1700007G11Rik         | C4orf22  | 0.05  | 2.33 | 0.49  | 6.37E-01 | 8.27E-01 | -6.58 |
| 1421537_PM_at   | Hoxd3                 | HOXD3    | -0.05 | 2.29 | -0.49 | 6.37E-01 | 8.27E-01 | -6.58 |
| 1430350_PM_at   | 2610035F20Rik         | NA       | 0.06  | 2.34 | 0.49  | 6.37E-01 | 8.27E-01 | -6.58 |
| 1455676_PM_x_at | Tial1                 | TIAL1    | -0.12 | 4.07 | -0.49 | 6.37E-01 | 8.27E-01 | -6.58 |
| 1442622_PM_at   | ---                   | NA       | 0.08  | 2.17 | 0.49  | 6.37E-01 | 8.27E-01 | -6.58 |
| 1442502_PM_at   | Lrch1                 | NA       | 0.08  | 3.39 | 0.49  | 6.37E-01 | 8.27E-01 | -6.58 |
| 1451277_PM_at   | Zadh2                 | ZADH2    | 0.11  | 2.48 | 0.49  | 6.37E-01 | 8.27E-01 | -6.58 |
| 1452614_PM_at   | Bcl2l15               | BCL2L15  | 0.04  | 2.11 | 0.49  | 6.37E-01 | 8.27E-01 | -6.58 |
| 1427085_PM_at   | Rpp25l                | RPP25L   | 0.07  | 3.05 | 0.49  | 6.37E-01 | 8.27E-01 | -6.58 |
| 1415910_PM_s_at | Ciapi1                | CIAPIN1  | 0.10  | 3.74 | 0.49  | 6.37E-01 | 8.27E-01 | -6.58 |
| 1458396_PM_at   | P2rx3                 | NA       | 0.04  | 2.02 | 0.49  | 6.38E-01 | 8.27E-01 | -6.58 |
| 1441753_PM_at   | Rictor                | RICTOR   | 0.11  | 3.31 | 0.49  | 6.38E-01 | 8.27E-01 | -6.58 |
| 1459652_PM_at   | C79356                | NA       | 0.04  | 2.28 | 0.49  | 6.38E-01 | 8.27E-01 | -6.58 |
| 1450897_PM_at   | Arhgap5               | NA       | -0.17 | 5.23 | -0.48 | 6.38E-01 | 8.27E-01 | -6.58 |
| 1438456_PM_at   | H13                   | HM13     | -0.07 | 2.35 | -0.48 | 6.38E-01 | 8.27E-01 | -6.58 |

|                 |                    |         |       |      |       |          |          |       |
|-----------------|--------------------|---------|-------|------|-------|----------|----------|-------|
| 144880_PM_at    | Gm10705 /// Ube2l3 | UBE2L5P | 0.12  | 2.88 | 0.48  | 6.38E-01 | 8.27E-01 | -6.58 |
| 1424646_PM_at   | Uckl1              | UCKL1   | -0.10 | 3.66 | -0.48 | 6.38E-01 | 8.27E-01 | -6.58 |
| 1431082_PM_a_at | Rabl3              | RABL3   | 0.06  | 2.44 | 0.48  | 6.38E-01 | 8.27E-01 | -6.58 |
| 1430085_PM_at   | 4933412A08Rik      | NA      | -0.05 | 2.30 | -0.48 | 6.38E-01 | 8.27E-01 | -6.58 |
| 1419417_PM_at   | Vegfc              | VEGFC   | 0.07  | 2.69 | 0.48  | 6.38E-01 | 8.27E-01 | -6.58 |
| 1438419_PM_at   | ---                | NA      | -0.16 | 3.48 | -0.48 | 6.38E-01 | 8.28E-01 | -6.58 |
| 1457186_PM_at   | ---                | NA      | -0.07 | 2.40 | -0.48 | 6.38E-01 | 8.28E-01 | -6.58 |
| 1418233_PM_a_at | Trappc5            | TRAPPC5 | -0.05 | 3.07 | -0.48 | 6.38E-01 | 8.28E-01 | -6.58 |
| 1421434_PM_at   | Dnah5              | DNAH5   | -0.04 | 2.10 | -0.48 | 6.38E-01 | 8.28E-01 | -6.58 |
| 1432764_PM_at   | 4933404i11Rik      | NA      | 0.06  | 2.21 | 0.48  | 6.38E-01 | 8.28E-01 | -6.58 |
| 1457253_PM_at   | Trim40             | TRIM40  | 0.07  | 2.57 | 0.48  | 6.38E-01 | 8.28E-01 | -6.58 |
| 1455936_PM_a_at | Rbpms              | RBPMS   | 0.07  | 2.60 | 0.48  | 6.38E-01 | 8.28E-01 | -6.58 |
| 1434907_PM_at   | Tbpl1              | TBPL1   | 0.09  | 2.80 | 0.48  | 6.38E-01 | 8.28E-01 | -6.58 |
| 1457492_PM_at   | ---                | NA      | 0.18  | 3.00 | 0.48  | 6.38E-01 | 8.28E-01 | -6.58 |
| 1454074_PM_a_at | Rsrc2              | RSRC2   | -0.17 | 5.04 | -0.48 | 6.38E-01 | 8.28E-01 | -6.58 |
| 1444201_PM_at   | Cep135             | CEP135  | -0.15 | 3.10 | -0.48 | 6.38E-01 | 8.28E-01 | -6.58 |
| 1428586_PM_at   | Tmem41b            | TMEM41B | -0.14 | 3.05 | -0.48 | 6.38E-01 | 8.28E-01 | -6.58 |
| 1435126_PM_at   | Dusp15             | DUSP15  | -0.13 | 2.85 | -0.48 | 6.38E-01 | 8.28E-01 | -6.58 |
| 1427027_PM_a_at | Gtf3a              | GTF3A   | -0.05 | 2.88 | -0.48 | 6.38E-01 | 8.28E-01 | -6.58 |
| 1439684_PM_at   | 4930570G19Rik      | NA      | -0.04 | 2.51 | -0.48 | 6.38E-01 | 8.28E-01 | -6.58 |
| 1433580_PM_at   | Nup54              | NUP54   | 0.06  | 2.52 | 0.48  | 6.38E-01 | 8.28E-01 | -6.58 |
| 1430358_PM_at   | Becn1              | BECN1   | 0.08  | 2.85 | 0.48  | 6.38E-01 | 8.28E-01 | -6.58 |
| 1460579_PM_at   | Dnpep              | DNPEP   | 0.10  | 2.51 | 0.48  | 6.38E-01 | 8.28E-01 | -6.58 |
| 1429170_PM_a_at | Mtf1               | MTF1    | 0.18  | 2.92 | 0.48  | 6.38E-01 | 8.28E-01 | -6.58 |
| 1417588_PM_at   | Galnt3             | GALNT3  | -0.25 | 3.94 | -0.48 | 6.39E-01 | 8.28E-01 | -6.58 |
| 1454766_PM_at   | Amn1               | AMN1    | -0.20 | 4.16 | -0.48 | 6.39E-01 | 8.28E-01 | -6.58 |
| 1459997_PM_s_at | Tmem17             | TMEM17  | -0.18 | 2.45 | -0.48 | 6.39E-01 | 8.28E-01 | -6.58 |
| 1447505_PM_at   | LOC105243207       | NA      | -0.04 | 2.54 | -0.48 | 6.39E-01 | 8.28E-01 | -6.58 |
| 1456088_PM_at   | Xiap               | BIRC8   | 0.05  | 2.53 | 0.48  | 6.38E-01 | 8.28E-01 | -6.58 |
| 1443046_PM_at   | Abcd3              | ABCD3   | 0.06  | 2.27 | 0.48  | 6.39E-01 | 8.28E-01 | -6.58 |
| 1457448_PM_at   | Pnpla1             | PNPLA1  | 0.07  | 2.58 | 0.48  | 6.38E-01 | 8.28E-01 | -6.58 |
| 1441982_PM_at   | Taf7               | TAF7    | 0.11  | 2.48 | 0.48  | 6.39E-01 | 8.28E-01 | -6.58 |
| 1443744_PM_at   | ---                | NA      | 0.35  | 3.96 | 0.48  | 6.38E-01 | 8.28E-01 | -6.58 |
| 1445486_PM_at   | Lrrc49             | NA      | 0.06  | 2.25 | 0.48  | 6.39E-01 | 8.28E-01 | -6.58 |
| 1421807_PM_at   | Defb6              | NA      | 0.06  | 2.52 | 0.48  | 6.39E-01 | 8.28E-01 | -6.58 |
| 1457123_PM_at   | Nrg4               | NRG4    | 0.05  | 2.36 | 0.48  | 6.39E-01 | 8.28E-01 | -6.58 |
| 1430671_PM_a_at | Brox               | BROX    | -0.14 | 2.56 | -0.48 | 6.39E-01 | 8.28E-01 | -6.58 |
| 1443269_PM_at   | ---                | NA      | 0.07  | 2.55 | 0.48  | 6.39E-01 | 8.28E-01 | -6.58 |
| 1444284_PM_at   | Gm41959            | NA      | 0.08  | 2.55 | 0.48  | 6.39E-01 | 8.28E-01 | -6.58 |
| 1437599_PM_at   | ---                | NA      | 0.12  | 2.56 | 0.48  | 6.39E-01 | 8.28E-01 | -6.58 |
| 1440238_PM_at   | Gltsr1             | NA      | -0.06 | 2.79 | -0.48 | 6.39E-01 | 8.28E-01 | -6.58 |
| 1435834_PM_at   | Fancf              | FANCF   | -0.16 | 2.60 | -0.48 | 6.39E-01 | 8.28E-01 | -6.58 |
| 1451113_PM_a_at | Ik                 | IK      | 0.18  | 6.56 | 0.48  | 6.39E-01 | 8.28E-01 | -6.58 |
| 1429848_PM_at   | Pvr                | PVR     | -0.07 | 2.76 | -0.48 | 6.39E-01 | 8.28E-01 | -6.58 |
| 1460507_PM_at   | 4930552P12Rik      | NA      | 0.04  | 2.26 | 0.48  | 6.39E-01 | 8.28E-01 | -6.58 |
| 1427842_PM_at   | Krtap6-3           | NA      | 0.04  | 2.10 | 0.48  | 6.39E-01 | 8.28E-01 | -6.58 |
| 1434325_PM_x_at | Prkar1b            | PRKAR1B | 0.18  | 7.97 | 0.48  | 6.39E-01 | 8.28E-01 | -6.58 |
| 1424921_PM_at   | Bst2               | BST2    | 0.04  | 2.89 | 0.48  | 6.39E-01 | 8.28E-01 | -6.58 |
| 1442169_PM_at   | Vldlr              | VDLDR   | -0.21 | 4.38 | -0.48 | 6.39E-01 | 8.28E-01 | -6.58 |
| 1445468_PM_at   | ---                | NA      | -0.04 | 2.57 | -0.48 | 6.39E-01 | 8.28E-01 | -6.58 |
| 1421540_PM_at   | Tcam1              | NA      | 0.04  | 2.19 | 0.48  | 6.39E-01 | 8.28E-01 | -6.58 |
| 1441863_PM_x_at | Krt13              | KRT13   | 0.04  | 2.69 | 0.48  | 6.39E-01 | 8.28E-01 | -6.58 |
| 1445424_PM_at   | Gm14285            | NA      | 0.04  | 2.60 | 0.48  | 6.39E-01 | 8.28E-01 | -6.58 |
| 1424151_PM_at   | Aimp2              | AIMP2   | 0.05  | 2.35 | 0.48  | 6.39E-01 | 8.28E-01 | -6.58 |
| 1460005_PM_at   | Bod1l              | BOD1L1  | 0.18  | 3.26 | 0.48  | 6.39E-01 | 8.28E-01 | -6.58 |
| 1452489_PM_at   | Vps11              | NA      | 0.07  | 2.53 | 0.48  | 6.39E-01 | 8.28E-01 | -6.58 |
| 1423152_PM_at   | Vapb               | VAPB    | -0.11 | 4.54 | -0.48 | 6.40E-01 | 8.28E-01 | -6.58 |
| 1420393_PM_at   | Nos2               | NOS2    | -0.04 | 2.63 | -0.48 | 6.40E-01 | 8.28E-01 | -6.58 |
| 1430004_PM_s_at | Wdr20rt            | WDR20   | 0.06  | 2.08 | 0.48  | 6.40E-01 | 8.28E-01 | -6.58 |
| 1426243_PM_at   | Cth                | CTH     | 0.07  | 2.21 | 0.48  | 6.40E-01 | 8.28E-01 | -6.58 |
| 1432646_PM_a_at | 2900097C17Rik      | NA      | -0.18 | 6.08 | -0.48 | 6.40E-01 | 8.28E-01 | -6.58 |
| 1430803_PM_at   | Lin28b             | NA      | -0.04 | 2.12 | -0.48 | 6.40E-01 | 8.28E-01 | -6.58 |
| 1437133_PM_x_at | Akr1b3 /// Gm6644  | AKR1B1  | -0.22 | 4.96 | -0.48 | 6.40E-01 | 8.28E-01 | -6.58 |
| 1455142_PM_at   | Socs4              | SOCS4   | -0.09 | 2.71 | -0.48 | 6.40E-01 | 8.28E-01 | -6.58 |
| 1421833_PM_at   | Pip5k1b            | PIP5K1B | 0.12  | 2.70 | 0.48  | 6.40E-01 | 8.28E-01 | -6.58 |
| 1421344_PM_a_at | Ajuba              | AJUBA   | -0.06 | 2.19 | -0.48 | 6.40E-01 | 8.28E-01 | -6.58 |
| 1417528_PM_at   | Spag6              | NA      | -0.07 | 2.76 | -0.48 | 6.40E-01 | 8.28E-01 | -6.58 |
| 1419378_PM_a_at | Fxyd2              | FXD2    | 0.04  | 2.19 | 0.48  | 6.40E-01 | 8.28E-01 | -6.58 |
| 1425769_PM_x_at | Klf                | NA      | 0.04  | 1.97 | 0.48  | 6.40E-01 | 8.28E-01 | -6.58 |
| 1432245_PM_s_at | Ttc9c              | TTC9C   | 0.06  | 2.47 | 0.48  | 6.40E-01 | 8.28E-01 | -6.58 |
| 1444837_PM_at   | Gm13261            | NA      | -0.04 | 2.11 | -0.48 | 6.40E-01 | 8.28E-01 | -6.58 |
| 1456002_PM_at   | Xpa                | NA      | 0.08  | 2.15 | 0.48  | 6.40E-01 | 8.28E-01 | -6.58 |
| 1456014_PM_s_at | Fermt3             | FERMT3  | 0.14  | 4.22 | 0.48  | 6.40E-01 | 8.28E-01 | -6.58 |
| 1460588_PM_at   | Carf               | CARF    | -0.13 | 2.82 | -0.48 | 6.40E-01 | 8.28E-01 | -6.58 |
| 1441697_PM_at   | ---                | NA      | -0.04 | 2.38 | -0.48 | 6.40E-01 | 8.28E-01 | -6.58 |

|                 |                            |             |       |      |       |          |          |       |
|-----------------|----------------------------|-------------|-------|------|-------|----------|----------|-------|
| 1454294_PM_at   | ---                        | NA          | -0.04 | 2.05 | -0.48 | 6.40E-01 | 8.29E-01 | -6.58 |
| 1427009_PM_at   | Lama5                      | LAMA5       | 0.06  | 2.47 | 0.48  | 6.40E-01 | 8.29E-01 | -6.58 |
| 1447409_PM_at   | ---                        | NA          | 0.06  | 2.17 | 0.48  | 6.40E-01 | 8.29E-01 | -6.58 |
| 1456174_PM_x_at | Ndrgr1                     | NDRGR1      | -0.24 | 6.19 | -0.48 | 6.40E-01 | 8.29E-01 | -6.58 |
| 1441434_PM_at   | Zfp788                     | AC008758.1  | -0.15 | 4.50 | -0.48 | 6.40E-01 | 8.29E-01 | -6.58 |
| 1447736_PM_at   | Fkbp5                      | FKBP5       | 0.05  | 2.43 | 0.48  | 6.40E-01 | 8.29E-01 | -6.58 |
| 1440564_PM_at   | Prokr2                     | PROKR2      | 0.05  | 2.41 | 0.48  | 6.40E-01 | 8.29E-01 | -6.58 |
| 1418130_PM_at   | Dhcr24                     | DHCR24      | 0.10  | 2.57 | 0.48  | 6.40E-01 | 8.29E-01 | -6.58 |
| 1451881_PM_at   | ---                        | NA          | -0.05 | 2.34 | -0.48 | 6.40E-01 | 8.29E-01 | -6.58 |
| 1418657_PM_at   | Ino80b                     | INO80B-WBP1 | 0.05  | 2.42 | 0.48  | 6.40E-01 | 8.29E-01 | -6.58 |
| 1419541_PM_at   | Ppp1r2-ps9                 | NA          | 0.13  | 2.94 | 0.48  | 6.40E-01 | 8.29E-01 | -6.58 |
| 1432067_PM_at   | 4930473O22Rik              | NA          | -0.06 | 2.17 | -0.48 | 6.40E-01 | 8.29E-01 | -6.58 |
| 1427814_PM_at   | Ofa                        | NA          | -0.04 | 1.92 | -0.48 | 6.40E-01 | 8.29E-01 | -6.58 |
| 1450598_PM_at   | Vmn1r47                    | NA          | 0.03  | 1.94 | 0.48  | 6.41E-01 | 8.29E-01 | -6.58 |
| 1449840_PM_at   | Sntb2                      | SNTB2       | 0.05  | 3.06 | 0.48  | 6.41E-01 | 8.29E-01 | -6.58 |
| 1450998_PM_at   | Zfp110                     | ZNF274      | 0.06  | 2.87 | 0.48  | 6.40E-01 | 8.29E-01 | -6.58 |
| 1423836_PM_at   | Zfp503                     | ZNF503      | 0.21  | 4.26 | 0.48  | 6.40E-01 | 8.29E-01 | -6.58 |
| 1427763_PM_a_at | Camk2d                     | NA          | 0.11  | 3.94 | 0.48  | 6.41E-01 | 8.29E-01 | -6.58 |
| 1458024_PM_at   | Gm4876                     | NA          | -0.06 | 2.60 | -0.48 | 6.41E-01 | 8.29E-01 | -6.58 |
| 1431469_PM_a_at | Cxcs5                      | CXCS5       | -0.09 | 3.29 | -0.48 | 6.41E-01 | 8.29E-01 | -6.58 |
| 1430206_PM_at   | 4933407L21Rik              | NA          | -0.05 | 2.60 | -0.48 | 6.41E-01 | 8.29E-01 | -6.58 |
| 1459589_PM_at   | Cryl1                      | CRYL1       | -0.04 | 2.03 | -0.48 | 6.41E-01 | 8.29E-01 | -6.58 |
| 1425637_PM_at   | BB283400                   | NA          | 0.04  | 2.49 | 0.48  | 6.41E-01 | 8.29E-01 | -6.58 |
| 1416631_PM_at   | Ap4b1                      | AP4B1       | 0.06  | 2.15 | 0.48  | 6.41E-01 | 8.29E-01 | -6.58 |
| 1437256_PM_at   | Dcun1d5                    | DCUN1D5     | 0.08  | 2.49 | 0.48  | 6.41E-01 | 8.29E-01 | -6.58 |
| 1442070_PM_at   | ---                        | NA          | 0.08  | 2.93 | 0.48  | 6.41E-01 | 8.29E-01 | -6.58 |
| 1442223_PM_at   | Enah                       | ENAH        | -0.17 | 3.95 | -0.48 | 6.41E-01 | 8.29E-01 | -6.58 |
| 1455193_PM_at   | Zbtb8b                     | ZBTB8B      | 0.06  | 2.63 | 0.48  | 6.41E-01 | 8.29E-01 | -6.58 |
| 1454391_PM_at   | LOC102633047               | NA          | 0.04  | 2.12 | 0.48  | 6.41E-01 | 8.29E-01 | -6.58 |
| 1454688_PM_x_at | Gm4024 /// Tmed10          | TMED10      | -0.11 | 3.78 | -0.48 | 6.41E-01 | 8.29E-01 | -6.58 |
| 1458861_PM_at   | Grm7                       | NA          | -0.09 | 3.11 | -0.48 | 6.41E-01 | 8.29E-01 | -6.58 |
| 1439591_PM_at   | Ulk2                       | NA          | 0.05  | 1.93 | 0.48  | 6.41E-01 | 8.29E-01 | -6.58 |
| 1430305_PM_at   | 2500004C02Rik              | NA          | 0.05  | 1.91 | 0.48  | 6.41E-01 | 8.29E-01 | -6.58 |
| 1442891_PM_at   | AU023386                   | NA          | 0.05  | 2.11 | 0.48  | 6.41E-01 | 8.29E-01 | -6.58 |
| 1441101_PM_at   | Hecw1                      | HECW1       | 0.07  | 2.94 | 0.48  | 6.41E-01 | 8.29E-01 | -6.58 |
| 1460321_PM_at   | Cntn4                      | CNTN4       | 0.08  | 2.46 | 0.48  | 6.41E-01 | 8.29E-01 | -6.58 |
| 1429350_PM_at   | Eid3                       | NA          | 0.09  | 2.54 | 0.48  | 6.41E-01 | 8.29E-01 | -6.58 |
| 1451265_PM_at   | Ccdc115                    | CCDC115     | 0.13  | 4.35 | 0.48  | 6.41E-01 | 8.29E-01 | -6.58 |
| 1443259_PM_at   | ---                        | NA          | -0.05 | 2.27 | -0.48 | 6.41E-01 | 8.29E-01 | -6.58 |
| 1417159_PM_at   | Zxdc                       | ZXDC        | 0.05  | 2.61 | 0.48  | 6.41E-01 | 8.29E-01 | -6.58 |
| 1440629_PM_at   | ---                        | NA          | 0.09  | 2.50 | 0.48  | 6.41E-01 | 8.29E-01 | -6.58 |
| 1432969_PM_at   | 4933423K11Rik              | NA          | -0.12 | 2.82 | -0.48 | 6.41E-01 | 8.29E-01 | -6.58 |
| 1431967_PM_at   | 1700006A11Rik              | NA          | -0.05 | 2.29 | -0.48 | 6.41E-01 | 8.29E-01 | -6.58 |
| 1418732_PM_s_at | Wdr83                      | WDR83       | 0.06  | 2.55 | 0.48  | 6.41E-01 | 8.29E-01 | -6.58 |
| 1447478_PM_at   | ---                        | NA          | -0.22 | 6.03 | -0.48 | 6.41E-01 | 8.29E-01 | -6.58 |
| 1446330_PM_at   | ---                        | NA          | 0.06  | 2.48 | 0.48  | 6.41E-01 | 8.29E-01 | -6.58 |
| 1459808_PM_at   | Fkbp4                      | FKBP4       | 0.05  | 2.09 | 0.48  | 6.41E-01 | 8.29E-01 | -6.58 |
| 1424229_PM_at   | Dyrk3                      | DYRK3       | -0.06 | 2.23 | -0.48 | 6.42E-01 | 8.29E-01 | -6.58 |
| 1442882_PM_at   | ---                        | NA          | 0.09  | 2.26 | 0.48  | 6.42E-01 | 8.29E-01 | -6.58 |
| 1440559_PM_at   | Hmga2-ps1                  | NA          | 0.07  | 2.55 | 0.48  | 6.42E-01 | 8.29E-01 | -6.58 |
| 1455940_PM_x_at | Wdr6                       | WDR6        | -0.18 | 6.52 | -0.48 | 6.42E-01 | 8.29E-01 | -6.58 |
| 1444929_PM_at   | ---                        | NA          | 0.09  | 3.23 | 0.48  | 6.42E-01 | 8.29E-01 | -6.58 |
| 1451636_PM_at   | Ankrd33                    | ANKRD33     | 0.04  | 2.15 | 0.48  | 6.42E-01 | 8.29E-01 | -6.58 |
| 1444995_PM_at   | Cdyl2                      | CDYL2       | 0.06  | 2.52 | 0.48  | 6.42E-01 | 8.29E-01 | -6.58 |
| 1441126_PM_at   | ---                        | NA          | 0.05  | 2.31 | 0.48  | 6.42E-01 | 8.30E-01 | -6.58 |
| 1446876_PM_at   | ---                        | NA          | 0.07  | 2.55 | 0.48  | 6.42E-01 | 8.30E-01 | -6.58 |
| 1432132_PM_at   | 4933401D09Rik              | NA          | -0.06 | 2.37 | -0.48 | 6.42E-01 | 8.30E-01 | -6.58 |
| 1437108_PM_at   | Lsm6                       | LSM6        | -0.11 | 3.40 | -0.48 | 6.42E-01 | 8.30E-01 | -6.58 |
| 1440955_PM_at   | Kcp                        | KCP         | -0.08 | 2.80 | -0.48 | 6.42E-01 | 8.30E-01 | -6.58 |
| 1426547_PM_at   | Gc                         | GC          | -0.04 | 2.21 | -0.48 | 6.42E-01 | 8.30E-01 | -6.58 |
| 1424292_PM_at   | Depdc1a                    | DEPDC1      | 0.04  | 1.98 | 0.48  | 6.42E-01 | 8.30E-01 | -6.58 |
| 1425860_PM_x_at | Cklf                       | CKLF        | 0.04  | 2.46 | 0.48  | 6.42E-01 | 8.30E-01 | -6.58 |
| 1449894_PM_at   | Lrrc18                     | LRRC18      | 0.06  | 2.44 | 0.48  | 6.42E-01 | 8.30E-01 | -6.58 |
| 1448715_PM_x_at | BC094435 /// Cog6 /// Noct | NOCT        | 0.06  | 9.30 | 0.48  | 6.42E-01 | 8.30E-01 | -6.58 |
| 1453898_PM_at   | Nmrk2                      | NMRK2       | 0.05  | 2.32 | 0.48  | 6.42E-01 | 8.30E-01 | -6.58 |
| 1456579_PM_x_at | Telo2                      | NA          | 0.16  | 5.23 | 0.48  | 6.42E-01 | 8.30E-01 | -6.58 |
| 1451508_PM_at   | Gm30289 /// Larp1b         | LARP1B      | -0.07 | 2.62 | -0.48 | 6.42E-01 | 8.30E-01 | -6.58 |
| 1433339_PM_at   | ---                        | NA          | 0.04  | 2.21 | 0.48  | 6.42E-01 | 8.30E-01 | -6.58 |
| 1440915_PM_at   | Mphosph9                   | MPHOSPH9    | 0.06  | 2.76 | 0.48  | 6.42E-01 | 8.30E-01 | -6.58 |
| 1443872_PM_at   | ---                        | NA          | -0.11 | 4.15 | -0.48 | 6.43E-01 | 8.30E-01 | -6.58 |
| 1423677_PM_at   | Fkbp9                      | FKBP9       | -0.09 | 2.53 | -0.48 | 6.43E-01 | 8.30E-01 | -6.58 |
| 1447452_PM_at   | Reep3                      | NA          | -0.06 | 2.15 | -0.48 | 6.43E-01 | 8.30E-01 | -6.58 |
| 1429111_PM_at   | Tln2                       | TLN2        | 0.15  | 4.02 | 0.48  | 6.43E-01 | 8.30E-01 | -6.58 |
| 1426326_PM_at   | Zfp91                      | ZFP91-CNTF  | -0.26 | 7.58 | -0.48 | 6.43E-01 | 8.30E-01 | -6.58 |

|                 |                                                             |          |       |      |       |          |          |       |
|-----------------|-------------------------------------------------------------|----------|-------|------|-------|----------|----------|-------|
| 1419369_PM_at   | Rnf138                                                      | RNF138   | -0.10 | 3.31 | -0.48 | 6.43E-01 | 8.30E-01 | -6.58 |
| 1456982_PM_at   | 6430562O15Rik                                               | NA       | 0.06  | 2.16 | 0.48  | 6.43E-01 | 8.30E-01 | -6.58 |
| 1416937_PM_at   | Gabarap                                                     | GABARAP  | 0.15  | 4.43 | 0.48  | 6.43E-01 | 8.30E-01 | -6.58 |
| 1432444_PM_a_at | Eapp                                                        | EAPP     | 0.15  | 3.94 | 0.48  | 6.43E-01 | 8.30E-01 | -6.58 |
| 1449115_PM_at   | Mtf2                                                        | MTF2     | 0.18  | 5.34 | 0.48  | 6.43E-01 | 8.30E-01 | -6.58 |
| 1440111_PM_at   | ---                                                         | NA       | -0.07 | 2.26 | -0.48 | 6.43E-01 | 8.30E-01 | -6.58 |
| 1416805_PM_at   | Fam198b                                                     | FAM198B  | -0.05 | 2.62 | -0.48 | 6.43E-01 | 8.30E-01 | -6.58 |
| 1448894_PM_at   | Akr1b8                                                      | AKR1B15  | 0.05  | 2.42 | 0.48  | 6.43E-01 | 8.30E-01 | -6.58 |
| 1446971_PM_at   | D10Wsu159e                                                  | NA       | 0.06  | 2.58 | 0.48  | 6.43E-01 | 8.30E-01 | -6.58 |
| 1422730_PM_at   | Limd1                                                       | LIMD1    | 0.06  | 2.23 | 0.48  | 6.43E-01 | 8.30E-01 | -6.58 |
| 1443839_PM_at   | 1700010H22Rik                                               | NA       | 0.11  | 2.95 | 0.48  | 6.43E-01 | 8.30E-01 | -6.58 |
| 1441288_PM_at   | 2010320O07Rik                                               | NA       | -0.11 | 3.22 | -0.48 | 6.43E-01 | 8.30E-01 | -6.58 |
| 1451166_PM_a_at | Sgf29                                                       | SGF29    | -0.26 | 5.30 | -0.48 | 6.43E-01 | 8.30E-01 | -6.58 |
| 1425370_PM_a_at | Erg                                                         | ERG      | -0.11 | 2.74 | -0.48 | 6.43E-01 | 8.30E-01 | -6.58 |
| 1428474_PM_at   | Ppp3cb                                                      | PPP3CB   | -0.11 | 3.25 | -0.48 | 6.43E-01 | 8.30E-01 | -6.58 |
| 1435500_PM_at   | Rab26                                                       | RAB26    | -0.09 | 2.92 | -0.48 | 6.43E-01 | 8.30E-01 | -6.58 |
| 1455581_PM_x_at | ---                                                         | NA       | -0.06 | 2.89 | -0.48 | 6.43E-01 | 8.30E-01 | -6.58 |
| 1418420_PM_at   | Myod1                                                       | MYOD1    | -0.06 | 2.37 | -0.48 | 6.43E-01 | 8.30E-01 | -6.58 |
| 1447309_PM_at   | Gm40923                                                     | NA       | -0.05 | 2.28 | -0.48 | 6.43E-01 | 8.30E-01 | -6.58 |
| 1424058_PM_at   | Prrc1                                                       | PRRC1    | -0.04 | 2.95 | -0.48 | 6.43E-01 | 8.30E-01 | -6.58 |
| 1438148_PM_at   | Cxcl3                                                       | CXCL3    | 0.04  | 1.97 | 0.48  | 6.43E-01 | 8.30E-01 | -6.58 |
| 1431551_PM_at   | ---                                                         | NA       | 0.07  | 2.28 | 0.48  | 6.43E-01 | 8.30E-01 | -6.58 |
| 1428285_PM_at   | Nol4l                                                       | NOL4L    | 0.07  | 2.43 | 0.48  | 6.43E-01 | 8.30E-01 | -6.58 |
| 1429430_PM_at   | Pcmtd1                                                      | PCMTD1   | 0.08  | 3.20 | 0.48  | 6.43E-01 | 8.30E-01 | -6.58 |
| 1445366_PM_at   | ---                                                         | NA       | 0.05  | 2.18 | 0.48  | 6.43E-01 | 8.30E-01 | -6.58 |
| 1450479_PM_x_at | Ptpn12                                                      | NA       | 0.05  | 3.07 | 0.48  | 6.43E-01 | 8.30E-01 | -6.58 |
| 1420367_PM_at   | Denr                                                        | DENR     | -0.11 | 2.87 | -0.48 | 6.43E-01 | 8.30E-01 | -6.58 |
| 1420976_PM_at   | Man1a2                                                      | MAN1A2   | -0.10 | 2.69 | -0.48 | 6.43E-01 | 8.30E-01 | -6.58 |
| 1434184_PM_s_at | Map4k4                                                      | MAP4K4   | -0.08 | 4.35 | -0.48 | 6.43E-01 | 8.30E-01 | -6.58 |
| 1451763_PM_at   | Cnga1                                                       | CNGA1    | -0.07 | 2.67 | -0.48 | 6.43E-01 | 8.30E-01 | -6.58 |
| 1439326_PM_at   | ---                                                         | NA       | -0.05 | 2.20 | -0.48 | 6.43E-01 | 8.30E-01 | -6.58 |
| 1457810_PM_at   | Zbtb37                                                      | ZBTB37   | 0.05  | 2.28 | 0.48  | 6.43E-01 | 8.30E-01 | -6.58 |
| 1436967_PM_at   | Ankrd11                                                     | ANKRD11  | 0.05  | 2.54 | 0.48  | 6.43E-01 | 8.30E-01 | -6.58 |
| 1459588_PM_at   | ---                                                         | NA       | 0.05  | 2.45 | 0.48  | 6.43E-01 | 8.30E-01 | -6.58 |
| 1429354_PM_at   | Them5                                                       | THEM5    | 0.05  | 2.22 | 0.48  | 6.43E-01 | 8.30E-01 | -6.58 |
| 1443854_PM_at   | Hand2                                                       | HAND2    | 0.04  | 2.50 | 0.48  | 6.44E-01 | 8.30E-01 | -6.58 |
| 1432594_PM_at   | ---                                                         | NA       | 0.04  | 2.13 | 0.48  | 6.44E-01 | 8.31E-01 | -6.58 |
| 1423885_PM_at   | Lamc1                                                       | LAMC1    | -0.11 | 3.03 | -0.48 | 6.44E-01 | 8.31E-01 | -6.58 |
| 1422930_PM_at   | Icam4                                                       | ICAM4    | -0.08 | 2.55 | -0.48 | 6.44E-01 | 8.31E-01 | -6.58 |
| 1457541_PM_at   | Akap14                                                      | AKAP14   | -0.06 | 2.86 | -0.48 | 6.44E-01 | 8.31E-01 | -6.58 |
| 1451662_PM_x_at | Akap4                                                       | AKAP4    | -0.04 | 2.20 | -0.48 | 6.44E-01 | 8.31E-01 | -6.58 |
| 1421599_PM_at   | Hs6st3                                                      | NA       | 0.05  | 2.40 | 0.48  | 6.44E-01 | 8.31E-01 | -6.58 |
| 1430290_PM_at   | Rps15a-ps6                                                  | NA       | 0.07  | 3.64 | 0.48  | 6.44E-01 | 8.31E-01 | -6.58 |
| 1424900_PM_at   | Cenpw /// Slc29a4                                           | SLC29A4  | 0.08  | 2.51 | 0.48  | 6.44E-01 | 8.31E-01 | -6.58 |
| 1451357_PM_at   | Mpnd                                                        | MPND     | -0.09 | 5.60 | -0.48 | 6.44E-01 | 8.31E-01 | -6.58 |
| 1457260_PM_at   | 5730409E04Rik                                               | C1orf216 | 0.08  | 3.40 | 0.48  | 6.44E-01 | 8.31E-01 | -6.58 |
| 1420281_PM_at   | ---                                                         | NA       | 0.06  | 2.25 | 0.48  | 6.44E-01 | 8.31E-01 | -6.58 |
| 1446987_PM_at   | ---                                                         | NA       | 0.04  | 1.99 | 0.48  | 6.44E-01 | 8.31E-01 | -6.58 |
| 1450392_PM_at   | Abca1                                                       | ABCA1    | -0.07 | 2.73 | -0.48 | 6.44E-01 | 8.31E-01 | -6.58 |
| 1421365_PM_at   | Fst                                                         | FST      | 0.05  | 2.91 | 0.48  | 6.44E-01 | 8.31E-01 | -6.58 |
| 1457164_PM_at   | Trpa1                                                       | TRPA1    | 0.05  | 2.47 | 0.48  | 6.44E-01 | 8.31E-01 | -6.58 |
| 1421612_PM_a_at | H2afy2 /// H2afy3                                           | H2AFY2   | 0.17  | 4.12 | 0.48  | 6.44E-01 | 8.31E-01 | -6.58 |
| 1457009_PM_at   | Rhobtb3                                                     | RHOBTB3  | -0.16 | 2.48 | -0.48 | 6.44E-01 | 8.31E-01 | -6.58 |
| 1434282_PM_at   | Ibtk                                                        | IBTK     | 0.06  | 2.29 | 0.48  | 6.44E-01 | 8.31E-01 | -6.58 |
| 1454895_PM_at   | Cyb561a3                                                    | NA       | 0.07  | 3.10 | 0.48  | 6.44E-01 | 8.31E-01 | -6.58 |
| 1417522_PM_at   | Fbxo32                                                      | FBXO32   | 0.13  | 2.62 | 0.48  | 6.44E-01 | 8.31E-01 | -6.58 |
| 1453864_PM_at   | Rdh14                                                       | RDH14    | -0.12 | 2.68 | -0.48 | 6.44E-01 | 8.31E-01 | -6.58 |
| 1452299_PM_at   | Wwp1                                                        | WWP1     | -0.10 | 3.44 | -0.48 | 6.44E-01 | 8.31E-01 | -6.58 |
| 1447269_PM_at   | ---                                                         | NA       | 0.14  | 3.83 | 0.48  | 6.44E-01 | 8.31E-01 | -6.58 |
| 1434493_PM_at   | 1810022K09Rik                                               | C8orf59  | -0.05 | 2.17 | -0.48 | 6.44E-01 | 8.31E-01 | -6.58 |
| 1439473_PM_at   | ---                                                         | NA       | -0.30 | 5.08 | -0.48 | 6.45E-01 | 8.31E-01 | -6.58 |
| 1445187_PM_at   | Axdnd1                                                      | NA       | 0.04  | 2.48 | 0.48  | 6.45E-01 | 8.31E-01 | -6.58 |
| 1419597_PM_at   | Eda                                                         | EDA      | 0.06  | 2.32 | 0.48  | 6.45E-01 | 8.31E-01 | -6.58 |
| 1418826_PM_at   | Ms4a6b                                                      | MS4A6E   | 0.06  | 2.43 | 0.48  | 6.45E-01 | 8.31E-01 | -6.58 |
| 1425630_PM_at   | Sin3b                                                       | SIN3B    | 0.09  | 2.57 | 0.48  | 6.45E-01 | 8.31E-01 | -6.58 |
| 1436907_PM_at   | Nav1                                                        | NAV1     | 0.11  | 2.53 | 0.48  | 6.44E-01 | 8.31E-01 | -6.58 |
| 1428494_PM_a_at | Polr2i                                                      | POLR2I   | 0.13  | 3.24 | 0.48  | 6.45E-01 | 8.31E-01 | -6.58 |
| 1420855_PM_at   | Eln                                                         | ELN      | 0.21  | 4.27 | 0.48  | 6.44E-01 | 8.31E-01 | -6.58 |
| 1450332_PM_s_at | Fmo5                                                        | FMO5     | 0.06  | 2.34 | 0.47  | 6.45E-01 | 8.31E-01 | -6.58 |
| 1417505_PM_s_at | Gm13305 /// Gm2002 /// Il11ra1 /// Il11ra2 /// LOC100861969 | IL11RA   | -0.14 | 3.06 | -0.47 | 6.45E-01 | 8.31E-01 | -6.58 |
| 1423913_PM_at   | Hectd3                                                      | HECTD3   | -0.12 | 2.84 | -0.47 | 6.45E-01 | 8.31E-01 | -6.58 |
| 1419586_PM_at   | Rp2                                                         | RP2      | 0.10  | 2.70 | 0.47  | 6.45E-01 | 8.31E-01 | -6.58 |
| 1451784_PM_x_at | H2-D1                                                       | NA       | 0.10  | 4.27 | 0.47  | 6.45E-01 | 8.31E-01 | -6.58 |

|                 |                                             |            |       |      |       |          |          |       |
|-----------------|---------------------------------------------|------------|-------|------|-------|----------|----------|-------|
| 146064_PM_at    | Gm12000                                     | NA         | -0.04 | 2.32 | -0.47 | 6.45E-01 | 8.31E-01 | -6.58 |
| 1428785_PM_at   | Amotl1                                      | AMOTL1     | -0.18 | 3.83 | -0.47 | 6.45E-01 | 8.31E-01 | -6.58 |
| 1435269_PM_at   | Ngamt2                                      | EEF1AKMT1  | 0.06  | 1.91 | 0.47  | 6.45E-01 | 8.31E-01 | -6.58 |
| 1425337_PM_at   | Slc12a5                                     | SLC12A5    | 0.07  | 2.36 | 0.47  | 6.45E-01 | 8.31E-01 | -6.58 |
| 1427234_PM_at   | Vangl1                                      | VANGL1     | 0.07  | 2.47 | 0.47  | 6.45E-01 | 8.31E-01 | -6.58 |
| 1452579_PM_at   | Iscu                                        | ISCU       | 0.20  | 5.48 | 0.47  | 6.45E-01 | 8.31E-01 | -6.58 |
| 1438923_PM_at   | Fibp                                        | NA         | -0.04 | 3.02 | -0.47 | 6.45E-01 | 8.31E-01 | -6.58 |
| 1448596_PM_at   | Slc6a8                                      | SLC6A8     | 0.12  | 2.89 | 0.47  | 6.45E-01 | 8.31E-01 | -6.58 |
| 1418223_PM_at   | Sec11a                                      | SEC11A     | 0.13  | 5.09 | 0.47  | 6.45E-01 | 8.31E-01 | -6.58 |
| 1457975_PM_at   | Gtpbp3 /// LOC102642476<br>/// LOC105243214 | GTPBP3     | 0.18  | 2.37 | 0.47  | 6.45E-01 | 8.31E-01 | -6.58 |
| 1444631_PM_at   | Zfp410                                      | NA         | 0.06  | 2.15 | 0.47  | 6.45E-01 | 8.31E-01 | -6.58 |
| 1429811_PM_at   | Asun                                        | INTS13     | 0.07  | 2.57 | 0.47  | 6.45E-01 | 8.31E-01 | -6.58 |
| 1421579_PM_at   | Hoxa9                                       | AC004080.3 | 0.06  | 2.35 | 0.47  | 6.45E-01 | 8.31E-01 | -6.58 |
| 1429295_PM_s_at | Trip13                                      | TRIP13     | 0.08  | 2.90 | 0.47  | 6.45E-01 | 8.32E-01 | -6.58 |
| 1453752_PM_at   | Gm10362 /// Rpl17                           | NA         | 0.23  | 3.08 | 0.47  | 6.45E-01 | 8.32E-01 | -6.58 |
| 1451374_PM_x_at | Cklf                                        | CKLF       | 0.05  | 2.36 | 0.47  | 6.45E-01 | 8.32E-01 | -6.58 |
| 1421587_PM_at   | Klk1b27                                     | KLK3       | 0.05  | 2.43 | 0.47  | 6.45E-01 | 8.32E-01 | -6.58 |
| 1437425_PM_at   | Gdap1                                       | GDAP1      | 0.11  | 2.84 | 0.47  | 6.45E-01 | 8.32E-01 | -6.58 |
| 1446035_PM_at   | Gm7173                                      | NA         | -0.05 | 2.24 | -0.47 | 6.45E-01 | 8.32E-01 | -6.58 |
| 1450278_PM_at   | Tacr3                                       | TACR3      | 0.04  | 2.17 | 0.47  | 6.45E-01 | 8.32E-01 | -6.58 |
| 1446315_PM_at   | ---                                         | NA         | 0.04  | 2.07 | 0.47  | 6.45E-01 | 8.32E-01 | -6.58 |
| 1421728_PM_at   | Olig3                                       | OLIG3      | 0.05  | 2.33 | 0.47  | 6.45E-01 | 8.32E-01 | -6.58 |
| 1429672_PM_at   | ---                                         | NA         | 0.21  | 2.75 | 0.47  | 6.45E-01 | 8.32E-01 | -6.58 |
| 1460134_PM_at   | 9330175E14Rik                               | NA         | -0.08 | 2.45 | -0.47 | 6.46E-01 | 8.32E-01 | -6.58 |
| 1451764_PM_at   | Marveld3                                    | MARVELD3   | -0.06 | 2.43 | -0.47 | 6.46E-01 | 8.32E-01 | -6.58 |
| 1446408_PM_at   | ---                                         | NA         | 0.04  | 2.19 | 0.47  | 6.46E-01 | 8.32E-01 | -6.58 |
| 1420164_PM_at   | D7Erttd183e                                 | NA         | 0.14  | 3.98 | 0.47  | 6.46E-01 | 8.32E-01 | -6.58 |
| 1422924_PM_at   | Tnfsf9                                      | TNFSF9     | 0.04  | 2.31 | 0.47  | 6.46E-01 | 8.32E-01 | -6.58 |
| 1445289_PM_at   | ---                                         | NA         | 0.05  | 2.48 | 0.47  | 6.46E-01 | 8.32E-01 | -6.58 |
| 1444739_PM_at   | ---                                         | NA         | 0.10  | 2.40 | 0.47  | 6.46E-01 | 8.32E-01 | -6.58 |
| 1458667_PM_at   | Ninl                                        | NINL       | -0.11 | 2.96 | -0.47 | 6.46E-01 | 8.32E-01 | -6.58 |
| 1429918_PM_at   | Arhgap20                                    | ARHGAP20   | -0.30 | 4.17 | -0.47 | 6.46E-01 | 8.32E-01 | -6.58 |
| 1420362_PM_a_at | Bik                                         | BIK        | 0.06  | 2.13 | 0.47  | 6.46E-01 | 8.32E-01 | -6.58 |
| 1431681_PM_at   | Klk9                                        | KLK9       | 0.05  | 2.41 | 0.47  | 6.46E-01 | 8.32E-01 | -6.58 |
| 1442492_PM_at   | ---                                         | NA         | 0.08  | 2.49 | 0.47  | 6.46E-01 | 8.32E-01 | -6.58 |
| 1427060_PM_at   | Mapk3                                       | MAPK3      | 0.11  | 2.62 | 0.47  | 6.46E-01 | 8.32E-01 | -6.58 |
| 1421941_PM_at   | Camk4                                       | CAMK4      | 0.18  | 3.83 | 0.47  | 6.46E-01 | 8.32E-01 | -6.58 |
| 1423405_PM_at   | Timp4                                       | TIMP4      | 0.16  | 4.24 | 0.47  | 6.46E-01 | 8.32E-01 | -6.58 |
| 1417657_PM_s_at | Dnajc2                                      | DNAJC2     | 0.17  | 5.37 | 0.47  | 6.46E-01 | 8.32E-01 | -6.58 |
| 1434854_PM_a_at | Rps10                                       | NA         | 0.24  | 5.42 | 0.47  | 6.46E-01 | 8.32E-01 | -6.58 |
| 1446252_PM_at   | Cerkl                                       | CERKL      | 0.04  | 1.88 | 0.47  | 6.46E-01 | 8.32E-01 | -6.58 |
| 1426456_PM_a_at | Pias2                                       | PIAS2      | -0.17 | 5.17 | -0.47 | 6.46E-01 | 8.32E-01 | -6.58 |
| 1433295_PM_at   | 4930449I04Rik                               | NA         | 0.05  | 2.10 | 0.47  | 6.46E-01 | 8.32E-01 | -6.58 |
| 1419308_PM_at   | Invs                                        | INVS       | -0.17 | 3.94 | -0.47 | 6.46E-01 | 8.32E-01 | -6.58 |
| 1458819_PM_at   | ---                                         | NA         | 0.05  | 2.38 | 0.47  | 6.46E-01 | 8.32E-01 | -6.58 |
| 1438620_PM_x_at | Sfrp1                                       | SFRP1      | 0.04  | 1.95 | 0.47  | 6.46E-01 | 8.32E-01 | -6.58 |
| 1444616_PM_x_at | ---                                         | NA         | 0.09  | 2.77 | 0.47  | 6.46E-01 | 8.32E-01 | -6.58 |
| 1418600_PM_at   | Klf1                                        | KLK1       | 0.05  | 2.62 | 0.47  | 6.46E-01 | 8.32E-01 | -6.58 |
| 1437080_PM_s_at | Psm11                                       | PSMD11     | 0.17  | 4.98 | 0.47  | 6.46E-01 | 8.32E-01 | -6.58 |
| 1431091_PM_at   | Pyg1                                        | PYGO1      | 0.11  | 2.80 | 0.47  | 6.46E-01 | 8.32E-01 | -6.58 |
| 1452041_PM_at   | Khl26                                       | KLHL26     | 0.12  | 4.87 | 0.47  | 6.46E-01 | 8.32E-01 | -6.58 |
| 1430143_PM_at   | 4930426D05Rik                               | NA         | 0.05  | 1.92 | 0.47  | 6.47E-01 | 8.32E-01 | -6.58 |
| 1419395_PM_at   | Acot12                                      | ACOT12     | 0.07  | 2.42 | 0.47  | 6.47E-01 | 8.32E-01 | -6.58 |
| 1420128_PM_s_at | Pigb                                        | PIGB       | -0.21 | 6.66 | -0.47 | 6.47E-01 | 8.32E-01 | -6.58 |
| 1434824_PM_at   | Baz1b                                       | BAZ1B      | -0.18 | 4.78 | -0.47 | 6.47E-01 | 8.32E-01 | -6.58 |
| 1446014_PM_at   | ---                                         | NA         | -0.08 | 2.60 | -0.47 | 6.47E-01 | 8.32E-01 | -6.58 |
| 1422108_PM_at   | Ppp1r3a                                     | PPP1R3A    | 0.10  | 2.41 | 0.47  | 6.47E-01 | 8.32E-01 | -6.58 |
| 1459505_PM_at   | ---                                         | NA         | 0.08  | 2.99 | 0.47  | 6.47E-01 | 8.32E-01 | -6.58 |
| 1426785_PM_s_at | Mgll                                        | MGLL       | -0.17 | 3.33 | -0.47 | 6.47E-01 | 8.32E-01 | -6.58 |
| 1446418_PM_at   | ---                                         | NA         | -0.05 | 2.34 | -0.47 | 6.47E-01 | 8.32E-01 | -6.58 |
| 1447254_PM_at   | ---                                         | NA         | 0.04  | 2.15 | 0.47  | 6.47E-01 | 8.32E-01 | -6.58 |
| 1457740_PM_at   | ---                                         | NA         | 0.05  | 2.17 | 0.47  | 6.47E-01 | 8.32E-01 | -6.58 |
| 1454270_PM_at   | Grfin                                       | GRIFIN     | 0.05  | 3.00 | 0.47  | 6.47E-01 | 8.32E-01 | -6.58 |
| 1425041_PM_at   | Lhx3                                        | LHX3       | 0.05  | 2.07 | 0.47  | 6.47E-01 | 8.32E-01 | -6.58 |
| 1455179_PM_at   | Mpp7                                        | MPP7       | 0.06  | 2.57 | 0.47  | 6.47E-01 | 8.32E-01 | -6.58 |
| 1427153_PM_at   | Bckdhh                                      | BCKDHB     | 0.18  | 2.82 | 0.47  | 6.47E-01 | 8.32E-01 | -6.58 |
| 1442923_PM_at   | Ptk6                                        | PTK6       | 0.04  | 2.42 | 0.47  | 6.47E-01 | 8.33E-01 | -6.58 |
| 1459855_PM_x_at | Actr1a                                      | ACTR1A     | -0.07 | 2.48 | -0.47 | 6.47E-01 | 8.33E-01 | -6.58 |
| 1439301_PM_at   | Rad51b                                      | NA         | -0.06 | 2.71 | -0.47 | 6.47E-01 | 8.33E-01 | -6.58 |
| 1424272_PM_at   | Stat3                                       | STAT3      | 0.04  | 2.44 | 0.47  | 6.47E-01 | 8.33E-01 | -6.58 |
| 1440593_PM_at   | ---                                         | NA         | 0.05  | 2.05 | 0.47  | 6.47E-01 | 8.33E-01 | -6.58 |
| 1424778_PM_at   | Reep3                                       | REEP3      | -0.10 | 3.47 | -0.47 | 6.47E-01 | 8.33E-01 | -6.58 |
| 1452946_PM_a_at | Rftn2                                       | RFTN2      | -0.06 | 2.86 | -0.47 | 6.47E-01 | 8.33E-01 | -6.58 |



|                 |                                                                                                                                                                                                                                                                       |          |       |       |       |          |          |       |
|-----------------|-----------------------------------------------------------------------------------------------------------------------------------------------------------------------------------------------------------------------------------------------------------------------|----------|-------|-------|-------|----------|----------|-------|
| 1452372_PM_at   | BsdC1                                                                                                                                                                                                                                                                 | BSDC1    | -0.05 | 2.76  | -0.47 | 6.47E-01 | 8.33E-01 | -6.58 |
| 1422120_PM_at   | Eaf2                                                                                                                                                                                                                                                                  | FAF2     | 0.11  | 3.18  | 0.47  | 6.47E-01 | 8.33E-01 | -6.58 |
| 1417131_PM_at   | Cdc25a                                                                                                                                                                                                                                                                | CD25A    | 0.06  | 2.11  | 0.47  | 6.47E-01 | 8.33E-01 | -6.58 |
| 1428891_PM_at   | Parm1                                                                                                                                                                                                                                                                 | PARM1    | -0.09 | 3.54  | -0.47 | 6.47E-01 | 8.33E-01 | -6.58 |
| 1420723_PM_at   | Vnn3                                                                                                                                                                                                                                                                  | VNN3     | -0.05 | 2.53  | -0.47 | 6.47E-01 | 8.33E-01 | -6.58 |
| 1427585_PM_at   | ---                                                                                                                                                                                                                                                                   | NA       | 0.04  | 2.09  | 0.47  | 6.47E-01 | 8.33E-01 | -6.58 |
| 1442100_PM_at   | Inpp5f                                                                                                                                                                                                                                                                | INPP5F   | 0.06  | 2.29  | 0.47  | 6.47E-01 | 8.33E-01 | -6.58 |
| 1458468_PM_at   | Coq10a                                                                                                                                                                                                                                                                | NA       | 0.06  | 2.38  | 0.47  | 6.47E-01 | 8.33E-01 | -6.58 |
| 1447361_PM_at   | ---                                                                                                                                                                                                                                                                   | NA       | -0.04 | 2.07  | -0.47 | 6.47E-01 | 8.33E-01 | -6.58 |
| 1450280_PM_a_at | Rrh                                                                                                                                                                                                                                                                   | RRH      | 0.04  | 2.22  | 0.47  | 6.48E-01 | 8.33E-01 | -6.58 |
| 1438146_PM_x_at | Spty2d1                                                                                                                                                                                                                                                               | SPTY2D1  | 0.06  | 2.36  | 0.47  | 6.48E-01 | 8.33E-01 | -6.58 |
| 1445733_PM_at   | ---                                                                                                                                                                                                                                                                   | NA       | 0.07  | 2.70  | 0.47  | 6.48E-01 | 8.33E-01 | -6.58 |
| 1420856_PM_a_at | LancL2                                                                                                                                                                                                                                                                | LANCL2   | -0.21 | 3.30  | -0.47 | 6.48E-01 | 8.33E-01 | -6.58 |
| 1415868_PM_at   | Cct4                                                                                                                                                                                                                                                                  | CCT4     | 0.12  | 3.41  | 0.47  | 6.48E-01 | 8.33E-01 | -6.58 |
| 1432061_PM_at   | 4933406B17Rik                                                                                                                                                                                                                                                         | NA       | 0.06  | 2.28  | 0.47  | 6.48E-01 | 8.33E-01 | -6.58 |
| 1437025_PM_at   | Cd28                                                                                                                                                                                                                                                                  | CD28     | -0.08 | 2.39  | -0.47 | 6.48E-01 | 8.33E-01 | -6.58 |
| 1457306_PM_at   | Alad                                                                                                                                                                                                                                                                  | NA       | 0.04  | 2.16  | 0.47  | 6.48E-01 | 8.33E-01 | -6.58 |
| 1436109_PM_at   | Al317395                                                                                                                                                                                                                                                              | MFS4B    | 0.05  | 1.96  | 0.47  | 6.48E-01 | 8.33E-01 | -6.58 |
| 1428331_PM_at   | 2210016F16Rik                                                                                                                                                                                                                                                         | C9orf64  | 0.08  | 3.01  | 0.47  | 6.48E-01 | 8.33E-01 | -6.58 |
| 1443181_PM_at   | ---                                                                                                                                                                                                                                                                   | NA       | 0.05  | 2.88  | 0.47  | 6.48E-01 | 8.33E-01 | -6.58 |
| 1426720_PM_at   | Apbb2                                                                                                                                                                                                                                                                 | APBB2    | -0.12 | 3.22  | -0.47 | 6.48E-01 | 8.33E-01 | -6.58 |
| 1457791_PM_at   | ---                                                                                                                                                                                                                                                                   | NA       | 0.08  | 2.58  | 0.47  | 6.48E-01 | 8.33E-01 | -6.58 |
| 1417556_PM_at   | Fabp1                                                                                                                                                                                                                                                                 | FABP1    | -0.06 | 2.49  | -0.47 | 6.48E-01 | 8.33E-01 | -6.58 |
| 1432124_PM_at   | 492151117Rik                                                                                                                                                                                                                                                          | NA       | -0.04 | 2.32  | -0.47 | 6.48E-01 | 8.33E-01 | -6.58 |
| 1425032_PM_at   | Scgb2b27                                                                                                                                                                                                                                                              | NA       | 0.04  | 2.08  | 0.47  | 6.48E-01 | 8.33E-01 | -6.58 |
| 1419762_PM_at   | Ubd                                                                                                                                                                                                                                                                   | UBD      | 0.06  | 2.66  | 0.47  | 6.48E-01 | 8.33E-01 | -6.58 |
| 1425869_PM_a_at | Psen2                                                                                                                                                                                                                                                                 | PSEN2    | -0.14 | 2.71  | -0.47 | 6.48E-01 | 8.33E-01 | -6.58 |
| 1435972_PM_at   | Cast                                                                                                                                                                                                                                                                  | NA       | 0.06  | 2.55  | 0.47  | 6.48E-01 | 8.33E-01 | -6.58 |
| 1448802_PM_at   | Nufip1                                                                                                                                                                                                                                                                | NUFIP1   | -0.08 | 2.82  | -0.47 | 6.48E-01 | 8.33E-01 | -6.58 |
| 1428547_PM_at   | Nt5e                                                                                                                                                                                                                                                                  | NT5E     | 0.07  | 3.52  | 0.47  | 6.48E-01 | 8.33E-01 | -6.58 |
| 1447939_PM_a_at | Gm13301 /// Gm17167 ///<br>Gm21075 /// Gm21093 ///<br>Gm2163 /// Gm29801 ///<br>Gm29804 /// Gm29964 ///<br>Gm3883 /// Gm3893 ///<br>Gm42275 /// Gm5859 ///<br>Gm7819 /// LOC100041536<br>/// LOC100041599 ///<br>LOC102637312 ///<br>LOC102637418 ///<br>LOC102637606 | FAM205A  | 0.24  | 5.02  | 0.47  | 6.48E-01 | 8.33E-01 | -6.58 |
| 1420145_PM_at   | ---                                                                                                                                                                                                                                                                   | NA       | 0.09  | 2.65  | 0.47  | 6.48E-01 | 8.33E-01 | -6.58 |
| 1431882_PM_at   | Als2cr12                                                                                                                                                                                                                                                              | ALS2CR12 | -0.05 | 2.39  | -0.47 | 6.48E-01 | 8.33E-01 | -6.58 |
| 1453384_PM_at   | Dennd1b                                                                                                                                                                                                                                                               | DENND1B  | -0.11 | 2.66  | -0.47 | 6.48E-01 | 8.33E-01 | -6.58 |
| 1436039_PM_at   | Cmah                                                                                                                                                                                                                                                                  | NA       | 0.04  | 2.42  | 0.47  | 6.48E-01 | 8.33E-01 | -6.58 |
| 1443113_PM_at   | ---                                                                                                                                                                                                                                                                   | NA       | 0.04  | 1.99  | 0.47  | 6.48E-01 | 8.33E-01 | -6.58 |
| 1444604_PM_at   | ---                                                                                                                                                                                                                                                                   | NA       | 0.05  | 2.01  | 0.47  | 6.49E-01 | 8.33E-01 | -6.58 |
| 1447482_PM_at   | Lin52                                                                                                                                                                                                                                                                 | NA       | 0.07  | 2.93  | 0.47  | 6.48E-01 | 8.33E-01 | -6.58 |
| 1430175_PM_at   | ---                                                                                                                                                                                                                                                                   | NA       | -0.06 | 2.53  | -0.47 | 6.49E-01 | 8.33E-01 | -6.58 |
| 1441832_PM_at   | Hdac10                                                                                                                                                                                                                                                                | HDAC10   | 0.04  | 2.01  | 0.47  | 6.49E-01 | 8.33E-01 | -6.58 |
| 1436568_PM_at   | Jam2                                                                                                                                                                                                                                                                  | JAM2     | -0.16 | 2.55  | -0.47 | 6.49E-01 | 8.33E-01 | -6.58 |
| 1433889_PM_at   | Sox9                                                                                                                                                                                                                                                                  | SOX9     | -0.06 | 2.65  | -0.47 | 6.49E-01 | 8.33E-01 | -6.58 |
| 1459489_PM_at   | ---                                                                                                                                                                                                                                                                   | NA       | -0.05 | 2.44  | -0.47 | 6.49E-01 | 8.33E-01 | -6.58 |
| 1428896_PM_at   | Pdgfrl                                                                                                                                                                                                                                                                | PDGFRL   | 0.10  | 2.90  | 0.47  | 6.49E-01 | 8.34E-01 | -6.58 |
| 1424343_PM_a_at | Eif1a                                                                                                                                                                                                                                                                 | NA       | -0.08 | 2.89  | -0.47 | 6.49E-01 | 8.34E-01 | -6.58 |
| 1437864_PM_at   | Adipor2                                                                                                                                                                                                                                                               | ADIPOR2  | 0.08  | 2.78  | 0.47  | 6.49E-01 | 8.34E-01 | -6.58 |
| 1425023_PM_at   | Usp3                                                                                                                                                                                                                                                                  | USP3     | 0.07  | 2.48  | 0.47  | 6.49E-01 | 8.34E-01 | -6.58 |
| 1428697_PM_at   | Dpp8                                                                                                                                                                                                                                                                  | DPP8     | 0.12  | 6.59  | 0.47  | 6.49E-01 | 8.34E-01 | -6.58 |
| 1422653_PM_at   | Cep70                                                                                                                                                                                                                                                                 | CEP70    | -0.13 | 3.64  | -0.47 | 6.49E-01 | 8.34E-01 | -6.58 |
| 1423047_PM_at   | Tollip                                                                                                                                                                                                                                                                | TOLLIP   | -0.11 | 4.59  | -0.47 | 6.49E-01 | 8.34E-01 | -6.58 |
| 1417013_PM_at   | Hspb8                                                                                                                                                                                                                                                                 | HSPB8    | -0.09 | 3.12  | -0.47 | 6.49E-01 | 8.34E-01 | -6.58 |
| 1454611_PM_a_at | Calm1                                                                                                                                                                                                                                                                 | NA       | -0.08 | 10.19 | -0.47 | 6.49E-01 | 8.34E-01 | -6.58 |
| 1439855_PM_at   | Tmtc1                                                                                                                                                                                                                                                                 | TMTC1    | -0.06 | 2.17  | -0.47 | 6.49E-01 | 8.34E-01 | -6.58 |
| 1423634_PM_at   | Gsdma                                                                                                                                                                                                                                                                 | GSDMA    | 0.04  | 2.22  | 0.47  | 6.49E-01 | 8.34E-01 | -6.58 |
| 1460019_PM_at   | Lrrc74a                                                                                                                                                                                                                                                               | LRRC74A  | 0.04  | 2.56  | 0.47  | 6.49E-01 | 8.34E-01 | -6.58 |
| 1432502_PM_at   | Map3k14                                                                                                                                                                                                                                                               | NA       | 0.05  | 2.16  | 0.47  | 6.49E-01 | 8.34E-01 | -6.58 |
| 1419445_PM_s_at | Gm10094 /// Sap18                                                                                                                                                                                                                                                     | SAP18    | 0.05  | 5.24  | 0.47  | 6.49E-01 | 8.34E-01 | -6.58 |
| 1436649_PM_at   | Ikzf3                                                                                                                                                                                                                                                                 | IKZF3    | 0.05  | 2.40  | 0.47  | 6.49E-01 | 8.34E-01 | -6.58 |
| 1447664_PM_x_at | AA986860                                                                                                                                                                                                                                                              | C1orf116 | 0.05  | 2.26  | 0.47  | 6.49E-01 | 8.34E-01 | -6.58 |
| 1443596_PM_at   | ---                                                                                                                                                                                                                                                                   | NA       | 0.05  | 2.32  | 0.47  | 6.49E-01 | 8.34E-01 | -6.58 |
| 1453211_PM_at   | Ccdc89                                                                                                                                                                                                                                                                | CCDC89   | 0.06  | 2.12  | 0.47  | 6.49E-01 | 8.34E-01 | -6.58 |
| 1457836_PM_at   | Mfsd11                                                                                                                                                                                                                                                                | MFS11    | 0.07  | 3.00  | 0.47  | 6.49E-01 | 8.34E-01 | -6.58 |
| 1444614_PM_x_at | Eno4                                                                                                                                                                                                                                                                  | ENO4     | 0.08  | 2.23  | 0.47  | 6.49E-01 | 8.34E-01 | -6.58 |
| 1445249_PM_at   | ---                                                                                                                                                                                                                                                                   | NA       | 0.08  | 2.78  | 0.47  | 6.49E-01 | 8.34E-01 | -6.58 |

|                 |               |          |       |      |       |          |          |       |
|-----------------|---------------|----------|-------|------|-------|----------|----------|-------|
| 1429655_PM_at   | Nudcd1        | NUDCD1   | 0.09  | 2.98 | 0.47  | 6.49E-01 | 8.34E-01 | -6.58 |
| 1446134_PM_at   | C78115        | NA       | -0.04 | 2.62 | -0.47 | 6.49E-01 | 8.34E-01 | -6.58 |
| 1416242_PM_at   | Klhl13        | KLHL13   | 0.07  | 2.59 | 0.47  | 6.49E-01 | 8.34E-01 | -6.58 |
| 1451241_PM_at   | Lamb1         | LAMB1    | 0.08  | 2.64 | 0.47  | 6.49E-01 | 8.34E-01 | -6.58 |
| 1442231_PM_at   | Alf16248      | NA       | -0.10 | 2.79 | -0.47 | 6.49E-01 | 8.34E-01 | -6.58 |
| 1446969_PM_at   | ---           | NA       | -0.04 | 2.25 | -0.47 | 6.49E-01 | 8.34E-01 | -6.58 |
| 1447287_PM_at   | C77137        | NA       | 0.04  | 2.81 | 0.47  | 6.50E-01 | 8.34E-01 | -6.58 |
| 1432659_PM_at   | ---           | NA       | 0.05  | 2.29 | 0.47  | 6.49E-01 | 8.34E-01 | -6.58 |
| 1456542_PM_s_at | Qrs1          | QRSL1    | -0.22 | 4.05 | -0.47 | 6.50E-01 | 8.34E-01 | -6.58 |
| 1457226_PM_at   | ---           | NA       | 0.04  | 2.04 | 0.47  | 6.50E-01 | 8.34E-01 | -6.58 |
| 1446471_PM_at   | Gm33122       | NA       | 0.05  | 2.33 | 0.47  | 6.50E-01 | 8.34E-01 | -6.58 |
| 1445393_PM_at   | ---           | NA       | -0.14 | 4.34 | -0.47 | 6.50E-01 | 8.34E-01 | -6.58 |
| 1452274_PM_at   | Zfand3        | ZFAND3   | -0.07 | 2.92 | -0.47 | 6.50E-01 | 8.34E-01 | -6.58 |
| 1452862_PM_at   | Rreb1         | RREB1    | 0.07  | 2.68 | 0.47  | 6.50E-01 | 8.34E-01 | -6.58 |
| 1424478_PM_at   | Bbs2          | BBS2     | -0.18 | 3.68 | -0.47 | 6.50E-01 | 8.34E-01 | -6.58 |
| 1434149_PM_at   | Tcf4          | TCF4     | -0.14 | 6.37 | -0.47 | 6.50E-01 | 8.34E-01 | -6.58 |
| 1424737_PM_at   | Thrsp         | THRSP    | -0.14 | 3.60 | -0.47 | 6.50E-01 | 8.34E-01 | -6.58 |
| 1450281_PM_a_at | Tbata         | TBATA    | -0.09 | 2.38 | -0.47 | 6.50E-01 | 8.34E-01 | -6.58 |
| 1429985_PM_at   | ---           | NA       | -0.09 | 2.26 | -0.47 | 6.50E-01 | 8.34E-01 | -6.59 |
| 1451349_PM_at   | Efcab7        | NA       | -0.08 | 2.76 | -0.47 | 6.50E-01 | 8.34E-01 | -6.58 |
| 1431246_PM_at   | Iqce          | IQCE     | -0.06 | 3.19 | -0.47 | 6.50E-01 | 8.34E-01 | -6.59 |
| 1441819_PM_x_at | Timm50        | TIMM50   | 0.04  | 2.03 | 0.47  | 6.50E-01 | 8.34E-01 | -6.59 |
| 1432473_PM_a_at | Abca14        | NA       | 0.05  | 2.53 | 0.47  | 6.50E-01 | 8.34E-01 | -6.58 |
| 1416553_PM_at   | Stra13        | CENPX    | 0.05  | 2.17 | 0.47  | 6.50E-01 | 8.34E-01 | -6.58 |
| 1445636_PM_at   | ---           | NA       | 0.05  | 2.42 | 0.47  | 6.50E-01 | 8.34E-01 | -6.58 |
| 1433705_PM_at   | Zfp213        | ZNF213   | 0.06  | 2.87 | 0.47  | 6.50E-01 | 8.34E-01 | -6.58 |
| 1431767_PM_at   | ---           | NA       | 0.06  | 2.68 | 0.47  | 6.50E-01 | 8.34E-01 | -6.59 |
| 1433155_PM_at   | ---           | NA       | 0.06  | 2.05 | 0.47  | 6.50E-01 | 8.34E-01 | -6.58 |
| 1427071_PM_at   | Fbxo42        | FBXO42   | 0.07  | 2.38 | 0.47  | 6.50E-01 | 8.34E-01 | -6.58 |
| 1449238_PM_at   | Psg16         | CEACAM3  | 0.07  | 2.28 | 0.47  | 6.50E-01 | 8.34E-01 | -6.59 |
| 1434808_PM_at   | Palb2         | PALB2    | 0.08  | 2.83 | 0.47  | 6.50E-01 | 8.34E-01 | -6.58 |
| 1453181_PM_x_at | Plscr1        | NA       | 0.08  | 2.68 | 0.47  | 6.50E-01 | 8.34E-01 | -6.58 |
| 1460476_PM_s_at | Fam13c        | FAM13C   | 0.10  | 2.96 | 0.47  | 6.50E-01 | 8.34E-01 | -6.58 |
| 1428745_PM_a_at | Ndufaf5       | NDUFAF5  | 0.19  | 5.36 | 0.47  | 6.50E-01 | 8.34E-01 | -6.59 |
| 1422377_PM_at   | Vmn1r44       | NA       | -0.09 | 2.80 | -0.47 | 6.50E-01 | 8.34E-01 | -6.59 |
| 1417812_PM_a_at | Lamb3         | LAMB3    | -0.05 | 2.52 | -0.47 | 6.50E-01 | 8.34E-01 | -6.59 |
| 1455223_PM_at   | Igf2bp1       | IGF2BP1  | -0.04 | 2.13 | -0.47 | 6.50E-01 | 8.34E-01 | -6.59 |
| 1417092_PM_at   | Pth1r         | PTH1R    | 0.05  | 2.48 | 0.47  | 6.50E-01 | 8.34E-01 | -6.59 |
| 1441318_PM_at   | Kdm5a         | KDM5A    | 0.08  | 4.82 | 0.47  | 6.50E-01 | 8.34E-01 | -6.59 |
| 1424718_PM_at   | Mapt          | MAPT     | -0.09 | 3.94 | -0.47 | 6.50E-01 | 8.34E-01 | -6.59 |
| 1431154_PM_at   | Znrf2         | ZNRF2    | 0.04  | 1.90 | 0.47  | 6.50E-01 | 8.34E-01 | -6.59 |
| 1448300_PM_at   | Mgst3         | MGST3    | 0.07  | 2.70 | 0.47  | 6.50E-01 | 8.34E-01 | -6.59 |
| 1440390_PM_at   | Fam171a2      | FAM171A2 | 0.07  | 2.58 | 0.47  | 6.50E-01 | 8.34E-01 | -6.59 |
| 1431708_PM_a_at | Tia1          | TIA1     | -0.13 | 5.45 | -0.47 | 6.50E-01 | 8.34E-01 | -6.59 |
| 1446714_PM_x_at | ---           | NA       | -0.05 | 2.20 | -0.47 | 6.50E-01 | 8.34E-01 | -6.59 |
| 1435281_PM_at   | Cpt1c         | CPT1C    | -0.19 | 5.57 | -0.47 | 6.50E-01 | 8.34E-01 | -6.59 |
| 1441777_PM_at   | Emx1          | EMX1     | 0.12  | 2.64 | 0.47  | 6.50E-01 | 8.34E-01 | -6.59 |
| 1449111_PM_a_at | Grb2          | GRB2     | 0.13  | 3.38 | 0.47  | 6.50E-01 | 8.34E-01 | -6.59 |
| 1422541_PM_at   | Ptprm         | PTPRM    | 0.10  | 4.84 | 0.47  | 6.50E-01 | 8.34E-01 | -6.59 |
| 1455048_PM_at   | Igsf3         | IGSF3    | -0.12 | 2.76 | -0.47 | 6.51E-01 | 8.34E-01 | -6.59 |
| 1457653_PM_at   | ---           | NA       | -0.07 | 2.31 | -0.47 | 6.51E-01 | 8.34E-01 | -6.59 |
| 1426986_PM_at   | Fam76b        | FAM76B   | -0.04 | 2.27 | -0.47 | 6.51E-01 | 8.34E-01 | -6.59 |
| 1418113_PM_at   | Cyp2d10       | CYP2D6   | 0.04  | 2.04 | 0.47  | 6.51E-01 | 8.34E-01 | -6.59 |
| 1424352_PM_at   | Cyp4a12a      | CYP4A11  | 0.04  | 2.41 | 0.47  | 6.51E-01 | 8.34E-01 | -6.59 |
| 1458052_PM_at   | ---           | NA       | 0.05  | 2.87 | 0.47  | 6.51E-01 | 8.34E-01 | -6.59 |
| 1439880_PM_at   | D630023F18Rik | C2orf80  | 0.11  | 2.47 | 0.47  | 6.51E-01 | 8.34E-01 | -6.59 |
| 1433590_PM_at   | Herc3         | HERC3    | -0.09 | 6.55 | -0.47 | 6.51E-01 | 8.34E-01 | -6.59 |
| 1424286_PM_at   | Prkx          | NA       | -0.08 | 3.28 | -0.47 | 6.51E-01 | 8.34E-01 | -6.59 |
| 1432150_PM_at   | Tmem59        | TMEM59   | -0.05 | 2.36 | -0.47 | 6.51E-01 | 8.34E-01 | -6.59 |
| 1419767_PM_at   | Padi3         | PADI3    | 0.05  | 2.32 | 0.47  | 6.51E-01 | 8.34E-01 | -6.59 |
| 1423424_PM_at   | Zic3          | ZIC3     | -0.09 | 2.59 | -0.47 | 6.51E-01 | 8.34E-01 | -6.59 |
| 1459018_PM_at   | D10Erd447e    | NA       | 0.04  | 1.97 | 0.47  | 6.51E-01 | 8.34E-01 | -6.59 |
| 1419136_PM_at   | Akr1c18       | AKR1C2   | 0.06  | 2.61 | 0.47  | 6.51E-01 | 8.34E-01 | -6.59 |
| 1446536_PM_at   | Sema6d        | SEMA6D   | 0.06  | 2.37 | 0.47  | 6.51E-01 | 8.34E-01 | -6.59 |
| 1418692_PM_at   | Rab8a         | RAB8A    | 0.07  | 2.43 | 0.47  | 6.51E-01 | 8.34E-01 | -6.59 |
| 1457854_PM_at   | AU018877      | NA       | 0.04  | 2.12 | 0.47  | 6.51E-01 | 8.34E-01 | -6.59 |
| 1441353_PM_at   | Nav2          | NAV2     | 0.05  | 2.17 | 0.47  | 6.51E-01 | 8.34E-01 | -6.59 |
| 1443863_PM_at   | Fndc3a        | FNDC3A   | -0.17 | 3.34 | -0.47 | 6.51E-01 | 8.34E-01 | -6.59 |
| 1431414_PM_at   | ---           | NA       | 0.06  | 2.75 | 0.47  | 6.51E-01 | 8.34E-01 | -6.59 |
| 1421395_PM_at   | Zik1          | ZIK1     | 0.05  | 2.15 | 0.47  | 6.51E-01 | 8.34E-01 | -6.59 |
| 1436391_PM_s_at | Clcc1         | CLCC1    | 0.07  | 2.90 | 0.47  | 6.51E-01 | 8.34E-01 | -6.59 |
| 1449773_PM_s_at | Gadd45b       | GADD45B  | 0.09  | 3.49 | 0.47  | 6.51E-01 | 8.34E-01 | -6.59 |
| 1424677_PM_at   | Cyp2j9        | CYP2J2   | -0.13 | 3.06 | -0.47 | 6.51E-01 | 8.34E-01 | -6.59 |
| 1459048_PM_s_at | Zfp142        | ZNF142   | -0.09 | 2.51 | -0.47 | 6.51E-01 | 8.34E-01 | -6.59 |
| 1439020_PM_at   | Gcfc2         | GCFC2    | 0.12  | 3.55 | 0.47  | 6.51E-01 | 8.34E-01 | -6.59 |

|                 |                    |            |       |      |       |          |          |       |
|-----------------|--------------------|------------|-------|------|-------|----------|----------|-------|
| 1452054_PM_at   | Ube2w              | ACO22826.2 | 0.10  | 7.10 | 0.47  | 6.51E-01 | 8.35E-01 | -6.59 |
| 1432709_PM_at   | ---                | NA         | 0.10  | 2.65 | 0.47  | 6.51E-01 | 8.35E-01 | -6.59 |
| 1427068_PM_x_at | Gid4               | GID4       | -0.27 | 5.87 | -0.46 | 6.52E-01 | 8.35E-01 | -6.59 |
| 1459145_PM_at   | A930033H14Rik      | NA         | -0.25 | 5.65 | -0.46 | 6.52E-01 | 8.35E-01 | -6.59 |
| 1434902_PM_at   | Rnf157             | RNF157     | -0.11 | 3.80 | -0.46 | 6.52E-01 | 8.35E-01 | -6.59 |
| 1459446_PM_at   | ---                | NA         | -0.07 | 2.06 | -0.46 | 6.52E-01 | 8.35E-01 | -6.59 |
| 1423104_PM_at   | Irs1               | IRS1       | -0.06 | 2.86 | -0.46 | 6.52E-01 | 8.35E-01 | -6.59 |
| 1448093_PM_s_at | C77405             | NA         | -0.05 | 2.00 | -0.47 | 6.52E-01 | 8.35E-01 | -6.59 |
| 1455798_PM_at   | Galk2              | GALK2      | 0.04  | 2.50 | 0.47  | 6.51E-01 | 8.35E-01 | -6.59 |
| 1448837_PM_at   | Vil1               | VIL1       | 0.05  | 2.26 | 0.46  | 6.52E-01 | 8.35E-01 | -6.59 |
| 1428029_PM_a_at | H2afv              | H2AFV      | 0.06  | 2.52 | 0.47  | 6.52E-01 | 8.35E-01 | -6.59 |
| 1419572_PM_a_at | Abcd4              | ABCD4      | 0.07  | 3.24 | 0.47  | 6.51E-01 | 8.35E-01 | -6.59 |
| 1424231_PM_s_at | Exoc6              | EXOC6      | 0.10  | 2.99 | 0.46  | 6.52E-01 | 8.35E-01 | -6.59 |
| 1435959_PM_at   | Arhgap15           | ARHGAP15   | 0.12  | 4.07 | 0.46  | 6.52E-01 | 8.35E-01 | -6.59 |
| 1429605_PM_at   | Ankrd7             | ANKRD7     | 0.04  | 2.45 | 0.46  | 6.52E-01 | 8.35E-01 | -6.59 |
| 1433058_PM_at   | ---                | NA         | 0.06  | 2.21 | 0.46  | 6.52E-01 | 8.35E-01 | -6.59 |
| 1451434_PM_s_at | Gpatch8            | GPATCH8    | -0.16 | 4.29 | -0.46 | 6.52E-01 | 8.35E-01 | -6.59 |
| 1426213_PM_at   | Imp4               | IMP4       | -0.14 | 3.56 | -0.46 | 6.52E-01 | 8.35E-01 | -6.59 |
| 1459412_PM_at   | ---                | NA         | -0.05 | 2.32 | -0.46 | 6.52E-01 | 8.35E-01 | -6.59 |
| 1433306_PM_at   | ---                | NA         | 0.04  | 2.00 | 0.46  | 6.52E-01 | 8.35E-01 | -6.59 |
| 1427857_PM_x_at | Igkv19-93          | NA         | 0.04  | 2.06 | 0.46  | 6.52E-01 | 8.35E-01 | -6.59 |
| 1431588_PM_at   | ---                | NA         | 0.06  | 2.45 | 0.46  | 6.52E-01 | 8.35E-01 | -6.59 |
| 1417280_PM_at   | Slc17a1            | SLC17A1    | 0.07  | 2.36 | 0.46  | 6.52E-01 | 8.35E-01 | -6.59 |
| 1434036_PM_at   | Mtss1              | MTSS1      | 0.14  | 4.89 | 0.46  | 6.52E-01 | 8.35E-01 | -6.59 |
| 1417026_PM_at   | Pfdn1              | PFDN1      | -0.21 | 5.60 | -0.46 | 6.52E-01 | 8.35E-01 | -6.59 |
| 1451119_PM_a_at | Fbln1              | FBLN1      | -0.19 | 3.66 | -0.46 | 6.52E-01 | 8.35E-01 | -6.59 |
| 1444904_PM_at   | ---                | NA         | -0.18 | 3.57 | -0.46 | 6.52E-01 | 8.35E-01 | -6.59 |
| 1458048_PM_at   | Gm12108            | NA         | 0.08  | 2.47 | 0.46  | 6.52E-01 | 8.35E-01 | -6.59 |
| 1455442_PM_at   | Slc6a19            | SLC6A19    | 0.04  | 2.12 | 0.46  | 6.52E-01 | 8.35E-01 | -6.59 |
| 1425691_PM_at   | B3gat1             | B3GAT1     | -0.16 | 4.29 | -0.46 | 6.52E-01 | 8.35E-01 | -6.59 |
| 1460373_PM_a_at | Setd4              | SETD4      | -0.13 | 3.60 | -0.46 | 6.52E-01 | 8.35E-01 | -6.59 |
| 1435289_PM_at   | Engase             | ENGASE     | -0.06 | 2.66 | -0.46 | 6.52E-01 | 8.35E-01 | -6.59 |
| 1460090_PM_at   | Arih1              | NA         | 0.05  | 2.17 | 0.46  | 6.52E-01 | 8.35E-01 | -6.59 |
| 1416121_PM_at   | Lox                | LOX        | 0.05  | 2.22 | 0.46  | 6.52E-01 | 8.35E-01 | -6.59 |
| 1459041_PM_at   | ---                | NA         | 0.07  | 2.52 | 0.46  | 6.52E-01 | 8.35E-01 | -6.59 |
| 1435105_PM_at   | Rnf208             | RNF208     | 0.08  | 4.03 | 0.46  | 6.52E-01 | 8.35E-01 | -6.59 |
| 1456746_PM_a_at | Cd99l2             | CD99L2     | 0.20  | 5.19 | 0.46  | 6.52E-01 | 8.35E-01 | -6.59 |
| 1433661_PM_at   | Nlr1               | NLRX1      | -0.06 | 2.19 | -0.46 | 6.52E-01 | 8.35E-01 | -6.59 |
| 1447386_PM_at   | ---                | NA         | 0.05  | 2.00 | 0.46  | 6.52E-01 | 8.35E-01 | -6.59 |
| 1425738_PM_at   | Igkv3-12///Igkv3-7 | NA         | 0.11  | 2.53 | 0.46  | 6.52E-01 | 8.35E-01 | -6.59 |
| 1447370_PM_at   | ---                | NA         | 0.04  | 2.20 | 0.46  | 6.52E-01 | 8.35E-01 | -6.59 |
| 1429229_PM_s_at | Cep128             | CEP128     | 0.09  | 2.45 | 0.46  | 6.52E-01 | 8.35E-01 | -6.59 |
| 1446359_PM_at   | ---                | NA         | 0.11  | 2.75 | 0.46  | 6.52E-01 | 8.35E-01 | -6.59 |
| 1434094_PM_at   | Tmem125            | TMEM125    | 0.06  | 2.35 | 0.46  | 6.52E-01 | 8.35E-01 | -6.59 |
| 1421360_PM_at   | Inpp4a             | INPP4A     | 0.10  | 3.51 | 0.46  | 6.53E-01 | 8.35E-01 | -6.59 |
| 1435499_PM_at   | Letm2              | LETM2      | 0.07  | 3.07 | 0.46  | 6.53E-01 | 8.35E-01 | -6.59 |
| 1454356_PM_at   | 1810021M19Rik      | NA         | 0.04  | 2.65 | 0.46  | 6.53E-01 | 8.35E-01 | -6.59 |
| 1425635_PM_at   | Tnk1               | TNK1       | 0.05  | 2.33 | 0.46  | 6.53E-01 | 8.35E-01 | -6.59 |
| 1417363_PM_at   | Zfp61              | AC245748.1 | 0.08  | 2.67 | 0.46  | 6.53E-01 | 8.35E-01 | -6.59 |
| 1442971_PM_at   | Baz2b              | BAZ2B      | 0.04  | 1.89 | 0.46  | 6.53E-01 | 8.35E-01 | -6.59 |
| 1456616_PM_a_at | Bsg                | BSG        | 0.27  | 5.01 | 0.46  | 6.53E-01 | 8.35E-01 | -6.59 |
| 1417430_PM_at   | Cdr2               | CDR2       | 0.05  | 2.03 | 0.46  | 6.53E-01 | 8.35E-01 | -6.59 |
| 1455779_PM_at   | Map1a              | MAP1A      | -0.16 | 4.14 | -0.46 | 6.53E-01 | 8.35E-01 | -6.59 |
| 1415740_PM_at   | Psmc5              | PSMC5      | -0.12 | 4.70 | -0.46 | 6.53E-01 | 8.35E-01 | -6.59 |
| 1440473_PM_at   | ---                | NA         | -0.04 | 2.24 | -0.46 | 6.53E-01 | 8.35E-01 | -6.59 |
| 1432794_PM_at   | ---                | NA         | 0.04  | 1.92 | 0.46  | 6.53E-01 | 8.35E-01 | -6.59 |
| 1417020_PM_at   | Spat4              | SPATA4     | 0.05  | 2.51 | 0.46  | 6.53E-01 | 8.35E-01 | -6.59 |
| 1439392_PM_x_at | Psmc1              | PSMC1      | -0.03 | 1.99 | -0.46 | 6.53E-01 | 8.35E-01 | -6.59 |
| 1451069_PM_at   | Pim3               | PIM3       | 0.04  | 2.60 | 0.46  | 6.53E-01 | 8.35E-01 | -6.59 |
| 1423020_PM_at   | Hspe1-ps2          | NA         | 0.09  | 2.42 | 0.46  | 6.53E-01 | 8.35E-01 | -6.59 |
| 1437909_PM_at   | Tmem265            | TMEM265    | 0.04  | 2.57 | 0.46  | 6.53E-01 | 8.35E-01 | -6.59 |
| 1426396_PM_at   | Cd247              | CD247      | 0.07  | 2.28 | 0.46  | 6.53E-01 | 8.35E-01 | -6.59 |
| 1455775_PM_at   | Zfp938             | NA         | 0.22  | 5.17 | 0.46  | 6.53E-01 | 8.35E-01 | -6.59 |
| 1443360_PM_x_at | Arhgap4            | ARHGAP4    | 0.04  | 2.72 | 0.46  | 6.53E-01 | 8.35E-01 | -6.59 |
| 1448549_PM_a_at | Dpagt1             | DPAGT1     | 0.05  | 2.55 | 0.46  | 6.53E-01 | 8.35E-01 | -6.59 |
| 1416252_PM_at   | Stk38              | STK38      | 0.06  | 3.18 | 0.46  | 6.53E-01 | 8.35E-01 | -6.59 |
| 1436632_PM_at   | Ubn2               | UBN2       | -0.13 | 4.98 | -0.46 | 6.53E-01 | 8.35E-01 | -6.59 |
| 1427737_PM_a_at | Smg8               | SMG8       | -0.07 | 2.42 | -0.46 | 6.53E-01 | 8.35E-01 | -6.59 |
| 1442883_PM_s_at | Abhd17a            | ABHD17A    | 0.04  | 2.31 | 0.46  | 6.53E-01 | 8.35E-01 | -6.59 |
| 1448922_PM_at   | Dusp19             | DUSP19     | 0.06  | 2.36 | 0.46  | 6.53E-01 | 8.35E-01 | -6.59 |
| 1455965_PM_at   | Adamts4            | ADAMTS4    | 0.08  | 2.96 | 0.46  | 6.53E-01 | 8.35E-01 | -6.59 |
| 1419026_PM_at   | Daxx               | DAXX       | 0.10  | 2.57 | 0.46  | 6.53E-01 | 8.35E-01 | -6.59 |
| 1424171_PM_a_at | Hagh               | HAGH       | 0.15  | 3.34 | 0.46  | 6.53E-01 | 8.35E-01 | -6.59 |
| 1435004_PM_at   | Pank4              | PANK4      | -0.08 | 2.65 | -0.46 | 6.53E-01 | 8.36E-01 | -6.59 |
| 1458736_PM_at   | ---                | NA         | -0.05 | 2.50 | -0.46 | 6.53E-01 | 8.36E-01 | -6.59 |

|                 |                                          |          |       |      |       |          |          |       |
|-----------------|------------------------------------------|----------|-------|------|-------|----------|----------|-------|
| 1427717_PM_at   | Cd80                                     | CD80     | 0.04  | 2.28 | 0.46  | 6.54E-01 | 8.36E-01 | -6.59 |
| 1433004_PM_at   | 4833446E11Rik                            | NA       | 0.05  | 2.65 | 0.46  | 6.54E-01 | 8.36E-01 | -6.59 |
| 1458804_PM_at   | ---                                      | NA       | 0.05  | 2.24 | 0.46  | 6.53E-01 | 8.36E-01 | -6.59 |
| 1446499_PM_at   | Fadd                                     | FADD     | 0.06  | 2.25 | 0.46  | 6.53E-01 | 8.36E-01 | -6.59 |
| 1417802_PM_at   | Sptssb                                   | SPTSSB   | 0.06  | 2.36 | 0.46  | 6.54E-01 | 8.36E-01 | -6.59 |
| 1417582_PM_s_at | Dhodh                                    | DHODH    | -0.21 | 2.80 | -0.46 | 6.54E-01 | 8.36E-01 | -6.59 |
| 1433176_PM_at   | ---                                      | NA       | 0.04  | 2.40 | 0.46  | 6.54E-01 | 8.36E-01 | -6.59 |
| 1435513_PM_at   | Htr2c                                    | HTR2C    | 0.15  | 3.16 | 0.46  | 6.54E-01 | 8.36E-01 | -6.59 |
| 1441022_PM_at   | Arih1                                    | ARIH1    | -0.11 | 3.01 | -0.46 | 6.54E-01 | 8.36E-01 | -6.59 |
| 1419962_PM_at   | ---                                      | NA       | 0.05  | 2.88 | 0.46  | 6.54E-01 | 8.36E-01 | -6.59 |
| 1429417_PM_at   | Chsy3                                    | NA       | -0.07 | 2.37 | -0.46 | 6.54E-01 | 8.36E-01 | -6.59 |
| 1427149_PM_at   | Plekha6                                  | PLEKHA6  | 0.05  | 1.99 | 0.46  | 6.54E-01 | 8.36E-01 | -6.59 |
| 1431888_PM_s_at | Psg21                                    | CEACAM3  | 0.06  | 2.66 | 0.46  | 6.54E-01 | 8.36E-01 | -6.59 |
| 1456117_PM_at   | Rrp1b                                    | RRP1B    | 0.14  | 4.16 | 0.46  | 6.54E-01 | 8.36E-01 | -6.59 |
| 1438739_PM_at   | ---                                      | NA       | -0.07 | 2.47 | -0.46 | 6.54E-01 | 8.36E-01 | -6.59 |
| 1460250_PM_at   | Sostdc1                                  | SOSTDC1  | 0.11  | 2.67 | 0.46  | 6.54E-01 | 8.36E-01 | -6.59 |
| 1428381_PM_a_at | Ppdf                                     | PPDPF    | -0.09 | 3.07 | -0.46 | 6.54E-01 | 8.36E-01 | -6.59 |
| 1432622_PM_a_at | 4930507D05Rik                            | NA       | 0.05  | 2.11 | 0.46  | 6.54E-01 | 8.36E-01 | -6.59 |
| 1432038_PM_at   | 4930509J09Rik                            | NA       | 0.05  | 2.22 | 0.46  | 6.54E-01 | 8.36E-01 | -6.59 |
| 1425215_PM_at   | Ffar2                                    | FFAR2    | 0.04  | 2.22 | 0.46  | 6.54E-01 | 8.36E-01 | -6.59 |
| 1432907_PM_at   | 1700126A01Rik                            | NA       | 0.04  | 2.41 | 0.46  | 6.54E-01 | 8.36E-01 | -6.59 |
| 1437988_PM_x_at | 1700003E24Rik ///<br>BC061195            | NA       | 0.06  | 2.20 | 0.46  | 6.54E-01 | 8.36E-01 | -6.59 |
| 1417810_PM_a_at | Kcnb1 /// Pacsin2                        | PAC SIN2 | -0.21 | 4.92 | -0.46 | 6.55E-01 | 8.36E-01 | -6.59 |
| 1456626_PM_a_at | Sarnp                                    | SARNP    | -0.20 | 5.02 | -0.46 | 6.55E-01 | 8.36E-01 | -6.59 |
| 1436428_PM_at   | Chrb2                                    | CHRN2    | -0.08 | 3.98 | -0.46 | 6.55E-01 | 8.36E-01 | -6.59 |
| 1454385_PM_at   | 1700018P08Rik                            | NA       | -0.05 | 2.15 | -0.46 | 6.55E-01 | 8.36E-01 | -6.59 |
| 1425566_PM_at   | Rest                                     | REST     | -0.04 | 2.12 | -0.46 | 6.55E-01 | 8.36E-01 | -6.59 |
| 1423238_PM_at   | Itgb1bp2                                 | ITGB1BP2 | 0.06  | 2.38 | 0.46  | 6.55E-01 | 8.36E-01 | -6.59 |
| 1438481_PM_at   | Prpf4                                    | PRPF4    | 0.06  | 2.84 | 0.46  | 6.55E-01 | 8.36E-01 | -6.59 |
| 1448558_PM_a_at | Pla2g4a                                  | PLA2G4A  | 0.11  | 3.27 | 0.46  | 6.55E-01 | 8.36E-01 | -6.59 |
| 1433779_PM_at   | Casc4                                    | CASC4    | 0.11  | 4.00 | 0.46  | 6.55E-01 | 8.36E-01 | -6.59 |
| 1459351_PM_at   | Adra1a                                   | ADRA1A   | 0.11  | 2.30 | 0.46  | 6.55E-01 | 8.36E-01 | -6.59 |
| 1430168_PM_at   | Cstad                                    | NA       | 0.13  | 3.47 | 0.46  | 6.55E-01 | 8.36E-01 | -6.59 |
| 1438165_PM_x_at | Vat1                                     | VAT1     | 0.23  | 3.33 | 0.46  | 6.55E-01 | 8.36E-01 | -6.59 |
| 1436145_PM_at   | ---                                      | NA       | -0.09 | 2.88 | -0.46 | 6.55E-01 | 8.36E-01 | -6.59 |
| 1443846_PM_x_at | ---                                      | NA       | -0.05 | 2.61 | -0.46 | 6.55E-01 | 8.36E-01 | -6.59 |
| 1420819_PM_at   | Sla                                      | SLA      | -0.13 | 2.72 | -0.46 | 6.55E-01 | 8.36E-01 | -6.59 |
| 1458549_PM_at   | E330027M22Rik                            | NA       | 0.09  | 3.16 | 0.46  | 6.55E-01 | 8.36E-01 | -6.59 |
| 1455060_PM_at   | G3bp1                                    | G3BP1    | 0.19  | 3.00 | 0.46  | 6.55E-01 | 8.36E-01 | -6.59 |
| 1415714_PM_a_at | Snrnp27                                  | SNRNP27  | -0.14 | 3.87 | -0.46 | 6.55E-01 | 8.36E-01 | -6.59 |
| 1460061_PM_at   | ---                                      | NA       | -0.13 | 2.75 | -0.46 | 6.55E-01 | 8.36E-01 | -6.59 |
| 1454884_PM_at   | Zbtb46                                   | ZBTB46   | -0.06 | 5.72 | -0.46 | 6.55E-01 | 8.36E-01 | -6.59 |
| 1459883_PM_at   | Gm26910                                  | NA       | 0.17  | 2.97 | 0.46  | 6.55E-01 | 8.36E-01 | -6.59 |
| 1421003_PM_at   | Gmeb1                                    | GMEB1    | -0.08 | 2.48 | -0.46 | 6.55E-01 | 8.37E-01 | -6.59 |
| 1439964_PM_at   | Tmem170                                  | NA       | 0.08  | 2.52 | 0.46  | 6.55E-01 | 8.37E-01 | -6.59 |
| 1457612_PM_at   | Gapdh /// Gapdh-ps15 ///<br>LOC102641387 | NA       | 0.05  | 2.36 | 0.46  | 6.55E-01 | 8.37E-01 | -6.59 |
| 1459236_PM_at   | AU022436                                 | NA       | 0.07  | 2.46 | 0.46  | 6.55E-01 | 8.37E-01 | -6.59 |
| 1448525_PM_a_at | Bnip3l                                   | BNIP3L   | -0.31 | 4.94 | -0.46 | 6.55E-01 | 8.37E-01 | -6.59 |
| 1444772_PM_at   | ---                                      | NA       | 0.05  | 1.96 | 0.46  | 6.55E-01 | 8.37E-01 | -6.59 |
| 1458272_PM_at   | ---                                      | NA       | -0.05 | 2.18 | -0.46 | 6.55E-01 | 8.37E-01 | -6.59 |
| 1443355_PM_at   | ---                                      | NA       | 0.12  | 2.49 | 0.46  | 6.55E-01 | 8.37E-01 | -6.59 |
| 1456736_PM_x_at | Mff                                      | MFF      | -0.26 | 8.03 | -0.46 | 6.56E-01 | 8.37E-01 | -6.59 |
| 1418562_PM_at   | Sf3b1                                    | SF3B1    | -0.19 | 5.52 | -0.46 | 6.56E-01 | 8.37E-01 | -6.59 |
| 1426262_PM_at   | Adnp2                                    | ADNP2    | -0.13 | 3.48 | -0.46 | 6.56E-01 | 8.37E-01 | -6.59 |
| 1436575_PM_at   | Grin3a                                   | GRIN3A   | -0.08 | 3.13 | -0.46 | 6.56E-01 | 8.37E-01 | -6.59 |
| 1444479_PM_at   | ---                                      | NA       | 0.05  | 2.35 | 0.46  | 6.56E-01 | 8.37E-01 | -6.59 |
| 1430761_PM_at   | 0610039K10Rik                            | NA       | 0.06  | 2.70 | 0.46  | 6.56E-01 | 8.37E-01 | -6.59 |
| 1434573_PM_at   | Traf3ip3                                 | TRAF3IP3 | 0.07  | 2.77 | 0.46  | 6.56E-01 | 8.37E-01 | -6.59 |
| 1455879_PM_at   | Gcn1l1                                   | GCN1     | 0.08  | 2.59 | 0.46  | 6.56E-01 | 8.37E-01 | -6.59 |
| 1438609_PM_x_at | Tnni2                                    | TNNI2    | 0.08  | 2.47 | 0.46  | 6.56E-01 | 8.37E-01 | -6.59 |
| 1436369_PM_at   | 2900076A07Rik                            | NA       | 0.09  | 2.67 | 0.46  | 6.56E-01 | 8.37E-01 | -6.59 |
| 1443442_PM_at   | AU022084                                 | NA       | -0.05 | 2.48 | -0.46 | 6.56E-01 | 8.37E-01 | -6.59 |
| 1420548_PM_a_at | Knop1                                    | KNOP1    | -0.15 | 3.45 | -0.46 | 6.56E-01 | 8.37E-01 | -6.59 |
| 1451395_PM_at   | Ccdc92                                   | CCDC92   | -0.12 | 3.50 | -0.46 | 6.56E-01 | 8.37E-01 | -6.59 |
| 1424250_PM_a_at | Arhgef3                                  | ARHGEF3  | -0.09 | 3.07 | -0.46 | 6.56E-01 | 8.37E-01 | -6.59 |
| 1432723_PM_at   | ---                                      | NA       | -0.09 | 2.38 | -0.46 | 6.56E-01 | 8.37E-01 | -6.59 |
| 1431956_PM_at   | ---                                      | NA       | -0.04 | 2.60 | -0.46 | 6.56E-01 | 8.37E-01 | -6.59 |
| 1446406_PM_at   | ---                                      | NA       | 0.04  | 2.07 | 0.46  | 6.56E-01 | 8.37E-01 | -6.59 |
| 1423602_PM_at   | Traf1                                    | TRAF1    | 0.07  | 2.33 | 0.46  | 6.56E-01 | 8.37E-01 | -6.59 |
| 1419937_PM_at   | ---                                      | NA       | -0.20 | 4.31 | -0.46 | 6.56E-01 | 8.37E-01 | -6.59 |
| 1417777_PM_at   | Ptgr1                                    | PTGR1    | -0.08 | 2.56 | -0.46 | 6.56E-01 | 8.37E-01 | -6.59 |
| 1442126_PM_at   | ---                                      | NA       | -0.07 | 1.97 | -0.46 | 6.56E-01 | 8.37E-01 | -6.59 |
| 1416360_PM_at   | Snx18                                    | SNX18    | -0.07 | 2.83 | -0.46 | 6.56E-01 | 8.37E-01 | -6.59 |

|                 |                              |            |       |      |       |          |          |       |
|-----------------|------------------------------|------------|-------|------|-------|----------|----------|-------|
| 1446518_PM_at   | ---                          | NA         | -0.06 | 2.31 | -0.46 | 6.56E-01 | 8.37E-01 | -6.59 |
| 1440684_PM_at   | Lpcat2                       | LPCAT2     | -0.05 | 2.30 | -0.46 | 6.56E-01 | 8.37E-01 | -6.59 |
| 1438899_PM_at   | Klf17                        | NA         | -0.05 | 2.44 | -0.46 | 6.56E-01 | 8.37E-01 | -6.59 |
| 1433877_PM_at   | Fam46b                       | FAM46B     | -0.05 | 2.18 | -0.46 | 6.56E-01 | 8.37E-01 | -6.59 |
| 1447652_PM_at   | Slc35a4                      | SLC35A4    | -0.03 | 2.08 | -0.46 | 6.56E-01 | 8.37E-01 | -6.59 |
| 1449793_PM_at   | ---                          | NA         | 0.04  | 2.02 | 0.46  | 6.56E-01 | 8.37E-01 | -6.59 |
| 1453968_PM_at   | 4833439F03Rik                | NA         | 0.04  | 2.43 | 0.46  | 6.56E-01 | 8.37E-01 | -6.59 |
| 1440538_PM_at   | ---                          | NA         | 0.04  | 2.09 | 0.46  | 6.56E-01 | 8.37E-01 | -6.59 |
| 1415976_PM_a_at | Carhsp1                      | CARHSP1    | 0.04  | 2.44 | 0.46  | 6.56E-01 | 8.37E-01 | -6.59 |
| 1457483_PM_at   | ---                          | NA         | 0.04  | 2.10 | 0.46  | 6.56E-01 | 8.37E-01 | -6.59 |
| 1450827_PM_at   | Klf23                        | NA         | 0.05  | 2.39 | 0.46  | 6.56E-01 | 8.37E-01 | -6.59 |
| 1446467_PM_at   | ---                          | NA         | 0.05  | 2.35 | 0.46  | 6.56E-01 | 8.37E-01 | -6.59 |
| 1419954_PM_s_at | Zfand3                       | ZFAND3     | 0.05  | 2.69 | 0.46  | 6.56E-01 | 8.37E-01 | -6.59 |
| 1437558_PM_at   | Cdh6                         | NA         | 0.05  | 2.48 | 0.46  | 6.56E-01 | 8.37E-01 | -6.59 |
| 1425649_PM_at   | Slc39a14                     | SLC39A14   | 0.05  | 2.36 | 0.46  | 6.56E-01 | 8.37E-01 | -6.59 |
| 1445039_PM_at   | ---                          | NA         | 0.05  | 3.01 | 0.46  | 6.56E-01 | 8.37E-01 | -6.59 |
| 1448523_PM_at   | Nphp1                        | NPHP1      | 0.06  | 2.45 | 0.46  | 6.56E-01 | 8.37E-01 | -6.59 |
| 1460605_PM_at   | Crxos                        | NA         | 0.06  | 2.56 | 0.46  | 6.56E-01 | 8.37E-01 | -6.59 |
| 1447380_PM_at   | Amdhd1                       | AMDHD1     | 0.07  | 2.52 | 0.46  | 6.56E-01 | 8.37E-01 | -6.59 |
| 1419644_PM_at   | Cstf2                        | CSTF2      | 0.09  | 3.28 | 0.46  | 6.56E-01 | 8.37E-01 | -6.59 |
| 1426398_PM_at   | Ube2w                        | ACO22826.2 | 0.13  | 4.00 | 0.46  | 6.56E-01 | 8.37E-01 | -6.59 |
| 1433662_PM_s_at | Timp2                        | TIMP2      | -0.16 | 4.85 | -0.46 | 6.57E-01 | 8.37E-01 | -6.59 |
| 1452248_PM_at   | Plekkg5                      | PLEKHG5    | -0.10 | 4.06 | -0.46 | 6.57E-01 | 8.37E-01 | -6.59 |
| 1440290_PM_at   | ---                          | NA         | -0.09 | 4.24 | -0.46 | 6.57E-01 | 8.37E-01 | -6.59 |
| 1430805_PM_s_at | Rmi1                         | RMI1       | -0.09 | 2.78 | -0.46 | 6.57E-01 | 8.37E-01 | -6.59 |
| 1454823_PM_at   | Wdr37                        | WDR37      | -0.07 | 2.32 | -0.46 | 6.57E-01 | 8.37E-01 | -6.59 |
| 1450000_PM_at   | Nlrp4c                       | NLRP4      | 0.05  | 2.97 | 0.46  | 6.57E-01 | 8.37E-01 | -6.59 |
| 1422970_PM_at   | Mxd3                         | MXD3       | 0.06  | 2.91 | 0.46  | 6.57E-01 | 8.37E-01 | -6.59 |
| 1456501_PM_at   | ---                          | NA         | 0.07  | 2.24 | 0.46  | 6.57E-01 | 8.37E-01 | -6.59 |
| 1422419_PM_s_at | Tnp2                         | TNP2       | 0.07  | 3.13 | 0.46  | 6.57E-01 | 8.37E-01 | -6.59 |
| 1437797_PM_at   | ---                          | NA         | 0.08  | 2.86 | 0.46  | 6.57E-01 | 8.37E-01 | -6.59 |
| 1417819_PM_at   | Tor1b                        | TOR1B      | 0.09  | 2.71 | 0.46  | 6.57E-01 | 8.37E-01 | -6.59 |
| 1424098_PM_at   | Elov17                       | ELOVL7     | 0.12  | 2.67 | 0.46  | 6.57E-01 | 8.37E-01 | -6.59 |
| 1418146_PM_a_at | Rbl2                         | RBL2       | 0.09  | 2.80 | 0.46  | 6.57E-01 | 8.37E-01 | -6.59 |
| 1457129_PM_at   | ---                          | NA         | 0.11  | 4.88 | 0.46  | 6.57E-01 | 8.37E-01 | -6.59 |
| 1434755_PM_at   | Coro2b                       | CORO2B     | 0.23  | 5.84 | 0.46  | 6.57E-01 | 8.37E-01 | -6.59 |
| 1444119_PM_at   | ---                          | NA         | -0.24 | 3.24 | -0.46 | 6.57E-01 | 8.37E-01 | -6.59 |
| 1431522_PM_at   | A930001A20Rik                | NA         | 0.04  | 2.19 | 0.46  | 6.57E-01 | 8.37E-01 | -6.59 |
| 1416634_PM_at   | Fam96a                       | FAM96A     | 0.09  | 2.85 | 0.46  | 6.57E-01 | 8.37E-01 | -6.59 |
| 1443543_PM_at   | ---                          | NA         | 0.10  | 2.66 | 0.46  | 6.57E-01 | 8.37E-01 | -6.59 |
| 1438829_PM_at   | Rnf165                       | RNF165     | -0.16 | 4.74 | -0.46 | 6.57E-01 | 8.37E-01 | -6.59 |
| 1420858_PM_at   | Pkia                         | PKIA       | -0.12 | 3.00 | -0.46 | 6.57E-01 | 8.37E-01 | -6.59 |
| 1423217_PM_a_at | Fam32a                       | FAM32A     | -0.07 | 8.47 | -0.46 | 6.57E-01 | 8.37E-01 | -6.59 |
| 1459428_PM_at   | C76662                       | NA         | -0.06 | 2.22 | -0.46 | 6.57E-01 | 8.37E-01 | -6.59 |
| 1427647_PM_at   | Zyg11a                       | ZYG11A     | 0.05  | 2.44 | 0.46  | 6.57E-01 | 8.37E-01 | -6.59 |
| 1442098_PM_at   | AU022434                     | NA         | 0.06  | 5.05 | 0.46  | 6.57E-01 | 8.37E-01 | -6.59 |
| 1440368_PM_at   | Kdm4b                        | NA         | 0.07  | 3.50 | 0.46  | 6.57E-01 | 8.37E-01 | -6.59 |
| 1420501_PM_at   | Dnajc1                       | DNAJC1     | 0.07  | 3.64 | 0.46  | 6.57E-01 | 8.37E-01 | -6.59 |
| 1439068_PM_at   | Erap1                        | ERAP1      | 0.05  | 2.11 | 0.46  | 6.57E-01 | 8.37E-01 | -6.59 |
| 1457103_PM_at   | ---                          | NA         | 0.06  | 2.59 | 0.46  | 6.57E-01 | 8.38E-01 | -6.59 |
| 1425937_PM_a_at | Hexim1                       | HEXIM1     | -0.07 | 3.41 | -0.46 | 6.57E-01 | 8.38E-01 | -6.59 |
| 1442200_PM_at   | ---                          | NA         | -0.04 | 1.98 | -0.46 | 6.57E-01 | 8.38E-01 | -6.59 |
| 1428177_PM_at   | Trappc6b                     | TRAPPC6B   | -0.08 | 8.09 | -0.46 | 6.57E-01 | 8.38E-01 | -6.59 |
| 1455242_PM_at   | Foxp1                        | FOXP1      | 0.15  | 4.53 | 0.46  | 6.57E-01 | 8.38E-01 | -6.59 |
| 1453583_PM_at   | Zef1                         | ZZEF1      | -0.10 | 2.84 | -0.46 | 6.58E-01 | 8.38E-01 | -6.59 |
| 1433175_PM_at   | 4930563F15Rik                | NA         | 0.04  | 2.35 | 0.46  | 6.58E-01 | 8.38E-01 | -6.59 |
| 1417789_PM_at   | Ccl11                        | CCL11      | 0.05  | 2.77 | 0.46  | 6.58E-01 | 8.38E-01 | -6.59 |
| 1436442_PM_at   | Ptpn14                       | PTPN14     | 0.08  | 3.04 | 0.46  | 6.58E-01 | 8.38E-01 | -6.59 |
| 1423432_PM_at   | Phip                         | PHIP       | 0.13  | 5.71 | 0.46  | 6.58E-01 | 8.38E-01 | -6.59 |
| 1448411_PM_at   | Wfs1                         | WFS1       | -0.43 | 6.14 | -0.46 | 6.58E-01 | 8.38E-01 | -6.59 |
| 1424185_PM_a_at | Morf41l1 /// Morf41l-ps1 /// | MORF41L1   | -0.20 | 5.12 | -0.46 | 6.58E-01 | 8.38E-01 | -6.59 |
| 1427297_PM_at   | Mrp9                         | MRPL9      | -0.05 | 2.64 | -0.46 | 6.58E-01 | 8.38E-01 | -6.59 |
| 1457913_PM_at   | Zfp266                       | ZNF561     | 0.06  | 2.39 | 0.46  | 6.58E-01 | 8.38E-01 | -6.59 |
| 1433862_PM_at   | Espl1                        | ESPL1      | 0.04  | 2.08 | 0.46  | 6.58E-01 | 8.38E-01 | -6.59 |
| 1431160_PM_x_at | Gm19924 /// LOC101056074     | NA         | 0.05  | 2.68 | 0.46  | 6.58E-01 | 8.38E-01 | -6.59 |
| 1429986_PM_at   | Gpr173                       | GPR173     | 0.04  | 2.27 | 0.46  | 6.58E-01 | 8.38E-01 | -6.59 |
| 1452891_PM_at   | Ccdc51                       | CCDC51     | 0.05  | 2.62 | 0.46  | 6.58E-01 | 8.38E-01 | -6.59 |
| 1439617_PM_s_at | Pck1                         | PCK1       | 0.04  | 2.32 | 0.46  | 6.58E-01 | 8.38E-01 | -6.59 |
| 1453902_PM_at   | Eif2ak1                      | EIF2AK1    | 0.07  | 2.24 | 0.46  | 6.58E-01 | 8.38E-01 | -6.59 |
| 1455545_PM_at   | 1110065P20Rik                | C1orf122   | -0.08 | 2.42 | -0.46 | 6.58E-01 | 8.38E-01 | -6.59 |
| 1436005_PM_at   | Sugp2                        | SUGP2      | 0.23  | 3.60 | 0.46  | 6.58E-01 | 8.38E-01 | -6.59 |
| 1424623_PM_at   | Serpinb5                     | SERPINB5   | -0.05 | 2.42 | -0.46 | 6.58E-01 | 8.38E-01 | -6.59 |
| 1434883_PM_at   | Mtdh                         | MTDH       | -0.30 | 5.34 | -0.46 | 6.58E-01 | 8.38E-01 | -6.59 |

|                   |                         |            |       |      |       |          |          |       |
|-------------------|-------------------------|------------|-------|------|-------|----------|----------|-------|
| 1444218_PM_at     | Fam204a                 | FAM204A    | 0.15  | 3.39 | 0.46  | 6.58E-01 | 8.38E-01 | -6.59 |
| 1439589_PM_at     | ---                     | NA         | -0.05 | 2.17 | -0.46 | 6.58E-01 | 8.38E-01 | -6.59 |
| 1426250_PM_s_at   | Mau2                    | MAU2       | 0.05  | 3.42 | 0.46  | 6.58E-01 | 8.38E-01 | -6.59 |
| 1458596_PM_at     | ---                     | NA         | 0.07  | 3.12 | 0.46  | 6.58E-01 | 8.38E-01 | -6.59 |
| 1454339_PM_at     | LOC105245204            | NA         | 0.04  | 2.31 | 0.46  | 6.58E-01 | 8.38E-01 | -6.59 |
| 1433222_PM_at     | 2610311E24Rik           | NA         | -0.05 | 2.22 | -0.45 | 6.59E-01 | 8.38E-01 | -6.59 |
| 1441399_PM_at     | ---                     | NA         | -0.04 | 2.21 | -0.45 | 6.59E-01 | 8.38E-01 | -6.59 |
| 1455848_PM_at     | Tmprss11a               | TMPRSS11A  | -0.04 | 2.04 | -0.45 | 6.58E-01 | 8.38E-01 | -6.59 |
| 1437135_PM_at     | Fbxw10                  | FBXW10     | 0.05  | 2.50 | 0.45  | 6.58E-01 | 8.38E-01 | -6.59 |
| 1425011_PM_x_at   | Stx18                   | STX18      | 0.08  | 3.78 | 0.45  | 6.59E-01 | 8.38E-01 | -6.59 |
| 1416783_PM_at     | Tac1                    | TAC1       | 0.16  | 3.60 | 0.45  | 6.59E-01 | 8.38E-01 | -6.59 |
| 1452062_PM_at     | Prpsap2                 | PRPSAP2    | -0.09 | 2.81 | -0.45 | 6.59E-01 | 8.38E-01 | -6.59 |
| 1420234_PM_at     | ---                     | NA         | 0.05  | 2.55 | 0.45  | 6.59E-01 | 8.38E-01 | -6.59 |
| 1452300_PM_at     | Wwp1                    | NA         | 0.06  | 2.52 | 0.45  | 6.59E-01 | 8.39E-01 | -6.59 |
| 1454745_PM_at     | Arhgap29                | ARHGAP29   | -0.21 | 4.11 | -0.45 | 6.59E-01 | 8.39E-01 | -6.59 |
| 1423544_PM_at     | Ptpn5                   | PTPN5      | -0.11 | 3.85 | -0.45 | 6.59E-01 | 8.39E-01 | -6.59 |
| 1433088_PM_at     | 5330430C04Rik           | NA         | 0.08  | 2.67 | 0.45  | 6.59E-01 | 8.39E-01 | -6.59 |
| 1445481_PM_at     | Al317158                | NA         | 0.12  | 2.37 | 0.45  | 6.59E-01 | 8.39E-01 | -6.59 |
| 1454709_PM_at     | Tmem64                  | TMEM64     | -0.09 | 3.44 | -0.45 | 6.59E-01 | 8.39E-01 | -6.59 |
| 1437774_PM_at     | ---                     | NA         | -0.17 | 5.78 | -0.45 | 6.59E-01 | 8.39E-01 | -6.59 |
| 1428360_PM_x_at   | Ndufa7                  | NDUFA7     | 0.08  | 4.03 | 0.45  | 6.59E-01 | 8.39E-01 | -6.59 |
| 1454646_PM_at     | Tcp11l2                 | TCP11L2    | -0.07 | 2.53 | -0.45 | 6.59E-01 | 8.39E-01 | -6.59 |
| 1423300_PM_at     | Zdhhc6                  | ZDHHC6     | -0.15 | 3.11 | -0.45 | 6.59E-01 | 8.39E-01 | -6.59 |
| 1416563_PM_at     | Ctps                    | CTPS1      | -0.13 | 4.33 | -0.45 | 6.59E-01 | 8.39E-01 | -6.59 |
| 1429342_PM_s_at   | Bpifa5                  | BP1FA1     | 0.05  | 2.61 | 0.45  | 6.59E-01 | 8.39E-01 | -6.59 |
| 1431955_PM_at     | 4930453H23Rik           | NA         | 0.06  | 2.17 | 0.45  | 6.59E-01 | 8.39E-01 | -6.59 |
| 1436541_PM_at     | Knop1                   | KNOP1      | 0.11  | 2.36 | 0.45  | 6.59E-01 | 8.39E-01 | -6.59 |
| 1457308_PM_at     | ---                     | NA         | -0.10 | 2.21 | -0.45 | 6.59E-01 | 8.39E-01 | -6.59 |
| 1425327_PM_at     | Fam76a                  | FAM76A     | -0.07 | 2.88 | -0.45 | 6.59E-01 | 8.39E-01 | -6.59 |
| 1425199_PM_a_at   | Epb41l5                 | EPB41L5    | 0.04  | 2.12 | 0.45  | 6.59E-01 | 8.39E-01 | -6.59 |
| 1429033_PM_at     | Gcc1                    | GCC1       | 0.14  | 3.45 | 0.45  | 6.59E-01 | 8.39E-01 | -6.59 |
| 1445479_PM_at     | ---                     | NA         | 0.17  | 2.99 | 0.45  | 6.59E-01 | 8.39E-01 | -6.59 |
| 1437539_PM_at     | Prkaa1                  | PRKAA1     | -0.12 | 2.56 | -0.45 | 6.59E-01 | 8.39E-01 | -6.59 |
| 1428337_PM_at     | Mdp1                    | MDP1       | -0.05 | 2.56 | -0.45 | 6.59E-01 | 8.39E-01 | -6.59 |
| 1453533_PM_at     | 4933403O08Rik           | NA         | 0.04  | 2.04 | 0.45  | 6.59E-01 | 8.39E-01 | -6.59 |
| 1438676_PM_at     | Gbp6                    | GBP6       | 0.07  | 2.36 | 0.45  | 6.59E-01 | 8.39E-01 | -6.59 |
| 1429469_PM_at     | A930013F10Rik           | NA         | -0.06 | 3.56 | -0.45 | 6.60E-01 | 8.39E-01 | -6.59 |
| 1430363_PM_at     | ---                     | NA         | -0.05 | 2.40 | -0.45 | 6.60E-01 | 8.39E-01 | -6.59 |
| 1430335_PM_a_at   | Pax3                    | PAX3       | -0.04 | 2.22 | -0.45 | 6.60E-01 | 8.39E-01 | -6.59 |
| 1460382_PM_at     | Ccm2l                   | NA         | 0.04  | 2.11 | 0.45  | 6.60E-01 | 8.39E-01 | -6.59 |
| 1446317_PM_at     | Arid4b                  | ARID4B     | 0.05  | 2.45 | 0.45  | 6.60E-01 | 8.39E-01 | -6.59 |
| 1454647_PM_at     | Acad11                  | ACAD11     | 0.14  | 2.17 | 0.45  | 6.60E-01 | 8.39E-01 | -6.59 |
| 1423420_PM_at     | Adrb1                   | ADRB1      | 0.16  | 2.90 | 0.45  | 6.60E-01 | 8.39E-01 | -6.59 |
| 1425727_PM_at     | Cldn19                  | CLDN19     | 0.04  | 2.19 | 0.45  | 6.60E-01 | 8.39E-01 | -6.59 |
| 1439321_PM_at     | ---                     | NA         | 0.09  | 2.42 | 0.45  | 6.60E-01 | 8.39E-01 | -6.59 |
| 1422040_PM_at     | Sema7a                  | SEMA7A     | 0.06  | 2.72 | 0.45  | 6.60E-01 | 8.39E-01 | -6.59 |
| 1430167_PM_a_at   | Rwdd3                   | RWDD3      | -0.16 | 3.29 | -0.45 | 6.60E-01 | 8.39E-01 | -6.59 |
| 1426851_PM_a_at   | Nov                     | NOV        | -0.19 | 4.21 | -0.45 | 6.60E-01 | 8.39E-01 | -6.59 |
| 1445275_PM_at     | Ccser1                  | CCSER1     | -0.09 | 2.81 | -0.45 | 6.60E-01 | 8.39E-01 | -6.59 |
| 1457482_PM_at     | Kdm5b                   | KDM5B      | 0.04  | 2.49 | 0.45  | 6.60E-01 | 8.39E-01 | -6.59 |
| 1433303_PM_at     | 4930483C01Rik           | NA         | 0.04  | 1.95 | 0.45  | 6.60E-01 | 8.39E-01 | -6.59 |
| 1430625_PM_at     | Krtap3-2                | KRTAP3-2   | 0.05  | 2.16 | 0.45  | 6.60E-01 | 8.39E-01 | -6.59 |
| 1421095_PM_a_at   | Trpc1                   | TRPC1      | 0.08  | 2.54 | 0.45  | 6.60E-01 | 8.39E-01 | -6.59 |
| 1434643_PM_at     | Tbl1x                   | TBL1Y      | 0.12  | 3.40 | 0.45  | 6.60E-01 | 8.39E-01 | -6.59 |
| 1416392_PM_a_at   | Atp6v0c /// Atp6v0c-ps2 | ATP6V0C    | -0.16 | 6.30 | -0.45 | 6.60E-01 | 8.39E-01 | -6.59 |
| 1450736_PM_a_at   | Hbb-bh1                 | HBG1       | 0.04  | 2.10 | 0.45  | 6.60E-01 | 8.39E-01 | -6.59 |
| 1430495_PM_at     | Impa1                   | IMPA1      | 0.05  | 2.45 | 0.45  | 6.60E-01 | 8.39E-01 | -6.59 |
| 1424773_PM_at     | Mvb12a                  | MVB12A     | 0.05  | 2.89 | 0.45  | 6.60E-01 | 8.39E-01 | -6.59 |
| 1447164_PM_at     | ---                     | NA         | 0.07  | 2.31 | 0.45  | 6.60E-01 | 8.39E-01 | -6.59 |
| 1427306_PM_at     | Ryr1                    | RYR1       | 0.07  | 2.88 | 0.45  | 6.60E-01 | 8.39E-01 | -6.59 |
| 1455933_PM_at     | Tra2a                   | TRA2A      | 0.07  | 2.57 | 0.45  | 6.60E-01 | 8.39E-01 | -6.59 |
| 1427999_PM_at     | Snapc5                  | SNAPC5     | 0.07  | 2.55 | 0.45  | 6.60E-01 | 8.39E-01 | -6.59 |
| 1456648_PM_at     | ---                     | NA         | 0.12  | 2.66 | 0.45  | 6.60E-01 | 8.39E-01 | -6.59 |
| 1427447_PM_a_at   | Triobp                  | TRIOBP     | 0.13  | 2.20 | 0.45  | 6.60E-01 | 8.39E-01 | -6.59 |
| 1453289_PM_at     | Ago4                    | AGO4       | 0.11  | 3.52 | 0.45  | 6.60E-01 | 8.39E-01 | -6.59 |
| 1456414_PM_at     | Platr30                 | NA         | 0.11  | 3.09 | 0.45  | 6.60E-01 | 8.39E-01 | -6.59 |
| 1454507_PM_at     | ---                     | NA         | 0.04  | 1.97 | 0.45  | 6.60E-01 | 8.39E-01 | -6.59 |
| 1446670_PM_at     | ---                     | NA         | -0.17 | 3.50 | -0.45 | 6.61E-01 | 8.40E-01 | -6.59 |
| 1432754_PM_at     | ---                     | NA         | 0.08  | 2.61 | 0.45  | 6.61E-01 | 8.40E-01 | -6.59 |
| 1432828_PM_at     | ---                     | NA         | 0.18  | 4.15 | 0.45  | 6.61E-01 | 8.40E-01 | -6.59 |
| 1424916_PM_x_at   | Zfp764                  | ACO02310.5 | -0.14 | 3.50 | -0.45 | 6.61E-01 | 8.40E-01 | -6.59 |
| 1452422_PM_a_at   | Snrpb2                  | SNRPB2     | -0.10 | 3.52 | -0.45 | 6.61E-01 | 8.40E-01 | -6.59 |
| 1419733_PM_at     | Glpr1l2                 | GLIPR1L2   | 0.04  | 2.07 | 0.45  | 6.61E-01 | 8.40E-01 | -6.59 |
| AFFX-r2-TagJ-5_at | ---                     | NA         | 0.05  | 1.90 | 0.45  | 6.61E-01 | 8.40E-01 | -6.59 |
| 1446552_PM_at     | ---                     | NA         | 0.05  | 2.37 | 0.45  | 6.61E-01 | 8.40E-01 | -6.59 |

|                 |                                                                 |            |       |       |       |          |          |       |
|-----------------|-----------------------------------------------------------------|------------|-------|-------|-------|----------|----------|-------|
| 1429338_PM_a_at | NoI9                                                            | NOL9       | 0.09  | 2.51  | 0.45  | 6.61E-01 | 8.40E-01 | -6.59 |
| 1433281_PM_at   | Prune                                                           | NA         | 0.07  | 3.12  | 0.45  | 6.61E-01 | 8.40E-01 | -6.59 |
| 1432393_PM_a_at | Thg1l                                                           | THG1L      | 0.11  | 2.35  | 0.45  | 6.61E-01 | 8.40E-01 | -6.59 |
| 1446509_PM_at   | ---                                                             | NA         | 0.08  | 2.42  | 0.45  | 6.61E-01 | 8.40E-01 | -6.59 |
| 1454449_PM_at   | Rabepk                                                          | RABEPK     | 0.08  | 2.64  | 0.45  | 6.61E-01 | 8.40E-01 | -6.59 |
| AFFX-BioB-5_at  | ---                                                             | NA         | 0.05  | 6.36  | 0.45  | 6.61E-01 | 8.40E-01 | -6.59 |
| 1433075_PM_at   | ---                                                             | NA         | 0.05  | 2.47  | 0.45  | 6.61E-01 | 8.40E-01 | -6.59 |
| 1430375_PM_a_at | CcI27a /// CcI27b ///<br>Gm13306 /// Gm2506 ///<br>LOC100861978 | CCL27      | -0.34 | 5.65  | -0.45 | 6.61E-01 | 8.40E-01 | -6.59 |
| 1421341_PM_at   | Axin2                                                           | AXIN2      | 0.05  | 2.52  | 0.45  | 6.61E-01 | 8.40E-01 | -6.59 |
| 1456149_PM_at   | Rbfox3                                                          | RBFOX3     | 0.05  | 3.06  | 0.45  | 6.61E-01 | 8.40E-01 | -6.59 |
| 1417360_PM_at   | Mlh1                                                            | MLH1       | 0.09  | 2.98  | 0.45  | 6.61E-01 | 8.40E-01 | -6.59 |
| 1417716_PM_at   | Got2                                                            | GOT2       | -0.15 | 3.43  | -0.45 | 6.61E-01 | 8.40E-01 | -6.59 |
| 1445859_PM_at   | ---                                                             | NA         | 0.04  | 2.12  | 0.45  | 6.61E-01 | 8.40E-01 | -6.59 |
| 1450794_PM_at   | Avp                                                             | AVP        | 0.05  | 2.22  | 0.45  | 6.61E-01 | 8.40E-01 | -6.59 |
| 1460012_PM_at   | Wfdc3                                                           | WFDC3      | 0.05  | 2.77  | 0.45  | 6.61E-01 | 8.40E-01 | -6.59 |
| 1427755_PM_at   | Mcpt-ps1                                                        | NA         | 0.06  | 2.41  | 0.45  | 6.61E-01 | 8.40E-01 | -6.59 |
| 1418270_PM_at   | Adamts8                                                         | ADAMTS8    | -0.05 | 2.44  | -0.45 | 6.62E-01 | 8.40E-01 | -6.59 |
| 1429075_PM_a_at | 1700018B08Rik                                                   | ACO10531.1 | 0.04  | 2.58  | 0.45  | 6.62E-01 | 8.40E-01 | -6.59 |
| 1424938_PM_at   | Steap1                                                          | STEAP1B    | 0.04  | 2.17  | 0.45  | 6.61E-01 | 8.40E-01 | -6.59 |
| 1459789_PM_at   | ---                                                             | NA         | -0.08 | 2.01  | -0.45 | 6.62E-01 | 8.40E-01 | -6.59 |
| 1429140_PM_at   | Spns3                                                           | SPNS3      | -0.07 | 3.56  | -0.45 | 6.62E-01 | 8.40E-01 | -6.59 |
| 1429632_PM_at   | Trappc4                                                         | NA         | 0.06  | 2.13  | 0.45  | 6.62E-01 | 8.40E-01 | -6.59 |
| 1453836_PM_a_at | Mgll                                                            | MGLL       | 0.05  | 2.58  | 0.45  | 6.62E-01 | 8.40E-01 | -6.59 |
| 1441218_PM_at   | ---                                                             | NA         | 0.05  | 2.41  | 0.45  | 6.62E-01 | 8.40E-01 | -6.59 |
| 1442515_PM_at   | ---                                                             | NA         | 0.06  | 3.04  | 0.45  | 6.62E-01 | 8.40E-01 | -6.59 |
| 1434554_PM_at   | Trim37                                                          | TRIM37     | 0.13  | 3.12  | 0.45  | 6.62E-01 | 8.40E-01 | -6.59 |
| 1447368_PM_at   | Mroh2a                                                          | MROH2A     | 0.06  | 2.39  | 0.45  | 6.62E-01 | 8.40E-01 | -6.59 |
| 1432588_PM_at   | 5830468K08Rik                                                   | NA         | 0.05  | 2.49  | 0.45  | 6.62E-01 | 8.40E-01 | -6.59 |
| 1430122_PM_at   | ---                                                             | NA         | -0.05 | 2.38  | -0.45 | 6.62E-01 | 8.40E-01 | -6.59 |
| 1429115_PM_at   | Toposors                                                        | NA         | 0.05  | 2.74  | 0.45  | 6.62E-01 | 8.40E-01 | -6.59 |
| 1455312_PM_at   | Phc3                                                            | PHC3       | -0.16 | 4.76  | -0.45 | 6.62E-01 | 8.40E-01 | -6.59 |
| 1421139_PM_a_at | Zfp386                                                          | ZNF519     | -0.09 | 2.45  | -0.45 | 6.62E-01 | 8.40E-01 | -6.59 |
| 1460620_PM_at   | Zfp592                                                          | ZNF592     | -0.08 | 2.95  | -0.45 | 6.62E-01 | 8.40E-01 | -6.59 |
| 1458689_PM_at   | ---                                                             | NA         | -0.07 | 2.58  | -0.45 | 6.62E-01 | 8.40E-01 | -6.59 |
| 1423239_PM_at   | Impdh1                                                          | IMPDH1     | -0.06 | 2.50  | -0.45 | 6.62E-01 | 8.40E-01 | -6.59 |
| 1449870_PM_a_at | Atp6v0a2                                                        | ATP6V0A2   | -0.06 | 2.76  | -0.45 | 6.62E-01 | 8.40E-01 | -6.59 |
| 1456019_PM_at   | Cwf19l2                                                         | CWF19L2    | -0.05 | 3.02  | -0.45 | 6.62E-01 | 8.40E-01 | -6.59 |
| 1428455_PM_at   | Col14a1                                                         | COL14A1    | -0.05 | 2.26  | -0.45 | 6.62E-01 | 8.40E-01 | -6.59 |
| 1441283_PM_at   | Ccny                                                            | NA         | -0.05 | 2.53  | -0.45 | 6.62E-01 | 8.40E-01 | -6.59 |
| 1432316_PM_at   | ---                                                             | NA         | -0.05 | 2.08  | -0.45 | 6.62E-01 | 8.40E-01 | -6.59 |
| 1417876_PM_at   | Fcgr1                                                           | FCGR1B     | -0.05 | 2.34  | -0.45 | 6.62E-01 | 8.40E-01 | -6.59 |
| 1457016_PM_at   | Gm33628                                                         | NA         | 0.04  | 2.18  | 0.45  | 6.62E-01 | 8.40E-01 | -6.59 |
| 1457588_PM_at   | Vcp                                                             | VCP        | 0.04  | 2.54  | 0.45  | 6.62E-01 | 8.40E-01 | -6.59 |
| 1428560_PM_at   | Xpo5                                                            | NA         | 0.05  | 2.43  | 0.45  | 6.62E-01 | 8.40E-01 | -6.59 |
| 1418538_PM_at   | Kdelr3                                                          | KDEL3      | 0.05  | 2.17  | 0.45  | 6.62E-01 | 8.40E-01 | -6.59 |
| 1432378_PM_at   | C030004G16Rik                                                   | NA         | 0.06  | 2.34  | 0.45  | 6.62E-01 | 8.40E-01 | -6.59 |
| 1431791_PM_a_at | Ptpn13                                                          | PTPN13     | 0.07  | 2.99  | 0.45  | 6.62E-01 | 8.40E-01 | -6.59 |
| 1456504_PM_at   | Zfp182                                                          | ZNF182     | 0.09  | 2.97  | 0.45  | 6.62E-01 | 8.40E-01 | -6.59 |
| 1432850_PM_at   | ---                                                             | NA         | 0.09  | 2.72  | 0.45  | 6.62E-01 | 8.40E-01 | -6.59 |
| 1450718_PM_at   | Sh2b2                                                           | SH2B2      | 0.04  | 2.30  | 0.45  | 6.62E-01 | 8.40E-01 | -6.59 |
| 1447036_PM_at   | Chl1                                                            | CHL1       | 0.06  | 2.13  | 0.45  | 6.62E-01 | 8.40E-01 | -6.59 |
| 1447184_PM_at   | ---                                                             | NA         | 0.08  | 2.34  | 0.45  | 6.62E-01 | 8.40E-01 | -6.59 |
| 1433285_PM_at   | ---                                                             | NA         | 0.04  | 2.95  | 0.45  | 6.62E-01 | 8.41E-01 | -6.59 |
| 1421155_PM_at   | B3galt6                                                         | B3GALT6    | -0.03 | 2.76  | -0.45 | 6.63E-01 | 8.41E-01 | -6.59 |
| 1445392_PM_at   | ---                                                             | NA         | 0.04  | 2.63  | 0.45  | 6.63E-01 | 8.41E-01 | -6.59 |
| 1447267_PM_at   | C85319                                                          | NA         | 0.07  | 2.24  | 0.45  | 6.62E-01 | 8.41E-01 | -6.59 |
| 1432108_PM_at   | Pcgf6                                                           | NA         | 0.10  | 2.45  | 0.45  | 6.62E-01 | 8.41E-01 | -6.59 |
| 1438383_PM_x_at | Ppp2r1a                                                         | PPP2R1A    | 0.13  | 10.39 | 0.45  | 6.63E-01 | 8.41E-01 | -6.59 |
| 1436938_PM_at   | Rbms3                                                           | RBMS3      | 0.10  | 3.82  | 0.45  | 6.63E-01 | 8.41E-01 | -6.59 |
| 1422588_PM_at   | Krt6b                                                           | KRT6B      | -0.06 | 2.06  | -0.45 | 6.63E-01 | 8.41E-01 | -6.59 |
| 1433550_PM_at   | Chfr                                                            | CHFR       | 0.07  | 3.22  | 0.45  | 6.63E-01 | 8.41E-01 | -6.59 |
| 1421523_PM_at   | Fgf17                                                           | FGF17      | 0.04  | 2.23  | 0.45  | 6.63E-01 | 8.41E-01 | -6.59 |
| 1443110_PM_at   | Gtf2e1                                                          | GTF2E1     | -0.05 | 2.40  | -0.45 | 6.63E-01 | 8.41E-01 | -6.59 |
| 1427242_PM_at   | Ddx4                                                            | DDX4       | 0.06  | 2.54  | 0.45  | 6.63E-01 | 8.41E-01 | -6.59 |
| 1423216_PM_a_at | Fam32a                                                          | FAM32A     | -0.15 | 4.26  | -0.45 | 6.63E-01 | 8.41E-01 | -6.59 |
| 1455874_PM_at   | Taf6l /// Tmem179b                                              | TAF6L      | -0.06 | 2.67  | -0.45 | 6.63E-01 | 8.41E-01 | -6.59 |
| 1422266_PM_at   | Mycs                                                            | MYCN       | 0.04  | 2.09  | 0.45  | 6.63E-01 | 8.41E-01 | -6.59 |
| 1442643_PM_at   | Kdm6b                                                           | KDM6B      | 0.08  | 3.24  | 0.45  | 6.63E-01 | 8.41E-01 | -6.59 |
| 1453748_PM_a_at | Kif23                                                           | KIF23      | 0.16  | 2.59  | 0.45  | 6.63E-01 | 8.41E-01 | -6.59 |
| 1453245_PM_at   | 9130024F11Rik                                                   | NA         | -0.19 | 2.85  | -0.45 | 6.63E-01 | 8.41E-01 | -6.59 |
| 1431157_PM_at   | Gm2762                                                          | NA         | -0.04 | 2.20  | -0.45 | 6.63E-01 | 8.41E-01 | -6.59 |
| 1449395_PM_at   | Ankrd61                                                         | ANKRD61    | 0.04  | 2.05  | 0.45  | 6.63E-01 | 8.41E-01 | -6.59 |
| 1454355_PM_at   | ---                                                             | NA         | 0.05  | 2.02  | 0.45  | 6.63E-01 | 8.41E-01 | -6.59 |

|                 |                       |             |       |      |       |          |          |       |
|-----------------|-----------------------|-------------|-------|------|-------|----------|----------|-------|
| 1453453_PM_at   | 1700080016Rik         | MAGEA2      | -0.05 | 2.41 | -0.45 | 6.63E-01 | 8.41E-01 | -6.59 |
| 1425678_PM_a_at | Snrk                  | SNRK        | 0.09  | 3.33 | 0.45  | 6.63E-01 | 8.41E-01 | -6.59 |
| 1452165_PM_at   | Prl2b1                | PRL         | 0.11  | 2.20 | 0.45  | 6.63E-01 | 8.41E-01 | -6.59 |
| 1422527_PM_at   | H2-DMa                | HLA-DMA     | 0.05  | 2.22 | 0.45  | 6.63E-01 | 8.41E-01 | -6.59 |
| 1449897_PM_a_at | Cmc4 /// Mtcp1        | CMC4        | 0.17  | 3.72 | 0.45  | 6.63E-01 | 8.41E-01 | -6.59 |
| 1434545_PM_x_at | Bola2                 | BOLA2       | -0.16 | 4.09 | -0.45 | 6.63E-01 | 8.41E-01 | -6.59 |
| 1430517_PM_at   | Tex38                 | TEX38       | -0.04 | 2.53 | -0.45 | 6.63E-01 | 8.41E-01 | -6.59 |
| 1427941_PM_at   | Dicer1                | DI CER1     | 0.13  | 4.62 | 0.45  | 6.63E-01 | 8.41E-01 | -6.59 |
| 1456755_PM_at   | Trak1                 | TRAK1       | -0.13 | 2.51 | -0.45 | 6.64E-01 | 8.41E-01 | -6.59 |
| 1453407_PM_at   | Tex29                 | TEX29       | 0.04  | 2.31 | 0.45  | 6.64E-01 | 8.41E-01 | -6.59 |
| 1426888_PM_at   | Ehmt2                 | EHMT2       | 0.05  | 2.65 | 0.45  | 6.64E-01 | 8.41E-01 | -6.59 |
| 1425832_PM_a_at | Cxcr6                 | CXCR6       | 0.05  | 2.25 | 0.45  | 6.63E-01 | 8.41E-01 | -6.59 |
| 1449324_PM_at   | Ero1l                 | ERO1A       | -0.21 | 3.55 | -0.45 | 6.64E-01 | 8.41E-01 | -6.59 |
| 1451369_PM_at   | Commd5                | COMMD5      | 0.04  | 2.31 | 0.45  | 6.64E-01 | 8.41E-01 | -6.59 |
| 1453832_PM_at   | ---                   | NA          | 0.06  | 2.62 | 0.45  | 6.64E-01 | 8.41E-01 | -6.59 |
| 1415768_PM_a_at | Ube2r2                | UBE2R2      | -0.10 | 6.54 | -0.45 | 6.64E-01 | 8.41E-01 | -6.59 |
| 1446246_PM_at   | Gm438                 | AADACL4     | 0.04  | 2.00 | 0.45  | 6.64E-01 | 8.41E-01 | -6.59 |
| 1429626_PM_at   | Sftpa1                | SFTPA1      | 0.04  | 2.14 | 0.45  | 6.64E-01 | 8.41E-01 | -6.59 |
| 1429543_PM_at   | ---                   | NA          | 0.06  | 3.31 | 0.45  | 6.64E-01 | 8.41E-01 | -6.59 |
| 1443250_PM_at   | Rgs2                  | RGS2        | 0.09  | 2.52 | 0.45  | 6.64E-01 | 8.41E-01 | -6.59 |
| 1420641_PM_a_at | Sqrdl                 | AC090527.2  | -0.13 | 3.28 | -0.45 | 6.64E-01 | 8.41E-01 | -6.59 |
| 1440503_PM_at   | ---                   | NA          | -0.08 | 2.64 | -0.45 | 6.64E-01 | 8.41E-01 | -6.59 |
| 1423835_PM_at   | Zfp503                | ZNF503      | -0.08 | 2.76 | -0.45 | 6.64E-01 | 8.41E-01 | -6.59 |
| 1453448_PM_at   | 2310067E19Rik         | NA          | -0.07 | 3.36 | -0.45 | 6.64E-01 | 8.41E-01 | -6.59 |
| 1438464_PM_at   | Arid4a                | ARID4A      | -0.06 | 2.63 | -0.45 | 6.64E-01 | 8.41E-01 | -6.59 |
| 1438757_PM_at   | Zfp850                | NA          | -0.05 | 2.37 | -0.45 | 6.64E-01 | 8.41E-01 | -6.59 |
| 1458265_PM_at   | ---                   | NA          | 0.04  | 1.95 | 0.45  | 6.64E-01 | 8.41E-01 | -6.59 |
| 1458515_PM_at   | Zfp128                | ZNF8        | 0.05  | 2.55 | 0.45  | 6.64E-01 | 8.41E-01 | -6.59 |
| 1459394_PM_at   | D130052B06Rik         | NA          | 0.05  | 2.04 | 0.45  | 6.64E-01 | 8.41E-01 | -6.59 |
| 1419729_PM_at   | Tex11                 | TEX11       | 0.05  | 2.27 | 0.45  | 6.64E-01 | 8.41E-01 | -6.59 |
| 1455404_PM_at   | Jph2                  | JPH2        | 0.05  | 2.49 | 0.45  | 6.64E-01 | 8.41E-01 | -6.59 |
| 1443322_PM_at   | ---                   | NA          | 0.06  | 2.59 | 0.45  | 6.64E-01 | 8.41E-01 | -6.59 |
| 1441156_PM_at   | Cops3                 | COPS3       | 0.07  | 2.25 | 0.45  | 6.64E-01 | 8.41E-01 | -6.59 |
| 1417712_PM_at   | Eif2s2                | EIF2S2      | 0.12  | 4.92 | 0.45  | 6.64E-01 | 8.41E-01 | -6.59 |
| 1437690_PM_x_at | Csnk1d                | CSNK1D      | -0.20 | 8.08 | -0.45 | 6.64E-01 | 8.41E-01 | -6.59 |
| 1460339_PM_at   | Psm4                  | PSMA4       | -0.11 | 4.22 | -0.45 | 6.64E-01 | 8.41E-01 | -6.59 |
| 1455745_PM_at   | Clh8                  | KBTBD11-OT1 | -0.07 | 2.69 | -0.45 | 6.64E-01 | 8.41E-01 | -6.60 |
| 1431271_PM_at   | ---                   | NA          | -0.06 | 2.15 | -0.45 | 6.64E-01 | 8.41E-01 | -6.59 |
| 1432672_PM_at   | 4933407A17Rik         | NA          | -0.06 | 2.72 | -0.45 | 6.64E-01 | 8.41E-01 | -6.59 |
| 1457349_PM_at   | LOC102642336 /// Ttc6 | NA          | -0.05 | 2.41 | -0.45 | 6.64E-01 | 8.41E-01 | -6.60 |
| 1437551_PM_at   | Fam63a                | MINDY1      | 0.04  | 2.27 | 0.45  | 6.64E-01 | 8.41E-01 | -6.59 |
| 1444150_PM_at   | ---                   | NA          | 0.04  | 2.39 | 0.45  | 6.64E-01 | 8.41E-01 | -6.59 |
| 1457316_PM_at   | Map6                  | MAP6        | 0.05  | 3.03 | 0.45  | 6.64E-01 | 8.41E-01 | -6.60 |
| 1436527_PM_at   | ---                   | NA          | 0.06  | 2.48 | 0.45  | 6.64E-01 | 8.41E-01 | -6.60 |
| 1433277_PM_at   | ---                   | NA          | 0.07  | 3.06 | 0.45  | 6.64E-01 | 8.41E-01 | -6.60 |
| 1418796_PM_at   | Clec11a               | CLEC11A     | 0.08  | 2.45 | 0.45  | 6.64E-01 | 8.41E-01 | -6.59 |
| 1453197_PM_at   | Med25                 | NA          | 0.09  | 3.12 | 0.45  | 6.64E-01 | 8.41E-01 | -6.59 |
| 1437219_PM_at   | ---                   | NA          | 0.04  | 2.53 | 0.45  | 6.64E-01 | 8.41E-01 | -6.60 |
| 1428747_PM_at   | Trna1ap               | TRNAU1AP    | 0.12  | 3.61 | 0.45  | 6.65E-01 | 8.42E-01 | -6.60 |
| 1433284_PM_at   | ---                   | NA          | -0.04 | 2.32 | -0.45 | 6.65E-01 | 8.42E-01 | -6.60 |
| 1418489_PM_a_at | Calcl1                | CALCRL      | 0.04  | 2.06 | 0.45  | 6.65E-01 | 8.42E-01 | -6.60 |
| 1435526_PM_at   | Tor1aip2              | TOR1AI P2   | 0.09  | 3.46 | 0.45  | 6.65E-01 | 8.42E-01 | -6.60 |
| 1442230_PM_at   | ---                   | NA          | 0.10  | 2.71 | 0.45  | 6.65E-01 | 8.42E-01 | -6.60 |
| 1433744_PM_at   | Lrtm2                 | LRTM2       | -0.07 | 2.66 | -0.45 | 6.65E-01 | 8.42E-01 | -6.60 |
| 1453090_PM_x_at | Obox1 /// Obox2       | NA          | -0.04 | 1.99 | -0.45 | 6.65E-01 | 8.42E-01 | -6.60 |
| 1419098_PM_at   | Stom                  | STOM        | 0.07  | 2.29 | 0.45  | 6.65E-01 | 8.42E-01 | -6.60 |
| 1456836_PM_at   | ---                   | NA          | 0.04  | 1.93 | 0.45  | 6.65E-01 | 8.42E-01 | -6.60 |
| 1424068_PM_at   | Tcta                  | TCTA        | -0.04 | 2.44 | -0.45 | 6.65E-01 | 8.42E-01 | -6.60 |
| 1447559_PM_at   | Gpr25                 | NA          | -0.09 | 2.48 | -0.45 | 6.65E-01 | 8.42E-01 | -6.60 |
| 1425240_PM_at   | Zfp959                | NA          | -0.05 | 2.04 | -0.45 | 6.65E-01 | 8.42E-01 | -6.60 |
| 1443195_PM_at   | ---                   | NA          | 0.06  | 2.52 | 0.45  | 6.65E-01 | 8.42E-01 | -6.60 |
| 1449544_PM_a_at | Kcnh2                 | KCNH2       | -0.12 | 2.51 | -0.45 | 6.65E-01 | 8.42E-01 | -6.60 |
| 1453983_PM_a_at | Mettl16               | METTL16     | -0.10 | 3.85 | -0.45 | 6.65E-01 | 8.42E-01 | -6.60 |
| 1421769_PM_at   | Lmx1b                 | LMX1B       | -0.04 | 2.39 | -0.45 | 6.65E-01 | 8.42E-01 | -6.60 |
| 1452138_PM_a_at | Ace2                  | ACE2        | 0.06  | 2.65 | 0.45  | 6.65E-01 | 8.42E-01 | -6.60 |
| 1459777_PM_at   | Il1r1                 | IL1R1       | 0.04  | 2.06 | 0.45  | 6.65E-01 | 8.42E-01 | -6.60 |
| 1430976_PM_a_at | Mrp9                  | MRPL9       | -0.11 | 2.77 | -0.45 | 6.65E-01 | 8.42E-01 | -6.60 |
| 1431846_PM_at   | 4930546C10Rik         | NA          | 0.05  | 2.51 | 0.45  | 6.65E-01 | 8.42E-01 | -6.60 |
| 1437337_PM_x_at | Fuk                   | FUK         | -0.13 | 5.56 | -0.44 | 6.65E-01 | 8.42E-01 | -6.60 |
| 1441925_PM_at   | Slc15a4               | SLC15A4     | 0.07  | 2.29 | 0.44  | 6.65E-01 | 8.42E-01 | -6.60 |
| 1436752_PM_at   | Tbccd1                | TBCCD1      | -0.05 | 2.53 | -0.44 | 6.66E-01 | 8.42E-01 | -6.60 |
| 1419683_PM_at   | Trp53rkb              | TP53RK      | -0.10 | 3.70 | -0.44 | 6.66E-01 | 8.42E-01 | -6.60 |
| 1437937_PM_at   | Ackr2                 | ACKR2       | 0.13  | 2.92 | 0.44  | 6.66E-01 | 8.42E-01 | -6.60 |
| 1441400_PM_at   | Tma16                 | TMA16       | -0.04 | 2.46 | -0.44 | 6.66E-01 | 8.42E-01 | -6.60 |
| 1437646_PM_at   | Znrf3                 | ZNRF3       | 0.04  | 2.90 | 0.44  | 6.66E-01 | 8.42E-01 | -6.60 |



|                      |                |            |       |      |       |          |          |       |
|----------------------|----------------|------------|-------|------|-------|----------|----------|-------|
| 1446665_PM_at        | C80918         | NA         | 0.04  | 2.32 | 0.44  | 6.66E-01 | 8.42E-01 | -6.60 |
| 1445023_PM_at        | ---            | NA         | -0.04 | 2.21 | -0.44 | 6.66E-01 | 8.42E-01 | -6.60 |
| 1457335_PM_at        | Gm16794        | NA         | -0.07 | 2.36 | -0.44 | 6.66E-01 | 8.42E-01 | -6.60 |
| 1453914_PM_at        | ---            | NA         | 0.06  | 2.53 | 0.44  | 6.66E-01 | 8.42E-01 | -6.60 |
| 1446569_PM_at        | ---            | NA         | 0.11  | 3.08 | 0.44  | 6.66E-01 | 8.42E-01 | -6.60 |
| 1455415_PM_at        | A730056A06Rik  | NA         | 0.05  | 2.19 | 0.44  | 6.66E-01 | 8.42E-01 | -6.60 |
| 1436278_PM_at        | Fundc1         | NA         | -0.20 | 3.12 | -0.44 | 6.66E-01 | 8.42E-01 | -6.60 |
| 1422576_PM_at        | Atxn10         | ATXN10     | -0.09 | 6.50 | -0.44 | 6.66E-01 | 8.42E-01 | -6.60 |
| 1429565_PM_s_at      | Lce1m          | NA         | 0.05  | 2.49 | 0.44  | 6.66E-01 | 8.42E-01 | -6.60 |
| 1427672_PM_a_at      | Kdm6a          | KDM6A      | 0.06  | 2.86 | 0.44  | 6.66E-01 | 8.42E-01 | -6.60 |
| 1430498_PM_at        | ---            | NA         | 0.05  | 2.48 | 0.44  | 6.66E-01 | 8.43E-01 | -6.60 |
| 1429349_PM_at        | Hmgb4          | HMGB4      | 0.04  | 2.47 | 0.44  | 6.66E-01 | 8.43E-01 | -6.60 |
| 1416214_PM_at        | Mcm4           | MCM4       | 0.07  | 2.38 | 0.44  | 6.66E-01 | 8.43E-01 | -6.60 |
| 1436298_PM_x_at      | Paics          | PAICS      | -0.31 | 5.28 | -0.44 | 6.66E-01 | 8.43E-01 | -6.60 |
| 1458047_PM_at        | Tnfsf13b       | NA         | -0.04 | 2.18 | -0.44 | 6.66E-01 | 8.43E-01 | -6.60 |
| 1443479_PM_at        | ---            | NA         | 0.04  | 2.06 | 0.44  | 6.66E-01 | 8.43E-01 | -6.60 |
| 1438934_PM_x_at      | Sema4a         | SEMA4A     | -0.09 | 4.49 | -0.44 | 6.66E-01 | 8.43E-01 | -6.60 |
| 1449690_PM_x_at      | ---            | NA         | 0.03  | 2.00 | 0.44  | 6.66E-01 | 8.43E-01 | -6.60 |
| 1449493_PM_at        | Insl5          | INSL5      | 0.04  | 2.33 | 0.44  | 6.66E-01 | 8.43E-01 | -6.60 |
| 1440436_PM_at        | Gm5083         | NA         | 0.06  | 2.46 | 0.44  | 6.66E-01 | 8.43E-01 | -6.60 |
| 1423688_PM_at        | Man2c1         | MAN2C1     | 0.06  | 3.12 | 0.44  | 6.66E-01 | 8.43E-01 | -6.60 |
| 1430428_PM_at        | ---            | NA         | 0.06  | 3.22 | 0.44  | 6.66E-01 | 8.43E-01 | -6.60 |
| 1450551_PM_x_at      | Klra15         | NA         | 0.04  | 2.09 | 0.44  | 6.66E-01 | 8.43E-01 | -6.60 |
| 1440640_PM_at        | ---            | NA         | 0.04  | 2.37 | 0.44  | 6.66E-01 | 8.43E-01 | -6.60 |
| 1421669_PM_at        | Sult3a1        | NA         | 0.04  | 2.19 | 0.44  | 6.66E-01 | 8.43E-01 | -6.60 |
| 1440603_PM_at        | Asb18          | ASB18      | 0.07  | 2.61 | 0.44  | 6.66E-01 | 8.43E-01 | -6.60 |
| 1460632_PM_at        | Rdh10          | RDH10      | -0.05 | 2.26 | -0.44 | 6.66E-01 | 8.43E-01 | -6.60 |
| 1429558_PM_a_at      | Larp7          | LARP7      | -0.11 | 4.16 | -0.44 | 6.67E-01 | 8.43E-01 | -6.60 |
| 1447567_PM_at        | ---            | NA         | 0.27  | 2.99 | 0.44  | 6.67E-01 | 8.43E-01 | -6.60 |
| 1427985_PM_at        | Spin4          | SPIN4      | -0.06 | 2.54 | -0.44 | 6.67E-01 | 8.43E-01 | -6.60 |
| 1417283_PM_at        | Lynx1          | LYNX1      | 0.18  | 4.75 | 0.44  | 6.67E-01 | 8.43E-01 | -6.60 |
| 1450891_PM_at        | Srp19          | ACO08575.2 | 0.22  | 6.97 | 0.44  | 6.67E-01 | 8.43E-01 | -6.60 |
| 1449135_PM_at        | Sox18          | SOX18      | -0.06 | 2.49 | -0.44 | 6.67E-01 | 8.43E-01 | -6.60 |
| 1423603_PM_at        | Zfpm1          | ZFPM1      | 0.04  | 2.12 | 0.44  | 6.67E-01 | 8.43E-01 | -6.60 |
| 1445164_PM_at        | ---            | NA         | -0.07 | 2.31 | -0.44 | 6.67E-01 | 8.43E-01 | -6.60 |
| 1430294_PM_at        | Ssbp1          | SSBP1      | 0.06  | 2.76 | 0.44  | 6.67E-01 | 8.43E-01 | -6.60 |
| 1422022_PM_at        | Zfp319         | ZNF319     | 0.03  | 2.19 | 0.44  | 6.67E-01 | 8.43E-01 | -6.60 |
| 1419966_PM_at        | Tubb2a-ps2     | NA         | 0.04  | 2.00 | 0.44  | 6.67E-01 | 8.43E-01 | -6.60 |
| 1438946_PM_at        | Pdgfra         | PDGFRA     | 0.11  | 2.51 | 0.44  | 6.67E-01 | 8.43E-01 | -6.60 |
| 1449078_PM_at        | St3gal6        | ST3GAL6    | 0.06  | 2.30 | 0.44  | 6.67E-01 | 8.43E-01 | -6.60 |
| 1422191_PM_at        | Cd200r1        | CD200R1L   | 0.05  | 2.79 | 0.44  | 6.67E-01 | 8.43E-01 | -6.60 |
| 1416667_PM_at        | Ebp            | EBP        | -0.08 | 2.88 | -0.44 | 6.67E-01 | 8.43E-01 | -6.60 |
| 1435971_PM_at        | Rims3          | RIMS3      | -0.06 | 2.32 | -0.44 | 6.67E-01 | 8.43E-01 | -6.60 |
| 1443753_PM_at        | Gals           | GALNS      | 0.03  | 1.93 | 0.44  | 6.67E-01 | 8.43E-01 | -6.60 |
| 1443047_PM_at        | Gm26911        | NA         | 0.07  | 2.69 | 0.44  | 6.67E-01 | 8.43E-01 | -6.60 |
| 1451342_PM_at        | Spon1          | SPON1      | 0.11  | 4.29 | 0.44  | 6.67E-01 | 8.43E-01 | -6.60 |
| 1448982_PM_at        | Klk6           | KLK6       | 0.06  | 2.65 | 0.44  | 6.67E-01 | 8.43E-01 | -6.60 |
| 1416101_PM_a_at      | Hist1h1c       | HIST1H1C   | 0.24  | 5.11 | 0.44  | 6.67E-01 | 8.43E-01 | -6.60 |
| 1452645_PM_x_at      | Klra1///Klra22 | NA         | 0.04  | 1.97 | 0.44  | 6.67E-01 | 8.43E-01 | -6.60 |
| AFFX-r2-Ec-bioC-3_at | ---            | NA         | 0.06  | 8.46 | 0.44  | 6.67E-01 | 8.43E-01 | -6.60 |
| 1424976_PM_at        | Rhov           | RHOV       | 0.09  | 2.57 | 0.44  | 6.67E-01 | 8.43E-01 | -6.60 |
| 1434174_PM_at        | Lysmd3         | NA         | 0.09  | 3.30 | 0.44  | 6.67E-01 | 8.43E-01 | -6.60 |
| 1434722_PM_at        | Ampd1          | AMPD1      | 0.04  | 2.17 | 0.44  | 6.67E-01 | 8.43E-01 | -6.60 |
| 1458944_PM_at        | Gm4251         | NA         | 0.04  | 2.41 | 0.44  | 6.67E-01 | 8.43E-01 | -6.60 |
| 1429940_PM_at        | Cdc73          | CDC73      | -0.13 | 3.61 | -0.44 | 6.68E-01 | 8.43E-01 | -6.60 |
| 1452198_PM_at        | Kdm2b          | KDM2B      | -0.12 | 3.26 | -0.44 | 6.68E-01 | 8.43E-01 | -6.60 |
| 1439938_PM_at        | Stk38          | STK38      | -0.08 | 2.72 | -0.44 | 6.68E-01 | 8.43E-01 | -6.60 |
| 1417519_PM_at        | Plag12         | PLAGL2     | 0.05  | 2.52 | 0.44  | 6.68E-01 | 8.43E-01 | -6.60 |
| 1456925_PM_at        | P2rx6          | P2RX6      | 0.05  | 2.34 | 0.44  | 6.68E-01 | 8.43E-01 | -6.60 |
| 1441671_PM_at        | ---            | NA         | 0.08  | 2.49 | 0.44  | 6.68E-01 | 8.43E-01 | -6.60 |
| 1436156_PM_at        | Ccar1          | CCAR1      | 0.27  | 5.80 | 0.44  | 6.68E-01 | 8.43E-01 | -6.60 |
| 1443166_PM_at        | ---            | NA         | 0.20  | 3.22 | 0.44  | 6.68E-01 | 8.43E-01 | -6.60 |
| 1422852_PM_at        | Cib2           | CIB2       | 0.05  | 2.45 | 0.44  | 6.68E-01 | 8.43E-01 | -6.60 |
| 1450591_PM_at        | Offr154        | NA         | 0.06  | 2.43 | 0.44  | 6.68E-01 | 8.43E-01 | -6.60 |
| 1435438_PM_at        | Sox8           | SOX8       | 0.09  | 3.01 | 0.44  | 6.68E-01 | 8.43E-01 | -6.60 |
| 1448022_PM_at        | ---            | NA         | -0.10 | 2.44 | -0.44 | 6.68E-01 | 8.43E-01 | -6.60 |
| 1451032_PM_at        | Fhl4           | NA         | -0.05 | 2.20 | -0.44 | 6.68E-01 | 8.44E-01 | -6.60 |
| 1428633_PM_at        | ---            | NA         | 0.05  | 2.80 | 0.44  | 6.68E-01 | 8.44E-01 | -6.60 |
| 1423335_PM_at        | 1110004F10Rik  | C11orf58   | -0.12 | 5.07 | -0.44 | 6.68E-01 | 8.44E-01 | -6.60 |
| 1449991_PM_at        | Cd244          | CD244      | 0.08  | 2.68 | 0.44  | 6.68E-01 | 8.44E-01 | -6.60 |
| 1455075_PM_at        | Pigv           | PIGV       | 0.11  | 2.34 | 0.44  | 6.68E-01 | 8.44E-01 | -6.60 |
| 1440525_PM_at        | Acvr2b         | NA         | -0.07 | 2.51 | -0.44 | 6.68E-01 | 8.44E-01 | -6.60 |
| 1434117_PM_at        | Tceb3          | ELOA       | -0.12 | 3.42 | -0.44 | 6.68E-01 | 8.44E-01 | -6.60 |
| 1452975_PM_at        | Etnppl         | ETNPPL     | 0.23  | 3.28 | 0.44  | 6.68E-01 | 8.44E-01 | -6.60 |
| 1424950_PM_at        | Sox9           | SOX9       | -0.05 | 2.02 | -0.44 | 6.68E-01 | 8.44E-01 | -6.60 |

|                 |                          |           |       |      |       |          |          |       |
|-----------------|--------------------------|-----------|-------|------|-------|----------|----------|-------|
| 1453629_PM_at   | 4930478L05Rik            | NA        | 0.03  | 2.33 | 0.44  | 6.68E-01 | 8.44E-01 | -6.60 |
| 1455557_PM_at   | Gm17750                  | NA        | 0.04  | 2.46 | 0.44  | 6.68E-01 | 8.44E-01 | -6.60 |
| 1459609_PM_at   | ---                      | NA        | -0.04 | 2.14 | -0.44 | 6.68E-01 | 8.44E-01 | -6.60 |
| 1434617_PM_x_at | Slc38a10                 | SLC38A10  | -0.06 | 2.89 | -0.44 | 6.69E-01 | 8.44E-01 | -6.60 |
| 1453808_PM_at   | 2210416O15Rik /// Cuedc1 | CUEDC1    | 0.04  | 2.40 | 0.44  | 6.69E-01 | 8.44E-01 | -6.60 |
| 1460217_PM_at   | Pr17d1                   | PRL       | 0.04  | 2.23 | 0.44  | 6.69E-01 | 8.44E-01 | -6.60 |
| 1439135_PM_at   | Gm36457                  | NA        | 0.09  | 2.49 | 0.44  | 6.68E-01 | 8.44E-01 | -6.60 |
| 1419903_PM_at   | Dbndd2                   | DBNDD2    | 0.09  | 3.20 | 0.44  | 6.69E-01 | 8.44E-01 | -6.60 |
| 1438175_PM_x_at | Myom2                    | MYOM2     | 0.13  | 3.09 | 0.44  | 6.69E-01 | 8.44E-01 | -6.60 |
| 1438978_PM_x_at | Ndn                      | NDN       | 0.04  | 2.17 | 0.44  | 6.69E-01 | 8.44E-01 | -6.60 |
| 1438293_PM_at   | Tchp                     | TCHP      | 0.05  | 2.31 | 0.44  | 6.69E-01 | 8.44E-01 | -6.60 |
| 1431813_PM_at   | Myo18b                   | MYO18B    | 0.07  | 2.45 | 0.44  | 6.69E-01 | 8.44E-01 | -6.60 |
| 1439885_PM_at   | Hoxc5                    | HOXC5     | 0.03  | 1.84 | 0.44  | 6.69E-01 | 8.44E-01 | -6.60 |
| 1444575_PM_at   | ---                      | NA        | 0.13  | 2.87 | 0.44  | 6.69E-01 | 8.44E-01 | -6.60 |
| 1438379_PM_x_at | Aagab                    | AAGAB     | -0.10 | 6.53 | -0.44 | 6.69E-01 | 8.44E-01 | -6.60 |
| 1447311_PM_at   | Slc6a2                   | SLC6A2    | 0.04  | 2.52 | 0.44  | 6.69E-01 | 8.44E-01 | -6.60 |
| 1456102_PM_a_at | Cul5                     | CUL5      | 0.32  | 6.88 | 0.44  | 6.69E-01 | 8.44E-01 | -6.60 |
| 1446263_PM_at   | AU015619                 | NA        | -0.05 | 2.17 | -0.44 | 6.69E-01 | 8.44E-01 | -6.60 |
| 1418499_PM_a_at | Kcne3                    | KCNE3     | -0.06 | 2.37 | -0.44 | 6.69E-01 | 8.44E-01 | -6.60 |
| 1426175_PM_a_at | Tpsab1                   | NA        | 0.04  | 2.42 | 0.44  | 6.69E-01 | 8.44E-01 | -6.60 |
| 1438642_PM_at   | Fam227b                  | FAM227B   | 0.06  | 6.43 | 0.44  | 6.69E-01 | 8.44E-01 | -6.60 |
| 1427405_PM_s_at | Rab11fip5                | RAB11FIP5 | 0.20  | 6.15 | 0.44  | 6.69E-01 | 8.44E-01 | -6.60 |
| 1439696_PM_at   | ---                      | NA        | 0.08  | 3.50 | 0.44  | 6.69E-01 | 8.44E-01 | -6.60 |
| 1442235_PM_at   | ---                      | NA        | 0.07  | 2.28 | 0.44  | 6.69E-01 | 8.44E-01 | -6.60 |
| 1418125_PM_at   | Ino80                    | INO80     | 0.05  | 4.09 | 0.44  | 6.69E-01 | 8.44E-01 | -6.60 |
| 1437396_PM_at   | Creb3l2                  | CREB3L2   | -0.07 | 2.74 | -0.44 | 6.69E-01 | 8.45E-01 | -6.60 |
| 1430210_PM_at   | Pgpep1l                  | PGPEP1L   | -0.05 | 2.25 | -0.44 | 6.69E-01 | 8.45E-01 | -6.60 |
| 1437122_PM_at   | Bcl2                     | BCL2      | -0.04 | 2.28 | -0.44 | 6.69E-01 | 8.45E-01 | -6.60 |
| 1450300_PM_at   | Gabbr1                   | NA        | 0.03  | 2.48 | 0.44  | 6.69E-01 | 8.45E-01 | -6.60 |
| 1451605_PM_at   | Dyx1c1                   | DNAAF4    | 0.05  | 2.73 | 0.44  | 6.69E-01 | 8.45E-01 | -6.60 |
| 1421499_PM_a_at | Ptpn14                   | PTPN14    | 0.07  | 2.52 | 0.44  | 6.69E-01 | 8.45E-01 | -6.60 |
| 1425153_PM_at   | Myh2                     | MYH2      | 0.07  | 2.36 | 0.44  | 6.69E-01 | 8.45E-01 | -6.60 |
| 1455162_PM_at   | Ttc39a                   | TTC39A    | 0.07  | 2.63 | 0.44  | 6.69E-01 | 8.45E-01 | -6.60 |
| 1421223_PM_a_at | Anxa4                    | ANXA4     | 0.07  | 2.89 | 0.44  | 6.69E-01 | 8.45E-01 | -6.60 |
| 1423986_PM_a_at | Shisa5                   | SHISA5    | 0.19  | 2.60 | 0.44  | 6.69E-01 | 8.45E-01 | -6.60 |
| 1424397_PM_at   | Dhx36                    | DHX36     | -0.05 | 2.36 | -0.44 | 6.69E-01 | 8.45E-01 | -6.60 |
| 1419800_PM_at   | Gm29638                  | NA        | 0.04  | 2.20 | 0.44  | 6.70E-01 | 8.45E-01 | -6.60 |
| 1447867_PM_x_at | Pomk                     | POMK      | 0.04  | 2.43 | 0.44  | 6.70E-01 | 8.45E-01 | -6.60 |
| 1440890_PM_a_at | Zfp809                   | NA        | -0.27 | 4.28 | -0.44 | 6.70E-01 | 8.45E-01 | -6.60 |
| 1445860_PM_at   | Tspan11                  | TSPAN11   | -0.06 | 2.59 | -0.44 | 6.70E-01 | 8.45E-01 | -6.60 |
| 1440546_PM_at   | ---                      | NA        | 0.04  | 2.47 | 0.44  | 6.70E-01 | 8.45E-01 | -6.60 |
| 1440185_PM_x_at | Sae1                     | SAE1      | 0.05  | 3.20 | 0.44  | 6.70E-01 | 8.45E-01 | -6.60 |
| 1443785_PM_x_at | Pdlim7                   | PDLIM7    | 0.06  | 2.63 | 0.44  | 6.70E-01 | 8.45E-01 | -6.60 |
| 1442441_PM_at   | Rnasek                   | RNASEK    | 0.07  | 2.14 | 0.44  | 6.70E-01 | 8.45E-01 | -6.60 |
| 1434326_PM_x_at | Coro2b                   | CORO2B    | 0.19  | 4.31 | 0.44  | 6.70E-01 | 8.45E-01 | -6.60 |
| 1447783_PM_x_at | Slc25a39                 | SLC25A39  | 0.20  | 6.13 | 0.44  | 6.70E-01 | 8.45E-01 | -6.60 |
| 1420504_PM_at   | Slc6a14                  | SLC6A14   | -0.03 | 2.14 | -0.44 | 6.70E-01 | 8.45E-01 | -6.60 |
| 1422437_PM_at   | Col5a2                   | COL5A2    | 0.05  | 2.29 | 0.44  | 6.70E-01 | 8.45E-01 | -6.60 |
| 1427855_PM_at   | Igkv19-93                | NA        | -0.13 | 3.03 | -0.44 | 6.70E-01 | 8.45E-01 | -6.60 |
| 1420364_PM_at   | Gpr87                    | GPR87     | 0.05  | 2.57 | 0.44  | 6.70E-01 | 8.45E-01 | -6.60 |
| 1428522_PM_at   | Ttf2                     | TTF2      | -0.07 | 2.36 | -0.44 | 6.70E-01 | 8.45E-01 | -6.60 |
| 1433439_PM_at   | Cpne1                    | CPNE1     | -0.19 | 4.37 | -0.44 | 6.70E-01 | 8.45E-01 | -6.60 |
| 1459250_PM_at   | Tshz2                    | TSHZ2     | -0.07 | 2.24 | -0.44 | 6.70E-01 | 8.45E-01 | -6.60 |
| 1446786_PM_at   | ---                      | NA        | 0.04  | 1.95 | 0.44  | 6.70E-01 | 8.45E-01 | -6.60 |
| 1452544_PM_x_at | H2-D1 /// LOC102641613   | NA        | 0.08  | 3.50 | 0.44  | 6.70E-01 | 8.45E-01 | -6.60 |
| 1445223_PM_at   | Pear1                    | PEAR1     | -0.04 | 2.14 | -0.44 | 6.70E-01 | 8.45E-01 | -6.60 |
| 1422075_PM_at   | Cdx2                     | CDX2      | 0.05  | 2.40 | 0.44  | 6.70E-01 | 8.45E-01 | -6.60 |
| 1424694_PM_at   | Fam210b                  | FAM210B   | -0.08 | 3.84 | -0.44 | 6.71E-01 | 8.45E-01 | -6.60 |
| 1440077_PM_at   | 6330549D23Rik            | NA        | -0.05 | 2.37 | -0.44 | 6.70E-01 | 8.45E-01 | -6.60 |
| 1456362_PM_at   | Cyp11b1                  | CYP11B1   | 0.06  | 2.54 | 0.44  | 6.71E-01 | 8.45E-01 | -6.60 |
| 1440531_PM_at   | Rbm11                    | RBM11     | 0.06  | 2.58 | 0.44  | 6.70E-01 | 8.45E-01 | -6.60 |
| 1455110_PM_at   | Gabpb2                   | GABPB2    | 0.07  | 2.26 | 0.44  | 6.70E-01 | 8.45E-01 | -6.60 |
| 1443651_PM_at   | Phc3                     | PHC3      | 0.07  | 2.06 | 0.44  | 6.71E-01 | 8.45E-01 | -6.60 |
| 1437343_PM_x_at | Atad3a                   | ATAD3C    | 0.23  | 3.37 | 0.44  | 6.70E-01 | 8.45E-01 | -6.60 |
| 1417584_PM_at   | Slc11a2                  | SLC11A2   | -0.09 | 2.41 | -0.44 | 6.71E-01 | 8.45E-01 | -6.60 |
| 1440711_PM_at   | ---                      | NA        | -0.04 | 2.40 | -0.44 | 6.71E-01 | 8.45E-01 | -6.60 |
| 1420461_PM_at   | Mst1r                    | MST1R     | 0.05  | 2.68 | 0.44  | 6.71E-01 | 8.45E-01 | -6.60 |
| 1423469_PM_at   | 1700129C05Rik            | NA        | 0.07  | 2.57 | 0.44  | 6.71E-01 | 8.45E-01 | -6.60 |
| 1437691_PM_at   | Anxa2                    | ANXA2     | -0.04 | 2.11 | -0.44 | 6.71E-01 | 8.45E-01 | -6.60 |
| 1449755_PM_at   | D7Ert183e                | NA        | 0.08  | 2.87 | 0.44  | 6.71E-01 | 8.45E-01 | -6.60 |
| 1432669_PM_at   | ---                      | NA        | 0.05  | 2.37 | 0.44  | 6.71E-01 | 8.45E-01 | -6.60 |
| 1447636_PM_x_at | Tmco4                    | TMCO4     | 0.05  | 2.45 | 0.44  | 6.71E-01 | 8.45E-01 | -6.60 |
| 1418213_PM_at   | Krt23                    | KRT23     | 0.05  | 2.77 | 0.44  | 6.71E-01 | 8.45E-01 | -6.60 |
| 1431390_PM_a_at | Polr2m                   | POLR2M    | -0.14 | 4.46 | -0.44 | 6.71E-01 | 8.46E-01 | -6.60 |

|                 |                           |            |       |      |       |          |          |       |
|-----------------|---------------------------|------------|-------|------|-------|----------|----------|-------|
| 1417751_PM_at   | Stk10                     | STK10      | -0.09 | 2.66 | -0.44 | 6.71E-01 | 8.46E-01 | -6.60 |
| 1424680_PM_at   | Fam26e                    | FAM26E     | -0.09 | 2.54 | -0.44 | 6.71E-01 | 8.46E-01 | -6.60 |
| 1441705_PM_at   | AU015680                  | NA         | -0.06 | 2.95 | -0.44 | 6.71E-01 | 8.46E-01 | -6.60 |
| 1455761_PM_at   | 2310009B15Rik             | C1orf53    | 0.05  | 2.23 | 0.44  | 6.71E-01 | 8.46E-01 | -6.60 |
| 1440585_PM_at   | Stx6                      | STX6       | 0.06  | 2.68 | 0.44  | 6.71E-01 | 8.46E-01 | -6.60 |
| 1425542_PM_a_at | Ppp2r5c                   | PPP2R5C    | 0.18  | 5.68 | 0.44  | 6.71E-01 | 8.46E-01 | -6.60 |
| 1421108_PM_at   | Cml2                      | NAT8       | -0.04 | 2.33 | -0.44 | 6.71E-01 | 8.46E-01 | -6.60 |
| 1437729_PM_at   | Rpl27a                    | NA         | -0.13 | 6.73 | -0.44 | 6.71E-01 | 8.46E-01 | -6.60 |
| 1444228_PM_s_at | Herc2                     | HERC2      | 0.26  | 5.95 | 0.44  | 6.71E-01 | 8.46E-01 | -6.60 |
| 1417808_PM_at   | 2310050C09Rik             | C1orf68    | -0.04 | 2.16 | -0.44 | 6.71E-01 | 8.46E-01 | -6.60 |
| 1436273_PM_at   | Pms2                      | PMS2       | 0.06  | 2.53 | 0.44  | 6.71E-01 | 8.46E-01 | -6.60 |
| 1459298_PM_at   | Aebp1                     | AEBP1      | 0.04  | 2.44 | 0.44  | 6.71E-01 | 8.46E-01 | -6.60 |
| 1430512_PM_a_at | Igbp1b                    | NA         | 0.04  | 2.11 | 0.44  | 6.71E-01 | 8.46E-01 | -6.60 |
| 1454342_PM_at   | C030007D22Rik             | NA         | 0.04  | 2.07 | 0.44  | 6.71E-01 | 8.46E-01 | -6.60 |
| 1452475_PM_at   | Pcsk5                     | PCSK5      | 0.05  | 2.23 | 0.44  | 6.72E-01 | 8.46E-01 | -6.60 |
| 1416909_PM_at   | Pigyl                     | PIGY       | 0.13  | 3.97 | 0.44  | 6.72E-01 | 8.46E-01 | -6.60 |
| 1457926_PM_at   | Rnpepl1                   | RNPEPL1    | 0.06  | 2.18 | 0.44  | 6.72E-01 | 8.46E-01 | -6.60 |
| 1436947_PM_a_at | Txn1                      | TXNL1      | 0.25  | 6.90 | 0.44  | 6.72E-01 | 8.46E-01 | -6.60 |
| 1448211_PM_at   | Atp6v0e2                  | ATP6V0E2   | -0.09 | 4.39 | -0.44 | 6.72E-01 | 8.46E-01 | -6.60 |
| 1419399_PM_at   | Mtpt                      | MTTP       | 0.05  | 2.44 | 0.44  | 6.72E-01 | 8.46E-01 | -6.60 |
| 1438425_PM_at   | Gtf3c1                    | GTF3C1     | -0.16 | 4.70 | -0.44 | 6.72E-01 | 8.46E-01 | -6.60 |
| 1428268_PM_at   | Psd2                      | PSD2       | -0.13 | 3.26 | -0.44 | 6.72E-01 | 8.46E-01 | -6.60 |
| 1431479_PM_at   | 4921524L21Rik             | NA         | -0.07 | 2.88 | -0.44 | 6.72E-01 | 8.46E-01 | -6.60 |
| 1416613_PM_at   | Cyp1b1                    | CYP1B1     | 0.04  | 2.09 | 0.44  | 6.72E-01 | 8.46E-01 | -6.60 |
| 1435501_PM_at   | Atg2b                     | ATG2B      | 0.08  | 2.47 | 0.44  | 6.72E-01 | 8.46E-01 | -6.60 |
| 1453265_PM_at   | Egtn                      | EQTN       | -0.12 | 2.40 | -0.44 | 6.72E-01 | 8.46E-01 | -6.60 |
| 1443603_PM_at   | ---                       | NA         | 0.05  | 2.25 | 0.44  | 6.72E-01 | 8.46E-01 | -6.60 |
| 1430664_PM_at   | Zfp169                    | ZNF169     | 0.10  | 3.15 | 0.44  | 6.72E-01 | 8.46E-01 | -6.60 |
| 1438313_PM_at   | Rab30                     | NA         | -0.12 | 2.32 | -0.44 | 6.72E-01 | 8.46E-01 | -6.60 |
| 1452326_PM_at   | Atp2c2                    | ATP2C2     | 0.04  | 2.28 | 0.44  | 6.72E-01 | 8.46E-01 | -6.60 |
| 1432341_PM_at   | 1700022A22Rik             | NA         | 0.07  | 2.67 | 0.44  | 6.72E-01 | 8.46E-01 | -6.60 |
| 1442256_PM_at   | Prkcd                     | PRKCD      | -0.15 | 3.68 | -0.44 | 6.72E-01 | 8.46E-01 | -6.60 |
| 1458783_PM_at   | ---                       | NA         | 0.05  | 2.14 | 0.44  | 6.72E-01 | 8.46E-01 | -6.60 |
| 1456846_PM_at   | Zbtb42                    | ZBTB42     | -0.05 | 2.34 | -0.44 | 6.72E-01 | 8.46E-01 | -6.60 |
| 1429653_PM_at   | Gse1                      | GSE1       | 0.04  | 2.62 | 0.44  | 6.72E-01 | 8.46E-01 | -6.60 |
| 1458420_PM_at   | Agbl5                     | AGBL5      | 0.04  | 2.45 | 0.44  | 6.72E-01 | 8.46E-01 | -6.60 |
| 1417904_PM_at   | Dclre1a                   | DCLRE1A    | 0.09  | 2.80 | 0.44  | 6.72E-01 | 8.46E-01 | -6.60 |
| 1443700_PM_at   | Bc9l                      | NA         | 0.05  | 2.57 | 0.44  | 6.72E-01 | 8.46E-01 | -6.60 |
| 1427423_PM_at   | Cyb5rl                    | CYB5RL     | 0.06  | 2.61 | 0.44  | 6.72E-01 | 8.46E-01 | -6.60 |
| 1434375_PM_at   | Fam168a                   | FAM168A    | 0.14  | 3.61 | 0.44  | 6.72E-01 | 8.46E-01 | -6.60 |
| 1442903_PM_at   | ---                       | NA         | -0.19 | 3.40 | -0.44 | 6.72E-01 | 8.46E-01 | -6.60 |
| 1416602_PM_a_at | Rad52                     | RAD52      | -0.18 | 4.04 | -0.44 | 6.72E-01 | 8.46E-01 | -6.60 |
| 1427821_PM_at   | Epha6                     | NA         | -0.06 | 2.80 | -0.44 | 6.72E-01 | 8.46E-01 | -6.60 |
| 1436043_PM_at   | Scn7a                     | SCN7A      | 0.05  | 1.95 | 0.44  | 6.72E-01 | 8.46E-01 | -6.60 |
| 1441107_PM_at   | Dmrt2                     | DMRT2      | 0.06  | 2.46 | 0.44  | 6.72E-01 | 8.46E-01 | -6.60 |
| 1430385_PM_a_at | Glb1l                     | GLB1L      | 0.09  | 2.57 | 0.44  | 6.72E-01 | 8.46E-01 | -6.60 |
| 1420862_PM_at   | Dctn4                     | DCTN4      | 0.13  | 2.88 | 0.44  | 6.72E-01 | 8.46E-01 | -6.60 |
| 1438925_PM_x_at | Atp6v0c /// Atp6v0c-ps2   | ATP6VOC    | 0.14  | 9.58 | 0.44  | 6.72E-01 | 8.46E-01 | -6.60 |
| 1417142_PM_at   | Fam120b                   | FAM120B    | -0.11 | 3.10 | -0.44 | 6.72E-01 | 8.46E-01 | -6.60 |
| 1432644_PM_at   | 6430711C07Rik             | NA         | 0.05  | 2.36 | 0.43  | 6.73E-01 | 8.46E-01 | -6.60 |
| 1433184_PM_at   | ---                       | NA         | 0.28  | 4.32 | 0.43  | 6.73E-01 | 8.46E-01 | -6.60 |
| 1431665_PM_a_at | Timm8b                    | TIMM8B     | -0.09 | 3.65 | -0.43 | 6.73E-01 | 8.46E-01 | -6.60 |
| 1417458_PM_s_at | Cks2                      | CKS2       | -0.04 | 2.36 | -0.43 | 6.73E-01 | 8.46E-01 | -6.60 |
| 1444207_PM_at   | ---                       | NA         | -0.05 | 2.86 | -0.43 | 6.73E-01 | 8.47E-01 | -6.60 |
| 1425685_PM_at   | Akr1b10                   | AKR1B15    | 0.06  | 2.23 | 0.43  | 6.73E-01 | 8.47E-01 | -6.60 |
| 1435017_PM_at   | Cisd3 /// Cisd3b          | CISD3      | 0.07  | 2.76 | 0.43  | 6.73E-01 | 8.47E-01 | -6.60 |
| 1425645_PM_s_at | Cyp2b10                   | CYP2B6     | 0.04  | 2.13 | 0.43  | 6.73E-01 | 8.47E-01 | -6.60 |
| 1419958_PM_at   | Cphx1 /// Cphx2 /// Cphx3 | AC009122.1 | 0.04  | 2.36 | 0.43  | 6.73E-01 | 8.47E-01 | -6.60 |
| 1458732_PM_at   | ---                       | NA         | 0.04  | 2.06 | 0.43  | 6.73E-01 | 8.47E-01 | -6.60 |
| 1434598_PM_at   | Larp4b                    | LARP4B     | 0.12  | 7.03 | 0.43  | 6.73E-01 | 8.47E-01 | -6.60 |
| 1425884_PM_at   | Rpf2                      | RPF2       | -0.12 | 4.67 | -0.43 | 6.73E-01 | 8.47E-01 | -6.60 |
| 1440331_PM_at   | Kdsr                      | KDSR       | 0.07  | 2.21 | 0.43  | 6.73E-01 | 8.47E-01 | -6.60 |
| 1451672_PM_at   | Grk6                      | GRK6       | -0.09 | 2.78 | -0.43 | 6.73E-01 | 8.47E-01 | -6.60 |
| 1452365_PM_at   | Csgalnact1                | CSGALNACT1 | 0.05  | 2.68 | 0.43  | 6.73E-01 | 8.47E-01 | -6.60 |
| 1454177_PM_at   | 4930597G03Rik             | NA         | 0.05  | 2.46 | 0.43  | 6.73E-01 | 8.47E-01 | -6.60 |
| 1429150_PM_at   | Ccdc77                    | CCDC77     | 0.17  | 3.22 | 0.43  | 6.73E-01 | 8.47E-01 | -6.60 |
| 1425395_PM_at   | Adam26a                   | NA         | 0.05  | 2.45 | 0.43  | 6.73E-01 | 8.47E-01 | -6.60 |
| 1423012_PM_at   | Syt7                      | SYT7       | 0.06  | 3.08 | 0.43  | 6.73E-01 | 8.47E-01 | -6.60 |
| 1456586_PM_x_at | Mvp                       | MVP        | 0.07  | 2.74 | 0.43  | 6.73E-01 | 8.47E-01 | -6.60 |
| 1453331_PM_at   | 1700013H16Rik             | NA         | -0.05 | 2.33 | -0.43 | 6.74E-01 | 8.47E-01 | -6.60 |
| 1436716_PM_at   | Ppp1r14b                  | NA         | 0.06  | 2.66 | 0.43  | 6.74E-01 | 8.47E-01 | -6.60 |
| 1455497_PM_at   | Leng9                     | LENG9      | 0.07  | 2.43 | 0.43  | 6.74E-01 | 8.47E-01 | -6.60 |
| 1432653_PM_at   | ---                       | NA         | 0.12  | 2.70 | 0.43  | 6.74E-01 | 8.47E-01 | -6.60 |
| 1455430_PM_at   | Rbm33                     | RBM33      | 0.14  | 3.69 | 0.43  | 6.74E-01 | 8.47E-01 | -6.60 |

|                         |                    |          |       |       |       |          |          |       |
|-------------------------|--------------------|----------|-------|-------|-------|----------|----------|-------|
| 1457674_PM_at           | Vps13a             | NA       | -0.08 | 2.66  | -0.43 | 6.74E-01 | 8.47E-01 | -6.60 |
| 1456679_PM_at           | ---                | NA       | 0.06  | 2.53  | 0.43  | 6.74E-01 | 8.47E-01 | -6.60 |
| 1424117_PM_at           | Gm2573 /// Wdr83os | WDR83OS  | -0.07 | 3.90  | -0.43 | 6.74E-01 | 8.47E-01 | -6.60 |
| 1458724_PM_at           | ---                | NA       | -0.06 | 2.69  | -0.43 | 6.74E-01 | 8.47E-01 | -6.60 |
| 1420754_PM_at           | Ttf1               | TTF1     | -0.05 | 2.60  | -0.43 | 6.74E-01 | 8.47E-01 | -6.60 |
| 1447751_PM_x_at         | Dus2               | DUS2     | 0.04  | 2.13  | 0.43  | 6.74E-01 | 8.47E-01 | -6.60 |
| 1449068_PM_at           | Zfp148             | ZNF148   | -0.21 | 3.19  | -0.43 | 6.74E-01 | 8.47E-01 | -6.60 |
| 1427640_PM_a_at         | Runx1t1            | RUNX1T1  | -0.10 | 3.63  | -0.43 | 6.74E-01 | 8.47E-01 | -6.60 |
| 1416882_PM_at           | Rgs10              | RGS10    | 0.15  | 3.21  | 0.43  | 6.74E-01 | 8.47E-01 | -6.60 |
| 1418631_PM_at           | Ube2h              | UBE2H    | -0.14 | 5.27  | -0.43 | 6.74E-01 | 8.47E-01 | -6.60 |
| 1423780_PM_at           | Hibadh             | HIBADH   | -0.06 | 2.35  | -0.43 | 6.74E-01 | 8.47E-01 | -6.60 |
| 1429842_PM_at           | Mdh1b              | MDH1B    | -0.05 | 2.42  | -0.43 | 6.74E-01 | 8.47E-01 | -6.60 |
| 1416063_PM_x_at         | Ceacam11           | CEACAM3  | 0.04  | 2.30  | 0.43  | 6.74E-01 | 8.47E-01 | -6.60 |
| 1424044_PM_at           | Kdm4b              | KDM4B    | 0.04  | 3.09  | 0.43  | 6.74E-01 | 8.47E-01 | -6.60 |
| 1435544_PM_at           | Aars /// Exosc6    | AARS     | 0.07  | 3.81  | 0.43  | 6.74E-01 | 8.47E-01 | -6.60 |
| 1459106_PM_at           | ---                | NA       | -0.05 | 2.18  | -0.43 | 6.74E-01 | 8.47E-01 | -6.60 |
| 1437449_PM_at           | Rsad1              | RSAD1    | -0.05 | 2.21  | -0.43 | 6.74E-01 | 8.47E-01 | -6.60 |
| 1431848_PM_at           | Angptl2            | ANGPTL2  | 0.04  | 2.16  | 0.43  | 6.74E-01 | 8.47E-01 | -6.60 |
| 1449650_PM_at           | ---                | NA       | 0.06  | 2.48  | 0.43  | 6.74E-01 | 8.47E-01 | -6.60 |
| 1451978_PM_at           | Lox1               | LOXL1    | 0.07  | 2.46  | 0.43  | 6.74E-01 | 8.47E-01 | -6.60 |
| 1457706_PM_at           | BC030336           | C16orf52 | 0.10  | 4.05  | 0.43  | 6.74E-01 | 8.47E-01 | -6.60 |
| 1435071_PM_at           | Zfyve1             | ZFYVE1   | 0.04  | 2.57  | 0.43  | 6.74E-01 | 8.48E-01 | -6.60 |
| 1455031_PM_at           | Cdk19              | CDK19    | 0.13  | 3.29  | 0.43  | 6.74E-01 | 8.48E-01 | -6.60 |
| 1457157_PM_at           | Plch1              | PLCH1    | -0.09 | 2.83  | -0.43 | 6.74E-01 | 8.48E-01 | -6.60 |
| 1418502_PM_a_at         | Oxr1               | OXR1     | -0.18 | 5.22  | -0.43 | 6.75E-01 | 8.48E-01 | -6.60 |
| 1420986_PM_s_at         | Kif3b              | KIF3B    | -0.15 | 3.70  | -0.43 | 6.75E-01 | 8.48E-01 | -6.60 |
| AFFX-NonspecificGC10_at | ---                | NA       | 0.03  | 1.95  | 0.43  | 6.74E-01 | 8.48E-01 | -6.60 |
| 1438890_PM_at           | Kdm2a              | KDM2A    | 0.04  | 2.35  | 0.43  | 6.75E-01 | 8.48E-01 | -6.60 |
| 1459960_PM_at           | 8430419K02Rik      | NA       | 0.08  | 2.32  | 0.43  | 6.75E-01 | 8.48E-01 | -6.60 |
| 1415991_PM_a_at         | Klhdc3             | KLHDC3   | 0.21  | 6.76  | 0.43  | 6.75E-01 | 8.48E-01 | -6.60 |
| 1442022_PM_at           | Themis             | THEMIS   | -0.04 | 2.21  | -0.43 | 6.75E-01 | 8.48E-01 | -6.60 |
| 1421936_PM_at           | Dapp1              | DAPP1    | 0.04  | 2.26  | 0.43  | 6.75E-01 | 8.48E-01 | -6.60 |
| 1459261_PM_at           | Sox5               | SOX5     | -0.09 | 2.32  | -0.43 | 6.75E-01 | 8.48E-01 | -6.60 |
| 1425966_PM_x_at         | Ubc                | UBC      | 0.05  | 7.64  | 0.43  | 6.75E-01 | 8.48E-01 | -6.60 |
| 1445251_PM_at           | Tnfsf13b           | NA       | -0.07 | 2.85  | -0.43 | 6.75E-01 | 8.48E-01 | -6.60 |
| 1460174_PM_at           | Dexi               | DEXI     | -0.06 | 5.24  | -0.43 | 6.75E-01 | 8.48E-01 | -6.60 |
| 1460354_PM_a_at         | Mrp13              | MRPL13   | 0.18  | 4.47  | 0.43  | 6.75E-01 | 8.48E-01 | -6.60 |
| 1426829_PM_at           | Uimc1              | UIMC1    | -0.09 | 4.27  | -0.43 | 6.75E-01 | 8.48E-01 | -6.60 |
| 1446043_PM_at           | Gm41038            | NA       | 0.15  | 3.66  | 0.43  | 6.75E-01 | 8.48E-01 | -6.60 |
| 1441550_PM_at           | ---                | NA       | 0.11  | 2.51  | 0.43  | 6.75E-01 | 8.48E-01 | -6.60 |
| 1453333_PM_at           | 1700012P22Rik      | C1orf158 | 0.05  | 2.37  | 0.43  | 6.75E-01 | 8.48E-01 | -6.60 |
| 1440308_PM_at           | Cmpk1              | CMPK1    | 0.08  | 2.57  | 0.43  | 6.75E-01 | 8.48E-01 | -6.60 |
| 1430550_PM_at           | Lipm               | LIPM     | -0.04 | 1.98  | -0.43 | 6.75E-01 | 8.48E-01 | -6.60 |
| 1434024_PM_at           | Nphp4              | NPHP4    | 0.04  | 2.66  | 0.43  | 6.75E-01 | 8.48E-01 | -6.60 |
| 1421224_PM_a_at         | Hnf1b              | HNF1B    | 0.07  | 2.79  | 0.43  | 6.75E-01 | 8.48E-01 | -6.60 |
| 1443711_PM_at           | ---                | NA       | 0.08  | 2.44  | 0.43  | 6.75E-01 | 8.48E-01 | -6.60 |
| 1420149_PM_at           | ---                | NA       | 0.05  | 2.62  | 0.43  | 6.75E-01 | 8.48E-01 | -6.60 |
| 1437098_PM_x_at         | Ttc30a2            | TTC30A   | 0.09  | 2.23  | 0.43  | 6.75E-01 | 8.48E-01 | -6.60 |
| 1429088_PM_at           | Lbh                | LBH      | 0.10  | 5.53  | 0.43  | 6.75E-01 | 8.48E-01 | -6.60 |
| 1418794_PM_at           | Cds2               | CDS2     | 0.16  | 4.31  | 0.43  | 6.75E-01 | 8.48E-01 | -6.60 |
| 1447571_PM_at           | Elk4               | ELK4     | -0.13 | 3.29  | -0.43 | 6.75E-01 | 8.48E-01 | -6.60 |
| 1420183_PM_at           | Lor                | NA       | -0.12 | 2.93  | -0.43 | 6.75E-01 | 8.48E-01 | -6.60 |
| 1425239_PM_at           | Setd4              | SETD4    | 0.11  | 3.26  | 0.43  | 6.75E-01 | 8.48E-01 | -6.60 |
| 1448038_PM_at           | 1810021B22Rik      | NA       | 0.08  | 2.88  | 0.43  | 6.75E-01 | 8.48E-01 | -6.60 |
| 1456582_PM_x_at         | Mff                | MFF      | -0.17 | 6.86  | -0.43 | 6.76E-01 | 8.48E-01 | -6.60 |
| 1438991_PM_x_at         | Ppp2r1a            | PPP2R1A  | 0.13  | 10.60 | 0.43  | 6.76E-01 | 8.48E-01 | -6.60 |
| 1443445_PM_at           | ---                | NA       | -0.11 | 2.49  | -0.43 | 6.76E-01 | 8.48E-01 | -6.60 |
| 1453125_PM_at           | Sox11              | SOX11    | -0.05 | 2.45  | -0.43 | 6.76E-01 | 8.48E-01 | -6.60 |
| 1445680_PM_x_at         | F2rl2              | F2RL2    | -0.03 | 1.73  | -0.43 | 6.76E-01 | 8.48E-01 | -6.60 |
| 1449596_PM_at           | C78142             | NA       | 0.04  | 2.35  | 0.43  | 6.76E-01 | 8.48E-01 | -6.60 |
| 1417540_PM_at           | Elf1               | ELF1     | 0.05  | 2.20  | 0.43  | 6.76E-01 | 8.48E-01 | -6.60 |
| 1431990_PM_at           | 4930429D17Rik      | NA       | 0.05  | 2.03  | 0.43  | 6.76E-01 | 8.48E-01 | -6.60 |
| 1442457_PM_at           | ---                | NA       | 0.06  | 2.50  | 0.43  | 6.76E-01 | 8.48E-01 | -6.60 |
| 1440091_PM_at           | Meis2              | MEIS2    | 0.06  | 2.31  | 0.43  | 6.76E-01 | 8.48E-01 | -6.60 |
| 1442270_PM_at           | ---                | NA       | 0.09  | 2.75  | 0.43  | 6.76E-01 | 8.48E-01 | -6.60 |
| 1420498_PM_a_at         | Dab2               | DAB2     | -0.09 | 2.80  | -0.43 | 6.76E-01 | 8.48E-01 | -6.60 |
| 1438070_PM_at           | Phf3               | PHF3     | 0.06  | 3.99  | 0.43  | 6.76E-01 | 8.48E-01 | -6.60 |
| 1457166_PM_at           | ---                | NA       | 0.06  | 2.91  | 0.43  | 6.76E-01 | 8.48E-01 | -6.60 |
| 1444183_PM_at           | C030013C21Rik      | NA       | -0.06 | 2.43  | -0.43 | 6.76E-01 | 8.48E-01 | -6.60 |
| 1454622_PM_at           | Slc38a5            | SLC38A5  | 0.06  | 2.24  | 0.43  | 6.76E-01 | 8.48E-01 | -6.60 |
| 1434453_PM_at           | Polr3a             | POLR3A   | -0.14 | 3.46  | -0.43 | 6.76E-01 | 8.48E-01 | -6.60 |
| 1457730_PM_at           | Fancm              | FANCM    | -0.06 | 2.34  | -0.43 | 6.76E-01 | 8.48E-01 | -6.60 |
| 1442158_PM_at           | Mast4              | MAST4    | 0.16  | 2.55  | 0.43  | 6.76E-01 | 8.48E-01 | -6.60 |
| 1430047_PM_at           | Slf1               | SLF1     | -0.16 | 3.61  | -0.43 | 6.76E-01 | 8.49E-01 | -6.60 |
| 1446730_PM_at           | ---                | NA       | 0.03  | 2.10  | 0.43  | 6.76E-01 | 8.49E-01 | -6.60 |

|                 |                                                                                                                                                             |          |       |      |       |          |          |       |
|-----------------|-------------------------------------------------------------------------------------------------------------------------------------------------------------|----------|-------|------|-------|----------|----------|-------|
| 1453511_PM_at   | 2310007B03Rik                                                                                                                                               | C2orf54  | 0.04  | 2.09 | 0.43  | 6.76E-01 | 8.49E-01 | -6.60 |
| 1427116_PM_at   | Setd1a                                                                                                                                                      | NA       | 0.05  | 3.20 | 0.43  | 6.76E-01 | 8.49E-01 | -6.60 |
| 1419849_PM_at   | ---                                                                                                                                                         | NA       | 0.05  | 2.64 | 0.43  | 6.76E-01 | 8.49E-01 | -6.60 |
| 1438217_PM_at   | Rbfox1                                                                                                                                                      | RBFOX1   | -0.16 | 8.40 | -0.43 | 6.76E-01 | 8.49E-01 | -6.60 |
| 1428492_PM_at   | Glpr2                                                                                                                                                       | GLIPR2   | 0.03  | 2.13 | 0.43  | 6.76E-01 | 8.49E-01 | -6.60 |
| 1430193_PM_at   | Casc5                                                                                                                                                       | KNL1     | 0.04  | 1.87 | 0.43  | 6.76E-01 | 8.49E-01 | -6.60 |
| 1416416_PM_x_at | Gstm1                                                                                                                                                       | NA       | -0.23 | 4.99 | -0.43 | 6.76E-01 | 8.49E-01 | -6.60 |
| 1446795_PM_at   | ---                                                                                                                                                         | NA       | -0.04 | 2.10 | -0.43 | 6.76E-01 | 8.49E-01 | -6.60 |
| 1442671_PM_at   | ---                                                                                                                                                         | NA       | 0.07  | 2.58 | 0.43  | 6.76E-01 | 8.49E-01 | -6.60 |
| 1455351_PM_at   | U2surp                                                                                                                                                      | U2SURP   | -0.20 | 5.94 | -0.43 | 6.77E-01 | 8.49E-01 | -6.60 |
| 1445040_PM_at   | D7ErtD783e                                                                                                                                                  | NA       | 0.05  | 3.25 | 0.43  | 6.77E-01 | 8.49E-01 | -6.60 |
| 1420004_PM_s_at | Pom121                                                                                                                                                      | NA       | 0.07  | 3.03 | 0.43  | 6.77E-01 | 8.49E-01 | -6.60 |
| 1433746_PM_at   | Wdr3                                                                                                                                                        | WDR3     | -0.11 | 6.49 | -0.43 | 6.77E-01 | 8.49E-01 | -6.60 |
| 1442210_PM_at   | Prox2                                                                                                                                                       | NA       | -0.08 | 2.78 | -0.43 | 6.77E-01 | 8.49E-01 | -6.60 |
| 1451367_PM_at   | Cops6                                                                                                                                                       | COPS6    | -0.07 | 2.35 | -0.43 | 6.77E-01 | 8.49E-01 | -6.60 |
| 1438576_PM_x_at | Kantr                                                                                                                                                       | NA       | -0.05 | 2.42 | -0.43 | 6.77E-01 | 8.49E-01 | -6.60 |
| 1437846_PM_x_at | Bace2                                                                                                                                                       | BACE2    | -0.04 | 2.30 | -0.43 | 6.77E-01 | 8.49E-01 | -6.60 |
| 1420209_PM_at   | ---                                                                                                                                                         | NA       | -0.04 | 2.42 | -0.43 | 6.77E-01 | 8.49E-01 | -6.60 |
| 1427922_PM_at   | Cmc2                                                                                                                                                        | CMC2     | 0.08  | 2.63 | 0.43  | 6.77E-01 | 8.49E-01 | -6.60 |
| 1417449_PM_at   | Acot8                                                                                                                                                       | ACOT8    | 0.08  | 2.99 | 0.43  | 6.77E-01 | 8.49E-01 | -6.60 |
| 1429101_PM_at   | Zfp697                                                                                                                                                      | ZNF697   | 0.09  | 3.15 | 0.43  | 6.77E-01 | 8.49E-01 | -6.60 |
| 1426052_PM_at   | Mlh3                                                                                                                                                        | MLH3     | 0.16  | 4.49 | 0.43  | 6.77E-01 | 8.49E-01 | -6.60 |
| 1453648_PM_at   | Susd3                                                                                                                                                       | SUSD3    | -0.03 | 2.21 | -0.43 | 6.77E-01 | 8.49E-01 | -6.60 |
| 1418417_PM_at   | Msc                                                                                                                                                         | MSC      | 0.05  | 3.28 | 0.43  | 6.77E-01 | 8.49E-01 | -6.60 |
| 1442163_PM_at   | ---                                                                                                                                                         | NA       | 0.11  | 2.62 | 0.43  | 6.77E-01 | 8.49E-01 | -6.60 |
| 1446678_PM_at   | D14ErtD16e                                                                                                                                                  | NA       | -0.05 | 2.94 | -0.43 | 6.77E-01 | 8.49E-01 | -6.60 |
| 1420920_PM_a_at | Arf1                                                                                                                                                        | ARF1     | -0.14 | 6.37 | -0.43 | 6.77E-01 | 8.49E-01 | -6.60 |
| 1435954_PM_at   | Zfp710                                                                                                                                                      | NA       | 0.05  | 2.78 | 0.43  | 6.77E-01 | 8.49E-01 | -6.60 |
| 1433835_PM_at   | Ppp3cb                                                                                                                                                      | PPP3CB   | -0.09 | 3.52 | -0.43 | 6.77E-01 | 8.49E-01 | -6.60 |
| 1429074_PM_at   | Cfap161                                                                                                                                                     | CFAP161  | 0.08  | 3.06 | 0.43  | 6.77E-01 | 8.49E-01 | -6.60 |
| 1427992_PM_a_at | Rab12                                                                                                                                                       | RAB12    | 0.10  | 6.12 | 0.43  | 6.77E-01 | 8.49E-01 | -6.60 |
| 1450082_PM_s_at | Etv5                                                                                                                                                        | ETV5     | -0.15 | 3.13 | -0.43 | 6.77E-01 | 8.49E-01 | -6.60 |
| 1449910_PM_at   | 2210418010Rik ///<br>Gm14296                                                                                                                                | NA       | 0.07  | 2.64 | 0.43  | 6.77E-01 | 8.49E-01 | -6.60 |
| 1447426_PM_at   | ---                                                                                                                                                         | NA       | 0.09  | 2.72 | 0.43  | 6.77E-01 | 8.49E-01 | -6.60 |
| 1459884_PM_at   | Cox7c /// LOC102642884                                                                                                                                      | COX7C    | -0.04 | 2.21 | -0.43 | 6.77E-01 | 8.49E-01 | -6.60 |
| 1453178_PM_at   | Iqch                                                                                                                                                        | IQCH     | 0.04  | 2.83 | 0.43  | 6.77E-01 | 8.49E-01 | -6.60 |
| 1424947_PM_at   | Dync11l1                                                                                                                                                    | DYNC11L1 | 0.05  | 2.74 | 0.43  | 6.77E-01 | 8.49E-01 | -6.60 |
| 1456053_PM_at   | ---                                                                                                                                                         | NA       | -0.08 | 2.43 | -0.43 | 6.77E-01 | 8.49E-01 | -6.60 |
| 1423026_PM_at   | Rad51c                                                                                                                                                      | RAD51C   | -0.05 | 2.55 | -0.43 | 6.77E-01 | 8.49E-01 | -6.60 |
| 1420515_PM_a_at | Pglyrp2                                                                                                                                                     | PGLYRP2  | 0.04  | 2.34 | 0.43  | 6.77E-01 | 8.49E-01 | -6.60 |
| 1420061_PM_s_at | AA675344                                                                                                                                                    | NA       | 0.05  | 2.42 | 0.43  | 6.77E-01 | 8.49E-01 | -6.60 |
| 1450400_PM_at   | Tgs1                                                                                                                                                        | TGS1     | -0.07 | 2.91 | -0.43 | 6.77E-01 | 8.49E-01 | -6.60 |
| 1431503_PM_at   | 4930513O06Rik                                                                                                                                               | NA       | 0.03  | 2.06 | 0.43  | 6.78E-01 | 8.49E-01 | -6.60 |
| 1445073_PM_at   | ---                                                                                                                                                         | NA       | 0.05  | 2.16 | 0.43  | 6.78E-01 | 8.49E-01 | -6.60 |
| 1449287_PM_at   | Srms                                                                                                                                                        | SRMS     | 0.05  | 2.36 | 0.43  | 6.78E-01 | 8.49E-01 | -6.60 |
| 1427734_PM_a_at | Dscam1                                                                                                                                                      | DSCAML1  | 0.11  | 2.79 | 0.43  | 6.78E-01 | 8.49E-01 | -6.60 |
| 1436462_PM_at   | Gm11007 /// Gm14308 ///<br>Gm14326 /// Gm14391 ///<br>Gm36055 /// Gm36391 ///<br>Gm41982 /// Gm41983 ///<br>Gm42247 ///<br>LOC102633156 ///<br>LOC102639653 | NA       | 0.12  | 5.94 | 0.43  | 6.78E-01 | 8.49E-01 | -6.60 |
| 1459308_PM_at   | ---                                                                                                                                                         | NA       | 0.04  | 2.45 | 0.43  | 6.78E-01 | 8.49E-01 | -6.60 |
| 1431647_PM_a_at | Ceacam13                                                                                                                                                    | CEACAM3  | -0.04 | 2.07 | -0.43 | 6.78E-01 | 8.49E-01 | -6.60 |
| 1448130_PM_at   | Fdft1                                                                                                                                                       | FDFT1    | -0.06 | 3.24 | -0.43 | 6.78E-01 | 8.49E-01 | -6.60 |
| 1432235_PM_at   | Epsti1                                                                                                                                                      | EPST11   | -0.05 | 2.31 | -0.43 | 6.78E-01 | 8.49E-01 | -6.60 |
| 1442561_PM_at   | ---                                                                                                                                                         | NA       | 0.06  | 2.79 | 0.43  | 6.78E-01 | 8.49E-01 | -6.60 |
| 1439231_PM_at   | ---                                                                                                                                                         | NA       | 0.04  | 2.51 | 0.43  | 6.78E-01 | 8.49E-01 | -6.60 |
| 1428876_PM_at   | Srp72                                                                                                                                                       | SRP72    | -0.11 | 3.05 | -0.43 | 6.78E-01 | 8.49E-01 | -6.60 |
| 1436007_PM_a_at | Thumpd1                                                                                                                                                     | THUMPD1  | -0.07 | 3.00 | -0.43 | 6.78E-01 | 8.49E-01 | -6.60 |
| 1431594_PM_at   | ---                                                                                                                                                         | NA       | -0.04 | 2.29 | -0.43 | 6.78E-01 | 8.49E-01 | -6.60 |
| 1422790_PM_at   | Nppc                                                                                                                                                        | NPPC     | -0.04 | 2.51 | -0.43 | 6.78E-01 | 8.49E-01 | -6.60 |
| 1429172_PM_a_at | Ncapg                                                                                                                                                       | NCAPG    | -0.04 | 2.21 | -0.43 | 6.78E-01 | 8.49E-01 | -6.60 |
| 1437732_PM_at   | Omt2a                                                                                                                                                       | NA       | 0.03  | 1.90 | 0.43  | 6.78E-01 | 8.49E-01 | -6.60 |
| 1447804_PM_x_at | Sde2                                                                                                                                                        | SDE2     | 0.05  | 2.46 | 0.43  | 6.78E-01 | 8.49E-01 | -6.60 |
| 1459969_PM_x_at | ---                                                                                                                                                         | NA       | 0.05  | 2.05 | 0.43  | 6.78E-01 | 8.49E-01 | -6.60 |
| 1420507_PM_a_at | Srek1ip1                                                                                                                                                    | SREK1IP1 | 0.06  | 2.46 | 0.43  | 6.78E-01 | 8.49E-01 | -6.60 |
| 1459008_PM_at   | ---                                                                                                                                                         | NA       | 0.08  | 2.42 | 0.43  | 6.78E-01 | 8.49E-01 | -6.60 |
| 1446464_PM_at   | Psme4                                                                                                                                                       | PSME4    | 0.04  | 2.39 | 0.43  | 6.78E-01 | 8.50E-01 | -6.60 |
| 1447292_PM_at   | Actr1b                                                                                                                                                      | ACTR1B   | 0.04  | 2.33 | 0.43  | 6.78E-01 | 8.50E-01 | -6.60 |
| 1426473_PM_at   | Dnajc9                                                                                                                                                      | DNAJC9   | -0.09 | 4.16 | -0.43 | 6.78E-01 | 8.50E-01 | -6.60 |
| 1419425_PM_at   | Cnr1                                                                                                                                                        | CNR1     | 0.09  | 4.67 | 0.43  | 6.78E-01 | 8.50E-01 | -6.60 |

|                 |               |          |       |      |       |          |          |       |
|-----------------|---------------|----------|-------|------|-------|----------|----------|-------|
| 1442420_PM_at   | ---           | NA       | -0.12 | 4.77 | -0.43 | 6.78E-01 | 8.50E-01 | -6.60 |
| 1431712_PM_a_at | 2310022A10Rik | C19orf47 | 0.09  | 3.62 | 0.43  | 6.78E-01 | 8.50E-01 | -6.60 |
| 1420150_PM_at   | Spsb1         | SPSB1    | 0.10  | 3.57 | 0.43  | 6.78E-01 | 8.50E-01 | -6.60 |
| 1417272_PM_at   | Fam114a1      | FAM114A1 | 0.12  | 2.64 | 0.43  | 6.78E-01 | 8.50E-01 | -6.60 |
| 1447897_PM_x_at | Anapc11       | NA       | -0.04 | 2.37 | -0.43 | 6.78E-01 | 8.50E-01 | -6.60 |
| 1441652_PM_at   | Bmpr2         | BMPR2    | -0.04 | 2.42 | -0.43 | 6.79E-01 | 8.50E-01 | -6.60 |
| 1419858_PM_at   | ---           | NA       | 0.07  | 2.61 | 0.43  | 6.79E-01 | 8.50E-01 | -6.60 |
| 1430055_PM_at   | 1700080G18Rik | NA       | 0.05  | 2.46 | 0.43  | 6.79E-01 | 8.50E-01 | -6.60 |
| 1451196_PM_at   | Ypel5         | YPEL5    | -0.19 | 6.43 | -0.43 | 6.79E-01 | 8.50E-01 | -6.60 |
| 1459979_PM_x_at | Zfp68         | ZNF717   | -0.18 | 2.78 | -0.43 | 6.79E-01 | 8.50E-01 | -6.60 |
| 1417927_PM_at   | Ddx19a        | DDX19A   | -0.13 | 3.08 | -0.43 | 6.79E-01 | 8.50E-01 | -6.60 |
| 1458502_PM_at   | ---           | NA       | -0.09 | 4.23 | -0.43 | 6.79E-01 | 8.50E-01 | -6.60 |
| 1429507_PM_at   | Nkd1          | NKD1     | -0.05 | 2.29 | -0.43 | 6.79E-01 | 8.50E-01 | -6.60 |
| 1460051_PM_at   | Ccdc64b       | BCDL2    | 0.04  | 2.16 | 0.43  | 6.79E-01 | 8.50E-01 | -6.60 |
| 1445703_PM_at   | Ptchd1        | NA       | 0.04  | 1.89 | 0.43  | 6.79E-01 | 8.50E-01 | -6.60 |
| 1417137_PM_at   | Uck2          | UCK2     | 0.04  | 2.07 | 0.43  | 6.79E-01 | 8.50E-01 | -6.60 |
| 1449219_PM_at   | Fads3         | FADS3    | 0.04  | 2.24 | 0.43  | 6.79E-01 | 8.50E-01 | -6.60 |
| 1445011_PM_at   | ---           | NA       | 0.05  | 2.42 | 0.43  | 6.79E-01 | 8.50E-01 | -6.60 |
| 1430912_PM_a_at | Tectb         | TECTB    | 0.05  | 2.40 | 0.43  | 6.79E-01 | 8.50E-01 | -6.60 |
| 1451014_PM_at   | Ror1          | ROR1     | 0.05  | 2.34 | 0.43  | 6.79E-01 | 8.50E-01 | -6.60 |
| 1441302_PM_at   | ---           | NA       | 0.06  | 2.75 | 0.43  | 6.79E-01 | 8.50E-01 | -6.60 |
| 1439608_PM_at   | ---           | NA       | 0.08  | 3.06 | 0.43  | 6.79E-01 | 8.50E-01 | -6.60 |
| 1416844_PM_at   | Prmt2         | PRMT2    | 0.12  | 5.01 | 0.43  | 6.79E-01 | 8.50E-01 | -6.60 |
| 1451415_PM_at   | 1810011O10Rik | C8orf4   | 0.11  | 2.47 | 0.43  | 6.79E-01 | 8.50E-01 | -6.60 |
| 1416610_PM_a_at | Cln3          | CLN3     | -0.13 | 4.13 | -0.43 | 6.79E-01 | 8.50E-01 | -6.60 |
| 1435584_PM_at   | A630033H20Rik | NA       | 0.05  | 1.92 | 0.43  | 6.79E-01 | 8.50E-01 | -6.60 |
| 1442988_PM_at   | Gm31718       | NA       | 0.05  | 2.58 | 0.43  | 6.79E-01 | 8.50E-01 | -6.60 |
| 1438916_PM_x_at | Fire          | NA       | 0.13  | 3.78 | 0.43  | 6.79E-01 | 8.50E-01 | -6.60 |
| 1439520_PM_at   | Dtl           | DTL      | 0.06  | 2.48 | 0.43  | 6.79E-01 | 8.50E-01 | -6.60 |
| 1430781_PM_at   | Ak7           | AK7      | 0.14  | 3.39 | 0.43  | 6.79E-01 | 8.50E-01 | -6.60 |
| 1449001_PM_at   | Ivd           | IVD      | 0.08  | 3.30 | 0.43  | 6.79E-01 | 8.50E-01 | -6.60 |
| 1452601_PM_a_at | Acdb6         | ACBD6    | 0.08  | 2.84 | 0.43  | 6.79E-01 | 8.50E-01 | -6.60 |
| 1425968_PM_s_at | Speg          | SPEG     | -0.11 | 6.71 | -0.43 | 6.80E-01 | 8.50E-01 | -6.60 |
| 1441208_PM_at   | ---           | NA       | -0.06 | 2.45 | -0.42 | 6.80E-01 | 8.50E-01 | -6.60 |
| 1417759_PM_at   | Pfpl          | MPEG1    | 0.04  | 2.12 | 0.43  | 6.79E-01 | 8.50E-01 | -6.60 |
| 1431787_PM_at   | ---           | NA       | 0.05  | 2.05 | 0.42  | 6.80E-01 | 8.50E-01 | -6.60 |
| 1452102_PM_at   | Copb2         | COPB2    | 0.07  | 5.23 | 0.42  | 6.80E-01 | 8.50E-01 | -6.60 |
| 1454969_PM_at   | Lypd6         | LYPD6    | -0.05 | 2.58 | -0.42 | 6.80E-01 | 8.50E-01 | -6.60 |
| 1432010_PM_at   | 4933408N05Rik | NA       | 0.05  | 2.15 | 0.42  | 6.80E-01 | 8.50E-01 | -6.61 |
| 1420398_PM_at   | Rgs18         | RG518    | -0.05 | 2.13 | -0.42 | 6.80E-01 | 8.50E-01 | -6.61 |
| 1419111_PM_at   | Ing2          | ING2     | -0.14 | 4.42 | -0.42 | 6.80E-01 | 8.50E-01 | -6.61 |
| 1450198_PM_at   | Dusp13        | DUSP13   | 0.05  | 2.47 | 0.42  | 6.80E-01 | 8.50E-01 | -6.61 |
| 1418062_PM_at   | Eef1a2        | EEF1A2   | -0.13 | 5.16 | -0.42 | 6.80E-01 | 8.50E-01 | -6.61 |
| 1437180_PM_at   | ---           | NA       | 0.09  | 2.94 | 0.42  | 6.80E-01 | 8.51E-01 | -6.61 |
| 1451317_PM_at   | Ythdf2        | YTHDF2   | -0.12 | 2.61 | -0.42 | 6.80E-01 | 8.51E-01 | -6.61 |
| 1421797_PM_a_at | Srx12         | SNX12    | -0.09 | 2.61 | -0.42 | 6.80E-01 | 8.51E-01 | -6.61 |
| 1427644_PM_at   | ---           | NA       | 0.08  | 2.25 | 0.42  | 6.80E-01 | 8.51E-01 | -6.61 |
| 1416166_PM_a_at | Prdx4         | PRDX4    | 0.09  | 2.28 | 0.42  | 6.80E-01 | 8.51E-01 | -6.61 |
| 1437257_PM_at   | Wdr47         | WDR47    | -0.09 | 2.78 | -0.42 | 6.80E-01 | 8.51E-01 | -6.61 |
| 1460410_PM_at   | Trmt44        | TRMT44   | -0.04 | 2.72 | -0.42 | 6.80E-01 | 8.51E-01 | -6.61 |
| 1439065_PM_x_at | Gm13152       | NA       | -0.04 | 1.97 | -0.42 | 6.80E-01 | 8.51E-01 | -6.61 |
| 1423894_PM_a_at | Dalrd3        | DALRD3   | -0.10 | 2.64 | -0.42 | 6.80E-01 | 8.51E-01 | -6.61 |
| 1459541_PM_at   | ---           | NA       | -0.04 | 2.15 | -0.42 | 6.80E-01 | 8.51E-01 | -6.61 |
| 1459836_PM_x_at | Sf3b2         | SF3B2    | 0.04  | 2.78 | 0.42  | 6.80E-01 | 8.51E-01 | -6.61 |
| 1427065_PM_at   | Gid4          | GID4     | -0.11 | 2.86 | -0.42 | 6.80E-01 | 8.51E-01 | -6.61 |
| 1440236_PM_at   | ---           | NA       | -0.09 | 2.85 | -0.42 | 6.80E-01 | 8.51E-01 | -6.61 |
| 1417318_PM_at   | Brinp1        | BRINP1   | -0.17 | 8.31 | -0.42 | 6.80E-01 | 8.51E-01 | -6.61 |
| 1455905_PM_at   | 2610507B11Rik | KIAA0100 | -0.15 | 4.61 | -0.42 | 6.80E-01 | 8.51E-01 | -6.61 |
| 1459516_PM_at   | ---           | NA       | -0.04 | 2.36 | -0.42 | 6.80E-01 | 8.51E-01 | -6.61 |
| 1458064_PM_at   | ---           | NA       | 0.07  | 2.29 | 0.42  | 6.80E-01 | 8.51E-01 | -6.61 |
| 1434684_PM_at   | Rin3          | RIN3     | 0.07  | 2.62 | 0.42  | 6.81E-01 | 8.51E-01 | -6.61 |
| 1424182_PM_at   | Acat1         | ACAT1    | 0.07  | 4.44 | 0.42  | 6.81E-01 | 8.51E-01 | -6.61 |
| 1420995_PM_at   | Plkna3        | PLXNA3   | 0.04  | 2.06 | 0.42  | 6.81E-01 | 8.51E-01 | -6.61 |
| 1430760_PM_a_at | Usp50         | USP50    | 0.06  | 2.29 | 0.42  | 6.81E-01 | 8.51E-01 | -6.61 |
| 1441882_PM_at   | ---           | NA       | 0.06  | 2.15 | 0.42  | 6.81E-01 | 8.51E-01 | -6.61 |
| 1441950_PM_s_at | 2010109A12Rik | NA       | -0.07 | 2.93 | -0.42 | 6.81E-01 | 8.51E-01 | -6.61 |
| 1444308_PM_at   | ---           | NA       | 0.04  | 2.25 | 0.42  | 6.81E-01 | 8.51E-01 | -6.61 |
| 1422365_PM_at   | Oftr17        | OR10A4   | 0.04  | 2.37 | 0.42  | 6.81E-01 | 8.51E-01 | -6.61 |
| 1440477_PM_at   | ---           | NA       | 0.03  | 2.01 | 0.42  | 6.81E-01 | 8.51E-01 | -6.61 |
| 1449560_PM_at   | Krtap1-5      | KRTAP1-4 | 0.04  | 2.03 | 0.42  | 6.81E-01 | 8.51E-01 | -6.61 |
| 1426291_PM_at   | Dimt1         | DIMT1    | 0.12  | 3.50 | 0.42  | 6.81E-01 | 8.51E-01 | -6.61 |
| 1436381_PM_at   | Dlgap3        | DLGAP3   | -0.06 | 2.86 | -0.42 | 6.81E-01 | 8.51E-01 | -6.61 |
| 1419538_PM_at   | Flt3          | FLT3     | 0.04  | 2.44 | 0.42  | 6.81E-01 | 8.51E-01 | -6.61 |
| 1428810_PM_at   | 2700097O09Rik | NA       | 0.05  | 2.45 | 0.42  | 6.81E-01 | 8.51E-01 | -6.61 |
| 1428431_PM_at   | Zcchc24       | ZCCHC24  | -0.07 | 3.04 | -0.42 | 6.81E-01 | 8.51E-01 | -6.61 |

|                 |                           |            |       |      |       |          |          |       |
|-----------------|---------------------------|------------|-------|------|-------|----------|----------|-------|
| 1427560_PM_at   | Six5                      | SIX5       | 0.05  | 2.34 | 0.42  | 6.81E-01 | 8.51E-01 | -6.61 |
| 1423345_PM_at   | Degs1                     | DEGS1      | 0.11  | 3.39 | 0.42  | 6.81E-01 | 8.51E-01 | -6.61 |
| 1450377_PM_at   | Thbs1                     | THBS1      | 0.05  | 2.44 | 0.42  | 6.81E-01 | 8.51E-01 | -6.61 |
| 1452730_PM_at   | Rps4l                     | NA         | -0.04 | 2.55 | -0.42 | 6.81E-01 | 8.51E-01 | -6.61 |
| 1436136_PM_at   | ---                       | NA         | 0.05  | 4.09 | 0.42  | 6.81E-01 | 8.51E-01 | -6.61 |
| 1455941_PM_s_at | Map2k5                    | MAP2K5     | 0.17  | 3.94 | 0.42  | 6.81E-01 | 8.52E-01 | -6.61 |
| 1459920_PM_at   | Atxn71l                   | NA         | 0.10  | 3.74 | 0.42  | 6.81E-01 | 8.52E-01 | -6.61 |
| 1455506_PM_at   | Slc25a34                  | SLC25A34   | -0.07 | 3.34 | -0.42 | 6.81E-01 | 8.52E-01 | -6.61 |
| 1451102_PM_at   | Cnot8                     | CNOT8      | -0.06 | 2.99 | -0.42 | 6.81E-01 | 8.52E-01 | -6.61 |
| 1436754_PM_at   | Tmem179                   | TMEM179    | -0.09 | 2.70 | -0.42 | 6.81E-01 | 8.52E-01 | -6.61 |
| 1435914_PM_at   | Ncor1                     | NCOR1      | -0.12 | 3.50 | -0.42 | 6.82E-01 | 8.52E-01 | -6.61 |
| 1416907_PM_at   | Tsn                       | TSN        | -0.11 | 3.07 | -0.42 | 6.82E-01 | 8.52E-01 | -6.61 |
| 1434594_PM_at   | Dnah1                     | DNAH1      | -0.05 | 3.33 | -0.42 | 6.82E-01 | 8.52E-01 | -6.61 |
| 1429561_PM_at   | Brf2                      | BRF2       | -0.12 | 3.73 | -0.42 | 6.82E-01 | 8.52E-01 | -6.61 |
| 1422909_PM_at   | Smc6                      | NA         | -0.09 | 2.80 | -0.42 | 6.82E-01 | 8.52E-01 | -6.61 |
| 1457619_PM_at   | Ces2b                     | CES2       | 0.03  | 2.19 | 0.42  | 6.82E-01 | 8.52E-01 | -6.61 |
| 1430490_PM_at   | Gm26688                   | NA         | 0.04  | 2.03 | 0.42  | 6.82E-01 | 8.52E-01 | -6.61 |
| 1421456_PM_at   | P2ry1                     | P2RY1      | -0.04 | 2.41 | -0.42 | 6.82E-01 | 8.52E-01 | -6.61 |
| 1438271_PM_at   | Lpp                       | LPP        | -0.06 | 2.24 | -0.42 | 6.82E-01 | 8.52E-01 | -6.61 |
| 1417740_PM_at   | Cdc37l1                   | CDC37L1    | -0.06 | 2.83 | -0.42 | 6.82E-01 | 8.52E-01 | -6.61 |
| 1434628_PM_a_at | Rhpn2                     | RHPN2      | 0.08  | 2.47 | 0.42  | 6.82E-01 | 8.52E-01 | -6.61 |
| 1457783_PM_at   | ---                       | NA         | 0.15  | 6.00 | 0.42  | 6.82E-01 | 8.52E-01 | -6.61 |
| 1444060_PM_at   | 2610027K06Rik             | NA         | -0.04 | 2.34 | -0.42 | 6.82E-01 | 8.52E-01 | -6.61 |
| 1450763_PM_x_at | Wnt3                      | WNT3       | 0.07  | 2.20 | 0.42  | 6.82E-01 | 8.52E-01 | -6.61 |
| 1448563_PM_at   | 1700071K01Rik /// Phb     | PHB        | 0.12  | 3.71 | 0.42  | 6.82E-01 | 8.52E-01 | -6.61 |
| 1429936_PM_at   | Ph1d2                     | PIH1D2     | 0.06  | 2.24 | 0.42  | 6.82E-01 | 8.52E-01 | -6.61 |
| 1455820_PM_x_at | Scarb1                    | SCARB1     | 0.09  | 2.59 | 0.42  | 6.82E-01 | 8.52E-01 | -6.61 |
| 1426686_PM_s_at | Map3k3                    | MAP3K3     | 0.04  | 2.29 | 0.42  | 6.82E-01 | 8.52E-01 | -6.61 |
| 1417525_PM_at   | Hand1                     | HAND1      | 0.04  | 2.36 | 0.42  | 6.82E-01 | 8.52E-01 | -6.61 |
| 1449341_PM_a_at | Stom                      | STOM       | -0.06 | 2.79 | -0.42 | 6.82E-01 | 8.52E-01 | -6.61 |
| 1457817_PM_at   | ---                       | NA         | -0.04 | 1.88 | -0.42 | 6.82E-01 | 8.52E-01 | -6.61 |
| 1446526_PM_at   | Gm2379                    | NA         | 0.04  | 2.31 | 0.42  | 6.82E-01 | 8.52E-01 | -6.61 |
| 1442251_PM_at   | Vcpi1                     | NA         | -0.05 | 2.16 | -0.42 | 6.82E-01 | 8.52E-01 | -6.61 |
| 1424102_PM_at   | Atg4b                     | ATG4B      | -0.13 | 3.65 | -0.42 | 6.82E-01 | 8.52E-01 | -6.61 |
| 1438203_PM_at   | Scarf2                    | NA         | 0.05  | 2.28 | 0.42  | 6.82E-01 | 8.52E-01 | -6.61 |
| 1433013_PM_at   | ---                       | NA         | 0.05  | 2.41 | 0.42  | 6.82E-01 | 8.52E-01 | -6.61 |
| 1446231_PM_at   | ---                       | NA         | -0.09 | 3.58 | -0.42 | 6.82E-01 | 8.52E-01 | -6.61 |
| 1455623_PM_at   | Mfsd4                     | MFSD4A     | 0.03  | 2.35 | 0.42  | 6.82E-01 | 8.52E-01 | -6.61 |
| 1452752_PM_at   | P3h1                      | P3H1       | 0.05  | 2.21 | 0.42  | 6.83E-01 | 8.52E-01 | -6.61 |
| 1458105_PM_at   | Syn2                      | NA         | 0.08  | 2.90 | 0.42  | 6.82E-01 | 8.52E-01 | -6.61 |
| 1437878_PM_s_at | Ttc14                     | TTC14      | 0.09  | 2.38 | 0.42  | 6.83E-01 | 8.52E-01 | -6.61 |
| 1441088_PM_at   | Ikzf3                     | IKZF3      | 0.04  | 2.14 | 0.42  | 6.83E-01 | 8.52E-01 | -6.61 |
| 1452997_PM_at   | Gm21811                   | NA         | -0.23 | 8.03 | -0.42 | 6.83E-01 | 8.52E-01 | -6.61 |
| 1436820_PM_at   | Kctd11                    | KCTD11     | -0.08 | 3.26 | -0.42 | 6.83E-01 | 8.52E-01 | -6.61 |
| 1432759_PM_at   | LOC105244616              | NA         | 0.04  | 2.06 | 0.42  | 6.83E-01 | 8.52E-01 | -6.61 |
| 1415757_PM_at   | Gbf1                      | GBF1       | -0.04 | 2.47 | -0.42 | 6.83E-01 | 8.52E-01 | -6.61 |
| 1447563_PM_at   | Rps3                      | RPS3       | 0.04  | 2.50 | 0.42  | 6.83E-01 | 8.52E-01 | -6.61 |
| 1437680_PM_x_at | Glxr2                     | GLRX2      | 0.06  | 3.77 | 0.42  | 6.83E-01 | 8.52E-01 | -6.61 |
| 1426573_PM_at   | Me2                       | NA         | 0.06  | 2.80 | 0.42  | 6.83E-01 | 8.52E-01 | -6.61 |
| 1442063_PM_at   | Adamts1                   | ADAMTSL1   | -0.07 | 2.37 | -0.42 | 6.83E-01 | 8.53E-01 | -6.61 |
| 1424462_PM_at   | Ergic2                    | ERGIC2     | -0.06 | 5.08 | -0.42 | 6.83E-01 | 8.53E-01 | -6.61 |
| 1417601_PM_at   | Rgs1                      | RGS1       | 0.04  | 2.42 | 0.42  | 6.83E-01 | 8.53E-01 | -6.61 |
| 1459122_PM_at   | Spef2                     | SPEF2      | 0.04  | 1.87 | 0.42  | 6.83E-01 | 8.53E-01 | -6.61 |
| 1441622_PM_at   | Gm5485                    | NA         | 0.04  | 2.25 | 0.42  | 6.83E-01 | 8.53E-01 | -6.61 |
| 1419959_PM_s_at | Cphx1 /// Cphx2 /// Cphx3 | ACO09122.1 | -0.05 | 2.19 | -0.42 | 6.83E-01 | 8.53E-01 | -6.61 |
| 1436604_PM_at   | Ttlb3                     | TTLB3      | 0.05  | 2.34 | 0.42  | 6.83E-01 | 8.53E-01 | -6.61 |
| 1434855_PM_at   | Amdhd2                    | AMDHD2     | 0.10  | 4.44 | 0.42  | 6.83E-01 | 8.53E-01 | -6.61 |
| 1437305_PM_at   | Zfp770                    | ZNF770     | -0.06 | 3.14 | -0.42 | 6.83E-01 | 8.53E-01 | -6.61 |
| 1422458_PM_at   | Tcl1                      | TCL1A      | 0.04  | 2.41 | 0.42  | 6.83E-01 | 8.53E-01 | -6.61 |
| 1439248_PM_at   | ---                       | NA         | 0.16  | 2.77 | 0.42  | 6.83E-01 | 8.53E-01 | -6.61 |
| 1419687_PM_at   | Macro1                    | MACROD1    | 0.11  | 3.24 | 0.42  | 6.83E-01 | 8.53E-01 | -6.61 |
| 1438020_PM_at   | Hapln1                    | HAPLN1     | -0.09 | 5.04 | -0.42 | 6.83E-01 | 8.53E-01 | -6.61 |
| 1441919_PM_x_at | Crat                      | CRAT       | 0.07  | 2.58 | 0.42  | 6.83E-01 | 8.53E-01 | -6.61 |
| 1438740_PM_at   | Nmt2                      | NMT2       | 0.12  | 3.10 | 0.42  | 6.83E-01 | 8.53E-01 | -6.61 |
| 1416906_PM_at   | Anapc5                    | ANAPC5     | 0.16  | 4.12 | 0.42  | 6.83E-01 | 8.53E-01 | -6.61 |
| 1447570_PM_s_at | ---                       | NA         | 0.15  | 3.74 | 0.42  | 6.83E-01 | 8.53E-01 | -6.61 |
| 1443904_PM_at   | Fads6                     | FADS6      | 0.04  | 2.34 | 0.42  | 6.83E-01 | 8.53E-01 | -6.61 |
| 1434356_PM_a_at | Psm5                      | PSMA5      | -0.21 | 5.49 | -0.42 | 6.84E-01 | 8.53E-01 | -6.61 |
| 1428158_PM_at   | Akt1s1                    | AKT1S1     | 0.04  | 2.13 | 0.42  | 6.84E-01 | 8.53E-01 | -6.61 |
| 1454277_PM_at   | 1700049J03Rik             | NA         | 0.04  | 2.29 | 0.42  | 6.84E-01 | 8.53E-01 | -6.61 |
| 1444037_PM_at   | ---                       | NA         | 0.04  | 2.13 | 0.42  | 6.84E-01 | 8.53E-01 | -6.61 |
| 1454180_PM_at   | Arm2                      | ARMC2      | 0.05  | 2.42 | 0.42  | 6.84E-01 | 8.53E-01 | -6.61 |
| 1432246_PM_at   | 4922502N22Rik             | NA         | 0.05  | 2.35 | 0.42  | 6.84E-01 | 8.53E-01 | -6.61 |
| 1422056_PM_at   | Ntn3                      | NTN3       | 0.05  | 2.60 | 0.42  | 6.84E-01 | 8.53E-01 | -6.61 |

|                 |                       |          |       |      |       |          |          |       |
|-----------------|-----------------------|----------|-------|------|-------|----------|----------|-------|
| 1415917_PM_at   | Mthfd1                | MTHFD1   | 0.05  | 3.00 | 0.42  | 6.83E-01 | 8.53E-01 | -6.61 |
| 1455625_PM_at   | Taf10                 | TAF10    | 0.07  | 2.65 | 0.42  | 6.84E-01 | 8.53E-01 | -6.61 |
| 1423522_PM_at   | Npm3///Npm3-ps1       | NPM3     | 0.08  | 3.17 | 0.42  | 6.84E-01 | 8.53E-01 | -6.61 |
| 1438503_PM_x_at | Edf1                  | EDF1     | -0.13 | 7.23 | -0.42 | 6.84E-01 | 8.53E-01 | -6.61 |
| 1446249_PM_at   | ---                   | NA       | -0.04 | 2.42 | -0.42 | 6.84E-01 | 8.53E-01 | -6.61 |
| 1457122_PM_at   | ---                   | NA       | 0.04  | 2.40 | 0.42  | 6.84E-01 | 8.53E-01 | -6.61 |
| 1444241_PM_at   | Wac                   | WAC      | 0.12  | 4.08 | 0.42  | 6.84E-01 | 8.53E-01 | -6.61 |
| 1442803_PM_at   | ---                   | NA       | 0.14  | 2.93 | 0.42  | 6.84E-01 | 8.53E-01 | -6.61 |
| 1450105_PM_at   | Adam10                | ADAM10   | -0.08 | 3.63 | -0.42 | 6.84E-01 | 8.53E-01 | -6.61 |
| 1419273_PM_at   | Uri1                  | URI1     | -0.09 | 5.54 | -0.42 | 6.84E-01 | 8.53E-01 | -6.61 |
| 1455786_PM_at   | Zfp820                | NA       | 0.03  | 2.15 | 0.42  | 6.84E-01 | 8.53E-01 | -6.61 |
| 1444691_PM_at   | Prkd3                 | PRKD3    | -0.07 | 2.07 | -0.42 | 6.84E-01 | 8.53E-01 | -6.61 |
| 1447869_PM_x_at | Rhobtb3               | RHOBTB3  | -0.07 | 2.69 | -0.42 | 6.84E-01 | 8.53E-01 | -6.61 |
| 1456057_PM_x_at | Tmem109               | TMEM109  | -0.07 | 8.99 | -0.42 | 6.84E-01 | 8.53E-01 | -6.61 |
| 1438779_PM_at   | Col4a3                | COL4A3   | -0.04 | 2.41 | -0.42 | 6.84E-01 | 8.53E-01 | -6.61 |
| 1441794_PM_at   | ---                   | NA       | 0.04  | 2.36 | 0.42  | 6.84E-01 | 8.53E-01 | -6.61 |
| 1453904_PM_at   | Ccdc146               | CCDC146  | 0.05  | 1.94 | 0.42  | 6.84E-01 | 8.53E-01 | -6.61 |
| 1452163_PM_at   | Ets1                  | ETS1     | 0.06  | 2.17 | 0.42  | 6.84E-01 | 8.53E-01 | -6.61 |
| 1439659_PM_at   | Usp49                 | USP49    | 0.07  | 2.98 | 0.42  | 6.84E-01 | 8.53E-01 | -6.61 |
| 1438404_PM_at   | Rnf144a               | RNF144A  | 0.09  | 3.03 | 0.42  | 6.84E-01 | 8.53E-01 | -6.61 |
| 1454838_PM_s_at | Pkdcc                 | PKDCC    | 0.18  | 2.51 | 0.42  | 6.84E-01 | 8.53E-01 | -6.61 |
| 1447656_PM_at   | Zdhc17                | ZDHH17   | -0.04 | 1.93 | -0.42 | 6.84E-01 | 8.53E-01 | -6.61 |
| 1452770_PM_at   | Vkorc1                | VKORC1   | 0.17  | 4.28 | 0.42  | 6.84E-01 | 8.53E-01 | -6.61 |
| 1460142_PM_at   | D13Erd324e            | NA       | 0.06  | 2.26 | 0.42  | 6.84E-01 | 8.53E-01 | -6.61 |
| 1448677_PM_at   | Emc8                  | EMC8     | -0.13 | 3.48 | -0.42 | 6.84E-01 | 8.53E-01 | -6.61 |
| 1456113_PM_at   | Tbc1d25               | TBC1D25  | -0.07 | 2.42 | -0.42 | 6.84E-01 | 8.53E-01 | -6.61 |
| 1453438_PM_x_at | Gsdma2                | GSDMA    | -0.07 | 3.32 | -0.42 | 6.84E-01 | 8.53E-01 | -6.61 |
| 1440358_PM_at   | Arhgef15              | ARHGEF15 | 0.03  | 3.12 | 0.42  | 6.84E-01 | 8.53E-01 | -6.61 |
| 1450237_PM_at   | Dnase2b               | DNASE2B  | 0.04  | 2.22 | 0.42  | 6.84E-01 | 8.53E-01 | -6.61 |
| 1451690_PM_a_at | Pvr14                 | NECTIN4  | 0.05  | 2.25 | 0.42  | 6.84E-01 | 8.53E-01 | -6.61 |
| 1430573_PM_s_at | Etohd2                | NA       | 0.10  | 4.75 | 0.42  | 6.84E-01 | 8.53E-01 | -6.61 |
| 1421924_PM_at   | Slc2a3                | SLC2A3   | 0.12  | 2.97 | 0.42  | 6.84E-01 | 8.53E-01 | -6.61 |
| 1436718_PM_at   | Nxph1                 | NXPH1    | -0.11 | 4.03 | -0.42 | 6.84E-01 | 8.53E-01 | -6.61 |
| 1457025_PM_at   | Sdr16c6               | NA       | 0.03  | 2.05 | 0.42  | 6.85E-01 | 8.53E-01 | -6.61 |
| 1445554_PM_at   | ---                   | NA       | 0.05  | 2.33 | 0.42  | 6.85E-01 | 8.53E-01 | -6.61 |
| 1418830_PM_at   | Cd79a                 | CD79A    | -0.08 | 2.70 | -0.42 | 6.85E-01 | 8.53E-01 | -6.61 |
| 1420363_PM_at   | Bik                   | BIK      | 0.04  | 2.31 | 0.42  | 6.85E-01 | 8.53E-01 | -6.61 |
| 1448948_PM_at   | Slc50a1               | SLC50A1  | -0.09 | 2.21 | -0.42 | 6.85E-01 | 8.53E-01 | -6.61 |
| 1433523_PM_at   | Radil                 | RADIL    | -0.08 | 3.79 | -0.42 | 6.85E-01 | 8.53E-01 | -6.61 |
| 1456185_PM_at   | Nlrp9a                | NLRP9    | 0.07  | 2.27 | 0.42  | 6.85E-01 | 8.53E-01 | -6.61 |
| 1424043_PM_at   | Ppil4                 | PPIL4    | 0.12  | 4.51 | 0.42  | 6.85E-01 | 8.53E-01 | -6.61 |
| 1438521_PM_at   | Gm38491               | NA       | 0.06  | 2.94 | 0.42  | 6.85E-01 | 8.53E-01 | -6.61 |
| 1447303_PM_at   | Speer8-ps1            | NA       | 0.20  | 3.89 | 0.42  | 6.85E-01 | 8.53E-01 | -6.61 |
| 1447947_PM_at   | Zfyve16               | ZFYVE16  | -0.14 | 3.06 | -0.42 | 6.85E-01 | 8.53E-01 | -6.61 |
| 1435749_PM_at   | Gda                   | GDA      | -0.20 | 4.57 | -0.42 | 6.85E-01 | 8.54E-01 | -6.61 |
| 1455634_PM_at   | Son                   | SON      | -0.08 | 3.48 | -0.42 | 6.85E-01 | 8.54E-01 | -6.61 |
| 1417048_PM_at   | Prom2                 | NA       | -0.03 | 2.29 | -0.42 | 6.85E-01 | 8.54E-01 | -6.61 |
| 1449428_PM_at   | Cldn18                | CLDN18   | 0.05  | 2.45 | 0.42  | 6.85E-01 | 8.54E-01 | -6.61 |
| 1435905_PM_at   | Supt20                | SUPT20H  | 0.07  | 2.72 | 0.42  | 6.85E-01 | 8.54E-01 | -6.61 |
| 1435337_PM_at   | Tshz3                 | TSHZ3    | 0.21  | 5.76 | 0.42  | 6.85E-01 | 8.54E-01 | -6.61 |
| 1420509_PM_at   | LOC102641936///Srfbp1 | SRFBP1   | 0.28  | 4.32 | 0.42  | 6.85E-01 | 8.54E-01 | -6.61 |
| 1451338_PM_at   | Nisch                 | NISCH    | -0.08 | 3.11 | -0.42 | 6.85E-01 | 8.54E-01 | -6.61 |
| 1452121_PM_at   | Fbxo22///LOC102642310 | FBXO22   | 0.04  | 3.24 | 0.42  | 6.85E-01 | 8.54E-01 | -6.61 |
| 1421652_PM_at   | Htr3b                 | HTR3B    | -0.05 | 2.49 | -0.42 | 6.86E-01 | 8.54E-01 | -6.61 |
| 1446087_PM_at   | ---                   | NA       | 0.04  | 2.13 | 0.42  | 6.86E-01 | 8.54E-01 | -6.61 |
| 1444584_PM_at   | Pgbd1                 | PGBD1    | 0.04  | 2.21 | 0.42  | 6.86E-01 | 8.54E-01 | -6.61 |
| 1439689_PM_at   | Mettl24               | METTL24  | 0.05  | 2.05 | 0.42  | 6.86E-01 | 8.54E-01 | -6.61 |
| 1456487_PM_at   | Adcy1                 | ADCY1    | 0.11  | 3.60 | 0.42  | 6.86E-01 | 8.54E-01 | -6.61 |
| 1434329_PM_s_at | Adipor2               | ADIPOR2  | 0.06  | 5.57 | 0.42  | 6.86E-01 | 8.54E-01 | -6.61 |
| 1431760_PM_a_at | Sdccag3               | SDCCAG3  | -0.05 | 2.56 | -0.42 | 6.86E-01 | 8.54E-01 | -6.61 |
| 1437944_PM_at   | Shc2                  | NA       | 0.05  | 2.23 | 0.42  | 6.86E-01 | 8.54E-01 | -6.61 |
| 1438692_PM_at   | Gtf3c4                | GTF3C4   | 0.06  | 2.90 | 0.42  | 6.86E-01 | 8.54E-01 | -6.61 |
| 1439825_PM_at   | Dtx3l                 | DTX3L    | 0.06  | 2.32 | 0.42  | 6.86E-01 | 8.54E-01 | -6.61 |
| 1435866_PM_s_at | Hist3h2a              | HIST3H2A | -0.07 | 2.62 | -0.42 | 6.86E-01 | 8.54E-01 | -6.61 |
| 1427359_PM_at   | Kdm7a                 | KDM7A    | 0.10  | 3.04 | 0.42  | 6.86E-01 | 8.54E-01 | -6.61 |
| 1457015_PM_at   | A230070E04Rik         | NA       | 0.11  | 2.81 | 0.42  | 6.86E-01 | 8.54E-01 | -6.61 |
| 1446034_PM_at   | LOC432842             | NA       | 0.06  | 2.80 | 0.42  | 6.86E-01 | 8.54E-01 | -6.61 |
| 1417305_PM_at   | Speg                  | SPEG     | 0.05  | 4.93 | 0.42  | 6.86E-01 | 8.54E-01 | -6.61 |
| 1425148_PM_a_at | Snx6                  | SNX6     | -0.31 | 3.23 | -0.42 | 6.86E-01 | 8.54E-01 | -6.61 |
| 1438674_PM_a_at | Sfswap                | SFSWAP   | 0.13  | 4.26 | 0.42  | 6.86E-01 | 8.54E-01 | -6.61 |
| 1432558_PM_a_at | Mal                   | MAL      | 0.17  | 5.59 | 0.42  | 6.86E-01 | 8.54E-01 | -6.61 |
| 1435487_PM_at   | Grid2                 | GRI2     | 0.21  | 3.25 | 0.42  | 6.86E-01 | 8.54E-01 | -6.61 |
| 1440223_PM_at   | Rbm6                  | RBM6     | 0.08  | 2.76 | 0.42  | 6.86E-01 | 8.54E-01 | -6.61 |
| 1444756_PM_at   | ---                   | NA       | 0.04  | 2.58 | 0.42  | 6.86E-01 | 8.54E-01 | -6.61 |



|                     |                           |             |       |       |       |          |          |       |
|---------------------|---------------------------|-------------|-------|-------|-------|----------|----------|-------|
| 1422856_PM_at       | Slc12a3                   | SLC12A3     | 0.04  | 2.45  | 0.42  | 6.86E-01 | 8.55E-01 | -6.61 |
| 1420639_PM_at       | Jmy                       | JMY         | 0.11  | 2.72  | 0.42  | 6.87E-01 | 8.55E-01 | -6.61 |
| 1457889_PM_at       | AU014972                  | NA          | 0.14  | 3.06  | 0.42  | 6.87E-01 | 8.55E-01 | -6.61 |
| 1447501_PM_at       | ---                       | NA          | 0.06  | 2.29  | 0.42  | 6.87E-01 | 8.55E-01 | -6.61 |
| 1435313_PM_at       | Cd200r4                   | CD200R1L    | 0.05  | 2.15  | 0.41  | 6.87E-01 | 8.55E-01 | -6.61 |
| 1442614_PM_at       | Il1rap                    | IL1RAP      | 0.21  | 4.73  | 0.41  | 6.87E-01 | 8.55E-01 | -6.61 |
| 1421995_PM_at       | Tfap2a                    | TFAP2A      | -0.10 | 2.47  | -0.41 | 6.87E-01 | 8.55E-01 | -6.61 |
| 1451621_PM_at       | Desi2                     | DESI2       | -0.07 | 2.42  | -0.41 | 6.87E-01 | 8.55E-01 | -6.61 |
| 1445147_PM_at       | ---                       | NA          | 0.08  | 3.23  | 0.41  | 6.87E-01 | 8.55E-01 | -6.61 |
| 1417056_PM_at       | Psme1                     | PSME1       | -0.12 | 3.49  | -0.41 | 6.87E-01 | 8.55E-01 | -6.61 |
| 1439894_PM_at       | Nwd1                      | NA          | 0.09  | 2.94  | 0.41  | 6.87E-01 | 8.55E-01 | -6.61 |
| 1458076_PM_at       | ---                       | NA          | 0.05  | 2.09  | 0.41  | 6.87E-01 | 8.55E-01 | -6.61 |
| 1438931_PM_s_at     | Sesn1                     | SESN1       | -0.23 | 6.23  | -0.41 | 6.87E-01 | 8.55E-01 | -6.61 |
| 1458087_PM_at       | Stac3                     | STAC3       | 0.04  | 2.12  | 0.41  | 6.87E-01 | 8.55E-01 | -6.61 |
| 1432260_PM_at       | Gpr39                     | GPR39       | 0.06  | 2.80  | 0.41  | 6.87E-01 | 8.55E-01 | -6.61 |
| 1417130_PM_s_at     | Angptl4                   | ANGPTL4     | 0.06  | 2.80  | 0.41  | 6.87E-01 | 8.55E-01 | -6.61 |
| 1429997_PM_at       | ---                       | NA          | -0.09 | 3.00  | -0.41 | 6.87E-01 | 8.55E-01 | -6.61 |
| 1417155_PM_at       | Mycn                      | MYCN        | -0.08 | 2.68  | -0.41 | 6.87E-01 | 8.55E-01 | -6.61 |
| 1449347_PM_a_at     | Xlr4a /// Xlr4b /// Xlr4c | NA          | -0.06 | 2.15  | -0.41 | 6.87E-01 | 8.55E-01 | -6.61 |
| 1458609_PM_at       | Gm20161                   | NA          | -0.05 | 2.23  | -0.41 | 6.87E-01 | 8.55E-01 | -6.61 |
| 1426111_PM_x_at     | Irf3                      | IRF3        | 0.11  | 3.63  | 0.41  | 6.87E-01 | 8.55E-01 | -6.61 |
| 1425005_PM_at       | Klrc1                     | KLRC4-KLRK1 | 0.04  | 2.17  | 0.41  | 6.87E-01 | 8.55E-01 | -6.61 |
| 1421430_PM_at       | Rad51b                    | NA          | -0.04 | 2.14  | -0.41 | 6.87E-01 | 8.55E-01 | -6.61 |
| 1453798_PM_at       | Ccdc93                    | CCDC93      | 0.05  | 2.67  | 0.41  | 6.87E-01 | 8.55E-01 | -6.61 |
| 1441730_PM_at       | ---                       | NA          | 0.07  | 2.33  | 0.41  | 6.87E-01 | 8.55E-01 | -6.61 |
| 1420486_PM_at       | Nol7                      | NOL7        | 0.14  | 4.14  | 0.41  | 6.87E-01 | 8.55E-01 | -6.61 |
| 1448265_PM_x_at     | Mpz2                      | MPZL2       | -0.14 | 2.16  | -0.41 | 6.87E-01 | 8.55E-01 | -6.61 |
| 1460441_PM_at       | Zxdb                      | ZXDB        | -0.07 | 3.52  | -0.41 | 6.88E-01 | 8.55E-01 | -6.61 |
| 1437438_PM_x_at     | Pnlpp2                    | PNLIPRP2    | -0.04 | 2.53  | -0.41 | 6.88E-01 | 8.55E-01 | -6.61 |
| 1419303_PM_at       | Heyl                      | HEYL        | -0.03 | 2.21  | -0.41 | 6.88E-01 | 8.55E-01 | -6.61 |
| AFFX-r2-P1-cre-5_at | ---                       | NA          | -0.03 | 12.33 | -0.41 | 6.88E-01 | 8.55E-01 | -6.61 |
| 1422907_PM_at       | Gnat2                     | GNAT2       | 0.04  | 2.90  | 0.41  | 6.88E-01 | 8.55E-01 | -6.61 |
| 1435488_PM_at       | Mthfd2l                   | MTHFD2L     | 0.06  | 2.04  | 0.41  | 6.88E-01 | 8.55E-01 | -6.61 |
| 1437295_PM_at       | Pkn2                      | PKN2        | 0.08  | 2.82  | 0.41  | 6.88E-01 | 8.55E-01 | -6.61 |
| 1440974_PM_at       | ---                       | NA          | -0.11 | 3.14  | -0.41 | 6.88E-01 | 8.55E-01 | -6.61 |
| 1437979_PM_at       | ---                       | NA          | -0.10 | 2.38  | -0.41 | 6.88E-01 | 8.55E-01 | -6.61 |
| 1451610_PM_at       | Cxcl17                    | CXCL17      | -0.06 | 2.24  | -0.41 | 6.88E-01 | 8.55E-01 | -6.61 |
| 1418981_PM_at       | Casp12                    | CASP12      | -0.06 | 2.37  | -0.41 | 6.88E-01 | 8.55E-01 | -6.61 |
| 1445252_PM_at       | ---                       | NA          | -0.05 | 2.55  | -0.41 | 6.88E-01 | 8.55E-01 | -6.61 |
| 1455839_PM_at       | LOC102642250 /// Uggt1    | UGGT1       | -0.04 | 2.84  | -0.41 | 6.88E-01 | 8.55E-01 | -6.61 |
| 1417074_PM_at       | Ceacam10                  | PSG7        | 0.03  | 1.89  | 0.41  | 6.88E-01 | 8.55E-01 | -6.61 |
| 1427880_PM_at       | Uqcrq                     | UQCRCQ      | 0.04  | 2.56  | 0.41  | 6.88E-01 | 8.55E-01 | -6.61 |
| 1454244_PM_at       | Mcm10                     | MCM10       | 0.04  | 2.00  | 0.41  | 6.88E-01 | 8.55E-01 | -6.61 |
| 1422197_PM_at       | Kcna2                     | KCNA2       | 0.05  | 2.61  | 0.41  | 6.88E-01 | 8.55E-01 | -6.61 |
| 1434959_PM_at       | Dhh                       | DHH         | 0.05  | 2.46  | 0.41  | 6.88E-01 | 8.55E-01 | -6.61 |
| 1447996_PM_at       | ---                       | NA          | 0.07  | 2.45  | 0.41  | 6.88E-01 | 8.55E-01 | -6.61 |
| 1431616_PM_at       | Catsperg1 /// Catsperg2   | NA          | 0.08  | 2.49  | 0.41  | 6.88E-01 | 8.55E-01 | -6.61 |
| 1455334_PM_at       | Zfp866                    | NA          | 0.08  | 3.20  | 0.41  | 6.88E-01 | 8.55E-01 | -6.61 |
| 1431530_PM_a_at     | Tspan5                    | TSPAN5      | 0.18  | 4.31  | 0.41  | 6.88E-01 | 8.55E-01 | -6.61 |
| 1429779_PM_at       | Ago4                      | AGO4        | -0.05 | 2.17  | -0.41 | 6.88E-01 | 8.55E-01 | -6.61 |
| 1425043_PM_s_at     | Ccdc163                   | NA          | 0.05  | 2.29  | 0.41  | 6.88E-01 | 8.55E-01 | -6.61 |
| 1421221_PM_at       | Bco2                      | BCO2        | -0.06 | 2.41  | -0.41 | 6.88E-01 | 8.56E-01 | -6.61 |
| 1427679_PM_at       | Lats1                     | LATS1       | 0.06  | 3.69  | 0.41  | 6.88E-01 | 8.56E-01 | -6.61 |
| 1451607_PM_at       | Klk1b21                   | KLK3        | 0.04  | 2.44  | 0.41  | 6.88E-01 | 8.56E-01 | -6.61 |
| 1422175_PM_at       | Mmp1a                     | MMP1        | 0.03  | 1.86  | 0.41  | 6.89E-01 | 8.56E-01 | -6.61 |
| 1437238_PM_x_at     | Nmd3                      | NMD3        | -0.13 | 4.39  | -0.41 | 6.89E-01 | 8.56E-01 | -6.61 |
| 1457480_PM_at       | ---                       | NA          | -0.08 | 2.49  | -0.41 | 6.89E-01 | 8.56E-01 | -6.61 |
| 1426723_PM_at       | Wdr48                     | WDR48       | 0.06  | 2.69  | 0.41  | 6.89E-01 | 8.56E-01 | -6.61 |
| 1422993_PM_s_at     | Alyref /// Alyref2        | ALYREF      | -0.21 | 3.91  | -0.41 | 6.89E-01 | 8.56E-01 | -6.61 |
| 1438000_PM_x_at     | Zfp622                    | ZNF622      | -0.18 | 7.58  | -0.41 | 6.89E-01 | 8.56E-01 | -6.61 |
| 1446164_PM_at       | ---                       | NA          | -0.07 | 2.56  | -0.41 | 6.89E-01 | 8.56E-01 | -6.61 |
| 1430440_PM_at       | Gm14144                   | NA          | -0.06 | 2.89  | -0.41 | 6.89E-01 | 8.56E-01 | -6.61 |
| 1442120_PM_at       | ---                       | NA          | -0.05 | 4.94  | -0.41 | 6.89E-01 | 8.56E-01 | -6.61 |
| 1455686_PM_at       | Lcorl                     | LCORL       | 0.06  | 2.43  | 0.41  | 6.89E-01 | 8.56E-01 | -6.61 |
| 1421608_PM_at       | Il20                      | IL20        | 0.06  | 2.29  | 0.41  | 6.89E-01 | 8.56E-01 | -6.61 |
| 1427294_PM_a_at     | Slc38a10                  | SLC38A10    | 0.12  | 3.20  | 0.41  | 6.89E-01 | 8.56E-01 | -6.61 |
| 1426254_PM_at       | Tm2d1                     | TM2D1       | 0.14  | 2.61  | 0.41  | 6.89E-01 | 8.56E-01 | -6.61 |
| 1432554_PM_at       | ---                       | NA          | 0.18  | 3.30  | 0.41  | 6.89E-01 | 8.56E-01 | -6.61 |
| 1451556_PM_a_at     | Cacul1                    | CACUL1      | 0.05  | 2.61  | 0.41  | 6.89E-01 | 8.56E-01 | -6.61 |
| 1426258_PM_at       | Sorl1                     | SORL1       | -0.06 | 3.19  | -0.41 | 6.89E-01 | 8.56E-01 | -6.61 |
| 1439562_PM_at       | Mms22l                    | MMS22L      | 0.05  | 2.41  | 0.41  | 6.89E-01 | 8.56E-01 | -6.61 |
| 1458914_PM_at       | Eral1                     | NA          | 0.06  | 2.88  | 0.41  | 6.89E-01 | 8.56E-01 | -6.61 |
| 1441739_PM_at       | ---                       | NA          | -0.12 | 2.96  | -0.41 | 6.89E-01 | 8.56E-01 | -6.61 |
| 1448928_PM_at       | Hdac6                     | HDAC6       | -0.10 | 3.04  | -0.41 | 6.89E-01 | 8.56E-01 | -6.61 |
| 1451138_PM_x_at     | Mier2                     | MIER2       | 0.04  | 2.69  | 0.41  | 6.89E-01 | 8.56E-01 | -6.61 |

|                     |                                    |         |       |      |       |          |          |       |
|---------------------|------------------------------------|---------|-------|------|-------|----------|----------|-------|
| 1446239_PM_at       | 4930444F02Rik                      | NA      | 0.06  | 2.40 | 0.41  | 6.89E-01 | 8.56E-01 | -6.61 |
| 1458300_PM_at       | Akr7a5                             | NA      | 0.06  | 2.71 | 0.41  | 6.89E-01 | 8.56E-01 | -6.61 |
| 1460711_PM_at       | Dnajc21                            | DNAJC21 | 0.08  | 2.66 | 0.41  | 6.89E-01 | 8.56E-01 | -6.61 |
| 1426019_PM_at       | Plaa                               | NA      | -0.04 | 2.13 | -0.41 | 6.89E-01 | 8.56E-01 | -6.61 |
| 1442208_PM_at       | Scn8a                              | NA      | -0.03 | 2.13 | -0.41 | 6.89E-01 | 8.56E-01 | -6.61 |
| 1439016_PM_x_at     | Sprr2a1 /// Sprr2a2 ///<br>Sprr2a3 | NA      | 0.09  | 3.13 | 0.41  | 6.89E-01 | 8.56E-01 | -6.61 |
| 1436851_PM_at       | Pkn1                               | PKN1    | 0.08  | 3.09 | 0.41  | 6.89E-01 | 8.56E-01 | -6.61 |
| 1458756_PM_at       | ---                                | NA      | 0.04  | 2.08 | 0.41  | 6.89E-01 | 8.56E-01 | -6.61 |
| 1450092_PM_at       | Ighmbp2                            | IGHMBP2 | -0.04 | 2.14 | -0.41 | 6.89E-01 | 8.56E-01 | -6.61 |
| 1445076_PM_at       | ---                                | NA      | 0.16  | 2.76 | 0.41  | 6.89E-01 | 8.56E-01 | -6.61 |
| 1432195_PM_s_at     | Ccnl2                              | CCNL2   | -0.10 | 5.09 | -0.41 | 6.89E-01 | 8.56E-01 | -6.61 |
| 1454219_PM_at       | Dnajc2                             | DNAJC2  | -0.08 | 2.19 | -0.41 | 6.90E-01 | 8.56E-01 | -6.61 |
| 1454333_PM_at       | Cryga                              | CRYGA   | 0.06  | 2.99 | 0.41  | 6.90E-01 | 8.56E-01 | -6.61 |
| 1451319_PM_at       | Senp1                              | SENP1   | 0.06  | 2.40 | 0.41  | 6.89E-01 | 8.56E-01 | -6.61 |
| 1426511_PM_at       | Susd2                              | SUSD2   | 0.11  | 2.41 | 0.41  | 6.89E-01 | 8.56E-01 | -6.61 |
| 1437416_PM_at       | Ankef1 /// BC034902                | ANKEF1  | 0.03  | 1.72 | 0.41  | 6.90E-01 | 8.56E-01 | -6.61 |
| 1458399_PM_at       | Lrrc3                              | LRRC3   | -0.04 | 2.05 | -0.41 | 6.90E-01 | 8.56E-01 | -6.61 |
| 1428884_PM_at       | Tmem57                             | TMEM57  | -0.08 | 5.35 | -0.41 | 6.90E-01 | 8.56E-01 | -6.61 |
| 1426489_PM_s_at     | Bfar                               | BFAR    | 0.14  | 5.45 | 0.41  | 6.90E-01 | 8.56E-01 | -6.61 |
| 1459328_PM_at       | ---                                | NA      | 0.04  | 2.68 | 0.41  | 6.90E-01 | 8.56E-01 | -6.61 |
| 1432231_PM_at       | 4930526H09Rik                      | NA      | 0.05  | 2.94 | 0.41  | 6.90E-01 | 8.56E-01 | -6.61 |
| 1435537_PM_at       | Ptprd                              | PTPRD   | -0.24 | 6.58 | -0.41 | 6.90E-01 | 8.57E-01 | -6.61 |
| 1440651_PM_at       | ---                                | NA      | 0.05  | 2.40 | 0.41  | 6.90E-01 | 8.57E-01 | -6.61 |
| 1447849_PM_s_at     | Maf                                | MAF     | 0.10  | 2.18 | 0.41  | 6.90E-01 | 8.57E-01 | -6.61 |
| 1427630_PM_x_at     | Ceacam1                            | PSG7    | 0.12  | 2.63 | 0.41  | 6.90E-01 | 8.57E-01 | -6.61 |
| 1420593_PM_a_at     | Tead3                              | TEAD3   | 0.05  | 2.76 | 0.41  | 6.90E-01 | 8.57E-01 | -6.61 |
| 1448834_PM_at       | Foxm1                              | FOXM1   | -0.06 | 2.28 | -0.41 | 6.90E-01 | 8.57E-01 | -6.61 |
| 1459435_PM_at       | ---                                | NA      | -0.03 | 2.47 | -0.41 | 6.90E-01 | 8.57E-01 | -6.61 |
| 1425740_PM_at       | Suv420h1                           | KMT5B   | -0.08 | 2.50 | -0.41 | 6.90E-01 | 8.57E-01 | -6.61 |
| 1437347_PM_at       | Ednrb                              | EDNRB   | -0.07 | 3.26 | -0.41 | 6.90E-01 | 8.57E-01 | -6.61 |
| 1422977_PM_at       | Gp1bb                              | GP1BB   | 0.05  | 2.55 | 0.41  | 6.90E-01 | 8.57E-01 | -6.61 |
| 1460685_PM_at       | Timm17b                            | TIMM17B | 0.05  | 2.52 | 0.41  | 6.90E-01 | 8.57E-01 | -6.61 |
| 1452129_PM_at       | Ph2r                               | NA      | 0.05  | 2.41 | 0.41  | 6.90E-01 | 8.57E-01 | -6.61 |
| 1423933_PM_a_at     | Plet1                              | PLET1   | 0.04  | 2.42 | 0.41  | 6.90E-01 | 8.57E-01 | -6.61 |
| 1459044_PM_at       | AU015558                           | NA      | 0.05  | 2.26 | 0.41  | 6.90E-01 | 8.57E-01 | -6.61 |
| 1427165_PM_at       | Il13ra1                            | IL13RA1 | -0.11 | 2.56 | -0.41 | 6.90E-01 | 8.57E-01 | -6.61 |
| 1452306_PM_at       | Zfyve26                            | ZFYVE26 | -0.08 | 2.39 | -0.41 | 6.90E-01 | 8.57E-01 | -6.61 |
| 1431101_PM_a_at     | Srd5a1                             | SRD5A1  | 0.03  | 2.06 | 0.41  | 6.90E-01 | 8.57E-01 | -6.61 |
| 1457644_PM_s_at     | Cxcl1                              | CXCL3   | -0.13 | 2.59 | -0.41 | 6.91E-01 | 8.57E-01 | -6.61 |
| AFFX-r2-Bs-dap-M_at | ---                                | NA      | 0.03  | 2.05 | 0.41  | 6.91E-01 | 8.57E-01 | -6.61 |
| 1449846_PM_at       | Ear12 /// Ear2 /// Ear3            | RNASE2  | 0.07  | 2.28 | 0.41  | 6.91E-01 | 8.57E-01 | -6.61 |
| 1424517_PM_at       | Ccdc12                             | CCDC12  | 0.08  | 2.29 | 0.41  | 6.91E-01 | 8.57E-01 | -6.61 |
| 1440437_PM_at       | Herc1                              | HERC1   | 0.09  | 2.72 | 0.41  | 6.91E-01 | 8.57E-01 | -6.61 |
| 1460743_PM_at       | Tigd5                              | TIGD5   | 0.08  | 2.71 | 0.41  | 6.91E-01 | 8.57E-01 | -6.61 |
| 1447855_PM_x_at     | Appbp2                             | APBP2   | 0.03  | 1.98 | 0.41  | 6.91E-01 | 8.57E-01 | -6.61 |
| 1422853_PM_at       | Shc1                               | SHC1    | -0.05 | 2.09 | -0.41 | 6.91E-01 | 8.57E-01 | -6.61 |
| 1429961_PM_at       | Tsacc                              | TSACC   | 0.04  | 2.30 | 0.41  | 6.91E-01 | 8.57E-01 | -6.61 |
| 1437159_PM_at       | Tmppe                              | TMPE    | 0.08  | 2.70 | 0.41  | 6.91E-01 | 8.57E-01 | -6.61 |
| 1454185_PM_at       | 4933436E23Rik                      | NA      | 0.05  | 2.49 | 0.41  | 6.91E-01 | 8.57E-01 | -6.61 |
| 1448778_PM_at       | Srsf4                              | SRSF4   | -0.08 | 7.11 | -0.41 | 6.91E-01 | 8.57E-01 | -6.61 |
| 1458987_PM_at       | Cdk7                               | CDK7    | -0.10 | 2.86 | -0.41 | 6.91E-01 | 8.57E-01 | -6.61 |
| 1434970_PM_a_at     | Mrp15                              | MRPL15  | -0.10 | 2.97 | -0.41 | 6.91E-01 | 8.57E-01 | -6.61 |
| 1428511_PM_at       | Phkg2                              | PHKG2   | -0.05 | 2.61 | -0.41 | 6.91E-01 | 8.57E-01 | -6.61 |
| AFFX-r2-TagO-3_at   | ---                                | NA      | 0.03  | 2.12 | 0.41  | 6.91E-01 | 8.57E-01 | -6.61 |
| 1439040_PM_at       | Cenpe                              | CENPE   | 0.05  | 2.04 | 0.41  | 6.91E-01 | 8.57E-01 | -6.61 |
| 1440333_PM_at       | Mamdc4                             | MAMDC4  | 0.06  | 3.10 | 0.41  | 6.91E-01 | 8.57E-01 | -6.61 |
| 1452255_PM_at       | Fbxo38                             | FBXO38  | 0.09  | 3.85 | 0.41  | 6.91E-01 | 8.57E-01 | -6.61 |
| 1431946_PM_a_at     | Necab3                             | NECAB3  | 0.11  | 3.57 | 0.41  | 6.91E-01 | 8.57E-01 | -6.61 |
| 1429370_PM_a_at     | Psmc11                             | PSMD11  | 0.11  | 2.74 | 0.41  | 6.91E-01 | 8.57E-01 | -6.61 |
| 1429870_PM_at       | Tnik                               | TNIK    | -0.12 | 2.59 | -0.41 | 6.91E-01 | 8.57E-01 | -6.61 |
| 1447533_PM_at       | ---                                | NA      | -0.04 | 1.98 | -0.41 | 6.91E-01 | 8.57E-01 | -6.61 |
| 1438351_PM_at       | Msx2                               | MSX2    | 0.04  | 1.96 | 0.41  | 6.91E-01 | 8.57E-01 | -6.61 |
| 1419600_PM_at       | Defb4                              | NA      | 0.04  | 2.05 | 0.41  | 6.91E-01 | 8.57E-01 | -6.61 |
| 1429652_PM_at       | Prrc1                              | PRRC1   | 0.07  | 3.03 | 0.41  | 6.91E-01 | 8.57E-01 | -6.61 |
| 1457725_PM_at       | Gm8369 /// Ms4a6c                  | NA      | 0.08  | 2.93 | 0.41  | 6.91E-01 | 8.57E-01 | -6.61 |
| 1426146_PM_a_at     | Chpt1                              | CHPT1   | 0.09  | 2.45 | 0.41  | 6.91E-01 | 8.57E-01 | -6.61 |
| 1448758_PM_at       | Nrbf2                              | NRBF2   | 0.12  | 3.64 | 0.41  | 6.91E-01 | 8.57E-01 | -6.61 |
| 1437275_PM_at       | Ctnna1                             | NA      | 0.08  | 2.71 | 0.41  | 6.91E-01 | 8.57E-01 | -6.61 |
| 1443939_PM_at       | Trabd2b                            | TRABD2B | 0.04  | 2.48 | 0.41  | 6.91E-01 | 8.57E-01 | -6.61 |
| 1442636_PM_at       | ---                                | NA      | 0.05  | 2.18 | 0.41  | 6.91E-01 | 8.57E-01 | -6.61 |
| 1418539_PM_a_at     | Ptpre                              | PTPRE   | -0.14 | 4.00 | -0.41 | 6.91E-01 | 8.57E-01 | -6.61 |
| 1426727_PM_s_at     | Gm8801 /// Ppp1r10                 | PPP1R10 | 0.06  | 2.93 | 0.41  | 6.91E-01 | 8.57E-01 | -6.61 |
| 1452928_PM_at       | Abi3                               | ABI3    | -0.05 | 3.03 | -0.41 | 6.92E-01 | 8.57E-01 | -6.61 |
| 1422406_PM_at       | Ifna9                              | IFNA6   | 0.04  | 2.23 | 0.41  | 6.92E-01 | 8.57E-01 | -6.61 |

|                 |                                                                                                             |            |       |       |       |          |          |       |
|-----------------|-------------------------------------------------------------------------------------------------------------|------------|-------|-------|-------|----------|----------|-------|
| 1426873_PM_s_at | Jup                                                                                                         | JUP        | 0.18  | 3.33  | 0.41  | 6.92E-01 | 8.57E-01 | -6.61 |
| 1441895_PM_x_at | Panx1                                                                                                       | NA         | -0.05 | 2.32  | -0.41 | 6.92E-01 | 8.57E-01 | -6.61 |
| 1420796_PM_at   | Ahrr                                                                                                        | AHRR       | -0.04 | 2.36  | -0.41 | 6.92E-01 | 8.58E-01 | -6.61 |
| 1435386_PM_at   | Vwf                                                                                                         | VWF        | 0.10  | 3.56  | 0.41  | 6.92E-01 | 8.58E-01 | -6.61 |
| 1422607_PM_at   | Etv1                                                                                                        | ETV1       | 0.10  | 2.65  | 0.41  | 6.92E-01 | 8.58E-01 | -6.61 |
| 1435660_PM_at   | C130026121Rik ///<br>Gm15753 /// Gm16026 ///<br>LOC100041057 ///<br>LOC102638047 ///<br>LOC664787 /// Sp110 | SP140      | 0.17  | 3.56  | 0.41  | 6.92E-01 | 8.58E-01 | -6.61 |
| 1459271_PM_at   | ---                                                                                                         | NA         | 0.08  | 2.36  | 0.41  | 6.92E-01 | 8.58E-01 | -6.61 |
| 1445178_PM_at   | ---                                                                                                         | NA         | -0.04 | 2.28  | -0.41 | 6.92E-01 | 8.58E-01 | -6.61 |
| 1458659_PM_at   | ---                                                                                                         | NA         | 0.07  | 2.45  | 0.41  | 6.92E-01 | 8.58E-01 | -6.61 |
| 1421063_PM_s_at | Snrpn /// Snurf                                                                                             | SNRPN      | -0.17 | 10.01 | -0.41 | 6.92E-01 | 8.58E-01 | -6.61 |
| 1430458_PM_at   | Supt6                                                                                                       | NA         | -0.15 | 2.70  | -0.41 | 6.92E-01 | 8.58E-01 | -6.61 |
| 1425223_PM_at   | Birc3                                                                                                       | BIRC3      | -0.03 | 2.43  | -0.41 | 6.92E-01 | 8.58E-01 | -6.61 |
| 1442281_PM_at   | ---                                                                                                         | NA         | 0.08  | 2.69  | 0.41  | 6.92E-01 | 8.58E-01 | -6.61 |
| 1438684_PM_at   | Nuak1                                                                                                       | NUAK1      | -0.09 | 3.03  | -0.41 | 6.92E-01 | 8.58E-01 | -6.61 |
| 1439409_PM_x_at | Tyrrp1                                                                                                      | TYRPP1     | 0.04  | 2.22  | 0.41  | 6.92E-01 | 8.58E-01 | -6.61 |
| 1442247_PM_at   | Zfp286                                                                                                      | ACO05324.4 | 0.07  | 2.54  | 0.41  | 6.92E-01 | 8.58E-01 | -6.61 |
| 1434744_PM_at   | Yrdc                                                                                                        | YRDC       | -0.10 | 3.11  | -0.41 | 6.92E-01 | 8.58E-01 | -6.61 |
| 1419565_PM_a_at | Zfx                                                                                                         | ZFY        | 0.08  | 2.36  | 0.41  | 6.92E-01 | 8.58E-01 | -6.61 |
| 1427532_PM_at   | Trat1                                                                                                       | NA         | -0.03 | 2.13  | -0.41 | 6.92E-01 | 8.58E-01 | -6.61 |
| 1460066_PM_at   | C80889                                                                                                      | NA         | 0.05  | 2.73  | 0.41  | 6.93E-01 | 8.58E-01 | -6.61 |
| 1416216_PM_at   | Reps1                                                                                                       | REPS1      | -0.06 | 2.50  | -0.41 | 6.93E-01 | 8.58E-01 | -6.61 |
| 1446504_PM_at   | ---                                                                                                         | NA         | 0.04  | 1.99  | 0.41  | 6.93E-01 | 8.58E-01 | -6.61 |
| 1421812_PM_at   | Tapbp                                                                                                       | TAPBP      | 0.18  | 4.45  | 0.41  | 6.93E-01 | 8.58E-01 | -6.61 |
| 1449874_PM_at   | Ly96                                                                                                        | LY96       | -0.07 | 2.38  | -0.41 | 6.93E-01 | 8.58E-01 | -6.61 |
| 1446888_PM_at   | D9Erttd115e                                                                                                 | NA         | 0.04  | 2.26  | 0.41  | 6.93E-01 | 8.58E-01 | -6.61 |
| 1438690_PM_at   | Tyms                                                                                                        | TYMS       | -0.05 | 2.30  | -0.41 | 6.93E-01 | 8.58E-01 | -6.61 |
| 1420583_PM_a_at | Rora                                                                                                        | RORA       | -0.15 | 4.51  | -0.41 | 6.93E-01 | 8.58E-01 | -6.61 |
| 1458094_PM_at   | ---                                                                                                         | NA         | 0.04  | 2.06  | 0.41  | 6.93E-01 | 8.59E-01 | -6.61 |
| 1444335_PM_at   | ---                                                                                                         | NA         | 0.04  | 3.01  | 0.41  | 6.93E-01 | 8.59E-01 | -6.61 |
| 1443471_PM_at   | ---                                                                                                         | NA         | 0.05  | 2.57  | 0.41  | 6.93E-01 | 8.59E-01 | -6.61 |
| 1459551_PM_at   | ---                                                                                                         | NA         | 0.10  | 2.88  | 0.41  | 6.93E-01 | 8.59E-01 | -6.61 |
| 1460292_PM_a_at | Smarca1                                                                                                     | SMARCA1    | -0.12 | 2.68  | -0.41 | 6.93E-01 | 8.59E-01 | -6.61 |
| 1418096_PM_at   | Dok3                                                                                                        | DOK3       | 0.04  | 3.13  | 0.41  | 6.93E-01 | 8.59E-01 | -6.61 |
| 1422649_PM_at   | Cntn6                                                                                                       | CNTN6      | 0.06  | 2.35  | 0.41  | 6.93E-01 | 8.59E-01 | -6.61 |
| 1448625_PM_at   | Golga2                                                                                                      | GOLGA8Q    | -0.09 | 3.78  | -0.41 | 6.93E-01 | 8.59E-01 | -6.61 |
| 1433230_PM_at   | 5730415C11Rik                                                                                               | NA         | 0.04  | 2.03  | 0.41  | 6.93E-01 | 8.59E-01 | -6.61 |
| 1420772_PM_a_at | Tsc22d3                                                                                                     | TSC22D3    | 0.08  | 3.43  | 0.41  | 6.93E-01 | 8.59E-01 | -6.61 |
| 1442654_PM_at   | Zfp729a                                                                                                     | ZNF208     | 0.06  | 2.36  | 0.41  | 6.93E-01 | 8.59E-01 | -6.61 |
| 1425036_PM_a_at | Tnrc6a                                                                                                      | TNRC6A     | -0.26 | 3.96  | -0.41 | 6.93E-01 | 8.59E-01 | -6.61 |
| 1452875_PM_at   | Hddc3                                                                                                       | HDCC3      | -0.06 | 2.49  | -0.41 | 6.93E-01 | 8.59E-01 | -6.61 |
| 1439493_PM_at   | Zfp827                                                                                                      | ZNF827     | 0.13  | 2.65  | 0.41  | 6.93E-01 | 8.59E-01 | -6.61 |
| 1422311_PM_a_at | Polr2a                                                                                                      | POLR2A     | 0.25  | 6.68  | 0.41  | 6.94E-01 | 8.59E-01 | -6.61 |
| 1446540_PM_at   | Gm33777                                                                                                     | NA         | 0.11  | 2.37  | 0.41  | 6.94E-01 | 8.59E-01 | -6.61 |
| 1437501_PM_at   | AF529169                                                                                                    | KIAA1024   | 0.04  | 2.28  | 0.41  | 6.94E-01 | 8.59E-01 | -6.61 |
| 1418239_PM_at   | Apof                                                                                                        | APOF       | 0.05  | 2.12  | 0.40  | 6.94E-01 | 8.59E-01 | -6.61 |
| 1443964_PM_at   | Tmie                                                                                                        | TMIE       | 0.06  | 2.42  | 0.40  | 6.94E-01 | 8.59E-01 | -6.61 |
| 1434278_PM_at   | Mtm1                                                                                                        | NA         | 0.09  | 8.15  | 0.40  | 6.94E-01 | 8.59E-01 | -6.61 |
| 1441901_PM_x_at | Fahd2a                                                                                                      | FAHD2B     | -0.05 | 2.53  | -0.40 | 6.94E-01 | 8.59E-01 | -6.61 |
| 1428465_PM_at   | Tmem147                                                                                                     | TMEM147    | 0.07  | 4.01  | 0.40  | 6.94E-01 | 8.59E-01 | -6.61 |
| 1445363_PM_at   | ---                                                                                                         | NA         | -0.06 | 2.28  | -0.40 | 6.94E-01 | 8.59E-01 | -6.61 |
| 1422677_PM_at   | Dgat2                                                                                                       | DGAT2      | 0.06  | 2.78  | 0.40  | 6.94E-01 | 8.59E-01 | -6.61 |
| 1431716_PM_at   | ---                                                                                                         | NA         | 0.07  | 2.51  | 0.40  | 6.94E-01 | 8.59E-01 | -6.61 |
| 1459390_PM_at   | ---                                                                                                         | NA         | -0.05 | 2.90  | -0.40 | 6.94E-01 | 8.59E-01 | -6.61 |
| 1423065_PM_at   | Dnmt3a                                                                                                      | DNMT3A     | 0.18  | 3.94  | 0.40  | 6.94E-01 | 8.59E-01 | -6.61 |
| 1425200_PM_at   | Clcc1                                                                                                       | CLCC1      | -0.07 | 2.47  | -0.40 | 6.94E-01 | 8.59E-01 | -6.61 |
| 1458738_PM_at   | ---                                                                                                         | NA         | 0.09  | 2.54  | 0.40  | 6.94E-01 | 8.59E-01 | -6.61 |
| 1440637_PM_at   | ---                                                                                                         | NA         | 0.05  | 2.30  | 0.40  | 6.94E-01 | 8.59E-01 | -6.61 |
| 1431509_PM_at   | 4933404G15Rik                                                                                               | NA         | 0.05  | 2.62  | 0.40  | 6.94E-01 | 8.59E-01 | -6.61 |
| 1458297_PM_s_at | Marco                                                                                                       | MARCO      | 0.06  | 2.86  | 0.40  | 6.94E-01 | 8.59E-01 | -6.61 |
| 1446412_PM_at   | ---                                                                                                         | NA         | -0.08 | 2.95  | -0.40 | 6.94E-01 | 8.59E-01 | -6.61 |
| 1445531_PM_at   | Csmd1                                                                                                       | CSMD1      | 0.13  | 3.57  | 0.40  | 6.94E-01 | 8.59E-01 | -6.61 |
| 1425170_PM_a_at | Adam15                                                                                                      | ADAM15     | 0.08  | 2.38  | 0.40  | 6.94E-01 | 8.60E-01 | -6.61 |
| 1446218_PM_at   | ---                                                                                                         | NA         | -0.04 | 2.08  | -0.40 | 6.95E-01 | 8.60E-01 | -6.61 |
| 1459529_PM_at   | E230016K23Rik                                                                                               | NA         | 0.03  | 2.10  | 0.40  | 6.95E-01 | 8.60E-01 | -6.61 |
| 1456557_PM_at   | Ccdc30                                                                                                      | CCDC30     | 0.05  | 2.38  | 0.40  | 6.95E-01 | 8.60E-01 | -6.61 |
| 1455178_PM_at   | Sgsm2                                                                                                       | SGSM2      | 0.07  | 2.80  | 0.40  | 6.95E-01 | 8.60E-01 | -6.61 |
| 1436779_PM_at   | Cybb                                                                                                        | CYBB       | 0.05  | 2.15  | 0.40  | 6.95E-01 | 8.60E-01 | -6.61 |
| 1447905_PM_x_at | Nup62                                                                                                       | NA         | -0.29 | 7.41  | -0.40 | 6.95E-01 | 8.60E-01 | -6.61 |
| 1452154_PM_at   | Iars                                                                                                        | IARS       | -0.29 | 6.47  | -0.40 | 6.95E-01 | 8.60E-01 | -6.61 |
| 1444608_PM_at   | ---                                                                                                         | NA         | -0.08 | 2.72  | -0.40 | 6.95E-01 | 8.60E-01 | -6.61 |
| 1443527_PM_at   | Terf1                                                                                                       | TERF1      | 0.05  | 2.44  | 0.40  | 6.95E-01 | 8.60E-01 | -6.61 |

|                 |                                                               |            |       |      |       |          |          |       |
|-----------------|---------------------------------------------------------------|------------|-------|------|-------|----------|----------|-------|
| 1433991_PM_x_at | Dbi                                                           | DBI        | -0.10 | 7.35 | -0.40 | 6.95E-01 | 8.60E-01 | -6.61 |
| 1432829_PM_at   | Eno1 /// Eno1b                                                | ENO1       | 0.05  | 2.56 | 0.40  | 6.95E-01 | 8.60E-01 | -6.61 |
| 1417720_PM_at   | Polr2j                                                        | AC093668.1 | 0.08  | 2.93 | 0.40  | 6.95E-01 | 8.60E-01 | -6.61 |
| 1451058_PM_at   | Mcst2                                                         | NA         | -0.12 | 3.16 | -0.40 | 6.95E-01 | 8.60E-01 | -6.61 |
| 1457048_PM_at   | Qrfpr                                                         | QRFPR      | -0.04 | 2.16 | -0.40 | 6.95E-01 | 8.60E-01 | -6.61 |
| 1432520_PM_at   | Igh-VJ558 /// Ighm /// Ighv1-80 /// Ighv1-82 /// LOC102641457 | NA         | 0.04  | 2.34 | 0.40  | 6.95E-01 | 8.60E-01 | -6.61 |
| 1423632_PM_at   | Gpr146                                                        | GPR146     | 0.04  | 2.34 | 0.40  | 6.95E-01 | 8.60E-01 | -6.61 |
| 1453485_PM_s_at | Mett23                                                        | ACO05837.2 | 0.05  | 2.53 | 0.40  | 6.95E-01 | 8.60E-01 | -6.61 |
| 1458371_PM_at   | ---                                                           | NA         | 0.06  | 2.62 | 0.40  | 6.95E-01 | 8.60E-01 | -6.61 |
| 1435081_PM_at   | Sypl                                                          | SYPL1      | -0.06 | 2.74 | -0.40 | 6.95E-01 | 8.60E-01 | -6.61 |
| 1438687_PM_at   | Lax1                                                          | LAX1       | -0.05 | 2.42 | -0.40 | 6.95E-01 | 8.60E-01 | -6.61 |
| 1456844_PM_at   | Camk2d                                                        | NA         | -0.07 | 2.27 | -0.40 | 6.95E-01 | 8.60E-01 | -6.61 |
| 1415685_PM_at   | Mtif2                                                         | MTIF2      | -0.07 | 3.52 | -0.40 | 6.95E-01 | 8.60E-01 | -6.61 |
| 1446434_PM_at   | ---                                                           | NA         | -0.06 | 2.41 | -0.40 | 6.95E-01 | 8.60E-01 | -6.61 |
| 1443936_PM_at   | Olfir976                                                      | NA         | 0.04  | 2.32 | 0.40  | 6.95E-01 | 8.60E-01 | -6.61 |
| 1458056_PM_at   | ---                                                           | NA         | 0.07  | 2.51 | 0.40  | 6.95E-01 | 8.60E-01 | -6.61 |
| 1433742_PM_at   | Kank1                                                         | KANK1      | 0.09  | 2.41 | 0.40  | 6.95E-01 | 8.60E-01 | -6.61 |
| 1425631_PM_at   | Ppp1r3c                                                       | PPP1R3C    | -0.04 | 2.07 | -0.40 | 6.95E-01 | 8.60E-01 | -6.61 |
| 1440749_PM_at   | ---                                                           | NA         | -0.15 | 3.23 | -0.40 | 6.95E-01 | 8.60E-01 | -6.61 |
| 1435364_PM_at   | Cyhr1                                                         | CYHR1      | 0.09  | 3.08 | 0.40  | 6.95E-01 | 8.60E-01 | -6.61 |
| 1445936_PM_at   | ---                                                           | NA         | 0.07  | 3.05 | 0.40  | 6.95E-01 | 8.60E-01 | -6.61 |
| 1417706_PM_at   | Naglu                                                         | NAGLU      | 0.04  | 2.16 | 0.40  | 6.95E-01 | 8.60E-01 | -6.61 |
| 1457341_PM_at   | ---                                                           | NA         | -0.05 | 2.63 | -0.40 | 6.95E-01 | 8.60E-01 | -6.61 |
| 1446696_PM_at   | ---                                                           | NA         | -0.04 | 2.25 | -0.40 | 6.96E-01 | 8.60E-01 | -6.61 |
| 1459923_PM_at   | Bex6                                                          | BEX4       | 0.03  | 2.00 | 0.40  | 6.96E-01 | 8.60E-01 | -6.61 |
| 1437486_PM_at   | Gprc5a                                                        | GPRC5A     | 0.04  | 2.15 | 0.40  | 6.95E-01 | 8.60E-01 | -6.61 |
| 1440087_PM_at   | Gm28523                                                       | NA         | 0.04  | 2.17 | 0.40  | 6.95E-01 | 8.60E-01 | -6.61 |
| 1444118_PM_at   | ---                                                           | NA         | 0.05  | 2.14 | 0.40  | 6.95E-01 | 8.60E-01 | -6.61 |
| 1416531_PM_at   | Gsto1                                                         | GSTO1      | 0.11  | 3.33 | 0.40  | 6.95E-01 | 8.60E-01 | -6.61 |
| 1453531_PM_at   | Zfp248                                                        | ZNF248     | 0.11  | 2.68 | 0.40  | 6.95E-01 | 8.60E-01 | -6.61 |
| 1448733_PM_at   | Bmi1                                                          | BMI1       | -0.12 | 3.92 | -0.40 | 6.96E-01 | 8.60E-01 | -6.61 |
| 1452259_PM_at   | Phf20                                                         | PHF20      | 0.08  | 3.26 | 0.40  | 6.96E-01 | 8.60E-01 | -6.61 |
| 1454841_PM_at   | Urb1                                                          | URB1       | -0.10 | 2.87 | -0.40 | 6.96E-01 | 8.60E-01 | -6.61 |
| 1432205_PM_a_at | Mtus2                                                         | MTUS2      | -0.07 | 2.35 | -0.40 | 6.96E-01 | 8.60E-01 | -6.61 |
| 1430303_PM_at   | Cep83                                                         | CEP83      | -0.05 | 2.94 | -0.40 | 6.96E-01 | 8.60E-01 | -6.61 |
| 1439112_PM_at   | Eldr                                                          | NA         | 0.06  | 2.29 | 0.40  | 6.96E-01 | 8.60E-01 | -6.61 |
| 1423193_PM_at   | Pspc1                                                         | PSPC1      | 0.03  | 2.46 | 0.40  | 6.96E-01 | 8.60E-01 | -6.62 |
| 1455819_PM_at   | Ptbp3                                                         | PTBP3      | 0.10  | 5.70 | 0.40  | 6.96E-01 | 8.60E-01 | -6.62 |
| 1422435_PM_at   | 2210010C04Rik                                                 | NA         | -0.04 | 2.24 | -0.40 | 6.96E-01 | 8.60E-01 | -6.62 |
| 1416289_PM_at   | Plod1                                                         | PLOD1      | 0.05  | 2.18 | 0.40  | 6.96E-01 | 8.60E-01 | -6.62 |
| 1418905_PM_at   | Nubp1                                                         | NUBP1      | 0.05  | 2.69 | 0.40  | 6.96E-01 | 8.60E-01 | -6.62 |
| 1433067_PM_at   | 6330582A15Rik                                                 | NA         | 0.05  | 2.53 | 0.40  | 6.96E-01 | 8.60E-01 | -6.62 |
| 1415833_PM_x_at | Rps29                                                         | RPS29      | -0.19 | 7.45 | -0.40 | 6.96E-01 | 8.60E-01 | -6.62 |
| 1448762_PM_at   | Rad17                                                         | RAD17      | -0.10 | 2.52 | -0.40 | 6.96E-01 | 8.60E-01 | -6.62 |
| 1448666_PM_s_at | Tob2                                                          | TOB2       | -0.10 | 2.96 | -0.40 | 6.96E-01 | 8.60E-01 | -6.62 |
| 1418585_PM_at   | Ccnh                                                          | CCNH       | -0.07 | 2.55 | -0.40 | 6.96E-01 | 8.60E-01 | -6.62 |
| 1452174_PM_at   | Sreb2                                                         | SREBF2     | -0.06 | 2.99 | -0.40 | 6.96E-01 | 8.60E-01 | -6.62 |
| 1437083_PM_at   | Tmem169                                                       | TMEM169    | -0.05 | 2.78 | -0.40 | 6.96E-01 | 8.60E-01 | -6.62 |
| 1454547_PM_at   | 2310045N14Rik                                                 | NA         | 0.05  | 2.26 | 0.40  | 6.96E-01 | 8.60E-01 | -6.62 |
| 1419875_PM_at   | ---                                                           | NA         | 0.05  | 2.43 | 0.40  | 6.96E-01 | 8.60E-01 | -6.62 |
| 1423555_PM_a_at | Ifi44                                                         | IFI44      | 0.05  | 2.62 | 0.40  | 6.96E-01 | 8.60E-01 | -6.62 |
| 1458264_PM_at   | AW046200                                                      | NA         | 0.06  | 2.59 | 0.40  | 6.96E-01 | 8.60E-01 | -6.62 |
| 1452696_PM_a_at | 4933439C10Rik                                                 | NA         | 0.09  | 3.03 | 0.40  | 6.96E-01 | 8.60E-01 | -6.62 |
| 1421881_PM_a_at | Elavl2                                                        | ELAVL2     | 0.15  | 4.59 | 0.40  | 6.96E-01 | 8.60E-01 | -6.62 |
| 1456667_PM_at   | Htt                                                           | HTT        | 0.04  | 2.32 | 0.40  | 6.96E-01 | 8.60E-01 | -6.62 |
| 1437929_PM_at   | Dact2                                                         | DACT2      | 0.07  | 4.34 | 0.40  | 6.96E-01 | 8.60E-01 | -6.62 |
| 1442731_PM_at   | Pds5a                                                         | PDS5A      | 0.09  | 2.71 | 0.40  | 6.96E-01 | 8.60E-01 | -6.62 |
| 1456777_PM_at   | Mgam                                                          | MGAM       | 0.15  | 2.83 | 0.40  | 6.96E-01 | 8.60E-01 | -6.62 |
| 1416771_PM_at   | Trappc3                                                       | TRAPPC3    | -0.12 | 3.20 | -0.40 | 6.96E-01 | 8.60E-01 | -6.62 |
| 1417928_PM_at   | Pdlim4                                                        | PDLIM4     | 0.06  | 2.34 | 0.40  | 6.97E-01 | 8.60E-01 | -6.62 |
| 1436689_PM_a_at | Aldh9a1                                                       | ALDH9A1    | 0.25  | 5.75 | 0.40  | 6.97E-01 | 8.60E-01 | -6.62 |
| 1422326_PM_at   | G6pd2                                                         | G6PD       | -0.04 | 1.96 | -0.40 | 6.97E-01 | 8.60E-01 | -6.62 |
| 1448412_PM_a_at | Tsc22d4                                                       | TSC22D4    | 0.05  | 2.35 | 0.40  | 6.97E-01 | 8.60E-01 | -6.62 |
| 1421380_PM_at   | Insr                                                          | INSR       | -0.09 | 4.80 | -0.40 | 6.97E-01 | 8.61E-01 | -6.62 |
| 1450778_PM_a_at | Phax                                                          | PHAX       | 0.24  | 4.53 | 0.40  | 6.97E-01 | 8.61E-01 | -6.62 |
| 1425570_PM_at   | Slamf1                                                        | SLAMF1     | 0.04  | 2.21 | 0.40  | 6.97E-01 | 8.61E-01 | -6.62 |
| 1422958_PM_at   | Krtap5-4                                                      | NA         | 0.04  | 2.24 | 0.40  | 6.97E-01 | 8.61E-01 | -6.62 |
| 1451537_PM_at   | Chil1                                                         | CHI3L1     | -0.06 | 2.40 | -0.40 | 6.97E-01 | 8.61E-01 | -6.62 |
| 1449154_PM_at   | Col11a1                                                       | COL11A1    | 0.04  | 2.20 | 0.40  | 6.97E-01 | 8.61E-01 | -6.62 |
| 1420296_PM_at   | ---                                                           | NA         | 0.13  | 3.24 | 0.40  | 6.97E-01 | 8.61E-01 | -6.62 |
| 1455771_PM_at   | Bzap1                                                         | TSPOAP1    | 0.07  | 3.47 | 0.40  | 6.97E-01 | 8.61E-01 | -6.62 |
| 1418356_PM_at   | Mpst                                                          | MPST       | 0.08  | 2.50 | 0.40  | 6.97E-01 | 8.61E-01 | -6.62 |
| 1441059_PM_at   | Zfp607                                                        | NA         | -0.06 | 2.11 | -0.40 | 6.97E-01 | 8.61E-01 | -6.62 |

|                 |                                                                |            |       |      |       |          |          |       |
|-----------------|----------------------------------------------------------------|------------|-------|------|-------|----------|----------|-------|
| 1445901_PM_at   | Lrp2                                                           | LRP2       | 0.03  | 2.32 | 0.40  | 6.97E-01 | 8.61E-01 | -6.62 |
| 1430596_PM_s_at | Vgl3                                                           | VGLL3      | -0.06 | 2.10 | -0.40 | 6.97E-01 | 8.61E-01 | -6.62 |
| 1456645_PM_at   | Wdr25                                                          | WDR25      | 0.05  | 2.58 | 0.40  | 6.97E-01 | 8.61E-01 | -6.62 |
| 1440715_PM_s_at | Cdkn2aipnl                                                     | CDKN2AIPNL | 0.06  | 2.50 | 0.40  | 6.97E-01 | 8.61E-01 | -6.62 |
| 1424110_PM_a_at | Nme1                                                           | NME1       | -0.12 | 5.05 | -0.40 | 6.97E-01 | 8.61E-01 | -6.62 |
| 1435357_PM_at   | Rsrp1                                                          | RSRP1      | 0.10  | 7.36 | 0.40  | 6.97E-01 | 8.61E-01 | -6.62 |
| 1452887_PM_at   | Traf3ip1                                                       | TRAF3IP1   | 0.13  | 3.56 | 0.40  | 6.97E-01 | 8.61E-01 | -6.62 |
| 1459564_PM_at   | ---                                                            | NA         | -0.07 | 6.12 | -0.40 | 6.97E-01 | 8.61E-01 | -6.62 |
| 1423875_PM_at   | Fam160b1                                                       | FAM160B1   | -0.06 | 2.69 | -0.40 | 6.97E-01 | 8.61E-01 | -6.62 |
| 1430001_PM_at   | Il31                                                           | IL31       | 0.06  | 2.19 | 0.40  | 6.97E-01 | 8.61E-01 | -6.62 |
| 1454802_PM_x_at | Arih2                                                          | ARIH2      | 0.10  | 9.32 | 0.40  | 6.97E-01 | 8.61E-01 | -6.62 |
| 1434874_PM_x_at | Acap1                                                          | NA         | 0.03  | 2.10 | 0.40  | 6.97E-01 | 8.61E-01 | -6.62 |
| 1427562_PM_a_at | Prkca                                                          | NA         | -0.17 | 5.11 | -0.40 | 6.98E-01 | 8.61E-01 | -6.62 |
| 1436311_PM_at   | Gemin5                                                         | GEMIN5     | 0.08  | 2.58 | 0.40  | 6.98E-01 | 8.61E-01 | -6.62 |
| 1435822_PM_at   | ---                                                            | NA         | 0.30  | 4.34 | 0.40  | 6.97E-01 | 8.61E-01 | -6.62 |
| 1427202_PM_at   | Mettl20                                                        | ETFBKMT    | -0.07 | 2.86 | -0.40 | 6.98E-01 | 8.61E-01 | -6.62 |
| 1432194_PM_at   | 9530020I12Rik                                                  | NA         | 0.04  | 2.00 | 0.40  | 6.98E-01 | 8.61E-01 | -6.62 |
| 1451891_PM_a_at | Dysf                                                           | DYSF       | 0.04  | 2.22 | 0.40  | 6.98E-01 | 8.61E-01 | -6.62 |
| 1456834_PM_at   | ---                                                            | NA         | 0.05  | 2.88 | 0.40  | 6.98E-01 | 8.61E-01 | -6.62 |
| 1416686_PM_at   | Plod2                                                          | PLOD2      | 0.06  | 2.25 | 0.40  | 6.98E-01 | 8.61E-01 | -6.62 |
| 1429748_PM_at   | Cahm                                                           | NA         | -0.04 | 2.09 | -0.40 | 6.98E-01 | 8.61E-01 | -6.62 |
| 1419309_PM_at   | Pdpn                                                           | PDPN       | -0.14 | 3.75 | -0.40 | 6.98E-01 | 8.61E-01 | -6.62 |
| 1430576_PM_at   | Tpp2                                                           | TPP2       | 0.06  | 2.40 | 0.40  | 6.98E-01 | 8.61E-01 | -6.62 |
| 1440255_PM_at   | Hinfp                                                          | HINFP      | 0.13  | 2.47 | 0.40  | 6.98E-01 | 8.61E-01 | -6.62 |
| 1421209_PM_s_at | Ikbkg                                                          | IKBKG      | 0.05  | 2.39 | 0.40  | 6.98E-01 | 8.61E-01 | -6.62 |
| 1457684_PM_at   | 1700037H04Rik                                                  | C20orf27   | 0.07  | 2.56 | 0.40  | 6.98E-01 | 8.61E-01 | -6.62 |
| 1423349_PM_at   | Socs5                                                          | SOCS5      | 0.08  | 3.34 | 0.40  | 6.98E-01 | 8.61E-01 | -6.62 |
| 1435366_PM_at   | D430042O09Rik                                                  | KIAA0556   | -0.07 | 2.63 | -0.40 | 6.98E-01 | 8.61E-01 | -6.62 |
| 1438689_PM_at   | Zfp784                                                         | ZNF784     | 0.10  | 3.10 | 0.40  | 6.98E-01 | 8.61E-01 | -6.62 |
| 1455185_PM_s_at | Jade3                                                          | JADE3      | -0.05 | 2.12 | -0.40 | 6.98E-01 | 8.61E-01 | -6.62 |
| 1431285_PM_at   | Mgrn1                                                          | MGRN1      | 0.07  | 2.98 | 0.40  | 6.98E-01 | 8.61E-01 | -6.62 |
| 1432286_PM_at   | Pole4                                                          | POLE4      | 0.03  | 1.99 | 0.40  | 6.98E-01 | 8.61E-01 | -6.62 |
| 1440595_PM_at   | ---                                                            | NA         | 0.03  | 2.22 | 0.40  | 6.98E-01 | 8.61E-01 | -6.62 |
| 1426049_PM_a_at | Terf2ip                                                        | TERF2IP    | 0.21  | 4.58 | 0.40  | 6.98E-01 | 8.61E-01 | -6.62 |
| 1447716_PM_x_at | Tmem229b                                                       | TMEM229B   | -0.12 | 2.93 | -0.40 | 6.98E-01 | 8.61E-01 | -6.62 |
| 1417478_PM_a_at | Ppp2r3c                                                        | PPP2R3C    | -0.05 | 2.43 | -0.40 | 6.98E-01 | 8.61E-01 | -6.62 |
| 1416328_PM_a_at | Atp6v0e                                                        | ATP6V0E1   | -0.10 | 4.42 | -0.40 | 6.98E-01 | 8.61E-01 | -6.62 |
| 1434889_PM_at   | Plekha7                                                        | PLEKHA7    | -0.04 | 2.25 | -0.40 | 6.98E-01 | 8.61E-01 | -6.62 |
| 1439294_PM_at   | ---                                                            | NA         | -0.03 | 2.37 | -0.40 | 6.98E-01 | 8.61E-01 | -6.62 |
| 1437157_PM_at   | ---                                                            | NA         | 0.07  | 3.50 | 0.40  | 6.98E-01 | 8.61E-01 | -6.62 |
| 1452335_PM_at   | Mfsd8                                                          | MFSDB8     | -0.11 | 2.58 | -0.40 | 6.98E-01 | 8.62E-01 | -6.62 |
| 1422887_PM_a_at | Ctbp2                                                          | CTBP2      | 0.12  | 3.35 | 0.40  | 6.98E-01 | 8.62E-01 | -6.62 |
| 1427568_PM_a_at | Ift80                                                          | IFT80      | -0.07 | 3.34 | -0.40 | 6.98E-01 | 8.62E-01 | -6.62 |
| 1446942_PM_at   | Gm3604                                                         | NA         | 0.04  | 2.14 | 0.40  | 6.99E-01 | 8.62E-01 | -6.62 |
| 1457510_PM_at   | ---                                                            | NA         | 0.07  | 2.60 | 0.40  | 6.99E-01 | 8.62E-01 | -6.62 |
| 1420376_PM_a_at | Gm10257 /// Gm12657 ///<br>H3f3b /// H3f3c ///<br>LOC102642045 | NA         | -0.20 | 5.21 | -0.40 | 6.99E-01 | 8.62E-01 | -6.62 |
| 1442736_PM_at   | Klh11                                                          | NA         | 0.03  | 2.08 | 0.40  | 6.99E-01 | 8.62E-01 | -6.62 |
| 1457324_PM_at   | ---                                                            | NA         | -0.06 | 3.38 | -0.40 | 6.99E-01 | 8.62E-01 | -6.62 |
| 1426652_PM_at   | Mcm3                                                           | MCM3       | 0.04  | 2.32 | 0.40  | 6.99E-01 | 8.62E-01 | -6.62 |
| 1440207_PM_at   | Lpcat4                                                         | LPCAT4     | 0.14  | 3.97 | 0.40  | 6.99E-01 | 8.62E-01 | -6.62 |
| 1450195_PM_at   | Ndst4                                                          | NDST4      | -0.06 | 2.83 | -0.40 | 6.99E-01 | 8.62E-01 | -6.62 |
| 1424837_PM_at   | Rnf113a1                                                       | RNF113B    | -0.04 | 2.59 | -0.40 | 6.99E-01 | 8.62E-01 | -6.62 |
| 1444365_PM_at   | ---                                                            | NA         | 0.03  | 2.30 | 0.40  | 6.99E-01 | 8.62E-01 | -6.62 |
| 1431178_PM_at   | Ulbp1                                                          | RAET1L     | 0.05  | 2.61 | 0.40  | 6.99E-01 | 8.62E-01 | -6.62 |
| 1417783_PM_at   | Als2                                                           | ALS2       | -0.17 | 3.89 | -0.40 | 6.99E-01 | 8.62E-01 | -6.62 |
| 1449421_PM_a_at | Kcne2                                                          | KCNE2      | -0.08 | 2.61 | -0.40 | 6.99E-01 | 8.62E-01 | -6.62 |
| 1424559_PM_at   | Rpap2                                                          | RPAP2      | -0.13 | 2.67 | -0.40 | 6.99E-01 | 8.62E-01 | -6.62 |
| 1425783_PM_at   | Tc2n                                                           | TC2N       | 0.04  | 2.02 | 0.40  | 6.99E-01 | 8.62E-01 | -6.62 |
| 1422645_PM_at   | Hfe                                                            | HFE        | 0.04  | 2.33 | 0.40  | 6.99E-01 | 8.62E-01 | -6.62 |
| 1460301_PM_at   | Vmn1r186 /// Vmn1r62                                           | NA         | -0.04 | 2.05 | -0.40 | 6.99E-01 | 8.62E-01 | -6.62 |
| 1415920_PM_at   | Cstf2t                                                         | CSTF2T     | -0.12 | 5.52 | -0.40 | 6.99E-01 | 8.62E-01 | -6.62 |
| 1434665_PM_at   | Aga                                                            | AGA        | -0.09 | 4.39 | -0.40 | 6.99E-01 | 8.62E-01 | -6.62 |
| 1456793_PM_at   | Cytl1                                                          | CYTL1      | 0.03  | 2.32 | 0.40  | 6.99E-01 | 8.62E-01 | -6.62 |
| 1446015_PM_at   | ---                                                            | NA         | 0.04  | 2.98 | 0.40  | 6.99E-01 | 8.62E-01 | -6.62 |
| 1431961_PM_at   | Dock8                                                          | NA         | 0.05  | 2.50 | 0.40  | 6.99E-01 | 8.62E-01 | -6.62 |
| 1454182_PM_at   | ---                                                            | NA         | 0.06  | 2.43 | 0.40  | 6.99E-01 | 8.62E-01 | -6.62 |
| 1448171_PM_at   | Siah2                                                          | SIAH2      | 0.08  | 2.42 | 0.40  | 6.99E-01 | 8.62E-01 | -6.62 |
| 1434098_PM_at   | Gira2                                                          | GLRA2      | 0.08  | 3.18 | 0.40  | 6.99E-01 | 8.62E-01 | -6.62 |
| 1445999_PM_at   | D19Erd132e                                                     | NA         | 0.14  | 3.28 | 0.40  | 6.99E-01 | 8.62E-01 | -6.62 |
| 1437172_PM_x_at | Hadhb                                                          | HADHB      | 0.14  | 5.42 | 0.40  | 6.99E-01 | 8.62E-01 | -6.62 |
| 1450049_PM_a_at | Hira                                                           | HIRA       | -0.10 | 3.29 | -0.40 | 6.99E-01 | 8.62E-01 | -6.62 |
| 1433681_PM_x_at | Capn3                                                          | CAPN3      | 0.08  | 3.68 | 0.40  | 6.99E-01 | 8.62E-01 | -6.62 |
| 1457543_PM_at   | Nsun7                                                          | NSUN7      | 0.08  | 2.63 | 0.40  | 6.99E-01 | 8.62E-01 | -6.62 |

|                 |                                                                                                              |            |       |      |       |          |          |       |
|-----------------|--------------------------------------------------------------------------------------------------------------|------------|-------|------|-------|----------|----------|-------|
| 1427691_PM_a_at | Ifnar2                                                                                                       | IFNAR2     | 0.22  | 3.36 | 0.40  | 6.99E-01 | 8.62E-01 | -6.62 |
| 1447121_PM_at   | ---                                                                                                          | NA         | -0.05 | 2.15 | -0.40 | 6.99E-01 | 8.62E-01 | -6.62 |
| 1442341_PM_at   | ---                                                                                                          | NA         | 0.16  | 4.44 | 0.40  | 7.00E-01 | 8.62E-01 | -6.62 |
| 1416211_PM_a_at | Ptn                                                                                                          | PTN        | 0.17  | 6.65 | 0.40  | 7.00E-01 | 8.62E-01 | -6.62 |
| 1438711_PM_at   | Pklr                                                                                                         | PKLR       | 0.05  | 2.37 | 0.40  | 7.00E-01 | 8.62E-01 | -6.62 |
| 1458295_PM_at   | BC038331                                                                                                     | NA         | -0.03 | 2.06 | -0.40 | 7.00E-01 | 8.62E-01 | -6.62 |
| 1432585_PM_at   | ---                                                                                                          | NA         | 0.05  | 2.75 | 0.40  | 7.00E-01 | 8.62E-01 | -6.62 |
| 1429669_PM_at   | 4930488L21Rik                                                                                                | NA         | 0.06  | 2.89 | 0.40  | 7.00E-01 | 8.62E-01 | -6.62 |
| 1441323_PM_at   | ---                                                                                                          | NA         | -0.07 | 2.66 | -0.40 | 7.00E-01 | 8.62E-01 | -6.62 |
| 1438381_PM_x_at | Ddx47                                                                                                        | DDX47      | 0.03  | 6.55 | 0.40  | 7.00E-01 | 8.62E-01 | -6.62 |
| 1454191_PM_at   | Krtap5-3                                                                                                     | NA         | 0.03  | 2.19 | 0.40  | 7.00E-01 | 8.62E-01 | -6.62 |
| 1457895_PM_at   | Kif18a                                                                                                       | KIF18A     | 0.04  | 1.91 | 0.40  | 7.00E-01 | 8.62E-01 | -6.62 |
| 1435546_PM_a_at | 1810013L24Rik                                                                                                | C16orf72   | 0.06  | 4.49 | 0.40  | 7.00E-01 | 8.62E-01 | -6.62 |
| 1444577_PM_x_at | ---                                                                                                          | NA         | 0.06  | 2.68 | 0.40  | 7.00E-01 | 8.62E-01 | -6.62 |
| 1417245_PM_at   | Gpr180                                                                                                       | GPR180     | 0.07  | 3.52 | 0.40  | 7.00E-01 | 8.62E-01 | -6.62 |
| 1457618_PM_at   | ---                                                                                                          | NA         | 0.07  | 5.07 | 0.40  | 7.00E-01 | 8.62E-01 | -6.62 |
| 1419297_PM_at   | H2-Oa                                                                                                        | HLA-DOA    | 0.07  | 2.58 | 0.40  | 7.00E-01 | 8.62E-01 | -6.62 |
| 1448134_PM_at   | Pald1                                                                                                        | PALD1      | 0.08  | 2.85 | 0.40  | 7.00E-01 | 8.62E-01 | -6.62 |
| 1446468_PM_at   | Csmd1                                                                                                        | CSMD1      | 0.05  | 2.27 | 0.40  | 7.00E-01 | 8.62E-01 | -6.62 |
| 1446209_PM_at   | Usp40                                                                                                        | USP40      | 0.05  | 2.46 | 0.40  | 7.00E-01 | 8.62E-01 | -6.62 |
| 1454714_PM_x_at | Phgdh                                                                                                        | PHGDH      | -0.19 | 4.80 | -0.40 | 7.00E-01 | 8.62E-01 | -6.62 |
| 1423118_PM_at   | Ncbp3                                                                                                        | NCBP3      | -0.06 | 2.82 | -0.40 | 7.00E-01 | 8.62E-01 | -6.62 |
| 1448242_PM_at   | Sec61a1                                                                                                      | SEC61A1    | -0.05 | 3.10 | -0.40 | 7.00E-01 | 8.62E-01 | -6.62 |
| 1448466_PM_at   | Cdca5                                                                                                        | CDCA5      | -0.04 | 2.30 | -0.40 | 7.00E-01 | 8.62E-01 | -6.62 |
| 1426228_PM_at   | Kras                                                                                                         | KRAS       | 0.04  | 2.05 | 0.40  | 7.00E-01 | 8.62E-01 | -6.62 |
| 1458277_PM_at   | Cc125                                                                                                        | CCL25      | 0.04  | 2.19 | 0.40  | 7.00E-01 | 8.62E-01 | -6.62 |
| 1442172_PM_at   | Prickle1                                                                                                     | NA         | 0.05  | 2.77 | 0.40  | 7.00E-01 | 8.62E-01 | -6.62 |
| 1422402_PM_a_at | Asz1                                                                                                         | ASZ1       | 0.06  | 2.25 | 0.40  | 7.00E-01 | 8.62E-01 | -6.62 |
| 1430337_PM_at   | ---                                                                                                          | NA         | -0.06 | 2.78 | -0.40 | 7.00E-01 | 8.62E-01 | -6.62 |
| 1452382_PM_at   | Dnm3os                                                                                                       | NA         | -0.06 | 2.45 | -0.40 | 7.00E-01 | 8.62E-01 | -6.62 |
| 1422071_PM_at   | Lgals6                                                                                                       | NA         | 0.04  | 2.37 | 0.40  | 7.00E-01 | 8.62E-01 | -6.62 |
| 1426909_PM_at   | Uck2                                                                                                         | UCK2       | 0.05  | 2.71 | 0.40  | 7.00E-01 | 8.62E-01 | -6.62 |
| 1420032_PM_at   | Chek1                                                                                                        | NA         | -0.03 | 2.08 | -0.40 | 7.00E-01 | 8.62E-01 | -6.62 |
| 1421236_PM_at   | Ripk2                                                                                                        | RIPK2      | 0.04  | 2.29 | 0.40  | 7.00E-01 | 8.62E-01 | -6.62 |
| 1459711_PM_at   | Sdk1                                                                                                         | SDK1       | 0.05  | 2.76 | 0.40  | 7.00E-01 | 8.62E-01 | -6.62 |
| 1425965_PM_at   | Ubc                                                                                                          | UBC        | 0.07  | 2.30 | 0.40  | 7.00E-01 | 8.62E-01 | -6.62 |
| 1457284_PM_at   | ---                                                                                                          | NA         | 0.07  | 2.61 | 0.40  | 7.00E-01 | 8.62E-01 | -6.62 |
| 1432491_PM_at   | LOC102633266                                                                                                 | NA         | -0.04 | 2.29 | -0.40 | 7.00E-01 | 8.62E-01 | -6.62 |
| 1427614_PM_at   | Pip                                                                                                          | PIP        | 0.04  | 1.98 | 0.40  | 7.00E-01 | 8.62E-01 | -6.62 |
| 1447824_PM_x_at | Hspa5                                                                                                        | HSPA5      | -0.05 | 2.47 | -0.40 | 7.01E-01 | 8.62E-01 | -6.62 |
| 1445904_PM_at   | ---                                                                                                          | NA         | -0.05 | 2.69 | -0.40 | 7.01E-01 | 8.63E-01 | -6.62 |
| 1425359_PM_at   | Mall                                                                                                         | MALL       | 0.03  | 1.98 | 0.40  | 7.01E-01 | 8.63E-01 | -6.62 |
| 1436588_PM_at   | Rtnn                                                                                                         | RTTN       | -0.14 | 2.72 | -0.39 | 7.01E-01 | 8.63E-01 | -6.62 |
| 1430179_PM_at   | ---                                                                                                          | NA         | -0.05 | 2.69 | -0.40 | 7.01E-01 | 8.63E-01 | -6.62 |
| 1447149_PM_at   | Slc9a9                                                                                                       | SLC9A9     | -0.05 | 2.69 | -0.40 | 7.01E-01 | 8.63E-01 | -6.62 |
| 1452511_PM_at   | Sox5                                                                                                         | SOX5       | -0.04 | 2.31 | -0.40 | 7.01E-01 | 8.63E-01 | -6.62 |
| 1422404_PM_x_at | Ifna1 /// Ifna12 /// Ifna13<br>/// Ifna15 /// Ifna16 ///<br>Ifna5 /// Ifna6 /// Ifna7 ///<br>Ifna9 /// Ifnab | IFNA6      | -0.04 | 2.26 | -0.40 | 7.01E-01 | 8.63E-01 | -6.62 |
| 1419626_PM_at   | Adam25                                                                                                       | NA         | 0.03  | 2.06 | 0.40  | 7.01E-01 | 8.63E-01 | -6.62 |
| 1425035_PM_s_at | Dnmt3l                                                                                                       | FP565260.4 | 0.04  | 2.58 | 0.40  | 7.01E-01 | 8.63E-01 | -6.62 |
| 1460525_PM_at   | ---                                                                                                          | NA         | 0.05  | 2.40 | 0.39  | 7.01E-01 | 8.63E-01 | -6.62 |
| 1442907_PM_at   | ---                                                                                                          | NA         | 0.05  | 2.50 | 0.39  | 7.01E-01 | 8.63E-01 | -6.62 |
| 1460486_PM_at   | Rabgap1                                                                                                      | RABGAP1    | 0.14  | 2.87 | 0.40  | 7.01E-01 | 8.63E-01 | -6.62 |
| 1431213_PM_a_at | Gm3579 /// Gm40514 ///<br>Gm40814 /// Gm40991 ///<br>Gm42035 /// Gm42102 ///<br>LOC105244034                 | NA         | 0.17  | 5.20 | 0.39  | 7.01E-01 | 8.63E-01 | -6.62 |
| 1423840_PM_at   | Coa3                                                                                                         | COA3       | 0.05  | 3.03 | 0.39  | 7.01E-01 | 8.63E-01 | -6.62 |
| 1421073_PM_a_at | Ptger4                                                                                                       | PTGER4     | 0.03  | 2.04 | 0.39  | 7.01E-01 | 8.63E-01 | -6.62 |
| 1449360_PM_at   | Csf2rb2                                                                                                      | CSF2RB     | 0.05  | 2.37 | 0.39  | 7.01E-01 | 8.63E-01 | -6.62 |
| 1440565_PM_at   | ---                                                                                                          | NA         | 0.06  | 4.25 | 0.39  | 7.01E-01 | 8.63E-01 | -6.62 |
| 1429201_PM_at   | Cyld                                                                                                         | CYLD       | -0.15 | 3.44 | -0.39 | 7.01E-01 | 8.63E-01 | -6.62 |
| 1418320_PM_at   | Prss8                                                                                                        | PRSS8      | 0.04  | 2.11 | 0.39  | 7.01E-01 | 8.63E-01 | -6.62 |
| 1424932_PM_at   | Egfr                                                                                                         | EGFR       | 0.07  | 2.52 | 0.39  | 7.01E-01 | 8.63E-01 | -6.62 |
| 1450481_PM_at   | Mybl1                                                                                                        | MYBL1      | -0.07 | 2.43 | -0.39 | 7.01E-01 | 8.63E-01 | -6.62 |
| 1449543_PM_at   | Zscan5b                                                                                                      | ZSCAN5C    | 0.03  | 2.47 | 0.39  | 7.01E-01 | 8.63E-01 | -6.62 |
| 1428336_PM_at   | Agpat4                                                                                                       | AGPAT4     | -0.05 | 2.80 | -0.39 | 7.01E-01 | 8.63E-01 | -6.62 |
| 1415947_PM_at   | Creg1                                                                                                        | CREG1      | 0.06  | 2.74 | 0.39  | 7.01E-01 | 8.63E-01 | -6.62 |
| 1432287_PM_a_at | Sntg1                                                                                                        | SNTG1      | -0.07 | 2.57 | -0.39 | 7.01E-01 | 8.63E-01 | -6.62 |
| 1434599_PM_a_at | Tjp2                                                                                                         | TJP2       | -0.06 | 2.39 | -0.39 | 7.01E-01 | 8.63E-01 | -6.62 |
| 1438930_PM_s_at | MeCP2                                                                                                        | MECP2      | -0.14 | 8.25 | -0.39 | 7.01E-01 | 8.63E-01 | -6.62 |
| 1417842_PM_at   | Caml                                                                                                         | CAMLG      | -0.13 | 3.90 | -0.39 | 7.01E-01 | 8.63E-01 | -6.62 |

|                 |                                                |            |       |      |       |          |          |       |
|-----------------|------------------------------------------------|------------|-------|------|-------|----------|----------|-------|
| 1423380_PM_s_at | Nfatc4                                         | NFATC4     | -0.10 | 3.98 | -0.39 | 7.01E-01 | 8.63E-01 | -6.62 |
| 1434479_PM_at   | Col5a1                                         | COL5A1     | 0.05  | 2.55 | 0.39  | 7.01E-01 | 8.63E-01 | -6.62 |
| 1419349_PM_a_at | Cyp2d9                                         | CYP2D6     | 0.03  | 2.22 | 0.39  | 7.02E-01 | 8.63E-01 | -6.62 |
| 1422715_PM_s_at | Acpi1///LOC102642088                           | ACP1       | -0.10 | 4.31 | -0.39 | 7.02E-01 | 8.63E-01 | -6.62 |
| 1425227_PM_a_at | Atp6v0a1                                       | ATP6V0A1   | -0.10 | 6.11 | -0.39 | 7.02E-01 | 8.63E-01 | -6.62 |
| 1433698_PM_a_at | Txn14a                                         | NA         | 0.06  | 2.78 | 0.39  | 7.02E-01 | 8.63E-01 | -6.62 |
| 1428116_PM_a_at | Dynt11a /// Dynt11b ///<br>Dynt11c /// Dynt11f | DYNLT1     | -0.10 | 3.13 | -0.39 | 7.02E-01 | 8.63E-01 | -6.62 |
| 1443975_PM_at   | Trip11                                         | TRIP11     | -0.06 | 4.23 | -0.39 | 7.02E-01 | 8.63E-01 | -6.62 |
| 1454685_PM_at   | Gpr146                                         | GPR146     | -0.04 | 2.39 | -0.39 | 7.02E-01 | 8.63E-01 | -6.62 |
| 1444555_PM_at   | ---                                            | NA         | -0.03 | 2.31 | -0.39 | 7.02E-01 | 8.63E-01 | -6.62 |
| 1429231_PM_at   | ---                                            | NA         | 0.05  | 2.17 | 0.39  | 7.02E-01 | 8.63E-01 | -6.62 |
| 1431393_PM_at   | 4930447C04Rik                                  | C14orf39   | 0.05  | 2.84 | 0.39  | 7.02E-01 | 8.63E-01 | -6.62 |
| 1447245_PM_at   | Tspan5                                         | TSPAN5     | -0.05 | 2.24 | -0.39 | 7.02E-01 | 8.63E-01 | -6.62 |
| 1449361_PM_at   | Tbx21                                          | TBX21      | 0.04  | 2.27 | 0.39  | 7.02E-01 | 8.63E-01 | -6.62 |
| 1460437_PM_at   | Cyth4                                          | CYTH4      | 0.05  | 2.43 | 0.39  | 7.02E-01 | 8.63E-01 | -6.62 |
| 1453519_PM_at   | 2610037D02Rik                                  | NA         | 0.07  | 2.62 | 0.39  | 7.02E-01 | 8.63E-01 | -6.62 |
| 1423893_PM_x_at | Apbb1                                          | APBB1      | 0.04  | 2.63 | 0.39  | 7.02E-01 | 8.63E-01 | -6.62 |
| 1459746_PM_at   | ---                                            | NA         | -0.15 | 2.57 | -0.39 | 7.02E-01 | 8.63E-01 | -6.62 |
| 1453835_PM_at   | ---                                            | NA         | 0.03  | 1.96 | 0.39  | 7.02E-01 | 8.63E-01 | -6.62 |
| 1418234_PM_s_at | Bcas2                                          | BCAS2      | -0.12 | 4.91 | -0.39 | 7.02E-01 | 8.63E-01 | -6.62 |
| 1439826_PM_at   | Hspa14                                         | ACO69544.2 | -0.09 | 2.70 | -0.39 | 7.02E-01 | 8.63E-01 | -6.62 |
| 1436961_PM_at   | Hspa12a                                        | HSPA12A    | 0.06  | 2.85 | 0.39  | 7.02E-01 | 8.63E-01 | -6.62 |
| 1436126_PM_at   | Dnal1                                          | DNAL1      | -0.07 | 2.60 | -0.39 | 7.02E-01 | 8.63E-01 | -6.62 |
| 1443782_PM_x_at | Cyp20a1                                        | CYP20A1    | -0.12 | 4.51 | -0.39 | 7.03E-01 | 8.63E-01 | -6.62 |
| 1451517_PM_at   | Rhobtb2                                        | RHOBTB2    | -0.10 | 3.23 | -0.39 | 7.03E-01 | 8.63E-01 | -6.62 |
| 1434732_PM_x_at | Tomm7                                          | TOMM7      | -0.06 | 9.09 | -0.39 | 7.02E-01 | 8.63E-01 | -6.62 |
| 1417579_PM_x_at | Gmppa                                          | GMPPA      | -0.05 | 2.21 | -0.39 | 7.03E-01 | 8.63E-01 | -6.62 |
| 1447331_PM_at   | ---                                            | NA         | -0.03 | 1.86 | -0.39 | 7.03E-01 | 8.63E-01 | -6.62 |
| 1446896_PM_at   | AU022186                                       | NA         | 0.04  | 2.29 | 0.39  | 7.02E-01 | 8.63E-01 | -6.62 |
| 1447354_PM_at   | ---                                            | NA         | 0.04  | 2.49 | 0.39  | 7.02E-01 | 8.63E-01 | -6.62 |
| 1432947_PM_at   | Gm33916                                        | NA         | 0.04  | 2.84 | 0.39  | 7.03E-01 | 8.63E-01 | -6.62 |
| 1440799_PM_s_at | Farp2                                          | FARP2      | 0.09  | 2.47 | 0.39  | 7.03E-01 | 8.63E-01 | -6.62 |
| 1451208_PM_at   | Etf1                                           | ETF1       | 0.20  | 3.21 | 0.39  | 7.02E-01 | 8.63E-01 | -6.62 |
| 1421225_PM_a_at | Slc4a4                                         | SLC4A4     | 0.25  | 4.02 | 0.39  | 7.02E-01 | 8.63E-01 | -6.62 |
| 1452149_PM_at   | Ube3b                                          | UBE3B      | -0.04 | 2.59 | -0.39 | 7.03E-01 | 8.64E-01 | -6.62 |
| 1438935_PM_at   | ---                                            | NA         | -0.03 | 2.27 | -0.39 | 7.03E-01 | 8.64E-01 | -6.62 |
| 1416278_PM_a_at | Atp5o///LOC102641678                           | ATP5O      | 0.13  | 4.94 | 0.39  | 7.03E-01 | 8.64E-01 | -6.62 |
| 1428280_PM_at   | Fip11                                          | FIP11      | -0.13 | 7.86 | -0.39 | 7.03E-01 | 8.64E-01 | -6.62 |
| 1446410_PM_at   | ---                                            | NA         | -0.08 | 2.57 | -0.39 | 7.03E-01 | 8.64E-01 | -6.62 |
| 1419659_PM_s_at | Chic2                                          | CHIC2      | 0.05  | 4.22 | 0.39  | 7.03E-01 | 8.64E-01 | -6.62 |
| 1423781_PM_at   | Nae1                                           | NAE1       | -0.09 | 4.65 | -0.39 | 7.03E-01 | 8.64E-01 | -6.62 |
| 1454847_PM_at   | Lhfp12                                         | LHFPL2     | 0.08  | 4.06 | 0.39  | 7.03E-01 | 8.64E-01 | -6.62 |
| 1458235_PM_at   | ---                                            | NA         | 0.19  | 3.18 | 0.39  | 7.03E-01 | 8.64E-01 | -6.62 |
| 1452803_PM_at   | Glpr2                                          | GLIPR2     | 0.04  | 2.16 | 0.39  | 7.03E-01 | 8.64E-01 | -6.62 |
| 1444230_PM_at   | ---                                            | NA         | -0.07 | 3.03 | -0.39 | 7.03E-01 | 8.64E-01 | -6.62 |
| 1416194_PM_at   | Cyp4b1                                         | CYP4B1     | 0.03  | 2.10 | 0.39  | 7.03E-01 | 8.64E-01 | -6.62 |
| 1448848_PM_at   | Tor1b                                          | TOR1B      | -0.22 | 5.78 | -0.39 | 7.03E-01 | 8.64E-01 | -6.62 |
| 1423490_PM_at   | Fbxo3                                          | FBXO3      | -0.09 | 2.92 | -0.39 | 7.03E-01 | 8.64E-01 | -6.62 |
| 1443827_PM_x_at | Fam20c                                         | FAM20C     | -0.07 | 3.28 | -0.39 | 7.03E-01 | 8.64E-01 | -6.62 |
| 1441525_PM_at   | Nek11                                          | NEK11      | -0.04 | 2.08 | -0.39 | 7.03E-01 | 8.64E-01 | -6.62 |
| 1440613_PM_at   | ---                                            | NA         | 0.05  | 2.83 | 0.39  | 7.03E-01 | 8.64E-01 | -6.62 |
| 1445471_PM_at   | ---                                            | NA         | 0.04  | 2.33 | 0.39  | 7.03E-01 | 8.64E-01 | -6.62 |
| 1457359_PM_at   | Inpp4b                                         | INPP4B     | -0.21 | 2.85 | -0.39 | 7.03E-01 | 8.64E-01 | -6.62 |
| 1417462_PM_at   | Cap1                                           | CAP1       | -0.09 | 3.93 | -0.39 | 7.03E-01 | 8.64E-01 | -6.62 |
| 1449659_PM_s_at | Mphosph9                                       | MPHOSPH9   | -0.08 | 3.16 | -0.39 | 7.03E-01 | 8.64E-01 | -6.62 |
| 1450676_PM_at   | Tceb3                                          | ELOA       | -0.05 | 2.85 | -0.39 | 7.03E-01 | 8.64E-01 | -6.62 |
| 1458554_PM_at   | ---                                            | NA         | -0.03 | 1.81 | -0.39 | 7.03E-01 | 8.64E-01 | -6.62 |
| 1421575_PM_at   | 2310057N15Rik                                  | KRTAP13-3  | 0.04  | 1.97 | 0.39  | 7.03E-01 | 8.64E-01 | -6.62 |
| 1416535_PM_at   | Mcrs1                                          | MCRS1      | 0.04  | 2.62 | 0.39  | 7.03E-01 | 8.64E-01 | -6.62 |
| 1433364_PM_at   | ---                                            | NA         | 0.04  | 2.38 | 0.39  | 7.03E-01 | 8.64E-01 | -6.62 |
| 1426656_PM_at   | Fam63a                                         | MINDY1     | 0.05  | 2.46 | 0.39  | 7.03E-01 | 8.64E-01 | -6.62 |
| 1426733_PM_at   | Itpk1                                          | ITPK1      | 0.05  | 2.86 | 0.39  | 7.03E-01 | 8.64E-01 | -6.62 |
| 1448544_PM_at   | Crat                                           | CRAT       | 0.05  | 2.48 | 0.39  | 7.03E-01 | 8.64E-01 | -6.62 |
| 1421084_PM_at   | Rs1                                            | RS1        | 0.05  | 2.35 | 0.39  | 7.03E-01 | 8.64E-01 | -6.62 |
| 1448827_PM_s_at | Myh6 /// Myh7                                  | MYH6       | 0.05  | 2.42 | 0.39  | 7.03E-01 | 8.64E-01 | -6.62 |
| 1417613_PM_at   | Ier5                                           | IER5       | 0.05  | 2.41 | 0.39  | 7.03E-01 | 8.64E-01 | -6.62 |
| 1441063_PM_at   | Ago3                                           | AGO3       | 0.06  | 2.63 | 0.39  | 7.03E-01 | 8.64E-01 | -6.62 |
| 1449490_PM_at   | Mbd4                                           | MBD4       | 0.07  | 2.11 | 0.39  | 7.03E-01 | 8.64E-01 | -6.62 |
| 1460460_PM_a_at | Goras2                                         | GORASP2    | 0.17  | 4.02 | 0.39  | 7.03E-01 | 8.64E-01 | -6.62 |
| 1442623_PM_at   | ---                                            | NA         | -0.19 | 4.06 | -0.39 | 7.04E-01 | 8.64E-01 | -6.62 |
| 1442957_PM_at   | G730013B05Rik                                  | NA         | 0.04  | 2.09 | 0.39  | 7.04E-01 | 8.64E-01 | -6.62 |
| 1424758_PM_s_at | Serpina10                                      | SERPINA10  | 0.04  | 2.35 | 0.39  | 7.04E-01 | 8.64E-01 | -6.62 |
| 1433458_PM_at   | E330021D16Rik                                  | UBE2Q2     | -0.03 | 2.06 | -0.39 | 7.04E-01 | 8.64E-01 | -6.62 |
| 1416590_PM_a_at | Rab34                                          | RAB34      | 0.06  | 2.48 | 0.39  | 7.04E-01 | 8.64E-01 | -6.62 |

|                 |                                                                                             |            |       |      |       |          |          |       |
|-----------------|---------------------------------------------------------------------------------------------|------------|-------|------|-------|----------|----------|-------|
| 1433881_PM_at   | Dnajc11                                                                                     | DNAJC11    | -0.04 | 2.59 | -0.39 | 7.04E-01 | 8.64E-01 | -6.62 |
| 1442798_PM_x_at | Hk3                                                                                         | HK3        | 0.04  | 2.44 | 0.39  | 7.04E-01 | 8.64E-01 | -6.62 |
| 1458111_PM_at   | Fam20b                                                                                      | FAM20B     | -0.05 | 2.25 | -0.39 | 7.04E-01 | 8.64E-01 | -6.62 |
| 1448725_PM_at   | Parg                                                                                        | PARG       | 0.07  | 4.11 | 0.39  | 7.04E-01 | 8.64E-01 | -6.62 |
| 1427911_PM_at   | Tmem173                                                                                     | TMEM173    | 0.06  | 2.67 | 0.39  | 7.04E-01 | 8.64E-01 | -6.62 |
| 1447518_PM_at   | Tpx2                                                                                        | TPX2       | -0.03 | 2.11 | -0.39 | 7.04E-01 | 8.64E-01 | -6.62 |
| 1445283_PM_at   | ---                                                                                         | NA         | 0.03  | 2.28 | 0.39  | 7.04E-01 | 8.64E-01 | -6.62 |
| 1454911_PM_at   | Fbxw24                                                                                      | FBXW12     | 0.04  | 2.35 | 0.39  | 7.04E-01 | 8.64E-01 | -6.62 |
| 1443934_PM_at   | 9230110C19Rik                                                                               | C11orf70   | 0.06  | 2.43 | 0.39  | 7.04E-01 | 8.64E-01 | -6.62 |
| 1437884_PM_at   | Ar15b                                                                                       | ARL5B      | 0.07  | 2.54 | 0.39  | 7.04E-01 | 8.64E-01 | -6.62 |
| 1431282_PM_at   | Med24                                                                                       | MED24      | 0.05  | 2.56 | 0.39  | 7.04E-01 | 8.64E-01 | -6.62 |
| 1432202_PM_a_at | Poc1a                                                                                       | POC1A      | -0.05 | 2.85 | -0.39 | 7.04E-01 | 8.64E-01 | -6.62 |
| 1449985_PM_at   | Samt3                                                                                       | NA         | -0.03 | 2.10 | -0.39 | 7.04E-01 | 8.64E-01 | -6.62 |
| 1455010_PM_at   | 1500012F01Rik                                                                               | NA         | -0.05 | 3.29 | -0.39 | 7.04E-01 | 8.64E-01 | -6.62 |
| 1432633_PM_at   | ---                                                                                         | NA         | 0.07  | 2.40 | 0.39  | 7.04E-01 | 8.64E-01 | -6.62 |
| 1443808_PM_at   | D2Bwg1423e /// Gm20071                                                                      | NA         | 0.03  | 2.18 | 0.39  | 7.04E-01 | 8.64E-01 | -6.62 |
| 1444447_PM_at   | ---                                                                                         | NA         | -0.09 | 3.32 | -0.39 | 7.05E-01 | 8.65E-01 | -6.62 |
| 1453355_PM_at   | Wnk2                                                                                        | WNK2       | -0.08 | 3.71 | -0.39 | 7.05E-01 | 8.65E-01 | -6.62 |
| 1426339_PM_at   | Ak5                                                                                         | AK5        | -0.09 | 2.95 | -0.39 | 7.05E-01 | 8.65E-01 | -6.62 |
| 1432354_PM_at   | 1700003H04Rik                                                                               | NA         | -0.03 | 2.15 | -0.39 | 7.05E-01 | 8.65E-01 | -6.62 |
| 1425214_PM_at   | P2ry6                                                                                       | P2RY6      | 0.10  | 3.22 | 0.39  | 7.05E-01 | 8.65E-01 | -6.62 |
| 1456116_PM_at   | Ctnnd2                                                                                      | CTNND2     | 0.10  | 4.77 | 0.39  | 7.05E-01 | 8.65E-01 | -6.62 |
| 1435417_PM_at   | Al464131                                                                                    | KIAA1161   | -0.04 | 2.39 | -0.39 | 7.05E-01 | 8.65E-01 | -6.62 |
| 1444743_PM_at   | ---                                                                                         | NA         | -0.07 | 3.11 | -0.39 | 7.05E-01 | 8.65E-01 | -6.62 |
| 1428157_PM_at   | Gng2                                                                                        | GNG2       | -0.24 | 6.13 | -0.39 | 7.05E-01 | 8.65E-01 | -6.62 |
| 1441330_PM_at   | Crb1                                                                                        | CRB1       | 0.04  | 2.31 | 0.39  | 7.05E-01 | 8.65E-01 | -6.62 |
| 1430138_PM_at   | Cd3eap                                                                                      | NA         | 0.09  | 3.00 | 0.39  | 7.05E-01 | 8.65E-01 | -6.62 |
| 1459253_PM_at   | 1700023H06Rik                                                                               | NA         | -0.04 | 2.05 | -0.39 | 7.05E-01 | 8.65E-01 | -6.62 |
| 1439993_PM_at   | ---                                                                                         | NA         | 0.03  | 2.15 | 0.39  | 7.05E-01 | 8.65E-01 | -6.62 |
| 1442429_PM_at   | ---                                                                                         | NA         | 0.04  | 2.55 | 0.39  | 7.05E-01 | 8.65E-01 | -6.62 |
| 1425785_PM_a_at | Txk                                                                                         | TXK        | 0.04  | 2.26 | 0.39  | 7.05E-01 | 8.65E-01 | -6.62 |
| 1457866_PM_at   | C77717                                                                                      | NA         | 0.06  | 2.53 | 0.39  | 7.05E-01 | 8.65E-01 | -6.62 |
| 1444698_PM_at   | ---                                                                                         | NA         | 0.07  | 2.78 | 0.39  | 7.05E-01 | 8.65E-01 | -6.62 |
| 1454831_PM_at   | Foxn2                                                                                       | FOXN2      | -0.14 | 4.49 | -0.39 | 7.05E-01 | 8.65E-01 | -6.62 |
| 1426901_PM_s_at | Camta2                                                                                      | CAMTA2     | -0.14 | 6.46 | -0.39 | 7.05E-01 | 8.65E-01 | -6.62 |
| 1453353_PM_at   | ---                                                                                         | NA         | -0.03 | 1.97 | -0.39 | 7.05E-01 | 8.65E-01 | -6.62 |
| 1439763_PM_at   | Dnajc11                                                                                     | DNAJC11    | 0.03  | 2.04 | 0.39  | 7.05E-01 | 8.65E-01 | -6.62 |
| 1425432_PM_at   | Oprm1                                                                                       | OPRM1      | 0.03  | 2.18 | 0.39  | 7.05E-01 | 8.65E-01 | -6.62 |
| 1437344_PM_x_at | Krt13                                                                                       | KRT13      | 0.05  | 2.39 | 0.39  | 7.05E-01 | 8.65E-01 | -6.62 |
| 1430559_PM_at   | Nt5c3b                                                                                      | NT5C3B     | 0.05  | 2.51 | 0.39  | 7.05E-01 | 8.65E-01 | -6.62 |
| 1443185_PM_at   | Lhfp12                                                                                      | LHFPL2     | 0.06  | 2.60 | 0.39  | 7.05E-01 | 8.65E-01 | -6.62 |
| 1425979_PM_a_at | Fbf1                                                                                        | FBF1       | 0.10  | 4.40 | 0.39  | 7.05E-01 | 8.65E-01 | -6.62 |
| 1456850_PM_at   | ---                                                                                         | NA         | -0.04 | 2.29 | -0.39 | 7.06E-01 | 8.65E-01 | -6.62 |
| 1453494_PM_at   | ---                                                                                         | NA         | 0.04  | 2.25 | 0.39  | 7.06E-01 | 8.65E-01 | -6.62 |
| 1446747_PM_at   | Spef2                                                                                       | SPEF2      | -0.06 | 2.50 | -0.39 | 7.06E-01 | 8.65E-01 | -6.62 |
| 1431117_PM_x_at | Tma16                                                                                       | TMA16      | -0.07 | 4.82 | -0.39 | 7.06E-01 | 8.65E-01 | -6.62 |
| 1434110_PM_x_at | Mup1 /// Mup10 /// Mup11<br>/// Mup12 /// Mup14 ///<br>Mup16 /// Mup18 /// Mup2<br>/// Mup9 | NA         | -0.13 | 4.48 | -0.39 | 7.06E-01 | 8.65E-01 | -6.62 |
| 1416401_PM_at   | Cd82                                                                                        | CD82       | -0.05 | 2.43 | -0.39 | 7.06E-01 | 8.65E-01 | -6.62 |
| 1441971_PM_at   | ---                                                                                         | NA         | 0.06  | 2.86 | 0.39  | 7.06E-01 | 8.65E-01 | -6.62 |
| 1416734_PM_at   | Mkln1                                                                                       | MKLN1      | -0.05 | 2.43 | -0.39 | 7.06E-01 | 8.65E-01 | -6.62 |
| 1418938_PM_at   | Dio2                                                                                        | DIO2       | -0.08 | 2.39 | -0.39 | 7.06E-01 | 8.65E-01 | -6.62 |
| 1430731_PM_at   | Krtap2-4                                                                                    | KRTAP2-3   | -0.04 | 2.18 | -0.39 | 7.06E-01 | 8.65E-01 | -6.62 |
| 1431546_PM_at   | 4930509K18Rik                                                                               | NA         | -0.04 | 2.21 | -0.39 | 7.06E-01 | 8.65E-01 | -6.62 |
| 1417239_PM_at   | Cetn3                                                                                       | CETN3      | 0.11  | 7.87 | 0.39  | 7.06E-01 | 8.65E-01 | -6.62 |
| 1428467_PM_at   | Tardbp                                                                                      | TARDBP     | 0.11  | 3.69 | 0.39  | 7.06E-01 | 8.65E-01 | -6.62 |
| 1436777_PM_at   | Mars2                                                                                       | MARS2      | -0.05 | 2.19 | -0.39 | 7.06E-01 | 8.66E-01 | -6.62 |
| 1422788_PM_at   | Slc43a3                                                                                     | AP000781.2 | 0.04  | 2.47 | 0.39  | 7.06E-01 | 8.66E-01 | -6.62 |
| 1427327_PM_at   | Pilra                                                                                       | PILRA      | 0.05  | 2.66 | 0.39  | 7.06E-01 | 8.66E-01 | -6.62 |
| 1458680_PM_at   | Heph1                                                                                       | HEPH1      | -0.04 | 2.55 | -0.39 | 7.06E-01 | 8.66E-01 | -6.62 |
| 1432321_PM_at   | Zcchc13                                                                                     | ZCCHC13    | 0.04  | 2.13 | 0.39  | 7.06E-01 | 8.66E-01 | -6.62 |
| 1453959_PM_at   | Zfp763                                                                                      | NA         | 0.05  | 2.89 | 0.39  | 7.06E-01 | 8.66E-01 | -6.62 |
| 1436894_PM_at   | Ildr2                                                                                       | ILDR2      | -0.08 | 2.80 | -0.39 | 7.06E-01 | 8.66E-01 | -6.62 |
| 1422671_PM_s_at | Naalad2                                                                                     | NAALAD2    | -0.08 | 2.36 | -0.39 | 7.06E-01 | 8.66E-01 | -6.62 |
| 1420057_PM_at   | Jmjd6                                                                                       | NA         | 0.18  | 3.47 | 0.39  | 7.06E-01 | 8.66E-01 | -6.62 |
| 1439012_PM_a_at | Dck                                                                                         | DCK        | 0.15  | 4.48 | 0.39  | 7.06E-01 | 8.66E-01 | -6.62 |
| 1418513_PM_at   | Stk3                                                                                        | STK3       | 0.14  | 3.72 | 0.39  | 7.06E-01 | 8.66E-01 | -6.62 |
| 1437459_PM_x_at | Slc25a19                                                                                    | SLC25A19   | -0.03 | 2.12 | -0.39 | 7.07E-01 | 8.66E-01 | -6.62 |
| 1453093_PM_at   | Rasgef1c                                                                                    | RASGEF1C   | -0.04 | 2.55 | -0.39 | 7.07E-01 | 8.66E-01 | -6.62 |
| 1454430_PM_at   | ---                                                                                         | NA         | -0.03 | 1.94 | -0.39 | 7.07E-01 | 8.66E-01 | -6.62 |
| 1420189_PM_at   | ---                                                                                         | NA         | 0.03  | 2.29 | 0.39  | 7.07E-01 | 8.66E-01 | -6.62 |
| 1426388_PM_s_at | Ryk                                                                                         | RYK        | 0.05  | 2.47 | 0.39  | 7.07E-01 | 8.66E-01 | -6.62 |



|                 |                     |          |       |      |       |          |          |       |
|-----------------|---------------------|----------|-------|------|-------|----------|----------|-------|
| 1425941_PM_a_at | Fanci               | FANCI    | 0.08  | 2.23 | 0.39  | 7.07E-01 | 8.66E-01 | -6.62 |
| 1451146_PM_at   | Zfp386              | ZNF519   | 0.14  | 3.18 | 0.39  | 7.07E-01 | 8.66E-01 | -6.62 |
| 1442367_PM_at   | Atp11c              | ATP11C   | 0.08  | 2.86 | 0.39  | 7.07E-01 | 8.66E-01 | -6.62 |
| 1452015_PM_at   | 6330416G13Rik       | TMEM268  | 0.04  | 2.39 | 0.39  | 7.07E-01 | 8.66E-01 | -6.62 |
| 1426518_PM_at   | Tabgcp5             | TUBGCP5  | -0.09 | 3.06 | -0.39 | 7.07E-01 | 8.66E-01 | -6.62 |
| 1444140_PM_at   | ---                 | NA       | -0.04 | 2.30 | -0.39 | 7.07E-01 | 8.66E-01 | -6.62 |
| 1419999_PM_at   | Igbp1               | IGBP1    | -0.03 | 2.23 | -0.39 | 7.07E-01 | 8.66E-01 | -6.62 |
| 1458407_PM_s_at | ---                 | NA       | 0.10  | 2.97 | 0.39  | 7.07E-01 | 8.66E-01 | -6.62 |
| 1440728_PM_at   | ---                 | NA       | 0.13  | 2.89 | 0.39  | 7.07E-01 | 8.66E-01 | -6.62 |
| 1418719_PM_at   | Haus8               | HAUS8    | -0.04 | 2.30 | -0.39 | 7.07E-01 | 8.66E-01 | -6.62 |
| 1428605_PM_at   | Ccdc124             | CCDC124  | 0.05  | 2.49 | 0.39  | 7.07E-01 | 8.66E-01 | -6.62 |
| 1423071_PM_x_at | 6720475J19Rik       | NA       | 0.11  | 5.01 | 0.39  | 7.07E-01 | 8.66E-01 | -6.62 |
| 1439564_PM_at   | Tmem247             | TMEM247  | 0.03  | 2.15 | 0.39  | 7.07E-01 | 8.66E-01 | -6.62 |
| 1454624_PM_at   | Dennd2a             | DENND2A  | 0.05  | 3.04 | 0.39  | 7.07E-01 | 8.66E-01 | -6.62 |
| 1418399_PM_at   | Kctd9               | KCTD9    | 0.09  | 3.10 | 0.39  | 7.07E-01 | 8.66E-01 | -6.62 |
| 1434102_PM_at   | Nfib                | NFIB     | 0.11  | 7.70 | 0.39  | 7.07E-01 | 8.66E-01 | -6.62 |
| 1460317_PM_s_at | Gna13               | GNA13    | -0.05 | 4.37 | -0.39 | 7.07E-01 | 8.66E-01 | -6.62 |
| 1432457_PM_at   | 4930448F12Rik       | NA       | -0.03 | 2.23 | -0.39 | 7.07E-01 | 8.66E-01 | -6.62 |
| 1455476_PM_a_at | Gse1                | GSE1     | -0.17 | 4.35 | -0.39 | 7.07E-01 | 8.66E-01 | -6.62 |
| 1446765_PM_at   | C77973              | NA       | 0.05  | 2.15 | 0.39  | 7.07E-01 | 8.66E-01 | -6.62 |
| 1431102_PM_at   | Cep350              | CEP350   | 0.11  | 2.49 | 0.39  | 7.07E-01 | 8.66E-01 | -6.62 |
| 1424179_PM_at   | Plekhl1             | PLEKH1   | 0.04  | 2.48 | 0.39  | 7.08E-01 | 8.66E-01 | -6.62 |
| 1427083_PM_a_at | Map4k5              | MAP4K5   | 0.08  | 2.95 | 0.39  | 7.08E-01 | 8.66E-01 | -6.62 |
| 1455685_PM_at   | Mica2               | MICAL2   | 0.15  | 4.07 | 0.39  | 7.08E-01 | 8.66E-01 | -6.62 |
| 1431734_PM_a_at | Dnajb4              | DNAJB4   | -0.11 | 3.61 | -0.39 | 7.08E-01 | 8.66E-01 | -6.62 |
| 1460100_PM_at   | ---                 | NA       | -0.04 | 2.28 | -0.39 | 7.08E-01 | 8.66E-01 | -6.62 |
| 1424021_PM_at   | Arl6ip6             | ARL6IP6  | -0.19 | 4.47 | -0.39 | 7.08E-01 | 8.67E-01 | -6.62 |
| 1432119_PM_at   | Muc4                | MUC4     | 0.03  | 2.18 | 0.39  | 7.08E-01 | 8.67E-01 | -6.62 |
| 1442590_PM_at   | Tnfrsf22///Tnfrsf23 | NA       | -0.04 | 2.29 | -0.39 | 7.08E-01 | 8.67E-01 | -6.62 |
| 1439378_PM_at   | BC048671            | C3orf22  | 0.03  | 2.45 | 0.39  | 7.08E-01 | 8.67E-01 | -6.62 |
| 1428296_PM_at   | Polr2l///Usp50      | USP50    | 0.08  | 3.77 | 0.39  | 7.08E-01 | 8.67E-01 | -6.62 |
| 1447337_PM_at   | ---                 | NA       | 0.04  | 2.47 | 0.39  | 7.08E-01 | 8.67E-01 | -6.62 |
| 1431412_PM_at   | ---                 | NA       | 0.04  | 2.34 | 0.39  | 7.08E-01 | 8.67E-01 | -6.62 |
| 1449538_PM_a_at | Gcnt1               | GCNT1    | 0.04  | 2.30 | 0.39  | 7.08E-01 | 8.67E-01 | -6.62 |
| 1422819_PM_at   | MrpB6               | MRPL36   | 0.05  | 2.26 | 0.39  | 7.08E-01 | 8.67E-01 | -6.62 |
| 1443884_PM_at   | Thada               | THADA    | 0.05  | 2.88 | 0.39  | 7.08E-01 | 8.67E-01 | -6.62 |
| 1424346_PM_at   | Ppp6c               | PPP6C    | 0.09  | 2.96 | 0.39  | 7.08E-01 | 8.67E-01 | -6.62 |
| 1456688_PM_at   | ---                 | NA       | -0.13 | 2.92 | -0.38 | 7.08E-01 | 8.67E-01 | -6.62 |
| 1434869_PM_at   | Tdrd3               | TDRD3    | -0.12 | 2.51 | -0.38 | 7.08E-01 | 8.67E-01 | -6.62 |
| 1448545_PM_at   | Sdc2                | SDC2     | -0.10 | 2.83 | -0.38 | 7.08E-01 | 8.67E-01 | -6.62 |
| 1451511_PM_at   | Hibch               | HIBCH    | -0.06 | 2.86 | -0.38 | 7.08E-01 | 8.67E-01 | -6.62 |
| 1446710_PM_at   | C76669              | NA       | 0.03  | 1.92 | 0.38  | 7.08E-01 | 8.67E-01 | -6.62 |
| 1432505_PM_at   | 1700009J07Rik       | NA       | 0.04  | 2.24 | 0.38  | 7.08E-01 | 8.67E-01 | -6.62 |
| 1415722_PM_a_at | Vta1                | VTA1     | 0.06  | 2.98 | 0.38  | 7.08E-01 | 8.67E-01 | -6.62 |
| 1448806_PM_at   | Mmp24               | MMP24    | 0.07  | 3.96 | 0.38  | 7.08E-01 | 8.67E-01 | -6.62 |
| 1446070_PM_at   | Tyw1                | TYW1B    | 0.04  | 2.31 | 0.38  | 7.08E-01 | 8.67E-01 | -6.62 |
| 1418282_PM_x_at | Serpina1b           | SERPINA1 | 0.03  | 2.03 | 0.38  | 7.08E-01 | 8.67E-01 | -6.62 |
| 1446092_PM_at   | ---                 | NA       | -0.10 | 2.55 | -0.38 | 7.08E-01 | 8.67E-01 | -6.62 |
| 1438646_PM_x_at | 2510039O18Rik       | KIAA2013 | -0.16 | 8.44 | -0.38 | 7.08E-01 | 8.67E-01 | -6.62 |
| 1430580_PM_at   | Skid1               | SKIDA1   | -0.09 | 2.50 | -0.38 | 7.08E-01 | 8.67E-01 | -6.62 |
| 1447694_PM_x_at | Neo1                | NEO1     | -0.05 | 2.65 | -0.38 | 7.08E-01 | 8.67E-01 | -6.62 |
| 1460280_PM_at   | Grap2               | GRAP2    | 0.04  | 2.77 | 0.38  | 7.08E-01 | 8.67E-01 | -6.62 |
| 1442494_PM_at   | C79242              | NA       | 0.06  | 2.34 | 0.38  | 7.08E-01 | 8.67E-01 | -6.62 |
| 1427258_PM_at   | Trim24              | TRIM24   | 0.07  | 2.49 | 0.38  | 7.08E-01 | 8.67E-01 | -6.62 |
| 1455700_PM_at   | Mterf2              | MTERF2   | -0.10 | 2.78 | -0.38 | 7.09E-01 | 8.67E-01 | -6.62 |
| 1450435_PM_at   | L1cam               | L1CAM    | -0.08 | 4.53 | -0.38 | 7.09E-01 | 8.67E-01 | -6.62 |
| 1418039_PM_at   | Rab3                | RABL3    | 0.13  | 2.98 | 0.38  | 7.09E-01 | 8.67E-01 | -6.62 |
| 1452490_PM_a_at | Ap2a2               | AP2A2    | -0.13 | 5.05 | -0.38 | 7.09E-01 | 8.67E-01 | -6.62 |
| 1444484_PM_at   | ---                 | NA       | -0.07 | 2.41 | -0.38 | 7.09E-01 | 8.67E-01 | -6.62 |
| 1427746_PM_x_at | H2-K1               | NA       | -0.06 | 2.67 | -0.38 | 7.09E-01 | 8.67E-01 | -6.62 |
| 1443633_PM_at   | 1700086O06Rik       | NA       | 0.04  | 2.34 | 0.38  | 7.09E-01 | 8.67E-01 | -6.62 |
| 1417211_PM_a_at | 1110032A03Rik       | C11orf1  | 0.18  | 4.59 | 0.38  | 7.09E-01 | 8.67E-01 | -6.62 |
| 1437470_PM_at   | Pknox1              | PKNOX1   | 0.06  | 2.32 | 0.38  | 7.09E-01 | 8.67E-01 | -6.62 |
| 1456176_PM_x_at | Slc25a39            | SLC25A39 | 0.16  | 7.76 | 0.38  | 7.09E-01 | 8.67E-01 | -6.62 |
| 1451401_PM_a_at | Mul1                | MUL1     | 0.17  | 4.29 | 0.38  | 7.09E-01 | 8.67E-01 | -6.62 |
| 1459535_PM_at   | ---                 | NA       | 0.03  | 2.50 | 0.38  | 7.09E-01 | 8.67E-01 | -6.62 |
| 1432472_PM_a_at | Mccc2               | MCCC2    | -0.09 | 2.56 | -0.38 | 7.09E-01 | 8.67E-01 | -6.62 |
| 1422073_PM_a_at | Celsr2              | CELSR2   | -0.06 | 2.62 | -0.38 | 7.09E-01 | 8.67E-01 | -6.62 |
| AFFX-LysX-5_at  | ---                 | NA       | -0.04 | 2.21 | -0.38 | 7.09E-01 | 8.67E-01 | -6.62 |
| 1420102_PM_at   | ---                 | NA       | 0.05  | 2.15 | 0.38  | 7.09E-01 | 8.67E-01 | -6.62 |
| 1449588_PM_at   | Abca4               | ABCA4    | 0.06  | 2.55 | 0.38  | 7.09E-01 | 8.67E-01 | -6.62 |
| 1418700_PM_at   | Lias                | LIAS     | 0.06  | 2.66 | 0.38  | 7.09E-01 | 8.67E-01 | -6.62 |
| 1433693_PM_x_at | Vamp3               | VAMP3    | 0.07  | 2.63 | 0.38  | 7.09E-01 | 8.67E-01 | -6.62 |
| 1436787_PM_x_at | Sec14B              | NA       | 0.08  | 2.49 | 0.38  | 7.09E-01 | 8.67E-01 | -6.62 |
| 1425261_PM_at   | Cebpg               | CEBPG    | 0.12  | 3.30 | 0.38  | 7.09E-01 | 8.67E-01 | -6.62 |

|                 |                                                      |          |       |      |       |          |          |       |
|-----------------|------------------------------------------------------|----------|-------|------|-------|----------|----------|-------|
| 1418448_PM_at   | Rras                                                 | RRAS     | -0.11 | 3.32 | -0.38 | 7.09E-01 | 8.67E-01 | -6.62 |
| 1454815_PM_at   | Sertad2                                              | SERTAD2  | -0.03 | 1.91 | -0.38 | 7.09E-01 | 8.67E-01 | -6.62 |
| 1423029_PM_at   | Hes2                                                 | HES2     | 0.04  | 2.15 | 0.38  | 7.09E-01 | 8.67E-01 | -6.62 |
| 1441182_PM_at   | Brwd3                                                | BRWD3    | -0.09 | 2.92 | -0.38 | 7.09E-01 | 8.67E-01 | -6.62 |
| 1459266_PM_at   | ---                                                  | NA       | 0.09  | 3.85 | 0.38  | 7.09E-01 | 8.67E-01 | -6.62 |
| 1429273_PM_at   | Bmper                                                | BMPER    | -0.05 | 2.25 | -0.38 | 7.09E-01 | 8.67E-01 | -6.62 |
| 1432415_PM_at   | Rab3c                                                | NA       | -0.10 | 2.47 | -0.38 | 7.09E-01 | 8.67E-01 | -6.62 |
| 1427697_PM_a_at | Trp73                                                | TP73     | 0.04  | 2.48 | 0.38  | 7.09E-01 | 8.67E-01 | -6.62 |
| 1434169_PM_at   | Kazn                                                 | KAZN     | -0.05 | 2.16 | -0.38 | 7.09E-01 | 8.67E-01 | -6.62 |
| 1440937_PM_at   | Rbm41                                                | RBM41    | -0.04 | 2.47 | -0.38 | 7.09E-01 | 8.67E-01 | -6.62 |
| 1428304_PM_at   | EscO2                                                | ESCO2    | -0.03 | 2.08 | -0.38 | 7.09E-01 | 8.67E-01 | -6.62 |
| 1434049_PM_at   | Entpd3                                               | ENTPD3   | 0.06  | 2.48 | 0.38  | 7.09E-01 | 8.67E-01 | -6.62 |
| 1451987_PM_at   | Arrb2                                                | ARRB2    | 0.07  | 3.60 | 0.38  | 7.09E-01 | 8.67E-01 | -6.62 |
| 1433465_PM_a_at | Al467606                                             | C16orf54 | -0.15 | 2.42 | -0.38 | 7.09E-01 | 8.67E-01 | -6.62 |
| 1426150_PM_at   | Gipc3                                                | GIPC3    | 0.04  | 2.12 | 0.38  | 7.09E-01 | 8.67E-01 | -6.62 |
| 1434812_PM_s_at | Dok7                                                 | DOK7     | 0.06  | 3.53 | 0.38  | 7.10E-01 | 8.67E-01 | -6.62 |
| 1441465_PM_at   | Cnot3                                                | NA       | -0.04 | 2.17 | -0.38 | 7.10E-01 | 8.67E-01 | -6.62 |
| 1424333_PM_at   | Trmt10c                                              | TRMT10C  | -0.08 | 2.26 | -0.38 | 7.10E-01 | 8.67E-01 | -6.62 |
| 1459872_PM_x_at | H2-DMa                                               | HLA-DMA  | 0.04  | 2.27 | 0.38  | 7.10E-01 | 8.67E-01 | -6.62 |
| 1415996_PM_at   | Txnip                                                | TXNIP    | -0.04 | 2.53 | -0.38 | 7.10E-01 | 8.67E-01 | -6.62 |
| 1447500_PM_at   | Cux2                                                 | CUX2     | 0.23  | 5.65 | 0.38  | 7.10E-01 | 8.68E-01 | -6.62 |
| 1448430_PM_a_at | Naca                                                 | NACA2    | -0.24 | 6.58 | -0.38 | 7.10E-01 | 8.68E-01 | -6.62 |
| 1418033_PM_s_at | Zkscan6                                              | ZNF18    | -0.04 | 2.64 | -0.38 | 7.10E-01 | 8.68E-01 | -6.62 |
| 1451720_PM_at   | Vps39                                                | VPS39    | 0.10  | 5.86 | 0.38  | 7.10E-01 | 8.68E-01 | -6.62 |
| 1427887_PM_at   | Rprd1b                                               | RPRD1B   | -0.07 | 2.99 | -0.38 | 7.10E-01 | 8.68E-01 | -6.62 |
| 1428677_PM_at   | Wdr73                                                | WDR73    | -0.10 | 2.87 | -0.38 | 7.10E-01 | 8.68E-01 | -6.62 |
| 1420516_PM_at   | a                                                    | ASIP     | 0.04  | 2.72 | 0.38  | 7.10E-01 | 8.68E-01 | -6.62 |
| 1455120_PM_at   | HpdL                                                 | HPDL     | -0.03 | 2.13 | -0.38 | 7.10E-01 | 8.68E-01 | -6.62 |
| 1459738_PM_x_at | Gla                                                  | GLA      | 0.03  | 2.22 | 0.38  | 7.10E-01 | 8.68E-01 | -6.62 |
| 1441320_PM_a_at | Trim56                                               | TRIM56   | -0.09 | 2.74 | -0.38 | 7.10E-01 | 8.68E-01 | -6.62 |
| 1451544_PM_at   | Tapbpl                                               | TAPBPL   | 0.04  | 2.32 | 0.38  | 7.10E-01 | 8.68E-01 | -6.62 |
| 1437296_PM_at   | Pkn2                                                 | PKN2     | -0.14 | 3.72 | -0.38 | 7.10E-01 | 8.68E-01 | -6.62 |
| 1452543_PM_a_at | Scgb1a1                                              | SCGB1A1  | 0.05  | 2.04 | 0.38  | 7.10E-01 | 8.68E-01 | -6.62 |
| 1460635_PM_at   | Fastk                                                | FASTK    | 0.05  | 3.00 | 0.38  | 7.10E-01 | 8.68E-01 | -6.62 |
| 1432901_PM_at   | Et4                                                  | NA       | 0.06  | 2.72 | 0.38  | 7.11E-01 | 8.68E-01 | -6.62 |
| 1449658_PM_at   | AA536748                                             | NA       | -0.03 | 2.27 | -0.38 | 7.11E-01 | 8.68E-01 | -6.62 |
| 1426116_PM_at   | Asb18                                                | ASB18    | -0.03 | 2.05 | -0.38 | 7.11E-01 | 8.68E-01 | -6.62 |
| 1420424_PM_at   | Hypm                                                 | HYPM     | 0.03  | 2.33 | 0.38  | 7.11E-01 | 8.68E-01 | -6.62 |
| 1453845_PM_at   | ---                                                  | NA       | 0.04  | 2.01 | 0.38  | 7.11E-01 | 8.68E-01 | -6.62 |
| 1443520_PM_at   | ---                                                  | NA       | 0.05  | 2.64 | 0.38  | 7.11E-01 | 8.68E-01 | -6.62 |
| 1424984_PM_at   | Cacl1                                                | CACUL1   | 0.06  | 2.62 | 0.38  | 7.11E-01 | 8.68E-01 | -6.62 |
| 1456614_PM_at   | Sdha3                                                | SDHAF3   | 0.06  | 3.36 | 0.38  | 7.11E-01 | 8.68E-01 | -6.62 |
| 1415967_PM_at   | Ndufv1                                               | NDUFV1   | -0.13 | 3.60 | -0.38 | 7.11E-01 | 8.68E-01 | -6.62 |
| 1452806_PM_at   | Fams5b                                               | FAMS5B   | -0.08 | 2.14 | -0.38 | 7.11E-01 | 8.68E-01 | -6.62 |
| 1418811_PM_at   | Barhl1                                               | BARHL1   | 0.03  | 2.16 | 0.38  | 7.11E-01 | 8.68E-01 | -6.62 |
| 1442672_PM_at   | 0610040F04Rik                                        | NA       | 0.04  | 2.43 | 0.38  | 7.11E-01 | 8.68E-01 | -6.62 |
| 1422875_PM_at   | Cd84                                                 | CD84     | 0.07  | 3.17 | 0.38  | 7.11E-01 | 8.68E-01 | -6.62 |
| 1416637_PM_at   | Slc4a2                                               | SLC4A2   | 0.05  | 2.96 | 0.38  | 7.11E-01 | 8.68E-01 | -6.62 |
| 1438124_PM_at   | Vmn2r-ps115 /// Vmn2r-ps117 /// Vmn2r103 /// Vmn2r96 | NA       | 0.05  | 2.46 | 0.38  | 7.11E-01 | 8.68E-01 | -6.62 |
| 1428434_PM_at   | Zcchc12                                              | ZCCHC12  | 0.10  | 3.24 | 0.38  | 7.11E-01 | 8.68E-01 | -6.62 |
| 1460342_PM_s_at | Mprip                                                | MPRIP    | -0.12 | 3.88 | -0.38 | 7.11E-01 | 8.68E-01 | -6.62 |
| 1433007_PM_at   | ---                                                  | NA       | -0.05 | 2.11 | -0.38 | 7.11E-01 | 8.68E-01 | -6.62 |
| 1438568_PM_at   | Mrgpre                                               | MRGPRE   | -0.04 | 2.74 | -0.38 | 7.11E-01 | 8.68E-01 | -6.62 |
| 1420571_PM_at   | Prl6a1                                               | PRL      | 0.04  | 2.26 | 0.38  | 7.11E-01 | 8.68E-01 | -6.62 |
| 1437970_PM_at   | Dnaaf5                                               | DNAAF5   | 0.04  | 2.38 | 0.38  | 7.11E-01 | 8.68E-01 | -6.62 |
| 1442419_PM_at   | ---                                                  | NA       | 0.09  | 3.22 | 0.38  | 7.11E-01 | 8.68E-01 | -6.62 |
| 1439791_PM_at   | Gm527                                                | C14orf28 | 0.09  | 2.56 | 0.38  | 7.11E-01 | 8.68E-01 | -6.62 |
| 1431363_PM_at   | Slc9b1                                               | SLC9B1   | 0.03  | 2.46 | 0.38  | 7.11E-01 | 8.68E-01 | -6.62 |
| 1420825_PM_at   | Letm1                                                | LETM1    | 0.06  | 2.36 | 0.38  | 7.11E-01 | 8.68E-01 | -6.62 |
| 1434602_PM_at   | Med13l                                               | MED13L   | 0.07  | 3.13 | 0.38  | 7.11E-01 | 8.68E-01 | -6.62 |
| 1428997_PM_at   | Phf23                                                | PHF23    | 0.07  | 2.59 | 0.38  | 7.11E-01 | 8.68E-01 | -6.62 |
| 1426171_PM_x_at | Klra7 /// LOC100862438                               | NA       | 0.04  | 2.37 | 0.38  | 7.11E-01 | 8.68E-01 | -6.62 |
| 1445470_PM_at   | Col6a4                                               | NA       | 0.04  | 2.18 | 0.38  | 7.11E-01 | 8.68E-01 | -6.62 |
| 1447466_PM_at   | ---                                                  | NA       | -0.09 | 2.43 | -0.38 | 7.12E-01 | 8.69E-01 | -6.62 |
| 1421149_PM_a_at | Atn1                                                 | ATN1     | -0.07 | 4.33 | -0.38 | 7.12E-01 | 8.69E-01 | -6.62 |
| 1419434_PM_at   | Slc2a10                                              | SLC2A10  | 0.04  | 2.21 | 0.38  | 7.12E-01 | 8.69E-01 | -6.62 |
| 1436386_PM_x_at | LOC105242453                                         | NA       | 0.04  | 2.09 | 0.38  | 7.12E-01 | 8.69E-01 | -6.62 |
| 1423940_PM_at   | Yif1a                                                | YIF1A    | 0.05  | 2.64 | 0.38  | 7.12E-01 | 8.69E-01 | -6.62 |
| 1445152_PM_at   | ---                                                  | NA       | 0.06  | 2.39 | 0.38  | 7.12E-01 | 8.69E-01 | -6.62 |
| 1426313_PM_at   | Bre                                                  | BABAM2   | 0.07  | 2.72 | 0.38  | 7.12E-01 | 8.69E-01 | -6.62 |
| 1444349_PM_at   | ---                                                  | NA       | 0.08  | 2.57 | 0.38  | 7.12E-01 | 8.69E-01 | -6.62 |
| 1457864_PM_at   | Rab11fip3                                            | NA       | 0.06  | 2.65 | 0.38  | 7.12E-01 | 8.69E-01 | -6.62 |
| 1429479_PM_at   | Magef1                                               | NA       | -0.03 | 2.27 | -0.38 | 7.12E-01 | 8.69E-01 | -6.62 |

|                 |                                                                        |          |       |       |       |          |          |          |       |
|-----------------|------------------------------------------------------------------------|----------|-------|-------|-------|----------|----------|----------|-------|
| 1447731_PM_at   | Peg3                                                                   | PEG3     | 0.03  | 1.79  | 0.38  | 7.12E-01 | 8.69E-01 | -6.62    |       |
| 1432081_PM_at   | Cyp1b1                                                                 | NA       | 0.03  | 2.53  | 0.38  | 7.12E-01 | 8.69E-01 | -6.62    |       |
| 1445752_PM_at   | ---                                                                    | NA       | 0.11  | 2.48  | 0.38  | 7.12E-01 | 8.69E-01 | -6.62    |       |
| 1415789_PM_a_at | Ublcp1                                                                 | UBLCP1   | 0.12  | 3.29  | 0.38  | 7.12E-01 | 8.69E-01 | -6.62    |       |
| 1441969_PM_at   | Trim36                                                                 | TRIM36   | -0.04 | 2.53  | -0.38 | 7.12E-01 | 8.69E-01 | -6.62    |       |
| 1418858_PM_at   | Aox3                                                                   | NA       | 0.05  | 2.23  | 0.38  | 7.12E-01 | 8.69E-01 | -6.62    |       |
| 1439678_PM_at   | ---                                                                    | NA       | -0.11 | 3.79  | -0.38 | 7.12E-01 | 8.69E-01 | -6.62    |       |
| 1432345_PM_at   | 1700048F04Rik                                                          | NA       | -0.03 | 2.33  | -0.38 | 7.12E-01 | 8.69E-01 | -6.62    |       |
| 1452401_PM_at   | Wtap                                                                   | WTAP     | -0.16 | 6.31  | -0.38 | 7.12E-01 | 8.69E-01 | -6.62    |       |
| 1431526_PM_at   | ---                                                                    | NA       | -0.04 | 2.30  | -0.38 | 7.12E-01 | 8.69E-01 | -6.62    |       |
| 1458015_PM_at   | Megf11                                                                 | MEGF11   | -0.15 | 6.90  | -0.38 | 7.12E-01 | 8.69E-01 | -6.62    |       |
| 1417333_PM_at   | Rasa4                                                                  | RASA4B   | 0.04  | 2.20  | 0.38  | 7.12E-01 | 8.69E-01 | -6.62    |       |
| 1440400_PM_at   | Rnf157                                                                 | RNF157   | -0.04 | 2.23  | -0.38 | 7.12E-01 | 8.69E-01 | -6.62    |       |
| 1440453_PM_at   | Zfp735                                                                 | NA       | 0.04  | 1.91  | 0.38  | 7.12E-01 | 8.69E-01 | -6.62    |       |
| 1444402_PM_at   | Zc3h12c                                                                | ZC3H12C  | 0.05  | 2.69  | 0.38  | 7.12E-01 | 8.69E-01 | -6.62    |       |
| 1423360_PM_at   | Yme1l1                                                                 | YME1L1   | 0.06  | 2.47  | 0.38  | 7.12E-01 | 8.69E-01 | -6.62    |       |
| 1450373_PM_at   | Gm5154 /// Gm8882 ///<br>LOC100502592 ///<br>LOC105242791 /// Prb1 /// | Prmp5    | NA    | -0.04 | 2.49  | -0.38    | 7.12E-01 | 8.69E-01 | -6.62 |
| 1419863_PM_at   | ---                                                                    | NA       | -0.09 | 2.39  | -0.38 | 7.12E-01 | 8.69E-01 | -6.62    |       |
| 1448821_PM_at   | Tyr                                                                    | TYR      | -0.06 | 2.24  | -0.38 | 7.12E-01 | 8.69E-01 | -6.62    |       |
| 1453310_PM_at   | Ppil6                                                                  | PPIL6    | -0.15 | 3.66  | -0.38 | 7.12E-01 | 8.69E-01 | -6.62    |       |
| 1455902_PM_x_at | Rhof                                                                   | NA       | -0.07 | 2.78  | -0.38 | 7.13E-01 | 8.69E-01 | -6.62    |       |
| 1456433_PM_at   | Rcctb1                                                                 | RCBTB1   | -0.07 | 4.62  | -0.38 | 7.13E-01 | 8.69E-01 | -6.62    |       |
| 1449857_PM_at   | Gpalpp1                                                                | GPALPP1  | -0.06 | 2.66  | -0.38 | 7.13E-01 | 8.69E-01 | -6.62    |       |
| 1418765_PM_at   | Timd2                                                                  | HAVCR1   | -0.04 | 2.12  | -0.38 | 7.13E-01 | 8.69E-01 | -6.62    |       |
| 1430738_PM_at   | Myoz3                                                                  | NA       | -0.03 | 2.37  | -0.38 | 7.13E-01 | 8.69E-01 | -6.62    |       |
| 1449729_PM_at   | Fgf4                                                                   | NA       | -0.03 | 2.27  | -0.38 | 7.13E-01 | 8.69E-01 | -6.62    |       |
| 1432880_PM_at   | ---                                                                    | NA       | 0.04  | 2.40  | 0.38  | 7.13E-01 | 8.69E-01 | -6.62    |       |
| 1422385_PM_at   | Olf1264                                                                | OR4C3    | 0.07  | 2.78  | 0.38  | 7.13E-01 | 8.69E-01 | -6.62    |       |
| 1457169_PM_at   | ---                                                                    | NA       | -0.08 | 2.50  | -0.38 | 7.13E-01 | 8.69E-01 | -6.62    |       |
| 1422540_PM_at   | Fbln1                                                                  | FBLN1    | 0.03  | 2.52  | 0.38  | 7.13E-01 | 8.69E-01 | -6.62    |       |
| 1455868_PM_a_at | Tube1cp2                                                               | TUBGCP2  | 0.08  | 2.43  | 0.38  | 7.13E-01 | 8.69E-01 | -6.62    |       |
| 1447123_PM_at   | ---                                                                    | NA       | -0.09 | 5.12  | -0.38 | 7.13E-01 | 8.69E-01 | -6.62    |       |
| 1450087_PM_a_at | Nolc1                                                                  | NOLC1    | -0.05 | 3.74  | -0.38 | 7.13E-01 | 8.69E-01 | -6.62    |       |
| 1443035_PM_at   | ---                                                                    | NA       | 0.03  | 2.30  | 0.38  | 7.13E-01 | 8.69E-01 | -6.62    |       |
| 1455174_PM_at   | Rps19bp1                                                               | RPS19BP1 | -0.10 | 2.93  | -0.38 | 7.13E-01 | 8.69E-01 | -6.63    |       |
| 1445383_PM_at   | ---                                                                    | NA       | -0.08 | 2.71  | -0.38 | 7.13E-01 | 8.69E-01 | -6.62    |       |
| 1432134_PM_at   | Mettl4-ps1                                                             | NA       | 0.03  | 2.31  | 0.38  | 7.13E-01 | 8.69E-01 | -6.63    |       |
| 1430897_PM_at   | 4931428L18Rik                                                          | NA       | 0.04  | 2.30  | 0.38  | 7.13E-01 | 8.69E-01 | -6.62    |       |
| 1421094_PM_at   | Zbtb33                                                                 | ZBTB33   | 0.04  | 2.21  | 0.38  | 7.13E-01 | 8.69E-01 | -6.62    |       |
| 1440423_PM_at   | Zbtb37                                                                 | ZBTB37   | 0.04  | 2.28  | 0.38  | 7.13E-01 | 8.69E-01 | -6.63    |       |
| 1454944_PM_at   | Hic2                                                                   | HIC2     | 0.05  | 2.24  | 0.38  | 7.13E-01 | 8.69E-01 | -6.63    |       |
| 1458682_PM_at   | Ubn2                                                                   | UBN2     | 0.05  | 2.49  | 0.38  | 7.13E-01 | 8.69E-01 | -6.62    |       |
| 1445800_PM_at   | ---                                                                    | NA       | 0.06  | 2.25  | 0.38  | 7.13E-01 | 8.69E-01 | -6.63    |       |
| 1424008_PM_a_at | Rbpms2                                                                 | RBPMS2   | 0.08  | 2.61  | 0.38  | 7.13E-01 | 8.69E-01 | -6.62    |       |
| 1433753_PM_x_at | Eral1                                                                  | ERAL1    | 0.09  | 2.68  | 0.38  | 7.13E-01 | 8.69E-01 | -6.63    |       |
| 1421704_PM_a_at | Pik3c2g                                                                | PIK3C2G  | 0.04  | 2.11  | 0.38  | 7.13E-01 | 8.69E-01 | -6.63    |       |
| 1452364_PM_at   | Suz12                                                                  | SUZ12    | 0.04  | 3.13  | 0.38  | 7.13E-01 | 8.69E-01 | -6.63    |       |
| 1447479_PM_at   | Gm32633                                                                | NA       | 0.03  | 2.16  | 0.38  | 7.13E-01 | 8.69E-01 | -6.63    |       |
| 1435365_PM_at   | Spata33                                                                | SPATA33  | -0.11 | 2.73  | -0.38 | 7.13E-01 | 8.69E-01 | -6.63    |       |
| 1447411_PM_at   | ---                                                                    | NA       | -0.03 | 2.18  | -0.38 | 7.13E-01 | 8.69E-01 | -6.63    |       |
| 1449529_PM_s_at | Pr17a1                                                                 | PRL      | 0.03  | 2.17  | 0.38  | 7.13E-01 | 8.69E-01 | -6.63    |       |
| 1456289_PM_at   | Hamp2                                                                  | HAMP     | 0.03  | 2.53  | 0.38  | 7.13E-01 | 8.69E-01 | -6.63    |       |
| 1424280_PM_at   | Mospd1                                                                 | MOSPD1   | -0.07 | 2.91  | -0.38 | 7.13E-01 | 8.69E-01 | -6.63    |       |
| 1441701_PM_at   | ---                                                                    | NA       | -0.05 | 2.63  | -0.38 | 7.13E-01 | 8.69E-01 | -6.63    |       |
| 1428423_PM_at   | Pcgf3                                                                  | PCGF3    | -0.05 | 3.23  | -0.38 | 7.14E-01 | 8.69E-01 | -6.63    |       |
| 1439887_PM_at   | Rnf152                                                                 | RNF152   | 0.10  | 3.19  | 0.38  | 7.13E-01 | 8.69E-01 | -6.63    |       |
| 1446792_PM_at   | Gm31255                                                                | NA       | -0.03 | 1.94  | -0.38 | 7.14E-01 | 8.70E-01 | -6.63    |       |
| 1440751_PM_at   | Ep400                                                                  | EP400    | -0.03 | 2.38  | -0.38 | 7.14E-01 | 8.70E-01 | -6.63    |       |
| 1443334_PM_at   | D430042O09Rik                                                          | KIAA0556 | 0.03  | 2.34  | 0.38  | 7.14E-01 | 8.70E-01 | -6.63    |       |
| 1455592_PM_at   | Vangl2                                                                 | VANGL2   | 0.04  | 2.28  | 0.38  | 7.14E-01 | 8.70E-01 | -6.63    |       |
| 1439865_PM_at   | Kbtb27                                                                 | NA       | 0.07  | 2.72  | 0.38  | 7.14E-01 | 8.70E-01 | -6.63    |       |
| 1440798_PM_x_at | Lrrc6                                                                  | LRRC6    | -0.05 | 2.42  | -0.38 | 7.14E-01 | 8.70E-01 | -6.63    |       |
| 1446444_PM_at   | Rc3h2                                                                  | RC3H2    | 0.05  | 2.09  | 0.38  | 7.14E-01 | 8.70E-01 | -6.63    |       |
| 1424269_PM_a_at | My16                                                                   | MYL6     | -0.11 | 6.72  | -0.38 | 7.14E-01 | 8.70E-01 | -6.63    |       |
| 1455190_PM_at   | Gng7                                                                   | GNG7     | -0.06 | 3.52  | -0.38 | 7.14E-01 | 8.70E-01 | -6.63    |       |
| 1446932_PM_at   | ---                                                                    | NA       | -0.05 | 2.31  | -0.38 | 7.14E-01 | 8.70E-01 | -6.63    |       |
| 1434227_PM_at   | Krt2dap                                                                | KRTDAP   | -0.04 | 2.13  | -0.38 | 7.14E-01 | 8.70E-01 | -6.63    |       |
| 1430102_PM_at   | Rnf148                                                                 | RNF148   | 0.03  | 2.12  | 0.38  | 7.14E-01 | 8.70E-01 | -6.63    |       |
| 1458940_PM_at   | ---                                                                    | NA       | 0.05  | 2.21  | 0.38  | 7.14E-01 | 8.70E-01 | -6.63    |       |
| 1424203_PM_at   | Ncln                                                                   | NCLN     | 0.05  | 2.64  | 0.38  | 7.14E-01 | 8.70E-01 | -6.63    |       |
| 1427927_PM_at   | Hscb                                                                   | HSCB     | 0.07  | 2.71  | 0.38  | 7.14E-01 | 8.70E-01 | -6.63    |       |
| 1459370_PM_at   | ---                                                                    | NA       | 0.07  | 2.62  | 0.38  | 7.14E-01 | 8.70E-01 | -6.63    |       |

|                 |               |          |       |      |       |          |          |       |
|-----------------|---------------|----------|-------|------|-------|----------|----------|-------|
| 1449553_PM_at   | Nkain1        | NA       | 0.22  | 3.69 | 0.38  | 7.14E-01 | 8.70E-01 | -6.63 |
| 1452496_PM_at   | Atp11c        | ATP11C   | -0.13 | 2.71 | -0.38 | 7.14E-01 | 8.70E-01 | -6.63 |
| 1449718_PM_s_at | 4930453N24Rik | C3orf38  | 0.04  | 2.56 | 0.38  | 7.14E-01 | 8.70E-01 | -6.63 |
| 1457354_PM_at   | Krt222        | KRT222   | 0.10  | 2.98 | 0.38  | 7.14E-01 | 8.70E-01 | -6.63 |
| 1454381_PM_at   | 5033428C03Rik | NA       | -0.04 | 2.19 | -0.38 | 7.14E-01 | 8.70E-01 | -6.63 |
| 1437961_PM_x_at | Unc119b       | UNC119B  | -0.04 | 2.32 | -0.38 | 7.14E-01 | 8.70E-01 | -6.63 |
| 1449774_PM_at   | ---           | NA       | -0.04 | 2.24 | -0.38 | 7.14E-01 | 8.70E-01 | -6.63 |
| 1459318_PM_at   | Sema6d        | SEMA6D   | 0.04  | 2.53 | 0.38  | 7.14E-01 | 8.70E-01 | -6.63 |
| 1437656_PM_at   | Arhgef4       | ARHGEF4  | 0.04  | 2.42 | 0.38  | 7.14E-01 | 8.70E-01 | -6.63 |
| 1457925_PM_at   | ---           | NA       | 0.05  | 2.41 | 0.38  | 7.14E-01 | 8.70E-01 | -6.63 |
| 1430802_PM_at   | H2-Q5         | NA       | 0.06  | 2.60 | 0.38  | 7.14E-01 | 8.70E-01 | -6.63 |
| 1424274_PM_at   | Uso1          | USO1     | 0.09  | 3.49 | 0.38  | 7.14E-01 | 8.70E-01 | -6.63 |
| 1459909_PM_at   | Nfix          | NFIX     | 0.09  | 3.20 | 0.38  | 7.14E-01 | 8.70E-01 | -6.63 |
| 1440729_PM_at   | Eps15         | EPS15    | 0.10  | 2.86 | 0.38  | 7.14E-01 | 8.70E-01 | -6.63 |
| 1431717_PM_at   | ---           | NA       | 0.13  | 2.93 | 0.38  | 7.14E-01 | 8.70E-01 | -6.63 |
| 1441841_PM_at   | Adamts16      | ADAMTS16 | 0.18  | 2.84 | 0.38  | 7.14E-01 | 8.70E-01 | -6.63 |
| 1433999_PM_at   | Slk           | SLK      | -0.15 | 8.49 | -0.38 | 7.14E-01 | 8.70E-01 | -6.63 |
| 1457490_PM_at   | Ankrd34c      | ANKRD34C | 0.05  | 2.19 | 0.38  | 7.14E-01 | 8.70E-01 | -6.63 |
| 1428887_PM_at   | Zfp157        | ZNF717   | 0.05  | 2.32 | 0.38  | 7.15E-01 | 8.70E-01 | -6.63 |
| 1449837_PM_at   | Spesp1        | SPESP1   | 0.05  | 2.39 | 0.38  | 7.15E-01 | 8.70E-01 | -6.63 |
| 1448791_PM_at   | Snx5          | SNX5     | 0.11  | 4.21 | 0.38  | 7.15E-01 | 8.70E-01 | -6.63 |
| 1435931_PM_at   | ---           | NA       | -0.10 | 2.95 | -0.38 | 7.15E-01 | 8.70E-01 | -6.63 |
| 1422824_PM_s_at | Eps8          | EPS8     | 0.13  | 3.21 | 0.38  | 7.15E-01 | 8.70E-01 | -6.63 |
| 1451296_PM_x_at | Pabpc4        | PABPC4   | 0.10  | 2.93 | 0.38  | 7.15E-01 | 8.70E-01 | -6.63 |
| 1426210_PM_x_at | Parp3         | PARP3    | -0.17 | 3.46 | -0.38 | 7.15E-01 | 8.70E-01 | -6.63 |
| 1454034_PM_a_at | Usp21         | USP21    | -0.08 | 3.22 | -0.38 | 7.15E-01 | 8.70E-01 | -6.63 |
| 1453061_PM_at   | Elac1         | ELAC1    | 0.12  | 2.91 | 0.38  | 7.15E-01 | 8.70E-01 | -6.63 |
| 1420122_PM_at   | AA517858      | NA       | -0.03 | 1.85 | -0.38 | 7.15E-01 | 8.70E-01 | -6.63 |
| 1419893_PM_at   | D930048N14Rik | NA       | 0.03  | 2.00 | 0.38  | 7.15E-01 | 8.70E-01 | -6.63 |
| 1442315_PM_at   | Foxd2         | FOXO2    | 0.03  | 2.55 | 0.38  | 7.15E-01 | 8.70E-01 | -6.63 |
| 1444967_PM_at   | ---           | NA       | 0.03  | 2.06 | 0.38  | 7.15E-01 | 8.70E-01 | -6.63 |
| 1444541_PM_at   | ---           | NA       | 0.08  | 4.52 | 0.38  | 7.15E-01 | 8.70E-01 | -6.63 |
| 1422809_PM_at   | Rims2         | NA       | 0.11  | 4.00 | 0.38  | 7.15E-01 | 8.70E-01 | -6.63 |
| 1427665_PM_a_at | Nfic          | NFIC     | -0.05 | 2.69 | -0.38 | 7.15E-01 | 8.70E-01 | -6.63 |
| 1447504_PM_at   | ---           | NA       | 0.07  | 2.35 | 0.38  | 7.15E-01 | 8.70E-01 | -6.63 |
| 1417823_PM_at   | Galr3///Gcat  | GCAT     | 0.04  | 2.46 | 0.38  | 7.15E-01 | 8.70E-01 | -6.63 |
| 1453059_PM_at   | Mlip          | MLIP     | -0.09 | 2.85 | -0.38 | 7.15E-01 | 8.70E-01 | -6.63 |
| 1425113_PM_x_at | ---           | NA       | 0.08  | 6.79 | 0.37  | 7.15E-01 | 8.70E-01 | -6.63 |
| 1458062_PM_at   | ---           | NA       | 0.09  | 2.73 | 0.37  | 7.15E-01 | 8.70E-01 | -6.63 |
| 1460541_PM_at   | Slc7a6        | SLC7A6   | 0.07  | 3.18 | 0.37  | 7.15E-01 | 8.70E-01 | -6.63 |
| 1417063_PM_at   | C1qb          | C1QB     | -0.05 | 2.42 | -0.37 | 7.15E-01 | 8.71E-01 | -6.63 |
| 1424406_PM_at   | Bcl2l13       | BCL2L13  | -0.08 | 2.58 | -0.37 | 7.16E-01 | 8.71E-01 | -6.63 |
| 1440530_PM_at   | AU019752      | NA       | -0.08 | 2.56 | -0.37 | 7.16E-01 | 8.71E-01 | -6.63 |
| 1429311_PM_at   | Ube2q1        | UBE2Q1   | -0.08 | 5.58 | -0.37 | 7.16E-01 | 8.71E-01 | -6.63 |
| 1423407_PM_a_at | Fbln2         | FBLN2    | -0.05 | 2.31 | -0.37 | 7.16E-01 | 8.71E-01 | -6.63 |
| 1423661_PM_s_at | Ctdsp2        | CTDSP2   | -0.08 | 2.51 | -0.37 | 7.16E-01 | 8.71E-01 | -6.63 |
| 1433379_PM_at   | ---           | NA       | -0.08 | 2.64 | -0.37 | 7.16E-01 | 8.71E-01 | -6.63 |
| 1432002_PM_at   | 2810471M01Rik | NA       | -0.05 | 2.58 | -0.37 | 7.16E-01 | 8.71E-01 | -6.63 |
| 1423771_PM_at   | Prkcdbp       | CAVIN3   | -0.04 | 2.42 | -0.37 | 7.16E-01 | 8.71E-01 | -6.63 |
| 1426186_PM_a_at | Fgf5          | FGF5     | 0.03  | 2.14 | 0.37  | 7.16E-01 | 8.71E-01 | -6.63 |
| 1459392_PM_at   | Phf8          | PHF8     | 0.04  | 2.36 | 0.37  | 7.16E-01 | 8.71E-01 | -6.63 |
| 1422837_PM_at   | Scel          | SCEL     | 0.06  | 2.40 | 0.37  | 7.16E-01 | 8.71E-01 | -6.63 |
| 1432485_PM_at   | Gm2011        | NA       | 0.09  | 3.05 | 0.37  | 7.16E-01 | 8.71E-01 | -6.63 |
| 1429046_PM_at   | Smurf2        | SMURF2   | 0.14  | 4.03 | 0.37  | 7.16E-01 | 8.71E-01 | -6.63 |
| 1441911_PM_x_at | Gart          | GART     | -0.16 | 3.51 | -0.37 | 7.16E-01 | 8.71E-01 | -6.63 |
| 1424073_PM_at   | Babam1        | BABAM1   | -0.08 | 4.13 | -0.37 | 7.16E-01 | 8.71E-01 | -6.63 |
| 1444703_PM_at   | 2810403D21Rik | NA       | -0.04 | 2.70 | -0.37 | 7.16E-01 | 8.71E-01 | -6.63 |
| 1450018_PM_s_at | Slc25a30      | SLC25A30 | 0.03  | 2.36 | 0.37  | 7.16E-01 | 8.71E-01 | -6.63 |
| 1444685_PM_at   | Arv1          | NA       | 0.03  | 2.06 | 0.37  | 7.16E-01 | 8.71E-01 | -6.63 |
| 1458004_PM_at   | Prrx1         | PRRX1    | 0.03  | 2.56 | 0.37  | 7.16E-01 | 8.71E-01 | -6.63 |
| 1421938_PM_at   | Serhl         | SERHL2   | 0.05  | 2.57 | 0.37  | 7.16E-01 | 8.71E-01 | -6.63 |
| 1453128_PM_at   | Lyve1         | LYVE1    | 0.06  | 2.65 | 0.37  | 7.16E-01 | 8.71E-01 | -6.63 |
| 1431032_PM_at   | Ag1           | AGL      | 0.06  | 2.45 | 0.37  | 7.16E-01 | 8.71E-01 | -6.63 |
| 1455210_PM_at   | Zhx2          | ZHX2     | 0.07  | 3.20 | 0.37  | 7.16E-01 | 8.71E-01 | -6.63 |
| 1441521_PM_at   | ---           | NA       | 0.04  | 2.45 | 0.37  | 7.16E-01 | 8.71E-01 | -6.63 |
| 1449697_PM_s_at | Mfn1          | MFN1     | -0.13 | 5.00 | -0.37 | 7.16E-01 | 8.71E-01 | -6.63 |
| 1423492_PM_at   | Mrpl45        | MRPL45   | -0.07 | 3.03 | -0.37 | 7.16E-01 | 8.71E-01 | -6.63 |
| 1453747_PM_at   | 2810021J22Rik | NA       | -0.06 | 2.86 | -0.37 | 7.16E-01 | 8.71E-01 | -6.63 |
| 1457114_PM_at   | ---           | NA       | -0.05 | 2.48 | -0.37 | 7.16E-01 | 8.71E-01 | -6.63 |
| 1441526_PM_at   | ---           | NA       | -0.05 | 2.16 | -0.37 | 7.16E-01 | 8.71E-01 | -6.63 |
| 1451409_PM_at   | Cdpf1         | CDPF1    | -0.04 | 2.79 | -0.37 | 7.16E-01 | 8.71E-01 | -6.63 |
| 1429216_PM_at   | Paqr3         | NA       | -0.04 | 2.50 | -0.37 | 7.16E-01 | 8.71E-01 | -6.63 |
| 1448119_PM_at   | Bpgm          | BPGM     | 0.05  | 2.27 | 0.37  | 7.16E-01 | 8.71E-01 | -6.63 |
| 1459340_PM_at   | ---           | NA       | 0.07  | 2.53 | 0.37  | 7.16E-01 | 8.71E-01 | -6.63 |
| 1427025_PM_at   | Mtmr7         | MTMR7    | -0.16 | 3.92 | -0.37 | 7.16E-01 | 8.71E-01 | -6.63 |

|                 |                 |         |       |      |       |          |          |       |
|-----------------|-----------------|---------|-------|------|-------|----------|----------|-------|
| 1445335_PM_at   | C78888          | NA      | -0.04 | 2.16 | -0.37 | 7.16E-01 | 8.71E-01 | -6.63 |
| 1432425_PM_at   | Ppp1r42         | PPP1R42 | -0.04 | 2.06 | -0.37 | 7.16E-01 | 8.71E-01 | -6.63 |
| 1459036_PM_at   | 9430091E24Rik   | NA      | -0.03 | 2.22 | -0.37 | 7.17E-01 | 8.71E-01 | -6.63 |
| 1438336_PM_at   | ---             | NA      | 0.04  | 2.51 | 0.37  | 7.17E-01 | 8.71E-01 | -6.63 |
| 1419487_PM_at   | Mybph           | MYBPH   | 0.05  | 2.72 | 0.37  | 7.17E-01 | 8.71E-01 | -6.63 |
| 1426806_PM_at   | Nabp1           | NABP1   | 0.06  | 2.75 | 0.37  | 7.17E-01 | 8.71E-01 | -6.63 |
| 1446601_PM_at   | ---             | NA      | 0.06  | 2.12 | 0.37  | 7.17E-01 | 8.71E-01 | -6.63 |
| 1435728_PM_at   | Tyw3            | TYW3    | 0.07  | 3.02 | 0.37  | 7.17E-01 | 8.71E-01 | -6.63 |
| 1444072_PM_at   | ---             | NA      | 0.10  | 2.36 | 0.37  | 7.17E-01 | 8.71E-01 | -6.63 |
| 1432488_PM_a_at | Sf3a3           | SF3A3   | -0.14 | 5.66 | -0.37 | 7.17E-01 | 8.71E-01 | -6.63 |
| 1459555_PM_at   | Gm41175         | NA      | -0.12 | 2.79 | -0.37 | 7.17E-01 | 8.71E-01 | -6.63 |
| 1419933_PM_at   | Pdrg1           | PDRG1   | -0.04 | 2.32 | -0.37 | 7.17E-01 | 8.71E-01 | -6.63 |
| 1441287_PM_at   | ---             | NA      | 0.04  | 2.18 | 0.37  | 7.17E-01 | 8.71E-01 | -6.63 |
| 1437190_PM_at   | Styk1           | STYK1   | 0.04  | 2.37 | 0.37  | 7.17E-01 | 8.71E-01 | -6.63 |
| 1432011_PM_at   | LOC102640779    | NA      | 0.04  | 2.26 | 0.37  | 7.17E-01 | 8.71E-01 | -6.63 |
| 1419935_PM_s_at | Csnk2a2         | NA      | 0.05  | 2.88 | 0.37  | 7.17E-01 | 8.71E-01 | -6.63 |
| 1444254_PM_at   | Tns4            | TNS4    | 0.05  | 2.28 | 0.37  | 7.17E-01 | 8.71E-01 | -6.63 |
| 1429136_PM_at   | 1700052K11Rik   | NA      | 0.05  | 2.97 | 0.37  | 7.17E-01 | 8.71E-01 | -6.63 |
| 1428794_PM_at   | Specc1          | SPECC1  | 0.10  | 4.55 | 0.37  | 7.17E-01 | 8.71E-01 | -6.63 |
| 1418272_PM_at   | Oxct2a          | OXCT2   | 0.04  | 2.76 | 0.37  | 7.17E-01 | 8.71E-01 | -6.63 |
| 1446967_PM_at   | ---             | NA      | 0.04  | 2.20 | 0.37  | 7.17E-01 | 8.71E-01 | -6.63 |
| 1459554_PM_at   | ---             | NA      | 0.04  | 2.17 | 0.37  | 7.17E-01 | 8.71E-01 | -6.63 |
| 1423418_PM_at   | Fdps            | FDPS    | 0.08  | 2.29 | 0.37  | 7.17E-01 | 8.71E-01 | -6.63 |
| 1439570_PM_at   | Gareml          | GAREM2  | 0.03  | 2.87 | 0.37  | 7.17E-01 | 8.71E-01 | -6.63 |
| 1454093_PM_at   | 4933436I20Rik   | NA      | -0.03 | 2.23 | -0.37 | 7.17E-01 | 8.71E-01 | -6.63 |
| 1424670_PM_s_at | Zfyve21         | ZFYVE21 | 0.09  | 2.46 | 0.37  | 7.17E-01 | 8.71E-01 | -6.63 |
| 1430649_PM_at   | Baalc           | NA      | 0.06  | 4.04 | 0.37  | 7.17E-01 | 8.71E-01 | -6.63 |
| 1453146_PM_at   | Gapvd1          | GAPVD1  | -0.04 | 2.79 | -0.37 | 7.17E-01 | 8.71E-01 | -6.63 |
| 1432181_PM_s_at | Sco2            | TYMP    | -0.06 | 2.45 | -0.37 | 7.17E-01 | 8.71E-01 | -6.63 |
| 1433045_PM_at   | 4930535F04Rik   | NA      | 0.03  | 2.32 | 0.37  | 7.17E-01 | 8.71E-01 | -6.63 |
| 1441110_PM_at   | Lrit1           | LRIT1   | 0.04  | 2.12 | 0.37  | 7.17E-01 | 8.71E-01 | -6.63 |
| 1434621_PM_at   | Tmem204         | TMEM204 | 0.04  | 2.33 | 0.37  | 7.17E-01 | 8.71E-01 | -6.63 |
| 1416574_PM_at   | Tox4            | TOX4    | -0.11 | 4.01 | -0.37 | 7.17E-01 | 8.71E-01 | -6.63 |
| 1442657_PM_at   | D1Ertd273e      | NA      | -0.06 | 2.19 | -0.37 | 7.17E-01 | 8.71E-01 | -6.63 |
| 1431050_PM_at   | Rps6ka5         | RPS6KA5 | -0.06 | 2.58 | -0.37 | 7.17E-01 | 8.71E-01 | -6.63 |
| 1457846_PM_at   | Cox11           | NA      | -0.04 | 2.23 | -0.37 | 7.17E-01 | 8.71E-01 | -6.63 |
| 1456711_PM_at   | Maats1          | MAATS1  | 0.05  | 2.53 | 0.37  | 7.17E-01 | 8.71E-01 | -6.63 |
| 1420666_PM_at   | Doc2b           | DOC2B   | 0.04  | 2.14 | 0.37  | 7.18E-01 | 8.71E-01 | -6.63 |
| 1436939_PM_at   | Unc45b          | UNC45B  | -0.12 | 2.90 | -0.37 | 7.18E-01 | 8.72E-01 | -6.63 |
| 1445524_PM_at   | ---             | NA      | 0.05  | 2.16 | 0.37  | 7.18E-01 | 8.72E-01 | -6.63 |
| 1453871_PM_at   | Slc6a11         | SLC6A11 | 0.05  | 2.27 | 0.37  | 7.18E-01 | 8.72E-01 | -6.63 |
| 1425157_PM_x_at | Tspan33         | TSPAN33 | -0.06 | 3.00 | -0.37 | 7.18E-01 | 8.72E-01 | -6.63 |
| 1449248_PM_at   | Clcn2           | CLCN2   | -0.05 | 2.74 | -0.37 | 7.18E-01 | 8.72E-01 | -6.63 |
| 1458796_PM_at   | ---             | NA      | 0.04  | 2.31 | 0.37  | 7.18E-01 | 8.72E-01 | -6.63 |
| 1425134_PM_a_at | Pigx            | PIGX    | 0.04  | 2.62 | 0.37  | 7.18E-01 | 8.72E-01 | -6.63 |
| 1442278_PM_at   | Kdm5b           | KDM5B   | 0.04  | 2.28 | 0.37  | 7.18E-01 | 8.72E-01 | -6.63 |
| 1452360_PM_a_at | Kdm5a           | KDM5A   | 0.09  | 3.04 | 0.37  | 7.18E-01 | 8.72E-01 | -6.63 |
| 1452578_PM_at   | ---             | NA      | -0.03 | 2.07 | -0.37 | 7.18E-01 | 8.72E-01 | -6.63 |
| 1424011_PM_at   | Aqp9            | AQP9    | 0.03  | 2.14 | 0.37  | 7.18E-01 | 8.72E-01 | -6.63 |
| 1427461_PM_at   | BC005561        | THOC2   | 0.06  | 2.74 | 0.37  | 7.18E-01 | 8.72E-01 | -6.63 |
| 1442214_PM_at   | ---             | NA      | 0.09  | 3.21 | 0.37  | 7.18E-01 | 8.72E-01 | -6.63 |
| 1450952_PM_at   | Pln             | PLN     | 0.10  | 2.64 | 0.37  | 7.18E-01 | 8.72E-01 | -6.63 |
| 1452219_PM_at   | Tmem63b         | TMEM63B | -0.08 | 2.91 | -0.37 | 7.18E-01 | 8.72E-01 | -6.63 |
| 1419390_PM_at   | Pde10a          | PDE10A  | 0.08  | 2.49 | 0.37  | 7.18E-01 | 8.72E-01 | -6.63 |
| 1431972_PM_a_at | Ccser2          | CCSER2  | 0.10  | 5.78 | 0.37  | 7.18E-01 | 8.72E-01 | -6.63 |
| 1418457_PM_at   | Cxcl14          | CXCL14  | 0.11  | 3.35 | 0.37  | 7.18E-01 | 8.72E-01 | -6.63 |
| 1452757_PM_s_at | Hba-a1///Hba-a2 | HBA1    | -0.23 | 3.28 | -0.37 | 7.18E-01 | 8.72E-01 | -6.63 |
| 1439421_PM_x_at | Cbx3            | CBX3    | -0.09 | 8.96 | -0.37 | 7.18E-01 | 8.72E-01 | -6.63 |
| 1455621_PM_at   | Zfp870          | NA      | -0.04 | 2.19 | -0.37 | 7.18E-01 | 8.72E-01 | -6.63 |
| 1421566_PM_at   | Pet2            | DCAF8L2 | 0.04  | 2.06 | 0.37  | 7.18E-01 | 8.72E-01 | -6.63 |
| 1418738_PM_at   | Scn1b           | SCN1B   | 0.06  | 5.83 | 0.37  | 7.18E-01 | 8.72E-01 | -6.63 |
| 1439028_PM_at   | Ufm1            | NA      | 0.16  | 3.99 | 0.37  | 7.18E-01 | 8.72E-01 | -6.63 |
| 1426942_PM_at   | Aim1            | CRYBG1  | 0.03  | 2.03 | 0.37  | 7.18E-01 | 8.72E-01 | -6.63 |
| 1457369_PM_at   | ---             | NA      | 0.04  | 2.29 | 0.37  | 7.18E-01 | 8.72E-01 | -6.63 |
| 1423054_PM_at   | Wdr1            | WDR1    | 0.08  | 3.09 | 0.37  | 7.18E-01 | 8.72E-01 | -6.63 |
| 1450214_PM_at   | Adora2b         | ADORA2B | 0.03  | 2.08 | 0.37  | 7.19E-01 | 8.72E-01 | -6.63 |
| 1445581_PM_at   | ---             | NA      | 0.05  | 2.09 | 0.37  | 7.19E-01 | 8.72E-01 | -6.63 |
| 1437720_PM_at   | Eif2d           | EIF2D   | 0.05  | 2.64 | 0.37  | 7.19E-01 | 8.72E-01 | -6.63 |
| 1437679_PM_a_at | Glrx2           | GLRX2   | 0.22  | 4.06 | 0.37  | 7.19E-01 | 8.72E-01 | -6.63 |
| 1458152_PM_at   | Etfdh           | ETFDH   | 0.03  | 2.04 | 0.37  | 7.19E-01 | 8.72E-01 | -6.63 |
| 1443563_PM_at   | Opa3            | OPA3    | 0.06  | 2.53 | 0.37  | 7.19E-01 | 8.72E-01 | -6.63 |
| 1456970_PM_at   | Cdh7            | CDH7    | 0.08  | 2.73 | 0.37  | 7.19E-01 | 8.72E-01 | -6.63 |
| 1440189_PM_at   | Ppp2r5a         | PPP2R5A | 0.04  | 2.07 | 0.37  | 7.19E-01 | 8.72E-01 | -6.63 |
| 1446713_PM_at   | ---             | NA      | -0.04 | 2.36 | -0.37 | 7.19E-01 | 8.72E-01 | -6.63 |
| 1437903_PM_at   | Lox             | LOX     | 0.03  | 1.94 | 0.37  | 7.19E-01 | 8.72E-01 | -6.63 |

|                 |                   |            |       |      |       |          |          |       |
|-----------------|-------------------|------------|-------|------|-------|----------|----------|-------|
| 1425764_PM_a_at | Bcat2             | BCAT2      | 0.04  | 2.65 | 0.37  | 7.19E-01 | 8.72E-01 | -6.63 |
| 1432026_PM_a_at | Herc6             | HERC6      | 0.04  | 2.26 | 0.37  | 7.19E-01 | 8.72E-01 | -6.63 |
| 1440272_PM_at   | ---               | NA         | -0.11 | 3.50 | -0.37 | 7.19E-01 | 8.72E-01 | -6.63 |
| 1456902_PM_at   | ---               | NA         | 0.03  | 2.16 | 0.37  | 7.19E-01 | 8.72E-01 | -6.63 |
| 1439402_PM_at   | 4930444F02Rik     | NA         | 0.03  | 2.11 | 0.37  | 7.19E-01 | 8.72E-01 | -6.63 |
| 1421577_PM_at   | Evx2              | EVX2       | 0.04  | 2.10 | 0.37  | 7.19E-01 | 8.72E-01 | -6.63 |
| 1440612_PM_at   | ---               | NA         | 0.07  | 2.34 | 0.37  | 7.19E-01 | 8.72E-01 | -6.63 |
| 1423586_PM_at   | Axl               | AXL        | 0.12  | 3.08 | 0.37  | 7.19E-01 | 8.72E-01 | -6.63 |
| 1449040_PM_a_at | Sephs2            | NA         | 0.25  | 5.25 | 0.37  | 7.19E-01 | 8.72E-01 | -6.63 |
| 1424846_PM_at   | Cep68             | CEP68      | -0.10 | 2.47 | -0.37 | 7.19E-01 | 8.72E-01 | -6.63 |
| 1440099_PM_at   | Slc38a6           | NA         | -0.05 | 2.68 | -0.37 | 7.19E-01 | 8.72E-01 | -6.63 |
| 1429280_PM_at   | Col22a1           | COL22A1    | -0.04 | 2.29 | -0.37 | 7.19E-01 | 8.72E-01 | -6.63 |
| 1444941_PM_at   | ---               | NA         | -0.03 | 1.95 | -0.37 | 7.19E-01 | 8.72E-01 | -6.63 |
| 1421291_PM_at   | Il18rap           | IL18RAP    | 0.03  | 2.12 | 0.37  | 7.19E-01 | 8.72E-01 | -6.63 |
| 1429833_PM_at   | Ly6g6e            | AL662899.1 | 0.03  | 2.65 | 0.37  | 7.19E-01 | 8.72E-01 | -6.63 |
| 1451696_PM_at   | Gm38422 /// Zfp64 | NA         | 0.03  | 2.34 | 0.37  | 7.19E-01 | 8.72E-01 | -6.63 |
| 1441013_PM_at   | ---               | NA         | 0.05  | 3.83 | 0.37  | 7.19E-01 | 8.72E-01 | -6.63 |
| 1441494_PM_at   | ---               | NA         | 0.07  | 2.43 | 0.37  | 7.19E-01 | 8.72E-01 | -6.63 |
| 1422936_PM_at   | Mas1              | MAS1       | -0.14 | 3.26 | -0.37 | 7.19E-01 | 8.72E-01 | -6.63 |
| 1440375_PM_at   | ---               | NA         | -0.13 | 3.79 | -0.37 | 7.19E-01 | 8.72E-01 | -6.63 |
| 1435363_PM_at   | Plekhg1           | PLEKHG1    | -0.11 | 3.03 | -0.37 | 7.19E-01 | 8.72E-01 | -6.63 |
| 1449593_PM_at   | Gm34703           | NA         | -0.06 | 2.64 | -0.37 | 7.19E-01 | 8.72E-01 | -6.63 |
| 1456856_PM_at   | Ppfia2            | PPFIA2     | -0.05 | 2.73 | -0.37 | 7.19E-01 | 8.72E-01 | -6.63 |
| 1447327_PM_at   | ---               | NA         | -0.04 | 2.29 | -0.37 | 7.19E-01 | 8.72E-01 | -6.63 |
| 1417841_PM_at   | Pxmp2             | PXMP2      | -0.03 | 2.42 | -0.37 | 7.19E-01 | 8.72E-01 | -6.63 |
| 1420217_PM_x_at | ---               | NA         | 0.03  | 1.87 | 0.37  | 7.19E-01 | 8.72E-01 | -6.63 |
| 1448089_PM_at   | D4Ert58e          | NA         | 0.04  | 2.14 | 0.37  | 7.19E-01 | 8.72E-01 | -6.63 |
| 1423237_PM_at   | Galt1             | GALNT1     | 0.06  | 2.72 | 0.37  | 7.19E-01 | 8.72E-01 | -6.63 |
| 1433967_PM_at   | Bpif9b            | NA         | 0.05  | 2.54 | 0.37  | 7.19E-01 | 8.72E-01 | -6.63 |
| 1445793_PM_at   | ---               | NA         | -0.03 | 2.33 | -0.37 | 7.20E-01 | 8.72E-01 | -6.63 |
| 1443283_PM_at   | ---               | NA         | -0.11 | 2.80 | -0.37 | 7.20E-01 | 8.72E-01 | -6.63 |
| 1446976_PM_at   | D7Ert758e         | NA         | 0.03  | 2.08 | 0.37  | 7.20E-01 | 8.72E-01 | -6.63 |
| 1437906_PM_x_at | Txn1              | TXNL1      | 0.04  | 3.21 | 0.37  | 7.20E-01 | 8.72E-01 | -6.63 |
| 1448671_PM_at   | Ube2e3            | UBE2E3     | 0.05  | 2.66 | 0.37  | 7.20E-01 | 8.72E-01 | -6.63 |
| 1423154_PM_at   | ---               | NA         | 0.09  | 3.25 | 0.37  | 7.20E-01 | 8.72E-01 | -6.63 |
| 1451279_PM_at   | Erc1              | ERC1       | 0.09  | 4.07 | 0.37  | 7.20E-01 | 8.72E-01 | -6.63 |
| 1442829_PM_at   | Gm39954           | NA         | -0.04 | 2.62 | -0.37 | 7.20E-01 | 8.72E-01 | -6.63 |
| 1446644_PM_at   | ---               | NA         | -0.03 | 2.10 | -0.37 | 7.20E-01 | 8.72E-01 | -6.63 |
| 1451942_PM_x_at | Klra20            | NA         | 0.03  | 1.84 | 0.37  | 7.20E-01 | 8.72E-01 | -6.63 |
| 1456540_PM_s_at | Mtmr6             | MTMR6      | -0.15 | 8.78 | -0.37 | 7.20E-01 | 8.72E-01 | -6.63 |
| 1422007_PM_at   | Aqp3              | AQP3       | -0.03 | 2.14 | -0.37 | 7.20E-01 | 8.73E-01 | -6.63 |
| 1451840_PM_at   | Kcnp4             | KCNP4      | 0.06  | 2.60 | 0.37  | 7.20E-01 | 8.73E-01 | -6.63 |
| 1424803_PM_at   | Mios              | MIOS       | 0.09  | 2.88 | 0.37  | 7.20E-01 | 8.73E-01 | -6.63 |
| 1444686_PM_at   | Fam173b           | FAM173B    | 0.04  | 2.56 | 0.37  | 7.20E-01 | 8.73E-01 | -6.63 |
| 1435524_PM_at   | Snhg8             | NA         | 0.19  | 4.85 | 0.37  | 7.20E-01 | 8.73E-01 | -6.63 |
| 1442083_PM_at   | Rsrc2             | RSRC2      | -0.10 | 3.51 | -0.37 | 7.20E-01 | 8.73E-01 | -6.63 |
| 1418559_PM_at   | Prss39            | NA         | 0.03  | 2.77 | 0.37  | 7.20E-01 | 8.73E-01 | -6.63 |
| 1417091_PM_at   | Chuk              | CHUK       | -0.14 | 3.94 | -0.37 | 7.20E-01 | 8.73E-01 | -6.63 |
| 1456945_PM_at   | Fgf2              | FGF2       | -0.05 | 2.89 | -0.37 | 7.20E-01 | 8.73E-01 | -6.63 |
| 1447610_PM_at   | Tmem184c          | TMEM184C   | 0.04  | 2.15 | 0.37  | 7.20E-01 | 8.73E-01 | -6.63 |
| 1432193_PM_at   | 4930412L05Rik     | NA         | -0.05 | 2.69 | -0.37 | 7.20E-01 | 8.73E-01 | -6.63 |
| 1445799_PM_at   | ---               | NA         | 0.03  | 2.23 | 0.37  | 7.20E-01 | 8.73E-01 | -6.63 |
| 1418708_PM_at   | Apoc4             | APOC4      | -0.04 | 2.48 | -0.37 | 7.20E-01 | 8.73E-01 | -6.63 |
| 1433109_PM_at   | Gm40697           | NA         | 0.04  | 2.19 | 0.37  | 7.20E-01 | 8.73E-01 | -6.63 |
| 1416170_PM_at   | Trap1             | TRAP1      | 0.07  | 3.84 | 0.37  | 7.20E-01 | 8.73E-01 | -6.63 |
| 1422236_PM_at   | Ttc39d            | NA         | 0.04  | 2.58 | 0.37  | 7.21E-01 | 8.73E-01 | -6.63 |
| 1456203_PM_at   | Dsc1              | NA         | 0.03  | 1.84 | 0.37  | 7.21E-01 | 8.73E-01 | -6.63 |
| 1452890_PM_at   | Ttl5              | TTLL5      | -0.20 | 3.74 | -0.37 | 7.21E-01 | 8.73E-01 | -6.63 |
| 1443654_PM_at   | Ankfy1            | ANKFY1     | -0.05 | 3.36 | -0.37 | 7.21E-01 | 8.73E-01 | -6.63 |
| 1441560_PM_at   | Ctnna3            | CTNNA3     | 0.04  | 2.25 | 0.37  | 7.21E-01 | 8.73E-01 | -6.63 |
| 1453050_PM_at   | Gins3             | GIN3       | -0.05 | 2.45 | -0.37 | 7.21E-01 | 8.73E-01 | -6.63 |
| 1429379_PM_at   | Lyve1             | LYVE1      | 0.04  | 2.18 | 0.37  | 7.21E-01 | 8.73E-01 | -6.63 |
| 1450330_PM_at   | Il10              | IL10       | 0.04  | 2.08 | 0.37  | 7.21E-01 | 8.73E-01 | -6.63 |
| 1457004_PM_at   | Arhgap39          | ARHGAP39   | 0.04  | 2.22 | 0.37  | 7.21E-01 | 8.73E-01 | -6.63 |
| 1446157_PM_at   | ---               | NA         | 0.08  | 2.87 | 0.37  | 7.21E-01 | 8.73E-01 | -6.63 |
| 1434924_PM_at   | Phf2              | PHF2       | -0.12 | 4.48 | -0.37 | 7.21E-01 | 8.73E-01 | -6.63 |
| 1425353_PM_at   | Enpp3             | NA         | 0.04  | 1.91 | 0.37  | 7.21E-01 | 8.73E-01 | -6.63 |
| 1428152_PM_a_at | Rpl18a            | RPL18A     | 0.19  | 6.74 | 0.37  | 7.21E-01 | 8.73E-01 | -6.63 |
| 1458231_PM_at   | Gm26919           | NA         | -0.18 | 3.43 | -0.37 | 7.21E-01 | 8.73E-01 | -6.63 |
| 1425949_PM_at   | Slc25a30          | NA         | 0.06  | 2.29 | 0.37  | 7.21E-01 | 8.73E-01 | -6.63 |
| 1445675_PM_at   | ---               | NA         | -0.03 | 2.21 | -0.37 | 7.21E-01 | 8.73E-01 | -6.63 |
| 1440968_PM_at   | Eif2d             | EIF2D      | 0.04  | 2.28 | 0.37  | 7.21E-01 | 8.73E-01 | -6.63 |
| 1449742_PM_at   | AA522020          | NA         | -0.04 | 2.23 | -0.37 | 7.21E-01 | 8.73E-01 | -6.63 |
| 1444998_PM_at   | ---               | NA         | -0.17 | 4.20 | -0.37 | 7.21E-01 | 8.73E-01 | -6.63 |
| 1428851_PM_at   | Pxdc1             | PXDC1      | -0.07 | 3.46 | -0.37 | 7.21E-01 | 8.73E-01 | -6.63 |

|                 |                   |          |       |       |       |          |          |       |
|-----------------|-------------------|----------|-------|-------|-------|----------|----------|-------|
| 1445842_PM_at   | ---               | NA       | 0.05  | 2.32  | 0.37  | 7.21E-01 | 8.73E-01 | -6.63 |
| 1458332_PM_x_at | Sox4              | SOX4     | -0.03 | 1.91  | -0.37 | 7.21E-01 | 8.73E-01 | -6.63 |
| 1456165_PM_at   | Akr1cl            | AKR1C2   | 0.05  | 2.57  | 0.37  | 7.21E-01 | 8.73E-01 | -6.63 |
| 1418929_PM_at   | Ift57             | IFT57    | 0.13  | 4.53  | 0.37  | 7.21E-01 | 8.73E-01 | -6.63 |
| 1438226_PM_at   | AU022252          | C1orf50  | 0.04  | 2.30  | 0.37  | 7.22E-01 | 8.74E-01 | -6.63 |
| 1442978_PM_at   | Mpdz              | MPDZ     | 0.07  | 2.36  | 0.37  | 7.22E-01 | 8.74E-01 | -6.63 |
| 1449340_PM_at   | Sostdc1           | SOSTDC1  | 0.24  | 4.07  | 0.37  | 7.22E-01 | 8.74E-01 | -6.63 |
| 1438066_PM_at   | Gtf2b             | GTF2B    | 0.04  | 2.41  | 0.37  | 7.22E-01 | 8.74E-01 | -6.63 |
| 1437334_PM_x_at | Parn              | PARN     | -0.15 | 7.96  | -0.37 | 7.22E-01 | 8.74E-01 | -6.63 |
| 1441787_PM_at   | Zc3h12c           | NA       | -0.05 | 2.59  | -0.37 | 7.22E-01 | 8.74E-01 | -6.63 |
| 1420119_PM_s_at | Phf3              | PHF3     | -0.20 | 3.11  | -0.37 | 7.22E-01 | 8.74E-01 | -6.63 |
| 1441536_PM_at   | ---               | NA       | -0.04 | 2.29  | -0.37 | 7.22E-01 | 8.74E-01 | -6.63 |
| 1452935_PM_at   | Ccpg1os           | C15orf65 | -0.16 | 3.38  | -0.37 | 7.22E-01 | 8.74E-01 | -6.63 |
| 1435891_PM_x_at | ---               | NA       | -0.06 | 2.80  | -0.37 | 7.22E-01 | 8.74E-01 | -6.63 |
| 1429958_PM_x_at | Haghl             | HAGHL    | 0.04  | 2.22  | 0.37  | 7.22E-01 | 8.74E-01 | -6.63 |
| 1456261_PM_at   | Sh3kbp1           | SH3KBP1  | 0.12  | 3.47  | 0.37  | 7.22E-01 | 8.74E-01 | -6.63 |
| 1456911_PM_at   | Clasp2            | CLASP2   | 0.06  | 5.43  | 0.37  | 7.22E-01 | 8.74E-01 | -6.63 |
| 1423130_PM_a_at | Srsf5             | SRSF5    | 0.14  | 4.20  | 0.37  | 7.22E-01 | 8.74E-01 | -6.63 |
| 1452914_PM_at   | N4bp2l1           | N4BP2L1  | 0.07  | 2.67  | 0.37  | 7.22E-01 | 8.74E-01 | -6.63 |
| 1447270_PM_at   | ---               | NA       | 0.04  | 2.42  | 0.37  | 7.22E-01 | 8.74E-01 | -6.63 |
| 1435448_PM_at   | Bcl2l11           | BCL2L11  | 0.06  | 2.60  | 0.37  | 7.22E-01 | 8.74E-01 | -6.63 |
| 1446801_PM_at   | ---               | NA       | 0.12  | 2.52  | 0.37  | 7.22E-01 | 8.74E-01 | -6.63 |
| 1435201_PM_at   | Tmem174           | TMEM174  | 0.03  | 2.06  | 0.37  | 7.22E-01 | 8.74E-01 | -6.63 |
| 1430507_PM_at   | 1700027J07Rik     | NA       | 0.04  | 2.71  | 0.37  | 7.22E-01 | 8.74E-01 | -6.63 |
| 1440364_PM_a_at | Aasdh             | AASDH    | 0.04  | 2.39  | 0.37  | 7.22E-01 | 8.74E-01 | -6.63 |
| 1447819_PM_x_at | ---               | NA       | -0.03 | 2.01  | -0.37 | 7.22E-01 | 8.74E-01 | -6.63 |
| 1449056_PM_at   | E330009J07Rik     | KIAA1147 | -0.08 | 3.99  | -0.36 | 7.23E-01 | 8.74E-01 | -6.63 |
| 1422908_PM_at   | Atp1b4            | ATP1B4   | 0.04  | 2.48  | 0.36  | 7.23E-01 | 8.74E-01 | -6.63 |
| 1420194_PM_at   | ---               | NA       | 0.04  | 2.26  | 0.36  | 7.23E-01 | 8.74E-01 | -6.63 |
| 1455155_PM_at   | Lsm14b            | LSM14B   | 0.09  | 4.68  | 0.36  | 7.23E-01 | 8.74E-01 | -6.63 |
| 1452653_PM_at   | Slc25a22          | SLC25A22 | 0.16  | 3.20  | 0.36  | 7.23E-01 | 8.74E-01 | -6.63 |
| 1435520_PM_at   | Msi2              | MSI2     | 0.17  | 5.22  | 0.36  | 7.23E-01 | 8.74E-01 | -6.63 |
| 1424379_PM_at   | Car11             | CA11     | 0.21  | 4.04  | 0.36  | 7.23E-01 | 8.74E-01 | -6.63 |
| 1434370_PM_s_at | Faf1              | FAF1     | -0.07 | 2.49  | -0.36 | 7.23E-01 | 8.74E-01 | -6.63 |
| 1454092_PM_a_at | Gtf2h3            | GTF2H3   | 0.04  | 3.07  | 0.36  | 7.23E-01 | 8.74E-01 | -6.63 |
| 1436784_PM_x_at | Sf3b4             | SF3B4    | 0.04  | 2.90  | 0.36  | 7.23E-01 | 8.74E-01 | -6.63 |
| 1453653_PM_at   | ---               | NA       | 0.05  | 2.45  | 0.36  | 7.23E-01 | 8.74E-01 | -6.63 |
| 1430705_PM_at   | Puf60             | PUF60    | 0.05  | 2.72  | 0.36  | 7.23E-01 | 8.74E-01 | -6.63 |
| 1417963_PM_at   | Pltp              | PLTP     | -0.12 | 3.11  | -0.36 | 7.23E-01 | 8.74E-01 | -6.63 |
| 1433118_PM_at   | Ncoa2             | NCOA2    | 0.06  | 2.75  | 0.36  | 7.23E-01 | 8.74E-01 | -6.63 |
| 1420243_PM_at   | Zeb1              | ZEB1     | -0.05 | 2.05  | -0.36 | 7.23E-01 | 8.74E-01 | -6.63 |
| 1459801_PM_at   | B3gal5            | B3GALT5  | 0.04  | 3.43  | 0.36  | 7.23E-01 | 8.74E-01 | -6.63 |
| 1444888_PM_at   | AU022852          | NA       | 0.10  | 2.28  | 0.36  | 7.23E-01 | 8.74E-01 | -6.63 |
| 1435481_PM_at   | Zfp653            | ZNF653   | 0.04  | 2.69  | 0.36  | 7.23E-01 | 8.74E-01 | -6.63 |
| 1435875_PM_at   | Prkab2            | PRKAB2   | 0.05  | 2.61  | 0.36  | 7.23E-01 | 8.74E-01 | -6.63 |
| 1445355_PM_at   | Spat6             | SPATA6   | 0.08  | 2.22  | 0.36  | 7.23E-01 | 8.74E-01 | -6.63 |
| 1440674_PM_at   | Edil3 /// Gm38504 | NA       | 0.04  | 2.27  | 0.36  | 7.23E-01 | 8.75E-01 | -6.63 |
| 1453338_PM_at   | Stam2             | STAM2    | 0.07  | 3.04  | 0.36  | 7.23E-01 | 8.75E-01 | -6.63 |
| 1419734_PM_at   | Actb              | ACTB     | -0.08 | 10.36 | -0.36 | 7.23E-01 | 8.75E-01 | -6.63 |
| 1428506_PM_at   | Atic              | ATIC     | -0.07 | 3.00  | -0.36 | 7.23E-01 | 8.75E-01 | -6.63 |
| 1444043_PM_at   | ---               | NA       | -0.04 | 2.33  | -0.36 | 7.23E-01 | 8.75E-01 | -6.63 |
| 1435569_PM_at   | D630029K05Rik     | NA       | -0.04 | 2.14  | -0.36 | 7.23E-01 | 8.75E-01 | -6.63 |
| 1425758_PM_a_at | Impg1             | IMPG1    | 0.04  | 2.35  | 0.36  | 7.23E-01 | 8.75E-01 | -6.63 |
| 1432826_PM_a_at | Cd80              | NA       | 0.05  | 2.85  | 0.36  | 7.23E-01 | 8.75E-01 | -6.63 |
| 1417882_PM_at   | Slc39a3           | SLC39A3  | 0.05  | 4.23  | 0.36  | 7.23E-01 | 8.75E-01 | -6.63 |
| 1435063_PM_at   | Fam43b            | FAM43B   | 0.06  | 2.48  | 0.36  | 7.23E-01 | 8.75E-01 | -6.63 |
| 1442051_PM_at   | Hist2h3c1         | NA       | 0.11  | 3.46  | 0.36  | 7.23E-01 | 8.75E-01 | -6.63 |
| 1418266_PM_at   | Alox12b           | ALOX12B  | 0.07  | 2.63  | 0.36  | 7.23E-01 | 8.75E-01 | -6.63 |
| 1436791_PM_at   | Wnt5a             | WNT5A    | 0.08  | 2.39  | 0.36  | 7.23E-01 | 8.75E-01 | -6.63 |
| 1451192_PM_a_at | Ttc4              | TTC4     | -0.06 | 2.84  | -0.36 | 7.24E-01 | 8.75E-01 | -6.63 |
| 1453183_PM_at   | Dnaaf2            | DNAAF2   | 0.03  | 2.36  | 0.36  | 7.24E-01 | 8.75E-01 | -6.63 |
| 1453115_PM_at   | Oaz3              | OAZ3     | 0.04  | 2.29  | 0.36  | 7.24E-01 | 8.75E-01 | -6.63 |
| 1442225_PM_at   | ---               | NA       | 0.04  | 2.35  | 0.36  | 7.24E-01 | 8.75E-01 | -6.63 |
| 1443243_PM_at   | ---               | NA       | 0.03  | 2.13  | 0.36  | 7.24E-01 | 8.75E-01 | -6.63 |
| 1418550_PM_x_at | Defa-rs1          | NA       | 0.05  | 2.51  | 0.36  | 7.24E-01 | 8.75E-01 | -6.63 |
| 1437779_PM_at   | Foxh1             | NA       | -0.04 | 4.20  | -0.36 | 7.24E-01 | 8.75E-01 | -6.63 |
| 1453960_PM_a_at | Capzb             | CAPZB    | -0.04 | 2.15  | -0.36 | 7.24E-01 | 8.75E-01 | -6.63 |
| 1443058_PM_at   | MacroD2           | MACROD2  | 0.09  | 2.50  | 0.36  | 7.24E-01 | 8.75E-01 | -6.63 |
| 1425426_PM_a_at | Mef2a             | MEF2A    | -0.12 | 3.85  | -0.36 | 7.24E-01 | 8.75E-01 | -6.63 |
| 1430499_PM_at   | 1700058M13Rik     | NA       | 0.03  | 2.19  | 0.36  | 7.24E-01 | 8.75E-01 | -6.63 |
| 1424892_PM_at   | Zkscan5           | ZKSCAN5  | 0.05  | 2.53  | 0.36  | 7.24E-01 | 8.75E-01 | -6.63 |
| 1428164_PM_at   | Nudt9             | NUDT9    | 0.20  | 5.45  | 0.36  | 7.24E-01 | 8.75E-01 | -6.63 |
| 1437871_PM_at   | Pgm5              | PGM5     | -0.04 | 2.32  | -0.36 | 7.24E-01 | 8.75E-01 | -6.63 |
| 1421842_PM_a_at | Adat3 /// Scamp4  | ADAT3    | 0.04  | 2.50  | 0.36  | 7.24E-01 | 8.75E-01 | -6.63 |
| 1447650_PM_at   | Nmd3              | NA       | -0.04 | 2.23  | -0.36 | 7.24E-01 | 8.75E-01 | -6.63 |

|                 |                |            |       |       |       |          |          |       |
|-----------------|----------------|------------|-------|-------|-------|----------|----------|-------|
| 1420750_PM_at   | 1110006O24Rik  | NA         | 0.05  | 2.31  | 0.36  | 7.24E-01 | 8.75E-01 | -6.63 |
| 1434447_PM_at   | Met            | MET        | -0.10 | 2.62  | -0.36 | 7.24E-01 | 8.75E-01 | -6.63 |
| 1449378_PM_at   | Krt27          | KRT27      | 0.04  | 2.23  | 0.36  | 7.24E-01 | 8.75E-01 | -6.63 |
| 1449680_PM_at   | C80678         | NA         | 0.04  | 2.05  | 0.36  | 7.24E-01 | 8.75E-01 | -6.63 |
| 1451526_PM_at   | Arhgap12       | ARHGAP12   | -0.10 | 3.19  | -0.36 | 7.24E-01 | 8.75E-01 | -6.63 |
| 1442974_PM_at   | ---            | NA         | 0.05  | 2.00  | 0.36  | 7.24E-01 | 8.75E-01 | -6.63 |
| 1444272_PM_at   | Intu           | INTU       | 0.03  | 2.33  | 0.36  | 7.24E-01 | 8.75E-01 | -6.63 |
| 1417399_PM_at   | Gas6           | GAS6       | 0.08  | 3.09  | 0.36  | 7.24E-01 | 8.75E-01 | -6.63 |
| 1438096_PM_a_at | Dtymk          | DTYMK      | -0.18 | 3.90  | -0.36 | 7.25E-01 | 8.75E-01 | -6.63 |
| 1433104_PM_at   | ---            | NA         | -0.06 | 2.78  | -0.36 | 7.25E-01 | 8.75E-01 | -6.63 |
| 1443252_PM_at   | ---            | NA         | -0.03 | 2.76  | -0.36 | 7.25E-01 | 8.75E-01 | -6.63 |
| 1449866_PM_at   | Syt2           | SYT2       | 0.05  | 2.52  | 0.36  | 7.25E-01 | 8.75E-01 | -6.63 |
| 1425243_PM_at   | Cd207          | CD207      | 0.03  | 2.39  | 0.36  | 7.25E-01 | 8.75E-01 | -6.63 |
| 1439214_PM_a_at | Api5           | API5       | 0.10  | 2.64  | 0.36  | 7.25E-01 | 8.75E-01 | -6.63 |
| 1426470_PM_at   | Tbp            | TBP        | 0.04  | 2.37  | 0.36  | 7.25E-01 | 8.75E-01 | -6.63 |
| 1459234_PM_at   | ---            | NA         | 0.06  | 2.36  | 0.36  | 7.25E-01 | 8.75E-01 | -6.63 |
| 1420701_PM_at   | Klk1b1         | KLK3       | 0.03  | 2.33  | 0.36  | 7.25E-01 | 8.75E-01 | -6.63 |
| 1451730_PM_at   | Zfp62          | ZFP62      | 0.07  | 3.02  | 0.36  | 7.25E-01 | 8.75E-01 | -6.63 |
| 1451719_PM_at   | Med17          | AP001273.2 | -0.04 | 2.52  | -0.36 | 7.25E-01 | 8.75E-01 | -6.63 |
| 1434204_PM_x_at | Shmt2          | SHMT2      | 0.04  | 2.35  | 0.36  | 7.25E-01 | 8.75E-01 | -6.63 |
| 1419064_PM_a_at | Ugt8a          | UGT8       | 0.04  | 2.56  | 0.36  | 7.25E-01 | 8.76E-01 | -6.63 |
| 1435759_PM_at   | Ctps2          | CTPS2      | -0.07 | 2.34  | -0.36 | 7.25E-01 | 8.76E-01 | -6.63 |
| 1450796_PM_at   | Atoh7          | ATOH7      | 0.05  | 2.70  | 0.36  | 7.25E-01 | 8.76E-01 | -6.63 |
| 1449936_PM_at   | Fam234b        | FAM234B    | 0.17  | 3.25  | 0.36  | 7.25E-01 | 8.76E-01 | -6.63 |
| 1451165_PM_at   | Lmbr1l         | LMBR1L     | 0.04  | 3.03  | 0.36  | 7.25E-01 | 8.76E-01 | -6.63 |
| 1454735_PM_at   | Odf2           | ODF2       | -0.09 | 4.62  | -0.36 | 7.25E-01 | 8.76E-01 | -6.63 |
| 1452643_PM_at   | Grhl2          | GRHL2      | 0.08  | 2.78  | 0.36  | 7.25E-01 | 8.76E-01 | -6.63 |
| 1417797_PM_a_at | Kdf1           | KDF1       | 0.03  | 2.05  | 0.36  | 7.25E-01 | 8.76E-01 | -6.63 |
| 1422195_PM_s_at | Tbx15          | TBX15      | 0.06  | 3.56  | 0.36  | 7.25E-01 | 8.76E-01 | -6.63 |
| 1429701_PM_at   | Mageb16        | MAGEB16    | 0.09  | 2.97  | 0.36  | 7.25E-01 | 8.76E-01 | -6.63 |
| 1430215_PM_at   | Z610020H08Rik  | REXO5      | 0.05  | 2.24  | 0.36  | 7.25E-01 | 8.76E-01 | -6.63 |
| 1441974_PM_at   | Camk4          | CAMK4      | 0.11  | 3.50  | 0.36  | 7.25E-01 | 8.76E-01 | -6.63 |
| 1425721_PM_at   | Phip           | PHIP       | 0.04  | 2.40  | 0.36  | 7.26E-01 | 8.76E-01 | -6.63 |
| 1422801_PM_at   | G3bp1          | G3BP1      | -0.12 | 3.25  | -0.36 | 7.26E-01 | 8.76E-01 | -6.63 |
| 1442249_PM_at   | ---            | NA         | -0.06 | 2.28  | -0.36 | 7.26E-01 | 8.76E-01 | -6.63 |
| 1451952_PM_at   | Prok2          | PROK2      | 0.03  | 2.28  | 0.36  | 7.26E-01 | 8.76E-01 | -6.63 |
| 1441646_PM_at   | Vta1           | VTA1       | 0.08  | 2.86  | 0.36  | 7.26E-01 | 8.76E-01 | -6.63 |
| 1438541_PM_at   | ---            | NA         | 0.08  | 3.12  | 0.36  | 7.26E-01 | 8.76E-01 | -6.63 |
| 1435628_PM_x_at | BC005512       | NA         | 0.09  | 10.06 | 0.36  | 7.26E-01 | 8.76E-01 | -6.63 |
| 1443561_PM_at   | ---            | NA         | -0.05 | 2.37  | -0.36 | 7.26E-01 | 8.76E-01 | -6.63 |
| 1432196_PM_a_at | Dscam1         | DSCAML1    | -0.08 | 2.87  | -0.36 | 7.26E-01 | 8.76E-01 | -6.63 |
| 1458925_PM_at   | Zfp82          | ZFP82      | -0.04 | 2.14  | -0.36 | 7.26E-01 | 8.76E-01 | -6.63 |
| 1459401_PM_at   | ---            | NA         | -0.05 | 2.18  | -0.36 | 7.26E-01 | 8.76E-01 | -6.63 |
| 1447584_PM_s_at | Myct1          | MYCT1      | -0.13 | 2.36  | -0.36 | 7.26E-01 | 8.76E-01 | -6.63 |
| 1460725_PM_at   | Xpa            | XPA        | -0.09 | 3.19  | -0.36 | 7.26E-01 | 8.76E-01 | -6.63 |
| 1435778_PM_at   | Ankrd11        | ANKRD11    | -0.08 | 2.73  | -0.36 | 7.26E-01 | 8.76E-01 | -6.63 |
| 1460510_PM_a_at | Coq10b         | COQ10B     | -0.07 | 2.46  | -0.36 | 7.26E-01 | 8.76E-01 | -6.63 |
| 1438288_PM_x_at | ---            | NA         | -0.07 | 2.32  | -0.36 | 7.26E-01 | 8.76E-01 | -6.63 |
| 1440448_PM_at   | ---            | NA         | -0.06 | 2.37  | -0.36 | 7.26E-01 | 8.76E-01 | -6.63 |
| 1453990_PM_at   | 4930554G24Rik  | NA         | 0.03  | 2.11  | 0.36  | 7.26E-01 | 8.76E-01 | -6.63 |
| 1453276_PM_at   | Kif13b         | KIF13B     | 0.04  | 2.10  | 0.36  | 7.26E-01 | 8.76E-01 | -6.63 |
| 1457368_PM_at   | Fam65c         | RIPOR3     | 0.05  | 2.91  | 0.36  | 7.26E-01 | 8.76E-01 | -6.63 |
| 1429498_PM_at   | ---            | NA         | 0.07  | 2.51  | 0.36  | 7.26E-01 | 8.76E-01 | -6.63 |
| 1427984_PM_at   | Senp6          | SENP6      | 0.07  | 2.85  | 0.36  | 7.26E-01 | 8.76E-01 | -6.63 |
| 1456376_PM_at   | ---            | NA         | 0.11  | 2.34  | 0.36  | 7.26E-01 | 8.76E-01 | -6.63 |
| 1422509_PM_at   | U2af1          | U2AF1L5    | 0.13  | 3.98  | 0.36  | 7.26E-01 | 8.76E-01 | -6.63 |
| 1426315_PM_a_at | 6330416G13Rik  | TMEM268    | 0.15  | 2.59  | 0.36  | 7.26E-01 | 8.76E-01 | -6.63 |
| 1439092_PM_at   | Nxf1///Tmem223 | NXF1       | -0.08 | 2.63  | -0.36 | 7.26E-01 | 8.76E-01 | -6.63 |
| 1418961_PM_at   | Necap2         | NECAP2     | 0.05  | 2.45  | 0.36  | 7.26E-01 | 8.76E-01 | -6.63 |
| 1421687_PM_at   | Msmb           | MSMB       | -0.04 | 2.57  | -0.36 | 7.26E-01 | 8.76E-01 | -6.63 |
| 1442036_PM_a_at | ---            | NA         | 0.04  | 2.39  | 0.36  | 7.26E-01 | 8.76E-01 | -6.63 |
| 1426105_PM_a_at | Ubxn11         | UBXN11     | 0.05  | 2.91  | 0.36  | 7.26E-01 | 8.76E-01 | -6.63 |
| 1434569_PM_at   | Tada2b         | TADA2B     | 0.08  | 3.38  | 0.36  | 7.26E-01 | 8.76E-01 | -6.63 |
| 1441957_PM_x_at | Rec114         | REC114     | 0.11  | 2.74  | 0.36  | 7.26E-01 | 8.76E-01 | -6.63 |
| 1420361_PM_at   | Slc11a1        | SLC11A1    | 0.12  | 2.64  | 0.36  | 7.26E-01 | 8.76E-01 | -6.63 |
| AFFX-BioC-5_at  | ---            | NA         | 0.04  | 8.48  | 0.36  | 7.26E-01 | 8.76E-01 | -6.63 |
| 1448700_PM_at   | Gos2           | GOS2       | -0.06 | 2.68  | -0.36 | 7.27E-01 | 8.76E-01 | -6.63 |
| 1454481_PM_at   | Mif            | NA         | 0.03  | 2.07  | 0.36  | 7.27E-01 | 8.76E-01 | -6.63 |
| 1439417_PM_at   | Qsox1          | QSOX1      | -0.05 | 2.56  | -0.36 | 7.27E-01 | 8.76E-01 | -6.63 |
| 1422072_PM_a_at | Gstm6          | NA         | -0.03 | 2.17  | -0.36 | 7.27E-01 | 8.76E-01 | -6.63 |
| 1449383_PM_at   | Adssl1         | ADSSL1     | 0.04  | 2.77  | 0.36  | 7.27E-01 | 8.76E-01 | -6.63 |
| 1417940_PM_s_at | Rad51ap1       | RAD51AP1   | -0.03 | 2.54  | -0.36 | 7.27E-01 | 8.76E-01 | -6.63 |
| 1449769_PM_at   | ---            | NA         | 0.04  | 2.26  | 0.36  | 7.27E-01 | 8.76E-01 | -6.63 |
| 1459596_PM_at   | ---            | NA         | 0.04  | 2.25  | 0.36  | 7.27E-01 | 8.76E-01 | -6.63 |
| 1456386_PM_at   | Rbm39          | NA         | -0.13 | 4.54  | -0.36 | 7.27E-01 | 8.76E-01 | -6.63 |



|                 |               |            |       |      |       |          |          |       |
|-----------------|---------------|------------|-------|------|-------|----------|----------|-------|
| 1424454_PM_at   | Tmem87a       | TMEM87A    | 0.10  | 3.33 | 0.36  | 7.27E-01 | 8.76E-01 | -6.63 |
| 1458246_PM_at   | Gm30421       | NA         | 0.03  | 2.14 | 0.36  | 7.27E-01 | 8.76E-01 | -6.63 |
| 1450558_PM_at   | Vmn1r51       | NA         | 0.04  | 2.06 | 0.36  | 7.27E-01 | 8.76E-01 | -6.63 |
| 1452786_PM_at   | Trmu          | TRMU       | 0.04  | 2.98 | 0.36  | 7.27E-01 | 8.76E-01 | -6.63 |
| 1449256_PM_a_at | Rab11a        | RAB11A     | -0.14 | 4.08 | -0.36 | 7.27E-01 | 8.77E-01 | -6.63 |
| 1452721_PM_a_at | Ccdc53        | WASHC3     | -0.09 | 2.55 | -0.36 | 7.27E-01 | 8.77E-01 | -6.63 |
| 1417234_PM_at   | Mmp11         | MMP11      | -0.05 | 2.67 | -0.36 | 7.27E-01 | 8.77E-01 | -6.63 |
| 1458986_PM_at   | ---           | NA         | -0.04 | 2.26 | -0.36 | 7.27E-01 | 8.77E-01 | -6.63 |
| 1432045_PM_at   | Tsk5          | NA         | 0.03  | 2.30 | 0.36  | 7.27E-01 | 8.77E-01 | -6.63 |
| 1433548_PM_at   | Nprl3         | NPRL3      | 0.05  | 2.62 | 0.36  | 7.27E-01 | 8.77E-01 | -6.63 |
| 1435548_PM_at   | Mrs2          | MRS2       | 0.06  | 3.08 | 0.36  | 7.27E-01 | 8.77E-01 | -6.63 |
| 1449610_PM_at   | Ep400         | NA         | 0.07  | 2.87 | 0.36  | 7.27E-01 | 8.77E-01 | -6.63 |
| 1437100_PM_x_at | Pim3          | PIM3       | 0.11  | 7.89 | 0.36  | 7.27E-01 | 8.77E-01 | -6.63 |
| 1458939_PM_at   | ---           | NA         | 0.04  | 2.04 | 0.36  | 7.27E-01 | 8.77E-01 | -6.63 |
| 1437214_PM_at   | Lrrtm4        | LRRTM4     | -0.18 | 3.73 | -0.36 | 7.27E-01 | 8.77E-01 | -6.63 |
| 1455026_PM_at   | Sbno1         | SBNO1      | -0.06 | 2.52 | -0.36 | 7.27E-01 | 8.77E-01 | -6.63 |
| 1459896_PM_at   | Pogk          | POGK       | -0.05 | 2.30 | -0.36 | 7.27E-01 | 8.77E-01 | -6.63 |
| 1453138_PM_at   | Rpusd2        | NA         | -0.03 | 2.55 | -0.36 | 7.27E-01 | 8.77E-01 | -6.63 |
| 1420251_PM_at   | ---           | NA         | 0.04  | 2.65 | 0.36  | 7.27E-01 | 8.77E-01 | -6.63 |
| 1429460_PM_at   | Adgrf4        | ADGRF4     | 0.04  | 2.60 | 0.36  | 7.27E-01 | 8.77E-01 | -6.63 |
| 1440512_PM_at   | Atg4b         | ATG4B      | 0.04  | 2.06 | 0.36  | 7.27E-01 | 8.77E-01 | -6.63 |
| 1433280_PM_at   | 4933417G07Rik | NA         | -0.03 | 2.54 | -0.36 | 7.28E-01 | 8.77E-01 | -6.63 |
| 1447661_PM_at   | Pglyrp3       | NA         | -0.03 | 2.09 | -0.36 | 7.28E-01 | 8.77E-01 | -6.63 |
| 1458938_PM_at   | Pdcd10        | PDCD10     | 0.03  | 2.57 | 0.36  | 7.28E-01 | 8.77E-01 | -6.63 |
| 1437545_PM_at   | Rcor1         | RCOR1      | 0.07  | 2.48 | 0.36  | 7.28E-01 | 8.77E-01 | -6.63 |
| 1426074_PM_at   | ---           | NA         | -0.07 | 2.33 | -0.36 | 7.28E-01 | 8.77E-01 | -6.63 |
| 1428980_PM_at   | Kprp          | KPRP       | 0.03  | 1.97 | 0.36  | 7.28E-01 | 8.77E-01 | -6.63 |
| 1421457_PM_a_at | Samsn1        | SAMSN1     | 0.05  | 2.31 | 0.36  | 7.28E-01 | 8.77E-01 | -6.63 |
| 1452319_PM_at   | Zfp82         | ZFP82      | 0.05  | 2.27 | 0.36  | 7.28E-01 | 8.77E-01 | -6.63 |
| 1439026_PM_at   | ---           | NA         | 0.18  | 2.98 | 0.36  | 7.28E-01 | 8.77E-01 | -6.63 |
| 1426818_PM_at   | Arrdc4        | ARRDC4     | -0.06 | 2.51 | -0.36 | 7.28E-01 | 8.77E-01 | -6.63 |
| 1424492_PM_at   | Xndc1         | APO02495.2 | -0.08 | 3.52 | -0.36 | 7.28E-01 | 8.77E-01 | -6.63 |
| 1457465_PM_at   | Shroom4       | SHROOM4    | -0.04 | 2.56 | -0.36 | 7.28E-01 | 8.77E-01 | -6.63 |
| 1450854_PM_at   | Pa2g4         | PA2G4      | 0.08  | 2.91 | 0.36  | 7.28E-01 | 8.77E-01 | -6.63 |
| 1443911_PM_at   | ---           | NA         | -0.04 | 2.20 | -0.36 | 7.28E-01 | 8.77E-01 | -6.63 |
| 1459280_PM_at   | D1Ertid185e   | NA         | 0.03  | 2.06 | 0.36  | 7.28E-01 | 8.77E-01 | -6.63 |
| 1417136_PM_s_at | Srpk2         | SRPK2      | -0.10 | 4.00 | -0.36 | 7.28E-01 | 8.77E-01 | -6.63 |
| 1435091_PM_at   | Zfp568        | NA         | 0.04  | 2.30 | 0.36  | 7.28E-01 | 8.77E-01 | -6.63 |
| 1427134_PM_at   | Srek1         | SREK1      | -0.07 | 3.10 | -0.36 | 7.28E-01 | 8.77E-01 | -6.63 |
| 1448755_PM_at   | Col15a1       | COL15A1    | 0.05  | 2.43 | 0.36  | 7.28E-01 | 8.77E-01 | -6.63 |
| 1449701_PM_at   | Etf1          | NA         | -0.06 | 2.50 | -0.36 | 7.28E-01 | 8.77E-01 | -6.63 |
| 1453392_PM_at   | Ttc39b        | TTC39B     | 0.07  | 2.96 | 0.36  | 7.28E-01 | 8.77E-01 | -6.63 |
| 1439285_PM_at   | Ibtk          | NA         | -0.04 | 2.50 | -0.36 | 7.28E-01 | 8.77E-01 | -6.63 |
| 1444398_PM_at   | ---           | NA         | 0.05  | 2.38 | 0.36  | 7.28E-01 | 8.77E-01 | -6.63 |
| 1445042_PM_at   | ---           | NA         | -0.05 | 2.11 | -0.36 | 7.28E-01 | 8.77E-01 | -6.63 |
| 1420163_PM_at   | AA511261      | NA         | 0.04  | 3.38 | 0.36  | 7.28E-01 | 8.77E-01 | -6.63 |
| 1446669_PM_at   | ---           | NA         | 0.05  | 2.20 | 0.36  | 7.28E-01 | 8.77E-01 | -6.63 |
| 1450933_PM_at   | Pde7a         | PDE7A      | -0.12 | 2.32 | -0.36 | 7.28E-01 | 8.77E-01 | -6.63 |
| 1456270_PM_s_at | Pramel6       | PRAMEF9    | 0.03  | 2.12 | 0.36  | 7.28E-01 | 8.77E-01 | -6.63 |
| 1429930_PM_at   | Cfap45        | CFAP45     | 0.11  | 2.76 | 0.36  | 7.28E-01 | 8.77E-01 | -6.63 |
| 1445095_PM_at   | Iib1ra        | NA         | -0.04 | 3.18 | -0.36 | 7.29E-01 | 8.77E-01 | -6.63 |
| 1432569_PM_at   | Cby3          | NA         | 0.03  | 2.21 | 0.36  | 7.29E-01 | 8.77E-01 | -6.63 |
| 1448311_PM_at   | Usp5          | USP5       | 0.06  | 3.38 | 0.36  | 7.29E-01 | 8.77E-01 | -6.63 |
| 1422679_PM_s_at | Ctr9          | CTR9       | 0.07  | 4.02 | 0.36  | 7.29E-01 | 8.77E-01 | -6.63 |
| 1437869_PM_at   | Ppp2r3a       | PPP2R3A    | 0.12  | 3.04 | 0.36  | 7.29E-01 | 8.77E-01 | -6.63 |
| 1424834_PM_s_at | Itp2r         | ITPR2      | -0.06 | 3.61 | -0.36 | 7.29E-01 | 8.77E-01 | -6.63 |
| 1419547_PM_at   | Fahd1         | FAHD1      | -0.06 | 2.62 | -0.36 | 7.29E-01 | 8.77E-01 | -6.63 |
| 1460647_PM_a_at | Nr2f6         | NR2F6      | -0.16 | 4.15 | -0.36 | 7.29E-01 | 8.78E-01 | -6.63 |
| 1446983_PM_at   | Cdc73         | CDC73      | -0.03 | 2.23 | -0.36 | 7.29E-01 | 8.78E-01 | -6.63 |
| 1439254_PM_at   | Akap13        | AKAP13     | 0.04  | 2.11 | 0.36  | 7.29E-01 | 8.78E-01 | -6.63 |
| 1421064_PM_at   | Mpp5          | MPP5       | 0.05  | 2.44 | 0.36  | 7.29E-01 | 8.78E-01 | -6.63 |
| 1432938_PM_at   | ---           | NA         | -0.04 | 2.17 | -0.36 | 7.29E-01 | 8.78E-01 | -6.63 |
| 1451658_PM_a_at | Polr3c        | POLR3C     | -0.11 | 2.58 | -0.36 | 7.29E-01 | 8.78E-01 | -6.63 |
| 1458334_PM_at   | Wnt7a         | WNT7A      | -0.04 | 2.24 | -0.36 | 7.29E-01 | 8.78E-01 | -6.63 |
| 1427145_PM_at   | Iqsec1        | IQSEC1     | 0.07  | 6.87 | 0.36  | 7.29E-01 | 8.78E-01 | -6.63 |
| 1457677_PM_at   | Zfp952        | NA         | 0.05  | 3.64 | 0.36  | 7.29E-01 | 8.78E-01 | -6.63 |
| 1432006_PM_at   | Ap2a2         | AP2A2      | -0.06 | 2.90 | -0.36 | 7.29E-01 | 8.78E-01 | -6.63 |
| 1426109_PM_a_at | Slc14a2       | SLC14A2    | 0.04  | 2.44 | 0.36  | 7.29E-01 | 8.78E-01 | -6.63 |
| 1444283_PM_at   | Gimap7        | GIMAP7     | 0.03  | 2.09 | 0.36  | 7.29E-01 | 8.78E-01 | -6.63 |
| 1418159_PM_at   | Tfcp2         | TFCP2      | 0.06  | 2.58 | 0.36  | 7.29E-01 | 8.78E-01 | -6.63 |
| 1459473_PM_at   | Pdss2         | NA         | 0.03  | 2.52 | 0.36  | 7.29E-01 | 8.78E-01 | -6.63 |
| 1448152_PM_at   | Igf2          | IGF2       | 0.12  | 3.24 | 0.36  | 7.29E-01 | 8.78E-01 | -6.63 |
| 1433545_PM_s_at | Acad11        | ACAD11     | -0.04 | 2.45 | -0.36 | 7.29E-01 | 8.78E-01 | -6.63 |
| 1422285_PM_at   | Otp           | OTP        | 0.04  | 2.36 | 0.36  | 7.29E-01 | 8.78E-01 | -6.63 |
| 1442726_PM_s_at | Al845619      | NA         | 0.07  | 2.31 | 0.36  | 7.29E-01 | 8.78E-01 | -6.63 |

|                 |                    |          |       |      |       |          |          |       |
|-----------------|--------------------|----------|-------|------|-------|----------|----------|-------|
| 1448449_PM_at   | Ripk3              | RIPK3    | 0.05  | 2.53 | 0.36  | 7.30E-01 | 8.78E-01 | -6.63 |
| 1449825_PM_at   | Actrt1             | ACTRT1   | -0.03 | 2.24 | -0.36 | 7.30E-01 | 8.78E-01 | -6.63 |
| 1456450_PM_at   | ---                | NA       | 0.03  | 2.24 | 0.36  | 7.30E-01 | 8.78E-01 | -6.63 |
| 1450926_PM_at   | Atp6v1g1           | ATP6V1G1 | -0.06 | 2.70 | -0.36 | 7.30E-01 | 8.78E-01 | -6.63 |
| 1424390_PM_at   | Nupl1              | NA       | -0.05 | 3.95 | -0.35 | 7.30E-01 | 8.78E-01 | -6.63 |
| 1446361_PM_at   | ---                | NA       | 0.04  | 2.23 | 0.35  | 7.30E-01 | 8.78E-01 | -6.63 |
| 1441361_PM_at   | ---                | NA       | 0.08  | 2.40 | 0.35  | 7.30E-01 | 8.78E-01 | -6.63 |
| 1458262_PM_at   | ---                | NA       | 0.03  | 2.07 | 0.35  | 7.30E-01 | 8.78E-01 | -6.63 |
| 1438056_PM_x_at | Abcc5              | ABCC5    | -0.03 | 2.58 | -0.35 | 7.30E-01 | 8.78E-01 | -6.63 |
| 1428069_PM_at   | Cdca7              | CDCA7    | 0.03  | 2.37 | 0.35  | 7.30E-01 | 8.78E-01 | -6.63 |
| 1427722_PM_at   | Slc15a5            | SLC15A5  | 0.04  | 2.25 | 0.35  | 7.30E-01 | 8.78E-01 | -6.63 |
| 1425846_PM_a_at | Caln1              | CALN1    | 0.05  | 2.64 | 0.35  | 7.30E-01 | 8.78E-01 | -6.63 |
| 1439685_PM_at   | ---                | NA       | 0.08  | 3.45 | 0.35  | 7.30E-01 | 8.78E-01 | -6.63 |
| 1460451_PM_at   | Tmem52             | TMEM52   | 0.04  | 2.37 | 0.35  | 7.30E-01 | 8.78E-01 | -6.63 |
| 1443495_PM_at   | Atp5j2             | ATP5J2   | -0.03 | 2.51 | -0.35 | 7.30E-01 | 8.78E-01 | -6.63 |
| 1443723_PM_at   | Trpm3              | TRPM3    | 0.16  | 2.55 | 0.35  | 7.30E-01 | 8.78E-01 | -6.63 |
| 1439056_PM_at   | Gm9866             | NA       | -0.06 | 2.84 | -0.35 | 7.30E-01 | 8.78E-01 | -6.63 |
| 1451404_PM_at   | Wash1              | WASHC1   | -0.04 | 2.69 | -0.35 | 7.30E-01 | 8.78E-01 | -6.63 |
| 1446683_PM_at   | ---                | NA       | 0.04  | 3.01 | 0.35  | 7.30E-01 | 8.78E-01 | -6.63 |
| 1447017_PM_at   | ---                | NA       | 0.04  | 2.25 | 0.35  | 7.30E-01 | 8.78E-01 | -6.63 |
| 1448405_PM_a_at | Eid1               | EID1     | 0.22  | 7.01 | 0.35  | 7.30E-01 | 8.78E-01 | -6.63 |
| 1428025_PM_s_at | Pitpnc1            | PITPNC1  | 0.05  | 2.46 | 0.35  | 7.30E-01 | 8.78E-01 | -6.63 |
| 1445354_PM_at   | Nxpe3              | NXPE3    | 0.04  | 2.38 | 0.35  | 7.30E-01 | 8.78E-01 | -6.63 |
| 1437381_PM_x_at | Slc52a2            | SLC52A1  | 0.09  | 3.05 | 0.35  | 7.30E-01 | 8.78E-01 | -6.63 |
| 1453576_PM_at   | Nipbl              | NA       | -0.16 | 3.53 | -0.35 | 7.30E-01 | 8.78E-01 | -6.63 |
| 1422389_PM_at   | Tas2r105           | TAS2R10  | -0.03 | 2.06 | -0.35 | 7.30E-01 | 8.78E-01 | -6.63 |
| 1446195_PM_at   | ---                | NA       | 0.03  | 2.37 | 0.35  | 7.30E-01 | 8.78E-01 | -6.63 |
| 1417898_PM_a_at | Gzma               | GZMA     | 0.03  | 2.18 | 0.35  | 7.30E-01 | 8.78E-01 | -6.63 |
| 1459895_PM_at   | Ppp4r1-ps          | NA       | 0.09  | 3.59 | 0.35  | 7.31E-01 | 8.78E-01 | -6.63 |
| 1445535_PM_at   | AA07107            | NA       | 0.04  | 2.69 | 0.35  | 7.31E-01 | 8.79E-01 | -6.63 |
| 1432724_PM_at   | ---                | NA       | 0.05  | 2.31 | 0.35  | 7.31E-01 | 8.79E-01 | -6.63 |
| 1427790_PM_at   | Adam1a             | NA       | -0.15 | 2.83 | -0.35 | 7.31E-01 | 8.79E-01 | -6.63 |
| 1422507_PM_at   | Cstb               | CSTB     | -0.06 | 3.27 | -0.35 | 7.31E-01 | 8.79E-01 | -6.63 |
| AFFX-MUR_b2_at  | ---                | NA       | -0.04 | 6.71 | -0.35 | 7.31E-01 | 8.79E-01 | -6.63 |
| 1427633_PM_a_at | Pappa              | PAPPA    | -0.04 | 2.40 | -0.35 | 7.31E-01 | 8.79E-01 | -6.63 |
| 1445571_PM_at   | ---                | NA       | 0.03  | 2.30 | 0.35  | 7.31E-01 | 8.79E-01 | -6.63 |
| 1437627_PM_at   | Mex3d              | MEX3D    | 0.04  | 2.19 | 0.35  | 7.31E-01 | 8.79E-01 | -6.63 |
| 1439859_PM_at   | Tigar              | TIGAR    | 0.11  | 5.76 | 0.35  | 7.31E-01 | 8.79E-01 | -6.63 |
| 1423623_PM_at   | Gm7102 /// Mplkip  | MPLKIP   | -0.05 | 2.88 | -0.35 | 7.31E-01 | 8.79E-01 | -6.63 |
| 1422659_PM_at   | Camk2d             | NA       | -0.11 | 4.58 | -0.35 | 7.31E-01 | 8.79E-01 | -6.63 |
| 1420764_PM_at   | Scrg1              | SCRG1    | -0.06 | 2.63 | -0.35 | 7.31E-01 | 8.79E-01 | -6.63 |
| 1450597_PM_at   | Offr870            | NA       | -0.06 | 2.43 | -0.35 | 7.31E-01 | 8.79E-01 | -6.63 |
| 1456435_PM_at   | Morn1              | MORN1    | -0.04 | 2.40 | -0.35 | 7.31E-01 | 8.79E-01 | -6.63 |
| 1426526_PM_s_at | Ovgp1              | OVGP1    | -0.04 | 2.35 | -0.35 | 7.31E-01 | 8.79E-01 | -6.63 |
| 1456543_PM_at   | Prokr1             | PROKR1   | 0.04  | 2.19 | 0.35  | 7.31E-01 | 8.79E-01 | -6.63 |
| 1437231_PM_at   | Slitrk6            | SLITRK6  | 0.06  | 2.17 | 0.35  | 7.31E-01 | 8.79E-01 | -6.63 |
| 1424430_PM_at   | Mterf4             | MTERF4   | 0.10  | 4.50 | 0.35  | 7.31E-01 | 8.79E-01 | -6.63 |
| 1420936_PM_s_at | Cpsf2              | CPSF2    | -0.05 | 3.17 | -0.35 | 7.31E-01 | 8.79E-01 | -6.63 |
| 1441380_PM_at   | Ttc39c             | NA       | -0.14 | 4.19 | -0.35 | 7.31E-01 | 8.79E-01 | -6.63 |
| 1457202_PM_at   | ---                | NA       | 0.04  | 2.28 | 0.35  | 7.31E-01 | 8.79E-01 | -6.63 |
| 1420619_PM_a_at | Aes                | NA       | -0.08 | 5.52 | -0.35 | 7.31E-01 | 8.79E-01 | -6.63 |
| 1430795_PM_at   | ---                | NA       | -0.04 | 2.91 | -0.35 | 7.31E-01 | 8.79E-01 | -6.63 |
| 1426451_PM_at   | Spg11              | SPG11    | 0.10  | 3.68 | 0.35  | 7.31E-01 | 8.79E-01 | -6.63 |
| 1442496_PM_at   | CdkB               | NA       | -0.06 | 2.56 | -0.35 | 7.31E-01 | 8.79E-01 | -6.63 |
| 1420960_PM_at   | Fancg              | FANCG    | -0.05 | 2.84 | -0.35 | 7.31E-01 | 8.79E-01 | -6.63 |
| 1441326_PM_at   | Cp                 | CP       | 0.03  | 2.12 | 0.35  | 7.31E-01 | 8.79E-01 | -6.63 |
| 1442371_PM_at   | Lmbr1              | LMBR1    | 0.05  | 2.70 | 0.35  | 7.31E-01 | 8.79E-01 | -6.63 |
| 1436469_PM_at   | Brd7               | NA       | 0.05  | 2.74 | 0.35  | 7.31E-01 | 8.79E-01 | -6.63 |
| 1454321_PM_at   | ---                | NA       | 0.07  | 2.78 | 0.35  | 7.31E-01 | 8.79E-01 | -6.63 |
| 1435662_PM_at   | Nkap               | NKAP     | 0.12  | 6.14 | 0.35  | 7.31E-01 | 8.79E-01 | -6.63 |
| 1420115_PM_at   | Exosc8             | EXOSC8   | -0.07 | 2.57 | -0.35 | 7.32E-01 | 8.79E-01 | -6.63 |
| 1448327_PM_at   | Actn2              | ACTN2    | -0.06 | 2.63 | -0.35 | 7.32E-01 | 8.79E-01 | -6.63 |
| 1442690_PM_at   | Tmem143            | TMEM143  | 0.03  | 2.26 | 0.35  | 7.32E-01 | 8.79E-01 | -6.63 |
| 1450297_PM_at   | Il6                | IL6      | 0.04  | 2.06 | 0.35  | 7.32E-01 | 8.79E-01 | -6.63 |
| 1438267_PM_x_at | Rnps1              | RNPS1    | -0.16 | 6.87 | -0.35 | 7.32E-01 | 8.79E-01 | -6.64 |
| 1432548_PM_at   | Parp14             | PARP14   | 0.06  | 3.07 | 0.35  | 7.32E-01 | 8.79E-01 | -6.64 |
| 1455035_PM_s_at | Nop56              | NOP56    | 0.07  | 8.27 | 0.35  | 7.32E-01 | 8.79E-01 | -6.64 |
| 1452177_PM_at   | Abcf3              | NA       | 0.09  | 2.63 | 0.35  | 7.32E-01 | 8.79E-01 | -6.64 |
| 1454694_PM_a_at | Top2a              | TOP2A    | 0.03  | 2.16 | 0.35  | 7.32E-01 | 8.79E-01 | -6.64 |
| 1418891_PM_a_at | Rab3d              | RAB3D    | 0.05  | 2.38 | 0.35  | 7.32E-01 | 8.79E-01 | -6.64 |
| 1452600_PM_at   | Taf6l /// Tmem179b | TAF6L    | 0.03  | 2.14 | 0.35  | 7.32E-01 | 8.79E-01 | -6.64 |
| 1440352_PM_at   | 1700028E10Rik      | NA       | 0.07  | 2.27 | 0.35  | 7.32E-01 | 8.79E-01 | -6.64 |
| 1433706_PM_a_at | Hacd3              | HACD3    | -0.16 | 8.94 | -0.35 | 7.32E-01 | 8.79E-01 | -6.64 |
| 1460335_PM_at   | Lysmd3             | LYSMD3   | 0.05  | 2.56 | 0.35  | 7.32E-01 | 8.79E-01 | -6.64 |
| 1432954_PM_at   | ---                | NA       | 0.05  | 2.45 | 0.35  | 7.32E-01 | 8.79E-01 | -6.64 |

|                 |                        |          |       |      |       |          |          |       |
|-----------------|------------------------|----------|-------|------|-------|----------|----------|-------|
| 1425131_PM_at   | Ptpn5                  | PTPN5    | -0.05 | 3.07 | -0.35 | 7.32E-01 | 8.79E-01 | -6.64 |
| 1441548_PM_at   | FrmD4b                 | FRMD4B   | 0.04  | 2.10 | 0.35  | 7.32E-01 | 8.79E-01 | -6.64 |
| 1456999_PM_at   | Wipi2                  | WIPI2    | 0.10  | 2.75 | 0.35  | 7.32E-01 | 8.79E-01 | -6.64 |
| 1433158_PM_at   | Kif13b                 | NA       | 0.04  | 2.87 | 0.35  | 7.32E-01 | 8.79E-01 | -6.64 |
| 1439737_PM_x_at | Med6                   | MED6     | 0.05  | 2.37 | 0.35  | 7.32E-01 | 8.79E-01 | -6.64 |
| 1442108_PM_at   | Rnf25                  | NA       | 0.04  | 2.47 | 0.35  | 7.32E-01 | 8.79E-01 | -6.64 |
| 1424751_PM_at   | Abt1                   | ABT1     | -0.07 | 2.77 | -0.35 | 7.32E-01 | 8.79E-01 | -6.64 |
| 1447966_PM_a_at | Tmem69                 | TMEM69   | 0.06  | 2.21 | 0.35  | 7.32E-01 | 8.79E-01 | -6.64 |
| 1425763_PM_x_at | Igh-VJ558 ///Igha      | NA       | 0.22  | 4.83 | 0.35  | 7.32E-01 | 8.79E-01 | -6.64 |
| 1452764_PM_at   | Socs6                  | SOCS6    | -0.09 | 2.87 | -0.35 | 7.32E-01 | 8.79E-01 | -6.64 |
| 1420842_PM_at   | Ptprf                  | PTPRF    | -0.08 | 5.37 | -0.35 | 7.32E-01 | 8.79E-01 | -6.64 |
| 1438745_PM_at   | Gm10638                | NA       | -0.06 | 2.51 | -0.35 | 7.32E-01 | 8.79E-01 | -6.64 |
| 1437830_PM_x_at | Zbed3                  | ZBED3    | -0.08 | 3.56 | -0.35 | 7.33E-01 | 8.80E-01 | -6.64 |
| 1449973_PM_a_at | Peip1                  | PELP1    | -0.07 | 2.86 | -0.35 | 7.33E-01 | 8.80E-01 | -6.64 |
| 1433193_PM_at   | 4930433M22Rik          | NA       | -0.04 | 2.71 | -0.35 | 7.33E-01 | 8.80E-01 | -6.64 |
| 1440619_PM_at   | Mapk8ip1               | MAPK8IP1 | 0.04  | 2.04 | 0.35  | 7.33E-01 | 8.80E-01 | -6.64 |
| 1430946_PM_at   | LOC102635707           | NA       | 0.05  | 2.80 | 0.35  | 7.33E-01 | 8.80E-01 | -6.64 |
| 1455121_PM_at   | Lcor                   | NA       | -0.08 | 2.55 | -0.35 | 7.33E-01 | 8.80E-01 | -6.64 |
| 1443457_PM_at   | ---                    | NA       | 0.04  | 2.51 | 0.35  | 7.33E-01 | 8.80E-01 | -6.64 |
| 1428588_PM_a_at | Mrp41                  | MRPL41   | -0.12 | 6.23 | -0.35 | 7.33E-01 | 8.80E-01 | -6.64 |
| 1436360_PM_at   | Zscan22                | ZSCAN22  | -0.08 | 2.34 | -0.35 | 7.33E-01 | 8.80E-01 | -6.64 |
| 1422135_PM_at   | LOC102643033 ///Zfp146 | ZNF146   | 0.05  | 2.10 | 0.35  | 7.33E-01 | 8.80E-01 | -6.64 |
| 1441975_PM_at   | Acpp                   | ACPP     | -0.04 | 2.33 | -0.35 | 7.33E-01 | 8.80E-01 | -6.64 |
| AFFX-PheX-M_at  | ---                    | NA       | 0.02  | 2.14 | 0.35  | 7.33E-01 | 8.80E-01 | -6.64 |
| 1453761_PM_at   | Phf6                   | PHF6     | 0.07  | 2.66 | 0.35  | 7.33E-01 | 8.80E-01 | -6.64 |
| 1429290_PM_at   | Cbx6                   | CBX6     | 0.04  | 3.22 | 0.35  | 7.33E-01 | 8.80E-01 | -6.64 |
| 1444052_PM_at   | Flt4                   | FLT4     | 0.04  | 2.31 | 0.35  | 7.33E-01 | 8.80E-01 | -6.64 |
| 1433675_PM_at   | Snhg1                  | NA       | -0.12 | 4.15 | -0.35 | 7.33E-01 | 8.80E-01 | -6.64 |
| 1428310_PM_at   | Larp7                  | LARP7    | -0.09 | 3.32 | -0.35 | 7.33E-01 | 8.80E-01 | -6.64 |
| 1424596_PM_s_at | Lmcd1                  | LMCD1    | 0.03  | 2.20 | 0.35  | 7.33E-01 | 8.80E-01 | -6.64 |
| 1459299_PM_at   | Myo3b                  | MYO3B    | 0.04  | 2.47 | 0.35  | 7.33E-01 | 8.80E-01 | -6.64 |
| 1458120_PM_at   | Cdh18                  | CDH18    | 0.04  | 2.17 | 0.35  | 7.33E-01 | 8.80E-01 | -6.64 |
| 1433906_PM_at   | Cvs1                   | CLVS1    | 0.07  | 4.45 | 0.35  | 7.33E-01 | 8.80E-01 | -6.64 |
| 1450420_PM_at   | Stag1                  | STAG1    | -0.06 | 2.79 | -0.35 | 7.33E-01 | 8.80E-01 | -6.64 |
| 1436903_PM_at   | Ubqln3                 | UBQLN3   | 0.06  | 2.16 | 0.35  | 7.33E-01 | 8.80E-01 | -6.64 |
| 1434591_PM_at   | Zfp862-ps              | NA       | 0.05  | 2.64 | 0.35  | 7.33E-01 | 8.80E-01 | -6.64 |
| 1450089_PM_a_at | Srprb                  | SRPRB    | 0.06  | 2.58 | 0.35  | 7.34E-01 | 8.80E-01 | -6.64 |
| 1438182_PM_x_at | Asb6                   | ASB6     | 0.12  | 4.52 | 0.35  | 7.33E-01 | 8.80E-01 | -6.64 |
| 1436445_PM_at   | Gm996                  | C9orf172 | -0.08 | 2.82 | -0.35 | 7.34E-01 | 8.80E-01 | -6.64 |
| 1429668_PM_at   | Pou4f1                 | POU4F1   | 0.04  | 2.19 | 0.35  | 7.34E-01 | 8.80E-01 | -6.64 |
| 1420014_PM_at   | Lss                    | NA       | 0.15  | 4.68 | 0.35  | 7.34E-01 | 8.80E-01 | -6.64 |
| 1430508_PM_at   | 1700084F23Rik          | NA       | 0.03  | 2.22 | 0.35  | 7.34E-01 | 8.80E-01 | -6.64 |
| 1451943_PM_a_at | Ppm1a                  | PPM1A    | 0.11  | 3.76 | 0.35  | 7.34E-01 | 8.80E-01 | -6.64 |
| 1438417_PM_at   | Pwpp2b                 | PWWP2B   | -0.07 | 2.21 | -0.35 | 7.34E-01 | 8.80E-01 | -6.64 |
| 1440811_PM_x_at | Cd8a                   | CD8A     | -0.03 | 2.08 | -0.35 | 7.34E-01 | 8.80E-01 | -6.64 |
| 1439181_PM_at   | Zfp658                 | ZNF175   | 0.04  | 2.49 | 0.35  | 7.34E-01 | 8.80E-01 | -6.64 |
| 1441087_PM_at   | Tunar                  | NA       | -0.13 | 2.94 | -0.35 | 7.34E-01 | 8.80E-01 | -6.64 |
| 1439095_PM_at   | Srsf11                 | SRSF11   | -0.16 | 6.06 | -0.35 | 7.34E-01 | 8.81E-01 | -6.64 |
| 1445111_PM_at   | Gm38785                | NA       | 0.03  | 1.98 | 0.35  | 7.34E-01 | 8.81E-01 | -6.64 |
| 1450601_PM_at   | Vmn1r46                | NA       | 0.04  | 2.11 | 0.35  | 7.34E-01 | 8.81E-01 | -6.64 |
| 1451695_PM_a_at | Gm7338 ///Gpx4         | GPX4     | 0.10  | 2.80 | 0.35  | 7.34E-01 | 8.81E-01 | -6.64 |
| 1420268_PM_x_at | ---                    | NA       | -0.03 | 2.30 | -0.35 | 7.34E-01 | 8.81E-01 | -6.64 |
| 1420950_PM_at   | Znrf1                  | ZNRF1    | -0.08 | 4.35 | -0.35 | 7.34E-01 | 8.81E-01 | -6.64 |
| 1442621_PM_at   | C77798                 | NA       | 0.06  | 2.65 | 0.35  | 7.34E-01 | 8.81E-01 | -6.64 |
| 1436514_PM_at   | Gpc4                   | NA       | -0.12 | 3.14 | -0.35 | 7.34E-01 | 8.81E-01 | -6.64 |
| 1418201_PM_at   | Plekkg2                | PLEKHG2  | -0.07 | 2.08 | -0.35 | 7.34E-01 | 8.81E-01 | -6.64 |
| 1446269_PM_at   | Hbp1                   | HBP1     | 0.03  | 2.09 | 0.35  | 7.34E-01 | 8.81E-01 | -6.64 |
| 1427180_PM_at   | Slc27a3                | SLC27A3  | 0.03  | 2.32 | 0.35  | 7.34E-01 | 8.81E-01 | -6.64 |
| 1421058_PM_at   | Adh7                   | ADH7     | 0.05  | 2.36 | 0.35  | 7.34E-01 | 8.81E-01 | -6.64 |
| 1457608_PM_at   | ---                    | NA       | 0.06  | 2.68 | 0.35  | 7.34E-01 | 8.81E-01 | -6.64 |
| 1441576_PM_at   | ---                    | NA       | 0.06  | 3.19 | 0.35  | 7.35E-01 | 8.81E-01 | -6.64 |
| 1452626_PM_a_at | Fuom                   | FUOM     | 0.06  | 2.94 | 0.35  | 7.35E-01 | 8.81E-01 | -6.64 |
| 1429926_PM_at   | ---                    | NA       | 0.07  | 2.48 | 0.35  | 7.35E-01 | 8.81E-01 | -6.64 |
| 1459033_PM_at   | ---                    | NA       | 0.04  | 2.23 | 0.35  | 7.35E-01 | 8.81E-01 | -6.64 |
| 1454761_PM_at   | Plppr3                 | PLPPR3   | -0.04 | 2.60 | -0.35 | 7.35E-01 | 8.81E-01 | -6.64 |
| 1422065_PM_at   | Klrb1b                 | KL RB1   | 0.03  | 1.87 | 0.35  | 7.35E-01 | 8.81E-01 | -6.64 |
| 1422840_PM_at   | Ube2d2b                | UBE2D2   | 0.03  | 2.04 | 0.35  | 7.35E-01 | 8.81E-01 | -6.64 |
| 1424192_PM_at   | Fam216a                | FAM216A  | 0.06  | 5.13 | 0.35  | 7.35E-01 | 8.81E-01 | -6.64 |
| 1450253_PM_a_at | Map3k4                 | MAP3K4   | 0.11  | 3.75 | 0.35  | 7.35E-01 | 8.81E-01 | -6.64 |
| 1459098_PM_at   | ---                    | NA       | -0.06 | 2.59 | -0.35 | 7.35E-01 | 8.81E-01 | -6.64 |
| 1416424_PM_at   | Plin3                  | PLIN3    | 0.03  | 2.30 | 0.35  | 7.35E-01 | 8.81E-01 | -6.64 |
| 1447455_PM_at   | ---                    | NA       | 0.04  | 2.49 | 0.35  | 7.35E-01 | 8.81E-01 | -6.64 |
| 1455451_PM_at   | Kctd14                 | KCTD14   | 0.04  | 2.22 | 0.35  | 7.35E-01 | 8.81E-01 | -6.64 |
| 1449131_PM_s_at | Cd1d1                  | CD1D     | 0.05  | 2.49 | 0.35  | 7.35E-01 | 8.81E-01 | -6.64 |

|                             |               |          |       |      |       |          |          |       |
|-----------------------------|---------------|----------|-------|------|-------|----------|----------|-------|
| 1447332_PM_at               | ---           | NA       | 0.09  | 2.41 | 0.35  | 7.35E-01 | 8.81E-01 | -6.64 |
| AFFX-b-ActinMur/M12481_5_at | Actb          | NA       | 0.16  | 6.39 | 0.35  | 7.35E-01 | 8.81E-01 | -6.64 |
| 1456615_PM_a_at             | Bptf          | BPTF     | -0.11 | 2.77 | -0.35 | 7.35E-01 | 8.81E-01 | -6.64 |
| 1442715_PM_at               | ---           | NA       | -0.09 | 2.67 | -0.35 | 7.35E-01 | 8.81E-01 | -6.64 |
| 1416019_PM_at               | Dr1           | DR1      | 0.09  | 3.08 | 0.35  | 7.35E-01 | 8.81E-01 | -6.64 |
| 1443153_PM_at               | ---           | NA       | -0.04 | 2.39 | -0.35 | 7.35E-01 | 8.81E-01 | -6.64 |
| 1452857_PM_at               | Crebzf        | CREBZF   | 0.07  | 2.27 | 0.35  | 7.35E-01 | 8.81E-01 | -6.64 |
| 1455985_PM_x_at             | Shmt2         | SHMT2    | 0.06  | 3.94 | 0.35  | 7.35E-01 | 8.81E-01 | -6.64 |
| 1456889_PM_at               | Gm4285        | NA       | -0.05 | 3.17 | -0.35 | 7.35E-01 | 8.81E-01 | -6.64 |
| 1431855_PM_at               | 4930570E03Rik | NA       | 0.03  | 2.28 | 0.35  | 7.35E-01 | 8.81E-01 | -6.64 |
| 1445812_PM_at               | ---           | NA       | -0.03 | 2.16 | -0.35 | 7.35E-01 | 8.81E-01 | -6.64 |
| 1434119_PM_at               | D2Wsu81e      | SPOUT1   | -0.11 | 3.44 | -0.35 | 7.36E-01 | 8.81E-01 | -6.64 |
| 1452510_PM_at               | Pax7          | PAX7     | 0.03  | 1.95 | 0.35  | 7.36E-01 | 8.81E-01 | -6.64 |
| 1459614_PM_at               | Lama5         | LAMA5    | 0.05  | 2.57 | 0.35  | 7.36E-01 | 8.81E-01 | -6.64 |
| 1460358_PM_s_at             | Nudt22        | NUDT22   | 0.05  | 2.97 | 0.35  | 7.36E-01 | 8.81E-01 | -6.64 |
| 1425675_PM_s_at             | Ceacam1       | PSG7     | 0.05  | 2.87 | 0.35  | 7.36E-01 | 8.81E-01 | -6.64 |
| 1445012_PM_at               | ---           | NA       | 0.03  | 1.96 | 0.35  | 7.36E-01 | 8.81E-01 | -6.64 |
| 1438905_PM_x_at             | R3hdm4        | R3HDM4   | 0.05  | 3.67 | 0.35  | 7.36E-01 | 8.81E-01 | -6.64 |
| 1447739_PM_x_at             | Klhdc4        | KLHDC4   | 0.07  | 4.59 | 0.35  | 7.36E-01 | 8.82E-01 | -6.64 |
| 1439876_PM_at               | Vti1a         | NA       | 0.03  | 2.59 | 0.35  | 7.36E-01 | 8.82E-01 | -6.64 |
| 1431279_PM_s_at             | Ttl5          | TTL5     | 0.03  | 2.95 | 0.35  | 7.36E-01 | 8.82E-01 | -6.64 |
| 1456803_PM_at               | ---           | NA       | 0.16  | 3.38 | 0.35  | 7.36E-01 | 8.82E-01 | -6.64 |
| 1438638_PM_x_at             | Dennd6b       | DENND6B  | -0.07 | 4.81 | -0.35 | 7.36E-01 | 8.82E-01 | -6.64 |
| 1428979_PM_at               | Mtf1          | MTF1     | -0.06 | 2.92 | -0.35 | 7.36E-01 | 8.82E-01 | -6.64 |
| 1437829_PM_s_at             | Eef2k         | EEF2K    | -0.06 | 8.83 | -0.35 | 7.36E-01 | 8.82E-01 | -6.64 |
| 1439203_PM_at               | ---           | NA       | 0.04  | 2.54 | 0.35  | 7.36E-01 | 8.82E-01 | -6.64 |
| 1419276_PM_at               | Enpp1         | ENPP1    | 0.04  | 2.05 | 0.35  | 7.36E-01 | 8.82E-01 | -6.64 |
| 1426769_PM_s_at             | Maml1         | MAML1    | -0.11 | 3.91 | -0.35 | 7.36E-01 | 8.82E-01 | -6.64 |
| 1417807_PM_at               | Ufsp1         | UFSP1    | -0.04 | 2.28 | -0.35 | 7.36E-01 | 8.82E-01 | -6.64 |
| 1419960_PM_at               | Cphx3         | NA       | -0.03 | 2.51 | -0.35 | 7.36E-01 | 8.82E-01 | -6.64 |
| 1441817_PM_at               | 1700099I09Rik | NA       | 0.03  | 2.05 | 0.35  | 7.36E-01 | 8.82E-01 | -6.64 |
| 1423760_PM_at               | Cd44          | CD44     | 0.03  | 2.05 | 0.35  | 7.36E-01 | 8.82E-01 | -6.64 |
| 1419394_PM_s_at             | S100a8        | S100A8   | 0.04  | 2.25 | 0.35  | 7.36E-01 | 8.82E-01 | -6.64 |
| 1418521_PM_a_at             | Mtx1          | MTX1     | 0.14  | 6.05 | 0.35  | 7.36E-01 | 8.82E-01 | -6.64 |
| 1420899_PM_at               | Rab18         | RAB18    | -0.09 | 3.32 | -0.35 | 7.36E-01 | 8.82E-01 | -6.64 |
| 1417224_PM_a_at             | Cd2bp2        | CD2BP2   | 0.22  | 3.94 | 0.35  | 7.36E-01 | 8.82E-01 | -6.64 |
| 1432221_PM_at               | ---           | NA       | 0.05  | 2.52 | 0.35  | 7.37E-01 | 8.82E-01 | -6.64 |
| 1444235_PM_at               | 1700025G04Rik | C1orf21  | -0.06 | 2.21 | -0.35 | 7.37E-01 | 8.82E-01 | -6.64 |
| 1415777_PM_at               | Pnlpp1        | PNLIPRP1 | 0.04  | 2.48 | 0.35  | 7.37E-01 | 8.82E-01 | -6.64 |
| 1424100_PM_s_at             | Cend1         | CEND1    | 0.10  | 3.89 | 0.35  | 7.37E-01 | 8.82E-01 | -6.64 |
| 1449306_PM_at               | Hsf2          | HSF2     | -0.05 | 2.29 | -0.35 | 7.37E-01 | 8.82E-01 | -6.64 |
| 1448054_PM_at               | Ing4          | ING4     | 0.06  | 2.77 | 0.35  | 7.37E-01 | 8.82E-01 | -6.64 |
| 1449445_PM_x_at             | Mfap1a        | MFAP1    | -0.08 | 4.90 | -0.35 | 7.37E-01 | 8.82E-01 | -6.64 |
| 1452334_PM_at               | Cenpf         | CENPF    | 0.02  | 2.22 | 0.35  | 7.37E-01 | 8.82E-01 | -6.64 |
| 1428510_PM_at               | Adgrl1        | ADGRL1   | 0.06  | 8.29 | 0.35  | 7.37E-01 | 8.82E-01 | -6.64 |
| 1436312_PM_at               | Ikzf1         | IKZF1    | 0.04  | 2.35 | 0.35  | 7.37E-01 | 8.82E-01 | -6.64 |
| 1442593_PM_at               | ---           | NA       | 0.17  | 3.33 | 0.35  | 7.37E-01 | 8.82E-01 | -6.64 |
| 1451210_PM_at               | Plpp2         | PLPP2    | 0.05  | 2.43 | 0.35  | 7.37E-01 | 8.82E-01 | -6.64 |
| 1424988_PM_at               | Myli1         | MYLIP    | -0.06 | 2.76 | -0.35 | 7.37E-01 | 8.82E-01 | -6.64 |
| 1420891_PM_at               | Wnt7b         | WNT7B    | -0.03 | 2.47 | -0.34 | 7.37E-01 | 8.82E-01 | -6.64 |
| 1438349_PM_at               | Zfp229        | NA       | 0.04  | 2.23 | 0.34  | 7.37E-01 | 8.82E-01 | -6.64 |
| 1419580_PM_at               | Dlg4          | DLG4     | 0.07  | 3.33 | 0.35  | 7.37E-01 | 8.82E-01 | -6.64 |
| 1424255_PM_at               | Supt5         | SUPT5H   | 0.10  | 5.86 | 0.34  | 7.37E-01 | 8.82E-01 | -6.64 |
| 1424045_PM_at               | Tmem242       | TMEM242  | -0.12 | 3.13 | -0.34 | 7.37E-01 | 8.82E-01 | -6.64 |
| 1446384_PM_at               | ---           | NA       | -0.06 | 2.12 | -0.34 | 7.37E-01 | 8.82E-01 | -6.64 |
| 1456220_PM_at               | Fbx7          | NA       | 0.08  | 2.86 | 0.34  | 7.37E-01 | 8.82E-01 | -6.64 |
| 1435104_PM_at               | Zdhc21        | ZDHHC21  | 0.11  | 3.34 | 0.34  | 7.37E-01 | 8.82E-01 | -6.64 |
| 1448513_PM_a_at             | Npc2          | NPC2     | -0.17 | 7.42 | -0.34 | 7.37E-01 | 8.82E-01 | -6.64 |
| 1449422_PM_at               | Cdh4          | CDH4     | 0.06  | 2.42 | 0.34  | 7.37E-01 | 8.82E-01 | -6.64 |
| 1460337_PM_at               | Sh3kbp1       | SH3KBP1  | 0.09  | 3.02 | 0.34  | 7.37E-01 | 8.82E-01 | -6.64 |
| 1443703_PM_at               | ---           | NA       | -0.04 | 1.99 | -0.34 | 7.37E-01 | 8.82E-01 | -6.64 |
| 1456254_PM_at               | ---           | NA       | 0.03  | 2.11 | 0.34  | 7.37E-01 | 8.82E-01 | -6.64 |
| 1453680_PM_at               | ---           | NA       | 0.04  | 2.35 | 0.34  | 7.37E-01 | 8.82E-01 | -6.64 |
| 1419123_PM_a_at             | Pdgfc         | PDGFC    | 0.11  | 2.49 | 0.34  | 7.37E-01 | 8.82E-01 | -6.64 |
| 1416125_PM_at               | Fkbp5         | FKBP5    | -0.13 | 3.50 | -0.34 | 7.38E-01 | 8.83E-01 | -6.64 |
| 1433438_PM_x_at             | Mela          | NA       | -0.04 | 2.20 | -0.34 | 7.38E-01 | 8.83E-01 | -6.64 |
| 1446591_PM_at               | Stmnd1        | STMND1   | 0.04  | 2.19 | 0.34  | 7.38E-01 | 8.83E-01 | -6.64 |
| 1430531_PM_at               | ---           | NA       | 0.05  | 2.32 | 0.34  | 7.38E-01 | 8.83E-01 | -6.64 |
| 1453445_PM_at               | ---           | NA       | 0.14  | 2.72 | 0.34  | 7.37E-01 | 8.83E-01 | -6.64 |
| 1417243_PM_at               | Fam192a       | FAM192A  | -0.05 | 5.00 | -0.34 | 7.38E-01 | 8.83E-01 | -6.64 |
| 1428934_PM_at               | Cntm2b        | CMTM2    | -0.03 | 2.15 | -0.34 | 7.38E-01 | 8.83E-01 | -6.64 |
| 1438246_PM_at               | Csnk1g1       | CSNK1G1  | 0.05  | 2.37 | 0.34  | 7.38E-01 | 8.83E-01 | -6.64 |
| 1452738_PM_at               | Stoml1        | STOML1   | 0.08  | 3.61 | 0.34  | 7.38E-01 | 8.83E-01 | -6.64 |
| 1431184_PM_a_at             | 4930503B20Rik | NA       | 0.03  | 2.03 | 0.34  | 7.38E-01 | 8.83E-01 | -6.64 |
| 1424734_PM_at               | Rasgrf1       | RASGRF1  | -0.14 | 5.64 | -0.34 | 7.38E-01 | 8.83E-01 | -6.64 |

|                 |                                                                 |          |       |      |       |          |          |       |
|-----------------|-----------------------------------------------------------------|----------|-------|------|-------|----------|----------|-------|
| 1446110_PM_at   | Gm34490                                                         | NA       | 0.03  | 2.15 | 0.34  | 7.38E-01 | 8.83E-01 | -6.64 |
| 1440475_PM_at   | ---                                                             | NA       | 0.04  | 2.48 | 0.34  | 7.38E-01 | 8.83E-01 | -6.64 |
| 1425657_PM_at   | 1700016D06Rik                                                   | NA       | -0.03 | 2.28 | -0.34 | 7.38E-01 | 8.83E-01 | -6.64 |
| 1449385_PM_at   | Hsd17b6                                                         | HSD17B6  | 0.06  | 2.61 | 0.34  | 7.38E-01 | 8.83E-01 | -6.64 |
| 1423243_PM_at   | Mpp1                                                            | MPP1     | 0.08  | 2.63 | 0.34  | 7.38E-01 | 8.83E-01 | -6.64 |
| 1417129_PM_a_at | Meis2                                                           | MEIS2    | 0.23  | 3.49 | 0.34  | 7.38E-01 | 8.83E-01 | -6.64 |
| 1437204_PM_a_at | Tcf25                                                           | TCF25    | -0.09 | 2.80 | -0.34 | 7.38E-01 | 8.83E-01 | -6.64 |
| 1453298_PM_at   | Ptpn21                                                          | NA       | -0.03 | 2.53 | -0.34 | 7.38E-01 | 8.83E-01 | -6.64 |
| 1427742_PM_a_at | Klf6                                                            | KLf6     | 0.04  | 2.12 | 0.34  | 7.38E-01 | 8.83E-01 | -6.64 |
| 1453319_PM_at   | Ccar1                                                           | NA       | -0.05 | 2.20 | -0.34 | 7.38E-01 | 8.83E-01 | -6.64 |
| 1452681_PM_at   | Dtymk                                                           | DTYMK    | -0.12 | 4.99 | -0.34 | 7.38E-01 | 8.83E-01 | -6.64 |
| 1446042_PM_at   | ---                                                             | NA       | -0.11 | 2.71 | -0.34 | 7.38E-01 | 8.83E-01 | -6.64 |
| 1457230_PM_at   | Gnpda2                                                          | GNPDA2   | -0.07 | 2.85 | -0.34 | 7.38E-01 | 8.83E-01 | -6.64 |
| 1434951_PM_at   | Arm8                                                            | ARM8     | 0.19  | 5.74 | 0.34  | 7.38E-01 | 8.83E-01 | -6.64 |
| 1457749_PM_at   | ---                                                             | NA       | 0.10  | 3.14 | 0.34  | 7.38E-01 | 8.83E-01 | -6.64 |
| 1459902_PM_at   | Arl14ep                                                         | ARL14EP  | 0.11  | 4.47 | 0.34  | 7.38E-01 | 8.83E-01 | -6.64 |
| 1447599_PM_x_at | Epn2                                                            | EPN2     | -0.04 | 2.05 | -0.34 | 7.39E-01 | 8.83E-01 | -6.64 |
| 1424180_PM_a_at | Med24                                                           | MED24    | -0.03 | 2.27 | -0.34 | 7.39E-01 | 8.83E-01 | -6.64 |
| 1416028_PM_a_at | Hn1                                                             | JPT1     | 0.06  | 2.53 | 0.34  | 7.39E-01 | 8.83E-01 | -6.64 |
| 1459367_PM_at   | ---                                                             | NA       | 0.11  | 2.40 | 0.34  | 7.39E-01 | 8.83E-01 | -6.64 |
| 1433689_PM_s_at | Rps9                                                            | RPS9     | 0.13  | 3.65 | 0.34  | 7.39E-01 | 8.83E-01 | -6.64 |
| 1416127_PM_a_at | Dnpep                                                           | DNPEP    | -0.06 | 2.71 | -0.34 | 7.39E-01 | 8.83E-01 | -6.64 |
| 1417752_PM_at   | Coro1c                                                          | CORO1C   | -0.05 | 2.92 | -0.34 | 7.39E-01 | 8.83E-01 | -6.64 |
| 1459118_PM_at   | LOC102641994                                                    | NA       | 0.03  | 2.08 | 0.34  | 7.39E-01 | 8.83E-01 | -6.64 |
| 1434142_PM_at   | Ppm1d                                                           | PPM1D    | 0.05  | 2.46 | 0.34  | 7.39E-01 | 8.83E-01 | -6.64 |
| 1452756_PM_at   | Rnf215                                                          | RNF215   | 0.07  | 3.27 | 0.34  | 7.39E-01 | 8.83E-01 | -6.64 |
| 1434962_PM_x_at | Cc127a /// Cc127b ///<br>Gm13306 /// Gm2506 ///<br>LOC100861978 | CCL27    | -0.17 | 5.37 | -0.34 | 7.39E-01 | 8.83E-01 | -6.64 |
| 1437928_PM_at   | Pcdh12                                                          | PCDH12   | -0.05 | 2.71 | -0.34 | 7.39E-01 | 8.83E-01 | -6.64 |
| 1444987_PM_at   | Ctsb                                                            | NA       | 0.04  | 2.23 | 0.34  | 7.39E-01 | 8.83E-01 | -6.64 |
| 1457585_PM_at   | C2cd2l                                                          | C2CD2L   | 0.06  | 2.28 | 0.34  | 7.39E-01 | 8.83E-01 | -6.64 |
| 1420581_PM_at   | Gpr143                                                          | GPR143   | -0.04 | 2.27 | -0.34 | 7.39E-01 | 8.83E-01 | -6.64 |
| 1451637_PM_a_at | Prol1                                                           | NA       | 0.14  | 3.45 | 0.34  | 7.39E-01 | 8.83E-01 | -6.64 |
| 1437325_PM_x_at | Aldh18a1                                                        | ALDH18A1 | -0.16 | 2.48 | -0.34 | 7.39E-01 | 8.84E-01 | -6.64 |
| 1450878_PM_at   | Sri                                                             | SRI      | -0.14 | 4.77 | -0.34 | 7.39E-01 | 8.84E-01 | -6.64 |
| 1433808_PM_at   | Mroh1                                                           | MROH1    | -0.08 | 3.26 | -0.34 | 7.39E-01 | 8.84E-01 | -6.64 |
| 1417301_PM_at   | Fzd6                                                            | FZD6     | -0.07 | 3.16 | -0.34 | 7.39E-01 | 8.84E-01 | -6.64 |
| 1425519_PM_a_at | Cd74                                                            | CD74     | -0.06 | 3.93 | -0.34 | 7.39E-01 | 8.84E-01 | -6.64 |
| 1442133_PM_at   | Ado                                                             | ADO      | -0.04 | 2.74 | -0.34 | 7.39E-01 | 8.84E-01 | -6.64 |
| 1455498_PM_at   | Gpr50                                                           | GPR50    | -0.04 | 2.28 | -0.34 | 7.39E-01 | 8.84E-01 | -6.64 |
| 1459943_PM_at   | ---                                                             | NA       | -0.03 | 2.05 | -0.34 | 7.39E-01 | 8.84E-01 | -6.64 |
| 1442580_PM_at   | A530020G20Rik                                                   | NA       | -0.03 | 1.97 | -0.34 | 7.39E-01 | 8.84E-01 | -6.64 |
| 1459136_PM_at   | ---                                                             | NA       | -0.03 | 2.44 | -0.34 | 7.39E-01 | 8.84E-01 | -6.64 |
| 1425374_PM_at   | Oas3                                                            | OAS3     | 0.03  | 2.10 | 0.34  | 7.39E-01 | 8.84E-01 | -6.64 |
| 1431318_PM_at   | 4833420G17Rik                                                   | NA       | 0.03  | 2.10 | 0.34  | 7.39E-01 | 8.84E-01 | -6.64 |
| 1425746_PM_at   | Cutal                                                           | NA       | 0.04  | 2.16 | 0.34  | 7.39E-01 | 8.84E-01 | -6.64 |
| 1420780_PM_at   | Asc13                                                           | ASCL3    | 0.05  | 2.55 | 0.34  | 7.39E-01 | 8.84E-01 | -6.64 |
| 1454713_PM_s_at | Hdc                                                             | HDC      | 0.08  | 2.57 | 0.34  | 7.39E-01 | 8.84E-01 | -6.64 |
| 1447027_PM_s_at | Lias                                                            | LIAS     | 0.12  | 4.82 | 0.34  | 7.39E-01 | 8.84E-01 | -6.64 |
| 1417259_PM_a_at | Capzb                                                           | CAPZB    | 0.13  | 5.60 | 0.34  | 7.39E-01 | 8.84E-01 | -6.64 |
| 1453470_PM_a_at | Gna13                                                           | GNA13    | 0.14  | 2.74 | 0.34  | 7.39E-01 | 8.84E-01 | -6.64 |
| 1442332_PM_at   | ---                                                             | NA       | -0.04 | 2.32 | -0.34 | 7.40E-01 | 8.84E-01 | -6.64 |
| 1438129_PM_at   | Wsb2                                                            | WSB2     | 0.06  | 2.99 | 0.34  | 7.40E-01 | 8.84E-01 | -6.64 |
| 1435307_PM_at   | Ankrd34b                                                        | ANKRD34B | -0.10 | 2.76 | -0.34 | 7.40E-01 | 8.84E-01 | -6.64 |
| 1426267_PM_at   | Zbtb8os                                                         | ZBTB8OS  | -0.03 | 1.84 | -0.34 | 7.40E-01 | 8.84E-01 | -6.64 |
| 1430462_PM_at   | 2310002L09Rik                                                   | NA       | 0.03  | 2.13 | 0.34  | 7.40E-01 | 8.84E-01 | -6.64 |
| 1460139_PM_at   | C79256                                                          | NA       | 0.04  | 1.99 | 0.34  | 7.40E-01 | 8.84E-01 | -6.64 |
| 1453562_PM_a_at | Nmral1                                                          | NMRAL1   | 0.03  | 2.07 | 0.34  | 7.40E-01 | 8.84E-01 | -6.64 |
| 1417661_PM_at   | Rdm1                                                            | RDM1     | 0.04  | 2.71 | 0.34  | 7.40E-01 | 8.84E-01 | -6.64 |
| 1435981_PM_at   | Nav2                                                            | NAV2     | 0.12  | 5.94 | 0.34  | 7.40E-01 | 8.84E-01 | -6.64 |
| 1445626_PM_at   | ---                                                             | NA       | 0.04  | 2.42 | 0.34  | 7.40E-01 | 8.84E-01 | -6.64 |
| 1423098_PM_at   | Capn7                                                           | CAPN7    | -0.09 | 4.22 | -0.34 | 7.40E-01 | 8.84E-01 | -6.64 |
| 1425097_PM_a_at | Zfp106                                                          | ZNF106   | -0.07 | 2.79 | -0.34 | 7.40E-01 | 8.84E-01 | -6.64 |
| 1451281_PM_at   | Zscan12                                                         | ZSCAN12  | 0.09  | 3.74 | 0.34  | 7.40E-01 | 8.84E-01 | -6.64 |
| 1436195_PM_at   | Lrrc75a                                                         | LRRC75A  | 0.10  | 3.29 | 0.34  | 7.40E-01 | 8.84E-01 | -6.64 |
| 1436885_PM_a_at | Cherp                                                           | CHERP    | 0.11  | 6.92 | 0.34  | 7.40E-01 | 8.84E-01 | -6.64 |
| 1437748_PM_at   | Fut11                                                           | FUT11    | -0.04 | 2.56 | -0.34 | 7.40E-01 | 8.84E-01 | -6.64 |
| 1435124_PM_at   | Vwa5b2                                                          | VWA5B2   | -0.21 | 3.56 | -0.34 | 7.40E-01 | 8.84E-01 | -6.64 |
| 1452106_PM_at   | Npnt                                                            | NPNT     | -0.15 | 2.52 | -0.34 | 7.40E-01 | 8.84E-01 | -6.64 |
| 1450941_PM_at   | Sdcbp                                                           | SDCBP    | -0.13 | 4.78 | -0.34 | 7.40E-01 | 8.84E-01 | -6.64 |
| 1421715_PM_at   | Vmn2r1                                                          | NA       | -0.08 | 3.14 | -0.34 | 7.40E-01 | 8.84E-01 | -6.64 |
| 1437068_PM_at   | ---                                                             | NA       | -0.04 | 2.69 | -0.34 | 7.40E-01 | 8.84E-01 | -6.64 |
| 1443343_PM_at   | Gm40317                                                         | NA       | 0.03  | 2.31 | 0.34  | 7.40E-01 | 8.84E-01 | -6.64 |
| 1425516_PM_at   | Ogt                                                             | OGT      | 0.10  | 6.22 | 0.34  | 7.40E-01 | 8.84E-01 | -6.64 |

|                             |                                                                                             |            |       |      |       |          |          |       |
|-----------------------------|---------------------------------------------------------------------------------------------|------------|-------|------|-------|----------|----------|-------|
| 1460645_PM_at               | Chordc1                                                                                     | CHORDC1    | 0.11  | 6.46 | 0.34  | 7.40E-01 | 8.84E-01 | -6.64 |
| 1437942_PM_x_at             | Tube1                                                                                       | TUBE1      | -0.08 | 2.48 | -0.34 | 7.40E-01 | 8.84E-01 | -6.64 |
| 1430927_PM_at               | Ceacam18                                                                                    | ACO20914.1 | 0.03  | 2.15 | 0.34  | 7.40E-01 | 8.84E-01 | -6.64 |
| 1421532_PM_at               | Rxfp2                                                                                       | RXFP2      | 0.04  | 2.10 | 0.34  | 7.40E-01 | 8.84E-01 | -6.64 |
| 1419058_PM_at               | Polr1e                                                                                      | POLR1E     | -0.03 | 2.26 | -0.34 | 7.41E-01 | 8.84E-01 | -6.64 |
| 1447583_PM_x_at             | Gper1                                                                                       | GPER1      | -0.16 | 3.56 | -0.34 | 7.41E-01 | 8.84E-01 | -6.64 |
| 1446534_PM_at               | Angptl2                                                                                     | ANGPTL2    | 0.03  | 2.44 | 0.34  | 7.41E-01 | 8.84E-01 | -6.64 |
| 1451496_PM_at               | Mtss1                                                                                       | MTSS1      | 0.05  | 3.19 | 0.34  | 7.41E-01 | 8.84E-01 | -6.64 |
| 1420409_PM_at               | Krt35                                                                                       | KRT35      | 0.03  | 2.06 | 0.34  | 7.41E-01 | 8.84E-01 | -6.64 |
| 1437170_PM_x_at             | Pdlim1                                                                                      | PDLIM1     | 0.03  | 2.17 | 0.34  | 7.41E-01 | 8.84E-01 | -6.64 |
| 1436236_PM_x_at             | Cotl1                                                                                       | COTL1      | -0.06 | 3.71 | -0.34 | 7.41E-01 | 8.84E-01 | -6.64 |
| 1460567_PM_at               | Rfx7                                                                                        | RFX7       | 0.13  | 3.46 | 0.34  | 7.41E-01 | 8.84E-01 | -6.64 |
| 1438548_PM_x_at             | Rhbdd3                                                                                      | RHBDD3     | 0.05  | 2.74 | 0.34  | 7.41E-01 | 8.84E-01 | -6.64 |
| 1455134_PM_at               | Tmem245                                                                                     | TMEM245    | -0.18 | 7.34 | -0.34 | 7.41E-01 | 8.84E-01 | -6.64 |
| 1436016_PM_x_at             | Gdi2                                                                                        | GDI2       | -0.11 | 8.38 | -0.34 | 7.41E-01 | 8.84E-01 | -6.64 |
| 1441608_PM_at               | ---                                                                                         | NA         | -0.09 | 3.12 | -0.34 | 7.41E-01 | 8.84E-01 | -6.64 |
| 1432681_PM_at               | 9130009M17Rik                                                                               | NA         | 0.03  | 2.24 | 0.34  | 7.41E-01 | 8.84E-01 | -6.64 |
| 1429646_PM_at               | Prss46                                                                                      | PRSS46     | 0.04  | 2.48 | 0.34  | 7.41E-01 | 8.84E-01 | -6.64 |
| 1450569_PM_a_at             | Rbm14                                                                                       | RBM14      | 0.06  | 3.55 | 0.34  | 7.41E-01 | 8.84E-01 | -6.64 |
| 1418978_PM_at               | LOC102643099 /// Sap30bp                                                                    | SAP30BP    | -0.04 | 2.40 | -0.34 | 7.41E-01 | 8.84E-01 | -6.64 |
| 1441439_PM_at               | Ucn3                                                                                        | UCN3       | 0.03  | 2.13 | 0.34  | 7.41E-01 | 8.84E-01 | -6.64 |
| 1418349_PM_at               | Hbegf                                                                                       | HBEGF      | 0.03  | 2.24 | 0.34  | 7.41E-01 | 8.84E-01 | -6.64 |
| 1430392_PM_at               | ---                                                                                         | NA         | 0.05  | 2.42 | 0.34  | 7.41E-01 | 8.84E-01 | -6.64 |
| 1438028_PM_at               | Rprd2                                                                                       | RPRD2      | -0.10 | 3.07 | -0.34 | 7.41E-01 | 8.84E-01 | -6.64 |
| 1454656_PM_at               | Spata13                                                                                     | SPATA13    | -0.05 | 2.40 | -0.34 | 7.41E-01 | 8.84E-01 | -6.64 |
| 1458108_PM_at               | ---                                                                                         | NA         | -0.05 | 2.89 | -0.34 | 7.41E-01 | 8.84E-01 | -6.64 |
| 1430402_PM_at               | Sucla2                                                                                      | SUCLA2     | 0.06  | 2.79 | 0.34  | 7.41E-01 | 8.84E-01 | -6.64 |
| 1453158_PM_at               | Zfp622                                                                                      | NA         | 0.05  | 2.37 | 0.34  | 7.41E-01 | 8.85E-01 | -6.64 |
| 1452675_PM_at               | Rbm22                                                                                       | RBM22      | -0.09 | 3.37 | -0.34 | 7.41E-01 | 8.85E-01 | -6.64 |
| 1443909_PM_at               | Cstf3                                                                                       | CSTF3      | 0.03  | 2.30 | 0.34  | 7.41E-01 | 8.85E-01 | -6.64 |
| 1438641_PM_x_at             | Fam57b                                                                                      | FAM57B     | -0.15 | 7.19 | -0.34 | 7.42E-01 | 8.85E-01 | -6.64 |
| 1422489_PM_at               | Mogs                                                                                        | MOGS       | -0.06 | 2.66 | -0.34 | 7.42E-01 | 8.85E-01 | -6.64 |
| 1430895_PM_at               | 2010109A12Rik                                                                               | NA         | -0.05 | 2.33 | -0.34 | 7.42E-01 | 8.85E-01 | -6.64 |
| 1451549_PM_at               | Cngb1                                                                                       | CNGB1      | -0.04 | 2.44 | -0.34 | 7.42E-01 | 8.85E-01 | -6.64 |
| 1434964_PM_at               | Amz2                                                                                        | AMZ2       | 0.03  | 3.46 | 0.34  | 7.41E-01 | 8.85E-01 | -6.64 |
| 1420017_PM_at               | Tspan8                                                                                      | TSPAN8     | 0.03  | 8.56 | 0.34  | 7.42E-01 | 8.85E-01 | -6.64 |
| 1452485_PM_at               | Phospho1 /// Zfp652                                                                         | PHOSPHO1   | 0.04  | 2.31 | 0.34  | 7.42E-01 | 8.85E-01 | -6.64 |
| 1454974_PM_at               | Ntn1                                                                                        | NTN1       | 0.05  | 2.79 | 0.34  | 7.41E-01 | 8.85E-01 | -6.64 |
| 1419732_PM_at               | Rtn4r                                                                                       | RTN4R      | 0.06  | 3.20 | 0.34  | 7.42E-01 | 8.85E-01 | -6.64 |
| 1443676_PM_at               | ---                                                                                         | NA         | 0.09  | 2.85 | 0.34  | 7.42E-01 | 8.85E-01 | -6.64 |
| 1428760_PM_at               | Snopc3                                                                                      | SNAPC3     | 0.07  | 3.61 | 0.34  | 7.42E-01 | 8.85E-01 | -6.64 |
| AFX-TransRecMur/X57349_M_at | Tfrc                                                                                        | NA         | 0.07  | 3.00 | 0.34  | 7.42E-01 | 8.85E-01 | -6.64 |
| 1433553_PM_at               | Garnl3                                                                                      | GARNL3     | 0.09  | 2.48 | 0.34  | 7.42E-01 | 8.85E-01 | -6.64 |
| 1418335_PM_a_at             | Dph1 /// Ovca2                                                                              | OVCA2      | -0.06 | 2.06 | -0.34 | 7.42E-01 | 8.85E-01 | -6.64 |
| 1431138_PM_at               | Arm9                                                                                        | ARM9       | 0.06  | 2.63 | 0.34  | 7.42E-01 | 8.85E-01 | -6.64 |
| 1430703_PM_at               | Gm11559                                                                                     | KRTAP9-1   | 0.03  | 1.98 | 0.34  | 7.42E-01 | 8.85E-01 | -6.64 |
| 1434302_PM_at               | Raph1                                                                                       | RAPH1      | 0.11  | 4.80 | 0.34  | 7.42E-01 | 8.85E-01 | -6.64 |
| 1425401_PM_at               | Cpsf4l                                                                                      | NA         | 0.09  | 2.78 | 0.34  | 7.42E-01 | 8.85E-01 | -6.64 |
| 1416025_PM_at               | Fgg                                                                                         | FGG        | 0.03  | 2.45 | 0.34  | 7.42E-01 | 8.85E-01 | -6.64 |
| 1460067_PM_at               | Ccr2                                                                                        | CCR2       | -0.05 | 2.50 | -0.34 | 7.42E-01 | 8.85E-01 | -6.64 |
| 1447612_PM_x_at             | Kdm6b                                                                                       | KDM6B      | 0.14  | 4.64 | 0.34  | 7.42E-01 | 8.85E-01 | -6.64 |
| 1447655_PM_x_at             | Sox6                                                                                        | NA         | -0.04 | 2.13 | -0.34 | 7.42E-01 | 8.85E-01 | -6.64 |
| 1437703_PM_at               | Fbxw22                                                                                      | FBXW12     | 0.03  | 2.13 | 0.34  | 7.42E-01 | 8.85E-01 | -6.64 |
| 1448846_PM_a_at             | Gm13213 /// Gm29376 /// Gm8210 /// LOC102634483 /// LOC102642233 /// LOC102642738 /// Rpl29 | RPL29      | -0.15 | 5.32 | -0.34 | 7.42E-01 | 8.85E-01 | -6.64 |
| 1419185_PM_a_at             | Mlxipl                                                                                      | MLXIPL     | -0.04 | 2.38 | -0.34 | 7.42E-01 | 8.85E-01 | -6.64 |
| 1438509_PM_at               | Psme3                                                                                       | NA         | -0.03 | 2.18 | -0.34 | 7.42E-01 | 8.85E-01 | -6.64 |
| 1444841_PM_at               | ---                                                                                         | NA         | 0.03  | 1.99 | 0.34  | 7.42E-01 | 8.85E-01 | -6.64 |
| 1447229_PM_x_at             | Arfgap2                                                                                     | ARFGAP2    | 0.04  | 2.42 | 0.34  | 7.42E-01 | 8.85E-01 | -6.64 |
| 1426284_PM_at               | Krt20                                                                                       | KRT20      | 0.11  | 3.21 | 0.34  | 7.42E-01 | 8.85E-01 | -6.64 |
| 1447591_PM_x_at             | A830082N09Rik                                                                               | NA         | -0.15 | 3.66 | -0.34 | 7.43E-01 | 8.85E-01 | -6.64 |
| 1452188_PM_at               | Maml1                                                                                       | MAML1      | -0.03 | 2.55 | -0.34 | 7.43E-01 | 8.85E-01 | -6.64 |
| 1427392_PM_at               | Dscaml1                                                                                     | DSCAML1    | 0.03  | 2.31 | 0.34  | 7.43E-01 | 8.85E-01 | -6.64 |
| 1440975_PM_at               | Mxra7                                                                                       | NA         | 0.09  | 3.56 | 0.34  | 7.43E-01 | 8.85E-01 | -6.64 |
| 1425750_PM_a_at             | Jak3                                                                                        | JAK3       | -0.04 | 2.26 | -0.34 | 7.43E-01 | 8.85E-01 | -6.64 |
| 1446652_PM_at               | Reps2                                                                                       | REPS2      | -0.05 | 2.38 | -0.34 | 7.43E-01 | 8.85E-01 | -6.64 |
| 1446161_PM_at               | ---                                                                                         | NA         | 0.10  | 3.34 | 0.34  | 7.43E-01 | 8.85E-01 | -6.64 |
| 1458430_PM_at               | C87436 /// Gm38849                                                                          | C2orf42    | 0.04  | 2.35 | 0.34  | 7.43E-01 | 8.86E-01 | -6.64 |
| 1428799_PM_at               | Lca5                                                                                        | LCA5       | 0.04  | 2.35 | 0.34  | 7.43E-01 | 8.86E-01 | -6.64 |
| 1442995_PM_at               | ---                                                                                         | NA         | 0.08  | 2.59 | 0.34  | 7.43E-01 | 8.86E-01 | -6.64 |
| 1429726_PM_at               | Slc16a9                                                                                     | SLC16A9    | 0.04  | 2.80 | 0.34  | 7.43E-01 | 8.86E-01 | -6.64 |

|                 |                       |           |       |       |       |          |          |       |
|-----------------|-----------------------|-----------|-------|-------|-------|----------|----------|-------|
| 1444018_PM_at   | Chic2                 | CHIC2     | 0.06  | 2.68  | 0.34  | 7.43E-01 | 8.86E-01 | -6.64 |
| 1433843_PM_at   | Hs1bp3                | HS1BP3    | 0.05  | 3.00  | 0.34  | 7.43E-01 | 8.86E-01 | -6.64 |
| 1448660_PM_at   | Arhgdig               | ARHGDIG   | 0.11  | 3.78  | 0.34  | 7.43E-01 | 8.86E-01 | -6.64 |
| 1441263_PM_a_at | A930005H10Rik         | NA        | 0.11  | 2.58  | 0.34  | 7.43E-01 | 8.86E-01 | -6.64 |
| 1458597_PM_at   | Apex2                 | NA        | -0.03 | 2.40  | -0.34 | 7.43E-01 | 8.86E-01 | -6.64 |
| 1439967_PM_at   | ---                   | NA        | 0.04  | 2.23  | 0.34  | 7.43E-01 | 8.86E-01 | -6.64 |
| 1423743_PM_at   | Arcn1                 | ARCN1     | -0.09 | 3.86  | -0.34 | 7.43E-01 | 8.86E-01 | -6.64 |
| 1435290_PM_x_at | H2-Aa                 | HLA-DQA2  | -0.12 | 2.69  | -0.34 | 7.44E-01 | 8.86E-01 | -6.64 |
| 1435372_PM_a_at | Pa2g4                 | PA2G4     | -0.07 | 2.98  | -0.34 | 7.44E-01 | 8.86E-01 | -6.64 |
| 1436676_PM_at   | Mapk8ip3              | MAPK8IP3  | -0.05 | 2.16  | -0.34 | 7.44E-01 | 8.86E-01 | -6.64 |
| 1422624_PM_at   | Rev1                  | REV1      | -0.05 | 3.85  | -0.34 | 7.44E-01 | 8.86E-01 | -6.64 |
| 1447638_PM_at   | Afrm4                 | AFMID     | 0.03  | 2.15  | 0.34  | 7.44E-01 | 8.86E-01 | -6.64 |
| 1454281_PM_at   | ---                   | NA        | 0.05  | 2.42  | 0.34  | 7.44E-01 | 8.86E-01 | -6.64 |
| 1443665_PM_at   | Dennd5b               | DENND5B   | 0.09  | 2.30  | 0.34  | 7.44E-01 | 8.86E-01 | -6.64 |
| 1432668_PM_at   | 2210411G17Rik         | NA        | -0.05 | 2.67  | -0.34 | 7.44E-01 | 8.86E-01 | -6.64 |
| 1437232_PM_at   | Bpifc                 | BPIFC     | 0.04  | 2.57  | 0.34  | 7.44E-01 | 8.86E-01 | -6.64 |
| 1456120_PM_at   | Secisbp2l             | SECISBP2L | -0.10 | 3.12  | -0.34 | 7.44E-01 | 8.86E-01 | -6.64 |
| 1458536_PM_at   | ---                   | NA        | -0.07 | 2.54  | -0.34 | 7.44E-01 | 8.86E-01 | -6.64 |
| 1423013_PM_at   | Foxf1                 | FOXF1     | -0.05 | 2.62  | -0.34 | 7.44E-01 | 8.86E-01 | -6.64 |
| 1432512_PM_at   | Agbl4                 | AGBL4     | 0.03  | 2.17  | 0.34  | 7.44E-01 | 8.86E-01 | -6.64 |
| 1431240_PM_at   | Clec2h                | CLEC2D    | 0.04  | 2.13  | 0.34  | 7.44E-01 | 8.86E-01 | -6.64 |
| 1437491_PM_at   | Bicd2                 | BICD2     | 0.04  | 2.38  | 0.34  | 7.44E-01 | 8.86E-01 | -6.64 |
| 1428774_PM_at   | Gpc6                  | GPC6      | 0.04  | 2.13  | 0.34  | 7.44E-01 | 8.86E-01 | -6.64 |
| 1448159_PM_at   | Rab7                  | RAB7A     | 0.05  | 6.34  | 0.34  | 7.44E-01 | 8.86E-01 | -6.64 |
| 1422965_PM_at   | Agtrap                | AGTRAP    | 0.05  | 2.71  | 0.34  | 7.44E-01 | 8.86E-01 | -6.64 |
| 1447955_PM_at   | Hp1bp3                | HP1BP3    | 0.06  | 2.81  | 0.34  | 7.44E-01 | 8.86E-01 | -6.64 |
| 1420625_PM_at   | Gtf3c6                | NA        | 0.07  | 2.82  | 0.34  | 7.44E-01 | 8.86E-01 | -6.64 |
| 1419238_PM_at   | Abca7                 | ABCA7     | 0.09  | 3.88  | 0.34  | 7.44E-01 | 8.86E-01 | -6.64 |
| 1421653_PM_a_at | Igh-VJ558 /// Igha    | NA        | -0.07 | 8.48  | -0.34 | 7.44E-01 | 8.86E-01 | -6.64 |
| 1435953_PM_at   | Btaf1                 | NA        | -0.06 | 3.08  | -0.34 | 7.44E-01 | 8.86E-01 | -6.64 |
| 1432803_PM_at   | Ankfn1                | NA        | 0.03  | 1.98  | 0.34  | 7.44E-01 | 8.86E-01 | -6.64 |
| 1430342_PM_at   | ---                   | NA        | 0.03  | 2.52  | 0.34  | 7.44E-01 | 8.86E-01 | -6.64 |
| 1459822_PM_at   | Rae1                  | RAE1      | 0.03  | 2.29  | 0.34  | 7.44E-01 | 8.86E-01 | -6.64 |
| 1435338_PM_at   | Cdk6                  | CDK6      | 0.03  | 2.07  | 0.34  | 7.44E-01 | 8.86E-01 | -6.64 |
| 1433378_PM_at   | 9430019H13Rik         | NA        | 0.03  | 2.45  | 0.34  | 7.44E-01 | 8.86E-01 | -6.64 |
| 1430846_PM_at   | 1700061G19Rik         | NA        | 0.04  | 2.29  | 0.34  | 7.44E-01 | 8.86E-01 | -6.64 |
| 1437918_PM_at   | 4930539E08Rik         | C6orf222  | -0.10 | 2.90  | -0.33 | 7.44E-01 | 8.86E-01 | -6.64 |
| 1444219_PM_at   | AY702103              | NA        | -0.03 | 2.25  | -0.33 | 7.44E-01 | 8.86E-01 | -6.64 |
| 1449722_PM_at   | ---                   | NA        | 0.04  | 2.26  | 0.33  | 7.44E-01 | 8.86E-01 | -6.64 |
| 1444545_PM_at   | ---                   | NA        | 0.03  | 3.07  | 0.33  | 7.45E-01 | 8.86E-01 | -6.64 |
| 1423820_PM_at   | Elof1                 | ELOF1     | 0.06  | 2.74  | 0.33  | 7.45E-01 | 8.87E-01 | -6.64 |
| 1416642_PM_a_at | Tpt1                  | TPT1      | -0.08 | 8.61  | -0.33 | 7.45E-01 | 8.87E-01 | -6.64 |
| 1431743_PM_a_at | Slc4a1                | SLC4A1    | 0.03  | 2.39  | 0.33  | 7.45E-01 | 8.87E-01 | -6.64 |
| 1417800_PM_at   | Parp2                 | PARP2     | 0.09  | 3.28  | 0.33  | 7.45E-01 | 8.87E-01 | -6.64 |
| 1419566_PM_at   | Fank1                 | FANK1     | -0.03 | 2.10  | -0.33 | 7.45E-01 | 8.87E-01 | -6.64 |
| 1422795_PM_at   | Cul3                  | CUL3      | -0.12 | 5.47  | -0.33 | 7.45E-01 | 8.87E-01 | -6.64 |
| 1418584_PM_at   | Ccnh                  | CCNH      | -0.10 | 3.77  | -0.33 | 7.45E-01 | 8.87E-01 | -6.64 |
| 1424020_PM_at   | Arl6ip6               | ARL6IP6   | -0.09 | 3.62  | -0.33 | 7.45E-01 | 8.87E-01 | -6.64 |
| 1451075_PM_s_at | Ctdsp2                | CTDSP2    | -0.10 | 5.13  | -0.33 | 7.45E-01 | 8.87E-01 | -6.64 |
| 1451570_PM_a_at | Fam92a                | FAM92A    | -0.10 | 4.71  | -0.33 | 7.45E-01 | 8.87E-01 | -6.64 |
| 1423007_PM_a_at | Gfra2                 | GFRA2     | -0.07 | 3.17  | -0.33 | 7.45E-01 | 8.87E-01 | -6.64 |
| 1437993_PM_x_at | LOC102643271 /// Qdpr | QDPR      | -0.05 | 10.25 | -0.33 | 7.45E-01 | 8.87E-01 | -6.64 |
| 1431398_PM_at   | Hoxaas2               | NA        | -0.03 | 2.26  | -0.33 | 7.45E-01 | 8.87E-01 | -6.64 |
| 1418668_PM_at   | Acsm1                 | ACSM1     | -0.03 | 2.75  | -0.33 | 7.45E-01 | 8.87E-01 | -6.64 |
| 1447885_PM_x_at | Nedd9                 | NEDD9     | -0.03 | 2.06  | -0.33 | 7.45E-01 | 8.87E-01 | -6.64 |
| 1447200_PM_at   | Tbc1d5                | NA        | 0.03  | 2.91  | 0.33  | 7.45E-01 | 8.87E-01 | -6.64 |
| 1452376_PM_at   | Zfp444                | ZNF444    | 0.03  | 2.54  | 0.33  | 7.45E-01 | 8.87E-01 | -6.64 |
| 1441289_PM_at   | ---                   | NA        | 0.03  | 2.26  | 0.33  | 7.45E-01 | 8.87E-01 | -6.64 |
| 1422582_PM_at   | Lep                   | LEP       | 0.03  | 2.10  | 0.33  | 7.45E-01 | 8.87E-01 | -6.64 |
| 1434357_PM_a_at | Kpnb1                 | KPNB1     | 0.03  | 1.90  | 0.33  | 7.45E-01 | 8.87E-01 | -6.64 |
| 1445191_PM_at   | Exd1                  | EXD1      | 0.03  | 2.17  | 0.33  | 7.45E-01 | 8.87E-01 | -6.64 |
| 1430457_PM_at   | Gm15674               | NA        | 0.04  | 2.27  | 0.33  | 7.45E-01 | 8.87E-01 | -6.64 |
| 1429808_PM_at   | Cfap57                | CFAP57    | 0.04  | 2.33  | 0.33  | 7.45E-01 | 8.87E-01 | -6.64 |
| 1453026_PM_at   | Fam166a               | FAM166A   | 0.04  | 2.68  | 0.33  | 7.45E-01 | 8.87E-01 | -6.64 |
| 1429687_PM_at   | Cox7b2                | COX7B2    | 0.04  | 1.99  | 0.33  | 7.45E-01 | 8.87E-01 | -6.64 |
| 1457479_PM_at   | ---                   | NA        | 0.05  | 2.45  | 0.33  | 7.45E-01 | 8.87E-01 | -6.64 |
| 1439715_PM_at   | Osgepl1               | OSGEPL1   | 0.07  | 3.08  | 0.33  | 7.45E-01 | 8.87E-01 | -6.64 |
| 1439075_PM_at   | Polr3f                | POLR3F    | 0.11  | 2.87  | 0.33  | 7.45E-01 | 8.87E-01 | -6.64 |
| 1421845_PM_at   | Golph3                | GOLPH3    | 0.11  | 3.60  | 0.33  | 7.45E-01 | 8.87E-01 | -6.64 |
| 1438816_PM_at   | Ahctf1                | NA        | 0.12  | 2.55  | 0.33  | 7.45E-01 | 8.87E-01 | -6.64 |
| 1450227_PM_at   | Ankrd6                | ANKRD6    | 0.23  | 3.91  | 0.33  | 7.45E-01 | 8.87E-01 | -6.64 |
| 1441048_PM_at   | 5930430L01Rik         | NA        | 0.03  | 2.36  | 0.33  | 7.45E-01 | 8.87E-01 | -6.64 |
| 1426619_PM_at   | Aim2                  | NA        | 0.06  | 2.74  | 0.33  | 7.45E-01 | 8.87E-01 | -6.64 |
| 1421401_PM_at   | Kcnmb1                | KCNMB1    | 0.09  | 2.65  | 0.33  | 7.45E-01 | 8.87E-01 | -6.64 |
| 1459805_PM_x_at | Dus3l                 | DUS3L     | -0.12 | 3.28  | -0.33 | 7.45E-01 | 8.87E-01 | -6.64 |

|                 |                    |          |       |      |       |          |          |       |
|-----------------|--------------------|----------|-------|------|-------|----------|----------|-------|
| 1423847_PM_at   | Ncapd2             | NCAPD2   | -0.10 | 2.80 | -0.33 | 7.45E-01 | 8.87E-01 | -6.64 |
| 1432062_PM_at   | Mdga1              | MDGA1    | -0.06 | 2.91 | -0.33 | 7.46E-01 | 8.87E-01 | -6.64 |
| 1447687_PM_x_at | ---                | NA       | -0.03 | 1.93 | -0.33 | 7.46E-01 | 8.87E-01 | -6.64 |
| 1459816_PM_x_at | Pole3              | POLE3    | 0.05  | 2.50 | 0.33  | 7.46E-01 | 8.87E-01 | -6.64 |
| 1433517_PM_at   | Myeov2             | COP59    | 0.07  | 2.51 | 0.33  | 7.46E-01 | 8.87E-01 | -6.64 |
| 1450315_PM_at   | Vmn1r148           | NA       | 0.09  | 4.83 | 0.33  | 7.46E-01 | 8.87E-01 | -6.64 |
| 1456919_PM_at   | Dgkeos             | NA       | 0.03  | 2.13 | 0.33  | 7.46E-01 | 8.87E-01 | -6.64 |
| 1431109_PM_at   | Prr16              | PRR16    | 0.03  | 2.15 | 0.33  | 7.46E-01 | 8.87E-01 | -6.64 |
| 1447630_PM_x_at | Gnb5               | NA       | 0.04  | 2.41 | 0.33  | 7.46E-01 | 8.87E-01 | -6.64 |
| 1441873_PM_at   | Pri7a1             | NA       | -0.04 | 2.04 | -0.33 | 7.46E-01 | 8.87E-01 | -6.64 |
| 1428273_PM_at   | Abhd13             | ABHD13   | -0.06 | 2.32 | -0.33 | 7.46E-01 | 8.87E-01 | -6.64 |
| 1417813_PM_at   | Ikbke              | IKBKE    | 0.05  | 2.90 | 0.33  | 7.46E-01 | 8.87E-01 | -6.64 |
| 1453885_PM_at   | Slc24a2            | SLC24A2  | -0.12 | 3.07 | -0.33 | 7.46E-01 | 8.87E-01 | -6.64 |
| 1447296_PM_at   | Fbxo27             | FBXO27   | -0.03 | 2.18 | -0.33 | 7.46E-01 | 8.87E-01 | -6.64 |
| 1456167_PM_at   | AA619741           | NA       | 0.04  | 2.42 | 0.33  | 7.46E-01 | 8.87E-01 | -6.64 |
| 1446900_PM_at   | D1Ert218e          | NA       | 0.04  | 2.03 | 0.33  | 7.46E-01 | 8.87E-01 | -6.64 |
| 1454109_PM_a_at | JmjD6              | JMJD6    | -0.06 | 2.41 | -0.33 | 7.46E-01 | 8.87E-01 | -6.64 |
| 1438491_PM_x_at | Zfp729a            | ZNF208   | 0.06  | 3.60 | 0.33  | 7.46E-01 | 8.87E-01 | -6.64 |
| 1436515_PM_at   | Bach2              | BACH2    | 0.06  | 2.71 | 0.33  | 7.46E-01 | 8.87E-01 | -6.64 |
| 1434477_PM_at   | Heca               | HECA     | -0.05 | 2.54 | -0.33 | 7.46E-01 | 8.87E-01 | -6.64 |
| 1432120_PM_at   | Rmdn2              | NA       | 0.03  | 2.27 | 0.33  | 7.46E-01 | 8.87E-01 | -6.64 |
| 1415804_PM_at   | Cx3c1l             | CX3CL1   | -0.10 | 5.25 | -0.33 | 7.46E-01 | 8.87E-01 | -6.64 |
| 1446717_PM_at   | ---                | NA       | -0.03 | 2.16 | -0.33 | 7.46E-01 | 8.87E-01 | -6.64 |
| 1435986_PM_x_at | Sdhc               | SDHC     | -0.15 | 5.44 | -0.33 | 7.46E-01 | 8.87E-01 | -6.64 |
| 1423739_PM_x_at | Ap12               | APL2     | -0.13 | 7.16 | -0.33 | 7.46E-01 | 8.87E-01 | -6.64 |
| 1446508_PM_at   | ---                | NA       | -0.06 | 2.90 | -0.33 | 7.46E-01 | 8.87E-01 | -6.64 |
| 1459852_PM_x_at | Trib2              | TRIB2    | 0.02  | 2.32 | 0.33  | 7.46E-01 | 8.87E-01 | -6.64 |
| 1460185_PM_at   | Krt85              | NA       | 0.04  | 2.80 | 0.33  | 7.46E-01 | 8.87E-01 | -6.64 |
| 1423932_PM_at   | Celf1              | CELF1    | 0.06  | 2.68 | 0.33  | 7.46E-01 | 8.87E-01 | -6.64 |
| 1417932_PM_at   | Il18               | IL18     | 0.06  | 3.02 | 0.33  | 7.46E-01 | 8.87E-01 | -6.64 |
| 1423087_PM_a_at | Prickle4 /// Tomm6 | TOMM6    | 0.14  | 5.19 | 0.33  | 7.46E-01 | 8.87E-01 | -6.64 |
| 1446046_PM_at   | ---                | NA       | 0.15  | 3.09 | 0.33  | 7.46E-01 | 8.87E-01 | -6.64 |
| 1442982_PM_at   | Ccdc66             | CCDC66   | -0.06 | 3.76 | -0.33 | 7.47E-01 | 8.87E-01 | -6.64 |
| 1439753_PM_x_at | Six4               | SIX4     | -0.03 | 2.20 | -0.33 | 7.47E-01 | 8.87E-01 | -6.64 |
| 1447672_PM_x_at | Pskh1              | PSKH1    | -0.04 | 2.17 | -0.33 | 7.47E-01 | 8.87E-01 | -6.64 |
| 1434896_PM_at   | Zfp955a            | NA       | -0.08 | 5.87 | -0.33 | 7.47E-01 | 8.87E-01 | -6.64 |
| 1433296_PM_at   | ---                | NA       | -0.04 | 2.28 | -0.33 | 7.47E-01 | 8.87E-01 | -6.64 |
| 1458331_PM_x_at | Ces5a              | CES5A    | 0.06  | 2.25 | 0.33  | 7.47E-01 | 8.87E-01 | -6.64 |
| 1427451_PM_a_at | BC018473           | NA       | 0.05  | 2.46 | 0.33  | 7.47E-01 | 8.87E-01 | -6.64 |
| 1439234_PM_a_at | Tm2d2              | TM2D2    | 0.10  | 2.79 | 0.33  | 7.47E-01 | 8.87E-01 | -6.64 |
| 1424813_PM_at   | Fam149b            | FAM149B1 | 0.17  | 3.88 | 0.33  | 7.47E-01 | 8.87E-01 | -6.64 |
| 1443057_PM_at   | Gm31679            | NA       | -0.03 | 2.40 | -0.33 | 7.47E-01 | 8.87E-01 | -6.64 |
| 1452647_PM_a_at | Dph2               | DPH2     | 0.03  | 2.31 | 0.33  | 7.47E-01 | 8.87E-01 | -6.64 |
| 1444595_PM_at   | Zxda               | NA       | 0.04  | 2.06 | 0.33  | 7.47E-01 | 8.87E-01 | -6.64 |
| 1421222_PM_at   | Fip11              | FIP11    | 0.05  | 2.43 | 0.33  | 7.47E-01 | 8.87E-01 | -6.64 |
| 1457661_PM_at   | Ccdc85c            | NA       | 0.05  | 2.10 | 0.33  | 7.47E-01 | 8.87E-01 | -6.64 |
| 1431100_PM_at   | Rinl               | RINL     | -0.03 | 2.27 | -0.33 | 7.47E-01 | 8.87E-01 | -6.64 |
| 1435208_PM_at   | Dtx3l              | DTX3L    | -0.09 | 2.63 | -0.33 | 7.47E-01 | 8.87E-01 | -6.64 |
| 1435947_PM_at   | ---                | NA       | -0.07 | 2.71 | -0.33 | 7.47E-01 | 8.87E-01 | -6.64 |
| 1441613_PM_at   | ---                | NA       | 0.03  | 2.02 | 0.33  | 7.47E-01 | 8.87E-01 | -6.64 |
| 1449191_PM_at   | Wfdc12             | WFDC12   | -0.03 | 2.39 | -0.33 | 7.47E-01 | 8.87E-01 | -6.64 |
| 1440020_PM_at   | ---                | NA       | 0.12  | 2.95 | 0.33  | 7.47E-01 | 8.88E-01 | -6.64 |
| 1430794_PM_at   | LOC102635527       | NA       | -0.08 | 2.47 | -0.33 | 7.47E-01 | 8.88E-01 | -6.64 |
| 1416545_PM_at   | Zdhc7              | ZDHC7    | -0.06 | 3.15 | -0.33 | 7.47E-01 | 8.88E-01 | -6.64 |
| 1437272_PM_at   | Dpy19l2            | DPY19L2  | -0.05 | 2.39 | -0.33 | 7.47E-01 | 8.88E-01 | -6.64 |
| 1430808_PM_at   | Tbc1d5             | NA       | -0.05 | 2.79 | -0.33 | 7.47E-01 | 8.88E-01 | -6.64 |
| 1421134_PM_at   | Areg               | AREG     | -0.03 | 2.12 | -0.33 | 7.47E-01 | 8.88E-01 | -6.64 |
| 1430973_PM_at   | Zfp558             | ZNF558   | -0.03 | 2.04 | -0.33 | 7.47E-01 | 8.88E-01 | -6.64 |
| 1430552_PM_a_at | Sbf1               | SBF1     | 0.03  | 2.49 | 0.33  | 7.47E-01 | 8.88E-01 | -6.64 |
| 1419241_PM_a_at | Aire               | AIRE     | 0.04  | 2.52 | 0.33  | 7.47E-01 | 8.88E-01 | -6.64 |
| 1420591_PM_at   | Gpr84              | GPR84    | 0.06  | 2.55 | 0.33  | 7.47E-01 | 8.88E-01 | -6.64 |
| 1433957_PM_at   | Rbm48              | RBM48    | 0.11  | 3.78 | 0.33  | 7.47E-01 | 8.88E-01 | -6.64 |
| 1444764_PM_at   | ---                | NA       | 0.06  | 2.69 | 0.33  | 7.47E-01 | 8.88E-01 | -6.64 |
| 1458190_PM_at   | Arhgap4            | ARHGAP4  | 0.04  | 2.85 | 0.33  | 7.47E-01 | 8.88E-01 | -6.64 |
| 1440523_PM_at   | Sdr16c5            | SDR16C5  | -0.03 | 2.09 | -0.33 | 7.47E-01 | 8.88E-01 | -6.64 |
| 1434963_PM_at   | Supt3              | SUPT3H   | 0.04  | 3.23 | 0.33  | 7.47E-01 | 8.88E-01 | -6.64 |
| 1431611_PM_a_at | Cadm1              | CADM1    | 0.14  | 5.32 | 0.33  | 7.48E-01 | 8.88E-01 | -6.64 |
| 1459407_PM_at   | ---                | NA       | 0.04  | 2.58 | 0.33  | 7.48E-01 | 8.88E-01 | -6.64 |
| 1457607_PM_at   | ---                | NA       | 0.05  | 2.69 | 0.33  | 7.48E-01 | 8.88E-01 | -6.64 |
| 1416144_PM_a_at | Dhx15              | DHX15    | -0.14 | 7.12 | -0.33 | 7.48E-01 | 8.88E-01 | -6.64 |
| 1418859_PM_at   | Rfxap              | RFXAP    | -0.08 | 3.13 | -0.33 | 7.48E-01 | 8.88E-01 | -6.64 |
| 1447678_PM_at   | Hsd17b14           | NA       | 0.03  | 2.17 | 0.33  | 7.48E-01 | 8.88E-01 | -6.64 |
| 1460439_PM_at   | Sik3               | SIK3     | 0.06  | 2.25 | 0.33  | 7.48E-01 | 8.88E-01 | -6.64 |
| 1456929_PM_at   | Junos              | NA       | 0.03  | 2.26 | 0.33  | 7.48E-01 | 8.88E-01 | -6.64 |
| 1431195_PM_at   | Rnf170             | RNF170   | 0.06  | 2.59 | 0.33  | 7.48E-01 | 8.88E-01 | -6.64 |



|                 |                          |            |       |      |       |          |          |       |
|-----------------|--------------------------|------------|-------|------|-------|----------|----------|-------|
| 1448842_PM_at   | Cdo1                     | CDO1       | -0.10 | 3.24 | -0.33 | 7.48E-01 | 8.88E-01 | -6.64 |
| 1416650_PM_at   | Rflp4                    | RFPL4AL1   | -0.03 | 2.05 | -0.33 | 7.48E-01 | 8.88E-01 | -6.64 |
| 1440053_PM_at   | ---                      | NA         | -0.03 | 2.25 | -0.33 | 7.48E-01 | 8.88E-01 | -6.64 |
| 1458656_PM_at   | Gm32031                  | NA         | 0.07  | 3.40 | 0.33  | 7.48E-01 | 8.88E-01 | -6.64 |
| 1426799_PM_at   | Rab8b                    | RAB8B      | -0.10 | 4.44 | -0.33 | 7.48E-01 | 8.88E-01 | -6.64 |
| 1420111_PM_at   | Zfp334                   | NA         | -0.06 | 3.05 | -0.33 | 7.48E-01 | 8.88E-01 | -6.64 |
| 1442233_PM_at   | ---                      | NA         | -0.05 | 2.48 | -0.33 | 7.48E-01 | 8.88E-01 | -6.64 |
| 1443712_PM_x_at | ---                      | NA         | -0.03 | 2.16 | -0.33 | 7.48E-01 | 8.88E-01 | -6.64 |
| 1437309_PM_a_at | Rpa1                     | RPA1       | 0.17  | 6.19 | 0.33  | 7.48E-01 | 8.88E-01 | -6.64 |
| 1423302_PM_a_at | Paxip1                   | PAXIP1     | 0.05  | 2.38 | 0.33  | 7.48E-01 | 8.88E-01 | -6.64 |
| 1416393_PM_at   | Emg1                     | EMG1       | -0.05 | 3.06 | -0.33 | 7.48E-01 | 8.88E-01 | -6.64 |
| 1427731_PM_at   | Gnrhr                    | GNRHR      | 0.03  | 2.06 | 0.33  | 7.48E-01 | 8.88E-01 | -6.64 |
| 1422173_PM_at   | Pdx1                     | PDX1       | 0.06  | 2.76 | 0.33  | 7.48E-01 | 8.88E-01 | -6.64 |
| 1439182_PM_at   | D17Wsu92e                | NA         | 0.08  | 2.95 | 0.33  | 7.48E-01 | 8.88E-01 | -6.64 |
| 1459317_PM_at   | Ank2                     | ANK2       | -0.06 | 4.64 | -0.33 | 7.49E-01 | 8.88E-01 | -6.64 |
| 1447304_PM_at   | ---                      | NA         | -0.05 | 2.50 | -0.33 | 7.49E-01 | 8.88E-01 | -6.64 |
| 1430911_PM_at   | Cfap43 ///Itrip          | CFAP43     | 0.03  | 2.38 | 0.33  | 7.49E-01 | 8.88E-01 | -6.64 |
| 1457300_PM_at   | Aftph                    | AFTPH      | 0.04  | 2.11 | 0.33  | 7.49E-01 | 8.88E-01 | -6.64 |
| 1450631_PM_x_at | Defa1 ///Defa24 ///Defa6 | NA         | 0.06  | 3.28 | 0.33  | 7.49E-01 | 8.88E-01 | -6.64 |
| 1426113_PM_x_at | Trav9d-3                 | NA         | 0.08  | 3.26 | 0.33  | 7.49E-01 | 8.88E-01 | -6.64 |
| 1439886_PM_at   | ---                      | NA         | -0.13 | 3.47 | -0.33 | 7.49E-01 | 8.88E-01 | -6.64 |
| 1420916_PM_at   | Prpf40a                  | PRPF40A    | 0.10  | 2.87 | 0.33  | 7.49E-01 | 8.88E-01 | -6.64 |
| 1454383_PM_at   | 5430434G16Rik            | NA         | 0.13  | 2.63 | 0.33  | 7.49E-01 | 8.88E-01 | -6.64 |
| 1430687_PM_at   | ---                      | NA         | 0.04  | 2.74 | 0.33  | 7.49E-01 | 8.88E-01 | -6.64 |
| 1430616_PM_at   | 4930528A17Rik            | NA         | -0.03 | 2.04 | -0.33 | 7.49E-01 | 8.88E-01 | -6.64 |
| 1459773_PM_x_at | Snip1                    | SNIP1      | 0.05  | 4.56 | 0.33  | 7.49E-01 | 8.88E-01 | -6.64 |
| 1424104_PM_at   | Syf2                     | SYF2       | 0.05  | 4.12 | 0.33  | 7.49E-01 | 8.88E-01 | -6.64 |
| 1453427_PM_at   | Csnk2a1                  | CSNK2A3    | 0.07  | 2.95 | 0.33  | 7.49E-01 | 8.88E-01 | -6.64 |
| 1437682_PM_x_at | 1110004E09Rik            | APO00275.2 | 0.11  | 4.01 | 0.33  | 7.49E-01 | 8.88E-01 | -6.64 |
| 1459189_PM_at   | 2610037D02Rik            | NA         | 0.05  | 2.56 | 0.33  | 7.49E-01 | 8.89E-01 | -6.64 |
| 1416382_PM_at   | Ctsc                     | CTSC       | -0.04 | 2.69 | -0.33 | 7.49E-01 | 8.89E-01 | -6.64 |
| 1434817_PM_s_at | Rprd2                    | RPRD2      | 0.07  | 2.58 | 0.33  | 7.49E-01 | 8.89E-01 | -6.64 |
| 1426563_PM_at   | Zfp553                   | ZNF48      | 0.04  | 2.26 | 0.33  | 7.49E-01 | 8.89E-01 | -6.64 |
| 1459404_PM_at   | ---                      | NA         | 0.04  | 2.25 | 0.33  | 7.49E-01 | 8.89E-01 | -6.64 |
| 1426860_PM_at   | Ep400                    | EP400      | -0.10 | 3.85 | -0.33 | 7.49E-01 | 8.89E-01 | -6.64 |
| 1423027_PM_at   | Foxl1                    | FOXL1      | 0.03  | 2.23 | 0.33  | 7.49E-01 | 8.89E-01 | -6.64 |
| 1438670_PM_at   | Ptpn1                    | PTPN1      | 0.09  | 3.30 | 0.33  | 7.49E-01 | 8.89E-01 | -6.64 |
| 1427484_PM_at   | Eml5                     | EML5       | -0.13 | 3.68 | -0.33 | 7.50E-01 | 8.89E-01 | -6.64 |
| 1427762_PM_x_at | Hist1h2bp                | NA         | 0.04  | 2.44 | 0.33  | 7.50E-01 | 8.89E-01 | -6.64 |
| 1455175_PM_at   | Phf13                    | PHF13      | 0.07  | 4.07 | 0.33  | 7.50E-01 | 8.89E-01 | -6.64 |
| 1436225_PM_at   | Trpm2                    | TRPM2      | -0.04 | 3.50 | -0.33 | 7.50E-01 | 8.89E-01 | -6.64 |
| 1416390_PM_at   | Rcctb2                   | RCBTB2     | -0.04 | 2.70 | -0.33 | 7.50E-01 | 8.89E-01 | -6.64 |
| 1436678_PM_at   | Sgcb                     | SGCB       | 0.04  | 5.08 | 0.33  | 7.50E-01 | 8.89E-01 | -6.64 |
| 1453261_PM_at   | 2610035D17Rik            | NA         | -0.07 | 2.58 | -0.33 | 7.50E-01 | 8.89E-01 | -6.64 |
| 1459846_PM_x_at | Cnpy2                    | ACO73896.1 | -0.06 | 2.81 | -0.33 | 7.50E-01 | 8.89E-01 | -6.64 |
| 1446066_PM_at   | Zcchc17                  | ZCCHC17    | 0.03  | 2.79 | 0.33  | 7.50E-01 | 8.89E-01 | -6.64 |
| 1437279_PM_x_at | Sdc1                     | SDC1       | 0.06  | 2.24 | 0.33  | 7.50E-01 | 8.89E-01 | -6.64 |
| 1452586_PM_at   | Anapc13                  | ANAPC13    | 0.11  | 6.14 | 0.33  | 7.50E-01 | 8.89E-01 | -6.64 |
| 1445033_PM_at   | Abca16                   | NA         | 0.03  | 2.23 | 0.33  | 7.50E-01 | 8.89E-01 | -6.64 |
| 1458714_PM_at   | Zfp963                   | NA         | 0.04  | 2.24 | 0.33  | 7.50E-01 | 8.89E-01 | -6.64 |
| 1436586_PM_x_at | LOC102634709 ///Rps14    | RPS14      | -0.14 | 3.84 | -0.33 | 7.50E-01 | 8.89E-01 | -6.64 |
| 1423146_PM_at   | Hes5                     | HES5       | 0.03  | 2.65 | 0.33  | 7.50E-01 | 8.89E-01 | -6.64 |
| 1440466_PM_at   | BC003965                 | C16orf91   | 0.04  | 2.32 | 0.33  | 7.50E-01 | 8.89E-01 | -6.64 |
| 1455513_PM_at   | Taf1                     | TAF1L      | -0.10 | 4.99 | -0.33 | 7.50E-01 | 8.89E-01 | -6.64 |
| 1450346_PM_at   | Gpr50                    | GPR50      | 0.03  | 2.30 | 0.33  | 7.50E-01 | 8.89E-01 | -6.64 |
| 1442908_PM_at   | ---                      | NA         | 0.05  | 2.32 | 0.33  | 7.50E-01 | 8.89E-01 | -6.64 |
| 1433533_PM_x_at | Prkag1                   | PRKAG1     | 0.05  | 4.68 | 0.33  | 7.50E-01 | 8.89E-01 | -6.64 |
| 1454998_PM_at   | Gpalpp1                  | GPALPP1    | 0.06  | 2.77 | 0.33  | 7.50E-01 | 8.89E-01 | -6.64 |
| 1423529_PM_at   | G6pc2                    | G6PC2      | -0.03 | 2.05 | -0.33 | 7.50E-01 | 8.89E-01 | -6.64 |
| 1424882_PM_a_at | NT5dc2                   | NT5DC2     | 0.04  | 2.32 | 0.33  | 7.50E-01 | 8.89E-01 | -6.64 |
| 1451344_PM_at   | Tmem119                  | TMEM119    | 0.05  | 2.40 | 0.33  | 7.50E-01 | 8.89E-01 | -6.64 |
| 1450915_PM_at   | Ap3b1                    | AP3B1      | -0.15 | 3.23 | -0.33 | 7.50E-01 | 8.89E-01 | -6.64 |
| 1430697_PM_at   | Ammecr1                  | AMMECR1    | 0.04  | 2.43 | 0.33  | 7.50E-01 | 8.89E-01 | -6.64 |
| 1444795_PM_at   | AU015723                 | NA         | 0.03  | 2.15 | 0.33  | 7.50E-01 | 8.89E-01 | -6.64 |
| 1424771_PM_at   | H2afj                    | H2AFJ      | 0.09  | 8.55 | 0.33  | 7.50E-01 | 8.89E-01 | -6.64 |
| 1441367_PM_a_at | Gm38882                  | NA         | -0.11 | 2.65 | -0.33 | 7.51E-01 | 8.89E-01 | -6.64 |
| 1442649_PM_at   | ---                      | NA         | -0.05 | 2.42 | -0.33 | 7.51E-01 | 8.89E-01 | -6.64 |
| 1459462_PM_at   | ---                      | NA         | 0.04  | 2.49 | 0.33  | 7.51E-01 | 8.89E-01 | -6.64 |
| 1448630_PM_a_at | Sdhc                     | SDHC       | 0.12  | 2.96 | 0.33  | 7.51E-01 | 8.89E-01 | -6.64 |
| 1437633_PM_at   | Ankrd11                  | ANKRD11    | 0.09  | 4.55 | 0.33  | 7.51E-01 | 8.89E-01 | -6.64 |
| 1421877_PM_at   | Mapk9                    | MAPK9      | -0.12 | 5.55 | -0.33 | 7.51E-01 | 8.89E-01 | -6.64 |
| 1452668_PM_x_at | Rab2b                    | RAB2B      | -0.08 | 2.86 | -0.33 | 7.51E-01 | 8.89E-01 | -6.64 |
| 1429495_PM_at   | Tmem107                  | TMEM107    | -0.03 | 2.14 | -0.33 | 7.51E-01 | 8.89E-01 | -6.64 |
| 1430176_PM_at   | Kbtbd13                  | KBTBD13    | 0.04  | 2.35 | 0.33  | 7.51E-01 | 8.89E-01 | -6.64 |

|                 |                                                                       |          |       |      |       |          |          |       |
|-----------------|-----------------------------------------------------------------------|----------|-------|------|-------|----------|----------|-------|
| 1434992_PM_at   | Zfr2                                                                  | ZFR2     | 0.08  | 3.28 | 0.33  | 7.51E-01 | 8.89E-01 | -6.64 |
| 1432753_PM_at   | 9130214F15Rik                                                         | NA       | 0.04  | 2.28 | 0.33  | 7.51E-01 | 8.90E-01 | -6.64 |
| 1420044_PM_at   | Osbp9                                                                 | OSBPL9   | -0.12 | 4.68 | -0.33 | 7.51E-01 | 8.90E-01 | -6.64 |
| 1433960_PM_at   | lsg20l2                                                               | ISG20L2  | -0.04 | 2.71 | -0.33 | 7.51E-01 | 8.90E-01 | -6.64 |
| 1447291_PM_at   | Nphs1os                                                               | NA       | 0.04  | 2.37 | 0.33  | 7.51E-01 | 8.90E-01 | -6.64 |
| 1423318_PM_at   | Rad18                                                                 | RAD18    | 0.07  | 3.85 | 0.33  | 7.51E-01 | 8.90E-01 | -6.64 |
| 1455707_PM_at   | Ranbp3l                                                               | NA       | 0.11  | 2.18 | 0.33  | 7.51E-01 | 8.90E-01 | -6.64 |
| 1455251_PM_at   | ltga1                                                                 | ITGA1    | -0.06 | 2.82 | -0.33 | 7.51E-01 | 8.90E-01 | -6.64 |
| 1437059_PM_at   | Sox21                                                                 | SOX21    | -0.05 | 2.36 | -0.33 | 7.51E-01 | 8.90E-01 | -6.64 |
| 1449975_PM_a_at | Park2                                                                 | PRKN     | 0.09  | 2.89 | 0.33  | 7.51E-01 | 8.90E-01 | -6.64 |
| 1431068_PM_at   | Rmnd5a                                                                | RMND5A   | 0.12  | 4.06 | 0.33  | 7.51E-01 | 8.90E-01 | -6.64 |
| 1457007_PM_at   | ---                                                                   | NA       | -0.06 | 2.85 | -0.33 | 7.51E-01 | 8.90E-01 | -6.64 |
| 1457565_PM_at   | ---                                                                   | NA       | 0.05  | 2.20 | 0.33  | 7.51E-01 | 8.90E-01 | -6.64 |
| 1442174_PM_at   | Tspan18                                                               | TSPAN18  | 0.08  | 3.15 | 0.33  | 7.51E-01 | 8.90E-01 | -6.64 |
| 1450849_PM_at   | Hnrnpu                                                                | HNRNPU   | -0.08 | 7.56 | -0.33 | 7.51E-01 | 8.90E-01 | -6.64 |
| 1416831_PM_at   | Neu1                                                                  | NEU1     | -0.03 | 2.29 | -0.33 | 7.51E-01 | 8.90E-01 | -6.64 |
| 1436388_PM_a_at | 3830406C13Rik                                                         | C3orf14  | -0.05 | 2.59 | -0.33 | 7.51E-01 | 8.90E-01 | -6.64 |
| 1416403_PM_at   | Abcb10                                                                | ABCB10   | 0.06  | 2.77 | 0.33  | 7.51E-01 | 8.90E-01 | -6.64 |
| 1444014_PM_at   | ---                                                                   | NA       | 0.03  | 2.30 | 0.33  | 7.52E-01 | 8.90E-01 | -6.64 |
| 1457623_PM_x_at | Trp53                                                                 | TP53     | 0.04  | 2.33 | 0.33  | 7.52E-01 | 8.90E-01 | -6.64 |
| 1449101_PM_at   | Ebf2                                                                  | EBF2     | 0.03  | 2.25 | 0.33  | 7.52E-01 | 8.90E-01 | -6.64 |
| 1434821_PM_at   | Brd1                                                                  | BRD1     | -0.08 | 3.84 | -0.32 | 7.52E-01 | 8.90E-01 | -6.64 |
| 1437024_PM_at   | Smpd4                                                                 | SMPD4    | 0.07  | 2.82 | 0.32  | 7.52E-01 | 8.90E-01 | -6.64 |
| 1417665_PM_a_at | Cpsf1                                                                 | CPSF1    | -0.09 | 3.57 | -0.32 | 7.52E-01 | 8.90E-01 | -6.64 |
| 1453391_PM_at   | Gm21847 /// Gm38698 ///<br>Speer4cos                                  | NA       | -0.14 | 4.80 | -0.32 | 7.52E-01 | 8.90E-01 | -6.64 |
| 1446204_PM_at   | ---                                                                   | NA       | 0.04  | 2.35 | 0.32  | 7.52E-01 | 8.90E-01 | -6.64 |
| 1437571_PM_at   | Hic2                                                                  | HIC2     | 0.03  | 2.53 | 0.32  | 7.52E-01 | 8.90E-01 | -6.65 |
| 1428097_PM_at   | 2510009E07Rik                                                         | C3orf70  | 0.04  | 3.01 | 0.32  | 7.52E-01 | 8.90E-01 | -6.65 |
| 1416513_PM_at   | Lamb2                                                                 | LAMB2    | -0.07 | 3.97 | -0.32 | 7.52E-01 | 8.90E-01 | -6.65 |
| 1453280_PM_at   | Gm14781 /// Mageb5                                                    | MAGEB5   | 0.03  | 2.18 | 0.32  | 7.52E-01 | 8.90E-01 | -6.65 |
| 1444141_PM_at   | Srx13                                                                 | SNX13    | -0.08 | 3.45 | -0.32 | 7.52E-01 | 8.90E-01 | -6.65 |
| 1444672_PM_at   | ---                                                                   | NA       | 0.04  | 2.64 | 0.32  | 7.52E-01 | 8.90E-01 | -6.65 |
| 1429720_PM_at   | Naa35                                                                 | NAA35    | 0.05  | 2.98 | 0.32  | 7.52E-01 | 8.90E-01 | -6.65 |
| 1456517_PM_at   | Tmem44                                                                | TMEM44   | 0.07  | 3.05 | 0.32  | 7.52E-01 | 8.90E-01 | -6.65 |
| 1438031_PM_at   | Rasgrp3                                                               | RASGRP3  | 0.12  | 3.70 | 0.32  | 7.52E-01 | 8.90E-01 | -6.65 |
| 1448414_PM_at   | Rad1                                                                  | RAD1     | -0.03 | 2.07 | -0.32 | 7.52E-01 | 8.90E-01 | -6.65 |
| 1418397_PM_at   | Zfp275                                                                | ZNF275   | 0.04  | 2.46 | 0.32  | 7.52E-01 | 8.90E-01 | -6.65 |
| 1424191_PM_a_at | Tmem41a                                                               | TMEM41A  | -0.05 | 3.75 | -0.32 | 7.52E-01 | 8.90E-01 | -6.65 |
| 1456556_PM_at   | A230009B12Rik                                                         | NA       | -0.04 | 2.73 | -0.32 | 7.52E-01 | 8.90E-01 | -6.65 |
| 1427861_PM_at   | ---                                                                   | NA       | 0.04  | 2.87 | 0.32  | 7.52E-01 | 8.90E-01 | -6.65 |
| 1429882_PM_at   | 2610005L07Rik ///<br>6820431F20Rik ///<br>Gm21811 ///<br>LOC102642711 | NA       | 0.09  | 6.24 | 0.32  | 7.52E-01 | 8.90E-01 | -6.65 |
| 1442006_PM_at   | ---                                                                   | NA       | 0.10  | 4.16 | 0.32  | 7.52E-01 | 8.90E-01 | -6.65 |
| 1430762_PM_at   | 4833427G06Rik                                                         | C11orf88 | 0.03  | 2.58 | 0.32  | 7.52E-01 | 8.90E-01 | -6.65 |
| 1438624_PM_x_at | Hs3st2                                                                | HS3ST2   | -0.10 | 2.85 | -0.32 | 7.53E-01 | 8.91E-01 | -6.65 |
| 1434355_PM_at   | Zfp617                                                                | NA       | -0.09 | 4.21 | -0.32 | 7.53E-01 | 8.91E-01 | -6.65 |
| 1424527_PM_at   | Ppp2r2d                                                               | PPP2R2D  | -0.06 | 3.05 | -0.32 | 7.53E-01 | 8.91E-01 | -6.65 |
| 1459739_PM_at   | ---                                                                   | NA       | -0.06 | 3.07 | -0.32 | 7.53E-01 | 8.91E-01 | -6.65 |
| 1446054_PM_at   | ---                                                                   | NA       | -0.03 | 2.11 | -0.32 | 7.53E-01 | 8.91E-01 | -6.65 |
| 1432164_PM_a_at | Gcsh /// LOC102641654                                                 | GCSH     | 0.05  | 5.65 | 0.32  | 7.53E-01 | 8.91E-01 | -6.65 |
| 1436652_PM_at   | Cep295                                                                | CEP295   | 0.05  | 2.96 | 0.32  | 7.53E-01 | 8.91E-01 | -6.65 |
| 1417384_PM_at   | Entpd5                                                                | ENTPD5   | 0.07  | 2.88 | 0.32  | 7.53E-01 | 8.91E-01 | -6.65 |
| 1432158_PM_a_at | Trappc2                                                               | TRAPPC2  | 0.08  | 3.51 | 0.32  | 7.53E-01 | 8.91E-01 | -6.65 |
| 1445463_PM_at   | Npepps                                                                | NPEPPS   | 0.08  | 2.92 | 0.32  | 7.53E-01 | 8.91E-01 | -6.65 |
| 1455474_PM_at   | Fam21                                                                 | WASHC2C  | 0.10  | 2.55 | 0.32  | 7.53E-01 | 8.91E-01 | -6.65 |
| 1436796_PM_at   | Snhg4                                                                 | NA       | 0.12  | 3.85 | 0.32  | 7.53E-01 | 8.91E-01 | -6.65 |
| 1426862_PM_at   | Aftph                                                                 | AFTPH    | -0.09 | 4.52 | -0.32 | 7.53E-01 | 8.91E-01 | -6.65 |
| 1426910_PM_at   | Pawr                                                                  | PAWR     | 0.12  | 3.11 | 0.32  | 7.53E-01 | 8.91E-01 | -6.65 |
| 1435652_PM_a_at | Gnai2                                                                 | GNAI2    | -0.09 | 3.54 | -0.32 | 7.53E-01 | 8.91E-01 | -6.65 |
| 1455680_PM_at   | Kpna4                                                                 | KPNA4    | -0.07 | 2.56 | -0.32 | 7.53E-01 | 8.91E-01 | -6.65 |
| 1443901_PM_at   | C2cd2                                                                 | C2CD2    | 0.06  | 2.63 | 0.32  | 7.53E-01 | 8.91E-01 | -6.65 |
| 1454124_PM_at   | 1700067K01Rik                                                         | C19orf67 | -0.03 | 2.62 | -0.32 | 7.53E-01 | 8.91E-01 | -6.65 |
| 1421632_PM_at   | Kcnn3                                                                 | KCNN3    | 0.08  | 3.01 | 0.32  | 7.53E-01 | 8.91E-01 | -6.65 |
| 1454516_PM_at   | LOC102635903                                                          | NA       | 0.06  | 2.22 | 0.32  | 7.53E-01 | 8.91E-01 | -6.65 |
| 1453596_PM_at   | Id2                                                                   | ID2      | 0.03  | 2.42 | 0.32  | 7.53E-01 | 8.91E-01 | -6.65 |
| 1421518_PM_at   | Kcns1                                                                 | KCNS1    | 0.04  | 2.63 | 0.32  | 7.53E-01 | 8.91E-01 | -6.65 |
| 1455715_PM_at   | Gm1976                                                                | NA       | -0.06 | 3.07 | -0.32 | 7.53E-01 | 8.91E-01 | -6.65 |
| 1456768_PM_a_at | Mmrr2                                                                 | MMRN2    | -0.06 | 2.83 | -0.32 | 7.53E-01 | 8.91E-01 | -6.65 |
| 1433863_PM_at   | Btf3                                                                  | BTF3     | 0.03  | 2.27 | 0.32  | 7.53E-01 | 8.91E-01 | -6.65 |
| 1416950_PM_at   | Tnfaip8                                                               | TNFAIP8  | -0.06 | 2.36 | -0.32 | 7.53E-01 | 8.91E-01 | -6.65 |
| 1452438_PM_s_at | Taf4a                                                                 | TAF4     | -0.17 | 3.90 | -0.32 | 7.53E-01 | 8.91E-01 | -6.65 |
| 1436801_PM_x_at | Cdc42ep4                                                              | CDC42EP4 | -0.12 | 3.59 | -0.32 | 7.53E-01 | 8.91E-01 | -6.65 |

|                 |                     |           |       |      |       |          |          |       |
|-----------------|---------------------|-----------|-------|------|-------|----------|----------|-------|
| 1424811_PM_at   | Cml5                | NAT8      | -0.03 | 2.03 | -0.32 | 7.54E-01 | 8.91E-01 | -6.65 |
| 1449187_PM_at   | Pdgfa               | PDGFA     | -0.07 | 4.37 | -0.32 | 7.54E-01 | 8.91E-01 | -6.65 |
| 1456470_PM_x_at | Tubb4b///Tubb4b-ps1 | TUBB4B    | -0.06 | 2.58 | -0.32 | 7.54E-01 | 8.91E-01 | -6.65 |
| 1433682_PM_at   | Arhgef17            | ARHGEF17  | -0.05 | 3.57 | -0.32 | 7.54E-01 | 8.91E-01 | -6.65 |
| 1449097_PM_at   | Txnrd2              | TXNRD2    | -0.03 | 2.60 | -0.32 | 7.54E-01 | 8.91E-01 | -6.65 |
| 1422327_PM_s_at | G6pd2///G6pdx       | G6PD      | 0.05  | 2.35 | 0.32  | 7.54E-01 | 8.91E-01 | -6.65 |
| 1447581_PM_at   | ---                 | NA        | 0.22  | 3.48 | 0.32  | 7.54E-01 | 8.91E-01 | -6.65 |
| 1441557_PM_at   | Setd8               | KMT5A     | -0.08 | 2.12 | -0.32 | 7.54E-01 | 8.91E-01 | -6.65 |
| 1443804_PM_at   | Ppp2r2c             | NA        | 0.03  | 2.29 | 0.32  | 7.54E-01 | 8.91E-01 | -6.65 |
| 1458630_PM_at   | ---                 | NA        | -0.04 | 2.15 | -0.32 | 7.54E-01 | 8.91E-01 | -6.65 |
| 1452755_PM_at   | ---                 | NA        | -0.04 | 2.89 | -0.32 | 7.54E-01 | 8.91E-01 | -6.65 |
| 1451218_PM_at   | Edem1               | EDEM1     | -0.04 | 2.99 | -0.32 | 7.54E-01 | 8.91E-01 | -6.65 |
| 1425970_PM_a_at | Ros1                | ROS1      | -0.03 | 2.12 | -0.32 | 7.54E-01 | 8.91E-01 | -6.65 |
| 1444975_PM_at   | ---                 | NA        | -0.03 | 2.07 | -0.32 | 7.54E-01 | 8.91E-01 | -6.65 |
| 1437011_PM_x_at | Oaz3                | OAZ3      | 0.04  | 2.54 | 0.32  | 7.54E-01 | 8.91E-01 | -6.65 |
| 1416705_PM_at   | Rpe                 | RPEL1     | 0.04  | 3.21 | 0.32  | 7.54E-01 | 8.91E-01 | -6.65 |
| 1428444_PM_at   | Asb2                | ASB2      | 0.05  | 4.03 | 0.32  | 7.54E-01 | 8.91E-01 | -6.65 |
| 1456884_PM_at   | ---                 | NA        | 0.05  | 2.35 | 0.32  | 7.54E-01 | 8.91E-01 | -6.65 |
| 1444180_PM_at   | ---                 | NA        | 0.06  | 2.58 | 0.32  | 7.54E-01 | 8.91E-01 | -6.65 |
| 1422472_PM_at   | Pex13               | PEX13     | -0.11 | 3.03 | -0.32 | 7.54E-01 | 8.91E-01 | -6.65 |
| 1423502_PM_at   | Brd2                | BRD2      | -0.05 | 3.69 | -0.32 | 7.54E-01 | 8.91E-01 | -6.65 |
| 1450285_PM_at   | Uba1y               | NA        | -0.03 | 2.16 | -0.32 | 7.54E-01 | 8.91E-01 | -6.65 |
| 1455454_PM_at   | Akr1c19             | AKR1C2    | 0.03  | 2.19 | 0.32  | 7.54E-01 | 8.91E-01 | -6.65 |
| 1436829_PM_at   | Trim67              | TRIM67    | 0.03  | 2.86 | 0.32  | 7.54E-01 | 8.91E-01 | -6.65 |
| 1446465_PM_at   | ---                 | NA        | 0.05  | 2.40 | 0.32  | 7.54E-01 | 8.91E-01 | -6.65 |
| 1451723_PM_at   | Cnot6l              | CNOT6L    | 0.06  | 2.42 | 0.32  | 7.54E-01 | 8.91E-01 | -6.65 |
| 1436459_PM_at   | Gpr161              | GPR161    | 0.07  | 3.27 | 0.32  | 7.54E-01 | 8.91E-01 | -6.65 |
| 1445108_PM_at   | ---                 | NA        | 0.07  | 2.57 | 0.32  | 7.54E-01 | 8.91E-01 | -6.65 |
| 1450076_PM_at   | Cfap97              | CFAP97    | 0.07  | 2.33 | 0.32  | 7.54E-01 | 8.91E-01 | -6.65 |
| 1436610_PM_at   | Ankrd12             | NA        | 0.16  | 5.00 | 0.32  | 7.54E-01 | 8.91E-01 | -6.65 |
| 1435668_PM_at   | Fam120b             | FAM120B   | 0.16  | 3.48 | 0.32  | 7.54E-01 | 8.91E-01 | -6.65 |
| 1422974_PM_at   | Nt5e                | NT5E      | 0.04  | 2.29 | 0.32  | 7.54E-01 | 8.91E-01 | -6.65 |
| 1447828_PM_x_at | Eepd1               | EEPD1     | -0.03 | 2.18 | -0.32 | 7.54E-01 | 8.91E-01 | -6.65 |
| 1451801_PM_at   | Trdn                | NA        | -0.03 | 2.14 | -0.32 | 7.55E-01 | 8.91E-01 | -6.65 |
| 1419294_PM_at   | 1700011H14Rik       | C14orf105 | 0.03  | 2.22 | 0.32  | 7.55E-01 | 8.91E-01 | -6.65 |
| 1437589_PM_x_at | Zgpat               | ZGPAT     | 0.06  | 2.59 | 0.32  | 7.55E-01 | 8.91E-01 | -6.65 |
| 1426070_PM_a_at | Kcnd3               | KCND3     | 0.05  | 2.72 | 0.32  | 7.55E-01 | 8.92E-01 | -6.65 |
| 1423891_PM_at   | Gstt3               | NA        | 0.04  | 2.38 | 0.32  | 7.55E-01 | 8.92E-01 | -6.65 |
| 1460097_PM_at   | ---                 | NA        | 0.06  | 2.36 | 0.32  | 7.55E-01 | 8.92E-01 | -6.65 |
| 1459983_PM_at   | Impa2               | IMPA2     | 0.08  | 2.49 | 0.32  | 7.55E-01 | 8.92E-01 | -6.65 |
| 1458350_PM_at   | Opa3                | OPA3      | -0.11 | 3.08 | -0.32 | 7.55E-01 | 8.92E-01 | -6.65 |
| 1433028_PM_at   | ---                 | NA        | 0.05  | 2.50 | 0.32  | 7.55E-01 | 8.92E-01 | -6.65 |
| 1426697_PM_a_at | Lrpap1              | LRPAP1    | -0.12 | 3.91 | -0.32 | 7.55E-01 | 8.92E-01 | -6.65 |
| 1430658_PM_a_at | Gsdma2              | GSDMA     | 0.05  | 2.56 | 0.32  | 7.55E-01 | 8.92E-01 | -6.65 |
| 1429884_PM_at   | Srgap2              | SRGAP2B   | -0.06 | 4.50 | -0.32 | 7.55E-01 | 8.92E-01 | -6.65 |
| 1445791_PM_at   | ---                 | NA        | -0.03 | 2.17 | -0.32 | 7.55E-01 | 8.92E-01 | -6.65 |
| 1422445_PM_at   | Itga6               | ITGA6     | -0.05 | 2.86 | -0.32 | 7.55E-01 | 8.92E-01 | -6.65 |
| 1453541_PM_at   | Pfk1                | NA        | 0.04  | 4.12 | 0.32  | 7.55E-01 | 8.92E-01 | -6.65 |
| 1433656_PM_a_at | Gnl3                | GNL3      | 0.12  | 4.93 | 0.32  | 7.55E-01 | 8.92E-01 | -6.65 |
| 1420262_PM_at   | ---                 | NA        | -0.03 | 2.20 | -0.32 | 7.55E-01 | 8.92E-01 | -6.65 |
| 1423776_PM_s_at | Tbc1d22a            | TBC1D22A  | 0.04  | 5.03 | 0.32  | 7.55E-01 | 8.92E-01 | -6.65 |
| 1455271_PM_at   | Gm13889             | C11orf96  | 0.07  | 3.23 | 0.32  | 7.55E-01 | 8.92E-01 | -6.65 |
| 1425609_PM_at   | Ncf1                | NCF1      | 0.08  | 2.33 | 0.32  | 7.55E-01 | 8.92E-01 | -6.65 |
| 1419558_PM_at   | Mdm4                | MDM4      | 0.10  | 4.32 | 0.32  | 7.55E-01 | 8.92E-01 | -6.65 |
| 1445192_PM_at   | D8Ert575e           | NA        | 0.03  | 1.91 | 0.32  | 7.55E-01 | 8.92E-01 | -6.65 |
| 1432225_PM_at   | 4930456L15Rik       | NA        | -0.03 | 2.33 | -0.32 | 7.55E-01 | 8.92E-01 | -6.65 |
| 1447071_PM_at   | ---                 | NA        | -0.03 | 2.43 | -0.32 | 7.55E-01 | 8.92E-01 | -6.65 |
| 1422557_PM_s_at | Mt1                 | MT1F      | -0.12 | 6.15 | -0.32 | 7.55E-01 | 8.92E-01 | -6.65 |
| 1452134_PM_at   | Tmem175             | TMEM175   | 0.03  | 2.51 | 0.32  | 7.55E-01 | 8.92E-01 | -6.65 |
| 1459681_PM_at   | ---                 | NA        | -0.03 | 2.28 | -0.32 | 7.56E-01 | 8.92E-01 | -6.65 |
| 1450267_PM_at   | Tlr8                | TLR8      | -0.03 | 2.10 | -0.32 | 7.56E-01 | 8.92E-01 | -6.65 |
| 1453673_PM_at   | Atp13a4             | ATP13A4   | 0.02  | 2.09 | 0.32  | 7.56E-01 | 8.92E-01 | -6.65 |
| 1445294_PM_at   | Kcnj3               | NA        | 0.02  | 1.92 | 0.32  | 7.56E-01 | 8.92E-01 | -6.65 |
| 1431578_PM_at   | Wbp2nl              | WBP2NL    | 0.03  | 2.47 | 0.32  | 7.56E-01 | 8.92E-01 | -6.65 |
| 1457392_PM_at   | Srek1               | NA        | -0.07 | 3.48 | -0.32 | 7.56E-01 | 8.92E-01 | -6.65 |
| 1424652_PM_at   | Eva1a               | EVA1A     | -0.06 | 2.46 | -0.32 | 7.56E-01 | 8.92E-01 | -6.65 |
| 1434269_PM_at   | Fam149b             | FAM149B1  | -0.05 | 2.82 | -0.32 | 7.56E-01 | 8.92E-01 | -6.65 |
| 1429988_PM_at   | ---                 | NA        | -0.04 | 2.28 | -0.32 | 7.56E-01 | 8.92E-01 | -6.65 |
| 1443431_PM_at   | ---                 | NA        | 0.03  | 2.23 | 0.32  | 7.56E-01 | 8.92E-01 | -6.65 |
| 1447590_PM_at   | ---                 | NA        | 0.03  | 2.25 | 0.32  | 7.56E-01 | 8.92E-01 | -6.65 |
| 1420330_PM_at   | Clec4e              | CLEC4E    | 0.03  | 2.14 | 0.32  | 7.56E-01 | 8.92E-01 | -6.65 |
| 1418548_PM_at   | Svs6                | NA        | 0.03  | 2.06 | 0.32  | 7.56E-01 | 8.92E-01 | -6.65 |
| 1421610_PM_at   | Cx3cl1              | NA        | 0.03  | 2.49 | 0.32  | 7.56E-01 | 8.92E-01 | -6.65 |
| 1438353_PM_at   | ---                 | NA        | 0.03  | 2.09 | 0.32  | 7.56E-01 | 8.92E-01 | -6.65 |
| 1454539_PM_at   | 4933417G07Rik       | NA        | 0.04  | 2.45 | 0.32  | 7.56E-01 | 8.92E-01 | -6.65 |

|                 |                    |          |       |      |       |          |          |       |
|-----------------|--------------------|----------|-------|------|-------|----------|----------|-------|
| 1448177_PM_at   | Tap1               | TAP1     | 0.05  | 2.81 | 0.32  | 7.56E-01 | 8.92E-01 | -6.65 |
| 1434767_PM_at   | Mis18bp1           | MIS18BP1 | 0.05  | 2.41 | 0.32  | 7.56E-01 | 8.92E-01 | -6.65 |
| 1421953_PM_at   | Crkl               | CRKL     | 0.05  | 4.00 | 0.32  | 7.56E-01 | 8.92E-01 | -6.65 |
| 1458827_PM_at   | ---                | NA       | 0.05  | 2.27 | 0.32  | 7.56E-01 | 8.92E-01 | -6.65 |
| 1457208_PM_at   | NFXl1              | NFXL1    | 0.05  | 2.47 | 0.32  | 7.56E-01 | 8.92E-01 | -6.65 |
| 1441284_PM_at   | ---                | NA       | 0.06  | 2.59 | 0.32  | 7.56E-01 | 8.92E-01 | -6.65 |
| 1434713_PM_at   | Mief1              | MIEF1    | 0.06  | 2.61 | 0.32  | 7.56E-01 | 8.92E-01 | -6.65 |
| 1460404_PM_at   | Erc6l2             | ERCC6L2  | 0.07  | 3.57 | 0.32  | 7.56E-01 | 8.92E-01 | -6.65 |
| 1435292_PM_at   | Tbc1d4             | TBC1D4   | 0.05  | 2.27 | 0.32  | 7.56E-01 | 8.92E-01 | -6.65 |
| 1439952_PM_at   | ---                | NA       | -0.03 | 2.49 | -0.32 | 7.56E-01 | 8.92E-01 | -6.65 |
| 1420072_PM_s_at | ---                | NA       | 0.05  | 2.10 | 0.32  | 7.56E-01 | 8.92E-01 | -6.65 |
| 1441512_PM_at   | LOC105247626       | NA       | -0.05 | 2.46 | -0.32 | 7.56E-01 | 8.92E-01 | -6.65 |
| 1424673_PM_at   | Clec2h             | CLEC2D   | -0.02 | 2.02 | -0.32 | 7.56E-01 | 8.92E-01 | -6.65 |
| 1445282_PM_at   | ---                | NA       | 0.05  | 2.66 | 0.32  | 7.56E-01 | 8.92E-01 | -6.65 |
| 1460740_PM_at   | Cltb               | CLTB     | 0.05  | 2.70 | 0.32  | 7.56E-01 | 8.92E-01 | -6.65 |
| 1460143_PM_at   | ---                | NA       | -0.04 | 2.49 | -0.32 | 7.56E-01 | 8.92E-01 | -6.65 |
| 1416397_PM_at   | Mesdc1             | MESDC1   | -0.05 | 2.42 | -0.32 | 7.56E-01 | 8.92E-01 | -6.65 |
| 1436926_PM_at   | Esrrb              | ESRRB    | 0.03  | 2.13 | 0.32  | 7.56E-01 | 8.92E-01 | -6.65 |
| 1434788_PM_at   | Fzd3               | NA       | -0.09 | 3.77 | -0.32 | 7.56E-01 | 8.92E-01 | -6.65 |
| 1427115_PM_at   | Myh3               | NA       | 0.12  | 3.92 | 0.32  | 7.56E-01 | 8.92E-01 | -6.65 |
| 1429284_PM_at   | Mob3b              | MOB3B    | 0.06  | 2.62 | 0.32  | 7.56E-01 | 8.92E-01 | -6.65 |
| 1453215_PM_at   | Rnase10            | RNASE10  | -0.03 | 2.42 | -0.32 | 7.57E-01 | 8.92E-01 | -6.65 |
| 1443004_PM_at   | ---                | NA       | 0.03  | 2.59 | 0.32  | 7.57E-01 | 8.92E-01 | -6.65 |
| 1420768_PM_a_at | Dhx58              | DHX58    | 0.03  | 2.39 | 0.32  | 7.57E-01 | 8.92E-01 | -6.65 |
| 1425416_PM_s_at | Psrc1              | PSRC1    | 0.04  | 2.31 | 0.32  | 7.57E-01 | 8.92E-01 | -6.65 |
| 1451082_PM_at   | Cmtr1///Rnf8-cmtr1 | CMTR1    | -0.10 | 2.56 | -0.32 | 7.57E-01 | 8.93E-01 | -6.65 |
| 1417300_PM_at   | Smpdl3b            | SMPDL3B  | -0.05 | 2.47 | -0.32 | 7.57E-01 | 8.93E-01 | -6.65 |
| 1425959_PM_x_at | Klra13-ps///Klra16 | NA       | -0.05 | 2.49 | -0.32 | 7.57E-01 | 8.93E-01 | -6.65 |
| 1447114_PM_x_at | Partic1            | NA       | 0.03  | 2.40 | 0.32  | 7.57E-01 | 8.93E-01 | -6.65 |
| 1429976_PM_at   | Clasp2             | NA       | 0.08  | 2.53 | 0.32  | 7.57E-01 | 8.93E-01 | -6.65 |
| 1441238_PM_at   | ---                | NA       | -0.10 | 4.30 | -0.32 | 7.57E-01 | 8.93E-01 | -6.65 |
| 1438470_PM_at   | Socs2              | SOCS2    | -0.05 | 3.12 | -0.32 | 7.57E-01 | 8.93E-01 | -6.65 |
| 1451427_PM_a_at | Egfl7              | EGFL7    | 0.03  | 2.95 | 0.32  | 7.57E-01 | 8.93E-01 | -6.65 |
| 1449998_PM_at   | Nkx3-1             | NKX3-1   | 0.03  | 2.26 | 0.32  | 7.57E-01 | 8.93E-01 | -6.65 |
| 1443142_PM_at   | ---                | NA       | 0.04  | 2.41 | 0.32  | 7.57E-01 | 8.93E-01 | -6.65 |
| 1455714_PM_at   | Vstm2l             | VSTM2L   | 0.05  | 4.35 | 0.32  | 7.57E-01 | 8.93E-01 | -6.65 |
| 1430346_PM_at   | Fam189a1           | FAM189A1 | 0.06  | 2.84 | 0.32  | 7.57E-01 | 8.93E-01 | -6.65 |
| 1455008_PM_at   | Gna12              | GNA12    | 0.07  | 3.76 | 0.32  | 7.57E-01 | 8.93E-01 | -6.65 |
| 1460108_PM_at   | ---                | NA       | -0.06 | 2.57 | -0.32 | 7.57E-01 | 8.93E-01 | -6.65 |
| 1437369_PM_at   | Fgd1               | FGD1     | -0.05 | 3.07 | -0.32 | 7.57E-01 | 8.93E-01 | -6.65 |
| 1437658_PM_a_at | Snord22            | NA       | -0.05 | 2.26 | -0.32 | 7.57E-01 | 8.93E-01 | -6.65 |
| 1440446_PM_at   | Nkd1               | NKD1     | 0.04  | 2.79 | 0.32  | 7.57E-01 | 8.93E-01 | -6.65 |
| 1415709_PM_s_at | Gbf1               | GBF1     | -0.04 | 2.61 | -0.32 | 7.57E-01 | 8.93E-01 | -6.65 |
| 1445133_PM_at   | ---                | NA       | -0.03 | 2.04 | -0.32 | 7.57E-01 | 8.93E-01 | -6.65 |
| 1457221_PM_at   | ---                | NA       | -0.03 | 2.50 | -0.32 | 7.57E-01 | 8.93E-01 | -6.65 |
| 1425060_PM_s_at | Clip1              | CLIP1    | 0.05  | 4.66 | 0.32  | 7.57E-01 | 8.93E-01 | -6.65 |
| 1419853_PM_a_at | P2rx7              | P2RX7    | 0.03  | 2.42 | 0.32  | 7.57E-01 | 8.93E-01 | -6.65 |
| 1440705_PM_at   | AU021720           | NA       | 0.04  | 2.39 | 0.32  | 7.57E-01 | 8.93E-01 | -6.65 |
| 1441562_PM_at   | A230048021Rik      | NA       | 0.03  | 2.12 | 0.32  | 7.57E-01 | 8.93E-01 | -6.65 |
| 1427575_PM_at   | Fbxw14             | NA       | 0.04  | 2.33 | 0.32  | 7.57E-01 | 8.93E-01 | -6.65 |
| 1449802_PM_x_at | Rpusd2             | NA       | 0.03  | 2.04 | 0.32  | 7.57E-01 | 8.93E-01 | -6.65 |
| 1454532_PM_at   | ---                | NA       | -0.07 | 3.14 | -0.32 | 7.57E-01 | 8.93E-01 | -6.65 |
| 1442246_PM_at   | Gm9054             | NA       | 0.03  | 2.64 | 0.32  | 7.57E-01 | 8.93E-01 | -6.65 |
| 1431183_PM_at   | 1700066M21Rik      | C2orf69  | 0.09  | 3.39 | 0.32  | 7.57E-01 | 8.93E-01 | -6.65 |
| 1447223_PM_at   | ---                | NA       | -0.13 | 4.10 | -0.32 | 7.57E-01 | 8.93E-01 | -6.65 |
| 1441876_PM_x_at | Zfp93              | ZNF235   | 0.07  | 3.45 | 0.32  | 7.58E-01 | 8.93E-01 | -6.65 |
| 1454692_PM_x_at | Hnrnpk             | HNRNPK   | -0.05 | 4.80 | -0.32 | 7.58E-01 | 8.93E-01 | -6.65 |
| 1419871_PM_at   | Sik2               | SIK2     | -0.05 | 2.53 | -0.32 | 7.58E-01 | 8.93E-01 | -6.65 |
| 1449526_PM_a_at | Gdpd3              | GDPD3    | -0.03 | 2.19 | -0.32 | 7.58E-01 | 8.93E-01 | -6.65 |
| 1446589_PM_at   | Rhbdd1             | RHBDD1   | 0.03  | 2.30 | 0.32  | 7.58E-01 | 8.93E-01 | -6.65 |
| 1423977_PM_at   | 4930453N24Rik      | C3orf38  | -0.04 | 2.18 | -0.32 | 7.58E-01 | 8.93E-01 | -6.65 |
| 1455966_PM_s_at | Nudt21             | NUDT21   | 0.06  | 2.18 | 0.32  | 7.58E-01 | 8.93E-01 | -6.65 |
| 1460656_PM_a_at | Sft2d1             | SFT2D1   | -0.04 | 2.53 | -0.32 | 7.58E-01 | 8.93E-01 | -6.65 |
| 1443614_PM_at   | ---                | NA       | -0.04 | 2.70 | -0.32 | 7.58E-01 | 8.93E-01 | -6.65 |
| 1415907_PM_at   | Ccnd3              | CCND3    | -0.03 | 2.34 | -0.32 | 7.58E-01 | 8.93E-01 | -6.65 |
| 1430809_PM_at   | Gm38058            | NA       | 0.02  | 2.22 | 0.32  | 7.58E-01 | 8.93E-01 | -6.65 |
| 1432479_PM_at   | Spn-ps             | NA       | 0.04  | 2.25 | 0.32  | 7.58E-01 | 8.93E-01 | -6.65 |
| 1456991_PM_at   | ---                | NA       | 0.04  | 2.56 | 0.32  | 7.58E-01 | 8.93E-01 | -6.65 |
| 1432913_PM_at   | Lrrc52             | LRRCS2   | 0.08  | 2.32 | 0.32  | 7.58E-01 | 8.93E-01 | -6.65 |
| 1440269_PM_at   | Scyl2              | SCYL2    | -0.05 | 2.36 | -0.32 | 7.58E-01 | 8.93E-01 | -6.65 |
| 1434201_PM_at   | Chrdl1             | CHRD1    | 0.04  | 2.58 | 0.32  | 7.58E-01 | 8.93E-01 | -6.65 |
| 1448476_PM_at   | Nap1l4             | NAP1L4   | 0.04  | 3.34 | 0.32  | 7.58E-01 | 8.93E-01 | -6.65 |
| 1446547_PM_at   | 9330175E14Rik      | NA       | 0.03  | 2.19 | 0.32  | 7.58E-01 | 8.93E-01 | -6.65 |
| 1444579_PM_at   | ---                | NA       | -0.09 | 2.71 | -0.32 | 7.58E-01 | 8.93E-01 | -6.65 |
| 1436279_PM_at   | Slc26a7            | SLC26A7  | -0.04 | 2.15 | -0.32 | 7.58E-01 | 8.93E-01 | -6.65 |

|                 |                     |          |       |      |       |          |          |       |
|-----------------|---------------------|----------|-------|------|-------|----------|----------|-------|
| 1416784_PM_at   | Pgk2                | PGK2     | 0.04  | 2.78 | 0.32  | 7.58E-01 | 8.93E-01 | -6.65 |
| 1432974_PM_at   | ---                 | NA       | 0.06  | 3.09 | 0.32  | 7.58E-01 | 8.93E-01 | -6.65 |
| 1458296_PM_at   | ---                 | NA       | 0.09  | 2.58 | 0.32  | 7.58E-01 | 8.93E-01 | -6.65 |
| 1439106_PM_at   | Zfp462              | ZNF462   | -0.11 | 3.81 | -0.32 | 7.58E-01 | 8.93E-01 | -6.65 |
| 1421055_PM_at   | Xpo4                | NA       | -0.07 | 3.46 | -0.32 | 7.58E-01 | 8.93E-01 | -6.65 |
| 1447372_PM_at   | Alh16a1             | ALDH16A1 | 0.03  | 1.97 | 0.32  | 7.58E-01 | 8.93E-01 | -6.65 |
| 1451400_PM_at   | Gemin8              | GEMIN8   | 0.04  | 2.53 | 0.32  | 7.58E-01 | 8.93E-01 | -6.65 |
| 1434917_PM_at   | Cobl                | COBL     | -0.13 | 3.38 | -0.32 | 7.59E-01 | 8.93E-01 | -6.65 |
| 1423390_PM_at   | Siah1a              | NA       | -0.10 | 4.62 | -0.32 | 7.59E-01 | 8.93E-01 | -6.65 |
| 1458177_PM_at   | ---                 | NA       | -0.04 | 2.31 | -0.32 | 7.59E-01 | 8.93E-01 | -6.65 |
| 1459312_PM_at   | ---                 | NA       | 0.03  | 2.01 | 0.32  | 7.59E-01 | 8.93E-01 | -6.65 |
| 1418478_PM_at   | Lmo1                | LMO1     | 0.04  | 2.26 | 0.32  | 7.59E-01 | 8.93E-01 | -6.65 |
| 1420649_PM_at   | Zfhx3               | ZFHX3    | 0.05  | 2.82 | 0.32  | 7.59E-01 | 8.93E-01 | -6.65 |
| 1451060_PM_at   | Gpr146              | GPR146   | 0.06  | 2.81 | 0.32  | 7.59E-01 | 8.93E-01 | -6.65 |
| 1454708_PM_at   | Ablim1              | ABLIM1   | 0.12  | 6.64 | 0.32  | 7.59E-01 | 8.93E-01 | -6.65 |
| 1450603_PM_s_at | Vmn1r47 /// Vmn1r48 | NA       | -0.16 | 2.65 | -0.32 | 7.59E-01 | 8.94E-01 | -6.65 |
| 1439002_PM_s_at | Pr13d1 /// Pr13d2   | PRL      | -0.07 | 2.20 | -0.32 | 7.59E-01 | 8.94E-01 | -6.65 |
| 1456643_PM_at   | 9230114K14Rik       | NA       | -0.06 | 2.59 | -0.32 | 7.59E-01 | 8.94E-01 | -6.65 |
| 1436085_PM_at   | Zbtb34              | ZBTB34   | 0.04  | 2.12 | 0.32  | 7.59E-01 | 8.94E-01 | -6.65 |
| 1444627_PM_at   | ---                 | NA       | 0.04  | 2.53 | 0.32  | 7.59E-01 | 8.94E-01 | -6.65 |
| 1448553_PM_at   | Myh7                | MYH7     | 0.23  | 3.29 | 0.32  | 7.59E-01 | 8.94E-01 | -6.65 |
| 1451507_PM_at   | Mef2c               | MEF2C    | -0.19 | 6.57 | -0.31 | 7.59E-01 | 8.94E-01 | -6.65 |
| 1459181_PM_at   | ---                 | NA       | 0.03  | 2.31 | 0.31  | 7.59E-01 | 8.94E-01 | -6.65 |
| 1435485_PM_at   | Emc1                | EMC1     | 0.05  | 2.57 | 0.31  | 7.59E-01 | 8.94E-01 | -6.65 |
| 1460692_PM_at   | Ehmt2               | EHMT2    | -0.16 | 5.92 | -0.31 | 7.59E-01 | 8.94E-01 | -6.65 |
| 1454471_PM_at   | 3110062G12Rik       | NA       | 0.03  | 2.18 | 0.31  | 7.59E-01 | 8.94E-01 | -6.65 |
| 1423904_PM_a_at | Pvr                 | PVR      | -0.05 | 2.13 | -0.31 | 7.59E-01 | 8.94E-01 | -6.65 |
| 1440591_PM_at   | ---                 | NA       | -0.05 | 2.36 | -0.31 | 7.59E-01 | 8.94E-01 | -6.65 |
| 1433938_PM_at   | Trp53bp2            | TP53BP2  | 0.07  | 3.08 | 0.31  | 7.59E-01 | 8.94E-01 | -6.65 |
| 1458408_PM_at   | Samd8               | SAMD8    | -0.08 | 3.24 | -0.31 | 7.59E-01 | 8.94E-01 | -6.65 |
| 1452963_PM_at   | 9530077C05Rik       | KIAA0895 | -0.03 | 2.62 | -0.31 | 7.59E-01 | 8.94E-01 | -6.65 |
| 1420601_PM_at   | Gcm1                | GCM1     | 0.03  | 2.64 | 0.31  | 7.59E-01 | 8.94E-01 | -6.65 |
| 1423037_PM_at   | Aplnr               | APLNR    | 0.05  | 3.39 | 0.31  | 7.59E-01 | 8.94E-01 | -6.65 |
| 1447439_PM_at   | Thegl               | THEGL    | 0.06  | 2.35 | 0.31  | 7.59E-01 | 8.94E-01 | -6.65 |
| 1454755_PM_at   | Itpkc               | ITPKC    | 0.08  | 2.46 | 0.31  | 7.59E-01 | 8.94E-01 | -6.65 |
| 1424508_PM_at   | Ttc5                | TTC5     | 0.10  | 3.52 | 0.31  | 7.59E-01 | 8.94E-01 | -6.65 |
| 1416089_PM_at   | Rps15               | NA       | 0.11  | 4.39 | 0.31  | 7.59E-01 | 8.94E-01 | -6.65 |
| 1436383_PM_at   | Cplx2               | CPLX2    | -0.06 | 5.63 | -0.31 | 7.59E-01 | 8.94E-01 | -6.65 |
| 1425321_PM_a_at | Clmn                | CLMN     | 0.07  | 2.82 | 0.31  | 7.59E-01 | 8.94E-01 | -6.65 |
| 1444652_PM_at   | ---                 | NA       | -0.03 | 2.39 | -0.31 | 7.60E-01 | 8.94E-01 | -6.65 |
| 1444196_PM_at   | Al662501            | NA       | 0.03  | 2.11 | 0.31  | 7.60E-01 | 8.94E-01 | -6.65 |
| 1439229_PM_at   | Plekha7             | PLEKHA7  | 0.04  | 2.77 | 0.31  | 7.60E-01 | 8.94E-01 | -6.65 |
| 1428487_PM_s_at | Coq10b              | COQ10B   | -0.12 | 6.19 | -0.31 | 7.60E-01 | 8.94E-01 | -6.65 |
| 1417634_PM_at   | Sod3                | SOD3     | -0.04 | 2.56 | -0.31 | 7.60E-01 | 8.94E-01 | -6.65 |
| 1460643_PM_at   | Ell                 | ELL      | -0.03 | 2.21 | -0.31 | 7.60E-01 | 8.94E-01 | -6.65 |
| 1440618_PM_at   | Rhbdl2              | RHBDL2   | 0.03  | 2.08 | 0.31  | 7.60E-01 | 8.94E-01 | -6.65 |
| 1423720_PM_a_at | Sar1a               | SAR1A    | 0.04  | 2.80 | 0.31  | 7.60E-01 | 8.94E-01 | -6.65 |
| 1447737_PM_at   | Prkra               | PRKRA    | 0.05  | 2.46 | 0.31  | 7.60E-01 | 8.94E-01 | -6.65 |
| 1429411_PM_a_at | Eny2                | ENY2     | 0.06  | 8.05 | 0.31  | 7.60E-01 | 8.94E-01 | -6.65 |
| 1440770_PM_at   | Bcl2                | BCL2     | 0.05  | 2.32 | 0.31  | 7.60E-01 | 8.94E-01 | -6.65 |
| 1430029_PM_a_at | Tspan31             | TSPAN31  | -0.09 | 5.06 | -0.31 | 7.60E-01 | 8.94E-01 | -6.65 |
| 1443817_PM_x_at | Nkx2-6              | NKX2-6   | -0.02 | 1.80 | -0.31 | 7.60E-01 | 8.94E-01 | -6.65 |
| 1434678_PM_at   | Mbn3                | NA       | 0.03  | 2.02 | 0.31  | 7.60E-01 | 8.94E-01 | -6.65 |
| 1440665_PM_at   | ---                 | NA       | 0.03  | 2.14 | 0.31  | 7.60E-01 | 8.94E-01 | -6.65 |
| 1457313_PM_at   | Ocrl                | OURL     | 0.03  | 2.57 | 0.31  | 7.60E-01 | 8.94E-01 | -6.65 |
| 1446112_PM_at   | ---                 | NA       | 0.05  | 2.48 | 0.31  | 7.60E-01 | 8.94E-01 | -6.65 |
| 1439724_PM_at   | Ric8b               | NA       | 0.07  | 2.97 | 0.31  | 7.60E-01 | 8.94E-01 | -6.65 |
| 1451996_PM_at   | Tm2d1               | NA       | 0.08  | 2.74 | 0.31  | 7.60E-01 | 8.94E-01 | -6.65 |
| 1436747_PM_at   | Ubal2               | UBALD2   | 0.08  | 3.50 | 0.31  | 7.60E-01 | 8.94E-01 | -6.65 |
| 1442524_PM_at   | Vps33a              | NA       | 0.08  | 4.68 | 0.31  | 7.60E-01 | 8.94E-01 | -6.65 |
| 1439219_PM_at   | A730082K24Rik       | NA       | 0.11  | 2.53 | 0.31  | 7.60E-01 | 8.94E-01 | -6.65 |
| 1445173_PM_at   | Cep126              | CEP126   | -0.03 | 2.49 | -0.31 | 7.60E-01 | 8.94E-01 | -6.65 |
| 1458258_PM_at   | ---                 | NA       | 0.03  | 2.07 | 0.31  | 7.60E-01 | 8.94E-01 | -6.65 |
| 1450789_PM_at   | Rhpn1               | RHPN1    | 0.03  | 2.34 | 0.31  | 7.60E-01 | 8.94E-01 | -6.65 |
| 1460375_PM_at   | Trmt112             | TRMT112  | 0.02  | 2.11 | 0.31  | 7.60E-01 | 8.94E-01 | -6.65 |
| 1458521_PM_at   | ---                 | NA       | 0.10  | 3.42 | 0.31  | 7.60E-01 | 8.94E-01 | -6.65 |
| 1460526_PM_at   | ---                 | NA       | -0.03 | 2.13 | -0.31 | 7.60E-01 | 8.94E-01 | -6.65 |
| 1448141_PM_at   | Rrp7a               | RRP7A    | -0.05 | 2.85 | -0.31 | 7.61E-01 | 8.94E-01 | -6.65 |
| 1446394_PM_at   | Oprk1               | OPRK1    | -0.03 | 2.36 | -0.31 | 7.61E-01 | 8.94E-01 | -6.65 |
| 1441157_PM_at   | ---                 | NA       | -0.07 | 2.99 | -0.31 | 7.61E-01 | 8.94E-01 | -6.65 |
| 1453590_PM_at   | Arl5b               | ARL5B    | -0.05 | 2.34 | -0.31 | 7.61E-01 | 8.94E-01 | -6.65 |
| 1443450_PM_at   | Gm16630             | NA       | 0.03  | 2.41 | 0.31  | 7.61E-01 | 8.94E-01 | -6.65 |
| 1417122_PM_at   | Vav3                | VAV3     | 0.03  | 2.13 | 0.31  | 7.61E-01 | 8.94E-01 | -6.65 |
| 1438410_PM_at   | Prtg                | PRTG     | 0.05  | 3.41 | 0.31  | 7.61E-01 | 8.94E-01 | -6.65 |
| 1449966_PM_s_at | Cab39l              | CAB39L   | 0.10  | 2.97 | 0.31  | 7.61E-01 | 8.94E-01 | -6.65 |

|                 |                           |          |       |      |       |          |          |       |
|-----------------|---------------------------|----------|-------|------|-------|----------|----------|-------|
| 1431639_PM_at   | Cldn34d                   | CLDN34   | 0.04  | 2.57 | 0.31  | 7.61E-01 | 8.94E-01 | -6.65 |
| 1446259_PM_at   | ---                       | NA       | 0.03  | 2.33 | 0.31  | 7.61E-01 | 8.94E-01 | -6.65 |
| 1425431_PM_at   | Krtap16-3                 | NA       | 0.03  | 1.99 | 0.31  | 7.61E-01 | 8.94E-01 | -6.65 |
| 1428776_PM_at   | Slc10a6                   | SLC10A6  | 0.03  | 2.29 | 0.31  | 7.61E-01 | 8.94E-01 | -6.65 |
| 1425916_PM_at   | Capn8                     | CAPN8    | 0.05  | 2.38 | 0.31  | 7.61E-01 | 8.94E-01 | -6.65 |
| 1417526_PM_at   | Pcbp3                     | PCBP3    | 0.08  | 3.12 | 0.31  | 7.61E-01 | 8.94E-01 | -6.65 |
| 1447460_PM_at   | ---                       | NA       | -0.08 | 2.98 | -0.31 | 7.61E-01 | 8.94E-01 | -6.65 |
| 1436291_PM_a_at | Dpys                      | DPYS     | 0.03  | 2.12 | 0.31  | 7.61E-01 | 8.94E-01 | -6.65 |
| 1428974_PM_s_at | Lztf1                     | LZTF1    | -0.07 | 3.08 | -0.31 | 7.61E-01 | 8.95E-01 | -6.65 |
| 1427507_PM_at   | Trim17                    | TRIM17   | -0.03 | 2.18 | -0.31 | 7.61E-01 | 8.95E-01 | -6.65 |
| 1430715_PM_at   | Rnf225                    | RNF225   | 0.02  | 1.98 | 0.31  | 7.61E-01 | 8.95E-01 | -6.65 |
| 1439058_PM_at   | Sfpq                      | NA       | -0.10 | 3.74 | -0.31 | 7.61E-01 | 8.95E-01 | -6.65 |
| 1416841_PM_at   | 1110059E24Rik             | C9orf85  | -0.03 | 2.82 | -0.31 | 7.61E-01 | 8.95E-01 | -6.65 |
| 1442500_PM_at   | C77406                    | NA       | -0.03 | 2.26 | -0.31 | 7.61E-01 | 8.95E-01 | -6.65 |
| 1420321_PM_at   | Rsad1                     | NA       | 0.04  | 2.24 | 0.31  | 7.61E-01 | 8.95E-01 | -6.65 |
| 1460371_PM_at   | Hspa12b                   | HSPA12B  | 0.11  | 3.27 | 0.31  | 7.61E-01 | 8.95E-01 | -6.65 |
| 1455973_PM_at   | Gm11992                   | C7orf57  | -0.05 | 1.86 | -0.31 | 7.61E-01 | 8.95E-01 | -6.65 |
| 1446617_PM_at   | St8sia4                   | ST8SIA4  | 0.05  | 2.33 | 0.31  | 7.61E-01 | 8.95E-01 | -6.65 |
| 1451426_PM_at   | Dhx58                     | DHX58    | 0.04  | 2.19 | 0.31  | 7.61E-01 | 8.95E-01 | -6.65 |
| 1453563_PM_at   | Nmral1                    | NMRAL1   | 0.04  | 2.41 | 0.31  | 7.61E-01 | 8.95E-01 | -6.65 |
| 1432798_PM_at   | Slc12a6                   | NA       | 0.04  | 2.20 | 0.31  | 7.61E-01 | 8.95E-01 | -6.65 |
| 1457361_PM_at   | Zfp804a                   | ZNF804A  | 0.21  | 5.30 | 0.31  | 7.62E-01 | 8.95E-01 | -6.65 |
| 1449220_PM_at   | Gimap3                    | GIMAP5   | -0.04 | 2.76 | -0.31 | 7.62E-01 | 8.95E-01 | -6.65 |
| 1434881_PM_s_at | Kctd12                    | KCTD12   | -0.06 | 2.84 | -0.31 | 7.62E-01 | 8.95E-01 | -6.65 |
| 1443954_PM_at   | Rad18                     | RAD18    | -0.05 | 3.00 | -0.31 | 7.62E-01 | 8.95E-01 | -6.65 |
| 1436937_PM_at   | Rbms3                     | RBMS3    | -0.05 | 2.39 | -0.31 | 7.62E-01 | 8.95E-01 | -6.65 |
| 1440931_PM_at   | Scrt2                     | SCRT2    | -0.04 | 2.38 | -0.31 | 7.62E-01 | 8.95E-01 | -6.65 |
| 1438074_PM_at   | Igsf23                    | IGSF23   | 0.03  | 2.43 | 0.31  | 7.62E-01 | 8.95E-01 | -6.65 |
| 1437602_PM_at   | Fam71b                    | FAM71B   | 0.08  | 2.59 | 0.31  | 7.62E-01 | 8.95E-01 | -6.65 |
| 1428711_PM_at   | Mon1b                     | MON1B    | -0.04 | 2.48 | -0.31 | 7.62E-01 | 8.95E-01 | -6.65 |
| 1443246_PM_at   | Fastkd2                   | FASTKD2  | 0.05  | 3.19 | 0.31  | 7.62E-01 | 8.95E-01 | -6.65 |
| 1423740_PM_a_at | Gm15455 /// Rbm10         | RBM10    | -0.06 | 8.93 | -0.31 | 7.62E-01 | 8.95E-01 | -6.65 |
| 1423164_PM_at   | Gpr137b /// Gpr137b-ps    | GPR137B  | 0.06  | 2.98 | 0.31  | 7.62E-01 | 8.95E-01 | -6.65 |
| 1460614_PM_at   | Mier3                     | MIER3    | 0.06  | 3.13 | 0.31  | 7.62E-01 | 8.95E-01 | -6.65 |
| 1444227_PM_at   | ---                       | NA       | 0.08  | 3.02 | 0.31  | 7.62E-01 | 8.95E-01 | -6.65 |
| 1454764_PM_s_at | Slc38a1                   | SLC38A1  | 0.09  | 7.52 | 0.31  | 7.62E-01 | 8.95E-01 | -6.65 |
| 1454054_PM_at   | 4930459I23Rik /// Gm26689 | NA       | 0.03  | 2.16 | 0.31  | 7.62E-01 | 8.95E-01 | -6.65 |
| 1454726_PM_s_at | Ptpdc1                    | PTPDC1   | -0.08 | 2.50 | -0.31 | 7.62E-01 | 8.95E-01 | -6.65 |
| 1436827_PM_at   | Garem                     | GAREM1   | 0.10  | 3.14 | 0.31  | 7.62E-01 | 8.95E-01 | -6.65 |
| 1440578_PM_at   | ---                       | NA       | 0.14  | 3.57 | 0.31  | 7.62E-01 | 8.95E-01 | -6.65 |
| 1444635_PM_at   | Usp3                      | USP3     | 0.07  | 2.44 | 0.31  | 7.62E-01 | 8.95E-01 | -6.65 |
| 1447126_PM_at   | Gm31367                   | NA       | 0.07  | 2.37 | 0.31  | 7.62E-01 | 8.95E-01 | -6.65 |
| 1440984_PM_at   | Baz2b                     | BAZ2B    | -0.14 | 3.71 | -0.31 | 7.62E-01 | 8.95E-01 | -6.65 |
| 1445235_PM_at   | ---                       | NA       | -0.12 | 3.78 | -0.31 | 7.62E-01 | 8.95E-01 | -6.65 |
| 1439004_PM_at   | Rps6ka5                   | RPS6KA5  | -0.10 | 2.30 | -0.31 | 7.63E-01 | 8.95E-01 | -6.65 |
| 1427272_PM_at   | Zbtb44                    | ZBTB44   | -0.08 | 6.06 | -0.31 | 7.62E-01 | 8.95E-01 | -6.65 |
| 1448531_PM_at   | Lmb2                      | LMNB2    | -0.05 | 3.25 | -0.31 | 7.62E-01 | 8.95E-01 | -6.65 |
| 1423961_PM_at   | Wdr26                     | WDR26    | -0.04 | 2.23 | -0.31 | 7.62E-01 | 8.95E-01 | -6.65 |
| 1427716_PM_at   | Prss44                    | NA       | 0.03  | 2.32 | 0.31  | 7.63E-01 | 8.95E-01 | -6.65 |
| 1416263_PM_at   | Abcb9                     | ABCB9    | 0.03  | 2.99 | 0.31  | 7.63E-01 | 8.95E-01 | -6.65 |
| 1445046_PM_at   | DBErt317e                 | NA       | 0.07  | 3.77 | 0.31  | 7.63E-01 | 8.95E-01 | -6.65 |
| 1460729_PM_at   | Rock1                     | ROCK1    | -0.15 | 5.57 | -0.31 | 7.63E-01 | 8.95E-01 | -6.65 |
| 1448260_PM_at   | Uchl1                     | UCL1     | -0.13 | 4.13 | -0.31 | 7.63E-01 | 8.95E-01 | -6.65 |
| 1454632_PM_at   | Tmem229b                  | TMEM229B | -0.08 | 3.29 | -0.31 | 7.63E-01 | 8.95E-01 | -6.65 |
| 1428417_PM_at   | Zc2hc1a                   | ZC2HC1A  | -0.06 | 5.28 | -0.31 | 7.63E-01 | 8.95E-01 | -6.65 |
| 1429520_PM_a_at | Acer3                     | ACER3    | -0.05 | 2.52 | -0.31 | 7.63E-01 | 8.95E-01 | -6.65 |
| 1446507_PM_at   | ---                       | NA       | 0.03  | 2.20 | 0.31  | 7.63E-01 | 8.95E-01 | -6.65 |
| 1443034_PM_at   | Hps1                      | HPS1     | 0.04  | 3.41 | 0.31  | 7.63E-01 | 8.95E-01 | -6.65 |
| 1428641_PM_at   | Hsf2bp                    | HSF2BP   | 0.05  | 2.23 | 0.31  | 7.63E-01 | 8.95E-01 | -6.65 |
| 1443229_PM_at   | Atad2                     | ATAD2    | 0.06  | 2.63 | 0.31  | 7.63E-01 | 8.95E-01 | -6.65 |
| 1417532_PM_at   | Cyp2j5                    | NA       | 0.03  | 2.21 | 0.31  | 7.63E-01 | 8.95E-01 | -6.65 |
| 1441023_PM_at   | Eif2s2                    | EIF2S2   | 0.06  | 2.10 | 0.31  | 7.63E-01 | 8.95E-01 | -6.65 |
| 1458719_PM_at   | ---                       | NA       | 0.03  | 2.03 | 0.31  | 7.63E-01 | 8.95E-01 | -6.65 |
| 1454029_PM_at   | 4930431F12Rik             | NA       | 0.03  | 2.50 | 0.31  | 7.63E-01 | 8.95E-01 | -6.65 |
| 1443865_PM_at   | Gabra2                    | GABRA2   | -0.12 | 3.39 | -0.31 | 7.63E-01 | 8.95E-01 | -6.65 |
| 1447422_PM_at   | ---                       | NA       | -0.08 | 2.74 | -0.31 | 7.63E-01 | 8.96E-01 | -6.65 |
| 1419550_PM_a_at | Stk39                     | STK39    | 0.20  | 4.08 | 0.31  | 7.63E-01 | 8.96E-01 | -6.65 |
| 1458006_PM_at   | ---                       | NA       | -0.08 | 2.80 | -0.31 | 7.63E-01 | 8.96E-01 | -6.65 |
| 1424227_PM_at   | Polr3h                    | POLR3H   | -0.03 | 3.71 | -0.31 | 7.63E-01 | 8.96E-01 | -6.65 |
| 1440008_PM_at   | 2310043L19Rik             | NA       | -0.03 | 2.46 | -0.31 | 7.63E-01 | 8.96E-01 | -6.65 |
| 1459955_PM_at   | ---                       | NA       | 0.08  | 2.76 | 0.31  | 7.63E-01 | 8.96E-01 | -6.65 |
| 1440028_PM_at   | ---                       | NA       | 0.05  | 2.93 | 0.31  | 7.63E-01 | 8.96E-01 | -6.65 |
| 1421385_PM_a_at | Myo7a                     | MYO7A    | 0.08  | 2.88 | 0.31  | 7.63E-01 | 8.96E-01 | -6.65 |
| 1438983_PM_x_at | Vipas39                   | VIPAS39  | 0.18  | 6.04 | 0.31  | 7.63E-01 | 8.96E-01 | -6.65 |

|                 |               |          |       |      |       |          |          |       |
|-----------------|---------------|----------|-------|------|-------|----------|----------|-------|
| 1427683_PM_at   | Egr2          | EGR2     | -0.16 | 3.51 | -0.31 | 7.63E-01 | 8.96E-01 | -6.65 |
| 1426307_PM_at   | Cyb5r4        | CYB5R4   | -0.08 | 4.60 | -0.31 | 7.63E-01 | 8.96E-01 | -6.65 |
| 1426692_PM_at   | Ccdc97        | CCDC97   | 0.03  | 2.19 | 0.31  | 7.63E-01 | 8.96E-01 | -6.65 |
| 1438084_PM_at   | ---           | NA       | 0.04  | 2.58 | 0.31  | 7.63E-01 | 8.96E-01 | -6.65 |
| 1434492_PM_at   | Eogt          | EOGT     | 0.09  | 2.94 | 0.31  | 7.63E-01 | 8.96E-01 | -6.65 |
| 1417173_PM_at   | Atf6b         | ATF6B    | -0.05 | 3.90 | -0.31 | 7.63E-01 | 8.96E-01 | -6.65 |
| 1419861_PM_at   | ---           | NA       | -0.03 | 1.88 | -0.31 | 7.63E-01 | 8.96E-01 | -6.65 |
| 1433978_PM_at   | 4930430F08Rik | C12orf29 | 0.07  | 3.02 | 0.31  | 7.64E-01 | 8.96E-01 | -6.65 |
| 1442445_PM_at   | ---           | NA       | -0.10 | 4.64 | -0.31 | 7.64E-01 | 8.96E-01 | -6.65 |
| 1448649_PM_at   | Enpep         | ENPEP    | 0.05  | 2.21 | 0.31  | 7.64E-01 | 8.96E-01 | -6.65 |
| 1440397_PM_at   | Cacna2d1      | CACNA2D1 | 0.03  | 2.65 | 0.31  | 7.64E-01 | 8.96E-01 | -6.65 |
| 1440210_PM_at   | Cacng2        | CACNG2   | 0.11  | 4.06 | 0.31  | 7.64E-01 | 8.96E-01 | -6.65 |
| 1451643_PM_a_at | Rab4b         | RAB4B    | -0.05 | 3.75 | -0.31 | 7.64E-01 | 8.96E-01 | -6.65 |
| 1429732_PM_at   | Ppp1r1c       | PPP1R1C  | 0.04  | 3.23 | 0.31  | 7.64E-01 | 8.96E-01 | -6.65 |
| 1446234_PM_at   | ---           | NA       | 0.03  | 2.36 | 0.31  | 7.64E-01 | 8.96E-01 | -6.65 |
| 1423832_PM_at   | Prkag2        | PRKAG2   | -0.13 | 3.71 | -0.31 | 7.64E-01 | 8.96E-01 | -6.65 |
| 1447199_PM_at   | C80763        | NA       | -0.03 | 2.02 | -0.31 | 7.64E-01 | 8.96E-01 | -6.65 |
| 1439767_PM_at   | Dlgap2        | DLGAP2   | 0.19  | 5.89 | 0.31  | 7.64E-01 | 8.96E-01 | -6.65 |
| 1427195_PM_at   | Slc26a2       | SLC26A2  | -0.10 | 2.80 | -0.31 | 7.64E-01 | 8.96E-01 | -6.65 |
| 1453414_PM_at   | Ypel2         | YPEL2    | -0.04 | 2.40 | -0.31 | 7.64E-01 | 8.96E-01 | -6.65 |
| 1450248_PM_at   | Adam11        | ADAM11   | 0.05  | 2.86 | 0.31  | 7.64E-01 | 8.96E-01 | -6.65 |
| 1446155_PM_at   | ---           | NA       | -0.12 | 3.26 | -0.31 | 7.64E-01 | 8.96E-01 | -6.65 |
| 1452002_PM_at   | Adnp2         | ADNP2    | -0.08 | 3.26 | -0.31 | 7.64E-01 | 8.96E-01 | -6.65 |
| 1432377_PM_x_at | Shroom3       | SHROOM3  | -0.03 | 2.49 | -0.31 | 7.64E-01 | 8.96E-01 | -6.65 |
| 1436359_PM_at   | Ret           | RET      | -0.03 | 2.19 | -0.31 | 7.64E-01 | 8.96E-01 | -6.65 |
| 1447727_PM_at   | Aqp3          | AQP3     | 0.03  | 2.56 | 0.31  | 7.64E-01 | 8.96E-01 | -6.65 |
| 1418165_PM_at   | Itnl1///Itnlb | ITLN1    | 0.05  | 3.04 | 0.31  | 7.64E-01 | 8.96E-01 | -6.65 |
| 1457233_PM_at   | ---           | NA       | 0.04  | 2.21 | 0.31  | 7.64E-01 | 8.96E-01 | -6.65 |
| 1460634_PM_at   | Ralgds        | RALGDS   | -0.04 | 2.96 | -0.31 | 7.64E-01 | 8.96E-01 | -6.65 |
| 1446480_PM_at   | ---           | NA       | 0.03  | 2.31 | 0.31  | 7.64E-01 | 8.96E-01 | -6.65 |
| 1423204_PM_at   | Tm9sf4        | TM9SF4   | 0.04  | 2.38 | 0.31  | 7.64E-01 | 8.96E-01 | -6.65 |
| 1431423_PM_a_at | Med8          | MED8     | 0.06  | 3.11 | 0.31  | 7.64E-01 | 8.96E-01 | -6.65 |
| 1421922_PM_at   | Sh3bp5        | SH3BP5   | -0.10 | 4.72 | -0.31 | 7.65E-01 | 8.96E-01 | -6.65 |
| 1455893_PM_at   | Rspo2         | RSPO2    | -0.09 | 3.90 | -0.31 | 7.65E-01 | 8.96E-01 | -6.65 |
| 1419542_PM_at   | Dazl          | DAZL     | -0.05 | 2.39 | -0.31 | 7.65E-01 | 8.96E-01 | -6.65 |
| 1423344_PM_at   | Epor          | EPOR     | 0.05  | 2.57 | 0.31  | 7.65E-01 | 8.96E-01 | -6.65 |
| 1424112_PM_at   | Igf2r         | IGF2R    | -0.10 | 3.34 | -0.31 | 7.65E-01 | 8.96E-01 | -6.65 |
| 1449716_PM_s_at | Nrd1          | NRDC     | -0.09 | 3.26 | -0.31 | 7.65E-01 | 8.96E-01 | -6.65 |
| 1417315_PM_at   | Gripap1       | GRI PAP1 | -0.07 | 3.89 | -0.31 | 7.65E-01 | 8.96E-01 | -6.65 |
| 1428276_PM_at   | Abhd13        | ABHD13   | -0.06 | 2.67 | -0.31 | 7.65E-01 | 8.96E-01 | -6.65 |
| 1434810_PM_a_at | Cage1         | CAGE1    | -0.05 | 2.42 | -0.31 | 7.65E-01 | 8.96E-01 | -6.65 |
| 1456411_PM_at   | Rccd1         | RCCD1    | 0.03  | 3.29 | 0.31  | 7.65E-01 | 8.96E-01 | -6.65 |
| 1456222_PM_at   | Btbd1         | NA       | 0.07  | 2.64 | 0.31  | 7.65E-01 | 8.96E-01 | -6.65 |
| 1420534_PM_at   | Gucy1a3       | GUCY1A3  | 0.08  | 4.30 | 0.31  | 7.65E-01 | 8.96E-01 | -6.65 |
| 1450846_PM_at   | Bzw1          | BZW1     | -0.07 | 2.88 | -0.31 | 7.65E-01 | 8.97E-01 | -6.65 |
| 1449463_PM_at   | Klk1b8        | KLK3     | 0.03  | 2.30 | 0.31  | 7.65E-01 | 8.97E-01 | -6.65 |
| 1433089_PM_at   | 4930404F17Rik | NA       | 0.03  | 2.56 | 0.31  | 7.65E-01 | 8.97E-01 | -6.65 |
| 1448351_PM_at   | Coro1b        | CORO1B   | 0.06  | 3.23 | 0.31  | 7.65E-01 | 8.97E-01 | -6.65 |
| 1440953_PM_at   | 1700096K18Rik | NA       | 0.07  | 2.37 | 0.31  | 7.65E-01 | 8.97E-01 | -6.65 |
| 1449647_PM_at   | ---           | NA       | 0.09  | 2.53 | 0.31  | 7.65E-01 | 8.97E-01 | -6.65 |
| 1416732_PM_at   | Top2b         | TOP2B    | 0.10  | 5.75 | 0.31  | 7.65E-01 | 8.97E-01 | -6.65 |
| 1418496_PM_at   | Foxa1         | FOXA1    | 0.04  | 2.38 | 0.31  | 7.65E-01 | 8.97E-01 | -6.65 |
| 1438543_PM_at   | ---           | NA       | 0.03  | 2.75 | 0.31  | 7.65E-01 | 8.97E-01 | -6.65 |
| 1418907_PM_at   | F5            | F5       | -0.15 | 2.78 | -0.31 | 7.65E-01 | 8.97E-01 | -6.65 |
| 1456658_PM_at   | Acta2         | ACTA2    | -0.05 | 2.55 | -0.31 | 7.65E-01 | 8.97E-01 | -6.65 |
| 1418618_PM_at   | En1           | NA       | -0.03 | 2.06 | -0.31 | 7.65E-01 | 8.97E-01 | -6.65 |
| 1435189_PM_at   | Frmpd1        | FRMPD1   | -0.03 | 2.54 | -0.31 | 7.65E-01 | 8.97E-01 | -6.65 |
| 1436263_PM_at   | Mobp          | MOBP     | 0.10  | 3.02 | 0.31  | 7.65E-01 | 8.97E-01 | -6.65 |
| 1428878_PM_a_at | Pitpnc1       | PITPNC1  | -0.15 | 4.11 | -0.31 | 7.65E-01 | 8.97E-01 | -6.65 |
| 1450411_PM_at   | Fam122a       | NA       | -0.10 | 2.49 | -0.31 | 7.66E-01 | 8.97E-01 | -6.65 |
| 1448475_PM_at   | Olfml3        | OLFML3   | 0.07  | 4.25 | 0.31  | 7.66E-01 | 8.97E-01 | -6.65 |
| 1424103_PM_at   | Atg4b         | ATG4B    | -0.08 | 2.94 | -0.31 | 7.66E-01 | 8.97E-01 | -6.65 |
| 1416539_PM_at   | Siae          | NA       | -0.04 | 3.16 | -0.31 | 7.66E-01 | 8.97E-01 | -6.65 |
| 1440611_PM_at   | Faxc          | FAXC     | -0.03 | 2.08 | -0.31 | 7.66E-01 | 8.97E-01 | -6.65 |
| 1422868_PM_s_at | Gda           | GDA      | 0.08  | 3.24 | 0.31  | 7.66E-01 | 8.97E-01 | -6.65 |
| 1446705_PM_at   | ---           | NA       | 0.04  | 2.38 | 0.31  | 7.66E-01 | 8.97E-01 | -6.65 |
| 1454050_PM_at   | ---           | NA       | -0.02 | 2.64 | -0.31 | 7.66E-01 | 8.97E-01 | -6.65 |
| 1451253_PM_at   | Pxk           | PXK      | -0.07 | 2.50 | -0.31 | 7.66E-01 | 8.97E-01 | -6.65 |
| 1436389_PM_at   | ---           | NA       | -0.13 | 4.43 | -0.31 | 7.66E-01 | 8.97E-01 | -6.65 |
| 1446566_PM_at   | ---           | NA       | -0.07 | 3.10 | -0.31 | 7.66E-01 | 8.97E-01 | -6.65 |
| 1430546_PM_at   | Cryz1         | CRYZ1    | -0.07 | 5.94 | -0.31 | 7.66E-01 | 8.97E-01 | -6.65 |
| 1451453_PM_at   | Dapk2         | DAPK2    | 0.04  | 2.75 | 0.31  | 7.66E-01 | 8.97E-01 | -6.65 |
| 1458606_PM_at   | ---           | NA       | 0.05  | 2.55 | 0.31  | 7.66E-01 | 8.97E-01 | -6.65 |
| 1458704_PM_at   | ---           | NA       | 0.07  | 3.45 | 0.31  | 7.66E-01 | 8.97E-01 | -6.65 |
| 1451353_PM_at   | Tm6sf1        | TM6SF1   | -0.08 | 3.51 | -0.31 | 7.66E-01 | 8.97E-01 | -6.65 |

|                 |                                                      |             |       |      |       |          |          |       |
|-----------------|------------------------------------------------------|-------------|-------|------|-------|----------|----------|-------|
| 1441198_PM_at   | Zfp39                                                | ZNF717      | -0.06 | 2.86 | -0.31 | 7.66E-01 | 8.97E-01 | -6.65 |
| 1429142_PM_at   | 1700012A03Rik                                        | NA          | -0.06 | 2.42 | -0.31 | 7.66E-01 | 8.97E-01 | -6.65 |
| 1434499_PM_a_at | Ldhd                                                 | LDHB        | -0.08 | 9.61 | -0.31 | 7.66E-01 | 8.97E-01 | -6.65 |
| 1452369_PM_at   | Mag1                                                 | MAG1        | -0.05 | 2.65 | -0.31 | 7.66E-01 | 8.97E-01 | -6.65 |
| 1444408_PM_at   | ---                                                  | NA          | -0.04 | 2.51 | -0.31 | 7.66E-01 | 8.97E-01 | -6.65 |
| 1431448_PM_at   | 4930474N09Rik                                        | NA          | 0.03  | 2.03 | 0.31  | 7.66E-01 | 8.97E-01 | -6.65 |
| 1419463_PM_at   | Clca2 /// Clca3a2                                    | NA          | 0.03  | 2.25 | 0.31  | 7.66E-01 | 8.97E-01 | -6.65 |
| 1446357_PM_at   | BC020402 /// Pcmt1                                   | NA          | 0.04  | 2.43 | 0.31  | 7.66E-01 | 8.97E-01 | -6.65 |
| 1450533_PM_a_at | Plag1                                                | PLAGL1      | 0.10  | 3.44 | 0.31  | 7.66E-01 | 8.97E-01 | -6.65 |
| 1443078_PM_at   | ---                                                  | NA          | 0.10  | 2.74 | 0.31  | 7.66E-01 | 8.97E-01 | -6.65 |
| 1453947_PM_at   | Klf24                                                | KIF24       | 0.03  | 1.96 | 0.31  | 7.66E-01 | 8.97E-01 | -6.65 |
| 1445528_PM_at   | Slc28a3                                              | SLC28A3     | 0.03  | 2.23 | 0.31  | 7.66E-01 | 8.97E-01 | -6.65 |
| 1457094_PM_at   | She                                                  | SHE         | -0.03 | 2.41 | -0.30 | 7.66E-01 | 8.97E-01 | -6.65 |
| 1423111_PM_at   | Atp5a1                                               | ATP5A1      | -0.12 | 5.84 | -0.30 | 7.67E-01 | 8.97E-01 | -6.65 |
| 1452034_PM_at   | Prepl                                                | PREPL       | 0.09  | 4.26 | 0.30  | 7.67E-01 | 8.97E-01 | -6.65 |
| 1452162_PM_at   | Wdr48                                                | WDR48       | 0.06  | 2.74 | 0.30  | 7.67E-01 | 8.97E-01 | -6.65 |
| 1434562_PM_at   | Mfabp3                                               | MFAP3       | -0.06 | 2.80 | -0.30 | 7.67E-01 | 8.98E-01 | -6.65 |
| 1417055_PM_at   | Sf3b6                                                | SF3B6       | -0.08 | 3.31 | -0.30 | 7.67E-01 | 8.98E-01 | -6.65 |
| 1433686_PM_at   | Cabin1                                               | CABIN1      | 0.07  | 2.48 | 0.30  | 7.67E-01 | 8.98E-01 | -6.65 |
| 1431691_PM_a_at | Rab31                                                | RAB31       | 0.15  | 4.42 | 0.30  | 7.67E-01 | 8.98E-01 | -6.65 |
| 1452277_PM_at   | Arsg                                                 | ARSG        | -0.02 | 1.81 | -0.30 | 7.67E-01 | 8.98E-01 | -6.65 |
| 1452279_PM_at   | Cfp                                                  | CFP         | 0.04  | 2.94 | 0.30  | 7.67E-01 | 8.98E-01 | -6.65 |
| 1425976_PM_x_at | Zfp353-ps                                            | NA          | 0.04  | 3.27 | 0.30  | 7.67E-01 | 8.98E-01 | -6.65 |
| 1458077_PM_at   | ---                                                  | NA          | 0.04  | 2.29 | 0.30  | 7.67E-01 | 8.98E-01 | -6.65 |
| 1459888_PM_at   | Bvht                                                 | NA          | -0.05 | 2.81 | -0.30 | 7.67E-01 | 8.98E-01 | -6.65 |
| 1427295_PM_at   | Slc38a10                                             | SLC38A10    | -0.09 | 2.85 | -0.30 | 7.67E-01 | 8.98E-01 | -6.65 |
| 1458343_PM_x_at | Med6                                                 | MED6        | -0.05 | 2.46 | -0.30 | 7.67E-01 | 8.98E-01 | -6.65 |
| 1457688_PM_at   | Zfp398                                               | ZNF398      | 0.04  | 3.42 | 0.30  | 7.67E-01 | 8.98E-01 | -6.65 |
| 1452063_PM_at   | Zbtb8a                                               | ZBTB8A      | 0.04  | 2.94 | 0.30  | 7.67E-01 | 8.98E-01 | -6.65 |
| 1453165_PM_at   | Mettl4                                               | METTL4      | 0.10  | 3.25 | 0.30  | 7.67E-01 | 8.98E-01 | -6.65 |
| 1453833_PM_a_at | Rnaseh1                                              | RNASEH1     | -0.04 | 2.67 | -0.30 | 7.67E-01 | 8.98E-01 | -6.65 |
| 1437451_PM_at   | Ecscr                                                | ECSCR       | -0.04 | 2.44 | -0.30 | 7.67E-01 | 8.98E-01 | -6.65 |
| 1449826_PM_a_at | Fgf2                                                 | FGF2        | 0.06  | 2.74 | 0.30  | 7.67E-01 | 8.98E-01 | -6.65 |
| 1415677_PM_at   | Dhrs1                                                | DHRS1       | 0.08  | 2.76 | 0.30  | 7.67E-01 | 8.98E-01 | -6.65 |
| 1427495_PM_at   | Scn7a                                                | SCN7A       | -0.03 | 2.19 | -0.30 | 7.67E-01 | 8.98E-01 | -6.65 |
| 1435680_PM_a_at | Dpp7                                                 | DPP7        | -0.05 | 2.31 | -0.30 | 7.68E-01 | 8.98E-01 | -6.65 |
| 1439154_PM_at   | Nup98                                                | NUP98       | -0.02 | 2.09 | -0.30 | 7.68E-01 | 8.98E-01 | -6.65 |
| 1458929_PM_at   | Abca9                                                | ABCA9       | -0.05 | 2.71 | -0.30 | 7.68E-01 | 8.98E-01 | -6.65 |
| 1433783_PM_at   | Ldb3                                                 | LDB3        | 0.03  | 2.31 | 0.30  | 7.68E-01 | 8.98E-01 | -6.65 |
| 1422614_PM_s_at | Bloc1s1 /// Gm7936 /// Rdh5                          | RDH5        | 0.06  | 3.48 | 0.30  | 7.68E-01 | 8.98E-01 | -6.65 |
| 1456812_PM_at   | Abcd2                                                | ABCD2       | 0.07  | 2.92 | 0.30  | 7.68E-01 | 8.98E-01 | -6.65 |
| 1427602_PM_at   | Dep1                                                 | NA          | 0.15  | 4.93 | 0.30  | 7.68E-01 | 8.98E-01 | -6.65 |
| 1440667_PM_at   | Dclre1b                                              | DCLRE1B     | -0.06 | 2.30 | -0.30 | 7.68E-01 | 8.98E-01 | -6.65 |
| 1451390_PM_s_at | Zfand2b                                              | ZFAND2B     | -0.05 | 3.75 | -0.30 | 7.68E-01 | 8.98E-01 | -6.65 |
| 1420025_PM_s_at | Aak1 /// Gm38495                                     | AAK1        | 0.03  | 2.16 | 0.30  | 7.68E-01 | 8.98E-01 | -6.65 |
| 1459249_PM_at   | Tdrd3                                                | NA          | 0.03  | 2.02 | 0.30  | 7.68E-01 | 8.98E-01 | -6.65 |
| 1433030_PM_at   | 5730406E14Rik                                        | NA          | -0.04 | 2.07 | -0.30 | 7.68E-01 | 8.98E-01 | -6.65 |
| 1455458_PM_x_at | Gmppa                                                | GMPPA       | -0.06 | 3.27 | -0.30 | 7.68E-01 | 8.98E-01 | -6.65 |
| 1416619_PM_at   | Vsir                                                 | VSIR        | -0.05 | 2.40 | -0.30 | 7.68E-01 | 8.98E-01 | -6.65 |
| 1418434_PM_at   | Mkrn1                                                | MKRN1       | 0.05  | 4.61 | 0.30  | 7.68E-01 | 8.98E-01 | -6.65 |
| 1434268_PM_at   | Adar                                                 | ADAR        | -0.11 | 3.11 | -0.30 | 7.68E-01 | 8.98E-01 | -6.65 |
| 1448428_PM_at   | Nbl1                                                 | MINOS1-NBL1 | 0.05  | 3.18 | 0.30  | 7.68E-01 | 8.98E-01 | -6.65 |
| 1426460_PM_a_at | Ugp2                                                 | UGP2        | 0.05  | 2.25 | 0.30  | 7.68E-01 | 8.98E-01 | -6.65 |
| 1435009_PM_at   | Slc9a6                                               | SLC9A6      | -0.06 | 2.60 | -0.30 | 7.68E-01 | 8.98E-01 | -6.65 |
| 1421742_PM_at   | ---                                                  | NA          | 0.03  | 2.51 | 0.30  | 7.68E-01 | 8.98E-01 | -6.65 |
| 1418656_PM_at   | Gm7846 /// LOC102636255<br>/// LOC102641341 /// Lsm5 | LSM5        | -0.10 | 3.57 | -0.30 | 7.68E-01 | 8.98E-01 | -6.65 |
| 1452505_PM_at   | Lamc2                                                | LAMC2       | 0.03  | 2.18 | 0.30  | 7.68E-01 | 8.98E-01 | -6.65 |
| 1416227_PM_at   | Arpc1b                                               | ARPC1B      | 0.04  | 2.41 | 0.30  | 7.68E-01 | 8.98E-01 | -6.65 |
| 1452357_PM_at   | Gp1bb /// Sept5                                      | GP1BB       | -0.05 | 3.19 | -0.30 | 7.68E-01 | 8.98E-01 | -6.65 |
| 1430476_PM_at   | Srp54a /// Srp54b /// Srp54c                         | SRP54       | -0.04 | 2.25 | -0.30 | 7.68E-01 | 8.98E-01 | -6.65 |
| 1442682_PM_at   | ---                                                  | NA          | 0.03  | 2.32 | 0.30  | 7.68E-01 | 8.98E-01 | -6.65 |
| 1460668_PM_at   | Gal                                                  | GAL         | 0.03  | 2.86 | 0.30  | 7.68E-01 | 8.98E-01 | -6.65 |
| 1429470_PM_at   | Spdya                                                | SPDYA       | 0.07  | 2.22 | 0.30  | 7.68E-01 | 8.98E-01 | -6.65 |
| 1423992_PM_at   | Gatad2a                                              | GATAD2A     | 0.07  | 4.29 | 0.30  | 7.68E-01 | 8.98E-01 | -6.65 |
| 1446928_PM_at   | Dnajc17                                              | DNAJC17     | 0.03  | 2.42 | 0.30  | 7.68E-01 | 8.98E-01 | -6.65 |
| 1447347_PM_at   | ---                                                  | NA          | 0.05  | 2.20 | 0.30  | 7.68E-01 | 8.98E-01 | -6.65 |
| 1442618_PM_at   | ---                                                  | NA          | 0.02  | 2.36 | 0.30  | 7.68E-01 | 8.98E-01 | -6.65 |
| 1456344_PM_at   | Tnc                                                  | NA          | 0.09  | 2.30 | 0.30  | 7.69E-01 | 8.99E-01 | -6.65 |
| 1415948_PM_at   | Creg1                                                | CREG1       | 0.05  | 2.90 | 0.30  | 7.69E-01 | 8.99E-01 | -6.65 |
| 1445877_PM_at   | Rfesd                                                | RFESD       | -0.04 | 2.55 | -0.30 | 7.69E-01 | 8.99E-01 | -6.65 |
| 1445338_PM_at   | ---                                                  | NA          | -0.03 | 2.60 | -0.30 | 7.69E-01 | 8.99E-01 | -6.65 |



|                 |               |            |       |      |       |          |          |       |
|-----------------|---------------|------------|-------|------|-------|----------|----------|-------|
| 1460503_PM_at   | ---           | NA         | 0.03  | 2.51 | 0.30  | 7.69E-01 | 8.99E-01 | -6.65 |
| 1460302_PM_at   | Thbs1         | THBS1      | 0.03  | 2.05 | 0.30  | 7.69E-01 | 8.99E-01 | -6.65 |
| 1440073_PM_at   | ---           | NA         | 0.03  | 2.07 | 0.30  | 7.69E-01 | 8.99E-01 | -6.65 |
| 1441169_PM_at   | Gm31437       | NA         | 0.04  | 2.90 | 0.30  | 7.69E-01 | 8.99E-01 | -6.65 |
| 1430901_PM_at   | Sfn5os        | NA         | 0.04  | 2.50 | 0.30  | 7.69E-01 | 8.99E-01 | -6.65 |
| 1437104_PM_at   | Arfgef1       | ARFGEF1    | 0.10  | 5.46 | 0.30  | 7.69E-01 | 8.99E-01 | -6.65 |
| 1431040_PM_at   | Dtd2          | AL139353.1 | -0.04 | 2.57 | -0.30 | 7.69E-01 | 8.99E-01 | -6.65 |
| 1422265_PM_at   | Brs3          | BRS3       | 0.03  | 2.01 | 0.30  | 7.69E-01 | 8.99E-01 | -6.65 |
| 1423186_PM_at   | Tiam2         | TIAM2      | 0.04  | 2.31 | 0.30  | 7.69E-01 | 8.99E-01 | -6.65 |
| 1445284_PM_at   | ---           | NA         | -0.03 | 2.19 | -0.30 | 7.69E-01 | 8.99E-01 | -6.65 |
| 1426270_PM_at   | Smc5          | SMC5       | -0.06 | 2.97 | -0.30 | 7.69E-01 | 8.99E-01 | -6.65 |
| 1422996_PM_at   | Acot2         | ACOT1      | -0.03 | 2.46 | -0.30 | 7.69E-01 | 8.99E-01 | -6.65 |
| 1446549_PM_at   | ---           | NA         | 0.04  | 2.06 | 0.30  | 7.69E-01 | 8.99E-01 | -6.65 |
| 1418944_PM_at   | Cysl1         | CYSL1      | 0.04  | 2.25 | 0.30  | 7.69E-01 | 8.99E-01 | -6.65 |
| 1430275_PM_a_at | Aqr           | AQR        | 0.06  | 4.21 | 0.30  | 7.69E-01 | 8.99E-01 | -6.65 |
| 1445148_PM_at   | ---           | NA         | -0.05 | 2.97 | -0.30 | 7.69E-01 | 8.99E-01 | -6.65 |
| 1444030_PM_at   | Dcp1b         | DCP1B      | 0.03  | 2.20 | 0.30  | 7.69E-01 | 8.99E-01 | -6.65 |
| 1451518_PM_at   | Zfp709        | NA         | -0.03 | 2.02 | -0.30 | 7.69E-01 | 8.99E-01 | -6.65 |
| 1439654_PM_at   | ---           | NA         | 0.03  | 2.22 | 0.30  | 7.69E-01 | 8.99E-01 | -6.65 |
| 1420078_PM_at   | ---           | NA         | 0.05  | 2.48 | 0.30  | 7.69E-01 | 8.99E-01 | -6.65 |
| 1443873_PM_at   | Fam210a       | FAM210A    | -0.07 | 2.88 | -0.30 | 7.69E-01 | 8.99E-01 | -6.65 |
| 1443089_PM_at   | ---           | NA         | -0.04 | 2.42 | -0.30 | 7.69E-01 | 8.99E-01 | -6.65 |
| 1451832_PM_at   | Clf           | NA         | -0.02 | 1.90 | -0.30 | 7.70E-01 | 8.99E-01 | -6.65 |
| 1424940_PM_s_at | BC022687      | C14orf79   | -0.02 | 2.24 | -0.30 | 7.69E-01 | 8.99E-01 | -6.65 |
| 1457371_PM_at   | Mff           | MFF        | -0.07 | 2.58 | -0.30 | 7.70E-01 | 8.99E-01 | -6.65 |
| 1449641_PM_at   | Adk           | NA         | 0.09  | 3.44 | 0.30  | 7.70E-01 | 8.99E-01 | -6.65 |
| 1447445_PM_at   | ---           | NA         | 0.05  | 2.95 | 0.30  | 7.70E-01 | 8.99E-01 | -6.65 |
| 1435889_PM_at   | Mark2         | MARK2      | 0.10  | 5.22 | 0.30  | 7.70E-01 | 8.99E-01 | -6.65 |
| 1436488_PM_at   | Csn152a       | NA         | -0.03 | 2.23 | -0.30 | 7.70E-01 | 8.99E-01 | -6.65 |
| 1422957_PM_at   | Ccr3          | CCR3       | 0.02  | 1.95 | 0.30  | 7.70E-01 | 8.99E-01 | -6.65 |
| 1444711_PM_at   | Kank1         | KANK1      | 0.08  | 2.85 | 0.30  | 7.70E-01 | 8.99E-01 | -6.65 |
| 1441449_PM_at   | Kdm5c         | KDM5C      | 0.05  | 2.62 | 0.30  | 7.70E-01 | 8.99E-01 | -6.65 |
| 1443935_PM_at   | Gltsr1l       | NA         | -0.05 | 3.23 | -0.30 | 7.70E-01 | 8.99E-01 | -6.65 |
| 1452270_PM_s_at | Cubn          | CUBN       | 0.05  | 2.53 | 0.30  | 7.70E-01 | 8.99E-01 | -6.65 |
| 1419758_PM_at   | Abcb1a        | ABCB1      | 0.04  | 2.45 | 0.30  | 7.70E-01 | 8.99E-01 | -6.65 |
| 1422246_PM_at   | Dspp          | DSPP       | 0.04  | 2.52 | 0.30  | 7.70E-01 | 8.99E-01 | -6.65 |
| 1459105_PM_at   | ---           | NA         | 0.08  | 3.74 | 0.30  | 7.70E-01 | 8.99E-01 | -6.65 |
| 1448587_PM_at   | Tbc1d10a      | AC004997.1 | 0.04  | 2.49 | 0.30  | 7.70E-01 | 8.99E-01 | -6.65 |
| 1455164_PM_at   | Arhgap31      | ARHGAP31   | 0.04  | 4.00 | 0.30  | 7.70E-01 | 8.99E-01 | -6.65 |
| 1441410_PM_at   | ---           | NA         | 0.09  | 3.44 | 0.30  | 7.70E-01 | 8.99E-01 | -6.65 |
| 1445295_PM_at   | ---           | NA         | 0.03  | 2.16 | 0.30  | 7.70E-01 | 8.99E-01 | -6.65 |
| 1460587_PM_at   | Sox2ot        | NA         | -0.09 | 2.59 | -0.30 | 7.70E-01 | 8.99E-01 | -6.65 |
| 1441002_PM_at   | ---           | NA         | -0.07 | 3.42 | -0.30 | 7.70E-01 | 8.99E-01 | -6.65 |
| 1432334_PM_at   | Cytc2         | CYLC2      | -0.02 | 2.34 | -0.30 | 7.70E-01 | 8.99E-01 | -6.65 |
| 1451092_PM_a_at | Rangap1       | RANGAP1    | 0.06  | 3.28 | 0.30  | 7.70E-01 | 8.99E-01 | -6.65 |
| 1447302_PM_at   | ---           | NA         | 0.07  | 3.42 | 0.30  | 7.70E-01 | 8.99E-01 | -6.65 |
| 1434231_PM_x_at | Rpl35         | RPL35      | -0.06 | 7.28 | -0.30 | 7.70E-01 | 9.00E-01 | -6.65 |
| 1452170_PM_at   | Chpf2         | CHPF2      | 0.02  | 2.57 | 0.30  | 7.71E-01 | 9.00E-01 | -6.65 |
| 1431817_PM_at   | Adh6-ps1      | NA         | 0.03  | 2.00 | 0.30  | 7.71E-01 | 9.00E-01 | -6.65 |
| 1453584_PM_at   | Stk36         | STK36      | -0.03 | 2.12 | -0.30 | 7.71E-01 | 9.00E-01 | -6.65 |
| 1436331_PM_at   | Vps13d        | VPS13D     | -0.05 | 2.85 | -0.30 | 7.71E-01 | 9.00E-01 | -6.65 |
| 1417429_PM_at   | Fmo1          | FMO1       | -0.05 | 2.59 | -0.30 | 7.71E-01 | 9.00E-01 | -6.65 |
| 1448350_PM_at   | Asl           | AC068533.4 | -0.04 | 3.29 | -0.30 | 7.71E-01 | 9.00E-01 | -6.65 |
| 1443773_PM_at   | Ylpm1         | YLP1       | -0.17 | 3.85 | -0.30 | 7.71E-01 | 9.00E-01 | -6.65 |
| 1418003_PM_at   | Rgcc          | RGCC       | -0.06 | 2.45 | -0.30 | 7.71E-01 | 9.00E-01 | -6.65 |
| 1434274_PM_at   | Mycbp2        | MYCBP2     | 0.06  | 6.74 | 0.30  | 7.71E-01 | 9.00E-01 | -6.65 |
| 1419498_PM_at   | Tmidg1        | TMIGD1     | 0.03  | 2.09 | 0.30  | 7.71E-01 | 9.00E-01 | -6.65 |
| 1436280_PM_at   | Zscan20       | ZSCAN20    | 0.03  | 2.86 | 0.30  | 7.71E-01 | 9.00E-01 | -6.65 |
| 1438791_PM_at   | 1700016P04Rik | NA         | 0.04  | 2.36 | 0.30  | 7.71E-01 | 9.00E-01 | -6.65 |
| 1424367_PM_a_at | Homer2        | HOMER2     | -0.14 | 3.58 | -0.30 | 7.71E-01 | 9.00E-01 | -6.65 |
| 1440019_PM_at   | ---           | NA         | -0.04 | 2.46 | -0.30 | 7.71E-01 | 9.00E-01 | -6.65 |
| 1442187_PM_at   | Bdkrb2        | NA         | -0.03 | 2.44 | -0.30 | 7.71E-01 | 9.00E-01 | -6.65 |
| 1441565_PM_at   | ---           | NA         | 0.09  | 4.91 | 0.30  | 7.71E-01 | 9.00E-01 | -6.65 |
| 1430699_PM_at   | Gpr165        | NA         | -0.03 | 2.28 | -0.30 | 7.71E-01 | 9.00E-01 | -6.65 |
| 1454530_PM_at   | Pick1         | PICK1      | 0.04  | 2.37 | 0.30  | 7.71E-01 | 9.00E-01 | -6.65 |
| 1427754_PM_a_at | Dnm1          | DNM1       | -0.12 | 7.28 | -0.30 | 7.71E-01 | 9.00E-01 | -6.65 |
| 1454996_PM_at   | Hsd1l         | HSDL1      | -0.08 | 3.85 | -0.30 | 7.71E-01 | 9.00E-01 | -6.65 |
| 1422546_PM_at   | Ilf3          | ILF3       | -0.04 | 2.65 | -0.30 | 7.71E-01 | 9.00E-01 | -6.65 |
| 1459373_PM_at   | ---           | NA         | -0.04 | 2.35 | -0.30 | 7.71E-01 | 9.00E-01 | -6.65 |
| 1455511_PM_at   | Sephs1        | SEPHS1     | -0.03 | 2.32 | -0.30 | 7.71E-01 | 9.00E-01 | -6.65 |
| 1449771_PM_at   | ---           | NA         | 0.03  | 2.39 | 0.30  | 7.71E-01 | 9.00E-01 | -6.65 |
| 1445939_PM_at   | ---           | NA         | 0.04  | 2.12 | 0.30  | 7.71E-01 | 9.00E-01 | -6.65 |
| 1439127_PM_at   | Al314180      | KIAA0368   | 0.11  | 4.93 | 0.30  | 7.71E-01 | 9.00E-01 | -6.65 |
| 1455405_PM_at   | Pstpip2       | NA         | -0.03 | 2.32 | -0.30 | 7.71E-01 | 9.00E-01 | -6.65 |
| 1418240_PM_at   | Gbp2          | GBP2       | -0.06 | 2.33 | -0.30 | 7.72E-01 | 9.00E-01 | -6.65 |

|                 |               |            |       |      |       |          |          |       |
|-----------------|---------------|------------|-------|------|-------|----------|----------|-------|
| 1459049_PM_at   | ---           | NA         | -0.06 | 2.71 | -0.30 | 7.72E-01 | 9.00E-01 | -6.65 |
| 1446974_PM_at   | Pikfyve       | PIKFYVE    | 0.03  | 2.54 | 0.30  | 7.72E-01 | 9.00E-01 | -6.65 |
| 1431715_PM_a_at | Lig3          | LIG3       | 0.04  | 2.38 | 0.30  | 7.72E-01 | 9.00E-01 | -6.65 |
| 1434979_PM_at   | Fam210a       | FAM210A    | -0.09 | 2.78 | -0.30 | 7.72E-01 | 9.00E-01 | -6.65 |
| 1427940_PM_s_at | Mycbp         | AL139260.3 | -0.08 | 2.22 | -0.30 | 7.72E-01 | 9.00E-01 | -6.65 |
| 1454765_PM_at   | Gtf3c3        | GTF3C3     | -0.03 | 2.50 | -0.30 | 7.72E-01 | 9.00E-01 | -6.65 |
| 1458652_PM_at   | ---           | NA         | 0.03  | 2.04 | 0.30  | 7.72E-01 | 9.00E-01 | -6.65 |
| 1453010_PM_at   | Iws1          | IWS1       | 0.14  | 4.13 | 0.30  | 7.72E-01 | 9.00E-01 | -6.65 |
| 1460542_PM_s_at | Mdm4          | MDM4       | -0.10 | 3.51 | -0.30 | 7.72E-01 | 9.00E-01 | -6.65 |
| 1444537_PM_at   | ---           | NA         | -0.04 | 2.54 | -0.30 | 7.72E-01 | 9.00E-01 | -6.65 |
| 1426302_PM_at   | Tmprss4       | TMPRSS4    | 0.03  | 1.99 | 0.30  | 7.72E-01 | 9.00E-01 | -6.65 |
| 1448546_PM_at   | Rassf3        | RASSF3     | 0.11  | 6.69 | 0.30  | 7.72E-01 | 9.00E-01 | -6.65 |
| 1440849_PM_at   | Rasgrf2       | NA         | 0.13  | 3.28 | 0.30  | 7.72E-01 | 9.00E-01 | -6.65 |
| 1447762_PM_x_at | Ca12          | CA12       | -0.02 | 1.99 | -0.30 | 7.72E-01 | 9.00E-01 | -6.65 |
| 1421817_PM_at   | Gsr           | GSR        | -0.10 | 6.03 | -0.30 | 7.72E-01 | 9.00E-01 | -6.65 |
| 1448123_PM_s_at | Tgfb1         | TGFB1      | -0.07 | 2.60 | -0.30 | 7.72E-01 | 9.00E-01 | -6.65 |
| 1417153_PM_at   | Nacc2         | NACC2      | -0.04 | 2.37 | -0.30 | 7.72E-01 | 9.00E-01 | -6.65 |
| 1442695_PM_at   | Caln1         | CALN1      | -0.04 | 2.73 | -0.30 | 7.72E-01 | 9.00E-01 | -6.65 |
| 1430988_PM_at   | Selt          | SELENOT    | -0.03 | 1.98 | -0.30 | 7.72E-01 | 9.00E-01 | -6.65 |
| 1432085_PM_at   | 4930425O10Rik | NA         | -0.02 | 2.10 | -0.30 | 7.72E-01 | 9.00E-01 | -6.65 |
| 1430456_PM_at   | Gm16086       | NA         | 0.02  | 1.89 | 0.30  | 7.72E-01 | 9.00E-01 | -6.65 |
| 1432771_PM_at   | Slc9a3        | SLC9A3     | 0.03  | 2.48 | 0.30  | 7.72E-01 | 9.00E-01 | -6.65 |
| 1430686_PM_at   | 4833418N02Rik | NA         | 0.03  | 2.20 | 0.30  | 7.72E-01 | 9.00E-01 | -6.65 |
| 1440540_PM_at   | Gle1          | GLE1       | 0.03  | 2.20 | 0.30  | 7.72E-01 | 9.00E-01 | -6.65 |
| 1445747_PM_at   | Gm15201       | NA         | 0.04  | 2.41 | 0.30  | 7.72E-01 | 9.00E-01 | -6.65 |
| 1421047_PM_at   | Smad5         | SMAD5      | 0.04  | 2.75 | 0.30  | 7.72E-01 | 9.00E-01 | -6.65 |
| 1440587_PM_at   | ---           | NA         | 0.05  | 2.62 | 0.30  | 7.72E-01 | 9.00E-01 | -6.65 |
| 1449407_PM_at   | Ift81         | IFT81      | 0.05  | 2.50 | 0.30  | 7.72E-01 | 9.00E-01 | -6.65 |
| 1443885_PM_at   | Pou2f2        | POU2F2     | 0.05  | 2.65 | 0.30  | 7.72E-01 | 9.00E-01 | -6.65 |
| 1446879_PM_at   | ---           | NA         | 0.05  | 2.31 | 0.30  | 7.72E-01 | 9.00E-01 | -6.65 |
| 1445258_PM_at   | ---           | NA         | 0.06  | 2.50 | 0.30  | 7.72E-01 | 9.00E-01 | -6.65 |
| 1421971_PM_a_at | Mmps34        | MRPS34     | 0.07  | 2.58 | 0.30  | 7.72E-01 | 9.00E-01 | -6.65 |
| 1422514_PM_at   | Aebp1         | AEBP1      | 0.07  | 2.98 | 0.30  | 7.72E-01 | 9.00E-01 | -6.65 |
| 1458220_PM_at   | Dlc1          | DLC1       | 0.09  | 2.64 | 0.30  | 7.72E-01 | 9.00E-01 | -6.65 |
| 1435736_PM_x_at | Ift27         | IFT27      | 0.09  | 2.96 | 0.30  | 7.72E-01 | 9.00E-01 | -6.65 |
| 1452504_PM_s_at | Ctbs          | CTBS       | 0.12  | 2.41 | 0.30  | 7.72E-01 | 9.00E-01 | -6.65 |
| 1443398_PM_at   | ---           | NA         | 0.16  | 4.43 | 0.30  | 7.72E-01 | 9.00E-01 | -6.65 |
| 1433420_PM_at   | 4930527J03Rik | NA         | -0.03 | 2.76 | -0.30 | 7.73E-01 | 9.00E-01 | -6.65 |
| 1443266_PM_at   | ---           | NA         | 0.03  | 2.11 | 0.30  | 7.73E-01 | 9.00E-01 | -6.65 |
| 1421685_PM_at   | Clec4b1       | CLEC4A     | 0.04  | 2.53 | 0.30  | 7.73E-01 | 9.00E-01 | -6.65 |
| 1438569_PM_at   | Ccdc38        | CCDC38     | 0.04  | 3.11 | 0.30  | 7.73E-01 | 9.00E-01 | -6.65 |
| 1458729_PM_at   | ---           | NA         | -0.03 | 2.36 | -0.30 | 7.73E-01 | 9.00E-01 | -6.65 |
| 1416317_PM_a_at | Stampb        | STAMPB     | -0.06 | 2.12 | -0.30 | 7.73E-01 | 9.00E-01 | -6.65 |
| 1423612_PM_at   | Clp1          | CLP1       | -0.03 | 2.08 | -0.30 | 7.73E-01 | 9.00E-01 | -6.65 |
| 1422447_PM_at   | Ins1          | INS        | -0.05 | 2.43 | -0.30 | 7.73E-01 | 9.01E-01 | -6.65 |
| 1438483_PM_at   | Nos1          | NOS1       | 0.10  | 2.88 | 0.30  | 7.73E-01 | 9.01E-01 | -6.65 |
| 1420655_PM_at   | Pnpla3        | PNPLA3     | 0.08  | 2.63 | 0.30  | 7.73E-01 | 9.01E-01 | -6.65 |
| 1458541_PM_at   | ---           | NA         | 0.12  | 2.97 | 0.30  | 7.73E-01 | 9.01E-01 | -6.65 |
| 1449651_PM_x_at | Gm29722       | NA         | -0.21 | 3.42 | -0.30 | 7.73E-01 | 9.01E-01 | -6.65 |
| 1436115_PM_at   | Gm266         | NA         | -0.06 | 2.68 | -0.30 | 7.73E-01 | 9.01E-01 | -6.65 |
| 1448097_PM_at   | ---           | NA         | -0.03 | 2.12 | -0.30 | 7.73E-01 | 9.01E-01 | -6.65 |
| 1440901_PM_at   | Dgkb          | DGKB       | 0.11  | 5.74 | 0.30  | 7.73E-01 | 9.01E-01 | -6.65 |
| 1440841_PM_at   | ---           | NA         | 0.03  | 2.07 | 0.30  | 7.73E-01 | 9.01E-01 | -6.65 |

|                 |                                                                                                                                                                                                                                                                                                                                                                                                                                                                                                                                                                                                                                                                                                                                                                                    |           |       |      |       |          |          |       |
|-----------------|------------------------------------------------------------------------------------------------------------------------------------------------------------------------------------------------------------------------------------------------------------------------------------------------------------------------------------------------------------------------------------------------------------------------------------------------------------------------------------------------------------------------------------------------------------------------------------------------------------------------------------------------------------------------------------------------------------------------------------------------------------------------------------|-----------|-------|------|-------|----------|----------|-------|
|                 | 2610042L04Rik ///<br>4930555G01Rik ///<br>D830030K20Rik ///<br>Gm10338 /// Gm10340 ///<br>Gm10406 /// Gm10409 ///<br>Gm10413 /// Gm16434 ///<br>Gm16525 /// Gm2237 ///<br>Gm2897 /// Gm2956 ///<br>Gm3012 /// Gm3020 ///<br>Gm30869 /// Gm3095 ///<br>Gm3164 /// Gm3173 ///<br>Gm3194 /// Gm3239 ///<br>Gm3248 /// Gm3252 ///<br>Gm3264 /// Gm3317 ///<br>Gm3373 /// Gm3383 ///<br>Gm33933 /// Gm3488 ///<br>Gm3500 /// Gm3558 ///<br>Gm3636 /// Gm3642 ///<br>Gm3667 /// Gm3696 ///<br>Gm3739 /// Gm41085 ///<br>Gm5795 /// Gm5796 ///<br>Gm8050 /// Gm8108 ///<br>Gm8279 /// Gm8281 ///<br>Gm9602 /// Gm9603 ///<br>LOC100040870 ///<br>LOC100861615 ///<br>LOC101055754 ///<br>LOC102638110 ///<br>LOC102642063 ///<br>LOC105242423 ///<br>LOC105242441 ///<br>LOC105245673 /// |           |       |      |       |          |          |       |
| 1460500_PM_at   | LOC105245675                                                                                                                                                                                                                                                                                                                                                                                                                                                                                                                                                                                                                                                                                                                                                                       | NA        | -0.12 | 3.71 | -0.30 | 7.73E-01 | 9.01E-01 | -6.65 |
| 1450604_PM_at   | Olfr140                                                                                                                                                                                                                                                                                                                                                                                                                                                                                                                                                                                                                                                                                                                                                                            | NA        | -0.03 | 2.55 | -0.30 | 7.73E-01 | 9.01E-01 | -6.65 |
| 1459221_PM_at   | ---                                                                                                                                                                                                                                                                                                                                                                                                                                                                                                                                                                                                                                                                                                                                                                                | NA        | 0.03  | 2.30 | 0.30  | 7.73E-01 | 9.01E-01 | -6.65 |
| 1442755_PM_at   | ---                                                                                                                                                                                                                                                                                                                                                                                                                                                                                                                                                                                                                                                                                                                                                                                | NA        | 0.04  | 2.74 | 0.30  | 7.73E-01 | 9.01E-01 | -6.65 |
| 1452268_PM_at   | Fam76b                                                                                                                                                                                                                                                                                                                                                                                                                                                                                                                                                                                                                                                                                                                                                                             | FAM76B    | 0.15  | 3.27 | 0.30  | 7.73E-01 | 9.01E-01 | -6.65 |
| 1430868_PM_at   | Tmem150cos                                                                                                                                                                                                                                                                                                                                                                                                                                                                                                                                                                                                                                                                                                                                                                         | NA        | -0.03 | 2.36 | -0.30 | 7.73E-01 | 9.01E-01 | -6.65 |
| 1458127_PM_at   | ---                                                                                                                                                                                                                                                                                                                                                                                                                                                                                                                                                                                                                                                                                                                                                                                | NA        | -0.04 | 2.55 | -0.30 | 7.73E-01 | 9.01E-01 | -6.65 |
| 1435084_PM_at   | Rnf125                                                                                                                                                                                                                                                                                                                                                                                                                                                                                                                                                                                                                                                                                                                                                                             | NA        | 0.10  | 4.02 | 0.30  | 7.73E-01 | 9.01E-01 | -6.65 |
| 1446017_PM_at   | ---                                                                                                                                                                                                                                                                                                                                                                                                                                                                                                                                                                                                                                                                                                                                                                                | NA        | -0.08 | 8.66 | -0.30 | 7.73E-01 | 9.01E-01 | -6.65 |
| 1455261_PM_at   | Luc7l                                                                                                                                                                                                                                                                                                                                                                                                                                                                                                                                                                                                                                                                                                                                                                              | LUC7L     | -0.10 | 3.33 | -0.30 | 7.73E-01 | 9.01E-01 | -6.65 |
| 1424781_PM_at   | Reep3                                                                                                                                                                                                                                                                                                                                                                                                                                                                                                                                                                                                                                                                                                                                                                              | REEP3     | -0.03 | 3.28 | -0.30 | 7.73E-01 | 9.01E-01 | -6.65 |
| 1438469_PM_at   | Bcor1                                                                                                                                                                                                                                                                                                                                                                                                                                                                                                                                                                                                                                                                                                                                                                              | BCORL1    | 0.05  | 2.19 | 0.30  | 7.73E-01 | 9.01E-01 | -6.65 |
| 1446208_PM_at   | Tdrd5                                                                                                                                                                                                                                                                                                                                                                                                                                                                                                                                                                                                                                                                                                                                                                              | NA        | -0.03 | 2.20 | -0.30 | 7.73E-01 | 9.01E-01 | -6.65 |
| 1440719_PM_at   | Gle1                                                                                                                                                                                                                                                                                                                                                                                                                                                                                                                                                                                                                                                                                                                                                                               | GLE1      | 0.05  | 4.75 | 0.30  | 7.73E-01 | 9.01E-01 | -6.65 |
| 1436439_PM_at   | 1700016G14Rik                                                                                                                                                                                                                                                                                                                                                                                                                                                                                                                                                                                                                                                                                                                                                                      | NA        | -0.04 | 2.25 | -0.30 | 7.73E-01 | 9.01E-01 | -6.65 |
| 1454777_PM_at   | Slco2b1                                                                                                                                                                                                                                                                                                                                                                                                                                                                                                                                                                                                                                                                                                                                                                            | SLCO2B1   | 0.03  | 2.55 | 0.30  | 7.74E-01 | 9.01E-01 | -6.65 |
| 1437266_PM_at   | Txndc2                                                                                                                                                                                                                                                                                                                                                                                                                                                                                                                                                                                                                                                                                                                                                                             | TXNDC2    | 0.04  | 2.28 | 0.30  | 7.73E-01 | 9.01E-01 | -6.65 |
| 1440551_PM_at   | ---                                                                                                                                                                                                                                                                                                                                                                                                                                                                                                                                                                                                                                                                                                                                                                                | NA        | 0.04  | 2.97 | 0.30  | 7.73E-01 | 9.01E-01 | -6.65 |
| 1459986_PM_a_at | Gm2614 /// Rps17                                                                                                                                                                                                                                                                                                                                                                                                                                                                                                                                                                                                                                                                                                                                                                   | RPS17     | -0.09 | 6.64 | -0.30 | 7.74E-01 | 9.01E-01 | -6.65 |
| 1436081_PM_a_at | Zfp414                                                                                                                                                                                                                                                                                                                                                                                                                                                                                                                                                                                                                                                                                                                                                                             | ZNF414    | -0.08 | 2.86 | -0.29 | 7.74E-01 | 9.01E-01 | -6.65 |
| 1428926_PM_at   | Fbxo31                                                                                                                                                                                                                                                                                                                                                                                                                                                                                                                                                                                                                                                                                                                                                                             | FBXO31    | -0.07 | 3.58 | -0.29 | 7.74E-01 | 9.01E-01 | -6.65 |
| 1451422_PM_at   | Myo18a                                                                                                                                                                                                                                                                                                                                                                                                                                                                                                                                                                                                                                                                                                                                                                             | MYO18A    | -0.07 | 3.74 | -0.29 | 7.74E-01 | 9.01E-01 | -6.66 |
| 1433778_PM_at   | Tnks                                                                                                                                                                                                                                                                                                                                                                                                                                                                                                                                                                                                                                                                                                                                                                               | NA        | -0.05 | 6.84 | -0.30 | 7.74E-01 | 9.01E-01 | -6.65 |
| 1442996_PM_x_at | ---                                                                                                                                                                                                                                                                                                                                                                                                                                                                                                                                                                                                                                                                                                                                                                                | NA        | -0.04 | 2.34 | -0.29 | 7.74E-01 | 9.01E-01 | -6.65 |
| 1459683_PM_at   | Gm10044                                                                                                                                                                                                                                                                                                                                                                                                                                                                                                                                                                                                                                                                                                                                                                            | NA        | -0.04 | 3.09 | -0.29 | 7.74E-01 | 9.01E-01 | -6.66 |
| 1431584_PM_at   | 1110028F18Rik                                                                                                                                                                                                                                                                                                                                                                                                                                                                                                                                                                                                                                                                                                                                                                      | NA        | -0.03 | 2.18 | -0.29 | 7.74E-01 | 9.01E-01 | -6.65 |
| 1459082_PM_at   | ---                                                                                                                                                                                                                                                                                                                                                                                                                                                                                                                                                                                                                                                                                                                                                                                | NA        | -0.03 | 2.50 | -0.29 | 7.74E-01 | 9.01E-01 | -6.65 |
| 1457548_PM_at   | Adamts6                                                                                                                                                                                                                                                                                                                                                                                                                                                                                                                                                                                                                                                                                                                                                                            | ADAMTS6   | -0.03 | 2.09 | -0.30 | 7.74E-01 | 9.01E-01 | -6.65 |
| 1422410_PM_at   | Ferd3l                                                                                                                                                                                                                                                                                                                                                                                                                                                                                                                                                                                                                                                                                                                                                                             | FERD3L    | 0.03  | 2.02 | 0.30  | 7.74E-01 | 9.01E-01 | -6.65 |
| 1456986_PM_at   | LOC105243404                                                                                                                                                                                                                                                                                                                                                                                                                                                                                                                                                                                                                                                                                                                                                                       | NA        | 0.03  | 1.95 | 0.30  | 7.74E-01 | 9.01E-01 | -6.65 |
| 1429957_PM_at   | Krtap26-1                                                                                                                                                                                                                                                                                                                                                                                                                                                                                                                                                                                                                                                                                                                                                                          | KRTAP26-1 | 0.03  | 2.79 | 0.29  | 7.74E-01 | 9.01E-01 | -6.65 |
| 1416806_PM_at   | Fdxr                                                                                                                                                                                                                                                                                                                                                                                                                                                                                                                                                                                                                                                                                                                                                                               | FDXR      | 0.03  | 2.23 | 0.29  | 7.74E-01 | 9.01E-01 | -6.65 |
| 1429739_PM_a_at | Patz1                                                                                                                                                                                                                                                                                                                                                                                                                                                                                                                                                                                                                                                                                                                                                                              | PATZ1     | 0.03  | 3.09 | 0.29  | 7.74E-01 | 9.01E-01 | -6.65 |
| 1427453_PM_at   | ---                                                                                                                                                                                                                                                                                                                                                                                                                                                                                                                                                                                                                                                                                                                                                                                | NA        | 0.03  | 2.18 | 0.29  | 7.74E-01 | 9.01E-01 | -6.65 |
| 1419066_PM_at   | Ier5l                                                                                                                                                                                                                                                                                                                                                                                                                                                                                                                                                                                                                                                                                                                                                                              | IER5L     | 0.03  | 2.89 | 0.29  | 7.74E-01 | 9.01E-01 | -6.65 |
| 1453345_PM_at   | Nipal1                                                                                                                                                                                                                                                                                                                                                                                                                                                                                                                                                                                                                                                                                                                                                                             | NIPAL1    | 0.03  | 2.22 | 0.29  | 7.74E-01 | 9.01E-01 | -6.66 |
| 1444031_PM_at   | Camk2d                                                                                                                                                                                                                                                                                                                                                                                                                                                                                                                                                                                                                                                                                                                                                                             | NA        | 0.03  | 2.49 | 0.29  | 7.74E-01 | 9.01E-01 | -6.65 |
| 1449197_PM_at   | Wdr20                                                                                                                                                                                                                                                                                                                                                                                                                                                                                                                                                                                                                                                                                                                                                                              | WDR20     | 0.03  | 3.73 | 0.30  | 7.74E-01 | 9.01E-01 | -6.65 |
| 1430092_PM_at   | Serac1                                                                                                                                                                                                                                                                                                                                                                                                                                                                                                                                                                                                                                                                                                                                                                             | SERAC1    | 0.03  | 2.35 | 0.30  | 7.74E-01 | 9.01E-01 | -6.65 |
| 1452605_PM_at   | Thns1                                                                                                                                                                                                                                                                                                                                                                                                                                                                                                                                                                                                                                                                                                                                                                              | THNSL1    | 0.04  | 2.38 | 0.29  | 7.74E-01 | 9.01E-01 | -6.65 |
| 1454816_PM_at   | Rp2                                                                                                                                                                                                                                                                                                                                                                                                                                                                                                                                                                                                                                                                                                                                                                                | RP2       | 0.04  | 2.28 | 0.29  | 7.74E-01 | 9.01E-01 | -6.65 |

|                 |                                  |            |       |      |       |          |          |       |
|-----------------|----------------------------------|------------|-------|------|-------|----------|----------|-------|
| 1425117_PM_at   | Aspdh                            | ASPDH      | 0.04  | 2.70 | 0.29  | 7.74E-01 | 9.01E-01 | -6.65 |
| 1444261_PM_at   | ---                              | NA         | 0.04  | 2.50 | 0.29  | 7.74E-01 | 9.01E-01 | -6.66 |
| 1435314_PM_at   | Tph2                             | TPH2       | 0.04  | 2.26 | 0.29  | 7.74E-01 | 9.01E-01 | -6.65 |
| 1443602_PM_at   | ---                              | NA         | 0.04  | 2.23 | 0.29  | 7.74E-01 | 9.01E-01 | -6.65 |
| 1427939_PM_s_at | Mycbp                            | AL139260.3 | 0.05  | 3.15 | 0.30  | 7.74E-01 | 9.01E-01 | -6.65 |
| 1455908_PM_a_at | Scpep1                           | SCPEP1     | 0.06  | 3.10 | 0.29  | 7.74E-01 | 9.01E-01 | -6.66 |
| 1434001_PM_at   | Ttc9c                            | TTC9C      | 0.07  | 3.65 | 0.29  | 7.74E-01 | 9.01E-01 | -6.65 |
| 1444559_PM_at   | ---                              | NA         | 0.07  | 2.98 | 0.29  | 7.74E-01 | 9.01E-01 | -6.65 |
| 1426368_PM_at   | Rin2                             | RIN2       | 0.07  | 2.95 | 0.29  | 7.74E-01 | 9.01E-01 | -6.65 |
| 1434985_PM_a_at | Eif4a1                           | EIF4A1     | 0.08  | 7.46 | 0.29  | 7.74E-01 | 9.01E-01 | -6.65 |
| 1428692_PM_at   | Hddc3                            | HDDC3      | 0.09  | 2.97 | 0.29  | 7.74E-01 | 9.01E-01 | -6.65 |
| 1436618_PM_at   | Sfxn5                            | SFXN5      | 0.09  | 4.03 | 0.29  | 7.74E-01 | 9.01E-01 | -6.66 |
| 1431054_PM_at   | Lsm6                             | LSM6       | 0.12  | 3.62 | 0.29  | 7.74E-01 | 9.01E-01 | -6.66 |
| 1437464_PM_at   | Spata7                           | SPATA7     | -0.12 | 3.57 | -0.29 | 7.74E-01 | 9.01E-01 | -6.66 |
| 1454550_PM_at   | ---                              | NA         | -0.03 | 2.60 | -0.29 | 7.74E-01 | 9.01E-01 | -6.66 |
| 1416442_PM_at   | Ier2                             | IER2       | -0.04 | 2.69 | -0.29 | 7.74E-01 | 9.01E-01 | -6.66 |
| 1455310_PM_at   | C530047H08Rik                    | NA         | 0.09  | 3.05 | 0.29  | 7.74E-01 | 9.01E-01 | -6.66 |
| 1449442_PM_at   | Pex11a                           | PEX11A     | -0.03 | 2.30 | -0.29 | 7.74E-01 | 9.01E-01 | -6.66 |
| 1433315_PM_at   | ---                              | NA         | 0.03  | 2.40 | 0.29  | 7.74E-01 | 9.01E-01 | -6.66 |
| 1418849_PM_x_at | Aqp7                             | AQP7       | -0.03 | 2.18 | -0.29 | 7.75E-01 | 9.01E-01 | -6.66 |
| 1445990_PM_at   | AU020096                         | NA         | -0.03 | 2.24 | -0.29 | 7.75E-01 | 9.01E-01 | -6.66 |
| 1439245_PM_at   | Tnrc6a                           | TNRC6A     | 0.03  | 2.08 | 0.29  | 7.75E-01 | 9.01E-01 | -6.66 |
| 1448110_PM_at   | Sema4a                           | SEMA4A     | 0.06  | 2.71 | 0.29  | 7.75E-01 | 9.01E-01 | -6.66 |
| 1442292_PM_at   | Arhgef6                          | ARHGEF6    | 0.06  | 2.47 | 0.29  | 7.75E-01 | 9.01E-01 | -6.66 |
| 1419943_PM_s_at | Ccnb1                            | CCNB1      | -0.04 | 2.76 | -0.29 | 7.75E-01 | 9.01E-01 | -6.66 |
| 1446321_PM_at   | LOC102634132 ///<br>LOC102643085 | NA         | 0.05  | 2.11 | 0.29  | 7.75E-01 | 9.01E-01 | -6.66 |
| 1424316_PM_at   | Slc25a19                         | SLC25A19   | 0.07  | 3.48 | 0.29  | 7.75E-01 | 9.01E-01 | -6.66 |
| 1438312_PM_s_at | Ltbp3                            | LTBP3      | 0.09  | 7.74 | 0.29  | 7.75E-01 | 9.01E-01 | -6.66 |
| 1457755_PM_at   | Gng8                             | NA         | -0.03 | 3.11 | -0.29 | 7.75E-01 | 9.01E-01 | -6.66 |
| 1426063_PM_a_at | Gem                              | GEM        | -0.03 | 2.23 | -0.29 | 7.75E-01 | 9.01E-01 | -6.66 |
| 1434841_PM_at   | Ino80d                           | INO80D     | -0.09 | 5.11 | -0.29 | 7.75E-01 | 9.01E-01 | -6.66 |
| 1419838_PM_s_at | Plk4                             | PLK4       | -0.07 | 2.46 | -0.29 | 7.75E-01 | 9.01E-01 | -6.66 |
| 1434131_PM_at   | Rufy1                            | RUFY1      | -0.04 | 2.54 | -0.29 | 7.75E-01 | 9.01E-01 | -6.66 |
| 1416615_PM_at   | Clpp                             | CLPP       | -0.03 | 2.84 | -0.29 | 7.75E-01 | 9.01E-01 | -6.66 |
| 1437137_PM_at   | Tmem255a                         | TMEM255A   | -0.03 | 1.91 | -0.29 | 7.75E-01 | 9.01E-01 | -6.66 |
| 1430372_PM_at   | Stard13                          | NA         | 0.02  | 2.35 | 0.29  | 7.75E-01 | 9.01E-01 | -6.66 |
| 1431603_PM_at   | ---                              | NA         | 0.03  | 2.17 | 0.29  | 7.75E-01 | 9.01E-01 | -6.66 |
| 1438086_PM_at   | Npy6r                            | NA         | 0.03  | 2.34 | 0.29  | 7.75E-01 | 9.01E-01 | -6.66 |
| 1417914_PM_at   | Rap2b                            | RAP2B      | 0.11  | 6.11 | 0.29  | 7.75E-01 | 9.01E-01 | -6.66 |
| 1453609_PM_s_at | Ccdc9                            | CCDC9      | 0.12  | 2.93 | 0.29  | 7.75E-01 | 9.01E-01 | -6.66 |
| 1444779_PM_s_at | Zfp59                            | NA         | -0.04 | 2.91 | -0.29 | 7.75E-01 | 9.01E-01 | -6.66 |
| 1441121_PM_at   | ---                              | NA         | 0.04  | 2.56 | 0.29  | 7.75E-01 | 9.01E-01 | -6.66 |
| 1454393_PM_at   | Dzip3                            | DZIP3      | -0.04 | 2.46 | -0.29 | 7.75E-01 | 9.01E-01 | -6.66 |
| 1442799_PM_x_at | Nudcd3                           | NUDCD3     | 0.04  | 3.68 | 0.29  | 7.75E-01 | 9.01E-01 | -6.66 |
| 1450362_PM_at   | ---                              | NA         | 0.02  | 1.87 | 0.29  | 7.76E-01 | 9.01E-01 | -6.66 |
| 1428111_PM_at   | Slc38a4                          | SLC38A4    | 0.03  | 2.48 | 0.29  | 7.76E-01 | 9.01E-01 | -6.66 |
| 1416762_PM_at   | S100a10                          | S100A10    | 0.03  | 2.43 | 0.29  | 7.76E-01 | 9.01E-01 | -6.66 |
| 1459434_PM_at   | ---                              | NA         | 0.03  | 2.29 | 0.29  | 7.76E-01 | 9.01E-01 | -6.66 |
| 1426263_PM_at   | Cadm4                            | CADM4      | 0.04  | 2.66 | 0.29  | 7.76E-01 | 9.01E-01 | -6.66 |
| 1459220_PM_at   | C78651                           | NA         | 0.05  | 2.22 | 0.29  | 7.76E-01 | 9.01E-01 | -6.66 |
| 1423282_PM_at   | Pitpna                           | PITPNA     | 0.05  | 3.89 | 0.29  | 7.75E-01 | 9.01E-01 | -6.66 |
| 1460173_PM_at   | Lasp1                            | LASP1      | -0.13 | 4.09 | -0.29 | 7.76E-01 | 9.02E-01 | -6.66 |
| 1449603_PM_at   | Al594671                         | NA         | 0.02  | 2.08 | 0.29  | 7.76E-01 | 9.02E-01 | -6.66 |
| 1420760_PM_s_at | Ndrp1                            | NDRG1      | -0.15 | 4.08 | -0.29 | 7.76E-01 | 9.02E-01 | -6.66 |
| 1421076_PM_at   | Sertad3                          | SERTAD3    | 0.03  | 2.19 | 0.29  | 7.76E-01 | 9.02E-01 | -6.66 |
| 1441519_PM_at   | ---                              | NA         | 0.02  | 2.01 | 0.29  | 7.76E-01 | 9.02E-01 | -6.66 |
| 1439893_PM_at   | ---                              | NA         | 0.02  | 3.43 | 0.29  | 7.76E-01 | 9.02E-01 | -6.66 |
| 1418754_PM_at   | Adcy8                            | ADCY8      | 0.09  | 2.43 | 0.29  | 7.76E-01 | 9.02E-01 | -6.66 |
| 1417473_PM_a_at | Gm8465 /// Ppcs                  | PPCS       | 0.03  | 2.02 | 0.29  | 7.76E-01 | 9.02E-01 | -6.66 |
| 1426629_PM_at   | Dhx8                             | DHX8       | 0.04  | 2.51 | 0.29  | 7.76E-01 | 9.02E-01 | -6.66 |
| 1416802_PM_a_at | Cdca5                            | CDCA5      | 0.03  | 2.36 | 0.29  | 7.76E-01 | 9.02E-01 | -6.66 |
| 1441875_PM_at   | ---                              | NA         | 0.03  | 2.20 | 0.29  | 7.76E-01 | 9.02E-01 | -6.66 |
| 1456513_PM_at   | ---                              | NA         | 0.03  | 2.63 | 0.29  | 7.76E-01 | 9.02E-01 | -6.66 |
| 1438908_PM_at   | Map3k12                          | MAP3K12    | -0.04 | 9.26 | -0.29 | 7.77E-01 | 9.02E-01 | -6.66 |
| 1420724_PM_at   | 1700067P10Rik                    | NA         | 0.03  | 2.20 | 0.29  | 7.77E-01 | 9.02E-01 | -6.66 |
| 1450518_PM_at   | Hnf4g                            | HNF4G      | 0.03  | 2.14 | 0.29  | 7.77E-01 | 9.02E-01 | -6.66 |
| 1429272_PM_a_at | Apo17a /// Apo17c ///<br>Gm8221  | NA         | 0.03  | 2.24 | 0.29  | 7.77E-01 | 9.02E-01 | -6.66 |
| 1418384_PM_at   | Apool                            | APOOL      | 0.05  | 2.99 | 0.29  | 7.77E-01 | 9.02E-01 | -6.66 |
| 1429693_PM_at   | Dab2                             | DAB2       | 0.06  | 2.92 | 0.29  | 7.77E-01 | 9.02E-01 | -6.66 |
| 1453992_PM_at   | Zpbb                             | NA         | 0.04  | 2.27 | 0.29  | 7.77E-01 | 9.02E-01 | -6.66 |
| 1454780_PM_at   | Galnt18                          | GALNT18    | -0.07 | 3.13 | -0.29 | 7.77E-01 | 9.02E-01 | -6.66 |
| 1427738_PM_at   | A230006K03Rik                    | NA         | -0.04 | 2.43 | -0.29 | 7.77E-01 | 9.02E-01 | -6.66 |
| 1432733_PM_at   | ---                              | NA         | 0.02  | 2.22 | 0.29  | 7.77E-01 | 9.02E-01 | -6.66 |

|                 |                                   |            |       |      |       |          |          |       |
|-----------------|-----------------------------------|------------|-------|------|-------|----------|----------|-------|
| 1422939_PM_at   | Serpinb3b /// Serpinb3c           | SERPINB4   | 0.03  | 2.32 | 0.29  | 7.77E-01 | 9.02E-01 | -6.66 |
| 1440471_PM_x_at | ---                               | NA         | 0.03  | 2.10 | 0.29  | 7.77E-01 | 9.02E-01 | -6.66 |
| 1427170_PM_at   | PsmA8                             | PSMA8      | 0.05  | 2.92 | 0.29  | 7.77E-01 | 9.02E-01 | -6.66 |
| 1430604_PM_a_at | Dab2                              | DAB2       | 0.05  | 3.36 | 0.29  | 7.77E-01 | 9.02E-01 | -6.66 |
| 1444783_PM_at   | ---                               | NA         | 0.06  | 3.11 | 0.29  | 7.77E-01 | 9.02E-01 | -6.66 |
| 1433734_PM_at   | Slc13a4                           | SLC13A4    | 0.08  | 2.99 | 0.29  | 7.77E-01 | 9.02E-01 | -6.66 |
| 1435244_PM_at   | Vav2                              | VAV2       | -0.05 | 3.09 | -0.29 | 7.77E-01 | 9.02E-01 | -6.66 |
| 1455339_PM_at   | Fkbp15                            | FKBP15     | 0.04  | 3.32 | 0.29  | 7.77E-01 | 9.02E-01 | -6.66 |
| 1448034_PM_at   | Inca1                             | INCA1      | 0.05  | 2.48 | 0.29  | 7.77E-01 | 9.02E-01 | -6.66 |
| 1424217_PM_at   | Papola                            | NA         | -0.11 | 3.91 | -0.29 | 7.77E-01 | 9.03E-01 | -6.66 |
| 1428269_PM_a_at | GlT8d1                            | GLT8D1     | -0.10 | 6.17 | -0.29 | 7.77E-01 | 9.03E-01 | -6.66 |
| 1429017_PM_at   | Smcr8                             | SMCR8      | -0.06 | 2.59 | -0.29 | 7.77E-01 | 9.03E-01 | -6.66 |
| 1437049_PM_at   | ---                               | NA         | -0.03 | 2.40 | -0.29 | 7.77E-01 | 9.03E-01 | -6.66 |
| 1419896_PM_at   | Tet1                              | TET1       | -0.03 | 2.39 | -0.29 | 7.77E-01 | 9.03E-01 | -6.66 |
| 1452855_PM_at   | Ly6k                              | LY6K       | -0.03 | 2.49 | -0.29 | 7.77E-01 | 9.03E-01 | -6.66 |
| 1437359_PM_at   | ---                               | NA         | -0.03 | 2.32 | -0.29 | 7.77E-01 | 9.03E-01 | -6.66 |
| 1458044_PM_at   | ---                               | NA         | 0.04  | 2.60 | 0.29  | 7.77E-01 | 9.03E-01 | -6.66 |
| 1424408_PM_at   | Lims2                             | LIMS2      | 0.04  | 2.46 | 0.29  | 7.77E-01 | 9.03E-01 | -6.66 |
| 1455866_PM_x_at | Txnl1                             | TXNL1      | 0.05  | 3.61 | 0.29  | 7.77E-01 | 9.03E-01 | -6.66 |
| 1453922_PM_at   | 4921539H07Rik                     | NA         | 0.06  | 3.12 | 0.29  | 7.77E-01 | 9.03E-01 | -6.66 |
| 1457456_PM_at   | Map3k10                           | MAP3K10    | -0.03 | 2.80 | -0.29 | 7.77E-01 | 9.03E-01 | -6.66 |
| 1433142_PM_at   | ---                               | NA         | 0.03  | 1.97 | 0.29  | 7.77E-01 | 9.03E-01 | -6.66 |
| 1456373_PM_x_at | Rps20                             | RPS20      | -0.06 | 8.10 | -0.29 | 7.77E-01 | 9.03E-01 | -6.66 |
| 1453931_PM_at   | Col14a1                           | COL14A1    | 0.03  | 2.20 | 0.29  | 7.77E-01 | 9.03E-01 | -6.66 |
| 1423985_PM_at   | Gm15776 /// Gng5 /// LOC102641276 | GN5        | -0.07 | 3.92 | -0.29 | 7.78E-01 | 9.03E-01 | -6.66 |
| 1416507_PM_at   | Cnpy2                             | ACO73896.1 | 0.03  | 2.47 | 0.29  | 7.78E-01 | 9.03E-01 | -6.66 |
| 1417031_PM_at   | Tmem206                           | TMEM206    | -0.13 | 2.83 | -0.29 | 7.78E-01 | 9.03E-01 | -6.66 |
| 1444674_PM_at   | AU015680                          | NA         | -0.06 | 3.53 | -0.29 | 7.78E-01 | 9.03E-01 | -6.66 |
| 1424278_PM_a_at | Birc5                             | BIRC5      | -0.03 | 2.74 | -0.29 | 7.78E-01 | 9.03E-01 | -6.66 |
| 1445188_PM_at   | ---                               | NA         | 0.04  | 2.37 | 0.29  | 7.78E-01 | 9.03E-01 | -6.66 |
| 1417304_PM_at   | Chrd                              | CHRD       | 0.04  | 2.71 | 0.29  | 7.78E-01 | 9.03E-01 | -6.66 |
| 1453161_PM_at   | Med13                             | NA         | 0.10  | 2.95 | 0.29  | 7.78E-01 | 9.03E-01 | -6.66 |
| 1419228_PM_at   | Elac1                             | ELAC1      | 0.10  | 3.02 | 0.29  | 7.78E-01 | 9.03E-01 | -6.66 |
| 1439266_PM_a_at | Polr3k                            | POLR3K     | -0.11 | 3.23 | -0.29 | 7.78E-01 | 9.03E-01 | -6.66 |
| 1440755_PM_at   | ---                               | NA         | -0.09 | 3.34 | -0.29 | 7.78E-01 | 9.03E-01 | -6.66 |
| 1431468_PM_at   | Crisp4                            | CRISP1     | 0.03  | 2.53 | 0.29  | 7.78E-01 | 9.03E-01 | -6.66 |
| 1435288_PM_at   | Coro1a                            | CORO1A     | 0.04  | 2.57 | 0.29  | 7.78E-01 | 9.03E-01 | -6.66 |
| 1431914_PM_at   | Pde3a                             | PDE3A      | -0.06 | 2.86 | -0.29 | 7.78E-01 | 9.03E-01 | -6.66 |
| 1439774_PM_at   | Prrx1                             | PRRX1      | -0.03 | 2.25 | -0.29 | 7.78E-01 | 9.03E-01 | -6.66 |
| 1422522_PM_at   | Fxr2                              | FXR2       | -0.03 | 2.54 | -0.29 | 7.78E-01 | 9.03E-01 | -6.66 |
| 1426010_PM_a_at | Epb41b                            | EPB41L3    | -0.20 | 6.18 | -0.29 | 7.78E-01 | 9.03E-01 | -6.66 |
| 1438218_PM_at   | Zbtb24                            | ZBTB24     | -0.10 | 3.66 | -0.29 | 7.78E-01 | 9.03E-01 | -6.66 |
| 1454378_PM_at   | ---                               | NA         | -0.09 | 4.17 | -0.29 | 7.78E-01 | 9.03E-01 | -6.66 |
| 1432478_PM_a_at | Rnf19b                            | RNF19B     | -0.09 | 4.17 | -0.29 | 7.78E-01 | 9.03E-01 | -6.66 |
| 1459362_PM_at   | ---                               | NA         | -0.05 | 2.18 | -0.29 | 7.78E-01 | 9.03E-01 | -6.66 |
| 1441520_PM_at   | Aspm                              | ASPM       | -0.04 | 2.27 | -0.29 | 7.78E-01 | 9.03E-01 | -6.66 |
| 1439977_PM_at   | ---                               | NA         | -0.04 | 2.61 | -0.29 | 7.78E-01 | 9.03E-01 | -6.66 |
| 1435199_PM_at   | Apc2                              | APC2       | -0.04 | 2.37 | -0.29 | 7.78E-01 | 9.03E-01 | -6.66 |
| 1419908_PM_at   | Fcrla                             | NA         | -0.03 | 2.41 | -0.29 | 7.78E-01 | 9.03E-01 | -6.66 |
| 1427637_PM_a_at | Dsc3                              | NA         | -0.03 | 2.33 | -0.29 | 7.78E-01 | 9.03E-01 | -6.66 |
| 1454337_PM_at   | 6330571C24Rik                     | NA         | 0.02  | 2.02 | 0.29  | 7.78E-01 | 9.03E-01 | -6.66 |
| 1450809_PM_at   | Sval2                             | NA         | 0.03  | 2.12 | 0.29  | 7.78E-01 | 9.03E-01 | -6.66 |
| 1459313_PM_at   | ---                               | NA         | 0.03  | 2.31 | 0.29  | 7.78E-01 | 9.03E-01 | -6.66 |
| 1422349_PM_at   | Ccr11                             | CCR1       | 0.03  | 1.89 | 0.29  | 7.78E-01 | 9.03E-01 | -6.66 |
| 1436259_PM_at   | Gm15523                           | NA         | 0.03  | 2.47 | 0.29  | 7.78E-01 | 9.03E-01 | -6.66 |
| 1455962_PM_at   | Hhat                              | HHAT       | 0.04  | 2.32 | 0.29  | 7.78E-01 | 9.03E-01 | -6.66 |
| 1439430_PM_x_at | Fam83e                            | FAM83E     | 0.04  | 2.35 | 0.29  | 7.78E-01 | 9.03E-01 | -6.66 |
| 1430144_PM_at   | Avl9                              | AVL9       | 0.05  | 2.58 | 0.29  | 7.78E-01 | 9.03E-01 | -6.66 |
| 1434783_PM_at   | Tmem106c                          | TMEM106C   | -0.04 | 2.43 | -0.29 | 7.78E-01 | 9.03E-01 | -6.66 |
| 1441522_PM_at   | Dcun1d2                           | DCUN1D2    | 0.05  | 2.60 | 0.29  | 7.78E-01 | 9.03E-01 | -6.66 |
| 1454254_PM_s_at | Plet1                             | PLET1      | 0.03  | 2.14 | 0.29  | 7.78E-01 | 9.03E-01 | -6.66 |
| 1422720_PM_at   | Isl1                              | ISL1       | -0.03 | 2.10 | -0.29 | 7.78E-01 | 9.03E-01 | -6.66 |
| 1433472_PM_x_at | Rpl38                             | RPL38      | 0.11  | 9.37 | 0.29  | 7.78E-01 | 9.03E-01 | -6.66 |
| 1427026_PM_at   | Myh4                              | MYH4       | -0.10 | 2.90 | -0.29 | 7.79E-01 | 9.03E-01 | -6.66 |
| 1424055_PM_at   | Ncoa5                             | NCOA5      | -0.09 | 3.74 | -0.29 | 7.79E-01 | 9.03E-01 | -6.66 |
| 1448262_PM_at   | Psmb2                             | PSMB2      | -0.08 | 4.81 | -0.29 | 7.79E-01 | 9.03E-01 | -6.66 |
| 1443386_PM_at   | ---                               | NA         | -0.08 | 3.63 | -0.29 | 7.79E-01 | 9.03E-01 | -6.66 |
| 1434632_PM_at   | ---                               | NA         | -0.03 | 2.48 | -0.29 | 7.79E-01 | 9.03E-01 | -6.66 |
| 1438011_PM_at   | Pcvt1a                            | PCYT1A     | -0.03 | 2.27 | -0.29 | 7.79E-01 | 9.03E-01 | -6.66 |
| 1427054_PM_s_at | Abi3bp                            | ABI3BP     | -0.03 | 2.20 | -0.29 | 7.79E-01 | 9.03E-01 | -6.66 |
| 1448095_PM_at   | ---                               | NA         | -0.03 | 2.19 | -0.29 | 7.79E-01 | 9.03E-01 | -6.66 |
| 1424772_PM_at   | H2afj                             | H2AFJ      | -0.03 | 2.45 | -0.29 | 7.79E-01 | 9.03E-01 | -6.66 |
| 1440411_PM_at   | Rassf9                            | NA         | -0.02 | 2.10 | -0.29 | 7.78E-01 | 9.03E-01 | -6.66 |
| 1459762_PM_x_at | Wdr12                             | WDR12      | 0.02  | 1.99 | 0.29  | 7.79E-01 | 9.03E-01 | -6.66 |

|                 |                       |          |       |      |       |          |          |       |
|-----------------|-----------------------|----------|-------|------|-------|----------|----------|-------|
| 1440109_PM_at   | ---                   | NA       | 0.02  | 2.22 | 0.29  | 7.79E-01 | 9.03E-01 | -6.66 |
| 1417835_PM_at   | Mug1///Mug2           | PZP      | 0.02  | 1.88 | 0.29  | 7.79E-01 | 9.03E-01 | -6.66 |
| 1437093_PM_at   | Dnaic1                | DNAI1    | 0.03  | 2.47 | 0.29  | 7.79E-01 | 9.03E-01 | -6.66 |
| 1449495_PM_at   | Reg3a                 | REG3G    | 0.03  | 2.26 | 0.29  | 7.78E-01 | 9.03E-01 | -6.66 |
| 1433077_PM_at   | ---                   | NA       | 0.04  | 2.23 | 0.29  | 7.79E-01 | 9.03E-01 | -6.66 |
| 1446282_PM_at   | Gm20754               | NA       | 0.04  | 2.28 | 0.29  | 7.79E-01 | 9.03E-01 | -6.66 |
| 1444182_PM_at   | Igsf23                | IGSF23   | 0.04  | 2.72 | 0.29  | 7.79E-01 | 9.03E-01 | -6.66 |
| 1434252_PM_at   | Tmcc3                 | TMCC3    | 0.04  | 2.34 | 0.29  | 7.79E-01 | 9.03E-01 | -6.66 |
| 1417025_PM_at   | H2-Eb1                | HLA-DRB1 | 0.05  | 3.78 | 0.29  | 7.79E-01 | 9.03E-01 | -6.66 |
| 1429490_PM_at   | Rif1                  | RIF1     | 0.06  | 2.20 | 0.29  | 7.79E-01 | 9.03E-01 | -6.66 |
| 1420295_PM_x_at | Clcn5                 | CLCN5    | 0.07  | 2.42 | 0.29  | 7.79E-01 | 9.03E-01 | -6.66 |
| 1421106_PM_at   | Jag1                  | JAG1     | 0.07  | 2.65 | 0.29  | 7.79E-01 | 9.03E-01 | -6.66 |
| 1460717_PM_at   | Tspyl1                | TSPYL1   | 0.09  | 3.86 | 0.29  | 7.79E-01 | 9.03E-01 | -6.66 |
| 1427713_PM_x_at | Pou2f2                | POU2F2   | 0.03  | 1.92 | 0.29  | 7.79E-01 | 9.03E-01 | -6.66 |
| 1421569_PM_at   | Grid1                 | GRID1    | 0.06  | 2.81 | 0.29  | 7.79E-01 | 9.03E-01 | -6.66 |
| 1435498_PM_at   | Arfp2                 | ARFP2    | -0.08 | 3.96 | -0.29 | 7.79E-01 | 9.03E-01 | -6.66 |
| 1428858_PM_at   | Wdr70                 | NA       | 0.05  | 4.26 | 0.29  | 7.79E-01 | 9.03E-01 | -6.66 |
| 1426015_PM_s_at | Asph                  | ASPH     | 0.17  | 4.65 | 0.29  | 7.79E-01 | 9.03E-01 | -6.66 |
| 1439592_PM_at   | Ppp4r1-ps             | NA       | 0.05  | 2.63 | 0.29  | 7.79E-01 | 9.03E-01 | -6.66 |
| 1449188_PM_at   | Midn                  | MIDN     | 0.05  | 3.91 | 0.29  | 7.79E-01 | 9.03E-01 | -6.66 |
| 1453750_PM_x_at | Pitpnc1               | PITPNC1  | 0.06  | 2.58 | 0.29  | 7.79E-01 | 9.03E-01 | -6.66 |
| 1458027_PM_at   | Mrpl7                 | NA       | -0.04 | 2.26 | -0.29 | 7.79E-01 | 9.03E-01 | -6.66 |
| 1456152_PM_at   | Paqr5                 | PAQR5    | -0.02 | 2.51 | -0.29 | 7.79E-01 | 9.03E-01 | -6.66 |
| 1436063_PM_at   | Loxl1                 | LOXL1    | 0.03  | 2.05 | 0.29  | 7.79E-01 | 9.03E-01 | -6.66 |
| 1460170_PM_at   | Ext2                  | EXT2     | 0.05  | 2.20 | 0.29  | 7.79E-01 | 9.03E-01 | -6.66 |
| 1447973_PM_at   | Trip11                | TRIP11   | -0.05 | 2.68 | -0.29 | 7.80E-01 | 9.03E-01 | -6.66 |
| 1446848_PM_at   | ---                   | NA       | -0.02 | 2.08 | -0.29 | 7.80E-01 | 9.03E-01 | -6.66 |
| 1428250_PM_at   | Gper1                 | GPBR1    | 0.03  | 2.22 | 0.29  | 7.80E-01 | 9.03E-01 | -6.66 |
| 1420765_PM_a_at | Foxp3                 | FOXP3    | 0.03  | 2.50 | 0.29  | 7.80E-01 | 9.03E-01 | -6.66 |
| 1441759_PM_at   | Gm10804               | NA       | 0.03  | 3.10 | 0.29  | 7.80E-01 | 9.03E-01 | -6.66 |
| 1422356_PM_at   | Vmn1r239-ps///Vmn1r41 | NA       | 0.03  | 2.44 | 0.29  | 7.80E-01 | 9.03E-01 | -6.66 |
| 1447680_PM_at   | ---                   | NA       | 0.02  | 1.95 | 0.29  | 7.80E-01 | 9.03E-01 | -6.66 |
| 1439513_PM_at   | Pnrc1                 | NA       | 0.04  | 2.45 | 0.29  | 7.80E-01 | 9.03E-01 | -6.66 |
| 1452759_PM_s_at | Ppfbp1                | PPFBP1   | 0.10  | 4.21 | 0.29  | 7.80E-01 | 9.03E-01 | -6.66 |
| 1429850_PM_x_at | Alkbh4                | ALKBH4   | 0.06  | 2.45 | 0.29  | 7.80E-01 | 9.03E-01 | -6.66 |
| 1424998_PM_at   | Adgre4                | NA       | 0.02  | 2.45 | 0.29  | 7.80E-01 | 9.03E-01 | -6.66 |
| 1428743_PM_at   | Bri3bp                | BRI3BP   | 0.04  | 2.75 | 0.29  | 7.80E-01 | 9.03E-01 | -6.66 |
| 1454888_PM_at   | Pfdn4                 | PFDN4    | 0.12  | 3.41 | 0.29  | 7.80E-01 | 9.03E-01 | -6.66 |
| 1459490_PM_at   | ---                   | NA       | 0.03  | 2.48 | 0.29  | 7.80E-01 | 9.04E-01 | -6.66 |
| 1436171_PM_at   | Arhgap30              | ARHGAP30 | 0.04  | 2.36 | 0.29  | 7.80E-01 | 9.04E-01 | -6.66 |
| 1416036_PM_at   | Fkbp1a                | FKBP1C   | 0.16  | 5.87 | 0.29  | 7.80E-01 | 9.04E-01 | -6.66 |
| 1458676_PM_at   | Nktr                  | NKTR     | -0.13 | 2.83 | -0.29 | 7.80E-01 | 9.04E-01 | -6.66 |
| 1444812_PM_at   | Prdm10                | NA       | 0.03  | 2.12 | 0.29  | 7.80E-01 | 9.04E-01 | -6.66 |
| 1430222_PM_at   | ---                   | NA       | 0.03  | 2.16 | 0.29  | 7.80E-01 | 9.04E-01 | -6.66 |
| 1458447_PM_at   | Cenpf                 | CENPF    | -0.03 | 2.20 | -0.29 | 7.80E-01 | 9.04E-01 | -6.66 |
| 1454079_PM_at   | Kcnmb4os2             | NA       | 0.03  | 2.28 | 0.29  | 7.80E-01 | 9.04E-01 | -6.66 |
| 1459748_PM_at   | ---                   | NA       | 0.04  | 2.40 | 0.29  | 7.80E-01 | 9.04E-01 | -6.66 |
| 1453658_PM_at   | Gm36589               | NA       | -0.14 | 3.38 | -0.29 | 7.81E-01 | 9.04E-01 | -6.66 |
| 1417918_PM_at   | Mrpl1                 | MRPL11   | -0.07 | 3.86 | -0.29 | 7.81E-01 | 9.04E-01 | -6.66 |
| 1450074_PM_at   | Kif3b                 | KIF3B    | -0.05 | 2.40 | -0.29 | 7.81E-01 | 9.04E-01 | -6.66 |
| 1460396_PM_at   | Ddx54                 | DDX54    | -0.03 | 2.45 | -0.29 | 7.81E-01 | 9.04E-01 | -6.66 |
| 1451986_PM_s_at | Lrrk1                 | LRRK1    | -0.03 | 2.59 | -0.29 | 7.81E-01 | 9.04E-01 | -6.66 |
| 1437900_PM_at   | 4930523C07Rik         | KIAA0040 | -0.02 | 1.98 | -0.29 | 7.81E-01 | 9.04E-01 | -6.66 |
| 1429218_PM_at   | Det1                  | DET1     | 0.03  | 2.43 | 0.29  | 7.81E-01 | 9.04E-01 | -6.66 |
| 1435713_PM_at   | Mettl2                | NA       | 0.03  | 3.04 | 0.29  | 7.81E-01 | 9.04E-01 | -6.66 |
| 1437915_PM_at   | Tom1l2                | NA       | 0.05  | 2.37 | 0.29  | 7.81E-01 | 9.04E-01 | -6.66 |
| 1426609_PM_at   | Dis3                  | DIS3     | 0.06  | 2.76 | 0.29  | 7.81E-01 | 9.04E-01 | -6.66 |
| 1418196_PM_at   | Tep1                  | TEP1     | 0.07  | 3.30 | 0.29  | 7.81E-01 | 9.04E-01 | -6.66 |
| 1449830_PM_at   | Pri3c1                | PRL      | 0.03  | 1.97 | 0.29  | 7.81E-01 | 9.04E-01 | -6.66 |
| 1430656_PM_a_at | Asnsd1                | ASNSD1   | 0.04  | 3.50 | 0.29  | 7.81E-01 | 9.04E-01 | -6.66 |
| 1427627_PM_at   | BC038268              | NA       | 0.04  | 2.54 | 0.29  | 7.81E-01 | 9.04E-01 | -6.66 |
| 1448946_PM_at   | Kif3c                 | KIF3C    | 0.05  | 5.16 | 0.29  | 7.81E-01 | 9.04E-01 | -6.66 |
| 1433731_PM_at   | Igf2bp3               | IGF2BP3  | -0.04 | 2.67 | -0.29 | 7.81E-01 | 9.04E-01 | -6.66 |
| 1443757_PM_x_at | Glb1l                 | GLB1L    | -0.02 | 2.11 | -0.29 | 7.81E-01 | 9.04E-01 | -6.66 |
| 1458110_PM_at   | ---                   | NA       | 0.05  | 3.25 | 0.29  | 7.81E-01 | 9.04E-01 | -6.66 |
| 1454980_PM_at   | Pdpr                  | NA       | -0.04 | 2.86 | -0.29 | 7.81E-01 | 9.04E-01 | -6.66 |
| 1415927_PM_at   | Actc1                 | ACTC1    | -0.02 | 2.32 | -0.29 | 7.81E-01 | 9.04E-01 | -6.66 |
| 1423283_PM_at   | Pitpna                | PITPNA   | -0.12 | 7.01 | -0.29 | 7.81E-01 | 9.04E-01 | -6.66 |
| 1454792_PM_s_at | Seph1s                | SEPH1S   | -0.10 | 4.08 | -0.28 | 7.81E-01 | 9.04E-01 | -6.66 |
| 1417105_PM_at   | Trappc2l              | TRAPPC2L | -0.08 | 3.26 | -0.28 | 7.81E-01 | 9.04E-01 | -6.66 |
| 1450187_PM_a_at | Galt                  | GALT     | -0.08 | 4.01 | -0.28 | 7.81E-01 | 9.04E-01 | -6.66 |
| 1430268_PM_at   | ---                   | NA       | -0.05 | 2.21 | -0.28 | 7.81E-01 | 9.04E-01 | -6.66 |
| 1421277_PM_at   | Spta1                 | SPTA1    | -0.03 | 2.24 | -0.28 | 7.81E-01 | 9.04E-01 | -6.66 |
| 1446712_PM_at   | ---                   | NA       | -0.03 | 2.33 | -0.28 | 7.81E-01 | 9.04E-01 | -6.66 |

|                 |               |            |       |       |       |          |          |       |
|-----------------|---------------|------------|-------|-------|-------|----------|----------|-------|
| 1451475_PM_at   | Pknd1         | PLXND1     | -0.03 | 2.51  | -0.28 | 7.81E-01 | 9.04E-01 | -6.66 |
| 1442046_PM_at   | Shroom2       | SHROOM2    | 0.04  | 2.40  | 0.28  | 7.81E-01 | 9.04E-01 | -6.66 |
| 1460538_PM_at   | ---           | NA         | 0.07  | 2.67  | 0.28  | 7.81E-01 | 9.04E-01 | -6.66 |
| 1450145_PM_at   | Ankef1        | ANKEF1     | -0.03 | 2.50  | -0.28 | 7.81E-01 | 9.04E-01 | -6.66 |
| 1454400_PM_at   | 4632432E15Rik | NA         | -0.06 | 4.92  | -0.28 | 7.82E-01 | 9.04E-01 | -6.66 |
| 1436869_PM_at   | Shh           | SHH        | 0.02  | 2.11  | 0.28  | 7.82E-01 | 9.04E-01 | -6.66 |
| 1450803_PM_at   | Ntf3          | NTF3       | 0.03  | 2.40  | 0.28  | 7.82E-01 | 9.04E-01 | -6.66 |
| 1430894_PM_at   | ---           | NA         | -0.03 | 2.24  | -0.28 | 7.82E-01 | 9.04E-01 | -6.66 |
| 1435621_PM_at   | Far2          | FAR2       | 0.04  | 2.77  | 0.28  | 7.82E-01 | 9.04E-01 | -6.66 |
| 1425475_PM_at   | Col4a5        | COL4A5     | -0.05 | 2.60  | -0.28 | 7.82E-01 | 9.04E-01 | -6.66 |
| 1425357_PM_a_at | Grem1         | GREM1      | 0.04  | 2.63  | 0.28  | 7.82E-01 | 9.04E-01 | -6.66 |
| 1452822_PM_at   | Ints7         | INTS7      | 0.05  | 2.67  | 0.28  | 7.82E-01 | 9.04E-01 | -6.66 |
| 1448436_PM_a_at | Irf1          | IRF1       | 0.07  | 3.53  | 0.28  | 7.82E-01 | 9.04E-01 | -6.66 |
| 1415854_PM_at   | Kitl          | KITLG      | -0.04 | 2.44  | -0.28 | 7.82E-01 | 9.05E-01 | -6.66 |
| 1450203_PM_at   | Smyd1         | SMYD1      | -0.02 | 2.15  | -0.28 | 7.82E-01 | 9.05E-01 | -6.66 |
| 1416099_PM_at   | Rpl27         | NA         | 0.15  | 5.01  | 0.28  | 7.82E-01 | 9.05E-01 | -6.66 |
| 1441179_PM_at   | ---           | NA         | 0.04  | 3.00  | 0.28  | 7.82E-01 | 9.05E-01 | -6.66 |
| 1424091_PM_at   | Zfp868        | NA         | -0.04 | 2.68  | -0.28 | 7.82E-01 | 9.05E-01 | -6.66 |
| 1434619_PM_at   | Rptor         | RPTOR      | -0.03 | 2.46  | -0.28 | 7.82E-01 | 9.05E-01 | -6.66 |
| 1451458_PM_at   | Tmem2         | TMEM2      | -0.03 | 2.03  | -0.28 | 7.82E-01 | 9.05E-01 | -6.66 |
| 1459963_PM_at   | ---           | NA         | 0.04  | 2.14  | 0.28  | 7.82E-01 | 9.05E-01 | -6.66 |
| 1453002_PM_at   | Sox11         | SOX11      | 0.07  | 3.44  | 0.28  | 7.82E-01 | 9.05E-01 | -6.66 |
| 1460322_PM_at   | Chst3         | CHST3      | 0.03  | 2.31  | 0.28  | 7.82E-01 | 9.05E-01 | -6.66 |
| 1451849_PM_a_at | Lmb2          | LMNB2      | 0.04  | 2.44  | 0.28  | 7.82E-01 | 9.05E-01 | -6.66 |
| 1437026_PM_at   | Tstd2         | TSTD2      | 0.18  | 4.87  | 0.28  | 7.82E-01 | 9.05E-01 | -6.66 |
| 1434543_PM_a_at | Bola2         | BOLA2      | -0.16 | 5.24  | -0.28 | 7.82E-01 | 9.05E-01 | -6.66 |
| 1430506_PM_at   | ---           | NA         | 0.03  | 2.48  | 0.28  | 7.82E-01 | 9.05E-01 | -6.66 |
| 1434368_PM_at   | 1700008K24Rik | NA         | -0.03 | 2.67  | -0.28 | 7.82E-01 | 9.05E-01 | -6.66 |
| 1446584_PM_at   | ---           | NA         | 0.03  | 2.20  | 0.28  | 7.82E-01 | 9.05E-01 | -6.66 |
| 1441584_PM_at   | ---           | NA         | 0.04  | 2.21  | 0.28  | 7.82E-01 | 9.05E-01 | -6.66 |
| 1443882_PM_at   | Slc26a2       | SLC26A2    | -0.07 | 2.54  | -0.28 | 7.82E-01 | 9.05E-01 | -6.66 |
| 1437142_PM_a_at | Pigo          | PIGO       | -0.16 | 4.98  | -0.28 | 7.82E-01 | 9.05E-01 | -6.66 |
| 1430562_PM_at   | Zkscan5       | ZKSCAN5    | -0.04 | 2.65  | -0.28 | 7.82E-01 | 9.05E-01 | -6.66 |
| 1446037_PM_at   | ---           | NA         | -0.03 | 1.98  | -0.28 | 7.82E-01 | 9.05E-01 | -6.66 |
| 1434658_PM_at   | Sppl2b        | SPPL2B     | 0.04  | 3.23  | 0.28  | 7.82E-01 | 9.05E-01 | -6.66 |
| 1415747_PM_s_at | Rlok3         | RIOK3      | -0.14 | 5.28  | -0.28 | 7.83E-01 | 9.05E-01 | -6.66 |
| 1438566_PM_at   | St8sia6       | ST8SIA6    | -0.06 | 2.43  | -0.28 | 7.83E-01 | 9.05E-01 | -6.66 |
| 1423534_PM_at   | Pdc2          | PDCD2      | -0.05 | 3.31  | -0.28 | 7.83E-01 | 9.05E-01 | -6.66 |
| 1420763_PM_at   | Klk4          | KLK4       | -0.03 | 2.14  | -0.28 | 7.83E-01 | 9.05E-01 | -6.66 |
| 1433036_PM_at   | ---           | NA         | 0.03  | 2.56  | 0.28  | 7.83E-01 | 9.05E-01 | -6.66 |
| 1442677_PM_at   | ---           | NA         | 0.03  | 2.40  | 0.28  | 7.83E-01 | 9.05E-01 | -6.66 |
| 1449506_PM_a_at | Eef1d         | EEF1D      | 0.07  | 6.77  | 0.28  | 7.83E-01 | 9.05E-01 | -6.66 |
| 1453001_PM_at   | Rnaseh2b      | RNASEH2B   | 0.13  | 4.22  | 0.28  | 7.83E-01 | 9.05E-01 | -6.66 |
| 1452513_PM_a_at | Fanca         | FANCA      | -0.03 | 2.62  | -0.28 | 7.83E-01 | 9.05E-01 | -6.66 |
| 1422384_PM_at   | Olfrl509      | ORME2      | 0.03  | 2.24  | 0.28  | 7.83E-01 | 9.05E-01 | -6.66 |
| 1449958_PM_a_at | Fgf14         | FGF14      | 0.09  | 2.73  | 0.28  | 7.83E-01 | 9.05E-01 | -6.66 |
| 1454581_PM_at   | LOC102633677  | NA         | 0.03  | 2.10  | 0.28  | 7.83E-01 | 9.05E-01 | -6.66 |
| 1419018_PM_at   | Rhox6         | NA         | -0.04 | 3.15  | -0.28 | 7.83E-01 | 9.05E-01 | -6.66 |
| 1455518_PM_at   | Zdhc18        | ZDHC18     | -0.04 | 3.29  | -0.28 | 7.83E-01 | 9.05E-01 | -6.66 |
| 1437310_PM_at   | Bbs1          | APO02748.4 | -0.04 | 3.51  | -0.28 | 7.83E-01 | 9.05E-01 | -6.66 |
| 1444062_PM_at   | Pvt1          | NA         | -0.04 | 2.92  | -0.28 | 7.83E-01 | 9.05E-01 | -6.66 |
| 1450953_PM_at   | Ciao1         | CIAO1      | -0.04 | 2.67  | -0.28 | 7.83E-01 | 9.05E-01 | -6.66 |
| 1459374_PM_at   | Gm41224       | NA         | -0.03 | 2.46  | -0.28 | 7.83E-01 | 9.05E-01 | -6.66 |
| 1424360_PM_at   | Tti2          | TTI2       | -0.03 | 2.43  | -0.28 | 7.83E-01 | 9.05E-01 | -6.66 |
| 1455637_PM_x_at | B230307C23Rik | NA         | 0.02  | 2.41  | 0.28  | 7.83E-01 | 9.05E-01 | -6.66 |
| 1424835_PM_at   | Gstm4         | GSTM4      | 0.03  | 2.62  | 0.28  | 7.83E-01 | 9.05E-01 | -6.66 |
| 1433207_PM_at   | ---           | NA         | 0.03  | 2.18  | 0.28  | 7.83E-01 | 9.05E-01 | -6.66 |
| 1457429_PM_s_at | Sbspon        | SBSPON     | 0.03  | 2.17  | 0.28  | 7.83E-01 | 9.05E-01 | -6.66 |
| 1421359_PM_at   | Ret           | RET        | 0.04  | 2.41  | 0.28  | 7.83E-01 | 9.05E-01 | -6.66 |
| 1451805_PM_at   | Phip          | PHIP       | 0.05  | 2.39  | 0.28  | 7.83E-01 | 9.05E-01 | -6.66 |
| 1426385_PM_x_at | Ywhae         | YWHAE      | 0.05  | 10.30 | 0.28  | 7.83E-01 | 9.05E-01 | -6.66 |
| 1437724_PM_x_at | Pitpnm1       | PITPNM1    | 0.06  | 5.99  | 0.28  | 7.83E-01 | 9.05E-01 | -6.66 |
| 1434792_PM_at   | 2010320M18Rik | NA         | 0.07  | 2.50  | 0.28  | 7.83E-01 | 9.05E-01 | -6.66 |
| 1448694_PM_at   | Jun           | JUN        | 0.15  | 5.31  | 0.28  | 7.83E-01 | 9.05E-01 | -6.66 |
| 1458028_PM_at   | Lym9          | ACO05697.1 | 0.08  | 4.06  | 0.28  | 7.83E-01 | 9.05E-01 | -6.66 |
| 1424113_PM_at   | Lamb1         | LAMB1      | -0.10 | 4.00  | -0.28 | 7.83E-01 | 9.05E-01 | -6.66 |
| 1415699_PM_a_at | Gps1          | GPS1       | -0.04 | 3.62  | -0.28 | 7.83E-01 | 9.05E-01 | -6.66 |
| 1431872_PM_at   | Gm16527       | NA         | 0.02  | 2.09  | 0.28  | 7.83E-01 | 9.05E-01 | -6.66 |
| 1431014_PM_at   | Cecr2         | CECR2      | 0.04  | 2.95  | 0.28  | 7.83E-01 | 9.05E-01 | -6.66 |
| 1422838_PM_at   | Kcnu1         | KCNU1      | 0.04  | 2.42  | 0.28  | 7.83E-01 | 9.05E-01 | -6.66 |
| 1419454_PM_x_at | Pias2         | PIAS2      | -0.04 | 3.54  | -0.28 | 7.83E-01 | 9.05E-01 | -6.66 |
| 1421398_PM_at   | Trim7         | TRIM7      | 0.02  | 1.93  | 0.28  | 7.83E-01 | 9.05E-01 | -6.66 |
| 1421718_PM_at   | Strm          | NA         | 0.03  | 2.80  | 0.28  | 7.83E-01 | 9.05E-01 | -6.66 |
| 1434144_PM_s_at | Wdyhv1        | WDYHV1     | 0.03  | 2.41  | 0.28  | 7.83E-01 | 9.05E-01 | -6.66 |
| 1442538_PM_at   | ---           | NA         | 0.12  | 3.32  | 0.28  | 7.83E-01 | 9.05E-01 | -6.66 |

|                 |                          |            |       |       |       |          |          |       |
|-----------------|--------------------------|------------|-------|-------|-------|----------|----------|-------|
| 1416217_PM_a_at | Rpl37a                   | RPL37A     | 0.19  | 5.79  | 0.28  | 7.84E-01 | 9.05E-01 | -6.66 |
| 1445649_PM_x_at | Zfp142                   | ZNF142     | 0.04  | 2.48  | 0.28  | 7.84E-01 | 9.05E-01 | -6.66 |
| 1422179_PM_at   | Gjb4                     | GJB4       | 0.03  | 2.38  | 0.28  | 7.84E-01 | 9.05E-01 | -6.66 |
| 1424163_PM_at   | Rmnd5b                   | RMND5B     | -0.08 | 3.91  | -0.28 | 7.84E-01 | 9.05E-01 | -6.66 |
| 1416936_PM_at   | Aatk                     | AATK       | -0.03 | 2.53  | -0.28 | 7.84E-01 | 9.05E-01 | -6.66 |
| 1433950_PM_at   | Igsf21                   | IGSF21     | -0.07 | 3.34  | -0.28 | 7.84E-01 | 9.05E-01 | -6.66 |
| 1435912_PM_at   | Ubxn7                    | UBXN7      | -0.04 | 3.31  | -0.28 | 7.84E-01 | 9.05E-01 | -6.66 |
| 1431638_PM_at   | 4930592A05Rik            | NA         | -0.03 | 2.59  | -0.28 | 7.84E-01 | 9.05E-01 | -6.66 |
| 1428119_PM_a_at | Rap2c                    | RAP2C      | 0.06  | 2.44  | 0.28  | 7.84E-01 | 9.05E-01 | -6.66 |
| 1426255_PM_at   | Nefl                     | NEFL       | -0.08 | 10.05 | -0.28 | 7.84E-01 | 9.05E-01 | -6.66 |
| 1443643_PM_at   | ---                      | NA         | 0.03  | 2.24  | 0.28  | 7.84E-01 | 9.05E-01 | -6.66 |
| 1434431_PM_x_at | Adora2b                  | ADORA2B    | 0.03  | 2.09  | 0.28  | 7.84E-01 | 9.05E-01 | -6.66 |
| 1430436_PM_at   | Tcaf1                    | TCAF1      | 0.09  | 3.80  | 0.28  | 7.84E-01 | 9.05E-01 | -6.66 |
| 1420121_PM_at   | AA517858                 | NA         | -0.03 | 2.17  | -0.28 | 7.84E-01 | 9.05E-01 | -6.66 |
| 1449902_PM_at   | Lce1f                    | NA         | -0.03 | 2.30  | -0.28 | 7.84E-01 | 9.05E-01 | -6.66 |
| 1424936_PM_a_at | Dnah8                    | DNAH8      | -0.03 | 2.21  | -0.28 | 7.84E-01 | 9.05E-01 | -6.66 |
| 1460000_PM_at   | Shisa3                   | SHISA3     | -0.03 | 2.22  | -0.28 | 7.84E-01 | 9.05E-01 | -6.66 |
| 1430347_PM_at   | ---                      | NA         | -0.02 | 2.44  | -0.28 | 7.84E-01 | 9.05E-01 | -6.66 |
| 1435040_PM_at   | Irak3                    | IRAK3      | 0.03  | 2.14  | 0.28  | 7.84E-01 | 9.05E-01 | -6.66 |
| 1425312_PM_s_at | Cpsf4l                   | CPSF4L     | 0.03  | 2.68  | 0.28  | 7.84E-01 | 9.05E-01 | -6.66 |
| 1440424_PM_at   | Tnnt2                    | TNNT2      | 0.03  | 2.19  | 0.28  | 7.84E-01 | 9.05E-01 | -6.66 |
| 1448140_PM_at   | Ciapi1                   | CIAPIN1    | 0.04  | 2.51  | 0.28  | 7.84E-01 | 9.05E-01 | -6.66 |
| 1460604_PM_at   | Cybrd1                   | CYBRD1     | -0.04 | 2.83  | -0.28 | 7.84E-01 | 9.05E-01 | -6.66 |
| 1418376_PM_at   | Fgf15                    | FGF19      | -0.03 | 2.33  | -0.28 | 7.84E-01 | 9.05E-01 | -6.66 |
| 1418512_PM_at   | Stk3                     | STK3       | 0.05  | 2.61  | 0.28  | 7.84E-01 | 9.05E-01 | -6.66 |
| 1455517_PM_at   | Gm21992 /// Rbm4         | RBM4       | 0.05  | 2.82  | 0.28  | 7.84E-01 | 9.06E-01 | -6.66 |
| 1442396_PM_at   | A730020M07Rik            | NA         | -0.04 | 2.58  | -0.28 | 7.85E-01 | 9.06E-01 | -6.66 |
| 1419845_PM_at   | Dlx1as                   | NA         | 0.07  | 2.96  | 0.28  | 7.85E-01 | 9.06E-01 | -6.66 |
| 1437882_PM_s_at | ---                      | NA         | 0.06  | 2.84  | 0.28  | 7.85E-01 | 9.06E-01 | -6.66 |
| 1421016_PM_at   | Ighmbp2                  | IGHMBP2    | 0.03  | 2.18  | 0.28  | 7.85E-01 | 9.06E-01 | -6.66 |
| 1450563_PM_at   | Mgst3                    | NA         | 0.03  | 2.15  | 0.28  | 7.85E-01 | 9.06E-01 | -6.66 |
| 1422666_PM_at   | Cblc                     | CBLC       | 0.03  | 2.59  | 0.28  | 7.85E-01 | 9.06E-01 | -6.66 |
| 1423942_PM_a_at | Camk2g                   | CAMK2G     | 0.06  | 3.26  | 0.28  | 7.85E-01 | 9.06E-01 | -6.66 |
| 1449121_PM_at   | Gm5446 /// LOC632268 /// | Srsf10     | -0.05 | 2.83  | -0.28 | 7.85E-01 | 9.06E-01 | -6.66 |
| 1453600_PM_at   | Ccdc18                   | CCDC18     | 0.03  | 2.13  | 0.28  | 7.85E-01 | 9.06E-01 | -6.66 |
| 1422575_PM_at   | Mxd4                     | MXD4       | 0.04  | 2.24  | 0.28  | 7.85E-01 | 9.06E-01 | -6.66 |
| 1427714_PM_at   | Smyd1                    | NA         | -0.03 | 2.29  | -0.28 | 7.85E-01 | 9.06E-01 | -6.66 |
| 1428533_PM_at   | Cnot11                   | CNOT11     | -0.03 | 2.58  | -0.28 | 7.85E-01 | 9.06E-01 | -6.66 |
| 1444336_PM_at   | ---                      | NA         | 0.05  | 2.27  | 0.28  | 7.85E-01 | 9.06E-01 | -6.66 |
| 1427894_PM_at   | Vasn                     | VASN       | 0.05  | 2.44  | 0.28  | 7.85E-01 | 9.06E-01 | -6.66 |
| 1459649_PM_at   | ---                      | NA         | -0.03 | 2.02  | -0.28 | 7.85E-01 | 9.06E-01 | -6.66 |
| 1437373_PM_at   | Aen                      | AEN        | -0.05 | 2.43  | -0.28 | 7.85E-01 | 9.06E-01 | -6.66 |
| 1455590_PM_at   | Nqo2                     | NQO2       | 0.04  | 3.29  | 0.28  | 7.85E-01 | 9.06E-01 | -6.66 |
| 1419372_PM_at   | Gosr2                    | ACO05670.2 | 0.06  | 2.63  | 0.28  | 7.85E-01 | 9.06E-01 | -6.66 |
| 1453953_PM_at   | 9130015A21Rik            | NA         | -0.04 | 2.43  | -0.28 | 7.85E-01 | 9.06E-01 | -6.66 |
| 1444263_PM_at   | ---                      | NA         | -0.03 | 2.54  | -0.28 | 7.85E-01 | 9.06E-01 | -6.66 |
| 1433556_PM_at   | Adap1                    | ADAP1      | 0.03  | 2.34  | 0.28  | 7.86E-01 | 9.06E-01 | -6.66 |
| 1425197_PM_at   | Ptpn2                    | PTPN2      | 0.06  | 2.27  | 0.28  | 7.86E-01 | 9.06E-01 | -6.66 |
| 1428507_PM_at   | Hdhd2                    | HDHD2      | -0.08 | 3.70  | -0.28 | 7.86E-01 | 9.06E-01 | -6.66 |
| 1418578_PM_at   | Dgka                     | DGKA       | 0.09  | 3.45  | 0.28  | 7.86E-01 | 9.06E-01 | -6.66 |
| 1452331_PM_s_at | Qser1                    | QSER1      | -0.03 | 2.58  | -0.28 | 7.86E-01 | 9.06E-01 | -6.66 |
| 1434791_PM_at   | Atp6v0a2                 | ATP6V0A2   | -0.07 | 3.43  | -0.28 | 7.86E-01 | 9.06E-01 | -6.66 |
| 1417697_PM_at   | Soat1                    | SOAT1      | 0.05  | 2.54  | 0.28  | 7.86E-01 | 9.06E-01 | -6.66 |
| 1425684_PM_at   | Akr1b10                  | AKR1B15    | 0.05  | 2.62  | 0.28  | 7.86E-01 | 9.06E-01 | -6.66 |
| 1417673_PM_at   | Grb14                    | GRB14      | -0.08 | 3.07  | -0.28 | 7.86E-01 | 9.06E-01 | -6.66 |
| 1457118_PM_at   | Shc4                     | SHC4       | 0.05  | 2.61  | 0.28  | 7.86E-01 | 9.06E-01 | -6.66 |
| 1428027_PM_at   | Mir155hg                 | NA         | -0.03 | 2.29  | -0.28 | 7.86E-01 | 9.07E-01 | -6.66 |
| 1447665_PM_at   | Lingo2                   | LINGO2     | 0.03  | 1.82  | 0.28  | 7.86E-01 | 9.07E-01 | -6.66 |
| 1439167_PM_at   | Pecr                     | PECR       | 0.03  | 2.07  | 0.28  | 7.86E-01 | 9.07E-01 | -6.66 |
| 1445052_PM_at   | ---                      | NA         | 0.04  | 2.27  | 0.28  | 7.86E-01 | 9.07E-01 | -6.66 |
| 1417750_PM_a_at | Slc25a37                 | SLC25A37   | 0.04  | 2.52  | 0.28  | 7.86E-01 | 9.07E-01 | -6.66 |
| 1457877_PM_at   | ---                      | NA         | 0.04  | 2.46  | 0.28  | 7.86E-01 | 9.07E-01 | -6.66 |
| 1456500_PM_at   | Aph1b                    | APH1B      | 0.07  | 3.24  | 0.28  | 7.86E-01 | 9.07E-01 | -6.66 |
| 1423371_PM_at   | Pole4                    | POLE4      | 0.09  | 2.97  | 0.28  | 7.86E-01 | 9.07E-01 | -6.66 |
| 1455747_PM_at   | Ggt5                     | GGT5       | 0.04  | 2.28  | 0.28  | 7.86E-01 | 9.07E-01 | -6.66 |
| 1429148_PM_at   | Nfic                     | NFIC       | 0.11  | 3.43  | 0.28  | 7.86E-01 | 9.07E-01 | -6.66 |
| 1460663_PM_at   | Cckbr                    | CCKBR      | -0.06 | 3.54  | -0.28 | 7.86E-01 | 9.07E-01 | -6.66 |
| 1440802_PM_at   | ---                      | NA         | -0.09 | 2.84  | -0.28 | 7.86E-01 | 9.07E-01 | -6.66 |
| 1459882_PM_at   | Asf1a                    | ASF1A      | -0.04 | 2.68  | -0.28 | 7.86E-01 | 9.07E-01 | -6.66 |
| 1445778_PM_at   | ---                      | NA         | 0.03  | 2.26  | 0.28  | 7.86E-01 | 9.07E-01 | -6.66 |
| 1425393_PM_a_at | Map2k7                   | MAP2K7     | 0.11  | 2.97  | 0.28  | 7.86E-01 | 9.07E-01 | -6.66 |
| 1433842_PM_at   | Lrrfp1                   | LRRFP1     | -0.07 | 2.89  | -0.28 | 7.87E-01 | 9.07E-01 | -6.66 |
| 1425057_PM_at   | Pbl1 /// Pbl12           | PBLD       | -0.02 | 2.21  | -0.28 | 7.86E-01 | 9.07E-01 | -6.66 |
| 1450173_PM_at   | Ripk2                    | RIPK2      | -0.02 | 1.96  | -0.28 | 7.86E-01 | 9.07E-01 | -6.66 |



|                 |                                      |         |       |      |       |          |          |       |
|-----------------|--------------------------------------|---------|-------|------|-------|----------|----------|-------|
| 1451440_PM_at   | Chodl                                | CHODL   | 0.02  | 2.35 | 0.28  | 7.86E-01 | 9.07E-01 | -6.66 |
| 1460184_PM_at   | Hadh                                 | HADH    | 0.07  | 3.16 | 0.28  | 7.87E-01 | 9.07E-01 | -6.66 |
| 1439247_PM_at   | Dock10                               | DOCK10  | -0.08 | 2.51 | -0.28 | 7.87E-01 | 9.07E-01 | -6.66 |
| 1438154_PM_x_at | Faap20                               | NA      | -0.03 | 2.30 | -0.28 | 7.87E-01 | 9.07E-01 | -6.66 |
| 1417246_PM_at   | Pzp                                  | NA      | -0.02 | 2.21 | -0.28 | 7.87E-01 | 9.07E-01 | -6.66 |
| 1450862_PM_at   | Rad54l                               | RAD54L  | 0.03  | 2.56 | 0.28  | 7.87E-01 | 9.07E-01 | -6.66 |
| 1425083_PM_at   | Otor                                 | OTOR    | 0.05  | 2.62 | 0.28  | 7.87E-01 | 9.07E-01 | -6.66 |
| 1439077_PM_at   | Zxda                                 | NA      | -0.03 | 2.28 | -0.28 | 7.87E-01 | 9.07E-01 | -6.66 |
| 1450045_PM_at   | Srrm1                                | SRRM1   | 0.03  | 3.52 | 0.28  | 7.87E-01 | 9.07E-01 | -6.66 |
| 1451524_PM_at   | Fbxw2                                | FBXW2   | -0.12 | 3.89 | -0.28 | 7.87E-01 | 9.07E-01 | -6.66 |
| 1452312_PM_at   | 2810002D19Rik                        | NA      | -0.08 | 3.42 | -0.28 | 7.87E-01 | 9.07E-01 | -6.66 |
| 1429942_PM_at   | Gmeb1                                | GMEB1   | -0.07 | 3.13 | -0.28 | 7.87E-01 | 9.07E-01 | -6.66 |
| 1450060_PM_at   | Pigr                                 | PIGR    | -0.05 | 2.50 | -0.28 | 7.87E-01 | 9.07E-01 | -6.66 |
| 1442834_PM_at   | ---                                  | NA      | -0.04 | 2.31 | -0.28 | 7.87E-01 | 9.07E-01 | -6.66 |
| 1459179_PM_at   | D8Erttd268e                          | NA      | -0.03 | 2.68 | -0.28 | 7.87E-01 | 9.07E-01 | -6.66 |
| 1451203_PM_at   | Mb                                   | MB      | -0.02 | 2.22 | -0.28 | 7.87E-01 | 9.07E-01 | -6.66 |
| 1449671_PM_at   | ---                                  | NA      | 0.02  | 2.06 | 0.28  | 7.87E-01 | 9.07E-01 | -6.66 |
| 1433211_PM_at   | ---                                  | NA      | 0.02  | 1.93 | 0.28  | 7.87E-01 | 9.07E-01 | -6.66 |
| 1427664_PM_at   | ---                                  | NA      | 0.02  | 2.52 | 0.28  | 7.87E-01 | 9.07E-01 | -6.66 |
| 1454549_PM_at   | 2900005I04Rik                        | NA      | 0.03  | 2.46 | 0.28  | 7.87E-01 | 9.07E-01 | -6.66 |
| 1432068_PM_a_at | Entpd7                               | ENTPD7  | 0.03  | 2.38 | 0.28  | 7.87E-01 | 9.07E-01 | -6.66 |
| 1419573_PM_a_at | Lgals1                               | LGALS1  | 0.05  | 2.98 | 0.28  | 7.87E-01 | 9.07E-01 | -6.66 |
| 1418364_PM_a_at | Ftl1 /// Ftl2-ps ///<br>LOC100862446 | FTL     | 0.08  | 2.88 | 0.28  | 7.87E-01 | 9.07E-01 | -6.66 |
| 1459197_PM_at   | Cntn1                                | NA      | 0.08  | 2.75 | 0.28  | 7.87E-01 | 9.07E-01 | -6.66 |
| 1452507_PM_at   | Dlx6                                 | DLX6    | 0.09  | 2.63 | 0.28  | 7.87E-01 | 9.07E-01 | -6.66 |
| 1426329_PM_s_at | Baal                                 | NA      | 0.07  | 4.45 | 0.28  | 7.87E-01 | 9.07E-01 | -6.66 |
| 1456488_PM_at   | Wdr33                                | WDR33   | 0.10  | 4.28 | 0.28  | 7.87E-01 | 9.07E-01 | -6.66 |
| 1446078_PM_at   | ---                                  | NA      | 0.03  | 2.92 | 0.28  | 7.87E-01 | 9.07E-01 | -6.66 |
| 1456721_PM_at   | Thsd7a                               | THSD7A  | -0.07 | 3.75 | -0.28 | 7.87E-01 | 9.07E-01 | -6.66 |
| 1429453_PM_a_at | Mrp55                                | MRPL55  | 0.06  | 3.24 | 0.28  | 7.87E-01 | 9.07E-01 | -6.66 |
| 1434124_PM_x_at | Lamt0r1                              | LAMTOR1 | 0.10  | 4.94 | 0.28  | 7.87E-01 | 9.07E-01 | -6.66 |
| 1429872_PM_at   | Prss51                               | PRSS51  | -0.03 | 2.93 | -0.28 | 7.88E-01 | 9.07E-01 | -6.66 |
| 1447483_PM_s_at | ---                                  | NA      | 0.04  | 2.37 | 0.28  | 7.88E-01 | 9.07E-01 | -6.66 |
| 1425342_PM_a_at | Kcnk3                                | KCNK3   | 0.03  | 2.73 | 0.28  | 7.88E-01 | 9.07E-01 | -6.66 |
| 1448618_PM_at   | Mvp                                  | MVP     | 0.04  | 2.95 | 0.28  | 7.88E-01 | 9.07E-01 | -6.66 |
| 1438065_PM_at   | Rprd1a                               | NA      | -0.17 | 4.06 | -0.28 | 7.88E-01 | 9.07E-01 | -6.66 |
| 1445707_PM_at   | Zdhc6                                | ZDHHC6  | 0.02  | 1.96 | 0.28  | 7.88E-01 | 9.07E-01 | -6.66 |
| 1456335_PM_at   | Sbspon                               | SBSPON  | -0.03 | 2.19 | -0.28 | 7.88E-01 | 9.07E-01 | -6.66 |
| 1440485_PM_at   | Gm36839                              | NA      | 0.04  | 2.40 | 0.28  | 7.88E-01 | 9.07E-01 | -6.66 |
| 1431991_PM_at   | 2410004P03Rik                        | C2orf50 | 0.04  | 2.73 | 0.28  | 7.88E-01 | 9.07E-01 | -6.66 |
| 1437363_PM_at   | Homer1                               | HOMER1  | -0.10 | 6.17 | -0.28 | 7.88E-01 | 9.07E-01 | -6.66 |
| 1433955_PM_at   | Brwd1                                | BRWD1   | -0.07 | 2.99 | -0.28 | 7.88E-01 | 9.07E-01 | -6.66 |
| 1449604_PM_at   | Acp1 /// LOC102642088                | ACP1    | 0.02  | 2.40 | 0.28  | 7.88E-01 | 9.07E-01 | -6.66 |
| 1446894_PM_at   | ---                                  | NA      | 0.03  | 2.79 | 0.28  | 7.88E-01 | 9.07E-01 | -6.66 |
| 1433382_PM_at   | Enho                                 | NA      | -0.03 | 2.73 | -0.28 | 7.88E-01 | 9.07E-01 | -6.66 |
| 1435090_PM_at   | Tubgcp6                              | TUBGCP6 | 0.03  | 2.34 | 0.28  | 7.88E-01 | 9.07E-01 | -6.66 |
| 1419033_PM_at   | Stk26                                | STK26   | -0.09 | 3.00 | -0.28 | 7.88E-01 | 9.07E-01 | -6.66 |
| 1452804_PM_at   | Morn5                                | MORN5   | -0.03 | 2.19 | -0.28 | 7.88E-01 | 9.07E-01 | -6.66 |
| 1440735_PM_at   | Polr3k                               | POLR3K  | 0.09  | 3.11 | 0.28  | 7.88E-01 | 9.07E-01 | -6.66 |
| 1455305_PM_x_at | Hnrnpa1                              | NA      | -0.13 | 6.71 | -0.28 | 7.88E-01 | 9.07E-01 | -6.66 |
| 1424969_PM_s_at | Upp2                                 | UPP2    | -0.04 | 2.24 | -0.28 | 7.88E-01 | 9.07E-01 | -6.66 |
| 1447322_PM_at   | ---                                  | NA      | -0.03 | 2.34 | -0.28 | 7.88E-01 | 9.07E-01 | -6.66 |
| 1435590_PM_at   | ---                                  | NA      | -0.03 | 2.59 | -0.28 | 7.88E-01 | 9.07E-01 | -6.66 |
| 1443565_PM_at   | Al849538                             | NA      | 0.03  | 2.03 | 0.28  | 7.88E-01 | 9.07E-01 | -6.66 |
| 1445981_PM_at   | ---                                  | NA      | 0.03  | 2.86 | 0.28  | 7.88E-01 | 9.07E-01 | -6.66 |
| 1444371_PM_at   | Ccdc186                              | NA      | 0.04  | 2.31 | 0.28  | 7.88E-01 | 9.07E-01 | -6.66 |
| 1458956_PM_at   | Pitpnm3                              | PITPNM3 | 0.04  | 2.86 | 0.28  | 7.88E-01 | 9.07E-01 | -6.66 |
| 1448817_PM_at   | Otub1                                | OTUB1   | 0.06  | 3.18 | 0.28  | 7.88E-01 | 9.07E-01 | -6.66 |
| 1425621_PM_at   | Trim35                               | TRIM35  | -0.06 | 2.35 | -0.28 | 7.88E-01 | 9.08E-01 | -6.66 |
| 1453478_PM_at   | Pou3f2                               | NA      | -0.04 | 3.30 | -0.28 | 7.88E-01 | 9.08E-01 | -6.66 |
| 1439143_PM_at   | A930018M24Rik                        | NA      | -0.04 | 2.27 | -0.28 | 7.88E-01 | 9.08E-01 | -6.66 |
| 1459415_PM_at   | Specc1                               | SPECC1  | -0.03 | 2.37 | -0.28 | 7.88E-01 | 9.08E-01 | -6.66 |
| 1435121_PM_at   | Dio3os                               | NA      | 0.03  | 2.29 | 0.28  | 7.88E-01 | 9.08E-01 | -6.66 |
| 1459616_PM_at   | ---                                  | NA      | 0.04  | 2.52 | 0.28  | 7.88E-01 | 9.08E-01 | -6.66 |
| 1449721_PM_at   | ---                                  | NA      | 0.03  | 2.30 | 0.28  | 7.89E-01 | 9.08E-01 | -6.66 |
| 1430380_PM_at   | Ngamt1                               | NGAMT1  | -0.03 | 2.19 | -0.28 | 7.89E-01 | 9.08E-01 | -6.66 |
| 1421831_PM_at   | Ak4                                  | NA      | 0.03  | 2.39 | 0.28  | 7.89E-01 | 9.08E-01 | -6.66 |
| 1429868_PM_at   | 1700020N01Rik                        | NA      | 0.03  | 2.21 | 0.28  | 7.89E-01 | 9.08E-01 | -6.66 |
| 1429327_PM_at   | Nemf                                 | NEMF    | -0.11 | 5.56 | -0.27 | 7.89E-01 | 9.08E-01 | -6.66 |
| 1456009_PM_x_at | Top3b                                | TOP3B   | -0.10 | 3.10 | -0.27 | 7.89E-01 | 9.08E-01 | -6.66 |
| 1443123_PM_at   | ---                                  | NA      | -0.09 | 3.53 | -0.27 | 7.89E-01 | 9.08E-01 | -6.66 |
| 1429534_PM_a_at | Immt                                 | IMMT    | -0.09 | 4.51 | -0.27 | 7.89E-01 | 9.08E-01 | -6.66 |
| 1434921_PM_at   | Nr2e1                                | NR2E1   | -0.07 | 2.89 | -0.27 | 7.89E-01 | 9.08E-01 | -6.66 |
| 1452113_PM_a_at | Rab23                                | RAB23   | -0.07 | 2.38 | -0.27 | 7.89E-01 | 9.08E-01 | -6.66 |

|                 |                                                                                                                                                                                                |          |       |      |       |          |          |       |
|-----------------|------------------------------------------------------------------------------------------------------------------------------------------------------------------------------------------------|----------|-------|------|-------|----------|----------|-------|
| 1427936_PM_at   | Thns1                                                                                                                                                                                          | THNSL1   | -0.06 | 4.42 | -0.27 | 7.89E-01 | 9.08E-01 | -6.66 |
| 1438388_PM_at   | Nxph1                                                                                                                                                                                          | NA       | -0.04 | 2.35 | -0.28 | 7.89E-01 | 9.08E-01 | -6.66 |
| 1420761_PM_at   | Chrnd                                                                                                                                                                                          | CHNRD    | -0.04 | 2.43 | -0.27 | 7.89E-01 | 9.08E-01 | -6.66 |
| 1443951_PM_at   | Mtpt                                                                                                                                                                                           | MTPT     | -0.03 | 2.33 | -0.27 | 7.89E-01 | 9.08E-01 | -6.66 |
| 1420676_PM_at   | Lce1a1                                                                                                                                                                                         | NA       | 0.02  | 2.04 | 0.27  | 7.89E-01 | 9.08E-01 | -6.66 |
| 1422633_PM_at   | 1700020D05Rik                                                                                                                                                                                  | NSMCE3   | 0.03  | 2.18 | 0.27  | 7.89E-01 | 9.08E-01 | -6.66 |
| 1434623_PM_at   | Kxd1///Uba52                                                                                                                                                                                   | KXD1     | 0.03  | 1.93 | 0.27  | 7.89E-01 | 9.08E-01 | -6.66 |
| 1417085_PM_at   | Akr1c6                                                                                                                                                                                         | AKR1C2   | 0.03  | 2.26 | 0.27  | 7.89E-01 | 9.08E-01 | -6.66 |
| 1444581_PM_at   | Rangap1                                                                                                                                                                                        | RANGAP1  | 0.03  | 2.44 | 0.27  | 7.89E-01 | 9.08E-01 | -6.66 |
| 1437181_PM_at   | Pel12                                                                                                                                                                                          | PEL12    | 0.03  | 2.50 | 0.27  | 7.89E-01 | 9.08E-01 | -6.66 |
| 1457344_PM_at   | ---                                                                                                                                                                                            | NA       | 0.04  | 2.48 | 0.27  | 7.89E-01 | 9.08E-01 | -6.66 |
| 1450384_PM_at   | Bace1                                                                                                                                                                                          | BACE1    | 0.04  | 2.44 | 0.27  | 7.89E-01 | 9.08E-01 | -6.66 |
| 1430200_PM_at   | ---                                                                                                                                                                                            | NA       | 0.05  | 2.70 | 0.27  | 7.89E-01 | 9.08E-01 | -6.66 |
| 1445047_PM_at   | C79246                                                                                                                                                                                         | NA       | 0.07  | 4.28 | 0.27  | 7.89E-01 | 9.08E-01 | -6.66 |
| 1422618_PM_x_at | Gm10058 /// Gm10096 ///<br>Gm10147 /// Gm10230 ///<br>Gm10486 /// Gm10488 ///<br>Gm14525 /// Gm14632 ///<br>Gm14819 /// Gm2012 ///<br>Gm2030 /// Gm4297 ///<br>Gm5169 /// Gm5934 ///<br>Gm6121 | NA       | 0.10  | 3.27 | 0.27  | 7.89E-01 | 9.08E-01 | -6.66 |
| 1455053_PM_a_at | Dcun1d1                                                                                                                                                                                        | DCUN1D1  | -0.07 | 3.16 | -0.27 | 7.89E-01 | 9.08E-01 | -6.66 |
| 1460376_PM_a_at | Cox15                                                                                                                                                                                          | COX15    | -0.06 | 2.71 | -0.27 | 7.89E-01 | 9.08E-01 | -6.66 |
| 1435876_PM_at   | ---                                                                                                                                                                                            | NA       | -0.02 | 2.11 | -0.27 | 7.89E-01 | 9.08E-01 | -6.66 |
| 1425308_PM_at   | Trim31                                                                                                                                                                                         | TRIM31   | 0.02  | 2.01 | 0.27  | 7.89E-01 | 9.08E-01 | -6.66 |
| 1440421_PM_at   | ---                                                                                                                                                                                            | NA       | -0.05 | 2.64 | -0.27 | 7.89E-01 | 9.08E-01 | -6.66 |
| 1423370_PM_a_at | Csnk1g2                                                                                                                                                                                        | CSNK1G2  | 0.08  | 4.25 | 0.27  | 7.89E-01 | 9.08E-01 | -6.66 |
| 1435007_PM_s_at | Slc25a47                                                                                                                                                                                       | SLC25A47 | -0.04 | 2.66 | -0.27 | 7.90E-01 | 9.08E-01 | -6.66 |
| 1448426_PM_at   | Sardh                                                                                                                                                                                          | SARDH    | -0.03 | 2.30 | -0.27 | 7.90E-01 | 9.08E-01 | -6.66 |
| 1444755_PM_at   | Mad1l1                                                                                                                                                                                         | MAD1L1   | 0.03  | 2.21 | 0.27  | 7.90E-01 | 9.08E-01 | -6.66 |
| 1441430_PM_at   | Etnppl                                                                                                                                                                                         | ETNPPL   | 0.03  | 2.16 | 0.27  | 7.90E-01 | 9.08E-01 | -6.66 |
| 1445608_PM_at   | 9130204L05Rik                                                                                                                                                                                  | NA       | 0.03  | 2.32 | 0.27  | 7.90E-01 | 9.08E-01 | -6.66 |
| 1419577_PM_at   | Fig4                                                                                                                                                                                           | FIG4     | 0.04  | 2.43 | 0.27  | 7.90E-01 | 9.08E-01 | -6.66 |
| 1420967_PM_at   | Slc25a15                                                                                                                                                                                       | NA       | 0.08  | 4.82 | 0.27  | 7.90E-01 | 9.08E-01 | -6.66 |
| 1449288_PM_at   | Gdf3                                                                                                                                                                                           | GDF3     | -0.02 | 2.13 | -0.27 | 7.90E-01 | 9.08E-01 | -6.66 |
| 1443446_PM_at   | ---                                                                                                                                                                                            | NA       | -0.03 | 2.21 | -0.27 | 7.90E-01 | 9.08E-01 | -6.66 |
| 1451583_PM_a_at | Mmgt2                                                                                                                                                                                          | MMGT1    | 0.04  | 2.48 | 0.27  | 7.90E-01 | 9.08E-01 | -6.66 |
| 1447777_PM_x_at | ---                                                                                                                                                                                            | NA       | -0.03 | 2.23 | -0.27 | 7.90E-01 | 9.08E-01 | -6.66 |
| 1450734_PM_at   | Sec16b                                                                                                                                                                                         | SEC16B   | 0.03  | 2.07 | 0.27  | 7.90E-01 | 9.08E-01 | -6.66 |
| 1422796_PM_at   | Prep                                                                                                                                                                                           | PREP     | -0.06 | 2.80 | -0.27 | 7.90E-01 | 9.08E-01 | -6.66 |
| 1439211_PM_at   | Umodl1                                                                                                                                                                                         | UMODL1   | -0.04 | 2.26 | -0.27 | 7.90E-01 | 9.08E-01 | -6.66 |
| 1438499_PM_at   | 1700029I15Rik                                                                                                                                                                                  | C11orf94 | -0.03 | 2.58 | -0.27 | 7.90E-01 | 9.08E-01 | -6.66 |
| 1442190_PM_at   | Gm11342                                                                                                                                                                                        | NA       | -0.03 | 2.26 | -0.27 | 7.90E-01 | 9.08E-01 | -6.66 |
| 1420848_PM_at   | Sufu                                                                                                                                                                                           | SUFU     | 0.02  | 2.30 | 0.27  | 7.90E-01 | 9.08E-01 | -6.66 |
| 1457911_PM_at   | Kcna2                                                                                                                                                                                          | NA       | 0.03  | 2.23 | 0.27  | 7.90E-01 | 9.08E-01 | -6.66 |
| 1430417_PM_s_at | Neurl4                                                                                                                                                                                         | NEURL4   | 0.04  | 2.90 | 0.27  | 7.90E-01 | 9.08E-01 | -6.66 |
| 1444289_PM_at   | Yipf5                                                                                                                                                                                          | YIPF5    | 0.10  | 3.33 | 0.27  | 7.90E-01 | 9.08E-01 | -6.66 |
| 1440899_PM_at   | Fmo5                                                                                                                                                                                           | FMO5     | 0.03  | 2.47 | 0.27  | 7.90E-01 | 9.08E-01 | -6.66 |
| 1446892_PM_at   | ---                                                                                                                                                                                            | NA       | 0.02  | 2.24 | 0.27  | 7.90E-01 | 9.08E-01 | -6.66 |
| 1427475_PM_a_at | Pdlim5                                                                                                                                                                                         | PDLIM5   | -0.06 | 2.83 | -0.27 | 7.90E-01 | 9.08E-01 | -6.66 |
| 1419602_PM_at   | Hoxa2                                                                                                                                                                                          | HOXA2    | -0.03 | 2.10 | -0.27 | 7.90E-01 | 9.08E-01 | -6.66 |
| 1445190_PM_at   | ---                                                                                                                                                                                            | NA       | 0.04  | 2.17 | 0.27  | 7.90E-01 | 9.08E-01 | -6.66 |
| 1455460_PM_at   | 2610100L16Rik                                                                                                                                                                                  | NA       | 0.09  | 3.77 | 0.27  | 7.90E-01 | 9.08E-01 | -6.66 |
| 1427199_PM_at   | Fryl                                                                                                                                                                                           | FRYL     | 0.10  | 5.61 | 0.27  | 7.90E-01 | 9.08E-01 | -6.66 |
| 1455582_PM_at   | C1qtnf1                                                                                                                                                                                        | NA       | 0.05  | 2.63 | 0.27  | 7.90E-01 | 9.08E-01 | -6.66 |
| 1439482_PM_at   | Uhrf1bp1                                                                                                                                                                                       | UHRF1BP1 | -0.06 | 3.23 | -0.27 | 7.90E-01 | 9.08E-01 | -6.66 |
| 1458701_PM_at   | ---                                                                                                                                                                                            | NA       | 0.04  | 2.26 | 0.27  | 7.90E-01 | 9.08E-01 | -6.66 |
| 1458386_PM_at   | ---                                                                                                                                                                                            | NA       | 0.04  | 4.28 | 0.27  | 7.90E-01 | 9.08E-01 | -6.66 |
| 1458808_PM_at   | ---                                                                                                                                                                                            | NA       | 0.05  | 2.41 | 0.27  | 7.90E-01 | 9.08E-01 | -6.66 |
| 1450972_PM_at   | 3110040N11Rik                                                                                                                                                                                  | C15orf40 | 0.06  | 2.37 | 0.27  | 7.90E-01 | 9.08E-01 | -6.66 |
| 1454757_PM_s_at | Ifi27                                                                                                                                                                                          | IFI27    | -0.05 | 3.55 | -0.27 | 7.90E-01 | 9.08E-01 | -6.66 |
| 1460043_PM_at   | ---                                                                                                                                                                                            | NA       | -0.05 | 2.41 | -0.27 | 7.90E-01 | 9.08E-01 | -6.66 |
| 1439862_PM_at   | Rorb                                                                                                                                                                                           | RORB     | 0.03  | 2.44 | 0.27  | 7.91E-01 | 9.08E-01 | -6.66 |
| 1418432_PM_at   | Cab39                                                                                                                                                                                          | CAB39    | 0.06  | 2.87 | 0.27  | 7.90E-01 | 9.08E-01 | -6.66 |
| 1434609_PM_at   | Vprbp                                                                                                                                                                                          | DCAF1    | -0.05 | 2.94 | -0.27 | 7.91E-01 | 9.08E-01 | -6.66 |
| 1440050_PM_at   | Hbs1l                                                                                                                                                                                          | HBS1L    | -0.02 | 2.07 | -0.27 | 7.91E-01 | 9.08E-01 | -6.66 |
| 1425392_PM_a_at | Nr1b3                                                                                                                                                                                          | NR1B3    | 0.03  | 2.03 | 0.27  | 7.91E-01 | 9.08E-01 | -6.66 |
| 1426955_PM_at   | Col18a1                                                                                                                                                                                        | COL18A1  | 0.04  | 2.96 | 0.27  | 7.91E-01 | 9.08E-01 | -6.66 |
| 1436476_PM_at   | Dand5                                                                                                                                                                                          | DAND5    | 0.10  | 3.33 | 0.27  | 7.91E-01 | 9.08E-01 | -6.66 |
| 1444394_PM_at   | ---                                                                                                                                                                                            | NA       | -0.08 | 2.80 | -0.27 | 7.91E-01 | 9.08E-01 | -6.66 |
| 1416598_PM_at   | Glis2                                                                                                                                                                                          | GLIS2    | -0.08 | 2.81 | -0.27 | 7.91E-01 | 9.08E-01 | -6.66 |
| 1440969_PM_at   | ---                                                                                                                                                                                            | NA       | -0.04 | 2.84 | -0.27 | 7.91E-01 | 9.08E-01 | -6.66 |
| 1437848_PM_x_at | Adpgk                                                                                                                                                                                          | ADPGK    | -0.11 | 3.60 | -0.27 | 7.91E-01 | 9.08E-01 | -6.66 |

|                 |                                   |          |       |      |       |          |          |       |
|-----------------|-----------------------------------|----------|-------|------|-------|----------|----------|-------|
| 1460742_PM_at   | Alg3                              | ALG3     | -0.06 | 2.96 | -0.27 | 7.91E-01 | 9.09E-01 | -6.66 |
| 1439286_PM_at   | ---                               | NA       | -0.03 | 2.21 | -0.27 | 7.91E-01 | 9.09E-01 | -6.66 |
| 1434324_PM_x_at | Eif3h                             | EIF3H    | 0.03  | 2.31 | 0.27  | 7.91E-01 | 9.09E-01 | -6.66 |
| 1420946_PM_at   | Atrx                              | ATRX     | -0.13 | 6.67 | -0.27 | 7.91E-01 | 9.09E-01 | -6.66 |
| 1437674_PM_at   | Rac1                              | RAC1     | 0.03  | 2.16 | 0.27  | 7.91E-01 | 9.09E-01 | -6.66 |
| 1418232_PM_s_at | Lims1                             | LIMS1    | -0.04 | 2.53 | -0.27 | 7.91E-01 | 9.09E-01 | -6.66 |
| 1429658_PM_a_at | Smc2                              | SMC2     | -0.04 | 2.65 | -0.27 | 7.91E-01 | 9.09E-01 | -6.66 |
| 1450947_PM_at   | 261052811Rik                      | C1orf210 | 0.02  | 2.11 | 0.27  | 7.91E-01 | 9.09E-01 | -6.66 |
| 1451542_PM_at   | Ssbp2                             | SSBP2    | 0.04  | 2.57 | 0.27  | 7.91E-01 | 9.09E-01 | -6.66 |
| 1430756_PM_at   | ---                               | NA       | 0.04  | 2.27 | 0.27  | 7.91E-01 | 9.09E-01 | -6.66 |
| 1455606_PM_at   | N4bp1                             | N4BP1    | 0.04  | 2.42 | 0.27  | 7.91E-01 | 9.09E-01 | -6.66 |
| 1431204_PM_at   | Ccdc173                           | CCDC173  | 0.06  | 2.62 | 0.27  | 7.91E-01 | 9.09E-01 | -6.66 |
| 1443739_PM_at   | ---                               | NA       | 0.09  | 2.92 | 0.27  | 7.91E-01 | 9.09E-01 | -6.66 |
| 1428672_PM_at   | Snrpf                             | SNRPF    | 0.04  | 3.31 | 0.27  | 7.91E-01 | 9.09E-01 | -6.66 |
| 1426079_PM_at   | Cd247                             | CD247    | -0.07 | 3.86 | -0.27 | 7.91E-01 | 9.09E-01 | -6.66 |
| 1449817_PM_at   | Abcb11                            | ABCB11   | 0.03  | 2.12 | 0.27  | 7.91E-01 | 9.09E-01 | -6.66 |
| 1442770_PM_at   | Zfp652                            | ZNF652   | -0.04 | 3.02 | -0.27 | 7.92E-01 | 9.09E-01 | -6.66 |
| 1415753_PM_at   | Abhd17a                           | ABHD17A  | 0.03  | 2.53 | 0.27  | 7.92E-01 | 9.09E-01 | -6.66 |
| 1454394_PM_at   | ---                               | NA       | 0.03  | 2.01 | 0.27  | 7.92E-01 | 9.09E-01 | -6.66 |
| 1439331_PM_at   | ---                               | NA       | 0.02  | 2.17 | 0.27  | 7.92E-01 | 9.09E-01 | -6.66 |
| 1423400_PM_at   | Kl                                | KL       | 0.08  | 2.80 | 0.27  | 7.92E-01 | 9.09E-01 | -6.66 |
| 1460682_PM_s_at | Ceacam1 /// Ceacam2               | PSG7     | 0.03  | 2.49 | 0.27  | 7.92E-01 | 9.09E-01 | -6.66 |
| 1424165_PM_a_at | Sharpin                           | SHARPIN  | -0.09 | 6.89 | -0.27 | 7.92E-01 | 9.09E-01 | -6.66 |
| 1439619_PM_at   | Tcf12                             | TCF12    | -0.08 | 2.35 | -0.27 | 7.92E-01 | 9.09E-01 | -6.66 |
| 1428961_PM_a_at | Clasrp                            | CLASRP   | -0.07 | 4.09 | -0.27 | 7.92E-01 | 9.09E-01 | -6.66 |
| 1432683_PM_at   | 5530400K19Rik                     | NA       | -0.06 | 3.64 | -0.27 | 7.92E-01 | 9.09E-01 | -6.66 |
| 1435572_PM_at   | Rnf225                            | RNF225   | -0.06 | 2.84 | -0.27 | 7.92E-01 | 9.09E-01 | -6.66 |
| 1458229_PM_at   | Robo2                             | ROBO2    | -0.06 | 2.67 | -0.27 | 7.92E-01 | 9.09E-01 | -6.66 |
| 1429613_PM_at   | Dusp28                            | DUSP28   | -0.05 | 2.51 | -0.27 | 7.92E-01 | 9.09E-01 | -6.66 |
| 1437000_PM_at   | Dgkq                              | DGKQ     | -0.05 | 2.90 | -0.27 | 7.92E-01 | 9.09E-01 | -6.66 |
| 1441460_PM_at   | ---                               | NA       | -0.04 | 2.58 | -0.27 | 7.92E-01 | 9.09E-01 | -6.66 |
| 1423862_PM_at   | Plekfh2                           | PLEKHF2  | -0.03 | 2.69 | -0.27 | 7.92E-01 | 9.09E-01 | -6.66 |
| 1438891_PM_at   | ---                               | NA       | -0.03 | 2.36 | -0.27 | 7.92E-01 | 9.09E-01 | -6.66 |
| 1427655_PM_a_at | A630038E17Rik /// Tdrcl           | NA       | -0.03 | 2.24 | -0.27 | 7.92E-01 | 9.09E-01 | -6.66 |
| 1455232_PM_at   | Cml2                              | NAT8     | -0.02 | 2.57 | -0.27 | 7.92E-01 | 9.09E-01 | -6.66 |
| 1459382_PM_at   | ---                               | NA       | 0.02  | 2.08 | 0.27  | 7.92E-01 | 9.09E-01 | -6.66 |
| 1457849_PM_at   | ---                               | NA       | 0.02  | 1.89 | 0.27  | 7.92E-01 | 9.09E-01 | -6.66 |
| 1454837_PM_at   | Cln6                              | CLN6     | 0.02  | 2.39 | 0.27  | 7.92E-01 | 9.09E-01 | -6.66 |
| 1455370_PM_at   | A630023P12Rik                     | NA       | 0.03  | 2.29 | 0.27  | 7.92E-01 | 9.09E-01 | -6.66 |
| 1430701_PM_a_at | Msaantd3                          | MSANTD3  | 0.03  | 2.80 | 0.27  | 7.92E-01 | 9.09E-01 | -6.66 |
| 1430549_PM_at   | Bet1l                             | BET1L    | 0.03  | 2.49 | 0.27  | 7.92E-01 | 9.09E-01 | -6.66 |
| 1449017_PM_at   | Nutf2 /// Nutf2-ps2               | NUTF2    | 0.04  | 3.23 | 0.27  | 7.92E-01 | 9.09E-01 | -6.66 |
| 1453665_PM_at   | Cfap61                            | CFAP61   | 0.04  | 2.56 | 0.27  | 7.92E-01 | 9.09E-01 | -6.66 |
| 1457064_PM_at   | ---                               | NA       | 0.04  | 2.43 | 0.27  | 7.92E-01 | 9.09E-01 | -6.66 |
| 1428109_PM_at   | Vps11                             | VPS11    | 0.05  | 2.72 | 0.27  | 7.92E-01 | 9.09E-01 | -6.66 |
| 1415754_PM_at   | Polr2f                            | POLR2F   | 0.05  | 3.07 | 0.27  | 7.92E-01 | 9.09E-01 | -6.66 |
| 1448331_PM_at   | Ndufb7                            | NDUFB7   | 0.05  | 3.60 | 0.27  | 7.92E-01 | 9.09E-01 | -6.66 |
| 1416587_PM_a_at | Xrcc1                             | XRCC1    | 0.06  | 3.08 | 0.27  | 7.92E-01 | 9.09E-01 | -6.66 |
| 1426702_PM_at   | Fam160a2                          | FAM160A2 | 0.06  | 4.23 | 0.27  | 7.92E-01 | 9.09E-01 | -6.66 |
| 1440780_PM_x_at | 1500015O10Rik                     | C2orf40  | 0.10  | 2.59 | 0.27  | 7.92E-01 | 9.09E-01 | -6.66 |
| 1455558_PM_at   | Kiz                               | KIZ      | 0.10  | 3.39 | 0.27  | 7.92E-01 | 9.09E-01 | -6.66 |
| 1452144_PM_a_at | Mrp44                             | MRPL44   | 0.11  | 8.07 | 0.27  | 7.92E-01 | 9.09E-01 | -6.66 |
| 1436380_PM_at   | Cdc42bpa                          | CDC42BPA | 0.13  | 4.16 | 0.27  | 7.92E-01 | 9.09E-01 | -6.66 |
| 1458034_PM_at   | ---                               | NA       | -0.04 | 2.98 | -0.27 | 7.92E-01 | 9.09E-01 | -6.66 |
| 1454343_PM_at   | ---                               | NA       | -0.03 | 2.44 | -0.27 | 7.92E-01 | 9.09E-01 | -6.66 |
| 1429114_PM_at   | Sestd1                            | SESTD1   | 0.08  | 2.98 | 0.27  | 7.92E-01 | 9.09E-01 | -6.66 |
| 1441469_PM_at   | ---                               | NA       | -0.09 | 2.82 | -0.27 | 7.93E-01 | 9.09E-01 | -6.66 |
| 1434424_PM_at   | Mfsd7b                            | FLVCR1   | -0.07 | 3.37 | -0.27 | 7.93E-01 | 9.09E-01 | -6.66 |
| 1440071_PM_at   | Magi1                             | MAG1     | 0.05  | 2.63 | 0.27  | 7.93E-01 | 9.09E-01 | -6.66 |
| 1423550_PM_at   | Slc1a4                            | SLC1A4   | -0.07 | 4.06 | -0.27 | 7.93E-01 | 9.09E-01 | -6.66 |
| 1457634_PM_at   | Tmsb15b1 /// Tmsb15b2 /// Tmsb15l | TMSB15B  | -0.02 | 1.85 | -0.27 | 7.93E-01 | 9.09E-01 | -6.66 |
| 1428559_PM_at   | Kdsr                              | KDSR     | 0.08  | 4.83 | 0.27  | 7.93E-01 | 9.09E-01 | -6.66 |
| 1450471_PM_at   | Smad3                             | SMAD3    | 0.04  | 2.37 | 0.27  | 7.93E-01 | 9.09E-01 | -6.66 |
| 1431293_PM_a_at | Cldnd1                            | CLDND1   | -0.12 | 2.90 | -0.27 | 7.93E-01 | 9.09E-01 | -6.66 |
| 1429768_PM_at   | Dtna                              | DTNA     | -0.08 | 6.14 | -0.27 | 7.93E-01 | 9.09E-01 | -6.66 |
| 1420736_PM_at   | Sim1                              | SIM1     | -0.03 | 2.29 | -0.27 | 7.93E-01 | 9.09E-01 | -6.66 |
| 1444148_PM_at   | ---                               | NA       | 0.03  | 2.31 | 0.27  | 7.93E-01 | 9.09E-01 | -6.66 |
| 1421244_PM_at   | Esr1                              | ESR1     | 0.02  | 2.04 | 0.27  | 7.93E-01 | 9.09E-01 | -6.66 |
| 1437790_PM_at   | Eml5                              | EML5     | -0.07 | 4.77 | -0.27 | 7.93E-01 | 9.09E-01 | -6.66 |
| 1426153_PM_a_at | Dsg2                              | DSG2     | 0.03  | 2.12 | 0.27  | 7.93E-01 | 9.09E-01 | -6.66 |
| 1434716_PM_at   | Havcr1                            | HAVCR1   | 0.04  | 2.45 | 0.27  | 7.93E-01 | 9.09E-01 | -6.66 |
| 1460157_PM_at   | ---                               | NA       | 0.04  | 2.20 | 0.27  | 7.93E-01 | 9.09E-01 | -6.66 |
| 1421916_PM_at   | Pdgfra                            | PDGFRA   | 0.03  | 2.37 | 0.27  | 7.93E-01 | 9.09E-01 | -6.66 |
| 1423075_PM_at   | Lman2                             | LMAN2    | -0.04 | 2.86 | -0.27 | 7.93E-01 | 9.09E-01 | -6.66 |

|                 |                        |          |       |       |       |          |          |       |
|-----------------|------------------------|----------|-------|-------|-------|----------|----------|-------|
| 1430926_PM_at   | Cfap70                 | CFAP70   | 0.03  | 2.35  | 0.27  | 7.93E-01 | 9.10E-01 | -6.66 |
| 1433570_PM_s_at | Naa35                  | NAA35    | -0.03 | 2.18  | -0.27 | 7.93E-01 | 9.10E-01 | -6.66 |
| 1420185_PM_at   | Ssx2ip                 | SSX2IP   | -0.03 | 1.87  | -0.27 | 7.93E-01 | 9.10E-01 | -6.66 |
| 1451985_PM_at   | Lrrk1                  | LRRK1    | 0.03  | 2.28  | 0.27  | 7.93E-01 | 9.10E-01 | -6.66 |
| 1454065_PM_at   | ---                    | NA       | 0.03  | 2.24  | 0.27  | 7.93E-01 | 9.10E-01 | -6.66 |
| 1421256_PM_at   | Gzmc                   | GZMB     | 0.04  | 2.35  | 0.27  | 7.93E-01 | 9.10E-01 | -6.66 |
| 1442393_PM_at   | ---                    | NA       | 0.09  | 3.31  | 0.27  | 7.93E-01 | 9.10E-01 | -6.66 |
| 1443685_PM_at   | Zfp865                 | NA       | 0.03  | 2.31  | 0.27  | 7.94E-01 | 9.10E-01 | -6.66 |
| 1459286_PM_at   | Gm6150                 | NA       | -0.02 | 2.01  | -0.27 | 7.94E-01 | 9.10E-01 | -6.66 |
| 1458083_PM_at   | ---                    | NA       | -0.02 | 2.08  | -0.27 | 7.94E-01 | 9.10E-01 | -6.66 |
| 1436981_PM_a_at | ---                    | NA       | -0.05 | 10.79 | -0.27 | 7.94E-01 | 9.10E-01 | -6.66 |
| 1423459_PM_at   | Cops2                  | COPS2    | -0.11 | 4.57  | -0.27 | 7.94E-01 | 9.10E-01 | -6.66 |
| 1422192_PM_at   | Gja5                   | GJA5     | -0.03 | 2.54  | -0.27 | 7.94E-01 | 9.10E-01 | -6.66 |
| 1417112_PM_at   | Arl2bp                 | ARL2BP   | -0.08 | 5.87  | -0.27 | 7.94E-01 | 9.10E-01 | -6.66 |
| 1415902_PM_at   | Aldh7a1                | ALDH7A1  | 0.03  | 2.39  | 0.27  | 7.94E-01 | 9.10E-01 | -6.66 |
| 1454467_PM_at   | Gm14025                | NA       | 0.04  | 2.91  | 0.27  | 7.94E-01 | 9.10E-01 | -6.66 |
| 1456819_PM_at   | Nrn1l                  | NRN1L    | -0.03 | 2.61  | -0.27 | 7.94E-01 | 9.10E-01 | -6.66 |
| 1449483_PM_at   | Polk                   | POLK     | 0.04  | 2.62  | 0.27  | 7.94E-01 | 9.10E-01 | -6.66 |
| 1454810_PM_s_at | Vps8                   | VPS8     | -0.03 | 3.35  | -0.27 | 7.94E-01 | 9.10E-01 | -6.66 |
| 1441583_PM_at   | ---                    | NA       | 0.03  | 2.55  | 0.27  | 7.94E-01 | 9.10E-01 | -6.66 |
| 1454821_PM_at   | B3gat1                 | B3GAT1   | -0.09 | 4.09  | -0.27 | 7.94E-01 | 9.10E-01 | -6.66 |
| 1417103_PM_at   | Ddt                    | DDT      | -0.04 | 2.66  | -0.27 | 7.94E-01 | 9.10E-01 | -6.66 |
| 1454827_PM_at   | Pogz                   | POGZ     | 0.05  | 3.01  | 0.27  | 7.94E-01 | 9.10E-01 | -6.66 |
| 1438440_PM_at   | Drosha                 | DROSHA   | 0.07  | 2.83  | 0.27  | 7.94E-01 | 9.10E-01 | -6.66 |
| 1429439_PM_at   | Erc8                   | ERCC8    | 0.13  | 2.71  | 0.27  | 7.94E-01 | 9.10E-01 | -6.66 |
| 1442156_PM_at   | E030030106Rik          | NA       | 0.02  | 2.15  | 0.27  | 7.94E-01 | 9.10E-01 | -6.66 |
| 1439534_PM_at   | Zfp248                 | ZNF248   | 0.03  | 2.20  | 0.27  | 7.94E-01 | 9.10E-01 | -6.66 |
| 1440936_PM_at   | Serac1                 | NA       | 0.07  | 3.25  | 0.27  | 7.94E-01 | 9.10E-01 | -6.66 |
| 1454663_PM_at   | Eif5 /// LOC102641436  | EIF5     | -0.10 | 5.69  | -0.27 | 7.95E-01 | 9.10E-01 | -6.66 |
| 1429875_PM_at   | 1700034J05Rik          | C12orf71 | 0.02  | 2.63  | 0.27  | 7.95E-01 | 9.10E-01 | -6.66 |
| 1431098_PM_at   | Clip1                  | CLIP1    | 0.08  | 3.34  | 0.27  | 7.95E-01 | 9.10E-01 | -6.66 |
| 1425313_PM_at   | Carf                   | CARF     | 0.09  | 2.84  | 0.27  | 7.95E-01 | 9.10E-01 | -6.66 |
| 1429104_PM_at   | Limd2                  | LIMD2    | 0.03  | 2.71  | 0.27  | 7.95E-01 | 9.10E-01 | -6.66 |
| 1449093_PM_at   | Ctf1                   | CTF1     | 0.02  | 2.07  | 0.27  | 7.95E-01 | 9.10E-01 | -6.66 |
| 1454798_PM_at   | Rbm15b                 | RBM15B   | -0.09 | 4.15  | -0.27 | 7.95E-01 | 9.10E-01 | -6.66 |
| 1429947_PM_a_at | Zbp1                   | ZBP1     | 0.04  | 2.45  | 0.27  | 7.95E-01 | 9.10E-01 | -6.66 |
| 1420384_PM_at   | Col4a3bp               | COL4A3BP | -0.09 | 3.31  | -0.27 | 7.95E-01 | 9.10E-01 | -6.66 |
| 1441635_PM_at   | ---                    | NA       | -0.03 | 2.48  | -0.27 | 7.95E-01 | 9.10E-01 | -6.66 |
| 1439118_PM_at   | Slc35e4                | SLC35E4  | -0.03 | 2.07  | -0.27 | 7.95E-01 | 9.10E-01 | -6.66 |
| 1416795_PM_at   | Cryl1                  | CRYL1    | 0.04  | 2.28  | 0.27  | 7.95E-01 | 9.10E-01 | -6.66 |
| 1418648_PM_at   | Egln3                  | EGLN3    | 0.05  | 2.57  | 0.27  | 7.95E-01 | 9.11E-01 | -6.66 |
| 1450007_PM_at   | Chp1                   | CHP1     | -0.06 | 3.53  | -0.27 | 7.95E-01 | 9.11E-01 | -6.66 |
| 1428766_PM_at   | Rnmt1l                 | MRM3     | -0.04 | 3.11  | -0.27 | 7.95E-01 | 9.11E-01 | -6.66 |
| 1456115_PM_at   | Phf3                   | NA       | -0.04 | 2.50  | -0.27 | 7.95E-01 | 9.11E-01 | -6.66 |
| 1443714_PM_at   | Cpped1                 | CPPED1   | -0.03 | 2.37  | -0.27 | 7.95E-01 | 9.11E-01 | -6.66 |
| 1459156_PM_at   | ---                    | NA       | -0.02 | 2.10  | -0.27 | 7.95E-01 | 9.11E-01 | -6.66 |
| 1444765_PM_at   | ---                    | NA       | 0.02  | 2.23  | 0.27  | 7.95E-01 | 9.11E-01 | -6.66 |
| 1418313_PM_at   | Zfp276                 | ZNF276   | 0.03  | 2.54  | 0.27  | 7.95E-01 | 9.11E-01 | -6.66 |
| 1438747_PM_at   | ---                    | NA       | 0.03  | 2.07  | 0.27  | 7.95E-01 | 9.11E-01 | -6.66 |
| 1421655_PM_a_at | Ccr4                   | CCR4     | 0.03  | 2.23  | 0.27  | 7.95E-01 | 9.11E-01 | -6.66 |
| 1429562_PM_at   | LOC105243844 /// Sp110 | SP110    | -0.04 | 4.17  | -0.27 | 7.95E-01 | 9.11E-01 | -6.66 |
| 1452006_PM_x_at | Zbtb8os                | ZBTB8OS  | 0.02  | 1.86  | 0.27  | 7.95E-01 | 9.11E-01 | -6.66 |
| 1432265_PM_at   | ---                    | NA       | 0.03  | 2.21  | 0.27  | 7.95E-01 | 9.11E-01 | -6.66 |
| 1458165_PM_at   | ---                    | NA       | 0.04  | 2.53  | 0.27  | 7.95E-01 | 9.11E-01 | -6.66 |
| 1426802_PM_at   | Sept8                  | SEPT8    | 0.10  | 3.44  | 0.27  | 7.95E-01 | 9.11E-01 | -6.66 |
| 1458001_PM_at   | ---                    | NA       | -0.02 | 2.12  | -0.27 | 7.96E-01 | 9.11E-01 | -6.66 |
| 1436393_PM_a_at | Trim37                 | TRIM37   | -0.12 | 6.08  | -0.27 | 7.96E-01 | 9.11E-01 | -6.66 |
| 1457673_PM_at   | Gm29782                | NA       | -0.05 | 3.12  | -0.27 | 7.96E-01 | 9.11E-01 | -6.66 |
| 1433163_PM_at   | ---                    | NA       | 0.05  | 4.66  | 0.27  | 7.96E-01 | 9.11E-01 | -6.66 |
| 1442301_PM_at   | AW060742               | NA       | -0.10 | 3.25  | -0.27 | 7.96E-01 | 9.11E-01 | -6.66 |
| 1440161_PM_at   | Mmp16                  | MMP16    | -0.08 | 2.62  | -0.27 | 7.96E-01 | 9.11E-01 | -6.66 |
| 1424616_PM_s_at | Pgap2                  | PGAP2    | -0.05 | 2.77  | -0.27 | 7.96E-01 | 9.11E-01 | -6.66 |
| 1438924_PM_x_at | Fibp                   | NA       | -0.04 | 3.37  | -0.27 | 7.96E-01 | 9.11E-01 | -6.66 |
| 1426365_PM_at   | 2810403A07Rik          | KIAA0907 | 0.04  | 3.32  | 0.27  | 7.96E-01 | 9.11E-01 | -6.66 |
| 1454682_PM_at   | A430005L14Rik          | C1orf174 | 0.05  | 3.73  | 0.27  | 7.96E-01 | 9.11E-01 | -6.66 |
| 1437607_PM_at   | Gcnt2                  | NA       | 0.02  | 2.51  | 0.27  | 7.96E-01 | 9.11E-01 | -6.66 |
| 1425391_PM_a_at | Osbpl5                 | OSBPL5   | 0.02  | 2.57  | 0.27  | 7.96E-01 | 9.11E-01 | -6.66 |
| 1422905_PM_s_at | Fmo2                   | FMO2     | 0.04  | 2.29  | 0.27  | 7.96E-01 | 9.11E-01 | -6.66 |
| 1446260_PM_at   | 4930447C04Rik          | C14orf39 | 0.04  | 2.43  | 0.27  | 7.96E-01 | 9.11E-01 | -6.66 |
| 1439122_PM_at   | Ddx6                   | DDX6     | 0.08  | 4.77  | 0.27  | 7.96E-01 | 9.11E-01 | -6.66 |
| 1456151_PM_at   | Zfp358                 | NA       | 0.14  | 5.24  | 0.27  | 7.96E-01 | 9.11E-01 | -6.66 |
| 1418491_PM_a_at | Pus3                   | PUS3     | -0.03 | 2.41  | -0.27 | 7.96E-01 | 9.11E-01 | -6.66 |
| 1437529_PM_at   | Mrgprb1                | MRGPRX2  | -0.02 | 2.07  | -0.27 | 7.96E-01 | 9.11E-01 | -6.66 |
| 1443052_PM_at   | Gm2381                 | NA       | -0.02 | 2.24  | -0.27 | 7.96E-01 | 9.11E-01 | -6.66 |
| 1421699_PM_at   | Enam                   | ENAM     | -0.02 | 2.09  | -0.27 | 7.96E-01 | 9.11E-01 | -6.66 |

|                 |               |          |       |      |       |          |          |       |
|-----------------|---------------|----------|-------|------|-------|----------|----------|-------|
| 1439628_PM_x_at | Rab38         | RAB38    | 0.03  | 2.36 | 0.27  | 7.96E-01 | 9.11E-01 | -6.66 |
| 1453988_PM_a_at | Ide           | IDE      | 0.06  | 2.59 | 0.27  | 7.96E-01 | 9.11E-01 | -6.66 |
| 1447704_PM_s_at | Utp23         | UTP23    | 0.12  | 2.75 | 0.27  | 7.96E-01 | 9.11E-01 | -6.66 |
| 1455551_PM_at   | Uevld         | UEVLD    | -0.04 | 2.74 | -0.26 | 7.96E-01 | 9.11E-01 | -6.66 |
| 1451553_PM_at   | Art5          | ART5     | 0.03  | 2.86 | 0.26  | 7.96E-01 | 9.11E-01 | -6.66 |
| 1439035_PM_at   | Zfp322a       | ZNF322   | -0.07 | 2.61 | -0.26 | 7.96E-01 | 9.11E-01 | -6.66 |
| 1426065_PM_a_at | Trib3         | TRIB3    | -0.03 | 2.28 | -0.26 | 7.96E-01 | 9.11E-01 | -6.66 |
| 1420246_PM_at   | Ankzf1        | ANKZF1   | 0.02  | 1.93 | 0.26  | 7.96E-01 | 9.11E-01 | -6.66 |
| 1449572_PM_at   | Trhr          | TRHR     | -0.03 | 2.89 | -0.26 | 7.97E-01 | 9.11E-01 | -6.66 |
| 1439816_PM_at   | Tcf24         | TCF24    | -0.03 | 2.08 | -0.26 | 7.96E-01 | 9.11E-01 | -6.66 |
| 1446587_PM_at   | ---           | NA       | -0.05 | 2.63 | -0.26 | 7.97E-01 | 9.11E-01 | -6.66 |
| 1451347_PM_at   | Ino80e        | INO80E   | -0.04 | 2.54 | -0.26 | 7.97E-01 | 9.11E-01 | -6.66 |
| 1449797_PM_x_at | Prph          | NA       | -0.03 | 2.36 | -0.26 | 7.97E-01 | 9.11E-01 | -6.66 |
| 1449195_PM_s_at | Cxcl16        | CXCL16   | 0.03  | 2.44 | 0.26  | 7.97E-01 | 9.11E-01 | -6.66 |
| 1445382_PM_at   | ---           | NA       | 0.03  | 2.19 | 0.26  | 7.97E-01 | 9.11E-01 | -6.66 |
| 1428085_PM_at   | Ldah          | LDAH     | 0.04  | 2.46 | 0.26  | 7.97E-01 | 9.11E-01 | -6.66 |
| 1433115_PM_at   | 5730552O08Rik | NA       | 0.05  | 2.42 | 0.26  | 7.97E-01 | 9.11E-01 | -6.66 |
| 1434782_PM_at   | Usp42         | USP42    | 0.07  | 4.13 | 0.26  | 7.97E-01 | 9.11E-01 | -6.66 |
| 1429812_PM_at   | Aunip         | AUNIP    | -0.03 | 2.65 | -0.26 | 7.97E-01 | 9.11E-01 | -6.66 |
| 1419666_PM_x_at | Nupr1         | NUPR1    | -0.08 | 3.00 | -0.26 | 7.97E-01 | 9.11E-01 | -6.66 |
| 1417921_PM_at   | Pbdc1         | PBDC1    | 0.06  | 3.59 | 0.26  | 7.97E-01 | 9.11E-01 | -6.66 |
| 1428819_PM_at   | Mapre1        | MAPRE1   | 0.04  | 2.73 | 0.26  | 7.97E-01 | 9.11E-01 | -6.66 |
| 1434769_PM_at   | Btbd9         | BTBD9    | -0.04 | 3.47 | -0.26 | 7.97E-01 | 9.11E-01 | -6.66 |
| 1436921_PM_at   | Atp7a         | NA       | -0.04 | 2.49 | -0.26 | 7.97E-01 | 9.11E-01 | -6.66 |
| 1433105_PM_at   | 5830438M01Rik | NA       | 0.03  | 2.11 | 0.26  | 7.97E-01 | 9.11E-01 | -6.66 |
| 1439693_PM_a_at | Fbxw16        | FBXW12   | 0.03  | 2.11 | 0.26  | 7.97E-01 | 9.11E-01 | -6.66 |
| 1438042_PM_at   | Shox2         | SHOX2    | 0.04  | 2.10 | 0.26  | 7.97E-01 | 9.11E-01 | -6.66 |
| 1432037_PM_at   | Ppp1r9a       | NA       | -0.05 | 2.65 | -0.26 | 7.97E-01 | 9.11E-01 | -6.66 |
| 1428598_PM_at   | Tbc1d7        | TBC1D7   | 0.04  | 2.42 | 0.26  | 7.97E-01 | 9.11E-01 | -6.66 |
| 1431379_PM_a_at | Slc13a1       | SLC13A1  | -0.02 | 2.41 | -0.26 | 7.97E-01 | 9.12E-01 | -6.66 |
| 1433820_PM_a_at | Tmem198b      | NA       | -0.08 | 2.89 | -0.26 | 7.97E-01 | 9.12E-01 | -6.66 |
| 1444264_PM_at   | Psmg2         | NA       | -0.06 | 3.24 | -0.26 | 7.97E-01 | 9.12E-01 | -6.66 |
| 1435552_PM_at   | Otud7b        | OTUD7B   | -0.08 | 4.36 | -0.26 | 7.97E-01 | 9.12E-01 | -6.66 |
| 1452617_PM_at   | Ssbp1         | SSBP1    | 0.03  | 2.16 | 0.26  | 7.97E-01 | 9.12E-01 | -6.66 |
| 1455892_PM_x_at | ---           | NA       | -0.09 | 9.27 | -0.26 | 7.97E-01 | 9.12E-01 | -6.66 |
| 1436059_PM_at   | Rfx1          | RFX1     | -0.06 | 5.51 | -0.26 | 7.97E-01 | 9.12E-01 | -6.66 |
| 1440203_PM_at   | Pcgf3         | PCGF3    | -0.05 | 2.75 | -0.26 | 7.97E-01 | 9.12E-01 | -6.66 |
| 1455231_PM_s_at | Apc2          | APC2     | -0.05 | 2.45 | -0.26 | 7.98E-01 | 9.12E-01 | -6.66 |
| 1416373_PM_at   | Nfs1          | NFS1     | -0.05 | 2.66 | -0.26 | 7.97E-01 | 9.12E-01 | -6.66 |
| 1449719_PM_at   | 4930453N24Rik | NA       | -0.04 | 2.36 | -0.26 | 7.98E-01 | 9.12E-01 | -6.66 |
| 1418121_PM_at   | Vrk3          | VRK3     | -0.03 | 2.79 | -0.26 | 7.97E-01 | 9.12E-01 | -6.66 |
| 1428915_PM_at   | Sirt5         | SIRT5    | -0.03 | 2.14 | -0.26 | 7.97E-01 | 9.12E-01 | -6.66 |
| 1431417_PM_at   | Jam2          | JAM2     | 0.03  | 1.94 | 0.26  | 7.97E-01 | 9.12E-01 | -6.66 |
| 1447688_PM_at   | Tbc1d20       | TBC1D20  | 0.03  | 2.55 | 0.26  | 7.98E-01 | 9.12E-01 | -6.66 |
| 1433923_PM_at   | Krt77         | KRT77    | 0.04  | 2.80 | 0.26  | 7.98E-01 | 9.12E-01 | -6.66 |
| 1451045_PM_at   | Syt13         | SYT13    | 0.04  | 3.14 | 0.26  | 7.98E-01 | 9.12E-01 | -6.66 |
| 1447345_PM_at   | ---           | NA       | -0.05 | 2.10 | -0.26 | 7.98E-01 | 9.12E-01 | -6.66 |
| 1431980_PM_a_at | As3mt         | AS3MT    | -0.04 | 2.42 | -0.26 | 7.98E-01 | 9.12E-01 | -6.66 |
| 1450492_PM_at   | Cngb3         | NA       | 0.03  | 2.17 | 0.26  | 7.98E-01 | 9.12E-01 | -6.66 |
| 1428667_PM_at   | Maoa          | MAOA     | 0.05  | 3.33 | 0.26  | 7.98E-01 | 9.12E-01 | -6.66 |
| 1444615_PM_x_at | Runx1t1       | RUNX1T1  | 0.07  | 3.87 | 0.26  | 7.98E-01 | 9.12E-01 | -6.66 |
| 1432848_PM_a_at | Frm8          | FRMD8    | -0.05 | 2.60 | -0.26 | 7.98E-01 | 9.12E-01 | -6.66 |
| 1416316_PM_at   | Slc27a2       | SLC27A2  | 0.07  | 3.74 | 0.26  | 7.98E-01 | 9.12E-01 | -6.66 |
| 1446226_PM_at   | Fancb         | NA       | -0.04 | 2.70 | -0.26 | 7.98E-01 | 9.12E-01 | -6.66 |
| 1441108_PM_at   | ---           | NA       | 0.04  | 2.66 | 0.26  | 7.98E-01 | 9.12E-01 | -6.66 |
| 1420989_PM_at   | Cfap97        | CFAP97   | 0.05  | 2.68 | 0.26  | 7.98E-01 | 9.12E-01 | -6.66 |
| 1460229_PM_at   | Stag3         | STAG3    | 0.02  | 2.05 | 0.26  | 7.98E-01 | 9.12E-01 | -6.66 |
| 1425138_PM_at   | Guca1b        | NA       | -0.04 | 2.75 | -0.26 | 7.98E-01 | 9.12E-01 | -6.66 |
| 1459523_PM_at   | C85403        | NA       | 0.03  | 2.49 | 0.26  | 7.98E-01 | 9.12E-01 | -6.66 |
| 1438885_PM_at   | Nmbr          | NA       | 0.02  | 1.96 | 0.26  | 7.98E-01 | 9.12E-01 | -6.66 |
| 1459582_PM_at   | ---           | NA       | 0.02  | 2.12 | 0.26  | 7.98E-01 | 9.12E-01 | -6.66 |
| 1425877_PM_at   | Hyal3         | HYAL3    | 0.04  | 2.60 | 0.26  | 7.98E-01 | 9.12E-01 | -6.66 |
| 1440949_PM_at   | Gm15471       | NA       | -0.02 | 2.05 | -0.26 | 7.98E-01 | 9.12E-01 | -6.66 |
| 1443541_PM_at   | Gm5148        | NA       | 0.03  | 2.06 | 0.26  | 7.98E-01 | 9.12E-01 | -6.66 |
| 1421332_PM_at   | H3st3b1       | H3ST3B1  | -0.03 | 2.54 | -0.26 | 7.98E-01 | 9.12E-01 | -6.66 |
| 1420292_PM_x_at | ---           | NA       | 0.02  | 2.29 | 0.26  | 7.98E-01 | 9.12E-01 | -6.66 |
| 1416487_PM_a_at | Yap1          | YAP1     | 0.03  | 2.51 | 0.26  | 7.98E-01 | 9.12E-01 | -6.66 |
| 1427362_PM_x_at | Hoxc6         | HOXC6    | 0.03  | 2.30 | 0.26  | 7.98E-01 | 9.12E-01 | -6.66 |
| 1459800_PM_s_at | Map3k4        | MAP3K4   | 0.12  | 3.85 | 0.26  | 7.98E-01 | 9.12E-01 | -6.66 |
| 1440167_PM_s_at | Lpp           | LPP      | 0.18  | 5.79 | 0.26  | 7.98E-01 | 9.12E-01 | -6.66 |
| 1420491_PM_at   | Eif2s1        | EIF2S1   | 0.06  | 2.66 | 0.26  | 7.98E-01 | 9.12E-01 | -6.66 |
| 1458292_PM_at   | Psm1          | NA       | 0.03  | 3.09 | 0.26  | 7.98E-01 | 9.12E-01 | -6.66 |
| 1445316_PM_at   | ---           | NA       | -0.04 | 2.49 | -0.26 | 7.99E-01 | 9.12E-01 | -6.66 |
| 1452815_PM_at   | P2ry10        | P2RY10   | 0.02  | 2.17 | 0.26  | 7.99E-01 | 9.12E-01 | -6.66 |
| 1428964_PM_at   | Slc25a18      | SLC25A18 | 0.06  | 2.78 | 0.26  | 7.99E-01 | 9.12E-01 | -6.66 |

|                 |                  |            |       |      |       |          |          |       |
|-----------------|------------------|------------|-------|------|-------|----------|----------|-------|
| 1452955_PM_at   | Gtf2h5           | GTF2H5     | -0.07 | 3.59 | -0.26 | 7.99E-01 | 9.12E-01 | -6.66 |
| 1449047_PM_at   | Hacl1            | HACL1      | -0.04 | 3.22 | -0.26 | 7.99E-01 | 9.12E-01 | -6.66 |
| 1423755_PM_at   | Zcchc8           | ZCCHC8     | 0.05  | 4.36 | 0.26  | 7.99E-01 | 9.12E-01 | -6.66 |
| 1440543_PM_at   | Heatr5a          | HEATR5A    | -0.04 | 2.70 | -0.26 | 7.99E-01 | 9.13E-01 | -6.66 |
| 1442267_PM_at   | Stxbp4           | STXBP4     | -0.03 | 2.65 | -0.26 | 7.99E-01 | 9.13E-01 | -6.66 |
| 1454891_PM_at   | Cds2             | CDS2       | -0.05 | 2.28 | -0.26 | 7.99E-01 | 9.13E-01 | -6.66 |
| 1439359_PM_x_at | Nrxn1            | NRXN1      | 0.02  | 2.04 | 0.26  | 7.99E-01 | 9.13E-01 | -6.66 |
| 1456466_PM_x_at | Atxn10           | ATXN10     | 0.08  | 8.04 | 0.26  | 7.99E-01 | 9.13E-01 | -6.67 |
| 1424580_PM_at   | Slc35a3          | SLC35A3    | -0.05 | 2.30 | -0.26 | 7.99E-01 | 9.13E-01 | -6.67 |
| 1424581_PM_at   | Stac2            | STAC2      | -0.07 | 3.39 | -0.26 | 7.99E-01 | 9.13E-01 | -6.67 |
| 1448747_PM_at   | Fbxo32           | FBXO32     | -0.06 | 2.46 | -0.26 | 8.00E-01 | 9.13E-01 | -6.67 |
| 1424511_PM_at   | Aurka            | AURKA      | 0.02  | 2.19 | 0.26  | 7.99E-01 | 9.13E-01 | -6.67 |
| 1445930_PM_at   | Fndc7            | FND7       | 0.03  | 2.57 | 0.26  | 8.00E-01 | 9.13E-01 | -6.67 |
| 1439042_PM_at   | Adcyap1r1        | ADCYAP1R1  | 0.03  | 2.52 | 0.26  | 8.00E-01 | 9.13E-01 | -6.67 |
| 1460563_PM_at   | Nus1             | NUS1       | 0.06  | 5.67 | 0.26  | 8.00E-01 | 9.13E-01 | -6.67 |
| 1440769_PM_at   | Coa7             | COA7       | 0.08  | 2.81 | 0.26  | 8.00E-01 | 9.13E-01 | -6.67 |
| 1441689_PM_at   | Nup153           | NUP153     | 0.02  | 2.65 | 0.26  | 8.00E-01 | 9.13E-01 | -6.67 |
| 1436559_PM_a_at | Psm10            | PSMD10     | -0.07 | 2.84 | -0.26 | 8.00E-01 | 9.13E-01 | -6.67 |
| 1455863_PM_at   | Spata51          | NA         | -0.10 | 2.89 | -0.26 | 8.00E-01 | 9.13E-01 | -6.67 |
| 1452085_PM_at   | Gatad1           | GATAD1     | 0.07  | 3.58 | 0.26  | 8.00E-01 | 9.13E-01 | -6.67 |
| 1446375_PM_at   | ---              | NA         | 0.04  | 2.78 | 0.26  | 8.00E-01 | 9.13E-01 | -6.67 |
| 1441874_PM_x_at | Pri7a1           | NA         | -0.04 | 2.13 | -0.26 | 8.00E-01 | 9.13E-01 | -6.67 |
| 1419794_PM_at   | Gm31133          | NA         | 0.02  | 2.75 | 0.26  | 8.00E-01 | 9.13E-01 | -6.67 |
| 1445145_PM_at   | ---              | NA         | 0.04  | 2.19 | 0.26  | 8.00E-01 | 9.13E-01 | -6.67 |
| 1442384_PM_at   | ---              | NA         | -0.08 | 2.37 | -0.26 | 8.00E-01 | 9.13E-01 | -6.67 |
| 1421671_PM_at   | Hsd17b3          | HSD17B3    | 0.04  | 2.56 | 0.26  | 8.00E-01 | 9.13E-01 | -6.67 |
| 1427410_PM_at   | Dleu2            | NA         | 0.06  | 2.55 | 0.26  | 8.00E-01 | 9.13E-01 | -6.67 |
| 1456084_PM_x_at | Fmod             | FMOD       | 0.24  | 5.42 | 0.26  | 8.00E-01 | 9.13E-01 | -6.67 |
| 1440900_PM_at   | Gpr174           | GPR174     | -0.04 | 2.40 | -0.26 | 8.00E-01 | 9.13E-01 | -6.67 |
| 1415810_PM_at   | Uhrf1            | UHRF1      | 0.04  | 2.78 | 0.26  | 8.00E-01 | 9.13E-01 | -6.67 |
| 1431048_PM_at   | Gm41143          | NA         | 0.03  | 2.40 | 0.26  | 8.00E-01 | 9.14E-01 | -6.67 |
| 1430757_PM_at   | Prune2           | PRUNE2     | 0.03  | 2.71 | 0.26  | 8.00E-01 | 9.14E-01 | -6.67 |
| 1434425_PM_at   | Tchh             | TCHH       | -0.07 | 2.08 | -0.26 | 8.01E-01 | 9.14E-01 | -6.67 |
| 1429897_PM_a_at | D16Ert472e       | C21orf91   | -0.06 | 2.55 | -0.26 | 8.01E-01 | 9.14E-01 | -6.67 |
| 1418839_PM_at   | Glmn             | GLMN       | -0.05 | 3.71 | -0.26 | 8.01E-01 | 9.14E-01 | -6.67 |
| 1450254_PM_at   | Tert             | TERT       | -0.03 | 2.24 | -0.26 | 8.01E-01 | 9.14E-01 | -6.67 |
| 1437070_PM_at   | Cdc14b           | CDC14B     | 0.03  | 2.36 | 0.26  | 8.01E-01 | 9.14E-01 | -6.67 |
| 1421363_PM_at   | Cyp2c39          | NA         | 0.05  | 2.21 | 0.26  | 8.01E-01 | 9.14E-01 | -6.67 |
| 1440846_PM_at   | Scal             | SCAI       | -0.05 | 3.90 | -0.26 | 8.01E-01 | 9.14E-01 | -6.67 |
| 1459184_PM_at   | ---              | NA         | -0.02 | 2.05 | -0.26 | 8.01E-01 | 9.14E-01 | -6.67 |
| 1445123_PM_at   | ---              | NA         | -0.03 | 2.45 | -0.26 | 8.01E-01 | 9.14E-01 | -6.67 |
| 1418694_PM_at   | Kcmf1            | KCMF1      | 0.03  | 2.84 | 0.26  | 8.01E-01 | 9.14E-01 | -6.67 |
| 1430075_PM_at   | Sf3b3            | NA         | 0.03  | 2.56 | 0.26  | 8.01E-01 | 9.14E-01 | -6.67 |
| 1424955_PM_at   | Haus1            | HAUS1      | -0.04 | 2.75 | -0.26 | 8.01E-01 | 9.14E-01 | -6.67 |
| 1420972_PM_at   | Arid5b           | ARID5B     | 0.04  | 2.46 | 0.26  | 8.01E-01 | 9.14E-01 | -6.67 |
| 1455591_PM_at   | Zfp618           | ZNF618     | 0.06  | 2.76 | 0.26  | 8.01E-01 | 9.14E-01 | -6.67 |
| 1416609_PM_at   | BC004004         | C6orf89    | -0.11 | 4.41 | -0.26 | 8.01E-01 | 9.14E-01 | -6.67 |
| 1447133_PM_at   | ---              | NA         | -0.02 | 2.07 | -0.26 | 8.01E-01 | 9.14E-01 | -6.67 |
| 1418216_PM_at   | Ggt5             | GGT5       | 0.03  | 2.55 | 0.26  | 8.01E-01 | 9.14E-01 | -6.67 |
| 1442462_PM_at   | Il17f            | IL17F      | 0.03  | 2.17 | 0.26  | 8.01E-01 | 9.14E-01 | -6.67 |
| 1449842_PM_at   | Taf6l///Tmem179b | TAF6L      | 0.03  | 2.55 | 0.26  | 8.01E-01 | 9.14E-01 | -6.67 |
| 1448978_PM_at   | Ngef             | NGEF       | 0.04  | 3.80 | 0.26  | 8.01E-01 | 9.14E-01 | -6.67 |
| 1417022_PM_at   | Slc7a3           | SLC7A3     | 0.05  | 2.83 | 0.26  | 8.01E-01 | 9.14E-01 | -6.67 |
| 1446210_PM_at   | ---              | NA         | 0.09  | 4.03 | 0.26  | 8.01E-01 | 9.14E-01 | -6.67 |
| 1449055_PM_x_at | Pcbp4            | PCBP4      | 0.02  | 2.45 | 0.26  | 8.01E-01 | 9.14E-01 | -6.67 |
| 1445878_PM_at   | C920006O11Rik    | NA         | 0.03  | 2.32 | 0.26  | 8.01E-01 | 9.14E-01 | -6.67 |
| 1428675_PM_at   | Pithd1           | PITHD1     | -0.06 | 3.97 | -0.26 | 8.02E-01 | 9.14E-01 | -6.67 |
| 1433988_PM_s_at | Lzts1            | LZTS1      | -0.04 | 3.08 | -0.26 | 8.02E-01 | 9.14E-01 | -6.67 |
| 1457116_PM_at   | Rexo1            | REXO1      | -0.03 | 2.15 | -0.26 | 8.02E-01 | 9.14E-01 | -6.67 |
| 1452115_PM_a_at | Plk4             | PLK4       | 0.02  | 2.48 | 0.26  | 8.02E-01 | 9.14E-01 | -6.67 |
| 1458709_PM_a_at | Atxn7l1          | ATXN7L1    | 0.03  | 2.18 | 0.26  | 8.02E-01 | 9.14E-01 | -6.67 |
| 1445154_PM_at   | ---              | NA         | 0.03  | 2.09 | 0.26  | 8.02E-01 | 9.14E-01 | -6.67 |
| 1436629_PM_at   | Tmem91           | TMEM91     | 0.03  | 2.63 | 0.26  | 8.02E-01 | 9.14E-01 | -6.67 |
| 1433153_PM_at   | 9030201C23Rik    | NA         | 0.03  | 2.49 | 0.26  | 8.02E-01 | 9.14E-01 | -6.67 |
| 1448942_PM_at   | Gng11            | GNG11      | 0.04  | 2.93 | 0.26  | 8.02E-01 | 9.14E-01 | -6.67 |
| 1452145_PM_at   | H6pd             | H6PD       | 0.05  | 2.47 | 0.26  | 8.02E-01 | 9.14E-01 | -6.67 |
| 1424831_PM_at   | Cpne2            | CPNE2      | 0.05  | 3.09 | 0.26  | 8.02E-01 | 9.14E-01 | -6.67 |
| 1442586_PM_at   | Soc2             | NA         | 0.08  | 2.93 | 0.26  | 8.02E-01 | 9.14E-01 | -6.67 |
| 1423041_PM_a_at | Bzw1             | BZW1       | 0.09  | 3.77 | 0.26  | 8.02E-01 | 9.14E-01 | -6.67 |
| 1448424_PM_at   | Frzb             | FRZB       | 0.05  | 2.52 | 0.26  | 8.02E-01 | 9.14E-01 | -6.67 |
| 1429616_PM_at   | Zfp91            | ZFP91-CNTF | -0.12 | 2.98 | -0.26 | 8.02E-01 | 9.14E-01 | -6.67 |
| 1422711_PM_a_at | Pnck             | PNCK       | 0.07  | 3.46 | 0.26  | 8.02E-01 | 9.14E-01 | -6.67 |
| 1440964_PM_s_at | Cbfa2t3          | NA         | 0.03  | 2.55 | 0.26  | 8.02E-01 | 9.14E-01 | -6.67 |
| 1421114_PM_a_at | Epyc             | EPYC       | 0.02  | 2.18 | 0.26  | 8.02E-01 | 9.14E-01 | -6.67 |
| 1442228_PM_at   | ---              | NA         | -0.03 | 2.18 | -0.26 | 8.02E-01 | 9.14E-01 | -6.67 |

|                 |                        |            |       |      |       |          |          |       |
|-----------------|------------------------|------------|-------|------|-------|----------|----------|-------|
| 1421965_PM_s_at | Notch3                 | NOTCH3     | 0.03  | 2.48 | 0.26  | 8.02E-01 | 9.14E-01 | -6.67 |
| 1437245_PM_at   | Tmem154                | TMEM154    | -0.03 | 2.27 | -0.26 | 8.02E-01 | 9.14E-01 | -6.67 |
| 1422771_PM_at   | Smad6                  | SMAD6      | 0.02  | 2.48 | 0.26  | 8.02E-01 | 9.14E-01 | -6.67 |
| 1426336_PM_at   | Cacng7                 | CACNG7     | 0.06  | 3.22 | 0.26  | 8.02E-01 | 9.14E-01 | -6.67 |
| 1448189_PM_a_at | Flii                   | FLII       | -0.06 | 3.96 | -0.26 | 8.02E-01 | 9.14E-01 | -6.67 |
| 1447801_PM_x_at | Map3k7                 | MAP3K7     | -0.04 | 4.21 | -0.26 | 8.02E-01 | 9.14E-01 | -6.67 |
| 1427249_PM_x_at | Mup3                   | NA         | 0.03  | 2.06 | 0.26  | 8.02E-01 | 9.14E-01 | -6.67 |
| 1440776_PM_at   | Limch1                 | LIMCH1     | 0.03  | 3.00 | 0.26  | 8.02E-01 | 9.14E-01 | -6.67 |
| 1421060_PM_at   | Mllt1                  | MLLT1      | 0.03  | 2.50 | 0.26  | 8.02E-01 | 9.14E-01 | -6.67 |
| 1442708_PM_at   | Gm32960                | NA         | 0.04  | 2.43 | 0.26  | 8.02E-01 | 9.14E-01 | -6.67 |
| 1438699_PM_at   | Srd5a1                 | SRD5A1     | 0.04  | 2.32 | 0.26  | 8.02E-01 | 9.14E-01 | -6.67 |
| 1426386_PM_at   | Rpl7l1                 | RPL7L1     | 0.03  | 2.38 | 0.26  | 8.02E-01 | 9.14E-01 | -6.67 |
| 1425897_PM_at   | ---                    | NA         | 0.03  | 2.47 | 0.26  | 8.02E-01 | 9.14E-01 | -6.67 |
| 1460548_PM_a_at | Eral1                  | ERAL1      | -0.10 | 2.87 | -0.26 | 8.03E-01 | 9.15E-01 | -6.67 |
| 1438736_PM_at   | Thoc2                  | THOC2      | -0.08 | 6.03 | -0.26 | 8.02E-01 | 9.15E-01 | -6.67 |
| 1443039_PM_at   | Rfc2                   | RFC2       | -0.03 | 2.23 | -0.26 | 8.03E-01 | 9.15E-01 | -6.67 |
| 1447911_PM_at   | ---                    | NA         | -0.03 | 2.12 | -0.26 | 8.02E-01 | 9.15E-01 | -6.67 |
| 1419272_PM_at   | Myd88                  | MYD88      | 0.03  | 2.48 | 0.26  | 8.02E-01 | 9.15E-01 | -6.67 |
| 1441114_PM_at   | ---                    | NA         | 0.06  | 2.87 | 0.26  | 8.03E-01 | 9.15E-01 | -6.67 |
| 1449507_PM_a_at | Cd47                   | CD47       | -0.10 | 5.23 | -0.26 | 8.03E-01 | 9.15E-01 | -6.67 |
| 1457651_PM_x_at | Rem2                   | REM2       | -0.10 | 6.19 | -0.26 | 8.03E-01 | 9.15E-01 | -6.67 |
| 1436377_PM_at   | Gpr137                 | GPR137     | 0.04  | 2.76 | 0.26  | 8.03E-01 | 9.15E-01 | -6.67 |
| 1445718_PM_at   | ---                    | NA         | 0.06  | 2.63 | 0.26  | 8.03E-01 | 9.15E-01 | -6.67 |
| 1433841_PM_at   | Ap5z1                  | AP5Z1      | 0.03  | 2.53 | 0.26  | 8.03E-01 | 9.15E-01 | -6.67 |
| 1438465_PM_at   | Zfp950                 | NA         | 0.03  | 2.44 | 0.26  | 8.03E-01 | 9.15E-01 | -6.67 |
| 1445563_PM_at   | Eif2a                  | EIF2A      | -0.03 | 2.17 | -0.26 | 8.03E-01 | 9.15E-01 | -6.67 |
| 1433170_PM_at   | Z900034C19Rik          | NA         | 0.02  | 2.52 | 0.26  | 8.03E-01 | 9.15E-01 | -6.67 |
| 1419942_PM_at   | Srxn1                  | NA         | -0.12 | 4.04 | -0.26 | 8.03E-01 | 9.15E-01 | -6.67 |
| 1423334_PM_at   | Ergic1                 | ERGI1      | -0.05 | 3.36 | -0.26 | 8.03E-01 | 9.15E-01 | -6.67 |
| 1432295_PM_a_at | Ap5s1                  | AP5S1      | 0.02  | 2.52 | 0.26  | 8.03E-01 | 9.15E-01 | -6.67 |
| 1429987_PM_at   | Cemip                  | CEMIP      | 0.06  | 2.30 | 0.26  | 8.03E-01 | 9.15E-01 | -6.67 |
| 1435072_PM_at   | Zfyve1                 | ZFYVE1     | -0.03 | 2.33 | -0.26 | 8.03E-01 | 9.15E-01 | -6.67 |
| 1440206_PM_at   | A930024E05Rik          | NA         | 0.05  | 2.83 | 0.26  | 8.03E-01 | 9.15E-01 | -6.67 |
| 1454738_PM_x_at | Pex6                   | PEX6       | 0.15  | 5.61 | 0.26  | 8.03E-01 | 9.15E-01 | -6.67 |
| 1427371_PM_at   | Abca8a                 | NA         | -0.04 | 2.41 | -0.26 | 8.03E-01 | 9.15E-01 | -6.67 |
| 1459416_PM_at   | Bcl7a                  | BCL7A      | -0.03 | 2.45 | -0.26 | 8.03E-01 | 9.15E-01 | -6.67 |
| 1455492_PM_at   | B330016D10Rik          | NA         | 0.03  | 2.51 | 0.26  | 8.03E-01 | 9.15E-01 | -6.67 |
| 1449141_PM_at   | Fblim1                 | FBLIM1     | 0.03  | 2.24 | 0.26  | 8.03E-01 | 9.15E-01 | -6.67 |
| 1460248_PM_at   | Cpxm2                  | CPXM2      | 0.05  | 2.60 | 0.26  | 8.03E-01 | 9.15E-01 | -6.67 |
| 1448118_PM_a_at | Ctsd                   | ACO68580.4 | 0.06  | 5.21 | 0.26  | 8.03E-01 | 9.15E-01 | -6.67 |
| 1445250_PM_at   | ---                    | NA         | 0.02  | 1.92 | 0.26  | 8.03E-01 | 9.15E-01 | -6.67 |
| 1432182_PM_at   | ---                    | NA         | 0.06  | 3.52 | 0.26  | 8.03E-01 | 9.15E-01 | -6.67 |
| 1439415_PM_x_at | LOC102638850 /// Rps21 | RPS21      | 0.06  | 4.39 | 0.26  | 8.03E-01 | 9.15E-01 | -6.67 |
| 1426560_PM_a_at | Npnt                   | NPNT       | 0.03  | 2.41 | 0.26  | 8.03E-01 | 9.15E-01 | -6.67 |
| 1420253_PM_at   | D2Ert63e               | NA         | 0.07  | 2.63 | 0.26  | 8.03E-01 | 9.15E-01 | -6.67 |
| 1446481_PM_at   | ---                    | NA         | -0.09 | 2.82 | -0.26 | 8.04E-01 | 9.15E-01 | -6.67 |
| 1420432_PM_at   | Tas1r1                 | TAS1R1     | 0.03  | 2.22 | 0.26  | 8.04E-01 | 9.15E-01 | -6.67 |
| 1426249_PM_at   | Adrbk1                 | GRK2       | 0.03  | 3.14 | 0.26  | 8.04E-01 | 9.15E-01 | -6.67 |
| 1423546_PM_at   | ---                    | NA         | 0.05  | 2.98 | 0.26  | 8.04E-01 | 9.15E-01 | -6.67 |
| 1460189_PM_at   | Dcaf11                 | AL136295.3 | -0.02 | 2.14 | -0.26 | 8.04E-01 | 9.15E-01 | -6.67 |
| 1423995_PM_at   | Kif1b                  | KIF1B      | 0.05  | 4.81 | 0.26  | 8.04E-01 | 9.15E-01 | -6.67 |
| 1434577_PM_at   | BC052040               | C15orf41   | -0.04 | 2.98 | -0.26 | 8.04E-01 | 9.15E-01 | -6.67 |
| 1443841_PM_x_at | Uap1l1                 | UAP1L1     | -0.09 | 2.31 | -0.26 | 8.04E-01 | 9.15E-01 | -6.67 |
| 1456585_PM_x_at | E130309D02Rik          | C7orf26    | -0.07 | 3.82 | -0.25 | 8.04E-01 | 9.15E-01 | -6.67 |
| 1451190_PM_a_at | Sbk1                   | SBK1       | 0.12  | 7.52 | 0.25  | 8.04E-01 | 9.15E-01 | -6.67 |
| 1451616_PM_at   | Psg-ps1                | NA         | -0.02 | 2.34 | -0.25 | 8.04E-01 | 9.15E-01 | -6.67 |
| 1452707_PM_at   | Klh30                  | KLHL30     | 0.03  | 2.14 | 0.25  | 8.04E-01 | 9.15E-01 | -6.67 |
| 1440172_PM_s_at | 1700113H08Rik          | C12orf42   | 0.04  | 1.83 | 0.25  | 8.04E-01 | 9.15E-01 | -6.67 |
| 1457017_PM_at   | Rmdn1                  | RMDN1      | 0.05  | 2.43 | 0.25  | 8.04E-01 | 9.15E-01 | -6.67 |
| 1433220_PM_at   | ---                    | NA         | -0.04 | 1.91 | -0.25 | 8.04E-01 | 9.15E-01 | -6.67 |
| 1445962_PM_at   | ---                    | NA         | -0.04 | 2.07 | -0.25 | 8.04E-01 | 9.15E-01 | -6.67 |
| 1439580_PM_at   | B930053N05Rik          | NA         | 0.03  | 2.11 | 0.25  | 8.04E-01 | 9.15E-01 | -6.67 |
| 1445559_PM_at   | ---                    | NA         | 0.03  | 2.38 | 0.25  | 8.04E-01 | 9.15E-01 | -6.67 |
| 1421700_PM_at   | Tex16                  | NA         | 0.02  | 1.91 | 0.25  | 8.04E-01 | 9.15E-01 | -6.67 |
| 1437660_PM_at   | Nktr                   | NKTR       | 0.11  | 4.07 | 0.25  | 8.04E-01 | 9.15E-01 | -6.67 |
| 1426998_PM_at   | Zfand3                 | ZFAND3     | -0.13 | 3.34 | -0.25 | 8.04E-01 | 9.15E-01 | -6.67 |
| 1440978_PM_at   | Pigm                   | PIGM       | -0.05 | 2.31 | -0.25 | 8.04E-01 | 9.15E-01 | -6.67 |
| 1453657_PM_at   | Z310065F04Rik          | NA         | 0.02  | 2.32 | 0.25  | 8.04E-01 | 9.15E-01 | -6.67 |
| 1455950_PM_x_at | Rpl35                  | RPL35      | -0.06 | 6.99 | -0.25 | 8.04E-01 | 9.15E-01 | -6.67 |
| 1416576_PM_at   | Socs3                  | SOCS3      | 0.02  | 2.14 | 0.25  | 8.04E-01 | 9.15E-01 | -6.67 |
| 1438307_PM_at   | Hmgb2                  | HMGB2      | -0.04 | 2.34 | -0.25 | 8.04E-01 | 9.15E-01 | -6.67 |
| 1447890_PM_at   | Rcn1                   | RCN1       | -0.02 | 1.98 | -0.25 | 8.04E-01 | 9.15E-01 | -6.67 |
| 1422661_PM_at   | Lgals8                 | LGALS8     | 0.07  | 3.36 | 0.25  | 8.04E-01 | 9.15E-01 | -6.67 |
| 1452941_PM_at   | Sdhaf2                 | SDHAF2     | -0.05 | 3.16 | -0.25 | 8.04E-01 | 9.15E-01 | -6.67 |
| 1443301_PM_at   | ---                    | NA         | 0.02  | 2.25 | 0.25  | 8.04E-01 | 9.15E-01 | -6.67 |

|                 |                       |            |       |      |       |          |          |       |
|-----------------|-----------------------|------------|-------|------|-------|----------|----------|-------|
| 1418333_PM_at   | Mtf1                  | MTF1       | 0.04  | 3.47 | 0.25  | 8.04E-01 | 9.15E-01 | -6.67 |
| 1427031_PM_s_at | Spice1                | SPICE1     | 0.05  | 3.21 | 0.25  | 8.04E-01 | 9.15E-01 | -6.67 |
| 1426738_PM_at   | Dgkz                  | DGKZ       | 0.06  | 4.13 | 0.25  | 8.04E-01 | 9.15E-01 | -6.67 |
| 1440338_PM_at   | Pde12                 | PDE12      | -0.08 | 2.74 | -0.25 | 8.05E-01 | 9.15E-01 | -6.67 |
| 1447312_PM_at   | ---                   | NA         | -0.07 | 2.81 | -0.25 | 8.05E-01 | 9.15E-01 | -6.67 |
| 1455709_PM_at   | ---                   | NA         | -0.06 | 2.94 | -0.25 | 8.05E-01 | 9.15E-01 | -6.67 |
| 1448900_PM_at   | Tango2                | TANGO2     | -0.06 | 4.18 | -0.25 | 8.05E-01 | 9.15E-01 | -6.67 |
| 1426553_PM_at   | Dnajc14               | ACO23055.1 | -0.06 | 3.91 | -0.25 | 8.05E-01 | 9.15E-01 | -6.67 |
| 1421873_PM_s_at | Rab24                 | RAB24      | -0.05 | 4.05 | -0.25 | 8.05E-01 | 9.15E-01 | -6.67 |
| 1434412_PM_x_at | Stub1                 | STUB1      | -0.05 | 4.82 | -0.25 | 8.05E-01 | 9.15E-01 | -6.67 |
| 1441589_PM_at   | Gm38448               | NA         | -0.03 | 2.27 | -0.25 | 8.05E-01 | 9.15E-01 | -6.67 |
| 1444454_PM_at   | ---                   | NA         | -0.02 | 1.83 | -0.25 | 8.05E-01 | 9.15E-01 | -6.67 |
| 1459063_PM_at   | ---                   | NA         | 0.02  | 2.06 | 0.25  | 8.05E-01 | 9.15E-01 | -6.67 |
| 1444533_PM_at   | Celf2                 | CELF2      | 0.03  | 2.16 | 0.25  | 8.05E-01 | 9.15E-01 | -6.67 |
| 1431408_PM_at   | 4930412B13Rik         | NA         | 0.03  | 2.33 | 0.25  | 8.05E-01 | 9.15E-01 | -6.67 |
| 1451351_PM_at   | Ttc13                 | TTC13      | 0.05  | 3.46 | 0.25  | 8.05E-01 | 9.15E-01 | -6.67 |
| 1424196_PM_at   | Yipf1                 | YIPF1      | 0.06  | 2.84 | 0.25  | 8.05E-01 | 9.15E-01 | -6.67 |
| 1424220_PM_a_at | Porcn                 | PORCN      | 0.08  | 4.22 | 0.25  | 8.05E-01 | 9.15E-01 | -6.67 |
| 1452044_PM_at   | Arpc5l                | ARPC5L     | 0.09  | 5.12 | 0.25  | 8.05E-01 | 9.15E-01 | -6.67 |
| 1435880_PM_at   | Ankrd50               | NA         | -0.15 | 3.23 | -0.25 | 8.05E-01 | 9.15E-01 | -6.67 |
| 1428227_PM_at   | Rest                  | REST       | -0.03 | 2.75 | -0.25 | 8.05E-01 | 9.15E-01 | -6.67 |
| 1458744_PM_at   | ---                   | NA         | -0.02 | 1.90 | -0.25 | 8.05E-01 | 9.15E-01 | -6.67 |
| 1432806_PM_at   | ---                   | NA         | 0.03  | 2.62 | 0.25  | 8.05E-01 | 9.15E-01 | -6.67 |
| 1456682_PM_at   | Lonrf2                | LONRF2     | 0.05  | 2.82 | 0.25  | 8.05E-01 | 9.15E-01 | -6.67 |
| 1417698_PM_at   | Gtf2f1                | GTF2F1     | -0.11 | 5.89 | -0.25 | 8.05E-01 | 9.15E-01 | -6.67 |
| 1445628_PM_at   | ---                   | NA         | -0.04 | 3.34 | -0.25 | 8.05E-01 | 9.15E-01 | -6.67 |
| 1449750_PM_at   | ---                   | NA         | 0.03  | 2.19 | 0.25  | 8.05E-01 | 9.15E-01 | -6.67 |
| 1427853_PM_a_at | ---                   | NA         | -0.04 | 3.34 | -0.25 | 8.05E-01 | 9.15E-01 | -6.67 |
| 1459937_PM_at   | Ass1                  | NA         | -0.03 | 2.36 | -0.25 | 8.05E-01 | 9.15E-01 | -6.67 |
| 1439498_PM_at   | Igdc3                 | NA         | 0.02  | 2.38 | 0.25  | 8.05E-01 | 9.16E-01 | -6.67 |
| 1419553_PM_a_at | Rabggtb               | RABGGTB    | -0.08 | 4.14 | -0.25 | 8.05E-01 | 9.16E-01 | -6.67 |
| 1419377_PM_at   | Med9                  | MED9       | -0.05 | 2.41 | -0.25 | 8.05E-01 | 9.16E-01 | -6.67 |
| 1460351_PM_at   | S100a11               | S100A11    | 0.16  | 4.73 | 0.25  | 8.05E-01 | 9.16E-01 | -6.67 |
| 1455456_PM_a_at | Timm50                | TIMM50     | 0.03  | 2.36 | 0.25  | 8.05E-01 | 9.16E-01 | -6.67 |
| 1443667_PM_at   | Mis18bp1              | MIS18BP1   | 0.04  | 2.89 | 0.25  | 8.05E-01 | 9.16E-01 | -6.67 |
| 1417189_PM_at   | Psme2                 | PSME2      | -0.04 | 2.68 | -0.25 | 8.05E-01 | 9.16E-01 | -6.67 |
| 1449150_PM_at   | Krba1                 | KRBA1      | 0.05  | 3.19 | 0.25  | 8.05E-01 | 9.16E-01 | -6.67 |
| 1426472_PM_at   | Zfp52                 | NA         | 0.07  | 2.68 | 0.25  | 8.05E-01 | 9.16E-01 | -6.67 |
| 1416034_PM_at   | Cd24a                 | CD24       | 0.05  | 2.66 | 0.25  | 8.06E-01 | 9.16E-01 | -6.67 |
| 1423072_PM_at   | ---                   | NA         | -0.03 | 3.66 | -0.25 | 8.06E-01 | 9.16E-01 | -6.67 |
| 1423494_PM_at   | Gm6551 /// Gm6557 /// | Teddm3     | 0.03  | 2.34 | 0.25  | 8.06E-01 | 9.16E-01 | -6.67 |
| 1442669_PM_at   | ---                   | NA         | 0.03  | 2.26 | 0.25  | 8.06E-01 | 9.16E-01 | -6.67 |
| 1440258_PM_at   | Kcng2                 | KCNQ2      | 0.07  | 3.05 | 0.25  | 8.06E-01 | 9.16E-01 | -6.67 |
| 1417655_PM_a_at | Srrt                  | SRRT       | 0.07  | 5.14 | 0.25  | 8.06E-01 | 9.16E-01 | -6.67 |
| 1427491_PM_at   | Nsun6                 | NSUN6      | -0.06 | 2.94 | -0.25 | 8.06E-01 | 9.16E-01 | -6.67 |
| 1457232_PM_at   | Fbxl21                | NA         | 0.03  | 2.28 | 0.25  | 8.06E-01 | 9.16E-01 | -6.67 |
| 1435408_PM_at   | N4bp2l2               | N4BP2L2    | 0.05  | 2.48 | 0.25  | 8.06E-01 | 9.16E-01 | -6.67 |
| 1452444_PM_at   | Napb                  | NAPB       | -0.17 | 4.31 | -0.25 | 8.06E-01 | 9.16E-01 | -6.67 |
| 1424312_PM_at   | Adipor1               | ADIPOR1    | 0.03  | 2.20 | 0.25  | 8.06E-01 | 9.16E-01 | -6.67 |
| 1451239_PM_a_at | Slc26a1               | SLC26A1    | 0.03  | 2.23 | 0.25  | 8.06E-01 | 9.16E-01 | -6.67 |
| 1426424_PM_at   | Sugt1                 | SUGT1      | -0.08 | 5.18 | -0.25 | 8.06E-01 | 9.16E-01 | -6.67 |
| 1448799_PM_s_at | Mrp512                | MRP512     | -0.05 | 4.43 | -0.25 | 8.06E-01 | 9.16E-01 | -6.67 |
| 1445851_PM_at   | ---                   | NA         | -0.03 | 2.81 | -0.25 | 8.06E-01 | 9.16E-01 | -6.67 |
| 1418627_PM_at   | Gclm                  | GCLM       | -0.03 | 2.91 | -0.25 | 8.06E-01 | 9.16E-01 | -6.67 |
| 1431735_PM_at   | 4930469G21Rik         | NA         | 0.03  | 2.43 | 0.25  | 8.06E-01 | 9.16E-01 | -6.67 |
| 1433022_PM_at   | 2310068G24Rik         | NA         | 0.05  | 2.71 | 0.25  | 8.06E-01 | 9.16E-01 | -6.67 |
| 1416093_PM_a_at | Mrp120                | MRP120     | 0.06  | 2.89 | 0.25  | 8.06E-01 | 9.16E-01 | -6.67 |
| 1420013_PM_s_at | Lss                   | LSS        | 0.10  | 4.37 | 0.25  | 8.06E-01 | 9.16E-01 | -6.67 |
| 1432247_PM_at   | ---                   | NA         | 0.11  | 3.35 | 0.25  | 8.06E-01 | 9.16E-01 | -6.67 |
| 1436745_PM_at   | Gorab                 | GORAB      | -0.04 | 2.61 | -0.25 | 8.06E-01 | 9.16E-01 | -6.67 |
| 1443579_PM_s_at | Deptor                | DEPTOR     | -0.05 | 3.54 | -0.25 | 8.06E-01 | 9.16E-01 | -6.67 |
| 1418835_PM_at   | Phlda1                | PHLDA1     | -0.11 | 3.32 | -0.25 | 8.07E-01 | 9.16E-01 | -6.67 |
| 1436354_PM_at   | Dzip1l                | DZIP1L     | 0.04  | 2.91 | 0.25  | 8.07E-01 | 9.16E-01 | -6.67 |
| 1447611_PM_at   | 1700073E17Rik         | NA         | -0.02 | 2.41 | -0.25 | 8.07E-01 | 9.16E-01 | -6.67 |
| 1451289_PM_at   | Dcl1                  | DCL1       | 0.07  | 4.03 | 0.25  | 8.07E-01 | 9.16E-01 | -6.67 |
| 1460071_PM_at   | ---                   | NA         | 0.08  | 4.35 | 0.25  | 8.07E-01 | 9.16E-01 | -6.67 |
| 1442236_PM_at   | Zfand6                | ZFAND6     | 0.04  | 2.53 | 0.25  | 8.07E-01 | 9.16E-01 | -6.67 |
| 1424818_PM_at   | Alg12                 | ALG12      | 0.07  | 3.57 | 0.25  | 8.07E-01 | 9.16E-01 | -6.67 |
| 1454002_PM_at   | ---                   | NA         | -0.02 | 2.34 | -0.25 | 8.07E-01 | 9.16E-01 | -6.67 |
| 1416633_PM_a_at | Fam96a                | FAM96A     | -0.08 | 4.58 | -0.25 | 8.07E-01 | 9.16E-01 | -6.67 |
| 1423077_PM_at   | Snx9                  | SNX9       | -0.03 | 2.34 | -0.25 | 8.07E-01 | 9.16E-01 | -6.67 |
| 1439610_PM_at   | Rab27b                | RAB27B     | -0.05 | 2.96 | -0.25 | 8.07E-01 | 9.16E-01 | -6.67 |
| 1441934_PM_at   | ---                   | NA         | -0.02 | 2.13 | -0.25 | 8.07E-01 | 9.16E-01 | -6.67 |
| 1426513_PM_at   | Rbm28                 | RBM28      | 0.02  | 2.16 | 0.25  | 8.07E-01 | 9.16E-01 | -6.67 |



|                 |                                      |           |       |      |       |          |          |       |
|-----------------|--------------------------------------|-----------|-------|------|-------|----------|----------|-------|
| 1419895_PM_at   | AA536748                             | NA        | 0.02  | 1.89 | 0.25  | 8.07E-01 | 9.16E-01 | -6.67 |
| 1444384_PM_at   | ---                                  | NA        | -0.03 | 2.67 | -0.25 | 8.07E-01 | 9.17E-01 | -6.67 |
| 1429455_PM_at   | Gapvd1                               | GAPVD1    | -0.07 | 2.81 | -0.25 | 8.07E-01 | 9.17E-01 | -6.67 |
| 1440439_PM_at   | ---                                  | NA        | -0.04 | 3.38 | -0.25 | 8.07E-01 | 9.17E-01 | -6.67 |
| 1433555_PM_at   | Eaf1                                 | EAF1      | 0.05  | 2.97 | 0.25  | 8.07E-01 | 9.17E-01 | -6.67 |
| 1424433_PM_at   | MsrB2                                | MSRB2     | 0.07  | 3.08 | 0.25  | 8.07E-01 | 9.17E-01 | -6.67 |
| 1455515_PM_at   | 1810041L15Rik                        | KIAA1644  | 0.06  | 3.38 | 0.25  | 8.07E-01 | 9.17E-01 | -6.67 |
| 1448724_PM_at   | Cish                                 | CISH      | -0.03 | 2.74 | -0.25 | 8.07E-01 | 9.17E-01 | -6.67 |
| 1432710_PM_at   | 4930505O19Rik                        | NA        | -0.04 | 2.36 | -0.25 | 8.07E-01 | 9.17E-01 | -6.67 |
| 1420155_PM_at   | AA408954                             | NA        | -0.04 | 2.39 | -0.25 | 8.07E-01 | 9.17E-01 | -6.67 |
| 1451360_PM_at   | Ergic2                               | ERGIC2    | -0.05 | 2.60 | -0.25 | 8.07E-01 | 9.17E-01 | -6.67 |
| 1457804_PM_at   | ---                                  | NA        | 0.03  | 2.07 | 0.25  | 8.07E-01 | 9.17E-01 | -6.67 |
| 1450843_PM_a_at | Serpinh1                             | SERPINH1  | 0.06  | 2.41 | 0.25  | 8.07E-01 | 9.17E-01 | -6.67 |
| 1448719_PM_at   | Tada3                                | TADA3     | 0.04  | 2.75 | 0.25  | 8.07E-01 | 9.17E-01 | -6.67 |
| 1441953_PM_at   | Stox2                                | STOX2     | -0.03 | 1.96 | -0.25 | 8.07E-01 | 9.17E-01 | -6.67 |
| 1427912_PM_at   | Cbr3                                 | CBR3      | -0.03 | 2.70 | -0.25 | 8.08E-01 | 9.17E-01 | -6.67 |
| 1440832_PM_at   | Ang4                                 | NA        | 0.04  | 2.19 | 0.25  | 8.08E-01 | 9.17E-01 | -6.67 |
| 1435306_PM_a_at | Kif11                                | KIF11     | -0.02 | 2.11 | -0.25 | 8.08E-01 | 9.17E-01 | -6.67 |
| 1456334_PM_s_at | Zfp783                               | NA        | 0.08  | 2.45 | 0.25  | 8.08E-01 | 9.17E-01 | -6.67 |
| 1419043_PM_a_at | Ilgp1                                | NA        | 0.09  | 2.40 | 0.25  | 8.08E-01 | 9.17E-01 | -6.67 |
| 1425820_PM_x_at | Gpatch4                              | GPATCH4   | 0.11  | 6.56 | 0.25  | 8.08E-01 | 9.17E-01 | -6.67 |
| 1417174_PM_at   | Tmem218                              | TMEM218   | 0.05  | 2.56 | 0.25  | 8.08E-01 | 9.17E-01 | -6.67 |
| 1427123_PM_s_at | Copg2os2                             | NA        | -0.13 | 5.66 | -0.25 | 8.08E-01 | 9.17E-01 | -6.67 |
| 1457775_PM_at   | Sacs                                 | SACS      | -0.08 | 2.93 | -0.25 | 8.08E-01 | 9.17E-01 | -6.67 |
| 1449033_PM_at   | Tnfrsf11b                            | TNFRSF11B | 0.03  | 2.18 | 0.25  | 8.08E-01 | 9.17E-01 | -6.67 |
| 1460684_PM_at   | Tm7sf2                               | TM7SF2    | -0.03 | 2.80 | -0.25 | 8.08E-01 | 9.17E-01 | -6.67 |
| 1430034_PM_at   | ---                                  | NA        | -0.06 | 2.80 | -0.25 | 8.08E-01 | 9.17E-01 | -6.67 |
| 1458658_PM_at   | ---                                  | NA        | -0.03 | 2.22 | -0.25 | 8.08E-01 | 9.17E-01 | -6.67 |
| 1452944_PM_at   | Afmid                                | AFMID     | -0.02 | 1.99 | -0.25 | 8.08E-01 | 9.17E-01 | -6.67 |
| 1428130_PM_at   | Lman1                                | LMAN1     | 0.08  | 3.52 | 0.25  | 8.08E-01 | 9.17E-01 | -6.67 |
| 1441908_PM_x_at | Cd93                                 | CD93      | 0.03  | 2.36 | 0.25  | 8.08E-01 | 9.17E-01 | -6.67 |
| 1453688_PM_at   | ---                                  | NA        | 0.09  | 4.08 | 0.25  | 8.08E-01 | 9.17E-01 | -6.67 |
| 1440822_PM_x_at | Reps1                                | REPS1     | -0.16 | 5.74 | -0.25 | 8.08E-01 | 9.17E-01 | -6.67 |
| 1433254_PM_at   | ---                                  | NA        | -0.02 | 2.31 | -0.25 | 8.08E-01 | 9.17E-01 | -6.67 |
| 1427401_PM_at   | Chrna5                               | CHRNA5    | 0.03  | 2.08 | 0.25  | 8.08E-01 | 9.17E-01 | -6.67 |
| 1418274_PM_at   | Nutf2 /// Nutf2-ps1 ///<br>Nutf2-ps2 | NUTF2     | 0.05  | 3.25 | 0.25  | 8.08E-01 | 9.17E-01 | -6.67 |
| 1452419_PM_at   | Heatr1                               | HEATR1    | -0.05 | 2.75 | -0.25 | 8.08E-01 | 9.17E-01 | -6.67 |
| 1434243_PM_s_at | Tomm70a                              | NA        | -0.05 | 3.16 | -0.25 | 8.08E-01 | 9.17E-01 | -6.67 |
| 1457302_PM_at   | ---                                  | NA        | -0.03 | 2.46 | -0.25 | 8.08E-01 | 9.17E-01 | -6.67 |
| 1443634_PM_at   | Gm26519                              | NA        | 0.02  | 2.92 | 0.25  | 8.08E-01 | 9.17E-01 | -6.67 |
| 1432142_PM_at   | Slc35f4                              | SLC35F4   | 0.03  | 2.51 | 0.25  | 8.08E-01 | 9.17E-01 | -6.67 |
| 1455813_PM_at   | Gm13023                              | PRAMEF9   | -0.02 | 1.92 | -0.25 | 8.08E-01 | 9.17E-01 | -6.67 |
| 1434263_PM_at   | Mfsd12                               | MFSD12    | 0.09  | 4.92 | 0.25  | 8.08E-01 | 9.17E-01 | -6.67 |
| 1451885_PM_at   | ---                                  | NA        | 0.02  | 2.56 | 0.25  | 8.08E-01 | 9.17E-01 | -6.67 |
| 1433743_PM_at   | Dach1                                | DACH1     | 0.04  | 2.20 | 0.25  | 8.08E-01 | 9.17E-01 | -6.67 |
| 1426980_PM_s_at | E130012A19Rik                        | EPOP      | 0.02  | 2.20 | 0.25  | 8.08E-01 | 9.17E-01 | -6.67 |
| 1430525_PM_at   | 2310001K24Rik                        | NA        | 0.03  | 2.09 | 0.25  | 8.09E-01 | 9.17E-01 | -6.67 |
| 1446872_PM_at   | AU021877                             | NA        | 0.03  | 2.27 | 0.25  | 8.09E-01 | 9.17E-01 | -6.67 |
| 1448897_PM_at   | Mkrr2                                | MKRN2     | 0.04  | 2.85 | 0.25  | 8.09E-01 | 9.17E-01 | -6.67 |
| 1444883_PM_at   | Tmem19                               | TMEM19    | 0.04  | 2.33 | 0.25  | 8.09E-01 | 9.17E-01 | -6.67 |
| 1427612_PM_at   | Defb9                                | NA        | -0.04 | 2.56 | -0.25 | 8.09E-01 | 9.17E-01 | -6.67 |
| 1416973_PM_at   | LOC100862468 /// Nhp2l1              | SNU13     | 0.03  | 4.22 | 0.25  | 8.09E-01 | 9.17E-01 | -6.67 |
| 1429799_PM_at   | Zfp606                               | ZNF606    | 0.05  | 2.53 | 0.25  | 8.09E-01 | 9.17E-01 | -6.67 |
| 1423936_PM_at   | Kctd5                                | KCTD5     | 0.03  | 3.17 | 0.25  | 8.09E-01 | 9.17E-01 | -6.67 |
| 1453302_PM_at   | Tmem81                               | TMEM81    | -0.03 | 2.50 | -0.25 | 8.09E-01 | 9.18E-01 | -6.67 |
| 1430283_PM_s_at | Ppp1r42                              | PPP1R42   | -0.02 | 1.99 | -0.25 | 8.09E-01 | 9.18E-01 | -6.67 |
| 1456408_PM_x_at | 4933439C10Rik                        | NA        | 0.05  | 2.61 | 0.25  | 8.09E-01 | 9.18E-01 | -6.67 |
| 1426768_PM_at   | Msl3l2                               | MSL3      | -0.07 | 3.49 | -0.25 | 8.09E-01 | 9.18E-01 | -6.67 |
| 1446312_PM_at   | Ksr2                                 | KSR2      | -0.03 | 2.81 | -0.25 | 8.09E-01 | 9.18E-01 | -6.67 |
| 1443811_PM_at   | ---                                  | NA        | 0.03  | 1.98 | 0.25  | 8.09E-01 | 9.18E-01 | -6.67 |
| 1433209_PM_at   | ---                                  | NA        | 0.03  | 2.27 | 0.25  | 8.09E-01 | 9.18E-01 | -6.67 |
| 1437144_PM_x_at | PsmA6                                | PSMA6     | -0.12 | 8.55 | -0.25 | 8.09E-01 | 9.18E-01 | -6.67 |
| 1423993_PM_at   | Atp6v1f                              | ATP6V1F   | -0.08 | 4.38 | -0.25 | 8.09E-01 | 9.18E-01 | -6.67 |
| 1436528_PM_at   | Kazald1                              | KAZALD1   | -0.08 | 2.53 | -0.25 | 8.09E-01 | 9.18E-01 | -6.67 |
| 1441224_PM_at   | Drp2                                 | DRP2      | -0.05 | 3.28 | -0.25 | 8.09E-01 | 9.18E-01 | -6.67 |
| 1431006_PM_at   | Mrp3                                 | MRPL3     | -0.03 | 3.10 | -0.25 | 8.09E-01 | 9.18E-01 | -6.67 |
| 1417072_PM_at   | Slc22a6                              | SLC22A6   | -0.03 | 2.56 | -0.25 | 8.09E-01 | 9.18E-01 | -6.67 |
| 1420206_PM_at   | ---                                  | NA        | 0.02  | 2.09 | 0.25  | 8.09E-01 | 9.18E-01 | -6.67 |
| 1420305_PM_at   | ---                                  | NA        | 0.02  | 2.06 | 0.25  | 8.09E-01 | 9.18E-01 | -6.67 |
| 1428145_PM_at   | Acaa2                                | ACAA2     | 0.03  | 2.54 | 0.25  | 8.09E-01 | 9.18E-01 | -6.67 |
| 1435815_PM_at   | Ldoc1                                | LDOC1     | 0.03  | 2.08 | 0.25  | 8.09E-01 | 9.18E-01 | -6.67 |
| 1449091_PM_at   | Cldn8                                | CLDN8     | 0.04  | 2.39 | 0.25  | 8.09E-01 | 9.18E-01 | -6.67 |
| 1436978_PM_at   | Wnt9a                                | WNT9A     | 0.05  | 3.88 | 0.25  | 8.09E-01 | 9.18E-01 | -6.67 |

|                 |                                                                                                                                                                                                                                                     |            |       |      |       |          |          |       |
|-----------------|-----------------------------------------------------------------------------------------------------------------------------------------------------------------------------------------------------------------------------------------------------|------------|-------|------|-------|----------|----------|-------|
| 1444206_PM_at   | Zfp595                                                                                                                                                                                                                                              | ZNF678     | -0.03 | 2.32 | -0.25 | 8.10E-01 | 9.18E-01 | -6.67 |
| 1442023_PM_at   | ---                                                                                                                                                                                                                                                 | NA         | 0.02  | 1.88 | 0.25  | 8.10E-01 | 9.18E-01 | -6.67 |
| 1417003_PM_at   | 0610012G03Rik                                                                                                                                                                                                                                       | NA         | 0.02  | 2.23 | 0.25  | 8.10E-01 | 9.18E-01 | -6.67 |
| 1452349_PM_x_at | Ifi205 ///Mnda                                                                                                                                                                                                                                      | IFI16      | 0.03  | 2.71 | 0.25  | 8.10E-01 | 9.18E-01 | -6.67 |
| 1421558_PM_at   | T2                                                                                                                                                                                                                                                  | NA         | 0.04  | 2.44 | 0.25  | 8.10E-01 | 9.18E-01 | -6.67 |
| 1426515_PM_a_at | Tor1a                                                                                                                                                                                                                                               | TOR1A      | -0.03 | 3.58 | -0.25 | 8.10E-01 | 9.18E-01 | -6.67 |
| 1420147_PM_at   | AA407331                                                                                                                                                                                                                                            | NA         | -0.03 | 2.36 | -0.25 | 8.10E-01 | 9.18E-01 | -6.67 |
| 1425348_PM_a_at | Srprb                                                                                                                                                                                                                                               | SRPRB      | 0.03  | 2.48 | 0.25  | 8.10E-01 | 9.18E-01 | -6.67 |
| 1443365_PM_at   | Htr4                                                                                                                                                                                                                                                | HTR4       | 0.03  | 2.56 | 0.25  | 8.10E-01 | 9.18E-01 | -6.67 |
| 1453924_PM_a_at | Ptgfr                                                                                                                                                                                                                                               | PTGFR      | 0.02  | 2.14 | 0.25  | 8.10E-01 | 9.18E-01 | -6.67 |
| 1447868_PM_x_at | Glrx3                                                                                                                                                                                                                                               | GLRX3      | -0.07 | 6.64 | -0.25 | 8.10E-01 | 9.18E-01 | -6.67 |
| 1420608_PM_at   | Rbm18                                                                                                                                                                                                                                               | RBM18      | -0.04 | 3.42 | -0.25 | 8.10E-01 | 9.18E-01 | -6.67 |
| 1447423_PM_at   | ---                                                                                                                                                                                                                                                 | NA         | 0.02  | 2.46 | 0.25  | 8.10E-01 | 9.18E-01 | -6.67 |
| 1431893_PM_a_at | Pdss1                                                                                                                                                                                                                                               | PDSS1      | -0.07 | 2.97 | -0.25 | 8.10E-01 | 9.18E-01 | -6.67 |
| 1429885_PM_at   | ---                                                                                                                                                                                                                                                 | NA         | -0.03 | 2.46 | -0.25 | 8.10E-01 | 9.18E-01 | -6.67 |
| 1435233_PM_at   | Ncoa2                                                                                                                                                                                                                                               | NCOA2      | -0.05 | 4.50 | -0.25 | 8.10E-01 | 9.18E-01 | -6.67 |
| 1437374_PM_at   | Zfp865                                                                                                                                                                                                                                              | ZNF865     | -0.04 | 2.96 | -0.25 | 8.10E-01 | 9.18E-01 | -6.67 |
| 1449749_PM_s_at | Tfb1m                                                                                                                                                                                                                                               | TFB1M      | -0.03 | 2.53 | -0.25 | 8.10E-01 | 9.18E-01 | -6.67 |
| 1417172_PM_at   | Ube2l6                                                                                                                                                                                                                                              | UBE2L6     | -0.03 | 2.35 | -0.25 | 8.10E-01 | 9.18E-01 | -6.67 |
| 1443478_PM_at   | Fam90a1a                                                                                                                                                                                                                                            | FAM90A1    | 0.05  | 2.11 | 0.25  | 8.10E-01 | 9.18E-01 | -6.67 |
| 1429663_PM_at   | Katnal2                                                                                                                                                                                                                                             | KATNAL2    | 0.03  | 2.34 | 0.25  | 8.10E-01 | 9.18E-01 | -6.67 |
| 1423575_PM_a_at | Wbscr22                                                                                                                                                                                                                                             | BUD23      | -0.06 | 3.60 | -0.25 | 8.10E-01 | 9.18E-01 | -6.67 |
| 1421228_PM_at   | Ccl7                                                                                                                                                                                                                                                | CCL7       | -0.06 | 2.29 | -0.25 | 8.10E-01 | 9.18E-01 | -6.67 |
| 1440017_PM_at   | Plekhh3                                                                                                                                                                                                                                             | NA         | 0.07  | 3.16 | 0.25  | 8.10E-01 | 9.18E-01 | -6.67 |
| 1435334_PM_at   | Ttc7                                                                                                                                                                                                                                                | ITC7A      | -0.03 | 2.61 | -0.25 | 8.11E-01 | 9.18E-01 | -6.67 |
| 1434164_PM_s_at | Khdc1b                                                                                                                                                                                                                                              | AL365232.1 | 0.02  | 2.13 | 0.25  | 8.11E-01 | 9.18E-01 | -6.67 |
| 1434250_PM_at   | Pak2                                                                                                                                                                                                                                                | PAK2       | -0.04 | 2.60 | -0.25 | 8.11E-01 | 9.18E-01 | -6.67 |
| 1428240_PM_at   | Nrxn1                                                                                                                                                                                                                                               | NRXN1      | -0.09 | 6.13 | -0.25 | 8.11E-01 | 9.18E-01 | -6.67 |
| 1449725_PM_at   | Gfpt1                                                                                                                                                                                                                                               | NA         | -0.04 | 2.60 | -0.25 | 8.11E-01 | 9.19E-01 | -6.67 |
| 1417200_PM_at   | Tmem183a                                                                                                                                                                                                                                            | TMEM183A   | 0.06  | 3.51 | 0.25  | 8.11E-01 | 9.19E-01 | -6.67 |
| 1423545_PM_a_at | Zfp207                                                                                                                                                                                                                                              | ZNF207     | 0.05  | 2.21 | 0.25  | 8.11E-01 | 9.19E-01 | -6.67 |
| 1449669_PM_at   | Rabif                                                                                                                                                                                                                                               | NA         | -0.10 | 3.58 | -0.25 | 8.11E-01 | 9.19E-01 | -6.67 |
| 1416543_PM_at   | Nfe2l2                                                                                                                                                                                                                                              | NFE2L2     | -0.07 | 3.05 | -0.25 | 8.11E-01 | 9.19E-01 | -6.67 |
| 1441645_PM_s_at | Ipo9                                                                                                                                                                                                                                                | IPO9       | 0.09  | 7.10 | 0.25  | 8.11E-01 | 9.19E-01 | -6.67 |
| 1453262_PM_at   | 2810032G03Rik                                                                                                                                                                                                                                       | NA         | 0.07  | 3.51 | 0.25  | 8.11E-01 | 9.19E-01 | -6.67 |
| 1458329_PM_x_at | Duxbl1 ///Duxbl2 ///Duxbl3                                                                                                                                                                                                                          | DUXB       | -0.02 | 2.03 | -0.25 | 8.11E-01 | 9.19E-01 | -6.67 |
| 1449366_PM_at   | Mmp8                                                                                                                                                                                                                                                | MMP8       | 0.03  | 2.43 | 0.25  | 8.11E-01 | 9.19E-01 | -6.67 |
| 1432207_PM_a_at | Toe1                                                                                                                                                                                                                                                | TOE1       | 0.05  | 2.83 | 0.25  | 8.11E-01 | 9.19E-01 | -6.67 |
| 1459337_PM_at   | Alg6                                                                                                                                                                                                                                                | ALG6       | 0.02  | 2.73 | 0.24  | 8.11E-01 | 9.19E-01 | -6.67 |
| 1426061_PM_x_at | Cul4a                                                                                                                                                                                                                                               | CUL4A      | -0.06 | 8.65 | -0.24 | 8.11E-01 | 9.19E-01 | -6.67 |
| 1433608_PM_at   | Scfd2                                                                                                                                                                                                                                               | SCFD2      | -0.05 | 3.24 | -0.24 | 8.12E-01 | 9.19E-01 | -6.67 |
| 1418703_PM_at   | Rbms1                                                                                                                                                                                                                                               | RBMS1      | -0.04 | 3.02 | -0.24 | 8.11E-01 | 9.19E-01 | -6.67 |
| 1430237_PM_at   | Cldn22                                                                                                                                                                                                                                              | CLDN24     | -0.03 | 2.39 | -0.24 | 8.12E-01 | 9.19E-01 | -6.67 |
| 1426495_PM_at   | Katnbl1                                                                                                                                                                                                                                             | KATNBL1    | -0.11 | 5.51 | -0.24 | 8.12E-01 | 9.19E-01 | -6.67 |
| 1456378_PM_s_at | Fbxl20                                                                                                                                                                                                                                              | FBXL20     | -0.11 | 4.26 | -0.24 | 8.12E-01 | 9.19E-01 | -6.67 |
| 1423897_PM_at   | Rnf187                                                                                                                                                                                                                                              | RNF187     | -0.06 | 4.31 | -0.24 | 8.12E-01 | 9.19E-01 | -6.67 |
| 1449655_PM_a_at | Cmtr1 ///Rnf8-cmtr1                                                                                                                                                                                                                                 | CMTR1      | -0.05 | 4.75 | -0.24 | 8.12E-01 | 9.19E-01 | -6.67 |
| 1417503_PM_at   | Rfc2                                                                                                                                                                                                                                                | RFC2       | -0.03 | 2.50 | -0.24 | 8.12E-01 | 9.19E-01 | -6.67 |
| 1427597_PM_at   | Plekhh2                                                                                                                                                                                                                                             | NA         | -0.02 | 2.31 | -0.24 | 8.12E-01 | 9.19E-01 | -6.67 |
| 1426883_PM_at   | Slc25a45                                                                                                                                                                                                                                            | SLC25A45   | 0.02  | 2.38 | 0.24  | 8.12E-01 | 9.19E-01 | -6.67 |
| 1430149_PM_at   | Ndufa3                                                                                                                                                                                                                                              | NDUFA3     | 0.02  | 2.57 | 0.24  | 8.12E-01 | 9.19E-01 | -6.67 |
| 1451345_PM_at   | Mtap                                                                                                                                                                                                                                                | AL359922.1 | 0.02  | 2.28 | 0.24  | 8.12E-01 | 9.19E-01 | -6.67 |
| 1447771_PM_at   | ---                                                                                                                                                                                                                                                 | NA         | 0.03  | 1.99 | 0.24  | 8.12E-01 | 9.19E-01 | -6.67 |
| 1417457_PM_at   | Cks2                                                                                                                                                                                                                                                | CKS2       | 0.04  | 2.12 | 0.24  | 8.12E-01 | 9.19E-01 | -6.67 |
| 1450727_PM_a_at | Poldip2                                                                                                                                                                                                                                             | POLDIP2    | 0.07  | 2.66 | 0.24  | 8.12E-01 | 9.19E-01 | -6.67 |
| 1439411_PM_a_at | Xpo7                                                                                                                                                                                                                                                | XPO7       | 0.09  | 7.10 | 0.24  | 8.12E-01 | 9.19E-01 | -6.67 |
| 1446820_PM_at   | Zfp182                                                                                                                                                                                                                                              | NA         | 0.11  | 4.03 | 0.24  | 8.12E-01 | 9.19E-01 | -6.67 |
| 1449041_PM_a_at | Trip6                                                                                                                                                                                                                                               | TRIP6      | 0.11  | 3.22 | 0.24  | 8.12E-01 | 9.19E-01 | -6.67 |
| 1446746_PM_at   | Osbpl3                                                                                                                                                                                                                                              | NA         | 0.02  | 2.06 | 0.24  | 8.12E-01 | 9.19E-01 | -6.67 |
| 1446160_PM_x_at | Tmem69                                                                                                                                                                                                                                              | TMEM69     | -0.04 | 2.31 | -0.24 | 8.12E-01 | 9.19E-01 | -6.67 |
| 1437112_PM_at   | Pld1                                                                                                                                                                                                                                                | PLD1       | -0.03 | 2.36 | -0.24 | 8.12E-01 | 9.19E-01 | -6.67 |
| 1434651_PM_a_at | Cldn3                                                                                                                                                                                                                                               | CLDN3      | -0.03 | 2.44 | -0.24 | 8.12E-01 | 9.19E-01 | -6.67 |
| 1431250_PM_at   | 9030624G23Rik ///<br>Gm30124 /// Gm38538 ///<br>Gm38711 /// Gm3973 ///<br>Gm40847 /// Gm40848 ///<br>Gm4983 /// Gm5784 ///<br>Gm9222 /// Gm9257 ///<br>LOC101056074 ///<br>LOC102637839 ///<br>LOC102639021 ///<br>LOC105243839 ///<br>LOC105244763 | NA         | 0.06  | 3.38 | 0.24  | 8.12E-01 | 9.19E-01 | -6.67 |

|                 |                                                                                                               |           |       |      |       |          |          |       |
|-----------------|---------------------------------------------------------------------------------------------------------------|-----------|-------|------|-------|----------|----------|-------|
| 1437760_PM_at   | Galnt12                                                                                                       | GALNT12   | 0.03  | 2.40 | 0.24  | 8.12E-01 | 9.19E-01 | -6.67 |
| 1457147_PM_at   | Et4                                                                                                           | KIAA1217  | -0.04 | 2.16 | -0.24 | 8.12E-01 | 9.19E-01 | -6.67 |
| 1450956_PM_at   | LOC102642893 /// Scd3                                                                                         | SCD       | -0.02 | 2.25 | -0.24 | 8.12E-01 | 9.19E-01 | -6.67 |
| 1416640_PM_at   | Kcne11                                                                                                        | KCNE5     | -0.02 | 2.18 | -0.24 | 8.13E-01 | 9.19E-01 | -6.67 |
| 1428703_PM_at   | 1700012B07Rik                                                                                                 | NA        | -0.02 | 2.17 | -0.24 | 8.12E-01 | 9.19E-01 | -6.67 |
| 1432507_PM_at   | ---                                                                                                           | NA        | 0.02  | 3.27 | 0.24  | 8.12E-01 | 9.19E-01 | -6.67 |
| 1432298_PM_at   | ---                                                                                                           | NA        | 0.03  | 2.48 | 0.24  | 8.12E-01 | 9.19E-01 | -6.67 |
| 1457055_PM_at   | ---                                                                                                           | NA        | 0.05  | 3.42 | 0.24  | 8.12E-01 | 9.19E-01 | -6.67 |
| 1433830_PM_at   | Hnrnpa2b1 /// LOC102642938                                                                                    | HNRNPA2B1 | 0.06  | 6.26 | 0.24  | 8.12E-01 | 9.19E-01 | -6.67 |
| 1431167_PM_at   | Dgkg                                                                                                          | NA        | -0.08 | 3.75 | -0.24 | 8.13E-01 | 9.20E-01 | -6.67 |
| 1446158_PM_at   | ---                                                                                                           | NA        | -0.03 | 2.42 | -0.24 | 8.13E-01 | 9.20E-01 | -6.67 |
| 1422159_PM_at   | Ppef2                                                                                                         | PPEF2     | 0.02  | 2.05 | 0.24  | 8.13E-01 | 9.20E-01 | -6.67 |
| 1439177_PM_at   | ---                                                                                                           | NA        | 0.05  | 2.60 | 0.24  | 8.13E-01 | 9.20E-01 | -6.67 |
| 1431533_PM_at   | Ccdc183                                                                                                       | CCDC183   | -0.04 | 2.89 | -0.24 | 8.13E-01 | 9.20E-01 | -6.67 |
| 1429725_PM_at   | Zfhx3                                                                                                         | ZFHX3     | 0.03  | 2.44 | 0.24  | 8.13E-01 | 9.20E-01 | -6.67 |
| 1448308_PM_at   | Ap3m1                                                                                                         | AP3M1     | 0.06  | 3.03 | 0.24  | 8.13E-01 | 9.20E-01 | -6.67 |
| 1420513_PM_at   | Efcab2                                                                                                        | EFCAB2    | -0.03 | 2.72 | -0.24 | 8.13E-01 | 9.20E-01 | -6.67 |
| 1435259_PM_s_at | Tmem141                                                                                                       | TMEM141   | 0.06  | 2.91 | 0.24  | 8.13E-01 | 9.20E-01 | -6.67 |
| 1458946_PM_at   | ---                                                                                                           | NA        | -0.02 | 2.21 | -0.24 | 8.13E-01 | 9.20E-01 | -6.67 |
| 1417793_PM_at   | Irgm2                                                                                                         | IRGM      | -0.08 | 3.29 | -0.24 | 8.13E-01 | 9.20E-01 | -6.67 |
| 1449831_PM_at   | Tctex1d1                                                                                                      | TCTEX1D1  | -0.02 | 2.28 | -0.24 | 8.13E-01 | 9.20E-01 | -6.67 |
| 1440885_PM_at   | Evl                                                                                                           | EVL       | 0.03  | 3.07 | 0.24  | 8.13E-01 | 9.20E-01 | -6.67 |
| 1453251_PM_at   | Dhx30                                                                                                         | DHX30     | 0.06  | 3.07 | 0.24  | 8.13E-01 | 9.20E-01 | -6.67 |
| 1458444_PM_at   | Gan                                                                                                           | GAN       | 0.03  | 2.39 | 0.24  | 8.13E-01 | 9.20E-01 | -6.67 |
| 1430524_PM_at   | 1700020N15Rik /// Gm6812                                                                                      | NA        | 0.02  | 2.13 | 0.24  | 8.13E-01 | 9.20E-01 | -6.67 |
| 1444449_PM_at   | ---                                                                                                           | NA        | 0.05  | 2.73 | 0.24  | 8.13E-01 | 9.20E-01 | -6.67 |
| 1450647_PM_at   | Hps3                                                                                                          | HPS3      | -0.17 | 4.24 | -0.24 | 8.13E-01 | 9.20E-01 | -6.67 |
| 1454580_PM_at   | 5430427N15Rik                                                                                                 | NA        | 0.02  | 1.99 | 0.24  | 8.13E-01 | 9.20E-01 | -6.67 |
| 1420228_PM_at   | ---                                                                                                           | NA        | 0.02  | 2.54 | 0.24  | 8.13E-01 | 9.20E-01 | -6.67 |
| 1424035_PM_at   | Rora                                                                                                          | RORA      | 0.04  | 3.01 | 0.24  | 8.13E-01 | 9.20E-01 | -6.67 |
| 1444337_PM_at   | ---                                                                                                           | NA        | -0.03 | 2.64 | -0.24 | 8.13E-01 | 9.20E-01 | -6.67 |
| 1427346_PM_at   | Gm10439 /// Gm15080 /// Gm15085 /// Gm15093 /// Gm15107 /// Gm15109 /// Gm15114 /// Gm15128 /// Luzp4 /// Ott | NA        | 0.05  | 3.00 | 0.24  | 8.13E-01 | 9.20E-01 | -6.67 |
| 1420789_PM_at   | Klra5                                                                                                         | NA        | -0.03 | 1.95 | -0.24 | 8.14E-01 | 9.20E-01 | -6.67 |
| 1416239_PM_at   | Ass1                                                                                                          | ASS1      | -0.03 | 2.15 | -0.24 | 8.14E-01 | 9.20E-01 | -6.67 |
| 1446130_PM_at   | Mir1931                                                                                                       | NA        | 0.05  | 2.78 | 0.24  | 8.14E-01 | 9.20E-01 | -6.67 |
| 1459954_PM_at   | ---                                                                                                           | NA        | 0.03  | 2.72 | 0.24  | 8.14E-01 | 9.20E-01 | -6.67 |
| 1428401_PM_at   | Zcchc3                                                                                                        | ZCCHC3    | 0.05  | 2.37 | 0.24  | 8.14E-01 | 9.20E-01 | -6.67 |
| 1427278_PM_at   | Clip4                                                                                                         | CLIP4     | -0.04 | 3.18 | -0.24 | 8.14E-01 | 9.20E-01 | -6.67 |
| 1417970_PM_at   | Atp5s                                                                                                         | ATP5S     | -0.08 | 2.63 | -0.24 | 8.14E-01 | 9.20E-01 | -6.67 |
| 1437218_PM_at   | Fn1                                                                                                           | FN1       | -0.03 | 2.31 | -0.24 | 8.14E-01 | 9.20E-01 | -6.67 |
| 1460639_PM_a_at | Atox1                                                                                                         | ATOX1     | 0.03  | 2.47 | 0.24  | 8.14E-01 | 9.20E-01 | -6.67 |
| 1432788_PM_at   | 6720420G18Rik                                                                                                 | NA        | -0.02 | 2.06 | -0.24 | 8.14E-01 | 9.20E-01 | -6.67 |
| 1448681_PM_at   | Il15ra                                                                                                        | IL15RA    | 0.03  | 2.27 | 0.24  | 8.14E-01 | 9.20E-01 | -6.67 |
| 1438604_PM_at   | Atp8b3                                                                                                        | ATP8B3    | 0.02  | 2.12 | 0.24  | 8.14E-01 | 9.20E-01 | -6.67 |
| 1450361_PM_at   | Prop1                                                                                                         | PROP1     | -0.05 | 2.80 | -0.24 | 8.14E-01 | 9.20E-01 | -6.67 |
| 1460693_PM_a_at | Col9a3                                                                                                        | COL9A3    | -0.18 | 3.41 | -0.24 | 8.14E-01 | 9.20E-01 | -6.67 |
| 1442473_PM_at   | ---                                                                                                           | NA        | -0.02 | 2.08 | -0.24 | 8.14E-01 | 9.20E-01 | -6.67 |
| 1449500_PM_at   | Serpib7                                                                                                       | SERPINB7  | -0.02 | 1.96 | -0.24 | 8.14E-01 | 9.20E-01 | -6.67 |
| 1457550_PM_at   | 9530059O14Rik                                                                                                 | NA        | -0.06 | 3.27 | -0.24 | 8.14E-01 | 9.20E-01 | -6.67 |
| 1431313_PM_at   | Arhgap27                                                                                                      | NA        | -0.03 | 2.23 | -0.24 | 8.14E-01 | 9.20E-01 | -6.67 |
| 1418461_PM_at   | Sh3d19                                                                                                        | SH3D19    | 0.05  | 3.77 | 0.24  | 8.14E-01 | 9.20E-01 | -6.67 |
| 1440706_PM_at   | Bmp8b                                                                                                         | BMP8B     | -0.03 | 2.76 | -0.24 | 8.14E-01 | 9.20E-01 | -6.67 |
| 1459384_PM_at   | ---                                                                                                           | NA        | 0.02  | 2.12 | 0.24  | 8.14E-01 | 9.21E-01 | -6.67 |
| 1445495_PM_at   | ---                                                                                                           | NA        | 0.02  | 2.16 | 0.24  | 8.14E-01 | 9.21E-01 | -6.67 |
| 1450303_PM_at   | Vax2                                                                                                          | VAX2      | 0.02  | 2.45 | 0.24  | 8.14E-01 | 9.21E-01 | -6.67 |
| 1441074_PM_at   | Rhbdd3                                                                                                        | NA        | 0.03  | 2.89 | 0.24  | 8.14E-01 | 9.21E-01 | -6.67 |
| 1457019_PM_s_at | ---                                                                                                           | NA        | 0.06  | 2.52 | 0.24  | 8.14E-01 | 9.21E-01 | -6.67 |
| 1427103_PM_at   | Plekho2                                                                                                       | PLEKHO2   | -0.02 | 2.73 | -0.24 | 8.14E-01 | 9.21E-01 | -6.67 |
| 1421122_PM_at   | Cbl1                                                                                                          | CBLL1     | 0.03  | 2.42 | 0.24  | 8.15E-01 | 9.21E-01 | -6.67 |
| 1441900_PM_x_at | Hspbap1                                                                                                       | HSPBAP1   | 0.02  | 2.24 | 0.24  | 8.15E-01 | 9.21E-01 | -6.67 |
| 1448512_PM_at   | Hils1                                                                                                         | NA        | -0.03 | 2.68 | -0.24 | 8.15E-01 | 9.21E-01 | -6.67 |
| 1435789_PM_x_at | ---                                                                                                           | NA        | -0.07 | 6.70 | -0.24 | 8.15E-01 | 9.21E-01 | -6.67 |
| 1439769_PM_at   | ---                                                                                                           | NA        | -0.05 | 3.23 | -0.24 | 8.15E-01 | 9.21E-01 | -6.67 |
| 1455240_PM_x_at | Gm7969 /// LOC102642957                                                                                       | NA        | -0.04 | 2.28 | -0.24 | 8.15E-01 | 9.21E-01 | -6.67 |
| 1435318_PM_at   | E130218I03Rik                                                                                                 | NA        | -0.02 | 2.32 | -0.24 | 8.15E-01 | 9.21E-01 | -6.67 |
| 1453824_PM_at   | TRMT13                                                                                                        | TRMT13    | 0.03  | 2.25 | 0.24  | 8.15E-01 | 9.21E-01 | -6.67 |
| 1457945_PM_at   | ---                                                                                                           | NA        | 0.07  | 2.73 | 0.24  | 8.15E-01 | 9.21E-01 | -6.67 |

|                 |                                                                                                                             |         |       |      |       |          |          |       |
|-----------------|-----------------------------------------------------------------------------------------------------------------------------|---------|-------|------|-------|----------|----------|-------|
| 1432439_PM_at   | Zfp175                                                                                                                      | ZNF175  | -0.04 | 3.10 | -0.24 | 8.15E-01 | 9.21E-01 | -6.67 |
| 1455348_PM_x_at | Gm29376 /// Gm8210 ///<br>LOC102634483 ///<br>LOC102642233 ///<br>LOC102642738 /// Rpl29                                    | RPL29   | -0.11 | 5.64 | -0.24 | 8.15E-01 | 9.21E-01 | -6.67 |
| 1443735_PM_at   | Gm3609                                                                                                                      | NA      | 0.04  | 4.20 | 0.24  | 8.15E-01 | 9.21E-01 | -6.67 |
| 1433190_PM_at   | 1700048B10Rik ///<br>4933433N18Rik ///<br>Gm31126 /// Gm31217 ///<br>Gm31712 /// Gm31835 ///<br>Gm32038 ///<br>LOC105243762 | NA      | -0.03 | 2.38 | -0.24 | 8.15E-01 | 9.21E-01 | -6.67 |
| 1426708_PM_at   | Antxr2                                                                                                                      | ANTXR2  | -0.02 | 2.19 | -0.24 | 8.15E-01 | 9.21E-01 | -6.67 |
| 1428975_PM_at   | SUSD3                                                                                                                       | SUSD3   | 0.02  | 2.25 | 0.24  | 8.15E-01 | 9.21E-01 | -6.67 |
| 1425928_PM_at   | Xkr6                                                                                                                        | XKR6    | 0.06  | 4.25 | 0.24  | 8.15E-01 | 9.21E-01 | -6.67 |
| 1456325_PM_at   | Cep68                                                                                                                       | CEP68   | -0.04 | 2.77 | -0.24 | 8.15E-01 | 9.21E-01 | -6.67 |
| 1433213_PM_at   | ---                                                                                                                         | NA      | -0.02 | 2.34 | -0.24 | 8.15E-01 | 9.21E-01 | -6.67 |
| 1452950_PM_at   | Mettl15                                                                                                                     | METTL15 | -0.02 | 2.30 | -0.24 | 8.15E-01 | 9.21E-01 | -6.67 |
| 1426828_PM_at   | Vps9d1                                                                                                                      | VPS9D1  | 0.03  | 2.83 | 0.24  | 8.15E-01 | 9.21E-01 | -6.67 |
| 1449242_PM_s_at | Hrg                                                                                                                         | HRG     | 0.03  | 2.38 | 0.24  | 8.15E-01 | 9.21E-01 | -6.67 |
| 1419017_PM_at   | Corin                                                                                                                       | CORIN   | 0.05  | 2.49 | 0.24  | 8.15E-01 | 9.21E-01 | -6.67 |
| 1454099_PM_at   | ---                                                                                                                         | NA      | 0.02  | 2.37 | 0.24  | 8.15E-01 | 9.21E-01 | -6.67 |
| 1443022_PM_at   | ---                                                                                                                         | NA      | -0.05 | 2.29 | -0.24 | 8.15E-01 | 9.21E-01 | -6.67 |
| 1453654_PM_at   | ---                                                                                                                         | NA      | -0.04 | 3.05 | -0.24 | 8.15E-01 | 9.21E-01 | -6.67 |
| 1439149_PM_s_at | Gm9999                                                                                                                      | NA      | -0.04 | 2.28 | -0.24 | 8.15E-01 | 9.21E-01 | -6.67 |
| 1420269_PM_at   | 2610201A13Rik                                                                                                               | NA      | 0.03  | 2.55 | 0.24  | 8.15E-01 | 9.21E-01 | -6.67 |
| 1441452_PM_at   | ---                                                                                                                         | NA      | 0.03  | 3.30 | 0.24  | 8.15E-01 | 9.21E-01 | -6.67 |
| 1444170_PM_at   | Tmem241                                                                                                                     | NA      | -0.04 | 2.58 | -0.24 | 8.15E-01 | 9.21E-01 | -6.67 |
| 1421317_PM_x_at | Myb                                                                                                                         | MYB     | -0.04 | 2.85 | -0.24 | 8.15E-01 | 9.21E-01 | -6.67 |
| 1416266_PM_at   | Pdyn                                                                                                                        | PDYN    | 0.03  | 3.16 | 0.24  | 8.16E-01 | 9.21E-01 | -6.67 |
| 1436181_PM_at   | Asap2                                                                                                                       | ASAP2   | -0.05 | 2.80 | -0.24 | 8.16E-01 | 9.21E-01 | -6.67 |
| 1450969_PM_at   | Pccb                                                                                                                        | PCCB    | -0.05 | 2.47 | -0.24 | 8.16E-01 | 9.21E-01 | -6.67 |
| 1434730_PM_at   | Al854517                                                                                                                    | NA      | -0.04 | 3.26 | -0.24 | 8.16E-01 | 9.21E-01 | -6.67 |
| 1447984_PM_at   | D1Erttd75e                                                                                                                  | NA      | -0.02 | 2.06 | -0.24 | 8.16E-01 | 9.21E-01 | -6.67 |
| 1459321_PM_at   | ---                                                                                                                         | NA      | 0.12  | 3.48 | 0.24  | 8.16E-01 | 9.21E-01 | -6.67 |
| 1440398_PM_at   | ---                                                                                                                         | NA      | -0.02 | 2.66 | -0.24 | 8.16E-01 | 9.21E-01 | -6.67 |
| 1436888_PM_at   | Nhlh2                                                                                                                       | NHLH2   | 0.02  | 2.39 | 0.24  | 8.16E-01 | 9.21E-01 | -6.67 |
| 1442565_PM_at   | Pcdh10                                                                                                                      | NA      | -0.04 | 2.40 | -0.24 | 8.16E-01 | 9.21E-01 | -6.67 |
| 1446761_PM_at   | D8Erttd56e                                                                                                                  | NA      | -0.05 | 2.52 | -0.24 | 8.16E-01 | 9.21E-01 | -6.67 |
| 1457127_PM_at   | Defb42                                                                                                                      | DEFB136 | -0.03 | 2.54 | -0.24 | 8.16E-01 | 9.21E-01 | -6.67 |
| 1430467_PM_at   | 4921511H03Rik                                                                                                               | TEX47   | -0.02 | 1.94 | -0.24 | 8.16E-01 | 9.21E-01 | -6.67 |
| 1444561_PM_at   | ---                                                                                                                         | NA      | 0.03  | 2.01 | 0.24  | 8.16E-01 | 9.21E-01 | -6.67 |
| 1423296_PM_at   | Psm8                                                                                                                        | PSMD8   | 0.03  | 3.34 | 0.24  | 8.16E-01 | 9.21E-01 | -6.67 |
| 1417645_PM_at   | Sspn                                                                                                                        | SSPN    | 0.03  | 2.42 | 0.24  | 8.16E-01 | 9.21E-01 | -6.67 |
| 1457289_PM_at   | Nr2e1                                                                                                                       | NR2E1   | -0.03 | 2.20 | -0.24 | 8.16E-01 | 9.21E-01 | -6.67 |
| 1430698_PM_a_at | Pibf1                                                                                                                       | PIBF1   | 0.09  | 3.00 | 0.24  | 8.16E-01 | 9.21E-01 | -6.67 |
| 1437013_PM_x_at | Atp6v0b                                                                                                                     | ATP6V0B | -0.06 | 8.03 | -0.24 | 8.16E-01 | 9.21E-01 | -6.67 |
| 1441602_PM_at   | Mettl23                                                                                                                     | NA      | 0.02  | 2.32 | 0.24  | 8.16E-01 | 9.21E-01 | -6.67 |
| 1420543_PM_at   | Dnajc28                                                                                                                     | DNAJC28 | 0.04  | 3.13 | 0.24  | 8.16E-01 | 9.21E-01 | -6.67 |
| 1422665_PM_a_at | Pcmt1                                                                                                                       | PCMT1   | -0.13 | 7.75 | -0.24 | 8.16E-01 | 9.22E-01 | -6.67 |
| 1442966_PM_at   | ---                                                                                                                         | NA      | -0.06 | 2.94 | -0.24 | 8.16E-01 | 9.22E-01 | -6.67 |
| 1431577_PM_at   | 5430437J10Rik                                                                                                               | NA      | -0.02 | 2.27 | -0.24 | 8.16E-01 | 9.22E-01 | -6.67 |
| 1439613_PM_at   | Adcy10                                                                                                                      | ADCY10  | 0.03  | 2.43 | 0.24  | 8.16E-01 | 9.22E-01 | -6.67 |
| 1437366_PM_at   | March9                                                                                                                      | MARCH9  | 0.03  | 2.84 | 0.24  | 8.16E-01 | 9.22E-01 | -6.67 |
| 1428628_PM_at   | Ak8                                                                                                                         | AK8     | 0.04  | 2.49 | 0.24  | 8.16E-01 | 9.22E-01 | -6.67 |
| 1422647_PM_at   | Ring1                                                                                                                       | RING1   | 0.09  | 3.81 | 0.24  | 8.16E-01 | 9.22E-01 | -6.67 |
| 1419108_PM_at   | Ophn1                                                                                                                       | OPHN1   | 0.05  | 2.91 | 0.24  | 8.17E-01 | 9.22E-01 | -6.67 |
| 1452674_PM_a_at | Eif3k                                                                                                                       | EIF3K   | 0.05  | 4.27 | 0.24  | 8.17E-01 | 9.22E-01 | -6.67 |
| 1452743_PM_at   | Pole3                                                                                                                       | POLE3   | -0.03 | 2.40 | -0.24 | 8.17E-01 | 9.22E-01 | -6.67 |
| 1422628_PM_at   | Fam111a                                                                                                                     | FAM111A | 0.02  | 2.52 | 0.24  | 8.17E-01 | 9.22E-01 | -6.67 |
| 1449571_PM_at   | Trhr                                                                                                                        | TRHR    | 0.03  | 2.33 | 0.24  | 8.17E-01 | 9.22E-01 | -6.67 |
| 1424963_PM_at   | Rp1                                                                                                                         | RP1     | 0.04  | 2.25 | 0.24  | 8.17E-01 | 9.22E-01 | -6.67 |
| 1419910_PM_at   | Mphosph9                                                                                                                    | NA      | 0.07  | 3.09 | 0.24  | 8.17E-01 | 9.22E-01 | -6.67 |
| 1416455_PM_a_at | Cryab                                                                                                                       | CRYAB   | -0.09 | 3.30 | -0.24 | 8.17E-01 | 9.22E-01 | -6.67 |
| 1455994_PM_x_at | Elov1                                                                                                                       | ELOVL1  | -0.07 | 2.89 | -0.24 | 8.17E-01 | 9.22E-01 | -6.67 |
| 1436670_PM_x_at | 1700019G17Rik                                                                                                               | NAT8    | -0.05 | 2.51 | -0.24 | 8.17E-01 | 9.22E-01 | -6.67 |
| 1452330_PM_a_at | Mxra8                                                                                                                       | MXRA8   | -0.04 | 2.67 | -0.24 | 8.17E-01 | 9.22E-01 | -6.67 |
| 1418090_PM_at   | Plvap                                                                                                                       | PLVAP   | -0.02 | 3.07 | -0.24 | 8.17E-01 | 9.22E-01 | -6.67 |
| 1447097_PM_at   | Gm3604                                                                                                                      | NA      | 0.02  | 2.29 | 0.24  | 8.17E-01 | 9.22E-01 | -6.67 |
| 1433512_PM_at   | Fli1                                                                                                                        | FLI1    | 0.02  | 1.94 | 0.24  | 8.17E-01 | 9.22E-01 | -6.67 |
| 1444646_PM_at   | Brc2                                                                                                                        | NA      | 0.03  | 2.46 | 0.24  | 8.17E-01 | 9.22E-01 | -6.67 |
| 1440463_PM_at   | 5430414B19Rik                                                                                                               | NA      | 0.05  | 2.46 | 0.24  | 8.17E-01 | 9.22E-01 | -6.67 |
| 1442095_PM_at   | Asxl3                                                                                                                       | ASXL3   | 0.02  | 2.20 | 0.24  | 8.17E-01 | 9.22E-01 | -6.67 |
| 1429374_PM_at   | Cypt12                                                                                                                      | NA      | 0.02  | 2.29 | 0.24  | 8.17E-01 | 9.22E-01 | -6.67 |
| 1415872_PM_at   | Hnrnp1                                                                                                                      | HNRNP1  | -0.09 | 8.12 | -0.24 | 8.17E-01 | 9.22E-01 | -6.67 |

|                        |                                                |           |       |      |       |          |          |       |
|------------------------|------------------------------------------------|-----------|-------|------|-------|----------|----------|-------|
| 1445681_PM_at          | ---                                            | NA        | -0.03 | 2.20 | -0.24 | 8.17E-01 | 9.22E-01 | -6.67 |
| 1458174_PM_at          | Spice1                                         | SPICE1    | -0.02 | 2.22 | -0.24 | 8.17E-01 | 9.22E-01 | -6.67 |
| 1435847_PM_at          | Cdc42bpa                                       | CDC42BPA  | 0.07  | 3.83 | 0.24  | 8.17E-01 | 9.22E-01 | -6.67 |
| 1457457_PM_at          | ---                                            | NA        | -0.04 | 3.08 | -0.24 | 8.17E-01 | 9.22E-01 | -6.67 |
| 1459894_PM_at          | Iqgap2                                         | IQGAP2    | 0.08  | 4.03 | 0.24  | 8.17E-01 | 9.22E-01 | -6.67 |
| 1449072_PM_a_at        | N6amt2                                         | EEF1AKMT1 | 0.08  | 3.98 | 0.24  | 8.17E-01 | 9.22E-01 | -6.67 |
| 1431968_PM_at          | ---                                            | NA        | -0.03 | 2.17 | -0.24 | 8.17E-01 | 9.22E-01 | -6.67 |
| 1459697_PM_at          | ---                                            | NA        | -0.02 | 2.43 | -0.24 | 8.17E-01 | 9.22E-01 | -6.67 |
| 1427603_PM_at          | Atf7ip2                                        | ATF7IP2   | -0.02 | 2.21 | -0.24 | 8.17E-01 | 9.22E-01 | -6.67 |
| 1418173_PM_at          | Krt25                                          | KRT25     | 0.03  | 2.12 | 0.24  | 8.17E-01 | 9.22E-01 | -6.67 |
| 1453213_PM_at          | Spata9                                         | SPATA9    | 0.03  | 2.26 | 0.24  | 8.17E-01 | 9.22E-01 | -6.67 |
| 1427579_PM_at          | Rhbdl3                                         | RHBDL3    | 0.03  | 2.51 | 0.24  | 8.17E-01 | 9.22E-01 | -6.67 |
| 1426387_PM_x_at        | Pisd /// Pisd-ps1 /// Pisd-ps2<br>/// Pisd-ps3 | NA        | -0.06 | 9.20 | -0.24 | 8.17E-01 | 9.22E-01 | -6.67 |
| 1444159_PM_at          | ---                                            | NA        | -0.04 | 2.90 | -0.24 | 8.17E-01 | 9.22E-01 | -6.67 |
| 1431384_PM_at          | Spem1                                          | SPEM1     | 0.02  | 2.30 | 0.24  | 8.17E-01 | 9.22E-01 | -6.67 |
| 1422980_PM_a_at        | Bet1l                                          | BET1L     | 0.03  | 3.97 | 0.24  | 8.17E-01 | 9.22E-01 | -6.67 |
| 1432509_PM_at          | 5033430115Rik                                  | NA        | -0.02 | 2.50 | -0.24 | 8.18E-01 | 9.22E-01 | -6.67 |
| 1435515_PM_at          | Gpr137c                                        | NA        | 0.04  | 3.04 | 0.24  | 8.18E-01 | 9.22E-01 | -6.67 |
| 1440575_PM_at          | Hspa4                                          | HSPA4     | -0.02 | 2.52 | -0.24 | 8.18E-01 | 9.22E-01 | -6.67 |
| 1420470_PM_at          | Sult1c1                                        | SULT1C3   | 0.03  | 2.44 | 0.24  | 8.18E-01 | 9.22E-01 | -6.67 |
| 1418728_PM_at          | Star                                           | STAR      | -0.04 | 2.58 | -0.24 | 8.18E-01 | 9.22E-01 | -6.67 |
| AFFX-NonspecificGC9_at | ---                                            | NA        | 0.02  | 1.97 | 0.24  | 8.18E-01 | 9.22E-01 | -6.67 |
| 1427061_PM_at          | Rbbp8                                          | RBBP8     | 0.04  | 2.55 | 0.24  | 8.18E-01 | 9.22E-01 | -6.67 |
| 1442905_PM_at          | ---                                            | NA        | 0.05  | 3.49 | 0.24  | 8.18E-01 | 9.22E-01 | -6.67 |
| 1428169_PM_at          | Atg16l1                                        | ATG16L1   | -0.05 | 3.08 | -0.24 | 8.18E-01 | 9.22E-01 | -6.67 |
| 1438556_PM_a_at        | Tmod3                                          | TMOD3     | -0.05 | 2.19 | -0.24 | 8.18E-01 | 9.22E-01 | -6.67 |
| 1441605_PM_at          | ---                                            | NA        | -0.03 | 2.49 | -0.24 | 8.18E-01 | 9.22E-01 | -6.67 |
| 1430135_PM_at          | Dnase2a /// Gm38426                            | DNASE2    | 0.02  | 2.39 | 0.24  | 8.18E-01 | 9.22E-01 | -6.67 |
| 1432958_PM_at          | ---                                            | NA        | 0.03  | 2.50 | 0.24  | 8.18E-01 | 9.22E-01 | -6.67 |
| 1446989_PM_at          | ---                                            | NA        | 0.03  | 2.59 | 0.24  | 8.18E-01 | 9.22E-01 | -6.67 |
| 1447171_PM_at          | ---                                            | NA        | 0.04  | 2.41 | 0.24  | 8.18E-01 | 9.22E-01 | -6.67 |
| 1428625_PM_a_at        | Rmi1                                           | RMI1      | 0.06  | 3.59 | 0.24  | 8.18E-01 | 9.22E-01 | -6.67 |
| 1450478_PM_a_at        | Ptpn12                                         | PTPN12    | 0.07  | 3.53 | 0.24  | 8.18E-01 | 9.22E-01 | -6.67 |
| 1460320_PM_at          | Becn1                                          | BECN1     | 0.10  | 3.63 | 0.24  | 8.18E-01 | 9.22E-01 | -6.67 |
| 1441586_PM_at          | ---                                            | NA        | -0.06 | 3.25 | -0.24 | 8.18E-01 | 9.22E-01 | -6.67 |
| 1460218_PM_at          | Cd52                                           | NA        | -0.02 | 2.40 | -0.24 | 8.18E-01 | 9.22E-01 | -6.67 |
| 1424826_PM_s_at        | Mtss1                                          | MTSS1     | 0.05  | 2.54 | 0.24  | 8.18E-01 | 9.22E-01 | -6.67 |
| 1436916_PM_at          | Tmem108                                        | TMEM108   | -0.08 | 3.09 | -0.24 | 8.18E-01 | 9.22E-01 | -6.67 |
| 1425627_PM_x_at        | Gstm1                                          | NA        | -0.03 | 2.29 | -0.24 | 8.18E-01 | 9.22E-01 | -6.67 |
| 1454587_PM_at          | ---                                            | NA        | 0.04  | 2.35 | 0.24  | 8.18E-01 | 9.22E-01 | -6.67 |
| 1435392_PM_at          | Wdr17                                          | WDR17     | 0.05  | 4.86 | 0.24  | 8.18E-01 | 9.22E-01 | -6.67 |
| 1446936_PM_at          | ---                                            | NA        | -0.02 | 2.31 | -0.24 | 8.18E-01 | 9.22E-01 | -6.67 |
| 1418712_PM_at          | Cdc42ep5                                       | CDC42EP5  | 0.03  | 2.42 | 0.24  | 8.18E-01 | 9.22E-01 | -6.67 |
| 1422245_PM_a_at        | Mrv1                                           | MRV1      | 0.03  | 2.49 | 0.24  | 8.18E-01 | 9.22E-01 | -6.67 |
| 1445075_PM_at          | ---                                            | NA        | 0.04  | 3.27 | 0.24  | 8.18E-01 | 9.22E-01 | -6.67 |
| 1418892_PM_at          | Rhoj                                           | RHOJ      | 0.09  | 3.10 | 0.24  | 8.18E-01 | 9.22E-01 | -6.67 |
| 1433913_PM_at          | Uri1                                           | URI1      | 0.12  | 5.87 | 0.24  | 8.18E-01 | 9.22E-01 | -6.67 |
| 1422862_PM_at          | Pdlim5                                         | PDLIM5    | -0.03 | 2.08 | -0.24 | 8.18E-01 | 9.22E-01 | -6.67 |
| 1443755_PM_at          | ---                                            | NA        | 0.02  | 2.40 | 0.24  | 8.18E-01 | 9.22E-01 | -6.67 |
| 1447643_PM_x_at        | Snai2                                          | SNAI2     | -0.11 | 2.77 | -0.24 | 8.19E-01 | 9.22E-01 | -6.67 |
| 1428842_PM_a_at        | Ngfrap1                                        | BEX3      | -0.09 | 7.08 | -0.24 | 8.19E-01 | 9.22E-01 | -6.67 |
| 1436424_PM_at          | 1600020E01Rik                                  | NA        | -0.06 | 3.04 | -0.24 | 8.19E-01 | 9.22E-01 | -6.67 |
| 1447236_PM_at          | Kif21a                                         | KIF21A    | -0.04 | 2.64 | -0.24 | 8.19E-01 | 9.22E-01 | -6.67 |
| 1428991_PM_at          | Hrasl5                                         | HRASL5    | -0.03 | 2.35 | -0.24 | 8.18E-01 | 9.22E-01 | -6.67 |
| 1436384_PM_at          | Rps10 /// Rps10-ps2                            | NA        | 0.02  | 2.34 | 0.24  | 8.19E-01 | 9.22E-01 | -6.67 |
| 1423825_PM_at          | Wls                                            | WLS       | 0.04  | 2.75 | 0.24  | 8.19E-01 | 9.22E-01 | -6.67 |
| 1455412_PM_at          | Sfmbt1                                         | SFMBT1    | -0.15 | 4.78 | -0.24 | 8.19E-01 | 9.22E-01 | -6.67 |
| 1447153_PM_x_at        | ---                                            | NA        | -0.02 | 2.14 | -0.24 | 8.19E-01 | 9.22E-01 | -6.67 |
| 1433696_PM_at          | Hn1                                            | JPT2      | 0.02  | 2.17 | 0.23  | 8.19E-01 | 9.22E-01 | -6.67 |
| 1441886_PM_at          | Ccdc79                                         | TERB1     | 0.03  | 2.17 | 0.23  | 8.19E-01 | 9.22E-01 | -6.67 |
| 1446141_PM_at          | ---                                            | NA        | 0.03  | 2.48 | 0.23  | 8.19E-01 | 9.22E-01 | -6.67 |
| 1442916_PM_at          | ---                                            | NA        | 0.04  | 2.30 | 0.23  | 8.19E-01 | 9.22E-01 | -6.67 |
| 1419579_PM_at          | Slc7a12                                        | NA        | 0.07  | 2.74 | 0.23  | 8.19E-01 | 9.22E-01 | -6.67 |
| 1435159_PM_at          | 9430038I01Rik                                  | LINC00959 | -0.03 | 2.56 | -0.23 | 8.19E-01 | 9.22E-01 | -6.67 |
| 1459560_PM_at          | Spopl                                          | SPOPL     | 0.02  | 2.57 | 0.23  | 8.19E-01 | 9.22E-01 | -6.67 |
| 1422028_PM_a_at        | Ets1                                           | ETS1      | 0.04  | 2.26 | 0.23  | 8.19E-01 | 9.22E-01 | -6.67 |
| 1426745_PM_at          | Rnasek                                         | RNASEK    | 0.05  | 3.69 | 0.23  | 8.19E-01 | 9.22E-01 | -6.67 |
| 1460669_PM_at          | Ilf3                                           | ILF3      | -0.07 | 5.17 | -0.23 | 8.19E-01 | 9.22E-01 | -6.67 |
| 1450172_PM_at          | Pknox1                                         | PKNOX1    | -0.06 | 2.93 | -0.23 | 8.19E-01 | 9.22E-01 | -6.67 |
| 1442237_PM_at          | ---                                            | NA        | 0.03  | 2.14 | 0.23  | 8.19E-01 | 9.22E-01 | -6.67 |
| 1419090_PM_x_at        | Egfbp2 /// Klk1b26                             | KLK3      | 0.03  | 2.56 | 0.23  | 8.19E-01 | 9.22E-01 | -6.67 |
| 1459973_PM_x_at        | Dpp4                                           | DPP4      | -0.02 | 2.20 | -0.23 | 8.19E-01 | 9.22E-01 | -6.67 |
| 1445719_PM_at          | Sf3a1                                          | NA        | 0.02  | 2.52 | 0.23  | 8.19E-01 | 9.22E-01 | -6.67 |
| 1439483_PM_at          | Al506816                                       | NA        | 0.02  | 2.15 | 0.23  | 8.19E-01 | 9.22E-01 | -6.67 |

|                 |                   |            |       |      |       |          |          |       |
|-----------------|-------------------|------------|-------|------|-------|----------|----------|-------|
| 1421175_PM_at   | Myt1l             | MYT1L      | -0.06 | 4.59 | -0.23 | 8.19E-01 | 9.23E-01 | -6.67 |
| 1441404_PM_at   | ---               | NA         | 0.06  | 4.08 | 0.23  | 8.19E-01 | 9.23E-01 | -6.67 |
| 1455535_PM_at   | Sox5              | SOX5       | 0.02  | 2.37 | 0.23  | 8.19E-01 | 9.23E-01 | -6.67 |
| 1432741_PM_at   | ---               | NA         | -0.02 | 1.99 | -0.23 | 8.19E-01 | 9.23E-01 | -6.67 |
| 1419944_PM_at   | Ccnb1             | NA         | 0.03  | 2.20 | 0.23  | 8.19E-01 | 9.23E-01 | -6.67 |
| 1427066_PM_a_at | Gid4              | GID4       | -0.08 | 4.03 | -0.23 | 8.20E-01 | 9.23E-01 | -6.67 |
| 1441750_PM_x_at | 4930447F24Rik     | NA         | -0.02 | 1.98 | -0.23 | 8.20E-01 | 9.23E-01 | -6.67 |
| 1431511_PM_at   | 9230110F15Rik     | NA         | 0.02  | 2.03 | 0.23  | 8.20E-01 | 9.23E-01 | -6.67 |
| 1424495_PM_a_at | Cklf              | CKLF       | 0.03  | 2.18 | 0.23  | 8.20E-01 | 9.23E-01 | -6.67 |
| 1449957_PM_at   | Ptprv             | NA         | -0.03 | 2.79 | -0.23 | 8.20E-01 | 9.23E-01 | -6.67 |
| 1422271_PM_at   | Npy4r             | AC245041.1 | 0.03  | 2.17 | 0.23  | 8.20E-01 | 9.23E-01 | -6.67 |
| 1458774_PM_at   | ---               | NA         | 0.04  | 2.51 | 0.23  | 8.20E-01 | 9.23E-01 | -6.67 |
| 1446045_PM_at   | AU024581          | NA         | -0.13 | 3.13 | -0.23 | 8.20E-01 | 9.23E-01 | -6.67 |
| 1459375_PM_at   | ---               | NA         | 0.03  | 2.12 | 0.23  | 8.20E-01 | 9.23E-01 | -6.67 |
| 1429149_PM_at   | Gins3             | GIN53      | 0.04  | 2.71 | 0.23  | 8.20E-01 | 9.23E-01 | -6.67 |
| 1418574_PM_a_at | Shfm1             | NA         | 0.10  | 5.48 | 0.23  | 8.20E-01 | 9.23E-01 | -6.67 |
| 1442289_PM_at   | Taf1d             | NA         | -0.07 | 2.96 | -0.23 | 8.20E-01 | 9.23E-01 | -6.67 |
| 1460183_PM_at   | Adprh             | NA         | -0.07 | 2.95 | -0.23 | 8.20E-01 | 9.23E-01 | -6.67 |
| 1448319_PM_at   | Akr1b3            | AKR1B1     | -0.05 | 3.47 | -0.23 | 8.20E-01 | 9.23E-01 | -6.67 |
| 1416296_PM_at   | Il2rg             | IL2RG      | -0.04 | 2.38 | -0.23 | 8.20E-01 | 9.23E-01 | -6.67 |
| 1422700_PM_at   | Alox12            | ALOX12     | -0.04 | 2.59 | -0.23 | 8.20E-01 | 9.23E-01 | -6.67 |
| 1457315_PM_at   | Iba57             | IBA57      | -0.03 | 2.49 | -0.23 | 8.20E-01 | 9.23E-01 | -6.67 |
| 1423011_PM_at   | Mecom             | MECOM      | -0.02 | 2.28 | -0.23 | 8.20E-01 | 9.23E-01 | -6.67 |
| 1453250_PM_at   | Vwa3b             | NA         | 0.03  | 2.66 | 0.23  | 8.20E-01 | 9.23E-01 | -6.67 |
| 1441779_PM_at   | ---               | NA         | 0.04  | 2.63 | 0.23  | 8.20E-01 | 9.23E-01 | -6.67 |
| 1423966_PM_at   | Cd99l2            | CD99L2     | 0.05  | 2.60 | 0.23  | 8.20E-01 | 9.23E-01 | -6.67 |
| 1443239_PM_at   | ---               | NA         | 0.06  | 2.49 | 0.23  | 8.20E-01 | 9.23E-01 | -6.67 |
| 1459331_PM_at   | ---               | NA         | 0.06  | 2.93 | 0.23  | 8.20E-01 | 9.23E-01 | -6.67 |
| 1450783_PM_at   | Ifit1             | IFIT1B     | -0.07 | 2.60 | -0.23 | 8.20E-01 | 9.23E-01 | -6.67 |
| 1442648_PM_at   | Zfp563            | NA         | -0.07 | 2.82 | -0.23 | 8.20E-01 | 9.23E-01 | -6.67 |
| 1419375_PM_at   | Wbp4              | WBP4       | -0.04 | 2.50 | -0.23 | 8.20E-01 | 9.23E-01 | -6.67 |
| 1432362_PM_at   | Cenpp             | NA         | -0.02 | 2.82 | -0.23 | 8.20E-01 | 9.23E-01 | -6.67 |
| 1433298_PM_at   | 5830461L22Rik     | NA         | -0.02 | 2.45 | -0.23 | 8.20E-01 | 9.23E-01 | -6.67 |
| 1451824_PM_at   | Btn1a1            | BTN1A1     | -0.02 | 2.04 | -0.23 | 8.20E-01 | 9.23E-01 | -6.67 |
| 1422836_PM_at   | Mbnl3             | MBNL3      | 0.02  | 1.81 | 0.23  | 8.20E-01 | 9.23E-01 | -6.67 |
| 1445811_PM_at   | ---               | NA         | 0.02  | 2.97 | 0.23  | 8.20E-01 | 9.23E-01 | -6.67 |
| 1456163_PM_at   | Fam72a            | FAM72D     | 0.03  | 2.43 | 0.23  | 8.20E-01 | 9.23E-01 | -6.67 |
| 1450696_PM_at   | Psmb9             | PSMB9      | 0.03  | 2.72 | 0.23  | 8.20E-01 | 9.23E-01 | -6.67 |
| 1435536_PM_at   | Ddj2              | RSC1A1     | 0.04  | 3.59 | 0.23  | 8.20E-01 | 9.23E-01 | -6.67 |
| 1450938_PM_at   | Pnn               | PNN        | 0.05  | 2.71 | 0.23  | 8.20E-01 | 9.23E-01 | -6.67 |
| 1444089_PM_at   | Sptbn1            | SPTBN1     | 0.09  | 4.11 | 0.23  | 8.20E-01 | 9.23E-01 | -6.67 |
| 1420627_PM_a_at | Csn1s1            | NA         | 0.02  | 2.14 | 0.23  | 8.20E-01 | 9.23E-01 | -6.67 |
| 1458054_PM_at   | Ext1              | EXT1       | 0.02  | 2.49 | 0.23  | 8.21E-01 | 9.23E-01 | -6.67 |
| 1458994_PM_at   | ---               | NA         | 0.03  | 2.70 | 0.23  | 8.21E-01 | 9.23E-01 | -6.67 |
| 1425893_PM_a_at | Fhit              | FHIT       | -0.02 | 2.22 | -0.23 | 8.21E-01 | 9.23E-01 | -6.67 |
| 1436673_PM_at   | Dcun1d3           | DCUN1D3    | 0.03  | 2.26 | 0.23  | 8.21E-01 | 9.23E-01 | -6.67 |
| 1441797_PM_at   | ---               | NA         | 0.03  | 2.37 | 0.23  | 8.21E-01 | 9.23E-01 | -6.67 |
| 1426237_PM_at   | Sp2               | SP2        | 0.04  | 3.90 | 0.23  | 8.21E-01 | 9.23E-01 | -6.67 |
| 1445504_PM_at   | Gm5124            | NA         | -0.14 | 6.79 | -0.23 | 8.21E-01 | 9.23E-01 | -6.67 |
| 1432590_PM_at   | Gm11783           | NA         | -0.06 | 2.77 | -0.23 | 8.21E-01 | 9.23E-01 | -6.67 |
| 1457812_PM_at   | Trp53bp1          | TP53BP1    | -0.05 | 2.51 | -0.23 | 8.21E-01 | 9.23E-01 | -6.67 |
| 1430879_PM_at   | ---               | NA         | -0.05 | 2.58 | -0.23 | 8.21E-01 | 9.23E-01 | -6.67 |
| 1416581_PM_at   | Wdr5              | WDR5       | -0.04 | 3.54 | -0.23 | 8.21E-01 | 9.23E-01 | -6.67 |
| 1437721_PM_at   | Coro1c            | CORO1C     | -0.03 | 1.99 | -0.23 | 8.21E-01 | 9.23E-01 | -6.67 |
| 1439312_PM_at   | Gm15631           | NA         | -0.02 | 2.27 | -0.23 | 8.21E-01 | 9.23E-01 | -6.67 |
| 1419556_PM_at   | Elf5              | ELF5       | 0.02  | 2.11 | 0.23  | 8.21E-01 | 9.23E-01 | -6.67 |
| 1430146_PM_at   | 4933402N03Rik     | C10orf120  | 0.02  | 2.23 | 0.23  | 8.21E-01 | 9.23E-01 | -6.67 |
| 1452325_PM_at   | Trp73             | TP73       | 0.02  | 2.42 | 0.23  | 8.21E-01 | 9.23E-01 | -6.67 |
| 1420179_PM_at   | ---               | NA         | 0.03  | 2.50 | 0.23  | 8.21E-01 | 9.23E-01 | -6.67 |
| 1431812_PM_a_at | Slc6a9            | SLC6A9     | 0.03  | 3.10 | 0.23  | 8.21E-01 | 9.23E-01 | -6.67 |
| 1445619_PM_at   | ---               | NA         | 0.03  | 3.38 | 0.23  | 8.21E-01 | 9.23E-01 | -6.67 |
| 1430095_PM_at   | D930020B18Rik     | C12orf56   | 0.03  | 2.48 | 0.23  | 8.21E-01 | 9.23E-01 | -6.67 |
| 1434154_PM_at   | Kctd13            | KCTD13     | 0.06  | 3.15 | 0.23  | 8.21E-01 | 9.23E-01 | -6.67 |
| 1420417_PM_at   | Sema3a            | NA         | 0.02  | 2.20 | 0.23  | 8.21E-01 | 9.23E-01 | -6.67 |
| 1459111_PM_at   | 4831440E17Rik     | NA         | 0.03  | 2.57 | 0.23  | 8.21E-01 | 9.23E-01 | -6.67 |
| 1460287_PM_at   | Timp2             | TIMP2      | -0.11 | 4.55 | -0.23 | 8.21E-01 | 9.23E-01 | -6.67 |
| 1432953_PM_at   | 4921520E09Rik     | NA         | -0.03 | 2.02 | -0.23 | 8.21E-01 | 9.23E-01 | -6.67 |
| 1431856_PM_a_at | C1qtnf6           | C1QTNF6    | -0.03 | 2.47 | -0.23 | 8.21E-01 | 9.23E-01 | -6.67 |
| 1432519_PM_at   | 1810059H22Rik /// | Gm15411    | -0.02 | 2.26 | -0.23 | 8.21E-01 | 9.23E-01 | -6.67 |
| 1420334_PM_at   | Slc12a8           | SLC12A8    | -0.02 | 2.49 | -0.23 | 8.21E-01 | 9.23E-01 | -6.67 |
| 1451245_PM_at   | Lrrc3b            | LRRC3B     | 0.03  | 2.90 | 0.23  | 8.21E-01 | 9.23E-01 | -6.67 |
| 1450837_PM_at   | Prp2              | NA         | 0.04  | 2.44 | 0.23  | 8.21E-01 | 9.23E-01 | -6.67 |
| 1443983_PM_at   | ---               | NA         | 0.08  | 4.39 | 0.23  | 8.21E-01 | 9.23E-01 | -6.67 |
| 1429473_PM_at   | Zfp869            | NA         | 0.03  | 2.37 | 0.23  | 8.21E-01 | 9.23E-01 | -6.67 |

|                 |                           |          |       |      |       |          |          |       |
|-----------------|---------------------------|----------|-------|------|-------|----------|----------|-------|
| 1420746_PM_at   | PrI3a1                    | PRL      | 0.04  | 2.40 | 0.23  | 8.21E-01 | 9.23E-01 | -6.67 |
| 1425840_PM_a_at | Sema3f                    | SEMA3F   | 0.02  | 2.39 | 0.23  | 8.21E-01 | 9.23E-01 | -6.67 |
| 1434510_PM_at   | Paps2                     | PAPSS2   | 0.02  | 2.73 | 0.23  | 8.21E-01 | 9.23E-01 | -6.67 |
| 1456020_PM_at   | Sh3tc2                    | SH3TC2   | 0.02  | 2.71 | 0.23  | 8.21E-01 | 9.23E-01 | -6.67 |
| 1424385_PM_at   | Gon4l                     | YY1AP1   | -0.07 | 5.51 | -0.23 | 8.22E-01 | 9.23E-01 | -6.67 |
| 1431788_PM_at   | Fabp12                    | FABP12   | -0.02 | 2.41 | -0.23 | 8.22E-01 | 9.23E-01 | -6.67 |
| 1442078_PM_at   | ---                       | NA       | 0.03  | 2.57 | 0.23  | 8.22E-01 | 9.23E-01 | -6.67 |
| 1431000_PM_at   | Gpatch11                  | GPATCH11 | -0.02 | 2.22 | -0.23 | 8.22E-01 | 9.23E-01 | -6.67 |
| 1458712_PM_at   | ---                       | NA       | 0.07  | 3.10 | 0.23  | 8.22E-01 | 9.23E-01 | -6.67 |
| 1440957_PM_at   | Defb29                    | DEFB116  | 0.02  | 2.91 | 0.23  | 8.22E-01 | 9.23E-01 | -6.67 |
| 1420667_PM_at   | Doc2b                     | DOC2B    | -0.03 | 2.55 | -0.23 | 8.22E-01 | 9.23E-01 | -6.67 |
| 1433064_PM_at   | Acot12                    | ACOT12   | -0.03 | 2.61 | -0.23 | 8.22E-01 | 9.23E-01 | -6.67 |
| 1454105_PM_at   | ---                       | NA       | -0.02 | 2.11 | -0.23 | 8.22E-01 | 9.23E-01 | -6.67 |
| 1458327_PM_x_at | Slc26a1                   | SLC26A1  | 0.02  | 2.26 | 0.23  | 8.22E-01 | 9.23E-01 | -6.67 |
| 1432553_PM_at   | 1700069L16Rik /// Gm42003 | NA       | 0.03  | 2.62 | 0.23  | 8.22E-01 | 9.23E-01 | -6.67 |
| 1420137_PM_at   | ---                       | NA       | 0.03  | 2.11 | 0.23  | 8.22E-01 | 9.23E-01 | -6.67 |
| 1452153_PM_at   | Fbxo18                    | FBXO18   | 0.03  | 3.30 | 0.23  | 8.22E-01 | 9.23E-01 | -6.67 |
| 1451065_PM_a_at | Ddx39                     | DDX39A   | -0.17 | 4.92 | -0.23 | 8.22E-01 | 9.23E-01 | -6.67 |
| 1431215_PM_at   | Dnajc6                    | DNAJC6   | -0.02 | 2.61 | -0.23 | 8.22E-01 | 9.23E-01 | -6.67 |
| 1439261_PM_x_at | Mitd1                     | MITD1    | -0.02 | 2.13 | -0.23 | 8.22E-01 | 9.23E-01 | -6.67 |
| 1431960_PM_at   | Wwox                      | WWOX     | 0.02  | 2.21 | 0.23  | 8.22E-01 | 9.23E-01 | -6.67 |
| 1445997_PM_at   | ---                       | NA       | 0.02  | 2.18 | 0.23  | 8.22E-01 | 9.23E-01 | -6.67 |
| 1431536_PM_at   | 4933432K03Rik             | NA       | 0.03  | 1.93 | 0.23  | 8.22E-01 | 9.23E-01 | -6.67 |
| 1427703_PM_at   | Pafah1b1                  | PAFAH1B1 | -0.09 | 3.20 | -0.23 | 8.22E-01 | 9.23E-01 | -6.67 |
| 1436650_PM_at   | Filip1                    | FILIP1   | -0.06 | 2.28 | -0.23 | 8.22E-01 | 9.23E-01 | -6.67 |
| 1455166_PM_at   | Arl5b                     | ARL5B    | 0.05  | 4.20 | 0.23  | 8.22E-01 | 9.24E-01 | -6.67 |
| 1448686_PM_at   | Il16                      | IL16     | -0.12 | 4.17 | -0.23 | 8.22E-01 | 9.24E-01 | -6.67 |
| 1424954_PM_a_at | Pip5k1c                   | PIP5K1C  | -0.06 | 6.90 | -0.23 | 8.22E-01 | 9.24E-01 | -6.67 |
| 1421338_PM_at   | Elf4                      | ELF4     | -0.04 | 2.35 | -0.23 | 8.22E-01 | 9.24E-01 | -6.67 |
| 1449906_PM_at   | Selp                      | SELP     | 0.03  | 2.51 | 0.23  | 8.22E-01 | 9.24E-01 | -6.67 |
| 1446865_PM_at   | ---                       | NA       | -0.02 | 2.39 | -0.23 | 8.22E-01 | 9.24E-01 | -6.67 |
| 1459057_PM_at   | ---                       | NA       | 0.08  | 2.72 | 0.23  | 8.22E-01 | 9.24E-01 | -6.67 |
| 1443290_PM_at   | Ddx25                     | DDX25    | -0.06 | 3.32 | -0.23 | 8.22E-01 | 9.24E-01 | -6.67 |
| 1420055_PM_at   | Sk35c2                    | NA       | 0.03  | 2.45 | 0.23  | 8.22E-01 | 9.24E-01 | -6.67 |
| 1435850_PM_at   | Xkr4                      | NA       | -0.06 | 2.32 | -0.23 | 8.22E-01 | 9.24E-01 | -6.67 |
| 1421838_PM_at   | Rps18                     | RPS18    | -0.02 | 2.25 | -0.23 | 8.23E-01 | 9.24E-01 | -6.67 |
| 1438957_PM_x_at | Cds2                      | CDS2     | -0.19 | 3.86 | -0.23 | 8.23E-01 | 9.24E-01 | -6.67 |
| 1418568_PM_x_at | LOC102642637 /// Srp14    | SRP14    | -0.08 | 5.45 | -0.23 | 8.23E-01 | 9.24E-01 | -6.67 |
| 1433603_PM_at   | Ndufs6                    | NDUFS6   | -0.08 | 5.69 | -0.23 | 8.23E-01 | 9.24E-01 | -6.67 |
| 1452446_PM_a_at | Tmub2                     | TMUB2    | -0.06 | 6.05 | -0.23 | 8.23E-01 | 9.24E-01 | -6.67 |
| 1448515_PM_at   | Tsn                       | TSN      | -0.06 | 2.95 | -0.23 | 8.23E-01 | 9.24E-01 | -6.67 |
| 1454418_PM_at   | ---                       | NA       | -0.06 | 3.07 | -0.23 | 8.23E-01 | 9.24E-01 | -6.67 |
| 1450835_PM_a_at | Gfra4                     | GFRA4    | -0.03 | 2.19 | -0.23 | 8.23E-01 | 9.24E-01 | -6.67 |
| 1459993_PM_at   | ---                       | NA       | -0.03 | 2.58 | -0.23 | 8.23E-01 | 9.24E-01 | -6.67 |
| 1424587_PM_at   | Gemin8                    | GEMIN8   | -0.03 | 2.41 | -0.23 | 8.23E-01 | 9.24E-01 | -6.67 |
| 1440101_PM_at   | Col12a1                   | COL12A1  | -0.03 | 2.26 | -0.23 | 8.23E-01 | 9.24E-01 | -6.67 |
| 1430749_PM_at   | ---                       | NA       | 0.02  | 2.05 | 0.23  | 8.23E-01 | 9.24E-01 | -6.67 |
| 1440556_PM_at   | Gm11985                   | NA       | 0.02  | 2.02 | 0.23  | 8.23E-01 | 9.24E-01 | -6.67 |
| 1459414_PM_at   | ---                       | NA       | 0.03  | 2.90 | 0.23  | 8.23E-01 | 9.24E-01 | -6.67 |
| 1422584_PM_at   | Skiv2l                    | SKIV2L   | 0.03  | 2.45 | 0.23  | 8.23E-01 | 9.24E-01 | -6.67 |
| 1434976_PM_x_at | Elf4ebp1                  | EIF4EBP1 | 0.03  | 2.33 | 0.23  | 8.23E-01 | 9.24E-01 | -6.67 |
| 1458920_PM_at   | ---                       | NA       | 0.04  | 2.47 | 0.23  | 8.23E-01 | 9.24E-01 | -6.67 |
| 1456635_PM_at   | LOC105247074              | NA       | 0.04  | 2.63 | 0.23  | 8.23E-01 | 9.24E-01 | -6.67 |
| 1455708_PM_at   | Tmod3                     | NA       | 0.05  | 2.63 | 0.23  | 8.23E-01 | 9.24E-01 | -6.67 |
| 1452920_PM_a_at | Ppil2                     | PPIL2    | 0.05  | 3.59 | 0.23  | 8.23E-01 | 9.24E-01 | -6.67 |
| 1426215_PM_at   | Ddc                       | DDC      | 0.05  | 2.49 | 0.23  | 8.23E-01 | 9.24E-01 | -6.67 |
| 1457397_PM_at   | Klf14                     | KLF14    | 0.06  | 2.44 | 0.23  | 8.23E-01 | 9.24E-01 | -6.67 |
| 1416846_PM_a_at | Pdzn3                     | PDZRN3   | 0.07  | 3.07 | 0.23  | 8.23E-01 | 9.24E-01 | -6.67 |
| 1450619_PM_x_at | ---                       | NA       | -0.03 | 2.46 | -0.23 | 8.23E-01 | 9.24E-01 | -6.67 |
| 1422603_PM_at   | Rnase4                    | RNASE4   | -0.05 | 2.67 | -0.23 | 8.23E-01 | 9.24E-01 | -6.67 |
| 1421247_PM_at   | Pax9                      | PAX9     | -0.04 | 2.87 | -0.23 | 8.23E-01 | 9.24E-01 | -6.67 |
| 1432521_PM_at   | ---                       | NA       | -0.03 | 2.29 | -0.23 | 8.23E-01 | 9.24E-01 | -6.67 |
| 1458538_PM_at   | ---                       | NA       | -0.02 | 2.32 | -0.23 | 8.23E-01 | 9.24E-01 | -6.67 |
| 1444564_PM_at   | Apod                      | APOD     | -0.12 | 3.32 | -0.23 | 8.23E-01 | 9.24E-01 | -6.67 |
| 1450287_PM_at   | Npas3                     | NPAS3    | -0.04 | 2.72 | -0.23 | 8.23E-01 | 9.24E-01 | -6.67 |
| 1443349_PM_at   | ---                       | NA       | -0.04 | 2.74 | -0.23 | 8.23E-01 | 9.24E-01 | -6.67 |
| 1449337_PM_at   | Tdo2                      | TDO2     | 0.02  | 2.70 | 0.23  | 8.23E-01 | 9.24E-01 | -6.67 |
| 1433398_PM_at   | Fgd3                      | NA       | 0.02  | 2.57 | 0.23  | 8.23E-01 | 9.24E-01 | -6.67 |
| 1419899_PM_at   | Zc3h7a                    | NA       | 0.06  | 3.25 | 0.23  | 8.23E-01 | 9.24E-01 | -6.67 |
| 1416006_PM_at   | Mdk                       | MDK      | 0.07  | 2.73 | 0.23  | 8.23E-01 | 9.24E-01 | -6.67 |
| 1459393_PM_at   | ---                       | NA       | 0.07  | 3.20 | 0.23  | 8.23E-01 | 9.24E-01 | -6.67 |
| 1438531_PM_at   | Kif26b                    | KIF26B   | 0.08  | 3.17 | 0.23  | 8.23E-01 | 9.24E-01 | -6.67 |
| 1446439_PM_at   | ---                       | NA       | 0.03  | 2.24 | 0.23  | 8.23E-01 | 9.24E-01 | -6.67 |
| 1415762_PM_x_at | Mrp52                     | MRPL52   | -0.04 | 3.27 | -0.23 | 8.24E-01 | 9.24E-01 | -6.67 |

|                 |                                                        |            |       |      |       |          |          |       |
|-----------------|--------------------------------------------------------|------------|-------|------|-------|----------|----------|-------|
| 1441998_PM_at   | ---                                                    | NA         | -0.04 | 2.45 | -0.23 | 8.24E-01 | 9.24E-01 | -6.67 |
| 1421300_PM_at   | Adarb2                                                 | ADARB2     | 0.02  | 1.99 | 0.23  | 8.24E-01 | 9.24E-01 | -6.67 |
| 1449778_PM_at   | ---                                                    | NA         | 0.02  | 1.76 | 0.23  | 8.24E-01 | 9.24E-01 | -6.67 |
| 1425994_PM_a_at | Asah2                                                  | ASAH2B     | 0.04  | 2.20 | 0.23  | 8.24E-01 | 9.24E-01 | -6.67 |
| 1441173_PM_at   | 4930451G09Rik                                          | NA         | 0.08  | 2.68 | 0.23  | 8.24E-01 | 9.24E-01 | -6.67 |
| 1455311_PM_at   | Dgcr8                                                  | DGCR8      | 0.09  | 3.48 | 0.23  | 8.24E-01 | 9.24E-01 | -6.67 |
| 1443902_PM_at   | 6430573F11Rik                                          | KIAA1456   | 0.04  | 2.26 | 0.23  | 8.24E-01 | 9.24E-01 | -6.67 |
| 1452535_PM_at   | Ighm                                                   | NA         | 0.02  | 2.39 | 0.23  | 8.24E-01 | 9.24E-01 | -6.67 |
| 1438185_PM_at   | ---                                                    | NA         | 0.06  | 2.57 | 0.23  | 8.24E-01 | 9.24E-01 | -6.67 |
| 1435195_PM_at   | Vash1                                                  | NA         | 0.08  | 3.64 | 0.23  | 8.24E-01 | 9.24E-01 | -6.67 |
| 1433340_PM_at   | Gm38914                                                | NA         | -0.03 | 2.61 | -0.23 | 8.24E-01 | 9.24E-01 | -6.67 |
| 1432394_PM_a_at | Aatf                                                   | AATF       | 0.06  | 4.15 | 0.23  | 8.24E-01 | 9.24E-01 | -6.67 |
| 1439467_PM_at   | ---                                                    | NA         | -0.02 | 2.34 | -0.23 | 8.24E-01 | 9.24E-01 | -6.67 |
| 1443825_PM_x_at | Spaca3                                                 | SPACA3     | 0.02  | 2.03 | 0.23  | 8.24E-01 | 9.24E-01 | -6.67 |
| 1424746_PM_at   | Kif1c                                                  | KIF1C      | 0.04  | 6.90 | 0.23  | 8.24E-01 | 9.24E-01 | -6.67 |
| 1426041_PM_a_at | Fgd4                                                   | FGD4       | 0.05  | 2.71 | 0.23  | 8.24E-01 | 9.24E-01 | -6.67 |
| 1449962_PM_at   | AV320801 /// Gm15023 /// Gm5128 /// Gm7903 /// Pramel3 | NA         | 0.02  | 1.96 | 0.23  | 8.24E-01 | 9.24E-01 | -6.67 |
| 1431599_PM_at   | 2310069B03Rik                                          | NA         | 0.03  | 2.38 | 0.23  | 8.24E-01 | 9.24E-01 | -6.67 |
| 1415890_PM_at   | Paps1                                                  | PAP51      | -0.06 | 3.86 | -0.23 | 8.24E-01 | 9.24E-01 | -6.67 |
| 1440495_PM_at   | Rmst                                                   | NA         | 0.02  | 2.31 | 0.23  | 8.24E-01 | 9.24E-01 | -6.67 |
| 1423843_PM_at   | Lrrc61                                                 | LRRC61     | 0.04  | 2.72 | 0.23  | 8.24E-01 | 9.24E-01 | -6.67 |
| 1418575_PM_at   | Shfm1                                                  | NA         | 0.11  | 4.98 | 0.23  | 8.24E-01 | 9.24E-01 | -6.67 |
| 1418769_PM_at   | Myoz2                                                  | MYOZ2      | -0.04 | 2.56 | -0.23 | 8.24E-01 | 9.24E-01 | -6.67 |
| 1445918_PM_at   | Tmem2                                                  | NA         | -0.03 | 2.39 | -0.23 | 8.24E-01 | 9.24E-01 | -6.67 |
| 1431741_PM_a_at | Pdzd9                                                  | PDZD9      | -0.03 | 2.36 | -0.23 | 8.24E-01 | 9.24E-01 | -6.67 |
| 1443318_PM_at   | Fsbp /// Rad54b                                        | RAD54B     | 0.02  | 2.08 | 0.23  | 8.24E-01 | 9.24E-01 | -6.67 |
| 1426529_PM_a_at | Tagln2                                                 | TAGLN2     | 0.03  | 2.78 | 0.23  | 8.24E-01 | 9.24E-01 | -6.67 |
| 1444019_PM_at   | Lrrc19                                                 | LRRC19     | 0.14  | 3.48 | 0.23  | 8.24E-01 | 9.24E-01 | -6.67 |
| 1455938_PM_x_at | Rad21                                                  | RAD21      | -0.09 | 7.56 | -0.23 | 8.25E-01 | 9.24E-01 | -6.67 |
| 1421977_PM_at   | Mmp19                                                  | MMP19      | -0.03 | 2.38 | -0.23 | 8.25E-01 | 9.24E-01 | -6.67 |
| 1433733_PM_a_at | Cry1                                                   | CRY1       | -0.11 | 3.82 | -0.23 | 8.25E-01 | 9.24E-01 | -6.67 |
| 1417988_PM_at   | Resp18                                                 | RESP18     | 0.07  | 2.70 | 0.23  | 8.25E-01 | 9.24E-01 | -6.67 |
| 1447161_PM_at   | ---                                                    | NA         | 0.02  | 1.94 | 0.23  | 8.25E-01 | 9.24E-01 | -6.67 |
| 1429802_PM_at   | Hsd17b14                                               | HSD17B14   | 0.02  | 2.40 | 0.23  | 8.25E-01 | 9.24E-01 | -6.67 |
| 1420904_PM_at   | Il17ra                                                 | IL17RA     | -0.09 | 6.29 | -0.23 | 8.25E-01 | 9.24E-01 | -6.67 |
| 1449970_PM_at   | Capn12                                                 | CAPN12     | 0.02  | 2.83 | 0.23  | 8.25E-01 | 9.24E-01 | -6.67 |
| 1441981_PM_at   | Tmprss11f                                              | NA         | 0.02  | 1.92 | 0.23  | 8.25E-01 | 9.25E-01 | -6.67 |
| 1452017_PM_at   | Sox15                                                  | SOX15      | 0.04  | 3.16 | 0.23  | 8.25E-01 | 9.25E-01 | -6.67 |
| 1428721_PM_at   | Klh128                                                 | KLHL28     | 0.04  | 2.58 | 0.23  | 8.25E-01 | 9.25E-01 | -6.67 |
| 1418296_PM_at   | Fxyd5                                                  | FXYD5      | 0.05  | 3.56 | 0.23  | 8.25E-01 | 9.25E-01 | -6.67 |
| 1432326_PM_at   | Cldn34b2                                               | CLDN34     | -0.02 | 2.01 | -0.23 | 8.25E-01 | 9.25E-01 | -6.67 |
| 1420274_PM_at   | Tap1                                                   | TAP1       | 0.02  | 2.12 | 0.23  | 8.25E-01 | 9.25E-01 | -6.67 |
| 1429563_PM_x_at | Sp110                                                  | SP110      | -0.05 | 3.91 | -0.23 | 8.25E-01 | 9.25E-01 | -6.67 |
| 1437395_PM_at   | Zcchc11                                                | ZCCHC11    | -0.02 | 2.63 | -0.23 | 8.25E-01 | 9.25E-01 | -6.67 |
| 1429813_PM_at   | Pank1                                                  | NA         | 0.04  | 2.48 | 0.23  | 8.25E-01 | 9.25E-01 | -6.67 |
| 1436620_PM_at   | ---                                                    | NA         | -0.06 | 2.67 | -0.23 | 8.25E-01 | 9.25E-01 | -6.67 |
| 1416895_PM_at   | Efn1                                                   | EFNA1      | 0.04  | 2.68 | 0.23  | 8.25E-01 | 9.25E-01 | -6.67 |
| 1457668_PM_x_at | D4Ert617e                                              | NA         | 0.06  | 3.15 | 0.23  | 8.25E-01 | 9.25E-01 | -6.67 |
| 1439817_PM_at   | Emc7                                                   | EMC7       | -0.06 | 4.55 | -0.23 | 8.25E-01 | 9.25E-01 | -6.67 |
| 1460030_PM_at   | Hecw1                                                  | NA         | -0.02 | 1.94 | -0.23 | 8.25E-01 | 9.25E-01 | -6.67 |
| 1449864_PM_at   | Il4                                                    | IL4        | 0.02  | 2.17 | 0.23  | 8.26E-01 | 9.25E-01 | -6.67 |
| 1428597_PM_at   | Tbc1d9b                                                | TBC1D9B    | 0.03  | 4.77 | 0.23  | 8.26E-01 | 9.25E-01 | -6.67 |
| 1422704_PM_at   | Gk                                                     | GK         | -0.06 | 2.53 | -0.23 | 8.26E-01 | 9.25E-01 | -6.67 |
| 1427833_PM_at   | Spi16                                                  | NA         | -0.03 | 2.40 | -0.23 | 8.26E-01 | 9.25E-01 | -6.67 |
| 1427775_PM_at   | Defb10                                                 | NA         | 0.02  | 2.15 | 0.23  | 8.26E-01 | 9.25E-01 | -6.67 |
| 1429131_PM_at   | Ube2v2                                                 | UBE2V2     | -0.07 | 5.54 | -0.23 | 8.26E-01 | 9.25E-01 | -6.67 |
| 1445122_PM_at   | A830082N09Rik                                          | NA         | 0.04  | 2.41 | 0.23  | 8.26E-01 | 9.25E-01 | -6.67 |
| 1448446_PM_at   | Deaf1                                                  | DEAF1      | 0.05  | 3.39 | 0.23  | 8.26E-01 | 9.25E-01 | -6.67 |
| 1435790_PM_at   | Olfm2                                                  | NA         | -0.04 | 2.79 | -0.23 | 8.26E-01 | 9.25E-01 | -6.67 |
| 1457664_PM_x_at | C2                                                     | C2         | 0.05  | 2.21 | 0.23  | 8.26E-01 | 9.25E-01 | -6.67 |
| 1425789_PM_s_at | Anxa8                                                  | ANXA8L1    | 0.03  | 2.45 | 0.23  | 8.26E-01 | 9.25E-01 | -6.67 |
| 1423789_PM_at   | BC005624                                               | C9orf78    | 0.06  | 4.30 | 0.23  | 8.26E-01 | 9.25E-01 | -6.67 |
| 1447651_PM_x_at | MrpB0                                                  | ACO79447.1 | 0.03  | 2.57 | 0.23  | 8.26E-01 | 9.25E-01 | -6.67 |
| 1436261_PM_at   | ---                                                    | NA         | -0.04 | 2.61 | -0.23 | 8.26E-01 | 9.26E-01 | -6.67 |
| 1436251_PM_at   | Pde1c                                                  | PDE1C      | -0.02 | 1.97 | -0.23 | 8.26E-01 | 9.26E-01 | -6.67 |
| 1445513_PM_at   | ---                                                    | NA         | 0.02  | 2.35 | 0.23  | 8.26E-01 | 9.26E-01 | -6.67 |
| 1460539_PM_at   | 4933404K13Rik                                          | NA         | 0.02  | 2.62 | 0.22  | 8.26E-01 | 9.26E-01 | -6.67 |
| 1449516_PM_a_at | Rgs3                                                   | RG3        | 0.03  | 2.25 | 0.22  | 8.26E-01 | 9.26E-01 | -6.67 |
| 1434148_PM_at   | Tcf4                                                   | TCF4       | 0.05  | 7.19 | 0.22  | 8.26E-01 | 9.26E-01 | -6.67 |
| 1448992_PM_at   | Ina                                                    | INA        | 0.09  | 3.52 | 0.22  | 8.26E-01 | 9.26E-01 | -6.67 |
| 1456901_PM_at   | Adamts20                                               | ADAMTS20   | 0.09  | 2.77 | 0.22  | 8.26E-01 | 9.26E-01 | -6.67 |
| 1458679_PM_a_at | Tatdn1                                                 | TATDN1     | 0.11  | 5.20 | 0.22  | 8.26E-01 | 9.26E-01 | -6.67 |
| 1458319_PM_at   | Wls                                                    | WLS        | 0.03  | 2.03 | 0.22  | 8.26E-01 | 9.26E-01 | -6.67 |



|                 |               |            |       |      |       |          |          |       |
|-----------------|---------------|------------|-------|------|-------|----------|----------|-------|
| 1455328_PM_at   | Asic1         | ASIC1      | -0.05 | 3.34 | -0.22 | 8.27E-01 | 9.26E-01 | -6.67 |
| 1453565_PM_at   | Ndufab1       | NDUFAB1    | -0.05 | 2.47 | -0.22 | 8.27E-01 | 9.26E-01 | -6.67 |
| 1449379_PM_at   | Kdr           | KDR        | 0.03  | 2.64 | 0.22  | 8.27E-01 | 9.26E-01 | -6.67 |
| 1429883_PM_at   | Actl6a        | ACTL6A     | -0.04 | 2.54 | -0.22 | 8.27E-01 | 9.26E-01 | -6.67 |
| 1427220_PM_a_at | Svs5          | NA         | 0.03  | 2.25 | 0.22  | 8.27E-01 | 9.26E-01 | -6.67 |
| 1424307_PM_at   | Arhgap1       | ARHGAP1    | -0.03 | 3.22 | -0.22 | 8.27E-01 | 9.26E-01 | -6.67 |
| 1447163_PM_x_at | ---           | NA         | -0.05 | 3.37 | -0.22 | 8.27E-01 | 9.26E-01 | -6.67 |
| 1431644_PM_a_at | Ica1          | ICA1       | -0.04 | 2.37 | -0.22 | 8.27E-01 | 9.26E-01 | -6.67 |
| 1429378_PM_x_at | AV761184      | NA         | 0.02  | 2.31 | 0.22  | 8.27E-01 | 9.26E-01 | -6.67 |
| 1459878_PM_a_at | ---           | NA         | -0.04 | 4.05 | -0.22 | 8.27E-01 | 9.26E-01 | -6.67 |
| 1459432_PM_at   | ---           | NA         | 0.02  | 2.43 | 0.22  | 8.27E-01 | 9.26E-01 | -6.67 |
| 1426005_PM_at   | Dmp1          | NA         | 0.02  | 2.29 | 0.22  | 8.27E-01 | 9.26E-01 | -6.67 |
| 1426507_PM_at   | Il1f5         | IL36RN     | 0.06  | 2.24 | 0.22  | 8.27E-01 | 9.26E-01 | -6.67 |
| 1439925_PM_at   | Tm4sf1        | TM4SF1     | -0.04 | 2.39 | -0.22 | 8.27E-01 | 9.26E-01 | -6.67 |
| 1437530_PM_at   | ---           | NA         | -0.02 | 2.30 | -0.22 | 8.27E-01 | 9.26E-01 | -6.67 |
| 1418342_PM_at   | Rfc1          | RFC1       | 0.04  | 2.82 | 0.22  | 8.27E-01 | 9.26E-01 | -6.67 |
| 1432012_PM_a_at | Nsun6         | NSUN6      | 0.02  | 2.36 | 0.22  | 8.27E-01 | 9.26E-01 | -6.67 |
| 1437726_PM_x_at | C1qb          | C1QB       | -0.17 | 6.32 | -0.22 | 8.27E-01 | 9.26E-01 | -6.67 |
| 1438269_PM_at   | Zbtb38        | ZBTB38     | -0.06 | 3.62 | -0.22 | 8.27E-01 | 9.26E-01 | -6.67 |
| 1426194_PM_x_at | Rev3l         | REV3L      | 0.02  | 2.36 | 0.22  | 8.27E-01 | 9.26E-01 | -6.67 |
| 1441888_PM_x_at | ---           | NA         | 0.03  | 2.13 | 0.22  | 8.27E-01 | 9.26E-01 | -6.67 |
| 1450691_PM_at   | Caskin2       | CASKIN2    | 0.05  | 3.26 | 0.22  | 8.27E-01 | 9.26E-01 | -6.67 |
| 1438077_PM_at   | Nlrp4a        | NLRP4      | 0.02  | 2.52 | 0.22  | 8.27E-01 | 9.26E-01 | -6.67 |
| 1432080_PM_s_at | Kat8          | KAT8       | 0.03  | 2.20 | 0.22  | 8.27E-01 | 9.26E-01 | -6.67 |
| 1453379_PM_at   | ---           | NA         | 0.06  | 2.47 | 0.22  | 8.27E-01 | 9.26E-01 | -6.67 |
| 1457370_PM_at   | ---           | NA         | -0.03 | 2.53 | -0.22 | 8.28E-01 | 9.26E-01 | -6.67 |
| 1431564_PM_at   | Bcar3         | BCAR3      | 0.03  | 2.30 | 0.22  | 8.27E-01 | 9.26E-01 | -6.67 |
| 1429260_PM_at   | 1810014B01Rik | NA         | 0.06  | 2.99 | 0.22  | 8.28E-01 | 9.26E-01 | -6.67 |
| 1448483_PM_a_at | Ndufb2        | NDUFB2     | 0.06  | 4.94 | 0.22  | 8.28E-01 | 9.26E-01 | -6.67 |
| 1424461_PM_at   | Dctn2         | DCTN2      | -0.05 | 3.84 | -0.22 | 8.28E-01 | 9.26E-01 | -6.67 |
| 1422623_PM_x_at | Rpl41         | RPL41      | -0.05 | 8.18 | -0.22 | 8.28E-01 | 9.26E-01 | -6.67 |
| 1460073_PM_at   | ---           | NA         | -0.04 | 2.14 | -0.22 | 8.28E-01 | 9.26E-01 | -6.67 |
| 1417093_PM_a_at | Gtf2h4        | GTF2H4     | -0.02 | 2.43 | -0.22 | 8.28E-01 | 9.26E-01 | -6.67 |
| 1437483_PM_at   | Zfp513        | ZNF513     | -0.02 | 2.08 | -0.22 | 8.28E-01 | 9.26E-01 | -6.67 |
| 1424118_PM_a_at | Spc25         | SPC25      | 0.02  | 1.97 | 0.22  | 8.28E-01 | 9.26E-01 | -6.67 |
| 1444740_PM_at   | Cers3         | CERS3      | 0.02  | 2.43 | 0.22  | 8.28E-01 | 9.26E-01 | -6.67 |
| 1424975_PM_at   | Siglec f      | NA         | 0.02  | 2.42 | 0.22  | 8.28E-01 | 9.26E-01 | -6.67 |
| 1436653_PM_at   | Tctex1d4      | TCTEX1D4   | 0.03  | 2.57 | 0.22  | 8.28E-01 | 9.26E-01 | -6.67 |
| 1456421_PM_at   | 4930578M01Rik | NA         | 0.03  | 2.64 | 0.22  | 8.28E-01 | 9.26E-01 | -6.67 |
| 1423178_PM_at   | Abi1          | ABI1       | 0.04  | 3.82 | 0.22  | 8.28E-01 | 9.26E-01 | -6.67 |
| 1437248_PM_at   | 2700049A03Rik | KIAA0586   | 0.09  | 3.79 | 0.22  | 8.28E-01 | 9.26E-01 | -6.67 |
| 1449037_PM_at   | Crem          | CREM       | -0.05 | 2.40 | -0.22 | 8.28E-01 | 9.26E-01 | -6.67 |
| 1436733_PM_at   | Plppr1        | PLPPR1     | -0.03 | 2.52 | -0.22 | 8.28E-01 | 9.26E-01 | -6.67 |
| 1450574_PM_at   | Cyp11b2       | CYP11B1    | -0.03 | 2.27 | -0.22 | 8.28E-01 | 9.26E-01 | -6.67 |
| 1451373_PM_at   | Ugt3a1        | UGT3A2     | 0.08  | 3.82 | 0.22  | 8.28E-01 | 9.26E-01 | -6.67 |
| 1448532_PM_at   | Prl8a9        | NA         | 0.02  | 2.19 | 0.22  | 8.28E-01 | 9.26E-01 | -6.67 |
| 1416322_PM_at   | Prelp         | PRELP      | 0.04  | 2.86 | 0.22  | 8.28E-01 | 9.26E-01 | -6.67 |
| 1454679_PM_at   | Champ1        | CHAMP1     | -0.09 | 3.43 | -0.22 | 8.28E-01 | 9.26E-01 | -6.67 |
| 1424784_PM_at   | Gm13139       | NA         | -0.03 | 2.18 | -0.22 | 8.28E-01 | 9.26E-01 | -6.67 |
| 1452234_PM_s_at | Tmem191c      | TMEM191C   | 0.05  | 3.92 | 0.22  | 8.28E-01 | 9.26E-01 | -6.67 |
| 1436107_PM_at   | Lsm8          | LSM8       | -0.09 | 2.93 | -0.22 | 8.28E-01 | 9.26E-01 | -6.68 |
| 1450296_PM_at   | Klrb1a        | KLRB1      | -0.03 | 2.41 | -0.22 | 8.28E-01 | 9.26E-01 | -6.68 |
| 1456602_PM_at   | Tmem231       | AC009163.2 | 0.03  | 2.44 | 0.22  | 8.28E-01 | 9.26E-01 | -6.68 |
| 1425594_PM_at   | Lamc3         | LAMC3      | 0.03  | 2.56 | 0.22  | 8.28E-01 | 9.26E-01 | -6.68 |
| 1450251_PM_a_at | Lnx1          | LNX1       | 0.05  | 3.95 | 0.22  | 8.28E-01 | 9.26E-01 | -6.68 |
| 1454186_PM_a_at | Cars2         | CARS2      | 0.02  | 2.47 | 0.22  | 8.28E-01 | 9.26E-01 | -6.68 |
| 1440066_PM_at   | ---           | NA         | 0.04  | 2.74 | 0.22  | 8.28E-01 | 9.26E-01 | -6.68 |
| 1444811_PM_at   | Sec62         | SEC62      | -0.03 | 2.00 | -0.22 | 8.28E-01 | 9.26E-01 | -6.68 |
| 1420852_PM_a_at | B3gnt2        | B3GNT2     | -0.03 | 2.29 | -0.22 | 8.29E-01 | 9.26E-01 | -6.68 |
| 1428682_PM_at   | Zc3h6         | ZC3H6      | -0.02 | 2.14 | -0.22 | 8.29E-01 | 9.26E-01 | -6.68 |
| 1444209_PM_at   | Fam204a       | FAM204A    | 0.04  | 2.24 | 0.22  | 8.29E-01 | 9.26E-01 | -6.68 |
| 1427218_PM_at   | Klhl1         | KLHL11     | 0.04  | 2.90 | 0.22  | 8.29E-01 | 9.26E-01 | -6.68 |
| 1429760_PM_at   | Rps6ka6       | NA         | 0.04  | 4.06 | 0.22  | 8.29E-01 | 9.26E-01 | -6.68 |
| 1437616_PM_x_at | Zdhc14        | ZDHHC14    | 0.05  | 3.99 | 0.22  | 8.29E-01 | 9.26E-01 | -6.68 |
| 1452036_PM_a_at | Tmpo          | TMPO       | -0.06 | 2.56 | -0.22 | 8.29E-01 | 9.27E-01 | -6.68 |
| 1453371_PM_at   | Rprd2         | NA         | 0.03  | 3.82 | 0.22  | 8.29E-01 | 9.27E-01 | -6.68 |
| 1417801_PM_a_at | Ppfbp2        | PPFBP2     | -0.03 | 2.46 | -0.22 | 8.29E-01 | 9.27E-01 | -6.68 |
| 1447618_PM_at   | B630019K06Rik | NA         | 0.04  | 2.48 | 0.22  | 8.29E-01 | 9.27E-01 | -6.68 |
| 1454098_PM_at   | Olfrl12       | NA         | -0.03 | 2.44 | -0.22 | 8.29E-01 | 9.27E-01 | -6.68 |
| 1418630_PM_at   | Khdrbs1       | KHDRBS1    | -0.03 | 3.04 | -0.22 | 8.29E-01 | 9.27E-01 | -6.68 |
| 1434680_PM_at   | Plekbg3       | PLEKHG3    | -0.03 | 2.30 | -0.22 | 8.29E-01 | 9.27E-01 | -6.68 |
| 1416274_PM_at   | Ctns          | CTNS       | -0.03 | 2.62 | -0.22 | 8.29E-01 | 9.27E-01 | -6.68 |
| 1431942_PM_at   | Wwox          | WWOX       | 0.03  | 2.00 | 0.22  | 8.29E-01 | 9.27E-01 | -6.68 |
| 1433905_PM_at   | Akap7         | AKAP7      | 0.04  | 2.34 | 0.22  | 8.29E-01 | 9.27E-01 | -6.68 |
| 1417222_PM_a_at | Tmem123       | TMEM123    | 0.05  | 2.53 | 0.22  | 8.29E-01 | 9.27E-01 | -6.68 |

|                 |                                    |            |       |      |       |          |          |       |
|-----------------|------------------------------------|------------|-------|------|-------|----------|----------|-------|
| 1415679_PM_at   | Psenen                             | AD000671.1 | 0.10  | 3.62 | 0.22  | 8.29E-01 | 9.27E-01 | -6.68 |
| 1455956_PM_x_at | Ccnd2                              | CCND2      | -0.09 | 5.91 | -0.22 | 8.29E-01 | 9.27E-01 | -6.68 |
| 1422903_PM_at   | Ly86                               | LY86       | -0.08 | 2.68 | -0.22 | 8.29E-01 | 9.27E-01 | -6.68 |
| 1422804_PM_at   | Serpnb6b                           | SERPINB6   | -0.05 | 2.28 | -0.22 | 8.29E-01 | 9.27E-01 | -6.68 |
| 1452195_PM_s_at | LOC100861749 ///Sf1                | SF1        | 0.04  | 5.03 | 0.22  | 8.29E-01 | 9.27E-01 | -6.68 |
| 1440145_PM_at   | H60b                               | NA         | -0.02 | 1.99 | -0.22 | 8.29E-01 | 9.27E-01 | -6.68 |
| 1431947_PM_at   | ---                                | NA         | 0.02  | 2.25 | 0.22  | 8.29E-01 | 9.27E-01 | -6.68 |
| 1435599_PM_at   | Ccm2l                              | CCM2L      | 0.02  | 2.05 | 0.22  | 8.29E-01 | 9.27E-01 | -6.68 |
| 1432020_PM_at   | ---                                | NA         | 0.03  | 2.38 | 0.22  | 8.29E-01 | 9.27E-01 | -6.68 |
| 1426078_PM_a_at | Gpr108                             | GPR108     | 0.05  | 2.74 | 0.22  | 8.29E-01 | 9.27E-01 | -6.68 |
| 1456857_PM_at   | 1500011B03Rik                      | NA         | 0.05  | 3.37 | 0.22  | 8.29E-01 | 9.27E-01 | -6.68 |
| 1448420_PM_a_at | Fbx12                              | FBXL12     | -0.09 | 2.69 | -0.22 | 8.30E-01 | 9.27E-01 | -6.68 |
| 1423685_PM_at   | Aars                               | AARS       | -0.06 | 3.60 | -0.22 | 8.30E-01 | 9.27E-01 | -6.68 |
| 1456388_PM_at   | Atp11a                             | ATP11A     | -0.05 | 3.32 | -0.22 | 8.30E-01 | 9.27E-01 | -6.68 |
| 1454440_PM_at   | ---                                | NA         | -0.02 | 2.93 | -0.22 | 8.30E-01 | 9.27E-01 | -6.68 |
| 1451009_PM_at   | Rnf151                             | RNF151     | -0.02 | 2.18 | -0.22 | 8.30E-01 | 9.27E-01 | -6.68 |
| 1456826_PM_at   | Taok2                              | TAOK2      | 0.03  | 2.32 | 0.22  | 8.30E-01 | 9.27E-01 | -6.68 |
| 1446450_PM_at   | Ttn                                | NA         | 0.02  | 2.13 | 0.22  | 8.30E-01 | 9.27E-01 | -6.68 |
| 1438952_PM_x_at | Tarbp2                             | TARBP2     | 0.03  | 3.82 | 0.22  | 8.30E-01 | 9.27E-01 | -6.68 |
| 1424926_PM_at   | Sec63                              | SEC63      | 0.06  | 3.68 | 0.22  | 8.30E-01 | 9.27E-01 | -6.68 |
| 1436064_PM_x_at | LOC102642752 ///Rps24 ///Rps24-ps3 | RPS24      | 0.08  | 6.03 | 0.22  | 8.30E-01 | 9.27E-01 | -6.68 |
| 1434299_PM_x_at | Ift27                              | IFT27      | 0.10  | 3.18 | 0.22  | 8.30E-01 | 9.27E-01 | -6.68 |
| 1429147_PM_at   | LOC102643144 ///Svip               | NA         | -0.06 | 3.25 | -0.22 | 8.30E-01 | 9.27E-01 | -6.68 |
| 1418654_PM_at   | Hao2                               | HAO2       | -0.03 | 2.16 | -0.22 | 8.30E-01 | 9.27E-01 | -6.68 |
| 1433335_PM_at   | 4930405G09Rik                      | NA         | 0.03  | 2.38 | 0.22  | 8.30E-01 | 9.27E-01 | -6.68 |
| 1445163_PM_at   | ---                                | NA         | 0.03  | 2.49 | 0.22  | 8.30E-01 | 9.27E-01 | -6.68 |
| 1441232_PM_at   | ---                                | NA         | 0.04  | 2.34 | 0.22  | 8.30E-01 | 9.27E-01 | -6.68 |
| 1419584_PM_at   | Ttc28                              | TTC28      | -0.04 | 2.64 | -0.22 | 8.30E-01 | 9.27E-01 | -6.68 |
| 1419088_PM_at   | Timp3                              | TIMP3      | 0.03  | 2.73 | 0.22  | 8.30E-01 | 9.27E-01 | -6.68 |
| 1418688_PM_at   | Calcr                              | CALCR      | -0.02 | 2.39 | -0.22 | 8.30E-01 | 9.27E-01 | -6.68 |
| 1438822_PM_at   | ---                                | NA         | 0.03  | 2.74 | 0.22  | 8.30E-01 | 9.27E-01 | -6.68 |
| 1417958_PM_at   | Tspan1                             | TSPAN1     | 0.07  | 2.71 | 0.22  | 8.30E-01 | 9.27E-01 | -6.68 |
| 1437155_PM_a_at | Wwtr1                              | WWTR1      | -0.03 | 2.25 | -0.22 | 8.30E-01 | 9.27E-01 | -6.68 |
| 1428215_PM_x_at | Tomm7                              | TOMM7      | -0.02 | 4.32 | -0.22 | 8.30E-01 | 9.27E-01 | -6.68 |
| 1420427_PM_a_at | Dhx32                              | DHX32      | 0.02  | 2.28 | 0.22  | 8.30E-01 | 9.27E-01 | -6.68 |
| 1425188_PM_s_at | Sel1l                              | SEL1L      | 0.03  | 2.54 | 0.22  | 8.30E-01 | 9.27E-01 | -6.68 |
| 1430635_PM_at   | Mlana                              | MLANA      | 0.03  | 2.39 | 0.22  | 8.30E-01 | 9.27E-01 | -6.68 |
| 1431871_PM_at   | Nme8                               | NME8       | 0.03  | 2.78 | 0.22  | 8.30E-01 | 9.27E-01 | -6.68 |
| 1457959_PM_at   | Sycp2l                             | NA         | 0.05  | 2.37 | 0.22  | 8.30E-01 | 9.27E-01 | -6.68 |
| 1440251_PM_s_at | Gm38422 ///Zfp64                   | ZFP64      | 0.02  | 2.66 | 0.22  | 8.30E-01 | 9.27E-01 | -6.68 |
| 1457965_PM_at   | ---                                | NA         | -0.02 | 2.30 | -0.22 | 8.30E-01 | 9.27E-01 | -6.68 |
| 1442612_PM_at   | C730036E19Rik                      | NA         | -0.02 | 2.34 | -0.22 | 8.31E-01 | 9.27E-01 | -6.68 |
| 1430022_PM_at   | Sae1                               | NA         | 0.02  | 2.53 | 0.22  | 8.31E-01 | 9.27E-01 | -6.68 |
| 1419352_PM_at   | I7rn6                              | HIKESHI    | 0.05  | 3.56 | 0.22  | 8.31E-01 | 9.27E-01 | -6.68 |
| 1432682_PM_at   | ---                                | NA         | 0.02  | 2.40 | 0.22  | 8.31E-01 | 9.27E-01 | -6.68 |
| 1439410_PM_x_at | Slc25a39                           | SLC25A39   | 0.08  | 5.65 | 0.22  | 8.31E-01 | 9.27E-01 | -6.68 |
| 1433979_PM_at   | Rbms2                              | RBMS2      | 0.05  | 2.50 | 0.22  | 8.31E-01 | 9.27E-01 | -6.68 |
| 1416982_PM_at   | Foxo1                              | FOXO1      | 0.02  | 2.36 | 0.22  | 8.31E-01 | 9.28E-01 | -6.68 |
| 1431017_PM_at   | Rcvtb2                             | RCVTB2     | -0.05 | 2.54 | -0.22 | 8.31E-01 | 9.28E-01 | -6.68 |
| 1437570_PM_at   | Luc7l3                             | LUC7L3     | -0.04 | 2.56 | -0.22 | 8.31E-01 | 9.28E-01 | -6.68 |
| 1452986_PM_at   | Hgd                                | HGD        | 0.02  | 2.41 | 0.22  | 8.31E-01 | 9.28E-01 | -6.68 |
| 1437955_PM_at   | Ubqlnl                             | UBQLNL     | 0.04  | 2.31 | 0.22  | 8.31E-01 | 9.28E-01 | -6.68 |
| 1417968_PM_a_at | Mbd1                               | MBD1       | -0.06 | 2.66 | -0.22 | 8.31E-01 | 9.28E-01 | -6.68 |
| 1432870_PM_at   | 4932429P19Rik                      | NA         | -0.03 | 2.40 | -0.22 | 8.31E-01 | 9.28E-01 | -6.68 |
| 1431072_PM_a_at | Ccdc50                             | CCDC50     | -0.04 | 5.54 | -0.22 | 8.31E-01 | 9.28E-01 | -6.68 |
| 1458610_PM_at   | ---                                | NA         | -0.02 | 2.05 | -0.22 | 8.31E-01 | 9.28E-01 | -6.68 |
| 1423837_PM_at   | Ist1                               | IST1       | -0.03 | 2.18 | -0.22 | 8.31E-01 | 9.28E-01 | -6.68 |
| 1419286_PM_s_at | Ift81                              | IFT81      | -0.07 | 2.43 | -0.22 | 8.32E-01 | 9.28E-01 | -6.68 |
| 1435716_PM_x_at | Snrpn ///Snurf                     | SNRPN      | -0.05 | 9.28 | -0.22 | 8.32E-01 | 9.28E-01 | -6.68 |
| 1434898_PM_at   | Tnrc6a                             | TNRC6A     | -0.04 | 3.05 | -0.22 | 8.32E-01 | 9.28E-01 | -6.68 |
| 1433792_PM_at   | Nrip2                              | NRIP2      | -0.04 | 3.29 | -0.22 | 8.32E-01 | 9.28E-01 | -6.68 |
| 1456328_PM_at   | Bank1                              | BANK1      | -0.04 | 2.33 | -0.22 | 8.31E-01 | 9.28E-01 | -6.68 |
| 1460459_PM_at   | Paqr5                              | PAQR5      | -0.03 | 2.53 | -0.22 | 8.32E-01 | 9.28E-01 | -6.68 |
| 1444208_PM_at   | Gm35823                            | NA         | -0.02 | 2.29 | -0.22 | 8.32E-01 | 9.28E-01 | -6.68 |
| 1459410_PM_at   | ---                                | NA         | -0.02 | 2.32 | -0.22 | 8.31E-01 | 9.28E-01 | -6.68 |
| 1443262_PM_at   | Mrps14                             | MRPS14     | -0.02 | 2.32 | -0.22 | 8.31E-01 | 9.28E-01 | -6.68 |
| 1437905_PM_at   | Txn1l                              | TXNL1      | 0.02  | 1.98 | 0.22  | 8.32E-01 | 9.28E-01 | -6.68 |
| 1440360_PM_at   | ---                                | NA         | 0.02  | 2.74 | 0.22  | 8.31E-01 | 9.28E-01 | -6.68 |
| 1420653_PM_at   | Tgfb1                              | TGFB1      | 0.02  | 2.29 | 0.22  | 8.31E-01 | 9.28E-01 | -6.68 |
| 1429989_PM_at   | Smim23                             | SMIM23     | 0.03  | 3.20 | 0.22  | 8.31E-01 | 9.28E-01 | -6.68 |
| 1444139_PM_at   | Ddit4l                             | DDIT4L     | 0.04  | 2.45 | 0.22  | 8.32E-01 | 9.28E-01 | -6.68 |
| 1427462_PM_at   | Ezf3                               | EZF3       | 0.04  | 2.76 | 0.22  | 8.32E-01 | 9.28E-01 | -6.68 |
| 1435310_PM_at   | Syn3                               | NA         | 0.06  | 6.74 | 0.22  | 8.31E-01 | 9.28E-01 | -6.68 |
| 1431822_PM_a_at | Azi2                               | AZI2       | -0.06 | 3.53 | -0.22 | 8.32E-01 | 9.28E-01 | -6.68 |

|                 |                      |         |       |      |       |          |          |       |
|-----------------|----------------------|---------|-------|------|-------|----------|----------|-------|
| 1417668_PM_at   | Rtn4ip1              | RTN4IP1 | 0.04  | 2.44 | 0.22  | 8.32E-01 | 9.28E-01 | -6.68 |
| 1441580_PM_at   | ---                  | NA      | -0.07 | 2.83 | -0.22 | 8.32E-01 | 9.28E-01 | -6.68 |
| 1415874_PM_at   | Spry1                | SPRY1   | 0.03  | 2.75 | 0.22  | 8.32E-01 | 9.28E-01 | -6.68 |
| 1458924_PM_at   | ---                  | NA      | 0.04  | 2.61 | 0.22  | 8.32E-01 | 9.28E-01 | -6.68 |
| 1419886_PM_at   | DXErttd23e           | NA      | 0.02  | 2.42 | 0.22  | 8.32E-01 | 9.28E-01 | -6.68 |
| 1420659_PM_at   | Slamf6               | SLAMF6  | 0.02  | 2.27 | 0.22  | 8.32E-01 | 9.28E-01 | -6.68 |
| 1426290_PM_at   | Dimt1                | DIMT1   | -0.04 | 3.36 | -0.22 | 8.32E-01 | 9.28E-01 | -6.68 |
| 1451046_PM_at   | Zfpm1                | ZFPM1   | 0.02  | 2.09 | 0.22  | 8.32E-01 | 9.28E-01 | -6.68 |
| 1421976_PM_at   | Mmp19                | MMP19   | 0.02  | 2.29 | 0.22  | 8.32E-01 | 9.28E-01 | -6.68 |
| 1453421_PM_at   | Srr                  | NA      | -0.04 | 3.30 | -0.22 | 8.32E-01 | 9.28E-01 | -6.68 |
| 1457469_PM_at   | ---                  | NA      | -0.05 | 2.44 | -0.22 | 8.32E-01 | 9.28E-01 | -6.68 |
| 1438134_PM_at   | Pcdh10               | NA      | -0.05 | 3.98 | -0.22 | 8.32E-01 | 9.28E-01 | -6.68 |
| 1456345_PM_at   | ---                  | NA      | 0.03  | 2.28 | 0.22  | 8.32E-01 | 9.28E-01 | -6.68 |
| 1422932_PM_a_at | Vav1                 | VAV1    | -0.02 | 2.35 | -0.22 | 8.32E-01 | 9.28E-01 | -6.68 |
| 1416510_PM_at   | Mrp4                 | MRPL4   | 0.05  | 3.67 | 0.22  | 8.32E-01 | 9.28E-01 | -6.68 |
| 1446796_PM_at   | ---                  | NA      | 0.02  | 2.24 | 0.22  | 8.32E-01 | 9.28E-01 | -6.68 |
| 1458074_PM_at   | Gm10037              | NA      | 0.04  | 3.08 | 0.22  | 8.32E-01 | 9.28E-01 | -6.68 |
| 1438954_PM_x_at | Figf                 | NA      | -0.05 | 2.50 | -0.22 | 8.32E-01 | 9.28E-01 | -6.68 |
| 1438311_PM_at   | Ifit1b2              | IFIT1B  | -0.02 | 2.19 | -0.22 | 8.33E-01 | 9.28E-01 | -6.68 |
| 1417187_PM_at   | Ube2k                | UBE2K   | 0.02  | 2.32 | 0.22  | 8.33E-01 | 9.28E-01 | -6.68 |
| 1420026_PM_at   | Aak1                 | NA      | 0.02  | 2.42 | 0.22  | 8.33E-01 | 9.28E-01 | -6.68 |
| 1437462_PM_x_at | Mmp15                | MMP15   | 0.11  | 4.22 | 0.22  | 8.33E-01 | 9.29E-01 | -6.68 |
| 1452728_PM_at   | Kirrel3              | KIRREL3 | -0.10 | 6.50 | -0.22 | 8.33E-01 | 9.29E-01 | -6.68 |
| 1428892_PM_at   | Ppil1                | PPIL1   | -0.04 | 3.63 | -0.22 | 8.33E-01 | 9.29E-01 | -6.68 |
| 1428765_PM_at   | Meg3                 | NA      | -0.03 | 8.98 | -0.22 | 8.33E-01 | 9.29E-01 | -6.68 |
| 1427666_PM_a_at | Tcrb-J///Trbv5       | NA      | -0.02 | 2.16 | -0.22 | 8.33E-01 | 9.29E-01 | -6.68 |
| 1431337_PM_a_at | Fam45a               | FAM45A  | 0.02  | 2.48 | 0.22  | 8.33E-01 | 9.29E-01 | -6.68 |
| 1436675_PM_at   | Wdr63                | WDR63   | 0.03  | 2.36 | 0.22  | 8.33E-01 | 9.29E-01 | -6.68 |
| 1447484_PM_x_at | ---                  | NA      | 0.03  | 2.47 | 0.22  | 8.33E-01 | 9.29E-01 | -6.68 |
| 1428436_PM_at   | Lsm14a               | LSM14A  | 0.04  | 4.96 | 0.22  | 8.33E-01 | 9.29E-01 | -6.68 |
| 1441414_PM_at   | ---                  | NA      | 0.05  | 4.82 | 0.22  | 8.33E-01 | 9.29E-01 | -6.68 |
| 1440778_PM_x_at | Zfp712               | NA      | 0.07  | 2.58 | 0.22  | 8.33E-01 | 9.29E-01 | -6.68 |
| 1457182_PM_at   | Map2k7               | MAP2K7  | 0.04  | 3.20 | 0.22  | 8.33E-01 | 9.29E-01 | -6.68 |
| 1425564_PM_at   | Rest                 | REST    | 0.03  | 2.46 | 0.22  | 8.33E-01 | 9.29E-01 | -6.68 |
| 1449165_PM_at   | Capn5                | CAPN5   | 0.04  | 2.53 | 0.22  | 8.33E-01 | 9.29E-01 | -6.68 |
| 1418079_PM_at   | Psme3                | PSME3   | 0.06  | 4.45 | 0.22  | 8.33E-01 | 9.29E-01 | -6.68 |
| 1428264_PM_at   | Snrnp40              | SNRNP40 | -0.07 | 2.82 | -0.22 | 8.33E-01 | 9.29E-01 | -6.68 |
| 1454303_PM_at   | ---                  | NA      | -0.04 | 2.53 | -0.22 | 8.33E-01 | 9.29E-01 | -6.68 |
| 1445669_PM_at   | Spry4                | SPRY4   | 0.08  | 2.61 | 0.22  | 8.33E-01 | 9.29E-01 | -6.68 |
| 1457798_PM_at   | Elmsan1              | ELMSAN1 | -0.03 | 2.59 | -0.22 | 8.33E-01 | 9.29E-01 | -6.68 |
| 1459177_PM_at   | AU015741             | NA      | 0.02  | 2.21 | 0.22  | 8.33E-01 | 9.29E-01 | -6.68 |
| 1430314_PM_at   | Noxred1              | NOXRED1 | 0.05  | 2.85 | 0.22  | 8.33E-01 | 9.29E-01 | -6.68 |
| 1437844_PM_x_at | Cog1///LOC102641618  | COG1    | -0.06 | 3.11 | -0.22 | 8.34E-01 | 9.29E-01 | -6.68 |
| 1442759_PM_at   | Akt1                 | NA      | 0.02  | 2.66 | 0.22  | 8.34E-01 | 9.29E-01 | -6.68 |
| 1431559_PM_at   | 6430710C18Rik        | NA      | 0.02  | 1.94 | 0.22  | 8.34E-01 | 9.29E-01 | -6.68 |
| 1445762_PM_at   | ---                  | NA      | -0.03 | 2.62 | -0.22 | 8.34E-01 | 9.29E-01 | -6.68 |
| 1444488_PM_at   | ---                  | NA      | 0.06  | 3.84 | 0.22  | 8.34E-01 | 9.29E-01 | -6.68 |
| 1456685_PM_at   | Nsg2                 | HMP19   | 0.13  | 3.88 | 0.22  | 8.34E-01 | 9.29E-01 | -6.68 |
| 1437140_PM_at   | Fam221b              | FAM221B | -0.03 | 2.99 | -0.22 | 8.34E-01 | 9.29E-01 | -6.68 |
| 1440039_PM_at   | ---                  | NA      | 0.03  | 2.35 | 0.22  | 8.34E-01 | 9.29E-01 | -6.68 |
| 1429996_PM_at   | ---                  | NA      | 0.03  | 2.61 | 0.22  | 8.34E-01 | 9.29E-01 | -6.68 |
| 1457464_PM_at   | ---                  | NA      | 0.03  | 2.26 | 0.22  | 8.34E-01 | 9.29E-01 | -6.68 |
| 1458793_PM_at   | ---                  | NA      | 0.03  | 2.82 | 0.22  | 8.34E-01 | 9.29E-01 | -6.68 |
| 1429648_PM_at   | Slc35a3              | SLC35A3 | -0.06 | 3.88 | -0.21 | 8.34E-01 | 9.29E-01 | -6.68 |
| 1434093_PM_at   | Lysmd4               | LYSMD4  | 0.03  | 2.35 | 0.21  | 8.34E-01 | 9.29E-01 | -6.68 |
| 1436724_PM_a_at | Eif2d                | EIF2D   | -0.14 | 4.02 | -0.21 | 8.34E-01 | 9.29E-01 | -6.68 |
| 1449608_PM_a_at | ---                  | NA      | -0.07 | 2.36 | -0.21 | 8.34E-01 | 9.29E-01 | -6.68 |
| 1424132_PM_at   | Hras                 | HRAS    | -0.06 | 5.02 | -0.21 | 8.34E-01 | 9.29E-01 | -6.68 |
| 1450402_PM_at   | Med1                 | MED1    | -0.04 | 3.07 | -0.21 | 8.34E-01 | 9.29E-01 | -6.68 |
| 1454584_PM_at   | Zfp54                | NA      | 0.03  | 2.66 | 0.21  | 8.34E-01 | 9.29E-01 | -6.68 |
| 1450882_PM_s_at | Gpr137b///Gpr137b-ps | GPR137B | 0.04  | 2.88 | 0.21  | 8.34E-01 | 9.29E-01 | -6.68 |
| 1427915_PM_s_at | LOC102642819///Tceb1 | ELOC    | 0.09  | 2.63 | 0.21  | 8.34E-01 | 9.29E-01 | -6.68 |
| 1426454_PM_at   | Arhgdib              | ARHGDIB | 0.09  | 2.86 | 0.21  | 8.34E-01 | 9.29E-01 | -6.68 |
| 1425781_PM_a_at | Plcb1                | PLCB1   | 0.11  | 5.00 | 0.21  | 8.34E-01 | 9.29E-01 | -6.68 |
| 1447271_PM_at   | Nck1                 | NCK1    | -0.02 | 2.43 | -0.21 | 8.34E-01 | 9.29E-01 | -6.68 |
| 1448014_PM_s_at | Usp24                | USP24   | -0.09 | 3.60 | -0.21 | 8.34E-01 | 9.29E-01 | -6.68 |
| 1419590_PM_at   | Cyp2b9               | CYP2B6  | 0.02  | 2.10 | 0.21  | 8.34E-01 | 9.29E-01 | -6.68 |
| 1428357_PM_at   | Tdrp                 | TDRP    | 0.08  | 4.72 | 0.21  | 8.34E-01 | 9.29E-01 | -6.68 |
| 1421594_PM_a_at | Sytl2                | SYTL2   | 0.06  | 2.95 | 0.21  | 8.34E-01 | 9.29E-01 | -6.68 |
| 1451487_PM_at   | Rabepk               | RABEPK  | 0.03  | 2.86 | 0.21  | 8.34E-01 | 9.29E-01 | -6.68 |
| 1449909_PM_at   | 2010005H15Rik        | CSTA    | 0.03  | 2.59 | 0.21  | 8.35E-01 | 9.29E-01 | -6.68 |
| 1418327_PM_at   | Sdhaf4               | SDHAF4  | 0.05  | 3.70 | 0.21  | 8.35E-01 | 9.30E-01 | -6.68 |
| 1457687_PM_at   | Bcl2                 | BCL2    | 0.05  | 2.75 | 0.21  | 8.35E-01 | 9.30E-01 | -6.68 |
| 1426893_PM_at   | Fam102a              | FAM102A | 0.03  | 3.11 | 0.21  | 8.35E-01 | 9.30E-01 | -6.68 |
| 1422754_PM_at   | Tmod1                | TMOD1   | -0.06 | 4.97 | -0.21 | 8.35E-01 | 9.30E-01 | -6.68 |

|                 |                          |          |       |      |       |          |          |       |
|-----------------|--------------------------|----------|-------|------|-------|----------|----------|-------|
| 1457741_PM_at   | Gm12688                  | NA       | -0.02 | 2.46 | -0.21 | 8.35E-01 | 9.30E-01 | -6.68 |
| 1459037_PM_at   | ---                      | NA       | 0.03  | 2.48 | 0.21  | 8.35E-01 | 9.30E-01 | -6.68 |
| 1460193_PM_at   | St13                     | ST13     | 0.06  | 4.84 | 0.21  | 8.35E-01 | 9.30E-01 | -6.68 |
| 1422100_PM_at   | Cyp7a1                   | CYP7A1   | 0.02  | 2.19 | 0.21  | 8.35E-01 | 9.30E-01 | -6.68 |
| 1423536_PM_at   | Strn3                    | STRN3    | 0.03  | 2.34 | 0.21  | 8.35E-01 | 9.30E-01 | -6.68 |
| 1448076_PM_at   | Ctr9                     | CTR9     | -0.04 | 2.54 | -0.21 | 8.35E-01 | 9.30E-01 | -6.68 |
| 1456712_PM_at   | Lcorl                    | LCORL    | 0.02  | 2.00 | 0.21  | 8.35E-01 | 9.30E-01 | -6.68 |
| 1421775_PM_at   | Fcer1a                   | FCER1A   | 0.02  | 2.06 | 0.21  | 8.35E-01 | 9.30E-01 | -6.68 |
| 1451213_PM_at   | Pex11b                   | PEX11B   | 0.04  | 2.68 | 0.21  | 8.35E-01 | 9.30E-01 | -6.68 |
| 1439289_PM_s_at | Pnma1                    | PNMA8A   | 0.08  | 3.30 | 0.21  | 8.35E-01 | 9.30E-01 | -6.68 |
| 1456372_PM_at   | ---                      | NA       | 0.02  | 2.29 | 0.21  | 8.35E-01 | 9.30E-01 | -6.68 |
| 1426661_PM_at   | Rpl27a                   | RPL27A   | -0.06 | 5.13 | -0.21 | 8.36E-01 | 9.30E-01 | -6.68 |
| 1447926_PM_at   | Arl5a                    | ARL5A    | -0.04 | 2.44 | -0.21 | 8.36E-01 | 9.30E-01 | -6.68 |
| 1444073_PM_at   | Maf                      | MAF      | -0.04 | 2.88 | -0.21 | 8.35E-01 | 9.30E-01 | -6.68 |
| 1423376_PM_a_at | Dok4                     | DOK4     | -0.04 | 2.72 | -0.21 | 8.35E-01 | 9.30E-01 | -6.68 |
| 1454870_PM_x_at | Slc52a2                  | SLC52A1  | -0.03 | 2.77 | -0.21 | 8.35E-01 | 9.30E-01 | -6.68 |
| 1446527_PM_at   | Agtr1b                   | AGTR1    | -0.03 | 2.08 | -0.21 | 8.35E-01 | 9.30E-01 | -6.68 |
| 1443094_PM_at   | BB031773                 | NA       | 0.02  | 2.01 | 0.21  | 8.36E-01 | 9.30E-01 | -6.68 |
| 1438792_PM_at   | Ergic1                   | ERGIC1   | 0.02  | 2.08 | 0.21  | 8.36E-01 | 9.30E-01 | -6.68 |
| 1459100_PM_at   | AU015253                 | NA       | 0.02  | 2.08 | 0.21  | 8.35E-01 | 9.30E-01 | -6.68 |
| 1444845_PM_at   | ---                      | NA       | 0.02  | 2.22 | 0.21  | 8.35E-01 | 9.30E-01 | -6.68 |
| 1454336_PM_at   | Ccnc                     | NA       | 0.03  | 2.59 | 0.21  | 8.36E-01 | 9.30E-01 | -6.68 |
| 1445866_PM_at   | Mast4                    | MAST4    | 0.03  | 2.17 | 0.21  | 8.35E-01 | 9.30E-01 | -6.68 |
| 1422982_PM_at   | Ar                       | AR       | 0.03  | 2.71 | 0.21  | 8.35E-01 | 9.30E-01 | -6.68 |
| 1450830_PM_a_at | Pde6c                    | PDE6C    | 0.04  | 2.68 | 0.21  | 8.35E-01 | 9.30E-01 | -6.68 |
| 1422529_PM_s_at | Casq2                    | CASQ2    | 0.04  | 2.74 | 0.21  | 8.36E-01 | 9.30E-01 | -6.68 |
| 1452827_PM_at   | 1500009C09Rik            | NA       | 0.05  | 2.71 | 0.21  | 8.35E-01 | 9.30E-01 | -6.68 |
| 1425658_PM_at   | Cd109                    | CD109    | -0.05 | 2.25 | -0.21 | 8.36E-01 | 9.30E-01 | -6.68 |
| 1417080_PM_a_at | Ecsit                    | ECSIT    | 0.03  | 3.28 | 0.21  | 8.36E-01 | 9.30E-01 | -6.68 |
| 1418601_PM_at   | Alh1a7                   | ALDH1A1  | -0.02 | 2.13 | -0.21 | 8.36E-01 | 9.30E-01 | -6.68 |
| 1424380_PM_at   | Vps37b                   | VPS37B   | 0.02  | 2.46 | 0.21  | 8.36E-01 | 9.30E-01 | -6.68 |
| 1445546_PM_at   | Al844685                 | NA       | 0.02  | 2.49 | 0.21  | 8.36E-01 | 9.30E-01 | -6.68 |
| 1431784_PM_a_at | Rpf1                     | RPF1     | 0.03  | 2.53 | 0.21  | 8.36E-01 | 9.30E-01 | -6.68 |
| 1445629_PM_at   | ---                      | NA       | -0.02 | 2.12 | -0.21 | 8.36E-01 | 9.30E-01 | -6.68 |
| 1452945_PM_at   | Zfp157                   | ZNF717   | 0.06  | 3.04 | 0.21  | 8.36E-01 | 9.30E-01 | -6.68 |
| 1423410_PM_at   | Meig1                    | MEIG1    | 0.02  | 1.95 | 0.21  | 8.36E-01 | 9.30E-01 | -6.68 |
| 1417910_PM_at   | Ccna2                    | CCNA2    | -0.03 | 2.39 | -0.21 | 8.36E-01 | 9.30E-01 | -6.68 |
| 1427414_PM_at   | Prkar2a                  | PRKAR2A  | -0.03 | 2.04 | -0.21 | 8.36E-01 | 9.30E-01 | -6.68 |
| 1440401_PM_at   | ---                      | NA       | 0.02  | 2.27 | 0.21  | 8.36E-01 | 9.30E-01 | -6.68 |
| 1421852_PM_at   | Kcnk5                    | KCNK5    | -0.03 | 2.53 | -0.21 | 8.36E-01 | 9.30E-01 | -6.68 |
| 1455131_PM_at   | Opa3                     | OPA3     | 0.03  | 4.99 | 0.21  | 8.36E-01 | 9.30E-01 | -6.68 |
| 1449947_PM_s_at | Zfhx3                    | ZFHX3    | -0.04 | 2.52 | -0.21 | 8.36E-01 | 9.30E-01 | -6.68 |
| 1446006_PM_at   | LOC105247521             | NA       | -0.05 | 2.60 | -0.21 | 8.36E-01 | 9.30E-01 | -6.68 |
| 1419635_PM_at   | 4833420G17Rik            | CSorf34  | -0.03 | 2.52 | -0.21 | 8.36E-01 | 9.30E-01 | -6.68 |
| 1417396_PM_at   | Podxl                    | PODXL    | -0.02 | 2.37 | -0.21 | 8.36E-01 | 9.30E-01 | -6.68 |
| 1426181_PM_a_at | Il24                     | IL24     | 0.02  | 2.57 | 0.21  | 8.36E-01 | 9.30E-01 | -6.68 |
| 1457352_PM_x_at | Svopl                    | SVOPL    | 0.03  | 2.06 | 0.21  | 8.36E-01 | 9.30E-01 | -6.68 |
| 1426504_PM_a_at | Rnf121                   | RNF121   | 0.03  | 3.30 | 0.21  | 8.36E-01 | 9.30E-01 | -6.68 |
| 1436366_PM_at   | Ppp1r15b                 | PPP1R15B | 0.05  | 2.87 | 0.21  | 8.37E-01 | 9.30E-01 | -6.68 |
| 1427055_PM_at   | Them4                    | THEM4    | 0.07  | 4.21 | 0.21  | 8.36E-01 | 9.30E-01 | -6.68 |
| 1438677_PM_at   | Pkp4                     | PKP4     | 0.08  | 5.94 | 0.21  | 8.37E-01 | 9.30E-01 | -6.68 |
| 1430893_PM_at   | Mup10 /// Mup18 /// Mup9 | NA       | 0.10  | 5.72 | 0.21  | 8.37E-01 | 9.30E-01 | -6.68 |
| 1436128_PM_at   | Plekha8                  | PLEKHA8  | 0.03  | 2.47 | 0.21  | 8.37E-01 | 9.31E-01 | -6.68 |
| 1450962_PM_at   | Pdha2                    | PDHA2    | -0.03 | 2.84 | -0.21 | 8.37E-01 | 9.31E-01 | -6.68 |
| 1424606_PM_at   | Cplx3                    | CPLX3    | 0.03  | 2.43 | 0.21  | 8.37E-01 | 9.31E-01 | -6.68 |
| 1451414_PM_at   | Nop16                    | NOP16    | 0.03  | 2.39 | 0.21  | 8.37E-01 | 9.31E-01 | -6.68 |
| 1458936_PM_at   | ---                      | NA       | -0.02 | 2.22 | -0.21 | 8.37E-01 | 9.31E-01 | -6.68 |
| 1445541_PM_at   | Kdm5a                    | KDMSA    | -0.02 | 2.16 | -0.21 | 8.37E-01 | 9.31E-01 | -6.68 |
| 1449474_PM_a_at | Nsmf                     | NSMF     | 0.06  | 3.34 | 0.21  | 8.37E-01 | 9.31E-01 | -6.68 |
| 1447186_PM_at   | Slc6a16                  | NA       | 0.02  | 2.54 | 0.21  | 8.37E-01 | 9.31E-01 | -6.68 |
| 1441502_PM_at   | ---                      | NA       | -0.03 | 2.50 | -0.21 | 8.37E-01 | 9.31E-01 | -6.68 |
| 1437685_PM_x_at | Fmod                     | FMOD     | 0.11  | 3.30 | 0.21  | 8.37E-01 | 9.31E-01 | -6.68 |
| 1460571_PM_at   | Dicer1                   | DICER1   | -0.09 | 5.14 | -0.21 | 8.37E-01 | 9.31E-01 | -6.68 |
| 1425794_PM_at   | Pola2                    | NA       | 0.03  | 2.63 | 0.21  | 8.37E-01 | 9.31E-01 | -6.68 |
| 1442207_PM_at   | Atg16l2                  | NA       | -0.03 | 2.53 | -0.21 | 8.37E-01 | 9.31E-01 | -6.68 |
| 1417992_PM_a_at | Svs3a /// Svs3b          | NA       | 0.02  | 2.03 | 0.21  | 8.37E-01 | 9.31E-01 | -6.68 |
| 1438953_PM_at   | Figf                     | NA       | 0.05  | 2.41 | 0.21  | 8.37E-01 | 9.31E-01 | -6.68 |
| 1456055_PM_x_at | Pold1                    | POLD1    | -0.06 | 4.12 | -0.21 | 8.37E-01 | 9.31E-01 | -6.68 |
| 1428755_PM_at   | Creb1                    | CREB1    | -0.05 | 4.00 | -0.21 | 8.37E-01 | 9.31E-01 | -6.68 |
| 1420080_PM_a_at | Gfpt1                    | GFPT1    | 0.07  | 2.29 | 0.21  | 8.37E-01 | 9.31E-01 | -6.68 |
| 1417168_PM_a_at | Usp2                     | USP2     | -0.13 | 4.13 | -0.21 | 8.37E-01 | 9.31E-01 | -6.68 |
| 1429956_PM_at   | Tbata                    | TBATA    | 0.02  | 2.43 | 0.21  | 8.38E-01 | 9.31E-01 | -6.68 |
| 1422963_PM_at   | Sprz2i                   | NA       | 0.03  | 2.37 | 0.21  | 8.38E-01 | 9.31E-01 | -6.68 |
| 1424545_PM_at   | BC003965                 | C16orf91 | -0.12 | 4.85 | -0.21 | 8.38E-01 | 9.31E-01 | -6.68 |

|                 |                                      |          |       |      |       |          |          |       |
|-----------------|--------------------------------------|----------|-------|------|-------|----------|----------|-------|
| 1432018_PM_at   | Ascl2                                | ASCL2    | 0.02  | 1.96 | 0.21  | 8.38E-01 | 9.31E-01 | -6.68 |
| 1431446_PM_at   | Plekhd1os                            | NA       | 0.03  | 2.72 | 0.21  | 8.38E-01 | 9.31E-01 | -6.68 |
| 1450637_PM_a_at | Aebp1                                | AEBP1    | 0.07  | 5.92 | 0.21  | 8.38E-01 | 9.31E-01 | -6.68 |
| 1425387_PM_at   | Akr1c20                              | AKR1C2   | 0.08  | 2.30 | 0.21  | 8.38E-01 | 9.31E-01 | -6.68 |
| 1440641_PM_at   | Vps29                                | VPS29    | -0.05 | 2.65 | -0.21 | 8.38E-01 | 9.31E-01 | -6.68 |
| 1447266_PM_at   | Utp18                                | UTP18    | -0.02 | 2.24 | -0.21 | 8.38E-01 | 9.31E-01 | -6.68 |
| 1450078_PM_at   | Nrk                                  | NRK      | 0.03  | 2.21 | 0.21  | 8.38E-01 | 9.31E-01 | -6.68 |
| 1438186_PM_at   | ---                                  | NA       | 0.03  | 2.61 | 0.21  | 8.38E-01 | 9.31E-01 | -6.68 |
| 1438660_PM_at   | Gcnt2                                | GCNT2    | -0.02 | 2.84 | -0.21 | 8.38E-01 | 9.31E-01 | -6.68 |
| 1440810_PM_x_at | ---                                  | NA       | 0.05  | 3.13 | 0.21  | 8.38E-01 | 9.31E-01 | -6.68 |
| 1429517_PM_at   | Rbsn                                 | RBSN     | -0.06 | 2.58 | -0.21 | 8.38E-01 | 9.32E-01 | -6.68 |
| 1447310_PM_at   | Hykk                                 | HYKK     | 0.02  | 2.43 | 0.21  | 8.38E-01 | 9.32E-01 | -6.68 |
| 1430298_PM_at   | ---                                  | NA       | -0.04 | 2.50 | -0.21 | 8.38E-01 | 9.32E-01 | -6.68 |
| 1450509_PM_at   | Chst11                               | CHST11   | -0.06 | 3.81 | -0.21 | 8.38E-01 | 9.32E-01 | -6.68 |
| 1449509_PM_at   | Serf1                                | SERF1B   | -0.03 | 2.43 | -0.21 | 8.38E-01 | 9.32E-01 | -6.68 |
| 1420539_PM_a_at | Chrdl2                               | CHRD12   | 0.03  | 2.19 | 0.21  | 8.39E-01 | 9.32E-01 | -6.68 |
| 1433039_PM_at   | 4930555B11Rik                        | NA       | -0.03 | 2.32 | -0.21 | 8.39E-01 | 9.32E-01 | -6.68 |
| 1431267_PM_at   | Slc6a19os                            | NA       | 0.02  | 2.60 | 0.21  | 8.39E-01 | 9.32E-01 | -6.68 |
| 1451171_PM_at   | Spidr                                | SPIDR    | 0.03  | 3.52 | 0.21  | 8.39E-01 | 9.32E-01 | -6.68 |
| 1446019_PM_at   | ---                                  | NA       | -0.03 | 3.15 | -0.21 | 8.39E-01 | 9.32E-01 | -6.68 |
| 1425045_PM_at   | Gm28042 /// Jmjd7                    | JMJD7    | -0.02 | 2.51 | -0.21 | 8.39E-01 | 9.32E-01 | -6.68 |
| 1460424_PM_at   | Tmem160                              | TMEM160  | -0.03 | 2.58 | -0.21 | 8.39E-01 | 9.32E-01 | -6.68 |
| 1424558_PM_a_at | Cabyr                                | CABYR    | 0.06  | 2.77 | 0.21  | 8.39E-01 | 9.32E-01 | -6.68 |
| 1419317_PM_x_at | Lce3c                                | NA       | -0.06 | 4.48 | -0.21 | 8.39E-01 | 9.32E-01 | -6.68 |
| 1450077_PM_at   | Chd1                                 | CHD1     | -0.04 | 2.95 | -0.21 | 8.39E-01 | 9.32E-01 | -6.68 |
| 1447136_PM_at   | ---                                  | NA       | -0.02 | 2.36 | -0.21 | 8.39E-01 | 9.32E-01 | -6.68 |
| 1425015_PM_at   | Ephb2                                | EPHB1    | -0.02 | 3.07 | -0.21 | 8.39E-01 | 9.32E-01 | -6.68 |
| 1422302_PM_s_at | Ftl1 /// Ftl2-ps ///<br>LOC100862446 | FTL      | 0.03  | 3.47 | 0.21  | 8.39E-01 | 9.32E-01 | -6.68 |
| 1455943_PM_at   | Zfp451                               | ZNF451   | 0.05  | 4.40 | 0.21  | 8.39E-01 | 9.32E-01 | -6.68 |
| 1428505_PM_at   | Ccdc90b                              | CCDC90B  | -0.09 | 3.60 | -0.21 | 8.39E-01 | 9.32E-01 | -6.68 |
| 1438789_PM_s_at | Dpysl3                               | DPYSL3   | -0.04 | 2.35 | -0.21 | 8.39E-01 | 9.32E-01 | -6.68 |
| 1440038_PM_at   | Gm38654                              | NA       | 0.02  | 2.50 | 0.21  | 8.39E-01 | 9.32E-01 | -6.68 |
| 1418523_PM_at   | Arih2                                | ARIH2    | 0.02  | 3.40 | 0.21  | 8.39E-01 | 9.32E-01 | -6.68 |
| 1437415_PM_at   | 4933427D06Rik                        | NA       | -0.02 | 2.91 | -0.21 | 8.39E-01 | 9.32E-01 | -6.68 |
| 1430023_PM_at   | Spata24                              | SPATA24  | -0.03 | 2.96 | -0.21 | 8.39E-01 | 9.32E-01 | -6.68 |
| 1446421_PM_at   | ---                                  | NA       | 0.05  | 3.09 | 0.21  | 8.39E-01 | 9.32E-01 | -6.68 |
| 1422176_PM_at   | Fgf23                                | FGF23    | 0.02  | 2.17 | 0.21  | 8.39E-01 | 9.32E-01 | -6.68 |
| 1454155_PM_at   | 4930500H12Rik                        | NA       | 0.03  | 2.82 | 0.21  | 8.39E-01 | 9.32E-01 | -6.68 |
| 1433994_PM_at   | 4931406P16Rik                        | KIAA0355 | -0.02 | 2.23 | -0.21 | 8.40E-01 | 9.32E-01 | -6.68 |
| 1454410_PM_at   | 9130414P19Rik                        | NA       | 0.03  | 2.33 | 0.21  | 8.40E-01 | 9.32E-01 | -6.68 |
| 1440638_PM_at   | A230107N01Rik                        | NA       | -0.02 | 2.25 | -0.21 | 8.40E-01 | 9.32E-01 | -6.68 |
| 1427954_PM_at   | BC048403                             | C12orf66 | 0.04  | 3.82 | 0.21  | 8.40E-01 | 9.32E-01 | -6.68 |
| 1440479_PM_at   | Cbx4                                 | CBX4     | -0.02 | 2.30 | -0.21 | 8.40E-01 | 9.32E-01 | -6.68 |
| 1432571_PM_at   | ---                                  | NA       | -0.03 | 2.19 | -0.21 | 8.40E-01 | 9.32E-01 | -6.68 |
| 1447682_PM_x_at | Traf5                                | NA       | 0.02  | 2.41 | 0.21  | 8.40E-01 | 9.32E-01 | -6.68 |
| 1451591_PM_a_at | Efnb1                                | EFNB1    | -0.03 | 3.42 | -0.21 | 8.40E-01 | 9.32E-01 | -6.68 |
| 1450048_PM_a_at | Idh2                                 | IDH2     | 0.05  | 3.90 | 0.21  | 8.40E-01 | 9.32E-01 | -6.68 |
| 1442395_PM_at   | ---                                  | NA       | 0.03  | 2.46 | 0.21  | 8.40E-01 | 9.33E-01 | -6.68 |
| 1460518_PM_at   | E130119H09Rik                        | NA       | 0.02  | 2.30 | 0.21  | 8.40E-01 | 9.33E-01 | -6.68 |
| 1442641_PM_at   | ---                                  | NA       | 0.04  | 2.35 | 0.21  | 8.40E-01 | 9.33E-01 | -6.68 |
| 1460714_PM_at   | Tfcp2l1                              | TFCP2L1  | 0.02  | 2.56 | 0.21  | 8.40E-01 | 9.33E-01 | -6.68 |
| 1439403_PM_x_at | Rlim                                 | RLIM     | -0.11 | 6.53 | -0.21 | 8.40E-01 | 9.33E-01 | -6.68 |
| 1419812_PM_s_at | Coa3                                 | COA3     | -0.07 | 5.88 | -0.21 | 8.40E-01 | 9.33E-01 | -6.68 |
| 1449269_PM_at   | F5                                   | F5       | -0.04 | 2.64 | -0.21 | 8.40E-01 | 9.33E-01 | -6.68 |
| 1428030_PM_at   | Adam34                               | NA       | -0.03 | 2.64 | -0.21 | 8.40E-01 | 9.33E-01 | -6.68 |
| 1432461_PM_at   | Eya4                                 | EYA4     | 0.02  | 2.52 | 0.21  | 8.40E-01 | 9.33E-01 | -6.68 |
| 1441861_PM_at   | 1700018G05Rik                        | NA       | 0.02  | 2.34 | 0.21  | 8.40E-01 | 9.33E-01 | -6.68 |
| 1436672_PM_at   | Grk5                                 | NA       | 0.02  | 2.00 | 0.21  | 8.40E-01 | 9.33E-01 | -6.68 |
| 1436659_PM_at   | Dclk1                                | DCLK1    | 0.04  | 5.67 | 0.21  | 8.40E-01 | 9.33E-01 | -6.68 |
| 1423863_PM_at   | Abcf2                                | ABCF2    | 0.05  | 4.40 | 0.21  | 8.40E-01 | 9.33E-01 | -6.68 |
| 1456923_PM_at   | ---                                  | NA       | 0.02  | 2.07 | 0.21  | 8.40E-01 | 9.33E-01 | -6.68 |
| 1452828_PM_at   | Fbxo21                               | FBXO21   | -0.03 | 5.14 | -0.21 | 8.40E-01 | 9.33E-01 | -6.68 |
| 1437718_PM_x_at | Fmod                                 | FMOD     | -0.11 | 3.44 | -0.21 | 8.41E-01 | 9.33E-01 | -6.68 |
| 1449396_PM_at   | Aoc3                                 | AOC3     | -0.09 | 3.04 | -0.21 | 8.41E-01 | 9.33E-01 | -6.68 |
| 1427547_PM_a_at | Slc26a3                              | SLC26A3  | -0.02 | 2.08 | -0.21 | 8.41E-01 | 9.33E-01 | -6.68 |
| 1418484_PM_at   | Tekt2                                | TEKT2    | 0.02  | 2.25 | 0.21  | 8.41E-01 | 9.33E-01 | -6.68 |
| 1421460_PM_at   | Dsc1                                 | DSC1     | 0.02  | 2.29 | 0.21  | 8.41E-01 | 9.33E-01 | -6.68 |
| 1444187_PM_at   | Gm8579                               | NA       | 0.03  | 2.46 | 0.21  | 8.40E-01 | 9.33E-01 | -6.68 |
| 1459097_PM_at   | ---                                  | NA       | 0.03  | 2.42 | 0.21  | 8.41E-01 | 9.33E-01 | -6.68 |
| 1417223_PM_at   | Cd2bp2                               | CD2BP2   | 0.04  | 4.15 | 0.21  | 8.41E-01 | 9.33E-01 | -6.68 |
| 1435054_PM_at   | Eme1                                 | EME1     | 0.04  | 2.52 | 0.21  | 8.41E-01 | 9.33E-01 | -6.68 |
| 1452603_PM_at   | Dpcd                                 | DPCD     | 0.06  | 2.97 | 0.21  | 8.41E-01 | 9.33E-01 | -6.68 |
| 1429783_PM_at   | Pdlim5                               | PDLIM5   | 0.06  | 4.87 | 0.21  | 8.41E-01 | 9.33E-01 | -6.68 |
| 1435683_PM_a_at | Abcc5                                | ABCC5    | 0.07  | 3.74 | 0.21  | 8.41E-01 | 9.33E-01 | -6.68 |

|                 |                                       |          |       |      |       |          |          |       |
|-----------------|---------------------------------------|----------|-------|------|-------|----------|----------|-------|
| 1433098_PM_at   | Nsmce1                                | NSMCE1   | 0.02  | 2.35 | 0.21  | 8.41E-01 | 9.33E-01 | -6.68 |
| 1460318_PM_at   | Csrp3                                 | CSRP3    | 0.03  | 2.48 | 0.21  | 8.41E-01 | 9.33E-01 | -6.68 |
| 1433836_PM_a_at | 8430408G22Rik                         | C10orf10 | -0.03 | 2.70 | -0.21 | 8.41E-01 | 9.33E-01 | -6.68 |
| 1441279_PM_at   | Platr4                                | NA       | 0.05  | 3.13 | 0.21  | 8.41E-01 | 9.33E-01 | -6.68 |
| 1452990_PM_at   | Mtf1                                  | MTF1     | -0.02 | 2.42 | -0.21 | 8.41E-01 | 9.33E-01 | -6.68 |
| 1430087_PM_at   | Nkpd1                                 | NKPD1    | 0.03  | 2.42 | 0.21  | 8.41E-01 | 9.33E-01 | -6.68 |
| 1419485_PM_at   | Foxc1                                 | FOXC1    | 0.04  | 2.30 | 0.21  | 8.41E-01 | 9.33E-01 | -6.68 |
| 1422126_PM_a_at | Nudt13                                | NUDT13   | -0.11 | 6.84 | -0.21 | 8.41E-01 | 9.33E-01 | -6.68 |
| 1435665_PM_at   | Trim30d                               | TRIM5    | 0.03  | 2.53 | 0.21  | 8.41E-01 | 9.33E-01 | -6.68 |
| 1455599_PM_at   | Gfod1                                 | NA       | 0.03  | 4.85 | 0.21  | 8.41E-01 | 9.33E-01 | -6.68 |
| 1451302_PM_at   | 1110012L19Rik                         | CXorf40B | -0.02 | 2.42 | -0.21 | 8.41E-01 | 9.33E-01 | -6.68 |
| 1448163_PM_at   | Gnpda1                                | GNPDA1   | 0.05  | 3.33 | 0.21  | 8.41E-01 | 9.33E-01 | -6.68 |
| 1431467_PM_at   | 4931402G19Rik                         | NA       | 0.02  | 2.43 | 0.21  | 8.41E-01 | 9.33E-01 | -6.68 |
| 1456695_PM_x_at | Anapc5                                | ANAPC5   | -0.06 | 5.80 | -0.21 | 8.42E-01 | 9.33E-01 | -6.68 |
| 1441390_PM_at   | Spdya                                 | SPDYA    | 0.03  | 2.34 | 0.21  | 8.42E-01 | 9.33E-01 | -6.68 |
| 1443108_PM_at   | Zfp800                                | NA       | -0.02 | 2.52 | -0.20 | 8.42E-01 | 9.33E-01 | -6.68 |
| 1438784_PM_at   | Bcl11b                                | BCL11B   | 0.04  | 2.50 | 0.20  | 8.42E-01 | 9.33E-01 | -6.68 |
| 1438982_PM_s_at | Flywch2                               | FLYWCH2  | 0.06  | 2.76 | 0.20  | 8.42E-01 | 9.33E-01 | -6.68 |
| 1451816_PM_at   | Zfp451                                | ZNF451   | -0.08 | 2.94 | -0.20 | 8.42E-01 | 9.34E-01 | -6.68 |
| 1418543_PM_s_at | Ccdc43                                | CCDC43   | -0.06 | 3.90 | -0.20 | 8.42E-01 | 9.34E-01 | -6.68 |
| 1430371_PM_x_at | Eif2ak3                               | EIF2AK3  | -0.02 | 2.40 | -0.20 | 8.42E-01 | 9.34E-01 | -6.68 |
| 1456802_PM_at   | Rnf133                                | RNF133   | 0.02  | 2.06 | 0.20  | 8.42E-01 | 9.34E-01 | -6.68 |
| 1450224_PM_at   | Col4a3                                | COL4A3   | 0.02  | 2.06 | 0.20  | 8.42E-01 | 9.34E-01 | -6.68 |
| 1449155_PM_at   | Polr3g                                | POLR3G   | 0.03  | 2.67 | 0.20  | 8.42E-01 | 9.34E-01 | -6.68 |
| 1441338_PM_at   | 5930412G12Rik                         | NA       | 0.04  | 2.94 | 0.20  | 8.42E-01 | 9.34E-01 | -6.68 |
| 1453135_PM_at   | Fndc5                                 | FNDC5    | 0.06  | 3.51 | 0.20  | 8.42E-01 | 9.34E-01 | -6.68 |
| 1444253_PM_at   | Adamts18                              | NA       | 0.02  | 2.17 | 0.20  | 8.42E-01 | 9.34E-01 | -6.68 |
| 1417871_PM_at   | Hsd17b7                               | HSD17B7  | -0.02 | 2.28 | -0.20 | 8.42E-01 | 9.34E-01 | -6.68 |
| 1449311_PM_at   | Bach1                                 | BACH1    | -0.02 | 2.20 | -0.20 | 8.42E-01 | 9.34E-01 | -6.68 |
| 1416013_PM_at   | Pld3                                  | PLD3     | -0.04 | 4.24 | -0.20 | 8.42E-01 | 9.34E-01 | -6.68 |
| 1460719_PM_a_at | P2rx1                                 | P2RX1    | 0.02  | 2.35 | 0.20  | 8.42E-01 | 9.34E-01 | -6.68 |
| 1441421_PM_at   | C530030P08Rik                         | NA       | 0.02  | 2.29 | 0.20  | 8.42E-01 | 9.34E-01 | -6.68 |
| 1447462_PM_at   | ---                                   | NA       | -0.03 | 2.43 | -0.20 | 8.42E-01 | 9.34E-01 | -6.68 |
| 1452611_PM_at   | Ltn1                                  | LTN1     | -0.02 | 2.26 | -0.20 | 8.42E-01 | 9.34E-01 | -6.68 |
| 1458771_PM_at   | ---                                   | NA       | 0.03  | 2.31 | 0.20  | 8.42E-01 | 9.34E-01 | -6.68 |
| 1428600_PM_at   | Nin                                   | NIN      | -0.07 | 5.51 | -0.20 | 8.42E-01 | 9.34E-01 | -6.68 |
| 1425843_PM_at   | MrpB3                                 | MRPL33   | 0.02  | 2.45 | 0.20  | 8.42E-01 | 9.34E-01 | -6.68 |
| 1417509_PM_at   | Rnf19a                                | RNF19A   | -0.06 | 3.39 | -0.20 | 8.42E-01 | 9.34E-01 | -6.68 |
| 1430518_PM_at   | 5430402E10Rik                         | NA       | -0.02 | 2.58 | -0.20 | 8.42E-01 | 9.34E-01 | -6.68 |
| 1453595_PM_at   | ---                                   | NA       | 0.03  | 2.34 | 0.20  | 8.42E-01 | 9.34E-01 | -6.68 |
| 1448877_PM_at   | Dlx2                                  | DLX2     | 0.05  | 2.28 | 0.20  | 8.42E-01 | 9.34E-01 | -6.68 |
| 1446783_PM_at   | ---                                   | NA       | 0.05  | 2.48 | 0.20  | 8.42E-01 | 9.34E-01 | -6.68 |
| 1428395_PM_at   | Smurf1                                | SMURF1   | 0.03  | 2.90 | 0.20  | 8.42E-01 | 9.34E-01 | -6.68 |
| 1453154_PM_at   | 1700029M20Rik                         | NA       | 0.02  | 2.31 | 0.20  | 8.43E-01 | 9.34E-01 | -6.68 |
| 1445660_PM_at   | Tmem209                               | TMEM209  | 0.02  | 2.23 | 0.20  | 8.43E-01 | 9.34E-01 | -6.68 |
| 1445484_PM_at   | Cyca                                  | CYCS     | -0.03 | 2.24 | -0.20 | 8.43E-01 | 9.34E-01 | -6.68 |
| 1425686_PM_at   | Cflar                                 | CFLAR    | -0.05 | 2.68 | -0.20 | 8.43E-01 | 9.34E-01 | -6.68 |
| 1452135_PM_at   | Gpx6                                  | GPX6     | -0.03 | 2.47 | -0.20 | 8.43E-01 | 9.34E-01 | -6.68 |
| 1460664_PM_at   | Iklzf4                                | IKZF4    | 0.05  | 2.32 | 0.20  | 8.43E-01 | 9.34E-01 | -6.68 |
| 1432167_PM_at   | ---                                   | NA       | -0.03 | 2.61 | -0.20 | 8.43E-01 | 9.34E-01 | -6.68 |
| 1416159_PM_at   | Nr2f2                                 | NR2F2    | 0.04  | 2.22 | 0.20  | 8.43E-01 | 9.34E-01 | -6.68 |
| 1418886_PM_s_at | Idh3b                                 | IDH3B    | -0.05 | 6.23 | -0.20 | 8.43E-01 | 9.34E-01 | -6.68 |
| 1428981_PM_at   | Sult2a8                               | SULT2A1  | 0.02  | 2.31 | 0.20  | 8.43E-01 | 9.34E-01 | -6.68 |
| 1446575_PM_at   | C77583                                | NA       | 0.02  | 2.21 | 0.20  | 8.43E-01 | 9.34E-01 | -6.68 |
| 1439871_PM_at   | ---                                   | NA       | -0.04 | 2.75 | -0.20 | 8.43E-01 | 9.34E-01 | -6.68 |
| 1432928_PM_at   | Plcd4                                 | PLCD4    | -0.03 | 2.47 | -0.20 | 8.43E-01 | 9.34E-01 | -6.68 |
| 1416779_PM_at   | Sdpr                                  | CAVIN2   | 0.04  | 2.47 | 0.20  | 8.43E-01 | 9.34E-01 | -6.68 |
| 1427971_PM_at   | Cdc73                                 | CDC73    | -0.04 | 2.74 | -0.20 | 8.43E-01 | 9.34E-01 | -6.68 |
| 1447999_PM_x_at | Gapdh /// Gapdh-ps15 /// LOC102641387 | NA       | -0.02 | 2.47 | -0.20 | 8.43E-01 | 9.34E-01 | -6.68 |
| 1442191_PM_at   | Gm40826 /// Sugct                     | NA       | 0.02  | 2.25 | 0.20  | 8.43E-01 | 9.34E-01 | -6.68 |
| 1423881_PM_at   | Ppp6r3                                | PPP6R3   | -0.03 | 2.86 | -0.20 | 8.43E-01 | 9.34E-01 | -6.68 |
| 1448973_PM_at   | Sult1d1                               | NA       | 0.02  | 2.09 | 0.20  | 8.43E-01 | 9.34E-01 | -6.68 |
| 1441152_PM_at   | ---                                   | NA       | 0.02  | 2.25 | 0.20  | 8.43E-01 | 9.35E-01 | -6.68 |
| 1459854_PM_s_at | Dynlt3                                | DYNLT3   | 0.10  | 7.80 | 0.20  | 8.44E-01 | 9.35E-01 | -6.68 |
| 1419160_PM_at   | Golga3                                | GOLGA3   | -0.04 | 2.55 | -0.20 | 8.44E-01 | 9.35E-01 | -6.68 |
| 1425421_PM_at   | Gm20274                               | NA       | 0.02  | 2.32 | 0.20  | 8.44E-01 | 9.35E-01 | -6.68 |
| 1460282_PM_at   | Trem1                                 | TREM1    | 0.03  | 2.29 | 0.20  | 8.44E-01 | 9.35E-01 | -6.68 |
| 1430191_PM_at   | ---                                   | NA       | 0.02  | 2.06 | 0.20  | 8.44E-01 | 9.35E-01 | -6.68 |
| 1457060_PM_at   | ---                                   | NA       | 0.03  | 3.59 | 0.20  | 8.44E-01 | 9.35E-01 | -6.68 |
| 1440440_PM_at   | ---                                   | NA       | 0.05  | 3.21 | 0.20  | 8.44E-01 | 9.35E-01 | -6.68 |
| 1417989_PM_at   | Tssk1                                 | TSSK1B   | -0.02 | 2.81 | -0.20 | 8.44E-01 | 9.35E-01 | -6.68 |
| 1458848_PM_at   | ---                                   | NA       | 0.03  | 3.00 | 0.20  | 8.44E-01 | 9.35E-01 | -6.68 |
| 1441276_PM_at   | Ptprk                                 | NA       | -0.07 | 3.18 | -0.20 | 8.44E-01 | 9.35E-01 | -6.68 |
| 1435926_PM_at   | Chml                                  | CHML     | -0.05 | 2.70 | -0.20 | 8.44E-01 | 9.35E-01 | -6.68 |

|                 |                                                                                                                                                                                                                                                                                                                                                                                                                                                                                                                                                                                       |          |       |      |       |          |          |       |
|-----------------|---------------------------------------------------------------------------------------------------------------------------------------------------------------------------------------------------------------------------------------------------------------------------------------------------------------------------------------------------------------------------------------------------------------------------------------------------------------------------------------------------------------------------------------------------------------------------------------|----------|-------|------|-------|----------|----------|-------|
| 1416113_PM_at   | Fkbp8                                                                                                                                                                                                                                                                                                                                                                                                                                                                                                                                                                                 | FKBP8    | -0.03 | 3.69 | -0.20 | 8.44E-01 | 9.35E-01 | -6.68 |
| 1443288_PM_at   | ---                                                                                                                                                                                                                                                                                                                                                                                                                                                                                                                                                                                   | NA       | -0.03 | 2.08 | -0.20 | 8.44E-01 | 9.35E-01 | -6.68 |
| 1420035_PM_at   | Aqp6                                                                                                                                                                                                                                                                                                                                                                                                                                                                                                                                                                                  | NA       | 0.02  | 2.37 | 0.20  | 8.44E-01 | 9.35E-01 | -6.68 |
| 1417337_PM_at   | Epb42                                                                                                                                                                                                                                                                                                                                                                                                                                                                                                                                                                                 | EPB42    | 0.02  | 2.19 | 0.20  | 8.44E-01 | 9.35E-01 | -6.68 |
| 1448235_PM_s_at | Gm21596 /// Hmgb1                                                                                                                                                                                                                                                                                                                                                                                                                                                                                                                                                                     | HMGB1    | 0.06  | 5.97 | 0.20  | 8.44E-01 | 9.35E-01 | -6.68 |
| 1431636_PM_at   | 4930558K02Rik                                                                                                                                                                                                                                                                                                                                                                                                                                                                                                                                                                         | C1orf105 | -0.03 | 2.13 | -0.20 | 8.44E-01 | 9.35E-01 | -6.68 |
| 1425695_PM_at   | Tbx5                                                                                                                                                                                                                                                                                                                                                                                                                                                                                                                                                                                  | TBX5     | 0.03  | 2.16 | 0.20  | 8.44E-01 | 9.35E-01 | -6.68 |
|                 | Gm10406 /// Gm10413 ///<br>Gm16434 /// Gm2888 ///<br>Gm3002 /// Gm3012 ///<br>Gm3043 /// Gm3095 ///<br>Gm3127 /// Gm3159 ///<br>Gm3164 /// Gm3173 ///<br>Gm3182 /// Gm3264 ///<br>Gm3373 /// Gm3383 ///<br>Gm33933 /// Gm3424 ///<br>Gm3476 /// Gm3500 ///<br>Gm3558 /// Gm3594 ///<br>Gm3636 /// Gm3667 ///<br>Gm3685 /// Gm3696 ///<br>Gm5458 /// Gm5795 ///<br>Gm5797 /// Gm6337 ///<br>Gm8246 /// Gm8279 ///<br>Gm9602 /// Gm9603 ///<br>LOC101055754 ///<br>LOC102632113 ///<br>LOC102636792 ///<br>LOC102638110 ///<br>LOC105242423 ///<br>LOC105242449 ///<br>LOC105245673 /// |          |       |      |       |          |          |       |
| 1429323_PM_at   | LOC105245675                                                                                                                                                                                                                                                                                                                                                                                                                                                                                                                                                                          | NA       | -0.06 | 3.52 | -0.20 | 8.44E-01 | 9.35E-01 | -6.68 |
| 1432965_PM_at   | 4921507H08Rik                                                                                                                                                                                                                                                                                                                                                                                                                                                                                                                                                                         | NA       | 0.02  | 2.07 | 0.20  | 8.44E-01 | 9.35E-01 | -6.68 |
| 1458635_PM_at   | Mettl21e                                                                                                                                                                                                                                                                                                                                                                                                                                                                                                                                                                              | NA       | 0.03  | 2.53 | 0.20  | 8.44E-01 | 9.35E-01 | -6.68 |
| 1429332_PM_at   | 4632427E13Rik                                                                                                                                                                                                                                                                                                                                                                                                                                                                                                                                                                         | NA       | -0.03 | 2.27 | -0.20 | 8.44E-01 | 9.35E-01 | -6.68 |
| 1452395_PM_at   | Med19                                                                                                                                                                                                                                                                                                                                                                                                                                                                                                                                                                                 | MED19    | -0.03 | 2.96 | -0.20 | 8.44E-01 | 9.35E-01 | -6.68 |
| 1420979_PM_at   | Pak1                                                                                                                                                                                                                                                                                                                                                                                                                                                                                                                                                                                  | PAK1     | 0.09  | 6.28 | 0.20  | 8.44E-01 | 9.35E-01 | -6.68 |
| 1420541_PM_at   | Rdh16                                                                                                                                                                                                                                                                                                                                                                                                                                                                                                                                                                                 | RDH16    | 0.02  | 2.22 | 0.20  | 8.44E-01 | 9.35E-01 | -6.68 |
| 1458129_PM_at   | Rora                                                                                                                                                                                                                                                                                                                                                                                                                                                                                                                                                                                  | RORA     | 0.05  | 2.71 | 0.20  | 8.44E-01 | 9.35E-01 | -6.68 |
| 1428545_PM_at   | Tmem248                                                                                                                                                                                                                                                                                                                                                                                                                                                                                                                                                                               | TMEM248  | -0.04 | 3.63 | -0.20 | 8.44E-01 | 9.35E-01 | -6.68 |
| 1443896_PM_at   | Tbc1d5                                                                                                                                                                                                                                                                                                                                                                                                                                                                                                                                                                                | TBC1D5   | -0.03 | 2.56 | -0.20 | 8.44E-01 | 9.35E-01 | -6.68 |
| 1453667_PM_at   | 1700065D16Rik                                                                                                                                                                                                                                                                                                                                                                                                                                                                                                                                                                         | NA       | 0.03  | 2.36 | 0.20  | 8.45E-01 | 9.35E-01 | -6.68 |
| 1426988_PM_at   | Klh42                                                                                                                                                                                                                                                                                                                                                                                                                                                                                                                                                                                 | KLHL42   | -0.07 | 2.45 | -0.20 | 8.45E-01 | 9.35E-01 | -6.68 |
| 1419488_PM_at   | Tnip2                                                                                                                                                                                                                                                                                                                                                                                                                                                                                                                                                                                 | TNIP2    | -0.02 | 2.52 | -0.20 | 8.45E-01 | 9.35E-01 | -6.68 |
| 1419156_PM_at   | Sox4                                                                                                                                                                                                                                                                                                                                                                                                                                                                                                                                                                                  | SOX4     | 0.07  | 2.63 | 0.20  | 8.45E-01 | 9.35E-01 | -6.68 |
| 1422412_PM_x_at | Ear3                                                                                                                                                                                                                                                                                                                                                                                                                                                                                                                                                                                  | NA       | 0.02  | 2.12 | 0.20  | 8.45E-01 | 9.35E-01 | -6.68 |
| 1419557_PM_a_at | Tmem9                                                                                                                                                                                                                                                                                                                                                                                                                                                                                                                                                                                 | TMEM9    | -0.04 | 2.83 | -0.20 | 8.45E-01 | 9.35E-01 | -6.68 |
| 1426555_PM_at   | Scpep1                                                                                                                                                                                                                                                                                                                                                                                                                                                                                                                                                                                | SCPEP1   | -0.03 | 2.57 | -0.20 | 8.45E-01 | 9.35E-01 | -6.68 |
| 1425237_PM_at   | Krtap6-5                                                                                                                                                                                                                                                                                                                                                                                                                                                                                                                                                                              | NA       | -0.03 | 2.05 | -0.20 | 8.45E-01 | 9.35E-01 | -6.68 |
| 1418878_PM_at   | Acrv1                                                                                                                                                                                                                                                                                                                                                                                                                                                                                                                                                                                 | ACRV1    | 0.03  | 2.61 | 0.20  | 8.45E-01 | 9.35E-01 | -6.68 |
| 1422314_PM_at   | Cln6                                                                                                                                                                                                                                                                                                                                                                                                                                                                                                                                                                                  | CLCN6    | 0.09  | 3.77 | 0.20  | 8.45E-01 | 9.35E-01 | -6.68 |
| 1432706_PM_at   | 5330428N10Rik                                                                                                                                                                                                                                                                                                                                                                                                                                                                                                                                                                         | NA       | 0.03  | 2.57 | 0.20  | 8.45E-01 | 9.35E-01 | -6.68 |
| 1415878_PM_at   | Rrm1                                                                                                                                                                                                                                                                                                                                                                                                                                                                                                                                                                                  | RRM1     | 0.04  | 2.97 | 0.20  | 8.45E-01 | 9.35E-01 | -6.68 |
| 1444492_PM_at   | Ptprd                                                                                                                                                                                                                                                                                                                                                                                                                                                                                                                                                                                 | PTPRD    | 0.05  | 3.05 | 0.20  | 8.45E-01 | 9.35E-01 | -6.68 |
| 1440652_PM_at   | Ankrd44                                                                                                                                                                                                                                                                                                                                                                                                                                                                                                                                                                               | ANKRD44  | 0.03  | 2.58 | 0.20  | 8.45E-01 | 9.35E-01 | -6.68 |
| 1459713_PM_s_at | Ano1                                                                                                                                                                                                                                                                                                                                                                                                                                                                                                                                                                                  | ANO1     | -0.04 | 3.02 | -0.20 | 8.45E-01 | 9.35E-01 | -6.68 |
| 1442550_PM_at   | ---                                                                                                                                                                                                                                                                                                                                                                                                                                                                                                                                                                                   | NA       | -0.02 | 2.17 | -0.20 | 8.45E-01 | 9.35E-01 | -6.68 |
| 1436430_PM_at   | ---                                                                                                                                                                                                                                                                                                                                                                                                                                                                                                                                                                                   | NA       | -0.02 | 2.12 | -0.20 | 8.45E-01 | 9.35E-01 | -6.68 |
| 1430515_PM_s_at | Aasdhppt                                                                                                                                                                                                                                                                                                                                                                                                                                                                                                                                                                              | AASDHPPT | 0.05  | 2.92 | 0.20  | 8.45E-01 | 9.35E-01 | -6.68 |
| 1418341_PM_at   | Rab4a                                                                                                                                                                                                                                                                                                                                                                                                                                                                                                                                                                                 | RAB4A    | 0.08  | 2.96 | 0.20  | 8.45E-01 | 9.35E-01 | -6.68 |
| 1416286_PM_at   | Rgs4                                                                                                                                                                                                                                                                                                                                                                                                                                                                                                                                                                                  | RG54     | 0.05  | 5.71 | 0.20  | 8.45E-01 | 9.35E-01 | -6.68 |
| 1419511_PM_at   | Msh4                                                                                                                                                                                                                                                                                                                                                                                                                                                                                                                                                                                  | MSH4     | 0.02  | 2.25 | 0.20  | 8.45E-01 | 9.35E-01 | -6.68 |
| 1421303_PM_at   | Ikzf1                                                                                                                                                                                                                                                                                                                                                                                                                                                                                                                                                                                 | IKZF1    | 0.02  | 2.30 | 0.20  | 8.45E-01 | 9.36E-01 | -6.68 |
| 1443501_PM_at   | Gm38462                                                                                                                                                                                                                                                                                                                                                                                                                                                                                                                                                                               | NA       | 0.02  | 2.32 | 0.20  | 8.46E-01 | 9.36E-01 | -6.68 |
| 1435470_PM_at   | ---                                                                                                                                                                                                                                                                                                                                                                                                                                                                                                                                                                                   | NA       | -0.08 | 5.29 | -0.20 | 8.46E-01 | 9.36E-01 | -6.68 |
| 1424238_PM_at   | Sirt7                                                                                                                                                                                                                                                                                                                                                                                                                                                                                                                                                                                 | SIRT7    | -0.05 | 2.67 | -0.20 | 8.46E-01 | 9.36E-01 | -6.68 |
| 1443736_PM_at   | Gm13648                                                                                                                                                                                                                                                                                                                                                                                                                                                                                                                                                                               | NA       | -0.02 | 2.26 | -0.20 | 8.46E-01 | 9.36E-01 | -6.68 |
| 1437815_PM_at   | Tll13                                                                                                                                                                                                                                                                                                                                                                                                                                                                                                                                                                                 | TLL13P   | 0.02  | 2.07 | 0.20  | 8.46E-01 | 9.36E-01 | -6.68 |
| 1420721_PM_at   | 4921536K21Rik                                                                                                                                                                                                                                                                                                                                                                                                                                                                                                                                                                         | CSorf52  | 0.02  | 2.60 | 0.20  | 8.46E-01 | 9.36E-01 | -6.68 |
| 1446914_PM_at   | C80425                                                                                                                                                                                                                                                                                                                                                                                                                                                                                                                                                                                | NA       | 0.03  | 2.07 | 0.20  | 8.46E-01 | 9.36E-01 | -6.68 |
| 1453738_PM_at   | C330018D20Rik                                                                                                                                                                                                                                                                                                                                                                                                                                                                                                                                                                         | CSorf63  | -0.04 | 3.28 | -0.20 | 8.46E-01 | 9.36E-01 | -6.68 |
| 1432299_PM_at   | ---                                                                                                                                                                                                                                                                                                                                                                                                                                                                                                                                                                                   | NA       | 0.02  | 2.07 | 0.20  | 8.46E-01 | 9.36E-01 | -6.68 |
| 1432274_PM_at   | 4930543N07Rik                                                                                                                                                                                                                                                                                                                                                                                                                                                                                                                                                                         | NA       | 0.02  | 2.37 | 0.20  | 8.46E-01 | 9.36E-01 | -6.68 |
| 1435261_PM_at   | Tmtc1                                                                                                                                                                                                                                                                                                                                                                                                                                                                                                                                                                                 | TMTC1    | -0.09 | 4.96 | -0.20 | 8.46E-01 | 9.36E-01 | -6.68 |

|                 |                    |             |       |      |       |          |          |       |
|-----------------|--------------------|-------------|-------|------|-------|----------|----------|-------|
| 1424721_PM_at   | Mfap3              | MFAP3       | 0.04  | 2.37 | 0.20  | 8.46E-01 | 9.36E-01 | -6.68 |
| 1453044_PM_at   | ---                | NA          | -0.03 | 3.00 | -0.20 | 8.46E-01 | 9.36E-01 | -6.68 |
| 1451491_PM_at   | Bcdin3d            | BCDIN3D     | -0.03 | 2.81 | -0.20 | 8.46E-01 | 9.36E-01 | -6.68 |
| 1421538_PM_at   | Kcnd1              | KCND1       | 0.02  | 2.37 | 0.20  | 8.46E-01 | 9.36E-01 | -6.68 |
| 1449502_PM_at   | Dazl               | DAZL        | 0.02  | 2.39 | 0.20  | 8.46E-01 | 9.36E-01 | -6.68 |
| 1423351_PM_at   | Mrp1               | MRP1        | 0.04  | 2.33 | 0.20  | 8.46E-01 | 9.36E-01 | -6.68 |
| 1455085_PM_at   | 1700086L19Rik      | NA          | 0.04  | 2.58 | 0.20  | 8.46E-01 | 9.36E-01 | -6.68 |
| 1437146_PM_x_at | Coro7              | CORO7-PAM16 | 0.12  | 5.42 | 0.20  | 8.46E-01 | 9.36E-01 | -6.68 |
| 1453893_PM_at   | 4933412O06Rik      | NA          | -0.02 | 2.33 | -0.20 | 8.46E-01 | 9.36E-01 | -6.68 |
| 1427786_PM_at   | Gm11532            | NA          | 0.02  | 2.23 | 0.20  | 8.46E-01 | 9.36E-01 | -6.68 |
| 1433276_PM_at   | ---                | NA          | 0.02  | 2.00 | 0.20  | 8.46E-01 | 9.36E-01 | -6.68 |
| 1460644_PM_at   | Bckdk              | BCKDK       | 0.02  | 2.90 | 0.20  | 8.46E-01 | 9.36E-01 | -6.68 |
| 1433727_PM_at   | GLB1L2             | GLB1L2      | 0.02  | 2.80 | 0.20  | 8.46E-01 | 9.36E-01 | -6.68 |
| 1424935_PM_at   | Gdap1l1            | GDAP1L1     | 0.06  | 2.81 | 0.20  | 8.46E-01 | 9.36E-01 | -6.68 |
| 1426508_PM_at   | Gfap               | GFAP        | 0.15  | 3.58 | 0.20  | 8.46E-01 | 9.36E-01 | -6.68 |
| 1427004_PM_at   | Fbxo2              | FBXO2       | -0.04 | 3.05 | -0.20 | 8.47E-01 | 9.36E-01 | -6.68 |
| 1424444_PM_a_at | 1600014C10Rik      | C19orf12    | 0.03  | 2.39 | 0.20  | 8.47E-01 | 9.36E-01 | -6.68 |
| 1431481_PM_at   | 4930443O20Rik      | NA          | -0.02 | 2.51 | -0.20 | 8.47E-01 | 9.36E-01 | -6.68 |
| 1458648_PM_at   | AU042950           | NA          | 0.02  | 1.97 | 0.20  | 8.47E-01 | 9.36E-01 | -6.68 |
| 1459952_PM_at   | Ankrd17            | ANKRD17     | -0.07 | 2.83 | -0.20 | 8.47E-01 | 9.36E-01 | -6.68 |
| 1431089_PM_at   | Cpsf2              | NA          | 0.03  | 2.10 | 0.20  | 8.47E-01 | 9.36E-01 | -6.68 |
| 1459342_PM_at   | Gm38403            | NA          | 0.02  | 2.21 | 0.20  | 8.47E-01 | 9.36E-01 | -6.68 |
| 1442380_PM_at   | Lcn4               | NA          | 0.02  | 1.98 | 0.20  | 8.47E-01 | 9.36E-01 | -6.68 |
| 1421181_PM_at   | Npcd /// Nptxr     | NPTXR       | -0.03 | 2.75 | -0.20 | 8.47E-01 | 9.36E-01 | -6.68 |
| 1456313_PM_x_at | Mrp28              | MRPL28      | -0.03 | 2.45 | -0.20 | 8.47E-01 | 9.36E-01 | -6.68 |
| 1428056_PM_at   | Kfra1              | NA          | -0.02 | 2.08 | -0.20 | 8.47E-01 | 9.36E-01 | -6.68 |
| 1439605_PM_at   | Tmem178b           | TMEM178B    | 0.04  | 2.68 | 0.20  | 8.47E-01 | 9.36E-01 | -6.68 |
| 1422276_PM_at   | P2ry4              | P2RY4       | 0.02  | 2.13 | 0.20  | 8.47E-01 | 9.36E-01 | -6.68 |
| 1456023_PM_at   | Zfp846             | NA          | 0.02  | 2.16 | 0.20  | 8.47E-01 | 9.36E-01 | -6.68 |
| 1445931_PM_at   | ---                | NA          | 0.04  | 3.17 | 0.20  | 8.47E-01 | 9.36E-01 | -6.68 |
| 1443050_PM_at   | Fn3krp             | FN3KRP      | -0.04 | 2.44 | -0.20 | 8.47E-01 | 9.36E-01 | -6.68 |
| 1425244_PM_a_at | Theg               | THEG        | 0.02  | 2.41 | 0.20  | 8.47E-01 | 9.36E-01 | -6.68 |
| 1441857_PM_x_at | Seh1l              | SEH1L       | 0.02  | 2.42 | 0.20  | 8.47E-01 | 9.36E-01 | -6.68 |
| 1439989_PM_at   | Tsc1               | TSC1        | 0.05  | 3.65 | 0.20  | 8.47E-01 | 9.36E-01 | -6.68 |
| 1444106_PM_at   | Gdpgp1             | GDPGP1      | 0.11  | 3.24 | 0.20  | 8.47E-01 | 9.36E-01 | -6.68 |
| 1442101_PM_at   | Elf1               | ELFN1       | -0.05 | 2.98 | -0.20 | 8.47E-01 | 9.36E-01 | -6.68 |
| 1453321_PM_at   | Fndc1              | FNDC1       | 0.02  | 2.53 | 0.20  | 8.47E-01 | 9.36E-01 | -6.68 |
| 1455062_PM_at   | Zfp957             | NA          | 0.02  | 2.33 | 0.20  | 8.47E-01 | 9.36E-01 | -6.68 |
| 1427548_PM_a_at | Clns1a             | CLNS1A      | -0.06 | 3.36 | -0.20 | 8.47E-01 | 9.36E-01 | -6.68 |
| 1418352_PM_at   | Hsd17b2            | HSD17B2     | 0.03  | 2.82 | 0.20  | 8.47E-01 | 9.36E-01 | -6.68 |
| 1426029_PM_a_at | Nfat5              | NFAT5       | 0.07  | 3.53 | 0.20  | 8.47E-01 | 9.36E-01 | -6.68 |
| 1457952_PM_at   | ---                | NA          | -0.02 | 3.44 | -0.20 | 8.47E-01 | 9.36E-01 | -6.68 |
| 1451339_PM_at   | Suox               | SUOX        | -0.02 | 2.23 | -0.20 | 8.47E-01 | 9.36E-01 | -6.68 |
| 1447816_PM_x_at | Oxnad1             | OXNAD1      | -0.11 | 3.54 | -0.20 | 8.48E-01 | 9.37E-01 | -6.68 |
| 1424667_PM_a_at | Cux1               | CUX1        | -0.03 | 2.19 | -0.20 | 8.48E-01 | 9.37E-01 | -6.68 |
| 1438824_PM_at   | Slc20a1            | SLC20A1     | 0.04  | 2.74 | 0.20  | 8.48E-01 | 9.37E-01 | -6.68 |
| 1422805_PM_a_at | Ing3               | ING3        | 0.05  | 2.64 | 0.20  | 8.48E-01 | 9.37E-01 | -6.68 |
| 1454808_PM_at   | Micu2              | MICU2       | -0.03 | 2.56 | -0.20 | 8.48E-01 | 9.37E-01 | -6.68 |
| 1427594_PM_at   | Gm31825 /// Zfp697 | ZNF697      | -0.10 | 3.21 | -0.20 | 8.48E-01 | 9.37E-01 | -6.68 |
| 1417006_PM_at   | Comm4              | COMM4       | -0.04 | 2.80 | -0.20 | 8.48E-01 | 9.37E-01 | -6.68 |
| 1453857_PM_at   | Rnf180             | RNF180      | -0.02 | 2.51 | -0.20 | 8.48E-01 | 9.37E-01 | -6.68 |
| 1439428_PM_x_at | Gmds               | GMDS        | -0.04 | 2.59 | -0.20 | 8.48E-01 | 9.37E-01 | -6.68 |
| 1459778_PM_at   | Rpn1               | NA          | -0.04 | 4.53 | -0.20 | 8.48E-01 | 9.37E-01 | -6.68 |
| 1433274_PM_at   | Nkain1             | NA          | -0.02 | 2.42 | -0.20 | 8.48E-01 | 9.37E-01 | -6.68 |
| 1440359_PM_at   | Fam110b            | FAM110B     | 0.03  | 2.32 | 0.20  | 8.48E-01 | 9.37E-01 | -6.68 |
| 1421193_PM_a_at | Pbx3               | PBX3        | 0.04  | 2.85 | 0.20  | 8.48E-01 | 9.37E-01 | -6.68 |
| 1439794_PM_at   | Ntn4               | NTN4        | -0.05 | 2.84 | -0.20 | 8.48E-01 | 9.37E-01 | -6.68 |
| 1451936_PM_a_at | Txnrd2             | TXNRD2      | 0.03  | 2.99 | 0.20  | 8.48E-01 | 9.37E-01 | -6.68 |
| 1440884_PM_s_at | Sgcd               | NA          | 0.03  | 3.05 | 0.20  | 8.48E-01 | 9.37E-01 | -6.68 |
| 1425969_PM_a_at | Htt                | HTT         | 0.02  | 2.72 | 0.20  | 8.48E-01 | 9.37E-01 | -6.68 |
| 1424901_PM_at   | Gcnt3              | GCNT3       | 0.02  | 2.01 | 0.20  | 8.48E-01 | 9.37E-01 | -6.68 |
| 1455126_PM_x_at | Minos1             | MINOS1      | -0.04 | 6.92 | -0.20 | 8.48E-01 | 9.37E-01 | -6.68 |
| 1446720_PM_at   | ---                | NA          | 0.07  | 2.57 | 0.20  | 8.48E-01 | 9.37E-01 | -6.68 |
| 1450779_PM_at   | Fabp7              | FABP7       | -0.12 | 3.95 | -0.20 | 8.48E-01 | 9.37E-01 | -6.68 |
| 1442244_PM_at   | Inadl              | PATJ        | -0.03 | 2.63 | -0.20 | 8.48E-01 | 9.37E-01 | -6.68 |
| 1424610_PM_at   | Trub2              | TRUB2       | -0.09 | 6.26 | -0.20 | 8.48E-01 | 9.37E-01 | -6.68 |
| 1459300_PM_at   | ---                | NA          | -0.03 | 2.85 | -0.20 | 8.48E-01 | 9.37E-01 | -6.68 |
| 1429903_PM_at   | Dpf2               | DPF2        | -0.03 | 2.41 | -0.20 | 8.48E-01 | 9.37E-01 | -6.68 |
| 1448919_PM_at   | Cd302              | CD302       | -0.05 | 3.64 | -0.20 | 8.48E-01 | 9.37E-01 | -6.68 |
| 1420344_PM_x_at | Gzmd               | GZMB        | -0.01 | 1.80 | -0.20 | 8.48E-01 | 9.37E-01 | -6.68 |
| 1449308_PM_at   | C6                 | C6          | -0.04 | 4.17 | -0.20 | 8.48E-01 | 9.37E-01 | -6.68 |
| 1438587_PM_at   | Fam71a             | FAM71A      | -0.02 | 3.99 | -0.20 | 8.48E-01 | 9.37E-01 | -6.68 |
| 1418863_PM_at   | Gata4              | GATA4       | 0.02  | 2.55 | 0.20  | 8.48E-01 | 9.37E-01 | -6.68 |
| 1449602_PM_at   | Klh5               | NA          | 0.02  | 2.62 | 0.20  | 8.48E-01 | 9.37E-01 | -6.68 |
| 1441585_PM_at   | Gm35677            | NA          | 0.02  | 2.70 | 0.20  | 8.48E-01 | 9.37E-01 | -6.68 |



|                 |                            |           |       |      |       |          |          |       |  |
|-----------------|----------------------------|-----------|-------|------|-------|----------|----------|-------|--|
| 1453733_PM_a_at | 1700094D03Rik ///          |           |       |      |       |          |          |       |  |
|                 | 4933434E20Rik              | C1orf43   | 0.04  | 2.89 | 0.20  | 8.48E-01 | 9.37E-01 | -6.68 |  |
| 1456708_PM_at   | 2610028E06Rik              | NA        | 0.02  | 2.11 | 0.20  | 8.49E-01 | 9.37E-01 | -6.68 |  |
| 1439506_PM_at   | Myrf                       | MYRF      | 0.04  | 2.43 | 0.20  | 8.49E-01 | 9.37E-01 | -6.68 |  |
| 1456590_PM_x_at | Akr1b3 ///Gm6644           | AKR1B1    | -0.08 | 4.98 | -0.20 | 8.49E-01 | 9.37E-01 | -6.68 |  |
| 1434736_PM_at   | Hlf                        | HLF       | -0.05 | 3.01 | -0.20 | 8.49E-01 | 9.37E-01 | -6.68 |  |
| 1448706_PM_at   | Tdp2                       | TDP2      | -0.03 | 3.31 | -0.20 | 8.49E-01 | 9.37E-01 | -6.68 |  |
| 1457613_PM_at   | ---                        | NA        | -0.02 | 2.15 | -0.20 | 8.49E-01 | 9.37E-01 | -6.68 |  |
| 1446627_PM_at   | ---                        | NA        | 0.03  | 2.26 | 0.20  | 8.49E-01 | 9.37E-01 | -6.68 |  |
| 1423314_PM_s_at | Pde7a                      | PDE7A     | 0.04  | 2.51 | 0.20  | 8.49E-01 | 9.37E-01 | -6.68 |  |
| 1433121_PM_at   | 5830490A04Rik              | NA        | 0.04  | 2.48 | 0.20  | 8.49E-01 | 9.37E-01 | -6.68 |  |
| 1428728_PM_at   | Ddx51                      | DDX51     | -0.02 | 2.69 | -0.20 | 8.49E-01 | 9.37E-01 | -6.68 |  |
| 1432494_PM_a_at | Ift43                      | IFT43     | 0.03  | 2.56 | 0.20  | 8.49E-01 | 9.37E-01 | -6.68 |  |
| 1436482_PM_a_at | Sdc3                       | SDC3      | 0.03  | 2.43 | 0.20  | 8.49E-01 | 9.37E-01 | -6.68 |  |
| 1427222_PM_a_at | Svs4                       | NA        | 0.02  | 2.30 | 0.20  | 8.49E-01 | 9.37E-01 | -6.68 |  |
| 1437378_PM_x_at | Scarb1                     | SCARB1    | 0.03  | 2.49 | 0.20  | 8.49E-01 | 9.37E-01 | -6.68 |  |
| 1430125_PM_s_at | Pqlc1                      | PQLC1     | -0.03 | 2.42 | -0.20 | 8.49E-01 | 9.37E-01 | -6.68 |  |
| 1448794_PM_s_at | Dnajc2                     | DNAJC2    | 0.04  | 3.08 | 0.20  | 8.49E-01 | 9.37E-01 | -6.68 |  |
| 1452673_PM_at   | Ranbp3                     | RANBP3    | -0.03 | 3.48 | -0.20 | 8.49E-01 | 9.37E-01 | -6.68 |  |
| 1459319_PM_at   | ---                        | NA        | -0.02 | 2.29 | -0.20 | 8.49E-01 | 9.37E-01 | -6.68 |  |
| 1459841_PM_x_at | Laptm5                     | LAPTM5    | 0.03  | 2.28 | 0.20  | 8.49E-01 | 9.37E-01 | -6.68 |  |
| 1420844_PM_at   | Ubqln2                     | UBQLN2    | 0.03  | 3.78 | 0.19  | 8.49E-01 | 9.37E-01 | -6.68 |  |
| 1452283_PM_at   | Rassf8                     | RASSF8    | 0.04  | 3.11 | 0.19  | 8.49E-01 | 9.37E-01 | -6.68 |  |
| 1418395_PM_at   | Slc47a1                    | SLC47A1   | -0.10 | 2.86 | -0.19 | 8.49E-01 | 9.37E-01 | -6.68 |  |
| 1432200_PM_at   | ---                        | NA        | 0.02  | 2.20 | 0.19  | 8.49E-01 | 9.37E-01 | -6.68 |  |
| 1428223_PM_at   | Mfsd2a                     | MFSD2A    | 0.03  | 2.65 | 0.19  | 8.49E-01 | 9.37E-01 | -6.68 |  |
| 1450781_PM_at   | Hmga2                      | HMGGA2    | -0.08 | 2.92 | -0.19 | 8.49E-01 | 9.37E-01 | -6.68 |  |
| 1454493_PM_at   | ---                        | NA        | -0.03 | 2.89 | -0.19 | 8.49E-01 | 9.37E-01 | -6.68 |  |
| 1446731_PM_at   | ---                        | NA        | -0.02 | 2.23 | -0.19 | 8.49E-01 | 9.37E-01 | -6.68 |  |
| 1420833_PM_at   | Vamp2                      | VAMP2     | 0.06  | 9.05 | 0.19  | 8.49E-01 | 9.37E-01 | -6.68 |  |
| 1454576_PM_at   | ---                        | NA        | 0.02  | 2.12 | 0.19  | 8.50E-01 | 9.37E-01 | -6.68 |  |
| 1437766_PM_at   | Gm19691                    | NA        | -0.02 | 2.49 | -0.19 | 8.50E-01 | 9.37E-01 | -6.68 |  |
| 1457821_PM_at   | ---                        | NA        | -0.06 | 5.77 | -0.19 | 8.50E-01 | 9.37E-01 | -6.68 |  |
| 1437597_PM_at   | ---                        | NA        | -0.03 | 3.69 | -0.19 | 8.50E-01 | 9.37E-01 | -6.68 |  |
| 1430810_PM_at   | Nhsl1                      | NHSL1     | 0.02  | 2.55 | 0.19  | 8.50E-01 | 9.37E-01 | -6.68 |  |
| 1439892_PM_at   | Brsk1                      | BRSK1     | -0.05 | 4.47 | -0.19 | 8.50E-01 | 9.38E-01 | -6.68 |  |
| 1429577_PM_at   | Iqc4                       | NA        | -0.03 | 2.47 | -0.19 | 8.50E-01 | 9.38E-01 | -6.68 |  |
| 1441675_PM_at   | Rnf169                     | NA        | -0.03 | 2.35 | -0.19 | 8.50E-01 | 9.38E-01 | -6.68 |  |
| 1444024_PM_at   | Erc6                       | ERCC6L    | -0.02 | 2.44 | -0.19 | 8.50E-01 | 9.38E-01 | -6.68 |  |
| 1433179_PM_at   | Morn1                      | NA        | 0.02  | 2.32 | 0.19  | 8.50E-01 | 9.38E-01 | -6.68 |  |
| 1443358_PM_at   | ---                        | NA        | 0.02  | 2.64 | 0.19  | 8.50E-01 | 9.38E-01 | -6.68 |  |
| 1424281_PM_at   | Ubap2                      | UBAP2     | 0.08  | 3.68 | 0.19  | 8.50E-01 | 9.38E-01 | -6.68 |  |
| 1441444_PM_at   | Nbeal1                     | NBEAL1    | 0.02  | 2.28 | 0.19  | 8.50E-01 | 9.38E-01 | -6.68 |  |
| 1434226_PM_at   | Cyb561d1                   | CYB561D1  | -0.02 | 2.08 | -0.19 | 8.50E-01 | 9.38E-01 | -6.68 |  |
| 1437953_PM_at   | Gpcpd1                     | GPCPD1    | 0.05  | 3.08 | 0.19  | 8.50E-01 | 9.38E-01 | -6.68 |  |
| 1415913_PM_at   | LOC102642137 ///Rps13 ///  |           |       |      |       |          |          |       |  |
|                 | Rps13-ps1 ///Rps13-ps2 /// |           |       |      |       |          |          |       |  |
|                 | Rps13-ps4                  | RPS13     | -0.05 | 2.93 | -0.19 | 8.50E-01 | 9.38E-01 | -6.68 |  |
| 1447565_PM_at   | 1700082C02Rik              | NA        | -0.02 | 2.36 | -0.19 | 8.50E-01 | 9.38E-01 | -6.68 |  |
| 1459079_PM_at   | ---                        | NA        | 0.02  | 2.23 | 0.19  | 8.50E-01 | 9.38E-01 | -6.68 |  |
| 1436819_PM_at   | Sept6                      | SEPT6     | 0.05  | 3.79 | 0.19  | 8.50E-01 | 9.38E-01 | -6.68 |  |
| 1441363_PM_at   | Gm29750                    | NA        | -0.03 | 2.72 | -0.19 | 8.50E-01 | 9.38E-01 | -6.68 |  |
| 1452864_PM_at   | Med12l                     | MED12L    | -0.03 | 2.84 | -0.19 | 8.50E-01 | 9.38E-01 | -6.68 |  |
| 1446874_PM_at   | ---                        | NA        | 0.02  | 1.94 | 0.19  | 8.50E-01 | 9.38E-01 | -6.68 |  |
| 1446052_PM_at   | ---                        | NA        | 0.04  | 5.62 | 0.19  | 8.50E-01 | 9.38E-01 | -6.68 |  |
| 1436015_PM_s_at | Stk4                       | STK4      | 0.12  | 4.75 | 0.19  | 8.50E-01 | 9.38E-01 | -6.68 |  |
| 1428591_PM_at   | Pnpla2                     | PNPLA2    | 0.02  | 2.31 | 0.19  | 8.50E-01 | 9.38E-01 | -6.68 |  |
| 1460450_PM_at   | Ammeccr1l                  | AMMECCR1L | -0.05 | 3.90 | -0.19 | 8.50E-01 | 9.38E-01 | -6.68 |  |
| 1443880_PM_at   | Zbtb39                     | ZBTB39    | -0.06 | 2.69 | -0.19 | 8.51E-01 | 9.38E-01 | -6.68 |  |
| 1443210_PM_at   | ---                        | NA        | -0.05 | 3.26 | -0.19 | 8.51E-01 | 9.38E-01 | -6.68 |  |
| 1430910_PM_at   | ---                        | NA        | -0.02 | 2.36 | -0.19 | 8.51E-01 | 9.38E-01 | -6.68 |  |
| 1423086_PM_at   | Npc1                       | NPC1      | 0.06  | 3.56 | 0.19  | 8.51E-01 | 9.38E-01 | -6.68 |  |
| 1432374_PM_a_at | Ept1                       | SELENOI   | -0.09 | 3.31 | -0.19 | 8.51E-01 | 9.38E-01 | -6.68 |  |
| 1432946_PM_at   | ---                        | NA        | -0.02 | 2.35 | -0.19 | 8.51E-01 | 9.38E-01 | -6.68 |  |
| 1419408_PM_at   | Six6                       | SIX6      | 0.02  | 2.38 | 0.19  | 8.51E-01 | 9.38E-01 | -6.68 |  |
| 1429389_PM_at   | Setmar                     | SETMAR    | 0.02  | 2.63 | 0.19  | 8.51E-01 | 9.38E-01 | -6.68 |  |
| 1444306_PM_at   | Msi1                       | MSI1      | 0.03  | 2.93 | 0.19  | 8.51E-01 | 9.38E-01 | -6.68 |  |
| 1460366_PM_at   | Eml3                       | EML3      | 0.04  | 2.35 | 0.19  | 8.51E-01 | 9.38E-01 | -6.68 |  |
| 1448717_PM_at   | Gcdh                       | GCDH      | 0.05  | 2.72 | 0.19  | 8.51E-01 | 9.38E-01 | -6.68 |  |
| 1423923_PM_a_at | Wrap73                     | WRAP73    | 0.09  | 3.47 | 0.19  | 8.51E-01 | 9.38E-01 | -6.68 |  |
| 1456247_PM_x_at | Gm13669 ///Plp2            | PLP2      | 0.02  | 2.32 | 0.19  | 8.51E-01 | 9.38E-01 | -6.68 |  |
| 1456451_PM_at   | Ceacam15                   | CEACAM21  | 0.02  | 2.41 | 0.19  | 8.51E-01 | 9.38E-01 | -6.68 |  |
| 1437752_PM_at   | Lin28a                     | LIN28A    | -0.02 | 2.32 | -0.19 | 8.51E-01 | 9.38E-01 | -6.68 |  |
| AFFX-BioDn-5_at | ---                        | NA        | -0.02 | 9.40 | -0.19 | 8.51E-01 | 9.38E-01 | -6.68 |  |
| 1418275_PM_a_at | Elf2                       | ELF2      | 0.03  | 3.82 | 0.19  | 8.51E-01 | 9.38E-01 | -6.68 |  |

|                 |                   |            |       |      |       |          |          |       |
|-----------------|-------------------|------------|-------|------|-------|----------|----------|-------|
| 1459460_PM_at   | ---               | NA         | 0.02  | 2.26 | 0.19  | 8.51E-01 | 9.38E-01 | -6.68 |
| 1416890_PM_at   | Wdr74             | WDR74      | -0.03 | 2.76 | -0.19 | 8.51E-01 | 9.38E-01 | -6.68 |
| 1454552_PM_at   | ---               | NA         | -0.02 | 2.07 | -0.19 | 8.51E-01 | 9.38E-01 | -6.68 |
| 1457113_PM_at   | Nasp              | NASP       | 0.02  | 2.23 | 0.19  | 8.51E-01 | 9.38E-01 | -6.68 |
| 1445256_PM_at   | ---               | NA         | 0.03  | 2.36 | 0.19  | 8.51E-01 | 9.38E-01 | -6.68 |
| 1435198_PM_at   | Gm5817            | NA         | -0.03 | 2.51 | -0.19 | 8.51E-01 | 9.38E-01 | -6.68 |
| 1442075_PM_at   | Enpp6             | NA         | 0.02  | 2.13 | 0.19  | 8.51E-01 | 9.38E-01 | -6.68 |
| 1418764_PM_a_at | Bpnt1             | BPNT1      | 0.07  | 3.13 | 0.19  | 8.51E-01 | 9.38E-01 | -6.68 |
| 1458211_PM_at   | Nek1              | NEK1       | 0.01  | 2.17 | 0.19  | 8.51E-01 | 9.38E-01 | -6.68 |
| 1460679_PM_at   | Exosc4            | EXOSC4     | 0.06  | 3.32 | 0.19  | 8.51E-01 | 9.38E-01 | -6.68 |
| 1451114_PM_at   | Cntm6             | CMTM6      | 0.03  | 3.00 | 0.19  | 8.52E-01 | 9.38E-01 | -6.68 |
| 1460456_PM_at   | Prorsd1           | NA         | 0.02  | 2.35 | 0.19  | 8.52E-01 | 9.38E-01 | -6.68 |
| 1430401_PM_at   | 3110045C21Rik     | NA         | -0.02 | 2.28 | -0.19 | 8.52E-01 | 9.39E-01 | -6.68 |
| 1452337_PM_at   | 4930427A07Rik     | C14orf80   | -0.02 | 2.14 | -0.19 | 8.52E-01 | 9.39E-01 | -6.68 |
| 1443577_PM_at   | Gm19723           | NA         | 0.02  | 2.24 | 0.19  | 8.52E-01 | 9.39E-01 | -6.68 |
| 1425636_PM_at   | Hhat              | HHAT       | 0.02  | 2.52 | 0.19  | 8.52E-01 | 9.39E-01 | -6.68 |
| 1457462_PM_at   | Zfp68             | ZNF717     | 0.02  | 2.74 | 0.19  | 8.52E-01 | 9.39E-01 | -6.68 |
| 1458364_PM_s_at | Tor1aip1          | TOR1AI1P1  | 0.04  | 2.36 | 0.19  | 8.52E-01 | 9.39E-01 | -6.68 |
| 1426774_PM_at   | Parp12            | PARP12     | 0.05  | 2.42 | 0.19  | 8.52E-01 | 9.39E-01 | -6.68 |
| 1451178_PM_at   | Mrp53             | MRPL53     | -0.03 | 4.01 | -0.19 | 8.52E-01 | 9.39E-01 | -6.68 |
| 1443012_PM_at   | ---               | NA         | 0.09  | 3.59 | 0.19  | 8.52E-01 | 9.39E-01 | -6.68 |
| 1439857_PM_at   | ---               | NA         | 0.02  | 2.56 | 0.19  | 8.52E-01 | 9.39E-01 | -6.68 |
| 1445685_PM_at   | Gas7              | GAS7       | -0.10 | 4.40 | -0.19 | 8.52E-01 | 9.39E-01 | -6.68 |
| 1451229_PM_at   | Hdac11            | HDAC11     | -0.05 | 3.82 | -0.19 | 8.52E-01 | 9.39E-01 | -6.68 |
| 1419521_PM_at   | Zfp94             | ZNF45      | -0.04 | 2.74 | -0.19 | 8.52E-01 | 9.39E-01 | -6.68 |
| 1424013_PM_at   | Etf1              | ETF1       | -0.03 | 2.73 | -0.19 | 8.52E-01 | 9.39E-01 | -6.68 |
| 1453505_PM_a_at | Eif2ak3           | EIF2AK3    | -0.03 | 2.98 | -0.19 | 8.52E-01 | 9.39E-01 | -6.68 |
| 1419435_PM_at   | Aox1              | AOX1       | -0.03 | 2.71 | -0.19 | 8.52E-01 | 9.39E-01 | -6.68 |
| 1423549_PM_at   | Slc1a4            | SLC1A4     | -0.03 | 2.55 | -0.19 | 8.52E-01 | 9.39E-01 | -6.68 |
| 1450512_PM_at   | Ntn4              | NA         | -0.03 | 2.47 | -0.19 | 8.53E-01 | 9.39E-01 | -6.68 |
| 1444846_PM_at   | D15Erttd529e      | NA         | -0.02 | 2.02 | -0.19 | 8.52E-01 | 9.39E-01 | -6.68 |
| 1431244_PM_s_at | Dnm1p             | DNMBP      | -0.02 | 2.23 | -0.19 | 8.52E-01 | 9.39E-01 | -6.68 |
| 1438357_PM_at   | Pfdn5             | PFDN5      | -0.02 | 3.31 | -0.19 | 8.52E-01 | 9.39E-01 | -6.68 |
| 1442738_PM_at   | Crebl2            | CREBL2     | -0.02 | 2.14 | -0.19 | 8.52E-01 | 9.39E-01 | -6.68 |
| 1422391_PM_at   | Vmn1r11           | NA         | 0.02  | 1.90 | 0.19  | 8.52E-01 | 9.39E-01 | -6.68 |
| 1454528_PM_at   | A930011E06Rik     | NA         | 0.02  | 2.08 | 0.19  | 8.52E-01 | 9.39E-01 | -6.68 |
| 1441365_PM_at   | Foxp2             | FOXP2      | 0.03  | 2.44 | 0.19  | 8.52E-01 | 9.39E-01 | -6.68 |
| 1423218_PM_a_at | Mrp49             | MRPL49     | 0.04  | 3.58 | 0.19  | 8.53E-01 | 9.39E-01 | -6.68 |
| 1451370_PM_at   | Ccdc107           | CCDC107    | 0.05  | 5.03 | 0.19  | 8.52E-01 | 9.39E-01 | -6.68 |
| 1435695_PM_a_at | Ggct              | ACO05154.6 | 0.08  | 4.79 | 0.19  | 8.52E-01 | 9.39E-01 | -6.68 |
| 1444361_PM_at   | Ap1s2             | NA         | 0.02  | 2.17 | 0.19  | 8.53E-01 | 9.39E-01 | -6.68 |
| 1426572_PM_at   | Me2               | ME2        | 0.04  | 2.66 | 0.19  | 8.53E-01 | 9.39E-01 | -6.68 |
| 1455776_PM_x_at | Bola2             | BOLA2      | -0.03 | 3.24 | -0.19 | 8.53E-01 | 9.39E-01 | -6.68 |
| 1451134_PM_a_at | Tm2d2             | TM2D2      | 0.13  | 3.53 | 0.19  | 8.53E-01 | 9.39E-01 | -6.68 |
| 1438519_PM_at   | ---               | NA         | -0.03 | 2.48 | -0.19 | 8.53E-01 | 9.39E-01 | -6.68 |
| 1422397_PM_a_at | Il15ra            | IL15RA     | 0.03  | 2.48 | 0.19  | 8.53E-01 | 9.39E-01 | -6.68 |
| 1441161_PM_at   | Spx               | SPX        | -0.02 | 2.49 | -0.19 | 8.53E-01 | 9.39E-01 | -6.68 |
| 1437123_PM_at   | Mmrn2             | MMRN2      | -0.02 | 2.38 | -0.19 | 8.53E-01 | 9.39E-01 | -6.68 |
| 1458154_PM_at   | ---               | NA         | -0.02 | 2.03 | -0.19 | 8.53E-01 | 9.39E-01 | -6.68 |
| 1437063_PM_at   | Fem1a             | FEM1A      | 0.03  | 2.51 | 0.19  | 8.53E-01 | 9.39E-01 | -6.68 |
| 1444983_PM_at   | ---               | NA         | 0.02  | 2.39 | 0.19  | 8.53E-01 | 9.39E-01 | -6.68 |
| 1419284_PM_at   | Cyhr1             | CYHR1      | 0.02  | 2.85 | 0.19  | 8.53E-01 | 9.39E-01 | -6.68 |
| 1452903_PM_at   | Fam212a           | FAM212A    | 0.02  | 2.46 | 0.19  | 8.53E-01 | 9.39E-01 | -6.68 |
| 1455721_PM_at   | Gm39525 /// Gspt2 | GSPT2      | -0.05 | 2.90 | -0.19 | 8.53E-01 | 9.39E-01 | -6.68 |
| 1441996_PM_at   | ---               | NA         | -0.03 | 2.41 | -0.19 | 8.53E-01 | 9.39E-01 | -6.68 |
| 1418739_PM_at   | Sgk2              | SGK2       | -0.02 | 2.52 | -0.19 | 8.53E-01 | 9.39E-01 | -6.68 |
| 1418098_PM_at   | Adcy4             | ADCY4      | 0.03  | 2.95 | 0.19  | 8.53E-01 | 9.39E-01 | -6.68 |
| 1426610_PM_a_at | Ttf1              | TTF1       | 0.05  | 2.71 | 0.19  | 8.53E-01 | 9.39E-01 | -6.68 |
| 1438405_PM_at   | Fgf7              | FGF7       | 0.02  | 2.50 | 0.19  | 8.53E-01 | 9.39E-01 | -6.68 |
| 1450936_PM_a_at | Dnase1l2          | DNASE1L2   | -0.04 | 2.36 | -0.19 | 8.53E-01 | 9.39E-01 | -6.68 |
| 1417930_PM_at   | Nab2              | NAB2       | -0.02 | 2.77 | -0.19 | 8.53E-01 | 9.39E-01 | -6.68 |
| 1458181_PM_at   | LOC105243039      | NA         | 0.02  | 2.57 | 0.19  | 8.53E-01 | 9.39E-01 | -6.68 |
| 1429480_PM_at   | Ddi1              | DDI1       | 0.02  | 2.26 | 0.19  | 8.53E-01 | 9.39E-01 | -6.68 |
| 1452904_PM_at   | 1700026L06Rik     | SPACA9     | 0.03  | 2.69 | 0.19  | 8.53E-01 | 9.39E-01 | -6.68 |
| 1423421_PM_at   | Ankrd49           | ANKRD49    | -0.05 | 3.14 | -0.19 | 8.53E-01 | 9.39E-01 | -6.68 |
| 1423121_PM_at   | Ide               | IDE        | -0.03 | 2.74 | -0.19 | 8.53E-01 | 9.39E-01 | -6.68 |
| 1418583_PM_at   | Hint3             | HINT3      | 0.03  | 2.19 | 0.19  | 8.53E-01 | 9.39E-01 | -6.68 |
| 1425107_PM_a_at | Lifr              | LIFR       | -0.07 | 2.80 | -0.19 | 8.54E-01 | 9.39E-01 | -6.68 |
| 1429335_PM_at   | Snapc1            | SNAPC1     | -0.05 | 4.06 | -0.19 | 8.54E-01 | 9.39E-01 | -6.68 |
| 1451115_PM_at   | Pias3             | PIAS3      | -0.02 | 2.40 | -0.19 | 8.54E-01 | 9.39E-01 | -6.68 |
| 1440337_PM_at   | ---               | NA         | -0.01 | 1.90 | -0.19 | 8.54E-01 | 9.39E-01 | -6.68 |
| 1440997_PM_at   | Tnrc6c            | TNRC6C     | 0.02  | 2.55 | 0.19  | 8.54E-01 | 9.39E-01 | -6.68 |
| 1419581_PM_at   | Dlg4              | DLG4       | 0.09  | 4.72 | 0.19  | 8.54E-01 | 9.39E-01 | -6.68 |
| 1421154_PM_at   | Hcn2              | HCN2       | -0.03 | 2.90 | -0.19 | 8.54E-01 | 9.39E-01 | -6.68 |
| 1447529_PM_at   | ---               | NA         | -0.02 | 2.40 | -0.19 | 8.54E-01 | 9.39E-01 | -6.68 |

|                 |                          |         |       |      |       |          |          |       |
|-----------------|--------------------------|---------|-------|------|-------|----------|----------|-------|
| 1451433_PM_at   | Mfsd3                    | MFSD3   | 0.05  | 3.03 | 0.19  | 8.54E-01 | 9.39E-01 | -6.68 |
| 1430063_PM_at   | 4930571K23Rik            | NA      | -0.02 | 2.31 | -0.19 | 8.54E-01 | 9.39E-01 | -6.68 |
| 1426536_PM_at   | Ice2                     | ICE2    | 0.04  | 3.17 | 0.19  | 8.54E-01 | 9.40E-01 | -6.68 |
| 1440024_PM_at   | ---                      | NA      | -0.03 | 2.78 | -0.19 | 8.54E-01 | 9.40E-01 | -6.68 |
| 1442227_PM_at   | ---                      | NA      | 0.03  | 2.60 | 0.19  | 8.54E-01 | 9.40E-01 | -6.68 |
| 1458257_PM_at   | ---                      | NA      | 0.03  | 1.94 | 0.19  | 8.54E-01 | 9.40E-01 | -6.68 |
| 1416287_PM_at   | Rgs4                     | RGS4    | 0.04  | 3.68 | 0.19  | 8.54E-01 | 9.40E-01 | -6.68 |
| 1451603_PM_at   | Rtbdn                    | RTBDN   | 0.03  | 2.72 | 0.19  | 8.54E-01 | 9.40E-01 | -6.68 |
| 1440318_PM_at   | Wdr35                    | WDR35   | -0.04 | 2.89 | -0.19 | 8.54E-01 | 9.40E-01 | -6.68 |
| 1452632_PM_at   | Aak1 /// Gm38495         | AAK1    | -0.02 | 2.15 | -0.19 | 8.54E-01 | 9.40E-01 | -6.68 |
| 1432978_PM_at   | ---                      | NA      | 0.05  | 2.54 | 0.19  | 8.54E-01 | 9.40E-01 | -6.68 |
| 1445296_PM_at   | ---                      | NA      | -0.04 | 4.53 | -0.19 | 8.54E-01 | 9.40E-01 | -6.68 |
| 1426367_PM_at   | Cab39l                   | CAB39L  | 0.06  | 3.28 | 0.19  | 8.54E-01 | 9.40E-01 | -6.68 |
| 1421379_PM_at   | Zfp354b                  | ZNF354A | -0.03 | 2.57 | -0.19 | 8.55E-01 | 9.40E-01 | -6.68 |
| 1444531_PM_at   | ---                      | NA      | -0.05 | 5.13 | -0.19 | 8.55E-01 | 9.40E-01 | -6.68 |
| 1429269_PM_at   | Pr36                     | PRR36   | 0.03  | 2.52 | 0.19  | 8.55E-01 | 9.40E-01 | -6.68 |
| 1443018_PM_at   | ---                      | NA      | 0.04  | 2.78 | 0.19  | 8.55E-01 | 9.40E-01 | -6.68 |
| 1434347_PM_s_at | Rufy2                    | RUFY2   | -0.05 | 2.72 | -0.19 | 8.55E-01 | 9.40E-01 | -6.68 |
| 1453927_PM_at   | Mrp47                    | MRPL47  | -0.02 | 2.16 | -0.19 | 8.55E-01 | 9.40E-01 | -6.68 |
| 1427238_PM_at   | Fbxo15                   | FBXO15  | -0.02 | 2.15 | -0.19 | 8.55E-01 | 9.40E-01 | -6.68 |
| 1456143_PM_at   | Zmynd8                   | ZMYND8  | 0.04  | 3.86 | 0.19  | 8.55E-01 | 9.40E-01 | -6.68 |
| 1437549_PM_at   | 2810408111Rik            | NA      | 0.02  | 2.83 | 0.19  | 8.55E-01 | 9.40E-01 | -6.68 |
| 1458802_PM_at   | Hivep3                   | HIVEP3  | 0.10  | 3.45 | 0.19  | 8.55E-01 | 9.40E-01 | -6.68 |
| 1455882_PM_x_at | Vwc2                     | VWC2    | -0.07 | 2.69 | -0.19 | 8.55E-01 | 9.40E-01 | -6.68 |
| 1444653_PM_at   | Gm30238                  | NA      | -0.04 | 2.76 | -0.19 | 8.55E-01 | 9.40E-01 | -6.68 |
| 1442373_PM_at   | ---                      | NA      | -0.08 | 2.85 | -0.19 | 8.55E-01 | 9.40E-01 | -6.68 |
| 1425104_PM_at   | Kctd1                    | KCTD1   | -0.06 | 4.64 | -0.19 | 8.55E-01 | 9.40E-01 | -6.68 |
| 1416167_PM_at   | Prdx4                    | PRDX4   | -0.03 | 2.51 | -0.19 | 8.55E-01 | 9.40E-01 | -6.68 |
| 1433019_PM_at   | Zbtb7c                   | ZBTB7C  | -0.03 | 2.41 | -0.19 | 8.55E-01 | 9.40E-01 | -6.68 |
| 1453234_PM_at   | Stra6l                   | NA      | -0.02 | 2.31 | -0.19 | 8.55E-01 | 9.40E-01 | -6.68 |
| 1423450_PM_a_at | Hs3st1                   | HS3ST1  | -0.02 | 2.48 | -0.19 | 8.55E-01 | 9.40E-01 | -6.68 |
| 1422960_PM_at   | Srd5a2                   | SRD5A2  | -0.02 | 2.33 | -0.19 | 8.55E-01 | 9.40E-01 | -6.68 |
| 1434805_PM_at   | Mllt1                    | MLL1    | 0.02  | 2.66 | 0.19  | 8.55E-01 | 9.40E-01 | -6.68 |
| 1422622_PM_at   | Nos3                     | NOS3    | 0.02  | 2.21 | 0.19  | 8.55E-01 | 9.40E-01 | -6.68 |
| 1454452_PM_at   | ---                      | NA      | 0.02  | 2.02 | 0.19  | 8.55E-01 | 9.40E-01 | -6.68 |
| 1431543_PM_at   | 9130001E16Rik            | NA      | 0.02  | 2.36 | 0.19  | 8.55E-01 | 9.40E-01 | -6.68 |
| 1438064_PM_at   | Ybx1                     | YBX1    | 0.02  | 2.83 | 0.19  | 8.55E-01 | 9.40E-01 | -6.68 |
| 1455916_PM_at   | Prmt10                   | PRMT9   | 0.03  | 2.32 | 0.19  | 8.55E-01 | 9.40E-01 | -6.68 |
| 1427114_PM_at   | Ttc19                    | TTC19   | 0.03  | 3.74 | 0.19  | 8.55E-01 | 9.40E-01 | -6.68 |
| 1416979_PM_at   | Pomp                     | POMP    | 0.07  | 7.17 | 0.19  | 8.55E-01 | 9.40E-01 | -6.68 |
| 1422476_PM_at   | Ifi30                    | NA      | 0.02  | 2.40 | 0.19  | 8.55E-01 | 9.40E-01 | -6.68 |
| 1437165_PM_a_at | Pcolce                   | PCOLCE  | -0.09 | 3.05 | -0.19 | 8.55E-01 | 9.40E-01 | -6.68 |
| 1419690_PM_at   | 2610002M06Rik /// Chmp1b | NA      | -0.03 | 2.32 | -0.19 | 8.55E-01 | 9.40E-01 | -6.68 |
| 1460311_PM_at   | Srst                     | NA      | -0.02 | 2.65 | -0.19 | 8.56E-01 | 9.40E-01 | -6.68 |
| 1427802_PM_a_at | Tcrg-V4                  | NA      | -0.01 | 2.37 | -0.19 | 8.56E-01 | 9.40E-01 | -6.68 |
| 1433355_PM_at   | 2610021J01Rik            | NA      | 0.03  | 2.50 | 0.19  | 8.56E-01 | 9.40E-01 | -6.68 |
| 1420003_PM_at   | Nsun5                    | NSUN5   | 0.03  | 4.17 | 0.19  | 8.56E-01 | 9.40E-01 | -6.68 |
| 1456621_PM_at   | Fam13a                   | FAM13A  | 0.04  | 2.59 | 0.19  | 8.55E-01 | 9.40E-01 | -6.68 |
| 1448624_PM_at   | Cd2bp2                   | CD2BP2  | 0.04  | 3.01 | 0.19  | 8.56E-01 | 9.40E-01 | -6.68 |
| 1451402_PM_at   | Ecd                      | ECD     | 0.06  | 3.78 | 0.19  | 8.56E-01 | 9.40E-01 | -6.68 |
| 1459843_PM_s_at | Smad1                    | SMAD1   | 0.07  | 5.68 | 0.19  | 8.56E-01 | 9.40E-01 | -6.68 |
| 1425699_PM_a_at | Abhd14a                  | ABHD14A | -0.05 | 2.85 | -0.19 | 8.56E-01 | 9.40E-01 | -6.68 |
| 1439864_PM_at   | Ccdc40                   | CCDC40  | -0.03 | 2.37 | -0.19 | 8.56E-01 | 9.40E-01 | -6.68 |
| 1418158_PM_at   | Trp63                    | TP63    | -0.04 | 3.75 | -0.19 | 8.56E-01 | 9.40E-01 | -6.68 |
| 1420256_PM_x_at | Prph                     | NA      | 0.02  | 2.37 | 0.19  | 8.56E-01 | 9.40E-01 | -6.68 |
| 1434797_PM_at   | Kirrel                   | KIRREL  | 0.02  | 2.41 | 0.19  | 8.56E-01 | 9.40E-01 | -6.68 |
| 1438612_PM_a_at | Clps                     | CLPS    | 0.02  | 2.06 | 0.19  | 8.56E-01 | 9.41E-01 | -6.68 |
| 1421697_PM_at   | Ush2a                    | USH2A   | 0.02  | 2.14 | 0.19  | 8.56E-01 | 9.41E-01 | -6.68 |
| 1431800_PM_at   | Vwa8                     | VWA8    | 0.02  | 2.23 | 0.19  | 8.56E-01 | 9.41E-01 | -6.68 |
| 1420734_PM_at   | Ppp1r3f                  | PPP1R3F | -0.09 | 6.30 | -0.19 | 8.56E-01 | 9.41E-01 | -6.68 |
| 1446060_PM_at   | ---                      | NA      | 0.02  | 2.11 | 0.19  | 8.56E-01 | 9.41E-01 | -6.68 |
| 1435863_PM_at   | Comm6                    | COMM6   | -0.02 | 2.95 | -0.19 | 8.56E-01 | 9.41E-01 | -6.68 |
| 1452073_PM_at   | Fam64a                   | PIMREG  | 0.02  | 2.12 | 0.19  | 8.56E-01 | 9.41E-01 | -6.68 |
| 1419406_PM_a_at | Bcl11a                   | BCL11A  | 0.06  | 6.81 | 0.19  | 8.56E-01 | 9.41E-01 | -6.68 |
| 1448092_PM_x_at | Serpina4-ps1             | NA      | -0.02 | 2.23 | -0.19 | 8.57E-01 | 9.41E-01 | -6.68 |
| 1454262_PM_at   | Fbxw27                   | NA      | 0.01  | 2.16 | 0.19  | 8.57E-01 | 9.41E-01 | -6.68 |
| 1448804_PM_at   | Cyp11a1                  | CYP11A1 | 0.02  | 2.58 | 0.19  | 8.56E-01 | 9.41E-01 | -6.68 |
| 1438884_PM_at   | Shisa3                   | SHISA3  | 0.02  | 2.40 | 0.19  | 8.56E-01 | 9.41E-01 | -6.68 |
| 1425292_PM_at   | Dtna                     | NA      | 0.04  | 3.41 | 0.19  | 8.57E-01 | 9.41E-01 | -6.68 |
| 1419398_PM_a_at | Reep5                    | REEP5   | 0.05  | 3.14 | 0.19  | 8.57E-01 | 9.41E-01 | -6.68 |
| 1437716_PM_x_at | Kif22                    | KIF22   | 0.09  | 4.65 | 0.19  | 8.57E-01 | 9.41E-01 | -6.68 |
| 1439332_PM_at   | Ddit4l                   | DDIT4L  | 0.02  | 2.40 | 0.19  | 8.57E-01 | 9.41E-01 | -6.68 |
| 1419921_PM_s_at | Usp7                     | NA      | 0.04  | 8.07 | 0.18  | 8.57E-01 | 9.41E-01 | -6.68 |
| 1422534_PM_at   | Cyp51                    | CYP51A1 | 0.03  | 2.66 | 0.18  | 8.57E-01 | 9.41E-01 | -6.68 |

|                 |                                                                                                                         |          |       |       |       |          |          |       |
|-----------------|-------------------------------------------------------------------------------------------------------------------------|----------|-------|-------|-------|----------|----------|-------|
| 1425034_PM_at   | Slc17a2                                                                                                                 | SLC17A2  | -0.02 | 2.19  | -0.18 | 8.57E-01 | 9.41E-01 | -6.68 |
| 1425795_PM_a_at | Map3k7                                                                                                                  | MAP3K7   | 0.03  | 2.74  | 0.18  | 8.57E-01 | 9.41E-01 | -6.68 |
| 1418401_PM_a_at | Dusp16                                                                                                                  | DUSP16   | 0.04  | 2.70  | 0.18  | 8.57E-01 | 9.41E-01 | -6.68 |
| 1457428_PM_at   | ---                                                                                                                     | NA       | -0.02 | 2.62  | -0.18 | 8.57E-01 | 9.41E-01 | -6.68 |
| 1421113_PM_at   | Pga5                                                                                                                    | NA       | -0.02 | 2.31  | -0.18 | 8.57E-01 | 9.41E-01 | -6.68 |
| 1435319_PM_at   | Ipk62                                                                                                                   | IP6K2    | -0.10 | 8.22  | -0.18 | 8.57E-01 | 9.41E-01 | -6.68 |
| 1452621_PM_at   | Pcbd2                                                                                                                   | PCBD2    | -0.07 | 3.36  | -0.18 | 8.57E-01 | 9.41E-01 | -6.68 |
| 1420371_PM_at   | Sntb2                                                                                                                   | SNTB2    | -0.06 | 2.32  | -0.18 | 8.57E-01 | 9.41E-01 | -6.68 |
| 1422488_PM_at   | Nxt1                                                                                                                    | NXT1     | -0.05 | 3.64  | -0.18 | 8.57E-01 | 9.41E-01 | -6.68 |
| 1448543_PM_at   | Slmo2                                                                                                                   | PRELID3B | -0.05 | 7.20  | -0.18 | 8.57E-01 | 9.41E-01 | -6.68 |
| 1443771_PM_x_at | Smad7                                                                                                                   | SMAD7    | -0.04 | 3.00  | -0.18 | 8.57E-01 | 9.41E-01 | -6.68 |
| 1424169_PM_at   | Tax1bp3                                                                                                                 | TAX1BP3  | -0.02 | 2.49  | -0.18 | 8.57E-01 | 9.41E-01 | -6.68 |
| 1435907_PM_at   | Nrxn2                                                                                                                   | NRXN2    | -0.02 | 4.00  | -0.18 | 8.57E-01 | 9.41E-01 | -6.68 |
| 1429445_PM_at   | Efcab3                                                                                                                  | EF CAB3  | -0.02 | 2.36  | -0.18 | 8.57E-01 | 9.41E-01 | -6.68 |
| 1422867_PM_at   | Gzmg                                                                                                                    | GZMB     | 0.02  | 2.18  | 0.18  | 8.57E-01 | 9.41E-01 | -6.68 |
| 1448419_PM_at   | Pop4                                                                                                                    | POP4     | 0.02  | 2.26  | 0.18  | 8.57E-01 | 9.41E-01 | -6.68 |
| 1439305_PM_at   | ---                                                                                                                     | NA       | 0.02  | 2.12  | 0.18  | 8.57E-01 | 9.41E-01 | -6.68 |
| 1435211_PM_at   | Ttc12                                                                                                                   | TTC12    | 0.03  | 2.22  | 0.18  | 8.57E-01 | 9.41E-01 | -6.68 |
| 1433140_PM_a_at | Nacc1                                                                                                                   | NACC1    | -0.02 | 3.09  | -0.18 | 8.57E-01 | 9.41E-01 | -6.68 |
| 1455529_PM_at   | Mex3a                                                                                                                   | MEX3A    | 0.03  | 2.47  | 0.18  | 8.57E-01 | 9.41E-01 | -6.68 |
| 1422926_PM_at   | Mc2r                                                                                                                    | MC2R     | 0.01  | 1.92  | 0.18  | 8.58E-01 | 9.41E-01 | -6.68 |
| 1436873_PM_at   | Fam26d                                                                                                                  | FAM26D   | 0.03  | 2.33  | 0.18  | 8.58E-01 | 9.41E-01 | -6.68 |
| 1426935_PM_at   | ---                                                                                                                     | NA       | 0.03  | 2.52  | 0.18  | 8.58E-01 | 9.41E-01 | -6.68 |
| 1427770_PM_a_at | Slc2a3                                                                                                                  | SLC2A3   | 0.04  | 2.43  | 0.18  | 8.58E-01 | 9.41E-01 | -6.68 |
| 1426497_PM_at   | Kdm5c                                                                                                                   | KDM5C    | 0.03  | 3.18  | 0.18  | 8.58E-01 | 9.41E-01 | -6.68 |
| 1450210_PM_at   | Bmp15                                                                                                                   | BMP15    | -0.02 | 2.09  | -0.18 | 8.58E-01 | 9.41E-01 | -6.68 |
| 1417135_PM_at   | Srpk2                                                                                                                   | SRPK2    | -0.06 | 3.99  | -0.18 | 8.58E-01 | 9.41E-01 | -6.68 |
| 1421051_PM_s_at | Ramp2 /// Vps25                                                                                                         | RAMP2    | -0.04 | 3.04  | -0.18 | 8.58E-01 | 9.41E-01 | -6.68 |
| 1436837_PM_at   | Mael                                                                                                                    | MAEL     | 0.02  | 2.15  | 0.18  | 8.58E-01 | 9.41E-01 | -6.68 |
| 1449112_PM_at   | Slc27a5                                                                                                                 | SLC27A5  | 0.03  | 2.66  | 0.18  | 8.58E-01 | 9.41E-01 | -6.68 |
| 1441752_PM_at   | Art3                                                                                                                    | ART3     | -0.02 | 2.11  | -0.18 | 8.58E-01 | 9.42E-01 | -6.68 |
| 1459290_PM_at   | ---                                                                                                                     | NA       | 0.02  | 2.54  | 0.18  | 8.58E-01 | 9.42E-01 | -6.68 |
| 1419191_PM_at   | Hipk3                                                                                                                   | HIPK3    | 0.07  | 4.99  | 0.18  | 8.58E-01 | 9.42E-01 | -6.68 |
| 1444708_PM_at   | Tmem29                                                                                                                  | FAM156A  | 0.02  | 1.95  | 0.18  | 8.58E-01 | 9.42E-01 | -6.68 |
| 1449594_PM_at   | ---                                                                                                                     | NA       | -0.05 | 3.87  | -0.18 | 8.58E-01 | 9.42E-01 | -6.68 |
| 1440675_PM_at   | ---                                                                                                                     | NA       | 0.02  | 2.18  | 0.18  | 8.58E-01 | 9.42E-01 | -6.68 |
| 1433782_PM_at   | Cldn12                                                                                                                  | CLDN12   | 0.02  | 2.35  | 0.18  | 8.58E-01 | 9.42E-01 | -6.68 |
| 1437604_PM_x_at | Apcdd1                                                                                                                  | NA       | -0.02 | 2.17  | -0.18 | 8.58E-01 | 9.42E-01 | -6.68 |
| 1423455_PM_at   | Ptma                                                                                                                    | NA       | 0.07  | 7.77  | 0.18  | 8.58E-01 | 9.42E-01 | -6.68 |
| 1438966_PM_x_at | Fmod                                                                                                                    | FMOD     | 0.06  | 3.18  | 0.18  | 8.58E-01 | 9.42E-01 | -6.68 |
| 1426902_PM_at   | Coq6                                                                                                                    | COQ6     | -0.03 | 2.59  | -0.18 | 8.58E-01 | 9.42E-01 | -6.68 |
| 1423205_PM_at   | Tm9sf4                                                                                                                  | TM9SF4   | -0.02 | 2.46  | -0.18 | 8.58E-01 | 9.42E-01 | -6.68 |
| 1431910_PM_at   | 5730460C07Rik                                                                                                           | NA       | -0.02 | 2.23  | -0.18 | 8.58E-01 | 9.42E-01 | -6.68 |
| 1451088_PM_a_at | Oxa1l                                                                                                                   | OXA1L    | 0.05  | 3.03  | 0.18  | 8.58E-01 | 9.42E-01 | -6.68 |
| 1452069_PM_a_at | Thap7                                                                                                                   | THAP7    | -0.09 | 5.15  | -0.18 | 8.58E-01 | 9.42E-01 | -6.68 |
| 1427765_PM_a_at | Trbv14                                                                                                                  | NA       | -0.02 | 2.29  | -0.18 | 8.58E-01 | 9.42E-01 | -6.68 |
| 1459926_PM_at   | C77068                                                                                                                  | NA       | 0.03  | 2.84  | 0.18  | 8.58E-01 | 9.42E-01 | -6.68 |
| 1426940_PM_at   | Sidt2                                                                                                                   | SIDT2    | -0.03 | 3.87  | -0.18 | 8.59E-01 | 9.42E-01 | -6.68 |
| 1430002_PM_at   | Iqcf1                                                                                                                   | IQCF1    | -0.02 | 2.08  | -0.18 | 8.59E-01 | 9.42E-01 | -6.68 |
| 1419407_PM_at   | Hc                                                                                                                      | C5       | 0.01  | 2.24  | 0.18  | 8.58E-01 | 9.42E-01 | -6.68 |
| 1421396_PM_at   | Pcsk1                                                                                                                   | PCSK1    | 0.03  | 2.54  | 0.18  | 8.59E-01 | 9.42E-01 | -6.68 |
| 1428358_PM_at   | Zg16                                                                                                                    | ZG16     | 0.02  | 3.08  | 0.18  | 8.59E-01 | 9.42E-01 | -6.68 |
| 1447194_PM_at   | ---                                                                                                                     | NA       | 0.03  | 2.24  | 0.18  | 8.59E-01 | 9.42E-01 | -6.68 |
| 1433750_PM_at   | Slc31a1                                                                                                                 | SLC31A1  | -0.04 | 2.51  | -0.18 | 8.59E-01 | 9.42E-01 | -6.68 |
| 1448073_PM_at   | ---                                                                                                                     | NA       | 0.02  | 2.53  | 0.18  | 8.59E-01 | 9.42E-01 | -6.68 |
| 1445494_PM_at   | ---                                                                                                                     | NA       | 0.03  | 2.09  | 0.18  | 8.59E-01 | 9.42E-01 | -6.68 |
| 1459767_PM_x_at | Vcan                                                                                                                    | VCAN     | 0.02  | 1.99  | 0.18  | 8.59E-01 | 9.42E-01 | -6.68 |
| 1418760_PM_at   | Rdh11                                                                                                                   | RDH11    | 0.06  | 2.99  | 0.18  | 8.59E-01 | 9.42E-01 | -6.68 |
| 1458073_PM_at   | ---                                                                                                                     | NA       | -0.06 | 3.22  | -0.18 | 8.59E-01 | 9.42E-01 | -6.68 |
| 1454706_PM_at   | Uvr3g                                                                                                                   | UVRAG    | -0.04 | 3.92  | -0.18 | 8.59E-01 | 9.42E-01 | -6.68 |
| 1427169_PM_at   | Pard3b                                                                                                                  | PARD3B   | -0.03 | 2.68  | -0.18 | 8.59E-01 | 9.42E-01 | -6.68 |
| 1449276_PM_at   | 1700029P11Rik                                                                                                           | NDUFB11  | 0.02  | 2.30  | 0.18  | 8.59E-01 | 9.42E-01 | -6.68 |
| 1457246_PM_at   | Fam160b2                                                                                                                | FAM160B2 | 0.03  | 10.34 | 0.18  | 8.59E-01 | 9.42E-01 | -6.68 |
| 1426288_PM_at   | Lrp4                                                                                                                    | LRP4     | 0.04  | 2.26  | 0.18  | 8.59E-01 | 9.42E-01 | -6.68 |
| 1426602_PM_at   | Araf                                                                                                                    | ARAF     | 0.03  | 2.86  | 0.18  | 8.59E-01 | 9.42E-01 | -6.68 |
| 1429586_PM_at   | ---                                                                                                                     | NA       | -0.03 | 2.48  | -0.18 | 8.59E-01 | 9.42E-01 | -6.68 |
| 1442795_PM_x_at | Prss37                                                                                                                  | PRSS37   | -0.01 | 2.06  | -0.18 | 8.59E-01 | 9.42E-01 | -6.68 |
| 1420464_PM_s_at | Gm10693 /// Gm14548 ///<br>Lilra6 /// Pira1 /// Pira11 ///<br>Pira2 /// Pira4 /// Pira5 ///<br>Pira6 /// Pira7 /// Pirb | NA       | 0.06  | 2.29  | 0.18  | 8.59E-01 | 9.42E-01 | -6.68 |
| 1454680_PM_at   | D5Erttd579e                                                                                                             | KIAA0232 | 0.07  | 6.09  | 0.18  | 8.59E-01 | 9.42E-01 | -6.68 |
| 1454514_PM_at   | ---                                                                                                                     | NA       | 0.02  | 2.10  | 0.18  | 8.59E-01 | 9.42E-01 | -6.68 |
| 1438490_PM_at   | Slc39a14                                                                                                                | SLC39A14 | 0.03  | 3.71  | 0.18  | 8.59E-01 | 9.42E-01 | -6.68 |

|                 |                                                                                          |            |       |      |       |          |          |       |
|-----------------|------------------------------------------------------------------------------------------|------------|-------|------|-------|----------|----------|-------|
| 1421592_PM_at   | Ncam2                                                                                    | NCAM2      | 0.04  | 4.51 | 0.18  | 8.59E-01 | 9.42E-01 | -6.68 |
| 1431845_PM_at   | ---                                                                                      | NA         | 0.03  | 2.66 | 0.18  | 8.59E-01 | 9.42E-01 | -6.68 |
| 1443747_PM_at   | Supt20                                                                                   | SUPT20H    | 0.07  | 5.77 | 0.18  | 8.60E-01 | 9.42E-01 | -6.68 |
| 1426353_PM_at   | Stat6                                                                                    | STAT6      | 0.02  | 3.15 | 0.18  | 8.60E-01 | 9.42E-01 | -6.68 |
| 1416061_PM_at   | Tbc1d15                                                                                  | TBC1D15    | 0.04  | 4.71 | 0.18  | 8.60E-01 | 9.42E-01 | -6.68 |
| 1455929_PM_x_at | Ppp2r1a                                                                                  | PPP2R1A    | 0.05  | 9.75 | 0.18  | 8.60E-01 | 9.42E-01 | -6.68 |
| 1446855_PM_at   | ---                                                                                      | NA         | 0.03  | 2.26 | 0.18  | 8.60E-01 | 9.42E-01 | -6.68 |
| 1458238_PM_at   | ---                                                                                      | NA         | -0.02 | 2.65 | -0.18 | 8.60E-01 | 9.42E-01 | -6.68 |
| 1453097_PM_a_at | Ubtf                                                                                     | UBTF       | 0.03  | 4.00 | 0.18  | 8.60E-01 | 9.42E-01 | -6.68 |
| 1439682_PM_at   | ---                                                                                      | NA         | 0.06  | 2.98 | 0.18  | 8.60E-01 | 9.42E-01 | -6.68 |
| 1443877_PM_a_at | Rapgef6                                                                                  | RAPGEF6    | 0.08  | 5.30 | 0.18  | 8.60E-01 | 9.42E-01 | -6.68 |
| 1444810_PM_at   | ---                                                                                      | NA         | -0.02 | 2.39 | -0.18 | 8.60E-01 | 9.42E-01 | -6.68 |
| 1429474_PM_at   | Ptgr2                                                                                    | ACO05520.1 | -0.02 | 1.93 | -0.18 | 8.60E-01 | 9.42E-01 | -6.68 |
| 1441397_PM_at   | ---                                                                                      | NA         | 0.06  | 3.14 | 0.18  | 8.60E-01 | 9.42E-01 | -6.68 |
| 1427230_PM_at   | B930041F14Rik                                                                            | FND C10    | 0.07  | 3.33 | 0.18  | 8.60E-01 | 9.42E-01 | -6.68 |
| 1424372_PM_at   | Mrp32                                                                                    | MRPL32     | -0.04 | 3.87 | -0.18 | 8.60E-01 | 9.43E-01 | -6.68 |
| 1420358_PM_at   | Krtap13                                                                                  | KRTAP13-3  | -0.02 | 2.03 | -0.18 | 8.60E-01 | 9.43E-01 | -6.68 |
| 1453876_PM_at   | ---                                                                                      | NA         | 0.02  | 2.36 | 0.18  | 8.60E-01 | 9.43E-01 | -6.68 |
| 1424199_PM_at   | Seh1l                                                                                    | SEH1L      | 0.03  | 2.17 | 0.18  | 8.60E-01 | 9.43E-01 | -6.68 |
| 1426624_PM_a_at | Ypel3                                                                                    | YPEL3      | 0.05  | 4.94 | 0.18  | 8.60E-01 | 9.43E-01 | -6.68 |
| 1420290_PM_at   | ---                                                                                      | NA         | -0.03 | 2.95 | -0.18 | 8.60E-01 | 9.43E-01 | -6.68 |
| 1432809_PM_at   | ---                                                                                      | NA         | 0.02  | 2.26 | 0.18  | 8.60E-01 | 9.43E-01 | -6.68 |
| 1423133_PM_at   | Cwc15                                                                                    | CWC15      | -0.07 | 4.85 | -0.18 | 8.60E-01 | 9.43E-01 | -6.68 |
| 1457625_PM_s_at | Cdk12                                                                                    | CDKL2      | -0.06 | 2.73 | -0.18 | 8.60E-01 | 9.43E-01 | -6.68 |
| 1434691_PM_at   | Scaf11                                                                                   | SCAF11     | -0.04 | 3.38 | -0.18 | 8.60E-01 | 9.43E-01 | -6.68 |
| 1453143_PM_at   | Glb1b                                                                                    | NA         | 0.02  | 2.06 | 0.18  | 8.60E-01 | 9.43E-01 | -6.68 |
| 1425540_PM_at   | Otc                                                                                      | OTC        | 0.02  | 2.01 | 0.18  | 8.60E-01 | 9.43E-01 | -6.68 |
| 1429301_PM_at   | Csnk2a2                                                                                  | NA         | 0.02  | 2.44 | 0.18  | 8.60E-01 | 9.43E-01 | -6.68 |
| 1456784_PM_at   | Gm14137                                                                                  | C15orf62   | 0.02  | 2.96 | 0.18  | 8.60E-01 | 9.43E-01 | -6.68 |
| 1453502_PM_at   | 2210408121Rik                                                                            | KIAA0825   | 0.02  | 2.66 | 0.18  | 8.60E-01 | 9.43E-01 | -6.68 |
| 1429435_PM_x_at | Pik3ca                                                                                   | PIK3CA     | 0.03  | 2.95 | 0.18  | 8.60E-01 | 9.43E-01 | -6.68 |
| 1448278_PM_at   | Xab2                                                                                     | XAB2       | 0.05  | 4.29 | 0.18  | 8.60E-01 | 9.43E-01 | -6.68 |
| 1443932_PM_at   | Klhdc1                                                                                   | KLHDC1     | -0.05 | 3.87 | -0.18 | 8.60E-01 | 9.43E-01 | -6.68 |
| 1444660_PM_at   | 4932438A13Rik                                                                            | KIAA1109   | -0.02 | 2.34 | -0.18 | 8.60E-01 | 9.43E-01 | -6.68 |
| 1434615_PM_x_at | ---                                                                                      | NA         | 0.03  | 6.47 | 0.18  | 8.60E-01 | 9.43E-01 | -6.68 |
| 1420460_PM_a_at | Pex11b                                                                                   | PEX11B     | 0.04  | 3.01 | 0.18  | 8.60E-01 | 9.43E-01 | -6.68 |
| 1435432_PM_at   | Agap1                                                                                    | AGAP1      | 0.05  | 2.84 | 0.18  | 8.60E-01 | 9.43E-01 | -6.68 |
| 1447734_PM_x_at | Aldoa                                                                                    | ALDOA      | -0.01 | 7.93 | -0.18 | 8.61E-01 | 9.43E-01 | -6.68 |
| 1452576_PM_at   | ---                                                                                      | NA         | -0.01 | 2.06 | -0.18 | 8.61E-01 | 9.43E-01 | -6.68 |
| 1425397_PM_at   | Gm9885                                                                                   | NA         | -0.02 | 2.62 | -0.18 | 8.61E-01 | 9.43E-01 | -6.68 |
| 1447073_PM_at   | Trip12                                                                                   | TRIP12     | -0.02 | 2.19 | -0.18 | 8.61E-01 | 9.43E-01 | -6.68 |
| 1422408_PM_at   | Ifna4                                                                                    | IFNA6      | 0.01  | 2.03 | 0.18  | 8.61E-01 | 9.43E-01 | -6.68 |
| 1419231_PM_s_at | Krt12                                                                                    | KRT12      | 0.04  | 2.49 | 0.18  | 8.61E-01 | 9.43E-01 | -6.68 |
| 1458410_PM_at   | Ralgapa1                                                                                 | RALGAPA1   | 0.06  | 4.08 | 0.18  | 8.61E-01 | 9.43E-01 | -6.68 |
| 1459591_PM_at   | ---                                                                                      | NA         | 0.02  | 2.40 | 0.18  | 8.61E-01 | 9.43E-01 | -6.68 |
| 1418309_PM_at   | Tnfrsf11b                                                                                | TNFRSF11B  | 0.02  | 2.32 | 0.18  | 8.61E-01 | 9.43E-01 | -6.68 |
| 1435670_PM_at   | Tfap2b                                                                                   | TFAP2B     | -0.05 | 2.54 | -0.18 | 8.61E-01 | 9.43E-01 | -6.68 |
| 1459344_PM_at   | ---                                                                                      | NA         | -0.02 | 2.45 | -0.18 | 8.61E-01 | 9.43E-01 | -6.68 |
| 1449738_PM_s_at | Supt20                                                                                   | SUPT20H    | 0.06  | 3.23 | 0.18  | 8.61E-01 | 9.43E-01 | -6.68 |
| 1446457_PM_at   | Ddx58                                                                                    | DDX58      | -0.02 | 2.87 | -0.18 | 8.61E-01 | 9.43E-01 | -6.68 |
| 1436046_PM_x_at | Gm29376 /// Gm8210 ///<br>LOC102634483 ///<br>LOC102642233 ///<br>LOC102642738 /// Rpl29 | RPL29      | -0.09 | 5.33 | -0.18 | 8.61E-01 | 9.43E-01 | -6.68 |
| 1453725_PM_a_at | Mrps7                                                                                    | MRPS7      | -0.06 | 4.73 | -0.18 | 8.61E-01 | 9.43E-01 | -6.68 |
| 1434568_PM_at   | Gtf3c6                                                                                   | NA         | -0.05 | 2.74 | -0.18 | 8.61E-01 | 9.43E-01 | -6.68 |
| 1447118_PM_at   | Ppp6r3                                                                                   | PPP6R3     | -0.02 | 2.50 | -0.18 | 8.61E-01 | 9.43E-01 | -6.68 |
| 1448257_PM_at   | Slc29a2                                                                                  | SLC29A2    | 0.02  | 2.50 | 0.18  | 8.61E-01 | 9.43E-01 | -6.68 |
| 1451300_PM_a_at | Chmp7                                                                                    | CHMP7      | 0.04  | 4.64 | 0.18  | 8.61E-01 | 9.43E-01 | -6.68 |
| AFFX-BioB-M_at  | ---                                                                                      | NA         | 0.02  | 7.81 | 0.18  | 8.61E-01 | 9.43E-01 | -6.68 |
| 1421191_PM_s_at | Gopc                                                                                     | AL132671.2 | -0.04 | 2.67 | -0.18 | 8.62E-01 | 9.43E-01 | -6.68 |
| 1441640_PM_at   | ---                                                                                      | NA         | 0.02  | 2.07 | 0.18  | 8.62E-01 | 9.43E-01 | -6.68 |
| 1432071_PM_at   | ---                                                                                      | NA         | 0.03  | 2.53 | 0.18  | 8.62E-01 | 9.43E-01 | -6.68 |
| 1446529_PM_at   | ---                                                                                      | NA         | 0.02  | 2.06 | 0.18  | 8.62E-01 | 9.43E-01 | -6.68 |
| 1432414_PM_at   | ---                                                                                      | NA         | 0.01  | 2.39 | 0.18  | 8.62E-01 | 9.43E-01 | -6.68 |
| 1442299_PM_at   | Mrp27                                                                                    | MRPL27     | 0.02  | 2.21 | 0.18  | 8.62E-01 | 9.43E-01 | -6.68 |
| 1434666_PM_at   | Pcgf5                                                                                    | NA         | 0.04  | 5.38 | 0.18  | 8.62E-01 | 9.43E-01 | -6.68 |
| 1432009_PM_at   | LOC102634350                                                                             | NA         | 0.02  | 2.56 | 0.18  | 8.62E-01 | 9.43E-01 | -6.68 |
| 1425382_PM_a_at | Aqp4                                                                                     | AQP4       | -0.08 | 3.01 | -0.18 | 8.62E-01 | 9.43E-01 | -6.68 |
| 1419640_PM_at   | Purb                                                                                     | PURB       | 0.04  | 4.27 | 0.18  | 8.62E-01 | 9.43E-01 | -6.68 |
| 1445041_PM_at   | D16Erd6e                                                                                 | NA         | 0.01  | 1.80 | 0.18  | 8.62E-01 | 9.43E-01 | -6.68 |
| 1420369_PM_a_at | Csn2                                                                                     | CSN2       | 0.02  | 2.06 | 0.18  | 8.62E-01 | 9.43E-01 | -6.68 |
| 1430227_PM_at   | Actl10                                                                                   | ACTL10     | 0.02  | 3.13 | 0.18  | 8.62E-01 | 9.43E-01 | -6.68 |
| 1444138_PM_at   | Cyp2r1                                                                                   | CYP2R1     | -0.02 | 2.16 | -0.18 | 8.62E-01 | 9.43E-01 | -6.68 |
| 1421918_PM_at   | Anp32a                                                                                   | ANP32A     | -0.04 | 3.04 | -0.18 | 8.62E-01 | 9.43E-01 | -6.68 |

|                 |                             |              |       |      |       |          |          |       |
|-----------------|-----------------------------|--------------|-------|------|-------|----------|----------|-------|
| 1438526_PM_at   | Gpr158                      | GPR158       | -0.04 | 2.24 | -0.18 | 8.62E-01 | 9.43E-01 | -6.68 |
| 1427850_PM_x_at | Igh-VJ558                   | NA           | -0.02 | 2.10 | -0.18 | 8.62E-01 | 9.43E-01 | -6.68 |
| 1430355_PM_a_at | Steap3                      | STEAP3       | 0.01  | 2.04 | 0.18  | 8.62E-01 | 9.43E-01 | -6.68 |
| 1455986_PM_at   | Zdhhc17                     | ZDHHHC17     | 0.03  | 2.52 | 0.18  | 8.62E-01 | 9.43E-01 | -6.68 |
| 1448062_PM_at   | Stk11                       | STK11        | 0.02  | 2.42 | 0.18  | 8.62E-01 | 9.43E-01 | -6.68 |
| 1423617_PM_at   | Pdf                         | COG8         | -0.07 | 3.81 | -0.18 | 8.62E-01 | 9.43E-01 | -6.68 |
| 1457757_PM_at   | Tox2                        | TOX2         | 0.02  | 2.18 | 0.18  | 8.62E-01 | 9.43E-01 | -6.68 |
| 1418243_PM_at   | Fcna                        | NA           | 0.02  | 2.17 | 0.18  | 8.62E-01 | 9.44E-01 | -6.68 |
| 1440220_PM_at   | Ocln                        | OCLN         | -0.03 | 2.89 | -0.18 | 8.62E-01 | 9.44E-01 | -6.68 |
| 1436241_PM_s_at | Hira                        | HIRA         | -0.02 | 2.19 | -0.18 | 8.62E-01 | 9.44E-01 | -6.68 |
| 1445500_PM_at   | ---                         | NA           | -0.03 | 2.75 | -0.18 | 8.62E-01 | 9.44E-01 | -6.68 |
| 1456749_PM_at   | ---                         | NA           | -0.02 | 2.48 | -0.18 | 8.63E-01 | 9.44E-01 | -6.68 |
| 1438119_PM_at   | Itgb1                       | NA           | 0.02  | 2.06 | 0.18  | 8.63E-01 | 9.44E-01 | -6.68 |
| 1442662_PM_at   | Tmem167                     | TMEM167A     | 0.04  | 2.30 | 0.18  | 8.63E-01 | 9.44E-01 | -6.68 |
| 1448487_PM_at   | Lrrfp1                      | LRRFP1       | -0.04 | 5.97 | -0.18 | 8.63E-01 | 9.44E-01 | -6.68 |
| 1440074_PM_at   | Gm9918                      | NA           | -0.03 | 2.43 | -0.18 | 8.63E-01 | 9.44E-01 | -6.68 |
| 1460275_PM_at   | Gpr3                        | GPR3         | -0.02 | 2.53 | -0.18 | 8.63E-01 | 9.44E-01 | -6.68 |
| 1439395_PM_at   | Zfp874b                     | ZNF720       | 0.03  | 2.61 | 0.18  | 8.63E-01 | 9.44E-01 | -6.68 |
| 1447723_PM_at   | Ntrk3                       | NA           | -0.05 | 3.34 | -0.18 | 8.63E-01 | 9.44E-01 | -6.68 |
| 1419897_PM_at   | Tet1                        | NA           | 0.03  | 2.57 | 0.18  | 8.63E-01 | 9.44E-01 | -6.68 |
| 1433231_PM_at   | 4933426i03Rik               | NA           | -0.02 | 2.89 | -0.18 | 8.63E-01 | 9.44E-01 | -6.68 |
| 1449205_PM_at   | Ovol2                       | OVOL2        | 0.02  | 2.26 | 0.18  | 8.63E-01 | 9.44E-01 | -6.68 |
| 1416975_PM_at   | Stam2                       | STAM2        | -0.03 | 3.16 | -0.18 | 8.63E-01 | 9.44E-01 | -6.68 |
| 1447959_PM_at   | Zfp398                      | ZNF398       | -0.04 | 4.17 | -0.18 | 8.63E-01 | 9.44E-01 | -6.68 |
| 1421583_PM_at   | Creb1                       | NA           | 0.01  | 1.97 | 0.18  | 8.63E-01 | 9.44E-01 | -6.68 |
| 1443829_PM_x_at | Coasy                       | COASY        | 0.03  | 5.41 | 0.18  | 8.63E-01 | 9.44E-01 | -6.68 |
| 1447813_PM_x_at | Sla                         | SLA          | -0.04 | 4.80 | -0.18 | 8.63E-01 | 9.44E-01 | -6.68 |
| 1423637_PM_at   | Galt4                       | POC1B-GALNT4 | 0.03  | 2.42 | 0.18  | 8.63E-01 | 9.44E-01 | -6.68 |
| 1418354_PM_at   | Cog1                        | COG1         | 0.02  | 2.51 | 0.18  | 8.63E-01 | 9.44E-01 | -6.68 |
| 1418516_PM_at   | Mtf2                        | MTF2         | -0.08 | 3.85 | -0.18 | 8.63E-01 | 9.44E-01 | -6.68 |
| 1440147_PM_at   | Lgi2                        | LGI2         | -0.05 | 5.29 | -0.18 | 8.63E-01 | 9.44E-01 | -6.68 |
| 1435899_PM_at   | Kdsr                        | KDSR         | -0.04 | 2.98 | -0.18 | 8.63E-01 | 9.44E-01 | -6.68 |
| 1458304_PM_at   | ---                         | NA           | -0.02 | 2.06 | -0.18 | 8.63E-01 | 9.44E-01 | -6.68 |
| 1436536_PM_at   | Exoc3l                      | EXOC3L1      | 0.02  | 2.17 | 0.18  | 8.63E-01 | 9.44E-01 | -6.68 |
| 1429442_PM_at   | Rpusd2                      | RPUSD2       | 0.02  | 3.35 | 0.18  | 8.63E-01 | 9.44E-01 | -6.68 |
| 1460245_PM_at   | Klr1                        | KL RD1       | 0.02  | 2.53 | 0.18  | 8.63E-01 | 9.44E-01 | -6.68 |
| 1442284_PM_at   | Sart1                       | SART1        | 0.03  | 2.29 | 0.18  | 8.63E-01 | 9.44E-01 | -6.68 |
| 1429788_PM_at   | Actr3                       | ACTRT3       | 0.04  | 2.40 | 0.18  | 8.63E-01 | 9.44E-01 | -6.68 |
| 1418285_PM_at   | Efnb1                       | EFNB1        | 0.02  | 2.35 | 0.18  | 8.64E-01 | 9.44E-01 | -6.68 |
| 1459735_PM_at   | Fkbp15                      | FKBP15       | -0.02 | 2.41 | -0.18 | 8.64E-01 | 9.44E-01 | -6.68 |
| 1422319_PM_at   | ---                         | NA           | -0.02 | 2.89 | -0.18 | 8.64E-01 | 9.44E-01 | -6.68 |
| 1439729_PM_at   | ---                         | NA           | -0.03 | 2.43 | -0.18 | 8.64E-01 | 9.44E-01 | -6.69 |
| 1441852_PM_x_at | Atg16l1                     | ATG16L1      | -0.03 | 2.97 | -0.18 | 8.64E-01 | 9.44E-01 | -6.68 |
| 1437105_PM_at   | Kdm5a                       | KDM5A        | -0.02 | 2.37 | -0.18 | 8.64E-01 | 9.44E-01 | -6.68 |
| 1455132_PM_at   | Rasal3                      | RASAL3       | -0.02 | 2.72 | -0.18 | 8.64E-01 | 9.44E-01 | -6.68 |
| 1427715_PM_a_at | Nt5c1b                      | NT5C1B       | -0.02 | 2.06 | -0.18 | 8.64E-01 | 9.44E-01 | -6.68 |
| 1457863_PM_at   | ---                         | NA           | -0.01 | 2.16 | -0.18 | 8.64E-01 | 9.44E-01 | -6.69 |
| 1432039_PM_a_at | Lrp2bp                      | LRP2BP       | 0.01  | 2.02 | 0.18  | 8.64E-01 | 9.44E-01 | -6.68 |
| 1420331_PM_at   | Clec4e                      | CLEC4E       | 0.01  | 2.30 | 0.18  | 8.64E-01 | 9.44E-01 | -6.69 |
| 1452687_PM_at   | Dus2                        | DUS2         | 0.02  | 2.27 | 0.18  | 8.64E-01 | 9.44E-01 | -6.68 |
| 1422878_PM_at   | Syt12                       | SYT12        | 0.04  | 3.26 | 0.18  | 8.64E-01 | 9.44E-01 | -6.69 |
| 1431820_PM_at   | 4632404H12Rik               | NA           | 0.07  | 3.68 | 0.18  | 8.64E-01 | 9.44E-01 | -6.68 |
| 1433328_PM_at   | 1700095A21Rik               | NA           | 0.07  | 4.09 | 0.18  | 8.64E-01 | 9.44E-01 | -6.69 |
| 1424885_PM_at   | Klhdc8a                     | KLHDC8A      | 0.08  | 2.86 | 0.18  | 8.64E-01 | 9.44E-01 | -6.68 |
| 1460637_PM_s_at | Pfdn5                       | PFDN5        | 0.05  | 2.90 | 0.18  | 8.64E-01 | 9.44E-01 | -6.69 |
| 1426352_PM_s_at | Tial1                       | TIAL1        | 0.06  | 6.35 | 0.18  | 8.64E-01 | 9.44E-01 | -6.69 |
| 1415739_PM_at   | Rbm42                       | RBM42        | -0.06 | 4.77 | -0.18 | 8.64E-01 | 9.44E-01 | -6.69 |
| 1453359_PM_at   | Exosc1                      | EXOSC1       | 0.03  | 2.71 | 0.18  | 8.64E-01 | 9.44E-01 | -6.69 |
| 1444290_PM_at   | Steap2                      | STEAP2       | 0.03  | 2.52 | 0.18  | 8.64E-01 | 9.44E-01 | -6.69 |
| 1433205_PM_at   | ---                         | NA           | 0.04  | 2.61 | 0.18  | 8.64E-01 | 9.44E-01 | -6.69 |
| 1437617_PM_x_at | 1110034G24Rik               | C20orf196    | 0.02  | 2.49 | 0.18  | 8.64E-01 | 9.45E-01 | -6.69 |
| 1427977_PM_x_at | Gm10436 /// Gm2042 /// Oog1 | PRAMEF9      | 0.02  | 2.24 | 0.18  | 8.64E-01 | 9.45E-01 | -6.69 |
| 1454853_PM_s_at | A1987944 /// AW146154       | NA           | 0.03  | 2.95 | 0.17  | 8.64E-01 | 9.45E-01 | -6.69 |
| 1447489_PM_at   | ---                         | NA           | 0.03  | 2.75 | 0.17  | 8.64E-01 | 9.45E-01 | -6.69 |
| 1447253_PM_x_at | Nup54                       | NUP54        | -0.02 | 2.68 | -0.17 | 8.64E-01 | 9.45E-01 | -6.69 |
| 1420898_PM_at   | Snap23                      | SNAP23       | -0.05 | 2.25 | -0.17 | 8.65E-01 | 9.45E-01 | -6.69 |
| 1453716_PM_at   | 4930480K23Rik               | NA           | -0.02 | 2.60 | -0.17 | 8.65E-01 | 9.45E-01 | -6.69 |
| 1450662_PM_at   | Tesk1                       | TESK1        | -0.03 | 3.49 | -0.17 | 8.65E-01 | 9.45E-01 | -6.69 |
| 1460334_PM_at   | Dbnl                        | DBNL         | 0.06  | 3.20 | 0.17  | 8.65E-01 | 9.45E-01 | -6.69 |
| 1421815_PM_at   | Epd1                        | EPDR1        | -0.04 | 4.27 | -0.17 | 8.65E-01 | 9.45E-01 | -6.69 |
| 1445532_PM_at   | Myo16                       | MYO16        | 0.03  | 2.34 | 0.17  | 8.65E-01 | 9.45E-01 | -6.69 |
| 1445976_PM_at   | C80279                      | NA           | -0.01 | 1.90 | -0.17 | 8.65E-01 | 9.45E-01 | -6.69 |
| 1452458_PM_s_at | Lrr1                        | LRR1         | 0.02  | 2.05 | 0.17  | 8.65E-01 | 9.45E-01 | -6.69 |
| 1450588_PM_at   | Olf167                      | ORS221       | -0.02 | 2.11 | -0.17 | 8.65E-01 | 9.45E-01 | -6.69 |

|                     |               |          |       |      |       |          |          |       |
|---------------------|---------------|----------|-------|------|-------|----------|----------|-------|
| 1431382_PM_a_at     | Clip4         | CLIP4    | 0.04  | 3.08 | 0.17  | 8.65E-01 | 9.45E-01 | -6.69 |
| 1456775_PM_at       | Ints8         | NA       | -0.04 | 3.01 | -0.17 | 8.65E-01 | 9.45E-01 | -6.69 |
| 1429621_PM_at       | Cand2         | CAND2    | -0.03 | 2.33 | -0.17 | 8.65E-01 | 9.45E-01 | -6.69 |
| 1422547_PM_at       | Ranbp1        | RANBP1   | -0.09 | 5.49 | -0.17 | 8.65E-01 | 9.45E-01 | -6.69 |
| 1436665_PM_a_at     | Ltbp4         | LTBP4    | -0.06 | 3.03 | -0.17 | 8.65E-01 | 9.45E-01 | -6.69 |
| 1447883_PM_x_at     | Map1lc3a      | MAP1LC3A | -0.05 | 8.70 | -0.17 | 8.65E-01 | 9.45E-01 | -6.69 |
| 1455435_PM_s_at     | Chdh          | CHDH     | -0.05 | 4.13 | -0.17 | 8.66E-01 | 9.45E-01 | -6.69 |
| 1421747_PM_at       | Esrrg         | ESRRG    | -0.04 | 2.67 | -0.17 | 8.65E-01 | 9.45E-01 | -6.69 |
| 1427530_PM_at       | Bicd1         | BICD1    | -0.03 | 2.41 | -0.17 | 8.65E-01 | 9.45E-01 | -6.69 |
| 1437255_PM_at       | Zbtb7a        | NA       | -0.02 | 3.44 | -0.17 | 8.65E-01 | 9.45E-01 | -6.69 |
| 1453510_PM_s_at     | Fam184a       | FAM184A  | -0.02 | 2.43 | -0.17 | 8.65E-01 | 9.45E-01 | -6.69 |
| 1453112_PM_a_at     | Lrrc18        | LRRC18   | -0.02 | 2.87 | -0.17 | 8.65E-01 | 9.45E-01 | -6.69 |
| 1420632_PM_a_at     | Bscl2         | BSCL2    | -0.02 | 3.68 | -0.17 | 8.65E-01 | 9.45E-01 | -6.69 |
| 1420255_PM_at       | ---           | NA       | 0.01  | 1.99 | 0.17  | 8.65E-01 | 9.45E-01 | -6.69 |
| 1432402_PM_at       | 4930402F11Rik | NA       | 0.02  | 2.09 | 0.17  | 8.65E-01 | 9.45E-01 | -6.69 |
| 1426157_PM_a_at     | Cd209b        | CD209    | 0.02  | 2.16 | 0.17  | 8.65E-01 | 9.45E-01 | -6.69 |
| 1425920_PM_at       | Cuedc1        | CUEDC1   | 0.02  | 2.19 | 0.17  | 8.65E-01 | 9.45E-01 | -6.69 |
| 1459695_PM_at       | ---           | NA       | 0.03  | 2.62 | 0.17  | 8.65E-01 | 9.45E-01 | -6.69 |
| 1443112_PM_at       | ---           | NA       | 0.03  | 2.71 | 0.17  | 8.65E-01 | 9.45E-01 | -6.69 |
| 1417786_PM_a_at     | Rgs19         | RG519    | 0.03  | 2.63 | 0.17  | 8.65E-01 | 9.45E-01 | -6.69 |
| 1459624_PM_at       | ---           | NA       | 0.04  | 3.02 | 0.17  | 8.66E-01 | 9.45E-01 | -6.69 |
| 1422753_PM_a_at     | Polr3k        | POLR3K   | 0.04  | 2.76 | 0.17  | 8.66E-01 | 9.45E-01 | -6.69 |
| 1459345_PM_at       | ---           | NA       | 0.05  | 3.29 | 0.17  | 8.66E-01 | 9.45E-01 | -6.69 |
| 1421027_PM_a_at     | Mef2c         | MEF2C    | 0.10  | 5.28 | 0.17  | 8.65E-01 | 9.45E-01 | -6.69 |
| 1446523_PM_at       | Gm15918       | NA       | -0.02 | 2.13 | -0.17 | 8.66E-01 | 9.45E-01 | -6.69 |
| 1416283_PM_at       | Gart          | GART     | 0.05  | 2.91 | 0.17  | 8.66E-01 | 9.45E-01 | -6.69 |
| 1443733_PM_x_at     | Pold3         | POLD3    | -0.03 | 2.22 | -0.17 | 8.66E-01 | 9.45E-01 | -6.69 |
| 1446400_PM_at       | Orf558        | OR51E1   | -0.03 | 2.34 | -0.17 | 8.66E-01 | 9.45E-01 | -6.69 |
| 1453884_PM_at       | 4930402K13Rik | FAM47C   | 0.01  | 1.99 | 0.17  | 8.66E-01 | 9.45E-01 | -6.69 |
| 1433351_PM_at       | ---           | NA       | -0.02 | 2.23 | -0.17 | 8.66E-01 | 9.45E-01 | -6.69 |
| 1442854_PM_at       | ---           | NA       | -0.02 | 2.37 | -0.17 | 8.66E-01 | 9.45E-01 | -6.69 |
| 1437762_PM_at       | Rab39         | RAB39A   | -0.02 | 2.13 | -0.17 | 8.66E-01 | 9.45E-01 | -6.69 |
| AFFX-r2-Bs-phe-3_at | ---           | NA       | 0.02  | 2.40 | 0.17  | 8.66E-01 | 9.45E-01 | -6.69 |
| 1440330_PM_at       | Hist1h2be     | NA       | 0.02  | 2.18 | 0.17  | 8.66E-01 | 9.45E-01 | -6.69 |
| 1424561_PM_at       | Ece2          | ECE2     | 0.03  | 2.56 | 0.17  | 8.66E-01 | 9.45E-01 | -6.69 |
| 1443476_PM_at       | Pax1          | PAX1     | 0.03  | 3.09 | 0.17  | 8.66E-01 | 9.45E-01 | -6.69 |
| 1421135_PM_a_at     | Cnot8         | CNOT8    | 0.03  | 2.38 | 0.17  | 8.66E-01 | 9.45E-01 | -6.69 |
| 1455533_PM_at       | Pced1a        | PCED1A   | 0.02  | 3.16 | 0.17  | 8.66E-01 | 9.45E-01 | -6.69 |
| 1417583_PM_a_at     | Utp3          | UTP3     | -0.07 | 6.07 | -0.17 | 8.66E-01 | 9.45E-01 | -6.69 |
| 1458975_PM_at       | ---           | NA       | 0.02  | 2.62 | 0.17  | 8.66E-01 | 9.45E-01 | -6.69 |
| 1452492_PM_a_at     | Slc37a2       | SLC37A2  | -0.02 | 2.40 | -0.17 | 8.66E-01 | 9.45E-01 | -6.69 |
| 1432535_PM_at       | 5530400C23Rik | NA       | 0.02  | 2.21 | 0.17  | 8.66E-01 | 9.45E-01 | -6.69 |
| 1423436_PM_at       | Gsta3         | GSTA3    | -0.02 | 2.94 | -0.17 | 8.66E-01 | 9.46E-01 | -6.69 |
| 1450951_PM_at       | Smc3          | SMC3     | 0.02  | 2.51 | 0.17  | 8.66E-01 | 9.46E-01 | -6.69 |
| 1446917_PM_at       | ---           | NA       | 0.03  | 2.35 | 0.17  | 8.66E-01 | 9.46E-01 | -6.69 |
| 1426541_PM_a_at     | Endod1        | ENDOD1   | -0.06 | 2.87 | -0.17 | 8.67E-01 | 9.46E-01 | -6.69 |
| 1442428_PM_at       | ---           | NA       | 0.02  | 2.20 | 0.17  | 8.67E-01 | 9.46E-01 | -6.69 |
| 1423874_PM_at       | Wdr33         | NA       | -0.02 | 2.53 | -0.17 | 8.67E-01 | 9.46E-01 | -6.69 |
| 1440639_PM_at       | Dlgap1        | DLGAP1   | -0.05 | 3.84 | -0.17 | 8.67E-01 | 9.46E-01 | -6.69 |
| 1423484_PM_at       | Bicc1         | BICC1    | -0.04 | 2.44 | -0.17 | 8.67E-01 | 9.46E-01 | -6.69 |
| 1445189_PM_at       | Gpatch2       | GPATCH2  | -0.02 | 2.56 | -0.17 | 8.67E-01 | 9.46E-01 | -6.69 |
| 1442975_PM_at       | ---           | NA       | -0.02 | 2.12 | -0.17 | 8.67E-01 | 9.46E-01 | -6.69 |
| 1441582_PM_at       | ---           | NA       | -0.02 | 2.44 | -0.17 | 8.67E-01 | 9.46E-01 | -6.69 |
| 1436090_PM_at       | Enpp6         | ENPP6    | -0.02 | 2.34 | -0.17 | 8.67E-01 | 9.46E-01 | -6.69 |
| 1441529_PM_at       | ---           | NA       | 0.01  | 2.13 | 0.17  | 8.67E-01 | 9.46E-01 | -6.69 |
| 1431168_PM_at       | Six3os1       | NA       | 0.02  | 2.12 | 0.17  | 8.67E-01 | 9.46E-01 | -6.69 |
| 1423507_PM_a_at     | Sirt2         | SIRT2    | -0.03 | 3.95 | -0.17 | 8.67E-01 | 9.46E-01 | -6.69 |
| 1445216_PM_at       | ---           | NA       | -0.02 | 2.44 | -0.17 | 8.67E-01 | 9.46E-01 | -6.69 |
| 1421693_PM_a_at     | Adgrv1        | ADGRV1   | -0.02 | 2.07 | -0.17 | 8.67E-01 | 9.46E-01 | -6.69 |
| 1453212_PM_at       | Zfp383        | ZNF383   | 0.06  | 3.14 | 0.17  | 8.67E-01 | 9.46E-01 | -6.69 |
| 1428664_PM_at       | Vip           | VIP      | 0.08  | 2.68 | 0.17  | 8.67E-01 | 9.46E-01 | -6.69 |
| 1419625_PM_at       | Hspa1l        | HSPA1L   | -0.03 | 2.53 | -0.17 | 8.67E-01 | 9.46E-01 | -6.69 |
| 1432707_PM_at       | Gm8096        | NA       | -0.02 | 2.05 | -0.17 | 8.67E-01 | 9.46E-01 | -6.69 |
| 1435468_PM_at       | B3gnt9        | B3GNT9   | -0.02 | 1.99 | -0.17 | 8.67E-01 | 9.46E-01 | -6.69 |
| 1421701_PM_at       | Vmn2r10       | NA       | 0.02  | 2.43 | 0.17  | 8.67E-01 | 9.46E-01 | -6.69 |
| 1449545_PM_at       | Fgf18         | FGF18    | 0.04  | 2.59 | 0.17  | 8.67E-01 | 9.46E-01 | -6.69 |
| 1434500_PM_at       | Ttyh2         | TTYH2    | 0.04  | 3.47 | 0.17  | 8.67E-01 | 9.46E-01 | -6.69 |
| 1458315_PM_at       | Epc1          | NA       | 0.01  | 2.08 | 0.17  | 8.67E-01 | 9.46E-01 | -6.69 |
| 1443570_PM_at       | Cops3         | COPS3    | 0.02  | 2.03 | 0.17  | 8.67E-01 | 9.46E-01 | -6.69 |
| 1421672_PM_at       | Ili17a        | IL17A    | 0.02  | 2.20 | 0.17  | 8.67E-01 | 9.46E-01 | -6.69 |
| 1456754_PM_at       | Rbsn          | RBSN     | -0.05 | 3.27 | -0.17 | 8.67E-01 | 9.46E-01 | -6.69 |
| 1447334_PM_at       | Bc11a         | NA       | 0.03  | 2.49 | 0.17  | 8.67E-01 | 9.46E-01 | -6.69 |
| 1430717_PM_at       | Fam83e        | FAM83E   | -0.02 | 2.65 | -0.17 | 8.67E-01 | 9.46E-01 | -6.69 |
| 1417161_PM_at       | Cdk2ap2       | CDK2AP2  | 0.02  | 3.04 | 0.17  | 8.67E-01 | 9.46E-01 | -6.69 |
| 1458085_PM_at       | Ubxn11        | UBXN11   | 0.02  | 2.41 | 0.17  | 8.68E-01 | 9.46E-01 | -6.69 |

|                 |                                |            |       |       |       |          |          |       |
|-----------------|--------------------------------|------------|-------|-------|-------|----------|----------|-------|
| 1428687_PM_at   | Zfp687                         | ZNF687     | -0.03 | 3.07  | -0.17 | 8.68E-01 | 9.46E-01 | -6.69 |
| 1423339_PM_s_at | Zfp830                         | NA         | -0.05 | 2.43  | -0.17 | 8.68E-01 | 9.46E-01 | -6.69 |
| 1445771_PM_at   | ---                            | NA         | -0.02 | 2.19  | -0.17 | 8.68E-01 | 9.46E-01 | -6.69 |
| 1435287_PM_at   | Add2                           | ADD2       | -0.02 | 2.40  | -0.17 | 8.68E-01 | 9.46E-01 | -6.69 |
| 1434410_PM_at   | Crybg3                         | NA         | 0.06  | 4.35  | 0.17  | 8.68E-01 | 9.46E-01 | -6.69 |
| 1427960_PM_at   | Ugt2b34                        | UGT2B15    | 0.02  | 2.20  | 0.17  | 8.68E-01 | 9.46E-01 | -6.69 |
| 1429219_PM_at   | Ikbip                          | IKBIP      | -0.05 | 2.75  | -0.17 | 8.68E-01 | 9.46E-01 | -6.69 |
| 1434379_PM_at   | Mxd4                           | MXD4       | -0.01 | 2.09  | -0.17 | 8.68E-01 | 9.46E-01 | -6.69 |
| 1427642_PM_at   | Trpm6                          | TRPM6      | 0.02  | 2.37  | 0.17  | 8.68E-01 | 9.46E-01 | -6.69 |
| 1438495_PM_at   | Top1                           | TOP1       | 0.03  | 2.65  | 0.17  | 8.68E-01 | 9.46E-01 | -6.69 |
| 1420213_PM_x_at | Gm36243                        | NA         | 0.05  | 2.47  | 0.17  | 8.68E-01 | 9.46E-01 | -6.69 |
| 1455748_PM_at   | Dynt1a /// Dynt1f              | NA         | 0.07  | 3.47  | 0.17  | 8.68E-01 | 9.46E-01 | -6.69 |
| 1426859_PM_at   | Inhbb                          | INHBB      | 0.02  | 2.14  | 0.17  | 8.68E-01 | 9.46E-01 | -6.69 |
| 1430674_PM_at   | 1700016C15Rik                  | C1orf100   | 0.02  | 2.18  | 0.17  | 8.68E-01 | 9.46E-01 | -6.69 |
| 1423609_PM_a_at | Mgat1                          | MGAT1      | -0.02 | 2.36  | -0.17 | 8.68E-01 | 9.46E-01 | -6.69 |
| 1448659_PM_at   | Casp7                          | CASP7      | 0.01  | 2.00  | 0.17  | 8.68E-01 | 9.46E-01 | -6.69 |
| 1423531_PM_a_at | Gm10052 /// Gm5803 /// Hnrnpa1 | HNRNPA1    | -0.08 | 7.50  | -0.17 | 8.68E-01 | 9.47E-01 | -6.69 |
| 1457670_PM_s_at | Lmna                           | LMNA       | 0.11  | 6.59  | 0.17  | 8.68E-01 | 9.47E-01 | -6.69 |
| 1419091_PM_a_at | Anxa2                          | ANXA2      | 0.03  | 2.56  | 0.17  | 8.68E-01 | 9.47E-01 | -6.69 |
| 1415997_PM_at   | Txnip                          | TXNIP      | 0.06  | 3.12  | 0.17  | 8.69E-01 | 9.47E-01 | -6.69 |
| 1429493_PM_at   | Mettl4                         | NA         | 0.02  | 2.88  | 0.17  | 8.69E-01 | 9.47E-01 | -6.69 |
| 1436356_PM_at   | Samd4                          | SAMD4A     | 0.05  | 3.09  | 0.17  | 8.69E-01 | 9.47E-01 | -6.69 |
| 1420793_PM_at   | Mup4                           | NA         | -0.02 | 2.45  | -0.17 | 8.69E-01 | 9.47E-01 | -6.69 |
| 1424591_PM_at   | Caap1                          | CAAP1      | 0.03  | 2.95  | 0.17  | 8.69E-01 | 9.47E-01 | -6.69 |
| 1416644_PM_a_at | Sema3b                         | SEMA3B     | -0.02 | 2.12  | -0.17 | 8.69E-01 | 9.47E-01 | -6.69 |
| 1454615_PM_x_at | LOC102642637 /// Srp14         | SRP14      | -0.02 | 10.21 | -0.17 | 8.69E-01 | 9.47E-01 | -6.69 |
| 1449913_PM_at   | Zfp2                           | ZFP2       | -0.04 | 3.50  | -0.17 | 8.69E-01 | 9.47E-01 | -6.69 |
| 1418904_PM_at   | Gfpt1                          | GFPT1      | -0.01 | 2.22  | -0.17 | 8.69E-01 | 9.47E-01 | -6.69 |
| 1447822_PM_x_at | Ufsp1                          | UFSP1      | 0.02  | 4.68  | 0.17  | 8.69E-01 | 9.47E-01 | -6.69 |
| 1418541_PM_at   | Cenpo                          | CENPO      | 0.04  | 2.28  | 0.17  | 8.69E-01 | 9.47E-01 | -6.69 |
| 1453156_PM_s_at | Ptgr2                          | ACO05520.1 | 0.07  | 2.72  | 0.17  | 8.69E-01 | 9.47E-01 | -6.69 |
| 1455671_PM_at   | CommD8                         | COMMMD8    | -0.05 | 3.09  | -0.17 | 8.69E-01 | 9.47E-01 | -6.69 |
| 1455322_PM_at   | Ttc21b                         | TTC21B     | 0.02  | 2.47  | 0.17  | 8.69E-01 | 9.47E-01 | -6.69 |
| 1431828_PM_a_at | Synj2                          | SYNJ2      | -0.02 | 3.96  | -0.17 | 8.69E-01 | 9.47E-01 | -6.69 |
| 1456029_PM_a_at | Ttc7b                          | TTC7B      | -0.04 | 3.91  | -0.17 | 8.69E-01 | 9.47E-01 | -6.69 |
| 1431615_PM_at   | ---                            | NA         | 0.02  | 2.11  | 0.17  | 8.69E-01 | 9.47E-01 | -6.69 |
| 1449646_PM_s_at | Tigd5                          | TIGD5      | 0.13  | 3.47  | 0.17  | 8.69E-01 | 9.47E-01 | -6.69 |
| 1442567_PM_at   | Zbtb24                         | NA         | 0.03  | 2.09  | 0.17  | 8.70E-01 | 9.47E-01 | -6.69 |
| 1431931_PM_a_at | Rab12                          | RABL2A     | -0.02 | 4.23  | -0.17 | 8.70E-01 | 9.47E-01 | -6.69 |
| 1429803_PM_at   | 1700021F07Rik                  | C2orf85    | -0.02 | 2.19  | -0.17 | 8.70E-01 | 9.47E-01 | -6.69 |
| 1438374_PM_x_at | App                            | APP        | 0.02  | 2.38  | 0.17  | 8.70E-01 | 9.47E-01 | -6.69 |
| 1448459_PM_at   | Kcni1                          | KCNI1      | 0.02  | 2.45  | 0.17  | 8.70E-01 | 9.47E-01 | -6.69 |
| 1421403_PM_at   | Pi15                           | PI15       | 0.03  | 2.18  | 0.17  | 8.70E-01 | 9.47E-01 | -6.69 |
| 1424230_PM_at   | Exoc6                          | EXOC6      | -0.04 | 2.83  | -0.17 | 8.70E-01 | 9.47E-01 | -6.69 |
| 1443452_PM_at   | ---                            | NA         | 0.02  | 2.89  | 0.17  | 8.70E-01 | 9.47E-01 | -6.69 |
| 1457394_PM_at   | Rbm3os                         | NA         | -0.02 | 2.22  | -0.17 | 8.70E-01 | 9.48E-01 | -6.69 |
| 1457652_PM_x_at | ---                            | NA         | 0.03  | 2.42  | 0.17  | 8.70E-01 | 9.48E-01 | -6.69 |
| 1453077_PM_a_at | Snapc3                         | SNAPC3     | -0.04 | 4.16  | -0.17 | 8.70E-01 | 9.48E-01 | -6.69 |
| 1451875_PM_at   | AF366264                       | NA         | 0.01  | 2.40  | 0.17  | 8.70E-01 | 9.48E-01 | -6.69 |
| 1460162_PM_at   | D8Erttd124e                    | NA         | -0.02 | 2.37  | -0.17 | 8.70E-01 | 9.48E-01 | -6.69 |
| 1435763_PM_at   | Tbc1d16                        | TBC1D16    | -0.02 | 2.46  | -0.17 | 8.70E-01 | 9.48E-01 | -6.69 |
| 1429192_PM_at   | Ski                            | SKI        | -0.09 | 7.04  | -0.17 | 8.70E-01 | 9.48E-01 | -6.69 |
| 1456223_PM_at   | ---                            | NA         | -0.05 | 3.08  | -0.17 | 8.70E-01 | 9.48E-01 | -6.69 |
| 1456147_PM_at   | St8sia6                        | ST8SIA6    | -0.04 | 2.27  | -0.17 | 8.70E-01 | 9.48E-01 | -6.69 |
| 1458391_PM_at   | ---                            | NA         | -0.02 | 2.77  | -0.17 | 8.70E-01 | 9.48E-01 | -6.69 |
| 1425754_PM_a_at | Btn1a1                         | BTN1A1     | -0.02 | 2.47  | -0.17 | 8.70E-01 | 9.48E-01 | -6.69 |
| 1445430_PM_at   | ---                            | NA         | -0.02 | 2.41  | -0.17 | 8.70E-01 | 9.48E-01 | -6.69 |
| 1421160_PM_a_at | Rfng                           | RFNG       | -0.02 | 2.41  | -0.17 | 8.70E-01 | 9.48E-01 | -6.69 |
| 1453538_PM_at   | Csrnp3                         | CSRNP3     | -0.02 | 2.36  | -0.17 | 8.70E-01 | 9.48E-01 | -6.69 |
| 1437693_PM_at   | D1Pas1                         | DDX3X      | -0.02 | 2.46  | -0.17 | 8.70E-01 | 9.48E-01 | -6.69 |
| 1445162_PM_at   | ---                            | NA         | 0.02  | 2.73  | 0.17  | 8.70E-01 | 9.48E-01 | -6.69 |
| 1422240_PM_s_at | Spr2h                          | NA         | 0.02  | 2.75  | 0.17  | 8.70E-01 | 9.48E-01 | -6.69 |
| 1454954_PM_at   | Wdr61                          | WDR61      | 0.03  | 2.36  | 0.17  | 8.70E-01 | 9.48E-01 | -6.69 |
| 1451703_PM_s_at | Aprt                           | APRT       | 0.06  | 4.33  | 0.17  | 8.70E-01 | 9.48E-01 | -6.69 |
| 1454443_PM_at   | 4833411110Rik                  | NA         | 0.05  | 3.27  | 0.17  | 8.70E-01 | 9.48E-01 | -6.69 |
| 1451617_PM_at   | Rho                            | RHO        | 0.02  | 2.47  | 0.17  | 8.71E-01 | 9.48E-01 | -6.69 |
| 1448180_PM_a_at | Hn1                            | JPT1       | 0.02  | 3.25  | 0.17  | 8.71E-01 | 9.48E-01 | -6.69 |
| 1428452_PM_at   | 2810025M15Rik                  | NA         | 0.04  | 2.79  | 0.17  | 8.71E-01 | 9.48E-01 | -6.69 |
| 1448098_PM_at   | AA517545                       | NA         | -0.01 | 1.94  | -0.17 | 8.71E-01 | 9.48E-01 | -6.69 |
| 1439039_PM_at   | Tmem104                        | TMEM104    | -0.01 | 2.31  | -0.17 | 8.71E-01 | 9.48E-01 | -6.69 |
| 1429224_PM_at   | Pnma1                          | PNMA1      | 0.02  | 2.38  | 0.17  | 8.71E-01 | 9.48E-01 | -6.69 |
| 1438304_PM_at   | Cxhc4                          | CXHC4      | 0.03  | 2.55  | 0.17  | 8.71E-01 | 9.48E-01 | -6.69 |
| 1430786_PM_at   | LOC102634333                   | AC083902.2 | 0.03  | 2.70  | 0.17  | 8.71E-01 | 9.48E-01 | -6.69 |
| 1442297_PM_at   | BB212172                       | NA         | -0.07 | 4.16  | -0.17 | 8.71E-01 | 9.48E-01 | -6.69 |



|                 |                                                                   |               |       |      |       |          |          |       |
|-----------------|-------------------------------------------------------------------|---------------|-------|------|-------|----------|----------|-------|
| 1454201_PM_a_at | Ccny                                                              | CCNY          | -0.03 | 3.73 | -0.17 | 8.71E-01 | 9.48E-01 | -6.69 |
| 1458090_PM_at   | Fam63a                                                            | MINDY1        | 0.02  | 2.03 | 0.17  | 8.71E-01 | 9.48E-01 | -6.69 |
| 1425505_PM_at   | Myk                                                               | MYLK          | -0.05 | 2.78 | -0.17 | 8.71E-01 | 9.48E-01 | -6.69 |
| 1455378_PM_at   | Rimk1a                                                            | RIMK1A        | -0.03 | 2.72 | -0.17 | 8.71E-01 | 9.48E-01 | -6.69 |
| 1452536_PM_s_at | Igk-V1 /// Igkv9-120                                              | NA            | 0.01  | 2.13 | 0.17  | 8.71E-01 | 9.48E-01 | -6.69 |
| 1450408_PM_at   | C1cn7                                                             | CLCN7         | -0.02 | 2.30 | -0.17 | 8.71E-01 | 9.48E-01 | -6.69 |
| 1446203_PM_at   | Mkln1                                                             | MKLN1         | 0.03  | 2.93 | 0.17  | 8.71E-01 | 9.48E-01 | -6.69 |
| 1459070_PM_at   | Mia3                                                              | NA            | -0.06 | 4.85 | -0.17 | 8.71E-01 | 9.48E-01 | -6.69 |
| 1437636_PM_at   | Pydc4                                                             | NA            | -0.03 | 2.58 | -0.17 | 8.71E-01 | 9.48E-01 | -6.69 |
| 1455055_PM_at   | Ccdc157                                                           | CCDC157       | -0.02 | 3.10 | -0.17 | 8.71E-01 | 9.48E-01 | -6.69 |
| 1443649_PM_at   | ---                                                               | NA            | 0.02  | 1.97 | 0.17  | 8.71E-01 | 9.48E-01 | -6.69 |
| 1450258_PM_a_at | Elavl4                                                            | ELAVL4        | 0.02  | 3.17 | 0.17  | 8.71E-01 | 9.48E-01 | -6.69 |
| 1426997_PM_at   | Thra                                                              | THRA          | 0.02  | 2.65 | 0.17  | 8.71E-01 | 9.48E-01 | -6.69 |
| 1429954_PM_at   | Clec4a3                                                           | CLEC4A        | 0.04  | 2.53 | 0.17  | 8.71E-01 | 9.48E-01 | -6.69 |
| 1450249_PM_s_at | Kif5a                                                             | KIF5A         | 0.11  | 5.35 | 0.17  | 8.71E-01 | 9.48E-01 | -6.69 |
| 1417100_PM_at   | Cd320                                                             | CD320         | -0.02 | 2.20 | -0.17 | 8.71E-01 | 9.48E-01 | -6.69 |
| 1449585_PM_at   | Il1rap                                                            | IL1RAP        | -0.02 | 2.15 | -0.17 | 8.71E-01 | 9.48E-01 | -6.69 |
| 1443743_PM_at   | Hypm                                                              | HYPM          | -0.01 | 1.94 | -0.17 | 8.71E-01 | 9.48E-01 | -6.69 |
| 1451543_PM_at   | Fbxo21                                                            | FBXO21        | 0.02  | 2.95 | 0.17  | 8.71E-01 | 9.48E-01 | -6.69 |
| 1454067_PM_a_at | 4931406C07Rik                                                     | C11orf54      | 0.07  | 3.27 | 0.17  | 8.71E-01 | 9.48E-01 | -6.69 |
| 1460628_PM_at   | Eme2                                                              | EME2          | -0.02 | 2.67 | -0.17 | 8.72E-01 | 9.48E-01 | -6.69 |
| 1418237_PM_s_at | Col18a1                                                           | COL18A1       | -0.03 | 2.65 | -0.17 | 8.72E-01 | 9.48E-01 | -6.69 |
| 1446877_PM_at   | ---                                                               | NA            | -0.02 | 2.11 | -0.17 | 8.72E-01 | 9.48E-01 | -6.69 |
| 1438593_PM_at   | Zfp638                                                            | ZNF638        | -0.03 | 2.59 | -0.17 | 8.72E-01 | 9.48E-01 | -6.69 |
| 1443836_PM_x_at | Wdr48                                                             | WDR48         | -0.03 | 7.13 | -0.17 | 8.72E-01 | 9.48E-01 | -6.69 |
| 1437795_PM_at   | Mrp21                                                             | NA            | 0.04  | 3.51 | 0.17  | 8.72E-01 | 9.48E-01 | -6.69 |
| 1441976_PM_at   | ---                                                               | NA            | 0.03  | 2.84 | 0.17  | 8.72E-01 | 9.48E-01 | -6.69 |
| 1446679_PM_at   | ---                                                               | NA            | 0.05  | 4.26 | 0.17  | 8.72E-01 | 9.48E-01 | -6.69 |
| 1418222_PM_at   | Noa1                                                              | NOA1          | -0.04 | 3.26 | -0.17 | 8.72E-01 | 9.48E-01 | -6.69 |
| 1428394_PM_at   | Phyh1                                                             | PHYHD1        | -0.03 | 3.42 | -0.17 | 8.72E-01 | 9.48E-01 | -6.69 |
| 1459618_PM_at   | ---                                                               | NA            | -0.03 | 2.71 | -0.16 | 8.72E-01 | 9.48E-01 | -6.69 |
| 1439185_PM_x_at | Mavs                                                              | MAVS          | -0.02 | 2.30 | -0.17 | 8.72E-01 | 9.48E-01 | -6.69 |
| 1416695_PM_at   | Tspo                                                              | TSPO          | -0.02 | 2.28 | -0.17 | 8.72E-01 | 9.48E-01 | -6.69 |
| 1454293_PM_at   | Rbl1                                                              | RBL1          | -0.02 | 2.32 | -0.17 | 8.72E-01 | 9.48E-01 | -6.69 |
| 1440633_PM_at   | Neil3                                                             | NEIL3         | 0.01  | 2.03 | 0.17  | 8.72E-01 | 9.48E-01 | -6.69 |
| 1449397_PM_at   | Hoxb2                                                             | HOXB2         | 0.01  | 2.01 | 0.16  | 8.72E-01 | 9.48E-01 | -6.69 |
| 1456806_PM_at   | ---                                                               | NA            | 0.01  | 2.57 | 0.17  | 8.72E-01 | 9.48E-01 | -6.69 |
| 1447360_PM_at   | ---                                                               | NA            | 0.02  | 2.03 | 0.17  | 8.72E-01 | 9.48E-01 | -6.69 |
| 1421932_PM_at   | ---                                                               | NA            | 0.02  | 2.18 | 0.16  | 8.72E-01 | 9.48E-01 | -6.69 |
| 1429477_PM_at   | ---                                                               | NA            | 0.02  | 2.42 | 0.16  | 8.72E-01 | 9.48E-01 | -6.69 |
| 1417442_PM_a_at | Pex3                                                              | PEX3          | 0.03  | 3.11 | 0.17  | 8.72E-01 | 9.48E-01 | -6.69 |
| 1453721_PM_a_at | Slc31a2                                                           | SLC31A2       | 0.03  | 2.86 | 0.17  | 8.72E-01 | 9.48E-01 | -6.69 |
| 1422087_PM_at   | Mycl                                                              | MYCL          | 0.04  | 2.60 | 0.16  | 8.72E-01 | 9.48E-01 | -6.69 |
| 1451845_PM_a_at | Pthr2                                                             | PTRH2         | 0.04  | 3.74 | 0.17  | 8.72E-01 | 9.48E-01 | -6.69 |
| 1416135_PM_at   | Apex1                                                             | APEX1         | 0.05  | 2.91 | 0.16  | 8.72E-01 | 9.48E-01 | -6.69 |
| 1442416_PM_at   | ---                                                               | NA            | -0.05 | 2.88 | -0.16 | 8.72E-01 | 9.49E-01 | -6.69 |
| 1449959_PM_x_at | Lce1h                                                             | NA            | 0.02  | 2.49 | 0.16  | 8.72E-01 | 9.49E-01 | -6.69 |
| 1419617_PM_at   | Kcnn1                                                             | KCNN1         | 0.03  | 3.95 | 0.16  | 8.72E-01 | 9.49E-01 | -6.69 |
| 1421968_PM_a_at | Nipa2                                                             | NIPA2         | 0.03  | 3.22 | 0.16  | 8.72E-01 | 9.49E-01 | -6.69 |
| 1421142_PM_s_at | Foxp1                                                             | FOXP1         | -0.03 | 2.23 | -0.16 | 8.72E-01 | 9.49E-01 | -6.69 |
| 1435617_PM_at   | Camkmt                                                            | NA            | -0.02 | 2.27 | -0.16 | 8.72E-01 | 9.49E-01 | -6.69 |
| 1459760_PM_at   | Ndufs4                                                            | NA            | -0.04 | 2.35 | -0.16 | 8.73E-01 | 9.49E-01 | -6.69 |
| 1415887_PM_at   | Tfg                                                               | TFG           | -0.03 | 3.22 | -0.16 | 8.73E-01 | 9.49E-01 | -6.69 |
| 1449536_PM_at   | Kcnn1                                                             | KCNN1         | -0.03 | 3.32 | -0.16 | 8.73E-01 | 9.49E-01 | -6.69 |
| 1443411_PM_at   | ---                                                               | NA            | -0.02 | 2.42 | -0.16 | 8.73E-01 | 9.49E-01 | -6.69 |
| 1446431_PM_at   | ---                                                               | NA            | -0.01 | 2.11 | -0.16 | 8.73E-01 | 9.49E-01 | -6.69 |
| 1428456_PM_at   | Bola1                                                             | BOLA1         | 0.02  | 2.24 | 0.16  | 8.73E-01 | 9.49E-01 | -6.69 |
| 1432404_PM_at   | 4930505A04Rik                                                     | C2orf73       | 0.02  | 2.32 | 0.16  | 8.73E-01 | 9.49E-01 | -6.69 |
| 1424866_PM_at   | Usp43                                                             | USP43         | 0.03  | 2.67 | 0.16  | 8.73E-01 | 9.49E-01 | -6.69 |
| 1425282_PM_at   | Rnf144b                                                           | RNF144B       | 0.03  | 2.30 | 0.16  | 8.73E-01 | 9.49E-01 | -6.69 |
| 1425436_PM_x_at | Klra3 /// Klra9                                                   | NA            | 0.03  | 2.40 | 0.16  | 8.73E-01 | 9.49E-01 | -6.69 |
| 1447377_PM_at   | Gm11236 /// Gm11237 /// Gm11238 /// Gm11239 /// Gm38423 /// Gm428 | NA            | 0.03  | 3.09 | 0.16  | 8.73E-01 | 9.49E-01 | -6.69 |
| 1416697_PM_at   | Dpp4                                                              | DPP4          | 0.03  | 2.86 | 0.16  | 8.73E-01 | 9.49E-01 | -6.69 |
| 1450618_PM_a_at | Sprr2a1 /// Sprr2a2 /// Sprr2a3                                   | NA            | 0.05  | 4.14 | 0.16  | 8.73E-01 | 9.49E-01 | -6.69 |
| 1428800_PM_a_at | Pus7l                                                             | PUS7L         | -0.06 | 2.88 | -0.16 | 8.73E-01 | 9.49E-01 | -6.69 |
| 1442179_PM_at   | LOC102633149                                                      | NA            | -0.06 | 2.91 | -0.16 | 8.73E-01 | 9.49E-01 | -6.69 |
| 1423190_PM_at   | Cox16 /// Synj2bp-cox16                                           | SYNJ2BP-COX16 | -0.03 | 2.66 | -0.16 | 8.73E-01 | 9.49E-01 | -6.69 |
| 1452187_PM_at   | Rbm5                                                              | RBMS          | 0.04  | 6.33 | 0.16  | 8.73E-01 | 9.49E-01 | -6.69 |
| 1430284_PM_at   | 1700008P02Rik                                                     | NA            | -0.02 | 2.47 | -0.16 | 8.73E-01 | 9.49E-01 | -6.69 |
| 1443556_PM_at   | Tmem140                                                           | TMEM140       | -0.02 | 2.23 | -0.16 | 8.73E-01 | 9.49E-01 | -6.69 |
| 1444234_PM_at   | Napb                                                              | NA            | 0.02  | 3.02 | 0.16  | 8.73E-01 | 9.49E-01 | -6.69 |

|                           |                      |           |       |      |       |          |          |       |
|---------------------------|----------------------|-----------|-------|------|-------|----------|----------|-------|
| 1451028_PM_at             | Baiap2               | BAIAP2    | 0.03  | 3.05 | 0.16  | 8.73E-01 | 9.49E-01 | -6.69 |
| 1420245_PM_x_at           | Tagln2               | TAGLN2    | -0.02 | 2.44 | -0.16 | 8.73E-01 | 9.49E-01 | -6.69 |
| 1458219_PM_at             | Bcas2                | BCAS2     | -0.02 | 2.85 | -0.16 | 8.73E-01 | 9.49E-01 | -6.69 |
| 1418606_PM_at             | Hoxd10               | HOXD10    | 0.02  | 2.15 | 0.16  | 8.73E-01 | 9.49E-01 | -6.69 |
| 1450343_PM_at             | Vmn1r187 /// Vmn1r63 | NA        | -0.01 | 1.86 | -0.16 | 8.73E-01 | 9.49E-01 | -6.69 |
| 1458833_PM_at             | Nrcam                | NA        | 0.08  | 4.85 | 0.16  | 8.73E-01 | 9.49E-01 | -6.69 |
| 1431859_PM_at             | 4930414F18Rik        | NA        | 0.01  | 2.37 | 0.16  | 8.73E-01 | 9.49E-01 | -6.69 |
| 1451053_PM_a_at           | Mdm1                 | MDM1      | -0.02 | 2.27 | -0.16 | 8.73E-01 | 9.49E-01 | -6.69 |
| 1425887_PM_at             | Tmem114              | TMEM114   | -0.02 | 2.51 | -0.16 | 8.73E-01 | 9.49E-01 | -6.69 |
| 1452216_PM_at             | Mcat                 | MCAT      | 0.02  | 2.92 | 0.16  | 8.73E-01 | 9.49E-01 | -6.69 |
| 1455411_PM_at             | Aqp11                | NA        | -0.03 | 3.03 | -0.16 | 8.73E-01 | 9.49E-01 | -6.69 |
| 1451831_PM_at             | Osbpl6               | OSBPL6    | -0.01 | 2.37 | -0.16 | 8.73E-01 | 9.49E-01 | -6.69 |
| 1439742_PM_at             | ---                  | NA        | 0.01  | 2.50 | 0.16  | 8.73E-01 | 9.49E-01 | -6.69 |
| 1452798_PM_s_at           | Mapk1ip1             | MAPK1IP1L | 0.04  | 6.43 | 0.16  | 8.73E-01 | 9.49E-01 | -6.69 |
| 1457075_PM_at             | Ctps2                | NA        | 0.07  | 3.00 | 0.16  | 8.73E-01 | 9.49E-01 | -6.69 |
| 1449628_PM_s_at           | Stard7               | STARD7    | -0.07 | 7.13 | -0.16 | 8.74E-01 | 9.49E-01 | -6.69 |
| AFFX-GapdhMur/M32599_5_at | Gapdh                | NA        | -0.06 | 5.07 | -0.16 | 8.74E-01 | 9.49E-01 | -6.69 |
| 1417412_PM_at             | F8a                  | F8A1      | -0.02 | 2.26 | -0.16 | 8.74E-01 | 9.49E-01 | -6.69 |
| 1433273_PM_at             | Nkain1               | NA        | 0.02  | 2.45 | 0.16  | 8.74E-01 | 9.49E-01 | -6.69 |
| 1447340_PM_at             | ---                  | NA        | 0.02  | 2.30 | 0.16  | 8.74E-01 | 9.49E-01 | -6.69 |
| 1418290_PM_a_at           | Ezh1                 | EZH1      | 0.04  | 2.92 | 0.16  | 8.74E-01 | 9.49E-01 | -6.69 |
| 1418731_PM_at             | Rlim                 | RLIM      | 0.04  | 3.42 | 0.16  | 8.74E-01 | 9.49E-01 | -6.69 |
| 1429055_PM_at             | Shtn1                | SHTN1     | 0.06  | 5.71 | 0.16  | 8.74E-01 | 9.49E-01 | -6.69 |
| 1425183_PM_a_at           | Rpl4                 | RPL4      | -0.07 | 7.79 | -0.16 | 8.74E-01 | 9.49E-01 | -6.69 |
| 1457110_PM_at             | ---                  | NA        | -0.05 | 3.05 | -0.16 | 8.74E-01 | 9.49E-01 | -6.69 |
| 1435619_PM_at             | Phf21a               | PHF21A    | 0.02  | 2.06 | 0.16  | 8.74E-01 | 9.49E-01 | -6.69 |
| 1446885_PM_at             | ---                  | NA        | 0.05  | 2.64 | 0.16  | 8.74E-01 | 9.49E-01 | -6.69 |
| 1423288_PM_s_at           | Cbln1                | CBLN1     | 0.12  | 2.99 | 0.16  | 8.74E-01 | 9.49E-01 | -6.69 |
| 1418172_PM_at             | Hebp1                | HEBP1     | -0.04 | 2.55 | -0.16 | 8.74E-01 | 9.49E-01 | -6.69 |
| 1457772_PM_at             | LOC105244007         | NA        | -0.03 | 2.40 | -0.16 | 8.74E-01 | 9.49E-01 | -6.69 |
| 1441738_PM_at             | ---                  | NA        | -0.01 | 2.37 | -0.16 | 8.74E-01 | 9.49E-01 | -6.69 |
| 1436720_PM_s_at           | Oog3                 | PRAMEF9   | 0.01  | 1.88 | 0.16  | 8.74E-01 | 9.49E-01 | -6.69 |
| 1438825_PM_at             | Calm3                | CALM3     | 0.02  | 1.87 | 0.16  | 8.74E-01 | 9.49E-01 | -6.69 |
| 1433365_PM_at             | ---                  | NA        | 0.02  | 2.04 | 0.16  | 8.74E-01 | 9.49E-01 | -6.69 |
| 1445884_PM_at             | ---                  | NA        | 0.02  | 2.31 | 0.16  | 8.74E-01 | 9.49E-01 | -6.69 |
| 1432401_PM_a_at           | Tmbim7               | NA        | -0.03 | 2.87 | -0.16 | 8.74E-01 | 9.49E-01 | -6.69 |
| 1422199_PM_at             | Omp                  | OMP       | 0.02  | 2.05 | 0.16  | 8.74E-01 | 9.49E-01 | -6.69 |
| 1433079_PM_at             | 4933436P19Rik        | NA        | -0.02 | 2.32 | -0.16 | 8.74E-01 | 9.49E-01 | -6.69 |
| 1458326_PM_at             | Polr2e               | POLR2E    | 0.01  | 2.19 | 0.16  | 8.74E-01 | 9.49E-01 | -6.69 |
| 1423719_PM_at             | Bpif1                | BPIFB1    | 0.02  | 2.11 | 0.16  | 8.74E-01 | 9.49E-01 | -6.69 |
| 1453635_PM_at             | Clec16a              | CLEC16A   | 0.02  | 2.54 | 0.16  | 8.74E-01 | 9.49E-01 | -6.69 |
| 1458731_PM_at             | ---                  | NA        | 0.04  | 2.17 | 0.16  | 8.74E-01 | 9.49E-01 | -6.69 |
| 1428727_PM_at             | Cep192               | CEP192    | 0.05  | 3.16 | 0.16  | 8.74E-01 | 9.49E-01 | -6.69 |
| 1439772_PM_at             | Cnot11               | CNOT11    | -0.03 | 2.72 | -0.16 | 8.74E-01 | 9.49E-01 | -6.69 |
| 1456693_PM_at             | ---                  | NA        | 0.04  | 7.18 | 0.16  | 8.74E-01 | 9.49E-01 | -6.69 |
| 1420153_PM_at             | ---                  | NA        | 0.02  | 2.10 | 0.16  | 8.75E-01 | 9.49E-01 | -6.69 |
| 1434853_PM_x_at           | Mkrm1                | MKRN1     | -0.15 | 6.68 | -0.16 | 8.75E-01 | 9.50E-01 | -6.69 |
| 1446829_PM_at             | D12Erd216e           | NA        | 0.01  | 2.47 | 0.16  | 8.75E-01 | 9.50E-01 | -6.69 |
| 1459840_PM_s_at           | Ccdc28b              | CCDC28B   | 0.11  | 5.33 | 0.16  | 8.75E-01 | 9.50E-01 | -6.69 |
| 1420517_PM_at             | Chmp4c               | CHMP4C    | -0.02 | 2.20 | -0.16 | 8.75E-01 | 9.50E-01 | -6.69 |
| 1424939_PM_at             | Asz1                 | ASZ1      | -0.02 | 2.24 | -0.16 | 8.75E-01 | 9.50E-01 | -6.69 |
| 1444745_PM_at             | ---                  | NA        | -0.01 | 2.34 | -0.16 | 8.75E-01 | 9.50E-01 | -6.69 |
| 1426916_PM_at             | Scrn3                | SCRN3     | 0.02  | 2.87 | 0.16  | 8.75E-01 | 9.50E-01 | -6.69 |
| 1456725_PM_x_at           | Ezr                  | EZR       | 0.02  | 2.51 | 0.16  | 8.75E-01 | 9.50E-01 | -6.69 |
| 1438453_PM_at             | Rad51c               | RAD51C    | -0.02 | 2.46 | -0.16 | 8.75E-01 | 9.50E-01 | -6.69 |
| 1425221_PM_at             | Agr3                 | AGR3      | 0.01  | 2.12 | 0.16  | 8.75E-01 | 9.50E-01 | -6.69 |
| 1416736_PM_at             | Casc3                | CASC3     | 0.03  | 2.80 | 0.16  | 8.75E-01 | 9.50E-01 | -6.69 |
| 1451819_PM_at             | Zswim6               | ZSWIM6    | 0.02  | 3.38 | 0.16  | 8.75E-01 | 9.50E-01 | -6.69 |
| 1453099_PM_at             | Csnk2a2              | NA        | 0.05  | 3.45 | 0.16  | 8.75E-01 | 9.50E-01 | -6.69 |
| 1430812_PM_at             | 4930511A02Rik        | NA        | -0.02 | 2.12 | -0.16 | 8.75E-01 | 9.50E-01 | -6.69 |
| 1439425_PM_x_at           | Mettl2               | NA        | 0.09  | 3.07 | 0.16  | 8.75E-01 | 9.50E-01 | -6.69 |
| 1436038_PM_a_at           | Pigp                 | PIGP      | -0.06 | 3.11 | -0.16 | 8.75E-01 | 9.50E-01 | -6.69 |
| 1425619_PM_s_at           | Dsg2                 | DSG2      | 0.02  | 2.25 | 0.16  | 8.75E-01 | 9.50E-01 | -6.69 |
| 1460224_PM_at             | Srx2                 | SNX2      | -0.04 | 5.28 | -0.16 | 8.75E-01 | 9.50E-01 | -6.69 |
| 1429969_PM_at             | ---                  | NA        | -0.01 | 2.02 | -0.16 | 8.76E-01 | 9.50E-01 | -6.69 |
| 1437959_PM_at             | Zfp324               | ZNF324B   | 0.05  | 3.12 | 0.16  | 8.75E-01 | 9.50E-01 | -6.69 |
| 1423482_PM_at             | Uros                 | UROS      | 0.06  | 3.89 | 0.16  | 8.76E-01 | 9.50E-01 | -6.69 |
| 1424716_PM_at             | RetSAT               | RETSAT    | -0.02 | 2.80 | -0.16 | 8.76E-01 | 9.50E-01 | -6.69 |
| 1438570_PM_at             | ---                  | NA        | 0.03  | 2.71 | 0.16  | 8.76E-01 | 9.50E-01 | -6.69 |
| 1422702_PM_at             | Azin1                | AZIN1     | -0.05 | 3.19 | -0.16 | 8.76E-01 | 9.50E-01 | -6.69 |
| 1450363_PM_at             | Asb7                 | ASB7      | -0.04 | 3.44 | -0.16 | 8.76E-01 | 9.50E-01 | -6.69 |
| 1439703_PM_at             | Cd200r1              | CD200R1L  | -0.01 | 2.09 | -0.16 | 8.76E-01 | 9.50E-01 | -6.69 |
| 1431664_PM_at             | Luc7l                | NA        | 0.04  | 3.13 | 0.16  | 8.76E-01 | 9.50E-01 | -6.69 |
| 1458465_PM_at             | Pan3                 | PAN3      | 0.02  | 2.25 | 0.16  | 8.76E-01 | 9.50E-01 | -6.69 |
| 1428769_PM_at             | Tatdn3               | TATDN3    | 0.03  | 2.51 | 0.16  | 8.76E-01 | 9.50E-01 | -6.69 |

|                 |                         |          |       |      |       |          |          |       |
|-----------------|-------------------------|----------|-------|------|-------|----------|----------|-------|
| 1416665_PM_at   | Coq7                    | COQ7     | -0.06 | 3.64 | -0.16 | 8.76E-01 | 9.50E-01 | -6.69 |
| 1457014_PM_x_at | Slc16a8                 | SLC16A8  | 0.02  | 2.29 | 0.16  | 8.76E-01 | 9.50E-01 | -6.69 |
| 1416775_PM_at   | Atp5sl                  | ATP5SL   | 0.03  | 2.58 | 0.16  | 8.76E-01 | 9.50E-01 | -6.69 |
| 1418717_PM_at   | Mrp525                  | MRP525   | -0.04 | 2.87 | -0.16 | 8.76E-01 | 9.50E-01 | -6.69 |
| 1436942_PM_at   | ---                     | NA       | -0.03 | 2.63 | -0.16 | 8.76E-01 | 9.50E-01 | -6.69 |
| 1441350_PM_at   | Fgf3                    | FGF3     | -0.01 | 2.87 | -0.16 | 8.76E-01 | 9.50E-01 | -6.69 |
| 1459786_PM_at   | ---                     | NA       | 0.01  | 2.20 | 0.16  | 8.76E-01 | 9.50E-01 | -6.69 |
| 1457754_PM_at   | ---                     | NA       | 0.02  | 2.40 | 0.16  | 8.76E-01 | 9.50E-01 | -6.69 |
| 1460676_PM_at   | Gm10651 /// Jsd1        | JOSD1    | 0.03  | 2.71 | 0.16  | 8.76E-01 | 9.50E-01 | -6.69 |
| 1423558_PM_at   | Ifngr2                  | IFNGR2   | 0.04  | 3.50 | 0.16  | 8.76E-01 | 9.50E-01 | -6.69 |
| 1435987_PM_x_at | ---                     | NA       | -0.03 | 2.67 | -0.16 | 8.76E-01 | 9.50E-01 | -6.69 |
| 1430751_PM_at   | Serpina3h /// Serpina3i | SERPINA3 | 0.02  | 2.40 | 0.16  | 8.76E-01 | 9.50E-01 | -6.69 |
| 1445220_PM_at   | ---                     | NA       | -0.03 | 3.14 | -0.16 | 8.76E-01 | 9.50E-01 | -6.69 |
| 1427783_PM_at   | ErbB4                   | ERBB4    | -0.02 | 2.52 | -0.16 | 8.76E-01 | 9.50E-01 | -6.69 |
| 1447820_PM_x_at | Cpt2                    | CPT2     | -0.01 | 1.99 | -0.16 | 8.76E-01 | 9.50E-01 | -6.69 |
| 1419555_PM_at   | Elf5                    | ELF5     | 0.02  | 2.85 | 0.16  | 8.76E-01 | 9.50E-01 | -6.69 |
| 1429892_PM_at   | Plac8l1                 | PLAC8L1  | -0.02 | 2.86 | -0.16 | 8.76E-01 | 9.50E-01 | -6.69 |
| 1431309_PM_at   | Ttl10                   | TTL10    | -0.02 | 1.98 | -0.16 | 8.76E-01 | 9.50E-01 | -6.69 |
| 1445995_PM_at   | Cdc25a                  | CDC25A   | 0.02  | 3.01 | 0.16  | 8.76E-01 | 9.50E-01 | -6.69 |
| 1455927_PM_x_at | Nsmce1                  | NA       | 0.03  | 2.83 | 0.16  | 8.76E-01 | 9.50E-01 | -6.69 |
| 1456278_PM_x_at | Slc52a2                 | SLC52A1  | -0.01 | 2.15 | -0.16 | 8.76E-01 | 9.50E-01 | -6.69 |
| 1432309_PM_at   | LOC105244659            | NA       | -0.02 | 2.21 | -0.16 | 8.76E-01 | 9.50E-01 | -6.69 |
| 1446551_PM_at   | ---                     | NA       | 0.02  | 2.57 | 0.16  | 8.76E-01 | 9.50E-01 | -6.69 |
| 1434811_PM_at   | Cage1                   | CAGE1    | 0.02  | 3.34 | 0.16  | 8.76E-01 | 9.50E-01 | -6.69 |
| 1446115_PM_at   | ---                     | NA       | 0.01  | 2.00 | 0.16  | 8.77E-01 | 9.50E-01 | -6.69 |
| 1453895_PM_at   | ---                     | NA       | 0.02  | 2.11 | 0.16  | 8.77E-01 | 9.50E-01 | -6.69 |
| 1444589_PM_at   | Gm4944                  | NA       | -0.03 | 2.86 | -0.16 | 8.77E-01 | 9.50E-01 | -6.69 |
| 1434025_PM_at   | ---                     | NA       | 0.06  | 4.58 | 0.16  | 8.77E-01 | 9.50E-01 | -6.69 |
| 1438345_PM_at   | ---                     | NA       | 0.08  | 4.39 | 0.16  | 8.77E-01 | 9.50E-01 | -6.69 |
| 1440889_PM_at   | BC006965                | NA       | -0.02 | 2.23 | -0.16 | 8.77E-01 | 9.50E-01 | -6.69 |
| 1424049_PM_at   | Lrrc42                  | LRRC42   | -0.03 | 3.00 | -0.16 | 8.77E-01 | 9.50E-01 | -6.69 |
| 1435571_PM_at   | Mpz3                    | MPZL3    | -0.02 | 2.11 | -0.16 | 8.77E-01 | 9.50E-01 | -6.69 |
| 1433260_PM_at   | Gm30527                 | NA       | -0.01 | 2.11 | -0.16 | 8.77E-01 | 9.50E-01 | -6.69 |
| 1421996_PM_at   | Tfap2a                  | TFAP2A   | 0.01  | 2.14 | 0.16  | 8.77E-01 | 9.50E-01 | -6.69 |
| 1440922_PM_at   | 9130208D14Rik           | NA       | 0.02  | 2.32 | 0.16  | 8.77E-01 | 9.50E-01 | -6.69 |
| 1433144_PM_at   | Alg2                    | NA       | 0.02  | 2.09 | 0.16  | 8.77E-01 | 9.50E-01 | -6.69 |
| 1451471_PM_at   | Ears2                   | EARS2    | 0.02  | 2.37 | 0.16  | 8.77E-01 | 9.50E-01 | -6.69 |
| 1429118_PM_a_at | Gin1                    | GIN1     | 0.03  | 2.80 | 0.16  | 8.77E-01 | 9.50E-01 | -6.69 |
| 1444681_PM_at   | Gm34996                 | NA       | 0.03  | 2.33 | 0.16  | 8.77E-01 | 9.50E-01 | -6.69 |
| 1457098_PM_at   | ---                     | NA       | 0.03  | 2.54 | 0.16  | 8.77E-01 | 9.50E-01 | -6.69 |
| 1441349_PM_at   | ---                     | NA       | 0.03  | 3.07 | 0.16  | 8.77E-01 | 9.50E-01 | -6.69 |
| 1459346_PM_at   | Tsen2                   | TSEN2    | 0.04  | 2.92 | 0.16  | 8.77E-01 | 9.50E-01 | -6.69 |
| 1434514_PM_at   | Rbm15                   | RBM15    | -0.02 | 3.04 | -0.16 | 8.77E-01 | 9.50E-01 | -6.69 |
| 1435217_PM_at   | Gm7969 /// LOC102642957 | NA       | 0.03  | 2.27 | 0.16  | 8.77E-01 | 9.50E-01 | -6.69 |
| 1454402_PM_at   | ---                     | NA       | -0.02 | 2.05 | -0.16 | 8.77E-01 | 9.51E-01 | -6.69 |
| 1433275_PM_at   | Tmem30c                 | NA       | -0.03 | 2.25 | -0.16 | 8.77E-01 | 9.51E-01 | -6.69 |
| 1421759_PM_a_at | Foxk1                   | FOXK1    | -0.03 | 2.95 | -0.16 | 8.77E-01 | 9.51E-01 | -6.69 |
| 1430877_PM_at   | ---                     | NA       | -0.02 | 2.52 | -0.16 | 8.77E-01 | 9.51E-01 | -6.69 |
| 1431409_PM_at   | ---                     | NA       | -0.01 | 2.02 | -0.16 | 8.78E-01 | 9.51E-01 | -6.69 |
| 1447732_PM_x_at | Peg3                    | PEG3     | -0.01 | 2.03 | -0.16 | 8.77E-01 | 9.51E-01 | -6.69 |
| 1447170_PM_at   | ---                     | NA       | -0.01 | 1.89 | -0.16 | 8.78E-01 | 9.51E-01 | -6.69 |
| 1453340_PM_at   | ---                     | NA       | 0.01  | 2.13 | 0.16  | 8.77E-01 | 9.51E-01 | -6.69 |
| 1430796_PM_at   | Trim14                  | TRIM14   | 0.01  | 2.45 | 0.16  | 8.77E-01 | 9.51E-01 | -6.69 |
| 1449982_PM_at   | Il11                    | IL11     | 0.02  | 2.14 | 0.16  | 8.77E-01 | 9.51E-01 | -6.69 |
| 1460402_PM_at   | Brpf1                   | BRPF1    | 0.03  | 3.24 | 0.16  | 8.77E-01 | 9.51E-01 | -6.69 |
| 1417227_PM_at   | Mccc1                   | MCCC1    | 0.04  | 3.94 | 0.16  | 8.78E-01 | 9.51E-01 | -6.69 |
| 1425807_PM_at   | BC021891                | MAP3K21  | -0.02 | 2.06 | -0.16 | 8.78E-01 | 9.51E-01 | -6.69 |
| 1440174_PM_at   | ---                     | NA       | 0.02  | 2.19 | 0.16  | 8.78E-01 | 9.51E-01 | -6.69 |
| 1446658_PM_at   | ---                     | NA       | 0.02  | 2.36 | 0.16  | 8.78E-01 | 9.51E-01 | -6.69 |
| 1443852_PM_at   | ---                     | NA       | 0.02  | 2.03 | 0.16  | 8.78E-01 | 9.51E-01 | -6.69 |
| 1432031_PM_at   | 4930563E18Rik           | NA       | 0.02  | 2.22 | 0.16  | 8.78E-01 | 9.51E-01 | -6.69 |
| 1449054_PM_a_at | Pcbp4                   | PCBP4    | 0.03  | 2.32 | 0.16  | 8.78E-01 | 9.51E-01 | -6.69 |
| 1437835_PM_a_at | Aar2                    | AAR2     | -0.02 | 2.69 | -0.16 | 8.78E-01 | 9.51E-01 | -6.69 |
| 1450414_PM_at   | Pdgfb                   | PDGFB    | -0.02 | 2.54 | -0.16 | 8.78E-01 | 9.51E-01 | -6.69 |
| 1451155_PM_at   | Celf2                   | CEL2     | -0.04 | 2.43 | -0.16 | 8.78E-01 | 9.51E-01 | -6.69 |
| 1432056_PM_at   | Cpvl                    | CPVL     | 0.01  | 2.60 | 0.16  | 8.78E-01 | 9.51E-01 | -6.69 |
| 1432655_PM_at   | ---                     | NA       | 0.01  | 2.44 | 0.16  | 8.78E-01 | 9.51E-01 | -6.69 |
| 1423320_PM_at   | Dnase1l2                | DNASE1L2 | 0.02  | 2.36 | 0.16  | 8.78E-01 | 9.51E-01 | -6.69 |
| 1434715_PM_at   | 1600014C10Rik           | C19orf12 | 0.04  | 3.08 | 0.16  | 8.78E-01 | 9.51E-01 | -6.69 |
| 1422912_PM_at   | Bmp4                    | BMP4     | 0.03  | 2.20 | 0.16  | 8.78E-01 | 9.51E-01 | -6.69 |
| 1447683_PM_x_at | Mettl1                  | METTL1   | 0.04  | 2.49 | 0.16  | 8.78E-01 | 9.51E-01 | -6.69 |
| 1425522_PM_at   | Rbm25                   | RBM25    | -0.04 | 3.58 | -0.16 | 8.78E-01 | 9.51E-01 | -6.69 |
| 1416652_PM_at   | Aspn                    | ASPEN    | 0.02  | 2.35 | 0.16  | 8.78E-01 | 9.51E-01 | -6.69 |
| 1430566_PM_at   | ---                     | NA       | 0.02  | 2.80 | 0.16  | 8.78E-01 | 9.51E-01 | -6.69 |

|                 |                                                                         |              |       |      |       |          |          |       |
|-----------------|-------------------------------------------------------------------------|--------------|-------|------|-------|----------|----------|-------|
| 1421045_PM_at   | Mrc2                                                                    | MRC2         | 0.02  | 2.62 | 0.16  | 8.78E-01 | 9.51E-01 | -6.69 |
| 1449079_PM_s_at | St3gal6                                                                 | ST3GAL6      | 0.03  | 2.56 | 0.16  | 8.78E-01 | 9.51E-01 | -6.69 |
| 1456518_PM_at   | Zfp949                                                                  | ZNF717       | 0.05  | 2.94 | 0.16  | 8.78E-01 | 9.51E-01 | -6.69 |
| 1457293_PM_at   | Zbtb4                                                                   | ZBTB4        | 0.07  | 4.48 | 0.16  | 8.78E-01 | 9.51E-01 | -6.69 |
| 1445323_PM_at   | Greb1                                                                   | GREB1        | 0.07  | 2.66 | 0.16  | 8.78E-01 | 9.51E-01 | -6.69 |
| 1434567_PM_at   | Pramef8                                                                 | PRAMEF9      | -0.01 | 2.30 | -0.16 | 8.78E-01 | 9.51E-01 | -6.69 |
| 1438043_PM_at   | ---                                                                     | NA           | -0.04 | 3.59 | -0.16 | 8.78E-01 | 9.51E-01 | -6.69 |
| 1457660_PM_x_at | 5430416O09Rik                                                           | NA           | 0.02  | 2.17 | 0.16  | 8.78E-01 | 9.51E-01 | -6.69 |
| 1418864_PM_at   | Gata4                                                                   | GATA4        | 0.02  | 2.21 | 0.16  | 8.78E-01 | 9.51E-01 | -6.69 |
| 1440868_PM_at   | Gabpb2                                                                  | GABPB2       | 0.02  | 2.38 | 0.16  | 8.78E-01 | 9.51E-01 | -6.69 |
| 1423860_PM_at   | Ptgds                                                                   | PTGDS        | -0.05 | 5.99 | -0.16 | 8.79E-01 | 9.51E-01 | -6.69 |
| 1424704_PM_at   | Runx2                                                                   | RUNX2        | -0.02 | 3.40 | -0.16 | 8.79E-01 | 9.51E-01 | -6.69 |
| 1421262_PM_at   | Lipg                                                                    | LIPG         | 0.01  | 2.32 | 0.16  | 8.79E-01 | 9.51E-01 | -6.69 |
| 1454199_PM_at   | H2bfm                                                                   | H2BFM        | 0.02  | 2.30 | 0.16  | 8.79E-01 | 9.51E-01 | -6.69 |
| 1433653_PM_at   | Fam20a                                                                  | FAM20A       | 0.02  | 3.37 | 0.16  | 8.79E-01 | 9.51E-01 | -6.69 |
| 1428165_PM_at   | Chmp3                                                                   | RNF103-CHMP3 | 0.03  | 2.92 | 0.16  | 8.79E-01 | 9.51E-01 | -6.69 |
| 1457999_PM_at   | ---                                                                     | NA           | -0.03 | 2.67 | -0.16 | 8.79E-01 | 9.51E-01 | -6.69 |
| 1441503_PM_at   | ---                                                                     | NA           | 0.02  | 2.10 | 0.16  | 8.79E-01 | 9.51E-01 | -6.69 |
| 1427429_PM_at   | Csf2                                                                    | CSF2         | 0.02  | 2.19 | 0.16  | 8.79E-01 | 9.51E-01 | -6.69 |
| 1448629_PM_at   | Hps4                                                                    | HPS4         | 0.04  | 5.25 | 0.16  | 8.79E-01 | 9.51E-01 | -6.69 |
| 1436986_PM_at   | Sntb2                                                                   | SNTB2        | 0.05  | 2.96 | 0.16  | 8.79E-01 | 9.51E-01 | -6.69 |
| 1451744_PM_a_at | Ptgr2                                                                   | ACO05520.1   | 0.07  | 4.40 | 0.16  | 8.79E-01 | 9.51E-01 | -6.69 |
| 1442364_PM_at   | Mapk14                                                                  | NA           | 0.03  | 2.78 | 0.16  | 8.79E-01 | 9.51E-01 | -6.69 |
| 1426540_PM_at   | Endod1                                                                  | ENDOD1       | 0.02  | 2.90 | 0.16  | 8.79E-01 | 9.51E-01 | -6.69 |
| 1420161_PM_at   | LOC105245295                                                            | NA           | -0.01 | 2.30 | -0.16 | 8.79E-01 | 9.51E-01 | -6.69 |
| 1425612_PM_at   | Cux1                                                                    | CUX1         | 0.04  | 2.52 | 0.16  | 8.79E-01 | 9.51E-01 | -6.69 |
| 1455267_PM_at   | Esrrg                                                                   | ESRRG        | 0.05  | 3.18 | 0.16  | 8.79E-01 | 9.51E-01 | -6.69 |
| 1439350_PM_s_at | Pigu                                                                    | PIGU         | -0.05 | 5.03 | -0.16 | 8.79E-01 | 9.51E-01 | -6.69 |
| 1449598_PM_at   | ---                                                                     | NA           | 0.02  | 2.57 | 0.16  | 8.79E-01 | 9.51E-01 | -6.69 |
| 1439847_PM_s_at | Klf12                                                                   | NA           | -0.03 | 2.30 | -0.16 | 8.79E-01 | 9.51E-01 | -6.69 |
| 1423199_PM_at   | Brd3                                                                    | BRD3         | 0.01  | 2.32 | 0.16  | 8.79E-01 | 9.51E-01 | -6.69 |
| 1424544_PM_at   | Nrbp2                                                                   | NRBP2        | 0.05  | 6.49 | 0.16  | 8.79E-01 | 9.51E-01 | -6.69 |
| 1441456_PM_at   | Mmp24                                                                   | MMP24        | 0.02  | 2.73 | 0.16  | 8.79E-01 | 9.51E-01 | -6.69 |
| 1438561_PM_x_at | Tmem180                                                                 | MFSD13A      | 0.12  | 3.20 | 0.16  | 8.79E-01 | 9.51E-01 | -6.69 |
| 1445735_PM_at   | ---                                                                     | NA           | 0.01  | 1.99 | 0.16  | 8.79E-01 | 9.51E-01 | -6.69 |
| 1443429_PM_at   | ---                                                                     | NA           | -0.03 | 3.82 | -0.16 | 8.79E-01 | 9.51E-01 | -6.69 |
| 1439512_PM_at   | 5830444B04Rik                                                           | NA           | -0.03 | 3.68 | -0.16 | 8.79E-01 | 9.51E-01 | -6.69 |
| 1435840_PM_x_at | BC147527                                                                | NA           | 0.01  | 2.69 | 0.16  | 8.79E-01 | 9.51E-01 | -6.69 |
| 1429993_PM_s_at | Gm10471 /// Gm21671 ///<br>Gm5862 /// Gm7347 ///<br>Speer4a /// Speer4b | NA           | 0.05  | 4.28 | 0.16  | 8.79E-01 | 9.51E-01 | -6.69 |
| 1443333_PM_at   | Gm20383 ///<br>LOC105242695                                             | NA           | 0.01  | 2.23 | 0.16  | 8.80E-01 | 9.51E-01 | -6.69 |
| 1439651_PM_at   | ---                                                                     | NA           | -0.03 | 2.42 | -0.16 | 8.80E-01 | 9.51E-01 | -6.69 |
| 1442053_PM_at   | ---                                                                     | NA           | -0.03 | 2.39 | -0.16 | 8.80E-01 | 9.52E-01 | -6.69 |
| 1427832_PM_at   | Tuba-rs1                                                                | NA           | -0.01 | 2.15 | -0.16 | 8.80E-01 | 9.52E-01 | -6.69 |
| 1455731_PM_at   | Slc29a3                                                                 | SLC29A3      | -0.04 | 4.86 | -0.16 | 8.80E-01 | 9.52E-01 | -6.69 |
| 1453064_PM_at   | Etaa1                                                                   | ETAA1        | -0.02 | 2.43 | -0.16 | 8.80E-01 | 9.52E-01 | -6.69 |
| 1446847_PM_at   | ---                                                                     | NA           | -0.02 | 2.44 | -0.16 | 8.80E-01 | 9.52E-01 | -6.69 |
| 1425008_PM_a_at | Gm16340 /// Ifi203 ///<br>LOC102641031                                  | NA           | 0.04  | 3.74 | 0.16  | 8.80E-01 | 9.52E-01 | -6.69 |
| 1439927_PM_at   | ---                                                                     | NA           | 0.02  | 3.01 | 0.16  | 8.80E-01 | 9.52E-01 | -6.69 |
| 1438651_PM_a_at | Aplnr                                                                   | APLNR        | -0.02 | 2.12 | -0.15 | 8.80E-01 | 9.52E-01 | -6.69 |
| 1431911_PM_at   | 4931423N10Rik                                                           | NA           | 0.02  | 2.43 | 0.15  | 8.80E-01 | 9.52E-01 | -6.69 |
| 1426767_PM_at   | Wdr90                                                                   | WDR90        | 0.05  | 3.40 | 0.15  | 8.80E-01 | 9.52E-01 | -6.69 |
| 1446719_PM_at   | ---                                                                     | NA           | -0.01 | 2.26 | -0.15 | 8.80E-01 | 9.52E-01 | -6.69 |
| 1429427_PM_s_at | Tcf7l2                                                                  | TCF7L2       | -0.01 | 1.85 | -0.15 | 8.80E-01 | 9.52E-01 | -6.69 |
| 1428316_PM_a_at | Fundc2                                                                  | FUNDCC2      | -0.05 | 4.97 | -0.15 | 8.80E-01 | 9.52E-01 | -6.69 |
| 1437643_PM_at   | Cenpj                                                                   | CENPJ        | -0.02 | 2.36 | -0.15 | 8.80E-01 | 9.52E-01 | -6.69 |
| 1451850_PM_at   | Prlr                                                                    | PRLR         | -0.01 | 2.18 | -0.15 | 8.80E-01 | 9.52E-01 | -6.69 |
| 1425229_PM_a_at | Tcf7l2                                                                  | TCF7L2       | 0.01  | 2.05 | 0.15  | 8.80E-01 | 9.52E-01 | -6.69 |
| 1434071_PM_a_at | Pelo                                                                    | PELO         | 0.01  | 2.46 | 0.15  | 8.80E-01 | 9.52E-01 | -6.69 |
| 1459764_PM_x_at | Snx10                                                                   | SNX10        | -0.06 | 3.51 | -0.15 | 8.80E-01 | 9.52E-01 | -6.69 |
| 1439416_PM_x_at | Tubb4b /// Tubb4b-ps1                                                   | TUBB4B       | -0.03 | 4.18 | -0.15 | 8.80E-01 | 9.52E-01 | -6.69 |
| 1458675_PM_at   | ---                                                                     | NA           | -0.01 | 2.26 | -0.15 | 8.80E-01 | 9.52E-01 | -6.69 |
| 1423411_PM_at   | Rbm47                                                                   | RBM47        | 0.01  | 2.14 | 0.15  | 8.80E-01 | 9.52E-01 | -6.69 |
| 1447577_PM_x_at | Pcca                                                                    | PCCA         | 0.01  | 2.14 | 0.15  | 8.80E-01 | 9.52E-01 | -6.69 |
| 1425760_PM_a_at | Pitpnm1                                                                 | PITPNM1      | 0.01  | 2.89 | 0.15  | 8.80E-01 | 9.52E-01 | -6.69 |
| 1444176_PM_at   | Atp6v0d2                                                                | ATP6V0D2     | 0.02  | 2.08 | 0.15  | 8.80E-01 | 9.52E-01 | -6.69 |
| 1459753_PM_x_at | Tra2a                                                                   | TRA2A        | 0.02  | 2.69 | 0.15  | 8.80E-01 | 9.52E-01 | -6.69 |
| 1432098_PM_a_at | Olfrr701                                                                | OR2AG2       | 0.02  | 2.90 | 0.15  | 8.80E-01 | 9.52E-01 | -6.69 |
| 1453586_PM_at   | ---                                                                     | NA           | 0.03  | 2.85 | 0.15  | 8.80E-01 | 9.52E-01 | -6.69 |
| 1422855_PM_at   | Cpsf3                                                                   | CPSF3        | 0.04  | 3.83 | 0.15  | 8.80E-01 | 9.52E-01 | -6.69 |
| 1418205_PM_at   | Thsd1                                                                   | THSD1        | 0.01  | 2.47 | 0.15  | 8.80E-01 | 9.52E-01 | -6.69 |
| 1421552_PM_at   | Cdx4                                                                    | CDX4         | -0.01 | 1.86 | -0.15 | 8.80E-01 | 9.52E-01 | -6.69 |

|                 |                                                                                    |            |       |      |       |          |          |       |
|-----------------|------------------------------------------------------------------------------------|------------|-------|------|-------|----------|----------|-------|
| 1420453_PM_at   | Crygs                                                                              | CRYGS      | 0.02  | 2.72 | 0.15  | 8.80E-01 | 9.52E-01 | -6.69 |
| 1432992_PM_at   | 4930403L11Rik                                                                      | NA         | 0.02  | 2.16 | 0.15  | 8.81E-01 | 9.52E-01 | -6.69 |
| 1436896_PM_at   | Ints9                                                                              | INTS9      | 0.04  | 2.85 | 0.15  | 8.80E-01 | 9.52E-01 | -6.69 |
| 1424663_PM_at   | Fam222b                                                                            | FAM222B    | 0.04  | 2.45 | 0.15  | 8.80E-01 | 9.52E-01 | -6.69 |
| 1457776_PM_at   | Naalad2                                                                            | NAALAD2    | -0.04 | 2.71 | -0.15 | 8.81E-01 | 9.52E-01 | -6.69 |
| 1454695_PM_at   | Wdr18                                                                              | WDR18      | -0.02 | 2.38 | -0.15 | 8.81E-01 | 9.52E-01 | -6.69 |
| 1417701_PM_at   | Ppp1r14c                                                                           | PPP1R14C   | -0.02 | 2.67 | -0.15 | 8.81E-01 | 9.52E-01 | -6.69 |
| 1422149_PM_at   | Foxo4                                                                              | FOXO4      | -0.01 | 2.28 | -0.15 | 8.81E-01 | 9.52E-01 | -6.69 |
| 1415958_PM_at   | Slc2a4                                                                             | SLC2A4     | -0.01 | 2.40 | -0.15 | 8.81E-01 | 9.52E-01 | -6.69 |
| 1430306_PM_a_at | Atp6v1c2                                                                           | ATP6V1C2   | 0.01  | 2.06 | 0.15  | 8.81E-01 | 9.52E-01 | -6.69 |
| 1451701_PM_x_at | Cldn3                                                                              | CLDN3      | 0.02  | 2.59 | 0.15  | 8.81E-01 | 9.52E-01 | -6.69 |
| 1438915_PM_at   | Fire                                                                               | NA         | 0.05  | 3.51 | 0.15  | 8.81E-01 | 9.52E-01 | -6.69 |
| 1442767_PM_s_at | Uba1                                                                               | UBA1       | -0.02 | 2.15 | -0.15 | 8.81E-01 | 9.52E-01 | -6.69 |
| 1430519_PM_a_at | Cnot7                                                                              | CNOT7      | 0.07  | 3.07 | 0.15  | 8.81E-01 | 9.52E-01 | -6.69 |
| 1421165_PM_at   | Mycbp                                                                              | NA         | -0.02 | 2.08 | -0.15 | 8.81E-01 | 9.52E-01 | -6.69 |
| 1452224_PM_at   | Morc3                                                                              | MORC3      | 0.03  | 2.82 | 0.15  | 8.81E-01 | 9.52E-01 | -6.69 |
| 1453863_PM_at   | ---                                                                                | NA         | -0.01 | 1.93 | -0.15 | 8.81E-01 | 9.52E-01 | -6.69 |
| 1427566_PM_at   | Wfikkn1                                                                            | WFIKKN1    | 0.02  | 2.78 | 0.15  | 8.81E-01 | 9.52E-01 | -6.69 |
| 1453778_PM_at   | Selt                                                                               | SELENOT    | 0.02  | 2.26 | 0.15  | 8.81E-01 | 9.52E-01 | -6.69 |
| 1451206_PM_s_at | Cytip                                                                              | CYTIP      | 0.05  | 2.59 | 0.15  | 8.81E-01 | 9.52E-01 | -6.69 |
| 1423849_PM_a_at | Clk3                                                                               | CLK3       | 0.06  | 5.92 | 0.15  | 8.81E-01 | 9.52E-01 | -6.69 |
| 1420890_PM_at   | Hccs                                                                               | HCCS       | -0.02 | 2.72 | -0.15 | 8.81E-01 | 9.52E-01 | -6.69 |
| 1432078_PM_at   | 4930453L07Rik                                                                      | NA         | 0.01  | 1.91 | 0.15  | 8.81E-01 | 9.52E-01 | -6.69 |
| 1448310_PM_at   | Ick                                                                                | ICK        | -0.02 | 2.49 | -0.15 | 8.81E-01 | 9.52E-01 | -6.69 |
| 1449889_PM_a_at | Ociad1                                                                             | OCIAD1     | 0.05  | 5.47 | 0.15  | 8.81E-01 | 9.52E-01 | -6.69 |
| 1424093_PM_x_at | Cd151                                                                              | CD151      | -0.02 | 2.29 | -0.15 | 8.81E-01 | 9.52E-01 | -6.69 |
| 1454543_PM_at   | ---                                                                                | NA         | -0.02 | 2.43 | -0.15 | 8.81E-01 | 9.52E-01 | -6.69 |
| 1451269_PM_at   | Pdxd11                                                                             | PDZD11     | -0.03 | 2.52 | -0.15 | 8.81E-01 | 9.52E-01 | -6.69 |
| 1455425_PM_at   | Tet1                                                                               | TET1       | -0.01 | 2.20 | -0.15 | 8.81E-01 | 9.52E-01 | -6.69 |
| 1425625_PM_at   | Il13ra1                                                                            | NA         | -0.01 | 2.23 | -0.15 | 8.81E-01 | 9.52E-01 | -6.69 |
| 1427810_PM_at   | Tyms                                                                               | NA         | 0.01  | 2.17 | 0.15  | 8.81E-01 | 9.52E-01 | -6.69 |
| 1418383_PM_at   | Apcdd1                                                                             | APCDD1     | 0.01  | 2.23 | 0.15  | 8.81E-01 | 9.52E-01 | -6.69 |
| 1430742_PM_a_at | Spata16                                                                            | SPATA16    | 0.02  | 3.00 | 0.15  | 8.81E-01 | 9.52E-01 | -6.69 |
| 1444676_PM_at   | ---                                                                                | NA         | 0.03  | 2.99 | 0.15  | 8.81E-01 | 9.52E-01 | -6.69 |
| 1439571_PM_at   | Vps13a                                                                             | NA         | -0.03 | 2.32 | -0.15 | 8.81E-01 | 9.52E-01 | -6.69 |
| 1448358_PM_s_at | Snrpg                                                                              | SNRPG      | -0.03 | 8.00 | -0.15 | 8.82E-01 | 9.52E-01 | -6.69 |
| 1438263_PM_at   | 9430020K01Rik                                                                      | KIAA1462   | 0.03  | 2.97 | 0.15  | 8.82E-01 | 9.52E-01 | -6.69 |
| 1417064_PM_at   | Jagn1                                                                              | JAGN1      | -0.03 | 2.68 | -0.15 | 8.82E-01 | 9.52E-01 | -6.69 |
| 1459811_PM_at   | Mtf2                                                                               | MTF2       | -0.01 | 2.11 | -0.15 | 8.82E-01 | 9.52E-01 | -6.69 |
| 1425947_PM_at   | Ifng                                                                               | IFNG       | 0.02  | 2.21 | 0.15  | 8.82E-01 | 9.52E-01 | -6.69 |
| 1460511_PM_at   | Pkp2                                                                               | PKP2       | 0.05  | 3.01 | 0.15  | 8.82E-01 | 9.52E-01 | -6.69 |
| 1458816_PM_at   | ---                                                                                | NA         | -0.02 | 2.45 | -0.15 | 8.82E-01 | 9.52E-01 | -6.69 |
| 1421123_PM_at   | Cdk5r1                                                                             | CDK5R1     | -0.02 | 2.44 | -0.15 | 8.82E-01 | 9.52E-01 | -6.69 |
| 1431602_PM_a_at | Uggt2                                                                              | UGGT2      | -0.03 | 2.57 | -0.15 | 8.82E-01 | 9.52E-01 | -6.69 |
| 1437030_PM_at   | Plcd4                                                                              | PLCD4      | 0.02  | 3.23 | 0.15  | 8.82E-01 | 9.52E-01 | -6.69 |
| 1435433_PM_at   | Agap1                                                                              | AGAP1      | -0.04 | 3.47 | -0.15 | 8.82E-01 | 9.52E-01 | -6.69 |
| 1425434_PM_a_at | Msr1                                                                               | MSR1       | 0.02  | 2.76 | 0.15  | 8.82E-01 | 9.52E-01 | -6.69 |
| 1448496_PM_a_at | Ing1                                                                               | ING1       | 0.05  | 2.88 | 0.15  | 8.82E-01 | 9.52E-01 | -6.69 |
| 1435674_PM_at   | Rhobtb2                                                                            | RHOBTB2    | 0.05  | 4.54 | 0.15  | 8.82E-01 | 9.52E-01 | -6.69 |
| 1460140_PM_at   | ---                                                                                | NA         | -0.02 | 2.64 | -0.15 | 8.82E-01 | 9.52E-01 | -6.69 |
| 1446221_PM_at   | ---                                                                                | NA         | -0.02 | 2.19 | -0.15 | 8.82E-01 | 9.52E-01 | -6.69 |
| 1454818_PM_at   | Gmeb2                                                                              | GMEB2      | -0.02 | 2.00 | -0.15 | 8.82E-01 | 9.52E-01 | -6.69 |
| 1416434_PM_at   | Bcl2l10                                                                            | BCL2L10    | 0.02  | 2.46 | 0.15  | 8.82E-01 | 9.52E-01 | -6.69 |
| 1425437_PM_a_at | Kcnk7                                                                              | KCNK7      | 0.02  | 2.39 | 0.15  | 8.82E-01 | 9.52E-01 | -6.69 |
| 1422189_PM_x_at | Tcrg-C1                                                                            | NA         | -0.03 | 2.73 | -0.15 | 8.82E-01 | 9.53E-01 | -6.69 |
| 1438623_PM_x_at | Gm9840 /// Rbx1                                                                    | RBX1       | 0.03  | 2.96 | 0.15  | 8.82E-01 | 9.53E-01 | -6.69 |
| 1425080_PM_at   | Zfp286                                                                             | ACO05324.4 | 0.05  | 2.51 | 0.15  | 8.82E-01 | 9.53E-01 | -6.69 |
| 1452876_PM_x_at | 2610044O15Rik8                                                                     | NA         | 0.01  | 2.34 | 0.15  | 8.82E-01 | 9.53E-01 | -6.69 |
| 1459417_PM_at   | ---                                                                                | NA         | 0.02  | 2.34 | 0.15  | 8.83E-01 | 9.53E-01 | -6.69 |
| 1417218_PM_at   | Calhm2                                                                             | CALHM2     | 0.02  | 2.81 | 0.15  | 8.83E-01 | 9.53E-01 | -6.69 |
| 1450093_PM_s_at | Zbtb7a                                                                             | ZBTB7A     | 0.02  | 2.85 | 0.15  | 8.83E-01 | 9.53E-01 | -6.69 |
| 1428046_PM_a_at | Zfx                                                                                | ZFY        | -0.02 | 2.27 | -0.15 | 8.83E-01 | 9.53E-01 | -6.69 |
| 1457388_PM_at   | ---                                                                                | NA         | 0.02  | 3.31 | 0.15  | 8.83E-01 | 9.53E-01 | -6.69 |
| 1460102_PM_at   | Clasp1                                                                             | CLASP1     | 0.02  | 2.59 | 0.15  | 8.83E-01 | 9.53E-01 | -6.69 |
| 1440663_PM_at   | ---                                                                                | NA         | 0.02  | 3.48 | 0.15  | 8.83E-01 | 9.53E-01 | -6.69 |
| 1453429_PM_at   | 9530057J20Rik ///<br>Gm29790 /// Gm31464 ///<br>Gm38710 /// Gm40470 ///<br>Gm40471 | NA         | 0.03  | 4.05 | 0.15  | 8.83E-01 | 9.53E-01 | -6.69 |
| 1442839_PM_at   | ---                                                                                | NA         | 0.05  | 2.45 | 0.15  | 8.83E-01 | 9.53E-01 | -6.69 |
| 1421188_PM_at   | Ccr2                                                                               | CCR2       | -0.02 | 2.15 | -0.15 | 8.83E-01 | 9.53E-01 | -6.69 |
| 1436785_PM_a_at | Sec14b3                                                                            | NA         | 0.05  | 2.72 | 0.15  | 8.83E-01 | 9.53E-01 | -6.69 |
| 1428329_PM_a_at | Ift80                                                                              | IFT80      | 0.02  | 2.24 | 0.15  | 8.83E-01 | 9.53E-01 | -6.69 |
| 1420522_PM_at   | Ccdc50                                                                             | CCDC50     | -0.05 | 3.26 | -0.15 | 8.83E-01 | 9.53E-01 | -6.69 |
| 1426214_PM_at   | Imp4                                                                               | IMP4       | -0.02 | 2.66 | -0.15 | 8.83E-01 | 9.53E-01 | -6.69 |

|                      |                         |          |       |       |       |          |          |       |
|----------------------|-------------------------|----------|-------|-------|-------|----------|----------|-------|
| AFFX-r2-Ec-bioD-3_at | ---                     | NA       | 0.02  | 11.16 | 0.15  | 8.83E-01 | 9.53E-01 | -6.69 |
| 1459728_PM_at        | Isy1                    | ISY1     | 0.04  | 3.81  | 0.15  | 8.83E-01 | 9.53E-01 | -6.69 |
| 1457381_PM_at        | Gm41313                 | NA       | -0.02 | 2.87  | -0.15 | 8.83E-01 | 9.53E-01 | -6.69 |
| 1430548_PM_at        | Brip1os                 | NA       | 0.02  | 1.91  | 0.15  | 8.83E-01 | 9.53E-01 | -6.69 |
| 1433903_PM_at        | Prps1Ib                 | NA       | 0.02  | 3.92  | 0.15  | 8.83E-01 | 9.53E-01 | -6.69 |
| 1441992_PM_at        | Rab14                   | RAB14    | -0.06 | 4.04  | -0.15 | 8.83E-01 | 9.53E-01 | -6.69 |
| 1455398_PM_at        | Lrrc8c                  | LRRC8C   | -0.04 | 3.53  | -0.15 | 8.83E-01 | 9.53E-01 | -6.69 |
| 1442103_PM_at        | ---                     | NA       | -0.01 | 2.00  | -0.15 | 8.83E-01 | 9.53E-01 | -6.69 |
| 1430021_PM_a_at      | Sae1                    | SAE1     | 0.04  | 3.48  | 0.15  | 8.83E-01 | 9.53E-01 | -6.69 |
| 1429527_PM_a_at      | Plscr1                  | NA       | -0.03 | 3.20  | -0.15 | 8.83E-01 | 9.53E-01 | -6.69 |
| 1422428_PM_at        | Acsbg1                  | ACSBG1   | -0.02 | 2.51  | -0.15 | 8.83E-01 | 9.53E-01 | -6.69 |
| 1446647_PM_at        | ---                     | NA       | -0.02 | 2.64  | -0.15 | 8.83E-01 | 9.53E-01 | -6.69 |
| 1442694_PM_at        | ---                     | NA       | -0.01 | 2.03  | -0.15 | 8.83E-01 | 9.53E-01 | -6.69 |
| 1443161_PM_at        | ---                     | NA       | 0.06  | 4.93  | 0.15  | 8.83E-01 | 9.53E-01 | -6.69 |
| 1457638_PM_x_at      | Rfc2                    | RFC2     | -0.06 | 3.36  | -0.15 | 8.83E-01 | 9.53E-01 | -6.69 |
| 1451450_PM_at        | Fam210b                 | FAM210B  | -0.03 | 3.12  | -0.15 | 8.84E-01 | 9.53E-01 | -6.69 |
| AFFX-BioC-3_at       | ---                     | NA       | 0.01  | 7.51  | 0.15  | 8.84E-01 | 9.53E-01 | -6.69 |
| 1449267_PM_at        | Chid1                   | CHID1    | 0.02  | 2.62  | 0.15  | 8.84E-01 | 9.53E-01 | -6.69 |
| 1457179_PM_at        | Nlrp4e                  | NLRP4    | 0.04  | 2.19  | 0.15  | 8.84E-01 | 9.53E-01 | -6.69 |
| 1435522_PM_a_at      | LOC102632739 ///Ost4    | OST4     | 0.06  | 4.44  | 0.15  | 8.84E-01 | 9.53E-01 | -6.69 |
| 1419045_PM_at        | Slc25a23                | SLC25A23 | -0.05 | 5.84  | -0.15 | 8.84E-01 | 9.53E-01 | -6.69 |
| 1417420_PM_at        | Ccnd1                   | CCND1    | -0.03 | 2.56  | -0.15 | 8.84E-01 | 9.53E-01 | -6.69 |
| 1429235_PM_at        | Galnt15                 | GALNT15  | -0.02 | 2.43  | -0.15 | 8.84E-01 | 9.53E-01 | -6.69 |
| 1459377_PM_at        | Palm2                   | PALM2    | 0.02  | 2.45  | 0.15  | 8.84E-01 | 9.53E-01 | -6.69 |
| 1453179_PM_at        | Acer3                   | ACER3    | 0.03  | 2.33  | 0.15  | 8.84E-01 | 9.53E-01 | -6.69 |
| 1439141_PM_at        | Gpr18                   | GPR18    | 0.02  | 2.43  | 0.15  | 8.84E-01 | 9.53E-01 | -6.69 |
| 1428732_PM_at        | 1700008J07Rik           | NA       | -0.05 | 2.59  | -0.15 | 8.84E-01 | 9.53E-01 | -6.69 |
| 1429402_PM_at        | GlT8d2                  | GLT8D2   | -0.02 | 2.82  | -0.15 | 8.84E-01 | 9.53E-01 | -6.69 |
| 1452238_PM_at        | Aefg1                   | AGFG1    | -0.05 | 3.88  | -0.15 | 8.84E-01 | 9.53E-01 | -6.69 |
| 1441881_PM_x_at      | Fam101a                 | RFLNA    | 0.04  | 3.33  | 0.15  | 8.84E-01 | 9.53E-01 | -6.69 |
| 1451901_PM_at        | Hltf                    | HLTF     | -0.02 | 2.24  | -0.15 | 8.84E-01 | 9.53E-01 | -6.69 |
| 1449257_PM_at        | Fam104a                 | FAM104A  | -0.04 | 3.72  | -0.15 | 8.84E-01 | 9.53E-01 | -6.69 |
| 1444684_PM_at        | ---                     | NA       | 0.02  | 1.96  | 0.15  | 8.84E-01 | 9.53E-01 | -6.69 |
| 1430599_PM_at        | ---                     | NA       | -0.02 | 2.73  | -0.15 | 8.84E-01 | 9.53E-01 | -6.69 |
| 1458197_PM_x_at      | Adam1a                  | NA       | -0.02 | 2.25  | -0.15 | 8.84E-01 | 9.53E-01 | -6.69 |
| 1421072_PM_at        | Irx5                    | IRX5     | 0.01  | 2.22  | 0.15  | 8.84E-01 | 9.53E-01 | -6.69 |
| 1436009_PM_at        | Usp30                   | USP30    | -0.04 | 4.20  | -0.15 | 8.84E-01 | 9.54E-01 | -6.69 |
| 1442816_PM_at        | Hs3st3b1                | NA       | -0.02 | 3.11  | -0.15 | 8.84E-01 | 9.54E-01 | -6.69 |
| 1456031_PM_at        | Tubb4b                  | TUBB4B   | -0.02 | 2.29  | -0.15 | 8.84E-01 | 9.54E-01 | -6.69 |
| 1455835_PM_at        | Rps16                   | NA       | -0.01 | 1.94  | -0.15 | 8.84E-01 | 9.54E-01 | -6.69 |
| 1460187_PM_at        | Sfrp1                   | SFRP1    | -0.01 | 1.84  | -0.15 | 8.84E-01 | 9.54E-01 | -6.69 |
| 1433348_PM_at        | 2810414N06Rik           | NA       | -0.02 | 2.26  | -0.15 | 8.84E-01 | 9.54E-01 | -6.69 |
| 1419842_PM_at        | Gm2682                  | NA       | 0.01  | 2.31  | 0.15  | 8.85E-01 | 9.54E-01 | -6.69 |
| 1426390_PM_a_at      | Arf1                    | ARF1     | -0.04 | 6.90  | -0.15 | 8.85E-01 | 9.54E-01 | -6.69 |
| 1454346_PM_at        | LOC102637419            | NA       | -0.01 | 2.42  | -0.15 | 8.85E-01 | 9.54E-01 | -6.69 |
| 1422378_PM_at        | Vmn1r40                 | NA       | 0.01  | 2.03  | 0.15  | 8.85E-01 | 9.54E-01 | -6.69 |
| 1430493_PM_at        | ---                     | NA       | -0.02 | 2.43  | -0.15 | 8.85E-01 | 9.54E-01 | -6.69 |
| 1459757_PM_x_at      | Cnot10                  | CNOT10   | -0.02 | 4.78  | -0.15 | 8.85E-01 | 9.54E-01 | -6.69 |
| 1438494_PM_at        | Hrh1                    | HRH1     | 0.02  | 2.85  | 0.15  | 8.85E-01 | 9.54E-01 | -6.69 |
| 1448202_PM_x_at      | LOC102641161 ///Prelid1 | PRELID1  | 0.04  | 4.14  | 0.15  | 8.85E-01 | 9.54E-01 | -6.69 |
| 1458670_PM_at        | Adarb2                  | ADARB2   | 0.05  | 2.76  | 0.15  | 8.85E-01 | 9.54E-01 | -6.69 |
| 1433916_PM_at        | Vamp3                   | VAMP3    | -0.04 | 4.08  | -0.15 | 8.85E-01 | 9.54E-01 | -6.69 |
| 1444898_PM_at        | ---                     | NA       | -0.02 | 2.71  | -0.15 | 8.85E-01 | 9.54E-01 | -6.69 |
| 1435804_PM_at        | Eif4e2                  | EIF4E2   | 0.06  | 2.44  | 0.15  | 8.85E-01 | 9.54E-01 | -6.69 |
| 1430223_PM_at        | ---                     | NA       | 0.02  | 2.62  | 0.15  | 8.85E-01 | 9.54E-01 | -6.69 |
| 1424260_PM_at        | Slc12a1                 | SLC12A1  | 0.02  | 2.44  | 0.15  | 8.85E-01 | 9.54E-01 | -6.69 |
| 1438592_PM_at        | ---                     | NA       | 0.02  | 2.25  | 0.15  | 8.85E-01 | 9.54E-01 | -6.69 |
| 1420552_PM_s_at      | Tsga8                   | NA       | 0.02  | 3.75  | 0.15  | 8.85E-01 | 9.54E-01 | -6.69 |
| 1422340_PM_a_at      | Actg2                   | ACTG2    | -0.01 | 2.12  | -0.15 | 8.85E-01 | 9.54E-01 | -6.69 |
| 1425425_PM_a_at      | Wif1                    | WIF1     | -0.01 | 2.04  | -0.15 | 8.85E-01 | 9.54E-01 | -6.69 |
| 1417703_PM_at        | Pvr2                    | NECTIN2  | 0.02  | 2.56  | 0.15  | 8.85E-01 | 9.54E-01 | -6.69 |
| 1457357_PM_at        | ---                     | NA       | 0.02  | 2.07  | 0.15  | 8.85E-01 | 9.54E-01 | -6.69 |
| 1417178_PM_at        | Gipc2                   | GIPC2    | 0.02  | 2.59  | 0.15  | 8.85E-01 | 9.54E-01 | -6.69 |
| 1429637_PM_at        | Fam198b                 | FAM198B  | 0.02  | 2.55  | 0.15  | 8.85E-01 | 9.54E-01 | -6.69 |
| 1444249_PM_at        | Fam81b                  | NA       | 0.02  | 2.87  | 0.15  | 8.85E-01 | 9.54E-01 | -6.69 |
| 1438123_PM_at        | ---                     | NA       | 0.04  | 2.78  | 0.15  | 8.85E-01 | 9.54E-01 | -6.69 |
| 1416072_PM_at        | Cd34                    | CD34     | 0.02  | 2.24  | 0.15  | 8.85E-01 | 9.54E-01 | -6.69 |
| 1440151_PM_s_at      | Edf1                    | EDF1     | -0.05 | 5.91  | -0.15 | 8.86E-01 | 9.54E-01 | -6.69 |
| 1427670_PM_a_at      | Tcf12                   | TCF12    | -0.05 | 3.35  | -0.15 | 8.86E-01 | 9.54E-01 | -6.69 |
| 1451217_PM_a_at      | Imm1p1l                 | IMMP1L   | -0.03 | 3.66  | -0.15 | 8.85E-01 | 9.54E-01 | -6.69 |
| 1444878_PM_at        | ---                     | NA       | -0.03 | 2.41  | -0.15 | 8.85E-01 | 9.54E-01 | -6.69 |
| 1430159_PM_at        | ---                     | NA       | -0.02 | 2.33  | -0.15 | 8.85E-01 | 9.54E-01 | -6.69 |
| 1438921_PM_at        | Atr                     | ATR      | -0.02 | 1.90  | -0.15 | 8.86E-01 | 9.54E-01 | -6.69 |
| 1421563_PM_at        | Atp7b                   | ATP7B    | 0.01  | 2.21  | 0.15  | 8.85E-01 | 9.54E-01 | -6.69 |

|                      |                  |            |       |       |       |          |          |       |
|----------------------|------------------|------------|-------|-------|-------|----------|----------|-------|
| 1449419_PM_at        | Dock8            | DOCK8      | 0.02  | 2.26  | 0.15  | 8.85E-01 | 9.54E-01 | -6.69 |
| 1451094_PM_at        | Ggt7             | GGT7       | 0.03  | 2.73  | 0.15  | 8.85E-01 | 9.54E-01 | -6.69 |
| 1452441_PM_at        | Phf3             | PHF3       | 0.06  | 5.92  | 0.15  | 8.85E-01 | 9.54E-01 | -6.69 |
| 1426571_PM_at        | Ano1             | ANO1       | 0.02  | 2.73  | 0.15  | 8.86E-01 | 9.54E-01 | -6.69 |
| 1435065_PM_x_at      | Vav2             | VAV2       | -0.02 | 3.52  | -0.15 | 8.86E-01 | 9.54E-01 | -6.69 |
| 1440768_PM_x_at      | 1700052122Rik    | NA         | 0.03  | 2.75  | 0.15  | 8.86E-01 | 9.54E-01 | -6.69 |
| 1447879_PM_x_at      | Wdr6             | WDR6       | -0.01 | 2.03  | -0.15 | 8.86E-01 | 9.54E-01 | -6.69 |
| 1458365_PM_at        | Gorab            | GORAB      | -0.01 | 2.36  | -0.15 | 8.86E-01 | 9.54E-01 | -6.69 |
| 1450403_PM_at        | Stat2            | STAT2      | 0.02  | 2.57  | 0.15  | 8.86E-01 | 9.54E-01 | -6.69 |
| 1417976_PM_at        | Ada              | ADA        | -0.01 | 2.17  | -0.15 | 8.86E-01 | 9.54E-01 | -6.69 |
| 1459620_PM_at        | ---              | NA         | 0.01  | 1.89  | 0.15  | 8.86E-01 | 9.54E-01 | -6.69 |
| 1458970_PM_at        | ---              | NA         | 0.02  | 2.23  | 0.15  | 8.86E-01 | 9.54E-01 | -6.69 |
| 1439565_PM_at        | Amer1            | AMER1      | -0.03 | 3.02  | -0.15 | 8.86E-01 | 9.54E-01 | -6.69 |
| AFFX-r2-Ec-bioD-5_at | ---              | NA         | 0.02  | 11.03 | 0.15  | 8.86E-01 | 9.54E-01 | -6.69 |
| 1444377_PM_at        | ---              | NA         | 0.01  | 2.34  | 0.15  | 8.86E-01 | 9.54E-01 | -6.69 |
| 1422021_PM_at        | Spry4            | SPRY4      | 0.01  | 2.16  | 0.15  | 8.86E-01 | 9.54E-01 | -6.69 |
| 1440863_PM_at        | ---              | NA         | 0.02  | 2.37  | 0.15  | 8.86E-01 | 9.54E-01 | -6.69 |
| 1444943_PM_at        | ---              | NA         | -0.01 | 2.39  | -0.15 | 8.86E-01 | 9.54E-01 | -6.69 |
| 1423285_PM_at        | Coch             | COCH       | 0.03  | 2.91  | 0.15  | 8.86E-01 | 9.54E-01 | -6.69 |
| 1419977_PM_s_at      | Esrp2            | ESRP2      | 0.03  | 5.43  | 0.15  | 8.86E-01 | 9.54E-01 | -6.69 |
| 1453901_PM_at        | Aldoat1          | ALDOA      | -0.02 | 2.09  | -0.15 | 8.87E-01 | 9.55E-01 | -6.69 |
| 1422688_PM_a_at      | Nras             | NRAS       | 0.04  | 3.49  | 0.15  | 8.87E-01 | 9.55E-01 | -6.69 |
| 1436963_PM_x_at      | Taf6l///Tmem179b | TAF6L      | 0.03  | 3.06  | 0.15  | 8.87E-01 | 9.55E-01 | -6.69 |
| 1424553_PM_at        | Hhat1            | HHATL      | 0.01  | 2.71  | 0.15  | 8.87E-01 | 9.55E-01 | -6.69 |
| 1441470_PM_at        | Wdpcp            | NA         | 0.01  | 1.95  | 0.15  | 8.87E-01 | 9.55E-01 | -6.69 |
| 1436238_PM_at        | Lg3              | NA         | 0.02  | 3.08  | 0.15  | 8.87E-01 | 9.55E-01 | -6.69 |
| 1451653_PM_a_at      | Fam161a          | FAM161A    | 0.02  | 2.63  | 0.15  | 8.87E-01 | 9.55E-01 | -6.69 |
| 1437525_PM_a_at      | Polr3a           | POLR3A     | -0.09 | 4.21  | -0.15 | 8.87E-01 | 9.55E-01 | -6.69 |
| 1426687_PM_at        | Map3k3           | NA         | -0.04 | 2.48  | -0.15 | 8.87E-01 | 9.55E-01 | -6.69 |
| 1416976_PM_at        | Stam2            | STAM2      | -0.04 | 2.77  | -0.15 | 8.87E-01 | 9.55E-01 | -6.69 |
| 1457636_PM_x_at      | ---              | NA         | -0.03 | 6.22  | -0.15 | 8.87E-01 | 9.55E-01 | -6.69 |
| 1425687_PM_at        | Cflar            | CFLAR      | -0.02 | 2.42  | -0.15 | 8.87E-01 | 9.55E-01 | -6.69 |
| 1425166_PM_at        | Rbl1             | RBL1       | -0.02 | 2.36  | -0.15 | 8.87E-01 | 9.55E-01 | -6.69 |
| 1450292_PM_a_at      | Hormad1          | HORMAD1    | -0.01 | 2.03  | -0.15 | 8.87E-01 | 9.55E-01 | -6.69 |
| 1447718_PM_at        | Pde4b            | PDE4B      | 0.01  | 1.86  | 0.15  | 8.87E-01 | 9.55E-01 | -6.69 |
| 1417806_PM_at        | Popdc2           | POPCDC2    | 0.02  | 2.36  | 0.15  | 8.87E-01 | 9.55E-01 | -6.69 |
| 1458187_PM_at        | Zfp142           | ZNF142     | 0.02  | 2.58  | 0.15  | 8.87E-01 | 9.55E-01 | -6.69 |
| 1419087_PM_s_at      | Sf3a1            | SF3A1      | 0.02  | 3.12  | 0.15  | 8.87E-01 | 9.55E-01 | -6.69 |
| 1435295_PM_at        | Dopey1           | DOPEY1     | 0.06  | 3.35  | 0.15  | 8.87E-01 | 9.55E-01 | -6.69 |
| 1452607_PM_at        | Vma21            | VMA21      | 0.06  | 3.76  | 0.15  | 8.87E-01 | 9.55E-01 | -6.69 |
| 1452869_PM_at        | Prpf38b          | PRPF38B    | 0.07  | 4.44  | 0.15  | 8.87E-01 | 9.55E-01 | -6.69 |
| 1420195_PM_at        | ---              | NA         | -0.02 | 2.23  | -0.15 | 8.87E-01 | 9.55E-01 | -6.69 |
| 1422976_PM_x_at      | Ndufa7           | NDUFA7     | 0.02  | 2.28  | 0.15  | 8.87E-01 | 9.55E-01 | -6.69 |
| 1418135_PM_at        | Aff1             | AFF1       | -0.04 | 3.37  | -0.15 | 8.87E-01 | 9.55E-01 | -6.69 |
| 1424466_PM_at        | Ipo9             | IPO9       | -0.04 | 6.83  | -0.15 | 8.87E-01 | 9.55E-01 | -6.69 |
| 1429091_PM_at        | 1600002K03Rik    | C19orf24   | -0.02 | 3.37  | -0.15 | 8.87E-01 | 9.55E-01 | -6.69 |
| 1431851_PM_at        | Prame            | NA         | -0.02 | 2.32  | -0.15 | 8.87E-01 | 9.55E-01 | -6.69 |
| 1424337_PM_at        | Srx15            | SNX15      | -0.01 | 3.09  | -0.15 | 8.87E-01 | 9.55E-01 | -6.69 |
| 1439935_PM_at        | Oosp2            | OOSP2      | -0.01 | 2.31  | -0.15 | 8.87E-01 | 9.55E-01 | -6.69 |
| 1441987_PM_at        | Mbd5             | MBD5       | 0.03  | 2.48  | 0.15  | 8.87E-01 | 9.55E-01 | -6.69 |
| 1421761_PM_a_at      | Barx2            | BARX2      | 0.01  | 2.17  | 0.14  | 8.88E-01 | 9.55E-01 | -6.69 |
| 1446119_PM_at        | Gm17733          | NA         | 0.02  | 2.37  | 0.15  | 8.87E-01 | 9.55E-01 | -6.69 |
| 1437260_PM_at        | Mmrn1            | MMRN1      | -0.02 | 2.23  | -0.14 | 8.88E-01 | 9.55E-01 | -6.69 |
| 1457551_PM_at        | ---              | NA         | -0.01 | 2.12  | -0.14 | 8.88E-01 | 9.55E-01 | -6.69 |
| 1424140_PM_at        | Gale             | GALE       | -0.02 | 2.56  | -0.14 | 8.88E-01 | 9.55E-01 | -6.69 |
| 1432664_PM_at        | ---              | NA         | -0.02 | 2.54  | -0.14 | 8.88E-01 | 9.55E-01 | -6.69 |
| 1426117_PM_a_at      | Slc19a2          | SLC19A2    | 0.01  | 2.52  | 0.14  | 8.88E-01 | 9.55E-01 | -6.69 |
| 1425725_PM_s_at      | Ppp2r5c          | PPP2R5C    | 0.01  | 2.24  | 0.14  | 8.88E-01 | 9.55E-01 | -6.69 |
| 1422922_PM_at        | Recql4           | RECQL4     | 0.01  | 2.78  | 0.14  | 8.88E-01 | 9.55E-01 | -6.69 |
| 1441867_PM_x_at      | Cep128           | CEP128     | 0.02  | 2.19  | 0.14  | 8.88E-01 | 9.55E-01 | -6.69 |
| 1418347_PM_at        | Ccdc22           | CCDC22     | 0.03  | 2.84  | 0.14  | 8.88E-01 | 9.55E-01 | -6.69 |
| 1436548_PM_at        | Lym9             | ACO05697.1 | 0.04  | 3.78  | 0.14  | 8.88E-01 | 9.55E-01 | -6.69 |
| 1442584_PM_at        | ---              | NA         | 0.03  | 2.92  | 0.14  | 8.88E-01 | 9.55E-01 | -6.69 |
| 1437504_PM_at        | Slc2             | SLA2       | -0.02 | 2.26  | -0.14 | 8.88E-01 | 9.55E-01 | -6.69 |
| 1418097_PM_a_at      | Crlf2            | CRLF2      | -0.02 | 3.16  | -0.14 | 8.88E-01 | 9.55E-01 | -6.69 |
| 1441258_PM_at        | AF529169         | KIAA1024   | 0.01  | 2.33  | 0.14  | 8.88E-01 | 9.55E-01 | -6.69 |
| 1427155_PM_at        | Fchsd1           | FCHSD1     | 0.02  | 2.69  | 0.14  | 8.88E-01 | 9.55E-01 | -6.69 |
| 1451775_PM_s_at      | Il13ra1          | IL13RA1    | 0.03  | 2.47  | 0.14  | 8.88E-01 | 9.55E-01 | -6.69 |
| 1415888_PM_at        | Hdgf             | HDGF       | 0.03  | 4.01  | 0.14  | 8.88E-01 | 9.55E-01 | -6.69 |
| 1442125_PM_at        | Krit1            | KRIT1      | 0.03  | 2.41  | 0.14  | 8.88E-01 | 9.55E-01 | -6.69 |
| 1460716_PM_a_at      | Cbfb             | CBFB       | 0.08  | 3.67  | 0.14  | 8.88E-01 | 9.55E-01 | -6.69 |
| 1415717_PM_at        | Rnf220           | RNF220     | -0.03 | 4.67  | -0.14 | 8.88E-01 | 9.55E-01 | -6.69 |
| 1428484_PM_at        | Osbpl3           | OSBPL3     | 0.02  | 2.77  | 0.14  | 8.89E-01 | 9.55E-01 | -6.69 |
| 1438239_PM_at        | Mid1             | MID1       | -0.12 | 5.93  | -0.14 | 8.89E-01 | 9.56E-01 | -6.69 |
| 1428112_PM_at        | Manf             | MANF       | -0.04 | 4.04  | -0.14 | 8.89E-01 | 9.56E-01 | -6.69 |

|                 |                                                                                  |          |       |      |       |          |          |       |
|-----------------|----------------------------------------------------------------------------------|----------|-------|------|-------|----------|----------|-------|
| 1460602_PM_at   | Dlc1                                                                             | DLC1     | 0.04  | 6.66 | 0.14  | 8.89E-01 | 9.56E-01 | -6.69 |
| 1431327_PM_at   | Vps13a                                                                           | NA       | -0.02 | 4.86 | -0.14 | 8.89E-01 | 9.56E-01 | -6.69 |
| 1416760_PM_at   | Galnt16                                                                          | GALNT16  | -0.02 | 3.07 | -0.14 | 8.89E-01 | 9.56E-01 | -6.69 |
| 1453490_PM_at   | Sass6                                                                            | SASS6    | 0.01  | 2.59 | 0.14  | 8.89E-01 | 9.56E-01 | -6.69 |
| 1449952_PM_s_at | Prss30                                                                           | NA       | 0.02  | 2.15 | 0.14  | 8.89E-01 | 9.56E-01 | -6.69 |
| 1457068_PM_at   | Naaladl1                                                                         | NAALADL1 | 0.02  | 2.83 | 0.14  | 8.89E-01 | 9.56E-01 | -6.69 |
| 1450103_PM_a_at | Cyth2                                                                            | CYTH2    | -0.03 | 3.20 | -0.14 | 8.89E-01 | 9.56E-01 | -6.69 |
| 1459665_PM_s_at | Mrv1                                                                             | MRV1     | -0.03 | 4.36 | -0.14 | 8.89E-01 | 9.56E-01 | -6.69 |
| 1426053_PM_a_at | Xpr1                                                                             | XPR1     | -0.05 | 2.90 | -0.14 | 8.89E-01 | 9.56E-01 | -6.69 |
| 1434975_PM_x_at | Pisd-ps3                                                                         | NA       | -0.04 | 9.60 | -0.14 | 8.89E-01 | 9.56E-01 | -6.69 |
| 1435238_PM_x_at | 2310009A05Rik                                                                    | NA       | -0.03 | 3.11 | -0.14 | 8.89E-01 | 9.56E-01 | -6.69 |
| 1436501_PM_at   | Mtus1                                                                            | MTUS1    | -0.02 | 2.26 | -0.14 | 8.89E-01 | 9.56E-01 | -6.69 |
| 1418608_PM_at   | Calml3                                                                           | CALML3   | 0.01  | 2.27 | 0.14  | 8.89E-01 | 9.56E-01 | -6.69 |
| 1456822_PM_at   | Rad23b                                                                           | RAD23B   | 0.01  | 2.08 | 0.14  | 8.89E-01 | 9.56E-01 | -6.69 |
| 1441079_PM_at   | Mbd4                                                                             | MBD4     | 0.02  | 2.40 | 0.14  | 8.89E-01 | 9.56E-01 | -6.69 |
| 1428212_PM_x_at | LOC102641215 /// Rpl31 /// Rpl31-ps12 /// Rpl31-ps17 /// Rpl31-ps8 /// Rpl31-ps9 | NA       | 0.05  | 8.14 | 0.14  | 8.89E-01 | 9.56E-01 | -6.69 |
| 1446430_PM_at   | ---                                                                              | NA       | 0.04  | 2.60 | 0.14  | 8.89E-01 | 9.56E-01 | -6.69 |
| 1434364_PM_at   | Map3k14                                                                          | MAP3K14  | -0.02 | 2.69 | -0.14 | 8.89E-01 | 9.56E-01 | -6.69 |
| 1440808_PM_x_at | Cd163l1                                                                          | SCART1   | -0.02 | 2.17 | -0.14 | 8.89E-01 | 9.56E-01 | -6.69 |
| 1454204_PM_at   | ---                                                                              | NA       | 0.03  | 2.43 | 0.14  | 8.89E-01 | 9.56E-01 | -6.69 |
| 1459850_PM_x_at | Glr3                                                                             | GLRB     | -0.05 | 7.99 | -0.14 | 8.89E-01 | 9.56E-01 | -6.69 |
| 1445496_PM_at   | Auh                                                                              | AUH      | -0.02 | 2.22 | -0.14 | 8.89E-01 | 9.56E-01 | -6.69 |
| 1458046_PM_at   | ---                                                                              | NA       | -0.01 | 2.12 | -0.14 | 8.89E-01 | 9.56E-01 | -6.69 |
| 1457799_PM_at   | Kcns3                                                                            | KCNS3    | 0.02  | 2.12 | 0.14  | 8.89E-01 | 9.56E-01 | -6.69 |
| 1425844_PM_a_at | Rngt1                                                                            | RNGTT    | 0.03  | 2.69 | 0.14  | 8.89E-01 | 9.56E-01 | -6.69 |
| 1434928_PM_at   | Gas2l1                                                                           | GAS2L1   | 0.04  | 4.47 | 0.14  | 8.90E-01 | 9.56E-01 | -6.69 |
| 1457576_PM_at   | ---                                                                              | NA       | 0.02  | 3.04 | 0.14  | 8.90E-01 | 9.56E-01 | -6.69 |
| 1422264_PM_s_at | Klf9                                                                             | KLF9     | 0.03  | 2.35 | 0.14  | 8.90E-01 | 9.56E-01 | -6.69 |
| 1416538_PM_at   | Siae                                                                             | SIAE     | 0.04  | 2.51 | 0.14  | 8.90E-01 | 9.56E-01 | -6.69 |
| 1440345_PM_at   | Ai450353                                                                         | NA       | 0.02  | 2.44 | 0.14  | 8.90E-01 | 9.56E-01 | -6.69 |
| 1427251_PM_at   | Atp2a2                                                                           | ATP2A2   | 0.02  | 2.85 | 0.14  | 8.90E-01 | 9.56E-01 | -6.69 |
| 1416768_PM_at   | Smim14                                                                           | SMIM14   | 0.04  | 3.98 | 0.14  | 8.90E-01 | 9.56E-01 | -6.69 |
| 1459123_PM_at   | ---                                                                              | NA       | 0.01  | 2.28 | 0.14  | 8.90E-01 | 9.56E-01 | -6.69 |
| 1445016_PM_at   | ---                                                                              | NA       | -0.01 | 2.14 | -0.14 | 8.90E-01 | 9.56E-01 | -6.69 |
| 1427124_PM_at   | 4932416H05Rik                                                                    | NA       | -0.01 | 2.32 | -0.14 | 8.90E-01 | 9.56E-01 | -6.69 |
| 1430455_PM_at   | Ofir701                                                                          | OR2AG2   | -0.02 | 2.84 | -0.14 | 8.90E-01 | 9.56E-01 | -6.69 |
| 1436524_PM_at   | 4833438C02Rik                                                                    | NA       | -0.03 | 2.81 | -0.14 | 8.90E-01 | 9.56E-01 | -6.69 |
| 1424419_PM_at   | Lrrc14                                                                           | LRRC14   | -0.02 | 2.85 | -0.14 | 8.90E-01 | 9.56E-01 | -6.69 |
| 1434420_PM_x_at | Tommm2                                                                           | TOMMM2   | -0.02 | 9.08 | -0.14 | 8.90E-01 | 9.56E-01 | -6.69 |
| 1419906_PM_at   | Hpgd                                                                             | NA       | 0.03  | 2.63 | 0.14  | 8.90E-01 | 9.56E-01 | -6.69 |
| 1436218_PM_at   | Lgr6                                                                             | LGR6     | 0.02  | 2.35 | 0.14  | 8.90E-01 | 9.56E-01 | -6.69 |
| 1426218_PM_at   | Glccl1                                                                           | GLCC1    | -0.03 | 2.62 | -0.14 | 8.90E-01 | 9.56E-01 | -6.69 |
| 1429361_PM_at   | Pmch                                                                             | PMCH     | -0.05 | 2.46 | -0.14 | 8.90E-01 | 9.56E-01 | -6.69 |
| 1451722_PM_s_at | Smyd5                                                                            | SMYD5    | -0.03 | 2.87 | -0.14 | 8.90E-01 | 9.56E-01 | -6.69 |
| 1432893_PM_at   | 9130011L11Rik                                                                    | NA       | -0.01 | 2.45 | -0.14 | 8.90E-01 | 9.56E-01 | -6.69 |
| 1446695_PM_at   | ---                                                                              | NA       | -0.01 | 2.06 | -0.14 | 8.91E-01 | 9.56E-01 | -6.69 |
| 1447733_PM_x_at | Tatdn3                                                                           | TATDN3   | 0.01  | 2.11 | 0.14  | 8.90E-01 | 9.56E-01 | -6.69 |
| 1420770_PM_at   | Klk1b24                                                                          | KLK3     | 0.01  | 2.32 | 0.14  | 8.90E-01 | 9.56E-01 | -6.69 |
| 1441504_PM_at   | Rbm44                                                                            | RBM44    | 0.02  | 2.24 | 0.14  | 8.90E-01 | 9.56E-01 | -6.69 |
| 1444822_PM_at   | ---                                                                              | NA       | 0.02  | 3.15 | 0.14  | 8.91E-01 | 9.56E-01 | -6.69 |
| 1417352_PM_s_at | Snrpa1                                                                           | SNRPA1   | 0.02  | 3.02 | 0.14  | 8.91E-01 | 9.56E-01 | -6.69 |
| 1432129_PM_a_at | Prrx1                                                                            | PRRX1    | 0.02  | 2.13 | 0.14  | 8.90E-01 | 9.56E-01 | -6.69 |
| 1453105_PM_at   | Zfp263                                                                           | ZNF263   | 0.03  | 2.97 | 0.14  | 8.91E-01 | 9.56E-01 | -6.69 |
| 1460324_PM_at   | Dnmt3a                                                                           | DNMT3A   | 0.03  | 5.49 | 0.14  | 8.90E-01 | 9.56E-01 | -6.69 |
| 1447308_PM_at   | Cers5                                                                            | CERS5    | -0.02 | 2.48 | -0.14 | 8.91E-01 | 9.56E-01 | -6.69 |
| 1441918_PM_x_at | Serp1nb6e                                                                        | SERP1NB6 | 0.02  | 2.32 | 0.14  | 8.91E-01 | 9.56E-01 | -6.69 |
| 1459081_PM_at   | ---                                                                              | NA       | 0.02  | 2.64 | 0.14  | 8.91E-01 | 9.56E-01 | -6.69 |
| 1441379_PM_at   | AU045094                                                                         | NA       | 0.02  | 2.12 | 0.14  | 8.91E-01 | 9.56E-01 | -6.69 |
| 1422882_PM_at   | Sypl                                                                             | SYPL1    | -0.04 | 2.91 | -0.14 | 8.91E-01 | 9.56E-01 | -6.69 |
| 1447428_PM_at   | ---                                                                              | NA       | -0.01 | 2.24 | -0.14 | 8.91E-01 | 9.56E-01 | -6.69 |
| 1440528_PM_at   | ---                                                                              | NA       | 0.01  | 2.04 | 0.14  | 8.91E-01 | 9.56E-01 | -6.69 |
| 1452048_PM_at   | Mrpl12                                                                           | MRPL12   | 0.02  | 2.56 | 0.14  | 8.91E-01 | 9.56E-01 | -6.69 |
| 1459629_PM_at   | ---                                                                              | NA       | -0.01 | 2.07 | -0.14 | 8.91E-01 | 9.56E-01 | -6.69 |
| 1453279_PM_x_at | Krt76                                                                            | KRT76    | 0.01  | 2.58 | 0.14  | 8.91E-01 | 9.56E-01 | -6.69 |
| 1438057_PM_at   | Gria2                                                                            | GRIA2    | 0.02  | 2.69 | 0.14  | 8.91E-01 | 9.56E-01 | -6.69 |
| 1456771_PM_at   | Zer1                                                                             | ZER1     | 0.05  | 4.92 | 0.14  | 8.91E-01 | 9.56E-01 | -6.69 |
| 1420677_PM_x_at | Lce1a1                                                                           | NA       | 0.01  | 2.23 | 0.14  | 8.91E-01 | 9.57E-01 | -6.69 |
| 1427917_PM_s_at | Ssbp3                                                                            | SSBP3    | -0.03 | 5.68 | -0.14 | 8.91E-01 | 9.57E-01 | -6.69 |
| 1432595_PM_at   | 4933413122Rik                                                                    | NA       | -0.02 | 2.24 | -0.14 | 8.91E-01 | 9.57E-01 | -6.69 |
| 1441688_PM_at   | ---                                                                              | NA       | -0.02 | 2.46 | -0.14 | 8.91E-01 | 9.57E-01 | -6.69 |
| 1437161_PM_x_at | Rbpms                                                                            | RBPMS    | -0.03 | 2.97 | -0.14 | 8.91E-01 | 9.57E-01 | -6.69 |
| 1436105_PM_at   | Ccdc74a                                                                          | CCDC74B  | -0.01 | 2.43 | -0.14 | 8.91E-01 | 9.57E-01 | -6.69 |



|                 |               |            |       |      |       |          |          |       |
|-----------------|---------------|------------|-------|------|-------|----------|----------|-------|
| 1434354_PM_at   | Maob          | MAOB       | -0.04 | 2.54 | -0.14 | 8.91E-01 | 9.57E-01 | -6.69 |
| 1445654_PM_at   | ---           | NA         | -0.03 | 3.09 | -0.14 | 8.91E-01 | 9.57E-01 | -6.69 |
| 1438672_PM_at   | Parvb         | PARVB      | -0.02 | 3.59 | -0.14 | 8.91E-01 | 9.57E-01 | -6.69 |
| 1456792_PM_at   | Tbc1d2        | TBC1D2     | -0.01 | 2.45 | -0.14 | 8.91E-01 | 9.57E-01 | -6.69 |
| 1418914_PM_s_at | Bhmt2         | BHMT2      | -0.01 | 2.24 | -0.14 | 8.91E-01 | 9.57E-01 | -6.69 |
| 1454112_PM_a_at | Haus2         | HAUS2      | -0.03 | 2.23 | -0.14 | 8.91E-01 | 9.57E-01 | -6.69 |
| 1416199_PM_at   | Kifc3         | KIFC3      | -0.02 | 2.46 | -0.14 | 8.91E-01 | 9.57E-01 | -6.69 |
| 1420544_PM_at   | Gcsam         | GCSAM      | -0.02 | 2.25 | -0.14 | 8.91E-01 | 9.57E-01 | -6.69 |
| 1426281_PM_at   | Catsper1      | NA         | 0.01  | 2.12 | 0.14  | 8.92E-01 | 9.57E-01 | -6.69 |
| 1430052_PM_at   | Ccdc187       | NA         | 0.02  | 2.84 | 0.14  | 8.91E-01 | 9.57E-01 | -6.69 |
| 1418260_PM_at   | Hunk          | HUNK       | 0.03  | 4.30 | 0.14  | 8.91E-01 | 9.57E-01 | -6.69 |
| 1452243_PM_at   | Kcnj14        | KCNJ14     | 0.02  | 3.03 | 0.14  | 8.92E-01 | 9.57E-01 | -6.69 |
| 1419898_PM_s_at | Zc3h7a        | ZC3H7A     | 0.06  | 2.82 | 0.14  | 8.92E-01 | 9.57E-01 | -6.69 |
| 1416164_PM_at   | Fbln5         | FBLN5      | -0.02 | 2.97 | -0.14 | 8.92E-01 | 9.57E-01 | -6.69 |
| 1430202_PM_at   | 1700108F19Rik | NA         | 0.01  | 2.21 | 0.14  | 8.92E-01 | 9.57E-01 | -6.69 |
| 1424342_PM_at   | Fyttt1        | FYTTT1     | -0.05 | 4.08 | -0.14 | 8.92E-01 | 9.57E-01 | -6.69 |
| 1430959_PM_at   | Spaca6        | SPACA6     | 0.04  | 2.60 | 0.14  | 8.92E-01 | 9.57E-01 | -6.69 |
| 1453591_PM_at   | Tmem242       | TMEM242    | -0.04 | 2.34 | -0.14 | 8.92E-01 | 9.57E-01 | -6.69 |
| 1457305_PM_at   | Btrc          | BTRC       | -0.03 | 6.29 | -0.14 | 8.92E-01 | 9.57E-01 | -6.69 |
| 1419150_PM_at   | Myf6          | MYF6       | 0.01  | 2.69 | 0.14  | 8.92E-01 | 9.57E-01 | -6.69 |
| 1431192_PM_at   | Sorbs2        | SORBS2     | 0.02  | 2.44 | 0.14  | 8.92E-01 | 9.57E-01 | -6.69 |
| 1444801_PM_at   | 2900041M22Rik | NA         | 0.02  | 2.20 | 0.14  | 8.92E-01 | 9.57E-01 | -6.69 |
| 1419510_PM_at   | Ces1e         | CES1       | 0.02  | 2.75 | 0.14  | 8.92E-01 | 9.57E-01 | -6.69 |
| 1431343_PM_at   | Gm10044       | NA         | 0.02  | 2.66 | 0.14  | 8.92E-01 | 9.57E-01 | -6.69 |
| 1444902_PM_at   | ---           | NA         | 0.03  | 2.66 | 0.14  | 8.92E-01 | 9.57E-01 | -6.69 |
| 1449518_PM_at   | Qpctl         | QPCTL      | 0.05  | 3.15 | 0.14  | 8.92E-01 | 9.57E-01 | -6.69 |
| 1437855_PM_at   | Map4          | MAP4       | -0.04 | 6.82 | -0.14 | 8.92E-01 | 9.57E-01 | -6.69 |
| 1458158_PM_at   | Tbc1d31       | TBC1D31    | 0.02  | 2.25 | 0.14  | 8.92E-01 | 9.57E-01 | -6.69 |
| 1430521_PM_s_at | Cpne8         | CPNE8      | 0.01  | 2.07 | 0.14  | 8.92E-01 | 9.57E-01 | -6.69 |
| 1437699_PM_at   | ---           | NA         | 0.03  | 2.76 | 0.14  | 8.92E-01 | 9.57E-01 | -6.69 |
| 1451044_PM_at   | Gemin2        | GEMIN2     | -0.02 | 2.34 | -0.14 | 8.92E-01 | 9.57E-01 | -6.69 |
| 1448341_PM_a_at | Stxbp2        | STXBP2     | -0.02 | 2.62 | -0.14 | 8.92E-01 | 9.57E-01 | -6.69 |
| 1458976_PM_at   | C230035116Rik | NA         | 0.01  | 2.46 | 0.14  | 8.92E-01 | 9.57E-01 | -6.69 |
| 1439518_PM_at   | Mmrn2         | MMRN2      | 0.02  | 2.29 | 0.14  | 8.92E-01 | 9.57E-01 | -6.69 |
| 1460363_PM_at   | Tnrc6c        | TNRC6C     | 0.02  | 2.94 | 0.14  | 8.93E-01 | 9.57E-01 | -6.69 |
| 1450863_PM_a_at | Dcl1          | DCLK1      | -0.03 | 6.37 | -0.14 | 8.93E-01 | 9.57E-01 | -6.69 |
| 1426382_PM_at   | Ppm1b         | PPM1B      | -0.04 | 5.70 | -0.14 | 8.93E-01 | 9.57E-01 | -6.69 |
| 1449784_PM_at   | ---           | NA         | 0.01  | 2.06 | 0.14  | 8.93E-01 | 9.58E-01 | -6.69 |
| 1433909_PM_at   | Syt17         | SYT17      | 0.06  | 3.77 | 0.14  | 8.93E-01 | 9.58E-01 | -6.69 |
| 1431229_PM_at   | Anks1b        | ANKS1B     | -0.05 | 3.56 | -0.14 | 8.93E-01 | 9.58E-01 | -6.69 |
| 1425461_PM_at   | Fbxw11        | FBXW11     | 0.08  | 3.63 | 0.14  | 8.93E-01 | 9.58E-01 | -6.69 |
| 1448693_PM_at   | Cptp          | CPTP       | -0.02 | 2.77 | -0.14 | 8.93E-01 | 9.58E-01 | -6.69 |
| 1439394_PM_x_at | Cdc20         | CDC20      | 0.01  | 2.47 | 0.14  | 8.93E-01 | 9.58E-01 | -6.69 |
| 1453768_PM_a_at | Fam110a       | FAM110A    | 0.02  | 2.62 | 0.14  | 8.93E-01 | 9.58E-01 | -6.69 |
| 1448907_PM_at   | Thop1         | THOP1      | 0.02  | 2.93 | 0.14  | 8.93E-01 | 9.58E-01 | -6.69 |
| 1422252_PM_a_at | Cdc25c        | CDC25C     | -0.02 | 2.83 | -0.14 | 8.93E-01 | 9.58E-01 | -6.69 |
| 1454749_PM_at   | Pcnt          | PCNT       | -0.02 | 2.47 | -0.14 | 8.93E-01 | 9.58E-01 | -6.69 |
| 1432360_PM_a_at | Tmtc4         | TMTC4      | 0.02  | 3.22 | 0.14  | 8.93E-01 | 9.58E-01 | -6.69 |
| 1440334_PM_at   | ---           | NA         | 0.03  | 3.28 | 0.14  | 8.93E-01 | 9.58E-01 | -6.69 |
| 1458949_PM_at   | 5330434G04Rik | NA         | 0.03  | 2.91 | 0.14  | 8.93E-01 | 9.58E-01 | -6.69 |
| 1416236_PM_a_at | Mpz2          | MPZL2      | -0.09 | 3.91 | -0.14 | 8.93E-01 | 9.58E-01 | -6.69 |
| 1420289_PM_at   | ---           | NA         | 0.04  | 2.98 | 0.14  | 8.93E-01 | 9.58E-01 | -6.69 |
| 1452358_PM_at   | Rai2          | RAI2       | -0.06 | 3.43 | -0.14 | 8.93E-01 | 9.58E-01 | -6.69 |
| 1454913_PM_at   | 9930104L06Rik | NA         | -0.04 | 2.93 | -0.14 | 8.93E-01 | 9.58E-01 | -6.69 |
| 1426180_PM_a_at | Smr2          | NA         | -0.01 | 2.16 | -0.14 | 8.93E-01 | 9.58E-01 | -6.69 |
| 1455051_PM_at   | Rnf31         | AL136295.5 | 0.02  | 2.26 | 0.14  | 8.93E-01 | 9.58E-01 | -6.69 |
| 1458757_PM_at   | ---           | NA         | 0.03  | 2.07 | 0.14  | 8.93E-01 | 9.58E-01 | -6.69 |
| 1443177_PM_at   | Gm4132        | NA         | 0.04  | 2.95 | 0.14  | 8.93E-01 | 9.58E-01 | -6.69 |
| 1418463_PM_at   | Pik3r2        | PIK3R2     | -0.02 | 2.65 | -0.14 | 8.94E-01 | 9.58E-01 | -6.69 |
| 1438163_PM_x_at | Rhbdd2        | NA         | -0.01 | 3.57 | -0.14 | 8.94E-01 | 9.58E-01 | -6.69 |
| 1456932_PM_at   | Gm5113        | NA         | -0.01 | 2.12 | -0.14 | 8.94E-01 | 9.58E-01 | -6.69 |
| 1420182_PM_x_at | Dmrt3         | DMRT3      | -0.01 | 2.37 | -0.14 | 8.94E-01 | 9.58E-01 | -6.69 |
| 1447633_PM_x_at | ---           | NA         | -0.01 | 1.78 | -0.14 | 8.94E-01 | 9.58E-01 | -6.69 |
| 1431199_PM_at   | Ggnbp1        | NA         | 0.01  | 2.31 | 0.14  | 8.94E-01 | 9.58E-01 | -6.69 |
| 1422423_PM_at   | Magea7-ps     | NA         | 0.01  | 2.39 | 0.14  | 8.94E-01 | 9.58E-01 | -6.69 |
| 1443832_PM_s_at | Sdpr          | CAVIN2     | 0.02  | 2.15 | 0.14  | 8.94E-01 | 9.58E-01 | -6.69 |
| 1421684_PM_at   | Ctsl3         | CTSL       | 0.02  | 2.45 | 0.14  | 8.94E-01 | 9.58E-01 | -6.69 |
| 1437587_PM_at   | ---           | NA         | 0.04  | 2.79 | 0.14  | 8.94E-01 | 9.58E-01 | -6.69 |
| 1422208_PM_a_at | Gnb5          | NA         | 0.04  | 3.47 | 0.14  | 8.94E-01 | 9.58E-01 | -6.69 |
| 1417292_PM_at   | Ifi47         | NA         | -0.02 | 2.52 | -0.14 | 8.94E-01 | 9.58E-01 | -6.69 |
| 1422697_PM_s_at | Jarid2        | JARID2     | -0.01 | 2.59 | -0.14 | 8.94E-01 | 9.58E-01 | -6.69 |
| 1417844_PM_at   | Med4          | MED4       | 0.03  | 5.19 | 0.14  | 8.94E-01 | 9.58E-01 | -6.69 |
| 1431906_PM_at   | 2700068H02Rik | NA         | -0.02 | 2.17 | -0.14 | 8.94E-01 | 9.58E-01 | -6.69 |
| 1425670_PM_at   | Rfxank        | RFXANK     | -0.01 | 2.48 | -0.14 | 8.94E-01 | 9.58E-01 | -6.69 |
| 1452615_PM_s_at | Trpt1         | TRPT1      | 0.03  | 2.51 | 0.14  | 8.94E-01 | 9.58E-01 | -6.69 |

|                 |                              |            |       |      |       |          |          |       |
|-----------------|------------------------------|------------|-------|------|-------|----------|----------|-------|
| 1435053_PM_s_at | Plekhh1                      | PLEKHH1    | -0.01 | 2.11 | -0.14 | 8.94E-01 | 9.58E-01 | -6.69 |
| 1452577_PM_at   | ---                          | NA         | 0.01  | 2.34 | 0.14  | 8.94E-01 | 9.58E-01 | -6.69 |
| 1433720_PM_s_at | Chchd10                      | CHCHD10    | -0.02 | 3.08 | -0.14 | 8.94E-01 | 9.58E-01 | -6.69 |
| 1436421_PM_s_at | Arpc5l                       | ARPC5L     | -0.07 | 6.55 | -0.14 | 8.94E-01 | 9.58E-01 | -6.69 |
| 1425075_PM_at   | Gatad2b                      | GATAD2B    | -0.06 | 4.51 | -0.14 | 8.94E-01 | 9.58E-01 | -6.69 |
| 1422287_PM_at   | Phxr2                        | NA         | -0.02 | 2.33 | -0.14 | 8.94E-01 | 9.58E-01 | -6.69 |
| 1418530_PM_at   | Nup160                       | NUP160     | -0.02 | 2.51 | -0.14 | 8.94E-01 | 9.58E-01 | -6.69 |
| 1441225_PM_at   | Gm39796                      | NA         | -0.01 | 2.83 | -0.14 | 8.94E-01 | 9.58E-01 | -6.69 |
| 1444915_PM_at   | ---                          | NA         | 0.01  | 2.32 | 0.14  | 8.94E-01 | 9.58E-01 | -6.69 |
| 1421590_PM_at   | Mrgprh                       | NA         | 0.02  | 2.08 | 0.14  | 8.94E-01 | 9.58E-01 | -6.69 |
| 1442296_PM_at   | Wdr75                        | WDR75      | 0.02  | 2.28 | 0.14  | 8.94E-01 | 9.58E-01 | -6.69 |
| 1428989_PM_at   | ---                          | NA         | 0.02  | 2.93 | 0.14  | 8.94E-01 | 9.58E-01 | -6.69 |
| 1431258_PM_at   | Dido1                        | DIDO1      | 0.03  | 3.82 | 0.14  | 8.94E-01 | 9.58E-01 | -6.69 |
| 1446102_PM_at   | D9Ert292e                    | NA         | -0.04 | 3.81 | -0.14 | 8.94E-01 | 9.58E-01 | -6.69 |
| 1424193_PM_at   | Pwp2                         | FP565260.1 | -0.02 | 2.50 | -0.14 | 8.94E-01 | 9.58E-01 | -6.69 |
| 1457323_PM_at   | LOC102641212 /// Smco3       | SMCO3      | -0.02 | 2.35 | -0.14 | 8.94E-01 | 9.58E-01 | -6.69 |
| 1438776_PM_x_at | Gm14586 /// Gm2614 /// Rps17 | RPS17      | -0.03 | 4.59 | -0.14 | 8.95E-01 | 9.58E-01 | -6.69 |
| 1456790_PM_at   | Zfp800                       | ZNF800     | -0.01 | 2.09 | -0.14 | 8.95E-01 | 9.58E-01 | -6.69 |
| 1453404_PM_at   | ---                          | NA         | 0.01  | 2.19 | 0.14  | 8.95E-01 | 9.58E-01 | -6.69 |
| 1450977_PM_s_at | Ndrgr1                       | NDRG1      | 0.02  | 2.36 | 0.14  | 8.95E-01 | 9.58E-01 | -6.69 |
| 1448128_PM_at   | Ctsa                         | CTSA       | 0.04  | 2.32 | 0.14  | 8.95E-01 | 9.58E-01 | -6.69 |
| 1453740_PM_a_at | Ccn2                         | CCNL2      | 0.03  | 2.76 | 0.14  | 8.95E-01 | 9.58E-01 | -6.69 |
| 1453575_PM_at   | 1200003110Rik                | NA         | 0.02  | 2.60 | 0.14  | 8.95E-01 | 9.58E-01 | -6.69 |
| 1429804_PM_at   | Slc22a16                     | SLC22A16   | 0.03  | 3.19 | 0.14  | 8.95E-01 | 9.58E-01 | -6.69 |
| 1443522_PM_s_at | Phip                         | PHIP       | 0.06  | 3.28 | 0.14  | 8.95E-01 | 9.58E-01 | -6.69 |
| 1434371_PM_x_at | Usp7                         | USP7       | -0.04 | 3.05 | -0.14 | 8.95E-01 | 9.58E-01 | -6.69 |
| 1426641_PM_at   | Trib2                        | TRIB2      | -0.03 | 3.04 | -0.14 | 8.95E-01 | 9.58E-01 | -6.69 |
| 1451853_PM_at   | Fktn                         | FKTN       | -0.01 | 2.54 | -0.14 | 8.95E-01 | 9.58E-01 | -6.69 |
| 1419589_PM_at   | Cd93                         | CD93       | 0.02  | 2.77 | 0.14  | 8.95E-01 | 9.58E-01 | -6.69 |
| 1440784_PM_at   | Eef2                         | NA         | 0.02  | 3.01 | 0.14  | 8.95E-01 | 9.58E-01 | -6.69 |
| 1420512_PM_at   | Dkk2                         | DKK2       | -0.02 | 2.27 | -0.14 | 8.95E-01 | 9.58E-01 | -6.69 |
| 1434011_PM_a_at | Ints5                        | INTS5      | -0.11 | 6.54 | -0.14 | 8.95E-01 | 9.58E-01 | -6.69 |
| 1419985_PM_s_at | Ccdc69                       | CCDC69     | -0.02 | 2.33 | -0.13 | 8.95E-01 | 9.58E-01 | -6.69 |
| 1417303_PM_at   | Mvd                          | MVD        | -0.02 | 2.38 | -0.14 | 8.95E-01 | 9.58E-01 | -6.69 |
| 1429226_PM_at   | 2310014F06Rik                | NA         | -0.01 | 2.46 | -0.13 | 8.95E-01 | 9.58E-01 | -6.69 |
| 1441954_PM_s_at | H1fnt                        | H1FNT      | -0.01 | 2.27 | -0.14 | 8.95E-01 | 9.58E-01 | -6.69 |
| 1445477_PM_at   | ---                          | NA         | 0.01  | 2.23 | 0.13  | 8.95E-01 | 9.58E-01 | -6.69 |
| 1446338_PM_at   | ---                          | NA         | 0.02  | 2.46 | 0.13  | 8.95E-01 | 9.58E-01 | -6.69 |
| 1417070_PM_at   | Cyp4v3                       | CYP4V2     | 0.02  | 2.37 | 0.14  | 8.95E-01 | 9.58E-01 | -6.69 |
| 1428951_PM_at   | Nol8                         | NOL8       | 0.02  | 4.94 | 0.13  | 8.95E-01 | 9.58E-01 | -6.69 |
| 1455573_PM_at   | Krt14                        | KRT14      | 0.03  | 2.56 | 0.14  | 8.95E-01 | 9.58E-01 | -6.69 |
| 1418553_PM_at   | Arhgef18                     | ARHGEF18   | 0.03  | 3.35 | 0.13  | 8.95E-01 | 9.58E-01 | -6.69 |
| 1450786_PM_x_at | Pdlim5                       | PDLIM5     | 0.03  | 3.19 | 0.13  | 8.95E-01 | 9.58E-01 | -6.69 |
| 1429155_PM_at   | Cfap97                       | CFAP97     | 0.04  | 4.32 | 0.13  | 8.95E-01 | 9.59E-01 | -6.69 |
| 1454388_PM_at   | ---                          | NA         | -0.04 | 3.30 | -0.13 | 8.96E-01 | 9.59E-01 | -6.69 |
| 1456475_PM_s_at | Prkar2b                      | PRKAR2B    | -0.02 | 2.10 | -0.13 | 8.96E-01 | 9.59E-01 | -6.69 |
| 1443007_PM_at   | ---                          | NA         | -0.02 | 2.28 | -0.13 | 8.96E-01 | 9.59E-01 | -6.69 |
| 1456723_PM_at   | ---                          | NA         | 0.02  | 2.41 | 0.13  | 8.96E-01 | 9.59E-01 | -6.69 |
| 1424061_PM_at   | Manbal                       | MANBAL     | 0.02  | 4.85 | 0.13  | 8.96E-01 | 9.59E-01 | -6.69 |
| 1440904_PM_at   | Senp5                        | SENP5      | 0.02  | 3.81 | 0.13  | 8.96E-01 | 9.59E-01 | -6.69 |
| 1444042_PM_at   | Trip11                       | TRIP11     | 0.03  | 2.80 | 0.13  | 8.96E-01 | 9.59E-01 | -6.69 |
| 1440179_PM_x_at | Rnf217                       | RNF217     | -0.05 | 4.17 | -0.13 | 8.96E-01 | 9.59E-01 | -6.69 |
| 1426090_PM_a_at | Fer                          | FER        | -0.05 | 3.79 | -0.13 | 8.96E-01 | 9.59E-01 | -6.69 |
| 1431596_PM_at   | ---                          | NA         | -0.04 | 2.66 | -0.13 | 8.96E-01 | 9.59E-01 | -6.69 |
| 1445204_PM_at   | ---                          | NA         | -0.02 | 2.28 | -0.13 | 8.96E-01 | 9.59E-01 | -6.69 |
| 1449293_PM_a_at | Skp2                         | SKP2       | 0.01  | 2.02 | 0.13  | 8.96E-01 | 9.59E-01 | -6.69 |
| 1424738_PM_at   | Ap5m1                        | AP5M1      | 0.01  | 2.33 | 0.13  | 8.96E-01 | 9.59E-01 | -6.69 |
| 1447544_PM_at   | ---                          | NA         | 0.01  | 2.36 | 0.13  | 8.96E-01 | 9.59E-01 | -6.69 |
| 1431562_PM_at   | 4921513I03Rik                | NA         | 0.01  | 2.46 | 0.13  | 8.96E-01 | 9.59E-01 | -6.69 |
| 1458484_PM_at   | A730020M07Rik                | NA         | 0.02  | 2.74 | 0.13  | 8.96E-01 | 9.59E-01 | -6.69 |
| 1444224_PM_at   | ---                          | NA         | 0.02  | 2.53 | 0.13  | 8.96E-01 | 9.59E-01 | -6.69 |
| 1432994_PM_at   | Panc1                        | NA         | 0.02  | 2.27 | 0.13  | 8.96E-01 | 9.59E-01 | -6.69 |
| 1429139_PM_at   | Otud7b                       | OTUD7B     | -0.04 | 3.24 | -0.13 | 8.96E-01 | 9.59E-01 | -6.69 |
| 1459107_PM_at   | Kcnh3                        | KCNH3      | 0.03  | 3.98 | 0.13  | 8.96E-01 | 9.59E-01 | -6.69 |
| AFFX-r2-TagG_at | ---                          | NA         | -0.01 | 2.19 | -0.13 | 8.96E-01 | 9.59E-01 | -6.69 |
| 1454525_PM_at   | Sep15                        | SELENOF    | 0.02  | 2.34 | 0.13  | 8.96E-01 | 9.59E-01 | -6.69 |
| 1429982_PM_at   | Rimklb                       | RIMKLB     | 0.04  | 3.75 | 0.13  | 8.96E-01 | 9.59E-01 | -6.69 |
| 1423044_PM_at   | Prosc                        | PLPBP      | -0.04 | 4.32 | -0.13 | 8.96E-01 | 9.59E-01 | -6.69 |
| 1446963_PM_at   | Mcc                          | NA         | -0.02 | 2.94 | -0.13 | 8.96E-01 | 9.59E-01 | -6.69 |
| 1447545_PM_at   | D7Ert193e                    | NA         | 0.01  | 2.19 | 0.13  | 8.96E-01 | 9.59E-01 | -6.69 |
| 1430295_PM_at   | Gna13                        | NA         | -0.02 | 2.57 | -0.13 | 8.96E-01 | 9.59E-01 | -6.69 |
| 1459167_PM_at   | ---                          | NA         | 0.02  | 2.61 | 0.13  | 8.96E-01 | 9.59E-01 | -6.69 |
| 1427339_PM_at   | Slc30a2                      | SLC30A2    | 0.03  | 2.40 | 0.13  | 8.96E-01 | 9.59E-01 | -6.69 |

|                 |                     |          |       |      |       |          |          |       |
|-----------------|---------------------|----------|-------|------|-------|----------|----------|-------|
| 1442901_PM_at   | Tax1bp1             | TAX1BP1  | 0.01  | 2.56 | 0.13  | 8.96E-01 | 9.59E-01 | -6.69 |
| 1434646_PM_s_at | Gm10094 /// Sap18   | SAP18    | -0.04 | 5.25 | -0.13 | 8.96E-01 | 9.59E-01 | -6.69 |
| 1446171_PM_at   | A230107N01Rik       | NA       | 0.02  | 2.14 | 0.13  | 8.96E-01 | 9.59E-01 | -6.69 |
| 1443090_PM_at   | ---                 | NA       | 0.05  | 2.74 | 0.13  | 8.96E-01 | 9.59E-01 | -6.69 |
| 1433317_PM_at   | ---                 | NA       | 0.01  | 2.44 | 0.13  | 8.96E-01 | 9.59E-01 | -6.69 |
| 1437568_PM_at   | Mmp16               | MMP16    | 0.02  | 2.00 | 0.13  | 8.96E-01 | 9.59E-01 | -6.69 |
| 1460491_PM_at   | Invs                | INVS     | 0.01  | 2.08 | 0.13  | 8.97E-01 | 9.59E-01 | -6.69 |
| 1426188_PM_s_at | BC005685            | NA       | 0.02  | 2.41 | 0.13  | 8.97E-01 | 9.59E-01 | -6.69 |
| 1436250_PM_at   | Tmem74b             | TMEM74B  | -0.02 | 3.70 | -0.13 | 8.97E-01 | 9.59E-01 | -6.69 |
| 1422084_PM_at   | Bmx                 | BMX      | -0.01 | 2.01 | -0.13 | 8.97E-01 | 9.59E-01 | -6.69 |
| 1447690_PM_at   | Lsr                 | LSR      | -0.01 | 2.25 | -0.13 | 8.97E-01 | 9.59E-01 | -6.69 |
| 1419783_PM_at   | ---                 | NA       | 0.01  | 2.30 | 0.13  | 8.97E-01 | 9.59E-01 | -6.69 |
| 1437972_PM_s_at | Sf3b5               | SF3B5    | 0.03  | 2.79 | 0.13  | 8.97E-01 | 9.59E-01 | -6.69 |
| 1441796_PM_at   | Fam136a             | FAM136A  | 0.05  | 2.83 | 0.13  | 8.97E-01 | 9.59E-01 | -6.69 |
| 1438081_PM_at   | Mcc                 | MCC      | 0.05  | 2.69 | 0.13  | 8.97E-01 | 9.59E-01 | -6.69 |
| 1444432_PM_at   | ---                 | NA       | 0.05  | 2.64 | 0.13  | 8.97E-01 | 9.59E-01 | -6.69 |
| 1460650_PM_at   | Atp6v0a1            | ATP6V0A1 | -0.03 | 3.02 | -0.13 | 8.97E-01 | 9.59E-01 | -6.69 |
| 1432881_PM_at   | ---                 | NA       | 0.01  | 2.30 | 0.13  | 8.97E-01 | 9.59E-01 | -6.69 |
| 1439406_PM_x_at | Fars2               | FARS2    | 0.03  | 2.55 | 0.13  | 8.97E-01 | 9.59E-01 | -6.69 |
| 1425917_PM_at   | Ifi44l              | NA       | -0.02 | 2.23 | -0.13 | 8.97E-01 | 9.59E-01 | -6.69 |
| 1459499_PM_at   | ---                 | NA       | 0.01  | 2.09 | 0.13  | 8.97E-01 | 9.59E-01 | -6.69 |
| 1453508_PM_at   | 1700104B16Rik       | NA       | 0.01  | 2.12 | 0.13  | 8.97E-01 | 9.59E-01 | -6.69 |
| 1441095_PM_at   | Fam179b             | NA       | 0.01  | 2.77 | 0.13  | 8.97E-01 | 9.59E-01 | -6.69 |
| 1443468_PM_at   | ---                 | NA       | 0.04  | 2.87 | 0.13  | 8.97E-01 | 9.59E-01 | -6.69 |
| 1421257_PM_at   | Pigb                | PIGB     | 0.04  | 3.87 | 0.13  | 8.97E-01 | 9.59E-01 | -6.69 |
| AFFX-r2-TagB_at | ---                 | NA       | 0.01  | 1.92 | 0.13  | 8.97E-01 | 9.59E-01 | -6.69 |
| 1415922_PM_s_at | Marcksl1            | MARCKSL1 | 0.01  | 2.20 | 0.13  | 8.97E-01 | 9.59E-01 | -6.69 |
| 1446864_PM_at   | ---                 | NA       | -0.02 | 2.60 | -0.13 | 8.97E-01 | 9.59E-01 | -6.69 |
| 1455788_PM_x_at | Poldip3             | POLDIP3  | -0.03 | 6.60 | -0.13 | 8.97E-01 | 9.59E-01 | -6.69 |
| 1444022_PM_at   | ---                 | NA       | -0.06 | 3.27 | -0.13 | 8.98E-01 | 9.59E-01 | -6.69 |
| 1422884_PM_at   | Snrpd3              | SNRPD3   | -0.03 | 3.92 | -0.13 | 8.98E-01 | 9.59E-01 | -6.69 |
| 1455224_PM_at   | Angptl1             | ANGPTL1  | -0.03 | 2.55 | -0.13 | 8.98E-01 | 9.59E-01 | -6.69 |
| 1458041_PM_at   | C80360              | NA       | -0.02 | 2.18 | -0.13 | 8.98E-01 | 9.59E-01 | -6.69 |
| 1447708_PM_x_at | Pde2a               | PDE2A    | -0.01 | 2.51 | -0.13 | 8.98E-01 | 9.59E-01 | -6.69 |
| 1439260_PM_a_at | Enpp3               | NA       | -0.01 | 1.93 | -0.13 | 8.97E-01 | 9.59E-01 | -6.69 |
| 1441368_PM_at   | ---                 | NA       | 0.01  | 2.16 | 0.13  | 8.98E-01 | 9.59E-01 | -6.69 |
| 1421549_PM_at   | Pcdhb15             | NA       | 0.01  | 2.27 | 0.13  | 8.98E-01 | 9.59E-01 | -6.69 |
| 1451670_PM_at   | Rab43               | RAB43    | 0.02  | 2.94 | 0.13  | 8.98E-01 | 9.59E-01 | -6.69 |
| 1439157_PM_at   | Btnl9               | BTNL9    | 0.02  | 3.10 | 0.13  | 8.98E-01 | 9.59E-01 | -6.69 |
| 1438828_PM_at   | Rapgef6             | RAPGEF6  | 0.03  | 3.83 | 0.13  | 8.98E-01 | 9.59E-01 | -6.69 |
| 1421557_PM_x_at | Txn2                | TXN2     | 0.02  | 3.19 | 0.13  | 8.98E-01 | 9.59E-01 | -6.69 |
| 1442260_PM_at   | Cdc42bpa            | CDC42BPA | 0.05  | 5.24 | 0.13  | 8.98E-01 | 9.59E-01 | -6.69 |
| 1422334_PM_a_at | Sftpa1              | SFTPA1   | -0.02 | 2.36 | -0.13 | 8.98E-01 | 9.59E-01 | -6.69 |
| 1432732_PM_at   | 5830437K03Rik       | NA       | -0.02 | 2.26 | -0.13 | 8.98E-01 | 9.59E-01 | -6.69 |
| 1430452_PM_at   | Cyp20a1             | CYP20A1  | -0.02 | 2.46 | -0.13 | 8.98E-01 | 9.59E-01 | -6.69 |
| 1426008_PM_a_at | Slc7a2              | SLC7A2   | -0.01 | 2.29 | -0.13 | 8.98E-01 | 9.59E-01 | -6.69 |
| 1435733_PM_x_at | Rnaseh2c            | RNASEH2C | 0.02  | 3.25 | 0.13  | 8.98E-01 | 9.59E-01 | -6.69 |
| 1435684_PM_at   | Abcc5               | ABCC5    | 0.02  | 5.73 | 0.13  | 8.98E-01 | 9.59E-01 | -6.69 |
| 1424314_PM_at   | Prpf3               | PRPF3    | -0.03 | 4.21 | -0.13 | 8.98E-01 | 9.59E-01 | -6.69 |
| 1421686_PM_at   | Npvf                | NPVF     | -0.02 | 2.54 | -0.13 | 8.98E-01 | 9.60E-01 | -6.69 |
| 1434913_PM_at   | Hmgcl1              | HMGCLL1  | -0.02 | 2.35 | -0.13 | 8.98E-01 | 9.60E-01 | -6.69 |
| 1422076_PM_at   | Acot4               | ACOT4    | -0.01 | 2.54 | -0.13 | 8.98E-01 | 9.60E-01 | -6.69 |
| 1441826_PM_x_at | Ubt1                | UBT1     | -0.01 | 2.48 | -0.13 | 8.98E-01 | 9.60E-01 | -6.69 |
| 1449565_PM_at   | Cyp2g1              | NA       | 0.01  | 2.38 | 0.13  | 8.98E-01 | 9.60E-01 | -6.69 |
| 1452625_PM_at   | Kctd2               | KCTD2    | 0.02  | 6.03 | 0.13  | 8.98E-01 | 9.60E-01 | -6.69 |
| 1439959_PM_at   | Fgf11               | FGF11    | 0.02  | 2.42 | 0.13  | 8.98E-01 | 9.60E-01 | -6.69 |
| 1459360_PM_at   | ---                 | NA       | 0.02  | 2.74 | 0.13  | 8.98E-01 | 9.60E-01 | -6.69 |
| 1452871_PM_at   | Neil1               | NEIL1    | 0.03  | 2.64 | 0.13  | 8.98E-01 | 9.60E-01 | -6.69 |
| 1439781_PM_at   | D930048N14Rik       | NA       | -0.02 | 4.76 | -0.13 | 8.98E-01 | 9.60E-01 | -6.69 |
| 1430746_PM_at   | ---                 | NA       | -0.01 | 2.65 | -0.13 | 8.98E-01 | 9.60E-01 | -6.69 |
| 1431989_PM_at   | Aoah                | NA       | -0.01 | 2.33 | -0.13 | 8.98E-01 | 9.60E-01 | -6.69 |
| 1419740_PM_at   | Pde6b               | PDE6B    | 0.01  | 2.74 | 0.13  | 8.98E-01 | 9.60E-01 | -6.69 |
| 1445586_PM_at   | ---                 | NA       | 0.01  | 2.36 | 0.13  | 8.98E-01 | 9.60E-01 | -6.69 |
| 1432796_PM_at   | 3110067C02Rik       | NA       | 0.01  | 2.15 | 0.13  | 8.98E-01 | 9.60E-01 | -6.69 |
| 1426120_PM_a_at | Cd244 /// LOC677008 | CD244    | 0.02  | 2.45 | 0.13  | 8.98E-01 | 9.60E-01 | -6.69 |
| 1427419_PM_x_at | Ccr9                | CCR9     | 0.02  | 2.45 | 0.13  | 8.98E-01 | 9.60E-01 | -6.69 |
| 1447666_PM_x_at | Anapc15             | ANAPC15  | 0.02  | 2.45 | 0.13  | 8.98E-01 | 9.60E-01 | -6.69 |
| 1439556_PM_at   | ---                 | NA       | 0.03  | 2.57 | 0.13  | 8.98E-01 | 9.60E-01 | -6.69 |
| 1424891_PM_a_at | Zw10                | ZW10     | 0.03  | 3.58 | 0.13  | 8.98E-01 | 9.60E-01 | -6.69 |
| 1439496_PM_at   | ---                 | NA       | -0.02 | 3.67 | -0.13 | 8.99E-01 | 9.60E-01 | -6.69 |
| 1433639_PM_at   | Fam117a             | FAM117A  | -0.01 | 2.17 | -0.13 | 8.99E-01 | 9.60E-01 | -6.69 |
| 1429556_PM_at   | Tead1               | TEAD1    | 0.03  | 3.28 | 0.13  | 8.99E-01 | 9.60E-01 | -6.69 |
| 1450470_PM_at   | Eps8l1              | NA       | -0.02 | 2.25 | -0.13 | 8.99E-01 | 9.60E-01 | -6.69 |
| 1416774_PM_at   | Wee1                | WEE1     | -0.02 | 2.63 | -0.13 | 8.99E-01 | 9.60E-01 | -6.69 |
| 1419013_PM_at   | Gpatch1             | GPATCH1  | -0.06 | 3.65 | -0.13 | 8.99E-01 | 9.60E-01 | -6.69 |

|                 |                                   |            |       |       |       |          |          |       |
|-----------------|-----------------------------------|------------|-------|-------|-------|----------|----------|-------|
| 1457503_PM_at   | ---                               | NA         | -0.04 | 3.13  | -0.13 | 8.99E-01 | 9.60E-01 | -6.69 |
| 1422080_PM_at   | IL7                               | IL7        | -0.01 | 2.21  | -0.13 | 8.99E-01 | 9.60E-01 | -6.69 |
| 1449482_PM_at   | Hist3h2ba                         | NA         | 0.02  | 2.43  | 0.13  | 8.99E-01 | 9.60E-01 | -6.69 |
| 1420850_PM_at   | Crnk1                             | CRNKL1     | 0.03  | 2.93  | 0.13  | 8.99E-01 | 9.60E-01 | -6.69 |
| 1428595_PM_at   | Slc6a19                           | SLC6A19    | -0.01 | 2.26  | -0.13 | 8.99E-01 | 9.60E-01 | -6.69 |
| 1438179_PM_s_at | Elp2                              | ELP2       | 0.02  | 10.85 | 0.13  | 8.99E-01 | 9.60E-01 | -6.69 |
| 1456040_PM_at   | Sf3b2                             | SF3B2      | -0.04 | 3.76  | -0.13 | 8.99E-01 | 9.60E-01 | -6.69 |
| 1426362_PM_at   | Tmem144                           | TMEM144    | -0.03 | 3.13  | -0.13 | 8.99E-01 | 9.60E-01 | -6.69 |
| 1422747_PM_at   | Chek2                             | CHEK2      | 0.01  | 2.38  | 0.13  | 8.99E-01 | 9.60E-01 | -6.69 |
| 1417865_PM_at   | Tnfaip1                           | TNFAIP1    | 0.03  | 4.18  | 0.13  | 8.99E-01 | 9.60E-01 | -6.69 |
| 1424649_PM_a_at | Tspan8                            | TSPAN8     | -0.01 | 2.27  | -0.13 | 8.99E-01 | 9.60E-01 | -6.69 |
| 1439711_PM_at   | ---                               | NA         | 0.01  | 2.16  | 0.13  | 8.99E-01 | 9.60E-01 | -6.69 |
| 1455828_PM_at   | Gprin1                            | NA         | -0.02 | 2.75  | -0.13 | 8.99E-01 | 9.60E-01 | -6.69 |
| 1458018_PM_at   | ---                               | NA         | 0.01  | 2.24  | 0.13  | 8.99E-01 | 9.60E-01 | -6.69 |
| 1426115_PM_a_at | Kcnj9                             | KCNJ9      | -0.01 | 2.24  | -0.13 | 8.99E-01 | 9.60E-01 | -6.69 |
| 1450978_PM_at   | Dvl1                              | DVL1       | 0.02  | 2.76  | 0.13  | 8.99E-01 | 9.60E-01 | -6.69 |
| 1431425_PM_a_at | Rprd2                             | RPRD2      | 0.02  | 2.45  | 0.13  | 8.99E-01 | 9.60E-01 | -6.69 |
| 1454141_PM_at   | ---                               | NA         | 0.03  | 2.26  | 0.13  | 8.99E-01 | 9.60E-01 | -6.69 |
| 1417517_PM_at   | Plag2                             | PLAGL2     | -0.03 | 2.68  | -0.13 | 8.99E-01 | 9.60E-01 | -6.69 |
| 1443984_PM_at   | Lin9                              | LIN9       | -0.02 | 2.31  | -0.13 | 8.99E-01 | 9.60E-01 | -6.69 |
| 1444257_PM_at   | Prr11                             | PRR11      | 0.01  | 2.28  | 0.13  | 8.99E-01 | 9.60E-01 | -6.69 |
| 1444793_PM_at   | ---                               | NA         | 0.01  | 2.31  | 0.13  | 8.99E-01 | 9.60E-01 | -6.69 |
| 1448472_PM_at   | Vars                              | VARS       | 0.01  | 2.35  | 0.13  | 8.99E-01 | 9.60E-01 | -6.69 |
| 1422639_PM_at   | Calcb                             | CALCB      | 0.02  | 2.19  | 0.13  | 8.99E-01 | 9.60E-01 | -6.69 |
| 1456005_PM_a_at | Bcl2l11                           | BCL2L11    | 0.10  | 3.56  | 0.13  | 8.99E-01 | 9.60E-01 | -6.69 |
| 1454633_PM_at   | Etnk1                             | ETNK1      | -0.07 | 4.68  | -0.13 | 9.00E-01 | 9.60E-01 | -6.69 |
| 1443312_PM_at   | ---                               | NA         | -0.01 | 2.60  | -0.13 | 9.00E-01 | 9.60E-01 | -6.69 |
| 1422051_PM_a_at | Gabbr1                            | GABBR1     | -0.02 | 4.45  | -0.13 | 9.00E-01 | 9.60E-01 | -6.69 |
| 1431407_PM_at   | LOC102635783                      | NA         | 0.01  | 2.32  | 0.13  | 9.00E-01 | 9.60E-01 | -6.69 |
| 1433919_PM_at   | Asb4                              | ASB4       | 0.01  | 2.33  | 0.13  | 9.00E-01 | 9.60E-01 | -6.69 |
| 1439330_PM_at   | ---                               | NA         | -0.03 | 3.03  | -0.13 | 9.00E-01 | 9.60E-01 | -6.69 |
| 1458678_PM_at   | Ndufab1                           | NDUFAB1    | 0.01  | 2.60  | 0.13  | 9.00E-01 | 9.60E-01 | -6.69 |
| 1446748_PM_at   | ---                               | NA         | 0.02  | 2.26  | 0.13  | 9.00E-01 | 9.60E-01 | -6.69 |
| 1431290_PM_at   | 4930588J15Rik ///<br>LOC105247322 | NA         | -0.01 | 2.85  | -0.13 | 9.00E-01 | 9.60E-01 | -6.69 |
| 1432421_PM_at   | Pms2                              | PMS2       | 0.02  | 2.04  | 0.13  | 9.00E-01 | 9.60E-01 | -6.69 |
| 1417617_PM_at   | St6galnac2                        | ST6GALNAC2 | 0.01  | 2.44  | 0.13  | 9.00E-01 | 9.60E-01 | -6.69 |
| 1424437_PM_s_at | Abcg4                             | ABCG4      | -0.02 | 3.42  | -0.13 | 9.00E-01 | 9.60E-01 | -6.69 |
| 1424317_PM_at   | Slc25a19                          | SLC25A19   | 0.02  | 2.53  | 0.13  | 9.00E-01 | 9.60E-01 | -6.69 |
| 1456729_PM_x_at | Rtel1                             | RTEL1      | 0.03  | 2.89  | 0.13  | 9.00E-01 | 9.60E-01 | -6.69 |
| 1437516_PM_at   | ---                               | NA         | -0.02 | 3.11  | -0.13 | 9.00E-01 | 9.60E-01 | -6.69 |
| 1429677_PM_at   | 1700056E22Rik                     | NA         | 0.01  | 2.23  | 0.13  | 9.00E-01 | 9.60E-01 | -6.69 |
| 1444815_PM_at   | C85328                            | NA         | 0.01  | 2.20  | 0.13  | 9.00E-01 | 9.60E-01 | -6.69 |
| 1438127_PM_at   | Prrc2c                            | PRRC2C     | -0.02 | 2.30  | -0.13 | 9.00E-01 | 9.60E-01 | -6.69 |
| 1436072_PM_at   | Zfp950                            | NA         | 0.03  | 3.25  | 0.13  | 9.00E-01 | 9.60E-01 | -6.69 |
| 1459949_PM_at   | ---                               | NA         | 0.02  | 2.88  | 0.13  | 9.00E-01 | 9.60E-01 | -6.69 |
| 1433429_PM_at   | Pigs                              | PIGS       | -0.02 | 2.77  | -0.13 | 9.00E-01 | 9.60E-01 | -6.69 |
| 1446491_PM_at   | ---                               | NA         | -0.01 | 2.21  | -0.13 | 9.00E-01 | 9.60E-01 | -6.69 |
| 1423016_PM_a_at | Gypa                              | GYPA       | -0.01 | 2.53  | -0.13 | 9.00E-01 | 9.60E-01 | -6.69 |
| 1421353_PM_at   | Pde7b                             | PDE7B      | 0.01  | 2.37  | 0.13  | 9.00E-01 | 9.60E-01 | -6.69 |
| 1441601_PM_at   | ---                               | NA         | 0.01  | 2.37  | 0.13  | 9.00E-01 | 9.60E-01 | -6.69 |
| 1439640_PM_at   | Gm17388 /// Hnrnpr                | HNRNPR     | 0.02  | 3.63  | 0.13  | 9.00E-01 | 9.60E-01 | -6.69 |
| 1457472_PM_at   | Gigyf2                            | GIGYF2     | 0.02  | 2.17  | 0.13  | 9.00E-01 | 9.60E-01 | -6.69 |
| 1432029_PM_a_at | Smap1                             | SMAP1      | 0.03  | 3.45  | 0.13  | 9.00E-01 | 9.60E-01 | -6.69 |
| 1425713_PM_a_at | Rnf146                            | RNF146     | 0.04  | 3.31  | 0.13  | 9.00E-01 | 9.60E-01 | -6.69 |
| 1450828_PM_at   | Synpo2                            | SYNPO2     | -0.01 | 2.43  | -0.13 | 9.00E-01 | 9.60E-01 | -6.69 |
| 1452618_PM_at   | Cdk5rap2                          | CDK5RAP2   | 0.02  | 2.29  | 0.13  | 9.01E-01 | 9.60E-01 | -6.69 |
| 1427919_PM_at   | SrpX2                             | SRPX2      | 0.01  | 2.21  | 0.13  | 9.01E-01 | 9.60E-01 | -6.69 |
| 1420961_PM_a_at | Ivns1abp                          | IVNS1ABP   | -0.03 | 3.34  | -0.13 | 9.01E-01 | 9.60E-01 | -6.69 |
| 1438815_PM_at   | ---                               | NA         | -0.03 | 2.82  | -0.13 | 9.01E-01 | 9.60E-01 | -6.69 |
| 1433390_PM_at   | Zfp961                            | NA         | -0.02 | 2.90  | -0.13 | 9.01E-01 | 9.60E-01 | -6.69 |
| 1460657_PM_at   | Wnt10a                            | WNT10A     | -0.02 | 2.36  | -0.13 | 9.01E-01 | 9.60E-01 | -6.69 |
| 1432728_PM_at   | 5830433D23Rik                     | NA         | -0.02 | 3.06  | -0.13 | 9.01E-01 | 9.60E-01 | -6.69 |
| 1423683_PM_at   | Cdca4                             | CDCA4      | -0.01 | 2.62  | -0.13 | 9.01E-01 | 9.60E-01 | -6.69 |
| 1421723_PM_at   | Pcdhb18                           | NA         | -0.01 | 1.92  | -0.13 | 9.01E-01 | 9.60E-01 | -6.69 |
| 1437316_PM_at   | Fbxw19                            | FBXW12     | 0.01  | 2.54  | 0.13  | 9.01E-01 | 9.60E-01 | -6.69 |
| 1432773_PM_at   | ---                               | NA         | 0.02  | 2.34  | 0.13  | 9.01E-01 | 9.60E-01 | -6.69 |
| 1453376_PM_at   | Ston1                             | STON1      | 0.02  | 2.29  | 0.13  | 9.01E-01 | 9.60E-01 | -6.69 |
| 1447589_PM_at   | ---                               | NA         | 0.02  | 3.42  | 0.13  | 9.01E-01 | 9.60E-01 | -6.69 |
| 1439748_PM_at   | Dpp6                              | DPP6       | 0.02  | 2.31  | 0.13  | 9.01E-01 | 9.60E-01 | -6.69 |
| 1453409_PM_at   | Cgrrf1                            | CGRRF1     | 0.03  | 2.71  | 0.13  | 9.01E-01 | 9.60E-01 | -6.69 |
| 1426729_PM_at   | Fam131a                           | FAM131A    | 0.05  | 4.60  | 0.13  | 9.01E-01 | 9.60E-01 | -6.69 |
| 1452292_PM_at   | Ap2b1                             | AP2B1      | 0.05  | 4.12  | 0.13  | 9.01E-01 | 9.60E-01 | -6.69 |
| 1450299_PM_at   | Chrna7                            | CHRNA7     | 0.05  | 3.35  | 0.13  | 9.01E-01 | 9.60E-01 | -6.69 |
| 1442811_PM_at   | Rgmb                              | NA         | 0.01  | 2.52  | 0.13  | 9.01E-01 | 9.60E-01 | -6.69 |

|                 |                                       |         |       |      |       |          |          |       |
|-----------------|---------------------------------------|---------|-------|------|-------|----------|----------|-------|
| 1459045_PM_at   | Golim4                                | GOLIM4  | 0.02  | 2.48 | 0.13  | 9.01E-01 | 9.60E-01 | -6.69 |
| 1453598_PM_at   | Ptchd4                                | PTCHD4  | -0.02 | 2.78 | -0.13 | 9.01E-01 | 9.60E-01 | -6.69 |
| 1456310_PM_a_at | Faap20                                | NA      | 0.05  | 4.12 | 0.13  | 9.01E-01 | 9.60E-01 | -6.69 |
| 1441845_PM_at   | Caps2                                 | CAPS2   | 0.01  | 2.23 | 0.13  | 9.01E-01 | 9.60E-01 | -6.69 |
| 1449568_PM_at   | Klb                                   | KLb     | -0.01 | 2.22 | -0.13 | 9.01E-01 | 9.61E-01 | -6.69 |
| 1441727_PM_s_at | Zfp467                                | ZNF467  | -0.03 | 3.66 | -0.13 | 9.01E-01 | 9.61E-01 | -6.69 |
| 1452352_PM_at   | Ctla2b                                | NA      | -0.02 | 2.45 | -0.13 | 9.01E-01 | 9.61E-01 | -6.69 |
| 1431515_PM_at   | 4932414N04Rik                         | NA      | 0.01  | 2.56 | 0.13  | 9.01E-01 | 9.61E-01 | -6.69 |
| 1443875_PM_at   | Rimbp3                                | RIMBP3C | -0.03 | 2.67 | -0.13 | 9.02E-01 | 9.61E-01 | -6.69 |
| 1443278_PM_at   | ---                                   | NA      | 0.01  | 2.49 | 0.13  | 9.02E-01 | 9.61E-01 | -6.69 |
| 1456553_PM_at   | ---                                   | NA      | -0.02 | 3.41 | -0.13 | 9.02E-01 | 9.61E-01 | -6.69 |
| 1443862_PM_at   | ---                                   | NA      | -0.03 | 3.31 | -0.13 | 9.02E-01 | 9.61E-01 | -6.69 |
| 1419509_PM_a_at | Nagk                                  | NAGK    | -0.03 | 2.98 | -0.13 | 9.02E-01 | 9.61E-01 | -6.69 |
| 1420318_PM_at   | ---                                   | NA      | -0.02 | 3.04 | -0.13 | 9.02E-01 | 9.61E-01 | -6.69 |
| 1459542_PM_at   | ---                                   | NA      | 0.02  | 2.27 | 0.13  | 9.02E-01 | 9.61E-01 | -6.69 |
| 1426881_PM_at   | Ube3c                                 | UBE3C   | -0.03 | 3.52 | -0.13 | 9.02E-01 | 9.61E-01 | -6.69 |
| 1442060_PM_at   | ---                                   | NA      | -0.04 | 2.96 | -0.13 | 9.02E-01 | 9.61E-01 | -6.69 |
| 1455519_PM_at   | Dsg1b                                 | NA      | -0.01 | 2.05 | -0.13 | 9.02E-01 | 9.61E-01 | -6.69 |
| 1424186_PM_at   | Ccdc80                                | CCDC80  | 0.03  | 2.66 | 0.13  | 9.02E-01 | 9.61E-01 | -6.69 |
| 1442578_PM_at   | ---                                   | NA      | -0.01 | 2.29 | -0.13 | 9.02E-01 | 9.61E-01 | -6.69 |
| 1459919_PM_a_at | Mob3c                                 | MOB3C   | -0.01 | 2.65 | -0.13 | 9.02E-01 | 9.61E-01 | -6.69 |
| 1441011_PM_at   | ---                                   | NA      | -0.01 | 2.16 | -0.13 | 9.02E-01 | 9.61E-01 | -6.69 |
| 1458604_PM_at   | ---                                   | NA      | 0.01  | 2.67 | 0.13  | 9.02E-01 | 9.61E-01 | -6.69 |
| 1429125_PM_at   | Ggnbp1 /// Zbtb9                      | ZBTB9   | -0.03 | 3.08 | -0.13 | 9.02E-01 | 9.61E-01 | -6.69 |
| 1444002_PM_at   | Foxl2                                 | FOXL2   | -0.01 | 1.98 | -0.13 | 9.02E-01 | 9.61E-01 | -6.69 |
| 1430728_PM_at   | Gm40460 /// Krtap5-5 /// LOC105243090 | NA      | 0.01  | 2.46 | 0.13  | 9.02E-01 | 9.61E-01 | -6.69 |
| 1450663_PM_at   | Thbs2                                 | THBS2   | -0.02 | 3.82 | -0.13 | 9.02E-01 | 9.61E-01 | -6.69 |
| 1421776_PM_at   | Olf74                                 | ORSD18  | 0.01  | 1.97 | 0.13  | 9.02E-01 | 9.61E-01 | -6.69 |
| 1452690_PM_at   | Khsrp                                 | KHSRP   | 0.02  | 5.23 | 0.13  | 9.02E-01 | 9.61E-01 | -6.69 |
| 1432613_PM_at   | Prr15                                 | PRR15   | 0.01  | 2.41 | 0.13  | 9.02E-01 | 9.61E-01 | -6.69 |
| 1447768_PM_at   | Got2                                  | GOT2    | 0.01  | 1.87 | 0.13  | 9.02E-01 | 9.61E-01 | -6.69 |
| 1418151_PM_at   | Mtmr4                                 | MTMR4   | -0.03 | 2.95 | -0.13 | 9.03E-01 | 9.61E-01 | -6.69 |
| 1443367_PM_at   | ---                                   | NA      | -0.01 | 2.66 | -0.13 | 9.03E-01 | 9.61E-01 | -6.69 |
| 1419986_PM_at   | Ccdc69                                | NA      | 0.01  | 2.57 | 0.13  | 9.03E-01 | 9.61E-01 | -6.69 |
| 1437681_PM_at   | Grik4                                 | GRIK4   | 0.03  | 4.57 | 0.13  | 9.03E-01 | 9.61E-01 | -6.69 |
| 1453400_PM_at   | Dydc2                                 | DYDC2   | -0.01 | 2.27 | -0.13 | 9.03E-01 | 9.62E-01 | -6.69 |
| 1455618_PM_x_at | Tspan33                               | TSPAN33 | 0.06  | 3.55 | 0.13  | 9.03E-01 | 9.62E-01 | -6.69 |
| 1449051_PM_at   | Ppara                                 | PPARA   | 0.02  | 2.13 | 0.13  | 9.03E-01 | 9.62E-01 | -6.69 |
| 1428114_PM_at   | Slc14a1                               | SLC14A1 | -0.01 | 2.21 | -0.12 | 9.03E-01 | 9.62E-01 | -6.69 |
| 1435932_PM_at   | Hps6                                  | HPS6    | -0.02 | 2.41 | -0.12 | 9.03E-01 | 9.62E-01 | -6.69 |
| 1438963_PM_s_at | Tfpt                                  | TFPT    | 0.03  | 8.72 | 0.12  | 9.03E-01 | 9.62E-01 | -6.69 |
| 1420160_PM_s_at | Myo1e                                 | MYO1E   | -0.01 | 2.84 | -0.12 | 9.03E-01 | 9.62E-01 | -6.69 |
| 1438887_PM_a_at | Gmcl1                                 | GMCL1   | -0.03 | 2.23 | -0.12 | 9.03E-01 | 9.62E-01 | -6.69 |
| 1430150_PM_at   | Dcp2                                  | DCP2    | -0.04 | 2.74 | -0.12 | 9.03E-01 | 9.62E-01 | -6.69 |
| 1433954_PM_at   | Brip1os                               | NA      | -0.04 | 3.37 | -0.12 | 9.03E-01 | 9.62E-01 | -6.69 |
| 1429207_PM_at   | 5730408K05Rik                         | NA      | -0.03 | 3.46 | -0.12 | 9.03E-01 | 9.62E-01 | -6.69 |
| 1416675_PM_s_at | Plcd1                                 | PLCD1   | -0.03 | 2.33 | -0.12 | 9.03E-01 | 9.62E-01 | -6.69 |
| 1446368_PM_at   | ---                                   | NA      | -0.01 | 2.26 | -0.12 | 9.03E-01 | 9.62E-01 | -6.69 |
| 1459022_PM_at   | ---                                   | NA      | 0.02  | 3.16 | 0.12  | 9.03E-01 | 9.62E-01 | -6.69 |
| 1433799_PM_at   | Rdh13                                 | RDH13   | 0.04  | 3.42 | 0.12  | 9.03E-01 | 9.62E-01 | -6.69 |
| 1425067_PM_at   | Celsr3                                | CELSR3  | -0.03 | 3.50 | -0.12 | 9.03E-01 | 9.62E-01 | -6.69 |
| 1447758_PM_x_at | Kat6b                                 | KAT6B   | -0.02 | 2.29 | -0.12 | 9.03E-01 | 9.62E-01 | -6.69 |
| 1459180_PM_at   | ---                                   | NA      | 0.01  | 2.45 | 0.12  | 9.03E-01 | 9.62E-01 | -6.69 |
| 1426256_PM_at   | Timm17a                               | TIMM17A | -0.03 | 4.59 | -0.12 | 9.04E-01 | 9.62E-01 | -6.69 |
| 1428684_PM_at   | Tamm41                                | TAMM41  | -0.02 | 3.16 | -0.12 | 9.04E-01 | 9.62E-01 | -6.69 |
| 1433575_PM_at   | Sox4                                  | SOX4    | -0.02 | 2.38 | -0.12 | 9.04E-01 | 9.62E-01 | -6.69 |
| 1430845_PM_at   | 2410018L13Rik                         | NA      | 0.01  | 2.10 | 0.12  | 9.04E-01 | 9.62E-01 | -6.69 |
| 1431074_PM_a_at | Pitpnc1                               | PITPNC1 | 0.01  | 2.30 | 0.12  | 9.04E-01 | 9.62E-01 | -6.69 |
| 1438152_PM_at   | Gpaa1                                 | NA      | -0.02 | 2.78 | -0.12 | 9.04E-01 | 9.62E-01 | -6.69 |
| 1425956_PM_a_at | Cdadc1                                | CDADC1  | -0.04 | 3.13 | -0.12 | 9.04E-01 | 9.62E-01 | -6.69 |
| 1455890_PM_x_at | Gm5802                                | NA      | -0.01 | 3.28 | -0.12 | 9.04E-01 | 9.62E-01 | -6.69 |
| 1455961_PM_at   | Mme                                   | MME     | -0.01 | 2.16 | -0.12 | 9.04E-01 | 9.62E-01 | -6.69 |
| 1449206_PM_at   | Sypl2                                 | SYPL2   | 0.01  | 2.33 | 0.12  | 9.04E-01 | 9.62E-01 | -6.69 |
| 1418377_PM_a_at | Siva1                                 | SIVA1   | 0.02  | 2.64 | 0.12  | 9.04E-01 | 9.62E-01 | -6.69 |
| 1439836_PM_at   | Asb15                                 | ASB15   | 0.02  | 2.19 | 0.12  | 9.04E-01 | 9.62E-01 | -6.69 |
| 1457592_PM_x_at | Zfp787                                | ZNF787  | 0.02  | 2.56 | 0.12  | 9.04E-01 | 9.62E-01 | -6.69 |
| 1433839_PM_at   | Nars2                                 | NARS2   | 0.03  | 3.37 | 0.12  | 9.04E-01 | 9.62E-01 | -6.69 |
| 1427262_PM_at   | Xist                                  | NA      | 0.04  | 2.40 | 0.12  | 9.04E-01 | 9.62E-01 | -6.69 |
| 1453706_PM_at   | ---                                   | NA      | -0.02 | 3.25 | -0.12 | 9.04E-01 | 9.62E-01 | -6.69 |
| 1437270_PM_a_at | Ckcf1                                 | CLCF1   | 0.02  | 2.00 | 0.12  | 9.04E-01 | 9.62E-01 | -6.69 |
| 1428552_PM_at   | 2610001J05Rik                         | NA      | 0.03  | 6.21 | 0.12  | 9.04E-01 | 9.62E-01 | -6.69 |
| 1419029_PM_at   | Ero1l                                 | ERO1A   | 0.04  | 4.27 | 0.12  | 9.04E-01 | 9.62E-01 | -6.69 |
| 1454643_PM_at   | Ubpap2l                               | UBAP2L  | -0.05 | 3.94 | -0.12 | 9.04E-01 | 9.62E-01 | -6.69 |
| 1457738_PM_at   | Lsm14a                                | LSM14A  | 0.01  | 1.89 | 0.12  | 9.04E-01 | 9.62E-01 | -6.69 |

|                        |                                              |            |       |      |       |          |          |       |
|------------------------|----------------------------------------------|------------|-------|------|-------|----------|----------|-------|
| 1418447_PM_at          | Golga5                                       | GOLGA5     | -0.02 | 2.93 | -0.12 | 9.04E-01 | 9.62E-01 | -6.69 |
| 1456697_PM_x_at        | Dmtf1                                        | DMTF1      | 0.01  | 2.09 | 0.12  | 9.04E-01 | 9.62E-01 | -6.69 |
| 1447519_PM_x_at        | Tpx2                                         | TPX2       | 0.01  | 2.11 | 0.12  | 9.04E-01 | 9.62E-01 | -6.69 |
| 1415942_PM_at          | Gm5621 /// Rpl10 /// Rpl10-ps1 /// Rpl10-ps6 | NA         | -0.03 | 3.32 | -0.12 | 9.04E-01 | 9.62E-01 | -6.69 |
| 1448025_PM_at          | LOC100038947 /// Sirpb1a /// Sirpb1b         | SIRPB1     | -0.03 | 3.04 | -0.12 | 9.04E-01 | 9.62E-01 | -6.69 |
| 1421900_PM_at          | Eif2ak1                                      | EIF2AK1    | -0.02 | 3.06 | -0.12 | 9.04E-01 | 9.62E-01 | -6.69 |
| 1430204_PM_at          | ---                                          | NA         | -0.02 | 2.38 | -0.12 | 9.04E-01 | 9.62E-01 | -6.69 |
| 1417714_PM_x_at        | Hba-a1 /// Hba-a2                            | HBA1       | -0.02 | 2.44 | -0.12 | 9.04E-01 | 9.62E-01 | -6.69 |
| AFFX-NonspecificGC6_at | ---                                          | NA         | 0.01  | 1.89 | 0.12  | 9.04E-01 | 9.62E-01 | -6.69 |
| 1416752_PM_at          | Ldb3                                         | LDB3       | 0.01  | 2.60 | 0.12  | 9.04E-01 | 9.62E-01 | -6.69 |
| 1446852_PM_at          | ---                                          | NA         | 0.01  | 2.09 | 0.12  | 9.04E-01 | 9.62E-01 | -6.69 |
| 1436545_PM_at          | Dtx4                                         | DTX4       | 0.01  | 3.40 | 0.12  | 9.04E-01 | 9.62E-01 | -6.69 |
| 1417160_PM_s_at        | Wfdc18                                       | NA         | 0.02  | 2.66 | 0.12  | 9.04E-01 | 9.62E-01 | -6.69 |
| 1454288_PM_at          | ---                                          | NA         | 0.02  | 3.32 | 0.12  | 9.04E-01 | 9.62E-01 | -6.69 |
| 1434235_PM_at          | Slc20a2                                      | SLC20A2    | 0.03  | 4.39 | 0.12  | 9.04E-01 | 9.62E-01 | -6.69 |
| 1452288_PM_at          | Mtmr10                                       | MTMR10     | 0.03  | 3.06 | 0.12  | 9.04E-01 | 9.62E-01 | -6.69 |
| 1446630_PM_at          | ---                                          | NA         | 0.01  | 2.61 | 0.12  | 9.04E-01 | 9.62E-01 | -6.69 |
| 1442220_PM_at          | ---                                          | NA         | 0.03  | 5.01 | 0.12  | 9.05E-01 | 9.62E-01 | -6.69 |
| 1429217_PM_at          | Zfp655                                       | ZNF655     | -0.02 | 2.90 | -0.12 | 9.05E-01 | 9.62E-01 | -6.69 |
| 1446149_PM_at          | Ppp3cb                                       | PPP3CB     | -0.01 | 2.71 | -0.12 | 9.05E-01 | 9.62E-01 | -6.69 |
| 1432892_PM_at          | Dhrs7                                        | NA         | -0.02 | 2.23 | -0.12 | 9.05E-01 | 9.62E-01 | -6.69 |
| 1417803_PM_at          | Sptsb                                        | SPTSSB     | -0.01 | 2.48 | -0.12 | 9.05E-01 | 9.62E-01 | -6.69 |
| 1443652_PM_x_at        | Spred1                                       | SPRED1     | -0.02 | 2.87 | -0.12 | 9.05E-01 | 9.62E-01 | -6.69 |
| 1423045_PM_at          | Ncbp2                                        | NCBP2      | 0.02  | 2.90 | 0.12  | 9.05E-01 | 9.62E-01 | -6.69 |
| 1431925_PM_at          | 4933433H22Rik                                | NA         | 0.01  | 2.35 | 0.12  | 9.05E-01 | 9.62E-01 | -6.69 |
| 1459532_PM_at          | Grm7                                         | GRM7       | -0.02 | 2.70 | -0.12 | 9.05E-01 | 9.63E-01 | -6.69 |
| 1452076_PM_at          | Spryd4                                       | SPRYD4     | -0.01 | 2.32 | -0.12 | 9.05E-01 | 9.63E-01 | -6.69 |
| 1449937_PM_at          | Endou                                        | ENDOU      | 0.01  | 2.32 | 0.12  | 9.05E-01 | 9.63E-01 | -6.69 |
| 1422630_PM_at          | Rad50                                        | AC116366.3 | 0.01  | 2.41 | 0.12  | 9.05E-01 | 9.63E-01 | -6.69 |
| 1436434_PM_at          | E2f2                                         | E2F2       | 0.01  | 2.34 | 0.12  | 9.05E-01 | 9.63E-01 | -6.69 |
| 1453869_PM_at          | Gm5085                                       | NA         | 0.01  | 2.39 | 0.12  | 9.05E-01 | 9.63E-01 | -6.69 |
| 1415977_PM_at          | Isyna1                                       | ISYNA1     | 0.01  | 2.60 | 0.12  | 9.05E-01 | 9.63E-01 | -6.69 |
| 1438741_PM_at          | Tti2                                         | TTI2       | 0.04  | 4.09 | 0.12  | 9.05E-01 | 9.63E-01 | -6.69 |
| 1420533_PM_at          | Gucy1a3                                      | GUCY1A3    | -0.05 | 4.47 | -0.12 | 9.05E-01 | 9.63E-01 | -6.69 |
| 1443893_PM_at          | ---                                          | NA         | -0.05 | 3.98 | -0.12 | 9.05E-01 | 9.63E-01 | -6.69 |
| 1456130_PM_at          | Thsd7a                                       | THSD7A     | -0.04 | 7.37 | -0.12 | 9.05E-01 | 9.63E-01 | -6.69 |
| 1453369_PM_a_at        | Fundc1                                       | FUNDC1     | -0.04 | 2.55 | -0.12 | 9.05E-01 | 9.63E-01 | -6.69 |
| 1453411_PM_at          | Cmc1                                         | NA         | -0.04 | 3.34 | -0.12 | 9.05E-01 | 9.63E-01 | -6.69 |
| 1454645_PM_at          | Mgrn1                                        | MGRN1      | -0.04 | 3.84 | -0.12 | 9.05E-01 | 9.63E-01 | -6.69 |
| 1434068_PM_s_at        | Al662270                                     | NA         | -0.02 | 2.46 | -0.12 | 9.06E-01 | 9.63E-01 | -6.69 |
| 1427973_PM_s_at        | Cdc73                                        | CDC73      | 0.02  | 2.91 | 0.12  | 9.06E-01 | 9.63E-01 | -6.69 |
| 1420242_PM_at          | ---                                          | NA         | 0.04  | 2.36 | 0.12  | 9.06E-01 | 9.63E-01 | -6.69 |
| 1416207_PM_at          | Taz                                          | TAZ        | 0.04  | 3.28 | 0.12  | 9.06E-01 | 9.63E-01 | -6.69 |
| 1444353_PM_at          | ---                                          | NA         | -0.03 | 2.68 | -0.12 | 9.06E-01 | 9.63E-01 | -6.69 |
| 1450379_PM_at          | Msn                                          | MSN        | -0.02 | 2.27 | -0.12 | 9.06E-01 | 9.63E-01 | -6.69 |
| 1428865_PM_at          | Bcl2l12                                      | BCL2L12    | -0.01 | 2.43 | -0.12 | 9.06E-01 | 9.63E-01 | -6.69 |
| 1439049_PM_at          | Dph5                                         | DPH5       | 0.01  | 2.32 | 0.12  | 9.06E-01 | 9.63E-01 | -6.69 |
| 1443609_PM_s_at        | Syvn1                                        | SYVN1      | 0.02  | 3.50 | 0.12  | 9.06E-01 | 9.63E-01 | -6.69 |
| 1445304_PM_at          | Mgrn1                                        | NA         | 0.02  | 3.01 | 0.12  | 9.06E-01 | 9.63E-01 | -6.69 |
| 1439504_PM_s_at        | Zfp28                                        | ZFP28      | 0.03  | 2.92 | 0.12  | 9.06E-01 | 9.63E-01 | -6.69 |
| 1423518_PM_at          | Csk                                          | CSK        | -0.02 | 3.28 | -0.12 | 9.06E-01 | 9.63E-01 | -6.69 |
| 1439129_PM_at          | Dock5                                        | DOCK5      | -0.01 | 2.32 | -0.12 | 9.06E-01 | 9.63E-01 | -6.69 |
| 1443819_PM_x_at        | Fis1                                         | FIS1       | -0.01 | 2.66 | -0.12 | 9.06E-01 | 9.63E-01 | -6.69 |
| 1449122_PM_at          | Ubxn2b                                       | UBXN2B     | 0.02  | 3.04 | 0.12  | 9.06E-01 | 9.63E-01 | -6.69 |
| 1447297_PM_at          | ---                                          | NA         | -0.02 | 2.60 | -0.12 | 9.06E-01 | 9.63E-01 | -6.69 |
| 1446162_PM_at          | Pabpc5                                       | PABPC5     | 0.01  | 2.09 | 0.12  | 9.06E-01 | 9.63E-01 | -6.69 |
| 1446520_PM_at          | Il1rapl2                                     | IL1RAPL2   | -0.01 | 2.02 | -0.12 | 9.06E-01 | 9.63E-01 | -6.69 |
| 1435689_PM_at          | 9030025P20Rik /// Ermard /// Gm3435          | ERMARD     | -0.03 | 3.34 | -0.12 | 9.06E-01 | 9.63E-01 | -6.69 |
| 1455103_PM_at          | Ddx46                                        | DDX46      | 0.04  | 2.84 | 0.12  | 9.06E-01 | 9.63E-01 | -6.69 |
| 1421007_PM_at          | Col4a6                                       | COL4A6     | 0.02  | 2.40 | 0.12  | 9.06E-01 | 9.63E-01 | -6.69 |
| 1430177_PM_at          | ---                                          | NA         | 0.03  | 2.55 | 0.12  | 9.06E-01 | 9.63E-01 | -6.69 |
| 1451050_PM_at          | Nt5c3                                        | NT5C3A     | -0.02 | 2.66 | -0.12 | 9.06E-01 | 9.63E-01 | -6.69 |
| 1417204_PM_at          | Kdelr2                                       | KDELRL2    | -0.05 | 6.38 | -0.12 | 9.06E-01 | 9.63E-01 | -6.69 |
| 1418909_PM_at          | Ermapp                                       | ERMAP      | 0.01  | 2.40 | 0.12  | 9.06E-01 | 9.63E-01 | -6.69 |
| 1429889_PM_at          | Fcmr                                         | FCMR       | -0.01 | 1.99 | -0.12 | 9.07E-01 | 9.63E-01 | -6.69 |
| 1441714_PM_at          | ---                                          | NA         | 0.01  | 2.13 | 0.12  | 9.07E-01 | 9.63E-01 | -6.69 |
| AFFX-r2-Ec-bioC-5_at   | ---                                          | NA         | -0.02 | 8.83 | -0.12 | 9.07E-01 | 9.63E-01 | -6.69 |
| 1455432_PM_at          | Taok1                                        | TAOK1      | 0.04  | 4.54 | 0.12  | 9.07E-01 | 9.63E-01 | -6.69 |
| 1440662_PM_at          | ---                                          | NA         | 0.03  | 2.36 | 0.12  | 9.07E-01 | 9.63E-01 | -6.69 |
| 1457637_PM_at          | ---                                          | NA         | 0.06  | 3.73 | 0.12  | 9.07E-01 | 9.63E-01 | -6.69 |
| 1443599_PM_at          | ---                                          | NA         | -0.04 | 3.14 | -0.12 | 9.07E-01 | 9.63E-01 | -6.69 |
| 1442953_PM_at          | ---                                          | NA         | -0.02 | 2.87 | -0.12 | 9.07E-01 | 9.63E-01 | -6.69 |

|                 |                      |          |       |      |       |          |          |       |
|-----------------|----------------------|----------|-------|------|-------|----------|----------|-------|
| 1437139_PM_at   | Gira1                | GLRA1    | -0.07 | 2.63 | -0.12 | 9.07E-01 | 9.63E-01 | -6.69 |
| 1441015_PM_at   | ---                  | NA       | 0.01  | 2.29 | 0.12  | 9.07E-01 | 9.63E-01 | -6.69 |
| 1419576_PM_at   | Hoxb13               | HOXB13   | 0.02  | 2.54 | 0.12  | 9.07E-01 | 9.63E-01 | -6.69 |
| 1452654_PM_at   | Zdhhc2               | ZDHHC2   | -0.03 | 4.51 | -0.12 | 9.07E-01 | 9.63E-01 | -6.69 |
| 1457659_PM_x_at | Odf1                 | ODF1     | 0.02  | 2.48 | 0.12  | 9.07E-01 | 9.63E-01 | -6.69 |
| 1428136_PM_at   | Sfrp1                | SFRP1    | 0.01  | 2.58 | 0.12  | 9.07E-01 | 9.63E-01 | -6.69 |
| 1437225_PM_x_at | Gnai3                | GNAI3    | 0.02  | 3.71 | 0.12  | 9.07E-01 | 9.63E-01 | -6.69 |
| 1423144_PM_at   | Pik3ca               | PIK3CA   | 0.02  | 3.60 | 0.12  | 9.07E-01 | 9.63E-01 | -6.69 |
| 1440924_PM_at   | Kif20b               | KIF20B   | 0.03  | 2.48 | 0.12  | 9.07E-01 | 9.63E-01 | -6.69 |
| 1421896_PM_at   | Elk1                 | ELK1     | -0.04 | 4.49 | -0.12 | 9.07E-01 | 9.63E-01 | -6.69 |
| 1431180_PM_at   | Gm32687 /// Zfp433   | NA       | 0.01  | 2.48 | 0.12  | 9.07E-01 | 9.63E-01 | -6.69 |
| 1432815_PM_at   | 4833419A21Rik        | NA       | -0.01 | 2.01 | -0.12 | 9.07E-01 | 9.64E-01 | -6.69 |
| 1437661_PM_at   | AU021092             | C16orf89 | 0.02  | 2.49 | 0.12  | 9.07E-01 | 9.64E-01 | -6.69 |
| 1425883_PM_at   | Smg6                 | SMG6     | 0.01  | 2.48 | 0.12  | 9.08E-01 | 9.64E-01 | -6.69 |
| 1438197_PM_at   | Vezt                 | VEZT     | 0.07  | 3.53 | 0.12  | 9.08E-01 | 9.64E-01 | -6.69 |
| 1448536_PM_at   | Lsm3                 | LSM3     | -0.03 | 4.00 | -0.12 | 9.08E-01 | 9.64E-01 | -6.69 |
| 1442239_PM_at   | ---                  | NA       | 0.02  | 2.67 | 0.12  | 9.08E-01 | 9.64E-01 | -6.69 |
| 1435406_PM_at   | Cchcr1               | CCHCR1   | 0.02  | 2.27 | 0.12  | 9.08E-01 | 9.64E-01 | -6.69 |
| 1426420_PM_at   | ---                  | NA       | 0.03  | 3.88 | 0.12  | 9.08E-01 | 9.64E-01 | -6.69 |
| 1417061_PM_at   | Slc40a1              | SLC40A1  | -0.02 | 3.04 | -0.12 | 9.08E-01 | 9.64E-01 | -6.69 |
| 1428790_PM_at   | Nfam1                | NFAM1    | 0.02  | 2.61 | 0.12  | 9.08E-01 | 9.64E-01 | -6.69 |
| 1436495_PM_s_at | Zfp260               | ZNF260   | 0.04  | 7.03 | 0.12  | 9.08E-01 | 9.64E-01 | -6.69 |
| 1438856_PM_x_at | Serpib5              | SERPIN5  | -0.02 | 2.28 | -0.12 | 9.08E-01 | 9.64E-01 | -6.69 |
| 1442424_PM_at   | ---                  | NA       | -0.02 | 2.78 | -0.12 | 9.08E-01 | 9.64E-01 | -6.69 |
| 1449815_PM_a_at | Ssbp2                | SSBP2    | -0.05 | 4.63 | -0.12 | 9.08E-01 | 9.64E-01 | -6.69 |
| 1437892_PM_at   | Zkscan3              | ZKSCAN4  | -0.01 | 2.51 | -0.12 | 9.08E-01 | 9.64E-01 | -6.69 |
| 1419460_PM_at   | Rpp14                | RPP14    | 0.03  | 3.29 | 0.12  | 9.08E-01 | 9.64E-01 | -6.69 |
| 1424760_PM_a_at | Smyd2                | SMYD2    | 0.03  | 4.58 | 0.12  | 9.08E-01 | 9.64E-01 | -6.69 |
| 1453149_PM_at   | Slc25a32             | SLC25A32 | -0.02 | 3.25 | -0.12 | 9.08E-01 | 9.64E-01 | -6.69 |
| 1423585_PM_at   | Igfbp7               | IGFBP7   | -0.02 | 2.84 | -0.12 | 9.08E-01 | 9.64E-01 | -6.69 |
| 1431500_PM_at   | 4933406j10Rik        | NA       | 0.02  | 2.48 | 0.12  | 9.08E-01 | 9.64E-01 | -6.69 |
| 1445651_PM_at   | ---                  | NA       | 0.02  | 2.55 | 0.12  | 9.08E-01 | 9.64E-01 | -6.69 |
| 1443426_PM_at   | Sltm                 | NA       | 0.02  | 2.60 | 0.12  | 9.08E-01 | 9.64E-01 | -6.69 |
| 1457021_PM_x_at | Amhr2                | AMHR2    | 0.04  | 3.07 | 0.12  | 9.08E-01 | 9.64E-01 | -6.69 |
| 1454475_PM_at   | 4921524M04Rik        | NA       | -0.01 | 2.28 | -0.12 | 9.08E-01 | 9.64E-01 | -6.69 |
| 1445086_PM_at   | ---                  | NA       | -0.01 | 2.37 | -0.12 | 9.08E-01 | 9.64E-01 | -6.69 |
| 1457733_PM_at   | Cntnap5a             | CNTNAP5  | 0.02  | 2.87 | 0.12  | 9.08E-01 | 9.64E-01 | -6.69 |
| 1433600_PM_at   | Adra2a               | ADRA2A   | 0.01  | 2.97 | 0.12  | 9.08E-01 | 9.64E-01 | -6.69 |
| 1434081_PM_at   | Ap1g1                | AP1G1    | -0.04 | 5.22 | -0.12 | 9.09E-01 | 9.64E-01 | -6.69 |
| 1448623_PM_at   | Tmem123              | TMEM123  | -0.03 | 2.69 | -0.12 | 9.09E-01 | 9.64E-01 | -6.69 |
| 1453463_PM_at   | 1700019B03Rik        | TEX45    | -0.01 | 2.13 | -0.12 | 9.09E-01 | 9.64E-01 | -6.69 |
| 1427961_PM_s_at | Ugt2b34              | UGT2B15  | -0.01 | 2.00 | -0.12 | 9.09E-01 | 9.64E-01 | -6.69 |
| 1430971_PM_a_at | Aqr                  | AQR      | 0.01  | 2.17 | 0.12  | 9.09E-01 | 9.64E-01 | -6.69 |
| 1425611_PM_a_at | Cux1                 | CUX1     | 0.01  | 2.32 | 0.12  | 9.09E-01 | 9.64E-01 | -6.69 |
| 1458655_PM_at   | ---                  | NA       | 0.02  | 2.63 | 0.12  | 9.09E-01 | 9.64E-01 | -6.69 |
| 1455314_PM_at   | Lpp                  | LPP      | 0.03  | 3.02 | 0.12  | 9.09E-01 | 9.64E-01 | -6.69 |
| 1423225_PM_at   | Selk                 | SELENOK  | 0.03  | 3.43 | 0.12  | 9.09E-01 | 9.64E-01 | -6.69 |
| 1444587_PM_at   | Al481207             | NA       | 0.04  | 3.19 | 0.12  | 9.09E-01 | 9.64E-01 | -6.69 |
| 1427460_PM_at   | Taf4a                | TAF4     | 0.01  | 2.69 | 0.12  | 9.09E-01 | 9.64E-01 | -6.69 |
| 1440497_PM_at   | Cmtr1 /// Rnf8-cmtr1 | CMTR1    | 0.01  | 2.37 | 0.12  | 9.09E-01 | 9.64E-01 | -6.69 |
| 1438948_PM_x_at | Tspo                 | TSPO     | -0.01 | 1.99 | -0.12 | 9.09E-01 | 9.64E-01 | -6.69 |
| 1416192_PM_at   | Napa                 | NAPA     | 0.02  | 2.61 | 0.12  | 9.09E-01 | 9.64E-01 | -6.69 |
| 1441655_PM_at   | Gm884                | LRRC37B  | -0.01 | 2.38 | -0.12 | 9.09E-01 | 9.64E-01 | -6.69 |
| 1420261_PM_at   | Psen1                | PSEN1    | 0.01  | 2.11 | 0.12  | 9.09E-01 | 9.64E-01 | -6.69 |
| 1421400_PM_at   | Kcnmb1               | KCNMB1   | 0.01  | 2.09 | 0.12  | 9.09E-01 | 9.64E-01 | -6.69 |
| 1450232_PM_at   | Xiap                 | NA       | 0.02  | 2.39 | 0.12  | 9.09E-01 | 9.64E-01 | -6.69 |
| 1428348_PM_at   | Gzf1                 | GZF1     | 0.02  | 2.22 | 0.12  | 9.09E-01 | 9.64E-01 | -6.69 |
| 1438928_PM_x_at | Ninj1                | NINJ1    | 0.02  | 2.65 | 0.12  | 9.09E-01 | 9.64E-01 | -6.69 |
| 1454972_PM_at   | Atcay                | ATCAY    | 0.03  | 4.67 | 0.12  | 9.09E-01 | 9.64E-01 | -6.69 |
| 1424154_PM_a_at | Isc a2               | ISCA2    | 0.03  | 5.30 | 0.12  | 9.09E-01 | 9.64E-01 | -6.69 |
| 1438333_PM_at   | Prtg                 | PRTG     | 0.03  | 2.43 | 0.12  | 9.09E-01 | 9.64E-01 | -6.69 |
| 1415772_PM_at   | Ncl                  | NCL      | -0.03 | 3.93 | -0.12 | 9.09E-01 | 9.64E-01 | -6.69 |
| 1436840_PM_x_at | Rpl35                | RPL35    | 0.02  | 7.97 | 0.12  | 9.09E-01 | 9.64E-01 | -6.69 |
| 1418725_PM_at   | Dnajc5b              | DNAJC5B  | 0.02  | 2.54 | 0.12  | 9.09E-01 | 9.64E-01 | -6.69 |
| 1422553_PM_at   | Pten                 | PTEN     | 0.03  | 4.93 | 0.12  | 9.09E-01 | 9.65E-01 | -6.69 |
| 1448337_PM_at   | Uqcc1                | UQCC1    | 0.02  | 3.29 | 0.12  | 9.09E-01 | 9.65E-01 | -6.69 |
| 1450260_PM_at   | Grpr                 | GRPR     | 0.02  | 2.43 | 0.12  | 9.10E-01 | 9.65E-01 | -6.69 |
| 1460153_PM_at   | ---                  | NA       | 0.02  | 3.11 | 0.12  | 9.09E-01 | 9.65E-01 | -6.69 |
| 1417710_PM_at   | Mettl9               | METTL9   | 0.02  | 3.10 | 0.12  | 9.10E-01 | 9.65E-01 | -6.69 |
| 1434932_PM_at   | Adarb1               | ADARB1   | 0.03  | 3.93 | 0.12  | 9.10E-01 | 9.65E-01 | -6.69 |
| 1457252_PM_x_at | Pld2                 | PLD2     | 0.05  | 5.09 | 0.12  | 9.09E-01 | 9.65E-01 | -6.69 |
| 1418112_PM_at   | Mrp10                | MRPL10   | -0.04 | 3.17 | -0.12 | 9.10E-01 | 9.65E-01 | -6.69 |
| 1432145_PM_at   | 2310026i22Rik        | NA       | -0.01 | 2.10 | -0.12 | 9.10E-01 | 9.65E-01 | -6.69 |
| 1445892_PM_at   | ---                  | NA       | -0.01 | 2.42 | -0.12 | 9.10E-01 | 9.65E-01 | -6.69 |
| 1455705_PM_at   | Tmem161a             | TMEM161A | 0.02  | 2.99 | 0.12  | 9.10E-01 | 9.65E-01 | -6.69 |

|                 |                                               |          |       |      |       |          |          |       |
|-----------------|-----------------------------------------------|----------|-------|------|-------|----------|----------|-------|
| 1448060_PM_at   | Sema6d                                        | SEMA6D   | 0.03  | 2.95 | 0.12  | 9.10E-01 | 9.65E-01 | -6.69 |
| 1446237_PM_at   | Akap9                                         | AKAP9    | 0.03  | 3.72 | 0.12  | 9.10E-01 | 9.65E-01 | -6.69 |
| 1419208_PM_at   | Map3k8                                        | MAP3K8   | 0.01  | 2.30 | 0.12  | 9.10E-01 | 9.65E-01 | -6.69 |
| 1431055_PM_a_at | Srx10                                         | SNX10    | -0.02 | 4.31 | -0.12 | 9.10E-01 | 9.65E-01 | -6.69 |
| 1443111_PM_at   | Plekha1                                       | PLEKHA1  | 0.01  | 2.45 | 0.12  | 9.10E-01 | 9.65E-01 | -6.69 |
| 1449092_PM_at   | Ppm1d                                         | PPM1D    | 0.03  | 2.69 | 0.12  | 9.10E-01 | 9.65E-01 | -6.69 |
| 1421740_PM_at   | Gnas                                          | NA       | -0.01 | 2.12 | -0.12 | 9.10E-01 | 9.65E-01 | -6.69 |
| 1440845_PM_at   | Gm31539 /// Tmem243                           | TMEM243  | 0.02  | 2.36 | 0.12  | 9.10E-01 | 9.65E-01 | -6.69 |
| 1425661_PM_at   | Cdadc1                                        | NA       | 0.04  | 4.05 | 0.12  | 9.10E-01 | 9.65E-01 | -6.69 |
| 1430151_PM_at   | Nisch                                         | NISCH    | -0.02 | 2.93 | -0.12 | 9.10E-01 | 9.65E-01 | -6.69 |
| 1433051_PM_at   | ---                                           | NA       | -0.01 | 2.29 | -0.12 | 9.10E-01 | 9.65E-01 | -6.69 |
| 1432496_PM_at   | 1700122O11Rik                                 | NA       | -0.01 | 2.17 | -0.12 | 9.10E-01 | 9.65E-01 | -6.69 |
| 1441973_PM_at   | Zbtb21                                        | ZBTB21   | 0.03  | 2.43 | 0.12  | 9.10E-01 | 9.65E-01 | -6.69 |
| 1425831_PM_at   | Zfp101                                        | NA       | 0.02  | 2.49 | 0.12  | 9.10E-01 | 9.65E-01 | -6.69 |
| 1442399_PM_at   | ---                                           | NA       | -0.01 | 2.25 | -0.12 | 9.10E-01 | 9.65E-01 | -6.69 |
| 1454082_PM_a_at | Sk1b                                          | SLX1B    | -0.01 | 2.51 | -0.12 | 9.10E-01 | 9.65E-01 | -6.69 |
| 1423201_PM_at   | Ncor1                                         | NCOR1    | 0.05  | 8.21 | 0.12  | 9.10E-01 | 9.65E-01 | -6.69 |
| 1427779_PM_a_at | Cd4                                           | CD4      | -0.02 | 2.64 | -0.12 | 9.10E-01 | 9.65E-01 | -6.69 |
| 1451098_PM_at   | Chmp1a                                        | CHMP1A   | 0.03  | 3.86 | 0.12  | 9.11E-01 | 9.65E-01 | -6.69 |
| 1452387_PM_a_at | Amotl2                                        | AMOTL2   | -0.01 | 2.86 | -0.12 | 9.11E-01 | 9.65E-01 | -6.69 |
| 1427380_PM_at   | Klk1b3                                        | KLK3     | -0.01 | 2.09 | -0.12 | 9.11E-01 | 9.65E-01 | -6.69 |
| 1458311_PM_at   | Usp36                                         | USP36    | 0.05  | 4.22 | 0.12  | 9.11E-01 | 9.65E-01 | -6.69 |
| 1437512_PM_x_at | Ebna1bp2                                      | EBNA1BP2 | 0.01  | 2.24 | 0.11  | 9.11E-01 | 9.65E-01 | -6.69 |
| 1426471_PM_at   | Zfp52                                         | NA       | -0.02 | 2.34 | -0.11 | 9.11E-01 | 9.65E-01 | -6.69 |
| 1459091_PM_at   | ---                                           | NA       | -0.01 | 2.09 | -0.11 | 9.11E-01 | 9.65E-01 | -6.69 |
| 1436411_PM_at   | Atp13a5                                       | ATP13A5  | -0.02 | 2.15 | -0.11 | 9.11E-01 | 9.65E-01 | -6.69 |
| 1438980_PM_x_at | Pm20d1                                        | PM20D1   | -0.01 | 2.14 | -0.11 | 9.11E-01 | 9.65E-01 | -6.69 |
| 1445607_PM_at   | Dcaf17                                        | DCAF17   | -0.01 | 2.38 | -0.11 | 9.11E-01 | 9.65E-01 | -6.69 |
| 1438793_PM_x_at | Ergic1                                        | ERGIC1   | -0.01 | 2.29 | -0.11 | 9.11E-01 | 9.65E-01 | -6.69 |
| 1419609_PM_at   | Ccr1                                          | CCR1     | 0.01  | 2.15 | 0.11  | 9.11E-01 | 9.65E-01 | -6.69 |
| 1454582_PM_at   | D530037P16Rik                                 | NA       | 0.01  | 2.20 | 0.11  | 9.11E-01 | 9.65E-01 | -6.69 |
| 1446347_PM_at   | ---                                           | NA       | 0.01  | 2.19 | 0.11  | 9.11E-01 | 9.65E-01 | -6.69 |
| 1441098_PM_at   | Pnlc1                                         | NA       | 0.02  | 2.72 | 0.11  | 9.11E-01 | 9.65E-01 | -6.69 |
| 1442138_PM_at   | Gpr62                                         | GPR62    | 0.03  | 2.65 | 0.11  | 9.11E-01 | 9.65E-01 | -6.69 |
| 1434107_PM_at   | Spata2                                        | SPATA2   | 0.05  | 4.26 | 0.11  | 9.11E-01 | 9.65E-01 | -6.69 |
| 1438927_PM_x_at | Gm8290 /// Rpl23a                             | RPL23A   | 0.01  | 2.23 | 0.11  | 9.11E-01 | 9.65E-01 | -6.69 |
| 1449008_PM_at   | Tulp3                                         | NA       | -0.01 | 2.88 | -0.11 | 9.11E-01 | 9.65E-01 | -6.69 |
| 1443888_PM_at   | AU023762                                      | NA       | -0.01 | 2.40 | -0.11 | 9.11E-01 | 9.65E-01 | -6.69 |
| 1454296_PM_at   | ---                                           | NA       | 0.01  | 2.14 | 0.11  | 9.11E-01 | 9.65E-01 | -6.69 |
| 1431593_PM_a_at | Tsen34                                        | TSEN34   | 0.02  | 3.12 | 0.11  | 9.11E-01 | 9.65E-01 | -6.69 |
| 1427537_PM_at   | Eppk1                                         | NA       | 0.01  | 2.09 | 0.11  | 9.11E-01 | 9.65E-01 | -6.69 |
| 1451287_PM_s_at | Aif1                                          | AIF1L    | -0.02 | 2.46 | -0.11 | 9.11E-01 | 9.65E-01 | -6.69 |
| 1449301_PM_at   | Slc7a13                                       | SLC7A13  | -0.01 | 2.78 | -0.11 | 9.11E-01 | 9.65E-01 | -6.69 |
| 1446809_PM_at   | ---                                           | NA       | -0.01 | 2.32 | -0.11 | 9.11E-01 | 9.65E-01 | -6.69 |
| 1420298_PM_at   | ---                                           | NA       | 0.02  | 2.47 | 0.11  | 9.11E-01 | 9.65E-01 | -6.69 |
| 1445198_PM_at   | Kdm6a                                         | KDM6A    | 0.04  | 2.86 | 0.11  | 9.11E-01 | 9.65E-01 | -6.69 |
| 1429095_PM_at   | Cenpp                                         | CENPP    | -0.01 | 2.29 | -0.11 | 9.11E-01 | 9.65E-01 | -6.69 |
| 1429557_PM_at   | Mcm8                                          | MCM8     | 0.02  | 2.41 | 0.11  | 9.11E-01 | 9.65E-01 | -6.69 |
| 1425173_PM_s_at | Golph3l                                       | GOLPH3L  | -0.06 | 4.81 | -0.11 | 9.12E-01 | 9.65E-01 | -6.69 |
| 1433882_PM_at   | Cnot10                                        | CNOT10   | -0.03 | 4.06 | -0.11 | 9.11E-01 | 9.65E-01 | -6.69 |
| 1424144_PM_at   | Cdt1                                          | CDT1     | 0.01  | 1.97 | 0.11  | 9.11E-01 | 9.65E-01 | -6.69 |
| 1454256_PM_s_at | Ptges3l                                       | PTGES3L  | 0.01  | 2.09 | 0.11  | 9.11E-01 | 9.65E-01 | -6.69 |
| 1438544_PM_at   | 1700001G11Rik                                 | NA       | 0.01  | 2.35 | 0.11  | 9.12E-01 | 9.65E-01 | -6.69 |
| 1454398_PM_at   | ---                                           | NA       | -0.01 | 2.52 | -0.11 | 9.12E-01 | 9.65E-01 | -6.69 |
| 1416173_PM_at   | Pes1                                          | PES1     | 0.01  | 2.09 | 0.11  | 9.12E-01 | 9.65E-01 | -6.69 |
| 1432574_PM_at   | ---                                           | NA       | 0.01  | 2.23 | 0.11  | 9.12E-01 | 9.65E-01 | -6.69 |
| 1433130_PM_at   | 8430418B16Rik                                 | NA       | 0.02  | 2.25 | 0.11  | 9.12E-01 | 9.65E-01 | -6.69 |
| 1458406_PM_at   | ---                                           | NA       | -0.04 | 3.28 | -0.11 | 9.12E-01 | 9.65E-01 | -6.69 |
| 1424473_PM_at   | Polr2h                                        | POLR2H   | -0.03 | 4.89 | -0.11 | 9.12E-01 | 9.65E-01 | -6.69 |
| 1430665_PM_at   | 5730480H06Rik /// Pacrgl<br>1190007I07Rik /// | PACRGL   | 0.01  | 2.55 | 0.11  | 9.12E-01 | 9.65E-01 | -6.69 |
| 1429259_PM_a_at | 1810014B01Rik                                 | C12orf73 | 0.01  | 3.40 | 0.11  | 9.12E-01 | 9.65E-01 | -6.69 |
| 1430486_PM_at   | Rad51b                                        | RAD51B   | -0.01 | 2.21 | -0.11 | 9.12E-01 | 9.65E-01 | -6.69 |
| 1447594_PM_at   | 1810012K16Rik                                 | NA       | 0.01  | 2.13 | 0.11  | 9.12E-01 | 9.65E-01 | -6.69 |
| 1422030_PM_at   | Atp6v0a4                                      | ATP6V0A4 | 0.01  | 2.58 | 0.11  | 9.12E-01 | 9.65E-01 | -6.69 |
| 1436182_PM_at   | Satb1                                         | SATB1    | -0.04 | 3.49 | -0.11 | 9.12E-01 | 9.66E-01 | -6.69 |
| 1434956_PM_at   | Rnf170                                        | RNF170   | -0.04 | 4.60 | -0.11 | 9.12E-01 | 9.66E-01 | -6.69 |
| 1451083_PM_s_at | Aars                                          | AARS     | -0.03 | 3.99 | -0.11 | 9.12E-01 | 9.66E-01 | -6.69 |
| 1452286_PM_at   | Slain2                                        | SLAIN2   | -0.03 | 5.13 | -0.11 | 9.12E-01 | 9.66E-01 | -6.69 |
| 1426437_PM_s_at | Hdac3                                         | HDAC3    | -0.03 | 3.60 | -0.11 | 9.12E-01 | 9.66E-01 | -6.69 |
| 1457728_PM_at   | Fam129c                                       | FAM129C  | -0.02 | 2.33 | -0.11 | 9.12E-01 | 9.66E-01 | -6.69 |
| 1443582_PM_at   | Gas2l2                                        | NA       | -0.01 | 2.48 | -0.11 | 9.12E-01 | 9.66E-01 | -6.69 |
| 1436881_PM_x_at | Afp                                           | AFP      | -0.01 | 2.15 | -0.11 | 9.12E-01 | 9.66E-01 | -6.69 |
| 1455996_PM_x_at | Prap1                                         | PRAP1    | -0.01 | 2.89 | -0.11 | 9.12E-01 | 9.66E-01 | -6.69 |



|                 |                     |         |       |      |       |          |          |       |
|-----------------|---------------------|---------|-------|------|-------|----------|----------|-------|
| 1443933_PM_at   | Tc2n                | TC2N    | -0.01 | 2.31 | -0.11 | 9.12E-01 | 9.66E-01 | -6.69 |
| 1424369_PM_at   | Psmf1               | PSMF1   | 0.01  | 2.05 | 0.11  | 9.12E-01 | 9.66E-01 | -6.69 |
| 1447212_PM_at   | ---                 | NA      | 0.01  | 2.07 | 0.11  | 9.12E-01 | 9.66E-01 | -6.69 |
| 1444427_PM_at   | Lipi                | LIP1    | 0.01  | 2.26 | 0.11  | 9.12E-01 | 9.66E-01 | -6.69 |
| 1433823_PM_at   | Ptpdc1              | PTPDC1  | 0.02  | 2.04 | 0.11  | 9.12E-01 | 9.66E-01 | -6.69 |
| 1448167_PM_at   | Ifngr1              | IFNGR1  | 0.02  | 2.63 | 0.11  | 9.12E-01 | 9.66E-01 | -6.69 |
| 1419874_PM_x_at | Zbtb16              | ZBTB16  | 0.03  | 5.21 | 0.11  | 9.12E-01 | 9.66E-01 | -6.69 |
| 1433408_PM_a_at | Mcm10               | MCM10   | 0.01  | 2.53 | 0.11  | 9.12E-01 | 9.66E-01 | -6.69 |
| 1426308_PM_at   | Mbd3l1              | MBD3L1  | 0.01  | 2.44 | 0.11  | 9.12E-01 | 9.66E-01 | -6.69 |
| 1457751_PM_at   | Rsf1                | RSF1    | -0.06 | 3.17 | -0.11 | 9.13E-01 | 9.66E-01 | -6.69 |
| 1458144_PM_at   | ---                 | NA      | -0.02 | 2.32 | -0.11 | 9.13E-01 | 9.66E-01 | -6.69 |
| 1451937_PM_at   | Gira4               | GLRA4   | -0.01 | 2.00 | -0.11 | 9.13E-01 | 9.66E-01 | -6.69 |
| 1428758_PM_at   | Tmem86a             | TMEM86A | 0.02  | 2.57 | 0.11  | 9.13E-01 | 9.66E-01 | -6.69 |
| 1415842_PM_at   | Mlst8               | MLST8   | 0.01  | 2.71 | 0.11  | 9.13E-01 | 9.66E-01 | -6.69 |
| 1417437_PM_at   | Xrcc6               | XRCC6   | 0.02  | 2.68 | 0.11  | 9.13E-01 | 9.66E-01 | -6.69 |
| 1445502_PM_at   | C78859 /// Mir138-2 | NA      | -0.03 | 2.35 | -0.11 | 9.13E-01 | 9.66E-01 | -6.69 |
| 1430012_PM_at   | Fendrr              | NA      | -0.01 | 2.51 | -0.11 | 9.13E-01 | 9.66E-01 | -6.69 |
| 1453383_PM_at   | Dcdc2c              | NA      | 0.01  | 2.02 | 0.11  | 9.13E-01 | 9.66E-01 | -6.69 |
| 1420490_PM_at   | Klk1b16             | KLK3    | -0.01 | 2.16 | -0.11 | 9.13E-01 | 9.66E-01 | -6.69 |
| 1441463_PM_at   | ---                 | NA      | -0.01 | 2.76 | -0.11 | 9.13E-01 | 9.66E-01 | -6.69 |
| 1431261_PM_at   | Clic5               | CLIC5   | -0.01 | 2.30 | -0.11 | 9.13E-01 | 9.66E-01 | -6.69 |
| 1429762_PM_a_at | Bbs5                | BBS5    | 0.03  | 3.43 | 0.11  | 9.13E-01 | 9.66E-01 | -6.69 |
| 1452768_PM_at   | Tex261              | TEX261  | -0.02 | 3.93 | -0.11 | 9.13E-01 | 9.66E-01 | -6.69 |
| 1457407_PM_at   | ---                 | NA      | -0.01 | 2.64 | -0.11 | 9.13E-01 | 9.66E-01 | -6.69 |
| 1453792_PM_at   | Zfp329              | NA      | 0.01  | 2.25 | 0.11  | 9.13E-01 | 9.66E-01 | -6.69 |
| 1448032_PM_at   | Azi2                | AZI2    | -0.03 | 2.81 | -0.11 | 9.13E-01 | 9.66E-01 | -6.69 |
| 1421320_PM_a_at | Qtrtd1              | QTRT2   | -0.01 | 2.51 | -0.11 | 9.13E-01 | 9.66E-01 | -6.69 |
| 1460163_PM_at   | C1qtnf7             | NA      | -0.01 | 1.95 | -0.11 | 9.13E-01 | 9.66E-01 | -6.69 |
| 1450979_PM_at   | Ceacam14            | CEACAM3 | 0.01  | 1.95 | 0.11  | 9.13E-01 | 9.66E-01 | -6.69 |
| 1431601_PM_at   | Rsph14              | RSPH14  | 0.01  | 2.22 | 0.11  | 9.13E-01 | 9.66E-01 | -6.69 |
| 1418472_PM_at   | Aspa                | ASPA    | 0.01  | 3.37 | 0.11  | 9.13E-01 | 9.66E-01 | -6.69 |
| 1455797_PM_x_at | Eif2d               | EIF2D   | 0.02  | 3.11 | 0.11  | 9.13E-01 | 9.66E-01 | -6.69 |
| 1416812_PM_at   | Tia1                | TIA1    | 0.02  | 3.69 | 0.11  | 9.13E-01 | 9.66E-01 | -6.69 |
| 1445368_PM_at   | ---                 | NA      | 0.01  | 2.78 | 0.11  | 9.13E-01 | 9.66E-01 | -6.69 |
| 1444536_PM_at   | ---                 | NA      | -0.02 | 2.33 | -0.11 | 9.13E-01 | 9.66E-01 | -6.69 |
| 1426499_PM_at   | Sh3glb2             | SH3GLB2 | -0.02 | 3.38 | -0.11 | 9.13E-01 | 9.66E-01 | -6.69 |
| 1432315_PM_at   | Grip1os1            | NA      | -0.01 | 2.06 | -0.11 | 9.13E-01 | 9.66E-01 | -6.69 |
| 1437247_PM_at   | Fosl2               | FOSL2   | -0.04 | 3.72 | -0.11 | 9.14E-01 | 9.66E-01 | -6.69 |
| 1425790_PM_a_at | Grik2               | GRK2    | -0.03 | 4.05 | -0.11 | 9.13E-01 | 9.66E-01 | -6.69 |
| 1439657_PM_at   | ---                 | NA      | -0.01 | 2.42 | -0.11 | 9.13E-01 | 9.66E-01 | -6.69 |
| 1439383_PM_x_at | Ppp2r4              | PTPA    | 0.01  | 2.17 | 0.11  | 9.13E-01 | 9.66E-01 | -6.69 |
| 1428033_PM_at   | Zfp937              | NA      | 0.01  | 2.63 | 0.11  | 9.14E-01 | 9.66E-01 | -6.69 |
| 1438220_PM_at   | Foxj3               | FOXJ3   | 0.01  | 2.33 | 0.11  | 9.13E-01 | 9.66E-01 | -6.69 |
| 1436158_PM_at   | ---                 | NA      | 0.02  | 2.56 | 0.11  | 9.14E-01 | 9.66E-01 | -6.69 |
| 1424946_PM_a_at | Mtfr1               | MTFR1   | 0.02  | 3.05 | 0.11  | 9.13E-01 | 9.66E-01 | -6.69 |
| 1419256_PM_at   | Sptbn1              | SPTBN1  | 0.03  | 8.23 | 0.11  | 9.14E-01 | 9.66E-01 | -6.69 |
| 1426360_PM_at   | Zbed6 /// Zc3h11a   | ZC3H11B | 0.04  | 3.60 | 0.11  | 9.14E-01 | 9.66E-01 | -6.69 |
| 1454948_PM_at   | Usp7                | USP7    | -0.03 | 3.11 | -0.11 | 9.14E-01 | 9.66E-01 | -6.69 |
| 1426951_PM_at   | Crim1               | CRIM1   | -0.03 | 2.87 | -0.11 | 9.14E-01 | 9.66E-01 | -6.69 |
| 1424452_PM_at   | Sltm                | SLTM    | 0.01  | 3.02 | 0.11  | 9.14E-01 | 9.66E-01 | -6.70 |
| 1424717_PM_at   | Mis12               | MIS12   | -0.02 | 2.74 | -0.11 | 9.14E-01 | 9.66E-01 | -6.70 |
| 1424288_PM_at   | Mepce               | MEPCE   | -0.02 | 2.48 | -0.11 | 9.14E-01 | 9.66E-01 | -6.70 |
| 1454309_PM_at   | ---                 | NA      | -0.02 | 2.25 | -0.11 | 9.14E-01 | 9.66E-01 | -6.70 |
| 1450879_PM_at   | Atp9b               | ATP9B   | -0.01 | 2.47 | -0.11 | 9.14E-01 | 9.66E-01 | -6.70 |
| 1449260_PM_at   | Rab3d               | RAB3D   | 0.03  | 2.59 | 0.11  | 9.14E-01 | 9.66E-01 | -6.70 |
| 1457225_PM_at   | Orfr288             | OR10AD1 | 0.06  | 2.70 | 0.11  | 9.14E-01 | 9.66E-01 | -6.70 |
| 1424248_PM_at   | Arpp21              | ARPP21  | 0.08  | 5.47 | 0.11  | 9.14E-01 | 9.66E-01 | -6.70 |
| 1454380_PM_at   | ---                 | NA      | -0.01 | 2.11 | -0.11 | 9.14E-01 | 9.66E-01 | -6.70 |
| 1432203_PM_at   | Tmc05b              | NA      | 0.01  | 2.24 | 0.11  | 9.14E-01 | 9.66E-01 | -6.70 |
| 1438558_PM_x_at | Foxq1               | FOXQ1   | -0.04 | 2.59 | -0.11 | 9.14E-01 | 9.66E-01 | -6.70 |
| 1423530_PM_at   | Stk32c              | STK32C  | 0.01  | 2.37 | 0.11  | 9.14E-01 | 9.66E-01 | -6.70 |
| 1426921_PM_at   | Abcf1               | ABCF1   | 0.01  | 2.71 | 0.11  | 9.14E-01 | 9.66E-01 | -6.70 |
| 1459911_PM_at   | Cdr2l               | CDR2L   | 0.02  | 3.05 | 0.11  | 9.14E-01 | 9.66E-01 | -6.70 |
| 1437113_PM_s_at | Pld1                | PLD1    | 0.01  | 2.22 | 0.11  | 9.14E-01 | 9.66E-01 | -6.70 |
| 1441891_PM_x_at | Elov17              | ELOVL7  | -0.03 | 2.92 | -0.11 | 9.14E-01 | 9.66E-01 | -6.70 |
| 1429734_PM_at   | Ddias               | DDIAS   | -0.02 | 2.32 | -0.11 | 9.14E-01 | 9.66E-01 | -6.70 |
| 1427141_PM_at   | 2700099C18Rik       | NA      | -0.01 | 2.03 | -0.11 | 9.14E-01 | 9.66E-01 | -6.70 |
| 1446899_PM_at   | ---                 | NA      | -0.01 | 2.43 | -0.11 | 9.14E-01 | 9.66E-01 | -6.70 |
| 1457862_PM_at   | ---                 | NA      | 0.01  | 2.08 | 0.11  | 9.14E-01 | 9.66E-01 | -6.70 |
| 1434186_PM_at   | Lpar4               | LPAR4   | 0.01  | 1.88 | 0.11  | 9.14E-01 | 9.66E-01 | -6.70 |
| 1423293_PM_at   | Rpa1                | RPA1    | -0.02 | 3.22 | -0.11 | 9.14E-01 | 9.66E-01 | -6.70 |
| 1456742_PM_x_at | Tm9sf2              | TM9SF2  | 0.01  | 2.01 | 0.11  | 9.14E-01 | 9.66E-01 | -6.70 |
| 1420157_PM_s_at | Abcf1               | ABCF1   | -0.04 | 3.83 | -0.11 | 9.15E-01 | 9.66E-01 | -6.70 |
| 1450908_PM_at   | Eif4e               | EIF4E   | -0.03 | 4.49 | -0.11 | 9.15E-01 | 9.66E-01 | -6.70 |
| 1447527_PM_at   | ---                 | NA      | -0.01 | 2.37 | -0.11 | 9.15E-01 | 9.66E-01 | -6.70 |

|                 |                             |          |       |      |       |          |          |       |
|-----------------|-----------------------------|----------|-------|------|-------|----------|----------|-------|
| 1442306_PM_at   | ---                         | NA       | 0.01  | 1.91 | 0.11  | 9.15E-01 | 9.66E-01 | -6.70 |
| 1420252_PM_at   | ---                         | NA       | 0.01  | 2.96 | 0.11  | 9.15E-01 | 9.66E-01 | -6.70 |
| 1427550_PM_at   | Peg10                       | PEG10    | 0.01  | 2.53 | 0.11  | 9.15E-01 | 9.66E-01 | -6.70 |
| 1444038_PM_at   | AU015836                    | NA       | 0.01  | 2.48 | 0.11  | 9.15E-01 | 9.66E-01 | -6.70 |
| 1439861_PM_at   | Zfp583                      | ZNF583   | 0.02  | 2.15 | 0.11  | 9.15E-01 | 9.66E-01 | -6.70 |
| 1427595_PM_at   | Acaca /// Gm5182            | ACACA    | 0.03  | 3.26 | 0.11  | 9.15E-01 | 9.66E-01 | -6.70 |
| 1429491_PM_s_at | Rif1                        | RIF1     | 0.04  | 2.84 | 0.11  | 9.15E-01 | 9.66E-01 | -6.70 |
| 1421161_PM_at   | Btc                         | BTC      | -0.01 | 2.32 | -0.11 | 9.15E-01 | 9.67E-01 | -6.70 |
| 1442774_PM_x_at | ---                         | NA       | -0.01 | 2.43 | -0.11 | 9.15E-01 | 9.67E-01 | -6.70 |
| 1440620_PM_at   | Rab8a                       | RAB8A    | -0.02 | 2.32 | -0.11 | 9.15E-01 | 9.67E-01 | -6.70 |
| 1416704_PM_at   | Mapk14                      | MAPK14   | -0.02 | 2.86 | -0.11 | 9.15E-01 | 9.67E-01 | -6.70 |
| 1427791_PM_a_at | Adam1a                      | NA       | -0.01 | 2.41 | -0.11 | 9.15E-01 | 9.67E-01 | -6.70 |
| 1455810_PM_a_at | Arhgef40                    | ARHGEF40 | -0.01 | 2.50 | -0.11 | 9.15E-01 | 9.67E-01 | -6.70 |
| 1432889_PM_at   | ---                         | NA       | -0.01 | 2.81 | -0.11 | 9.15E-01 | 9.67E-01 | -6.70 |
| 1424618_PM_at   | Hpd                         | HPD      | -0.01 | 2.23 | -0.11 | 9.15E-01 | 9.67E-01 | -6.70 |
| 1434720_PM_at   | Zfp652                      | ZNF652   | -0.01 | 2.73 | -0.11 | 9.15E-01 | 9.67E-01 | -6.70 |
| 1418773_PM_at   | Fads3                       | FADS3    | 0.02  | 3.47 | 0.11  | 9.15E-01 | 9.67E-01 | -6.70 |
| 1434978_PM_at   | Fam210a                     | FAM210A  | 0.02  | 2.45 | 0.11  | 9.15E-01 | 9.67E-01 | -6.70 |
| 1442976_PM_at   | ---                         | NA       | 0.02  | 3.25 | 0.11  | 9.15E-01 | 9.67E-01 | -6.70 |
| 1434147_PM_at   | Rel2                        | RELL2    | 0.02  | 3.11 | 0.11  | 9.15E-01 | 9.67E-01 | -6.70 |
| 1436804_PM_s_at | Scyl1                       | SCYL1    | 0.03  | 6.50 | 0.11  | 9.15E-01 | 9.67E-01 | -6.70 |
| 1419006_PM_s_at | Pel2                        | PEL12    | 0.03  | 2.69 | 0.11  | 9.15E-01 | 9.67E-01 | -6.70 |
| 1437858_PM_at   | Dpy193                      | DPY19L3  | -0.05 | 3.93 | -0.11 | 9.15E-01 | 9.67E-01 | -6.70 |
| 1450275_PM_x_at | Ube2f                       | UBE2F    | -0.03 | 3.49 | -0.11 | 9.15E-01 | 9.67E-01 | -6.70 |
| 1460122_PM_at   | Tmem41b                     | TMEM41B  | -0.03 | 2.62 | -0.11 | 9.15E-01 | 9.67E-01 | -6.70 |
| 1458826_PM_at   | C78809                      | NA       | -0.02 | 2.39 | -0.11 | 9.15E-01 | 9.67E-01 | -6.70 |
| 1416413_PM_at   | Ctsj                        | CTSL     | 0.01  | 2.16 | 0.11  | 9.15E-01 | 9.67E-01 | -6.70 |
| 1450277_PM_at   | Avpr2                       | AVPR2    | 0.01  | 2.31 | 0.11  | 9.15E-01 | 9.67E-01 | -6.70 |
| 1452736_PM_at   | R3hcc1                      | R3HCC1   | 0.02  | 2.60 | 0.11  | 9.15E-01 | 9.67E-01 | -6.70 |
| 1460307_PM_at   | Akt3                        | AKT3     | -0.03 | 5.71 | -0.11 | 9.15E-01 | 9.67E-01 | -6.70 |
| 1458191_PM_at   | Foxp2                       | FOXP2    | -0.01 | 2.45 | -0.11 | 9.15E-01 | 9.67E-01 | -6.70 |
| 1446707_PM_at   | ---                         | NA       | 0.01  | 2.30 | 0.11  | 9.15E-01 | 9.67E-01 | -6.70 |
| 1457085_PM_at   | Gm7854                      | NA       | 0.01  | 2.17 | 0.11  | 9.16E-01 | 9.67E-01 | -6.70 |
| 1438372_PM_at   | Myom2                       | MYOM2    | 0.01  | 1.84 | 0.11  | 9.16E-01 | 9.67E-01 | -6.70 |
| 1440459_PM_at   | ---                         | NA       | -0.02 | 2.36 | -0.11 | 9.16E-01 | 9.67E-01 | -6.70 |
| 1431135_PM_at   | ---                         | NA       | -0.02 | 2.75 | -0.11 | 9.16E-01 | 9.67E-01 | -6.70 |
| 1451479_PM_a_at | Tmem53                      | TMEM53   | -0.02 | 2.76 | -0.11 | 9.16E-01 | 9.67E-01 | -6.70 |
| 1427323_PM_s_at | Wipi1                       | WIP1     | -0.02 | 3.01 | -0.11 | 9.16E-01 | 9.67E-01 | -6.70 |
| 1441747_PM_at   | ---                         | NA       | -0.01 | 2.35 | -0.11 | 9.16E-01 | 9.67E-01 | -6.70 |
| 1436504_PM_x_at | Apoa4                       | APOA4    | -0.01 | 2.53 | -0.11 | 9.16E-01 | 9.67E-01 | -6.70 |
| 1441038_PM_at   | ---                         | NA       | -0.01 | 2.47 | -0.11 | 9.16E-01 | 9.67E-01 | -6.70 |
| 1425450_PM_at   | Chi4                        | CHIA     | -0.01 | 2.36 | -0.11 | 9.16E-01 | 9.67E-01 | -6.70 |
| 1430209_PM_at   | Tex36                       | TEX36    | 0.01  | 2.47 | 0.11  | 9.16E-01 | 9.67E-01 | -6.70 |
| 1455669_PM_at   | Wdr19                       | WDR19    | 0.02  | 2.88 | 0.11  | 9.16E-01 | 9.67E-01 | -6.70 |
| 1439979_PM_at   | Zfp398                      | ZNF398   | 0.03  | 3.07 | 0.11  | 9.16E-01 | 9.67E-01 | -6.70 |
| 1446558_PM_at   | ---                         | NA       | -0.02 | 2.17 | -0.11 | 9.16E-01 | 9.67E-01 | -6.70 |
| 1435565_PM_at   | Vps29                       | VPS29    | -0.04 | 5.70 | -0.11 | 9.16E-01 | 9.67E-01 | -6.70 |
| 1453141_PM_at   | 0610009L18Rik               | NA       | -0.02 | 2.78 | -0.11 | 9.16E-01 | 9.67E-01 | -6.70 |
| 1457249_PM_at   | Uba2l                       | UBAP2L   | -0.02 | 2.25 | -0.11 | 9.16E-01 | 9.67E-01 | -6.70 |
| 1455338_PM_at   | A4galt                      | A4GALT   | -0.01 | 2.76 | -0.11 | 9.16E-01 | 9.67E-01 | -6.70 |
| 1458989_PM_at   | ---                         | NA       | -0.01 | 2.49 | -0.11 | 9.16E-01 | 9.67E-01 | -6.70 |
| 1450302_PM_at   | 4930470P17Rik               | NA       | -0.01 | 2.28 | -0.11 | 9.16E-01 | 9.67E-01 | -6.70 |
| 1448444_PM_at   | Rpe                         | RPEL1    | 0.01  | 2.11 | 0.11  | 9.16E-01 | 9.67E-01 | -6.70 |
| 1443812_PM_x_at | ---                         | NA       | 0.01  | 1.90 | 0.11  | 9.16E-01 | 9.67E-01 | -6.70 |
| 1446724_PM_at   | ---                         | NA       | 0.01  | 2.45 | 0.11  | 9.16E-01 | 9.67E-01 | -6.70 |
| 1425988_PM_a_at | Hipk1                       | HIPK1    | 0.02  | 3.79 | 0.11  | 9.16E-01 | 9.67E-01 | -6.70 |
| 1431039_PM_at   | Otud4                       | OTUD4    | 0.02  | 2.64 | 0.11  | 9.16E-01 | 9.67E-01 | -6.70 |
| 1421878_PM_at   | Mapk9                       | MAPK9    | 0.02  | 3.71 | 0.11  | 9.16E-01 | 9.67E-01 | -6.70 |
| 1428379_PM_at   | Slc17a6                     | SLC17A6  | 0.02  | 2.29 | 0.11  | 9.16E-01 | 9.67E-01 | -6.70 |
| 1442188_PM_at   | ---                         | NA       | -0.01 | 2.42 | -0.11 | 9.16E-01 | 9.67E-01 | -6.70 |
| 1458880_PM_at   | ---                         | NA       | -0.01 | 2.03 | -0.11 | 9.16E-01 | 9.67E-01 | -6.70 |
| 1436073_PM_at   | Ccdc186                     | CCDC186  | -0.02 | 5.12 | -0.11 | 9.16E-01 | 9.67E-01 | -6.70 |
| 1441487_PM_at   | Trim2                       | TRIM2    | 0.01  | 2.57 | 0.11  | 9.16E-01 | 9.67E-01 | -6.70 |
| 1444311_PM_at   | Arhgap25                    | ARHGAP25 | 0.01  | 2.59 | 0.11  | 9.16E-01 | 9.67E-01 | -6.70 |
| 1459534_PM_at   | Gm41408 ///<br>LOC102641624 | NA       | 0.01  | 2.55 | 0.11  | 9.17E-01 | 9.67E-01 | -6.70 |
| 1432528_PM_at   | ---                         | NA       | -0.01 | 2.31 | -0.11 | 9.17E-01 | 9.67E-01 | -6.70 |
| 1421424_PM_a_at | Anpep                       | ANPEP    | -0.01 | 2.18 | -0.11 | 9.17E-01 | 9.67E-01 | -6.70 |
| 1434271_PM_at   | Gba2                        | GBA2     | 0.02  | 2.61 | 0.11  | 9.17E-01 | 9.67E-01 | -6.70 |
| 1421879_PM_at   | Mtmt1                       | MTMR1    | 0.01  | 2.75 | 0.11  | 9.17E-01 | 9.67E-01 | -6.70 |
| 1455084_PM_x_at | Shmt2                       | SHMT2    | -0.03 | 3.88 | -0.11 | 9.17E-01 | 9.67E-01 | -6.70 |
| 1439195_PM_at   | ---                         | NA       | -0.01 | 2.40 | -0.11 | 9.17E-01 | 9.67E-01 | -6.70 |
| 1424749_PM_at   | Wdfy1                       | WDFY1    | 0.02  | 2.33 | 0.11  | 9.17E-01 | 9.67E-01 | -6.70 |
| 1442293_PM_at   | Helz                        | HELZ     | 0.03  | 2.45 | 0.11  | 9.17E-01 | 9.67E-01 | -6.70 |
| 1426060_PM_at   | Cul4a                       | CUL4A    | -0.03 | 8.14 | -0.11 | 9.17E-01 | 9.67E-01 | -6.70 |

|                 |                                                                                                                                                                                                |          |       |      |       |          |          |       |
|-----------------|------------------------------------------------------------------------------------------------------------------------------------------------------------------------------------------------|----------|-------|------|-------|----------|----------|-------|
| 1417166_PM_at   | Psip1                                                                                                                                                                                          | PSIP1    | 0.02  | 3.44 | 0.11  | 9.17E-01 | 9.67E-01 | -6.70 |
| 1443325_PM_at   | ---                                                                                                                                                                                            | NA       | 0.02  | 2.49 | 0.11  | 9.17E-01 | 9.67E-01 | -6.70 |
| 1438466_PM_at   | Dnah7b                                                                                                                                                                                         | NA       | 0.04  | 2.91 | 0.11  | 9.17E-01 | 9.67E-01 | -6.70 |
| 1445452_PM_at   | Traf1                                                                                                                                                                                          | TRAF1    | 0.01  | 2.32 | 0.11  | 9.17E-01 | 9.67E-01 | -6.70 |
| 1455918_PM_at   | Adrb3                                                                                                                                                                                          | ADRB3    | -0.01 | 2.24 | -0.11 | 9.17E-01 | 9.68E-01 | -6.70 |
| 1427573_PM_at   | Chic1                                                                                                                                                                                          | CHIC1    | 0.01  | 2.32 | 0.11  | 9.17E-01 | 9.68E-01 | -6.70 |
| 1431357_PM_a_at | Rpgr1p1                                                                                                                                                                                        | RPGRIP1  | -0.02 | 2.89 | -0.11 | 9.17E-01 | 9.68E-01 | -6.70 |
| 1453813_PM_at   | Cd200r3                                                                                                                                                                                        | CD200R1L | 0.01  | 2.33 | 0.11  | 9.17E-01 | 9.68E-01 | -6.70 |
| 1445807_PM_at   | ---                                                                                                                                                                                            | NA       | -0.02 | 2.41 | -0.11 | 9.18E-01 | 9.68E-01 | -6.70 |
| 1416810_PM_at   | Mea1                                                                                                                                                                                           | MEA1     | -0.04 | 4.36 | -0.11 | 9.18E-01 | 9.68E-01 | -6.70 |
| 1440184_PM_at   | Z610005L07Rik                                                                                                                                                                                  | NA       | 0.01  | 2.24 | 0.11  | 9.18E-01 | 9.68E-01 | -6.70 |
| 1440072_PM_at   | ---                                                                                                                                                                                            | NA       | 0.03  | 2.88 | 0.11  | 9.18E-01 | 9.68E-01 | -6.70 |
| 1444993_PM_at   | ---                                                                                                                                                                                            | NA       | 0.02  | 2.53 | 0.11  | 9.18E-01 | 9.68E-01 | -6.70 |
| 1459294_PM_at   | ---                                                                                                                                                                                            | NA       | 0.01  | 2.54 | 0.11  | 9.18E-01 | 9.68E-01 | -6.70 |
| 1451826_PM_at   | Cabp5                                                                                                                                                                                          | CABP5    | -0.01 | 2.24 | -0.11 | 9.18E-01 | 9.68E-01 | -6.70 |
| 1420791_PM_x_at | Speer4f1                                                                                                                                                                                       | NA       | -0.01 | 2.33 | -0.11 | 9.18E-01 | 9.68E-01 | -6.70 |
| 1422617_PM_at   | Gm10058 /// Gm10096 ///<br>Gm10147 /// Gm10230 ///<br>Gm10486 /// Gm10488 ///<br>Gm14525 /// Gm14632 ///<br>Gm14819 /// Gm2012 ///<br>Gm2030 /// Gm4297 ///<br>Gm5169 /// Gm5934 ///<br>Gm6121 | NA       | -0.02 | 2.94 | -0.11 | 9.18E-01 | 9.68E-01 | -6.70 |
| 1432546_PM_at   | LOC102637001                                                                                                                                                                                   | NA       | 0.01  | 2.25 | 0.11  | 9.18E-01 | 9.68E-01 | -6.70 |
| 1445881_PM_at   | ---                                                                                                                                                                                            | NA       | 0.02  | 2.34 | 0.11  | 9.18E-01 | 9.68E-01 | -6.70 |
| 1435243_PM_at   | Zfp746                                                                                                                                                                                         | ZNF746   | 0.05  | 3.59 | 0.11  | 9.18E-01 | 9.68E-01 | -6.70 |
| 1447906_PM_at   | ---                                                                                                                                                                                            | NA       | -0.02 | 2.35 | -0.11 | 9.18E-01 | 9.68E-01 | -6.70 |
| 1439899_PM_at   | Galnt13                                                                                                                                                                                        | GALNT13  | -0.02 | 2.99 | -0.11 | 9.18E-01 | 9.68E-01 | -6.70 |
| 1423700_PM_at   | Rfc3                                                                                                                                                                                           | RFC3     | 0.01  | 2.40 | 0.11  | 9.18E-01 | 9.68E-01 | -6.70 |
| 1444083_PM_at   | Ttn                                                                                                                                                                                            | TTN      | 0.05  | 2.98 | 0.11  | 9.18E-01 | 9.68E-01 | -6.70 |
| 1447230_PM_at   | Wdr92                                                                                                                                                                                          | NA       | -0.05 | 2.80 | -0.11 | 9.18E-01 | 9.68E-01 | -6.70 |
| 1441282_PM_at   | ---                                                                                                                                                                                            | NA       | -0.02 | 2.45 | -0.11 | 9.18E-01 | 9.68E-01 | -6.70 |
| 1448215_PM_a_at | Dpp3                                                                                                                                                                                           | DPP3     | -0.01 | 2.83 | -0.11 | 9.18E-01 | 9.68E-01 | -6.70 |
| 1429891_PM_at   | Capsl                                                                                                                                                                                          | CAPSL    | 0.02  | 2.43 | 0.11  | 9.18E-01 | 9.68E-01 | -6.70 |
| 1460076_PM_x_at | Zfp3                                                                                                                                                                                           | ZFP3     | 0.02  | 4.53 | 0.11  | 9.18E-01 | 9.68E-01 | -6.70 |
| 1437620_PM_x_at | Aldh18a1                                                                                                                                                                                       | ALDH18A1 | 0.02  | 2.59 | 0.11  | 9.18E-01 | 9.68E-01 | -6.70 |
| 1452414_PM_s_at | Ccdc86                                                                                                                                                                                         | CCDC86   | 0.02  | 2.82 | 0.11  | 9.18E-01 | 9.68E-01 | -6.70 |
| 1420120_PM_at   | Phf3                                                                                                                                                                                           | NA       | 0.06  | 3.09 | 0.11  | 9.18E-01 | 9.68E-01 | -6.70 |
| 1446416_PM_at   | Sulf1                                                                                                                                                                                          | SULF1    | 0.02  | 2.44 | 0.10  | 9.18E-01 | 9.68E-01 | -6.70 |
| 1447532_PM_at   | ---                                                                                                                                                                                            | NA       | -0.03 | 2.78 | -0.10 | 9.18E-01 | 9.68E-01 | -6.70 |
| 1422183_PM_a_at | Adra1b                                                                                                                                                                                         | ADRA1B   | -0.01 | 2.69 | -0.10 | 9.18E-01 | 9.68E-01 | -6.70 |
| 1432688_PM_at   | ---                                                                                                                                                                                            | NA       | 0.02  | 2.47 | 0.10  | 9.18E-01 | 9.68E-01 | -6.70 |
| 1440088_PM_at   | ---                                                                                                                                                                                            | NA       | -0.01 | 2.57 | -0.10 | 9.19E-01 | 9.68E-01 | -6.70 |
| 1415954_PM_at   | Try4 /// Try5                                                                                                                                                                                  | PRSS2    | -0.01 | 2.04 | -0.10 | 9.19E-01 | 9.68E-01 | -6.70 |
| 1440013_PM_at   | ---                                                                                                                                                                                            | NA       | 0.03  | 3.50 | 0.10  | 9.19E-01 | 9.68E-01 | -6.70 |
| 1431441_PM_at   | Ccdc182                                                                                                                                                                                        | CCDC182  | -0.01 | 2.45 | -0.10 | 9.19E-01 | 9.68E-01 | -6.70 |
| 1456794_PM_at   | E230016M11Rik                                                                                                                                                                                  | NA       | 0.01  | 2.01 | 0.10  | 9.19E-01 | 9.68E-01 | -6.70 |
| 1429418_PM_at   | Cdc14b                                                                                                                                                                                         | CDC14B   | -0.01 | 2.23 | -0.10 | 9.19E-01 | 9.68E-01 | -6.70 |
| 1418624_PM_at   | Ybx1                                                                                                                                                                                           | YBX1     | -0.04 | 6.83 | -0.10 | 9.19E-01 | 9.68E-01 | -6.70 |
| 1444114_PM_at   | ---                                                                                                                                                                                            | NA       | -0.04 | 4.46 | -0.10 | 9.19E-01 | 9.68E-01 | -6.70 |
| 1440590_PM_at   | ---                                                                                                                                                                                            | NA       | 0.01  | 2.72 | 0.10  | 9.19E-01 | 9.68E-01 | -6.70 |
| 1457806_PM_at   | ---                                                                                                                                                                                            | NA       | -0.04 | 4.11 | -0.10 | 9.19E-01 | 9.68E-01 | -6.70 |
| 1426936_PM_at   | BC005512 /// Gm29673 ///<br>Gm6958                                                                                                                                                             | NA       | -0.05 | 7.68 | -0.10 | 9.19E-01 | 9.68E-01 | -6.70 |
| 1438478_PM_a_at | Ppp3ca                                                                                                                                                                                         | PPP3CA   | -0.02 | 8.21 | -0.10 | 9.19E-01 | 9.68E-01 | -6.70 |
| 1423660_PM_at   | Ctdsp2                                                                                                                                                                                         | CTDSP2   | -0.04 | 3.80 | -0.10 | 9.19E-01 | 9.69E-01 | -6.70 |
| 1420680_PM_at   | Cts8                                                                                                                                                                                           | CTS8     | 0.01  | 2.24 | 0.10  | 9.19E-01 | 9.69E-01 | -6.70 |
| 1433840_PM_a_at | Ap5z1                                                                                                                                                                                          | AP5Z1    | 0.03  | 3.35 | 0.10  | 9.19E-01 | 9.69E-01 | -6.70 |
| 1449926_PM_at   | Cd70                                                                                                                                                                                           | CD70     | -0.01 | 2.48 | -0.10 | 9.19E-01 | 9.69E-01 | -6.70 |
| 1458801_PM_at   | AU022320                                                                                                                                                                                       | NA       | 0.01  | 2.60 | 0.10  | 9.19E-01 | 9.69E-01 | -6.70 |
| 1416756_PM_at   | Dnajb1                                                                                                                                                                                         | DNAJB1   | 0.01  | 2.27 | 0.10  | 9.19E-01 | 9.69E-01 | -6.70 |
| 1415968_PM_a_at | Kap                                                                                                                                                                                            | NA       | 0.01  | 2.32 | 0.10  | 9.19E-01 | 9.69E-01 | -6.70 |
| 1417818_PM_at   | Wwtr1                                                                                                                                                                                          | WWTR1    | 0.02  | 2.66 | 0.10  | 9.19E-01 | 9.69E-01 | -6.70 |
| 1436048_PM_at   | Exoc8                                                                                                                                                                                          | EXOC8    | -0.02 | 2.51 | -0.10 | 9.19E-01 | 9.69E-01 | -6.70 |
| 1452463_PM_x_at | Igk                                                                                                                                                                                            | NA       | -0.04 | 3.54 | -0.10 | 9.20E-01 | 9.69E-01 | -6.70 |
| 1451027_PM_at   | Baiap2                                                                                                                                                                                         | BAIAP2   | 0.01  | 2.51 | 0.10  | 9.19E-01 | 9.69E-01 | -6.70 |
| 1428634_PM_at   | Twistnb                                                                                                                                                                                        | TWISTNB  | -0.01 | 3.09 | -0.10 | 9.20E-01 | 9.69E-01 | -6.70 |
| 1422859_PM_a_at | LOC100044627 ///<br>LOC100862455 /// Rpl23                                                                                                                                                     | RPL23    | 0.02  | 2.44 | 0.10  | 9.20E-01 | 9.69E-01 | -6.70 |
| 1443985_PM_at   | Zfp719                                                                                                                                                                                         | NA       | 0.02  | 2.25 | 0.10  | 9.20E-01 | 9.69E-01 | -6.70 |
| 1418815_PM_at   | Cdh2 /// Gm34039                                                                                                                                                                               | CDH2     | -0.04 | 7.06 | -0.10 | 9.20E-01 | 9.69E-01 | -6.70 |
| 1425027_PM_s_at | Sft2d2                                                                                                                                                                                         | SFT2D2   | -0.02 | 2.99 | -0.10 | 9.20E-01 | 9.69E-01 | -6.70 |
| 1453225_PM_at   | Ndnf                                                                                                                                                                                           | NDNF     | -0.01 | 2.26 | -0.10 | 9.20E-01 | 9.69E-01 | -6.70 |

|                 |                                    |              |       |      |       |          |          |       |
|-----------------|------------------------------------|--------------|-------|------|-------|----------|----------|-------|
| 1417392_PM_a_at | Slc7a7                             | SLC7A7       | 0.01  | 2.48 | 0.10  | 9.20E-01 | 9.69E-01 | -6.70 |
| 1433940_PM_at   | Spag7                              | SPAG7        | 0.01  | 2.67 | 0.10  | 9.20E-01 | 9.69E-01 | -6.70 |
| 1452853_PM_at   | Shpk                               | ACO27796.3   | 0.02  | 2.94 | 0.10  | 9.20E-01 | 9.69E-01 | -6.70 |
| 1424857_PM_a_at | Trim34a                            | TRIM6-TRIM34 | 0.02  | 2.51 | 0.10  | 9.20E-01 | 9.69E-01 | -6.70 |
| 1419291_PM_x_at | Gas5                               | NA           | -0.03 | 8.90 | -0.10 | 9.20E-01 | 9.69E-01 | -6.70 |
| 1428860_PM_at   | Them6                              | THEM6        | 0.01  | 2.29 | 0.10  | 9.20E-01 | 9.69E-01 | -6.70 |
| 1445819_PM_at   | ---                                | NA           | -0.01 | 2.40 | -0.10 | 9.20E-01 | 9.69E-01 | -6.70 |
| 1448504_PM_a_at | Cbx3                               | CBX3         | -0.02 | 9.66 | -0.10 | 9.20E-01 | 9.69E-01 | -6.70 |
| 1449754_PM_at   | AA511261                           | NA           | -0.01 | 2.46 | -0.10 | 9.20E-01 | 9.69E-01 | -6.70 |
| 1456251_PM_x_at | Tspo                               | TSPO         | 0.01  | 1.96 | 0.10  | 9.20E-01 | 9.69E-01 | -6.70 |
| 1447715_PM_x_at | Prdx6b                             | PRDX6        | -0.01 | 2.19 | -0.10 | 9.20E-01 | 9.69E-01 | -6.70 |
| 1419936_PM_at   | ---                                | NA           | 0.02  | 2.86 | 0.10  | 9.20E-01 | 9.69E-01 | -6.70 |
| 1454198_PM_a_at | Efcab1                             | EFCAB1       | -0.02 | 2.42 | -0.10 | 9.20E-01 | 9.69E-01 | -6.70 |
| 1421232_PM_at   | Pkna1                              | PLXNA1       | -0.01 | 2.44 | -0.10 | 9.20E-01 | 9.69E-01 | -6.70 |
| 1432301_PM_a_at | 1700074P13Rik                      | NA           | -0.01 | 2.36 | -0.10 | 9.20E-01 | 9.69E-01 | -6.70 |
| 1436975_PM_at   | Pom121l2                           | NA           | 0.01  | 2.15 | 0.10  | 9.20E-01 | 9.69E-01 | -6.70 |
| 1454027_PM_at   | ---                                | NA           | 0.01  | 2.30 | 0.10  | 9.20E-01 | 9.69E-01 | -6.70 |
| 1425136_PM_x_at | Dnm2                               | DNM2         | 0.01  | 2.53 | 0.10  | 9.20E-01 | 9.69E-01 | -6.70 |
| 1416974_PM_at   | Stam2                              | STAM2        | -0.02 | 3.41 | -0.10 | 9.20E-01 | 9.69E-01 | -6.70 |
| 1436615_PM_a_at | Otc                                | OTC          | -0.01 | 2.13 | -0.10 | 9.20E-01 | 9.69E-01 | -6.70 |
| 1457159_PM_at   | Cfap221                            | CFAP221      | 0.01  | 2.21 | 0.10  | 9.20E-01 | 9.69E-01 | -6.70 |
| 1435821_PM_s_at | Ppp1r8                             | PPP1R8       | 0.05  | 3.80 | 0.10  | 9.20E-01 | 9.69E-01 | -6.70 |
| 1448552_PM_s_at | Tmem206                            | TMEM206      | -0.02 | 3.20 | -0.10 | 9.20E-01 | 9.69E-01 | -6.70 |
| 1442072_PM_at   | Peak1                              | PEAK1        | -0.09 | 4.35 | -0.10 | 9.21E-01 | 9.69E-01 | -6.70 |
| 1418699_PM_s_at | Fech                               | FECH         | -0.03 | 5.02 | -0.10 | 9.20E-01 | 9.69E-01 | -6.70 |
| 1445970_PM_at   | AU022526                           | NA           | 0.02  | 3.01 | 0.10  | 9.21E-01 | 9.69E-01 | -6.70 |
| 1448726_PM_at   | Snapc2                             | SNAPC2       | 0.01  | 2.54 | 0.10  | 9.21E-01 | 9.69E-01 | -6.70 |
| 1442038_PM_at   | Rbm26                              | RBM26        | 0.02  | 2.82 | 0.10  | 9.21E-01 | 9.69E-01 | -6.70 |
| 1459030_PM_at   | Bbox1                              | BBOX1        | 0.01  | 1.87 | 0.10  | 9.21E-01 | 9.69E-01 | -6.70 |
| 1427686_PM_at   | Vmn2r88                            | NA           | -0.01 | 2.04 | -0.10 | 9.21E-01 | 9.69E-01 | -6.70 |
| 1435477_PM_s_at | Fcgr2b                             | FCGR2A       | -0.01 | 2.28 | -0.10 | 9.21E-01 | 9.69E-01 | -6.70 |
| 1449114_PM_at   | Stk3                               | NA           | 0.01  | 2.71 | 0.10  | 9.21E-01 | 9.69E-01 | -6.70 |
| 1448627_PM_s_at | Pbk                                | PBK          | 0.01  | 2.11 | 0.10  | 9.21E-01 | 9.69E-01 | -6.70 |
| 1439429_PM_x_at | Dtx2                               | DTX2         | -0.03 | 4.62 | -0.10 | 9.21E-01 | 9.69E-01 | -6.70 |
| 1421808_PM_at   | Defb5                              | NA           | -0.01 | 2.06 | -0.10 | 9.21E-01 | 9.69E-01 | -6.70 |
| 1424819_PM_a_at | Ric8                               | RIC8A        | -0.02 | 2.89 | -0.10 | 9.21E-01 | 9.69E-01 | -6.70 |
| 1421689_PM_at   | Krtap19-5                          | NA           | 0.02  | 2.16 | 0.10  | 9.21E-01 | 9.69E-01 | -6.70 |
| 1453079_PM_at   | Tpgs2                              | TPGS2        | -0.01 | 2.65 | -0.10 | 9.21E-01 | 9.69E-01 | -6.70 |
| 1438214_PM_at   | Trps1                              | TRPS1        | -0.06 | 4.93 | -0.10 | 9.21E-01 | 9.69E-01 | -6.70 |
| 1436519_PM_a_at | Ldah                               | LDHA         | 0.01  | 2.10 | 0.10  | 9.21E-01 | 9.69E-01 | -6.70 |
| 1437631_PM_at   | Kcnp4                              | KCNP4        | -0.04 | 3.56 | -0.10 | 9.21E-01 | 9.69E-01 | -6.70 |
| 1428443_PM_a_at | Rap1gap                            | RAP1GAP      | -0.03 | 3.80 | -0.10 | 9.21E-01 | 9.69E-01 | -6.70 |
| 1421467_PM_at   | Runx3                              | RUNX3        | -0.01 | 2.46 | -0.10 | 9.21E-01 | 9.69E-01 | -6.70 |
| 1440381_PM_at   | Rio2                               | NA           | -0.01 | 2.10 | -0.10 | 9.21E-01 | 9.69E-01 | -6.70 |
| 1458501_PM_at   | Vapb                               | VAPB         | 0.02  | 2.94 | 0.10  | 9.21E-01 | 9.69E-01 | -6.70 |
| 1425242_PM_at   | Tmem258                            | NA           | -0.02 | 2.62 | -0.10 | 9.21E-01 | 9.69E-01 | -6.70 |
| 1440773_PM_at   | Cep44                              | CEP44        | 0.04  | 2.72 | 0.10  | 9.21E-01 | 9.69E-01 | -6.70 |
| 1454904_PM_at   | Mtm1                               | NA           | -0.03 | 4.28 | -0.10 | 9.21E-01 | 9.69E-01 | -6.70 |
| 1447210_PM_at   | ---                                | NA           | 0.01  | 2.81 | 0.10  | 9.21E-01 | 9.69E-01 | -6.70 |
| 1425839_PM_at   | Fkbp11                             | FKBP11       | 0.01  | 2.72 | 0.10  | 9.21E-01 | 9.69E-01 | -6.70 |
| 1423030_PM_at   | Vcp                                | VCP          | 0.05  | 5.86 | 0.10  | 9.21E-01 | 9.69E-01 | -6.70 |
| 1416503_PM_at   | Lxn                                | LXN          | -0.03 | 3.31 | -0.10 | 9.21E-01 | 9.69E-01 | -6.70 |
| 1445539_PM_at   | Pde7b                              | NA           | -0.01 | 2.37 | -0.10 | 9.22E-01 | 9.69E-01 | -6.70 |
| 1454347_PM_at   | 4930540E01Rik                      | NA           | -0.01 | 2.29 | -0.10 | 9.21E-01 | 9.69E-01 | -6.70 |
| 1460060_PM_at   | ---                                | NA           | -0.01 | 2.04 | -0.10 | 9.21E-01 | 9.69E-01 | -6.70 |
| 1432483_PM_at   | Arid2                              | ARID2        | -0.04 | 3.15 | -0.10 | 9.22E-01 | 9.69E-01 | -6.70 |
| 1421127_PM_at   | Tmem42                             | TMEM42       | -0.02 | 4.07 | -0.10 | 9.22E-01 | 9.69E-01 | -6.70 |
| 1449879_PM_at   | Ccdc7b /// Zfp821                  | CCDC7        | -0.01 | 2.23 | -0.10 | 9.22E-01 | 9.69E-01 | -6.70 |
| 1452232_PM_at   | Galnt7                             | GALNT7       | -0.01 | 2.22 | -0.10 | 9.22E-01 | 9.69E-01 | -6.70 |
| 1458908_PM_at   | ---                                | NA           | -0.01 | 2.10 | -0.10 | 9.22E-01 | 9.69E-01 | -6.70 |
| 1425986_PM_a_at | Dcun1d1                            | DCUN1D1      | 0.01  | 2.45 | 0.10  | 9.22E-01 | 9.69E-01 | -6.70 |
| 1434589_PM_x_at | Surf4                              | SURF4        | 0.01  | 2.58 | 0.10  | 9.22E-01 | 9.69E-01 | -6.70 |
| 1430688_PM_s_at | Catal                              | NA           | 0.01  | 2.59 | 0.10  | 9.22E-01 | 9.69E-01 | -6.70 |
| 1447511_PM_at   | LOC105247496                       | NA           | 0.03  | 4.02 | 0.10  | 9.22E-01 | 9.69E-01 | -6.70 |
| 1455976_PM_x_at | Dbi                                | DBI          | -0.02 | 7.55 | -0.10 | 9.22E-01 | 9.69E-01 | -6.70 |
| 1432906_PM_at   | ---                                | NA           | -0.01 | 2.20 | -0.10 | 9.22E-01 | 9.70E-01 | -6.70 |
| 1437913_PM_at   | Bcl2a1a /// Bcl2a1b ///<br>Bcl2a1d | BCL2A1       | 0.01  | 2.08 | 0.10  | 9.22E-01 | 9.70E-01 | -6.70 |
| 1427496_PM_at   | Cep152                             | CEP152       | 0.01  | 2.25 | 0.10  | 9.22E-01 | 9.70E-01 | -6.70 |
| 1417467_PM_a_at | Tada3                              | TADA3        | -0.02 | 2.81 | -0.10 | 9.22E-01 | 9.70E-01 | -6.70 |
| 1423607_PM_at   | Lum                                | LUM          | -0.02 | 2.61 | -0.10 | 9.22E-01 | 9.70E-01 | -6.70 |
| 1444393_PM_at   | ---                                | NA           | -0.02 | 2.44 | -0.10 | 9.22E-01 | 9.70E-01 | -6.70 |
| 1429888_PM_a_at | Hspb2                              | HSPB2        | -0.01 | 2.50 | -0.10 | 9.22E-01 | 9.70E-01 | -6.70 |
| 1444749_PM_at   | ---                                | NA           | -0.01 | 2.49 | -0.10 | 9.22E-01 | 9.70E-01 | -6.70 |
| 1441506_PM_at   | ---                                | NA           | -0.01 | 2.46 | -0.10 | 9.22E-01 | 9.70E-01 | -6.70 |

|                        |                              |             |       |       |       |          |          |       |
|------------------------|------------------------------|-------------|-------|-------|-------|----------|----------|-------|
| 1447438_PM_at          | ---                          | NA          | -0.01 | 2.22  | -0.10 | 9.22E-01 | 9.70E-01 | -6.70 |
| 1440105_PM_at          | Kdm4d                        | KDM4D       | -0.01 | 2.43  | -0.10 | 9.22E-01 | 9.70E-01 | -6.70 |
| 1442068_PM_at          | ---                          | NA          | -0.01 | 2.48  | -0.10 | 9.22E-01 | 9.70E-01 | -6.70 |
| 1447659_PM_x_at        | Atp6v1h                      | ATP6V1H     | 0.01  | 2.04  | 0.10  | 9.22E-01 | 9.70E-01 | -6.70 |
| 1433278_PM_at          | 5830440H09Rik                | NA          | 0.01  | 2.15  | 0.10  | 9.22E-01 | 9.70E-01 | -6.70 |
| 1432338_PM_at          | ---                          | NA          | 0.01  | 2.08  | 0.10  | 9.22E-01 | 9.70E-01 | -6.70 |
| 1448795_PM_a_at        | LOC105242484 ///Tbrg4        | TBRG4       | 0.01  | 2.16  | 0.10  | 9.22E-01 | 9.70E-01 | -6.70 |
| 1449871_PM_at          | Tbx18                        | TBX18       | 0.01  | 2.12  | 0.10  | 9.22E-01 | 9.70E-01 | -6.70 |
| 1423615_PM_at          | Rnf115                       | RNF115      | 0.02  | 3.17  | 0.10  | 9.22E-01 | 9.70E-01 | -6.70 |
| 1432518_PM_at          | ---                          | NA          | 0.02  | 2.56  | 0.10  | 9.22E-01 | 9.70E-01 | -6.70 |
| 1432673_PM_at          | ---                          | NA          | 0.02  | 2.66  | 0.10  | 9.22E-01 | 9.70E-01 | -6.70 |
| 1447481_PM_at          | ---                          | NA          | 0.03  | 2.42  | 0.10  | 9.22E-01 | 9.70E-01 | -6.70 |
| 1446561_PM_at          | Pax8                         | PAX8        | 0.02  | 2.45  | 0.10  | 9.22E-01 | 9.70E-01 | -6.70 |
| 1419681_PM_a_at        | Prok2                        | PROK2       | 0.01  | 1.87  | 0.10  | 9.23E-01 | 9.70E-01 | -6.70 |
| 1415869_PM_a_at        | Trim28                       | TRIM28      | -0.03 | 3.98  | -0.10 | 9.23E-01 | 9.70E-01 | -6.70 |
| 1443134_PM_at          | LOC102639568                 | NA          | 0.01  | 2.28  | 0.10  | 9.23E-01 | 9.70E-01 | -6.70 |
| 1432371_PM_a_at        | 1700109K24Rik                | NA          | -0.03 | 3.47  | -0.10 | 9.23E-01 | 9.70E-01 | -6.70 |
| 1432711_PM_at          | ---                          | NA          | 0.01  | 2.55  | 0.10  | 9.23E-01 | 9.70E-01 | -6.70 |
| 1428366_PM_at          | Mrgbp                        | MRGBP       | 0.02  | 2.94  | 0.10  | 9.23E-01 | 9.70E-01 | -6.70 |
| 1439003_PM_s_at        | Ccdc7b ///Zfp821             | CCDC7       | -0.02 | 2.59  | -0.10 | 9.23E-01 | 9.70E-01 | -6.70 |
| 1452868_PM_at          | Usp24                        | USP24       | 0.01  | 2.37  | 0.10  | 9.23E-01 | 9.70E-01 | -6.70 |
| 1429736_PM_at          | Qk                           | NA          | 0.01  | 2.55  | 0.10  | 9.23E-01 | 9.70E-01 | -6.70 |
| 1457502_PM_at          | ---                          | NA          | 0.03  | 3.55  | 0.10  | 9.23E-01 | 9.70E-01 | -6.70 |
| 1426952_PM_at          | Arhgap18                     | ARHGAP18    | -0.01 | 2.42  | -0.10 | 9.23E-01 | 9.70E-01 | -6.70 |
| 1421794_PM_at          | Klrc3                        | KLRC4-KLRK1 | -0.01 | 2.04  | -0.10 | 9.23E-01 | 9.70E-01 | -6.70 |
| 1447632_PM_at          | Fancc                        | FANCC       | 0.01  | 2.34  | 0.10  | 9.23E-01 | 9.70E-01 | -6.70 |
| 1420019_PM_at          | Tspan8                       | NA          | 0.02  | 2.26  | 0.10  | 9.23E-01 | 9.70E-01 | -6.70 |
| 1425776_PM_a_at        | C87436                       | C2orf42     | 0.01  | 2.40  | 0.10  | 9.23E-01 | 9.70E-01 | -6.70 |
| 1445499_PM_at          | Zc3h13                       | ZC3H13      | 0.04  | 5.82  | 0.10  | 9.23E-01 | 9.70E-01 | -6.70 |
| 1441885_PM_s_at        | Gm26760                      | NA          | -0.01 | 2.17  | -0.10 | 9.23E-01 | 9.70E-01 | -6.70 |
| 1419478_PM_at          | Sectm1b                      | SECTM1      | 0.01  | 2.63  | 0.10  | 9.23E-01 | 9.70E-01 | -6.70 |
| 1432534_PM_at          | 3300002108Rik                | NA          | 0.01  | 2.56  | 0.10  | 9.23E-01 | 9.70E-01 | -6.70 |
| 1419615_PM_at          | Trpv6                        | TRPV6       | 0.01  | 2.25  | 0.10  | 9.23E-01 | 9.70E-01 | -6.70 |
| 1456499_PM_at          | Rnf130                       | NA          | 0.03  | 3.93  | 0.10  | 9.23E-01 | 9.70E-01 | -6.70 |
| 1454454_PM_at          | Elavl2                       | NA          | 0.05  | 5.91  | 0.10  | 9.23E-01 | 9.70E-01 | -6.70 |
| 1435155_PM_at          | Cgn                          | CGN         | -0.01 | 2.18  | -0.10 | 9.23E-01 | 9.70E-01 | -6.70 |
| 1460547_PM_a_at        | Hnrnpk                       | HNRNPK      | -0.02 | 10.20 | -0.10 | 9.23E-01 | 9.70E-01 | -6.70 |
| 1442625_PM_at          | ---                          | NA          | 0.01  | 2.57  | 0.10  | 9.23E-01 | 9.70E-01 | -6.70 |
| 1447787_PM_x_at        | Gjc1                         | GJC1        | -0.04 | 2.35  | -0.10 | 9.24E-01 | 9.70E-01 | -6.70 |
| 1426050_PM_at          | Bcl2l1                       | BCL2L1      | 0.02  | 2.48  | 0.10  | 9.24E-01 | 9.70E-01 | -6.70 |
| 1428577_PM_at          | Ppfia4                       | PPFIA4      | 0.02  | 2.72  | 0.10  | 9.24E-01 | 9.70E-01 | -6.70 |
| 1439950_PM_at          | ---                          | NA          | -0.01 | 2.41  | -0.10 | 9.24E-01 | 9.70E-01 | -6.70 |
| 1435740_PM_at          | Zmiz1                        | ZMIZ1       | -0.02 | 3.67  | -0.10 | 9.24E-01 | 9.70E-01 | -6.70 |
| 1453589_PM_a_at        | 6820431F20Rik ///<br>Gm21811 | NA          | 0.03  | 6.58  | 0.10  | 9.24E-01 | 9.70E-01 | -6.70 |
| 1437467_PM_at          | Alcam                        | ALCAM       | -0.09 | 5.48  | -0.10 | 9.24E-01 | 9.70E-01 | -6.70 |
| 1423898_PM_a_at        | Trip12                       | TRIP12      | -0.04 | 5.80  | -0.10 | 9.25E-01 | 9.70E-01 | -6.70 |
| 1452974_PM_at          | Nol8                         | NOL8        | -0.03 | 3.57  | -0.10 | 9.24E-01 | 9.70E-01 | -6.70 |
| 1441766_PM_at          | ---                          | NA          | -0.02 | 2.60  | -0.10 | 9.24E-01 | 9.70E-01 | -6.70 |
| 1452280_PM_at          | Farp1                        | FARP1       | -0.02 | 3.31  | -0.10 | 9.24E-01 | 9.70E-01 | -6.70 |
| 1438259_PM_at          | ---                          | NA          | -0.02 | 2.67  | -0.10 | 9.24E-01 | 9.70E-01 | -6.70 |
| 1433247_PM_at          | ---                          | NA          | -0.02 | 2.45  | -0.10 | 9.24E-01 | 9.70E-01 | -6.70 |
| 1428733_PM_at          | Gngt2                        | GNGT2       | -0.02 | 2.91  | -0.10 | 9.24E-01 | 9.70E-01 | -6.70 |
| 1451940_PM_x_at        | Trdn                         | NA          | -0.02 | 3.54  | -0.10 | 9.24E-01 | 9.70E-01 | -6.70 |
| 1446832_PM_at          | ---                          | NA          | -0.02 | 2.59  | -0.10 | 9.24E-01 | 9.70E-01 | -6.70 |
| 1435418_PM_at          | Slc22a8                      | SLC22A8     | -0.01 | 2.50  | -0.10 | 9.24E-01 | 9.70E-01 | -6.70 |
| 1445333_PM_at          | ---                          | NA          | -0.01 | 2.44  | -0.10 | 9.24E-01 | 9.70E-01 | -6.70 |
| 1420757_PM_at          | Myf5                         | MYF5        | -0.01 | 2.33  | -0.10 | 9.24E-01 | 9.70E-01 | -6.70 |
| 1454114_PM_a_at        | Slc9b1                       | SLC9B1      | -0.01 | 2.38  | -0.10 | 9.24E-01 | 9.70E-01 | -6.70 |
| 1449387_PM_at          | Krt33a                       | KRT33B      | -0.01 | 2.39  | -0.10 | 9.24E-01 | 9.70E-01 | -6.70 |
| 1458005_PM_at          | ---                          | NA          | -0.01 | 2.27  | -0.10 | 9.25E-01 | 9.70E-01 | -6.70 |
| 1421787_PM_at          | ---                          | NA          | -0.01 | 2.23  | -0.10 | 9.24E-01 | 9.70E-01 | -6.70 |
| 1457042_PM_at          | Gxylt2                       | GXYLT2      | -0.01 | 2.75  | -0.10 | 9.25E-01 | 9.70E-01 | -6.70 |
| 1425288_PM_at          | Samd11                       | SAMD11      | -0.01 | 2.69  | -0.10 | 9.24E-01 | 9.70E-01 | -6.70 |
| AFFX-NonspecificGC8_at | ---                          | NA          | 0.01  | 1.92  | 0.10  | 9.25E-01 | 9.70E-01 | -6.70 |
| 1453801_PM_at          | Them5                        | THEM5       | 0.01  | 1.86  | 0.10  | 9.24E-01 | 9.70E-01 | -6.70 |
| 1419021_PM_at          | Mcf2                         | MCF2        | 0.01  | 2.07  | 0.10  | 9.24E-01 | 9.70E-01 | -6.70 |
| 1453132_PM_a_at        | Gkn2                         | GKN2        | 0.01  | 2.56  | 0.10  | 9.25E-01 | 9.70E-01 | -6.70 |
| 1455209_PM_at          | Pck1                         | NA          | 0.01  | 1.96  | 0.10  | 9.24E-01 | 9.70E-01 | -6.70 |
| 1444498_PM_at          | ---                          | NA          | 0.01  | 2.08  | 0.10  | 9.25E-01 | 9.70E-01 | -6.70 |
| 1459275_PM_at          | Rnf17                        | RNF17       | 0.01  | 1.87  | 0.10  | 9.24E-01 | 9.70E-01 | -6.70 |
| 1419607_PM_at          | Tnf                          | NA          | 0.01  | 2.55  | 0.10  | 9.24E-01 | 9.70E-01 | -6.70 |
| 1438389_PM_x_at        | Acly                         | ACLY        | 0.01  | 2.18  | 0.10  | 9.24E-01 | 9.70E-01 | -6.70 |
| 1420933_PM_a_at        | Eya3                         | EYA3        | 0.01  | 2.84  | 0.10  | 9.24E-01 | 9.70E-01 | -6.70 |
| 1426057_PM_a_at        | Epha3                        | EPHA3       | 0.01  | 2.46  | 0.10  | 9.24E-01 | 9.70E-01 | -6.70 |

|                 |                       |            |       |      |       |          |          |       |
|-----------------|-----------------------|------------|-------|------|-------|----------|----------|-------|
| 1440313_PM_at   | Fuca2                 | FUCA2      | 0.02  | 4.11 | 0.10  | 9.24E-01 | 9.70E-01 | -6.70 |
| 1440158_PM_x_at | Chchd7                | NA         | 0.02  | 2.41 | 0.10  | 9.24E-01 | 9.70E-01 | -6.70 |
| 1444688_PM_at   | ---                   | NA         | 0.02  | 2.47 | 0.10  | 9.24E-01 | 9.70E-01 | -6.70 |
| 1427499_PM_at   | Zfp81                 | NA         | 0.02  | 2.96 | 0.10  | 9.24E-01 | 9.70E-01 | -6.70 |
| 1435482_PM_at   | Fibcd1                | FIBCD1     | 0.02  | 2.73 | 0.10  | 9.24E-01 | 9.70E-01 | -6.70 |
| 1424101_PM_at   | Hnrnpl                | ACO08982.1 | 0.02  | 3.74 | 0.10  | 9.24E-01 | 9.70E-01 | -6.70 |
| 1453569_PM_s_at | Mark4                 | NA         | 0.03  | 3.61 | 0.10  | 9.24E-01 | 9.70E-01 | -6.70 |
| 1428335_PM_a_at | Scfd1                 | SCFD1      | 0.04  | 2.99 | 0.10  | 9.24E-01 | 9.70E-01 | -6.70 |
| 1418474_PM_at   | Emc9                  | EMC9       | -0.02 | 2.91 | -0.10 | 9.25E-01 | 9.70E-01 | -6.70 |
| 1438012_PM_at   | Ppm1l                 | PPM1L      | -0.04 | 4.86 | -0.10 | 9.25E-01 | 9.70E-01 | -6.70 |
| 1429154_PM_at   | Slc35f2               | SLC35F2    | -0.01 | 2.21 | -0.10 | 9.25E-01 | 9.70E-01 | -6.70 |
| 1450829_PM_at   | Tnfaip3               | TNFAIP3    | 0.01  | 2.20 | 0.10  | 9.25E-01 | 9.70E-01 | -6.70 |
| 1451235_PM_at   | Cend1                 | CEND1      | 0.02  | 5.50 | 0.10  | 9.25E-01 | 9.70E-01 | -6.70 |
| 1456202_PM_at   | Elfn2                 | ELFN2      | -0.01 | 2.26 | -0.10 | 9.25E-01 | 9.70E-01 | -6.70 |
| 1429444_PM_at   | Rasl11a               | RASL11A    | 0.01  | 2.48 | 0.10  | 9.25E-01 | 9.70E-01 | -6.70 |
| 1419723_PM_at   | Opn1mw                | OPN1MW2    | -0.01 | 2.24 | -0.10 | 9.25E-01 | 9.71E-01 | -6.70 |
| 1417805_PM_at   | Xpnpep2               | XPNPEP2    | -0.01 | 3.00 | -0.10 | 9.25E-01 | 9.71E-01 | -6.70 |
| 1447244_PM_at   | Cyb561a3              | NA         | 0.01  | 2.16 | 0.10  | 9.25E-01 | 9.71E-01 | -6.70 |
| 1426426_PM_at   | Mak16                 | MAK16      | -0.04 | 4.18 | -0.10 | 9.25E-01 | 9.71E-01 | -6.70 |
| 1449427_PM_at   | Prss37                | PRSS37     | -0.02 | 2.33 | -0.10 | 9.25E-01 | 9.71E-01 | -6.70 |
| 1434813_PM_x_at | Wars                  | WARS       | -0.02 | 3.41 | -0.10 | 9.25E-01 | 9.71E-01 | -6.70 |
| 1429928_PM_at   | Ctag2                 | CTAG1A     | -0.01 | 2.19 | -0.10 | 9.25E-01 | 9.71E-01 | -6.70 |
| 1442629_PM_at   | ---                   | NA         | -0.01 | 2.24 | -0.10 | 9.25E-01 | 9.71E-01 | -6.70 |
| 1458251_PM_at   | AU022166              | NA         | 0.01  | 2.37 | 0.10  | 9.25E-01 | 9.71E-01 | -6.70 |
| 1457038_PM_at   | Frem2                 | FREM2      | 0.01  | 2.17 | 0.10  | 9.25E-01 | 9.71E-01 | -6.70 |
| 1445083_PM_at   | ---                   | NA         | 0.01  | 2.33 | 0.10  | 9.25E-01 | 9.71E-01 | -6.70 |
| 1458894_PM_at   | ---                   | NA         | 0.01  | 2.29 | 0.10  | 9.25E-01 | 9.71E-01 | -6.70 |
| 1430010_PM_at   | Ncapd2                | NCAPD2     | 0.01  | 2.71 | 0.10  | 9.25E-01 | 9.71E-01 | -6.70 |
| 1455118_PM_at   | Tcaim                 | TCAIM      | 0.01  | 2.50 | 0.10  | 9.25E-01 | 9.71E-01 | -6.70 |
| 1435567_PM_at   | Phka1                 | PHKA1      | 0.01  | 2.55 | 0.10  | 9.25E-01 | 9.71E-01 | -6.70 |
| 1454983_PM_at   | Fam63b                | MINDY2     | 0.03  | 3.37 | 0.10  | 9.25E-01 | 9.71E-01 | -6.70 |
| 1432905_PM_at   | ---                   | NA         | 0.03  | 2.69 | 0.10  | 9.25E-01 | 9.71E-01 | -6.70 |
| 1455675_PM_a_at | Tial1                 | TIAL1      | -0.04 | 5.84 | -0.10 | 9.25E-01 | 9.71E-01 | -6.70 |
| 1433201_PM_at   | 2310079F09Rik         | NA         | -0.02 | 3.04 | -0.10 | 9.25E-01 | 9.71E-01 | -6.70 |
| 1449720_PM_at   | ---                   | NA         | 0.01  | 2.64 | 0.10  | 9.25E-01 | 9.71E-01 | -6.70 |
| 1452313_PM_at   | Rhno1                 | NA         | 0.01  | 3.10 | 0.10  | 9.25E-01 | 9.71E-01 | -6.70 |
| 1444863_PM_at   | ---                   | NA         | 0.02  | 3.59 | 0.10  | 9.25E-01 | 9.71E-01 | -6.70 |
| 1456200_PM_at   | Ipmk                  | IPMK       | 0.02  | 3.12 | 0.10  | 9.25E-01 | 9.71E-01 | -6.70 |
| 1418888_PM_a_at | Msrb1                 | MSRB1      | -0.01 | 3.15 | -0.10 | 9.26E-01 | 9.71E-01 | -6.70 |
| 1429328_PM_at   | Nsfl1c                | NSFL1C     | -0.03 | 2.72 | -0.10 | 9.26E-01 | 9.71E-01 | -6.70 |
| 1454142_PM_a_at | Pwp1                  | PWP1       | -0.02 | 2.68 | -0.10 | 9.26E-01 | 9.71E-01 | -6.70 |
| 1424166_PM_at   | Msh3                  | MSH3       | -0.01 | 2.48 | -0.10 | 9.26E-01 | 9.71E-01 | -6.70 |
| 1452554_PM_at   | Gm8479                | NA         | -0.01 | 2.20 | -0.10 | 9.26E-01 | 9.71E-01 | -6.70 |
| 1425310_PM_a_at | Col26a1               | COL26A1    | 0.01  | 2.20 | 0.10  | 9.26E-01 | 9.71E-01 | -6.70 |
| 1423437_PM_at   | Gsta3                 | GSTA3      | 0.01  | 2.79 | 0.10  | 9.26E-01 | 9.71E-01 | -6.70 |
| 1456190_PM_a_at | Acsm2                 | ACSM2B     | 0.01  | 2.17 | 0.10  | 9.26E-01 | 9.71E-01 | -6.70 |
| 1421682_PM_a_at | Gm3417 /// Gm3448 /// | Tcte3      | 0.01  | 2.66 | 0.10  | 9.26E-01 | 9.71E-01 | -6.70 |
| 1440170_PM_at   | ---                   | NA         | 0.02  | 2.50 | 0.10  | 9.26E-01 | 9.71E-01 | -6.70 |
| 1440958_PM_at   | Chadl                 | CHADL      | 0.02  | 3.10 | 0.10  | 9.26E-01 | 9.71E-01 | -6.70 |
| 1426824_PM_at   | Psme4                 | PSME4      | 0.03  | 3.52 | 0.10  | 9.26E-01 | 9.71E-01 | -6.70 |
| 1446750_PM_at   | Impact                | NA         | 0.03  | 4.08 | 0.10  | 9.26E-01 | 9.71E-01 | -6.70 |
| 1449660_PM_s_at | Coro1c                | CORO1C     | 0.04  | 2.68 | 0.10  | 9.26E-01 | 9.71E-01 | -6.70 |
| 1449123_PM_at   | Ith3                  | ITH3       | -0.05 | 3.93 | -0.10 | 9.26E-01 | 9.71E-01 | -6.70 |
| 1459573_PM_at   | Rpf1                  | RPF1       | -0.03 | 2.71 | -0.10 | 9.26E-01 | 9.71E-01 | -6.70 |
| 1421746_PM_a_at | Fbxo17                | FBXO17     | -0.02 | 2.69 | -0.10 | 9.26E-01 | 9.71E-01 | -6.70 |
| 1455528_PM_at   | ---                   | NA         | -0.02 | 2.55 | -0.10 | 9.26E-01 | 9.71E-01 | -6.70 |
| 1430118_PM_at   | 2700046A07Rik         | NA         | -0.01 | 2.16 | -0.10 | 9.26E-01 | 9.71E-01 | -6.70 |
| 1441818_PM_at   | Fer1l6                | FER1L6     | -0.01 | 2.01 | -0.10 | 9.26E-01 | 9.71E-01 | -6.70 |
| 1436825_PM_a_at | A630095E13Rik         | NA         | 0.01  | 2.14 | 0.10  | 9.26E-01 | 9.71E-01 | -6.70 |
| 1433033_PM_at   | 2310007H11Rik         | NA         | 0.01  | 2.42 | 0.10  | 9.26E-01 | 9.71E-01 | -6.70 |
| 1446399_PM_at   | Cdh10                 | NA         | 0.02  | 3.47 | 0.10  | 9.26E-01 | 9.71E-01 | -6.70 |
| 1436786_PM_at   | Sec14b3               | NA         | 0.03  | 2.59 | 0.10  | 9.26E-01 | 9.71E-01 | -6.70 |
| 1436116_PM_x_at | Appl1                 | APPL1      | 0.04  | 5.76 | 0.09  | 9.26E-01 | 9.71E-01 | -6.70 |
| 1431873_PM_a_at | Tube1                 | TUBE1      | -0.01 | 2.31 | -0.09 | 9.26E-01 | 9.71E-01 | -6.70 |
| 1416916_PM_at   | Elf3                  | ELF3       | -0.01 | 2.36 | -0.09 | 9.26E-01 | 9.71E-01 | -6.70 |
| 1449640_PM_at   | Tlr7                  | TLR7       | 0.01  | 2.57 | 0.09  | 9.26E-01 | 9.71E-01 | -6.70 |
| 1454601_PM_at   | 8030497O21Rik         | NA         | -0.01 | 2.53 | -0.09 | 9.26E-01 | 9.71E-01 | -6.70 |
| 1422049_PM_at   | Nkx1-2                | NKX1-2     | 0.01  | 2.47 | 0.09  | 9.26E-01 | 9.71E-01 | -6.70 |
| 1420058_PM_s_at | Mtfr1l                | MTFR1L     | -0.02 | 3.23 | -0.09 | 9.26E-01 | 9.71E-01 | -6.70 |
| 1448890_PM_at   | Klf2                  | KLF2       | -0.01 | 2.98 | -0.09 | 9.26E-01 | 9.71E-01 | -6.70 |
| 1442868_PM_at   | ---                   | NA         | 0.01  | 2.28 | 0.09  | 9.27E-01 | 9.71E-01 | -6.70 |
| 1428221_PM_at   | Klhdc8b               | KLHDC8B    | 0.02  | 2.63 | 0.09  | 9.27E-01 | 9.71E-01 | -6.70 |
| 1448949_PM_at   | Car4                  | CA4        | 0.05  | 6.18 | 0.09  | 9.27E-01 | 9.71E-01 | -6.70 |
| 1440121_PM_at   | St6galnac3            | NA         | -0.01 | 2.33 | -0.09 | 9.27E-01 | 9.71E-01 | -6.70 |

|                 |                                                                                                  |           |       |      |       |          |          |       |
|-----------------|--------------------------------------------------------------------------------------------------|-----------|-------|------|-------|----------|----------|-------|
| 1430923_PM_at   | 2610300M13Rik                                                                                    | NA        | -0.01 | 2.23 | -0.09 | 9.27E-01 | 9.71E-01 | -6.70 |
| 1418198_PM_a_at | Ipo4 /// Tm9sf1                                                                                  | IPO4      | -0.02 | 3.30 | -0.09 | 9.27E-01 | 9.71E-01 | -6.70 |
| 1436902_PM_x_at | Tmsb10                                                                                           | TMSB10    | -0.08 | 6.25 | -0.09 | 9.27E-01 | 9.71E-01 | -6.70 |
| 1456036_PM_x_at | Gsto1                                                                                            | GSTO1     | -0.05 | 4.64 | -0.09 | 9.27E-01 | 9.71E-01 | -6.70 |
| 1445977_PM_at   | AU022793                                                                                         | NA        | -0.04 | 2.85 | -0.09 | 9.27E-01 | 9.71E-01 | -6.70 |
| 1438859_PM_x_at | Rps29                                                                                            | RPS29     | -0.03 | 8.91 | -0.09 | 9.27E-01 | 9.71E-01 | -6.70 |
| 1460001_PM_at   | Pgpep1                                                                                           | PGPEP1    | -0.02 | 2.96 | -0.09 | 9.27E-01 | 9.71E-01 | -6.70 |
| 1437485_PM_at   | Nos1ap                                                                                           | NOS1AP    | -0.02 | 3.53 | -0.09 | 9.27E-01 | 9.71E-01 | -6.70 |
| 1454134_PM_at   | 5730412P04Rik                                                                                    | NA        | -0.01 | 2.27 | -0.09 | 9.27E-01 | 9.71E-01 | -6.70 |
| 1451838_PM_a_at | Tc2n                                                                                             | TC2N      | 0.01  | 2.18 | 0.09  | 9.27E-01 | 9.71E-01 | -6.70 |
| 1426206_PM_at   | Robo4                                                                                            | ROBO4     | 0.01  | 2.58 | 0.09  | 9.27E-01 | 9.71E-01 | -6.70 |
| 1442685_PM_at   | ---                                                                                              | NA        | 0.01  | 2.38 | 0.09  | 9.27E-01 | 9.71E-01 | -6.70 |
| 1421433_PM_at   | Zfhx4                                                                                            | ZFHX4     | 0.01  | 2.24 | 0.09  | 9.27E-01 | 9.71E-01 | -6.70 |
| 1451362_PM_at   | Rab29                                                                                            | RAB29     | 0.01  | 2.55 | 0.09  | 9.27E-01 | 9.71E-01 | -6.70 |
| 1459468_PM_at   | C79743                                                                                           | NA        | -0.01 | 2.22 | -0.09 | 9.27E-01 | 9.71E-01 | -6.70 |
| 1428569_PM_at   | B230217C12Rik                                                                                    | NA        | 0.01  | 2.04 | 0.09  | 9.27E-01 | 9.71E-01 | -6.70 |
| 1451297_PM_at   | Gulo                                                                                             | NA        | 0.01  | 1.98 | 0.09  | 9.27E-01 | 9.71E-01 | -6.70 |
| 1447004_PM_at   | 9630028H03Rik                                                                                    | NA        | -0.01 | 2.18 | -0.09 | 9.27E-01 | 9.71E-01 | -6.70 |
| 1458393_PM_at   | ---                                                                                              | NA        | -0.01 | 2.53 | -0.09 | 9.27E-01 | 9.71E-01 | -6.70 |
| 1430032_PM_at   | Rbm4b                                                                                            | RBM4B     | -0.03 | 2.71 | -0.09 | 9.28E-01 | 9.72E-01 | -6.70 |
| 1439172_PM_at   | Atp13a5                                                                                          | ATP13A5   | -0.02 | 2.36 | -0.09 | 9.28E-01 | 9.72E-01 | -6.70 |
| 1422436_PM_at   | 2210010C04Rik                                                                                    | NA        | -0.02 | 3.64 | -0.09 | 9.28E-01 | 9.72E-01 | -6.70 |
| 1442001_PM_at   | Prkab2                                                                                           | PRKAB2    | -0.02 | 2.89 | -0.09 | 9.28E-01 | 9.72E-01 | -6.70 |
| 1437500_PM_at   | Noc3l                                                                                            | NOC3L     | -0.02 | 2.49 | -0.09 | 9.28E-01 | 9.72E-01 | -6.70 |
| 1420015_PM_s_at | Ppt1                                                                                             | NA        | -0.02 | 3.21 | -0.09 | 9.28E-01 | 9.72E-01 | -6.70 |
| 1454279_PM_at   | Oaz3                                                                                             | OAZ3      | -0.01 | 2.35 | -0.09 | 9.28E-01 | 9.72E-01 | -6.70 |
| 1434399_PM_at   | Galnt6                                                                                           | GALNT6    | -0.01 | 2.43 | -0.09 | 9.28E-01 | 9.72E-01 | -6.70 |
| 1428763_PM_at   | Smug1                                                                                            | SMUG1     | -0.01 | 2.92 | -0.09 | 9.28E-01 | 9.72E-01 | -6.70 |
| 1424783_PM_a_at | Ugt1a1 /// Ugt1a10 ///<br>Ugt1a2 /// Ugt1a5 ///<br>Ugt1a6a /// Ugt1a6b ///<br>Ugt1a7c /// Ugt1a9 | UGT1A6    | -0.01 | 2.09 | -0.09 | 9.28E-01 | 9.72E-01 | -6.70 |
| 1457561_PM_at   | Itga5                                                                                            | ITGA5     | -0.01 | 2.24 | -0.09 | 9.28E-01 | 9.72E-01 | -6.70 |
| 1457427_PM_at   | Ajap1                                                                                            | AJAP1     | 0.01  | 2.59 | 0.09  | 9.28E-01 | 9.72E-01 | -6.70 |
| 1459544_PM_at   | Lipt1                                                                                            | NA        | 0.02  | 5.35 | 0.09  | 9.28E-01 | 9.72E-01 | -6.70 |
| 1416059_PM_at   | Sec23b                                                                                           | SEC23B    | 0.03  | 4.40 | 0.09  | 9.28E-01 | 9.72E-01 | -6.70 |
| 1442180_PM_at   | Dleu7                                                                                            | DLEU7     | -0.02 | 2.41 | -0.09 | 9.28E-01 | 9.72E-01 | -6.70 |
| 1438265_PM_at   | ---                                                                                              | NA        | 0.01  | 2.31 | 0.09  | 9.28E-01 | 9.72E-01 | -6.70 |
| 1422861_PM_s_at | Pdlim5                                                                                           | PDLIM5    | 0.02  | 2.94 | 0.09  | 9.28E-01 | 9.72E-01 | -6.70 |
| 1421625_PM_a_at | Tmc1                                                                                             | TMC1      | -0.01 | 2.64 | -0.09 | 9.28E-01 | 9.72E-01 | -6.70 |
| 1446977_PM_at   | ---                                                                                              | NA        | 0.01  | 2.61 | 0.09  | 9.28E-01 | 9.72E-01 | -6.70 |
| 1433541_PM_a_at | Ubap2l                                                                                           | UBAP2L    | 0.04  | 3.45 | 0.09  | 9.28E-01 | 9.72E-01 | -6.70 |
| 1458813_PM_at   | Scn5a                                                                                            | SCN5A     | 0.01  | 2.20 | 0.09  | 9.28E-01 | 9.72E-01 | -6.70 |
| 1443562_PM_at   | ---                                                                                              | NA        | 0.01  | 2.69 | 0.09  | 9.28E-01 | 9.72E-01 | -6.70 |
| 1451825_PM_a_at | Copz1                                                                                            | COPZ1     | -0.02 | 2.68 | -0.09 | 9.28E-01 | 9.72E-01 | -6.70 |
| 1454839_PM_a_at | Ccdc84                                                                                           | CCDC84    | -0.02 | 4.11 | -0.09 | 9.28E-01 | 9.72E-01 | -6.70 |
| 1439342_PM_at   | ---                                                                                              | NA        | 0.01  | 2.33 | 0.09  | 9.28E-01 | 9.72E-01 | -6.70 |
| 1437975_PM_a_at | Gm8290 /// Rpl23a                                                                                | RPL23A    | -0.04 | 6.01 | -0.09 | 9.29E-01 | 9.72E-01 | -6.70 |
| 1442863_PM_at   | Cacna2d4                                                                                         | CACNA2D4  | 0.01  | 2.03 | 0.09  | 9.29E-01 | 9.72E-01 | -6.70 |
| 1450823_PM_at   | Sebox                                                                                            | SEBOX     | -0.01 | 2.34 | -0.09 | 9.29E-01 | 9.72E-01 | -6.70 |
| 1429826_PM_at   | Prf7b1                                                                                           | PRL       | 0.01  | 2.64 | 0.09  | 9.29E-01 | 9.72E-01 | -6.70 |
| 1433577_PM_at   | A730017C20Rik                                                                                    | KIAA1024L | -0.01 | 3.16 | -0.09 | 9.29E-01 | 9.72E-01 | -6.70 |
| 1430645_PM_at   | Cd200r3                                                                                          | CD200R1L  | -0.01 | 2.20 | -0.09 | 9.29E-01 | 9.72E-01 | -6.70 |
| 1421473_PM_at   | Illa                                                                                             | NA        | 0.01  | 1.99 | 0.09  | 9.29E-01 | 9.72E-01 | -6.70 |
| 1426479_PM_a_at | Cnpy3                                                                                            | CNPY3     | 0.01  | 2.72 | 0.09  | 9.29E-01 | 9.72E-01 | -6.70 |
| 1438144_PM_x_at | Atxn2                                                                                            | ATXN2     | 0.01  | 2.88 | 0.09  | 9.29E-01 | 9.72E-01 | -6.70 |
| 1458221_PM_at   | ---                                                                                              | NA        | 0.01  | 2.42 | 0.09  | 9.29E-01 | 9.72E-01 | -6.70 |
| 1424224_PM_at   | Asb8                                                                                             | ASB8      | 0.01  | 2.47 | 0.09  | 9.29E-01 | 9.72E-01 | -6.70 |
| 1443506_PM_at   | Kctd2                                                                                            | KCTD2     | 0.02  | 2.77 | 0.09  | 9.29E-01 | 9.72E-01 | -6.70 |
| 1417241_PM_at   | Amz2 /// LOC100503496                                                                            | AMZ2      | 0.02  | 2.69 | 0.09  | 9.29E-01 | 9.72E-01 | -6.70 |
| 1428068_PM_at   | Samm50                                                                                           | SAMM50    | -0.02 | 3.03 | -0.09 | 9.29E-01 | 9.72E-01 | -6.70 |
| 1442873_PM_at   | Figl                                                                                             | FIGN      | -0.01 | 2.42 | -0.09 | 9.29E-01 | 9.72E-01 | -6.70 |
| 1451948_PM_at   | Igkv5-39                                                                                         | NA        | 0.01  | 2.27 | 0.09  | 9.29E-01 | 9.72E-01 | -6.70 |
| 1438202_PM_at   | Fam109b                                                                                          | FAM109B   | 0.01  | 2.46 | 0.09  | 9.29E-01 | 9.72E-01 | -6.70 |
| 1438750_PM_at   | Atrx                                                                                             | ATRX      | 0.02  | 2.44 | 0.09  | 9.29E-01 | 9.72E-01 | -6.70 |
| 1436663_PM_at   | Al846148                                                                                         | C11orf84  | 0.02  | 2.70 | 0.09  | 9.29E-01 | 9.72E-01 | -6.70 |
| 1421311_PM_at   | Pcdh10                                                                                           | NA        | -0.01 | 3.14 | -0.09 | 9.29E-01 | 9.72E-01 | -6.70 |
| 1438137_PM_at   | ---                                                                                              | NA        | -0.01 | 2.49 | -0.09 | 9.29E-01 | 9.72E-01 | -6.70 |
| 1458475_PM_at   | ---                                                                                              | NA        | -0.01 | 2.25 | -0.09 | 9.29E-01 | 9.72E-01 | -6.70 |
| 1422234_PM_at   | Tacr2                                                                                            | TACR2     | 0.01  | 2.18 | 0.09  | 9.29E-01 | 9.72E-01 | -6.70 |
| 1460343_PM_at   | Neurl1a                                                                                          | NEURL1    | 0.02  | 2.74 | 0.09  | 9.29E-01 | 9.72E-01 | -6.70 |
| 1422395_PM_at   | Vmn1r25 /// Vmn1r30                                                                              | NA        | 0.01  | 1.82 | 0.09  | 9.29E-01 | 9.72E-01 | -6.70 |
| 1435213_PM_at   | Nhlrc1                                                                                           | NHLRC1    | 0.01  | 2.48 | 0.09  | 9.29E-01 | 9.72E-01 | -6.70 |
| 1438653_PM_x_at | Atxn10                                                                                           | ATXN10    | -0.03 | 9.78 | -0.09 | 9.29E-01 | 9.72E-01 | -6.70 |
| 1430027_PM_at   | ---                                                                                              | NA        | -0.01 | 1.82 | -0.09 | 9.29E-01 | 9.72E-01 | -6.70 |

|                     |                                   |         |       |       |       |          |          |       |
|---------------------|-----------------------------------|---------|-------|-------|-------|----------|----------|-------|
| 1450372_PM_a_at     | Rpl18                             | RPL18   | -0.04 | 3.62  | -0.09 | 9.30E-01 | 9.72E-01 | -6.70 |
| 1440541_PM_at       | Eldr                              | NA      | 0.01  | 2.50  | 0.09  | 9.30E-01 | 9.72E-01 | -6.70 |
| 1437606_PM_at       | Btbd19                            | NA      | 0.02  | 2.68  | 0.09  | 9.30E-01 | 9.72E-01 | -6.70 |
| 1422941_PM_at       | Wnt16                             | WNT16   | 0.01  | 2.86  | 0.09  | 9.30E-01 | 9.72E-01 | -6.70 |
| 1418900_PM_at       | Ufm1                              | UFM1    | 0.01  | 2.77  | 0.09  | 9.30E-01 | 9.73E-01 | -6.70 |
| 1458316_PM_at       | ---                               | NA      | 0.01  | 2.21  | 0.09  | 9.30E-01 | 9.73E-01 | -6.70 |
| 1427356_PM_at       | Fam89a                            | FAM89A  | 0.01  | 2.27  | 0.09  | 9.30E-01 | 9.73E-01 | -6.70 |
| 1418778_PM_at       | Ccdc109b                          | MCUB    | 0.01  | 2.59  | 0.09  | 9.30E-01 | 9.73E-01 | -6.70 |
| 1452624_PM_at       | Lrrtm1                            | LRRTM1  | 0.02  | 3.09  | 0.09  | 9.30E-01 | 9.73E-01 | -6.70 |
| 1438537_PM_at       | ---                               | NA      | -0.01 | 2.49  | -0.09 | 9.30E-01 | 9.73E-01 | -6.70 |
| 1452683_PM_at       | Dnajc8                            | DNAJC8  | 0.02  | 7.26  | 0.09  | 9.30E-01 | 9.73E-01 | -6.70 |
| 1449643_PM_s_at     | Btf3                              | BTF3    | -0.02 | 3.13  | -0.09 | 9.30E-01 | 9.73E-01 | -6.70 |
| 1449753_PM_at       | ---                               | NA      | 0.01  | 2.13  | 0.09  | 9.30E-01 | 9.73E-01 | -6.70 |
| 1458012_PM_at       | Dach2                             | DACH2   | 0.01  | 1.94  | 0.09  | 9.30E-01 | 9.73E-01 | -6.70 |
| 1441185_PM_at       | Msi2                              | MSI2    | 0.01  | 2.31  | 0.09  | 9.30E-01 | 9.73E-01 | -6.70 |
| 1439469_PM_at       | ---                               | NA      | 0.01  | 2.36  | 0.09  | 9.30E-01 | 9.73E-01 | -6.70 |
| 1434352_PM_at       | B63005N14Rik                      | BMT2    | 0.02  | 2.78  | 0.09  | 9.30E-01 | 9.73E-01 | -6.70 |
| 1444066_PM_at       | Gapvd1                            | GAPVD1  | -0.02 | 2.72  | -0.09 | 9.30E-01 | 9.73E-01 | -6.70 |
| 1429823_PM_at       | Sgcg                              | NA      | -0.01 | 3.26  | -0.09 | 9.30E-01 | 9.73E-01 | -6.70 |
| 1453284_PM_at       | Fam151b                           | FAM151B | -0.01 | 2.58  | -0.09 | 9.30E-01 | 9.73E-01 | -6.70 |
| 1445575_PM_at       | ---                               | NA      | -0.01 | 2.47  | -0.09 | 9.30E-01 | 9.73E-01 | -6.70 |
| 1459427_PM_at       | Stam                              | STAM    | 0.01  | 2.21  | 0.09  | 9.30E-01 | 9.73E-01 | -6.70 |
| 1425449_PM_at       | Plpp1                             | NA      | 0.01  | 2.22  | 0.09  | 9.30E-01 | 9.73E-01 | -6.70 |
| 1450004_PM_at       | Tslp                              | TSLP    | 0.01  | 2.43  | 0.09  | 9.30E-01 | 9.73E-01 | -6.70 |
| 1420654_PM_a_at     | Gbe1                              | GBE1    | 0.01  | 2.29  | 0.09  | 9.30E-01 | 9.73E-01 | -6.70 |
| 1429063_PM_s_at     | Kif16b                            | KIF16B  | 0.01  | 2.31  | 0.09  | 9.30E-01 | 9.73E-01 | -6.70 |
| 1447575_PM_at       | ---                               | NA      | 0.01  | 2.39  | 0.09  | 9.30E-01 | 9.73E-01 | -6.70 |
| 1427266_PM_at       | Pbrm1                             | PBRM1   | 0.02  | 2.89  | 0.09  | 9.30E-01 | 9.73E-01 | -6.70 |
| 1429878_PM_a_at     | Nup1                              | NUP58   | 0.03  | 2.98  | 0.09  | 9.30E-01 | 9.73E-01 | -6.70 |
| 1420752_PM_at       | Dtx3                              | DTX3    | 0.04  | 3.54  | 0.09  | 9.30E-01 | 9.73E-01 | -6.70 |
| 1433316_PM_at       | 4930477O15Rik                     | NA      | 0.01  | 2.47  | 0.09  | 9.30E-01 | 9.73E-01 | -6.70 |
| 1458834_PM_at       | ---                               | NA      | 0.01  | 2.55  | 0.09  | 9.30E-01 | 9.73E-01 | -6.70 |
| 1421805_PM_at       | ---                               | NA      | -0.01 | 2.12  | -0.09 | 9.31E-01 | 9.73E-01 | -6.70 |
| 1416260_PM_a_at     | Srx1                              | SNX1    | 0.02  | 3.89  | 0.09  | 9.31E-01 | 9.73E-01 | -6.70 |
| 1442977_PM_at       | Col3a1                            | COL3A1  | -0.01 | 2.40  | -0.09 | 9.31E-01 | 9.73E-01 | -6.70 |
| 1460641_PM_a_at     | Rbm42                             | RBM42   | -0.01 | 3.02  | -0.09 | 9.31E-01 | 9.73E-01 | -6.70 |
| 1434489_PM_at       | Elmo3                             | ELMO3   | 0.01  | 2.46  | 0.09  | 9.31E-01 | 9.73E-01 | -6.70 |
| 1431220_PM_at       | 2810416G20Rik ///<br>LOC102642487 | NA      | -0.03 | 3.31  | -0.09 | 9.31E-01 | 9.73E-01 | -6.70 |
| 1420202_PM_at       | ---                               | NA      | -0.01 | 2.01  | -0.09 | 9.31E-01 | 9.73E-01 | -6.70 |
| 1430496_PM_at       | Agk                               | AGK     | 0.01  | 2.08  | 0.09  | 9.31E-01 | 9.73E-01 | -6.70 |
| 1440154_PM_at       | ---                               | NA      | 0.01  | 2.26  | 0.09  | 9.31E-01 | 9.73E-01 | -6.70 |
| 1451608_PM_a_at     | Tspan33                           | TSPAN33 | 0.03  | 5.56  | 0.09  | 9.31E-01 | 9.73E-01 | -6.70 |
| 1448160_PM_at       | Lcp1                              | LCP1    | 0.01  | 2.78  | 0.09  | 9.31E-01 | 9.73E-01 | -6.70 |
| 1432070_PM_at       | 4921511C10Rik                     | NA      | -0.01 | 2.22  | -0.09 | 9.31E-01 | 9.73E-01 | -6.70 |
| 1427848_PM_at       | ---                               | NA      | -0.01 | 2.50  | -0.09 | 9.31E-01 | 9.73E-01 | -6.70 |
| AFFX-r2-Bs-lys-5_at | ---                               | NA      | -0.01 | 2.24  | -0.09 | 9.31E-01 | 9.73E-01 | -6.70 |
| 1432255_PM_at       | Mast1                             | NA      | -0.01 | 2.64  | -0.09 | 9.31E-01 | 9.73E-01 | -6.70 |
| 1425816_PM_at       | Zfp287                            | ZNF883  | -0.01 | 2.36  | -0.09 | 9.31E-01 | 9.73E-01 | -6.70 |
| 1429825_PM_at       | Tmem225                           | TMEM225 | 0.01  | 1.91  | 0.09  | 9.31E-01 | 9.73E-01 | -6.70 |
| 1448469_PM_at       | Nid1                              | NID1    | -0.01 | 2.26  | -0.09 | 9.31E-01 | 9.73E-01 | -6.70 |
| 1457243_PM_at       | Tmem219                           | NA      | 0.02  | 2.70  | 0.09  | 9.31E-01 | 9.73E-01 | -6.70 |
| 1426226_PM_at       | Dyrk1a                            | DYRK1A  | -0.03 | 2.50  | -0.09 | 9.31E-01 | 9.73E-01 | -6.70 |
| 1430037_PM_at       | Srx27                             | SNX27   | -0.02 | 5.30  | -0.09 | 9.31E-01 | 9.73E-01 | -6.70 |
| 1457554_PM_at       | Apob                              | APOB    | -0.01 | 3.06  | -0.09 | 9.31E-01 | 9.73E-01 | -6.70 |
| 1424535_PM_at       | Tctn3                             | TCTN3   | 0.02  | 3.84  | 0.09  | 9.31E-01 | 9.73E-01 | -6.70 |
| 1422731_PM_at       | Limd1                             | LIMD1   | 0.03  | 2.64  | 0.09  | 9.31E-01 | 9.73E-01 | -6.70 |
| 1426911_PM_at       | Dsc2                              | DSC2    | -0.01 | 2.22  | -0.09 | 9.32E-01 | 9.73E-01 | -6.70 |
| 1421638_PM_at       | Psg17                             | CEACAM3 | 0.01  | 2.39  | 0.09  | 9.32E-01 | 9.73E-01 | -6.70 |
| 1439432_PM_x_at     | Morf4l2                           | MORF4L2 | 0.02  | 9.65  | 0.09  | 9.32E-01 | 9.73E-01 | -6.70 |
| 1443989_PM_at       | ---                               | NA      | -0.03 | 4.69  | -0.09 | 9.32E-01 | 9.73E-01 | -6.70 |
| 1440584_PM_at       | ---                               | NA      | -0.01 | 2.55  | -0.09 | 9.32E-01 | 9.73E-01 | -6.70 |
| 1443377_PM_at       | Adam1a                            | NA      | 0.01  | 2.15  | 0.09  | 9.32E-01 | 9.73E-01 | -6.70 |
| 1431471_PM_at       | ---                               | NA      | -0.01 | 2.19  | -0.09 | 9.32E-01 | 9.73E-01 | -6.70 |
| 1448564_PM_at       | Cib1                              | CIB1    | -0.01 | 2.32  | -0.09 | 9.32E-01 | 9.73E-01 | -6.70 |
| 1451455_PM_at       | Thnsl2                            | THNSL2  | -0.01 | 2.76  | -0.09 | 9.32E-01 | 9.73E-01 | -6.70 |
| 1418821_PM_at       | Cyp2a12                           | CYP2A6  | 0.01  | 2.28  | 0.09  | 9.32E-01 | 9.73E-01 | -6.70 |
| 1444864_PM_at       | D12Erd125e                        | NA      | 0.02  | 3.29  | 0.09  | 9.32E-01 | 9.73E-01 | -6.70 |
| 1433304_PM_at       | ---                               | NA      | -0.01 | 2.04  | -0.09 | 9.32E-01 | 9.73E-01 | -6.70 |
| 1443507_PM_at       | ---                               | NA      | -0.01 | 2.32  | -0.09 | 9.32E-01 | 9.74E-01 | -6.70 |
| 1435086_PM_s_at     | Klhdc2                            | KLHDC2  | -0.02 | 10.08 | -0.09 | 9.32E-01 | 9.74E-01 | -6.70 |
| 1457396_PM_at       | Vax1                              | NA      | -0.01 | 2.66  | -0.09 | 9.32E-01 | 9.74E-01 | -6.70 |
| 1419494_PM_a_at     | Tpd52                             | TPD52   | -0.01 | 2.57  | -0.09 | 9.32E-01 | 9.74E-01 | -6.70 |
| 1429084_PM_at       | Vezf1                             | VEZF1   | 0.01  | 2.50  | 0.09  | 9.32E-01 | 9.74E-01 | -6.70 |
| 1428723_PM_at       | Borc56                            | BORCS6  | 0.03  | 2.70  | 0.09  | 9.32E-01 | 9.74E-01 | -6.70 |



|                 |                                        |            |       |      |       |          |          |       |
|-----------------|----------------------------------------|------------|-------|------|-------|----------|----------|-------|
| 1448471_PM_a_at | Ctla2a                                 | NA         | 0.03  | 3.80 | 0.09  | 9.32E-01 | 9.74E-01 | -6.70 |
| 1425135_PM_a_at | Dnm2                                   | DNM2       | -0.04 | 4.21 | -0.09 | 9.32E-01 | 9.74E-01 | -6.70 |
| 1439059_PM_at   | Fam199x                                | FAM199X    | -0.03 | 3.73 | -0.09 | 9.33E-01 | 9.74E-01 | -6.70 |
| 1445099_PM_at   | ---                                    | NA         | -0.03 | 2.69 | -0.09 | 9.33E-01 | 9.74E-01 | -6.70 |
| 1443770_PM_x_at | ---                                    | NA         | -0.03 | 2.83 | -0.09 | 9.33E-01 | 9.74E-01 | -6.70 |
| 1438255_PM_at   | Foxn3                                  | FOXN3      | -0.02 | 3.79 | -0.09 | 9.33E-01 | 9.74E-01 | -6.70 |
| 1434159_PM_at   | Stk4                                   | STK4       | -0.02 | 3.74 | -0.09 | 9.32E-01 | 9.74E-01 | -6.70 |
| 1453365_PM_at   | Rabgap1l                               | RABGAP1L   | -0.02 | 2.33 | -0.09 | 9.32E-01 | 9.74E-01 | -6.70 |
| 1443646_PM_at   | Igsf10                                 | NA         | -0.02 | 2.39 | -0.09 | 9.33E-01 | 9.74E-01 | -6.70 |
| 1455135_PM_at   | Inafm1                                 | INAFM1     | -0.01 | 3.14 | -0.09 | 9.33E-01 | 9.74E-01 | -6.70 |
| 1452366_PM_at   | Csgalnact1                             | CSGALNACT1 | -0.01 | 2.72 | -0.09 | 9.33E-01 | 9.74E-01 | -6.70 |
| 1428691_PM_at   | Chd2                                   | CHD2       | -0.01 | 4.47 | -0.09 | 9.33E-01 | 9.74E-01 | -6.70 |
| 1456318_PM_at   | Clec1a                                 | CLEC1A     | -0.01 | 2.44 | -0.09 | 9.33E-01 | 9.74E-01 | -6.70 |
| 1443548_PM_at   | LOC100862268                           | NA         | -0.01 | 2.22 | -0.09 | 9.33E-01 | 9.74E-01 | -6.70 |
| 1430886_PM_at   | 1700112E06Rik                          | LRMDA      | -0.01 | 2.00 | -0.09 | 9.32E-01 | 9.74E-01 | -6.70 |
| 1430918_PM_at   | March3                                 | NA         | 0.01  | 2.26 | 0.09  | 9.32E-01 | 9.74E-01 | -6.70 |
| 1423783_PM_at   | Tor2a                                  | TOR2A      | 0.01  | 2.36 | 0.09  | 9.33E-01 | 9.74E-01 | -6.70 |
| 1417743_PM_at   | Clk2                                   | CLK2       | 0.01  | 2.17 | 0.09  | 9.33E-01 | 9.74E-01 | -6.70 |
| 1446437_PM_at   | ---                                    | NA         | 0.01  | 2.22 | 0.09  | 9.33E-01 | 9.74E-01 | -6.70 |
| 1431051_PM_at   | 4930577N17Rik                          | NA         | 0.01  | 2.17 | 0.09  | 9.33E-01 | 9.74E-01 | -6.70 |
| 1457100_PM_at   | Gm7972                                 | NA         | 0.01  | 2.62 | 0.09  | 9.33E-01 | 9.74E-01 | -6.70 |
| 1453204_PM_at   | ---                                    | NA         | 0.02  | 2.40 | 0.09  | 9.32E-01 | 9.74E-01 | -6.70 |
| 1416308_PM_at   | Ugdh                                   | UGDH       | 0.02  | 4.05 | 0.09  | 9.33E-01 | 9.74E-01 | -6.70 |
| 1439503_PM_at   | Zfp28                                  | ZFP28      | 0.03  | 2.69 | 0.09  | 9.32E-01 | 9.74E-01 | -6.70 |
| 1441240_PM_at   | ---                                    | NA         | -0.02 | 2.47 | -0.09 | 9.33E-01 | 9.74E-01 | -6.70 |
| 1429807_PM_at   | Izumo3                                 | IZUMO3     | 0.01  | 2.07 | 0.09  | 9.33E-01 | 9.74E-01 | -6.70 |
| 1445440_PM_at   | Ccdc88a                                | NA         | 0.01  | 2.47 | 0.09  | 9.33E-01 | 9.74E-01 | -6.70 |
| 1457840_PM_at   | Pkna4                                  | PLXNA4     | 0.01  | 2.64 | 0.09  | 9.33E-01 | 9.74E-01 | -6.70 |
| 1458877_PM_at   | ---                                    | NA         | -0.02 | 3.76 | -0.09 | 9.33E-01 | 9.74E-01 | -6.70 |
| 1454278_PM_at   | A430105D02Rik                          | NA         | -0.03 | 3.56 | -0.09 | 9.33E-01 | 9.74E-01 | -6.70 |
| 1433990_PM_at   | Lhfp3                                  | LHFPL3     | 0.02  | 2.46 | 0.09  | 9.33E-01 | 9.74E-01 | -6.70 |
| 1458374_PM_at   | Mis18bp1                               | MIS18BP1   | -0.01 | 2.35 | -0.09 | 9.33E-01 | 9.74E-01 | -6.70 |
| 1422597_PM_at   | Mmp15                                  | MMP15      | 0.01  | 2.58 | 0.09  | 9.33E-01 | 9.74E-01 | -6.70 |
| 1447524_PM_at   | Ap3m2                                  | AP3M2      | 0.01  | 2.39 | 0.09  | 9.33E-01 | 9.74E-01 | -6.70 |
| 1443979_PM_at   | ---                                    | NA         | 0.01  | 2.37 | 0.09  | 9.34E-01 | 9.74E-01 | -6.70 |
| 1450331_PM_s_at | Vmn2r34 /// Vmn2r42 ///<br>Vmn2r45     | NA         | -0.02 | 5.00 | -0.09 | 9.34E-01 | 9.74E-01 | -6.70 |
| 1428754_PM_at   | Trmt6                                  | TRMT6      | -0.02 | 4.73 | -0.09 | 9.34E-01 | 9.74E-01 | -6.70 |
| 1428905_PM_at   | Rraga                                  | RRAGA      | -0.04 | 4.23 | -0.09 | 9.34E-01 | 9.74E-01 | -6.70 |
| 1436271_PM_at   | Apo17b /// Apo17e                      | NA         | -0.01 | 2.53 | -0.09 | 9.34E-01 | 9.74E-01 | -6.70 |
| 1434834_PM_at   | Socs7                                  | SOCS7      | 0.02  | 4.64 | 0.09  | 9.34E-01 | 9.74E-01 | -6.70 |
| 1444971_PM_at   | ---                                    | NA         | 0.01  | 1.99 | 0.09  | 9.34E-01 | 9.74E-01 | -6.70 |
| 1447226_PM_at   | ---                                    | NA         | 0.01  | 2.74 | 0.09  | 9.34E-01 | 9.74E-01 | -6.70 |
| 1443679_PM_at   | 2510003B16Rik /// Pomgnt1              | POMGNT1    | 0.01  | 2.54 | 0.08  | 9.34E-01 | 9.74E-01 | -6.70 |
| 1453943_PM_a_at | Acpp                                   | ACPP       | 0.01  | 2.39 | 0.08  | 9.34E-01 | 9.74E-01 | -6.70 |
| 1431586_PM_at   | ---                                    | NA         | 0.01  | 2.16 | 0.08  | 9.34E-01 | 9.74E-01 | -6.70 |
| 1441741_PM_at   | 1700024B05Rik /// Gm7995<br>/// Gm8267 | NA         | -0.01 | 2.33 | -0.08 | 9.34E-01 | 9.74E-01 | -6.70 |
| 1433052_PM_at   | Elav2                                  | NA         | 0.01  | 2.22 | 0.08  | 9.34E-01 | 9.74E-01 | -6.70 |
| 1444921_PM_at   | ---                                    | NA         | 0.01  | 2.08 | 0.08  | 9.34E-01 | 9.74E-01 | -6.70 |
| 1433286_PM_at   | 4833417116Rik                          | NA         | 0.01  | 2.49 | 0.08  | 9.34E-01 | 9.74E-01 | -6.70 |
| 1425410_PM_at   | Tprkb                                  | TPRKB      | 0.01  | 2.56 | 0.08  | 9.34E-01 | 9.74E-01 | -6.70 |
| 1437877_PM_at   | Ttc14                                  | TTC14      | 0.02  | 2.90 | 0.08  | 9.34E-01 | 9.74E-01 | -6.70 |
| 1420953_PM_at   | Add1                                   | ADD1       | 0.03  | 2.95 | 0.08  | 9.34E-01 | 9.74E-01 | -6.70 |
| 1422761_PM_at   | Tbl1xr1                                | TBL1XR1    | -0.02 | 3.43 | -0.08 | 9.34E-01 | 9.74E-01 | -6.70 |
| 1452712_PM_at   | Hrnnpa3                                | NA         | 0.03  | 5.41 | 0.08  | 9.34E-01 | 9.74E-01 | -6.70 |
| 1434048_PM_at   | Slc35f6                                | SLC35F6    | -0.02 | 2.87 | -0.08 | 9.34E-01 | 9.74E-01 | -6.70 |
| 1436838_PM_x_at | Cotl1                                  | COTL1      | -0.02 | 3.15 | -0.08 | 9.34E-01 | 9.74E-01 | -6.70 |
| 1437092_PM_at   | Clip4                                  | NA         | -0.02 | 2.21 | -0.08 | 9.34E-01 | 9.74E-01 | -6.70 |
| 1425376_PM_at   | Alox8                                  | ALOX15B    | -0.01 | 3.34 | -0.08 | 9.34E-01 | 9.74E-01 | -6.70 |
| 1437980_PM_at   | ---                                    | NA         | 0.02  | 2.61 | 0.08  | 9.34E-01 | 9.74E-01 | -6.70 |
| 1419210_PM_at   | Hrh1                                   | HRH1       | -0.01 | 2.24 | -0.08 | 9.34E-01 | 9.74E-01 | -6.70 |
| 1422604_PM_at   | Uox                                    | NA         | -0.01 | 2.19 | -0.08 | 9.34E-01 | 9.74E-01 | -6.70 |
| 1424137_PM_at   | Gprin1                                 | GPRIN1     | 0.02  | 3.49 | 0.08  | 9.34E-01 | 9.74E-01 | -6.70 |
| 1445110_PM_at   | ---                                    | NA         | 0.01  | 2.51 | 0.08  | 9.34E-01 | 9.75E-01 | -6.70 |
| 1445326_PM_at   | Sdk1                                   | SDK1       | 0.01  | 2.00 | 0.08  | 9.35E-01 | 9.75E-01 | -6.70 |
| 1417903_PM_at   | Dfna5                                  | DFNA5      | 0.03  | 3.29 | 0.08  | 9.35E-01 | 9.75E-01 | -6.70 |
| 1446606_PM_at   | ---                                    | NA         | -0.02 | 2.37 | -0.08 | 9.35E-01 | 9.75E-01 | -6.70 |
| 1445985_PM_at   | ---                                    | NA         | -0.01 | 2.42 | -0.08 | 9.35E-01 | 9.75E-01 | -6.70 |
| 1432603_PM_at   | Nrip1                                  | NA         | -0.01 | 2.24 | -0.08 | 9.35E-01 | 9.75E-01 | -6.70 |
| 1423174_PM_a_at | Pard6b                                 | PARD6B     | 0.01  | 2.14 | 0.08  | 9.35E-01 | 9.75E-01 | -6.70 |
| 1433473_PM_x_at | Tm2d2                                  | TM2D2      | 0.01  | 2.66 | 0.08  | 9.35E-01 | 9.75E-01 | -6.70 |
| 1446242_PM_at   | ---                                    | NA         | 0.02  | 2.85 | 0.08  | 9.35E-01 | 9.75E-01 | -6.70 |
| 1452695_PM_at   | Erp27                                  | ERP27      | 0.01  | 2.41 | 0.08  | 9.35E-01 | 9.75E-01 | -6.70 |

|                 |                                   |            |       |      |       |          |          |       |
|-----------------|-----------------------------------|------------|-------|------|-------|----------|----------|-------|
| 1431609_PM_a_at | Acp5                              | ACP5       | 0.01  | 2.30 | 0.08  | 9.35E-01 | 9.75E-01 | -6.70 |
| 1440433_PM_at   | ---                               | NA         | -0.02 | 2.63 | -0.08 | 9.35E-01 | 9.75E-01 | -6.70 |
| 1425681_PM_a_at | Prn /// Prnd                      | PRND       | 0.01  | 2.78 | 0.08  | 9.35E-01 | 9.75E-01 | -6.70 |
| 1443680_PM_at   | Otx2os1                           | NA         | 0.01  | 2.22 | 0.08  | 9.35E-01 | 9.75E-01 | -6.70 |
| 1455830_PM_s_at | C87414 /// Gm3259 /// Gm6367      | PRAMEF9    | -0.04 | 3.82 | -0.08 | 9.35E-01 | 9.75E-01 | -6.70 |
| 1440894_PM_at   | Tmtc3                             | TMTC3      | -0.03 | 2.86 | -0.08 | 9.35E-01 | 9.75E-01 | -6.70 |
| 1436019_PM_a_at | Trappc1                           | TRAPPC1    | -0.03 | 3.39 | -0.08 | 9.35E-01 | 9.75E-01 | -6.70 |
| 1434143_PM_at   | Atmin                             | ATMIN      | -0.02 | 2.99 | -0.08 | 9.35E-01 | 9.75E-01 | -6.70 |
| 1451979_PM_at   | Kras                              | KRAS       | -0.02 | 5.80 | -0.08 | 9.35E-01 | 9.75E-01 | -6.70 |
| 1448500_PM_a_at | Lime1 /// Zgpat                   | ZGPAT      | -0.01 | 2.77 | -0.08 | 9.35E-01 | 9.75E-01 | -6.70 |
| 1439652_PM_at   | ---                               | NA         | -0.01 | 2.46 | -0.08 | 9.35E-01 | 9.75E-01 | -6.70 |
| 1455423_PM_at   | Khdcd1a                           | AL365232.1 | -0.01 | 2.11 | -0.08 | 9.35E-01 | 9.75E-01 | -6.70 |
| 1429886_PM_at   | Ltn1                              | LTN1       | -0.01 | 2.21 | -0.08 | 9.35E-01 | 9.75E-01 | -6.70 |
| 1419778_PM_at   | ---                               | NA         | -0.01 | 2.65 | -0.08 | 9.35E-01 | 9.75E-01 | -6.70 |
| 1427852_PM_x_at | Igh-VJ558                         | NA         | 0.01  | 2.21 | 0.08  | 9.35E-01 | 9.75E-01 | -6.70 |
| 1440114_PM_x_at | Kank3                             | KANK3      | 0.01  | 2.18 | 0.08  | 9.35E-01 | 9.75E-01 | -6.70 |
| 1431935_PM_at   | Lias                              | LIAS       | 0.01  | 2.44 | 0.08  | 9.36E-01 | 9.75E-01 | -6.70 |
| 1452978_PM_at   | Tmem138                           | TMEM138    | 0.01  | 2.57 | 0.08  | 9.35E-01 | 9.75E-01 | -6.70 |
| 1457790_PM_at   | Asb3                              | ASB3       | 0.01  | 2.24 | 0.08  | 9.35E-01 | 9.75E-01 | -6.70 |
| 1441877_PM_x_at | Tssc1                             | TSSC1      | 0.01  | 2.55 | 0.08  | 9.35E-01 | 9.75E-01 | -6.70 |
| 1458755_PM_at   | ---                               | NA         | 0.01  | 2.11 | 0.08  | 9.35E-01 | 9.75E-01 | -6.70 |
| 1419093_PM_at   | Tdo2                              | TDO2       | 0.01  | 2.36 | 0.08  | 9.35E-01 | 9.75E-01 | -6.70 |
| 1440415_PM_at   | Gm38440 /// Teddm2                | NA         | 0.01  | 2.39 | 0.08  | 9.35E-01 | 9.75E-01 | -6.70 |
| 1460201_PM_a_at | Gm9385 /// LOC102641064 /// Rpl24 | RPL24      | 0.02  | 6.26 | 0.08  | 9.35E-01 | 9.75E-01 | -6.70 |
| 1445381_PM_at   | Pcbp2                             | NA         | -0.01 | 5.56 | -0.08 | 9.36E-01 | 9.75E-01 | -6.70 |
| 1460549_PM_a_at | Cdc23                             | CDC23      | -0.04 | 2.90 | -0.08 | 9.36E-01 | 9.75E-01 | -6.70 |
| 1446229_PM_at   | ---                               | NA         | -0.01 | 2.49 | -0.08 | 9.36E-01 | 9.75E-01 | -6.70 |
| 1459849_PM_x_at | Vcjp1                             | VCPIP1     | -0.01 | 1.79 | -0.08 | 9.36E-01 | 9.75E-01 | -6.70 |
| 1441839_PM_s_at | Mettl22                           | METTL22    | 0.01  | 2.13 | 0.08  | 9.36E-01 | 9.75E-01 | -6.70 |
| 1421307_PM_at   | Car13                             | CA13       | 0.02  | 2.48 | 0.08  | 9.36E-01 | 9.75E-01 | -6.70 |
| 1437901_PM_a_at | Vps41                             | VPS41      | 0.05  | 4.66 | 0.08  | 9.36E-01 | 9.75E-01 | -6.70 |
| 1446318_PM_at   | ---                               | NA         | -0.01 | 2.16 | -0.08 | 9.36E-01 | 9.75E-01 | -6.70 |
| 1423903_PM_at   | Pvr                               | PVR        | 0.01  | 2.22 | 0.08  | 9.36E-01 | 9.75E-01 | -6.70 |
| 1424643_PM_at   | Tcof1                             | TCOF1      | 0.01  | 2.92 | 0.08  | 9.36E-01 | 9.75E-01 | -6.70 |
| 1420694_PM_a_at | Dach1                             | DACH1      | -0.01 | 2.33 | -0.08 | 9.36E-01 | 9.75E-01 | -6.70 |
| 1460733_PM_at   | Unc119b                           | UNC119B    | -0.01 | 2.77 | -0.08 | 9.36E-01 | 9.75E-01 | -6.70 |
| 1459474_PM_at   | D1Ert86e                          | NA         | 0.01  | 2.19 | 0.08  | 9.36E-01 | 9.75E-01 | -6.70 |
| 1436550_PM_at   | Fbxo30                            | FBXO30     | -0.03 | 3.56 | -0.08 | 9.36E-01 | 9.75E-01 | -6.70 |
| 1449766_PM_at   | Syt6                              | NA         | 0.01  | 1.99 | 0.08  | 9.36E-01 | 9.75E-01 | -6.70 |
| 1421798_PM_at   | Msgn1                             | MSGN1      | 0.01  | 2.28 | 0.08  | 9.36E-01 | 9.75E-01 | -6.70 |
| 1432632_PM_at   | ---                               | NA         | -0.01 | 2.50 | -0.08 | 9.36E-01 | 9.75E-01 | -6.70 |
| 1435157_PM_at   | Hook3                             | HOOK3      | -0.03 | 5.05 | -0.08 | 9.36E-01 | 9.75E-01 | -6.70 |
| 1434121_PM_at   | Lgi4                              | LGI4       | -0.01 | 3.07 | -0.08 | 9.36E-01 | 9.75E-01 | -6.70 |
| 1430282_PM_at   | Tmem242                           | TMEM242    | -0.02 | 2.68 | -0.08 | 9.36E-01 | 9.75E-01 | -6.70 |
| 1425683_PM_at   | ---                               | NA         | -0.01 | 2.25 | -0.08 | 9.36E-01 | 9.75E-01 | -6.70 |
| 1441644_PM_at   | ---                               | NA         | 0.01  | 2.35 | 0.08  | 9.36E-01 | 9.75E-01 | -6.70 |
| 1455491_PM_at   | Hnrnp3                            | HNRNP3     | 0.01  | 6.86 | 0.08  | 9.36E-01 | 9.75E-01 | -6.70 |
| 1425478_PM_x_at | Ube2i                             | NA         | 0.01  | 2.59 | 0.08  | 9.36E-01 | 9.75E-01 | -6.70 |
| 1457853_PM_at   | BC021785                          | MFSD4B     | 0.01  | 2.23 | 0.08  | 9.36E-01 | 9.75E-01 | -6.70 |
| 1423664_PM_at   | LOC102643271 /// Qdpr             | QDPR       | 0.02  | 2.68 | 0.08  | 9.36E-01 | 9.75E-01 | -6.70 |
| 1457117_PM_at   | LOC105244211 /// Nfe2l2           | NFE2L2     | 0.01  | 2.50 | 0.08  | 9.37E-01 | 9.75E-01 | -6.70 |
| 1452110_PM_at   | Mtrr                              | MTRR       | 0.01  | 2.75 | 0.08  | 9.37E-01 | 9.75E-01 | -6.70 |
| 1448225_PM_at   | Gpaa1                             | GPAA1      | -0.01 | 2.68 | -0.08 | 9.37E-01 | 9.75E-01 | -6.70 |
| 1434435_PM_s_at | Cox17                             | COX17      | -0.02 | 9.05 | -0.08 | 9.37E-01 | 9.75E-01 | -6.70 |
| 1451673_PM_at   | Cd8a                              | CD8A       | -0.01 | 2.37 | -0.08 | 9.37E-01 | 9.75E-01 | -6.70 |
| 1432369_PM_at   | ---                               | NA         | 0.01  | 3.06 | 0.08  | 9.37E-01 | 9.75E-01 | -6.70 |
| 1459484_PM_at   | ---                               | NA         | 0.02  | 2.39 | 0.08  | 9.37E-01 | 9.75E-01 | -6.70 |
| 1447888_PM_x_at | Msh2                              | MSH2       | -0.01 | 2.45 | -0.08 | 9.37E-01 | 9.75E-01 | -6.70 |
| 1432028_PM_at   | Rab11fip2                         | RAB11FIP2  | 0.02  | 3.20 | 0.08  | 9.37E-01 | 9.75E-01 | -6.70 |
| 1429222_PM_at   | Pus3                              | PUS3       | -0.01 | 2.52 | -0.08 | 9.37E-01 | 9.75E-01 | -6.70 |
| 1441633_PM_at   | ---                               | NA         | 0.01  | 2.34 | 0.08  | 9.37E-01 | 9.75E-01 | -6.70 |
| 1446702_PM_at   | ---                               | NA         | 0.01  | 2.43 | 0.08  | 9.37E-01 | 9.75E-01 | -6.70 |
| 1420687_PM_at   | 4932438H23Rik                     | C21orf62   | 0.02  | 2.51 | 0.08  | 9.37E-01 | 9.75E-01 | -6.70 |
| 1441473_PM_at   | ---                               | NA         | 0.01  | 2.29 | 0.08  | 9.37E-01 | 9.75E-01 | -6.70 |
| 1418343_PM_at   | Gtf2ird2                          | GTF2IRD2   | -0.03 | 5.17 | -0.08 | 9.37E-01 | 9.75E-01 | -6.70 |
| 1435823_PM_x_at | Egfl7                             | NA         | 0.01  | 2.46 | 0.08  | 9.37E-01 | 9.75E-01 | -6.70 |
| 1459010_PM_at   | ---                               | NA         | 0.01  | 3.10 | 0.08  | 9.37E-01 | 9.75E-01 | -6.70 |
| 1436349_PM_at   | 2700094K13Rik                     | SELENOH    | -0.03 | 2.77 | -0.08 | 9.37E-01 | 9.76E-01 | -6.70 |
| 1429905_PM_at   | Lhx9                              | LHX9       | 0.01  | 2.08 | 0.08  | 9.37E-01 | 9.76E-01 | -6.70 |
| 1458373_PM_at   | Gen1                              | GEN1       | 0.01  | 2.53 | 0.08  | 9.37E-01 | 9.76E-01 | -6.70 |
| 1426822_PM_at   | Rhot2                             | RHOT2      | 0.01  | 2.85 | 0.08  | 9.37E-01 | 9.76E-01 | -6.70 |
| 1428775_PM_at   | 1110008L16Rik                     | AL121594.3 | 0.02  | 3.14 | 0.08  | 9.37E-01 | 9.76E-01 | -6.70 |

|                 |                |          |       |      |       |          |          |       |
|-----------------|----------------|----------|-------|------|-------|----------|----------|-------|
| 1416781_PM_at   | Praf2          | PRAF2    | -0.04 | 3.09 | -0.08 | 9.37E-01 | 9.76E-01 | -6.70 |
| 1428581_PM_at   | Fam178b        | FAM178B  | 0.01  | 2.39 | 0.08  | 9.37E-01 | 9.76E-01 | -6.70 |
| 1434342_PM_at   | S100b          | S100B    | 0.02  | 5.13 | 0.08  | 9.38E-01 | 9.76E-01 | -6.70 |
| 1429846_PM_at   | ---            | NA       | -0.01 | 2.34 | -0.08 | 9.38E-01 | 9.76E-01 | -6.70 |
| 1442043_PM_at   | Lhfp4          | LHFPL4   | -0.01 | 2.21 | -0.08 | 9.38E-01 | 9.76E-01 | -6.70 |
| 1445045_PM_at   | ---            | NA       | 0.01  | 2.08 | 0.08  | 9.38E-01 | 9.76E-01 | -6.70 |
| 1416751_PM_a_at | Ddx20          | DDX20    | -0.01 | 2.92 | -0.08 | 9.38E-01 | 9.76E-01 | -6.70 |
| 1443807_PM_x_at | Ccnf           | CCNF     | 0.01  | 2.08 | 0.08  | 9.38E-01 | 9.76E-01 | -6.70 |
| 1445823_PM_at   | ---            | NA       | 0.01  | 2.44 | 0.08  | 9.38E-01 | 9.76E-01 | -6.70 |
| 1442432_PM_x_at | Atxn7l1        | ATXN7L1  | 0.01  | 2.36 | 0.08  | 9.38E-01 | 9.76E-01 | -6.70 |
| 1446935_PM_at   | ---            | NA       | 0.01  | 2.45 | 0.08  | 9.38E-01 | 9.76E-01 | -6.70 |
| 1444521_PM_at   | ---            | NA       | 0.04  | 5.17 | 0.08  | 9.38E-01 | 9.76E-01 | -6.70 |
| 1456454_PM_at   | Alx1           | ALX1     | -0.01 | 3.13 | -0.08 | 9.38E-01 | 9.76E-01 | -6.70 |
| 1442555_PM_at   | Kcnd3          | KCND3    | -0.01 | 2.64 | -0.08 | 9.38E-01 | 9.76E-01 | -6.70 |
| 1439716_PM_at   | Piwil4         | PIWIL4   | 0.01  | 2.27 | 0.08  | 9.38E-01 | 9.76E-01 | -6.70 |
| 1447766_PM_x_at | Limd2          | LIMD2    | 0.01  | 2.19 | 0.08  | 9.38E-01 | 9.76E-01 | -6.70 |
| 1450530_PM_at   | B3galt1        | B3GALT1  | 0.02  | 2.75 | 0.08  | 9.38E-01 | 9.76E-01 | -6.70 |
| 1420271_PM_at   | Rpusd2         | NA       | 0.01  | 2.13 | 0.08  | 9.38E-01 | 9.76E-01 | -6.70 |
| 1440027_PM_at   | Mon2           | MON2     | 0.02  | 3.52 | 0.08  | 9.38E-01 | 9.76E-01 | -6.70 |
| 1456156_PM_at   | Lepr           | LEPR     | -0.03 | 2.87 | -0.08 | 9.38E-01 | 9.76E-01 | -6.70 |
| 1435883_PM_at   | Tango6         | TANGO6   | -0.01 | 1.93 | -0.08 | 9.38E-01 | 9.76E-01 | -6.70 |
| 1417277_PM_at   | Cyp4f16        | NA       | 0.01  | 2.52 | 0.08  | 9.38E-01 | 9.76E-01 | -6.70 |
| 1426374_PM_at   | Mtfr1l         | MTFR1L   | 0.01  | 2.91 | 0.08  | 9.38E-01 | 9.76E-01 | -6.70 |
| 1441382_PM_at   | Gpr101         | GPR101   | -0.01 | 2.13 | -0.08 | 9.38E-01 | 9.76E-01 | -6.70 |
| 1443784_PM_at   | A230046K03Rik  | NA       | -0.01 | 1.89 | -0.08 | 9.38E-01 | 9.76E-01 | -6.70 |
| 1438850_PM_at   | Cldn1          | CLDN1    | -0.01 | 1.77 | -0.08 | 9.38E-01 | 9.76E-01 | -6.70 |
| 1445834_PM_at   | ---            | NA       | 0.01  | 1.97 | 0.08  | 9.38E-01 | 9.76E-01 | -6.70 |
| 1446142_PM_at   | ---            | NA       | 0.01  | 2.14 | 0.08  | 9.38E-01 | 9.76E-01 | -6.70 |
| 1432802_PM_at   | ---            | NA       | -0.01 | 2.30 | -0.08 | 9.38E-01 | 9.76E-01 | -6.70 |
| 1457079_PM_at   | Gm38639        | NA       | 0.01  | 2.37 | 0.08  | 9.38E-01 | 9.76E-01 | -6.70 |
| 1443372_PM_at   | ---            | NA       | 0.01  | 2.20 | 0.08  | 9.39E-01 | 9.76E-01 | -6.70 |
| 1429816_PM_at   | Armc3          | ARMC3    | -0.01 | 2.21 | -0.08 | 9.39E-01 | 9.76E-01 | -6.70 |
| 1445102_PM_at   | ---            | NA       | 0.01  | 2.30 | 0.08  | 9.39E-01 | 9.76E-01 | -6.70 |
| 1426668_PM_at   | Slc30a9        | SLC30A9  | 0.02  | 3.71 | 0.08  | 9.39E-01 | 9.76E-01 | -6.70 |
| 1437423_PM_a_at | Appb3 /// Sra1 | APBB3    | -0.03 | 3.21 | -0.08 | 9.39E-01 | 9.76E-01 | -6.70 |
| 1456743_PM_x_at | Morf4l2        | MORF4L2  | -0.02 | 9.67 | -0.08 | 9.39E-01 | 9.76E-01 | -6.70 |
| 1460480_PM_at   | Erv3           | NA       | -0.02 | 2.55 | -0.08 | 9.39E-01 | 9.76E-01 | -6.70 |
| 1419259_PM_at   | Rsu1           | RSU1     | -0.02 | 3.67 | -0.08 | 9.39E-01 | 9.76E-01 | -6.70 |
| 1415673_PM_at   | Psph           | PSPH     | -0.01 | 3.35 | -0.08 | 9.39E-01 | 9.76E-01 | -6.70 |
| 1458473_PM_at   | Pou6f2         | POU6F2   | -0.01 | 2.43 | -0.08 | 9.39E-01 | 9.76E-01 | -6.70 |
| 1453642_PM_at   | 6530411M01Rik  | NA       | -0.01 | 2.19 | -0.08 | 9.39E-01 | 9.76E-01 | -6.70 |
| 1444428_PM_at   | ---            | NA       | -0.01 | 2.75 | -0.08 | 9.39E-01 | 9.76E-01 | -6.70 |
| 1457504_PM_at   | ---            | NA       | -0.01 | 2.15 | -0.08 | 9.39E-01 | 9.76E-01 | -6.70 |
| 1434248_PM_at   | Prkch          | PRKCH    | 0.01  | 2.55 | 0.08  | 9.39E-01 | 9.76E-01 | -6.70 |
| 1441051_PM_at   | ---            | NA       | 0.01  | 2.45 | 0.08  | 9.39E-01 | 9.76E-01 | -6.70 |
| 1418848_PM_at   | Aqp7           | AQP7     | 0.01  | 2.64 | 0.08  | 9.39E-01 | 9.76E-01 | -6.70 |
| 1451632_PM_a_at | Ighg           | NA       | 0.01  | 2.58 | 0.08  | 9.39E-01 | 9.76E-01 | -6.70 |
| 1437403_PM_at   | Samd5          | SAMD5    | 0.03  | 3.89 | 0.08  | 9.39E-01 | 9.76E-01 | -6.70 |
| 1431368_PM_at   | 4930404N11Rik  | C19orf71 | 0.01  | 2.19 | 0.08  | 9.39E-01 | 9.76E-01 | -6.70 |
| 1458884_PM_at   | ---            | NA       | 0.02  | 4.18 | 0.08  | 9.39E-01 | 9.76E-01 | -6.70 |
| 1422502_PM_at   | Parp1          | PARP1    | -0.03 | 3.02 | -0.08 | 9.39E-01 | 9.76E-01 | -6.70 |
| 1432267_PM_at   | 6720483E21Rik  | NA       | 0.01  | 2.75 | 0.08  | 9.39E-01 | 9.76E-01 | -6.70 |
| 1421234_PM_at   | Hnf1a          | NA       | 0.01  | 3.86 | 0.08  | 9.39E-01 | 9.76E-01 | -6.70 |
| 1424092_PM_at   | Epb41          | EPB41    | 0.02  | 3.09 | 0.08  | 9.39E-01 | 9.76E-01 | -6.70 |
| 1445987_PM_at   | ---            | NA       | 0.01  | 3.15 | 0.08  | 9.39E-01 | 9.77E-01 | -6.70 |
| 1437178_PM_at   | Gm7056         | NA       | 0.01  | 2.60 | 0.08  | 9.39E-01 | 9.77E-01 | -6.70 |
| 1427928_PM_s_at | Pigu           | PIGU     | 0.03  | 3.54 | 0.08  | 9.39E-01 | 9.77E-01 | -6.70 |
| 1442119_PM_at   | Al449212       | NA       | 0.01  | 2.21 | 0.08  | 9.39E-01 | 9.77E-01 | -6.70 |
| 1419414_PM_at   | Gng13          | GNG13    | -0.05 | 4.67 | -0.08 | 9.40E-01 | 9.77E-01 | -6.70 |
| 1421241_PM_at   | Ngfr           | NGFR     | 0.01  | 2.54 | 0.08  | 9.40E-01 | 9.77E-01 | -6.70 |
| 1436198_PM_at   | 2310075K07Rik  | NA       | 0.01  | 2.41 | 0.08  | 9.40E-01 | 9.77E-01 | -6.70 |
| 1437592_PM_x_at | Sgf29          | SGF29    | 0.03  | 4.89 | 0.08  | 9.40E-01 | 9.77E-01 | -6.70 |
| 1440361_PM_at   | Gm12371        | NA       | -0.01 | 2.62 | -0.08 | 9.40E-01 | 9.77E-01 | -6.70 |
| 1423475_PM_at   | Cnm2           | CNNM2    | -0.01 | 3.39 | -0.08 | 9.40E-01 | 9.77E-01 | -6.70 |
| 1437399_PM_at   | Cldnd1         | NA       | -0.04 | 3.26 | -0.08 | 9.40E-01 | 9.77E-01 | -6.70 |
| 1430856_PM_at   | Pex11g         | PEX11G   | -0.03 | 3.38 | -0.08 | 9.40E-01 | 9.77E-01 | -6.70 |
| 1428541_PM_at   | Tcaf1          | TCAF1    | -0.03 | 5.32 | -0.08 | 9.40E-01 | 9.77E-01 | -6.70 |
| 1420937_PM_at   | Cpsf2          | CPSF2    | -0.02 | 3.27 | -0.08 | 9.40E-01 | 9.77E-01 | -6.70 |
| 1421442_PM_at   | Flt4           | FLT4     | -0.02 | 3.69 | -0.08 | 9.40E-01 | 9.77E-01 | -6.70 |
| 1417094_PM_at   | Acot7          | ACOT7    | -0.02 | 5.37 | -0.08 | 9.40E-01 | 9.77E-01 | -6.70 |
| 1447934_PM_at   | Tigar          | TIGAR    | -0.02 | 2.75 | -0.08 | 9.40E-01 | 9.77E-01 | -6.70 |
| 1443320_PM_at   | ---            | NA       | -0.01 | 2.73 | -0.08 | 9.40E-01 | 9.77E-01 | -6.70 |
| 1449590_PM_a_at | Mras           | MRAS     | -0.01 | 3.05 | -0.08 | 9.41E-01 | 9.77E-01 | -6.70 |
| 1456861_PM_at   | Gm14005        | NA       | -0.01 | 2.63 | -0.08 | 9.40E-01 | 9.77E-01 | -6.70 |
| 1436814_PM_at   | 1810010D01Rik  | NA       | -0.01 | 2.19 | -0.08 | 9.40E-01 | 9.77E-01 | -6.70 |

|                 |               |            |       |      |       |          |          |       |
|-----------------|---------------|------------|-------|------|-------|----------|----------|-------|
| 1432156_PM_a_at | Rnf32         | RNF32      | -0.01 | 3.31 | -0.08 | 9.40E-01 | 9.77E-01 | -6.70 |
| 1453812_PM_at   | Jakmp2        | JAKMP2     | -0.01 | 2.49 | -0.08 | 9.40E-01 | 9.77E-01 | -6.70 |
| 1436929_PM_x_at | Adcy3         | ADCY3      | -0.01 | 2.47 | -0.08 | 9.40E-01 | 9.77E-01 | -6.70 |
| 1422944_PM_a_at | Diaph3        | DIAPH3     | -0.01 | 2.30 | -0.08 | 9.40E-01 | 9.77E-01 | -6.70 |
| 1446861_PM_at   | ---           | NA         | -0.01 | 2.36 | -0.08 | 9.40E-01 | 9.77E-01 | -6.70 |
| 1425002_PM_at   | Sectm1a       | SECTM1     | -0.01 | 2.28 | -0.08 | 9.40E-01 | 9.77E-01 | -6.70 |
| 1419830_PM_at   | ---           | NA         | -0.01 | 2.13 | -0.08 | 9.40E-01 | 9.77E-01 | -6.70 |
| 1430488_PM_at   | 1700066B19Rik | AC138517.2 | -0.01 | 2.06 | -0.08 | 9.40E-01 | 9.77E-01 | -6.70 |
| 1421367_PM_at   | 4930549C01Rik | TEX46      | -0.01 | 2.63 | -0.08 | 9.40E-01 | 9.77E-01 | -6.70 |
| 1443585_PM_at   | Zfp526        | ZNF526     | 0.01  | 2.22 | 0.08  | 9.40E-01 | 9.77E-01 | -6.70 |
| 1443370_PM_at   | ---           | NA         | 0.01  | 1.97 | 0.08  | 9.40E-01 | 9.77E-01 | -6.70 |
| 1445828_PM_at   | ---           | NA         | 0.01  | 2.20 | 0.08  | 9.40E-01 | 9.77E-01 | -6.70 |
| 1458232_PM_at   | Dkk1          | DKK1       | 0.01  | 2.06 | 0.08  | 9.40E-01 | 9.77E-01 | -6.70 |
| 1444603_PM_at   | 2810030D12Rik | NA         | 0.01  | 2.20 | 0.08  | 9.41E-01 | 9.77E-01 | -6.70 |
| 1455501_PM_at   | Slc2a12       | SLC2A12    | 0.01  | 2.25 | 0.08  | 9.40E-01 | 9.77E-01 | -6.70 |
| 1447085_PM_s_at | Nfatc1        | NFATC1     | 0.01  | 2.04 | 0.08  | 9.40E-01 | 9.77E-01 | -6.70 |
| 1444673_PM_at   | ---           | NA         | 0.01  | 2.21 | 0.08  | 9.40E-01 | 9.77E-01 | -6.70 |
| 1417862_PM_at   | Fam181b       | NA         | 0.01  | 2.81 | 0.08  | 9.40E-01 | 9.77E-01 | -6.70 |
| 1457088_PM_at   | Bloc1s6       | BLOC1S6    | 0.01  | 2.19 | 0.08  | 9.40E-01 | 9.77E-01 | -6.70 |
| 1438158_PM_at   | Agbl4         | AGBL4      | 0.01  | 2.41 | 0.08  | 9.40E-01 | 9.77E-01 | -6.70 |
| 1428929_PM_s_at | Slc25a26      | SLC25A26   | 0.01  | 2.72 | 0.08  | 9.40E-01 | 9.77E-01 | -6.70 |
| 1452858_PM_at   | Elavl1        | ELAVL1     | 0.02  | 3.10 | 0.08  | 9.41E-01 | 9.77E-01 | -6.70 |
| 1434171_PM_at   | Zfp874a       | ZNF720     | 0.02  | 2.78 | 0.08  | 9.40E-01 | 9.77E-01 | -6.70 |
| 1450959_PM_at   | Akip1         | AKIP1      | 0.02  | 2.63 | 0.08  | 9.41E-01 | 9.77E-01 | -6.70 |
| 1436995_PM_a_at | Rpl26         | RPL26      | 0.03  | 7.71 | 0.08  | 9.40E-01 | 9.77E-01 | -6.70 |
| 1450056_PM_at   | Apc           | APC        | 0.04  | 4.15 | 0.08  | 9.40E-01 | 9.77E-01 | -6.70 |
| 1458234_PM_at   | ---           | NA         | 0.01  | 2.29 | 0.08  | 9.41E-01 | 9.77E-01 | -6.70 |
| 1442048_PM_at   | Rnf11         | RNF11      | 0.01  | 2.82 | 0.08  | 9.41E-01 | 9.77E-01 | -6.70 |
| 1442544_PM_at   | Ighg1         | NA         | -0.01 | 2.17 | -0.08 | 9.41E-01 | 9.77E-01 | -6.70 |
| 1419382_PM_a_at | Dhrs4         | DHRS4L2    | 0.02  | 2.68 | 0.08  | 9.41E-01 | 9.77E-01 | -6.70 |
| 1459011_PM_at   | ---           | NA         | -0.01 | 2.44 | -0.08 | 9.41E-01 | 9.77E-01 | -6.70 |
| 1451252_PM_at   | Irf2bp1       | IRF2BP1    | -0.01 | 2.96 | -0.08 | 9.41E-01 | 9.77E-01 | -6.70 |
| 1457197_PM_at   | Prkacb        | PRKACB     | -0.01 | 2.30 | -0.08 | 9.41E-01 | 9.77E-01 | -6.70 |
| 1417113_PM_at   | Gmcl1         | GMCL1      | 0.02  | 4.06 | 0.08  | 9.41E-01 | 9.77E-01 | -6.70 |
| 1456855_PM_at   | ---           | NA         | -0.01 | 2.37 | -0.08 | 9.41E-01 | 9.77E-01 | -6.70 |
| 1420535_PM_a_at | Nub1          | NUB1       | 0.01  | 2.45 | 0.08  | 9.41E-01 | 9.77E-01 | -6.70 |
| 1424146_PM_at   | Gpr37l1       | GPR37L1    | 0.01  | 2.40 | 0.08  | 9.41E-01 | 9.77E-01 | -6.70 |
| 1420463_PM_at   | Clnk          | CLNK       | 0.01  | 2.35 | 0.08  | 9.41E-01 | 9.77E-01 | -6.70 |
| 1456882_PM_at   | Sox12         | NA         | -0.01 | 2.41 | -0.08 | 9.41E-01 | 9.77E-01 | -6.70 |
| 1441128_PM_at   | 2900016110Rik | NA         | -0.01 | 2.46 | -0.08 | 9.41E-01 | 9.77E-01 | -6.70 |
| 1417666_PM_at   | Dnttip1       | DNTTIP1    | -0.01 | 3.35 | -0.08 | 9.41E-01 | 9.77E-01 | -6.70 |
| 1441638_PM_at   | ---           | NA         | -0.01 | 2.57 | -0.08 | 9.41E-01 | 9.77E-01 | -6.70 |
| 1446383_PM_at   | ---           | NA         | 0.01  | 1.95 | 0.08  | 9.41E-01 | 9.77E-01 | -6.70 |
| 1457912_PM_at   | E130317F20Rik | NA         | 0.01  | 2.82 | 0.08  | 9.41E-01 | 9.77E-01 | -6.70 |
| 1458969_PM_at   | AU019559      | NA         | 0.02  | 2.43 | 0.08  | 9.41E-01 | 9.77E-01 | -6.70 |
| 1424905_PM_a_at | Slc39a11      | SLC39A11   | 0.02  | 2.73 | 0.08  | 9.41E-01 | 9.77E-01 | -6.70 |
| 1449372_PM_at   | Dnajc3        | DNAJC3     | 0.03  | 4.37 | 0.08  | 9.41E-01 | 9.77E-01 | -6.70 |
| 1418137_PM_at   | Mrp57         | MRPL57     | 0.03  | 3.78 | 0.08  | 9.41E-01 | 9.77E-01 | -6.70 |
| 1459779_PM_s_at | Setd8         | KMT5A      | -0.02 | 4.64 | -0.08 | 9.42E-01 | 9.77E-01 | -6.70 |
| 1440349_PM_at   | ---           | NA         | -0.02 | 2.63 | -0.08 | 9.42E-01 | 9.77E-01 | -6.70 |
| 1444476_PM_at   | ---           | NA         | -0.01 | 1.93 | -0.08 | 9.42E-01 | 9.77E-01 | -6.70 |
| 1449192_PM_at   | Atf7ip        | ATF7IP     | 0.01  | 2.66 | 0.08  | 9.42E-01 | 9.77E-01 | -6.70 |
| 1427409_PM_at   | March9        | MARCH9     | 0.01  | 2.40 | 0.08  | 9.42E-01 | 9.77E-01 | -6.70 |
| 1433221_PM_at   | 2610311E24Rik | NA         | 0.02  | 2.96 | 0.08  | 9.42E-01 | 9.77E-01 | -6.70 |
| 1460111_PM_at   | Myt1l         | NA         | 0.03  | 3.53 | 0.08  | 9.42E-01 | 9.77E-01 | -6.70 |
| 1419097_PM_a_at | Stom          | STOM       | 0.01  | 2.34 | 0.08  | 9.42E-01 | 9.77E-01 | -6.70 |
| 1444831_PM_at   | Gm15423       | NA         | -0.01 | 2.28 | -0.07 | 9.42E-01 | 9.77E-01 | -6.70 |
| 1416700_PM_at   | Rnd3          | RND3       | -0.02 | 3.35 | -0.07 | 9.42E-01 | 9.77E-01 | -6.70 |
| 1434212_PM_at   | Ndufs8        | NDUFS8     | 0.01  | 2.70 | 0.07  | 9.42E-01 | 9.77E-01 | -6.70 |
| 1439237_PM_a_at | Ssh1          | SSH1       | 0.01  | 2.42 | 0.07  | 9.42E-01 | 9.77E-01 | -6.70 |
| 1446734_PM_at   | C77438        | NA         | 0.01  | 2.47 | 0.07  | 9.42E-01 | 9.77E-01 | -6.70 |
| 1427526_PM_at   | Fgfr1op2      | FGFR1OP2   | 0.01  | 2.21 | 0.07  | 9.42E-01 | 9.77E-01 | -6.70 |
| 1447323_PM_at   | Sptbn2        | NA         | 0.01  | 2.66 | 0.07  | 9.42E-01 | 9.77E-01 | -6.70 |
| 1440634_PM_at   | ---           | NA         | 0.01  | 2.76 | 0.07  | 9.42E-01 | 9.77E-01 | -6.70 |
| 1424265_PM_at   | Npl           | NPL        | 0.01  | 2.56 | 0.07  | 9.42E-01 | 9.77E-01 | -6.70 |
| 1454282_PM_at   | ---           | NA         | 0.01  | 2.77 | 0.07  | 9.42E-01 | 9.77E-01 | -6.70 |
| 1424409_PM_at   | Cldn23        | CLDN23     | 0.01  | 2.05 | 0.07  | 9.42E-01 | 9.77E-01 | -6.70 |
| 1454753_PM_at   | Rnpepl1       | RNPEPL1    | 0.01  | 3.56 | 0.07  | 9.42E-01 | 9.77E-01 | -6.70 |
| 1423240_PM_at   | Src           | SRC        | -0.07 | 5.75 | -0.07 | 9.42E-01 | 9.77E-01 | -6.70 |
| 1456998_PM_at   | Dbpht2        | NA         | -0.01 | 2.12 | -0.07 | 9.42E-01 | 9.77E-01 | -6.70 |
| 1433961_PM_at   | Rrnad1        | RRNAD1     | 0.02  | 2.50 | 0.07  | 9.42E-01 | 9.77E-01 | -6.70 |
| 1445711_PM_at   | ---           | NA         | 0.03  | 3.49 | 0.07  | 9.42E-01 | 9.77E-01 | -6.70 |
| 1419632_PM_at   | Tecta         | TECTA      | 0.01  | 3.10 | 0.07  | 9.42E-01 | 9.77E-01 | -6.70 |
| 1425604_PM_at   | Crkl          | NA         | -0.01 | 2.59 | -0.07 | 9.43E-01 | 9.78E-01 | -6.70 |
| 1419799_PM_at   | Rpl27a        | NA         | -0.01 | 2.36 | -0.07 | 9.43E-01 | 9.78E-01 | -6.70 |

|                 |                             |            |       |      |       |          |          |       |
|-----------------|-----------------------------|------------|-------|------|-------|----------|----------|-------|
| 1454089_PM_at   | Apobec4                     | APOBEC4    | 0.01  | 2.25 | 0.07  | 9.43E-01 | 9.78E-01 | -6.70 |
| 1456779_PM_a_at | Particl                     | NA         | 0.01  | 2.43 | 0.07  | 9.43E-01 | 9.78E-01 | -6.70 |
| 1430589_PM_at   | 9230116L04Rik /// Pigh      | NA         | 0.01  | 2.19 | 0.07  | 9.43E-01 | 9.78E-01 | -6.70 |
| 1456713_PM_at   | ---                         | NA         | -0.01 | 2.55 | -0.07 | 9.43E-01 | 9.78E-01 | -6.70 |
| 1416498_PM_at   | Ppic                        | PPIC       | -0.01 | 2.73 | -0.07 | 9.43E-01 | 9.78E-01 | -6.70 |
| 1459398_PM_at   | ---                         | NA         | -0.01 | 2.06 | -0.07 | 9.43E-01 | 9.78E-01 | -6.70 |
| 1427976_PM_at   | Gm10436 /// Gm2042 /// Oog1 | PRAMEF9    | 0.01  | 2.11 | 0.07  | 9.43E-01 | 9.78E-01 | -6.70 |
| 1457712_PM_at   | Chd8                        | CHD8       | 0.01  | 2.17 | 0.07  | 9.43E-01 | 9.78E-01 | -6.70 |
| 1423131_PM_at   | LOC102642514 /// Nsa2       | NSA2       | 0.03  | 4.01 | 0.07  | 9.43E-01 | 9.78E-01 | -6.70 |
| 1416281_PM_at   | Wdr45b                      | WDR45B     | -0.01 | 5.32 | -0.07 | 9.43E-01 | 9.78E-01 | -6.70 |
| 1436397_PM_at   | Tifab                       | TIFAB      | 0.01  | 2.37 | 0.07  | 9.43E-01 | 9.78E-01 | -6.70 |
| 1437125_PM_at   | Camk2a                      | CAMK2A     | 0.04  | 4.17 | 0.07  | 9.43E-01 | 9.78E-01 | -6.70 |
| 1439956_PM_at   | Ms4a6b                      | MS4A6E     | -0.01 | 2.31 | -0.07 | 9.43E-01 | 9.78E-01 | -6.70 |
| 1425372_PM_at   | Dnajc19 /// Dnajc19-ps      | DNAJC19    | 0.02  | 2.26 | 0.07  | 9.43E-01 | 9.78E-01 | -6.70 |
| 1454331_PM_at   | ---                         | NA         | 0.01  | 2.22 | 0.07  | 9.43E-01 | 9.78E-01 | -6.70 |
| 1447530_PM_at   | F8a                         | NA         | 0.01  | 2.43 | 0.07  | 9.43E-01 | 9.78E-01 | -6.70 |
| 1439232_PM_at   | Lhx1os                      | NA         | 0.02  | 2.25 | 0.07  | 9.43E-01 | 9.78E-01 | -6.70 |
| 1457410_PM_at   | ---                         | NA         | -0.02 | 3.22 | -0.07 | 9.43E-01 | 9.78E-01 | -6.70 |
| 1441442_PM_at   | ---                         | NA         | -0.01 | 2.81 | -0.07 | 9.43E-01 | 9.78E-01 | -6.70 |
| 1438586_PM_at   | Tbx22                       | TBX22      | -0.01 | 2.22 | -0.07 | 9.43E-01 | 9.78E-01 | -6.70 |
| 1420297_PM_at   | ---                         | NA         | -0.01 | 1.96 | -0.07 | 9.43E-01 | 9.78E-01 | -6.70 |
| 1439160_PM_at   | Pramef8                     | PRAMEF9    | 0.01  | 2.65 | 0.07  | 9.43E-01 | 9.78E-01 | -6.70 |
| 1448453_PM_at   | Hsd3b1                      | HSD3B2     | 0.01  | 2.27 | 0.07  | 9.43E-01 | 9.78E-01 | -6.70 |
| 1435854_PM_at   | Opalin                      | OPALIN     | 0.01  | 3.14 | 0.07  | 9.43E-01 | 9.78E-01 | -6.70 |
| 1436773_PM_x_at | Marveld1                    | MARVELD1   | 0.01  | 2.08 | 0.07  | 9.43E-01 | 9.78E-01 | -6.70 |
| 1453267_PM_at   | Zfhx3                       | ZFH3       | 0.03  | 3.88 | 0.07  | 9.43E-01 | 9.78E-01 | -6.70 |
| 1442437_PM_at   | ---                         | NA         | -0.01 | 2.14 | -0.07 | 9.43E-01 | 9.78E-01 | -6.70 |
| 1451659_PM_at   | Fgd4                        | FGD4       | 0.01  | 2.71 | 0.07  | 9.43E-01 | 9.78E-01 | -6.70 |
| 1448448_PM_a_at | Chkb                        | CHKB-CPT1B | -0.02 | 3.50 | -0.07 | 9.44E-01 | 9.78E-01 | -6.70 |
| 1416611_PM_at   | Scamp2                      | SCAMP2     | -0.01 | 2.30 | -0.07 | 9.44E-01 | 9.78E-01 | -6.70 |
| 1416133_PM_at   | Efr3a                       | EFR3A      | 0.05  | 6.86 | 0.07  | 9.44E-01 | 9.78E-01 | -6.70 |
| 1441637_PM_at   | ---                         | NA         | 0.01  | 2.10 | 0.07  | 9.44E-01 | 9.78E-01 | -6.70 |
| 1444379_PM_at   | ---                         | NA         | -0.01 | 2.81 | -0.07 | 9.44E-01 | 9.78E-01 | -6.70 |
| 1446919_PM_at   | Zfp873                      | NA         | 0.01  | 2.46 | 0.07  | 9.44E-01 | 9.78E-01 | -6.70 |
| 1430890_PM_at   | Igsf23                      | IGSF23     | -0.01 | 2.25 | -0.07 | 9.44E-01 | 9.78E-01 | -6.70 |
| 1438169_PM_a_at | Frm4b                       | FRMD4B     | -0.03 | 3.85 | -0.07 | 9.44E-01 | 9.78E-01 | -6.70 |
| 1447962_PM_at   | ---                         | NA         | -0.01 | 2.49 | -0.07 | 9.44E-01 | 9.78E-01 | -6.70 |
| 1442945_PM_at   | ---                         | NA         | 0.01  | 2.41 | 0.07  | 9.44E-01 | 9.78E-01 | -6.70 |
| 1430543_PM_at   | Clip3                       | CLIP3      | 0.01  | 8.42 | 0.07  | 9.44E-01 | 9.78E-01 | -6.70 |
| 1453815_PM_at   | Spc25                       | SPC25      | 0.01  | 3.21 | 0.07  | 9.44E-01 | 9.78E-01 | -6.70 |
| 1455304_PM_at   | Unc13c                      | UNC13C     | -0.03 | 3.12 | -0.07 | 9.44E-01 | 9.78E-01 | -6.70 |
| 1434965_PM_at   | R3hcc1l                     | R3HCC1L    | -0.01 | 2.64 | -0.07 | 9.44E-01 | 9.78E-01 | -6.70 |
| 1432008_PM_at   | Gm35121                     | NA         | -0.01 | 2.00 | -0.07 | 9.44E-01 | 9.78E-01 | -6.70 |
| 1460247_PM_a_at | Skp2                        | SKP2       | 0.01  | 2.51 | 0.07  | 9.44E-01 | 9.78E-01 | -6.70 |
| 1451596_PM_a_at | Sphk1                       | SPHK1      | 0.01  | 2.49 | 0.07  | 9.44E-01 | 9.78E-01 | -6.70 |
| 1431259_PM_at   | Zscan29                     | ZSCAN29    | 0.01  | 2.44 | 0.07  | 9.44E-01 | 9.78E-01 | -6.70 |
| 1456530_PM_x_at | Elov1                       | ELOVL1     | 0.02  | 3.98 | 0.07  | 9.44E-01 | 9.78E-01 | -6.70 |
| 1416947_PM_s_at | Acaa1a /// Acaa1b           | ACAA1      | 0.04  | 4.41 | 0.07  | 9.44E-01 | 9.78E-01 | -6.70 |
| 1453358_PM_s_at | Amn1                        | AMN1       | -0.02 | 2.79 | -0.07 | 9.44E-01 | 9.78E-01 | -6.70 |
| 1458564_PM_at   | ---                         | NA         | -0.01 | 2.59 | -0.07 | 9.44E-01 | 9.79E-01 | -6.70 |
| 1419065_PM_at   | Nepn                        | NA         | -0.01 | 2.24 | -0.07 | 9.45E-01 | 9.79E-01 | -6.70 |
| 1418284_PM_at   | Vps72                       | VPS72      | 0.01  | 2.69 | 0.07  | 9.45E-01 | 9.79E-01 | -6.70 |
| 1455282_PM_x_at | Alas1                       | ALAS1      | 0.01  | 2.50 | 0.07  | 9.45E-01 | 9.79E-01 | -6.70 |
| 1450393_PM_a_at | Adat3 /// Scamp4            | ADAT3      | 0.01  | 2.54 | 0.07  | 9.45E-01 | 9.79E-01 | -6.70 |
| 1432885_PM_at   | ---                         | NA         | -0.01 | 2.99 | -0.07 | 9.45E-01 | 9.79E-01 | -6.70 |
| 1441985_PM_at   | 4933416C03Rik               | TAF7L      | -0.01 | 2.34 | -0.07 | 9.45E-01 | 9.79E-01 | -6.70 |
| 1422210_PM_at   | Foxd3                       | NA         | 0.01  | 2.37 | 0.07  | 9.45E-01 | 9.79E-01 | -6.70 |
| 1429881_PM_at   | Arhgap15                    | ARHGAP15   | 0.01  | 2.97 | 0.07  | 9.45E-01 | 9.79E-01 | -6.70 |
| 1446777_PM_at   | Spp2                        | NA         | -0.01 | 2.64 | -0.07 | 9.45E-01 | 9.79E-01 | -6.70 |
| 1451787_PM_at   | Cyp2b10                     | CYP2B6     | -0.01 | 2.32 | -0.07 | 9.45E-01 | 9.79E-01 | -6.70 |
| 1435699_PM_at   | Ppm1l                       | PPM1L      | -0.03 | 5.87 | -0.07 | 9.45E-01 | 9.79E-01 | -6.70 |
| 1451499_PM_at   | Cadps2                      | CADPS2     | -0.05 | 5.75 | -0.07 | 9.45E-01 | 9.79E-01 | -6.70 |
| 1435282_PM_at   | Fam189a2                    | FAM189A2   | 0.01  | 3.25 | 0.07  | 9.45E-01 | 9.79E-01 | -6.70 |
| 1455971_PM_at   | Serp2                       | NA         | -0.02 | 3.66 | -0.07 | 9.45E-01 | 9.79E-01 | -6.70 |
| 1455924_PM_at   | Rab6b                       | RAB6B      | -0.02 | 3.10 | -0.07 | 9.45E-01 | 9.79E-01 | -6.70 |
| 1456028_PM_x_at | Marcks                      | MARCKS     | -0.02 | 7.62 | -0.07 | 9.45E-01 | 9.79E-01 | -6.70 |
| 1444970_PM_at   | C79870                      | NA         | 0.01  | 2.02 | 0.07  | 9.45E-01 | 9.79E-01 | -6.70 |
| 1439360_PM_x_at | ---                         | NA         | 0.02  | 2.88 | 0.07  | 9.45E-01 | 9.79E-01 | -6.70 |
| 1450118_PM_a_at | Tnnt3                       | TNNT3      | 0.02  | 2.34 | 0.07  | 9.45E-01 | 9.79E-01 | -6.70 |
| 1416927_PM_at   | Trp53inp1                   | TP53INP1   | 0.01  | 2.27 | 0.07  | 9.45E-01 | 9.79E-01 | -6.70 |
| 1452899_PM_at   | Rian                        | NA         | 0.02  | 9.13 | 0.07  | 9.45E-01 | 9.79E-01 | -6.70 |
| 1451230_PM_a_at | Wbp5                        | TCEAL9     | 0.02  | 4.04 | 0.07  | 9.45E-01 | 9.79E-01 | -6.70 |
| 1444410_PM_at   | ---                         | NA         | 0.01  | 2.22 | 0.07  | 9.46E-01 | 9.79E-01 | -6.70 |
| 1432696_PM_at   | ---                         | NA         | -0.01 | 2.65 | -0.07 | 9.46E-01 | 9.79E-01 | -6.70 |

|                 |                    |            |       |       |       |          |          |       |
|-----------------|--------------------|------------|-------|-------|-------|----------|----------|-------|
| 1428791_PM_at   | Ube2h              | UBE2H      | -0.01 | 3.00  | -0.07 | 9.46E-01 | 9.79E-01 | -6.70 |
| 1417541_PM_at   | Hells              | HELLS      | -0.01 | 2.05  | -0.07 | 9.46E-01 | 9.79E-01 | -6.70 |
| 1436699_PM_x_at | Rpl18              | RPL18      | 0.01  | 10.60 | 0.07  | 9.46E-01 | 9.79E-01 | -6.70 |
| 1425205_PM_at   | Ddx19b             | DDX19B     | 0.01  | 2.83  | 0.07  | 9.46E-01 | 9.79E-01 | -6.70 |
| 1459897_PM_a_at | Sbsn               | SBSN       | 0.03  | 3.01  | 0.07  | 9.46E-01 | 9.79E-01 | -6.70 |
| 1447988_PM_at   | ---                | NA         | 0.03  | 2.48  | 0.07  | 9.46E-01 | 9.79E-01 | -6.70 |
| 1420276_PM_x_at | Mmrn2              | MMRN2      | -0.01 | 2.57  | -0.07 | 9.46E-01 | 9.79E-01 | -6.70 |
| 1444733_PM_at   | ---                | NA         | -0.01 | 3.78  | -0.07 | 9.46E-01 | 9.79E-01 | -6.70 |
| 1434346_PM_at   | Rufy2              | RUFY2      | -0.01 | 3.39  | -0.07 | 9.46E-01 | 9.79E-01 | -6.70 |
| 1444171_PM_at   | ---                | NA         | -0.01 | 4.82  | -0.07 | 9.46E-01 | 9.79E-01 | -6.70 |
| 1451878_PM_a_at | Jmy                | JMY        | 0.02  | 4.20  | 0.07  | 9.46E-01 | 9.79E-01 | -6.70 |
| 1446873_PM_at   | ---                | NA         | 0.01  | 2.38  | 0.07  | 9.46E-01 | 9.80E-01 | -6.70 |
| 1425559_PM_a_at | AcsM3              | ACSM3      | 0.01  | 2.94  | 0.07  | 9.46E-01 | 9.80E-01 | -6.70 |
| 1448301_PM_s_at | Serpnb1a           | SERPINB1   | -0.01 | 2.70  | -0.07 | 9.46E-01 | 9.80E-01 | -6.70 |
| 1424153_PM_s_at | Sall4              | SALL4      | 0.01  | 2.00  | 0.07  | 9.46E-01 | 9.80E-01 | -6.70 |
| 1445815_PM_at   | ---                | NA         | -0.01 | 2.36  | -0.07 | 9.46E-01 | 9.80E-01 | -6.70 |
| 1448294_PM_at   | Gm9861 /// Litaf   | LITAF      | 0.01  | 2.09  | 0.07  | 9.46E-01 | 9.80E-01 | -6.70 |
| 1422415_PM_at   | Ang2               | ANG        | -0.01 | 2.20  | -0.07 | 9.46E-01 | 9.80E-01 | -6.70 |
| 1430992_PM_s_at | Cisd2              | CISD2      | 0.01  | 2.20  | 0.07  | 9.46E-01 | 9.80E-01 | -6.70 |
| 1440724_PM_at   | Al854703           | NA         | 0.01  | 2.66  | 0.07  | 9.46E-01 | 9.80E-01 | -6.70 |
| 1442398_PM_at   | Ube2t              | UBE2T      | 0.01  | 2.66  | 0.07  | 9.46E-01 | 9.80E-01 | -6.70 |
| 1446782_PM_at   | Lins1              | LINS1      | -0.01 | 2.46  | -0.07 | 9.47E-01 | 9.80E-01 | -6.70 |
| 1434858_PM_x_at | Zfp511             | AL360181.5 | 0.01  | 2.55  | 0.07  | 9.47E-01 | 9.80E-01 | -6.70 |
| 1453053_PM_at   | Cenpw              | CENPW      | 0.01  | 2.33  | 0.07  | 9.47E-01 | 9.80E-01 | -6.70 |
| 1436776_PM_x_at | Slc7a4             | SLC7A4     | 0.01  | 2.02  | 0.07  | 9.47E-01 | 9.80E-01 | -6.70 |
| 1419258_PM_at   | Tcea1              | TCEA1      | 0.02  | 3.46  | 0.07  | 9.47E-01 | 9.80E-01 | -6.70 |
| 1437114_PM_at   | Crebrf             | CREBRF     | -0.01 | 3.33  | -0.07 | 9.47E-01 | 9.80E-01 | -6.70 |
| 1449348_PM_at   | Mpp6               | MPP6       | 0.02  | 5.87  | 0.07  | 9.47E-01 | 9.80E-01 | -6.70 |
| 1440299_PM_at   | Mb21d1             | MB21D1     | -0.03 | 2.79  | -0.07 | 9.47E-01 | 9.80E-01 | -6.70 |
| 1457689_PM_at   | Sbf2               | SBF2       | -0.01 | 2.04  | -0.07 | 9.47E-01 | 9.80E-01 | -6.70 |
| 1427893_PM_a_at | Pmvk               | PMVK       | 0.02  | 5.19  | 0.07  | 9.47E-01 | 9.80E-01 | -6.70 |
| 1429365_PM_at   | Mroh4              | NA         | -0.01 | 2.30  | -0.07 | 9.47E-01 | 9.80E-01 | -6.70 |
| 1459226_PM_at   | ---                | NA         | 0.01  | 2.34  | 0.07  | 9.47E-01 | 9.80E-01 | -6.70 |
| 1450541_PM_at   | Pvt1               | NA         | -0.02 | 2.26  | -0.07 | 9.47E-01 | 9.80E-01 | -6.70 |
| 1452723_PM_at   | Klf9               | KLf9       | -0.01 | 2.22  | -0.07 | 9.47E-01 | 9.80E-01 | -6.70 |
| 1435403_PM_at   | 1700007L15Rik      | NA         | -0.01 | 2.42  | -0.07 | 9.47E-01 | 9.80E-01 | -6.70 |
| 1419306_PM_at   | Ccdc96             | CCDC96     | -0.01 | 2.14  | -0.07 | 9.47E-01 | 9.80E-01 | -6.70 |
| 1429073_PM_at   | Ube2d-ps           | NA         | 0.01  | 2.32  | 0.07  | 9.47E-01 | 9.80E-01 | -6.70 |
| 1453341_PM_a_at | Tmem202            | TMEM202    | 0.01  | 2.21  | 0.07  | 9.47E-01 | 9.80E-01 | -6.70 |
| 1417456_PM_at   | Gnpat              | GNPAT      | 0.01  | 4.48  | 0.07  | 9.47E-01 | 9.80E-01 | -6.70 |
| 1425805_PM_a_at | Usp12              | USP12      | -0.01 | 2.75  | -0.07 | 9.47E-01 | 9.80E-01 | -6.70 |
| 1447764_PM_at   | Kcnd2              | KCND2      | 0.01  | 2.17  | 0.07  | 9.47E-01 | 9.80E-01 | -6.70 |
| 1449494_PM_at   | Rab3c              | RAB3C      | 0.03  | 4.35  | 0.07  | 9.48E-01 | 9.80E-01 | -6.70 |
| 1446350_PM_at   | ---                | NA         | -0.01 | 3.64  | -0.07 | 9.48E-01 | 9.80E-01 | -6.70 |
| 1432652_PM_at   | ---                | NA         | -0.01 | 2.27  | -0.07 | 9.48E-01 | 9.80E-01 | -6.70 |
| 1440353_PM_at   | Ntf5               | NTF4       | 0.00  | 2.23  | -0.07 | 9.48E-01 | 9.80E-01 | -6.70 |
| 1437328_PM_x_at | Cpsf3              | CPSF3      | 0.01  | 2.41  | 0.07  | 9.48E-01 | 9.80E-01 | -6.70 |
| 1451919_PM_a_at | Mpl                | MPL        | 0.01  | 2.92  | 0.07  | 9.48E-01 | 9.80E-01 | -6.70 |
| 1435185_PM_at   | Lrrc1              | LRRCC1     | -0.01 | 2.09  | -0.07 | 9.48E-01 | 9.80E-01 | -6.70 |
| 1438873_PM_at   | Zfp389             | NA         | 0.03  | 2.48  | 0.07  | 9.48E-01 | 9.80E-01 | -6.70 |
| 1439538_PM_at   | Ccdc127            | CCDC127    | 0.02  | 3.66  | 0.07  | 9.48E-01 | 9.80E-01 | -6.70 |
| 1426356_PM_at   | Coa5               | COA5       | 0.02  | 3.73  | 0.07  | 9.48E-01 | 9.80E-01 | -6.70 |
| 1422325_PM_at   | Magea5             | MAGEA2     | 0.01  | 2.04  | 0.07  | 9.48E-01 | 9.80E-01 | -6.70 |
| 1436887_PM_x_at | Grwd1              | GRWD1      | -0.01 | 2.68  | -0.07 | 9.48E-01 | 9.81E-01 | -6.70 |
| 1425314_PM_at   | Adgrv1             | ADGRV1     | -0.01 | 2.56  | -0.07 | 9.48E-01 | 9.81E-01 | -6.70 |
| 1419848_PM_x_at | Tlr7               | TLR7       | -0.01 | 2.55  | -0.07 | 9.48E-01 | 9.81E-01 | -6.70 |
| 1430320_PM_at   | Dmd                | DMD        | -0.01 | 2.06  | -0.07 | 9.48E-01 | 9.81E-01 | -6.70 |
| 1431019_PM_at   | Lrrc28             | LRRCC28    | -0.01 | 2.04  | -0.07 | 9.48E-01 | 9.81E-01 | -6.70 |
| 1450234_PM_at   | Ms4a6c             | MS4A6E     | 0.01  | 2.17  | 0.07  | 9.48E-01 | 9.81E-01 | -6.70 |
| 1450233_PM_a_at | Rsph6a             | RSPH6A     | 0.01  | 2.22  | 0.07  | 9.48E-01 | 9.81E-01 | -6.70 |
| 1445015_PM_at   | ---                | NA         | 0.01  | 2.14  | 0.07  | 9.48E-01 | 9.81E-01 | -6.70 |
| 1442279_PM_at   | ---                | NA         | 0.01  | 2.57  | 0.07  | 9.48E-01 | 9.81E-01 | -6.70 |
| 1442924_PM_at   | ---                | NA         | -0.01 | 2.71  | -0.07 | 9.48E-01 | 9.81E-01 | -6.70 |
| 1459936_PM_at   | ---                | NA         | 0.01  | 2.19  | 0.07  | 9.48E-01 | 9.81E-01 | -6.70 |
| 1444452_PM_at   | Pcdh10             | NA         | -0.01 | 2.33  | -0.07 | 9.49E-01 | 9.81E-01 | -6.70 |
| 1430850_PM_x_at | Cgrrf1             | CGRRF1     | -0.01 | 2.08  | -0.07 | 9.49E-01 | 9.81E-01 | -6.70 |
| 1452171_PM_at   | Grwd1              | GRWD1      | -0.01 | 2.43  | -0.07 | 9.49E-01 | 9.81E-01 | -6.70 |
| 1459368_PM_at   | ---                | NA         | 0.01  | 2.47  | 0.07  | 9.49E-01 | 9.81E-01 | -6.70 |
| 1415851_PM_a_at | Gm15210 /// Impdh2 | IMPDH2     | 0.03  | 4.62  | 0.07  | 9.49E-01 | 9.81E-01 | -6.70 |
| 1437561_PM_at   | Trat1              | NA         | -0.01 | 2.36  | -0.07 | 9.49E-01 | 9.81E-01 | -6.70 |
| 1444156_PM_at   | 9230112E08Rik      | NA         | -0.01 | 2.45  | -0.07 | 9.49E-01 | 9.81E-01 | -6.70 |
| 1449416_PM_at   | Fzd4               | FZD4       | -0.01 | 2.15  | -0.07 | 9.49E-01 | 9.81E-01 | -6.70 |
| 1430943_PM_at   | 6030498E09Rik      | NA         | 0.01  | 2.16  | 0.07  | 9.49E-01 | 9.81E-01 | -6.70 |
| 1452847_PM_at   | Gatsb              | CASTOR1    | 0.01  | 2.50  | 0.07  | 9.49E-01 | 9.81E-01 | -6.70 |
| 1434555_PM_at   | Anp32a             | ANP32A     | 0.02  | 5.43  | 0.07  | 9.49E-01 | 9.81E-01 | -6.70 |

|                 |                                        |            |       |      |       |          |          |       |
|-----------------|----------------------------------------|------------|-------|------|-------|----------|----------|-------|
| 1435316_PM_at   | Psma6                                  | PSMA6      | -0.01 | 2.12 | -0.07 | 9.49E-01 | 9.81E-01 | -6.70 |
| 1457600_PM_x_at | Nkd2                                   | NKD2       | 0.01  | 2.57 | 0.07  | 9.49E-01 | 9.81E-01 | -6.70 |
| 1436120_PM_at   | Phf11c ///Setdb2                       | SETDB2     | 0.01  | 2.75 | 0.07  | 9.49E-01 | 9.81E-01 | -6.70 |
| 1455393_PM_at   | Cp                                     | CP         | -0.03 | 3.30 | -0.07 | 9.49E-01 | 9.81E-01 | -6.70 |
| 1443338_PM_at   | ---                                    | NA         | -0.02 | 2.83 | -0.07 | 9.49E-01 | 9.81E-01 | -6.70 |
| 1449489_PM_at   | Tssk2                                  | TSSK2      | 0.01  | 2.26 | 0.07  | 9.49E-01 | 9.81E-01 | -6.70 |
| 1436497_PM_at   | Igf1it                                 | NA         | -0.01 | 2.25 | -0.07 | 9.49E-01 | 9.81E-01 | -6.70 |
| 1416318_PM_at   | Serpnb1a                               | SERPINB1   | -0.01 | 2.38 | -0.07 | 9.49E-01 | 9.81E-01 | -6.70 |
| 1431252_PM_a_at | Zfp655                                 | ZNF655     | 0.02  | 3.74 | 0.07  | 9.49E-01 | 9.81E-01 | -6.70 |
| 1458092_PM_at   | ---                                    | NA         | 0.01  | 2.27 | 0.07  | 9.49E-01 | 9.81E-01 | -6.70 |
| 1442257_PM_at   | Cdh6                                   | NA         | 0.01  | 2.17 | 0.07  | 9.49E-01 | 9.81E-01 | -6.70 |
| 1438835_PM_a_at | Eftud2                                 | EFTUD2     | -0.02 | 2.72 | -0.06 | 9.49E-01 | 9.81E-01 | -6.70 |
| 1426605_PM_at   | Brcc3                                  | BRCC3      | -0.02 | 2.68 | -0.06 | 9.50E-01 | 9.81E-01 | -6.70 |
| 1455027_PM_at   | Rufy3                                  | RUFY3      | -0.01 | 5.45 | -0.06 | 9.50E-01 | 9.81E-01 | -6.70 |
| 1422394_PM_at   | Vmn1r-ps8                              | NA         | -0.01 | 2.05 | -0.07 | 9.49E-01 | 9.81E-01 | -6.70 |
| 1431589_PM_at   | Gm26832                                | NA         | -0.01 | 2.45 | -0.06 | 9.50E-01 | 9.81E-01 | -6.70 |
| 1442827_PM_at   | Tlr4                                   | NA         | 0.01  | 2.05 | 0.06  | 9.49E-01 | 9.81E-01 | -6.70 |
| 1426148_PM_at   | Gbgt1                                  | GBGT1      | 0.01  | 2.33 | 0.06  | 9.50E-01 | 9.81E-01 | -6.70 |
| 1441846_PM_x_at | Tmed3                                  | NA         | 0.01  | 2.35 | 0.07  | 9.49E-01 | 9.81E-01 | -6.70 |
| 1435663_PM_at   | Esr1                                   | ESR1       | 0.01  | 2.17 | 0.06  | 9.49E-01 | 9.81E-01 | -6.70 |
| 1426327_PM_s_at | Zfp91 ///Zfp91Cntf                     | ZFP91-CNTF | 0.01  | 2.67 | 0.07  | 9.49E-01 | 9.81E-01 | -6.70 |
| 1445053_PM_at   | AU022537                               | NA         | 0.02  | 2.46 | 0.06  | 9.50E-01 | 9.81E-01 | -6.70 |
| 1437622_PM_x_at | Mrp28                                  | MRPL28     | 0.03  | 3.74 | 0.06  | 9.50E-01 | 9.81E-01 | -6.70 |
| 1460662_PM_at   | Per3                                   | PER3       | 0.01  | 2.47 | 0.06  | 9.50E-01 | 9.81E-01 | -6.70 |
| 1423693_PM_at   | Cela1                                  | CELA1      | -0.01 | 2.38 | -0.06 | 9.50E-01 | 9.81E-01 | -6.70 |
| 1443758_PM_at   | Wdr18                                  | NA         | -0.01 | 1.81 | -0.06 | 9.50E-01 | 9.81E-01 | -6.70 |
| 1426463_PM_at   | Gphn                                   | GPHN       | -0.02 | 4.07 | -0.06 | 9.50E-01 | 9.81E-01 | -6.70 |
| 1439970_PM_at   | ---                                    | NA         | -0.02 | 2.70 | -0.06 | 9.50E-01 | 9.81E-01 | -6.70 |
| 1448293_PM_at   | Ebf1                                   | EBF1       | -0.02 | 2.44 | -0.06 | 9.50E-01 | 9.81E-01 | -6.70 |
| 1415758_PM_at   | Fryl                                   | FRYL       | -0.01 | 3.81 | -0.06 | 9.50E-01 | 9.81E-01 | -6.70 |
| 1443247_PM_at   | ---                                    | NA         | -0.01 | 2.39 | -0.06 | 9.50E-01 | 9.81E-01 | -6.70 |
| 1438338_PM_at   | ---                                    | NA         | -0.01 | 2.18 | -0.06 | 9.50E-01 | 9.81E-01 | -6.70 |
| 1445996_PM_at   | ---                                    | NA         | 0.01  | 2.15 | 0.06  | 9.50E-01 | 9.81E-01 | -6.70 |
| 1447077_PM_at   | ---                                    | NA         | 0.01  | 2.47 | 0.06  | 9.50E-01 | 9.81E-01 | -6.70 |
| 1427956_PM_at   | Pcgf1                                  | PCGF1      | 0.01  | 2.60 | 0.06  | 9.50E-01 | 9.81E-01 | -6.70 |
| 1439776_PM_at   | Ogfod1                                 | OGFOD1     | 0.01  | 2.76 | 0.06  | 9.50E-01 | 9.81E-01 | -6.70 |
| 1445404_PM_at   | Kif27                                  | KIF27      | 0.01  | 2.71 | 0.06  | 9.50E-01 | 9.81E-01 | -6.70 |
| 1420877_PM_at   | Sept6                                  | SEPT6      | -0.02 | 3.85 | -0.06 | 9.50E-01 | 9.81E-01 | -6.70 |
| 1439034_PM_at   | Spn                                    | SPN        | -0.02 | 3.87 | -0.06 | 9.50E-01 | 9.81E-01 | -6.70 |
| 1447182_PM_at   | C77815                                 | NA         | -0.01 | 3.57 | -0.06 | 9.50E-01 | 9.81E-01 | -6.70 |
| 1449058_PM_at   | Gl1                                    | GLI1       | -0.01 | 2.65 | -0.06 | 9.50E-01 | 9.81E-01 | -6.70 |
| 1428895_PM_at   | Rftn2                                  | RFTN2      | -0.01 | 2.60 | -0.06 | 9.50E-01 | 9.81E-01 | -6.70 |
| 1449102_PM_at   | Ebf2                                   | EBF2       | -0.01 | 2.03 | -0.06 | 9.50E-01 | 9.81E-01 | -6.70 |
| 1444759_PM_at   | Prickle1                               | PRICKLE1   | 0.01  | 2.13 | 0.06  | 9.50E-01 | 9.81E-01 | -6.70 |
| 1447592_PM_at   | Dbh                                    | DBH        | 0.01  | 2.87 | 0.06  | 9.50E-01 | 9.81E-01 | -6.70 |
| 1416750_PM_at   | Sigmar1                                | SIGMAR1    | 0.01  | 2.83 | 0.06  | 9.50E-01 | 9.81E-01 | -6.70 |
| 1417886_PM_at   | 1810009A15Rik ///Lbhd1 ///LOC105242733 | AP001458.2 | 0.01  | 3.33 | 0.06  | 9.50E-01 | 9.81E-01 | -6.70 |
| 1426885_PM_a_at | Cdk2ap1                                | CDK2AP1    | 0.01  | 4.82 | 0.06  | 9.50E-01 | 9.81E-01 | -6.70 |
| 1452651_PM_a_at | My1l                                   | MYL1       | 0.02  | 2.60 | 0.06  | 9.50E-01 | 9.81E-01 | -6.70 |
| 1420136_PM_a_at | ---                                    | NA         | -0.01 | 2.32 | -0.06 | 9.50E-01 | 9.81E-01 | -6.70 |
| 1442453_PM_at   | Fcho2                                  | NA         | 0.02  | 2.60 | 0.06  | 9.50E-01 | 9.81E-01 | -6.70 |
| 1441213_PM_at   | BC021891                               | MAP3K21    | 0.01  | 2.38 | 0.06  | 9.50E-01 | 9.81E-01 | -6.70 |
| 1435531_PM_at   | Usp3                                   | USP3       | 0.03  | 3.16 | 0.06  | 9.50E-01 | 9.81E-01 | -6.70 |
| 1459056_PM_at   | Rasgrf1                                | RASGRF1    | -0.02 | 3.18 | -0.06 | 9.50E-01 | 9.81E-01 | -6.70 |
| 1423714_PM_at   | Asf1b                                  | ASF1B      | -0.01 | 2.84 | -0.06 | 9.50E-01 | 9.81E-01 | -6.70 |
| 1449868_PM_at   | Tbx6                                   | TBX6       | 0.01  | 2.25 | 0.06  | 9.51E-01 | 9.81E-01 | -6.70 |
| 1436572_PM_at   | Cep95                                  | CEP95      | -0.03 | 3.63 | -0.06 | 9.51E-01 | 9.82E-01 | -6.70 |
| 1423128_PM_at   | Aip                                    | AIP        | 0.01  | 3.53 | 0.06  | 9.51E-01 | 9.82E-01 | -6.70 |
| 1440519_PM_at   | Sp8                                    | SP8        | 0.01  | 2.25 | 0.06  | 9.51E-01 | 9.82E-01 | -6.70 |
| 1458466_PM_at   | Ctsa                                   | CTSA       | 0.01  | 2.26 | 0.06  | 9.51E-01 | 9.82E-01 | -6.70 |
| 1417097_PM_at   | Mecr                                   | MECR       | 0.01  | 2.52 | 0.06  | 9.51E-01 | 9.82E-01 | -6.70 |
| 1424644_PM_at   | Tbcc                                   | TBCC       | 0.02  | 4.03 | 0.06  | 9.51E-01 | 9.82E-01 | -6.70 |
| 1447134_PM_at   | ---                                    | NA         | 0.01  | 2.26 | 0.06  | 9.51E-01 | 9.82E-01 | -6.70 |
| 1455723_PM_at   | Imp4                                   | IMP4       | 0.01  | 2.18 | 0.06  | 9.51E-01 | 9.82E-01 | -6.70 |
| 1437956_PM_at   | Pik3r6                                 | PIK3R6     | -0.01 | 2.40 | -0.06 | 9.51E-01 | 9.82E-01 | -6.70 |
| 1444044_PM_at   | Gm7265                                 | NA         | -0.01 | 2.70 | -0.06 | 9.51E-01 | 9.82E-01 | -6.70 |
| 1433981_PM_s_at | Kat5                                   | KAT5       | -0.01 | 2.83 | -0.06 | 9.51E-01 | 9.82E-01 | -6.70 |
| 1430244_PM_at   | ---                                    | NA         | -0.02 | 3.03 | -0.06 | 9.51E-01 | 9.82E-01 | -6.70 |
| 1416733_PM_at   | Mkln1                                  | MKLN1      | 0.02  | 2.81 | 0.06  | 9.51E-01 | 9.82E-01 | -6.70 |
| 1448324_PM_at   | Rnps1                                  | RNPS1      | 0.02  | 4.44 | 0.06  | 9.51E-01 | 9.82E-01 | -6.70 |
| 1440709_PM_at   | ---                                    | NA         | -0.01 | 2.33 | -0.06 | 9.51E-01 | 9.82E-01 | -6.70 |
| 1456906_PM_at   | ---                                    | NA         | 0.01  | 2.33 | 0.06  | 9.51E-01 | 9.82E-01 | -6.70 |
| 1436936_PM_s_at | Xist                                   | NA         | -0.03 | 3.13 | -0.06 | 9.51E-01 | 9.82E-01 | -6.70 |
| 1456523_PM_at   | Gm2115                                 | NA         | -0.01 | 2.60 | -0.06 | 9.51E-01 | 9.82E-01 | -6.70 |

|                 |                  |            |       |       |       |          |          |       |
|-----------------|------------------|------------|-------|-------|-------|----------|----------|-------|
| 1439975_PM_at   | Tmem150c         | TMEM150C   | -0.01 | 2.84  | -0.06 | 9.51E-01 | 9.82E-01 | -6.70 |
| 1453656_PM_a_at | 4933431G14Rik    | NA         | -0.01 | 2.32  | -0.06 | 9.51E-01 | 9.82E-01 | -6.70 |
| 1438639_PM_x_at | Exoc3l2          | NA         | 0.01  | 2.47  | 0.06  | 9.51E-01 | 9.82E-01 | -6.70 |
| 1416815_PM_s_at | Bub3             | BUB3       | -0.02 | 4.17  | -0.06 | 9.52E-01 | 9.82E-01 | -6.70 |
| 1416630_PM_at   | Id3              | ID3        | -0.01 | 3.10  | -0.06 | 9.52E-01 | 9.82E-01 | -6.70 |
| 1424684_PM_at   | Rab5c            | RAB5C      | -0.01 | 2.60  | -0.06 | 9.52E-01 | 9.82E-01 | -6.70 |
| 1430161_PM_at   | ---              | NA         | -0.01 | 2.68  | -0.06 | 9.52E-01 | 9.82E-01 | -6.70 |
| 1438411_PM_at   | Hcar1            | HCAR1      | 0.01  | 2.20  | 0.06  | 9.52E-01 | 9.82E-01 | -6.70 |
| 1457516_PM_at   | ---              | NA         | 0.01  | 2.42  | 0.06  | 9.52E-01 | 9.82E-01 | -6.70 |
| 1453695_PM_at   | Nlrp5-ps         | NA         | 0.01  | 2.46  | 0.06  | 9.52E-01 | 9.82E-01 | -6.70 |
| 1418075_PM_at   | St6galnac4       | ST6GALNAC4 | 0.01  | 2.74  | 0.06  | 9.52E-01 | 9.82E-01 | -6.70 |
| 1458535_PM_at   | ---              | NA         | 0.01  | 2.25  | 0.06  | 9.52E-01 | 9.82E-01 | -6.70 |
| 1422687_PM_at   | Nras             | NRAS       | -0.01 | 2.68  | -0.06 | 9.52E-01 | 9.82E-01 | -6.70 |
| 1453649_PM_at   | C030039L03Rik    | NA         | -0.01 | 2.56  | -0.06 | 9.52E-01 | 9.82E-01 | -6.70 |
| 1444826_PM_at   | ---              | NA         | -0.01 | 2.38  | -0.06 | 9.52E-01 | 9.82E-01 | -6.70 |
| 1452131_PM_at   | Snrpb2           | SNRPB2     | 0.01  | 2.36  | 0.06  | 9.52E-01 | 9.82E-01 | -6.70 |
| 1433059_PM_at   | ---              | NA         | 0.01  | 2.84  | 0.06  | 9.52E-01 | 9.82E-01 | -6.70 |
| 1429898_PM_at   | Ostc             | OSTC       | 0.01  | 2.48  | 0.06  | 9.52E-01 | 9.82E-01 | -6.70 |
| 1440047_PM_at   | ---              | NA         | -0.01 | 2.90  | -0.06 | 9.52E-01 | 9.82E-01 | -6.70 |
| 1458725_PM_at   | ---              | NA         | -0.01 | 2.32  | -0.06 | 9.52E-01 | 9.82E-01 | -6.70 |
| 1420716_PM_at   | Cd247            | CD247      | -0.01 | 2.47  | -0.06 | 9.52E-01 | 9.82E-01 | -6.70 |
| 1449319_PM_at   | Rspo1            | RSP01      | 0.01  | 2.43  | 0.06  | 9.52E-01 | 9.82E-01 | -6.70 |
| 1417141_PM_at   | Igtp             | IRGM       | -0.02 | 3.20  | -0.06 | 9.52E-01 | 9.82E-01 | -6.70 |
| 1450439_PM_at   | Hcfc1            | HCFC1      | -0.01 | 2.76  | -0.06 | 9.52E-01 | 9.82E-01 | -6.70 |
| 1435027_PM_at   | Golga1           | GOLGA1     | -0.01 | 2.32  | -0.06 | 9.52E-01 | 9.82E-01 | -6.70 |
| 1433484_PM_at   | D6Erttd527e      | NA         | -0.01 | 2.02  | -0.06 | 9.52E-01 | 9.82E-01 | -6.70 |
| 1447178_PM_at   | ---              | NA         | -0.01 | 2.38  | -0.06 | 9.52E-01 | 9.82E-01 | -6.70 |
| 1460599_PM_at   | Ermp1            | ERMP1      | 0.01  | 2.24  | 0.06  | 9.52E-01 | 9.82E-01 | -6.70 |
| 1417403_PM_at   | Elov6            | ELOVL6     | 0.01  | 2.99  | 0.06  | 9.52E-01 | 9.82E-01 | -6.70 |
| 1442018_PM_at   | Btg1             | BTG1       | 0.01  | 3.10  | 0.06  | 9.52E-01 | 9.82E-01 | -6.70 |
| 1435700_PM_at   | Tln2             | TLN2       | 0.01  | 4.97  | 0.06  | 9.52E-01 | 9.82E-01 | -6.70 |
| 1421174_PM_at   | Irf4             | IRF4       | 0.01  | 2.03  | 0.06  | 9.52E-01 | 9.82E-01 | -6.70 |
| 1430908_PM_at   | 4933429O19Rik    | NA         | 0.01  | 2.06  | 0.06  | 9.52E-01 | 9.82E-01 | -6.70 |
| 1418437_PM_a_at | Mlx              | MLX        | -0.01 | 3.28  | -0.06 | 9.53E-01 | 9.82E-01 | -6.70 |
| 1455336_PM_at   | ---              | NA         | -0.01 | 2.43  | -0.06 | 9.53E-01 | 9.82E-01 | -6.70 |
| 1430292_PM_a_at | Smim8            | SMIM8      | -0.01 | 2.44  | -0.06 | 9.53E-01 | 9.82E-01 | -6.70 |
| 1446869_PM_at   | Gm19784          | NA         | 0.00  | 2.06  | -0.06 | 9.53E-01 | 9.82E-01 | -6.70 |
| 1431541_PM_at   | Gm9757           | NA         | 0.01  | 2.25  | 0.06  | 9.53E-01 | 9.82E-01 | -6.70 |
| 1442893_PM_at   | ---              | NA         | 0.01  | 2.39  | 0.06  | 9.53E-01 | 9.82E-01 | -6.70 |
| 1457729_PM_at   | ---              | NA         | -0.01 | 3.39  | -0.06 | 9.53E-01 | 9.82E-01 | -6.70 |
| 1437637_PM_at   | Phtf2            | PHTF2      | -0.03 | 3.65  | -0.06 | 9.53E-01 | 9.82E-01 | -6.70 |
| 1455127_PM_at   | Xkr5             | XKR5       | -0.01 | 1.98  | -0.06 | 9.53E-01 | 9.82E-01 | -6.70 |
| 1452575_PM_at   | Krtap6-3         | NA         | 0.00  | 1.99  | -0.06 | 9.53E-01 | 9.82E-01 | -6.70 |
| 1440521_PM_x_at | 1700051A21Rik    | NA         | 0.01  | 2.36  | 0.06  | 9.53E-01 | 9.82E-01 | -6.70 |
| 1423786_PM_at   | Hmces            | HMCES      | 0.01  | 2.46  | 0.06  | 9.53E-01 | 9.82E-01 | -6.70 |
| 1453101_PM_at   | Klh25            | KLHL25     | 0.01  | 2.66  | 0.06  | 9.53E-01 | 9.82E-01 | -6.70 |
| 1430101_PM_at   | Gabrg3           | GABRG3     | 0.01  | 2.49  | 0.06  | 9.53E-01 | 9.82E-01 | -6.70 |
| 1460304_PM_a_at | Ubtf             | UBTF       | 0.02  | 3.08  | 0.06  | 9.53E-01 | 9.82E-01 | -6.70 |
| 1418142_PM_at   | Kcnj8            | KCNJ8      | -0.03 | 2.71  | -0.06 | 9.53E-01 | 9.82E-01 | -6.70 |
| 1459646_PM_at   | Hs3st6           | HS3ST6     | 0.01  | 2.30  | 0.06  | 9.53E-01 | 9.82E-01 | -6.70 |
| 1417696_PM_at   | Soat1            | SOAT1      | 0.01  | 2.79  | 0.06  | 9.53E-01 | 9.82E-01 | -6.70 |
| 1441356_PM_at   | Shc2             | SHC2       | -0.01 | 3.06  | -0.06 | 9.53E-01 | 9.82E-01 | -6.70 |
| 1441492_PM_at   | ---              | NA         | 0.00  | 2.25  | 0.06  | 9.53E-01 | 9.82E-01 | -6.70 |
| 1432617_PM_at   | ---              | NA         | -0.01 | 1.90  | -0.06 | 9.53E-01 | 9.82E-01 | -6.70 |
| 1439236_PM_at   | Phf20l1          | NA         | -0.01 | 2.16  | -0.06 | 9.53E-01 | 9.82E-01 | -6.70 |
| 1453528_PM_at   | Lta4h            | LTA4H      | 0.02  | 3.04  | 0.06  | 9.53E-01 | 9.82E-01 | -6.70 |
| 1448892_PM_at   | Dock7            | DOCK7      | -0.01 | 3.68  | -0.06 | 9.53E-01 | 9.83E-01 | -6.70 |
| 1426121_PM_at   | Mrgpra3          | NA         | 0.00  | 1.98  | -0.06 | 9.53E-01 | 9.83E-01 | -6.70 |
| 1447928_PM_at   | Car5b            | CASB       | -0.01 | 2.57  | -0.06 | 9.54E-01 | 9.83E-01 | -6.70 |
| 1455601_PM_at   | Gm16793          | NA         | -0.01 | 2.31  | -0.06 | 9.54E-01 | 9.83E-01 | -6.70 |
| 1427282_PM_a_at | Fxn              | FXN        | 0.01  | 2.82  | 0.06  | 9.53E-01 | 9.83E-01 | -6.70 |
| 1427201_PM_at   | Mustn1           | ACO06254.1 | 0.01  | 3.26  | 0.06  | 9.53E-01 | 9.83E-01 | -6.70 |
| 1436029_PM_at   | Bicc1            | BICC1      | 0.01  | 3.23  | 0.06  | 9.53E-01 | 9.83E-01 | -6.70 |
| 1452633_PM_s_at | Aak1 /// Gm38495 | AAK1       | 0.01  | 4.06  | 0.06  | 9.53E-01 | 9.83E-01 | -6.70 |
| 1420313_PM_x_at | ---              | NA         | 0.01  | 3.59  | 0.06  | 9.54E-01 | 9.83E-01 | -6.70 |
| 1440335_PM_at   | Gm11716          | NA         | 0.01  | 1.99  | 0.06  | 9.54E-01 | 9.83E-01 | -6.70 |
| 1441253_PM_at   | ---              | NA         | -0.02 | 3.80  | -0.06 | 9.54E-01 | 9.83E-01 | -6.70 |
| 1420783_PM_at   | Trpd52l3         | TPD52L3    | 0.01  | 2.24  | 0.06  | 9.54E-01 | 9.83E-01 | -6.70 |
| 1427324_PM_at   | Tmem120b         | TMEM120B   | -0.02 | 3.09  | -0.06 | 9.54E-01 | 9.83E-01 | -6.70 |
| 1460715_PM_x_at | Tfcp2l1          | TFCP2L1    | -0.01 | 2.61  | -0.06 | 9.54E-01 | 9.83E-01 | -6.70 |
| 1420259_PM_at   | Pkp2             | NA         | -0.02 | 4.35  | -0.06 | 9.54E-01 | 9.83E-01 | -6.70 |
| 1418189_PM_s_at | Malat1           | NA         | 0.00  | 12.66 | 0.06  | 9.54E-01 | 9.83E-01 | -6.70 |
| 1433020_PM_at   | ---              | NA         | 0.00  | 1.86  | 0.06  | 9.54E-01 | 9.83E-01 | -6.70 |
| 1452570_PM_at   | ---              | NA         | 0.01  | 2.55  | 0.06  | 9.54E-01 | 9.83E-01 | -6.70 |
| 1460082_PM_at   | Ing3             | ING3       | 0.02  | 2.28  | 0.06  | 9.54E-01 | 9.83E-01 | -6.70 |



|                 |                       |            |       |       |       |          |          |       |
|-----------------|-----------------------|------------|-------|-------|-------|----------|----------|-------|
| 1420408_PM_a_at | Abcc9                 | ABCC9      | -0.02 | 2.74  | -0.06 | 9.54E-01 | 9.83E-01 | -6.70 |
| 1428551_PM_at   | Trmt11                | TRMT11     | -0.01 | 3.70  | -0.06 | 9.54E-01 | 9.83E-01 | -6.70 |
| 1435686_PM_at   | Fam149b               | NA         | -0.01 | 3.43  | -0.06 | 9.54E-01 | 9.83E-01 | -6.70 |
| 1458968_PM_at   | C80283                | NA         | 0.01  | 2.35  | 0.06  | 9.54E-01 | 9.83E-01 | -6.70 |
| 1453806_PM_at   | Ndufb2                | NDUFB2     | 0.01  | 2.44  | 0.06  | 9.54E-01 | 9.83E-01 | -6.70 |
| 1444607_PM_at   | ---                   | NA         | 0.01  | 2.76  | 0.06  | 9.54E-01 | 9.83E-01 | -6.70 |
| 1429943_PM_at   | Ctbs                  | CTBS       | 0.01  | 2.14  | 0.06  | 9.54E-01 | 9.83E-01 | -6.70 |
| 1421739_PM_a_at | Matk                  | MATK       | 0.01  | 2.97  | 0.06  | 9.54E-01 | 9.83E-01 | -6.70 |
| 1439869_PM_at   | Zfp493                | ZNF141     | 0.01  | 2.75  | 0.06  | 9.54E-01 | 9.83E-01 | -6.70 |
| 1452926_PM_at   | Ttc14                 | TTC14      | 0.01  | 3.41  | 0.06  | 9.54E-01 | 9.83E-01 | -6.70 |
| 1430676_PM_at   | Col19a1               | COL19A1    | 0.02  | 3.56  | 0.06  | 9.54E-01 | 9.83E-01 | -6.70 |
| 1421820_PM_a_at | Nf2                   | NF2        | 0.01  | 3.04  | 0.06  | 9.54E-01 | 9.83E-01 | -6.70 |
| 1424148_PM_a_at | Stap2                 | STAP2      | 0.02  | 2.50  | 0.06  | 9.54E-01 | 9.83E-01 | -6.70 |
| 1431387_PM_at   | ---                   | NA         | -0.01 | 2.48  | -0.06 | 9.54E-01 | 9.83E-01 | -6.70 |
| 1432972_PM_at   | ---                   | NA         | -0.01 | 2.60  | -0.06 | 9.54E-01 | 9.83E-01 | -6.70 |
| 1422196_PM_at   | Htr5b                 | NA         | -0.01 | 2.10  | -0.06 | 9.55E-01 | 9.83E-01 | -6.70 |
| 1457231_PM_at   | ---                   | NA         | -0.01 | 2.62  | -0.06 | 9.55E-01 | 9.83E-01 | -6.70 |
| 1434836_PM_at   | Nfatc2ip              | NFATC2IP   | -0.01 | 3.85  | -0.06 | 9.55E-01 | 9.83E-01 | -6.70 |
| 1432703_PM_at   | ---                   | NA         | -0.01 | 2.33  | -0.06 | 9.55E-01 | 9.83E-01 | -6.70 |
| 1421519_PM_a_at | Zfp120                | NA         | -0.01 | 2.46  | -0.06 | 9.55E-01 | 9.83E-01 | -6.70 |
| 1438228_PM_at   | 4930452B06Rik         | C3orf67    | -0.01 | 2.53  | -0.06 | 9.55E-01 | 9.83E-01 | -6.70 |
| 1442348_PM_at   | Katnal1               | KATNAL1    | -0.01 | 3.32  | -0.06 | 9.55E-01 | 9.83E-01 | -6.70 |
| 1419000_PM_at   | Cpxm2                 | CPXM2      | -0.01 | 2.21  | -0.06 | 9.55E-01 | 9.83E-01 | -6.70 |
| 1431920_PM_a_at | Ilb4                  | IL34       | -0.01 | 2.20  | -0.06 | 9.55E-01 | 9.83E-01 | -6.70 |
| 1430672_PM_at   | ---                   | NA         | 0.00  | 2.87  | 0.06  | 9.55E-01 | 9.83E-01 | -6.70 |
| 1456862_PM_at   | Six4                  | SIX4       | 0.01  | 2.41  | 0.06  | 9.55E-01 | 9.83E-01 | -6.70 |
| 1417990_PM_at   | Ppp1r14d              | PPP1R14D   | 0.01  | 2.39  | 0.06  | 9.55E-01 | 9.83E-01 | -6.70 |
| 1448874_PM_a_at | Sh2b1                 | SH2B1      | 0.01  | 2.92  | 0.06  | 9.55E-01 | 9.83E-01 | -6.70 |
| 1430884_PM_at   | 4930568G15Rik         | NA         | -0.01 | 2.89  | -0.06 | 9.55E-01 | 9.83E-01 | -6.70 |
| 1434413_PM_at   | Igf1                  | IGF1       | 0.00  | 2.11  | 0.06  | 9.55E-01 | 9.83E-01 | -6.70 |
| 1424669_PM_at   | Zfyve21               | ZFYVE21    | -0.01 | 2.66  | -0.06 | 9.55E-01 | 9.83E-01 | -6.70 |
| 1417255_PM_at   | Ift140                | IFT140     | -0.02 | 5.42  | -0.06 | 9.55E-01 | 9.83E-01 | -6.70 |
| 1436834_PM_x_at | Mdh1                  | MDH1       | -0.01 | 11.54 | -0.06 | 9.55E-01 | 9.83E-01 | -6.70 |
| 1457036_PM_at   | ---                   | NA         | -0.01 | 2.47  | -0.06 | 9.55E-01 | 9.83E-01 | -6.70 |
| 1438585_PM_at   | Syne2                 | SYNE2      | -0.01 | 2.10  | -0.06 | 9.55E-01 | 9.83E-01 | -6.70 |
| 1446916_PM_at   | ---                   | NA         | -0.01 | 2.20  | -0.06 | 9.55E-01 | 9.83E-01 | -6.70 |
| 1437523_PM_s_at | Sgcg                  | SGCG       | 0.01  | 2.03  | 0.06  | 9.55E-01 | 9.83E-01 | -6.70 |
| 1436373_PM_at   | Map3k10               | MAP3K10    | 0.01  | 4.93  | 0.06  | 9.55E-01 | 9.83E-01 | -6.70 |
| 1447116_PM_at   | ---                   | NA         | -0.01 | 2.32  | -0.06 | 9.55E-01 | 9.83E-01 | -6.70 |
| 1449931_PM_at   | Cpeb4                 | CPEB4      | 0.01  | 2.16  | 0.06  | 9.55E-01 | 9.83E-01 | -6.70 |
| 1448115_PM_at   | Trmt2a                | TRMT2A     | 0.01  | 2.59  | 0.06  | 9.56E-01 | 9.83E-01 | -6.70 |
| 1451407_PM_at   | Igsf5                 | IGSF5      | -0.01 | 2.47  | -0.06 | 9.56E-01 | 9.84E-01 | -6.70 |
| 1452734_PM_at   | Rnaset2a /// Rnaset2b | AL159163.1 | 0.02  | 3.68  | 0.06  | 9.56E-01 | 9.84E-01 | -6.70 |
| 1422045_PM_a_at | Ptpn12                | PTPN12     | -0.02 | 3.24  | -0.06 | 9.56E-01 | 9.84E-01 | -6.70 |
| 1438843_PM_x_at | Mtch2                 | MTCH2      | -0.01 | 3.43  | -0.06 | 9.56E-01 | 9.84E-01 | -6.70 |
| 1421334_PM_x_at | Mynn                  | MYNN       | 0.00  | 2.35  | -0.06 | 9.56E-01 | 9.84E-01 | -6.70 |
| 1416687_PM_at   | Plod2                 | PLOD2      | 0.01  | 2.42  | 0.06  | 9.56E-01 | 9.84E-01 | -6.70 |
| 1424147_PM_at   | Ahsa1                 | AHSA1      | -0.01 | 3.62  | -0.06 | 9.56E-01 | 9.84E-01 | -6.70 |
| 1437857_PM_at   | Dpy19l3               | DPY19L3    | -0.01 | 2.70  | -0.06 | 9.56E-01 | 9.84E-01 | -6.70 |
| 1438088_PM_at   | Kcnk10                | NA         | 0.01  | 2.80  | 0.06  | 9.56E-01 | 9.84E-01 | -6.70 |
| 1443456_PM_at   | ---                   | NA         | -0.01 | 2.70  | -0.06 | 9.56E-01 | 9.84E-01 | -6.70 |
| 1446681_PM_at   | BB086117              | NA         | 0.01  | 2.36  | 0.06  | 9.56E-01 | 9.84E-01 | -6.70 |
| 1456653_PM_a_at | Mthfd1l               | MTHFD1L    | -0.01 | 2.48  | -0.06 | 9.56E-01 | 9.84E-01 | -6.70 |
| 1448651_PM_at   | Nudt5                 | NUDT5      | -0.01 | 2.18  | -0.06 | 9.56E-01 | 9.84E-01 | -6.70 |
| 1437220_PM_x_at | Psm13                 | PSMD13     | 0.01  | 2.86  | 0.06  | 9.56E-01 | 9.84E-01 | -6.70 |
| 1452411_PM_at   | Lrrc1                 | LRRC1      | 0.01  | 2.04  | 0.06  | 9.56E-01 | 9.84E-01 | -6.70 |
| 1460154_PM_at   | Al194348              | NA         | -0.01 | 2.18  | -0.06 | 9.57E-01 | 9.84E-01 | -6.70 |
| 1437818_PM_at   | 9430016H08Rik         | MAIP1      | -0.01 | 2.89  | -0.06 | 9.57E-01 | 9.84E-01 | -6.70 |
| 1416486_PM_at   | Aimp1                 | AIMP1      | -0.02 | 3.87  | -0.06 | 9.57E-01 | 9.84E-01 | -6.70 |
| 1460054_PM_at   | ---                   | NA         | -0.01 | 2.72  | -0.06 | 9.57E-01 | 9.84E-01 | -6.70 |
| 1443748_PM_x_at | Ankrd44               | ANKRD44    | -0.01 | 2.22  | -0.06 | 9.57E-01 | 9.84E-01 | -6.70 |
| 1438461_PM_at   | Khdrbs1               | KHDRBS1    | 0.00  | 1.97  | -0.06 | 9.57E-01 | 9.84E-01 | -6.70 |
| 1416117_PM_at   | Orc3                  | NA         | -0.01 | 3.63  | -0.06 | 9.57E-01 | 9.84E-01 | -6.70 |
| 1427008_PM_at   | Rnf43                 | RNF43      | -0.01 | 2.13  | -0.06 | 9.57E-01 | 9.84E-01 | -6.70 |
| 1443645_PM_at   | ---                   | NA         | 0.00  | 2.40  | -0.06 | 9.57E-01 | 9.84E-01 | -6.70 |
| 1456888_PM_at   | Pfkfb4                | PFKFB4     | 0.01  | 2.82  | 0.06  | 9.57E-01 | 9.84E-01 | -6.70 |
| 1449465_PM_at   | Reln                  | RELN       | 0.02  | 5.67  | 0.06  | 9.57E-01 | 9.84E-01 | -6.70 |
| 1442699_PM_at   | ---                   | NA         | -0.02 | 2.60  | -0.06 | 9.57E-01 | 9.84E-01 | -6.70 |
| 1432400_PM_at   | Epha1                 | EPHA1      | 0.00  | 1.99  | -0.06 | 9.57E-01 | 9.84E-01 | -6.70 |
| 1452522_PM_at   | Stom                  | NA         | 0.01  | 2.37  | 0.06  | 9.57E-01 | 9.84E-01 | -6.70 |
| 1416956_PM_at   | Kcnab2                | KCNAB2     | 0.01  | 3.04  | 0.06  | 9.57E-01 | 9.84E-01 | -6.70 |
| 1416544_PM_at   | Ezh2                  | EZH2       | 0.00  | 2.12  | 0.06  | 9.57E-01 | 9.84E-01 | -6.70 |
| 1419427_PM_at   | Csf3                  | CSF3       | 0.00  | 2.31  | -0.06 | 9.57E-01 | 9.84E-01 | -6.70 |
| 1443363_PM_at   | ---                   | NA         | -0.01 | 2.40  | -0.05 | 9.57E-01 | 9.84E-01 | -6.70 |
| 1420931_PM_at   | Mapk8                 | MAPK8      | -0.01 | 3.68  | -0.05 | 9.57E-01 | 9.85E-01 | -6.70 |

|                 |                        |                         |       |      |       |          |          |       |
|-----------------|------------------------|-------------------------|-------|------|-------|----------|----------|-------|
| 1443164_PM_at   | ---                    | NA                      | -0.01 | 2.08 | -0.05 | 9.57E-01 | 9.85E-01 | -6.70 |
| 1431361_PM_at   | ---                    | NA                      | -0.01 | 2.40 | -0.05 | 9.57E-01 | 9.85E-01 | -6.70 |
| 1426321_PM_at   | Tbx4                   | TBX4                    | 0.00  | 2.15 | -0.05 | 9.57E-01 | 9.85E-01 | -6.70 |
| 1416347_PM_at   | Men1                   | MEN1                    | 0.01  | 2.12 | 0.05  | 9.57E-01 | 9.85E-01 | -6.70 |
| 1427705_PM_a_at | Nfkb1                  | NFKB1                   | 0.01  | 2.31 | 0.05  | 9.57E-01 | 9.85E-01 | -6.70 |
| 1442688_PM_at   | ---                    | NA                      | -0.01 | 2.49 | -0.05 | 9.57E-01 | 9.85E-01 | -6.70 |
| 1445356_PM_at   | ---                    | NA                      | 0.00  | 2.03 | 0.05  | 9.57E-01 | 9.85E-01 | -6.70 |
| 1445610_PM_at   | ---                    | NA                      | 0.01  | 2.14 | 0.05  | 9.58E-01 | 9.85E-01 | -6.70 |
| 1416427_PM_at   | Ccni                   | CCNI                    | -0.04 | 5.75 | -0.05 | 9.58E-01 | 9.85E-01 | -6.70 |
| 1436196_PM_at   | Rel                    | REL                     | -0.02 | 3.15 | -0.05 | 9.58E-01 | 9.85E-01 | -6.70 |
| 1424160_PM_at   | Alg5                   | ALG5                    | 0.02  | 2.78 | 0.05  | 9.58E-01 | 9.85E-01 | -6.70 |
| 1434837_PM_at   | Mdc1                   | MDC1                    | -0.01 | 3.24 | -0.05 | 9.58E-01 | 9.85E-01 | -6.70 |
| 1423306_PM_at   | Smin3                  | SMIN3                   | -0.01 | 2.46 | -0.05 | 9.58E-01 | 9.85E-01 | -6.70 |
| 1431499_PM_at   | ---                    | NA                      | 0.01  | 2.07 | 0.05  | 9.58E-01 | 9.85E-01 | -6.70 |
| 1450570_PM_a_at | Cd19                   | CD19                    | 0.00  | 2.21 | -0.05 | 9.58E-01 | 9.85E-01 | -6.70 |
| 1434353_PM_at   | Sfmbt2                 | SFMBT2                  | 0.01  | 2.74 | 0.05  | 9.58E-01 | 9.85E-01 | -6.70 |
| 1430974_PM_a_at | Senp7                  | SENP7                   | -0.01 | 2.31 | -0.05 | 9.58E-01 | 9.85E-01 | -6.70 |
| 1448756_PM_at   | S100a9                 | S100A9                  | -0.01 | 3.52 | -0.05 | 9.58E-01 | 9.85E-01 | -6.70 |
| 1447769_PM_x_at | Amigo2                 | AMIGO2                  | -0.01 | 3.10 | -0.05 | 9.58E-01 | 9.85E-01 | -6.70 |
| 1419813_PM_at   | Kdm5c                  | KDM5C                   | -0.01 | 2.21 | -0.05 | 9.58E-01 | 9.85E-01 | -6.70 |
| 1429704_PM_at   | Lrp2bp                 | LRP2BP                  | 0.00  | 2.24 | -0.05 | 9.58E-01 | 9.85E-01 | -6.70 |
| 1451590_PM_at   | Cplx4                  | CPLX4                   | 0.01  | 2.27 | 0.05  | 9.58E-01 | 9.85E-01 | -6.70 |
| 1456770_PM_at   | Zfp14                  | NA                      | 0.01  | 2.45 | 0.05  | 9.58E-01 | 9.85E-01 | -6.70 |
| 1450751_PM_at   | Zpbb                   | ZBPB                    | 0.01  | 2.28 | 0.05  | 9.58E-01 | 9.85E-01 | -6.70 |
| 1416449_PM_x_at | Stxbp2                 | STXBP2                  | 0.01  | 4.08 | 0.05  | 9.58E-01 | 9.85E-01 | -6.70 |
| 1446859_PM_at   | ---                    | NA                      | 0.01  | 2.29 | 0.05  | 9.58E-01 | 9.85E-01 | -6.70 |
| 1424131_PM_at   | Col6a3                 | COL6A3                  | 0.01  | 2.06 | 0.05  | 9.58E-01 | 9.85E-01 | -6.70 |
| 1423068_PM_at   | Ift172                 | IFT172                  | -0.01 | 2.72 | -0.05 | 9.59E-01 | 9.85E-01 | -6.70 |
| 1438590_PM_at   | Rapgef3                | RAPGEF3                 | 0.00  | 2.23 | 0.05  | 9.59E-01 | 9.85E-01 | -6.70 |
| 1452616_PM_s_at | Ssbp1                  | SSBP1                   | -0.03 | 3.52 | -0.05 | 9.59E-01 | 9.85E-01 | -6.70 |
| 1419588_PM_at   | Spag1                  | SPAG1                   | -0.01 | 4.22 | -0.05 | 9.59E-01 | 9.85E-01 | -6.70 |
| 1459978_PM_x_at | Ccnj                   | CCNJL                   | -0.01 | 3.25 | -0.05 | 9.59E-01 | 9.85E-01 | -6.70 |
| 1452596_PM_at   | LOC100862456 ///       | LOC102641086 /// Polr2k | -0.01 | 5.38 | -0.05 | 9.59E-01 | 9.85E-01 | -6.70 |
| 1435516_PM_x_at | Rtel1                  | RTEL1                   | 0.00  | 2.02 | -0.05 | 9.59E-01 | 9.85E-01 | -6.70 |
| 1428363_PM_at   | Eif4g2                 | NA                      | 0.01  | 2.07 | 0.05  | 9.59E-01 | 9.85E-01 | -6.70 |
| 1444293_PM_at   | LOC105242581           | NA                      | 0.01  | 2.63 | 0.05  | 9.59E-01 | 9.85E-01 | -6.70 |
| 1437010_PM_a_at | Oaz3                   | OAZ3                    | 0.01  | 2.66 | 0.05  | 9.59E-01 | 9.85E-01 | -6.70 |
| 1424239_PM_at   | Fam65a                 | RIPOR1                  | 0.01  | 3.32 | 0.05  | 9.59E-01 | 9.85E-01 | -6.70 |
| 1419695_PM_at   | St8sia1                | ST8SIA1                 | 0.01  | 3.01 | 0.05  | 9.59E-01 | 9.85E-01 | -6.70 |
| 1435777_PM_at   | Itprip2                | ITPRIP2                 | 0.01  | 2.43 | 0.05  | 9.59E-01 | 9.85E-01 | -6.70 |
| 1453558_PM_at   | Efcab10                | EFCAB10                 | -0.01 | 2.89 | -0.05 | 9.59E-01 | 9.85E-01 | -6.70 |
| 1441068_PM_at   | ---                    | NA                      | 0.01  | 2.44 | 0.05  | 9.59E-01 | 9.85E-01 | -6.70 |
| 1435151_PM_a_at | Rps3                   | RPS3                    | 0.02  | 7.79 | 0.05  | 9.59E-01 | 9.85E-01 | -6.70 |
| 1429266_PM_at   | Lhfp5                  | LHFPL5                  | 0.01  | 2.65 | 0.05  | 9.59E-01 | 9.85E-01 | -6.70 |
| 1426487_PM_a_at | Rbbp6                  | RBBP6                   | -0.01 | 4.70 | -0.05 | 9.59E-01 | 9.85E-01 | -6.70 |
| 1431789_PM_s_at | Tmed5                  | TMED5                   | -0.01 | 2.39 | -0.05 | 9.59E-01 | 9.85E-01 | -6.70 |
| 1419643_PM_s_at | 2310057118Rik          | Cgorf58                 | -0.01 | 2.26 | -0.05 | 9.59E-01 | 9.85E-01 | -6.70 |
| 1416980_PM_at   | Mettl7b                | METTL7B                 | 0.00  | 2.11 | -0.05 | 9.59E-01 | 9.85E-01 | -6.70 |
| 1436823_PM_x_at | Hbb-y /// LOC102643133 | HBE1                    | 0.00  | 1.98 | 0.05  | 9.59E-01 | 9.85E-01 | -6.70 |
| 1458558_PM_at   | ---                    | NA                      | 0.01  | 2.03 | 0.05  | 9.59E-01 | 9.85E-01 | -6.70 |
| 1444906_PM_at   | Adgrl2                 | ADGRL2                  | 0.01  | 2.37 | 0.05  | 9.59E-01 | 9.85E-01 | -6.70 |
| 1435132_PM_at   | Disp1                  | DISP1                   | 0.01  | 2.83 | 0.05  | 9.59E-01 | 9.85E-01 | -6.70 |
| 1452635_PM_x_at | Taf1d                  | TAF1D                   | 0.01  | 3.48 | 0.05  | 9.59E-01 | 9.85E-01 | -6.70 |
| 1429684_PM_at   | Ttpal                  | TTPAL                   | 0.01  | 2.73 | 0.05  | 9.59E-01 | 9.85E-01 | -6.70 |
| 1415897_PM_a_at | Mgst1                  | MGST1                   | -0.01 | 2.70 | -0.05 | 9.60E-01 | 9.86E-01 | -6.70 |
| 1458206_PM_at   | Gm30054                | NA                      | -0.01 | 2.54 | -0.05 | 9.60E-01 | 9.86E-01 | -6.70 |
| 1438467_PM_at   | Mgl2                   | NA                      | 0.00  | 1.91 | -0.05 | 9.60E-01 | 9.86E-01 | -6.70 |
| 1442433_PM_at   | ---                    | NA                      | 0.00  | 1.91 | -0.05 | 9.59E-01 | 9.86E-01 | -6.70 |
| 1460550_PM_at   | Mtmr11                 | MTMR11                  | 0.00  | 2.36 | 0.05  | 9.60E-01 | 9.86E-01 | -6.70 |
| 1459438_PM_at   | ---                    | NA                      | 0.01  | 2.38 | 0.05  | 9.60E-01 | 9.86E-01 | -6.70 |
| 1433016_PM_s_at | Gm28840 /// Orly       | NA                      | -0.01 | 5.95 | -0.05 | 9.60E-01 | 9.86E-01 | -6.70 |
| 1451193_PM_x_at | Ttc4                   | TTC4                    | 0.01  | 3.29 | 0.05  | 9.60E-01 | 9.86E-01 | -6.70 |
| 1420239_PM_x_at | March2                 | MARCH2                  | -0.01 | 2.06 | -0.05 | 9.60E-01 | 9.86E-01 | -6.70 |
| 1456250_PM_x_at | Tgfb1                  | TGFB1                   | 0.01  | 2.84 | 0.05  | 9.60E-01 | 9.86E-01 | -6.70 |
| 1424115_PM_at   | Ppp5c                  | PPP5C                   | 0.01  | 3.15 | 0.05  | 9.60E-01 | 9.86E-01 | -6.70 |
| 1418893_PM_at   | Pbx2                   | PBX2                    | 0.01  | 3.78 | 0.05  | 9.60E-01 | 9.86E-01 | -6.70 |
| 1425995_PM_s_at | Wt1                    | WT1                     | 0.01  | 3.05 | 0.05  | 9.60E-01 | 9.86E-01 | -6.70 |
| 1421888_PM_x_at | Aplp2                  | APLP2                   | 0.01  | 2.82 | 0.05  | 9.60E-01 | 9.86E-01 | -6.70 |
| 1435958_PM_at   | Pigb                   | PIGB                    | -0.01 | 2.89 | -0.05 | 9.60E-01 | 9.86E-01 | -6.70 |
| 1448822_PM_at   | Psmb6                  | PSMB6                   | -0.01 | 4.54 | -0.05 | 9.60E-01 | 9.86E-01 | -6.70 |
| 1455170_PM_at   | 2810001G20Rik          | NA                      | -0.01 | 3.70 | -0.05 | 9.60E-01 | 9.86E-01 | -6.70 |
| 1441220_PM_at   | ---                    | NA                      | -0.01 | 3.00 | -0.05 | 9.60E-01 | 9.86E-01 | -6.70 |
| 1448491_PM_at   | Ech1                   | ECH1                    | -0.01 | 2.73 | -0.05 | 9.60E-01 | 9.86E-01 | -6.70 |
| 1434359_PM_at   | Fam65b                 | RIPOR2                  | -0.01 | 2.66 | -0.05 | 9.60E-01 | 9.86E-01 | -6.70 |

|                 |                 |            |       |      |       |          |          |       |
|-----------------|-----------------|------------|-------|------|-------|----------|----------|-------|
| 1424362_PM_at   | Plpp7           | PLPP7      | -0.01 | 2.49 | -0.05 | 9.60E-01 | 9.86E-01 | -6.70 |
| 1417880_PM_at   | G6pc            | G6PC       | -0.01 | 2.55 | -0.05 | 9.60E-01 | 9.86E-01 | -6.70 |
| 1430560_PM_at   | Ppp1r10         | NA         | -0.01 | 2.52 | -0.05 | 9.60E-01 | 9.86E-01 | -6.70 |
| 1445510_PM_at   | C79601          | NA         | -0.01 | 3.06 | -0.05 | 9.60E-01 | 9.86E-01 | -6.70 |
| 1456159_PM_at   | ---             | NA         | -0.01 | 1.93 | -0.05 | 9.60E-01 | 9.86E-01 | -6.70 |
| 1424107_PM_at   | Kif18a          | KIF18A     | -0.01 | 2.02 | -0.05 | 9.60E-01 | 9.86E-01 | -6.70 |
| 1452317_PM_at   | Hoxb9           | HOXB9      | 0.00  | 2.43 | -0.05 | 9.60E-01 | 9.86E-01 | -6.70 |
| 1453043_PM_at   | Them7           | NA         | 0.00  | 2.07 | 0.05  | 9.60E-01 | 9.86E-01 | -6.70 |
| 1422380_PM_at   | ---             | NA         | 0.00  | 2.09 | 0.05  | 9.60E-01 | 9.86E-01 | -6.70 |
| 1424855_PM_at   | Olah            | OLAH       | 0.01  | 2.27 | 0.05  | 9.60E-01 | 9.86E-01 | -6.70 |
| 1431886_PM_at   | Ern1            | ERN1       | 0.01  | 2.08 | 0.05  | 9.60E-01 | 9.86E-01 | -6.70 |
| 1438044_PM_at   | 1700047M11Rik   | NA         | 0.01  | 2.76 | 0.05  | 9.60E-01 | 9.86E-01 | -6.70 |
| 1446272_PM_at   | ---             | NA         | 0.01  | 2.35 | 0.05  | 9.60E-01 | 9.86E-01 | -6.70 |
| 1447305_PM_at   | ---             | NA         | 0.01  | 2.34 | 0.05  | 9.60E-01 | 9.86E-01 | -6.70 |
| 1415792_PM_at   | Rbck1           | RBCK1      | 0.01  | 2.89 | 0.05  | 9.60E-01 | 9.86E-01 | -6.70 |
| 1425096_PM_a_at | Ptcd1           | PTCD1      | 0.01  | 2.84 | 0.05  | 9.60E-01 | 9.86E-01 | -6.70 |
| 1450155_PM_at   | Itga4           | ITGA4      | 0.01  | 2.78 | 0.05  | 9.60E-01 | 9.86E-01 | -6.70 |
| 1421029_PM_a_at | Hbs1l           | HBS1L      | 0.01  | 3.63 | 0.05  | 9.60E-01 | 9.86E-01 | -6.70 |
| 1454426_PM_at   | ---             | NA         | 0.02  | 2.84 | 0.05  | 9.60E-01 | 9.86E-01 | -6.70 |
| 1435578_PM_s_at | Dab1            | DAB1       | -0.02 | 5.58 | -0.05 | 9.60E-01 | 9.86E-01 | -6.70 |
| 1449855_PM_s_at | Uchl3 /// Uchl4 | Uchl3      | 0.01  | 3.21 | 0.05  | 9.60E-01 | 9.86E-01 | -6.70 |
| 1451611_PM_at   | Pla2g16         | PLA2G16    | -0.01 | 2.68 | -0.05 | 9.60E-01 | 9.86E-01 | -6.70 |
| 1443724_PM_at   | Jph3            | JPH3       | 0.01  | 2.76 | 0.05  | 9.60E-01 | 9.86E-01 | -6.70 |
| 1446178_PM_at   | ---             | NA         | 0.00  | 2.17 | 0.05  | 9.61E-01 | 9.86E-01 | -6.70 |
| 1442542_PM_at   | Eya4            | NA         | 0.01  | 2.21 | 0.05  | 9.61E-01 | 9.86E-01 | -6.70 |
| 1416738_PM_at   | Brap            | BRAP       | 0.01  | 3.54 | 0.05  | 9.61E-01 | 9.86E-01 | -6.70 |
| 1417581_PM_at   | Dhodh           | DHODH      | 0.02  | 2.87 | 0.05  | 9.61E-01 | 9.86E-01 | -6.70 |
| 1425263_PM_a_at | Mbp             | MBP        | 0.01  | 2.40 | 0.05  | 9.61E-01 | 9.86E-01 | -6.70 |
| 1434971_PM_x_at | Mrp15           | MRPL15     | -0.01 | 3.26 | -0.05 | 9.61E-01 | 9.86E-01 | -6.70 |
| 1441053_PM_at   | Mrops26         | MRPS26     | -0.01 | 2.53 | -0.05 | 9.61E-01 | 9.86E-01 | -6.70 |
| 1438133_PM_a_at | Cyr61           | CYR61      | 0.00  | 2.52 | 0.05  | 9.61E-01 | 9.86E-01 | -6.70 |
| 1454534_PM_at   | Ing1            | NA         | 0.00  | 2.25 | 0.05  | 9.61E-01 | 9.86E-01 | -6.70 |
| 1424310_PM_at   | Mocs2           | MOC52      | 0.01  | 3.54 | 0.05  | 9.61E-01 | 9.86E-01 | -6.70 |
| 1418993_PM_s_at | F10             | F10        | 0.01  | 2.30 | 0.05  | 9.61E-01 | 9.86E-01 | -6.70 |
| 1455564_PM_at   | Bcr             | BCR        | 0.01  | 4.10 | 0.05  | 9.61E-01 | 9.86E-01 | -6.70 |
| 1422503_PM_s_at | Parp1           | PARP1      | 0.02  | 3.40 | 0.05  | 9.61E-01 | 9.86E-01 | -6.70 |
| 1424485_PM_at   | Angptl3         | ANGPTL3    | 0.01  | 2.94 | 0.05  | 9.61E-01 | 9.86E-01 | -6.70 |
| 1455783_PM_at   | ---             | NA         | -0.01 | 2.69 | -0.05 | 9.61E-01 | 9.86E-01 | -6.70 |
| 1453374_PM_at   | Zfand5          | NA         | -0.01 | 2.30 | -0.05 | 9.61E-01 | 9.86E-01 | -6.70 |
| 1460622_PM_x_at | Wdr18           | WDR18      | -0.01 | 3.58 | -0.05 | 9.61E-01 | 9.86E-01 | -6.70 |
| 1460422_PM_at   | DOK1st5         | NA         | 0.00  | 2.23 | -0.05 | 9.61E-01 | 9.86E-01 | -6.70 |
| 1446843_PM_at   | ---             | NA         | 0.00  | 2.00 | 0.05  | 9.61E-01 | 9.86E-01 | -6.70 |
| 1429542_PM_at   | 1700007B14Rik   | AC093893.1 | 0.00  | 2.08 | 0.05  | 9.61E-01 | 9.86E-01 | -6.70 |
| 1428773_PM_s_at | Bcor            | BCOR       | 0.00  | 2.12 | 0.05  | 9.61E-01 | 9.86E-01 | -6.70 |
| 1457215_PM_at   | Gm13111         | NA         | 0.01  | 2.29 | 0.05  | 9.61E-01 | 9.86E-01 | -6.70 |
| 1434735_PM_at   | Hlf             | HLF        | 0.01  | 2.87 | 0.05  | 9.61E-01 | 9.86E-01 | -6.70 |
| 1423815_PM_at   | Ddx56           | DDX56      | 0.01  | 3.30 | 0.05  | 9.61E-01 | 9.86E-01 | -6.70 |
| 1428073_PM_a_at | Nup88           | NUP88      | 0.02  | 5.73 | 0.05  | 9.61E-01 | 9.86E-01 | -6.70 |
| 1453917_PM_at   | Ifitm7          | IFITM1     | -0.01 | 2.36 | -0.05 | 9.61E-01 | 9.86E-01 | -6.70 |
| 1434294_PM_at   | Fam199x         | FAM199X    | -0.01 | 6.62 | -0.05 | 9.61E-01 | 9.86E-01 | -6.70 |
| 1451630_PM_at   | Ttl             | TTL        | 0.02  | 4.35 | 0.05  | 9.61E-01 | 9.86E-01 | -6.70 |
| 1438038_PM_at   | 4930402H24Rik   | C20orf194  | -0.02 | 4.76 | -0.05 | 9.61E-01 | 9.86E-01 | -6.70 |
| 1455173_PM_at   | Gspt1           | NA         | 0.01  | 3.09 | 0.05  | 9.61E-01 | 9.86E-01 | -6.70 |
| 1458312_PM_at   | ---             | NA         | -0.02 | 3.57 | -0.05 | 9.61E-01 | 9.86E-01 | -6.70 |
| 1422249_PM_s_at | Zfa-ps /// Zfx  | ZFY        | -0.01 | 2.92 | -0.05 | 9.61E-01 | 9.86E-01 | -6.70 |
| 1458851_PM_at   | ---             | NA         | 0.00  | 2.03 | -0.05 | 9.61E-01 | 9.86E-01 | -6.70 |
| 1456873_PM_at   | Clc5            | CLIC5      | 0.01  | 2.21 | 0.05  | 9.61E-01 | 9.86E-01 | -6.70 |
| 1450040_PM_at   | Timp2           | TIMP2      | -0.02 | 5.42 | -0.05 | 9.62E-01 | 9.86E-01 | -6.70 |
| 1425433_PM_a_at | ---             | NA         | -0.02 | 4.59 | -0.05 | 9.62E-01 | 9.86E-01 | -6.70 |
| 1428592_PM_s_at | Usp38           | USP38      | 0.01  | 2.40 | 0.05  | 9.62E-01 | 9.86E-01 | -6.70 |
| 1416617_PM_at   | Acss1           | ACSS1      | 0.01  | 2.54 | 0.05  | 9.62E-01 | 9.86E-01 | -6.70 |
| 1419431_PM_at   | Ereg            | EREG       | 0.01  | 1.97 | 0.05  | 9.62E-01 | 9.86E-01 | -6.70 |
| 1446477_PM_at   | Zfp622          | ZNF622     | -0.01 | 2.28 | -0.05 | 9.62E-01 | 9.86E-01 | -6.70 |
| 1423805_PM_at   | Dab2            | DAB2       | -0.01 | 3.01 | -0.05 | 9.62E-01 | 9.86E-01 | -6.70 |
| 1455457_PM_at   | Cyp2c54         | NA         | -0.01 | 3.77 | -0.05 | 9.62E-01 | 9.86E-01 | -6.70 |
| 1421909_PM_at   | Tcf20           | TCF20      | -0.01 | 2.42 | -0.05 | 9.62E-01 | 9.86E-01 | -6.70 |
| 1426159_PM_x_at | Tcrb-J          | NA         | 0.01  | 2.63 | 0.05  | 9.62E-01 | 9.86E-01 | -6.70 |
| 1419300_PM_at   | Ft1             | FLT1       | 0.01  | 3.00 | 0.05  | 9.62E-01 | 9.86E-01 | -6.70 |
| 1443551_PM_at   | ---             | NA         | 0.01  | 2.41 | 0.05  | 9.62E-01 | 9.86E-01 | -6.70 |
| 1420207_PM_at   | ---             | NA         | -0.01 | 2.27 | -0.05 | 9.62E-01 | 9.86E-01 | -6.70 |
| 1425315_PM_at   | Dock7           | DOCK7      | -0.01 | 2.07 | -0.05 | 9.62E-01 | 9.86E-01 | -6.70 |
| 1456369_PM_at   | Pot1a           | POT1       | 0.01  | 2.12 | 0.05  | 9.62E-01 | 9.86E-01 | -6.70 |
| 1455486_PM_at   | Pias1           | NA         | 0.01  | 4.84 | 0.05  | 9.62E-01 | 9.86E-01 | -6.70 |
| 1431976_PM_at   | 4930526F13Rik   | NA         | 0.00  | 2.05 | 0.05  | 9.62E-01 | 9.86E-01 | -6.70 |
| 1452014_PM_a_at | Igf1            | IGF1       | 0.01  | 2.99 | 0.05  | 9.62E-01 | 9.86E-01 | -6.70 |

|                       |                         |          |       |      |       |          |          |       |
|-----------------------|-------------------------|----------|-------|------|-------|----------|----------|-------|
| 1457345_PM_at         | ---                     | NA       | 0.01  | 2.49 | 0.05  | 9.62E-01 | 9.86E-01 | -6.70 |
| 1430986_PM_at         | Farsb                   | FARSB    | -0.01 | 3.39 | -0.05 | 9.62E-01 | 9.86E-01 | -6.70 |
| 1456984_PM_at         | Scml2                   | SCML2    | -0.01 | 2.56 | -0.05 | 9.62E-01 | 9.86E-01 | -6.70 |
| 1440373_PM_at         | ---                     | NA       | -0.01 | 2.07 | -0.05 | 9.62E-01 | 9.86E-01 | -6.70 |
| 1428014_PM_at         | Hist1h4h///LOC102641229 | HIST1H4G | -0.01 | 2.24 | -0.05 | 9.62E-01 | 9.86E-01 | -6.70 |
| 1419039_PM_at         | Cyp2d22                 | CYP2D6   | -0.01 | 2.03 | -0.05 | 9.62E-01 | 9.86E-01 | -6.70 |
| 1448759_PM_at         | Il2rb                   | IL2RB    | -0.01 | 2.60 | -0.05 | 9.62E-01 | 9.86E-01 | -6.70 |
| 1447514_PM_at         | ---                     | NA       | 0.00  | 1.97 | -0.05 | 9.62E-01 | 9.86E-01 | -6.70 |
| 1431763_PM_a_at       | Ctrl                    | CTRL     | 0.00  | 2.19 | 0.05  | 9.62E-01 | 9.86E-01 | -6.70 |
| 1431843_PM_a_at       | Nfkbie                  | NFKBIE   | 0.00  | 2.21 | 0.05  | 9.62E-01 | 9.86E-01 | -6.70 |
| 1430924_PM_at         | 4933440M02Rik           | NA       | 0.00  | 2.24 | 0.05  | 9.62E-01 | 9.86E-01 | -6.70 |
| 1431036_PM_a_at       | Gm21540///Tmed2         | TMED2    | 0.01  | 2.88 | 0.05  | 9.62E-01 | 9.86E-01 | -6.70 |
| 1437544_PM_at         | Fubp1                   | FUBP1    | 0.01  | 2.99 | 0.05  | 9.62E-01 | 9.86E-01 | -6.70 |
| 1458866_PM_at         | Tmem215                 | TMEM215  | 0.01  | 2.63 | 0.05  | 9.62E-01 | 9.86E-01 | -6.70 |
| 1439072_PM_at         | Slc1a3                  | SLC1A3   | 0.01  | 2.54 | 0.05  | 9.62E-01 | 9.86E-01 | -6.70 |
| 1428233_PM_at         | Cpsf6                   | CPSF6    | 0.01  | 3.44 | 0.05  | 9.62E-01 | 9.86E-01 | -6.70 |
| 1459160_PM_at         | ---                     | NA       | 0.03  | 3.39 | 0.05  | 9.62E-01 | 9.86E-01 | -6.70 |
| 1439602_PM_at         | Figl                    | FIGL     | -0.01 | 2.60 | -0.05 | 9.63E-01 | 9.86E-01 | -6.70 |
| 1432830_PM_at         | Ccdc138                 | NA       | -0.01 | 3.46 | -0.05 | 9.63E-01 | 9.86E-01 | -6.70 |
| 1426427_PM_at         | Tll1                    | TLL1     | -0.02 | 2.63 | -0.05 | 9.63E-01 | 9.86E-01 | -6.70 |
| 1433560_PM_at         | Slc45a4                 | SLC45A4  | 0.00  | 2.18 | -0.05 | 9.63E-01 | 9.86E-01 | -6.70 |
| 1429840_PM_at         | Carlr                   | NA       | 0.01  | 2.31 | 0.05  | 9.63E-01 | 9.86E-01 | -6.70 |
| 1441025_PM_at         | ---                     | NA       | 0.01  | 3.09 | 0.05  | 9.63E-01 | 9.86E-01 | -6.70 |
| 1445206_PM_at         | Zw10                    | ZW10     | 0.01  | 2.32 | 0.05  | 9.63E-01 | 9.86E-01 | -6.70 |
| 1454373_PM_x_at       | Ubc                     | NA       | -0.02 | 7.42 | -0.05 | 9.63E-01 | 9.86E-01 | -6.70 |
| 1417256_PM_at         | Mmp13                   | MMP13    | -0.01 | 2.12 | -0.05 | 9.63E-01 | 9.86E-01 | -6.70 |
| 1430772_PM_at         | ---                     | NA       | 0.00  | 2.15 | -0.05 | 9.63E-01 | 9.86E-01 | -6.70 |
| 1444839_PM_at         | ---                     | NA       | 0.00  | 1.96 | -0.05 | 9.63E-01 | 9.86E-01 | -6.70 |
| 1449789_PM_x_at       | Ly6g6c                  | LY6G6C   | 0.00  | 2.31 | 0.05  | 9.63E-01 | 9.86E-01 | -6.70 |
| 1440159_PM_at         | ---                     | NA       | 0.00  | 2.31 | 0.05  | 9.63E-01 | 9.86E-01 | -6.70 |
| 1425064_PM_at         | Arnt                    | ARNT     | 0.01  | 2.22 | 0.05  | 9.63E-01 | 9.86E-01 | -6.70 |
| 1420040_PM_at         | Fam73b                  | NA       | 0.01  | 3.99 | 0.05  | 9.63E-01 | 9.86E-01 | -6.70 |
| 1419801_PM_x_at       | ---                     | NA       | -0.02 | 4.59 | -0.05 | 9.63E-01 | 9.86E-01 | -6.70 |
| 1420126_PM_at         | AA522020                | NA       | 0.01  | 2.08 | 0.05  | 9.63E-01 | 9.86E-01 | -6.70 |
| 1424359_PM_at         | Oplah                   | OPLAH    | 0.00  | 2.11 | -0.05 | 9.63E-01 | 9.86E-01 | -6.70 |
| 1441080_PM_at         | ---                     | NA       | 0.01  | 2.94 | 0.05  | 9.63E-01 | 9.86E-01 | -6.70 |
| 1459258_PM_at         | ---                     | NA       | 0.01  | 2.25 | 0.05  | 9.63E-01 | 9.86E-01 | -6.70 |
| 1448266_PM_at         | Edf1                    | EDF1     | -0.01 | 3.91 | -0.05 | 9.63E-01 | 9.86E-01 | -6.70 |
| 1435727_PM_s_at       | Lima1                   | LIMA1    | -0.01 | 3.79 | -0.05 | 9.63E-01 | 9.86E-01 | -6.70 |
| 1422000_PM_at         | Akr1c12                 | AKR1C2   | -0.01 | 2.41 | -0.05 | 9.63E-01 | 9.86E-01 | -6.70 |
| 1444954_PM_at         | ---                     | NA       | -0.01 | 2.13 | -0.05 | 9.63E-01 | 9.86E-01 | -6.70 |
| 1424127_PM_at         | Eya2                    | EYA2     | 0.01  | 2.35 | 0.05  | 9.63E-01 | 9.86E-01 | -6.70 |
| 1441275_PM_at         | Kbtbd8                  | KBTBD8   | 0.01  | 2.62 | 0.05  | 9.63E-01 | 9.86E-01 | -6.70 |
| 1435385_PM_at         | Tshz2                   | TSHZ2    | 0.01  | 2.92 | 0.05  | 9.63E-01 | 9.86E-01 | -6.70 |
| 1438737_PM_at         | Zic3                    | ZIC3     | -0.01 | 2.13 | -0.05 | 9.63E-01 | 9.86E-01 | -6.70 |
| 1443162_PM_at         | ---                     | NA       | -0.01 | 2.89 | -0.05 | 9.63E-01 | 9.86E-01 | -6.70 |
| 1421530_PM_a_at       | Grm8                    | GRM8     | 0.00  | 2.44 | 0.05  | 9.63E-01 | 9.86E-01 | -6.70 |
| 1431805_PM_a_at       | Rhpn2                   | RHPN2    | 0.01  | 1.97 | 0.05  | 9.63E-01 | 9.86E-01 | -6.70 |
| 1420762_PM_a_at       | Ybx2                    | YBX2     | -0.01 | 2.25 | -0.05 | 9.64E-01 | 9.87E-01 | -6.70 |
| 1452525_PM_a_at       | Nf1                     | NF1      | -0.01 | 2.85 | -0.05 | 9.64E-01 | 9.87E-01 | -6.70 |
| 1457265_PM_at         | Akap17b                 | NA       | -0.01 | 3.05 | -0.05 | 9.64E-01 | 9.87E-01 | -6.70 |
| 1460509_PM_at         | B3galt1                 | NA       | -0.01 | 2.99 | -0.05 | 9.64E-01 | 9.87E-01 | -6.70 |
| 1433171_PM_at         | 3110049103Rik           | NA       | -0.01 | 2.09 | -0.05 | 9.64E-01 | 9.87E-01 | -6.70 |
| 1420338_PM_at         | Alox15                  | ALOX15   | 0.00  | 2.15 | 0.05  | 9.64E-01 | 9.87E-01 | -6.70 |
| 1440445_PM_at         | Pax6os1                 | NA       | 0.01  | 2.19 | 0.05  | 9.64E-01 | 9.87E-01 | -6.70 |
| 1444391_PM_at         | ---                     | NA       | -0.02 | 4.04 | -0.05 | 9.64E-01 | 9.87E-01 | -6.70 |
| 1424375_PM_s_at       | Gimap4                  | GIMAP4   | 0.00  | 2.28 | 0.05  | 9.64E-01 | 9.87E-01 | -6.70 |
| AFX-NonspecificGC4_at | ---                     | NA       | 0.00  | 1.82 | 0.05  | 9.64E-01 | 9.87E-01 | -6.70 |
| 1431434_PM_at         | Stk39                   | STK39    | 0.01  | 2.34 | 0.05  | 9.64E-01 | 9.87E-01 | -6.70 |
| 1422257_PM_s_at       | Cyp2b10                 | CYP2B6   | 0.00  | 2.23 | -0.05 | 9.64E-01 | 9.87E-01 | -6.70 |
| 1453133_PM_at         | Slc25a31                | SLC25A31 | 0.00  | 2.19 | 0.05  | 9.64E-01 | 9.87E-01 | -6.70 |
| 1449425_PM_at         | Wnt2                    | WNT2     | -0.01 | 2.58 | -0.05 | 9.64E-01 | 9.87E-01 | -6.70 |
| 1436529_PM_at         | Adgra1                  | ADGRA1   | -0.01 | 3.40 | -0.05 | 9.64E-01 | 9.87E-01 | -6.70 |
| 1422350_PM_at         | Fpr-rs3                 | FPR3     | -0.01 | 2.31 | -0.05 | 9.64E-01 | 9.87E-01 | -6.70 |
| 1420193_PM_at         | Krt17                   | KRT17    | 0.00  | 2.42 | -0.05 | 9.64E-01 | 9.87E-01 | -6.70 |
| 1436288_PM_at         | Wfdc15a                 | NA       | 0.00  | 2.99 | 0.05  | 9.64E-01 | 9.87E-01 | -6.70 |
| 1451862_PM_a_at       | Prf1                    | PRF1     | 0.01  | 2.77 | 0.05  | 9.64E-01 | 9.87E-01 | -6.70 |
| 1434707_PM_at         | Sbf1                    | SBF1     | 0.01  | 2.37 | 0.05  | 9.64E-01 | 9.87E-01 | -6.70 |
| 1453005_PM_at         | Prpf31                  | PRPF31   | 0.01  | 3.33 | 0.05  | 9.64E-01 | 9.87E-01 | -6.70 |
| 1452966_PM_at         | Bcl11b                  | BCL11B   | 0.01  | 3.98 | 0.05  | 9.64E-01 | 9.87E-01 | -6.70 |
| 1437006_PM_x_at       | Becn1                   | BECN1    | 0.00  | 2.48 | 0.05  | 9.64E-01 | 9.87E-01 | -6.70 |
| 1424062_PM_at         | Ube2d1                  | UBE2D1   | 0.02  | 4.61 | 0.05  | 9.64E-01 | 9.87E-01 | -6.70 |
| 1457669_PM_x_at       | Rfc2                    | RFC2     | -0.02 | 5.02 | -0.05 | 9.65E-01 | 9.87E-01 | -6.70 |
| 1432327_PM_at         | 9530067L11Rik           | NA       | 0.00  | 2.04 | -0.05 | 9.65E-01 | 9.87E-01 | -6.70 |

|                        |                                                                                                                                                                                                    |           |       |       |       |          |          |       |
|------------------------|----------------------------------------------------------------------------------------------------------------------------------------------------------------------------------------------------|-----------|-------|-------|-------|----------|----------|-------|
| 1416825_PM_at          | Snta1                                                                                                                                                                                              | SNTA1     | 0.00  | 2.66  | -0.05 | 9.65E-01 | 9.87E-01 | -6.70 |
| 1447067_PM_at          | ---                                                                                                                                                                                                | NA        | 0.00  | 1.95  | -0.05 | 9.65E-01 | 9.87E-01 | -6.70 |
| 1419598_PM_at          | Ms4a6d                                                                                                                                                                                             | MS4A6E    | 0.00  | 1.96  | 0.05  | 9.65E-01 | 9.87E-01 | -6.70 |
| 1431924_PM_at          | ---                                                                                                                                                                                                | NA        | 0.00  | 2.04  | 0.05  | 9.65E-01 | 9.87E-01 | -6.70 |
| 1441427_PM_at          | Vvc2                                                                                                                                                                                               | VWC2      | 0.01  | 2.08  | 0.05  | 9.65E-01 | 9.87E-01 | -6.70 |
| 1434698_PM_at          | Mia3                                                                                                                                                                                               | NA        | 0.01  | 2.83  | 0.05  | 9.65E-01 | 9.87E-01 | -6.70 |
| 1439354_PM_at          | ---                                                                                                                                                                                                | NA        | 0.01  | 2.41  | 0.05  | 9.65E-01 | 9.87E-01 | -6.70 |
| 1419752_PM_at          | Nfx1                                                                                                                                                                                               | NFX1      | 0.01  | 4.00  | 0.05  | 9.65E-01 | 9.87E-01 | -6.70 |
| 1429852_PM_at          | Ccdc57                                                                                                                                                                                             | CCDC57    | -0.01 | 2.42  | -0.04 | 9.65E-01 | 9.87E-01 | -6.70 |
| 1430968_PM_at          | 4930517O19Rik                                                                                                                                                                                      | NA        | 0.00  | 2.26  | -0.04 | 9.65E-01 | 9.87E-01 | -6.70 |
| 1441031_PM_at          | Gm13032                                                                                                                                                                                            | NA        | 0.01  | 2.34  | 0.05  | 9.65E-01 | 9.87E-01 | -6.70 |
| 1456379_PM_x_at        | Dner                                                                                                                                                                                               | DNER      | -0.01 | 10.78 | -0.04 | 9.65E-01 | 9.87E-01 | -6.70 |
| 1417383_PM_at          | Entpd5                                                                                                                                                                                             | ENTPD5    | -0.01 | 2.12  | -0.04 | 9.65E-01 | 9.87E-01 | -6.70 |
| 1418834_PM_at          | Bloc1s4                                                                                                                                                                                            | BLOC1S4   | -0.01 | 2.55  | -0.04 | 9.65E-01 | 9.87E-01 | -6.70 |
| 1451623_PM_at          | Mrpl15                                                                                                                                                                                             | MRPL15    | 0.00  | 2.26  | -0.04 | 9.65E-01 | 9.87E-01 | -6.70 |
| 1447473_PM_at          | ---                                                                                                                                                                                                | NA        | -0.01 | 2.30  | -0.04 | 9.65E-01 | 9.87E-01 | -6.70 |
| 1434140_PM_at          | Mcf2l                                                                                                                                                                                              | MCF2L     | 0.01  | 3.70  | 0.04  | 9.65E-01 | 9.87E-01 | -6.70 |
| 1443620_PM_at          | ---                                                                                                                                                                                                | NA        | -0.01 | 2.94  | -0.04 | 9.65E-01 | 9.87E-01 | -6.70 |
| 1419010_PM_x_at        | Klk1b5                                                                                                                                                                                             | KLK3      | -0.01 | 2.13  | -0.04 | 9.65E-01 | 9.87E-01 | -6.70 |
| 1441118_PM_at          | ---                                                                                                                                                                                                | NA        | 0.01  | 2.60  | 0.04  | 9.65E-01 | 9.87E-01 | -6.70 |
| 1448261_PM_at          | Cdh1                                                                                                                                                                                               | CDH1      | 0.01  | 3.04  | 0.04  | 9.66E-01 | 9.88E-01 | -6.70 |
| 1455666_PM_at          | Zfp595                                                                                                                                                                                             | ZNF678    | -0.01 | 2.45  | -0.04 | 9.66E-01 | 9.88E-01 | -6.70 |
| 1418958_PM_at          | Slc35g3                                                                                                                                                                                            | SLC35G5   | 0.00  | 2.84  | -0.04 | 9.66E-01 | 9.88E-01 | -6.70 |
| 1428957_PM_at          | Tmem177                                                                                                                                                                                            | TMEM177   | 0.00  | 2.37  | 0.04  | 9.66E-01 | 9.88E-01 | -6.70 |
| 1418402_PM_at          | Adam19                                                                                                                                                                                             | ADAM19    | 0.01  | 2.97  | 0.04  | 9.66E-01 | 9.88E-01 | -6.70 |
| 1457177_PM_at          | ---                                                                                                                                                                                                | NA        | 0.01  | 2.63  | 0.04  | 9.66E-01 | 9.88E-01 | -6.70 |
| 1453500_PM_at          | Cyp2u1                                                                                                                                                                                             | CYP2U1    | 0.00  | 2.66  | -0.04 | 9.66E-01 | 9.88E-01 | -6.70 |
| 1455129_PM_at          | Mtdh                                                                                                                                                                                               | MTDH      | 0.01  | 5.09  | 0.04  | 9.66E-01 | 9.88E-01 | -6.70 |
| 1438840_PM_x_at        | Apoa1                                                                                                                                                                                              | APOA1     | -0.01 | 3.07  | -0.04 | 9.66E-01 | 9.88E-01 | -6.70 |
| 1450404_PM_at          | Slc23a1                                                                                                                                                                                            | SLC23A1   | -0.01 | 2.70  | -0.04 | 9.66E-01 | 9.88E-01 | -6.70 |
| 1458965_PM_at          | ---                                                                                                                                                                                                | NA        | -0.01 | 2.18  | -0.04 | 9.66E-01 | 9.88E-01 | -6.70 |
| 1450406_PM_a_at        | St3gal3                                                                                                                                                                                            | ST3GAL3   | 0.00  | 2.71  | -0.04 | 9.66E-01 | 9.88E-01 | -6.70 |
| 1451615_PM_at          | Ces4a                                                                                                                                                                                              | CES4A     | 0.00  | 2.06  | 0.04  | 9.66E-01 | 9.88E-01 | -6.70 |
| 1450201_PM_at          | Proz                                                                                                                                                                                               | NA        | 0.01  | 2.55  | 0.04  | 9.66E-01 | 9.88E-01 | -6.70 |
| 1422228_PM_at          | Wnt8a                                                                                                                                                                                              | WNT8A     | 0.01  | 2.46  | 0.04  | 9.66E-01 | 9.88E-01 | -6.70 |
| 1419515_PM_at          | Fgd2                                                                                                                                                                                               | FGD2      | 0.01  | 2.61  | 0.04  | 9.66E-01 | 9.88E-01 | -6.70 |
| 1423187_PM_at          | Gabarapl2                                                                                                                                                                                          | GABARAPL2 | 0.01  | 4.24  | 0.04  | 9.66E-01 | 9.88E-01 | -6.70 |
| 1455580_PM_at          | Usp6nl                                                                                                                                                                                             | USP6NL    | 0.01  | 2.62  | 0.04  | 9.66E-01 | 9.88E-01 | -6.70 |
| 1434054_PM_at          | Mafg                                                                                                                                                                                               | MAFG      | -0.01 | 3.29  | -0.04 | 9.66E-01 | 9.88E-01 | -6.70 |
| 1425929_PM_a_at        | Rnf14                                                                                                                                                                                              | RNF14     | -0.01 | 5.41  | -0.04 | 9.66E-01 | 9.88E-01 | -6.70 |
| 1452218_PM_at          | Ccdc117                                                                                                                                                                                            | CCDC117   | -0.01 | 2.47  | -0.04 | 9.66E-01 | 9.88E-01 | -6.70 |
| 1451593_PM_at          | H2-K1                                                                                                                                                                                              | NA        | -0.01 | 2.63  | -0.04 | 9.66E-01 | 9.88E-01 | -6.70 |
| 1420914_PM_at          | Slco2a1                                                                                                                                                                                            | SLCO2A1   | -0.01 | 2.88  | -0.04 | 9.66E-01 | 9.88E-01 | -6.70 |
| 1446089_PM_at          | C86400                                                                                                                                                                                             | NA        | 0.00  | 2.17  | -0.04 | 9.66E-01 | 9.88E-01 | -6.70 |
| AFFX-NonspecificGC7_at | ---                                                                                                                                                                                                | NA        | 0.00  | 1.91  | 0.04  | 9.66E-01 | 9.88E-01 | -6.70 |
| 1451976_PM_s_at        | Cmtm1 /// Cmtm2a                                                                                                                                                                                   | CMTM1     | 0.01  | 2.67  | 0.04  | 9.66E-01 | 9.88E-01 | -6.70 |
| 1457336_PM_at          | R3hdm1                                                                                                                                                                                             | R3HDM1    | -0.01 | 2.81  | -0.04 | 9.67E-01 | 9.88E-01 | -6.70 |
| 1429294_PM_at          | Trip13                                                                                                                                                                                             | TRIP13    | -0.01 | 2.81  | -0.04 | 9.67E-01 | 9.88E-01 | -6.70 |
| 1448425_PM_at          | Eif3a                                                                                                                                                                                              | EIF3A     | -0.01 | 5.31  | -0.04 | 9.67E-01 | 9.88E-01 | -6.70 |
| 1446870_PM_at          | D4Erttd510e                                                                                                                                                                                        | NA        | 0.00  | 1.92  | -0.04 | 9.67E-01 | 9.88E-01 | -6.70 |
| 1459812_PM_x_at        | Tspan7                                                                                                                                                                                             | TSPAN7    | 0.00  | 2.11  | 0.04  | 9.67E-01 | 9.88E-01 | -6.70 |
| 1448081_PM_at          | Colq /// Hac1 /// LOC102639719                                                                                                                                                                     | HACL1     | 0.01  | 2.44  | 0.04  | 9.67E-01 | 9.88E-01 | -6.70 |
| 1420159_PM_at          | Myo1e                                                                                                                                                                                              | MYO1E     | 0.01  | 2.14  | 0.04  | 9.67E-01 | 9.88E-01 | -6.70 |
| 1434529_PM_x_at        | Chfr                                                                                                                                                                                               | CHFR      | -0.01 | 7.38  | -0.04 | 9.67E-01 | 9.88E-01 | -6.70 |
| 1448967_PM_at          | Nipsnap3b                                                                                                                                                                                          | NIPSNAP3A | -0.02 | 2.60  | -0.04 | 9.67E-01 | 9.88E-01 | -6.70 |
| 1416084_PM_at          | Zfand5                                                                                                                                                                                             | ZFAND5    | -0.01 | 5.26  | -0.04 | 9.67E-01 | 9.88E-01 | -6.70 |
| 1448344_PM_at          | Rps12 /// Rps12-ps10 /// Rps12-ps11 /// Rps12-ps12 /// Rps12-ps13 /// Rps12-ps14 /// Rps12-ps15 /// Rps12-ps17 /// Rps12-ps18 /// Rps12-ps24 /// Rps12-ps5 /// Rps12-ps6 /// Rps12-ps9 /// Rps12l1 | RPS12     | -0.01 | 3.48  | -0.04 | 9.67E-01 | 9.88E-01 | -6.70 |
| 1449441_PM_a_at        | Wbp1                                                                                                                                                                                               | WBP1      | -0.01 | 2.61  | -0.04 | 9.67E-01 | 9.88E-01 | -6.70 |
| 1441665_PM_at          | Iars2                                                                                                                                                                                              | IARS2     | -0.01 | 2.60  | -0.04 | 9.67E-01 | 9.88E-01 | -6.70 |
| 1443213_PM_at          | ---                                                                                                                                                                                                | NA        | 0.00  | 2.29  | -0.04 | 9.67E-01 | 9.88E-01 | -6.70 |
| 1447451_PM_at          | 4930556M19Rik                                                                                                                                                                                      | NA        | 0.00  | 2.24  | 0.04  | 9.67E-01 | 9.88E-01 | -6.70 |
| 1415718_PM_at          | Sap30l                                                                                                                                                                                             | SAP30L    | 0.01  | 3.21  | 0.04  | 9.67E-01 | 9.88E-01 | -6.70 |
| 1436763_PM_a_at        | Klf9                                                                                                                                                                                               | KL F9     | -0.01 | 2.93  | -0.04 | 9.67E-01 | 9.88E-01 | -6.70 |
| 1450398_PM_at          | Kcnk5                                                                                                                                                                                              | KCNK5     | 0.00  | 2.14  | -0.04 | 9.67E-01 | 9.88E-01 | -6.70 |
| 1446261_PM_at          | D1Erttd507e                                                                                                                                                                                        | NA        | 0.00  | 2.17  | 0.04  | 9.67E-01 | 9.88E-01 | -6.70 |
| 1444225_PM_at          | Sgip1                                                                                                                                                                                              | NA        | -0.01 | 2.61  | -0.04 | 9.67E-01 | 9.88E-01 | -6.70 |

|                 |                                                                                                        |            |       |      |       |          |          |       |
|-----------------|--------------------------------------------------------------------------------------------------------|------------|-------|------|-------|----------|----------|-------|
| 1430248_PM_at   | ---                                                                                                    | NA         | 0.00  | 2.19 | -0.04 | 9.67E-01 | 9.88E-01 | -6.70 |
| 1457191_PM_at   | ---                                                                                                    | NA         | 0.01  | 2.67 | 0.04  | 9.67E-01 | 9.88E-01 | -6.70 |
| 1435426_PM_s_at | Pisd-ps1 /// Pisd-ps3                                                                                  | NA         | 0.01  | 2.76 | 0.04  | 9.67E-01 | 9.88E-01 | -6.70 |
| 1434677_PM_at   | Hps5                                                                                                   | HPS5       | 0.03  | 2.66 | 0.04  | 9.67E-01 | 9.88E-01 | -6.70 |
| 1459723_PM_at   | Zdhhc22                                                                                                | NA         | -0.02 | 3.12 | -0.04 | 9.67E-01 | 9.88E-01 | -6.70 |
| 1456440_PM_s_at | St8sia6                                                                                                | ST8SIA6    | -0.01 | 3.33 | -0.04 | 9.67E-01 | 9.88E-01 | -6.70 |
| 1438965_PM_x_at | ---                                                                                                    | NA         | 0.01  | 2.10 | 0.04  | 9.68E-01 | 9.88E-01 | -6.70 |
| 1444318_PM_at   | Chchd7                                                                                                 | NA         | -0.01 | 3.60 | -0.04 | 9.68E-01 | 9.88E-01 | -6.70 |
| 1419227_PM_at   | Cct6b                                                                                                  | CCT6B      | 0.00  | 2.78 | 0.04  | 9.68E-01 | 9.88E-01 | -6.70 |
| 1425775_PM_at   | Zfp820                                                                                                 | NA         | 0.00  | 1.89 | -0.04 | 9.68E-01 | 9.88E-01 | -6.70 |
| 1452976_PM_a_at | Slc9a3r2                                                                                               | SLC9A3R2   | -0.01 | 2.69 | -0.04 | 9.68E-01 | 9.89E-01 | -6.70 |
| 1445022_PM_at   | ---                                                                                                    | NA         | 0.01  | 2.56 | 0.04  | 9.68E-01 | 9.89E-01 | -6.70 |
| 1427382_PM_a_at | Suv39h1                                                                                                | SUV39H1    | 0.01  | 2.40 | 0.04  | 9.68E-01 | 9.89E-01 | -6.70 |
| 1460083_PM_at   | ---                                                                                                    | NA         | 0.01  | 2.60 | 0.04  | 9.68E-01 | 9.89E-01 | -6.70 |
| 1424052_PM_at   | Thap4                                                                                                  | THAP4      | -0.02 | 3.76 | -0.04 | 9.68E-01 | 9.89E-01 | -6.70 |
| 1449082_PM_at   | Mfap5                                                                                                  | MFAP5      | 0.00  | 2.18 | -0.04 | 9.68E-01 | 9.89E-01 | -6.70 |
| 1454889_PM_x_at | Tmcc3                                                                                                  | TMCC3      | 0.02  | 4.38 | 0.04  | 9.68E-01 | 9.89E-01 | -6.70 |
| 1447117_PM_at   | ---                                                                                                    | NA         | 0.02  | 3.31 | 0.04  | 9.68E-01 | 9.89E-01 | -6.70 |
| 1460367_PM_at   | Hbp1                                                                                                   | HBP1       | 0.01  | 3.28 | 0.04  | 9.68E-01 | 9.89E-01 | -6.70 |
| 1445785_PM_at   | ---                                                                                                    | NA         | 0.00  | 2.11 | -0.04 | 9.68E-01 | 9.89E-01 | -6.70 |
| 1452610_PM_at   | Zkscan14                                                                                               | ZNF394     | 0.00  | 2.25 | -0.04 | 9.68E-01 | 9.89E-01 | -6.70 |
| 1455832_PM_a_at | Umps                                                                                                   | UMPS       | 0.01  | 2.90 | 0.04  | 9.68E-01 | 9.89E-01 | -6.70 |
| 1436215_PM_at   | Ipmk                                                                                                   | IPMK       | 0.01  | 4.06 | 0.04  | 9.68E-01 | 9.89E-01 | -6.70 |
| 1421147_PM_at   | Terf2                                                                                                  | TERF2      | 0.01  | 3.11 | 0.04  | 9.68E-01 | 9.89E-01 | -6.70 |
| 1416031_PM_s_at | Mcm7                                                                                                   | MCM7       | 0.01  | 2.63 | 0.04  | 9.68E-01 | 9.89E-01 | -6.70 |
| 1440527_PM_at   | Creb5                                                                                                  | CREB5      | -0.01 | 2.94 | -0.04 | 9.68E-01 | 9.89E-01 | -6.70 |
| 1439015_PM_at   | Gfra1                                                                                                  | GFRA1      | -0.01 | 2.55 | -0.04 | 9.68E-01 | 9.89E-01 | -6.70 |
| 1426680_PM_at   | Sepr1                                                                                                  | AL020996.2 | 0.00  | 2.54 | 0.04  | 9.68E-01 | 9.89E-01 | -6.70 |
| 1458321_PM_at   | Pik3cd                                                                                                 | PIK3CD     | 0.00  | 1.82 | -0.04 | 9.68E-01 | 9.89E-01 | -6.70 |
| 1459003_PM_at   | Fhl1                                                                                                   | FHL1       | 0.01  | 2.52 | 0.04  | 9.68E-01 | 9.89E-01 | -6.70 |
| 1427117_PM_at   | Mttr3                                                                                                  | MTMR3      | 0.01  | 3.36 | 0.04  | 9.68E-01 | 9.89E-01 | -6.70 |
| 1457374_PM_at   | Nedd4l                                                                                                 | NA         | 0.01  | 2.82 | 0.04  | 9.68E-01 | 9.89E-01 | -6.70 |
| 1455773_PM_at   | ---                                                                                                    | NA         | 0.00  | 2.30 | -0.04 | 9.69E-01 | 9.89E-01 | -6.70 |
| 1421410_PM_a_at | Pstpip2                                                                                                | NA         | -0.01 | 2.12 | -0.04 | 9.69E-01 | 9.89E-01 | -6.70 |
| 1430155_PM_at   | 4933427E11Rik                                                                                          | NA         | 0.00  | 2.20 | -0.04 | 9.69E-01 | 9.89E-01 | -6.70 |
| 1419820_PM_at   | Pkhd1                                                                                                  | PKHD1      | 0.00  | 2.10 | 0.04  | 9.69E-01 | 9.89E-01 | -6.70 |
| 1423136_PM_at   | Fgf1                                                                                                   | FGF1       | -0.01 | 2.60 | -0.04 | 9.69E-01 | 9.89E-01 | -6.70 |
| 1449096_PM_at   | Ccdc127                                                                                                | CCDC127    | 0.01  | 3.70 | 0.04  | 9.69E-01 | 9.89E-01 | -6.70 |
| 1435139_PM_at   | Naa15                                                                                                  | NAA15      | -0.01 | 2.53 | -0.04 | 9.69E-01 | 9.89E-01 | -6.70 |
| 1450298_PM_at   | Tnfsf14                                                                                                | TNFSF14    | 0.00  | 2.22 | -0.04 | 9.69E-01 | 9.89E-01 | -6.70 |
| 1443093_PM_at   | ---                                                                                                    | NA         | 0.00  | 2.22 | -0.04 | 9.69E-01 | 9.89E-01 | -6.70 |
| 1427908_PM_at   | Bnip1                                                                                                  | BNIP1      | 0.00  | 2.63 | -0.04 | 9.69E-01 | 9.89E-01 | -6.70 |
| 1441292_PM_at   | ---                                                                                                    | NA         | 0.00  | 1.97 | 0.04  | 9.69E-01 | 9.89E-01 | -6.70 |
| 1431606_PM_a_at | Angel2                                                                                                 | ANGEL2     | 0.01  | 2.63 | 0.04  | 9.69E-01 | 9.89E-01 | -6.70 |
| 1428528_PM_at   | Get4                                                                                                   | GET4       | 0.01  | 3.82 | 0.04  | 9.69E-01 | 9.89E-01 | -6.70 |
| 1422612_PM_at   | Hk2                                                                                                    | HK2        | 0.01  | 3.22 | 0.04  | 9.69E-01 | 9.89E-01 | -6.70 |
| 1420059_PM_at   | Mtfr1l                                                                                                 | NA         | 0.01  | 4.89 | 0.04  | 9.69E-01 | 9.89E-01 | -6.70 |
| 1416942_PM_at   | Erap1                                                                                                  | ERAP1      | -0.01 | 2.34 | -0.04 | 9.69E-01 | 9.89E-01 | -6.70 |
| 1441391_PM_at   | ---                                                                                                    | NA         | 0.01  | 2.60 | 0.04  | 9.69E-01 | 9.89E-01 | -6.70 |
| 1425600_PM_a_at | Plcb1                                                                                                  | PLCB1      | 0.01  | 5.20 | 0.04  | 9.69E-01 | 9.89E-01 | -6.70 |
| 1424072_PM_at   | 2010107G23Rik                                                                                          | C10orf35   | -0.01 | 4.27 | -0.04 | 9.69E-01 | 9.89E-01 | -6.70 |
| 1452540_PM_a_at | Hist1h2bc /// Hist1h2be ///<br>Hist1h2bl /// Hist1h2bm ///<br>Hist1h2bp /// Hist1h2bq ///<br>Hist1h2br | HIST1H2BI  | -0.01 | 2.51 | -0.04 | 9.69E-01 | 9.89E-01 | -6.70 |
| 1451194_PM_at   | Aldob                                                                                                  | ALDOB      | -0.01 | 2.92 | -0.04 | 9.69E-01 | 9.89E-01 | -6.70 |
| 1458067_PM_at   | ---                                                                                                    | NA         | -0.01 | 2.55 | -0.04 | 9.69E-01 | 9.89E-01 | -6.70 |
| 1432390_PM_at   | 4933400F21Rik                                                                                          | NA         | 0.00  | 2.23 | 0.04  | 9.69E-01 | 9.89E-01 | -6.70 |
| 1430839_PM_at   | Redrum                                                                                                 | NA         | 0.01  | 2.10 | 0.04  | 9.69E-01 | 9.89E-01 | -6.70 |
| 1444907_PM_at   | AU022138                                                                                               | NA         | 0.01  | 2.48 | 0.04  | 9.69E-01 | 9.89E-01 | -6.70 |
| 1448063_PM_at   | Iqsec2                                                                                                 | IQSEC2     | 0.01  | 4.47 | 0.04  | 9.69E-01 | 9.89E-01 | -6.70 |
| 1441207_PM_at   | Zfp879                                                                                                 | ZNF879     | 0.01  | 2.22 | 0.04  | 9.69E-01 | 9.89E-01 | -6.70 |
| 1434191_PM_at   | Agmo                                                                                                   | AGMO       | 0.01  | 2.90 | 0.04  | 9.69E-01 | 9.89E-01 | -6.70 |
| 1446674_PM_at   | ---                                                                                                    | NA         | 0.01  | 2.48 | 0.04  | 9.69E-01 | 9.89E-01 | -6.70 |
| 1448729_PM_a_at | Sept4                                                                                                  | SEPT4      | 0.02  | 5.75 | 0.04  | 9.69E-01 | 9.89E-01 | -6.70 |
| 1445219_PM_at   | Olfrc315                                                                                               | NA         | 0.00  | 2.09 | 0.04  | 9.70E-01 | 9.89E-01 | -6.70 |
| 1432330_PM_at   | Cfr3                                                                                                   | NA         | 0.01  | 2.48 | 0.04  | 9.70E-01 | 9.89E-01 | -6.70 |
| 1452075_PM_at   | Pus10                                                                                                  | PUS10      | 0.01  | 2.91 | 0.04  | 9.70E-01 | 9.89E-01 | -6.70 |
| 1454947_PM_a_at | Ublcp1                                                                                                 | UBLCP1     | -0.01 | 4.06 | -0.04 | 9.70E-01 | 9.89E-01 | -6.70 |
| 1422966_PM_a_at | Tfrc                                                                                                   | TFRC       | -0.01 | 2.62 | -0.04 | 9.70E-01 | 9.89E-01 | -6.70 |
| 1458572_PM_at   | Chmp5                                                                                                  | NA         | 0.00  | 2.03 | -0.04 | 9.70E-01 | 9.89E-01 | -6.70 |
| 1449657_PM_at   | Gm6787                                                                                                 | NA         | 0.00  | 2.26 | -0.04 | 9.70E-01 | 9.89E-01 | -6.70 |
| 1449972_PM_s_at | Zfp960 /// Zfp97                                                                                       | NA         | 0.01  | 2.56 | 0.04  | 9.70E-01 | 9.89E-01 | -6.70 |
| 1420699_PM_at   | Clec7a                                                                                                 | CLEC7A     | 0.00  | 2.24 | -0.04 | 9.70E-01 | 9.89E-01 | -6.70 |

|                 |                      |         |       |       |       |          |          |       |
|-----------------|----------------------|---------|-------|-------|-------|----------|----------|-------|
| 1420826_PM_at   | Letm1                | LETM1   | 0.01  | 6.49  | 0.04  | 9.70E-01 | 9.89E-01 | -6.70 |
| 1431460_PM_at   | 4930519D14Rik        | NA      | -0.01 | 2.23  | -0.04 | 9.70E-01 | 9.89E-01 | -6.70 |
| 1451848_PM_a_at | Cryz                 | CRYZ    | -0.01 | 2.45  | -0.04 | 9.70E-01 | 9.89E-01 | -6.70 |
| 1446639_PM_at   | ---                  | NA      | -0.01 | 2.53  | -0.04 | 9.70E-01 | 9.89E-01 | -6.70 |
| 1445553_PM_at   | Ric3                 | RIC3    | -0.01 | 2.76  | -0.04 | 9.70E-01 | 9.89E-01 | -6.70 |
| 1444696_PM_at   | BC059841             | NA      | -0.01 | 5.05  | -0.04 | 9.70E-01 | 9.89E-01 | -6.70 |
| 1438788_PM_at   | ---                  | NA      | 0.01  | 2.36  | 0.04  | 9.70E-01 | 9.89E-01 | -6.70 |
| 1443180_PM_at   | ---                  | NA      | 0.01  | 2.66  | 0.04  | 9.70E-01 | 9.89E-01 | -6.70 |
| 1458338_PM_x_at | Nr2c1                | NR2C1   | 0.00  | 2.59  | 0.04  | 9.70E-01 | 9.89E-01 | -6.70 |
| 1417452_PM_a_at | Fau                  | FAU     | -0.01 | 5.69  | -0.04 | 9.70E-01 | 9.89E-01 | -6.70 |
| 1456527_PM_at   | Hecw1                | HECW1   | -0.01 | 2.80  | -0.04 | 9.70E-01 | 9.89E-01 | -6.70 |
| 1422635_PM_at   | Ache                 | ACHE    | 0.01  | 2.57  | 0.04  | 9.70E-01 | 9.89E-01 | -6.70 |
| 1446502_PM_at   | ---                  | NA      | 0.01  | 2.40  | 0.04  | 9.70E-01 | 9.89E-01 | -6.70 |
| 1456497_PM_x_at | Rps10                | NA      | 0.01  | 3.86  | 0.04  | 9.70E-01 | 9.89E-01 | -6.70 |
| 1432586_PM_at   | ---                  | NA      | 0.01  | 2.98  | 0.04  | 9.70E-01 | 9.89E-01 | -6.70 |
| 1448864_PM_at   | Snrk                 | SNRK    | -0.02 | 4.55  | -0.04 | 9.71E-01 | 9.89E-01 | -6.70 |
| 1423366_PM_at   | Scd3                 | SCD     | -0.02 | 2.96  | -0.04 | 9.71E-01 | 9.89E-01 | -6.70 |
| 1449932_PM_at   | Csnk1d               | CSNK1D  | -0.01 | 2.81  | -0.04 | 9.70E-01 | 9.89E-01 | -6.70 |
| 1458591_PM_at   | Rasef                | RASEF   | 0.00  | 2.04  | -0.04 | 9.70E-01 | 9.89E-01 | -6.70 |
| 1418120_PM_at   | Rbm8a                | RBM8A   | 0.00  | 3.71  | -0.04 | 9.70E-01 | 9.89E-01 | -6.70 |
| 1454369_PM_a_at | Nfatc4               | NFATC4  | 0.00  | 2.12  | -0.04 | 9.71E-01 | 9.89E-01 | -6.70 |
| 1427685_PM_a_at | Synj2                | SYNJ2   | 0.00  | 2.29  | -0.04 | 9.71E-01 | 9.89E-01 | -6.70 |
| 1447539_PM_at   | ---                  | NA      | 0.00  | 2.34  | -0.04 | 9.70E-01 | 9.89E-01 | -6.70 |
| 1457328_PM_at   | Adra2c               | ADRA2C  | 0.00  | 2.40  | -0.04 | 9.71E-01 | 9.89E-01 | -6.70 |
| 1459119_PM_at   | Cenpo                | CENPO   | 0.00  | 2.04  | -0.04 | 9.71E-01 | 9.89E-01 | -6.70 |
| 1448609_PM_at   | Tst                  | TST     | 0.00  | 2.71  | 0.04  | 9.70E-01 | 9.89E-01 | -6.70 |
| 1458841_PM_at   | ---                  | NA      | 0.00  | 2.43  | 0.04  | 9.70E-01 | 9.89E-01 | -6.70 |
| 1454130_PM_at   | ---                  | NA      | 0.01  | 2.92  | 0.04  | 9.70E-01 | 9.89E-01 | -6.70 |
| 1434312_PM_at   | Arf6                 | ARF6    | -0.01 | 6.45  | -0.04 | 9.71E-01 | 9.90E-01 | -6.70 |
| 1438249_PM_at   | Usp7                 | USP7    | -0.01 | 3.43  | -0.04 | 9.71E-01 | 9.90E-01 | -6.70 |
| 1452060_PM_a_at | Limk2                | LIMK2   | -0.01 | 3.73  | -0.04 | 9.71E-01 | 9.90E-01 | -6.70 |
| 1447076_PM_at   | Nell1                | NELL1   | -0.01 | 2.16  | -0.04 | 9.71E-01 | 9.90E-01 | -6.70 |
| 1425479_PM_at   | Smyd5                | SMYD5   | 0.00  | 2.53  | -0.04 | 9.71E-01 | 9.90E-01 | -6.70 |
| 1444216_PM_at   | Emx1                 | EMX1    | 0.00  | 2.21  | -0.04 | 9.71E-01 | 9.90E-01 | -6.70 |
| AFFX-BioDn-3_at | ---                  | NA      | 0.00  | 11.16 | -0.04 | 9.71E-01 | 9.90E-01 | -6.70 |
| 1431128_PM_at   | Tmem170              | NA      | 0.00  | 2.19  | 0.04  | 9.71E-01 | 9.90E-01 | -6.70 |
| 1438997_PM_at   | ---                  | NA      | 0.00  | 2.68  | 0.04  | 9.71E-01 | 9.90E-01 | -6.70 |
| 1421702_PM_at   | Rdh1                 | RDH16   | 0.00  | 1.85  | 0.04  | 9.71E-01 | 9.90E-01 | -6.70 |
| 1427002_PM_s_at | Arsg                 | ARSG    | 0.01  | 2.53  | 0.04  | 9.71E-01 | 9.90E-01 | -6.70 |
| 1454397_PM_at   | ---                  | NA      | 0.01  | 2.29  | 0.04  | 9.71E-01 | 9.90E-01 | -6.70 |
| 1442116_PM_at   | Gpr176               | GPR176  | 0.01  | 3.35  | 0.04  | 9.71E-01 | 9.90E-01 | -6.70 |
| 1451888_PM_a_at | Tenm4                | TENM4   | 0.01  | 4.14  | 0.04  | 9.71E-01 | 9.90E-01 | -6.70 |
| 1417071_PM_s_at | Cyp4v3               | CYP4V2  | -0.02 | 4.02  | -0.04 | 9.71E-01 | 9.90E-01 | -6.70 |
| 1442014_PM_at   | ---                  | NA      | -0.01 | 3.37  | -0.04 | 9.71E-01 | 9.90E-01 | -6.70 |
| 1429566_PM_a_at | Hipk2                | HIPK2   | -0.01 | 2.87  | -0.04 | 9.71E-01 | 9.90E-01 | -6.70 |
| 1431756_PM_at   | ---                  | NA      | 0.00  | 2.27  | -0.04 | 9.71E-01 | 9.90E-01 | -6.70 |
| 1444720_PM_at   | AA408456             | NA      | 0.00  | 2.05  | -0.04 | 9.71E-01 | 9.90E-01 | -6.70 |
| 1449469_PM_at   | Pkd2l2               | PKD2L2  | 0.00  | 2.07  | -0.04 | 9.71E-01 | 9.90E-01 | -6.70 |
| 1444267_PM_at   | ---                  | NA      | 0.00  | 2.11  | 0.04  | 9.71E-01 | 9.90E-01 | -6.70 |
| 1457082_PM_at   | ---                  | NA      | 0.00  | 2.12  | 0.04  | 9.71E-01 | 9.90E-01 | -6.70 |
| 1416172_PM_at   | Pes1                 | PES1    | -0.01 | 3.02  | -0.04 | 9.71E-01 | 9.90E-01 | -6.70 |
| 1436574_PM_at   | Gm13139 /// Znf41-ps | NA      | -0.01 | 3.23  | -0.04 | 9.71E-01 | 9.90E-01 | -6.70 |
| 1430163_PM_at   | Rab43                | RAB43   | 0.01  | 2.56  | 0.04  | 9.71E-01 | 9.90E-01 | -6.70 |
| 1441821_PM_at   | ---                  | NA      | 0.01  | 2.34  | 0.04  | 9.71E-01 | 9.90E-01 | -6.70 |
| 1441828_PM_at   | Stard5               | STARD5  | 0.00  | 1.93  | 0.04  | 9.71E-01 | 9.90E-01 | -6.70 |
| 1425111_PM_at   | Sorcs3               | SORCS3  | -0.01 | 2.37  | -0.04 | 9.71E-01 | 9.90E-01 | -6.70 |
| 1419934_PM_at   | Pdrg1                | NA      | 0.01  | 3.59  | 0.04  | 9.72E-01 | 9.90E-01 | -6.70 |
| 1425250_PM_a_at | Slc14a2              | NA      | 0.00  | 2.56  | 0.04  | 9.72E-01 | 9.90E-01 | -6.70 |
| 1432662_PM_at   | 0610042E11Rik        | NA      | 0.00  | 2.01  | -0.04 | 9.72E-01 | 9.90E-01 | -6.70 |
| 1455695_PM_at   | St8sia1              | ST8SIA1 | 0.01  | 7.87  | 0.04  | 9.72E-01 | 9.90E-01 | -6.70 |
| 1456995_PM_at   | Shisa9               | SHISA9  | -0.01 | 3.51  | -0.04 | 9.72E-01 | 9.90E-01 | -6.70 |
| 1458458_PM_at   | Slfns5               | SLFNS5  | 0.00  | 2.41  | 0.04  | 9.72E-01 | 9.90E-01 | -6.70 |
| 1422767_PM_at   | Bysl                 | BYSL    | 0.00  | 2.39  | -0.04 | 9.72E-01 | 9.90E-01 | -6.70 |
| 1451552_PM_at   | Lipt1                | LIPT1   | 0.00  | 2.14  | 0.04  | 9.72E-01 | 9.90E-01 | -6.70 |
| 1441230_PM_at   | ---                  | NA      | 0.01  | 2.72  | 0.04  | 9.72E-01 | 9.90E-01 | -6.70 |
| 1448644_PM_at   | Pef1                 | PEF1    | -0.01 | 2.86  | -0.04 | 9.72E-01 | 9.90E-01 | -6.70 |
| 1429662_PM_at   | Spata1               | SPATA1  | 0.00  | 2.08  | -0.04 | 9.72E-01 | 9.90E-01 | -6.70 |
| 1429482_PM_at   | 1700003H04Rik        | NA      | 0.00  | 2.17  | -0.04 | 9.72E-01 | 9.90E-01 | -6.70 |
| 1429767_PM_at   | 2810013P06Rik        | NA      | 0.01  | 2.94  | 0.04  | 9.72E-01 | 9.90E-01 | -6.70 |
| 1416719_PM_a_at | Rps10                | NA      | 0.02  | 3.01  | 0.04  | 9.72E-01 | 9.90E-01 | -6.70 |
| 1423308_PM_at   | Tgoh1 /// Tgoh2      | TGOLN2  | 0.02  | 4.57  | 0.04  | 9.72E-01 | 9.90E-01 | -6.70 |
| 1421824_PM_at   | Bace1                | BACE1   | -0.01 | 3.87  | -0.04 | 9.72E-01 | 9.90E-01 | -6.70 |
| 1454778_PM_x_at | Rps28                | RPS28   | -0.01 | 9.14  | -0.04 | 9.72E-01 | 9.90E-01 | -6.70 |
| 1456403_PM_at   | Pag1                 | PAG1    | -0.01 | 2.26  | -0.04 | 9.72E-01 | 9.90E-01 | -6.70 |
| 1458592_PM_at   | ---                  | NA      | 0.00  | 2.28  | -0.04 | 9.72E-01 | 9.90E-01 | -6.70 |

|                       |                                                    |          |       |      |       |          |          |       |
|-----------------------|----------------------------------------------------|----------|-------|------|-------|----------|----------|-------|
| 1433188_PM_at         | ---                                                | NA       | 0.00  | 2.13 | -0.04 | 9.72E-01 | 9.90E-01 | -6.70 |
| 1418180_PM_at         | Sp1                                                | SP1      | 0.00  | 2.36 | -0.04 | 9.72E-01 | 9.90E-01 | -6.70 |
| AFFX-r2-TagJ-3_at     | ---                                                | NA       | 0.00  | 2.09 | 0.04  | 9.72E-01 | 9.90E-01 | -6.70 |
| 1450337_PM_a_at       | Nek8                                               | NEK8     | 0.01  | 2.14 | 0.04  | 9.72E-01 | 9.90E-01 | -6.70 |
| 1455381_PM_at         | Marf1                                              | MARF1    | -0.02 | 6.79 | -0.04 | 9.72E-01 | 9.90E-01 | -6.70 |
| 1442248_PM_at         | ---                                                | NA       | 0.01  | 2.56 | 0.04  | 9.72E-01 | 9.90E-01 | -6.70 |
| 1459804_PM_at         | Crebbp                                             | CREBBP   | -0.01 | 3.14 | -0.04 | 9.72E-01 | 9.90E-01 | -6.70 |
| 1431352_PM_s_at       | Pvt1                                               | NA       | -0.01 | 2.45 | -0.04 | 9.72E-01 | 9.90E-01 | -6.70 |
| 1426534_PM_a_at       | Arfgap3                                            | ARFGAP3  | -0.01 | 3.09 | -0.04 | 9.73E-01 | 9.90E-01 | -6.70 |
| 1439233_PM_at         | ---                                                | NA       | 0.00  | 2.23 | -0.04 | 9.73E-01 | 9.90E-01 | -6.70 |
| 1452775_PM_at         | Csrp2bp                                            | KAT14    | 0.00  | 2.63 | -0.04 | 9.73E-01 | 9.90E-01 | -6.70 |
| 1452634_PM_at         | Obox3                                              | NA       | 0.00  | 2.24 | -0.04 | 9.73E-01 | 9.90E-01 | -6.70 |
| 1432539_PM_a_at       | Nup54                                              | NUP54    | 0.01  | 3.81 | 0.04  | 9.73E-01 | 9.90E-01 | -6.70 |
| 1457203_PM_at         | ---                                                | NA       | 0.00  | 2.57 | -0.04 | 9.73E-01 | 9.90E-01 | -6.70 |
| 1443064_PM_at         | ---                                                | NA       | 0.00  | 2.24 | -0.03 | 9.73E-01 | 9.90E-01 | -6.70 |
| 1419559_PM_at         | Cyp4f14                                            | CYP4F12  | 0.00  | 2.10 | 0.04  | 9.73E-01 | 9.90E-01 | -6.70 |
| 1429792_PM_at         | Btdb19                                             | NA       | 0.00  | 2.25 | 0.03  | 9.73E-01 | 9.90E-01 | -6.70 |
| 1425580_PM_a_at       | Pik3c3                                             | PIK3C3   | -0.01 | 3.06 | -0.03 | 9.73E-01 | 9.90E-01 | -6.70 |
| 1418473_PM_at         | Cutc                                               | CUTC     | -0.01 | 2.51 | -0.03 | 9.73E-01 | 9.90E-01 | -6.70 |
| 1436583_PM_at         | Dsc1                                               | DSCC1    | 0.00  | 2.57 | 0.03  | 9.73E-01 | 9.90E-01 | -6.70 |
| 1419619_PM_at         | Krt80                                              | NA       | 0.00  | 2.70 | 0.03  | 9.73E-01 | 9.90E-01 | -6.70 |
| 1436664_PM_a_at       | Slc35a2                                            | SLC35A2  | 0.00  | 2.37 | 0.03  | 9.73E-01 | 9.90E-01 | -6.70 |
| 1459823_PM_at         | Ehd2                                               | EHD2     | 0.00  | 2.16 | 0.03  | 9.73E-01 | 9.90E-01 | -6.70 |
| 1426669_PM_at         | Cpped1                                             | CPPED1   | 0.01  | 3.15 | 0.03  | 9.73E-01 | 9.90E-01 | -6.70 |
| 1438713_PM_at         | Rassf8                                             | RASSF8   | 0.01  | 2.61 | 0.03  | 9.73E-01 | 9.90E-01 | -6.70 |
| 1452795_PM_at         | Fcf1                                               | FCF1     | 0.01  | 4.32 | 0.03  | 9.73E-01 | 9.90E-01 | -6.70 |
| 1429028_PM_at         | Dock11                                             | DOCK11   | 0.01  | 3.47 | 0.03  | 9.73E-01 | 9.90E-01 | -6.70 |
| 1444520_PM_at         | Fryl                                               | FRYL     | 0.01  | 2.07 | 0.03  | 9.73E-01 | 9.90E-01 | -6.70 |
| 1428813_PM_a_at       | Caly                                               | CALY     | 0.01  | 3.34 | 0.03  | 9.73E-01 | 9.90E-01 | -6.70 |
| 1443344_PM_at         | C2cd4c                                             | C2CD4C   | -0.01 | 2.98 | -0.03 | 9.73E-01 | 9.90E-01 | -6.70 |
| 1450135_PM_at         | Fzd3                                               | FZD3     | -0.01 | 3.22 | -0.03 | 9.73E-01 | 9.90E-01 | -6.70 |
| 1422783_PM_a_at       | Krt6a                                              | KRT6B    | -0.01 | 2.41 | -0.03 | 9.73E-01 | 9.90E-01 | -6.70 |
| 1443319_PM_at         | Pag1                                               | PAG1     | -0.01 | 3.10 | -0.03 | 9.73E-01 | 9.90E-01 | -6.70 |
| 1452685_PM_at         | 0610009O20Rik                                      | KIAA0141 | -0.01 | 4.31 | -0.03 | 9.73E-01 | 9.90E-01 | -6.70 |
| 1445417_PM_at         | ---                                                | NA       | 0.00  | 2.10 | 0.03  | 9.73E-01 | 9.90E-01 | -6.70 |
| 1434583_PM_at         | Tmem26                                             | TMEM26   | 0.00  | 1.95 | -0.03 | 9.73E-01 | 9.90E-01 | -6.70 |
| 1460104_PM_at         | ---                                                | NA       | 0.00  | 2.31 | 0.03  | 9.73E-01 | 9.90E-01 | -6.70 |
| 1446245_PM_at         | ---                                                | NA       | 0.01  | 3.01 | 0.03  | 9.73E-01 | 9.90E-01 | -6.70 |
| 1451540_PM_at         | Mpi                                                | MPI      | -0.01 | 2.54 | -0.03 | 9.73E-01 | 9.90E-01 | -6.70 |
| 1420431_PM_at         | Rptn                                               | RPTN     | 0.00  | 2.14 | 0.03  | 9.73E-01 | 9.91E-01 | -6.70 |
| 1459173_PM_at         | Ptprd                                              | PTPRD    | 0.00  | 2.05 | -0.03 | 9.74E-01 | 9.91E-01 | -6.70 |
| 1453668_PM_at         | ---                                                | NA       | -0.01 | 2.68 | -0.03 | 9.74E-01 | 9.91E-01 | -6.70 |
| 1437879_PM_at         | Alg10b                                             | ALG10    | 0.01  | 3.53 | 0.03  | 9.74E-01 | 9.91E-01 | -6.70 |
| 1442842_PM_at         | Hspbap1                                            | HSPBAP1  | 0.01  | 3.64 | 0.03  | 9.74E-01 | 9.91E-01 | -6.70 |
| 1448407_PM_at         | Vsir                                               | VSIR     | 0.00  | 3.30 | 0.03  | 9.74E-01 | 9.91E-01 | -6.70 |
| 1428530_PM_x_at       | Gm8942 /// LOC102642752<br>/// Rps24 /// Rps24-ps3 | RPS24    | -0.01 | 5.63 | -0.03 | 9.74E-01 | 9.91E-01 | -6.70 |
| 1416814_PM_at         | Tia1                                               | TIA1     | -0.01 | 3.31 | -0.03 | 9.74E-01 | 9.91E-01 | -6.70 |
| 1421729_PM_a_at       | Fer                                                | FER      | -0.01 | 2.96 | -0.03 | 9.74E-01 | 9.91E-01 | -6.70 |
| 1432332_PM_a_at       | Nudt19                                             | NUDT19   | 0.00  | 2.40 | -0.03 | 9.74E-01 | 9.91E-01 | -6.70 |
| 1431185_PM_at         | 4930503B20Rik                                      | SAMD13   | 0.00  | 2.24 | -0.03 | 9.74E-01 | 9.91E-01 | -6.70 |
| 1459228_PM_at         | Mipol1                                             | MIPOL1   | 0.00  | 2.11 | -0.03 | 9.74E-01 | 9.91E-01 | -6.70 |
| AFFX-r2-Bs-thr-M_s_at | ---                                                | NA       | 0.00  | 2.29 | -0.03 | 9.74E-01 | 9.91E-01 | -6.70 |
| 1457707_PM_at         | Mc tp2                                             | MCTP2    | 0.00  | 2.13 | -0.03 | 9.74E-01 | 9.91E-01 | -6.70 |
| 1425871_PM_a_at       | Igk-V28 /// Igkv12-46                              | NA       | 0.00  | 2.02 | 0.03  | 9.74E-01 | 9.91E-01 | -6.70 |
| 1420205_PM_at         | ---                                                | NA       | 0.00  | 2.54 | 0.03  | 9.74E-01 | 9.91E-01 | -6.70 |
| 1419122_PM_at         | Mettl1                                             | METTL1   | 0.00  | 2.67 | 0.03  | 9.74E-01 | 9.91E-01 | -6.70 |
| 1415864_PM_at         | Bpgm                                               | BPGM     | 0.01  | 3.78 | 0.03  | 9.74E-01 | 9.91E-01 | -6.70 |
| 1423060_PM_at         | Pa2g4                                              | PA2G4    | -0.02 | 4.89 | -0.03 | 9.74E-01 | 9.91E-01 | -6.70 |
| 1425558_PM_at         | Klc3                                               | KLC3     | 0.00  | 2.41 | -0.03 | 9.74E-01 | 9.91E-01 | -6.70 |
| 1451945_PM_at         | ---                                                | NA       | 0.00  | 2.13 | -0.03 | 9.74E-01 | 9.91E-01 | -6.70 |
| 1421404_PM_at         | Cxc115                                             | NA       | 0.00  | 2.48 | 0.03  | 9.74E-01 | 9.91E-01 | -6.70 |
| 1431501_PM_at         | 1700037C18Rik                                      | C16orf90 | 0.00  | 2.07 | 0.03  | 9.74E-01 | 9.91E-01 | -6.70 |
| 1441268_PM_at         | ---                                                | NA       | 0.00  | 2.18 | 0.03  | 9.74E-01 | 9.91E-01 | -6.70 |
| 1460069_PM_at         | Smc6                                               | NA       | 0.01  | 3.34 | 0.03  | 9.74E-01 | 9.91E-01 | -6.70 |
| 1423359_PM_at         | Pln                                                | PLN      | -0.01 | 2.57 | -0.03 | 9.74E-01 | 9.91E-01 | -6.70 |
| 1421318_PM_at         | Ndst4                                              | NDST4    | 0.00  | 2.00 | -0.03 | 9.75E-01 | 9.91E-01 | -6.70 |
| 1425095_PM_at         | BC002059                                           | NA       | 0.00  | 2.94 | 0.03  | 9.75E-01 | 9.91E-01 | -6.70 |
| 1455896_PM_a_at       | Kcnk1                                              | KCNK1    | 0.00  | 3.42 | 0.03  | 9.75E-01 | 9.91E-01 | -6.70 |
| 1441060_PM_at         | 2900052L18Rik                                      | NA       | 0.00  | 2.53 | -0.03 | 9.75E-01 | 9.91E-01 | -6.70 |
| 1424532_PM_at         | Ylpm1                                              | YLP1     | -0.01 | 5.86 | -0.03 | 9.75E-01 | 9.91E-01 | -6.70 |
| 1426677_PM_at         | Flna                                               | FLNA     | -0.01 | 2.72 | -0.03 | 9.75E-01 | 9.91E-01 | -6.70 |
| 1459009_PM_at         | ---                                                | NA       | 0.00  | 2.56 | 0.03  | 9.75E-01 | 9.91E-01 | -6.70 |
| 1434234_PM_at         | Zfp341                                             | ZNF341   | 0.00  | 2.40 | 0.03  | 9.75E-01 | 9.91E-01 | -6.70 |



|                 |                                                                                                                                                                                                                                                                                                             |          |       |      |       |          |          |       |
|-----------------|-------------------------------------------------------------------------------------------------------------------------------------------------------------------------------------------------------------------------------------------------------------------------------------------------------------|----------|-------|------|-------|----------|----------|-------|
| 1418154_PM_at   | N4bp1                                                                                                                                                                                                                                                                                                       | N4BP1    | 0.00  | 2.43 | 0.03  | 9.75E-01 | 9.91E-01 | -6.70 |
| 1428345_PM_at   | Plpp6                                                                                                                                                                                                                                                                                                       | PLPP6    | 0.01  | 4.83 | 0.03  | 9.75E-01 | 9.91E-01 | -6.70 |
| 1417877_PM_at   | Eepd1                                                                                                                                                                                                                                                                                                       | EEPD1    | 0.00  | 2.41 | -0.03 | 9.75E-01 | 9.91E-01 | -6.70 |
| 1417299_PM_at   | Nek2                                                                                                                                                                                                                                                                                                        | NEK2     | 0.00  | 2.40 | -0.03 | 9.75E-01 | 9.91E-01 | -6.70 |
| 1441719_PM_at   | Atg4c                                                                                                                                                                                                                                                                                                       | NA       | 0.00  | 2.33 | 0.03  | 9.75E-01 | 9.91E-01 | -6.70 |
| 1451951_PM_at   | Igk /// Igkv14-111                                                                                                                                                                                                                                                                                          | NA       | 0.00  | 2.48 | 0.03  | 9.75E-01 | 9.91E-01 | -6.70 |
| 1418080_PM_at   | B4galt2                                                                                                                                                                                                                                                                                                     | B4GALT2  | 0.00  | 2.30 | -0.03 | 9.75E-01 | 9.91E-01 | -6.70 |
| 1427937_PM_at   | Vma21                                                                                                                                                                                                                                                                                                       | VMA21    | -0.01 | 2.57 | -0.03 | 9.75E-01 | 9.91E-01 | -6.70 |
| 1416542_PM_at   | Phf1                                                                                                                                                                                                                                                                                                        | PHF1     | 0.00  | 2.74 | 0.03  | 9.75E-01 | 9.91E-01 | -6.70 |
| 1457709_PM_a_at | A930005H10Rik                                                                                                                                                                                                                                                                                               | NA       | -0.01 | 2.48 | -0.03 | 9.75E-01 | 9.91E-01 | -6.70 |
| 1420693_PM_at   | Myom1                                                                                                                                                                                                                                                                                                       | MYOM1    | -0.01 | 3.18 | -0.03 | 9.75E-01 | 9.91E-01 | -6.70 |
| 1455301_PM_at   | Wipf3                                                                                                                                                                                                                                                                                                       | WIPF3    | -0.01 | 9.04 | -0.03 | 9.75E-01 | 9.91E-01 | -6.70 |
| 1457953_PM_at   | Gm41177                                                                                                                                                                                                                                                                                                     | NA       | 0.00  | 2.79 | -0.03 | 9.75E-01 | 9.91E-01 | -6.70 |
| 1416569_PM_at   | Actl6a                                                                                                                                                                                                                                                                                                      | ACTL6A   | 0.01  | 2.41 | 0.03  | 9.75E-01 | 9.91E-01 | -6.70 |
| 1459861_PM_s_at | Kdm2b                                                                                                                                                                                                                                                                                                       | KDM2B    | -0.01 | 3.10 | -0.03 | 9.75E-01 | 9.91E-01 | -6.70 |
| 1434072_PM_at   | Mief2                                                                                                                                                                                                                                                                                                       | MIEF2    | -0.01 | 2.80 | -0.03 | 9.75E-01 | 9.91E-01 | -6.70 |
| 1447673_PM_x_at | ---                                                                                                                                                                                                                                                                                                         | NA       | 0.00  | 2.98 | 0.03  | 9.75E-01 | 9.91E-01 | -6.70 |
| 1433777_PM_at   | L3mbtl2                                                                                                                                                                                                                                                                                                     | L3MBTL2  | -0.01 | 3.90 | -0.03 | 9.75E-01 | 9.91E-01 | -6.70 |
| 1456676_PM_a_at | Pfkfb3                                                                                                                                                                                                                                                                                                      | PFKFB3   | -0.01 | 4.42 | -0.03 | 9.76E-01 | 9.92E-01 | -6.70 |
| 1446407_PM_at   | ---                                                                                                                                                                                                                                                                                                         | NA       | 0.00  | 2.40 | -0.03 | 9.76E-01 | 9.92E-01 | -6.70 |
| 1458470_PM_at   | ---                                                                                                                                                                                                                                                                                                         | NA       | 0.00  | 1.78 | 0.03  | 9.76E-01 | 9.92E-01 | -6.70 |
| 1426960_PM_a_at | Fa2h                                                                                                                                                                                                                                                                                                        | FA2H     | -0.01 | 2.97 | -0.03 | 9.76E-01 | 9.92E-01 | -6.70 |
| 1428513_PM_at   | Calcoco1                                                                                                                                                                                                                                                                                                    | CALCOCO1 | -0.01 | 5.95 | -0.03 | 9.76E-01 | 9.92E-01 | -6.70 |
| 1423513_PM_at   | Neo1                                                                                                                                                                                                                                                                                                        | NEO1     | -0.01 | 5.46 | -0.03 | 9.76E-01 | 9.92E-01 | -6.70 |
| 1441670_PM_at   | ---                                                                                                                                                                                                                                                                                                         | NA       | 0.00  | 2.18 | -0.03 | 9.76E-01 | 9.92E-01 | -6.70 |
| 1426123_PM_a_at | Rrbp1                                                                                                                                                                                                                                                                                                       | RBBP1    | 0.00  | 2.00 | 0.03  | 9.76E-01 | 9.92E-01 | -6.70 |
| 1426872_PM_at   | Fcgbp                                                                                                                                                                                                                                                                                                       | FCGBP    | 0.00  | 2.54 | 0.03  | 9.76E-01 | 9.92E-01 | -6.70 |
| 1456507_PM_at   | Zfp454                                                                                                                                                                                                                                                                                                      | ZNF454   | 0.01  | 2.88 | 0.03  | 9.76E-01 | 9.92E-01 | -6.70 |
| 1440385_PM_at   | Nmd3                                                                                                                                                                                                                                                                                                        | NMD3     | 0.01  | 3.56 | 0.03  | 9.76E-01 | 9.92E-01 | -6.70 |
| 1455172_PM_at   | AU020094                                                                                                                                                                                                                                                                                                    | NA       | -0.01 | 2.62 | -0.03 | 9.76E-01 | 9.92E-01 | -6.70 |
| 1456332_PM_at   | Tmem17                                                                                                                                                                                                                                                                                                      | TMEM17   | 0.01  | 2.65 | 0.03  | 9.76E-01 | 9.92E-01 | -6.70 |
| 1417690_PM_at   | Prkag1                                                                                                                                                                                                                                                                                                      | PRKAG1   | 0.01  | 3.38 | 0.03  | 9.76E-01 | 9.92E-01 | -6.70 |
| 1454684_PM_at   | Bbs7                                                                                                                                                                                                                                                                                                        | BBS7     | 0.00  | 3.32 | -0.03 | 9.76E-01 | 9.92E-01 | -6.70 |
| 1423946_PM_at   | Pdlim2                                                                                                                                                                                                                                                                                                      | PDLIM2   | 0.00  | 2.57 | -0.03 | 9.76E-01 | 9.92E-01 | -6.70 |
| 1455770_PM_at   | Tdo2                                                                                                                                                                                                                                                                                                        | TDO2     | 0.00  | 2.28 | -0.03 | 9.76E-01 | 9.92E-01 | -6.70 |
| 1430482_PM_at   | Adora3 /// Tmigd3                                                                                                                                                                                                                                                                                           | ADORA3   | 0.00  | 2.30 | -0.03 | 9.76E-01 | 9.92E-01 | -6.70 |
| 1428821_PM_at   | Agpat2                                                                                                                                                                                                                                                                                                      | AGPAT2   | 0.00  | 2.41 | 0.03  | 9.76E-01 | 9.92E-01 | -6.70 |
| 1425779_PM_a_at | Tbx1                                                                                                                                                                                                                                                                                                        | TBX1     | -0.01 | 3.07 | -0.03 | 9.76E-01 | 9.92E-01 | -6.70 |
| 1443616_PM_at   | Sypl                                                                                                                                                                                                                                                                                                        | NA       | 0.00  | 2.30 | 0.03  | 9.76E-01 | 9.92E-01 | -6.70 |
| 1434481_PM_at   | Msl1                                                                                                                                                                                                                                                                                                        | MSL1     | -0.01 | 3.84 | -0.03 | 9.76E-01 | 9.92E-01 | -6.70 |
| 1427730_PM_a_at | Zfp148                                                                                                                                                                                                                                                                                                      | ZNF148   | 0.01  | 4.03 | 0.03  | 9.76E-01 | 9.92E-01 | -6.70 |
| 1441360_PM_at   | ---                                                                                                                                                                                                                                                                                                         | NA       | 0.00  | 2.67 | 0.03  | 9.76E-01 | 9.92E-01 | -6.70 |
| 1457278_PM_at   | 6720489N17Rik                                                                                                                                                                                                                                                                                               | NA       | 0.01  | 2.97 | 0.03  | 9.76E-01 | 9.92E-01 | -6.70 |
| 1435710_PM_at   | Cd226                                                                                                                                                                                                                                                                                                       | NA       | 0.00  | 2.03 | 0.03  | 9.77E-01 | 9.92E-01 | -6.70 |
| 1423628_PM_s_at | Gm37013 /// Gm38666 /// Pcdha7-g /// Pcdhga1 /// Pcdhga10 /// Pcdhga11 /// Pcdhga12 /// Pcdhga2 /// Pcdhga3 /// Pcdhga4 /// Pcdhga5 /// Pcdhga6 /// Pcdhga7 /// Pcdhga8 /// Pcdhga9 /// Pcdhgb1 /// Pcdhgb2 /// Pcdhgb4 /// Pcdhgb5 /// Pcdhgb6 /// Pcdhgb7 /// Pcdhgb8 /// Pcdhgc3 /// Pcdhgc4 /// Pcdhgc5 | PCDHGA2  | 0.00  | 4.24 | -0.03 | 9.77E-01 | 9.92E-01 | -6.70 |
| 1430692_PM_a_at | Sel1l                                                                                                                                                                                                                                                                                                       | SEL1L    | -0.01 | 4.68 | -0.03 | 9.77E-01 | 9.92E-01 | -6.70 |
| 1421268_PM_at   | Ugcg                                                                                                                                                                                                                                                                                                        | UGCG     | 0.01  | 2.64 | 0.03  | 9.77E-01 | 9.92E-01 | -6.70 |
| 1425787_PM_a_at | Gm29719 /// Gm29721 /// Sytl3                                                                                                                                                                                                                                                                               | SYTL3    | 0.00  | 2.42 | 0.03  | 9.77E-01 | 9.92E-01 | -6.70 |
| 1445849_PM_at   | BC080696                                                                                                                                                                                                                                                                                                    | PRAMEF9  | 0.01  | 3.61 | 0.03  | 9.77E-01 | 9.92E-01 | -6.70 |
| 1443750_PM_s_at | Rpp40                                                                                                                                                                                                                                                                                                       | RPP40    | -0.01 | 2.46 | -0.03 | 9.77E-01 | 9.92E-01 | -6.70 |
| 1426793_PM_a_at | Rpl14 /// Rpl14-ps1                                                                                                                                                                                                                                                                                         | RPL14    | -0.02 | 5.35 | -0.03 | 9.77E-01 | 9.92E-01 | -6.70 |
| 1456940_PM_at   | Slc43a2                                                                                                                                                                                                                                                                                                     | SLC43A2  | 0.00  | 2.14 | 0.03  | 9.77E-01 | 9.92E-01 | -6.70 |
| 1460308_PM_a_at | Ict1                                                                                                                                                                                                                                                                                                        | MRPL58   | 0.01  | 2.52 | 0.03  | 9.77E-01 | 9.92E-01 | -6.70 |
| 1458765_PM_at   | ---                                                                                                                                                                                                                                                                                                         | NA       | -0.01 | 3.58 | -0.03 | 9.77E-01 | 9.92E-01 | -6.70 |
| 1446897_PM_at   | ---                                                                                                                                                                                                                                                                                                         | NA       | 0.00  | 2.28 | 0.03  | 9.77E-01 | 9.92E-01 | -6.70 |
| 1427039_PM_at   | Epn1                                                                                                                                                                                                                                                                                                        | EPN1     | 0.01  | 6.28 | 0.03  | 9.77E-01 | 9.92E-01 | -6.70 |
| 1420074_PM_at   | D8Ert738e                                                                                                                                                                                                                                                                                                   | NA       | -0.01 | 5.55 | -0.03 | 9.77E-01 | 9.92E-01 | -6.70 |
| 1457825_PM_x_at | Tcn2                                                                                                                                                                                                                                                                                                        | TCN2     | 0.00  | 2.32 | -0.03 | 9.77E-01 | 9.92E-01 | -6.70 |
| 1455586_PM_at   | Rnf168                                                                                                                                                                                                                                                                                                      | RNF168   | 0.00  | 2.39 | 0.03  | 9.77E-01 | 9.92E-01 | -6.70 |
| 1445770_PM_at   | ---                                                                                                                                                                                                                                                                                                         | NA       | 0.00  | 2.04 | 0.03  | 9.77E-01 | 9.92E-01 | -6.70 |
| 1442322_PM_at   | ---                                                                                                                                                                                                                                                                                                         | NA       | 0.00  | 2.41 | 0.03  | 9.77E-01 | 9.92E-01 | -6.70 |
| 1426303_PM_at   | B4galt7                                                                                                                                                                                                                                                                                                     | B4GALT7  | 0.00  | 3.50 | 0.03  | 9.77E-01 | 9.92E-01 | -6.70 |

|                        |                         |          |       |      |       |          |          |       |
|------------------------|-------------------------|----------|-------|------|-------|----------|----------|-------|
| 1425679_PM_a_at        | Mapk8ip1                | MAPK8IP1 | 0.01  | 3.57 | 0.03  | 9.77E-01 | 9.92E-01 | -6.70 |
| 1417193_PM_at          | Sod2                    | SOD2     | -0.01 | 6.34 | -0.03 | 9.77E-01 | 9.92E-01 | -6.70 |
| 1428693_PM_at          | Z610044015Rik8          | NA       | 0.00  | 2.48 | -0.03 | 9.77E-01 | 9.92E-01 | -6.70 |
| 1456952_PM_at          | ---                     | NA       | 0.00  | 2.80 | 0.03  | 9.77E-01 | 9.92E-01 | -6.70 |
| 1438872_PM_at          | Triml1                  | TRIML1   | 0.00  | 2.12 | 0.03  | 9.77E-01 | 9.92E-01 | -6.70 |
| 1437575_PM_at          | ---                     | NA       | -0.01 | 2.37 | -0.03 | 9.77E-01 | 9.92E-01 | -6.70 |
| 1436697_PM_at          | ---                     | NA       | 0.01  | 3.35 | 0.03  | 9.78E-01 | 9.92E-01 | -6.70 |
| 1444780_PM_at          | Nav2                    | NAV2     | 0.01  | 3.02 | 0.03  | 9.78E-01 | 9.92E-01 | -6.70 |
| 1451056_PM_at          | Psmd7                   | PSMD7    | -0.01 | 3.11 | -0.03 | 9.78E-01 | 9.92E-01 | -6.70 |
| 1456017_PM_x_at        | Obox2                   | NA       | -0.01 | 2.28 | -0.03 | 9.78E-01 | 9.92E-01 | -6.70 |
| 1453343_PM_s_at        | Vrk2                    | VRK2     | -0.01 | 3.02 | -0.03 | 9.78E-01 | 9.92E-01 | -6.70 |
| 1445225_PM_at          | ---                     | NA       | -0.01 | 2.48 | -0.03 | 9.78E-01 | 9.92E-01 | -6.70 |
| 1450943_PM_at          | Magohb                  | MAGOHB   | -0.01 | 2.77 | -0.03 | 9.78E-01 | 9.92E-01 | -6.70 |
| 1448855_PM_at          | Rassf1                  | RASSF1   | -0.01 | 2.67 | -0.03 | 9.78E-01 | 9.92E-01 | -6.70 |
| 1422551_PM_at          | Zkscan3                 | ZKSCAN4  | -0.01 | 2.47 | -0.03 | 9.78E-01 | 9.92E-01 | -6.70 |
| 1436242_PM_a_at        | Cklf                    | CKLF     | -0.01 | 2.44 | -0.03 | 9.78E-01 | 9.92E-01 | -6.70 |
| 1434759_PM_at          | Lrrtm3                  | LRRTM3   | -0.01 | 2.25 | -0.03 | 9.78E-01 | 9.92E-01 | -6.70 |
| 1426548_PM_a_at        | Dph6                    | DPH6     | -0.01 | 3.30 | -0.03 | 9.78E-01 | 9.92E-01 | -6.70 |
| 1421816_PM_at          | Gsr                     | GSR      | 0.00  | 2.38 | -0.03 | 9.79E-01 | 9.92E-01 | -6.70 |
| 1459144_PM_at          | ---                     | NA       | 0.00  | 2.49 | -0.03 | 9.78E-01 | 9.92E-01 | -6.70 |
| 1439130_PM_at          | Atg4d                   | ATG4D    | 0.00  | 2.38 | -0.03 | 9.78E-01 | 9.92E-01 | -6.70 |
| 1431358_PM_at          | Parppb                  | PARPPB   | 0.00  | 2.31 | -0.03 | 9.79E-01 | 9.92E-01 | -6.70 |
| 1443433_PM_at          | Plknc1                  | PLXNC1   | 0.00  | 2.20 | -0.03 | 9.79E-01 | 9.92E-01 | -6.70 |
| 1421514_PM_a_at        | Scml2                   | SCML2    | 0.00  | 2.32 | -0.03 | 9.78E-01 | 9.92E-01 | -6.70 |
| 1436477_PM_x_at        | Rab2a                   | RAB2A    | 0.00  | 1.73 | -0.03 | 9.78E-01 | 9.92E-01 | -6.70 |
| 1417991_PM_at          | Dio1                    | DI01     | 0.00  | 2.08 | -0.03 | 9.78E-01 | 9.92E-01 | -6.70 |
| 1420225_PM_at          | ---                     | NA       | 0.00  | 1.93 | -0.03 | 9.78E-01 | 9.92E-01 | -6.70 |
| 1435731_PM_x_at        | Prdx4                   | NA       | 0.00  | 2.08 | 0.03  | 9.78E-01 | 9.92E-01 | -6.70 |
| 1456353_PM_at          | ---                     | NA       | 0.00  | 2.33 | 0.03  | 9.78E-01 | 9.92E-01 | -6.70 |
| 1442551_PM_at          | ---                     | NA       | 0.00  | 1.96 | 0.03  | 9.78E-01 | 9.92E-01 | -6.70 |
| 1426013_PM_s_at        | Plekha4                 | PLEKHA4  | 0.00  | 2.36 | 0.03  | 9.78E-01 | 9.92E-01 | -6.70 |
| 1444976_PM_at          | ---                     | NA       | 0.00  | 2.60 | 0.03  | 9.78E-01 | 9.92E-01 | -6.70 |
| 1435300_PM_at          | Letm1                   | LETM1    | 0.00  | 2.93 | 0.03  | 9.78E-01 | 9.92E-01 | -6.70 |
| 1437792_PM_at          | 1700013D24Rik           | NA       | 0.00  | 3.29 | 0.03  | 9.78E-01 | 9.92E-01 | -6.70 |
| 1440394_PM_at          | ---                     | NA       | 0.00  | 2.66 | 0.03  | 9.79E-01 | 9.92E-01 | -6.70 |
| 1418652_PM_at          | Cxc19                   | CXCL9    | 0.00  | 2.38 | 0.03  | 9.78E-01 | 9.92E-01 | -6.70 |
| 1455934_PM_at          | Ndufb9                  | NDUFB9   | 0.00  | 2.34 | 0.03  | 9.78E-01 | 9.92E-01 | -6.70 |
| 1456404_PM_at          | Adamts5                 | ADAMTS5  | 0.00  | 3.03 | 0.03  | 9.78E-01 | 9.92E-01 | -6.70 |
| 1436357_PM_at          | Ggnbp2os                | NA       | 0.00  | 2.56 | 0.03  | 9.78E-01 | 9.92E-01 | -6.70 |
| 1440840_PM_at          | Slc16a7                 | NA       | 0.00  | 4.12 | 0.03  | 9.78E-01 | 9.92E-01 | -6.70 |
| 1429068_PM_at          | A430035B10Rik           | NA       | 0.00  | 2.39 | 0.03  | 9.78E-01 | 9.92E-01 | -6.70 |
| 1431472_PM_at          | ---                     | NA       | 0.01  | 2.85 | 0.03  | 9.78E-01 | 9.92E-01 | -6.70 |
| 1453582_PM_at          | Chka                    | CHKA     | 0.01  | 2.79 | 0.03  | 9.78E-01 | 9.92E-01 | -6.70 |
| 1435320_PM_at          | Ctdspl2                 | CTDSP2   | 0.01  | 2.75 | 0.03  | 9.78E-01 | 9.92E-01 | -6.70 |
| 1427509_PM_at          | Baiap3                  | BAIAP3   | 0.01  | 3.19 | 0.03  | 9.78E-01 | 9.92E-01 | -6.70 |
| 1453548_PM_at          | ---                     | NA       | 0.01  | 2.40 | 0.03  | 9.78E-01 | 9.92E-01 | -6.70 |
| 1460653_PM_at          | Atxn2                   | ATXN2    | 0.01  | 2.58 | 0.03  | 9.78E-01 | 9.92E-01 | -6.70 |
| 1448125_PM_at          | Rit2                    | RIT2     | 0.01  | 3.71 | 0.03  | 9.78E-01 | 9.92E-01 | -6.70 |
| 1433598_PM_at          | Arglu1                  | NA       | -0.01 | 6.76 | -0.03 | 9.79E-01 | 9.93E-01 | -6.70 |
| 1426546_PM_at          | Tesk2                   | TESK2    | 0.00  | 3.56 | -0.03 | 9.79E-01 | 9.93E-01 | -6.70 |
| 1421651_PM_at          | Ankrd22                 | NA       | 0.00  | 2.10 | 0.03  | 9.79E-01 | 9.93E-01 | -6.70 |
| 1443211_PM_at          | Fgfr2                   | NA       | 0.00  | 2.21 | 0.03  | 9.79E-01 | 9.93E-01 | -6.70 |
| 1439594_PM_at          | D130062J10Rik           | NA       | 0.00  | 4.13 | 0.03  | 9.79E-01 | 9.93E-01 | -6.70 |
| AFFX-NonspecificGC3_at | ---                     | NA       | 0.00  | 1.83 | 0.03  | 9.79E-01 | 9.93E-01 | -6.70 |
| 1434430_PM_s_at        | Adora2b                 | ADORA2B  | 0.00  | 2.01 | -0.03 | 9.79E-01 | 9.93E-01 | -6.70 |
| 1456458_PM_at          | Ccdc53                  | WASHC3   | 0.00  | 2.02 | 0.03  | 9.79E-01 | 9.93E-01 | -6.70 |
| 1449546_PM_a_at        | Zfp617                  | NA       | 0.00  | 2.33 | 0.03  | 9.79E-01 | 9.93E-01 | -6.70 |
| 1415980_PM_at          | Atp5g2 /// LOC102641133 | ATP5G2   | 0.00  | 2.99 | -0.03 | 9.79E-01 | 9.93E-01 | -6.70 |
| 1451536_PM_at          | Mtfr1                   | MTFR1    | 0.00  | 2.33 | 0.03  | 9.79E-01 | 9.93E-01 | -6.70 |
| 1458103_PM_at          | Ncor1                   | NA       | 0.00  | 2.57 | 0.03  | 9.79E-01 | 9.93E-01 | -6.70 |
| 1436638_PM_at          | Firre                   | NA       | 0.01  | 2.78 | 0.03  | 9.79E-01 | 9.93E-01 | -6.70 |
| 1434389_PM_at          | Sos1                    | SOS1     | 0.00  | 3.34 | -0.03 | 9.79E-01 | 9.93E-01 | -6.70 |
| 1452452_PM_at          | ---                     | NA       | 0.01  | 6.82 | 0.03  | 9.79E-01 | 9.93E-01 | -6.70 |
| 1450239_PM_at          | Gira3                   | GLRA3    | 0.00  | 2.43 | 0.03  | 9.79E-01 | 9.93E-01 | -6.70 |
| 1460145_PM_at          | ---                     | NA       | 0.00  | 2.15 | -0.03 | 9.79E-01 | 9.93E-01 | -6.70 |
| 1434749_PM_at          | Mettl25                 | METTL25  | 0.00  | 2.45 | -0.03 | 9.79E-01 | 9.93E-01 | -6.70 |
| 1425226_PM_x_at        | LOC665506 /// Trbc2     | NA       | 0.00  | 2.54 | 0.03  | 9.79E-01 | 9.93E-01 | -6.70 |
| 1441631_PM_at          | ---                     | NA       | 0.00  | 2.38 | 0.03  | 9.79E-01 | 9.93E-01 | -6.70 |
| 1428558_PM_at          | Osgepl1                 | OSGEPL1  | 0.00  | 2.97 | 0.03  | 9.79E-01 | 9.93E-01 | -6.70 |
| 1425386_PM_at          | Ocstamp                 | OCSTAMP  | 0.00  | 2.27 | -0.03 | 9.79E-01 | 9.93E-01 | -6.70 |
| 1420662_PM_at          | Gid4                    | GID4     | 0.00  | 2.36 | -0.03 | 9.80E-01 | 9.93E-01 | -6.70 |
| 1452025_PM_a_at        | Zfp2                    | ZFP2     | 0.00  | 1.99 | -0.03 | 9.79E-01 | 9.93E-01 | -6.70 |
| 1453814_PM_at          | Bc11a                   | NA       | 0.01  | 3.65 | 0.03  | 9.80E-01 | 9.93E-01 | -6.70 |
| 1423577_PM_at          | Slf1                    | SLF1     | 0.01  | 3.32 | 0.03  | 9.79E-01 | 9.93E-01 | -6.70 |

|                 |                                   |            |       |      |       |          |          |       |
|-----------------|-----------------------------------|------------|-------|------|-------|----------|----------|-------|
| 1457189_PM_at   | ---                               | NA         | 0.00  | 2.24 | -0.03 | 9.80E-01 | 9.93E-01 | -6.70 |
| 1439879_PM_at   | ---                               | NA         | 0.00  | 2.22 | 0.03  | 9.80E-01 | 9.93E-01 | -6.70 |
| 1442870_PM_at   | ---                               | NA         | 0.00  | 2.77 | -0.03 | 9.80E-01 | 9.93E-01 | -6.70 |
| 1433518_PM_at   | Lcmt2                             | LCMT2      | 0.00  | 2.29 | 0.03  | 9.80E-01 | 9.93E-01 | -6.70 |
| 1446454_PM_at   | ---                               | NA         | 0.00  | 2.32 | 0.03  | 9.80E-01 | 9.93E-01 | -6.70 |
| 1455257_PM_at   | ltgb3                             | ACO68234.1 | -0.01 | 3.31 | -0.03 | 9.80E-01 | 9.93E-01 | -6.70 |
| 1430565_PM_at   | 1700030J2Rik                      | C16orf46   | 0.00  | 2.52 | -0.03 | 9.80E-01 | 9.93E-01 | -6.70 |
| 1424861_PM_at   | D930016D06Rik                     | NA         | 0.01  | 3.02 | 0.03  | 9.80E-01 | 9.93E-01 | -6.70 |
| 1442566_PM_at   | C78878                            | NA         | 0.01  | 3.14 | 0.03  | 9.80E-01 | 9.93E-01 | -6.70 |
| 1441897_PM_at   | Zak                               | MAP3K20    | -0.01 | 3.55 | -0.03 | 9.80E-01 | 9.93E-01 | -6.70 |
| 1446768_PM_at   | ---                               | NA         | -0.01 | 2.41 | -0.03 | 9.80E-01 | 9.93E-01 | -6.70 |
| 1453620_PM_at   | Cttntp2                           | NA         | 0.00  | 2.54 | -0.03 | 9.80E-01 | 9.93E-01 | -6.70 |
| 1425886_PM_at   | Fev                               | FEV        | 0.00  | 2.44 | -0.03 | 9.80E-01 | 9.93E-01 | -6.70 |
| 1449550_PM_at   | Myo1c                             | NA         | 0.00  | 2.70 | 0.03  | 9.80E-01 | 9.93E-01 | -6.70 |
| 1451123_PM_at   | N4bp3                             | N4BP3      | 0.00  | 2.76 | 0.03  | 9.80E-01 | 9.93E-01 | -6.70 |
| 1455207_PM_at   | Pthr1                             | PTRHD1     | 0.00  | 3.08 | 0.03  | 9.80E-01 | 9.93E-01 | -6.70 |
| 1439422_PM_a_at | Fam132a                           | C1QTNF12   | -0.01 | 3.19 | -0.03 | 9.80E-01 | 9.93E-01 | -6.70 |
| 1421037_PM_at   | Npas2                             | NPAS2      | -0.01 | 5.61 | -0.03 | 9.80E-01 | 9.93E-01 | -6.70 |
| 1455514_PM_at   | Kcnd1                             | KCND1      | 0.00  | 2.30 | 0.03  | 9.80E-01 | 9.93E-01 | -6.70 |
| 1456305_PM_x_at | Obox2                             | NA         | 0.01  | 2.43 | 0.03  | 9.80E-01 | 9.93E-01 | -6.70 |
| 1452742_PM_at   | Trak1                             | TRAK1      | 0.00  | 2.42 | 0.03  | 9.80E-01 | 9.93E-01 | -6.70 |
| 1418642_PM_at   | Lcp2                              | LCP2       | 0.00  | 2.19 | 0.03  | 9.80E-01 | 9.93E-01 | -6.70 |
| 1438225_PM_x_at | Tram1                             | TRAM1      | 0.00  | 2.30 | 0.03  | 9.80E-01 | 9.93E-01 | -6.70 |
| 1423070_PM_at   | Gm10045 /// Rpl21                 | RPL21      | 0.00  | 2.93 | 0.03  | 9.80E-01 | 9.93E-01 | -6.70 |
| 1420146_PM_at   | Tiam2                             | TIAM2      | 0.00  | 2.46 | 0.03  | 9.80E-01 | 9.93E-01 | -6.70 |
| 1434253_PM_s_at | Tmcc3                             | TMCC3      | -0.01 | 3.00 | -0.02 | 9.81E-01 | 9.93E-01 | -6.70 |
| 1425575_PM_at   | Epha3                             | EPHA3      | -0.01 | 4.48 | -0.02 | 9.81E-01 | 9.93E-01 | -6.70 |
| 1424207_PM_at   | Smarca5                           | SMARCA5    | 0.00  | 4.51 | -0.02 | 9.81E-01 | 9.93E-01 | -6.70 |
| 1428912_PM_at   | Ttl4                              | TTL4       | 0.00  | 3.33 | -0.02 | 9.81E-01 | 9.93E-01 | -6.70 |
| 1441990_PM_at   | Mre11a                            | MRE11      | 0.00  | 2.63 | -0.03 | 9.80E-01 | 9.93E-01 | -6.70 |
| 1459655_PM_at   | ---                               | NA         | 0.00  | 4.32 | -0.02 | 9.81E-01 | 9.93E-01 | -6.70 |
| 1455163_PM_at   | Guf1                              | GUF1       | 0.00  | 2.44 | -0.02 | 9.81E-01 | 9.93E-01 | -6.70 |
| 1440054_PM_at   | Pik3ca                            | PIK3CA     | 0.00  | 2.90 | -0.02 | 9.81E-01 | 9.93E-01 | -6.70 |
| 1420692_PM_at   | Il2ra                             | IL2RA      | 0.00  | 2.20 | -0.03 | 9.80E-01 | 9.93E-01 | -6.70 |
| 1425808_PM_a_at | Myocd                             | MYOCD      | 0.00  | 2.20 | -0.02 | 9.81E-01 | 9.93E-01 | -6.70 |
| 1420883_PM_at   | Sln                               | SLN        | 0.00  | 2.31 | -0.02 | 9.81E-01 | 9.93E-01 | -6.70 |
| 1439445_PM_x_at | Acly                              | ACLY       | 0.00  | 1.96 | 0.02  | 9.81E-01 | 9.93E-01 | -6.70 |
| 1457839_PM_at   | ---                               | NA         | 0.00  | 2.00 | 0.02  | 9.81E-01 | 9.93E-01 | -6.70 |
| 1420944_PM_at   | Zfp185                            | ZNF185     | 0.00  | 2.04 | 0.02  | 9.81E-01 | 9.93E-01 | -6.70 |
| 1448852_PM_at   | Rgn                               | RGN        | 0.00  | 2.26 | 0.02  | 9.81E-01 | 9.93E-01 | -6.70 |
| 1431933_PM_a_at | Dcp1a                             | DCP1A      | 0.00  | 2.39 | 0.02  | 9.81E-01 | 9.93E-01 | -6.70 |
| 1447276_PM_at   | D13Ert37e                         | NA         | 0.00  | 2.01 | 0.02  | 9.81E-01 | 9.93E-01 | -6.70 |
| 1428403_PM_at   | Fbrs1                             | FBRS1      | 0.00  | 2.02 | 0.02  | 9.81E-01 | 9.93E-01 | -6.70 |
| 1422322_PM_at   | Chml                              | CHML       | 0.00  | 2.35 | 0.02  | 9.81E-01 | 9.93E-01 | -6.70 |
| 1450483_PM_at   | Gjc2                              | GJC2       | 0.00  | 2.18 | 0.02  | 9.81E-01 | 9.93E-01 | -6.70 |
| 1425012_PM_at   | Gm15776 /// Gng5 /// LOC102641276 | GNG5       | 0.00  | 2.47 | 0.02  | 9.81E-01 | 9.93E-01 | -6.70 |
| 1459211_PM_at   | Gl12                              | GLI2       | 0.00  | 2.34 | 0.02  | 9.81E-01 | 9.93E-01 | -6.70 |
| 1448898_PM_at   | Ccl9                              | CCL15      | 0.00  | 2.17 | 0.02  | 9.81E-01 | 9.93E-01 | -6.70 |
| 1422289_PM_a_at | Ctsq                              | CTSL       | 0.00  | 2.33 | 0.02  | 9.81E-01 | 9.93E-01 | -6.70 |
| 1426494_PM_at   | Trmt10b                           | TRMT10B    | 0.00  | 2.44 | 0.02  | 9.81E-01 | 9.93E-01 | -6.70 |
| 1451246_PM_s_at | Aurkb                             | AURKB      | 0.00  | 2.89 | 0.02  | 9.81E-01 | 9.93E-01 | -6.70 |
| 1454986_PM_at   | Zfp668                            | ZNF668     | 0.00  | 2.69 | 0.02  | 9.81E-01 | 9.93E-01 | -6.70 |
| 1417897_PM_at   | Brms1                             | BRMS1      | 0.00  | 2.60 | 0.02  | 9.81E-01 | 9.93E-01 | -6.70 |
| 1424519_PM_at   | Mtg1                              | MTG1       | 0.00  | 2.69 | 0.02  | 9.81E-01 | 9.93E-01 | -6.70 |
| 1435752_PM_s_at | Abcc9                             | ABCC9      | 0.01  | 2.27 | 0.02  | 9.81E-01 | 9.93E-01 | -6.70 |
| 1433503_PM_at   | Ptgr2                             | ACO05520.1 | 0.01  | 5.30 | 0.02  | 9.81E-01 | 9.93E-01 | -6.70 |
| 1449338_PM_at   | Anapc16                           | ANAPC16    | 0.01  | 2.91 | 0.02  | 9.81E-01 | 9.93E-01 | -6.70 |
| 1426948_PM_at   | Tpr                               | TPR        | 0.01  | 3.06 | 0.02  | 9.81E-01 | 9.93E-01 | -6.70 |
| 1434667_PM_at   | Col8a2                            | COL8A2     | 0.00  | 2.43 | -0.02 | 9.81E-01 | 9.93E-01 | -6.70 |
| 1443117_PM_at   | Eya1                              | EYA1       | 0.00  | 3.23 | -0.02 | 9.81E-01 | 9.93E-01 | -6.70 |
| 1436006_PM_at   | Eif2ak1                           | EIF2AK1    | 0.00  | 2.84 | -0.02 | 9.81E-01 | 9.93E-01 | -6.70 |
| 1453192_PM_at   | Fam101a                           | RFLNA      | 0.00  | 2.42 | -0.02 | 9.81E-01 | 9.93E-01 | -6.70 |
| 1444512_PM_at   | Arhgap29                          | ARHGAP29   | 0.00  | 2.04 | -0.02 | 9.81E-01 | 9.93E-01 | -6.70 |
| 1439045_PM_x_at | Tc2n                              | TC2N       | 0.00  | 2.13 | 0.02  | 9.81E-01 | 9.93E-01 | -6.70 |
| 1450136_PM_at   | Cd38                              | CD38       | 0.00  | 2.22 | 0.02  | 9.81E-01 | 9.93E-01 | -6.70 |
| 1433300_PM_at   | ---                               | NA         | 0.01  | 3.61 | 0.02  | 9.81E-01 | 9.93E-01 | -6.70 |
| 1438211_PM_s_at | Dbp                               | DBP        | 0.01  | 6.39 | 0.02  | 9.81E-01 | 9.93E-01 | -6.70 |
| 1416583_PM_at   | Bad                               | BAD        | 0.00  | 2.93 | -0.02 | 9.82E-01 | 9.93E-01 | -6.70 |
| 1459147_PM_at   | Crtac1                            | NA         | 0.00  | 2.32 | -0.02 | 9.82E-01 | 9.93E-01 | -6.70 |
| 1446648_PM_at   | ---                               | NA         | 0.00  | 2.13 | -0.02 | 9.82E-01 | 9.93E-01 | -6.70 |
| 1443146_PM_at   | Atad2                             | ATAD2      | 0.00  | 2.86 | 0.02  | 9.82E-01 | 9.93E-01 | -6.70 |
| 1427996_PM_at   | BC028528                          | C1orf54    | 0.01  | 3.17 | 0.02  | 9.82E-01 | 9.93E-01 | -6.70 |
| 1445166_PM_at   | ---                               | NA         | 0.00  | 2.19 | -0.02 | 9.82E-01 | 9.93E-01 | -6.70 |
| 1431895_PM_at   | ---                               | NA         | 0.00  | 2.34 | -0.02 | 9.82E-01 | 9.93E-01 | -6.70 |

|                 |                              |          |       |       |       |          |          |       |
|-----------------|------------------------------|----------|-------|-------|-------|----------|----------|-------|
| 1441626_PM_at   | ---                          | NA       | 0.00  | 2.41  | 0.02  | 9.82E-01 | 9.93E-01 | -6.70 |
| 1428034_PM_a_at | Tnfrsf9                      | TNFRSF9  | 0.00  | 2.32  | 0.02  | 9.82E-01 | 9.93E-01 | -6.70 |
| 1447662_PM_x_at | Ldlrad4                      | LDLRAD4  | 0.00  | 2.66  | 0.02  | 9.82E-01 | 9.93E-01 | -6.70 |
| 1427033_PM_at   | Dnmbp                        | NA       | 0.01  | 2.45  | 0.02  | 9.82E-01 | 9.93E-01 | -6.70 |
| 1454071_PM_at   | ---                          | NA       | 0.00  | 2.32  | -0.02 | 9.82E-01 | 9.93E-01 | -6.70 |
| 1443564_PM_at   | Gm7969                       | NA       | 0.00  | 2.39  | 0.02  | 9.82E-01 | 9.93E-01 | -6.70 |
| 1432065_PM_at   | ---                          | NA       | 0.00  | 2.38  | 0.02  | 9.82E-01 | 9.93E-01 | -6.70 |
| 1424914_PM_at   | Cipc                         | CIPC     | 0.00  | 2.42  | -0.02 | 9.82E-01 | 9.94E-01 | -6.70 |
| 1451444_PM_s_at | Heatr6                       | HEATR6   | 0.00  | 2.22  | -0.02 | 9.82E-01 | 9.94E-01 | -6.70 |
| 1443399_PM_at   | AU021001                     | NA       | 0.01  | 2.31  | 0.02  | 9.82E-01 | 9.94E-01 | -6.70 |
| 1416698_PM_a_at | Cks1b                        | CKS1B    | -0.01 | 4.19  | -0.02 | 9.82E-01 | 9.94E-01 | -6.70 |
| 1433628_PM_at   | Coq10a                       | COQ10A   | 0.00  | 4.31  | -0.02 | 9.82E-01 | 9.94E-01 | -6.70 |
| 1424225_PM_at   | Asb8                         | ASB8     | 0.00  | 2.78  | -0.02 | 9.82E-01 | 9.94E-01 | -6.70 |
| 1443215_PM_at   | ---                          | NA       | 0.00  | 2.12  | 0.02  | 9.82E-01 | 9.94E-01 | -6.70 |
| 1428042_PM_at   | Igf1os                       | NA       | -0.01 | 3.87  | -0.02 | 9.82E-01 | 9.94E-01 | -6.70 |
| 1440108_PM_at   | Foxp2                        | FOXP2    | 0.00  | 2.27  | -0.02 | 9.82E-01 | 9.94E-01 | -6.70 |
| 1441910_PM_x_at | Ccne1                        | CCNE1    | -0.01 | 4.58  | -0.02 | 9.83E-01 | 9.94E-01 | -6.70 |
| 1440003_PM_at   | ---                          | NA       | 0.00  | 2.89  | -0.02 | 9.82E-01 | 9.94E-01 | -6.70 |
| 1451568_PM_at   | Dennd6a                      | DENND6A  | 0.00  | 3.71  | -0.02 | 9.82E-01 | 9.94E-01 | -6.70 |
| 1448473_PM_at   | Bub3                         | BUB3     | 0.00  | 3.41  | -0.02 | 9.83E-01 | 9.94E-01 | -6.70 |
| 1450765_PM_a_at | Pde6h                        | PDE6H    | 0.00  | 2.87  | -0.02 | 9.83E-01 | 9.94E-01 | -6.70 |
| 1439006_PM_x_at | Tmem255a                     | TMEM255A | 0.00  | 1.99  | -0.02 | 9.83E-01 | 9.94E-01 | -6.70 |
| 1433481_PM_at   | Fkbp14                       | FKBP14   | 0.00  | 2.38  | -0.02 | 9.83E-01 | 9.94E-01 | -6.70 |
| 1423827_PM_s_at | Noc4l                        | NOC4L    | 0.00  | 2.40  | -0.02 | 9.83E-01 | 9.94E-01 | -6.70 |
| 1422673_PM_at   | Prkd1                        | PRKD1    | 0.00  | 2.53  | -0.02 | 9.83E-01 | 9.94E-01 | -6.70 |
| 1428984_PM_a_at | 1700012B09Rik                | C11orf97 | 0.00  | 2.46  | -0.02 | 9.83E-01 | 9.94E-01 | -6.70 |
| 1446592_PM_at   | ---                          | NA       | 0.00  | 2.37  | -0.02 | 9.83E-01 | 9.94E-01 | -6.70 |
| 1456757_PM_at   | Zfp771                       | NA       | 0.00  | 2.01  | -0.02 | 9.83E-01 | 9.94E-01 | -6.70 |
| 1456842_PM_at   | Boll                         | BOLL     | 0.00  | 2.32  | 0.02  | 9.83E-01 | 9.94E-01 | -6.70 |
| 1431297_PM_a_at | Crnde                        | NA       | 0.00  | 2.48  | 0.02  | 9.82E-01 | 9.94E-01 | -6.70 |
| 1451183_PM_at   | Myo19                        | MYO19    | 0.00  | 2.45  | 0.02  | 9.83E-01 | 9.94E-01 | -6.70 |
| 1432650_PM_at   | ---                          | NA       | 0.00  | 2.15  | 0.02  | 9.83E-01 | 9.94E-01 | -6.70 |
| 1445786_PM_at   | Braf                         | BRAF     | 0.00  | 3.51  | 0.02  | 9.82E-01 | 9.94E-01 | -6.70 |
| 1428566_PM_at   | Hspbap1                      | HSPBAP1  | 0.00  | 2.71  | 0.02  | 9.83E-01 | 9.94E-01 | -6.70 |
| 1416836_PM_at   | Lrp10                        | LRP10    | 0.00  | 3.00  | 0.02  | 9.82E-01 | 9.94E-01 | -6.70 |
| 1451266_PM_at   | Mrp50                        | MRPL50   | 0.01  | 3.61  | 0.02  | 9.83E-01 | 9.94E-01 | -6.70 |
| 1454132_PM_at   | Tmeff2                       | TMEFF2   | 0.00  | 1.86  | 0.02  | 9.83E-01 | 9.94E-01 | -6.70 |
| 1427483_PM_at   | Slc25a24                     | SLC25A24 | 0.00  | 2.45  | 0.02  | 9.83E-01 | 9.94E-01 | -6.70 |
| 1417147_PM_at   | Fam69b                       | FAM69B   | 0.00  | 2.88  | -0.02 | 9.83E-01 | 9.94E-01 | -6.70 |
| 1420030_PM_at   | Slu7                         | NA       | 0.00  | 2.84  | -0.02 | 9.83E-01 | 9.94E-01 | -6.70 |
| 1445710_PM_x_at | Duxbl1 /// Duxbl2 /// Duxbl3 | DUXB     | 0.00  | 2.31  | -0.02 | 9.83E-01 | 9.94E-01 | -6.70 |
| 1455090_PM_at   | Angptl2                      | ANGPTL2  | 0.00  | 2.67  | -0.02 | 9.83E-01 | 9.94E-01 | -6.70 |
| 1445292_PM_at   | Cd300a                       | CD300A   | 0.00  | 2.33  | -0.02 | 9.83E-01 | 9.94E-01 | -6.70 |
| 1444961_PM_at   | ---                          | NA       | 0.00  | 2.42  | -0.02 | 9.83E-01 | 9.94E-01 | -6.70 |
| 1446425_PM_at   | Efcab14                      | EFCAB14  | 0.00  | 1.97  | 0.02  | 9.83E-01 | 9.94E-01 | -6.70 |
| 1460063_PM_at   | ---                          | NA       | 0.00  | 2.28  | 0.02  | 9.83E-01 | 9.94E-01 | -6.70 |
| 1436590_PM_at   | Ppp1r3b                      | PPP1R3B  | -0.01 | 2.66  | -0.02 | 9.83E-01 | 9.94E-01 | -6.70 |
| 1424030_PM_at   | Grhl1                        | GRHL1    | 0.00  | 3.47  | -0.02 | 9.83E-01 | 9.94E-01 | -6.70 |
| 1449401_PM_at   | C1qc                         | C1QC     | 0.00  | 2.87  | -0.02 | 9.83E-01 | 9.94E-01 | -6.70 |
| 1431437_PM_at   | Foxp4                        | NA       | 0.00  | 2.93  | -0.02 | 9.83E-01 | 9.94E-01 | -6.70 |
| 1452693_PM_at   | Dhx35                        | DHX35    | 0.00  | 2.31  | -0.02 | 9.83E-01 | 9.94E-01 | -6.70 |
| 1460713_PM_at   | Dnph1                        | DNPH1    | 0.00  | 2.66  | -0.02 | 9.83E-01 | 9.94E-01 | -6.70 |
| 1450585_PM_at   | Tas2r119                     | TAS2R1   | 0.00  | 2.21  | -0.02 | 9.83E-01 | 9.94E-01 | -6.70 |
| 1455897_PM_x_at | Hmgn1 /// LOC102641809       | NA       | 0.00  | 10.35 | 0.02  | 9.83E-01 | 9.94E-01 | -6.70 |
| 1425693_PM_at   | Braf                         | BRAF     | 0.00  | 3.75  | 0.02  | 9.83E-01 | 9.94E-01 | -6.70 |
| 1428930_PM_at   | Tmem29                       | FAM156A  | 0.00  | 2.97  | 0.02  | 9.83E-01 | 9.94E-01 | -6.70 |
| 1421054_PM_at   | Xpo4                         | XPO4     | 0.00  | 2.70  | 0.02  | 9.83E-01 | 9.94E-01 | -6.70 |
| 1429638_PM_at   | ---                          | NA       | 0.00  | 2.33  | 0.02  | 9.83E-01 | 9.94E-01 | -6.70 |
| 1457680_PM_a_at | Tmem69                       | TMEM69   | 0.00  | 2.82  | 0.02  | 9.83E-01 | 9.94E-01 | -6.70 |
| 1451398_PM_at   | Cbr4                         | CBR4     | -0.01 | 3.37  | -0.02 | 9.84E-01 | 9.94E-01 | -6.70 |
| 1428321_PM_at   | Eml1                         | EML1     | 0.00  | 2.70  | 0.02  | 9.84E-01 | 9.94E-01 | -6.70 |
| 1416785_PM_at   | Kcnp1                        | KCNP1    | 0.00  | 3.25  | 0.02  | 9.84E-01 | 9.94E-01 | -6.70 |
| 1428230_PM_at   | Prkd3                        | PRKD3    | 0.01  | 3.38  | 0.02  | 9.84E-01 | 9.94E-01 | -6.70 |
| 1433082_PM_at   | 4930448K20Rik                | NA       | 0.00  | 3.22  | 0.02  | 9.84E-01 | 9.94E-01 | -6.70 |
| 1448678_PM_at   | Fam118a                      | FAM118A  | 0.00  | 2.95  | -0.02 | 9.84E-01 | 9.94E-01 | -6.70 |
| 1440379_PM_at   | Slc1a5                       | SLC1A5   | 0.00  | 2.30  | -0.02 | 9.84E-01 | 9.94E-01 | -6.70 |
| 1451852_PM_at   | Tcstv3                       | NA       | 0.00  | 1.82  | 0.02  | 9.84E-01 | 9.94E-01 | -6.70 |
| 1420341_PM_at   | Tmco5                        | TMCO5A   | 0.00  | 2.27  | 0.02  | 9.84E-01 | 9.94E-01 | -6.70 |
| 1446684_PM_at   | Ralgapa1                     | RALGAP1  | 0.00  | 2.55  | 0.02  | 9.84E-01 | 9.94E-01 | -6.70 |
| 1440104_PM_at   | Ranbp2                       | RANBP2   | 0.00  | 2.27  | -0.02 | 9.84E-01 | 9.94E-01 | -6.70 |
| 1433091_PM_at   | ---                          | NA       | 0.00  | 2.35  | 0.02  | 9.84E-01 | 9.94E-01 | -6.70 |
| 1450732_PM_a_at | Bicd2                        | BICD2    | 0.00  | 2.59  | 0.02  | 9.84E-01 | 9.94E-01 | -6.70 |
| 1435127_PM_a_at | Osgep1                       | OSGEP1   | 0.00  | 2.53  | 0.02  | 9.84E-01 | 9.94E-01 | -6.70 |

|                 |                                                                            |            |       |      |       |          |          |       |
|-----------------|----------------------------------------------------------------------------|------------|-------|------|-------|----------|----------|-------|
| 1436561_PM_at   | Suv39h2                                                                    | SUV39H2    | 0.00  | 2.70 | 0.02  | 9.84E-01 | 9.94E-01 | -6.70 |
| 1447425_PM_at   | Vstm2b                                                                     | VSTM2B     | 0.00  | 2.15 | 0.02  | 9.84E-01 | 9.94E-01 | -6.70 |
| 1437128_PM_a_at | Zfp945                                                                     | NA         | 0.00  | 2.09 | 0.02  | 9.84E-01 | 9.94E-01 | -6.70 |
| 1433873_PM_s_at | Pcnt                                                                       | PCNT       | 0.00  | 4.55 | 0.02  | 9.84E-01 | 9.94E-01 | -6.70 |
| 1434723_PM_at   | E130307A14Rik                                                              | NA         | 0.00  | 4.57 | 0.02  | 9.84E-01 | 9.94E-01 | -6.70 |
| 1440965_PM_at   | Pigl                                                                       | NA         | 0.00  | 2.35 | 0.02  | 9.84E-01 | 9.94E-01 | -6.70 |
| 1429289_PM_at   | Letmd1                                                                     | NA         | 0.00  | 2.27 | 0.02  | 9.84E-01 | 9.94E-01 | -6.70 |
| 1433212_PM_at   | 2700008E08Rik                                                              | NA         | 0.00  | 2.38 | 0.02  | 9.84E-01 | 9.94E-01 | -6.70 |
| 1460131_PM_at   | ---                                                                        | NA         | 0.00  | 2.66 | 0.02  | 9.84E-01 | 9.94E-01 | -6.70 |
| 1427090_PM_at   | Gm15583 /// Zbed4                                                          | ZBED4      | -0.01 | 3.67 | -0.02 | 9.84E-01 | 9.94E-01 | -6.70 |
| 1437034_PM_x_at | Marcks                                                                     | MARCKS     | 0.00  | 2.71 | -0.02 | 9.85E-01 | 9.94E-01 | -6.70 |
| 1422392_PM_at   | Vmn1r15                                                                    | NA         | 0.00  | 2.58 | 0.02  | 9.85E-01 | 9.94E-01 | -6.70 |
| 1426196_PM_at   | Ighm                                                                       | NA         | 0.00  | 2.55 | -0.02 | 9.85E-01 | 9.94E-01 | -6.70 |
| 1453046_PM_at   | 1700110I01Rik ///<br>4930521O11Rik ///<br>Gm10410 /// Gm2977 ///<br>Gm3050 | NA         | 0.01  | 4.33 | 0.02  | 9.85E-01 | 9.94E-01 | -6.70 |
| 1416863_PM_at   | Abhd8                                                                      | ABHD8      | 0.00  | 2.99 | -0.02 | 9.85E-01 | 9.94E-01 | -6.70 |
| 1445087_PM_at   | ---                                                                        | NA         | 0.00  | 2.18 | -0.02 | 9.85E-01 | 9.94E-01 | -6.70 |
| 1425588_PM_at   | Ptprj                                                                      | PTPRJ      | 0.00  | 3.10 | -0.02 | 9.85E-01 | 9.95E-01 | -6.70 |
| 1420204_PM_at   | ---                                                                        | NA         | 0.01  | 2.50 | 0.02  | 9.85E-01 | 9.95E-01 | -6.70 |
| 1418533_PM_s_at | Fzd2                                                                       | FZD2       | 0.00  | 2.02 | 0.02  | 9.85E-01 | 9.95E-01 | -6.70 |
| 1429774_PM_a_at | Fam175a                                                                    | FAM175A    | 0.00  | 3.09 | 0.02  | 9.85E-01 | 9.95E-01 | -6.70 |
| 1440873_PM_at   | Skc2a9                                                                     | SLC2A9     | 0.00  | 2.30 | 0.02  | 9.85E-01 | 9.95E-01 | -6.70 |
| 1460114_PM_at   | ---                                                                        | NA         | 0.00  | 2.53 | 0.02  | 9.85E-01 | 9.95E-01 | -6.70 |
| 1427182_PM_s_at | Ldlrad4                                                                    | LDLRAD4    | 0.01  | 4.18 | 0.02  | 9.85E-01 | 9.95E-01 | -6.70 |
| 1422223_PM_at   | Grin2b                                                                     | GRIN2B     | 0.00  | 2.53 | -0.02 | 9.85E-01 | 9.95E-01 | -6.70 |
| 1458346_PM_x_at | ---                                                                        | NA         | 0.00  | 2.12 | -0.02 | 9.85E-01 | 9.95E-01 | -6.70 |
| 1427211_PM_at   | Krtap8-1                                                                   | KRTAP8-1   | 0.00  | 2.44 | -0.02 | 9.85E-01 | 9.95E-01 | -6.70 |
| 1443006_PM_at   | ---                                                                        | NA         | 0.00  | 2.42 | 0.02  | 9.85E-01 | 9.95E-01 | -6.70 |
| 1459511_PM_at   | ---                                                                        | NA         | 0.00  | 2.56 | 0.02  | 9.85E-01 | 9.95E-01 | -6.70 |
| 1423625_PM_a_at | Dnajc19 /// Dnajc19-ps                                                     | DNAJC19    | 0.01  | 5.44 | 0.02  | 9.85E-01 | 9.95E-01 | -6.70 |
| 1432812_PM_at   | LOC102632493                                                               | NA         | -0.01 | 2.61 | -0.02 | 9.85E-01 | 9.95E-01 | -6.70 |
| 1450566_PM_at   | Iib3                                                                       | NA         | 0.00  | 2.34 | -0.02 | 9.85E-01 | 9.95E-01 | -6.70 |
| 1419500_PM_at   | Pabpc2                                                                     | PABPC3     | 0.00  | 1.97 | 0.02  | 9.85E-01 | 9.95E-01 | -6.70 |
| 1426634_PM_at   | Skc5a9                                                                     | SLC5A9     | 0.00  | 2.23 | 0.02  | 9.85E-01 | 9.95E-01 | -6.70 |
| 1445044_PM_at   | ---                                                                        | NA         | 0.00  | 2.74 | 0.02  | 9.85E-01 | 9.95E-01 | -6.70 |
| 1422004_PM_at   | D730048I06Rik                                                              | NA         | 0.00  | 2.39 | 0.02  | 9.85E-01 | 9.95E-01 | -6.70 |
| 1451007_PM_at   | Cnmn2                                                                      | CNNM2      | 0.01  | 3.87 | 0.02  | 9.85E-01 | 9.95E-01 | -6.70 |
| 1436719_PM_at   | Skc35f1                                                                    | SLC35F1    | 0.01  | 6.32 | 0.02  | 9.85E-01 | 9.95E-01 | -6.70 |
| 1425987_PM_a_at | Kcnma1                                                                     | KCNMA1     | -0.01 | 5.48 | -0.02 | 9.86E-01 | 9.95E-01 | -6.70 |
| 1422038_PM_a_at | Tnfrsf22                                                                   | NA         | 0.00  | 2.51 | -0.02 | 9.85E-01 | 9.95E-01 | -6.70 |
| 1448899_PM_s_at | Rad51ap1                                                                   | RAD51AP1   | 0.00  | 2.30 | 0.02  | 9.85E-01 | 9.95E-01 | -6.70 |
| 1440560_PM_at   | ---                                                                        | NA         | 0.00  | 2.42 | 0.02  | 9.85E-01 | 9.95E-01 | -6.70 |
| 1425133_PM_s_at | Rab3il1                                                                    | RAB3IL1    | 0.00  | 3.16 | 0.02  | 9.86E-01 | 9.95E-01 | -6.70 |
| 1429749_PM_at   | Sfmbt1                                                                     | SFMBT1     | 0.00  | 2.93 | 0.02  | 9.86E-01 | 9.95E-01 | -6.70 |
| 1431439_PM_at   | 5830487J09Rik                                                              | NA         | 0.00  | 2.37 | -0.02 | 9.86E-01 | 9.95E-01 | -6.70 |
| 1430322_PM_at   | Arl13b                                                                     | ARL13B     | 0.00  | 2.13 | 0.02  | 9.86E-01 | 9.95E-01 | -6.70 |
| 1447018_PM_at   | ---                                                                        | NA         | 0.00  | 2.46 | 0.02  | 9.86E-01 | 9.95E-01 | -6.70 |
| 1455309_PM_at   | Ano6                                                                       | ANO6       | -0.01 | 5.05 | -0.02 | 9.86E-01 | 9.95E-01 | -6.70 |
| 1439244_PM_a_at | Tnrc6a                                                                     | TNRC6A     | -0.01 | 2.84 | -0.02 | 9.86E-01 | 9.95E-01 | -6.70 |
| 1432643_PM_at   | 4933411E06Rik                                                              | NA         | 0.00  | 2.13 | -0.02 | 9.86E-01 | 9.95E-01 | -6.70 |
| 1450153_PM_at   | Gopc                                                                       | AL132671.2 | 0.00  | 2.71 | -0.02 | 9.86E-01 | 9.95E-01 | -6.70 |
| 1427565_PM_a_at | Abcc5                                                                      | ABCC5      | 0.00  | 2.24 | -0.02 | 9.86E-01 | 9.95E-01 | -6.70 |
| 1443776_PM_at   | ---                                                                        | NA         | 0.00  | 2.13 | -0.02 | 9.86E-01 | 9.95E-01 | -6.70 |
| 1432469_PM_at   | Dusp21                                                                     | DUSP21     | 0.00  | 2.26 | 0.02  | 9.86E-01 | 9.95E-01 | -6.70 |
| 1444734_PM_at   | LOC102632594                                                               | NA         | 0.00  | 2.13 | 0.02  | 9.86E-01 | 9.95E-01 | -6.70 |
| 1437302_PM_at   | Adrb2                                                                      | ADRB2      | 0.00  | 2.59 | 0.02  | 9.86E-01 | 9.95E-01 | -6.70 |
| 1425939_PM_at   | Rad50                                                                      | NA         | 0.00  | 2.27 | 0.02  | 9.86E-01 | 9.95E-01 | -6.70 |
| 1417875_PM_at   | Ddx50                                                                      | DDX50      | 0.01  | 6.82 | 0.02  | 9.86E-01 | 9.95E-01 | -6.70 |
| 1438155_PM_x_at | Pigo                                                                       | PIGO       | 0.01  | 4.43 | 0.02  | 9.86E-01 | 9.95E-01 | -6.70 |
| 1444768_PM_at   | ---                                                                        | NA         | 0.00  | 2.89 | 0.02  | 9.86E-01 | 9.95E-01 | -6.70 |
| 1444570_PM_at   | ---                                                                        | NA         | 0.00  | 2.31 | -0.02 | 9.86E-01 | 9.95E-01 | -6.70 |
| 1440792_PM_x_at | Sigmar1                                                                    | SIGMAR1    | 0.00  | 2.62 | 0.02  | 9.86E-01 | 9.95E-01 | -6.70 |
| 1432013_PM_a_at | Mtfr2                                                                      | MTFR2      | 0.00  | 2.42 | 0.02  | 9.86E-01 | 9.95E-01 | -6.70 |
| 1431454_PM_at   | 4930523O13Rik                                                              | NA         | 0.00  | 2.22 | 0.02  | 9.86E-01 | 9.95E-01 | -6.70 |
| 1447306_PM_at   | 4930545H06Rik                                                              | NA         | 0.00  | 2.13 | 0.02  | 9.86E-01 | 9.95E-01 | -6.70 |
| 1440514_PM_at   | ---                                                                        | NA         | 0.00  | 2.31 | 0.02  | 9.87E-01 | 9.95E-01 | -6.70 |
| 1422316_PM_at   | Gp1ba                                                                      | GP1BA      | 0.00  | 2.45 | 0.02  | 9.87E-01 | 9.95E-01 | -6.70 |
| 1440305_PM_at   | ---                                                                        | NA         | -0.01 | 2.63 | -0.02 | 9.87E-01 | 9.95E-01 | -6.70 |
| 1431954_PM_x_at | 4930431C11Rik                                                              | NA         | 0.00  | 2.17 | -0.02 | 9.87E-01 | 9.95E-01 | -6.70 |
| 1431523_PM_at   | Rbm46os                                                                    | NA         | 0.00  | 2.17 | 0.02  | 9.87E-01 | 9.95E-01 | -6.70 |
| 1431737_PM_at   | Gm7008                                                                     | NA         | 0.00  | 2.13 | 0.02  | 9.87E-01 | 9.95E-01 | -6.70 |
| 1428619_PM_at   | Cox20                                                                      | COX20      | 0.00  | 6.60 | -0.02 | 9.87E-01 | 9.95E-01 | -6.70 |
| 1427079_PM_at   | Mapre3                                                                     | MAPRE3     | 0.00  | 3.84 | -0.02 | 9.87E-01 | 9.95E-01 | -6.70 |

|                 |                  |            |       |      |       |          |          |       |
|-----------------|------------------|------------|-------|------|-------|----------|----------|-------|
| 1446163_PM_at   | ---              | NA         | 0.00  | 2.61 | -0.02 | 9.87E-01 | 9.95E-01 | -6.70 |
| 1435483_PM_x_at | Slc25a32         | SLC25A32   | 0.00  | 2.73 | -0.02 | 9.87E-01 | 9.95E-01 | -6.70 |
| 1446240_PM_at   | ---              | NA         | 0.00  | 2.37 | -0.02 | 9.87E-01 | 9.95E-01 | -6.70 |
| 1430430_PM_at   | Egfem1           | NA         | 0.00  | 2.09 | -0.02 | 9.87E-01 | 9.95E-01 | -6.70 |
| 1428604_PM_at   | Z610305D13Rik    | NA         | 0.00  | 1.97 | -0.02 | 9.87E-01 | 9.95E-01 | -6.70 |
| 1439091_PM_at   | Fancd2           | FANCD2     | 0.00  | 2.45 | -0.02 | 9.87E-01 | 9.95E-01 | -6.70 |
| 1423478_PM_at   | Prkcb            | PRKCB      | 0.00  | 5.86 | 0.02  | 9.87E-01 | 9.95E-01 | -6.70 |
| 1419909_PM_at   | Mphosph9         | MPHOSPH9   | -0.01 | 3.13 | -0.02 | 9.87E-01 | 9.95E-01 | -6.70 |
| 1458547_PM_at   | ---              | NA         | 0.00  | 2.22 | 0.02  | 9.87E-01 | 9.95E-01 | -6.70 |
| 1449779_PM_at   | ---              | NA         | 0.00  | 2.57 | -0.02 | 9.87E-01 | 9.95E-01 | -6.70 |
| 1445454_PM_at   | D2Ert282e        | NA         | 0.00  | 2.35 | -0.02 | 9.87E-01 | 9.95E-01 | -6.70 |
| 1421418_PM_a_at | Psg19            | CEACAM3    | 0.00  | 2.14 | -0.02 | 9.87E-01 | 9.95E-01 | -6.70 |
| 1437683_PM_x_at | Serf2            | SERF2      | 0.00  | 3.55 | 0.02  | 9.87E-01 | 9.95E-01 | -6.70 |
| 1457986_PM_at   | ---              | NA         | 0.01  | 3.31 | 0.02  | 9.87E-01 | 9.95E-01 | -6.70 |
| 1435202_PM_at   | Zfp574           | ZNF574     | 0.00  | 2.73 | 0.02  | 9.87E-01 | 9.95E-01 | -6.70 |
| 1430985_PM_at   | Tmem256          | TMEM256    | 0.00  | 3.42 | -0.02 | 9.87E-01 | 9.95E-01 | -6.70 |
| 1453318_PM_at   | Tmem102          | TMEM102    | 0.00  | 2.29 | -0.02 | 9.87E-01 | 9.96E-01 | -6.70 |
| 1428398_PM_at   | B3galt5          | B3GALT5    | 0.00  | 2.52 | 0.02  | 9.87E-01 | 9.96E-01 | -6.70 |
| 1420887_PM_a_at | Bcl2l1           | BCL2L1     | 0.01  | 3.47 | 0.02  | 9.87E-01 | 9.96E-01 | -6.70 |
| 1438382_PM_x_at | Urgcp            | NA         | 0.00  | 3.80 | 0.02  | 9.87E-01 | 9.96E-01 | -6.70 |
| 1440577_PM_at   | ---              | NA         | 0.00  | 3.23 | 0.02  | 9.88E-01 | 9.96E-01 | -6.70 |
| 1446265_PM_at   | Dnm3             | DNM3       | 0.00  | 2.87 | -0.02 | 9.88E-01 | 9.96E-01 | -6.70 |
| 1432092_PM_a_at | Gulp1            | GULP1      | 0.00  | 2.44 | 0.02  | 9.88E-01 | 9.96E-01 | -6.70 |
| 1421090_PM_at   | Epb41l1          | EPB41L1    | 0.00  | 3.82 | -0.02 | 9.88E-01 | 9.96E-01 | -6.70 |
| 1443316_PM_at   | ---              | NA         | 0.00  | 2.16 | -0.02 | 9.88E-01 | 9.96E-01 | -6.70 |
| 1459980_PM_x_at | Rab3a            | RAB3A      | 0.00  | 9.08 | -0.02 | 9.88E-01 | 9.96E-01 | -6.70 |
| 1441115_PM_at   | ---              | NA         | 0.00  | 2.10 | -0.02 | 9.88E-01 | 9.96E-01 | -6.70 |
| 1429371_PM_at   | Zfp788           | ACO08758.1 | -0.01 | 3.00 | -0.02 | 9.88E-01 | 9.96E-01 | -6.70 |
| 1441624_PM_at   | Sorbs2           | SORBS2     | 0.01  | 3.81 | 0.02  | 9.88E-01 | 9.96E-01 | -6.70 |
| 1445906_PM_at   | ---              | NA         | 0.00  | 2.24 | -0.02 | 9.88E-01 | 9.96E-01 | -6.70 |
| 1418063_PM_at   | Kera             | KERA       | 0.00  | 2.10 | 0.02  | 9.88E-01 | 9.96E-01 | -6.70 |
| 1443598_PM_at   | Gm38396          | NA         | 0.00  | 2.73 | 0.02  | 9.88E-01 | 9.96E-01 | -6.70 |
| 1436235_PM_x_at | Simc1            | SIMC1      | 0.00  | 2.48 | 0.02  | 9.88E-01 | 9.96E-01 | -6.70 |
| 1437989_PM_at   | Pde8b            | PDE8B      | 0.01  | 4.40 | 0.02  | 9.88E-01 | 9.96E-01 | -6.70 |
| 1421528_PM_a_at | Med22            | MED22      | 0.00  | 3.87 | -0.02 | 9.88E-01 | 9.96E-01 | -6.70 |
| 1457833_PM_at   | Al450241         | NA         | 0.00  | 2.66 | 0.02  | 9.88E-01 | 9.96E-01 | -6.70 |
| 1424109_PM_a_at | Glo1             | GLO1       | 0.00  | 2.67 | -0.02 | 9.88E-01 | 9.96E-01 | -6.70 |
| 1419380_PM_at   | Zfp423           | ZNF423     | 0.00  | 2.79 | -0.02 | 9.88E-01 | 9.96E-01 | -6.70 |
| 1416193_PM_at   | Car1             | CA1        | 0.00  | 2.53 | 0.02  | 9.88E-01 | 9.96E-01 | -6.70 |
| 1451793_PM_at   | Klh24            | KLHL24     | -0.01 | 4.77 | -0.01 | 9.88E-01 | 9.96E-01 | -6.70 |
| 1451421_PM_a_at | Rogdi            | ROGDI      | 0.00  | 4.91 | -0.01 | 9.88E-01 | 9.96E-01 | -6.70 |
| 1425247_PM_a_at | Ighg1            | NA         | 0.00  | 3.14 | -0.01 | 9.88E-01 | 9.96E-01 | -6.70 |
| 1431305_PM_at   | Mcoln1           | NA         | 0.00  | 2.42 | -0.01 | 9.88E-01 | 9.96E-01 | -6.70 |
| 1417798_PM_at   | Kdf1             | KDF1       | 0.00  | 2.65 | 0.01  | 9.88E-01 | 9.96E-01 | -6.70 |
| 1442229_PM_at   | Pax9             | PAX9       | 0.00  | 2.45 | 0.01  | 9.88E-01 | 9.96E-01 | -6.70 |
| 1422631_PM_at   | Ahr              | AHR        | 0.00  | 2.99 | -0.01 | 9.89E-01 | 9.96E-01 | -6.70 |
| 1419482_PM_at   | C3ar1            | C3AR1      | 0.00  | 2.29 | -0.01 | 9.89E-01 | 9.96E-01 | -6.70 |
| 1431514_PM_at   | 5730453C05Rik    | NA         | 0.00  | 2.71 | 0.01  | 9.89E-01 | 9.96E-01 | -6.70 |
| 1448902_PM_at   | Ttc23            | ITTC23     | 0.00  | 2.05 | -0.01 | 9.89E-01 | 9.96E-01 | -6.70 |
| 1417206_PM_at   | Urod             | UROD       | 0.00  | 4.94 | -0.01 | 9.89E-01 | 9.96E-01 | -6.70 |
| 1417878_PM_at   | Ezf1             | EZF1       | 0.00  | 2.32 | 0.01  | 9.89E-01 | 9.96E-01 | -6.70 |
| 1429401_PM_at   | Stox2            | STOX2      | 0.00  | 2.60 | 0.01  | 9.89E-01 | 9.96E-01 | -6.70 |
| 1417060_PM_at   | Ppp1r11          | PPP1R11    | 0.00  | 2.25 | -0.01 | 9.89E-01 | 9.96E-01 | -6.70 |
| 1434366_PM_x_at | C1qb             | C1QB       | -0.01 | 5.52 | -0.01 | 9.89E-01 | 9.96E-01 | -6.70 |
| 1425019_PM_at   | Ubxn2a           | UBXN2A     | 0.00  | 3.98 | -0.01 | 9.89E-01 | 9.96E-01 | -6.70 |
| 1452901_PM_at   | Creb1            | CREB1      | 0.00  | 6.06 | -0.01 | 9.89E-01 | 9.96E-01 | -6.70 |
| 1435037_PM_at   | Pgap3            | PGAP3      | 0.00  | 3.11 | -0.01 | 9.89E-01 | 9.96E-01 | -6.70 |
| 1453555_PM_at   | ---              | NA         | 0.00  | 2.45 | -0.01 | 9.89E-01 | 9.96E-01 | -6.70 |
| 1444694_PM_at   | ---              | NA         | 0.00  | 2.34 | -0.01 | 9.89E-01 | 9.96E-01 | -6.70 |
| 1453110_PM_at   | Poc1b            | POC1B      | 0.00  | 2.89 | -0.01 | 9.89E-01 | 9.96E-01 | -6.70 |
| 1438323_PM_at   | Gm38999 /// Lim2 | LIM2       | 0.00  | 2.62 | -0.01 | 9.89E-01 | 9.96E-01 | -6.70 |
| 1415837_PM_at   | Klk1             | KLK3       | 0.00  | 2.09 | -0.01 | 9.89E-01 | 9.96E-01 | -6.70 |
| 1458657_PM_at   | ---              | NA         | 0.00  | 2.51 | 0.01  | 9.89E-01 | 9.96E-01 | -6.70 |
| 1421299_PM_a_at | Lef1             | LEF1       | 0.00  | 2.09 | 0.01  | 9.89E-01 | 9.96E-01 | -6.70 |
| 1415921_PM_a_at | Tnfrsf19         | TNFRSF19   | 0.00  | 2.35 | 0.01  | 9.89E-01 | 9.96E-01 | -6.70 |
| 1425162_PM_at   | Rorb             | RORB       | 0.00  | 2.48 | 0.01  | 9.89E-01 | 9.96E-01 | -6.70 |
| 1449480_PM_at   | Sap18            | SAP18      | 0.00  | 3.14 | 0.01  | 9.89E-01 | 9.96E-01 | -6.70 |
| 1427263_PM_at   | Xist             | NA         | 0.01  | 2.49 | 0.01  | 9.89E-01 | 9.96E-01 | -6.70 |
| 1417035_PM_at   | Sac3d1           | SAC3D1     | 0.00  | 3.02 | 0.01  | 9.89E-01 | 9.96E-01 | -6.70 |
| 1427441_PM_a_at | Suclg2           | SUCLG2     | 0.00  | 2.37 | -0.01 | 9.89E-01 | 9.96E-01 | -6.70 |
| 1435969_PM_at   | Slx4             | SLX4       | 0.00  | 2.67 | -0.01 | 9.89E-01 | 9.96E-01 | -6.70 |
| 1435560_PM_at   | Ilgal            | ITGAL      | 0.00  | 2.48 | -0.01 | 9.89E-01 | 9.96E-01 | -6.70 |
| 1429199_PM_s_at | Saal1            | SAAL1      | 0.00  | 2.96 | 0.01  | 9.89E-01 | 9.96E-01 | -6.70 |
| 1445056_PM_at   | 9230102K24Rik    | NA         | 0.00  | 1.97 | 0.01  | 9.89E-01 | 9.96E-01 | -6.70 |
| 1437653_PM_at   | Irgq             | IRGQ       | 0.00  | 2.62 | -0.01 | 9.89E-01 | 9.96E-01 | -6.70 |

|                 |                        |          |       |      |       |          |          |       |
|-----------------|------------------------|----------|-------|------|-------|----------|----------|-------|
| 1459013_PM_at   | ---                    | NA       | 0.00  | 2.12 | 0.01  | 9.89E-01 | 9.96E-01 | -6.70 |
| 1451548_PM_at   | Upp2                   | UPP2     | 0.00  | 1.95 | 0.01  | 9.89E-01 | 9.96E-01 | -6.70 |
| 1419730_PM_at   | Ahcy12                 | AHCYL2   | 0.00  | 2.67 | -0.01 | 9.89E-01 | 9.96E-01 | -6.70 |
| 1446845_PM_at   | Gm5065                 | NA       | 0.00  | 2.44 | -0.01 | 9.89E-01 | 9.96E-01 | -6.70 |
| 1424041_PM_s_at | C1s1                   | C1S      | 0.00  | 2.29 | 0.01  | 9.89E-01 | 9.96E-01 | -6.70 |
| 1455225_PM_at   | Syne1                  | SYNE1    | 0.00  | 4.95 | 0.01  | 9.89E-01 | 9.96E-01 | -6.70 |
| 1453866_PM_a_at | Xk                     | XK       | 0.00  | 2.29 | -0.01 | 9.90E-01 | 9.96E-01 | -6.70 |
| 1431243_PM_at   | Tbck                   | TBCK     | 0.00  | 2.72 | -0.01 | 9.90E-01 | 9.96E-01 | -6.70 |
| 1440891_PM_at   | Gria4                  | GRIA4    | 0.00  | 2.23 | -0.01 | 9.90E-01 | 9.96E-01 | -6.70 |
| 1459218_PM_at   | Mroh1                  | MROH1    | 0.00  | 2.71 | 0.01  | 9.90E-01 | 9.96E-01 | -6.70 |
| 1431187_PM_s_at | Dlg5                   | DLG5     | 0.00  | 2.45 | 0.01  | 9.90E-01 | 9.96E-01 | -6.70 |
| 1450528_PM_at   | B3galt5                | B3GALT5  | 0.00  | 2.29 | 0.01  | 9.90E-01 | 9.96E-01 | -6.70 |
| 1439449_PM_at   | Satb1                  | SATB1    | 0.00  | 3.36 | 0.01  | 9.90E-01 | 9.96E-01 | -6.70 |
| 1458837_PM_at   | 2810006K23Rik          | C12orf65 | 0.00  | 2.47 | -0.01 | 9.90E-01 | 9.96E-01 | -6.70 |
| 1431341_PM_at   | ---                    | NA       | 0.00  | 2.79 | -0.01 | 9.90E-01 | 9.96E-01 | -6.70 |
| 1422427_PM_a_at | Svs2                   | NA       | 0.00  | 2.22 | -0.01 | 9.90E-01 | 9.96E-01 | -6.70 |
| 1430438_PM_at   | Bod1l                  | BOD1L1   | 0.00  | 2.33 | -0.01 | 9.90E-01 | 9.96E-01 | -6.70 |
| 1437130_PM_at   | Kbtb6                  | NA       | 0.00  | 2.26 | -0.01 | 9.90E-01 | 9.96E-01 | -6.70 |
| 1424549_PM_at   | Degs2                  | DEGS2    | 0.00  | 2.82 | 0.01  | 9.90E-01 | 9.96E-01 | -6.70 |
| 1445826_PM_at   | Ankrd17                | ANKRD17  | 0.00  | 2.46 | 0.01  | 9.90E-01 | 9.96E-01 | -6.70 |
| 1459066_PM_at   | ---                    | NA       | 0.00  | 4.95 | 0.01  | 9.90E-01 | 9.96E-01 | -6.70 |
| 1440520_PM_a_at | 1700051A21Rik          | NA       | 0.01  | 2.59 | 0.01  | 9.90E-01 | 9.96E-01 | -6.70 |
| 1420233_PM_at   | ---                    | NA       | 0.00  | 2.50 | 0.01  | 9.90E-01 | 9.96E-01 | -6.70 |
| 1458053_PM_at   | Abi2                   | ABI2     | 0.00  | 3.73 | -0.01 | 9.90E-01 | 9.96E-01 | -6.70 |
| 1445232_PM_at   | Dock9                  | NA       | 0.00  | 3.26 | -0.01 | 9.90E-01 | 9.96E-01 | -6.70 |
| 1423571_PM_at   | S1pr1                  | S1PR1    | 0.00  | 4.21 | -0.01 | 9.90E-01 | 9.96E-01 | -6.70 |
| 1431324_PM_at   | Ecm2                   | NA       | 0.00  | 2.47 | -0.01 | 9.90E-01 | 9.96E-01 | -6.70 |
| 1425238_PM_at   | Gm6607                 | NA       | 0.00  | 2.55 | -0.01 | 9.90E-01 | 9.96E-01 | -6.70 |
| 1453950_PM_a_at | Xrcc2                  | XRCC2    | 0.00  | 2.60 | -0.01 | 9.90E-01 | 9.96E-01 | -6.70 |
| 1446482_PM_at   | Cep63                  | CEP63    | 0.00  | 2.39 | -0.01 | 9.90E-01 | 9.96E-01 | -6.70 |
| 1417554_PM_at   | Gm10681 /// Gm4450 /// | Hsd3b4   | 0.00  | 2.02 | -0.01 | 9.90E-01 | 9.96E-01 | -6.70 |
| 1445593_PM_at   | ---                    | NA       | 0.00  | 1.98 | -0.01 | 9.90E-01 | 9.96E-01 | -6.70 |
| 1427358_PM_a_at | Dapk1                  | DAPK1    | 0.00  | 2.48 | 0.01  | 9.90E-01 | 9.96E-01 | -6.70 |
| 1444295_PM_at   | ---                    | NA       | 0.00  | 2.58 | 0.01  | 9.90E-01 | 9.96E-01 | -6.70 |
| 1446445_PM_at   | ---                    | NA       | 0.00  | 2.66 | 0.01  | 9.90E-01 | 9.96E-01 | -6.70 |
| 1427583_PM_at   | Rictor                 | RICTOR   | 0.00  | 2.51 | 0.01  | 9.90E-01 | 9.96E-01 | -6.70 |
| 1427501_PM_at   | Erich3                 | ERICH3   | 0.00  | 2.72 | 0.01  | 9.90E-01 | 9.96E-01 | -6.70 |
| 1444571_PM_at   | ---                    | NA       | 0.01  | 4.28 | 0.01  | 9.90E-01 | 9.96E-01 | -6.70 |
| 1422681_PM_at   | Ctr9                   | CTR9     | 0.00  | 2.50 | 0.01  | 9.90E-01 | 9.96E-01 | -6.70 |
| 1429824_PM_at   | 4930550C14Rik          | C11orf65 | 0.00  | 2.26 | -0.01 | 9.90E-01 | 9.96E-01 | -6.70 |
| 1444750_PM_at   | ---                    | NA       | 0.00  | 2.69 | -0.01 | 9.90E-01 | 9.96E-01 | -6.70 |
| 1438034_PM_at   | Rmdn1                  | RMDN1    | 0.00  | 2.18 | 0.01  | 9.90E-01 | 9.96E-01 | -6.70 |
| 1418088_PM_a_at | Stx8                   | STX8     | 0.00  | 2.64 | 0.01  | 9.91E-01 | 9.97E-01 | -6.70 |
| 1438889_PM_at   | Pcdh11x                | PCDH11Y  | 0.00  | 3.19 | 0.01  | 9.91E-01 | 9.97E-01 | -6.70 |
| 1416901_PM_at   | Npc2                   | NPC2     | 0.00  | 3.48 | -0.01 | 9.91E-01 | 9.97E-01 | -6.70 |
| 1443944_PM_at   | C530005A16Rik          | NA       | 0.00  | 2.42 | -0.01 | 9.91E-01 | 9.97E-01 | -6.70 |
| 1453850_PM_at   | 1500002I01Rik          | NA       | 0.00  | 4.43 | 0.01  | 9.91E-01 | 9.97E-01 | -6.70 |
| 1419345_PM_at   | Pth                    | PTH      | 0.00  | 2.21 | 0.01  | 9.91E-01 | 9.97E-01 | -6.70 |
| 1445552_PM_at   | ---                    | NA       | 0.00  | 3.35 | -0.01 | 9.91E-01 | 9.97E-01 | -6.70 |
| 1451405_PM_at   | Pcca                   | PCCA     | 0.00  | 3.04 | -0.01 | 9.91E-01 | 9.97E-01 | -6.70 |
| 1433103_PM_at   | Hyls1                  | HYLS1    | 0.00  | 2.95 | -0.01 | 9.91E-01 | 9.97E-01 | -6.70 |
| 1427896_PM_at   | Suds3                  | SUDS3    | 0.00  | 2.66 | -0.01 | 9.91E-01 | 9.97E-01 | -6.70 |
| 1445974_PM_at   | ---                    | NA       | 0.00  | 2.29 | -0.01 | 9.91E-01 | 9.97E-01 | -6.70 |
| 1447494_PM_at   | ---                    | NA       | 0.00  | 2.13 | -0.01 | 9.91E-01 | 9.97E-01 | -6.70 |
| 1442797_PM_x_at | Cmtm2a                 | CMTM2    | 0.00  | 1.98 | -0.01 | 9.91E-01 | 9.97E-01 | -6.70 |
| 1419319_PM_at   | Saa4                   | SAA4     | 0.00  | 2.10 | 0.01  | 9.91E-01 | 9.97E-01 | -6.70 |
| 1443789_PM_x_at | Cox8c                  | COX8C    | 0.00  | 2.20 | 0.01  | 9.91E-01 | 9.97E-01 | -6.70 |
| 1430339_PM_at   | Efcab11                | EFCAB11  | 0.00  | 2.06 | 0.01  | 9.91E-01 | 9.97E-01 | -6.70 |
| 1440898_PM_at   | Fam179a                | TOGARAM2 | 0.00  | 2.87 | 0.01  | 9.91E-01 | 9.97E-01 | -6.70 |
| 1420387_PM_at   | Mpv17                  | MPV17    | 0.00  | 2.88 | 0.01  | 9.91E-01 | 9.97E-01 | -6.70 |
| 1423053_PM_at   | Arf4                   | ARF4     | 0.00  | 3.09 | 0.01  | 9.91E-01 | 9.97E-01 | -6.70 |
| 1434401_PM_at   | Zcchc2                 | ZCCHC2   | 0.00  | 5.99 | 0.01  | 9.91E-01 | 9.97E-01 | -6.70 |
| 1454631_PM_at   | Gtf2a1                 | GTF2A1   | 0.01  | 4.01 | 0.01  | 9.91E-01 | 9.97E-01 | -6.70 |
| 1438707_PM_at   | Atp13a4                | ATP13A4  | 0.00  | 3.47 | -0.01 | 9.91E-01 | 9.97E-01 | -6.70 |
| 1444823_PM_at   | ---                    | NA       | 0.00  | 1.95 | 0.01  | 9.91E-01 | 9.97E-01 | -6.70 |
| 1435864_PM_a_at | Coa6                   | COA6     | -0.01 | 3.01 | -0.01 | 9.91E-01 | 9.97E-01 | -6.70 |
| 1431134_PM_at   | Ing5                   | ING5     | 0.00  | 2.37 | -0.01 | 9.91E-01 | 9.97E-01 | -6.70 |
| 1459400_PM_at   | Trdc                   | NA       | 0.00  | 2.05 | 0.01  | 9.91E-01 | 9.97E-01 | -6.70 |
| 1457413_PM_at   | ---                    | NA       | 0.00  | 2.31 | -0.01 | 9.91E-01 | 9.97E-01 | -6.70 |
| 1436944_PM_x_at | Pisd-ps1 /// Pisd-ps3  | NA       | 0.00  | 9.39 | -0.01 | 9.91E-01 | 9.97E-01 | -6.70 |
| 1424120_PM_at   | Rnf8                   | RNF8     | 0.00  | 4.48 | -0.01 | 9.92E-01 | 9.97E-01 | -6.70 |
| 1420485_PM_at   | Nol7                   | NOL7     | 0.00  | 2.24 | -0.01 | 9.91E-01 | 9.97E-01 | -6.70 |
| 1458735_PM_at   | ---                    | NA       | 0.00  | 2.28 | -0.01 | 9.92E-01 | 9.97E-01 | -6.70 |
| 1441401_PM_at   | C79329                 | NA       | 0.00  | 2.08 | 0.01  | 9.91E-01 | 9.97E-01 | -6.70 |

|                 |                              |          |      |      |       |          |          |       |
|-----------------|------------------------------|----------|------|------|-------|----------|----------|-------|
| 1441802_PM_at   | ---                          | NA       | 0.00 | 2.22 | 0.01  | 9.92E-01 | 9.97E-01 | -6.70 |
| 1455765_PM_a_at | Abcc8                        | ABCC8    | 0.00 | 2.83 | 0.01  | 9.92E-01 | 9.97E-01 | -6.70 |
| 1417506_PM_at   | Gmnn                         | GMNN     | 0.00 | 2.36 | 0.01  | 9.92E-01 | 9.97E-01 | -6.70 |
| 1439870_PM_at   | ---                          | NA       | 0.00 | 3.41 | 0.01  | 9.92E-01 | 9.97E-01 | -6.70 |
| 1418171_PM_at   | Tcea18                       | TCEAL8   | 0.00 | 3.54 | 0.01  | 9.92E-01 | 9.97E-01 | -6.70 |
| 1426469_PM_a_at | Tbp                          | TBP      | 0.00 | 3.80 | 0.01  | 9.92E-01 | 9.97E-01 | -6.70 |
| 1439457_PM_x_at | Atg12                        | ATG12    | 0.00 | 2.16 | -0.01 | 9.92E-01 | 9.97E-01 | -6.70 |
| 1421947_PM_at   | Gng12                        | GNG12    | 0.00 | 3.74 | -0.01 | 9.92E-01 | 9.97E-01 | -6.70 |
| 1444438_PM_at   | Cib3                         | CIB3     | 0.00 | 2.80 | -0.01 | 9.92E-01 | 9.97E-01 | -6.70 |
| 1449960_PM_at   | Nptx2                        | NPTX2    | 0.00 | 2.34 | 0.01  | 9.92E-01 | 9.97E-01 | -6.70 |
| 1452437_PM_at   | Ccdc167                      | CCDC167  | 0.00 | 2.46 | -0.01 | 9.92E-01 | 9.97E-01 | -6.70 |
| 1438060_PM_at   | Npas3                        | NPAS3    | 0.00 | 2.56 | 0.01  | 9.92E-01 | 9.97E-01 | -6.70 |
| 1455684_PM_at   | Map3k9                       | MAP3K9   | 0.00 | 3.44 | 0.01  | 9.92E-01 | 9.97E-01 | -6.70 |
| 1446090_PM_at   | Zfp800                       | NA       | 0.00 | 2.64 | -0.01 | 9.92E-01 | 9.97E-01 | -6.70 |
| 1423581_PM_at   | Nmt2                         | NMT2     | 0.00 | 3.72 | -0.01 | 9.92E-01 | 9.97E-01 | -6.70 |
| 1435264_PM_at   | Emilin2                      | EMILIN2  | 0.00 | 2.19 | -0.01 | 9.92E-01 | 9.97E-01 | -6.70 |
| 1422721_PM_at   | Tnk1                         | TNK1     | 0.00 | 2.62 | -0.01 | 9.92E-01 | 9.97E-01 | -6.70 |
| 1443381_PM_at   | Etv4                         | NA       | 0.00 | 2.31 | 0.01  | 9.92E-01 | 9.97E-01 | -6.70 |
| 1418488_PM_s_at | Ripk4                        | RIPK4    | 0.00 | 1.96 | -0.01 | 9.92E-01 | 9.97E-01 | -6.70 |
| 1421868_PM_a_at | Pnlip                        | PNLIP    | 0.00 | 2.05 | -0.01 | 9.92E-01 | 9.97E-01 | -6.70 |
| 1436580_PM_at   | ---                          | NA       | 0.00 | 3.71 | -0.01 | 9.92E-01 | 9.97E-01 | -6.70 |
| 1439713_PM_at   | ---                          | NA       | 0.00 | 2.72 | 0.01  | 9.92E-01 | 9.97E-01 | -6.70 |
| 1456627_PM_at   | Ubqln2                       | NA       | 0.00 | 2.33 | -0.01 | 9.92E-01 | 9.97E-01 | -6.70 |
| 1446207_PM_at   | ---                          | NA       | 0.00 | 3.45 | 0.01  | 9.92E-01 | 9.97E-01 | -6.70 |
| 1420881_PM_at   | Nsd1                         | NSD1     | 0.00 | 7.39 | -0.01 | 9.92E-01 | 9.97E-01 | -6.70 |
| 1449895_PM_at   | Acr                          | ACR      | 0.00 | 2.49 | 0.01  | 9.92E-01 | 9.97E-01 | -6.70 |
| 1447676_PM_x_at | S100a16                      | S100A16  | 0.00 | 4.50 | 0.01  | 9.92E-01 | 9.97E-01 | -6.70 |
| 1441133_PM_at   | Stx6                         | STX6     | 0.00 | 3.13 | -0.01 | 9.92E-01 | 9.97E-01 | -6.70 |
| 1444301_PM_at   | Pcdh10                       | NA       | 0.00 | 3.02 | -0.01 | 9.93E-01 | 9.97E-01 | -6.70 |
| 1435512_PM_at   | Ccdc184                      | CCDC184  | 0.00 | 4.20 | -0.01 | 9.93E-01 | 9.97E-01 | -6.70 |
| 1419930_PM_at   | D15Erttd55e                  | NA       | 0.00 | 1.99 | -0.01 | 9.93E-01 | 9.97E-01 | -6.70 |
| 1432562_PM_at   | Sox6os                       | NA       | 0.00 | 2.21 | 0.01  | 9.93E-01 | 9.97E-01 | -6.70 |
| 1430623_PM_s_at | Nabp1                        | NABP1    | 0.00 | 2.67 | 0.01  | 9.93E-01 | 9.97E-01 | -6.70 |
| 1427292_PM_at   | Igk1///Iglv1///<br>LOC433053 | NA       | 0.00 | 2.51 | -0.01 | 9.93E-01 | 9.97E-01 | -6.70 |
| 1446201_PM_at   | ---                          | NA       | 0.00 | 2.61 | 0.01  | 9.93E-01 | 9.97E-01 | -6.70 |
| 1421411_PM_at   | Pstpip2                      | PSTPIP2  | 0.00 | 2.66 | -0.01 | 9.93E-01 | 9.97E-01 | -6.70 |
| 1450716_PM_at   | Adamts1                      | ADAMTS1  | 0.00 | 3.91 | -0.01 | 9.93E-01 | 9.97E-01 | -6.70 |
| 1416772_PM_at   | Cpt2                         | CPT2     | 0.00 | 2.51 | -0.01 | 9.93E-01 | 9.97E-01 | -6.70 |
| 1433717_PM_at   | Wbp1l                        | WBP1L    | 0.00 | 2.80 | -0.01 | 9.93E-01 | 9.97E-01 | -6.70 |
| 1416873_PM_a_at | Cdk2                         | CDK2     | 0.00 | 2.37 | -0.01 | 9.93E-01 | 9.97E-01 | -6.70 |
| 1423648_PM_at   | Pdia6                        | PDIA6    | 0.00 | 4.25 | -0.01 | 9.93E-01 | 9.97E-01 | -6.70 |
| 1432379_PM_at   | ---                          | NA       | 0.00 | 3.16 | 0.01  | 9.93E-01 | 9.97E-01 | -6.70 |
| 1430478_PM_at   | B9d1os                       | NA       | 0.00 | 2.15 | 0.01  | 9.93E-01 | 9.97E-01 | -6.70 |
| 1440233_PM_at   | ---                          | NA       | 0.00 | 2.31 | 0.01  | 9.93E-01 | 9.97E-01 | -6.70 |
| 1443791_PM_at   | Rnf220                       | RNF220   | 0.00 | 1.84 | 0.01  | 9.93E-01 | 9.97E-01 | -6.70 |
| 1419053_PM_at   | Pex14                        | PEX14    | 0.00 | 2.15 | 0.01  | 9.93E-01 | 9.97E-01 | -6.70 |
| 1429597_PM_at   | Dppa4                        | DPPA4    | 0.00 | 2.78 | 0.01  | 9.93E-01 | 9.97E-01 | -6.70 |
| 1425765_PM_at   | LOC101055727                 | NA       | 0.00 | 2.89 | 0.01  | 9.93E-01 | 9.97E-01 | -6.70 |
| 1458397_PM_at   | Gm6297                       | NA       | 0.00 | 2.25 | 0.01  | 9.93E-01 | 9.97E-01 | -6.70 |
| 1451251_PM_at   | Appbp2                       | APPBP2   | 0.00 | 2.82 | 0.01  | 9.93E-01 | 9.97E-01 | -6.70 |
| 1447100_PM_s_at | 5730508B09Rik                | C4orf32  | 0.00 | 2.72 | 0.01  | 9.93E-01 | 9.97E-01 | -6.70 |
| 1424381_PM_at   | Sugp1                        | SUGP1    | 0.00 | 6.56 | 0.01  | 9.93E-01 | 9.97E-01 | -6.70 |
| 1447891_PM_at   | ---                          | NA       | 0.00 | 2.34 | -0.01 | 9.93E-01 | 9.97E-01 | -6.70 |
| 1452023_PM_at   | Asb16                        | ASB16    | 0.00 | 2.06 | -0.01 | 9.93E-01 | 9.97E-01 | -6.70 |
| 1444350_PM_at   | Sifn10-ps                    | NA       | 0.00 | 2.30 | 0.01  | 9.93E-01 | 9.97E-01 | -6.70 |
| 1415670_PM_at   | Cogp1                        | COGP1    | 0.00 | 6.48 | 0.01  | 9.93E-01 | 9.97E-01 | -6.70 |
| 1425076_PM_at   | Dnajc18                      | DNAJC18  | 0.00 | 2.35 | 0.01  | 9.93E-01 | 9.97E-01 | -6.70 |
| 1441879_PM_x_at | Mkrn1                        | MKRN1    | 0.00 | 3.38 | -0.01 | 9.93E-01 | 9.97E-01 | -6.70 |
| 1454639_PM_x_at | Rpl41                        | NA       | 0.00 | 3.20 | -0.01 | 9.93E-01 | 9.97E-01 | -6.70 |
| 1425499_PM_at   | ---                          | NA       | 0.00 | 1.89 | 0.01  | 9.94E-01 | 9.97E-01 | -6.70 |
| 1453592_PM_at   | Lrrc39                       | LRRC39   | 0.00 | 2.03 | 0.01  | 9.93E-01 | 9.97E-01 | -6.70 |
| 1454981_PM_at   | Szrd1                        | SZRD1    | 0.00 | 2.89 | 0.01  | 9.93E-01 | 9.97E-01 | -6.70 |
| 1459052_PM_at   | Hif3a                        | HIF3A    | 0.00 | 2.27 | 0.01  | 9.94E-01 | 9.97E-01 | -6.70 |
| 1439926_PM_at   | Heg1                         | HEG1     | 0.00 | 2.66 | 0.01  | 9.94E-01 | 9.97E-01 | -6.70 |
| 1426143_PM_at   | Trdn                         | NA       | 0.00 | 2.32 | 0.01  | 9.94E-01 | 9.97E-01 | -6.70 |
| 1426241_PM_a_at | Scmh1                        | SCMH1    | 0.00 | 2.28 | 0.01  | 9.94E-01 | 9.98E-01 | -6.70 |
| 1441827_PM_x_at | Hsp90aa1                     | HSP90AA1 | 0.00 | 2.89 | 0.01  | 9.94E-01 | 9.98E-01 | -6.70 |
| 1428270_PM_at   | Gltd1                        | GLT8D1   | 0.00 | 3.47 | -0.01 | 9.94E-01 | 9.98E-01 | -6.70 |
| 1451389_PM_at   | Dnajc24                      | DNAJC24  | 0.00 | 2.89 | -0.01 | 9.94E-01 | 9.98E-01 | -6.70 |
| 1438190_PM_x_at | Tpbpa                        | NA       | 0.00 | 2.49 | -0.01 | 9.94E-01 | 9.98E-01 | -6.70 |
| 1421657_PM_a_at | Sox17                        | SOX17    | 0.00 | 1.97 | 0.01  | 9.94E-01 | 9.98E-01 | -6.70 |
| 1444868_PM_at   | Lrrc9                        | NA       | 0.00 | 2.37 | 0.01  | 9.94E-01 | 9.98E-01 | -6.70 |



|                        |                                                                      |          |      |      |       |          |          |       |
|------------------------|----------------------------------------------------------------------|----------|------|------|-------|----------|----------|-------|
| 1454627_PM_a_at        | Gm29376 /// Gm8210 ///<br>LOC102634483 ///<br>LOC102642738 /// Rpl29 | RPL29    | 0.00 | 9.26 | 0.01  | 9.94E-01 | 9.98E-01 | -6.70 |
| 1438729_PM_at          | Sox1                                                                 | SOX1     | 0.00 | 4.78 | 0.01  | 9.94E-01 | 9.98E-01 | -6.70 |
| 1447808_PM_s_at        | Slc15a2                                                              | SLC15A2  | 0.00 | 3.06 | 0.01  | 9.94E-01 | 9.98E-01 | -6.70 |
| 1439374_PM_x_at        | Rps10 /// Rps10-ps2                                                  | NA       | 0.00 | 4.02 | -0.01 | 9.94E-01 | 9.98E-01 | -6.70 |
| 1422494_PM_s_at        | Cdk20                                                                | CDK20    | 0.00 | 2.52 | -0.01 | 9.94E-01 | 9.98E-01 | -6.70 |
| 1421014_PM_a_at        | Clybl                                                                | CLYBL    | 0.00 | 2.24 | 0.01  | 9.94E-01 | 9.98E-01 | -6.70 |
| 1428404_PM_at          | Fbrsl1                                                               | FBRSL1   | 0.00 | 2.31 | 0.01  | 9.94E-01 | 9.98E-01 | -6.70 |
| 1440860_PM_at          | Nbea                                                                 | NBEA     | 0.00 | 2.53 | 0.01  | 9.94E-01 | 9.98E-01 | -6.70 |
| 1426488_PM_at          | Bfar                                                                 | BFAR     | 0.00 | 3.34 | -0.01 | 9.94E-01 | 9.98E-01 | -6.70 |
| 1440447_PM_at          | Abhd2                                                                | ABHD2    | 0.00 | 4.65 | -0.01 | 9.94E-01 | 9.98E-01 | -6.70 |
| 1419486_PM_at          | Foxc1                                                                | FOXC1    | 0.00 | 2.81 | -0.01 | 9.94E-01 | 9.98E-01 | -6.70 |
| 1423972_PM_at          | Etfa                                                                 | ETFA     | 0.00 | 5.49 | -0.01 | 9.95E-01 | 9.98E-01 | -6.70 |
| 1434378_PM_a_at        | Mxd4                                                                 | MXD4     | 0.00 | 7.57 | -0.01 | 9.95E-01 | 9.98E-01 | -6.70 |
| 1446248_PM_at          | Slc18a1                                                              | SLC18A1  | 0.00 | 2.42 | -0.01 | 9.94E-01 | 9.98E-01 | -6.70 |
| 1439517_PM_at          | Mysm1                                                                | NA       | 0.00 | 3.44 | -0.01 | 9.95E-01 | 9.98E-01 | -6.70 |
| 1430660_PM_at          | ---                                                                  | NA       | 0.00 | 3.36 | -0.01 | 9.95E-01 | 9.98E-01 | -6.70 |
| 1459293_PM_at          | ---                                                                  | NA       | 0.00 | 2.65 | -0.01 | 9.95E-01 | 9.98E-01 | -6.70 |
| 1450697_PM_at          | Slc30a7                                                              | SLC30A7  | 0.00 | 2.75 | -0.01 | 9.95E-01 | 9.98E-01 | -6.70 |
| 1458183_PM_at          | ---                                                                  | NA       | 0.00 | 2.02 | -0.01 | 9.94E-01 | 9.98E-01 | -6.70 |
| 1455667_PM_at          | Preb                                                                 | PREB     | 0.00 | 2.53 | -0.01 | 9.94E-01 | 9.98E-01 | -6.70 |
| 1430464_PM_at          | 9430021M05Rik                                                        | NA       | 0.00 | 2.29 | -0.01 | 9.94E-01 | 9.98E-01 | -6.70 |
| 1454830_PM_at          | Fbn2 /// LOC102642295                                                | FBN2     | 0.00 | 2.19 | -0.01 | 9.95E-01 | 9.98E-01 | -6.70 |
| 1449776_PM_at          | ---                                                                  | NA       | 0.00 | 2.38 | 0.01  | 9.95E-01 | 9.98E-01 | -6.70 |
| 1444619_PM_x_at        | Psmb8                                                                | PSMB8    | 0.00 | 2.13 | 0.01  | 9.95E-01 | 9.98E-01 | -6.70 |
| 1420702_PM_at          | 1700093K21Rik                                                        | C2orf74  | 0.00 | 2.02 | 0.01  | 9.95E-01 | 9.98E-01 | -6.70 |
| 1447294_PM_at          | ---                                                                  | NA       | 0.00 | 2.15 | 0.01  | 9.94E-01 | 9.98E-01 | -6.70 |
| 1453497_PM_a_at        | Piga                                                                 | PIGA     | 0.00 | 1.99 | 0.01  | 9.95E-01 | 9.98E-01 | -6.70 |
| 1451143_PM_at          | Fam98c                                                               | FAM98C   | 0.00 | 3.63 | 0.01  | 9.95E-01 | 9.98E-01 | -6.70 |
| 1416823_PM_a_at        | Osbpl1a                                                              | OSBPL1A  | 0.00 | 4.35 | 0.01  | 9.95E-01 | 9.98E-01 | -6.70 |
| 1415680_PM_at          | Anapc1                                                               | ANAPC1   | 0.00 | 2.62 | 0.01  | 9.95E-01 | 9.98E-01 | -6.70 |
| 1455470_PM_x_at        | Lasp1                                                                | LASP1    | 0.00 | 4.26 | 0.01  | 9.95E-01 | 9.98E-01 | -6.70 |
| 1433619_PM_at          | Zfp956                                                               | NA       | 0.00 | 3.13 | 0.01  | 9.95E-01 | 9.98E-01 | -6.70 |
| 1416616_PM_s_at        | Clpp                                                                 | CLPP     | 0.00 | 5.52 | 0.01  | 9.94E-01 | 9.98E-01 | -6.70 |
| 1443958_PM_at          | 9030203C11Rik                                                        | NA       | 0.00 | 2.32 | 0.01  | 9.95E-01 | 9.98E-01 | -6.70 |
| 1458959_PM_at          | Aff4                                                                 | AFF4     | 0.00 | 2.58 | 0.01  | 9.95E-01 | 9.98E-01 | -6.70 |
| 1429707_PM_at          | Plaa                                                                 | PLAA     | 0.00 | 2.64 | -0.01 | 9.95E-01 | 9.98E-01 | -6.70 |
| 1443783_PM_x_at        | H2-Aa                                                                | HLA-DQA2 | 0.00 | 1.92 | 0.01  | 9.95E-01 | 9.98E-01 | -6.70 |
| 1457830_PM_at          | ---                                                                  | NA       | 0.00 | 2.21 | 0.01  | 9.95E-01 | 9.98E-01 | -6.70 |
| 1416722_PM_at          | Hmg20a                                                               | HMG20A   | 0.00 | 3.10 | 0.01  | 9.95E-01 | 9.98E-01 | -6.70 |
| 1448652_PM_at          | Ift88                                                                | IFT88    | 0.00 | 3.17 | 0.01  | 9.95E-01 | 9.98E-01 | -6.70 |
| 1460325_PM_at          | Pum1                                                                 | PUM1     | 0.00 | 2.73 | 0.01  | 9.95E-01 | 9.98E-01 | -6.70 |
| 1429484_PM_at          | 1110002L01Rik                                                        | NA       | 0.00 | 3.21 | -0.01 | 9.95E-01 | 9.98E-01 | -6.70 |
| 1445109_PM_at          | ---                                                                  | NA       | 0.00 | 2.12 | -0.01 | 9.95E-01 | 9.98E-01 | -6.70 |
| 1443740_PM_at          | St3gal6                                                              | NA       | 0.00 | 2.03 | -0.01 | 9.95E-01 | 9.98E-01 | -6.70 |
| 1447956_PM_at          | C76614                                                               | NA       | 0.00 | 2.69 | 0.01  | 9.95E-01 | 9.98E-01 | -6.70 |
| 1435877_PM_at          | Stk38l                                                               | STK38L   | 0.00 | 2.31 | -0.01 | 9.96E-01 | 9.98E-01 | -6.70 |
| 1432183_PM_at          | Tmem116                                                              | TMEM116  | 0.00 | 2.42 | -0.01 | 9.96E-01 | 9.98E-01 | -6.70 |
| 1458491_PM_at          | Zfp949                                                               | ZNF717   | 0.00 | 2.31 | 0.01  | 9.96E-01 | 9.98E-01 | -6.70 |
| 1420689_PM_at          | 4933415F23Rik                                                        | NA       | 0.00 | 2.37 | 0.01  | 9.96E-01 | 9.98E-01 | -6.70 |
| 1443953_PM_at          | Tex2                                                                 | TEX2     | 0.00 | 3.32 | -0.01 | 9.96E-01 | 9.98E-01 | -6.70 |
| 1417143_PM_at          | Lpar1                                                                | LPAR1    | 0.00 | 3.20 | -0.01 | 9.96E-01 | 9.98E-01 | -6.70 |
| 1417589_PM_at          | Galnt3                                                               | GALNT3   | 0.00 | 2.79 | -0.01 | 9.96E-01 | 9.98E-01 | -6.70 |
| 1440919_PM_at          | Mob3c                                                                | MOB3C    | 0.00 | 2.79 | -0.01 | 9.96E-01 | 9.98E-01 | -6.70 |
| 1440794_PM_x_at        | 1700029M03Rik                                                        | NA       | 0.00 | 2.32 | -0.01 | 9.96E-01 | 9.98E-01 | -6.70 |
| 1456240_PM_x_at        | Cdca4                                                                | CDCA4    | 0.00 | 3.94 | 0.01  | 9.96E-01 | 9.98E-01 | -6.70 |
| 1421943_PM_at          | Tgfa                                                                 | TGFA     | 0.00 | 3.18 | 0.01  | 9.96E-01 | 9.98E-01 | -6.70 |
| 1421863_PM_at          | Vamp1                                                                | VAMP1    | 0.00 | 4.77 | 0.01  | 9.96E-01 | 9.98E-01 | -6.70 |
| 1418247_PM_s_at        | Rbfox2                                                               | RBFOX2   | 0.00 | 2.95 | 0.01  | 9.96E-01 | 9.98E-01 | -6.70 |
| 1431129_PM_at          | Usp31                                                                | USP31    | 0.00 | 2.71 | 0.01  | 9.96E-01 | 9.98E-01 | -6.70 |
| 1424741_PM_s_at        | Creb3                                                                | CREB3    | 0.00 | 2.66 | 0.00  | 9.96E-01 | 9.98E-01 | -6.70 |
| 1418547_PM_at          | Tfpi2                                                                | TFPI2    | 0.00 | 2.19 | 0.00  | 9.96E-01 | 9.98E-01 | -6.70 |
| 1430131_PM_at          | Cr1l                                                                 | CR1L     | 0.00 | 2.96 | 0.00  | 9.96E-01 | 9.98E-01 | -6.70 |
| 1416381_PM_a_at        | Prdx5                                                                | PRDX5    | 0.00 | 5.54 | 0.00  | 9.96E-01 | 9.98E-01 | -6.70 |
| 1450704_PM_at          | Ihh                                                                  | IHH      | 0.00 | 2.36 | 0.00  | 9.96E-01 | 9.98E-01 | -6.70 |
| AFFX-NonspecificGCS_at | ---                                                                  | NA       | 0.00 | 1.84 | 0.00  | 9.96E-01 | 9.99E-01 | -6.70 |
| 1449107_PM_at          | Nudt4                                                                | NUDT4P1  | 0.00 | 3.68 | 0.00  | 9.96E-01 | 9.99E-01 | -6.70 |
| 1419702_PM_at          | Taf1a                                                                | TAF1A    | 0.00 | 3.41 | 0.00  | 9.97E-01 | 9.99E-01 | -6.70 |
| 1451686_PM_x_at        | Amek                                                                 | AMELY    | 0.00 | 2.67 | 0.00  | 9.97E-01 | 9.99E-01 | -6.70 |
| 1437968_PM_at          | Grin1                                                                | GRIN1    | 0.00 | 2.97 | 0.00  | 9.97E-01 | 9.99E-01 | -6.70 |
| 1457575_PM_at          | AU021128                                                             | NA       | 0.00 | 2.30 | 0.00  | 9.97E-01 | 9.99E-01 | -6.70 |
| 1454138_PM_a_at        | Stk31                                                                | STK31    | 0.00 | 1.98 | 0.00  | 9.97E-01 | 9.99E-01 | -6.70 |
| 1430108_PM_at          | ---                                                                  | NA       | 0.00 | 2.40 | 0.00  | 9.97E-01 | 9.99E-01 | -6.70 |
| 1425616_PM_a_at        | Svbp                                                                 | SVBP     | 0.00 | 4.42 | 0.00  | 9.97E-01 | 9.99E-01 | -6.70 |

|                 |                                                    |          |      |      |      |          |          |       |
|-----------------|----------------------------------------------------|----------|------|------|------|----------|----------|-------|
| 1442730_PM_at   | ---                                                | NA       | 0.00 | 2.76 | 0.00 | 9.97E-01 | 9.99E-01 | -6.70 |
| 1457582_PM_at   | ---                                                | NA       | 0.00 | 2.91 | 0.00 | 9.97E-01 | 9.99E-01 | -6.70 |
| 1417306_PM_at   | Tyk2                                               | TYK2     | 0.00 | 2.82 | 0.00 | 9.97E-01 | 9.99E-01 | -6.70 |
| 1442582_PM_at   | Gcsam                                              | GCSAM    | 0.00 | 2.30 | 0.00 | 9.97E-01 | 9.99E-01 | -6.70 |
| 1456296_PM_at   | Cep295                                             | CEP295   | 0.00 | 2.30 | 0.00 | 9.97E-01 | 9.99E-01 | -6.70 |
| 1452689_PM_at   | Zfp512                                             | ZNF512   | 0.00 | 2.67 | 0.00 | 9.97E-01 | 9.99E-01 | -6.70 |
| 1456479_PM_at   | Snx30                                              | SNX30    | 0.00 | 3.33 | 0.00 | 9.97E-01 | 9.99E-01 | -6.70 |
| 1426732_PM_at   | Des                                                | DES      | 0.00 | 2.06 | 0.00 | 9.97E-01 | 9.99E-01 | -6.70 |
| 1456274_PM_at   | ---                                                | NA       | 0.00 | 2.04 | 0.00 | 9.98E-01 | 9.99E-01 | -6.70 |
| 1421266_PM_s_at | Nfkbib                                             | NFKBIB   | 0.00 | 2.94 | 0.00 | 9.98E-01 | 9.99E-01 | -6.70 |
| 1455505_PM_at   | Gatad2a                                            | GATAD2A  | 0.00 | 3.00 | 0.00 | 9.98E-01 | 9.99E-01 | -6.70 |
| 1447400_PM_at   | Ryk                                                | RYK      | 0.00 | 2.35 | 0.00 | 9.98E-01 | 9.99E-01 | -6.70 |
| 1433814_PM_at   | ---                                                | NA       | 0.00 | 2.80 | 0.00 | 9.98E-01 | 9.99E-01 | -6.70 |
| 1447191_PM_at   | ---                                                | NA       | 0.00 | 2.53 | 0.00 | 9.98E-01 | 9.99E-01 | -6.70 |
| 1452564_PM_at   | Ofa                                                | NA       | 0.00 | 1.81 | 0.00 | 9.98E-01 | 9.99E-01 | -6.70 |
| 1456539_PM_at   | Klk13                                              | NA       | 0.00 | 2.91 | 0.00 | 9.98E-01 | 9.99E-01 | -6.70 |
| 1443709_PM_at   | ---                                                | NA       | 0.00 | 2.81 | 0.00 | 9.98E-01 | 9.99E-01 | -6.70 |
| 1457868_PM_at   | ---                                                | NA       | 0.00 | 2.49 | 0.00 | 9.98E-01 | 9.99E-01 | -6.70 |
| 1419595_PM_a_at | Ggh                                                | GGH      | 0.00 | 2.55 | 0.00 | 9.98E-01 | 9.99E-01 | -6.70 |
| 1448861_PM_at   | Traf5                                              | NA       | 0.00 | 2.94 | 0.00 | 9.98E-01 | 9.99E-01 | -6.70 |
| 1418193_PM_at   | Mnt                                                | MNT      | 0.00 | 2.85 | 0.00 | 9.98E-01 | 9.99E-01 | -6.70 |
| 1442117_PM_at   | Gm35878                                            | NA       | 0.00 | 3.05 | 0.00 | 9.98E-01 | 9.99E-01 | -6.70 |
| 1460023_PM_at   | ---                                                | NA       | 0.00 | 2.36 | 0.00 | 9.98E-01 | 9.99E-01 | -6.70 |
| 1435925_PM_at   | Git2                                               | GIT2     | 0.00 | 2.13 | 0.00 | 9.98E-01 | 9.99E-01 | -6.70 |
| 1450463_PM_at   | 4833439L19Rik                                      | KIAA1191 | 0.00 | 2.65 | 0.00 | 9.98E-01 | 9.99E-01 | -6.70 |
| 1444597_PM_at   | Gm6590                                             | NA       | 0.00 | 1.98 | 0.00 | 9.98E-01 | 9.99E-01 | -6.70 |
| 1438871_PM_at   | ---                                                | NA       | 0.00 | 3.43 | 0.00 | 9.98E-01 | 9.99E-01 | -6.70 |
| 1430156_PM_at   | 4930520O04Rik                                      | NA       | 0.00 | 2.48 | 0.00 | 9.98E-01 | 9.99E-01 | -6.70 |
| 1452367_PM_at   | Coro2a                                             | CORO2A   | 0.00 | 5.92 | 0.00 | 9.98E-01 | 9.99E-01 | -6.70 |
| 1424792_PM_at   | Rpp40                                              | RPP40    | 0.00 | 2.42 | 0.00 | 9.98E-01 | 9.99E-01 | -6.70 |
| 1434504_PM_at   | Zfyve28                                            | ZFYVE28  | 0.00 | 4.46 | 0.00 | 9.98E-01 | 9.99E-01 | -6.70 |
| 1435136_PM_at   | Whsc1                                              | NSD2     | 0.00 | 3.00 | 0.00 | 9.98E-01 | 1.00E+00 | -6.70 |
| 1453139_PM_at   | Nudt12                                             | NUDT12   | 0.00 | 2.46 | 0.00 | 9.98E-01 | 1.00E+00 | -6.70 |
| 1454497_PM_at   | ---                                                | NA       | 0.00 | 2.23 | 0.00 | 9.98E-01 | 1.00E+00 | -6.70 |
| 1416350_PM_at   | Klf16                                              | KLF16    | 0.00 | 2.60 | 0.00 | 9.98E-01 | 1.00E+00 | -6.70 |
| 1444260_PM_at   | ---                                                | NA       | 0.00 | 3.04 | 0.00 | 9.98E-01 | 1.00E+00 | -6.70 |
| 1436905_PM_x_at | Laptm5                                             | LAPTM5   | 0.00 | 6.67 | 0.00 | 9.98E-01 | 1.00E+00 | -6.70 |
| 1453581_PM_at   | Cep170                                             | CEP170   | 0.00 | 4.17 | 0.00 | 9.98E-01 | 1.00E+00 | -6.70 |
| 1421818_PM_at   | Bcl6                                               | BCL6     | 0.00 | 5.05 | 0.00 | 9.98E-01 | 1.00E+00 | -6.70 |
| 1423589_PM_at   | Arpc4                                              | ARPC4    | 0.00 | 3.34 | 0.00 | 9.98E-01 | 1.00E+00 | -6.70 |
| 1455119_PM_at   | Plpp4                                              | PLPP4    | 0.00 | 2.35 | 0.00 | 9.98E-01 | 1.00E+00 | -6.70 |
| 1429321_PM_at   | Rnf149                                             | RNF149   | 0.00 | 3.45 | 0.00 | 9.98E-01 | 1.00E+00 | -6.70 |
| 1447049_PM_at   | ---                                                | NA       | 0.00 | 2.56 | 0.00 | 9.98E-01 | 1.00E+00 | -6.70 |
| 1454861_PM_at   | Txlna                                              | TXLNA    | 0.00 | 2.54 | 0.00 | 9.98E-01 | 1.00E+00 | -6.70 |
| 1445700_PM_at   | Psmg4                                              | PSMG4    | 0.00 | 1.99 | 0.00 | 9.98E-01 | 1.00E+00 | -6.70 |
| 1431683_PM_at   | 4930473H19Rik                                      | NA       | 0.00 | 2.02 | 0.00 | 9.99E-01 | 1.00E+00 | -6.70 |
| 1449592_PM_at   | Tcf15                                              | TCF15    | 0.00 | 2.38 | 0.00 | 9.99E-01 | 1.00E+00 | -6.70 |
| 1437196_PM_x_at | Gm8623 /// LOC100862433<br>/// Rps16 /// Rps16-ps2 | RPS16    | 0.00 | 8.33 | 0.00 | 9.99E-01 | 1.00E+00 | -6.70 |
| 1445421_PM_at   | ---                                                | NA       | 0.00 | 2.43 | 0.00 | 9.99E-01 | 1.00E+00 | -6.70 |
| 1425222_PM_x_at | Slc22a29 /// Slc22a30                              | SLC22A9  | 0.00 | 2.12 | 0.00 | 9.99E-01 | 1.00E+00 | -6.70 |
| 1431009_PM_at   | B230219D22Rik                                      | C5orf24  | 0.00 | 2.02 | 0.00 | 9.99E-01 | 1.00E+00 | -6.70 |
| 1440068_PM_at   | ---                                                | NA       | 0.00 | 2.28 | 0.00 | 9.99E-01 | 1.00E+00 | -6.70 |
| 1441197_PM_at   | ---                                                | NA       | 0.00 | 2.69 | 0.00 | 9.99E-01 | 1.00E+00 | -6.70 |
| 1424567_PM_at   | Tspan2                                             | TSPAN2   | 0.00 | 3.27 | 0.00 | 9.99E-01 | 1.00E+00 | -6.70 |
| 1447778_PM_x_at | Brcc3                                              | BRCC3    | 0.00 | 3.45 | 0.00 | 9.99E-01 | 1.00E+00 | -6.70 |
| 1437124_PM_at   | A630052C17Rik                                      | NA       | 0.00 | 2.95 | 0.00 | 9.99E-01 | 1.00E+00 | -6.70 |
| 1455397_PM_at   | Caskin1                                            | CASKIN1  | 0.00 | 7.03 | 0.00 | 9.99E-01 | 1.00E+00 | -6.70 |
| 1427518_PM_at   | Zfp930                                             | NA       | 0.00 | 2.55 | 0.00 | 9.99E-01 | 1.00E+00 | -6.70 |
| 1427109_PM_at   | Tmem259                                            | TMEM259  | 0.00 | 4.05 | 0.00 | 9.99E-01 | 1.00E+00 | -6.70 |
| 1437350_PM_at   | Ovca2                                              | OVCA2    | 0.00 | 3.63 | 0.00 | 9.99E-01 | 1.00E+00 | -6.70 |
| 1446511_PM_at   | Msh3                                               | MSH3     | 0.00 | 2.47 | 0.00 | 9.99E-01 | 1.00E+00 | -6.70 |
| 1421526_PM_at   | Til2                                               | NA       | 0.00 | 2.16 | 0.00 | 9.99E-01 | 1.00E+00 | -6.70 |
| 1443225_PM_at   | Acvr1c                                             | ACVR1C   | 0.00 | 2.34 | 0.00 | 9.99E-01 | 1.00E+00 | -6.70 |
| 1441417_PM_at   | Stt3a                                              | STT3A    | 0.00 | 2.57 | 0.00 | 9.99E-01 | 1.00E+00 | -6.70 |
| 1449313_PM_at   | Klk1b5                                             | KLK3     | 0.00 | 2.06 | 0.00 | 9.99E-01 | 1.00E+00 | -6.70 |
| 1421706_PM_at   | Mmp20                                              | MMP20    | 0.00 | 2.31 | 0.00 | 9.99E-01 | 1.00E+00 | -6.70 |
| 1457843_PM_at   | Lypd6                                              | LYPD6    | 0.00 | 1.92 | 0.00 | 9.99E-01 | 1.00E+00 | -6.70 |
| 1447641_PM_at   | Dmwd                                               | DMWD     | 0.00 | 1.83 | 0.00 | 9.99E-01 | 1.00E+00 | -6.70 |
| 1442603_PM_at   | ---                                                | NA       | 0.00 | 2.44 | 0.00 | 9.99E-01 | 1.00E+00 | -6.70 |
| 1418458_PM_at   | Anapc7                                             | ANAPC7   | 0.00 | 3.24 | 0.00 | 9.99E-01 | 1.00E+00 | -6.70 |
| 1419995_PM_at   | Anapc16                                            | NA       | 0.00 | 2.41 | 0.00 | 9.99E-01 | 1.00E+00 | -6.70 |
| 1446396_PM_at   | ---                                                | NA       | 0.00 | 3.15 | 0.00 | 9.99E-01 | 1.00E+00 | -6.70 |
| 1456196_PM_x_at | Fkbp1a                                             | FKBP1C   | 0.00 | 9.80 | 0.00 | 9.99E-01 | 1.00E+00 | -6.70 |

|                 |               |          |      |      |      |          |          |       |
|-----------------|---------------|----------|------|------|------|----------|----------|-------|
| 1421892_PM_at   | St3gal2       | ST3GAL2  | 0.00 | 2.43 | 0.00 | 9.99E-01 | 1.00E+00 | -6.70 |
| 1435348_PM_at   | Kdm5c         | NA       | 0.00 | 3.02 | 0.00 | 9.99E-01 | 1.00E+00 | -6.70 |
| 1435855_PM_x_at | Aldh18a1      | ALDH18A1 | 0.00 | 2.95 | 0.00 | 9.99E-01 | 1.00E+00 | -6.70 |
| 1426402_PM_at   | Syncrip       | SYNCRIP  | 0.00 | 6.22 | 0.00 | 9.99E-01 | 1.00E+00 | -6.70 |
| 1422797_PM_at   | Lamtor2       | LAMTOR2  | 0.00 | 4.89 | 0.00 | 9.99E-01 | 1.00E+00 | -6.70 |
| 1427407_PM_s_at | Tripl1        | TRIP11   | 0.00 | 5.00 | 0.00 | 9.99E-01 | 1.00E+00 | -6.70 |
| 1442693_PM_at   | Trim5         | TRIM5    | 0.00 | 2.89 | 0.00 | 9.99E-01 | 1.00E+00 | -6.70 |
| 1446385_PM_at   | 9430083A17Rik | NA       | 0.00 | 2.83 | 0.00 | 9.99E-01 | 1.00E+00 | -6.70 |
| 1447698_PM_x_at | ---           | NA       | 0.00 | 2.13 | 0.00 | 1.00E+00 | 1.00E+00 | -6.70 |
| AFFX-r2-TagC_at | ---           | NA       | 0.00 | 1.97 | 0.00 | 1.00E+00 | 1.00E+00 | -6.70 |
| 1436003_PM_at   | Vcam1         | VCAM1    | 0.00 | 2.04 | 0.00 | 9.99E-01 | 1.00E+00 | -6.70 |
| 1438394_PM_x_at | Krt4          | KRT4     | 0.00 | 2.18 | 0.00 | 1.00E+00 | 1.00E+00 | -6.70 |
| 1454167_PM_at   | Nr2c2         | NR2C2    | 0.00 | 3.46 | 0.00 | 9.99E-01 | 1.00E+00 | -6.70 |
| 1441733_PM_s_at | Nup153        | NUP153   | 0.00 | 4.63 | 0.00 | 1.00E+00 | 1.00E+00 | -6.70 |
| 1449634_PM_a_at | Anks1b        | ANKS1B   | 0.00 | 5.75 | 0.00 | 1.00E+00 | 1.00E+00 | -6.70 |
| 1438198_PM_at   | Bri3bp        | BRI3BP   | 0.00 | 2.75 | 0.00 | 1.00E+00 | 1.00E+00 | -6.70 |
| 1419196_PM_at   | Hamp          | HAMP     | 0.00 | 2.60 | 0.00 | 1.00E+00 | 1.00E+00 | -6.70 |
| 1434870_PM_at   | ---           | NA       | 0.00 | 4.10 | 0.00 | 1.00E+00 | 1.00E+00 | -6.70 |
| 1437845_PM_x_at | Pofut2        | POFUT2   | 0.00 | 4.11 | 0.00 | 1.00E+00 | 1.00E+00 | -6.70 |
| 1426613_PM_a_at | Snrpb2        | SNRPB2   | 0.00 | 3.79 | 0.00 | 1.00E+00 | 1.00E+00 | -6.70 |

Supplemental Table 2: DAVID EASE

| Annotation Cluster 1                |                            |       |            |          |                                                                                                                                                                                                                                                                                                                                                                                                                                                                                                                                                                                                                                                                                                                                                                                                                                                                                                                                                                                                                                                                                                                                                          |            |          |           |                 |             |             |             |
|-------------------------------------|----------------------------|-------|------------|----------|----------------------------------------------------------------------------------------------------------------------------------------------------------------------------------------------------------------------------------------------------------------------------------------------------------------------------------------------------------------------------------------------------------------------------------------------------------------------------------------------------------------------------------------------------------------------------------------------------------------------------------------------------------------------------------------------------------------------------------------------------------------------------------------------------------------------------------------------------------------------------------------------------------------------------------------------------------------------------------------------------------------------------------------------------------------------------------------------------------------------------------------------------------|------------|----------|-----------|-----------------|-------------|-------------|-------------|
| Enrichment Score: 7.94527841026619  |                            |       |            |          |                                                                                                                                                                                                                                                                                                                                                                                                                                                                                                                                                                                                                                                                                                                                                                                                                                                                                                                                                                                                                                                                                                                                                          |            |          |           |                 |             |             |             |
| Category                            | Term                       | Count | %          | PValue   | Genes                                                                                                                                                                                                                                                                                                                                                                                                                                                                                                                                                                                                                                                                                                                                                                                                                                                                                                                                                                                                                                                                                                                                                    | List Total | Pop Hits | Pop Total | Fold Enrichment | Bonferroni  | Benjamini   | FDR         |
| UP_KEYWORDS                         | Synapse                    | 26    | 10.4417671 | 1.67E-12 | GABRB3, CADM2, GABRB1, ABI1, NRN1, SYNPR, DMXL2, SV2B, UNC5C, OLFM1, GLRB, DLGAP1, GABRA4, SYT11, MAP1B, GRIN2A, PRKCG, NRXN1, PCLO, CAMK2N1, CADPS, EPHA4, GRIA2, TENM2, CYFIP2, CYFIP1                                                                                                                                                                                                                                                                                                                                                                                                                                                                                                                                                                                                                                                                                                                                                                                                                                                                                                                                                                 | 249        | 357      | 20581     | 6.019664091     | 4.61E-10    | 1.54E-10    | 2.20E-09    |
| UP_KEYWORDS                         | Cell junction              | 29    | 11.6465863 | 1.33E-08 | GABRB3, CADM2, GABRB1, ABI1, NRN1, CTTN, SYNPR, DMXL2, SV2B, UNC5C, RAPGEF2, OLFM1, GLRB, DLGAP1, GABRA4, SYT11, MAP1B, GRIN2A, PRKCG, NRXN1, PCLO, RUFY3, CAMK2N1, CADPS, EPHA4, GRIA2, TENM2, CYFIP2, CYFIP1                                                                                                                                                                                                                                                                                                                                                                                                                                                                                                                                                                                                                                                                                                                                                                                                                                                                                                                                           | 249        | 675      | 20581     | 3.551087312     | 3.68E-06    | 6.14E-07    | 1.76E-05    |
| UP_KEYWORDS                         | Postsynaptic cell membrane | 11    | 4.41767068 | 6.55E-05 | EPHA4, GLRB, DLGAP1, GRIA2, GABRB3, GABRA4, GABRB1, TENM2, GRIN2A, ABI1, CAMK2N1                                                                                                                                                                                                                                                                                                                                                                                                                                                                                                                                                                                                                                                                                                                                                                                                                                                                                                                                                                                                                                                                         | 249        | 179      | 20581     | 5.079334096     | 0.017906221 | 0.001388917 | 0.086331352 |
| Annotation Cluster 2                |                            |       |            |          |                                                                                                                                                                                                                                                                                                                                                                                                                                                                                                                                                                                                                                                                                                                                                                                                                                                                                                                                                                                                                                                                                                                                                          |            |          |           |                 |             |             |             |
| Enrichment Score: 5.179972403254068 |                            |       |            |          |                                                                                                                                                                                                                                                                                                                                                                                                                                                                                                                                                                                                                                                                                                                                                                                                                                                                                                                                                                                                                                                                                                                                                          |            |          |           |                 |             |             |             |
| Category                            | Term                       | Count | %          | PValue   | Genes                                                                                                                                                                                                                                                                                                                                                                                                                                                                                                                                                                                                                                                                                                                                                                                                                                                                                                                                                                                                                                                                                                                                                    | List Total | Pop Hits | Pop Total | Fold Enrichment | Bonferroni  | Benjamini   | FDR         |
| UP_KEYWORDS                         | Membrane                   | 151   | 60.6425703 | 8.61E-15 | ATP1B1, IMPAD1, GABRB3, SLC6A1, CADM2, ATP6AP2, GABRB1, NELL2, LEMD3, COX5A, UBQLN1, KLHL2, ATP2B1, NRCAM, KIF13A, ATP2B3, APP, CISD1, DMXL2, ROBO1, UNC5C, OGT, RAPGEF2, ADGRB3, ITFG1, SCAMP1, PTPRG, SMI13, GRIN2A, STIM2, LIFR, NAV3, PCLO, TNKS2, MGAT3, ARFGEF3, KCNT2, ACAP2, LRP11, RNF139, RYR2, AKAP6, TMEM170B, TMEM184C, MGAT5, ADD1, TMX2, MMD, ASTN1, NRN1, PCDHAC2, SEMA5A, GPR22, PFN2, GPR27, SERINC1, SLC35F3, B4GALT6, TMEM30A, SASH1, GPR158, GABRA4, SYT11, CACNA2D3, CAMK2N1, REEP5, DOCK4, EPHA3, EPHA4, SLC4A10, EPHA7, HDAC2, ATP2A2, COX6A1, CACNA1E, SLC36A4, NRG3, NRP1, CLSTN2, OPCML1, LRRC8B, ATP5B, NBEA, CDS2, CTTN, NISCH, KCNQ3, RNF103, ANO3, SV2B, ABHD12, PLCB1, SLC1A1, VASN, SGK1, CLMN, PI4KA, ACKR3, PRKCG, NRXN1, KIDINS220, LPIN2, SLC7A14, MCTP1, GRM5, EMC7, FAM120A, SEMA4F, C16ORF52, CNTN1, KPNA4, PRNP, SPAST, MFSD6, TNFRSF21, NDUF84, MEGF9, NDUF86, HS3ST4, SLC39A10, ABHD6, NR3C2, CABP7, ABI1, GPR68, DISP2, SYNPR, PCNX1, RASGRP1, VPS35, PPP3CA, PIK3R4, ACSL3, GDI2, NUP153, GLRB, DLGAP1, COX7A2, CAP2, RNF19A, FADS1, LRRN3, ATP1A3, TRIM23, RUFY3, CADPS, PREB, GRIA2, SLC6A7, TENM2, CDH11 | 249        | 7494     | 20581     | 1.665445342     | 2.39E-12    | 1.20E-12    | 1.14E-11    |
| UP_KEYWORDS                         | Transmembrane helix        | 112   | 44.9799197 | 2.80E-09 | ATP1B1, IMPAD1, SLC6A1, GABRB3, CADM2, ATP6AP2, GABRB1, NELL2, LEMD3, KLHL2, ATP2B1, NRCAM, ATP2B3, APP, CISD1, ROBO1, UNC5C, ADGRB3, ITFG1, SCAMP1, PTPRG, SMI13, GRIN2A, LIFR, STIM2, PCLO, MGAT3, KCNT2, ARFGEF3, LRP11, RNF139, TMEM170B, RYR2, TMEM184C, MGAT5, TMX2, MMD, ASTN1, PCDHAC2, SEMA5A, PFN2, GPR22, GPR27, SERINC1, SLC35F3, B4GALT6, TMEM30A, SASH1, GPR158, GABRA4, SYT11, CACNA2D3, REEP5, EPHA3, EPHA4, SLC4A10, EPHA7, HDAC2, ATP2A2, COX6A1, CACNA1E, SLC36A4, NRP1, NRG3, CLSTN2, LRRC8B, CDS2, KCNQ3, RNF103, ANO3, SV2B, ABHD12, SLC1A1, VASN, CLMN, ACKR3, NRXN1, KIDINS220, SLC7A14, MCTP1, EMC7, GRM5, SEMA4F, C16ORF52, KPNA4, PRNP, SPAST, MFSD6, NDUF84, TNFRSF21, MEGF9, NDUF86, HS3ST4, SLC39A10, ABHD6, CABP7, GPR68, DISP2, SYNPR, PCNX1, ACSL3, GLRB, COX7A2, RNF19A, FADS1, LRRN3, ATP1A3, PREB, GRIA2, SLC6A7, TENM2, CDH11                                                                                                                                                                                                                                                                                       | 249        | 5634     | 20581     | 1.643116306     | 7.73E-07    | 1.93E-07    | 3.70E-06    |

|                 |                                  |     |            |          |                                                                                                                                                                                                                                                                                                                                                                                                                                                                                                                                                                                                                                                                                                                                                                                                                                                                     |     |      |       |             |             |             |             |
|-----------------|----------------------------------|-----|------------|----------|---------------------------------------------------------------------------------------------------------------------------------------------------------------------------------------------------------------------------------------------------------------------------------------------------------------------------------------------------------------------------------------------------------------------------------------------------------------------------------------------------------------------------------------------------------------------------------------------------------------------------------------------------------------------------------------------------------------------------------------------------------------------------------------------------------------------------------------------------------------------|-----|------|-------|-------------|-------------|-------------|-------------|
| UP_KEYWORDS     | Transmembrane                    | 112 | 44.9799197 | 3.37E-09 | ATP1B1, IMPAD1, SLC6A1, GABRB3, CADM2, ATP6AP2, GABRB1, NELL2, LEMD3, KLHL2, ATP2B1, NRCAM, ATP2B3, APP, CISD1, ROBO1, UNC5C, ADGRB3, ITFG1, SCAMP1, PTPRG, SMIM13, GRIN2A, LIFR, STIM2, PCLO, MGAT3, KCNT2, ARFGEF3, LRP11, RNF139, TMEM170B, RYR2, TMEM184C, MGAT5, TMX2, MMD, ASTN1, PCDHAC2, SEMA5A, PFN2, GPR22, GPR27, SERINC1, SLC35F3, B4GALT6, TMEM30A, SASH1, GPR158, GABRA4, SYT11, CACNA2D3, REEP5, EPHA3, EPHA4, SLC4A10, EPHA7, HDAC2, ATP2A2, COX6A1, CACNA1E, SLC36A4, NRP1, NRG3, CLSTN2, LRRC8B, CDS2, KCNQ3, RNF103, ANO3, SV2B, ABHD12, SLC1A1, VASN, CLMN, ACKR3, NRXN1, KIDINS220, SLC7A14, MCTP1, EMC7, GRM5, SEMA4F, C16ORF52, KPNA4, PRNP, SPAST, MFSD6, NDUFB4, TNFRSF21, MEGF9, NDUFB6, HS3ST4, SLC39A10, ABHD6, CABP7, GPR68, DISP2, SYNPR, PCNX1, ACSL3, GLRB, COX7A2, RNF19A, FADS1, LRRN3, ATP1A3, PREB, GRIA2, SLC6A7, TENM2, CDH11 | 249 | 5651 | 20581 | 1.638173291 | 9.30E-07    | 1.86E-07    | 4.45E-06    |
| UP_SEQ_FEATUR E | transmembrane region             | 101 | 40.562249  | 8.34E-08 | ATP1B1, IMPAD1, SLC6A1, GABRB3, CADM2, ATP6AP2, GABRB1, LEMD3, ATP2B1, NRCAM, APP, ATP2B3, CISD1, ROBO1, UNC5C, ADGRB3, ITFG1, SCAMP1, PTPRG, LIFR, STIM2, GRIN2A, FRY, MGAT3, KCNT2, ARFGEF3, LRP11, RNF139, TMEM170B, RYR2, TMEM184C, MGAT5, TMX2, ASTN1, MMD, PCDHAC2, SEMA5A, GPR27, GPR27, SERINC1, SLC35F3, B4GALT6, TMEM30A, GPR158, GABRA4, SYT11, CACNA2D3, EPHA3, REEP5, EPHA4, SLC4A10, EPHA7, ATP2A2, CACNA1E, SLC36A4, NRP1, NRG3, CLSTN2, LRRC8B, CDS2, KCNQ3, RNF103, ANO3, SV2B, ABHD12, SLC1A1, VASN, CLMN, ACKR3, NRXN1, KIDINS220, SLC7A14, MCTP1, EMC7, GRM5, SEMA4F, SPAST, MFSD6, NDUFB4, TNFRSF21, MEGF9, NDUFB6, HS3ST4, SLC39A10, ABHD6, CABP7, GPR68, DISP2, SYNPR, PCNX1, ACSL3, GLRB, RNF19A, FADS1, LRRN3, ATP1A3, PREB, SLC6A7, GRIA2, TENM2, CDH11                                                                                   | 248 | 5056 | 20063 | 1.616063795 | 7.82E-05    | 7.82E-05    | 1.31E-04    |
| UP_SEQ_FEATUR E | topological domain:Cytoplasmic   | 74  | 29.7188755 | 1.07E-06 | ATP1B1, NRP1, NRG3, CLSTN2, SLC6A1, GABRB3, ATP6AP2, CADM2, GABRB1, ATP2B1, NRCAM, ATP2B3, APP, CISD1, ROBO1, ANO3, SV2B, ABHD12, UNC5C, SLC1A1, ADGRB3, SCAMP1, VASN, PTPRG, GRIN2A, LIFR, STIM2, ACKR3, NRXN1, KIDINS220, GRM5, EMC7, MGAT3, KCNT2, SEMA4F, LRP11, TMEM170B, RYR2, MGAT5, TMX2, TNFRSF21, MEGF9, HS3ST4, ABHD6, MMD, CABP7, GPR68, PCDHAC2, SEMA5A, SYNPR, GPR22, GPR27, SERINC1, B4GALT6, ACSL3, GPR158, GLRB, GABRA4, FADS1, SYT11, LRRN3, ATP1A3, CACNA2D3, EPHA3, PREB, EPHA4, SLC4A10, EPHA7, ATP2A2, GRIA2, SLC6A7, TENM2, CACNA1E, CDH11                                                                                                                                                                                                                                                                                                   | 248 | 3456 | 20063 | 1.732216529 | 0.00100682  | 5.04E-04    | 0.001682888 |
| UP_KEYWORDS     | Glycoprotein                     | 84  | 33.7349398 | 2.38E-05 | ATP1B1, IMPAD1, NRP1, NRG3, OPCML, CLSTN2, SLC6A1, GABRB3, LRRC8B, CADM2, ATP5B, GABRB1, NELL2, B2M, TGFB2, NRCAM, APP, ROBO1, CREG2, ANO3, SV2B, ABHD12, UNC5C, OGT, SLC1A1, ADGRB3, ITFG1, VASN, PTPRG, GRIN2A, LIFR, STIM2, ACKR3, MESDC2, NRXN1, SLC7A14, GRM5, MGAT3, KCNT2, SEMA4F, LRP11, TMEM170B, CNTN1, PCYOX1, PRNP, MGAT5, TNFRSF21, MEGF9, HS3ST4, SLC39A10, ASTN1, GPR68, DISP2, NRN1, PCDHAC2, PCSK2, SEMA5A, SYNPR, NPTX1, GPR22, PCNX1, GPR27, SERINC1, B4GALT6, NEFL, TMEM30A, OLFM1, GPR158, NUP153, GLRB, GABRA4, LRRN3, CACNA2D3, EPHA3, EPHA4, DKK3, EPHA7, GRIA2, SLC6A7, TENM2, CACNA1E, SLC36A4, IGFBP4, CDH11                                                                                                                                                                                                                             | 249 | 4551 | 20581 | 1.525596122 | 0.006536067 | 8.19E-04    | 0.031340515 |
| UP_SEQ_FEATUR E | topological domain:Extracellular | 59  | 23.6947791 | 3.16E-05 | ATP1B1, NRP1, NRG3, SLC6A1, CLSTN2, GABRB3, ATP6AP2, CADM2, GABRB1, ATP2B1, NRCAM, ATP2B3, APP, ROBO1, ANO3, SV2B, ABHD12, UNC5C, SLC1A1, ADGRB3, VASN, PTPRG, GRIN2A, LIFR, STIM2, ACKR3, NRXN1, KIDINS220, EMC7, GRM5, KCNT2, SEMA4F, LRP11, TMEM170B, TMX2, TNFRSF21, MEGF9, ABHD6, CABP7, GPR68, PCDHAC2, SEMA5A, GPR22, GPR27, SERINC1, GLRB, GPR158, GABRA4, LRRN3, CACNA2D3, EPHA3, EPHA4, SLC4A10, EPHA7, SLC6A7, GRIA2, TENM2, CACNA1E, CDH11                                                                                                                                                                                                                                                                                                                                                                                                              | 248 | 2787 | 20063 | 1.712612996 | 0.029237435 | 0.009842366 | 0.04956183  |

|                             |                                             |              |            |               |                                                                                                                                                                                                                                                                                                                                                                                                                                                                                                                                                                                    |                   |                 |                  |                        |                   |                  |             |
|-----------------------------|---------------------------------------------|--------------|------------|---------------|------------------------------------------------------------------------------------------------------------------------------------------------------------------------------------------------------------------------------------------------------------------------------------------------------------------------------------------------------------------------------------------------------------------------------------------------------------------------------------------------------------------------------------------------------------------------------------|-------------------|-----------------|------------------|------------------------|-------------------|------------------|-------------|
| UP_SEQ_FEATUR E             | glycosylation site:N-linked (GlcNAc...)     | 76           | 30.5220884 | 3.71E-04      | ATP1B1, NRP1, OPCML, CLSTN2, SLC6A1, GABRB3, LRRC8B, CADM2, GABRB1, NELL2, TGFB2, NRCAM, APP, ROBO1, CREG2, ANO3, SV2B, UNC5C, SLC1A1, ADGRB3, ITFG1, VASN, PTPRG, GRIN2A, LIFR, STIM2, ACKR3, MESDC2, NRXN1, SLC7A14, GRM5, MGAT3, KCNT2, SEMA4F, LRP11, TMEM170B, CNTN1, RYR2, PCYOX1, PRNP, MGAT5, TNFRSF21, MEGF9, HS3ST4, SLC39A10, ASTN1, GPR68, DISP2, PCDHAC2, PCSK2, SEMA5A, SYNPR, NPTX1, GPR22, PCNX1, GPR27, SERINC1, B4GALT6, TMEM30A, OLFM1, GPR158, GLRB, GABRA4, LRRN3, CACNA2D3, EPHA3, EPHA4, DKK3, EPHA7, GRIA2, SLC6A7, TENM2, CACNA1E, SLC36A4, IGFBP4, CDH11 | 248               | 4234            | 20063            | 1.452134792            | 0.294268426       | 0.083442138      | 0.580567208 |
| UP_SEQ_FEATUR E             | signal peptide                              | 58           | 23.2931727 | 0.005611275   | NRP1, CLSTN2, GABRB3, PDIA3, OPCML, ATP6AP2, CADM2, GABRB1, NELL2, TGFB2, B2M, NRCAM, APP, ROBO1, CREG2, UNC5C, ADGRB3, ITFG1, VASN, PTPRG, GRIN2A, LIFR, STIM2, MESDC2, NRXN1, EMC7, GRM5, SEMA4F, LRP11, CNTN1, PCYOX1, PRNP, TMX2, TNFRSF21, MEGF9, SLC39A10, ASTN1, NRN1, PCDHAC2, PCSK2, SEMA5A, NPTX1, HSPA5, OLFM1, GPR158, GLRB, GABRA4, LRRN3, DLAT, CACNA2D3, EPHA3, EPHA4, DKK3, EPHA7, GRIA2, CRH, IGFBP4, CDH11                                                                                                                                                       | 248               | 3346            | 20063            | 1.402317163            | 0.994898388       | 0.410110398      | 8.44046497  |
| UP_KEYWORDS                 | Signal                                      | 64           | 25.7028112 | 0.026853481   | NRP1, OPCML, CLSTN2, GABRB3, PDIA3, ATP6AP2, CADM2, GABRB1, NELL2, NBEA, TGFB2, B2M, NRCAM, ATP2B3, APP, KCNQ3, ROBO1, CREG2, UNC5C, ADGRB3, ITFG1, VASN, PTPRG, GRIN2A, LIFR, STIM2, MESDC2, NRXN1, GRM5, EMC7, SEMA4F, LRP11, C16ORF52, CNTN1, PCYOX1, PRNP, TMX2, TNFRSF21, MEGF9, SLC39A10, ASTN1, NRN1, PCDHAC2, PCSK2, SEMA5A, SYNPR, NPTX1, HSPA5, OLFM1, GPR158, GLRB, GABRA4, FADS1, LRRN3, CACNA2D3, EPHA3, EPHA4, DKK3, EPHA7, GRIA2, CHN1, CRH, IGFBP4, CDH11                                                                                                          | 249               | 4160            | 20581            | 1.271609515            | 0.999454          | 0.1837635        | 30.17106449 |
| UP_KEYWORDS                 | Disulfide bond                              | 50           | 20.0803213 | 0.112704742   | ATP1B1, NRP1, NRG3, GABRB3, SLC6A1, PDIA3, OPCML, CADM2, GABRB1, NELL2, TGFB2, B2M, NRCAM, APP, ROBO1, UNC5C, ADGRB3, VASN, SGK1, PTPRG, LIFR, GRIN2A, ACKR3, NRXN1, GRM5, SEMA4F, LRP11, CNTN1, PRNP, TNFRSF21, MEGF9, HS3ST4, ASTN1, GPR68, SEMA5A, PCSK2, NPTX1, GPR27, B4GALT6, OLFM1, GLRB, GABRA4, LRRN3, TRI O, CACNA2D3, DKK3, GRIA2, TENM2, CACNA1E, IGFBP4                                                                                                                                                                                                               | 249               | 3434            | 20581            | 1.203474352            | 1                 | 0.41785696       | 79.35270379 |
| UP_SEQ_FEATUR E             | disulfide bond                              | 42           | 16.8674699 | 0.200461959   | TNFRSF21, ATP1B1, MEGF9, NRG3, NRP1, HS3ST4, GABRB3, PDIA3, OPCML, CADM2, GABRB1, NELL2, ASTN1, GPR68, B2M, TGFB2, SEMA5A, NRCAM, PCSK2, APP, NPTX1, GPR27, ROBO1, UNC5C, B4GALT6, OLFM1, ADGRB3, VASN, GLRB, GABRA4, LRRN3, LIFR, TRI O, ACKR3, NRXN1, DKK3, SEMA4F, TENM2, LRP11, CNTN1, PRNP, IGFBP4                                                                                                                                                                                                                                                                            | 248               | 2917            | 20063            | 1.164815265            | 1                 | 0.991513924      | 96.99799015 |
| <b>Annotation Cluster 3</b> | <b>Enrichment Score: 2.5592229550464975</b> |              |            |               |                                                                                                                                                                                                                                                                                                                                                                                                                                                                                                                                                                                    |                   |                 |                  |                        |                   |                  |             |
| <b>Category</b>             | <b>Term</b>                                 | <b>Count</b> | <b>%</b>   | <b>PValue</b> | <b>Genes</b>                                                                                                                                                                                                                                                                                                                                                                                                                                                                                                                                                                       | <b>List Total</b> | <b>Pop Hits</b> | <b>Pop Total</b> | <b>Fold Enrichment</b> | <b>Bonferroni</b> | <b>Benjamini</b> | <b>FDR</b>  |
| UP_KEYWORDS                 | Postsynaptic cell membrane                  | 11           | 4.41767068 | 6.55E-05      | EPHA4, GLRB, DLGAP1, GRIA2, GABRB3, GABRA4, GABRB1, TENM2, GRIN2A, ABI1, CAMK2N1                                                                                                                                                                                                                                                                                                                                                                                                                                                                                                   | 249               | 179             | 20581            | 5.079334096            | 0.017906221       | 0.001388917      | 0.086331352 |
| UP_KEYWORDS                 | Ligand-gated ion channel                    | 7            | 2.81124498 | 4.11E-04      | GLRB, GRIA2, GABRB3, GABRA4, GABRB1, GRIN2A, RYR2                                                                                                                                                                                                                                                                                                                                                                                                                                                                                                                                  | 249               | 80              | 20581            | 7.232279116            | 0.107325252       | 0.006287538      | 0.541226016 |
| UP_KEYWORDS                 | Ion channel                                 | 12           | 4.81927711 | 0.00433931    | GLRB, KCNQ3, KCNT2, GRIA2, GABRB3, GABRA4, LRRC8B, GABRB1, GRIN2A, RYR2, CACNA1E, CACNA2D3                                                                                                                                                                                                                                                                                                                                                                                                                                                                                         | 249               | 359             | 20581            | 2.762828473            | 0.698882745       | 0.046875955      | 5.575828238 |
| UP_KEYWORDS                 | Chloride channel                            | 4            | 1.6064257  | 0.02354622    | GLRB, GABRB3, GABRA4, GABRB1                                                                                                                                                                                                                                                                                                                                                                                                                                                                                                                                                       | 249               | 51              | 20581            | 6.482715174            | 0.998607271       | 0.171302188      | 26.9744647  |
| UP_KEYWORDS                 | Chloride                                    | 4            | 1.6064257  | 0.058132826   | GLRB, GABRB3, GABRA4, GABRB1                                                                                                                                                                                                                                                                                                                                                                                                                                                                                                                                                       | 249               | 73              | 20581            | 4.52902019             | 0.999999934       | 0.291335708      | 54.62197704 |
| <b>Annotation Cluster 4</b> | <b>Enrichment Score: 2.4492741088767285</b> |              |            |               |                                                                                                                                                                                                                                                                                                                                                                                                                                                                                                                                                                                    |                   |                 |                  |                        |                   |                  |             |

| Category             | Term                                         | Count | %          | PValue      | Genes                                                                                                                 | List Total | Pop Hits | Pop Total | Fold Enrichment | Bonferroni  | Benjamini   | FDR         |
|----------------------|----------------------------------------------|-------|------------|-------------|-----------------------------------------------------------------------------------------------------------------------|------------|----------|-----------|-----------------|-------------|-------------|-------------|
| UP_KEYWORDS          | Neurogenesis                                 | 14    | 5.62248996 | 1.15E-05    | NRP1,ZEB1,KIDINS220,RUFY3,SEMA5A,EPHA4,EPHA7,SEMA4F,ROBO1,CHN1,CYFIP1,RAPGEF2,SPAST,KIF2A                             | 249        | 250      | 20581     | 4.628658635     | 0.00316719  | 4.53E-04    | 0.015162273 |
| UP_KEYWORDS          | Developmental protein                        | 20    | 8.03212851 | 0.021378058 | SPIN1,NRP1,ACKR3,ZFR,RUFY3,SEMA5A,DKK3,EPHA4,EPHA7,HEY1,ROBO1,SEMA4F,RYR2,CYFIP1,ODF2,UNC5C,RAPGEF2,OLFM1,SPAST,KIF2A | 249        | 949      | 20581     | 1.741930842     | 0.997431226 | 0.165345297 | 24.80603068 |
| UP_KEYWORDS          | Differentiation                              | 12    | 4.81927711 | 0.182708296 | SEMA5A,NRP1,ROBO1,SEMA4F,RASGRP1,CYFIP1,ODF2,ZEB1,RAPGEF2,SPAST,RUFY3,KIF2A                                           | 249        | 667      | 20581     | 1.487039613     | 1           | 0.538563249 | 93.01782274 |
| Annotation Cluster 5 | Enrichment Score: 1.9171547688557342         |       |            |             |                                                                                                                       |            |          |           |                 |             |             |             |
| Category             | Term                                         | Count | %          | PValue      | Genes                                                                                                                 | List Total | Pop Hits | Pop Total | Fold Enrichment | Bonferroni  | Benjamini   | FDR         |
| UP_SEQ_FEATUR E      | repeat:NHL 5                                 | 3     | 1.20481928 | 0.010767053 | TRIM2,TENM2,TRIM32                                                                                                    | 248        | 13       | 20063     | 18.66904467     | 0.99996109  | 0.570952783 | 15.60340942 |
| UP_SEQ_FEATUR E      | repeat:NHL 4                                 | 3     | 1.20481928 | 0.01246041  | TRIM2,TENM2,TRIM32                                                                                                    | 248        | 14       | 20063     | 17.33554147     | 0.999992199 | 0.595342739 | 17.83914777 |
| UP_SEQ_FEATUR E      | repeat:NHL 3                                 | 3     | 1.20481928 | 0.01246041  | TRIM2,TENM2,TRIM32                                                                                                    | 248        | 14       | 20063     | 17.33554147     | 0.999992199 | 0.595342739 | 17.83914777 |
| UP_SEQ_FEATUR E      | repeat:NHL 2                                 | 3     | 1.20481928 | 0.01246041  | TRIM2,TENM2,TRIM32                                                                                                    | 248        | 14       | 20063     | 17.33554147     | 0.999992199 | 0.595342739 | 17.83914777 |
| UP_SEQ_FEATUR E      | repeat:NHL 1                                 | 3     | 1.20481928 | 0.01246041  | TRIM2,TENM2,TRIM32                                                                                                    | 248        | 14       | 20063     | 17.33554147     | 0.999992199 | 0.595342739 | 17.83914777 |
| Annotation Cluster 6 | Enrichment Score: 1.6084925386733684         |       |            |             |                                                                                                                       |            |          |           |                 |             |             |             |
| Category             | Term                                         | Count | %          | PValue      | Genes                                                                                                                 | List Total | Pop Hits | Pop Total | Fold Enrichment | Bonferroni  | Benjamini   | FDR         |
| UP_KEYWORDS          | Calcium transport                            | 7     | 2.81124498 | 0.00120387  | ATP2B1,ATP2B3,ATP2A2,STIM2,RYR2,CACNA1E,CACNA2D3                                                                      | 249        | 98       | 20581     | 5.90390132      | 0.282848661 | 0.015707163 | 1.57666159  |
| UP_SEQ_FEATUR E      | active site:4-aspartylphosphate intermediate | 4     | 1.6064257  | 0.013023873 | ATP2B1,ATP2B3,ATP2A2,ATP1A3                                                                                           | 248        | 40       | 20063     | 8.089919355     | 0.999995433 | 0.584524499 | 18.57070802 |
| UP_KEYWORDS          | Magnesium                                    | 11    | 4.41767068 | 0.131817895 | MAST3,ATP2B1,IMPAD1,ATP2B3,ATP2A2,NEK1,GRIN2A,ATP1A3,B4GALT6,ACSL3,PGM2L1                                             | 249        | 552      | 20581     | 1.647102904     | 1           | 0.45642534  | 84.50853054 |
| UP_SEQ_FEATUR E      | metal ion-binding site:Magnesium             | 4     | 1.6064257  | 0.178129394 | ATP2B1,ATP2B3,ATP2A2,ATP1A3                                                                                           | 248        | 118      | 20063     | 2.742345544     | 1           | 0.988757339 | 95.3772283  |
| Annotation Cluster 7 | Enrichment Score: 1.5115233040448124         |       |            |             |                                                                                                                       |            |          |           |                 |             |             |             |
| Category             | Term                                         | Count | %          | PValue      | Genes                                                                                                                 | List Total | Pop Hits | Pop Total | Fold Enrichment | Bonferroni  | Benjamini   | FDR         |
| UP_SEQ_FEATUR E      | short sequence motif:PDZ-binding             | 6     | 2.40963855 | 0.002610719 | EPHA4,EPHA7,DLGAP1,SLC6A1,GRIN2A,EPHA3                                                                                | 248        | 77       | 20063     | 6.303833264     | 0.913883672 | 0.295518882 | 4.013778363 |
| UP_SEQ_FEATUR E      | domain:Fibronectin type-III 2                | 7     | 2.81124498 | 0.006132988 | NRCAM,EPHA4,EPHA7,ROBO1,LIFR,CNTN1,EPHA3                                                                              | 248        | 133      | 20063     | 4.257852292     | 0.996881665 | 0.408200224 | 9.190358046 |
| UP_SEQ_FEATUR E      | domain:SAM                                   | 5     | 2.00803213 | 0.019318905 | EPHA4,EPHA7,STIM2,EPHA3,TKNS2                                                                                         | 248        | 83       | 20063     | 4.873445394     | 0.999999989 | 0.704739532 | 26.33961951 |
| UP_KEYWORDS          | Tyrosine-protein kinase                      | 4     | 1.6064257  | 0.153090296 | EPHA4,EPHA7,NEK1,EPHA3                                                                                                | 249        | 112      | 20581     | 2.95195066      | 1           | 0.495650061 | 88.83252701 |
| UP_SEQ_FEATUR E      | compositionally biased region:Cys-rich       | 3     | 1.20481928 | 0.584818534 | EPHA4,EPHA7,EPHA3                                                                                                     | 248        | 159      | 20063     | 1.526399878     | 1           | 0.999938745 | 99.99989589 |

| Annotation Cluster 8                 |                                                        |       |            |             |                                                                                                                                                                                                                                     |            |          |           |                 |             |             |             |
|--------------------------------------|--------------------------------------------------------|-------|------------|-------------|-------------------------------------------------------------------------------------------------------------------------------------------------------------------------------------------------------------------------------------|------------|----------|-----------|-----------------|-------------|-------------|-------------|
| Enrichment Score: 1.4691507480589372 |                                                        |       |            |             |                                                                                                                                                                                                                                     |            |          |           |                 |             |             |             |
| Category                             | Term                                                   | Count | %          | PValue      | Genes                                                                                                                                                                                                                               | List Total | Pop Hits | Pop Total | Fold Enrichment | Bonferroni  | Benjamini   | FDR         |
| UP_SEQ_FEATUR E                      | metal ion-binding site: Calcium 1                      | 4     | 1.6064257  | 0.020077617 | NPTX1, ATP2A2, SYT11, PRKCG                                                                                                                                                                                                         | 248        | 47       | 20063     | 6.885037749     | 0.999999995 | 0.695482606 | 27.2276161  |
| UP_SEQ_FEATUR E                      | metal ion-binding site: Calcium 2                      | 4     | 1.6064257  | 0.033147071 | NPTX1, ATP2A2, SYT11, PRKCG                                                                                                                                                                                                         | 248        | 57       | 20063     | 5.677136389     | 1           | 0.827370475 | 41.03611039 |
| UP_SEQ_FEATUR E                      | metal ion-binding site: Calcium 1; via carbonyl oxygen | 3     | 1.20481928 | 0.058801774 | NPTX1, SYT11, PRKCG                                                                                                                                                                                                                 | 248        | 32       | 20063     | 7.584299395     | 1           | 0.915540871 | 61.31327582 |
| Annotation Cluster 9                 |                                                        |       |            |             |                                                                                                                                                                                                                                     |            |          |           |                 |             |             |             |
| Enrichment Score: 1.4322036123126636 |                                                        |       |            |             |                                                                                                                                                                                                                                     |            |          |           |                 |             |             |             |
| Category                             | Term                                                   | Count | %          | PValue      | Genes                                                                                                                                                                                                                               | List Total | Pop Hits | Pop Total | Fold Enrichment | Bonferroni  | Benjamini   | FDR         |
| UP_SEQ_FEATUR E                      | domain: N-terminal Ras-GEF                             | 3     | 1.20481928 | 0.02965805  | RASGRF1, RASGRP1, RAPGEF2                                                                                                                                                                                                           | 248        | 22       | 20063     | 11.03170821     | 1           | 0.810085982 | 37.61195738 |
| UP_KEYWORDS                          | Guanine-nucleotide releasing factor                    | 6     | 2.40963855 | 0.03455126  | ARFGEF3, RASGRF1, RASGRP1, TRIO, RAPGEF2, DOCK4                                                                                                                                                                                     | 249        | 149      | 20581     | 3.328373898     | 0.999939009 | 0.220295814 | 37.11709647 |
| UP_SEQ_FEATUR E                      | domain: Ras-GEF                                        | 3     | 1.20481928 | 0.049292709 | RASGRF1, RASGRP1, RAPGEF2                                                                                                                                                                                                           | 248        | 29       | 20063     | 8.368882091     | 1           | 0.895425734 | 54.71271096 |
| Annotation Cluster 10                |                                                        |       |            |             |                                                                                                                                                                                                                                     |            |          |           |                 |             |             |             |
| Enrichment Score: 1.4234918714966898 |                                                        |       |            |             |                                                                                                                                                                                                                                     |            |          |           |                 |             |             |             |
| Category                             | Term                                                   | Count | %          | PValue      | Genes                                                                                                                                                                                                                               | List Total | Pop Hits | Pop Total | Fold Enrichment | Bonferroni  | Benjamini   | FDR         |
| UP_SEQ_FEATUR E                      | domain: Fibronectin type-III 1                         | 8     | 3.21285141 | 0.001373948 | NRCAM, EPHA4, EPHA7, ROBO1, LIFR, ASTN1, CNTN1, EPHA3                                                                                                                                                                               | 248        | 134      | 20063     | 4.8298026       | 0.724632781 | 0.193411474 | 2.131521581 |
| UP_SEQ_FEATUR E                      | domain: Fibronectin type-III 2                         | 7     | 2.81124498 | 0.006132988 | NRCAM, EPHA4, EPHA7, ROBO1, LIFR, CNTN1, EPHA3                                                                                                                                                                                      | 248        | 133      | 20063     | 4.257852292     | 0.996881665 | 0.408200224 | 9.190358046 |
| UP_SEQ_FEATUR E                      | domain: Fibronectin type-III 3                         | 4     | 1.6064257  | 0.085155376 | NRCAM, ROBO1, LIFR, CNTN1                                                                                                                                                                                                           | 248        | 84       | 20063     | 3.85234255      | 1           | 0.93813284  | 75.2096783  |
| UP_SEQ_FEATUR E                      | domain: Fibronectin type-III 4                         | 3     | 1.20481928 | 0.181829736 | NRCAM, LIFR, CNTN1                                                                                                                                                                                                                  | 248        | 63       | 20063     | 3.85234255      | 1           | 0.988688789 | 95.69283505 |
| UP_SEQ_FEATUR E                      | compositionally biased region: Cys-rich                | 3     | 1.20481928 | 0.584818534 | EPHA4, EPHA7, EPHA3                                                                                                                                                                                                                 | 248        | 159      | 20063     | 1.526399878     | 1           | 0.999938745 | 99.99989589 |
| Annotation Cluster 11                |                                                        |       |            |             |                                                                                                                                                                                                                                     |            |          |           |                 |             |             |             |
| Enrichment Score: 1.0865456583420658 |                                                        |       |            |             |                                                                                                                                                                                                                                     |            |          |           |                 |             |             |             |
| Category                             | Term                                                   | Count | %          | PValue      | Genes                                                                                                                                                                                                                               | List Total | Pop Hits | Pop Total | Fold Enrichment | Bonferroni  | Benjamini   | FDR         |
| UP_KEYWORDS                          | ATP-binding                                            | 30    | 12.0481928 | 0.002806961 | NEK1, ATP5B, CCT2, ATP2B1, MTHFD1, ACTR3, KIF13A, ATP2B3, DGKB, HSPA5, PIK3R4, ACSL3, KIF2A, SGK1, ATP1A3, PI4KA, TRIO, PRKCG, MMAPB, EPHA3, MAST3, EPHA4, ATP6V1A, EPHA7, ATP2A2, KCNT2, HSPA4L, PGK1, SPAST, UBE2E1               | 249        | 1391     | 20581     | 1.782630161     | 0.539669461 | 0.031808554 | 3.640510507 |
| UP_KEYWORDS                          | Nucleotide-binding                                     | 32    | 12.8514056 | 0.025461581 | NEK1, ATP5B, CCT2, ATP2B1, ACTR3, KIF13A, MTHFD1, ATP2B3, DGKB, HSPA5, PIK3R4, ACSL3, KIF2A, SGK1, PI4KA, ATP1A3, TRIO, PRKCG, TRIM23, MMAPB, EPHA3, MAST3, ATP6V1A, EPHA4, EPHA7, ATP2A2, KCNT2, ARF3, HSPA4L, PGK1, SPAST, UBE2E1 | 249        | 1788     | 20581     | 1.479277288     | 0.999189945 | 0.179411557 | 28.84183659 |
| UP_KEYWORDS                          | Kinase                                                 | 16    | 6.42570281 | 0.033412859 | SGK1, NEK1, NELL2, PI4KA, TRIO, PRKCG, KIDINS220, EPHA3, MAST3, EPHA4, EPHA7, DGKB, MAPK8IP2, AKAP6, PGK1, PIK3R4                                                                                                                   | 249        | 735      | 20581     | 1.799284212     | 0.999915566 | 0.218726404 | 36.131801   |



|                              |                                             |              |            |               |                                                                                                                                                                                                                                                                                                                                                                                                                         |                   |                 |                  |                        |                   |                  |             |
|------------------------------|---------------------------------------------|--------------|------------|---------------|-------------------------------------------------------------------------------------------------------------------------------------------------------------------------------------------------------------------------------------------------------------------------------------------------------------------------------------------------------------------------------------------------------------------------|-------------------|-----------------|------------------|------------------------|-------------------|------------------|-------------|
| UP_KEYWORDS                  | Transferase                                 | 29           | 11.6465863 | 0.059249601   | HS3ST4, NEK1, NELL2, CDS2, DGKB, OGT, B4GALT6, PIK3R4, SGK1, RNF19A, PI4KA, TRIO, PRKCG, DLAT, KIDINS220, MMAP, EPHA3, PGM2L1, TNKS2, MAST3, EPHA4, EPHA7, MGAT3, SMYD5, MAPK8IP2, AKAP6, PGK1, MGAT5, UBE2E1                                                                                                                                                                                                           | 249               | 1708            | 20581            | 1.403386379            | 0.999999952       | 0.286196374      | 55.3267159  |
| UP_SEQ_FEATUR E              | nucleotide phosphate-binding region:ATP     | 18           | 7.22891566 | 0.107265335   | SGK1, NEK1, ATP5B, TRIO, PRKCG, MMAP, EPHA3, MAST3, MTHFD1, KIF13A, EPHA4, ATP6V1A, EPHA7, KCNT2, PGK1, PIK3R4, SPAST, KIF2A                                                                                                                                                                                                                                                                                            | 248               | 994             | 20063            | 1.464975336            | 1                 | 0.956296327      | 83.1041169  |
| UP_SEQ_FEATUR E              | binding site:ATP                            | 11           | 4.41767068 | 0.152134725   | MAST3, EPHA4, SGK1, EPHA7, NEK1, TRIO, PRKCG, PGK1, PIK3R4, MMAP, EPHA3                                                                                                                                                                                                                                                                                                                                                 | 248               | 558             | 20063            | 1.59478697             | 1                 | 0.982986062      | 92.46948177 |
| UP_SEQ_FEATUR E              | domain:Protein kinase                       | 9            | 3.61445783 | 0.238193041   | MAST3, EPHA4, SGK1, EPHA7, NEK1, TRIO, PRKCG, PIK3R4, EPHA3                                                                                                                                                                                                                                                                                                                                                             | 248               | 478             | 20063            | 1.523206573            | 1                 | 0.995615434      | 98.59260368 |
| UP_KEYWORDS                  | Serine/threonine-protein kinase             | 6            | 2.40963855 | 0.514098506   | MAST3, SGK1, NEK1, TRIO, PRKCG, PIK3R4                                                                                                                                                                                                                                                                                                                                                                                  | 249               | 393             | 20581            | 1.261902572            | 1                 | 0.850007465      | 99.99267799 |
| UP_SEQ_FEATUR E              | active site:Proton acceptor                 | 9            | 3.61445783 | 0.58844401    | MAST3, EPHA4, SGK1, EPHA7, CNP2, NEK1, PRKCG, PIK3R4, EPHA3                                                                                                                                                                                                                                                                                                                                                             | 248               | 672             | 20063            | 1.083471342            | 1                 | 0.999937686      | 99.99990926 |
| <b>Annotation Cluster 12</b> | <b>Enrichment Score: 0.998358442576134</b>  |              |            |               |                                                                                                                                                                                                                                                                                                                                                                                                                         |                   |                 |                  |                        |                   |                  |             |
| <b>Category</b>              | <b>Term</b>                                 | <b>Count</b> | <b>%</b>   | <b>PValue</b> | <b>Genes</b>                                                                                                                                                                                                                                                                                                                                                                                                            | <b>List Total</b> | <b>Pop Hits</b> | <b>Pop Total</b> | <b>Fold Enrichment</b> | <b>Bonferroni</b> | <b>Benjamini</b> | <b>FDR</b>  |
| UP_KEYWORDS                  | Metal-binding                               | 56           | 22.4899598 | 0.040271695   | IIMPAD1, NRP1, SLG6A1, CNP2, ZEB2, ZEB1, COX5A, ATP2B1, TRIM2, APP, ATP2B3, CISD1, RNF103, NR2F1, ZBTB20, ACO2, GRIN2A, STIM2, PRKCG, DZANK1, NRXN1, RBBP6, PCLO, TNKS2, PGM2L1, SNRNP48, TRIM32, ACAP2, RNF139, PRNP, ZBTB11, NEK1, NR3C2, CABP7, TTC3, NPTX1, DGKB, RASGRP1, PPP3CA, B4GALT6, NUP153, RNF19A, SYT11, ATP1A3, NR4A2, CACNA2D3, TRIM23, RUFY2, CADPS, PHF3, ATP2A2, SMYD5, CHN1, ZNF318, CACNA1E, CDH11 | 249               | 3640            | 20581            | 1.271609515            | 0.999988171       | 0.231901323      | 41.85899306 |
| UP_KEYWORDS                  | Zinc-finger                                 | 28           | 11.2449799 | 0.127585688   | ZBTB11, NR3C2, ZEB2, ZEB1, TTC3, TRIM2, DGKB, RNF103, RASGRP1, NR2F1, NUP153, ZBTB20, RNF19A, NR4A2, PRKCG, DZANK1, TRIM23, RBBP6, PCLO, RUFY2, SNRNP48, PHF3, TRIM32, SMYD5, ACAP2, RNF139, CHN1, ZNF318                                                                                                                                                                                                               | 249               | 1781            | 20581            | 1.299454979            | 1                 | 0.450067572      | 83.48207078 |
| UP_KEYWORDS                  | Zinc                                        | 34           | 13.6546185 | 0.196844281   | SLC39A10, ZBTB11, NR3C2, ZEB2, ZEB1, TTC3, APP, TRIM2, DGKB, RNF103, RASGRP1, PPP3CA, NR2F1, ZBTB20, NUP153, RNF19A, GRIN2A, NR4A2, PRKCG, DZANK1, TRIM23, RBBP6, PCLO, TNKS2, RUFY2, SNRNP48, PHF3, TRIM32, SMYD5, ACAP2, RNF139, CHN1, ZNF318, PRNP                                                                                                                                                                   | 249               | 2348            | 20581            | 1.19687267             | 1                 | 0.553662782      | 94.45344804 |
| <b>Annotation Cluster 13</b> | <b>Enrichment Score: 0.8090174159219522</b> |              |            |               |                                                                                                                                                                                                                                                                                                                                                                                                                         |                   |                 |                  |                        |                   |                  |             |
| <b>Category</b>              | <b>Term</b>                                 | <b>Count</b> | <b>%</b>   | <b>PValue</b> | <b>Genes</b>                                                                                                                                                                                                                                                                                                                                                                                                            | <b>List Total</b> | <b>Pop Hits</b> | <b>Pop Total</b> | <b>Fold Enrichment</b> | <b>Bonferroni</b> | <b>Benjamini</b> | <b>FDR</b>  |
| UP_KEYWORDS                  | Ligase                                      | 9            | 3.61445783 | 0.059903446   | MTHFD1, TRIM2, RNF103, TRIM32, RNF139, TRIM23, ACSL3, RBBP6, TTC3                                                                                                                                                                                                                                                                                                                                                       | 249               | 347             | 20581            | 2.14377973             | 0.999999961       | 0.284160483      | 55.7346149  |
| UP_KEYWORDS                  | Ubl conjugation pathway                     | 12           | 4.81927711 | 0.19848858    | TRIM2, RNF103, RNF19A, USP9X, TRIM32, RNF139, USP25, TRIM23, RBBP6, TTC3, KLHL2, UBE2E1                                                                                                                                                                                                                                                                                                                                 | 249               | 680             | 20581            | 1.458610914            | 1                 | 0.54754803       | 94.60140476 |
| UP_SEQ_FEATUR E              | zinc finger region:RING-type                | 5            | 2.00803213 | 0.314601233   | TRIM2, RNF103, TRIM32, TRIM23, TTC3                                                                                                                                                                                                                                                                                                                                                                                     | 248               | 230             | 20063            | 1.758678121            | 1                 | 0.998901829      | 99.73140269 |
| <b>Annotation Cluster 14</b> | <b>Enrichment Score: 0.8057389338435338</b> |              |            |               |                                                                                                                                                                                                                                                                                                                                                                                                                         |                   |                 |                  |                        |                   |                  |             |
| <b>Category</b>              | <b>Term</b>                                 | <b>Count</b> | <b>%</b>   | <b>PValue</b> | <b>Genes</b>                                                                                                                                                                                                                                                                                                                                                                                                            | <b>List Total</b> | <b>Pop Hits</b> | <b>Pop Total</b> | <b>Fold Enrichment</b> | <b>Bonferroni</b> | <b>Benjamini</b> | <b>FDR</b>  |
| UP_SEQ_FEATUR E              | domain:EGF-like 3                           | 4            | 1.6064257  | 0.067368483   | TENM2, NELL2, ASTN1, NRXN1                                                                                                                                                                                                                                                                                                                                                                                              | 248               | 76              | 20063            | 4.257852292            | 1                 | 0.919233145      | 66.47775856 |
| UP_KEYWORDS                  | EGF-like domain                             | 6            | 2.40963855 | 0.160868981   | VASN, NRG3, TENM2, NELL2, ASTN1, NRXN1                                                                                                                                                                                                                                                                                                                                                                                  | 249               | 238             | 20581            | 2.083729877            | 1                 | 0.504185639      | 90.11250787 |
| UP_SEQ_FEATUR E              | domain:EGF-like 1                           | 4            | 1.6064257  | 0.184273159   | TENM2, NELL2, ASTN1, NRXN1                                                                                                                                                                                                                                                                                                                                                                                              | 248               | 120             | 20063            | 2.696639785            | 1                 | 0.988239079      | 95.89005412 |

|                                  |                                              |              |            |               |                                                                                                                                      |                   |                 |                  |                        |                   |                  |             |
|----------------------------------|----------------------------------------------|--------------|------------|---------------|--------------------------------------------------------------------------------------------------------------------------------------|-------------------|-----------------|------------------|------------------------|-------------------|------------------|-------------|
| UP_SEQ_FEATUR<br>E               | domain:EGF-like 2                            | 3            | 1.20481928 | 0.29967679    | TENM2,ASTN1,NRXN1                                                                                                                    | 248               | 89              | 20063            | 2.726939108            | 1                 | 0.998747435      | 99.62355192 |
| <b>Annotation Cluster<br/>15</b> | <b>Enrichment Score: 0.6457910727527878</b>  |              |            |               |                                                                                                                                      |                   |                 |                  |                        |                   |                  |             |
| <b>Category</b>                  | <b>Term</b>                                  | <b>Count</b> | <b>%</b>   | <b>PValue</b> | <b>Genes</b>                                                                                                                         | <b>List Total</b> | <b>Pop Hits</b> | <b>Pop Total</b> | <b>Fold Enrichment</b> | <b>Bonferroni</b> | <b>Benjamini</b> | <b>FDR</b>  |
| UP_KEYWORDS                      | Mitochondrion inner<br>membrane              | 7            | 2.81124498 | 0.108985114   | CDS2, NDUFB4, COX7A2, NDUFB6, ATP5B, COX6A1, COX5A                                                                                   | 249               | 270             | 20581            | 2.142897516            | 1                 | 0.422540497      | 78.18113154 |
| UP_KEYWORDS                      | Mitochondrion                                | 19           | 7.63052209 | 0.132686065   | NDUFB4, SGK1, COX7A2, NDUFB6, ACO2, FADS1, ATP5B, ABHD6, DLAT, COX5A, MMAB,<br>SH3BP5, CDS2, CISD1, COX6A1, MRPL48, OGT, PRNP, ACSL3 | 249               | 1119            | 20581            | 1.403429626            | 1                 | 0.453629603      | 84.7116653  |
| UP_SEQ_FEATUR<br>E               | transit<br>peptide:Mitochondrion             | 8            | 3.21285141 | 0.385700681   | COX7A2, ACO2, ATP5B, COX6A1, MRPL48, DLAT, COX5A, MMAB                                                                               | 248               | 482             | 20063            | 1.342725204            | 1                 | 0.999508329      | 99.95172222 |
| UP_KEYWORDS                      | Transit peptide                              | 8            | 3.21285141 | 0.468158385   | COX7A2, ACO2, ATP5B, COX6A1, MRPL48, DLAT, COX5A, MMAB                                                                               | 249               | 536             | 20581            | 1.233651022            | 1                 | 0.824951177      | 99.9758873  |
| <b>Annotation Cluster<br/>16</b> | <b>Enrichment Score: 0.45622026915395386</b> |              |            |               |                                                                                                                                      |                   |                 |                  |                        |                   |                  |             |
| <b>Category</b>                  | <b>Term</b>                                  | <b>Count</b> | <b>%</b>   | <b>PValue</b> | <b>Genes</b>                                                                                                                         | <b>List Total</b> | <b>Pop Hits</b> | <b>Pop Total</b> | <b>Fold Enrichment</b> | <b>Bonferroni</b> | <b>Benjamini</b> | <b>FDR</b>  |
| UP_KEYWORDS                      | Spliceosome                                  | 4            | 1.6064257  | 0.197699181   | SRSF1, SNRNP48, SREK1, SRRM1                                                                                                         | 249               | 127             | 20581            | 2.60329507             | 1                 | 0.550641337      | 94.53083468 |
| UP_KEYWORDS                      | mRNA splicing                                | 5            | 2.00803213 | 0.38010997    | SRSF1, SNRNP48, SREK1, SRRM1, RBM39                                                                                                  | 249               | 260             | 20581            | 1.589511894            | 1                 | 0.761798795      | 99.81802699 |
| UP_KEYWORDS                      | mRNA processing                              | 5            | 2.00803213 | 0.569409962   | SRSF1, SNRNP48, SREK1, SRRM1, RBM39                                                                                                  | 249               | 332             | 20581            | 1.244798471            | 1                 | 0.874619763      | 99.99851336 |
| <b>Annotation Cluster<br/>17</b> | <b>Enrichment Score: 0.44663913013558265</b> |              |            |               |                                                                                                                                      |                   |                 |                  |                        |                   |                  |             |
| <b>Category</b>                  | <b>Term</b>                                  | <b>Count</b> | <b>%</b>   | <b>PValue</b> | <b>Genes</b>                                                                                                                         | <b>List Total</b> | <b>Pop Hits</b> | <b>Pop Total</b> | <b>Fold Enrichment</b> | <b>Bonferroni</b> | <b>Benjamini</b> | <b>FDR</b>  |
| UP_KEYWORDS                      | Microtubule                                  | 6            | 2.40963855 | 0.248890544   | KIF13A, INCENP, MAP1B, ODF2, SPAST, KIF2A                                                                                            | 249               | 280             | 20581            | 1.771170396            | 1                 | 0.613921338      | 97.70832735 |
| UP_KEYWORDS                      | Cell division                                | 7            | 2.81124498 | 0.323317085   | KIF13A, USP9X, INCENP, NEK1, WASL, SPAST, KIF2A                                                                                      | 249               | 388             | 20581            | 1.49119157             | 1                 | 0.71446795       | 99.42154188 |
| UP_KEYWORDS                      | Mitosis                                      | 5            | 2.00803213 | 0.389039474   | USP9X, INCENP, NEK1, WASL, KIF2A                                                                                                     | 249               | 262             | 20581            | 1.577378215            | 1                 | 0.768291346      | 99.84973035 |
| UP_KEYWORDS                      | Cell cycle                                   | 9            | 3.61445783 | 0.522171011   | KIF13A, SPIN1, USP9X, INCENP, NEK1, WASL, PRNP, SPAST, KIF2A                                                                         | 249               | 650             | 20581            | 1.144448563            | 1                 | 0.853816555      | 99.99412995 |
| <b>Annotation Cluster<br/>18</b> | <b>Enrichment Score: 0.41911699944096487</b> |              |            |               |                                                                                                                                      |                   |                 |                  |                        |                   |                  |             |
| <b>Category</b>                  | <b>Term</b>                                  | <b>Count</b> | <b>%</b>   | <b>PValue</b> | <b>Genes</b>                                                                                                                         | <b>List Total</b> | <b>Pop Hits</b> | <b>Pop Total</b> | <b>Fold Enrichment</b> | <b>Bonferroni</b> | <b>Benjamini</b> | <b>FDR</b>  |
| UP_KEYWORDS                      | Immunoglobulin<br>domain                     | 10           | 4.01606426 | 0.215028873   | NRCAM, OPCML, ROBO1, SEMA4F, CADM2, LRRN3, TRIO, CNTN1, UNC5C, B2M                                                                   | 249               | 546             | 20581            | 1.513820851            | 1                 | 0.570806266      | 95.89980482 |
| UP_SEQ_FEATUR<br>E               | domain:Ig-like C2-type<br>1                  | 4            | 1.6064257  | 0.456246225   | OPCML, ROBO1, CADM2, CNTN1                                                                                                           | 248               | 202             | 20063            | 1.601964229            | 1                 | 0.999747067      | 99.99286254 |
| UP_SEQ_FEATUR<br>E               | domain:Ig-like C2-type<br>2                  | 4            | 1.6064257  | 0.457803879   | OPCML, ROBO1, CADM2, CNTN1                                                                                                           | 248               | 203             | 20063            | 1.594072779            | 1                 | 0.999692483      | 99.9931763  |
| UP_SEQ_FEATUR<br>E               | domain:Ig-like C2-type<br>3                  | 3            | 1.20481928 | 0.468982321   | OPCML, ROBO1, CNTN1                                                                                                                  | 248               | 128             | 20063            | 1.896074849            | 1                 | 0.999737711      | 99.99507689 |
| <b>Annotation Cluster<br/>19</b> | <b>Enrichment Score: 0.40825648746145293</b> |              |            |               |                                                                                                                                      |                   |                 |                  |                        |                   |                  |             |

| Category              | Term                                  | Count | %          | PValue      | Genes                                                          | List Total | Pop Hits | Pop Total | Fold Enrichment | Bonferroni | Benjamini   | FDR         |
|-----------------------|---------------------------------------|-------|------------|-------------|----------------------------------------------------------------|------------|----------|-----------|-----------------|------------|-------------|-------------|
| UP_SEQ_FEATUR E       | repeat:ANK 1                          | 5     | 2.00803213 | 0.353419661 | MTPN,ACAP2,DZANK1,KIDINS220,TNKS2                              | 248        | 244      | 20063     | 1.65777036      | 1          | 0.999327137 | 99.89227804 |
| UP_SEQ_FEATUR E       | repeat:ANK 2                          | 5     | 2.00803213 | 0.356269637 | MTPN,ACAP2,DZANK1,KIDINS220,TNKS2                              | 248        | 245      | 20063     | 1.65100395      | 1          | 0.999194099 | 99.89948293 |
| UP_KEYWORDS           | ANK repeat                            | 5     | 2.00803213 | 0.393707742 | MTPN,ACAP2,DZANK1,KIDINS220,TNKS2                              | 249        | 264      | 20581     | 1.56542838      | 1          | 0.766313252 | 99.86419252 |
| UP_SEQ_FEATUR E       | repeat:ANK 3                          | 4     | 1.6064257  | 0.469602692 | MTPN,ACAP2,KIDINS220,TNKS2                                     | 248        | 207      | 20063     | 1.563269441     | 1          | 0.999710722 | 99.99516625 |
| Annotation Cluster 20 | Enrichment Score: 0.3742016041490842  |       |            |             |                                                                |            |          |           |                 |            |             |             |
| Category              | Term                                  | Count | %          | PValue      | Genes                                                          | List Total | Pop Hits | Pop Total | Fold Enrichment | Bonferroni | Benjamini   | FDR         |
| UP_SEQ_FEATUR E       | domain:EF-hand 1                      | 4     | 1.6064257  | 0.398553602 | DGKB,RASGRP1,CABP7,RYR2                                        | 248        | 185      | 20063     | 1.749171752     | 1          | 0.999543476 | 99.96533903 |
| UP_SEQ_FEATUR E       | domain:EF-hand 2                      | 4     | 1.6064257  | 0.398553602 | DGKB,RASGRP1,CABP7,RYR2                                        | 248        | 185      | 20063     | 1.749171752     | 1          | 0.999543476 | 99.96533903 |
| UP_SEQ_FEATUR E       | calcium-binding region:2              | 3     | 1.20481928 | 0.42762554  | DGKB,RASGRP1,CABP7                                             | 248        | 118      | 20063     | 2.056759158     | 1          | 0.999545627 | 99.9840538  |
| UP_SEQ_FEATUR E       | calcium-binding region:1              | 3     | 1.20481928 | 0.468982321 | DGKB,RASGRP1,CABP7                                             | 248        | 128      | 20063     | 1.896074849     | 1          | 0.999737711 | 99.99507689 |
| Annotation Cluster 21 | Enrichment Score: 0.347356047281063   |       |            |             |                                                                |            |          |           |                 |            |             |             |
| Category              | Term                                  | Count | %          | PValue      | Genes                                                          | List Total | Pop Hits | Pop Total | Fold Enrichment | Bonferroni | Benjamini   | FDR         |
| UP_KEYWORDS           | GPI-anchor                            | 4     | 1.6064257  | 0.228982822 | OPCML,CNTN1,NRN1,PRNP                                          | 249        | 137      | 20581     | 2.413273532     | 1          | 0.587730487 | 96.76379556 |
| UP_SEQ_FEATUR E       | propeptide:Removed in mature form     | 4     | 1.6064257  | 0.563902252 | OPCML,CNTN1,NRN1,PRNP                                          | 248        | 237      | 20063     | 1.365387233     | 1          | 0.999915499 | 99.9997751  |
| UP_KEYWORDS           | Lipoprotein                           | 10    | 4.01606426 | 0.702951117 | TNFRSF21,GRIA2,OPCML,SERINC1,ARF3,LRP11,CNTN1,NRN1,PRNP,PIK3R4 | 249        | 852      | 20581     | 0.97012463      | 1          | 0.938693824 | 99.99998891 |
| Annotation Cluster 22 | Enrichment Score: 0.3470381752749516  |       |            |             |                                                                |            |          |           |                 |            |             |             |
| Category              | Term                                  | Count | %          | PValue      | Genes                                                          | List Total | Pop Hits | Pop Total | Fold Enrichment | Bonferroni | Benjamini   | FDR         |
| UP_SEQ_FEATUR E       | repeat:3                              | 5     | 2.00803213 | 0.300783462 | SYNPR,BDP1,DNAIC6,RYR2,PRNP                                    | 248        | 225      | 20063     | 1.797759857     | 1          | 0.998613008 | 99.6327668  |
| UP_SEQ_FEATUR E       | repeat:2                              | 5     | 2.00803213 | 0.398041878 | SYNPR,BDP1,DNAIC6,RYR2,PRNP                                    | 248        | 260      | 20063     | 1.555753722     | 1          | 0.999592263 | 99.964874   |
| UP_SEQ_FEATUR E       | repeat:4                              | 4     | 1.6064257  | 0.421775922 | SYNPR,BDP1,RYR2,PRNP                                           | 248        | 192      | 20063     | 1.685399866     | 1          | 0.999532968 | 99.98129928 |
| UP_SEQ_FEATUR E       | repeat:5                              | 3     | 1.20481928 | 0.591864086 | SYNPR,BDP1,PRNP                                                | 248        | 161      | 20063     | 1.507438389     | 1          | 0.999936342 | 99.99992038 |
| UP_SEQ_FEATUR E       | repeat:1                              | 4     | 1.6064257  | 0.615634048 | SYNPR,DNAIC6,RYR2,PRNP                                         | 248        | 257      | 20063     | 1.259131417     | 1          | 0.999952998 | 99.99996891 |
| Annotation Cluster 23 | Enrichment Score: 0.24276318543958272 |       |            |             |                                                                |            |          |           |                 |            |             |             |
| Category              | Term                                  | Count | %          | PValue      | Genes                                                          | List Total | Pop Hits | Pop Total | Fold Enrichment | Bonferroni | Benjamini   | FDR         |
| UP_SEQ_FEATUR E       | repeat:LRR 11                         | 3     | 1.20481928 | 0.353759648 | VASN,LRRC8B,LRRN3                                              | 248        | 101      | 20063     | 2.402946343     | 1          | 0.99924174  | 99.89316226 |

|                                  |                                              |              |            |               |                                                                                                                                          |                   |                 |                  |                        |                   |                  |             |
|----------------------------------|----------------------------------------------|--------------|------------|---------------|------------------------------------------------------------------------------------------------------------------------------------------|-------------------|-----------------|------------------|------------------------|-------------------|------------------|-------------|
| UP_SEQ_FEATUR<br>E               | repeat:LRR10                                 | 3            | 1.20481928 | 0.419152048   | VASN, LRRC8B, LRRN3                                                                                                                      | 248               | 116             | 20063            | 2.092220523            | 1                 | 0.999556568      | 99.97992426 |
| UP_SEQ_FEATUR<br>E               | repeat:LRR6                                  | 4            | 1.6064257  | 0.476270352   | VASN, NISCH, LRRC8B, LRRN3                                                                                                               | 248               | 209             | 20063            | 1.548309924            | 1                 | 0.999724898      | 99.99603552 |
| UP_SEQ_FEATUR<br>E               | repeat:LRR9                                  | 3            | 1.20481928 | 0.492930682   | VASN, LRRC8B, LRRN3                                                                                                                      | 248               | 134             | 20063            | 1.811175975            | 1                 | 0.999744622      | 99.99761125 |
| UP_SEQ_FEATUR<br>E               | repeat:LRR5                                  | 4            | 1.6064257  | 0.54316845    | VASN, NISCH, LRRC8B, LRRN3                                                                                                               | 248               | 231             | 20063            | 1.400851836            | 1                 | 0.99989752       | 99.9995343  |
| UP_SEQ_FEATUR<br>E               | repeat:LRR8                                  | 3            | 1.20481928 | 0.546084115   | VASN, LRRC8B, LRRN3                                                                                                                      | 248               | 148             | 20063            | 1.639848518            | 1                 | 0.999893416      | 99.99957876 |
| UP_SEQ_FEATUR<br>E               | repeat:LRR4                                  | 4            | 1.6064257  | 0.610351872   | VASN, NISCH, LRRC8B, LRRN3                                                                                                               | 248               | 255             | 20063            | 1.269006958            | 1                 | 0.999956655      | 99.9999615  |
| UP_SEQ_FEATUR<br>E               | repeat:LRR7                                  | 3            | 1.20481928 | 0.640319663   | VASN, LRRC8B, LRRN3                                                                                                                      | 248               | 176             | 20063            | 1.378963526            | 1                 | 0.999973544      | 99.99998901 |
| UP_SEQ_FEATUR<br>E               | repeat:LRR3                                  | 4            | 1.6064257  | 0.721562224   | VASN, NISCH, LRRC8B, LRRN3                                                                                                               | 248               | 302             | 20063            | 1.071512497            | 1                 | 0.99999573       | 99.9999998  |
| UP_KEYWORDS                      | Leucine-rich repeat                          | 4            | 1.6064257  | 0.726470775   | VASN, NISCH, LRRC8B, LRRN3                                                                                                               | 249               | 311             | 20581            | 1.06308191             | 1                 | 0.946747951      | 99.99999626 |
| UP_SEQ_FEATUR<br>E               | repeat:LRR1                                  | 4            | 1.6064257  | 0.758928735   | VASN, NISCH, LRRC8B, LRRN3                                                                                                               | 248               | 321             | 20063            | 1.008089639            | 1                 | 0.99999878       | 99.99999998 |
| UP_SEQ_FEATUR<br>E               | repeat:LRR2                                  | 4            | 1.6064257  | 0.760778725   | VASN, NISCH, LRRC8B, LRRN3                                                                                                               | 248               | 322             | 20063            | 1.004958926            | 1                 | 0.999998699      | 99.99999998 |
| <b>Annotation Cluster<br/>24</b> | <b>Enrichment Score: 0.15079982243963927</b> |              |            |               |                                                                                                                                          |                   |                 |                  |                        |                   |                  |             |
| <b>Category</b>                  | <b>Term</b>                                  | <b>Count</b> | <b>%</b>   | <b>PValue</b> | <b>Genes</b>                                                                                                                             | <b>List Total</b> | <b>Pop Hits</b> | <b>Pop Total</b> | <b>Fold Enrichment</b> | <b>Bonferroni</b> | <b>Benjamini</b> | <b>FDR</b>  |
| UP_SEQ_FEATUR<br>E               | repeat:WD3                                   | 4            | 1.6064257  | 0.646308681   | PREB, DMXL2, NBEA, PIK3R4                                                                                                                | 248               | 269             | 20063            | 1.202961986            | 1                 | 0.999971983      | 99.99999156 |
| UP_KEYWORDS                      | WD repeat                                    | 4            | 1.6064257  | 0.661030428   | PREB, DMXL2, NBEA, PIK3R4                                                                                                                | 249               | 281             | 20581            | 1.176578199            | 1                 | 0.922077806      | 99.9999367  |
| UP_SEQ_FEATUR<br>E               | repeat:WD2                                   | 4            | 1.6064257  | 0.668157473   | PREB, DMXL2, NBEA, PIK3R4                                                                                                                | 248               | 278             | 20063            | 1.164017173            | 1                 | 0.999983423      | 99.99999689 |
| UP_SEQ_FEATUR<br>E               | repeat:WD1                                   | 4            | 1.6064257  | 0.668157473   | PREB, DMXL2, NBEA, PIK3R4                                                                                                                | 248               | 278             | 20063            | 1.164017173            | 1                 | 0.999983423      | 99.99999689 |
| UP_SEQ_FEATUR<br>E               | repeat:WD5                                   | 3            | 1.20481928 | 0.791883449   | DMXL2, NBEA, PIK3R4                                                                                                                      | 248               | 237             | 20063            | 1.024040425            | 1                 | 0.999999597      | 100         |
| UP_SEQ_FEATUR<br>E               | repeat:WD4                                   | 3            | 1.20481928 | 0.824367191   | DMXL2, NBEA, PIK3R4                                                                                                                      | 248               | 255             | 20063            | 0.951755218            | 1                 | 0.999999887      | 100         |
| <b>Annotation Cluster<br/>25</b> | <b>Enrichment Score: 0.09710433727517169</b> |              |            |               |                                                                                                                                          |                   |                 |                  |                        |                   |                  |             |
| <b>Category</b>                  | <b>Term</b>                                  | <b>Count</b> | <b>%</b>   | <b>PValue</b> | <b>Genes</b>                                                                                                                             | <b>List Total</b> | <b>Pop Hits</b> | <b>Pop Total</b> | <b>Fold Enrichment</b> | <b>Bonferroni</b> | <b>Benjamini</b> | <b>FDR</b>  |
| UP_KEYWORDS                      | Repressor                                    | 9            | 3.61445783 | 0.42880397    | TSC22D1, EIF4G2, HDAC2, HEY1, TENM2, ZNF318, ZEB2, ZEB1, NR2F1                                                                           | 249               | 592             | 20581            | 1.256573592            | 1                 | 0.796780172      | 99.9381604  |
| UP_KEYWORDS                      | Transcription regulation                     | 20           | 8.03212851 | 0.978296014   | ZBTB20, ZBTB11, BDP1, ARID4B, AFF4, NR3C2, NR4A2, ZEB2, ZEB1, LPIN2, TBR1, TSC22D1, PREB, HDAC2, HEY1, TENM2, ZNF318, WASL, RBM39, NR2F1 | 249               | 2332            | 20581            | 0.708873229            | 1                 | 0.999687173      | 100         |
| UP_KEYWORDS                      | Transcription                                | 20           | 8.03212851 | 0.985004016   | ZBTB20, ZBTB11, BDP1, ARID4B, AFF4, NR3C2, NR4A2, ZEB2, ZEB1, LPIN2, TBR1, TSC22D1, PREB, HDAC2, HEY1, TENM2, ZNF318, WASL, RBM39, NR2F1 | 249               | 2398            | 20581            | 0.689362956            | 1                 | 0.999846493      | 100         |
| UP_KEYWORDS                      | DNA-binding                                  | 16           | 6.42570281 | 0.989499474   | NUP153, ZBTB20, ZBTB11, ARID4B, NR3C2, NR4A2, LEMD3, ZEB2, ZEB1, ZFR, TBR1, PREB, HEY1, CENPB, SRRM1, NR2F1                              | 249               | 2050            | 20581            | 0.645109217            | 1                 | 0.999921722      | 100         |

| Annotation Cluster 26                  |                                    |       |            |             |                         |            |          |           |                 |            |           |     |
|----------------------------------------|------------------------------------|-------|------------|-------------|-------------------------|------------|----------|-----------|-----------------|------------|-----------|-----|
| Enrichment Score: 0.009646657059772808 |                                    |       |            |             |                         |            |          |           |                 |            |           |     |
| Category                               | Term                               | Count | %          | PValue      | Genes                   | List Total | Pop Hits | Pop Total | Fold Enrichment | Bonferroni | Benjamini | FDR |
| UP_SEQ_FEATUR<br>E                     | zinc finger region:C2H2-<br>type 5 | 4     | 1.6064257  | 0.967271006 | ZBTB20,ZBTB11,ZEB2,ZEB1 | 248        | 550      | 20063     | 0.588357771     | 1          | 1         | 100 |
| UP_SEQ_FEATUR<br>E                     | zinc finger region:C2H2-<br>type 1 | 4     | 1.6064257  | 0.968494338 | ZBTB20,ZBTB11,ZEB2,ZEB1 | 248        | 554      | 20063     | 0.584109701     | 1          | 1         | 100 |
| UP_SEQ_FEATUR<br>E                     | zinc finger region:C2H2-<br>type 2 | 4     | 1.6064257  | 0.982555044 | ZBTB20,ZBTB11,ZEB2,ZEB1 | 248        | 615      | 20063     | 0.526173617     | 1          | 1         | 100 |
| UP_SEQ_FEATUR<br>E                     | zinc finger region:C2H2-<br>type 3 | 4     | 1.6064257  | 0.9858257   | ZBTB20,ZBTB11,ZEB2,ZEB1 | 248        | 636      | 20063     | 0.508799959     | 1          | 1         | 100 |
| UP_SEQ_FEATUR<br>E                     | zinc finger region:C2H2-<br>type 6 | 3     | 1.20481928 | 0.986198717 | ZBTB11,ZEB2,ZEB1        | 248        | 501      | 20063     | 0.484426309     | 1          | 1         | 100 |

Supplemental Table 3: caCN GSEA c3 MsigDB

| NAME                                        | SIZE | ES          | NES        | NOM p-val   | FDR q-val  | FWER p-val | RANKAT<br>MAX | LEADING EDGE                      |
|---------------------------------------------|------|-------------|------------|-------------|------------|------------|---------------|-----------------------------------|
| GTCTACC_MIR379                              | 17   | -0.5778604  | -1.5160992 | 0.014084507 | 1          | 0.495      | 1804          | tags=29%, list=12%,<br>signal=33% |
| CDX2_Q5                                     | 218  | -0.39150468 | -1.5044196 | 0.005847953 | 1          | 0.528      | 2510          | tags=28%, list=16%,<br>signal=32% |
| TTGGGAG_MIR150                              | 86   | -0.5191229  | -1.482956  | 0.001945525 | 1          | 0.597      | 3234          | tags=41%, list=21%,<br>signal=51% |
| TCTATGA_MIR376A_MIR376B                     | 75   | -0.5715711  | -1.4800076 | 0           | 0.8261493  | 0.603      | 3211          | tags=41%, list=21%,<br>signal=52% |
| TAATAAT_MIR126                              | 193  | -0.54125273 | -1.4673655 | 0.007984032 | 0.7507221  | 0.64       | 3357          | tags=44%, list=22%,<br>signal=55% |
| PAX8_B                                      | 87   | -0.49243167 | -1.4602499 | 0.003944773 | 0.66693723 | 0.645      | 2305          | tags=32%, list=15%,<br>signal=38% |
| AAGTCCA_MIR422B_MIR422A                     | 62   | -0.42742056 | -1.4577342 | 0.011764706 | 0.5873004  | 0.652      | 1810          | tags=19%, list=12%,<br>signal=22% |
| ATGTTTC_MIR494                              | 144  | -0.49505407 | -1.4533463 | 0           | 0.54675436 | 0.658      | 3357          | tags=40%, list=22%,<br>signal=50% |
| ATACTGT_MIR144                              | 184  | -0.4957733  | -1.4532721 | 0.00591716  | 0.48600388 | 0.658      | 4049          | tags=47%, list=26%,<br>signal=62% |
| TGTATGA_MIR4853P                            | 132  | -0.5682688  | -1.4522694 | 0.001953125 | 0.44197267 | 0.659      | 2920          | tags=41%, list=19%,<br>signal=50% |
| GCCATNTTG_YY1_Q6                            | 253  | -0.37702042 | -1.4522507 | 0.005813954 | 0.40179333 | 0.659      | 2931          | tags=29%, list=19%,<br>signal=35% |
| ATGTTAA_MIR302C                             | 221  | -0.57966524 | -1.4492922 | 0           | 0.3802648  | 0.661      | 4044          | tags=53%, list=26%,<br>signal=70% |
| ACTWSNACTNY_UNKNOW<br>N                     | 100  | -0.40852612 | -1.4459587 | 0.020449897 | 0.36976504 | 0.671      | 3874          | tags=31%, list=25%,<br>signal=41% |
| TGCTTTG_MIR330                              | 287  | -0.5549064  | -1.4458663 | 0           | 0.34349865 | 0.671      | 3921          | tags=54%, list=25%,<br>signal=71% |
| AGGAAGC_MIR5163P                            | 108  | -0.4573482  | -1.4456501 | 0.001980198 | 0.3214526  | 0.671      | 3751          | tags=38%, list=24%,<br>signal=50% |
| ACAWNRNSRCGG_UNKNO<br>WN                    | 82   | -0.49397346 | -1.4447906 | 0.005976096 | 0.30368322 | 0.673      | 2715          | tags=33%, list=17%,<br>signal=40% |
| HLF_Q1                                      | 225  | -0.44292223 | -1.4444771 | 0           | 0.2862398  | 0.673      | 3944          | tags=40%, list=25%,<br>signal=53% |
| GTGACTT_MIR224                              | 145  | -0.49610925 | -1.4433237 | 0           | 0.2749618  | 0.675      | 3899          | tags=42%, list=25%,<br>signal=56% |
| STTCRNTTT_IRF_Q6                            | 63   | -0.43057042 | -1.4431844 | 0.011976048 | 0.26059654 | 0.675      | 1490          | tags=22%, list=10%,<br>signal=24% |
| RYTGCNWTGGNR_UNKN<br>OWN                    | 84   | -0.38549843 | -1.4388003 | 0           | 0.25888115 | 0.677      | 2177          | tags=24%, list=14%,<br>signal=28% |
| AAAGGAT_MIR501                              | 114  | -0.55174804 | -1.4367754 | 0.00589391  | 0.25523776 | 0.681      | 4094          | tags=50%, list=26%,<br>signal=67% |
| GTGCAAT_MIR25_MIR32_<br>MIR92_MIR363_MIR367 | 277  | -0.4887496  | -1.4308053 | 0           | 0.2676311  | 0.69       | 3878          | tags=44%, list=25%,<br>signal=57% |

|                                                       |     |             |            |             |            |       |      |                                   |
|-------------------------------------------------------|-----|-------------|------------|-------------|------------|-------|------|-----------------------------------|
| TGTTGA_MIR377                                         | 172 | -0.49284467 | -1.4290735 | 0           | 0.2621971  | 0.69  | 4266 | tags=53%, list=27%,<br>signal=73% |
| ATATGCA_MIR448                                        | 169 | -0.5616365  | -1.4285209 | 0.012121212 | 0.25295177 | 0.691 | 3200 | tags=46%, list=20%,<br>signal=57% |
| CAGTATT_MIR200B_MIR200C_MIR429                        | 421 | -0.53637844 | -1.427473  | 0           | 0.2456042  | 0.692 | 4240 | tags=52%, list=27%,<br>signal=70% |
| HSF1_01                                               | 235 | -0.4002157  | -1.4267734 | 0           | 0.23749322 | 0.692 | 2903 | tags=28%, list=19%,<br>signal=33% |
| TCCAGAT_MIR5165P                                      | 97  | -0.47614643 | -1.4260539 | 0.013833992 | 0.2299771  | 0.693 | 3689 | tags=39%, list=24%,<br>signal=51% |
| AR_02                                                 | 33  | -0.5075796  | -1.4249203 | 0.055009823 | 0.22632048 | 0.695 | 1585 | tags=30%, list=10%,<br>signal=34% |
| ATGCTGC_MIR103_MIR107                                 | 197 | -0.5304705  | -1.4225733 | 0.011952192 | 0.22430982 | 0.698 | 3778 | tags=47%, list=24%,<br>signal=61% |
| GGCCAGT_MIR193A_MIR193B                               | 82  | -0.44173548 | -1.4187235 | 0.025590552 | 0.23057191 | 0.716 | 2744 | tags=28%, list=18%,<br>signal=34% |
| GTTAAAG_MIR302B                                       | 63  | -0.54519486 | -1.4179935 | 0.015810277 | 0.2252054  | 0.716 | 4319 | tags=56%, list=28%,<br>signal=76% |
| ACTGTGA_MIR27A_MIR27B                                 | 419 | -0.43995535 | -1.4177426 | 0           | 0.21839754 | 0.716 | 3699 | tags=38%, list=24%,<br>signal=48% |
| ACAACTT_MIR382                                        | 61  | -0.5385987  | -1.4177145 | 0.009861933 | 0.21177943 | 0.716 | 3699 | tags=51%, list=24%,<br>signal=66% |
| EV1_02                                                | 115 | -0.3951284  | -1.4160432 | 0.00990099  | 0.21052887 | 0.717 | 2907 | tags=30%, list=19%,<br>signal=36% |
| ATCATGA_MIR433                                        | 100 | -0.53107667 | -1.4160193 | 0.021868788 | 0.20454282 | 0.717 | 3503 | tags=45%, list=22%,<br>signal=58% |
| IK3_01                                                | 195 | -0.34654158 | -1.415817  | 0.00204918  | 0.19922644 | 0.717 | 2818 | tags=24%, list=18%,<br>signal=29% |
| AAGCAAT_MIR137                                        | 195 | -0.5083298  | -1.4157776 | 0.008048289 | 0.1940611  | 0.717 | 2031 | tags=31%, list=13%,<br>signal=36% |
| CTACTAG_MIR325                                        | 17  | -0.68981355 | -1.415346  | 0.021956088 | 0.1915457  | 0.72  | 3346 | tags=59%, list=21%,<br>signal=75% |
| GCACTTT_MIR175P_MIR20A_MIR106A_MIR106B_MIR20B_MIR519D | 531 | -0.47732124 | -1.4143108 | 0.015779093 | 0.18894596 | 0.721 | 3571 | tags=40%, list=23%,<br>signal=50% |
| GCATTTG_MIR105                                        | 157 | -0.56745744 | -1.4139533 | 0.01002004  | 0.18462926 | 0.721 | 4173 | tags=55%, list=27%,<br>signal=75% |
| TGAGATT_MIR216                                        | 96  | -0.5669027  | -1.4132887 | 0.004115226 | 0.18146512 | 0.723 | 3190 | tags=49%, list=20%,<br>signal=61% |
| TAGCTTT_MIR9                                          | 219 | -0.5717553  | -1.4127176 | 0.006097561 | 0.17806676 | 0.723 | 4052 | tags=57%, list=26%,<br>signal=76% |
| ATAACCT_MIR154                                        | 60  | -0.60969853 | -1.412467  | 0.011904762 | 0.1743285  | 0.723 | 3503 | tags=52%, list=22%,<br>signal=66% |
| TACTTGA_MIR26A_MIR26B                                 | 279 | -0.5433742  | -1.4122396 | 0.006122449 | 0.17080863 | 0.724 | 4056 | tags=50%, list=26%,<br>signal=67% |
| TAXCREB_01                                            | 121 | -0.45850143 | -1.412218  | 0.002       | 0.16701289 | 0.724 | 3363 | tags=36%, list=22%,<br>signal=45% |

|                                 |     |             |            |             |            |       |      |                                |
|---------------------------------|-----|-------------|------------|-------------|------------|-------|------|--------------------------------|
| CCAGGTT_MIR490                  | 56  | -0.5049987  | -1.4118239 | 0.015810277 | 0.16413227 | 0.726 | 2891 | tags=36%, list=19%, signal=44% |
| CAGCTTT_MIR320                  | 223 | -0.55320805 | -1.4102901 | 0.00610998  | 0.16346829 | 0.729 | 4090 | tags=50%, list=26%, signal=67% |
| CATGTAA_MIR496                  | 164 | -0.5442177  | -1.4099222 | 0.008247423 | 0.16086487 | 0.729 | 4030 | tags=52%, list=26%, signal=69% |
| ETF_Q6                          | 101 | -0.51445454 | -1.4098605 | 0           | 0.15758193 | 0.729 | 3094 | tags=45%, list=20%, signal=55% |
| GGTGAAG_MIR412                  | 53  | -0.41339648 | -1.4085566 | 0.04518664  | 0.15771103 | 0.735 | 3692 | tags=42%, list=24%, signal=54% |
| AGTCAGC_MIR345                  | 54  | -0.5892781  | -1.4084165 | 0.01        | 0.15483332 | 0.735 | 3645 | tags=54%, list=23%, signal=70% |
| AAGGGAT_MIR188                  | 69  | -0.5659163  | -1.4082551 | 0.02004008  | 0.15209581 | 0.735 | 3296 | tags=45%, list=21%, signal=57% |
| TTTGAG_MIR518A2                 | 189 | -0.5232108  | -1.4069188 | 0.002024292 | 0.15265325 | 0.738 | 4303 | tags=52%, list=28%, signal=71% |
| GTGGTGA_MIR197                  | 65  | -0.5119544  | -1.405824  | 0.01968504  | 0.15196043 | 0.739 | 3430 | tags=40%, list=22%, signal=51% |
| TTCNRGNNTTC_HSF_Q6              | 389 | -0.37030384 | -1.4055023 | 0           | 0.14940853 | 0.739 | 3278 | tags=29%, list=21%, signal=36% |
| ACACTGG_MIR199A_MIR199B         | 140 | -0.48705488 | -1.4050122 | 0.001996008 | 0.14795159 | 0.741 | 3923 | tags=46%, list=25%, signal=61% |
| ACTGTAG_MIR139                  | 115 | -0.5290265  | -1.4049956 | 0.017821781 | 0.14535595 | 0.741 | 4095 | tags=52%, list=26%, signal=70% |
| ACTGCAG_MIR173P                 | 94  | -0.47955167 | -1.4048454 | 0.004016064 | 0.14317396 | 0.741 | 2999 | tags=35%, list=19%, signal=43% |
| TGATTRY_GFI1_01                 | 231 | -0.47713163 | -1.4039044 | 0.004008016 | 0.14272144 | 0.741 | 4048 | tags=45%, list=26%, signal=60% |
| ACATATC_MIR190                  | 59  | -0.5491247  | -1.4037055 | 0.05533597  | 0.14062507 | 0.741 | 2594 | tags=39%, list=17%, signal=47% |
| AAAGGA_MIR204_MIR211            | 203 | -0.49565545 | -1.4027636 | 0.001992032 | 0.14007892 | 0.743 | 3480 | tags=43%, list=22%, signal=54% |
| TGCACTG_MIR148A_MIR152_MIR148B  | 271 | -0.5224012  | -1.4024454 | 0.002028398 | 0.13834777 | 0.743 | 4082 | tags=49%, list=26%, signal=66% |
| CCTGTGA_MIR513                  | 112 | -0.49102715 | -1.40138   | 0.011904762 | 0.13840015 | 0.743 | 3089 | tags=37%, list=20%, signal=45% |
| TGCACTT_MIR519C_MIR519B_MIR519A | 393 | -0.49840033 | -1.4011887 | 0.007920792 | 0.13664806 | 0.745 | 4126 | tags=48%, list=26%, signal=63% |
| AACATTC_MIR4093P                | 129 | -0.5115596  | -1.4010288 | 0.00407332  | 0.13485181 | 0.745 | 2640 | tags=33%, list=17%, signal=40% |
| AAGCACT_MIR520F                 | 214 | -0.47041276 | -1.4007243 | 0.005813954 | 0.13351813 | 0.746 | 3222 | tags=38%, list=21%, signal=48% |
| GTGTCAA_MIR514                  | 54  | -0.5082434  | -1.4006267 | 0.050980393 | 0.13167763 | 0.746 | 3268 | tags=44%, list=21%, signal=56% |
| TTGCACT_MIR130A_MIR301_MIR130B  | 365 | -0.5122835  | -1.4003017 | 0.010183299 | 0.13024174 | 0.746 | 4548 | tags=53%, list=29%, signal=73% |



|                                         |     |             |            |             |             |       |      |                                |
|-----------------------------------------|-----|-------------|------------|-------------|-------------|-------|------|--------------------------------|
| AGCATT_A_MIR155                         | 122 | -0.5071509  | -1.4000348 | 0.020449897 | 0.12884969  | 0.746 | 2669 | tags=37%, list=17%, signal=44% |
| CREBP1_01                               | 157 | -0.43880132 | -1.39879   | 0.003992016 | 0.12884094  | 0.747 | 4048 | tags=41%, list=26%, signal=55% |
| ACTTTAT_MIR1425P                        | 262 | -0.5059366  | -1.3985356 | 0.010080645 | 0.12735324  | 0.747 | 3720 | tags=44%, list=24%, signal=56% |
| MYCMA_X_02                              | 224 | -0.38740996 | -1.3984263 | 0.019120459 | 0.12569682  | 0.747 | 3504 | tags=33%, list=22%, signal=43% |
| HSF2_01                                 | 217 | -0.39301124 | -1.3979746 | 0.004081633 | 0.12476588  | 0.747 | 2718 | tags=25%, list=17%, signal=30% |
| TTGTAG_MIR520D                          | 308 | -0.5143198  | -1.3974744 | 0.020449897 | 0.12376878  | 0.747 | 3503 | tags=44%, list=22%, signal=56% |
| FREAC4_01                               | 130 | -0.3806953  | -1.3974617 | 0.01734104  | 0.12215946  | 0.747 | 3432 | tags=32%, list=22%, signal=41% |
| ATAAGCT_MIR21                           | 108 | -0.5518787  | -1.3972385 | 0.024590164 | 0.121178254 | 0.748 | 2941 | tags=43%, list=19%, signal=52% |
| TTGCCA_MIR182                           | 293 | -0.5232848  | -1.396203  | 0.005928854 | 0.12093369  | 0.748 | 4435 | tags=52%, list=28%, signal=72% |
| AAACCAC_MIR140                          | 98  | -0.49787533 | -1.3960115 | 0.004032258 | 0.11973881  | 0.751 | 2621 | tags=33%, list=17%, signal=39% |
| TATTATA_MIR374                          | 263 | -0.47055018 | -1.3935844 | 0.008230452 | 0.12138462  | 0.751 | 4644 | tags=48%, list=30%, signal=67% |
| ACCAAAG_MIR9                            | 452 | -0.4479862  | -1.3927155 | 0           | 0.12147917  | 0.753 | 4023 | tags=41%, list=26%, signal=53% |
| MEIS1BHOXA9_01                          | 123 | -0.3858148  | -1.3923475 | 0.025590552 | 0.120572425 | 0.753 | 4048 | tags=36%, list=26%, signal=48% |
| YY1_01                                  | 214 | -0.4060724  | -1.3913732 | 0.007936508 | 0.12096989  | 0.755 | 3689 | tags=34%, list=24%, signal=43% |
| P53_02                                  | 213 | -0.3871936  | -1.3904942 | 0           | 0.120721474 | 0.756 | 4080 | tags=36%, list=26%, signal=48% |
| GTCCAT_MIR183                           | 157 | -0.57604706 | -1.390371  | 0.018292682 | 0.11944417  | 0.756 | 3108 | tags=46%, list=20%, signal=57% |
| TGAATGT_MIR181A_MIR181B_MIR181C_MIR181D | 416 | -0.49328786 | -1.3901105 | 0.007936508 | 0.11835777  | 0.756 | 4365 | tags=50%, list=28%, signal=68% |
| CTATGA_MIR153                           | 189 | -0.4774907  | -1.3899854 | 0.006048387 | 0.1171964   | 0.756 | 4077 | tags=45%, list=26%, signal=60% |
| TTGCAC_MIR19A_MIR19B                    | 468 | -0.48939842 | -1.3898243 | 0.006072875 | 0.11606694  | 0.756 | 4541 | tags=51%, list=29%, signal=69% |
| CACGTTT_MIR302A                         | 30  | -0.63565063 | -1.3890966 | 0.024       | 0.11600402  | 0.757 | 3573 | tags=63%, list=23%, signal=82% |
| AACGGTT_MIR451                          | 9   | -0.7412377  | -1.3887879 | 0.023622047 | 0.11500503  | 0.757 | 2801 | tags=56%, list=18%, signal=68% |
| AACTAC_MIR1423P                         | 119 | -0.5044515  | -1.3880898 | 0.012244898 | 0.11466081  | 0.757 | 4279 | tags=50%, list=27%, signal=68% |
| ACTACCT_MIR196A_MIR196B                 | 124 | -0.42460477 | -1.3879355 | 0           | 0.113781795 | 0.757 | 4297 | tags=44%, list=28%, signal=61% |

|                                                                                                                                 |     |             |            |             |             |       |      |                                   |
|---------------------------------------------------------------------------------------------------------------------------------|-----|-------------|------------|-------------|-------------|-------|------|-----------------------------------|
| CAAGGAT_MIR362                                                                                                                  | 61  | -0.49114984 | -1.3875431 | 0.01372549  | 0.11308875  | 0.757 | 3581 | tags=44%, list=23%,<br>signal=57% |
| KRCTCNNNMANAGC_UN<br>KNOWN                                                                                                      | 184 | -0.44622818 | -1.387306  | 0.001992032 | 0.112198815 | 0.757 | 4450 | tags=43%, list=29%,<br>signal=59% |
| ACCATT_MIR522                                                                                                                   | 142 | -0.5233698  | -1.3868625 | 0.004040404 | 0.111519665 | 0.757 | 4847 | tags=59%, list=31%,<br>signal=85% |
| AATGTGA_MIR23A_MIR23<br>B                                                                                                       | 375 | -0.4879344  | -1.3862817 | 0.011952192 | 0.11099598  | 0.757 | 3474 | tags=41%, list=22%,<br>signal=51% |
| AGGTGCA_MIR500                                                                                                                  | 90  | -0.53510725 | -1.3859507 | 0.03557312  | 0.11030533  | 0.757 | 4407 | tags=57%, list=28%,<br>signal=79% |
| LEF1_Q6                                                                                                                         | 231 | -0.3259251  | -1.3858321 | 0           | 0.10929244  | 0.757 | 3309 | tags=26%, list=21%,<br>signal=33% |
| CACTTTG_MIR520G_MIR5<br>20H                                                                                                     | 197 | -0.45143065 | -1.3850703 | 0.02534113  | 0.108943164 | 0.757 | 3836 | tags=43%, list=25%,<br>signal=56% |
| GGTAACC_MIR4095P                                                                                                                | 28  | -0.5853102  | -1.3846718 | 0.04233871  | 0.10872612  | 0.759 | 2831 | tags=39%, list=18%,<br>signal=48% |
| ATTCTT_MIR186                                                                                                                   | 237 | -0.56269884 | -1.3843254 | 0.028747434 | 0.10802845  | 0.759 | 3946 | tags=55%, list=25%,<br>signal=72% |
| GGGTGRR_PAX4_Q3                                                                                                                 | 135 | -0.36944875 | -1.3838319 | 0.009633912 | 0.10788203  | 0.76  | 1277 | tags=16%, list=8%,<br>signal=17%  |
| TGCTGCT_MIR15A_MIR16<br>_MIR15B_MIR195_MIR42<br>4_MIR497                                                                        | 534 | -0.43868297 | -1.383045  | 0.015717093 | 0.10807534  | 0.761 | 4257 | tags=42%, list=27%,<br>signal=55% |
| TGCAAC_MIR452                                                                                                                   | 99  | -0.48632106 | -1.3830057 | 0.00990099  | 0.10708238  | 0.761 | 3628 | tags=43%, list=23%,<br>signal=56% |
| GTAAGT_MIR101                                                                                                                   | 230 | -0.5193739  | -1.3829283 | 0.004106776 | 0.10613083  | 0.761 | 4266 | tags=53%, list=27%,<br>signal=71% |
| PR_Q2                                                                                                                           | 226 | -0.33140036 | -1.3828323 | 0.012269938 | 0.10519835  | 0.761 | 3820 | tags=28%, list=24%,<br>signal=37% |
| CTAGGAA_MIR384                                                                                                                  | 56  | -0.5813861  | -1.381359  | 0.01417004  | 0.106019236 | 0.761 | 4321 | tags=59%, list=28%,<br>signal=81% |
| AP2_Q3                                                                                                                          | 224 | -0.37589377 | -1.3808036 | 0.023809524 | 0.1056321   | 0.761 | 3072 | tags=28%, list=20%,<br>signal=35% |
| AGCACTT_MIR93_MIR302<br>A_MIR302B_MIR302C_MI<br>R302D_MIR372_MIR373_<br>MIR520E_MIR520A_MIR5<br>26B_MIR520B_MIR520C_<br>MIR520D | 298 | -0.45692718 | -1.3807247 | 0.010080645 | 0.10478579  | 0.761 | 4017 | tags=42%, list=26%,<br>signal=56% |
| AACTGGA_MIR145                                                                                                                  | 201 | -0.47457385 | -1.3806306 | 0.015686275 | 0.10394578  | 0.761 | 3766 | tags=42%, list=24%,<br>signal=54% |
| AACTGAC_MIR223                                                                                                                  | 88  | -0.530584   | -1.3799442 | 0.013779528 | 0.1038679   | 0.761 | 3581 | tags=45%, list=23%,<br>signal=59% |
| TGTTTAC_MIR30ASP_MIR<br>30C_MIR30D_MIR30B_MI<br>R30E5P                                                                          | 528 | -0.44320446 | -1.3793529 | 0           | 0.10368662  | 0.761 | 3599 | tags=38%, list=23%,<br>signal=47% |
| ACCAATC_MIR509                                                                                                                  | 34  | -0.5505596  | -1.3793296 | 0.06048387  | 0.102778755 | 0.761 | 3145 | tags=50%, list=20%,<br>signal=62% |
| CAGTGTT_MIR141_MIR20<br>0A                                                                                                      | 284 | -0.5087533  | -1.378227  | 0.012121212 | 0.103541344 | 0.764 | 4257 | tags=51%, list=27%,<br>signal=69% |

|                                 |     |             |            |             |             |       |      |                                   |
|---------------------------------|-----|-------------|------------|-------------|-------------|-------|------|-----------------------------------|
| GTATTAT_MIR3693P                | 180 | -0.5444644  | -1.3780044 | 0.018367346 | 0.10282286  | 0.764 | 4218 | tags=58%, list=27%,<br>signal=78% |
| AAGCACA_MIR218                  | 344 | -0.48133865 | -1.3773378 | 0.027722772 | 0.10291576  | 0.764 | 4080 | tags=44%, list=26%,<br>signal=58% |
| E4BP4_01                        | 195 | -0.47337875 | -1.3765979 | 0.011976048 | 0.10294246  | 0.767 | 4540 | tags=49%, list=29%,<br>signal=69% |
| OCT_Q6                          | 210 | -0.34279045 | -1.376373  | 0.004140787 | 0.102289304 | 0.767 | 2478 | tags=22%, list=16%,<br>signal=26% |
| TAATGTG_MIR323                  | 149 | -0.53952706 | -1.3738177 | 0.04024145  | 0.10526804  | 0.771 | 3017 | tags=44%, list=19%,<br>signal=54% |
| ATGTACA_MIR493                  | 290 | -0.52511394 | -1.3737715 | 0.014028057 | 0.104477346 | 0.771 | 4121 | tags=51%, list=26%,<br>signal=68% |
| AGCGCTT_MIR518F_MIR518E_MIR518A | 16  | -0.46402842 | -1.3729928 | 0.103238866 | 0.10477918  | 0.771 | 1238 | tags=19%, list=8%,<br>signal=20%  |
| TGCCTTA_MIR124A                 | 512 | -0.43946606 | -1.3728706 | 0.01923077  | 0.10403179  | 0.771 | 4211 | tags=43%, list=27%,<br>signal=57% |
| EVI1_04                         | 204 | -0.40089992 | -1.3708465 | 0.020366598 | 0.106449045 | 0.774 | 2305 | tags=26%, list=15%,<br>signal=30% |
| GTGTGA_MIR505                   | 91  | -0.5251563  | -1.3707247 | 0.033203125 | 0.10570134  | 0.774 | 3841 | tags=53%, list=25%,<br>signal=70% |
| LYF1_01                         | 226 | -0.33534837 | -1.3699725 | 0.003875969 | 0.10621609  | 0.775 | 3171 | tags=26%, list=20%,<br>signal=32% |
| GGGCATT_MIR365                  | 98  | -0.4794237  | -1.3692926 | 0.01968504  | 0.10653202  | 0.778 | 3393 | tags=44%, list=22%,<br>signal=56% |
| AAGCCAT_MIR135A_MIR135B         | 299 | -0.47040185 | -1.3692847 | 0.01192843  | 0.10573161  | 0.778 | 4021 | tags=45%, list=26%,<br>signal=59% |
| GTTTGTT_MIR495                  | 220 | -0.526616   | -1.3692497 | 0.006198347 | 0.10492285  | 0.778 | 3865 | tags=47%, list=25%,<br>signal=61% |
| CATTCA_MIR203                   | 257 | -0.5198528  | -1.3691081 | 0.034274194 | 0.10430912  | 0.781 | 3053 | tags=42%, list=20%,<br>signal=52% |
| ATAGGAA_MIR202                  | 96  | -0.5497336  | -1.3676559 | 0.03307393  | 0.10544838  | 0.783 | 3194 | tags=47%, list=20%,<br>signal=59% |
| CTTGAT_MIR381                   | 180 | -0.52488756 | -1.3668958 | 0.032520324 | 0.10588632  | 0.783 | 4125 | tags=52%, list=26%,<br>signal=69% |
| CTACTGT_MIR199A                 | 166 | -0.49820662 | -1.3668506 | 0.01863354  | 0.10510209  | 0.783 | 4017 | tags=45%, list=26%,<br>signal=60% |
| OCT1_B                          | 223 | -0.3524851  | -1.3665388 | 0.009633912 | 0.10471525  | 0.783 | 1870 | tags=19%, list=12%,<br>signal=21% |
| SOX5_01                         | 236 | -0.40811506 | -1.3665025 | 0.016194332 | 0.10398968  | 0.783 | 4206 | tags=40%, list=27%,<br>signal=54% |
| GCAAGAC_MIR431                  | 41  | -0.53096765 | -1.3663557 | 0.07272727  | 0.103442356 | 0.783 | 4876 | tags=56%, list=31%,<br>signal=81% |
| ATGAAGG_MIR205                  | 142 | -0.5069094  | -1.3660266 | 0.02385686  | 0.10298763  | 0.783 | 4019 | tags=47%, list=26%,<br>signal=63% |
| SGCGSSAAA_E2F1DP2_01            | 89  | -0.43925035 | -1.3655188 | 0.015968064 | 0.1026959   | 0.783 | 4929 | tags=51%, list=32%,<br>signal=73% |

|                       |      |             |            |             |             |       |      |                                   |
|-----------------------|------|-------------|------------|-------------|-------------|-------|------|-----------------------------------|
| GNCF_01               | 67   | -0.411454   | -1.3646069 | 0.051896207 | 0.1031706   | 0.785 | 3161 | tags=33%, list=20%,<br>signal=41% |
| CAGGTCC_MIR492        | 52   | -0.4594372  | -1.3634902 | 0.03557312  | 0.103778265 | 0.787 | 3354 | tags=35%, list=21%,<br>signal=44% |
| DBP_Q6                | 227  | -0.36788514 | -1.3632084 | 0           | 0.10355704  | 0.787 | 2905 | tags=26%, list=19%,<br>signal=32% |
| CTTTGCA_MIR527        | 221  | -0.4874882  | -1.3626822 | 0.02        | 0.10338484  | 0.787 | 4194 | tags=45%, list=27%,<br>signal=60% |
| GCTCTTG_MIR335        | 80   | -0.4921179  | -1.3625835 | 0.04        | 0.102737874 | 0.787 | 4016 | tags=44%, list=26%,<br>signal=59% |
| FOX_Q2                | 189  | -0.39839792 | -1.3624578 | 0.011904762 | 0.102185905 | 0.787 | 4489 | tags=42%, list=29%,<br>signal=59% |
| AAAYRNCTG_UNKNOWN     | 324  | -0.3462754  | -1.3620825 | 0.008032128 | 0.10249837  | 0.788 | 3414 | tags=27%, list=22%,<br>signal=34% |
| ATGCACG_MIR517B       | 18   | -0.6106439  | -1.361973  | 0.09867173  | 0.10189715  | 0.788 | 4257 | tags=56%, list=27%,<br>signal=76% |
| TTGCWCAAY_CEBPB_02    | 1716 | -0.34403342 | -1.3616908 | 0           | 0.101600945 | 0.788 | 3680 | tags=29%, list=24%,<br>signal=34% |
| GACTGTT_MIR212_MIR132 | 136  | -0.47308704 | -1.3611273 | 0.001984127 | 0.101772875 | 0.788 | 3626 | tags=40%, list=23%,<br>signal=52% |
| AGTCTTA_MIR499        | 67   | -0.53977764 | -1.360972  | 0.04133858  | 0.10119514  | 0.788 | 3397 | tags=43%, list=22%,<br>signal=55% |
| CACGTG_MYC_Q2         | 66   | -0.4300409  | -1.3599396 | 0.045816734 | 0.10192447  | 0.789 | 2834 | tags=32%, list=18%,<br>signal=39% |
| PBX1_01               | 214  | -0.34424743 | -1.3596394 | 0.008163265 | 0.10169357  | 0.789 | 2494 | tags=21%, list=16%,<br>signal=25% |
| E4F1_Q6               | 249  | -0.3987937  | -1.3588034 | 0.01183432  | 0.102205284 | 0.789 | 4395 | tags=39%, list=28%,<br>signal=54% |
| GGCACTT_MIR519E       | 112  | -0.49229598 | -1.3586869 | 0.028056113 | 0.10171421  | 0.789 | 3980 | tags=47%, list=25%,<br>signal=63% |
| AP2GAMMA_01           | 223  | -0.31274298 | -1.3586812 | 0.013888889 | 0.101045035 | 0.789 | 2646 | tags=21%, list=17%,<br>signal=24% |
| RYTTCCTG_ETS2_B       | 108  | -0.541272   | -1.358294  | 0.07874016  | 0.100896835 | 0.789 | 4345 | tags=57%, list=28%,<br>signal=79% |
| TATCTGG_MIR488        | 48   | -0.5925429  | -1.3581607 | 0.035856575 | 0.100378335 | 0.789 | 3531 | tags=50%, list=23%,<br>signal=64% |
| CTTTGTA_MIR524        | 395  | -0.4689248  | -1.3580303 | 0.01192843  | 0.099968575 | 0.789 | 3205 | tags=39%, list=21%,<br>signal=48% |
| ATACCTC_MIR202        | 166  | -0.459376   | -1.3577489 | 0.021825397 | 0.09972676  | 0.789 | 3749 | tags=41%, list=24%,<br>signal=53% |
| ACAACCT_MIR453        | 36   | -0.51445395 | -1.3571277 | 0.08219178  | 0.099849835 | 0.789 | 2845 | tags=33%, list=18%,<br>signal=41% |
| GTGTGAG_MIR342        | 57   | -0.4576087  | -1.3548993 | 0.016949153 | 0.10259713  | 0.794 | 2773 | tags=35%, list=18%,<br>signal=43% |
| AAAYWAACM_HFH4_01     | 1647 | -0.381291   | -1.3547585 | 0           | 0.10214944  | 0.794 | 4037 | tags=34%, list=26%,<br>signal=41% |

|                                     |      |             |            |             |             |       |      |                                   |
|-------------------------------------|------|-------------|------------|-------------|-------------|-------|------|-----------------------------------|
| ERR1_Q2                             | 228  | -0.4031305  | -1.3545178 | 0.021442495 | 0.10176237  | 0.794 | 3652 | tags=35%, list=23%,<br>signal=45% |
| CACTGCC_MIR34A_MIR34<br>C_MIR449    | 257  | -0.46264482 | -1.3544043 | 0.02964427  | 0.10128683  | 0.794 | 3937 | tags=43%, list=25%,<br>signal=56% |
| GTGCCTT_MIR506                      | 653  | -0.40916058 | -1.354331  | 0.00390625  | 0.100699425 | 0.794 | 4277 | tags=41%, list=27%,<br>signal=54% |
| ATTACAT_MIR3803P                    | 91   | -0.58000135 | -1.3539182 | 0.048879836 | 0.10074737  | 0.794 | 4241 | tags=60%, list=27%,<br>signal=82% |
| CTCNANGTGNV_UNKNO<br>WN             | 63   | -0.47720385 | -1.3530952 | 0.054435484 | 0.10114381  | 0.794 | 3244 | tags=40%, list=21%,<br>signal=50% |
| EV11_05                             | 153  | -0.36929637 | -1.3529269 | 0.012145749 | 0.10073056  | 0.794 | 1848 | tags=21%, list=12%,<br>signal=23% |
| ARNT_01                             | 223  | -0.39759168 | -1.3518156 | 0.015655577 | 0.101750314 | 0.795 | 3429 | tags=34%, list=22%,<br>signal=42% |
| GGCACAT_MIR455                      | 55   | -0.4969958  | -1.3511928 | 0.06706114  | 0.10195814  | 0.795 | 3134 | tags=38%, list=20%,<br>signal=48% |
| ELK1_02                             | 218  | -0.45821476 | -1.3504881 | 0.041501977 | 0.10275507  | 0.798 | 3880 | tags=40%, list=25%,<br>signal=52% |
| PBX1_02                             | 110  | -0.38181597 | -1.349267  | 0.034552846 | 0.10398265  | 0.798 | 2745 | tags=25%, list=18%,<br>signal=31% |
| ATGTAC_MIR489                       | 73   | -0.4792188  | -1.3468016 | 0.049309663 | 0.107012875 | 0.803 | 2622 | tags=30%, list=17%,<br>signal=36% |
| ACTGAAA_MIR30A3P_MIR<br>30E3P       | 179  | -0.54127616 | -1.3463507 | 0.046938777 | 0.10705778  | 0.803 | 4460 | tags=58%, list=29%,<br>signal=80% |
| CATTGTYT_SOX9_B1                    | 70   | -0.4964464  | -1.345417  | 0.044       | 0.107649736 | 0.805 | 4694 | tags=53%, list=30%,<br>signal=75% |
| CEBPB_02                            | 228  | -0.3396695  | -1.3433743 | 0.031311154 | 0.10986248  | 0.806 | 3690 | tags=29%, list=24%,<br>signal=38% |
| CTCTAGA_MIR526C_MIR5<br>18F_MIR526A | 47   | -0.49096027 | -1.3433183 | 0.029880479 | 0.10931497  | 0.806 | 5239 | tags=64%, list=34%,<br>signal=96% |
| MYCMAX_B                            | 234  | -0.3304872  | -1.3427007 | 0.00591716  | 0.1094451   | 0.806 | 4375 | tags=36%, list=28%,<br>signal=49% |
| AAAGACA_MIR511                      | 173  | -0.4572969  | -1.3403357 | 0.03373016  | 0.11217691  | 0.807 | 4297 | tags=48%, list=28%,<br>signal=65% |
| AP2ALPHA_01                         | 213  | -0.33200207 | -1.3398887 | 0.041501977 | 0.11236439  | 0.807 | 2663 | tags=22%, list=17%,<br>signal=26% |
| TAGAACC_MIR182                      | 36   | -0.576063   | -1.3397006 | 0.07185629  | 0.11210675  | 0.807 | 2220 | tags=33%, list=14%,<br>signal=39% |
| YTAATTAA_LHX3_01                    | 415  | -0.38363913 | -1.3396859 | 0.003976143 | 0.11149907  | 0.807 | 3739 | tags=32%, list=24%,<br>signal=40% |
| TAATTA_CHX10_01                     | 133  | -0.40946    | -1.339377  | 0.051587302 | 0.11143387  | 0.807 | 3374 | tags=32%, list=22%,<br>signal=41% |
| GTCAGGA_MIR378                      | 47   | -0.5017384  | -1.3386966 | 0.012269938 | 0.11187642  | 0.807 | 4146 | tags=49%, list=27%,<br>signal=66% |
| TGGAAA_NFAT_Q4_01                   | 1780 | -0.36238223 | -1.3381655 | 0           | 0.11229415  | 0.807 | 4095 | tags=34%, list=26%,<br>signal=40% |

|                           |     |             |            |             |             |       |      |                                |
|---------------------------|-----|-------------|------------|-------------|-------------|-------|------|--------------------------------|
| OCT1_06                   | 219 | -0.36502457 | -1.3379292 | 0.01        | 0.1119308   | 0.807 | 2780 | tags=26%, list=18%, signal=32% |
| GCACCTT_MIR18A_MIR18B     | 108 | -0.47410485 | -1.33745   | 0.045908183 | 0.11193449  | 0.808 | 4188 | tags=47%, list=27%, signal=64% |
| TCATCTC_MIR143            | 141 | -0.45011663 | -1.3373941 | 0.059880238 | 0.11143491  | 0.808 | 3597 | tags=38%, list=23%, signal=49% |
| WCAANNNYCAG_UNKNO WN      | 606 | -0.31575504 | -1.3355337 | 0.003976143 | 0.1132335   | 0.808 | 3736 | tags=27%, list=24%, signal=35% |
| CTCAGGG_MIR125B_MIR125A   | 292 | -0.3911321  | -1.3344023 | 0.06732673  | 0.11408235  | 0.808 | 3476 | tags=31%, list=22%, signal=39% |
| RGCANGCGY_NRF1_Q6         | 803 | -0.34535614 | -1.3343472 | 0           | 0.11352261  | 0.808 | 3648 | tags=30%, list=23%, signal=37% |
| AR_03                     | 52  | -0.4280145  | -1.3337576 | 0.03557312  | 0.11397296  | 0.81  | 3739 | tags=44%, list=24%, signal=58% |
| AGGCACT_MIR5153P          | 81  | -0.5273945  | -1.3331431 | 0.08730159  | 0.11422481  | 0.81  | 4712 | tags=64%, list=30%, signal=91% |
| ACATTCC_MIR1_MIR206       | 275 | -0.47369528 | -1.3331113 | 0.0591716   | 0.113648355 | 0.81  | 3911 | tags=43%, list=25%, signal=56% |
| TTGGAGA_MIR5155P_MI R519E | 125 | -0.47271255 | -1.3328398 | 0.034907598 | 0.11356623  | 0.81  | 3276 | tags=37%, list=21%, signal=46% |
| CTGYNNCTYTA_UNKNO WN      | 95  | -0.30354336 | -1.3327569 | 0.049407113 | 0.11307277  | 0.81  | 4285 | tags=34%, list=27%, signal=46% |
| GACAATC_MIR219            | 129 | -0.46906868 | -1.3322642 | 0.040899795 | 0.11322623  | 0.81  | 3105 | tags=35%, list=20%, signal=43% |
| KTGGYRSGAA_UNKNO WN       | 570 | -0.35557458 | -1.3318307 | 0.008032128 | 0.11307499  | 0.81  | 4244 | tags=35%, list=27%, signal=46% |
| AHRARNT_01                | 125 | -0.36526388 | -1.3317542 | 0.01764706  | 0.11263088  | 0.81  | 2927 | tags=28%, list=19%, signal=34% |
| TTCCGTT_MIR191            | 29  | -0.5070277  | -1.3316493 | 0.06333973  | 0.112181626 | 0.81  | 3571 | tags=41%, list=23%, signal=54% |
| S8_01                     | 218 | -0.33447188 | -1.3312951 | 0.028571429 | 0.11219134  | 0.812 | 2643 | tags=23%, list=17%, signal=28% |
| BRN2_01                   | 213 | -0.357811   | -1.331245  | 0.016359918 | 0.11170713  | 0.812 | 3072 | tags=28%, list=20%, signal=34% |
| GTATGAT_MIR154_MIR487     | 62  | -0.61133265 | -1.3301872 | 0.057971016 | 0.1125541   | 0.813 | 2831 | tags=50%, list=18%, signal=61% |
| XBP1_01                   | 120 | -0.41444796 | -1.3300669 | 0.00589391  | 0.11215617  | 0.813 | 2927 | tags=30%, list=19%, signal=37% |
| OCT1_04                   | 201 | -0.3622519  | -1.3297173 | 0.010060363 | 0.11215514  | 0.813 | 3010 | tags=26%, list=19%, signal=32% |
| TCTGATA_MIR361            | 79  | -0.50823545 | -1.3294516 | 0.040816326 | 0.11192089  | 0.813 | 3864 | tags=54%, list=25%, signal=72% |
| YNTTTNNNANGCARM_UN KNOWN  | 211 | -0.43884087 | -1.3287379 | 0.116935484 | 0.1126512   | 0.814 | 4157 | tags=43%, list=27%, signal=57% |
| AATGGAG_MIR136            | 75  | -0.4396304  | -1.3286334 | 0.09920635  | 0.112180226 | 0.814 | 3927 | tags=43%, list=25%, signal=57% |

|                              |     |             |            |             |             |       |      |                                |
|------------------------------|-----|-------------|------------|-------------|-------------|-------|------|--------------------------------|
| TGCGCANK_UNKNOWN             | 896 | -0.33990687 | -1.3281038 | 0.007827789 | 0.11255863  | 0.816 | 4201 | tags=34%, list=27%, signal=44% |
| CTCAAGA_MIR526B              | 60  | -0.49839044 | -1.327288  | 0.06841046  | 0.11332351  | 0.816 | 2996 | tags=38%, list=19%, signal=47% |
| ATF4_Q2                      | 230 | -0.38759446 | -1.3266239 | 0.013888889 | 0.113864236 | 0.817 | 4410 | tags=38%, list=28%, signal=52% |
| GCTTGAA_MIR498               | 104 | -0.4906123  | -1.3263668 | 0.097222224 | 0.11369245  | 0.817 | 3256 | tags=42%, list=21%, signal=53% |
| TGGTGCT_MIR29A_MIR29B_MIR29C | 454 | -0.3460594  | -1.3263078 | 0.019417476 | 0.113302745 | 0.817 | 3904 | tags=32%, list=25%, signal=41% |
| GTGCCAA_MIR96                | 273 | -0.45595586 | -1.3261169 | 0.06521739  | 0.113049194 | 0.817 | 4712 | tags=47%, list=30%, signal=66% |
| ATGCAGT_MIR217               | 102 | -0.51776296 | -1.3260034 | 0.08230453  | 0.11265936  | 0.817 | 3205 | tags=38%, list=21%, signal=48% |
| TCTGATC_MIR383               | 44  | -0.50137347 | -1.3254228 | 0.072       | 0.112979725 | 0.817 | 4080 | tags=43%, list=26%, signal=58% |
| SP1_Q2_01                    | 220 | -0.362003   | -1.3253778 | 0.016064256 | 0.11250424  | 0.817 | 4181 | tags=36%, list=27%, signal=48% |
| ARNT_Q2                      | 210 | -0.42112955 | -1.3244878 | 0.055445544 | 0.1132617   | 0.817 | 4302 | tags=42%, list=28%, signal=57% |
| CEBPA_Q1                     | 210 | -0.3521125  | -1.3239082 | 0.012170386 | 0.11347988  | 0.817 | 4052 | tags=33%, list=26%, signal=44% |
| TGACATY_UNKNOWN              | 656 | -0.33647293 | -1.3237547 | 0.003875969 | 0.11318297  | 0.817 | 3289 | tags=26%, list=21%, signal=31% |
| YYCATTCAWW_UNKNOWN           | 377 | -0.4275527  | -1.3234074 | 0.03508772  | 0.11313194  | 0.817 | 4209 | tags=42%, list=27%, signal=56% |
| RGAGGAARY_PU1_Q6             | 282 | -0.38492182 | -1.322805  | 0           | 0.11344434  | 0.817 | 4357 | tags=39%, list=28%, signal=53% |
| TST1_Q1                      | 221 | -0.3693525  | -1.3226227 | 0.0295858   | 0.11332994  | 0.819 | 4195 | tags=36%, list=27%, signal=49% |
| GCTNWTGK_UNKNOWN             | 94  | -0.46743345 | -1.3225918 | 0.05788423  | 0.11286986  | 0.819 | 4707 | tags=51%, list=30%, signal=73% |
| WTGAAAT_UNKNOWN              | 800 | -0.3016624  | -1.3216789 | 0           | 0.11367754  | 0.82  | 3825 | tags=28%, list=25%, signal=35% |
| TEF1_Q6                      | 192 | -0.33570746 | -1.3214232 | 0.01953125  | 0.11365539  | 0.821 | 2642 | tags=24%, list=17%, signal=29% |
| GGCAGTG_MIR3243P             | 91  | -0.44237095 | -1.3213669 | 0.07185629  | 0.113251016 | 0.821 | 4967 | tags=53%, list=32%, signal=77% |
| TACAATC_MIR508               | 59  | -0.5349489  | -1.321     | 0.040567953 | 0.11317213  | 0.821 | 4494 | tags=61%, list=29%, signal=85% |
| GR_Q6_01                     | 238 | -0.3282443  | -1.3199683 | 0.060311284 | 0.11404067  | 0.821 | 3089 | tags=25%, list=20%, signal=31% |
| OCT1_Q5_01                   | 222 | -0.31061643 | -1.3198994 | 0.00203666  | 0.11361841  | 0.821 | 2478 | tags=21%, list=16%, signal=24% |
| GAGACTG_MIR452               | 89  | -0.51362365 | -1.3197918 | 0.08514851  | 0.11323235  | 0.821 | 4121 | tags=51%, list=26%, signal=68% |

|                             |     |             |            |             |             |       |      |                                |
|-----------------------------|-----|-------------|------------|-------------|-------------|-------|------|--------------------------------|
| PXR_Q2                      | 226 | -0.35746342 | -1.3191738 | 0.001934236 | 0.11360681  | 0.821 | 3652 | tags=31%, list=23%, signal=39% |
| STAT6_Q2                    | 232 | -0.29322952 | -1.3191198 | 0.019880716 | 0.11316877  | 0.821 | 3736 | tags=27%, list=24%, signal=35% |
| GTAAACC_MIR2995P            | 43  | -0.5744881  | -1.3189735 | 0.07171315  | 0.11283054  | 0.821 | 3878 | tags=53%, list=25%, signal=71% |
| AHR_Q1                      | 53  | -0.42086172 | -1.3185662 | 0.120162934 | 0.11294085  | 0.821 | 3899 | tags=36%, list=25%, signal=48% |
| CCAWNWWNNNGGC_UN<br>KNOWN   | 43  | -0.5129443  | -1.3180889 | 0.08982036  | 0.11302619  | 0.821 | 4914 | tags=63%, list=31%, signal=91% |
| WHN_B                       | 228 | -0.3669234  | -1.3175802 | 0.024048096 | 0.113201186 | 0.821 | 3363 | tags=31%, list=22%, signal=39% |
| GTACAGG_MIR486              | 52  | -0.48962528 | -1.3174891 | 0.16898608  | 0.11285932  | 0.821 | 4039 | tags=48%, list=26%, signal=65% |
| TGAYRTCA_ATF3_Q6            | 573 | -0.3912056  | -1.3166887 | 0.043564357 | 0.11366613  | 0.823 | 3956 | tags=35%, list=25%, signal=45% |
| AAGWWRNYGGC_UNKNO<br>WN     | 58  | -0.44865915 | -1.3164797 | 0.048582997 | 0.11352382  | 0.824 | 4757 | tags=53%, list=30%, signal=77% |
| GATA1_Q1                    | 211 | -0.40004337 | -1.3162915 | 0.031311154 | 0.11344202  | 0.826 | 4526 | tags=40%, list=29%, signal=56% |
| GTGCAA_MIR507               | 116 | -0.4570344  | -1.3161768 | 0.09467456  | 0.11311979  | 0.826 | 2646 | tags=35%, list=17%, signal=42% |
| TGCACGA_MIR517A_MIR5<br>17C | 16  | -0.5593777  | -1.3157    | 0.15238096  | 0.11322878  | 0.826 | 2446 | tags=31%, list=16%, signal=37% |
| GCM_Q2                      | 208 | -0.33848658 | -1.3155595 | 0.021153847 | 0.112918444 | 0.826 | 3459 | tags=29%, list=22%, signal=37% |
| CART1_Q1                    | 192 | -0.38123873 | -1.3154337 | 0.036437247 | 0.11264131  | 0.826 | 2826 | tags=27%, list=18%, signal=32% |
| CAGCACT_MIR5123P            | 121 | -0.49518692 | -1.3154306 | 0.060240965 | 0.11218188  | 0.826 | 4146 | tags=49%, list=27%, signal=66% |
| GR_Q1                       | 178 | -0.35926926 | -1.3153197 | 0.03757829  | 0.11184792  | 0.826 | 4475 | tags=40%, list=29%, signal=55% |
| SEF1_C                      | 6   | -0.75830024 | -1.315243  | 0.118473895 | 0.111535646 | 0.826 | 2499 | tags=50%, list=16%, signal=60% |
| TGACCTY_ERR1_Q2             | 468 | -0.30028537 | -1.3152208 | 0.009727626 | 0.11111082  | 0.826 | 3007 | tags=22%, list=19%, signal=26% |
| ATGTAGC_MIR221_MIR22<br>2   | 116 | -0.4170722  | -1.3148599 | 0.07272727  | 0.11108666  | 0.826 | 3432 | tags=38%, list=22%, signal=48% |
| YATGNWAAT_OCT_C             | 796 | -0.40073323 | -1.3145255 | 0.03137255  | 0.11119277  | 0.827 | 4421 | tags=40%, list=28%, signal=53% |
| IK1_Q1                      | 243 | -0.29046464 | -1.314188  | 0.02        | 0.11112451  | 0.827 | 3296 | tags=23%, list=21%, signal=29% |
| RRAGTTGT_UNKNOWN            | 519 | -0.35006616 | -1.3137872 | 0.026804123 | 0.11122377  | 0.827 | 3325 | tags=27%, list=21%, signal=34% |
| HNF3B_Q1                    | 191 | -0.29934928 | -1.3136383 | 0.013752456 | 0.110979296 | 0.827 | 2873 | tags=23%, list=18%, signal=27% |



|                                                               |     |             |            |             |             |       |      |                                |
|---------------------------------------------------------------|-----|-------------|------------|-------------|-------------|-------|------|--------------------------------|
| CACTGTG_MIR128A_MIR128B                                       | 294 | -0.45152014 | -1.3135488 | 0.051282052 | 0.11063547  | 0.827 | 4049 | tags=43%, list=26%, signal=56% |
| GAANYNYGACNY_UNKNO WN                                         | 67  | -0.40003714 | -1.3132832 | 0.06990291  | 0.11076548  | 0.828 | 4257 | tags=39%, list=27%, signal=53% |
| PAX2_02                                                       | 224 | -0.32823387 | -1.313224  | 0.05882353  | 0.11038303  | 0.828 | 4199 | tags=31%, list=27%, signal=42% |
| GCGCCTT_MIR525_MIR524                                         | 14  | -0.57944494 | -1.3130412 | 0.12701613  | 0.11017436  | 0.828 | 3153 | tags=50%, list=20%, signal=63% |
| MAX_01                                                        | 219 | -0.38660413 | -1.3126425 | 0.06042885  | 0.11011844  | 0.828 | 4302 | tags=37%, list=28%, signal=51% |
| TAGGTCA_MIR192_MIR215                                         | 39  | -0.49188507 | -1.3124723 | 0.07214429  | 0.10994853  | 0.828 | 4367 | tags=51%, list=28%, signal=71% |
| E2F_Q4                                                        | 207 | -0.3756387  | -1.312458  | 0.049603175 | 0.10953809  | 0.828 | 3602 | tags=32%, list=23%, signal=41% |
| HOX13_01                                                      | 42  | -0.42001572 | -1.3121208 | 0.076612905 | 0.10961212  | 0.828 | 2336 | tags=26%, list=15%, signal=31% |
| E2F1_Q3_01                                                    | 215 | -0.36916038 | -1.3112286 | 0.021526419 | 0.11051344  | 0.828 | 3450 | tags=33%, list=22%, signal=41% |
| ZIC2_01                                                       | 227 | -0.3117584  | -1.3101115 | 0.05905512  | 0.11155561  | 0.829 | 3562 | tags=27%, list=23%, signal=35% |
| GATAAGR_GATA_C                                                | 68  | -0.39534065 | -1.3098716 | 0.046184737 | 0.111424886 | 0.829 | 1644 | tags=22%, list=11%, signal=25% |
| AGGAGTG_MIR483                                                | 58  | -0.49850053 | -1.3094867 | 0.11176471  | 0.11148068  | 0.829 | 4472 | tags=52%, list=29%, signal=72% |
| GGAANCGAANY_UNKNO WN                                          | 77  | -0.4740197  | -1.30812   | 0.10404624  | 0.11335861  | 0.835 | 3345 | tags=43%, list=21%, signal=54% |
| CTACCTC_LET7A_LET7B_LET7C_LET7D_LET7E_LET7F_MIR98_LET7G_LET7I | 348 | -0.33652484 | -1.30794   | 0.04527559  | 0.11310984  | 0.835 | 3636 | tags=28%, list=23%, signal=36% |
| ER_Q6_01                                                      | 233 | -0.34568208 | -1.3077301 | 0.011976048 | 0.112962574 | 0.835 | 4199 | tags=34%, list=27%, signal=46% |
| MEIS1_01                                                      | 217 | -0.34969765 | -1.3075762 | 0.03976143  | 0.112746336 | 0.835 | 2695 | tags=24%, list=17%, signal=29% |
| ATCTTGC_MIR31                                                 | 66  | -0.54880655 | -1.3073702 | 0.1         | 0.112462655 | 0.835 | 2730 | tags=44%, list=17%, signal=53% |
| CAGTCAC_MIR134                                                | 45  | -0.49728453 | -1.3073541 | 0.09108911  | 0.11206346  | 0.835 | 4786 | tags=58%, list=31%, signal=83% |
| NFMUE1_Q6                                                     | 212 | -0.43124557 | -1.307241  | 0.056640625 | 0.11176676  | 0.835 | 4338 | tags=43%, list=28%, signal=59% |
| ACGCACA_MIR210                                                | 7   | -0.6987331  | -1.3067849 | 0.095703125 | 0.112081215 | 0.836 | 3412 | tags=57%, list=22%, signal=73% |
| YRCCAANNNGNCGC_UNKN OWN                                       | 325 | -0.36132005 | -1.3066833 | 0.028       | 0.11182496  | 0.836 | 4272 | tags=37%, list=27%, signal=49% |
| TAL1ALPHAE47_01                                               | 226 | -0.3425055  | -1.3063123 | 0.009727626 | 0.11195442  | 0.836 | 2393 | tags=21%, list=15%, signal=25% |
| SREBP1_02                                                     | 79  | -0.3769768  | -1.3062351 | 0.099609375 | 0.11163168  | 0.836 | 3571 | tags=30%, list=23%, signal=39% |

|                             |      |             |            |             |             |       |      |                                |
|-----------------------------|------|-------------|------------|-------------|-------------|-------|------|--------------------------------|
| TEF_Q6                      | 216  | -0.32472277 | -1.3053282 | 0.013487476 | 0.1127146   | 0.837 | 4033 | tags=31%, list=26%, signal=41% |
| HAND1E47_01                 | 229  | -0.33232546 | -1.3051217 | 0.037190083 | 0.11253284  | 0.837 | 4130 | tags=32%, list=26%, signal=43% |
| GGGATGC_MIR3245P            | 43   | -0.5332345  | -1.3049293 | 0.09741551  | 0.11234757  | 0.837 | 4976 | tags=58%, list=32%, signal=85% |
| TATA_C                      | 247  | -0.30851474 | -1.3046672 | 0.025440313 | 0.11222542  | 0.837 | 2280 | tags=18%, list=15%, signal=21% |
| HTF_01                      | 65   | -0.47805196 | -1.304474  | 0.0951417   | 0.11204703  | 0.837 | 2888 | tags=35%, list=18%, signal=43% |
| GR_Q6                       | 222  | -0.3422005  | -1.3034049 | 0.02964427  | 0.113373965 | 0.837 | 3617 | tags=30%, list=23%, signal=38% |
| CGTSACG_PAX3_B              | 61   | -0.49234954 | -1.3026555 | 0.07797271  | 0.11400619  | 0.837 | 4536 | tags=54%, list=29%, signal=76% |
| GCANCTGNY_MYOD_Q6           | 90   | -0.43394712 | -1.3024787 | 0.12795275  | 0.11378404  | 0.837 | 4028 | tags=39%, list=26%, signal=52% |
| WGTTNNNNNA_A_UNKN<br>OWN    | 884  | -0.3527193  | -1.3017298 | 0.007843138 | 0.11427328  | 0.837 | 4352 | tags=36%, list=28%, signal=47% |
| TNCATNTCCYR_UNKNOW<br>N     | 221  | -0.3611715  | -1.3014938 | 0.026156941 | 0.11450299  | 0.842 | 4457 | tags=38%, list=29%, signal=52% |
| TTTTGAG_MIR373              | 199  | -0.46751583 | -1.3009737 | 0.10621242  | 0.11471799  | 0.842 | 4888 | tags=57%, list=31%, signal=82% |
| TGANNYRGCA_TCF11MAF<br>G_01 | 697  | -0.31498584 | -1.3008136 | 0.011764706 | 0.11456842  | 0.842 | 3830 | tags=29%, list=25%, signal=37% |
| SMTTTTGT_UNKNOWN            | 239  | -0.34584108 | -1.3001684 | 0.036511157 | 0.114991225 | 0.842 | 4366 | tags=36%, list=28%, signal=49% |
| HFH1_01                     | 217  | -0.35167792 | -1.3000634 | 0.027888447 | 0.114764296 | 0.842 | 3653 | tags=31%, list=23%, signal=40% |
| PAX8_01                     | 29   | -0.5353972  | -1.2979462 | 0.108481266 | 0.117287934 | 0.846 | 1979 | tags=38%, list=13%, signal=43% |
| YAATNRNNNNYATT_UNK<br>NOWN  | 1002 | -0.32585883 | -1.2970454 | 0           | 0.11831187  | 0.848 | 4098 | tags=31%, list=26%, signal=39% |
| YY1_Q6                      | 206  | -0.41226858 | -1.2968699 | 0.057086613 | 0.11813716  | 0.848 | 4334 | tags=41%, list=28%, signal=56% |
| CTTTGA_LEF1_Q2              | 55   | -0.43326893 | -1.2967668 | 0.076       | 0.11790515  | 0.848 | 3636 | tags=42%, list=23%, signal=54% |
| GTAAGAT_MIR200A             | 45   | -0.4903814  | -1.296458  | 0.10557769  | 0.11796413  | 0.849 | 3317 | tags=44%, list=21%, signal=56% |
| CAGCAGG_MIR370              | 131  | -0.38041508 | -1.2960889 | 0.082       | 0.11813642  | 0.85  | 2895 | tags=27%, list=19%, signal=33% |
| HFH3_01                     | 163  | -0.3601556  | -1.2958652 | 0.043222003 | 0.11808058  | 0.85  | 3635 | tags=29%, list=23%, signal=37% |
| RORA1_01                    | 222  | -0.34855983 | -1.2952884 | 0.031496063 | 0.11849591  | 0.85  | 2855 | tags=25%, list=18%, signal=30% |
| TGGNNNNNNKCCAR_UNK<br>NOWN  | 803  | -0.3382136  | -1.2951751 | 0.004       | 0.118259735 | 0.85  | 4271 | tags=34%, list=27%, signal=44% |

|                             |      |             |            |             |             |       |      |                                |
|-----------------------------|------|-------------|------------|-------------|-------------|-------|------|--------------------------------|
| E2F_01                      | 61   | -0.43810475 | -1.2950386 | 0.053784862 | 0.11805389  | 0.85  | 3345 | tags=36%, list=21%, signal=46% |
| CTGRYYNATT_UNKNOW<br>N      | 99   | -0.42437556 | -1.293736  | 0.092843324 | 0.119420774 | 0.85  | 3891 | tags=40%, list=25%, signal=53% |
| FOXD3_01                    | 184  | -0.35893866 | -1.293665  | 0.027722772 | 0.11916222  | 0.85  | 2947 | tags=27%, list=19%, signal=32% |
| GATA1_03                    | 223  | -0.31316003 | -1.2935221 | 0.060606062 | 0.11900504  | 0.85  | 3795 | tags=30%, list=24%, signal=39% |
| OCT_C                       | 215  | -0.32701993 | -1.2930245 | 0.014056225 | 0.11952277  | 0.852 | 2738 | tags=23%, list=18%, signal=28% |
| WWTAAGGC_UNKNOWN            | 1625 | -0.3096984  | -1.2928739 | 0           | 0.11933221  | 0.852 | 4232 | tags=32%, list=27%, signal=39% |
| TAXCREB_02                  | 24   | -0.41000906 | -1.2926961 | 0.12352941  | 0.119082846 | 0.852 | 3128 | tags=33%, list=20%, signal=42% |
| ATF_01                      | 230  | -0.37686646 | -1.2916026 | 0.06534653  | 0.12010815  | 0.852 | 4682 | tags=39%, list=30%, signal=55% |
| TCF11_01                    | 221  | -0.40093267 | -1.2902797 | 0.019880716 | 0.121483706 | 0.852 | 4281 | tags=40%, list=27%, signal=54% |
| CEBP_Q2_01                  | 233  | -0.32516766 | -1.2898419 | 0.047058824 | 0.121584624 | 0.852 | 3268 | tags=27%, list=21%, signal=34% |
| PITX2_Q2                    | 217  | -0.33641386 | -1.2897757 | 0.029880479 | 0.1212658   | 0.852 | 3186 | tags=26%, list=20%, signal=33% |
| MCAATNNNNNGCG_UNK<br>NOWN   | 468  | -0.40141016 | -1.2890576 | 0.084645666 | 0.121758215 | 0.853 | 4278 | tags=39%, list=27%, signal=52% |
| ATF3_Q6                     | 224  | -0.32092148 | -1.2880653 | 0.0332681   | 0.12269763  | 0.853 | 4451 | tags=36%, list=29%, signal=49% |
| RYTAAWNNTGAY_UNKN<br>OWN    | 315  | -0.3315401  | -1.2879525 | 0.007968128 | 0.12244058  | 0.853 | 3736 | tags=30%, list=24%, signal=38% |
| NKX3A_01                    | 192  | -0.34974164 | -1.2877483 | 0.042769857 | 0.12228012  | 0.853 | 3774 | tags=30%, list=24%, signal=39% |
| MAZR_01                     | 200  | -0.36337    | -1.2876369 | 0.06007752  | 0.12202541  | 0.853 | 4470 | tags=40%, list=29%, signal=55% |
| YGGYRCGC_UNKNOWN            | 511  | -0.29572466 | -1.2875854 | 0.009803922 | 0.12178883  | 0.853 | 2873 | tags=21%, list=18%, signal=25% |
| SREBP_Q3                    | 226  | -0.30030403 | -1.2874887 | 0.012121212 | 0.121464394 | 0.853 | 3358 | tags=24%, list=22%, signal=31% |
| AGTCTAG_MIR151              | 20   | -0.5970433  | -1.2865896 | 0.10633947  | 0.122316375 | 0.853 | 3689 | tags=55%, list=24%, signal=72% |
| ARGGGTTAA_UNKNOWN           | 45   | -0.40416723 | -1.286342  | 0.1402439   | 0.122259066 | 0.853 | 3746 | tags=42%, list=24%, signal=55% |
| AGTTCTC_MIR146A_MIR1<br>46B | 52   | -0.37694797 | -1.2859359 | 0.123046875 | 0.122425646 | 0.856 | 4675 | tags=42%, list=30%, signal=60% |
| YRTCANNRCGC_UNKNOW<br>N     | 2594 | -0.3327033  | -1.2858424 | 0.005847953 | 0.122181214 | 0.856 | 4219 | tags=32%, list=27%, signal=37% |
| CAATGCA_MIR33               | 88   | -0.46013144 | -1.2857374 | 0.079457365 | 0.121878654 | 0.856 | 4531 | tags=51%, list=29%, signal=72% |

|                              |      |             |            |             |             |       |      |                                |
|------------------------------|------|-------------|------------|-------------|-------------|-------|------|--------------------------------|
| TACGGGT_MIR99A_MIR100_MIR99B | 21   | -0.5887657  | -1.2854035 | 0.11066398  | 0.1220422   | 0.857 | 2744 | tags=43%, list=18%, signal=52% |
| CCGNMNNNTNACG_UNKNOWN        | 827  | -0.30494457 | -1.2852751 | 0.019723866 | 0.12184975  | 0.857 | 4272 | tags=31%, list=27%, signal=40% |
| TGCCAAR_NF1_Q6               | 1055 | -0.37339434 | -1.284705  | 0.03125     | 0.12229289  | 0.857 | 4807 | tags=41%, list=31%, signal=56% |
| NRF1_Q6                      | 217  | -0.40005183 | -1.2839444 | 0.07436399  | 0.123141    | 0.86  | 4019 | tags=38%, list=26%, signal=50% |
| RGTTAMWNATT_HNF1_01          | 88   | -0.33300748 | -1.283298  | 0.06653226  | 0.12374412  | 0.861 | 3026 | tags=26%, list=19%, signal=32% |
| GAGCCTG_MIR484               | 93   | -0.37615582 | -1.2829124 | 0.08190476  | 0.124028884 | 0.862 | 3412 | tags=32%, list=22%, signal=41% |
| CCAWYNGAAR_UNKNOWN           | 648  | -0.35236698 | -1.2828345 | 0.07017544  | 0.12375472  | 0.862 | 4299 | tags=34%, list=28%, signal=45% |
| STAT5A_04                    | 190  | -0.35131952 | -1.2818261 | 0.03353057  | 0.12473322  | 0.863 | 3639 | tags=32%, list=23%, signal=41% |
| PR_02                        | 122  | -0.3401162  | -1.2816797 | 0.041666668 | 0.12461796  | 0.863 | 4619 | tags=38%, list=30%, signal=53% |
| CTCTATG_MIR368               | 36   | -0.50646406 | -1.2815353 | 0.123732254 | 0.12441914  | 0.863 | 4077 | tags=53%, list=26%, signal=71% |
| FAC1_01                      | 192  | -0.35599488 | -1.2813201 | 0.061420344 | 0.12433059  | 0.863 | 3766 | tags=31%, list=24%, signal=40% |
| HIF1_Q3                      | 202  | -0.3690656  | -1.2810118 | 0.036437247 | 0.12449718  | 0.863 | 4299 | tags=37%, list=28%, signal=51% |
| CTGCAGY_UNKNOWN              | 269  | -0.3338506  | -1.280758  | 0.037475344 | 0.1244401   | 0.863 | 3479 | tags=27%, list=22%, signal=34% |
| TAL1BETAIF2_01               | 222  | -0.31914496 | -1.2804458 | 0.001949318 | 0.12457715  | 0.863 | 2306 | tags=20%, list=15%, signal=23% |
| GTGGGTGK_UNKNOWN             | 352  | -0.36304697 | -1.2798789 | 0.058708414 | 0.12490168  | 0.863 | 3845 | tags=33%, list=25%, signal=43% |
| CHOP_01                      | 211  | -0.32354015 | -1.279121  | 0.024048096 | 0.1255739   | 0.865 | 2899 | tags=24%, list=19%, signal=29% |
| PIT1_Q6                      | 198  | -0.3288836  | -1.2790754 | 0.011605416 | 0.12532362  | 0.865 | 3479 | tags=31%, list=22%, signal=39% |
| MYB_Q5_01                    | 226  | -0.34257427 | -1.2790581 | 0.009765625 | 0.12500145  | 0.865 | 4235 | tags=35%, list=27%, signal=48% |
| GCGSCMNTTT_UNKNOWN           | 135  | -0.3510641  | -1.279035  | 0.119760476 | 0.124674305 | 0.865 | 2868 | tags=23%, list=18%, signal=28% |
| ACTGCCT_MIR34B               | 205  | -0.41776386 | -1.2788054 | 0.1237721   | 0.124669485 | 0.865 | 5061 | tags=53%, list=32%, signal=77% |
| EV11_03                      | 54   | -0.34537303 | -1.2781973 | 0.102725364 | 0.12516846  | 0.867 | 1733 | tags=20%, list=11%, signal=23% |
| OCT1_03                      | 199  | -0.37290668 | -1.2773489 | 0.03868472  | 0.12616132  | 0.868 | 2709 | tags=27%, list=17%, signal=32% |
| NKX61_01                     | 208  | -0.33220503 | -1.2769743 | 0.026104419 | 0.12632205  | 0.868 | 3935 | tags=32%, list=25%, signal=42% |

|                        |     |             |            |             |            |       |      |                                   |
|------------------------|-----|-------------|------------|-------------|------------|-------|------|-----------------------------------|
| E2F1DP1_01             | 204 | -0.3425329  | -1.2761049 | 0.02952756  | 0.1271598  | 0.868 | 3913 | tags=31%, list=25%,<br>signal=41% |
| E2F1DP2_01             | 204 | -0.3425329  | -1.2761049 | 0.02952756  | 0.12679122 | 0.868 | 3913 | tags=31%, list=25%,<br>signal=41% |
| E2F4DP2_01             | 204 | -0.3425329  | -1.2761049 | 0.02952756  | 0.12642477 | 0.868 | 3913 | tags=31%, list=25%,<br>signal=41% |
| CCCNNGGAR_OLF1_01      | 57  | -0.408913   | -1.2760923 | 0.105050504 | 0.12607211 | 0.868 | 3736 | tags=33%, list=24%,<br>signal=44% |
| CEBPGAMMA_Q6           | 220 | -0.3477231  | -1.275392  | 0.043650795 | 0.12679614 | 0.868 | 4532 | tags=40%, list=29%,<br>signal=56% |
| HFH8_01                | 176 | -0.32992658 | -1.274985  | 0.054325957 | 0.12709327 | 0.868 | 3675 | tags=30%, list=24%,<br>signal=38% |
| CREBP1_Q2              | 228 | -0.35369414 | -1.2749413 | 0.0940499   | 0.12678087 | 0.868 | 2899 | tags=24%, list=19%,<br>signal=29% |
| TAL1BETA47_01          | 216 | -0.3253603  | -1.2745414 | 0.006097561 | 0.12704612 | 0.868 | 3782 | tags=31%, list=24%,<br>signal=41% |
| E47_02                 | 216 | -0.3511614  | -1.2744043 | 0.06300813  | 0.12689972 | 0.868 | 3259 | tags=28%, list=21%,<br>signal=35% |
| E2F_Q6                 | 203 | -0.35422134 | -1.2742677 | 0.061507937 | 0.1267095  | 0.868 | 3602 | tags=31%, list=23%,<br>signal=40% |
| STAT4_01               | 233 | -0.31146184 | -1.2734821 | 0.049701788 | 0.12744337 | 0.871 | 3746 | tags=28%, list=24%,<br>signal=37% |
| EV1_01                 | 13  | -0.49613252 | -1.2726059 | 0.16877638  | 0.12842123 | 0.871 | 1685 | tags=31%, list=11%,<br>signal=34% |
| TCTAGAG_MIRS17         | 44  | -0.4292465  | -1.2725201 | 0.09572301  | 0.1281631  | 0.871 | 4646 | tags=45%, list=30%,<br>signal=65% |
| MMEF2_Q6               | 235 | -0.28291678 | -1.2721432 | 0.009940358 | 0.12828037 | 0.871 | 2688 | tags=19%, list=17%,<br>signal=23% |
| ATCMNTCCGY_UNKNOW<br>N | 88  | -0.4337924  | -1.2720606 | 0.11389961  | 0.12801231 | 0.871 | 4159 | tags=43%, list=27%,<br>signal=59% |
| RFX1_02                | 227 | -0.37287372 | -1.2720315 | 0.08964144  | 0.12768857 | 0.871 | 2926 | tags=25%, list=19%,<br>signal=30% |
| EGR1_01                | 241 | -0.36158648 | -1.2714753 | 0.05068226  | 0.12818065 | 0.871 | 4259 | tags=37%, list=27%,<br>signal=50% |
| E2F_Q2                 | 155 | -0.40632144 | -1.2713809 | 0.06746032  | 0.1279137  | 0.871 | 3286 | tags=35%, list=21%,<br>signal=44% |
| NGFIC_01               | 227 | -0.38009977 | -1.2710377 | 0.08269231  | 0.12807845 | 0.872 | 4424 | tags=40%, list=28%,<br>signal=55% |
| GATA1_05               | 248 | -0.28067794 | -1.2707866 | 0.018518519 | 0.12807019 | 0.872 | 3363 | tags=23%, list=22%,<br>signal=29% |
| AP2REP_01              | 158 | -0.3206417  | -1.2706254 | 0.01004016  | 0.1280289  | 0.872 | 1644 | tags=15%, list=11%,<br>signal=17% |
| MAF_Q6                 | 230 | -0.3472942  | -1.2700999 | 0.039447732 | 0.1286538  | 0.874 | 3267 | tags=30%, list=21%,<br>signal=37% |
| STAT6_01               | 222 | -0.32306692 | -1.2686564 | 0.06882591  | 0.13029759 | 0.874 | 4895 | tags=40%, list=31%,<br>signal=57% |

|                             |     |             |            |             |            |       |      |                                    |
|-----------------------------|-----|-------------|------------|-------------|------------|-------|------|------------------------------------|
| RACCACAR_AML_Q6             | 141 | -0.47600883 | -1.2686516 | 0.10080645  | 0.12994555 | 0.874 | 4078 | tags=48%, list=26%,<br>signal=64%  |
| TCANNTGAY_SREBP1_01         | 171 | -0.3715341  | -1.2686149 | 0.105058365 | 0.12964024 | 0.874 | 4297 | tags=41%, list=28%,<br>signal=56%  |
| LHX3_01                     | 195 | -0.32087654 | -1.2685064 | 0.060606062 | 0.12955886 | 0.874 | 3468 | tags=27%, list=22%,<br>signal=34%  |
| CCTGCTG_MIR214              | 210 | -0.40902928 | -1.2684504 | 0.10685484  | 0.12930548 | 0.874 | 3306 | tags=34%, list=21%,<br>signal=42%  |
| ATGCTGG_MIR338              | 101 | -0.40328664 | -1.268343  | 0.05788423  | 0.12911406 | 0.874 | 3500 | tags=32%, list=22%,<br>signal=41%  |
| FREAC2_01                   | 218 | -0.3524757  | -1.2680987 | 0.04771372  | 0.12903857 | 0.874 | 2644 | tags=24%, list=17%,<br>signal=29%  |
| NMYC_01                     | 240 | -0.34432817 | -1.2679818 | 0.056640625 | 0.12887356 | 0.874 | 4539 | tags=37%, list=29%,<br>signal=51%  |
| TGTYNNNNNRGCARM_U<br>NKOWN  | 262 | -0.2748243  | -1.26764   | 0.06451613  | 0.1289772  | 0.874 | 3086 | tags=21%, list=20%,<br>signal=26%  |
| CEBP_C                      | 177 | -0.3460816  | -1.2676013 | 0.02385686  | 0.12868004 | 0.874 | 2108 | tags=20%, list=14%,<br>signal=23%  |
| TGACCTTG_SF1_Q6             | 205 | -0.35300413 | -1.2671033 | 0.05882353  | 0.12891172 | 0.874 | 2151 | tags=21%, list=14%,<br>signal=25%  |
| NFY_C                       | 213 | -0.31861392 | -1.2670703 | 0.06175299  | 0.1286237  | 0.874 | 2587 | tags=21%, list=17%,<br>signal=25%  |
| GTAGGCA_MIR189              | 27  | -0.5837468  | -1.2670194 | 0.1541502   | 0.12836653 | 0.874 | 4960 | tags=74%, list=32%,<br>signal=108% |
| GTCAACC_MIR3805P            | 17  | -0.5569487  | -1.2661145 | 0.13121273  | 0.12959297 | 0.876 | 2635 | tags=53%, list=17%,<br>signal=64%  |
| AP1_Q4                      | 240 | -0.29959324 | -1.2659248 | 0.044315994 | 0.1294339  | 0.876 | 4336 | tags=34%, list=28%,<br>signal=46%  |
| CREB_Q2_01                  | 203 | -0.37702975 | -1.2649966 | 0.08514851  | 0.13010183 | 0.877 | 2715 | tags=25%, list=17%,<br>signal=30%  |
| KMCATNNWGA_UNKNO<br>WN      | 209 | -0.349099   | -1.2644501 | 0.047904193 | 0.13047029 | 0.877 | 4086 | tags=34%, list=26%,<br>signal=45%  |
| RORA2_01                    | 131 | -0.33738664 | -1.2641768 | 0.07632094  | 0.13048789 | 0.877 | 2718 | tags=23%, list=17%,<br>signal=27%  |
| SCGGAAGY_ELK1_02            | 275 | -0.37789452 | -1.264158  | 0.09266409  | 0.13019672 | 0.877 | 4199 | tags=37%, list=27%,<br>signal=50%  |
| USF_02                      | 238 | -0.33317566 | -1.2637916 | 0.017681729 | 0.13037165 | 0.878 | 3095 | tags=24%, list=20%,<br>signal=29%  |
| CCTNTMAGA_UNKNOWN           | 127 | -0.37564358 | -1.2637141 | 0.09859155  | 0.13015833 | 0.878 | 4050 | tags=33%, list=26%,<br>signal=44%  |
| GGGACCA_MIR133A_MIR<br>133B | 158 | -0.4125733  | -1.2635686 | 0.14396887  | 0.13000222 | 0.878 | 2978 | tags=31%, list=19%,<br>signal=38%  |
| ALPHACP1_01                 | 227 | -0.3065431  | -1.2628009 | 0.06311637  | 0.13064867 | 0.878 | 3503 | tags=26%, list=22%,<br>signal=32%  |
| P53_DECAMER_Q2              | 222 | -0.29415807 | -1.262633  | 0.08846154  | 0.1306022  | 0.88  | 3350 | tags=24%, list=21%,<br>signal=30%  |

|                       |     |             |            |             |            |       |      |                                   |
|-----------------------|-----|-------------|------------|-------------|------------|-------|------|-----------------------------------|
| FOXJ2_02              | 195 | -0.3339494  | -1.2626306 | 0.05263158  | 0.13027038 | 0.88  | 4324 | tags=33%, list=28%,<br>signal=45% |
| GGTGTGT_MIR329        | 86  | -0.44480377 | -1.2619518 | 0.17092338  | 0.13074574 | 0.88  | 4527 | tags=49%, list=29%,<br>signal=68% |
| ATF_B                 | 168 | -0.3648488  | -1.2619185 | 0.07495069  | 0.1304782  | 0.88  | 2773 | tags=26%, list=18%,<br>signal=32% |
| ACAGGGT_MIR10A_MIR10B | 112 | -0.3992579  | -1.2616532 | 0.13163064  | 0.13068408 | 0.88  | 3190 | tags=32%, list=20%,<br>signal=40% |
| CREBP1CJUN_01         | 231 | -0.3642304  | -1.2612909 | 0.08102767  | 0.13081273 | 0.88  | 2752 | tags=26%, list=18%,<br>signal=31% |
| FOXJ2_01              | 157 | -0.32884783 | -1.2612473 | 0.07171315  | 0.1305311  | 0.88  | 3675 | tags=29%, list=24%,<br>signal=38% |
| TTAYRTAA_E4BP4_01     | 135 | -0.35449916 | -1.2608547 | 0.081871346 | 0.13090257 | 0.882 | 2432 | tags=24%, list=16%,<br>signal=29% |
| USF_C                 | 246 | -0.34641096 | -1.2608274 | 0.070564516 | 0.13060689 | 0.882 | 4334 | tags=37%, list=28%,<br>signal=51% |
| CTAWWWATA_RSRFC4_Q2   | 108 | -0.3656929  | -1.2604121 | 0.096339114 | 0.13080515 | 0.882 | 4191 | tags=36%, list=27%,<br>signal=49% |
| WTTGKCTG_UNKNOWN      | 616 | -0.29405966 | -1.2600434 | 0           | 0.13091446 | 0.882 | 3601 | tags=26%, list=23%,<br>signal=32% |
| STAT_01               | 221 | -0.2951417  | -1.2593971 | 0.023904383 | 0.13150606 | 0.882 | 4595 | tags=36%, list=29%,<br>signal=50% |
| RNGTGGGC_UNKNOWN      | 68  | -0.3856722  | -1.2581881 | 0.09920635  | 0.13294612 | 0.882 | 1812 | tags=21%, list=12%,<br>signal=23% |
| TATAAA_TATA_01        | 62  | -0.3709501  | -1.2577187 | 0.10547667  | 0.13333233 | 0.882 | 2831 | tags=26%, list=18%,<br>signal=31% |
| GTTATAT_MIR410        | 84  | -0.50565374 | -1.2573962 | 0.16842106  | 0.13350397 | 0.882 | 4513 | tags=56%, list=29%,<br>signal=78% |
| TGIF_01               | 213 | -0.33393127 | -1.2571149 | 0.08016032  | 0.13351193 | 0.882 | 4019 | tags=33%, list=26%,<br>signal=44% |
| EGR_Q6                | 245 | -0.32675976 | -1.2564923 | 0.06126482  | 0.13408977 | 0.883 | 4259 | tags=33%, list=27%,<br>signal=45% |
| ER_Q6                 | 236 | -0.34216553 | -1.2564819 | 0.05836576  | 0.13379622 | 0.883 | 4214 | tags=34%, list=27%,<br>signal=46% |
| GAGCCAG_MIR149        | 130 | -0.38488013 | -1.2562369 | 0.11287129  | 0.13380745 | 0.883 | 3539 | tags=35%, list=23%,<br>signal=45% |
| SREBP1_01             | 144 | -0.41678292 | -1.2557994 | 0.08966862  | 0.13406596 | 0.883 | 5034 | tags=49%, list=32%,<br>signal=71% |
| E2F_02                | 204 | -0.33532575 | -1.2549552 | 0.041749503 | 0.13476895 | 0.883 | 3913 | tags=30%, list=25%,<br>signal=40% |
| AP1_Q4_01             | 231 | -0.3284909  | -1.25493   | 0.08637236  | 0.13446318 | 0.883 | 4620 | tags=39%, list=30%,<br>signal=54% |
| TCF11MAFG_01          | 182 | -0.3542238  | -1.2548369 | 0.09770115  | 0.1342641  | 0.883 | 4531 | tags=42%, list=29%,<br>signal=58% |
| E2F1_Q3               | 211 | -0.3269656  | -1.2544899 | 0.06374502  | 0.13430701 | 0.883 | 2959 | tags=25%, list=19%,<br>signal=30% |

|                         |      |             |            |             |            |       |      |                                |
|-------------------------|------|-------------|------------|-------------|------------|-------|------|--------------------------------|
| RFX1_01                 | 208  | -0.30556655 | -1.2544866 | 0.01764706  | 0.13398704 | 0.883 | 3294 | tags=25%, list=21%, signal=31% |
| CTCTGGA_MIR520A_MIRS25  | 139  | -0.33650458 | -1.253932  | 0.097609565 | 0.13431293 | 0.883 | 4025 | tags=32%, list=26%, signal=43% |
| PR_01                   | 130  | -0.33786085 | -1.2532222 | 0.08565737  | 0.13501483 | 0.885 | 3617 | tags=28%, list=23%, signal=37% |
| STAT5A_Q3               | 220  | -0.31023505 | -1.2531608 | 0.06560636  | 0.1347714  | 0.885 | 3022 | tags=25%, list=19%, signal=30% |
| RYAAAKNNNNNTTGW_UNKNOWN | 54   | -0.36782944 | -1.2531561 | 0.09504132  | 0.13445301 | 0.885 | 3878 | tags=35%, list=25%, signal=47% |
| TGASTMAGC_NFE2_01       | 147  | -0.33168048 | -1.2530347 | 0.033932135 | 0.13427621 | 0.885 | 4006 | tags=31%, list=26%, signal=41% |
| YATTNATC_UNKNOWN        | 305  | -0.3038228  | -1.2525294 | 0.007797271 | 0.13456808 | 0.885 | 2785 | tags=22%, list=18%, signal=26% |
| FOXO1_Q2                | 214  | -0.34670767 | -1.2524563 | 0.105367795 | 0.13430405 | 0.885 | 4271 | tags=35%, list=27%, signal=47% |
| E2F1_Q4                 | 213  | -0.32418734 | -1.2518476 | 0.08510638  | 0.13495268 | 0.885 | 3839 | tags=30%, list=25%, signal=39% |
| USF_Q6_Q1               | 203  | -0.3380258  | -1.2500869 | 0.083657585 | 0.13713236 | 0.888 | 4385 | tags=36%, list=28%, signal=49% |
| ATF1_Q6                 | 209  | -0.31278342 | -1.249952  | 0.08431373  | 0.13700107 | 0.888 | 2670 | tags=20%, list=17%, signal=23% |
| GGATTA_PITX2_Q2         | 74   | -0.4299251  | -1.2497805 | 0.14049587  | 0.13684218 | 0.888 | 4193 | tags=39%, list=27%, signal=53% |
| CREB_Q3                 | 217  | -0.38258335 | -1.2497663 | 0.044       | 0.13653941 | 0.888 | 4052 | tags=40%, list=26%, signal=53% |
| TCF1P_Q6                | 232  | -0.29667002 | -1.249726  | 0.043052837 | 0.13626431 | 0.888 | 4306 | tags=32%, list=28%, signal=44% |
| RSRFC4_Q2               | 191  | -0.2927622  | -1.2496066 | 0.04715128  | 0.13609588 | 0.888 | 2786 | tags=22%, list=18%, signal=26% |
| E2F4DP1_Q1              | 207  | -0.33521867 | -1.2490519 | 0.04761905  | 0.13646026 | 0.888 | 3602 | tags=28%, list=23%, signal=36% |
| YY1_Q2                  | 217  | -0.3924848  | -1.2490059 | 0.11309524  | 0.13625634 | 0.888 | 5046 | tags=50%, list=32%, signal=73% |
| CREB_Q2                 | 218  | -0.36563376 | -1.2488686 | 0.13827655  | 0.13615929 | 0.888 | 3007 | tags=27%, list=19%, signal=33% |
| WCTCNATGGY_UNKNOW N     | 725  | -0.3143493  | -1.2487931 | 0.028225806 | 0.1359245  | 0.888 | 3589 | tags=28%, list=23%, signal=34% |
| HIF1_Q5                 | 213  | -0.33517575 | -1.2486032 | 0.044624746 | 0.1358354  | 0.888 | 4350 | tags=35%, list=28%, signal=48% |
| OCT1_Q7                 | 136  | -0.3425146  | -1.2484757 | 0.08151093  | 0.13566598 | 0.888 | 3314 | tags=29%, list=21%, signal=36% |
| CAGNWMCNNGAC_UNKNOW N   | 78   | -0.41167784 | -1.2476224 | 0.08219178  | 0.1363413  | 0.888 | 3345 | tags=35%, list=21%, signal=44% |
| TGACAGNY_MEIS1_Q1       | 1303 | -0.26532313 | -1.2471981 | 0.00591716  | 0.13672782 | 0.888 | 3499 | tags=22%, list=22%, signal=26% |



|                              |      |             |            |             |            |       |      |                                   |
|------------------------------|------|-------------|------------|-------------|------------|-------|------|-----------------------------------|
| TITF1_Q3                     | 212  | -0.32169044 | -1.2469736 | 0.06626506  | 0.13667901 | 0.888 | 4217 | tags=35%, list=27%,<br>signal=47% |
| AREB6_01                     | 232  | -0.2591362  | -1.2467608 | 0.021868788 | 0.13663839 | 0.888 | 3600 | tags=25%, list=23%,<br>signal=33% |
| GCAAAAA_MIR129               | 160  | -0.44369873 | -1.2463185 | 0.14314115  | 0.13690567 | 0.888 | 4331 | tags=47%, list=28%,<br>signal=64% |
| NKX25_02                     | 225  | -0.31306916 | -1.244787  | 0.044265594 | 0.1384944  | 0.889 | 3503 | tags=27%, list=22%,<br>signal=34% |
| AFP1_Q6                      | 222  | -0.29735962 | -1.2446109 | 0.07905138  | 0.13836713 | 0.889 | 4130 | tags=30%, list=26%,<br>signal=40% |
| GTTNYNNNGGTNA_UNKN<br>OWN    | 203  | -0.33881608 | -1.2443221 | 0.102970295 | 0.13840055 | 0.889 | 4209 | tags=34%, list=27%,<br>signal=47% |
| AHR_Q5                       | 185  | -0.36777186 | -1.2430723 | 0.12815534  | 0.13979933 | 0.889 | 3427 | tags=29%, list=22%,<br>signal=36% |
| AGCTCCT_MIR28                | 81   | -0.3899788  | -1.2428851 | 0.15984406  | 0.13975713 | 0.889 | 3698 | tags=35%, list=24%,<br>signal=45% |
| YGACNNYACAR_UNKNOW<br>N      | 130  | -0.3887507  | -1.2428594 | 0.16438356  | 0.13945894 | 0.889 | 3882 | tags=38%, list=25%,<br>signal=51% |
| USF_01                       | 220  | -0.38276318 | -1.2428532 | 0.12068965  | 0.13914779 | 0.889 | 4258 | tags=38%, list=27%,<br>signal=52% |
| IK2_01                       | 237  | -0.30342156 | -1.2425655 | 0.05511811  | 0.13919345 | 0.889 | 3533 | tags=27%, list=23%,<br>signal=35% |
| CREB_Q4                      | 243  | -0.34011066 | -1.2422822 | 0.13229571  | 0.13915615 | 0.889 | 4451 | tags=35%, list=29%,<br>signal=48% |
| SMAD4_Q6                     | 214  | -0.27777177 | -1.2421371 | 0.04518664  | 0.13908613 | 0.889 | 3448 | tags=22%, list=22%,<br>signal=28% |
| TTTNNANAGCYR_UNKNO<br>WN     | 2003 | -0.28383178 | -1.2419823 | 0.039215688 | 0.13892174 | 0.889 | 4211 | tags=29%, list=27%,<br>signal=35% |
| GKCGCNNNNNNTGAYG<br>_UNKNOWN | 61   | -0.33543903 | -1.241541  | 0.11394892  | 0.1391214  | 0.889 | 2785 | tags=25%, list=18%,<br>signal=30% |
| HMGYI_Q6                     | 215  | -0.27210426 | -1.2407143 | 0.035928145 | 0.13985354 | 0.889 | 4206 | tags=29%, list=27%,<br>signal=39% |
| TBP_01                       | 208  | -0.27585623 | -1.2407061 | 0.026104419 | 0.13955611 | 0.889 | 2851 | tags=21%, list=18%,<br>signal=25% |
| CCATCCA_MIR432               | 54   | -0.366488   | -1.2404318 | 0.154       | 0.13955797 | 0.889 | 3115 | tags=31%, list=20%,<br>signal=39% |
| CETS1P54_01                  | 231  | -0.34628028 | -1.2387908 | 0.09393346  | 0.14134562 | 0.889 | 5072 | tags=41%, list=32%,<br>signal=60% |
| GGCNRNWCTTYS_UNKNO<br>WN     | 67   | -0.3456851  | -1.2381579 | 0.097609565 | 0.14178929 | 0.889 | 3285 | tags=28%, list=21%,<br>signal=36% |
| RREB1_01                     | 186  | -0.3258387  | -1.2378607 | 0.078350514 | 0.14183988 | 0.889 | 3593 | tags=28%, list=23%,<br>signal=37% |
| MEF2_03                      | 208  | -0.31726417 | -1.2376755 | 0.106090374 | 0.1417913  | 0.889 | 2786 | tags=23%, list=18%,<br>signal=28% |
| NKX22_01                     | 162  | -0.35548836 | -1.2374598 | 0.09741551  | 0.14170982 | 0.889 | 4017 | tags=34%, list=26%,<br>signal=45% |

|                           |      |             |            |             |            |       |      |                                   |
|---------------------------|------|-------------|------------|-------------|------------|-------|------|-----------------------------------|
| SNACANNYSYAGA_UNK<br>NOWN | 330  | -0.31776145 | -1.2370824 | 0.021568628 | 0.14179826 | 0.889 | 2831 | tags=23%, list=18%,<br>signal=27% |
| NFE2_01                   | 238  | -0.2971643  | -1.2352035 | 0.056420233 | 0.14416575 | 0.89  | 4620 | tags=34%, list=30%,<br>signal=48% |
| GATA2_01                  | 95   | -0.366011   | -1.2347691 | 0.12401575  | 0.14455885 | 0.89  | 3620 | tags=34%, list=23%,<br>signal=44% |
| FOXM1_01                  | 217  | -0.3194929  | -1.2346518 | 0.055666003 | 0.14437547 | 0.89  | 4090 | tags=32%, list=26%,<br>signal=43% |
| CTCCAAG_MIR432            | 70   | -0.41230306 | -1.234431  | 0.16039604  | 0.14433666 | 0.89  | 4104 | tags=47%, list=26%,<br>signal=64% |
| GATA1_02                  | 215  | -0.30412108 | -1.2343494 | 0.057692308 | 0.14411208 | 0.89  | 3803 | tags=27%, list=24%,<br>signal=36% |
| ACCTGTTG_UNKNOWN          | 375  | -0.34559947 | -1.2342523 | 0.064327486 | 0.14394617 | 0.89  | 5277 | tags=43%, list=34%,<br>signal=64% |
| TTCYRGAA_UNKNOWN          | 1043 | -0.29351056 | -1.2341187 | 0.051181104 | 0.14380367 | 0.89  | 3746 | tags=27%, list=24%,<br>signal=33% |
| MEF2_04                   | 22   | -0.45519635 | -1.233293  | 0.1605691   | 0.14459324 | 0.891 | 1538 | tags=27%, list=10%,<br>signal=30% |
| CTGTTAC_MIR194            | 92   | -0.44170865 | -1.2328377 | 0.1573499   | 0.14494099 | 0.891 | 5308 | tags=57%, list=34%,<br>signal=85% |
| TAAWWATAG_RSRFC4_Q2       | 65   | -0.38974133 | -1.2309378 | 0.16232465  | 0.14715457 | 0.891 | 4052 | tags=35%, list=26%,<br>signal=48% |
| STAT1_03                  | 206  | -0.3050354  | -1.2304767 | 0.08695652  | 0.14762329 | 0.892 | 3780 | tags=29%, list=24%,<br>signal=37% |
| CTTTAAR_UNKNOWN           | 69   | -0.33127475 | -1.230281  | 0.11        | 0.147529   | 0.892 | 4225 | tags=30%, list=27%,<br>signal=42% |
| MSX1_01                   | 156  | -0.29721552 | -1.2300994 | 0.079395086 | 0.14744405 | 0.892 | 2565 | tags=21%, list=16%,<br>signal=24% |
| HNF6_Q6                   | 203  | -0.34217346 | -1.2294359 | 0.09255533  | 0.1481366  | 0.893 | 4095 | tags=35%, list=26%,<br>signal=47% |
| CREB_Q4_01                | 189  | -0.3475567  | -1.2286935 | 0.11811024  | 0.14872436 | 0.894 | 2670 | tags=23%, list=17%,<br>signal=28% |
| ER_Q6_02                  | 227  | -0.33127096 | -1.2286723 | 0.14285715  | 0.14843842 | 0.894 | 4257 | tags=36%, list=27%,<br>signal=48% |
| NFAT_Q6                   | 220  | -0.31990716 | -1.2282228 | 0.11857708  | 0.1488062  | 0.894 | 4114 | tags=35%, list=26%,<br>signal=46% |
| FXR_Q3                    | 100  | -0.3162577  | -1.228117  | 0.100409836 | 0.14862727 | 0.894 | 2381 | tags=21%, list=15%,<br>signal=25% |
| CEBP_01                   | 229  | -0.30461884 | -1.2277142 | 0.04016064  | 0.14889546 | 0.894 | 4130 | tags=29%, list=26%,<br>signal=39% |
| CACCAGC_MIR138            | 197  | -0.36453924 | -1.2275108 | 0.12974052  | 0.14880466 | 0.894 | 4483 | tags=37%, list=29%,<br>signal=51% |
| AR_01                     | 139  | -0.3097286  | -1.2273268 | 0.09542744  | 0.14875016 | 0.894 | 4095 | tags=32%, list=26%,<br>signal=43% |
| OSF2_Q6                   | 231  | -0.2921922  | -1.2271765 | 0.040697675 | 0.14862786 | 0.894 | 4214 | tags=29%, list=27%,<br>signal=39% |

|                        |     |             |            |             |            |       |      |                                   |
|------------------------|-----|-------------|------------|-------------|------------|-------|------|-----------------------------------|
| TAANNYSGCG_UNKNOW<br>N | 59  | -0.44448894 | -1.2268744 | 0.19769673  | 0.14869995 | 0.894 | 4184 | tags=46%, list=27%,<br>signal=62% |
| CREB_01                | 233 | -0.3404862  | -1.2268541 | 0.10671937  | 0.14841957 | 0.894 | 2670 | tags=23%, list=17%,<br>signal=28% |
| E2F1_Q6                | 204 | -0.33347374 | -1.2268083 | 0.11811024  | 0.14816694 | 0.894 | 4006 | tags=32%, list=26%,<br>signal=43% |
| PAX6_01                | 81  | -0.40416995 | -1.2261268 | 0.14341846  | 0.14874324 | 0.894 | 4037 | tags=42%, list=26%,<br>signal=56% |
| ZID_01                 | 221 | -0.32940176 | -1.2261233 | 0.09465021  | 0.14843927 | 0.894 | 3766 | tags=32%, list=24%,<br>signal=41% |
| EGR3_01                | 71  | -0.3654215  | -1.2258976 | 0.17681728  | 0.14838284 | 0.894 | 4183 | tags=39%, list=27%,<br>signal=54% |
| SRY_02                 | 226 | -0.3691619  | -1.2257359 | 0.11491936  | 0.14828438 | 0.894 | 4206 | tags=37%, list=27%,<br>signal=50% |
| OCT1_01                | 220 | -0.30149674 | -1.2256687 | 0.07514451  | 0.14807612 | 0.894 | 2643 | tags=20%, list=17%,<br>signal=24% |
| SOX9_B1                | 213 | -0.38052687 | -1.2252457 | 0.14457831  | 0.14841293 | 0.896 | 4838 | tags=45%, list=31%,<br>signal=64% |
| HNF3_Q6                | 171 | -0.31037918 | -1.2241648 | 0.111328125 | 0.14951755 | 0.897 | 4489 | tags=37%, list=29%,<br>signal=51% |
| T3R_Q6                 | 216 | -0.28646126 | -1.2241467 | 0.08695652  | 0.14923635 | 0.897 | 3320 | tags=25%, list=21%,<br>signal=31% |
| CEBPB_01               | 233 | -0.31856653 | -1.2239585 | 0.10707071  | 0.14914204 | 0.897 | 2448 | tags=21%, list=16%,<br>signal=24% |
| ZF5_01                 | 211 | -0.33600026 | -1.2235447 | 0.10826772  | 0.14937854 | 0.897 | 4092 | tags=35%, list=26%,<br>signal=47% |
| GATGKMRGCG_UNKNOW<br>N | 587 | -0.29403692 | -1.2214991 | 0.072897196 | 0.15157722 | 0.898 | 4481 | tags=34%, list=29%,<br>signal=46% |
| GATTGGY_NFY_Q6_01      | 50  | -0.48175347 | -1.2210258 | 0.19460501  | 0.15190497 | 0.898 | 2568 | tags=40%, list=16%,<br>signal=48% |
| TCCAGAG_MIR518C        | 109 | -0.3944409  | -1.2209798 | 0.20355731  | 0.15164928 | 0.898 | 5086 | tags=50%, list=33%,<br>signal=73% |
| AP4_Q5                 | 230 | -0.28323925 | -1.2205826 | 0.016       | 0.1518895  | 0.898 | 3262 | tags=21%, list=21%,<br>signal=27% |
| CREB_Q2                | 238 | -0.3422095  | -1.2197111 | 0.14648438  | 0.15276214 | 0.898 | 4439 | tags=34%, list=28%,<br>signal=47% |
| NF1_Q6_01              | 227 | -0.26652524 | -1.2191007 | 0.033203125 | 0.15326133 | 0.898 | 2905 | tags=20%, list=19%,<br>signal=24% |
| PAX4_01                | 236 | -0.31509304 | -1.2188808 | 0.04733728  | 0.15326755 | 0.898 | 3470 | tags=27%, list=22%,<br>signal=34% |
| LBP1_Q6                | 193 | -0.2663058  | -1.2187666 | 0.0805501   | 0.15314741 | 0.898 | 3227 | tags=21%, list=21%,<br>signal=26% |
| ZF5_B                  | 212 | -0.329962   | -1.2184162 | 0.18055555  | 0.15325442 | 0.898 | 4449 | tags=36%, list=28%,<br>signal=49% |
| ACAWYAAAG_UNKNOWN      | 136 | -0.35169396 | -1.2180344 | 0.15294118  | 0.1536242  | 0.901 | 4510 | tags=39%, list=29%,<br>signal=54% |

|                              |      |             |            |             |            |       |      |                                   |
|------------------------------|------|-------------|------------|-------------|------------|-------|------|-----------------------------------|
| GTCTCC_MIR7                  | 147  | -0.39715514 | -1.217953  | 0.19148937  | 0.15339334 | 0.901 | 4644 | tags=48%, list=30%,<br>signal=68% |
| IPF1_Q4                      | 212  | -0.30016133 | -1.2178204 | 0.10236221  | 0.15324658 | 0.901 | 3729 | tags=28%, list=24%,<br>signal=36% |
| HNF4ALPHA_Q6                 | 235  | -0.284723   | -1.217726  | 0.08604206  | 0.15311487 | 0.901 | 4052 | tags=29%, list=26%,<br>signal=39% |
| ACCGAGC_MIR423               | 8    | -0.60512024 | -1.2154927 | 0.22540984  | 0.15555769 | 0.901 | 996  | tags=38%, list=6%,<br>signal=40%  |
| CP2_01                       | 237  | -0.2812122  | -1.2148647 | 0.036398467 | 0.15610693 | 0.901 | 4011 | tags=27%, list=26%,<br>signal=36% |
| GABP_B                       | 237  | -0.36017808 | -1.2143267 | 0.1755424   | 0.15644856 | 0.901 | 4110 | tags=36%, list=26%,<br>signal=48% |
| SP1_Q4_01                    | 223  | -0.30663112 | -1.2140648 | 0.038986355 | 0.15646014 | 0.901 | 4192 | tags=31%, list=27%,<br>signal=42% |
| STAT1_02                     | 217  | -0.33760008 | -1.2131785 | 0.16920152  | 0.15726395 | 0.902 | 4356 | tags=36%, list=28%,<br>signal=49% |
| PAX2_01                      | 47   | -0.41225144 | -1.2129645 | 0.1425819   | 0.15728231 | 0.902 | 4918 | tags=49%, list=32%,<br>signal=71% |
| GGGCGGR_SP1_Q6               | 56   | -0.37133053 | -1.2129543 | 0.19467214  | 0.15698591 | 0.902 | 5050 | tags=45%, list=32%,<br>signal=66% |
| CCACACA_MIR147               | 56   | -0.38749626 | -1.2127013 | 0.20240481  | 0.15695983 | 0.902 | 5109 | tags=46%, list=33%,<br>signal=69% |
| RNTCANNRNNYNATTW_U<br>NKNOWN | 470  | -0.3027903  | -1.2124573 | 0.08383234  | 0.15718228 | 0.902 | 4206 | tags=31%, list=27%,<br>signal=42% |
| CEBP_Q2                      | 205  | -0.303617   | -1.2123954 | 0.10805501  | 0.15697895 | 0.902 | 4072 | tags=30%, list=26%,<br>signal=40% |
| SP1_01                       | 214  | -0.30776545 | -1.2118416 | 0.06262231  | 0.15731108 | 0.902 | 3567 | tags=27%, list=23%,<br>signal=35% |
| FREAC7_01                    | 156  | -0.30421343 | -1.2105925 | 0.11857708  | 0.15850924 | 0.902 | 3118 | tags=22%, list=20%,<br>signal=28% |
| CCCNNNNNNAAGWT_UN<br>KNOWN   | 78   | -0.34257734 | -1.2104775 | 0.11336032  | 0.15830834 | 0.902 | 4130 | tags=35%, list=26%,<br>signal=47% |
| NRF2_01                      | 246  | -0.3509691  | -1.2102635 | 0.1553398   | 0.15825959 | 0.902 | 5072 | tags=43%, list=32%,<br>signal=63% |
| USF_Q6                       | 219  | -0.35052088 | -1.2098011 | 0.13469388  | 0.1585247  | 0.902 | 4258 | tags=35%, list=27%,<br>signal=48% |
| CCAATNNSNNGCG_UNK<br>NOWN    | 111  | -0.33972198 | -1.2086995 | 0.17254902  | 0.15977202 | 0.905 | 4470 | tags=34%, list=29%,<br>signal=48% |
| E2F1_Q4_01                   | 197  | -0.32459778 | -1.2082584 | 0.1027668   | 0.16009636 | 0.905 | 4025 | tags=32%, list=26%,<br>signal=43% |
| CDPCR1_01                    | 114  | -0.29115024 | -1.208152  | 0.08527132  | 0.15991418 | 0.905 | 4739 | tags=38%, list=30%,<br>signal=54% |
| TGANTCA_AP1_C                | 2166 | -0.27181676 | -1.2081381 | 0.05        | 0.15962611 | 0.905 | 3746 | tags=26%, list=24%,<br>signal=29% |
| E2F_Q4_01                    | 204  | -0.32133955 | -1.2075789 | 0.14990138  | 0.16003032 | 0.905 | 4025 | tags=32%, list=26%,<br>signal=43% |

|                           |      |             |            |             |            |       |      |                                |
|---------------------------|------|-------------|------------|-------------|------------|-------|------|--------------------------------|
| RSRFC4_01                 | 216  | -0.27288944 | -1.2073991 | 0.101960786 | 0.15997544 | 0.905 | 2858 | tags=22%, list=18%, signal=26% |
| E2F_Q3                    | 196  | -0.3153498  | -1.2064018 | 0.100196466 | 0.16116542 | 0.905 | 3475 | tags=28%, list=22%, signal=35% |
| PAX4_Q3                   | 228  | -0.3079605  | -1.2063468 | 0.15109344  | 0.16090688 | 0.905 | 5131 | tags=39%, list=33%, signal=57% |
| CCCAGAG_MIR326            | 134  | -0.33788064 | -1.2063149 | 0.120792076 | 0.1606385  | 0.905 | 4753 | tags=40%, list=30%, signal=56% |
| AP1_Q6_01                 | 240  | -0.27534482 | -1.2059588 | 0.12115385  | 0.16089544 | 0.905 | 4226 | tags=30%, list=27%, signal=41% |
| STAT_Q6                   | 227  | -0.31582958 | -1.2058829 | 0.13980582  | 0.1606567  | 0.905 | 4154 | tags=33%, list=27%, signal=45% |
| MYOGNF1_01                | 39   | -0.37449968 | -1.2053375 | 0.14117648  | 0.16116555 | 0.905 | 1848 | tags=23%, list=12%, signal=26% |
| MEF2_Q2                   | 198  | -0.29148817 | -1.2051947 | 0.12156863  | 0.1610897  | 0.906 | 2786 | tags=22%, list=18%, signal=26% |
| YGCANTGCR_UNKNOWN         | 1150 | -0.27645478 | -1.2041252 | 0.08232932  | 0.16216017 | 0.906 | 4133 | tags=29%, list=26%, signal=37% |
| YTCCRNAGGY_UNKNO<br>WN    | 1066 | -0.24537763 | -1.2029762 | 0.046       | 0.16365153 | 0.907 | 2938 | tags=19%, list=19%, signal=21% |
| MIF1_Q1                   | 154  | -0.29874372 | -1.2023125 | 0.15757576  | 0.16420099 | 0.907 | 3294 | tags=25%, list=21%, signal=31% |
| E2F_Q3_Q1                 | 203  | -0.3192652  | -1.2015786 | 0.11811024  | 0.16496395 | 0.907 | 3739 | tags=30%, list=24%, signal=39% |
| MEF2_Q6_Q1                | 215  | -0.29996493 | -1.201361  | 0.10245901  | 0.16492996 | 0.907 | 2688 | tags=22%, list=17%, signal=27% |
| RYTGCNRRGNAAC_MIF1_<br>Q1 | 485  | -0.2828957  | -1.2009196 | 0.068897635 | 0.16527067 | 0.907 | 3537 | tags=25%, list=23%, signal=32% |
| MYCMAX_Q3                 | 219  | -0.35146847 | -1.2001417 | 0.17137097  | 0.1659042  | 0.907 | 3333 | tags=29%, list=21%, signal=37% |
| GGCAGCT_MIR22             | 208  | -0.37017697 | -1.1998686 | 0.16666667  | 0.1659092  | 0.907 | 3821 | tags=35%, list=24%, signal=46% |
| EVI1_Q6                   | 18   | -0.3947073  | -1.1997849 | 0.18700787  | 0.16567993 | 0.907 | 4037 | tags=33%, list=26%, signal=45% |
| TCF4_Q5                   | 201  | -0.2547614  | -1.1997237 | 0.055666003 | 0.16544656 | 0.907 | 3366 | tags=22%, list=22%, signal=28% |
| GRE_C                     | 114  | -0.30126008 | -1.1995943 | 0.09589041  | 0.16533376 | 0.907 | 3739 | tags=29%, list=24%, signal=38% |
| AP2_Q6_Q1                 | 246  | -0.30566517 | -1.1990209 | 0.16269842  | 0.16584758 | 0.908 | 4226 | tags=31%, list=27%, signal=42% |
| SRF_Q5_Q1                 | 200  | -0.3168437  | -1.198646  | 0.16829745  | 0.166011   | 0.908 | 4432 | tags=34%, list=28%, signal=47% |
| E2F_Q3                    | 217  | -0.32315004 | -1.19845   | 0.14757282  | 0.1659685  | 0.909 | 3459 | tags=26%, list=22%, signal=33% |
| HEB_Q6                    | 224  | -0.2737348  | -1.1979419 | 0.12401575  | 0.16644822 | 0.909 | 4306 | tags=29%, list=28%, signal=40% |

|                         |     |             |            |             |            |       |      |                                |
|-------------------------|-----|-------------|------------|-------------|------------|-------|------|--------------------------------|
| TCTGGAC_MIR198          | 78  | -0.42939934 | -1.1972315 | 0.22554891  | 0.16717951 | 0.912 | 4407 | tags=44%, list=28%, signal=60% |
| MYCMA_X_01              | 214 | -0.30566034 | -1.1949852 | 0.15961538  | 0.16968898 | 0.912 | 3885 | tags=29%, list=25%, signal=37% |
| TCCCRNNRTGC_UNKNOW<br>N | 985 | -0.2594856  | -1.1943054 | 0.078895465 | 0.17031287 | 0.912 | 4662 | tags=32%, list=30%, signal=43% |
| CD_C5_01                | 216 | -0.28812864 | -1.1940529 | 0.09356725  | 0.17029674 | 0.912 | 3729 | tags=27%, list=24%, signal=35% |
| NFY_Q6_01               | 232 | -0.2696038  | -1.193405  | 0.086519115 | 0.17067535 | 0.912 | 4488 | tags=29%, list=29%, signal=41% |
| SRF_C                   | 196 | -0.28769436 | -1.1933873 | 0.20696326  | 0.17039418 | 0.912 | 4225 | tags=30%, list=27%, signal=40% |
| GGGAGGRR_MAZ_Q6         | 655 | -0.29581732 | -1.1928902 | 0.12451362  | 0.17074932 | 0.912 | 4494 | tags=34%, list=29%, signal=46% |
| PAX5_01                 | 136 | -0.2959366  | -1.1928822 | 0.12031558  | 0.17045285 | 0.912 | 3182 | tags=24%, list=20%, signal=30% |
| AP2_Q6                  | 235 | -0.31956154 | -1.1919664 | 0.17322835  | 0.17161812 | 0.912 | 4339 | tags=34%, list=28%, signal=47% |
| OCT1_Q6                 | 216 | -0.27430892 | -1.1919392 | 0.11741683  | 0.17133456 | 0.912 | 3405 | tags=26%, list=22%, signal=33% |
| AR_Q6                   | 215 | -0.31673747 | -1.1915038 | 0.18467583  | 0.1715828  | 0.913 | 4481 | tags=35%, list=29%, signal=48% |
| WGGAATGY_TEF1_Q6        | 70  | -0.29357243 | -1.1898639 | 0.17692308  | 0.17327933 | 0.914 | 2370 | tags=17%, list=15%, signal=20% |
| ELK1_01                 | 240 | -0.28745392 | -1.1898282 | 0.15353535  | 0.17300549 | 0.914 | 2646 | tags=20%, list=17%, signal=24% |
| RP58_01                 | 185 | -0.24227944 | -1.1894908 | 0.11177645  | 0.17311236 | 0.914 | 2715 | tags=17%, list=17%, signal=21% |
| E2F1DP1RB_01            | 200 | -0.31188652 | -1.1891692 | 0.1643002   | 0.17321436 | 0.914 | 3602 | tags=26%, list=23%, signal=34% |
| CGCAAAA_MIR450          | 8   | -0.5388267  | -1.1879355 | 0.2761905   | 0.17449982 | 0.915 | 1707 | tags=38%, list=11%, signal=42% |
| CAGGTA_AREB6_01         | 55  | -0.37785998 | -1.1865631 | 0.21588595  | 0.1759174  | 0.915 | 3199 | tags=31%, list=20%, signal=39% |
| HFH4_01                 | 170 | -0.29553786 | -1.1864302 | 0.10843374  | 0.17571259 | 0.915 | 3675 | tags=29%, list=24%, signal=37% |
| CCTGAGT_MIR510          | 39  | -0.39001572 | -1.1861331 | 0.2109375   | 0.17567126 | 0.915 | 5558 | tags=54%, list=36%, signal=83% |
| YKACATTT_UNKNOWN        | 322 | -0.24890268 | -1.1860824 | 0.06090373  | 0.17540687 | 0.915 | 2858 | tags=20%, list=18%, signal=23% |
| GTTRYCATRR_UNKNOWN      | 72  | -0.3834003  | -1.1857128 | 0.214       | 0.1755533  | 0.915 | 4226 | tags=36%, list=27%, signal=49% |
| TMTCGCGANR_UNKNOWN<br>N | 248 | -0.26763076 | -1.1850076 | 0.108       | 0.17611116 | 0.915 | 2948 | tags=21%, list=19%, signal=25% |
| OLF1_01                 | 231 | -0.2870644  | -1.1834842 | 0.2         | 0.1777606  | 0.917 | 2479 | tags=18%, list=16%, signal=21% |

|                          |     |             |            |             |            |       |      |                                   |
|--------------------------|-----|-------------|------------|-------------|------------|-------|------|-----------------------------------|
| POU3F2_02                | 224 | -0.2866681  | -1.1832373 | 0.10444874  | 0.1778102  | 0.918 | 4306 | tags=29%, list=28%,<br>signal=39% |
| AP3_Q6                   | 209 | -0.299958   | -1.182528  | 0.14314115  | 0.17848223 | 0.918 | 2927 | tags=22%, list=19%,<br>signal=27% |
| MZF1_01                  | 209 | -0.30189905 | -1.1825093 | 0.18525897  | 0.17819716 | 0.918 | 4155 | tags=33%, list=27%,<br>signal=44% |
| EGR2_01                  | 170 | -0.30565864 | -1.1821673 | 0.15650406  | 0.17831402 | 0.918 | 3427 | tags=28%, list=22%,<br>signal=36% |
| BACH1_01                 | 231 | -0.2871303  | -1.1818546 | 0.1754386   | 0.17841367 | 0.918 | 3782 | tags=30%, list=24%,<br>signal=39% |
| ACACTCC_MIR122A          | 64  | -0.42192075 | -1.1812364 | 0.2651072   | 0.17889978 | 0.919 | 5308 | tags=52%, list=34%,<br>signal=78% |
| CCCAT_MIR2993P           | 49  | -0.39628756 | -1.1795542 | 0.2303263   | 0.18093078 | 0.92  | 4319 | tags=39%, list=28%,<br>signal=53% |
| GAGCTGG_MIR337           | 137 | -0.3323255  | -1.1795151 | 0.21072797  | 0.18066366 | 0.92  | 4281 | tags=36%, list=27%,<br>signal=49% |
| IRF7_01                  | 219 | -0.2776504  | -1.1794894 | 0.13572854  | 0.18036538 | 0.92  | 3736 | tags=25%, list=24%,<br>signal=33% |
| PAX4_Q4                  | 183 | -0.33363232 | -1.1792146 | 0.202       | 0.18040152 | 0.92  | 3567 | tags=28%, list=23%,<br>signal=36% |
| RRCCGTTA_UNKNOWN         | 446 | -0.3049251  | -1.1786191 | 0.14717741  | 0.18081072 | 0.92  | 3022 | tags=22%, list=19%,<br>signal=27% |
| SP1_Q6                   | 222 | -0.30013335 | -1.1780274 | 0.124282986 | 0.18132897 | 0.92  | 4192 | tags=32%, list=27%,<br>signal=42% |
| AP1_01                   | 233 | -0.27883682 | -1.1771429 | 0.15116279  | 0.18219613 | 0.92  | 4623 | tags=36%, list=30%,<br>signal=50% |
| GCAAGGA_MIR502           | 68  | -0.36648637 | -1.1760626 | 0.21        | 0.18329835 | 0.921 | 3346 | tags=29%, list=21%,<br>signal=37% |
| HSF_Q6                   | 170 | -0.32144558 | -1.1758639 | 0.19607843  | 0.18331844 | 0.921 | 4270 | tags=32%, list=27%,<br>signal=44% |
| ATGGYGGGA_UNKNOWN        | 69  | -0.33234745 | -1.175082  | 0.257874    | 0.18399492 | 0.921 | 3301 | tags=29%, list=21%,<br>signal=37% |
| CDP_Q2                   | 89  | -0.2995532  | -1.1740952 | 0.21042085  | 0.18506178 | 0.921 | 4963 | tags=43%, list=32%,<br>signal=62% |
| AP1_Q6                   | 232 | -0.285547   | -1.173723  | 0.13572854  | 0.18538518 | 0.921 | 4545 | tags=36%, list=29%,<br>signal=50% |
| POU6F1_01                | 207 | -0.3015043  | -1.1736368 | 0.10934394  | 0.18517913 | 0.921 | 2390 | tags=20%, list=15%,<br>signal=23% |
| CACBINDINGPROTEIN_Q6     | 220 | -0.29159787 | -1.1725852 | 0.19246031  | 0.186507   | 0.921 | 3429 | tags=24%, list=22%,<br>signal=30% |
| YTTCCNNGGAMR_UNKN<br>OWN | 253 | -0.31714875 | -1.1713433 | 0.2164751   | 0.1877958  | 0.921 | 4733 | tags=40%, list=30%,<br>signal=56% |
| CI2_01                   | 203 | -0.29722145 | -1.1711485 | 0.12948208  | 0.18771616 | 0.921 | 3079 | tags=23%, list=20%,<br>signal=28% |
| LMO2COM_Q2               | 206 | -0.24926467 | -1.1711329 | 0.07212476  | 0.18741837 | 0.921 | 3623 | tags=24%, list=23%,<br>signal=31% |

|                          |     |             |            |            |            |       |      |                                |
|--------------------------|-----|-------------|------------|------------|------------|-------|------|--------------------------------|
| SRY_01                   | 196 | -0.29650143 | -1.1709598 | 0.21713148 | 0.1873822  | 0.921 | 4505 | tags=38%, list=29%, signal=52% |
| YGTCTTGR_UNKNOWN         | 442 | -0.23836176 | -1.1706259 | 0.09055118 | 0.18760033 | 0.921 | 2646 | tags=17%, list=17%, signal=19% |
| SP3_Q3                   | 222 | -0.25878847 | -1.1702813 | 0.1325536  | 0.18778794 | 0.921 | 4257 | tags=27%, list=27%, signal=37% |
| TGTTTGY_HNF3_Q6          | 672 | -0.30202097 | -1.1693572 | 0.14619882 | 0.18868436 | 0.922 | 4589 | tags=34%, list=29%, signal=46% |
| TTGTTT_FOXO4_01          | 171 | -0.28912836 | -1.169247  | 0.16498993 | 0.18862012 | 0.924 | 4702 | tags=36%, list=30%, signal=50% |
| YTAAYNGCT_UNKNOWN        | 80  | -0.32506722 | -1.1691184 | 0.26171875 | 0.18854687 | 0.925 | 1711 | tags=18%, list=11%, signal=20% |
| FOXO4_01                 | 205 | -0.30800778 | -1.1686828 | 0.19433199 | 0.18880007 | 0.925 | 3432 | tags=27%, list=22%, signal=34% |
| CTGAGCC_MIR24            | 206 | -0.33038205 | -1.1685457 | 0.2480315  | 0.18865904 | 0.925 | 4188 | tags=33%, list=27%, signal=45% |
| CEBP_Q3                  | 220 | -0.27931726 | -1.1670561 | 0.1663443  | 0.19038282 | 0.927 | 3280 | tags=24%, list=21%, signal=30% |
| NKX25_01                 | 110 | -0.27184492 | -1.1667087 | 0.11001965 | 0.190513   | 0.927 | 3473 | tags=25%, list=22%, signal=33% |
| NERF_Q2                  | 213 | -0.26526615 | -1.1663487 | 0.1643002  | 0.1907405  | 0.927 | 3320 | tags=23%, list=21%, signal=29% |
| TTANWNANTGGM_UNKN<br>OWN | 639 | -0.25628978 | -1.1658894 | 0.12865497 | 0.19102107 | 0.927 | 4501 | tags=30%, list=29%, signal=40% |
| CAGCCTC_MIR4855P         | 130 | -0.30461276 | -1.1647489 | 0.21146245 | 0.19234562 | 0.927 | 4733 | tags=32%, list=30%, signal=46% |
| GFI1_01                  | 234 | -0.29928592 | -1.1643355 | 0.16016427 | 0.19263697 | 0.927 | 4195 | tags=30%, list=27%, signal=40% |
| PAX3_01                  | 20  | -0.46453935 | -1.1636455 | 0.27142859 | 0.19325304 | 0.927 | 4918 | tags=55%, list=32%, signal=80% |
| DR4_Q2                   | 226 | -0.30816734 | -1.1633863 | 0.21343873 | 0.19330968 | 0.927 | 3202 | tags=24%, list=21%, signal=30% |
| NFY_01                   | 221 | -0.26021662 | -1.1631659 | 0.11776447 | 0.19328691 | 0.927 | 2623 | tags=17%, list=17%, signal=20% |
| FREAC3_01                | 214 | -0.30569798 | -1.1626953 | 0.20641282 | 0.19358417 | 0.927 | 4206 | tags=31%, list=27%, signal=42% |
| MYB_Q3                   | 216 | -0.2975541  | -1.1626191 | 0.15594542 | 0.19338399 | 0.927 | 4414 | tags=33%, list=28%, signal=45% |
| CHX10_01                 | 196 | -0.28832337 | -1.1620302 | 0.11554622 | 0.19392537 | 0.928 | 2393 | tags=20%, list=15%, signal=24% |
| IRF1_Q6                  | 226 | -0.27532318 | -1.1599895 | 0.122      | 0.19661614 | 0.93  | 3562 | tags=25%, list=23%, signal=32% |
| CDPCR3HD_01              | 206 | -0.26076353 | -1.1597764 | 0.1749503  | 0.1965529  | 0.93  | 4449 | tags=31%, list=28%, signal=43% |
| HMEF2_Q6                 | 121 | -0.29266667 | -1.1592654 | 0.2128514  | 0.1968973  | 0.93  | 4209 | tags=30%, list=27%, signal=40% |



|                       |     |             |            |            |            |       |      |                                 |
|-----------------------|-----|-------------|------------|------------|------------|-------|------|---------------------------------|
| HNFB3ALPHA_Q6         | 184 | -0.29731846 | -1.1591237 | 0.184      | 0.19673744 | 0.93  | 4489 | tags=35%, list=29%, signal=49%  |
| PTF1BETA_Q6           | 208 | -0.2791202  | -1.1590827 | 0.19646366 | 0.19646546 | 0.93  | 4011 | tags=30%, list=26%, signal=40%  |
| HNFB4_01_B            | 219 | -0.24530126 | -1.1584541 | 0.1184466  | 0.19691753 | 0.93  | 3380 | tags=21%, list=22%, signal=27%  |
| GTCGATC_MIR3695P      | 4   | -0.66741043 | -1.1579409 | 0.31075698 | 0.19736794 | 0.93  | 4483 | tags=75%, list=29%, signal=105% |
| EFC_Q6                | 233 | -0.32351336 | -1.1578028 | 0.19607843 | 0.19723372 | 0.93  | 2888 | tags=24%, list=18%, signal=29%  |
| YCATTAA_UNKNOWN       | 276 | -0.25036314 | -1.1577872 | 0.13827655 | 0.19693667 | 0.93  | 4532 | tags=30%, list=29%, signal=42%  |
| OCT1_02               | 192 | -0.32740608 | -1.1571326 | 0.25       | 0.19742116 | 0.93  | 4335 | tags=36%, list=28%, signal=49%  |
| SMAD_Q6               | 215 | -0.3004503  | -1.1570749 | 0.19298245 | 0.19718659 | 0.93  | 3262 | tags=25%, list=21%, signal=31%  |
| FOXO3_01              | 214 | -0.29474846 | -1.1565136 | 0.2193676  | 0.19772373 | 0.931 | 3583 | tags=29%, list=23%, signal=36%  |
| COREBINDINGFACTOR_Q6  | 234 | -0.23913297 | -1.15644   | 0.1237525  | 0.19747792 | 0.931 | 3581 | tags=24%, list=23%, signal=31%  |
| E2F_Q6_01             | 207 | -0.2904724  | -1.1563293 | 0.17519686 | 0.1973459  | 0.931 | 4078 | tags=30%, list=26%, signal=40%  |
| P300_01               | 218 | -0.30614582 | -1.1560237 | 0.17821783 | 0.19750406 | 0.931 | 4299 | tags=30%, list=28%, signal=41%  |
| NRF2_Q4               | 223 | -0.28455397 | -1.1551641 | 0.20396039 | 0.19858143 | 0.933 | 4531 | tags=37%, list=29%, signal=51%  |
| OCT1_05               | 211 | -0.29125    | -1.1546612 | 0.21541502 | 0.19897893 | 0.933 | 2513 | tags=21%, list=16%, signal=25%  |
| IRF1_01               | 209 | -0.2850048  | -1.1533346 | 0.16367266 | 0.2003744  | 0.933 | 2712 | tags=21%, list=17%, signal=25%  |
| ATF6_01               | 113 | -0.33150837 | -1.15323   | 0.2699029  | 0.20017134 | 0.933 | 4682 | tags=38%, list=30%, signal=54%  |
| RITTTNNNYTGGM_UNKNOWN | 59  | -0.31704813 | -1.1519654 | 0.17769375 | 0.20142832 | 0.933 | 3363 | tags=29%, list=22%, signal=37%  |
| GGGNRMNNYCAT_UNKNOWN  | 75  | -0.34059718 | -1.151226  | 0.25757575 | 0.20203565 | 0.933 | 3732 | tags=31%, list=24%, signal=40%  |
| SF1_Q6                | 221 | -0.3380158  | -1.1469231 | 0.3        | 0.20776571 | 0.935 | 4189 | tags=33%, list=27%, signal=45%  |
| GATA1_04              | 215 | -0.24136943 | -1.1468186 | 0.11088296 | 0.20758128 | 0.935 | 3151 | tags=19%, list=20%, signal=23%  |
| CMYB_01               | 218 | -0.31497815 | -1.1467193 | 0.24950495 | 0.20737879 | 0.935 | 3600 | tags=28%, list=23%, signal=36%  |
| MYB_Q6                | 215 | -0.28729156 | -1.1458039 | 0.2148289  | 0.20825835 | 0.935 | 3259 | tags=23%, list=21%, signal=29%  |
| CEBPDDELTA_Q6         | 215 | -0.27701184 | -1.1435115 | 0.18786693 | 0.21096624 | 0.935 | 3917 | tags=28%, list=25%, signal=37%  |

|                          |     |             |            |             |            |       |      |                                |
|--------------------------|-----|-------------|------------|-------------|------------|-------|------|--------------------------------|
| CAGGGTC_MIR504           | 76  | -0.34039092 | -1.1428862 | 0.24547283  | 0.21147054 | 0.935 | 4527 | tags=36%, list=29%, signal=50% |
| ZIC1_01                  | 233 | -0.27498218 | -1.1427279 | 0.19758065  | 0.2113436  | 0.935 | 3012 | tags=22%, list=19%, signal=27% |
| AGTGCGT_MIR521           | 6   | -0.54219306 | -1.1422169 | 0.30058938  | 0.2119113  | 0.937 | 3179 | tags=50%, list=20%, signal=63% |
| HOXA3_01                 | 12  | -0.4351884  | -1.142158  | 0.31663325  | 0.21163718 | 0.937 | 2377 | tags=33%, list=15%, signal=39% |
| AP4_Q6_01                | 213 | -0.259793   | -1.1406655 | 0.18762475  | 0.21356258 | 0.937 | 4019 | tags=25%, list=26%, signal=34% |
| CGGAARNGGCNG_UNKN<br>OWN | 67  | -0.34636974 | -1.1405011 | 0.24212599  | 0.21339402 | 0.937 | 3933 | tags=34%, list=25%, signal=46% |
| STAT3_02                 | 129 | -0.2878247  | -1.1393851 | 0.20576923  | 0.2146476  | 0.937 | 2322 | tags=17%, list=15%, signal=20% |
| RTAAACA_FREAC2_01        | 126 | -0.27634066 | -1.1373475 | 0.2035225   | 0.21691504 | 0.938 | 4943 | tags=33%, list=32%, signal=48% |
| CTTTGT_LEF1_Q2           | 107 | -0.326279   | -1.13505   | 0.30367506  | 0.2196329  | 0.939 | 1937 | tags=18%, list=12%, signal=20% |
| GGCNKCCATNK_UNKNOW<br>N  | 126 | -0.2559317  | -1.1337876 | 0.16182573  | 0.22109005 | 0.941 | 3489 | tags=22%, list=22%, signal=28% |
| SPZ1_01                  | 200 | -0.2750335  | -1.133501  | 0.22889306  | 0.22121672 | 0.942 | 3960 | tags=29%, list=25%, signal=38% |
| MYOD_Q6                  | 216 | -0.270509   | -1.132913  | 0.2209073   | 0.22180346 | 0.942 | 3210 | tags=23%, list=21%, signal=29% |
| RGAAANTTC_HSF1_01        | 51  | -0.3423344  | -1.1318091 | 0.256       | 0.22291507 | 0.942 | 4488 | tags=41%, list=29%, signal=58% |
| NRSF_01                  | 84  | -0.33460733 | -1.1309519 | 0.3172147   | 0.22392154 | 0.943 | 3571 | tags=30%, list=23%, signal=38% |
| MYOD_Q6_01               | 228 | -0.2490718  | -1.1304647 | 0.20850202  | 0.2242805  | 0.943 | 3238 | tags=22%, list=21%, signal=27% |
| LXR_Q3                   | 65  | -0.32749644 | -1.1291636 | 0.22393823  | 0.22592042 | 0.943 | 3058 | tags=26%, list=20%, signal=32% |
| AGGGCAG_MIR18A           | 113 | -0.3112421  | -1.1273941 | 0.27201566  | 0.22803551 | 0.944 | 4008 | tags=33%, list=26%, signal=44% |
| AML1_01                  | 224 | -0.25321808 | -1.127375  | 0.20114942  | 0.22771147 | 0.944 | 3503 | tags=25%, list=22%, signal=32% |
| AML1_Q6                  | 224 | -0.25321808 | -1.127375  | 0.20114942  | 0.22736698 | 0.944 | 3503 | tags=25%, list=22%, signal=32% |
| SRF_Q4                   | 201 | -0.30211377 | -1.1271486 | 0.28875968  | 0.22741699 | 0.945 | 3023 | tags=23%, list=19%, signal=29% |
| CP2_02                   | 221 | -0.26263732 | -1.1263969 | 0.23333333  | 0.22801389 | 0.945 | 4801 | tags=33%, list=31%, signal=46% |
| SMAD3_Q6                 | 206 | -0.21814564 | -1.1246634 | 0.104950495 | 0.22996026 | 0.945 | 4193 | tags=27%, list=27%, signal=36% |
| FOXO1_01                 | 211 | -0.29420042 | -1.1239914 | 0.23123732  | 0.2305584  | 0.945 | 3072 | tags=25%, list=20%, signal=30% |

|                            |     |             |            |            |            |       |      |                                |
|----------------------------|-----|-------------|------------|------------|------------|-------|------|--------------------------------|
| NKX62_Q2                   | 214 | -0.24779585 | -1.1232332 | 0.18969072 | 0.23129909 | 0.945 | 4532 | tags=30%, list=29%, signal=42% |
| TGCTGAY_UNKNOWN            | 949 | -0.22896603 | -1.1231885 | 0.16438356 | 0.23101057 | 0.945 | 3811 | tags=24%, list=24%, signal=30% |
| YWATTWNNRGCT_UNKN<br>OWN   | 331 | -0.2510387  | -1.1174233 | 0.22176592 | 0.23938125 | 0.951 | 3741 | tags=24%, list=24%, signal=32% |
| ETS1_B                     | 227 | -0.26064155 | -1.1165665 | 0.24177949 | 0.24031769 | 0.951 | 3503 | tags=24%, list=22%, signal=30% |
| CAGNYGKNAAA_UNKNOW<br>N    | 124 | -0.30414045 | -1.1154578 | 0.2602459  | 0.2415328  | 0.951 | 4306 | tags=33%, list=28%, signal=45% |
| HNF1_01                    | 213 | -0.24170578 | -1.114693  | 0.24637681 | 0.24220297 | 0.951 | 2070 | tags=15%, list=13%, signal=18% |
| ETS_Q4                     | 221 | -0.27033585 | -1.1144327 | 0.26838967 | 0.24218139 | 0.951 | 3811 | tags=27%, list=24%, signal=35% |
| WYAAANRRNNNGCG_UN<br>KNOWN | 171 | -0.28504443 | -1.1129814 | 0.29615384 | 0.24366859 | 0.951 | 3740 | tags=29%, list=24%, signal=37% |
| RAAGNYNNCTTY_UNKNO<br>WN   | 78  | -0.33343047 | -1.1125172 | 0.2965932  | 0.24388847 | 0.951 | 2214 | tags=22%, list=14%, signal=25% |
| AP1FJ_Q2                   | 241 | -0.2674962  | -1.1124964 | 0.2581262  | 0.24355982 | 0.951 | 4513 | tags=34%, list=29%, signal=47% |
| AP4_01                     | 231 | -0.23478344 | -1.1114448 | 0.18849206 | 0.24452393 | 0.951 | 3946 | tags=26%, list=25%, signal=34% |
| E12_Q6                     | 235 | -0.26283303 | -1.111422  | 0.2913386  | 0.24417754 | 0.951 | 2643 | tags=19%, list=17%, signal=22% |
| GCTGAGT_MIR5125P           | 47  | -0.42512155 | -1.1110015 | 0.35856575 | 0.24438106 | 0.951 | 3713 | tags=43%, list=24%, signal=56% |
| SRF_Q6                     | 219 | -0.27075896 | -1.1106402 | 0.2735849  | 0.24467382 | 0.951 | 4214 | tags=29%, list=27%, signal=39% |
| CAGGTG_E12_Q6              | 93  | -0.2964936  | -1.1098051 | 0.27916667 | 0.24545836 | 0.951 | 3713 | tags=27%, list=24%, signal=35% |
| AREB6_02                   | 228 | -0.24236265 | -1.1077454 | 0.20930232 | 0.2480786  | 0.951 | 3935 | tags=26%, list=25%, signal=34% |
| DR1_Q3                     | 220 | -0.23365536 | -1.10756   | 0.22986248 | 0.24797088 | 0.951 | 4722 | tags=31%, list=30%, signal=44% |
| YNGTTNNNATT_UNKNO<br>WN    | 145 | -0.25944844 | -1.1057892 | 0.19178082 | 0.25005987 | 0.952 | 4182 | tags=30%, list=27%, signal=40% |
| MEF2_01                    | 123 | -0.25866476 | -1.1057044 | 0.286      | 0.24984254 | 0.952 | 4193 | tags=28%, list=27%, signal=39% |
| GGCAGAC_MIR346             | 35  | -0.3315865  | -1.1056056 | 0.32595575 | 0.2496031  | 0.952 | 3106 | tags=31%, list=20%, signal=39% |
| GATA4_Q3                   | 202 | -0.27454078 | -1.1055342 | 0.2837838  | 0.24934736 | 0.952 | 3741 | tags=26%, list=24%, signal=34% |
| AP1_C                      | 244 | -0.2449614  | -1.104414  | 0.24806201 | 0.2508644  | 0.952 | 4930 | tags=35%, list=32%, signal=50% |
| ROAZ_01                    | 8   | -0.44634104 | -1.1028262 | 0.355042   | 0.25277075 | 0.952 | 1896 | tags=25%, list=12%, signal=28% |

|                            |     |             |            |            |            |       |      |                                |
|----------------------------|-----|-------------|------------|------------|------------|-------|------|--------------------------------|
| TFIII_Q6                   | 187 | -0.25582057 | -1.1026833 | 0.22916667 | 0.25258148 | 0.952 | 3576 | tags=25%, list=23%, signal=32% |
| TCTCTCC_MIR185             | 95  | -0.3495233  | -1.102018  | 0.3295238  | 0.25311393 | 0.952 | 4121 | tags=33%, list=26%, signal=44% |
| GATA_C                     | 232 | -0.2323817  | -1.1009103 | 0.20912547 | 0.2541185  | 0.952 | 1591 | tags=11%, list=10%, signal=12% |
| GCGNANTTCC_UNKNO<br>WN     | 75  | -0.34878308 | -1.1006322 | 0.33333334 | 0.254093   | 0.952 | 3956 | tags=33%, list=25%, signal=44% |
| COMP1_01                   | 106 | -0.29621002 | -1.1005555 | 0.295858   | 0.2538301  | 0.952 | 4934 | tags=35%, list=32%, signal=51% |
| SYATTGTG_UNKNOWN           | 55  | -0.30600405 | -1.1004996 | 0.26415095 | 0.2536083  | 0.952 | 3881 | tags=29%, list=25%, signal=39% |
| DR3_Q4                     | 126 | -0.25138018 | -1.0994501 | 0.23137255 | 0.25471795 | 0.952 | 2803 | tags=21%, list=18%, signal=25% |
| HP1SITEFACTOR_Q6           | 197 | -0.28243762 | -1.0965714 | 0.32755297 | 0.25845304 | 0.954 | 3717 | tags=28%, list=24%, signal=36% |
| AREB6_04                   | 229 | -0.26426208 | -1.0959715 | 0.275154   | 0.25896335 | 0.955 | 3741 | tags=24%, list=24%, signal=31% |
| CRX_Q4                     | 229 | -0.24369547 | -1.0942405 | 0.26728973 | 0.26129907 | 0.959 | 2381 | tags=16%, list=15%, signal=18% |
| BACH2_01                   | 238 | -0.25157392 | -1.093219  | 0.305835   | 0.26224223 | 0.959 | 3688 | tags=25%, list=24%, signal=33% |
| GTTGNYNNRGAAC_UNK<br>NOWN  | 76  | -0.27379084 | -1.0922604 | 0.27865613 | 0.26318118 | 0.96  | 5389 | tags=42%, list=35%, signal=64% |
| RYCACNRRNRNCAG_UN<br>KNOWN | 92  | -0.25773543 | -1.0907699 | 0.2689243  | 0.26511565 | 0.96  | 3736 | tags=24%, list=24%, signal=31% |
| MEIS1AHOXA9_01             | 104 | -0.26775345 | -1.0899487 | 0.25098816 | 0.2659768  | 0.96  | 2668 | tags=21%, list=17%, signal=25% |
| NCX_01                     | 150 | -0.2625591  | -1.0890318 | 0.29531568 | 0.26702845 | 0.96  | 3573 | tags=24%, list=23%, signal=31% |
| GGATCCG_MIR127             | 9   | -0.34679618 | -1.0878841 | 0.3429158  | 0.26822418 | 0.96  | 2337 | tags=22%, list=15%, signal=26% |
| TTF1_Q6                    | 226 | -0.25874493 | -1.0865549 | 0.27833003 | 0.26954076 | 0.96  | 4484 | tags=29%, list=29%, signal=40% |
| CYTAGCAAY_UNKNOWN          | 67  | -0.31439    | -1.0864998 | 0.33730158 | 0.26922023 | 0.96  | 2336 | tags=19%, list=15%, signal=23% |
| LMO2COM_01                 | 223 | -0.2604562  | -1.0859162 | 0.28189301 | 0.26989606 | 0.96  | 2351 | tags=16%, list=15%, signal=19% |
| NFAT_Q4_01                 | 238 | -0.2538023  | -1.0845194 | 0.2874494  | 0.2714428  | 0.96  | 4104 | tags=28%, list=26%, signal=38% |
| AREB6_03                   | 233 | -0.25686866 | -1.0843948 | 0.29352227 | 0.27128753 | 0.961 | 3388 | tags=23%, list=22%, signal=29% |
| RACTNRRTTTC_UNKNO<br>WN    | 105 | -0.31050363 | -1.0831223 | 0.38846153 | 0.27289024 | 0.962 | 4356 | tags=32%, list=28%, signal=45% |
| MGGAAGTG_GABP_B            | 460 | -0.26772606 | -1.082914  | 0.30120483 | 0.27278855 | 0.962 | 3282 | tags=22%, list=21%, signal=27% |

|                         |     |             |            |            |            |       |      |                                |
|-------------------------|-----|-------------|------------|------------|------------|-------|------|--------------------------------|
| PEA3_Q6                 | 223 | -0.22597551 | -1.0807661 | 0.26181102 | 0.2757211  | 0.964 | 3188 | tags=20%, list=20%, signal=25% |
| POU1F1_Q6               | 205 | -0.2505442  | -1.0794051 | 0.28174603 | 0.27748084 | 0.964 | 2642 | tags=18%, list=17%, signal=21% |
| GGARNTKYCCA_UNKNOW<br>N | 73  | -0.3161616  | -1.0789462 | 0.36489153 | 0.27788034 | 0.964 | 3814 | tags=27%, list=24%, signal=36% |
| SREBP1_Q6               | 218 | -0.23117189 | -1.0762086 | 0.30384615 | 0.2813582  | 0.964 | 3354 | tags=20%, list=21%, signal=25% |
| HOXA4_Q2                | 229 | -0.25467697 | -1.0748587 | 0.334      | 0.28284255 | 0.964 | 4080 | tags=28%, list=26%, signal=37% |
| NF1_Q6                  | 225 | -0.21409352 | -1.0744181 | 0.26285714 | 0.28304806 | 0.964 | 3601 | tags=20%, list=23%, signal=26% |
| AR_Q2                   | 115 | -0.25162464 | -1.0739489 | 0.33056134 | 0.28337473 | 0.964 | 3263 | tags=23%, list=21%, signal=28% |
| NFY_Q6                  | 227 | -0.22832735 | -1.072044  | 0.2765531  | 0.28586718 | 0.965 | 2587 | tags=16%, list=17%, signal=19% |
| VDR_Q3                  | 194 | -0.23701084 | -1.0709977 | 0.29411766 | 0.2871895  | 0.965 | 2778 | tags=18%, list=18%, signal=21% |
| GATA6_01                | 241 | -0.22030295 | -1.0707349 | 0.28458497 | 0.28712758 | 0.965 | 2963 | tags=18%, list=19%, signal=22% |
| FOXO4_Q2                | 224 | -0.26228338 | -1.0704199 | 0.33200794 | 0.28715187 | 0.965 | 3661 | tags=28%, list=23%, signal=36% |
| AACTTT_UNKNOWN          | 122 | -0.27789056 | -1.0703357 | 0.31287128 | 0.2869696  | 0.965 | 4080 | tags=31%, list=26%, signal=42% |
| TGACGTCA_ATF3_Q6        | 57  | -0.274856   | -1.0696079 | 0.33015266 | 0.28759417 | 0.965 | 3258 | tags=25%, list=21%, signal=31% |
| STAT1_01                | 59  | -0.2499277  | -1.0682539 | 0.33661416 | 0.2891897  | 0.965 | 4595 | tags=36%, list=29%, signal=50% |
| GGGYGTGNY_UNKNOWN       | 75  | -0.25416398 | -1.068047  | 0.328      | 0.28908417 | 0.965 | 3087 | tags=20%, list=20%, signal=25% |
| FXR_IR1_Q6              | 96  | -0.26625544 | -1.067443  | 0.33069307 | 0.28954193 | 0.965 | 4084 | tags=27%, list=26%, signal=36% |
| E2F1_Q6_01              | 209 | -0.28596547 | -1.0667516 | 0.34697855 | 0.2902488  | 0.967 | 4450 | tags=33%, list=29%, signal=46% |
| HNF4_Q6                 | 234 | -0.2075331  | -1.0655097 | 0.29492188 | 0.29159304 | 0.967 | 2972 | tags=17%, list=19%, signal=20% |
| POU3F2_01               | 91  | -0.2504469  | -1.0637947 | 0.30343512 | 0.29370776 | 0.968 | 2424 | tags=18%, list=16%, signal=21% |
| VDR_Q6                  | 236 | -0.24022363 | -1.0636152 | 0.33665338 | 0.2935336  | 0.968 | 4393 | tags=29%, list=28%, signal=40% |
| MTF1_Q4                 | 216 | -0.2526707  | -1.0621974 | 0.35871744 | 0.295047   | 0.968 | 5120 | tags=36%, list=33%, signal=53% |
| LXR_DR4_Q3              | 81  | -0.31151202 | -1.0618571 | 0.38653848 | 0.29516956 | 0.968 | 3171 | tags=27%, list=20%, signal=34% |
| HMX1_01                 | 34  | -0.31709257 | -1.0611956 | 0.374761   | 0.2958781  | 0.969 | 2061 | tags=21%, list=13%, signal=24% |

|                             |     |             |            |            |            |       |      |                                   |
|-----------------------------|-----|-------------|------------|------------|------------|-------|------|-----------------------------------|
| TEL2_Q6                     | 209 | -0.26569632 | -1.0609039 | 0.30470347 | 0.29586145 | 0.969 | 4285 | tags=29%, list=27%,<br>signal=40% |
| MZF1_Q2                     | 206 | -0.2560984  | -1.0603966 | 0.38627452 | 0.29633865 | 0.969 | 2377 | tags=17%, list=15%,<br>signal=20% |
| PAX3_B                      | 80  | -0.3028259  | -1.0603718 | 0.38446215 | 0.2959567  | 0.969 | 4457 | tags=38%, list=29%,<br>signal=52% |
| IRF2_Q1                     | 108 | -0.2771112  | -1.0594138 | 0.33667335 | 0.29673463 | 0.969 | 2832 | tags=20%, list=18%,<br>signal=25% |
| GTGACGY_E4F1_Q6             | 103 | -0.29614785 | -1.0585951 | 0.38132295 | 0.29745078 | 0.969 | 1690 | tags=14%, list=11%,<br>signal=15% |
| ETS2_B                      | 254 | -0.23460989 | -1.0579653 | 0.3452381  | 0.2978087  | 0.969 | 3706 | tags=23%, list=24%,<br>signal=29% |
| GGCKCATGS_UNKNOWN           | 96  | -0.3062296  | -1.0576165 | 0.41338584 | 0.29814303 | 0.969 | 4552 | tags=40%, list=29%,<br>signal=56% |
| AGGGCCA_MIR328              | 74  | -0.3016741  | -1.0564208 | 0.41199225 | 0.29962647 | 0.969 | 3279 | tags=28%, list=21%,<br>signal=36% |
| USF2_Q6                     | 222 | -0.25765717 | -1.0560124 | 0.3709369  | 0.29979557 | 0.969 | 4299 | tags=29%, list=28%,<br>signal=39% |
| AACYNNNNNTCCS_UNKN<br>OWN   | 105 | -0.32582933 | -1.0534022 | 0.42718446 | 0.30333748 | 0.969 | 4315 | tags=37%, list=28%,<br>signal=51% |
| LEF1_Q2                     | 184 | -0.2827716  | -1.0486648 | 0.41130605 | 0.30984095 | 0.971 | 3227 | tags=25%, list=21%,<br>signal=31% |
| TAAYNNRNTCC_UNKNOW<br>N     | 42  | -0.27631822 | -1.0478792 | 0.3776091  | 0.31069672 | 0.971 | 2646 | tags=19%, list=17%,<br>signal=23% |
| CCANNAGRKGGC_UNKNO<br>WN    | 46  | -0.3171949  | -1.0468512 | 0.37406015 | 0.31187797 | 0.971 | 4667 | tags=37%, list=30%,<br>signal=53% |
| AAANWWTGC_UNKNOWN           | 174 | -0.27661628 | -1.045877  | 0.3995984  | 0.31269464 | 0.971 | 3653 | tags=25%, list=23%,<br>signal=33% |
| EN1_Q1                      | 103 | -0.28677857 | -1.0441363 | 0.38791424 | 0.31503224 | 0.973 | 4083 | tags=32%, list=26%,<br>signal=43% |
| HNF4_Q1                     | 236 | -0.200095   | -1.0438582 | 0.3299389  | 0.31500196 | 0.973 | 2888 | tags=17%, list=18%,<br>signal=20% |
| MYC_Q2                      | 160 | -0.24542136 | -1.0411463 | 0.3813084  | 0.31860292 | 0.973 | 2446 | tags=18%, list=16%,<br>signal=21% |
| RNCTGNYNRNCTGNY_UN<br>KNOWN | 224 | -0.28115106 | -1.0402857 | 0.43700787 | 0.3193682  | 0.973 | 5266 | tags=38%, list=34%,<br>signal=57% |
| MYOD_Q1                     | 222 | -0.24980736 | -1.039639  | 0.39787233 | 0.31987697 | 0.973 | 4584 | tags=33%, list=29%,<br>signal=46% |
| MYAATNNNNNNNGGC_U<br>NKNOWN | 368 | -0.22281778 | -1.0341669 | 0.38276553 | 0.32814214 | 0.977 | 4389 | tags=27%, list=28%,<br>signal=37% |
| E2A_Q2                      | 210 | -0.24956027 | -1.0313344 | 0.41980198 | 0.33204642 | 0.978 | 2282 | tags=17%, list=15%,<br>signal=19% |
| YTATTTNR_MEF2_Q2            | 288 | -0.21789052 | -1.0293056 | 0.36631578 | 0.33514217 | 0.978 | 4502 | tags=28%, list=29%,<br>signal=39% |
| ICSBP_Q6                    | 218 | -0.23883593 | -1.0292615 | 0.41188118 | 0.3347774  | 0.978 | 3704 | tags=24%, list=24%,<br>signal=31% |

|                            |     |             |             |            |            |       |      |                                    |
|----------------------------|-----|-------------|-------------|------------|------------|-------|------|------------------------------------|
| AMEF2_Q6                   | 223 | -0.23137583 | -1.0284034  | 0.36902484 | 0.3356683  | 0.982 | 3455 | tags=21%, list=22%,<br>signal=27%  |
| GGAMTNNNNNTCCY_UN<br>KNOWN | 20  | -0.3451227  | -1.0213199  | 0.44509804 | 0.3462206  | 0.982 | 3007 | tags=25%, list=19%,<br>signal=31%  |
| GATA_Q6                    | 171 | -0.21738401 | -1.0206324  | 0.4352227  | 0.34690142 | 0.982 | 3739 | tags=23%, list=24%,<br>signal=30%  |
| AP1_Q2                     | 231 | -0.2284274  | -1.0126685  | 0.42773438 | 0.35904843 | 0.982 | 4532 | tags=31%, list=29%,<br>signal=43%  |
| COUP_DR1_Q6                | 216 | -0.20411235 | -1.0119531  | 0.41359222 | 0.35953844 | 0.982 | 3380 | tags=20%, list=22%,<br>signal=25%  |
| GGGNNTTCC_NFKB_Q6_<br>01   | 217 | -0.2768323  | -1.0113224  | 0.5029586  | 0.36019993 | 0.982 | 4245 | tags=33%, list=27%,<br>signal=45%  |
| ISRE_Q1                    | 214 | -0.2170614  | -1.0079519  | 0.4764706  | 0.36576882 | 0.982 | 3736 | tags=24%, list=24%,<br>signal=31%  |
| GGCNMMSMYNTTG_UNK<br>NOWN  | 99  | -0.28067875 | -1.0079094  | 0.4446565  | 0.36533332 | 0.982 | 4356 | tags=31%, list=28%,<br>signal=43%  |
| CACCCBINDINGFACTOR_Q<br>6  | 242 | -0.22951779 | -1.0053219  | 0.45736435 | 0.36911896 | 0.983 | 4206 | tags=27%, list=27%,<br>signal=36%  |
| KCCGNSWTTT_UNKNOW<br>N     | 147 | -0.2451725  | -1.0026073  | 0.5020408  | 0.37302345 | 0.983 | 4563 | tags=32%, list=29%,<br>signal=45%  |
| E47_Q1                     | 224 | -0.24436083 | -1.0023326  | 0.4502924  | 0.37302303 | 0.983 | 4699 | tags=33%, list=30%,<br>signal=46%  |
| STAT5B_Q1                  | 213 | -0.2146192  | -1.0006802  | 0.44333997 | 0.37515825 | 0.983 | 4048 | tags=24%, list=26%,<br>signal=32%  |
| IRF_Q6                     | 209 | -0.24335282 | -0.9932697  | 0.4679089  | 0.3871845  | 0.984 | 4084 | tags=29%, list=26%,<br>signal=38%  |
| STAT5A_Q1                  | 220 | -0.20615287 | -0.98856384 | 0.462      | 0.39473113 | 0.985 | 4095 | tags=25%, list=26%,<br>signal=34%  |
| PPAR_DR1_Q2                | 225 | -0.19442791 | -0.98442334 | 0.5148515  | 0.40122885 | 0.986 | 3435 | tags=20%, list=22%,<br>signal=25%  |
| NFKB_Q6                    | 234 | -0.2018156  | -0.98000556 | 0.50392157 | 0.4087209  | 0.986 | 2812 | tags=16%, list=18%,<br>signal=20%  |
| CATRRAGC_UNKNOWN           | 89  | -0.2445072  | -0.97347534 | 0.5559921  | 0.4197222  | 0.99  | 4505 | tags=34%, list=29%,<br>signal=47%  |
| HNF1_C                     | 207 | -0.19214833 | -0.9725205  | 0.56213015 | 0.42092177 | 0.99  | 3023 | tags=18%, list=19%,<br>signal=22%  |
| AGCYRWTC_UNKNOWN           | 109 | -0.23173799 | -0.9701599  | 0.5561905  | 0.42436075 | 0.991 | 4531 | tags=28%, list=29%,<br>signal=40%  |
| GACAGGG_MIR339             | 59  | -0.29919022 | -0.9692161  | 0.507874   | 0.4253263  | 0.991 | 5339 | tags=44%, list=34%,<br>signal=67%  |
| PPARA_Q1                   | 33  | -0.27413163 | -0.9686932  | 0.5        | 0.42562753 | 0.991 | 4708 | tags=39%, list=30%,<br>signal=56%  |
| CGTCTTA_MIR208             | 8   | -0.43116814 | -0.963527   | 0.5307377  | 0.43443128 | 0.991 | 5719 | tags=75%, list=37%,<br>signal=118% |
| PPARG_Q1                   | 41  | -0.23445551 | -0.9592241  | 0.55193484 | 0.44259432 | 0.991 | 4716 | tags=32%, list=30%,<br>signal=45%  |

|                                    |     |             |             |            |            |       |      |                                   |
|------------------------------------|-----|-------------|-------------|------------|------------|-------|------|-----------------------------------|
| NFKB_C                             | 241 | -0.1918753  | -0.9573138  | 0.6193294  | 0.44586784 | 0.991 | 4080 | tags=23%, list=26%,<br>signal=30% |
| ZIC3_01                            | 230 | -0.20919797 | -0.955809   | 0.5498008  | 0.4480046  | 0.992 | 3432 | tags=22%, list=22%,<br>signal=28% |
| SRF_01                             | 46  | -0.23824303 | -0.95446014 | 0.5812133  | 0.44971725 | 0.992 | 1516 | tags=11%, list=10%,<br>signal=12% |
| PAX4_02                            | 206 | -0.23347478 | -0.9543412  | 0.6118547  | 0.44933504 | 0.992 | 3064 | tags=21%, list=20%,<br>signal=26% |
| GATA3_01                           | 204 | -0.20545846 | -0.9519257  | 0.56153846 | 0.453263   | 0.992 | 3289 | tags=19%, list=21%,<br>signal=24% |
| ACTAYRNNNCCCR_UNKNO<br>WN          | 92  | -0.27325445 | -0.9496526  | 0.536862   | 0.45689327 | 0.992 | 5266 | tags=43%, list=34%,<br>signal=65% |
| TCYNRGAA_STAT5B_01                 | 165 | -0.21613418 | -0.9477638  | 0.5878906  | 0.45991716 | 0.992 | 4084 | tags=25%, list=26%,<br>signal=34% |
| YAATNANRNNNCAG_UNK<br>NOWN         | 128 | -0.1954791  | -0.94459593 | 0.5968992  | 0.46468067 | 0.992 | 2200 | tags=13%, list=14%,<br>signal=15% |
| MAZ_Q6                             | 174 | -0.22318278 | -0.9422547  | 0.58964145 | 0.46826136 | 0.993 | 5195 | tags=34%, list=33%,<br>signal=51% |
| GCCNNNWTAAR_UNKNO<br>WN            | 90  | -0.2728941  | -0.9387638  | 0.58928573 | 0.4746047  | 0.994 | 4169 | tags=29%, list=27%,<br>signal=39% |
| LFA1_Q6                            | 220 | -0.20355052 | -0.9346348  | 0.5860735  | 0.48163208 | 0.994 | 3742 | tags=21%, list=24%,<br>signal=27% |
| PAX_Q6                             | 225 | -0.1959238  | -0.9323853  | 0.63003665 | 0.48489416 | 0.994 | 2449 | tags=15%, list=16%,<br>signal=17% |
| GCGCTT_MIR518B_MIR5<br>18C_MIR518D | 19  | -0.28483295 | -0.9305707  | 0.5731225  | 0.48793846 | 0.994 | 4931 | tags=37%, list=32%,<br>signal=54% |
| TCCATTKW_UNKNOWN                   | 228 | -0.19099101 | -0.92866266 | 0.65225935 | 0.49097162 | 0.994 | 3736 | tags=21%, list=24%,<br>signal=27% |
| TCGATGG_MIR213                     | 5   | -0.4189869  | -0.9281846  | 0.553719   | 0.49114347 | 0.994 | 3393 | tags=60%, list=22%,<br>signal=77% |
| SP1_Q6_01                          | 212 | -0.23047063 | -0.9207865  | 0.68582374 | 0.50574046 | 0.994 | 2876 | tags=19%, list=18%,<br>signal=23% |
| STAT5A_02                          | 130 | -0.21432382 | -0.91928804 | 0.6422925  | 0.508252   | 0.994 | 4595 | tags=30%, list=29%,<br>signal=42% |
| AP1_Q2_01                          | 235 | -0.17940237 | -0.8827112  | 0.7726397  | 0.5812283  | 0.999 | 4642 | tags=27%, list=30%,<br>signal=38% |
| NFKAPPAB_01                        | 226 | -0.17074457 | -0.8808683  | 0.80039525 | 0.5837333  | 0.999 | 2377 | tags=13%, list=15%,<br>signal=15% |
| AHRARNT_02                         | 14  | -0.263192   | -0.88028514 | 0.68359375 | 0.58423615 | 0.999 | 4697 | tags=36%, list=30%,<br>signal=51% |
| TFIIA_Q6                           | 230 | -0.17948593 | -0.8718536  | 0.7991803  | 0.60129493 | 0.999 | 4712 | tags=28%, list=30%,<br>signal=39% |
| ELF1_Q6                            | 209 | -0.20807344 | -0.8716782  | 0.68810916 | 0.60079354 | 0.999 | 1955 | tags=12%, list=13%,<br>signal=14% |
| ARP1_01                            | 138 | -0.1925256  | -0.8659568  | 0.72778827 | 0.6120442  | 0.999 | 2117 | tags=13%, list=14%,<br>signal=15% |



|                          |     |             |             |            |            |       |      |                                |
|--------------------------|-----|-------------|-------------|------------|------------|-------|------|--------------------------------|
| PU1_Q6                   | 206 | -0.19207348 | -0.860573   | 0.733871   | 0.62301064 | 0.999 | 1801 | tags=11%, list=12%, signal=12% |
| CDP_01                   | 76  | -0.21488439 | -0.8572027  | 0.81765836 | 0.6295082  | 0.999 | 4702 | tags=33%, list=30%, signal=47% |
| PPARA_02                 | 108 | -0.18556277 | -0.84632516 | 0.67304015 | 0.6523298  | 0.999 | 2685 | tags=16%, list=17%, signal=19% |
| HNFB1_Q6                 | 218 | -0.17732234 | -0.8442165  | 0.79157895 | 0.65557146 | 0.999 | 2507 | tags=13%, list=16%, signal=15% |
| AP4_Q6                   | 188 | -0.18126416 | -0.843822   | 0.8188679  | 0.6555785  | 0.999 | 1895 | tags=10%, list=12%, signal=11% |
| AACWWCAANK_UNKNOW<br>N   | 83  | -0.19728543 | -0.8370744  | 0.8403042  | 0.6685921  | 0.999 | 4198 | tags=27%, list=27%, signal=36% |
| HEN1_02                  | 168 | -0.19144015 | -0.8364727  | 0.75482625 | 0.66922283 | 0.999 | 4960 | tags=31%, list=32%, signal=45% |
| TCCGTCC_MIR184           | 11  | -0.31082955 | -0.83475304 | 0.7073643  | 0.67203295 | 0.999 | 3836 | tags=36%, list=25%, signal=48% |
| COUP_01                  | 230 | -0.15279005 | -0.79467344 | 0.9746094  | 0.75149    | 1     | 3432 | tags=17%, list=22%, signal=22% |
| CRGAARNNNCGA_UNKN<br>OWN | 132 | -0.18679835 | -0.79335177 | 0.9092664  | 0.7530356  | 1     | 5062 | tags=32%, list=32%, signal=47% |
| CGGTGTG_MIR220           | 4   | -0.395885   | -0.7803582  | 0.7461832  | 0.7780104  | 1     | 3564 | tags=50%, list=23%, signal=65% |
| TCCCCAC_MIR491           | 55  | -0.24391867 | -0.7726594  | 0.7680312  | 0.79065526 | 1     | 2505 | tags=18%, list=16%, signal=22% |
| STAT3_01                 | 19  | -0.23714872 | -0.7693994  | 0.76160336 | 0.7958086  | 1     | 5218 | tags=32%, list=33%, signal=47% |
| TATA_01                  | 218 | -0.1394387  | -0.7616668  | 0.9759519  | 0.8085613  | 1     | 4807 | tags=25%, list=31%, signal=36% |
| AML_Q6                   | 231 | -0.15206976 | -0.7472777  | 0.98031497 | 0.8313595  | 1     | 3736 | tags=20%, list=24%, signal=26% |
| MYOGENIN_Q6              | 221 | -0.16168074 | -0.7154593  | 0.95284873 | 0.87565726 | 1     | 3187 | tags=17%, list=20%, signal=21% |
| HNFB4_DR1_Q3             | 233 | -0.1372458  | -0.7039821  | 0.99610895 | 0.89015937 | 1     | 4613 | tags=25%, list=30%, signal=35% |
| CREL_01                  | 241 | -0.13238111 | -0.63925374 | 0.9920319  | 0.94833535 | 1     | 4931 | tags=27%, list=32%, signal=39% |
| NFKB_Q6_01               | 213 | -0.12914856 | -0.63763446 | 0.9921875  | 0.9483025  | 1     | 4951 | tags=27%, list=32%, signal=39% |
| ALX4_01                  | 12  | -0.24085164 | -0.6346396  | 0.9466403  | 0.9492463  | 1     | 1848 | tags=17%, list=12%, signal=19% |
